# Supplementary material for: Initial evaluation of nighttime restlessness in a naturally occurring canine model of osteoarthritis pain
Source: PeerJ. 2015 Feb 17;3:e772. doi: 10.7717/peerj.772 (PMC4340376; doi:10.7717/peerj.772)
Supplement: Supplemental Information 3 [file peerj-03-772-s003.xlsx]

## Sheet: Office Visits
Visit Date	Visit Number
2008-08-20 06:00:00	1
2008-09-03 06:00:00	2
2008-09-17 06:00:00	3
2008-10-01 06:00:00	4
2008-10-15 06:00:00	5
2008-10-29 06:00:00	6
2008-11-12 06:00:00	7

## Sheet: 01_Data
Segment	DateTime	Activity	Hour	Quadrant	Study Day	Weekday
1	2008-08-27 06:01:00	0	6	2	7	4
1	2008-08-27 06:02:00	0	6	2	7	4
1	2008-08-27 06:03:00	0	6	2	7	4
1	2008-08-27 06:04:00	0	6	2	7	4
1	2008-08-27 06:05:00	0	6	2	7	4
1	2008-08-27 06:06:00	0	6	2	7	4
1	2008-08-27 06:07:00	0	6	2	7	4
1	2008-08-27 06:08:00	0	6	2	7	4
1	2008-08-27 06:09:00	0	6	2	7	4
1	2008-08-27 06:10:00	0	6	2	7	4
1	2008-08-27 06:11:00	0	6	2	7	4
1	2008-08-27 06:12:00	0	6	2	7	4
1	2008-08-27 06:13:00	0	6	2	7	4
1	2008-08-27 06:14:00	0	6	2	7	4
1	2008-08-27 06:15:00	0	6	2	7	4
1	2008-08-27 06:16:00	0	6	2	7	4
1	2008-08-27 06:17:00	0	6	2	7	4
1	2008-08-27 06:18:00	0	6	2	7	4
1	2008-08-27 06:19:00	0	6	2	7	4
1	2008-08-27 06:20:00	0	6	2	7	4
1	2008-08-27 06:21:00	0	6	2	7	4
1	2008-08-27 06:22:00	0	6	2	7	4
1	2008-08-27 06:23:00	0	6	2	7	4
1	2008-08-27 06:24:00	0	6	2	7	4
1	2008-08-27 06:25:00	0	6	2	7	4
1	2008-08-27 06:26:00	0	6	2	7	4
1	2008-08-27 06:27:00	0	6	2	7	4
1	2008-08-27 06:28:00	0	6	2	7	4
1	2008-08-27 06:29:00	0	6	2	7	4
1	2008-08-27 06:30:00	0	6	2	7	4
1	2008-08-27 06:31:00	0	6	2	7	4
1	2008-08-27 06:32:00	0	6	2	7	4
1	2008-08-27 06:33:00	26	6	2	7	4
1	2008-08-27 06:34:00	0	6	2	7	4
1	2008-08-27 06:35:00	0	6	2	7	4
1	2008-08-27 06:36:00	0	6	2	7	4
1	2008-08-27 06:37:00	0	6	2	7	4
1	2008-08-27 06:38:00	0	6	2	7	4
1	2008-08-27 06:39:00	0	6	2	7	4
1	2008-08-27 06:40:00	0	6	2	7	4
1	2008-08-27 06:41:00	0	6	2	7	4
1	2008-08-27 06:42:00	0	6	2	7	4
1	2008-08-27 06:43:00	0	6	2	7	4
1	2008-08-27 06:44:00	5	6	2	7	4
1	2008-08-27 06:45:00	0	6	2	7	4
1	2008-08-27 06:46:00	0	6	2	7	4
1	2008-08-27 06:47:00	0	6	2	7	4
1	2008-08-27 06:48:00	0	6	2	7	4
1	2008-08-27 06:49:00	0	6	2	7	4
1	2008-08-27 06:50:00	62	6	2	7	4
1	2008-08-27 06:51:00	26	6	2	7	4
1	2008-08-27 06:52:00	0	6	2	7	4
1	2008-08-27 06:53:00	10	6	2	7	4
1	2008-08-27 06:54:00	0	6	2	7	4
1	2008-08-27 06:55:00	0	6	2	7	4
1	2008-08-27 06:56:00	0	6	2	7	4
1	2008-08-27 06:57:00	0	6	2	7	4
1	2008-08-27 06:58:00	0	6	2	7	4
1	2008-08-27 06:59:00	0	6	2	7	4
1	2008-08-27 07:00:00	0	6	2	7	4
1	2008-08-27 07:01:00	0	7	2	7	4
1	2008-08-27 07:02:00	0	7	2	7	4
1	2008-08-27 07:03:00	0	7	2	7	4
1	2008-08-27 07:04:00	0	7	2	7	4
1	2008-08-27 07:05:00	0	7	2	7	4
1	2008-08-27 07:06:00	31	7	2	7	4
1	2008-08-27 07:07:00	0	7	2	7	4
1	2008-08-27 07:08:00	0	7	2	7	4
1	2008-08-27 07:09:00	0	7	2	7	4
1	2008-08-27 07:10:00	0	7	2	7	4
1	2008-08-27 07:11:00	0	7	2	7	4
1	2008-08-27 07:12:00	0	7	2	7	4
1	2008-08-27 07:13:00	0	7	2	7	4
1	2008-08-27 07:14:00	57	7	2	7	4
1	2008-08-27 07:15:00	0	7	2	7	4
1	2008-08-27 07:16:00	31	7	2	7	4
1	2008-08-27 07:17:00	136	7	2	7	4
1	2008-08-27 07:18:00	74	7	2	7	4
1	2008-08-27 07:19:00	1577	7	2	7	4
1	2008-08-27 07:20:00	1282	7	2	7	4
1	2008-08-27 07:21:00	1282	7	2	7	4
1	2008-08-27 07:22:00	488	7	2	7	4
1	2008-08-27 07:23:00	111	7	2	7	4
1	2008-08-27 07:24:00	99	7	2	7	4
1	2008-08-27 07:25:00	195	7	2	7	4
1	2008-08-27 07:26:00	268	7	2	7	4
1	2008-08-27 07:27:00	86	7	2	7	4
1	2008-08-27 07:28:00	0	7	2	7	4
1	2008-08-27 07:29:00	0	7	2	7	4
1	2008-08-27 07:30:00	0	7	2	7	4
1	2008-08-27 07:31:00	0	7	2	7	4
1	2008-08-27 07:32:00	195	7	2	7	4
1	2008-08-27 07:33:00	144	7	2	7	4
1	2008-08-27 07:34:00	0	7	2	7	4
1	2008-08-27 07:35:00	31	7	2	7	4
1	2008-08-27 07:36:00	1014	7	2	7	4
1	2008-08-27 07:37:00	1636	7	2	7	4
1	2008-08-27 07:38:00	36	7	2	7	4
1	2008-08-27 07:39:00	105	7	2	7	4
1	2008-08-27 07:40:00	52	7	2	7	4
1	2008-08-27 07:41:00	16	7	2	7	4
1	2008-08-27 07:42:00	57	7	2	7	4
1	2008-08-27 07:43:00	52	7	2	7	4
1	2008-08-27 07:44:00	227	7	2	7	4
1	2008-08-27 07:45:00	130	7	2	7	4
1	2008-08-27 07:46:00	297	7	2	7	4
1	2008-08-27 07:47:00	606	7	2	7	4
1	2008-08-27 07:48:00	694	7	2	7	4
1	2008-08-27 07:49:00	0	7	2	7	4
1	2008-08-27 07:50:00	0	7	2	7	4
1	2008-08-27 07:51:00	278	7	2	7	4
1	2008-08-27 07:52:00	202	7	2	7	4
1	2008-08-27 07:53:00	144	7	2	7	4
1	2008-08-27 07:54:00	306	7	2	7	4
1	2008-08-27 07:55:00	430	7	2	7	4
1	2008-08-27 07:56:00	306	7	2	7	4
1	2008-08-27 07:57:00	315	7	2	7	4
1	2008-08-27 07:58:00	136	7	2	7	4
1	2008-08-27 07:59:00	0	7	2	7	4
1	2008-08-27 08:00:00	10	7	2	7	4
1	2008-08-27 08:01:00	0	8	2	7	4
1	2008-08-27 08:02:00	0	8	2	7	4
1	2008-08-27 08:03:00	287	8	2	7	4
1	2008-08-27 08:04:00	418	8	2	7	4
1	2008-08-27 08:05:00	52	8	2	7	4
1	2008-08-27 08:06:00	679	8	2	7	4
1	2008-08-27 08:07:00	306	8	2	7	4
1	2008-08-27 08:08:00	325	8	2	7	4
1	2008-08-27 08:09:00	1697	8	2	7	4
1	2008-08-27 08:10:00	1636	8	2	7	4
1	2008-08-27 08:11:00	1055	8	2	7	4
1	2008-08-27 08:12:00	1491	8	2	7	4
1	2008-08-27 08:13:00	974	8	2	7	4
1	2008-08-27 08:14:00	592	8	2	7	4
1	2008-08-27 08:15:00	774	8	2	7	4
1	2008-08-27 08:16:00	5	8	2	7	4
1	2008-08-27 08:17:00	10	8	2	7	4
1	2008-08-27 08:18:00	210	8	2	7	4
1	2008-08-27 08:19:00	725	8	2	7	4
1	2008-08-27 08:20:00	694	8	2	7	4
1	2008-08-27 08:21:00	476	8	2	7	4
1	2008-08-27 08:22:00	430	8	2	7	4
1	2008-08-27 08:23:00	202	8	2	7	4
1	2008-08-27 08:24:00	62	8	2	7	4
1	2008-08-27 08:25:00	47	8	2	7	4
1	2008-08-27 08:26:00	0	8	2	7	4
1	2008-08-27 08:27:00	649	8	2	7	4
1	2008-08-27 08:28:00	453	8	2	7	4
1	2008-08-27 08:29:00	10	8	2	7	4
1	2008-08-27 08:30:00	36	8	2	7	4
1	2008-08-27 08:31:00	843	8	2	7	4
1	2008-08-27 08:32:00	513	8	2	7	4
1	2008-08-27 08:33:00	144	8	2	7	4
1	2008-08-27 08:34:00	80	8	2	7	4
1	2008-08-27 08:35:00	16	8	2	7	4
1	2008-08-27 08:36:00	52	8	2	7	4
1	2008-08-27 08:37:00	5	8	2	7	4
1	2008-08-27 08:38:00	355	8	2	7	4
1	2008-08-27 08:39:00	0	8	2	7	4
1	2008-08-27 08:40:00	0	8	2	7	4
1	2008-08-27 08:41:00	36	8	2	7	4
1	2008-08-27 08:42:00	407	8	2	7	4
1	2008-08-27 08:43:00	0	8	2	7	4
1	2008-08-27 08:44:00	0	8	2	7	4
1	2008-08-27 08:45:00	74	8	2	7	4
1	2008-08-27 08:46:00	0	8	2	7	4
1	2008-08-27 08:47:00	42	8	2	7	4
1	2008-08-27 08:48:00	592	8	2	7	4
1	2008-08-27 08:49:00	0	8	2	7	4
1	2008-08-27 08:50:00	227	8	2	7	4
1	2008-08-27 08:51:00	513	8	2	7	4
1	2008-08-27 08:52:00	620	8	2	7	4
1	2008-08-27 08:53:00	16	8	2	7	4
1	2008-08-27 08:54:00	0	8	2	7	4
1	2008-08-27 08:55:00	0	8	2	7	4
1	2008-08-27 08:56:00	173	8	2	7	4
1	2008-08-27 08:57:00	0	8	2	7	4
1	2008-08-27 08:58:00	5	8	2	7	4
1	2008-08-27 08:59:00	0	8	2	7	4
1	2008-08-27 09:00:00	5	8	2	7	4
1	2008-08-27 09:01:00	118	9	2	7	4
1	2008-08-27 09:02:00	195	9	2	7	4
1	2008-08-27 09:03:00	21	9	2	7	4
1	2008-08-27 09:04:00	0	9	2	7	4
1	2008-08-27 09:05:00	144	9	2	7	4
1	2008-08-27 09:06:00	679	9	2	7	4
1	2008-08-27 09:07:00	42	9	2	7	4
1	2008-08-27 09:08:00	80	9	2	7	4
1	2008-08-27 09:09:00	47	9	2	7	4
1	2008-08-27 09:10:00	10	9	2	7	4
1	2008-08-27 09:11:00	36	9	2	7	4
1	2008-08-27 09:12:00	36	9	2	7	4
1	2008-08-27 09:13:00	0	9	2	7	4
1	2008-08-27 09:14:00	26	9	2	7	4
1	2008-08-27 09:15:00	0	9	2	7	4
1	2008-08-27 09:16:00	219	9	2	7	4
1	2008-08-27 09:17:00	355	9	2	7	4
1	2008-08-27 09:18:00	635	9	2	7	4
1	2008-08-27 09:19:00	325	9	2	7	4
1	2008-08-27 09:20:00	93	9	2	7	4
1	2008-08-27 09:21:00	187	9	2	7	4
1	2008-08-27 09:22:00	144	9	2	7	4
1	2008-08-27 09:23:00	130	9	2	7	4
1	2008-08-27 09:24:00	130	9	2	7	4
1	2008-08-27 09:25:00	210	9	2	7	4
1	2008-08-27 09:26:00	252	9	2	7	4
1	2008-08-27 09:27:00	57	9	2	7	4
1	2008-08-27 09:28:00	111	9	2	7	4
1	2008-08-27 09:29:00	0	9	2	7	4
1	2008-08-27 09:30:00	0	9	2	7	4
1	2008-08-27 09:31:00	5	9	2	7	4
1	2008-08-27 09:32:00	227	9	2	7	4
1	2008-08-27 09:33:00	430	9	2	7	4
1	2008-08-27 09:34:00	0	9	2	7	4
1	2008-08-27 09:35:00	5	9	2	7	4
1	2008-08-27 09:36:00	244	9	2	7	4
1	2008-08-27 09:37:00	306	9	2	7	4
1	2008-08-27 09:38:00	287	9	2	7	4
1	2008-08-27 09:39:00	538	9	2	7	4
1	2008-08-27 09:40:00	180	9	2	7	4
1	2008-08-27 09:41:00	0	9	2	7	4
1	2008-08-27 09:42:00	0	9	2	7	4
1	2008-08-27 09:43:00	268	9	2	7	4
1	2008-08-27 09:44:00	0	9	2	7	4
1	2008-08-27 09:45:00	0	9	2	7	4
1	2008-08-27 09:46:00	0	9	2	7	4
1	2008-08-27 09:47:00	0	9	2	7	4
1	2008-08-27 09:48:00	151	9	2	7	4
1	2008-08-27 09:49:00	453	9	2	7	4
1	2008-08-27 09:50:00	165	9	2	7	4
1	2008-08-27 09:51:00	0	9	2	7	4
1	2008-08-27 09:52:00	0	9	2	7	4
1	2008-08-27 09:53:00	5	9	2	7	4
1	2008-08-27 09:54:00	136	9	2	7	4
1	2008-08-27 09:55:00	158	9	2	7	4
1	2008-08-27 09:56:00	5	9	2	7	4
1	2008-08-27 09:57:00	202	9	2	7	4
1	2008-08-27 09:58:00	42	9	2	7	4
1	2008-08-27 09:59:00	173	9	2	7	4
1	2008-08-27 10:00:00	407	9	2	7	4
1	2008-08-27 10:01:00	407	10	2	7	4
1	2008-08-27 10:02:00	0	10	2	7	4
1	2008-08-27 10:03:00	0	10	2	7	4
1	2008-08-27 10:04:00	0	10	2	7	4
1	2008-08-27 10:05:00	0	10	2	7	4
1	2008-08-27 10:06:00	0	10	2	7	4
1	2008-08-27 10:07:00	0	10	2	7	4
1	2008-08-27 10:08:00	5	10	2	7	4
1	2008-08-27 10:09:00	0	10	2	7	4
1	2008-08-27 10:10:00	0	10	2	7	4
1	2008-08-27 10:11:00	42	10	2	7	4
1	2008-08-27 10:12:00	538	10	2	7	4
1	2008-08-27 10:13:00	5	10	2	7	4
1	2008-08-27 10:14:00	0	10	2	7	4
1	2008-08-27 10:15:00	57	10	2	7	4
1	2008-08-27 10:16:00	173	10	2	7	4
1	2008-08-27 10:17:00	260	10	2	7	4
1	2008-08-27 10:18:00	5	10	2	7	4
1	2008-08-27 10:19:00	80	10	2	7	4
1	2008-08-27 10:20:00	57	10	2	7	4
1	2008-08-27 10:21:00	0	10	2	7	4
1	2008-08-27 10:22:00	5	10	2	7	4
1	2008-08-27 10:23:00	0	10	2	7	4
1	2008-08-27 10:24:00	0	10	2	7	4
1	2008-08-27 10:25:00	0	10	2	7	4
1	2008-08-27 10:26:00	31	10	2	7	4
1	2008-08-27 10:27:00	0	10	2	7	4
1	2008-08-27 10:28:00	0	10	2	7	4
1	2008-08-27 10:29:00	0	10	2	7	4
1	2008-08-27 10:30:00	0	10	2	7	4
1	2008-08-27 10:31:00	0	10	2	7	4
1	2008-08-27 10:32:00	0	10	2	7	4
1	2008-08-27 10:33:00	0	10	2	7	4
1	2008-08-27 10:34:00	0	10	2	7	4
1	2008-08-27 10:35:00	5	10	2	7	4
1	2008-08-27 10:36:00	0	10	2	7	4
1	2008-08-27 10:37:00	0	10	2	7	4
1	2008-08-27 10:38:00	0	10	2	7	4
1	2008-08-27 10:39:00	0	10	2	7	4
1	2008-08-27 10:40:00	26	10	2	7	4
1	2008-08-27 10:41:00	0	10	2	7	4
1	2008-08-27 10:42:00	5	10	2	7	4
1	2008-08-27 10:43:00	26	10	2	7	4
1	2008-08-27 10:44:00	57	10	2	7	4
1	2008-08-27 10:45:00	144	10	2	7	4
1	2008-08-27 10:46:00	202	10	2	7	4
1	2008-08-27 10:47:00	93	10	2	7	4
1	2008-08-27 10:48:00	111	10	2	7	4
1	2008-08-27 10:49:00	80	10	2	7	4
1	2008-08-27 10:50:00	5	10	2	7	4
1	2008-08-27 10:51:00	5	10	2	7	4
1	2008-08-27 10:52:00	5	10	2	7	4
1	2008-08-27 10:53:00	0	10	2	7	4
1	2008-08-27 10:54:00	0	10	2	7	4
1	2008-08-27 10:55:00	0	10	2	7	4
1	2008-08-27 10:56:00	252	10	2	7	4
1	2008-08-27 10:57:00	252	10	2	7	4
1	2008-08-27 10:58:00	334	10	2	7	4
1	2008-08-27 10:59:00	202	10	2	7	4
1	2008-08-27 11:00:00	158	10	2	7	4
1	2008-08-27 11:01:00	0	11	2	7	4
1	2008-08-27 11:02:00	0	11	2	7	4
1	2008-08-27 11:03:00	0	11	2	7	4
1	2008-08-27 11:04:00	0	11	2	7	4
1	2008-08-27 11:05:00	0	11	2	7	4
1	2008-08-27 11:06:00	0	11	2	7	4
1	2008-08-27 11:07:00	0	11	2	7	4
1	2008-08-27 11:08:00	0	11	2	7	4
1	2008-08-27 11:09:00	0	11	2	7	4
1	2008-08-27 11:10:00	16	11	2	7	4
1	2008-08-27 11:11:00	0	11	2	7	4
1	2008-08-27 11:12:00	0	11	2	7	4
1	2008-08-27 11:13:00	0	11	2	7	4
1	2008-08-27 11:14:00	0	11	2	7	4
1	2008-08-27 11:15:00	0	11	2	7	4
1	2008-08-27 11:16:00	0	11	2	7	4
1	2008-08-27 11:17:00	0	11	2	7	4
1	2008-08-27 11:18:00	0	11	2	7	4
1	2008-08-27 11:19:00	0	11	2	7	4
1	2008-08-27 11:20:00	0	11	2	7	4
1	2008-08-27 11:21:00	0	11	2	7	4
1	2008-08-27 11:22:00	0	11	2	7	4
1	2008-08-27 11:23:00	0	11	2	7	4
1	2008-08-27 11:24:00	0	11	2	7	4
1	2008-08-27 11:25:00	0	11	2	7	4
1	2008-08-27 11:26:00	0	11	2	7	4
1	2008-08-27 11:27:00	0	11	2	7	4
1	2008-08-27 11:28:00	0	11	2	7	4
1	2008-08-27 11:29:00	0	11	2	7	4
1	2008-08-27 11:30:00	0	11	2	7	4
1	2008-08-27 11:31:00	0	11	2	7	4
1	2008-08-27 11:32:00	0	11	2	7	4
1	2008-08-27 11:33:00	0	11	2	7	4
1	2008-08-27 11:34:00	0	11	2	7	4
1	2008-08-27 11:35:00	0	11	2	7	4
1	2008-08-27 11:36:00	0	11	2	7	4
1	2008-08-27 11:37:00	0	11	2	7	4
1	2008-08-27 11:38:00	0	11	2	7	4
1	2008-08-27 11:39:00	0	11	2	7	4
1	2008-08-27 11:40:00	0	11	2	7	4
1	2008-08-27 11:41:00	0	11	2	7	4
1	2008-08-27 11:42:00	0	11	2	7	4
1	2008-08-27 11:43:00	0	11	2	7	4
1	2008-08-27 11:44:00	0	11	2	7	4
1	2008-08-27 11:45:00	0	11	2	7	4
1	2008-08-27 11:46:00	0	11	2	7	4
1	2008-08-27 11:47:00	0	11	2	7	4
1	2008-08-27 11:48:00	0	11	2	7	4
1	2008-08-27 11:49:00	0	11	2	7	4
1	2008-08-27 11:50:00	0	11	2	7	4
1	2008-08-27 11:51:00	0	11	2	7	4
1	2008-08-27 11:52:00	0	11	2	7	4
1	2008-08-27 11:53:00	0	11	2	7	4
1	2008-08-27 11:54:00	0	11	2	7	4
1	2008-08-27 11:55:00	0	11	2	7	4
1	2008-08-27 11:56:00	0	11	2	7	4
1	2008-08-27 11:57:00	0	11	2	7	4
1	2008-08-27 11:58:00	0	11	2	7	4
1	2008-08-27 11:59:00	0	11	2	7	4
1	2008-08-27 12:00:00	0	11	2	7	4
1	2008-08-27 12:01:00	0	12	3	7	4
1	2008-08-27 12:02:00	0	12	3	7	4
1	2008-08-27 12:03:00	0	12	3	7	4
1	2008-08-27 12:04:00	0	12	3	7	4
1	2008-08-27 12:05:00	0	12	3	7	4
1	2008-08-27 12:06:00	0	12	3	7	4
1	2008-08-27 12:07:00	0	12	3	7	4
1	2008-08-27 12:08:00	0	12	3	7	4
1	2008-08-27 12:09:00	0	12	3	7	4
1	2008-08-27 12:10:00	0	12	3	7	4
1	2008-08-27 12:11:00	0	12	3	7	4
1	2008-08-27 12:12:00	0	12	3	7	4
1	2008-08-27 12:13:00	0	12	3	7	4
1	2008-08-27 12:14:00	0	12	3	7	4
1	2008-08-27 12:15:00	0	12	3	7	4
1	2008-08-27 12:16:00	0	12	3	7	4
1	2008-08-27 12:17:00	0	12	3	7	4
1	2008-08-27 12:18:00	0	12	3	7	4
1	2008-08-27 12:19:00	0	12	3	7	4
1	2008-08-27 12:20:00	0	12	3	7	4
1	2008-08-27 12:21:00	0	12	3	7	4
1	2008-08-27 12:22:00	21	12	3	7	4
1	2008-08-27 12:23:00	0	12	3	7	4
1	2008-08-27 12:24:00	0	12	3	7	4
1	2008-08-27 12:25:00	0	12	3	7	4
1	2008-08-27 12:26:00	0	12	3	7	4
1	2008-08-27 12:27:00	0	12	3	7	4
1	2008-08-27 12:28:00	0	12	3	7	4
1	2008-08-27 12:29:00	0	12	3	7	4
1	2008-08-27 12:30:00	0	12	3	7	4
1	2008-08-27 12:31:00	0	12	3	7	4
1	2008-08-27 12:32:00	0	12	3	7	4
1	2008-08-27 12:33:00	0	12	3	7	4
1	2008-08-27 12:34:00	0	12	3	7	4
1	2008-08-27 12:35:00	0	12	3	7	4
1	2008-08-27 12:36:00	0	12	3	7	4
1	2008-08-27 12:37:00	0	12	3	7	4
1	2008-08-27 12:38:00	0	12	3	7	4
1	2008-08-27 12:39:00	0	12	3	7	4
1	2008-08-27 12:40:00	0	12	3	7	4
1	2008-08-27 12:41:00	0	12	3	7	4
1	2008-08-27 12:42:00	0	12	3	7	4
1	2008-08-27 12:43:00	0	12	3	7	4
1	2008-08-27 12:44:00	0	12	3	7	4
1	2008-08-27 12:45:00	0	12	3	7	4
1	2008-08-27 12:46:00	0	12	3	7	4
1	2008-08-27 12:47:00	0	12	3	7	4
1	2008-08-27 12:48:00	476	12	3	7	4
1	2008-08-27 12:49:00	31	12	3	7	4
1	2008-08-27 12:50:00	0	12	3	7	4
1	2008-08-27 12:51:00	219	12	3	7	4
1	2008-08-27 12:52:00	57	12	3	7	4
1	2008-08-27 12:53:00	227	12	3	7	4
1	2008-08-27 12:54:00	278	12	3	7	4
1	2008-08-27 12:55:00	635	12	3	7	4
1	2008-08-27 12:56:00	244	12	3	7	4
1	2008-08-27 12:57:00	0	12	3	7	4
1	2008-08-27 12:58:00	31	12	3	7	4
1	2008-08-27 12:59:00	501	12	3	7	4
1	2008-08-27 13:00:00	0	12	3	7	4
1	2008-08-27 13:01:00	0	13	3	7	4
1	2008-08-27 13:02:00	0	13	3	7	4
1	2008-08-27 13:03:00	5	13	3	7	4
1	2008-08-27 13:04:00	16	13	3	7	4
1	2008-08-27 13:05:00	16	13	3	7	4
1	2008-08-27 13:06:00	0	13	3	7	4
1	2008-08-27 13:07:00	21	13	3	7	4
1	2008-08-27 13:08:00	0	13	3	7	4
1	2008-08-27 13:09:00	0	13	3	7	4
1	2008-08-27 13:10:00	0	13	3	7	4
1	2008-08-27 13:11:00	0	13	3	7	4
1	2008-08-27 13:12:00	42	13	3	7	4
1	2008-08-27 13:13:00	0	13	3	7	4
1	2008-08-27 13:14:00	10	13	3	7	4
1	2008-08-27 13:15:00	26	13	3	7	4
1	2008-08-27 13:16:00	0	13	3	7	4
1	2008-08-27 13:17:00	21	13	3	7	4
1	2008-08-27 13:18:00	36	13	3	7	4
1	2008-08-27 13:19:00	0	13	3	7	4
1	2008-08-27 13:20:00	0	13	3	7	4
1	2008-08-27 13:21:00	0	13	3	7	4
1	2008-08-27 13:22:00	57	13	3	7	4
1	2008-08-27 13:23:00	16	13	3	7	4
1	2008-08-27 13:24:00	74	13	3	7	4
1	2008-08-27 13:25:00	42	13	3	7	4
1	2008-08-27 13:26:00	42	13	3	7	4
1	2008-08-27 13:27:00	0	13	3	7	4
1	2008-08-27 13:28:00	0	13	3	7	4
1	2008-08-27 13:29:00	0	13	3	7	4
1	2008-08-27 13:30:00	0	13	3	7	4
1	2008-08-27 13:31:00	0	13	3	7	4
1	2008-08-27 13:32:00	0	13	3	7	4
1	2008-08-27 13:33:00	0	13	3	7	4
1	2008-08-27 13:34:00	0	13	3	7	4
1	2008-08-27 13:35:00	0	13	3	7	4
1	2008-08-27 13:36:00	0	13	3	7	4
1	2008-08-27 13:37:00	0	13	3	7	4
1	2008-08-27 13:38:00	0	13	3	7	4
1	2008-08-27 13:39:00	0	13	3	7	4
1	2008-08-27 13:40:00	0	13	3	7	4
1	2008-08-27 13:41:00	0	13	3	7	4
1	2008-08-27 13:42:00	0	13	3	7	4
1	2008-08-27 13:43:00	93	13	3	7	4
1	2008-08-27 13:44:00	16	13	3	7	4
1	2008-08-27 13:45:00	0	13	3	7	4
1	2008-08-27 13:46:00	0	13	3	7	4
1	2008-08-27 13:47:00	0	13	3	7	4
1	2008-08-27 13:48:00	0	13	3	7	4
1	2008-08-27 13:49:00	5	13	3	7	4
1	2008-08-27 13:50:00	396	13	3	7	4
1	2008-08-27 13:51:00	0	13	3	7	4
1	2008-08-27 13:52:00	0	13	3	7	4
1	2008-08-27 13:53:00	31	13	3	7	4
1	2008-08-27 13:54:00	74	13	3	7	4
1	2008-08-27 13:55:00	5	13	3	7	4
1	2008-08-27 13:56:00	202	13	3	7	4
1	2008-08-27 13:57:00	16	13	3	7	4
1	2008-08-27 13:58:00	74	13	3	7	4
1	2008-08-27 13:59:00	124	13	3	7	4
1	2008-08-27 14:00:00	111	13	3	7	4
1	2008-08-27 14:01:00	10	14	3	7	4
1	2008-08-27 14:02:00	0	14	3	7	4
1	2008-08-27 14:03:00	52	14	3	7	4
1	2008-08-27 14:04:00	62	14	3	7	4
1	2008-08-27 14:05:00	0	14	3	7	4
1	2008-08-27 14:06:00	0	14	3	7	4
1	2008-08-27 14:07:00	0	14	3	7	4
1	2008-08-27 14:08:00	0	14	3	7	4
1	2008-08-27 14:09:00	2104	14	3	7	4
1	2008-08-27 14:10:00	1055	14	3	7	4
1	2008-08-27 14:11:00	1014	14	3	7	4
1	2008-08-27 14:12:00	725	14	3	7	4
1	2008-08-27 14:13:00	843	14	3	7	4
1	2008-08-27 14:14:00	31	14	3	7	4
1	2008-08-27 14:15:00	0	14	3	7	4
1	2008-08-27 14:16:00	0	14	3	7	4
1	2008-08-27 14:17:00	0	14	3	7	4
1	2008-08-27 14:18:00	0	14	3	7	4
1	2008-08-27 14:19:00	0	14	3	7	4
1	2008-08-27 14:20:00	0	14	3	7	4
1	2008-08-27 14:21:00	0	14	3	7	4
1	2008-08-27 14:22:00	0	14	3	7	4
1	2008-08-27 14:23:00	0	14	3	7	4
1	2008-08-27 14:24:00	0	14	3	7	4
1	2008-08-27 14:25:00	0	14	3	7	4
1	2008-08-27 14:26:00	0	14	3	7	4
1	2008-08-27 14:27:00	0	14	3	7	4
1	2008-08-27 14:28:00	0	14	3	7	4
1	2008-08-27 14:29:00	0	14	3	7	4
1	2008-08-27 14:30:00	0	14	3	7	4
1	2008-08-27 14:31:00	0	14	3	7	4
1	2008-08-27 14:32:00	5	14	3	7	4
1	2008-08-27 14:33:00	0	14	3	7	4
1	2008-08-27 14:34:00	165	14	3	7	4
1	2008-08-27 14:35:00	111	14	3	7	4
1	2008-08-27 14:36:00	42	14	3	7	4
1	2008-08-27 14:37:00	0	14	3	7	4
1	2008-08-27 14:38:00	0	14	3	7	4
1	2008-08-27 14:39:00	74	14	3	7	4
1	2008-08-27 14:40:00	118	14	3	7	4
1	2008-08-27 14:41:00	16	14	3	7	4
1	2008-08-27 14:42:00	158	14	3	7	4
1	2008-08-27 14:43:00	210	14	3	7	4
1	2008-08-27 14:44:00	165	14	3	7	4
1	2008-08-27 14:45:00	151	14	3	7	4
1	2008-08-27 14:46:00	552	14	3	7	4
1	2008-08-27 14:47:00	565	14	3	7	4
1	2008-08-27 14:48:00	158	14	3	7	4
1	2008-08-27 14:49:00	80	14	3	7	4
1	2008-08-27 14:50:00	464	14	3	7	4
1	2008-08-27 14:51:00	16	14	3	7	4
1	2008-08-27 14:52:00	10	14	3	7	4
1	2008-08-27 14:53:00	68	14	3	7	4
1	2008-08-27 14:54:00	158	14	3	7	4
1	2008-08-27 14:55:00	86	14	3	7	4
1	2008-08-27 14:56:00	0	14	3	7	4
1	2008-08-27 14:57:00	0	14	3	7	4
1	2008-08-27 14:58:00	68	14	3	7	4
1	2008-08-27 14:59:00	21	14	3	7	4
1	2008-08-27 15:00:00	118	14	3	7	4
1	2008-08-27 15:01:00	0	15	3	7	4
1	2008-08-27 15:02:00	180	15	3	7	4
1	2008-08-27 15:03:00	136	15	3	7	4
1	2008-08-27 15:04:00	0	15	3	7	4
1	2008-08-27 15:05:00	86	15	3	7	4
1	2008-08-27 15:06:00	0	15	3	7	4
1	2008-08-27 15:07:00	0	15	3	7	4
1	2008-08-27 15:08:00	68	15	3	7	4
1	2008-08-27 15:09:00	0	15	3	7	4
1	2008-08-27 15:10:00	52	15	3	7	4
1	2008-08-27 15:11:00	0	15	3	7	4
1	2008-08-27 15:12:00	0	15	3	7	4
1	2008-08-27 15:13:00	0	15	3	7	4
1	2008-08-27 15:14:00	0	15	3	7	4
1	2008-08-27 15:15:00	5	15	3	7	4
1	2008-08-27 15:16:00	0	15	3	7	4
1	2008-08-27 15:17:00	42	15	3	7	4
1	2008-08-27 15:18:00	0	15	3	7	4
1	2008-08-27 15:19:00	26	15	3	7	4
1	2008-08-27 15:20:00	42	15	3	7	4
1	2008-08-27 15:21:00	10	15	3	7	4
1	2008-08-27 15:22:00	0	15	3	7	4
1	2008-08-27 15:23:00	93	15	3	7	4
1	2008-08-27 15:24:00	5	15	3	7	4
1	2008-08-27 15:25:00	579	15	3	7	4
1	2008-08-27 15:26:00	219	15	3	7	4
1	2008-08-27 15:27:00	268	15	3	7	4
1	2008-08-27 15:28:00	235	15	3	7	4
1	2008-08-27 15:29:00	808	15	3	7	4
1	2008-08-27 15:30:00	260	15	3	7	4
1	2008-08-27 15:31:00	0	15	3	7	4
1	2008-08-27 15:32:00	0	15	3	7	4
1	2008-08-27 15:33:00	5	15	3	7	4
1	2008-08-27 15:34:00	0	15	3	7	4
1	2008-08-27 15:35:00	16	15	3	7	4
1	2008-08-27 15:36:00	0	15	3	7	4
1	2008-08-27 15:37:00	0	15	3	7	4
1	2008-08-27 15:38:00	592	15	3	7	4
1	2008-08-27 15:39:00	202	15	3	7	4
1	2008-08-27 15:40:00	0	15	3	7	4
1	2008-08-27 15:41:00	0	15	3	7	4
1	2008-08-27 15:42:00	0	15	3	7	4
1	2008-08-27 15:43:00	16	15	3	7	4
1	2008-08-27 15:44:00	5	15	3	7	4
1	2008-08-27 15:45:00	0	15	3	7	4
1	2008-08-27 15:46:00	0	15	3	7	4
1	2008-08-27 15:47:00	80	15	3	7	4
1	2008-08-27 15:48:00	10	15	3	7	4
1	2008-08-27 15:49:00	5	15	3	7	4
1	2008-08-27 15:50:00	0	15	3	7	4
1	2008-08-27 15:51:00	5	15	3	7	4
1	2008-08-27 15:52:00	5	15	3	7	4
1	2008-08-27 15:53:00	0	15	3	7	4
1	2008-08-27 15:54:00	5	15	3	7	4
1	2008-08-27 15:55:00	5	15	3	7	4
1	2008-08-27 15:56:00	16	15	3	7	4
1	2008-08-27 15:57:00	0	15	3	7	4
1	2008-08-27 15:58:00	0	15	3	7	4
1	2008-08-27 15:59:00	5	15	3	7	4
1	2008-08-27 16:00:00	0	15	3	7	4
1	2008-08-27 16:01:00	5	16	3	7	4
1	2008-08-27 16:02:00	10	16	3	7	4
1	2008-08-27 16:03:00	0	16	3	7	4
1	2008-08-27 16:04:00	268	16	3	7	4
1	2008-08-27 16:05:00	5	16	3	7	4
1	2008-08-27 16:06:00	21	16	3	7	4
1	2008-08-27 16:07:00	0	16	3	7	4
1	2008-08-27 16:08:00	0	16	3	7	4
1	2008-08-27 16:09:00	649	16	3	7	4
1	2008-08-27 16:10:00	453	16	3	7	4
1	2008-08-27 16:11:00	36	16	3	7	4
1	2008-08-27 16:12:00	10	16	3	7	4
1	2008-08-27 16:13:00	0	16	3	7	4
1	2008-08-27 16:14:00	136	16	3	7	4
1	2008-08-27 16:15:00	0	16	3	7	4
1	2008-08-27 16:16:00	180	16	3	7	4
1	2008-08-27 16:17:00	0	16	3	7	4
1	2008-08-27 16:18:00	21	16	3	7	4
1	2008-08-27 16:19:00	476	16	3	7	4
1	2008-08-27 16:20:00	260	16	3	7	4
1	2008-08-27 16:21:00	47	16	3	7	4
1	2008-08-27 16:22:00	26	16	3	7	4
1	2008-08-27 16:23:00	86	16	3	7	4
1	2008-08-27 16:24:00	0	16	3	7	4
1	2008-08-27 16:25:00	10	16	3	7	4
1	2008-08-27 16:26:00	31	16	3	7	4
1	2008-08-27 16:27:00	0	16	3	7	4
1	2008-08-27 16:28:00	0	16	3	7	4
1	2008-08-27 16:29:00	0	16	3	7	4
1	2008-08-27 16:30:00	0	16	3	7	4
1	2008-08-27 16:31:00	0	16	3	7	4
1	2008-08-27 16:32:00	526	16	3	7	4
1	2008-08-27 16:33:00	526	16	3	7	4
1	2008-08-27 16:34:00	441	16	3	7	4
1	2008-08-27 16:35:00	565	16	3	7	4
1	2008-08-27 16:36:00	649	16	3	7	4
1	2008-08-27 16:37:00	165	16	3	7	4
1	2008-08-27 16:38:00	180	16	3	7	4
1	2008-08-27 16:39:00	80	16	3	7	4
1	2008-08-27 16:40:00	187	16	3	7	4
1	2008-08-27 16:41:00	144	16	3	7	4
1	2008-08-27 16:42:00	0	16	3	7	4
1	2008-08-27 16:43:00	5	16	3	7	4
1	2008-08-27 16:44:00	5	16	3	7	4
1	2008-08-27 16:45:00	476	16	3	7	4
1	2008-08-27 16:46:00	252	16	3	7	4
1	2008-08-27 16:47:00	344	16	3	7	4
1	2008-08-27 16:48:00	441	16	3	7	4
1	2008-08-27 16:49:00	0	16	3	7	4
1	2008-08-27 16:50:00	0	16	3	7	4
1	2008-08-27 16:51:00	0	16	3	7	4
1	2008-08-27 16:52:00	0	16	3	7	4
1	2008-08-27 16:53:00	0	16	3	7	4
1	2008-08-27 16:54:00	0	16	3	7	4
1	2008-08-27 16:55:00	0	16	3	7	4
1	2008-08-27 16:56:00	0	16	3	7	4
1	2008-08-27 16:57:00	158	16	3	7	4
1	2008-08-27 16:58:00	376	16	3	7	4
1	2008-08-27 16:59:00	334	16	3	7	4
1	2008-08-27 17:00:00	355	16	3	7	4
1	2008-08-27 17:01:00	635	17	3	7	4
1	2008-08-27 17:02:00	5	17	3	7	4
1	2008-08-27 17:03:00	5	17	3	7	4
1	2008-08-27 17:04:00	0	17	3	7	4
1	2008-08-27 17:05:00	0	17	3	7	4
1	2008-08-27 17:06:00	0	17	3	7	4
1	2008-08-27 17:07:00	0	17	3	7	4
1	2008-08-27 17:08:00	0	17	3	7	4
1	2008-08-27 17:09:00	488	17	3	7	4
1	2008-08-27 17:10:00	144	17	3	7	4
1	2008-08-27 17:11:00	16	17	3	7	4
1	2008-08-27 17:12:00	0	17	3	7	4
1	2008-08-27 17:13:00	180	17	3	7	4
1	2008-08-27 17:14:00	80	17	3	7	4
1	2008-08-27 17:15:00	235	17	3	7	4
1	2008-08-27 17:16:00	476	17	3	7	4
1	2008-08-27 17:17:00	195	17	3	7	4
1	2008-08-27 17:18:00	105	17	3	7	4
1	2008-08-27 17:19:00	592	17	3	7	4
1	2008-08-27 17:20:00	5	17	3	7	4
1	2008-08-27 17:21:00	187	17	3	7	4
1	2008-08-27 17:22:00	105	17	3	7	4
1	2008-08-27 17:23:00	0	17	3	7	4
1	2008-08-27 17:24:00	26	17	3	7	4
1	2008-08-27 17:25:00	0	17	3	7	4
1	2008-08-27 17:26:00	0	17	3	7	4
1	2008-08-27 17:27:00	0	17	3	7	4
1	2008-08-27 17:28:00	165	17	3	7	4
1	2008-08-27 17:29:00	219	17	3	7	4
1	2008-08-27 17:30:00	10	17	3	7	4
1	2008-08-27 17:31:00	16	17	3	7	4
1	2008-08-27 17:32:00	118	17	3	7	4
1	2008-08-27 17:33:00	5	17	3	7	4
1	2008-08-27 17:34:00	5	17	3	7	4
1	2008-08-27 17:35:00	0	17	3	7	4
1	2008-08-27 17:36:00	5	17	3	7	4
1	2008-08-27 17:37:00	16	17	3	7	4
1	2008-08-27 17:38:00	0	17	3	7	4
1	2008-08-27 17:39:00	0	17	3	7	4
1	2008-08-27 17:40:00	0	17	3	7	4
1	2008-08-27 17:41:00	0	17	3	7	4
1	2008-08-27 17:42:00	16	17	3	7	4
1	2008-08-27 17:43:00	195	17	3	7	4
1	2008-08-27 17:44:00	0	17	3	7	4
1	2008-08-27 17:45:00	0	17	3	7	4
1	2008-08-27 17:46:00	0	17	3	7	4
1	2008-08-27 17:47:00	0	17	3	7	4
1	2008-08-27 17:48:00	0	17	3	7	4
1	2008-08-27 17:49:00	5	17	3	7	4
1	2008-08-27 17:50:00	42	17	3	7	4
1	2008-08-27 17:51:00	26	17	3	7	4
1	2008-08-27 17:52:00	0	17	3	7	4
1	2008-08-27 17:53:00	16	17	3	7	4
1	2008-08-27 17:54:00	5	17	3	7	4
1	2008-08-27 17:55:00	306	17	3	7	4
1	2008-08-27 17:56:00	5	17	3	7	4
1	2008-08-27 17:57:00	21	17	3	7	4
1	2008-08-27 17:58:00	26	17	3	7	4
1	2008-08-27 17:59:00	26	17	3	7	4
1	2008-08-27 18:00:00	10	17	3	7	4
1	2008-08-27 18:01:00	26	18	4	7	4
1	2008-08-27 18:02:00	0	18	4	7	4
1	2008-08-27 18:03:00	268	18	4	7	4
1	2008-08-27 18:04:00	42	18	4	7	4
1	2008-08-27 18:05:00	136	18	4	7	4
1	2008-08-27 18:06:00	16	18	4	7	4
1	2008-08-27 18:07:00	21	18	4	7	4
1	2008-08-27 18:08:00	5	18	4	7	4
1	2008-08-27 18:09:00	0	18	4	7	4
1	2008-08-27 18:10:00	26	18	4	7	4
1	2008-08-27 18:11:00	0	18	4	7	4
1	2008-08-27 18:12:00	0	18	4	7	4
1	2008-08-27 18:13:00	0	18	4	7	4
1	2008-08-27 18:14:00	10	18	4	7	4
1	2008-08-27 18:15:00	5	18	4	7	4
1	2008-08-27 18:16:00	0	18	4	7	4
1	2008-08-27 18:17:00	0	18	4	7	4
1	2008-08-27 18:18:00	0	18	4	7	4
1	2008-08-27 18:19:00	16	18	4	7	4
1	2008-08-27 18:20:00	0	18	4	7	4
1	2008-08-27 18:21:00	5	18	4	7	4
1	2008-08-27 18:22:00	5	18	4	7	4
1	2008-08-27 18:23:00	0	18	4	7	4
1	2008-08-27 18:24:00	0	18	4	7	4
1	2008-08-27 18:25:00	0	18	4	7	4
1	2008-08-27 18:26:00	5	18	4	7	4
1	2008-08-27 18:27:00	16	18	4	7	4
1	2008-08-27 18:28:00	227	18	4	7	4
1	2008-08-27 18:29:00	579	18	4	7	4
1	2008-08-27 18:30:00	187	18	4	7	4
1	2008-08-27 18:31:00	252	18	4	7	4
1	2008-08-27 18:32:00	202	18	4	7	4
1	2008-08-27 18:33:00	396	18	4	7	4
1	2008-08-27 18:34:00	325	18	4	7	4
1	2008-08-27 18:35:00	16	18	4	7	4
1	2008-08-27 18:36:00	219	18	4	7	4
1	2008-08-27 18:37:00	16	18	4	7	4
1	2008-08-27 18:38:00	579	18	4	7	4
1	2008-08-27 18:39:00	694	18	4	7	4
1	2008-08-27 18:40:00	111	18	4	7	4
1	2008-08-27 18:41:00	202	18	4	7	4
1	2008-08-27 18:42:00	488	18	4	7	4
1	2008-08-27 18:43:00	334	18	4	7	4
1	2008-08-27 18:44:00	453	18	4	7	4
1	2008-08-27 18:45:00	187	18	4	7	4
1	2008-08-27 18:46:00	16	18	4	7	4
1	2008-08-27 18:47:00	0	18	4	7	4
1	2008-08-27 18:48:00	0	18	4	7	4
1	2008-08-27 18:49:00	0	18	4	7	4
1	2008-08-27 18:50:00	0	18	4	7	4
1	2008-08-27 18:51:00	0	18	4	7	4
1	2008-08-27 18:52:00	0	18	4	7	4
1	2008-08-27 18:53:00	0	18	4	7	4
1	2008-08-27 18:54:00	0	18	4	7	4
1	2008-08-27 18:55:00	0	18	4	7	4
1	2008-08-27 18:56:00	0	18	4	7	4
1	2008-08-27 18:57:00	0	18	4	7	4
1	2008-08-27 18:58:00	0	18	4	7	4
1	2008-08-27 18:59:00	0	18	4	7	4
1	2008-08-27 19:00:00	0	18	4	7	4
1	2008-08-27 19:01:00	0	19	4	7	4
1	2008-08-27 19:02:00	0	19	4	7	4
1	2008-08-27 19:03:00	202	19	4	7	4
1	2008-08-27 19:04:00	710	19	4	7	4
1	2008-08-27 19:05:00	260	19	4	7	4
1	2008-08-27 19:06:00	355	19	4	7	4
1	2008-08-27 19:07:00	441	19	4	7	4
1	2008-08-27 19:08:00	606	19	4	7	4
1	2008-08-27 19:09:00	606	19	4	7	4
1	2008-08-27 19:10:00	187	19	4	7	4
1	2008-08-27 19:11:00	306	19	4	7	4
1	2008-08-27 19:12:00	219	19	4	7	4
1	2008-08-27 19:13:00	31	19	4	7	4
1	2008-08-27 19:14:00	0	19	4	7	4
1	2008-08-27 19:15:00	0	19	4	7	4
1	2008-08-27 19:16:00	0	19	4	7	4
1	2008-08-27 19:17:00	0	19	4	7	4
1	2008-08-27 19:18:00	0	19	4	7	4
1	2008-08-27 19:19:00	0	19	4	7	4
1	2008-08-27 19:20:00	0	19	4	7	4
1	2008-08-27 19:21:00	0	19	4	7	4
1	2008-08-27 19:22:00	26	19	4	7	4
1	2008-08-27 19:23:00	0	19	4	7	4
1	2008-08-27 19:24:00	0	19	4	7	4
1	2008-08-27 19:25:00	0	19	4	7	4
1	2008-08-27 19:26:00	0	19	4	7	4
1	2008-08-27 19:27:00	26	19	4	7	4
1	2008-08-27 19:28:00	0	19	4	7	4
1	2008-08-27 19:29:00	0	19	4	7	4
1	2008-08-27 19:30:00	0	19	4	7	4
1	2008-08-27 19:31:00	0	19	4	7	4
1	2008-08-27 19:32:00	0	19	4	7	4
1	2008-08-27 19:33:00	0	19	4	7	4
1	2008-08-27 19:34:00	0	19	4	7	4
1	2008-08-27 19:35:00	0	19	4	7	4
1	2008-08-27 19:36:00	21	19	4	7	4
1	2008-08-27 19:37:00	0	19	4	7	4
1	2008-08-27 19:38:00	0	19	4	7	4
1	2008-08-27 19:39:00	0	19	4	7	4
1	2008-08-27 19:40:00	897	19	4	7	4
1	2008-08-27 19:41:00	1464	19	4	7	4
1	2008-08-27 19:42:00	2464	19	4	7	4
1	2008-08-27 19:43:00	1960	19	4	7	4
1	2008-08-27 19:44:00	10	19	4	7	4
1	2008-08-27 19:45:00	173	19	4	7	4
1	2008-08-27 19:46:00	136	19	4	7	4
1	2008-08-27 19:47:00	278	19	4	7	4
1	2008-08-27 19:48:00	386	19	4	7	4
1	2008-08-27 19:49:00	260	19	4	7	4
1	2008-08-27 19:50:00	386	19	4	7	4
1	2008-08-27 19:51:00	21	19	4	7	4
1	2008-08-27 19:52:00	725	19	4	7	4
1	2008-08-27 19:53:00	5	19	4	7	4
1	2008-08-27 19:54:00	679	19	4	7	4
1	2008-08-27 19:55:00	774	19	4	7	4
1	2008-08-27 19:56:00	52	19	4	7	4
1	2008-08-27 19:57:00	0	19	4	7	4
1	2008-08-27 19:58:00	86	19	4	7	4
1	2008-08-27 19:59:00	278	19	4	7	4
1	2008-08-27 20:00:00	202	19	4	7	4
1	2008-08-27 20:01:00	21	20	4	7	4
1	2008-08-27 20:02:00	173	20	4	7	4
1	2008-08-27 20:03:00	187	20	4	7	4
1	2008-08-27 20:04:00	124	20	4	7	4
1	2008-08-27 20:05:00	62	20	4	7	4
1	2008-08-27 20:06:00	31	20	4	7	4
1	2008-08-27 20:07:00	825	20	4	7	4
1	2008-08-27 20:08:00	974	20	4	7	4
1	2008-08-27 20:09:00	202	20	4	7	4
1	2008-08-27 20:10:00	287	20	4	7	4
1	2008-08-27 20:11:00	93	20	4	7	4
1	2008-08-27 20:12:00	297	20	4	7	4
1	2008-08-27 20:13:00	526	20	4	7	4
1	2008-08-27 20:14:00	315	20	4	7	4
1	2008-08-27 20:15:00	725	20	4	7	4
1	2008-08-27 20:16:00	219	20	4	7	4
1	2008-08-27 20:17:00	5	20	4	7	4
1	2008-08-27 20:18:00	21	20	4	7	4
1	2008-08-27 20:19:00	26	20	4	7	4
1	2008-08-27 20:20:00	187	20	4	7	4
1	2008-08-27 20:21:00	74	20	4	7	4
1	2008-08-27 20:22:00	151	20	4	7	4
1	2008-08-27 20:23:00	418	20	4	7	4
1	2008-08-27 20:24:00	843	20	4	7	4
1	2008-08-27 20:25:00	118	20	4	7	4
1	2008-08-27 20:26:00	31	20	4	7	4
1	2008-08-27 20:27:00	16	20	4	7	4
1	2008-08-27 20:28:00	86	20	4	7	4
1	2008-08-27 20:29:00	74	20	4	7	4
1	2008-08-27 20:30:00	16	20	4	7	4
1	2008-08-27 20:31:00	0	20	4	7	4
1	2008-08-27 20:32:00	0	20	4	7	4
1	2008-08-27 20:33:00	0	20	4	7	4
1	2008-08-27 20:34:00	5	20	4	7	4
1	2008-08-27 20:35:00	0	20	4	7	4
1	2008-08-27 20:36:00	5	20	4	7	4
1	2008-08-27 20:37:00	0	20	4	7	4
1	2008-08-27 20:38:00	0	20	4	7	4
1	2008-08-27 20:39:00	0	20	4	7	4
1	2008-08-27 20:40:00	0	20	4	7	4
1	2008-08-27 20:41:00	0	20	4	7	4
1	2008-08-27 20:42:00	0	20	4	7	4
1	2008-08-27 20:43:00	418	20	4	7	4
1	2008-08-27 20:44:00	0	20	4	7	4
1	2008-08-27 20:45:00	0	20	4	7	4
1	2008-08-27 20:46:00	0	20	4	7	4
1	2008-08-27 20:47:00	0	20	4	7	4
1	2008-08-27 20:48:00	16	20	4	7	4
1	2008-08-27 20:49:00	0	20	4	7	4
1	2008-08-27 20:50:00	861	20	4	7	4
1	2008-08-27 20:51:00	325	20	4	7	4
1	2008-08-27 20:52:00	825	20	4	7	4
1	2008-08-27 20:53:00	649	20	4	7	4
1	2008-08-27 20:54:00	31	20	4	7	4
1	2008-08-27 20:55:00	124	20	4	7	4
1	2008-08-27 20:56:00	10	20	4	7	4
1	2008-08-27 20:57:00	130	20	4	7	4
1	2008-08-27 20:58:00	86	20	4	7	4
1	2008-08-27 20:59:00	130	20	4	7	4
1	2008-08-27 21:00:00	325	20	4	7	4
1	2008-08-27 21:01:00	57	21	4	7	4
1	2008-08-27 21:02:00	10	21	4	7	4
1	2008-08-27 21:03:00	592	21	4	7	4
1	2008-08-27 21:04:00	105	21	4	7	4
1	2008-08-27 21:05:00	86	21	4	7	4
1	2008-08-27 21:06:00	36	21	4	7	4
1	2008-08-27 21:07:00	21	21	4	7	4
1	2008-08-27 21:08:00	42	21	4	7	4
1	2008-08-27 21:09:00	16	21	4	7	4
1	2008-08-27 21:10:00	0	21	4	7	4
1	2008-08-27 21:11:00	10	21	4	7	4
1	2008-08-27 21:12:00	0	21	4	7	4
1	2008-08-27 21:13:00	0	21	4	7	4
1	2008-08-27 21:14:00	0	21	4	7	4
1	2008-08-27 21:15:00	0	21	4	7	4
1	2008-08-27 21:16:00	0	21	4	7	4
1	2008-08-27 21:17:00	0	21	4	7	4
1	2008-08-27 21:18:00	31	21	4	7	4
1	2008-08-27 21:19:00	16	21	4	7	4
1	2008-08-27 21:20:00	31	21	4	7	4
1	2008-08-27 21:21:00	10	21	4	7	4
1	2008-08-27 21:22:00	0	21	4	7	4
1	2008-08-27 21:23:00	0	21	4	7	4
1	2008-08-27 21:24:00	0	21	4	7	4
1	2008-08-27 21:25:00	0	21	4	7	4
1	2008-08-27 21:26:00	0	21	4	7	4
1	2008-08-27 21:27:00	0	21	4	7	4
1	2008-08-27 21:28:00	0	21	4	7	4
1	2008-08-27 21:29:00	0	21	4	7	4
1	2008-08-27 21:30:00	0	21	4	7	4
1	2008-08-27 21:31:00	0	21	4	7	4
1	2008-08-27 21:32:00	0	21	4	7	4
1	2008-08-27 21:33:00	0	21	4	7	4
1	2008-08-27 21:34:00	0	21	4	7	4
1	2008-08-27 21:35:00	16	21	4	7	4
1	2008-08-27 21:36:00	0	21	4	7	4
1	2008-08-27 21:37:00	268	21	4	7	4
1	2008-08-27 21:38:00	396	21	4	7	4
1	2008-08-27 21:39:00	99	21	4	7	4
1	2008-08-27 21:40:00	195	21	4	7	4
1	2008-08-27 21:41:00	268	21	4	7	4
1	2008-08-27 21:42:00	0	21	4	7	4
1	2008-08-27 21:43:00	0	21	4	7	4
1	2008-08-27 21:44:00	10	21	4	7	4
1	2008-08-27 21:45:00	0	21	4	7	4
1	2008-08-27 21:46:00	0	21	4	7	4
1	2008-08-27 21:47:00	93	21	4	7	4
1	2008-08-27 21:48:00	0	21	4	7	4
1	2008-08-27 21:49:00	0	21	4	7	4
1	2008-08-27 21:50:00	0	21	4	7	4
1	2008-08-27 21:51:00	0	21	4	7	4
1	2008-08-27 21:52:00	0	21	4	7	4
1	2008-08-27 21:53:00	5	21	4	7	4
1	2008-08-27 21:54:00	10	21	4	7	4
1	2008-08-27 21:55:00	0	21	4	7	4
1	2008-08-27 21:56:00	0	21	4	7	4
1	2008-08-27 21:57:00	0	21	4	7	4
1	2008-08-27 21:58:00	0	21	4	7	4
1	2008-08-27 21:59:00	0	21	4	7	4
1	2008-08-27 22:00:00	16	21	4	7	4
1	2008-08-27 22:01:00	0	22	4	7	4
1	2008-08-27 22:02:00	0	22	4	7	4
1	2008-08-27 22:03:00	0	22	4	7	4
1	2008-08-27 22:04:00	0	22	4	7	4
1	2008-08-27 22:05:00	0	22	4	7	4
1	2008-08-27 22:06:00	0	22	4	7	4
1	2008-08-27 22:07:00	0	22	4	7	4
1	2008-08-27 22:08:00	0	22	4	7	4
1	2008-08-27 22:09:00	0	22	4	7	4
1	2008-08-27 22:10:00	0	22	4	7	4
1	2008-08-27 22:11:00	5	22	4	7	4
1	2008-08-27 22:12:00	0	22	4	7	4
1	2008-08-27 22:13:00	0	22	4	7	4
1	2008-08-27 22:14:00	0	22	4	7	4
1	2008-08-27 22:15:00	0	22	4	7	4
1	2008-08-27 22:16:00	36	22	4	7	4
1	2008-08-27 22:17:00	0	22	4	7	4
1	2008-08-27 22:18:00	0	22	4	7	4
1	2008-08-27 22:19:00	0	22	4	7	4
1	2008-08-27 22:20:00	0	22	4	7	4
1	2008-08-27 22:21:00	0	22	4	7	4
1	2008-08-27 22:22:00	0	22	4	7	4
1	2008-08-27 22:23:00	0	22	4	7	4
1	2008-08-27 22:24:00	0	22	4	7	4
1	2008-08-27 22:25:00	0	22	4	7	4
1	2008-08-27 22:26:00	0	22	4	7	4
1	2008-08-27 22:27:00	0	22	4	7	4
1	2008-08-27 22:28:00	0	22	4	7	4
1	2008-08-27 22:29:00	0	22	4	7	4
1	2008-08-27 22:30:00	5	22	4	7	4
1	2008-08-27 22:31:00	0	22	4	7	4
1	2008-08-27 22:32:00	0	22	4	7	4
1	2008-08-27 22:33:00	0	22	4	7	4
1	2008-08-27 22:34:00	0	22	4	7	4
1	2008-08-27 22:35:00	5	22	4	7	4
1	2008-08-27 22:36:00	0	22	4	7	4
1	2008-08-27 22:37:00	0	22	4	7	4
1	2008-08-27 22:38:00	0	22	4	7	4
1	2008-08-27 22:39:00	124	22	4	7	4
1	2008-08-27 22:40:00	0	22	4	7	4
1	2008-08-27 22:41:00	0	22	4	7	4
1	2008-08-27 22:42:00	0	22	4	7	4
1	2008-08-27 22:43:00	0	22	4	7	4
1	2008-08-27 22:44:00	0	22	4	7	4
1	2008-08-27 22:45:00	47	22	4	7	4
1	2008-08-27 22:46:00	0	22	4	7	4
1	2008-08-27 22:47:00	0	22	4	7	4
1	2008-08-27 22:48:00	0	22	4	7	4
1	2008-08-27 22:49:00	0	22	4	7	4
1	2008-08-27 22:50:00	0	22	4	7	4
1	2008-08-27 22:51:00	5	22	4	7	4
1	2008-08-27 22:52:00	68	22	4	7	4
1	2008-08-27 22:53:00	227	22	4	7	4
1	2008-08-27 22:54:00	16	22	4	7	4
1	2008-08-27 22:55:00	0	22	4	7	4
1	2008-08-27 22:56:00	0	22	4	7	4
1	2008-08-27 22:57:00	0	22	4	7	4
1	2008-08-27 22:58:00	0	22	4	7	4
1	2008-08-27 22:59:00	180	22	4	7	4
1	2008-08-27 23:00:00	0	22	4	7	4
1	2008-08-27 23:01:00	0	23	4	7	4
1	2008-08-27 23:02:00	0	23	4	7	4
1	2008-08-27 23:03:00	0	23	4	7	4
1	2008-08-27 23:04:00	0	23	4	7	4
1	2008-08-27 23:05:00	0	23	4	7	4
1	2008-08-27 23:06:00	0	23	4	7	4
1	2008-08-27 23:07:00	0	23	4	7	4
1	2008-08-27 23:08:00	0	23	4	7	4
1	2008-08-27 23:09:00	0	23	4	7	4
1	2008-08-27 23:10:00	0	23	4	7	4
1	2008-08-27 23:11:00	0	23	4	7	4
1	2008-08-27 23:12:00	0	23	4	7	4
1	2008-08-27 23:13:00	0	23	4	7	4
1	2008-08-27 23:14:00	0	23	4	7	4
1	2008-08-27 23:15:00	0	23	4	7	4
1	2008-08-27 23:16:00	0	23	4	7	4
1	2008-08-27 23:17:00	111	23	4	7	4
1	2008-08-27 23:18:00	464	23	4	7	4
1	2008-08-27 23:19:00	227	23	4	7	4
1	2008-08-27 23:20:00	501	23	4	7	4
1	2008-08-27 23:21:00	31	23	4	7	4
1	2008-08-27 23:22:00	260	23	4	7	4
1	2008-08-27 23:23:00	187	23	4	7	4
1	2008-08-27 23:24:00	219	23	4	7	4
1	2008-08-27 23:25:00	488	23	4	7	4
1	2008-08-27 23:26:00	501	23	4	7	4
1	2008-08-27 23:27:00	0	23	4	7	4
1	2008-08-27 23:28:00	0	23	4	7	4
1	2008-08-27 23:29:00	0	23	4	7	4
1	2008-08-27 23:30:00	0	23	4	7	4
1	2008-08-27 23:31:00	21	23	4	7	4
1	2008-08-27 23:32:00	0	23	4	7	4
1	2008-08-27 23:33:00	0	23	4	7	4
1	2008-08-27 23:34:00	0	23	4	7	4
1	2008-08-27 23:35:00	0	23	4	7	4
1	2008-08-27 23:36:00	0	23	4	7	4
1	2008-08-27 23:37:00	0	23	4	7	4
1	2008-08-27 23:38:00	42	23	4	7	4
1	2008-08-27 23:39:00	0	23	4	7	4
1	2008-08-27 23:40:00	0	23	4	7	4
1	2008-08-27 23:41:00	0	23	4	7	4
1	2008-08-27 23:42:00	0	23	4	7	4
1	2008-08-27 23:43:00	0	23	4	7	4
1	2008-08-27 23:44:00	0	23	4	7	4
1	2008-08-27 23:45:00	0	23	4	7	4
1	2008-08-27 23:46:00	0	23	4	7	4
1	2008-08-27 23:47:00	0	23	4	7	4
1	2008-08-27 23:48:00	0	23	4	7	4
1	2008-08-27 23:49:00	0	23	4	7	4
1	2008-08-27 23:50:00	5	23	4	7	4
1	2008-08-27 23:51:00	0	23	4	7	4
1	2008-08-27 23:52:00	0	23	4	7	4
1	2008-08-27 23:53:00	0	23	4	7	4
1	2008-08-27 23:54:00	0	23	4	7	4
1	2008-08-27 23:55:00	0	23	4	7	4
1	2008-08-27 23:56:00	0	23	4	7	4
1	2008-08-27 23:57:00	0	23	4	7	4
1	2008-08-27 23:58:00	0	23	4	7	4
1	2008-08-27 23:59:00	0	23	4	7	4
1	2008-08-28	0	23	4	7	4
1	2008-08-28 00:01:00	0	0	1	8	5
1	2008-08-28 00:02:00	0	0	1	8	5
1	2008-08-28 00:03:00	0	0	1	8	5
1	2008-08-28 00:04:00	0	0	1	8	5
1	2008-08-28 00:05:00	0	0	1	8	5
1	2008-08-28 00:06:00	0	0	1	8	5
1	2008-08-28 00:07:00	0	0	1	8	5
1	2008-08-28 00:08:00	0	0	1	8	5
1	2008-08-28 00:09:00	0	0	1	8	5
1	2008-08-28 00:10:00	0	0	1	8	5
1	2008-08-28 00:11:00	0	0	1	8	5
1	2008-08-28 00:12:00	0	0	1	8	5
1	2008-08-28 00:13:00	0	0	1	8	5
1	2008-08-28 00:14:00	0	0	1	8	5
1	2008-08-28 00:15:00	0	0	1	8	5
1	2008-08-28 00:16:00	16	0	1	8	5
1	2008-08-28 00:17:00	0	0	1	8	5
1	2008-08-28 00:18:00	0	0	1	8	5
1	2008-08-28 00:19:00	0	0	1	8	5
1	2008-08-28 00:20:00	0	0	1	8	5
1	2008-08-28 00:21:00	80	0	1	8	5
1	2008-08-28 00:22:00	0	0	1	8	5
1	2008-08-28 00:23:00	0	0	1	8	5
1	2008-08-28 00:24:00	21	0	1	8	5
1	2008-08-28 00:25:00	5	0	1	8	5
1	2008-08-28 00:26:00	0	0	1	8	5
1	2008-08-28 00:27:00	0	0	1	8	5
1	2008-08-28 00:28:00	0	0	1	8	5
1	2008-08-28 00:29:00	0	0	1	8	5
1	2008-08-28 00:30:00	0	0	1	8	5
1	2008-08-28 00:31:00	0	0	1	8	5
1	2008-08-28 00:32:00	0	0	1	8	5
1	2008-08-28 00:33:00	0	0	1	8	5
1	2008-08-28 00:34:00	0	0	1	8	5
1	2008-08-28 00:35:00	0	0	1	8	5
1	2008-08-28 00:36:00	0	0	1	8	5
1	2008-08-28 00:37:00	0	0	1	8	5
1	2008-08-28 00:38:00	0	0	1	8	5
1	2008-08-28 00:39:00	0	0	1	8	5
1	2008-08-28 00:40:00	0	0	1	8	5
1	2008-08-28 00:41:00	0	0	1	8	5
1	2008-08-28 00:42:00	0	0	1	8	5
1	2008-08-28 00:43:00	0	0	1	8	5
1	2008-08-28 00:44:00	0	0	1	8	5
1	2008-08-28 00:45:00	0	0	1	8	5
1	2008-08-28 00:46:00	0	0	1	8	5
1	2008-08-28 00:47:00	0	0	1	8	5
1	2008-08-28 00:48:00	0	0	1	8	5
1	2008-08-28 00:49:00	0	0	1	8	5
1	2008-08-28 00:50:00	0	0	1	8	5
1	2008-08-28 00:51:00	0	0	1	8	5
1	2008-08-28 00:52:00	0	0	1	8	5
1	2008-08-28 00:53:00	0	0	1	8	5
1	2008-08-28 00:54:00	0	0	1	8	5
1	2008-08-28 00:55:00	0	0	1	8	5
1	2008-08-28 00:56:00	5	0	1	8	5
1	2008-08-28 00:57:00	0	0	1	8	5
1	2008-08-28 00:58:00	0	0	1	8	5
1	2008-08-28 00:59:00	0	0	1	8	5
1	2008-08-28 01:00:00	0	0	1	8	5
1	2008-08-28 01:01:00	0	1	1	8	5
1	2008-08-28 01:02:00	0	1	1	8	5
1	2008-08-28 01:03:00	0	1	1	8	5
1	2008-08-28 01:04:00	0	1	1	8	5
1	2008-08-28 01:05:00	0	1	1	8	5
1	2008-08-28 01:06:00	0	1	1	8	5
1	2008-08-28 01:07:00	0	1	1	8	5
1	2008-08-28 01:08:00	0	1	1	8	5
1	2008-08-28 01:09:00	0	1	1	8	5
1	2008-08-28 01:10:00	0	1	1	8	5
1	2008-08-28 01:11:00	0	1	1	8	5
1	2008-08-28 01:12:00	0	1	1	8	5
1	2008-08-28 01:13:00	0	1	1	8	5
1	2008-08-28 01:14:00	0	1	1	8	5
1	2008-08-28 01:15:00	0	1	1	8	5
1	2008-08-28 01:16:00	26	1	1	8	5
1	2008-08-28 01:17:00	52	1	1	8	5
1	2008-08-28 01:18:00	0	1	1	8	5
1	2008-08-28 01:19:00	0	1	1	8	5
1	2008-08-28 01:20:00	0	1	1	8	5
1	2008-08-28 01:21:00	0	1	1	8	5
1	2008-08-28 01:22:00	0	1	1	8	5
1	2008-08-28 01:23:00	0	1	1	8	5
1	2008-08-28 01:24:00	0	1	1	8	5
1	2008-08-28 01:25:00	62	1	1	8	5
1	2008-08-28 01:26:00	0	1	1	8	5
1	2008-08-28 01:27:00	0	1	1	8	5
1	2008-08-28 01:28:00	0	1	1	8	5
1	2008-08-28 01:29:00	0	1	1	8	5
1	2008-08-28 01:30:00	0	1	1	8	5
1	2008-08-28 01:31:00	0	1	1	8	5
1	2008-08-28 01:32:00	0	1	1	8	5
1	2008-08-28 01:33:00	0	1	1	8	5
1	2008-08-28 01:34:00	0	1	1	8	5
1	2008-08-28 01:35:00	0	1	1	8	5
1	2008-08-28 01:36:00	0	1	1	8	5
1	2008-08-28 01:37:00	0	1	1	8	5
1	2008-08-28 01:38:00	0	1	1	8	5
1	2008-08-28 01:39:00	0	1	1	8	5
1	2008-08-28 01:40:00	0	1	1	8	5
1	2008-08-28 01:41:00	0	1	1	8	5
1	2008-08-28 01:42:00	0	1	1	8	5
1	2008-08-28 01:43:00	0	1	1	8	5
1	2008-08-28 01:44:00	0	1	1	8	5
1	2008-08-28 01:45:00	0	1	1	8	5
1	2008-08-28 01:46:00	0	1	1	8	5
1	2008-08-28 01:47:00	10	1	1	8	5
1	2008-08-28 01:48:00	0	1	1	8	5
1	2008-08-28 01:49:00	16	1	1	8	5
1	2008-08-28 01:50:00	0	1	1	8	5
1	2008-08-28 01:51:00	0	1	1	8	5
1	2008-08-28 01:52:00	0	1	1	8	5
1	2008-08-28 01:53:00	0	1	1	8	5
1	2008-08-28 01:54:00	0	1	1	8	5
1	2008-08-28 01:55:00	0	1	1	8	5
1	2008-08-28 01:56:00	0	1	1	8	5
1	2008-08-28 01:57:00	0	1	1	8	5
1	2008-08-28 01:58:00	0	1	1	8	5
1	2008-08-28 01:59:00	0	1	1	8	5
1	2008-08-28 02:00:00	0	1	1	8	5
1	2008-08-28 02:01:00	0	2	1	8	5
1	2008-08-28 02:02:00	0	2	1	8	5
1	2008-08-28 02:03:00	0	2	1	8	5
1	2008-08-28 02:04:00	0	2	1	8	5
1	2008-08-28 02:05:00	0	2	1	8	5
1	2008-08-28 02:06:00	0	2	1	8	5
1	2008-08-28 02:07:00	0	2	1	8	5
1	2008-08-28 02:08:00	0	2	1	8	5
1	2008-08-28 02:09:00	0	2	1	8	5
1	2008-08-28 02:10:00	0	2	1	8	5
1	2008-08-28 02:11:00	0	2	1	8	5
1	2008-08-28 02:12:00	5	2	1	8	5
1	2008-08-28 02:13:00	42	2	1	8	5
1	2008-08-28 02:14:00	86	2	1	8	5
1	2008-08-28 02:15:00	0	2	1	8	5
1	2008-08-28 02:16:00	0	2	1	8	5
1	2008-08-28 02:17:00	0	2	1	8	5
1	2008-08-28 02:18:00	0	2	1	8	5
1	2008-08-28 02:19:00	0	2	1	8	5
1	2008-08-28 02:20:00	0	2	1	8	5
1	2008-08-28 02:21:00	0	2	1	8	5
1	2008-08-28 02:22:00	0	2	1	8	5
1	2008-08-28 02:23:00	0	2	1	8	5
1	2008-08-28 02:24:00	0	2	1	8	5
1	2008-08-28 02:25:00	0	2	1	8	5
1	2008-08-28 02:26:00	0	2	1	8	5
1	2008-08-28 02:27:00	80	2	1	8	5
1	2008-08-28 02:28:00	5	2	1	8	5
1	2008-08-28 02:29:00	0	2	1	8	5
1	2008-08-28 02:30:00	0	2	1	8	5
1	2008-08-28 02:31:00	0	2	1	8	5
1	2008-08-28 02:32:00	0	2	1	8	5
1	2008-08-28 02:33:00	0	2	1	8	5
1	2008-08-28 02:34:00	0	2	1	8	5
1	2008-08-28 02:35:00	0	2	1	8	5
1	2008-08-28 02:36:00	0	2	1	8	5
1	2008-08-28 02:37:00	0	2	1	8	5
1	2008-08-28 02:38:00	0	2	1	8	5
1	2008-08-28 02:39:00	0	2	1	8	5
1	2008-08-28 02:40:00	0	2	1	8	5
1	2008-08-28 02:41:00	0	2	1	8	5
1	2008-08-28 02:42:00	0	2	1	8	5
1	2008-08-28 02:43:00	0	2	1	8	5
1	2008-08-28 02:44:00	0	2	1	8	5
1	2008-08-28 02:45:00	0	2	1	8	5
1	2008-08-28 02:46:00	0	2	1	8	5
1	2008-08-28 02:47:00	0	2	1	8	5
1	2008-08-28 02:48:00	0	2	1	8	5
1	2008-08-28 02:49:00	0	2	1	8	5
1	2008-08-28 02:50:00	0	2	1	8	5
1	2008-08-28 02:51:00	0	2	1	8	5
1	2008-08-28 02:52:00	0	2	1	8	5
1	2008-08-28 02:53:00	0	2	1	8	5
1	2008-08-28 02:54:00	0	2	1	8	5
1	2008-08-28 02:55:00	0	2	1	8	5
1	2008-08-28 02:56:00	0	2	1	8	5
1	2008-08-28 02:57:00	0	2	1	8	5
1	2008-08-28 02:58:00	0	2	1	8	5
1	2008-08-28 02:59:00	0	2	1	8	5
1	2008-08-28 03:00:00	0	2	1	8	5
1	2008-08-28 03:01:00	0	3	1	8	5
1	2008-08-28 03:02:00	0	3	1	8	5
1	2008-08-28 03:03:00	0	3	1	8	5
1	2008-08-28 03:04:00	0	3	1	8	5
1	2008-08-28 03:05:00	0	3	1	8	5
1	2008-08-28 03:06:00	10	3	1	8	5
1	2008-08-28 03:07:00	10	3	1	8	5
1	2008-08-28 03:08:00	47	3	1	8	5
1	2008-08-28 03:09:00	0	3	1	8	5
1	2008-08-28 03:10:00	0	3	1	8	5
1	2008-08-28 03:11:00	0	3	1	8	5
1	2008-08-28 03:12:00	0	3	1	8	5
1	2008-08-28 03:13:00	0	3	1	8	5
1	2008-08-28 03:14:00	0	3	1	8	5
1	2008-08-28 03:15:00	0	3	1	8	5
1	2008-08-28 03:16:00	0	3	1	8	5
1	2008-08-28 03:17:00	0	3	1	8	5
1	2008-08-28 03:18:00	0	3	1	8	5
1	2008-08-28 03:19:00	0	3	1	8	5
1	2008-08-28 03:20:00	0	3	1	8	5
1	2008-08-28 03:21:00	0	3	1	8	5
1	2008-08-28 03:22:00	0	3	1	8	5
1	2008-08-28 03:23:00	0	3	1	8	5
1	2008-08-28 03:24:00	0	3	1	8	5
1	2008-08-28 03:25:00	0	3	1	8	5
1	2008-08-28 03:26:00	0	3	1	8	5
1	2008-08-28 03:27:00	5	3	1	8	5
1	2008-08-28 03:28:00	5	3	1	8	5
1	2008-08-28 03:29:00	16	3	1	8	5
1	2008-08-28 03:30:00	136	3	1	8	5
1	2008-08-28 03:31:00	10	3	1	8	5
1	2008-08-28 03:32:00	0	3	1	8	5
1	2008-08-28 03:33:00	0	3	1	8	5
1	2008-08-28 03:34:00	0	3	1	8	5
1	2008-08-28 03:35:00	74	3	1	8	5
1	2008-08-28 03:36:00	16	3	1	8	5
1	2008-08-28 03:37:00	287	3	1	8	5
1	2008-08-28 03:38:00	0	3	1	8	5
1	2008-08-28 03:39:00	52	3	1	8	5
1	2008-08-28 03:40:00	0	3	1	8	5
1	2008-08-28 03:41:00	0	3	1	8	5
1	2008-08-28 03:42:00	0	3	1	8	5
1	2008-08-28 03:43:00	0	3	1	8	5
1	2008-08-28 03:44:00	0	3	1	8	5
1	2008-08-28 03:45:00	0	3	1	8	5
1	2008-08-28 03:46:00	0	3	1	8	5
1	2008-08-28 03:47:00	0	3	1	8	5
1	2008-08-28 03:48:00	0	3	1	8	5
1	2008-08-28 03:49:00	0	3	1	8	5
1	2008-08-28 03:50:00	0	3	1	8	5
1	2008-08-28 03:51:00	0	3	1	8	5
1	2008-08-28 03:52:00	0	3	1	8	5
1	2008-08-28 03:53:00	0	3	1	8	5
1	2008-08-28 03:54:00	0	3	1	8	5
1	2008-08-28 03:55:00	0	3	1	8	5
1	2008-08-28 03:56:00	0	3	1	8	5
1	2008-08-28 03:57:00	0	3	1	8	5
1	2008-08-28 03:58:00	0	3	1	8	5
1	2008-08-28 03:59:00	0	3	1	8	5
1	2008-08-28 04:00:00	0	3	1	8	5
1	2008-08-28 04:01:00	0	4	1	8	5
1	2008-08-28 04:02:00	0	4	1	8	5
1	2008-08-28 04:03:00	10	4	1	8	5
1	2008-08-28 04:04:00	0	4	1	8	5
1	2008-08-28 04:05:00	0	4	1	8	5
1	2008-08-28 04:06:00	0	4	1	8	5
1	2008-08-28 04:07:00	124	4	1	8	5
1	2008-08-28 04:08:00	0	4	1	8	5
1	2008-08-28 04:09:00	0	4	1	8	5
1	2008-08-28 04:10:00	0	4	1	8	5
1	2008-08-28 04:11:00	0	4	1	8	5
1	2008-08-28 04:12:00	0	4	1	8	5
1	2008-08-28 04:13:00	0	4	1	8	5
1	2008-08-28 04:14:00	0	4	1	8	5
1	2008-08-28 04:15:00	0	4	1	8	5
1	2008-08-28 04:16:00	0	4	1	8	5
1	2008-08-28 04:17:00	0	4	1	8	5
1	2008-08-28 04:18:00	0	4	1	8	5
1	2008-08-28 04:19:00	0	4	1	8	5
1	2008-08-28 04:20:00	0	4	1	8	5
1	2008-08-28 04:21:00	0	4	1	8	5
1	2008-08-28 04:22:00	0	4	1	8	5
1	2008-08-28 04:23:00	0	4	1	8	5
1	2008-08-28 04:24:00	0	4	1	8	5
1	2008-08-28 04:25:00	0	4	1	8	5
1	2008-08-28 04:26:00	5	4	1	8	5
1	2008-08-28 04:27:00	0	4	1	8	5
1	2008-08-28 04:28:00	0	4	1	8	5
1	2008-08-28 04:29:00	0	4	1	8	5
1	2008-08-28 04:30:00	0	4	1	8	5
1	2008-08-28 04:31:00	0	4	1	8	5
1	2008-08-28 04:32:00	0	4	1	8	5
1	2008-08-28 04:33:00	0	4	1	8	5
1	2008-08-28 04:34:00	0	4	1	8	5
1	2008-08-28 04:35:00	0	4	1	8	5
1	2008-08-28 04:36:00	0	4	1	8	5
1	2008-08-28 04:37:00	0	4	1	8	5
1	2008-08-28 04:38:00	0	4	1	8	5
1	2008-08-28 04:39:00	0	4	1	8	5
1	2008-08-28 04:40:00	0	4	1	8	5
1	2008-08-28 04:41:00	0	4	1	8	5
1	2008-08-28 04:42:00	0	4	1	8	5
1	2008-08-28 04:43:00	0	4	1	8	5
1	2008-08-28 04:44:00	0	4	1	8	5
1	2008-08-28 04:45:00	62	4	1	8	5
1	2008-08-28 04:46:00	0	4	1	8	5
1	2008-08-28 04:47:00	0	4	1	8	5
1	2008-08-28 04:48:00	0	4	1	8	5
1	2008-08-28 04:49:00	0	4	1	8	5
1	2008-08-28 04:50:00	0	4	1	8	5
1	2008-08-28 04:51:00	0	4	1	8	5
1	2008-08-28 04:52:00	0	4	1	8	5
1	2008-08-28 04:53:00	0	4	1	8	5
1	2008-08-28 04:54:00	0	4	1	8	5
1	2008-08-28 04:55:00	0	4	1	8	5
1	2008-08-28 04:56:00	0	4	1	8	5
1	2008-08-28 04:57:00	0	4	1	8	5
1	2008-08-28 04:58:00	0	4	1	8	5
1	2008-08-28 04:59:00	0	4	1	8	5
1	2008-08-28 05:00:00	0	4	1	8	5
1	2008-08-28 05:01:00	0	5	1	8	5
1	2008-08-28 05:02:00	0	5	1	8	5
1	2008-08-28 05:03:00	0	5	1	8	5
1	2008-08-28 05:04:00	0	5	1	8	5
1	2008-08-28 05:05:00	0	5	1	8	5
1	2008-08-28 05:06:00	0	5	1	8	5
1	2008-08-28 05:07:00	5	5	1	8	5
1	2008-08-28 05:08:00	0	5	1	8	5
1	2008-08-28 05:09:00	0	5	1	8	5
1	2008-08-28 05:10:00	0	5	1	8	5
1	2008-08-28 05:11:00	0	5	1	8	5
1	2008-08-28 05:12:00	0	5	1	8	5
1	2008-08-28 05:13:00	99	5	1	8	5
1	2008-08-28 05:14:00	0	5	1	8	5
1	2008-08-28 05:15:00	0	5	1	8	5
1	2008-08-28 05:16:00	0	5	1	8	5
1	2008-08-28 05:17:00	0	5	1	8	5
1	2008-08-28 05:18:00	0	5	1	8	5
1	2008-08-28 05:19:00	0	5	1	8	5
1	2008-08-28 05:20:00	0	5	1	8	5
1	2008-08-28 05:21:00	0	5	1	8	5
1	2008-08-28 05:22:00	0	5	1	8	5
1	2008-08-28 05:23:00	0	5	1	8	5
1	2008-08-28 05:24:00	0	5	1	8	5
1	2008-08-28 05:25:00	0	5	1	8	5
1	2008-08-28 05:26:00	0	5	1	8	5
1	2008-08-28 05:27:00	0	5	1	8	5
1	2008-08-28 05:28:00	0	5	1	8	5
1	2008-08-28 05:29:00	0	5	1	8	5
1	2008-08-28 05:30:00	0	5	1	8	5
1	2008-08-28 05:31:00	0	5	1	8	5
1	2008-08-28 05:32:00	0	5	1	8	5
1	2008-08-28 05:33:00	0	5	1	8	5
1	2008-08-28 05:34:00	0	5	1	8	5
1	2008-08-28 05:35:00	0	5	1	8	5
1	2008-08-28 05:36:00	0	5	1	8	5
1	2008-08-28 05:37:00	0	5	1	8	5
1	2008-08-28 05:38:00	0	5	1	8	5
1	2008-08-28 05:39:00	5	5	1	8	5
1	2008-08-28 05:40:00	16	5	1	8	5
1	2008-08-28 05:41:00	118	5	1	8	5
1	2008-08-28 05:42:00	0	5	1	8	5
1	2008-08-28 05:43:00	0	5	1	8	5
1	2008-08-28 05:44:00	0	5	1	8	5
1	2008-08-28 05:45:00	0	5	1	8	5
1	2008-08-28 05:46:00	0	5	1	8	5
1	2008-08-28 05:47:00	0	5	1	8	5
1	2008-08-28 05:48:00	5	5	1	8	5
1	2008-08-28 05:49:00	21	5	1	8	5
1	2008-08-28 05:50:00	0	5	1	8	5
1	2008-08-28 05:51:00	0	5	1	8	5
1	2008-08-28 05:52:00	0	5	1	8	5
1	2008-08-28 05:53:00	0	5	1	8	5
1	2008-08-28 05:54:00	0	5	1	8	5
1	2008-08-28 05:55:00	0	5	1	8	5
1	2008-08-28 05:56:00	0	5	1	8	5
1	2008-08-28 05:57:00	0	5	1	8	5
1	2008-08-28 05:58:00	0	5	1	8	5
1	2008-08-28 05:59:00	0	5	1	8	5
1	2008-08-28 06:00:00	0	5	1	8	5
1	2008-08-28 06:01:00	0	6	2	8	5
1	2008-08-28 06:02:00	0	6	2	8	5
1	2008-08-28 06:03:00	0	6	2	8	5
1	2008-08-28 06:04:00	0	6	2	8	5
1	2008-08-28 06:05:00	0	6	2	8	5
1	2008-08-28 06:06:00	0	6	2	8	5
1	2008-08-28 06:07:00	0	6	2	8	5
1	2008-08-28 06:08:00	0	6	2	8	5
1	2008-08-28 06:09:00	10	6	2	8	5
1	2008-08-28 06:10:00	5	6	2	8	5
1	2008-08-28 06:11:00	36	6	2	8	5
1	2008-08-28 06:12:00	10	6	2	8	5
1	2008-08-28 06:13:00	0	6	2	8	5
1	2008-08-28 06:14:00	0	6	2	8	5
1	2008-08-28 06:15:00	0	6	2	8	5
1	2008-08-28 06:16:00	0	6	2	8	5
1	2008-08-28 06:17:00	16	6	2	8	5
1	2008-08-28 06:18:00	0	6	2	8	5
1	2008-08-28 06:19:00	0	6	2	8	5
1	2008-08-28 06:20:00	5	6	2	8	5
1	2008-08-28 06:21:00	0	6	2	8	5
1	2008-08-28 06:22:00	0	6	2	8	5
1	2008-08-28 06:23:00	0	6	2	8	5
1	2008-08-28 06:24:00	68	6	2	8	5
1	2008-08-28 06:25:00	0	6	2	8	5
1	2008-08-28 06:26:00	173	6	2	8	5
1	2008-08-28 06:27:00	10	6	2	8	5
1	2008-08-28 06:28:00	0	6	2	8	5
1	2008-08-28 06:29:00	0	6	2	8	5
1	2008-08-28 06:30:00	0	6	2	8	5
1	2008-08-28 06:31:00	0	6	2	8	5
1	2008-08-28 06:32:00	0	6	2	8	5
1	2008-08-28 06:33:00	0	6	2	8	5
1	2008-08-28 06:34:00	0	6	2	8	5
1	2008-08-28 06:35:00	0	6	2	8	5
1	2008-08-28 06:36:00	0	6	2	8	5
1	2008-08-28 06:37:00	0	6	2	8	5
1	2008-08-28 06:38:00	0	6	2	8	5
1	2008-08-28 06:39:00	0	6	2	8	5
1	2008-08-28 06:40:00	0	6	2	8	5
1	2008-08-28 06:41:00	0	6	2	8	5
1	2008-08-28 06:42:00	0	6	2	8	5
1	2008-08-28 06:43:00	0	6	2	8	5
1	2008-08-28 06:44:00	0	6	2	8	5
1	2008-08-28 06:45:00	0	6	2	8	5
1	2008-08-28 06:46:00	0	6	2	8	5
1	2008-08-28 06:47:00	0	6	2	8	5
1	2008-08-28 06:48:00	0	6	2	8	5
1	2008-08-28 06:49:00	0	6	2	8	5
1	2008-08-28 06:50:00	26	6	2	8	5
1	2008-08-28 06:51:00	0	6	2	8	5
1	2008-08-28 06:52:00	0	6	2	8	5
1	2008-08-28 06:53:00	0	6	2	8	5
1	2008-08-28 06:54:00	0	6	2	8	5
1	2008-08-28 06:55:00	0	6	2	8	5
1	2008-08-28 06:56:00	0	6	2	8	5
1	2008-08-28 06:57:00	0	6	2	8	5
1	2008-08-28 06:58:00	0	6	2	8	5
1	2008-08-28 06:59:00	31	6	2	8	5
1	2008-08-28 07:00:00	0	6	2	8	5
1	2008-08-28 07:01:00	0	7	2	8	5
1	2008-08-28 07:02:00	0	7	2	8	5
1	2008-08-28 07:03:00	0	7	2	8	5
1	2008-08-28 07:04:00	0	7	2	8	5
1	2008-08-28 07:05:00	31	7	2	8	5
1	2008-08-28 07:06:00	0	7	2	8	5
1	2008-08-28 07:07:00	0	7	2	8	5
1	2008-08-28 07:08:00	0	7	2	8	5
1	2008-08-28 07:09:00	0	7	2	8	5
1	2008-08-28 07:10:00	0	7	2	8	5
1	2008-08-28 07:11:00	0	7	2	8	5
1	2008-08-28 07:12:00	57	7	2	8	5
1	2008-08-28 07:13:00	36	7	2	8	5
1	2008-08-28 07:14:00	10	7	2	8	5
1	2008-08-28 07:15:00	0	7	2	8	5
1	2008-08-28 07:16:00	0	7	2	8	5
1	2008-08-28 07:17:00	0	7	2	8	5
1	2008-08-28 07:18:00	0	7	2	8	5
1	2008-08-28 07:19:00	0	7	2	8	5
1	2008-08-28 07:20:00	21	7	2	8	5
1	2008-08-28 07:21:00	0	7	2	8	5
1	2008-08-28 07:22:00	0	7	2	8	5
1	2008-08-28 07:23:00	0	7	2	8	5
1	2008-08-28 07:24:00	0	7	2	8	5
1	2008-08-28 07:25:00	0	7	2	8	5
1	2008-08-28 07:26:00	16	7	2	8	5
1	2008-08-28 07:27:00	0	7	2	8	5
1	2008-08-28 07:28:00	0	7	2	8	5
1	2008-08-28 07:29:00	80	7	2	8	5
1	2008-08-28 07:30:00	1358	7	2	8	5
1	2008-08-28 07:31:00	1307	7	2	8	5
1	2008-08-28 07:32:00	1142	7	2	8	5
1	2008-08-28 07:33:00	0	7	2	8	5
1	2008-08-28 07:34:00	144	7	2	8	5
1	2008-08-28 07:35:00	47	7	2	8	5
1	2008-08-28 07:36:00	0	7	2	8	5
1	2008-08-28 07:37:00	26	7	2	8	5
1	2008-08-28 07:38:00	235	7	2	8	5
1	2008-08-28 07:39:00	334	7	2	8	5
1	2008-08-28 07:40:00	252	7	2	8	5
1	2008-08-28 07:41:00	1055	7	2	8	5
1	2008-08-28 07:42:00	151	7	2	8	5
1	2008-08-28 07:43:00	26	7	2	8	5
1	2008-08-28 07:44:00	16	7	2	8	5
1	2008-08-28 07:45:00	0	7	2	8	5
1	2008-08-28 07:46:00	0	7	2	8	5
1	2008-08-28 07:47:00	476	7	2	8	5
1	2008-08-28 07:48:00	210	7	2	8	5
1	2008-08-28 07:49:00	0	7	2	8	5
1	2008-08-28 07:50:00	10	7	2	8	5
1	2008-08-28 07:51:00	21	7	2	8	5
1	2008-08-28 07:52:00	0	7	2	8	5
1	2008-08-28 07:53:00	0	7	2	8	5
1	2008-08-28 07:54:00	36	7	2	8	5
1	2008-08-28 07:55:00	10	7	2	8	5
1	2008-08-28 07:56:00	0	7	2	8	5
1	2008-08-28 07:57:00	0	7	2	8	5
1	2008-08-28 07:58:00	0	7	2	8	5
1	2008-08-28 07:59:00	21	7	2	8	5
1	2008-08-28 08:00:00	0	7	2	8	5
1	2008-08-28 08:01:00	0	8	2	8	5
1	2008-08-28 08:02:00	99	8	2	8	5
1	2008-08-28 08:03:00	565	8	2	8	5
1	2008-08-28 08:04:00	124	8	2	8	5
1	2008-08-28 08:05:00	5	8	2	8	5
1	2008-08-28 08:06:00	0	8	2	8	5
1	2008-08-28 08:07:00	0	8	2	8	5
1	2008-08-28 08:08:00	0	8	2	8	5
1	2008-08-28 08:09:00	80	8	2	8	5
1	2008-08-28 08:10:00	99	8	2	8	5
1	2008-08-28 08:11:00	118	8	2	8	5
1	2008-08-28 08:12:00	62	8	2	8	5
1	2008-08-28 08:13:00	173	8	2	8	5
1	2008-08-28 08:14:00	334	8	2	8	5
1	2008-08-28 08:15:00	2180	8	2	8	5
1	2008-08-28 08:16:00	1164	8	2	8	5
1	2008-08-28 08:17:00	606	8	2	8	5
1	2008-08-28 08:18:00	47	8	2	8	5
1	2008-08-28 08:19:00	1076	8	2	8	5
1	2008-08-28 08:20:00	758	8	2	8	5
1	2008-08-28 08:21:00	187	8	2	8	5
1	2008-08-28 08:22:00	606	8	2	8	5
1	2008-08-28 08:23:00	344	8	2	8	5
1	2008-08-28 08:24:00	679	8	2	8	5
1	2008-08-28 08:25:00	278	8	2	8	5
1	2008-08-28 08:26:00	180	8	2	8	5
1	2008-08-28 08:27:00	158	8	2	8	5
1	2008-08-28 08:28:00	538	8	2	8	5
1	2008-08-28 08:29:00	565	8	2	8	5
1	2008-08-28 08:30:00	592	8	2	8	5
1	2008-08-28 08:31:00	47	8	2	8	5
1	2008-08-28 08:32:00	195	8	2	8	5
1	2008-08-28 08:33:00	501	8	2	8	5
1	2008-08-28 08:34:00	47	8	2	8	5
1	2008-08-28 08:35:00	21	8	2	8	5
1	2008-08-28 08:36:00	0	8	2	8	5
1	2008-08-28 08:37:00	0	8	2	8	5
1	2008-08-28 08:38:00	26	8	2	8	5
1	2008-08-28 08:39:00	0	8	2	8	5
1	2008-08-28 08:40:00	5	8	2	8	5
1	2008-08-28 08:41:00	0	8	2	8	5
1	2008-08-28 08:42:00	0	8	2	8	5
1	2008-08-28 08:43:00	0	8	2	8	5
1	2008-08-28 08:44:00	0	8	2	8	5
1	2008-08-28 08:45:00	0	8	2	8	5
1	2008-08-28 08:46:00	0	8	2	8	5
1	2008-08-28 08:47:00	0	8	2	8	5
1	2008-08-28 08:48:00	0	8	2	8	5
1	2008-08-28 08:49:00	0	8	2	8	5
1	2008-08-28 08:50:00	0	8	2	8	5
1	2008-08-28 08:51:00	0	8	2	8	5
1	2008-08-28 08:52:00	0	8	2	8	5
1	2008-08-28 08:53:00	0	8	2	8	5
1	2008-08-28 08:54:00	0	8	2	8	5
1	2008-08-28 08:55:00	0	8	2	8	5
1	2008-08-28 08:56:00	0	8	2	8	5
1	2008-08-28 08:57:00	0	8	2	8	5
1	2008-08-28 08:58:00	0	8	2	8	5
1	2008-08-28 08:59:00	0	8	2	8	5
1	2008-08-28 09:00:00	0	8	2	8	5
1	2008-08-28 09:01:00	0	9	2	8	5
1	2008-08-28 09:02:00	0	9	2	8	5
1	2008-08-28 09:03:00	0	9	2	8	5
1	2008-08-28 09:04:00	0	9	2	8	5
1	2008-08-28 09:05:00	0	9	2	8	5
1	2008-08-28 09:06:00	0	9	2	8	5
1	2008-08-28 09:07:00	0	9	2	8	5
1	2008-08-28 09:08:00	0	9	2	8	5
1	2008-08-28 09:09:00	0	9	2	8	5
1	2008-08-28 09:10:00	0	9	2	8	5
1	2008-08-28 09:11:00	0	9	2	8	5
1	2008-08-28 09:12:00	0	9	2	8	5
1	2008-08-28 09:13:00	0	9	2	8	5
1	2008-08-28 09:14:00	0	9	2	8	5
1	2008-08-28 09:15:00	0	9	2	8	5
1	2008-08-28 09:16:00	0	9	2	8	5
1	2008-08-28 09:17:00	0	9	2	8	5
1	2008-08-28 09:18:00	0	9	2	8	5
1	2008-08-28 09:19:00	10	9	2	8	5
1	2008-08-28 09:20:00	297	9	2	8	5
1	2008-08-28 09:21:00	118	9	2	8	5
1	2008-08-28 09:22:00	124	9	2	8	5
1	2008-08-28 09:23:00	10	9	2	8	5
1	2008-08-28 09:24:00	26	9	2	8	5
1	2008-08-28 09:25:00	16	9	2	8	5
1	2008-08-28 09:26:00	0	9	2	8	5
1	2008-08-28 09:27:00	16	9	2	8	5
1	2008-08-28 09:28:00	31	9	2	8	5
1	2008-08-28 09:29:00	0	9	2	8	5
1	2008-08-28 09:30:00	0	9	2	8	5
1	2008-08-28 09:31:00	31	9	2	8	5
1	2008-08-28 09:32:00	0	9	2	8	5
1	2008-08-28 09:33:00	0	9	2	8	5
1	2008-08-28 09:34:00	0	9	2	8	5
1	2008-08-28 09:35:00	0	9	2	8	5
1	2008-08-28 09:36:00	0	9	2	8	5
1	2008-08-28 09:37:00	0	9	2	8	5
1	2008-08-28 09:38:00	0	9	2	8	5
1	2008-08-28 09:39:00	0	9	2	8	5
1	2008-08-28 09:40:00	0	9	2	8	5
1	2008-08-28 09:41:00	0	9	2	8	5
1	2008-08-28 09:42:00	0	9	2	8	5
1	2008-08-28 09:43:00	0	9	2	8	5
1	2008-08-28 09:44:00	0	9	2	8	5
1	2008-08-28 09:45:00	0	9	2	8	5
1	2008-08-28 09:46:00	0	9	2	8	5
1	2008-08-28 09:47:00	0	9	2	8	5
1	2008-08-28 09:48:00	0	9	2	8	5
1	2008-08-28 09:49:00	0	9	2	8	5
1	2008-08-28 09:50:00	0	9	2	8	5
1	2008-08-28 09:51:00	0	9	2	8	5
1	2008-08-28 09:52:00	0	9	2	8	5
1	2008-08-28 09:53:00	0	9	2	8	5
1	2008-08-28 09:54:00	0	9	2	8	5
1	2008-08-28 09:55:00	0	9	2	8	5
1	2008-08-28 09:56:00	0	9	2	8	5
1	2008-08-28 09:57:00	0	9	2	8	5
1	2008-08-28 09:58:00	0	9	2	8	5
1	2008-08-28 09:59:00	0	9	2	8	5
1	2008-08-28 10:00:00	0	9	2	8	5
1	2008-08-28 10:01:00	0	10	2	8	5
1	2008-08-28 10:02:00	0	10	2	8	5
1	2008-08-28 10:03:00	0	10	2	8	5
1	2008-08-28 10:04:00	26	10	2	8	5
1	2008-08-28 10:05:00	0	10	2	8	5
1	2008-08-28 10:06:00	0	10	2	8	5
1	2008-08-28 10:07:00	21	10	2	8	5
1	2008-08-28 10:08:00	0	10	2	8	5
1	2008-08-28 10:09:00	0	10	2	8	5
1	2008-08-28 10:10:00	0	10	2	8	5
1	2008-08-28 10:11:00	0	10	2	8	5
1	2008-08-28 10:12:00	0	10	2	8	5
1	2008-08-28 10:13:00	0	10	2	8	5
1	2008-08-28 10:14:00	0	10	2	8	5
1	2008-08-28 10:15:00	0	10	2	8	5
1	2008-08-28 10:16:00	0	10	2	8	5
1	2008-08-28 10:17:00	0	10	2	8	5
1	2008-08-28 10:18:00	0	10	2	8	5
1	2008-08-28 10:19:00	0	10	2	8	5
1	2008-08-28 10:20:00	0	10	2	8	5
1	2008-08-28 10:21:00	68	10	2	8	5
1	2008-08-28 10:22:00	0	10	2	8	5
1	2008-08-28 10:23:00	5	10	2	8	5
1	2008-08-28 10:24:00	0	10	2	8	5
1	2008-08-28 10:25:00	26	10	2	8	5
1	2008-08-28 10:26:00	0	10	2	8	5
1	2008-08-28 10:27:00	0	10	2	8	5
1	2008-08-28 10:28:00	0	10	2	8	5
1	2008-08-28 10:29:00	0	10	2	8	5
1	2008-08-28 10:30:00	0	10	2	8	5
1	2008-08-28 10:31:00	0	10	2	8	5
1	2008-08-28 10:32:00	0	10	2	8	5
1	2008-08-28 10:33:00	0	10	2	8	5
1	2008-08-28 10:34:00	0	10	2	8	5
1	2008-08-28 10:35:00	0	10	2	8	5
1	2008-08-28 10:36:00	0	10	2	8	5
1	2008-08-28 10:37:00	0	10	2	8	5
1	2008-08-28 10:38:00	0	10	2	8	5
1	2008-08-28 10:39:00	0	10	2	8	5
1	2008-08-28 10:40:00	0	10	2	8	5
1	2008-08-28 10:41:00	0	10	2	8	5
1	2008-08-28 10:42:00	0	10	2	8	5
1	2008-08-28 10:43:00	0	10	2	8	5
1	2008-08-28 10:44:00	0	10	2	8	5
1	2008-08-28 10:45:00	0	10	2	8	5
1	2008-08-28 10:46:00	0	10	2	8	5
1	2008-08-28 10:47:00	0	10	2	8	5
1	2008-08-28 10:48:00	0	10	2	8	5
1	2008-08-28 10:49:00	0	10	2	8	5
1	2008-08-28 10:50:00	0	10	2	8	5
1	2008-08-28 10:51:00	0	10	2	8	5
1	2008-08-28 10:52:00	0	10	2	8	5
1	2008-08-28 10:53:00	0	10	2	8	5
1	2008-08-28 10:54:00	0	10	2	8	5
1	2008-08-28 10:55:00	0	10	2	8	5
1	2008-08-28 10:56:00	0	10	2	8	5
1	2008-08-28 10:57:00	0	10	2	8	5
1	2008-08-28 10:58:00	0	10	2	8	5
1	2008-08-28 10:59:00	0	10	2	8	5
1	2008-08-28 11:00:00	0	10	2	8	5
1	2008-08-28 11:01:00	0	11	2	8	5
1	2008-08-28 11:02:00	0	11	2	8	5
1	2008-08-28 11:03:00	0	11	2	8	5
1	2008-08-28 11:04:00	0	11	2	8	5
1	2008-08-28 11:05:00	36	11	2	8	5
1	2008-08-28 11:06:00	0	11	2	8	5
1	2008-08-28 11:07:00	21	11	2	8	5
1	2008-08-28 11:08:00	0	11	2	8	5
1	2008-08-28 11:09:00	0	11	2	8	5
1	2008-08-28 11:10:00	0	11	2	8	5
1	2008-08-28 11:11:00	0	11	2	8	5
1	2008-08-28 11:12:00	0	11	2	8	5
1	2008-08-28 11:13:00	0	11	2	8	5
1	2008-08-28 11:14:00	0	11	2	8	5
1	2008-08-28 11:15:00	0	11	2	8	5
1	2008-08-28 11:16:00	0	11	2	8	5
1	2008-08-28 11:17:00	0	11	2	8	5
1	2008-08-28 11:18:00	0	11	2	8	5
1	2008-08-28 11:19:00	0	11	2	8	5
1	2008-08-28 11:20:00	0	11	2	8	5
1	2008-08-28 11:21:00	0	11	2	8	5
1	2008-08-28 11:22:00	0	11	2	8	5
1	2008-08-28 11:23:00	16	11	2	8	5
1	2008-08-28 11:24:00	57	11	2	8	5
1	2008-08-28 11:25:00	57	11	2	8	5
1	2008-08-28 11:26:00	0	11	2	8	5
1	2008-08-28 11:27:00	42	11	2	8	5
1	2008-08-28 11:28:00	210	11	2	8	5
1	2008-08-28 11:29:00	42	11	2	8	5
1	2008-08-28 11:30:00	74	11	2	8	5
1	2008-08-28 11:31:00	99	11	2	8	5
1	2008-08-28 11:32:00	10	11	2	8	5
1	2008-08-28 11:33:00	0	11	2	8	5
1	2008-08-28 11:34:00	0	11	2	8	5
1	2008-08-28 11:35:00	0	11	2	8	5
1	2008-08-28 11:36:00	165	11	2	8	5
1	2008-08-28 11:37:00	1098	11	2	8	5
1	2008-08-28 11:38:00	42	11	2	8	5
1	2008-08-28 11:39:00	0	11	2	8	5
1	2008-08-28 11:40:00	0	11	2	8	5
1	2008-08-28 11:41:00	0	11	2	8	5
1	2008-08-28 11:42:00	0	11	2	8	5
1	2008-08-28 11:43:00	0	11	2	8	5
1	2008-08-28 11:44:00	0	11	2	8	5
1	2008-08-28 11:45:00	0	11	2	8	5
1	2008-08-28 11:46:00	0	11	2	8	5
1	2008-08-28 11:47:00	0	11	2	8	5
1	2008-08-28 11:48:00	0	11	2	8	5
1	2008-08-28 11:49:00	0	11	2	8	5
1	2008-08-28 11:50:00	0	11	2	8	5
1	2008-08-28 11:51:00	0	11	2	8	5
1	2008-08-28 11:52:00	0	11	2	8	5
1	2008-08-28 11:53:00	0	11	2	8	5
1	2008-08-28 11:54:00	0	11	2	8	5
1	2008-08-28 11:55:00	0	11	2	8	5
1	2008-08-28 11:56:00	0	11	2	8	5
1	2008-08-28 11:57:00	0	11	2	8	5
1	2008-08-28 11:58:00	0	11	2	8	5
1	2008-08-28 11:59:00	0	11	2	8	5
1	2008-08-28 12:00:00	0	11	2	8	5
1	2008-08-28 12:01:00	0	12	3	8	5
1	2008-08-28 12:02:00	0	12	3	8	5
1	2008-08-28 12:03:00	0	12	3	8	5
1	2008-08-28 12:04:00	0	12	3	8	5
1	2008-08-28 12:05:00	0	12	3	8	5
1	2008-08-28 12:06:00	0	12	3	8	5
1	2008-08-28 12:07:00	31	12	3	8	5
1	2008-08-28 12:08:00	0	12	3	8	5
1	2008-08-28 12:09:00	0	12	3	8	5
1	2008-08-28 12:10:00	0	12	3	8	5
1	2008-08-28 12:11:00	0	12	3	8	5
1	2008-08-28 12:12:00	0	12	3	8	5
1	2008-08-28 12:13:00	0	12	3	8	5
1	2008-08-28 12:14:00	0	12	3	8	5
1	2008-08-28 12:15:00	0	12	3	8	5
1	2008-08-28 12:16:00	0	12	3	8	5
1	2008-08-28 12:17:00	0	12	3	8	5
1	2008-08-28 12:18:00	0	12	3	8	5
1	2008-08-28 12:19:00	0	12	3	8	5
1	2008-08-28 12:20:00	0	12	3	8	5
1	2008-08-28 12:21:00	0	12	3	8	5
1	2008-08-28 12:22:00	0	12	3	8	5
1	2008-08-28 12:23:00	0	12	3	8	5
1	2008-08-28 12:24:00	0	12	3	8	5
1	2008-08-28 12:25:00	0	12	3	8	5
1	2008-08-28 12:26:00	0	12	3	8	5
1	2008-08-28 12:27:00	0	12	3	8	5
1	2008-08-28 12:28:00	0	12	3	8	5
1	2008-08-28 12:29:00	0	12	3	8	5
1	2008-08-28 12:30:00	0	12	3	8	5
1	2008-08-28 12:31:00	0	12	3	8	5
1	2008-08-28 12:32:00	0	12	3	8	5
1	2008-08-28 12:33:00	0	12	3	8	5
1	2008-08-28 12:34:00	0	12	3	8	5
1	2008-08-28 12:35:00	0	12	3	8	5
1	2008-08-28 12:36:00	0	12	3	8	5
1	2008-08-28 12:37:00	0	12	3	8	5
1	2008-08-28 12:38:00	0	12	3	8	5
1	2008-08-28 12:39:00	5	12	3	8	5
1	2008-08-28 12:40:00	0	12	3	8	5
1	2008-08-28 12:41:00	0	12	3	8	5
1	2008-08-28 12:42:00	0	12	3	8	5
1	2008-08-28 12:43:00	0	12	3	8	5
1	2008-08-28 12:44:00	0	12	3	8	5
1	2008-08-28 12:45:00	0	12	3	8	5
1	2008-08-28 12:46:00	0	12	3	8	5
1	2008-08-28 12:47:00	0	12	3	8	5
1	2008-08-28 12:48:00	0	12	3	8	5
1	2008-08-28 12:49:00	0	12	3	8	5
1	2008-08-28 12:50:00	0	12	3	8	5
1	2008-08-28 12:51:00	0	12	3	8	5
1	2008-08-28 12:52:00	0	12	3	8	5
1	2008-08-28 12:53:00	0	12	3	8	5
1	2008-08-28 12:54:00	5	12	3	8	5
1	2008-08-28 12:55:00	0	12	3	8	5
1	2008-08-28 12:56:00	0	12	3	8	5
1	2008-08-28 12:57:00	0	12	3	8	5
1	2008-08-28 12:58:00	0	12	3	8	5
1	2008-08-28 12:59:00	0	12	3	8	5
1	2008-08-28 13:00:00	0	12	3	8	5
1	2008-08-28 13:01:00	0	13	3	8	5
1	2008-08-28 13:02:00	0	13	3	8	5
1	2008-08-28 13:03:00	0	13	3	8	5
1	2008-08-28 13:04:00	0	13	3	8	5
1	2008-08-28 13:05:00	0	13	3	8	5
1	2008-08-28 13:06:00	0	13	3	8	5
1	2008-08-28 13:07:00	0	13	3	8	5
1	2008-08-28 13:08:00	0	13	3	8	5
1	2008-08-28 13:09:00	0	13	3	8	5
1	2008-08-28 13:10:00	0	13	3	8	5
1	2008-08-28 13:11:00	0	13	3	8	5
1	2008-08-28 13:12:00	0	13	3	8	5
1	2008-08-28 13:13:00	0	13	3	8	5
1	2008-08-28 13:14:00	0	13	3	8	5
1	2008-08-28 13:15:00	0	13	3	8	5
1	2008-08-28 13:16:00	0	13	3	8	5
1	2008-08-28 13:17:00	0	13	3	8	5
1	2008-08-28 13:18:00	0	13	3	8	5
1	2008-08-28 13:19:00	0	13	3	8	5
1	2008-08-28 13:20:00	5	13	3	8	5
1	2008-08-28 13:21:00	0	13	3	8	5
1	2008-08-28 13:22:00	0	13	3	8	5
1	2008-08-28 13:23:00	47	13	3	8	5
1	2008-08-28 13:24:00	10	13	3	8	5
1	2008-08-28 13:25:00	86	13	3	8	5
1	2008-08-28 13:26:00	0	13	3	8	5
1	2008-08-28 13:27:00	0	13	3	8	5
1	2008-08-28 13:28:00	0	13	3	8	5
1	2008-08-28 13:29:00	0	13	3	8	5
1	2008-08-28 13:30:00	111	13	3	8	5
1	2008-08-28 13:31:00	52	13	3	8	5
1	2008-08-28 13:32:00	118	13	3	8	5
1	2008-08-28 13:33:00	297	13	3	8	5
1	2008-08-28 13:34:00	42	13	3	8	5
1	2008-08-28 13:35:00	47	13	3	8	5
1	2008-08-28 13:36:00	130	13	3	8	5
1	2008-08-28 13:37:00	5	13	3	8	5
1	2008-08-28 13:38:00	0	13	3	8	5
1	2008-08-28 13:39:00	0	13	3	8	5
1	2008-08-28 13:40:00	0	13	3	8	5
1	2008-08-28 13:41:00	0	13	3	8	5
1	2008-08-28 13:42:00	0	13	3	8	5
1	2008-08-28 13:43:00	0	13	3	8	5
1	2008-08-28 13:44:00	0	13	3	8	5
1	2008-08-28 13:45:00	0	13	3	8	5
1	2008-08-28 13:46:00	0	13	3	8	5
1	2008-08-28 13:47:00	0	13	3	8	5
1	2008-08-28 13:48:00	0	13	3	8	5
1	2008-08-28 13:49:00	0	13	3	8	5
1	2008-08-28 13:50:00	0	13	3	8	5
1	2008-08-28 13:51:00	0	13	3	8	5
1	2008-08-28 13:52:00	0	13	3	8	5
1	2008-08-28 13:53:00	0	13	3	8	5
1	2008-08-28 13:54:00	0	13	3	8	5
1	2008-08-28 13:55:00	0	13	3	8	5
1	2008-08-28 13:56:00	0	13	3	8	5
1	2008-08-28 13:57:00	0	13	3	8	5
1	2008-08-28 13:58:00	0	13	3	8	5
1	2008-08-28 13:59:00	0	13	3	8	5
1	2008-08-28 14:00:00	0	13	3	8	5
1	2008-08-28 14:01:00	0	14	3	8	5
1	2008-08-28 14:02:00	0	14	3	8	5
1	2008-08-28 14:03:00	0	14	3	8	5
1	2008-08-28 14:04:00	0	14	3	8	5
1	2008-08-28 14:05:00	0	14	3	8	5
1	2008-08-28 14:06:00	0	14	3	8	5
1	2008-08-28 14:07:00	10	14	3	8	5
1	2008-08-28 14:08:00	0	14	3	8	5
1	2008-08-28 14:09:00	0	14	3	8	5
1	2008-08-28 14:10:00	0	14	3	8	5
1	2008-08-28 14:11:00	0	14	3	8	5
1	2008-08-28 14:12:00	0	14	3	8	5
1	2008-08-28 14:13:00	0	14	3	8	5
1	2008-08-28 14:14:00	0	14	3	8	5
1	2008-08-28 14:15:00	0	14	3	8	5
1	2008-08-28 14:16:00	0	14	3	8	5
1	2008-08-28 14:17:00	0	14	3	8	5
1	2008-08-28 14:18:00	5	14	3	8	5
1	2008-08-28 14:19:00	0	14	3	8	5
1	2008-08-28 14:20:00	0	14	3	8	5
1	2008-08-28 14:21:00	0	14	3	8	5
1	2008-08-28 14:22:00	0	14	3	8	5
1	2008-08-28 14:23:00	93	14	3	8	5
1	2008-08-28 14:24:00	0	14	3	8	5
1	2008-08-28 14:25:00	0	14	3	8	5
1	2008-08-28 14:26:00	0	14	3	8	5
1	2008-08-28 14:27:00	47	14	3	8	5
1	2008-08-28 14:28:00	16	14	3	8	5
1	2008-08-28 14:29:00	0	14	3	8	5
1	2008-08-28 14:30:00	0	14	3	8	5
1	2008-08-28 14:31:00	0	14	3	8	5
1	2008-08-28 14:32:00	0	14	3	8	5
1	2008-08-28 14:33:00	0	14	3	8	5
1	2008-08-28 14:34:00	0	14	3	8	5
1	2008-08-28 14:35:00	0	14	3	8	5
1	2008-08-28 14:36:00	0	14	3	8	5
1	2008-08-28 14:37:00	0	14	3	8	5
1	2008-08-28 14:38:00	0	14	3	8	5
1	2008-08-28 14:39:00	0	14	3	8	5
1	2008-08-28 14:40:00	0	14	3	8	5
1	2008-08-28 14:41:00	0	14	3	8	5
1	2008-08-28 14:42:00	0	14	3	8	5
1	2008-08-28 14:43:00	0	14	3	8	5
1	2008-08-28 14:44:00	0	14	3	8	5
1	2008-08-28 14:45:00	0	14	3	8	5
1	2008-08-28 14:46:00	0	14	3	8	5
1	2008-08-28 14:47:00	0	14	3	8	5
1	2008-08-28 14:48:00	99	14	3	8	5
1	2008-08-28 14:49:00	62	14	3	8	5
1	2008-08-28 14:50:00	0	14	3	8	5
1	2008-08-28 14:51:00	0	14	3	8	5
1	2008-08-28 14:52:00	10	14	3	8	5
1	2008-08-28 14:53:00	0	14	3	8	5
1	2008-08-28 14:54:00	0	14	3	8	5
1	2008-08-28 14:55:00	0	14	3	8	5
1	2008-08-28 14:56:00	0	14	3	8	5
1	2008-08-28 14:57:00	0	14	3	8	5
1	2008-08-28 14:58:00	0	14	3	8	5
1	2008-08-28 14:59:00	0	14	3	8	5
1	2008-08-28 15:00:00	52	14	3	8	5
1	2008-08-28 15:01:00	297	15	3	8	5
1	2008-08-28 15:02:00	74	15	3	8	5
1	2008-08-28 15:03:00	36	15	3	8	5
1	2008-08-28 15:04:00	10	15	3	8	5
1	2008-08-28 15:05:00	202	15	3	8	5
1	2008-08-28 15:06:00	0	15	3	8	5
1	2008-08-28 15:07:00	441	15	3	8	5
1	2008-08-28 15:08:00	552	15	3	8	5
1	2008-08-28 15:09:00	376	15	3	8	5
1	2008-08-28 15:10:00	552	15	3	8	5
1	2008-08-28 15:11:00	974	15	3	8	5
1	2008-08-28 15:12:00	664	15	3	8	5
1	2008-08-28 15:13:00	1384	15	3	8	5
1	2008-08-28 15:14:00	376	15	3	8	5
1	2008-08-28 15:15:00	620	15	3	8	5
1	2008-08-28 15:16:00	355	15	3	8	5
1	2008-08-28 15:17:00	21	15	3	8	5
1	2008-08-28 15:18:00	31	15	3	8	5
1	2008-08-28 15:19:00	36	15	3	8	5
[truncated: 58,481 more rows]

## Sheet: Pivot Segment
Multiplier	2
x (Low Intensity)	472.581
y (High Intensity)	472.707
	Column Labels
Values	1	2	3	4	5	6	Grand Total
Average of Activity	65.3771	68.3712	66.4529	57.0953	69.9743	74.4246	66.9557
StdDev of Activity	203.602	202.168	207.63	217.754	239.481	281.683	227.434
Count of Activity	10080	10080	9300	10080	10080	10080	59700
Count Above x	353	395	390	347	424	454
% Above x	0.0350198	0.0391865	0.0419355	0.0344246	0.0420635	0.0450397
Count Above y		395	390	347	424	454
% Above y		0.0391865	0.0419355	0.0344246	0.0420635	0.0450397

## Sheet: Pivot Weekday
Sum of Activity	Column Labels
Row Labels	1	2	3	4	5	6	Grand Total
1	119528	110762	70705	77808	157590	143331	679724
2	76415	104551	98415	66088	75616	132998	554083
3	62213	125077	86817	76392	96876	168479	615854
4	115994	77410	97087	69756	114168	59232	533647
5	108333	92371	113172	69377	85504	85292	554049
6	82631	106850	84364	61834	99664	78594	513937
7	93887	72161	67452	154266	75923	82274	545963
Grand Total	659001	689182	618012	575521	705341	750200	3997257
Count of Activity	Column Labels
Row Labels	1	2	3	4	5	6	Grand Total
1	1440	1440	960	1440	1440	1440	8160
2	1440	1440	1440	1440	1440	1440	8640
3	1440	1440	1440	1440	1440	1440	8640
4	1440	1440	1440	1440	1440	1440	8640
5	1440	1440	1440	1440	1440	1440	8640
6	1440	1440	1440	1440	1440	1440	8640
7	1440	1440	1140	1440	1440	1440	8340
Grand Total	10080	10080	9300	10080	10080	10080	59700

## Sheet: Pivot Quadrant
Sum of Activity	Column Labels
Row Labels	1	2	3	4	5	6	Grand Total
1	9983	7402	8670	8635	14558	32733	81981
2	167942	151190	148519	114020	127525	105434	814630
3	223360	237287	189737	188173	233385	226543	1298485
4	257716	293303	271086	264693	329873	385490	1802161
Grand Total	659001	689182	618012	575521	705341	750200	3997257
Average	164750	172296	154503	143880	176335	187550
Count of Activity	Column Labels
Row Labels	1	2	3	4	5	6	Grand Total
1	2520	2520	2160	2520	2520	2520	14760
2	2520	2520	2400	2520	2520	2520	15000
3	2520	2520	2520	2520	2520	2520	15120
4	2520	2520	2220	2520	2520	2520	14820
Grand Total	10080	10080	9300	10080	10080	10080	59700

## Sheet: 8.20.08
Actogram, Copy Raw Data, All Days
Identity:	Denver
Filename:	E:\Active Research Files\meloxicam titre canine\cases\denver\Denver 8.20.08.AWC
Gender:	M
Age:	11
Height:	40.6 cm	16.0 in
Weight:	26.6 kg	58.6 lbs
Start Date:	20-Aug-2008 (Wed)
Start Time:	18:00:00
Interval:	1.00 mins
Date Stamp:	Time Stamp:	Activity Data:	Marker Press:
2008-08-20	00:00:00	0
2008-08-20	00:01:00	0
2008-08-20	00:02:00	0
2008-08-20	00:03:00	0
2008-08-20	00:04:00	0
2008-08-20	00:05:00	0
2008-08-20	00:06:00	0
2008-08-20	00:07:00	0
2008-08-20	00:08:00	0
2008-08-20	00:09:00	0
2008-08-20	00:10:00	0
2008-08-20	00:11:00	0
2008-08-20	00:12:00	0
2008-08-20	00:13:00	0
2008-08-20	00:14:00	0
2008-08-20	00:15:00	0
2008-08-20	00:16:00	0
2008-08-20	00:17:00	0
2008-08-20	00:18:00	0
2008-08-20	00:19:00	0
2008-08-20	00:20:00	0
2008-08-20	00:21:00	0
2008-08-20	00:22:00	0
2008-08-20	00:23:00	0
2008-08-20	00:24:00	0
2008-08-20	00:25:00	0
2008-08-20	00:26:00	0
2008-08-20	00:27:00	0
2008-08-20	00:28:00	0
2008-08-20	00:29:00	0
2008-08-20	00:30:00	0
2008-08-20	00:31:00	0
2008-08-20	00:32:00	0
2008-08-20	00:33:00	0
2008-08-20	00:34:00	0
2008-08-20	00:35:00	0
2008-08-20	00:36:00	0
2008-08-20	00:37:00	0
2008-08-20	00:38:00	0
2008-08-20	00:39:00	0
2008-08-20	00:40:00	0
2008-08-20	00:41:00	0
2008-08-20	00:42:00	0
2008-08-20	00:43:00	0
2008-08-20	00:44:00	0
2008-08-20	00:45:00	0
2008-08-20	00:46:00	0
2008-08-20	00:47:00	0
2008-08-20	00:48:00	0
2008-08-20	00:49:00	0
2008-08-20	00:50:00	0
2008-08-20	00:51:00	0
2008-08-20	00:52:00	0
2008-08-20	00:53:00	0
2008-08-20	00:54:00	0
2008-08-20	00:55:00	0
2008-08-20	00:56:00	0
2008-08-20	00:57:00	0
2008-08-20	00:58:00	0
2008-08-20	00:59:00	0
2008-08-20	01:00:00	0
2008-08-20	01:01:00	0
2008-08-20	01:02:00	0
2008-08-20	01:03:00	0
2008-08-20	01:04:00	0
2008-08-20	01:05:00	0
2008-08-20	01:06:00	0
2008-08-20	01:07:00	0
2008-08-20	01:08:00	0
2008-08-20	01:09:00	0
2008-08-20	01:10:00	0
2008-08-20	01:11:00	0
2008-08-20	01:12:00	0
2008-08-20	01:13:00	0
2008-08-20	01:14:00	0
2008-08-20	01:15:00	0
2008-08-20	01:16:00	0
2008-08-20	01:17:00	0
2008-08-20	01:18:00	0
2008-08-20	01:19:00	0
2008-08-20	01:20:00	0
2008-08-20	01:21:00	0
2008-08-20	01:22:00	0
2008-08-20	01:23:00	0
2008-08-20	01:24:00	0
2008-08-20	01:25:00	0
2008-08-20	01:26:00	0
2008-08-20	01:27:00	0
2008-08-20	01:28:00	0
2008-08-20	01:29:00	0
2008-08-20	01:30:00	0
2008-08-20	01:31:00	0
2008-08-20	01:32:00	0
2008-08-20	01:33:00	0
2008-08-20	01:34:00	0
2008-08-20	01:35:00	0
2008-08-20	01:36:00	0
2008-08-20	01:37:00	0
2008-08-20	01:38:00	0
2008-08-20	01:39:00	0
2008-08-20	01:40:00	0
2008-08-20	01:41:00	0
2008-08-20	01:42:00	0
2008-08-20	01:43:00	0
2008-08-20	01:44:00	0
2008-08-20	01:45:00	0
2008-08-20	01:46:00	0
2008-08-20	01:47:00	0
2008-08-20	01:48:00	0
2008-08-20	01:49:00	0
2008-08-20	01:50:00	0
2008-08-20	01:51:00	0
2008-08-20	01:52:00	0
2008-08-20	01:53:00	0
2008-08-20	01:54:00	0
2008-08-20	01:55:00	0
2008-08-20	01:56:00	0
2008-08-20	01:57:00	0
2008-08-20	01:58:00	0
2008-08-20	01:59:00	0
2008-08-20	02:00:00	0
2008-08-20	02:01:00	0
2008-08-20	02:02:00	0
2008-08-20	02:03:00	0
2008-08-20	02:04:00	0
2008-08-20	02:05:00	0
2008-08-20	02:06:00	0
2008-08-20	02:07:00	0
2008-08-20	02:08:00	0
2008-08-20	02:09:00	0
2008-08-20	02:10:00	0
2008-08-20	02:11:00	0
2008-08-20	02:12:00	0
2008-08-20	02:13:00	0
2008-08-20	02:14:00	0
2008-08-20	02:15:00	0
2008-08-20	02:16:00	0
2008-08-20	02:17:00	0
2008-08-20	02:18:00	0
2008-08-20	02:19:00	0
2008-08-20	02:20:00	0
2008-08-20	02:21:00	0
2008-08-20	02:22:00	0
2008-08-20	02:23:00	0
2008-08-20	02:24:00	0
2008-08-20	02:25:00	0
2008-08-20	02:26:00	0
2008-08-20	02:27:00	0
2008-08-20	02:28:00	0
2008-08-20	02:29:00	0
2008-08-20	02:30:00	0
2008-08-20	02:31:00	0
2008-08-20	02:32:00	0
2008-08-20	02:33:00	0
2008-08-20	02:34:00	0
2008-08-20	02:35:00	0
2008-08-20	02:36:00	0
2008-08-20	02:37:00	0
2008-08-20	02:38:00	0
2008-08-20	02:39:00	0
2008-08-20	02:40:00	0
2008-08-20	02:41:00	0
2008-08-20	02:42:00	0
2008-08-20	02:43:00	0
2008-08-20	02:44:00	0
2008-08-20	02:45:00	0
2008-08-20	02:46:00	0
2008-08-20	02:47:00	0
2008-08-20	02:48:00	0
2008-08-20	02:49:00	0
2008-08-20	02:50:00	0
2008-08-20	02:51:00	0
2008-08-20	02:52:00	0
2008-08-20	02:53:00	0
2008-08-20	02:54:00	0
2008-08-20	02:55:00	0
2008-08-20	02:56:00	0
2008-08-20	02:57:00	0
2008-08-20	02:58:00	0
2008-08-20	02:59:00	0
2008-08-20	03:00:00	0
2008-08-20	03:01:00	0
2008-08-20	03:02:00	0
2008-08-20	03:03:00	0
2008-08-20	03:04:00	0
2008-08-20	03:05:00	0
2008-08-20	03:06:00	0
2008-08-20	03:07:00	0
2008-08-20	03:08:00	0
2008-08-20	03:09:00	0
2008-08-20	03:10:00	0
2008-08-20	03:11:00	0
2008-08-20	03:12:00	0
2008-08-20	03:13:00	0
2008-08-20	03:14:00	0
2008-08-20	03:15:00	0
2008-08-20	03:16:00	0
2008-08-20	03:17:00	0
2008-08-20	03:18:00	0
2008-08-20	03:19:00	0
2008-08-20	03:20:00	0
2008-08-20	03:21:00	0
2008-08-20	03:22:00	0
2008-08-20	03:23:00	0
2008-08-20	03:24:00	0
2008-08-20	03:25:00	0
2008-08-20	03:26:00	0
2008-08-20	03:27:00	0
2008-08-20	03:28:00	0
2008-08-20	03:29:00	0
2008-08-20	03:30:00	0
2008-08-20	03:31:00	0
2008-08-20	03:32:00	0
2008-08-20	03:33:00	0
2008-08-20	03:34:00	0
2008-08-20	03:35:00	0
2008-08-20	03:36:00	0
2008-08-20	03:37:00	0
2008-08-20	03:38:00	0
2008-08-20	03:39:00	0
2008-08-20	03:40:00	0
2008-08-20	03:41:00	0
2008-08-20	03:42:00	0
2008-08-20	03:43:00	0
2008-08-20	03:44:00	0
2008-08-20	03:45:00	0
2008-08-20	03:46:00	0
2008-08-20	03:47:00	0
2008-08-20	03:48:00	0
2008-08-20	03:49:00	0
2008-08-20	03:50:00	0
2008-08-20	03:51:00	0
2008-08-20	03:52:00	0
2008-08-20	03:53:00	0
2008-08-20	03:54:00	0
2008-08-20	03:55:00	0
2008-08-20	03:56:00	0
2008-08-20	03:57:00	0
2008-08-20	03:58:00	0
2008-08-20	03:59:00	0
2008-08-20	04:00:00	0
2008-08-20	04:01:00	0
2008-08-20	04:02:00	0
2008-08-20	04:03:00	0
2008-08-20	04:04:00	0
2008-08-20	04:05:00	0
2008-08-20	04:06:00	0
2008-08-20	04:07:00	0
2008-08-20	04:08:00	0
2008-08-20	04:09:00	0
2008-08-20	04:10:00	0
2008-08-20	04:11:00	0
2008-08-20	04:12:00	0
2008-08-20	04:13:00	0
2008-08-20	04:14:00	0
2008-08-20	04:15:00	0
2008-08-20	04:16:00	0
2008-08-20	04:17:00	0
2008-08-20	04:18:00	0
2008-08-20	04:19:00	0
2008-08-20	04:20:00	0
2008-08-20	04:21:00	0
2008-08-20	04:22:00	0
2008-08-20	04:23:00	0
2008-08-20	04:24:00	0
2008-08-20	04:25:00	0
2008-08-20	04:26:00	0
2008-08-20	04:27:00	0
2008-08-20	04:28:00	0
2008-08-20	04:29:00	0
2008-08-20	04:30:00	0
2008-08-20	04:31:00	0
2008-08-20	04:32:00	0
2008-08-20	04:33:00	0
2008-08-20	04:34:00	0
2008-08-20	04:35:00	0
2008-08-20	04:36:00	0
2008-08-20	04:37:00	0
2008-08-20	04:38:00	0
2008-08-20	04:39:00	0
2008-08-20	04:40:00	0
2008-08-20	04:41:00	0
2008-08-20	04:42:00	0
2008-08-20	04:43:00	0
2008-08-20	04:44:00	0
2008-08-20	04:45:00	0
2008-08-20	04:46:00	0
2008-08-20	04:47:00	0
2008-08-20	04:48:00	0
2008-08-20	04:49:00	0
2008-08-20	04:50:00	0
2008-08-20	04:51:00	0
2008-08-20	04:52:00	0
2008-08-20	04:53:00	0
2008-08-20	04:54:00	0
2008-08-20	04:55:00	0
2008-08-20	04:56:00	0
2008-08-20	04:57:00	0
2008-08-20	04:58:00	0
2008-08-20	04:59:00	0
2008-08-20	05:00:00	0
2008-08-20	05:01:00	0
2008-08-20	05:02:00	0
2008-08-20	05:03:00	0
2008-08-20	05:04:00	0
2008-08-20	05:05:00	0
2008-08-20	05:06:00	0
2008-08-20	05:07:00	0
2008-08-20	05:08:00	0
2008-08-20	05:09:00	0
2008-08-20	05:10:00	0
2008-08-20	05:11:00	0
2008-08-20	05:12:00	0
2008-08-20	05:13:00	0
2008-08-20	05:14:00	0
2008-08-20	05:15:00	0
2008-08-20	05:16:00	0
2008-08-20	05:17:00	0
2008-08-20	05:18:00	0
2008-08-20	05:19:00	0
2008-08-20	05:20:00	0
2008-08-20	05:21:00	0
2008-08-20	05:22:00	0
2008-08-20	05:23:00	0
2008-08-20	05:24:00	0
2008-08-20	05:25:00	0
2008-08-20	05:26:00	0
2008-08-20	05:27:00	0
2008-08-20	05:28:00	0
2008-08-20	05:29:00	0
2008-08-20	05:30:00	0
2008-08-20	05:31:00	0
2008-08-20	05:32:00	0
2008-08-20	05:33:00	0
2008-08-20	05:34:00	0
2008-08-20	05:35:00	0
2008-08-20	05:36:00	0
2008-08-20	05:37:00	0
2008-08-20	05:38:00	0
2008-08-20	05:39:00	0
2008-08-20	05:40:00	0
2008-08-20	05:41:00	0
2008-08-20	05:42:00	0
2008-08-20	05:43:00	0
2008-08-20	05:44:00	0
2008-08-20	05:45:00	0
2008-08-20	05:46:00	0
2008-08-20	05:47:00	0
2008-08-20	05:48:00	0
2008-08-20	05:49:00	0
2008-08-20	05:50:00	0
2008-08-20	05:51:00	0
2008-08-20	05:52:00	0
2008-08-20	05:53:00	0
2008-08-20	05:54:00	0
2008-08-20	05:55:00	0
2008-08-20	05:56:00	0
2008-08-20	05:57:00	0
2008-08-20	05:58:00	0
2008-08-20	05:59:00	0
2008-08-20	06:00:00	0
2008-08-20	06:01:00	0
2008-08-20	06:02:00	0
2008-08-20	06:03:00	0
2008-08-20	06:04:00	0
2008-08-20	06:05:00	0
2008-08-20	06:06:00	0
2008-08-20	06:07:00	0
2008-08-20	06:08:00	0
2008-08-20	06:09:00	0
2008-08-20	06:10:00	0
2008-08-20	06:11:00	0
2008-08-20	06:12:00	0
2008-08-20	06:13:00	0
2008-08-20	06:14:00	0
2008-08-20	06:15:00	0
2008-08-20	06:16:00	0
2008-08-20	06:17:00	0
2008-08-20	06:18:00	0
2008-08-20	06:19:00	0
2008-08-20	06:20:00	0
2008-08-20	06:21:00	0
2008-08-20	06:22:00	0
2008-08-20	06:23:00	0
2008-08-20	06:24:00	0
2008-08-20	06:25:00	0
2008-08-20	06:26:00	0
2008-08-20	06:27:00	0
2008-08-20	06:28:00	0
2008-08-20	06:29:00	0
2008-08-20	06:30:00	0
2008-08-20	06:31:00	0
2008-08-20	06:32:00	0
2008-08-20	06:33:00	0
2008-08-20	06:34:00	0
2008-08-20	06:35:00	0
2008-08-20	06:36:00	0
2008-08-20	06:37:00	0
2008-08-20	06:38:00	0
2008-08-20	06:39:00	0
2008-08-20	06:40:00	0
2008-08-20	06:41:00	0
2008-08-20	06:42:00	0
2008-08-20	06:43:00	0
2008-08-20	06:44:00	0
2008-08-20	06:45:00	0
2008-08-20	06:46:00	0
2008-08-20	06:47:00	0
2008-08-20	06:48:00	0
2008-08-20	06:49:00	0
2008-08-20	06:50:00	0
2008-08-20	06:51:00	0
2008-08-20	06:52:00	0
2008-08-20	06:53:00	0
2008-08-20	06:54:00	0
2008-08-20	06:55:00	0
2008-08-20	06:56:00	0
2008-08-20	06:57:00	0
2008-08-20	06:58:00	0
2008-08-20	06:59:00	0
2008-08-20	07:00:00	0
2008-08-20	07:01:00	0
2008-08-20	07:02:00	0
2008-08-20	07:03:00	0
2008-08-20	07:04:00	0
2008-08-20	07:05:00	0
2008-08-20	07:06:00	0
2008-08-20	07:07:00	0
2008-08-20	07:08:00	0
2008-08-20	07:09:00	0
2008-08-20	07:10:00	0
2008-08-20	07:11:00	0
2008-08-20	07:12:00	0
2008-08-20	07:13:00	0
2008-08-20	07:14:00	0
2008-08-20	07:15:00	0
2008-08-20	07:16:00	0
2008-08-20	07:17:00	0
2008-08-20	07:18:00	0
2008-08-20	07:19:00	0
2008-08-20	07:20:00	0
2008-08-20	07:21:00	0
2008-08-20	07:22:00	0
2008-08-20	07:23:00	0
2008-08-20	07:24:00	0
2008-08-20	07:25:00	0
2008-08-20	07:26:00	0
2008-08-20	07:27:00	0
2008-08-20	07:28:00	0
2008-08-20	07:29:00	0
2008-08-20	07:30:00	0
2008-08-20	07:31:00	0
2008-08-20	07:32:00	0
2008-08-20	07:33:00	0
2008-08-20	07:34:00	0
2008-08-20	07:35:00	0
2008-08-20	07:36:00	0
2008-08-20	07:37:00	0
2008-08-20	07:38:00	0
2008-08-20	07:39:00	0
2008-08-20	07:40:00	0
2008-08-20	07:41:00	0
2008-08-20	07:42:00	0
2008-08-20	07:43:00	0
2008-08-20	07:44:00	0
2008-08-20	07:45:00	0
2008-08-20	07:46:00	0
2008-08-20	07:47:00	0
2008-08-20	07:48:00	0
2008-08-20	07:49:00	0
2008-08-20	07:50:00	0
2008-08-20	07:51:00	0
2008-08-20	07:52:00	0
2008-08-20	07:53:00	0
2008-08-20	07:54:00	0
2008-08-20	07:55:00	0
2008-08-20	07:56:00	0
2008-08-20	07:57:00	0
2008-08-20	07:58:00	0
2008-08-20	07:59:00	0
2008-08-20	08:00:00	0
2008-08-20	08:01:00	0
2008-08-20	08:02:00	0
2008-08-20	08:03:00	0
2008-08-20	08:04:00	0
2008-08-20	08:05:00	0
2008-08-20	08:06:00	0
2008-08-20	08:07:00	0
2008-08-20	08:08:00	0
2008-08-20	08:09:00	0
2008-08-20	08:10:00	0
2008-08-20	08:11:00	0
2008-08-20	08:12:00	0
2008-08-20	08:13:00	0
2008-08-20	08:14:00	0
2008-08-20	08:15:00	0
2008-08-20	08:16:00	0
2008-08-20	08:17:00	0
2008-08-20	08:18:00	0
2008-08-20	08:19:00	0
2008-08-20	08:20:00	0
2008-08-20	08:21:00	0
2008-08-20	08:22:00	0
2008-08-20	08:23:00	0
2008-08-20	08:24:00	0
2008-08-20	08:25:00	0
2008-08-20	08:26:00	0
2008-08-20	08:27:00	0
2008-08-20	08:28:00	0
2008-08-20	08:29:00	0
2008-08-20	08:30:00	0
2008-08-20	08:31:00	0
2008-08-20	08:32:00	0
2008-08-20	08:33:00	0
2008-08-20	08:34:00	0
2008-08-20	08:35:00	0
2008-08-20	08:36:00	0
2008-08-20	08:37:00	0
2008-08-20	08:38:00	0
2008-08-20	08:39:00	0
2008-08-20	08:40:00	0
2008-08-20	08:41:00	0
2008-08-20	08:42:00	0
2008-08-20	08:43:00	0
2008-08-20	08:44:00	0
2008-08-20	08:45:00	0
2008-08-20	08:46:00	0
2008-08-20	08:47:00	0
2008-08-20	08:48:00	0
2008-08-20	08:49:00	0
2008-08-20	08:50:00	0
2008-08-20	08:51:00	0
2008-08-20	08:52:00	0
2008-08-20	08:53:00	0
2008-08-20	08:54:00	0
2008-08-20	08:55:00	0
2008-08-20	08:56:00	0
2008-08-20	08:57:00	0
2008-08-20	08:58:00	0
2008-08-20	08:59:00	0
2008-08-20	09:00:00	0
2008-08-20	09:01:00	0
2008-08-20	09:02:00	0
2008-08-20	09:03:00	0
2008-08-20	09:04:00	0
2008-08-20	09:05:00	0
2008-08-20	09:06:00	0
2008-08-20	09:07:00	0
2008-08-20	09:08:00	0
2008-08-20	09:09:00	0
2008-08-20	09:10:00	0
2008-08-20	09:11:00	0
2008-08-20	09:12:00	0
2008-08-20	09:13:00	0
2008-08-20	09:14:00	0
2008-08-20	09:15:00	0
2008-08-20	09:16:00	0
2008-08-20	09:17:00	0
2008-08-20	09:18:00	0
2008-08-20	09:19:00	0
2008-08-20	09:20:00	0
2008-08-20	09:21:00	0
2008-08-20	09:22:00	0
2008-08-20	09:23:00	0
2008-08-20	09:24:00	0
2008-08-20	09:25:00	0
2008-08-20	09:26:00	0
2008-08-20	09:27:00	0
2008-08-20	09:28:00	0
2008-08-20	09:29:00	0
2008-08-20	09:30:00	0
2008-08-20	09:31:00	0
2008-08-20	09:32:00	0
2008-08-20	09:33:00	0
2008-08-20	09:34:00	0
2008-08-20	09:35:00	0
2008-08-20	09:36:00	0
2008-08-20	09:37:00	0
2008-08-20	09:38:00	0
2008-08-20	09:39:00	0
2008-08-20	09:40:00	0
2008-08-20	09:41:00	0
2008-08-20	09:42:00	0
2008-08-20	09:43:00	0
2008-08-20	09:44:00	0
2008-08-20	09:45:00	0
2008-08-20	09:46:00	0
2008-08-20	09:47:00	0
2008-08-20	09:48:00	0
2008-08-20	09:49:00	0
2008-08-20	09:50:00	0
2008-08-20	09:51:00	0
2008-08-20	09:52:00	0
2008-08-20	09:53:00	0
2008-08-20	09:54:00	0
2008-08-20	09:55:00	0
2008-08-20	09:56:00	0
2008-08-20	09:57:00	0
2008-08-20	09:58:00	0
2008-08-20	09:59:00	0
2008-08-20	10:00:00	0
2008-08-20	10:01:00	0
2008-08-20	10:02:00	0
2008-08-20	10:03:00	0
2008-08-20	10:04:00	0
2008-08-20	10:05:00	0
2008-08-20	10:06:00	0
2008-08-20	10:07:00	0
2008-08-20	10:08:00	0
2008-08-20	10:09:00	0
2008-08-20	10:10:00	0
2008-08-20	10:11:00	0
2008-08-20	10:12:00	0
2008-08-20	10:13:00	0
2008-08-20	10:14:00	0
2008-08-20	10:15:00	0
2008-08-20	10:16:00	0
2008-08-20	10:17:00	0
2008-08-20	10:18:00	0
2008-08-20	10:19:00	0
2008-08-20	10:20:00	0
2008-08-20	10:21:00	0
2008-08-20	10:22:00	0
2008-08-20	10:23:00	0
2008-08-20	10:24:00	0
2008-08-20	10:25:00	0
2008-08-20	10:26:00	0
2008-08-20	10:27:00	0
2008-08-20	10:28:00	0
2008-08-20	10:29:00	0
2008-08-20	10:30:00	0
2008-08-20	10:31:00	0
2008-08-20	10:32:00	0
2008-08-20	10:33:00	0
2008-08-20	10:34:00	0
2008-08-20	10:35:00	0
2008-08-20	10:36:00	0
2008-08-20	10:37:00	0
2008-08-20	10:38:00	0
2008-08-20	10:39:00	0
2008-08-20	10:40:00	0
2008-08-20	10:41:00	0
2008-08-20	10:42:00	0
2008-08-20	10:43:00	0
2008-08-20	10:44:00	0
2008-08-20	10:45:00	0
2008-08-20	10:46:00	0
2008-08-20	10:47:00	0
2008-08-20	10:48:00	0
2008-08-20	10:49:00	0
2008-08-20	10:50:00	0
2008-08-20	10:51:00	0
2008-08-20	10:52:00	0
2008-08-20	10:53:00	0
2008-08-20	10:54:00	0
2008-08-20	10:55:00	0
2008-08-20	10:56:00	0
2008-08-20	10:57:00	0
2008-08-20	10:58:00	0
2008-08-20	10:59:00	0
2008-08-20	11:00:00	0
2008-08-20	11:01:00	0
2008-08-20	11:02:00	0
2008-08-20	11:03:00	0
2008-08-20	11:04:00	0
2008-08-20	11:05:00	0
2008-08-20	11:06:00	0
2008-08-20	11:07:00	0
2008-08-20	11:08:00	0
2008-08-20	11:09:00	0
2008-08-20	11:10:00	0
2008-08-20	11:11:00	0
2008-08-20	11:12:00	0
2008-08-20	11:13:00	0
2008-08-20	11:14:00	0
2008-08-20	11:15:00	0
2008-08-20	11:16:00	0
2008-08-20	11:17:00	0
2008-08-20	11:18:00	0
2008-08-20	11:19:00	0
2008-08-20	11:20:00	0
2008-08-20	11:21:00	0
2008-08-20	11:22:00	0
2008-08-20	11:23:00	0
2008-08-20	11:24:00	0
2008-08-20	11:25:00	0
2008-08-20	11:26:00	0
2008-08-20	11:27:00	0
2008-08-20	11:28:00	0
2008-08-20	11:29:00	0
2008-08-20	11:30:00	0
2008-08-20	11:31:00	0
2008-08-20	11:32:00	0
2008-08-20	11:33:00	0
2008-08-20	11:34:00	0
2008-08-20	11:35:00	0
2008-08-20	11:36:00	0
2008-08-20	11:37:00	0
2008-08-20	11:38:00	0
2008-08-20	11:39:00	0
2008-08-20	11:40:00	0
2008-08-20	11:41:00	0
2008-08-20	11:42:00	0
2008-08-20	11:43:00	0
2008-08-20	11:44:00	0
2008-08-20	11:45:00	0
2008-08-20	11:46:00	0
2008-08-20	11:47:00	0
2008-08-20	11:48:00	0
2008-08-20	11:49:00	0
2008-08-20	11:50:00	0
2008-08-20	11:51:00	0
2008-08-20	11:52:00	0
2008-08-20	11:53:00	0
2008-08-20	11:54:00	0
2008-08-20	11:55:00	0
2008-08-20	11:56:00	0
2008-08-20	11:57:00	0
2008-08-20	11:58:00	0
2008-08-20	11:59:00	0
2008-08-20	12:00:00	0
2008-08-20	12:01:00	0
2008-08-20	12:02:00	0
2008-08-20	12:03:00	0
2008-08-20	12:04:00	0
2008-08-20	12:05:00	0
2008-08-20	12:06:00	0
2008-08-20	12:07:00	0
2008-08-20	12:08:00	0
2008-08-20	12:09:00	0
2008-08-20	12:10:00	0
2008-08-20	12:11:00	0
2008-08-20	12:12:00	0
2008-08-20	12:13:00	0
2008-08-20	12:14:00	0
2008-08-20	12:15:00	0
2008-08-20	12:16:00	0
2008-08-20	12:17:00	0
2008-08-20	12:18:00	0
2008-08-20	12:19:00	0
2008-08-20	12:20:00	0
2008-08-20	12:21:00	0
2008-08-20	12:22:00	0
2008-08-20	12:23:00	0
2008-08-20	12:24:00	0
2008-08-20	12:25:00	0
2008-08-20	12:26:00	0
2008-08-20	12:27:00	0
2008-08-20	12:28:00	0
2008-08-20	12:29:00	0
2008-08-20	12:30:00	0
2008-08-20	12:31:00	0
2008-08-20	12:32:00	0
2008-08-20	12:33:00	0
2008-08-20	12:34:00	0
2008-08-20	12:35:00	0
2008-08-20	12:36:00	0
2008-08-20	12:37:00	0
2008-08-20	12:38:00	0
2008-08-20	12:39:00	0
2008-08-20	12:40:00	0
2008-08-20	12:41:00	0
2008-08-20	12:42:00	0
2008-08-20	12:43:00	0
2008-08-20	12:44:00	0
2008-08-20	12:45:00	0
2008-08-20	12:46:00	0
2008-08-20	12:47:00	0
2008-08-20	12:48:00	0
2008-08-20	12:49:00	0
2008-08-20	12:50:00	0
2008-08-20	12:51:00	0
2008-08-20	12:52:00	0
2008-08-20	12:53:00	0
2008-08-20	12:54:00	0
2008-08-20	12:55:00	0
2008-08-20	12:56:00	0
2008-08-20	12:57:00	0
2008-08-20	12:58:00	0
2008-08-20	12:59:00	0
2008-08-20	13:00:00	0
2008-08-20	13:01:00	0
2008-08-20	13:02:00	0
2008-08-20	13:03:00	0
2008-08-20	13:04:00	0
2008-08-20	13:05:00	0
2008-08-20	13:06:00	0
2008-08-20	13:07:00	0
2008-08-20	13:08:00	0
2008-08-20	13:09:00	0
2008-08-20	13:10:00	0
2008-08-20	13:11:00	0
2008-08-20	13:12:00	0
2008-08-20	13:13:00	0
2008-08-20	13:14:00	0
2008-08-20	13:15:00	0
2008-08-20	13:16:00	0
2008-08-20	13:17:00	0
2008-08-20	13:18:00	0
2008-08-20	13:19:00	0
2008-08-20	13:20:00	0
2008-08-20	13:21:00	0
2008-08-20	13:22:00	0
2008-08-20	13:23:00	0
2008-08-20	13:24:00	0
2008-08-20	13:25:00	0
2008-08-20	13:26:00	0
2008-08-20	13:27:00	0
2008-08-20	13:28:00	0
2008-08-20	13:29:00	0
2008-08-20	13:30:00	0
2008-08-20	13:31:00	0
2008-08-20	13:32:00	0
2008-08-20	13:33:00	0
2008-08-20	13:34:00	0
2008-08-20	13:35:00	0
2008-08-20	13:36:00	0
2008-08-20	13:37:00	0
2008-08-20	13:38:00	0
2008-08-20	13:39:00	0
2008-08-20	13:40:00	0
2008-08-20	13:41:00	0
2008-08-20	13:42:00	0
2008-08-20	13:43:00	0
2008-08-20	13:44:00	0
2008-08-20	13:45:00	0
2008-08-20	13:46:00	0
2008-08-20	13:47:00	0
2008-08-20	13:48:00	0
2008-08-20	13:49:00	0
2008-08-20	13:50:00	0
2008-08-20	13:51:00	0
2008-08-20	13:52:00	0
2008-08-20	13:53:00	0
2008-08-20	13:54:00	0
2008-08-20	13:55:00	0
2008-08-20	13:56:00	0
2008-08-20	13:57:00	0
2008-08-20	13:58:00	0
2008-08-20	13:59:00	0
2008-08-20	14:00:00	0
2008-08-20	14:01:00	0
2008-08-20	14:02:00	0
2008-08-20	14:03:00	0
2008-08-20	14:04:00	0
2008-08-20	14:05:00	0
2008-08-20	14:06:00	0
2008-08-20	14:07:00	0
2008-08-20	14:08:00	0
2008-08-20	14:09:00	0
2008-08-20	14:10:00	0
2008-08-20	14:11:00	0
2008-08-20	14:12:00	0
2008-08-20	14:13:00	0
2008-08-20	14:14:00	0
2008-08-20	14:15:00	0
2008-08-20	14:16:00	0
2008-08-20	14:17:00	0
2008-08-20	14:18:00	0
2008-08-20	14:19:00	0
2008-08-20	14:20:00	0
2008-08-20	14:21:00	0
2008-08-20	14:22:00	0
2008-08-20	14:23:00	0
2008-08-20	14:24:00	0
2008-08-20	14:25:00	0
2008-08-20	14:26:00	0
2008-08-20	14:27:00	0
2008-08-20	14:28:00	0
2008-08-20	14:29:00	0
2008-08-20	14:30:00	0
2008-08-20	14:31:00	0
2008-08-20	14:32:00	0
2008-08-20	14:33:00	0
2008-08-20	14:34:00	0
2008-08-20	14:35:00	0
2008-08-20	14:36:00	0
2008-08-20	14:37:00	0
2008-08-20	14:38:00	0
2008-08-20	14:39:00	0
2008-08-20	14:40:00	0
2008-08-20	14:41:00	0
2008-08-20	14:42:00	0
2008-08-20	14:43:00	0
2008-08-20	14:44:00	0
2008-08-20	14:45:00	0
2008-08-20	14:46:00	0
2008-08-20	14:47:00	0
2008-08-20	14:48:00	0
2008-08-20	14:49:00	0
2008-08-20	14:50:00	0
2008-08-20	14:51:00	0
2008-08-20	14:52:00	0
2008-08-20	14:53:00	0
2008-08-20	14:54:00	0
2008-08-20	14:55:00	0
2008-08-20	14:56:00	0
2008-08-20	14:57:00	0
2008-08-20	14:58:00	0
2008-08-20	14:59:00	0
2008-08-20	15:00:00	0
2008-08-20	15:01:00	0
2008-08-20	15:02:00	0
2008-08-20	15:03:00	0
2008-08-20	15:04:00	0
2008-08-20	15:05:00	0
2008-08-20	15:06:00	0
2008-08-20	15:07:00	0
2008-08-20	15:08:00	0
2008-08-20	15:09:00	0
2008-08-20	15:10:00	0
2008-08-20	15:11:00	0
2008-08-20	15:12:00	0
2008-08-20	15:13:00	0
2008-08-20	15:14:00	0
2008-08-20	15:15:00	0
2008-08-20	15:16:00	0
2008-08-20	15:17:00	0
2008-08-20	15:18:00	0
2008-08-20	15:19:00	0
2008-08-20	15:20:00	0
2008-08-20	15:21:00	0
2008-08-20	15:22:00	0
2008-08-20	15:23:00	0
2008-08-20	15:24:00	0
2008-08-20	15:25:00	0
2008-08-20	15:26:00	0
2008-08-20	15:27:00	0
2008-08-20	15:28:00	0
2008-08-20	15:29:00	0
2008-08-20	15:30:00	0
2008-08-20	15:31:00	0
2008-08-20	15:32:00	0
2008-08-20	15:33:00	0
2008-08-20	15:34:00	0
2008-08-20	15:35:00	0
2008-08-20	15:36:00	0
2008-08-20	15:37:00	0
2008-08-20	15:38:00	0
2008-08-20	15:39:00	0
2008-08-20	15:40:00	0
2008-08-20	15:41:00	0
2008-08-20	15:42:00	0
2008-08-20	15:43:00	0
2008-08-20	15:44:00	0
2008-08-20	15:45:00	0
2008-08-20	15:46:00	0
2008-08-20	15:47:00	0
2008-08-20	15:48:00	0
2008-08-20	15:49:00	0
2008-08-20	15:50:00	0
2008-08-20	15:51:00	0
2008-08-20	15:52:00	0
2008-08-20	15:53:00	0
2008-08-20	15:54:00	0
2008-08-20	15:55:00	0
2008-08-20	15:56:00	0
2008-08-20	15:57:00	0
2008-08-20	15:58:00	0
2008-08-20	15:59:00	0
2008-08-20	16:00:00	0
2008-08-20	16:01:00	0
2008-08-20	16:02:00	0
2008-08-20	16:03:00	0
2008-08-20	16:04:00	0
2008-08-20	16:05:00	0
2008-08-20	16:06:00	0
2008-08-20	16:07:00	0
2008-08-20	16:08:00	0
2008-08-20	16:09:00	0
2008-08-20	16:10:00	0
2008-08-20	16:11:00	0
2008-08-20	16:12:00	0
2008-08-20	16:13:00	0
2008-08-20	16:14:00	0
2008-08-20	16:15:00	0
2008-08-20	16:16:00	0
2008-08-20	16:17:00	0
2008-08-20	16:18:00	0
2008-08-20	16:19:00	0
2008-08-20	16:20:00	0
2008-08-20	16:21:00	0
2008-08-20	16:22:00	0
2008-08-20	16:23:00	0
2008-08-20	16:24:00	0
2008-08-20	16:25:00	0
2008-08-20	16:26:00	0
2008-08-20	16:27:00	0
2008-08-20	16:28:00	0
2008-08-20	16:29:00	0
2008-08-20	16:30:00	0
2008-08-20	16:31:00	0
2008-08-20	16:32:00	0
2008-08-20	16:33:00	0
2008-08-20	16:34:00	0
2008-08-20	16:35:00	0
2008-08-20	16:36:00	0
2008-08-20	16:37:00	0
2008-08-20	16:38:00	0
2008-08-20	16:39:00	0
2008-08-20	16:40:00	0
2008-08-20	16:41:00	0
2008-08-20	16:42:00	0
2008-08-20	16:43:00	0
2008-08-20	16:44:00	0
2008-08-20	16:45:00	0
2008-08-20	16:46:00	0
2008-08-20	16:47:00	0
2008-08-20	16:48:00	0
2008-08-20	16:49:00	0
2008-08-20	16:50:00	0
2008-08-20	16:51:00	0
2008-08-20	16:52:00	0
2008-08-20	16:53:00	0
2008-08-20	16:54:00	0
2008-08-20	16:55:00	0
2008-08-20	16:56:00	0
2008-08-20	16:57:00	0
2008-08-20	16:58:00	0
2008-08-20	16:59:00	0
2008-08-20	17:00:00	0
2008-08-20	17:01:00	0
2008-08-20	17:02:00	0
2008-08-20	17:03:00	0
2008-08-20	17:04:00	0
2008-08-20	17:05:00	0
2008-08-20	17:06:00	0
2008-08-20	17:07:00	0
2008-08-20	17:08:00	0
2008-08-20	17:09:00	0
2008-08-20	17:10:00	0
2008-08-20	17:11:00	0
2008-08-20	17:12:00	0
2008-08-20	17:13:00	0
2008-08-20	17:14:00	0
2008-08-20	17:15:00	0
2008-08-20	17:16:00	0
2008-08-20	17:17:00	0
2008-08-20	17:18:00	0
2008-08-20	17:19:00	0
2008-08-20	17:20:00	0
2008-08-20	17:21:00	0
2008-08-20	17:22:00	0
2008-08-20	17:23:00	0
2008-08-20	17:24:00	0
2008-08-20	17:25:00	0
2008-08-20	17:26:00	0
2008-08-20	17:27:00	0
2008-08-20	17:28:00	0
2008-08-20	17:29:00	0
2008-08-20	17:30:00	0
2008-08-20	17:31:00	0
2008-08-20	17:32:00	0
2008-08-20	17:33:00	0
2008-08-20	17:34:00	0
2008-08-20	17:35:00	0
2008-08-20	17:36:00	0
2008-08-20	17:37:00	0
2008-08-20	17:38:00	0
2008-08-20	17:39:00	0
2008-08-20	17:40:00	0
2008-08-20	17:41:00	0
2008-08-20	17:42:00	0
2008-08-20	17:43:00	0
2008-08-20	17:44:00	0
2008-08-20	17:45:00	0
2008-08-20	17:46:00	0
2008-08-20	17:47:00	0
2008-08-20	17:48:00	0
2008-08-20	17:49:00	0
2008-08-20	17:50:00	0
2008-08-20	17:51:00	0
2008-08-20	17:52:00	0
2008-08-20	17:53:00	0
2008-08-20	17:54:00	0
2008-08-20	17:55:00	0
2008-08-20	17:56:00	0
2008-08-20	17:57:00	0
2008-08-20	17:58:00	0
2008-08-20	17:59:00	0
2008-08-20	18:00:00	0	M
2008-08-20	18:01:00	26
2008-08-20	18:02:00	74
2008-08-20	18:03:00	10
2008-08-20	18:04:00	42
2008-08-20	18:05:00	31
2008-08-20	18:06:00	57
2008-08-20	18:07:00	36
2008-08-20	18:08:00	111
2008-08-20	18:09:00	244
2008-08-20	18:10:00	165
2008-08-20	18:11:00	62
2008-08-20	18:12:00	68
2008-08-20	18:13:00	93
2008-08-20	18:14:00	151
2008-08-20	18:15:00	80
2008-08-20	18:16:00	297
2008-08-20	18:17:00	52
2008-08-20	18:18:00	36
2008-08-20	18:19:00	808
2008-08-20	18:20:00	1666
2008-08-20	18:21:00	774
2008-08-20	18:22:00	1384
2008-08-20	18:23:00	725
2008-08-20	18:24:00	1120
2008-08-20	18:25:00	3029
2008-08-20	18:26:00	2782
2008-08-20	18:27:00	10
2008-08-20	18:28:00	180
2008-08-20	18:29:00	144
2008-08-20	18:30:00	219
2008-08-20	18:31:00	74
2008-08-20	18:32:00	118
2008-08-20	18:33:00	62
2008-08-20	18:34:00	124
2008-08-20	18:35:00	334
2008-08-20	18:36:00	21
2008-08-20	18:37:00	606
2008-08-20	18:38:00	994
2008-08-20	18:39:00	31
2008-08-20	18:40:00	0
2008-08-20	18:41:00	68
2008-08-20	18:42:00	80
2008-08-20	18:43:00	10
2008-08-20	18:44:00	52
2008-08-20	18:45:00	99
2008-08-20	18:46:00	42
2008-08-20	18:47:00	118
2008-08-20	18:48:00	418
2008-08-20	18:49:00	47
2008-08-20	18:50:00	202
2008-08-20	18:51:00	31
2008-08-20	18:52:00	325
2008-08-20	18:53:00	42
2008-08-20	18:54:00	620
2008-08-20	18:55:00	31
2008-08-20	18:56:00	0
2008-08-20	18:57:00	10
2008-08-20	18:58:00	118
2008-08-20	18:59:00	57
2008-08-20	19:00:00	0
2008-08-20	19:01:00	86
2008-08-20	19:02:00	26
2008-08-20	19:03:00	235
2008-08-20	19:04:00	260
2008-08-20	19:05:00	365
2008-08-20	19:06:00	552
2008-08-20	19:07:00	16
2008-08-20	19:08:00	268
2008-08-20	19:09:00	501
2008-08-20	19:10:00	74
2008-08-20	19:11:00	5
2008-08-20	19:12:00	144
2008-08-20	19:13:00	210
2008-08-20	19:14:00	26
2008-08-20	19:15:00	10
2008-08-20	19:16:00	111
2008-08-20	19:17:00	124
2008-08-20	19:18:00	173
2008-08-20	19:19:00	974
2008-08-20	19:20:00	694
2008-08-20	19:21:00	565
2008-08-20	19:22:00	124
2008-08-20	19:23:00	325
2008-08-20	19:24:00	42
2008-08-20	19:25:00	0
2008-08-20	19:26:00	74
2008-08-20	19:27:00	57
2008-08-20	19:28:00	0
2008-08-20	19:29:00	0
2008-08-20	19:30:00	0
2008-08-20	19:31:00	0
2008-08-20	19:32:00	0
2008-08-20	19:33:00	0
2008-08-20	19:34:00	0
2008-08-20	19:35:00	441
2008-08-20	19:36:00	325
2008-08-20	19:37:00	376
2008-08-20	19:38:00	227
2008-08-20	19:39:00	31
2008-08-20	19:40:00	74
2008-08-20	19:41:00	476
2008-08-20	19:42:00	396
2008-08-20	19:43:00	165
2008-08-20	19:44:00	124
2008-08-20	19:45:00	0
2008-08-20	19:46:00	86
2008-08-20	19:47:00	260
2008-08-20	19:48:00	219
2008-08-20	19:49:00	187
2008-08-20	19:50:00	791
2008-08-20	19:51:00	187
2008-08-20	19:52:00	16
2008-08-20	19:53:00	118
2008-08-20	19:54:00	144
2008-08-20	19:55:00	180
2008-08-20	19:56:00	0
2008-08-20	19:57:00	0
2008-08-20	19:58:00	42
2008-08-20	19:59:00	315
2008-08-20	20:00:00	0
2008-08-20	20:01:00	0
2008-08-20	20:02:00	0
2008-08-20	20:03:00	0
2008-08-20	20:04:00	0
2008-08-20	20:05:00	0
2008-08-20	20:06:00	0
2008-08-20	20:07:00	0
2008-08-20	20:08:00	187
2008-08-20	20:09:00	136
2008-08-20	20:10:00	0
2008-08-20	20:11:00	5
2008-08-20	20:12:00	16
2008-08-20	20:13:00	0
2008-08-20	20:14:00	0
2008-08-20	20:15:00	0
2008-08-20	20:16:00	0
2008-08-20	20:17:00	0
2008-08-20	20:18:00	252
2008-08-20	20:19:00	80
2008-08-20	20:20:00	124
2008-08-20	20:21:00	441
2008-08-20	20:22:00	130
2008-08-20	20:23:00	278
2008-08-20	20:24:00	195
2008-08-20	20:25:00	0
2008-08-20	20:26:00	0
2008-08-20	20:27:00	57
2008-08-20	20:28:00	26
2008-08-20	20:29:00	0
2008-08-20	20:30:00	0
2008-08-20	20:31:00	173
2008-08-20	20:32:00	552
2008-08-20	20:33:00	878
2008-08-20	20:34:00	954
2008-08-20	20:35:00	897
2008-08-20	20:36:00	0
2008-08-20	20:37:00	5
2008-08-20	20:38:00	464
2008-08-20	20:39:00	31
2008-08-20	20:40:00	136
2008-08-20	20:41:00	418
2008-08-20	20:42:00	5
2008-08-20	20:43:00	0
2008-08-20	20:44:00	0
2008-08-20	20:45:00	0
2008-08-20	20:46:00	0
2008-08-20	20:47:00	0
2008-08-20	20:48:00	10
2008-08-20	20:49:00	0
2008-08-20	20:50:00	36
2008-08-20	20:51:00	16
2008-08-20	20:52:00	227
2008-08-20	20:53:00	252
2008-08-20	20:54:00	710
2008-08-20	20:55:00	268
2008-08-20	20:56:00	111
2008-08-20	20:57:00	210
2008-08-20	20:58:00	158
2008-08-20	20:59:00	86
2008-08-20	21:00:00	287
2008-08-20	21:01:00	80
2008-08-20	21:02:00	93
2008-08-20	21:03:00	74
2008-08-20	21:04:00	173
2008-08-20	21:05:00	16
2008-08-20	21:06:00	334
2008-08-20	21:07:00	430
2008-08-20	21:08:00	180
2008-08-20	21:09:00	74
2008-08-20	21:10:00	0
2008-08-20	21:11:00	0
2008-08-20	21:12:00	0
2008-08-20	21:13:00	0
2008-08-20	21:14:00	441
2008-08-20	21:15:00	0
2008-08-20	21:16:00	0
2008-08-20	21:17:00	0
2008-08-20	21:18:00	26
2008-08-20	21:19:00	124
2008-08-20	21:20:00	0
2008-08-20	21:21:00	0
2008-08-20	21:22:00	0
2008-08-20	21:23:00	0
2008-08-20	21:24:00	0
2008-08-20	21:25:00	0
2008-08-20	21:26:00	0
2008-08-20	21:27:00	0
2008-08-20	21:28:00	0
2008-08-20	21:29:00	0
2008-08-20	21:30:00	0
2008-08-20	21:31:00	0
2008-08-20	21:32:00	0
2008-08-20	21:33:00	0
2008-08-20	21:34:00	0
2008-08-20	21:35:00	0
2008-08-20	21:36:00	0
2008-08-20	21:37:00	0
2008-08-20	21:38:00	0
2008-08-20	21:39:00	0
2008-08-20	21:40:00	0
2008-08-20	21:41:00	0
2008-08-20	21:42:00	42
2008-08-20	21:43:00	0
2008-08-20	21:44:00	26
2008-08-20	21:45:00	0
2008-08-20	21:46:00	0
2008-08-20	21:47:00	0
2008-08-20	21:48:00	0
2008-08-20	21:49:00	0
2008-08-20	21:50:00	0
2008-08-20	21:51:00	0
2008-08-20	21:52:00	10
2008-08-20	21:53:00	0
2008-08-20	21:54:00	0
2008-08-20	21:55:00	0
2008-08-20	21:56:00	0
2008-08-20	21:57:00	0
2008-08-20	21:58:00	0
2008-08-20	21:59:00	0
2008-08-20	22:00:00	5
2008-08-20	22:01:00	0
2008-08-20	22:02:00	0
2008-08-20	22:03:00	0
2008-08-20	22:04:00	0
2008-08-20	22:05:00	47
2008-08-20	22:06:00	0
2008-08-20	22:07:00	16
2008-08-20	22:08:00	0
2008-08-20	22:09:00	0
2008-08-20	22:10:00	0
2008-08-20	22:11:00	0
2008-08-20	22:12:00	118
2008-08-20	22:13:00	5
2008-08-20	22:14:00	10
2008-08-20	22:15:00	0
2008-08-20	22:16:00	0
2008-08-20	22:17:00	0
2008-08-20	22:18:00	0
2008-08-20	22:19:00	0
2008-08-20	22:20:00	0
2008-08-20	22:21:00	0
2008-08-20	22:22:00	0
2008-08-20	22:23:00	0
2008-08-20	22:24:00	0
2008-08-20	22:25:00	0
2008-08-20	22:26:00	0
2008-08-20	22:27:00	0
2008-08-20	22:28:00	5
2008-08-20	22:29:00	86
2008-08-20	22:30:00	396
2008-08-20	22:31:00	74
2008-08-20	22:32:00	80
2008-08-20	22:33:00	80
2008-08-20	22:34:00	843
2008-08-20	22:35:00	136
2008-08-20	22:36:00	47
2008-08-20	22:37:00	5
2008-08-20	22:38:00	10
2008-08-20	22:39:00	42
2008-08-20	22:40:00	0
2008-08-20	22:41:00	16
2008-08-20	22:42:00	0
2008-08-20	22:43:00	0
2008-08-20	22:44:00	0
2008-08-20	22:45:00	0
2008-08-20	22:46:00	0
2008-08-20	22:47:00	0
2008-08-20	22:48:00	0
2008-08-20	22:49:00	0
2008-08-20	22:50:00	0
2008-08-20	22:51:00	0
2008-08-20	22:52:00	0
2008-08-20	22:53:00	0
2008-08-20	22:54:00	0
2008-08-20	22:55:00	0
2008-08-20	22:56:00	0
2008-08-20	22:57:00	0
2008-08-20	22:58:00	0
2008-08-20	22:59:00	0
2008-08-20	23:00:00	0
2008-08-20	23:01:00	0
2008-08-20	23:02:00	0
2008-08-20	23:03:00	5
2008-08-20	23:04:00	16
2008-08-20	23:05:00	0
2008-08-20	23:06:00	0
2008-08-20	23:07:00	0
2008-08-20	23:08:00	0
2008-08-20	23:09:00	0
2008-08-20	23:10:00	0
2008-08-20	23:11:00	0
2008-08-20	23:12:00	0
2008-08-20	23:13:00	0
2008-08-20	23:14:00	0
2008-08-20	23:15:00	0
2008-08-20	23:16:00	0
2008-08-20	23:17:00	0
2008-08-20	23:18:00	0
2008-08-20	23:19:00	0
2008-08-20	23:20:00	0
2008-08-20	23:21:00	0
2008-08-20	23:22:00	0
2008-08-20	23:23:00	0
2008-08-20	23:24:00	0
2008-08-20	23:25:00	0
2008-08-20	23:26:00	0
2008-08-20	23:27:00	0
2008-08-20	23:28:00	0
2008-08-20	23:29:00	68
2008-08-20	23:30:00	0
2008-08-20	23:31:00	0
2008-08-20	23:32:00	0
2008-08-20	23:33:00	0
2008-08-20	23:34:00	0
2008-08-20	23:35:00	0
2008-08-20	23:36:00	0
2008-08-20	23:37:00	0
2008-08-20	23:38:00	0
2008-08-20	23:39:00	0
2008-08-20	23:40:00	0
2008-08-20	23:41:00	0
2008-08-20	23:42:00	0
2008-08-20	23:43:00	0
2008-08-20	23:44:00	0
2008-08-20	23:45:00	0
2008-08-20	23:46:00	0
2008-08-20	23:47:00	0
2008-08-20	23:48:00	16
2008-08-20	23:49:00	0
2008-08-20	23:50:00	0
2008-08-20	23:51:00	0
2008-08-20	23:52:00	0
2008-08-20	23:53:00	0
2008-08-20	23:54:00	0
2008-08-20	23:55:00	0
2008-08-20	23:56:00	0
2008-08-20	23:57:00	0
2008-08-20	23:58:00	21
2008-08-20	23:59:00	0
2008-08-21	00:00:00	0
2008-08-21	00:01:00	5
2008-08-21	00:02:00	0
2008-08-21	00:03:00	26
2008-08-21	00:04:00	0
2008-08-21	00:05:00	0
2008-08-21	00:06:00	0
2008-08-21	00:07:00	0
2008-08-21	00:08:00	0
2008-08-21	00:09:00	0
2008-08-21	00:10:00	0
2008-08-21	00:11:00	0
2008-08-21	00:12:00	0
2008-08-21	00:13:00	5
2008-08-21	00:14:00	0
2008-08-21	00:15:00	0
2008-08-21	00:16:00	0
2008-08-21	00:17:00	0
2008-08-21	00:18:00	0
2008-08-21	00:19:00	0
2008-08-21	00:20:00	0
2008-08-21	00:21:00	0
2008-08-21	00:22:00	0
2008-08-21	00:23:00	0
2008-08-21	00:24:00	0
2008-08-21	00:25:00	5
2008-08-21	00:26:00	0
2008-08-21	00:27:00	0
2008-08-21	00:28:00	0
2008-08-21	00:29:00	0
2008-08-21	00:30:00	0
2008-08-21	00:31:00	0
2008-08-21	00:32:00	0
2008-08-21	00:33:00	0
2008-08-21	00:34:00	0
2008-08-21	00:35:00	0
2008-08-21	00:36:00	0
2008-08-21	00:37:00	0
2008-08-21	00:38:00	0
2008-08-21	00:39:00	36
2008-08-21	00:40:00	0
2008-08-21	00:41:00	0
2008-08-21	00:42:00	57
2008-08-21	00:43:00	74
2008-08-21	00:44:00	0
2008-08-21	00:45:00	99
2008-08-21	00:46:00	36
2008-08-21	00:47:00	0
2008-08-21	00:48:00	0
2008-08-21	00:49:00	0
2008-08-21	00:50:00	0
2008-08-21	00:51:00	0
2008-08-21	00:52:00	0
2008-08-21	00:53:00	0
2008-08-21	00:54:00	0
2008-08-21	00:55:00	0
2008-08-21	00:56:00	0
2008-08-21	00:57:00	0
2008-08-21	00:58:00	0
2008-08-21	00:59:00	0
2008-08-21	01:00:00	0
2008-08-21	01:01:00	0
2008-08-21	01:02:00	5
2008-08-21	01:03:00	0
2008-08-21	01:04:00	99
2008-08-21	01:05:00	0
2008-08-21	01:06:00	0
2008-08-21	01:07:00	36
2008-08-21	01:08:00	0
2008-08-21	01:09:00	0
2008-08-21	01:10:00	0
2008-08-21	01:11:00	0
2008-08-21	01:12:00	0
2008-08-21	01:13:00	0
2008-08-21	01:14:00	0
2008-08-21	01:15:00	0
2008-08-21	01:16:00	0
2008-08-21	01:17:00	0
2008-08-21	01:18:00	5
2008-08-21	01:19:00	0
2008-08-21	01:20:00	47
2008-08-21	01:21:00	5
2008-08-21	01:22:00	0
2008-08-21	01:23:00	5
2008-08-21	01:24:00	74
2008-08-21	01:25:00	306
2008-08-21	01:26:00	0
2008-08-21	01:27:00	0
2008-08-21	01:28:00	5
2008-08-21	01:29:00	0
2008-08-21	01:30:00	0
2008-08-21	01:31:00	5
2008-08-21	01:32:00	36
2008-08-21	01:33:00	441
2008-08-21	01:34:00	57
2008-08-21	01:35:00	144
2008-08-21	01:36:00	464
2008-08-21	01:37:00	297
2008-08-21	01:38:00	42
2008-08-21	01:39:00	86
2008-08-21	01:40:00	606
2008-08-21	01:41:00	195
2008-08-21	01:42:00	36
2008-08-21	01:43:00	21
2008-08-21	01:44:00	26
2008-08-21	01:45:00	10
2008-08-21	01:46:00	0
2008-08-21	01:47:00	80
2008-08-21	01:48:00	325
2008-08-21	01:49:00	93
2008-08-21	01:50:00	0
2008-08-21	01:51:00	5
2008-08-21	01:52:00	0
2008-08-21	01:53:00	0
2008-08-21	01:54:00	0
2008-08-21	01:55:00	0
2008-08-21	01:56:00	0
2008-08-21	01:57:00	0
2008-08-21	01:58:00	0
2008-08-21	01:59:00	0
2008-08-21	02:00:00	0
2008-08-21	02:01:00	0
2008-08-21	02:02:00	0
2008-08-21	02:03:00	0
2008-08-21	02:04:00	0
2008-08-21	02:05:00	0
2008-08-21	02:06:00	0
2008-08-21	02:07:00	0
2008-08-21	02:08:00	0
2008-08-21	02:09:00	0
2008-08-21	02:10:00	0
2008-08-21	02:11:00	0
2008-08-21	02:12:00	0
2008-08-21	02:13:00	0
2008-08-21	02:14:00	0
2008-08-21	02:15:00	0
2008-08-21	02:16:00	0
2008-08-21	02:17:00	0
2008-08-21	02:18:00	0
2008-08-21	02:19:00	0
2008-08-21	02:20:00	0
2008-08-21	02:21:00	0
2008-08-21	02:22:00	0
2008-08-21	02:23:00	0
2008-08-21	02:24:00	0
2008-08-21	02:25:00	0
2008-08-21	02:26:00	0
2008-08-21	02:27:00	0
2008-08-21	02:28:00	0
2008-08-21	02:29:00	0
2008-08-21	02:30:00	0
2008-08-21	02:31:00	0
2008-08-21	02:32:00	0
2008-08-21	02:33:00	0
2008-08-21	02:34:00	0
2008-08-21	02:35:00	0
2008-08-21	02:36:00	0
2008-08-21	02:37:00	0
2008-08-21	02:38:00	0
2008-08-21	02:39:00	0
2008-08-21	02:40:00	0
2008-08-21	02:41:00	0
2008-08-21	02:42:00	0
2008-08-21	02:43:00	0
2008-08-21	02:44:00	0
2008-08-21	02:45:00	0
2008-08-21	02:46:00	0
2008-08-21	02:47:00	0
2008-08-21	02:48:00	0
2008-08-21	02:49:00	0
2008-08-21	02:50:00	0
2008-08-21	02:51:00	0
2008-08-21	02:52:00	0
2008-08-21	02:53:00	0
2008-08-21	02:54:00	0
2008-08-21	02:55:00	0
2008-08-21	02:56:00	0
2008-08-21	02:57:00	0
2008-08-21	02:58:00	0
2008-08-21	02:59:00	0
2008-08-21	03:00:00	0
2008-08-21	03:01:00	0
2008-08-21	03:02:00	0
2008-08-21	03:03:00	0
2008-08-21	03:04:00	0
2008-08-21	03:05:00	0
2008-08-21	03:06:00	0
2008-08-21	03:07:00	0
2008-08-21	03:08:00	0
2008-08-21	03:09:00	0
2008-08-21	03:10:00	0
2008-08-21	03:11:00	0
2008-08-21	03:12:00	0
2008-08-21	03:13:00	0
2008-08-21	03:14:00	0
2008-08-21	03:15:00	0
2008-08-21	03:16:00	0
2008-08-21	03:17:00	0
2008-08-21	03:18:00	0
2008-08-21	03:19:00	0
2008-08-21	03:20:00	0
2008-08-21	03:21:00	0
2008-08-21	03:22:00	0
2008-08-21	03:23:00	0
2008-08-21	03:24:00	0
2008-08-21	03:25:00	0
2008-08-21	03:26:00	0
2008-08-21	03:27:00	0
2008-08-21	03:28:00	0
2008-08-21	03:29:00	0
2008-08-21	03:30:00	0
2008-08-21	03:31:00	0
2008-08-21	03:32:00	0
2008-08-21	03:33:00	0
2008-08-21	03:34:00	0
2008-08-21	03:35:00	0
2008-08-21	03:36:00	0
2008-08-21	03:37:00	0
2008-08-21	03:38:00	0
2008-08-21	03:39:00	0
2008-08-21	03:40:00	0
2008-08-21	03:41:00	0
2008-08-21	03:42:00	0
2008-08-21	03:43:00	0
2008-08-21	03:44:00	0
2008-08-21	03:45:00	0
2008-08-21	03:46:00	0
2008-08-21	03:47:00	0
2008-08-21	03:48:00	0
2008-08-21	03:49:00	0
2008-08-21	03:50:00	0
2008-08-21	03:51:00	0
2008-08-21	03:52:00	0
2008-08-21	03:53:00	0
2008-08-21	03:54:00	0
2008-08-21	03:55:00	0
2008-08-21	03:56:00	0
2008-08-21	03:57:00	0
2008-08-21	03:58:00	0
2008-08-21	03:59:00	0
2008-08-21	04:00:00	0
2008-08-21	04:01:00	0
2008-08-21	04:02:00	0
2008-08-21	04:03:00	0
2008-08-21	04:04:00	0
2008-08-21	04:05:00	0
2008-08-21	04:06:00	0
2008-08-21	04:07:00	0
2008-08-21	04:08:00	0
2008-08-21	04:09:00	0
2008-08-21	04:10:00	0
2008-08-21	04:11:00	0
2008-08-21	04:12:00	0
2008-08-21	04:13:00	0
2008-08-21	04:14:00	0
2008-08-21	04:15:00	0
2008-08-21	04:16:00	0
2008-08-21	04:17:00	0
2008-08-21	04:18:00	0
2008-08-21	04:19:00	0
2008-08-21	04:20:00	0
2008-08-21	04:21:00	0
2008-08-21	04:22:00	0
2008-08-21	04:23:00	0
2008-08-21	04:24:00	0
2008-08-21	04:25:00	0
2008-08-21	04:26:00	0
2008-08-21	04:27:00	0
2008-08-21	04:28:00	0
2008-08-21	04:29:00	0
2008-08-21	04:30:00	0
2008-08-21	04:31:00	0
2008-08-21	04:32:00	0
2008-08-21	04:33:00	0
2008-08-21	04:34:00	0
2008-08-21	04:35:00	0
2008-08-21	04:36:00	0
2008-08-21	04:37:00	0
2008-08-21	04:38:00	0
2008-08-21	04:39:00	0
2008-08-21	04:40:00	0
2008-08-21	04:41:00	0
2008-08-21	04:42:00	0
2008-08-21	04:43:00	0
2008-08-21	04:44:00	0
2008-08-21	04:45:00	0
2008-08-21	04:46:00	0
2008-08-21	04:47:00	0
2008-08-21	04:48:00	0
2008-08-21	04:49:00	0
2008-08-21	04:50:00	0
2008-08-21	04:51:00	0
2008-08-21	04:52:00	0
2008-08-21	04:53:00	0
2008-08-21	04:54:00	0
2008-08-21	04:55:00	0
2008-08-21	04:56:00	0
2008-08-21	04:57:00	0
2008-08-21	04:58:00	0
2008-08-21	04:59:00	0
2008-08-21	05:00:00	0
2008-08-21	05:01:00	0
2008-08-21	05:02:00	0
2008-08-21	05:03:00	0
2008-08-21	05:04:00	0
2008-08-21	05:05:00	0
2008-08-21	05:06:00	0
2008-08-21	05:07:00	0
2008-08-21	05:08:00	0
2008-08-21	05:09:00	0
2008-08-21	05:10:00	0
2008-08-21	05:11:00	0
2008-08-21	05:12:00	0
2008-08-21	05:13:00	0
2008-08-21	05:14:00	0
2008-08-21	05:15:00	0
2008-08-21	05:16:00	0
2008-08-21	05:17:00	0
2008-08-21	05:18:00	0
2008-08-21	05:19:00	0
2008-08-21	05:20:00	0
2008-08-21	05:21:00	0
2008-08-21	05:22:00	0
2008-08-21	05:23:00	0
2008-08-21	05:24:00	0
2008-08-21	05:25:00	0
2008-08-21	05:26:00	0
2008-08-21	05:27:00	0
2008-08-21	05:28:00	0
2008-08-21	05:29:00	0
2008-08-21	05:30:00	0
2008-08-21	05:31:00	0
2008-08-21	05:32:00	0
2008-08-21	05:33:00	0
2008-08-21	05:34:00	0
2008-08-21	05:35:00	0
2008-08-21	05:36:00	0
2008-08-21	05:37:00	0
2008-08-21	05:38:00	0
2008-08-21	05:39:00	0
2008-08-21	05:40:00	0
2008-08-21	05:41:00	0
2008-08-21	05:42:00	0
2008-08-21	05:43:00	0
2008-08-21	05:44:00	0
2008-08-21	05:45:00	0
2008-08-21	05:46:00	0
2008-08-21	05:47:00	0
2008-08-21	05:48:00	0
2008-08-21	05:49:00	0
2008-08-21	05:50:00	0
2008-08-21	05:51:00	0
2008-08-21	05:52:00	0
2008-08-21	05:53:00	5
2008-08-21	05:54:00	0
2008-08-21	05:55:00	0
2008-08-21	05:56:00	0
2008-08-21	05:57:00	0
2008-08-21	05:58:00	0
2008-08-21	05:59:00	0
2008-08-21	06:00:00	0
2008-08-21	06:01:00	5
2008-08-21	06:02:00	5
2008-08-21	06:03:00	0
2008-08-21	06:04:00	0
2008-08-21	06:05:00	16
2008-08-21	06:06:00	165
2008-08-21	06:07:00	0
2008-08-21	06:08:00	0
2008-08-21	06:09:00	0
2008-08-21	06:10:00	0
2008-08-21	06:11:00	0
2008-08-21	06:12:00	0
2008-08-21	06:13:00	0
2008-08-21	06:14:00	0
2008-08-21	06:15:00	0
2008-08-21	06:16:00	0
2008-08-21	06:17:00	0
2008-08-21	06:18:00	0
2008-08-21	06:19:00	0
2008-08-21	06:20:00	0
2008-08-21	06:21:00	0
2008-08-21	06:22:00	0
2008-08-21	06:23:00	0
2008-08-21	06:24:00	0
2008-08-21	06:25:00	0
2008-08-21	06:26:00	0
2008-08-21	06:27:00	5
2008-08-21	06:28:00	0
2008-08-21	06:29:00	26
2008-08-21	06:30:00	0
2008-08-21	06:31:00	0
2008-08-21	06:32:00	0
2008-08-21	06:33:00	0
2008-08-21	06:34:00	0
2008-08-21	06:35:00	0
2008-08-21	06:36:00	0
2008-08-21	06:37:00	0
2008-08-21	06:38:00	5
2008-08-21	06:39:00	0
2008-08-21	06:40:00	0
2008-08-21	06:41:00	0
2008-08-21	06:42:00	0
2008-08-21	06:43:00	16
2008-08-21	06:44:00	0
2008-08-21	06:45:00	0
2008-08-21	06:46:00	0
2008-08-21	06:47:00	0
2008-08-21	06:48:00	0
2008-08-21	06:49:00	0
2008-08-21	06:50:00	0
2008-08-21	06:51:00	0
2008-08-21	06:52:00	0
2008-08-21	06:53:00	0
2008-08-21	06:54:00	0
2008-08-21	06:55:00	0
2008-08-21	06:56:00	0
2008-08-21	06:57:00	0
2008-08-21	06:58:00	0
2008-08-21	06:59:00	0
2008-08-21	07:00:00	774
2008-08-21	07:01:00	386
2008-08-21	07:02:00	376
2008-08-21	07:03:00	111
2008-08-21	07:04:00	0
2008-08-21	07:05:00	0
2008-08-21	07:06:00	386
2008-08-21	07:07:00	526
2008-08-21	07:08:00	10
2008-08-21	07:09:00	151
2008-08-21	07:10:00	21
2008-08-21	07:11:00	0
2008-08-21	07:12:00	0
2008-08-21	07:13:00	0
2008-08-21	07:14:00	5
2008-08-21	07:15:00	0
2008-08-21	07:16:00	0
2008-08-21	07:17:00	0
2008-08-21	07:18:00	0
2008-08-21	07:19:00	0
2008-08-21	07:20:00	0
2008-08-21	07:21:00	16
2008-08-21	07:22:00	0
2008-08-21	07:23:00	0
2008-08-21	07:24:00	0
2008-08-21	07:25:00	355
2008-08-21	07:26:00	376
2008-08-21	07:27:00	418
2008-08-21	07:28:00	31
2008-08-21	07:29:00	5
2008-08-21	07:30:00	42
2008-08-21	07:31:00	418
2008-08-21	07:32:00	679
2008-08-21	07:33:00	158
2008-08-21	07:34:00	151
2008-08-21	07:35:00	144
2008-08-21	07:36:00	42
2008-08-21	07:37:00	86
2008-08-21	07:38:00	26
2008-08-21	07:39:00	21
2008-08-21	07:40:00	0
2008-08-21	07:41:00	52
2008-08-21	07:42:00	52
2008-08-21	07:43:00	0
2008-08-21	07:44:00	0
2008-08-21	07:45:00	0
2008-08-21	07:46:00	0
2008-08-21	07:47:00	664
2008-08-21	07:48:00	365
2008-08-21	07:49:00	31
2008-08-21	07:50:00	130
2008-08-21	07:51:00	57
2008-08-21	07:52:00	260
2008-08-21	07:53:00	376
2008-08-21	07:54:00	418
2008-08-21	07:55:00	57
2008-08-21	07:56:00	202
2008-08-21	07:57:00	210
2008-08-21	07:58:00	165
2008-08-21	07:59:00	808
2008-08-21	08:00:00	244
2008-08-21	08:01:00	210
2008-08-21	08:02:00	407
2008-08-21	08:03:00	0
2008-08-21	08:04:00	0
2008-08-21	08:05:00	0
2008-08-21	08:06:00	0
2008-08-21	08:07:00	0
2008-08-21	08:08:00	0
2008-08-21	08:09:00	0
2008-08-21	08:10:00	0
2008-08-21	08:11:00	5
2008-08-21	08:12:00	0
2008-08-21	08:13:00	0
2008-08-21	08:14:00	0
2008-08-21	08:15:00	0
2008-08-21	08:16:00	0
2008-08-21	08:17:00	0
2008-08-21	08:18:00	0
2008-08-21	08:19:00	0
2008-08-21	08:20:00	0
2008-08-21	08:21:00	0
2008-08-21	08:22:00	0
2008-08-21	08:23:00	0
2008-08-21	08:24:00	0
2008-08-21	08:25:00	0
2008-08-21	08:26:00	0
2008-08-21	08:27:00	0
2008-08-21	08:28:00	0
2008-08-21	08:29:00	0
2008-08-21	08:30:00	0
2008-08-21	08:31:00	0
2008-08-21	08:32:00	0
2008-08-21	08:33:00	180
2008-08-21	08:34:00	5
2008-08-21	08:35:00	0
2008-08-21	08:36:00	0
2008-08-21	08:37:00	0
2008-08-21	08:38:00	0
2008-08-21	08:39:00	5
2008-08-21	08:40:00	0
2008-08-21	08:41:00	5
2008-08-21	08:42:00	0
2008-08-21	08:43:00	0
2008-08-21	08:44:00	0
2008-08-21	08:45:00	0
2008-08-21	08:46:00	0
2008-08-21	08:47:00	0
2008-08-21	08:48:00	0
2008-08-21	08:49:00	0
2008-08-21	08:50:00	0
2008-08-21	08:51:00	0
2008-08-21	08:52:00	0
2008-08-21	08:53:00	0
2008-08-21	08:54:00	0
2008-08-21	08:55:00	0
2008-08-21	08:56:00	0
2008-08-21	08:57:00	0
2008-08-21	08:58:00	0
2008-08-21	08:59:00	0
2008-08-21	09:00:00	0
2008-08-21	09:01:00	0
2008-08-21	09:02:00	0
2008-08-21	09:03:00	0
2008-08-21	09:04:00	0
2008-08-21	09:05:00	0
2008-08-21	09:06:00	0
2008-08-21	09:07:00	0
2008-08-21	09:08:00	0
[truncated: 19,611 more rows]

## Sheet: 9.3.08
Actogram, Copy Raw Data, All Days
Identity:	Denver
Filename:	E:\Active Research Files\meloxicam titre canine\cases\denver\Denver 9.3.08.AWC
Gender:	M
Age:	11
Height:	40.6 cm	16.0 in
Weight:	26.6 kg	58.6 lbs
Start Date:	03-Sep-2008 (Wed)
Start Time:	17:00:00
Interval:	1.00 mins
Date Stamp:	Time Stamp:	Activity Data:	Marker Press:
2008-09-03	00:00:00	0
2008-09-03	00:01:00	0
2008-09-03	00:02:00	0
2008-09-03	00:03:00	0
2008-09-03	00:04:00	0
2008-09-03	00:05:00	0
2008-09-03	00:06:00	0
2008-09-03	00:07:00	0
2008-09-03	00:08:00	0
2008-09-03	00:09:00	0
2008-09-03	00:10:00	0
2008-09-03	00:11:00	0
2008-09-03	00:12:00	0
2008-09-03	00:13:00	0
2008-09-03	00:14:00	0
2008-09-03	00:15:00	0
2008-09-03	00:16:00	0
2008-09-03	00:17:00	0
2008-09-03	00:18:00	0
2008-09-03	00:19:00	0
2008-09-03	00:20:00	0
2008-09-03	00:21:00	0
2008-09-03	00:22:00	0
2008-09-03	00:23:00	0
2008-09-03	00:24:00	0
2008-09-03	00:25:00	0
2008-09-03	00:26:00	0
2008-09-03	00:27:00	0
2008-09-03	00:28:00	0
2008-09-03	00:29:00	0
2008-09-03	00:30:00	0
2008-09-03	00:31:00	0
2008-09-03	00:32:00	0
2008-09-03	00:33:00	0
2008-09-03	00:34:00	0
2008-09-03	00:35:00	0
2008-09-03	00:36:00	0
2008-09-03	00:37:00	0
2008-09-03	00:38:00	0
2008-09-03	00:39:00	0
2008-09-03	00:40:00	0
2008-09-03	00:41:00	0
2008-09-03	00:42:00	0
2008-09-03	00:43:00	0
2008-09-03	00:44:00	0
2008-09-03	00:45:00	0
2008-09-03	00:46:00	0
2008-09-03	00:47:00	0
2008-09-03	00:48:00	0
2008-09-03	00:49:00	0
2008-09-03	00:50:00	0
2008-09-03	00:51:00	0
2008-09-03	00:52:00	0
2008-09-03	00:53:00	0
2008-09-03	00:54:00	0
2008-09-03	00:55:00	0
2008-09-03	00:56:00	0
2008-09-03	00:57:00	0
2008-09-03	00:58:00	0
2008-09-03	00:59:00	0
2008-09-03	01:00:00	0
2008-09-03	01:01:00	0
2008-09-03	01:02:00	0
2008-09-03	01:03:00	0
2008-09-03	01:04:00	0
2008-09-03	01:05:00	0
2008-09-03	01:06:00	0
2008-09-03	01:07:00	0
2008-09-03	01:08:00	0
2008-09-03	01:09:00	0
2008-09-03	01:10:00	0
2008-09-03	01:11:00	0
2008-09-03	01:12:00	0
2008-09-03	01:13:00	0
2008-09-03	01:14:00	0
2008-09-03	01:15:00	0
2008-09-03	01:16:00	0
2008-09-03	01:17:00	0
2008-09-03	01:18:00	0
2008-09-03	01:19:00	0
2008-09-03	01:20:00	0
2008-09-03	01:21:00	0
2008-09-03	01:22:00	0
2008-09-03	01:23:00	0
2008-09-03	01:24:00	0
2008-09-03	01:25:00	0
2008-09-03	01:26:00	0
2008-09-03	01:27:00	0
2008-09-03	01:28:00	0
2008-09-03	01:29:00	0
2008-09-03	01:30:00	0
2008-09-03	01:31:00	0
2008-09-03	01:32:00	0
2008-09-03	01:33:00	0
2008-09-03	01:34:00	0
2008-09-03	01:35:00	0
2008-09-03	01:36:00	0
2008-09-03	01:37:00	0
2008-09-03	01:38:00	0
2008-09-03	01:39:00	0
2008-09-03	01:40:00	0
2008-09-03	01:41:00	0
2008-09-03	01:42:00	0
2008-09-03	01:43:00	0
2008-09-03	01:44:00	0
2008-09-03	01:45:00	0
2008-09-03	01:46:00	0
2008-09-03	01:47:00	0
2008-09-03	01:48:00	0
2008-09-03	01:49:00	0
2008-09-03	01:50:00	0
2008-09-03	01:51:00	0
2008-09-03	01:52:00	0
2008-09-03	01:53:00	0
2008-09-03	01:54:00	0
2008-09-03	01:55:00	0
2008-09-03	01:56:00	0
2008-09-03	01:57:00	0
2008-09-03	01:58:00	0
2008-09-03	01:59:00	0
2008-09-03	02:00:00	0
2008-09-03	02:01:00	0
2008-09-03	02:02:00	0
2008-09-03	02:03:00	0
2008-09-03	02:04:00	0
2008-09-03	02:05:00	0
2008-09-03	02:06:00	0
2008-09-03	02:07:00	0
2008-09-03	02:08:00	0
2008-09-03	02:09:00	0
2008-09-03	02:10:00	0
2008-09-03	02:11:00	0
2008-09-03	02:12:00	0
2008-09-03	02:13:00	0
2008-09-03	02:14:00	0
2008-09-03	02:15:00	0
2008-09-03	02:16:00	0
2008-09-03	02:17:00	0
2008-09-03	02:18:00	0
2008-09-03	02:19:00	0
2008-09-03	02:20:00	0
2008-09-03	02:21:00	0
2008-09-03	02:22:00	0
2008-09-03	02:23:00	0
2008-09-03	02:24:00	0
2008-09-03	02:25:00	0
2008-09-03	02:26:00	0
2008-09-03	02:27:00	0
2008-09-03	02:28:00	0
2008-09-03	02:29:00	0
2008-09-03	02:30:00	0
2008-09-03	02:31:00	0
2008-09-03	02:32:00	0
2008-09-03	02:33:00	0
2008-09-03	02:34:00	0
2008-09-03	02:35:00	0
2008-09-03	02:36:00	0
2008-09-03	02:37:00	0
2008-09-03	02:38:00	0
2008-09-03	02:39:00	0
2008-09-03	02:40:00	0
2008-09-03	02:41:00	0
2008-09-03	02:42:00	0
2008-09-03	02:43:00	0
2008-09-03	02:44:00	0
2008-09-03	02:45:00	0
2008-09-03	02:46:00	0
2008-09-03	02:47:00	0
2008-09-03	02:48:00	0
2008-09-03	02:49:00	0
2008-09-03	02:50:00	0
2008-09-03	02:51:00	0
2008-09-03	02:52:00	0
2008-09-03	02:53:00	0
2008-09-03	02:54:00	0
2008-09-03	02:55:00	0
2008-09-03	02:56:00	0
2008-09-03	02:57:00	0
2008-09-03	02:58:00	0
2008-09-03	02:59:00	0
2008-09-03	03:00:00	0
2008-09-03	03:01:00	0
2008-09-03	03:02:00	0
2008-09-03	03:03:00	0
2008-09-03	03:04:00	0
2008-09-03	03:05:00	0
2008-09-03	03:06:00	0
2008-09-03	03:07:00	0
2008-09-03	03:08:00	0
2008-09-03	03:09:00	0
2008-09-03	03:10:00	0
2008-09-03	03:11:00	0
2008-09-03	03:12:00	0
2008-09-03	03:13:00	0
2008-09-03	03:14:00	0
2008-09-03	03:15:00	0
2008-09-03	03:16:00	0
2008-09-03	03:17:00	0
2008-09-03	03:18:00	0
2008-09-03	03:19:00	0
2008-09-03	03:20:00	0
2008-09-03	03:21:00	0
2008-09-03	03:22:00	0
2008-09-03	03:23:00	0
2008-09-03	03:24:00	0
2008-09-03	03:25:00	0
2008-09-03	03:26:00	0
2008-09-03	03:27:00	0
2008-09-03	03:28:00	0
2008-09-03	03:29:00	0
2008-09-03	03:30:00	0
2008-09-03	03:31:00	0
2008-09-03	03:32:00	0
2008-09-03	03:33:00	0
2008-09-03	03:34:00	0
2008-09-03	03:35:00	0
2008-09-03	03:36:00	0
2008-09-03	03:37:00	0
2008-09-03	03:38:00	0
2008-09-03	03:39:00	0
2008-09-03	03:40:00	0
2008-09-03	03:41:00	0
2008-09-03	03:42:00	0
2008-09-03	03:43:00	0
2008-09-03	03:44:00	0
2008-09-03	03:45:00	0
2008-09-03	03:46:00	0
2008-09-03	03:47:00	0
2008-09-03	03:48:00	0
2008-09-03	03:49:00	0
2008-09-03	03:50:00	0
2008-09-03	03:51:00	0
2008-09-03	03:52:00	0
2008-09-03	03:53:00	0
2008-09-03	03:54:00	0
2008-09-03	03:55:00	0
2008-09-03	03:56:00	0
2008-09-03	03:57:00	0
2008-09-03	03:58:00	0
2008-09-03	03:59:00	0
2008-09-03	04:00:00	0
2008-09-03	04:01:00	0
2008-09-03	04:02:00	0
2008-09-03	04:03:00	0
2008-09-03	04:04:00	0
2008-09-03	04:05:00	0
2008-09-03	04:06:00	0
2008-09-03	04:07:00	0
2008-09-03	04:08:00	0
2008-09-03	04:09:00	0
2008-09-03	04:10:00	0
2008-09-03	04:11:00	0
2008-09-03	04:12:00	0
2008-09-03	04:13:00	0
2008-09-03	04:14:00	0
2008-09-03	04:15:00	0
2008-09-03	04:16:00	0
2008-09-03	04:17:00	0
2008-09-03	04:18:00	0
2008-09-03	04:19:00	0
2008-09-03	04:20:00	0
2008-09-03	04:21:00	0
2008-09-03	04:22:00	0
2008-09-03	04:23:00	0
2008-09-03	04:24:00	0
2008-09-03	04:25:00	0
2008-09-03	04:26:00	0
2008-09-03	04:27:00	0
2008-09-03	04:28:00	0
2008-09-03	04:29:00	0
2008-09-03	04:30:00	0
2008-09-03	04:31:00	0
2008-09-03	04:32:00	0
2008-09-03	04:33:00	0
2008-09-03	04:34:00	0
2008-09-03	04:35:00	0
2008-09-03	04:36:00	0
2008-09-03	04:37:00	0
2008-09-03	04:38:00	0
2008-09-03	04:39:00	0
2008-09-03	04:40:00	0
2008-09-03	04:41:00	0
2008-09-03	04:42:00	0
2008-09-03	04:43:00	0
2008-09-03	04:44:00	0
2008-09-03	04:45:00	0
2008-09-03	04:46:00	0
2008-09-03	04:47:00	0
2008-09-03	04:48:00	0
2008-09-03	04:49:00	0
2008-09-03	04:50:00	0
2008-09-03	04:51:00	0
2008-09-03	04:52:00	0
2008-09-03	04:53:00	0
2008-09-03	04:54:00	0
2008-09-03	04:55:00	0
2008-09-03	04:56:00	0
2008-09-03	04:57:00	0
2008-09-03	04:58:00	0
2008-09-03	04:59:00	0
2008-09-03	05:00:00	0
2008-09-03	05:01:00	0
2008-09-03	05:02:00	0
2008-09-03	05:03:00	0
2008-09-03	05:04:00	0
2008-09-03	05:05:00	0
2008-09-03	05:06:00	0
2008-09-03	05:07:00	0
2008-09-03	05:08:00	0
2008-09-03	05:09:00	0
2008-09-03	05:10:00	0
2008-09-03	05:11:00	0
2008-09-03	05:12:00	0
2008-09-03	05:13:00	0
2008-09-03	05:14:00	0
2008-09-03	05:15:00	0
2008-09-03	05:16:00	0
2008-09-03	05:17:00	0
2008-09-03	05:18:00	0
2008-09-03	05:19:00	0
2008-09-03	05:20:00	0
2008-09-03	05:21:00	0
2008-09-03	05:22:00	0
2008-09-03	05:23:00	0
2008-09-03	05:24:00	0
2008-09-03	05:25:00	0
2008-09-03	05:26:00	0
2008-09-03	05:27:00	0
2008-09-03	05:28:00	0
2008-09-03	05:29:00	0
2008-09-03	05:30:00	0
2008-09-03	05:31:00	0
2008-09-03	05:32:00	0
2008-09-03	05:33:00	0
2008-09-03	05:34:00	0
2008-09-03	05:35:00	0
2008-09-03	05:36:00	0
2008-09-03	05:37:00	0
2008-09-03	05:38:00	0
2008-09-03	05:39:00	0
2008-09-03	05:40:00	0
2008-09-03	05:41:00	0
2008-09-03	05:42:00	0
2008-09-03	05:43:00	0
2008-09-03	05:44:00	0
2008-09-03	05:45:00	0
2008-09-03	05:46:00	0
2008-09-03	05:47:00	0
2008-09-03	05:48:00	0
2008-09-03	05:49:00	0
2008-09-03	05:50:00	0
2008-09-03	05:51:00	0
2008-09-03	05:52:00	0
2008-09-03	05:53:00	0
2008-09-03	05:54:00	0
2008-09-03	05:55:00	0
2008-09-03	05:56:00	0
2008-09-03	05:57:00	0
2008-09-03	05:58:00	0
2008-09-03	05:59:00	0
2008-09-03	06:00:00	0
2008-09-03	06:01:00	0
2008-09-03	06:02:00	0
2008-09-03	06:03:00	0
2008-09-03	06:04:00	0
2008-09-03	06:05:00	0
2008-09-03	06:06:00	0
2008-09-03	06:07:00	0
2008-09-03	06:08:00	0
2008-09-03	06:09:00	0
2008-09-03	06:10:00	0
2008-09-03	06:11:00	0
2008-09-03	06:12:00	0
2008-09-03	06:13:00	0
2008-09-03	06:14:00	0
2008-09-03	06:15:00	0
2008-09-03	06:16:00	0
2008-09-03	06:17:00	0
2008-09-03	06:18:00	0
2008-09-03	06:19:00	0
2008-09-03	06:20:00	0
2008-09-03	06:21:00	0
2008-09-03	06:22:00	0
2008-09-03	06:23:00	0
2008-09-03	06:24:00	0
2008-09-03	06:25:00	0
2008-09-03	06:26:00	0
2008-09-03	06:27:00	0
2008-09-03	06:28:00	0
2008-09-03	06:29:00	0
2008-09-03	06:30:00	0
2008-09-03	06:31:00	0
2008-09-03	06:32:00	0
2008-09-03	06:33:00	0
2008-09-03	06:34:00	0
2008-09-03	06:35:00	0
2008-09-03	06:36:00	0
2008-09-03	06:37:00	0
2008-09-03	06:38:00	0
2008-09-03	06:39:00	0
2008-09-03	06:40:00	0
2008-09-03	06:41:00	0
2008-09-03	06:42:00	0
2008-09-03	06:43:00	0
2008-09-03	06:44:00	0
2008-09-03	06:45:00	0
2008-09-03	06:46:00	0
2008-09-03	06:47:00	0
2008-09-03	06:48:00	0
2008-09-03	06:49:00	0
2008-09-03	06:50:00	0
2008-09-03	06:51:00	0
2008-09-03	06:52:00	0
2008-09-03	06:53:00	0
2008-09-03	06:54:00	0
2008-09-03	06:55:00	0
2008-09-03	06:56:00	0
2008-09-03	06:57:00	0
2008-09-03	06:58:00	0
2008-09-03	06:59:00	0
2008-09-03	07:00:00	0
2008-09-03	07:01:00	0
2008-09-03	07:02:00	0
2008-09-03	07:03:00	0
2008-09-03	07:04:00	0
2008-09-03	07:05:00	0
2008-09-03	07:06:00	0
2008-09-03	07:07:00	0
2008-09-03	07:08:00	0
2008-09-03	07:09:00	0
2008-09-03	07:10:00	0
2008-09-03	07:11:00	0
2008-09-03	07:12:00	0
2008-09-03	07:13:00	0
2008-09-03	07:14:00	0
2008-09-03	07:15:00	0
2008-09-03	07:16:00	0
2008-09-03	07:17:00	0
2008-09-03	07:18:00	0
2008-09-03	07:19:00	0
2008-09-03	07:20:00	0
2008-09-03	07:21:00	0
2008-09-03	07:22:00	0
2008-09-03	07:23:00	0
2008-09-03	07:24:00	0
2008-09-03	07:25:00	0
2008-09-03	07:26:00	0
2008-09-03	07:27:00	0
2008-09-03	07:28:00	0
2008-09-03	07:29:00	0
2008-09-03	07:30:00	0
2008-09-03	07:31:00	0
2008-09-03	07:32:00	0
2008-09-03	07:33:00	0
2008-09-03	07:34:00	0
2008-09-03	07:35:00	0
2008-09-03	07:36:00	0
2008-09-03	07:37:00	0
2008-09-03	07:38:00	0
2008-09-03	07:39:00	0
2008-09-03	07:40:00	0
2008-09-03	07:41:00	0
2008-09-03	07:42:00	0
2008-09-03	07:43:00	0
2008-09-03	07:44:00	0
2008-09-03	07:45:00	0
2008-09-03	07:46:00	0
2008-09-03	07:47:00	0
2008-09-03	07:48:00	0
2008-09-03	07:49:00	0
2008-09-03	07:50:00	0
2008-09-03	07:51:00	0
2008-09-03	07:52:00	0
2008-09-03	07:53:00	0
2008-09-03	07:54:00	0
2008-09-03	07:55:00	0
2008-09-03	07:56:00	0
2008-09-03	07:57:00	0
2008-09-03	07:58:00	0
2008-09-03	07:59:00	0
2008-09-03	08:00:00	0
2008-09-03	08:01:00	0
2008-09-03	08:02:00	0
2008-09-03	08:03:00	0
2008-09-03	08:04:00	0
2008-09-03	08:05:00	0
2008-09-03	08:06:00	0
2008-09-03	08:07:00	0
2008-09-03	08:08:00	0
2008-09-03	08:09:00	0
2008-09-03	08:10:00	0
2008-09-03	08:11:00	0
2008-09-03	08:12:00	0
2008-09-03	08:13:00	0
2008-09-03	08:14:00	0
2008-09-03	08:15:00	0
2008-09-03	08:16:00	0
2008-09-03	08:17:00	0
2008-09-03	08:18:00	0
2008-09-03	08:19:00	0
2008-09-03	08:20:00	0
2008-09-03	08:21:00	0
2008-09-03	08:22:00	0
2008-09-03	08:23:00	0
2008-09-03	08:24:00	0
2008-09-03	08:25:00	0
2008-09-03	08:26:00	0
2008-09-03	08:27:00	0
2008-09-03	08:28:00	0
2008-09-03	08:29:00	0
2008-09-03	08:30:00	0
2008-09-03	08:31:00	0
2008-09-03	08:32:00	0
2008-09-03	08:33:00	0
2008-09-03	08:34:00	0
2008-09-03	08:35:00	0
2008-09-03	08:36:00	0
2008-09-03	08:37:00	0
2008-09-03	08:38:00	0
2008-09-03	08:39:00	0
2008-09-03	08:40:00	0
2008-09-03	08:41:00	0
2008-09-03	08:42:00	0
2008-09-03	08:43:00	0
2008-09-03	08:44:00	0
2008-09-03	08:45:00	0
2008-09-03	08:46:00	0
2008-09-03	08:47:00	0
2008-09-03	08:48:00	0
2008-09-03	08:49:00	0
2008-09-03	08:50:00	0
2008-09-03	08:51:00	0
2008-09-03	08:52:00	0
2008-09-03	08:53:00	0
2008-09-03	08:54:00	0
2008-09-03	08:55:00	0
2008-09-03	08:56:00	0
2008-09-03	08:57:00	0
2008-09-03	08:58:00	0
2008-09-03	08:59:00	0
2008-09-03	09:00:00	0
2008-09-03	09:01:00	0
2008-09-03	09:02:00	0
2008-09-03	09:03:00	0
2008-09-03	09:04:00	0
2008-09-03	09:05:00	0
2008-09-03	09:06:00	0
2008-09-03	09:07:00	0
2008-09-03	09:08:00	0
2008-09-03	09:09:00	0
2008-09-03	09:10:00	0
2008-09-03	09:11:00	0
2008-09-03	09:12:00	0
2008-09-03	09:13:00	0
2008-09-03	09:14:00	0
2008-09-03	09:15:00	0
2008-09-03	09:16:00	0
2008-09-03	09:17:00	0
2008-09-03	09:18:00	0
2008-09-03	09:19:00	0
2008-09-03	09:20:00	0
2008-09-03	09:21:00	0
2008-09-03	09:22:00	0
2008-09-03	09:23:00	0
2008-09-03	09:24:00	0
2008-09-03	09:25:00	0
2008-09-03	09:26:00	0
2008-09-03	09:27:00	0
2008-09-03	09:28:00	0
2008-09-03	09:29:00	0
2008-09-03	09:30:00	0
2008-09-03	09:31:00	0
2008-09-03	09:32:00	0
2008-09-03	09:33:00	0
2008-09-03	09:34:00	0
2008-09-03	09:35:00	0
2008-09-03	09:36:00	0
2008-09-03	09:37:00	0
2008-09-03	09:38:00	0
2008-09-03	09:39:00	0
2008-09-03	09:40:00	0
2008-09-03	09:41:00	0
2008-09-03	09:42:00	0
2008-09-03	09:43:00	0
2008-09-03	09:44:00	0
2008-09-03	09:45:00	0
2008-09-03	09:46:00	0
2008-09-03	09:47:00	0
2008-09-03	09:48:00	0
2008-09-03	09:49:00	0
2008-09-03	09:50:00	0
2008-09-03	09:51:00	0
2008-09-03	09:52:00	0
2008-09-03	09:53:00	0
2008-09-03	09:54:00	0
2008-09-03	09:55:00	0
2008-09-03	09:56:00	0
2008-09-03	09:57:00	0
2008-09-03	09:58:00	0
2008-09-03	09:59:00	0
2008-09-03	10:00:00	0
2008-09-03	10:01:00	0
2008-09-03	10:02:00	0
2008-09-03	10:03:00	0
2008-09-03	10:04:00	0
2008-09-03	10:05:00	0
2008-09-03	10:06:00	0
2008-09-03	10:07:00	0
2008-09-03	10:08:00	0
2008-09-03	10:09:00	0
2008-09-03	10:10:00	0
2008-09-03	10:11:00	0
2008-09-03	10:12:00	0
2008-09-03	10:13:00	0
2008-09-03	10:14:00	0
2008-09-03	10:15:00	0
2008-09-03	10:16:00	0
2008-09-03	10:17:00	0
2008-09-03	10:18:00	0
2008-09-03	10:19:00	0
2008-09-03	10:20:00	0
2008-09-03	10:21:00	0
2008-09-03	10:22:00	0
2008-09-03	10:23:00	0
2008-09-03	10:24:00	0
2008-09-03	10:25:00	0
2008-09-03	10:26:00	0
2008-09-03	10:27:00	0
2008-09-03	10:28:00	0
2008-09-03	10:29:00	0
2008-09-03	10:30:00	0
2008-09-03	10:31:00	0
2008-09-03	10:32:00	0
2008-09-03	10:33:00	0
2008-09-03	10:34:00	0
2008-09-03	10:35:00	0
2008-09-03	10:36:00	0
2008-09-03	10:37:00	0
2008-09-03	10:38:00	0
2008-09-03	10:39:00	0
2008-09-03	10:40:00	0
2008-09-03	10:41:00	0
2008-09-03	10:42:00	0
2008-09-03	10:43:00	0
2008-09-03	10:44:00	0
2008-09-03	10:45:00	0
2008-09-03	10:46:00	0
2008-09-03	10:47:00	0
2008-09-03	10:48:00	0
2008-09-03	10:49:00	0
2008-09-03	10:50:00	0
2008-09-03	10:51:00	0
2008-09-03	10:52:00	0
2008-09-03	10:53:00	0
2008-09-03	10:54:00	0
2008-09-03	10:55:00	0
2008-09-03	10:56:00	0
2008-09-03	10:57:00	0
2008-09-03	10:58:00	0
2008-09-03	10:59:00	0
2008-09-03	11:00:00	0
2008-09-03	11:01:00	0
2008-09-03	11:02:00	0
2008-09-03	11:03:00	0
2008-09-03	11:04:00	0
2008-09-03	11:05:00	0
2008-09-03	11:06:00	0
2008-09-03	11:07:00	0
2008-09-03	11:08:00	0
2008-09-03	11:09:00	0
2008-09-03	11:10:00	0
2008-09-03	11:11:00	0
2008-09-03	11:12:00	0
2008-09-03	11:13:00	0
2008-09-03	11:14:00	0
2008-09-03	11:15:00	0
2008-09-03	11:16:00	0
2008-09-03	11:17:00	0
2008-09-03	11:18:00	0
2008-09-03	11:19:00	0
2008-09-03	11:20:00	0
2008-09-03	11:21:00	0
2008-09-03	11:22:00	0
2008-09-03	11:23:00	0
2008-09-03	11:24:00	0
2008-09-03	11:25:00	0
2008-09-03	11:26:00	0
2008-09-03	11:27:00	0
2008-09-03	11:28:00	0
2008-09-03	11:29:00	0
2008-09-03	11:30:00	0
2008-09-03	11:31:00	0
2008-09-03	11:32:00	0
2008-09-03	11:33:00	0
2008-09-03	11:34:00	0
2008-09-03	11:35:00	0
2008-09-03	11:36:00	0
2008-09-03	11:37:00	0
2008-09-03	11:38:00	0
2008-09-03	11:39:00	0
2008-09-03	11:40:00	0
2008-09-03	11:41:00	0
2008-09-03	11:42:00	0
2008-09-03	11:43:00	0
2008-09-03	11:44:00	0
2008-09-03	11:45:00	0
2008-09-03	11:46:00	0
2008-09-03	11:47:00	0
2008-09-03	11:48:00	0
2008-09-03	11:49:00	0
2008-09-03	11:50:00	0
2008-09-03	11:51:00	0
2008-09-03	11:52:00	0
2008-09-03	11:53:00	0
2008-09-03	11:54:00	0
2008-09-03	11:55:00	0
2008-09-03	11:56:00	0
2008-09-03	11:57:00	0
2008-09-03	11:58:00	0
2008-09-03	11:59:00	0
2008-09-03	12:00:00	0
2008-09-03	12:01:00	0
2008-09-03	12:02:00	0
2008-09-03	12:03:00	0
2008-09-03	12:04:00	0
2008-09-03	12:05:00	0
2008-09-03	12:06:00	0
2008-09-03	12:07:00	0
2008-09-03	12:08:00	0
2008-09-03	12:09:00	0
2008-09-03	12:10:00	0
2008-09-03	12:11:00	0
2008-09-03	12:12:00	0
2008-09-03	12:13:00	0
2008-09-03	12:14:00	0
2008-09-03	12:15:00	0
2008-09-03	12:16:00	0
2008-09-03	12:17:00	0
2008-09-03	12:18:00	0
2008-09-03	12:19:00	0
2008-09-03	12:20:00	0
2008-09-03	12:21:00	0
2008-09-03	12:22:00	0
2008-09-03	12:23:00	0
2008-09-03	12:24:00	0
2008-09-03	12:25:00	0
2008-09-03	12:26:00	0
2008-09-03	12:27:00	0
2008-09-03	12:28:00	0
2008-09-03	12:29:00	0
2008-09-03	12:30:00	0
2008-09-03	12:31:00	0
2008-09-03	12:32:00	0
2008-09-03	12:33:00	0
2008-09-03	12:34:00	0
2008-09-03	12:35:00	0
2008-09-03	12:36:00	0
2008-09-03	12:37:00	0
2008-09-03	12:38:00	0
2008-09-03	12:39:00	0
2008-09-03	12:40:00	0
2008-09-03	12:41:00	0
2008-09-03	12:42:00	0
2008-09-03	12:43:00	0
2008-09-03	12:44:00	0
2008-09-03	12:45:00	0
2008-09-03	12:46:00	0
2008-09-03	12:47:00	0
2008-09-03	12:48:00	0
2008-09-03	12:49:00	0
2008-09-03	12:50:00	0
2008-09-03	12:51:00	0
2008-09-03	12:52:00	0
2008-09-03	12:53:00	0
2008-09-03	12:54:00	0
2008-09-03	12:55:00	0
2008-09-03	12:56:00	0
2008-09-03	12:57:00	0
2008-09-03	12:58:00	0
2008-09-03	12:59:00	0
2008-09-03	13:00:00	0
2008-09-03	13:01:00	0
2008-09-03	13:02:00	0
2008-09-03	13:03:00	0
2008-09-03	13:04:00	0
2008-09-03	13:05:00	0
2008-09-03	13:06:00	0
2008-09-03	13:07:00	0
2008-09-03	13:08:00	0
2008-09-03	13:09:00	0
2008-09-03	13:10:00	0
2008-09-03	13:11:00	0
2008-09-03	13:12:00	0
2008-09-03	13:13:00	0
2008-09-03	13:14:00	0
2008-09-03	13:15:00	0
2008-09-03	13:16:00	0
2008-09-03	13:17:00	0
2008-09-03	13:18:00	0
2008-09-03	13:19:00	0
2008-09-03	13:20:00	0
2008-09-03	13:21:00	0
2008-09-03	13:22:00	0
2008-09-03	13:23:00	0
2008-09-03	13:24:00	0
2008-09-03	13:25:00	0
2008-09-03	13:26:00	0
2008-09-03	13:27:00	0
2008-09-03	13:28:00	0
2008-09-03	13:29:00	0
2008-09-03	13:30:00	0
2008-09-03	13:31:00	0
2008-09-03	13:32:00	0
2008-09-03	13:33:00	0
2008-09-03	13:34:00	0
2008-09-03	13:35:00	0
2008-09-03	13:36:00	0
2008-09-03	13:37:00	0
2008-09-03	13:38:00	0
2008-09-03	13:39:00	0
2008-09-03	13:40:00	0
2008-09-03	13:41:00	0
2008-09-03	13:42:00	0
2008-09-03	13:43:00	0
2008-09-03	13:44:00	0
2008-09-03	13:45:00	0
2008-09-03	13:46:00	0
2008-09-03	13:47:00	0
2008-09-03	13:48:00	0
2008-09-03	13:49:00	0
2008-09-03	13:50:00	0
2008-09-03	13:51:00	0
2008-09-03	13:52:00	0
2008-09-03	13:53:00	0
2008-09-03	13:54:00	0
2008-09-03	13:55:00	0
2008-09-03	13:56:00	0
2008-09-03	13:57:00	0
2008-09-03	13:58:00	0
2008-09-03	13:59:00	0
2008-09-03	14:00:00	0
2008-09-03	14:01:00	0
2008-09-03	14:02:00	0
2008-09-03	14:03:00	0
2008-09-03	14:04:00	0
2008-09-03	14:05:00	0
2008-09-03	14:06:00	0
2008-09-03	14:07:00	0
2008-09-03	14:08:00	0
2008-09-03	14:09:00	0
2008-09-03	14:10:00	0
2008-09-03	14:11:00	0
2008-09-03	14:12:00	0
2008-09-03	14:13:00	0
2008-09-03	14:14:00	0
2008-09-03	14:15:00	0
2008-09-03	14:16:00	0
2008-09-03	14:17:00	0
2008-09-03	14:18:00	0
2008-09-03	14:19:00	0
2008-09-03	14:20:00	0
2008-09-03	14:21:00	0
2008-09-03	14:22:00	0
2008-09-03	14:23:00	0
2008-09-03	14:24:00	0
2008-09-03	14:25:00	0
2008-09-03	14:26:00	0
2008-09-03	14:27:00	0
2008-09-03	14:28:00	0
2008-09-03	14:29:00	0
2008-09-03	14:30:00	0
2008-09-03	14:31:00	0
2008-09-03	14:32:00	0
2008-09-03	14:33:00	0
2008-09-03	14:34:00	0
2008-09-03	14:35:00	0
2008-09-03	14:36:00	0
2008-09-03	14:37:00	0
2008-09-03	14:38:00	0
2008-09-03	14:39:00	0
2008-09-03	14:40:00	0
2008-09-03	14:41:00	0
2008-09-03	14:42:00	0
2008-09-03	14:43:00	0
2008-09-03	14:44:00	0
2008-09-03	14:45:00	0
2008-09-03	14:46:00	0
2008-09-03	14:47:00	0
2008-09-03	14:48:00	0
2008-09-03	14:49:00	0
2008-09-03	14:50:00	0
2008-09-03	14:51:00	0
2008-09-03	14:52:00	0
2008-09-03	14:53:00	0
2008-09-03	14:54:00	0
2008-09-03	14:55:00	0
2008-09-03	14:56:00	0
2008-09-03	14:57:00	0
2008-09-03	14:58:00	0
2008-09-03	14:59:00	0
2008-09-03	15:00:00	0
2008-09-03	15:01:00	0
2008-09-03	15:02:00	0
2008-09-03	15:03:00	0
2008-09-03	15:04:00	0
2008-09-03	15:05:00	0
2008-09-03	15:06:00	0
2008-09-03	15:07:00	0
2008-09-03	15:08:00	0
2008-09-03	15:09:00	0
2008-09-03	15:10:00	0
2008-09-03	15:11:00	0
2008-09-03	15:12:00	0
2008-09-03	15:13:00	0
2008-09-03	15:14:00	0
2008-09-03	15:15:00	0
2008-09-03	15:16:00	0
2008-09-03	15:17:00	0
2008-09-03	15:18:00	0
2008-09-03	15:19:00	0
2008-09-03	15:20:00	0
2008-09-03	15:21:00	0
2008-09-03	15:22:00	0
2008-09-03	15:23:00	0
2008-09-03	15:24:00	0
2008-09-03	15:25:00	0
2008-09-03	15:26:00	0
2008-09-03	15:27:00	0
2008-09-03	15:28:00	0
2008-09-03	15:29:00	0
2008-09-03	15:30:00	0
2008-09-03	15:31:00	0
2008-09-03	15:32:00	0
2008-09-03	15:33:00	0
2008-09-03	15:34:00	0
2008-09-03	15:35:00	0
2008-09-03	15:36:00	0
2008-09-03	15:37:00	0
2008-09-03	15:38:00	0
2008-09-03	15:39:00	0
2008-09-03	15:40:00	0
2008-09-03	15:41:00	0
2008-09-03	15:42:00	0
2008-09-03	15:43:00	0
2008-09-03	15:44:00	0
2008-09-03	15:45:00	0
2008-09-03	15:46:00	0
2008-09-03	15:47:00	0
2008-09-03	15:48:00	0
2008-09-03	15:49:00	0
2008-09-03	15:50:00	0
2008-09-03	15:51:00	0
2008-09-03	15:52:00	0
2008-09-03	15:53:00	0
2008-09-03	15:54:00	0
2008-09-03	15:55:00	0
2008-09-03	15:56:00	0
2008-09-03	15:57:00	0
2008-09-03	15:58:00	0
2008-09-03	15:59:00	0
2008-09-03	16:00:00	0
2008-09-03	16:01:00	0
2008-09-03	16:02:00	0
2008-09-03	16:03:00	0
2008-09-03	16:04:00	0
2008-09-03	16:05:00	0
2008-09-03	16:06:00	0
2008-09-03	16:07:00	0
2008-09-03	16:08:00	0
2008-09-03	16:09:00	0
2008-09-03	16:10:00	0
2008-09-03	16:11:00	0
2008-09-03	16:12:00	0
2008-09-03	16:13:00	0
2008-09-03	16:14:00	0
2008-09-03	16:15:00	0
2008-09-03	16:16:00	0
2008-09-03	16:17:00	0
2008-09-03	16:18:00	0
2008-09-03	16:19:00	0
2008-09-03	16:20:00	0
2008-09-03	16:21:00	0
2008-09-03	16:22:00	0
2008-09-03	16:23:00	0
2008-09-03	16:24:00	0
2008-09-03	16:25:00	0
2008-09-03	16:26:00	0
2008-09-03	16:27:00	0
2008-09-03	16:28:00	0
2008-09-03	16:29:00	0
2008-09-03	16:30:00	0
2008-09-03	16:31:00	0
2008-09-03	16:32:00	0
2008-09-03	16:33:00	0
2008-09-03	16:34:00	0
2008-09-03	16:35:00	0
2008-09-03	16:36:00	0
2008-09-03	16:37:00	0
2008-09-03	16:38:00	0
2008-09-03	16:39:00	0
2008-09-03	16:40:00	0
2008-09-03	16:41:00	0
2008-09-03	16:42:00	0
2008-09-03	16:43:00	0
2008-09-03	16:44:00	0
2008-09-03	16:45:00	0
2008-09-03	16:46:00	0
2008-09-03	16:47:00	0
2008-09-03	16:48:00	0
2008-09-03	16:49:00	0
2008-09-03	16:50:00	0
2008-09-03	16:51:00	0
2008-09-03	16:52:00	0
2008-09-03	16:53:00	0
2008-09-03	16:54:00	0
2008-09-03	16:55:00	0
2008-09-03	16:56:00	0
2008-09-03	16:57:00	0
2008-09-03	16:58:00	0
2008-09-03	16:59:00	0
2008-09-03	17:00:00	0	M
2008-09-03	17:01:00	0
2008-09-03	17:02:00	0
2008-09-03	17:03:00	0
2008-09-03	17:04:00	0
2008-09-03	17:05:00	0
2008-09-03	17:06:00	0
2008-09-03	17:07:00	0
2008-09-03	17:08:00	0
2008-09-03	17:09:00	0
2008-09-03	17:10:00	0
2008-09-03	17:11:00	430
2008-09-03	17:12:00	758
2008-09-03	17:13:00	501
2008-09-03	17:14:00	0
2008-09-03	17:15:00	62
2008-09-03	17:16:00	430
2008-09-03	17:17:00	0
2008-09-03	17:18:00	0
2008-09-03	17:19:00	0
2008-09-03	17:20:00	0
2008-09-03	17:21:00	0
2008-09-03	17:22:00	0
2008-09-03	17:23:00	0
2008-09-03	17:24:00	0
2008-09-03	17:25:00	0
2008-09-03	17:26:00	0
2008-09-03	17:27:00	0
2008-09-03	17:28:00	0
2008-09-03	17:29:00	0
2008-09-03	17:30:00	0
2008-09-03	17:31:00	26
2008-09-03	17:32:00	0
2008-09-03	17:33:00	0
2008-09-03	17:34:00	0
2008-09-03	17:35:00	1729
2008-09-03	17:36:00	897
2008-09-03	17:37:00	386
2008-09-03	17:38:00	210
2008-09-03	17:39:00	1358
2008-09-03	17:40:00	2030
2008-09-03	17:41:00	513
2008-09-03	17:42:00	158
2008-09-03	17:43:00	488
2008-09-03	17:44:00	315
2008-09-03	17:45:00	187
2008-09-03	17:46:00	287
2008-09-03	17:47:00	195
2008-09-03	17:48:00	418
2008-09-03	17:49:00	105
2008-09-03	17:50:00	47
2008-09-03	17:51:00	118
2008-09-03	17:52:00	105
2008-09-03	17:53:00	173
2008-09-03	17:54:00	202
2008-09-03	17:55:00	187
2008-09-03	17:56:00	620
2008-09-03	17:57:00	16
2008-09-03	17:58:00	16
2008-09-03	17:59:00	376
2008-09-03	18:00:00	1014
2008-09-03	18:01:00	80
2008-09-03	18:02:00	57
2008-09-03	18:03:00	42
2008-09-03	18:04:00	21
2008-09-03	18:05:00	74
2008-09-03	18:06:00	31
2008-09-03	18:07:00	26
2008-09-03	18:08:00	36
2008-09-03	18:09:00	62
2008-09-03	18:10:00	144
2008-09-03	18:11:00	42
2008-09-03	18:12:00	0
2008-09-03	18:13:00	5
2008-09-03	18:14:00	68
2008-09-03	18:15:00	5
2008-09-03	18:16:00	5
2008-09-03	18:17:00	31
2008-09-03	18:18:00	0
2008-09-03	18:19:00	0
2008-09-03	18:20:00	26
2008-09-03	18:21:00	47
2008-09-03	18:22:00	227
2008-09-03	18:23:00	158
2008-09-03	18:24:00	287
2008-09-03	18:25:00	165
2008-09-03	18:26:00	5
2008-09-03	18:27:00	0
2008-09-03	18:28:00	52
2008-09-03	18:29:00	124
2008-09-03	18:30:00	36
2008-09-03	18:31:00	86
2008-09-03	18:32:00	124
2008-09-03	18:33:00	219
2008-09-03	18:34:00	1210
2008-09-03	18:35:00	1792
2008-09-03	18:36:00	1464
2008-09-03	18:37:00	235
2008-09-03	18:38:00	365
2008-09-03	18:39:00	538
2008-09-03	18:40:00	694
2008-09-03	18:41:00	1187
2008-09-03	18:42:00	1410
2008-09-03	18:43:00	418
2008-09-03	18:44:00	21
2008-09-03	18:45:00	5
2008-09-03	18:46:00	144
2008-09-03	18:47:00	5
2008-09-03	18:48:00	0
2008-09-03	18:49:00	26
2008-09-03	18:50:00	0
2008-09-03	18:51:00	144
2008-09-03	18:52:00	16
2008-09-03	18:53:00	0
2008-09-03	18:54:00	10
2008-09-03	18:55:00	16
2008-09-03	18:56:00	130
2008-09-03	18:57:00	710
2008-09-03	18:58:00	334
2008-09-03	18:59:00	227
2008-09-03	19:00:00	195
2008-09-03	19:01:00	165
2008-09-03	19:02:00	287
2008-09-03	19:03:00	158
2008-09-03	19:04:00	5
2008-09-03	19:05:00	16
2008-09-03	19:06:00	31
2008-09-03	19:07:00	1258
2008-09-03	19:08:00	16
2008-09-03	19:09:00	0
2008-09-03	19:10:00	0
2008-09-03	19:11:00	0
2008-09-03	19:12:00	0
2008-09-03	19:13:00	26
2008-09-03	19:14:00	0
2008-09-03	19:15:00	16
2008-09-03	19:16:00	0
2008-09-03	19:17:00	0
2008-09-03	19:18:00	0
2008-09-03	19:19:00	0
2008-09-03	19:20:00	0
2008-09-03	19:21:00	5
2008-09-03	19:22:00	0
2008-09-03	19:23:00	0
2008-09-03	19:24:00	0
2008-09-03	19:25:00	105
2008-09-03	19:26:00	16
2008-09-03	19:27:00	0
2008-09-03	19:28:00	0
2008-09-03	19:29:00	0
2008-09-03	19:30:00	0
2008-09-03	19:31:00	21
2008-09-03	19:32:00	0
2008-09-03	19:33:00	0
2008-09-03	19:34:00	0
2008-09-03	19:35:00	0
2008-09-03	19:36:00	0
2008-09-03	19:37:00	0
2008-09-03	19:38:00	0
2008-09-03	19:39:00	0
2008-09-03	19:40:00	0
2008-09-03	19:41:00	0
2008-09-03	19:42:00	0
2008-09-03	19:43:00	0
2008-09-03	19:44:00	0
2008-09-03	19:45:00	0
2008-09-03	19:46:00	0
2008-09-03	19:47:00	0
2008-09-03	19:48:00	0
2008-09-03	19:49:00	0
2008-09-03	19:50:00	0
2008-09-03	19:51:00	0
2008-09-03	19:52:00	0
2008-09-03	19:53:00	0
2008-09-03	19:54:00	0
2008-09-03	19:55:00	0
2008-09-03	19:56:00	0
2008-09-03	19:57:00	0
2008-09-03	19:58:00	0
2008-09-03	19:59:00	268
2008-09-03	20:00:00	679
2008-09-03	20:01:00	306
2008-09-03	20:02:00	606
2008-09-03	20:03:00	219
2008-09-03	20:04:00	476
2008-09-03	20:05:00	538
2008-09-03	20:06:00	278
2008-09-03	20:07:00	0
2008-09-03	20:08:00	0
2008-09-03	20:09:00	0
2008-09-03	20:10:00	0
2008-09-03	20:11:00	0
2008-09-03	20:12:00	0
2008-09-03	20:13:00	0
2008-09-03	20:14:00	5
2008-09-03	20:15:00	0
2008-09-03	20:16:00	0
2008-09-03	20:17:00	0
2008-09-03	20:18:00	0
2008-09-03	20:19:00	0
2008-09-03	20:20:00	0
2008-09-03	20:21:00	0
2008-09-03	20:22:00	679
2008-09-03	20:23:00	268
2008-09-03	20:24:00	227
2008-09-03	20:25:00	210
2008-09-03	20:26:00	694
2008-09-03	20:27:00	219
2008-09-03	20:28:00	0
2008-09-03	20:29:00	158
2008-09-03	20:30:00	244
2008-09-03	20:31:00	334
2008-09-03	20:32:00	151
2008-09-03	20:33:00	36
2008-09-03	20:34:00	10
2008-09-03	20:35:00	93
2008-09-03	20:36:00	21
2008-09-03	20:37:00	42
2008-09-03	20:38:00	36
2008-09-03	20:39:00	0
2008-09-03	20:40:00	47
2008-09-03	20:41:00	0
2008-09-03	20:42:00	0
2008-09-03	20:43:00	0
2008-09-03	20:44:00	355
2008-09-03	20:45:00	0
2008-09-03	20:46:00	325
2008-09-03	20:47:00	21
2008-09-03	20:48:00	74
2008-09-03	20:49:00	5
2008-09-03	20:50:00	0
2008-09-03	20:51:00	202
2008-09-03	20:52:00	0
2008-09-03	20:53:00	36
2008-09-03	20:54:00	0
2008-09-03	20:55:00	173
2008-09-03	20:56:00	0
2008-09-03	20:57:00	0
2008-09-03	20:58:00	5
2008-09-03	20:59:00	0
2008-09-03	21:00:00	0
2008-09-03	21:01:00	0
2008-09-03	21:02:00	710
2008-09-03	21:03:00	26
2008-09-03	21:04:00	0
2008-09-03	21:05:00	0
2008-09-03	21:06:00	0
2008-09-03	21:07:00	0
2008-09-03	21:08:00	315
2008-09-03	21:09:00	344
2008-09-03	21:10:00	386
2008-09-03	21:11:00	430
2008-09-03	21:12:00	0
2008-09-03	21:13:00	26
2008-09-03	21:14:00	21
2008-09-03	21:15:00	36
2008-09-03	21:16:00	0
2008-09-03	21:17:00	0
2008-09-03	21:18:00	0
2008-09-03	21:19:00	0
2008-09-03	21:20:00	0
2008-09-03	21:21:00	0
2008-09-03	21:22:00	0
2008-09-03	21:23:00	0
2008-09-03	21:24:00	0
2008-09-03	21:25:00	21
2008-09-03	21:26:00	10
2008-09-03	21:27:00	0
2008-09-03	21:28:00	0
2008-09-03	21:29:00	0
2008-09-03	21:30:00	0
2008-09-03	21:31:00	0
2008-09-03	21:32:00	42
2008-09-03	21:33:00	0
2008-09-03	21:34:00	36
2008-09-03	21:35:00	0
2008-09-03	21:36:00	252
2008-09-03	21:37:00	158
2008-09-03	21:38:00	68
2008-09-03	21:39:00	501
2008-09-03	21:40:00	202
2008-09-03	21:41:00	227
2008-09-03	21:42:00	227
2008-09-03	21:43:00	173
2008-09-03	21:44:00	244
2008-09-03	21:45:00	227
2008-09-03	21:46:00	453
2008-09-03	21:47:00	334
2008-09-03	21:48:00	136
2008-09-03	21:49:00	118
2008-09-03	21:50:00	219
2008-09-03	21:51:00	124
2008-09-03	21:52:00	130
2008-09-03	21:53:00	68
2008-09-03	21:54:00	5
2008-09-03	21:55:00	0
2008-09-03	21:56:00	47
2008-09-03	21:57:00	26
2008-09-03	21:58:00	0
2008-09-03	21:59:00	0
2008-09-03	22:00:00	0
2008-09-03	22:01:00	5
2008-09-03	22:02:00	0
2008-09-03	22:03:00	0
2008-09-03	22:04:00	124
2008-09-03	22:05:00	297
2008-09-03	22:06:00	130
2008-09-03	22:07:00	187
2008-09-03	22:08:00	0
2008-09-03	22:09:00	260
2008-09-03	22:10:00	57
2008-09-03	22:11:00	16
2008-09-03	22:12:00	16
2008-09-03	22:13:00	10
2008-09-03	22:14:00	344
2008-09-03	22:15:00	526
2008-09-03	22:16:00	80
2008-09-03	22:17:00	47
2008-09-03	22:18:00	99
2008-09-03	22:19:00	68
2008-09-03	22:20:00	202
2008-09-03	22:21:00	268
2008-09-03	22:22:00	396
2008-09-03	22:23:00	441
2008-09-03	22:24:00	26
2008-09-03	22:25:00	16
2008-09-03	22:26:00	21
2008-09-03	22:27:00	16
2008-09-03	22:28:00	0
2008-09-03	22:29:00	31
2008-09-03	22:30:00	31
2008-09-03	22:31:00	5
2008-09-03	22:32:00	16
2008-09-03	22:33:00	0
2008-09-03	22:34:00	10
2008-09-03	22:35:00	407
2008-09-03	22:36:00	74
2008-09-03	22:37:00	0
2008-09-03	22:38:00	0
2008-09-03	22:39:00	260
2008-09-03	22:40:00	565
2008-09-03	22:41:00	42
2008-09-03	22:42:00	5
2008-09-03	22:43:00	0
2008-09-03	22:44:00	315
2008-09-03	22:45:00	16
2008-09-03	22:46:00	0
2008-09-03	22:47:00	5
2008-09-03	22:48:00	21
2008-09-03	22:49:00	10
2008-09-03	22:50:00	10
2008-09-03	22:51:00	5
2008-09-03	22:52:00	10
2008-09-03	22:53:00	325
2008-09-03	22:54:00	36
2008-09-03	22:55:00	21
2008-09-03	22:56:00	579
2008-09-03	22:57:00	235
2008-09-03	22:58:00	80
2008-09-03	22:59:00	355
2008-09-03	23:00:00	16
2008-09-03	23:01:00	0
2008-09-03	23:02:00	10
2008-09-03	23:03:00	31
2008-09-03	23:04:00	0
2008-09-03	23:05:00	21
2008-09-03	23:06:00	42
2008-09-03	23:07:00	0
2008-09-03	23:08:00	0
2008-09-03	23:09:00	0
2008-09-03	23:10:00	0
2008-09-03	23:11:00	0
2008-09-03	23:12:00	0
2008-09-03	23:13:00	0
2008-09-03	23:14:00	0
2008-09-03	23:15:00	0
2008-09-03	23:16:00	0
2008-09-03	23:17:00	31
2008-09-03	23:18:00	0
2008-09-03	23:19:00	0
2008-09-03	23:20:00	0
2008-09-03	23:21:00	0
2008-09-03	23:22:00	441
2008-09-03	23:23:00	306
2008-09-03	23:24:00	136
2008-09-03	23:25:00	5
2008-09-03	23:26:00	47
2008-09-03	23:27:00	0
2008-09-03	23:28:00	0
2008-09-03	23:29:00	173
2008-09-03	23:30:00	0
2008-09-03	23:31:00	0
2008-09-03	23:32:00	0
2008-09-03	23:33:00	0
2008-09-03	23:34:00	0
2008-09-03	23:35:00	0
2008-09-03	23:36:00	0
2008-09-03	23:37:00	5
2008-09-03	23:38:00	0
2008-09-03	23:39:00	0
2008-09-03	23:40:00	0
2008-09-03	23:41:00	5
2008-09-03	23:42:00	0
2008-09-03	23:43:00	0
2008-09-03	23:44:00	0
2008-09-03	23:45:00	0
2008-09-03	23:46:00	0
2008-09-03	23:47:00	0
2008-09-03	23:48:00	0
2008-09-03	23:49:00	0
2008-09-03	23:50:00	0
2008-09-03	23:51:00	0
2008-09-03	23:52:00	0
2008-09-03	23:53:00	0
2008-09-03	23:54:00	0
2008-09-03	23:55:00	0
2008-09-03	23:56:00	0
2008-09-03	23:57:00	0
2008-09-03	23:58:00	0
2008-09-03	23:59:00	0
2008-09-04	00:00:00	0
2008-09-04	00:01:00	0
2008-09-04	00:02:00	0
2008-09-04	00:03:00	0
2008-09-04	00:04:00	52
2008-09-04	00:05:00	0
2008-09-04	00:06:00	0
2008-09-04	00:07:00	0
2008-09-04	00:08:00	0
2008-09-04	00:09:00	0
2008-09-04	00:10:00	0
2008-09-04	00:11:00	0
2008-09-04	00:12:00	0
2008-09-04	00:13:00	0
2008-09-04	00:14:00	0
2008-09-04	00:15:00	31
2008-09-04	00:16:00	0
2008-09-04	00:17:00	0
2008-09-04	00:18:00	0
2008-09-04	00:19:00	0
2008-09-04	00:20:00	5
2008-09-04	00:21:00	0
2008-09-04	00:22:00	0
2008-09-04	00:23:00	0
2008-09-04	00:24:00	0
2008-09-04	00:25:00	80
2008-09-04	00:26:00	0
2008-09-04	00:27:00	16
2008-09-04	00:28:00	0
2008-09-04	00:29:00	10
2008-09-04	00:30:00	0
2008-09-04	00:31:00	5
2008-09-04	00:32:00	173
2008-09-04	00:33:00	21
2008-09-04	00:34:00	0
2008-09-04	00:35:00	0
2008-09-04	00:36:00	31
2008-09-04	00:37:00	0
2008-09-04	00:38:00	36
2008-09-04	00:39:00	93
2008-09-04	00:40:00	0
2008-09-04	00:41:00	0
2008-09-04	00:42:00	0
2008-09-04	00:43:00	0
2008-09-04	00:44:00	0
2008-09-04	00:45:00	0
2008-09-04	00:46:00	0
2008-09-04	00:47:00	0
2008-09-04	00:48:00	0
2008-09-04	00:49:00	0
2008-09-04	00:50:00	0
2008-09-04	00:51:00	0
2008-09-04	00:52:00	0
2008-09-04	00:53:00	0
2008-09-04	00:54:00	16
2008-09-04	00:55:00	26
2008-09-04	00:56:00	0
2008-09-04	00:57:00	0
2008-09-04	00:58:00	0
2008-09-04	00:59:00	0
2008-09-04	01:00:00	0
2008-09-04	01:01:00	0
2008-09-04	01:02:00	0
2008-09-04	01:03:00	0
2008-09-04	01:04:00	0
2008-09-04	01:05:00	0
2008-09-04	01:06:00	0
2008-09-04	01:07:00	0
2008-09-04	01:08:00	0
2008-09-04	01:09:00	0
2008-09-04	01:10:00	0
2008-09-04	01:11:00	0
2008-09-04	01:12:00	0
2008-09-04	01:13:00	0
2008-09-04	01:14:00	0
2008-09-04	01:15:00	0
2008-09-04	01:16:00	0
2008-09-04	01:17:00	0
2008-09-04	01:18:00	0
2008-09-04	01:19:00	0
2008-09-04	01:20:00	0
2008-09-04	01:21:00	0
2008-09-04	01:22:00	0
2008-09-04	01:23:00	0
2008-09-04	01:24:00	0
2008-09-04	01:25:00	0
2008-09-04	01:26:00	0
2008-09-04	01:27:00	0
2008-09-04	01:28:00	0
2008-09-04	01:29:00	47
2008-09-04	01:30:00	0
2008-09-04	01:31:00	0
2008-09-04	01:32:00	0
2008-09-04	01:33:00	105
2008-09-04	01:34:00	0
2008-09-04	01:35:00	0
2008-09-04	01:36:00	0
2008-09-04	01:37:00	0
2008-09-04	01:38:00	0
2008-09-04	01:39:00	0
2008-09-04	01:40:00	0
2008-09-04	01:41:00	36
2008-09-04	01:42:00	144
2008-09-04	01:43:00	0
2008-09-04	01:44:00	0
2008-09-04	01:45:00	0
2008-09-04	01:46:00	0
2008-09-04	01:47:00	0
2008-09-04	01:48:00	0
2008-09-04	01:49:00	0
2008-09-04	01:50:00	0
2008-09-04	01:51:00	0
2008-09-04	01:52:00	0
2008-09-04	01:53:00	0
2008-09-04	01:54:00	0
2008-09-04	01:55:00	0
2008-09-04	01:56:00	0
2008-09-04	01:57:00	0
2008-09-04	01:58:00	0
2008-09-04	01:59:00	0
2008-09-04	02:00:00	0
2008-09-04	02:01:00	0
2008-09-04	02:02:00	0
2008-09-04	02:03:00	0
2008-09-04	02:04:00	0
2008-09-04	02:05:00	16
2008-09-04	02:06:00	0
2008-09-04	02:07:00	0
2008-09-04	02:08:00	0
2008-09-04	02:09:00	0
2008-09-04	02:10:00	0
2008-09-04	02:11:00	0
2008-09-04	02:12:00	0
2008-09-04	02:13:00	0
2008-09-04	02:14:00	0
2008-09-04	02:15:00	0
2008-09-04	02:16:00	0
2008-09-04	02:17:00	0
2008-09-04	02:18:00	0
2008-09-04	02:19:00	0
2008-09-04	02:20:00	0
2008-09-04	02:21:00	0
2008-09-04	02:22:00	52
2008-09-04	02:23:00	0
2008-09-04	02:24:00	0
2008-09-04	02:25:00	0
2008-09-04	02:26:00	0
2008-09-04	02:27:00	0
2008-09-04	02:28:00	0
2008-09-04	02:29:00	0
2008-09-04	02:30:00	0
2008-09-04	02:31:00	36
2008-09-04	02:32:00	0
2008-09-04	02:33:00	0
2008-09-04	02:34:00	0
2008-09-04	02:35:00	0
2008-09-04	02:36:00	0
2008-09-04	02:37:00	0
2008-09-04	02:38:00	0
2008-09-04	02:39:00	0
2008-09-04	02:40:00	0
2008-09-04	02:41:00	0
2008-09-04	02:42:00	0
2008-09-04	02:43:00	0
2008-09-04	02:44:00	0
2008-09-04	02:45:00	0
2008-09-04	02:46:00	0
2008-09-04	02:47:00	16
2008-09-04	02:48:00	16
2008-09-04	02:49:00	0
2008-09-04	02:50:00	0
2008-09-04	02:51:00	0
2008-09-04	02:52:00	0
2008-09-04	02:53:00	10
2008-09-04	02:54:00	0
2008-09-04	02:55:00	0
2008-09-04	02:56:00	0
2008-09-04	02:57:00	0
2008-09-04	02:58:00	0
2008-09-04	02:59:00	0
2008-09-04	03:00:00	0
2008-09-04	03:01:00	0
2008-09-04	03:02:00	0
2008-09-04	03:03:00	0
2008-09-04	03:04:00	31
2008-09-04	03:05:00	0
2008-09-04	03:06:00	0
2008-09-04	03:07:00	0
2008-09-04	03:08:00	0
2008-09-04	03:09:00	0
2008-09-04	03:10:00	0
2008-09-04	03:11:00	0
2008-09-04	03:12:00	0
2008-09-04	03:13:00	0
2008-09-04	03:14:00	0
2008-09-04	03:15:00	0
2008-09-04	03:16:00	21
2008-09-04	03:17:00	5
2008-09-04	03:18:00	0
2008-09-04	03:19:00	0
2008-09-04	03:20:00	0
2008-09-04	03:21:00	0
2008-09-04	03:22:00	0
2008-09-04	03:23:00	0
2008-09-04	03:24:00	16
2008-09-04	03:25:00	0
2008-09-04	03:26:00	0
2008-09-04	03:27:00	0
2008-09-04	03:28:00	0
2008-09-04	03:29:00	0
2008-09-04	03:30:00	0
2008-09-04	03:31:00	0
2008-09-04	03:32:00	0
2008-09-04	03:33:00	0
2008-09-04	03:34:00	0
2008-09-04	03:35:00	0
2008-09-04	03:36:00	0
2008-09-04	03:37:00	0
2008-09-04	03:38:00	0
2008-09-04	03:39:00	0
2008-09-04	03:40:00	0
2008-09-04	03:41:00	0
2008-09-04	03:42:00	0
2008-09-04	03:43:00	0
2008-09-04	03:44:00	0
2008-09-04	03:45:00	0
2008-09-04	03:46:00	0
2008-09-04	03:47:00	0
2008-09-04	03:48:00	0
2008-09-04	03:49:00	21
2008-09-04	03:50:00	0
2008-09-04	03:51:00	0
2008-09-04	03:52:00	0
2008-09-04	03:53:00	0
2008-09-04	03:54:00	0
2008-09-04	03:55:00	0
2008-09-04	03:56:00	0
2008-09-04	03:57:00	0
2008-09-04	03:58:00	0
2008-09-04	03:59:00	0
2008-09-04	04:00:00	0
2008-09-04	04:01:00	0
2008-09-04	04:02:00	0
2008-09-04	04:03:00	0
2008-09-04	04:04:00	0
2008-09-04	04:05:00	0
2008-09-04	04:06:00	0
2008-09-04	04:07:00	0
2008-09-04	04:08:00	0
2008-09-04	04:09:00	0
2008-09-04	04:10:00	10
2008-09-04	04:11:00	0
2008-09-04	04:12:00	0
2008-09-04	04:13:00	0
2008-09-04	04:14:00	0
2008-09-04	04:15:00	0
2008-09-04	04:16:00	0
2008-09-04	04:17:00	0
2008-09-04	04:18:00	0
2008-09-04	04:19:00	0
2008-09-04	04:20:00	0
2008-09-04	04:21:00	0
2008-09-04	04:22:00	0
2008-09-04	04:23:00	0
2008-09-04	04:24:00	0
2008-09-04	04:25:00	0
2008-09-04	04:26:00	0
2008-09-04	04:27:00	0
2008-09-04	04:28:00	0
2008-09-04	04:29:00	0
2008-09-04	04:30:00	0
2008-09-04	04:31:00	0
2008-09-04	04:32:00	0
2008-09-04	04:33:00	0
2008-09-04	04:34:00	0
2008-09-04	04:35:00	0
2008-09-04	04:36:00	0
2008-09-04	04:37:00	0
2008-09-04	04:38:00	0
2008-09-04	04:39:00	0
2008-09-04	04:40:00	0
2008-09-04	04:41:00	0
2008-09-04	04:42:00	0
2008-09-04	04:43:00	0
2008-09-04	04:44:00	0
2008-09-04	04:45:00	0
2008-09-04	04:46:00	0
2008-09-04	04:47:00	0
2008-09-04	04:48:00	0
2008-09-04	04:49:00	0
2008-09-04	04:50:00	0
2008-09-04	04:51:00	5
2008-09-04	04:52:00	0
2008-09-04	04:53:00	0
2008-09-04	04:54:00	0
2008-09-04	04:55:00	0
2008-09-04	04:56:00	0
2008-09-04	04:57:00	0
2008-09-04	04:58:00	0
2008-09-04	04:59:00	0
2008-09-04	05:00:00	0
2008-09-04	05:01:00	0
2008-09-04	05:02:00	0
2008-09-04	05:03:00	0
2008-09-04	05:04:00	0
2008-09-04	05:05:00	0
2008-09-04	05:06:00	0
2008-09-04	05:07:00	0
2008-09-04	05:08:00	0
2008-09-04	05:09:00	0
2008-09-04	05:10:00	0
2008-09-04	05:11:00	0
2008-09-04	05:12:00	0
2008-09-04	05:13:00	0
2008-09-04	05:14:00	0
2008-09-04	05:15:00	0
2008-09-04	05:16:00	0
2008-09-04	05:17:00	0
2008-09-04	05:18:00	0
2008-09-04	05:19:00	0
2008-09-04	05:20:00	0
2008-09-04	05:21:00	0
2008-09-04	05:22:00	0
2008-09-04	05:23:00	0
2008-09-04	05:24:00	0
2008-09-04	05:25:00	0
2008-09-04	05:26:00	0
2008-09-04	05:27:00	5
2008-09-04	05:28:00	21
2008-09-04	05:29:00	0
2008-09-04	05:30:00	0
2008-09-04	05:31:00	0
2008-09-04	05:32:00	0
2008-09-04	05:33:00	0
2008-09-04	05:34:00	0
2008-09-04	05:35:00	0
2008-09-04	05:36:00	287
2008-09-04	05:37:00	36
2008-09-04	05:38:00	0
2008-09-04	05:39:00	0
2008-09-04	05:40:00	0
2008-09-04	05:41:00	0
2008-09-04	05:42:00	0
2008-09-04	05:43:00	0
2008-09-04	05:44:00	0
2008-09-04	05:45:00	0
2008-09-04	05:46:00	0
2008-09-04	05:47:00	0
2008-09-04	05:48:00	0
2008-09-04	05:49:00	0
2008-09-04	05:50:00	5
2008-09-04	05:51:00	0
2008-09-04	05:52:00	0
2008-09-04	05:53:00	0
2008-09-04	05:54:00	0
2008-09-04	05:55:00	5
2008-09-04	05:56:00	0
2008-09-04	05:57:00	0
2008-09-04	05:58:00	0
2008-09-04	05:59:00	0
2008-09-04	06:00:00	0
2008-09-04	06:01:00	0
2008-09-04	06:02:00	0
2008-09-04	06:03:00	0
2008-09-04	06:04:00	0
2008-09-04	06:05:00	0
2008-09-04	06:06:00	0
2008-09-04	06:07:00	0
2008-09-04	06:08:00	0
2008-09-04	06:09:00	0
2008-09-04	06:10:00	0
2008-09-04	06:11:00	0
2008-09-04	06:12:00	0
2008-09-04	06:13:00	5
2008-09-04	06:14:00	0
2008-09-04	06:15:00	0
2008-09-04	06:16:00	0
2008-09-04	06:17:00	0
2008-09-04	06:18:00	0
2008-09-04	06:19:00	0
2008-09-04	06:20:00	0
2008-09-04	06:21:00	0
2008-09-04	06:22:00	0
2008-09-04	06:23:00	47
2008-09-04	06:24:00	0
2008-09-04	06:25:00	0
2008-09-04	06:26:00	0
2008-09-04	06:27:00	0
2008-09-04	06:28:00	0
2008-09-04	06:29:00	0
2008-09-04	06:30:00	26
2008-09-04	06:31:00	0
2008-09-04	06:32:00	0
2008-09-04	06:33:00	36
2008-09-04	06:34:00	10
2008-09-04	06:35:00	565
2008-09-04	06:36:00	1636
2008-09-04	06:37:00	476
2008-09-04	06:38:00	165
2008-09-04	06:39:00	173
2008-09-04	06:40:00	501
2008-09-04	06:41:00	565
2008-09-04	06:42:00	513
2008-09-04	06:43:00	365
2008-09-04	06:44:00	74
2008-09-04	06:45:00	26
2008-09-04	06:46:00	0
2008-09-04	06:47:00	287
2008-09-04	06:48:00	99
2008-09-04	06:49:00	124
2008-09-04	06:50:00	0
2008-09-04	06:51:00	202
2008-09-04	06:52:00	0
2008-09-04	06:53:00	0
2008-09-04	06:54:00	47
2008-09-04	06:55:00	0
2008-09-04	06:56:00	0
2008-09-04	06:57:00	0
2008-09-04	06:58:00	0
2008-09-04	06:59:00	0
2008-09-04	07:00:00	0
2008-09-04	07:01:00	0
2008-09-04	07:02:00	0
2008-09-04	07:03:00	180
2008-09-04	07:04:00	86
2008-09-04	07:05:00	0
2008-09-04	07:06:00	0
2008-09-04	07:07:00	0
2008-09-04	07:08:00	0
2008-09-04	07:09:00	0
2008-09-04	07:10:00	0
2008-09-04	07:11:00	396
2008-09-04	07:12:00	0
2008-09-04	07:13:00	252
2008-09-04	07:14:00	80
2008-09-04	07:15:00	219
2008-09-04	07:16:00	86
2008-09-04	07:17:00	0
2008-09-04	07:18:00	10
2008-09-04	07:19:00	0
2008-09-04	07:20:00	86
2008-09-04	07:21:00	0
2008-09-04	07:22:00	0
2008-09-04	07:23:00	26
2008-09-04	07:24:00	0
2008-09-04	07:25:00	0
2008-09-04	07:26:00	52
2008-09-04	07:27:00	0
2008-09-04	07:28:00	0
2008-09-04	07:29:00	0
2008-09-04	07:30:00	0
2008-09-04	07:31:00	0
2008-09-04	07:32:00	68
2008-09-04	07:33:00	1358
2008-09-04	07:34:00	861
2008-09-04	07:35:00	5
2008-09-04	07:36:00	0
2008-09-04	07:37:00	42
2008-09-04	07:38:00	86
2008-09-04	07:39:00	430
2008-09-04	07:40:00	501
2008-09-04	07:41:00	355
2008-09-04	07:42:00	741
2008-09-04	07:43:00	99
2008-09-04	07:44:00	0
2008-09-04	07:45:00	0
2008-09-04	07:46:00	0
2008-09-04	07:47:00	252
2008-09-04	07:48:00	325
2008-09-04	07:49:00	57
2008-09-04	07:50:00	202
2008-09-04	07:51:00	664
2008-09-04	07:52:00	158
2008-09-04	07:53:00	86
2008-09-04	07:54:00	0
2008-09-04	07:55:00	31
2008-09-04	07:56:00	93
2008-09-04	07:57:00	26
2008-09-04	07:58:00	47
2008-09-04	07:59:00	36
2008-09-04	08:00:00	0
2008-09-04	08:01:00	210
2008-09-04	08:02:00	0
2008-09-04	08:03:00	42
2008-09-04	08:04:00	0
2008-09-04	08:05:00	0
2008-09-04	08:06:00	0
2008-09-04	08:07:00	0
2008-09-04	08:08:00	124
2008-09-04	08:09:00	16
2008-09-04	08:10:00	0
2008-09-04	08:11:00	10
2008-09-04	08:12:00	0
2008-09-04	08:13:00	0
2008-09-04	08:14:00	0
2008-09-04	08:15:00	0
2008-09-04	08:16:00	0
2008-09-04	08:17:00	0
2008-09-04	08:18:00	0
2008-09-04	08:19:00	0
2008-09-04	08:20:00	268
2008-09-04	08:21:00	68
2008-09-04	08:22:00	0
2008-09-04	08:23:00	0
2008-09-04	08:24:00	0
2008-09-04	08:25:00	0
2008-09-04	08:26:00	0
2008-09-04	08:27:00	0
2008-09-04	08:28:00	0
2008-09-04	08:29:00	0
2008-09-04	08:30:00	0
2008-09-04	08:31:00	0
2008-09-04	08:32:00	0
2008-09-04	08:33:00	0
2008-09-04	08:34:00	0
2008-09-04	08:35:00	0
2008-09-04	08:36:00	0
2008-09-04	08:37:00	0
2008-09-04	08:38:00	16
2008-09-04	08:39:00	0
2008-09-04	08:40:00	0
2008-09-04	08:41:00	0
2008-09-04	08:42:00	0
2008-09-04	08:43:00	16
2008-09-04	08:44:00	0
2008-09-04	08:45:00	0
2008-09-04	08:46:00	0
2008-09-04	08:47:00	0
2008-09-04	08:48:00	0
2008-09-04	08:49:00	0
2008-09-04	08:50:00	0
2008-09-04	08:51:00	0
2008-09-04	08:52:00	0
2008-09-04	08:53:00	0
2008-09-04	08:54:00	0
2008-09-04	08:55:00	0
2008-09-04	08:56:00	0
2008-09-04	08:57:00	0
2008-09-04	08:58:00	0
2008-09-04	08:59:00	0
2008-09-04	09:00:00	0
2008-09-04	09:01:00	0
2008-09-04	09:02:00	0
2008-09-04	09:03:00	0
2008-09-04	09:04:00	0
2008-09-04	09:05:00	0
2008-09-04	09:06:00	0
2008-09-04	09:07:00	21
2008-09-04	09:08:00	0
[truncated: 19,611 more rows]

## Sheet: 9.17.08
Actogram, Copy Raw Data, All Days
Identity:	Denver
Filename:	E:\Active Research Files\meloxicam titre canine\cases\denver\Denver 9.17.08.AWC
Gender:	M
Age:	11
Height:	40.6 cm	16.0 in
Weight:	27.0 kg	59.5 lbs
Start Date:	17-Sep-2008 (Wed)
Start Time:	14:00:00
Interval:	1.00 mins
Date Stamp:	Time Stamp:	Activity Data:	Marker Press:
2008-09-17	00:00:00	0
2008-09-17	00:01:00	0
2008-09-17	00:02:00	0
2008-09-17	00:03:00	0
2008-09-17	00:04:00	0
2008-09-17	00:05:00	0
2008-09-17	00:06:00	0
2008-09-17	00:07:00	0
2008-09-17	00:08:00	0
2008-09-17	00:09:00	0
2008-09-17	00:10:00	0
2008-09-17	00:11:00	0
2008-09-17	00:12:00	0
2008-09-17	00:13:00	0
2008-09-17	00:14:00	0
2008-09-17	00:15:00	0
2008-09-17	00:16:00	0
2008-09-17	00:17:00	0
2008-09-17	00:18:00	0
2008-09-17	00:19:00	0
2008-09-17	00:20:00	0
2008-09-17	00:21:00	0
2008-09-17	00:22:00	0
2008-09-17	00:23:00	0
2008-09-17	00:24:00	0
2008-09-17	00:25:00	0
2008-09-17	00:26:00	0
2008-09-17	00:27:00	0
2008-09-17	00:28:00	0
2008-09-17	00:29:00	0
2008-09-17	00:30:00	0
2008-09-17	00:31:00	0
2008-09-17	00:32:00	0
2008-09-17	00:33:00	0
2008-09-17	00:34:00	0
2008-09-17	00:35:00	0
2008-09-17	00:36:00	0
2008-09-17	00:37:00	0
2008-09-17	00:38:00	0
2008-09-17	00:39:00	0
2008-09-17	00:40:00	0
2008-09-17	00:41:00	0
2008-09-17	00:42:00	0
2008-09-17	00:43:00	0
2008-09-17	00:44:00	0
2008-09-17	00:45:00	0
2008-09-17	00:46:00	0
2008-09-17	00:47:00	0
2008-09-17	00:48:00	0
2008-09-17	00:49:00	0
2008-09-17	00:50:00	0
2008-09-17	00:51:00	0
2008-09-17	00:52:00	0
2008-09-17	00:53:00	0
2008-09-17	00:54:00	0
2008-09-17	00:55:00	0
2008-09-17	00:56:00	0
2008-09-17	00:57:00	0
2008-09-17	00:58:00	0
2008-09-17	00:59:00	0
2008-09-17	01:00:00	0
2008-09-17	01:01:00	0
2008-09-17	01:02:00	0
2008-09-17	01:03:00	0
2008-09-17	01:04:00	0
2008-09-17	01:05:00	0
2008-09-17	01:06:00	0
2008-09-17	01:07:00	0
2008-09-17	01:08:00	0
2008-09-17	01:09:00	0
2008-09-17	01:10:00	0
2008-09-17	01:11:00	0
2008-09-17	01:12:00	0
2008-09-17	01:13:00	0
2008-09-17	01:14:00	0
2008-09-17	01:15:00	0
2008-09-17	01:16:00	0
2008-09-17	01:17:00	0
2008-09-17	01:18:00	0
2008-09-17	01:19:00	0
2008-09-17	01:20:00	0
2008-09-17	01:21:00	0
2008-09-17	01:22:00	0
2008-09-17	01:23:00	0
2008-09-17	01:24:00	0
2008-09-17	01:25:00	0
2008-09-17	01:26:00	0
2008-09-17	01:27:00	0
2008-09-17	01:28:00	0
2008-09-17	01:29:00	0
2008-09-17	01:30:00	0
2008-09-17	01:31:00	0
2008-09-17	01:32:00	0
2008-09-17	01:33:00	0
2008-09-17	01:34:00	0
2008-09-17	01:35:00	0
2008-09-17	01:36:00	0
2008-09-17	01:37:00	0
2008-09-17	01:38:00	0
2008-09-17	01:39:00	0
2008-09-17	01:40:00	0
2008-09-17	01:41:00	0
2008-09-17	01:42:00	0
2008-09-17	01:43:00	0
2008-09-17	01:44:00	0
2008-09-17	01:45:00	0
2008-09-17	01:46:00	0
2008-09-17	01:47:00	0
2008-09-17	01:48:00	0
2008-09-17	01:49:00	0
2008-09-17	01:50:00	0
2008-09-17	01:51:00	0
2008-09-17	01:52:00	0
2008-09-17	01:53:00	0
2008-09-17	01:54:00	0
2008-09-17	01:55:00	0
2008-09-17	01:56:00	0
2008-09-17	01:57:00	0
2008-09-17	01:58:00	0
2008-09-17	01:59:00	0
2008-09-17	02:00:00	0
2008-09-17	02:01:00	0
2008-09-17	02:02:00	0
2008-09-17	02:03:00	0
2008-09-17	02:04:00	0
2008-09-17	02:05:00	0
2008-09-17	02:06:00	0
2008-09-17	02:07:00	0
2008-09-17	02:08:00	0
2008-09-17	02:09:00	0
2008-09-17	02:10:00	0
2008-09-17	02:11:00	0
2008-09-17	02:12:00	0
2008-09-17	02:13:00	0
2008-09-17	02:14:00	0
2008-09-17	02:15:00	0
2008-09-17	02:16:00	0
2008-09-17	02:17:00	0
2008-09-17	02:18:00	0
2008-09-17	02:19:00	0
2008-09-17	02:20:00	0
2008-09-17	02:21:00	0
2008-09-17	02:22:00	0
2008-09-17	02:23:00	0
2008-09-17	02:24:00	0
2008-09-17	02:25:00	0
2008-09-17	02:26:00	0
2008-09-17	02:27:00	0
2008-09-17	02:28:00	0
2008-09-17	02:29:00	0
2008-09-17	02:30:00	0
2008-09-17	02:31:00	0
2008-09-17	02:32:00	0
2008-09-17	02:33:00	0
2008-09-17	02:34:00	0
2008-09-17	02:35:00	0
2008-09-17	02:36:00	0
2008-09-17	02:37:00	0
2008-09-17	02:38:00	0
2008-09-17	02:39:00	0
2008-09-17	02:40:00	0
2008-09-17	02:41:00	0
2008-09-17	02:42:00	0
2008-09-17	02:43:00	0
2008-09-17	02:44:00	0
2008-09-17	02:45:00	0
2008-09-17	02:46:00	0
2008-09-17	02:47:00	0
2008-09-17	02:48:00	0
2008-09-17	02:49:00	0
2008-09-17	02:50:00	0
2008-09-17	02:51:00	0
2008-09-17	02:52:00	0
2008-09-17	02:53:00	0
2008-09-17	02:54:00	0
2008-09-17	02:55:00	0
2008-09-17	02:56:00	0
2008-09-17	02:57:00	0
2008-09-17	02:58:00	0
2008-09-17	02:59:00	0
2008-09-17	03:00:00	0
2008-09-17	03:01:00	0
2008-09-17	03:02:00	0
2008-09-17	03:03:00	0
2008-09-17	03:04:00	0
2008-09-17	03:05:00	0
2008-09-17	03:06:00	0
2008-09-17	03:07:00	0
2008-09-17	03:08:00	0
2008-09-17	03:09:00	0
2008-09-17	03:10:00	0
2008-09-17	03:11:00	0
2008-09-17	03:12:00	0
2008-09-17	03:13:00	0
2008-09-17	03:14:00	0
2008-09-17	03:15:00	0
2008-09-17	03:16:00	0
2008-09-17	03:17:00	0
2008-09-17	03:18:00	0
2008-09-17	03:19:00	0
2008-09-17	03:20:00	0
2008-09-17	03:21:00	0
2008-09-17	03:22:00	0
2008-09-17	03:23:00	0
2008-09-17	03:24:00	0
2008-09-17	03:25:00	0
2008-09-17	03:26:00	0
2008-09-17	03:27:00	0
2008-09-17	03:28:00	0
2008-09-17	03:29:00	0
2008-09-17	03:30:00	0
2008-09-17	03:31:00	0
2008-09-17	03:32:00	0
2008-09-17	03:33:00	0
2008-09-17	03:34:00	0
2008-09-17	03:35:00	0
2008-09-17	03:36:00	0
2008-09-17	03:37:00	0
2008-09-17	03:38:00	0
2008-09-17	03:39:00	0
2008-09-17	03:40:00	0
2008-09-17	03:41:00	0
2008-09-17	03:42:00	0
2008-09-17	03:43:00	0
2008-09-17	03:44:00	0
2008-09-17	03:45:00	0
2008-09-17	03:46:00	0
2008-09-17	03:47:00	0
2008-09-17	03:48:00	0
2008-09-17	03:49:00	0
2008-09-17	03:50:00	0
2008-09-17	03:51:00	0
2008-09-17	03:52:00	0
2008-09-17	03:53:00	0
2008-09-17	03:54:00	0
2008-09-17	03:55:00	0
2008-09-17	03:56:00	0
2008-09-17	03:57:00	0
2008-09-17	03:58:00	0
2008-09-17	03:59:00	0
2008-09-17	04:00:00	0
2008-09-17	04:01:00	0
2008-09-17	04:02:00	0
2008-09-17	04:03:00	0
2008-09-17	04:04:00	0
2008-09-17	04:05:00	0
2008-09-17	04:06:00	0
2008-09-17	04:07:00	0
2008-09-17	04:08:00	0
2008-09-17	04:09:00	0
2008-09-17	04:10:00	0
2008-09-17	04:11:00	0
2008-09-17	04:12:00	0
2008-09-17	04:13:00	0
2008-09-17	04:14:00	0
2008-09-17	04:15:00	0
2008-09-17	04:16:00	0
2008-09-17	04:17:00	0
2008-09-17	04:18:00	0
2008-09-17	04:19:00	0
2008-09-17	04:20:00	0
2008-09-17	04:21:00	0
2008-09-17	04:22:00	0
2008-09-17	04:23:00	0
2008-09-17	04:24:00	0
2008-09-17	04:25:00	0
2008-09-17	04:26:00	0
2008-09-17	04:27:00	0
2008-09-17	04:28:00	0
2008-09-17	04:29:00	0
2008-09-17	04:30:00	0
2008-09-17	04:31:00	0
2008-09-17	04:32:00	0
2008-09-17	04:33:00	0
2008-09-17	04:34:00	0
2008-09-17	04:35:00	0
2008-09-17	04:36:00	0
2008-09-17	04:37:00	0
2008-09-17	04:38:00	0
2008-09-17	04:39:00	0
2008-09-17	04:40:00	0
2008-09-17	04:41:00	0
2008-09-17	04:42:00	0
2008-09-17	04:43:00	0
2008-09-17	04:44:00	0
2008-09-17	04:45:00	0
2008-09-17	04:46:00	0
2008-09-17	04:47:00	0
2008-09-17	04:48:00	0
2008-09-17	04:49:00	0
2008-09-17	04:50:00	0
2008-09-17	04:51:00	0
2008-09-17	04:52:00	0
2008-09-17	04:53:00	0
2008-09-17	04:54:00	0
2008-09-17	04:55:00	0
2008-09-17	04:56:00	0
2008-09-17	04:57:00	0
2008-09-17	04:58:00	0
2008-09-17	04:59:00	0
2008-09-17	05:00:00	0
2008-09-17	05:01:00	0
2008-09-17	05:02:00	0
2008-09-17	05:03:00	0
2008-09-17	05:04:00	0
2008-09-17	05:05:00	0
2008-09-17	05:06:00	0
2008-09-17	05:07:00	0
2008-09-17	05:08:00	0
2008-09-17	05:09:00	0
2008-09-17	05:10:00	0
2008-09-17	05:11:00	0
2008-09-17	05:12:00	0
2008-09-17	05:13:00	0
2008-09-17	05:14:00	0
2008-09-17	05:15:00	0
2008-09-17	05:16:00	0
2008-09-17	05:17:00	0
2008-09-17	05:18:00	0
2008-09-17	05:19:00	0
2008-09-17	05:20:00	0
2008-09-17	05:21:00	0
2008-09-17	05:22:00	0
2008-09-17	05:23:00	0
2008-09-17	05:24:00	0
2008-09-17	05:25:00	0
2008-09-17	05:26:00	0
2008-09-17	05:27:00	0
2008-09-17	05:28:00	0
2008-09-17	05:29:00	0
2008-09-17	05:30:00	0
2008-09-17	05:31:00	0
2008-09-17	05:32:00	0
2008-09-17	05:33:00	0
2008-09-17	05:34:00	0
2008-09-17	05:35:00	0
2008-09-17	05:36:00	0
2008-09-17	05:37:00	0
2008-09-17	05:38:00	0
2008-09-17	05:39:00	0
2008-09-17	05:40:00	0
2008-09-17	05:41:00	0
2008-09-17	05:42:00	0
2008-09-17	05:43:00	0
2008-09-17	05:44:00	0
2008-09-17	05:45:00	0
2008-09-17	05:46:00	0
2008-09-17	05:47:00	0
2008-09-17	05:48:00	0
2008-09-17	05:49:00	0
2008-09-17	05:50:00	0
2008-09-17	05:51:00	0
2008-09-17	05:52:00	0
2008-09-17	05:53:00	0
2008-09-17	05:54:00	0
2008-09-17	05:55:00	0
2008-09-17	05:56:00	0
2008-09-17	05:57:00	0
2008-09-17	05:58:00	0
2008-09-17	05:59:00	0
2008-09-17	06:00:00	0
2008-09-17	06:01:00	0
2008-09-17	06:02:00	0
2008-09-17	06:03:00	0
2008-09-17	06:04:00	0
2008-09-17	06:05:00	0
2008-09-17	06:06:00	0
2008-09-17	06:07:00	0
2008-09-17	06:08:00	0
2008-09-17	06:09:00	0
2008-09-17	06:10:00	0
2008-09-17	06:11:00	0
2008-09-17	06:12:00	0
2008-09-17	06:13:00	0
2008-09-17	06:14:00	0
2008-09-17	06:15:00	0
2008-09-17	06:16:00	0
2008-09-17	06:17:00	0
2008-09-17	06:18:00	0
2008-09-17	06:19:00	0
2008-09-17	06:20:00	0
2008-09-17	06:21:00	0
2008-09-17	06:22:00	0
2008-09-17	06:23:00	0
2008-09-17	06:24:00	0
2008-09-17	06:25:00	0
2008-09-17	06:26:00	0
2008-09-17	06:27:00	0
2008-09-17	06:28:00	0
2008-09-17	06:29:00	0
2008-09-17	06:30:00	0
2008-09-17	06:31:00	0
2008-09-17	06:32:00	0
2008-09-17	06:33:00	0
2008-09-17	06:34:00	0
2008-09-17	06:35:00	0
2008-09-17	06:36:00	0
2008-09-17	06:37:00	0
2008-09-17	06:38:00	0
2008-09-17	06:39:00	0
2008-09-17	06:40:00	0
2008-09-17	06:41:00	0
2008-09-17	06:42:00	0
2008-09-17	06:43:00	0
2008-09-17	06:44:00	0
2008-09-17	06:45:00	0
2008-09-17	06:46:00	0
2008-09-17	06:47:00	0
2008-09-17	06:48:00	0
2008-09-17	06:49:00	0
2008-09-17	06:50:00	0
2008-09-17	06:51:00	0
2008-09-17	06:52:00	0
2008-09-17	06:53:00	0
2008-09-17	06:54:00	0
2008-09-17	06:55:00	0
2008-09-17	06:56:00	0
2008-09-17	06:57:00	0
2008-09-17	06:58:00	0
2008-09-17	06:59:00	0
2008-09-17	07:00:00	0
2008-09-17	07:01:00	0
2008-09-17	07:02:00	0
2008-09-17	07:03:00	0
2008-09-17	07:04:00	0
2008-09-17	07:05:00	0
2008-09-17	07:06:00	0
2008-09-17	07:07:00	0
2008-09-17	07:08:00	0
2008-09-17	07:09:00	0
2008-09-17	07:10:00	0
2008-09-17	07:11:00	0
2008-09-17	07:12:00	0
2008-09-17	07:13:00	0
2008-09-17	07:14:00	0
2008-09-17	07:15:00	0
2008-09-17	07:16:00	0
2008-09-17	07:17:00	0
2008-09-17	07:18:00	0
2008-09-17	07:19:00	0
2008-09-17	07:20:00	0
2008-09-17	07:21:00	0
2008-09-17	07:22:00	0
2008-09-17	07:23:00	0
2008-09-17	07:24:00	0
2008-09-17	07:25:00	0
2008-09-17	07:26:00	0
2008-09-17	07:27:00	0
2008-09-17	07:28:00	0
2008-09-17	07:29:00	0
2008-09-17	07:30:00	0
2008-09-17	07:31:00	0
2008-09-17	07:32:00	0
2008-09-17	07:33:00	0
2008-09-17	07:34:00	0
2008-09-17	07:35:00	0
2008-09-17	07:36:00	0
2008-09-17	07:37:00	0
2008-09-17	07:38:00	0
2008-09-17	07:39:00	0
2008-09-17	07:40:00	0
2008-09-17	07:41:00	0
2008-09-17	07:42:00	0
2008-09-17	07:43:00	0
2008-09-17	07:44:00	0
2008-09-17	07:45:00	0
2008-09-17	07:46:00	0
2008-09-17	07:47:00	0
2008-09-17	07:48:00	0
2008-09-17	07:49:00	0
2008-09-17	07:50:00	0
2008-09-17	07:51:00	0
2008-09-17	07:52:00	0
2008-09-17	07:53:00	0
2008-09-17	07:54:00	0
2008-09-17	07:55:00	0
2008-09-17	07:56:00	0
2008-09-17	07:57:00	0
2008-09-17	07:58:00	0
2008-09-17	07:59:00	0
2008-09-17	08:00:00	0
2008-09-17	08:01:00	0
2008-09-17	08:02:00	0
2008-09-17	08:03:00	0
2008-09-17	08:04:00	0
2008-09-17	08:05:00	0
2008-09-17	08:06:00	0
2008-09-17	08:07:00	0
2008-09-17	08:08:00	0
2008-09-17	08:09:00	0
2008-09-17	08:10:00	0
2008-09-17	08:11:00	0
2008-09-17	08:12:00	0
2008-09-17	08:13:00	0
2008-09-17	08:14:00	0
2008-09-17	08:15:00	0
2008-09-17	08:16:00	0
2008-09-17	08:17:00	0
2008-09-17	08:18:00	0
2008-09-17	08:19:00	0
2008-09-17	08:20:00	0
2008-09-17	08:21:00	0
2008-09-17	08:22:00	0
2008-09-17	08:23:00	0
2008-09-17	08:24:00	0
2008-09-17	08:25:00	0
2008-09-17	08:26:00	0
2008-09-17	08:27:00	0
2008-09-17	08:28:00	0
2008-09-17	08:29:00	0
2008-09-17	08:30:00	0
2008-09-17	08:31:00	0
2008-09-17	08:32:00	0
2008-09-17	08:33:00	0
2008-09-17	08:34:00	0
2008-09-17	08:35:00	0
2008-09-17	08:36:00	0
2008-09-17	08:37:00	0
2008-09-17	08:38:00	0
2008-09-17	08:39:00	0
2008-09-17	08:40:00	0
2008-09-17	08:41:00	0
2008-09-17	08:42:00	0
2008-09-17	08:43:00	0
2008-09-17	08:44:00	0
2008-09-17	08:45:00	0
2008-09-17	08:46:00	0
2008-09-17	08:47:00	0
2008-09-17	08:48:00	0
2008-09-17	08:49:00	0
2008-09-17	08:50:00	0
2008-09-17	08:51:00	0
2008-09-17	08:52:00	0
2008-09-17	08:53:00	0
2008-09-17	08:54:00	0
2008-09-17	08:55:00	0
2008-09-17	08:56:00	0
2008-09-17	08:57:00	0
2008-09-17	08:58:00	0
2008-09-17	08:59:00	0
2008-09-17	09:00:00	0
2008-09-17	09:01:00	0
2008-09-17	09:02:00	0
2008-09-17	09:03:00	0
2008-09-17	09:04:00	0
2008-09-17	09:05:00	0
2008-09-17	09:06:00	0
2008-09-17	09:07:00	0
2008-09-17	09:08:00	0
2008-09-17	09:09:00	0
2008-09-17	09:10:00	0
2008-09-17	09:11:00	0
2008-09-17	09:12:00	0
2008-09-17	09:13:00	0
2008-09-17	09:14:00	0
2008-09-17	09:15:00	0
2008-09-17	09:16:00	0
2008-09-17	09:17:00	0
2008-09-17	09:18:00	0
2008-09-17	09:19:00	0
2008-09-17	09:20:00	0
2008-09-17	09:21:00	0
2008-09-17	09:22:00	0
2008-09-17	09:23:00	0
2008-09-17	09:24:00	0
2008-09-17	09:25:00	0
2008-09-17	09:26:00	0
2008-09-17	09:27:00	0
2008-09-17	09:28:00	0
2008-09-17	09:29:00	0
2008-09-17	09:30:00	0
2008-09-17	09:31:00	0
2008-09-17	09:32:00	0
2008-09-17	09:33:00	0
2008-09-17	09:34:00	0
2008-09-17	09:35:00	0
2008-09-17	09:36:00	0
2008-09-17	09:37:00	0
2008-09-17	09:38:00	0
2008-09-17	09:39:00	0
2008-09-17	09:40:00	0
2008-09-17	09:41:00	0
2008-09-17	09:42:00	0
2008-09-17	09:43:00	0
2008-09-17	09:44:00	0
2008-09-17	09:45:00	0
2008-09-17	09:46:00	0
2008-09-17	09:47:00	0
2008-09-17	09:48:00	0
2008-09-17	09:49:00	0
2008-09-17	09:50:00	0
2008-09-17	09:51:00	0
2008-09-17	09:52:00	0
2008-09-17	09:53:00	0
2008-09-17	09:54:00	0
2008-09-17	09:55:00	0
2008-09-17	09:56:00	0
2008-09-17	09:57:00	0
2008-09-17	09:58:00	0
2008-09-17	09:59:00	0
2008-09-17	10:00:00	0
2008-09-17	10:01:00	0
2008-09-17	10:02:00	0
2008-09-17	10:03:00	0
2008-09-17	10:04:00	0
2008-09-17	10:05:00	0
2008-09-17	10:06:00	0
2008-09-17	10:07:00	0
2008-09-17	10:08:00	0
2008-09-17	10:09:00	0
2008-09-17	10:10:00	0
2008-09-17	10:11:00	0
2008-09-17	10:12:00	0
2008-09-17	10:13:00	0
2008-09-17	10:14:00	0
2008-09-17	10:15:00	0
2008-09-17	10:16:00	0
2008-09-17	10:17:00	0
2008-09-17	10:18:00	0
2008-09-17	10:19:00	0
2008-09-17	10:20:00	0
2008-09-17	10:21:00	0
2008-09-17	10:22:00	0
2008-09-17	10:23:00	0
2008-09-17	10:24:00	0
2008-09-17	10:25:00	0
2008-09-17	10:26:00	0
2008-09-17	10:27:00	0
2008-09-17	10:28:00	0
2008-09-17	10:29:00	0
2008-09-17	10:30:00	0
2008-09-17	10:31:00	0
2008-09-17	10:32:00	0
2008-09-17	10:33:00	0
2008-09-17	10:34:00	0
2008-09-17	10:35:00	0
2008-09-17	10:36:00	0
2008-09-17	10:37:00	0
2008-09-17	10:38:00	0
2008-09-17	10:39:00	0
2008-09-17	10:40:00	0
2008-09-17	10:41:00	0
2008-09-17	10:42:00	0
2008-09-17	10:43:00	0
2008-09-17	10:44:00	0
2008-09-17	10:45:00	0
2008-09-17	10:46:00	0
2008-09-17	10:47:00	0
2008-09-17	10:48:00	0
2008-09-17	10:49:00	0
2008-09-17	10:50:00	0
2008-09-17	10:51:00	0
2008-09-17	10:52:00	0
2008-09-17	10:53:00	0
2008-09-17	10:54:00	0
2008-09-17	10:55:00	0
2008-09-17	10:56:00	0
2008-09-17	10:57:00	0
2008-09-17	10:58:00	0
2008-09-17	10:59:00	0
2008-09-17	11:00:00	0
2008-09-17	11:01:00	0
2008-09-17	11:02:00	0
2008-09-17	11:03:00	0
2008-09-17	11:04:00	0
2008-09-17	11:05:00	0
2008-09-17	11:06:00	0
2008-09-17	11:07:00	0
2008-09-17	11:08:00	0
2008-09-17	11:09:00	0
2008-09-17	11:10:00	0
2008-09-17	11:11:00	0
2008-09-17	11:12:00	0
2008-09-17	11:13:00	0
2008-09-17	11:14:00	0
2008-09-17	11:15:00	0
2008-09-17	11:16:00	0
2008-09-17	11:17:00	0
2008-09-17	11:18:00	0
2008-09-17	11:19:00	0
2008-09-17	11:20:00	0
2008-09-17	11:21:00	0
2008-09-17	11:22:00	0
2008-09-17	11:23:00	0
2008-09-17	11:24:00	0
2008-09-17	11:25:00	0
2008-09-17	11:26:00	0
2008-09-17	11:27:00	0
2008-09-17	11:28:00	0
2008-09-17	11:29:00	0
2008-09-17	11:30:00	0
2008-09-17	11:31:00	0
2008-09-17	11:32:00	0
2008-09-17	11:33:00	0
2008-09-17	11:34:00	0
2008-09-17	11:35:00	0
2008-09-17	11:36:00	0
2008-09-17	11:37:00	0
2008-09-17	11:38:00	0
2008-09-17	11:39:00	0
2008-09-17	11:40:00	0
2008-09-17	11:41:00	0
2008-09-17	11:42:00	0
2008-09-17	11:43:00	0
2008-09-17	11:44:00	0
2008-09-17	11:45:00	0
2008-09-17	11:46:00	0
2008-09-17	11:47:00	0
2008-09-17	11:48:00	0
2008-09-17	11:49:00	0
2008-09-17	11:50:00	0
2008-09-17	11:51:00	0
2008-09-17	11:52:00	0
2008-09-17	11:53:00	0
2008-09-17	11:54:00	0
2008-09-17	11:55:00	0
2008-09-17	11:56:00	0
2008-09-17	11:57:00	0
2008-09-17	11:58:00	0
2008-09-17	11:59:00	0
2008-09-17	12:00:00	0
2008-09-17	12:01:00	0
2008-09-17	12:02:00	0
2008-09-17	12:03:00	0
2008-09-17	12:04:00	0
2008-09-17	12:05:00	0
2008-09-17	12:06:00	0
2008-09-17	12:07:00	0
2008-09-17	12:08:00	0
2008-09-17	12:09:00	0
2008-09-17	12:10:00	0
2008-09-17	12:11:00	0
2008-09-17	12:12:00	0
2008-09-17	12:13:00	0
2008-09-17	12:14:00	0
2008-09-17	12:15:00	0
2008-09-17	12:16:00	0
2008-09-17	12:17:00	0
2008-09-17	12:18:00	0
2008-09-17	12:19:00	0
2008-09-17	12:20:00	0
2008-09-17	12:21:00	0
2008-09-17	12:22:00	0
2008-09-17	12:23:00	0
2008-09-17	12:24:00	0
2008-09-17	12:25:00	0
2008-09-17	12:26:00	0
2008-09-17	12:27:00	0
2008-09-17	12:28:00	0
2008-09-17	12:29:00	0
2008-09-17	12:30:00	0
2008-09-17	12:31:00	0
2008-09-17	12:32:00	0
2008-09-17	12:33:00	0
2008-09-17	12:34:00	0
2008-09-17	12:35:00	0
2008-09-17	12:36:00	0
2008-09-17	12:37:00	0
2008-09-17	12:38:00	0
2008-09-17	12:39:00	0
2008-09-17	12:40:00	0
2008-09-17	12:41:00	0
2008-09-17	12:42:00	0
2008-09-17	12:43:00	0
2008-09-17	12:44:00	0
2008-09-17	12:45:00	0
2008-09-17	12:46:00	0
2008-09-17	12:47:00	0
2008-09-17	12:48:00	0
2008-09-17	12:49:00	0
2008-09-17	12:50:00	0
2008-09-17	12:51:00	0
2008-09-17	12:52:00	0
2008-09-17	12:53:00	0
2008-09-17	12:54:00	0
2008-09-17	12:55:00	0
2008-09-17	12:56:00	0
2008-09-17	12:57:00	0
2008-09-17	12:58:00	0
2008-09-17	12:59:00	0
2008-09-17	13:00:00	0
2008-09-17	13:01:00	0
2008-09-17	13:02:00	0
2008-09-17	13:03:00	0
2008-09-17	13:04:00	0
2008-09-17	13:05:00	0
2008-09-17	13:06:00	0
2008-09-17	13:07:00	0
2008-09-17	13:08:00	0
2008-09-17	13:09:00	0
2008-09-17	13:10:00	0
2008-09-17	13:11:00	0
2008-09-17	13:12:00	0
2008-09-17	13:13:00	0
2008-09-17	13:14:00	0
2008-09-17	13:15:00	0
2008-09-17	13:16:00	0
2008-09-17	13:17:00	0
2008-09-17	13:18:00	0
2008-09-17	13:19:00	0
2008-09-17	13:20:00	0
2008-09-17	13:21:00	0
2008-09-17	13:22:00	0
2008-09-17	13:23:00	0
2008-09-17	13:24:00	0
2008-09-17	13:25:00	0
2008-09-17	13:26:00	0
2008-09-17	13:27:00	0
2008-09-17	13:28:00	0
2008-09-17	13:29:00	0
2008-09-17	13:30:00	0
2008-09-17	13:31:00	0
2008-09-17	13:32:00	0
2008-09-17	13:33:00	0
2008-09-17	13:34:00	0
2008-09-17	13:35:00	0
2008-09-17	13:36:00	0
2008-09-17	13:37:00	0
2008-09-17	13:38:00	0
2008-09-17	13:39:00	0
2008-09-17	13:40:00	0
2008-09-17	13:41:00	0
2008-09-17	13:42:00	0
2008-09-17	13:43:00	0
2008-09-17	13:44:00	0
2008-09-17	13:45:00	0
2008-09-17	13:46:00	0
2008-09-17	13:47:00	0
2008-09-17	13:48:00	0
2008-09-17	13:49:00	0
2008-09-17	13:50:00	0
2008-09-17	13:51:00	0
2008-09-17	13:52:00	0
2008-09-17	13:53:00	0
2008-09-17	13:54:00	0
2008-09-17	13:55:00	0
2008-09-17	13:56:00	0
2008-09-17	13:57:00	0
2008-09-17	13:58:00	0
2008-09-17	13:59:00	0
2008-09-17	14:00:00	0	M
2008-09-17	14:01:00	0
2008-09-17	14:02:00	0
2008-09-17	14:03:00	0
2008-09-17	14:04:00	0
2008-09-17	14:05:00	0
2008-09-17	14:06:00	0
2008-09-17	14:07:00	0
2008-09-17	14:08:00	0
2008-09-17	14:09:00	0
2008-09-17	14:10:00	0
2008-09-17	14:11:00	0
2008-09-17	14:12:00	0
2008-09-17	14:13:00	0
2008-09-17	14:14:00	0
2008-09-17	14:15:00	0
2008-09-17	14:16:00	0
2008-09-17	14:17:00	0
2008-09-17	14:18:00	0
2008-09-17	14:19:00	0
2008-09-17	14:20:00	0
2008-09-17	14:21:00	0
2008-09-17	14:22:00	0
2008-09-17	14:23:00	0
2008-09-17	14:24:00	0
2008-09-17	14:25:00	0
2008-09-17	14:26:00	0
2008-09-17	14:27:00	0
2008-09-17	14:28:00	0
2008-09-17	14:29:00	0
2008-09-17	14:30:00	0
2008-09-17	14:31:00	0
2008-09-17	14:32:00	0
2008-09-17	14:33:00	0
2008-09-17	14:34:00	0
2008-09-17	14:35:00	0
2008-09-17	14:36:00	0
2008-09-17	14:37:00	0
2008-09-17	14:38:00	0
2008-09-17	14:39:00	0
2008-09-17	14:40:00	0
2008-09-17	14:41:00	0
2008-09-17	14:42:00	0
2008-09-17	14:43:00	0
2008-09-17	14:44:00	0
2008-09-17	14:45:00	0
2008-09-17	14:46:00	0
2008-09-17	14:47:00	0
2008-09-17	14:48:00	0
2008-09-17	14:49:00	0
2008-09-17	14:50:00	0
2008-09-17	14:51:00	0
2008-09-17	14:52:00	0
2008-09-17	14:53:00	0
2008-09-17	14:54:00	0
2008-09-17	14:55:00	0
2008-09-17	14:56:00	0
2008-09-17	14:57:00	0
2008-09-17	14:58:00	0
2008-09-17	14:59:00	0
2008-09-17	15:00:00	0
2008-09-17	15:01:00	0
2008-09-17	15:02:00	0
2008-09-17	15:03:00	0
2008-09-17	15:04:00	0
2008-09-17	15:05:00	0
2008-09-17	15:06:00	0
2008-09-17	15:07:00	0
2008-09-17	15:08:00	0
2008-09-17	15:09:00	0
2008-09-17	15:10:00	0
2008-09-17	15:11:00	0
2008-09-17	15:12:00	0
2008-09-17	15:13:00	0
2008-09-17	15:14:00	0
2008-09-17	15:15:00	0
2008-09-17	15:16:00	0
2008-09-17	15:17:00	0
2008-09-17	15:18:00	0
2008-09-17	15:19:00	0
2008-09-17	15:20:00	0
2008-09-17	15:21:00	0
2008-09-17	15:22:00	0
2008-09-17	15:23:00	0
2008-09-17	15:24:00	0
2008-09-17	15:25:00	0
2008-09-17	15:26:00	0
2008-09-17	15:27:00	0
2008-09-17	15:28:00	0
2008-09-17	15:29:00	0
2008-09-17	15:30:00	0
2008-09-17	15:31:00	0
2008-09-17	15:32:00	0
2008-09-17	15:33:00	0
2008-09-17	15:34:00	0
2008-09-17	15:35:00	0
2008-09-17	15:36:00	0
2008-09-17	15:37:00	0
2008-09-17	15:38:00	0
2008-09-17	15:39:00	0
2008-09-17	15:40:00	0
2008-09-17	15:41:00	0
2008-09-17	15:42:00	0
2008-09-17	15:43:00	0
2008-09-17	15:44:00	0
2008-09-17	15:45:00	0
2008-09-17	15:46:00	0
2008-09-17	15:47:00	0
2008-09-17	15:48:00	0
2008-09-17	15:49:00	0
2008-09-17	15:50:00	0
2008-09-17	15:51:00	0
2008-09-17	15:52:00	0
2008-09-17	15:53:00	0
2008-09-17	15:54:00	0
2008-09-17	15:55:00	0
2008-09-17	15:56:00	0
2008-09-17	15:57:00	0
2008-09-17	15:58:00	0
2008-09-17	15:59:00	0
2008-09-17	16:00:00	0
2008-09-17	16:01:00	0
2008-09-17	16:02:00	0
2008-09-17	16:03:00	0
2008-09-17	16:04:00	0
2008-09-17	16:05:00	0
2008-09-17	16:06:00	0
2008-09-17	16:07:00	0
2008-09-17	16:08:00	0
2008-09-17	16:09:00	0
2008-09-17	16:10:00	0
2008-09-17	16:11:00	0
2008-09-17	16:12:00	0
2008-09-17	16:13:00	0
2008-09-17	16:14:00	0
2008-09-17	16:15:00	0
2008-09-17	16:16:00	0
2008-09-17	16:17:00	0
2008-09-17	16:18:00	0
2008-09-17	16:19:00	0
2008-09-17	16:20:00	0
2008-09-17	16:21:00	0
2008-09-17	16:22:00	0
2008-09-17	16:23:00	0
2008-09-17	16:24:00	0
2008-09-17	16:25:00	0
2008-09-17	16:26:00	0
2008-09-17	16:27:00	31
2008-09-17	16:28:00	0
2008-09-17	16:29:00	0
2008-09-17	16:30:00	0
2008-09-17	16:31:00	0
2008-09-17	16:32:00	0
2008-09-17	16:33:00	0
2008-09-17	16:34:00	0
2008-09-17	16:35:00	0
2008-09-17	16:36:00	0
2008-09-17	16:37:00	0
2008-09-17	16:38:00	0
2008-09-17	16:39:00	0
2008-09-17	16:40:00	0
2008-09-17	16:41:00	0
2008-09-17	16:42:00	0
2008-09-17	16:43:00	0
2008-09-17	16:44:00	0
2008-09-17	16:45:00	0
2008-09-17	16:46:00	0
2008-09-17	16:47:00	0
2008-09-17	16:48:00	0
2008-09-17	16:49:00	552
2008-09-17	16:50:00	635
2008-09-17	16:51:00	808
2008-09-17	16:52:00	0
2008-09-17	16:53:00	0
2008-09-17	16:54:00	111
2008-09-17	16:55:00	0
2008-09-17	16:56:00	0
2008-09-17	16:57:00	0
2008-09-17	16:58:00	0
2008-09-17	16:59:00	0
2008-09-17	17:00:00	0
2008-09-17	17:01:00	758
2008-09-17	17:02:00	1519
2008-09-17	17:03:00	2030
2008-09-17	17:04:00	1792
2008-09-17	17:05:00	808
2008-09-17	17:06:00	1697
2008-09-17	17:07:00	315
2008-09-17	17:08:00	165
2008-09-17	17:09:00	74
2008-09-17	17:10:00	315
2008-09-17	17:11:00	526
2008-09-17	17:12:00	151
2008-09-17	17:13:00	344
2008-09-17	17:14:00	173
2008-09-17	17:15:00	649
2008-09-17	17:16:00	878
2008-09-17	17:17:00	513
2008-09-17	17:18:00	453
2008-09-17	17:19:00	355
2008-09-17	17:20:00	99
2008-09-17	17:21:00	5
2008-09-17	17:22:00	86
2008-09-17	17:23:00	144
2008-09-17	17:24:00	68
2008-09-17	17:25:00	86
2008-09-17	17:26:00	42
2008-09-17	17:27:00	16
2008-09-17	17:28:00	165
2008-09-17	17:29:00	118
2008-09-17	17:30:00	62
2008-09-17	17:31:00	21
2008-09-17	17:32:00	57
2008-09-17	17:33:00	26
2008-09-17	17:34:00	36
2008-09-17	17:35:00	16
2008-09-17	17:36:00	5
2008-09-17	17:37:00	136
2008-09-17	17:38:00	130
2008-09-17	17:39:00	36
2008-09-17	17:40:00	31
2008-09-17	17:41:00	21
2008-09-17	17:42:00	52
2008-09-17	17:43:00	80
2008-09-17	17:44:00	130
2008-09-17	17:45:00	195
2008-09-17	17:46:00	173
2008-09-17	17:47:00	227
2008-09-17	17:48:00	195
2008-09-17	17:49:00	173
2008-09-17	17:50:00	105
2008-09-17	17:51:00	244
2008-09-17	17:52:00	260
2008-09-17	17:53:00	297
2008-09-17	17:54:00	86
2008-09-17	17:55:00	260
2008-09-17	17:56:00	62
2008-09-17	17:57:00	306
2008-09-17	17:58:00	173
2008-09-17	17:59:00	136
2008-09-17	18:00:00	136
2008-09-17	18:01:00	592
2008-09-17	18:02:00	1076
2008-09-17	18:03:00	592
2008-09-17	18:04:00	136
2008-09-17	18:05:00	252
2008-09-17	18:06:00	47
2008-09-17	18:07:00	36
2008-09-17	18:08:00	47
2008-09-17	18:09:00	407
2008-09-17	18:10:00	1384
2008-09-17	18:11:00	355
2008-09-17	18:12:00	791
2008-09-17	18:13:00	476
2008-09-17	18:14:00	620
2008-09-17	18:15:00	710
2008-09-17	18:16:00	1697
2008-09-17	18:17:00	297
2008-09-17	18:18:00	725
2008-09-17	18:19:00	974
2008-09-17	18:20:00	1120
2008-09-17	18:21:00	74
2008-09-17	18:22:00	0
2008-09-17	18:23:00	16
2008-09-17	18:24:00	93
2008-09-17	18:25:00	151
2008-09-17	18:26:00	180
2008-09-17	18:27:00	344
2008-09-17	18:28:00	165
2008-09-17	18:29:00	244
2008-09-17	18:30:00	74
2008-09-17	18:31:00	173
2008-09-17	18:32:00	1760
2008-09-17	18:33:00	1995
2008-09-17	18:34:00	4998
2008-09-17	18:35:00	861
2008-09-17	18:36:00	994
2008-09-17	18:37:00	2180
2008-09-17	18:38:00	1960
2008-09-17	18:39:00	1697
2008-09-17	18:40:00	1358
2008-09-17	18:41:00	1410
2008-09-17	18:42:00	1697
2008-09-17	18:43:00	2067
2008-09-17	18:44:00	1120
2008-09-17	18:45:00	1234
2008-09-17	18:46:00	1410
2008-09-17	18:47:00	1210
2008-09-17	18:48:00	1164
2008-09-17	18:49:00	710
2008-09-17	18:50:00	1437
2008-09-17	18:51:00	1437
2008-09-17	18:52:00	1858
2008-09-17	18:53:00	1307
2008-09-17	18:54:00	1519
2008-09-17	18:55:00	1437
2008-09-17	18:56:00	1034
2008-09-17	18:57:00	897
2008-09-17	18:58:00	878
2008-09-17	18:59:00	1187
2008-09-17	19:00:00	1547
2008-09-17	19:01:00	1666
2008-09-17	19:02:00	1234
2008-09-17	19:03:00	1034
2008-09-17	19:04:00	2978
2008-09-17	19:05:00	4837
2008-09-17	19:06:00	2928
2008-09-17	19:07:00	2219
2008-09-17	19:08:00	1437
2008-09-17	19:09:00	1858
2008-09-17	19:10:00	2258
2008-09-17	19:11:00	635
2008-09-17	19:12:00	105
2008-09-17	19:13:00	195
2008-09-17	19:14:00	93
2008-09-17	19:15:00	365
2008-09-17	19:16:00	344
2008-09-17	19:17:00	297
2008-09-17	19:18:00	441
2008-09-17	19:19:00	278
2008-09-17	19:20:00	235
2008-09-17	19:21:00	1014
2008-09-17	19:22:00	878
2008-09-17	19:23:00	1729
2008-09-17	19:24:00	1098
2008-09-17	19:25:00	111
2008-09-17	19:26:00	26
2008-09-17	19:27:00	878
2008-09-17	19:28:00	808
2008-09-17	19:29:00	74
2008-09-17	19:30:00	808
2008-09-17	19:31:00	376
2008-09-17	19:32:00	526
2008-09-17	19:33:00	10
2008-09-17	19:34:00	0
2008-09-17	19:35:00	99
2008-09-17	19:36:00	334
2008-09-17	19:37:00	0
2008-09-17	19:38:00	0
2008-09-17	19:39:00	111
2008-09-17	19:40:00	86
2008-09-17	19:41:00	0
2008-09-17	19:42:00	0
2008-09-17	19:43:00	0
2008-09-17	19:44:00	501
2008-09-17	19:45:00	592
2008-09-17	19:46:00	210
2008-09-17	19:47:00	10
2008-09-17	19:48:00	5
2008-09-17	19:49:00	180
2008-09-17	19:50:00	344
2008-09-17	19:51:00	297
2008-09-17	19:52:00	664
2008-09-17	19:53:00	202
2008-09-17	19:54:00	579
2008-09-17	19:55:00	93
2008-09-17	19:56:00	26
2008-09-17	19:57:00	21
2008-09-17	19:58:00	0
2008-09-17	19:59:00	47
2008-09-17	20:00:00	5
2008-09-17	20:01:00	0
2008-09-17	20:02:00	74
2008-09-17	20:03:00	52
2008-09-17	20:04:00	5
2008-09-17	20:05:00	47
2008-09-17	20:06:00	202
2008-09-17	20:07:00	334
2008-09-17	20:08:00	1437
2008-09-17	20:09:00	42
2008-09-17	20:10:00	5
2008-09-17	20:11:00	0
2008-09-17	20:12:00	0
2008-09-17	20:13:00	0
2008-09-17	20:14:00	158
2008-09-17	20:15:00	376
2008-09-17	20:16:00	187
2008-09-17	20:17:00	278
2008-09-17	20:18:00	808
2008-09-17	20:19:00	476
2008-09-17	20:20:00	679
2008-09-17	20:21:00	694
2008-09-17	20:22:00	725
2008-09-17	20:23:00	26
2008-09-17	20:24:00	0
2008-09-17	20:25:00	0
2008-09-17	20:26:00	0
2008-09-17	20:27:00	0
2008-09-17	20:28:00	235
2008-09-17	20:29:00	144
2008-09-17	20:30:00	1055
2008-09-17	20:31:00	552
2008-09-17	20:32:00	488
2008-09-17	20:33:00	407
2008-09-17	20:34:00	287
2008-09-17	20:35:00	0
2008-09-17	20:36:00	268
2008-09-17	20:37:00	180
2008-09-17	20:38:00	10
2008-09-17	20:39:00	0
2008-09-17	20:40:00	0
2008-09-17	20:41:00	0
2008-09-17	20:42:00	0
2008-09-17	20:43:00	0
2008-09-17	20:44:00	0
2008-09-17	20:45:00	0
2008-09-17	20:46:00	0
2008-09-17	20:47:00	31
2008-09-17	20:48:00	0
2008-09-17	20:49:00	0
2008-09-17	20:50:00	0
2008-09-17	20:51:00	0
2008-09-17	20:52:00	0
2008-09-17	20:53:00	0
2008-09-17	20:54:00	344
2008-09-17	20:55:00	74
2008-09-17	20:56:00	0
2008-09-17	20:57:00	0
2008-09-17	20:58:00	10
2008-09-17	20:59:00	0
2008-09-17	21:00:00	0
2008-09-17	21:01:00	0
2008-09-17	21:02:00	0
2008-09-17	21:03:00	0
2008-09-17	21:04:00	0
2008-09-17	21:05:00	0
2008-09-17	21:06:00	93
2008-09-17	21:07:00	260
2008-09-17	21:08:00	136
2008-09-17	21:09:00	36
2008-09-17	21:10:00	0
2008-09-17	21:11:00	0
2008-09-17	21:12:00	0
2008-09-17	21:13:00	0
2008-09-17	21:14:00	0
2008-09-17	21:15:00	0
2008-09-17	21:16:00	0
2008-09-17	21:17:00	5
2008-09-17	21:18:00	16
2008-09-17	21:19:00	0
2008-09-17	21:20:00	0
2008-09-17	21:21:00	0
2008-09-17	21:22:00	0
2008-09-17	21:23:00	52
2008-09-17	21:24:00	26
2008-09-17	21:25:00	42
2008-09-17	21:26:00	0
2008-09-17	21:27:00	0
2008-09-17	21:28:00	0
2008-09-17	21:29:00	0
2008-09-17	21:30:00	0
2008-09-17	21:31:00	0
2008-09-17	21:32:00	0
2008-09-17	21:33:00	0
2008-09-17	21:34:00	0
2008-09-17	21:35:00	0
2008-09-17	21:36:00	124
2008-09-17	21:37:00	0
2008-09-17	21:38:00	0
2008-09-17	21:39:00	0
2008-09-17	21:40:00	0
2008-09-17	21:41:00	21
2008-09-17	21:42:00	47
2008-09-17	21:43:00	16
2008-09-17	21:44:00	0
2008-09-17	21:45:00	0
2008-09-17	21:46:00	99
2008-09-17	21:47:00	579
2008-09-17	21:48:00	430
2008-09-17	21:49:00	0
2008-09-17	21:50:00	0
2008-09-17	21:51:00	0
2008-09-17	21:52:00	0
2008-09-17	21:53:00	31
2008-09-17	21:54:00	0
2008-09-17	21:55:00	315
2008-09-17	21:56:00	124
2008-09-17	21:57:00	620
2008-09-17	21:58:00	916
2008-09-17	21:59:00	710
2008-09-17	22:00:00	774
2008-09-17	22:01:00	80
2008-09-17	22:02:00	219
2008-09-17	22:03:00	396
2008-09-17	22:04:00	334
2008-09-17	22:05:00	86
2008-09-17	22:06:00	26
2008-09-17	22:07:00	86
2008-09-17	22:08:00	80
2008-09-17	22:09:00	26
2008-09-17	22:10:00	0
2008-09-17	22:11:00	21
2008-09-17	22:12:00	0
2008-09-17	22:13:00	0
2008-09-17	22:14:00	0
2008-09-17	22:15:00	5
2008-09-17	22:16:00	0
2008-09-17	22:17:00	538
2008-09-17	22:18:00	774
2008-09-17	22:19:00	287
2008-09-17	22:20:00	93
2008-09-17	22:21:00	0
2008-09-17	22:22:00	0
2008-09-17	22:23:00	5
2008-09-17	22:24:00	31
2008-09-17	22:25:00	0
2008-09-17	22:26:00	0
2008-09-17	22:27:00	0
2008-09-17	22:28:00	5
2008-09-17	22:29:00	0
2008-09-17	22:30:00	0
2008-09-17	22:31:00	0
2008-09-17	22:32:00	0
2008-09-17	22:33:00	0
2008-09-17	22:34:00	0
2008-09-17	22:35:00	62
2008-09-17	22:36:00	0
2008-09-17	22:37:00	0
2008-09-17	22:38:00	136
2008-09-17	22:39:00	0
2008-09-17	22:40:00	0
2008-09-17	22:41:00	0
2008-09-17	22:42:00	0
2008-09-17	22:43:00	0
2008-09-17	22:44:00	0
2008-09-17	22:45:00	0
2008-09-17	22:46:00	0
2008-09-17	22:47:00	0
2008-09-17	22:48:00	0
2008-09-17	22:49:00	0
2008-09-17	22:50:00	0
2008-09-17	22:51:00	0
2008-09-17	22:52:00	0
2008-09-17	22:53:00	0
2008-09-17	22:54:00	0
2008-09-17	22:55:00	0
2008-09-17	22:56:00	0
2008-09-17	22:57:00	31
2008-09-17	22:58:00	0
2008-09-17	22:59:00	0
2008-09-17	23:00:00	0
2008-09-17	23:01:00	0
2008-09-17	23:02:00	0
2008-09-17	23:03:00	0
2008-09-17	23:04:00	0
2008-09-17	23:05:00	0
2008-09-17	23:06:00	0
2008-09-17	23:07:00	0
2008-09-17	23:08:00	0
2008-09-17	23:09:00	227
2008-09-17	23:10:00	5
2008-09-17	23:11:00	0
2008-09-17	23:12:00	0
2008-09-17	23:13:00	0
2008-09-17	23:14:00	0
2008-09-17	23:15:00	0
2008-09-17	23:16:00	0
2008-09-17	23:17:00	0
2008-09-17	23:18:00	0
2008-09-17	23:19:00	0
2008-09-17	23:20:00	0
2008-09-17	23:21:00	0
2008-09-17	23:22:00	0
2008-09-17	23:23:00	0
2008-09-17	23:24:00	0
2008-09-17	23:25:00	0
2008-09-17	23:26:00	0
2008-09-17	23:27:00	0
2008-09-17	23:28:00	0
2008-09-17	23:29:00	62
2008-09-17	23:30:00	0
2008-09-17	23:31:00	0
2008-09-17	23:32:00	0
2008-09-17	23:33:00	0
2008-09-17	23:34:00	0
2008-09-17	23:35:00	0
2008-09-17	23:36:00	0
2008-09-17	23:37:00	0
2008-09-17	23:38:00	0
2008-09-17	23:39:00	0
2008-09-17	23:40:00	0
2008-09-17	23:41:00	31
2008-09-17	23:42:00	31
2008-09-17	23:43:00	0
2008-09-17	23:44:00	0
2008-09-17	23:45:00	0
2008-09-17	23:46:00	0
2008-09-17	23:47:00	0
2008-09-17	23:48:00	0
2008-09-17	23:49:00	0
2008-09-17	23:50:00	0
2008-09-17	23:51:00	0
2008-09-17	23:52:00	0
2008-09-17	23:53:00	0
2008-09-17	23:54:00	0
2008-09-17	23:55:00	0
2008-09-17	23:56:00	0
2008-09-17	23:57:00	0
2008-09-17	23:58:00	0
2008-09-17	23:59:00	0
2008-09-18	00:00:00	0
2008-09-18	00:01:00	0
2008-09-18	00:02:00	0
2008-09-18	00:03:00	0
2008-09-18	00:04:00	0
2008-09-18	00:05:00	0
2008-09-18	00:06:00	0
2008-09-18	00:07:00	80
2008-09-18	00:08:00	80
2008-09-18	00:09:00	0
2008-09-18	00:10:00	0
2008-09-18	00:11:00	0
2008-09-18	00:12:00	0
2008-09-18	00:13:00	0
2008-09-18	00:14:00	0
2008-09-18	00:15:00	0
2008-09-18	00:16:00	0
2008-09-18	00:17:00	0
2008-09-18	00:18:00	5
2008-09-18	00:19:00	0
2008-09-18	00:20:00	0
2008-09-18	00:21:00	0
2008-09-18	00:22:00	0
2008-09-18	00:23:00	0
2008-09-18	00:24:00	0
2008-09-18	00:25:00	0
2008-09-18	00:26:00	0
2008-09-18	00:27:00	0
2008-09-18	00:28:00	57
2008-09-18	00:29:00	26
2008-09-18	00:30:00	5
2008-09-18	00:31:00	68
2008-09-18	00:32:00	0
2008-09-18	00:33:00	0
2008-09-18	00:34:00	0
2008-09-18	00:35:00	0
2008-09-18	00:36:00	0
2008-09-18	00:37:00	0
2008-09-18	00:38:00	0
2008-09-18	00:39:00	0
2008-09-18	00:40:00	0
2008-09-18	00:41:00	0
2008-09-18	00:42:00	0
2008-09-18	00:43:00	0
2008-09-18	00:44:00	0
2008-09-18	00:45:00	0
2008-09-18	00:46:00	0
2008-09-18	00:47:00	0
2008-09-18	00:48:00	0
2008-09-18	00:49:00	0
2008-09-18	00:50:00	0
2008-09-18	00:51:00	0
2008-09-18	00:52:00	0
2008-09-18	00:53:00	0
2008-09-18	00:54:00	0
2008-09-18	00:55:00	0
2008-09-18	00:56:00	10
2008-09-18	00:57:00	16
2008-09-18	00:58:00	5
2008-09-18	00:59:00	74
2008-09-18	01:00:00	21
2008-09-18	01:01:00	0
2008-09-18	01:02:00	0
2008-09-18	01:03:00	0
2008-09-18	01:04:00	0
2008-09-18	01:05:00	0
2008-09-18	01:06:00	0
2008-09-18	01:07:00	0
2008-09-18	01:08:00	0
2008-09-18	01:09:00	0
2008-09-18	01:10:00	0
2008-09-18	01:11:00	0
2008-09-18	01:12:00	0
2008-09-18	01:13:00	0
2008-09-18	01:14:00	0
2008-09-18	01:15:00	0
2008-09-18	01:16:00	0
2008-09-18	01:17:00	0
2008-09-18	01:18:00	0
2008-09-18	01:19:00	0
2008-09-18	01:20:00	0
2008-09-18	01:21:00	0
2008-09-18	01:22:00	0
2008-09-18	01:23:00	0
2008-09-18	01:24:00	0
2008-09-18	01:25:00	0
2008-09-18	01:26:00	0
2008-09-18	01:27:00	0
2008-09-18	01:28:00	0
2008-09-18	01:29:00	0
2008-09-18	01:30:00	16
2008-09-18	01:31:00	10
2008-09-18	01:32:00	0
2008-09-18	01:33:00	0
2008-09-18	01:34:00	0
2008-09-18	01:35:00	0
2008-09-18	01:36:00	0
2008-09-18	01:37:00	0
2008-09-18	01:38:00	0
2008-09-18	01:39:00	0
2008-09-18	01:40:00	0
2008-09-18	01:41:00	0
2008-09-18	01:42:00	0
2008-09-18	01:43:00	0
2008-09-18	01:44:00	0
2008-09-18	01:45:00	0
2008-09-18	01:46:00	0
2008-09-18	01:47:00	0
2008-09-18	01:48:00	0
2008-09-18	01:49:00	0
2008-09-18	01:50:00	26
2008-09-18	01:51:00	52
2008-09-18	01:52:00	10
2008-09-18	01:53:00	0
2008-09-18	01:54:00	0
2008-09-18	01:55:00	0
2008-09-18	01:56:00	0
2008-09-18	01:57:00	0
2008-09-18	01:58:00	10
2008-09-18	01:59:00	0
2008-09-18	02:00:00	0
2008-09-18	02:01:00	0
2008-09-18	02:02:00	0
2008-09-18	02:03:00	0
2008-09-18	02:04:00	0
2008-09-18	02:05:00	0
2008-09-18	02:06:00	0
2008-09-18	02:07:00	0
2008-09-18	02:08:00	0
2008-09-18	02:09:00	0
2008-09-18	02:10:00	0
2008-09-18	02:11:00	0
2008-09-18	02:12:00	10
2008-09-18	02:13:00	10
2008-09-18	02:14:00	0
2008-09-18	02:15:00	0
2008-09-18	02:16:00	0
2008-09-18	02:17:00	0
2008-09-18	02:18:00	0
2008-09-18	02:19:00	0
2008-09-18	02:20:00	0
2008-09-18	02:21:00	0
2008-09-18	02:22:00	16
2008-09-18	02:23:00	0
2008-09-18	02:24:00	47
2008-09-18	02:25:00	5
2008-09-18	02:26:00	0
2008-09-18	02:27:00	0
2008-09-18	02:28:00	0
2008-09-18	02:29:00	0
2008-09-18	02:30:00	0
2008-09-18	02:31:00	0
2008-09-18	02:32:00	0
2008-09-18	02:33:00	0
2008-09-18	02:34:00	0
2008-09-18	02:35:00	0
2008-09-18	02:36:00	0
2008-09-18	02:37:00	0
2008-09-18	02:38:00	0
2008-09-18	02:39:00	0
2008-09-18	02:40:00	0
2008-09-18	02:41:00	0
2008-09-18	02:42:00	0
2008-09-18	02:43:00	0
2008-09-18	02:44:00	0
2008-09-18	02:45:00	0
2008-09-18	02:46:00	0
2008-09-18	02:47:00	0
2008-09-18	02:48:00	0
2008-09-18	02:49:00	0
2008-09-18	02:50:00	0
2008-09-18	02:51:00	0
2008-09-18	02:52:00	0
2008-09-18	02:53:00	0
2008-09-18	02:54:00	0
2008-09-18	02:55:00	0
2008-09-18	02:56:00	0
2008-09-18	02:57:00	0
2008-09-18	02:58:00	5
2008-09-18	02:59:00	5
2008-09-18	03:00:00	0
2008-09-18	03:01:00	0
2008-09-18	03:02:00	0
2008-09-18	03:03:00	0
2008-09-18	03:04:00	0
2008-09-18	03:05:00	0
2008-09-18	03:06:00	0
2008-09-18	03:07:00	0
2008-09-18	03:08:00	0
2008-09-18	03:09:00	0
2008-09-18	03:10:00	0
2008-09-18	03:11:00	0
2008-09-18	03:12:00	0
2008-09-18	03:13:00	244
2008-09-18	03:14:00	0
2008-09-18	03:15:00	0
2008-09-18	03:16:00	47
2008-09-18	03:17:00	0
2008-09-18	03:18:00	0
2008-09-18	03:19:00	0
2008-09-18	03:20:00	0
2008-09-18	03:21:00	0
2008-09-18	03:22:00	0
2008-09-18	03:23:00	0
2008-09-18	03:24:00	0
2008-09-18	03:25:00	0
2008-09-18	03:26:00	0
2008-09-18	03:27:00	0
2008-09-18	03:28:00	0
2008-09-18	03:29:00	0
2008-09-18	03:30:00	0
2008-09-18	03:31:00	0
2008-09-18	03:32:00	0
2008-09-18	03:33:00	0
2008-09-18	03:34:00	0
2008-09-18	03:35:00	0
2008-09-18	03:36:00	0
2008-09-18	03:37:00	16
2008-09-18	03:38:00	0
2008-09-18	03:39:00	0
2008-09-18	03:40:00	0
2008-09-18	03:41:00	0
2008-09-18	03:42:00	47
2008-09-18	03:43:00	86
2008-09-18	03:44:00	93
2008-09-18	03:45:00	0
2008-09-18	03:46:00	0
2008-09-18	03:47:00	0
2008-09-18	03:48:00	0
2008-09-18	03:49:00	0
2008-09-18	03:50:00	0
2008-09-18	03:51:00	0
2008-09-18	03:52:00	0
2008-09-18	03:53:00	0
2008-09-18	03:54:00	0
2008-09-18	03:55:00	0
2008-09-18	03:56:00	0
2008-09-18	03:57:00	0
2008-09-18	03:58:00	0
2008-09-18	03:59:00	0
2008-09-18	04:00:00	0
2008-09-18	04:01:00	5
2008-09-18	04:02:00	0
2008-09-18	04:03:00	16
2008-09-18	04:04:00	16
2008-09-18	04:05:00	57
2008-09-18	04:06:00	173
2008-09-18	04:07:00	173
2008-09-18	04:08:00	16
2008-09-18	04:09:00	0
2008-09-18	04:10:00	0
2008-09-18	04:11:00	74
2008-09-18	04:12:00	36
2008-09-18	04:13:00	244
2008-09-18	04:14:00	0
2008-09-18	04:15:00	0
2008-09-18	04:16:00	0
2008-09-18	04:17:00	0
2008-09-18	04:18:00	0
2008-09-18	04:19:00	0
2008-09-18	04:20:00	0
2008-09-18	04:21:00	0
2008-09-18	04:22:00	0
2008-09-18	04:23:00	0
2008-09-18	04:24:00	0
2008-09-18	04:25:00	0
2008-09-18	04:26:00	0
2008-09-18	04:27:00	0
2008-09-18	04:28:00	21
2008-09-18	04:29:00	0
2008-09-18	04:30:00	0
2008-09-18	04:31:00	0
2008-09-18	04:32:00	0
2008-09-18	04:33:00	0
2008-09-18	04:34:00	0
2008-09-18	04:35:00	0
2008-09-18	04:36:00	0
2008-09-18	04:37:00	0
2008-09-18	04:38:00	0
2008-09-18	04:39:00	0
2008-09-18	04:40:00	0
2008-09-18	04:41:00	0
2008-09-18	04:42:00	0
2008-09-18	04:43:00	0
2008-09-18	04:44:00	0
2008-09-18	04:45:00	0
2008-09-18	04:46:00	0
2008-09-18	04:47:00	0
2008-09-18	04:48:00	0
2008-09-18	04:49:00	0
2008-09-18	04:50:00	0
2008-09-18	04:51:00	0
2008-09-18	04:52:00	0
2008-09-18	04:53:00	0
2008-09-18	04:54:00	0
2008-09-18	04:55:00	0
2008-09-18	04:56:00	0
2008-09-18	04:57:00	0
2008-09-18	04:58:00	0
2008-09-18	04:59:00	0
2008-09-18	05:00:00	0
2008-09-18	05:01:00	0
2008-09-18	05:02:00	0
2008-09-18	05:03:00	0
2008-09-18	05:04:00	0
2008-09-18	05:05:00	0
2008-09-18	05:06:00	0
2008-09-18	05:07:00	0
2008-09-18	05:08:00	0
2008-09-18	05:09:00	16
2008-09-18	05:10:00	0
2008-09-18	05:11:00	0
2008-09-18	05:12:00	0
2008-09-18	05:13:00	0
2008-09-18	05:14:00	0
2008-09-18	05:15:00	0
2008-09-18	05:16:00	0
2008-09-18	05:17:00	0
2008-09-18	05:18:00	0
2008-09-18	05:19:00	0
2008-09-18	05:20:00	0
2008-09-18	05:21:00	0
2008-09-18	05:22:00	0
2008-09-18	05:23:00	0
2008-09-18	05:24:00	0
2008-09-18	05:25:00	0
2008-09-18	05:26:00	21
2008-09-18	05:27:00	0
2008-09-18	05:28:00	0
2008-09-18	05:29:00	0
2008-09-18	05:30:00	0
2008-09-18	05:31:00	0
2008-09-18	05:32:00	0
2008-09-18	05:33:00	0
2008-09-18	05:34:00	0
2008-09-18	05:35:00	0
2008-09-18	05:36:00	0
2008-09-18	05:37:00	0
2008-09-18	05:38:00	0
2008-09-18	05:39:00	21
2008-09-18	05:40:00	0
2008-09-18	05:41:00	42
2008-09-18	05:42:00	0
2008-09-18	05:43:00	26
2008-09-18	05:44:00	5
2008-09-18	05:45:00	0
2008-09-18	05:46:00	0
2008-09-18	05:47:00	0
2008-09-18	05:48:00	0
2008-09-18	05:49:00	0
2008-09-18	05:50:00	0
2008-09-18	05:51:00	0
2008-09-18	05:52:00	0
2008-09-18	05:53:00	0
2008-09-18	05:54:00	0
2008-09-18	05:55:00	0
2008-09-18	05:56:00	0
2008-09-18	05:57:00	0
2008-09-18	05:58:00	0
2008-09-18	05:59:00	5
2008-09-18	06:00:00	0
2008-09-18	06:01:00	0
2008-09-18	06:02:00	0
2008-09-18	06:03:00	0
2008-09-18	06:04:00	0
2008-09-18	06:05:00	0
2008-09-18	06:06:00	0
2008-09-18	06:07:00	0
2008-09-18	06:08:00	0
2008-09-18	06:09:00	0
2008-09-18	06:10:00	0
2008-09-18	06:11:00	0
2008-09-18	06:12:00	31
2008-09-18	06:13:00	0
2008-09-18	06:14:00	26
2008-09-18	06:15:00	5
2008-09-18	06:16:00	0
2008-09-18	06:17:00	0
2008-09-18	06:18:00	0
2008-09-18	06:19:00	0
2008-09-18	06:20:00	5
2008-09-18	06:21:00	21
2008-09-18	06:22:00	0
2008-09-18	06:23:00	0
2008-09-18	06:24:00	0
2008-09-18	06:25:00	0
2008-09-18	06:26:00	0
2008-09-18	06:27:00	0
2008-09-18	06:28:00	0
2008-09-18	06:29:00	0
2008-09-18	06:30:00	0
2008-09-18	06:31:00	0
2008-09-18	06:32:00	0
2008-09-18	06:33:00	0
2008-09-18	06:34:00	0
2008-09-18	06:35:00	0
2008-09-18	06:36:00	0
2008-09-18	06:37:00	0
2008-09-18	06:38:00	0
2008-09-18	06:39:00	0
2008-09-18	06:40:00	0
2008-09-18	06:41:00	0
2008-09-18	06:42:00	0
2008-09-18	06:43:00	0
2008-09-18	06:44:00	0
2008-09-18	06:45:00	0
2008-09-18	06:46:00	0
2008-09-18	06:47:00	0
2008-09-18	06:48:00	0
2008-09-18	06:49:00	0
2008-09-18	06:50:00	0
2008-09-18	06:51:00	0
2008-09-18	06:52:00	0
2008-09-18	06:53:00	31
2008-09-18	06:54:00	21
2008-09-18	06:55:00	36
2008-09-18	06:56:00	725
2008-09-18	06:57:00	620
2008-09-18	06:58:00	1332
2008-09-18	06:59:00	1055
2008-09-18	07:00:00	1666
2008-09-18	07:01:00	99
2008-09-18	07:02:00	10
2008-09-18	07:03:00	325
2008-09-18	07:04:00	306
2008-09-18	07:05:00	325
2008-09-18	07:06:00	334
2008-09-18	07:07:00	954
2008-09-18	07:08:00	725
2008-09-18	07:09:00	10
2008-09-18	07:10:00	287
2008-09-18	07:11:00	0
2008-09-18	07:12:00	210
2008-09-18	07:13:00	278
2008-09-18	07:14:00	195
2008-09-18	07:15:00	187
2008-09-18	07:16:00	158
2008-09-18	07:17:00	151
2008-09-18	07:18:00	26
2008-09-18	07:19:00	93
2008-09-18	07:20:00	325
2008-09-18	07:21:00	897
2008-09-18	07:22:00	1142
2008-09-18	07:23:00	99
2008-09-18	07:24:00	219
2008-09-18	07:25:00	74
2008-09-18	07:26:00	21
2008-09-18	07:27:00	0
2008-09-18	07:28:00	0
2008-09-18	07:29:00	62
2008-09-18	07:30:00	111
2008-09-18	07:31:00	0
2008-09-18	07:32:00	0
2008-09-18	07:33:00	0
2008-09-18	07:34:00	26
2008-09-18	07:35:00	0
2008-09-18	07:36:00	80
2008-09-18	07:37:00	0
2008-09-18	07:38:00	0
2008-09-18	07:39:00	0
2008-09-18	07:40:00	0
2008-09-18	07:41:00	0
2008-09-18	07:42:00	0
2008-09-18	07:43:00	0
2008-09-18	07:44:00	0
2008-09-18	07:45:00	0
2008-09-18	07:46:00	0
2008-09-18	07:47:00	0
2008-09-18	07:48:00	0
2008-09-18	07:49:00	0
2008-09-18	07:50:00	10
2008-09-18	07:51:00	0
2008-09-18	07:52:00	0
2008-09-18	07:53:00	0
2008-09-18	07:54:00	0
2008-09-18	07:55:00	0
2008-09-18	07:56:00	0
2008-09-18	07:57:00	0
2008-09-18	07:58:00	0
2008-09-18	07:59:00	0
2008-09-18	08:00:00	0
2008-09-18	08:01:00	0
2008-09-18	08:02:00	0
2008-09-18	08:03:00	0
2008-09-18	08:04:00	0
2008-09-18	08:05:00	0
2008-09-18	08:06:00	0
2008-09-18	08:07:00	0
2008-09-18	08:08:00	0
2008-09-18	08:09:00	0
2008-09-18	08:10:00	0
2008-09-18	08:11:00	21
2008-09-18	08:12:00	0
2008-09-18	08:13:00	47
2008-09-18	08:14:00	219
2008-09-18	08:15:00	144
2008-09-18	08:16:00	80
2008-09-18	08:17:00	36
2008-09-18	08:18:00	21
2008-09-18	08:19:00	0
2008-09-18	08:20:00	26
2008-09-18	08:21:00	57
2008-09-18	08:22:00	16
2008-09-18	08:23:00	0
2008-09-18	08:24:00	151
2008-09-18	08:25:00	195
2008-09-18	08:26:00	99
2008-09-18	08:27:00	31
2008-09-18	08:28:00	0
2008-09-18	08:29:00	0
2008-09-18	08:30:00	0
2008-09-18	08:31:00	0
2008-09-18	08:32:00	0
2008-09-18	08:33:00	0
2008-09-18	08:34:00	0
2008-09-18	08:35:00	0
2008-09-18	08:36:00	0
2008-09-18	08:37:00	0
2008-09-18	08:38:00	0
2008-09-18	08:39:00	0
2008-09-18	08:40:00	0
2008-09-18	08:41:00	0
2008-09-18	08:42:00	0
2008-09-18	08:43:00	0
2008-09-18	08:44:00	0
2008-09-18	08:45:00	0
2008-09-18	08:46:00	0
2008-09-18	08:47:00	0
2008-09-18	08:48:00	0
2008-09-18	08:49:00	52
2008-09-18	08:50:00	538
2008-09-18	08:51:00	62
2008-09-18	08:52:00	0
2008-09-18	08:53:00	0
2008-09-18	08:54:00	0
2008-09-18	08:55:00	0
2008-09-18	08:56:00	0
2008-09-18	08:57:00	0
2008-09-18	08:58:00	0
2008-09-18	08:59:00	0
2008-09-18	09:00:00	0
2008-09-18	09:01:00	0
2008-09-18	09:02:00	0
2008-09-18	09:03:00	0
2008-09-18	09:04:00	0
2008-09-18	09:05:00	0
2008-09-18	09:06:00	0
2008-09-18	09:07:00	0
2008-09-18	09:08:00	0
[truncated: 19,611 more rows]

## Sheet: 10.01.08
Actogram, Copy Raw Data, All Days
Identity:	Denver
Filename:	E:\Active Research Files\meloxicam titre canine\cases\denver\Denver10.1.08.AWC
Gender:	M
Age:	11
Height:	40.6 cm	16.0 in
Weight:	27.0 kg	59.5 lbs
Start Date:	01-Oct-2008 (Wed)
Start Time:	18:00:00
Interval:	1.00 mins
Date Stamp:	Time Stamp:	Activity Data:	Marker Press:
2008-10-01	00:00:00	0
2008-10-01	00:01:00	0
2008-10-01	00:02:00	0
2008-10-01	00:03:00	0
2008-10-01	00:04:00	0
2008-10-01	00:05:00	0
2008-10-01	00:06:00	0
2008-10-01	00:07:00	0
2008-10-01	00:08:00	0
2008-10-01	00:09:00	0
2008-10-01	00:10:00	0
2008-10-01	00:11:00	0
2008-10-01	00:12:00	0
2008-10-01	00:13:00	0
2008-10-01	00:14:00	0
2008-10-01	00:15:00	0
2008-10-01	00:16:00	0
2008-10-01	00:17:00	0
2008-10-01	00:18:00	0
2008-10-01	00:19:00	0
2008-10-01	00:20:00	0
2008-10-01	00:21:00	0
2008-10-01	00:22:00	0
2008-10-01	00:23:00	0
2008-10-01	00:24:00	0
2008-10-01	00:25:00	0
2008-10-01	00:26:00	0
2008-10-01	00:27:00	0
2008-10-01	00:28:00	0
2008-10-01	00:29:00	0
2008-10-01	00:30:00	0
2008-10-01	00:31:00	0
2008-10-01	00:32:00	0
2008-10-01	00:33:00	0
2008-10-01	00:34:00	0
2008-10-01	00:35:00	0
2008-10-01	00:36:00	0
2008-10-01	00:37:00	0
2008-10-01	00:38:00	0
2008-10-01	00:39:00	0
2008-10-01	00:40:00	0
2008-10-01	00:41:00	0
2008-10-01	00:42:00	0
2008-10-01	00:43:00	0
2008-10-01	00:44:00	0
2008-10-01	00:45:00	0
2008-10-01	00:46:00	0
2008-10-01	00:47:00	0
2008-10-01	00:48:00	0
2008-10-01	00:49:00	0
2008-10-01	00:50:00	0
2008-10-01	00:51:00	0
2008-10-01	00:52:00	0
2008-10-01	00:53:00	0
2008-10-01	00:54:00	0
2008-10-01	00:55:00	0
2008-10-01	00:56:00	0
2008-10-01	00:57:00	0
2008-10-01	00:58:00	0
2008-10-01	00:59:00	0
2008-10-01	01:00:00	0
2008-10-01	01:01:00	0
2008-10-01	01:02:00	0
2008-10-01	01:03:00	0
2008-10-01	01:04:00	0
2008-10-01	01:05:00	0
2008-10-01	01:06:00	0
2008-10-01	01:07:00	0
2008-10-01	01:08:00	0
2008-10-01	01:09:00	0
2008-10-01	01:10:00	0
2008-10-01	01:11:00	0
2008-10-01	01:12:00	0
2008-10-01	01:13:00	0
2008-10-01	01:14:00	0
2008-10-01	01:15:00	0
2008-10-01	01:16:00	0
2008-10-01	01:17:00	0
2008-10-01	01:18:00	0
2008-10-01	01:19:00	0
2008-10-01	01:20:00	0
2008-10-01	01:21:00	0
2008-10-01	01:22:00	0
2008-10-01	01:23:00	0
2008-10-01	01:24:00	0
2008-10-01	01:25:00	0
2008-10-01	01:26:00	0
2008-10-01	01:27:00	0
2008-10-01	01:28:00	0
2008-10-01	01:29:00	0
2008-10-01	01:30:00	0
2008-10-01	01:31:00	0
2008-10-01	01:32:00	0
2008-10-01	01:33:00	0
2008-10-01	01:34:00	0
2008-10-01	01:35:00	0
2008-10-01	01:36:00	0
2008-10-01	01:37:00	0
2008-10-01	01:38:00	0
2008-10-01	01:39:00	0
2008-10-01	01:40:00	0
2008-10-01	01:41:00	0
2008-10-01	01:42:00	0
2008-10-01	01:43:00	0
2008-10-01	01:44:00	0
2008-10-01	01:45:00	0
2008-10-01	01:46:00	0
2008-10-01	01:47:00	0
2008-10-01	01:48:00	0
2008-10-01	01:49:00	0
2008-10-01	01:50:00	0
2008-10-01	01:51:00	0
2008-10-01	01:52:00	0
2008-10-01	01:53:00	0
2008-10-01	01:54:00	0
2008-10-01	01:55:00	0
2008-10-01	01:56:00	0
2008-10-01	01:57:00	0
2008-10-01	01:58:00	0
2008-10-01	01:59:00	0
2008-10-01	02:00:00	0
2008-10-01	02:01:00	0
2008-10-01	02:02:00	0
2008-10-01	02:03:00	0
2008-10-01	02:04:00	0
2008-10-01	02:05:00	0
2008-10-01	02:06:00	0
2008-10-01	02:07:00	0
2008-10-01	02:08:00	0
2008-10-01	02:09:00	0
2008-10-01	02:10:00	0
2008-10-01	02:11:00	0
2008-10-01	02:12:00	0
2008-10-01	02:13:00	0
2008-10-01	02:14:00	0
2008-10-01	02:15:00	0
2008-10-01	02:16:00	0
2008-10-01	02:17:00	0
2008-10-01	02:18:00	0
2008-10-01	02:19:00	0
2008-10-01	02:20:00	0
2008-10-01	02:21:00	0
2008-10-01	02:22:00	0
2008-10-01	02:23:00	0
2008-10-01	02:24:00	0
2008-10-01	02:25:00	0
2008-10-01	02:26:00	0
2008-10-01	02:27:00	0
2008-10-01	02:28:00	0
2008-10-01	02:29:00	0
2008-10-01	02:30:00	0
2008-10-01	02:31:00	0
2008-10-01	02:32:00	0
2008-10-01	02:33:00	0
2008-10-01	02:34:00	0
2008-10-01	02:35:00	0
2008-10-01	02:36:00	0
2008-10-01	02:37:00	0
2008-10-01	02:38:00	0
2008-10-01	02:39:00	0
2008-10-01	02:40:00	0
2008-10-01	02:41:00	0
2008-10-01	02:42:00	0
2008-10-01	02:43:00	0
2008-10-01	02:44:00	0
2008-10-01	02:45:00	0
2008-10-01	02:46:00	0
2008-10-01	02:47:00	0
2008-10-01	02:48:00	0
2008-10-01	02:49:00	0
2008-10-01	02:50:00	0
2008-10-01	02:51:00	0
2008-10-01	02:52:00	0
2008-10-01	02:53:00	0
2008-10-01	02:54:00	0
2008-10-01	02:55:00	0
2008-10-01	02:56:00	0
2008-10-01	02:57:00	0
2008-10-01	02:58:00	0
2008-10-01	02:59:00	0
2008-10-01	03:00:00	0
2008-10-01	03:01:00	0
2008-10-01	03:02:00	0
2008-10-01	03:03:00	0
2008-10-01	03:04:00	0
2008-10-01	03:05:00	0
2008-10-01	03:06:00	0
2008-10-01	03:07:00	0
2008-10-01	03:08:00	0
2008-10-01	03:09:00	0
2008-10-01	03:10:00	0
2008-10-01	03:11:00	0
2008-10-01	03:12:00	0
2008-10-01	03:13:00	0
2008-10-01	03:14:00	0
2008-10-01	03:15:00	0
2008-10-01	03:16:00	0
2008-10-01	03:17:00	0
2008-10-01	03:18:00	0
2008-10-01	03:19:00	0
2008-10-01	03:20:00	0
2008-10-01	03:21:00	0
2008-10-01	03:22:00	0
2008-10-01	03:23:00	0
2008-10-01	03:24:00	0
2008-10-01	03:25:00	0
2008-10-01	03:26:00	0
2008-10-01	03:27:00	0
2008-10-01	03:28:00	0
2008-10-01	03:29:00	0
2008-10-01	03:30:00	0
2008-10-01	03:31:00	0
2008-10-01	03:32:00	0
2008-10-01	03:33:00	0
2008-10-01	03:34:00	0
2008-10-01	03:35:00	0
2008-10-01	03:36:00	0
2008-10-01	03:37:00	0
2008-10-01	03:38:00	0
2008-10-01	03:39:00	0
2008-10-01	03:40:00	0
2008-10-01	03:41:00	0
2008-10-01	03:42:00	0
2008-10-01	03:43:00	0
2008-10-01	03:44:00	0
2008-10-01	03:45:00	0
2008-10-01	03:46:00	0
2008-10-01	03:47:00	0
2008-10-01	03:48:00	0
2008-10-01	03:49:00	0
2008-10-01	03:50:00	0
2008-10-01	03:51:00	0
2008-10-01	03:52:00	0
2008-10-01	03:53:00	0
2008-10-01	03:54:00	0
2008-10-01	03:55:00	0
2008-10-01	03:56:00	0
2008-10-01	03:57:00	0
2008-10-01	03:58:00	0
2008-10-01	03:59:00	0
2008-10-01	04:00:00	0
2008-10-01	04:01:00	0
2008-10-01	04:02:00	0
2008-10-01	04:03:00	0
2008-10-01	04:04:00	0
2008-10-01	04:05:00	0
2008-10-01	04:06:00	0
2008-10-01	04:07:00	0
2008-10-01	04:08:00	0
2008-10-01	04:09:00	0
2008-10-01	04:10:00	0
2008-10-01	04:11:00	0
2008-10-01	04:12:00	0
2008-10-01	04:13:00	0
2008-10-01	04:14:00	0
2008-10-01	04:15:00	0
2008-10-01	04:16:00	0
2008-10-01	04:17:00	0
2008-10-01	04:18:00	0
2008-10-01	04:19:00	0
2008-10-01	04:20:00	0
2008-10-01	04:21:00	0
2008-10-01	04:22:00	0
2008-10-01	04:23:00	0
2008-10-01	04:24:00	0
2008-10-01	04:25:00	0
2008-10-01	04:26:00	0
2008-10-01	04:27:00	0
2008-10-01	04:28:00	0
2008-10-01	04:29:00	0
2008-10-01	04:30:00	0
2008-10-01	04:31:00	0
2008-10-01	04:32:00	0
2008-10-01	04:33:00	0
2008-10-01	04:34:00	0
2008-10-01	04:35:00	0
2008-10-01	04:36:00	0
2008-10-01	04:37:00	0
2008-10-01	04:38:00	0
2008-10-01	04:39:00	0
2008-10-01	04:40:00	0
2008-10-01	04:41:00	0
2008-10-01	04:42:00	0
2008-10-01	04:43:00	0
2008-10-01	04:44:00	0
2008-10-01	04:45:00	0
2008-10-01	04:46:00	0
2008-10-01	04:47:00	0
2008-10-01	04:48:00	0
2008-10-01	04:49:00	0
2008-10-01	04:50:00	0
2008-10-01	04:51:00	0
2008-10-01	04:52:00	0
2008-10-01	04:53:00	0
2008-10-01	04:54:00	0
2008-10-01	04:55:00	0
2008-10-01	04:56:00	0
2008-10-01	04:57:00	0
2008-10-01	04:58:00	0
2008-10-01	04:59:00	0
2008-10-01	05:00:00	0
2008-10-01	05:01:00	0
2008-10-01	05:02:00	0
2008-10-01	05:03:00	0
2008-10-01	05:04:00	0
2008-10-01	05:05:00	0
2008-10-01	05:06:00	0
2008-10-01	05:07:00	0
2008-10-01	05:08:00	0
2008-10-01	05:09:00	0
2008-10-01	05:10:00	0
2008-10-01	05:11:00	0
2008-10-01	05:12:00	0
2008-10-01	05:13:00	0
2008-10-01	05:14:00	0
2008-10-01	05:15:00	0
2008-10-01	05:16:00	0
2008-10-01	05:17:00	0
2008-10-01	05:18:00	0
2008-10-01	05:19:00	0
2008-10-01	05:20:00	0
2008-10-01	05:21:00	0
2008-10-01	05:22:00	0
2008-10-01	05:23:00	0
2008-10-01	05:24:00	0
2008-10-01	05:25:00	0
2008-10-01	05:26:00	0
2008-10-01	05:27:00	0
2008-10-01	05:28:00	0
2008-10-01	05:29:00	0
2008-10-01	05:30:00	0
2008-10-01	05:31:00	0
2008-10-01	05:32:00	0
2008-10-01	05:33:00	0
2008-10-01	05:34:00	0
2008-10-01	05:35:00	0
2008-10-01	05:36:00	0
2008-10-01	05:37:00	0
2008-10-01	05:38:00	0
2008-10-01	05:39:00	0
2008-10-01	05:40:00	0
2008-10-01	05:41:00	0
2008-10-01	05:42:00	0
2008-10-01	05:43:00	0
2008-10-01	05:44:00	0
2008-10-01	05:45:00	0
2008-10-01	05:46:00	0
2008-10-01	05:47:00	0
2008-10-01	05:48:00	0
2008-10-01	05:49:00	0
2008-10-01	05:50:00	0
2008-10-01	05:51:00	0
2008-10-01	05:52:00	0
2008-10-01	05:53:00	0
2008-10-01	05:54:00	0
2008-10-01	05:55:00	0
2008-10-01	05:56:00	0
2008-10-01	05:57:00	0
2008-10-01	05:58:00	0
2008-10-01	05:59:00	0
2008-10-01	06:00:00	0
2008-10-01	06:01:00	0
2008-10-01	06:02:00	0
2008-10-01	06:03:00	0
2008-10-01	06:04:00	0
2008-10-01	06:05:00	0
2008-10-01	06:06:00	0
2008-10-01	06:07:00	0
2008-10-01	06:08:00	0
2008-10-01	06:09:00	0
2008-10-01	06:10:00	0
2008-10-01	06:11:00	0
2008-10-01	06:12:00	0
2008-10-01	06:13:00	0
2008-10-01	06:14:00	0
2008-10-01	06:15:00	0
2008-10-01	06:16:00	0
2008-10-01	06:17:00	0
2008-10-01	06:18:00	0
2008-10-01	06:19:00	0
2008-10-01	06:20:00	0
2008-10-01	06:21:00	0
2008-10-01	06:22:00	0
2008-10-01	06:23:00	0
2008-10-01	06:24:00	0
2008-10-01	06:25:00	0
2008-10-01	06:26:00	0
2008-10-01	06:27:00	0
2008-10-01	06:28:00	0
2008-10-01	06:29:00	0
2008-10-01	06:30:00	0
2008-10-01	06:31:00	0
2008-10-01	06:32:00	0
2008-10-01	06:33:00	0
2008-10-01	06:34:00	0
2008-10-01	06:35:00	0
2008-10-01	06:36:00	0
2008-10-01	06:37:00	0
2008-10-01	06:38:00	0
2008-10-01	06:39:00	0
2008-10-01	06:40:00	0
2008-10-01	06:41:00	0
2008-10-01	06:42:00	0
2008-10-01	06:43:00	0
2008-10-01	06:44:00	0
2008-10-01	06:45:00	0
2008-10-01	06:46:00	0
2008-10-01	06:47:00	0
2008-10-01	06:48:00	0
2008-10-01	06:49:00	0
2008-10-01	06:50:00	0
2008-10-01	06:51:00	0
2008-10-01	06:52:00	0
2008-10-01	06:53:00	0
2008-10-01	06:54:00	0
2008-10-01	06:55:00	0
2008-10-01	06:56:00	0
2008-10-01	06:57:00	0
2008-10-01	06:58:00	0
2008-10-01	06:59:00	0
2008-10-01	07:00:00	0
2008-10-01	07:01:00	0
2008-10-01	07:02:00	0
2008-10-01	07:03:00	0
2008-10-01	07:04:00	0
2008-10-01	07:05:00	0
2008-10-01	07:06:00	0
2008-10-01	07:07:00	0
2008-10-01	07:08:00	0
2008-10-01	07:09:00	0
2008-10-01	07:10:00	0
2008-10-01	07:11:00	0
2008-10-01	07:12:00	0
2008-10-01	07:13:00	0
2008-10-01	07:14:00	0
2008-10-01	07:15:00	0
2008-10-01	07:16:00	0
2008-10-01	07:17:00	0
2008-10-01	07:18:00	0
2008-10-01	07:19:00	0
2008-10-01	07:20:00	0
2008-10-01	07:21:00	0
2008-10-01	07:22:00	0
2008-10-01	07:23:00	0
2008-10-01	07:24:00	0
2008-10-01	07:25:00	0
2008-10-01	07:26:00	0
2008-10-01	07:27:00	0
2008-10-01	07:28:00	0
2008-10-01	07:29:00	0
2008-10-01	07:30:00	0
2008-10-01	07:31:00	0
2008-10-01	07:32:00	0
2008-10-01	07:33:00	0
2008-10-01	07:34:00	0
2008-10-01	07:35:00	0
2008-10-01	07:36:00	0
2008-10-01	07:37:00	0
2008-10-01	07:38:00	0
2008-10-01	07:39:00	0
2008-10-01	07:40:00	0
2008-10-01	07:41:00	0
2008-10-01	07:42:00	0
2008-10-01	07:43:00	0
2008-10-01	07:44:00	0
2008-10-01	07:45:00	0
2008-10-01	07:46:00	0
2008-10-01	07:47:00	0
2008-10-01	07:48:00	0
2008-10-01	07:49:00	0
2008-10-01	07:50:00	0
2008-10-01	07:51:00	0
2008-10-01	07:52:00	0
2008-10-01	07:53:00	0
2008-10-01	07:54:00	0
2008-10-01	07:55:00	0
2008-10-01	07:56:00	0
2008-10-01	07:57:00	0
2008-10-01	07:58:00	0
2008-10-01	07:59:00	0
2008-10-01	08:00:00	0
2008-10-01	08:01:00	0
2008-10-01	08:02:00	0
2008-10-01	08:03:00	0
2008-10-01	08:04:00	0
2008-10-01	08:05:00	0
2008-10-01	08:06:00	0
2008-10-01	08:07:00	0
2008-10-01	08:08:00	0
2008-10-01	08:09:00	0
2008-10-01	08:10:00	0
2008-10-01	08:11:00	0
2008-10-01	08:12:00	0
2008-10-01	08:13:00	0
2008-10-01	08:14:00	0
2008-10-01	08:15:00	0
2008-10-01	08:16:00	0
2008-10-01	08:17:00	0
2008-10-01	08:18:00	0
2008-10-01	08:19:00	0
2008-10-01	08:20:00	0
2008-10-01	08:21:00	0
2008-10-01	08:22:00	0
2008-10-01	08:23:00	0
2008-10-01	08:24:00	0
2008-10-01	08:25:00	0
2008-10-01	08:26:00	0
2008-10-01	08:27:00	0
2008-10-01	08:28:00	0
2008-10-01	08:29:00	0
2008-10-01	08:30:00	0
2008-10-01	08:31:00	0
2008-10-01	08:32:00	0
2008-10-01	08:33:00	0
2008-10-01	08:34:00	0
2008-10-01	08:35:00	0
2008-10-01	08:36:00	0
2008-10-01	08:37:00	0
2008-10-01	08:38:00	0
2008-10-01	08:39:00	0
2008-10-01	08:40:00	0
2008-10-01	08:41:00	0
2008-10-01	08:42:00	0
2008-10-01	08:43:00	0
2008-10-01	08:44:00	0
2008-10-01	08:45:00	0
2008-10-01	08:46:00	0
2008-10-01	08:47:00	0
2008-10-01	08:48:00	0
2008-10-01	08:49:00	0
2008-10-01	08:50:00	0
2008-10-01	08:51:00	0
2008-10-01	08:52:00	0
2008-10-01	08:53:00	0
2008-10-01	08:54:00	0
2008-10-01	08:55:00	0
2008-10-01	08:56:00	0
2008-10-01	08:57:00	0
2008-10-01	08:58:00	0
2008-10-01	08:59:00	0
2008-10-01	09:00:00	0
2008-10-01	09:01:00	0
2008-10-01	09:02:00	0
2008-10-01	09:03:00	0
2008-10-01	09:04:00	0
2008-10-01	09:05:00	0
2008-10-01	09:06:00	0
2008-10-01	09:07:00	0
2008-10-01	09:08:00	0
2008-10-01	09:09:00	0
2008-10-01	09:10:00	0
2008-10-01	09:11:00	0
2008-10-01	09:12:00	0
2008-10-01	09:13:00	0
2008-10-01	09:14:00	0
2008-10-01	09:15:00	0
2008-10-01	09:16:00	0
2008-10-01	09:17:00	0
2008-10-01	09:18:00	0
2008-10-01	09:19:00	0
2008-10-01	09:20:00	0
2008-10-01	09:21:00	0
2008-10-01	09:22:00	0
2008-10-01	09:23:00	0
2008-10-01	09:24:00	0
2008-10-01	09:25:00	0
2008-10-01	09:26:00	0
2008-10-01	09:27:00	0
2008-10-01	09:28:00	0
2008-10-01	09:29:00	0
2008-10-01	09:30:00	0
2008-10-01	09:31:00	0
2008-10-01	09:32:00	0
2008-10-01	09:33:00	0
2008-10-01	09:34:00	0
2008-10-01	09:35:00	0
2008-10-01	09:36:00	0
2008-10-01	09:37:00	0
2008-10-01	09:38:00	0
2008-10-01	09:39:00	0
2008-10-01	09:40:00	0
2008-10-01	09:41:00	0
2008-10-01	09:42:00	0
2008-10-01	09:43:00	0
2008-10-01	09:44:00	0
2008-10-01	09:45:00	0
2008-10-01	09:46:00	0
2008-10-01	09:47:00	0
2008-10-01	09:48:00	0
2008-10-01	09:49:00	0
2008-10-01	09:50:00	0
2008-10-01	09:51:00	0
2008-10-01	09:52:00	0
2008-10-01	09:53:00	0
2008-10-01	09:54:00	0
2008-10-01	09:55:00	0
2008-10-01	09:56:00	0
2008-10-01	09:57:00	0
2008-10-01	09:58:00	0
2008-10-01	09:59:00	0
2008-10-01	10:00:00	0
2008-10-01	10:01:00	0
2008-10-01	10:02:00	0
2008-10-01	10:03:00	0
2008-10-01	10:04:00	0
2008-10-01	10:05:00	0
2008-10-01	10:06:00	0
2008-10-01	10:07:00	0
2008-10-01	10:08:00	0
2008-10-01	10:09:00	0
2008-10-01	10:10:00	0
2008-10-01	10:11:00	0
2008-10-01	10:12:00	0
2008-10-01	10:13:00	0
2008-10-01	10:14:00	0
2008-10-01	10:15:00	0
2008-10-01	10:16:00	0
2008-10-01	10:17:00	0
2008-10-01	10:18:00	0
2008-10-01	10:19:00	0
2008-10-01	10:20:00	0
2008-10-01	10:21:00	0
2008-10-01	10:22:00	0
2008-10-01	10:23:00	0
2008-10-01	10:24:00	0
2008-10-01	10:25:00	0
2008-10-01	10:26:00	0
2008-10-01	10:27:00	0
2008-10-01	10:28:00	0
2008-10-01	10:29:00	0
2008-10-01	10:30:00	0
2008-10-01	10:31:00	0
2008-10-01	10:32:00	0
2008-10-01	10:33:00	0
2008-10-01	10:34:00	0
2008-10-01	10:35:00	0
2008-10-01	10:36:00	0
2008-10-01	10:37:00	0
2008-10-01	10:38:00	0
2008-10-01	10:39:00	0
2008-10-01	10:40:00	0
2008-10-01	10:41:00	0
2008-10-01	10:42:00	0
2008-10-01	10:43:00	0
2008-10-01	10:44:00	0
2008-10-01	10:45:00	0
2008-10-01	10:46:00	0
2008-10-01	10:47:00	0
2008-10-01	10:48:00	0
2008-10-01	10:49:00	0
2008-10-01	10:50:00	0
2008-10-01	10:51:00	0
2008-10-01	10:52:00	0
2008-10-01	10:53:00	0
2008-10-01	10:54:00	0
2008-10-01	10:55:00	0
2008-10-01	10:56:00	0
2008-10-01	10:57:00	0
2008-10-01	10:58:00	0
2008-10-01	10:59:00	0
2008-10-01	11:00:00	0
2008-10-01	11:01:00	0
2008-10-01	11:02:00	0
2008-10-01	11:03:00	0
2008-10-01	11:04:00	0
2008-10-01	11:05:00	0
2008-10-01	11:06:00	0
2008-10-01	11:07:00	0
2008-10-01	11:08:00	0
2008-10-01	11:09:00	0
2008-10-01	11:10:00	0
2008-10-01	11:11:00	0
2008-10-01	11:12:00	0
2008-10-01	11:13:00	0
2008-10-01	11:14:00	0
2008-10-01	11:15:00	0
2008-10-01	11:16:00	0
2008-10-01	11:17:00	0
2008-10-01	11:18:00	0
2008-10-01	11:19:00	0
2008-10-01	11:20:00	0
2008-10-01	11:21:00	0
2008-10-01	11:22:00	0
2008-10-01	11:23:00	0
2008-10-01	11:24:00	0
2008-10-01	11:25:00	0
2008-10-01	11:26:00	0
2008-10-01	11:27:00	0
2008-10-01	11:28:00	0
2008-10-01	11:29:00	0
2008-10-01	11:30:00	0
2008-10-01	11:31:00	0
2008-10-01	11:32:00	0
2008-10-01	11:33:00	0
2008-10-01	11:34:00	0
2008-10-01	11:35:00	0
2008-10-01	11:36:00	0
2008-10-01	11:37:00	0
2008-10-01	11:38:00	0
2008-10-01	11:39:00	0
2008-10-01	11:40:00	0
2008-10-01	11:41:00	0
2008-10-01	11:42:00	0
2008-10-01	11:43:00	0
2008-10-01	11:44:00	0
2008-10-01	11:45:00	0
2008-10-01	11:46:00	0
2008-10-01	11:47:00	0
2008-10-01	11:48:00	0
2008-10-01	11:49:00	0
2008-10-01	11:50:00	0
2008-10-01	11:51:00	0
2008-10-01	11:52:00	0
2008-10-01	11:53:00	0
2008-10-01	11:54:00	0
2008-10-01	11:55:00	0
2008-10-01	11:56:00	0
2008-10-01	11:57:00	0
2008-10-01	11:58:00	0
2008-10-01	11:59:00	0
2008-10-01	12:00:00	0
2008-10-01	12:01:00	0
2008-10-01	12:02:00	0
2008-10-01	12:03:00	0
2008-10-01	12:04:00	0
2008-10-01	12:05:00	0
2008-10-01	12:06:00	0
2008-10-01	12:07:00	0
2008-10-01	12:08:00	0
2008-10-01	12:09:00	0
2008-10-01	12:10:00	0
2008-10-01	12:11:00	0
2008-10-01	12:12:00	0
2008-10-01	12:13:00	0
2008-10-01	12:14:00	0
2008-10-01	12:15:00	0
2008-10-01	12:16:00	0
2008-10-01	12:17:00	0
2008-10-01	12:18:00	0
2008-10-01	12:19:00	0
2008-10-01	12:20:00	0
2008-10-01	12:21:00	0
2008-10-01	12:22:00	0
2008-10-01	12:23:00	0
2008-10-01	12:24:00	0
2008-10-01	12:25:00	0
2008-10-01	12:26:00	0
2008-10-01	12:27:00	0
2008-10-01	12:28:00	0
2008-10-01	12:29:00	0
2008-10-01	12:30:00	0
2008-10-01	12:31:00	0
2008-10-01	12:32:00	0
2008-10-01	12:33:00	0
2008-10-01	12:34:00	0
2008-10-01	12:35:00	0
2008-10-01	12:36:00	0
2008-10-01	12:37:00	0
2008-10-01	12:38:00	0
2008-10-01	12:39:00	0
2008-10-01	12:40:00	0
2008-10-01	12:41:00	0
2008-10-01	12:42:00	0
2008-10-01	12:43:00	0
2008-10-01	12:44:00	0
2008-10-01	12:45:00	0
2008-10-01	12:46:00	0
2008-10-01	12:47:00	0
2008-10-01	12:48:00	0
2008-10-01	12:49:00	0
2008-10-01	12:50:00	0
2008-10-01	12:51:00	0
2008-10-01	12:52:00	0
2008-10-01	12:53:00	0
2008-10-01	12:54:00	0
2008-10-01	12:55:00	0
2008-10-01	12:56:00	0
2008-10-01	12:57:00	0
2008-10-01	12:58:00	0
2008-10-01	12:59:00	0
2008-10-01	13:00:00	0
2008-10-01	13:01:00	0
2008-10-01	13:02:00	0
2008-10-01	13:03:00	0
2008-10-01	13:04:00	0
2008-10-01	13:05:00	0
2008-10-01	13:06:00	0
2008-10-01	13:07:00	0
2008-10-01	13:08:00	0
2008-10-01	13:09:00	0
2008-10-01	13:10:00	0
2008-10-01	13:11:00	0
2008-10-01	13:12:00	0
2008-10-01	13:13:00	0
2008-10-01	13:14:00	0
2008-10-01	13:15:00	0
2008-10-01	13:16:00	0
2008-10-01	13:17:00	0
2008-10-01	13:18:00	0
2008-10-01	13:19:00	0
2008-10-01	13:20:00	0
2008-10-01	13:21:00	0
2008-10-01	13:22:00	0
2008-10-01	13:23:00	0
2008-10-01	13:24:00	0
2008-10-01	13:25:00	0
2008-10-01	13:26:00	0
2008-10-01	13:27:00	0
2008-10-01	13:28:00	0
2008-10-01	13:29:00	0
2008-10-01	13:30:00	0
2008-10-01	13:31:00	0
2008-10-01	13:32:00	0
2008-10-01	13:33:00	0
2008-10-01	13:34:00	0
2008-10-01	13:35:00	0
2008-10-01	13:36:00	0
2008-10-01	13:37:00	0
2008-10-01	13:38:00	0
2008-10-01	13:39:00	0
2008-10-01	13:40:00	0
2008-10-01	13:41:00	0
2008-10-01	13:42:00	0
2008-10-01	13:43:00	0
2008-10-01	13:44:00	0
2008-10-01	13:45:00	0
2008-10-01	13:46:00	0
2008-10-01	13:47:00	0
2008-10-01	13:48:00	0
2008-10-01	13:49:00	0
2008-10-01	13:50:00	0
2008-10-01	13:51:00	0
2008-10-01	13:52:00	0
2008-10-01	13:53:00	0
2008-10-01	13:54:00	0
2008-10-01	13:55:00	0
2008-10-01	13:56:00	0
2008-10-01	13:57:00	0
2008-10-01	13:58:00	0
2008-10-01	13:59:00	0
2008-10-01	14:00:00	0
2008-10-01	14:01:00	0
2008-10-01	14:02:00	0
2008-10-01	14:03:00	0
2008-10-01	14:04:00	0
2008-10-01	14:05:00	0
2008-10-01	14:06:00	0
2008-10-01	14:07:00	0
2008-10-01	14:08:00	0
2008-10-01	14:09:00	0
2008-10-01	14:10:00	0
2008-10-01	14:11:00	0
2008-10-01	14:12:00	0
2008-10-01	14:13:00	0
2008-10-01	14:14:00	0
2008-10-01	14:15:00	0
2008-10-01	14:16:00	0
2008-10-01	14:17:00	0
2008-10-01	14:18:00	0
2008-10-01	14:19:00	0
2008-10-01	14:20:00	0
2008-10-01	14:21:00	0
2008-10-01	14:22:00	0
2008-10-01	14:23:00	0
2008-10-01	14:24:00	0
2008-10-01	14:25:00	0
2008-10-01	14:26:00	0
2008-10-01	14:27:00	0
2008-10-01	14:28:00	0
2008-10-01	14:29:00	0
2008-10-01	14:30:00	0
2008-10-01	14:31:00	0
2008-10-01	14:32:00	0
2008-10-01	14:33:00	0
2008-10-01	14:34:00	0
2008-10-01	14:35:00	0
2008-10-01	14:36:00	0
2008-10-01	14:37:00	0
2008-10-01	14:38:00	0
2008-10-01	14:39:00	0
2008-10-01	14:40:00	0
2008-10-01	14:41:00	0
2008-10-01	14:42:00	0
2008-10-01	14:43:00	0
2008-10-01	14:44:00	0
2008-10-01	14:45:00	0
2008-10-01	14:46:00	0
2008-10-01	14:47:00	0
2008-10-01	14:48:00	0
2008-10-01	14:49:00	0
2008-10-01	14:50:00	0
2008-10-01	14:51:00	0
2008-10-01	14:52:00	0
2008-10-01	14:53:00	0
2008-10-01	14:54:00	0
2008-10-01	14:55:00	0
2008-10-01	14:56:00	0
2008-10-01	14:57:00	0
2008-10-01	14:58:00	0
2008-10-01	14:59:00	0
2008-10-01	15:00:00	0
2008-10-01	15:01:00	0
2008-10-01	15:02:00	0
2008-10-01	15:03:00	0
2008-10-01	15:04:00	0
2008-10-01	15:05:00	0
2008-10-01	15:06:00	0
2008-10-01	15:07:00	0
2008-10-01	15:08:00	0
2008-10-01	15:09:00	0
2008-10-01	15:10:00	0
2008-10-01	15:11:00	0
2008-10-01	15:12:00	0
2008-10-01	15:13:00	0
2008-10-01	15:14:00	0
2008-10-01	15:15:00	0
2008-10-01	15:16:00	0
2008-10-01	15:17:00	0
2008-10-01	15:18:00	0
2008-10-01	15:19:00	0
2008-10-01	15:20:00	0
2008-10-01	15:21:00	0
2008-10-01	15:22:00	0
2008-10-01	15:23:00	0
2008-10-01	15:24:00	0
2008-10-01	15:25:00	0
2008-10-01	15:26:00	0
2008-10-01	15:27:00	0
2008-10-01	15:28:00	0
2008-10-01	15:29:00	0
2008-10-01	15:30:00	0
2008-10-01	15:31:00	0
2008-10-01	15:32:00	0
2008-10-01	15:33:00	0
2008-10-01	15:34:00	0
2008-10-01	15:35:00	0
2008-10-01	15:36:00	0
2008-10-01	15:37:00	0
2008-10-01	15:38:00	0
2008-10-01	15:39:00	0
2008-10-01	15:40:00	0
2008-10-01	15:41:00	0
2008-10-01	15:42:00	0
2008-10-01	15:43:00	0
2008-10-01	15:44:00	0
2008-10-01	15:45:00	0
2008-10-01	15:46:00	0
2008-10-01	15:47:00	0
2008-10-01	15:48:00	0
2008-10-01	15:49:00	0
2008-10-01	15:50:00	0
2008-10-01	15:51:00	0
2008-10-01	15:52:00	0
2008-10-01	15:53:00	0
2008-10-01	15:54:00	0
2008-10-01	15:55:00	0
2008-10-01	15:56:00	0
2008-10-01	15:57:00	0
2008-10-01	15:58:00	0
2008-10-01	15:59:00	0
2008-10-01	16:00:00	0
2008-10-01	16:01:00	0
2008-10-01	16:02:00	0
2008-10-01	16:03:00	0
2008-10-01	16:04:00	0
2008-10-01	16:05:00	0
2008-10-01	16:06:00	0
2008-10-01	16:07:00	0
2008-10-01	16:08:00	0
2008-10-01	16:09:00	0
2008-10-01	16:10:00	0
2008-10-01	16:11:00	0
2008-10-01	16:12:00	0
2008-10-01	16:13:00	0
2008-10-01	16:14:00	0
2008-10-01	16:15:00	0
2008-10-01	16:16:00	0
2008-10-01	16:17:00	0
2008-10-01	16:18:00	0
2008-10-01	16:19:00	0
2008-10-01	16:20:00	0
2008-10-01	16:21:00	0
2008-10-01	16:22:00	0
2008-10-01	16:23:00	0
2008-10-01	16:24:00	0
2008-10-01	16:25:00	0
2008-10-01	16:26:00	0
2008-10-01	16:27:00	0
2008-10-01	16:28:00	0
2008-10-01	16:29:00	0
2008-10-01	16:30:00	0
2008-10-01	16:31:00	0
2008-10-01	16:32:00	0
2008-10-01	16:33:00	0
2008-10-01	16:34:00	0
2008-10-01	16:35:00	0
2008-10-01	16:36:00	0
2008-10-01	16:37:00	0
2008-10-01	16:38:00	0
2008-10-01	16:39:00	0
2008-10-01	16:40:00	0
2008-10-01	16:41:00	0
2008-10-01	16:42:00	0
2008-10-01	16:43:00	0
2008-10-01	16:44:00	0
2008-10-01	16:45:00	0
2008-10-01	16:46:00	0
2008-10-01	16:47:00	0
2008-10-01	16:48:00	0
2008-10-01	16:49:00	0
2008-10-01	16:50:00	0
2008-10-01	16:51:00	0
2008-10-01	16:52:00	0
2008-10-01	16:53:00	0
2008-10-01	16:54:00	0
2008-10-01	16:55:00	0
2008-10-01	16:56:00	0
2008-10-01	16:57:00	0
2008-10-01	16:58:00	0
2008-10-01	16:59:00	0
2008-10-01	17:00:00	0
2008-10-01	17:01:00	0
2008-10-01	17:02:00	0
2008-10-01	17:03:00	0
2008-10-01	17:04:00	0
2008-10-01	17:05:00	0
2008-10-01	17:06:00	0
2008-10-01	17:07:00	0
2008-10-01	17:08:00	0
2008-10-01	17:09:00	0
2008-10-01	17:10:00	0
2008-10-01	17:11:00	0
2008-10-01	17:12:00	0
2008-10-01	17:13:00	0
2008-10-01	17:14:00	0
2008-10-01	17:15:00	0
2008-10-01	17:16:00	0
2008-10-01	17:17:00	0
2008-10-01	17:18:00	0
2008-10-01	17:19:00	0
2008-10-01	17:20:00	0
2008-10-01	17:21:00	0
2008-10-01	17:22:00	0
2008-10-01	17:23:00	0
2008-10-01	17:24:00	0
2008-10-01	17:25:00	0
2008-10-01	17:26:00	0
2008-10-01	17:27:00	0
2008-10-01	17:28:00	0
2008-10-01	17:29:00	0
2008-10-01	17:30:00	0
2008-10-01	17:31:00	0
2008-10-01	17:32:00	0
2008-10-01	17:33:00	0
2008-10-01	17:34:00	0
2008-10-01	17:35:00	0
2008-10-01	17:36:00	0
2008-10-01	17:37:00	0
2008-10-01	17:38:00	0
2008-10-01	17:39:00	0
2008-10-01	17:40:00	0
2008-10-01	17:41:00	0
2008-10-01	17:42:00	0
2008-10-01	17:43:00	0
2008-10-01	17:44:00	0
2008-10-01	17:45:00	0
2008-10-01	17:46:00	0
2008-10-01	17:47:00	0
2008-10-01	17:48:00	0
2008-10-01	17:49:00	0
2008-10-01	17:50:00	0
2008-10-01	17:51:00	0
2008-10-01	17:52:00	0
2008-10-01	17:53:00	0
2008-10-01	17:54:00	0
2008-10-01	17:55:00	0
2008-10-01	17:56:00	0
2008-10-01	17:57:00	0
2008-10-01	17:58:00	0
2008-10-01	17:59:00	0
2008-10-01	18:00:00	180
2008-10-01	18:01:00	165
2008-10-01	18:02:00	244
2008-10-01	18:03:00	47
2008-10-01	18:04:00	42
2008-10-01	18:05:00	453
2008-10-01	18:06:00	526
2008-10-01	18:07:00	124
2008-10-01	18:08:00	124
2008-10-01	18:09:00	5
2008-10-01	18:10:00	26
2008-10-01	18:11:00	47
2008-10-01	18:12:00	297
2008-10-01	18:13:00	136
2008-10-01	18:14:00	334
2008-10-01	18:15:00	5
2008-10-01	18:16:00	47
2008-10-01	18:17:00	31
2008-10-01	18:18:00	219
2008-10-01	18:19:00	111
2008-10-01	18:20:00	187
2008-10-01	18:21:00	2067
2008-10-01	18:22:00	741
2008-10-01	18:23:00	1410
2008-10-01	18:24:00	1258
2008-10-01	18:25:00	99
2008-10-01	18:26:00	5
2008-10-01	18:27:00	1187
2008-10-01	18:28:00	620
2008-10-01	18:29:00	187
2008-10-01	18:30:00	173
2008-10-01	18:31:00	180
2008-10-01	18:32:00	118
2008-10-01	18:33:00	227
2008-10-01	18:34:00	365
2008-10-01	18:35:00	173
2008-10-01	18:36:00	297
2008-10-01	18:37:00	158
2008-10-01	18:38:00	0
2008-10-01	18:39:00	74
2008-10-01	18:40:00	376
2008-10-01	18:41:00	954
2008-10-01	18:42:00	268
2008-10-01	18:43:00	0
2008-10-01	18:44:00	93
2008-10-01	18:45:00	235
2008-10-01	18:46:00	26
2008-10-01	18:47:00	42
2008-10-01	18:48:00	5
2008-10-01	18:49:00	173
2008-10-01	18:50:00	21
2008-10-01	18:51:00	42
2008-10-01	18:52:00	16
2008-10-01	18:53:00	0
2008-10-01	18:54:00	334
2008-10-01	18:55:00	80
2008-10-01	18:56:00	344
2008-10-01	18:57:00	10
2008-10-01	18:58:00	464
2008-10-01	18:59:00	187
2008-10-01	19:00:00	306
2008-10-01	19:01:00	16
2008-10-01	19:02:00	0
2008-10-01	19:03:00	10
2008-10-01	19:04:00	0
2008-10-01	19:05:00	0
2008-10-01	19:06:00	0
2008-10-01	19:07:00	0
2008-10-01	19:08:00	0
2008-10-01	19:09:00	0
2008-10-01	19:10:00	62
2008-10-01	19:11:00	52
2008-10-01	19:12:00	10
2008-10-01	19:13:00	0
2008-10-01	19:14:00	0
2008-10-01	19:15:00	36
2008-10-01	19:16:00	5
2008-10-01	19:17:00	0
2008-10-01	19:18:00	10
2008-10-01	19:19:00	0
2008-10-01	19:20:00	31
2008-10-01	19:21:00	80
2008-10-01	19:22:00	21
2008-10-01	19:23:00	74
2008-10-01	19:24:00	0
2008-10-01	19:25:00	26
2008-10-01	19:26:00	0
2008-10-01	19:27:00	47
2008-10-01	19:28:00	10
2008-10-01	19:29:00	0
2008-10-01	19:30:00	0
2008-10-01	19:31:00	0
2008-10-01	19:32:00	0
2008-10-01	19:33:00	0
2008-10-01	19:34:00	0
2008-10-01	19:35:00	0
2008-10-01	19:36:00	0
2008-10-01	19:37:00	5
2008-10-01	19:38:00	0
2008-10-01	19:39:00	0
2008-10-01	19:40:00	0
2008-10-01	19:41:00	0
2008-10-01	19:42:00	5
2008-10-01	19:43:00	0
2008-10-01	19:44:00	0
2008-10-01	19:45:00	0
2008-10-01	19:46:00	5
2008-10-01	19:47:00	0
2008-10-01	19:48:00	5
2008-10-01	19:49:00	0
2008-10-01	19:50:00	0
2008-10-01	19:51:00	10
2008-10-01	19:52:00	0
2008-10-01	19:53:00	0
2008-10-01	19:54:00	5
2008-10-01	19:55:00	579
2008-10-01	19:56:00	325
2008-10-01	19:57:00	315
2008-10-01	19:58:00	0
2008-10-01	19:59:00	0
2008-10-01	20:00:00	0
2008-10-01	20:01:00	0
2008-10-01	20:02:00	5
2008-10-01	20:03:00	0
2008-10-01	20:04:00	10
2008-10-01	20:05:00	0
2008-10-01	20:06:00	0
2008-10-01	20:07:00	0
2008-10-01	20:08:00	0
2008-10-01	20:09:00	0
2008-10-01	20:10:00	0
2008-10-01	20:11:00	10
2008-10-01	20:12:00	0
2008-10-01	20:13:00	0
2008-10-01	20:14:00	0
2008-10-01	20:15:00	0
2008-10-01	20:16:00	0
2008-10-01	20:17:00	5
2008-10-01	20:18:00	0
2008-10-01	20:19:00	0
2008-10-01	20:20:00	5
2008-10-01	20:21:00	0
2008-10-01	20:22:00	0
2008-10-01	20:23:00	0
2008-10-01	20:24:00	5
2008-10-01	20:25:00	74
2008-10-01	20:26:00	118
2008-10-01	20:27:00	1142
2008-10-01	20:28:00	974
2008-10-01	20:29:00	74
2008-10-01	20:30:00	244
2008-10-01	20:31:00	0
2008-10-01	20:32:00	278
2008-10-01	20:33:00	538
2008-10-01	20:34:00	344
2008-10-01	20:35:00	158
2008-10-01	20:36:00	16
2008-10-01	20:37:00	10
2008-10-01	20:38:00	5
2008-10-01	20:39:00	0
2008-10-01	20:40:00	0
2008-10-01	20:41:00	710
2008-10-01	20:42:00	210
2008-10-01	20:43:00	52
2008-10-01	20:44:00	0
2008-10-01	20:45:00	501
2008-10-01	20:46:00	620
2008-10-01	20:47:00	5
2008-10-01	20:48:00	42
2008-10-01	20:49:00	278
2008-10-01	20:50:00	165
2008-10-01	20:51:00	0
2008-10-01	20:52:00	0
2008-10-01	20:53:00	0
2008-10-01	20:54:00	57
2008-10-01	20:55:00	0
2008-10-01	20:56:00	5
2008-10-01	20:57:00	42
2008-10-01	20:58:00	10
2008-10-01	20:59:00	0
2008-10-01	21:00:00	306
2008-10-01	21:01:00	501
2008-10-01	21:02:00	344
2008-10-01	21:03:00	5
2008-10-01	21:04:00	430
2008-10-01	21:05:00	635
2008-10-01	21:06:00	21
2008-10-01	21:07:00	165
2008-10-01	21:08:00	124
2008-10-01	21:09:00	441
2008-10-01	21:10:00	0
2008-10-01	21:11:00	0
2008-10-01	21:12:00	0
2008-10-01	21:13:00	0
2008-10-01	21:14:00	10
2008-10-01	21:15:00	21
2008-10-01	21:16:00	31
2008-10-01	21:17:00	105
2008-10-01	21:18:00	0
2008-10-01	21:19:00	0
2008-10-01	21:20:00	0
2008-10-01	21:21:00	26
2008-10-01	21:22:00	0
2008-10-01	21:23:00	0
2008-10-01	21:24:00	0
2008-10-01	21:25:00	0
2008-10-01	21:26:00	0
2008-10-01	21:27:00	0
2008-10-01	21:28:00	0
2008-10-01	21:29:00	21
2008-10-01	21:30:00	0
2008-10-01	21:31:00	0
2008-10-01	21:32:00	0
2008-10-01	21:33:00	0
2008-10-01	21:34:00	0
2008-10-01	21:35:00	0
2008-10-01	21:36:00	0
2008-10-01	21:37:00	0
2008-10-01	21:38:00	0
2008-10-01	21:39:00	0
2008-10-01	21:40:00	0
2008-10-01	21:41:00	5
2008-10-01	21:42:00	0
2008-10-01	21:43:00	0
2008-10-01	21:44:00	0
2008-10-01	21:45:00	0
2008-10-01	21:46:00	0
2008-10-01	21:47:00	0
2008-10-01	21:48:00	0
2008-10-01	21:49:00	0
2008-10-01	21:50:00	0
2008-10-01	21:51:00	0
2008-10-01	21:52:00	0
2008-10-01	21:53:00	0
2008-10-01	21:54:00	0
2008-10-01	21:55:00	5
2008-10-01	21:56:00	0
2008-10-01	21:57:00	0
2008-10-01	21:58:00	0
2008-10-01	21:59:00	0
2008-10-01	22:00:00	5
2008-10-01	22:01:00	0
2008-10-01	22:02:00	0
2008-10-01	22:03:00	0
2008-10-01	22:04:00	0
2008-10-01	22:05:00	0
2008-10-01	22:06:00	0
2008-10-01	22:07:00	0
2008-10-01	22:08:00	0
2008-10-01	22:09:00	10
2008-10-01	22:10:00	21
2008-10-01	22:11:00	5
2008-10-01	22:12:00	0
2008-10-01	22:13:00	0
2008-10-01	22:14:00	86
2008-10-01	22:15:00	0
2008-10-01	22:16:00	0
2008-10-01	22:17:00	0
2008-10-01	22:18:00	0
2008-10-01	22:19:00	0
2008-10-01	22:20:00	0
2008-10-01	22:21:00	0
2008-10-01	22:22:00	0
2008-10-01	22:23:00	0
2008-10-01	22:24:00	47
2008-10-01	22:25:00	0
2008-10-01	22:26:00	0
2008-10-01	22:27:00	5
2008-10-01	22:28:00	0
2008-10-01	22:29:00	5
2008-10-01	22:30:00	418
2008-10-01	22:31:00	74
2008-10-01	22:32:00	74
2008-10-01	22:33:00	325
2008-10-01	22:34:00	235
2008-10-01	22:35:00	99
2008-10-01	22:36:00	173
2008-10-01	22:37:00	165
2008-10-01	22:38:00	74
2008-10-01	22:39:00	26
2008-10-01	22:40:00	5
2008-10-01	22:41:00	16
2008-10-01	22:42:00	0
2008-10-01	22:43:00	0
2008-10-01	22:44:00	0
2008-10-01	22:45:00	0
2008-10-01	22:46:00	0
2008-10-01	22:47:00	0
2008-10-01	22:48:00	0
2008-10-01	22:49:00	0
2008-10-01	22:50:00	268
2008-10-01	22:51:00	0
2008-10-01	22:52:00	0
2008-10-01	22:53:00	0
2008-10-01	22:54:00	5
2008-10-01	22:55:00	16
2008-10-01	22:56:00	0
2008-10-01	22:57:00	0
2008-10-01	22:58:00	0
2008-10-01	22:59:00	0
2008-10-01	23:00:00	0
2008-10-01	23:01:00	0
2008-10-01	23:02:00	5
2008-10-01	23:03:00	57
2008-10-01	23:04:00	0
2008-10-01	23:05:00	0
2008-10-01	23:06:00	0
2008-10-01	23:07:00	0
2008-10-01	23:08:00	0
2008-10-01	23:09:00	0
2008-10-01	23:10:00	0
2008-10-01	23:11:00	0
2008-10-01	23:12:00	0
2008-10-01	23:13:00	0
2008-10-01	23:14:00	0
2008-10-01	23:15:00	0
2008-10-01	23:16:00	0
2008-10-01	23:17:00	42
2008-10-01	23:18:00	5
2008-10-01	23:19:00	0
2008-10-01	23:20:00	0
2008-10-01	23:21:00	0
2008-10-01	23:22:00	0
2008-10-01	23:23:00	0
2008-10-01	23:24:00	0
2008-10-01	23:25:00	0
2008-10-01	23:26:00	0
2008-10-01	23:27:00	0
2008-10-01	23:28:00	0
2008-10-01	23:29:00	0
2008-10-01	23:30:00	0
2008-10-01	23:31:00	0
2008-10-01	23:32:00	0
2008-10-01	23:33:00	0
2008-10-01	23:34:00	0
2008-10-01	23:35:00	0
2008-10-01	23:36:00	0
2008-10-01	23:37:00	0
2008-10-01	23:38:00	0
2008-10-01	23:39:00	0
2008-10-01	23:40:00	21
2008-10-01	23:41:00	5
2008-10-01	23:42:00	0
2008-10-01	23:43:00	0
2008-10-01	23:44:00	0
2008-10-01	23:45:00	0
2008-10-01	23:46:00	0
2008-10-01	23:47:00	0
2008-10-01	23:48:00	0
2008-10-01	23:49:00	0
2008-10-01	23:50:00	0
2008-10-01	23:51:00	0
2008-10-01	23:52:00	0
2008-10-01	23:53:00	0
2008-10-01	23:54:00	16
2008-10-01	23:55:00	0
2008-10-01	23:56:00	0
2008-10-01	23:57:00	0
2008-10-01	23:58:00	0
2008-10-01	23:59:00	0
2008-10-02	00:00:00	0
2008-10-02	00:01:00	0
2008-10-02	00:02:00	26
2008-10-02	00:03:00	144
2008-10-02	00:04:00	0
2008-10-02	00:05:00	0
2008-10-02	00:06:00	0
2008-10-02	00:07:00	0
2008-10-02	00:08:00	0
2008-10-02	00:09:00	0
2008-10-02	00:10:00	0
2008-10-02	00:11:00	0
2008-10-02	00:12:00	0
2008-10-02	00:13:00	0
2008-10-02	00:14:00	0
2008-10-02	00:15:00	0
2008-10-02	00:16:00	0
2008-10-02	00:17:00	0
2008-10-02	00:18:00	0
2008-10-02	00:19:00	0
2008-10-02	00:20:00	0
2008-10-02	00:21:00	0
2008-10-02	00:22:00	10
2008-10-02	00:23:00	0
2008-10-02	00:24:00	0
2008-10-02	00:25:00	0
2008-10-02	00:26:00	0
2008-10-02	00:27:00	0
2008-10-02	00:28:00	0
2008-10-02	00:29:00	0
2008-10-02	00:30:00	0
2008-10-02	00:31:00	0
2008-10-02	00:32:00	0
2008-10-02	00:33:00	0
2008-10-02	00:34:00	0
2008-10-02	00:35:00	0
2008-10-02	00:36:00	0
2008-10-02	00:37:00	0
2008-10-02	00:38:00	0
2008-10-02	00:39:00	0
2008-10-02	00:40:00	0
2008-10-02	00:41:00	0
2008-10-02	00:42:00	0
2008-10-02	00:43:00	0
2008-10-02	00:44:00	0
2008-10-02	00:45:00	0
2008-10-02	00:46:00	0
2008-10-02	00:47:00	0
2008-10-02	00:48:00	0
2008-10-02	00:49:00	0
2008-10-02	00:50:00	0
2008-10-02	00:51:00	0
2008-10-02	00:52:00	0
2008-10-02	00:53:00	0
2008-10-02	00:54:00	0
2008-10-02	00:55:00	0
2008-10-02	00:56:00	0
2008-10-02	00:57:00	0
2008-10-02	00:58:00	0
2008-10-02	00:59:00	0
2008-10-02	01:00:00	0
2008-10-02	01:01:00	0
2008-10-02	01:02:00	0
2008-10-02	01:03:00	0
2008-10-02	01:04:00	0
2008-10-02	01:05:00	0
2008-10-02	01:06:00	0
2008-10-02	01:07:00	0
2008-10-02	01:08:00	0
2008-10-02	01:09:00	0
2008-10-02	01:10:00	0
2008-10-02	01:11:00	5
2008-10-02	01:12:00	42
2008-10-02	01:13:00	21
2008-10-02	01:14:00	0
2008-10-02	01:15:00	0
2008-10-02	01:16:00	0
2008-10-02	01:17:00	36
2008-10-02	01:18:00	21
2008-10-02	01:19:00	0
2008-10-02	01:20:00	0
2008-10-02	01:21:00	0
2008-10-02	01:22:00	0
2008-10-02	01:23:00	0
2008-10-02	01:24:00	0
2008-10-02	01:25:00	0
2008-10-02	01:26:00	0
2008-10-02	01:27:00	0
2008-10-02	01:28:00	0
2008-10-02	01:29:00	0
2008-10-02	01:30:00	0
2008-10-02	01:31:00	0
2008-10-02	01:32:00	0
2008-10-02	01:33:00	0
2008-10-02	01:34:00	0
2008-10-02	01:35:00	0
2008-10-02	01:36:00	0
2008-10-02	01:37:00	0
2008-10-02	01:38:00	0
2008-10-02	01:39:00	0
2008-10-02	01:40:00	0
2008-10-02	01:41:00	0
2008-10-02	01:42:00	0
2008-10-02	01:43:00	0
2008-10-02	01:44:00	0
2008-10-02	01:45:00	0
2008-10-02	01:46:00	0
2008-10-02	01:47:00	0
2008-10-02	01:48:00	0
2008-10-02	01:49:00	0
2008-10-02	01:50:00	0
2008-10-02	01:51:00	0
2008-10-02	01:52:00	0
2008-10-02	01:53:00	0
2008-10-02	01:54:00	0
2008-10-02	01:55:00	0
2008-10-02	01:56:00	0
2008-10-02	01:57:00	0
2008-10-02	01:58:00	0
2008-10-02	01:59:00	0
2008-10-02	02:00:00	0
2008-10-02	02:01:00	0
2008-10-02	02:02:00	0
2008-10-02	02:03:00	0
2008-10-02	02:04:00	0
2008-10-02	02:05:00	0
2008-10-02	02:06:00	0
2008-10-02	02:07:00	0
2008-10-02	02:08:00	0
2008-10-02	02:09:00	0
2008-10-02	02:10:00	0
2008-10-02	02:11:00	0
2008-10-02	02:12:00	0
2008-10-02	02:13:00	0
2008-10-02	02:14:00	0
2008-10-02	02:15:00	0
2008-10-02	02:16:00	0
2008-10-02	02:17:00	0
2008-10-02	02:18:00	0
2008-10-02	02:19:00	0
2008-10-02	02:20:00	0
2008-10-02	02:21:00	0
2008-10-02	02:22:00	0
2008-10-02	02:23:00	0
2008-10-02	02:24:00	0
2008-10-02	02:25:00	0
2008-10-02	02:26:00	0
2008-10-02	02:27:00	0
2008-10-02	02:28:00	0
2008-10-02	02:29:00	0
2008-10-02	02:30:00	0
2008-10-02	02:31:00	0
2008-10-02	02:32:00	0
2008-10-02	02:33:00	0
2008-10-02	02:34:00	0
2008-10-02	02:35:00	0
2008-10-02	02:36:00	0
2008-10-02	02:37:00	0
2008-10-02	02:38:00	0
2008-10-02	02:39:00	0
2008-10-02	02:40:00	0
2008-10-02	02:41:00	0
2008-10-02	02:42:00	0
2008-10-02	02:43:00	0
2008-10-02	02:44:00	0
2008-10-02	02:45:00	0
2008-10-02	02:46:00	0
2008-10-02	02:47:00	0
2008-10-02	02:48:00	0
2008-10-02	02:49:00	0
2008-10-02	02:50:00	0
2008-10-02	02:51:00	0
2008-10-02	02:52:00	0
2008-10-02	02:53:00	0
2008-10-02	02:54:00	0
2008-10-02	02:55:00	0
2008-10-02	02:56:00	0
2008-10-02	02:57:00	0
2008-10-02	02:58:00	0
2008-10-02	02:59:00	0
2008-10-02	03:00:00	0
2008-10-02	03:01:00	0
2008-10-02	03:02:00	0
2008-10-02	03:03:00	0
2008-10-02	03:04:00	0
2008-10-02	03:05:00	0
2008-10-02	03:06:00	0
2008-10-02	03:07:00	0
2008-10-02	03:08:00	0
2008-10-02	03:09:00	0
2008-10-02	03:10:00	0
2008-10-02	03:11:00	0
2008-10-02	03:12:00	0
2008-10-02	03:13:00	0
2008-10-02	03:14:00	0
2008-10-02	03:15:00	0
2008-10-02	03:16:00	0
2008-10-02	03:17:00	0
2008-10-02	03:18:00	0
2008-10-02	03:19:00	0
2008-10-02	03:20:00	0
2008-10-02	03:21:00	0
2008-10-02	03:22:00	0
2008-10-02	03:23:00	0
2008-10-02	03:24:00	0
2008-10-02	03:25:00	0
2008-10-02	03:26:00	0
2008-10-02	03:27:00	0
2008-10-02	03:28:00	0
2008-10-02	03:29:00	0
2008-10-02	03:30:00	0
2008-10-02	03:31:00	26
2008-10-02	03:32:00	47
2008-10-02	03:33:00	0
2008-10-02	03:34:00	0
2008-10-02	03:35:00	0
2008-10-02	03:36:00	0
2008-10-02	03:37:00	0
2008-10-02	03:38:00	0
2008-10-02	03:39:00	0
2008-10-02	03:40:00	0
2008-10-02	03:41:00	0
2008-10-02	03:42:00	0
2008-10-02	03:43:00	0
2008-10-02	03:44:00	0
2008-10-02	03:45:00	0
2008-10-02	03:46:00	0
2008-10-02	03:47:00	0
2008-10-02	03:48:00	0
2008-10-02	03:49:00	0
2008-10-02	03:50:00	0
2008-10-02	03:51:00	0
2008-10-02	03:52:00	0
2008-10-02	03:53:00	0
2008-10-02	03:54:00	0
2008-10-02	03:55:00	0
2008-10-02	03:56:00	0
2008-10-02	03:57:00	5
2008-10-02	03:58:00	0
2008-10-02	03:59:00	0
2008-10-02	04:00:00	0
2008-10-02	04:01:00	0
2008-10-02	04:02:00	0
2008-10-02	04:03:00	0
2008-10-02	04:04:00	0
2008-10-02	04:05:00	0
2008-10-02	04:06:00	0
2008-10-02	04:07:00	5
2008-10-02	04:08:00	21
2008-10-02	04:09:00	0
2008-10-02	04:10:00	0
2008-10-02	04:11:00	0
2008-10-02	04:12:00	0
2008-10-02	04:13:00	0
2008-10-02	04:14:00	0
2008-10-02	04:15:00	0
2008-10-02	04:16:00	0
2008-10-02	04:17:00	0
2008-10-02	04:18:00	0
2008-10-02	04:19:00	0
2008-10-02	04:20:00	0
2008-10-02	04:21:00	0
2008-10-02	04:22:00	5
2008-10-02	04:23:00	0
2008-10-02	04:24:00	0
2008-10-02	04:25:00	0
2008-10-02	04:26:00	0
2008-10-02	04:27:00	0
2008-10-02	04:28:00	0
2008-10-02	04:29:00	0
2008-10-02	04:30:00	0
2008-10-02	04:31:00	0
2008-10-02	04:32:00	0
2008-10-02	04:33:00	0
2008-10-02	04:34:00	0
2008-10-02	04:35:00	0
2008-10-02	04:36:00	0
2008-10-02	04:37:00	42
2008-10-02	04:38:00	0
2008-10-02	04:39:00	0
2008-10-02	04:40:00	0
2008-10-02	04:41:00	0
2008-10-02	04:42:00	0
2008-10-02	04:43:00	0
2008-10-02	04:44:00	0
2008-10-02	04:45:00	0
2008-10-02	04:46:00	0
2008-10-02	04:47:00	5
2008-10-02	04:48:00	0
2008-10-02	04:49:00	0
2008-10-02	04:50:00	0
2008-10-02	04:51:00	0
2008-10-02	04:52:00	0
2008-10-02	04:53:00	0
2008-10-02	04:54:00	0
2008-10-02	04:55:00	0
2008-10-02	04:56:00	0
2008-10-02	04:57:00	0
2008-10-02	04:58:00	0
2008-10-02	04:59:00	0
2008-10-02	05:00:00	0
2008-10-02	05:01:00	0
2008-10-02	05:02:00	0
2008-10-02	05:03:00	0
2008-10-02	05:04:00	0
2008-10-02	05:05:00	0
2008-10-02	05:06:00	0
2008-10-02	05:07:00	0
2008-10-02	05:08:00	0
2008-10-02	05:09:00	0
2008-10-02	05:10:00	0
2008-10-02	05:11:00	0
2008-10-02	05:12:00	0
2008-10-02	05:13:00	0
2008-10-02	05:14:00	0
2008-10-02	05:15:00	0
2008-10-02	05:16:00	0
2008-10-02	05:17:00	0
2008-10-02	05:18:00	0
2008-10-02	05:19:00	0
2008-10-02	05:20:00	0
2008-10-02	05:21:00	0
2008-10-02	05:22:00	0
2008-10-02	05:23:00	0
2008-10-02	05:24:00	0
2008-10-02	05:25:00	0
2008-10-02	05:26:00	0
2008-10-02	05:27:00	0
2008-10-02	05:28:00	0
2008-10-02	05:29:00	0
2008-10-02	05:30:00	0
2008-10-02	05:31:00	0
2008-10-02	05:32:00	0
2008-10-02	05:33:00	0
2008-10-02	05:34:00	0
2008-10-02	05:35:00	0
2008-10-02	05:36:00	0
2008-10-02	05:37:00	0
2008-10-02	05:38:00	0
2008-10-02	05:39:00	0
2008-10-02	05:40:00	0
2008-10-02	05:41:00	0
2008-10-02	05:42:00	0
2008-10-02	05:43:00	0
2008-10-02	05:44:00	0
2008-10-02	05:45:00	0
2008-10-02	05:46:00	0
2008-10-02	05:47:00	0
2008-10-02	05:48:00	0
2008-10-02	05:49:00	0
2008-10-02	05:50:00	0
2008-10-02	05:51:00	0
2008-10-02	05:52:00	0
2008-10-02	05:53:00	0
2008-10-02	05:54:00	0
2008-10-02	05:55:00	0
2008-10-02	05:56:00	0
2008-10-02	05:57:00	0
2008-10-02	05:58:00	0
2008-10-02	05:59:00	0
2008-10-02	06:00:00	0
2008-10-02	06:01:00	0
2008-10-02	06:02:00	0
2008-10-02	06:03:00	0
2008-10-02	06:04:00	0
2008-10-02	06:05:00	0
2008-10-02	06:06:00	0
2008-10-02	06:07:00	0
2008-10-02	06:08:00	0
2008-10-02	06:09:00	0
2008-10-02	06:10:00	0
2008-10-02	06:11:00	0
2008-10-02	06:12:00	0
2008-10-02	06:13:00	0
2008-10-02	06:14:00	0
2008-10-02	06:15:00	0
2008-10-02	06:16:00	0
2008-10-02	06:17:00	0
2008-10-02	06:18:00	0
2008-10-02	06:19:00	5
2008-10-02	06:20:00	21
2008-10-02	06:21:00	0
2008-10-02	06:22:00	136
2008-10-02	06:23:00	0
2008-10-02	06:24:00	0
2008-10-02	06:25:00	0
2008-10-02	06:26:00	0
2008-10-02	06:27:00	0
2008-10-02	06:28:00	31
2008-10-02	06:29:00	0
2008-10-02	06:30:00	0
2008-10-02	06:31:00	10
2008-10-02	06:32:00	31
2008-10-02	06:33:00	5
2008-10-02	06:34:00	0
2008-10-02	06:35:00	0
2008-10-02	06:36:00	0
2008-10-02	06:37:00	0
2008-10-02	06:38:00	0
2008-10-02	06:39:00	0
2008-10-02	06:40:00	0
2008-10-02	06:41:00	0
2008-10-02	06:42:00	0
2008-10-02	06:43:00	0
2008-10-02	06:44:00	0
2008-10-02	06:45:00	0
2008-10-02	06:46:00	0
2008-10-02	06:47:00	0
2008-10-02	06:48:00	0
2008-10-02	06:49:00	0
2008-10-02	06:50:00	0
2008-10-02	06:51:00	0
2008-10-02	06:52:00	0
2008-10-02	06:53:00	0
2008-10-02	06:54:00	0
2008-10-02	06:55:00	0
2008-10-02	06:56:00	0
2008-10-02	06:57:00	0
2008-10-02	06:58:00	0
2008-10-02	06:59:00	0
2008-10-02	07:00:00	0
2008-10-02	07:01:00	0
2008-10-02	07:02:00	0
2008-10-02	07:03:00	0
2008-10-02	07:04:00	0
2008-10-02	07:05:00	0
2008-10-02	07:06:00	0
2008-10-02	07:07:00	0
2008-10-02	07:08:00	0
2008-10-02	07:09:00	0
2008-10-02	07:10:00	0
2008-10-02	07:11:00	0
2008-10-02	07:12:00	0
2008-10-02	07:13:00	0
2008-10-02	07:14:00	0
2008-10-02	07:15:00	0
2008-10-02	07:16:00	5
2008-10-02	07:17:00	0
2008-10-02	07:18:00	0
2008-10-02	07:19:00	36
2008-10-02	07:20:00	0
2008-10-02	07:21:00	5
2008-10-02	07:22:00	21
2008-10-02	07:23:00	0
2008-10-02	07:24:00	0
2008-10-02	07:25:00	0
2008-10-02	07:26:00	0
2008-10-02	07:27:00	26
2008-10-02	07:28:00	0
2008-10-02	07:29:00	21
2008-10-02	07:30:00	0
2008-10-02	07:31:00	136
2008-10-02	07:32:00	130
2008-10-02	07:33:00	136
2008-10-02	07:34:00	151
2008-10-02	07:35:00	861
2008-10-02	07:36:00	407
2008-10-02	07:37:00	244
2008-10-02	07:38:00	916
2008-10-02	07:39:00	994
2008-10-02	07:40:00	16
2008-10-02	07:41:00	93
2008-10-02	07:42:00	68
2008-10-02	07:43:00	725
2008-10-02	07:44:00	376
2008-10-02	07:45:00	165
2008-10-02	07:46:00	5
2008-10-02	07:47:00	31
2008-10-02	07:48:00	5
2008-10-02	07:49:00	31
2008-10-02	07:50:00	0
2008-10-02	07:51:00	476
2008-10-02	07:52:00	365
2008-10-02	07:53:00	260
2008-10-02	07:54:00	0
2008-10-02	07:55:00	0
2008-10-02	07:56:00	10
2008-10-02	07:57:00	0
2008-10-02	07:58:00	0
2008-10-02	07:59:00	0
2008-10-02	08:00:00	0
2008-10-02	08:01:00	136
2008-10-02	08:02:00	42
2008-10-02	08:03:00	0
2008-10-02	08:04:00	0
2008-10-02	08:05:00	0
2008-10-02	08:06:00	0
2008-10-02	08:07:00	0
2008-10-02	08:08:00	0
2008-10-02	08:09:00	0
2008-10-02	08:10:00	0
2008-10-02	08:11:00	0
2008-10-02	08:12:00	0
2008-10-02	08:13:00	0
2008-10-02	08:14:00	0
2008-10-02	08:15:00	0
2008-10-02	08:16:00	0
2008-10-02	08:17:00	0
2008-10-02	08:18:00	0
2008-10-02	08:19:00	0
2008-10-02	08:20:00	0
2008-10-02	08:21:00	0
2008-10-02	08:22:00	0
2008-10-02	08:23:00	0
2008-10-02	08:24:00	5
2008-10-02	08:25:00	0
2008-10-02	08:26:00	0
2008-10-02	08:27:00	0
2008-10-02	08:28:00	0
2008-10-02	08:29:00	0
2008-10-02	08:30:00	31
2008-10-02	08:31:00	0
2008-10-02	08:32:00	0
2008-10-02	08:33:00	0
2008-10-02	08:34:00	0
2008-10-02	08:35:00	0
2008-10-02	08:36:00	0
2008-10-02	08:37:00	0
2008-10-02	08:38:00	0
2008-10-02	08:39:00	0
2008-10-02	08:40:00	0
2008-10-02	08:41:00	0
2008-10-02	08:42:00	0
2008-10-02	08:43:00	0
2008-10-02	08:44:00	0
2008-10-02	08:45:00	0
2008-10-02	08:46:00	0
2008-10-02	08:47:00	0
2008-10-02	08:48:00	0
2008-10-02	08:49:00	0
2008-10-02	08:50:00	0
2008-10-02	08:51:00	0
2008-10-02	08:52:00	0
2008-10-02	08:53:00	0
2008-10-02	08:54:00	0
2008-10-02	08:55:00	0
2008-10-02	08:56:00	0
2008-10-02	08:57:00	0
2008-10-02	08:58:00	0
2008-10-02	08:59:00	0
2008-10-02	09:00:00	0
2008-10-02	09:01:00	0
2008-10-02	09:02:00	0
2008-10-02	09:03:00	0
2008-10-02	09:04:00	0
2008-10-02	09:05:00	0
2008-10-02	09:06:00	0
2008-10-02	09:07:00	0
2008-10-02	09:08:00	0
[truncated: 19,611 more rows]

## Sheet: 10.15.08
Actogram, Copy Raw Data, All Days
Identity:	Denver
Filename:	E:\Active Research Files\meloxicam titre canine\cases\denver\Denver 10.15.08.AWC
Gender:	M
Age:	11
Height:	40.6 cm	16.0 in
Weight:	27.0 kg	59.5 lbs
Start Date:	15-Oct-2008 (Wed)
Start Time:	17:00:00
Interval:	1.00 mins
Date Stamp:	Time Stamp:	Activity Data:	Marker Press:
2008-10-15	00:00:00	0
2008-10-15	00:01:00	0
2008-10-15	00:02:00	0
2008-10-15	00:03:00	0
2008-10-15	00:04:00	0
2008-10-15	00:05:00	0
2008-10-15	00:06:00	0
2008-10-15	00:07:00	0
2008-10-15	00:08:00	0
2008-10-15	00:09:00	0
2008-10-15	00:10:00	0
2008-10-15	00:11:00	0
2008-10-15	00:12:00	0
2008-10-15	00:13:00	0
2008-10-15	00:14:00	0
2008-10-15	00:15:00	0
2008-10-15	00:16:00	0
2008-10-15	00:17:00	0
2008-10-15	00:18:00	0
2008-10-15	00:19:00	0
2008-10-15	00:20:00	0
2008-10-15	00:21:00	0
2008-10-15	00:22:00	0
2008-10-15	00:23:00	0
2008-10-15	00:24:00	0
2008-10-15	00:25:00	0
2008-10-15	00:26:00	0
2008-10-15	00:27:00	0
2008-10-15	00:28:00	0
2008-10-15	00:29:00	0
2008-10-15	00:30:00	0
2008-10-15	00:31:00	0
2008-10-15	00:32:00	0
2008-10-15	00:33:00	0
2008-10-15	00:34:00	0
2008-10-15	00:35:00	0
2008-10-15	00:36:00	0
2008-10-15	00:37:00	0
2008-10-15	00:38:00	0
2008-10-15	00:39:00	0
2008-10-15	00:40:00	0
2008-10-15	00:41:00	0
2008-10-15	00:42:00	0
2008-10-15	00:43:00	0
2008-10-15	00:44:00	0
2008-10-15	00:45:00	0
2008-10-15	00:46:00	0
2008-10-15	00:47:00	0
2008-10-15	00:48:00	0
2008-10-15	00:49:00	0
2008-10-15	00:50:00	0
2008-10-15	00:51:00	0
2008-10-15	00:52:00	0
2008-10-15	00:53:00	0
2008-10-15	00:54:00	0
2008-10-15	00:55:00	0
2008-10-15	00:56:00	0
2008-10-15	00:57:00	0
2008-10-15	00:58:00	0
2008-10-15	00:59:00	0
2008-10-15	01:00:00	0
2008-10-15	01:01:00	0
2008-10-15	01:02:00	0
2008-10-15	01:03:00	0
2008-10-15	01:04:00	0
2008-10-15	01:05:00	0
2008-10-15	01:06:00	0
2008-10-15	01:07:00	0
2008-10-15	01:08:00	0
2008-10-15	01:09:00	0
2008-10-15	01:10:00	0
2008-10-15	01:11:00	0
2008-10-15	01:12:00	0
2008-10-15	01:13:00	0
2008-10-15	01:14:00	0
2008-10-15	01:15:00	0
2008-10-15	01:16:00	0
2008-10-15	01:17:00	0
2008-10-15	01:18:00	0
2008-10-15	01:19:00	0
2008-10-15	01:20:00	0
2008-10-15	01:21:00	0
2008-10-15	01:22:00	0
2008-10-15	01:23:00	0
2008-10-15	01:24:00	0
2008-10-15	01:25:00	0
2008-10-15	01:26:00	0
2008-10-15	01:27:00	0
2008-10-15	01:28:00	0
2008-10-15	01:29:00	0
2008-10-15	01:30:00	0
2008-10-15	01:31:00	0
2008-10-15	01:32:00	0
2008-10-15	01:33:00	0
2008-10-15	01:34:00	0
2008-10-15	01:35:00	0
2008-10-15	01:36:00	0
2008-10-15	01:37:00	0
2008-10-15	01:38:00	0
2008-10-15	01:39:00	0
2008-10-15	01:40:00	0
2008-10-15	01:41:00	0
2008-10-15	01:42:00	0
2008-10-15	01:43:00	0
2008-10-15	01:44:00	0
2008-10-15	01:45:00	0
2008-10-15	01:46:00	0
2008-10-15	01:47:00	0
2008-10-15	01:48:00	0
2008-10-15	01:49:00	0
2008-10-15	01:50:00	0
2008-10-15	01:51:00	0
2008-10-15	01:52:00	0
2008-10-15	01:53:00	0
2008-10-15	01:54:00	0
2008-10-15	01:55:00	0
2008-10-15	01:56:00	0
2008-10-15	01:57:00	0
2008-10-15	01:58:00	0
2008-10-15	01:59:00	0
2008-10-15	02:00:00	0
2008-10-15	02:01:00	0
2008-10-15	02:02:00	0
2008-10-15	02:03:00	0
2008-10-15	02:04:00	0
2008-10-15	02:05:00	0
2008-10-15	02:06:00	0
2008-10-15	02:07:00	0
2008-10-15	02:08:00	0
2008-10-15	02:09:00	0
2008-10-15	02:10:00	0
2008-10-15	02:11:00	0
2008-10-15	02:12:00	0
2008-10-15	02:13:00	0
2008-10-15	02:14:00	0
2008-10-15	02:15:00	0
2008-10-15	02:16:00	0
2008-10-15	02:17:00	0
2008-10-15	02:18:00	0
2008-10-15	02:19:00	0
2008-10-15	02:20:00	0
2008-10-15	02:21:00	0
2008-10-15	02:22:00	0
2008-10-15	02:23:00	0
2008-10-15	02:24:00	0
2008-10-15	02:25:00	0
2008-10-15	02:26:00	0
2008-10-15	02:27:00	0
2008-10-15	02:28:00	0
2008-10-15	02:29:00	0
2008-10-15	02:30:00	0
2008-10-15	02:31:00	0
2008-10-15	02:32:00	0
2008-10-15	02:33:00	0
2008-10-15	02:34:00	0
2008-10-15	02:35:00	0
2008-10-15	02:36:00	0
2008-10-15	02:37:00	0
2008-10-15	02:38:00	0
2008-10-15	02:39:00	0
2008-10-15	02:40:00	0
2008-10-15	02:41:00	0
2008-10-15	02:42:00	0
2008-10-15	02:43:00	0
2008-10-15	02:44:00	0
2008-10-15	02:45:00	0
2008-10-15	02:46:00	0
2008-10-15	02:47:00	0
2008-10-15	02:48:00	0
2008-10-15	02:49:00	0
2008-10-15	02:50:00	0
2008-10-15	02:51:00	0
2008-10-15	02:52:00	0
2008-10-15	02:53:00	0
2008-10-15	02:54:00	0
2008-10-15	02:55:00	0
2008-10-15	02:56:00	0
2008-10-15	02:57:00	0
2008-10-15	02:58:00	0
2008-10-15	02:59:00	0
2008-10-15	03:00:00	0
2008-10-15	03:01:00	0
2008-10-15	03:02:00	0
2008-10-15	03:03:00	0
2008-10-15	03:04:00	0
2008-10-15	03:05:00	0
2008-10-15	03:06:00	0
2008-10-15	03:07:00	0
2008-10-15	03:08:00	0
2008-10-15	03:09:00	0
2008-10-15	03:10:00	0
2008-10-15	03:11:00	0
2008-10-15	03:12:00	0
2008-10-15	03:13:00	0
2008-10-15	03:14:00	0
2008-10-15	03:15:00	0
2008-10-15	03:16:00	0
2008-10-15	03:17:00	0
2008-10-15	03:18:00	0
2008-10-15	03:19:00	0
2008-10-15	03:20:00	0
2008-10-15	03:21:00	0
2008-10-15	03:22:00	0
2008-10-15	03:23:00	0
2008-10-15	03:24:00	0
2008-10-15	03:25:00	0
2008-10-15	03:26:00	0
2008-10-15	03:27:00	0
2008-10-15	03:28:00	0
2008-10-15	03:29:00	0
2008-10-15	03:30:00	0
2008-10-15	03:31:00	0
2008-10-15	03:32:00	0
2008-10-15	03:33:00	0
2008-10-15	03:34:00	0
2008-10-15	03:35:00	0
2008-10-15	03:36:00	0
2008-10-15	03:37:00	0
2008-10-15	03:38:00	0
2008-10-15	03:39:00	0
2008-10-15	03:40:00	0
2008-10-15	03:41:00	0
2008-10-15	03:42:00	0
2008-10-15	03:43:00	0
2008-10-15	03:44:00	0
2008-10-15	03:45:00	0
2008-10-15	03:46:00	0
2008-10-15	03:47:00	0
2008-10-15	03:48:00	0
2008-10-15	03:49:00	0
2008-10-15	03:50:00	0
2008-10-15	03:51:00	0
2008-10-15	03:52:00	0
2008-10-15	03:53:00	0
2008-10-15	03:54:00	0
2008-10-15	03:55:00	0
2008-10-15	03:56:00	0
2008-10-15	03:57:00	0
2008-10-15	03:58:00	0
2008-10-15	03:59:00	0
2008-10-15	04:00:00	0
2008-10-15	04:01:00	0
2008-10-15	04:02:00	0
2008-10-15	04:03:00	0
2008-10-15	04:04:00	0
2008-10-15	04:05:00	0
2008-10-15	04:06:00	0
2008-10-15	04:07:00	0
2008-10-15	04:08:00	0
2008-10-15	04:09:00	0
2008-10-15	04:10:00	0
2008-10-15	04:11:00	0
2008-10-15	04:12:00	0
2008-10-15	04:13:00	0
2008-10-15	04:14:00	0
2008-10-15	04:15:00	0
2008-10-15	04:16:00	0
2008-10-15	04:17:00	0
2008-10-15	04:18:00	0
2008-10-15	04:19:00	0
2008-10-15	04:20:00	0
2008-10-15	04:21:00	0
2008-10-15	04:22:00	0
2008-10-15	04:23:00	0
2008-10-15	04:24:00	0
2008-10-15	04:25:00	0
2008-10-15	04:26:00	0
2008-10-15	04:27:00	0
2008-10-15	04:28:00	0
2008-10-15	04:29:00	0
2008-10-15	04:30:00	0
2008-10-15	04:31:00	0
2008-10-15	04:32:00	0
2008-10-15	04:33:00	0
2008-10-15	04:34:00	0
2008-10-15	04:35:00	0
2008-10-15	04:36:00	0
2008-10-15	04:37:00	0
2008-10-15	04:38:00	0
2008-10-15	04:39:00	0
2008-10-15	04:40:00	0
2008-10-15	04:41:00	0
2008-10-15	04:42:00	0
2008-10-15	04:43:00	0
2008-10-15	04:44:00	0
2008-10-15	04:45:00	0
2008-10-15	04:46:00	0
2008-10-15	04:47:00	0
2008-10-15	04:48:00	0
2008-10-15	04:49:00	0
2008-10-15	04:50:00	0
2008-10-15	04:51:00	0
2008-10-15	04:52:00	0
2008-10-15	04:53:00	0
2008-10-15	04:54:00	0
2008-10-15	04:55:00	0
2008-10-15	04:56:00	0
2008-10-15	04:57:00	0
2008-10-15	04:58:00	0
2008-10-15	04:59:00	0
2008-10-15	05:00:00	0
2008-10-15	05:01:00	0
2008-10-15	05:02:00	0
2008-10-15	05:03:00	0
2008-10-15	05:04:00	0
2008-10-15	05:05:00	0
2008-10-15	05:06:00	0
2008-10-15	05:07:00	0
2008-10-15	05:08:00	0
2008-10-15	05:09:00	0
2008-10-15	05:10:00	0
2008-10-15	05:11:00	0
2008-10-15	05:12:00	0
2008-10-15	05:13:00	0
2008-10-15	05:14:00	0
2008-10-15	05:15:00	0
2008-10-15	05:16:00	0
2008-10-15	05:17:00	0
2008-10-15	05:18:00	0
2008-10-15	05:19:00	0
2008-10-15	05:20:00	0
2008-10-15	05:21:00	0
2008-10-15	05:22:00	0
2008-10-15	05:23:00	0
2008-10-15	05:24:00	0
2008-10-15	05:25:00	0
2008-10-15	05:26:00	0
2008-10-15	05:27:00	0
2008-10-15	05:28:00	0
2008-10-15	05:29:00	0
2008-10-15	05:30:00	0
2008-10-15	05:31:00	0
2008-10-15	05:32:00	0
2008-10-15	05:33:00	0
2008-10-15	05:34:00	0
2008-10-15	05:35:00	0
2008-10-15	05:36:00	0
2008-10-15	05:37:00	0
2008-10-15	05:38:00	0
2008-10-15	05:39:00	0
2008-10-15	05:40:00	0
2008-10-15	05:41:00	0
2008-10-15	05:42:00	0
2008-10-15	05:43:00	0
2008-10-15	05:44:00	0
2008-10-15	05:45:00	0
2008-10-15	05:46:00	0
2008-10-15	05:47:00	0
2008-10-15	05:48:00	0
2008-10-15	05:49:00	0
2008-10-15	05:50:00	0
2008-10-15	05:51:00	0
2008-10-15	05:52:00	0
2008-10-15	05:53:00	0
2008-10-15	05:54:00	0
2008-10-15	05:55:00	0
2008-10-15	05:56:00	0
2008-10-15	05:57:00	0
2008-10-15	05:58:00	0
2008-10-15	05:59:00	0
2008-10-15	06:00:00	0
2008-10-15	06:01:00	0
2008-10-15	06:02:00	0
2008-10-15	06:03:00	0
2008-10-15	06:04:00	0
2008-10-15	06:05:00	0
2008-10-15	06:06:00	0
2008-10-15	06:07:00	0
2008-10-15	06:08:00	0
2008-10-15	06:09:00	0
2008-10-15	06:10:00	0
2008-10-15	06:11:00	0
2008-10-15	06:12:00	0
2008-10-15	06:13:00	0
2008-10-15	06:14:00	0
2008-10-15	06:15:00	0
2008-10-15	06:16:00	0
2008-10-15	06:17:00	0
2008-10-15	06:18:00	0
2008-10-15	06:19:00	0
2008-10-15	06:20:00	0
2008-10-15	06:21:00	0
2008-10-15	06:22:00	0
2008-10-15	06:23:00	0
2008-10-15	06:24:00	0
2008-10-15	06:25:00	0
2008-10-15	06:26:00	0
2008-10-15	06:27:00	0
2008-10-15	06:28:00	0
2008-10-15	06:29:00	0
2008-10-15	06:30:00	0
2008-10-15	06:31:00	0
2008-10-15	06:32:00	0
2008-10-15	06:33:00	0
2008-10-15	06:34:00	0
2008-10-15	06:35:00	0
2008-10-15	06:36:00	0
2008-10-15	06:37:00	0
2008-10-15	06:38:00	0
2008-10-15	06:39:00	0
2008-10-15	06:40:00	0
2008-10-15	06:41:00	0
2008-10-15	06:42:00	0
2008-10-15	06:43:00	0
2008-10-15	06:44:00	0
2008-10-15	06:45:00	0
2008-10-15	06:46:00	0
2008-10-15	06:47:00	0
2008-10-15	06:48:00	0
2008-10-15	06:49:00	0
2008-10-15	06:50:00	0
2008-10-15	06:51:00	0
2008-10-15	06:52:00	0
2008-10-15	06:53:00	0
2008-10-15	06:54:00	0
2008-10-15	06:55:00	0
2008-10-15	06:56:00	0
2008-10-15	06:57:00	0
2008-10-15	06:58:00	0
2008-10-15	06:59:00	0
2008-10-15	07:00:00	0
2008-10-15	07:01:00	0
2008-10-15	07:02:00	0
2008-10-15	07:03:00	0
2008-10-15	07:04:00	0
2008-10-15	07:05:00	0
2008-10-15	07:06:00	0
2008-10-15	07:07:00	0
2008-10-15	07:08:00	0
2008-10-15	07:09:00	0
2008-10-15	07:10:00	0
2008-10-15	07:11:00	0
2008-10-15	07:12:00	0
2008-10-15	07:13:00	0
2008-10-15	07:14:00	0
2008-10-15	07:15:00	0
2008-10-15	07:16:00	0
2008-10-15	07:17:00	0
2008-10-15	07:18:00	0
2008-10-15	07:19:00	0
2008-10-15	07:20:00	0
2008-10-15	07:21:00	0
2008-10-15	07:22:00	0
2008-10-15	07:23:00	0
2008-10-15	07:24:00	0
2008-10-15	07:25:00	0
2008-10-15	07:26:00	0
2008-10-15	07:27:00	0
2008-10-15	07:28:00	0
2008-10-15	07:29:00	0
2008-10-15	07:30:00	0
2008-10-15	07:31:00	0
2008-10-15	07:32:00	0
2008-10-15	07:33:00	0
2008-10-15	07:34:00	0
2008-10-15	07:35:00	0
2008-10-15	07:36:00	0
2008-10-15	07:37:00	0
2008-10-15	07:38:00	0
2008-10-15	07:39:00	0
2008-10-15	07:40:00	0
2008-10-15	07:41:00	0
2008-10-15	07:42:00	0
2008-10-15	07:43:00	0
2008-10-15	07:44:00	0
2008-10-15	07:45:00	0
2008-10-15	07:46:00	0
2008-10-15	07:47:00	0
2008-10-15	07:48:00	0
2008-10-15	07:49:00	0
2008-10-15	07:50:00	0
2008-10-15	07:51:00	0
2008-10-15	07:52:00	0
2008-10-15	07:53:00	0
2008-10-15	07:54:00	0
2008-10-15	07:55:00	0
2008-10-15	07:56:00	0
2008-10-15	07:57:00	0
2008-10-15	07:58:00	0
2008-10-15	07:59:00	0
2008-10-15	08:00:00	0
2008-10-15	08:01:00	0
2008-10-15	08:02:00	0
2008-10-15	08:03:00	0
2008-10-15	08:04:00	0
2008-10-15	08:05:00	0
2008-10-15	08:06:00	0
2008-10-15	08:07:00	0
2008-10-15	08:08:00	0
2008-10-15	08:09:00	0
2008-10-15	08:10:00	0
2008-10-15	08:11:00	0
2008-10-15	08:12:00	0
2008-10-15	08:13:00	0
2008-10-15	08:14:00	0
2008-10-15	08:15:00	0
2008-10-15	08:16:00	0
2008-10-15	08:17:00	0
2008-10-15	08:18:00	0
2008-10-15	08:19:00	0
2008-10-15	08:20:00	0
2008-10-15	08:21:00	0
2008-10-15	08:22:00	0
2008-10-15	08:23:00	0
2008-10-15	08:24:00	0
2008-10-15	08:25:00	0
2008-10-15	08:26:00	0
2008-10-15	08:27:00	0
2008-10-15	08:28:00	0
2008-10-15	08:29:00	0
2008-10-15	08:30:00	0
2008-10-15	08:31:00	0
2008-10-15	08:32:00	0
2008-10-15	08:33:00	0
2008-10-15	08:34:00	0
2008-10-15	08:35:00	0
2008-10-15	08:36:00	0
2008-10-15	08:37:00	0
2008-10-15	08:38:00	0
2008-10-15	08:39:00	0
2008-10-15	08:40:00	0
2008-10-15	08:41:00	0
2008-10-15	08:42:00	0
2008-10-15	08:43:00	0
2008-10-15	08:44:00	0
2008-10-15	08:45:00	0
2008-10-15	08:46:00	0
2008-10-15	08:47:00	0
2008-10-15	08:48:00	0
2008-10-15	08:49:00	0
2008-10-15	08:50:00	0
2008-10-15	08:51:00	0
2008-10-15	08:52:00	0
2008-10-15	08:53:00	0
2008-10-15	08:54:00	0
2008-10-15	08:55:00	0
2008-10-15	08:56:00	0
2008-10-15	08:57:00	0
2008-10-15	08:58:00	0
2008-10-15	08:59:00	0
2008-10-15	09:00:00	0
2008-10-15	09:01:00	0
2008-10-15	09:02:00	0
2008-10-15	09:03:00	0
2008-10-15	09:04:00	0
2008-10-15	09:05:00	0
2008-10-15	09:06:00	0
2008-10-15	09:07:00	0
2008-10-15	09:08:00	0
2008-10-15	09:09:00	0
2008-10-15	09:10:00	0
2008-10-15	09:11:00	0
2008-10-15	09:12:00	0
2008-10-15	09:13:00	0
2008-10-15	09:14:00	0
2008-10-15	09:15:00	0
2008-10-15	09:16:00	0
2008-10-15	09:17:00	0
2008-10-15	09:18:00	0
2008-10-15	09:19:00	0
2008-10-15	09:20:00	0
2008-10-15	09:21:00	0
2008-10-15	09:22:00	0
2008-10-15	09:23:00	0
2008-10-15	09:24:00	0
2008-10-15	09:25:00	0
2008-10-15	09:26:00	0
2008-10-15	09:27:00	0
2008-10-15	09:28:00	0
2008-10-15	09:29:00	0
2008-10-15	09:30:00	0
2008-10-15	09:31:00	0
2008-10-15	09:32:00	0
2008-10-15	09:33:00	0
2008-10-15	09:34:00	0
2008-10-15	09:35:00	0
2008-10-15	09:36:00	0
2008-10-15	09:37:00	0
2008-10-15	09:38:00	0
2008-10-15	09:39:00	0
2008-10-15	09:40:00	0
2008-10-15	09:41:00	0
2008-10-15	09:42:00	0
2008-10-15	09:43:00	0
2008-10-15	09:44:00	0
2008-10-15	09:45:00	0
2008-10-15	09:46:00	0
2008-10-15	09:47:00	0
2008-10-15	09:48:00	0
2008-10-15	09:49:00	0
2008-10-15	09:50:00	0
2008-10-15	09:51:00	0
2008-10-15	09:52:00	0
2008-10-15	09:53:00	0
2008-10-15	09:54:00	0
2008-10-15	09:55:00	0
2008-10-15	09:56:00	0
2008-10-15	09:57:00	0
2008-10-15	09:58:00	0
2008-10-15	09:59:00	0
2008-10-15	10:00:00	0
2008-10-15	10:01:00	0
2008-10-15	10:02:00	0
2008-10-15	10:03:00	0
2008-10-15	10:04:00	0
2008-10-15	10:05:00	0
2008-10-15	10:06:00	0
2008-10-15	10:07:00	0
2008-10-15	10:08:00	0
2008-10-15	10:09:00	0
2008-10-15	10:10:00	0
2008-10-15	10:11:00	0
2008-10-15	10:12:00	0
2008-10-15	10:13:00	0
2008-10-15	10:14:00	0
2008-10-15	10:15:00	0
2008-10-15	10:16:00	0
2008-10-15	10:17:00	0
2008-10-15	10:18:00	0
2008-10-15	10:19:00	0
2008-10-15	10:20:00	0
2008-10-15	10:21:00	0
2008-10-15	10:22:00	0
2008-10-15	10:23:00	0
2008-10-15	10:24:00	0
2008-10-15	10:25:00	0
2008-10-15	10:26:00	0
2008-10-15	10:27:00	0
2008-10-15	10:28:00	0
2008-10-15	10:29:00	0
2008-10-15	10:30:00	0
2008-10-15	10:31:00	0
2008-10-15	10:32:00	0
2008-10-15	10:33:00	0
2008-10-15	10:34:00	0
2008-10-15	10:35:00	0
2008-10-15	10:36:00	0
2008-10-15	10:37:00	0
2008-10-15	10:38:00	0
2008-10-15	10:39:00	0
2008-10-15	10:40:00	0
2008-10-15	10:41:00	0
2008-10-15	10:42:00	0
2008-10-15	10:43:00	0
2008-10-15	10:44:00	0
2008-10-15	10:45:00	0
2008-10-15	10:46:00	0
2008-10-15	10:47:00	0
2008-10-15	10:48:00	0
2008-10-15	10:49:00	0
2008-10-15	10:50:00	0
2008-10-15	10:51:00	0
2008-10-15	10:52:00	0
2008-10-15	10:53:00	0
2008-10-15	10:54:00	0
2008-10-15	10:55:00	0
2008-10-15	10:56:00	0
2008-10-15	10:57:00	0
2008-10-15	10:58:00	0
2008-10-15	10:59:00	0
2008-10-15	11:00:00	0
2008-10-15	11:01:00	0
2008-10-15	11:02:00	0
2008-10-15	11:03:00	0
2008-10-15	11:04:00	0
2008-10-15	11:05:00	0
2008-10-15	11:06:00	0
2008-10-15	11:07:00	0
2008-10-15	11:08:00	0
2008-10-15	11:09:00	0
2008-10-15	11:10:00	0
2008-10-15	11:11:00	0
2008-10-15	11:12:00	0
2008-10-15	11:13:00	0
2008-10-15	11:14:00	0
2008-10-15	11:15:00	0
2008-10-15	11:16:00	0
2008-10-15	11:17:00	0
2008-10-15	11:18:00	0
2008-10-15	11:19:00	0
2008-10-15	11:20:00	0
2008-10-15	11:21:00	0
2008-10-15	11:22:00	0
2008-10-15	11:23:00	0
2008-10-15	11:24:00	0
2008-10-15	11:25:00	0
2008-10-15	11:26:00	0
2008-10-15	11:27:00	0
2008-10-15	11:28:00	0
2008-10-15	11:29:00	0
2008-10-15	11:30:00	0
2008-10-15	11:31:00	0
2008-10-15	11:32:00	0
2008-10-15	11:33:00	0
2008-10-15	11:34:00	0
2008-10-15	11:35:00	0
2008-10-15	11:36:00	0
2008-10-15	11:37:00	0
2008-10-15	11:38:00	0
2008-10-15	11:39:00	0
2008-10-15	11:40:00	0
2008-10-15	11:41:00	0
2008-10-15	11:42:00	0
2008-10-15	11:43:00	0
2008-10-15	11:44:00	0
2008-10-15	11:45:00	0
2008-10-15	11:46:00	0
2008-10-15	11:47:00	0
2008-10-15	11:48:00	0
2008-10-15	11:49:00	0
2008-10-15	11:50:00	0
2008-10-15	11:51:00	0
2008-10-15	11:52:00	0
2008-10-15	11:53:00	0
2008-10-15	11:54:00	0
2008-10-15	11:55:00	0
2008-10-15	11:56:00	0
2008-10-15	11:57:00	0
2008-10-15	11:58:00	0
2008-10-15	11:59:00	0
2008-10-15	12:00:00	0
2008-10-15	12:01:00	0
2008-10-15	12:02:00	0
2008-10-15	12:03:00	0
2008-10-15	12:04:00	0
2008-10-15	12:05:00	0
2008-10-15	12:06:00	0
2008-10-15	12:07:00	0
2008-10-15	12:08:00	0
2008-10-15	12:09:00	0
2008-10-15	12:10:00	0
2008-10-15	12:11:00	0
2008-10-15	12:12:00	0
2008-10-15	12:13:00	0
2008-10-15	12:14:00	0
2008-10-15	12:15:00	0
2008-10-15	12:16:00	0
2008-10-15	12:17:00	0
2008-10-15	12:18:00	0
2008-10-15	12:19:00	0
2008-10-15	12:20:00	0
2008-10-15	12:21:00	0
2008-10-15	12:22:00	0
2008-10-15	12:23:00	0
2008-10-15	12:24:00	0
2008-10-15	12:25:00	0
2008-10-15	12:26:00	0
2008-10-15	12:27:00	0
2008-10-15	12:28:00	0
2008-10-15	12:29:00	0
2008-10-15	12:30:00	0
2008-10-15	12:31:00	0
2008-10-15	12:32:00	0
2008-10-15	12:33:00	0
2008-10-15	12:34:00	0
2008-10-15	12:35:00	0
2008-10-15	12:36:00	0
2008-10-15	12:37:00	0
2008-10-15	12:38:00	0
2008-10-15	12:39:00	0
2008-10-15	12:40:00	0
2008-10-15	12:41:00	0
2008-10-15	12:42:00	0
2008-10-15	12:43:00	0
2008-10-15	12:44:00	0
2008-10-15	12:45:00	0
2008-10-15	12:46:00	0
2008-10-15	12:47:00	0
2008-10-15	12:48:00	0
2008-10-15	12:49:00	0
2008-10-15	12:50:00	0
2008-10-15	12:51:00	0
2008-10-15	12:52:00	0
2008-10-15	12:53:00	0
2008-10-15	12:54:00	0
2008-10-15	12:55:00	0
2008-10-15	12:56:00	0
2008-10-15	12:57:00	0
2008-10-15	12:58:00	0
2008-10-15	12:59:00	0
2008-10-15	13:00:00	0
2008-10-15	13:01:00	0
2008-10-15	13:02:00	0
2008-10-15	13:03:00	0
2008-10-15	13:04:00	0
2008-10-15	13:05:00	0
2008-10-15	13:06:00	0
2008-10-15	13:07:00	0
2008-10-15	13:08:00	0
2008-10-15	13:09:00	0
2008-10-15	13:10:00	0
2008-10-15	13:11:00	0
2008-10-15	13:12:00	0
2008-10-15	13:13:00	0
2008-10-15	13:14:00	0
2008-10-15	13:15:00	0
2008-10-15	13:16:00	0
2008-10-15	13:17:00	0
2008-10-15	13:18:00	0
2008-10-15	13:19:00	0
2008-10-15	13:20:00	0
2008-10-15	13:21:00	0
2008-10-15	13:22:00	0
2008-10-15	13:23:00	0
2008-10-15	13:24:00	0
2008-10-15	13:25:00	0
2008-10-15	13:26:00	0
2008-10-15	13:27:00	0
2008-10-15	13:28:00	0
2008-10-15	13:29:00	0
2008-10-15	13:30:00	0
2008-10-15	13:31:00	0
2008-10-15	13:32:00	0
2008-10-15	13:33:00	0
2008-10-15	13:34:00	0
2008-10-15	13:35:00	0
2008-10-15	13:36:00	0
2008-10-15	13:37:00	0
2008-10-15	13:38:00	0
2008-10-15	13:39:00	0
2008-10-15	13:40:00	0
2008-10-15	13:41:00	0
2008-10-15	13:42:00	0
2008-10-15	13:43:00	0
2008-10-15	13:44:00	0
2008-10-15	13:45:00	0
2008-10-15	13:46:00	0
2008-10-15	13:47:00	0
2008-10-15	13:48:00	0
2008-10-15	13:49:00	0
2008-10-15	13:50:00	0
2008-10-15	13:51:00	0
2008-10-15	13:52:00	0
2008-10-15	13:53:00	0
2008-10-15	13:54:00	0
2008-10-15	13:55:00	0
2008-10-15	13:56:00	0
2008-10-15	13:57:00	0
2008-10-15	13:58:00	0
2008-10-15	13:59:00	0
2008-10-15	14:00:00	0
2008-10-15	14:01:00	0
2008-10-15	14:02:00	0
2008-10-15	14:03:00	0
2008-10-15	14:04:00	0
2008-10-15	14:05:00	0
2008-10-15	14:06:00	0
2008-10-15	14:07:00	0
2008-10-15	14:08:00	0
2008-10-15	14:09:00	0
2008-10-15	14:10:00	0
2008-10-15	14:11:00	0
2008-10-15	14:12:00	0
2008-10-15	14:13:00	0
2008-10-15	14:14:00	0
2008-10-15	14:15:00	0
2008-10-15	14:16:00	0
2008-10-15	14:17:00	0
2008-10-15	14:18:00	0
2008-10-15	14:19:00	0
2008-10-15	14:20:00	0
2008-10-15	14:21:00	0
2008-10-15	14:22:00	0
2008-10-15	14:23:00	0
2008-10-15	14:24:00	0
2008-10-15	14:25:00	0
2008-10-15	14:26:00	0
2008-10-15	14:27:00	0
2008-10-15	14:28:00	0
2008-10-15	14:29:00	0
2008-10-15	14:30:00	0
2008-10-15	14:31:00	0
2008-10-15	14:32:00	0
2008-10-15	14:33:00	0
2008-10-15	14:34:00	0
2008-10-15	14:35:00	0
2008-10-15	14:36:00	0
2008-10-15	14:37:00	0
2008-10-15	14:38:00	0
2008-10-15	14:39:00	0
2008-10-15	14:40:00	0
2008-10-15	14:41:00	0
2008-10-15	14:42:00	0
2008-10-15	14:43:00	0
2008-10-15	14:44:00	0
2008-10-15	14:45:00	0
2008-10-15	14:46:00	0
2008-10-15	14:47:00	0
2008-10-15	14:48:00	0
2008-10-15	14:49:00	0
2008-10-15	14:50:00	0
2008-10-15	14:51:00	0
2008-10-15	14:52:00	0
2008-10-15	14:53:00	0
2008-10-15	14:54:00	0
2008-10-15	14:55:00	0
2008-10-15	14:56:00	0
2008-10-15	14:57:00	0
2008-10-15	14:58:00	0
2008-10-15	14:59:00	0
2008-10-15	15:00:00	0
2008-10-15	15:01:00	0
2008-10-15	15:02:00	0
2008-10-15	15:03:00	0
2008-10-15	15:04:00	0
2008-10-15	15:05:00	0
2008-10-15	15:06:00	0
2008-10-15	15:07:00	0
2008-10-15	15:08:00	0
2008-10-15	15:09:00	0
2008-10-15	15:10:00	0
2008-10-15	15:11:00	0
2008-10-15	15:12:00	0
2008-10-15	15:13:00	0
2008-10-15	15:14:00	0
2008-10-15	15:15:00	0
2008-10-15	15:16:00	0
2008-10-15	15:17:00	0
2008-10-15	15:18:00	0
2008-10-15	15:19:00	0
2008-10-15	15:20:00	0
2008-10-15	15:21:00	0
2008-10-15	15:22:00	0
2008-10-15	15:23:00	0
2008-10-15	15:24:00	0
2008-10-15	15:25:00	0
2008-10-15	15:26:00	0
2008-10-15	15:27:00	0
2008-10-15	15:28:00	0
2008-10-15	15:29:00	0
2008-10-15	15:30:00	0
2008-10-15	15:31:00	0
2008-10-15	15:32:00	0
2008-10-15	15:33:00	0
2008-10-15	15:34:00	0
2008-10-15	15:35:00	0
2008-10-15	15:36:00	0
2008-10-15	15:37:00	0
2008-10-15	15:38:00	0
2008-10-15	15:39:00	0
2008-10-15	15:40:00	0
2008-10-15	15:41:00	0
2008-10-15	15:42:00	0
2008-10-15	15:43:00	0
2008-10-15	15:44:00	0
2008-10-15	15:45:00	0
2008-10-15	15:46:00	0
2008-10-15	15:47:00	0
2008-10-15	15:48:00	0
2008-10-15	15:49:00	0
2008-10-15	15:50:00	0
2008-10-15	15:51:00	0
2008-10-15	15:52:00	0
2008-10-15	15:53:00	0
2008-10-15	15:54:00	0
2008-10-15	15:55:00	0
2008-10-15	15:56:00	0
2008-10-15	15:57:00	0
2008-10-15	15:58:00	0
2008-10-15	15:59:00	0
2008-10-15	16:00:00	0
2008-10-15	16:01:00	0
2008-10-15	16:02:00	0
2008-10-15	16:03:00	0
2008-10-15	16:04:00	0
2008-10-15	16:05:00	0
2008-10-15	16:06:00	0
2008-10-15	16:07:00	0
2008-10-15	16:08:00	0
2008-10-15	16:09:00	0
2008-10-15	16:10:00	0
2008-10-15	16:11:00	0
2008-10-15	16:12:00	0
2008-10-15	16:13:00	0
2008-10-15	16:14:00	0
2008-10-15	16:15:00	0
2008-10-15	16:16:00	0
2008-10-15	16:17:00	0
2008-10-15	16:18:00	0
2008-10-15	16:19:00	0
2008-10-15	16:20:00	0
2008-10-15	16:21:00	0
2008-10-15	16:22:00	0
2008-10-15	16:23:00	0
2008-10-15	16:24:00	0
2008-10-15	16:25:00	0
2008-10-15	16:26:00	0
2008-10-15	16:27:00	0
2008-10-15	16:28:00	0
2008-10-15	16:29:00	0
2008-10-15	16:30:00	0
2008-10-15	16:31:00	0
2008-10-15	16:32:00	0
2008-10-15	16:33:00	0
2008-10-15	16:34:00	0
2008-10-15	16:35:00	0
2008-10-15	16:36:00	0
2008-10-15	16:37:00	0
2008-10-15	16:38:00	0
2008-10-15	16:39:00	0
2008-10-15	16:40:00	0
2008-10-15	16:41:00	0
2008-10-15	16:42:00	0
2008-10-15	16:43:00	0
2008-10-15	16:44:00	0
2008-10-15	16:45:00	0
2008-10-15	16:46:00	0
2008-10-15	16:47:00	0
2008-10-15	16:48:00	0
2008-10-15	16:49:00	0
2008-10-15	16:50:00	0
2008-10-15	16:51:00	0
2008-10-15	16:52:00	0
2008-10-15	16:53:00	0
2008-10-15	16:54:00	0
2008-10-15	16:55:00	0
2008-10-15	16:56:00	0
2008-10-15	16:57:00	0
2008-10-15	16:58:00	0
2008-10-15	16:59:00	0
2008-10-15	17:00:00	0	M
2008-10-15	17:01:00	105
2008-10-15	17:02:00	10
2008-10-15	17:03:00	21
2008-10-15	17:04:00	165
2008-10-15	17:05:00	151
2008-10-15	17:06:00	453
2008-10-15	17:07:00	118
2008-10-15	17:08:00	26
2008-10-15	17:09:00	227
2008-10-15	17:10:00	42
2008-10-15	17:11:00	202
2008-10-15	17:12:00	136
2008-10-15	17:13:00	31
2008-10-15	17:14:00	386
2008-10-15	17:15:00	210
2008-10-15	17:16:00	464
2008-10-15	17:17:00	86
2008-10-15	17:18:00	165
2008-10-15	17:19:00	86
2008-10-15	17:20:00	111
2008-10-15	17:21:00	306
2008-10-15	17:22:00	36
2008-10-15	17:23:00	62
2008-10-15	17:24:00	124
2008-10-15	17:25:00	476
2008-10-15	17:26:00	16
2008-10-15	17:27:00	158
2008-10-15	17:28:00	441
2008-10-15	17:29:00	105
2008-10-15	17:30:00	26
2008-10-15	17:31:00	86
2008-10-15	17:32:00	47
2008-10-15	17:33:00	130
2008-10-15	17:34:00	334
2008-10-15	17:35:00	36
2008-10-15	17:36:00	86
2008-10-15	17:37:00	68
2008-10-15	17:38:00	252
2008-10-15	17:39:00	86
2008-10-15	17:40:00	31
2008-10-15	17:41:00	86
2008-10-15	17:42:00	144
2008-10-15	17:43:00	0
2008-10-15	17:44:00	26
2008-10-15	17:45:00	227
2008-10-15	17:46:00	187
2008-10-15	17:47:00	62
2008-10-15	17:48:00	210
2008-10-15	17:49:00	10
2008-10-15	17:50:00	68
2008-10-15	17:51:00	144
2008-10-15	17:52:00	16
2008-10-15	17:53:00	105
2008-10-15	17:54:00	5
2008-10-15	17:55:00	173
2008-10-15	17:56:00	47
2008-10-15	17:57:00	16
2008-10-15	17:58:00	118
2008-10-15	17:59:00	93
2008-10-15	18:00:00	99
2008-10-15	18:01:00	10
2008-10-15	18:02:00	42
2008-10-15	18:03:00	111
2008-10-15	18:04:00	62
2008-10-15	18:05:00	47
2008-10-15	18:06:00	26
2008-10-15	18:07:00	0
2008-10-15	18:08:00	42
2008-10-15	18:09:00	57
2008-10-15	18:10:00	219
2008-10-15	18:11:00	0
2008-10-15	18:12:00	42
2008-10-15	18:13:00	21
2008-10-15	18:14:00	579
2008-10-15	18:15:00	151
2008-10-15	18:16:00	1234
2008-10-15	18:17:00	3529
2008-10-15	18:18:00	1307
2008-10-15	18:19:00	2258
2008-10-15	18:20:00	861
2008-10-15	18:21:00	488
2008-10-15	18:22:00	579
2008-10-15	18:23:00	861
2008-10-15	18:24:00	741
2008-10-15	18:25:00	565
2008-10-15	18:26:00	52
2008-10-15	18:27:00	10
2008-10-15	18:28:00	187
2008-10-15	18:29:00	268
2008-10-15	18:30:00	36
2008-10-15	18:31:00	111
2008-10-15	18:32:00	476
2008-10-15	18:33:00	187
2008-10-15	18:34:00	118
2008-10-15	18:35:00	26
2008-10-15	18:36:00	0
2008-10-15	18:37:00	0
2008-10-15	18:38:00	42
2008-10-15	18:39:00	21
2008-10-15	18:40:00	118
2008-10-15	18:41:00	158
2008-10-15	18:42:00	297
2008-10-15	18:43:00	173
2008-10-15	18:44:00	74
2008-10-15	18:45:00	105
2008-10-15	18:46:00	105
2008-10-15	18:47:00	187
2008-10-15	18:48:00	99
2008-10-15	18:49:00	16
2008-10-15	18:50:00	195
2008-10-15	18:51:00	124
2008-10-15	18:52:00	825
2008-10-15	18:53:00	2298
2008-10-15	18:54:00	1606
2008-10-15	18:55:00	897
2008-10-15	18:56:00	1234
2008-10-15	18:57:00	994
2008-10-15	18:58:00	2067
2008-10-15	18:59:00	1358
2008-10-15	19:00:00	244
2008-10-15	19:01:00	344
2008-10-15	19:02:00	365
2008-10-15	19:03:00	165
2008-10-15	19:04:00	219
2008-10-15	19:05:00	93
2008-10-15	19:06:00	501
2008-10-15	19:07:00	36
2008-10-15	19:08:00	47
2008-10-15	19:09:00	244
2008-10-15	19:10:00	42
2008-10-15	19:11:00	151
2008-10-15	19:12:00	165
2008-10-15	19:13:00	407
2008-10-15	19:14:00	287
2008-10-15	19:15:00	488
2008-10-15	19:16:00	99
2008-10-15	19:17:00	1258
2008-10-15	19:18:00	694
2008-10-15	19:19:00	365
2008-10-15	19:20:00	21
2008-10-15	19:21:00	57
2008-10-15	19:22:00	0
2008-10-15	19:23:00	118
2008-10-15	19:24:00	418
2008-10-15	19:25:00	93
2008-10-15	19:26:00	47
2008-10-15	19:27:00	0
2008-10-15	19:28:00	0
2008-10-15	19:29:00	0
2008-10-15	19:30:00	0
2008-10-15	19:31:00	0
2008-10-15	19:32:00	0
2008-10-15	19:33:00	16
2008-10-15	19:34:00	0
2008-10-15	19:35:00	0
2008-10-15	19:36:00	31
2008-10-15	19:37:00	5
2008-10-15	19:38:00	16
2008-10-15	19:39:00	0
2008-10-15	19:40:00	5
2008-10-15	19:41:00	0
2008-10-15	19:42:00	306
2008-10-15	19:43:00	725
2008-10-15	19:44:00	453
2008-10-15	19:45:00	513
2008-10-15	19:46:00	158
2008-10-15	19:47:00	219
2008-10-15	19:48:00	0
2008-10-15	19:49:00	10
2008-10-15	19:50:00	0
2008-10-15	19:51:00	0
2008-10-15	19:52:00	0
2008-10-15	19:53:00	5
2008-10-15	19:54:00	0
2008-10-15	19:55:00	118
2008-10-15	19:56:00	111
2008-10-15	19:57:00	306
2008-10-15	19:58:00	36
2008-10-15	19:59:00	10
2008-10-15	20:00:00	165
2008-10-15	20:01:00	5
2008-10-15	20:02:00	86
2008-10-15	20:03:00	10
2008-10-15	20:04:00	0
2008-10-15	20:05:00	62
2008-10-15	20:06:00	80
2008-10-15	20:07:00	10
2008-10-15	20:08:00	16
2008-10-15	20:09:00	0
2008-10-15	20:10:00	5
2008-10-15	20:11:00	5
2008-10-15	20:12:00	5
2008-10-15	20:13:00	16
2008-10-15	20:14:00	5
2008-10-15	20:15:00	297
2008-10-15	20:16:00	1098
2008-10-15	20:17:00	710
2008-10-15	20:18:00	464
2008-10-15	20:19:00	488
2008-10-15	20:20:00	306
2008-10-15	20:21:00	93
2008-10-15	20:22:00	0
2008-10-15	20:23:00	16
2008-10-15	20:24:00	52
2008-10-15	20:25:00	144
2008-10-15	20:26:00	124
2008-10-15	20:27:00	26
2008-10-15	20:28:00	0
2008-10-15	20:29:00	80
2008-10-15	20:30:00	74
2008-10-15	20:31:00	52
2008-10-15	20:32:00	5
2008-10-15	20:33:00	10
2008-10-15	20:34:00	187
2008-10-15	20:35:00	47
2008-10-15	20:36:00	31
2008-10-15	20:37:00	74
2008-10-15	20:38:00	5
2008-10-15	20:39:00	5
2008-10-15	20:40:00	0
2008-10-15	20:41:00	0
2008-10-15	20:42:00	52
2008-10-15	20:43:00	36
2008-10-15	20:44:00	244
2008-10-15	20:45:00	21
2008-10-15	20:46:00	26
2008-10-15	20:47:00	10
2008-10-15	20:48:00	16
2008-10-15	20:49:00	5
2008-10-15	20:50:00	0
2008-10-15	20:51:00	21
2008-10-15	20:52:00	36
2008-10-15	20:53:00	0
2008-10-15	20:54:00	0
2008-10-15	20:55:00	0
2008-10-15	20:56:00	0
2008-10-15	20:57:00	0
2008-10-15	20:58:00	0
2008-10-15	20:59:00	0
2008-10-15	21:00:00	10
2008-10-15	21:01:00	0
2008-10-15	21:02:00	10
2008-10-15	21:03:00	16
2008-10-15	21:04:00	0
2008-10-15	21:05:00	0
2008-10-15	21:06:00	0
2008-10-15	21:07:00	0
2008-10-15	21:08:00	0
2008-10-15	21:09:00	0
2008-10-15	21:10:00	0
2008-10-15	21:11:00	0
2008-10-15	21:12:00	0
2008-10-15	21:13:00	5
2008-10-15	21:14:00	16
2008-10-15	21:15:00	52
2008-10-15	21:16:00	16
2008-10-15	21:17:00	36
2008-10-15	21:18:00	21
2008-10-15	21:19:00	219
2008-10-15	21:20:00	62
2008-10-15	21:21:00	0
2008-10-15	21:22:00	0
2008-10-15	21:23:00	5
2008-10-15	21:24:00	0
2008-10-15	21:25:00	74
2008-10-15	21:26:00	0
2008-10-15	21:27:00	0
2008-10-15	21:28:00	16
2008-10-15	21:29:00	26
2008-10-15	21:30:00	26
2008-10-15	21:31:00	0
2008-10-15	21:32:00	0
2008-10-15	21:33:00	0
2008-10-15	21:34:00	0
2008-10-15	21:35:00	62
2008-10-15	21:36:00	111
2008-10-15	21:37:00	111
2008-10-15	21:38:00	47
2008-10-15	21:39:00	0
2008-10-15	21:40:00	0
2008-10-15	21:41:00	0
2008-10-15	21:42:00	0
2008-10-15	21:43:00	0
2008-10-15	21:44:00	0
2008-10-15	21:45:00	0
2008-10-15	21:46:00	0
2008-10-15	21:47:00	0
2008-10-15	21:48:00	0
2008-10-15	21:49:00	0
2008-10-15	21:50:00	0
2008-10-15	21:51:00	68
2008-10-15	21:52:00	0
2008-10-15	21:53:00	0
2008-10-15	21:54:00	0
2008-10-15	21:55:00	0
2008-10-15	21:56:00	0
2008-10-15	21:57:00	0
2008-10-15	21:58:00	0
2008-10-15	21:59:00	0
2008-10-15	22:00:00	0
2008-10-15	22:01:00	0
2008-10-15	22:02:00	0
2008-10-15	22:03:00	0
2008-10-15	22:04:00	0
2008-10-15	22:05:00	0
2008-10-15	22:06:00	0
2008-10-15	22:07:00	0
2008-10-15	22:08:00	0
2008-10-15	22:09:00	0
2008-10-15	22:10:00	0
2008-10-15	22:11:00	0
2008-10-15	22:12:00	0
2008-10-15	22:13:00	0
2008-10-15	22:14:00	0
2008-10-15	22:15:00	0
2008-10-15	22:16:00	0
2008-10-15	22:17:00	0
2008-10-15	22:18:00	0
2008-10-15	22:19:00	0
2008-10-15	22:20:00	0
2008-10-15	22:21:00	124
2008-10-15	22:22:00	0
2008-10-15	22:23:00	0
2008-10-15	22:24:00	68
2008-10-15	22:25:00	5
2008-10-15	22:26:00	144
2008-10-15	22:27:00	180
2008-10-15	22:28:00	80
2008-10-15	22:29:00	136
2008-10-15	22:30:00	297
2008-10-15	22:31:00	187
2008-10-15	22:32:00	118
2008-10-15	22:33:00	151
2008-10-15	22:34:00	219
2008-10-15	22:35:00	42
2008-10-15	22:36:00	260
2008-10-15	22:37:00	935
2008-10-15	22:38:00	31
2008-10-15	22:39:00	5
2008-10-15	22:40:00	0
2008-10-15	22:41:00	1282
2008-10-15	22:42:00	565
2008-10-15	22:43:00	476
2008-10-15	22:44:00	86
2008-10-15	22:45:00	52
2008-10-15	22:46:00	74
2008-10-15	22:47:00	16
2008-10-15	22:48:00	21
2008-10-15	22:49:00	0
2008-10-15	22:50:00	42
2008-10-15	22:51:00	124
2008-10-15	22:52:00	26
2008-10-15	22:53:00	0
2008-10-15	22:54:00	0
2008-10-15	22:55:00	0
2008-10-15	22:56:00	31
2008-10-15	22:57:00	111
2008-10-15	22:58:00	407
2008-10-15	22:59:00	10
2008-10-15	23:00:00	26
2008-10-15	23:01:00	16
2008-10-15	23:02:00	151
2008-10-15	23:03:00	36
2008-10-15	23:04:00	365
2008-10-15	23:05:00	565
2008-10-15	23:06:00	105
2008-10-15	23:07:00	0
2008-10-15	23:08:00	0
2008-10-15	23:09:00	0
2008-10-15	23:10:00	0
2008-10-15	23:11:00	21
2008-10-15	23:12:00	16
2008-10-15	23:13:00	0
2008-10-15	23:14:00	0
2008-10-15	23:15:00	0
2008-10-15	23:16:00	0
2008-10-15	23:17:00	0
2008-10-15	23:18:00	0
2008-10-15	23:19:00	0
2008-10-15	23:20:00	0
2008-10-15	23:21:00	0
2008-10-15	23:22:00	0
2008-10-15	23:23:00	0
2008-10-15	23:24:00	0
2008-10-15	23:25:00	0
2008-10-15	23:26:00	0
2008-10-15	23:27:00	0
2008-10-15	23:28:00	0
2008-10-15	23:29:00	0
2008-10-15	23:30:00	0
2008-10-15	23:31:00	0
2008-10-15	23:32:00	0
2008-10-15	23:33:00	0
2008-10-15	23:34:00	0
2008-10-15	23:35:00	0
2008-10-15	23:36:00	36
2008-10-15	23:37:00	0
2008-10-15	23:38:00	0
2008-10-15	23:39:00	0
2008-10-15	23:40:00	0
2008-10-15	23:41:00	0
2008-10-15	23:42:00	0
2008-10-15	23:43:00	0
2008-10-15	23:44:00	0
2008-10-15	23:45:00	0
2008-10-15	23:46:00	0
2008-10-15	23:47:00	0
2008-10-15	23:48:00	0
2008-10-15	23:49:00	0
2008-10-15	23:50:00	0
2008-10-15	23:51:00	0
2008-10-15	23:52:00	0
2008-10-15	23:53:00	0
2008-10-15	23:54:00	0
2008-10-15	23:55:00	0
2008-10-15	23:56:00	0
2008-10-15	23:57:00	0
2008-10-15	23:58:00	0
2008-10-15	23:59:00	0
2008-10-16	00:00:00	0
2008-10-16	00:01:00	0
2008-10-16	00:02:00	0
2008-10-16	00:03:00	0
2008-10-16	00:04:00	0
2008-10-16	00:05:00	0
2008-10-16	00:06:00	0
2008-10-16	00:07:00	0
2008-10-16	00:08:00	0
2008-10-16	00:09:00	0
2008-10-16	00:10:00	0
2008-10-16	00:11:00	0
2008-10-16	00:12:00	0
2008-10-16	00:13:00	0
2008-10-16	00:14:00	0
2008-10-16	00:15:00	0
2008-10-16	00:16:00	0
2008-10-16	00:17:00	0
2008-10-16	00:18:00	0
2008-10-16	00:19:00	0
2008-10-16	00:20:00	0
2008-10-16	00:21:00	0
2008-10-16	00:22:00	0
2008-10-16	00:23:00	0
2008-10-16	00:24:00	0
2008-10-16	00:25:00	0
2008-10-16	00:26:00	0
2008-10-16	00:27:00	0
2008-10-16	00:28:00	0
2008-10-16	00:29:00	0
2008-10-16	00:30:00	0
2008-10-16	00:31:00	0
2008-10-16	00:32:00	0
2008-10-16	00:33:00	0
2008-10-16	00:34:00	0
2008-10-16	00:35:00	0
2008-10-16	00:36:00	0
2008-10-16	00:37:00	0
2008-10-16	00:38:00	0
2008-10-16	00:39:00	0
2008-10-16	00:40:00	0
2008-10-16	00:41:00	0
2008-10-16	00:42:00	0
2008-10-16	00:43:00	0
2008-10-16	00:44:00	0
2008-10-16	00:45:00	0
2008-10-16	00:46:00	0
2008-10-16	00:47:00	0
2008-10-16	00:48:00	0
2008-10-16	00:49:00	0
2008-10-16	00:50:00	0
2008-10-16	00:51:00	0
2008-10-16	00:52:00	0
2008-10-16	00:53:00	0
2008-10-16	00:54:00	0
2008-10-16	00:55:00	0
2008-10-16	00:56:00	0
2008-10-16	00:57:00	0
2008-10-16	00:58:00	0
2008-10-16	00:59:00	0
2008-10-16	01:00:00	0
2008-10-16	01:01:00	0
2008-10-16	01:02:00	0
2008-10-16	01:03:00	0
2008-10-16	01:04:00	0
2008-10-16	01:05:00	0
2008-10-16	01:06:00	0
2008-10-16	01:07:00	0
2008-10-16	01:08:00	0
2008-10-16	01:09:00	0
2008-10-16	01:10:00	0
2008-10-16	01:11:00	68
2008-10-16	01:12:00	0
2008-10-16	01:13:00	0
2008-10-16	01:14:00	0
2008-10-16	01:15:00	0
2008-10-16	01:16:00	0
2008-10-16	01:17:00	0
2008-10-16	01:18:00	0
2008-10-16	01:19:00	0
2008-10-16	01:20:00	0
2008-10-16	01:21:00	0
2008-10-16	01:22:00	0
2008-10-16	01:23:00	0
2008-10-16	01:24:00	0
2008-10-16	01:25:00	0
2008-10-16	01:26:00	0
2008-10-16	01:27:00	0
2008-10-16	01:28:00	0
2008-10-16	01:29:00	0
2008-10-16	01:30:00	0
2008-10-16	01:31:00	0
2008-10-16	01:32:00	0
2008-10-16	01:33:00	5
2008-10-16	01:34:00	31
2008-10-16	01:35:00	306
2008-10-16	01:36:00	105
2008-10-16	01:37:00	0
2008-10-16	01:38:00	0
2008-10-16	01:39:00	0
2008-10-16	01:40:00	0
2008-10-16	01:41:00	0
2008-10-16	01:42:00	0
2008-10-16	01:43:00	0
2008-10-16	01:44:00	0
2008-10-16	01:45:00	0
2008-10-16	01:46:00	0
2008-10-16	01:47:00	0
2008-10-16	01:48:00	0
2008-10-16	01:49:00	0
2008-10-16	01:50:00	0
2008-10-16	01:51:00	0
2008-10-16	01:52:00	21
2008-10-16	01:53:00	0
2008-10-16	01:54:00	0
2008-10-16	01:55:00	0
2008-10-16	01:56:00	0
2008-10-16	01:57:00	0
2008-10-16	01:58:00	0
2008-10-16	01:59:00	5
2008-10-16	02:00:00	0
2008-10-16	02:01:00	0
2008-10-16	02:02:00	0
2008-10-16	02:03:00	0
2008-10-16	02:04:00	0
2008-10-16	02:05:00	0
2008-10-16	02:06:00	0
2008-10-16	02:07:00	0
2008-10-16	02:08:00	0
2008-10-16	02:09:00	0
2008-10-16	02:10:00	0
2008-10-16	02:11:00	0
2008-10-16	02:12:00	0
2008-10-16	02:13:00	0
2008-10-16	02:14:00	0
2008-10-16	02:15:00	0
2008-10-16	02:16:00	0
2008-10-16	02:17:00	0
2008-10-16	02:18:00	0
2008-10-16	02:19:00	0
2008-10-16	02:20:00	0
2008-10-16	02:21:00	0
2008-10-16	02:22:00	0
2008-10-16	02:23:00	0
2008-10-16	02:24:00	0
2008-10-16	02:25:00	0
2008-10-16	02:26:00	0
2008-10-16	02:27:00	0
2008-10-16	02:28:00	0
2008-10-16	02:29:00	0
2008-10-16	02:30:00	0
2008-10-16	02:31:00	0
2008-10-16	02:32:00	0
2008-10-16	02:33:00	0
2008-10-16	02:34:00	0
2008-10-16	02:35:00	0
2008-10-16	02:36:00	0
2008-10-16	02:37:00	0
2008-10-16	02:38:00	0
2008-10-16	02:39:00	0
2008-10-16	02:40:00	0
2008-10-16	02:41:00	0
2008-10-16	02:42:00	0
2008-10-16	02:43:00	0
2008-10-16	02:44:00	5
2008-10-16	02:45:00	0
2008-10-16	02:46:00	0
2008-10-16	02:47:00	0
2008-10-16	02:48:00	0
2008-10-16	02:49:00	0
2008-10-16	02:50:00	0
2008-10-16	02:51:00	0
2008-10-16	02:52:00	16
2008-10-16	02:53:00	0
2008-10-16	02:54:00	0
2008-10-16	02:55:00	0
2008-10-16	02:56:00	0
2008-10-16	02:57:00	0
2008-10-16	02:58:00	0
2008-10-16	02:59:00	0
2008-10-16	03:00:00	0
2008-10-16	03:01:00	0
2008-10-16	03:02:00	0
2008-10-16	03:03:00	0
2008-10-16	03:04:00	0
2008-10-16	03:05:00	10
2008-10-16	03:06:00	5
2008-10-16	03:07:00	0
2008-10-16	03:08:00	0
2008-10-16	03:09:00	0
2008-10-16	03:10:00	0
2008-10-16	03:11:00	0
2008-10-16	03:12:00	0
2008-10-16	03:13:00	0
2008-10-16	03:14:00	0
2008-10-16	03:15:00	0
2008-10-16	03:16:00	0
2008-10-16	03:17:00	0
2008-10-16	03:18:00	0
2008-10-16	03:19:00	16
2008-10-16	03:20:00	0
2008-10-16	03:21:00	0
2008-10-16	03:22:00	0
2008-10-16	03:23:00	0
2008-10-16	03:24:00	0
2008-10-16	03:25:00	0
2008-10-16	03:26:00	0
2008-10-16	03:27:00	0
2008-10-16	03:28:00	21
2008-10-16	03:29:00	0
2008-10-16	03:30:00	0
2008-10-16	03:31:00	0
2008-10-16	03:32:00	0
2008-10-16	03:33:00	0
2008-10-16	03:34:00	0
2008-10-16	03:35:00	0
2008-10-16	03:36:00	0
2008-10-16	03:37:00	0
2008-10-16	03:38:00	0
2008-10-16	03:39:00	5
2008-10-16	03:40:00	0
2008-10-16	03:41:00	0
2008-10-16	03:42:00	0
2008-10-16	03:43:00	0
2008-10-16	03:44:00	0
2008-10-16	03:45:00	0
2008-10-16	03:46:00	0
2008-10-16	03:47:00	0
2008-10-16	03:48:00	0
2008-10-16	03:49:00	0
2008-10-16	03:50:00	0
2008-10-16	03:51:00	0
2008-10-16	03:52:00	0
2008-10-16	03:53:00	0
2008-10-16	03:54:00	0
2008-10-16	03:55:00	0
2008-10-16	03:56:00	0
2008-10-16	03:57:00	0
2008-10-16	03:58:00	0
2008-10-16	03:59:00	0
2008-10-16	04:00:00	0
2008-10-16	04:01:00	0
2008-10-16	04:02:00	0
2008-10-16	04:03:00	0
2008-10-16	04:04:00	0
2008-10-16	04:05:00	0
2008-10-16	04:06:00	0
2008-10-16	04:07:00	42
2008-10-16	04:08:00	93
2008-10-16	04:09:00	5
2008-10-16	04:10:00	74
2008-10-16	04:11:00	0
2008-10-16	04:12:00	0
2008-10-16	04:13:00	0
2008-10-16	04:14:00	0
2008-10-16	04:15:00	0
2008-10-16	04:16:00	0
2008-10-16	04:17:00	0
2008-10-16	04:18:00	0
2008-10-16	04:19:00	0
2008-10-16	04:20:00	0
2008-10-16	04:21:00	0
2008-10-16	04:22:00	0
2008-10-16	04:23:00	0
2008-10-16	04:24:00	0
2008-10-16	04:25:00	0
2008-10-16	04:26:00	0
2008-10-16	04:27:00	0
2008-10-16	04:28:00	0
2008-10-16	04:29:00	0
2008-10-16	04:30:00	5
2008-10-16	04:31:00	0
2008-10-16	04:32:00	0
2008-10-16	04:33:00	0
2008-10-16	04:34:00	0
2008-10-16	04:35:00	0
2008-10-16	04:36:00	0
2008-10-16	04:37:00	0
2008-10-16	04:38:00	0
2008-10-16	04:39:00	0
2008-10-16	04:40:00	0
2008-10-16	04:41:00	0
2008-10-16	04:42:00	0
2008-10-16	04:43:00	0
2008-10-16	04:44:00	62
2008-10-16	04:45:00	0
2008-10-16	04:46:00	0
2008-10-16	04:47:00	0
2008-10-16	04:48:00	31
2008-10-16	04:49:00	0
2008-10-16	04:50:00	0
2008-10-16	04:51:00	0
2008-10-16	04:52:00	5
2008-10-16	04:53:00	0
2008-10-16	04:54:00	0
2008-10-16	04:55:00	0
2008-10-16	04:56:00	0
2008-10-16	04:57:00	0
2008-10-16	04:58:00	0
2008-10-16	04:59:00	0
2008-10-16	05:00:00	0
2008-10-16	05:01:00	0
2008-10-16	05:02:00	0
2008-10-16	05:03:00	0
2008-10-16	05:04:00	42
2008-10-16	05:05:00	0
2008-10-16	05:06:00	0
2008-10-16	05:07:00	5
2008-10-16	05:08:00	0
2008-10-16	05:09:00	0
2008-10-16	05:10:00	0
2008-10-16	05:11:00	0
2008-10-16	05:12:00	5
2008-10-16	05:13:00	0
2008-10-16	05:14:00	47
2008-10-16	05:15:00	0
2008-10-16	05:16:00	0
2008-10-16	05:17:00	0
2008-10-16	05:18:00	0
2008-10-16	05:19:00	0
2008-10-16	05:20:00	10
2008-10-16	05:21:00	0
2008-10-16	05:22:00	0
2008-10-16	05:23:00	0
2008-10-16	05:24:00	0
2008-10-16	05:25:00	0
2008-10-16	05:26:00	0
2008-10-16	05:27:00	0
2008-10-16	05:28:00	0
2008-10-16	05:29:00	0
2008-10-16	05:30:00	0
2008-10-16	05:31:00	0
2008-10-16	05:32:00	0
2008-10-16	05:33:00	0
2008-10-16	05:34:00	0
2008-10-16	05:35:00	0
2008-10-16	05:36:00	0
2008-10-16	05:37:00	0
2008-10-16	05:38:00	0
2008-10-16	05:39:00	0
2008-10-16	05:40:00	0
2008-10-16	05:41:00	0
2008-10-16	05:42:00	0
2008-10-16	05:43:00	0
2008-10-16	05:44:00	0
2008-10-16	05:45:00	0
2008-10-16	05:46:00	0
2008-10-16	05:47:00	0
2008-10-16	05:48:00	0
2008-10-16	05:49:00	0
2008-10-16	05:50:00	0
2008-10-16	05:51:00	10
2008-10-16	05:52:00	0
2008-10-16	05:53:00	0
2008-10-16	05:54:00	0
2008-10-16	05:55:00	0
2008-10-16	05:56:00	0
2008-10-16	05:57:00	0
2008-10-16	05:58:00	0
2008-10-16	05:59:00	0
2008-10-16	06:00:00	10
2008-10-16	06:01:00	86
2008-10-16	06:02:00	26
2008-10-16	06:03:00	10
2008-10-16	06:04:00	344
2008-10-16	06:05:00	144
2008-10-16	06:06:00	86
2008-10-16	06:07:00	99
2008-10-16	06:08:00	0
2008-10-16	06:09:00	86
2008-10-16	06:10:00	0
2008-10-16	06:11:00	130
2008-10-16	06:12:00	315
2008-10-16	06:13:00	93
2008-10-16	06:14:00	0
2008-10-16	06:15:00	0
2008-10-16	06:16:00	0
2008-10-16	06:17:00	0
2008-10-16	06:18:00	0
2008-10-16	06:19:00	0
2008-10-16	06:20:00	0
2008-10-16	06:21:00	62
2008-10-16	06:22:00	0
2008-10-16	06:23:00	0
2008-10-16	06:24:00	0
2008-10-16	06:25:00	0
2008-10-16	06:26:00	0
2008-10-16	06:27:00	0
2008-10-16	06:28:00	0
2008-10-16	06:29:00	0
2008-10-16	06:30:00	0
2008-10-16	06:31:00	0
2008-10-16	06:32:00	36
2008-10-16	06:33:00	0
2008-10-16	06:34:00	0
2008-10-16	06:35:00	0
2008-10-16	06:36:00	0
2008-10-16	06:37:00	0
2008-10-16	06:38:00	0
2008-10-16	06:39:00	0
2008-10-16	06:40:00	0
2008-10-16	06:41:00	0
2008-10-16	06:42:00	0
2008-10-16	06:43:00	0
2008-10-16	06:44:00	0
2008-10-16	06:45:00	0
2008-10-16	06:46:00	0
2008-10-16	06:47:00	0
2008-10-16	06:48:00	0
2008-10-16	06:49:00	0
2008-10-16	06:50:00	0
2008-10-16	06:51:00	0
2008-10-16	06:52:00	5
2008-10-16	06:53:00	0
2008-10-16	06:54:00	0
2008-10-16	06:55:00	0
2008-10-16	06:56:00	0
2008-10-16	06:57:00	0
2008-10-16	06:58:00	0
2008-10-16	06:59:00	0
2008-10-16	07:00:00	579
2008-10-16	07:01:00	1282
2008-10-16	07:02:00	227
2008-10-16	07:03:00	513
2008-10-16	07:04:00	774
2008-10-16	07:05:00	227
2008-10-16	07:06:00	974
2008-10-16	07:07:00	86
2008-10-16	07:08:00	36
2008-10-16	07:09:00	1076
2008-10-16	07:10:00	396
2008-10-16	07:11:00	441
2008-10-16	07:12:00	325
2008-10-16	07:13:00	649
2008-10-16	07:14:00	118
2008-10-16	07:15:00	21
2008-10-16	07:16:00	0
2008-10-16	07:17:00	86
2008-10-16	07:18:00	21
2008-10-16	07:19:00	42
2008-10-16	07:20:00	252
2008-10-16	07:21:00	36
2008-10-16	07:22:00	10
2008-10-16	07:23:00	0
2008-10-16	07:24:00	86
2008-10-16	07:25:00	0
2008-10-16	07:26:00	26
2008-10-16	07:27:00	36
2008-10-16	07:28:00	0
2008-10-16	07:29:00	93
2008-10-16	07:30:00	99
2008-10-16	07:31:00	0
2008-10-16	07:32:00	0
2008-10-16	07:33:00	0
2008-10-16	07:34:00	0
2008-10-16	07:35:00	791
2008-10-16	07:36:00	0
2008-10-16	07:37:00	0
2008-10-16	07:38:00	0
2008-10-16	07:39:00	0
2008-10-16	07:40:00	0
2008-10-16	07:41:00	0
2008-10-16	07:42:00	0
2008-10-16	07:43:00	0
2008-10-16	07:44:00	0
2008-10-16	07:45:00	0
2008-10-16	07:46:00	0
2008-10-16	07:47:00	0
2008-10-16	07:48:00	0
2008-10-16	07:49:00	42
2008-10-16	07:50:00	105
2008-10-16	07:51:00	62
2008-10-16	07:52:00	16
2008-10-16	07:53:00	21
2008-10-16	07:54:00	144
2008-10-16	07:55:00	725
2008-10-16	07:56:00	16
2008-10-16	07:57:00	31
2008-10-16	07:58:00	0
2008-10-16	07:59:00	99
2008-10-16	08:00:00	195
2008-10-16	08:01:00	195
2008-10-16	08:02:00	334
2008-10-16	08:03:00	694
2008-10-16	08:04:00	130
2008-10-16	08:05:00	0
2008-10-16	08:06:00	5
2008-10-16	08:07:00	80
2008-10-16	08:08:00	0
2008-10-16	08:09:00	0
2008-10-16	08:10:00	0
2008-10-16	08:11:00	0
2008-10-16	08:12:00	0
2008-10-16	08:13:00	0
2008-10-16	08:14:00	0
2008-10-16	08:15:00	0
2008-10-16	08:16:00	0
2008-10-16	08:17:00	0
2008-10-16	08:18:00	0
2008-10-16	08:19:00	10
2008-10-16	08:20:00	0
2008-10-16	08:21:00	0
2008-10-16	08:22:00	0
2008-10-16	08:23:00	0
2008-10-16	08:24:00	47
2008-10-16	08:25:00	36
2008-10-16	08:26:00	74
2008-10-16	08:27:00	62
2008-10-16	08:28:00	0
2008-10-16	08:29:00	0
2008-10-16	08:30:00	0
2008-10-16	08:31:00	0
2008-10-16	08:32:00	0
2008-10-16	08:33:00	0
2008-10-16	08:34:00	0
2008-10-16	08:35:00	0
2008-10-16	08:36:00	0
2008-10-16	08:37:00	0
2008-10-16	08:38:00	0
2008-10-16	08:39:00	0
2008-10-16	08:40:00	0
2008-10-16	08:41:00	0
2008-10-16	08:42:00	0
2008-10-16	08:43:00	0
2008-10-16	08:44:00	0
2008-10-16	08:45:00	0
2008-10-16	08:46:00	0
2008-10-16	08:47:00	0
2008-10-16	08:48:00	0
2008-10-16	08:49:00	0
2008-10-16	08:50:00	0
2008-10-16	08:51:00	0
2008-10-16	08:52:00	0
2008-10-16	08:53:00	0
2008-10-16	08:54:00	0
2008-10-16	08:55:00	0
2008-10-16	08:56:00	0
2008-10-16	08:57:00	0
2008-10-16	08:58:00	0
2008-10-16	08:59:00	0
2008-10-16	09:00:00	0
2008-10-16	09:01:00	0
2008-10-16	09:02:00	0
2008-10-16	09:03:00	0
2008-10-16	09:04:00	10
2008-10-16	09:05:00	0
2008-10-16	09:06:00	0
2008-10-16	09:07:00	0
2008-10-16	09:08:00	0
[truncated: 19,611 more rows]

[truncated: 1 more sheets: 10.29.08]
