# Supplementary material for: Initial evaluation of nighttime restlessness in a naturally occurring canine model of osteoarthritis pain
Source: PeerJ. 2015 Feb 17;3:e772. doi: 10.7717/peerj.772 (PMC4340376; doi:10.7717/peerj.772)
Supplement: Supplemental Information 5 [file peerj-03-772-s005.xlsx]

## Sheet: Office Visits
Visit Date	Visit Number
2008-09-04 06:00:00	1
2008-09-18 06:00:00	2
2008-10-03 06:00:00	3
2008-10-17 06:00:00	4
2008-10-31 06:00:00	5
2008-11-14 06:00:00	6
2008-12-01 06:00:00	7

## Sheet: 03_Data
Segment	DateTime	Activity	Hour	Quadrant	Study Day	Weekday
1	2008-09-11 06:01:00	91	6	2	7	5
1	2008-09-11 06:02:00	0	6	2	7	5
1	2008-09-11 06:03:00	0	6	2	7	5
1	2008-09-11 06:04:00	0	6	2	7	5
1	2008-09-11 06:05:00	0	6	2	7	5
1	2008-09-11 06:06:00	0	6	2	7	5
1	2008-09-11 06:07:00	0	6	2	7	5
1	2008-09-11 06:08:00	0	6	2	7	5
1	2008-09-11 06:09:00	0	6	2	7	5
1	2008-09-11 06:10:00	0	6	2	7	5
1	2008-09-11 06:11:00	0	6	2	7	5
1	2008-09-11 06:12:00	0	6	2	7	5
1	2008-09-11 06:13:00	0	6	2	7	5
1	2008-09-11 06:14:00	20	6	2	7	5
1	2008-09-11 06:15:00	0	6	2	7	5
1	2008-09-11 06:16:00	0	6	2	7	5
1	2008-09-11 06:17:00	0	6	2	7	5
1	2008-09-11 06:18:00	51	6	2	7	5
1	2008-09-11 06:19:00	0	6	2	7	5
1	2008-09-11 06:20:00	0	6	2	7	5
1	2008-09-11 06:21:00	0	6	2	7	5
1	2008-09-11 06:22:00	0	6	2	7	5
1	2008-09-11 06:23:00	0	6	2	7	5
1	2008-09-11 06:24:00	0	6	2	7	5
1	2008-09-11 06:25:00	0	6	2	7	5
1	2008-09-11 06:26:00	0	6	2	7	5
1	2008-09-11 06:27:00	0	6	2	7	5
1	2008-09-11 06:28:00	0	6	2	7	5
1	2008-09-11 06:29:00	0	6	2	7	5
1	2008-09-11 06:30:00	0	6	2	7	5
1	2008-09-11 06:31:00	0	6	2	7	5
1	2008-09-11 06:32:00	0	6	2	7	5
1	2008-09-11 06:33:00	0	6	2	7	5
1	2008-09-11 06:34:00	0	6	2	7	5
1	2008-09-11 06:35:00	0	6	2	7	5
1	2008-09-11 06:36:00	0	6	2	7	5
1	2008-09-11 06:37:00	0	6	2	7	5
1	2008-09-11 06:38:00	0	6	2	7	5
1	2008-09-11 06:39:00	0	6	2	7	5
1	2008-09-11 06:40:00	0	6	2	7	5
1	2008-09-11 06:41:00	0	6	2	7	5
1	2008-09-11 06:42:00	30	6	2	7	5
1	2008-09-11 06:43:00	0	6	2	7	5
1	2008-09-11 06:44:00	0	6	2	7	5
1	2008-09-11 06:45:00	0	6	2	7	5
1	2008-09-11 06:46:00	0	6	2	7	5
1	2008-09-11 06:47:00	0	6	2	7	5
1	2008-09-11 06:48:00	0	6	2	7	5
1	2008-09-11 06:49:00	0	6	2	7	5
1	2008-09-11 06:50:00	0	6	2	7	5
1	2008-09-11 06:51:00	0	6	2	7	5
1	2008-09-11 06:52:00	0	6	2	7	5
1	2008-09-11 06:53:00	0	6	2	7	5
1	2008-09-11 06:54:00	0	6	2	7	5
1	2008-09-11 06:55:00	0	6	2	7	5
1	2008-09-11 06:56:00	0	6	2	7	5
1	2008-09-11 06:57:00	0	6	2	7	5
1	2008-09-11 06:58:00	0	6	2	7	5
1	2008-09-11 06:59:00	81	6	2	7	5
1	2008-09-11 07:00:00	20	6	2	7	5
1	2008-09-11 07:01:00	10	7	2	7	5
1	2008-09-11 07:02:00	0	7	2	7	5
1	2008-09-11 07:03:00	0	7	2	7	5
1	2008-09-11 07:04:00	410	7	2	7	5
1	2008-09-11 07:05:00	156	7	2	7	5
1	2008-09-11 07:06:00	542	7	2	7	5
1	2008-09-11 07:07:00	410	7	2	7	5
1	2008-09-11 07:08:00	652	7	2	7	5
1	2008-09-11 07:09:00	394	7	2	7	5
1	2008-09-11 07:10:00	0	7	2	7	5
1	2008-09-11 07:11:00	242	7	2	7	5
1	2008-09-11 07:12:00	366	7	2	7	5
1	2008-09-11 07:13:00	754	7	2	7	5
1	2008-09-11 07:14:00	733	7	2	7	5
1	2008-09-11 07:15:00	380	7	2	7	5
1	2008-09-11 07:16:00	597	7	2	7	5
1	2008-09-11 07:17:00	884	7	2	7	5
1	2008-09-11 07:18:00	861	7	2	7	5
1	2008-09-11 07:19:00	0	7	2	7	5
1	2008-09-11 07:20:00	0	7	2	7	5
1	2008-09-11 07:21:00	20	7	2	7	5
1	2008-09-11 07:22:00	61	7	2	7	5
1	2008-09-11 07:23:00	0	7	2	7	5
1	2008-09-11 07:24:00	144	7	2	7	5
1	2008-09-11 07:25:00	0	7	2	7	5
1	2008-09-11 07:26:00	0	7	2	7	5
1	2008-09-11 07:27:00	122	7	2	7	5
1	2008-09-11 07:28:00	0	7	2	7	5
1	2008-09-11 07:29:00	0	7	2	7	5
1	2008-09-11 07:30:00	0	7	2	7	5
1	2008-09-11 07:31:00	20	7	2	7	5
1	2008-09-11 07:32:00	0	7	2	7	5
1	2008-09-11 07:33:00	30	7	2	7	5
1	2008-09-11 07:34:00	112	7	2	7	5
1	2008-09-11 07:35:00	0	7	2	7	5
1	2008-09-11 07:36:00	0	7	2	7	5
1	2008-09-11 07:37:00	144	7	2	7	5
1	2008-09-11 07:38:00	0	7	2	7	5
1	2008-09-11 07:39:00	884	7	2	7	5
1	2008-09-11 07:40:00	634	7	2	7	5
1	2008-09-11 07:41:00	20	7	2	7	5
1	2008-09-11 07:42:00	0	7	2	7	5
1	2008-09-11 07:43:00	61	7	2	7	5
1	2008-09-11 07:44:00	0	7	2	7	5
1	2008-09-11 07:45:00	0	7	2	7	5
1	2008-09-11 07:46:00	61	7	2	7	5
1	2008-09-11 07:47:00	0	7	2	7	5
1	2008-09-11 07:48:00	0	7	2	7	5
1	2008-09-11 07:49:00	774	7	2	7	5
1	2008-09-11 07:50:00	0	7	2	7	5
1	2008-09-11 07:51:00	0	7	2	7	5
1	2008-09-11 07:52:00	51	7	2	7	5
1	2008-09-11 07:53:00	0	7	2	7	5
1	2008-09-11 07:54:00	0	7	2	7	5
1	2008-09-11 07:55:00	0	7	2	7	5
1	2008-09-11 07:56:00	61	7	2	7	5
1	2008-09-11 07:57:00	0	7	2	7	5
1	2008-09-11 07:58:00	0	7	2	7	5
1	2008-09-11 07:59:00	0	7	2	7	5
1	2008-09-11 08:00:00	0	7	2	7	5
1	2008-09-11 08:01:00	61	8	2	7	5
1	2008-09-11 08:02:00	0	8	2	7	5
1	2008-09-11 08:03:00	61	8	2	7	5
1	2008-09-11 08:04:00	579	8	2	7	5
1	2008-09-11 08:05:00	169	8	2	7	5
1	2008-09-11 08:06:00	0	8	2	7	5
1	2008-09-11 08:07:00	0	8	2	7	5
1	2008-09-11 08:08:00	0	8	2	7	5
1	2008-09-11 08:09:00	0	8	2	7	5
1	2008-09-11 08:10:00	0	8	2	7	5
1	2008-09-11 08:11:00	10	8	2	7	5
1	2008-09-11 08:12:00	0	8	2	7	5
1	2008-09-11 08:13:00	906	8	2	7	5
1	2008-09-11 08:14:00	20	8	2	7	5
1	2008-09-11 08:15:00	0	8	2	7	5
1	2008-09-11 08:16:00	0	8	2	7	5
1	2008-09-11 08:17:00	0	8	2	7	5
1	2008-09-11 08:18:00	51	8	2	7	5
1	2008-09-11 08:19:00	0	8	2	7	5
1	2008-09-11 08:20:00	0	8	2	7	5
1	2008-09-11 08:21:00	0	8	2	7	5
1	2008-09-11 08:22:00	51	8	2	7	5
1	2008-09-11 08:23:00	0	8	2	7	5
1	2008-09-11 08:24:00	0	8	2	7	5
1	2008-09-11 08:25:00	0	8	2	7	5
1	2008-09-11 08:26:00	0	8	2	7	5
1	2008-09-11 08:27:00	0	8	2	7	5
1	2008-09-11 08:28:00	0	8	2	7	5
1	2008-09-11 08:29:00	0	8	2	7	5
1	2008-09-11 08:30:00	0	8	2	7	5
1	2008-09-11 08:31:00	0	8	2	7	5
1	2008-09-11 08:32:00	0	8	2	7	5
1	2008-09-11 08:33:00	0	8	2	7	5
1	2008-09-11 08:34:00	0	8	2	7	5
1	2008-09-11 08:35:00	0	8	2	7	5
1	2008-09-11 08:36:00	10	8	2	7	5
1	2008-09-11 08:37:00	0	8	2	7	5
1	2008-09-11 08:38:00	0	8	2	7	5
1	2008-09-11 08:39:00	0	8	2	7	5
1	2008-09-11 08:40:00	0	8	2	7	5
1	2008-09-11 08:41:00	0	8	2	7	5
1	2008-09-11 08:42:00	0	8	2	7	5
1	2008-09-11 08:43:00	0	8	2	7	5
1	2008-09-11 08:44:00	0	8	2	7	5
1	2008-09-11 08:45:00	0	8	2	7	5
1	2008-09-11 08:46:00	0	8	2	7	5
1	2008-09-11 08:47:00	0	8	2	7	5
1	2008-09-11 08:48:00	0	8	2	7	5
1	2008-09-11 08:49:00	0	8	2	7	5
1	2008-09-11 08:50:00	0	8	2	7	5
1	2008-09-11 08:51:00	0	8	2	7	5
1	2008-09-11 08:52:00	0	8	2	7	5
1	2008-09-11 08:53:00	0	8	2	7	5
1	2008-09-11 08:54:00	0	8	2	7	5
1	2008-09-11 08:55:00	30	8	2	7	5
1	2008-09-11 08:56:00	10	8	2	7	5
1	2008-09-11 08:57:00	0	8	2	7	5
1	2008-09-11 08:58:00	0	8	2	7	5
1	2008-09-11 08:59:00	0	8	2	7	5
1	2008-09-11 09:00:00	0	8	2	7	5
1	2008-09-11 09:01:00	0	9	2	7	5
1	2008-09-11 09:02:00	0	9	2	7	5
1	2008-09-11 09:03:00	0	9	2	7	5
1	2008-09-11 09:04:00	616	9	2	7	5
1	2008-09-11 09:05:00	0	9	2	7	5
1	2008-09-11 09:06:00	0	9	2	7	5
1	2008-09-11 09:07:00	0	9	2	7	5
1	2008-09-11 09:08:00	0	9	2	7	5
1	2008-09-11 09:09:00	30	9	2	7	5
1	2008-09-11 09:10:00	0	9	2	7	5
1	2008-09-11 09:11:00	0	9	2	7	5
1	2008-09-11 09:12:00	61	9	2	7	5
1	2008-09-11 09:13:00	0	9	2	7	5
1	2008-09-11 09:14:00	0	9	2	7	5
1	2008-09-11 09:15:00	0	9	2	7	5
1	2008-09-11 09:16:00	0	9	2	7	5
1	2008-09-11 09:17:00	41	9	2	7	5
1	2008-09-11 09:18:00	0	9	2	7	5
1	2008-09-11 09:19:00	0	9	2	7	5
1	2008-09-11 09:20:00	0	9	2	7	5
1	2008-09-11 09:21:00	0	9	2	7	5
1	2008-09-11 09:22:00	0	9	2	7	5
1	2008-09-11 09:23:00	0	9	2	7	5
1	2008-09-11 09:24:00	0	9	2	7	5
1	2008-09-11 09:25:00	20	9	2	7	5
1	2008-09-11 09:26:00	0	9	2	7	5
1	2008-09-11 09:27:00	0	9	2	7	5
1	2008-09-11 09:28:00	0	9	2	7	5
1	2008-09-11 09:29:00	0	9	2	7	5
1	2008-09-11 09:30:00	0	9	2	7	5
1	2008-09-11 09:31:00	0	9	2	7	5
1	2008-09-11 09:32:00	0	9	2	7	5
1	2008-09-11 09:33:00	0	9	2	7	5
1	2008-09-11 09:34:00	0	9	2	7	5
1	2008-09-11 09:35:00	0	9	2	7	5
1	2008-09-11 09:36:00	0	9	2	7	5
1	2008-09-11 09:37:00	0	9	2	7	5
1	2008-09-11 09:38:00	0	9	2	7	5
1	2008-09-11 09:39:00	51	9	2	7	5
1	2008-09-11 09:40:00	1103	9	2	7	5
1	2008-09-11 09:41:00	508	9	2	7	5
1	2008-09-11 09:42:00	10	9	2	7	5
1	2008-09-11 09:43:00	0	9	2	7	5
1	2008-09-11 09:44:00	0	9	2	7	5
1	2008-09-11 09:45:00	0	9	2	7	5
1	2008-09-11 09:46:00	0	9	2	7	5
1	2008-09-11 09:47:00	0	9	2	7	5
1	2008-09-11 09:48:00	0	9	2	7	5
1	2008-09-11 09:49:00	0	9	2	7	5
1	2008-09-11 09:50:00	0	9	2	7	5
1	2008-09-11 09:51:00	351	9	2	7	5
1	2008-09-11 09:52:00	906	9	2	7	5
1	2008-09-11 09:53:00	492	9	2	7	5
1	2008-09-11 09:54:00	323	9	2	7	5
1	2008-09-11 09:55:00	524	9	2	7	5
1	2008-09-11 09:56:00	1103	9	2	7	5
1	2008-09-11 09:57:00	616	9	2	7	5
1	2008-09-11 09:58:00	0	9	2	7	5
1	2008-09-11 09:59:00	0	9	2	7	5
1	2008-09-11 10:00:00	0	9	2	7	5
1	2008-09-11 10:01:00	0	10	2	7	5
1	2008-09-11 10:02:00	0	10	2	7	5
1	2008-09-11 10:03:00	10	10	2	7	5
1	2008-09-11 10:04:00	0	10	2	7	5
1	2008-09-11 10:05:00	132	10	2	7	5
1	2008-09-11 10:06:00	112	10	2	7	5
1	2008-09-11 10:07:00	0	10	2	7	5
1	2008-09-11 10:08:00	0	10	2	7	5
1	2008-09-11 10:09:00	10	10	2	7	5
1	2008-09-11 10:10:00	0	10	2	7	5
1	2008-09-11 10:11:00	0	10	2	7	5
1	2008-09-11 10:12:00	0	10	2	7	5
1	2008-09-11 10:13:00	0	10	2	7	5
1	2008-09-11 10:14:00	0	10	2	7	5
1	2008-09-11 10:15:00	394	10	2	7	5
1	2008-09-11 10:16:00	652	10	2	7	5
1	2008-09-11 10:17:00	10	10	2	7	5
1	2008-09-11 10:18:00	0	10	2	7	5
1	2008-09-11 10:19:00	0	10	2	7	5
1	2008-09-11 10:20:00	0	10	2	7	5
1	2008-09-11 10:21:00	193	10	2	7	5
1	2008-09-11 10:22:00	0	10	2	7	5
1	2008-09-11 10:23:00	10	10	2	7	5
1	2008-09-11 10:24:00	20	10	2	7	5
1	2008-09-11 10:25:00	10	10	2	7	5
1	2008-09-11 10:26:00	0	10	2	7	5
1	2008-09-11 10:27:00	10	10	2	7	5
1	2008-09-11 10:28:00	20	10	2	7	5
1	2008-09-11 10:29:00	10	10	2	7	5
1	2008-09-11 10:30:00	10	10	2	7	5
1	2008-09-11 10:31:00	10	10	2	7	5
1	2008-09-11 10:32:00	20	10	2	7	5
1	2008-09-11 10:33:00	10	10	2	7	5
1	2008-09-11 10:34:00	0	10	2	7	5
1	2008-09-11 10:35:00	0	10	2	7	5
1	2008-09-11 10:36:00	20	10	2	7	5
1	2008-09-11 10:37:00	10	10	2	7	5
1	2008-09-11 10:38:00	10	10	2	7	5
1	2008-09-11 10:39:00	10	10	2	7	5
1	2008-09-11 10:40:00	20	10	2	7	5
1	2008-09-11 10:41:00	10	10	2	7	5
1	2008-09-11 10:42:00	10	10	2	7	5
1	2008-09-11 10:43:00	112	10	2	7	5
1	2008-09-11 10:44:00	41	10	2	7	5
1	2008-09-11 10:45:00	41	10	2	7	5
1	2008-09-11 10:46:00	0	10	2	7	5
1	2008-09-11 10:47:00	51	10	2	7	5
1	2008-09-11 10:48:00	0	10	2	7	5
1	2008-09-11 10:49:00	30	10	2	7	5
1	2008-09-11 10:50:00	30	10	2	7	5
1	2008-09-11 10:51:00	30	10	2	7	5
1	2008-09-11 10:52:00	0	10	2	7	5
1	2008-09-11 10:53:00	41	10	2	7	5
1	2008-09-11 10:54:00	30	10	2	7	5
1	2008-09-11 10:55:00	0	10	2	7	5
1	2008-09-11 10:56:00	0	10	2	7	5
1	2008-09-11 10:57:00	0	10	2	7	5
1	2008-09-11 10:58:00	0	10	2	7	5
1	2008-09-11 10:59:00	41	10	2	7	5
1	2008-09-11 11:00:00	0	10	2	7	5
1	2008-09-11 11:01:00	0	11	2	7	5
1	2008-09-11 11:02:00	20	11	2	7	5
1	2008-09-11 11:03:00	0	11	2	7	5
1	2008-09-11 11:04:00	3314	11	2	7	5
1	2008-09-11 11:05:00	1296	11	2	7	5
1	2008-09-11 11:06:00	156	11	2	7	5
1	2008-09-11 11:07:00	122	11	2	7	5
1	2008-09-11 11:08:00	102	11	2	7	5
1	2008-09-11 11:09:00	266	11	2	7	5
1	2008-09-11 11:10:00	0	11	2	7	5
1	2008-09-11 11:11:00	0	11	2	7	5
1	2008-09-11 11:12:00	0	11	2	7	5
1	2008-09-11 11:13:00	0	11	2	7	5
1	2008-09-11 11:14:00	0	11	2	7	5
1	2008-09-11 11:15:00	10	11	2	7	5
1	2008-09-11 11:16:00	0	11	2	7	5
1	2008-09-11 11:17:00	20	11	2	7	5
1	2008-09-11 11:18:00	351	11	2	7	5
1	2008-09-11 11:19:00	10	11	2	7	5
1	2008-09-11 11:20:00	205	11	2	7	5
1	2008-09-11 11:21:00	20	11	2	7	5
1	2008-09-11 11:22:00	41	11	2	7	5
1	2008-09-11 11:23:00	0	11	2	7	5
1	2008-09-11 11:24:00	181	11	2	7	5
1	2008-09-11 11:25:00	20	11	2	7	5
1	2008-09-11 11:26:00	0	11	2	7	5
1	2008-09-11 11:27:00	30	11	2	7	5
1	2008-09-11 11:28:00	132	11	2	7	5
1	2008-09-11 11:29:00	51	11	2	7	5
1	2008-09-11 11:30:00	10	11	2	7	5
1	2008-09-11 11:31:00	30	11	2	7	5
1	2008-09-11 11:32:00	51	11	2	7	5
1	2008-09-11 11:33:00	0	11	2	7	5
1	2008-09-11 11:34:00	20	11	2	7	5
1	2008-09-11 11:35:00	410	11	2	7	5
1	2008-09-11 11:36:00	410	11	2	7	5
1	2008-09-11 11:37:00	20	11	2	7	5
1	2008-09-11 11:38:00	0	11	2	7	5
1	2008-09-11 11:39:00	0	11	2	7	5
1	2008-09-11 11:40:00	20	11	2	7	5
1	2008-09-11 11:41:00	0	11	2	7	5
1	2008-09-11 11:42:00	41	11	2	7	5
1	2008-09-11 11:43:00	71	11	2	7	5
1	2008-09-11 11:44:00	132	11	2	7	5
1	2008-09-11 11:45:00	30	11	2	7	5
1	2008-09-11 11:46:00	0	11	2	7	5
1	2008-09-11 11:47:00	0	11	2	7	5
1	2008-09-11 11:48:00	0	11	2	7	5
1	2008-09-11 11:49:00	0	11	2	7	5
1	2008-09-11 11:50:00	0	11	2	7	5
1	2008-09-11 11:51:00	0	11	2	7	5
1	2008-09-11 11:52:00	230	11	2	7	5
1	2008-09-11 11:53:00	0	11	2	7	5
1	2008-09-11 11:54:00	71	11	2	7	5
1	2008-09-11 11:55:00	71	11	2	7	5
1	2008-09-11 11:56:00	205	11	2	7	5
1	2008-09-11 11:57:00	51	11	2	7	5
1	2008-09-11 11:58:00	30	11	2	7	5
1	2008-09-11 11:59:00	0	11	2	7	5
1	2008-09-11 12:00:00	0	11	2	7	5
1	2008-09-11 12:01:00	0	12	3	7	5
1	2008-09-11 12:02:00	0	12	3	7	5
1	2008-09-11 12:03:00	0	12	3	7	5
1	2008-09-11 12:04:00	0	12	3	7	5
1	2008-09-11 12:05:00	0	12	3	7	5
1	2008-09-11 12:06:00	0	12	3	7	5
1	2008-09-11 12:07:00	61	12	3	7	5
1	2008-09-11 12:08:00	61	12	3	7	5
1	2008-09-11 12:09:00	20	12	3	7	5
1	2008-09-11 12:10:00	91	12	3	7	5
1	2008-09-11 12:11:00	0	12	3	7	5
1	2008-09-11 12:12:00	30	12	3	7	5
1	2008-09-11 12:13:00	41	12	3	7	5
1	2008-09-11 12:14:00	30	12	3	7	5
1	2008-09-11 12:15:00	0	12	3	7	5
1	2008-09-11 12:16:00	41	12	3	7	5
1	2008-09-11 12:17:00	91	12	3	7	5
1	2008-09-11 12:18:00	0	12	3	7	5
1	2008-09-11 12:19:00	81	12	3	7	5
1	2008-09-11 12:20:00	0	12	3	7	5
1	2008-09-11 12:21:00	0	12	3	7	5
1	2008-09-11 12:22:00	0	12	3	7	5
1	2008-09-11 12:23:00	0	12	3	7	5
1	2008-09-11 12:24:00	0	12	3	7	5
1	2008-09-11 12:25:00	144	12	3	7	5
1	2008-09-11 12:26:00	1447	12	3	7	5
1	2008-09-11 12:27:00	20	12	3	7	5
1	2008-09-11 12:28:00	41	12	3	7	5
1	2008-09-11 12:29:00	0	12	3	7	5
1	2008-09-11 12:30:00	410	12	3	7	5
1	2008-09-11 12:31:00	20	12	3	7	5
1	2008-09-11 12:32:00	102	12	3	7	5
1	2008-09-11 12:33:00	102	12	3	7	5
1	2008-09-11 12:34:00	51	12	3	7	5
1	2008-09-11 12:35:00	41	12	3	7	5
1	2008-09-11 12:36:00	169	12	3	7	5
1	2008-09-11 12:37:00	634	12	3	7	5
1	2008-09-11 12:38:00	10	12	3	7	5
1	2008-09-11 12:39:00	30	12	3	7	5
1	2008-09-11 12:40:00	41	12	3	7	5
1	2008-09-11 12:41:00	61	12	3	7	5
1	2008-09-11 12:42:00	266	12	3	7	5
1	2008-09-11 12:43:00	20	12	3	7	5
1	2008-09-11 12:44:00	10	12	3	7	5
1	2008-09-11 12:45:00	71	12	3	7	5
1	2008-09-11 12:46:00	51	12	3	7	5
1	2008-09-11 12:47:00	0	12	3	7	5
1	2008-09-11 12:48:00	91	12	3	7	5
1	2008-09-11 12:49:00	41	12	3	7	5
1	2008-09-11 12:50:00	41	12	3	7	5
1	2008-09-11 12:51:00	0	12	3	7	5
1	2008-09-11 12:52:00	0	12	3	7	5
1	2008-09-11 12:53:00	10	12	3	7	5
1	2008-09-11 12:54:00	410	12	3	7	5
1	2008-09-11 12:55:00	81	12	3	7	5
1	2008-09-11 12:56:00	10	12	3	7	5
1	2008-09-11 12:57:00	20	12	3	7	5
1	2008-09-11 12:58:00	51	12	3	7	5
1	2008-09-11 12:59:00	20	12	3	7	5
1	2008-09-11 13:00:00	459	12	3	7	5
1	2008-09-11 13:01:00	673	13	3	7	5
1	2008-09-11 13:02:00	41	13	3	7	5
1	2008-09-11 13:03:00	0	13	3	7	5
1	2008-09-11 13:04:00	0	13	3	7	5
1	2008-09-11 13:05:00	10	13	3	7	5
1	2008-09-11 13:06:00	10	13	3	7	5
1	2008-09-11 13:07:00	0	13	3	7	5
1	2008-09-11 13:08:00	0	13	3	7	5
1	2008-09-11 13:09:00	1130	13	3	7	5
1	2008-09-11 13:10:00	1026	13	3	7	5
1	2008-09-11 13:11:00	794	13	3	7	5
1	2008-09-11 13:12:00	351	13	3	7	5
1	2008-09-11 13:13:00	0	13	3	7	5
1	2008-09-11 13:14:00	0	13	3	7	5
1	2008-09-11 13:15:00	61	13	3	7	5
1	2008-09-11 13:16:00	41	13	3	7	5
1	2008-09-11 13:17:00	71	13	3	7	5
1	2008-09-11 13:18:00	30	13	3	7	5
1	2008-09-11 13:19:00	81	13	3	7	5
1	2008-09-11 13:20:00	144	13	3	7	5
1	2008-09-11 13:21:00	41	13	3	7	5
1	2008-09-11 13:22:00	51	13	3	7	5
1	2008-09-11 13:23:00	0	13	3	7	5
1	2008-09-11 13:24:00	0	13	3	7	5
1	2008-09-11 13:25:00	0	13	3	7	5
1	2008-09-11 13:26:00	81	13	3	7	5
1	2008-09-11 13:27:00	91	13	3	7	5
1	2008-09-11 13:28:00	0	13	3	7	5
1	2008-09-11 13:29:00	0	13	3	7	5
1	2008-09-11 13:30:00	242	13	3	7	5
1	2008-09-11 13:31:00	0	13	3	7	5
1	2008-09-11 13:32:00	884	13	3	7	5
1	2008-09-11 13:33:00	443	13	3	7	5
1	2008-09-11 13:34:00	0	13	3	7	5
1	2008-09-11 13:35:00	0	13	3	7	5
1	2008-09-11 13:36:00	0	13	3	7	5
1	2008-09-11 13:37:00	0	13	3	7	5
1	2008-09-11 13:38:00	0	13	3	7	5
1	2008-09-11 13:39:00	30	13	3	7	5
1	2008-09-11 13:40:00	0	13	3	7	5
1	2008-09-11 13:41:00	0	13	3	7	5
1	2008-09-11 13:42:00	0	13	3	7	5
1	2008-09-11 13:43:00	0	13	3	7	5
1	2008-09-11 13:44:00	0	13	3	7	5
1	2008-09-11 13:45:00	0	13	3	7	5
1	2008-09-11 13:46:00	0	13	3	7	5
1	2008-09-11 13:47:00	0	13	3	7	5
1	2008-09-11 13:48:00	0	13	3	7	5
1	2008-09-11 13:49:00	0	13	3	7	5
1	2008-09-11 13:50:00	0	13	3	7	5
1	2008-09-11 13:51:00	30	13	3	7	5
1	2008-09-11 13:52:00	91	13	3	7	5
1	2008-09-11 13:53:00	266	13	3	7	5
1	2008-09-11 13:54:00	0	13	3	7	5
1	2008-09-11 13:55:00	0	13	3	7	5
1	2008-09-11 13:56:00	20	13	3	7	5
1	2008-09-11 13:57:00	0	13	3	7	5
1	2008-09-11 13:58:00	0	13	3	7	5
1	2008-09-11 13:59:00	217	13	3	7	5
1	2008-09-11 14:00:00	10	13	3	7	5
1	2008-09-11 14:01:00	0	14	3	7	5
1	2008-09-11 14:02:00	0	14	3	7	5
1	2008-09-11 14:03:00	0	14	3	7	5
1	2008-09-11 14:04:00	61	14	3	7	5
1	2008-09-11 14:05:00	0	14	3	7	5
1	2008-09-11 14:06:00	0	14	3	7	5
1	2008-09-11 14:07:00	542	14	3	7	5
1	2008-09-11 14:08:00	1182	14	3	7	5
1	2008-09-11 14:09:00	30	14	3	7	5
1	2008-09-11 14:10:00	0	14	3	7	5
1	2008-09-11 14:11:00	0	14	3	7	5
1	2008-09-11 14:12:00	0	14	3	7	5
1	2008-09-11 14:13:00	0	14	3	7	5
1	2008-09-11 14:14:00	0	14	3	7	5
1	2008-09-11 14:15:00	0	14	3	7	5
1	2008-09-11 14:16:00	0	14	3	7	5
1	2008-09-11 14:17:00	0	14	3	7	5
1	2008-09-11 14:18:00	0	14	3	7	5
1	2008-09-11 14:19:00	0	14	3	7	5
1	2008-09-11 14:20:00	0	14	3	7	5
1	2008-09-11 14:21:00	51	14	3	7	5
1	2008-09-11 14:22:00	906	14	3	7	5
1	2008-09-11 14:23:00	351	14	3	7	5
1	2008-09-11 14:24:00	61	14	3	7	5
1	2008-09-11 14:25:00	0	14	3	7	5
1	2008-09-11 14:26:00	10	14	3	7	5
1	2008-09-11 14:27:00	0	14	3	7	5
1	2008-09-11 14:28:00	0	14	3	7	5
1	2008-09-11 14:29:00	0	14	3	7	5
1	2008-09-11 14:30:00	295	14	3	7	5
1	2008-09-11 14:31:00	673	14	3	7	5
1	2008-09-11 14:32:00	542	14	3	7	5
1	2008-09-11 14:33:00	380	14	3	7	5
1	2008-09-11 14:34:00	475	14	3	7	5
1	2008-09-11 14:35:00	459	14	3	7	5
1	2008-09-11 14:36:00	693	14	3	7	5
1	2008-09-11 14:37:00	794	14	3	7	5
1	2008-09-11 14:38:00	217	14	3	7	5
1	2008-09-11 14:39:00	0	14	3	7	5
1	2008-09-11 14:40:00	0	14	3	7	5
1	2008-09-11 14:41:00	0	14	3	7	5
1	2008-09-11 14:42:00	20	14	3	7	5
1	2008-09-11 14:43:00	774	14	3	7	5
1	2008-09-11 14:44:00	693	14	3	7	5
1	2008-09-11 14:45:00	20	14	3	7	5
1	2008-09-11 14:46:00	20	14	3	7	5
1	2008-09-11 14:47:00	754	14	3	7	5
1	2008-09-11 14:48:00	0	14	3	7	5
1	2008-09-11 14:49:00	0	14	3	7	5
1	2008-09-11 14:50:00	0	14	3	7	5
1	2008-09-11 14:51:00	0	14	3	7	5
1	2008-09-11 14:52:00	0	14	3	7	5
1	2008-09-11 14:53:00	10	14	3	7	5
1	2008-09-11 14:54:00	81	14	3	7	5
1	2008-09-11 14:55:00	230	14	3	7	5
1	2008-09-11 14:56:00	323	14	3	7	5
1	2008-09-11 14:57:00	112	14	3	7	5
1	2008-09-11 14:58:00	0	14	3	7	5
1	2008-09-11 14:59:00	0	14	3	7	5
1	2008-09-11 15:00:00	0	14	3	7	5
1	2008-09-11 15:01:00	20	15	3	7	5
1	2008-09-11 15:02:00	443	15	3	7	5
1	2008-09-11 15:03:00	81	15	3	7	5
1	2008-09-11 15:04:00	0	15	3	7	5
1	2008-09-11 15:05:00	122	15	3	7	5
1	2008-09-11 15:06:00	280	15	3	7	5
1	2008-09-11 15:07:00	459	15	3	7	5
1	2008-09-11 15:08:00	20	15	3	7	5
1	2008-09-11 15:09:00	0	15	3	7	5
1	2008-09-11 15:10:00	508	15	3	7	5
1	2008-09-11 15:11:00	205	15	3	7	5
1	2008-09-11 15:12:00	295	15	3	7	5
1	2008-09-11 15:13:00	542	15	3	7	5
1	2008-09-11 15:14:00	0	15	3	7	5
1	2008-09-11 15:15:00	20	15	3	7	5
1	2008-09-11 15:16:00	0	15	3	7	5
1	2008-09-11 15:17:00	0	15	3	7	5
1	2008-09-11 15:18:00	0	15	3	7	5
1	2008-09-11 15:19:00	0	15	3	7	5
1	2008-09-11 15:20:00	10	15	3	7	5
1	2008-09-11 15:21:00	0	15	3	7	5
1	2008-09-11 15:22:00	0	15	3	7	5
1	2008-09-11 15:23:00	0	15	3	7	5
1	2008-09-11 15:24:00	0	15	3	7	5
1	2008-09-11 15:25:00	0	15	3	7	5
1	2008-09-11 15:26:00	0	15	3	7	5
1	2008-09-11 15:27:00	0	15	3	7	5
1	2008-09-11 15:28:00	0	15	3	7	5
1	2008-09-11 15:29:00	0	15	3	7	5
1	2008-09-11 15:30:00	0	15	3	7	5
1	2008-09-11 15:31:00	0	15	3	7	5
1	2008-09-11 15:32:00	0	15	3	7	5
1	2008-09-11 15:33:00	0	15	3	7	5
1	2008-09-11 15:34:00	0	15	3	7	5
1	2008-09-11 15:35:00	0	15	3	7	5
1	2008-09-11 15:36:00	0	15	3	7	5
1	2008-09-11 15:37:00	10	15	3	7	5
1	2008-09-11 15:38:00	0	15	3	7	5
1	2008-09-11 15:39:00	0	15	3	7	5
1	2008-09-11 15:40:00	0	15	3	7	5
1	2008-09-11 15:41:00	0	15	3	7	5
1	2008-09-11 15:42:00	0	15	3	7	5
1	2008-09-11 15:43:00	0	15	3	7	5
1	2008-09-11 15:44:00	0	15	3	7	5
1	2008-09-11 15:45:00	0	15	3	7	5
1	2008-09-11 15:46:00	0	15	3	7	5
1	2008-09-11 15:47:00	0	15	3	7	5
1	2008-09-11 15:48:00	20	15	3	7	5
1	2008-09-11 15:49:00	0	15	3	7	5
1	2008-09-11 15:50:00	0	15	3	7	5
1	2008-09-11 15:51:00	0	15	3	7	5
1	2008-09-11 15:52:00	0	15	3	7	5
1	2008-09-11 15:53:00	0	15	3	7	5
1	2008-09-11 15:54:00	0	15	3	7	5
1	2008-09-11 15:55:00	0	15	3	7	5
1	2008-09-11 15:56:00	0	15	3	7	5
1	2008-09-11 15:57:00	0	15	3	7	5
1	2008-09-11 15:58:00	41	15	3	7	5
1	2008-09-11 15:59:00	0	15	3	7	5
1	2008-09-11 16:00:00	0	15	3	7	5
1	2008-09-11 16:01:00	20	16	3	7	5
1	2008-09-11 16:02:00	0	16	3	7	5
1	2008-09-11 16:03:00	0	16	3	7	5
1	2008-09-11 16:04:00	0	16	3	7	5
1	2008-09-11 16:05:00	0	16	3	7	5
1	2008-09-11 16:06:00	0	16	3	7	5
1	2008-09-11 16:07:00	0	16	3	7	5
1	2008-09-11 16:08:00	0	16	3	7	5
1	2008-09-11 16:09:00	0	16	3	7	5
1	2008-09-11 16:10:00	0	16	3	7	5
1	2008-09-11 16:11:00	0	16	3	7	5
1	2008-09-11 16:12:00	0	16	3	7	5
1	2008-09-11 16:13:00	0	16	3	7	5
1	2008-09-11 16:14:00	0	16	3	7	5
1	2008-09-11 16:15:00	0	16	3	7	5
1	2008-09-11 16:16:00	0	16	3	7	5
1	2008-09-11 16:17:00	0	16	3	7	5
1	2008-09-11 16:18:00	0	16	3	7	5
1	2008-09-11 16:19:00	0	16	3	7	5
1	2008-09-11 16:20:00	0	16	3	7	5
1	2008-09-11 16:21:00	0	16	3	7	5
1	2008-09-11 16:22:00	0	16	3	7	5
1	2008-09-11 16:23:00	0	16	3	7	5
1	2008-09-11 16:24:00	0	16	3	7	5
1	2008-09-11 16:25:00	0	16	3	7	5
1	2008-09-11 16:26:00	0	16	3	7	5
1	2008-09-11 16:27:00	0	16	3	7	5
1	2008-09-11 16:28:00	30	16	3	7	5
1	2008-09-11 16:29:00	0	16	3	7	5
1	2008-09-11 16:30:00	0	16	3	7	5
1	2008-09-11 16:31:00	0	16	3	7	5
1	2008-09-11 16:32:00	0	16	3	7	5
1	2008-09-11 16:33:00	0	16	3	7	5
1	2008-09-11 16:34:00	0	16	3	7	5
1	2008-09-11 16:35:00	71	16	3	7	5
1	2008-09-11 16:36:00	0	16	3	7	5
1	2008-09-11 16:37:00	0	16	3	7	5
1	2008-09-11 16:38:00	0	16	3	7	5
1	2008-09-11 16:39:00	0	16	3	7	5
1	2008-09-11 16:40:00	0	16	3	7	5
1	2008-09-11 16:41:00	0	16	3	7	5
1	2008-09-11 16:42:00	0	16	3	7	5
1	2008-09-11 16:43:00	30	16	3	7	5
1	2008-09-11 16:44:00	20	16	3	7	5
1	2008-09-11 16:45:00	0	16	3	7	5
1	2008-09-11 16:46:00	0	16	3	7	5
1	2008-09-11 16:47:00	0	16	3	7	5
1	2008-09-11 16:48:00	0	16	3	7	5
1	2008-09-11 16:49:00	0	16	3	7	5
1	2008-09-11 16:50:00	0	16	3	7	5
1	2008-09-11 16:51:00	0	16	3	7	5
1	2008-09-11 16:52:00	0	16	3	7	5
1	2008-09-11 16:53:00	0	16	3	7	5
1	2008-09-11 16:54:00	0	16	3	7	5
1	2008-09-11 16:55:00	0	16	3	7	5
1	2008-09-11 16:56:00	0	16	3	7	5
1	2008-09-11 16:57:00	0	16	3	7	5
1	2008-09-11 16:58:00	0	16	3	7	5
1	2008-09-11 16:59:00	0	16	3	7	5
1	2008-09-11 17:00:00	0	16	3	7	5
1	2008-09-11 17:01:00	30	17	3	7	5
1	2008-09-11 17:02:00	0	17	3	7	5
1	2008-09-11 17:03:00	41	17	3	7	5
1	2008-09-11 17:04:00	0	17	3	7	5
1	2008-09-11 17:05:00	71	17	3	7	5
1	2008-09-11 17:06:00	0	17	3	7	5
1	2008-09-11 17:07:00	0	17	3	7	5
1	2008-09-11 17:08:00	10	17	3	7	5
1	2008-09-11 17:09:00	20	17	3	7	5
1	2008-09-11 17:10:00	295	17	3	7	5
1	2008-09-11 17:11:00	0	17	3	7	5
1	2008-09-11 17:12:00	0	17	3	7	5
1	2008-09-11 17:13:00	0	17	3	7	5
1	2008-09-11 17:14:00	0	17	3	7	5
1	2008-09-11 17:15:00	0	17	3	7	5
1	2008-09-11 17:16:00	0	17	3	7	5
1	2008-09-11 17:17:00	0	17	3	7	5
1	2008-09-11 17:18:00	0	17	3	7	5
1	2008-09-11 17:19:00	0	17	3	7	5
1	2008-09-11 17:20:00	0	17	3	7	5
1	2008-09-11 17:21:00	0	17	3	7	5
1	2008-09-11 17:22:00	0	17	3	7	5
1	2008-09-11 17:23:00	0	17	3	7	5
1	2008-09-11 17:24:00	0	17	3	7	5
1	2008-09-11 17:25:00	0	17	3	7	5
1	2008-09-11 17:26:00	0	17	3	7	5
1	2008-09-11 17:27:00	0	17	3	7	5
1	2008-09-11 17:28:00	0	17	3	7	5
1	2008-09-11 17:29:00	0	17	3	7	5
1	2008-09-11 17:30:00	0	17	3	7	5
1	2008-09-11 17:31:00	0	17	3	7	5
1	2008-09-11 17:32:00	0	17	3	7	5
1	2008-09-11 17:33:00	0	17	3	7	5
1	2008-09-11 17:34:00	0	17	3	7	5
1	2008-09-11 17:35:00	0	17	3	7	5
1	2008-09-11 17:36:00	0	17	3	7	5
1	2008-09-11 17:37:00	0	17	3	7	5
1	2008-09-11 17:38:00	0	17	3	7	5
1	2008-09-11 17:39:00	20	17	3	7	5
1	2008-09-11 17:40:00	0	17	3	7	5
1	2008-09-11 17:41:00	0	17	3	7	5
1	2008-09-11 17:42:00	61	17	3	7	5
1	2008-09-11 17:43:00	0	17	3	7	5
1	2008-09-11 17:44:00	51	17	3	7	5
1	2008-09-11 17:45:00	0	17	3	7	5
1	2008-09-11 17:46:00	91	17	3	7	5
1	2008-09-11 17:47:00	0	17	3	7	5
1	2008-09-11 17:48:00	0	17	3	7	5
1	2008-09-11 17:49:00	0	17	3	7	5
1	2008-09-11 17:50:00	0	17	3	7	5
1	2008-09-11 17:51:00	0	17	3	7	5
1	2008-09-11 17:52:00	0	17	3	7	5
1	2008-09-11 17:53:00	0	17	3	7	5
1	2008-09-11 17:54:00	0	17	3	7	5
1	2008-09-11 17:55:00	0	17	3	7	5
1	2008-09-11 17:56:00	0	17	3	7	5
1	2008-09-11 17:57:00	0	17	3	7	5
1	2008-09-11 17:58:00	0	17	3	7	5
1	2008-09-11 17:59:00	41	17	3	7	5
1	2008-09-11 18:00:00	0	17	3	7	5
1	2008-09-11 18:01:00	0	18	4	7	5
1	2008-09-11 18:02:00	0	18	4	7	5
1	2008-09-11 18:03:00	0	18	4	7	5
1	2008-09-11 18:04:00	0	18	4	7	5
1	2008-09-11 18:05:00	0	18	4	7	5
1	2008-09-11 18:06:00	0	18	4	7	5
1	2008-09-11 18:07:00	0	18	4	7	5
1	2008-09-11 18:08:00	0	18	4	7	5
1	2008-09-11 18:09:00	0	18	4	7	5
1	2008-09-11 18:10:00	0	18	4	7	5
1	2008-09-11 18:11:00	0	18	4	7	5
1	2008-09-11 18:12:00	0	18	4	7	5
1	2008-09-11 18:13:00	0	18	4	7	5
1	2008-09-11 18:14:00	0	18	4	7	5
1	2008-09-11 18:15:00	0	18	4	7	5
1	2008-09-11 18:16:00	0	18	4	7	5
1	2008-09-11 18:17:00	0	18	4	7	5
1	2008-09-11 18:18:00	0	18	4	7	5
1	2008-09-11 18:19:00	0	18	4	7	5
1	2008-09-11 18:20:00	91	18	4	7	5
1	2008-09-11 18:21:00	1026	18	4	7	5
1	2008-09-11 18:22:00	351	18	4	7	5
1	2008-09-11 18:23:00	309	18	4	7	5
1	2008-09-11 18:24:00	427	18	4	7	5
1	2008-09-11 18:25:00	1447	18	4	7	5
1	2008-09-11 18:26:00	1002	18	4	7	5
1	2008-09-11 18:27:00	459	18	4	7	5
1	2008-09-11 18:28:00	839	18	4	7	5
1	2008-09-11 18:29:00	906	18	4	7	5
1	2008-09-11 18:30:00	1156	18	4	7	5
1	2008-09-11 18:31:00	774	18	4	7	5
1	2008-09-11 18:32:00	597	18	4	7	5
1	2008-09-11 18:33:00	475	18	4	7	5
1	2008-09-11 18:34:00	156	18	4	7	5
1	2008-09-11 18:35:00	475	18	4	7	5
1	2008-09-11 18:36:00	309	18	4	7	5
1	2008-09-11 18:37:00	0	18	4	7	5
1	2008-09-11 18:38:00	0	18	4	7	5
1	2008-09-11 18:39:00	0	18	4	7	5
1	2008-09-11 18:40:00	0	18	4	7	5
1	2008-09-11 18:41:00	0	18	4	7	5
1	2008-09-11 18:42:00	0	18	4	7	5
1	2008-09-11 18:43:00	0	18	4	7	5
1	2008-09-11 18:44:00	10	18	4	7	5
1	2008-09-11 18:45:00	0	18	4	7	5
1	2008-09-11 18:46:00	0	18	4	7	5
1	2008-09-11 18:47:00	0	18	4	7	5
1	2008-09-11 18:48:00	0	18	4	7	5
1	2008-09-11 18:49:00	0	18	4	7	5
1	2008-09-11 18:50:00	0	18	4	7	5
1	2008-09-11 18:51:00	0	18	4	7	5
1	2008-09-11 18:52:00	0	18	4	7	5
1	2008-09-11 18:53:00	1296	18	4	7	5
1	2008-09-11 18:54:00	295	18	4	7	5
1	2008-09-11 18:55:00	230	18	4	7	5
1	2008-09-11 18:56:00	0	18	4	7	5
1	2008-09-11 18:57:00	20	18	4	7	5
1	2008-09-11 18:58:00	0	18	4	7	5
1	2008-09-11 18:59:00	20	18	4	7	5
1	2008-09-11 19:00:00	20	18	4	7	5
1	2008-09-11 19:01:00	0	19	4	7	5
1	2008-09-11 19:02:00	144	19	4	7	5
1	2008-09-11 19:03:00	10	19	4	7	5
1	2008-09-11 19:04:00	91	19	4	7	5
1	2008-09-11 19:05:00	0	19	4	7	5
1	2008-09-11 19:06:00	30	19	4	7	5
1	2008-09-11 19:07:00	0	19	4	7	5
1	2008-09-11 19:08:00	10	19	4	7	5
1	2008-09-11 19:09:00	0	19	4	7	5
1	2008-09-11 19:10:00	0	19	4	7	5
1	2008-09-11 19:11:00	0	19	4	7	5
1	2008-09-11 19:12:00	0	19	4	7	5
1	2008-09-11 19:13:00	0	19	4	7	5
1	2008-09-11 19:14:00	0	19	4	7	5
1	2008-09-11 19:15:00	0	19	4	7	5
1	2008-09-11 19:16:00	0	19	4	7	5
1	2008-09-11 19:17:00	20	19	4	7	5
1	2008-09-11 19:18:00	20	19	4	7	5
1	2008-09-11 19:19:00	0	19	4	7	5
1	2008-09-11 19:20:00	51	19	4	7	5
1	2008-09-11 19:21:00	61	19	4	7	5
1	2008-09-11 19:22:00	30	19	4	7	5
1	2008-09-11 19:23:00	0	19	4	7	5
1	2008-09-11 19:24:00	0	19	4	7	5
1	2008-09-11 19:25:00	0	19	4	7	5
1	2008-09-11 19:26:00	10	19	4	7	5
1	2008-09-11 19:27:00	0	19	4	7	5
1	2008-09-11 19:28:00	0	19	4	7	5
1	2008-09-11 19:29:00	0	19	4	7	5
1	2008-09-11 19:30:00	0	19	4	7	5
1	2008-09-11 19:31:00	0	19	4	7	5
1	2008-09-11 19:32:00	0	19	4	7	5
1	2008-09-11 19:33:00	0	19	4	7	5
1	2008-09-11 19:34:00	0	19	4	7	5
1	2008-09-11 19:35:00	0	19	4	7	5
1	2008-09-11 19:36:00	0	19	4	7	5
1	2008-09-11 19:37:00	0	19	4	7	5
1	2008-09-11 19:38:00	10	19	4	7	5
1	2008-09-11 19:39:00	10	19	4	7	5
1	2008-09-11 19:40:00	0	19	4	7	5
1	2008-09-11 19:41:00	0	19	4	7	5
1	2008-09-11 19:42:00	20	19	4	7	5
1	2008-09-11 19:43:00	0	19	4	7	5
1	2008-09-11 19:44:00	10	19	4	7	5
1	2008-09-11 19:45:00	10	19	4	7	5
1	2008-09-11 19:46:00	10	19	4	7	5
1	2008-09-11 19:47:00	10	19	4	7	5
1	2008-09-11 19:48:00	0	19	4	7	5
1	2008-09-11 19:49:00	10	19	4	7	5
1	2008-09-11 19:50:00	10	19	4	7	5
1	2008-09-11 19:51:00	0	19	4	7	5
1	2008-09-11 19:52:00	0	19	4	7	5
1	2008-09-11 19:53:00	0	19	4	7	5
1	2008-09-11 19:54:00	41	19	4	7	5
1	2008-09-11 19:55:00	10	19	4	7	5
1	2008-09-11 19:56:00	0	19	4	7	5
1	2008-09-11 19:57:00	10	19	4	7	5
1	2008-09-11 19:58:00	10	19	4	7	5
1	2008-09-11 19:59:00	0	19	4	7	5
1	2008-09-11 20:00:00	112	19	4	7	5
1	2008-09-11 20:01:00	102	20	4	7	5
1	2008-09-11 20:02:00	0	20	4	7	5
1	2008-09-11 20:03:00	10	20	4	7	5
1	2008-09-11 20:04:00	280	20	4	7	5
1	2008-09-11 20:05:00	61	20	4	7	5
1	2008-09-11 20:06:00	0	20	4	7	5
1	2008-09-11 20:07:00	10	20	4	7	5
1	2008-09-11 20:08:00	0	20	4	7	5
1	2008-09-11 20:09:00	10	20	4	7	5
1	2008-09-11 20:10:00	0	20	4	7	5
1	2008-09-11 20:11:00	10	20	4	7	5
1	2008-09-11 20:12:00	0	20	4	7	5
1	2008-09-11 20:13:00	0	20	4	7	5
1	2008-09-11 20:14:00	0	20	4	7	5
1	2008-09-11 20:15:00	0	20	4	7	5
1	2008-09-11 20:16:00	0	20	4	7	5
1	2008-09-11 20:17:00	0	20	4	7	5
1	2008-09-11 20:18:00	81	20	4	7	5
1	2008-09-11 20:19:00	0	20	4	7	5
1	2008-09-11 20:20:00	0	20	4	7	5
1	2008-09-11 20:21:00	0	20	4	7	5
1	2008-09-11 20:22:00	0	20	4	7	5
1	2008-09-11 20:23:00	112	20	4	7	5
1	2008-09-11 20:24:00	884	20	4	7	5
1	2008-09-11 20:25:00	41	20	4	7	5
1	2008-09-11 20:26:00	10	20	4	7	5
1	2008-09-11 20:27:00	71	20	4	7	5
1	2008-09-11 20:28:00	266	20	4	7	5
1	2008-09-11 20:29:00	0	20	4	7	5
1	2008-09-11 20:30:00	122	20	4	7	5
1	2008-09-11 20:31:00	2060	20	4	7	5
1	2008-09-11 20:32:00	71	20	4	7	5
1	2008-09-11 20:33:00	0	20	4	7	5
1	2008-09-11 20:34:00	205	20	4	7	5
1	2008-09-11 20:35:00	71	20	4	7	5
1	2008-09-11 20:36:00	0	20	4	7	5
1	2008-09-11 20:37:00	30	20	4	7	5
1	2008-09-11 20:38:00	0	20	4	7	5
1	2008-09-11 20:39:00	0	20	4	7	5
1	2008-09-11 20:40:00	10	20	4	7	5
1	2008-09-11 20:41:00	0	20	4	7	5
1	2008-09-11 20:42:00	0	20	4	7	5
1	2008-09-11 20:43:00	0	20	4	7	5
1	2008-09-11 20:44:00	0	20	4	7	5
1	2008-09-11 20:45:00	0	20	4	7	5
1	2008-09-11 20:46:00	0	20	4	7	5
1	2008-09-11 20:47:00	0	20	4	7	5
1	2008-09-11 20:48:00	1182	20	4	7	5
1	2008-09-11 20:49:00	217	20	4	7	5
1	2008-09-11 20:50:00	0	20	4	7	5
1	2008-09-11 20:51:00	0	20	4	7	5
1	2008-09-11 20:52:00	30	20	4	7	5
1	2008-09-11 20:53:00	0	20	4	7	5
1	2008-09-11 20:54:00	0	20	4	7	5
1	2008-09-11 20:55:00	295	20	4	7	5
1	2008-09-11 20:56:00	0	20	4	7	5
1	2008-09-11 20:57:00	0	20	4	7	5
1	2008-09-11 20:58:00	230	20	4	7	5
1	2008-09-11 20:59:00	242	20	4	7	5
1	2008-09-11 21:00:00	0	20	4	7	5
1	2008-09-11 21:01:00	0	21	4	7	5
1	2008-09-11 21:02:00	266	21	4	7	5
1	2008-09-11 21:03:00	0	21	4	7	5
1	2008-09-11 21:04:00	0	21	4	7	5
1	2008-09-11 21:05:00	0	21	4	7	5
1	2008-09-11 21:06:00	884	21	4	7	5
1	2008-09-11 21:07:00	337	21	4	7	5
1	2008-09-11 21:08:00	1050	21	4	7	5
1	2008-09-11 21:09:00	1002	21	4	7	5
1	2008-09-11 21:10:00	579	21	4	7	5
1	2008-09-11 21:11:00	1002	21	4	7	5
1	2008-09-11 21:12:00	884	21	4	7	5
1	2008-09-11 21:13:00	733	21	4	7	5
1	2008-09-11 21:14:00	693	21	4	7	5
1	2008-09-11 21:15:00	524	21	4	7	5
1	2008-09-11 21:16:00	41	21	4	7	5
1	2008-09-11 21:17:00	0	21	4	7	5
1	2008-09-11 21:18:00	0	21	4	7	5
1	2008-09-11 21:19:00	0	21	4	7	5
1	2008-09-11 21:20:00	41	21	4	7	5
1	2008-09-11 21:21:00	0	21	4	7	5
1	2008-09-11 21:22:00	0	21	4	7	5
1	2008-09-11 21:23:00	10	21	4	7	5
1	2008-09-11 21:24:00	0	21	4	7	5
1	2008-09-11 21:25:00	0	21	4	7	5
1	2008-09-11 21:26:00	30	21	4	7	5
1	2008-09-11 21:27:00	0	21	4	7	5
1	2008-09-11 21:28:00	0	21	4	7	5
1	2008-09-11 21:29:00	0	21	4	7	5
1	2008-09-11 21:30:00	30	21	4	7	5
1	2008-09-11 21:31:00	10	21	4	7	5
1	2008-09-11 21:32:00	0	21	4	7	5
1	2008-09-11 21:33:00	0	21	4	7	5
1	2008-09-11 21:34:00	10	21	4	7	5
1	2008-09-11 21:35:00	41	21	4	7	5
1	2008-09-11 21:36:00	0	21	4	7	5
1	2008-09-11 21:37:00	0	21	4	7	5
1	2008-09-11 21:38:00	0	21	4	7	5
1	2008-09-11 21:39:00	0	21	4	7	5
1	2008-09-11 21:40:00	0	21	4	7	5
1	2008-09-11 21:41:00	0	21	4	7	5
1	2008-09-11 21:42:00	0	21	4	7	5
1	2008-09-11 21:43:00	0	21	4	7	5
1	2008-09-11 21:44:00	0	21	4	7	5
1	2008-09-11 21:45:00	0	21	4	7	5
1	2008-09-11 21:46:00	0	21	4	7	5
1	2008-09-11 21:47:00	0	21	4	7	5
1	2008-09-11 21:48:00	0	21	4	7	5
1	2008-09-11 21:49:00	0	21	4	7	5
1	2008-09-11 21:50:00	0	21	4	7	5
1	2008-09-11 21:51:00	20	21	4	7	5
1	2008-09-11 21:52:00	102	21	4	7	5
1	2008-09-11 21:53:00	122	21	4	7	5
1	2008-09-11 21:54:00	122	21	4	7	5
1	2008-09-11 21:55:00	132	21	4	7	5
1	2008-09-11 21:56:00	102	21	4	7	5
1	2008-09-11 21:57:00	112	21	4	7	5
1	2008-09-11 21:58:00	51	21	4	7	5
1	2008-09-11 21:59:00	0	21	4	7	5
1	2008-09-11 22:00:00	0	21	4	7	5
1	2008-09-11 22:01:00	0	22	4	7	5
1	2008-09-11 22:02:00	0	22	4	7	5
1	2008-09-11 22:03:00	0	22	4	7	5
1	2008-09-11 22:04:00	0	22	4	7	5
1	2008-09-11 22:05:00	0	22	4	7	5
1	2008-09-11 22:06:00	0	22	4	7	5
1	2008-09-11 22:07:00	0	22	4	7	5
1	2008-09-11 22:08:00	0	22	4	7	5
1	2008-09-11 22:09:00	0	22	4	7	5
1	2008-09-11 22:10:00	0	22	4	7	5
1	2008-09-11 22:11:00	0	22	4	7	5
1	2008-09-11 22:12:00	0	22	4	7	5
1	2008-09-11 22:13:00	0	22	4	7	5
1	2008-09-11 22:14:00	0	22	4	7	5
1	2008-09-11 22:15:00	0	22	4	7	5
1	2008-09-11 22:16:00	0	22	4	7	5
1	2008-09-11 22:17:00	0	22	4	7	5
1	2008-09-11 22:18:00	0	22	4	7	5
1	2008-09-11 22:19:00	0	22	4	7	5
1	2008-09-11 22:20:00	0	22	4	7	5
1	2008-09-11 22:21:00	0	22	4	7	5
1	2008-09-11 22:22:00	0	22	4	7	5
1	2008-09-11 22:23:00	0	22	4	7	5
1	2008-09-11 22:24:00	0	22	4	7	5
1	2008-09-11 22:25:00	0	22	4	7	5
1	2008-09-11 22:26:00	0	22	4	7	5
1	2008-09-11 22:27:00	0	22	4	7	5
1	2008-09-11 22:28:00	10	22	4	7	5
1	2008-09-11 22:29:00	0	22	4	7	5
1	2008-09-11 22:30:00	0	22	4	7	5
1	2008-09-11 22:31:00	41	22	4	7	5
1	2008-09-11 22:32:00	0	22	4	7	5
1	2008-09-11 22:33:00	0	22	4	7	5
1	2008-09-11 22:34:00	0	22	4	7	5
1	2008-09-11 22:35:00	0	22	4	7	5
1	2008-09-11 22:36:00	0	22	4	7	5
1	2008-09-11 22:37:00	20	22	4	7	5
1	2008-09-11 22:38:00	0	22	4	7	5
1	2008-09-11 22:39:00	0	22	4	7	5
1	2008-09-11 22:40:00	0	22	4	7	5
1	2008-09-11 22:41:00	0	22	4	7	5
1	2008-09-11 22:42:00	0	22	4	7	5
1	2008-09-11 22:43:00	0	22	4	7	5
1	2008-09-11 22:44:00	71	22	4	7	5
1	2008-09-11 22:45:00	51	22	4	7	5
1	2008-09-11 22:46:00	0	22	4	7	5
1	2008-09-11 22:47:00	0	22	4	7	5
1	2008-09-11 22:48:00	0	22	4	7	5
1	2008-09-11 22:49:00	0	22	4	7	5
1	2008-09-11 22:50:00	0	22	4	7	5
1	2008-09-11 22:51:00	0	22	4	7	5
1	2008-09-11 22:52:00	0	22	4	7	5
1	2008-09-11 22:53:00	0	22	4	7	5
1	2008-09-11 22:54:00	71	22	4	7	5
1	2008-09-11 22:55:00	0	22	4	7	5
1	2008-09-11 22:56:00	0	22	4	7	5
1	2008-09-11 22:57:00	0	22	4	7	5
1	2008-09-11 22:58:00	0	22	4	7	5
1	2008-09-11 22:59:00	0	22	4	7	5
1	2008-09-11 23:00:00	0	22	4	7	5
1	2008-09-11 23:01:00	0	23	4	7	5
1	2008-09-11 23:02:00	0	23	4	7	5
1	2008-09-11 23:03:00	0	23	4	7	5
1	2008-09-11 23:04:00	0	23	4	7	5
1	2008-09-11 23:05:00	0	23	4	7	5
1	2008-09-11 23:06:00	0	23	4	7	5
1	2008-09-11 23:07:00	91	23	4	7	5
1	2008-09-11 23:08:00	102	23	4	7	5
1	2008-09-11 23:09:00	673	23	4	7	5
1	2008-09-11 23:10:00	61	23	4	7	5
1	2008-09-11 23:11:00	0	23	4	7	5
1	2008-09-11 23:12:00	10	23	4	7	5
1	2008-09-11 23:13:00	0	23	4	7	5
1	2008-09-11 23:14:00	0	23	4	7	5
1	2008-09-11 23:15:00	0	23	4	7	5
1	2008-09-11 23:16:00	0	23	4	7	5
1	2008-09-11 23:17:00	0	23	4	7	5
1	2008-09-11 23:18:00	0	23	4	7	5
1	2008-09-11 23:19:00	20	23	4	7	5
1	2008-09-11 23:20:00	0	23	4	7	5
1	2008-09-11 23:21:00	0	23	4	7	5
1	2008-09-11 23:22:00	0	23	4	7	5
1	2008-09-11 23:23:00	0	23	4	7	5
1	2008-09-11 23:24:00	0	23	4	7	5
1	2008-09-11 23:25:00	0	23	4	7	5
1	2008-09-11 23:26:00	0	23	4	7	5
1	2008-09-11 23:27:00	0	23	4	7	5
1	2008-09-11 23:28:00	0	23	4	7	5
1	2008-09-11 23:29:00	0	23	4	7	5
1	2008-09-11 23:30:00	0	23	4	7	5
1	2008-09-11 23:31:00	10	23	4	7	5
1	2008-09-11 23:32:00	0	23	4	7	5
1	2008-09-11 23:33:00	0	23	4	7	5
1	2008-09-11 23:34:00	0	23	4	7	5
1	2008-09-11 23:35:00	0	23	4	7	5
1	2008-09-11 23:36:00	0	23	4	7	5
1	2008-09-11 23:37:00	0	23	4	7	5
1	2008-09-11 23:38:00	0	23	4	7	5
1	2008-09-11 23:39:00	0	23	4	7	5
1	2008-09-11 23:40:00	20	23	4	7	5
1	2008-09-11 23:41:00	0	23	4	7	5
1	2008-09-11 23:42:00	81	23	4	7	5
1	2008-09-11 23:43:00	0	23	4	7	5
1	2008-09-11 23:44:00	0	23	4	7	5
1	2008-09-11 23:45:00	0	23	4	7	5
1	2008-09-11 23:46:00	0	23	4	7	5
1	2008-09-11 23:47:00	337	23	4	7	5
1	2008-09-11 23:48:00	0	23	4	7	5
1	2008-09-11 23:49:00	0	23	4	7	5
1	2008-09-11 23:50:00	51	23	4	7	5
1	2008-09-11 23:51:00	0	23	4	7	5
1	2008-09-11 23:52:00	0	23	4	7	5
1	2008-09-11 23:53:00	0	23	4	7	5
1	2008-09-11 23:54:00	0	23	4	7	5
1	2008-09-11 23:55:00	0	23	4	7	5
1	2008-09-11 23:56:00	0	23	4	7	5
1	2008-09-11 23:57:00	0	23	4	7	5
1	2008-09-11 23:58:00	0	23	4	7	5
1	2008-09-11 23:59:00	0	23	4	7	5
1	2008-09-12	0	23	4	7	5
1	2008-09-12 00:01:00	0	0	1	8	6
1	2008-09-12 00:02:00	0	0	1	8	6
1	2008-09-12 00:03:00	0	0	1	8	6
1	2008-09-12 00:04:00	30	0	1	8	6
1	2008-09-12 00:05:00	20	0	1	8	6
1	2008-09-12 00:06:00	51	0	1	8	6
1	2008-09-12 00:07:00	266	0	1	8	6
1	2008-09-12 00:08:00	81	0	1	8	6
1	2008-09-12 00:09:00	30	0	1	8	6
1	2008-09-12 00:10:00	41	0	1	8	6
1	2008-09-12 00:11:00	71	0	1	8	6
1	2008-09-12 00:12:00	0	0	1	8	6
1	2008-09-12 00:13:00	0	0	1	8	6
1	2008-09-12 00:14:00	0	0	1	8	6
1	2008-09-12 00:15:00	0	0	1	8	6
1	2008-09-12 00:16:00	0	0	1	8	6
1	2008-09-12 00:17:00	0	0	1	8	6
1	2008-09-12 00:18:00	0	0	1	8	6
1	2008-09-12 00:19:00	0	0	1	8	6
1	2008-09-12 00:20:00	0	0	1	8	6
1	2008-09-12 00:21:00	0	0	1	8	6
1	2008-09-12 00:22:00	0	0	1	8	6
1	2008-09-12 00:23:00	0	0	1	8	6
1	2008-09-12 00:24:00	0	0	1	8	6
1	2008-09-12 00:25:00	0	0	1	8	6
1	2008-09-12 00:26:00	0	0	1	8	6
1	2008-09-12 00:27:00	51	0	1	8	6
1	2008-09-12 00:28:00	20	0	1	8	6
1	2008-09-12 00:29:00	0	0	1	8	6
1	2008-09-12 00:30:00	0	0	1	8	6
1	2008-09-12 00:31:00	0	0	1	8	6
1	2008-09-12 00:32:00	0	0	1	8	6
1	2008-09-12 00:33:00	0	0	1	8	6
1	2008-09-12 00:34:00	0	0	1	8	6
1	2008-09-12 00:35:00	0	0	1	8	6
1	2008-09-12 00:36:00	0	0	1	8	6
1	2008-09-12 00:37:00	0	0	1	8	6
1	2008-09-12 00:38:00	0	0	1	8	6
1	2008-09-12 00:39:00	0	0	1	8	6
1	2008-09-12 00:40:00	0	0	1	8	6
1	2008-09-12 00:41:00	0	0	1	8	6
1	2008-09-12 00:42:00	0	0	1	8	6
1	2008-09-12 00:43:00	0	0	1	8	6
1	2008-09-12 00:44:00	0	0	1	8	6
1	2008-09-12 00:45:00	0	0	1	8	6
1	2008-09-12 00:46:00	0	0	1	8	6
1	2008-09-12 00:47:00	0	0	1	8	6
1	2008-09-12 00:48:00	0	0	1	8	6
1	2008-09-12 00:49:00	0	0	1	8	6
1	2008-09-12 00:50:00	0	0	1	8	6
1	2008-09-12 00:51:00	0	0	1	8	6
1	2008-09-12 00:52:00	0	0	1	8	6
1	2008-09-12 00:53:00	0	0	1	8	6
1	2008-09-12 00:54:00	0	0	1	8	6
1	2008-09-12 00:55:00	81	0	1	8	6
1	2008-09-12 00:56:00	380	0	1	8	6
1	2008-09-12 00:57:00	20	0	1	8	6
1	2008-09-12 00:58:00	0	0	1	8	6
1	2008-09-12 00:59:00	20	0	1	8	6
1	2008-09-12 01:00:00	0	0	1	8	6
1	2008-09-12 01:01:00	0	1	1	8	6
1	2008-09-12 01:02:00	0	1	1	8	6
1	2008-09-12 01:03:00	0	1	1	8	6
1	2008-09-12 01:04:00	0	1	1	8	6
1	2008-09-12 01:05:00	0	1	1	8	6
1	2008-09-12 01:06:00	0	1	1	8	6
1	2008-09-12 01:07:00	0	1	1	8	6
1	2008-09-12 01:08:00	0	1	1	8	6
1	2008-09-12 01:09:00	0	1	1	8	6
1	2008-09-12 01:10:00	0	1	1	8	6
1	2008-09-12 01:11:00	0	1	1	8	6
1	2008-09-12 01:12:00	0	1	1	8	6
1	2008-09-12 01:13:00	0	1	1	8	6
1	2008-09-12 01:14:00	0	1	1	8	6
1	2008-09-12 01:15:00	0	1	1	8	6
1	2008-09-12 01:16:00	0	1	1	8	6
1	2008-09-12 01:17:00	0	1	1	8	6
1	2008-09-12 01:18:00	0	1	1	8	6
1	2008-09-12 01:19:00	0	1	1	8	6
1	2008-09-12 01:20:00	0	1	1	8	6
1	2008-09-12 01:21:00	0	1	1	8	6
1	2008-09-12 01:22:00	0	1	1	8	6
1	2008-09-12 01:23:00	0	1	1	8	6
1	2008-09-12 01:24:00	0	1	1	8	6
1	2008-09-12 01:25:00	0	1	1	8	6
1	2008-09-12 01:26:00	0	1	1	8	6
1	2008-09-12 01:27:00	0	1	1	8	6
1	2008-09-12 01:28:00	0	1	1	8	6
1	2008-09-12 01:29:00	0	1	1	8	6
1	2008-09-12 01:30:00	0	1	1	8	6
1	2008-09-12 01:31:00	0	1	1	8	6
1	2008-09-12 01:32:00	0	1	1	8	6
1	2008-09-12 01:33:00	0	1	1	8	6
1	2008-09-12 01:34:00	0	1	1	8	6
1	2008-09-12 01:35:00	0	1	1	8	6
1	2008-09-12 01:36:00	0	1	1	8	6
1	2008-09-12 01:37:00	0	1	1	8	6
1	2008-09-12 01:38:00	0	1	1	8	6
1	2008-09-12 01:39:00	0	1	1	8	6
1	2008-09-12 01:40:00	0	1	1	8	6
1	2008-09-12 01:41:00	0	1	1	8	6
1	2008-09-12 01:42:00	0	1	1	8	6
1	2008-09-12 01:43:00	0	1	1	8	6
1	2008-09-12 01:44:00	0	1	1	8	6
1	2008-09-12 01:45:00	0	1	1	8	6
1	2008-09-12 01:46:00	0	1	1	8	6
1	2008-09-12 01:47:00	0	1	1	8	6
1	2008-09-12 01:48:00	0	1	1	8	6
1	2008-09-12 01:49:00	0	1	1	8	6
1	2008-09-12 01:50:00	0	1	1	8	6
1	2008-09-12 01:51:00	0	1	1	8	6
1	2008-09-12 01:52:00	0	1	1	8	6
1	2008-09-12 01:53:00	0	1	1	8	6
1	2008-09-12 01:54:00	0	1	1	8	6
1	2008-09-12 01:55:00	0	1	1	8	6
1	2008-09-12 01:56:00	0	1	1	8	6
1	2008-09-12 01:57:00	0	1	1	8	6
1	2008-09-12 01:58:00	0	1	1	8	6
1	2008-09-12 01:59:00	0	1	1	8	6
1	2008-09-12 02:00:00	10	1	1	8	6
1	2008-09-12 02:01:00	0	2	1	8	6
1	2008-09-12 02:02:00	91	2	1	8	6
1	2008-09-12 02:03:00	30	2	1	8	6
1	2008-09-12 02:04:00	102	2	1	8	6
1	2008-09-12 02:05:00	10	2	1	8	6
1	2008-09-12 02:06:00	10	2	1	8	6
1	2008-09-12 02:07:00	0	2	1	8	6
1	2008-09-12 02:08:00	156	2	1	8	6
1	2008-09-12 02:09:00	0	2	1	8	6
1	2008-09-12 02:10:00	0	2	1	8	6
1	2008-09-12 02:11:00	0	2	1	8	6
1	2008-09-12 02:12:00	0	2	1	8	6
1	2008-09-12 02:13:00	0	2	1	8	6
1	2008-09-12 02:14:00	0	2	1	8	6
1	2008-09-12 02:15:00	30	2	1	8	6
1	2008-09-12 02:16:00	0	2	1	8	6
1	2008-09-12 02:17:00	0	2	1	8	6
1	2008-09-12 02:18:00	0	2	1	8	6
1	2008-09-12 02:19:00	0	2	1	8	6
1	2008-09-12 02:20:00	0	2	1	8	6
1	2008-09-12 02:21:00	0	2	1	8	6
1	2008-09-12 02:22:00	0	2	1	8	6
1	2008-09-12 02:23:00	0	2	1	8	6
1	2008-09-12 02:24:00	0	2	1	8	6
1	2008-09-12 02:25:00	0	2	1	8	6
1	2008-09-12 02:26:00	0	2	1	8	6
1	2008-09-12 02:27:00	0	2	1	8	6
1	2008-09-12 02:28:00	0	2	1	8	6
1	2008-09-12 02:29:00	0	2	1	8	6
1	2008-09-12 02:30:00	0	2	1	8	6
1	2008-09-12 02:31:00	0	2	1	8	6
1	2008-09-12 02:32:00	0	2	1	8	6
1	2008-09-12 02:33:00	0	2	1	8	6
1	2008-09-12 02:34:00	0	2	1	8	6
1	2008-09-12 02:35:00	0	2	1	8	6
1	2008-09-12 02:36:00	0	2	1	8	6
1	2008-09-12 02:37:00	0	2	1	8	6
1	2008-09-12 02:38:00	0	2	1	8	6
1	2008-09-12 02:39:00	0	2	1	8	6
1	2008-09-12 02:40:00	0	2	1	8	6
1	2008-09-12 02:41:00	0	2	1	8	6
1	2008-09-12 02:42:00	0	2	1	8	6
1	2008-09-12 02:43:00	0	2	1	8	6
1	2008-09-12 02:44:00	0	2	1	8	6
1	2008-09-12 02:45:00	0	2	1	8	6
1	2008-09-12 02:46:00	0	2	1	8	6
1	2008-09-12 02:47:00	0	2	1	8	6
1	2008-09-12 02:48:00	20	2	1	8	6
1	2008-09-12 02:49:00	0	2	1	8	6
1	2008-09-12 02:50:00	0	2	1	8	6
1	2008-09-12 02:51:00	254	2	1	8	6
1	2008-09-12 02:52:00	10	2	1	8	6
1	2008-09-12 02:53:00	0	2	1	8	6
1	2008-09-12 02:54:00	0	2	1	8	6
1	2008-09-12 02:55:00	0	2	1	8	6
1	2008-09-12 02:56:00	0	2	1	8	6
1	2008-09-12 02:57:00	0	2	1	8	6
1	2008-09-12 02:58:00	0	2	1	8	6
1	2008-09-12 02:59:00	0	2	1	8	6
1	2008-09-12 03:00:00	0	2	1	8	6
1	2008-09-12 03:01:00	0	3	1	8	6
1	2008-09-12 03:02:00	0	3	1	8	6
1	2008-09-12 03:03:00	0	3	1	8	6
1	2008-09-12 03:04:00	0	3	1	8	6
1	2008-09-12 03:05:00	0	3	1	8	6
1	2008-09-12 03:06:00	0	3	1	8	6
1	2008-09-12 03:07:00	0	3	1	8	6
1	2008-09-12 03:08:00	0	3	1	8	6
1	2008-09-12 03:09:00	0	3	1	8	6
1	2008-09-12 03:10:00	0	3	1	8	6
1	2008-09-12 03:11:00	0	3	1	8	6
1	2008-09-12 03:12:00	0	3	1	8	6
1	2008-09-12 03:13:00	579	3	1	8	6
1	2008-09-12 03:14:00	1544	3	1	8	6
1	2008-09-12 03:15:00	977	3	1	8	6
1	2008-09-12 03:16:00	459	3	1	8	6
1	2008-09-12 03:17:00	10	3	1	8	6
1	2008-09-12 03:18:00	10	3	1	8	6
1	2008-09-12 03:19:00	10	3	1	8	6
1	2008-09-12 03:20:00	0	3	1	8	6
1	2008-09-12 03:21:00	579	3	1	8	6
1	2008-09-12 03:22:00	30	3	1	8	6
1	2008-09-12 03:23:00	309	3	1	8	6
1	2008-09-12 03:24:00	266	3	1	8	6
1	2008-09-12 03:25:00	410	3	1	8	6
1	2008-09-12 03:26:00	542	3	1	8	6
1	2008-09-12 03:27:00	508	3	1	8	6
1	2008-09-12 03:28:00	794	3	1	8	6
1	2008-09-12 03:29:00	561	3	1	8	6
1	2008-09-12 03:30:00	0	3	1	8	6
1	2008-09-12 03:31:00	20	3	1	8	6
1	2008-09-12 03:32:00	0	3	1	8	6
1	2008-09-12 03:33:00	10	3	1	8	6
1	2008-09-12 03:34:00	0	3	1	8	6
1	2008-09-12 03:35:00	0	3	1	8	6
1	2008-09-12 03:36:00	242	3	1	8	6
1	2008-09-12 03:37:00	884	3	1	8	6
1	2008-09-12 03:38:00	410	3	1	8	6
1	2008-09-12 03:39:00	884	3	1	8	6
1	2008-09-12 03:40:00	616	3	1	8	6
1	2008-09-12 03:41:00	309	3	1	8	6
1	2008-09-12 03:42:00	0	3	1	8	6
1	2008-09-12 03:43:00	0	3	1	8	6
1	2008-09-12 03:44:00	0	3	1	8	6
1	2008-09-12 03:45:00	0	3	1	8	6
1	2008-09-12 03:46:00	0	3	1	8	6
1	2008-09-12 03:47:00	10	3	1	8	6
1	2008-09-12 03:48:00	51	3	1	8	6
1	2008-09-12 03:49:00	634	3	1	8	6
1	2008-09-12 03:50:00	91	3	1	8	6
1	2008-09-12 03:51:00	0	3	1	8	6
1	2008-09-12 03:52:00	673	3	1	8	6
1	2008-09-12 03:53:00	693	3	1	8	6
1	2008-09-12 03:54:00	394	3	1	8	6
1	2008-09-12 03:55:00	181	3	1	8	6
1	2008-09-12 03:56:00	309	3	1	8	6
1	2008-09-12 03:57:00	10	3	1	8	6
1	2008-09-12 03:58:00	10	3	1	8	6
1	2008-09-12 03:59:00	0	3	1	8	6
1	2008-09-12 04:00:00	0	3	1	8	6
1	2008-09-12 04:01:00	41	4	1	8	6
1	2008-09-12 04:02:00	0	4	1	8	6
1	2008-09-12 04:03:00	10	4	1	8	6
1	2008-09-12 04:04:00	144	4	1	8	6
1	2008-09-12 04:05:00	0	4	1	8	6
1	2008-09-12 04:06:00	0	4	1	8	6
1	2008-09-12 04:07:00	0	4	1	8	6
1	2008-09-12 04:08:00	0	4	1	8	6
1	2008-09-12 04:09:00	0	4	1	8	6
1	2008-09-12 04:10:00	0	4	1	8	6
1	2008-09-12 04:11:00	0	4	1	8	6
1	2008-09-12 04:12:00	0	4	1	8	6
1	2008-09-12 04:13:00	61	4	1	8	6
1	2008-09-12 04:14:00	0	4	1	8	6
1	2008-09-12 04:15:00	20	4	1	8	6
1	2008-09-12 04:16:00	0	4	1	8	6
1	2008-09-12 04:17:00	10	4	1	8	6
1	2008-09-12 04:18:00	10	4	1	8	6
1	2008-09-12 04:19:00	169	4	1	8	6
1	2008-09-12 04:20:00	673	4	1	8	6
1	2008-09-12 04:21:00	0	4	1	8	6
1	2008-09-12 04:22:00	10	4	1	8	6
1	2008-09-12 04:23:00	0	4	1	8	6
1	2008-09-12 04:24:00	0	4	1	8	6
1	2008-09-12 04:25:00	0	4	1	8	6
1	2008-09-12 04:26:00	0	4	1	8	6
1	2008-09-12 04:27:00	102	4	1	8	6
1	2008-09-12 04:28:00	10	4	1	8	6
1	2008-09-12 04:29:00	0	4	1	8	6
1	2008-09-12 04:30:00	0	4	1	8	6
1	2008-09-12 04:31:00	0	4	1	8	6
1	2008-09-12 04:32:00	0	4	1	8	6
1	2008-09-12 04:33:00	0	4	1	8	6
1	2008-09-12 04:34:00	0	4	1	8	6
1	2008-09-12 04:35:00	0	4	1	8	6
1	2008-09-12 04:36:00	0	4	1	8	6
1	2008-09-12 04:37:00	0	4	1	8	6
1	2008-09-12 04:38:00	0	4	1	8	6
1	2008-09-12 04:39:00	0	4	1	8	6
1	2008-09-12 04:40:00	0	4	1	8	6
1	2008-09-12 04:41:00	0	4	1	8	6
1	2008-09-12 04:42:00	0	4	1	8	6
1	2008-09-12 04:43:00	309	4	1	8	6
1	2008-09-12 04:44:00	0	4	1	8	6
1	2008-09-12 04:45:00	0	4	1	8	6
1	2008-09-12 04:46:00	0	4	1	8	6
1	2008-09-12 04:47:00	71	4	1	8	6
1	2008-09-12 04:48:00	0	4	1	8	6
1	2008-09-12 04:49:00	122	4	1	8	6
1	2008-09-12 04:50:00	81	4	1	8	6
1	2008-09-12 04:51:00	0	4	1	8	6
1	2008-09-12 04:52:00	0	4	1	8	6
1	2008-09-12 04:53:00	0	4	1	8	6
1	2008-09-12 04:54:00	0	4	1	8	6
1	2008-09-12 04:55:00	0	4	1	8	6
1	2008-09-12 04:56:00	0	4	1	8	6
1	2008-09-12 04:57:00	0	4	1	8	6
1	2008-09-12 04:58:00	0	4	1	8	6
1	2008-09-12 04:59:00	0	4	1	8	6
1	2008-09-12 05:00:00	0	4	1	8	6
1	2008-09-12 05:01:00	0	5	1	8	6
1	2008-09-12 05:02:00	0	5	1	8	6
1	2008-09-12 05:03:00	0	5	1	8	6
1	2008-09-12 05:04:00	0	5	1	8	6
1	2008-09-12 05:05:00	0	5	1	8	6
1	2008-09-12 05:06:00	0	5	1	8	6
1	2008-09-12 05:07:00	0	5	1	8	6
1	2008-09-12 05:08:00	102	5	1	8	6
1	2008-09-12 05:09:00	10	5	1	8	6
1	2008-09-12 05:10:00	30	5	1	8	6
1	2008-09-12 05:11:00	20	5	1	8	6
1	2008-09-12 05:12:00	0	5	1	8	6
1	2008-09-12 05:13:00	30	5	1	8	6
1	2008-09-12 05:14:00	81	5	1	8	6
1	2008-09-12 05:15:00	217	5	1	8	6
1	2008-09-12 05:16:00	817	5	1	8	6
1	2008-09-12 05:17:00	20	5	1	8	6
1	2008-09-12 05:18:00	0	5	1	8	6
1	2008-09-12 05:19:00	0	5	1	8	6
1	2008-09-12 05:20:00	0	5	1	8	6
1	2008-09-12 05:21:00	0	5	1	8	6
1	2008-09-12 05:22:00	0	5	1	8	6
1	2008-09-12 05:23:00	0	5	1	8	6
1	2008-09-12 05:24:00	0	5	1	8	6
1	2008-09-12 05:25:00	0	5	1	8	6
1	2008-09-12 05:26:00	0	5	1	8	6
1	2008-09-12 05:27:00	0	5	1	8	6
1	2008-09-12 05:28:00	0	5	1	8	6
1	2008-09-12 05:29:00	0	5	1	8	6
1	2008-09-12 05:30:00	0	5	1	8	6
1	2008-09-12 05:31:00	0	5	1	8	6
1	2008-09-12 05:32:00	0	5	1	8	6
1	2008-09-12 05:33:00	0	5	1	8	6
1	2008-09-12 05:34:00	0	5	1	8	6
1	2008-09-12 05:35:00	0	5	1	8	6
1	2008-09-12 05:36:00	0	5	1	8	6
1	2008-09-12 05:37:00	0	5	1	8	6
1	2008-09-12 05:38:00	0	5	1	8	6
1	2008-09-12 05:39:00	0	5	1	8	6
1	2008-09-12 05:40:00	0	5	1	8	6
1	2008-09-12 05:41:00	41	5	1	8	6
1	2008-09-12 05:42:00	0	5	1	8	6
1	2008-09-12 05:43:00	0	5	1	8	6
1	2008-09-12 05:44:00	0	5	1	8	6
1	2008-09-12 05:45:00	0	5	1	8	6
1	2008-09-12 05:46:00	0	5	1	8	6
1	2008-09-12 05:47:00	10	5	1	8	6
1	2008-09-12 05:48:00	0	5	1	8	6
1	2008-09-12 05:49:00	0	5	1	8	6
1	2008-09-12 05:50:00	0	5	1	8	6
1	2008-09-12 05:51:00	0	5	1	8	6
1	2008-09-12 05:52:00	0	5	1	8	6
1	2008-09-12 05:53:00	0	5	1	8	6
1	2008-09-12 05:54:00	10	5	1	8	6
1	2008-09-12 05:55:00	0	5	1	8	6
1	2008-09-12 05:56:00	0	5	1	8	6
1	2008-09-12 05:57:00	0	5	1	8	6
1	2008-09-12 05:58:00	51	5	1	8	6
1	2008-09-12 05:59:00	794	5	1	8	6
1	2008-09-12 06:00:00	508	5	1	8	6
1	2008-09-12 06:01:00	508	6	2	8	6
1	2008-09-12 06:02:00	0	6	2	8	6
1	2008-09-12 06:03:00	30	6	2	8	6
1	2008-09-12 06:04:00	0	6	2	8	6
1	2008-09-12 06:05:00	0	6	2	8	6
1	2008-09-12 06:06:00	20	6	2	8	6
1	2008-09-12 06:07:00	254	6	2	8	6
1	2008-09-12 06:08:00	410	6	2	8	6
1	2008-09-12 06:09:00	754	6	2	8	6
1	2008-09-12 06:10:00	380	6	2	8	6
1	2008-09-12 06:11:00	0	6	2	8	6
1	2008-09-12 06:12:00	0	6	2	8	6
1	2008-09-12 06:13:00	10	6	2	8	6
1	2008-09-12 06:14:00	0	6	2	8	6
1	2008-09-12 06:15:00	906	6	2	8	6
1	2008-09-12 06:16:00	0	6	2	8	6
1	2008-09-12 06:17:00	81	6	2	8	6
1	2008-09-12 06:18:00	10	6	2	8	6
1	2008-09-12 06:19:00	0	6	2	8	6
1	2008-09-12 06:20:00	10	6	2	8	6
1	2008-09-12 06:21:00	0	6	2	8	6
1	2008-09-12 06:22:00	10	6	2	8	6
1	2008-09-12 06:23:00	10	6	2	8	6
1	2008-09-12 06:24:00	0	6	2	8	6
1	2008-09-12 06:25:00	41	6	2	8	6
1	2008-09-12 06:26:00	524	6	2	8	6
1	2008-09-12 06:27:00	51	6	2	8	6
1	2008-09-12 06:28:00	0	6	2	8	6
1	2008-09-12 06:29:00	0	6	2	8	6
1	2008-09-12 06:30:00	41	6	2	8	6
1	2008-09-12 06:31:00	0	6	2	8	6
1	2008-09-12 06:32:00	41	6	2	8	6
1	2008-09-12 06:33:00	102	6	2	8	6
1	2008-09-12 06:34:00	0	6	2	8	6
1	2008-09-12 06:35:00	91	6	2	8	6
1	2008-09-12 06:36:00	0	6	2	8	6
1	2008-09-12 06:37:00	81	6	2	8	6
1	2008-09-12 06:38:00	673	6	2	8	6
1	2008-09-12 06:39:00	410	6	2	8	6
1	2008-09-12 06:40:00	20	6	2	8	6
1	2008-09-12 06:41:00	181	6	2	8	6
1	2008-09-12 06:42:00	266	6	2	8	6
1	2008-09-12 06:43:00	10	6	2	8	6
1	2008-09-12 06:44:00	10	6	2	8	6
1	2008-09-12 06:45:00	242	6	2	8	6
1	2008-09-12 06:46:00	30	6	2	8	6
1	2008-09-12 06:47:00	0	6	2	8	6
1	2008-09-12 06:48:00	351	6	2	8	6
1	2008-09-12 06:49:00	112	6	2	8	6
1	2008-09-12 06:50:00	81	6	2	8	6
1	2008-09-12 06:51:00	0	6	2	8	6
1	2008-09-12 06:52:00	266	6	2	8	6
1	2008-09-12 06:53:00	459	6	2	8	6
1	2008-09-12 06:54:00	0	6	2	8	6
1	2008-09-12 06:55:00	0	6	2	8	6
1	2008-09-12 06:56:00	0	6	2	8	6
1	2008-09-12 06:57:00	10	6	2	8	6
1	2008-09-12 06:58:00	205	6	2	8	6
1	2008-09-12 06:59:00	410	6	2	8	6
1	2008-09-12 07:00:00	524	6	2	8	6
1	2008-09-12 07:01:00	156	7	2	8	6
1	2008-09-12 07:02:00	492	7	2	8	6
1	2008-09-12 07:03:00	20	7	2	8	6
1	2008-09-12 07:04:00	122	7	2	8	6
1	2008-09-12 07:05:00	51	7	2	8	6
1	2008-09-12 07:06:00	10	7	2	8	6
1	2008-09-12 07:07:00	561	7	2	8	6
1	2008-09-12 07:08:00	929	7	2	8	6
1	2008-09-12 07:09:00	41	7	2	8	6
1	2008-09-12 07:10:00	30	7	2	8	6
1	2008-09-12 07:11:00	366	7	2	8	6
1	2008-09-12 07:12:00	144	7	2	8	6
1	2008-09-12 07:13:00	0	7	2	8	6
1	2008-09-12 07:14:00	0	7	2	8	6
1	2008-09-12 07:15:00	475	7	2	8	6
1	2008-09-12 07:16:00	0	7	2	8	6
1	2008-09-12 07:17:00	410	7	2	8	6
1	2008-09-12 07:18:00	51	7	2	8	6
1	2008-09-12 07:19:00	323	7	2	8	6
1	2008-09-12 07:20:00	181	7	2	8	6
1	2008-09-12 07:21:00	0	7	2	8	6
1	2008-09-12 07:22:00	10	7	2	8	6
1	2008-09-12 07:23:00	20	7	2	8	6
1	2008-09-12 07:24:00	0	7	2	8	6
1	2008-09-12 07:25:00	51	7	2	8	6
1	2008-09-12 07:26:00	0	7	2	8	6
1	2008-09-12 07:27:00	61	7	2	8	6
1	2008-09-12 07:28:00	51	7	2	8	6
1	2008-09-12 07:29:00	0	7	2	8	6
1	2008-09-12 07:30:00	193	7	2	8	6
1	2008-09-12 07:31:00	380	7	2	8	6
1	2008-09-12 07:32:00	1026	7	2	8	6
1	2008-09-12 07:33:00	884	7	2	8	6
1	2008-09-12 07:34:00	774	7	2	8	6
1	2008-09-12 07:35:00	1544	7	2	8	6
1	2008-09-12 07:36:00	906	7	2	8	6
1	2008-09-12 07:37:00	929	7	2	8	6
1	2008-09-12 07:38:00	1002	7	2	8	6
1	2008-09-12 07:39:00	977	7	2	8	6
1	2008-09-12 07:40:00	1002	7	2	8	6
1	2008-09-12 07:41:00	754	7	2	8	6
1	2008-09-12 07:42:00	977	7	2	8	6
1	2008-09-12 07:43:00	817	7	2	8	6
1	2008-09-12 07:44:00	929	7	2	8	6
1	2008-09-12 07:45:00	1156	7	2	8	6
1	2008-09-12 07:46:00	1268	7	2	8	6
1	2008-09-12 07:47:00	906	7	2	8	6
1	2008-09-12 07:48:00	1002	7	2	8	6
1	2008-09-12 07:49:00	1026	7	2	8	6
1	2008-09-12 07:50:00	861	7	2	8	6
1	2008-09-12 07:51:00	1416	7	2	8	6
1	2008-09-12 07:52:00	953	7	2	8	6
1	2008-09-12 07:53:00	443	7	2	8	6
1	2008-09-12 07:54:00	193	7	2	8	6
1	2008-09-12 07:55:00	181	7	2	8	6
1	2008-09-12 07:56:00	508	7	2	8	6
1	2008-09-12 07:57:00	542	7	2	8	6
1	2008-09-12 07:58:00	1447	7	2	8	6
1	2008-09-12 07:59:00	1788	7	2	8	6
1	2008-09-12 08:00:00	1211	7	2	8	6
1	2008-09-12 08:01:00	977	8	2	8	6
1	2008-09-12 08:02:00	410	8	2	8	6
1	2008-09-12 08:03:00	51	8	2	8	6
1	2008-09-12 08:04:00	0	8	2	8	6
1	2008-09-12 08:05:00	0	8	2	8	6
1	2008-09-12 08:06:00	61	8	2	8	6
1	2008-09-12 08:07:00	459	8	2	8	6
1	2008-09-12 08:08:00	754	8	2	8	6
1	2008-09-12 08:09:00	953	8	2	8	6
1	2008-09-12 08:10:00	839	8	2	8	6
1	2008-09-12 08:11:00	733	8	2	8	6
1	2008-09-12 08:12:00	1211	8	2	8	6
1	2008-09-12 08:13:00	1156	8	2	8	6
1	2008-09-12 08:14:00	693	8	2	8	6
1	2008-09-12 08:15:00	884	8	2	8	6
1	2008-09-12 08:16:00	1050	8	2	8	6
1	2008-09-12 08:17:00	929	8	2	8	6
1	2008-09-12 08:18:00	1130	8	2	8	6
1	2008-09-12 08:19:00	1103	8	2	8	6
1	2008-09-12 08:20:00	1026	8	2	8	6
1	2008-09-12 08:21:00	1156	8	2	8	6
1	2008-09-12 08:22:00	1386	8	2	8	6
1	2008-09-12 08:23:00	1103	8	2	8	6
1	2008-09-12 08:24:00	794	8	2	8	6
1	2008-09-12 08:25:00	1611	8	2	8	6
1	2008-09-12 08:26:00	1325	8	2	8	6
1	2008-09-12 08:27:00	929	8	2	8	6
1	2008-09-12 08:28:00	673	8	2	8	6
1	2008-09-12 08:29:00	295	8	2	8	6
1	2008-09-12 08:30:00	459	8	2	8	6
1	2008-09-12 08:31:00	410	8	2	8	6
1	2008-09-12 08:32:00	0	8	2	8	6
1	2008-09-12 08:33:00	0	8	2	8	6
1	2008-09-12 08:34:00	817	8	2	8	6
1	2008-09-12 08:35:00	30	8	2	8	6
1	2008-09-12 08:36:00	0	8	2	8	6
1	2008-09-12 08:37:00	0	8	2	8	6
1	2008-09-12 08:38:00	10	8	2	8	6
1	2008-09-12 08:39:00	0	8	2	8	6
1	2008-09-12 08:40:00	0	8	2	8	6
1	2008-09-12 08:41:00	20	8	2	8	6
1	2008-09-12 08:42:00	156	8	2	8	6
1	2008-09-12 08:43:00	20	8	2	8	6
1	2008-09-12 08:44:00	10	8	2	8	6
1	2008-09-12 08:45:00	51	8	2	8	6
1	2008-09-12 08:46:00	102	8	2	8	6
1	2008-09-12 08:47:00	181	8	2	8	6
1	2008-09-12 08:48:00	0	8	2	8	6
1	2008-09-12 08:49:00	132	8	2	8	6
1	2008-09-12 08:50:00	652	8	2	8	6
1	2008-09-12 08:51:00	524	8	2	8	6
1	2008-09-12 08:52:00	81	8	2	8	6
1	2008-09-12 08:53:00	10	8	2	8	6
1	2008-09-12 08:54:00	280	8	2	8	6
1	2008-09-12 08:55:00	81	8	2	8	6
1	2008-09-12 08:56:00	41	8	2	8	6
1	2008-09-12 08:57:00	20	8	2	8	6
1	2008-09-12 08:58:00	81	8	2	8	6
1	2008-09-12 08:59:00	30	8	2	8	6
1	2008-09-12 09:00:00	81	8	2	8	6
1	2008-09-12 09:01:00	0	9	2	8	6
1	2008-09-12 09:02:00	112	9	2	8	6
1	2008-09-12 09:03:00	102	9	2	8	6
1	2008-09-12 09:04:00	0	9	2	8	6
1	2008-09-12 09:05:00	0	9	2	8	6
1	2008-09-12 09:06:00	30	9	2	8	6
1	2008-09-12 09:07:00	112	9	2	8	6
1	2008-09-12 09:08:00	0	9	2	8	6
1	2008-09-12 09:09:00	242	9	2	8	6
1	2008-09-12 09:10:00	0	9	2	8	6
1	2008-09-12 09:11:00	112	9	2	8	6
1	2008-09-12 09:12:00	41	9	2	8	6
1	2008-09-12 09:13:00	51	9	2	8	6
1	2008-09-12 09:14:00	0	9	2	8	6
1	2008-09-12 09:15:00	266	9	2	8	6
1	2008-09-12 09:16:00	508	9	2	8	6
1	2008-09-12 09:17:00	427	9	2	8	6
1	2008-09-12 09:18:00	673	9	2	8	6
1	2008-09-12 09:19:00	323	9	2	8	6
1	2008-09-12 09:20:00	459	9	2	8	6
1	2008-09-12 09:21:00	10	9	2	8	6
1	2008-09-12 09:22:00	0	9	2	8	6
1	2008-09-12 09:23:00	10	9	2	8	6
1	2008-09-12 09:24:00	10	9	2	8	6
1	2008-09-12 09:25:00	10	9	2	8	6
1	2008-09-12 09:26:00	0	9	2	8	6
1	2008-09-12 09:27:00	30	9	2	8	6
1	2008-09-12 09:28:00	0	9	2	8	6
1	2008-09-12 09:29:00	41	9	2	8	6
1	2008-09-12 09:30:00	10	9	2	8	6
1	2008-09-12 09:31:00	0	9	2	8	6
1	2008-09-12 09:32:00	169	9	2	8	6
1	2008-09-12 09:33:00	0	9	2	8	6
1	2008-09-12 09:34:00	254	9	2	8	6
1	2008-09-12 09:35:00	205	9	2	8	6
1	2008-09-12 09:36:00	0	9	2	8	6
1	2008-09-12 09:37:00	81	9	2	8	6
1	2008-09-12 09:38:00	0	9	2	8	6
1	2008-09-12 09:39:00	0	9	2	8	6
1	2008-09-12 09:40:00	0	9	2	8	6
1	2008-09-12 09:41:00	91	9	2	8	6
1	2008-09-12 09:42:00	51	9	2	8	6
1	2008-09-12 09:43:00	0	9	2	8	6
1	2008-09-12 09:44:00	0	9	2	8	6
1	2008-09-12 09:45:00	0	9	2	8	6
1	2008-09-12 09:46:00	61	9	2	8	6
1	2008-09-12 09:47:00	0	9	2	8	6
1	2008-09-12 09:48:00	0	9	2	8	6
1	2008-09-12 09:49:00	0	9	2	8	6
1	2008-09-12 09:50:00	71	9	2	8	6
1	2008-09-12 09:51:00	41	9	2	8	6
1	2008-09-12 09:52:00	0	9	2	8	6
1	2008-09-12 09:53:00	61	9	2	8	6
1	2008-09-12 09:54:00	112	9	2	8	6
1	2008-09-12 09:55:00	0	9	2	8	6
1	2008-09-12 09:56:00	112	9	2	8	6
1	2008-09-12 09:57:00	61	9	2	8	6
1	2008-09-12 09:58:00	144	9	2	8	6
1	2008-09-12 09:59:00	71	9	2	8	6
1	2008-09-12 10:00:00	20	9	2	8	6
1	2008-09-12 10:01:00	61	10	2	8	6
1	2008-09-12 10:02:00	144	10	2	8	6
1	2008-09-12 10:03:00	10	10	2	8	6
1	2008-09-12 10:04:00	51	10	2	8	6
1	2008-09-12 10:05:00	122	10	2	8	6
1	2008-09-12 10:06:00	61	10	2	8	6
1	2008-09-12 10:07:00	0	10	2	8	6
1	2008-09-12 10:08:00	0	10	2	8	6
1	2008-09-12 10:09:00	144	10	2	8	6
1	2008-09-12 10:10:00	81	10	2	8	6
1	2008-09-12 10:11:00	0	10	2	8	6
1	2008-09-12 10:12:00	0	10	2	8	6
1	2008-09-12 10:13:00	20	10	2	8	6
1	2008-09-12 10:14:00	144	10	2	8	6
1	2008-09-12 10:15:00	0	10	2	8	6
1	2008-09-12 10:16:00	132	10	2	8	6
1	2008-09-12 10:17:00	41	10	2	8	6
1	2008-09-12 10:18:00	0	10	2	8	6
1	2008-09-12 10:19:00	122	10	2	8	6
1	2008-09-12 10:20:00	112	10	2	8	6
1	2008-09-12 10:21:00	0	10	2	8	6
1	2008-09-12 10:22:00	112	10	2	8	6
1	2008-09-12 10:23:00	0	10	2	8	6
1	2008-09-12 10:24:00	0	10	2	8	6
1	2008-09-12 10:25:00	0	10	2	8	6
1	2008-09-12 10:26:00	0	10	2	8	6
1	2008-09-12 10:27:00	0	10	2	8	6
1	2008-09-12 10:28:00	0	10	2	8	6
1	2008-09-12 10:29:00	112	10	2	8	6
1	2008-09-12 10:30:00	51	10	2	8	6
1	2008-09-12 10:31:00	10	10	2	8	6
1	2008-09-12 10:32:00	0	10	2	8	6
1	2008-09-12 10:33:00	0	10	2	8	6
1	2008-09-12 10:34:00	30	10	2	8	6
1	2008-09-12 10:35:00	0	10	2	8	6
1	2008-09-12 10:36:00	0	10	2	8	6
1	2008-09-12 10:37:00	0	10	2	8	6
1	2008-09-12 10:38:00	0	10	2	8	6
1	2008-09-12 10:39:00	0	10	2	8	6
1	2008-09-12 10:40:00	112	10	2	8	6
1	2008-09-12 10:41:00	977	10	2	8	6
1	2008-09-12 10:42:00	794	10	2	8	6
1	2008-09-12 10:43:00	280	10	2	8	6
1	2008-09-12 10:44:00	0	10	2	8	6
1	2008-09-12 10:45:00	51	10	2	8	6
1	2008-09-12 10:46:00	91	10	2	8	6
1	2008-09-12 10:47:00	41	10	2	8	6
1	2008-09-12 10:48:00	30	10	2	8	6
1	2008-09-12 10:49:00	0	10	2	8	6
1	2008-09-12 10:50:00	20	10	2	8	6
1	2008-09-12 10:51:00	0	10	2	8	6
1	2008-09-12 10:52:00	0	10	2	8	6
1	2008-09-12 10:53:00	0	10	2	8	6
1	2008-09-12 10:54:00	0	10	2	8	6
1	2008-09-12 10:55:00	41	10	2	8	6
1	2008-09-12 10:56:00	0	10	2	8	6
1	2008-09-12 10:57:00	295	10	2	8	6
1	2008-09-12 10:58:00	81	10	2	8	6
1	2008-09-12 10:59:00	41	10	2	8	6
1	2008-09-12 11:00:00	0	10	2	8	6
1	2008-09-12 11:01:00	41	11	2	8	6
1	2008-09-12 11:02:00	0	11	2	8	6
1	2008-09-12 11:03:00	0	11	2	8	6
1	2008-09-12 11:04:00	51	11	2	8	6
1	2008-09-12 11:05:00	0	11	2	8	6
1	2008-09-12 11:06:00	242	11	2	8	6
1	2008-09-12 11:07:00	713	11	2	8	6
1	2008-09-12 11:08:00	102	11	2	8	6
1	2008-09-12 11:09:00	169	11	2	8	6
1	2008-09-12 11:10:00	0	11	2	8	6
1	2008-09-12 11:11:00	10	11	2	8	6
1	2008-09-12 11:12:00	71	11	2	8	6
1	2008-09-12 11:13:00	71	11	2	8	6
1	2008-09-12 11:14:00	1002	11	2	8	6
1	2008-09-12 11:15:00	156	11	2	8	6
1	2008-09-12 11:16:00	61	11	2	8	6
1	2008-09-12 11:17:00	839	11	2	8	6
1	2008-09-12 11:18:00	673	11	2	8	6
1	2008-09-12 11:19:00	193	11	2	8	6
1	2008-09-12 11:20:00	0	11	2	8	6
1	2008-09-12 11:21:00	1239	11	2	8	6
1	2008-09-12 11:22:00	634	11	2	8	6
1	2008-09-12 11:23:00	597	11	2	8	6
1	2008-09-12 11:24:00	713	11	2	8	6
1	2008-09-12 11:25:00	839	11	2	8	6
1	2008-09-12 11:26:00	597	11	2	8	6
1	2008-09-12 11:27:00	953	11	2	8	6
1	2008-09-12 11:28:00	1325	11	2	8	6
1	2008-09-12 11:29:00	1211	11	2	8	6
1	2008-09-12 11:30:00	1355	11	2	8	6
1	2008-09-12 11:31:00	1156	11	2	8	6
1	2008-09-12 11:32:00	634	11	2	8	6
1	2008-09-12 11:33:00	492	11	2	8	6
1	2008-09-12 11:34:00	542	11	2	8	6
1	2008-09-12 11:35:00	884	11	2	8	6
1	2008-09-12 11:36:00	839	11	2	8	6
1	2008-09-12 11:37:00	1050	11	2	8	6
1	2008-09-12 11:38:00	929	11	2	8	6
1	2008-09-12 11:39:00	1268	11	2	8	6
1	2008-09-12 11:40:00	1268	11	2	8	6
1	2008-09-12 11:41:00	733	11	2	8	6
1	2008-09-12 11:42:00	1002	11	2	8	6
1	2008-09-12 11:43:00	91	11	2	8	6
1	2008-09-12 11:44:00	542	11	2	8	6
1	2008-09-12 11:45:00	492	11	2	8	6
1	2008-09-12 11:46:00	20	11	2	8	6
1	2008-09-12 11:47:00	0	11	2	8	6
1	2008-09-12 11:48:00	10	11	2	8	6
1	2008-09-12 11:49:00	10	11	2	8	6
1	2008-09-12 11:50:00	217	11	2	8	6
1	2008-09-12 11:51:00	0	11	2	8	6
1	2008-09-12 11:52:00	0	11	2	8	6
1	2008-09-12 11:53:00	10	11	2	8	6
1	2008-09-12 11:54:00	0	11	2	8	6
1	2008-09-12 11:55:00	0	11	2	8	6
1	2008-09-12 11:56:00	0	11	2	8	6
1	2008-09-12 11:57:00	10	11	2	8	6
1	2008-09-12 11:58:00	0	11	2	8	6
1	2008-09-12 11:59:00	0	11	2	8	6
1	2008-09-12 12:00:00	0	11	2	8	6
1	2008-09-12 12:01:00	0	12	3	8	6
1	2008-09-12 12:02:00	41	12	3	8	6
1	2008-09-12 12:03:00	41	12	3	8	6
1	2008-09-12 12:04:00	30	12	3	8	6
1	2008-09-12 12:05:00	0	12	3	8	6
1	2008-09-12 12:06:00	10	12	3	8	6
1	2008-09-12 12:07:00	20	12	3	8	6
1	2008-09-12 12:08:00	0	12	3	8	6
1	2008-09-12 12:09:00	0	12	3	8	6
1	2008-09-12 12:10:00	30	12	3	8	6
1	2008-09-12 12:11:00	0	12	3	8	6
1	2008-09-12 12:12:00	0	12	3	8	6
1	2008-09-12 12:13:00	0	12	3	8	6
1	2008-09-12 12:14:00	0	12	3	8	6
1	2008-09-12 12:15:00	10	12	3	8	6
1	2008-09-12 12:16:00	0	12	3	8	6
1	2008-09-12 12:17:00	10	12	3	8	6
1	2008-09-12 12:18:00	0	12	3	8	6
1	2008-09-12 12:19:00	0	12	3	8	6
1	2008-09-12 12:20:00	0	12	3	8	6
1	2008-09-12 12:21:00	0	12	3	8	6
1	2008-09-12 12:22:00	0	12	3	8	6
1	2008-09-12 12:23:00	0	12	3	8	6
1	2008-09-12 12:24:00	41	12	3	8	6
1	2008-09-12 12:25:00	0	12	3	8	6
1	2008-09-12 12:26:00	10	12	3	8	6
1	2008-09-12 12:27:00	61	12	3	8	6
1	2008-09-12 12:28:00	20	12	3	8	6
1	2008-09-12 12:29:00	0	12	3	8	6
1	2008-09-12 12:30:00	0	12	3	8	6
1	2008-09-12 12:31:00	30	12	3	8	6
1	2008-09-12 12:32:00	508	12	3	8	6
1	2008-09-12 12:33:00	1103	12	3	8	6
1	2008-09-12 12:34:00	906	12	3	8	6
1	2008-09-12 12:35:00	1026	12	3	8	6
1	2008-09-12 12:36:00	929	12	3	8	6
1	2008-09-12 12:37:00	1077	12	3	8	6
1	2008-09-12 12:38:00	1239	12	3	8	6
1	2008-09-12 12:39:00	71	12	3	8	6
1	2008-09-12 12:40:00	20	12	3	8	6
1	2008-09-12 12:41:00	132	12	3	8	6
1	2008-09-12 12:42:00	0	12	3	8	6
1	2008-09-12 12:43:00	10	12	3	8	6
1	2008-09-12 12:44:00	20	12	3	8	6
1	2008-09-12 12:45:00	0	12	3	8	6
1	2008-09-12 12:46:00	0	12	3	8	6
1	2008-09-12 12:47:00	41	12	3	8	6
1	2008-09-12 12:48:00	30	12	3	8	6
1	2008-09-12 12:49:00	0	12	3	8	6
1	2008-09-12 12:50:00	0	12	3	8	6
1	2008-09-12 12:51:00	30	12	3	8	6
1	2008-09-12 12:52:00	20	12	3	8	6
1	2008-09-12 12:53:00	20	12	3	8	6
1	2008-09-12 12:54:00	0	12	3	8	6
1	2008-09-12 12:55:00	0	12	3	8	6
1	2008-09-12 12:56:00	0	12	3	8	6
1	2008-09-12 12:57:00	61	12	3	8	6
1	2008-09-12 12:58:00	20	12	3	8	6
1	2008-09-12 12:59:00	0	12	3	8	6
1	2008-09-12 13:00:00	10	12	3	8	6
1	2008-09-12 13:01:00	51	13	3	8	6
1	2008-09-12 13:02:00	20	13	3	8	6
1	2008-09-12 13:03:00	10	13	3	8	6
1	2008-09-12 13:04:00	20	13	3	8	6
1	2008-09-12 13:05:00	51	13	3	8	6
1	2008-09-12 13:06:00	794	13	3	8	6
1	2008-09-12 13:07:00	508	13	3	8	6
1	2008-09-12 13:08:00	817	13	3	8	6
1	2008-09-12 13:09:00	337	13	3	8	6
1	2008-09-12 13:10:00	10	13	3	8	6
1	2008-09-12 13:11:00	0	13	3	8	6
1	2008-09-12 13:12:00	0	13	3	8	6
1	2008-09-12 13:13:00	61	13	3	8	6
1	2008-09-12 13:14:00	41	13	3	8	6
1	2008-09-12 13:15:00	0	13	3	8	6
1	2008-09-12 13:16:00	0	13	3	8	6
1	2008-09-12 13:17:00	0	13	3	8	6
1	2008-09-12 13:18:00	30	13	3	8	6
1	2008-09-12 13:19:00	0	13	3	8	6
1	2008-09-12 13:20:00	0	13	3	8	6
1	2008-09-12 13:21:00	0	13	3	8	6
1	2008-09-12 13:22:00	30	13	3	8	6
1	2008-09-12 13:23:00	51	13	3	8	6
1	2008-09-12 13:24:00	20	13	3	8	6
1	2008-09-12 13:25:00	0	13	3	8	6
1	2008-09-12 13:26:00	0	13	3	8	6
1	2008-09-12 13:27:00	0	13	3	8	6
1	2008-09-12 13:28:00	0	13	3	8	6
1	2008-09-12 13:29:00	0	13	3	8	6
1	2008-09-12 13:30:00	0	13	3	8	6
1	2008-09-12 13:31:00	0	13	3	8	6
1	2008-09-12 13:32:00	71	13	3	8	6
1	2008-09-12 13:33:00	41	13	3	8	6
1	2008-09-12 13:34:00	0	13	3	8	6
1	2008-09-12 13:35:00	41	13	3	8	6
1	2008-09-12 13:36:00	0	13	3	8	6
1	2008-09-12 13:37:00	81	13	3	8	6
1	2008-09-12 13:38:00	10	13	3	8	6
1	2008-09-12 13:39:00	0	13	3	8	6
1	2008-09-12 13:40:00	0	13	3	8	6
1	2008-09-12 13:41:00	0	13	3	8	6
1	2008-09-12 13:42:00	10	13	3	8	6
1	2008-09-12 13:43:00	0	13	3	8	6
1	2008-09-12 13:44:00	61	13	3	8	6
1	2008-09-12 13:45:00	0	13	3	8	6
1	2008-09-12 13:46:00	0	13	3	8	6
1	2008-09-12 13:47:00	0	13	3	8	6
1	2008-09-12 13:48:00	0	13	3	8	6
1	2008-09-12 13:49:00	0	13	3	8	6
1	2008-09-12 13:50:00	0	13	3	8	6
1	2008-09-12 13:51:00	0	13	3	8	6
1	2008-09-12 13:52:00	0	13	3	8	6
1	2008-09-12 13:53:00	0	13	3	8	6
1	2008-09-12 13:54:00	0	13	3	8	6
1	2008-09-12 13:55:00	0	13	3	8	6
1	2008-09-12 13:56:00	0	13	3	8	6
1	2008-09-12 13:57:00	0	13	3	8	6
1	2008-09-12 13:58:00	0	13	3	8	6
1	2008-09-12 13:59:00	0	13	3	8	6
1	2008-09-12 14:00:00	0	13	3	8	6
1	2008-09-12 14:01:00	0	14	3	8	6
1	2008-09-12 14:02:00	0	14	3	8	6
1	2008-09-12 14:03:00	0	14	3	8	6
1	2008-09-12 14:04:00	0	14	3	8	6
1	2008-09-12 14:05:00	0	14	3	8	6
1	2008-09-12 14:06:00	0	14	3	8	6
1	2008-09-12 14:07:00	0	14	3	8	6
1	2008-09-12 14:08:00	0	14	3	8	6
1	2008-09-12 14:09:00	0	14	3	8	6
1	2008-09-12 14:10:00	0	14	3	8	6
1	2008-09-12 14:11:00	0	14	3	8	6
1	2008-09-12 14:12:00	0	14	3	8	6
1	2008-09-12 14:13:00	0	14	3	8	6
1	2008-09-12 14:14:00	0	14	3	8	6
1	2008-09-12 14:15:00	0	14	3	8	6
1	2008-09-12 14:16:00	0	14	3	8	6
1	2008-09-12 14:17:00	0	14	3	8	6
1	2008-09-12 14:18:00	0	14	3	8	6
1	2008-09-12 14:19:00	0	14	3	8	6
1	2008-09-12 14:20:00	0	14	3	8	6
1	2008-09-12 14:21:00	0	14	3	8	6
1	2008-09-12 14:22:00	0	14	3	8	6
1	2008-09-12 14:23:00	0	14	3	8	6
1	2008-09-12 14:24:00	0	14	3	8	6
1	2008-09-12 14:25:00	0	14	3	8	6
1	2008-09-12 14:26:00	0	14	3	8	6
1	2008-09-12 14:27:00	0	14	3	8	6
1	2008-09-12 14:28:00	20	14	3	8	6
1	2008-09-12 14:29:00	0	14	3	8	6
1	2008-09-12 14:30:00	0	14	3	8	6
1	2008-09-12 14:31:00	0	14	3	8	6
1	2008-09-12 14:32:00	10	14	3	8	6
1	2008-09-12 14:33:00	0	14	3	8	6
1	2008-09-12 14:34:00	0	14	3	8	6
1	2008-09-12 14:35:00	0	14	3	8	6
1	2008-09-12 14:36:00	0	14	3	8	6
1	2008-09-12 14:37:00	20	14	3	8	6
1	2008-09-12 14:38:00	71	14	3	8	6
1	2008-09-12 14:39:00	169	14	3	8	6
1	2008-09-12 14:40:00	112	14	3	8	6
1	2008-09-12 14:41:00	30	14	3	8	6
1	2008-09-12 14:42:00	10	14	3	8	6
1	2008-09-12 14:43:00	0	14	3	8	6
1	2008-09-12 14:44:00	0	14	3	8	6
1	2008-09-12 14:45:00	0	14	3	8	6
1	2008-09-12 14:46:00	0	14	3	8	6
1	2008-09-12 14:47:00	0	14	3	8	6
1	2008-09-12 14:48:00	0	14	3	8	6
1	2008-09-12 14:49:00	20	14	3	8	6
1	2008-09-12 14:50:00	794	14	3	8	6
1	2008-09-12 14:51:00	0	14	3	8	6
1	2008-09-12 14:52:00	0	14	3	8	6
1	2008-09-12 14:53:00	0	14	3	8	6
1	2008-09-12 14:54:00	0	14	3	8	6
1	2008-09-12 14:55:00	0	14	3	8	6
1	2008-09-12 14:56:00	0	14	3	8	6
1	2008-09-12 14:57:00	0	14	3	8	6
1	2008-09-12 14:58:00	0	14	3	8	6
1	2008-09-12 14:59:00	0	14	3	8	6
1	2008-09-12 15:00:00	0	14	3	8	6
1	2008-09-12 15:01:00	0	15	3	8	6
1	2008-09-12 15:02:00	0	15	3	8	6
1	2008-09-12 15:03:00	0	15	3	8	6
1	2008-09-12 15:04:00	0	15	3	8	6
1	2008-09-12 15:05:00	0	15	3	8	6
1	2008-09-12 15:06:00	0	15	3	8	6
1	2008-09-12 15:07:00	0	15	3	8	6
1	2008-09-12 15:08:00	0	15	3	8	6
1	2008-09-12 15:09:00	0	15	3	8	6
1	2008-09-12 15:10:00	0	15	3	8	6
1	2008-09-12 15:11:00	0	15	3	8	6
1	2008-09-12 15:12:00	0	15	3	8	6
1	2008-09-12 15:13:00	0	15	3	8	6
1	2008-09-12 15:14:00	0	15	3	8	6
1	2008-09-12 15:15:00	0	15	3	8	6
1	2008-09-12 15:16:00	0	15	3	8	6
1	2008-09-12 15:17:00	0	15	3	8	6
1	2008-09-12 15:18:00	0	15	3	8	6
1	2008-09-12 15:19:00	0	15	3	8	6
[truncated: 58,481 more rows]

## Sheet: Pivot Segment
Multiplier	2
x (Low Intensity)	840.971
y (High Intensity)	1043.63
	Column Labels
Values	1	2	3	4	5	6	Grand Total
Average of Activity	110.173	157.068	130.132	99.0313	132.261	109.259	122.987
StdDev of Activity	365.399	443.282	478.432	258.3	442.223	362.853	398.957
Count of Activity	10080	10080	10080	10080	10080	10080	60480
Count Above x	393	586	384	241	401	286
% Above x	0.0389881	0.0581349	0.0380952	0.0239087	0.0397817	0.028373
Count Above y		430	289	130	282	174
% Above y		0.0426587	0.0286706	0.0128968	0.0279762	0.0172619

## Sheet: Pivot Weekday
Sum of Activity	Column Labels
Row Labels	1	2	3	4	5	6	Grand Total
1	73617	122432	413069	162251	141385	130075	1042829
2	130292	128158	157395	166841	146188	148635	877509
3	104636	188579	165522	181551	192296	123107	955691
4	139614	202704	133117	81426	111522	328356	996739
5	100849	678307	158824	171654	133583	137421	1380638
6	178612	156398	111816	91490	314422	86757	939495
7	382925	106669	171984	143023	293795	146978	1245374
Grand Total	1110545	1583247	1311727	998236	1333191	1101329	7438275
Count of Activity	Column Labels
Row Labels	1	2	3	4	5	6	Grand Total
1	1440	1440	1440	1440	1440	1440	8640
2	1440	1440	1440	1440	1440	1440	8640
3	1440	1440	1440	1440	1440	1440	8640
4	1440	1440	1440	1440	1440	1440	8640
5	1440	1440	1440	1440	1440	1440	8640
6	1440	1440	1440	1440	1440	1440	8640
7	1440	1440	1440	1440	1440	1440	8640
Grand Total	10080	10080	10080	10080	10080	10080	60480

## Sheet: Pivot Quadrant
Sum of Activity	Column Labels
Row Labels	1	2	3	4	5	6	Grand Total
1	95116	230798	158022	128834	171938	74583	859291
2	385086	576132	461303	291896	256544	415899	2386860
3	345581	435262	379798	241305	515188	343424	2260558
4	284762	341055	312604	336201	389521	267423	1931566
Grand Total	1110545	1583247	1311727	998236	1333191	1101329	7438275
Average	277636	395812	327932	249559	333298	275332
Count of Activity	Column Labels
Row Labels	1	2	3	4	5	6	Grand Total
1	2520	2520	2520	2520	2520	2520	15120
2	2520	2520	2520	2520	2520	2520	15120
3	2520	2520	2520	2520	2520	2520	15120
4	2520	2520	2520	2520	2520	2520	15120
Grand Total	10080	10080	10080	10080	10080	10080	60480

## Sheet: 9.04.08
Actogram, Copy Raw Data, All Days
Identity:	Patty
Filename:	E:\Active Research Files\meloxicam titre canine\cases\patty\Patty 9.4.08.AWC
Gender:	F
Age:	10
Height:	45.7 cm	18.0 in
Weight:	16.0 kg	35.3 lbs
Start Date:	04-Sep-2008 (Thu)
Start Time:	18:00:00
Interval:	1.00 mins
Date Stamp:	Time Stamp:	Activity Data:	Marker Press:
2008-09-04	00:00:00	0
2008-09-04	00:01:00	0
2008-09-04	00:02:00	0
2008-09-04	00:03:00	0
2008-09-04	00:04:00	0
2008-09-04	00:05:00	0
2008-09-04	00:06:00	0
2008-09-04	00:07:00	0
2008-09-04	00:08:00	0
2008-09-04	00:09:00	0
2008-09-04	00:10:00	0
2008-09-04	00:11:00	0
2008-09-04	00:12:00	0
2008-09-04	00:13:00	0
2008-09-04	00:14:00	0
2008-09-04	00:15:00	0
2008-09-04	00:16:00	0
2008-09-04	00:17:00	0
2008-09-04	00:18:00	0
2008-09-04	00:19:00	0
2008-09-04	00:20:00	0
2008-09-04	00:21:00	0
2008-09-04	00:22:00	0
2008-09-04	00:23:00	0
2008-09-04	00:24:00	0
2008-09-04	00:25:00	0
2008-09-04	00:26:00	0
2008-09-04	00:27:00	0
2008-09-04	00:28:00	0
2008-09-04	00:29:00	0
2008-09-04	00:30:00	0
2008-09-04	00:31:00	0
2008-09-04	00:32:00	0
2008-09-04	00:33:00	0
2008-09-04	00:34:00	0
2008-09-04	00:35:00	0
2008-09-04	00:36:00	0
2008-09-04	00:37:00	0
2008-09-04	00:38:00	0
2008-09-04	00:39:00	0
2008-09-04	00:40:00	0
2008-09-04	00:41:00	0
2008-09-04	00:42:00	0
2008-09-04	00:43:00	0
2008-09-04	00:44:00	0
2008-09-04	00:45:00	0
2008-09-04	00:46:00	0
2008-09-04	00:47:00	0
2008-09-04	00:48:00	0
2008-09-04	00:49:00	0
2008-09-04	00:50:00	0
2008-09-04	00:51:00	0
2008-09-04	00:52:00	0
2008-09-04	00:53:00	0
2008-09-04	00:54:00	0
2008-09-04	00:55:00	0
2008-09-04	00:56:00	0
2008-09-04	00:57:00	0
2008-09-04	00:58:00	0
2008-09-04	00:59:00	0
2008-09-04	01:00:00	0
2008-09-04	01:01:00	0
2008-09-04	01:02:00	0
2008-09-04	01:03:00	0
2008-09-04	01:04:00	0
2008-09-04	01:05:00	0
2008-09-04	01:06:00	0
2008-09-04	01:07:00	0
2008-09-04	01:08:00	0
2008-09-04	01:09:00	0
2008-09-04	01:10:00	0
2008-09-04	01:11:00	0
2008-09-04	01:12:00	0
2008-09-04	01:13:00	0
2008-09-04	01:14:00	0
2008-09-04	01:15:00	0
2008-09-04	01:16:00	0
2008-09-04	01:17:00	0
2008-09-04	01:18:00	0
2008-09-04	01:19:00	0
2008-09-04	01:20:00	0
2008-09-04	01:21:00	0
2008-09-04	01:22:00	0
2008-09-04	01:23:00	0
2008-09-04	01:24:00	0
2008-09-04	01:25:00	0
2008-09-04	01:26:00	0
2008-09-04	01:27:00	0
2008-09-04	01:28:00	0
2008-09-04	01:29:00	0
2008-09-04	01:30:00	0
2008-09-04	01:31:00	0
2008-09-04	01:32:00	0
2008-09-04	01:33:00	0
2008-09-04	01:34:00	0
2008-09-04	01:35:00	0
2008-09-04	01:36:00	0
2008-09-04	01:37:00	0
2008-09-04	01:38:00	0
2008-09-04	01:39:00	0
2008-09-04	01:40:00	0
2008-09-04	01:41:00	0
2008-09-04	01:42:00	0
2008-09-04	01:43:00	0
2008-09-04	01:44:00	0
2008-09-04	01:45:00	0
2008-09-04	01:46:00	0
2008-09-04	01:47:00	0
2008-09-04	01:48:00	0
2008-09-04	01:49:00	0
2008-09-04	01:50:00	0
2008-09-04	01:51:00	0
2008-09-04	01:52:00	0
2008-09-04	01:53:00	0
2008-09-04	01:54:00	0
2008-09-04	01:55:00	0
2008-09-04	01:56:00	0
2008-09-04	01:57:00	0
2008-09-04	01:58:00	0
2008-09-04	01:59:00	0
2008-09-04	02:00:00	0
2008-09-04	02:01:00	0
2008-09-04	02:02:00	0
2008-09-04	02:03:00	0
2008-09-04	02:04:00	0
2008-09-04	02:05:00	0
2008-09-04	02:06:00	0
2008-09-04	02:07:00	0
2008-09-04	02:08:00	0
2008-09-04	02:09:00	0
2008-09-04	02:10:00	0
2008-09-04	02:11:00	0
2008-09-04	02:12:00	0
2008-09-04	02:13:00	0
2008-09-04	02:14:00	0
2008-09-04	02:15:00	0
2008-09-04	02:16:00	0
2008-09-04	02:17:00	0
2008-09-04	02:18:00	0
2008-09-04	02:19:00	0
2008-09-04	02:20:00	0
2008-09-04	02:21:00	0
2008-09-04	02:22:00	0
2008-09-04	02:23:00	0
2008-09-04	02:24:00	0
2008-09-04	02:25:00	0
2008-09-04	02:26:00	0
2008-09-04	02:27:00	0
2008-09-04	02:28:00	0
2008-09-04	02:29:00	0
2008-09-04	02:30:00	0
2008-09-04	02:31:00	0
2008-09-04	02:32:00	0
2008-09-04	02:33:00	0
2008-09-04	02:34:00	0
2008-09-04	02:35:00	0
2008-09-04	02:36:00	0
2008-09-04	02:37:00	0
2008-09-04	02:38:00	0
2008-09-04	02:39:00	0
2008-09-04	02:40:00	0
2008-09-04	02:41:00	0
2008-09-04	02:42:00	0
2008-09-04	02:43:00	0
2008-09-04	02:44:00	0
2008-09-04	02:45:00	0
2008-09-04	02:46:00	0
2008-09-04	02:47:00	0
2008-09-04	02:48:00	0
2008-09-04	02:49:00	0
2008-09-04	02:50:00	0
2008-09-04	02:51:00	0
2008-09-04	02:52:00	0
2008-09-04	02:53:00	0
2008-09-04	02:54:00	0
2008-09-04	02:55:00	0
2008-09-04	02:56:00	0
2008-09-04	02:57:00	0
2008-09-04	02:58:00	0
2008-09-04	02:59:00	0
2008-09-04	03:00:00	0
2008-09-04	03:01:00	0
2008-09-04	03:02:00	0
2008-09-04	03:03:00	0
2008-09-04	03:04:00	0
2008-09-04	03:05:00	0
2008-09-04	03:06:00	0
2008-09-04	03:07:00	0
2008-09-04	03:08:00	0
2008-09-04	03:09:00	0
2008-09-04	03:10:00	0
2008-09-04	03:11:00	0
2008-09-04	03:12:00	0
2008-09-04	03:13:00	0
2008-09-04	03:14:00	0
2008-09-04	03:15:00	0
2008-09-04	03:16:00	0
2008-09-04	03:17:00	0
2008-09-04	03:18:00	0
2008-09-04	03:19:00	0
2008-09-04	03:20:00	0
2008-09-04	03:21:00	0
2008-09-04	03:22:00	0
2008-09-04	03:23:00	0
2008-09-04	03:24:00	0
2008-09-04	03:25:00	0
2008-09-04	03:26:00	0
2008-09-04	03:27:00	0
2008-09-04	03:28:00	0
2008-09-04	03:29:00	0
2008-09-04	03:30:00	0
2008-09-04	03:31:00	0
2008-09-04	03:32:00	0
2008-09-04	03:33:00	0
2008-09-04	03:34:00	0
2008-09-04	03:35:00	0
2008-09-04	03:36:00	0
2008-09-04	03:37:00	0
2008-09-04	03:38:00	0
2008-09-04	03:39:00	0
2008-09-04	03:40:00	0
2008-09-04	03:41:00	0
2008-09-04	03:42:00	0
2008-09-04	03:43:00	0
2008-09-04	03:44:00	0
2008-09-04	03:45:00	0
2008-09-04	03:46:00	0
2008-09-04	03:47:00	0
2008-09-04	03:48:00	0
2008-09-04	03:49:00	0
2008-09-04	03:50:00	0
2008-09-04	03:51:00	0
2008-09-04	03:52:00	0
2008-09-04	03:53:00	0
2008-09-04	03:54:00	0
2008-09-04	03:55:00	0
2008-09-04	03:56:00	0
2008-09-04	03:57:00	0
2008-09-04	03:58:00	0
2008-09-04	03:59:00	0
2008-09-04	04:00:00	0
2008-09-04	04:01:00	0
2008-09-04	04:02:00	0
2008-09-04	04:03:00	0
2008-09-04	04:04:00	0
2008-09-04	04:05:00	0
2008-09-04	04:06:00	0
2008-09-04	04:07:00	0
2008-09-04	04:08:00	0
2008-09-04	04:09:00	0
2008-09-04	04:10:00	0
2008-09-04	04:11:00	0
2008-09-04	04:12:00	0
2008-09-04	04:13:00	0
2008-09-04	04:14:00	0
2008-09-04	04:15:00	0
2008-09-04	04:16:00	0
2008-09-04	04:17:00	0
2008-09-04	04:18:00	0
2008-09-04	04:19:00	0
2008-09-04	04:20:00	0
2008-09-04	04:21:00	0
2008-09-04	04:22:00	0
2008-09-04	04:23:00	0
2008-09-04	04:24:00	0
2008-09-04	04:25:00	0
2008-09-04	04:26:00	0
2008-09-04	04:27:00	0
2008-09-04	04:28:00	0
2008-09-04	04:29:00	0
2008-09-04	04:30:00	0
2008-09-04	04:31:00	0
2008-09-04	04:32:00	0
2008-09-04	04:33:00	0
2008-09-04	04:34:00	0
2008-09-04	04:35:00	0
2008-09-04	04:36:00	0
2008-09-04	04:37:00	0
2008-09-04	04:38:00	0
2008-09-04	04:39:00	0
2008-09-04	04:40:00	0
2008-09-04	04:41:00	0
2008-09-04	04:42:00	0
2008-09-04	04:43:00	0
2008-09-04	04:44:00	0
2008-09-04	04:45:00	0
2008-09-04	04:46:00	0
2008-09-04	04:47:00	0
2008-09-04	04:48:00	0
2008-09-04	04:49:00	0
2008-09-04	04:50:00	0
2008-09-04	04:51:00	0
2008-09-04	04:52:00	0
2008-09-04	04:53:00	0
2008-09-04	04:54:00	0
2008-09-04	04:55:00	0
2008-09-04	04:56:00	0
2008-09-04	04:57:00	0
2008-09-04	04:58:00	0
2008-09-04	04:59:00	0
2008-09-04	05:00:00	0
2008-09-04	05:01:00	0
2008-09-04	05:02:00	0
2008-09-04	05:03:00	0
2008-09-04	05:04:00	0
2008-09-04	05:05:00	0
2008-09-04	05:06:00	0
2008-09-04	05:07:00	0
2008-09-04	05:08:00	0
2008-09-04	05:09:00	0
2008-09-04	05:10:00	0
2008-09-04	05:11:00	0
2008-09-04	05:12:00	0
2008-09-04	05:13:00	0
2008-09-04	05:14:00	0
2008-09-04	05:15:00	0
2008-09-04	05:16:00	0
2008-09-04	05:17:00	0
2008-09-04	05:18:00	0
2008-09-04	05:19:00	0
2008-09-04	05:20:00	0
2008-09-04	05:21:00	0
2008-09-04	05:22:00	0
2008-09-04	05:23:00	0
2008-09-04	05:24:00	0
2008-09-04	05:25:00	0
2008-09-04	05:26:00	0
2008-09-04	05:27:00	0
2008-09-04	05:28:00	0
2008-09-04	05:29:00	0
2008-09-04	05:30:00	0
2008-09-04	05:31:00	0
2008-09-04	05:32:00	0
2008-09-04	05:33:00	0
2008-09-04	05:34:00	0
2008-09-04	05:35:00	0
2008-09-04	05:36:00	0
2008-09-04	05:37:00	0
2008-09-04	05:38:00	0
2008-09-04	05:39:00	0
2008-09-04	05:40:00	0
2008-09-04	05:41:00	0
2008-09-04	05:42:00	0
2008-09-04	05:43:00	0
2008-09-04	05:44:00	0
2008-09-04	05:45:00	0
2008-09-04	05:46:00	0
2008-09-04	05:47:00	0
2008-09-04	05:48:00	0
2008-09-04	05:49:00	0
2008-09-04	05:50:00	0
2008-09-04	05:51:00	0
2008-09-04	05:52:00	0
2008-09-04	05:53:00	0
2008-09-04	05:54:00	0
2008-09-04	05:55:00	0
2008-09-04	05:56:00	0
2008-09-04	05:57:00	0
2008-09-04	05:58:00	0
2008-09-04	05:59:00	0
2008-09-04	06:00:00	0
2008-09-04	06:01:00	0
2008-09-04	06:02:00	0
2008-09-04	06:03:00	0
2008-09-04	06:04:00	0
2008-09-04	06:05:00	0
2008-09-04	06:06:00	0
2008-09-04	06:07:00	0
2008-09-04	06:08:00	0
2008-09-04	06:09:00	0
2008-09-04	06:10:00	0
2008-09-04	06:11:00	0
2008-09-04	06:12:00	0
2008-09-04	06:13:00	0
2008-09-04	06:14:00	0
2008-09-04	06:15:00	0
2008-09-04	06:16:00	0
2008-09-04	06:17:00	0
2008-09-04	06:18:00	0
2008-09-04	06:19:00	0
2008-09-04	06:20:00	0
2008-09-04	06:21:00	0
2008-09-04	06:22:00	0
2008-09-04	06:23:00	0
2008-09-04	06:24:00	0
2008-09-04	06:25:00	0
2008-09-04	06:26:00	0
2008-09-04	06:27:00	0
2008-09-04	06:28:00	0
2008-09-04	06:29:00	0
2008-09-04	06:30:00	0
2008-09-04	06:31:00	0
2008-09-04	06:32:00	0
2008-09-04	06:33:00	0
2008-09-04	06:34:00	0
2008-09-04	06:35:00	0
2008-09-04	06:36:00	0
2008-09-04	06:37:00	0
2008-09-04	06:38:00	0
2008-09-04	06:39:00	0
2008-09-04	06:40:00	0
2008-09-04	06:41:00	0
2008-09-04	06:42:00	0
2008-09-04	06:43:00	0
2008-09-04	06:44:00	0
2008-09-04	06:45:00	0
2008-09-04	06:46:00	0
2008-09-04	06:47:00	0
2008-09-04	06:48:00	0
2008-09-04	06:49:00	0
2008-09-04	06:50:00	0
2008-09-04	06:51:00	0
2008-09-04	06:52:00	0
2008-09-04	06:53:00	0
2008-09-04	06:54:00	0
2008-09-04	06:55:00	0
2008-09-04	06:56:00	0
2008-09-04	06:57:00	0
2008-09-04	06:58:00	0
2008-09-04	06:59:00	0
2008-09-04	07:00:00	0
2008-09-04	07:01:00	0
2008-09-04	07:02:00	0
2008-09-04	07:03:00	0
2008-09-04	07:04:00	0
2008-09-04	07:05:00	0
2008-09-04	07:06:00	0
2008-09-04	07:07:00	0
2008-09-04	07:08:00	0
2008-09-04	07:09:00	0
2008-09-04	07:10:00	0
2008-09-04	07:11:00	0
2008-09-04	07:12:00	0
2008-09-04	07:13:00	0
2008-09-04	07:14:00	0
2008-09-04	07:15:00	0
2008-09-04	07:16:00	0
2008-09-04	07:17:00	0
2008-09-04	07:18:00	0
2008-09-04	07:19:00	0
2008-09-04	07:20:00	0
2008-09-04	07:21:00	0
2008-09-04	07:22:00	0
2008-09-04	07:23:00	0
2008-09-04	07:24:00	0
2008-09-04	07:25:00	0
2008-09-04	07:26:00	0
2008-09-04	07:27:00	0
2008-09-04	07:28:00	0
2008-09-04	07:29:00	0
2008-09-04	07:30:00	0
2008-09-04	07:31:00	0
2008-09-04	07:32:00	0
2008-09-04	07:33:00	0
2008-09-04	07:34:00	0
2008-09-04	07:35:00	0
2008-09-04	07:36:00	0
2008-09-04	07:37:00	0
2008-09-04	07:38:00	0
2008-09-04	07:39:00	0
2008-09-04	07:40:00	0
2008-09-04	07:41:00	0
2008-09-04	07:42:00	0
2008-09-04	07:43:00	0
2008-09-04	07:44:00	0
2008-09-04	07:45:00	0
2008-09-04	07:46:00	0
2008-09-04	07:47:00	0
2008-09-04	07:48:00	0
2008-09-04	07:49:00	0
2008-09-04	07:50:00	0
2008-09-04	07:51:00	0
2008-09-04	07:52:00	0
2008-09-04	07:53:00	0
2008-09-04	07:54:00	0
2008-09-04	07:55:00	0
2008-09-04	07:56:00	0
2008-09-04	07:57:00	0
2008-09-04	07:58:00	0
2008-09-04	07:59:00	0
2008-09-04	08:00:00	0
2008-09-04	08:01:00	0
2008-09-04	08:02:00	0
2008-09-04	08:03:00	0
2008-09-04	08:04:00	0
2008-09-04	08:05:00	0
2008-09-04	08:06:00	0
2008-09-04	08:07:00	0
2008-09-04	08:08:00	0
2008-09-04	08:09:00	0
2008-09-04	08:10:00	0
2008-09-04	08:11:00	0
2008-09-04	08:12:00	0
2008-09-04	08:13:00	0
2008-09-04	08:14:00	0
2008-09-04	08:15:00	0
2008-09-04	08:16:00	0
2008-09-04	08:17:00	0
2008-09-04	08:18:00	0
2008-09-04	08:19:00	0
2008-09-04	08:20:00	0
2008-09-04	08:21:00	0
2008-09-04	08:22:00	0
2008-09-04	08:23:00	0
2008-09-04	08:24:00	0
2008-09-04	08:25:00	0
2008-09-04	08:26:00	0
2008-09-04	08:27:00	0
2008-09-04	08:28:00	0
2008-09-04	08:29:00	0
2008-09-04	08:30:00	0
2008-09-04	08:31:00	0
2008-09-04	08:32:00	0
2008-09-04	08:33:00	0
2008-09-04	08:34:00	0
2008-09-04	08:35:00	0
2008-09-04	08:36:00	0
2008-09-04	08:37:00	0
2008-09-04	08:38:00	0
2008-09-04	08:39:00	0
2008-09-04	08:40:00	0
2008-09-04	08:41:00	0
2008-09-04	08:42:00	0
2008-09-04	08:43:00	0
2008-09-04	08:44:00	0
2008-09-04	08:45:00	0
2008-09-04	08:46:00	0
2008-09-04	08:47:00	0
2008-09-04	08:48:00	0
2008-09-04	08:49:00	0
2008-09-04	08:50:00	0
2008-09-04	08:51:00	0
2008-09-04	08:52:00	0
2008-09-04	08:53:00	0
2008-09-04	08:54:00	0
2008-09-04	08:55:00	0
2008-09-04	08:56:00	0
2008-09-04	08:57:00	0
2008-09-04	08:58:00	0
2008-09-04	08:59:00	0
2008-09-04	09:00:00	0
2008-09-04	09:01:00	0
2008-09-04	09:02:00	0
2008-09-04	09:03:00	0
2008-09-04	09:04:00	0
2008-09-04	09:05:00	0
2008-09-04	09:06:00	0
2008-09-04	09:07:00	0
2008-09-04	09:08:00	0
2008-09-04	09:09:00	0
2008-09-04	09:10:00	0
2008-09-04	09:11:00	0
2008-09-04	09:12:00	0
2008-09-04	09:13:00	0
2008-09-04	09:14:00	0
2008-09-04	09:15:00	0
2008-09-04	09:16:00	0
2008-09-04	09:17:00	0
2008-09-04	09:18:00	0
2008-09-04	09:19:00	0
2008-09-04	09:20:00	0
2008-09-04	09:21:00	0
2008-09-04	09:22:00	0
2008-09-04	09:23:00	0
2008-09-04	09:24:00	0
2008-09-04	09:25:00	0
2008-09-04	09:26:00	0
2008-09-04	09:27:00	0
2008-09-04	09:28:00	0
2008-09-04	09:29:00	0
2008-09-04	09:30:00	0
2008-09-04	09:31:00	0
2008-09-04	09:32:00	0
2008-09-04	09:33:00	0
2008-09-04	09:34:00	0
2008-09-04	09:35:00	0
2008-09-04	09:36:00	0
2008-09-04	09:37:00	0
2008-09-04	09:38:00	0
2008-09-04	09:39:00	0
2008-09-04	09:40:00	0
2008-09-04	09:41:00	0
2008-09-04	09:42:00	0
2008-09-04	09:43:00	0
2008-09-04	09:44:00	0
2008-09-04	09:45:00	0
2008-09-04	09:46:00	0
2008-09-04	09:47:00	0
2008-09-04	09:48:00	0
2008-09-04	09:49:00	0
2008-09-04	09:50:00	0
2008-09-04	09:51:00	0
2008-09-04	09:52:00	0
2008-09-04	09:53:00	0
2008-09-04	09:54:00	0
2008-09-04	09:55:00	0
2008-09-04	09:56:00	0
2008-09-04	09:57:00	0
2008-09-04	09:58:00	0
2008-09-04	09:59:00	0
2008-09-04	10:00:00	0
2008-09-04	10:01:00	0
2008-09-04	10:02:00	0
2008-09-04	10:03:00	0
2008-09-04	10:04:00	0
2008-09-04	10:05:00	0
2008-09-04	10:06:00	0
2008-09-04	10:07:00	0
2008-09-04	10:08:00	0
2008-09-04	10:09:00	0
2008-09-04	10:10:00	0
2008-09-04	10:11:00	0
2008-09-04	10:12:00	0
2008-09-04	10:13:00	0
2008-09-04	10:14:00	0
2008-09-04	10:15:00	0
2008-09-04	10:16:00	0
2008-09-04	10:17:00	0
2008-09-04	10:18:00	0
2008-09-04	10:19:00	0
2008-09-04	10:20:00	0
2008-09-04	10:21:00	0
2008-09-04	10:22:00	0
2008-09-04	10:23:00	0
2008-09-04	10:24:00	0
2008-09-04	10:25:00	0
2008-09-04	10:26:00	0
2008-09-04	10:27:00	0
2008-09-04	10:28:00	0
2008-09-04	10:29:00	0
2008-09-04	10:30:00	0
2008-09-04	10:31:00	0
2008-09-04	10:32:00	0
2008-09-04	10:33:00	0
2008-09-04	10:34:00	0
2008-09-04	10:35:00	0
2008-09-04	10:36:00	0
2008-09-04	10:37:00	0
2008-09-04	10:38:00	0
2008-09-04	10:39:00	0
2008-09-04	10:40:00	0
2008-09-04	10:41:00	0
2008-09-04	10:42:00	0
2008-09-04	10:43:00	0
2008-09-04	10:44:00	0
2008-09-04	10:45:00	0
2008-09-04	10:46:00	0
2008-09-04	10:47:00	0
2008-09-04	10:48:00	0
2008-09-04	10:49:00	0
2008-09-04	10:50:00	0
2008-09-04	10:51:00	0
2008-09-04	10:52:00	0
2008-09-04	10:53:00	0
2008-09-04	10:54:00	0
2008-09-04	10:55:00	0
2008-09-04	10:56:00	0
2008-09-04	10:57:00	0
2008-09-04	10:58:00	0
2008-09-04	10:59:00	0
2008-09-04	11:00:00	0
2008-09-04	11:01:00	0
2008-09-04	11:02:00	0
2008-09-04	11:03:00	0
2008-09-04	11:04:00	0
2008-09-04	11:05:00	0
2008-09-04	11:06:00	0
2008-09-04	11:07:00	0
2008-09-04	11:08:00	0
2008-09-04	11:09:00	0
2008-09-04	11:10:00	0
2008-09-04	11:11:00	0
2008-09-04	11:12:00	0
2008-09-04	11:13:00	0
2008-09-04	11:14:00	0
2008-09-04	11:15:00	0
2008-09-04	11:16:00	0
2008-09-04	11:17:00	0
2008-09-04	11:18:00	0
2008-09-04	11:19:00	0
2008-09-04	11:20:00	0
2008-09-04	11:21:00	0
2008-09-04	11:22:00	0
2008-09-04	11:23:00	0
2008-09-04	11:24:00	0
2008-09-04	11:25:00	0
2008-09-04	11:26:00	0
2008-09-04	11:27:00	0
2008-09-04	11:28:00	0
2008-09-04	11:29:00	0
2008-09-04	11:30:00	0
2008-09-04	11:31:00	0
2008-09-04	11:32:00	0
2008-09-04	11:33:00	0
2008-09-04	11:34:00	0
2008-09-04	11:35:00	0
2008-09-04	11:36:00	0
2008-09-04	11:37:00	0
2008-09-04	11:38:00	0
2008-09-04	11:39:00	0
2008-09-04	11:40:00	0
2008-09-04	11:41:00	0
2008-09-04	11:42:00	0
2008-09-04	11:43:00	0
2008-09-04	11:44:00	0
2008-09-04	11:45:00	0
2008-09-04	11:46:00	0
2008-09-04	11:47:00	0
2008-09-04	11:48:00	0
2008-09-04	11:49:00	0
2008-09-04	11:50:00	0
2008-09-04	11:51:00	0
2008-09-04	11:52:00	0
2008-09-04	11:53:00	0
2008-09-04	11:54:00	0
2008-09-04	11:55:00	0
2008-09-04	11:56:00	0
2008-09-04	11:57:00	0
2008-09-04	11:58:00	0
2008-09-04	11:59:00	0
2008-09-04	12:00:00	0
2008-09-04	12:01:00	0
2008-09-04	12:02:00	0
2008-09-04	12:03:00	0
2008-09-04	12:04:00	0
2008-09-04	12:05:00	0
2008-09-04	12:06:00	0
2008-09-04	12:07:00	0
2008-09-04	12:08:00	0
2008-09-04	12:09:00	0
2008-09-04	12:10:00	0
2008-09-04	12:11:00	0
2008-09-04	12:12:00	0
2008-09-04	12:13:00	0
2008-09-04	12:14:00	0
2008-09-04	12:15:00	0
2008-09-04	12:16:00	0
2008-09-04	12:17:00	0
2008-09-04	12:18:00	0
2008-09-04	12:19:00	0
2008-09-04	12:20:00	0
2008-09-04	12:21:00	0
2008-09-04	12:22:00	0
2008-09-04	12:23:00	0
2008-09-04	12:24:00	0
2008-09-04	12:25:00	0
2008-09-04	12:26:00	0
2008-09-04	12:27:00	0
2008-09-04	12:28:00	0
2008-09-04	12:29:00	0
2008-09-04	12:30:00	0
2008-09-04	12:31:00	0
2008-09-04	12:32:00	0
2008-09-04	12:33:00	0
2008-09-04	12:34:00	0
2008-09-04	12:35:00	0
2008-09-04	12:36:00	0
2008-09-04	12:37:00	0
2008-09-04	12:38:00	0
2008-09-04	12:39:00	0
2008-09-04	12:40:00	0
2008-09-04	12:41:00	0
2008-09-04	12:42:00	0
2008-09-04	12:43:00	0
2008-09-04	12:44:00	0
2008-09-04	12:45:00	0
2008-09-04	12:46:00	0
2008-09-04	12:47:00	0
2008-09-04	12:48:00	0
2008-09-04	12:49:00	0
2008-09-04	12:50:00	0
2008-09-04	12:51:00	0
2008-09-04	12:52:00	0
2008-09-04	12:53:00	0
2008-09-04	12:54:00	0
2008-09-04	12:55:00	0
2008-09-04	12:56:00	0
2008-09-04	12:57:00	0
2008-09-04	12:58:00	0
2008-09-04	12:59:00	0
2008-09-04	13:00:00	0
2008-09-04	13:01:00	0
2008-09-04	13:02:00	0
2008-09-04	13:03:00	0
2008-09-04	13:04:00	0
2008-09-04	13:05:00	0
2008-09-04	13:06:00	0
2008-09-04	13:07:00	0
2008-09-04	13:08:00	0
2008-09-04	13:09:00	0
2008-09-04	13:10:00	0
2008-09-04	13:11:00	0
2008-09-04	13:12:00	0
2008-09-04	13:13:00	0
2008-09-04	13:14:00	0
2008-09-04	13:15:00	0
2008-09-04	13:16:00	0
2008-09-04	13:17:00	0
2008-09-04	13:18:00	0
2008-09-04	13:19:00	0
2008-09-04	13:20:00	0
2008-09-04	13:21:00	0
2008-09-04	13:22:00	0
2008-09-04	13:23:00	0
2008-09-04	13:24:00	0
2008-09-04	13:25:00	0
2008-09-04	13:26:00	0
2008-09-04	13:27:00	0
2008-09-04	13:28:00	0
2008-09-04	13:29:00	0
2008-09-04	13:30:00	0
2008-09-04	13:31:00	0
2008-09-04	13:32:00	0
2008-09-04	13:33:00	0
2008-09-04	13:34:00	0
2008-09-04	13:35:00	0
2008-09-04	13:36:00	0
2008-09-04	13:37:00	0
2008-09-04	13:38:00	0
2008-09-04	13:39:00	0
2008-09-04	13:40:00	0
2008-09-04	13:41:00	0
2008-09-04	13:42:00	0
2008-09-04	13:43:00	0
2008-09-04	13:44:00	0
2008-09-04	13:45:00	0
2008-09-04	13:46:00	0
2008-09-04	13:47:00	0
2008-09-04	13:48:00	0
2008-09-04	13:49:00	0
2008-09-04	13:50:00	0
2008-09-04	13:51:00	0
2008-09-04	13:52:00	0
2008-09-04	13:53:00	0
2008-09-04	13:54:00	0
2008-09-04	13:55:00	0
2008-09-04	13:56:00	0
2008-09-04	13:57:00	0
2008-09-04	13:58:00	0
2008-09-04	13:59:00	0
2008-09-04	14:00:00	0
2008-09-04	14:01:00	0
2008-09-04	14:02:00	0
2008-09-04	14:03:00	0
2008-09-04	14:04:00	0
2008-09-04	14:05:00	0
2008-09-04	14:06:00	0
2008-09-04	14:07:00	0
2008-09-04	14:08:00	0
2008-09-04	14:09:00	0
2008-09-04	14:10:00	0
2008-09-04	14:11:00	0
2008-09-04	14:12:00	0
2008-09-04	14:13:00	0
2008-09-04	14:14:00	0
2008-09-04	14:15:00	0
2008-09-04	14:16:00	0
2008-09-04	14:17:00	0
2008-09-04	14:18:00	0
2008-09-04	14:19:00	0
2008-09-04	14:20:00	0
2008-09-04	14:21:00	0
2008-09-04	14:22:00	0
2008-09-04	14:23:00	0
2008-09-04	14:24:00	0
2008-09-04	14:25:00	0
2008-09-04	14:26:00	0
2008-09-04	14:27:00	0
2008-09-04	14:28:00	0
2008-09-04	14:29:00	0
2008-09-04	14:30:00	0
2008-09-04	14:31:00	0
2008-09-04	14:32:00	0
2008-09-04	14:33:00	0
2008-09-04	14:34:00	0
2008-09-04	14:35:00	0
2008-09-04	14:36:00	0
2008-09-04	14:37:00	0
2008-09-04	14:38:00	0
2008-09-04	14:39:00	0
2008-09-04	14:40:00	0
2008-09-04	14:41:00	0
2008-09-04	14:42:00	0
2008-09-04	14:43:00	0
2008-09-04	14:44:00	0
2008-09-04	14:45:00	0
2008-09-04	14:46:00	0
2008-09-04	14:47:00	0
2008-09-04	14:48:00	0
2008-09-04	14:49:00	0
2008-09-04	14:50:00	0
2008-09-04	14:51:00	0
2008-09-04	14:52:00	0
2008-09-04	14:53:00	0
2008-09-04	14:54:00	0
2008-09-04	14:55:00	0
2008-09-04	14:56:00	0
2008-09-04	14:57:00	0
2008-09-04	14:58:00	0
2008-09-04	14:59:00	0
2008-09-04	15:00:00	0
2008-09-04	15:01:00	0
2008-09-04	15:02:00	0
2008-09-04	15:03:00	0
2008-09-04	15:04:00	0
2008-09-04	15:05:00	0
2008-09-04	15:06:00	0
2008-09-04	15:07:00	0
2008-09-04	15:08:00	0
2008-09-04	15:09:00	0
2008-09-04	15:10:00	0
2008-09-04	15:11:00	0
2008-09-04	15:12:00	0
2008-09-04	15:13:00	0
2008-09-04	15:14:00	0
2008-09-04	15:15:00	0
2008-09-04	15:16:00	0
2008-09-04	15:17:00	0
2008-09-04	15:18:00	0
2008-09-04	15:19:00	0
2008-09-04	15:20:00	0
2008-09-04	15:21:00	0
2008-09-04	15:22:00	0
2008-09-04	15:23:00	0
2008-09-04	15:24:00	0
2008-09-04	15:25:00	0
2008-09-04	15:26:00	0
2008-09-04	15:27:00	0
2008-09-04	15:28:00	0
2008-09-04	15:29:00	0
2008-09-04	15:30:00	0
2008-09-04	15:31:00	0
2008-09-04	15:32:00	0
2008-09-04	15:33:00	0
2008-09-04	15:34:00	0
2008-09-04	15:35:00	0
2008-09-04	15:36:00	0
2008-09-04	15:37:00	0
2008-09-04	15:38:00	0
2008-09-04	15:39:00	0
2008-09-04	15:40:00	0
2008-09-04	15:41:00	0
2008-09-04	15:42:00	0
2008-09-04	15:43:00	0
2008-09-04	15:44:00	0
2008-09-04	15:45:00	0
2008-09-04	15:46:00	0
2008-09-04	15:47:00	0
2008-09-04	15:48:00	0
2008-09-04	15:49:00	0
2008-09-04	15:50:00	0
2008-09-04	15:51:00	0
2008-09-04	15:52:00	0
2008-09-04	15:53:00	0
2008-09-04	15:54:00	0
2008-09-04	15:55:00	0
2008-09-04	15:56:00	0
2008-09-04	15:57:00	0
2008-09-04	15:58:00	0
2008-09-04	15:59:00	0
2008-09-04	16:00:00	0
2008-09-04	16:01:00	0
2008-09-04	16:02:00	0
2008-09-04	16:03:00	0
2008-09-04	16:04:00	0
2008-09-04	16:05:00	0
2008-09-04	16:06:00	0
2008-09-04	16:07:00	0
2008-09-04	16:08:00	0
2008-09-04	16:09:00	0
2008-09-04	16:10:00	0
2008-09-04	16:11:00	0
2008-09-04	16:12:00	0
2008-09-04	16:13:00	0
2008-09-04	16:14:00	0
2008-09-04	16:15:00	0
2008-09-04	16:16:00	0
2008-09-04	16:17:00	0
2008-09-04	16:18:00	0
2008-09-04	16:19:00	0
2008-09-04	16:20:00	0
2008-09-04	16:21:00	0
2008-09-04	16:22:00	0
2008-09-04	16:23:00	0
2008-09-04	16:24:00	0
2008-09-04	16:25:00	0
2008-09-04	16:26:00	0
2008-09-04	16:27:00	0
2008-09-04	16:28:00	0
2008-09-04	16:29:00	0
2008-09-04	16:30:00	0
2008-09-04	16:31:00	0
2008-09-04	16:32:00	0
2008-09-04	16:33:00	0
2008-09-04	16:34:00	0
2008-09-04	16:35:00	0
2008-09-04	16:36:00	0
2008-09-04	16:37:00	0
2008-09-04	16:38:00	0
2008-09-04	16:39:00	0
2008-09-04	16:40:00	0
2008-09-04	16:41:00	0
2008-09-04	16:42:00	0
2008-09-04	16:43:00	0
2008-09-04	16:44:00	0
2008-09-04	16:45:00	0
2008-09-04	16:46:00	0
2008-09-04	16:47:00	0
2008-09-04	16:48:00	0
2008-09-04	16:49:00	0
2008-09-04	16:50:00	0
2008-09-04	16:51:00	0
2008-09-04	16:52:00	0
2008-09-04	16:53:00	0
2008-09-04	16:54:00	0
2008-09-04	16:55:00	0
2008-09-04	16:56:00	0
2008-09-04	16:57:00	0
2008-09-04	16:58:00	0
2008-09-04	16:59:00	0
2008-09-04	17:00:00	0
2008-09-04	17:01:00	0
2008-09-04	17:02:00	0
2008-09-04	17:03:00	0
2008-09-04	17:04:00	0
2008-09-04	17:05:00	0
2008-09-04	17:06:00	0
2008-09-04	17:07:00	0
2008-09-04	17:08:00	0
2008-09-04	17:09:00	0
2008-09-04	17:10:00	0
2008-09-04	17:11:00	0
2008-09-04	17:12:00	0
2008-09-04	17:13:00	0
2008-09-04	17:14:00	0
2008-09-04	17:15:00	0
2008-09-04	17:16:00	0
2008-09-04	17:17:00	0
2008-09-04	17:18:00	0
2008-09-04	17:19:00	0
2008-09-04	17:20:00	0
2008-09-04	17:21:00	0
2008-09-04	17:22:00	0
2008-09-04	17:23:00	0
2008-09-04	17:24:00	0
2008-09-04	17:25:00	0
2008-09-04	17:26:00	0
2008-09-04	17:27:00	0
2008-09-04	17:28:00	0
2008-09-04	17:29:00	0
2008-09-04	17:30:00	0
2008-09-04	17:31:00	0
2008-09-04	17:32:00	0
2008-09-04	17:33:00	0
2008-09-04	17:34:00	0
2008-09-04	17:35:00	0
2008-09-04	17:36:00	0
2008-09-04	17:37:00	0
2008-09-04	17:38:00	0
2008-09-04	17:39:00	0
2008-09-04	17:40:00	0
2008-09-04	17:41:00	0
2008-09-04	17:42:00	0
2008-09-04	17:43:00	0
2008-09-04	17:44:00	0
2008-09-04	17:45:00	0
2008-09-04	17:46:00	0
2008-09-04	17:47:00	0
2008-09-04	17:48:00	0
2008-09-04	17:49:00	0
2008-09-04	17:50:00	0
2008-09-04	17:51:00	0
2008-09-04	17:52:00	0
2008-09-04	17:53:00	0
2008-09-04	17:54:00	0
2008-09-04	17:55:00	0
2008-09-04	17:56:00	0
2008-09-04	17:57:00	0
2008-09-04	17:58:00	0
2008-09-04	17:59:00	0
2008-09-04	18:00:00	0	M
2008-09-04	18:01:00	0
2008-09-04	18:02:00	0
2008-09-04	18:03:00	0
2008-09-04	18:04:00	0
2008-09-04	18:05:00	0
2008-09-04	18:06:00	10
2008-09-04	18:07:00	0
2008-09-04	18:08:00	0
2008-09-04	18:09:00	0
2008-09-04	18:10:00	0
2008-09-04	18:11:00	0
2008-09-04	18:12:00	0
2008-09-04	18:13:00	10
2008-09-04	18:14:00	0
2008-09-04	18:15:00	0
2008-09-04	18:16:00	0
2008-09-04	18:17:00	0
2008-09-04	18:18:00	597
2008-09-04	18:19:00	733
2008-09-04	18:20:00	3499
2008-09-04	18:21:00	1825
2008-09-04	18:22:00	1268
2008-09-04	18:23:00	1979
2008-09-04	18:24:00	2229
2008-09-04	18:25:00	3021
2008-09-04	18:26:00	2859
2008-09-04	18:27:00	2753
2008-09-04	18:28:00	1825
2008-09-04	18:29:00	2859
2008-09-04	18:30:00	1715
2008-09-04	18:31:00	2601
2008-09-04	18:32:00	2318
2008-09-04	18:33:00	1825
2008-09-04	18:34:00	2601
2008-09-04	18:35:00	2552
2008-09-04	18:36:00	3436
2008-09-04	18:37:00	2806
2008-09-04	18:38:00	1715
2008-09-04	18:39:00	1940
2008-09-04	18:40:00	2101
2008-09-04	18:41:00	2456
2008-09-04	18:42:00	2503
2008-09-04	18:43:00	2186
2008-09-04	18:44:00	2186
2008-09-04	18:45:00	2101
2008-09-04	18:46:00	2186
2008-09-04	18:47:00	1002
2008-09-04	18:48:00	1715
2008-09-04	18:49:00	1479
2008-09-04	18:50:00	906
2008-09-04	18:51:00	323
2008-09-04	18:52:00	366
2008-09-04	18:53:00	524
2008-09-04	18:54:00	492
2008-09-04	18:55:00	673
2008-09-04	18:56:00	616
2008-09-04	18:57:00	817
2008-09-04	18:58:00	733
2008-09-04	18:59:00	1077
2008-09-04	19:00:00	475
2008-09-04	19:01:00	5914
2008-09-04	19:02:00	2859
2008-09-04	19:03:00	2651
2008-09-04	19:04:00	4486
2008-09-04	19:05:00	1751
2008-09-04	19:06:00	1825
2008-09-04	19:07:00	1211
2008-09-04	19:08:00	1130
2008-09-04	19:09:00	1026
2008-09-04	19:10:00	410
2008-09-04	19:11:00	20
2008-09-04	19:12:00	0
2008-09-04	19:13:00	102
2008-09-04	19:14:00	30
2008-09-04	19:15:00	0
2008-09-04	19:16:00	0
2008-09-04	19:17:00	10
2008-09-04	19:18:00	10
2008-09-04	19:19:00	41
2008-09-04	19:20:00	20
2008-09-04	19:21:00	144
2008-09-04	19:22:00	10
2008-09-04	19:23:00	0
2008-09-04	19:24:00	0
2008-09-04	19:25:00	0
2008-09-04	19:26:00	20
2008-09-04	19:27:00	10
2008-09-04	19:28:00	71
2008-09-04	19:29:00	61
2008-09-04	19:30:00	71
2008-09-04	19:31:00	20
2008-09-04	19:32:00	0
2008-09-04	19:33:00	0
2008-09-04	19:34:00	0
2008-09-04	19:35:00	0
2008-09-04	19:36:00	0
2008-09-04	19:37:00	0
2008-09-04	19:38:00	61
2008-09-04	19:39:00	0
2008-09-04	19:40:00	132
2008-09-04	19:41:00	0
2008-09-04	19:42:00	0
2008-09-04	19:43:00	0
2008-09-04	19:44:00	0
2008-09-04	19:45:00	0
2008-09-04	19:46:00	91
2008-09-04	19:47:00	51
2008-09-04	19:48:00	41
2008-09-04	19:49:00	0
2008-09-04	19:50:00	51
2008-09-04	19:51:00	61
2008-09-04	19:52:00	0
2008-09-04	19:53:00	0
2008-09-04	19:54:00	0
2008-09-04	19:55:00	0
2008-09-04	19:56:00	0
2008-09-04	19:57:00	0
2008-09-04	19:58:00	0
2008-09-04	19:59:00	0
2008-09-04	20:00:00	102
2008-09-04	20:01:00	1026
2008-09-04	20:02:00	524
2008-09-04	20:03:00	20
2008-09-04	20:04:00	0
2008-09-04	20:05:00	0
2008-09-04	20:06:00	0
2008-09-04	20:07:00	0
2008-09-04	20:08:00	0
2008-09-04	20:09:00	20
2008-09-04	20:10:00	0
2008-09-04	20:11:00	51
2008-09-04	20:12:00	0
2008-09-04	20:13:00	427
2008-09-04	20:14:00	652
2008-09-04	20:15:00	0
2008-09-04	20:16:00	0
2008-09-04	20:17:00	20
2008-09-04	20:18:00	0
2008-09-04	20:19:00	0
2008-09-04	20:20:00	0
2008-09-04	20:21:00	0
2008-09-04	20:22:00	0
2008-09-04	20:23:00	0
2008-09-04	20:24:00	0
2008-09-04	20:25:00	0
2008-09-04	20:26:00	0
2008-09-04	20:27:00	30
2008-09-04	20:28:00	51
2008-09-04	20:29:00	0
2008-09-04	20:30:00	0
2008-09-04	20:31:00	0
2008-09-04	20:32:00	20
2008-09-04	20:33:00	10
2008-09-04	20:34:00	20
2008-09-04	20:35:00	10
2008-09-04	20:36:00	0
2008-09-04	20:37:00	0
2008-09-04	20:38:00	0
2008-09-04	20:39:00	193
2008-09-04	20:40:00	542
2008-09-04	20:41:00	0
2008-09-04	20:42:00	0
2008-09-04	20:43:00	713
2008-09-04	20:44:00	242
2008-09-04	20:45:00	1239
2008-09-04	20:46:00	977
2008-09-04	20:47:00	1130
2008-09-04	20:48:00	1156
2008-09-04	20:49:00	953
2008-09-04	20:50:00	953
2008-09-04	20:51:00	817
2008-09-04	20:52:00	280
2008-09-04	20:53:00	10
2008-09-04	20:54:00	0
2008-09-04	20:55:00	10
2008-09-04	20:56:00	0
2008-09-04	20:57:00	10
2008-09-04	20:58:00	0
2008-09-04	20:59:00	51
2008-09-04	21:00:00	0
2008-09-04	21:01:00	0
2008-09-04	21:02:00	0
2008-09-04	21:03:00	0
2008-09-04	21:04:00	0
2008-09-04	21:05:00	0
2008-09-04	21:06:00	0
2008-09-04	21:07:00	41
2008-09-04	21:08:00	0
2008-09-04	21:09:00	0
2008-09-04	21:10:00	10
2008-09-04	21:11:00	0
2008-09-04	21:12:00	0
2008-09-04	21:13:00	0
2008-09-04	21:14:00	0
2008-09-04	21:15:00	0
2008-09-04	21:16:00	0
2008-09-04	21:17:00	0
2008-09-04	21:18:00	0
2008-09-04	21:19:00	0
2008-09-04	21:20:00	0
2008-09-04	21:21:00	0
2008-09-04	21:22:00	0
2008-09-04	21:23:00	0
2008-09-04	21:24:00	71
2008-09-04	21:25:00	0
2008-09-04	21:26:00	0
2008-09-04	21:27:00	0
2008-09-04	21:28:00	0
2008-09-04	21:29:00	0
2008-09-04	21:30:00	0
2008-09-04	21:31:00	0
2008-09-04	21:32:00	0
2008-09-04	21:33:00	0
2008-09-04	21:34:00	0
2008-09-04	21:35:00	20
2008-09-04	21:36:00	0
2008-09-04	21:37:00	0
2008-09-04	21:38:00	61
2008-09-04	21:39:00	71
2008-09-04	21:40:00	0
2008-09-04	21:41:00	0
2008-09-04	21:42:00	0
2008-09-04	21:43:00	20
2008-09-04	21:44:00	193
2008-09-04	21:45:00	0
2008-09-04	21:46:00	0
2008-09-04	21:47:00	0
2008-09-04	21:48:00	0
2008-09-04	21:49:00	0
2008-09-04	21:50:00	0
2008-09-04	21:51:00	10
2008-09-04	21:52:00	0
2008-09-04	21:53:00	0
2008-09-04	21:54:00	0
2008-09-04	21:55:00	0
2008-09-04	21:56:00	0
2008-09-04	21:57:00	0
2008-09-04	21:58:00	0
2008-09-04	21:59:00	0
2008-09-04	22:00:00	0
2008-09-04	22:01:00	0
2008-09-04	22:02:00	0
2008-09-04	22:03:00	0
2008-09-04	22:04:00	0
2008-09-04	22:05:00	0
2008-09-04	22:06:00	0
2008-09-04	22:07:00	0
2008-09-04	22:08:00	0
2008-09-04	22:09:00	0
2008-09-04	22:10:00	0
2008-09-04	22:11:00	0
2008-09-04	22:12:00	0
2008-09-04	22:13:00	0
2008-09-04	22:14:00	10
2008-09-04	22:15:00	0
2008-09-04	22:16:00	0
2008-09-04	22:17:00	0
2008-09-04	22:18:00	41
2008-09-04	22:19:00	0
2008-09-04	22:20:00	0
2008-09-04	22:21:00	0
2008-09-04	22:22:00	0
2008-09-04	22:23:00	0
2008-09-04	22:24:00	0
2008-09-04	22:25:00	0
2008-09-04	22:26:00	0
2008-09-04	22:27:00	0
2008-09-04	22:28:00	0
2008-09-04	22:29:00	0
2008-09-04	22:30:00	0
2008-09-04	22:31:00	0
2008-09-04	22:32:00	0
2008-09-04	22:33:00	0
2008-09-04	22:34:00	0
2008-09-04	22:35:00	0
2008-09-04	22:36:00	0
2008-09-04	22:37:00	0
2008-09-04	22:38:00	0
2008-09-04	22:39:00	0
2008-09-04	22:40:00	0
2008-09-04	22:41:00	0
2008-09-04	22:42:00	0
2008-09-04	22:43:00	0
2008-09-04	22:44:00	0
2008-09-04	22:45:00	0
2008-09-04	22:46:00	0
2008-09-04	22:47:00	0
2008-09-04	22:48:00	0
2008-09-04	22:49:00	0
2008-09-04	22:50:00	10
2008-09-04	22:51:00	0
2008-09-04	22:52:00	0
2008-09-04	22:53:00	0
2008-09-04	22:54:00	0
2008-09-04	22:55:00	0
2008-09-04	22:56:00	0
2008-09-04	22:57:00	0
2008-09-04	22:58:00	0
2008-09-04	22:59:00	0
2008-09-04	23:00:00	0
2008-09-04	23:01:00	0
2008-09-04	23:02:00	0
2008-09-04	23:03:00	0
2008-09-04	23:04:00	0
2008-09-04	23:05:00	0
2008-09-04	23:06:00	0
2008-09-04	23:07:00	0
2008-09-04	23:08:00	0
2008-09-04	23:09:00	0
2008-09-04	23:10:00	0
2008-09-04	23:11:00	0
2008-09-04	23:12:00	0
2008-09-04	23:13:00	0
2008-09-04	23:14:00	0
2008-09-04	23:15:00	0
2008-09-04	23:16:00	0
2008-09-04	23:17:00	0
2008-09-04	23:18:00	0
2008-09-04	23:19:00	0
2008-09-04	23:20:00	0
2008-09-04	23:21:00	0
2008-09-04	23:22:00	0
2008-09-04	23:23:00	0
2008-09-04	23:24:00	0
2008-09-04	23:25:00	0
2008-09-04	23:26:00	0
2008-09-04	23:27:00	0
2008-09-04	23:28:00	0
2008-09-04	23:29:00	0
2008-09-04	23:30:00	0
2008-09-04	23:31:00	0
2008-09-04	23:32:00	0
2008-09-04	23:33:00	0
2008-09-04	23:34:00	0
2008-09-04	23:35:00	0
2008-09-04	23:36:00	0
2008-09-04	23:37:00	0
2008-09-04	23:38:00	0
2008-09-04	23:39:00	0
2008-09-04	23:40:00	0
2008-09-04	23:41:00	0
2008-09-04	23:42:00	0
2008-09-04	23:43:00	0
2008-09-04	23:44:00	0
2008-09-04	23:45:00	366
2008-09-04	23:46:00	794
2008-09-04	23:47:00	0
2008-09-04	23:48:00	0
2008-09-04	23:49:00	0
2008-09-04	23:50:00	0
2008-09-04	23:51:00	0
2008-09-04	23:52:00	0
2008-09-04	23:53:00	0
2008-09-04	23:54:00	0
2008-09-04	23:55:00	0
2008-09-04	23:56:00	0
2008-09-04	23:57:00	0
2008-09-04	23:58:00	0
2008-09-04	23:59:00	0
2008-09-05	00:00:00	0
2008-09-05	00:01:00	10
2008-09-05	00:02:00	10
2008-09-05	00:03:00	0
2008-09-05	00:04:00	0
2008-09-05	00:05:00	0
2008-09-05	00:06:00	0
2008-09-05	00:07:00	10
2008-09-05	00:08:00	0
2008-09-05	00:09:00	0
2008-09-05	00:10:00	0
2008-09-05	00:11:00	0
2008-09-05	00:12:00	0
2008-09-05	00:13:00	0
2008-09-05	00:14:00	0
2008-09-05	00:15:00	0
2008-09-05	00:16:00	0
2008-09-05	00:17:00	0
2008-09-05	00:18:00	0
2008-09-05	00:19:00	0
2008-09-05	00:20:00	0
2008-09-05	00:21:00	0
2008-09-05	00:22:00	0
2008-09-05	00:23:00	0
2008-09-05	00:24:00	0
2008-09-05	00:25:00	41
2008-09-05	00:26:00	0
2008-09-05	00:27:00	0
2008-09-05	00:28:00	0
2008-09-05	00:29:00	0
2008-09-05	00:30:00	0
2008-09-05	00:31:00	0
2008-09-05	00:32:00	41
2008-09-05	00:33:00	10
2008-09-05	00:34:00	0
2008-09-05	00:35:00	0
2008-09-05	00:36:00	51
2008-09-05	00:37:00	366
2008-09-05	00:38:00	41
2008-09-05	00:39:00	0
2008-09-05	00:40:00	0
2008-09-05	00:41:00	0
2008-09-05	00:42:00	0
2008-09-05	00:43:00	0
2008-09-05	00:44:00	0
2008-09-05	00:45:00	0
2008-09-05	00:46:00	0
2008-09-05	00:47:00	0
2008-09-05	00:48:00	0
2008-09-05	00:49:00	0
2008-09-05	00:50:00	0
2008-09-05	00:51:00	0
2008-09-05	00:52:00	0
2008-09-05	00:53:00	0
2008-09-05	00:54:00	10
2008-09-05	00:55:00	0
2008-09-05	00:56:00	0
2008-09-05	00:57:00	0
2008-09-05	00:58:00	0
2008-09-05	00:59:00	0
2008-09-05	01:00:00	0
2008-09-05	01:01:00	0
2008-09-05	01:02:00	0
2008-09-05	01:03:00	0
2008-09-05	01:04:00	0
2008-09-05	01:05:00	0
2008-09-05	01:06:00	0
2008-09-05	01:07:00	0
2008-09-05	01:08:00	0
2008-09-05	01:09:00	0
2008-09-05	01:10:00	0
2008-09-05	01:11:00	0
2008-09-05	01:12:00	0
2008-09-05	01:13:00	0
2008-09-05	01:14:00	0
2008-09-05	01:15:00	0
2008-09-05	01:16:00	0
2008-09-05	01:17:00	10
2008-09-05	01:18:00	0
2008-09-05	01:19:00	0
2008-09-05	01:20:00	0
2008-09-05	01:21:00	0
2008-09-05	01:22:00	0
2008-09-05	01:23:00	0
2008-09-05	01:24:00	0
2008-09-05	01:25:00	61
2008-09-05	01:26:00	2552
2008-09-05	01:27:00	1077
2008-09-05	01:28:00	10
2008-09-05	01:29:00	323
2008-09-05	01:30:00	20
2008-09-05	01:31:00	597
2008-09-05	01:32:00	1863
2008-09-05	01:33:00	337
2008-09-05	01:34:00	10
2008-09-05	01:35:00	0
2008-09-05	01:36:00	30
2008-09-05	01:37:00	144
2008-09-05	01:38:00	774
2008-09-05	01:39:00	0
2008-09-05	01:40:00	20
2008-09-05	01:41:00	351
2008-09-05	01:42:00	542
2008-09-05	01:43:00	0
2008-09-05	01:44:00	169
2008-09-05	01:45:00	0
2008-09-05	01:46:00	0
2008-09-05	01:47:00	0
2008-09-05	01:48:00	0
2008-09-05	01:49:00	0
2008-09-05	01:50:00	0
2008-09-05	01:51:00	20
2008-09-05	01:52:00	0
2008-09-05	01:53:00	0
2008-09-05	01:54:00	0
2008-09-05	01:55:00	41
2008-09-05	01:56:00	0
2008-09-05	01:57:00	0
2008-09-05	01:58:00	0
2008-09-05	01:59:00	0
2008-09-05	02:00:00	0
2008-09-05	02:01:00	0
2008-09-05	02:02:00	0
2008-09-05	02:03:00	0
2008-09-05	02:04:00	0
2008-09-05	02:05:00	0
2008-09-05	02:06:00	0
2008-09-05	02:07:00	0
2008-09-05	02:08:00	0
2008-09-05	02:09:00	0
2008-09-05	02:10:00	0
2008-09-05	02:11:00	0
2008-09-05	02:12:00	0
2008-09-05	02:13:00	0
2008-09-05	02:14:00	51
2008-09-05	02:15:00	0
2008-09-05	02:16:00	71
2008-09-05	02:17:00	309
2008-09-05	02:18:00	10
2008-09-05	02:19:00	0
2008-09-05	02:20:00	0
2008-09-05	02:21:00	0
2008-09-05	02:22:00	0
2008-09-05	02:23:00	0
2008-09-05	02:24:00	0
2008-09-05	02:25:00	0
2008-09-05	02:26:00	0
2008-09-05	02:27:00	0
2008-09-05	02:28:00	0
2008-09-05	02:29:00	0
2008-09-05	02:30:00	0
2008-09-05	02:31:00	0
2008-09-05	02:32:00	0
2008-09-05	02:33:00	0
2008-09-05	02:34:00	0
2008-09-05	02:35:00	0
2008-09-05	02:36:00	0
2008-09-05	02:37:00	0
2008-09-05	02:38:00	0
2008-09-05	02:39:00	0
2008-09-05	02:40:00	0
2008-09-05	02:41:00	20
2008-09-05	02:42:00	20
2008-09-05	02:43:00	0
2008-09-05	02:44:00	0
2008-09-05	02:45:00	0
2008-09-05	02:46:00	0
2008-09-05	02:47:00	0
2008-09-05	02:48:00	0
2008-09-05	02:49:00	0
2008-09-05	02:50:00	0
2008-09-05	02:51:00	0
2008-09-05	02:52:00	0
2008-09-05	02:53:00	0
2008-09-05	02:54:00	0
2008-09-05	02:55:00	0
2008-09-05	02:56:00	0
2008-09-05	02:57:00	0
2008-09-05	02:58:00	0
2008-09-05	02:59:00	0
2008-09-05	03:00:00	0
2008-09-05	03:01:00	0
2008-09-05	03:02:00	0
2008-09-05	03:03:00	0
2008-09-05	03:04:00	0
2008-09-05	03:05:00	10
2008-09-05	03:06:00	0
2008-09-05	03:07:00	0
2008-09-05	03:08:00	0
2008-09-05	03:09:00	0
2008-09-05	03:10:00	0
2008-09-05	03:11:00	0
2008-09-05	03:12:00	0
2008-09-05	03:13:00	0
2008-09-05	03:14:00	0
2008-09-05	03:15:00	0
2008-09-05	03:16:00	0
2008-09-05	03:17:00	0
2008-09-05	03:18:00	0
2008-09-05	03:19:00	0
2008-09-05	03:20:00	0
2008-09-05	03:21:00	0
2008-09-05	03:22:00	0
2008-09-05	03:23:00	0
2008-09-05	03:24:00	0
2008-09-05	03:25:00	242
2008-09-05	03:26:00	102
2008-09-05	03:27:00	0
2008-09-05	03:28:00	0
2008-09-05	03:29:00	0
2008-09-05	03:30:00	0
2008-09-05	03:31:00	0
2008-09-05	03:32:00	0
2008-09-05	03:33:00	0
2008-09-05	03:34:00	0
2008-09-05	03:35:00	0
2008-09-05	03:36:00	0
2008-09-05	03:37:00	0
2008-09-05	03:38:00	0
2008-09-05	03:39:00	0
2008-09-05	03:40:00	0
2008-09-05	03:41:00	0
2008-09-05	03:42:00	0
2008-09-05	03:43:00	0
2008-09-05	03:44:00	0
2008-09-05	03:45:00	0
2008-09-05	03:46:00	0
2008-09-05	03:47:00	0
2008-09-05	03:48:00	0
2008-09-05	03:49:00	0
2008-09-05	03:50:00	0
2008-09-05	03:51:00	0
2008-09-05	03:52:00	0
2008-09-05	03:53:00	10
2008-09-05	03:54:00	0
2008-09-05	03:55:00	0
2008-09-05	03:56:00	0
2008-09-05	03:57:00	0
2008-09-05	03:58:00	0
2008-09-05	03:59:00	0
2008-09-05	04:00:00	0
2008-09-05	04:01:00	0
2008-09-05	04:02:00	0
2008-09-05	04:03:00	0
2008-09-05	04:04:00	0
2008-09-05	04:05:00	0
2008-09-05	04:06:00	0
2008-09-05	04:07:00	0
2008-09-05	04:08:00	0
2008-09-05	04:09:00	0
2008-09-05	04:10:00	0
2008-09-05	04:11:00	0
2008-09-05	04:12:00	0
2008-09-05	04:13:00	0
2008-09-05	04:14:00	0
2008-09-05	04:15:00	0
2008-09-05	04:16:00	0
2008-09-05	04:17:00	0
2008-09-05	04:18:00	0
2008-09-05	04:19:00	0
2008-09-05	04:20:00	10
2008-09-05	04:21:00	0
2008-09-05	04:22:00	0
2008-09-05	04:23:00	0
2008-09-05	04:24:00	0
2008-09-05	04:25:00	0
2008-09-05	04:26:00	0
2008-09-05	04:27:00	0
2008-09-05	04:28:00	0
2008-09-05	04:29:00	0
2008-09-05	04:30:00	0
2008-09-05	04:31:00	0
2008-09-05	04:32:00	0
2008-09-05	04:33:00	0
2008-09-05	04:34:00	0
2008-09-05	04:35:00	0
2008-09-05	04:36:00	0
2008-09-05	04:37:00	0
2008-09-05	04:38:00	0
2008-09-05	04:39:00	0
2008-09-05	04:40:00	0
2008-09-05	04:41:00	0
2008-09-05	04:42:00	0
2008-09-05	04:43:00	0
2008-09-05	04:44:00	0
2008-09-05	04:45:00	0
2008-09-05	04:46:00	0
2008-09-05	04:47:00	0
2008-09-05	04:48:00	0
2008-09-05	04:49:00	30
2008-09-05	04:50:00	20
2008-09-05	04:51:00	0
2008-09-05	04:52:00	0
2008-09-05	04:53:00	0
2008-09-05	04:54:00	0
2008-09-05	04:55:00	0
2008-09-05	04:56:00	10
2008-09-05	04:57:00	0
2008-09-05	04:58:00	0
2008-09-05	04:59:00	0
2008-09-05	05:00:00	41
2008-09-05	05:01:00	579
2008-09-05	05:02:00	713
2008-09-05	05:03:00	0
2008-09-05	05:04:00	10
2008-09-05	05:05:00	10
2008-09-05	05:06:00	20
2008-09-05	05:07:00	0
2008-09-05	05:08:00	0
2008-09-05	05:09:00	0
2008-09-05	05:10:00	0
2008-09-05	05:11:00	0
2008-09-05	05:12:00	0
2008-09-05	05:13:00	0
2008-09-05	05:14:00	10
2008-09-05	05:15:00	0
2008-09-05	05:16:00	0
2008-09-05	05:17:00	0
2008-09-05	05:18:00	0
2008-09-05	05:19:00	0
2008-09-05	05:20:00	0
2008-09-05	05:21:00	0
2008-09-05	05:22:00	0
2008-09-05	05:23:00	0
2008-09-05	05:24:00	0
2008-09-05	05:25:00	81
2008-09-05	05:26:00	0
2008-09-05	05:27:00	0
2008-09-05	05:28:00	0
2008-09-05	05:29:00	0
2008-09-05	05:30:00	0
2008-09-05	05:31:00	0
2008-09-05	05:32:00	0
2008-09-05	05:33:00	0
2008-09-05	05:34:00	0
2008-09-05	05:35:00	0
2008-09-05	05:36:00	0
2008-09-05	05:37:00	0
2008-09-05	05:38:00	0
2008-09-05	05:39:00	0
2008-09-05	05:40:00	0
2008-09-05	05:41:00	0
2008-09-05	05:42:00	0
2008-09-05	05:43:00	0
2008-09-05	05:44:00	0
2008-09-05	05:45:00	0
2008-09-05	05:46:00	0
2008-09-05	05:47:00	30
2008-09-05	05:48:00	0
2008-09-05	05:49:00	0
2008-09-05	05:50:00	61
2008-09-05	05:51:00	733
2008-09-05	05:52:00	1646
2008-09-05	05:53:00	10
2008-09-05	05:54:00	20
2008-09-05	05:55:00	0
2008-09-05	05:56:00	0
2008-09-05	05:57:00	0
2008-09-05	05:58:00	0
2008-09-05	05:59:00	0
2008-09-05	06:00:00	0
2008-09-05	06:01:00	0
2008-09-05	06:02:00	20
2008-09-05	06:03:00	0
2008-09-05	06:04:00	0
2008-09-05	06:05:00	0
2008-09-05	06:06:00	0
2008-09-05	06:07:00	0
2008-09-05	06:08:00	0
2008-09-05	06:09:00	0
2008-09-05	06:10:00	0
2008-09-05	06:11:00	0
2008-09-05	06:12:00	10
2008-09-05	06:13:00	0
2008-09-05	06:14:00	0
2008-09-05	06:15:00	0
2008-09-05	06:16:00	0
2008-09-05	06:17:00	0
2008-09-05	06:18:00	0
2008-09-05	06:19:00	0
2008-09-05	06:20:00	0
2008-09-05	06:21:00	0
2008-09-05	06:22:00	0
2008-09-05	06:23:00	0
2008-09-05	06:24:00	0
2008-09-05	06:25:00	0
2008-09-05	06:26:00	0
2008-09-05	06:27:00	0
2008-09-05	06:28:00	0
2008-09-05	06:29:00	0
2008-09-05	06:30:00	0
2008-09-05	06:31:00	0
2008-09-05	06:32:00	0
2008-09-05	06:33:00	0
2008-09-05	06:34:00	20
2008-09-05	06:35:00	0
2008-09-05	06:36:00	0
2008-09-05	06:37:00	20
2008-09-05	06:38:00	0
2008-09-05	06:39:00	0
2008-09-05	06:40:00	51
2008-09-05	06:41:00	112
2008-09-05	06:42:00	20
2008-09-05	06:43:00	61
2008-09-05	06:44:00	1386
2008-09-05	06:45:00	733
2008-09-05	06:46:00	0
2008-09-05	06:47:00	51
2008-09-05	06:48:00	71
2008-09-05	06:49:00	41
2008-09-05	06:50:00	0
2008-09-05	06:51:00	61
2008-09-05	06:52:00	0
2008-09-05	06:53:00	0
2008-09-05	06:54:00	0
2008-09-05	06:55:00	61
2008-09-05	06:56:00	51
2008-09-05	06:57:00	410
2008-09-05	06:58:00	380
2008-09-05	06:59:00	366
2008-09-05	07:00:00	380
2008-09-05	07:01:00	1077
2008-09-05	07:02:00	524
2008-09-05	07:03:00	0
2008-09-05	07:04:00	0
2008-09-05	07:05:00	0
2008-09-05	07:06:00	0
2008-09-05	07:07:00	0
2008-09-05	07:08:00	0
2008-09-05	07:09:00	0
2008-09-05	07:10:00	0
2008-09-05	07:11:00	0
2008-09-05	07:12:00	0
2008-09-05	07:13:00	0
2008-09-05	07:14:00	0
2008-09-05	07:15:00	0
2008-09-05	07:16:00	0
2008-09-05	07:17:00	81
2008-09-05	07:18:00	394
2008-09-05	07:19:00	102
2008-09-05	07:20:00	0
2008-09-05	07:21:00	861
2008-09-05	07:22:00	1077
2008-09-05	07:23:00	1296
2008-09-05	07:24:00	280
2008-09-05	07:25:00	112
2008-09-05	07:26:00	1077
2008-09-05	07:27:00	1416
2008-09-05	07:28:00	1103
2008-09-05	07:29:00	1296
2008-09-05	07:30:00	309
2008-09-05	07:31:00	443
2008-09-05	07:32:00	1447
2008-09-05	07:33:00	1296
2008-09-05	07:34:00	443
2008-09-05	07:35:00	3194
2008-09-05	07:36:00	2702
2008-09-05	07:37:00	3759
2008-09-05	07:38:00	3499
2008-09-05	07:39:00	3135
2008-09-05	07:40:00	1512
2008-09-05	07:41:00	1479
2008-09-05	07:42:00	977
2008-09-05	07:43:00	1646
2008-09-05	07:44:00	1386
2008-09-05	07:45:00	1239
2008-09-05	07:46:00	1715
2008-09-05	07:47:00	1268
2008-09-05	07:48:00	2186
2008-09-05	07:49:00	1077
2008-09-05	07:50:00	693
2008-09-05	07:51:00	884
2008-09-05	07:52:00	754
2008-09-05	07:53:00	1002
2008-09-05	07:54:00	861
2008-09-05	07:55:00	693
2008-09-05	07:56:00	1577
2008-09-05	07:57:00	1386
2008-09-05	07:58:00	953
2008-09-05	07:59:00	929
2008-09-05	08:00:00	1103
2008-09-05	08:01:00	616
2008-09-05	08:02:00	2601
2008-09-05	08:03:00	2229
2008-09-05	08:04:00	1979
2008-09-05	08:05:00	1863
2008-09-05	08:06:00	1268
2008-09-05	08:07:00	733
2008-09-05	08:08:00	181
2008-09-05	08:09:00	132
2008-09-05	08:10:00	280
2008-09-05	08:11:00	1863
2008-09-05	08:12:00	542
2008-09-05	08:13:00	1002
2008-09-05	08:14:00	693
2008-09-05	08:15:00	0
2008-09-05	08:16:00	20
2008-09-05	08:17:00	443
2008-09-05	08:18:00	351
2008-09-05	08:19:00	0
2008-09-05	08:20:00	10
2008-09-05	08:21:00	0
2008-09-05	08:22:00	0
2008-09-05	08:23:00	10
2008-09-05	08:24:00	51
2008-09-05	08:25:00	91
2008-09-05	08:26:00	0
2008-09-05	08:27:00	0
2008-09-05	08:28:00	0
2008-09-05	08:29:00	0
2008-09-05	08:30:00	156
2008-09-05	08:31:00	41
2008-09-05	08:32:00	61
2008-09-05	08:33:00	81
2008-09-05	08:34:00	122
2008-09-05	08:35:00	0
2008-09-05	08:36:00	122
2008-09-05	08:37:00	132
2008-09-05	08:38:00	51
2008-09-05	08:39:00	61
2008-09-05	08:40:00	10
2008-09-05	08:41:00	71
2008-09-05	08:42:00	61
2008-09-05	08:43:00	81
2008-09-05	08:44:00	41
2008-09-05	08:45:00	71
2008-09-05	08:46:00	10
2008-09-05	08:47:00	51
2008-09-05	08:48:00	51
2008-09-05	08:49:00	366
2008-09-05	08:50:00	366
2008-09-05	08:51:00	30
2008-09-05	08:52:00	0
2008-09-05	08:53:00	102
2008-09-05	08:54:00	20
2008-09-05	08:55:00	61
2008-09-05	08:56:00	102
2008-09-05	08:57:00	30
2008-09-05	08:58:00	71
2008-09-05	08:59:00	205
2008-09-05	09:00:00	0
2008-09-05	09:01:00	30
2008-09-05	09:02:00	10
2008-09-05	09:03:00	254
2008-09-05	09:04:00	30
2008-09-05	09:05:00	0
2008-09-05	09:06:00	0
2008-09-05	09:07:00	132
2008-09-05	09:08:00	61
[truncated: 19,611 more rows]

## Sheet: 9.18.08
Actogram, Copy Raw Data, All Days
Identity:	Patty
Filename:	E:\Active Research Files\meloxicam titre canine\cases\patty\Patty 9.18.08.AWC
Gender:	F
Age:	10
Height:	45.7 cm	18.0 in
Weight:	16.0 kg	35.3 lbs
Start Date:	18-Sep-2008 (Thu)
Start Time:	12:00:00
Interval:	1.00 mins
Date Stamp:	Time Stamp:	Activity Data:	Marker Press:
2008-09-18	00:00:00	0
2008-09-18	00:01:00	0
2008-09-18	00:02:00	0
2008-09-18	00:03:00	0
2008-09-18	00:04:00	0
2008-09-18	00:05:00	0
2008-09-18	00:06:00	0
2008-09-18	00:07:00	0
2008-09-18	00:08:00	0
2008-09-18	00:09:00	0
2008-09-18	00:10:00	0
2008-09-18	00:11:00	0
2008-09-18	00:12:00	0
2008-09-18	00:13:00	0
2008-09-18	00:14:00	0
2008-09-18	00:15:00	0
2008-09-18	00:16:00	0
2008-09-18	00:17:00	0
2008-09-18	00:18:00	0
2008-09-18	00:19:00	0
2008-09-18	00:20:00	0
2008-09-18	00:21:00	0
2008-09-18	00:22:00	0
2008-09-18	00:23:00	0
2008-09-18	00:24:00	0
2008-09-18	00:25:00	0
2008-09-18	00:26:00	0
2008-09-18	00:27:00	0
2008-09-18	00:28:00	0
2008-09-18	00:29:00	0
2008-09-18	00:30:00	0
2008-09-18	00:31:00	0
2008-09-18	00:32:00	0
2008-09-18	00:33:00	0
2008-09-18	00:34:00	0
2008-09-18	00:35:00	0
2008-09-18	00:36:00	0
2008-09-18	00:37:00	0
2008-09-18	00:38:00	0
2008-09-18	00:39:00	0
2008-09-18	00:40:00	0
2008-09-18	00:41:00	0
2008-09-18	00:42:00	0
2008-09-18	00:43:00	0
2008-09-18	00:44:00	0
2008-09-18	00:45:00	0
2008-09-18	00:46:00	0
2008-09-18	00:47:00	0
2008-09-18	00:48:00	0
2008-09-18	00:49:00	0
2008-09-18	00:50:00	0
2008-09-18	00:51:00	0
2008-09-18	00:52:00	0
2008-09-18	00:53:00	0
2008-09-18	00:54:00	0
2008-09-18	00:55:00	0
2008-09-18	00:56:00	0
2008-09-18	00:57:00	0
2008-09-18	00:58:00	0
2008-09-18	00:59:00	0
2008-09-18	01:00:00	0
2008-09-18	01:01:00	0
2008-09-18	01:02:00	0
2008-09-18	01:03:00	0
2008-09-18	01:04:00	0
2008-09-18	01:05:00	0
2008-09-18	01:06:00	0
2008-09-18	01:07:00	0
2008-09-18	01:08:00	0
2008-09-18	01:09:00	0
2008-09-18	01:10:00	0
2008-09-18	01:11:00	0
2008-09-18	01:12:00	0
2008-09-18	01:13:00	0
2008-09-18	01:14:00	0
2008-09-18	01:15:00	0
2008-09-18	01:16:00	0
2008-09-18	01:17:00	0
2008-09-18	01:18:00	0
2008-09-18	01:19:00	0
2008-09-18	01:20:00	0
2008-09-18	01:21:00	0
2008-09-18	01:22:00	0
2008-09-18	01:23:00	0
2008-09-18	01:24:00	0
2008-09-18	01:25:00	0
2008-09-18	01:26:00	0
2008-09-18	01:27:00	0
2008-09-18	01:28:00	0
2008-09-18	01:29:00	0
2008-09-18	01:30:00	0
2008-09-18	01:31:00	0
2008-09-18	01:32:00	0
2008-09-18	01:33:00	0
2008-09-18	01:34:00	0
2008-09-18	01:35:00	0
2008-09-18	01:36:00	0
2008-09-18	01:37:00	0
2008-09-18	01:38:00	0
2008-09-18	01:39:00	0
2008-09-18	01:40:00	0
2008-09-18	01:41:00	0
2008-09-18	01:42:00	0
2008-09-18	01:43:00	0
2008-09-18	01:44:00	0
2008-09-18	01:45:00	0
2008-09-18	01:46:00	0
2008-09-18	01:47:00	0
2008-09-18	01:48:00	0
2008-09-18	01:49:00	0
2008-09-18	01:50:00	0
2008-09-18	01:51:00	0
2008-09-18	01:52:00	0
2008-09-18	01:53:00	0
2008-09-18	01:54:00	0
2008-09-18	01:55:00	0
2008-09-18	01:56:00	0
2008-09-18	01:57:00	0
2008-09-18	01:58:00	0
2008-09-18	01:59:00	0
2008-09-18	02:00:00	0
2008-09-18	02:01:00	0
2008-09-18	02:02:00	0
2008-09-18	02:03:00	0
2008-09-18	02:04:00	0
2008-09-18	02:05:00	0
2008-09-18	02:06:00	0
2008-09-18	02:07:00	0
2008-09-18	02:08:00	0
2008-09-18	02:09:00	0
2008-09-18	02:10:00	0
2008-09-18	02:11:00	0
2008-09-18	02:12:00	0
2008-09-18	02:13:00	0
2008-09-18	02:14:00	0
2008-09-18	02:15:00	0
2008-09-18	02:16:00	0
2008-09-18	02:17:00	0
2008-09-18	02:18:00	0
2008-09-18	02:19:00	0
2008-09-18	02:20:00	0
2008-09-18	02:21:00	0
2008-09-18	02:22:00	0
2008-09-18	02:23:00	0
2008-09-18	02:24:00	0
2008-09-18	02:25:00	0
2008-09-18	02:26:00	0
2008-09-18	02:27:00	0
2008-09-18	02:28:00	0
2008-09-18	02:29:00	0
2008-09-18	02:30:00	0
2008-09-18	02:31:00	0
2008-09-18	02:32:00	0
2008-09-18	02:33:00	0
2008-09-18	02:34:00	0
2008-09-18	02:35:00	0
2008-09-18	02:36:00	0
2008-09-18	02:37:00	0
2008-09-18	02:38:00	0
2008-09-18	02:39:00	0
2008-09-18	02:40:00	0
2008-09-18	02:41:00	0
2008-09-18	02:42:00	0
2008-09-18	02:43:00	0
2008-09-18	02:44:00	0
2008-09-18	02:45:00	0
2008-09-18	02:46:00	0
2008-09-18	02:47:00	0
2008-09-18	02:48:00	0
2008-09-18	02:49:00	0
2008-09-18	02:50:00	0
2008-09-18	02:51:00	0
2008-09-18	02:52:00	0
2008-09-18	02:53:00	0
2008-09-18	02:54:00	0
2008-09-18	02:55:00	0
2008-09-18	02:56:00	0
2008-09-18	02:57:00	0
2008-09-18	02:58:00	0
2008-09-18	02:59:00	0
2008-09-18	03:00:00	0
2008-09-18	03:01:00	0
2008-09-18	03:02:00	0
2008-09-18	03:03:00	0
2008-09-18	03:04:00	0
2008-09-18	03:05:00	0
2008-09-18	03:06:00	0
2008-09-18	03:07:00	0
2008-09-18	03:08:00	0
2008-09-18	03:09:00	0
2008-09-18	03:10:00	0
2008-09-18	03:11:00	0
2008-09-18	03:12:00	0
2008-09-18	03:13:00	0
2008-09-18	03:14:00	0
2008-09-18	03:15:00	0
2008-09-18	03:16:00	0
2008-09-18	03:17:00	0
2008-09-18	03:18:00	0
2008-09-18	03:19:00	0
2008-09-18	03:20:00	0
2008-09-18	03:21:00	0
2008-09-18	03:22:00	0
2008-09-18	03:23:00	0
2008-09-18	03:24:00	0
2008-09-18	03:25:00	0
2008-09-18	03:26:00	0
2008-09-18	03:27:00	0
2008-09-18	03:28:00	0
2008-09-18	03:29:00	0
2008-09-18	03:30:00	0
2008-09-18	03:31:00	0
2008-09-18	03:32:00	0
2008-09-18	03:33:00	0
2008-09-18	03:34:00	0
2008-09-18	03:35:00	0
2008-09-18	03:36:00	0
2008-09-18	03:37:00	0
2008-09-18	03:38:00	0
2008-09-18	03:39:00	0
2008-09-18	03:40:00	0
2008-09-18	03:41:00	0
2008-09-18	03:42:00	0
2008-09-18	03:43:00	0
2008-09-18	03:44:00	0
2008-09-18	03:45:00	0
2008-09-18	03:46:00	0
2008-09-18	03:47:00	0
2008-09-18	03:48:00	0
2008-09-18	03:49:00	0
2008-09-18	03:50:00	0
2008-09-18	03:51:00	0
2008-09-18	03:52:00	0
2008-09-18	03:53:00	0
2008-09-18	03:54:00	0
2008-09-18	03:55:00	0
2008-09-18	03:56:00	0
2008-09-18	03:57:00	0
2008-09-18	03:58:00	0
2008-09-18	03:59:00	0
2008-09-18	04:00:00	0
2008-09-18	04:01:00	0
2008-09-18	04:02:00	0
2008-09-18	04:03:00	0
2008-09-18	04:04:00	0
2008-09-18	04:05:00	0
2008-09-18	04:06:00	0
2008-09-18	04:07:00	0
2008-09-18	04:08:00	0
2008-09-18	04:09:00	0
2008-09-18	04:10:00	0
2008-09-18	04:11:00	0
2008-09-18	04:12:00	0
2008-09-18	04:13:00	0
2008-09-18	04:14:00	0
2008-09-18	04:15:00	0
2008-09-18	04:16:00	0
2008-09-18	04:17:00	0
2008-09-18	04:18:00	0
2008-09-18	04:19:00	0
2008-09-18	04:20:00	0
2008-09-18	04:21:00	0
2008-09-18	04:22:00	0
2008-09-18	04:23:00	0
2008-09-18	04:24:00	0
2008-09-18	04:25:00	0
2008-09-18	04:26:00	0
2008-09-18	04:27:00	0
2008-09-18	04:28:00	0
2008-09-18	04:29:00	0
2008-09-18	04:30:00	0
2008-09-18	04:31:00	0
2008-09-18	04:32:00	0
2008-09-18	04:33:00	0
2008-09-18	04:34:00	0
2008-09-18	04:35:00	0
2008-09-18	04:36:00	0
2008-09-18	04:37:00	0
2008-09-18	04:38:00	0
2008-09-18	04:39:00	0
2008-09-18	04:40:00	0
2008-09-18	04:41:00	0
2008-09-18	04:42:00	0
2008-09-18	04:43:00	0
2008-09-18	04:44:00	0
2008-09-18	04:45:00	0
2008-09-18	04:46:00	0
2008-09-18	04:47:00	0
2008-09-18	04:48:00	0
2008-09-18	04:49:00	0
2008-09-18	04:50:00	0
2008-09-18	04:51:00	0
2008-09-18	04:52:00	0
2008-09-18	04:53:00	0
2008-09-18	04:54:00	0
2008-09-18	04:55:00	0
2008-09-18	04:56:00	0
2008-09-18	04:57:00	0
2008-09-18	04:58:00	0
2008-09-18	04:59:00	0
2008-09-18	05:00:00	0
2008-09-18	05:01:00	0
2008-09-18	05:02:00	0
2008-09-18	05:03:00	0
2008-09-18	05:04:00	0
2008-09-18	05:05:00	0
2008-09-18	05:06:00	0
2008-09-18	05:07:00	0
2008-09-18	05:08:00	0
2008-09-18	05:09:00	0
2008-09-18	05:10:00	0
2008-09-18	05:11:00	0
2008-09-18	05:12:00	0
2008-09-18	05:13:00	0
2008-09-18	05:14:00	0
2008-09-18	05:15:00	0
2008-09-18	05:16:00	0
2008-09-18	05:17:00	0
2008-09-18	05:18:00	0
2008-09-18	05:19:00	0
2008-09-18	05:20:00	0
2008-09-18	05:21:00	0
2008-09-18	05:22:00	0
2008-09-18	05:23:00	0
2008-09-18	05:24:00	0
2008-09-18	05:25:00	0
2008-09-18	05:26:00	0
2008-09-18	05:27:00	0
2008-09-18	05:28:00	0
2008-09-18	05:29:00	0
2008-09-18	05:30:00	0
2008-09-18	05:31:00	0
2008-09-18	05:32:00	0
2008-09-18	05:33:00	0
2008-09-18	05:34:00	0
2008-09-18	05:35:00	0
2008-09-18	05:36:00	0
2008-09-18	05:37:00	0
2008-09-18	05:38:00	0
2008-09-18	05:39:00	0
2008-09-18	05:40:00	0
2008-09-18	05:41:00	0
2008-09-18	05:42:00	0
2008-09-18	05:43:00	0
2008-09-18	05:44:00	0
2008-09-18	05:45:00	0
2008-09-18	05:46:00	0
2008-09-18	05:47:00	0
2008-09-18	05:48:00	0
2008-09-18	05:49:00	0
2008-09-18	05:50:00	0
2008-09-18	05:51:00	0
2008-09-18	05:52:00	0
2008-09-18	05:53:00	0
2008-09-18	05:54:00	0
2008-09-18	05:55:00	0
2008-09-18	05:56:00	0
2008-09-18	05:57:00	0
2008-09-18	05:58:00	0
2008-09-18	05:59:00	0
2008-09-18	06:00:00	0
2008-09-18	06:01:00	0
2008-09-18	06:02:00	0
2008-09-18	06:03:00	0
2008-09-18	06:04:00	0
2008-09-18	06:05:00	0
2008-09-18	06:06:00	0
2008-09-18	06:07:00	0
2008-09-18	06:08:00	0
2008-09-18	06:09:00	0
2008-09-18	06:10:00	0
2008-09-18	06:11:00	0
2008-09-18	06:12:00	0
2008-09-18	06:13:00	0
2008-09-18	06:14:00	0
2008-09-18	06:15:00	0
2008-09-18	06:16:00	0
2008-09-18	06:17:00	0
2008-09-18	06:18:00	0
2008-09-18	06:19:00	0
2008-09-18	06:20:00	0
2008-09-18	06:21:00	0
2008-09-18	06:22:00	0
2008-09-18	06:23:00	0
2008-09-18	06:24:00	0
2008-09-18	06:25:00	0
2008-09-18	06:26:00	0
2008-09-18	06:27:00	0
2008-09-18	06:28:00	0
2008-09-18	06:29:00	0
2008-09-18	06:30:00	0
2008-09-18	06:31:00	0
2008-09-18	06:32:00	0
2008-09-18	06:33:00	0
2008-09-18	06:34:00	0
2008-09-18	06:35:00	0
2008-09-18	06:36:00	0
2008-09-18	06:37:00	0
2008-09-18	06:38:00	0
2008-09-18	06:39:00	0
2008-09-18	06:40:00	0
2008-09-18	06:41:00	0
2008-09-18	06:42:00	0
2008-09-18	06:43:00	0
2008-09-18	06:44:00	0
2008-09-18	06:45:00	0
2008-09-18	06:46:00	0
2008-09-18	06:47:00	0
2008-09-18	06:48:00	0
2008-09-18	06:49:00	0
2008-09-18	06:50:00	0
2008-09-18	06:51:00	0
2008-09-18	06:52:00	0
2008-09-18	06:53:00	0
2008-09-18	06:54:00	0
2008-09-18	06:55:00	0
2008-09-18	06:56:00	0
2008-09-18	06:57:00	0
2008-09-18	06:58:00	0
2008-09-18	06:59:00	0
2008-09-18	07:00:00	0
2008-09-18	07:01:00	0
2008-09-18	07:02:00	0
2008-09-18	07:03:00	0
2008-09-18	07:04:00	0
2008-09-18	07:05:00	0
2008-09-18	07:06:00	0
2008-09-18	07:07:00	0
2008-09-18	07:08:00	0
2008-09-18	07:09:00	0
2008-09-18	07:10:00	0
2008-09-18	07:11:00	0
2008-09-18	07:12:00	0
2008-09-18	07:13:00	0
2008-09-18	07:14:00	0
2008-09-18	07:15:00	0
2008-09-18	07:16:00	0
2008-09-18	07:17:00	0
2008-09-18	07:18:00	0
2008-09-18	07:19:00	0
2008-09-18	07:20:00	0
2008-09-18	07:21:00	0
2008-09-18	07:22:00	0
2008-09-18	07:23:00	0
2008-09-18	07:24:00	0
2008-09-18	07:25:00	0
2008-09-18	07:26:00	0
2008-09-18	07:27:00	0
2008-09-18	07:28:00	0
2008-09-18	07:29:00	0
2008-09-18	07:30:00	0
2008-09-18	07:31:00	0
2008-09-18	07:32:00	0
2008-09-18	07:33:00	0
2008-09-18	07:34:00	0
2008-09-18	07:35:00	0
2008-09-18	07:36:00	0
2008-09-18	07:37:00	0
2008-09-18	07:38:00	0
2008-09-18	07:39:00	0
2008-09-18	07:40:00	0
2008-09-18	07:41:00	0
2008-09-18	07:42:00	0
2008-09-18	07:43:00	0
2008-09-18	07:44:00	0
2008-09-18	07:45:00	0
2008-09-18	07:46:00	0
2008-09-18	07:47:00	0
2008-09-18	07:48:00	0
2008-09-18	07:49:00	0
2008-09-18	07:50:00	0
2008-09-18	07:51:00	0
2008-09-18	07:52:00	0
2008-09-18	07:53:00	0
2008-09-18	07:54:00	0
2008-09-18	07:55:00	0
2008-09-18	07:56:00	0
2008-09-18	07:57:00	0
2008-09-18	07:58:00	0
2008-09-18	07:59:00	0
2008-09-18	08:00:00	0
2008-09-18	08:01:00	0
2008-09-18	08:02:00	0
2008-09-18	08:03:00	0
2008-09-18	08:04:00	0
2008-09-18	08:05:00	0
2008-09-18	08:06:00	0
2008-09-18	08:07:00	0
2008-09-18	08:08:00	0
2008-09-18	08:09:00	0
2008-09-18	08:10:00	0
2008-09-18	08:11:00	0
2008-09-18	08:12:00	0
2008-09-18	08:13:00	0
2008-09-18	08:14:00	0
2008-09-18	08:15:00	0
2008-09-18	08:16:00	0
2008-09-18	08:17:00	0
2008-09-18	08:18:00	0
2008-09-18	08:19:00	0
2008-09-18	08:20:00	0
2008-09-18	08:21:00	0
2008-09-18	08:22:00	0
2008-09-18	08:23:00	0
2008-09-18	08:24:00	0
2008-09-18	08:25:00	0
2008-09-18	08:26:00	0
2008-09-18	08:27:00	0
2008-09-18	08:28:00	0
2008-09-18	08:29:00	0
2008-09-18	08:30:00	0
2008-09-18	08:31:00	0
2008-09-18	08:32:00	0
2008-09-18	08:33:00	0
2008-09-18	08:34:00	0
2008-09-18	08:35:00	0
2008-09-18	08:36:00	0
2008-09-18	08:37:00	0
2008-09-18	08:38:00	0
2008-09-18	08:39:00	0
2008-09-18	08:40:00	0
2008-09-18	08:41:00	0
2008-09-18	08:42:00	0
2008-09-18	08:43:00	0
2008-09-18	08:44:00	0
2008-09-18	08:45:00	0
2008-09-18	08:46:00	0
2008-09-18	08:47:00	0
2008-09-18	08:48:00	0
2008-09-18	08:49:00	0
2008-09-18	08:50:00	0
2008-09-18	08:51:00	0
2008-09-18	08:52:00	0
2008-09-18	08:53:00	0
2008-09-18	08:54:00	0
2008-09-18	08:55:00	0
2008-09-18	08:56:00	0
2008-09-18	08:57:00	0
2008-09-18	08:58:00	0
2008-09-18	08:59:00	0
2008-09-18	09:00:00	0
2008-09-18	09:01:00	0
2008-09-18	09:02:00	0
2008-09-18	09:03:00	0
2008-09-18	09:04:00	0
2008-09-18	09:05:00	0
2008-09-18	09:06:00	0
2008-09-18	09:07:00	0
2008-09-18	09:08:00	0
2008-09-18	09:09:00	0
2008-09-18	09:10:00	0
2008-09-18	09:11:00	0
2008-09-18	09:12:00	0
2008-09-18	09:13:00	0
2008-09-18	09:14:00	0
2008-09-18	09:15:00	0
2008-09-18	09:16:00	0
2008-09-18	09:17:00	0
2008-09-18	09:18:00	0
2008-09-18	09:19:00	0
2008-09-18	09:20:00	0
2008-09-18	09:21:00	0
2008-09-18	09:22:00	0
2008-09-18	09:23:00	0
2008-09-18	09:24:00	0
2008-09-18	09:25:00	0
2008-09-18	09:26:00	0
2008-09-18	09:27:00	0
2008-09-18	09:28:00	0
2008-09-18	09:29:00	0
2008-09-18	09:30:00	0
2008-09-18	09:31:00	0
2008-09-18	09:32:00	0
2008-09-18	09:33:00	0
2008-09-18	09:34:00	0
2008-09-18	09:35:00	0
2008-09-18	09:36:00	0
2008-09-18	09:37:00	0
2008-09-18	09:38:00	0
2008-09-18	09:39:00	0
2008-09-18	09:40:00	0
2008-09-18	09:41:00	0
2008-09-18	09:42:00	0
2008-09-18	09:43:00	0
2008-09-18	09:44:00	0
2008-09-18	09:45:00	0
2008-09-18	09:46:00	0
2008-09-18	09:47:00	0
2008-09-18	09:48:00	0
2008-09-18	09:49:00	0
2008-09-18	09:50:00	0
2008-09-18	09:51:00	0
2008-09-18	09:52:00	0
2008-09-18	09:53:00	0
2008-09-18	09:54:00	0
2008-09-18	09:55:00	0
2008-09-18	09:56:00	0
2008-09-18	09:57:00	0
2008-09-18	09:58:00	0
2008-09-18	09:59:00	0
2008-09-18	10:00:00	0
2008-09-18	10:01:00	0
2008-09-18	10:02:00	0
2008-09-18	10:03:00	0
2008-09-18	10:04:00	0
2008-09-18	10:05:00	0
2008-09-18	10:06:00	0
2008-09-18	10:07:00	0
2008-09-18	10:08:00	0
2008-09-18	10:09:00	0
2008-09-18	10:10:00	0
2008-09-18	10:11:00	0
2008-09-18	10:12:00	0
2008-09-18	10:13:00	0
2008-09-18	10:14:00	0
2008-09-18	10:15:00	0
2008-09-18	10:16:00	0
2008-09-18	10:17:00	0
2008-09-18	10:18:00	0
2008-09-18	10:19:00	0
2008-09-18	10:20:00	0
2008-09-18	10:21:00	0
2008-09-18	10:22:00	0
2008-09-18	10:23:00	0
2008-09-18	10:24:00	0
2008-09-18	10:25:00	0
2008-09-18	10:26:00	0
2008-09-18	10:27:00	0
2008-09-18	10:28:00	0
2008-09-18	10:29:00	0
2008-09-18	10:30:00	0
2008-09-18	10:31:00	0
2008-09-18	10:32:00	0
2008-09-18	10:33:00	0
2008-09-18	10:34:00	0
2008-09-18	10:35:00	0
2008-09-18	10:36:00	0
2008-09-18	10:37:00	0
2008-09-18	10:38:00	0
2008-09-18	10:39:00	0
2008-09-18	10:40:00	0
2008-09-18	10:41:00	0
2008-09-18	10:42:00	0
2008-09-18	10:43:00	0
2008-09-18	10:44:00	0
2008-09-18	10:45:00	0
2008-09-18	10:46:00	0
2008-09-18	10:47:00	0
2008-09-18	10:48:00	0
2008-09-18	10:49:00	0
2008-09-18	10:50:00	0
2008-09-18	10:51:00	0
2008-09-18	10:52:00	0
2008-09-18	10:53:00	0
2008-09-18	10:54:00	0
2008-09-18	10:55:00	0
2008-09-18	10:56:00	0
2008-09-18	10:57:00	0
2008-09-18	10:58:00	0
2008-09-18	10:59:00	0
2008-09-18	11:00:00	0
2008-09-18	11:01:00	0
2008-09-18	11:02:00	0
2008-09-18	11:03:00	0
2008-09-18	11:04:00	0
2008-09-18	11:05:00	0
2008-09-18	11:06:00	0
2008-09-18	11:07:00	0
2008-09-18	11:08:00	0
2008-09-18	11:09:00	0
2008-09-18	11:10:00	0
2008-09-18	11:11:00	0
2008-09-18	11:12:00	0
2008-09-18	11:13:00	0
2008-09-18	11:14:00	0
2008-09-18	11:15:00	0
2008-09-18	11:16:00	0
2008-09-18	11:17:00	0
2008-09-18	11:18:00	0
2008-09-18	11:19:00	0
2008-09-18	11:20:00	0
2008-09-18	11:21:00	0
2008-09-18	11:22:00	0
2008-09-18	11:23:00	0
2008-09-18	11:24:00	0
2008-09-18	11:25:00	0
2008-09-18	11:26:00	0
2008-09-18	11:27:00	0
2008-09-18	11:28:00	0
2008-09-18	11:29:00	0
2008-09-18	11:30:00	0
2008-09-18	11:31:00	0
2008-09-18	11:32:00	0
2008-09-18	11:33:00	0
2008-09-18	11:34:00	0
2008-09-18	11:35:00	0
2008-09-18	11:36:00	0
2008-09-18	11:37:00	0
2008-09-18	11:38:00	0
2008-09-18	11:39:00	0
2008-09-18	11:40:00	0
2008-09-18	11:41:00	0
2008-09-18	11:42:00	0
2008-09-18	11:43:00	0
2008-09-18	11:44:00	0
2008-09-18	11:45:00	0
2008-09-18	11:46:00	0
2008-09-18	11:47:00	0
2008-09-18	11:48:00	0
2008-09-18	11:49:00	0
2008-09-18	11:50:00	0
2008-09-18	11:51:00	0
2008-09-18	11:52:00	0
2008-09-18	11:53:00	0
2008-09-18	11:54:00	0
2008-09-18	11:55:00	0
2008-09-18	11:56:00	0
2008-09-18	11:57:00	0
2008-09-18	11:58:00	0
2008-09-18	11:59:00	0
2008-09-18	12:00:00	0	M
2008-09-18	12:01:00	0
2008-09-18	12:02:00	0
2008-09-18	12:03:00	0
2008-09-18	12:04:00	0
2008-09-18	12:05:00	144
2008-09-18	12:06:00	1026
2008-09-18	12:07:00	673
2008-09-18	12:08:00	542
2008-09-18	12:09:00	0
2008-09-18	12:10:00	10
2008-09-18	12:11:00	10
2008-09-18	12:12:00	0
2008-09-18	12:13:00	122
2008-09-18	12:14:00	144
2008-09-18	12:15:00	427
2008-09-18	12:16:00	0
2008-09-18	12:17:00	0
2008-09-18	12:18:00	0
2008-09-18	12:19:00	0
2008-09-18	12:20:00	0
2008-09-18	12:21:00	10
2008-09-18	12:22:00	0
2008-09-18	12:23:00	0
2008-09-18	12:24:00	10
2008-09-18	12:25:00	10
2008-09-18	12:26:00	0
2008-09-18	12:27:00	20
2008-09-18	12:28:00	71
2008-09-18	12:29:00	41
2008-09-18	12:30:00	266
2008-09-18	12:31:00	30
2008-09-18	12:32:00	71
2008-09-18	12:33:00	10
2008-09-18	12:34:00	61
2008-09-18	12:35:00	81
2008-09-18	12:36:00	41
2008-09-18	12:37:00	20
2008-09-18	12:38:00	102
2008-09-18	12:39:00	156
2008-09-18	12:40:00	91
2008-09-18	12:41:00	20
2008-09-18	12:42:00	30
2008-09-18	12:43:00	10
2008-09-18	12:44:00	0
2008-09-18	12:45:00	0
2008-09-18	12:46:00	10
2008-09-18	12:47:00	51
2008-09-18	12:48:00	10
2008-09-18	12:49:00	10
2008-09-18	12:50:00	30
2008-09-18	12:51:00	10
2008-09-18	12:52:00	10
2008-09-18	12:53:00	10
2008-09-18	12:54:00	10
2008-09-18	12:55:00	10
2008-09-18	12:56:00	0
2008-09-18	12:57:00	51
2008-09-18	12:58:00	0
2008-09-18	12:59:00	91
2008-09-18	13:00:00	81
2008-09-18	13:01:00	20
2008-09-18	13:02:00	91
2008-09-18	13:03:00	30
2008-09-18	13:04:00	71
2008-09-18	13:05:00	0
2008-09-18	13:06:00	51
2008-09-18	13:07:00	30
2008-09-18	13:08:00	10
2008-09-18	13:09:00	30
2008-09-18	13:10:00	51
2008-09-18	13:11:00	0
2008-09-18	13:12:00	20
2008-09-18	13:13:00	10
2008-09-18	13:14:00	112
2008-09-18	13:15:00	0
2008-09-18	13:16:00	0
2008-09-18	13:17:00	0
2008-09-18	13:18:00	10
2008-09-18	13:19:00	30
2008-09-18	13:20:00	10
2008-09-18	13:21:00	0
2008-09-18	13:22:00	0
2008-09-18	13:23:00	20
2008-09-18	13:24:00	10
2008-09-18	13:25:00	20
2008-09-18	13:26:00	10
2008-09-18	13:27:00	169
2008-09-18	13:28:00	51
2008-09-18	13:29:00	0
2008-09-18	13:30:00	10
2008-09-18	13:31:00	0
2008-09-18	13:32:00	0
2008-09-18	13:33:00	0
2008-09-18	13:34:00	0
2008-09-18	13:35:00	0
2008-09-18	13:36:00	0
2008-09-18	13:37:00	10
2008-09-18	13:38:00	0
2008-09-18	13:39:00	30
2008-09-18	13:40:00	41
2008-09-18	13:41:00	0
2008-09-18	13:42:00	81
2008-09-18	13:43:00	0
2008-09-18	13:44:00	0
2008-09-18	13:45:00	20
2008-09-18	13:46:00	10
2008-09-18	13:47:00	10
2008-09-18	13:48:00	10
2008-09-18	13:49:00	0
2008-09-18	13:50:00	20
2008-09-18	13:51:00	0
2008-09-18	13:52:00	10
2008-09-18	13:53:00	30
2008-09-18	13:54:00	41
2008-09-18	13:55:00	0
2008-09-18	13:56:00	0
2008-09-18	13:57:00	20
2008-09-18	13:58:00	0
2008-09-18	13:59:00	0
2008-09-18	14:00:00	1788
2008-09-18	14:01:00	1979
2008-09-18	14:02:00	1680
2008-09-18	14:03:00	1715
2008-09-18	14:04:00	1512
2008-09-18	14:05:00	410
2008-09-18	14:06:00	10
2008-09-18	14:07:00	10
2008-09-18	14:08:00	0
2008-09-18	14:09:00	0
2008-09-18	14:10:00	10
2008-09-18	14:11:00	20
2008-09-18	14:12:00	20
2008-09-18	14:13:00	0
2008-09-18	14:14:00	10
2008-09-18	14:15:00	0
2008-09-18	14:16:00	0
2008-09-18	14:17:00	0
2008-09-18	14:18:00	0
2008-09-18	14:19:00	10
2008-09-18	14:20:00	0
2008-09-18	14:21:00	0
2008-09-18	14:22:00	0
2008-09-18	14:23:00	10
2008-09-18	14:24:00	20
2008-09-18	14:25:00	0
2008-09-18	14:26:00	0
2008-09-18	14:27:00	10
2008-09-18	14:28:00	30
2008-09-18	14:29:00	10
2008-09-18	14:30:00	10
2008-09-18	14:31:00	20
2008-09-18	14:32:00	280
2008-09-18	14:33:00	10
2008-09-18	14:34:00	10
2008-09-18	14:35:00	0
2008-09-18	14:36:00	0
2008-09-18	14:37:00	0
2008-09-18	14:38:00	30
2008-09-18	14:39:00	337
2008-09-18	14:40:00	0
2008-09-18	14:41:00	20
2008-09-18	14:42:00	30
2008-09-18	14:43:00	20
2008-09-18	14:44:00	0
2008-09-18	14:45:00	0
2008-09-18	14:46:00	0
2008-09-18	14:47:00	0
2008-09-18	14:48:00	0
2008-09-18	14:49:00	0
2008-09-18	14:50:00	10
2008-09-18	14:51:00	0
2008-09-18	14:52:00	20
2008-09-18	14:53:00	30
2008-09-18	14:54:00	0
2008-09-18	14:55:00	0
2008-09-18	14:56:00	0
2008-09-18	14:57:00	10
2008-09-18	14:58:00	0
2008-09-18	14:59:00	0
2008-09-18	15:00:00	0
2008-09-18	15:01:00	0
2008-09-18	15:02:00	193
2008-09-18	15:03:00	132
2008-09-18	15:04:00	295
2008-09-18	15:05:00	0
2008-09-18	15:06:00	0
2008-09-18	15:07:00	20
2008-09-18	15:08:00	0
2008-09-18	15:09:00	10
2008-09-18	15:10:00	0
2008-09-18	15:11:00	0
2008-09-18	15:12:00	0
2008-09-18	15:13:00	0
2008-09-18	15:14:00	10
2008-09-18	15:15:00	10
2008-09-18	15:16:00	20
2008-09-18	15:17:00	20
2008-09-18	15:18:00	0
2008-09-18	15:19:00	10
2008-09-18	15:20:00	0
2008-09-18	15:21:00	0
2008-09-18	15:22:00	0
2008-09-18	15:23:00	10
2008-09-18	15:24:00	0
2008-09-18	15:25:00	10
2008-09-18	15:26:00	0
2008-09-18	15:27:00	10
2008-09-18	15:28:00	0
2008-09-18	15:29:00	0
2008-09-18	15:30:00	0
2008-09-18	15:31:00	0
2008-09-18	15:32:00	0
2008-09-18	15:33:00	0
2008-09-18	15:34:00	0
2008-09-18	15:35:00	0
2008-09-18	15:36:00	0
2008-09-18	15:37:00	10
2008-09-18	15:38:00	0
2008-09-18	15:39:00	0
2008-09-18	15:40:00	0
2008-09-18	15:41:00	0
2008-09-18	15:42:00	0
2008-09-18	15:43:00	0
2008-09-18	15:44:00	0
2008-09-18	15:45:00	0
2008-09-18	15:46:00	0
2008-09-18	15:47:00	10
2008-09-18	15:48:00	0
2008-09-18	15:49:00	0
2008-09-18	15:50:00	0
2008-09-18	15:51:00	0
2008-09-18	15:52:00	0
2008-09-18	15:53:00	10
2008-09-18	15:54:00	0
2008-09-18	15:55:00	0
2008-09-18	15:56:00	0
2008-09-18	15:57:00	10
2008-09-18	15:58:00	10
2008-09-18	15:59:00	10
2008-09-18	16:00:00	0
2008-09-18	16:01:00	0
2008-09-18	16:02:00	0
2008-09-18	16:03:00	0
2008-09-18	16:04:00	0
2008-09-18	16:05:00	0
2008-09-18	16:06:00	0
2008-09-18	16:07:00	0
2008-09-18	16:08:00	0
2008-09-18	16:09:00	0
2008-09-18	16:10:00	0
2008-09-18	16:11:00	0
2008-09-18	16:12:00	0
2008-09-18	16:13:00	10
2008-09-18	16:14:00	20
2008-09-18	16:15:00	10
2008-09-18	16:16:00	0
2008-09-18	16:17:00	0
2008-09-18	16:18:00	0
2008-09-18	16:19:00	10
2008-09-18	16:20:00	0
2008-09-18	16:21:00	20
2008-09-18	16:22:00	20
2008-09-18	16:23:00	0
2008-09-18	16:24:00	0
2008-09-18	16:25:00	0
2008-09-18	16:26:00	0
2008-09-18	16:27:00	0
2008-09-18	16:28:00	10
2008-09-18	16:29:00	10
2008-09-18	16:30:00	10
2008-09-18	16:31:00	10
2008-09-18	16:32:00	0
2008-09-18	16:33:00	20
2008-09-18	16:34:00	0
2008-09-18	16:35:00	0
2008-09-18	16:36:00	0
2008-09-18	16:37:00	0
2008-09-18	16:38:00	0
2008-09-18	16:39:00	10
2008-09-18	16:40:00	0
2008-09-18	16:41:00	0
2008-09-18	16:42:00	0
2008-09-18	16:43:00	0
2008-09-18	16:44:00	0
2008-09-18	16:45:00	0
2008-09-18	16:46:00	0
2008-09-18	16:47:00	0
2008-09-18	16:48:00	0
2008-09-18	16:49:00	0
2008-09-18	16:50:00	10
2008-09-18	16:51:00	295
2008-09-18	16:52:00	0
2008-09-18	16:53:00	0
2008-09-18	16:54:00	0
2008-09-18	16:55:00	0
2008-09-18	16:56:00	41
2008-09-18	16:57:00	508
2008-09-18	16:58:00	1902
2008-09-18	16:59:00	2020
2008-09-18	17:00:00	1680
2008-09-18	17:01:00	337
2008-09-18	17:02:00	459
2008-09-18	17:03:00	427
2008-09-18	17:04:00	20
2008-09-18	17:05:00	61
2008-09-18	17:06:00	193
2008-09-18	17:07:00	156
2008-09-18	17:08:00	30
2008-09-18	17:09:00	20
2008-09-18	17:10:00	81
2008-09-18	17:11:00	41
2008-09-18	17:12:00	30
2008-09-18	17:13:00	0
2008-09-18	17:14:00	30
2008-09-18	17:15:00	71
2008-09-18	17:16:00	41
2008-09-18	17:17:00	81
2008-09-18	17:18:00	20
2008-09-18	17:19:00	0
2008-09-18	17:20:00	61
2008-09-18	17:21:00	51
2008-09-18	17:22:00	51
2008-09-18	17:23:00	10
2008-09-18	17:24:00	91
2008-09-18	17:25:00	10
2008-09-18	17:26:00	81
2008-09-18	17:27:00	61
2008-09-18	17:28:00	10
2008-09-18	17:29:00	20
2008-09-18	17:30:00	41
2008-09-18	17:31:00	10
2008-09-18	17:32:00	20
2008-09-18	17:33:00	10
2008-09-18	17:34:00	0
2008-09-18	17:35:00	81
2008-09-18	17:36:00	91
2008-09-18	17:37:00	181
2008-09-18	17:38:00	156
2008-09-18	17:39:00	61
2008-09-18	17:40:00	30
2008-09-18	17:41:00	30
2008-09-18	17:42:00	169
2008-09-18	17:43:00	20
2008-09-18	17:44:00	71
2008-09-18	17:45:00	41
2008-09-18	17:46:00	41
2008-09-18	17:47:00	61
2008-09-18	17:48:00	132
2008-09-18	17:49:00	579
2008-09-18	17:50:00	366
2008-09-18	17:51:00	91
2008-09-18	17:52:00	81
2008-09-18	17:53:00	410
2008-09-18	17:54:00	132
2008-09-18	17:55:00	181
2008-09-18	17:56:00	144
2008-09-18	17:57:00	1103
2008-09-18	17:58:00	1239
2008-09-18	17:59:00	380
2008-09-18	18:00:00	193
2008-09-18	18:01:00	91
2008-09-18	18:02:00	205
2008-09-18	18:03:00	112
2008-09-18	18:04:00	169
2008-09-18	18:05:00	102
2008-09-18	18:06:00	91
2008-09-18	18:07:00	144
2008-09-18	18:08:00	144
2008-09-18	18:09:00	102
2008-09-18	18:10:00	51
2008-09-18	18:11:00	122
2008-09-18	18:12:00	81
2008-09-18	18:13:00	61
2008-09-18	18:14:00	144
2008-09-18	18:15:00	122
2008-09-18	18:16:00	20
2008-09-18	18:17:00	205
2008-09-18	18:18:00	91
2008-09-18	18:19:00	91
2008-09-18	18:20:00	71
2008-09-18	18:21:00	51
2008-09-18	18:22:00	41
2008-09-18	18:23:00	20
2008-09-18	18:24:00	112
2008-09-18	18:25:00	51
2008-09-18	18:26:00	30
2008-09-18	18:27:00	10
2008-09-18	18:28:00	61
2008-09-18	18:29:00	112
2008-09-18	18:30:00	169
2008-09-18	18:31:00	41
2008-09-18	18:32:00	71
2008-09-18	18:33:00	51
2008-09-18	18:34:00	41
2008-09-18	18:35:00	51
2008-09-18	18:36:00	102
2008-09-18	18:37:00	81
2008-09-18	18:38:00	30
2008-09-18	18:39:00	30
2008-09-18	18:40:00	91
2008-09-18	18:41:00	51
2008-09-18	18:42:00	51
2008-09-18	18:43:00	181
2008-09-18	18:44:00	71
2008-09-18	18:45:00	169
2008-09-18	18:46:00	1902
2008-09-18	18:47:00	1544
2008-09-18	18:48:00	579
2008-09-18	18:49:00	693
2008-09-18	18:50:00	1002
2008-09-18	18:51:00	774
2008-09-18	18:52:00	713
2008-09-18	18:53:00	394
2008-09-18	18:54:00	561
2008-09-18	18:55:00	616
2008-09-18	18:56:00	861
2008-09-18	18:57:00	733
2008-09-18	18:58:00	1156
2008-09-18	18:59:00	953
2008-09-18	19:00:00	977
2008-09-18	19:01:00	542
2008-09-18	19:02:00	295
2008-09-18	19:03:00	652
2008-09-18	19:04:00	977
2008-09-18	19:05:00	112
2008-09-18	19:06:00	0
2008-09-18	19:07:00	0
2008-09-18	19:08:00	0
2008-09-18	19:09:00	0
2008-09-18	19:10:00	10
2008-09-18	19:11:00	10
2008-09-18	19:12:00	295
2008-09-18	19:13:00	443
2008-09-18	19:14:00	754
2008-09-18	19:15:00	839
2008-09-18	19:16:00	754
2008-09-18	19:17:00	1002
2008-09-18	19:18:00	693
2008-09-18	19:19:00	10
2008-09-18	19:20:00	10
2008-09-18	19:21:00	0
2008-09-18	19:22:00	10
2008-09-18	19:23:00	337
2008-09-18	19:24:00	169
2008-09-18	19:25:00	380
2008-09-18	19:26:00	217
2008-09-18	19:27:00	579
2008-09-18	19:28:00	132
2008-09-18	19:29:00	61
2008-09-18	19:30:00	309
2008-09-18	19:31:00	217
2008-09-18	19:32:00	366
2008-09-18	19:33:00	337
2008-09-18	19:34:00	508
2008-09-18	19:35:00	323
2008-09-18	19:36:00	524
2008-09-18	19:37:00	132
2008-09-18	19:38:00	733
2008-09-18	19:39:00	132
2008-09-18	19:40:00	10
2008-09-18	19:41:00	0
2008-09-18	19:42:00	0
2008-09-18	19:43:00	10
2008-09-18	19:44:00	597
2008-09-18	19:45:00	254
2008-09-18	19:46:00	20
2008-09-18	19:47:00	81
2008-09-18	19:48:00	10
2008-09-18	19:49:00	0
2008-09-18	19:50:00	0
2008-09-18	19:51:00	0
2008-09-18	19:52:00	0
2008-09-18	19:53:00	0
2008-09-18	19:54:00	205
2008-09-18	19:55:00	102
2008-09-18	19:56:00	1130
2008-09-18	19:57:00	1077
2008-09-18	19:58:00	1182
2008-09-18	19:59:00	205
2008-09-18	20:00:00	61
2008-09-18	20:01:00	20
2008-09-18	20:02:00	61
2008-09-18	20:03:00	169
2008-09-18	20:04:00	91
2008-09-18	20:05:00	61
2008-09-18	20:06:00	20
2008-09-18	20:07:00	10
2008-09-18	20:08:00	309
2008-09-18	20:09:00	1103
2008-09-18	20:10:00	1355
2008-09-18	20:11:00	295
2008-09-18	20:12:00	156
2008-09-18	20:13:00	0
2008-09-18	20:14:00	10
2008-09-18	20:15:00	0
2008-09-18	20:16:00	0
2008-09-18	20:17:00	10
2008-09-18	20:18:00	0
2008-09-18	20:19:00	0
2008-09-18	20:20:00	10
2008-09-18	20:21:00	0
2008-09-18	20:22:00	0
2008-09-18	20:23:00	0
2008-09-18	20:24:00	977
2008-09-18	20:25:00	1103
2008-09-18	20:26:00	693
2008-09-18	20:27:00	733
2008-09-18	20:28:00	652
2008-09-18	20:29:00	754
2008-09-18	20:30:00	217
2008-09-18	20:31:00	713
2008-09-18	20:32:00	380
2008-09-18	20:33:00	1002
2008-09-18	20:34:00	733
2008-09-18	20:35:00	953
2008-09-18	20:36:00	1296
2008-09-18	20:37:00	1026
2008-09-18	20:38:00	112
2008-09-18	20:39:00	394
2008-09-18	20:40:00	193
2008-09-18	20:41:00	266
2008-09-18	20:42:00	1026
2008-09-18	20:43:00	774
2008-09-18	20:44:00	794
2008-09-18	20:45:00	443
2008-09-18	20:46:00	1479
2008-09-18	20:47:00	1156
2008-09-18	20:48:00	20
2008-09-18	20:49:00	0
2008-09-18	20:50:00	0
2008-09-18	20:51:00	102
2008-09-18	20:52:00	2410
2008-09-18	20:53:00	1325
2008-09-18	20:54:00	2060
2008-09-18	20:55:00	1268
2008-09-18	20:56:00	1355
2008-09-18	20:57:00	280
2008-09-18	20:58:00	542
2008-09-18	20:59:00	254
2008-09-18	21:00:00	579
2008-09-18	21:01:00	693
2008-09-18	21:02:00	713
2008-09-18	21:03:00	542
2008-09-18	21:04:00	0
2008-09-18	21:05:00	0
2008-09-18	21:06:00	1479
2008-09-18	21:07:00	561
2008-09-18	21:08:00	475
2008-09-18	21:09:00	242
2008-09-18	21:10:00	652
2008-09-18	21:11:00	242
2008-09-18	21:12:00	459
2008-09-18	21:13:00	122
2008-09-18	21:14:00	10
2008-09-18	21:15:00	0
2008-09-18	21:16:00	443
2008-09-18	21:17:00	579
2008-09-18	21:18:00	652
2008-09-18	21:19:00	169
2008-09-18	21:20:00	0
2008-09-18	21:21:00	0
2008-09-18	21:22:00	351
2008-09-18	21:23:00	102
2008-09-18	21:24:00	10
2008-09-18	21:25:00	0
2008-09-18	21:26:00	0
2008-09-18	21:27:00	459
2008-09-18	21:28:00	132
2008-09-18	21:29:00	443
2008-09-18	21:30:00	323
2008-09-18	21:31:00	20
2008-09-18	21:32:00	41
2008-09-18	21:33:00	169
2008-09-18	21:34:00	10
2008-09-18	21:35:00	0
2008-09-18	21:36:00	10
2008-09-18	21:37:00	10
2008-09-18	21:38:00	733
2008-09-18	21:39:00	51
2008-09-18	21:40:00	0
2008-09-18	21:41:00	693
2008-09-18	21:42:00	144
2008-09-18	21:43:00	0
2008-09-18	21:44:00	0
2008-09-18	21:45:00	0
2008-09-18	21:46:00	91
2008-09-18	21:47:00	542
2008-09-18	21:48:00	754
2008-09-18	21:49:00	524
2008-09-18	21:50:00	977
2008-09-18	21:51:00	71
2008-09-18	21:52:00	10
2008-09-18	21:53:00	71
2008-09-18	21:54:00	280
2008-09-18	21:55:00	71
2008-09-18	21:56:00	20
2008-09-18	21:57:00	20
2008-09-18	21:58:00	0
2008-09-18	21:59:00	0
2008-09-18	22:00:00	0
2008-09-18	22:01:00	61
2008-09-18	22:02:00	41
2008-09-18	22:03:00	205
2008-09-18	22:04:00	112
2008-09-18	22:05:00	144
2008-09-18	22:06:00	91
2008-09-18	22:07:00	0
2008-09-18	22:08:00	51
2008-09-18	22:09:00	20
2008-09-18	22:10:00	10
2008-09-18	22:11:00	71
2008-09-18	22:12:00	61
2008-09-18	22:13:00	41
2008-09-18	22:14:00	41
2008-09-18	22:15:00	41
2008-09-18	22:16:00	81
2008-09-18	22:17:00	51
2008-09-18	22:18:00	71
2008-09-18	22:19:00	280
2008-09-18	22:20:00	20
2008-09-18	22:21:00	0
2008-09-18	22:22:00	0
2008-09-18	22:23:00	0
2008-09-18	22:24:00	0
2008-09-18	22:25:00	0
2008-09-18	22:26:00	0
2008-09-18	22:27:00	0
2008-09-18	22:28:00	0
2008-09-18	22:29:00	10
2008-09-18	22:30:00	169
2008-09-18	22:31:00	71
2008-09-18	22:32:00	0
2008-09-18	22:33:00	0
2008-09-18	22:34:00	0
2008-09-18	22:35:00	0
2008-09-18	22:36:00	0
2008-09-18	22:37:00	0
2008-09-18	22:38:00	0
2008-09-18	22:39:00	41
2008-09-18	22:40:00	41
2008-09-18	22:41:00	366
2008-09-18	22:42:00	20
2008-09-18	22:43:00	144
2008-09-18	22:44:00	71
2008-09-18	22:45:00	0
2008-09-18	22:46:00	71
2008-09-18	22:47:00	0
2008-09-18	22:48:00	323
2008-09-18	22:49:00	41
2008-09-18	22:50:00	0
2008-09-18	22:51:00	0
2008-09-18	22:52:00	10
2008-09-18	22:53:00	0
2008-09-18	22:54:00	112
2008-09-18	22:55:00	10
2008-09-18	22:56:00	193
2008-09-18	22:57:00	10
2008-09-18	22:58:00	0
2008-09-18	22:59:00	561
2008-09-18	23:00:00	794
2008-09-18	23:01:00	0
2008-09-18	23:02:00	0
2008-09-18	23:03:00	0
2008-09-18	23:04:00	0
2008-09-18	23:05:00	0
2008-09-18	23:06:00	0
2008-09-18	23:07:00	0
2008-09-18	23:08:00	0
2008-09-18	23:09:00	380
2008-09-18	23:10:00	351
2008-09-18	23:11:00	0
2008-09-18	23:12:00	443
2008-09-18	23:13:00	561
2008-09-18	23:14:00	10
2008-09-18	23:15:00	0
2008-09-18	23:16:00	0
2008-09-18	23:17:00	0
2008-09-18	23:18:00	0
2008-09-18	23:19:00	242
2008-09-18	23:20:00	0
2008-09-18	23:21:00	10
2008-09-18	23:22:00	10
2008-09-18	23:23:00	10
2008-09-18	23:24:00	0
2008-09-18	23:25:00	0
2008-09-18	23:26:00	0
2008-09-18	23:27:00	10
2008-09-18	23:28:00	394
2008-09-18	23:29:00	524
2008-09-18	23:30:00	0
2008-09-18	23:31:00	1211
2008-09-18	23:32:00	10
2008-09-18	23:33:00	0
2008-09-18	23:34:00	0
2008-09-18	23:35:00	30
2008-09-18	23:36:00	0
2008-09-18	23:37:00	10
2008-09-18	23:38:00	0
2008-09-18	23:39:00	0
2008-09-18	23:40:00	0
2008-09-18	23:41:00	0
2008-09-18	23:42:00	0
2008-09-18	23:43:00	0
2008-09-18	23:44:00	10
2008-09-18	23:45:00	51
2008-09-18	23:46:00	81
2008-09-18	23:47:00	30
2008-09-18	23:48:00	0
2008-09-18	23:49:00	0
2008-09-18	23:50:00	0
2008-09-18	23:51:00	0
2008-09-18	23:52:00	0
2008-09-18	23:53:00	0
2008-09-18	23:54:00	20
2008-09-18	23:55:00	30
2008-09-18	23:56:00	0
2008-09-18	23:57:00	41
2008-09-18	23:58:00	10
2008-09-18	23:59:00	0
2008-09-19	00:00:00	0
2008-09-19	00:01:00	0
2008-09-19	00:02:00	0
2008-09-19	00:03:00	0
2008-09-19	00:04:00	0
2008-09-19	00:05:00	0
2008-09-19	00:06:00	0
2008-09-19	00:07:00	0
2008-09-19	00:08:00	0
2008-09-19	00:09:00	0
2008-09-19	00:10:00	0
2008-09-19	00:11:00	81
2008-09-19	00:12:00	30
2008-09-19	00:13:00	0
2008-09-19	00:14:00	0
2008-09-19	00:15:00	0
2008-09-19	00:16:00	0
2008-09-19	00:17:00	0
2008-09-19	00:18:00	0
2008-09-19	00:19:00	0
2008-09-19	00:20:00	0
2008-09-19	00:21:00	0
2008-09-19	00:22:00	0
2008-09-19	00:23:00	0
2008-09-19	00:24:00	0
2008-09-19	00:25:00	0
2008-09-19	00:26:00	0
2008-09-19	00:27:00	0
2008-09-19	00:28:00	0
2008-09-19	00:29:00	0
2008-09-19	00:30:00	0
2008-09-19	00:31:00	0
2008-09-19	00:32:00	0
2008-09-19	00:33:00	0
2008-09-19	00:34:00	0
2008-09-19	00:35:00	0
2008-09-19	00:36:00	0
2008-09-19	00:37:00	0
2008-09-19	00:38:00	0
2008-09-19	00:39:00	0
2008-09-19	00:40:00	0
2008-09-19	00:41:00	0
2008-09-19	00:42:00	0
2008-09-19	00:43:00	0
2008-09-19	00:44:00	0
2008-09-19	00:45:00	0
2008-09-19	00:46:00	0
2008-09-19	00:47:00	0
2008-09-19	00:48:00	0
2008-09-19	00:49:00	0
2008-09-19	00:50:00	0
2008-09-19	00:51:00	0
2008-09-19	00:52:00	0
2008-09-19	00:53:00	0
2008-09-19	00:54:00	0
2008-09-19	00:55:00	0
2008-09-19	00:56:00	0
2008-09-19	00:57:00	0
2008-09-19	00:58:00	0
2008-09-19	00:59:00	10
2008-09-19	01:00:00	30
2008-09-19	01:01:00	41
2008-09-19	01:02:00	0
2008-09-19	01:03:00	0
2008-09-19	01:04:00	0
2008-09-19	01:05:00	0
2008-09-19	01:06:00	0
2008-09-19	01:07:00	0
2008-09-19	01:08:00	0
2008-09-19	01:09:00	0
2008-09-19	01:10:00	0
2008-09-19	01:11:00	30
2008-09-19	01:12:00	81
2008-09-19	01:13:00	0
2008-09-19	01:14:00	61
2008-09-19	01:15:00	0
2008-09-19	01:16:00	0
2008-09-19	01:17:00	0
2008-09-19	01:18:00	0
2008-09-19	01:19:00	0
2008-09-19	01:20:00	0
2008-09-19	01:21:00	0
2008-09-19	01:22:00	0
2008-09-19	01:23:00	0
2008-09-19	01:24:00	0
2008-09-19	01:25:00	0
2008-09-19	01:26:00	0
2008-09-19	01:27:00	0
2008-09-19	01:28:00	0
2008-09-19	01:29:00	0
2008-09-19	01:30:00	0
2008-09-19	01:31:00	0
2008-09-19	01:32:00	0
2008-09-19	01:33:00	0
2008-09-19	01:34:00	10
2008-09-19	01:35:00	0
2008-09-19	01:36:00	0
2008-09-19	01:37:00	0
2008-09-19	01:38:00	0
2008-09-19	01:39:00	0
2008-09-19	01:40:00	0
2008-09-19	01:41:00	0
2008-09-19	01:42:00	0
2008-09-19	01:43:00	0
2008-09-19	01:44:00	0
2008-09-19	01:45:00	0
2008-09-19	01:46:00	0
2008-09-19	01:47:00	0
2008-09-19	01:48:00	0
2008-09-19	01:49:00	0
2008-09-19	01:50:00	0
2008-09-19	01:51:00	0
2008-09-19	01:52:00	0
2008-09-19	01:53:00	0
2008-09-19	01:54:00	0
2008-09-19	01:55:00	0
2008-09-19	01:56:00	0
2008-09-19	01:57:00	0
2008-09-19	01:58:00	0
2008-09-19	01:59:00	0
2008-09-19	02:00:00	10
2008-09-19	02:01:00	0
2008-09-19	02:02:00	0
2008-09-19	02:03:00	0
2008-09-19	02:04:00	0
2008-09-19	02:05:00	0
2008-09-19	02:06:00	0
2008-09-19	02:07:00	0
2008-09-19	02:08:00	0
2008-09-19	02:09:00	20
2008-09-19	02:10:00	156
2008-09-19	02:11:00	0
2008-09-19	02:12:00	0
2008-09-19	02:13:00	0
2008-09-19	02:14:00	0
2008-09-19	02:15:00	0
2008-09-19	02:16:00	0
2008-09-19	02:17:00	0
2008-09-19	02:18:00	10
2008-09-19	02:19:00	0
2008-09-19	02:20:00	0
2008-09-19	02:21:00	0
2008-09-19	02:22:00	0
2008-09-19	02:23:00	0
2008-09-19	02:24:00	0
2008-09-19	02:25:00	0
2008-09-19	02:26:00	0
2008-09-19	02:27:00	30
2008-09-19	02:28:00	0
2008-09-19	02:29:00	0
2008-09-19	02:30:00	0
2008-09-19	02:31:00	0
2008-09-19	02:32:00	0
2008-09-19	02:33:00	0
2008-09-19	02:34:00	0
2008-09-19	02:35:00	0
2008-09-19	02:36:00	0
2008-09-19	02:37:00	0
2008-09-19	02:38:00	0
2008-09-19	02:39:00	0
2008-09-19	02:40:00	0
2008-09-19	02:41:00	0
2008-09-19	02:42:00	20
2008-09-19	02:43:00	0
2008-09-19	02:44:00	0
2008-09-19	02:45:00	0
2008-09-19	02:46:00	0
2008-09-19	02:47:00	0
2008-09-19	02:48:00	0
2008-09-19	02:49:00	0
2008-09-19	02:50:00	0
2008-09-19	02:51:00	0
2008-09-19	02:52:00	0
2008-09-19	02:53:00	0
2008-09-19	02:54:00	0
2008-09-19	02:55:00	0
2008-09-19	02:56:00	0
2008-09-19	02:57:00	0
2008-09-19	02:58:00	0
2008-09-19	02:59:00	0
2008-09-19	03:00:00	0
2008-09-19	03:01:00	0
2008-09-19	03:02:00	0
2008-09-19	03:03:00	0
2008-09-19	03:04:00	0
2008-09-19	03:05:00	20
2008-09-19	03:06:00	20
2008-09-19	03:07:00	0
2008-09-19	03:08:00	0
2008-09-19	03:09:00	0
2008-09-19	03:10:00	0
2008-09-19	03:11:00	0
2008-09-19	03:12:00	0
2008-09-19	03:13:00	0
2008-09-19	03:14:00	0
2008-09-19	03:15:00	0
2008-09-19	03:16:00	0
2008-09-19	03:17:00	10
2008-09-19	03:18:00	0
2008-09-19	03:19:00	0
2008-09-19	03:20:00	0
2008-09-19	03:21:00	0
2008-09-19	03:22:00	20
2008-09-19	03:23:00	0
2008-09-19	03:24:00	0
2008-09-19	03:25:00	0
2008-09-19	03:26:00	0
2008-09-19	03:27:00	0
2008-09-19	03:28:00	0
2008-09-19	03:29:00	0
2008-09-19	03:30:00	0
2008-09-19	03:31:00	0
2008-09-19	03:32:00	0
2008-09-19	03:33:00	0
2008-09-19	03:34:00	0
2008-09-19	03:35:00	0
2008-09-19	03:36:00	0
2008-09-19	03:37:00	0
2008-09-19	03:38:00	0
2008-09-19	03:39:00	0
2008-09-19	03:40:00	0
2008-09-19	03:41:00	144
2008-09-19	03:42:00	41
2008-09-19	03:43:00	0
2008-09-19	03:44:00	0
2008-09-19	03:45:00	0
2008-09-19	03:46:00	0
2008-09-19	03:47:00	0
2008-09-19	03:48:00	0
2008-09-19	03:49:00	0
2008-09-19	03:50:00	0
2008-09-19	03:51:00	0
2008-09-19	03:52:00	0
2008-09-19	03:53:00	0
2008-09-19	03:54:00	0
2008-09-19	03:55:00	0
2008-09-19	03:56:00	0
2008-09-19	03:57:00	0
2008-09-19	03:58:00	0
2008-09-19	03:59:00	0
2008-09-19	04:00:00	0
2008-09-19	04:01:00	0
2008-09-19	04:02:00	0
2008-09-19	04:03:00	0
2008-09-19	04:04:00	0
2008-09-19	04:05:00	0
2008-09-19	04:06:00	0
2008-09-19	04:07:00	0
2008-09-19	04:08:00	0
2008-09-19	04:09:00	0
2008-09-19	04:10:00	0
2008-09-19	04:11:00	0
2008-09-19	04:12:00	10
2008-09-19	04:13:00	0
2008-09-19	04:14:00	0
2008-09-19	04:15:00	0
2008-09-19	04:16:00	0
2008-09-19	04:17:00	0
2008-09-19	04:18:00	0
2008-09-19	04:19:00	0
2008-09-19	04:20:00	0
2008-09-19	04:21:00	0
2008-09-19	04:22:00	0
2008-09-19	04:23:00	0
2008-09-19	04:24:00	0
2008-09-19	04:25:00	0
2008-09-19	04:26:00	0
2008-09-19	04:27:00	0
2008-09-19	04:28:00	0
2008-09-19	04:29:00	0
2008-09-19	04:30:00	0
2008-09-19	04:31:00	0
2008-09-19	04:32:00	0
2008-09-19	04:33:00	0
2008-09-19	04:34:00	0
2008-09-19	04:35:00	0
2008-09-19	04:36:00	0
2008-09-19	04:37:00	41
2008-09-19	04:38:00	0
2008-09-19	04:39:00	0
2008-09-19	04:40:00	0
2008-09-19	04:41:00	0
2008-09-19	04:42:00	0
2008-09-19	04:43:00	0
2008-09-19	04:44:00	0
2008-09-19	04:45:00	0
2008-09-19	04:46:00	0
2008-09-19	04:47:00	0
2008-09-19	04:48:00	0
2008-09-19	04:49:00	0
2008-09-19	04:50:00	0
2008-09-19	04:51:00	41
2008-09-19	04:52:00	10
2008-09-19	04:53:00	0
2008-09-19	04:54:00	0
2008-09-19	04:55:00	0
2008-09-19	04:56:00	0
2008-09-19	04:57:00	20
2008-09-19	04:58:00	0
2008-09-19	04:59:00	71
2008-09-19	05:00:00	443
2008-09-19	05:01:00	51
2008-09-19	05:02:00	0
2008-09-19	05:03:00	0
2008-09-19	05:04:00	0
2008-09-19	05:05:00	597
2008-09-19	05:06:00	839
2008-09-19	05:07:00	10
2008-09-19	05:08:00	20
2008-09-19	05:09:00	0
2008-09-19	05:10:00	10
2008-09-19	05:11:00	0
2008-09-19	05:12:00	0
2008-09-19	05:13:00	0
2008-09-19	05:14:00	0
2008-09-19	05:15:00	0
2008-09-19	05:16:00	0
2008-09-19	05:17:00	0
2008-09-19	05:18:00	0
2008-09-19	05:19:00	0
2008-09-19	05:20:00	0
2008-09-19	05:21:00	0
2008-09-19	05:22:00	0
2008-09-19	05:23:00	0
2008-09-19	05:24:00	20
2008-09-19	05:25:00	0
2008-09-19	05:26:00	0
2008-09-19	05:27:00	0
2008-09-19	05:28:00	0
2008-09-19	05:29:00	0
2008-09-19	05:30:00	0
2008-09-19	05:31:00	0
2008-09-19	05:32:00	0
2008-09-19	05:33:00	0
2008-09-19	05:34:00	0
2008-09-19	05:35:00	0
2008-09-19	05:36:00	0
2008-09-19	05:37:00	0
2008-09-19	05:38:00	0
2008-09-19	05:39:00	10
2008-09-19	05:40:00	0
2008-09-19	05:41:00	0
2008-09-19	05:42:00	0
2008-09-19	05:43:00	0
2008-09-19	05:44:00	0
2008-09-19	05:45:00	0
2008-09-19	05:46:00	0
2008-09-19	05:47:00	0
2008-09-19	05:48:00	0
2008-09-19	05:49:00	0
2008-09-19	05:50:00	0
2008-09-19	05:51:00	0
2008-09-19	05:52:00	0
2008-09-19	05:53:00	0
2008-09-19	05:54:00	0
2008-09-19	05:55:00	0
2008-09-19	05:56:00	0
2008-09-19	05:57:00	51
2008-09-19	05:58:00	0
2008-09-19	05:59:00	0
2008-09-19	06:00:00	0
2008-09-19	06:01:00	30
2008-09-19	06:02:00	61
2008-09-19	06:03:00	254
2008-09-19	06:04:00	0
2008-09-19	06:05:00	0
2008-09-19	06:06:00	0
2008-09-19	06:07:00	579
2008-09-19	06:08:00	0
2008-09-19	06:09:00	0
2008-09-19	06:10:00	0
2008-09-19	06:11:00	20
2008-09-19	06:12:00	0
2008-09-19	06:13:00	0
2008-09-19	06:14:00	0
2008-09-19	06:15:00	0
2008-09-19	06:16:00	0
2008-09-19	06:17:00	0
2008-09-19	06:18:00	0
2008-09-19	06:19:00	0
2008-09-19	06:20:00	0
2008-09-19	06:21:00	0
2008-09-19	06:22:00	0
2008-09-19	06:23:00	0
2008-09-19	06:24:00	0
2008-09-19	06:25:00	0
2008-09-19	06:26:00	0
2008-09-19	06:27:00	0
2008-09-19	06:28:00	0
2008-09-19	06:29:00	10
2008-09-19	06:30:00	0
2008-09-19	06:31:00	41
2008-09-19	06:32:00	0
2008-09-19	06:33:00	0
2008-09-19	06:34:00	30
2008-09-19	06:35:00	0
2008-09-19	06:36:00	0
2008-09-19	06:37:00	0
2008-09-19	06:38:00	0
2008-09-19	06:39:00	0
2008-09-19	06:40:00	0
2008-09-19	06:41:00	0
2008-09-19	06:42:00	0
2008-09-19	06:43:00	0
2008-09-19	06:44:00	0
2008-09-19	06:45:00	0
2008-09-19	06:46:00	0
2008-09-19	06:47:00	0
2008-09-19	06:48:00	0
2008-09-19	06:49:00	10
2008-09-19	06:50:00	0
2008-09-19	06:51:00	10
2008-09-19	06:52:00	20
2008-09-19	06:53:00	10
2008-09-19	06:54:00	839
2008-09-19	06:55:00	953
2008-09-19	06:56:00	71
2008-09-19	06:57:00	91
2008-09-19	06:58:00	30
2008-09-19	06:59:00	380
2008-09-19	07:00:00	0
2008-09-19	07:01:00	20
2008-09-19	07:02:00	410
2008-09-19	07:03:00	0
2008-09-19	07:04:00	0
2008-09-19	07:05:00	20
2008-09-19	07:06:00	30
2008-09-19	07:07:00	0
2008-09-19	07:08:00	0
2008-09-19	07:09:00	81
2008-09-19	07:10:00	10
2008-09-19	07:11:00	0
2008-09-19	07:12:00	10
2008-09-19	07:13:00	0
2008-09-19	07:14:00	10
2008-09-19	07:15:00	0
2008-09-19	07:16:00	0
2008-09-19	07:17:00	0
2008-09-19	07:18:00	0
2008-09-19	07:19:00	41
2008-09-19	07:20:00	0
2008-09-19	07:21:00	30
2008-09-19	07:22:00	0
2008-09-19	07:23:00	0
2008-09-19	07:24:00	0
2008-09-19	07:25:00	10
2008-09-19	07:26:00	0
2008-09-19	07:27:00	0
2008-09-19	07:28:00	112
2008-09-19	07:29:00	0
2008-09-19	07:30:00	309
2008-09-19	07:31:00	91
2008-09-19	07:32:00	295
2008-09-19	07:33:00	205
2008-09-19	07:34:00	524
2008-09-19	07:35:00	10
2008-09-19	07:36:00	10
2008-09-19	07:37:00	20
2008-09-19	07:38:00	20
2008-09-19	07:39:00	20
2008-09-19	07:40:00	0
2008-09-19	07:41:00	0
2008-09-19	07:42:00	0
2008-09-19	07:43:00	0
2008-09-19	07:44:00	81
2008-09-19	07:45:00	20
2008-09-19	07:46:00	81
2008-09-19	07:47:00	20
2008-09-19	07:48:00	10
2008-09-19	07:49:00	51
2008-09-19	07:50:00	380
2008-09-19	07:51:00	132
2008-09-19	07:52:00	132
2008-09-19	07:53:00	10
2008-09-19	07:54:00	323
2008-09-19	07:55:00	309
2008-09-19	07:56:00	693
2008-09-19	07:57:00	693
2008-09-19	07:58:00	81
2008-09-19	07:59:00	51
2008-09-19	08:00:00	181
2008-09-19	08:01:00	51
2008-09-19	08:02:00	0
2008-09-19	08:03:00	0
2008-09-19	08:04:00	0
2008-09-19	08:05:00	0
2008-09-19	08:06:00	906
2008-09-19	08:07:00	839
2008-09-19	08:08:00	774
2008-09-19	08:09:00	754
2008-09-19	08:10:00	906
2008-09-19	08:11:00	542
2008-09-19	08:12:00	254
2008-09-19	08:13:00	1577
2008-09-19	08:14:00	1050
2008-09-19	08:15:00	884
2008-09-19	08:16:00	1239
2008-09-19	08:17:00	1077
2008-09-19	08:18:00	1156
2008-09-19	08:19:00	597
2008-09-19	08:20:00	839
2008-09-19	08:21:00	693
2008-09-19	08:22:00	774
2008-09-19	08:23:00	693
2008-09-19	08:24:00	597
2008-09-19	08:25:00	713
2008-09-19	08:26:00	861
2008-09-19	08:27:00	953
2008-09-19	08:28:00	733
2008-09-19	08:29:00	634
2008-09-19	08:30:00	774
2008-09-19	08:31:00	884
2008-09-19	08:32:00	1325
2008-09-19	08:33:00	884
2008-09-19	08:34:00	953
2008-09-19	08:35:00	1103
2008-09-19	08:36:00	1077
2008-09-19	08:37:00	1296
2008-09-19	08:38:00	977
2008-09-19	08:39:00	1611
2008-09-19	08:40:00	579
2008-09-19	08:41:00	427
2008-09-19	08:42:00	884
2008-09-19	08:43:00	309
2008-09-19	08:44:00	10
2008-09-19	08:45:00	508
2008-09-19	08:46:00	30
2008-09-19	08:47:00	10
2008-09-19	08:48:00	20
2008-09-19	08:49:00	0
2008-09-19	08:50:00	0
2008-09-19	08:51:00	10
2008-09-19	08:52:00	0
2008-09-19	08:53:00	0
2008-09-19	08:54:00	0
2008-09-19	08:55:00	0
2008-09-19	08:56:00	0
2008-09-19	08:57:00	0
2008-09-19	08:58:00	0
2008-09-19	08:59:00	0
2008-09-19	09:00:00	0
2008-09-19	09:01:00	0
2008-09-19	09:02:00	0
2008-09-19	09:03:00	20
2008-09-19	09:04:00	41
2008-09-19	09:05:00	0
2008-09-19	09:06:00	0
2008-09-19	09:07:00	0
2008-09-19	09:08:00	0
[truncated: 21,051 more rows]

## Sheet: 10.03.08
Actogram, Copy Raw Data, All Days
Identity:	Patty
Filename:	E:\Active Research Files\meloxicam titre canine\cases\patty\Patty 10.3.08.AWC
Gender:	F
Age:	10
Height:	45.7 cm	18.0 in
Weight:	16.0 kg	35.3 lbs
Start Date:	03-Oct-2008 (Fri)
Start Time:	18:00:00
Interval:	1.00 mins
Date Stamp:	Time Stamp:	Activity Data:	Marker Press:
2008-10-03	00:00:00	0
2008-10-03	00:01:00	0
2008-10-03	00:02:00	0
2008-10-03	00:03:00	0
2008-10-03	00:04:00	0
2008-10-03	00:05:00	0
2008-10-03	00:06:00	0
2008-10-03	00:07:00	0
2008-10-03	00:08:00	0
2008-10-03	00:09:00	0
2008-10-03	00:10:00	0
2008-10-03	00:11:00	0
2008-10-03	00:12:00	0
2008-10-03	00:13:00	0
2008-10-03	00:14:00	0
2008-10-03	00:15:00	0
2008-10-03	00:16:00	0
2008-10-03	00:17:00	0
2008-10-03	00:18:00	0
2008-10-03	00:19:00	0
2008-10-03	00:20:00	0
2008-10-03	00:21:00	0
2008-10-03	00:22:00	0
2008-10-03	00:23:00	0
2008-10-03	00:24:00	0
2008-10-03	00:25:00	0
2008-10-03	00:26:00	0
2008-10-03	00:27:00	0
2008-10-03	00:28:00	0
2008-10-03	00:29:00	0
2008-10-03	00:30:00	0
2008-10-03	00:31:00	0
2008-10-03	00:32:00	0
2008-10-03	00:33:00	0
2008-10-03	00:34:00	0
2008-10-03	00:35:00	0
2008-10-03	00:36:00	0
2008-10-03	00:37:00	0
2008-10-03	00:38:00	0
2008-10-03	00:39:00	0
2008-10-03	00:40:00	0
2008-10-03	00:41:00	0
2008-10-03	00:42:00	0
2008-10-03	00:43:00	0
2008-10-03	00:44:00	0
2008-10-03	00:45:00	0
2008-10-03	00:46:00	0
2008-10-03	00:47:00	0
2008-10-03	00:48:00	0
2008-10-03	00:49:00	0
2008-10-03	00:50:00	0
2008-10-03	00:51:00	0
2008-10-03	00:52:00	0
2008-10-03	00:53:00	0
2008-10-03	00:54:00	0
2008-10-03	00:55:00	0
2008-10-03	00:56:00	0
2008-10-03	00:57:00	0
2008-10-03	00:58:00	0
2008-10-03	00:59:00	0
2008-10-03	01:00:00	0
2008-10-03	01:01:00	0
2008-10-03	01:02:00	0
2008-10-03	01:03:00	0
2008-10-03	01:04:00	0
2008-10-03	01:05:00	0
2008-10-03	01:06:00	0
2008-10-03	01:07:00	0
2008-10-03	01:08:00	0
2008-10-03	01:09:00	0
2008-10-03	01:10:00	0
2008-10-03	01:11:00	0
2008-10-03	01:12:00	0
2008-10-03	01:13:00	0
2008-10-03	01:14:00	0
2008-10-03	01:15:00	0
2008-10-03	01:16:00	0
2008-10-03	01:17:00	0
2008-10-03	01:18:00	0
2008-10-03	01:19:00	0
2008-10-03	01:20:00	0
2008-10-03	01:21:00	0
2008-10-03	01:22:00	0
2008-10-03	01:23:00	0
2008-10-03	01:24:00	0
2008-10-03	01:25:00	0
2008-10-03	01:26:00	0
2008-10-03	01:27:00	0
2008-10-03	01:28:00	0
2008-10-03	01:29:00	0
2008-10-03	01:30:00	0
2008-10-03	01:31:00	0
2008-10-03	01:32:00	0
2008-10-03	01:33:00	0
2008-10-03	01:34:00	0
2008-10-03	01:35:00	0
2008-10-03	01:36:00	0
2008-10-03	01:37:00	0
2008-10-03	01:38:00	0
2008-10-03	01:39:00	0
2008-10-03	01:40:00	0
2008-10-03	01:41:00	0
2008-10-03	01:42:00	0
2008-10-03	01:43:00	0
2008-10-03	01:44:00	0
2008-10-03	01:45:00	0
2008-10-03	01:46:00	0
2008-10-03	01:47:00	0
2008-10-03	01:48:00	0
2008-10-03	01:49:00	0
2008-10-03	01:50:00	0
2008-10-03	01:51:00	0
2008-10-03	01:52:00	0
2008-10-03	01:53:00	0
2008-10-03	01:54:00	0
2008-10-03	01:55:00	0
2008-10-03	01:56:00	0
2008-10-03	01:57:00	0
2008-10-03	01:58:00	0
2008-10-03	01:59:00	0
2008-10-03	02:00:00	0
2008-10-03	02:01:00	0
2008-10-03	02:02:00	0
2008-10-03	02:03:00	0
2008-10-03	02:04:00	0
2008-10-03	02:05:00	0
2008-10-03	02:06:00	0
2008-10-03	02:07:00	0
2008-10-03	02:08:00	0
2008-10-03	02:09:00	0
2008-10-03	02:10:00	0
2008-10-03	02:11:00	0
2008-10-03	02:12:00	0
2008-10-03	02:13:00	0
2008-10-03	02:14:00	0
2008-10-03	02:15:00	0
2008-10-03	02:16:00	0
2008-10-03	02:17:00	0
2008-10-03	02:18:00	0
2008-10-03	02:19:00	0
2008-10-03	02:20:00	0
2008-10-03	02:21:00	0
2008-10-03	02:22:00	0
2008-10-03	02:23:00	0
2008-10-03	02:24:00	0
2008-10-03	02:25:00	0
2008-10-03	02:26:00	0
2008-10-03	02:27:00	0
2008-10-03	02:28:00	0
2008-10-03	02:29:00	0
2008-10-03	02:30:00	0
2008-10-03	02:31:00	0
2008-10-03	02:32:00	0
2008-10-03	02:33:00	0
2008-10-03	02:34:00	0
2008-10-03	02:35:00	0
2008-10-03	02:36:00	0
2008-10-03	02:37:00	0
2008-10-03	02:38:00	0
2008-10-03	02:39:00	0
2008-10-03	02:40:00	0
2008-10-03	02:41:00	0
2008-10-03	02:42:00	0
2008-10-03	02:43:00	0
2008-10-03	02:44:00	0
2008-10-03	02:45:00	0
2008-10-03	02:46:00	0
2008-10-03	02:47:00	0
2008-10-03	02:48:00	0
2008-10-03	02:49:00	0
2008-10-03	02:50:00	0
2008-10-03	02:51:00	0
2008-10-03	02:52:00	0
2008-10-03	02:53:00	0
2008-10-03	02:54:00	0
2008-10-03	02:55:00	0
2008-10-03	02:56:00	0
2008-10-03	02:57:00	0
2008-10-03	02:58:00	0
2008-10-03	02:59:00	0
2008-10-03	03:00:00	0
2008-10-03	03:01:00	0
2008-10-03	03:02:00	0
2008-10-03	03:03:00	0
2008-10-03	03:04:00	0
2008-10-03	03:05:00	0
2008-10-03	03:06:00	0
2008-10-03	03:07:00	0
2008-10-03	03:08:00	0
2008-10-03	03:09:00	0
2008-10-03	03:10:00	0
2008-10-03	03:11:00	0
2008-10-03	03:12:00	0
2008-10-03	03:13:00	0
2008-10-03	03:14:00	0
2008-10-03	03:15:00	0
2008-10-03	03:16:00	0
2008-10-03	03:17:00	0
2008-10-03	03:18:00	0
2008-10-03	03:19:00	0
2008-10-03	03:20:00	0
2008-10-03	03:21:00	0
2008-10-03	03:22:00	0
2008-10-03	03:23:00	0
2008-10-03	03:24:00	0
2008-10-03	03:25:00	0
2008-10-03	03:26:00	0
2008-10-03	03:27:00	0
2008-10-03	03:28:00	0
2008-10-03	03:29:00	0
2008-10-03	03:30:00	0
2008-10-03	03:31:00	0
2008-10-03	03:32:00	0
2008-10-03	03:33:00	0
2008-10-03	03:34:00	0
2008-10-03	03:35:00	0
2008-10-03	03:36:00	0
2008-10-03	03:37:00	0
2008-10-03	03:38:00	0
2008-10-03	03:39:00	0
2008-10-03	03:40:00	0
2008-10-03	03:41:00	0
2008-10-03	03:42:00	0
2008-10-03	03:43:00	0
2008-10-03	03:44:00	0
2008-10-03	03:45:00	0
2008-10-03	03:46:00	0
2008-10-03	03:47:00	0
2008-10-03	03:48:00	0
2008-10-03	03:49:00	0
2008-10-03	03:50:00	0
2008-10-03	03:51:00	0
2008-10-03	03:52:00	0
2008-10-03	03:53:00	0
2008-10-03	03:54:00	0
2008-10-03	03:55:00	0
2008-10-03	03:56:00	0
2008-10-03	03:57:00	0
2008-10-03	03:58:00	0
2008-10-03	03:59:00	0
2008-10-03	04:00:00	0
2008-10-03	04:01:00	0
2008-10-03	04:02:00	0
2008-10-03	04:03:00	0
2008-10-03	04:04:00	0
2008-10-03	04:05:00	0
2008-10-03	04:06:00	0
2008-10-03	04:07:00	0
2008-10-03	04:08:00	0
2008-10-03	04:09:00	0
2008-10-03	04:10:00	0
2008-10-03	04:11:00	0
2008-10-03	04:12:00	0
2008-10-03	04:13:00	0
2008-10-03	04:14:00	0
2008-10-03	04:15:00	0
2008-10-03	04:16:00	0
2008-10-03	04:17:00	0
2008-10-03	04:18:00	0
2008-10-03	04:19:00	0
2008-10-03	04:20:00	0
2008-10-03	04:21:00	0
2008-10-03	04:22:00	0
2008-10-03	04:23:00	0
2008-10-03	04:24:00	0
2008-10-03	04:25:00	0
2008-10-03	04:26:00	0
2008-10-03	04:27:00	0
2008-10-03	04:28:00	0
2008-10-03	04:29:00	0
2008-10-03	04:30:00	0
2008-10-03	04:31:00	0
2008-10-03	04:32:00	0
2008-10-03	04:33:00	0
2008-10-03	04:34:00	0
2008-10-03	04:35:00	0
2008-10-03	04:36:00	0
2008-10-03	04:37:00	0
2008-10-03	04:38:00	0
2008-10-03	04:39:00	0
2008-10-03	04:40:00	0
2008-10-03	04:41:00	0
2008-10-03	04:42:00	0
2008-10-03	04:43:00	0
2008-10-03	04:44:00	0
2008-10-03	04:45:00	0
2008-10-03	04:46:00	0
2008-10-03	04:47:00	0
2008-10-03	04:48:00	0
2008-10-03	04:49:00	0
2008-10-03	04:50:00	0
2008-10-03	04:51:00	0
2008-10-03	04:52:00	0
2008-10-03	04:53:00	0
2008-10-03	04:54:00	0
2008-10-03	04:55:00	0
2008-10-03	04:56:00	0
2008-10-03	04:57:00	0
2008-10-03	04:58:00	0
2008-10-03	04:59:00	0
2008-10-03	05:00:00	0
2008-10-03	05:01:00	0
2008-10-03	05:02:00	0
2008-10-03	05:03:00	0
2008-10-03	05:04:00	0
2008-10-03	05:05:00	0
2008-10-03	05:06:00	0
2008-10-03	05:07:00	0
2008-10-03	05:08:00	0
2008-10-03	05:09:00	0
2008-10-03	05:10:00	0
2008-10-03	05:11:00	0
2008-10-03	05:12:00	0
2008-10-03	05:13:00	0
2008-10-03	05:14:00	0
2008-10-03	05:15:00	0
2008-10-03	05:16:00	0
2008-10-03	05:17:00	0
2008-10-03	05:18:00	0
2008-10-03	05:19:00	0
2008-10-03	05:20:00	0
2008-10-03	05:21:00	0
2008-10-03	05:22:00	0
2008-10-03	05:23:00	0
2008-10-03	05:24:00	0
2008-10-03	05:25:00	0
2008-10-03	05:26:00	0
2008-10-03	05:27:00	0
2008-10-03	05:28:00	0
2008-10-03	05:29:00	0
2008-10-03	05:30:00	0
2008-10-03	05:31:00	0
2008-10-03	05:32:00	0
2008-10-03	05:33:00	0
2008-10-03	05:34:00	0
2008-10-03	05:35:00	0
2008-10-03	05:36:00	0
2008-10-03	05:37:00	0
2008-10-03	05:38:00	0
2008-10-03	05:39:00	0
2008-10-03	05:40:00	0
2008-10-03	05:41:00	0
2008-10-03	05:42:00	0
2008-10-03	05:43:00	0
2008-10-03	05:44:00	0
2008-10-03	05:45:00	0
2008-10-03	05:46:00	0
2008-10-03	05:47:00	0
2008-10-03	05:48:00	0
2008-10-03	05:49:00	0
2008-10-03	05:50:00	0
2008-10-03	05:51:00	0
2008-10-03	05:52:00	0
2008-10-03	05:53:00	0
2008-10-03	05:54:00	0
2008-10-03	05:55:00	0
2008-10-03	05:56:00	0
2008-10-03	05:57:00	0
2008-10-03	05:58:00	0
2008-10-03	05:59:00	0
2008-10-03	06:00:00	0
2008-10-03	06:01:00	0
2008-10-03	06:02:00	0
2008-10-03	06:03:00	0
2008-10-03	06:04:00	0
2008-10-03	06:05:00	0
2008-10-03	06:06:00	0
2008-10-03	06:07:00	0
2008-10-03	06:08:00	0
2008-10-03	06:09:00	0
2008-10-03	06:10:00	0
2008-10-03	06:11:00	0
2008-10-03	06:12:00	0
2008-10-03	06:13:00	0
2008-10-03	06:14:00	0
2008-10-03	06:15:00	0
2008-10-03	06:16:00	0
2008-10-03	06:17:00	0
2008-10-03	06:18:00	0
2008-10-03	06:19:00	0
2008-10-03	06:20:00	0
2008-10-03	06:21:00	0
2008-10-03	06:22:00	0
2008-10-03	06:23:00	0
2008-10-03	06:24:00	0
2008-10-03	06:25:00	0
2008-10-03	06:26:00	0
2008-10-03	06:27:00	0
2008-10-03	06:28:00	0
2008-10-03	06:29:00	0
2008-10-03	06:30:00	0
2008-10-03	06:31:00	0
2008-10-03	06:32:00	0
2008-10-03	06:33:00	0
2008-10-03	06:34:00	0
2008-10-03	06:35:00	0
2008-10-03	06:36:00	0
2008-10-03	06:37:00	0
2008-10-03	06:38:00	0
2008-10-03	06:39:00	0
2008-10-03	06:40:00	0
2008-10-03	06:41:00	0
2008-10-03	06:42:00	0
2008-10-03	06:43:00	0
2008-10-03	06:44:00	0
2008-10-03	06:45:00	0
2008-10-03	06:46:00	0
2008-10-03	06:47:00	0
2008-10-03	06:48:00	0
2008-10-03	06:49:00	0
2008-10-03	06:50:00	0
2008-10-03	06:51:00	0
2008-10-03	06:52:00	0
2008-10-03	06:53:00	0
2008-10-03	06:54:00	0
2008-10-03	06:55:00	0
2008-10-03	06:56:00	0
2008-10-03	06:57:00	0
2008-10-03	06:58:00	0
2008-10-03	06:59:00	0
2008-10-03	07:00:00	0
2008-10-03	07:01:00	0
2008-10-03	07:02:00	0
2008-10-03	07:03:00	0
2008-10-03	07:04:00	0
2008-10-03	07:05:00	0
2008-10-03	07:06:00	0
2008-10-03	07:07:00	0
2008-10-03	07:08:00	0
2008-10-03	07:09:00	0
2008-10-03	07:10:00	0
2008-10-03	07:11:00	0
2008-10-03	07:12:00	0
2008-10-03	07:13:00	0
2008-10-03	07:14:00	0
2008-10-03	07:15:00	0
2008-10-03	07:16:00	0
2008-10-03	07:17:00	0
2008-10-03	07:18:00	0
2008-10-03	07:19:00	0
2008-10-03	07:20:00	0
2008-10-03	07:21:00	0
2008-10-03	07:22:00	0
2008-10-03	07:23:00	0
2008-10-03	07:24:00	0
2008-10-03	07:25:00	0
2008-10-03	07:26:00	0
2008-10-03	07:27:00	0
2008-10-03	07:28:00	0
2008-10-03	07:29:00	0
2008-10-03	07:30:00	0
2008-10-03	07:31:00	0
2008-10-03	07:32:00	0
2008-10-03	07:33:00	0
2008-10-03	07:34:00	0
2008-10-03	07:35:00	0
2008-10-03	07:36:00	0
2008-10-03	07:37:00	0
2008-10-03	07:38:00	0
2008-10-03	07:39:00	0
2008-10-03	07:40:00	0
2008-10-03	07:41:00	0
2008-10-03	07:42:00	0
2008-10-03	07:43:00	0
2008-10-03	07:44:00	0
2008-10-03	07:45:00	0
2008-10-03	07:46:00	0
2008-10-03	07:47:00	0
2008-10-03	07:48:00	0
2008-10-03	07:49:00	0
2008-10-03	07:50:00	0
2008-10-03	07:51:00	0
2008-10-03	07:52:00	0
2008-10-03	07:53:00	0
2008-10-03	07:54:00	0
2008-10-03	07:55:00	0
2008-10-03	07:56:00	0
2008-10-03	07:57:00	0
2008-10-03	07:58:00	0
2008-10-03	07:59:00	0
2008-10-03	08:00:00	0
2008-10-03	08:01:00	0
2008-10-03	08:02:00	0
2008-10-03	08:03:00	0
2008-10-03	08:04:00	0
2008-10-03	08:05:00	0
2008-10-03	08:06:00	0
2008-10-03	08:07:00	0
2008-10-03	08:08:00	0
2008-10-03	08:09:00	0
2008-10-03	08:10:00	0
2008-10-03	08:11:00	0
2008-10-03	08:12:00	0
2008-10-03	08:13:00	0
2008-10-03	08:14:00	0
2008-10-03	08:15:00	0
2008-10-03	08:16:00	0
2008-10-03	08:17:00	0
2008-10-03	08:18:00	0
2008-10-03	08:19:00	0
2008-10-03	08:20:00	0
2008-10-03	08:21:00	0
2008-10-03	08:22:00	0
2008-10-03	08:23:00	0
2008-10-03	08:24:00	0
2008-10-03	08:25:00	0
2008-10-03	08:26:00	0
2008-10-03	08:27:00	0
2008-10-03	08:28:00	0
2008-10-03	08:29:00	0
2008-10-03	08:30:00	0
2008-10-03	08:31:00	0
2008-10-03	08:32:00	0
2008-10-03	08:33:00	0
2008-10-03	08:34:00	0
2008-10-03	08:35:00	0
2008-10-03	08:36:00	0
2008-10-03	08:37:00	0
2008-10-03	08:38:00	0
2008-10-03	08:39:00	0
2008-10-03	08:40:00	0
2008-10-03	08:41:00	0
2008-10-03	08:42:00	0
2008-10-03	08:43:00	0
2008-10-03	08:44:00	0
2008-10-03	08:45:00	0
2008-10-03	08:46:00	0
2008-10-03	08:47:00	0
2008-10-03	08:48:00	0
2008-10-03	08:49:00	0
2008-10-03	08:50:00	0
2008-10-03	08:51:00	0
2008-10-03	08:52:00	0
2008-10-03	08:53:00	0
2008-10-03	08:54:00	0
2008-10-03	08:55:00	0
2008-10-03	08:56:00	0
2008-10-03	08:57:00	0
2008-10-03	08:58:00	0
2008-10-03	08:59:00	0
2008-10-03	09:00:00	0
2008-10-03	09:01:00	0
2008-10-03	09:02:00	0
2008-10-03	09:03:00	0
2008-10-03	09:04:00	0
2008-10-03	09:05:00	0
2008-10-03	09:06:00	0
2008-10-03	09:07:00	0
2008-10-03	09:08:00	0
2008-10-03	09:09:00	0
2008-10-03	09:10:00	0
2008-10-03	09:11:00	0
2008-10-03	09:12:00	0
2008-10-03	09:13:00	0
2008-10-03	09:14:00	0
2008-10-03	09:15:00	0
2008-10-03	09:16:00	0
2008-10-03	09:17:00	0
2008-10-03	09:18:00	0
2008-10-03	09:19:00	0
2008-10-03	09:20:00	0
2008-10-03	09:21:00	0
2008-10-03	09:22:00	0
2008-10-03	09:23:00	0
2008-10-03	09:24:00	0
2008-10-03	09:25:00	0
2008-10-03	09:26:00	0
2008-10-03	09:27:00	0
2008-10-03	09:28:00	0
2008-10-03	09:29:00	0
2008-10-03	09:30:00	0
2008-10-03	09:31:00	0
2008-10-03	09:32:00	0
2008-10-03	09:33:00	0
2008-10-03	09:34:00	0
2008-10-03	09:35:00	0
2008-10-03	09:36:00	0
2008-10-03	09:37:00	0
2008-10-03	09:38:00	0
2008-10-03	09:39:00	0
2008-10-03	09:40:00	0
2008-10-03	09:41:00	0
2008-10-03	09:42:00	0
2008-10-03	09:43:00	0
2008-10-03	09:44:00	0
2008-10-03	09:45:00	0
2008-10-03	09:46:00	0
2008-10-03	09:47:00	0
2008-10-03	09:48:00	0
2008-10-03	09:49:00	0
2008-10-03	09:50:00	0
2008-10-03	09:51:00	0
2008-10-03	09:52:00	0
2008-10-03	09:53:00	0
2008-10-03	09:54:00	0
2008-10-03	09:55:00	0
2008-10-03	09:56:00	0
2008-10-03	09:57:00	0
2008-10-03	09:58:00	0
2008-10-03	09:59:00	0
2008-10-03	10:00:00	0
2008-10-03	10:01:00	0
2008-10-03	10:02:00	0
2008-10-03	10:03:00	0
2008-10-03	10:04:00	0
2008-10-03	10:05:00	0
2008-10-03	10:06:00	0
2008-10-03	10:07:00	0
2008-10-03	10:08:00	0
2008-10-03	10:09:00	0
2008-10-03	10:10:00	0
2008-10-03	10:11:00	0
2008-10-03	10:12:00	0
2008-10-03	10:13:00	0
2008-10-03	10:14:00	0
2008-10-03	10:15:00	0
2008-10-03	10:16:00	0
2008-10-03	10:17:00	0
2008-10-03	10:18:00	0
2008-10-03	10:19:00	0
2008-10-03	10:20:00	0
2008-10-03	10:21:00	0
2008-10-03	10:22:00	0
2008-10-03	10:23:00	0
2008-10-03	10:24:00	0
2008-10-03	10:25:00	0
2008-10-03	10:26:00	0
2008-10-03	10:27:00	0
2008-10-03	10:28:00	0
2008-10-03	10:29:00	0
2008-10-03	10:30:00	0
2008-10-03	10:31:00	0
2008-10-03	10:32:00	0
2008-10-03	10:33:00	0
2008-10-03	10:34:00	0
2008-10-03	10:35:00	0
2008-10-03	10:36:00	0
2008-10-03	10:37:00	0
2008-10-03	10:38:00	0
2008-10-03	10:39:00	0
2008-10-03	10:40:00	0
2008-10-03	10:41:00	0
2008-10-03	10:42:00	0
2008-10-03	10:43:00	0
2008-10-03	10:44:00	0
2008-10-03	10:45:00	0
2008-10-03	10:46:00	0
2008-10-03	10:47:00	0
2008-10-03	10:48:00	0
2008-10-03	10:49:00	0
2008-10-03	10:50:00	0
2008-10-03	10:51:00	0
2008-10-03	10:52:00	0
2008-10-03	10:53:00	0
2008-10-03	10:54:00	0
2008-10-03	10:55:00	0
2008-10-03	10:56:00	0
2008-10-03	10:57:00	0
2008-10-03	10:58:00	0
2008-10-03	10:59:00	0
2008-10-03	11:00:00	0
2008-10-03	11:01:00	0
2008-10-03	11:02:00	0
2008-10-03	11:03:00	0
2008-10-03	11:04:00	0
2008-10-03	11:05:00	0
2008-10-03	11:06:00	0
2008-10-03	11:07:00	0
2008-10-03	11:08:00	0
2008-10-03	11:09:00	0
2008-10-03	11:10:00	0
2008-10-03	11:11:00	0
2008-10-03	11:12:00	0
2008-10-03	11:13:00	0
2008-10-03	11:14:00	0
2008-10-03	11:15:00	0
2008-10-03	11:16:00	0
2008-10-03	11:17:00	0
2008-10-03	11:18:00	0
2008-10-03	11:19:00	0
2008-10-03	11:20:00	0
2008-10-03	11:21:00	0
2008-10-03	11:22:00	0
2008-10-03	11:23:00	0
2008-10-03	11:24:00	0
2008-10-03	11:25:00	0
2008-10-03	11:26:00	0
2008-10-03	11:27:00	0
2008-10-03	11:28:00	0
2008-10-03	11:29:00	0
2008-10-03	11:30:00	0
2008-10-03	11:31:00	0
2008-10-03	11:32:00	0
2008-10-03	11:33:00	0
2008-10-03	11:34:00	0
2008-10-03	11:35:00	0
2008-10-03	11:36:00	0
2008-10-03	11:37:00	0
2008-10-03	11:38:00	0
2008-10-03	11:39:00	0
2008-10-03	11:40:00	0
2008-10-03	11:41:00	0
2008-10-03	11:42:00	0
2008-10-03	11:43:00	0
2008-10-03	11:44:00	0
2008-10-03	11:45:00	0
2008-10-03	11:46:00	0
2008-10-03	11:47:00	0
2008-10-03	11:48:00	0
2008-10-03	11:49:00	0
2008-10-03	11:50:00	0
2008-10-03	11:51:00	0
2008-10-03	11:52:00	0
2008-10-03	11:53:00	0
2008-10-03	11:54:00	0
2008-10-03	11:55:00	0
2008-10-03	11:56:00	0
2008-10-03	11:57:00	0
2008-10-03	11:58:00	0
2008-10-03	11:59:00	0
2008-10-03	12:00:00	0
2008-10-03	12:01:00	0
2008-10-03	12:02:00	0
2008-10-03	12:03:00	0
2008-10-03	12:04:00	0
2008-10-03	12:05:00	0
2008-10-03	12:06:00	0
2008-10-03	12:07:00	0
2008-10-03	12:08:00	0
2008-10-03	12:09:00	0
2008-10-03	12:10:00	0
2008-10-03	12:11:00	0
2008-10-03	12:12:00	0
2008-10-03	12:13:00	0
2008-10-03	12:14:00	0
2008-10-03	12:15:00	0
2008-10-03	12:16:00	0
2008-10-03	12:17:00	0
2008-10-03	12:18:00	0
2008-10-03	12:19:00	0
2008-10-03	12:20:00	0
2008-10-03	12:21:00	0
2008-10-03	12:22:00	0
2008-10-03	12:23:00	0
2008-10-03	12:24:00	0
2008-10-03	12:25:00	0
2008-10-03	12:26:00	0
2008-10-03	12:27:00	0
2008-10-03	12:28:00	0
2008-10-03	12:29:00	0
2008-10-03	12:30:00	0
2008-10-03	12:31:00	0
2008-10-03	12:32:00	0
2008-10-03	12:33:00	0
2008-10-03	12:34:00	0
2008-10-03	12:35:00	0
2008-10-03	12:36:00	0
2008-10-03	12:37:00	0
2008-10-03	12:38:00	0
2008-10-03	12:39:00	0
2008-10-03	12:40:00	0
2008-10-03	12:41:00	0
2008-10-03	12:42:00	0
2008-10-03	12:43:00	0
2008-10-03	12:44:00	0
2008-10-03	12:45:00	0
2008-10-03	12:46:00	0
2008-10-03	12:47:00	0
2008-10-03	12:48:00	0
2008-10-03	12:49:00	0
2008-10-03	12:50:00	0
2008-10-03	12:51:00	0
2008-10-03	12:52:00	0
2008-10-03	12:53:00	0
2008-10-03	12:54:00	0
2008-10-03	12:55:00	0
2008-10-03	12:56:00	0
2008-10-03	12:57:00	0
2008-10-03	12:58:00	0
2008-10-03	12:59:00	0
2008-10-03	13:00:00	0
2008-10-03	13:01:00	0
2008-10-03	13:02:00	0
2008-10-03	13:03:00	0
2008-10-03	13:04:00	0
2008-10-03	13:05:00	0
2008-10-03	13:06:00	0
2008-10-03	13:07:00	0
2008-10-03	13:08:00	0
2008-10-03	13:09:00	0
2008-10-03	13:10:00	0
2008-10-03	13:11:00	0
2008-10-03	13:12:00	0
2008-10-03	13:13:00	0
2008-10-03	13:14:00	0
2008-10-03	13:15:00	0
2008-10-03	13:16:00	0
2008-10-03	13:17:00	0
2008-10-03	13:18:00	0
2008-10-03	13:19:00	0
2008-10-03	13:20:00	0
2008-10-03	13:21:00	0
2008-10-03	13:22:00	0
2008-10-03	13:23:00	0
2008-10-03	13:24:00	0
2008-10-03	13:25:00	0
2008-10-03	13:26:00	0
2008-10-03	13:27:00	0
2008-10-03	13:28:00	0
2008-10-03	13:29:00	0
2008-10-03	13:30:00	0
2008-10-03	13:31:00	0
2008-10-03	13:32:00	0
2008-10-03	13:33:00	0
2008-10-03	13:34:00	0
2008-10-03	13:35:00	0
2008-10-03	13:36:00	0
2008-10-03	13:37:00	0
2008-10-03	13:38:00	0
2008-10-03	13:39:00	0
2008-10-03	13:40:00	0
2008-10-03	13:41:00	0
2008-10-03	13:42:00	0
2008-10-03	13:43:00	0
2008-10-03	13:44:00	0
2008-10-03	13:45:00	0
2008-10-03	13:46:00	0
2008-10-03	13:47:00	0
2008-10-03	13:48:00	0
2008-10-03	13:49:00	0
2008-10-03	13:50:00	0
2008-10-03	13:51:00	0
2008-10-03	13:52:00	0
2008-10-03	13:53:00	0
2008-10-03	13:54:00	0
2008-10-03	13:55:00	0
2008-10-03	13:56:00	0
2008-10-03	13:57:00	0
2008-10-03	13:58:00	0
2008-10-03	13:59:00	0
2008-10-03	14:00:00	0
2008-10-03	14:01:00	0
2008-10-03	14:02:00	0
2008-10-03	14:03:00	0
2008-10-03	14:04:00	0
2008-10-03	14:05:00	0
2008-10-03	14:06:00	0
2008-10-03	14:07:00	0
2008-10-03	14:08:00	0
2008-10-03	14:09:00	0
2008-10-03	14:10:00	0
2008-10-03	14:11:00	0
2008-10-03	14:12:00	0
2008-10-03	14:13:00	0
2008-10-03	14:14:00	0
2008-10-03	14:15:00	0
2008-10-03	14:16:00	0
2008-10-03	14:17:00	0
2008-10-03	14:18:00	0
2008-10-03	14:19:00	0
2008-10-03	14:20:00	0
2008-10-03	14:21:00	0
2008-10-03	14:22:00	0
2008-10-03	14:23:00	0
2008-10-03	14:24:00	0
2008-10-03	14:25:00	0
2008-10-03	14:26:00	0
2008-10-03	14:27:00	0
2008-10-03	14:28:00	0
2008-10-03	14:29:00	0
2008-10-03	14:30:00	0
2008-10-03	14:31:00	0
2008-10-03	14:32:00	0
2008-10-03	14:33:00	0
2008-10-03	14:34:00	0
2008-10-03	14:35:00	0
2008-10-03	14:36:00	0
2008-10-03	14:37:00	0
2008-10-03	14:38:00	0
2008-10-03	14:39:00	0
2008-10-03	14:40:00	0
2008-10-03	14:41:00	0
2008-10-03	14:42:00	0
2008-10-03	14:43:00	0
2008-10-03	14:44:00	0
2008-10-03	14:45:00	0
2008-10-03	14:46:00	0
2008-10-03	14:47:00	0
2008-10-03	14:48:00	0
2008-10-03	14:49:00	0
2008-10-03	14:50:00	0
2008-10-03	14:51:00	0
2008-10-03	14:52:00	0
2008-10-03	14:53:00	0
2008-10-03	14:54:00	0
2008-10-03	14:55:00	0
2008-10-03	14:56:00	0
2008-10-03	14:57:00	0
2008-10-03	14:58:00	0
2008-10-03	14:59:00	0
2008-10-03	15:00:00	0
2008-10-03	15:01:00	0
2008-10-03	15:02:00	0
2008-10-03	15:03:00	0
2008-10-03	15:04:00	0
2008-10-03	15:05:00	0
2008-10-03	15:06:00	0
2008-10-03	15:07:00	0
2008-10-03	15:08:00	0
2008-10-03	15:09:00	0
2008-10-03	15:10:00	0
2008-10-03	15:11:00	0
2008-10-03	15:12:00	0
2008-10-03	15:13:00	0
2008-10-03	15:14:00	0
2008-10-03	15:15:00	0
2008-10-03	15:16:00	0
2008-10-03	15:17:00	0
2008-10-03	15:18:00	0
2008-10-03	15:19:00	0
2008-10-03	15:20:00	0
2008-10-03	15:21:00	0
2008-10-03	15:22:00	0
2008-10-03	15:23:00	0
2008-10-03	15:24:00	0
2008-10-03	15:25:00	0
2008-10-03	15:26:00	0
2008-10-03	15:27:00	0
2008-10-03	15:28:00	0
2008-10-03	15:29:00	0
2008-10-03	15:30:00	0
2008-10-03	15:31:00	0
2008-10-03	15:32:00	0
2008-10-03	15:33:00	0
2008-10-03	15:34:00	0
2008-10-03	15:35:00	0
2008-10-03	15:36:00	0
2008-10-03	15:37:00	0
2008-10-03	15:38:00	0
2008-10-03	15:39:00	0
2008-10-03	15:40:00	0
2008-10-03	15:41:00	0
2008-10-03	15:42:00	0
2008-10-03	15:43:00	0
2008-10-03	15:44:00	0
2008-10-03	15:45:00	0
2008-10-03	15:46:00	0
2008-10-03	15:47:00	0
2008-10-03	15:48:00	0
2008-10-03	15:49:00	0
2008-10-03	15:50:00	0
2008-10-03	15:51:00	0
2008-10-03	15:52:00	0
2008-10-03	15:53:00	0
2008-10-03	15:54:00	0
2008-10-03	15:55:00	0
2008-10-03	15:56:00	0
2008-10-03	15:57:00	0
2008-10-03	15:58:00	0
2008-10-03	15:59:00	0
2008-10-03	16:00:00	0
2008-10-03	16:01:00	0
2008-10-03	16:02:00	0
2008-10-03	16:03:00	0
2008-10-03	16:04:00	0
2008-10-03	16:05:00	0
2008-10-03	16:06:00	0
2008-10-03	16:07:00	0
2008-10-03	16:08:00	0
2008-10-03	16:09:00	0
2008-10-03	16:10:00	0
2008-10-03	16:11:00	0
2008-10-03	16:12:00	0
2008-10-03	16:13:00	0
2008-10-03	16:14:00	0
2008-10-03	16:15:00	0
2008-10-03	16:16:00	0
2008-10-03	16:17:00	0
2008-10-03	16:18:00	0
2008-10-03	16:19:00	0
2008-10-03	16:20:00	0
2008-10-03	16:21:00	0
2008-10-03	16:22:00	0
2008-10-03	16:23:00	0
2008-10-03	16:24:00	0
2008-10-03	16:25:00	0
2008-10-03	16:26:00	0
2008-10-03	16:27:00	0
2008-10-03	16:28:00	0
2008-10-03	16:29:00	0
2008-10-03	16:30:00	0
2008-10-03	16:31:00	0
2008-10-03	16:32:00	0
2008-10-03	16:33:00	0
2008-10-03	16:34:00	0
2008-10-03	16:35:00	0
2008-10-03	16:36:00	0
2008-10-03	16:37:00	0
2008-10-03	16:38:00	0
2008-10-03	16:39:00	0
2008-10-03	16:40:00	0
2008-10-03	16:41:00	0
2008-10-03	16:42:00	0
2008-10-03	16:43:00	0
2008-10-03	16:44:00	0
2008-10-03	16:45:00	0
2008-10-03	16:46:00	0
2008-10-03	16:47:00	0
2008-10-03	16:48:00	0
2008-10-03	16:49:00	0
2008-10-03	16:50:00	0
2008-10-03	16:51:00	0
2008-10-03	16:52:00	0
2008-10-03	16:53:00	0
2008-10-03	16:54:00	0
2008-10-03	16:55:00	0
2008-10-03	16:56:00	0
2008-10-03	16:57:00	0
2008-10-03	16:58:00	0
2008-10-03	16:59:00	0
2008-10-03	17:00:00	0
2008-10-03	17:01:00	0
2008-10-03	17:02:00	0
2008-10-03	17:03:00	0
2008-10-03	17:04:00	0
2008-10-03	17:05:00	0
2008-10-03	17:06:00	0
2008-10-03	17:07:00	0
2008-10-03	17:08:00	0
2008-10-03	17:09:00	0
2008-10-03	17:10:00	0
2008-10-03	17:11:00	0
2008-10-03	17:12:00	0
2008-10-03	17:13:00	0
2008-10-03	17:14:00	0
2008-10-03	17:15:00	0
2008-10-03	17:16:00	0
2008-10-03	17:17:00	0
2008-10-03	17:18:00	0
2008-10-03	17:19:00	0
2008-10-03	17:20:00	0
2008-10-03	17:21:00	0
2008-10-03	17:22:00	0
2008-10-03	17:23:00	0
2008-10-03	17:24:00	0
2008-10-03	17:25:00	0
2008-10-03	17:26:00	0
2008-10-03	17:27:00	0
2008-10-03	17:28:00	0
2008-10-03	17:29:00	0
2008-10-03	17:30:00	0
2008-10-03	17:31:00	0
2008-10-03	17:32:00	0
2008-10-03	17:33:00	0
2008-10-03	17:34:00	0
2008-10-03	17:35:00	0
2008-10-03	17:36:00	0
2008-10-03	17:37:00	0
2008-10-03	17:38:00	0
2008-10-03	17:39:00	0
2008-10-03	17:40:00	0
2008-10-03	17:41:00	0
2008-10-03	17:42:00	0
2008-10-03	17:43:00	0
2008-10-03	17:44:00	0
2008-10-03	17:45:00	0
2008-10-03	17:46:00	0
2008-10-03	17:47:00	0
2008-10-03	17:48:00	0
2008-10-03	17:49:00	0
2008-10-03	17:50:00	0
2008-10-03	17:51:00	0
2008-10-03	17:52:00	0
2008-10-03	17:53:00	0
2008-10-03	17:54:00	0
2008-10-03	17:55:00	0
2008-10-03	17:56:00	0
2008-10-03	17:57:00	0
2008-10-03	17:58:00	0
2008-10-03	17:59:00	0
2008-10-03	18:00:00	0	M
2008-10-03	18:01:00	0
2008-10-03	18:02:00	0
2008-10-03	18:03:00	81
2008-10-03	18:04:00	0
2008-10-03	18:05:00	0
2008-10-03	18:06:00	0
2008-10-03	18:07:00	0
2008-10-03	18:08:00	30
2008-10-03	18:09:00	0
2008-10-03	18:10:00	30
2008-10-03	18:11:00	71
2008-10-03	18:12:00	0
2008-10-03	18:13:00	71
2008-10-03	18:14:00	323
2008-10-03	18:15:00	0
2008-10-03	18:16:00	0
2008-10-03	18:17:00	0
2008-10-03	18:18:00	0
2008-10-03	18:19:00	10
2008-10-03	18:20:00	0
2008-10-03	18:21:00	0
2008-10-03	18:22:00	0
2008-10-03	18:23:00	0
2008-10-03	18:24:00	0
2008-10-03	18:25:00	0
2008-10-03	18:26:00	0
2008-10-03	18:27:00	0
2008-10-03	18:28:00	0
2008-10-03	18:29:00	0
2008-10-03	18:30:00	0
2008-10-03	18:31:00	10
2008-10-03	18:32:00	0
2008-10-03	18:33:00	0
2008-10-03	18:34:00	0
2008-10-03	18:35:00	0
2008-10-03	18:36:00	0
2008-10-03	18:37:00	0
2008-10-03	18:38:00	0
2008-10-03	18:39:00	0
2008-10-03	18:40:00	0
2008-10-03	18:41:00	0
2008-10-03	18:42:00	0
2008-10-03	18:43:00	0
2008-10-03	18:44:00	0
2008-10-03	18:45:00	0
2008-10-03	18:46:00	0
2008-10-03	18:47:00	0
2008-10-03	18:48:00	0
2008-10-03	18:49:00	0
2008-10-03	18:50:00	0
2008-10-03	18:51:00	0
2008-10-03	18:52:00	0
2008-10-03	18:53:00	41
2008-10-03	18:54:00	0
2008-10-03	18:55:00	0
2008-10-03	18:56:00	0
2008-10-03	18:57:00	0
2008-10-03	18:58:00	10
2008-10-03	18:59:00	0
2008-10-03	19:00:00	0
2008-10-03	19:01:00	20
2008-10-03	19:02:00	0
2008-10-03	19:03:00	0
2008-10-03	19:04:00	0
2008-10-03	19:05:00	0
2008-10-03	19:06:00	280
2008-10-03	19:07:00	112
2008-10-03	19:08:00	0
2008-10-03	19:09:00	0
2008-10-03	19:10:00	0
2008-10-03	19:11:00	0
2008-10-03	19:12:00	10
2008-10-03	19:13:00	0
2008-10-03	19:14:00	0
2008-10-03	19:15:00	0
2008-10-03	19:16:00	0
2008-10-03	19:17:00	0
2008-10-03	19:18:00	0
2008-10-03	19:19:00	0
2008-10-03	19:20:00	0
2008-10-03	19:21:00	20
2008-10-03	19:22:00	10
2008-10-03	19:23:00	30
2008-10-03	19:24:00	0
2008-10-03	19:25:00	0
2008-10-03	19:26:00	0
2008-10-03	19:27:00	0
2008-10-03	19:28:00	0
2008-10-03	19:29:00	0
2008-10-03	19:30:00	0
2008-10-03	19:31:00	0
2008-10-03	19:32:00	0
2008-10-03	19:33:00	0
2008-10-03	19:34:00	0
2008-10-03	19:35:00	30
2008-10-03	19:36:00	41
2008-10-03	19:37:00	10
2008-10-03	19:38:00	102
2008-10-03	19:39:00	0
2008-10-03	19:40:00	0
2008-10-03	19:41:00	102
2008-10-03	19:42:00	0
2008-10-03	19:43:00	0
2008-10-03	19:44:00	0
2008-10-03	19:45:00	0
2008-10-03	19:46:00	0
2008-10-03	19:47:00	0
2008-10-03	19:48:00	0
2008-10-03	19:49:00	0
2008-10-03	19:50:00	0
2008-10-03	19:51:00	0
2008-10-03	19:52:00	122
2008-10-03	19:53:00	20
2008-10-03	19:54:00	0
2008-10-03	19:55:00	0
2008-10-03	19:56:00	0
2008-10-03	19:57:00	0
2008-10-03	19:58:00	0
2008-10-03	19:59:00	0
2008-10-03	20:00:00	0
2008-10-03	20:01:00	0
2008-10-03	20:02:00	0
2008-10-03	20:03:00	0
2008-10-03	20:04:00	30
2008-10-03	20:05:00	0
2008-10-03	20:06:00	0
2008-10-03	20:07:00	0
2008-10-03	20:08:00	0
2008-10-03	20:09:00	0
2008-10-03	20:10:00	0
2008-10-03	20:11:00	0
2008-10-03	20:12:00	0
2008-10-03	20:13:00	0
2008-10-03	20:14:00	0
2008-10-03	20:15:00	0
2008-10-03	20:16:00	0
2008-10-03	20:17:00	0
2008-10-03	20:18:00	0
2008-10-03	20:19:00	0
2008-10-03	20:20:00	0
2008-10-03	20:21:00	0
2008-10-03	20:22:00	10
2008-10-03	20:23:00	0
2008-10-03	20:24:00	0
2008-10-03	20:25:00	0
2008-10-03	20:26:00	0
2008-10-03	20:27:00	0
2008-10-03	20:28:00	51
2008-10-03	20:29:00	61
2008-10-03	20:30:00	91
2008-10-03	20:31:00	0
2008-10-03	20:32:00	0
2008-10-03	20:33:00	0
2008-10-03	20:34:00	0
2008-10-03	20:35:00	0
2008-10-03	20:36:00	0
2008-10-03	20:37:00	0
2008-10-03	20:38:00	0
2008-10-03	20:39:00	61
2008-10-03	20:40:00	0
2008-10-03	20:41:00	61
2008-10-03	20:42:00	0
2008-10-03	20:43:00	61
2008-10-03	20:44:00	0
2008-10-03	20:45:00	0
2008-10-03	20:46:00	0
2008-10-03	20:47:00	0
2008-10-03	20:48:00	0
2008-10-03	20:49:00	0
2008-10-03	20:50:00	0
2008-10-03	20:51:00	0
2008-10-03	20:52:00	0
2008-10-03	20:53:00	0
2008-10-03	20:54:00	0
2008-10-03	20:55:00	0
2008-10-03	20:56:00	0
2008-10-03	20:57:00	0
2008-10-03	20:58:00	0
2008-10-03	20:59:00	0
2008-10-03	21:00:00	0
2008-10-03	21:01:00	169
2008-10-03	21:02:00	254
2008-10-03	21:03:00	0
2008-10-03	21:04:00	0
2008-10-03	21:05:00	0
2008-10-03	21:06:00	0
2008-10-03	21:07:00	0
2008-10-03	21:08:00	0
2008-10-03	21:09:00	0
2008-10-03	21:10:00	0
2008-10-03	21:11:00	0
2008-10-03	21:12:00	0
2008-10-03	21:13:00	0
2008-10-03	21:14:00	0
2008-10-03	21:15:00	30
2008-10-03	21:16:00	205
2008-10-03	21:17:00	0
2008-10-03	21:18:00	0
2008-10-03	21:19:00	10
2008-10-03	21:20:00	0
2008-10-03	21:21:00	0
2008-10-03	21:22:00	0
2008-10-03	21:23:00	0
2008-10-03	21:24:00	0
2008-10-03	21:25:00	0
2008-10-03	21:26:00	0
2008-10-03	21:27:00	0
2008-10-03	21:28:00	0
2008-10-03	21:29:00	0
2008-10-03	21:30:00	0
2008-10-03	21:31:00	0
2008-10-03	21:32:00	0
2008-10-03	21:33:00	0
2008-10-03	21:34:00	122
2008-10-03	21:35:00	81
2008-10-03	21:36:00	91
2008-10-03	21:37:00	0
2008-10-03	21:38:00	0
2008-10-03	21:39:00	0
2008-10-03	21:40:00	0
2008-10-03	21:41:00	0
2008-10-03	21:42:00	0
2008-10-03	21:43:00	0
2008-10-03	21:44:00	0
2008-10-03	21:45:00	0
2008-10-03	21:46:00	0
2008-10-03	21:47:00	0
2008-10-03	21:48:00	0
2008-10-03	21:49:00	0
2008-10-03	21:50:00	0
2008-10-03	21:51:00	0
2008-10-03	21:52:00	0
2008-10-03	21:53:00	0
2008-10-03	21:54:00	0
2008-10-03	21:55:00	10
2008-10-03	21:56:00	0
2008-10-03	21:57:00	0
2008-10-03	21:58:00	0
2008-10-03	21:59:00	0
2008-10-03	22:00:00	0
2008-10-03	22:01:00	0
2008-10-03	22:02:00	0
2008-10-03	22:03:00	0
2008-10-03	22:04:00	0
2008-10-03	22:05:00	0
2008-10-03	22:06:00	0
2008-10-03	22:07:00	0
2008-10-03	22:08:00	0
2008-10-03	22:09:00	0
2008-10-03	22:10:00	0
2008-10-03	22:11:00	0
2008-10-03	22:12:00	193
2008-10-03	22:13:00	0
2008-10-03	22:14:00	0
2008-10-03	22:15:00	0
2008-10-03	22:16:00	0
2008-10-03	22:17:00	0
2008-10-03	22:18:00	0
2008-10-03	22:19:00	337
2008-10-03	22:20:00	337
2008-10-03	22:21:00	0
2008-10-03	22:22:00	0
2008-10-03	22:23:00	0
2008-10-03	22:24:00	0
2008-10-03	22:25:00	0
2008-10-03	22:26:00	0
2008-10-03	22:27:00	0
2008-10-03	22:28:00	0
2008-10-03	22:29:00	0
2008-10-03	22:30:00	0
2008-10-03	22:31:00	0
2008-10-03	22:32:00	0
2008-10-03	22:33:00	0
2008-10-03	22:34:00	71
2008-10-03	22:35:00	20
2008-10-03	22:36:00	112
2008-10-03	22:37:00	0
2008-10-03	22:38:00	0
2008-10-03	22:39:00	0
2008-10-03	22:40:00	0
2008-10-03	22:41:00	0
2008-10-03	22:42:00	0
2008-10-03	22:43:00	0
2008-10-03	22:44:00	0
2008-10-03	22:45:00	0
2008-10-03	22:46:00	0
2008-10-03	22:47:00	0
2008-10-03	22:48:00	0
2008-10-03	22:49:00	0
2008-10-03	22:50:00	0
2008-10-03	22:51:00	0
2008-10-03	22:52:00	0
2008-10-03	22:53:00	0
2008-10-03	22:54:00	0
2008-10-03	22:55:00	0
2008-10-03	22:56:00	0
2008-10-03	22:57:00	112
2008-10-03	22:58:00	0
2008-10-03	22:59:00	0
2008-10-03	23:00:00	41
2008-10-03	23:01:00	81
2008-10-03	23:02:00	0
2008-10-03	23:03:00	144
2008-10-03	23:04:00	132
2008-10-03	23:05:00	0
2008-10-03	23:06:00	0
2008-10-03	23:07:00	0
2008-10-03	23:08:00	0
2008-10-03	23:09:00	0
2008-10-03	23:10:00	0
2008-10-03	23:11:00	0
2008-10-03	23:12:00	0
2008-10-03	23:13:00	0
2008-10-03	23:14:00	0
2008-10-03	23:15:00	0
2008-10-03	23:16:00	0
2008-10-03	23:17:00	0
2008-10-03	23:18:00	0
2008-10-03	23:19:00	0
2008-10-03	23:20:00	0
2008-10-03	23:21:00	0
2008-10-03	23:22:00	0
2008-10-03	23:23:00	0
2008-10-03	23:24:00	0
2008-10-03	23:25:00	0
2008-10-03	23:26:00	0
2008-10-03	23:27:00	0
2008-10-03	23:28:00	10
2008-10-03	23:29:00	0
2008-10-03	23:30:00	0
2008-10-03	23:31:00	0
2008-10-03	23:32:00	0
2008-10-03	23:33:00	0
2008-10-03	23:34:00	0
2008-10-03	23:35:00	0
2008-10-03	23:36:00	0
2008-10-03	23:37:00	0
2008-10-03	23:38:00	0
2008-10-03	23:39:00	0
2008-10-03	23:40:00	0
2008-10-03	23:41:00	0
2008-10-03	23:42:00	0
2008-10-03	23:43:00	0
2008-10-03	23:44:00	0
2008-10-03	23:45:00	0
2008-10-03	23:46:00	0
2008-10-03	23:47:00	0
2008-10-03	23:48:00	0
2008-10-03	23:49:00	0
2008-10-03	23:50:00	0
2008-10-03	23:51:00	0
2008-10-03	23:52:00	30
2008-10-03	23:53:00	10
2008-10-03	23:54:00	0
2008-10-03	23:55:00	0
2008-10-03	23:56:00	0
2008-10-03	23:57:00	0
2008-10-03	23:58:00	0
2008-10-03	23:59:00	81
2008-10-04	00:00:00	351
2008-10-04	00:01:00	20
2008-10-04	00:02:00	0
2008-10-04	00:03:00	0
2008-10-04	00:04:00	10
2008-10-04	00:05:00	30
2008-10-04	00:06:00	0
2008-10-04	00:07:00	0
2008-10-04	00:08:00	0
2008-10-04	00:09:00	0
2008-10-04	00:10:00	0
2008-10-04	00:11:00	0
2008-10-04	00:12:00	0
2008-10-04	00:13:00	0
2008-10-04	00:14:00	0
2008-10-04	00:15:00	0
2008-10-04	00:16:00	0
2008-10-04	00:17:00	0
2008-10-04	00:18:00	0
2008-10-04	00:19:00	0
2008-10-04	00:20:00	0
2008-10-04	00:21:00	10
2008-10-04	00:22:00	0
2008-10-04	00:23:00	0
2008-10-04	00:24:00	0
2008-10-04	00:25:00	0
2008-10-04	00:26:00	0
2008-10-04	00:27:00	0
2008-10-04	00:28:00	0
2008-10-04	00:29:00	0
2008-10-04	00:30:00	20
2008-10-04	00:31:00	0
2008-10-04	00:32:00	0
2008-10-04	00:33:00	0
2008-10-04	00:34:00	0
2008-10-04	00:35:00	0
2008-10-04	00:36:00	0
2008-10-04	00:37:00	0
2008-10-04	00:38:00	0
2008-10-04	00:39:00	0
2008-10-04	00:40:00	30
2008-10-04	00:41:00	51
2008-10-04	00:42:00	102
2008-10-04	00:43:00	71
2008-10-04	00:44:00	102
2008-10-04	00:45:00	0
2008-10-04	00:46:00	693
2008-10-04	00:47:00	181
2008-10-04	00:48:00	1026
2008-10-04	00:49:00	30
2008-10-04	00:50:00	0
2008-10-04	00:51:00	0
2008-10-04	00:52:00	30
2008-10-04	00:53:00	0
2008-10-04	00:54:00	0
2008-10-04	00:55:00	0
2008-10-04	00:56:00	0
2008-10-04	00:57:00	10
2008-10-04	00:58:00	0
2008-10-04	00:59:00	0
2008-10-04	01:00:00	0
2008-10-04	01:01:00	0
2008-10-04	01:02:00	10
2008-10-04	01:03:00	0
2008-10-04	01:04:00	0
2008-10-04	01:05:00	0
2008-10-04	01:06:00	0
2008-10-04	01:07:00	0
2008-10-04	01:08:00	0
2008-10-04	01:09:00	0
2008-10-04	01:10:00	0
2008-10-04	01:11:00	0
2008-10-04	01:12:00	0
2008-10-04	01:13:00	0
2008-10-04	01:14:00	0
2008-10-04	01:15:00	61
2008-10-04	01:16:00	0
2008-10-04	01:17:00	0
2008-10-04	01:18:00	0
2008-10-04	01:19:00	380
2008-10-04	01:20:00	0
2008-10-04	01:21:00	0
2008-10-04	01:22:00	0
2008-10-04	01:23:00	0
2008-10-04	01:24:00	0
2008-10-04	01:25:00	0
2008-10-04	01:26:00	0
2008-10-04	01:27:00	0
2008-10-04	01:28:00	0
2008-10-04	01:29:00	0
2008-10-04	01:30:00	10
2008-10-04	01:31:00	0
2008-10-04	01:32:00	0
2008-10-04	01:33:00	0
2008-10-04	01:34:00	0
2008-10-04	01:35:00	0
2008-10-04	01:36:00	0
2008-10-04	01:37:00	0
2008-10-04	01:38:00	0
2008-10-04	01:39:00	0
2008-10-04	01:40:00	0
2008-10-04	01:41:00	0
2008-10-04	01:42:00	61
2008-10-04	01:43:00	10
2008-10-04	01:44:00	0
2008-10-04	01:45:00	0
2008-10-04	01:46:00	0
2008-10-04	01:47:00	0
2008-10-04	01:48:00	0
2008-10-04	01:49:00	0
2008-10-04	01:50:00	0
2008-10-04	01:51:00	0
2008-10-04	01:52:00	0
2008-10-04	01:53:00	0
2008-10-04	01:54:00	0
2008-10-04	01:55:00	0
2008-10-04	01:56:00	61
2008-10-04	01:57:00	0
2008-10-04	01:58:00	0
2008-10-04	01:59:00	0
2008-10-04	02:00:00	0
2008-10-04	02:01:00	0
2008-10-04	02:02:00	0
2008-10-04	02:03:00	0
2008-10-04	02:04:00	0
2008-10-04	02:05:00	0
2008-10-04	02:06:00	0
2008-10-04	02:07:00	0
2008-10-04	02:08:00	0
2008-10-04	02:09:00	0
2008-10-04	02:10:00	0
2008-10-04	02:11:00	0
2008-10-04	02:12:00	0
2008-10-04	02:13:00	0
2008-10-04	02:14:00	0
2008-10-04	02:15:00	0
2008-10-04	02:16:00	0
2008-10-04	02:17:00	0
2008-10-04	02:18:00	0
2008-10-04	02:19:00	0
2008-10-04	02:20:00	0
2008-10-04	02:21:00	0
2008-10-04	02:22:00	0
2008-10-04	02:23:00	0
2008-10-04	02:24:00	0
2008-10-04	02:25:00	0
2008-10-04	02:26:00	0
2008-10-04	02:27:00	0
2008-10-04	02:28:00	0
2008-10-04	02:29:00	0
2008-10-04	02:30:00	0
2008-10-04	02:31:00	0
2008-10-04	02:32:00	0
2008-10-04	02:33:00	0
2008-10-04	02:34:00	0
2008-10-04	02:35:00	0
2008-10-04	02:36:00	0
2008-10-04	02:37:00	0
2008-10-04	02:38:00	0
2008-10-04	02:39:00	0
2008-10-04	02:40:00	0
2008-10-04	02:41:00	0
2008-10-04	02:42:00	0
2008-10-04	02:43:00	0
2008-10-04	02:44:00	0
2008-10-04	02:45:00	51
2008-10-04	02:46:00	41
2008-10-04	02:47:00	0
2008-10-04	02:48:00	51
2008-10-04	02:49:00	254
2008-10-04	02:50:00	673
2008-10-04	02:51:00	0
2008-10-04	02:52:00	0
2008-10-04	02:53:00	0
2008-10-04	02:54:00	733
2008-10-04	02:55:00	1103
2008-10-04	02:56:00	1447
2008-10-04	02:57:00	929
2008-10-04	02:58:00	81
2008-10-04	02:59:00	0
2008-10-04	03:00:00	0
2008-10-04	03:01:00	10
2008-10-04	03:02:00	20
2008-10-04	03:03:00	10
2008-10-04	03:04:00	20
2008-10-04	03:05:00	10
2008-10-04	03:06:00	10
2008-10-04	03:07:00	41
2008-10-04	03:08:00	0
2008-10-04	03:09:00	30
2008-10-04	03:10:00	10
2008-10-04	03:11:00	0
2008-10-04	03:12:00	0
2008-10-04	03:13:00	71
2008-10-04	03:14:00	10
2008-10-04	03:15:00	10
2008-10-04	03:16:00	0
2008-10-04	03:17:00	0
2008-10-04	03:18:00	0
2008-10-04	03:19:00	0
2008-10-04	03:20:00	0
2008-10-04	03:21:00	30
2008-10-04	03:22:00	71
2008-10-04	03:23:00	30
2008-10-04	03:24:00	61
2008-10-04	03:25:00	10
2008-10-04	03:26:00	10
2008-10-04	03:27:00	20
2008-10-04	03:28:00	51
2008-10-04	03:29:00	10
2008-10-04	03:30:00	30
2008-10-04	03:31:00	0
2008-10-04	03:32:00	0
2008-10-04	03:33:00	0
2008-10-04	03:34:00	0
2008-10-04	03:35:00	0
2008-10-04	03:36:00	0
2008-10-04	03:37:00	0
2008-10-04	03:38:00	0
2008-10-04	03:39:00	0
2008-10-04	03:40:00	51
2008-10-04	03:41:00	30
2008-10-04	03:42:00	0
2008-10-04	03:43:00	0
2008-10-04	03:44:00	30
2008-10-04	03:45:00	0
2008-10-04	03:46:00	0
2008-10-04	03:47:00	51
2008-10-04	03:48:00	91
2008-10-04	03:49:00	30
2008-10-04	03:50:00	10
2008-10-04	03:51:00	0
2008-10-04	03:52:00	0
2008-10-04	03:53:00	112
2008-10-04	03:54:00	0
2008-10-04	03:55:00	0
2008-10-04	03:56:00	91
2008-10-04	03:57:00	10
2008-10-04	03:58:00	0
2008-10-04	03:59:00	0
2008-10-04	04:00:00	10
2008-10-04	04:01:00	0
2008-10-04	04:02:00	0
2008-10-04	04:03:00	0
2008-10-04	04:04:00	0
2008-10-04	04:05:00	0
2008-10-04	04:06:00	71
2008-10-04	04:07:00	51
2008-10-04	04:08:00	61
2008-10-04	04:09:00	81
2008-10-04	04:10:00	144
2008-10-04	04:11:00	30
2008-10-04	04:12:00	0
2008-10-04	04:13:00	41
2008-10-04	04:14:00	10
2008-10-04	04:15:00	41
2008-10-04	04:16:00	337
2008-10-04	04:17:00	0
2008-10-04	04:18:00	0
2008-10-04	04:19:00	30
2008-10-04	04:20:00	0
2008-10-04	04:21:00	0
2008-10-04	04:22:00	0
2008-10-04	04:23:00	0
2008-10-04	04:24:00	0
2008-10-04	04:25:00	0
2008-10-04	04:26:00	0
2008-10-04	04:27:00	20
2008-10-04	04:28:00	10
2008-10-04	04:29:00	0
2008-10-04	04:30:00	0
2008-10-04	04:31:00	0
2008-10-04	04:32:00	0
2008-10-04	04:33:00	0
2008-10-04	04:34:00	0
2008-10-04	04:35:00	0
2008-10-04	04:36:00	0
2008-10-04	04:37:00	0
2008-10-04	04:38:00	0
2008-10-04	04:39:00	0
2008-10-04	04:40:00	0
2008-10-04	04:41:00	0
2008-10-04	04:42:00	0
2008-10-04	04:43:00	0
2008-10-04	04:44:00	0
2008-10-04	04:45:00	10
2008-10-04	04:46:00	0
2008-10-04	04:47:00	71
2008-10-04	04:48:00	0
2008-10-04	04:49:00	0
2008-10-04	04:50:00	0
2008-10-04	04:51:00	0
2008-10-04	04:52:00	0
2008-10-04	04:53:00	0
2008-10-04	04:54:00	0
2008-10-04	04:55:00	0
2008-10-04	04:56:00	0
2008-10-04	04:57:00	0
2008-10-04	04:58:00	0
2008-10-04	04:59:00	0
2008-10-04	05:00:00	10
2008-10-04	05:01:00	0
2008-10-04	05:02:00	51
2008-10-04	05:03:00	61
2008-10-04	05:04:00	0
2008-10-04	05:05:00	0
2008-10-04	05:06:00	0
2008-10-04	05:07:00	91
2008-10-04	05:08:00	266
2008-10-04	05:09:00	10
2008-10-04	05:10:00	0
2008-10-04	05:11:00	0
2008-10-04	05:12:00	0
2008-10-04	05:13:00	0
2008-10-04	05:14:00	20
2008-10-04	05:15:00	0
2008-10-04	05:16:00	597
2008-10-04	05:17:00	693
2008-10-04	05:18:00	0
2008-10-04	05:19:00	0
2008-10-04	05:20:00	0
2008-10-04	05:21:00	0
2008-10-04	05:22:00	71
2008-10-04	05:23:00	0
2008-10-04	05:24:00	0
2008-10-04	05:25:00	1680
2008-10-04	05:26:00	634
2008-10-04	05:27:00	30
2008-10-04	05:28:00	0
2008-10-04	05:29:00	0
2008-10-04	05:30:00	0
2008-10-04	05:31:00	0
2008-10-04	05:32:00	0
2008-10-04	05:33:00	0
2008-10-04	05:34:00	0
2008-10-04	05:35:00	0
2008-10-04	05:36:00	0
2008-10-04	05:37:00	0
2008-10-04	05:38:00	0
2008-10-04	05:39:00	0
2008-10-04	05:40:00	10
2008-10-04	05:41:00	0
2008-10-04	05:42:00	10
2008-10-04	05:43:00	10
2008-10-04	05:44:00	0
2008-10-04	05:45:00	0
2008-10-04	05:46:00	0
2008-10-04	05:47:00	0
2008-10-04	05:48:00	0
2008-10-04	05:49:00	0
2008-10-04	05:50:00	0
2008-10-04	05:51:00	0
2008-10-04	05:52:00	0
2008-10-04	05:53:00	0
2008-10-04	05:54:00	0
2008-10-04	05:55:00	0
2008-10-04	05:56:00	0
2008-10-04	05:57:00	0
2008-10-04	05:58:00	0
2008-10-04	05:59:00	0
2008-10-04	06:00:00	0
2008-10-04	06:01:00	0
2008-10-04	06:02:00	0
2008-10-04	06:03:00	0
2008-10-04	06:04:00	20
2008-10-04	06:05:00	0
2008-10-04	06:06:00	0
2008-10-04	06:07:00	0
2008-10-04	06:08:00	0
2008-10-04	06:09:00	0
2008-10-04	06:10:00	0
2008-10-04	06:11:00	0
2008-10-04	06:12:00	0
2008-10-04	06:13:00	0
2008-10-04	06:14:00	0
2008-10-04	06:15:00	0
2008-10-04	06:16:00	0
2008-10-04	06:17:00	0
2008-10-04	06:18:00	0
2008-10-04	06:19:00	0
2008-10-04	06:20:00	0
2008-10-04	06:21:00	0
2008-10-04	06:22:00	0
2008-10-04	06:23:00	51
2008-10-04	06:24:00	861
2008-10-04	06:25:00	309
2008-10-04	06:26:00	337
2008-10-04	06:27:00	181
2008-10-04	06:28:00	693
2008-10-04	06:29:00	366
2008-10-04	06:30:00	475
2008-10-04	06:31:00	579
2008-10-04	06:32:00	112
2008-10-04	06:33:00	0
2008-10-04	06:34:00	10
2008-10-04	06:35:00	0
2008-10-04	06:36:00	0
2008-10-04	06:37:00	323
2008-10-04	06:38:00	0
2008-10-04	06:39:00	61
2008-10-04	06:40:00	542
2008-10-04	06:41:00	673
2008-10-04	06:42:00	280
2008-10-04	06:43:00	597
2008-10-04	06:44:00	169
2008-10-04	06:45:00	475
2008-10-04	06:46:00	0
2008-10-04	06:47:00	0
2008-10-04	06:48:00	0
2008-10-04	06:49:00	0
2008-10-04	06:50:00	10
2008-10-04	06:51:00	0
2008-10-04	06:52:00	10
2008-10-04	06:53:00	280
2008-10-04	06:54:00	0
2008-10-04	06:55:00	0
2008-10-04	06:56:00	51
2008-10-04	06:57:00	0
2008-10-04	06:58:00	0
2008-10-04	06:59:00	0
2008-10-04	07:00:00	51
2008-10-04	07:01:00	20
2008-10-04	07:02:00	10
2008-10-04	07:03:00	10
2008-10-04	07:04:00	0
2008-10-04	07:05:00	10
2008-10-04	07:06:00	0
2008-10-04	07:07:00	0
2008-10-04	07:08:00	51
2008-10-04	07:09:00	169
2008-10-04	07:10:00	0
2008-10-04	07:11:00	0
2008-10-04	07:12:00	20
2008-10-04	07:13:00	0
2008-10-04	07:14:00	0
2008-10-04	07:15:00	0
2008-10-04	07:16:00	0
2008-10-04	07:17:00	30
2008-10-04	07:18:00	0
2008-10-04	07:19:00	0
2008-10-04	07:20:00	0
2008-10-04	07:21:00	0
2008-10-04	07:22:00	0
2008-10-04	07:23:00	0
2008-10-04	07:24:00	0
2008-10-04	07:25:00	0
2008-10-04	07:26:00	0
2008-10-04	07:27:00	0
2008-10-04	07:28:00	0
2008-10-04	07:29:00	0
2008-10-04	07:30:00	0
2008-10-04	07:31:00	0
2008-10-04	07:32:00	0
2008-10-04	07:33:00	0
2008-10-04	07:34:00	0
2008-10-04	07:35:00	0
2008-10-04	07:36:00	0
2008-10-04	07:37:00	20
2008-10-04	07:38:00	0
2008-10-04	07:39:00	0
2008-10-04	07:40:00	0
2008-10-04	07:41:00	30
2008-10-04	07:42:00	41
2008-10-04	07:43:00	10
2008-10-04	07:44:00	0
2008-10-04	07:45:00	0
2008-10-04	07:46:00	0
2008-10-04	07:47:00	0
2008-10-04	07:48:00	0
2008-10-04	07:49:00	0
2008-10-04	07:50:00	41
2008-10-04	07:51:00	0
2008-10-04	07:52:00	0
2008-10-04	07:53:00	0
2008-10-04	07:54:00	0
2008-10-04	07:55:00	0
2008-10-04	07:56:00	0
2008-10-04	07:57:00	0
2008-10-04	07:58:00	10
2008-10-04	07:59:00	30
2008-10-04	08:00:00	0
2008-10-04	08:01:00	0
2008-10-04	08:02:00	0
2008-10-04	08:03:00	0
2008-10-04	08:04:00	0
2008-10-04	08:05:00	0
2008-10-04	08:06:00	0
2008-10-04	08:07:00	0
2008-10-04	08:08:00	0
2008-10-04	08:09:00	0
2008-10-04	08:10:00	10
2008-10-04	08:11:00	41
2008-10-04	08:12:00	51
2008-10-04	08:13:00	51
2008-10-04	08:14:00	0
2008-10-04	08:15:00	0
2008-10-04	08:16:00	0
2008-10-04	08:17:00	0
2008-10-04	08:18:00	0
2008-10-04	08:19:00	0
2008-10-04	08:20:00	0
2008-10-04	08:21:00	0
2008-10-04	08:22:00	0
2008-10-04	08:23:00	0
2008-10-04	08:24:00	10
2008-10-04	08:25:00	20
2008-10-04	08:26:00	0
2008-10-04	08:27:00	0
2008-10-04	08:28:00	0
2008-10-04	08:29:00	254
2008-10-04	08:30:00	693
2008-10-04	08:31:00	20
2008-10-04	08:32:00	20
2008-10-04	08:33:00	0
2008-10-04	08:34:00	0
2008-10-04	08:35:00	0
2008-10-04	08:36:00	30
2008-10-04	08:37:00	0
2008-10-04	08:38:00	61
2008-10-04	08:39:00	10
2008-10-04	08:40:00	0
2008-10-04	08:41:00	0
2008-10-04	08:42:00	0
2008-10-04	08:43:00	0
2008-10-04	08:44:00	0
2008-10-04	08:45:00	0
2008-10-04	08:46:00	0
2008-10-04	08:47:00	0
2008-10-04	08:48:00	0
2008-10-04	08:49:00	0
2008-10-04	08:50:00	0
2008-10-04	08:51:00	0
2008-10-04	08:52:00	0
2008-10-04	08:53:00	0
2008-10-04	08:54:00	0
2008-10-04	08:55:00	0
2008-10-04	08:56:00	0
2008-10-04	08:57:00	0
2008-10-04	08:58:00	0
2008-10-04	08:59:00	0
2008-10-04	09:00:00	0
2008-10-04	09:01:00	0
2008-10-04	09:02:00	0
2008-10-04	09:03:00	0
2008-10-04	09:04:00	0
2008-10-04	09:05:00	0
2008-10-04	09:06:00	0
2008-10-04	09:07:00	41
2008-10-04	09:08:00	230
[truncated: 19,611 more rows]

## Sheet: 10.17.08
Actogram, Copy Raw Data, All Days
Identity:	Patty
Filename:	E:\Active Research Files\meloxicam titre canine\cases\patty\Patty 10.17.08.AWC
Gender:	F
Age:	10
Height:	45.7 cm	18.0 in
Weight:	16.0 kg	35.3 lbs
Start Date:	17-Oct-2008 (Fri)
Start Time:	18:00:00
Interval:	1.00 mins
Date Stamp:	Time Stamp:	Activity Data:	Marker Press:
2008-10-17	00:00:00	0
2008-10-17	00:01:00	0
2008-10-17	00:02:00	0
2008-10-17	00:03:00	0
2008-10-17	00:04:00	0
2008-10-17	00:05:00	0
2008-10-17	00:06:00	0
2008-10-17	00:07:00	0
2008-10-17	00:08:00	0
2008-10-17	00:09:00	0
2008-10-17	00:10:00	0
2008-10-17	00:11:00	0
2008-10-17	00:12:00	0
2008-10-17	00:13:00	0
2008-10-17	00:14:00	0
2008-10-17	00:15:00	0
2008-10-17	00:16:00	0
2008-10-17	00:17:00	0
2008-10-17	00:18:00	0
2008-10-17	00:19:00	0
2008-10-17	00:20:00	0
2008-10-17	00:21:00	0
2008-10-17	00:22:00	0
2008-10-17	00:23:00	0
2008-10-17	00:24:00	0
2008-10-17	00:25:00	0
2008-10-17	00:26:00	0
2008-10-17	00:27:00	0
2008-10-17	00:28:00	0
2008-10-17	00:29:00	0
2008-10-17	00:30:00	0
2008-10-17	00:31:00	0
2008-10-17	00:32:00	0
2008-10-17	00:33:00	0
2008-10-17	00:34:00	0
2008-10-17	00:35:00	0
2008-10-17	00:36:00	0
2008-10-17	00:37:00	0
2008-10-17	00:38:00	0
2008-10-17	00:39:00	0
2008-10-17	00:40:00	0
2008-10-17	00:41:00	0
2008-10-17	00:42:00	0
2008-10-17	00:43:00	0
2008-10-17	00:44:00	0
2008-10-17	00:45:00	0
2008-10-17	00:46:00	0
2008-10-17	00:47:00	0
2008-10-17	00:48:00	0
2008-10-17	00:49:00	0
2008-10-17	00:50:00	0
2008-10-17	00:51:00	0
2008-10-17	00:52:00	0
2008-10-17	00:53:00	0
2008-10-17	00:54:00	0
2008-10-17	00:55:00	0
2008-10-17	00:56:00	0
2008-10-17	00:57:00	0
2008-10-17	00:58:00	0
2008-10-17	00:59:00	0
2008-10-17	01:00:00	0
2008-10-17	01:01:00	0
2008-10-17	01:02:00	0
2008-10-17	01:03:00	0
2008-10-17	01:04:00	0
2008-10-17	01:05:00	0
2008-10-17	01:06:00	0
2008-10-17	01:07:00	0
2008-10-17	01:08:00	0
2008-10-17	01:09:00	0
2008-10-17	01:10:00	0
2008-10-17	01:11:00	0
2008-10-17	01:12:00	0
2008-10-17	01:13:00	0
2008-10-17	01:14:00	0
2008-10-17	01:15:00	0
2008-10-17	01:16:00	0
2008-10-17	01:17:00	0
2008-10-17	01:18:00	0
2008-10-17	01:19:00	0
2008-10-17	01:20:00	0
2008-10-17	01:21:00	0
2008-10-17	01:22:00	0
2008-10-17	01:23:00	0
2008-10-17	01:24:00	0
2008-10-17	01:25:00	0
2008-10-17	01:26:00	0
2008-10-17	01:27:00	0
2008-10-17	01:28:00	0
2008-10-17	01:29:00	0
2008-10-17	01:30:00	0
2008-10-17	01:31:00	0
2008-10-17	01:32:00	0
2008-10-17	01:33:00	0
2008-10-17	01:34:00	0
2008-10-17	01:35:00	0
2008-10-17	01:36:00	0
2008-10-17	01:37:00	0
2008-10-17	01:38:00	0
2008-10-17	01:39:00	0
2008-10-17	01:40:00	0
2008-10-17	01:41:00	0
2008-10-17	01:42:00	0
2008-10-17	01:43:00	0
2008-10-17	01:44:00	0
2008-10-17	01:45:00	0
2008-10-17	01:46:00	0
2008-10-17	01:47:00	0
2008-10-17	01:48:00	0
2008-10-17	01:49:00	0
2008-10-17	01:50:00	0
2008-10-17	01:51:00	0
2008-10-17	01:52:00	0
2008-10-17	01:53:00	0
2008-10-17	01:54:00	0
2008-10-17	01:55:00	0
2008-10-17	01:56:00	0
2008-10-17	01:57:00	0
2008-10-17	01:58:00	0
2008-10-17	01:59:00	0
2008-10-17	02:00:00	0
2008-10-17	02:01:00	0
2008-10-17	02:02:00	0
2008-10-17	02:03:00	0
2008-10-17	02:04:00	0
2008-10-17	02:05:00	0
2008-10-17	02:06:00	0
2008-10-17	02:07:00	0
2008-10-17	02:08:00	0
2008-10-17	02:09:00	0
2008-10-17	02:10:00	0
2008-10-17	02:11:00	0
2008-10-17	02:12:00	0
2008-10-17	02:13:00	0
2008-10-17	02:14:00	0
2008-10-17	02:15:00	0
2008-10-17	02:16:00	0
2008-10-17	02:17:00	0
2008-10-17	02:18:00	0
2008-10-17	02:19:00	0
2008-10-17	02:20:00	0
2008-10-17	02:21:00	0
2008-10-17	02:22:00	0
2008-10-17	02:23:00	0
2008-10-17	02:24:00	0
2008-10-17	02:25:00	0
2008-10-17	02:26:00	0
2008-10-17	02:27:00	0
2008-10-17	02:28:00	0
2008-10-17	02:29:00	0
2008-10-17	02:30:00	0
2008-10-17	02:31:00	0
2008-10-17	02:32:00	0
2008-10-17	02:33:00	0
2008-10-17	02:34:00	0
2008-10-17	02:35:00	0
2008-10-17	02:36:00	0
2008-10-17	02:37:00	0
2008-10-17	02:38:00	0
2008-10-17	02:39:00	0
2008-10-17	02:40:00	0
2008-10-17	02:41:00	0
2008-10-17	02:42:00	0
2008-10-17	02:43:00	0
2008-10-17	02:44:00	0
2008-10-17	02:45:00	0
2008-10-17	02:46:00	0
2008-10-17	02:47:00	0
2008-10-17	02:48:00	0
2008-10-17	02:49:00	0
2008-10-17	02:50:00	0
2008-10-17	02:51:00	0
2008-10-17	02:52:00	0
2008-10-17	02:53:00	0
2008-10-17	02:54:00	0
2008-10-17	02:55:00	0
2008-10-17	02:56:00	0
2008-10-17	02:57:00	0
2008-10-17	02:58:00	0
2008-10-17	02:59:00	0
2008-10-17	03:00:00	0
2008-10-17	03:01:00	0
2008-10-17	03:02:00	0
2008-10-17	03:03:00	0
2008-10-17	03:04:00	0
2008-10-17	03:05:00	0
2008-10-17	03:06:00	0
2008-10-17	03:07:00	0
2008-10-17	03:08:00	0
2008-10-17	03:09:00	0
2008-10-17	03:10:00	0
2008-10-17	03:11:00	0
2008-10-17	03:12:00	0
2008-10-17	03:13:00	0
2008-10-17	03:14:00	0
2008-10-17	03:15:00	0
2008-10-17	03:16:00	0
2008-10-17	03:17:00	0
2008-10-17	03:18:00	0
2008-10-17	03:19:00	0
2008-10-17	03:20:00	0
2008-10-17	03:21:00	0
2008-10-17	03:22:00	0
2008-10-17	03:23:00	0
2008-10-17	03:24:00	0
2008-10-17	03:25:00	0
2008-10-17	03:26:00	0
2008-10-17	03:27:00	0
2008-10-17	03:28:00	0
2008-10-17	03:29:00	0
2008-10-17	03:30:00	0
2008-10-17	03:31:00	0
2008-10-17	03:32:00	0
2008-10-17	03:33:00	0
2008-10-17	03:34:00	0
2008-10-17	03:35:00	0
2008-10-17	03:36:00	0
2008-10-17	03:37:00	0
2008-10-17	03:38:00	0
2008-10-17	03:39:00	0
2008-10-17	03:40:00	0
2008-10-17	03:41:00	0
2008-10-17	03:42:00	0
2008-10-17	03:43:00	0
2008-10-17	03:44:00	0
2008-10-17	03:45:00	0
2008-10-17	03:46:00	0
2008-10-17	03:47:00	0
2008-10-17	03:48:00	0
2008-10-17	03:49:00	0
2008-10-17	03:50:00	0
2008-10-17	03:51:00	0
2008-10-17	03:52:00	0
2008-10-17	03:53:00	0
2008-10-17	03:54:00	0
2008-10-17	03:55:00	0
2008-10-17	03:56:00	0
2008-10-17	03:57:00	0
2008-10-17	03:58:00	0
2008-10-17	03:59:00	0
2008-10-17	04:00:00	0
2008-10-17	04:01:00	0
2008-10-17	04:02:00	0
2008-10-17	04:03:00	0
2008-10-17	04:04:00	0
2008-10-17	04:05:00	0
2008-10-17	04:06:00	0
2008-10-17	04:07:00	0
2008-10-17	04:08:00	0
2008-10-17	04:09:00	0
2008-10-17	04:10:00	0
2008-10-17	04:11:00	0
2008-10-17	04:12:00	0
2008-10-17	04:13:00	0
2008-10-17	04:14:00	0
2008-10-17	04:15:00	0
2008-10-17	04:16:00	0
2008-10-17	04:17:00	0
2008-10-17	04:18:00	0
2008-10-17	04:19:00	0
2008-10-17	04:20:00	0
2008-10-17	04:21:00	0
2008-10-17	04:22:00	0
2008-10-17	04:23:00	0
2008-10-17	04:24:00	0
2008-10-17	04:25:00	0
2008-10-17	04:26:00	0
2008-10-17	04:27:00	0
2008-10-17	04:28:00	0
2008-10-17	04:29:00	0
2008-10-17	04:30:00	0
2008-10-17	04:31:00	0
2008-10-17	04:32:00	0
2008-10-17	04:33:00	0
2008-10-17	04:34:00	0
2008-10-17	04:35:00	0
2008-10-17	04:36:00	0
2008-10-17	04:37:00	0
2008-10-17	04:38:00	0
2008-10-17	04:39:00	0
2008-10-17	04:40:00	0
2008-10-17	04:41:00	0
2008-10-17	04:42:00	0
2008-10-17	04:43:00	0
2008-10-17	04:44:00	0
2008-10-17	04:45:00	0
2008-10-17	04:46:00	0
2008-10-17	04:47:00	0
2008-10-17	04:48:00	0
2008-10-17	04:49:00	0
2008-10-17	04:50:00	0
2008-10-17	04:51:00	0
2008-10-17	04:52:00	0
2008-10-17	04:53:00	0
2008-10-17	04:54:00	0
2008-10-17	04:55:00	0
2008-10-17	04:56:00	0
2008-10-17	04:57:00	0
2008-10-17	04:58:00	0
2008-10-17	04:59:00	0
2008-10-17	05:00:00	0
2008-10-17	05:01:00	0
2008-10-17	05:02:00	0
2008-10-17	05:03:00	0
2008-10-17	05:04:00	0
2008-10-17	05:05:00	0
2008-10-17	05:06:00	0
2008-10-17	05:07:00	0
2008-10-17	05:08:00	0
2008-10-17	05:09:00	0
2008-10-17	05:10:00	0
2008-10-17	05:11:00	0
2008-10-17	05:12:00	0
2008-10-17	05:13:00	0
2008-10-17	05:14:00	0
2008-10-17	05:15:00	0
2008-10-17	05:16:00	0
2008-10-17	05:17:00	0
2008-10-17	05:18:00	0
2008-10-17	05:19:00	0
2008-10-17	05:20:00	0
2008-10-17	05:21:00	0
2008-10-17	05:22:00	0
2008-10-17	05:23:00	0
2008-10-17	05:24:00	0
2008-10-17	05:25:00	0
2008-10-17	05:26:00	0
2008-10-17	05:27:00	0
2008-10-17	05:28:00	0
2008-10-17	05:29:00	0
2008-10-17	05:30:00	0
2008-10-17	05:31:00	0
2008-10-17	05:32:00	0
2008-10-17	05:33:00	0
2008-10-17	05:34:00	0
2008-10-17	05:35:00	0
2008-10-17	05:36:00	0
2008-10-17	05:37:00	0
2008-10-17	05:38:00	0
2008-10-17	05:39:00	0
2008-10-17	05:40:00	0
2008-10-17	05:41:00	0
2008-10-17	05:42:00	0
2008-10-17	05:43:00	0
2008-10-17	05:44:00	0
2008-10-17	05:45:00	0
2008-10-17	05:46:00	0
2008-10-17	05:47:00	0
2008-10-17	05:48:00	0
2008-10-17	05:49:00	0
2008-10-17	05:50:00	0
2008-10-17	05:51:00	0
2008-10-17	05:52:00	0
2008-10-17	05:53:00	0
2008-10-17	05:54:00	0
2008-10-17	05:55:00	0
2008-10-17	05:56:00	0
2008-10-17	05:57:00	0
2008-10-17	05:58:00	0
2008-10-17	05:59:00	0
2008-10-17	06:00:00	0
2008-10-17	06:01:00	0
2008-10-17	06:02:00	0
2008-10-17	06:03:00	0
2008-10-17	06:04:00	0
2008-10-17	06:05:00	0
2008-10-17	06:06:00	0
2008-10-17	06:07:00	0
2008-10-17	06:08:00	0
2008-10-17	06:09:00	0
2008-10-17	06:10:00	0
2008-10-17	06:11:00	0
2008-10-17	06:12:00	0
2008-10-17	06:13:00	0
2008-10-17	06:14:00	0
2008-10-17	06:15:00	0
2008-10-17	06:16:00	0
2008-10-17	06:17:00	0
2008-10-17	06:18:00	0
2008-10-17	06:19:00	0
2008-10-17	06:20:00	0
2008-10-17	06:21:00	0
2008-10-17	06:22:00	0
2008-10-17	06:23:00	0
2008-10-17	06:24:00	0
2008-10-17	06:25:00	0
2008-10-17	06:26:00	0
2008-10-17	06:27:00	0
2008-10-17	06:28:00	0
2008-10-17	06:29:00	0
2008-10-17	06:30:00	0
2008-10-17	06:31:00	0
2008-10-17	06:32:00	0
2008-10-17	06:33:00	0
2008-10-17	06:34:00	0
2008-10-17	06:35:00	0
2008-10-17	06:36:00	0
2008-10-17	06:37:00	0
2008-10-17	06:38:00	0
2008-10-17	06:39:00	0
2008-10-17	06:40:00	0
2008-10-17	06:41:00	0
2008-10-17	06:42:00	0
2008-10-17	06:43:00	0
2008-10-17	06:44:00	0
2008-10-17	06:45:00	0
2008-10-17	06:46:00	0
2008-10-17	06:47:00	0
2008-10-17	06:48:00	0
2008-10-17	06:49:00	0
2008-10-17	06:50:00	0
2008-10-17	06:51:00	0
2008-10-17	06:52:00	0
2008-10-17	06:53:00	0
2008-10-17	06:54:00	0
2008-10-17	06:55:00	0
2008-10-17	06:56:00	0
2008-10-17	06:57:00	0
2008-10-17	06:58:00	0
2008-10-17	06:59:00	0
2008-10-17	07:00:00	0
2008-10-17	07:01:00	0
2008-10-17	07:02:00	0
2008-10-17	07:03:00	0
2008-10-17	07:04:00	0
2008-10-17	07:05:00	0
2008-10-17	07:06:00	0
2008-10-17	07:07:00	0
2008-10-17	07:08:00	0
2008-10-17	07:09:00	0
2008-10-17	07:10:00	0
2008-10-17	07:11:00	0
2008-10-17	07:12:00	0
2008-10-17	07:13:00	0
2008-10-17	07:14:00	0
2008-10-17	07:15:00	0
2008-10-17	07:16:00	0
2008-10-17	07:17:00	0
2008-10-17	07:18:00	0
2008-10-17	07:19:00	0
2008-10-17	07:20:00	0
2008-10-17	07:21:00	0
2008-10-17	07:22:00	0
2008-10-17	07:23:00	0
2008-10-17	07:24:00	0
2008-10-17	07:25:00	0
2008-10-17	07:26:00	0
2008-10-17	07:27:00	0
2008-10-17	07:28:00	0
2008-10-17	07:29:00	0
2008-10-17	07:30:00	0
2008-10-17	07:31:00	0
2008-10-17	07:32:00	0
2008-10-17	07:33:00	0
2008-10-17	07:34:00	0
2008-10-17	07:35:00	0
2008-10-17	07:36:00	0
2008-10-17	07:37:00	0
2008-10-17	07:38:00	0
2008-10-17	07:39:00	0
2008-10-17	07:40:00	0
2008-10-17	07:41:00	0
2008-10-17	07:42:00	0
2008-10-17	07:43:00	0
2008-10-17	07:44:00	0
2008-10-17	07:45:00	0
2008-10-17	07:46:00	0
2008-10-17	07:47:00	0
2008-10-17	07:48:00	0
2008-10-17	07:49:00	0
2008-10-17	07:50:00	0
2008-10-17	07:51:00	0
2008-10-17	07:52:00	0
2008-10-17	07:53:00	0
2008-10-17	07:54:00	0
2008-10-17	07:55:00	0
2008-10-17	07:56:00	0
2008-10-17	07:57:00	0
2008-10-17	07:58:00	0
2008-10-17	07:59:00	0
2008-10-17	08:00:00	0
2008-10-17	08:01:00	0
2008-10-17	08:02:00	0
2008-10-17	08:03:00	0
2008-10-17	08:04:00	0
2008-10-17	08:05:00	0
2008-10-17	08:06:00	0
2008-10-17	08:07:00	0
2008-10-17	08:08:00	0
2008-10-17	08:09:00	0
2008-10-17	08:10:00	0
2008-10-17	08:11:00	0
2008-10-17	08:12:00	0
2008-10-17	08:13:00	0
2008-10-17	08:14:00	0
2008-10-17	08:15:00	0
2008-10-17	08:16:00	0
2008-10-17	08:17:00	0
2008-10-17	08:18:00	0
2008-10-17	08:19:00	0
2008-10-17	08:20:00	0
2008-10-17	08:21:00	0
2008-10-17	08:22:00	0
2008-10-17	08:23:00	0
2008-10-17	08:24:00	0
2008-10-17	08:25:00	0
2008-10-17	08:26:00	0
2008-10-17	08:27:00	0
2008-10-17	08:28:00	0
2008-10-17	08:29:00	0
2008-10-17	08:30:00	0
2008-10-17	08:31:00	0
2008-10-17	08:32:00	0
2008-10-17	08:33:00	0
2008-10-17	08:34:00	0
2008-10-17	08:35:00	0
2008-10-17	08:36:00	0
2008-10-17	08:37:00	0
2008-10-17	08:38:00	0
2008-10-17	08:39:00	0
2008-10-17	08:40:00	0
2008-10-17	08:41:00	0
2008-10-17	08:42:00	0
2008-10-17	08:43:00	0
2008-10-17	08:44:00	0
2008-10-17	08:45:00	0
2008-10-17	08:46:00	0
2008-10-17	08:47:00	0
2008-10-17	08:48:00	0
2008-10-17	08:49:00	0
2008-10-17	08:50:00	0
2008-10-17	08:51:00	0
2008-10-17	08:52:00	0
2008-10-17	08:53:00	0
2008-10-17	08:54:00	0
2008-10-17	08:55:00	0
2008-10-17	08:56:00	0
2008-10-17	08:57:00	0
2008-10-17	08:58:00	0
2008-10-17	08:59:00	0
2008-10-17	09:00:00	0
2008-10-17	09:01:00	0
2008-10-17	09:02:00	0
2008-10-17	09:03:00	0
2008-10-17	09:04:00	0
2008-10-17	09:05:00	0
2008-10-17	09:06:00	0
2008-10-17	09:07:00	0
2008-10-17	09:08:00	0
2008-10-17	09:09:00	0
2008-10-17	09:10:00	0
2008-10-17	09:11:00	0
2008-10-17	09:12:00	0
2008-10-17	09:13:00	0
2008-10-17	09:14:00	0
2008-10-17	09:15:00	0
2008-10-17	09:16:00	0
2008-10-17	09:17:00	0
2008-10-17	09:18:00	0
2008-10-17	09:19:00	0
2008-10-17	09:20:00	0
2008-10-17	09:21:00	0
2008-10-17	09:22:00	0
2008-10-17	09:23:00	0
2008-10-17	09:24:00	0
2008-10-17	09:25:00	0
2008-10-17	09:26:00	0
2008-10-17	09:27:00	0
2008-10-17	09:28:00	0
2008-10-17	09:29:00	0
2008-10-17	09:30:00	0
2008-10-17	09:31:00	0
2008-10-17	09:32:00	0
2008-10-17	09:33:00	0
2008-10-17	09:34:00	0
2008-10-17	09:35:00	0
2008-10-17	09:36:00	0
2008-10-17	09:37:00	0
2008-10-17	09:38:00	0
2008-10-17	09:39:00	0
2008-10-17	09:40:00	0
2008-10-17	09:41:00	0
2008-10-17	09:42:00	0
2008-10-17	09:43:00	0
2008-10-17	09:44:00	0
2008-10-17	09:45:00	0
2008-10-17	09:46:00	0
2008-10-17	09:47:00	0
2008-10-17	09:48:00	0
2008-10-17	09:49:00	0
2008-10-17	09:50:00	0
2008-10-17	09:51:00	0
2008-10-17	09:52:00	0
2008-10-17	09:53:00	0
2008-10-17	09:54:00	0
2008-10-17	09:55:00	0
2008-10-17	09:56:00	0
2008-10-17	09:57:00	0
2008-10-17	09:58:00	0
2008-10-17	09:59:00	0
2008-10-17	10:00:00	0
2008-10-17	10:01:00	0
2008-10-17	10:02:00	0
2008-10-17	10:03:00	0
2008-10-17	10:04:00	0
2008-10-17	10:05:00	0
2008-10-17	10:06:00	0
2008-10-17	10:07:00	0
2008-10-17	10:08:00	0
2008-10-17	10:09:00	0
2008-10-17	10:10:00	0
2008-10-17	10:11:00	0
2008-10-17	10:12:00	0
2008-10-17	10:13:00	0
2008-10-17	10:14:00	0
2008-10-17	10:15:00	0
2008-10-17	10:16:00	0
2008-10-17	10:17:00	0
2008-10-17	10:18:00	0
2008-10-17	10:19:00	0
2008-10-17	10:20:00	0
2008-10-17	10:21:00	0
2008-10-17	10:22:00	0
2008-10-17	10:23:00	0
2008-10-17	10:24:00	0
2008-10-17	10:25:00	0
2008-10-17	10:26:00	0
2008-10-17	10:27:00	0
2008-10-17	10:28:00	0
2008-10-17	10:29:00	0
2008-10-17	10:30:00	0
2008-10-17	10:31:00	0
2008-10-17	10:32:00	0
2008-10-17	10:33:00	0
2008-10-17	10:34:00	0
2008-10-17	10:35:00	0
2008-10-17	10:36:00	0
2008-10-17	10:37:00	0
2008-10-17	10:38:00	0
2008-10-17	10:39:00	0
2008-10-17	10:40:00	0
2008-10-17	10:41:00	0
2008-10-17	10:42:00	0
2008-10-17	10:43:00	0
2008-10-17	10:44:00	0
2008-10-17	10:45:00	0
2008-10-17	10:46:00	0
2008-10-17	10:47:00	0
2008-10-17	10:48:00	0
2008-10-17	10:49:00	0
2008-10-17	10:50:00	0
2008-10-17	10:51:00	0
2008-10-17	10:52:00	0
2008-10-17	10:53:00	0
2008-10-17	10:54:00	0
2008-10-17	10:55:00	0
2008-10-17	10:56:00	0
2008-10-17	10:57:00	0
2008-10-17	10:58:00	0
2008-10-17	10:59:00	0
2008-10-17	11:00:00	0
2008-10-17	11:01:00	0
2008-10-17	11:02:00	0
2008-10-17	11:03:00	0
2008-10-17	11:04:00	0
2008-10-17	11:05:00	0
2008-10-17	11:06:00	0
2008-10-17	11:07:00	0
2008-10-17	11:08:00	0
2008-10-17	11:09:00	0
2008-10-17	11:10:00	0
2008-10-17	11:11:00	0
2008-10-17	11:12:00	0
2008-10-17	11:13:00	0
2008-10-17	11:14:00	0
2008-10-17	11:15:00	0
2008-10-17	11:16:00	0
2008-10-17	11:17:00	0
2008-10-17	11:18:00	0
2008-10-17	11:19:00	0
2008-10-17	11:20:00	0
2008-10-17	11:21:00	0
2008-10-17	11:22:00	0
2008-10-17	11:23:00	0
2008-10-17	11:24:00	0
2008-10-17	11:25:00	0
2008-10-17	11:26:00	0
2008-10-17	11:27:00	0
2008-10-17	11:28:00	0
2008-10-17	11:29:00	0
2008-10-17	11:30:00	0
2008-10-17	11:31:00	0
2008-10-17	11:32:00	0
2008-10-17	11:33:00	0
2008-10-17	11:34:00	0
2008-10-17	11:35:00	0
2008-10-17	11:36:00	0
2008-10-17	11:37:00	0
2008-10-17	11:38:00	0
2008-10-17	11:39:00	0
2008-10-17	11:40:00	0
2008-10-17	11:41:00	0
2008-10-17	11:42:00	0
2008-10-17	11:43:00	0
2008-10-17	11:44:00	0
2008-10-17	11:45:00	0
2008-10-17	11:46:00	0
2008-10-17	11:47:00	0
2008-10-17	11:48:00	0
2008-10-17	11:49:00	0
2008-10-17	11:50:00	0
2008-10-17	11:51:00	0
2008-10-17	11:52:00	0
2008-10-17	11:53:00	0
2008-10-17	11:54:00	0
2008-10-17	11:55:00	0
2008-10-17	11:56:00	0
2008-10-17	11:57:00	0
2008-10-17	11:58:00	0
2008-10-17	11:59:00	0
2008-10-17	12:00:00	0
2008-10-17	12:01:00	0
2008-10-17	12:02:00	0
2008-10-17	12:03:00	0
2008-10-17	12:04:00	0
2008-10-17	12:05:00	0
2008-10-17	12:06:00	0
2008-10-17	12:07:00	0
2008-10-17	12:08:00	0
2008-10-17	12:09:00	0
2008-10-17	12:10:00	0
2008-10-17	12:11:00	0
2008-10-17	12:12:00	0
2008-10-17	12:13:00	0
2008-10-17	12:14:00	0
2008-10-17	12:15:00	0
2008-10-17	12:16:00	0
2008-10-17	12:17:00	0
2008-10-17	12:18:00	0
2008-10-17	12:19:00	0
2008-10-17	12:20:00	0
2008-10-17	12:21:00	0
2008-10-17	12:22:00	0
2008-10-17	12:23:00	0
2008-10-17	12:24:00	0
2008-10-17	12:25:00	0
2008-10-17	12:26:00	0
2008-10-17	12:27:00	0
2008-10-17	12:28:00	0
2008-10-17	12:29:00	0
2008-10-17	12:30:00	0
2008-10-17	12:31:00	0
2008-10-17	12:32:00	0
2008-10-17	12:33:00	0
2008-10-17	12:34:00	0
2008-10-17	12:35:00	0
2008-10-17	12:36:00	0
2008-10-17	12:37:00	0
2008-10-17	12:38:00	0
2008-10-17	12:39:00	0
2008-10-17	12:40:00	0
2008-10-17	12:41:00	0
2008-10-17	12:42:00	0
2008-10-17	12:43:00	0
2008-10-17	12:44:00	0
2008-10-17	12:45:00	0
2008-10-17	12:46:00	0
2008-10-17	12:47:00	0
2008-10-17	12:48:00	0
2008-10-17	12:49:00	0
2008-10-17	12:50:00	0
2008-10-17	12:51:00	0
2008-10-17	12:52:00	0
2008-10-17	12:53:00	0
2008-10-17	12:54:00	0
2008-10-17	12:55:00	0
2008-10-17	12:56:00	0
2008-10-17	12:57:00	0
2008-10-17	12:58:00	0
2008-10-17	12:59:00	0
2008-10-17	13:00:00	0
2008-10-17	13:01:00	0
2008-10-17	13:02:00	0
2008-10-17	13:03:00	0
2008-10-17	13:04:00	0
2008-10-17	13:05:00	0
2008-10-17	13:06:00	0
2008-10-17	13:07:00	0
2008-10-17	13:08:00	0
2008-10-17	13:09:00	0
2008-10-17	13:10:00	0
2008-10-17	13:11:00	0
2008-10-17	13:12:00	0
2008-10-17	13:13:00	0
2008-10-17	13:14:00	0
2008-10-17	13:15:00	0
2008-10-17	13:16:00	0
2008-10-17	13:17:00	0
2008-10-17	13:18:00	0
2008-10-17	13:19:00	0
2008-10-17	13:20:00	0
2008-10-17	13:21:00	0
2008-10-17	13:22:00	0
2008-10-17	13:23:00	0
2008-10-17	13:24:00	0
2008-10-17	13:25:00	0
2008-10-17	13:26:00	0
2008-10-17	13:27:00	0
2008-10-17	13:28:00	0
2008-10-17	13:29:00	0
2008-10-17	13:30:00	0
2008-10-17	13:31:00	0
2008-10-17	13:32:00	0
2008-10-17	13:33:00	0
2008-10-17	13:34:00	0
2008-10-17	13:35:00	0
2008-10-17	13:36:00	0
2008-10-17	13:37:00	0
2008-10-17	13:38:00	0
2008-10-17	13:39:00	0
2008-10-17	13:40:00	0
2008-10-17	13:41:00	0
2008-10-17	13:42:00	0
2008-10-17	13:43:00	0
2008-10-17	13:44:00	0
2008-10-17	13:45:00	0
2008-10-17	13:46:00	0
2008-10-17	13:47:00	0
2008-10-17	13:48:00	0
2008-10-17	13:49:00	0
2008-10-17	13:50:00	0
2008-10-17	13:51:00	0
2008-10-17	13:52:00	0
2008-10-17	13:53:00	0
2008-10-17	13:54:00	0
2008-10-17	13:55:00	0
2008-10-17	13:56:00	0
2008-10-17	13:57:00	0
2008-10-17	13:58:00	0
2008-10-17	13:59:00	0
2008-10-17	14:00:00	0
2008-10-17	14:01:00	0
2008-10-17	14:02:00	0
2008-10-17	14:03:00	0
2008-10-17	14:04:00	0
2008-10-17	14:05:00	0
2008-10-17	14:06:00	0
2008-10-17	14:07:00	0
2008-10-17	14:08:00	0
2008-10-17	14:09:00	0
2008-10-17	14:10:00	0
2008-10-17	14:11:00	0
2008-10-17	14:12:00	0
2008-10-17	14:13:00	0
2008-10-17	14:14:00	0
2008-10-17	14:15:00	0
2008-10-17	14:16:00	0
2008-10-17	14:17:00	0
2008-10-17	14:18:00	0
2008-10-17	14:19:00	0
2008-10-17	14:20:00	0
2008-10-17	14:21:00	0
2008-10-17	14:22:00	0
2008-10-17	14:23:00	0
2008-10-17	14:24:00	0
2008-10-17	14:25:00	0
2008-10-17	14:26:00	0
2008-10-17	14:27:00	0
2008-10-17	14:28:00	0
2008-10-17	14:29:00	0
2008-10-17	14:30:00	0
2008-10-17	14:31:00	0
2008-10-17	14:32:00	0
2008-10-17	14:33:00	0
2008-10-17	14:34:00	0
2008-10-17	14:35:00	0
2008-10-17	14:36:00	0
2008-10-17	14:37:00	0
2008-10-17	14:38:00	0
2008-10-17	14:39:00	0
2008-10-17	14:40:00	0
2008-10-17	14:41:00	0
2008-10-17	14:42:00	0
2008-10-17	14:43:00	0
2008-10-17	14:44:00	0
2008-10-17	14:45:00	0
2008-10-17	14:46:00	0
2008-10-17	14:47:00	0
2008-10-17	14:48:00	0
2008-10-17	14:49:00	0
2008-10-17	14:50:00	0
2008-10-17	14:51:00	0
2008-10-17	14:52:00	0
2008-10-17	14:53:00	0
2008-10-17	14:54:00	0
2008-10-17	14:55:00	0
2008-10-17	14:56:00	0
2008-10-17	14:57:00	0
2008-10-17	14:58:00	0
2008-10-17	14:59:00	0
2008-10-17	15:00:00	0
2008-10-17	15:01:00	0
2008-10-17	15:02:00	0
2008-10-17	15:03:00	0
2008-10-17	15:04:00	0
2008-10-17	15:05:00	0
2008-10-17	15:06:00	0
2008-10-17	15:07:00	0
2008-10-17	15:08:00	0
2008-10-17	15:09:00	0
2008-10-17	15:10:00	0
2008-10-17	15:11:00	0
2008-10-17	15:12:00	0
2008-10-17	15:13:00	0
2008-10-17	15:14:00	0
2008-10-17	15:15:00	0
2008-10-17	15:16:00	0
2008-10-17	15:17:00	0
2008-10-17	15:18:00	0
2008-10-17	15:19:00	0
2008-10-17	15:20:00	0
2008-10-17	15:21:00	0
2008-10-17	15:22:00	0
2008-10-17	15:23:00	0
2008-10-17	15:24:00	0
2008-10-17	15:25:00	0
2008-10-17	15:26:00	0
2008-10-17	15:27:00	0
2008-10-17	15:28:00	0
2008-10-17	15:29:00	0
2008-10-17	15:30:00	0
2008-10-17	15:31:00	0
2008-10-17	15:32:00	0
2008-10-17	15:33:00	0
2008-10-17	15:34:00	0
2008-10-17	15:35:00	0
2008-10-17	15:36:00	0
2008-10-17	15:37:00	0
2008-10-17	15:38:00	0
2008-10-17	15:39:00	0
2008-10-17	15:40:00	0
2008-10-17	15:41:00	0
2008-10-17	15:42:00	0
2008-10-17	15:43:00	0
2008-10-17	15:44:00	0
2008-10-17	15:45:00	0
2008-10-17	15:46:00	0
2008-10-17	15:47:00	0
2008-10-17	15:48:00	0
2008-10-17	15:49:00	0
2008-10-17	15:50:00	0
2008-10-17	15:51:00	0
2008-10-17	15:52:00	0
2008-10-17	15:53:00	0
2008-10-17	15:54:00	0
2008-10-17	15:55:00	0
2008-10-17	15:56:00	0
2008-10-17	15:57:00	0
2008-10-17	15:58:00	0
2008-10-17	15:59:00	0
2008-10-17	16:00:00	0
2008-10-17	16:01:00	0
2008-10-17	16:02:00	0
2008-10-17	16:03:00	0
2008-10-17	16:04:00	0
2008-10-17	16:05:00	0
2008-10-17	16:06:00	0
2008-10-17	16:07:00	0
2008-10-17	16:08:00	0
2008-10-17	16:09:00	0
2008-10-17	16:10:00	0
2008-10-17	16:11:00	0
2008-10-17	16:12:00	0
2008-10-17	16:13:00	0
2008-10-17	16:14:00	0
2008-10-17	16:15:00	0
2008-10-17	16:16:00	0
2008-10-17	16:17:00	0
2008-10-17	16:18:00	0
2008-10-17	16:19:00	0
2008-10-17	16:20:00	0
2008-10-17	16:21:00	0
2008-10-17	16:22:00	0
2008-10-17	16:23:00	0
2008-10-17	16:24:00	0
2008-10-17	16:25:00	0
2008-10-17	16:26:00	0
2008-10-17	16:27:00	0
2008-10-17	16:28:00	0
2008-10-17	16:29:00	0
2008-10-17	16:30:00	0
2008-10-17	16:31:00	0
2008-10-17	16:32:00	0
2008-10-17	16:33:00	0
2008-10-17	16:34:00	0
2008-10-17	16:35:00	0
2008-10-17	16:36:00	0
2008-10-17	16:37:00	0
2008-10-17	16:38:00	0
2008-10-17	16:39:00	0
2008-10-17	16:40:00	0
2008-10-17	16:41:00	0
2008-10-17	16:42:00	0
2008-10-17	16:43:00	0
2008-10-17	16:44:00	0
2008-10-17	16:45:00	0
2008-10-17	16:46:00	0
2008-10-17	16:47:00	0
2008-10-17	16:48:00	0
2008-10-17	16:49:00	0
2008-10-17	16:50:00	0
2008-10-17	16:51:00	0
2008-10-17	16:52:00	0
2008-10-17	16:53:00	0
2008-10-17	16:54:00	0
2008-10-17	16:55:00	0
2008-10-17	16:56:00	0
2008-10-17	16:57:00	0
2008-10-17	16:58:00	0
2008-10-17	16:59:00	0
2008-10-17	17:00:00	0
2008-10-17	17:01:00	0
2008-10-17	17:02:00	0
2008-10-17	17:03:00	0
2008-10-17	17:04:00	0
2008-10-17	17:05:00	0
2008-10-17	17:06:00	0
2008-10-17	17:07:00	0
2008-10-17	17:08:00	0
2008-10-17	17:09:00	0
2008-10-17	17:10:00	0
2008-10-17	17:11:00	0
2008-10-17	17:12:00	0
2008-10-17	17:13:00	0
2008-10-17	17:14:00	0
2008-10-17	17:15:00	0
2008-10-17	17:16:00	0
2008-10-17	17:17:00	0
2008-10-17	17:18:00	0
2008-10-17	17:19:00	0
2008-10-17	17:20:00	0
2008-10-17	17:21:00	0
2008-10-17	17:22:00	0
2008-10-17	17:23:00	0
2008-10-17	17:24:00	0
2008-10-17	17:25:00	0
2008-10-17	17:26:00	0
2008-10-17	17:27:00	0
2008-10-17	17:28:00	0
2008-10-17	17:29:00	0
2008-10-17	17:30:00	0
2008-10-17	17:31:00	0
2008-10-17	17:32:00	0
2008-10-17	17:33:00	0
2008-10-17	17:34:00	0
2008-10-17	17:35:00	0
2008-10-17	17:36:00	0
2008-10-17	17:37:00	0
2008-10-17	17:38:00	0
2008-10-17	17:39:00	0
2008-10-17	17:40:00	0
2008-10-17	17:41:00	0
2008-10-17	17:42:00	0
2008-10-17	17:43:00	0
2008-10-17	17:44:00	0
2008-10-17	17:45:00	0
2008-10-17	17:46:00	0
2008-10-17	17:47:00	0
2008-10-17	17:48:00	0
2008-10-17	17:49:00	0
2008-10-17	17:50:00	0
2008-10-17	17:51:00	0
2008-10-17	17:52:00	0
2008-10-17	17:53:00	0
2008-10-17	17:54:00	0
2008-10-17	17:55:00	0
2008-10-17	17:56:00	0
2008-10-17	17:57:00	0
2008-10-17	17:58:00	0
2008-10-17	17:59:00	0
2008-10-17	18:00:00	0	M
2008-10-17	18:01:00	3078
2008-10-17	18:02:00	2859
2008-10-17	18:03:00	2753
2008-10-17	18:04:00	2859
2008-10-17	18:05:00	2363
2008-10-17	18:06:00	2363
2008-10-17	18:07:00	2503
2008-10-17	18:08:00	2186
2008-10-17	18:09:00	2911
2008-10-17	18:10:00	2911
2008-10-17	18:11:00	2911
2008-10-17	18:12:00	2318
2008-10-17	18:13:00	1130
2008-10-17	18:14:00	2274
2008-10-17	18:15:00	2503
2008-10-17	18:16:00	2101
2008-10-17	18:17:00	2363
2008-10-17	18:18:00	1646
2008-10-17	18:19:00	1512
2008-10-17	18:20:00	561
2008-10-17	18:21:00	0
2008-10-17	18:22:00	10
2008-10-17	18:23:00	30
2008-10-17	18:24:00	181
2008-10-17	18:25:00	20
2008-10-17	18:26:00	0
2008-10-17	18:27:00	0
2008-10-17	18:28:00	0
2008-10-17	18:29:00	10
2008-10-17	18:30:00	10
2008-10-17	18:31:00	61
2008-10-17	18:32:00	0
2008-10-17	18:33:00	0
2008-10-17	18:34:00	51
2008-10-17	18:35:00	579
2008-10-17	18:36:00	309
2008-10-17	18:37:00	51
2008-10-17	18:38:00	774
2008-10-17	18:39:00	193
2008-10-17	18:40:00	20
2008-10-17	18:41:00	0
2008-10-17	18:42:00	0
2008-10-17	18:43:00	20
2008-10-17	18:44:00	0
2008-10-17	18:45:00	0
2008-10-17	18:46:00	0
2008-10-17	18:47:00	0
2008-10-17	18:48:00	10
2008-10-17	18:49:00	0
2008-10-17	18:50:00	205
2008-10-17	18:51:00	156
2008-10-17	18:52:00	459
2008-10-17	18:53:00	380
2008-10-17	18:54:00	0
2008-10-17	18:55:00	0
2008-10-17	18:56:00	10
2008-10-17	18:57:00	242
2008-10-17	18:58:00	794
2008-10-17	18:59:00	102
2008-10-17	19:00:00	977
2008-10-17	19:01:00	693
2008-10-17	19:02:00	929
2008-10-17	19:03:00	1156
2008-10-17	19:04:00	475
2008-10-17	19:05:00	10
2008-10-17	19:06:00	337
2008-10-17	19:07:00	652
2008-10-17	19:08:00	774
2008-10-17	19:09:00	366
2008-10-17	19:10:00	10
2008-10-17	19:11:00	10
2008-10-17	19:12:00	0
2008-10-17	19:13:00	0
2008-10-17	19:14:00	0
2008-10-17	19:15:00	10
2008-10-17	19:16:00	0
2008-10-17	19:17:00	0
2008-10-17	19:18:00	0
2008-10-17	19:19:00	51
2008-10-17	19:20:00	10
2008-10-17	19:21:00	0
2008-10-17	19:22:00	0
2008-10-17	19:23:00	0
2008-10-17	19:24:00	0
2008-10-17	19:25:00	0
2008-10-17	19:26:00	10
2008-10-17	19:27:00	0
2008-10-17	19:28:00	10
2008-10-17	19:29:00	10
2008-10-17	19:30:00	0
2008-10-17	19:31:00	0
2008-10-17	19:32:00	0
2008-10-17	19:33:00	10
2008-10-17	19:34:00	0
2008-10-17	19:35:00	0
2008-10-17	19:36:00	0
2008-10-17	19:37:00	0
2008-10-17	19:38:00	102
2008-10-17	19:39:00	0
2008-10-17	19:40:00	0
2008-10-17	19:41:00	30
2008-10-17	19:42:00	132
2008-10-17	19:43:00	10
2008-10-17	19:44:00	0
2008-10-17	19:45:00	30
2008-10-17	19:46:00	10
2008-10-17	19:47:00	0
2008-10-17	19:48:00	0
2008-10-17	19:49:00	71
2008-10-17	19:50:00	10
2008-10-17	19:51:00	20
2008-10-17	19:52:00	10
2008-10-17	19:53:00	10
2008-10-17	19:54:00	0
2008-10-17	19:55:00	10
2008-10-17	19:56:00	0
2008-10-17	19:57:00	0
2008-10-17	19:58:00	0
2008-10-17	19:59:00	0
2008-10-17	20:00:00	0
2008-10-17	20:01:00	0
2008-10-17	20:02:00	0
2008-10-17	20:03:00	0
2008-10-17	20:04:00	0
2008-10-17	20:05:00	0
2008-10-17	20:06:00	0
2008-10-17	20:07:00	0
2008-10-17	20:08:00	0
2008-10-17	20:09:00	0
2008-10-17	20:10:00	0
2008-10-17	20:11:00	0
2008-10-17	20:12:00	0
2008-10-17	20:13:00	0
2008-10-17	20:14:00	0
2008-10-17	20:15:00	0
2008-10-17	20:16:00	0
2008-10-17	20:17:00	0
2008-10-17	20:18:00	0
2008-10-17	20:19:00	0
2008-10-17	20:20:00	0
2008-10-17	20:21:00	0
2008-10-17	20:22:00	0
2008-10-17	20:23:00	0
2008-10-17	20:24:00	0
2008-10-17	20:25:00	0
2008-10-17	20:26:00	0
2008-10-17	20:27:00	0
2008-10-17	20:28:00	20
2008-10-17	20:29:00	0
2008-10-17	20:30:00	20
2008-10-17	20:31:00	0
2008-10-17	20:32:00	0
2008-10-17	20:33:00	0
2008-10-17	20:34:00	0
2008-10-17	20:35:00	0
2008-10-17	20:36:00	0
2008-10-17	20:37:00	10
2008-10-17	20:38:00	0
2008-10-17	20:39:00	0
2008-10-17	20:40:00	0
2008-10-17	20:41:00	0
2008-10-17	20:42:00	0
2008-10-17	20:43:00	61
2008-10-17	20:44:00	0
2008-10-17	20:45:00	0
2008-10-17	20:46:00	0
2008-10-17	20:47:00	10
2008-10-17	20:48:00	0
2008-10-17	20:49:00	0
2008-10-17	20:50:00	0
2008-10-17	20:51:00	0
2008-10-17	20:52:00	0
2008-10-17	20:53:00	0
2008-10-17	20:54:00	0
2008-10-17	20:55:00	0
2008-10-17	20:56:00	30
2008-10-17	20:57:00	30
2008-10-17	20:58:00	30
2008-10-17	20:59:00	81
2008-10-17	21:00:00	0
2008-10-17	21:01:00	0
2008-10-17	21:02:00	0
2008-10-17	21:03:00	10
2008-10-17	21:04:00	0
2008-10-17	21:05:00	51
2008-10-17	21:06:00	91
2008-10-17	21:07:00	230
2008-10-17	21:08:00	0
2008-10-17	21:09:00	20
2008-10-17	21:10:00	0
2008-10-17	21:11:00	0
2008-10-17	21:12:00	0
2008-10-17	21:13:00	0
2008-10-17	21:14:00	0
2008-10-17	21:15:00	20
2008-10-17	21:16:00	0
2008-10-17	21:17:00	0
2008-10-17	21:18:00	0
2008-10-17	21:19:00	0
2008-10-17	21:20:00	0
2008-10-17	21:21:00	81
2008-10-17	21:22:00	41
2008-10-17	21:23:00	0
2008-10-17	21:24:00	0
2008-10-17	21:25:00	71
2008-10-17	21:26:00	0
2008-10-17	21:27:00	0
2008-10-17	21:28:00	0
2008-10-17	21:29:00	0
2008-10-17	21:30:00	0
2008-10-17	21:31:00	0
2008-10-17	21:32:00	0
2008-10-17	21:33:00	0
2008-10-17	21:34:00	0
2008-10-17	21:35:00	71
2008-10-17	21:36:00	91
2008-10-17	21:37:00	30
2008-10-17	21:38:00	0
2008-10-17	21:39:00	0
2008-10-17	21:40:00	0
2008-10-17	21:41:00	0
2008-10-17	21:42:00	0
2008-10-17	21:43:00	0
2008-10-17	21:44:00	0
2008-10-17	21:45:00	0
2008-10-17	21:46:00	61
2008-10-17	21:47:00	30
2008-10-17	21:48:00	112
2008-10-17	21:49:00	0
2008-10-17	21:50:00	0
2008-10-17	21:51:00	20
2008-10-17	21:52:00	0
2008-10-17	21:53:00	0
2008-10-17	21:54:00	20
2008-10-17	21:55:00	0
2008-10-17	21:56:00	0
2008-10-17	21:57:00	0
2008-10-17	21:58:00	102
2008-10-17	21:59:00	20
2008-10-17	22:00:00	0
2008-10-17	22:01:00	0
2008-10-17	22:02:00	0
2008-10-17	22:03:00	0
2008-10-17	22:04:00	0
2008-10-17	22:05:00	0
2008-10-17	22:06:00	0
2008-10-17	22:07:00	0
2008-10-17	22:08:00	0
2008-10-17	22:09:00	0
2008-10-17	22:10:00	0
2008-10-17	22:11:00	41
2008-10-17	22:12:00	51
2008-10-17	22:13:00	0
2008-10-17	22:14:00	0
2008-10-17	22:15:00	0
2008-10-17	22:16:00	0
2008-10-17	22:17:00	0
2008-10-17	22:18:00	0
2008-10-17	22:19:00	0
2008-10-17	22:20:00	0
2008-10-17	22:21:00	0
2008-10-17	22:22:00	0
2008-10-17	22:23:00	0
2008-10-17	22:24:00	0
2008-10-17	22:25:00	0
2008-10-17	22:26:00	0
2008-10-17	22:27:00	51
2008-10-17	22:28:00	0
2008-10-17	22:29:00	0
2008-10-17	22:30:00	0
2008-10-17	22:31:00	0
2008-10-17	22:32:00	0
2008-10-17	22:33:00	0
2008-10-17	22:34:00	0
2008-10-17	22:35:00	0
2008-10-17	22:36:00	30
2008-10-17	22:37:00	10
2008-10-17	22:38:00	0
2008-10-17	22:39:00	61
2008-10-17	22:40:00	0
2008-10-17	22:41:00	0
2008-10-17	22:42:00	0
2008-10-17	22:43:00	0
2008-10-17	22:44:00	0
2008-10-17	22:45:00	0
2008-10-17	22:46:00	0
2008-10-17	22:47:00	0
2008-10-17	22:48:00	0
2008-10-17	22:49:00	0
2008-10-17	22:50:00	0
2008-10-17	22:51:00	0
2008-10-17	22:52:00	0
2008-10-17	22:53:00	0
2008-10-17	22:54:00	0
2008-10-17	22:55:00	0
2008-10-17	22:56:00	0
2008-10-17	22:57:00	10
2008-10-17	22:58:00	0
2008-10-17	22:59:00	0
2008-10-17	23:00:00	0
2008-10-17	23:01:00	0
2008-10-17	23:02:00	0
2008-10-17	23:03:00	0
2008-10-17	23:04:00	0
2008-10-17	23:05:00	0
2008-10-17	23:06:00	0
2008-10-17	23:07:00	0
2008-10-17	23:08:00	0
2008-10-17	23:09:00	0
2008-10-17	23:10:00	122
2008-10-17	23:11:00	20
2008-10-17	23:12:00	91
2008-10-17	23:13:00	0
2008-10-17	23:14:00	0
2008-10-17	23:15:00	0
2008-10-17	23:16:00	0
2008-10-17	23:17:00	0
2008-10-17	23:18:00	0
2008-10-17	23:19:00	0
2008-10-17	23:20:00	0
2008-10-17	23:21:00	0
2008-10-17	23:22:00	0
2008-10-17	23:23:00	0
2008-10-17	23:24:00	0
2008-10-17	23:25:00	0
2008-10-17	23:26:00	0
2008-10-17	23:27:00	0
2008-10-17	23:28:00	0
2008-10-17	23:29:00	0
2008-10-17	23:30:00	0
2008-10-17	23:31:00	0
2008-10-17	23:32:00	0
2008-10-17	23:33:00	0
2008-10-17	23:34:00	0
2008-10-17	23:35:00	0
2008-10-17	23:36:00	0
2008-10-17	23:37:00	0
2008-10-17	23:38:00	0
2008-10-17	23:39:00	0
2008-10-17	23:40:00	0
2008-10-17	23:41:00	0
2008-10-17	23:42:00	0
2008-10-17	23:43:00	0
2008-10-17	23:44:00	51
2008-10-17	23:45:00	10
2008-10-17	23:46:00	0
2008-10-17	23:47:00	0
2008-10-17	23:48:00	0
2008-10-17	23:49:00	0
2008-10-17	23:50:00	0
2008-10-17	23:51:00	91
2008-10-17	23:52:00	10
2008-10-17	23:53:00	30
2008-10-17	23:54:00	0
2008-10-17	23:55:00	0
2008-10-17	23:56:00	0
2008-10-17	23:57:00	0
2008-10-17	23:58:00	81
2008-10-17	23:59:00	0
2008-10-18	00:00:00	0
2008-10-18	00:01:00	0
2008-10-18	00:02:00	0
2008-10-18	00:03:00	0
2008-10-18	00:04:00	0
2008-10-18	00:05:00	0
2008-10-18	00:06:00	0
2008-10-18	00:07:00	0
2008-10-18	00:08:00	61
2008-10-18	00:09:00	0
2008-10-18	00:10:00	0
2008-10-18	00:11:00	0
2008-10-18	00:12:00	0
2008-10-18	00:13:00	0
2008-10-18	00:14:00	0
2008-10-18	00:15:00	0
2008-10-18	00:16:00	0
2008-10-18	00:17:00	0
2008-10-18	00:18:00	0
2008-10-18	00:19:00	0
2008-10-18	00:20:00	0
2008-10-18	00:21:00	0
2008-10-18	00:22:00	0
2008-10-18	00:23:00	71
2008-10-18	00:24:00	0
2008-10-18	00:25:00	0
2008-10-18	00:26:00	0
2008-10-18	00:27:00	0
2008-10-18	00:28:00	1611
2008-10-18	00:29:00	102
2008-10-18	00:30:00	1077
2008-10-18	00:31:00	266
2008-10-18	00:32:00	30
2008-10-18	00:33:00	10
2008-10-18	00:34:00	112
2008-10-18	00:35:00	122
2008-10-18	00:36:00	410
2008-10-18	00:37:00	652
2008-10-18	00:38:00	10
2008-10-18	00:39:00	794
2008-10-18	00:40:00	71
2008-10-18	00:41:00	10
2008-10-18	00:42:00	0
2008-10-18	00:43:00	0
2008-10-18	00:44:00	616
2008-10-18	00:45:00	156
2008-10-18	00:46:00	394
2008-10-18	00:47:00	906
2008-10-18	00:48:00	20
2008-10-18	00:49:00	561
2008-10-18	00:50:00	254
2008-10-18	00:51:00	380
2008-10-18	00:52:00	861
2008-10-18	00:53:00	394
2008-10-18	00:54:00	1002
2008-10-18	00:55:00	366
2008-10-18	00:56:00	351
2008-10-18	00:57:00	380
2008-10-18	00:58:00	61
2008-10-18	00:59:00	51
2008-10-18	01:00:00	0
2008-10-18	01:01:00	0
2008-10-18	01:02:00	0
2008-10-18	01:03:00	597
2008-10-18	01:04:00	1002
2008-10-18	01:05:00	10
2008-10-18	01:06:00	309
2008-10-18	01:07:00	794
2008-10-18	01:08:00	459
2008-10-18	01:09:00	542
2008-10-18	01:10:00	492
2008-10-18	01:11:00	10
2008-10-18	01:12:00	41
2008-10-18	01:13:00	10
2008-10-18	01:14:00	0
2008-10-18	01:15:00	20
2008-10-18	01:16:00	10
2008-10-18	01:17:00	30
2008-10-18	01:18:00	91
2008-10-18	01:19:00	81
2008-10-18	01:20:00	309
2008-10-18	01:21:00	0
2008-10-18	01:22:00	0
2008-10-18	01:23:00	132
2008-10-18	01:24:00	20
2008-10-18	01:25:00	0
2008-10-18	01:26:00	0
2008-10-18	01:27:00	10
2008-10-18	01:28:00	0
2008-10-18	01:29:00	144
2008-10-18	01:30:00	30
2008-10-18	01:31:00	61
2008-10-18	01:32:00	10
2008-10-18	01:33:00	10
2008-10-18	01:34:00	0
2008-10-18	01:35:00	10
2008-10-18	01:36:00	30
2008-10-18	01:37:00	0
2008-10-18	01:38:00	0
2008-10-18	01:39:00	0
2008-10-18	01:40:00	0
2008-10-18	01:41:00	0
2008-10-18	01:42:00	0
2008-10-18	01:43:00	181
2008-10-18	01:44:00	41
2008-10-18	01:45:00	51
2008-10-18	01:46:00	0
2008-10-18	01:47:00	41
2008-10-18	01:48:00	91
2008-10-18	01:49:00	0
2008-10-18	01:50:00	0
2008-10-18	01:51:00	0
2008-10-18	01:52:00	0
2008-10-18	01:53:00	10
2008-10-18	01:54:00	0
2008-10-18	01:55:00	0
2008-10-18	01:56:00	0
2008-10-18	01:57:00	0
2008-10-18	01:58:00	0
2008-10-18	01:59:00	0
2008-10-18	02:00:00	10
2008-10-18	02:01:00	0
2008-10-18	02:02:00	0
2008-10-18	02:03:00	0
2008-10-18	02:04:00	0
2008-10-18	02:05:00	0
2008-10-18	02:06:00	0
2008-10-18	02:07:00	30
2008-10-18	02:08:00	20
2008-10-18	02:09:00	51
2008-10-18	02:10:00	20
2008-10-18	02:11:00	0
2008-10-18	02:12:00	0
2008-10-18	02:13:00	20
2008-10-18	02:14:00	0
2008-10-18	02:15:00	112
2008-10-18	02:16:00	10
2008-10-18	02:17:00	169
2008-10-18	02:18:00	112
2008-10-18	02:19:00	337
2008-10-18	02:20:00	0
2008-10-18	02:21:00	20
2008-10-18	02:22:00	0
2008-10-18	02:23:00	0
2008-10-18	02:24:00	10
2008-10-18	02:25:00	0
2008-10-18	02:26:00	0
2008-10-18	02:27:00	0
2008-10-18	02:28:00	10
2008-10-18	02:29:00	51
2008-10-18	02:30:00	0
2008-10-18	02:31:00	0
2008-10-18	02:32:00	0
2008-10-18	02:33:00	0
2008-10-18	02:34:00	0
2008-10-18	02:35:00	0
2008-10-18	02:36:00	0
2008-10-18	02:37:00	0
2008-10-18	02:38:00	0
2008-10-18	02:39:00	0
2008-10-18	02:40:00	0
2008-10-18	02:41:00	0
2008-10-18	02:42:00	0
2008-10-18	02:43:00	0
2008-10-18	02:44:00	0
2008-10-18	02:45:00	0
2008-10-18	02:46:00	0
2008-10-18	02:47:00	0
2008-10-18	02:48:00	144
2008-10-18	02:49:00	0
2008-10-18	02:50:00	0
2008-10-18	02:51:00	0
2008-10-18	02:52:00	0
2008-10-18	02:53:00	0
2008-10-18	02:54:00	0
2008-10-18	02:55:00	0
2008-10-18	02:56:00	0
2008-10-18	02:57:00	0
2008-10-18	02:58:00	0
2008-10-18	02:59:00	0
2008-10-18	03:00:00	20
2008-10-18	03:01:00	81
2008-10-18	03:02:00	0
2008-10-18	03:03:00	51
2008-10-18	03:04:00	693
2008-10-18	03:05:00	169
2008-10-18	03:06:00	0
2008-10-18	03:07:00	0
2008-10-18	03:08:00	0
2008-10-18	03:09:00	0
2008-10-18	03:10:00	0
2008-10-18	03:11:00	0
2008-10-18	03:12:00	0
2008-10-18	03:13:00	0
2008-10-18	03:14:00	0
2008-10-18	03:15:00	0
2008-10-18	03:16:00	0
2008-10-18	03:17:00	0
2008-10-18	03:18:00	0
2008-10-18	03:19:00	0
2008-10-18	03:20:00	0
2008-10-18	03:21:00	0
2008-10-18	03:22:00	0
2008-10-18	03:23:00	0
2008-10-18	03:24:00	0
2008-10-18	03:25:00	0
2008-10-18	03:26:00	0
2008-10-18	03:27:00	0
2008-10-18	03:28:00	0
2008-10-18	03:29:00	0
2008-10-18	03:30:00	0
2008-10-18	03:31:00	0
2008-10-18	03:32:00	181
2008-10-18	03:33:00	0
2008-10-18	03:34:00	0
2008-10-18	03:35:00	0
2008-10-18	03:36:00	0
2008-10-18	03:37:00	0
2008-10-18	03:38:00	0
2008-10-18	03:39:00	0
2008-10-18	03:40:00	0
2008-10-18	03:41:00	0
2008-10-18	03:42:00	0
2008-10-18	03:43:00	0
2008-10-18	03:44:00	0
2008-10-18	03:45:00	0
2008-10-18	03:46:00	61
2008-10-18	03:47:00	71
2008-10-18	03:48:00	0
2008-10-18	03:49:00	0
2008-10-18	03:50:00	0
2008-10-18	03:51:00	0
2008-10-18	03:52:00	0
2008-10-18	03:53:00	0
2008-10-18	03:54:00	0
2008-10-18	03:55:00	0
2008-10-18	03:56:00	0
2008-10-18	03:57:00	0
2008-10-18	03:58:00	0
2008-10-18	03:59:00	0
2008-10-18	04:00:00	0
2008-10-18	04:01:00	0
2008-10-18	04:02:00	0
2008-10-18	04:03:00	0
2008-10-18	04:04:00	10
2008-10-18	04:05:00	0
2008-10-18	04:06:00	0
2008-10-18	04:07:00	0
2008-10-18	04:08:00	0
2008-10-18	04:09:00	0
2008-10-18	04:10:00	0
2008-10-18	04:11:00	0
2008-10-18	04:12:00	0
2008-10-18	04:13:00	0
2008-10-18	04:14:00	0
2008-10-18	04:15:00	0
2008-10-18	04:16:00	0
2008-10-18	04:17:00	0
2008-10-18	04:18:00	0
2008-10-18	04:19:00	0
2008-10-18	04:20:00	0
2008-10-18	04:21:00	0
2008-10-18	04:22:00	20
2008-10-18	04:23:00	0
2008-10-18	04:24:00	0
2008-10-18	04:25:00	0
2008-10-18	04:26:00	0
2008-10-18	04:27:00	0
2008-10-18	04:28:00	0
2008-10-18	04:29:00	0
2008-10-18	04:30:00	0
2008-10-18	04:31:00	0
2008-10-18	04:32:00	0
2008-10-18	04:33:00	0
2008-10-18	04:34:00	0
2008-10-18	04:35:00	0
2008-10-18	04:36:00	0
2008-10-18	04:37:00	0
2008-10-18	04:38:00	0
2008-10-18	04:39:00	0
2008-10-18	04:40:00	0
2008-10-18	04:41:00	0
2008-10-18	04:42:00	0
2008-10-18	04:43:00	0
2008-10-18	04:44:00	0
2008-10-18	04:45:00	20
2008-10-18	04:46:00	41
2008-10-18	04:47:00	508
2008-10-18	04:48:00	61
2008-10-18	04:49:00	20
2008-10-18	04:50:00	217
2008-10-18	04:51:00	0
2008-10-18	04:52:00	10
2008-10-18	04:53:00	0
2008-10-18	04:54:00	0
2008-10-18	04:55:00	0
2008-10-18	04:56:00	0
2008-10-18	04:57:00	0
2008-10-18	04:58:00	0
2008-10-18	04:59:00	0
2008-10-18	05:00:00	0
2008-10-18	05:01:00	0
2008-10-18	05:02:00	0
2008-10-18	05:03:00	0
2008-10-18	05:04:00	0
2008-10-18	05:05:00	0
2008-10-18	05:06:00	0
2008-10-18	05:07:00	0
2008-10-18	05:08:00	0
2008-10-18	05:09:00	0
2008-10-18	05:10:00	0
2008-10-18	05:11:00	0
2008-10-18	05:12:00	0
2008-10-18	05:13:00	0
2008-10-18	05:14:00	193
2008-10-18	05:15:00	0
2008-10-18	05:16:00	0
2008-10-18	05:17:00	0
2008-10-18	05:18:00	0
2008-10-18	05:19:00	0
2008-10-18	05:20:00	0
2008-10-18	05:21:00	0
2008-10-18	05:22:00	0
2008-10-18	05:23:00	0
2008-10-18	05:24:00	0
2008-10-18	05:25:00	0
2008-10-18	05:26:00	0
2008-10-18	05:27:00	0
2008-10-18	05:28:00	0
2008-10-18	05:29:00	0
2008-10-18	05:30:00	0
2008-10-18	05:31:00	0
2008-10-18	05:32:00	0
2008-10-18	05:33:00	0
2008-10-18	05:34:00	0
2008-10-18	05:35:00	0
2008-10-18	05:36:00	0
2008-10-18	05:37:00	0
2008-10-18	05:38:00	0
2008-10-18	05:39:00	0
2008-10-18	05:40:00	0
2008-10-18	05:41:00	0
2008-10-18	05:42:00	0
2008-10-18	05:43:00	0
2008-10-18	05:44:00	0
2008-10-18	05:45:00	0
2008-10-18	05:46:00	0
2008-10-18	05:47:00	0
2008-10-18	05:48:00	0
2008-10-18	05:49:00	0
2008-10-18	05:50:00	0
2008-10-18	05:51:00	0
2008-10-18	05:52:00	0
2008-10-18	05:53:00	0
2008-10-18	05:54:00	0
2008-10-18	05:55:00	0
2008-10-18	05:56:00	0
2008-10-18	05:57:00	0
2008-10-18	05:58:00	0
2008-10-18	05:59:00	0
2008-10-18	06:00:00	0
2008-10-18	06:01:00	0
2008-10-18	06:02:00	0
2008-10-18	06:03:00	0
2008-10-18	06:04:00	0
2008-10-18	06:05:00	0
2008-10-18	06:06:00	0
2008-10-18	06:07:00	0
2008-10-18	06:08:00	10
2008-10-18	06:09:00	0
2008-10-18	06:10:00	0
2008-10-18	06:11:00	0
2008-10-18	06:12:00	0
2008-10-18	06:13:00	0
2008-10-18	06:14:00	0
2008-10-18	06:15:00	0
2008-10-18	06:16:00	0
2008-10-18	06:17:00	0
2008-10-18	06:18:00	0
2008-10-18	06:19:00	0
2008-10-18	06:20:00	0
2008-10-18	06:21:00	20
2008-10-18	06:22:00	10
2008-10-18	06:23:00	91
2008-10-18	06:24:00	0
2008-10-18	06:25:00	20
2008-10-18	06:26:00	30
2008-10-18	06:27:00	132
2008-10-18	06:28:00	266
2008-10-18	06:29:00	30
2008-10-18	06:30:00	0
2008-10-18	06:31:00	41
2008-10-18	06:32:00	0
2008-10-18	06:33:00	0
2008-10-18	06:34:00	30
2008-10-18	06:35:00	10
2008-10-18	06:36:00	0
2008-10-18	06:37:00	30
2008-10-18	06:38:00	0
2008-10-18	06:39:00	0
2008-10-18	06:40:00	0
2008-10-18	06:41:00	0
2008-10-18	06:42:00	0
2008-10-18	06:43:00	0
2008-10-18	06:44:00	0
2008-10-18	06:45:00	0
2008-10-18	06:46:00	61
2008-10-18	06:47:00	20
2008-10-18	06:48:00	0
2008-10-18	06:49:00	754
2008-10-18	06:50:00	542
2008-10-18	06:51:00	323
2008-10-18	06:52:00	492
2008-10-18	06:53:00	733
2008-10-18	06:54:00	579
2008-10-18	06:55:00	733
2008-10-18	06:56:00	794
2008-10-18	06:57:00	634
2008-10-18	06:58:00	953
2008-10-18	06:59:00	1050
2008-10-18	07:00:00	839
2008-10-18	07:01:00	132
2008-10-18	07:02:00	10
2008-10-18	07:03:00	30
2008-10-18	07:04:00	10
2008-10-18	07:05:00	0
2008-10-18	07:06:00	30
2008-10-18	07:07:00	10
2008-10-18	07:08:00	61
2008-10-18	07:09:00	0
2008-10-18	07:10:00	0
2008-10-18	07:11:00	10
2008-10-18	07:12:00	156
2008-10-18	07:13:00	91
2008-10-18	07:14:00	51
2008-10-18	07:15:00	0
2008-10-18	07:16:00	323
2008-10-18	07:17:00	713
2008-10-18	07:18:00	0
2008-10-18	07:19:00	0
2008-10-18	07:20:00	10
2008-10-18	07:21:00	0
2008-10-18	07:22:00	0
2008-10-18	07:23:00	0
2008-10-18	07:24:00	91
2008-10-18	07:25:00	0
2008-10-18	07:26:00	0
2008-10-18	07:27:00	0
2008-10-18	07:28:00	0
2008-10-18	07:29:00	0
2008-10-18	07:30:00	0
2008-10-18	07:31:00	0
2008-10-18	07:32:00	0
2008-10-18	07:33:00	0
2008-10-18	07:34:00	0
2008-10-18	07:35:00	0
2008-10-18	07:36:00	10
2008-10-18	07:37:00	0
2008-10-18	07:38:00	30
2008-10-18	07:39:00	0
2008-10-18	07:40:00	0
2008-10-18	07:41:00	0
2008-10-18	07:42:00	0
2008-10-18	07:43:00	0
2008-10-18	07:44:00	0
2008-10-18	07:45:00	0
2008-10-18	07:46:00	0
2008-10-18	07:47:00	0
2008-10-18	07:48:00	0
2008-10-18	07:49:00	112
2008-10-18	07:50:00	0
2008-10-18	07:51:00	71
2008-10-18	07:52:00	0
2008-10-18	07:53:00	51
2008-10-18	07:54:00	51
2008-10-18	07:55:00	10
2008-10-18	07:56:00	193
2008-10-18	07:57:00	1296
2008-10-18	07:58:00	579
2008-10-18	07:59:00	492
2008-10-18	08:00:00	475
2008-10-18	08:01:00	597
2008-10-18	08:02:00	492
2008-10-18	08:03:00	774
2008-10-18	08:04:00	733
2008-10-18	08:05:00	508
2008-10-18	08:06:00	30
2008-10-18	08:07:00	0
2008-10-18	08:08:00	0
2008-10-18	08:09:00	0
2008-10-18	08:10:00	0
2008-10-18	08:11:00	30
2008-10-18	08:12:00	0
2008-10-18	08:13:00	0
2008-10-18	08:14:00	0
2008-10-18	08:15:00	0
2008-10-18	08:16:00	0
2008-10-18	08:17:00	0
2008-10-18	08:18:00	0
2008-10-18	08:19:00	102
2008-10-18	08:20:00	0
2008-10-18	08:21:00	0
2008-10-18	08:22:00	0
2008-10-18	08:23:00	0
2008-10-18	08:24:00	0
2008-10-18	08:25:00	0
2008-10-18	08:26:00	20
2008-10-18	08:27:00	266
2008-10-18	08:28:00	1050
2008-10-18	08:29:00	20
2008-10-18	08:30:00	0
2008-10-18	08:31:00	0
2008-10-18	08:32:00	0
2008-10-18	08:33:00	0
2008-10-18	08:34:00	0
2008-10-18	08:35:00	0
2008-10-18	08:36:00	0
2008-10-18	08:37:00	0
2008-10-18	08:38:00	0
2008-10-18	08:39:00	0
2008-10-18	08:40:00	0
2008-10-18	08:41:00	20
2008-10-18	08:42:00	156
2008-10-18	08:43:00	10
2008-10-18	08:44:00	81
2008-10-18	08:45:00	0
2008-10-18	08:46:00	0
2008-10-18	08:47:00	0
2008-10-18	08:48:00	0
2008-10-18	08:49:00	0
2008-10-18	08:50:00	0
2008-10-18	08:51:00	0
2008-10-18	08:52:00	10
2008-10-18	08:53:00	20
2008-10-18	08:54:00	0
2008-10-18	08:55:00	20
2008-10-18	08:56:00	10
2008-10-18	08:57:00	20
2008-10-18	08:58:00	51
2008-10-18	08:59:00	0
2008-10-18	09:00:00	0
2008-10-18	09:01:00	0
2008-10-18	09:02:00	0
2008-10-18	09:03:00	0
2008-10-18	09:04:00	10
2008-10-18	09:05:00	20
2008-10-18	09:06:00	0
2008-10-18	09:07:00	0
2008-10-18	09:08:00	0
[truncated: 19,611 more rows]

## Sheet: 10.31.08
Actogram, Copy Raw Data, All Days
Identity:	Patty
Filename:	E:\Active Research Files\meloxicam titre canine\cases\patty\Patty 10.31.08.AWC
Gender:	F
Age:	10
Height:	45.7 cm	18.0 in
Weight:	16.0 kg	35.3 lbs
Start Date:	31-Oct-2008 (Fri)
Start Time:	17:00:00
Interval:	1.00 mins
Date Stamp:	Time Stamp:	Activity Data:	Marker Press:
2008-10-31	00:00:00	0
2008-10-31	00:01:00	0
2008-10-31	00:02:00	0
2008-10-31	00:03:00	0
2008-10-31	00:04:00	0
2008-10-31	00:05:00	0
2008-10-31	00:06:00	0
2008-10-31	00:07:00	0
2008-10-31	00:08:00	0
2008-10-31	00:09:00	0
2008-10-31	00:10:00	0
2008-10-31	00:11:00	0
2008-10-31	00:12:00	0
2008-10-31	00:13:00	0
2008-10-31	00:14:00	0
2008-10-31	00:15:00	0
2008-10-31	00:16:00	0
2008-10-31	00:17:00	0
2008-10-31	00:18:00	0
2008-10-31	00:19:00	0
2008-10-31	00:20:00	0
2008-10-31	00:21:00	0
2008-10-31	00:22:00	0
2008-10-31	00:23:00	0
2008-10-31	00:24:00	0
2008-10-31	00:25:00	0
2008-10-31	00:26:00	0
2008-10-31	00:27:00	0
2008-10-31	00:28:00	0
2008-10-31	00:29:00	0
2008-10-31	00:30:00	0
2008-10-31	00:31:00	0
2008-10-31	00:32:00	0
2008-10-31	00:33:00	0
2008-10-31	00:34:00	0
2008-10-31	00:35:00	0
2008-10-31	00:36:00	0
2008-10-31	00:37:00	0
2008-10-31	00:38:00	0
2008-10-31	00:39:00	0
2008-10-31	00:40:00	0
2008-10-31	00:41:00	0
2008-10-31	00:42:00	0
2008-10-31	00:43:00	0
2008-10-31	00:44:00	0
2008-10-31	00:45:00	0
2008-10-31	00:46:00	0
2008-10-31	00:47:00	0
2008-10-31	00:48:00	0
2008-10-31	00:49:00	0
2008-10-31	00:50:00	0
2008-10-31	00:51:00	0
2008-10-31	00:52:00	0
2008-10-31	00:53:00	0
2008-10-31	00:54:00	0
2008-10-31	00:55:00	0
2008-10-31	00:56:00	0
2008-10-31	00:57:00	0
2008-10-31	00:58:00	0
2008-10-31	00:59:00	0
2008-10-31	01:00:00	0
2008-10-31	01:01:00	0
2008-10-31	01:02:00	0
2008-10-31	01:03:00	0
2008-10-31	01:04:00	0
2008-10-31	01:05:00	0
2008-10-31	01:06:00	0
2008-10-31	01:07:00	0
2008-10-31	01:08:00	0
2008-10-31	01:09:00	0
2008-10-31	01:10:00	0
2008-10-31	01:11:00	0
2008-10-31	01:12:00	0
2008-10-31	01:13:00	0
2008-10-31	01:14:00	0
2008-10-31	01:15:00	0
2008-10-31	01:16:00	0
2008-10-31	01:17:00	0
2008-10-31	01:18:00	0
2008-10-31	01:19:00	0
2008-10-31	01:20:00	0
2008-10-31	01:21:00	0
2008-10-31	01:22:00	0
2008-10-31	01:23:00	0
2008-10-31	01:24:00	0
2008-10-31	01:25:00	0
2008-10-31	01:26:00	0
2008-10-31	01:27:00	0
2008-10-31	01:28:00	0
2008-10-31	01:29:00	0
2008-10-31	01:30:00	0
2008-10-31	01:31:00	0
2008-10-31	01:32:00	0
2008-10-31	01:33:00	0
2008-10-31	01:34:00	0
2008-10-31	01:35:00	0
2008-10-31	01:36:00	0
2008-10-31	01:37:00	0
2008-10-31	01:38:00	0
2008-10-31	01:39:00	0
2008-10-31	01:40:00	0
2008-10-31	01:41:00	0
2008-10-31	01:42:00	0
2008-10-31	01:43:00	0
2008-10-31	01:44:00	0
2008-10-31	01:45:00	0
2008-10-31	01:46:00	0
2008-10-31	01:47:00	0
2008-10-31	01:48:00	0
2008-10-31	01:49:00	0
2008-10-31	01:50:00	0
2008-10-31	01:51:00	0
2008-10-31	01:52:00	0
2008-10-31	01:53:00	0
2008-10-31	01:54:00	0
2008-10-31	01:55:00	0
2008-10-31	01:56:00	0
2008-10-31	01:57:00	0
2008-10-31	01:58:00	0
2008-10-31	01:59:00	0
2008-10-31	02:00:00	0
2008-10-31	02:01:00	0
2008-10-31	02:02:00	0
2008-10-31	02:03:00	0
2008-10-31	02:04:00	0
2008-10-31	02:05:00	0
2008-10-31	02:06:00	0
2008-10-31	02:07:00	0
2008-10-31	02:08:00	0
2008-10-31	02:09:00	0
2008-10-31	02:10:00	0
2008-10-31	02:11:00	0
2008-10-31	02:12:00	0
2008-10-31	02:13:00	0
2008-10-31	02:14:00	0
2008-10-31	02:15:00	0
2008-10-31	02:16:00	0
2008-10-31	02:17:00	0
2008-10-31	02:18:00	0
2008-10-31	02:19:00	0
2008-10-31	02:20:00	0
2008-10-31	02:21:00	0
2008-10-31	02:22:00	0
2008-10-31	02:23:00	0
2008-10-31	02:24:00	0
2008-10-31	02:25:00	0
2008-10-31	02:26:00	0
2008-10-31	02:27:00	0
2008-10-31	02:28:00	0
2008-10-31	02:29:00	0
2008-10-31	02:30:00	0
2008-10-31	02:31:00	0
2008-10-31	02:32:00	0
2008-10-31	02:33:00	0
2008-10-31	02:34:00	0
2008-10-31	02:35:00	0
2008-10-31	02:36:00	0
2008-10-31	02:37:00	0
2008-10-31	02:38:00	0
2008-10-31	02:39:00	0
2008-10-31	02:40:00	0
2008-10-31	02:41:00	0
2008-10-31	02:42:00	0
2008-10-31	02:43:00	0
2008-10-31	02:44:00	0
2008-10-31	02:45:00	0
2008-10-31	02:46:00	0
2008-10-31	02:47:00	0
2008-10-31	02:48:00	0
2008-10-31	02:49:00	0
2008-10-31	02:50:00	0
2008-10-31	02:51:00	0
2008-10-31	02:52:00	0
2008-10-31	02:53:00	0
2008-10-31	02:54:00	0
2008-10-31	02:55:00	0
2008-10-31	02:56:00	0
2008-10-31	02:57:00	0
2008-10-31	02:58:00	0
2008-10-31	02:59:00	0
2008-10-31	03:00:00	0
2008-10-31	03:01:00	0
2008-10-31	03:02:00	0
2008-10-31	03:03:00	0
2008-10-31	03:04:00	0
2008-10-31	03:05:00	0
2008-10-31	03:06:00	0
2008-10-31	03:07:00	0
2008-10-31	03:08:00	0
2008-10-31	03:09:00	0
2008-10-31	03:10:00	0
2008-10-31	03:11:00	0
2008-10-31	03:12:00	0
2008-10-31	03:13:00	0
2008-10-31	03:14:00	0
2008-10-31	03:15:00	0
2008-10-31	03:16:00	0
2008-10-31	03:17:00	0
2008-10-31	03:18:00	0
2008-10-31	03:19:00	0
2008-10-31	03:20:00	0
2008-10-31	03:21:00	0
2008-10-31	03:22:00	0
2008-10-31	03:23:00	0
2008-10-31	03:24:00	0
2008-10-31	03:25:00	0
2008-10-31	03:26:00	0
2008-10-31	03:27:00	0
2008-10-31	03:28:00	0
2008-10-31	03:29:00	0
2008-10-31	03:30:00	0
2008-10-31	03:31:00	0
2008-10-31	03:32:00	0
2008-10-31	03:33:00	0
2008-10-31	03:34:00	0
2008-10-31	03:35:00	0
2008-10-31	03:36:00	0
2008-10-31	03:37:00	0
2008-10-31	03:38:00	0
2008-10-31	03:39:00	0
2008-10-31	03:40:00	0
2008-10-31	03:41:00	0
2008-10-31	03:42:00	0
2008-10-31	03:43:00	0
2008-10-31	03:44:00	0
2008-10-31	03:45:00	0
2008-10-31	03:46:00	0
2008-10-31	03:47:00	0
2008-10-31	03:48:00	0
2008-10-31	03:49:00	0
2008-10-31	03:50:00	0
2008-10-31	03:51:00	0
2008-10-31	03:52:00	0
2008-10-31	03:53:00	0
2008-10-31	03:54:00	0
2008-10-31	03:55:00	0
2008-10-31	03:56:00	0
2008-10-31	03:57:00	0
2008-10-31	03:58:00	0
2008-10-31	03:59:00	0
2008-10-31	04:00:00	0
2008-10-31	04:01:00	0
2008-10-31	04:02:00	0
2008-10-31	04:03:00	0
2008-10-31	04:04:00	0
2008-10-31	04:05:00	0
2008-10-31	04:06:00	0
2008-10-31	04:07:00	0
2008-10-31	04:08:00	0
2008-10-31	04:09:00	0
2008-10-31	04:10:00	0
2008-10-31	04:11:00	0
2008-10-31	04:12:00	0
2008-10-31	04:13:00	0
2008-10-31	04:14:00	0
2008-10-31	04:15:00	0
2008-10-31	04:16:00	0
2008-10-31	04:17:00	0
2008-10-31	04:18:00	0
2008-10-31	04:19:00	0
2008-10-31	04:20:00	0
2008-10-31	04:21:00	0
2008-10-31	04:22:00	0
2008-10-31	04:23:00	0
2008-10-31	04:24:00	0
2008-10-31	04:25:00	0
2008-10-31	04:26:00	0
2008-10-31	04:27:00	0
2008-10-31	04:28:00	0
2008-10-31	04:29:00	0
2008-10-31	04:30:00	0
2008-10-31	04:31:00	0
2008-10-31	04:32:00	0
2008-10-31	04:33:00	0
2008-10-31	04:34:00	0
2008-10-31	04:35:00	0
2008-10-31	04:36:00	0
2008-10-31	04:37:00	0
2008-10-31	04:38:00	0
2008-10-31	04:39:00	0
2008-10-31	04:40:00	0
2008-10-31	04:41:00	0
2008-10-31	04:42:00	0
2008-10-31	04:43:00	0
2008-10-31	04:44:00	0
2008-10-31	04:45:00	0
2008-10-31	04:46:00	0
2008-10-31	04:47:00	0
2008-10-31	04:48:00	0
2008-10-31	04:49:00	0
2008-10-31	04:50:00	0
2008-10-31	04:51:00	0
2008-10-31	04:52:00	0
2008-10-31	04:53:00	0
2008-10-31	04:54:00	0
2008-10-31	04:55:00	0
2008-10-31	04:56:00	0
2008-10-31	04:57:00	0
2008-10-31	04:58:00	0
2008-10-31	04:59:00	0
2008-10-31	05:00:00	0
2008-10-31	05:01:00	0
2008-10-31	05:02:00	0
2008-10-31	05:03:00	0
2008-10-31	05:04:00	0
2008-10-31	05:05:00	0
2008-10-31	05:06:00	0
2008-10-31	05:07:00	0
2008-10-31	05:08:00	0
2008-10-31	05:09:00	0
2008-10-31	05:10:00	0
2008-10-31	05:11:00	0
2008-10-31	05:12:00	0
2008-10-31	05:13:00	0
2008-10-31	05:14:00	0
2008-10-31	05:15:00	0
2008-10-31	05:16:00	0
2008-10-31	05:17:00	0
2008-10-31	05:18:00	0
2008-10-31	05:19:00	0
2008-10-31	05:20:00	0
2008-10-31	05:21:00	0
2008-10-31	05:22:00	0
2008-10-31	05:23:00	0
2008-10-31	05:24:00	0
2008-10-31	05:25:00	0
2008-10-31	05:26:00	0
2008-10-31	05:27:00	0
2008-10-31	05:28:00	0
2008-10-31	05:29:00	0
2008-10-31	05:30:00	0
2008-10-31	05:31:00	0
2008-10-31	05:32:00	0
2008-10-31	05:33:00	0
2008-10-31	05:34:00	0
2008-10-31	05:35:00	0
2008-10-31	05:36:00	0
2008-10-31	05:37:00	0
2008-10-31	05:38:00	0
2008-10-31	05:39:00	0
2008-10-31	05:40:00	0
2008-10-31	05:41:00	0
2008-10-31	05:42:00	0
2008-10-31	05:43:00	0
2008-10-31	05:44:00	0
2008-10-31	05:45:00	0
2008-10-31	05:46:00	0
2008-10-31	05:47:00	0
2008-10-31	05:48:00	0
2008-10-31	05:49:00	0
2008-10-31	05:50:00	0
2008-10-31	05:51:00	0
2008-10-31	05:52:00	0
2008-10-31	05:53:00	0
2008-10-31	05:54:00	0
2008-10-31	05:55:00	0
2008-10-31	05:56:00	0
2008-10-31	05:57:00	0
2008-10-31	05:58:00	0
2008-10-31	05:59:00	0
2008-10-31	06:00:00	0
2008-10-31	06:01:00	0
2008-10-31	06:02:00	0
2008-10-31	06:03:00	0
2008-10-31	06:04:00	0
2008-10-31	06:05:00	0
2008-10-31	06:06:00	0
2008-10-31	06:07:00	0
2008-10-31	06:08:00	0
2008-10-31	06:09:00	0
2008-10-31	06:10:00	0
2008-10-31	06:11:00	0
2008-10-31	06:12:00	0
2008-10-31	06:13:00	0
2008-10-31	06:14:00	0
2008-10-31	06:15:00	0
2008-10-31	06:16:00	0
2008-10-31	06:17:00	0
2008-10-31	06:18:00	0
2008-10-31	06:19:00	0
2008-10-31	06:20:00	0
2008-10-31	06:21:00	0
2008-10-31	06:22:00	0
2008-10-31	06:23:00	0
2008-10-31	06:24:00	0
2008-10-31	06:25:00	0
2008-10-31	06:26:00	0
2008-10-31	06:27:00	0
2008-10-31	06:28:00	0
2008-10-31	06:29:00	0
2008-10-31	06:30:00	0
2008-10-31	06:31:00	0
2008-10-31	06:32:00	0
2008-10-31	06:33:00	0
2008-10-31	06:34:00	0
2008-10-31	06:35:00	0
2008-10-31	06:36:00	0
2008-10-31	06:37:00	0
2008-10-31	06:38:00	0
2008-10-31	06:39:00	0
2008-10-31	06:40:00	0
2008-10-31	06:41:00	0
2008-10-31	06:42:00	0
2008-10-31	06:43:00	0
2008-10-31	06:44:00	0
2008-10-31	06:45:00	0
2008-10-31	06:46:00	0
2008-10-31	06:47:00	0
2008-10-31	06:48:00	0
2008-10-31	06:49:00	0
2008-10-31	06:50:00	0
2008-10-31	06:51:00	0
2008-10-31	06:52:00	0
2008-10-31	06:53:00	0
2008-10-31	06:54:00	0
2008-10-31	06:55:00	0
2008-10-31	06:56:00	0
2008-10-31	06:57:00	0
2008-10-31	06:58:00	0
2008-10-31	06:59:00	0
2008-10-31	07:00:00	0
2008-10-31	07:01:00	0
2008-10-31	07:02:00	0
2008-10-31	07:03:00	0
2008-10-31	07:04:00	0
2008-10-31	07:05:00	0
2008-10-31	07:06:00	0
2008-10-31	07:07:00	0
2008-10-31	07:08:00	0
2008-10-31	07:09:00	0
2008-10-31	07:10:00	0
2008-10-31	07:11:00	0
2008-10-31	07:12:00	0
2008-10-31	07:13:00	0
2008-10-31	07:14:00	0
2008-10-31	07:15:00	0
2008-10-31	07:16:00	0
2008-10-31	07:17:00	0
2008-10-31	07:18:00	0
2008-10-31	07:19:00	0
2008-10-31	07:20:00	0
2008-10-31	07:21:00	0
2008-10-31	07:22:00	0
2008-10-31	07:23:00	0
2008-10-31	07:24:00	0
2008-10-31	07:25:00	0
2008-10-31	07:26:00	0
2008-10-31	07:27:00	0
2008-10-31	07:28:00	0
2008-10-31	07:29:00	0
2008-10-31	07:30:00	0
2008-10-31	07:31:00	0
2008-10-31	07:32:00	0
2008-10-31	07:33:00	0
2008-10-31	07:34:00	0
2008-10-31	07:35:00	0
2008-10-31	07:36:00	0
2008-10-31	07:37:00	0
2008-10-31	07:38:00	0
2008-10-31	07:39:00	0
2008-10-31	07:40:00	0
2008-10-31	07:41:00	0
2008-10-31	07:42:00	0
2008-10-31	07:43:00	0
2008-10-31	07:44:00	0
2008-10-31	07:45:00	0
2008-10-31	07:46:00	0
2008-10-31	07:47:00	0
2008-10-31	07:48:00	0
2008-10-31	07:49:00	0
2008-10-31	07:50:00	0
2008-10-31	07:51:00	0
2008-10-31	07:52:00	0
2008-10-31	07:53:00	0
2008-10-31	07:54:00	0
2008-10-31	07:55:00	0
2008-10-31	07:56:00	0
2008-10-31	07:57:00	0
2008-10-31	07:58:00	0
2008-10-31	07:59:00	0
2008-10-31	08:00:00	0
2008-10-31	08:01:00	0
2008-10-31	08:02:00	0
2008-10-31	08:03:00	0
2008-10-31	08:04:00	0
2008-10-31	08:05:00	0
2008-10-31	08:06:00	0
2008-10-31	08:07:00	0
2008-10-31	08:08:00	0
2008-10-31	08:09:00	0
2008-10-31	08:10:00	0
2008-10-31	08:11:00	0
2008-10-31	08:12:00	0
2008-10-31	08:13:00	0
2008-10-31	08:14:00	0
2008-10-31	08:15:00	0
2008-10-31	08:16:00	0
2008-10-31	08:17:00	0
2008-10-31	08:18:00	0
2008-10-31	08:19:00	0
2008-10-31	08:20:00	0
2008-10-31	08:21:00	0
2008-10-31	08:22:00	0
2008-10-31	08:23:00	0
2008-10-31	08:24:00	0
2008-10-31	08:25:00	0
2008-10-31	08:26:00	0
2008-10-31	08:27:00	0
2008-10-31	08:28:00	0
2008-10-31	08:29:00	0
2008-10-31	08:30:00	0
2008-10-31	08:31:00	0
2008-10-31	08:32:00	0
2008-10-31	08:33:00	0
2008-10-31	08:34:00	0
2008-10-31	08:35:00	0
2008-10-31	08:36:00	0
2008-10-31	08:37:00	0
2008-10-31	08:38:00	0
2008-10-31	08:39:00	0
2008-10-31	08:40:00	0
2008-10-31	08:41:00	0
2008-10-31	08:42:00	0
2008-10-31	08:43:00	0
2008-10-31	08:44:00	0
2008-10-31	08:45:00	0
2008-10-31	08:46:00	0
2008-10-31	08:47:00	0
2008-10-31	08:48:00	0
2008-10-31	08:49:00	0
2008-10-31	08:50:00	0
2008-10-31	08:51:00	0
2008-10-31	08:52:00	0
2008-10-31	08:53:00	0
2008-10-31	08:54:00	0
2008-10-31	08:55:00	0
2008-10-31	08:56:00	0
2008-10-31	08:57:00	0
2008-10-31	08:58:00	0
2008-10-31	08:59:00	0
2008-10-31	09:00:00	0
2008-10-31	09:01:00	0
2008-10-31	09:02:00	0
2008-10-31	09:03:00	0
2008-10-31	09:04:00	0
2008-10-31	09:05:00	0
2008-10-31	09:06:00	0
2008-10-31	09:07:00	0
2008-10-31	09:08:00	0
2008-10-31	09:09:00	0
2008-10-31	09:10:00	0
2008-10-31	09:11:00	0
2008-10-31	09:12:00	0
2008-10-31	09:13:00	0
2008-10-31	09:14:00	0
2008-10-31	09:15:00	0
2008-10-31	09:16:00	0
2008-10-31	09:17:00	0
2008-10-31	09:18:00	0
2008-10-31	09:19:00	0
2008-10-31	09:20:00	0
2008-10-31	09:21:00	0
2008-10-31	09:22:00	0
2008-10-31	09:23:00	0
2008-10-31	09:24:00	0
2008-10-31	09:25:00	0
2008-10-31	09:26:00	0
2008-10-31	09:27:00	0
2008-10-31	09:28:00	0
2008-10-31	09:29:00	0
2008-10-31	09:30:00	0
2008-10-31	09:31:00	0
2008-10-31	09:32:00	0
2008-10-31	09:33:00	0
2008-10-31	09:34:00	0
2008-10-31	09:35:00	0
2008-10-31	09:36:00	0
2008-10-31	09:37:00	0
2008-10-31	09:38:00	0
2008-10-31	09:39:00	0
2008-10-31	09:40:00	0
2008-10-31	09:41:00	0
2008-10-31	09:42:00	0
2008-10-31	09:43:00	0
2008-10-31	09:44:00	0
2008-10-31	09:45:00	0
2008-10-31	09:46:00	0
2008-10-31	09:47:00	0
2008-10-31	09:48:00	0
2008-10-31	09:49:00	0
2008-10-31	09:50:00	0
2008-10-31	09:51:00	0
2008-10-31	09:52:00	0
2008-10-31	09:53:00	0
2008-10-31	09:54:00	0
2008-10-31	09:55:00	0
2008-10-31	09:56:00	0
2008-10-31	09:57:00	0
2008-10-31	09:58:00	0
2008-10-31	09:59:00	0
2008-10-31	10:00:00	0
2008-10-31	10:01:00	0
2008-10-31	10:02:00	0
2008-10-31	10:03:00	0
2008-10-31	10:04:00	0
2008-10-31	10:05:00	0
2008-10-31	10:06:00	0
2008-10-31	10:07:00	0
2008-10-31	10:08:00	0
2008-10-31	10:09:00	0
2008-10-31	10:10:00	0
2008-10-31	10:11:00	0
2008-10-31	10:12:00	0
2008-10-31	10:13:00	0
2008-10-31	10:14:00	0
2008-10-31	10:15:00	0
2008-10-31	10:16:00	0
2008-10-31	10:17:00	0
2008-10-31	10:18:00	0
2008-10-31	10:19:00	0
2008-10-31	10:20:00	0
2008-10-31	10:21:00	0
2008-10-31	10:22:00	0
2008-10-31	10:23:00	0
2008-10-31	10:24:00	0
2008-10-31	10:25:00	0
2008-10-31	10:26:00	0
2008-10-31	10:27:00	0
2008-10-31	10:28:00	0
2008-10-31	10:29:00	0
2008-10-31	10:30:00	0
2008-10-31	10:31:00	0
2008-10-31	10:32:00	0
2008-10-31	10:33:00	0
2008-10-31	10:34:00	0
2008-10-31	10:35:00	0
2008-10-31	10:36:00	0
2008-10-31	10:37:00	0
2008-10-31	10:38:00	0
2008-10-31	10:39:00	0
2008-10-31	10:40:00	0
2008-10-31	10:41:00	0
2008-10-31	10:42:00	0
2008-10-31	10:43:00	0
2008-10-31	10:44:00	0
2008-10-31	10:45:00	0
2008-10-31	10:46:00	0
2008-10-31	10:47:00	0
2008-10-31	10:48:00	0
2008-10-31	10:49:00	0
2008-10-31	10:50:00	0
2008-10-31	10:51:00	0
2008-10-31	10:52:00	0
2008-10-31	10:53:00	0
2008-10-31	10:54:00	0
2008-10-31	10:55:00	0
2008-10-31	10:56:00	0
2008-10-31	10:57:00	0
2008-10-31	10:58:00	0
2008-10-31	10:59:00	0
2008-10-31	11:00:00	0
2008-10-31	11:01:00	0
2008-10-31	11:02:00	0
2008-10-31	11:03:00	0
2008-10-31	11:04:00	0
2008-10-31	11:05:00	0
2008-10-31	11:06:00	0
2008-10-31	11:07:00	0
2008-10-31	11:08:00	0
2008-10-31	11:09:00	0
2008-10-31	11:10:00	0
2008-10-31	11:11:00	0
2008-10-31	11:12:00	0
2008-10-31	11:13:00	0
2008-10-31	11:14:00	0
2008-10-31	11:15:00	0
2008-10-31	11:16:00	0
2008-10-31	11:17:00	0
2008-10-31	11:18:00	0
2008-10-31	11:19:00	0
2008-10-31	11:20:00	0
2008-10-31	11:21:00	0
2008-10-31	11:22:00	0
2008-10-31	11:23:00	0
2008-10-31	11:24:00	0
2008-10-31	11:25:00	0
2008-10-31	11:26:00	0
2008-10-31	11:27:00	0
2008-10-31	11:28:00	0
2008-10-31	11:29:00	0
2008-10-31	11:30:00	0
2008-10-31	11:31:00	0
2008-10-31	11:32:00	0
2008-10-31	11:33:00	0
2008-10-31	11:34:00	0
2008-10-31	11:35:00	0
2008-10-31	11:36:00	0
2008-10-31	11:37:00	0
2008-10-31	11:38:00	0
2008-10-31	11:39:00	0
2008-10-31	11:40:00	0
2008-10-31	11:41:00	0
2008-10-31	11:42:00	0
2008-10-31	11:43:00	0
2008-10-31	11:44:00	0
2008-10-31	11:45:00	0
2008-10-31	11:46:00	0
2008-10-31	11:47:00	0
2008-10-31	11:48:00	0
2008-10-31	11:49:00	0
2008-10-31	11:50:00	0
2008-10-31	11:51:00	0
2008-10-31	11:52:00	0
2008-10-31	11:53:00	0
2008-10-31	11:54:00	0
2008-10-31	11:55:00	0
2008-10-31	11:56:00	0
2008-10-31	11:57:00	0
2008-10-31	11:58:00	0
2008-10-31	11:59:00	0
2008-10-31	12:00:00	0
2008-10-31	12:01:00	0
2008-10-31	12:02:00	0
2008-10-31	12:03:00	0
2008-10-31	12:04:00	0
2008-10-31	12:05:00	0
2008-10-31	12:06:00	0
2008-10-31	12:07:00	0
2008-10-31	12:08:00	0
2008-10-31	12:09:00	0
2008-10-31	12:10:00	0
2008-10-31	12:11:00	0
2008-10-31	12:12:00	0
2008-10-31	12:13:00	0
2008-10-31	12:14:00	0
2008-10-31	12:15:00	0
2008-10-31	12:16:00	0
2008-10-31	12:17:00	0
2008-10-31	12:18:00	0
2008-10-31	12:19:00	0
2008-10-31	12:20:00	0
2008-10-31	12:21:00	0
2008-10-31	12:22:00	0
2008-10-31	12:23:00	0
2008-10-31	12:24:00	0
2008-10-31	12:25:00	0
2008-10-31	12:26:00	0
2008-10-31	12:27:00	0
2008-10-31	12:28:00	0
2008-10-31	12:29:00	0
2008-10-31	12:30:00	0
2008-10-31	12:31:00	0
2008-10-31	12:32:00	0
2008-10-31	12:33:00	0
2008-10-31	12:34:00	0
2008-10-31	12:35:00	0
2008-10-31	12:36:00	0
2008-10-31	12:37:00	0
2008-10-31	12:38:00	0
2008-10-31	12:39:00	0
2008-10-31	12:40:00	0
2008-10-31	12:41:00	0
2008-10-31	12:42:00	0
2008-10-31	12:43:00	0
2008-10-31	12:44:00	0
2008-10-31	12:45:00	0
2008-10-31	12:46:00	0
2008-10-31	12:47:00	0
2008-10-31	12:48:00	0
2008-10-31	12:49:00	0
2008-10-31	12:50:00	0
2008-10-31	12:51:00	0
2008-10-31	12:52:00	0
2008-10-31	12:53:00	0
2008-10-31	12:54:00	0
2008-10-31	12:55:00	0
2008-10-31	12:56:00	0
2008-10-31	12:57:00	0
2008-10-31	12:58:00	0
2008-10-31	12:59:00	0
2008-10-31	13:00:00	0
2008-10-31	13:01:00	0
2008-10-31	13:02:00	0
2008-10-31	13:03:00	0
2008-10-31	13:04:00	0
2008-10-31	13:05:00	0
2008-10-31	13:06:00	0
2008-10-31	13:07:00	0
2008-10-31	13:08:00	0
2008-10-31	13:09:00	0
2008-10-31	13:10:00	0
2008-10-31	13:11:00	0
2008-10-31	13:12:00	0
2008-10-31	13:13:00	0
2008-10-31	13:14:00	0
2008-10-31	13:15:00	0
2008-10-31	13:16:00	0
2008-10-31	13:17:00	0
2008-10-31	13:18:00	0
2008-10-31	13:19:00	0
2008-10-31	13:20:00	0
2008-10-31	13:21:00	0
2008-10-31	13:22:00	0
2008-10-31	13:23:00	0
2008-10-31	13:24:00	0
2008-10-31	13:25:00	0
2008-10-31	13:26:00	0
2008-10-31	13:27:00	0
2008-10-31	13:28:00	0
2008-10-31	13:29:00	0
2008-10-31	13:30:00	0
2008-10-31	13:31:00	0
2008-10-31	13:32:00	0
2008-10-31	13:33:00	0
2008-10-31	13:34:00	0
2008-10-31	13:35:00	0
2008-10-31	13:36:00	0
2008-10-31	13:37:00	0
2008-10-31	13:38:00	0
2008-10-31	13:39:00	0
2008-10-31	13:40:00	0
2008-10-31	13:41:00	0
2008-10-31	13:42:00	0
2008-10-31	13:43:00	0
2008-10-31	13:44:00	0
2008-10-31	13:45:00	0
2008-10-31	13:46:00	0
2008-10-31	13:47:00	0
2008-10-31	13:48:00	0
2008-10-31	13:49:00	0
2008-10-31	13:50:00	0
2008-10-31	13:51:00	0
2008-10-31	13:52:00	0
2008-10-31	13:53:00	0
2008-10-31	13:54:00	0
2008-10-31	13:55:00	0
2008-10-31	13:56:00	0
2008-10-31	13:57:00	0
2008-10-31	13:58:00	0
2008-10-31	13:59:00	0
2008-10-31	14:00:00	0
2008-10-31	14:01:00	0
2008-10-31	14:02:00	0
2008-10-31	14:03:00	0
2008-10-31	14:04:00	0
2008-10-31	14:05:00	0
2008-10-31	14:06:00	0
2008-10-31	14:07:00	0
2008-10-31	14:08:00	0
2008-10-31	14:09:00	0
2008-10-31	14:10:00	0
2008-10-31	14:11:00	0
2008-10-31	14:12:00	0
2008-10-31	14:13:00	0
2008-10-31	14:14:00	0
2008-10-31	14:15:00	0
2008-10-31	14:16:00	0
2008-10-31	14:17:00	0
2008-10-31	14:18:00	0
2008-10-31	14:19:00	0
2008-10-31	14:20:00	0
2008-10-31	14:21:00	0
2008-10-31	14:22:00	0
2008-10-31	14:23:00	0
2008-10-31	14:24:00	0
2008-10-31	14:25:00	0
2008-10-31	14:26:00	0
2008-10-31	14:27:00	0
2008-10-31	14:28:00	0
2008-10-31	14:29:00	0
2008-10-31	14:30:00	0
2008-10-31	14:31:00	0
2008-10-31	14:32:00	0
2008-10-31	14:33:00	0
2008-10-31	14:34:00	0
2008-10-31	14:35:00	0
2008-10-31	14:36:00	0
2008-10-31	14:37:00	0
2008-10-31	14:38:00	0
2008-10-31	14:39:00	0
2008-10-31	14:40:00	0
2008-10-31	14:41:00	0
2008-10-31	14:42:00	0
2008-10-31	14:43:00	0
2008-10-31	14:44:00	0
2008-10-31	14:45:00	0
2008-10-31	14:46:00	0
2008-10-31	14:47:00	0
2008-10-31	14:48:00	0
2008-10-31	14:49:00	0
2008-10-31	14:50:00	0
2008-10-31	14:51:00	0
2008-10-31	14:52:00	0
2008-10-31	14:53:00	0
2008-10-31	14:54:00	0
2008-10-31	14:55:00	0
2008-10-31	14:56:00	0
2008-10-31	14:57:00	0
2008-10-31	14:58:00	0
2008-10-31	14:59:00	0
2008-10-31	15:00:00	0
2008-10-31	15:01:00	0
2008-10-31	15:02:00	0
2008-10-31	15:03:00	0
2008-10-31	15:04:00	0
2008-10-31	15:05:00	0
2008-10-31	15:06:00	0
2008-10-31	15:07:00	0
2008-10-31	15:08:00	0
2008-10-31	15:09:00	0
2008-10-31	15:10:00	0
2008-10-31	15:11:00	0
2008-10-31	15:12:00	0
2008-10-31	15:13:00	0
2008-10-31	15:14:00	0
2008-10-31	15:15:00	0
2008-10-31	15:16:00	0
2008-10-31	15:17:00	0
2008-10-31	15:18:00	0
2008-10-31	15:19:00	0
2008-10-31	15:20:00	0
2008-10-31	15:21:00	0
2008-10-31	15:22:00	0
2008-10-31	15:23:00	0
2008-10-31	15:24:00	0
2008-10-31	15:25:00	0
2008-10-31	15:26:00	0
2008-10-31	15:27:00	0
2008-10-31	15:28:00	0
2008-10-31	15:29:00	0
2008-10-31	15:30:00	0
2008-10-31	15:31:00	0
2008-10-31	15:32:00	0
2008-10-31	15:33:00	0
2008-10-31	15:34:00	0
2008-10-31	15:35:00	0
2008-10-31	15:36:00	0
2008-10-31	15:37:00	0
2008-10-31	15:38:00	0
2008-10-31	15:39:00	0
2008-10-31	15:40:00	0
2008-10-31	15:41:00	0
2008-10-31	15:42:00	0
2008-10-31	15:43:00	0
2008-10-31	15:44:00	0
2008-10-31	15:45:00	0
2008-10-31	15:46:00	0
2008-10-31	15:47:00	0
2008-10-31	15:48:00	0
2008-10-31	15:49:00	0
2008-10-31	15:50:00	0
2008-10-31	15:51:00	0
2008-10-31	15:52:00	0
2008-10-31	15:53:00	0
2008-10-31	15:54:00	0
2008-10-31	15:55:00	0
2008-10-31	15:56:00	0
2008-10-31	15:57:00	0
2008-10-31	15:58:00	0
2008-10-31	15:59:00	0
2008-10-31	16:00:00	0
2008-10-31	16:01:00	0
2008-10-31	16:02:00	0
2008-10-31	16:03:00	0
2008-10-31	16:04:00	0
2008-10-31	16:05:00	0
2008-10-31	16:06:00	0
2008-10-31	16:07:00	0
2008-10-31	16:08:00	0
2008-10-31	16:09:00	0
2008-10-31	16:10:00	0
2008-10-31	16:11:00	0
2008-10-31	16:12:00	0
2008-10-31	16:13:00	0
2008-10-31	16:14:00	0
2008-10-31	16:15:00	0
2008-10-31	16:16:00	0
2008-10-31	16:17:00	0
2008-10-31	16:18:00	0
2008-10-31	16:19:00	0
2008-10-31	16:20:00	0
2008-10-31	16:21:00	0
2008-10-31	16:22:00	0
2008-10-31	16:23:00	0
2008-10-31	16:24:00	0
2008-10-31	16:25:00	0
2008-10-31	16:26:00	0
2008-10-31	16:27:00	0
2008-10-31	16:28:00	0
2008-10-31	16:29:00	0
2008-10-31	16:30:00	0
2008-10-31	16:31:00	0
2008-10-31	16:32:00	0
2008-10-31	16:33:00	0
2008-10-31	16:34:00	0
2008-10-31	16:35:00	0
2008-10-31	16:36:00	0
2008-10-31	16:37:00	0
2008-10-31	16:38:00	0
2008-10-31	16:39:00	0
2008-10-31	16:40:00	0
2008-10-31	16:41:00	0
2008-10-31	16:42:00	0
2008-10-31	16:43:00	0
2008-10-31	16:44:00	0
2008-10-31	16:45:00	0
2008-10-31	16:46:00	0
2008-10-31	16:47:00	0
2008-10-31	16:48:00	0
2008-10-31	16:49:00	0
2008-10-31	16:50:00	0
2008-10-31	16:51:00	0
2008-10-31	16:52:00	0
2008-10-31	16:53:00	0
2008-10-31	16:54:00	0
2008-10-31	16:55:00	0
2008-10-31	16:56:00	0
2008-10-31	16:57:00	0
2008-10-31	16:58:00	0
2008-10-31	16:59:00	0
2008-10-31	17:00:00	0	M
2008-10-31	17:01:00	2020
2008-10-31	17:02:00	1479
2008-10-31	17:03:00	2274
2008-10-31	17:04:00	2229
2008-10-31	17:05:00	693
2008-10-31	17:06:00	122
2008-10-31	17:07:00	71
2008-10-31	17:08:00	122
2008-10-31	17:09:00	81
2008-10-31	17:10:00	0
2008-10-31	17:11:00	0
2008-10-31	17:12:00	217
2008-10-31	17:13:00	41
2008-10-31	17:14:00	10
2008-10-31	17:15:00	156
2008-10-31	17:16:00	30
2008-10-31	17:17:00	41
2008-10-31	17:18:00	102
2008-10-31	17:19:00	144
2008-10-31	17:20:00	427
2008-10-31	17:21:00	156
2008-10-31	17:22:00	156
2008-10-31	17:23:00	102
2008-10-31	17:24:00	51
2008-10-31	17:25:00	10
2008-10-31	17:26:00	10
2008-10-31	17:27:00	122
2008-10-31	17:28:00	41
2008-10-31	17:29:00	132
2008-10-31	17:30:00	30
2008-10-31	17:31:00	20
2008-10-31	17:32:00	51
2008-10-31	17:33:00	71
2008-10-31	17:34:00	144
2008-10-31	17:35:00	427
2008-10-31	17:36:00	1715
2008-10-31	17:37:00	4035
2008-10-31	17:38:00	7365
2008-10-31	17:39:00	5524
2008-10-31	17:40:00	2911
2008-10-31	17:41:00	2456
2008-10-31	17:42:00	3135
2008-10-31	17:43:00	2020
2008-10-31	17:44:00	2911
2008-10-31	17:45:00	3499
2008-10-31	17:46:00	3627
2008-10-31	17:47:00	2186
2008-10-31	17:48:00	2020
2008-10-31	17:49:00	3314
2008-10-31	17:50:00	2363
2008-10-31	17:51:00	3078
2008-10-31	17:52:00	2601
2008-10-31	17:53:00	2753
2008-10-31	17:54:00	3562
2008-10-31	17:55:00	3021
2008-10-31	17:56:00	2186
2008-10-31	17:57:00	3499
2008-10-31	17:58:00	524
2008-10-31	17:59:00	3436
2008-10-31	18:00:00	3499
2008-10-31	18:01:00	2363
2008-10-31	18:02:00	3562
2008-10-31	18:03:00	3135
2008-10-31	18:04:00	3135
2008-10-31	18:05:00	2966
2008-10-31	18:06:00	2702
2008-10-31	18:07:00	2552
2008-10-31	18:08:00	1680
2008-10-31	18:09:00	2552
2008-10-31	18:10:00	3964
2008-10-31	18:11:00	3826
2008-10-31	18:12:00	1355
2008-10-31	18:13:00	2753
2008-10-31	18:14:00	4332
2008-10-31	18:15:00	2966
2008-10-31	18:16:00	1825
2008-10-31	18:17:00	1544
2008-10-31	18:18:00	1479
2008-10-31	18:19:00	1130
2008-10-31	18:20:00	1386
2008-10-31	18:21:00	1788
2008-10-31	18:22:00	3078
2008-10-31	18:23:00	2143
2008-10-31	18:24:00	1715
2008-10-31	18:25:00	2702
2008-10-31	18:26:00	2753
2008-10-31	18:27:00	1940
2008-10-31	18:28:00	1416
2008-10-31	18:29:00	2753
2008-10-31	18:30:00	1902
2008-10-31	18:31:00	1863
2008-10-31	18:32:00	1902
2008-10-31	18:33:00	673
2008-10-31	18:34:00	61
2008-10-31	18:35:00	102
2008-10-31	18:36:00	1211
2008-10-31	18:37:00	1512
2008-10-31	18:38:00	1325
2008-10-31	18:39:00	542
2008-10-31	18:40:00	542
2008-10-31	18:41:00	0
2008-10-31	18:42:00	0
2008-10-31	18:43:00	0
2008-10-31	18:44:00	0
2008-10-31	18:45:00	0
2008-10-31	18:46:00	10
2008-10-31	18:47:00	91
2008-10-31	18:48:00	0
2008-10-31	18:49:00	0
2008-10-31	18:50:00	242
2008-10-31	18:51:00	280
2008-10-31	18:52:00	0
2008-10-31	18:53:00	0
2008-10-31	18:54:00	0
2008-10-31	18:55:00	181
2008-10-31	18:56:00	366
2008-10-31	18:57:00	410
2008-10-31	18:58:00	295
2008-10-31	18:59:00	0
2008-10-31	19:00:00	0
2008-10-31	19:01:00	0
2008-10-31	19:02:00	0
2008-10-31	19:03:00	0
2008-10-31	19:04:00	0
2008-10-31	19:05:00	10
2008-10-31	19:06:00	30
2008-10-31	19:07:00	20
2008-10-31	19:08:00	0
2008-10-31	19:09:00	492
2008-10-31	19:10:00	733
2008-10-31	19:11:00	1103
2008-10-31	19:12:00	1788
2008-10-31	19:13:00	1544
2008-10-31	19:14:00	1077
2008-10-31	19:15:00	616
2008-10-31	19:16:00	309
2008-10-31	19:17:00	713
2008-10-31	19:18:00	673
2008-10-31	19:19:00	1211
2008-10-31	19:20:00	1325
2008-10-31	19:21:00	1325
2008-10-31	19:22:00	733
2008-10-31	19:23:00	817
2008-10-31	19:24:00	10
2008-10-31	19:25:00	10
2008-10-31	19:26:00	0
2008-10-31	19:27:00	20
2008-10-31	19:28:00	394
2008-10-31	19:29:00	1050
2008-10-31	19:30:00	1788
2008-10-31	19:31:00	616
2008-10-31	19:32:00	81
2008-10-31	19:33:00	30
2008-10-31	19:34:00	10
2008-10-31	19:35:00	0
2008-10-31	19:36:00	906
2008-10-31	19:37:00	713
2008-10-31	19:38:00	616
2008-10-31	19:39:00	861
2008-10-31	19:40:00	1182
2008-10-31	19:41:00	861
2008-10-31	19:42:00	713
2008-10-31	19:43:00	774
2008-10-31	19:44:00	254
2008-10-31	19:45:00	1156
2008-10-31	19:46:00	713
2008-10-31	19:47:00	380
2008-10-31	19:48:00	309
2008-10-31	19:49:00	977
2008-10-31	19:50:00	524
2008-10-31	19:51:00	1002
2008-10-31	19:52:00	309
2008-10-31	19:53:00	774
2008-10-31	19:54:00	1325
2008-10-31	19:55:00	1002
2008-10-31	19:56:00	1447
2008-10-31	19:57:00	977
2008-10-31	19:58:00	1077
2008-10-31	19:59:00	10
2008-10-31	20:00:00	475
2008-10-31	20:01:00	295
2008-10-31	20:02:00	337
2008-10-31	20:03:00	0
2008-10-31	20:04:00	0
2008-10-31	20:05:00	0
2008-10-31	20:06:00	443
2008-10-31	20:07:00	205
2008-10-31	20:08:00	10
2008-10-31	20:09:00	0
2008-10-31	20:10:00	71
2008-10-31	20:11:00	30
2008-10-31	20:12:00	144
2008-10-31	20:13:00	652
2008-10-31	20:14:00	71
2008-10-31	20:15:00	181
2008-10-31	20:16:00	693
2008-10-31	20:17:00	977
2008-10-31	20:18:00	443
2008-10-31	20:19:00	884
2008-10-31	20:20:00	91
2008-10-31	20:21:00	144
2008-10-31	20:22:00	20
2008-10-31	20:23:00	0
2008-10-31	20:24:00	351
2008-10-31	20:25:00	280
2008-10-31	20:26:00	0
2008-10-31	20:27:00	41
2008-10-31	20:28:00	579
2008-10-31	20:29:00	394
2008-10-31	20:30:00	112
2008-10-31	20:31:00	754
2008-10-31	20:32:00	230
2008-10-31	20:33:00	295
2008-10-31	20:34:00	280
2008-10-31	20:35:00	1026
2008-10-31	20:36:00	1050
2008-10-31	20:37:00	561
2008-10-31	20:38:00	953
2008-10-31	20:39:00	10
2008-10-31	20:40:00	0
2008-10-31	20:41:00	30
2008-10-31	20:42:00	10
2008-10-31	20:43:00	0
2008-10-31	20:44:00	193
2008-10-31	20:45:00	91
2008-10-31	20:46:00	0
2008-10-31	20:47:00	673
2008-10-31	20:48:00	205
2008-10-31	20:49:00	61
2008-10-31	20:50:00	492
2008-10-31	20:51:00	351
2008-10-31	20:52:00	122
2008-10-31	20:53:00	10
2008-10-31	20:54:00	20
2008-10-31	20:55:00	634
2008-10-31	20:56:00	524
2008-10-31	20:57:00	10
2008-10-31	20:58:00	0
2008-10-31	20:59:00	0
2008-10-31	21:00:00	410
2008-10-31	21:01:00	20
2008-10-31	21:02:00	0
2008-10-31	21:03:00	351
2008-10-31	21:04:00	561
2008-10-31	21:05:00	323
2008-10-31	21:06:00	0
2008-10-31	21:07:00	0
2008-10-31	21:08:00	0
2008-10-31	21:09:00	0
2008-10-31	21:10:00	0
2008-10-31	21:11:00	0
2008-10-31	21:12:00	10
2008-10-31	21:13:00	0
2008-10-31	21:14:00	0
2008-10-31	21:15:00	10
2008-10-31	21:16:00	0
2008-10-31	21:17:00	20
2008-10-31	21:18:00	242
2008-10-31	21:19:00	861
2008-10-31	21:20:00	906
2008-10-31	21:21:00	102
2008-10-31	21:22:00	542
2008-10-31	21:23:00	929
2008-10-31	21:24:00	337
2008-10-31	21:25:00	0
2008-10-31	21:26:00	459
2008-10-31	21:27:00	112
2008-10-31	21:28:00	41
2008-10-31	21:29:00	10
2008-10-31	21:30:00	524
2008-10-31	21:31:00	169
2008-10-31	21:32:00	0
2008-10-31	21:33:00	0
2008-10-31	21:34:00	0
2008-10-31	21:35:00	0
2008-10-31	21:36:00	30
2008-10-31	21:37:00	81
2008-10-31	21:38:00	71
2008-10-31	21:39:00	30
2008-10-31	21:40:00	181
2008-10-31	21:41:00	634
2008-10-31	21:42:00	1268
2008-10-31	21:43:00	884
2008-10-31	21:44:00	794
2008-10-31	21:45:00	309
2008-10-31	21:46:00	0
2008-10-31	21:47:00	0
2008-10-31	21:48:00	309
2008-10-31	21:49:00	0
2008-10-31	21:50:00	1211
2008-10-31	21:51:00	524
2008-10-31	21:52:00	524
2008-10-31	21:53:00	1026
2008-10-31	21:54:00	524
2008-10-31	21:55:00	0
2008-10-31	21:56:00	0
2008-10-31	21:57:00	0
2008-10-31	21:58:00	0
2008-10-31	21:59:00	10
2008-10-31	22:00:00	309
2008-10-31	22:01:00	266
2008-10-31	22:02:00	205
2008-10-31	22:03:00	112
2008-10-31	22:04:00	132
2008-10-31	22:05:00	0
2008-10-31	22:06:00	0
2008-10-31	22:07:00	51
2008-10-31	22:08:00	561
2008-10-31	22:09:00	217
2008-10-31	22:10:00	0
2008-10-31	22:11:00	230
2008-10-31	22:12:00	337
2008-10-31	22:13:00	309
2008-10-31	22:14:00	112
2008-10-31	22:15:00	394
2008-10-31	22:16:00	794
2008-10-31	22:17:00	91
2008-10-31	22:18:00	794
2008-10-31	22:19:00	295
2008-10-31	22:20:00	380
2008-10-31	22:21:00	10
2008-10-31	22:22:00	693
2008-10-31	22:23:00	652
2008-10-31	22:24:00	754
2008-10-31	22:25:00	122
2008-10-31	22:26:00	0
2008-10-31	22:27:00	0
2008-10-31	22:28:00	0
2008-10-31	22:29:00	10
2008-10-31	22:30:00	0
2008-10-31	22:31:00	30
2008-10-31	22:32:00	30
2008-10-31	22:33:00	0
2008-10-31	22:34:00	0
2008-10-31	22:35:00	20
2008-10-31	22:36:00	30
2008-10-31	22:37:00	10
2008-10-31	22:38:00	410
2008-10-31	22:39:00	713
2008-10-31	22:40:00	754
2008-10-31	22:41:00	561
2008-10-31	22:42:00	71
2008-10-31	22:43:00	41
2008-10-31	22:44:00	10
2008-10-31	22:45:00	20
2008-10-31	22:46:00	280
2008-10-31	22:47:00	0
2008-10-31	22:48:00	0
2008-10-31	22:49:00	20
2008-10-31	22:50:00	0
2008-10-31	22:51:00	205
2008-10-31	22:52:00	884
2008-10-31	22:53:00	953
2008-10-31	22:54:00	579
2008-10-31	22:55:00	1182
2008-10-31	22:56:00	1050
2008-10-31	22:57:00	929
2008-10-31	22:58:00	41
2008-10-31	22:59:00	0
2008-10-31	23:00:00	0
2008-10-31	23:01:00	20
2008-10-31	23:02:00	30
2008-10-31	23:03:00	0
2008-10-31	23:04:00	0
2008-10-31	23:05:00	0
2008-10-31	23:06:00	1680
2008-10-31	23:07:00	713
2008-10-31	23:08:00	309
2008-10-31	23:09:00	193
2008-10-31	23:10:00	524
2008-10-31	23:11:00	10
2008-10-31	23:12:00	0
2008-10-31	23:13:00	20
2008-10-31	23:14:00	30
2008-10-31	23:15:00	0
2008-10-31	23:16:00	20
2008-10-31	23:17:00	0
2008-10-31	23:18:00	10
2008-10-31	23:19:00	597
2008-10-31	23:20:00	351
2008-10-31	23:21:00	0
2008-10-31	23:22:00	10
2008-10-31	23:23:00	0
2008-10-31	23:24:00	0
2008-10-31	23:25:00	10
2008-10-31	23:26:00	351
2008-10-31	23:27:00	10
2008-10-31	23:28:00	0
2008-10-31	23:29:00	0
2008-10-31	23:30:00	41
2008-10-31	23:31:00	71
2008-10-31	23:32:00	20
2008-10-31	23:33:00	10
2008-10-31	23:34:00	0
2008-10-31	23:35:00	0
2008-10-31	23:36:00	0
2008-10-31	23:37:00	295
2008-10-31	23:38:00	0
2008-10-31	23:39:00	10
2008-10-31	23:40:00	561
2008-10-31	23:41:00	10
2008-10-31	23:42:00	0
2008-10-31	23:43:00	0
2008-10-31	23:44:00	0
2008-10-31	23:45:00	10
2008-10-31	23:46:00	0
2008-10-31	23:47:00	20
2008-10-31	23:48:00	71
2008-10-31	23:49:00	41
2008-10-31	23:50:00	10
2008-10-31	23:51:00	10
2008-10-31	23:52:00	0
2008-10-31	23:53:00	10
2008-10-31	23:54:00	10
2008-10-31	23:55:00	0
2008-10-31	23:56:00	0
2008-10-31	23:57:00	0
2008-10-31	23:58:00	61
2008-10-31	23:59:00	0
2008-11-01	00:00:00	0
2008-11-01	00:01:00	0
2008-11-01	00:02:00	91
2008-11-01	00:03:00	10
2008-11-01	00:04:00	0
2008-11-01	00:05:00	0
2008-11-01	00:06:00	0
2008-11-01	00:07:00	10
2008-11-01	00:08:00	0
2008-11-01	00:09:00	0
2008-11-01	00:10:00	61
2008-11-01	00:11:00	30
2008-11-01	00:12:00	0
2008-11-01	00:13:00	181
2008-11-01	00:14:00	0
2008-11-01	00:15:00	0
2008-11-01	00:16:00	0
2008-11-01	00:17:00	181
2008-11-01	00:18:00	0
2008-11-01	00:19:00	0
2008-11-01	00:20:00	0
2008-11-01	00:21:00	0
2008-11-01	00:22:00	0
2008-11-01	00:23:00	10
2008-11-01	00:24:00	323
2008-11-01	00:25:00	542
2008-11-01	00:26:00	20
2008-11-01	00:27:00	0
2008-11-01	00:28:00	0
2008-11-01	00:29:00	10
2008-11-01	00:30:00	0
2008-11-01	00:31:00	0
2008-11-01	00:32:00	0
2008-11-01	00:33:00	0
2008-11-01	00:34:00	0
2008-11-01	00:35:00	0
2008-11-01	00:36:00	0
2008-11-01	00:37:00	0
2008-11-01	00:38:00	0
2008-11-01	00:39:00	0
2008-11-01	00:40:00	0
2008-11-01	00:41:00	51
2008-11-01	00:42:00	0
2008-11-01	00:43:00	0
2008-11-01	00:44:00	0
2008-11-01	00:45:00	0
2008-11-01	00:46:00	0
2008-11-01	00:47:00	0
2008-11-01	00:48:00	0
2008-11-01	00:49:00	0
2008-11-01	00:50:00	0
2008-11-01	00:51:00	0
2008-11-01	00:52:00	0
2008-11-01	00:53:00	0
2008-11-01	00:54:00	0
2008-11-01	00:55:00	0
2008-11-01	00:56:00	102
2008-11-01	00:57:00	1577
2008-11-01	00:58:00	733
2008-11-01	00:59:00	693
2008-11-01	01:00:00	41
2008-11-01	01:01:00	0
2008-11-01	01:02:00	0
2008-11-01	01:03:00	0
2008-11-01	01:04:00	0
2008-11-01	01:05:00	0
2008-11-01	01:06:00	427
2008-11-01	01:07:00	524
2008-11-01	01:08:00	51
2008-11-01	01:09:00	492
2008-11-01	01:10:00	122
2008-11-01	01:11:00	0
2008-11-01	01:12:00	0
2008-11-01	01:13:00	0
2008-11-01	01:14:00	0
2008-11-01	01:15:00	0
2008-11-01	01:16:00	0
2008-11-01	01:17:00	0
2008-11-01	01:18:00	0
2008-11-01	01:19:00	0
2008-11-01	01:20:00	0
2008-11-01	01:21:00	0
2008-11-01	01:22:00	0
2008-11-01	01:23:00	0
2008-11-01	01:24:00	0
2008-11-01	01:25:00	0
2008-11-01	01:26:00	0
2008-11-01	01:27:00	0
2008-11-01	01:28:00	0
2008-11-01	01:29:00	0
2008-11-01	01:30:00	0
2008-11-01	01:31:00	0
2008-11-01	01:32:00	0
2008-11-01	01:33:00	0
2008-11-01	01:34:00	144
2008-11-01	01:35:00	132
2008-11-01	01:36:00	10
2008-11-01	01:37:00	0
2008-11-01	01:38:00	0
2008-11-01	01:39:00	0
2008-11-01	01:40:00	0
2008-11-01	01:41:00	0
2008-11-01	01:42:00	0
2008-11-01	01:43:00	10
2008-11-01	01:44:00	0
2008-11-01	01:45:00	0
2008-11-01	01:46:00	10
2008-11-01	01:47:00	266
2008-11-01	01:48:00	977
2008-11-01	01:49:00	508
2008-11-01	01:50:00	492
2008-11-01	01:51:00	156
2008-11-01	01:52:00	193
2008-11-01	01:53:00	0
2008-11-01	01:54:00	0
2008-11-01	01:55:00	366
2008-11-01	01:56:00	351
2008-11-01	01:57:00	3314
2008-11-01	01:58:00	2020
2008-11-01	01:59:00	977
2008-11-01	02:00:00	1050
2008-11-01	02:01:00	1103
2008-11-01	02:02:00	1026
2008-11-01	02:03:00	774
2008-11-01	02:04:00	295
2008-11-01	02:05:00	309
2008-11-01	02:06:00	41
2008-11-01	02:07:00	20
2008-11-01	02:08:00	0
2008-11-01	02:09:00	10
2008-11-01	02:10:00	51
2008-11-01	02:11:00	410
2008-11-01	02:12:00	817
2008-11-01	02:13:00	1355
2008-11-01	02:14:00	475
2008-11-01	02:15:00	861
2008-11-01	02:16:00	280
2008-11-01	02:17:00	122
2008-11-01	02:18:00	30
2008-11-01	02:19:00	0
2008-11-01	02:20:00	61
2008-11-01	02:21:00	0
2008-11-01	02:22:00	0
2008-11-01	02:23:00	0
2008-11-01	02:24:00	0
2008-11-01	02:25:00	0
2008-11-01	02:26:00	0
2008-11-01	02:27:00	20
2008-11-01	02:28:00	20
2008-11-01	02:29:00	30
2008-11-01	02:30:00	61
2008-11-01	02:31:00	0
2008-11-01	02:32:00	41
2008-11-01	02:33:00	30
2008-11-01	02:34:00	10
2008-11-01	02:35:00	30
2008-11-01	02:36:00	0
2008-11-01	02:37:00	102
2008-11-01	02:38:00	0
2008-11-01	02:39:00	0
2008-11-01	02:40:00	0
2008-11-01	02:41:00	0
2008-11-01	02:42:00	0
2008-11-01	02:43:00	0
2008-11-01	02:44:00	0
2008-11-01	02:45:00	0
2008-11-01	02:46:00	20
2008-11-01	02:47:00	20
2008-11-01	02:48:00	0
2008-11-01	02:49:00	0
2008-11-01	02:50:00	0
2008-11-01	02:51:00	754
2008-11-01	02:52:00	713
2008-11-01	02:53:00	0
2008-11-01	02:54:00	156
2008-11-01	02:55:00	443
2008-11-01	02:56:00	217
2008-11-01	02:57:00	673
2008-11-01	02:58:00	380
2008-11-01	02:59:00	616
2008-11-01	03:00:00	20
2008-11-01	03:01:00	0
2008-11-01	03:02:00	181
2008-11-01	03:03:00	817
2008-11-01	03:04:00	508
2008-11-01	03:05:00	323
2008-11-01	03:06:00	112
2008-11-01	03:07:00	713
2008-11-01	03:08:00	929
2008-11-01	03:09:00	616
2008-11-01	03:10:00	0
2008-11-01	03:11:00	0
2008-11-01	03:12:00	0
2008-11-01	03:13:00	0
2008-11-01	03:14:00	0
2008-11-01	03:15:00	0
2008-11-01	03:16:00	0
2008-11-01	03:17:00	0
2008-11-01	03:18:00	0
2008-11-01	03:19:00	616
2008-11-01	03:20:00	597
2008-11-01	03:21:00	1077
2008-11-01	03:22:00	10
2008-11-01	03:23:00	0
2008-11-01	03:24:00	0
2008-11-01	03:25:00	0
2008-11-01	03:26:00	0
2008-11-01	03:27:00	0
2008-11-01	03:28:00	0
2008-11-01	03:29:00	0
2008-11-01	03:30:00	30
2008-11-01	03:31:00	0
2008-11-01	03:32:00	0
2008-11-01	03:33:00	0
2008-11-01	03:34:00	0
2008-11-01	03:35:00	0
2008-11-01	03:36:00	0
2008-11-01	03:37:00	0
2008-11-01	03:38:00	0
2008-11-01	03:39:00	0
2008-11-01	03:40:00	0
2008-11-01	03:41:00	0
2008-11-01	03:42:00	0
2008-11-01	03:43:00	10
2008-11-01	03:44:00	0
2008-11-01	03:45:00	0
2008-11-01	03:46:00	0
2008-11-01	03:47:00	0
2008-11-01	03:48:00	0
2008-11-01	03:49:00	0
2008-11-01	03:50:00	0
2008-11-01	03:51:00	0
2008-11-01	03:52:00	0
2008-11-01	03:53:00	30
2008-11-01	03:54:00	0
2008-11-01	03:55:00	0
2008-11-01	03:56:00	0
2008-11-01	03:57:00	0
2008-11-01	03:58:00	0
2008-11-01	03:59:00	0
2008-11-01	04:00:00	0
2008-11-01	04:01:00	0
2008-11-01	04:02:00	0
2008-11-01	04:03:00	0
2008-11-01	04:04:00	0
2008-11-01	04:05:00	0
2008-11-01	04:06:00	30
2008-11-01	04:07:00	51
2008-11-01	04:08:00	0
2008-11-01	04:09:00	0
2008-11-01	04:10:00	0
2008-11-01	04:11:00	0
2008-11-01	04:12:00	0
2008-11-01	04:13:00	0
2008-11-01	04:14:00	10
2008-11-01	04:15:00	0
2008-11-01	04:16:00	0
2008-11-01	04:17:00	0
2008-11-01	04:18:00	10
2008-11-01	04:19:00	51
2008-11-01	04:20:00	41
2008-11-01	04:21:00	0
2008-11-01	04:22:00	0
2008-11-01	04:23:00	0
2008-11-01	04:24:00	0
2008-11-01	04:25:00	0
2008-11-01	04:26:00	0
2008-11-01	04:27:00	0
2008-11-01	04:28:00	0
2008-11-01	04:29:00	0
2008-11-01	04:30:00	0
2008-11-01	04:31:00	20
2008-11-01	04:32:00	0
2008-11-01	04:33:00	0
2008-11-01	04:34:00	0
2008-11-01	04:35:00	0
2008-11-01	04:36:00	0
2008-11-01	04:37:00	0
2008-11-01	04:38:00	0
2008-11-01	04:39:00	0
2008-11-01	04:40:00	30
2008-11-01	04:41:00	61
2008-11-01	04:42:00	10
2008-11-01	04:43:00	217
2008-11-01	04:44:00	0
2008-11-01	04:45:00	0
2008-11-01	04:46:00	0
2008-11-01	04:47:00	0
2008-11-01	04:48:00	0
2008-11-01	04:49:00	0
2008-11-01	04:50:00	0
2008-11-01	04:51:00	0
2008-11-01	04:52:00	0
2008-11-01	04:53:00	0
2008-11-01	04:54:00	0
2008-11-01	04:55:00	0
2008-11-01	04:56:00	0
2008-11-01	04:57:00	0
2008-11-01	04:58:00	0
2008-11-01	04:59:00	0
2008-11-01	05:00:00	0
2008-11-01	05:01:00	0
2008-11-01	05:02:00	0
2008-11-01	05:03:00	0
2008-11-01	05:04:00	0
2008-11-01	05:05:00	0
2008-11-01	05:06:00	0
2008-11-01	05:07:00	0
2008-11-01	05:08:00	0
2008-11-01	05:09:00	0
2008-11-01	05:10:00	0
2008-11-01	05:11:00	0
2008-11-01	05:12:00	0
2008-11-01	05:13:00	0
2008-11-01	05:14:00	0
2008-11-01	05:15:00	0
2008-11-01	05:16:00	0
2008-11-01	05:17:00	0
2008-11-01	05:18:00	0
2008-11-01	05:19:00	0
2008-11-01	05:20:00	0
2008-11-01	05:21:00	0
2008-11-01	05:22:00	0
2008-11-01	05:23:00	0
2008-11-01	05:24:00	0
2008-11-01	05:25:00	0
2008-11-01	05:26:00	0
2008-11-01	05:27:00	0
2008-11-01	05:28:00	0
2008-11-01	05:29:00	0
2008-11-01	05:30:00	0
2008-11-01	05:31:00	0
2008-11-01	05:32:00	0
2008-11-01	05:33:00	0
2008-11-01	05:34:00	0
2008-11-01	05:35:00	0
2008-11-01	05:36:00	0
2008-11-01	05:37:00	0
2008-11-01	05:38:00	0
2008-11-01	05:39:00	10
2008-11-01	05:40:00	30
2008-11-01	05:41:00	30
2008-11-01	05:42:00	0
2008-11-01	05:43:00	0
2008-11-01	05:44:00	0
2008-11-01	05:45:00	0
2008-11-01	05:46:00	0
2008-11-01	05:47:00	51
2008-11-01	05:48:00	0
2008-11-01	05:49:00	0
2008-11-01	05:50:00	0
2008-11-01	05:51:00	0
2008-11-01	05:52:00	0
2008-11-01	05:53:00	0
2008-11-01	05:54:00	0
2008-11-01	05:55:00	0
2008-11-01	05:56:00	0
2008-11-01	05:57:00	0
2008-11-01	05:58:00	0
2008-11-01	05:59:00	0
2008-11-01	06:00:00	0
2008-11-01	06:01:00	10
2008-11-01	06:02:00	10
2008-11-01	06:03:00	0
2008-11-01	06:04:00	41
2008-11-01	06:05:00	30
2008-11-01	06:06:00	0
2008-11-01	06:07:00	71
2008-11-01	06:08:00	30
2008-11-01	06:09:00	0
2008-11-01	06:10:00	0
2008-11-01	06:11:00	41
2008-11-01	06:12:00	0
2008-11-01	06:13:00	0
2008-11-01	06:14:00	0
2008-11-01	06:15:00	10
2008-11-01	06:16:00	0
2008-11-01	06:17:00	0
2008-11-01	06:18:00	0
2008-11-01	06:19:00	0
2008-11-01	06:20:00	20
2008-11-01	06:21:00	0
2008-11-01	06:22:00	20
2008-11-01	06:23:00	0
2008-11-01	06:24:00	0
2008-11-01	06:25:00	0
2008-11-01	06:26:00	0
2008-11-01	06:27:00	0
2008-11-01	06:28:00	0
2008-11-01	06:29:00	0
2008-11-01	06:30:00	0
2008-11-01	06:31:00	20
2008-11-01	06:32:00	0
2008-11-01	06:33:00	0
2008-11-01	06:34:00	0
2008-11-01	06:35:00	0
2008-11-01	06:36:00	0
2008-11-01	06:37:00	0
2008-11-01	06:38:00	181
2008-11-01	06:39:00	41
2008-11-01	06:40:00	193
2008-11-01	06:41:00	0
2008-11-01	06:42:00	0
2008-11-01	06:43:00	0
2008-11-01	06:44:00	0
2008-11-01	06:45:00	0
2008-11-01	06:46:00	0
2008-11-01	06:47:00	0
2008-11-01	06:48:00	0
2008-11-01	06:49:00	0
2008-11-01	06:50:00	0
2008-11-01	06:51:00	0
2008-11-01	06:52:00	0
2008-11-01	06:53:00	0
2008-11-01	06:54:00	0
2008-11-01	06:55:00	0
2008-11-01	06:56:00	0
2008-11-01	06:57:00	0
2008-11-01	06:58:00	0
2008-11-01	06:59:00	30
2008-11-01	07:00:00	20
2008-11-01	07:01:00	0
2008-11-01	07:02:00	0
2008-11-01	07:03:00	0
2008-11-01	07:04:00	0
2008-11-01	07:05:00	0
2008-11-01	07:06:00	0
2008-11-01	07:07:00	0
2008-11-01	07:08:00	0
2008-11-01	07:09:00	0
2008-11-01	07:10:00	0
2008-11-01	07:11:00	0
2008-11-01	07:12:00	0
2008-11-01	07:13:00	0
2008-11-01	07:14:00	0
2008-11-01	07:15:00	0
2008-11-01	07:16:00	0
2008-11-01	07:17:00	0
2008-11-01	07:18:00	10
2008-11-01	07:19:00	0
2008-11-01	07:20:00	0
2008-11-01	07:21:00	10
2008-11-01	07:22:00	0
2008-11-01	07:23:00	0
2008-11-01	07:24:00	41
2008-11-01	07:25:00	112
2008-11-01	07:26:00	839
2008-11-01	07:27:00	475
2008-11-01	07:28:00	492
2008-11-01	07:29:00	144
2008-11-01	07:30:00	280
2008-11-01	07:31:00	839
2008-11-01	07:32:00	217
2008-11-01	07:33:00	459
2008-11-01	07:34:00	427
2008-11-01	07:35:00	112
2008-11-01	07:36:00	0
2008-11-01	07:37:00	0
2008-11-01	07:38:00	597
2008-11-01	07:39:00	673
2008-11-01	07:40:00	929
2008-11-01	07:41:00	634
2008-11-01	07:42:00	817
2008-11-01	07:43:00	673
2008-11-01	07:44:00	217
2008-11-01	07:45:00	0
2008-11-01	07:46:00	0
2008-11-01	07:47:00	0
2008-11-01	07:48:00	0
2008-11-01	07:49:00	0
2008-11-01	07:50:00	0
2008-11-01	07:51:00	0
2008-11-01	07:52:00	0
2008-11-01	07:53:00	0
2008-11-01	07:54:00	71
2008-11-01	07:55:00	20
2008-11-01	07:56:00	0
2008-11-01	07:57:00	10
2008-11-01	07:58:00	0
2008-11-01	07:59:00	0
2008-11-01	08:00:00	0
2008-11-01	08:01:00	0
2008-11-01	08:02:00	0
2008-11-01	08:03:00	10
2008-11-01	08:04:00	10
2008-11-01	08:05:00	81
2008-11-01	08:06:00	0
2008-11-01	08:07:00	508
2008-11-01	08:08:00	380
2008-11-01	08:09:00	0
2008-11-01	08:10:00	0
2008-11-01	08:11:00	41
2008-11-01	08:12:00	0
2008-11-01	08:13:00	10
2008-11-01	08:14:00	30
2008-11-01	08:15:00	0
2008-11-01	08:16:00	0
2008-11-01	08:17:00	144
2008-11-01	08:18:00	884
2008-11-01	08:19:00	156
2008-11-01	08:20:00	0
2008-11-01	08:21:00	20
2008-11-01	08:22:00	10
2008-11-01	08:23:00	0
2008-11-01	08:24:00	0
2008-11-01	08:25:00	0
2008-11-01	08:26:00	10
2008-11-01	08:27:00	30
2008-11-01	08:28:00	132
2008-11-01	08:29:00	10
2008-11-01	08:30:00	673
2008-11-01	08:31:00	508
2008-11-01	08:32:00	71
2008-11-01	08:33:00	0
2008-11-01	08:34:00	0
2008-11-01	08:35:00	156
2008-11-01	08:36:00	169
2008-11-01	08:37:00	309
2008-11-01	08:38:00	0
2008-11-01	08:39:00	0
2008-11-01	08:40:00	20
2008-11-01	08:41:00	0
2008-11-01	08:42:00	0
2008-11-01	08:43:00	0
2008-11-01	08:44:00	181
2008-11-01	08:45:00	122
2008-11-01	08:46:00	112
2008-11-01	08:47:00	41
2008-11-01	08:48:00	132
2008-11-01	08:49:00	10
2008-11-01	08:50:00	0
2008-11-01	08:51:00	10
2008-11-01	08:52:00	616
2008-11-01	08:53:00	266
2008-11-01	08:54:00	0
2008-11-01	08:55:00	20
2008-11-01	08:56:00	0
2008-11-01	08:57:00	0
2008-11-01	08:58:00	144
2008-11-01	08:59:00	1751
2008-11-01	09:00:00	1940
2008-11-01	09:01:00	2020
2008-11-01	09:02:00	1544
2008-11-01	09:03:00	410
2008-11-01	09:04:00	2060
2008-11-01	09:05:00	754
2008-11-01	09:06:00	524
2008-11-01	09:07:00	181
2008-11-01	09:08:00	20
[truncated: 19,611 more rows]

[truncated: 1 more sheets: 11.14.08]
