# Supplementary material for: Initial evaluation of nighttime restlessness in a naturally occurring canine model of osteoarthritis pain
Source: PeerJ. 2015 Feb 17;3:e772. doi: 10.7717/peerj.772 (PMC4340376; doi:10.7717/peerj.772)
Supplement: Supplemental Information 6 [file peerj-03-772-s006.xlsx]

## Sheet: Office Visits
Visit Date	Visit Number
2008-09-11 06:00:00	1
2008-09-25 06:00:00	2
2008-10-09 06:00:00	3
2008-10-22 06:00:00	4
2008-11-06 06:00:00	5
2008-11-20 06:00:00	6
2008-12-04 06:00:00	7

## Sheet: 04_Data
Segment	DateTime	Activity	Hour	Quadrant	Study Day	Weekday
1	2008-09-18 06:01:00	0	6	2	7	5
1	2008-09-18 06:02:00	0	6	2	7	5
1	2008-09-18 06:03:00	0	6	2	7	5
1	2008-09-18 06:04:00	0	6	2	7	5
1	2008-09-18 06:05:00	0	6	2	7	5
1	2008-09-18 06:06:00	0	6	2	7	5
1	2008-09-18 06:07:00	0	6	2	7	5
1	2008-09-18 06:08:00	0	6	2	7	5
1	2008-09-18 06:09:00	0	6	2	7	5
1	2008-09-18 06:10:00	0	6	2	7	5
1	2008-09-18 06:11:00	0	6	2	7	5
1	2008-09-18 06:12:00	0	6	2	7	5
1	2008-09-18 06:13:00	0	6	2	7	5
1	2008-09-18 06:14:00	0	6	2	7	5
1	2008-09-18 06:15:00	0	6	2	7	5
1	2008-09-18 06:16:00	0	6	2	7	5
1	2008-09-18 06:17:00	0	6	2	7	5
1	2008-09-18 06:18:00	10	6	2	7	5
1	2008-09-18 06:19:00	0	6	2	7	5
1	2008-09-18 06:20:00	20	6	2	7	5
1	2008-09-18 06:21:00	0	6	2	7	5
1	2008-09-18 06:22:00	0	6	2	7	5
1	2008-09-18 06:23:00	0	6	2	7	5
1	2008-09-18 06:24:00	0	6	2	7	5
1	2008-09-18 06:25:00	10	6	2	7	5
1	2008-09-18 06:26:00	0	6	2	7	5
1	2008-09-18 06:27:00	0	6	2	7	5
1	2008-09-18 06:28:00	0	6	2	7	5
1	2008-09-18 06:29:00	0	6	2	7	5
1	2008-09-18 06:30:00	0	6	2	7	5
1	2008-09-18 06:31:00	0	6	2	7	5
1	2008-09-18 06:32:00	0	6	2	7	5
1	2008-09-18 06:33:00	0	6	2	7	5
1	2008-09-18 06:34:00	0	6	2	7	5
1	2008-09-18 06:35:00	0	6	2	7	5
1	2008-09-18 06:36:00	0	6	2	7	5
1	2008-09-18 06:37:00	0	6	2	7	5
1	2008-09-18 06:38:00	0	6	2	7	5
1	2008-09-18 06:39:00	0	6	2	7	5
1	2008-09-18 06:40:00	0	6	2	7	5
1	2008-09-18 06:41:00	0	6	2	7	5
1	2008-09-18 06:42:00	0	6	2	7	5
1	2008-09-18 06:43:00	0	6	2	7	5
1	2008-09-18 06:44:00	0	6	2	7	5
1	2008-09-18 06:45:00	0	6	2	7	5
1	2008-09-18 06:46:00	0	6	2	7	5
1	2008-09-18 06:47:00	10	6	2	7	5
1	2008-09-18 06:48:00	0	6	2	7	5
1	2008-09-18 06:49:00	0	6	2	7	5
1	2008-09-18 06:50:00	0	6	2	7	5
1	2008-09-18 06:51:00	0	6	2	7	5
1	2008-09-18 06:52:00	0	6	2	7	5
1	2008-09-18 06:53:00	0	6	2	7	5
1	2008-09-18 06:54:00	0	6	2	7	5
1	2008-09-18 06:55:00	0	6	2	7	5
1	2008-09-18 06:56:00	0	6	2	7	5
1	2008-09-18 06:57:00	0	6	2	7	5
1	2008-09-18 06:58:00	0	6	2	7	5
1	2008-09-18 06:59:00	10	6	2	7	5
1	2008-09-18 07:00:00	0	6	2	7	5
1	2008-09-18 07:01:00	0	7	2	7	5
1	2008-09-18 07:02:00	0	7	2	7	5
1	2008-09-18 07:03:00	10	7	2	7	5
1	2008-09-18 07:04:00	10	7	2	7	5
1	2008-09-18 07:05:00	0	7	2	7	5
1	2008-09-18 07:06:00	10	7	2	7	5
1	2008-09-18 07:07:00	193	7	2	7	5
1	2008-09-18 07:08:00	20	7	2	7	5
1	2008-09-18 07:09:00	0	7	2	7	5
1	2008-09-18 07:10:00	0	7	2	7	5
1	2008-09-18 07:11:00	0	7	2	7	5
1	2008-09-18 07:12:00	0	7	2	7	5
1	2008-09-18 07:13:00	0	7	2	7	5
1	2008-09-18 07:14:00	0	7	2	7	5
1	2008-09-18 07:15:00	0	7	2	7	5
1	2008-09-18 07:16:00	0	7	2	7	5
1	2008-09-18 07:17:00	0	7	2	7	5
1	2008-09-18 07:18:00	0	7	2	7	5
1	2008-09-18 07:19:00	0	7	2	7	5
1	2008-09-18 07:20:00	0	7	2	7	5
1	2008-09-18 07:21:00	0	7	2	7	5
1	2008-09-18 07:22:00	0	7	2	7	5
1	2008-09-18 07:23:00	0	7	2	7	5
1	2008-09-18 07:24:00	0	7	2	7	5
1	2008-09-18 07:25:00	0	7	2	7	5
1	2008-09-18 07:26:00	0	7	2	7	5
1	2008-09-18 07:27:00	0	7	2	7	5
1	2008-09-18 07:28:00	0	7	2	7	5
1	2008-09-18 07:29:00	0	7	2	7	5
1	2008-09-18 07:30:00	0	7	2	7	5
1	2008-09-18 07:31:00	0	7	2	7	5
1	2008-09-18 07:32:00	0	7	2	7	5
1	2008-09-18 07:33:00	0	7	2	7	5
1	2008-09-18 07:34:00	0	7	2	7	5
1	2008-09-18 07:35:00	0	7	2	7	5
1	2008-09-18 07:36:00	0	7	2	7	5
1	2008-09-18 07:37:00	0	7	2	7	5
1	2008-09-18 07:38:00	0	7	2	7	5
1	2008-09-18 07:39:00	0	7	2	7	5
1	2008-09-18 07:40:00	0	7	2	7	5
1	2008-09-18 07:41:00	0	7	2	7	5
1	2008-09-18 07:42:00	0	7	2	7	5
1	2008-09-18 07:43:00	0	7	2	7	5
1	2008-09-18 07:44:00	0	7	2	7	5
1	2008-09-18 07:45:00	0	7	2	7	5
1	2008-09-18 07:46:00	0	7	2	7	5
1	2008-09-18 07:47:00	0	7	2	7	5
1	2008-09-18 07:48:00	0	7	2	7	5
1	2008-09-18 07:49:00	0	7	2	7	5
1	2008-09-18 07:50:00	0	7	2	7	5
1	2008-09-18 07:51:00	0	7	2	7	5
1	2008-09-18 07:52:00	0	7	2	7	5
1	2008-09-18 07:53:00	0	7	2	7	5
1	2008-09-18 07:54:00	0	7	2	7	5
1	2008-09-18 07:55:00	0	7	2	7	5
1	2008-09-18 07:56:00	0	7	2	7	5
1	2008-09-18 07:57:00	0	7	2	7	5
1	2008-09-18 07:58:00	0	7	2	7	5
1	2008-09-18 07:59:00	0	7	2	7	5
1	2008-09-18 08:00:00	0	7	2	7	5
1	2008-09-18 08:01:00	0	8	2	7	5
1	2008-09-18 08:02:00	0	8	2	7	5
1	2008-09-18 08:03:00	0	8	2	7	5
1	2008-09-18 08:04:00	0	8	2	7	5
1	2008-09-18 08:05:00	0	8	2	7	5
1	2008-09-18 08:06:00	0	8	2	7	5
1	2008-09-18 08:07:00	0	8	2	7	5
1	2008-09-18 08:08:00	0	8	2	7	5
1	2008-09-18 08:09:00	0	8	2	7	5
1	2008-09-18 08:10:00	0	8	2	7	5
1	2008-09-18 08:11:00	0	8	2	7	5
1	2008-09-18 08:12:00	0	8	2	7	5
1	2008-09-18 08:13:00	0	8	2	7	5
1	2008-09-18 08:14:00	0	8	2	7	5
1	2008-09-18 08:15:00	0	8	2	7	5
1	2008-09-18 08:16:00	0	8	2	7	5
1	2008-09-18 08:17:00	0	8	2	7	5
1	2008-09-18 08:18:00	0	8	2	7	5
1	2008-09-18 08:19:00	0	8	2	7	5
1	2008-09-18 08:20:00	0	8	2	7	5
1	2008-09-18 08:21:00	0	8	2	7	5
1	2008-09-18 08:22:00	0	8	2	7	5
1	2008-09-18 08:23:00	0	8	2	7	5
1	2008-09-18 08:24:00	0	8	2	7	5
1	2008-09-18 08:25:00	0	8	2	7	5
1	2008-09-18 08:26:00	0	8	2	7	5
1	2008-09-18 08:27:00	0	8	2	7	5
1	2008-09-18 08:28:00	0	8	2	7	5
1	2008-09-18 08:29:00	0	8	2	7	5
1	2008-09-18 08:30:00	0	8	2	7	5
1	2008-09-18 08:31:00	884	8	2	7	5
1	2008-09-18 08:32:00	508	8	2	7	5
1	2008-09-18 08:33:00	156	8	2	7	5
1	2008-09-18 08:34:00	280	8	2	7	5
1	2008-09-18 08:35:00	51	8	2	7	5
1	2008-09-18 08:36:00	112	8	2	7	5
1	2008-09-18 08:37:00	0	8	2	7	5
1	2008-09-18 08:38:00	0	8	2	7	5
1	2008-09-18 08:39:00	0	8	2	7	5
1	2008-09-18 08:40:00	0	8	2	7	5
1	2008-09-18 08:41:00	0	8	2	7	5
1	2008-09-18 08:42:00	0	8	2	7	5
1	2008-09-18 08:43:00	0	8	2	7	5
1	2008-09-18 08:44:00	0	8	2	7	5
1	2008-09-18 08:45:00	0	8	2	7	5
1	2008-09-18 08:46:00	0	8	2	7	5
1	2008-09-18 08:47:00	0	8	2	7	5
1	2008-09-18 08:48:00	0	8	2	7	5
1	2008-09-18 08:49:00	0	8	2	7	5
1	2008-09-18 08:50:00	0	8	2	7	5
1	2008-09-18 08:51:00	0	8	2	7	5
1	2008-09-18 08:52:00	0	8	2	7	5
1	2008-09-18 08:53:00	0	8	2	7	5
1	2008-09-18 08:54:00	0	8	2	7	5
1	2008-09-18 08:55:00	0	8	2	7	5
1	2008-09-18 08:56:00	0	8	2	7	5
1	2008-09-18 08:57:00	0	8	2	7	5
1	2008-09-18 08:58:00	0	8	2	7	5
1	2008-09-18 08:59:00	0	8	2	7	5
1	2008-09-18 09:00:00	0	8	2	7	5
1	2008-09-18 09:01:00	0	9	2	7	5
1	2008-09-18 09:02:00	0	9	2	7	5
1	2008-09-18 09:03:00	0	9	2	7	5
1	2008-09-18 09:04:00	0	9	2	7	5
1	2008-09-18 09:05:00	0	9	2	7	5
1	2008-09-18 09:06:00	0	9	2	7	5
1	2008-09-18 09:07:00	0	9	2	7	5
1	2008-09-18 09:08:00	0	9	2	7	5
1	2008-09-18 09:09:00	0	9	2	7	5
1	2008-09-18 09:10:00	0	9	2	7	5
1	2008-09-18 09:11:00	0	9	2	7	5
1	2008-09-18 09:12:00	0	9	2	7	5
1	2008-09-18 09:13:00	0	9	2	7	5
1	2008-09-18 09:14:00	0	9	2	7	5
1	2008-09-18 09:15:00	0	9	2	7	5
1	2008-09-18 09:16:00	0	9	2	7	5
1	2008-09-18 09:17:00	0	9	2	7	5
1	2008-09-18 09:18:00	0	9	2	7	5
1	2008-09-18 09:19:00	0	9	2	7	5
1	2008-09-18 09:20:00	0	9	2	7	5
1	2008-09-18 09:21:00	0	9	2	7	5
1	2008-09-18 09:22:00	0	9	2	7	5
1	2008-09-18 09:23:00	0	9	2	7	5
1	2008-09-18 09:24:00	0	9	2	7	5
1	2008-09-18 09:25:00	0	9	2	7	5
1	2008-09-18 09:26:00	0	9	2	7	5
1	2008-09-18 09:27:00	0	9	2	7	5
1	2008-09-18 09:28:00	0	9	2	7	5
1	2008-09-18 09:29:00	0	9	2	7	5
1	2008-09-18 09:30:00	0	9	2	7	5
1	2008-09-18 09:31:00	0	9	2	7	5
1	2008-09-18 09:32:00	0	9	2	7	5
1	2008-09-18 09:33:00	0	9	2	7	5
1	2008-09-18 09:34:00	0	9	2	7	5
1	2008-09-18 09:35:00	0	9	2	7	5
1	2008-09-18 09:36:00	0	9	2	7	5
1	2008-09-18 09:37:00	0	9	2	7	5
1	2008-09-18 09:38:00	0	9	2	7	5
1	2008-09-18 09:39:00	0	9	2	7	5
1	2008-09-18 09:40:00	0	9	2	7	5
1	2008-09-18 09:41:00	0	9	2	7	5
1	2008-09-18 09:42:00	0	9	2	7	5
1	2008-09-18 09:43:00	0	9	2	7	5
1	2008-09-18 09:44:00	0	9	2	7	5
1	2008-09-18 09:45:00	0	9	2	7	5
1	2008-09-18 09:46:00	0	9	2	7	5
1	2008-09-18 09:47:00	0	9	2	7	5
1	2008-09-18 09:48:00	0	9	2	7	5
1	2008-09-18 09:49:00	0	9	2	7	5
1	2008-09-18 09:50:00	0	9	2	7	5
1	2008-09-18 09:51:00	0	9	2	7	5
1	2008-09-18 09:52:00	0	9	2	7	5
1	2008-09-18 09:53:00	0	9	2	7	5
1	2008-09-18 09:54:00	0	9	2	7	5
1	2008-09-18 09:55:00	0	9	2	7	5
1	2008-09-18 09:56:00	0	9	2	7	5
1	2008-09-18 09:57:00	0	9	2	7	5
1	2008-09-18 09:58:00	0	9	2	7	5
1	2008-09-18 09:59:00	0	9	2	7	5
1	2008-09-18 10:00:00	0	9	2	7	5
1	2008-09-18 10:01:00	0	10	2	7	5
1	2008-09-18 10:02:00	0	10	2	7	5
1	2008-09-18 10:03:00	0	10	2	7	5
1	2008-09-18 10:04:00	0	10	2	7	5
1	2008-09-18 10:05:00	0	10	2	7	5
1	2008-09-18 10:06:00	0	10	2	7	5
1	2008-09-18 10:07:00	0	10	2	7	5
1	2008-09-18 10:08:00	0	10	2	7	5
1	2008-09-18 10:09:00	0	10	2	7	5
1	2008-09-18 10:10:00	0	10	2	7	5
1	2008-09-18 10:11:00	0	10	2	7	5
1	2008-09-18 10:12:00	0	10	2	7	5
1	2008-09-18 10:13:00	0	10	2	7	5
1	2008-09-18 10:14:00	0	10	2	7	5
1	2008-09-18 10:15:00	0	10	2	7	5
1	2008-09-18 10:16:00	0	10	2	7	5
1	2008-09-18 10:17:00	0	10	2	7	5
1	2008-09-18 10:18:00	0	10	2	7	5
1	2008-09-18 10:19:00	0	10	2	7	5
1	2008-09-18 10:20:00	193	10	2	7	5
1	2008-09-18 10:21:00	977	10	2	7	5
1	2008-09-18 10:22:00	102	10	2	7	5
1	2008-09-18 10:23:00	181	10	2	7	5
1	2008-09-18 10:24:00	51	10	2	7	5
1	2008-09-18 10:25:00	0	10	2	7	5
1	2008-09-18 10:26:00	0	10	2	7	5
1	2008-09-18 10:27:00	0	10	2	7	5
1	2008-09-18 10:28:00	0	10	2	7	5
1	2008-09-18 10:29:00	0	10	2	7	5
1	2008-09-18 10:30:00	0	10	2	7	5
1	2008-09-18 10:31:00	10	10	2	7	5
1	2008-09-18 10:32:00	20	10	2	7	5
1	2008-09-18 10:33:00	10	10	2	7	5
1	2008-09-18 10:34:00	0	10	2	7	5
1	2008-09-18 10:35:00	20	10	2	7	5
1	2008-09-18 10:36:00	0	10	2	7	5
1	2008-09-18 10:37:00	0	10	2	7	5
1	2008-09-18 10:38:00	0	10	2	7	5
1	2008-09-18 10:39:00	0	10	2	7	5
1	2008-09-18 10:40:00	0	10	2	7	5
1	2008-09-18 10:41:00	20	10	2	7	5
1	2008-09-18 10:42:00	0	10	2	7	5
1	2008-09-18 10:43:00	0	10	2	7	5
1	2008-09-18 10:44:00	0	10	2	7	5
1	2008-09-18 10:45:00	10	10	2	7	5
1	2008-09-18 10:46:00	0	10	2	7	5
1	2008-09-18 10:47:00	0	10	2	7	5
1	2008-09-18 10:48:00	0	10	2	7	5
1	2008-09-18 10:49:00	0	10	2	7	5
1	2008-09-18 10:50:00	0	10	2	7	5
1	2008-09-18 10:51:00	0	10	2	7	5
1	2008-09-18 10:52:00	181	10	2	7	5
1	2008-09-18 10:53:00	309	10	2	7	5
1	2008-09-18 10:54:00	0	10	2	7	5
1	2008-09-18 10:55:00	0	10	2	7	5
1	2008-09-18 10:56:00	0	10	2	7	5
1	2008-09-18 10:57:00	0	10	2	7	5
1	2008-09-18 10:58:00	0	10	2	7	5
1	2008-09-18 10:59:00	0	10	2	7	5
1	2008-09-18 11:00:00	0	10	2	7	5
1	2008-09-18 11:01:00	0	11	2	7	5
1	2008-09-18 11:02:00	0	11	2	7	5
1	2008-09-18 11:03:00	0	11	2	7	5
1	2008-09-18 11:04:00	0	11	2	7	5
1	2008-09-18 11:05:00	0	11	2	7	5
1	2008-09-18 11:06:00	0	11	2	7	5
1	2008-09-18 11:07:00	0	11	2	7	5
1	2008-09-18 11:08:00	0	11	2	7	5
1	2008-09-18 11:09:00	51	11	2	7	5
1	2008-09-18 11:10:00	41	11	2	7	5
1	2008-09-18 11:11:00	30	11	2	7	5
1	2008-09-18 11:12:00	0	11	2	7	5
1	2008-09-18 11:13:00	0	11	2	7	5
1	2008-09-18 11:14:00	0	11	2	7	5
1	2008-09-18 11:15:00	0	11	2	7	5
1	2008-09-18 11:16:00	0	11	2	7	5
1	2008-09-18 11:17:00	0	11	2	7	5
1	2008-09-18 11:18:00	0	11	2	7	5
1	2008-09-18 11:19:00	0	11	2	7	5
1	2008-09-18 11:20:00	0	11	2	7	5
1	2008-09-18 11:21:00	0	11	2	7	5
1	2008-09-18 11:22:00	81	11	2	7	5
1	2008-09-18 11:23:00	475	11	2	7	5
1	2008-09-18 11:24:00	41	11	2	7	5
1	2008-09-18 11:25:00	0	11	2	7	5
1	2008-09-18 11:26:00	0	11	2	7	5
1	2008-09-18 11:27:00	0	11	2	7	5
1	2008-09-18 11:28:00	0	11	2	7	5
1	2008-09-18 11:29:00	0	11	2	7	5
1	2008-09-18 11:30:00	0	11	2	7	5
1	2008-09-18 11:31:00	0	11	2	7	5
1	2008-09-18 11:32:00	0	11	2	7	5
1	2008-09-18 11:33:00	0	11	2	7	5
1	2008-09-18 11:34:00	0	11	2	7	5
1	2008-09-18 11:35:00	0	11	2	7	5
1	2008-09-18 11:36:00	0	11	2	7	5
1	2008-09-18 11:37:00	0	11	2	7	5
1	2008-09-18 11:38:00	0	11	2	7	5
1	2008-09-18 11:39:00	0	11	2	7	5
1	2008-09-18 11:40:00	0	11	2	7	5
1	2008-09-18 11:41:00	0	11	2	7	5
1	2008-09-18 11:42:00	0	11	2	7	5
1	2008-09-18 11:43:00	30	11	2	7	5
1	2008-09-18 11:44:00	839	11	2	7	5
1	2008-09-18 11:45:00	0	11	2	7	5
1	2008-09-18 11:46:00	0	11	2	7	5
1	2008-09-18 11:47:00	0	11	2	7	5
1	2008-09-18 11:48:00	0	11	2	7	5
1	2008-09-18 11:49:00	51	11	2	7	5
1	2008-09-18 11:50:00	10	11	2	7	5
1	2008-09-18 11:51:00	0	11	2	7	5
1	2008-09-18 11:52:00	0	11	2	7	5
1	2008-09-18 11:53:00	0	11	2	7	5
1	2008-09-18 11:54:00	0	11	2	7	5
1	2008-09-18 11:55:00	0	11	2	7	5
1	2008-09-18 11:56:00	0	11	2	7	5
1	2008-09-18 11:57:00	0	11	2	7	5
1	2008-09-18 11:58:00	0	11	2	7	5
1	2008-09-18 11:59:00	0	11	2	7	5
1	2008-09-18 12:00:00	0	11	2	7	5
1	2008-09-18 12:01:00	81	12	3	7	5
1	2008-09-18 12:02:00	0	12	3	7	5
1	2008-09-18 12:03:00	0	12	3	7	5
1	2008-09-18 12:04:00	0	12	3	7	5
1	2008-09-18 12:05:00	30	12	3	7	5
1	2008-09-18 12:06:00	492	12	3	7	5
1	2008-09-18 12:07:00	112	12	3	7	5
1	2008-09-18 12:08:00	0	12	3	7	5
1	2008-09-18 12:09:00	51	12	3	7	5
1	2008-09-18 12:10:00	0	12	3	7	5
1	2008-09-18 12:11:00	0	12	3	7	5
1	2008-09-18 12:12:00	0	12	3	7	5
1	2008-09-18 12:13:00	0	12	3	7	5
1	2008-09-18 12:14:00	0	12	3	7	5
1	2008-09-18 12:15:00	0	12	3	7	5
1	2008-09-18 12:16:00	0	12	3	7	5
1	2008-09-18 12:17:00	0	12	3	7	5
1	2008-09-18 12:18:00	0	12	3	7	5
1	2008-09-18 12:19:00	0	12	3	7	5
1	2008-09-18 12:20:00	0	12	3	7	5
1	2008-09-18 12:21:00	0	12	3	7	5
1	2008-09-18 12:22:00	0	12	3	7	5
1	2008-09-18 12:23:00	0	12	3	7	5
1	2008-09-18 12:24:00	0	12	3	7	5
1	2008-09-18 12:25:00	0	12	3	7	5
1	2008-09-18 12:26:00	0	12	3	7	5
1	2008-09-18 12:27:00	0	12	3	7	5
1	2008-09-18 12:28:00	20	12	3	7	5
1	2008-09-18 12:29:00	295	12	3	7	5
1	2008-09-18 12:30:00	0	12	3	7	5
1	2008-09-18 12:31:00	0	12	3	7	5
1	2008-09-18 12:32:00	0	12	3	7	5
1	2008-09-18 12:33:00	0	12	3	7	5
1	2008-09-18 12:34:00	0	12	3	7	5
1	2008-09-18 12:35:00	0	12	3	7	5
1	2008-09-18 12:36:00	0	12	3	7	5
1	2008-09-18 12:37:00	0	12	3	7	5
1	2008-09-18 12:38:00	0	12	3	7	5
1	2008-09-18 12:39:00	0	12	3	7	5
1	2008-09-18 12:40:00	144	12	3	7	5
1	2008-09-18 12:41:00	156	12	3	7	5
1	2008-09-18 12:42:00	61	12	3	7	5
1	2008-09-18 12:43:00	0	12	3	7	5
1	2008-09-18 12:44:00	0	12	3	7	5
1	2008-09-18 12:45:00	0	12	3	7	5
1	2008-09-18 12:46:00	0	12	3	7	5
1	2008-09-18 12:47:00	0	12	3	7	5
1	2008-09-18 12:48:00	0	12	3	7	5
1	2008-09-18 12:49:00	0	12	3	7	5
1	2008-09-18 12:50:00	0	12	3	7	5
1	2008-09-18 12:51:00	51	12	3	7	5
1	2008-09-18 12:52:00	0	12	3	7	5
1	2008-09-18 12:53:00	0	12	3	7	5
1	2008-09-18 12:54:00	10	12	3	7	5
1	2008-09-18 12:55:00	394	12	3	7	5
1	2008-09-18 12:56:00	0	12	3	7	5
1	2008-09-18 12:57:00	0	12	3	7	5
1	2008-09-18 12:58:00	0	12	3	7	5
1	2008-09-18 12:59:00	0	12	3	7	5
1	2008-09-18 13:00:00	0	12	3	7	5
1	2008-09-18 13:01:00	0	13	3	7	5
1	2008-09-18 13:02:00	20	13	3	7	5
1	2008-09-18 13:03:00	10	13	3	7	5
1	2008-09-18 13:04:00	0	13	3	7	5
1	2008-09-18 13:05:00	10	13	3	7	5
1	2008-09-18 13:06:00	0	13	3	7	5
1	2008-09-18 13:07:00	0	13	3	7	5
1	2008-09-18 13:08:00	0	13	3	7	5
1	2008-09-18 13:09:00	0	13	3	7	5
1	2008-09-18 13:10:00	0	13	3	7	5
1	2008-09-18 13:11:00	0	13	3	7	5
1	2008-09-18 13:12:00	0	13	3	7	5
1	2008-09-18 13:13:00	0	13	3	7	5
1	2008-09-18 13:14:00	0	13	3	7	5
1	2008-09-18 13:15:00	0	13	3	7	5
1	2008-09-18 13:16:00	0	13	3	7	5
1	2008-09-18 13:17:00	0	13	3	7	5
1	2008-09-18 13:18:00	0	13	3	7	5
1	2008-09-18 13:19:00	0	13	3	7	5
1	2008-09-18 13:20:00	0	13	3	7	5
1	2008-09-18 13:21:00	0	13	3	7	5
1	2008-09-18 13:22:00	0	13	3	7	5
1	2008-09-18 13:23:00	0	13	3	7	5
1	2008-09-18 13:24:00	51	13	3	7	5
1	2008-09-18 13:25:00	0	13	3	7	5
1	2008-09-18 13:26:00	0	13	3	7	5
1	2008-09-18 13:27:00	10	13	3	7	5
1	2008-09-18 13:28:00	0	13	3	7	5
1	2008-09-18 13:29:00	0	13	3	7	5
1	2008-09-18 13:30:00	0	13	3	7	5
1	2008-09-18 13:31:00	20	13	3	7	5
1	2008-09-18 13:32:00	673	13	3	7	5
1	2008-09-18 13:33:00	122	13	3	7	5
1	2008-09-18 13:34:00	0	13	3	7	5
1	2008-09-18 13:35:00	0	13	3	7	5
1	2008-09-18 13:36:00	0	13	3	7	5
1	2008-09-18 13:37:00	0	13	3	7	5
1	2008-09-18 13:38:00	0	13	3	7	5
1	2008-09-18 13:39:00	0	13	3	7	5
1	2008-09-18 13:40:00	0	13	3	7	5
1	2008-09-18 13:41:00	0	13	3	7	5
1	2008-09-18 13:42:00	0	13	3	7	5
1	2008-09-18 13:43:00	0	13	3	7	5
1	2008-09-18 13:44:00	0	13	3	7	5
1	2008-09-18 13:45:00	0	13	3	7	5
1	2008-09-18 13:46:00	0	13	3	7	5
1	2008-09-18 13:47:00	0	13	3	7	5
1	2008-09-18 13:48:00	0	13	3	7	5
1	2008-09-18 13:49:00	0	13	3	7	5
1	2008-09-18 13:50:00	0	13	3	7	5
1	2008-09-18 13:51:00	0	13	3	7	5
1	2008-09-18 13:52:00	0	13	3	7	5
1	2008-09-18 13:53:00	0	13	3	7	5
1	2008-09-18 13:54:00	394	13	3	7	5
1	2008-09-18 13:55:00	122	13	3	7	5
1	2008-09-18 13:56:00	0	13	3	7	5
1	2008-09-18 13:57:00	0	13	3	7	5
1	2008-09-18 13:58:00	0	13	3	7	5
1	2008-09-18 13:59:00	0	13	3	7	5
1	2008-09-18 14:00:00	0	13	3	7	5
1	2008-09-18 14:01:00	0	14	3	7	5
1	2008-09-18 14:02:00	0	14	3	7	5
1	2008-09-18 14:03:00	0	14	3	7	5
1	2008-09-18 14:04:00	10	14	3	7	5
1	2008-09-18 14:05:00	30	14	3	7	5
1	2008-09-18 14:06:00	0	14	3	7	5
1	2008-09-18 14:07:00	0	14	3	7	5
1	2008-09-18 14:08:00	0	14	3	7	5
1	2008-09-18 14:09:00	0	14	3	7	5
1	2008-09-18 14:10:00	0	14	3	7	5
1	2008-09-18 14:11:00	0	14	3	7	5
1	2008-09-18 14:12:00	0	14	3	7	5
1	2008-09-18 14:13:00	0	14	3	7	5
1	2008-09-18 14:14:00	0	14	3	7	5
1	2008-09-18 14:15:00	0	14	3	7	5
1	2008-09-18 14:16:00	0	14	3	7	5
1	2008-09-18 14:17:00	0	14	3	7	5
1	2008-09-18 14:18:00	0	14	3	7	5
1	2008-09-18 14:19:00	0	14	3	7	5
1	2008-09-18 14:20:00	41	14	3	7	5
1	2008-09-18 14:21:00	0	14	3	7	5
1	2008-09-18 14:22:00	0	14	3	7	5
1	2008-09-18 14:23:00	20	14	3	7	5
1	2008-09-18 14:24:00	0	14	3	7	5
1	2008-09-18 14:25:00	459	14	3	7	5
1	2008-09-18 14:26:00	295	14	3	7	5
1	2008-09-18 14:27:00	0	14	3	7	5
1	2008-09-18 14:28:00	0	14	3	7	5
1	2008-09-18 14:29:00	0	14	3	7	5
1	2008-09-18 14:30:00	0	14	3	7	5
1	2008-09-18 14:31:00	0	14	3	7	5
1	2008-09-18 14:32:00	0	14	3	7	5
1	2008-09-18 14:33:00	0	14	3	7	5
1	2008-09-18 14:34:00	0	14	3	7	5
1	2008-09-18 14:35:00	20	14	3	7	5
1	2008-09-18 14:36:00	0	14	3	7	5
1	2008-09-18 14:37:00	0	14	3	7	5
1	2008-09-18 14:38:00	0	14	3	7	5
1	2008-09-18 14:39:00	0	14	3	7	5
1	2008-09-18 14:40:00	0	14	3	7	5
1	2008-09-18 14:41:00	0	14	3	7	5
1	2008-09-18 14:42:00	0	14	3	7	5
1	2008-09-18 14:43:00	0	14	3	7	5
1	2008-09-18 14:44:00	0	14	3	7	5
1	2008-09-18 14:45:00	0	14	3	7	5
1	2008-09-18 14:46:00	0	14	3	7	5
1	2008-09-18 14:47:00	0	14	3	7	5
1	2008-09-18 14:48:00	0	14	3	7	5
1	2008-09-18 14:49:00	0	14	3	7	5
1	2008-09-18 14:50:00	0	14	3	7	5
1	2008-09-18 14:51:00	0	14	3	7	5
1	2008-09-18 14:52:00	0	14	3	7	5
1	2008-09-18 14:53:00	0	14	3	7	5
1	2008-09-18 14:54:00	0	14	3	7	5
1	2008-09-18 14:55:00	0	14	3	7	5
1	2008-09-18 14:56:00	0	14	3	7	5
1	2008-09-18 14:57:00	0	14	3	7	5
1	2008-09-18 14:58:00	0	14	3	7	5
1	2008-09-18 14:59:00	0	14	3	7	5
1	2008-09-18 15:00:00	0	14	3	7	5
1	2008-09-18 15:01:00	0	15	3	7	5
1	2008-09-18 15:02:00	0	15	3	7	5
1	2008-09-18 15:03:00	0	15	3	7	5
1	2008-09-18 15:04:00	0	15	3	7	5
1	2008-09-18 15:05:00	0	15	3	7	5
1	2008-09-18 15:06:00	0	15	3	7	5
1	2008-09-18 15:07:00	0	15	3	7	5
1	2008-09-18 15:08:00	0	15	3	7	5
1	2008-09-18 15:09:00	0	15	3	7	5
1	2008-09-18 15:10:00	0	15	3	7	5
1	2008-09-18 15:11:00	0	15	3	7	5
1	2008-09-18 15:12:00	0	15	3	7	5
1	2008-09-18 15:13:00	0	15	3	7	5
1	2008-09-18 15:14:00	0	15	3	7	5
1	2008-09-18 15:15:00	0	15	3	7	5
1	2008-09-18 15:16:00	91	15	3	7	5
1	2008-09-18 15:17:00	295	15	3	7	5
1	2008-09-18 15:18:00	0	15	3	7	5
1	2008-09-18 15:19:00	0	15	3	7	5
1	2008-09-18 15:20:00	10	15	3	7	5
1	2008-09-18 15:21:00	0	15	3	7	5
1	2008-09-18 15:22:00	0	15	3	7	5
1	2008-09-18 15:23:00	0	15	3	7	5
1	2008-09-18 15:24:00	0	15	3	7	5
1	2008-09-18 15:25:00	30	15	3	7	5
1	2008-09-18 15:26:00	0	15	3	7	5
1	2008-09-18 15:27:00	10	15	3	7	5
1	2008-09-18 15:28:00	0	15	3	7	5
1	2008-09-18 15:29:00	0	15	3	7	5
1	2008-09-18 15:30:00	0	15	3	7	5
1	2008-09-18 15:31:00	61	15	3	7	5
1	2008-09-18 15:32:00	0	15	3	7	5
1	2008-09-18 15:33:00	0	15	3	7	5
1	2008-09-18 15:34:00	0	15	3	7	5
1	2008-09-18 15:35:00	0	15	3	7	5
1	2008-09-18 15:36:00	0	15	3	7	5
1	2008-09-18 15:37:00	0	15	3	7	5
1	2008-09-18 15:38:00	0	15	3	7	5
1	2008-09-18 15:39:00	0	15	3	7	5
1	2008-09-18 15:40:00	0	15	3	7	5
1	2008-09-18 15:41:00	0	15	3	7	5
1	2008-09-18 15:42:00	0	15	3	7	5
1	2008-09-18 15:43:00	0	15	3	7	5
1	2008-09-18 15:44:00	0	15	3	7	5
1	2008-09-18 15:45:00	0	15	3	7	5
1	2008-09-18 15:46:00	0	15	3	7	5
1	2008-09-18 15:47:00	0	15	3	7	5
1	2008-09-18 15:48:00	0	15	3	7	5
1	2008-09-18 15:49:00	0	15	3	7	5
1	2008-09-18 15:50:00	0	15	3	7	5
1	2008-09-18 15:51:00	0	15	3	7	5
1	2008-09-18 15:52:00	0	15	3	7	5
1	2008-09-18 15:53:00	0	15	3	7	5
1	2008-09-18 15:54:00	20	15	3	7	5
1	2008-09-18 15:55:00	366	15	3	7	5
1	2008-09-18 15:56:00	524	15	3	7	5
1	2008-09-18 15:57:00	616	15	3	7	5
1	2008-09-18 15:58:00	0	15	3	7	5
1	2008-09-18 15:59:00	0	15	3	7	5
1	2008-09-18 16:00:00	0	15	3	7	5
1	2008-09-18 16:01:00	0	16	3	7	5
1	2008-09-18 16:02:00	0	16	3	7	5
1	2008-09-18 16:03:00	0	16	3	7	5
1	2008-09-18 16:04:00	0	16	3	7	5
1	2008-09-18 16:05:00	0	16	3	7	5
1	2008-09-18 16:06:00	0	16	3	7	5
1	2008-09-18 16:07:00	0	16	3	7	5
1	2008-09-18 16:08:00	0	16	3	7	5
1	2008-09-18 16:09:00	0	16	3	7	5
1	2008-09-18 16:10:00	0	16	3	7	5
1	2008-09-18 16:11:00	0	16	3	7	5
1	2008-09-18 16:12:00	0	16	3	7	5
1	2008-09-18 16:13:00	0	16	3	7	5
1	2008-09-18 16:14:00	0	16	3	7	5
1	2008-09-18 16:15:00	0	16	3	7	5
1	2008-09-18 16:16:00	0	16	3	7	5
1	2008-09-18 16:17:00	0	16	3	7	5
1	2008-09-18 16:18:00	0	16	3	7	5
1	2008-09-18 16:19:00	20	16	3	7	5
1	2008-09-18 16:20:00	20	16	3	7	5
1	2008-09-18 16:21:00	0	16	3	7	5
1	2008-09-18 16:22:00	0	16	3	7	5
1	2008-09-18 16:23:00	0	16	3	7	5
1	2008-09-18 16:24:00	10	16	3	7	5
1	2008-09-18 16:25:00	102	16	3	7	5
1	2008-09-18 16:26:00	51	16	3	7	5
1	2008-09-18 16:27:00	337	16	3	7	5
1	2008-09-18 16:28:00	524	16	3	7	5
1	2008-09-18 16:29:00	351	16	3	7	5
1	2008-09-18 16:30:00	366	16	3	7	5
1	2008-09-18 16:31:00	0	16	3	7	5
1	2008-09-18 16:32:00	0	16	3	7	5
1	2008-09-18 16:33:00	0	16	3	7	5
1	2008-09-18 16:34:00	0	16	3	7	5
1	2008-09-18 16:35:00	0	16	3	7	5
1	2008-09-18 16:36:00	0	16	3	7	5
1	2008-09-18 16:37:00	0	16	3	7	5
1	2008-09-18 16:38:00	0	16	3	7	5
1	2008-09-18 16:39:00	61	16	3	7	5
1	2008-09-18 16:40:00	41	16	3	7	5
1	2008-09-18 16:41:00	10	16	3	7	5
1	2008-09-18 16:42:00	10	16	3	7	5
1	2008-09-18 16:43:00	0	16	3	7	5
1	2008-09-18 16:44:00	0	16	3	7	5
1	2008-09-18 16:45:00	10	16	3	7	5
1	2008-09-18 16:46:00	0	16	3	7	5
1	2008-09-18 16:47:00	0	16	3	7	5
1	2008-09-18 16:48:00	0	16	3	7	5
1	2008-09-18 16:49:00	30	16	3	7	5
1	2008-09-18 16:50:00	10	16	3	7	5
1	2008-09-18 16:51:00	0	16	3	7	5
1	2008-09-18 16:52:00	0	16	3	7	5
1	2008-09-18 16:53:00	0	16	3	7	5
1	2008-09-18 16:54:00	0	16	3	7	5
1	2008-09-18 16:55:00	0	16	3	7	5
1	2008-09-18 16:56:00	0	16	3	7	5
1	2008-09-18 16:57:00	0	16	3	7	5
1	2008-09-18 16:58:00	0	16	3	7	5
1	2008-09-18 16:59:00	0	16	3	7	5
1	2008-09-18 17:00:00	0	16	3	7	5
1	2008-09-18 17:01:00	0	17	3	7	5
1	2008-09-18 17:02:00	0	17	3	7	5
1	2008-09-18 17:03:00	0	17	3	7	5
1	2008-09-18 17:04:00	0	17	3	7	5
1	2008-09-18 17:05:00	0	17	3	7	5
1	2008-09-18 17:06:00	0	17	3	7	5
1	2008-09-18 17:07:00	0	17	3	7	5
1	2008-09-18 17:08:00	0	17	3	7	5
1	2008-09-18 17:09:00	0	17	3	7	5
1	2008-09-18 17:10:00	0	17	3	7	5
1	2008-09-18 17:11:00	0	17	3	7	5
1	2008-09-18 17:12:00	0	17	3	7	5
1	2008-09-18 17:13:00	0	17	3	7	5
1	2008-09-18 17:14:00	30	17	3	7	5
1	2008-09-18 17:15:00	51	17	3	7	5
1	2008-09-18 17:16:00	10	17	3	7	5
1	2008-09-18 17:17:00	0	17	3	7	5
1	2008-09-18 17:18:00	0	17	3	7	5
1	2008-09-18 17:19:00	0	17	3	7	5
1	2008-09-18 17:20:00	0	17	3	7	5
1	2008-09-18 17:21:00	0	17	3	7	5
1	2008-09-18 17:22:00	0	17	3	7	5
1	2008-09-18 17:23:00	0	17	3	7	5
1	2008-09-18 17:24:00	0	17	3	7	5
1	2008-09-18 17:25:00	71	17	3	7	5
1	2008-09-18 17:26:00	1680	17	3	7	5
1	2008-09-18 17:27:00	616	17	3	7	5
1	2008-09-18 17:28:00	0	17	3	7	5
1	2008-09-18 17:29:00	20	17	3	7	5
1	2008-09-18 17:30:00	0	17	3	7	5
1	2008-09-18 17:31:00	0	17	3	7	5
1	2008-09-18 17:32:00	0	17	3	7	5
1	2008-09-18 17:33:00	10	17	3	7	5
1	2008-09-18 17:34:00	0	17	3	7	5
1	2008-09-18 17:35:00	0	17	3	7	5
1	2008-09-18 17:36:00	0	17	3	7	5
1	2008-09-18 17:37:00	337	17	3	7	5
1	2008-09-18 17:38:00	144	17	3	7	5
1	2008-09-18 17:39:00	0	17	3	7	5
1	2008-09-18 17:40:00	0	17	3	7	5
1	2008-09-18 17:41:00	20	17	3	7	5
1	2008-09-18 17:42:00	0	17	3	7	5
1	2008-09-18 17:43:00	10	17	3	7	5
1	2008-09-18 17:44:00	0	17	3	7	5
1	2008-09-18 17:45:00	0	17	3	7	5
1	2008-09-18 17:46:00	205	17	3	7	5
1	2008-09-18 17:47:00	10	17	3	7	5
1	2008-09-18 17:48:00	0	17	3	7	5
1	2008-09-18 17:49:00	0	17	3	7	5
1	2008-09-18 17:50:00	0	17	3	7	5
1	2008-09-18 17:51:00	0	17	3	7	5
1	2008-09-18 17:52:00	0	17	3	7	5
1	2008-09-18 17:53:00	0	17	3	7	5
1	2008-09-18 17:54:00	10	17	3	7	5
1	2008-09-18 17:55:00	0	17	3	7	5
1	2008-09-18 17:56:00	0	17	3	7	5
1	2008-09-18 17:57:00	0	17	3	7	5
1	2008-09-18 17:58:00	0	17	3	7	5
1	2008-09-18 17:59:00	0	17	3	7	5
1	2008-09-18 18:00:00	0	17	3	7	5
1	2008-09-18 18:01:00	10	18	4	7	5
1	2008-09-18 18:02:00	0	18	4	7	5
1	2008-09-18 18:03:00	0	18	4	7	5
1	2008-09-18 18:04:00	0	18	4	7	5
1	2008-09-18 18:05:00	0	18	4	7	5
1	2008-09-18 18:06:00	0	18	4	7	5
1	2008-09-18 18:07:00	0	18	4	7	5
1	2008-09-18 18:08:00	0	18	4	7	5
1	2008-09-18 18:09:00	0	18	4	7	5
1	2008-09-18 18:10:00	0	18	4	7	5
1	2008-09-18 18:11:00	0	18	4	7	5
1	2008-09-18 18:12:00	0	18	4	7	5
1	2008-09-18 18:13:00	0	18	4	7	5
1	2008-09-18 18:14:00	41	18	4	7	5
1	2008-09-18 18:15:00	0	18	4	7	5
1	2008-09-18 18:16:00	156	18	4	7	5
1	2008-09-18 18:17:00	0	18	4	7	5
1	2008-09-18 18:18:00	0	18	4	7	5
1	2008-09-18 18:19:00	0	18	4	7	5
1	2008-09-18 18:20:00	0	18	4	7	5
1	2008-09-18 18:21:00	0	18	4	7	5
1	2008-09-18 18:22:00	0	18	4	7	5
1	2008-09-18 18:23:00	0	18	4	7	5
1	2008-09-18 18:24:00	0	18	4	7	5
1	2008-09-18 18:25:00	0	18	4	7	5
1	2008-09-18 18:26:00	0	18	4	7	5
1	2008-09-18 18:27:00	0	18	4	7	5
1	2008-09-18 18:28:00	0	18	4	7	5
1	2008-09-18 18:29:00	1050	18	4	7	5
1	2008-09-18 18:30:00	1026	18	4	7	5
1	2008-09-18 18:31:00	30	18	4	7	5
1	2008-09-18 18:32:00	10	18	4	7	5
1	2008-09-18 18:33:00	0	18	4	7	5
1	2008-09-18 18:34:00	71	18	4	7	5
1	2008-09-18 18:35:00	112	18	4	7	5
1	2008-09-18 18:36:00	41	18	4	7	5
1	2008-09-18 18:37:00	41	18	4	7	5
1	2008-09-18 18:38:00	0	18	4	7	5
1	2008-09-18 18:39:00	30	18	4	7	5
1	2008-09-18 18:40:00	380	18	4	7	5
1	2008-09-18 18:41:00	61	18	4	7	5
1	2008-09-18 18:42:00	295	18	4	7	5
1	2008-09-18 18:43:00	652	18	4	7	5
1	2008-09-18 18:44:00	61	18	4	7	5
1	2008-09-18 18:45:00	0	18	4	7	5
1	2008-09-18 18:46:00	10	18	4	7	5
1	2008-09-18 18:47:00	0	18	4	7	5
1	2008-09-18 18:48:00	0	18	4	7	5
1	2008-09-18 18:49:00	0	18	4	7	5
1	2008-09-18 18:50:00	0	18	4	7	5
1	2008-09-18 18:51:00	10	18	4	7	5
1	2008-09-18 18:52:00	193	18	4	7	5
1	2008-09-18 18:53:00	193	18	4	7	5
1	2008-09-18 18:54:00	181	18	4	7	5
1	2008-09-18 18:55:00	169	18	4	7	5
1	2008-09-18 18:56:00	30	18	4	7	5
1	2008-09-18 18:57:00	10	18	4	7	5
1	2008-09-18 18:58:00	0	18	4	7	5
1	2008-09-18 18:59:00	0	18	4	7	5
1	2008-09-18 19:00:00	0	18	4	7	5
1	2008-09-18 19:01:00	0	19	4	7	5
1	2008-09-18 19:02:00	0	19	4	7	5
1	2008-09-18 19:03:00	0	19	4	7	5
1	2008-09-18 19:04:00	0	19	4	7	5
1	2008-09-18 19:05:00	0	19	4	7	5
1	2008-09-18 19:06:00	0	19	4	7	5
1	2008-09-18 19:07:00	61	19	4	7	5
1	2008-09-18 19:08:00	280	19	4	7	5
1	2008-09-18 19:09:00	81	19	4	7	5
1	2008-09-18 19:10:00	634	19	4	7	5
1	2008-09-18 19:11:00	337	19	4	7	5
1	2008-09-18 19:12:00	673	19	4	7	5
1	2008-09-18 19:13:00	380	19	4	7	5
1	2008-09-18 19:14:00	181	19	4	7	5
1	2008-09-18 19:15:00	71	19	4	7	5
1	2008-09-18 19:16:00	91	19	4	7	5
1	2008-09-18 19:17:00	254	19	4	7	5
1	2008-09-18 19:18:00	30	19	4	7	5
1	2008-09-18 19:19:00	337	19	4	7	5
1	2008-09-18 19:20:00	0	19	4	7	5
1	2008-09-18 19:21:00	0	19	4	7	5
1	2008-09-18 19:22:00	0	19	4	7	5
1	2008-09-18 19:23:00	10	19	4	7	5
1	2008-09-18 19:24:00	0	19	4	7	5
1	2008-09-18 19:25:00	0	19	4	7	5
1	2008-09-18 19:26:00	10	19	4	7	5
1	2008-09-18 19:27:00	0	19	4	7	5
1	2008-09-18 19:28:00	0	19	4	7	5
1	2008-09-18 19:29:00	0	19	4	7	5
1	2008-09-18 19:30:00	0	19	4	7	5
1	2008-09-18 19:31:00	0	19	4	7	5
1	2008-09-18 19:32:00	0	19	4	7	5
1	2008-09-18 19:33:00	10	19	4	7	5
1	2008-09-18 19:34:00	10	19	4	7	5
1	2008-09-18 19:35:00	0	19	4	7	5
1	2008-09-18 19:36:00	0	19	4	7	5
1	2008-09-18 19:37:00	10	19	4	7	5
1	2008-09-18 19:38:00	0	19	4	7	5
1	2008-09-18 19:39:00	10	19	4	7	5
1	2008-09-18 19:40:00	0	19	4	7	5
1	2008-09-18 19:41:00	0	19	4	7	5
1	2008-09-18 19:42:00	0	19	4	7	5
1	2008-09-18 19:43:00	0	19	4	7	5
1	2008-09-18 19:44:00	0	19	4	7	5
1	2008-09-18 19:45:00	0	19	4	7	5
1	2008-09-18 19:46:00	0	19	4	7	5
1	2008-09-18 19:47:00	0	19	4	7	5
1	2008-09-18 19:48:00	0	19	4	7	5
1	2008-09-18 19:49:00	0	19	4	7	5
1	2008-09-18 19:50:00	0	19	4	7	5
1	2008-09-18 19:51:00	0	19	4	7	5
1	2008-09-18 19:52:00	0	19	4	7	5
1	2008-09-18 19:53:00	0	19	4	7	5
1	2008-09-18 19:54:00	0	19	4	7	5
1	2008-09-18 19:55:00	0	19	4	7	5
1	2008-09-18 19:56:00	0	19	4	7	5
1	2008-09-18 19:57:00	0	19	4	7	5
1	2008-09-18 19:58:00	0	19	4	7	5
1	2008-09-18 19:59:00	0	19	4	7	5
1	2008-09-18 20:00:00	0	19	4	7	5
1	2008-09-18 20:01:00	0	20	4	7	5
1	2008-09-18 20:02:00	0	20	4	7	5
1	2008-09-18 20:03:00	0	20	4	7	5
1	2008-09-18 20:04:00	0	20	4	7	5
1	2008-09-18 20:05:00	0	20	4	7	5
1	2008-09-18 20:06:00	0	20	4	7	5
1	2008-09-18 20:07:00	0	20	4	7	5
1	2008-09-18 20:08:00	0	20	4	7	5
1	2008-09-18 20:09:00	0	20	4	7	5
1	2008-09-18 20:10:00	0	20	4	7	5
1	2008-09-18 20:11:00	0	20	4	7	5
1	2008-09-18 20:12:00	0	20	4	7	5
1	2008-09-18 20:13:00	0	20	4	7	5
1	2008-09-18 20:14:00	0	20	4	7	5
1	2008-09-18 20:15:00	0	20	4	7	5
1	2008-09-18 20:16:00	0	20	4	7	5
1	2008-09-18 20:17:00	0	20	4	7	5
1	2008-09-18 20:18:00	0	20	4	7	5
1	2008-09-18 20:19:00	0	20	4	7	5
1	2008-09-18 20:20:00	0	20	4	7	5
1	2008-09-18 20:21:00	0	20	4	7	5
1	2008-09-18 20:22:00	0	20	4	7	5
1	2008-09-18 20:23:00	0	20	4	7	5
1	2008-09-18 20:24:00	0	20	4	7	5
1	2008-09-18 20:25:00	0	20	4	7	5
1	2008-09-18 20:26:00	0	20	4	7	5
1	2008-09-18 20:27:00	51	20	4	7	5
1	2008-09-18 20:28:00	0	20	4	7	5
1	2008-09-18 20:29:00	81	20	4	7	5
1	2008-09-18 20:30:00	0	20	4	7	5
1	2008-09-18 20:31:00	0	20	4	7	5
1	2008-09-18 20:32:00	0	20	4	7	5
1	2008-09-18 20:33:00	0	20	4	7	5
1	2008-09-18 20:34:00	0	20	4	7	5
1	2008-09-18 20:35:00	0	20	4	7	5
1	2008-09-18 20:36:00	0	20	4	7	5
1	2008-09-18 20:37:00	0	20	4	7	5
1	2008-09-18 20:38:00	0	20	4	7	5
1	2008-09-18 20:39:00	0	20	4	7	5
1	2008-09-18 20:40:00	0	20	4	7	5
1	2008-09-18 20:41:00	0	20	4	7	5
1	2008-09-18 20:42:00	0	20	4	7	5
1	2008-09-18 20:43:00	0	20	4	7	5
1	2008-09-18 20:44:00	0	20	4	7	5
1	2008-09-18 20:45:00	0	20	4	7	5
1	2008-09-18 20:46:00	0	20	4	7	5
1	2008-09-18 20:47:00	0	20	4	7	5
1	2008-09-18 20:48:00	0	20	4	7	5
1	2008-09-18 20:49:00	0	20	4	7	5
1	2008-09-18 20:50:00	0	20	4	7	5
1	2008-09-18 20:51:00	0	20	4	7	5
1	2008-09-18 20:52:00	0	20	4	7	5
1	2008-09-18 20:53:00	0	20	4	7	5
1	2008-09-18 20:54:00	0	20	4	7	5
1	2008-09-18 20:55:00	0	20	4	7	5
1	2008-09-18 20:56:00	0	20	4	7	5
1	2008-09-18 20:57:00	10	20	4	7	5
1	2008-09-18 20:58:00	156	20	4	7	5
1	2008-09-18 20:59:00	475	20	4	7	5
1	2008-09-18 21:00:00	132	20	4	7	5
1	2008-09-18 21:01:00	394	21	4	7	5
1	2008-09-18 21:02:00	10	21	4	7	5
1	2008-09-18 21:03:00	0	21	4	7	5
1	2008-09-18 21:04:00	10	21	4	7	5
1	2008-09-18 21:05:00	652	21	4	7	5
1	2008-09-18 21:06:00	652	21	4	7	5
1	2008-09-18 21:07:00	169	21	4	7	5
1	2008-09-18 21:08:00	181	21	4	7	5
1	2008-09-18 21:09:00	10	21	4	7	5
1	2008-09-18 21:10:00	0	21	4	7	5
1	2008-09-18 21:11:00	0	21	4	7	5
1	2008-09-18 21:12:00	0	21	4	7	5
1	2008-09-18 21:13:00	0	21	4	7	5
1	2008-09-18 21:14:00	0	21	4	7	5
1	2008-09-18 21:15:00	0	21	4	7	5
1	2008-09-18 21:16:00	309	21	4	7	5
1	2008-09-18 21:17:00	122	21	4	7	5
1	2008-09-18 21:18:00	0	21	4	7	5
1	2008-09-18 21:19:00	0	21	4	7	5
1	2008-09-18 21:20:00	0	21	4	7	5
1	2008-09-18 21:21:00	0	21	4	7	5
1	2008-09-18 21:22:00	0	21	4	7	5
1	2008-09-18 21:23:00	0	21	4	7	5
1	2008-09-18 21:24:00	0	21	4	7	5
1	2008-09-18 21:25:00	0	21	4	7	5
1	2008-09-18 21:26:00	0	21	4	7	5
1	2008-09-18 21:27:00	0	21	4	7	5
1	2008-09-18 21:28:00	0	21	4	7	5
1	2008-09-18 21:29:00	0	21	4	7	5
1	2008-09-18 21:30:00	0	21	4	7	5
1	2008-09-18 21:31:00	0	21	4	7	5
1	2008-09-18 21:32:00	0	21	4	7	5
1	2008-09-18 21:33:00	0	21	4	7	5
1	2008-09-18 21:34:00	10	21	4	7	5
1	2008-09-18 21:35:00	0	21	4	7	5
1	2008-09-18 21:36:00	10	21	4	7	5
1	2008-09-18 21:37:00	0	21	4	7	5
1	2008-09-18 21:38:00	0	21	4	7	5
1	2008-09-18 21:39:00	0	21	4	7	5
1	2008-09-18 21:40:00	0	21	4	7	5
1	2008-09-18 21:41:00	10	21	4	7	5
1	2008-09-18 21:42:00	0	21	4	7	5
1	2008-09-18 21:43:00	0	21	4	7	5
1	2008-09-18 21:44:00	0	21	4	7	5
1	2008-09-18 21:45:00	0	21	4	7	5
1	2008-09-18 21:46:00	0	21	4	7	5
1	2008-09-18 21:47:00	0	21	4	7	5
1	2008-09-18 21:48:00	0	21	4	7	5
1	2008-09-18 21:49:00	0	21	4	7	5
1	2008-09-18 21:50:00	0	21	4	7	5
1	2008-09-18 21:51:00	20	21	4	7	5
1	2008-09-18 21:52:00	0	21	4	7	5
1	2008-09-18 21:53:00	0	21	4	7	5
1	2008-09-18 21:54:00	0	21	4	7	5
1	2008-09-18 21:55:00	0	21	4	7	5
1	2008-09-18 21:56:00	0	21	4	7	5
1	2008-09-18 21:57:00	0	21	4	7	5
1	2008-09-18 21:58:00	0	21	4	7	5
1	2008-09-18 21:59:00	0	21	4	7	5
1	2008-09-18 22:00:00	0	21	4	7	5
1	2008-09-18 22:01:00	0	22	4	7	5
1	2008-09-18 22:02:00	0	22	4	7	5
1	2008-09-18 22:03:00	0	22	4	7	5
1	2008-09-18 22:04:00	0	22	4	7	5
1	2008-09-18 22:05:00	0	22	4	7	5
1	2008-09-18 22:06:00	0	22	4	7	5
1	2008-09-18 22:07:00	0	22	4	7	5
1	2008-09-18 22:08:00	0	22	4	7	5
1	2008-09-18 22:09:00	0	22	4	7	5
1	2008-09-18 22:10:00	0	22	4	7	5
1	2008-09-18 22:11:00	0	22	4	7	5
1	2008-09-18 22:12:00	0	22	4	7	5
1	2008-09-18 22:13:00	0	22	4	7	5
1	2008-09-18 22:14:00	0	22	4	7	5
1	2008-09-18 22:15:00	0	22	4	7	5
1	2008-09-18 22:16:00	673	22	4	7	5
1	2008-09-18 22:17:00	733	22	4	7	5
1	2008-09-18 22:18:00	230	22	4	7	5
1	2008-09-18 22:19:00	351	22	4	7	5
1	2008-09-18 22:20:00	579	22	4	7	5
1	2008-09-18 22:21:00	254	22	4	7	5
1	2008-09-18 22:22:00	10	22	4	7	5
1	2008-09-18 22:23:00	0	22	4	7	5
1	2008-09-18 22:24:00	0	22	4	7	5
1	2008-09-18 22:25:00	0	22	4	7	5
1	2008-09-18 22:26:00	217	22	4	7	5
1	2008-09-18 22:27:00	41	22	4	7	5
1	2008-09-18 22:28:00	193	22	4	7	5
1	2008-09-18 22:29:00	10	22	4	7	5
1	2008-09-18 22:30:00	0	22	4	7	5
1	2008-09-18 22:31:00	0	22	4	7	5
1	2008-09-18 22:32:00	0	22	4	7	5
1	2008-09-18 22:33:00	0	22	4	7	5
1	2008-09-18 22:34:00	81	22	4	7	5
1	2008-09-18 22:35:00	169	22	4	7	5
1	2008-09-18 22:36:00	20	22	4	7	5
1	2008-09-18 22:37:00	0	22	4	7	5
1	2008-09-18 22:38:00	10	22	4	7	5
1	2008-09-18 22:39:00	0	22	4	7	5
1	2008-09-18 22:40:00	0	22	4	7	5
1	2008-09-18 22:41:00	0	22	4	7	5
1	2008-09-18 22:42:00	0	22	4	7	5
1	2008-09-18 22:43:00	0	22	4	7	5
1	2008-09-18 22:44:00	0	22	4	7	5
1	2008-09-18 22:45:00	10	22	4	7	5
1	2008-09-18 22:46:00	561	22	4	7	5
1	2008-09-18 22:47:00	91	22	4	7	5
1	2008-09-18 22:48:00	0	22	4	7	5
1	2008-09-18 22:49:00	0	22	4	7	5
1	2008-09-18 22:50:00	0	22	4	7	5
1	2008-09-18 22:51:00	0	22	4	7	5
1	2008-09-18 22:52:00	0	22	4	7	5
1	2008-09-18 22:53:00	0	22	4	7	5
1	2008-09-18 22:54:00	0	22	4	7	5
1	2008-09-18 22:55:00	0	22	4	7	5
1	2008-09-18 22:56:00	0	22	4	7	5
1	2008-09-18 22:57:00	0	22	4	7	5
1	2008-09-18 22:58:00	0	22	4	7	5
1	2008-09-18 22:59:00	0	22	4	7	5
1	2008-09-18 23:00:00	0	22	4	7	5
1	2008-09-18 23:01:00	0	23	4	7	5
1	2008-09-18 23:02:00	0	23	4	7	5
1	2008-09-18 23:03:00	0	23	4	7	5
1	2008-09-18 23:04:00	0	23	4	7	5
1	2008-09-18 23:05:00	0	23	4	7	5
1	2008-09-18 23:06:00	0	23	4	7	5
1	2008-09-18 23:07:00	10	23	4	7	5
1	2008-09-18 23:08:00	20	23	4	7	5
1	2008-09-18 23:09:00	0	23	4	7	5
1	2008-09-18 23:10:00	0	23	4	7	5
1	2008-09-18 23:11:00	0	23	4	7	5
1	2008-09-18 23:12:00	0	23	4	7	5
1	2008-09-18 23:13:00	0	23	4	7	5
1	2008-09-18 23:14:00	0	23	4	7	5
1	2008-09-18 23:15:00	0	23	4	7	5
1	2008-09-18 23:16:00	0	23	4	7	5
1	2008-09-18 23:17:00	10	23	4	7	5
1	2008-09-18 23:18:00	0	23	4	7	5
1	2008-09-18 23:19:00	10	23	4	7	5
1	2008-09-18 23:20:00	0	23	4	7	5
1	2008-09-18 23:21:00	0	23	4	7	5
1	2008-09-18 23:22:00	0	23	4	7	5
1	2008-09-18 23:23:00	0	23	4	7	5
1	2008-09-18 23:24:00	0	23	4	7	5
1	2008-09-18 23:25:00	0	23	4	7	5
1	2008-09-18 23:26:00	0	23	4	7	5
1	2008-09-18 23:27:00	0	23	4	7	5
1	2008-09-18 23:28:00	0	23	4	7	5
1	2008-09-18 23:29:00	0	23	4	7	5
1	2008-09-18 23:30:00	0	23	4	7	5
1	2008-09-18 23:31:00	0	23	4	7	5
1	2008-09-18 23:32:00	0	23	4	7	5
1	2008-09-18 23:33:00	0	23	4	7	5
1	2008-09-18 23:34:00	10	23	4	7	5
1	2008-09-18 23:35:00	10	23	4	7	5
1	2008-09-18 23:36:00	10	23	4	7	5
1	2008-09-18 23:37:00	20	23	4	7	5
1	2008-09-18 23:38:00	0	23	4	7	5
1	2008-09-18 23:39:00	0	23	4	7	5
1	2008-09-18 23:40:00	0	23	4	7	5
1	2008-09-18 23:41:00	0	23	4	7	5
1	2008-09-18 23:42:00	0	23	4	7	5
1	2008-09-18 23:43:00	0	23	4	7	5
1	2008-09-18 23:44:00	10	23	4	7	5
1	2008-09-18 23:45:00	10	23	4	7	5
1	2008-09-18 23:46:00	0	23	4	7	5
1	2008-09-18 23:47:00	0	23	4	7	5
1	2008-09-18 23:48:00	0	23	4	7	5
1	2008-09-18 23:49:00	0	23	4	7	5
1	2008-09-18 23:50:00	0	23	4	7	5
1	2008-09-18 23:51:00	0	23	4	7	5
1	2008-09-18 23:52:00	0	23	4	7	5
1	2008-09-18 23:53:00	0	23	4	7	5
1	2008-09-18 23:54:00	0	23	4	7	5
1	2008-09-18 23:55:00	0	23	4	7	5
1	2008-09-18 23:56:00	0	23	4	7	5
1	2008-09-18 23:57:00	0	23	4	7	5
1	2008-09-18 23:58:00	0	23	4	7	5
1	2008-09-18 23:59:00	10	23	4	7	5
1	2008-09-19	0	23	4	7	5
1	2008-09-19 00:01:00	0	0	1	8	6
1	2008-09-19 00:02:00	0	0	1	8	6
1	2008-09-19 00:03:00	0	0	1	8	6
1	2008-09-19 00:04:00	0	0	1	8	6
1	2008-09-19 00:05:00	0	0	1	8	6
1	2008-09-19 00:06:00	0	0	1	8	6
1	2008-09-19 00:07:00	0	0	1	8	6
1	2008-09-19 00:08:00	0	0	1	8	6
1	2008-09-19 00:09:00	0	0	1	8	6
1	2008-09-19 00:10:00	0	0	1	8	6
1	2008-09-19 00:11:00	0	0	1	8	6
1	2008-09-19 00:12:00	0	0	1	8	6
1	2008-09-19 00:13:00	0	0	1	8	6
1	2008-09-19 00:14:00	0	0	1	8	6
1	2008-09-19 00:15:00	0	0	1	8	6
1	2008-09-19 00:16:00	0	0	1	8	6
1	2008-09-19 00:17:00	0	0	1	8	6
1	2008-09-19 00:18:00	0	0	1	8	6
1	2008-09-19 00:19:00	0	0	1	8	6
1	2008-09-19 00:20:00	0	0	1	8	6
1	2008-09-19 00:21:00	0	0	1	8	6
1	2008-09-19 00:22:00	0	0	1	8	6
1	2008-09-19 00:23:00	0	0	1	8	6
1	2008-09-19 00:24:00	0	0	1	8	6
1	2008-09-19 00:25:00	0	0	1	8	6
1	2008-09-19 00:26:00	0	0	1	8	6
1	2008-09-19 00:27:00	0	0	1	8	6
1	2008-09-19 00:28:00	0	0	1	8	6
1	2008-09-19 00:29:00	0	0	1	8	6
1	2008-09-19 00:30:00	10	0	1	8	6
1	2008-09-19 00:31:00	0	0	1	8	6
1	2008-09-19 00:32:00	0	0	1	8	6
1	2008-09-19 00:33:00	0	0	1	8	6
1	2008-09-19 00:34:00	0	0	1	8	6
1	2008-09-19 00:35:00	0	0	1	8	6
1	2008-09-19 00:36:00	0	0	1	8	6
1	2008-09-19 00:37:00	0	0	1	8	6
1	2008-09-19 00:38:00	0	0	1	8	6
1	2008-09-19 00:39:00	0	0	1	8	6
1	2008-09-19 00:40:00	351	0	1	8	6
1	2008-09-19 00:41:00	0	0	1	8	6
1	2008-09-19 00:42:00	30	0	1	8	6
1	2008-09-19 00:43:00	0	0	1	8	6
1	2008-09-19 00:44:00	0	0	1	8	6
1	2008-09-19 00:45:00	181	0	1	8	6
1	2008-09-19 00:46:00	61	0	1	8	6
1	2008-09-19 00:47:00	0	0	1	8	6
1	2008-09-19 00:48:00	0	0	1	8	6
1	2008-09-19 00:49:00	0	0	1	8	6
1	2008-09-19 00:50:00	0	0	1	8	6
1	2008-09-19 00:51:00	0	0	1	8	6
1	2008-09-19 00:52:00	0	0	1	8	6
1	2008-09-19 00:53:00	0	0	1	8	6
1	2008-09-19 00:54:00	0	0	1	8	6
1	2008-09-19 00:55:00	0	0	1	8	6
1	2008-09-19 00:56:00	0	0	1	8	6
1	2008-09-19 00:57:00	0	0	1	8	6
1	2008-09-19 00:58:00	0	0	1	8	6
1	2008-09-19 00:59:00	0	0	1	8	6
1	2008-09-19 01:00:00	0	0	1	8	6
1	2008-09-19 01:01:00	0	1	1	8	6
1	2008-09-19 01:02:00	0	1	1	8	6
1	2008-09-19 01:03:00	0	1	1	8	6
1	2008-09-19 01:04:00	0	1	1	8	6
1	2008-09-19 01:05:00	0	1	1	8	6
1	2008-09-19 01:06:00	0	1	1	8	6
1	2008-09-19 01:07:00	0	1	1	8	6
1	2008-09-19 01:08:00	0	1	1	8	6
1	2008-09-19 01:09:00	0	1	1	8	6
1	2008-09-19 01:10:00	0	1	1	8	6
1	2008-09-19 01:11:00	0	1	1	8	6
1	2008-09-19 01:12:00	0	1	1	8	6
1	2008-09-19 01:13:00	0	1	1	8	6
1	2008-09-19 01:14:00	0	1	1	8	6
1	2008-09-19 01:15:00	0	1	1	8	6
1	2008-09-19 01:16:00	0	1	1	8	6
1	2008-09-19 01:17:00	0	1	1	8	6
1	2008-09-19 01:18:00	0	1	1	8	6
1	2008-09-19 01:19:00	0	1	1	8	6
1	2008-09-19 01:20:00	0	1	1	8	6
1	2008-09-19 01:21:00	0	1	1	8	6
1	2008-09-19 01:22:00	0	1	1	8	6
1	2008-09-19 01:23:00	0	1	1	8	6
1	2008-09-19 01:24:00	0	1	1	8	6
1	2008-09-19 01:25:00	0	1	1	8	6
1	2008-09-19 01:26:00	0	1	1	8	6
1	2008-09-19 01:27:00	0	1	1	8	6
1	2008-09-19 01:28:00	0	1	1	8	6
1	2008-09-19 01:29:00	0	1	1	8	6
1	2008-09-19 01:30:00	0	1	1	8	6
1	2008-09-19 01:31:00	0	1	1	8	6
1	2008-09-19 01:32:00	0	1	1	8	6
1	2008-09-19 01:33:00	0	1	1	8	6
1	2008-09-19 01:34:00	0	1	1	8	6
1	2008-09-19 01:35:00	0	1	1	8	6
1	2008-09-19 01:36:00	0	1	1	8	6
1	2008-09-19 01:37:00	0	1	1	8	6
1	2008-09-19 01:38:00	0	1	1	8	6
1	2008-09-19 01:39:00	0	1	1	8	6
1	2008-09-19 01:40:00	0	1	1	8	6
1	2008-09-19 01:41:00	0	1	1	8	6
1	2008-09-19 01:42:00	0	1	1	8	6
1	2008-09-19 01:43:00	0	1	1	8	6
1	2008-09-19 01:44:00	0	1	1	8	6
1	2008-09-19 01:45:00	0	1	1	8	6
1	2008-09-19 01:46:00	0	1	1	8	6
1	2008-09-19 01:47:00	0	1	1	8	6
1	2008-09-19 01:48:00	0	1	1	8	6
1	2008-09-19 01:49:00	0	1	1	8	6
1	2008-09-19 01:50:00	0	1	1	8	6
1	2008-09-19 01:51:00	0	1	1	8	6
1	2008-09-19 01:52:00	0	1	1	8	6
1	2008-09-19 01:53:00	0	1	1	8	6
1	2008-09-19 01:54:00	0	1	1	8	6
1	2008-09-19 01:55:00	0	1	1	8	6
1	2008-09-19 01:56:00	0	1	1	8	6
1	2008-09-19 01:57:00	0	1	1	8	6
1	2008-09-19 01:58:00	0	1	1	8	6
1	2008-09-19 01:59:00	0	1	1	8	6
1	2008-09-19 02:00:00	0	1	1	8	6
1	2008-09-19 02:01:00	0	2	1	8	6
1	2008-09-19 02:02:00	30	2	1	8	6
1	2008-09-19 02:03:00	10	2	1	8	6
1	2008-09-19 02:04:00	0	2	1	8	6
1	2008-09-19 02:05:00	0	2	1	8	6
1	2008-09-19 02:06:00	0	2	1	8	6
1	2008-09-19 02:07:00	71	2	1	8	6
1	2008-09-19 02:08:00	0	2	1	8	6
1	2008-09-19 02:09:00	30	2	1	8	6
1	2008-09-19 02:10:00	0	2	1	8	6
1	2008-09-19 02:11:00	0	2	1	8	6
1	2008-09-19 02:12:00	0	2	1	8	6
1	2008-09-19 02:13:00	0	2	1	8	6
1	2008-09-19 02:14:00	0	2	1	8	6
1	2008-09-19 02:15:00	0	2	1	8	6
1	2008-09-19 02:16:00	0	2	1	8	6
1	2008-09-19 02:17:00	0	2	1	8	6
1	2008-09-19 02:18:00	0	2	1	8	6
1	2008-09-19 02:19:00	0	2	1	8	6
1	2008-09-19 02:20:00	0	2	1	8	6
1	2008-09-19 02:21:00	0	2	1	8	6
1	2008-09-19 02:22:00	0	2	1	8	6
1	2008-09-19 02:23:00	0	2	1	8	6
1	2008-09-19 02:24:00	0	2	1	8	6
1	2008-09-19 02:25:00	0	2	1	8	6
1	2008-09-19 02:26:00	0	2	1	8	6
1	2008-09-19 02:27:00	0	2	1	8	6
1	2008-09-19 02:28:00	0	2	1	8	6
1	2008-09-19 02:29:00	0	2	1	8	6
1	2008-09-19 02:30:00	0	2	1	8	6
1	2008-09-19 02:31:00	0	2	1	8	6
1	2008-09-19 02:32:00	0	2	1	8	6
1	2008-09-19 02:33:00	0	2	1	8	6
1	2008-09-19 02:34:00	0	2	1	8	6
1	2008-09-19 02:35:00	0	2	1	8	6
1	2008-09-19 02:36:00	0	2	1	8	6
1	2008-09-19 02:37:00	0	2	1	8	6
1	2008-09-19 02:38:00	0	2	1	8	6
1	2008-09-19 02:39:00	0	2	1	8	6
1	2008-09-19 02:40:00	0	2	1	8	6
1	2008-09-19 02:41:00	0	2	1	8	6
1	2008-09-19 02:42:00	0	2	1	8	6
1	2008-09-19 02:43:00	0	2	1	8	6
1	2008-09-19 02:44:00	0	2	1	8	6
1	2008-09-19 02:45:00	0	2	1	8	6
1	2008-09-19 02:46:00	0	2	1	8	6
1	2008-09-19 02:47:00	0	2	1	8	6
1	2008-09-19 02:48:00	0	2	1	8	6
1	2008-09-19 02:49:00	0	2	1	8	6
1	2008-09-19 02:50:00	0	2	1	8	6
1	2008-09-19 02:51:00	10	2	1	8	6
1	2008-09-19 02:52:00	0	2	1	8	6
1	2008-09-19 02:53:00	0	2	1	8	6
1	2008-09-19 02:54:00	0	2	1	8	6
1	2008-09-19 02:55:00	0	2	1	8	6
1	2008-09-19 02:56:00	0	2	1	8	6
1	2008-09-19 02:57:00	0	2	1	8	6
1	2008-09-19 02:58:00	0	2	1	8	6
1	2008-09-19 02:59:00	0	2	1	8	6
1	2008-09-19 03:00:00	0	2	1	8	6
1	2008-09-19 03:01:00	0	3	1	8	6
1	2008-09-19 03:02:00	0	3	1	8	6
1	2008-09-19 03:03:00	0	3	1	8	6
1	2008-09-19 03:04:00	0	3	1	8	6
1	2008-09-19 03:05:00	0	3	1	8	6
1	2008-09-19 03:06:00	0	3	1	8	6
1	2008-09-19 03:07:00	0	3	1	8	6
1	2008-09-19 03:08:00	0	3	1	8	6
1	2008-09-19 03:09:00	0	3	1	8	6
1	2008-09-19 03:10:00	0	3	1	8	6
1	2008-09-19 03:11:00	0	3	1	8	6
1	2008-09-19 03:12:00	0	3	1	8	6
1	2008-09-19 03:13:00	0	3	1	8	6
1	2008-09-19 03:14:00	0	3	1	8	6
1	2008-09-19 03:15:00	0	3	1	8	6
1	2008-09-19 03:16:00	0	3	1	8	6
1	2008-09-19 03:17:00	0	3	1	8	6
1	2008-09-19 03:18:00	0	3	1	8	6
1	2008-09-19 03:19:00	0	3	1	8	6
1	2008-09-19 03:20:00	0	3	1	8	6
1	2008-09-19 03:21:00	0	3	1	8	6
1	2008-09-19 03:22:00	0	3	1	8	6
1	2008-09-19 03:23:00	0	3	1	8	6
1	2008-09-19 03:24:00	0	3	1	8	6
1	2008-09-19 03:25:00	132	3	1	8	6
1	2008-09-19 03:26:00	410	3	1	8	6
1	2008-09-19 03:27:00	20	3	1	8	6
1	2008-09-19 03:28:00	0	3	1	8	6
1	2008-09-19 03:29:00	0	3	1	8	6
1	2008-09-19 03:30:00	0	3	1	8	6
1	2008-09-19 03:31:00	0	3	1	8	6
1	2008-09-19 03:32:00	0	3	1	8	6
1	2008-09-19 03:33:00	0	3	1	8	6
1	2008-09-19 03:34:00	0	3	1	8	6
1	2008-09-19 03:35:00	0	3	1	8	6
1	2008-09-19 03:36:00	0	3	1	8	6
1	2008-09-19 03:37:00	0	3	1	8	6
1	2008-09-19 03:38:00	0	3	1	8	6
1	2008-09-19 03:39:00	0	3	1	8	6
1	2008-09-19 03:40:00	0	3	1	8	6
1	2008-09-19 03:41:00	0	3	1	8	6
1	2008-09-19 03:42:00	0	3	1	8	6
1	2008-09-19 03:43:00	0	3	1	8	6
1	2008-09-19 03:44:00	0	3	1	8	6
1	2008-09-19 03:45:00	0	3	1	8	6
1	2008-09-19 03:46:00	0	3	1	8	6
1	2008-09-19 03:47:00	0	3	1	8	6
1	2008-09-19 03:48:00	0	3	1	8	6
1	2008-09-19 03:49:00	0	3	1	8	6
1	2008-09-19 03:50:00	0	3	1	8	6
1	2008-09-19 03:51:00	0	3	1	8	6
1	2008-09-19 03:52:00	0	3	1	8	6
1	2008-09-19 03:53:00	0	3	1	8	6
1	2008-09-19 03:54:00	0	3	1	8	6
1	2008-09-19 03:55:00	0	3	1	8	6
1	2008-09-19 03:56:00	20	3	1	8	6
1	2008-09-19 03:57:00	30	3	1	8	6
1	2008-09-19 03:58:00	20	3	1	8	6
1	2008-09-19 03:59:00	0	3	1	8	6
1	2008-09-19 04:00:00	0	3	1	8	6
1	2008-09-19 04:01:00	0	4	1	8	6
1	2008-09-19 04:02:00	0	4	1	8	6
1	2008-09-19 04:03:00	0	4	1	8	6
1	2008-09-19 04:04:00	0	4	1	8	6
1	2008-09-19 04:05:00	0	4	1	8	6
1	2008-09-19 04:06:00	0	4	1	8	6
1	2008-09-19 04:07:00	0	4	1	8	6
1	2008-09-19 04:08:00	0	4	1	8	6
1	2008-09-19 04:09:00	0	4	1	8	6
1	2008-09-19 04:10:00	0	4	1	8	6
1	2008-09-19 04:11:00	0	4	1	8	6
1	2008-09-19 04:12:00	0	4	1	8	6
1	2008-09-19 04:13:00	205	4	1	8	6
1	2008-09-19 04:14:00	91	4	1	8	6
1	2008-09-19 04:15:00	0	4	1	8	6
1	2008-09-19 04:16:00	0	4	1	8	6
1	2008-09-19 04:17:00	0	4	1	8	6
1	2008-09-19 04:18:00	0	4	1	8	6
1	2008-09-19 04:19:00	0	4	1	8	6
1	2008-09-19 04:20:00	0	4	1	8	6
1	2008-09-19 04:21:00	0	4	1	8	6
1	2008-09-19 04:22:00	20	4	1	8	6
1	2008-09-19 04:23:00	0	4	1	8	6
1	2008-09-19 04:24:00	0	4	1	8	6
1	2008-09-19 04:25:00	0	4	1	8	6
1	2008-09-19 04:26:00	0	4	1	8	6
1	2008-09-19 04:27:00	0	4	1	8	6
1	2008-09-19 04:28:00	0	4	1	8	6
1	2008-09-19 04:29:00	0	4	1	8	6
1	2008-09-19 04:30:00	0	4	1	8	6
1	2008-09-19 04:31:00	0	4	1	8	6
1	2008-09-19 04:32:00	0	4	1	8	6
1	2008-09-19 04:33:00	0	4	1	8	6
1	2008-09-19 04:34:00	0	4	1	8	6
1	2008-09-19 04:35:00	0	4	1	8	6
1	2008-09-19 04:36:00	0	4	1	8	6
1	2008-09-19 04:37:00	0	4	1	8	6
1	2008-09-19 04:38:00	0	4	1	8	6
1	2008-09-19 04:39:00	0	4	1	8	6
1	2008-09-19 04:40:00	0	4	1	8	6
1	2008-09-19 04:41:00	0	4	1	8	6
1	2008-09-19 04:42:00	0	4	1	8	6
1	2008-09-19 04:43:00	0	4	1	8	6
1	2008-09-19 04:44:00	0	4	1	8	6
1	2008-09-19 04:45:00	0	4	1	8	6
1	2008-09-19 04:46:00	0	4	1	8	6
1	2008-09-19 04:47:00	0	4	1	8	6
1	2008-09-19 04:48:00	0	4	1	8	6
1	2008-09-19 04:49:00	0	4	1	8	6
1	2008-09-19 04:50:00	0	4	1	8	6
1	2008-09-19 04:51:00	0	4	1	8	6
1	2008-09-19 04:52:00	0	4	1	8	6
1	2008-09-19 04:53:00	0	4	1	8	6
1	2008-09-19 04:54:00	0	4	1	8	6
1	2008-09-19 04:55:00	0	4	1	8	6
1	2008-09-19 04:56:00	0	4	1	8	6
1	2008-09-19 04:57:00	0	4	1	8	6
1	2008-09-19 04:58:00	0	4	1	8	6
1	2008-09-19 04:59:00	0	4	1	8	6
1	2008-09-19 05:00:00	0	4	1	8	6
1	2008-09-19 05:01:00	0	5	1	8	6
1	2008-09-19 05:02:00	30	5	1	8	6
1	2008-09-19 05:03:00	10	5	1	8	6
1	2008-09-19 05:04:00	51	5	1	8	6
1	2008-09-19 05:05:00	0	5	1	8	6
1	2008-09-19 05:06:00	0	5	1	8	6
1	2008-09-19 05:07:00	20	5	1	8	6
1	2008-09-19 05:08:00	10	5	1	8	6
1	2008-09-19 05:09:00	0	5	1	8	6
1	2008-09-19 05:10:00	0	5	1	8	6
1	2008-09-19 05:11:00	0	5	1	8	6
1	2008-09-19 05:12:00	0	5	1	8	6
1	2008-09-19 05:13:00	0	5	1	8	6
1	2008-09-19 05:14:00	0	5	1	8	6
1	2008-09-19 05:15:00	0	5	1	8	6
1	2008-09-19 05:16:00	0	5	1	8	6
1	2008-09-19 05:17:00	0	5	1	8	6
1	2008-09-19 05:18:00	0	5	1	8	6
1	2008-09-19 05:19:00	0	5	1	8	6
1	2008-09-19 05:20:00	0	5	1	8	6
1	2008-09-19 05:21:00	0	5	1	8	6
1	2008-09-19 05:22:00	0	5	1	8	6
1	2008-09-19 05:23:00	0	5	1	8	6
1	2008-09-19 05:24:00	0	5	1	8	6
1	2008-09-19 05:25:00	0	5	1	8	6
1	2008-09-19 05:26:00	0	5	1	8	6
1	2008-09-19 05:27:00	0	5	1	8	6
1	2008-09-19 05:28:00	0	5	1	8	6
1	2008-09-19 05:29:00	0	5	1	8	6
1	2008-09-19 05:30:00	0	5	1	8	6
1	2008-09-19 05:31:00	0	5	1	8	6
1	2008-09-19 05:32:00	10	5	1	8	6
1	2008-09-19 05:33:00	0	5	1	8	6
1	2008-09-19 05:34:00	0	5	1	8	6
1	2008-09-19 05:35:00	0	5	1	8	6
1	2008-09-19 05:36:00	0	5	1	8	6
1	2008-09-19 05:37:00	0	5	1	8	6
1	2008-09-19 05:38:00	0	5	1	8	6
1	2008-09-19 05:39:00	0	5	1	8	6
1	2008-09-19 05:40:00	0	5	1	8	6
1	2008-09-19 05:41:00	0	5	1	8	6
1	2008-09-19 05:42:00	0	5	1	8	6
1	2008-09-19 05:43:00	0	5	1	8	6
1	2008-09-19 05:44:00	0	5	1	8	6
1	2008-09-19 05:45:00	0	5	1	8	6
1	2008-09-19 05:46:00	0	5	1	8	6
1	2008-09-19 05:47:00	0	5	1	8	6
1	2008-09-19 05:48:00	0	5	1	8	6
1	2008-09-19 05:49:00	0	5	1	8	6
1	2008-09-19 05:50:00	0	5	1	8	6
1	2008-09-19 05:51:00	0	5	1	8	6
1	2008-09-19 05:52:00	0	5	1	8	6
1	2008-09-19 05:53:00	0	5	1	8	6
1	2008-09-19 05:54:00	0	5	1	8	6
1	2008-09-19 05:55:00	0	5	1	8	6
1	2008-09-19 05:56:00	0	5	1	8	6
1	2008-09-19 05:57:00	0	5	1	8	6
1	2008-09-19 05:58:00	0	5	1	8	6
1	2008-09-19 05:59:00	0	5	1	8	6
1	2008-09-19 06:00:00	0	5	1	8	6
1	2008-09-19 06:01:00	0	6	2	8	6
1	2008-09-19 06:02:00	0	6	2	8	6
1	2008-09-19 06:03:00	0	6	2	8	6
1	2008-09-19 06:04:00	0	6	2	8	6
1	2008-09-19 06:05:00	0	6	2	8	6
1	2008-09-19 06:06:00	0	6	2	8	6
1	2008-09-19 06:07:00	0	6	2	8	6
1	2008-09-19 06:08:00	0	6	2	8	6
1	2008-09-19 06:09:00	0	6	2	8	6
1	2008-09-19 06:10:00	0	6	2	8	6
1	2008-09-19 06:11:00	0	6	2	8	6
1	2008-09-19 06:12:00	0	6	2	8	6
1	2008-09-19 06:13:00	0	6	2	8	6
1	2008-09-19 06:14:00	0	6	2	8	6
1	2008-09-19 06:15:00	0	6	2	8	6
1	2008-09-19 06:16:00	0	6	2	8	6
1	2008-09-19 06:17:00	0	6	2	8	6
1	2008-09-19 06:18:00	0	6	2	8	6
1	2008-09-19 06:19:00	10	6	2	8	6
1	2008-09-19 06:20:00	0	6	2	8	6
1	2008-09-19 06:21:00	0	6	2	8	6
1	2008-09-19 06:22:00	0	6	2	8	6
1	2008-09-19 06:23:00	0	6	2	8	6
1	2008-09-19 06:24:00	0	6	2	8	6
1	2008-09-19 06:25:00	0	6	2	8	6
1	2008-09-19 06:26:00	41	6	2	8	6
1	2008-09-19 06:27:00	0	6	2	8	6
1	2008-09-19 06:28:00	0	6	2	8	6
1	2008-09-19 06:29:00	0	6	2	8	6
1	2008-09-19 06:30:00	0	6	2	8	6
1	2008-09-19 06:31:00	0	6	2	8	6
1	2008-09-19 06:32:00	0	6	2	8	6
1	2008-09-19 06:33:00	0	6	2	8	6
1	2008-09-19 06:34:00	0	6	2	8	6
1	2008-09-19 06:35:00	0	6	2	8	6
1	2008-09-19 06:36:00	0	6	2	8	6
1	2008-09-19 06:37:00	0	6	2	8	6
1	2008-09-19 06:38:00	0	6	2	8	6
1	2008-09-19 06:39:00	0	6	2	8	6
1	2008-09-19 06:40:00	0	6	2	8	6
1	2008-09-19 06:41:00	0	6	2	8	6
1	2008-09-19 06:42:00	0	6	2	8	6
1	2008-09-19 06:43:00	0	6	2	8	6
1	2008-09-19 06:44:00	0	6	2	8	6
1	2008-09-19 06:45:00	0	6	2	8	6
1	2008-09-19 06:46:00	0	6	2	8	6
1	2008-09-19 06:47:00	0	6	2	8	6
1	2008-09-19 06:48:00	0	6	2	8	6
1	2008-09-19 06:49:00	0	6	2	8	6
1	2008-09-19 06:50:00	0	6	2	8	6
1	2008-09-19 06:51:00	0	6	2	8	6
1	2008-09-19 06:52:00	0	6	2	8	6
1	2008-09-19 06:53:00	0	6	2	8	6
1	2008-09-19 06:54:00	0	6	2	8	6
1	2008-09-19 06:55:00	0	6	2	8	6
1	2008-09-19 06:56:00	0	6	2	8	6
1	2008-09-19 06:57:00	0	6	2	8	6
1	2008-09-19 06:58:00	0	6	2	8	6
1	2008-09-19 06:59:00	0	6	2	8	6
1	2008-09-19 07:00:00	0	6	2	8	6
1	2008-09-19 07:01:00	0	7	2	8	6
1	2008-09-19 07:02:00	0	7	2	8	6
1	2008-09-19 07:03:00	0	7	2	8	6
1	2008-09-19 07:04:00	10	7	2	8	6
1	2008-09-19 07:05:00	30	7	2	8	6
1	2008-09-19 07:06:00	0	7	2	8	6
1	2008-09-19 07:07:00	0	7	2	8	6
1	2008-09-19 07:08:00	0	7	2	8	6
1	2008-09-19 07:09:00	0	7	2	8	6
1	2008-09-19 07:10:00	20	7	2	8	6
1	2008-09-19 07:11:00	0	7	2	8	6
1	2008-09-19 07:12:00	0	7	2	8	6
1	2008-09-19 07:13:00	0	7	2	8	6
1	2008-09-19 07:14:00	0	7	2	8	6
1	2008-09-19 07:15:00	0	7	2	8	6
1	2008-09-19 07:16:00	0	7	2	8	6
1	2008-09-19 07:17:00	112	7	2	8	6
1	2008-09-19 07:18:00	51	7	2	8	6
1	2008-09-19 07:19:00	205	7	2	8	6
1	2008-09-19 07:20:00	0	7	2	8	6
1	2008-09-19 07:21:00	61	7	2	8	6
1	2008-09-19 07:22:00	693	7	2	8	6
1	2008-09-19 07:23:00	169	7	2	8	6
1	2008-09-19 07:24:00	266	7	2	8	6
1	2008-09-19 07:25:00	242	7	2	8	6
1	2008-09-19 07:26:00	242	7	2	8	6
1	2008-09-19 07:27:00	41	7	2	8	6
1	2008-09-19 07:28:00	754	7	2	8	6
1	2008-09-19 07:29:00	839	7	2	8	6
1	2008-09-19 07:30:00	337	7	2	8	6
1	2008-09-19 07:31:00	122	7	2	8	6
1	2008-09-19 07:32:00	10	7	2	8	6
1	2008-09-19 07:33:00	181	7	2	8	6
1	2008-09-19 07:34:00	20	7	2	8	6
1	2008-09-19 07:35:00	0	7	2	8	6
1	2008-09-19 07:36:00	0	7	2	8	6
1	2008-09-19 07:37:00	0	7	2	8	6
1	2008-09-19 07:38:00	0	7	2	8	6
1	2008-09-19 07:39:00	0	7	2	8	6
1	2008-09-19 07:40:00	0	7	2	8	6
1	2008-09-19 07:41:00	71	7	2	8	6
1	2008-09-19 07:42:00	410	7	2	8	6
1	2008-09-19 07:43:00	0	7	2	8	6
1	2008-09-19 07:44:00	0	7	2	8	6
1	2008-09-19 07:45:00	0	7	2	8	6
1	2008-09-19 07:46:00	0	7	2	8	6
1	2008-09-19 07:47:00	977	7	2	8	6
1	2008-09-19 07:48:00	181	7	2	8	6
1	2008-09-19 07:49:00	61	7	2	8	6
1	2008-09-19 07:50:00	132	7	2	8	6
1	2008-09-19 07:51:00	0	7	2	8	6
1	2008-09-19 07:52:00	0	7	2	8	6
1	2008-09-19 07:53:00	0	7	2	8	6
1	2008-09-19 07:54:00	20	7	2	8	6
1	2008-09-19 07:55:00	205	7	2	8	6
1	2008-09-19 07:56:00	0	7	2	8	6
1	2008-09-19 07:57:00	0	7	2	8	6
1	2008-09-19 07:58:00	0	7	2	8	6
1	2008-09-19 07:59:00	0	7	2	8	6
1	2008-09-19 08:00:00	0	7	2	8	6
1	2008-09-19 08:01:00	0	8	2	8	6
1	2008-09-19 08:02:00	0	8	2	8	6
1	2008-09-19 08:03:00	0	8	2	8	6
1	2008-09-19 08:04:00	0	8	2	8	6
1	2008-09-19 08:05:00	0	8	2	8	6
1	2008-09-19 08:06:00	0	8	2	8	6
1	2008-09-19 08:07:00	0	8	2	8	6
1	2008-09-19 08:08:00	0	8	2	8	6
1	2008-09-19 08:09:00	0	8	2	8	6
1	2008-09-19 08:10:00	0	8	2	8	6
1	2008-09-19 08:11:00	0	8	2	8	6
1	2008-09-19 08:12:00	0	8	2	8	6
1	2008-09-19 08:13:00	0	8	2	8	6
1	2008-09-19 08:14:00	0	8	2	8	6
1	2008-09-19 08:15:00	0	8	2	8	6
1	2008-09-19 08:16:00	0	8	2	8	6
1	2008-09-19 08:17:00	0	8	2	8	6
1	2008-09-19 08:18:00	0	8	2	8	6
1	2008-09-19 08:19:00	0	8	2	8	6
1	2008-09-19 08:20:00	0	8	2	8	6
1	2008-09-19 08:21:00	0	8	2	8	6
1	2008-09-19 08:22:00	0	8	2	8	6
1	2008-09-19 08:23:00	0	8	2	8	6
1	2008-09-19 08:24:00	0	8	2	8	6
1	2008-09-19 08:25:00	0	8	2	8	6
1	2008-09-19 08:26:00	0	8	2	8	6
1	2008-09-19 08:27:00	0	8	2	8	6
1	2008-09-19 08:28:00	0	8	2	8	6
1	2008-09-19 08:29:00	0	8	2	8	6
1	2008-09-19 08:30:00	351	8	2	8	6
1	2008-09-19 08:31:00	71	8	2	8	6
1	2008-09-19 08:32:00	0	8	2	8	6
1	2008-09-19 08:33:00	0	8	2	8	6
1	2008-09-19 08:34:00	0	8	2	8	6
1	2008-09-19 08:35:00	0	8	2	8	6
1	2008-09-19 08:36:00	0	8	2	8	6
1	2008-09-19 08:37:00	0	8	2	8	6
1	2008-09-19 08:38:00	0	8	2	8	6
1	2008-09-19 08:39:00	0	8	2	8	6
1	2008-09-19 08:40:00	0	8	2	8	6
1	2008-09-19 08:41:00	0	8	2	8	6
1	2008-09-19 08:42:00	0	8	2	8	6
1	2008-09-19 08:43:00	0	8	2	8	6
1	2008-09-19 08:44:00	0	8	2	8	6
1	2008-09-19 08:45:00	0	8	2	8	6
1	2008-09-19 08:46:00	0	8	2	8	6
1	2008-09-19 08:47:00	0	8	2	8	6
1	2008-09-19 08:48:00	0	8	2	8	6
1	2008-09-19 08:49:00	10	8	2	8	6
1	2008-09-19 08:50:00	20	8	2	8	6
1	2008-09-19 08:51:00	10	8	2	8	6
1	2008-09-19 08:52:00	0	8	2	8	6
1	2008-09-19 08:53:00	0	8	2	8	6
1	2008-09-19 08:54:00	0	8	2	8	6
1	2008-09-19 08:55:00	0	8	2	8	6
1	2008-09-19 08:56:00	0	8	2	8	6
1	2008-09-19 08:57:00	112	8	2	8	6
1	2008-09-19 08:58:00	0	8	2	8	6
1	2008-09-19 08:59:00	0	8	2	8	6
1	2008-09-19 09:00:00	0	8	2	8	6
1	2008-09-19 09:01:00	0	9	2	8	6
1	2008-09-19 09:02:00	0	9	2	8	6
1	2008-09-19 09:03:00	0	9	2	8	6
1	2008-09-19 09:04:00	0	9	2	8	6
1	2008-09-19 09:05:00	0	9	2	8	6
1	2008-09-19 09:06:00	0	9	2	8	6
1	2008-09-19 09:07:00	0	9	2	8	6
1	2008-09-19 09:08:00	0	9	2	8	6
1	2008-09-19 09:09:00	0	9	2	8	6
1	2008-09-19 09:10:00	0	9	2	8	6
1	2008-09-19 09:11:00	0	9	2	8	6
1	2008-09-19 09:12:00	0	9	2	8	6
1	2008-09-19 09:13:00	0	9	2	8	6
1	2008-09-19 09:14:00	0	9	2	8	6
1	2008-09-19 09:15:00	0	9	2	8	6
1	2008-09-19 09:16:00	0	9	2	8	6
1	2008-09-19 09:17:00	0	9	2	8	6
1	2008-09-19 09:18:00	0	9	2	8	6
1	2008-09-19 09:19:00	0	9	2	8	6
1	2008-09-19 09:20:00	0	9	2	8	6
1	2008-09-19 09:21:00	0	9	2	8	6
1	2008-09-19 09:22:00	0	9	2	8	6
1	2008-09-19 09:23:00	0	9	2	8	6
1	2008-09-19 09:24:00	0	9	2	8	6
1	2008-09-19 09:25:00	0	9	2	8	6
1	2008-09-19 09:26:00	0	9	2	8	6
1	2008-09-19 09:27:00	0	9	2	8	6
1	2008-09-19 09:28:00	0	9	2	8	6
1	2008-09-19 09:29:00	0	9	2	8	6
1	2008-09-19 09:30:00	0	9	2	8	6
1	2008-09-19 09:31:00	0	9	2	8	6
1	2008-09-19 09:32:00	0	9	2	8	6
1	2008-09-19 09:33:00	0	9	2	8	6
1	2008-09-19 09:34:00	0	9	2	8	6
1	2008-09-19 09:35:00	0	9	2	8	6
1	2008-09-19 09:36:00	0	9	2	8	6
1	2008-09-19 09:37:00	0	9	2	8	6
1	2008-09-19 09:38:00	0	9	2	8	6
1	2008-09-19 09:39:00	0	9	2	8	6
1	2008-09-19 09:40:00	0	9	2	8	6
1	2008-09-19 09:41:00	0	9	2	8	6
1	2008-09-19 09:42:00	41	9	2	8	6
1	2008-09-19 09:43:00	41	9	2	8	6
1	2008-09-19 09:44:00	0	9	2	8	6
1	2008-09-19 09:45:00	0	9	2	8	6
1	2008-09-19 09:46:00	41	9	2	8	6
1	2008-09-19 09:47:00	0	9	2	8	6
1	2008-09-19 09:48:00	0	9	2	8	6
1	2008-09-19 09:49:00	0	9	2	8	6
1	2008-09-19 09:50:00	0	9	2	8	6
1	2008-09-19 09:51:00	0	9	2	8	6
1	2008-09-19 09:52:00	0	9	2	8	6
1	2008-09-19 09:53:00	0	9	2	8	6
1	2008-09-19 09:54:00	0	9	2	8	6
1	2008-09-19 09:55:00	0	9	2	8	6
1	2008-09-19 09:56:00	0	9	2	8	6
1	2008-09-19 09:57:00	0	9	2	8	6
1	2008-09-19 09:58:00	0	9	2	8	6
1	2008-09-19 09:59:00	0	9	2	8	6
1	2008-09-19 10:00:00	0	9	2	8	6
1	2008-09-19 10:01:00	0	10	2	8	6
1	2008-09-19 10:02:00	0	10	2	8	6
1	2008-09-19 10:03:00	0	10	2	8	6
1	2008-09-19 10:04:00	0	10	2	8	6
1	2008-09-19 10:05:00	0	10	2	8	6
1	2008-09-19 10:06:00	0	10	2	8	6
1	2008-09-19 10:07:00	0	10	2	8	6
1	2008-09-19 10:08:00	0	10	2	8	6
1	2008-09-19 10:09:00	0	10	2	8	6
1	2008-09-19 10:10:00	0	10	2	8	6
1	2008-09-19 10:11:00	0	10	2	8	6
1	2008-09-19 10:12:00	0	10	2	8	6
1	2008-09-19 10:13:00	0	10	2	8	6
1	2008-09-19 10:14:00	0	10	2	8	6
1	2008-09-19 10:15:00	0	10	2	8	6
1	2008-09-19 10:16:00	0	10	2	8	6
1	2008-09-19 10:17:00	0	10	2	8	6
1	2008-09-19 10:18:00	0	10	2	8	6
1	2008-09-19 10:19:00	0	10	2	8	6
1	2008-09-19 10:20:00	0	10	2	8	6
1	2008-09-19 10:21:00	0	10	2	8	6
1	2008-09-19 10:22:00	0	10	2	8	6
1	2008-09-19 10:23:00	0	10	2	8	6
1	2008-09-19 10:24:00	0	10	2	8	6
1	2008-09-19 10:25:00	0	10	2	8	6
1	2008-09-19 10:26:00	0	10	2	8	6
1	2008-09-19 10:27:00	0	10	2	8	6
1	2008-09-19 10:28:00	0	10	2	8	6
1	2008-09-19 10:29:00	0	10	2	8	6
1	2008-09-19 10:30:00	0	10	2	8	6
1	2008-09-19 10:31:00	0	10	2	8	6
1	2008-09-19 10:32:00	0	10	2	8	6
1	2008-09-19 10:33:00	0	10	2	8	6
1	2008-09-19 10:34:00	0	10	2	8	6
1	2008-09-19 10:35:00	0	10	2	8	6
1	2008-09-19 10:36:00	0	10	2	8	6
1	2008-09-19 10:37:00	20	10	2	8	6
1	2008-09-19 10:38:00	10	10	2	8	6
1	2008-09-19 10:39:00	0	10	2	8	6
1	2008-09-19 10:40:00	0	10	2	8	6
1	2008-09-19 10:41:00	0	10	2	8	6
1	2008-09-19 10:42:00	0	10	2	8	6
1	2008-09-19 10:43:00	41	10	2	8	6
1	2008-09-19 10:44:00	20	10	2	8	6
1	2008-09-19 10:45:00	0	10	2	8	6
1	2008-09-19 10:46:00	0	10	2	8	6
1	2008-09-19 10:47:00	0	10	2	8	6
1	2008-09-19 10:48:00	10	10	2	8	6
1	2008-09-19 10:49:00	0	10	2	8	6
1	2008-09-19 10:50:00	0	10	2	8	6
1	2008-09-19 10:51:00	0	10	2	8	6
1	2008-09-19 10:52:00	0	10	2	8	6
1	2008-09-19 10:53:00	0	10	2	8	6
1	2008-09-19 10:54:00	0	10	2	8	6
1	2008-09-19 10:55:00	0	10	2	8	6
1	2008-09-19 10:56:00	0	10	2	8	6
1	2008-09-19 10:57:00	0	10	2	8	6
1	2008-09-19 10:58:00	0	10	2	8	6
1	2008-09-19 10:59:00	0	10	2	8	6
1	2008-09-19 11:00:00	112	10	2	8	6
1	2008-09-19 11:01:00	91	11	2	8	6
1	2008-09-19 11:02:00	20	11	2	8	6
1	2008-09-19 11:03:00	0	11	2	8	6
1	2008-09-19 11:04:00	0	11	2	8	6
1	2008-09-19 11:05:00	0	11	2	8	6
1	2008-09-19 11:06:00	0	11	2	8	6
1	2008-09-19 11:07:00	0	11	2	8	6
1	2008-09-19 11:08:00	0	11	2	8	6
1	2008-09-19 11:09:00	0	11	2	8	6
1	2008-09-19 11:10:00	0	11	2	8	6
1	2008-09-19 11:11:00	0	11	2	8	6
1	2008-09-19 11:12:00	0	11	2	8	6
1	2008-09-19 11:13:00	0	11	2	8	6
1	2008-09-19 11:14:00	0	11	2	8	6
1	2008-09-19 11:15:00	0	11	2	8	6
1	2008-09-19 11:16:00	0	11	2	8	6
1	2008-09-19 11:17:00	0	11	2	8	6
1	2008-09-19 11:18:00	0	11	2	8	6
1	2008-09-19 11:19:00	0	11	2	8	6
1	2008-09-19 11:20:00	0	11	2	8	6
1	2008-09-19 11:21:00	0	11	2	8	6
1	2008-09-19 11:22:00	0	11	2	8	6
1	2008-09-19 11:23:00	0	11	2	8	6
1	2008-09-19 11:24:00	0	11	2	8	6
1	2008-09-19 11:25:00	0	11	2	8	6
1	2008-09-19 11:26:00	0	11	2	8	6
1	2008-09-19 11:27:00	0	11	2	8	6
1	2008-09-19 11:28:00	0	11	2	8	6
1	2008-09-19 11:29:00	0	11	2	8	6
1	2008-09-19 11:30:00	0	11	2	8	6
1	2008-09-19 11:31:00	0	11	2	8	6
1	2008-09-19 11:32:00	0	11	2	8	6
1	2008-09-19 11:33:00	0	11	2	8	6
1	2008-09-19 11:34:00	0	11	2	8	6
1	2008-09-19 11:35:00	0	11	2	8	6
1	2008-09-19 11:36:00	0	11	2	8	6
1	2008-09-19 11:37:00	0	11	2	8	6
1	2008-09-19 11:38:00	0	11	2	8	6
1	2008-09-19 11:39:00	0	11	2	8	6
1	2008-09-19 11:40:00	0	11	2	8	6
1	2008-09-19 11:41:00	0	11	2	8	6
1	2008-09-19 11:42:00	0	11	2	8	6
1	2008-09-19 11:43:00	0	11	2	8	6
1	2008-09-19 11:44:00	10	11	2	8	6
1	2008-09-19 11:45:00	0	11	2	8	6
1	2008-09-19 11:46:00	0	11	2	8	6
1	2008-09-19 11:47:00	0	11	2	8	6
1	2008-09-19 11:48:00	10	11	2	8	6
1	2008-09-19 11:49:00	0	11	2	8	6
1	2008-09-19 11:50:00	0	11	2	8	6
1	2008-09-19 11:51:00	0	11	2	8	6
1	2008-09-19 11:52:00	0	11	2	8	6
1	2008-09-19 11:53:00	10	11	2	8	6
1	2008-09-19 11:54:00	0	11	2	8	6
1	2008-09-19 11:55:00	0	11	2	8	6
1	2008-09-19 11:56:00	0	11	2	8	6
1	2008-09-19 11:57:00	0	11	2	8	6
1	2008-09-19 11:58:00	20	11	2	8	6
1	2008-09-19 11:59:00	0	11	2	8	6
1	2008-09-19 12:00:00	0	11	2	8	6
1	2008-09-19 12:01:00	0	12	3	8	6
1	2008-09-19 12:02:00	0	12	3	8	6
1	2008-09-19 12:03:00	0	12	3	8	6
1	2008-09-19 12:04:00	0	12	3	8	6
1	2008-09-19 12:05:00	0	12	3	8	6
1	2008-09-19 12:06:00	0	12	3	8	6
1	2008-09-19 12:07:00	0	12	3	8	6
1	2008-09-19 12:08:00	0	12	3	8	6
1	2008-09-19 12:09:00	0	12	3	8	6
1	2008-09-19 12:10:00	0	12	3	8	6
1	2008-09-19 12:11:00	0	12	3	8	6
1	2008-09-19 12:12:00	0	12	3	8	6
1	2008-09-19 12:13:00	0	12	3	8	6
1	2008-09-19 12:14:00	0	12	3	8	6
1	2008-09-19 12:15:00	0	12	3	8	6
1	2008-09-19 12:16:00	0	12	3	8	6
1	2008-09-19 12:17:00	0	12	3	8	6
1	2008-09-19 12:18:00	0	12	3	8	6
1	2008-09-19 12:19:00	0	12	3	8	6
1	2008-09-19 12:20:00	0	12	3	8	6
1	2008-09-19 12:21:00	0	12	3	8	6
1	2008-09-19 12:22:00	0	12	3	8	6
1	2008-09-19 12:23:00	0	12	3	8	6
1	2008-09-19 12:24:00	0	12	3	8	6
1	2008-09-19 12:25:00	0	12	3	8	6
1	2008-09-19 12:26:00	0	12	3	8	6
1	2008-09-19 12:27:00	10	12	3	8	6
1	2008-09-19 12:28:00	0	12	3	8	6
1	2008-09-19 12:29:00	20	12	3	8	6
1	2008-09-19 12:30:00	0	12	3	8	6
1	2008-09-19 12:31:00	0	12	3	8	6
1	2008-09-19 12:32:00	10	12	3	8	6
1	2008-09-19 12:33:00	20	12	3	8	6
1	2008-09-19 12:34:00	0	12	3	8	6
1	2008-09-19 12:35:00	0	12	3	8	6
1	2008-09-19 12:36:00	0	12	3	8	6
1	2008-09-19 12:37:00	0	12	3	8	6
1	2008-09-19 12:38:00	0	12	3	8	6
1	2008-09-19 12:39:00	0	12	3	8	6
1	2008-09-19 12:40:00	0	12	3	8	6
1	2008-09-19 12:41:00	0	12	3	8	6
1	2008-09-19 12:42:00	0	12	3	8	6
1	2008-09-19 12:43:00	0	12	3	8	6
1	2008-09-19 12:44:00	10	12	3	8	6
1	2008-09-19 12:45:00	0	12	3	8	6
1	2008-09-19 12:46:00	0	12	3	8	6
1	2008-09-19 12:47:00	0	12	3	8	6
1	2008-09-19 12:48:00	0	12	3	8	6
1	2008-09-19 12:49:00	0	12	3	8	6
1	2008-09-19 12:50:00	0	12	3	8	6
1	2008-09-19 12:51:00	0	12	3	8	6
1	2008-09-19 12:52:00	0	12	3	8	6
1	2008-09-19 12:53:00	0	12	3	8	6
1	2008-09-19 12:54:00	0	12	3	8	6
1	2008-09-19 12:55:00	0	12	3	8	6
1	2008-09-19 12:56:00	0	12	3	8	6
1	2008-09-19 12:57:00	0	12	3	8	6
1	2008-09-19 12:58:00	0	12	3	8	6
1	2008-09-19 12:59:00	0	12	3	8	6
1	2008-09-19 13:00:00	0	12	3	8	6
1	2008-09-19 13:01:00	0	13	3	8	6
1	2008-09-19 13:02:00	0	13	3	8	6
1	2008-09-19 13:03:00	0	13	3	8	6
1	2008-09-19 13:04:00	0	13	3	8	6
1	2008-09-19 13:05:00	0	13	3	8	6
1	2008-09-19 13:06:00	0	13	3	8	6
1	2008-09-19 13:07:00	0	13	3	8	6
1	2008-09-19 13:08:00	0	13	3	8	6
1	2008-09-19 13:09:00	0	13	3	8	6
1	2008-09-19 13:10:00	30	13	3	8	6
1	2008-09-19 13:11:00	0	13	3	8	6
1	2008-09-19 13:12:00	0	13	3	8	6
1	2008-09-19 13:13:00	10	13	3	8	6
1	2008-09-19 13:14:00	0	13	3	8	6
1	2008-09-19 13:15:00	0	13	3	8	6
1	2008-09-19 13:16:00	10	13	3	8	6
1	2008-09-19 13:17:00	0	13	3	8	6
1	2008-09-19 13:18:00	0	13	3	8	6
1	2008-09-19 13:19:00	20	13	3	8	6
1	2008-09-19 13:20:00	205	13	3	8	6
1	2008-09-19 13:21:00	41	13	3	8	6
1	2008-09-19 13:22:00	181	13	3	8	6
1	2008-09-19 13:23:00	41	13	3	8	6
1	2008-09-19 13:24:00	10	13	3	8	6
1	2008-09-19 13:25:00	0	13	3	8	6
1	2008-09-19 13:26:00	0	13	3	8	6
1	2008-09-19 13:27:00	0	13	3	8	6
1	2008-09-19 13:28:00	0	13	3	8	6
1	2008-09-19 13:29:00	0	13	3	8	6
1	2008-09-19 13:30:00	0	13	3	8	6
1	2008-09-19 13:31:00	0	13	3	8	6
1	2008-09-19 13:32:00	10	13	3	8	6
1	2008-09-19 13:33:00	0	13	3	8	6
1	2008-09-19 13:34:00	0	13	3	8	6
1	2008-09-19 13:35:00	0	13	3	8	6
1	2008-09-19 13:36:00	0	13	3	8	6
1	2008-09-19 13:37:00	0	13	3	8	6
1	2008-09-19 13:38:00	0	13	3	8	6
1	2008-09-19 13:39:00	0	13	3	8	6
1	2008-09-19 13:40:00	0	13	3	8	6
1	2008-09-19 13:41:00	0	13	3	8	6
1	2008-09-19 13:42:00	410	13	3	8	6
1	2008-09-19 13:43:00	0	13	3	8	6
1	2008-09-19 13:44:00	10	13	3	8	6
1	2008-09-19 13:45:00	156	13	3	8	6
1	2008-09-19 13:46:00	20	13	3	8	6
1	2008-09-19 13:47:00	0	13	3	8	6
1	2008-09-19 13:48:00	0	13	3	8	6
1	2008-09-19 13:49:00	475	13	3	8	6
1	2008-09-19 13:50:00	427	13	3	8	6
1	2008-09-19 13:51:00	309	13	3	8	6
1	2008-09-19 13:52:00	230	13	3	8	6
1	2008-09-19 13:53:00	217	13	3	8	6
1	2008-09-19 13:54:00	61	13	3	8	6
1	2008-09-19 13:55:00	10	13	3	8	6
1	2008-09-19 13:56:00	0	13	3	8	6
1	2008-09-19 13:57:00	20	13	3	8	6
1	2008-09-19 13:58:00	91	13	3	8	6
1	2008-09-19 13:59:00	0	13	3	8	6
1	2008-09-19 14:00:00	0	13	3	8	6
1	2008-09-19 14:01:00	0	14	3	8	6
1	2008-09-19 14:02:00	0	14	3	8	6
1	2008-09-19 14:03:00	30	14	3	8	6
1	2008-09-19 14:04:00	0	14	3	8	6
1	2008-09-19 14:05:00	0	14	3	8	6
1	2008-09-19 14:06:00	0	14	3	8	6
1	2008-09-19 14:07:00	0	14	3	8	6
1	2008-09-19 14:08:00	0	14	3	8	6
1	2008-09-19 14:09:00	0	14	3	8	6
1	2008-09-19 14:10:00	0	14	3	8	6
1	2008-09-19 14:11:00	0	14	3	8	6
1	2008-09-19 14:12:00	0	14	3	8	6
1	2008-09-19 14:13:00	0	14	3	8	6
1	2008-09-19 14:14:00	0	14	3	8	6
1	2008-09-19 14:15:00	0	14	3	8	6
1	2008-09-19 14:16:00	0	14	3	8	6
1	2008-09-19 14:17:00	0	14	3	8	6
1	2008-09-19 14:18:00	0	14	3	8	6
1	2008-09-19 14:19:00	0	14	3	8	6
1	2008-09-19 14:20:00	0	14	3	8	6
1	2008-09-19 14:21:00	0	14	3	8	6
1	2008-09-19 14:22:00	0	14	3	8	6
1	2008-09-19 14:23:00	0	14	3	8	6
1	2008-09-19 14:24:00	0	14	3	8	6
1	2008-09-19 14:25:00	0	14	3	8	6
1	2008-09-19 14:26:00	0	14	3	8	6
1	2008-09-19 14:27:00	10	14	3	8	6
1	2008-09-19 14:28:00	0	14	3	8	6
1	2008-09-19 14:29:00	0	14	3	8	6
1	2008-09-19 14:30:00	0	14	3	8	6
1	2008-09-19 14:31:00	10	14	3	8	6
1	2008-09-19 14:32:00	0	14	3	8	6
1	2008-09-19 14:33:00	41	14	3	8	6
1	2008-09-19 14:34:00	0	14	3	8	6
1	2008-09-19 14:35:00	0	14	3	8	6
1	2008-09-19 14:36:00	0	14	3	8	6
1	2008-09-19 14:37:00	0	14	3	8	6
1	2008-09-19 14:38:00	0	14	3	8	6
1	2008-09-19 14:39:00	122	14	3	8	6
1	2008-09-19 14:40:00	20	14	3	8	6
1	2008-09-19 14:41:00	0	14	3	8	6
1	2008-09-19 14:42:00	0	14	3	8	6
1	2008-09-19 14:43:00	0	14	3	8	6
1	2008-09-19 14:44:00	0	14	3	8	6
1	2008-09-19 14:45:00	0	14	3	8	6
1	2008-09-19 14:46:00	0	14	3	8	6
1	2008-09-19 14:47:00	0	14	3	8	6
1	2008-09-19 14:48:00	0	14	3	8	6
1	2008-09-19 14:49:00	0	14	3	8	6
1	2008-09-19 14:50:00	0	14	3	8	6
1	2008-09-19 14:51:00	0	14	3	8	6
1	2008-09-19 14:52:00	0	14	3	8	6
1	2008-09-19 14:53:00	0	14	3	8	6
1	2008-09-19 14:54:00	0	14	3	8	6
1	2008-09-19 14:55:00	0	14	3	8	6
1	2008-09-19 14:56:00	0	14	3	8	6
1	2008-09-19 14:57:00	0	14	3	8	6
1	2008-09-19 14:58:00	10	14	3	8	6
1	2008-09-19 14:59:00	0	14	3	8	6
1	2008-09-19 15:00:00	122	14	3	8	6
1	2008-09-19 15:01:00	61	15	3	8	6
1	2008-09-19 15:02:00	0	15	3	8	6
1	2008-09-19 15:03:00	0	15	3	8	6
1	2008-09-19 15:04:00	10	15	3	8	6
1	2008-09-19 15:05:00	0	15	3	8	6
1	2008-09-19 15:06:00	0	15	3	8	6
1	2008-09-19 15:07:00	0	15	3	8	6
1	2008-09-19 15:08:00	817	15	3	8	6
1	2008-09-19 15:09:00	10	15	3	8	6
1	2008-09-19 15:10:00	0	15	3	8	6
1	2008-09-19 15:11:00	597	15	3	8	6
1	2008-09-19 15:12:00	351	15	3	8	6
1	2008-09-19 15:13:00	112	15	3	8	6
1	2008-09-19 15:14:00	20	15	3	8	6
1	2008-09-19 15:15:00	0	15	3	8	6
1	2008-09-19 15:16:00	10	15	3	8	6
1	2008-09-19 15:17:00	1386	15	3	8	6
1	2008-09-19 15:18:00	0	15	3	8	6
1	2008-09-19 15:19:00	0	15	3	8	6
[truncated: 58,481 more rows]

## Sheet: Pivot Segment
Multiplier	2
x (Low Intensity)	402.653
y (High Intensity)	328.892
	Column Labels
Values	1	2	3	4	5	6	Grand Total
Average of Activity	44.0027	34.0993	45.4154	50.0457	51.9115	47.777	45.5419
StdDev of Activity	179.325	147.396	175.493	200.663	208.648	182.655	183.497
Count of Activity	10080	10080	10080	10080	10080	10080	60480
Count Above x	395	269	384	407	438	409
% Above x	0.0391865	0.0266865	0.0380952	0.040377	0.0434524	0.0405754
Count Above y		344	463	488	512	500
% Above y		0.034127	0.0459325	0.0484127	0.0507937	0.0496032

## Sheet: Pivot Weekday
Sum of Activity	Column Labels
Row Labels	1	2	3	4	5	6	Grand Total
1	68921	38245	66276	58307	70768	38612	341129
2	72381	49090	71253	81390	110889	108407	493410
3	74478	75481	83162	42486	102168	83437	461212
4	66058	41436	39599	63158	99084	71403	380738
5	34629	30541	46808	74583	62580	69855	318996
6	53153	57595	70004	131528	31958	58768	403006
7	73927	51333	80685	53009	45821	51110	355885
Grand Total	443547	343721	457787	504461	523268	481592	2754376
Count of Activity	Column Labels
Row Labels	1	2	3	4	5	6	Grand Total
1	1440	1440	1440	1440	1440	1440	8640
2	1440	1440	1440	1440	1440	1440	8640
3	1440	1440	1440	1440	1440	1440	8640
4	1440	1440	1440	1440	1440	1440	8640
5	1440	1440	1440	1440	1440	1440	8640
6	1440	1440	1440	1440	1440	1440	8640
7	1440	1440	1440	1440	1440	1440	8640
Grand Total	10080	10080	10080	10080	10080	10080	60480

## Sheet: Pivot Quadrant
Sum of Activity	Column Labels
Row Labels	1	2	3	4	5	6	Grand Total
1	9697	8494	9071	10423	10841	6022	54548
2	92855	58787	75372	135479	157026	131301	650820
3	144442	121301	196645	198604	220421	205836	1087249
4	196553	155139	176699	159955	134980	138433	961759
Grand Total	443547	343721	457787	504461	523268	481592	2754376
Average	110887	85930.2	114447	126115	130817	120398
Count of Activity	Column Labels
Row Labels	1	2	3	4	5	6	Grand Total
1	2520	2520	2520	2520	2520	2520	15120
2	2520	2520	2520	2520	2520	2520	15120
3	2520	2520	2520	2520	2520	2520	15120
4	2520	2520	2520	2520	2520	2520	15120
Grand Total	10080	10080	10080	10080	10080	10080	60480

## Sheet: 9.11.08
Actogram, Copy Raw Data, All Days
Identity:	Lena
Filename:	E:\Active Research Files\meloxicam titre canine\cases\lena\Lena 9.11.08.AWC
Gender:	F
Age:	9
Height:	40.6 cm	16.0 in
Weight:	21.8 kg	48.1 lbs
Start Date:	11-Sep-2008 (Thu)
Start Time:	18:00:00
Interval:	1.00 mins
Date Stamp:	Time Stamp:	Activity Data:	Marker Press:
2008-09-11	00:00:00	0
2008-09-11	00:01:00	0
2008-09-11	00:02:00	0
2008-09-11	00:03:00	0
2008-09-11	00:04:00	0
2008-09-11	00:05:00	0
2008-09-11	00:06:00	0
2008-09-11	00:07:00	0
2008-09-11	00:08:00	0
2008-09-11	00:09:00	0
2008-09-11	00:10:00	0
2008-09-11	00:11:00	0
2008-09-11	00:12:00	0
2008-09-11	00:13:00	0
2008-09-11	00:14:00	0
2008-09-11	00:15:00	0
2008-09-11	00:16:00	0
2008-09-11	00:17:00	0
2008-09-11	00:18:00	0
2008-09-11	00:19:00	0
2008-09-11	00:20:00	0
2008-09-11	00:21:00	0
2008-09-11	00:22:00	0
2008-09-11	00:23:00	0
2008-09-11	00:24:00	0
2008-09-11	00:25:00	0
2008-09-11	00:26:00	0
2008-09-11	00:27:00	0
2008-09-11	00:28:00	0
2008-09-11	00:29:00	0
2008-09-11	00:30:00	0
2008-09-11	00:31:00	0
2008-09-11	00:32:00	0
2008-09-11	00:33:00	0
2008-09-11	00:34:00	0
2008-09-11	00:35:00	0
2008-09-11	00:36:00	0
2008-09-11	00:37:00	0
2008-09-11	00:38:00	0
2008-09-11	00:39:00	0
2008-09-11	00:40:00	0
2008-09-11	00:41:00	0
2008-09-11	00:42:00	0
2008-09-11	00:43:00	0
2008-09-11	00:44:00	0
2008-09-11	00:45:00	0
2008-09-11	00:46:00	0
2008-09-11	00:47:00	0
2008-09-11	00:48:00	0
2008-09-11	00:49:00	0
2008-09-11	00:50:00	0
2008-09-11	00:51:00	0
2008-09-11	00:52:00	0
2008-09-11	00:53:00	0
2008-09-11	00:54:00	0
2008-09-11	00:55:00	0
2008-09-11	00:56:00	0
2008-09-11	00:57:00	0
2008-09-11	00:58:00	0
2008-09-11	00:59:00	0
2008-09-11	01:00:00	0
2008-09-11	01:01:00	0
2008-09-11	01:02:00	0
2008-09-11	01:03:00	0
2008-09-11	01:04:00	0
2008-09-11	01:05:00	0
2008-09-11	01:06:00	0
2008-09-11	01:07:00	0
2008-09-11	01:08:00	0
2008-09-11	01:09:00	0
2008-09-11	01:10:00	0
2008-09-11	01:11:00	0
2008-09-11	01:12:00	0
2008-09-11	01:13:00	0
2008-09-11	01:14:00	0
2008-09-11	01:15:00	0
2008-09-11	01:16:00	0
2008-09-11	01:17:00	0
2008-09-11	01:18:00	0
2008-09-11	01:19:00	0
2008-09-11	01:20:00	0
2008-09-11	01:21:00	0
2008-09-11	01:22:00	0
2008-09-11	01:23:00	0
2008-09-11	01:24:00	0
2008-09-11	01:25:00	0
2008-09-11	01:26:00	0
2008-09-11	01:27:00	0
2008-09-11	01:28:00	0
2008-09-11	01:29:00	0
2008-09-11	01:30:00	0
2008-09-11	01:31:00	0
2008-09-11	01:32:00	0
2008-09-11	01:33:00	0
2008-09-11	01:34:00	0
2008-09-11	01:35:00	0
2008-09-11	01:36:00	0
2008-09-11	01:37:00	0
2008-09-11	01:38:00	0
2008-09-11	01:39:00	0
2008-09-11	01:40:00	0
2008-09-11	01:41:00	0
2008-09-11	01:42:00	0
2008-09-11	01:43:00	0
2008-09-11	01:44:00	0
2008-09-11	01:45:00	0
2008-09-11	01:46:00	0
2008-09-11	01:47:00	0
2008-09-11	01:48:00	0
2008-09-11	01:49:00	0
2008-09-11	01:50:00	0
2008-09-11	01:51:00	0
2008-09-11	01:52:00	0
2008-09-11	01:53:00	0
2008-09-11	01:54:00	0
2008-09-11	01:55:00	0
2008-09-11	01:56:00	0
2008-09-11	01:57:00	0
2008-09-11	01:58:00	0
2008-09-11	01:59:00	0
2008-09-11	02:00:00	0
2008-09-11	02:01:00	0
2008-09-11	02:02:00	0
2008-09-11	02:03:00	0
2008-09-11	02:04:00	0
2008-09-11	02:05:00	0
2008-09-11	02:06:00	0
2008-09-11	02:07:00	0
2008-09-11	02:08:00	0
2008-09-11	02:09:00	0
2008-09-11	02:10:00	0
2008-09-11	02:11:00	0
2008-09-11	02:12:00	0
2008-09-11	02:13:00	0
2008-09-11	02:14:00	0
2008-09-11	02:15:00	0
2008-09-11	02:16:00	0
2008-09-11	02:17:00	0
2008-09-11	02:18:00	0
2008-09-11	02:19:00	0
2008-09-11	02:20:00	0
2008-09-11	02:21:00	0
2008-09-11	02:22:00	0
2008-09-11	02:23:00	0
2008-09-11	02:24:00	0
2008-09-11	02:25:00	0
2008-09-11	02:26:00	0
2008-09-11	02:27:00	0
2008-09-11	02:28:00	0
2008-09-11	02:29:00	0
2008-09-11	02:30:00	0
2008-09-11	02:31:00	0
2008-09-11	02:32:00	0
2008-09-11	02:33:00	0
2008-09-11	02:34:00	0
2008-09-11	02:35:00	0
2008-09-11	02:36:00	0
2008-09-11	02:37:00	0
2008-09-11	02:38:00	0
2008-09-11	02:39:00	0
2008-09-11	02:40:00	0
2008-09-11	02:41:00	0
2008-09-11	02:42:00	0
2008-09-11	02:43:00	0
2008-09-11	02:44:00	0
2008-09-11	02:45:00	0
2008-09-11	02:46:00	0
2008-09-11	02:47:00	0
2008-09-11	02:48:00	0
2008-09-11	02:49:00	0
2008-09-11	02:50:00	0
2008-09-11	02:51:00	0
2008-09-11	02:52:00	0
2008-09-11	02:53:00	0
2008-09-11	02:54:00	0
2008-09-11	02:55:00	0
2008-09-11	02:56:00	0
2008-09-11	02:57:00	0
2008-09-11	02:58:00	0
2008-09-11	02:59:00	0
2008-09-11	03:00:00	0
2008-09-11	03:01:00	0
2008-09-11	03:02:00	0
2008-09-11	03:03:00	0
2008-09-11	03:04:00	0
2008-09-11	03:05:00	0
2008-09-11	03:06:00	0
2008-09-11	03:07:00	0
2008-09-11	03:08:00	0
2008-09-11	03:09:00	0
2008-09-11	03:10:00	0
2008-09-11	03:11:00	0
2008-09-11	03:12:00	0
2008-09-11	03:13:00	0
2008-09-11	03:14:00	0
2008-09-11	03:15:00	0
2008-09-11	03:16:00	0
2008-09-11	03:17:00	0
2008-09-11	03:18:00	0
2008-09-11	03:19:00	0
2008-09-11	03:20:00	0
2008-09-11	03:21:00	0
2008-09-11	03:22:00	0
2008-09-11	03:23:00	0
2008-09-11	03:24:00	0
2008-09-11	03:25:00	0
2008-09-11	03:26:00	0
2008-09-11	03:27:00	0
2008-09-11	03:28:00	0
2008-09-11	03:29:00	0
2008-09-11	03:30:00	0
2008-09-11	03:31:00	0
2008-09-11	03:32:00	0
2008-09-11	03:33:00	0
2008-09-11	03:34:00	0
2008-09-11	03:35:00	0
2008-09-11	03:36:00	0
2008-09-11	03:37:00	0
2008-09-11	03:38:00	0
2008-09-11	03:39:00	0
2008-09-11	03:40:00	0
2008-09-11	03:41:00	0
2008-09-11	03:42:00	0
2008-09-11	03:43:00	0
2008-09-11	03:44:00	0
2008-09-11	03:45:00	0
2008-09-11	03:46:00	0
2008-09-11	03:47:00	0
2008-09-11	03:48:00	0
2008-09-11	03:49:00	0
2008-09-11	03:50:00	0
2008-09-11	03:51:00	0
2008-09-11	03:52:00	0
2008-09-11	03:53:00	0
2008-09-11	03:54:00	0
2008-09-11	03:55:00	0
2008-09-11	03:56:00	0
2008-09-11	03:57:00	0
2008-09-11	03:58:00	0
2008-09-11	03:59:00	0
2008-09-11	04:00:00	0
2008-09-11	04:01:00	0
2008-09-11	04:02:00	0
2008-09-11	04:03:00	0
2008-09-11	04:04:00	0
2008-09-11	04:05:00	0
2008-09-11	04:06:00	0
2008-09-11	04:07:00	0
2008-09-11	04:08:00	0
2008-09-11	04:09:00	0
2008-09-11	04:10:00	0
2008-09-11	04:11:00	0
2008-09-11	04:12:00	0
2008-09-11	04:13:00	0
2008-09-11	04:14:00	0
2008-09-11	04:15:00	0
2008-09-11	04:16:00	0
2008-09-11	04:17:00	0
2008-09-11	04:18:00	0
2008-09-11	04:19:00	0
2008-09-11	04:20:00	0
2008-09-11	04:21:00	0
2008-09-11	04:22:00	0
2008-09-11	04:23:00	0
2008-09-11	04:24:00	0
2008-09-11	04:25:00	0
2008-09-11	04:26:00	0
2008-09-11	04:27:00	0
2008-09-11	04:28:00	0
2008-09-11	04:29:00	0
2008-09-11	04:30:00	0
2008-09-11	04:31:00	0
2008-09-11	04:32:00	0
2008-09-11	04:33:00	0
2008-09-11	04:34:00	0
2008-09-11	04:35:00	0
2008-09-11	04:36:00	0
2008-09-11	04:37:00	0
2008-09-11	04:38:00	0
2008-09-11	04:39:00	0
2008-09-11	04:40:00	0
2008-09-11	04:41:00	0
2008-09-11	04:42:00	0
2008-09-11	04:43:00	0
2008-09-11	04:44:00	0
2008-09-11	04:45:00	0
2008-09-11	04:46:00	0
2008-09-11	04:47:00	0
2008-09-11	04:48:00	0
2008-09-11	04:49:00	0
2008-09-11	04:50:00	0
2008-09-11	04:51:00	0
2008-09-11	04:52:00	0
2008-09-11	04:53:00	0
2008-09-11	04:54:00	0
2008-09-11	04:55:00	0
2008-09-11	04:56:00	0
2008-09-11	04:57:00	0
2008-09-11	04:58:00	0
2008-09-11	04:59:00	0
2008-09-11	05:00:00	0
2008-09-11	05:01:00	0
2008-09-11	05:02:00	0
2008-09-11	05:03:00	0
2008-09-11	05:04:00	0
2008-09-11	05:05:00	0
2008-09-11	05:06:00	0
2008-09-11	05:07:00	0
2008-09-11	05:08:00	0
2008-09-11	05:09:00	0
2008-09-11	05:10:00	0
2008-09-11	05:11:00	0
2008-09-11	05:12:00	0
2008-09-11	05:13:00	0
2008-09-11	05:14:00	0
2008-09-11	05:15:00	0
2008-09-11	05:16:00	0
2008-09-11	05:17:00	0
2008-09-11	05:18:00	0
2008-09-11	05:19:00	0
2008-09-11	05:20:00	0
2008-09-11	05:21:00	0
2008-09-11	05:22:00	0
2008-09-11	05:23:00	0
2008-09-11	05:24:00	0
2008-09-11	05:25:00	0
2008-09-11	05:26:00	0
2008-09-11	05:27:00	0
2008-09-11	05:28:00	0
2008-09-11	05:29:00	0
2008-09-11	05:30:00	0
2008-09-11	05:31:00	0
2008-09-11	05:32:00	0
2008-09-11	05:33:00	0
2008-09-11	05:34:00	0
2008-09-11	05:35:00	0
2008-09-11	05:36:00	0
2008-09-11	05:37:00	0
2008-09-11	05:38:00	0
2008-09-11	05:39:00	0
2008-09-11	05:40:00	0
2008-09-11	05:41:00	0
2008-09-11	05:42:00	0
2008-09-11	05:43:00	0
2008-09-11	05:44:00	0
2008-09-11	05:45:00	0
2008-09-11	05:46:00	0
2008-09-11	05:47:00	0
2008-09-11	05:48:00	0
2008-09-11	05:49:00	0
2008-09-11	05:50:00	0
2008-09-11	05:51:00	0
2008-09-11	05:52:00	0
2008-09-11	05:53:00	0
2008-09-11	05:54:00	0
2008-09-11	05:55:00	0
2008-09-11	05:56:00	0
2008-09-11	05:57:00	0
2008-09-11	05:58:00	0
2008-09-11	05:59:00	0
2008-09-11	06:00:00	0
2008-09-11	06:01:00	0
2008-09-11	06:02:00	0
2008-09-11	06:03:00	0
2008-09-11	06:04:00	0
2008-09-11	06:05:00	0
2008-09-11	06:06:00	0
2008-09-11	06:07:00	0
2008-09-11	06:08:00	0
2008-09-11	06:09:00	0
2008-09-11	06:10:00	0
2008-09-11	06:11:00	0
2008-09-11	06:12:00	0
2008-09-11	06:13:00	0
2008-09-11	06:14:00	0
2008-09-11	06:15:00	0
2008-09-11	06:16:00	0
2008-09-11	06:17:00	0
2008-09-11	06:18:00	0
2008-09-11	06:19:00	0
2008-09-11	06:20:00	0
2008-09-11	06:21:00	0
2008-09-11	06:22:00	0
2008-09-11	06:23:00	0
2008-09-11	06:24:00	0
2008-09-11	06:25:00	0
2008-09-11	06:26:00	0
2008-09-11	06:27:00	0
2008-09-11	06:28:00	0
2008-09-11	06:29:00	0
2008-09-11	06:30:00	0
2008-09-11	06:31:00	0
2008-09-11	06:32:00	0
2008-09-11	06:33:00	0
2008-09-11	06:34:00	0
2008-09-11	06:35:00	0
2008-09-11	06:36:00	0
2008-09-11	06:37:00	0
2008-09-11	06:38:00	0
2008-09-11	06:39:00	0
2008-09-11	06:40:00	0
2008-09-11	06:41:00	0
2008-09-11	06:42:00	0
2008-09-11	06:43:00	0
2008-09-11	06:44:00	0
2008-09-11	06:45:00	0
2008-09-11	06:46:00	0
2008-09-11	06:47:00	0
2008-09-11	06:48:00	0
2008-09-11	06:49:00	0
2008-09-11	06:50:00	0
2008-09-11	06:51:00	0
2008-09-11	06:52:00	0
2008-09-11	06:53:00	0
2008-09-11	06:54:00	0
2008-09-11	06:55:00	0
2008-09-11	06:56:00	0
2008-09-11	06:57:00	0
2008-09-11	06:58:00	0
2008-09-11	06:59:00	0
2008-09-11	07:00:00	0
2008-09-11	07:01:00	0
2008-09-11	07:02:00	0
2008-09-11	07:03:00	0
2008-09-11	07:04:00	0
2008-09-11	07:05:00	0
2008-09-11	07:06:00	0
2008-09-11	07:07:00	0
2008-09-11	07:08:00	0
2008-09-11	07:09:00	0
2008-09-11	07:10:00	0
2008-09-11	07:11:00	0
2008-09-11	07:12:00	0
2008-09-11	07:13:00	0
2008-09-11	07:14:00	0
2008-09-11	07:15:00	0
2008-09-11	07:16:00	0
2008-09-11	07:17:00	0
2008-09-11	07:18:00	0
2008-09-11	07:19:00	0
2008-09-11	07:20:00	0
2008-09-11	07:21:00	0
2008-09-11	07:22:00	0
2008-09-11	07:23:00	0
2008-09-11	07:24:00	0
2008-09-11	07:25:00	0
2008-09-11	07:26:00	0
2008-09-11	07:27:00	0
2008-09-11	07:28:00	0
2008-09-11	07:29:00	0
2008-09-11	07:30:00	0
2008-09-11	07:31:00	0
2008-09-11	07:32:00	0
2008-09-11	07:33:00	0
2008-09-11	07:34:00	0
2008-09-11	07:35:00	0
2008-09-11	07:36:00	0
2008-09-11	07:37:00	0
2008-09-11	07:38:00	0
2008-09-11	07:39:00	0
2008-09-11	07:40:00	0
2008-09-11	07:41:00	0
2008-09-11	07:42:00	0
2008-09-11	07:43:00	0
2008-09-11	07:44:00	0
2008-09-11	07:45:00	0
2008-09-11	07:46:00	0
2008-09-11	07:47:00	0
2008-09-11	07:48:00	0
2008-09-11	07:49:00	0
2008-09-11	07:50:00	0
2008-09-11	07:51:00	0
2008-09-11	07:52:00	0
2008-09-11	07:53:00	0
2008-09-11	07:54:00	0
2008-09-11	07:55:00	0
2008-09-11	07:56:00	0
2008-09-11	07:57:00	0
2008-09-11	07:58:00	0
2008-09-11	07:59:00	0
2008-09-11	08:00:00	0
2008-09-11	08:01:00	0
2008-09-11	08:02:00	0
2008-09-11	08:03:00	0
2008-09-11	08:04:00	0
2008-09-11	08:05:00	0
2008-09-11	08:06:00	0
2008-09-11	08:07:00	0
2008-09-11	08:08:00	0
2008-09-11	08:09:00	0
2008-09-11	08:10:00	0
2008-09-11	08:11:00	0
2008-09-11	08:12:00	0
2008-09-11	08:13:00	0
2008-09-11	08:14:00	0
2008-09-11	08:15:00	0
2008-09-11	08:16:00	0
2008-09-11	08:17:00	0
2008-09-11	08:18:00	0
2008-09-11	08:19:00	0
2008-09-11	08:20:00	0
2008-09-11	08:21:00	0
2008-09-11	08:22:00	0
2008-09-11	08:23:00	0
2008-09-11	08:24:00	0
2008-09-11	08:25:00	0
2008-09-11	08:26:00	0
2008-09-11	08:27:00	0
2008-09-11	08:28:00	0
2008-09-11	08:29:00	0
2008-09-11	08:30:00	0
2008-09-11	08:31:00	0
2008-09-11	08:32:00	0
2008-09-11	08:33:00	0
2008-09-11	08:34:00	0
2008-09-11	08:35:00	0
2008-09-11	08:36:00	0
2008-09-11	08:37:00	0
2008-09-11	08:38:00	0
2008-09-11	08:39:00	0
2008-09-11	08:40:00	0
2008-09-11	08:41:00	0
2008-09-11	08:42:00	0
2008-09-11	08:43:00	0
2008-09-11	08:44:00	0
2008-09-11	08:45:00	0
2008-09-11	08:46:00	0
2008-09-11	08:47:00	0
2008-09-11	08:48:00	0
2008-09-11	08:49:00	0
2008-09-11	08:50:00	0
2008-09-11	08:51:00	0
2008-09-11	08:52:00	0
2008-09-11	08:53:00	0
2008-09-11	08:54:00	0
2008-09-11	08:55:00	0
2008-09-11	08:56:00	0
2008-09-11	08:57:00	0
2008-09-11	08:58:00	0
2008-09-11	08:59:00	0
2008-09-11	09:00:00	0
2008-09-11	09:01:00	0
2008-09-11	09:02:00	0
2008-09-11	09:03:00	0
2008-09-11	09:04:00	0
2008-09-11	09:05:00	0
2008-09-11	09:06:00	0
2008-09-11	09:07:00	0
2008-09-11	09:08:00	0
2008-09-11	09:09:00	0
2008-09-11	09:10:00	0
2008-09-11	09:11:00	0
2008-09-11	09:12:00	0
2008-09-11	09:13:00	0
2008-09-11	09:14:00	0
2008-09-11	09:15:00	0
2008-09-11	09:16:00	0
2008-09-11	09:17:00	0
2008-09-11	09:18:00	0
2008-09-11	09:19:00	0
2008-09-11	09:20:00	0
2008-09-11	09:21:00	0
2008-09-11	09:22:00	0
2008-09-11	09:23:00	0
2008-09-11	09:24:00	0
2008-09-11	09:25:00	0
2008-09-11	09:26:00	0
2008-09-11	09:27:00	0
2008-09-11	09:28:00	0
2008-09-11	09:29:00	0
2008-09-11	09:30:00	0
2008-09-11	09:31:00	0
2008-09-11	09:32:00	0
2008-09-11	09:33:00	0
2008-09-11	09:34:00	0
2008-09-11	09:35:00	0
2008-09-11	09:36:00	0
2008-09-11	09:37:00	0
2008-09-11	09:38:00	0
2008-09-11	09:39:00	0
2008-09-11	09:40:00	0
2008-09-11	09:41:00	0
2008-09-11	09:42:00	0
2008-09-11	09:43:00	0
2008-09-11	09:44:00	0
2008-09-11	09:45:00	0
2008-09-11	09:46:00	0
2008-09-11	09:47:00	0
2008-09-11	09:48:00	0
2008-09-11	09:49:00	0
2008-09-11	09:50:00	0
2008-09-11	09:51:00	0
2008-09-11	09:52:00	0
2008-09-11	09:53:00	0
2008-09-11	09:54:00	0
2008-09-11	09:55:00	0
2008-09-11	09:56:00	0
2008-09-11	09:57:00	0
2008-09-11	09:58:00	0
2008-09-11	09:59:00	0
2008-09-11	10:00:00	0
2008-09-11	10:01:00	0
2008-09-11	10:02:00	0
2008-09-11	10:03:00	0
2008-09-11	10:04:00	0
2008-09-11	10:05:00	0
2008-09-11	10:06:00	0
2008-09-11	10:07:00	0
2008-09-11	10:08:00	0
2008-09-11	10:09:00	0
2008-09-11	10:10:00	0
2008-09-11	10:11:00	0
2008-09-11	10:12:00	0
2008-09-11	10:13:00	0
2008-09-11	10:14:00	0
2008-09-11	10:15:00	0
2008-09-11	10:16:00	0
2008-09-11	10:17:00	0
2008-09-11	10:18:00	0
2008-09-11	10:19:00	0
2008-09-11	10:20:00	0
2008-09-11	10:21:00	0
2008-09-11	10:22:00	0
2008-09-11	10:23:00	0
2008-09-11	10:24:00	0
2008-09-11	10:25:00	0
2008-09-11	10:26:00	0
2008-09-11	10:27:00	0
2008-09-11	10:28:00	0
2008-09-11	10:29:00	0
2008-09-11	10:30:00	0
2008-09-11	10:31:00	0
2008-09-11	10:32:00	0
2008-09-11	10:33:00	0
2008-09-11	10:34:00	0
2008-09-11	10:35:00	0
2008-09-11	10:36:00	0
2008-09-11	10:37:00	0
2008-09-11	10:38:00	0
2008-09-11	10:39:00	0
2008-09-11	10:40:00	0
2008-09-11	10:41:00	0
2008-09-11	10:42:00	0
2008-09-11	10:43:00	0
2008-09-11	10:44:00	0
2008-09-11	10:45:00	0
2008-09-11	10:46:00	0
2008-09-11	10:47:00	0
2008-09-11	10:48:00	0
2008-09-11	10:49:00	0
2008-09-11	10:50:00	0
2008-09-11	10:51:00	0
2008-09-11	10:52:00	0
2008-09-11	10:53:00	0
2008-09-11	10:54:00	0
2008-09-11	10:55:00	0
2008-09-11	10:56:00	0
2008-09-11	10:57:00	0
2008-09-11	10:58:00	0
2008-09-11	10:59:00	0
2008-09-11	11:00:00	0
2008-09-11	11:01:00	0
2008-09-11	11:02:00	0
2008-09-11	11:03:00	0
2008-09-11	11:04:00	0
2008-09-11	11:05:00	0
2008-09-11	11:06:00	0
2008-09-11	11:07:00	0
2008-09-11	11:08:00	0
2008-09-11	11:09:00	0
2008-09-11	11:10:00	0
2008-09-11	11:11:00	0
2008-09-11	11:12:00	0
2008-09-11	11:13:00	0
2008-09-11	11:14:00	0
2008-09-11	11:15:00	0
2008-09-11	11:16:00	0
2008-09-11	11:17:00	0
2008-09-11	11:18:00	0
2008-09-11	11:19:00	0
2008-09-11	11:20:00	0
2008-09-11	11:21:00	0
2008-09-11	11:22:00	0
2008-09-11	11:23:00	0
2008-09-11	11:24:00	0
2008-09-11	11:25:00	0
2008-09-11	11:26:00	0
2008-09-11	11:27:00	0
2008-09-11	11:28:00	0
2008-09-11	11:29:00	0
2008-09-11	11:30:00	0
2008-09-11	11:31:00	0
2008-09-11	11:32:00	0
2008-09-11	11:33:00	0
2008-09-11	11:34:00	0
2008-09-11	11:35:00	0
2008-09-11	11:36:00	0
2008-09-11	11:37:00	0
2008-09-11	11:38:00	0
2008-09-11	11:39:00	0
2008-09-11	11:40:00	0
2008-09-11	11:41:00	0
2008-09-11	11:42:00	0
2008-09-11	11:43:00	0
2008-09-11	11:44:00	0
2008-09-11	11:45:00	0
2008-09-11	11:46:00	0
2008-09-11	11:47:00	0
2008-09-11	11:48:00	0
2008-09-11	11:49:00	0
2008-09-11	11:50:00	0
2008-09-11	11:51:00	0
2008-09-11	11:52:00	0
2008-09-11	11:53:00	0
2008-09-11	11:54:00	0
2008-09-11	11:55:00	0
2008-09-11	11:56:00	0
2008-09-11	11:57:00	0
2008-09-11	11:58:00	0
2008-09-11	11:59:00	0
2008-09-11	12:00:00	0
2008-09-11	12:01:00	0
2008-09-11	12:02:00	0
2008-09-11	12:03:00	0
2008-09-11	12:04:00	0
2008-09-11	12:05:00	0
2008-09-11	12:06:00	0
2008-09-11	12:07:00	0
2008-09-11	12:08:00	0
2008-09-11	12:09:00	0
2008-09-11	12:10:00	0
2008-09-11	12:11:00	0
2008-09-11	12:12:00	0
2008-09-11	12:13:00	0
2008-09-11	12:14:00	0
2008-09-11	12:15:00	0
2008-09-11	12:16:00	0
2008-09-11	12:17:00	0
2008-09-11	12:18:00	0
2008-09-11	12:19:00	0
2008-09-11	12:20:00	0
2008-09-11	12:21:00	0
2008-09-11	12:22:00	0
2008-09-11	12:23:00	0
2008-09-11	12:24:00	0
2008-09-11	12:25:00	0
2008-09-11	12:26:00	0
2008-09-11	12:27:00	0
2008-09-11	12:28:00	0
2008-09-11	12:29:00	0
2008-09-11	12:30:00	0
2008-09-11	12:31:00	0
2008-09-11	12:32:00	0
2008-09-11	12:33:00	0
2008-09-11	12:34:00	0
2008-09-11	12:35:00	0
2008-09-11	12:36:00	0
2008-09-11	12:37:00	0
2008-09-11	12:38:00	0
2008-09-11	12:39:00	0
2008-09-11	12:40:00	0
2008-09-11	12:41:00	0
2008-09-11	12:42:00	0
2008-09-11	12:43:00	0
2008-09-11	12:44:00	0
2008-09-11	12:45:00	0
2008-09-11	12:46:00	0
2008-09-11	12:47:00	0
2008-09-11	12:48:00	0
2008-09-11	12:49:00	0
2008-09-11	12:50:00	0
2008-09-11	12:51:00	0
2008-09-11	12:52:00	0
2008-09-11	12:53:00	0
2008-09-11	12:54:00	0
2008-09-11	12:55:00	0
2008-09-11	12:56:00	0
2008-09-11	12:57:00	0
2008-09-11	12:58:00	0
2008-09-11	12:59:00	0
2008-09-11	13:00:00	0
2008-09-11	13:01:00	0
2008-09-11	13:02:00	0
2008-09-11	13:03:00	0
2008-09-11	13:04:00	0
2008-09-11	13:05:00	0
2008-09-11	13:06:00	0
2008-09-11	13:07:00	0
2008-09-11	13:08:00	0
2008-09-11	13:09:00	0
2008-09-11	13:10:00	0
2008-09-11	13:11:00	0
2008-09-11	13:12:00	0
2008-09-11	13:13:00	0
2008-09-11	13:14:00	0
2008-09-11	13:15:00	0
2008-09-11	13:16:00	0
2008-09-11	13:17:00	0
2008-09-11	13:18:00	0
2008-09-11	13:19:00	0
2008-09-11	13:20:00	0
2008-09-11	13:21:00	0
2008-09-11	13:22:00	0
2008-09-11	13:23:00	0
2008-09-11	13:24:00	0
2008-09-11	13:25:00	0
2008-09-11	13:26:00	0
2008-09-11	13:27:00	0
2008-09-11	13:28:00	0
2008-09-11	13:29:00	0
2008-09-11	13:30:00	0
2008-09-11	13:31:00	0
2008-09-11	13:32:00	0
2008-09-11	13:33:00	0
2008-09-11	13:34:00	0
2008-09-11	13:35:00	0
2008-09-11	13:36:00	0
2008-09-11	13:37:00	0
2008-09-11	13:38:00	0
2008-09-11	13:39:00	0
2008-09-11	13:40:00	0
2008-09-11	13:41:00	0
2008-09-11	13:42:00	0
2008-09-11	13:43:00	0
2008-09-11	13:44:00	0
2008-09-11	13:45:00	0
2008-09-11	13:46:00	0
2008-09-11	13:47:00	0
2008-09-11	13:48:00	0
2008-09-11	13:49:00	0
2008-09-11	13:50:00	0
2008-09-11	13:51:00	0
2008-09-11	13:52:00	0
2008-09-11	13:53:00	0
2008-09-11	13:54:00	0
2008-09-11	13:55:00	0
2008-09-11	13:56:00	0
2008-09-11	13:57:00	0
2008-09-11	13:58:00	0
2008-09-11	13:59:00	0
2008-09-11	14:00:00	0
2008-09-11	14:01:00	0
2008-09-11	14:02:00	0
2008-09-11	14:03:00	0
2008-09-11	14:04:00	0
2008-09-11	14:05:00	0
2008-09-11	14:06:00	0
2008-09-11	14:07:00	0
2008-09-11	14:08:00	0
2008-09-11	14:09:00	0
2008-09-11	14:10:00	0
2008-09-11	14:11:00	0
2008-09-11	14:12:00	0
2008-09-11	14:13:00	0
2008-09-11	14:14:00	0
2008-09-11	14:15:00	0
2008-09-11	14:16:00	0
2008-09-11	14:17:00	0
2008-09-11	14:18:00	0
2008-09-11	14:19:00	0
2008-09-11	14:20:00	0
2008-09-11	14:21:00	0
2008-09-11	14:22:00	0
2008-09-11	14:23:00	0
2008-09-11	14:24:00	0
2008-09-11	14:25:00	0
2008-09-11	14:26:00	0
2008-09-11	14:27:00	0
2008-09-11	14:28:00	0
2008-09-11	14:29:00	0
2008-09-11	14:30:00	0
2008-09-11	14:31:00	0
2008-09-11	14:32:00	0
2008-09-11	14:33:00	0
2008-09-11	14:34:00	0
2008-09-11	14:35:00	0
2008-09-11	14:36:00	0
2008-09-11	14:37:00	0
2008-09-11	14:38:00	0
2008-09-11	14:39:00	0
2008-09-11	14:40:00	0
2008-09-11	14:41:00	0
2008-09-11	14:42:00	0
2008-09-11	14:43:00	0
2008-09-11	14:44:00	0
2008-09-11	14:45:00	0
2008-09-11	14:46:00	0
2008-09-11	14:47:00	0
2008-09-11	14:48:00	0
2008-09-11	14:49:00	0
2008-09-11	14:50:00	0
2008-09-11	14:51:00	0
2008-09-11	14:52:00	0
2008-09-11	14:53:00	0
2008-09-11	14:54:00	0
2008-09-11	14:55:00	0
2008-09-11	14:56:00	0
2008-09-11	14:57:00	0
2008-09-11	14:58:00	0
2008-09-11	14:59:00	0
2008-09-11	15:00:00	0
2008-09-11	15:01:00	0
2008-09-11	15:02:00	0
2008-09-11	15:03:00	0
2008-09-11	15:04:00	0
2008-09-11	15:05:00	0
2008-09-11	15:06:00	0
2008-09-11	15:07:00	0
2008-09-11	15:08:00	0
2008-09-11	15:09:00	0
2008-09-11	15:10:00	0
2008-09-11	15:11:00	0
2008-09-11	15:12:00	0
2008-09-11	15:13:00	0
2008-09-11	15:14:00	0
2008-09-11	15:15:00	0
2008-09-11	15:16:00	0
2008-09-11	15:17:00	0
2008-09-11	15:18:00	0
2008-09-11	15:19:00	0
2008-09-11	15:20:00	0
2008-09-11	15:21:00	0
2008-09-11	15:22:00	0
2008-09-11	15:23:00	0
2008-09-11	15:24:00	0
2008-09-11	15:25:00	0
2008-09-11	15:26:00	0
2008-09-11	15:27:00	0
2008-09-11	15:28:00	0
2008-09-11	15:29:00	0
2008-09-11	15:30:00	0
2008-09-11	15:31:00	0
2008-09-11	15:32:00	0
2008-09-11	15:33:00	0
2008-09-11	15:34:00	0
2008-09-11	15:35:00	0
2008-09-11	15:36:00	0
2008-09-11	15:37:00	0
2008-09-11	15:38:00	0
2008-09-11	15:39:00	0
2008-09-11	15:40:00	0
2008-09-11	15:41:00	0
2008-09-11	15:42:00	0
2008-09-11	15:43:00	0
2008-09-11	15:44:00	0
2008-09-11	15:45:00	0
2008-09-11	15:46:00	0
2008-09-11	15:47:00	0
2008-09-11	15:48:00	0
2008-09-11	15:49:00	0
2008-09-11	15:50:00	0
2008-09-11	15:51:00	0
2008-09-11	15:52:00	0
2008-09-11	15:53:00	0
2008-09-11	15:54:00	0
2008-09-11	15:55:00	0
2008-09-11	15:56:00	0
2008-09-11	15:57:00	0
2008-09-11	15:58:00	0
2008-09-11	15:59:00	0
2008-09-11	16:00:00	0
2008-09-11	16:01:00	0
2008-09-11	16:02:00	0
2008-09-11	16:03:00	0
2008-09-11	16:04:00	0
2008-09-11	16:05:00	0
2008-09-11	16:06:00	0
2008-09-11	16:07:00	0
2008-09-11	16:08:00	0
2008-09-11	16:09:00	0
2008-09-11	16:10:00	0
2008-09-11	16:11:00	0
2008-09-11	16:12:00	0
2008-09-11	16:13:00	0
2008-09-11	16:14:00	0
2008-09-11	16:15:00	0
2008-09-11	16:16:00	0
2008-09-11	16:17:00	0
2008-09-11	16:18:00	0
2008-09-11	16:19:00	0
2008-09-11	16:20:00	0
2008-09-11	16:21:00	0
2008-09-11	16:22:00	0
2008-09-11	16:23:00	0
2008-09-11	16:24:00	0
2008-09-11	16:25:00	0
2008-09-11	16:26:00	0
2008-09-11	16:27:00	0
2008-09-11	16:28:00	0
2008-09-11	16:29:00	0
2008-09-11	16:30:00	0
2008-09-11	16:31:00	0
2008-09-11	16:32:00	0
2008-09-11	16:33:00	0
2008-09-11	16:34:00	0
2008-09-11	16:35:00	0
2008-09-11	16:36:00	0
2008-09-11	16:37:00	0
2008-09-11	16:38:00	0
2008-09-11	16:39:00	0
2008-09-11	16:40:00	0
2008-09-11	16:41:00	0
2008-09-11	16:42:00	0
2008-09-11	16:43:00	0
2008-09-11	16:44:00	0
2008-09-11	16:45:00	0
2008-09-11	16:46:00	0
2008-09-11	16:47:00	0
2008-09-11	16:48:00	0
2008-09-11	16:49:00	0
2008-09-11	16:50:00	0
2008-09-11	16:51:00	0
2008-09-11	16:52:00	0
2008-09-11	16:53:00	0
2008-09-11	16:54:00	0
2008-09-11	16:55:00	0
2008-09-11	16:56:00	0
2008-09-11	16:57:00	0
2008-09-11	16:58:00	0
2008-09-11	16:59:00	0
2008-09-11	17:00:00	0
2008-09-11	17:01:00	0
2008-09-11	17:02:00	0
2008-09-11	17:03:00	0
2008-09-11	17:04:00	0
2008-09-11	17:05:00	0
2008-09-11	17:06:00	0
2008-09-11	17:07:00	0
2008-09-11	17:08:00	0
2008-09-11	17:09:00	0
2008-09-11	17:10:00	0
2008-09-11	17:11:00	0
2008-09-11	17:12:00	0
2008-09-11	17:13:00	0
2008-09-11	17:14:00	0
2008-09-11	17:15:00	0
2008-09-11	17:16:00	0
2008-09-11	17:17:00	0
2008-09-11	17:18:00	0
2008-09-11	17:19:00	0
2008-09-11	17:20:00	0
2008-09-11	17:21:00	0
2008-09-11	17:22:00	0
2008-09-11	17:23:00	0
2008-09-11	17:24:00	0
2008-09-11	17:25:00	0
2008-09-11	17:26:00	0
2008-09-11	17:27:00	0
2008-09-11	17:28:00	0
2008-09-11	17:29:00	0
2008-09-11	17:30:00	0
2008-09-11	17:31:00	0
2008-09-11	17:32:00	0
2008-09-11	17:33:00	0
2008-09-11	17:34:00	0
2008-09-11	17:35:00	0
2008-09-11	17:36:00	0
2008-09-11	17:37:00	0
2008-09-11	17:38:00	0
2008-09-11	17:39:00	0
2008-09-11	17:40:00	0
2008-09-11	17:41:00	0
2008-09-11	17:42:00	0
2008-09-11	17:43:00	0
2008-09-11	17:44:00	0
2008-09-11	17:45:00	0
2008-09-11	17:46:00	0
2008-09-11	17:47:00	0
2008-09-11	17:48:00	0
2008-09-11	17:49:00	0
2008-09-11	17:50:00	0
2008-09-11	17:51:00	0
2008-09-11	17:52:00	0
2008-09-11	17:53:00	0
2008-09-11	17:54:00	0
2008-09-11	17:55:00	0
2008-09-11	17:56:00	0
2008-09-11	17:57:00	0
2008-09-11	17:58:00	0
2008-09-11	17:59:00	0
2008-09-11	18:00:00	524
2008-09-11	18:01:00	41
2008-09-11	18:02:00	0
2008-09-11	18:03:00	230
2008-09-11	18:04:00	1103
2008-09-11	18:05:00	953
2008-09-11	18:06:00	508
2008-09-11	18:07:00	0
2008-09-11	18:08:00	309
2008-09-11	18:09:00	61
2008-09-11	18:10:00	132
2008-09-11	18:11:00	156
2008-09-11	18:12:00	144
2008-09-11	18:13:00	205
2008-09-11	18:14:00	193
2008-09-11	18:15:00	242
2008-09-11	18:16:00	71
2008-09-11	18:17:00	242
2008-09-11	18:18:00	217
2008-09-11	18:19:00	10
2008-09-11	18:20:00	30
2008-09-11	18:21:00	61
2008-09-11	18:22:00	181
2008-09-11	18:23:00	91
2008-09-11	18:24:00	41
2008-09-11	18:25:00	91
2008-09-11	18:26:00	51
2008-09-11	18:27:00	30
2008-09-11	18:28:00	193
2008-09-11	18:29:00	91
2008-09-11	18:30:00	230
2008-09-11	18:31:00	181
2008-09-11	18:32:00	81
2008-09-11	18:33:00	30
2008-09-11	18:34:00	144
2008-09-11	18:35:00	193
2008-09-11	18:36:00	61
2008-09-11	18:37:00	205
2008-09-11	18:38:00	41
2008-09-11	18:39:00	30
2008-09-11	18:40:00	41
2008-09-11	18:41:00	30
2008-09-11	18:42:00	51
2008-09-11	18:43:00	41
2008-09-11	18:44:00	51
2008-09-11	18:45:00	10
2008-09-11	18:46:00	102
2008-09-11	18:47:00	181
2008-09-11	18:48:00	71
2008-09-11	18:49:00	953
2008-09-11	18:50:00	542
2008-09-11	18:51:00	266
2008-09-11	18:52:00	20
2008-09-11	18:53:00	0
2008-09-11	18:54:00	0
2008-09-11	18:55:00	0
2008-09-11	18:56:00	0
2008-09-11	18:57:00	0
2008-09-11	18:58:00	242
2008-09-11	18:59:00	61
2008-09-11	19:00:00	193
2008-09-11	19:01:00	0
2008-09-11	19:02:00	0
2008-09-11	19:03:00	0
2008-09-11	19:04:00	0
2008-09-11	19:05:00	0
2008-09-11	19:06:00	0
2008-09-11	19:07:00	0
2008-09-11	19:08:00	0
2008-09-11	19:09:00	0
2008-09-11	19:10:00	0
2008-09-11	19:11:00	0
2008-09-11	19:12:00	0
2008-09-11	19:13:00	0
2008-09-11	19:14:00	0
2008-09-11	19:15:00	0
2008-09-11	19:16:00	0
2008-09-11	19:17:00	0
2008-09-11	19:18:00	0
2008-09-11	19:19:00	0
2008-09-11	19:20:00	0
2008-09-11	19:21:00	0
2008-09-11	19:22:00	0
2008-09-11	19:23:00	0
2008-09-11	19:24:00	0
2008-09-11	19:25:00	0
2008-09-11	19:26:00	0
2008-09-11	19:27:00	0
2008-09-11	19:28:00	0
2008-09-11	19:29:00	0
2008-09-11	19:30:00	0
2008-09-11	19:31:00	0
2008-09-11	19:32:00	0
2008-09-11	19:33:00	0
2008-09-11	19:34:00	0
2008-09-11	19:35:00	0
2008-09-11	19:36:00	10
2008-09-11	19:37:00	0
2008-09-11	19:38:00	0
2008-09-11	19:39:00	0
2008-09-11	19:40:00	0
2008-09-11	19:41:00	0
2008-09-11	19:42:00	0
2008-09-11	19:43:00	0
2008-09-11	19:44:00	0
2008-09-11	19:45:00	0
2008-09-11	19:46:00	0
2008-09-11	19:47:00	0
2008-09-11	19:48:00	0
2008-09-11	19:49:00	0
2008-09-11	19:50:00	0
2008-09-11	19:51:00	0
2008-09-11	19:52:00	0
2008-09-11	19:53:00	0
2008-09-11	19:54:00	0
2008-09-11	19:55:00	0
2008-09-11	19:56:00	0
2008-09-11	19:57:00	0
2008-09-11	19:58:00	0
2008-09-11	19:59:00	20
2008-09-11	20:00:00	10
2008-09-11	20:01:00	0
2008-09-11	20:02:00	0
2008-09-11	20:03:00	61
2008-09-11	20:04:00	0
2008-09-11	20:05:00	0
2008-09-11	20:06:00	0
2008-09-11	20:07:00	0
2008-09-11	20:08:00	0
2008-09-11	20:09:00	0
2008-09-11	20:10:00	0
2008-09-11	20:11:00	0
2008-09-11	20:12:00	0
2008-09-11	20:13:00	0
2008-09-11	20:14:00	0
2008-09-11	20:15:00	0
2008-09-11	20:16:00	0
2008-09-11	20:17:00	0
2008-09-11	20:18:00	0
2008-09-11	20:19:00	0
2008-09-11	20:20:00	0
2008-09-11	20:21:00	0
2008-09-11	20:22:00	0
2008-09-11	20:23:00	0
2008-09-11	20:24:00	0
2008-09-11	20:25:00	0
2008-09-11	20:26:00	0
2008-09-11	20:27:00	0
2008-09-11	20:28:00	0
2008-09-11	20:29:00	0
2008-09-11	20:30:00	0
2008-09-11	20:31:00	0
2008-09-11	20:32:00	0
2008-09-11	20:33:00	0
2008-09-11	20:34:00	0
2008-09-11	20:35:00	0
2008-09-11	20:36:00	0
2008-09-11	20:37:00	0
2008-09-11	20:38:00	0
2008-09-11	20:39:00	0
2008-09-11	20:40:00	0
2008-09-11	20:41:00	0
2008-09-11	20:42:00	0
2008-09-11	20:43:00	0
2008-09-11	20:44:00	0
2008-09-11	20:45:00	0
2008-09-11	20:46:00	0
2008-09-11	20:47:00	0
2008-09-11	20:48:00	0
2008-09-11	20:49:00	0
2008-09-11	20:50:00	0
2008-09-11	20:51:00	0
2008-09-11	20:52:00	0
2008-09-11	20:53:00	0
2008-09-11	20:54:00	0
2008-09-11	20:55:00	0
2008-09-11	20:56:00	0
2008-09-11	20:57:00	0
2008-09-11	20:58:00	0
2008-09-11	20:59:00	0
2008-09-11	21:00:00	0
2008-09-11	21:01:00	0
2008-09-11	21:02:00	0
2008-09-11	21:03:00	0
2008-09-11	21:04:00	0
2008-09-11	21:05:00	10
2008-09-11	21:06:00	0
2008-09-11	21:07:00	0
2008-09-11	21:08:00	0
2008-09-11	21:09:00	0
2008-09-11	21:10:00	0
2008-09-11	21:11:00	0
2008-09-11	21:12:00	0
2008-09-11	21:13:00	0
2008-09-11	21:14:00	0
2008-09-11	21:15:00	0
2008-09-11	21:16:00	0
2008-09-11	21:17:00	0
2008-09-11	21:18:00	0
2008-09-11	21:19:00	0
2008-09-11	21:20:00	0
2008-09-11	21:21:00	0
2008-09-11	21:22:00	0
2008-09-11	21:23:00	0
2008-09-11	21:24:00	0
2008-09-11	21:25:00	0
2008-09-11	21:26:00	0
2008-09-11	21:27:00	0
2008-09-11	21:28:00	0
2008-09-11	21:29:00	0
2008-09-11	21:30:00	0
2008-09-11	21:31:00	0
2008-09-11	21:32:00	0
2008-09-11	21:33:00	0
2008-09-11	21:34:00	0
2008-09-11	21:35:00	0
2008-09-11	21:36:00	0
2008-09-11	21:37:00	0
2008-09-11	21:38:00	0
2008-09-11	21:39:00	0
2008-09-11	21:40:00	0
2008-09-11	21:41:00	0
2008-09-11	21:42:00	0
2008-09-11	21:43:00	0
2008-09-11	21:44:00	0
2008-09-11	21:45:00	0
2008-09-11	21:46:00	0
2008-09-11	21:47:00	0
2008-09-11	21:48:00	0
2008-09-11	21:49:00	0
2008-09-11	21:50:00	0
2008-09-11	21:51:00	0
2008-09-11	21:52:00	0
2008-09-11	21:53:00	0
2008-09-11	21:54:00	0
2008-09-11	21:55:00	0
2008-09-11	21:56:00	0
2008-09-11	21:57:00	0
2008-09-11	21:58:00	0
2008-09-11	21:59:00	0
2008-09-11	22:00:00	0
2008-09-11	22:01:00	0
2008-09-11	22:02:00	0
2008-09-11	22:03:00	0
2008-09-11	22:04:00	0
2008-09-11	22:05:00	861
2008-09-11	22:06:00	337
2008-09-11	22:07:00	380
2008-09-11	22:08:00	71
2008-09-11	22:09:00	443
2008-09-11	22:10:00	144
2008-09-11	22:11:00	112
2008-09-11	22:12:00	427
2008-09-11	22:13:00	492
2008-09-11	22:14:00	0
2008-09-11	22:15:00	0
2008-09-11	22:16:00	10
2008-09-11	22:17:00	0
2008-09-11	22:18:00	0
2008-09-11	22:19:00	0
2008-09-11	22:20:00	0
2008-09-11	22:21:00	0
2008-09-11	22:22:00	0
2008-09-11	22:23:00	0
2008-09-11	22:24:00	0
2008-09-11	22:25:00	0
2008-09-11	22:26:00	0
2008-09-11	22:27:00	0
2008-09-11	22:28:00	0
2008-09-11	22:29:00	0
2008-09-11	22:30:00	0
2008-09-11	22:31:00	0
2008-09-11	22:32:00	0
2008-09-11	22:33:00	0
2008-09-11	22:34:00	0
2008-09-11	22:35:00	0
2008-09-11	22:36:00	0
2008-09-11	22:37:00	0
2008-09-11	22:38:00	0
2008-09-11	22:39:00	0
2008-09-11	22:40:00	0
2008-09-11	22:41:00	0
2008-09-11	22:42:00	0
2008-09-11	22:43:00	0
2008-09-11	22:44:00	0
2008-09-11	22:45:00	0
2008-09-11	22:46:00	0
2008-09-11	22:47:00	0
2008-09-11	22:48:00	0
2008-09-11	22:49:00	0
2008-09-11	22:50:00	0
2008-09-11	22:51:00	0
2008-09-11	22:52:00	0
2008-09-11	22:53:00	0
2008-09-11	22:54:00	0
2008-09-11	22:55:00	0
2008-09-11	22:56:00	0
2008-09-11	22:57:00	0
2008-09-11	22:58:00	0
2008-09-11	22:59:00	0
2008-09-11	23:00:00	0
2008-09-11	23:01:00	0
2008-09-11	23:02:00	0
2008-09-11	23:03:00	0
2008-09-11	23:04:00	0
2008-09-11	23:05:00	0
2008-09-11	23:06:00	0
2008-09-11	23:07:00	0
2008-09-11	23:08:00	0
2008-09-11	23:09:00	0
2008-09-11	23:10:00	0
2008-09-11	23:11:00	0
2008-09-11	23:12:00	0
2008-09-11	23:13:00	0
2008-09-11	23:14:00	0
2008-09-11	23:15:00	0
2008-09-11	23:16:00	0
2008-09-11	23:17:00	0
2008-09-11	23:18:00	0
2008-09-11	23:19:00	0
2008-09-11	23:20:00	0
2008-09-11	23:21:00	0
2008-09-11	23:22:00	0
2008-09-11	23:23:00	0
2008-09-11	23:24:00	0
2008-09-11	23:25:00	0
2008-09-11	23:26:00	0
2008-09-11	23:27:00	0
2008-09-11	23:28:00	0
2008-09-11	23:29:00	0
2008-09-11	23:30:00	0
2008-09-11	23:31:00	0
2008-09-11	23:32:00	0
2008-09-11	23:33:00	0
2008-09-11	23:34:00	0
2008-09-11	23:35:00	20
2008-09-11	23:36:00	0
2008-09-11	23:37:00	0
2008-09-11	23:38:00	0
2008-09-11	23:39:00	0
2008-09-11	23:40:00	0
2008-09-11	23:41:00	0
2008-09-11	23:42:00	0
2008-09-11	23:43:00	20
2008-09-11	23:44:00	0
2008-09-11	23:45:00	0
2008-09-11	23:46:00	0
2008-09-11	23:47:00	0
2008-09-11	23:48:00	0
2008-09-11	23:49:00	0
2008-09-11	23:50:00	0
2008-09-11	23:51:00	0
2008-09-11	23:52:00	0
2008-09-11	23:53:00	0
2008-09-11	23:54:00	0
2008-09-11	23:55:00	0
2008-09-11	23:56:00	0
2008-09-11	23:57:00	0
2008-09-11	23:58:00	0
2008-09-11	23:59:00	0
2008-09-12	00:00:00	0
2008-09-12	00:01:00	0
2008-09-12	00:02:00	0
2008-09-12	00:03:00	0
2008-09-12	00:04:00	0
2008-09-12	00:05:00	0
2008-09-12	00:06:00	0
2008-09-12	00:07:00	0
2008-09-12	00:08:00	0
2008-09-12	00:09:00	0
2008-09-12	00:10:00	20
2008-09-12	00:11:00	0
2008-09-12	00:12:00	0
2008-09-12	00:13:00	0
2008-09-12	00:14:00	0
2008-09-12	00:15:00	0
2008-09-12	00:16:00	0
2008-09-12	00:17:00	0
2008-09-12	00:18:00	0
2008-09-12	00:19:00	0
2008-09-12	00:20:00	0
2008-09-12	00:21:00	0
2008-09-12	00:22:00	0
2008-09-12	00:23:00	0
2008-09-12	00:24:00	0
2008-09-12	00:25:00	0
2008-09-12	00:26:00	0
2008-09-12	00:27:00	0
2008-09-12	00:28:00	51
2008-09-12	00:29:00	30
2008-09-12	00:30:00	0
2008-09-12	00:31:00	0
2008-09-12	00:32:00	0
2008-09-12	00:33:00	0
2008-09-12	00:34:00	0
2008-09-12	00:35:00	0
2008-09-12	00:36:00	0
2008-09-12	00:37:00	0
2008-09-12	00:38:00	0
2008-09-12	00:39:00	0
2008-09-12	00:40:00	0
2008-09-12	00:41:00	0
2008-09-12	00:42:00	0
2008-09-12	00:43:00	0
2008-09-12	00:44:00	0
2008-09-12	00:45:00	0
2008-09-12	00:46:00	0
2008-09-12	00:47:00	0
2008-09-12	00:48:00	0
2008-09-12	00:49:00	0
2008-09-12	00:50:00	0
2008-09-12	00:51:00	0
2008-09-12	00:52:00	0
2008-09-12	00:53:00	0
2008-09-12	00:54:00	0
2008-09-12	00:55:00	0
2008-09-12	00:56:00	0
2008-09-12	00:57:00	0
2008-09-12	00:58:00	0
2008-09-12	00:59:00	0
2008-09-12	01:00:00	0
2008-09-12	01:01:00	0
2008-09-12	01:02:00	0
2008-09-12	01:03:00	0
2008-09-12	01:04:00	0
2008-09-12	01:05:00	0
2008-09-12	01:06:00	0
2008-09-12	01:07:00	0
2008-09-12	01:08:00	0
2008-09-12	01:09:00	0
2008-09-12	01:10:00	0
2008-09-12	01:11:00	0
2008-09-12	01:12:00	0
2008-09-12	01:13:00	0
2008-09-12	01:14:00	0
2008-09-12	01:15:00	0
2008-09-12	01:16:00	0
2008-09-12	01:17:00	0
2008-09-12	01:18:00	0
2008-09-12	01:19:00	0
2008-09-12	01:20:00	0
2008-09-12	01:21:00	0
2008-09-12	01:22:00	0
2008-09-12	01:23:00	0
2008-09-12	01:24:00	0
2008-09-12	01:25:00	0
2008-09-12	01:26:00	0
2008-09-12	01:27:00	0
2008-09-12	01:28:00	0
2008-09-12	01:29:00	0
2008-09-12	01:30:00	0
2008-09-12	01:31:00	0
2008-09-12	01:32:00	0
2008-09-12	01:33:00	0
2008-09-12	01:34:00	0
2008-09-12	01:35:00	0
2008-09-12	01:36:00	0
2008-09-12	01:37:00	0
2008-09-12	01:38:00	0
2008-09-12	01:39:00	0
2008-09-12	01:40:00	0
2008-09-12	01:41:00	0
2008-09-12	01:42:00	0
2008-09-12	01:43:00	0
2008-09-12	01:44:00	0
2008-09-12	01:45:00	0
2008-09-12	01:46:00	0
2008-09-12	01:47:00	0
2008-09-12	01:48:00	0
2008-09-12	01:49:00	0
2008-09-12	01:50:00	0
2008-09-12	01:51:00	0
2008-09-12	01:52:00	0
2008-09-12	01:53:00	0
2008-09-12	01:54:00	0
2008-09-12	01:55:00	30
2008-09-12	01:56:00	0
2008-09-12	01:57:00	0
2008-09-12	01:58:00	0
2008-09-12	01:59:00	0
2008-09-12	02:00:00	0
2008-09-12	02:01:00	0
2008-09-12	02:02:00	0
2008-09-12	02:03:00	0
2008-09-12	02:04:00	0
2008-09-12	02:05:00	0
2008-09-12	02:06:00	0
2008-09-12	02:07:00	0
2008-09-12	02:08:00	0
2008-09-12	02:09:00	0
2008-09-12	02:10:00	0
2008-09-12	02:11:00	0
2008-09-12	02:12:00	0
2008-09-12	02:13:00	0
2008-09-12	02:14:00	0
2008-09-12	02:15:00	0
2008-09-12	02:16:00	0
2008-09-12	02:17:00	0
2008-09-12	02:18:00	0
2008-09-12	02:19:00	0
2008-09-12	02:20:00	0
2008-09-12	02:21:00	0
2008-09-12	02:22:00	0
2008-09-12	02:23:00	0
2008-09-12	02:24:00	0
2008-09-12	02:25:00	0
2008-09-12	02:26:00	0
2008-09-12	02:27:00	0
2008-09-12	02:28:00	0
2008-09-12	02:29:00	0
2008-09-12	02:30:00	0
2008-09-12	02:31:00	0
2008-09-12	02:32:00	0
2008-09-12	02:33:00	0
2008-09-12	02:34:00	0
2008-09-12	02:35:00	0
2008-09-12	02:36:00	0
2008-09-12	02:37:00	242
2008-09-12	02:38:00	0
2008-09-12	02:39:00	0
2008-09-12	02:40:00	0
2008-09-12	02:41:00	0
2008-09-12	02:42:00	0
2008-09-12	02:43:00	0
2008-09-12	02:44:00	0
2008-09-12	02:45:00	0
2008-09-12	02:46:00	0
2008-09-12	02:47:00	0
2008-09-12	02:48:00	0
2008-09-12	02:49:00	0
2008-09-12	02:50:00	0
2008-09-12	02:51:00	0
2008-09-12	02:52:00	0
2008-09-12	02:53:00	0
2008-09-12	02:54:00	0
2008-09-12	02:55:00	0
2008-09-12	02:56:00	0
2008-09-12	02:57:00	0
2008-09-12	02:58:00	0
2008-09-12	02:59:00	0
2008-09-12	03:00:00	0
2008-09-12	03:01:00	0
2008-09-12	03:02:00	0
2008-09-12	03:03:00	0
2008-09-12	03:04:00	0
2008-09-12	03:05:00	0
2008-09-12	03:06:00	0
2008-09-12	03:07:00	0
2008-09-12	03:08:00	0
2008-09-12	03:09:00	0
2008-09-12	03:10:00	0
2008-09-12	03:11:00	0
2008-09-12	03:12:00	0
2008-09-12	03:13:00	0
2008-09-12	03:14:00	0
2008-09-12	03:15:00	0
2008-09-12	03:16:00	0
2008-09-12	03:17:00	0
2008-09-12	03:18:00	0
2008-09-12	03:19:00	0
2008-09-12	03:20:00	0
2008-09-12	03:21:00	0
2008-09-12	03:22:00	0
2008-09-12	03:23:00	0
2008-09-12	03:24:00	0
2008-09-12	03:25:00	0
2008-09-12	03:26:00	0
2008-09-12	03:27:00	0
2008-09-12	03:28:00	0
2008-09-12	03:29:00	0
2008-09-12	03:30:00	0
2008-09-12	03:31:00	0
2008-09-12	03:32:00	0
2008-09-12	03:33:00	0
2008-09-12	03:34:00	0
2008-09-12	03:35:00	0
2008-09-12	03:36:00	0
2008-09-12	03:37:00	0
2008-09-12	03:38:00	0
2008-09-12	03:39:00	0
2008-09-12	03:40:00	0
2008-09-12	03:41:00	0
2008-09-12	03:42:00	0
2008-09-12	03:43:00	0
2008-09-12	03:44:00	0
2008-09-12	03:45:00	0
2008-09-12	03:46:00	0
2008-09-12	03:47:00	0
2008-09-12	03:48:00	10
2008-09-12	03:49:00	10
2008-09-12	03:50:00	0
2008-09-12	03:51:00	0
2008-09-12	03:52:00	0
2008-09-12	03:53:00	0
2008-09-12	03:54:00	0
2008-09-12	03:55:00	0
2008-09-12	03:56:00	0
2008-09-12	03:57:00	0
2008-09-12	03:58:00	0
2008-09-12	03:59:00	0
2008-09-12	04:00:00	0
2008-09-12	04:01:00	0
2008-09-12	04:02:00	0
2008-09-12	04:03:00	0
2008-09-12	04:04:00	0
2008-09-12	04:05:00	0
2008-09-12	04:06:00	0
2008-09-12	04:07:00	0
2008-09-12	04:08:00	0
2008-09-12	04:09:00	0
2008-09-12	04:10:00	0
2008-09-12	04:11:00	0
2008-09-12	04:12:00	0
2008-09-12	04:13:00	0
2008-09-12	04:14:00	0
2008-09-12	04:15:00	0
2008-09-12	04:16:00	0
2008-09-12	04:17:00	0
2008-09-12	04:18:00	0
2008-09-12	04:19:00	0
2008-09-12	04:20:00	0
2008-09-12	04:21:00	0
2008-09-12	04:22:00	0
2008-09-12	04:23:00	0
2008-09-12	04:24:00	0
2008-09-12	04:25:00	0
2008-09-12	04:26:00	0
2008-09-12	04:27:00	0
2008-09-12	04:28:00	0
2008-09-12	04:29:00	0
2008-09-12	04:30:00	0
2008-09-12	04:31:00	0
2008-09-12	04:32:00	0
2008-09-12	04:33:00	0
2008-09-12	04:34:00	0
2008-09-12	04:35:00	0
2008-09-12	04:36:00	0
2008-09-12	04:37:00	0
2008-09-12	04:38:00	0
2008-09-12	04:39:00	0
2008-09-12	04:40:00	0
2008-09-12	04:41:00	0
2008-09-12	04:42:00	0
2008-09-12	04:43:00	0
2008-09-12	04:44:00	0
2008-09-12	04:45:00	0
2008-09-12	04:46:00	0
2008-09-12	04:47:00	0
2008-09-12	04:48:00	0
2008-09-12	04:49:00	0
2008-09-12	04:50:00	0
2008-09-12	04:51:00	0
2008-09-12	04:52:00	0
2008-09-12	04:53:00	0
2008-09-12	04:54:00	0
2008-09-12	04:55:00	0
2008-09-12	04:56:00	0
2008-09-12	04:57:00	337
2008-09-12	04:58:00	0
2008-09-12	04:59:00	0
2008-09-12	05:00:00	0
2008-09-12	05:01:00	0
2008-09-12	05:02:00	0
2008-09-12	05:03:00	0
2008-09-12	05:04:00	0
2008-09-12	05:05:00	0
2008-09-12	05:06:00	0
2008-09-12	05:07:00	0
2008-09-12	05:08:00	0
2008-09-12	05:09:00	0
2008-09-12	05:10:00	0
2008-09-12	05:11:00	0
2008-09-12	05:12:00	0
2008-09-12	05:13:00	0
2008-09-12	05:14:00	0
2008-09-12	05:15:00	0
2008-09-12	05:16:00	0
2008-09-12	05:17:00	0
2008-09-12	05:18:00	0
2008-09-12	05:19:00	0
2008-09-12	05:20:00	0
2008-09-12	05:21:00	0
2008-09-12	05:22:00	0
2008-09-12	05:23:00	0
2008-09-12	05:24:00	0
2008-09-12	05:25:00	0
2008-09-12	05:26:00	0
2008-09-12	05:27:00	0
2008-09-12	05:28:00	0
2008-09-12	05:29:00	0
2008-09-12	05:30:00	0
2008-09-12	05:31:00	0
2008-09-12	05:32:00	0
2008-09-12	05:33:00	0
2008-09-12	05:34:00	0
2008-09-12	05:35:00	0
2008-09-12	05:36:00	0
2008-09-12	05:37:00	0
2008-09-12	05:38:00	0
2008-09-12	05:39:00	0
2008-09-12	05:40:00	10
2008-09-12	05:41:00	30
2008-09-12	05:42:00	0
2008-09-12	05:43:00	0
2008-09-12	05:44:00	0
2008-09-12	05:45:00	20
2008-09-12	05:46:00	0
2008-09-12	05:47:00	0
2008-09-12	05:48:00	0
2008-09-12	05:49:00	0
2008-09-12	05:50:00	0
2008-09-12	05:51:00	0
2008-09-12	05:52:00	0
2008-09-12	05:53:00	0
2008-09-12	05:54:00	0
2008-09-12	05:55:00	0
2008-09-12	05:56:00	0
2008-09-12	05:57:00	0
2008-09-12	05:58:00	0
2008-09-12	05:59:00	0
2008-09-12	06:00:00	0
2008-09-12	06:01:00	0
2008-09-12	06:02:00	0
2008-09-12	06:03:00	0
2008-09-12	06:04:00	0
2008-09-12	06:05:00	0
2008-09-12	06:06:00	0
2008-09-12	06:07:00	0
2008-09-12	06:08:00	0
2008-09-12	06:09:00	0
2008-09-12	06:10:00	0
2008-09-12	06:11:00	0
2008-09-12	06:12:00	0
2008-09-12	06:13:00	0
2008-09-12	06:14:00	0
2008-09-12	06:15:00	10
2008-09-12	06:16:00	10
2008-09-12	06:17:00	0
2008-09-12	06:18:00	0
2008-09-12	06:19:00	0
2008-09-12	06:20:00	0
2008-09-12	06:21:00	0
2008-09-12	06:22:00	0
2008-09-12	06:23:00	0
2008-09-12	06:24:00	0
2008-09-12	06:25:00	0
2008-09-12	06:26:00	0
2008-09-12	06:27:00	0
2008-09-12	06:28:00	0
2008-09-12	06:29:00	0
2008-09-12	06:30:00	0
2008-09-12	06:31:00	0
2008-09-12	06:32:00	0
2008-09-12	06:33:00	0
2008-09-12	06:34:00	0
2008-09-12	06:35:00	0
2008-09-12	06:36:00	20
2008-09-12	06:37:00	0
2008-09-12	06:38:00	0
2008-09-12	06:39:00	0
2008-09-12	06:40:00	0
2008-09-12	06:41:00	0
2008-09-12	06:42:00	0
2008-09-12	06:43:00	0
2008-09-12	06:44:00	0
2008-09-12	06:45:00	0
2008-09-12	06:46:00	0
2008-09-12	06:47:00	0
2008-09-12	06:48:00	0
2008-09-12	06:49:00	0
2008-09-12	06:50:00	0
2008-09-12	06:51:00	0
2008-09-12	06:52:00	0
2008-09-12	06:53:00	0
2008-09-12	06:54:00	0
2008-09-12	06:55:00	0
2008-09-12	06:56:00	0
2008-09-12	06:57:00	0
2008-09-12	06:58:00	0
2008-09-12	06:59:00	0
2008-09-12	07:00:00	0
2008-09-12	07:01:00	0
2008-09-12	07:02:00	0
2008-09-12	07:03:00	0
2008-09-12	07:04:00	0
2008-09-12	07:05:00	0
2008-09-12	07:06:00	0
2008-09-12	07:07:00	41
2008-09-12	07:08:00	0
2008-09-12	07:09:00	0
2008-09-12	07:10:00	0
2008-09-12	07:11:00	0
2008-09-12	07:12:00	0
2008-09-12	07:13:00	0
2008-09-12	07:14:00	0
2008-09-12	07:15:00	0
2008-09-12	07:16:00	0
2008-09-12	07:17:00	0
2008-09-12	07:18:00	0
2008-09-12	07:19:00	0
2008-09-12	07:20:00	0
2008-09-12	07:21:00	0
2008-09-12	07:22:00	0
2008-09-12	07:23:00	0
2008-09-12	07:24:00	0
2008-09-12	07:25:00	0
2008-09-12	07:26:00	0
2008-09-12	07:27:00	0
2008-09-12	07:28:00	0
2008-09-12	07:29:00	0
2008-09-12	07:30:00	0
2008-09-12	07:31:00	0
2008-09-12	07:32:00	0
2008-09-12	07:33:00	0
2008-09-12	07:34:00	0
2008-09-12	07:35:00	10
2008-09-12	07:36:00	51
2008-09-12	07:37:00	20
2008-09-12	07:38:00	0
2008-09-12	07:39:00	0
2008-09-12	07:40:00	0
2008-09-12	07:41:00	0
2008-09-12	07:42:00	0
2008-09-12	07:43:00	0
2008-09-12	07:44:00	0
2008-09-12	07:45:00	0
2008-09-12	07:46:00	0
2008-09-12	07:47:00	0
2008-09-12	07:48:00	0
2008-09-12	07:49:00	0
2008-09-12	07:50:00	0
2008-09-12	07:51:00	0
2008-09-12	07:52:00	0
2008-09-12	07:53:00	0
2008-09-12	07:54:00	0
2008-09-12	07:55:00	0
2008-09-12	07:56:00	0
2008-09-12	07:57:00	0
2008-09-12	07:58:00	0
2008-09-12	07:59:00	0
2008-09-12	08:00:00	0
2008-09-12	08:01:00	0
2008-09-12	08:02:00	0
2008-09-12	08:03:00	0
2008-09-12	08:04:00	0
2008-09-12	08:05:00	0
2008-09-12	08:06:00	0
2008-09-12	08:07:00	0
2008-09-12	08:08:00	0
2008-09-12	08:09:00	0
2008-09-12	08:10:00	0
2008-09-12	08:11:00	0
2008-09-12	08:12:00	0
2008-09-12	08:13:00	0
2008-09-12	08:14:00	0
2008-09-12	08:15:00	0
2008-09-12	08:16:00	0
2008-09-12	08:17:00	0
2008-09-12	08:18:00	0
2008-09-12	08:19:00	0
2008-09-12	08:20:00	0
2008-09-12	08:21:00	0
2008-09-12	08:22:00	0
2008-09-12	08:23:00	0
2008-09-12	08:24:00	0
2008-09-12	08:25:00	0
2008-09-12	08:26:00	0
2008-09-12	08:27:00	0
2008-09-12	08:28:00	0
2008-09-12	08:29:00	0
2008-09-12	08:30:00	0
2008-09-12	08:31:00	41
2008-09-12	08:32:00	0
2008-09-12	08:33:00	0
2008-09-12	08:34:00	0
2008-09-12	08:35:00	0
2008-09-12	08:36:00	0
2008-09-12	08:37:00	0
2008-09-12	08:38:00	10
2008-09-12	08:39:00	0
2008-09-12	08:40:00	10
2008-09-12	08:41:00	0
2008-09-12	08:42:00	230
2008-09-12	08:43:00	266
2008-09-12	08:44:00	10
2008-09-12	08:45:00	0
2008-09-12	08:46:00	0
2008-09-12	08:47:00	0
2008-09-12	08:48:00	0
2008-09-12	08:49:00	0
2008-09-12	08:50:00	0
2008-09-12	08:51:00	0
2008-09-12	08:52:00	0
2008-09-12	08:53:00	0
2008-09-12	08:54:00	0
2008-09-12	08:55:00	0
2008-09-12	08:56:00	0
2008-09-12	08:57:00	0
2008-09-12	08:58:00	0
2008-09-12	08:59:00	0
2008-09-12	09:00:00	0
2008-09-12	09:01:00	0
2008-09-12	09:02:00	0
2008-09-12	09:03:00	0
2008-09-12	09:04:00	0
2008-09-12	09:05:00	0
2008-09-12	09:06:00	0
2008-09-12	09:07:00	0
2008-09-12	09:08:00	0
[truncated: 19,611 more rows]

## Sheet: 9.25.08
Actogram, Copy Raw Data, All Days
Identity:	Lena
Filename:	E:\Active Research Files\meloxicam titre canine\cases\lena\Lena 9.25.08.AWC
Gender:	F
Age:	9
Height:	40.6 cm	16.0 in
Weight:	21.8 kg	48.1 lbs
Start Date:	25-Sep-2008 (Thu)
Start Time:	17:00:00
Interval:	1.00 mins
Date Stamp:	Time Stamp:	Activity Data:	Marker Press:
2008-09-25	00:00:00	0
2008-09-25	00:01:00	0
2008-09-25	00:02:00	0
2008-09-25	00:03:00	0
2008-09-25	00:04:00	0
2008-09-25	00:05:00	0
2008-09-25	00:06:00	0
2008-09-25	00:07:00	0
2008-09-25	00:08:00	0
2008-09-25	00:09:00	0
2008-09-25	00:10:00	0
2008-09-25	00:11:00	0
2008-09-25	00:12:00	0
2008-09-25	00:13:00	0
2008-09-25	00:14:00	0
2008-09-25	00:15:00	0
2008-09-25	00:16:00	0
2008-09-25	00:17:00	0
2008-09-25	00:18:00	0
2008-09-25	00:19:00	0
2008-09-25	00:20:00	0
2008-09-25	00:21:00	0
2008-09-25	00:22:00	0
2008-09-25	00:23:00	0
2008-09-25	00:24:00	0
2008-09-25	00:25:00	0
2008-09-25	00:26:00	0
2008-09-25	00:27:00	0
2008-09-25	00:28:00	0
2008-09-25	00:29:00	0
2008-09-25	00:30:00	0
2008-09-25	00:31:00	0
2008-09-25	00:32:00	0
2008-09-25	00:33:00	0
2008-09-25	00:34:00	0
2008-09-25	00:35:00	0
2008-09-25	00:36:00	0
2008-09-25	00:37:00	0
2008-09-25	00:38:00	0
2008-09-25	00:39:00	0
2008-09-25	00:40:00	0
2008-09-25	00:41:00	0
2008-09-25	00:42:00	0
2008-09-25	00:43:00	0
2008-09-25	00:44:00	0
2008-09-25	00:45:00	0
2008-09-25	00:46:00	0
2008-09-25	00:47:00	0
2008-09-25	00:48:00	0
2008-09-25	00:49:00	0
2008-09-25	00:50:00	0
2008-09-25	00:51:00	0
2008-09-25	00:52:00	0
2008-09-25	00:53:00	0
2008-09-25	00:54:00	0
2008-09-25	00:55:00	0
2008-09-25	00:56:00	0
2008-09-25	00:57:00	0
2008-09-25	00:58:00	0
2008-09-25	00:59:00	0
2008-09-25	01:00:00	0
2008-09-25	01:01:00	0
2008-09-25	01:02:00	0
2008-09-25	01:03:00	0
2008-09-25	01:04:00	0
2008-09-25	01:05:00	0
2008-09-25	01:06:00	0
2008-09-25	01:07:00	0
2008-09-25	01:08:00	0
2008-09-25	01:09:00	0
2008-09-25	01:10:00	0
2008-09-25	01:11:00	0
2008-09-25	01:12:00	0
2008-09-25	01:13:00	0
2008-09-25	01:14:00	0
2008-09-25	01:15:00	0
2008-09-25	01:16:00	0
2008-09-25	01:17:00	0
2008-09-25	01:18:00	0
2008-09-25	01:19:00	0
2008-09-25	01:20:00	0
2008-09-25	01:21:00	0
2008-09-25	01:22:00	0
2008-09-25	01:23:00	0
2008-09-25	01:24:00	0
2008-09-25	01:25:00	0
2008-09-25	01:26:00	0
2008-09-25	01:27:00	0
2008-09-25	01:28:00	0
2008-09-25	01:29:00	0
2008-09-25	01:30:00	0
2008-09-25	01:31:00	0
2008-09-25	01:32:00	0
2008-09-25	01:33:00	0
2008-09-25	01:34:00	0
2008-09-25	01:35:00	0
2008-09-25	01:36:00	0
2008-09-25	01:37:00	0
2008-09-25	01:38:00	0
2008-09-25	01:39:00	0
2008-09-25	01:40:00	0
2008-09-25	01:41:00	0
2008-09-25	01:42:00	0
2008-09-25	01:43:00	0
2008-09-25	01:44:00	0
2008-09-25	01:45:00	0
2008-09-25	01:46:00	0
2008-09-25	01:47:00	0
2008-09-25	01:48:00	0
2008-09-25	01:49:00	0
2008-09-25	01:50:00	0
2008-09-25	01:51:00	0
2008-09-25	01:52:00	0
2008-09-25	01:53:00	0
2008-09-25	01:54:00	0
2008-09-25	01:55:00	0
2008-09-25	01:56:00	0
2008-09-25	01:57:00	0
2008-09-25	01:58:00	0
2008-09-25	01:59:00	0
2008-09-25	02:00:00	0
2008-09-25	02:01:00	0
2008-09-25	02:02:00	0
2008-09-25	02:03:00	0
2008-09-25	02:04:00	0
2008-09-25	02:05:00	0
2008-09-25	02:06:00	0
2008-09-25	02:07:00	0
2008-09-25	02:08:00	0
2008-09-25	02:09:00	0
2008-09-25	02:10:00	0
2008-09-25	02:11:00	0
2008-09-25	02:12:00	0
2008-09-25	02:13:00	0
2008-09-25	02:14:00	0
2008-09-25	02:15:00	0
2008-09-25	02:16:00	0
2008-09-25	02:17:00	0
2008-09-25	02:18:00	0
2008-09-25	02:19:00	0
2008-09-25	02:20:00	0
2008-09-25	02:21:00	0
2008-09-25	02:22:00	0
2008-09-25	02:23:00	0
2008-09-25	02:24:00	0
2008-09-25	02:25:00	0
2008-09-25	02:26:00	0
2008-09-25	02:27:00	0
2008-09-25	02:28:00	0
2008-09-25	02:29:00	0
2008-09-25	02:30:00	0
2008-09-25	02:31:00	0
2008-09-25	02:32:00	0
2008-09-25	02:33:00	0
2008-09-25	02:34:00	0
2008-09-25	02:35:00	0
2008-09-25	02:36:00	0
2008-09-25	02:37:00	0
2008-09-25	02:38:00	0
2008-09-25	02:39:00	0
2008-09-25	02:40:00	0
2008-09-25	02:41:00	0
2008-09-25	02:42:00	0
2008-09-25	02:43:00	0
2008-09-25	02:44:00	0
2008-09-25	02:45:00	0
2008-09-25	02:46:00	0
2008-09-25	02:47:00	0
2008-09-25	02:48:00	0
2008-09-25	02:49:00	0
2008-09-25	02:50:00	0
2008-09-25	02:51:00	0
2008-09-25	02:52:00	0
2008-09-25	02:53:00	0
2008-09-25	02:54:00	0
2008-09-25	02:55:00	0
2008-09-25	02:56:00	0
2008-09-25	02:57:00	0
2008-09-25	02:58:00	0
2008-09-25	02:59:00	0
2008-09-25	03:00:00	0
2008-09-25	03:01:00	0
2008-09-25	03:02:00	0
2008-09-25	03:03:00	0
2008-09-25	03:04:00	0
2008-09-25	03:05:00	0
2008-09-25	03:06:00	0
2008-09-25	03:07:00	0
2008-09-25	03:08:00	0
2008-09-25	03:09:00	0
2008-09-25	03:10:00	0
2008-09-25	03:11:00	0
2008-09-25	03:12:00	0
2008-09-25	03:13:00	0
2008-09-25	03:14:00	0
2008-09-25	03:15:00	0
2008-09-25	03:16:00	0
2008-09-25	03:17:00	0
2008-09-25	03:18:00	0
2008-09-25	03:19:00	0
2008-09-25	03:20:00	0
2008-09-25	03:21:00	0
2008-09-25	03:22:00	0
2008-09-25	03:23:00	0
2008-09-25	03:24:00	0
2008-09-25	03:25:00	0
2008-09-25	03:26:00	0
2008-09-25	03:27:00	0
2008-09-25	03:28:00	0
2008-09-25	03:29:00	0
2008-09-25	03:30:00	0
2008-09-25	03:31:00	0
2008-09-25	03:32:00	0
2008-09-25	03:33:00	0
2008-09-25	03:34:00	0
2008-09-25	03:35:00	0
2008-09-25	03:36:00	0
2008-09-25	03:37:00	0
2008-09-25	03:38:00	0
2008-09-25	03:39:00	0
2008-09-25	03:40:00	0
2008-09-25	03:41:00	0
2008-09-25	03:42:00	0
2008-09-25	03:43:00	0
2008-09-25	03:44:00	0
2008-09-25	03:45:00	0
2008-09-25	03:46:00	0
2008-09-25	03:47:00	0
2008-09-25	03:48:00	0
2008-09-25	03:49:00	0
2008-09-25	03:50:00	0
2008-09-25	03:51:00	0
2008-09-25	03:52:00	0
2008-09-25	03:53:00	0
2008-09-25	03:54:00	0
2008-09-25	03:55:00	0
2008-09-25	03:56:00	0
2008-09-25	03:57:00	0
2008-09-25	03:58:00	0
2008-09-25	03:59:00	0
2008-09-25	04:00:00	0
2008-09-25	04:01:00	0
2008-09-25	04:02:00	0
2008-09-25	04:03:00	0
2008-09-25	04:04:00	0
2008-09-25	04:05:00	0
2008-09-25	04:06:00	0
2008-09-25	04:07:00	0
2008-09-25	04:08:00	0
2008-09-25	04:09:00	0
2008-09-25	04:10:00	0
2008-09-25	04:11:00	0
2008-09-25	04:12:00	0
2008-09-25	04:13:00	0
2008-09-25	04:14:00	0
2008-09-25	04:15:00	0
2008-09-25	04:16:00	0
2008-09-25	04:17:00	0
2008-09-25	04:18:00	0
2008-09-25	04:19:00	0
2008-09-25	04:20:00	0
2008-09-25	04:21:00	0
2008-09-25	04:22:00	0
2008-09-25	04:23:00	0
2008-09-25	04:24:00	0
2008-09-25	04:25:00	0
2008-09-25	04:26:00	0
2008-09-25	04:27:00	0
2008-09-25	04:28:00	0
2008-09-25	04:29:00	0
2008-09-25	04:30:00	0
2008-09-25	04:31:00	0
2008-09-25	04:32:00	0
2008-09-25	04:33:00	0
2008-09-25	04:34:00	0
2008-09-25	04:35:00	0
2008-09-25	04:36:00	0
2008-09-25	04:37:00	0
2008-09-25	04:38:00	0
2008-09-25	04:39:00	0
2008-09-25	04:40:00	0
2008-09-25	04:41:00	0
2008-09-25	04:42:00	0
2008-09-25	04:43:00	0
2008-09-25	04:44:00	0
2008-09-25	04:45:00	0
2008-09-25	04:46:00	0
2008-09-25	04:47:00	0
2008-09-25	04:48:00	0
2008-09-25	04:49:00	0
2008-09-25	04:50:00	0
2008-09-25	04:51:00	0
2008-09-25	04:52:00	0
2008-09-25	04:53:00	0
2008-09-25	04:54:00	0
2008-09-25	04:55:00	0
2008-09-25	04:56:00	0
2008-09-25	04:57:00	0
2008-09-25	04:58:00	0
2008-09-25	04:59:00	0
2008-09-25	05:00:00	0
2008-09-25	05:01:00	0
2008-09-25	05:02:00	0
2008-09-25	05:03:00	0
2008-09-25	05:04:00	0
2008-09-25	05:05:00	0
2008-09-25	05:06:00	0
2008-09-25	05:07:00	0
2008-09-25	05:08:00	0
2008-09-25	05:09:00	0
2008-09-25	05:10:00	0
2008-09-25	05:11:00	0
2008-09-25	05:12:00	0
2008-09-25	05:13:00	0
2008-09-25	05:14:00	0
2008-09-25	05:15:00	0
2008-09-25	05:16:00	0
2008-09-25	05:17:00	0
2008-09-25	05:18:00	0
2008-09-25	05:19:00	0
2008-09-25	05:20:00	0
2008-09-25	05:21:00	0
2008-09-25	05:22:00	0
2008-09-25	05:23:00	0
2008-09-25	05:24:00	0
2008-09-25	05:25:00	0
2008-09-25	05:26:00	0
2008-09-25	05:27:00	0
2008-09-25	05:28:00	0
2008-09-25	05:29:00	0
2008-09-25	05:30:00	0
2008-09-25	05:31:00	0
2008-09-25	05:32:00	0
2008-09-25	05:33:00	0
2008-09-25	05:34:00	0
2008-09-25	05:35:00	0
2008-09-25	05:36:00	0
2008-09-25	05:37:00	0
2008-09-25	05:38:00	0
2008-09-25	05:39:00	0
2008-09-25	05:40:00	0
2008-09-25	05:41:00	0
2008-09-25	05:42:00	0
2008-09-25	05:43:00	0
2008-09-25	05:44:00	0
2008-09-25	05:45:00	0
2008-09-25	05:46:00	0
2008-09-25	05:47:00	0
2008-09-25	05:48:00	0
2008-09-25	05:49:00	0
2008-09-25	05:50:00	0
2008-09-25	05:51:00	0
2008-09-25	05:52:00	0
2008-09-25	05:53:00	0
2008-09-25	05:54:00	0
2008-09-25	05:55:00	0
2008-09-25	05:56:00	0
2008-09-25	05:57:00	0
2008-09-25	05:58:00	0
2008-09-25	05:59:00	0
2008-09-25	06:00:00	0
2008-09-25	06:01:00	0
2008-09-25	06:02:00	0
2008-09-25	06:03:00	0
2008-09-25	06:04:00	0
2008-09-25	06:05:00	0
2008-09-25	06:06:00	0
2008-09-25	06:07:00	0
2008-09-25	06:08:00	0
2008-09-25	06:09:00	0
2008-09-25	06:10:00	0
2008-09-25	06:11:00	0
2008-09-25	06:12:00	0
2008-09-25	06:13:00	0
2008-09-25	06:14:00	0
2008-09-25	06:15:00	0
2008-09-25	06:16:00	0
2008-09-25	06:17:00	0
2008-09-25	06:18:00	0
2008-09-25	06:19:00	0
2008-09-25	06:20:00	0
2008-09-25	06:21:00	0
2008-09-25	06:22:00	0
2008-09-25	06:23:00	0
2008-09-25	06:24:00	0
2008-09-25	06:25:00	0
2008-09-25	06:26:00	0
2008-09-25	06:27:00	0
2008-09-25	06:28:00	0
2008-09-25	06:29:00	0
2008-09-25	06:30:00	0
2008-09-25	06:31:00	0
2008-09-25	06:32:00	0
2008-09-25	06:33:00	0
2008-09-25	06:34:00	0
2008-09-25	06:35:00	0
2008-09-25	06:36:00	0
2008-09-25	06:37:00	0
2008-09-25	06:38:00	0
2008-09-25	06:39:00	0
2008-09-25	06:40:00	0
2008-09-25	06:41:00	0
2008-09-25	06:42:00	0
2008-09-25	06:43:00	0
2008-09-25	06:44:00	0
2008-09-25	06:45:00	0
2008-09-25	06:46:00	0
2008-09-25	06:47:00	0
2008-09-25	06:48:00	0
2008-09-25	06:49:00	0
2008-09-25	06:50:00	0
2008-09-25	06:51:00	0
2008-09-25	06:52:00	0
2008-09-25	06:53:00	0
2008-09-25	06:54:00	0
2008-09-25	06:55:00	0
2008-09-25	06:56:00	0
2008-09-25	06:57:00	0
2008-09-25	06:58:00	0
2008-09-25	06:59:00	0
2008-09-25	07:00:00	0
2008-09-25	07:01:00	0
2008-09-25	07:02:00	0
2008-09-25	07:03:00	0
2008-09-25	07:04:00	0
2008-09-25	07:05:00	0
2008-09-25	07:06:00	0
2008-09-25	07:07:00	0
2008-09-25	07:08:00	0
2008-09-25	07:09:00	0
2008-09-25	07:10:00	0
2008-09-25	07:11:00	0
2008-09-25	07:12:00	0
2008-09-25	07:13:00	0
2008-09-25	07:14:00	0
2008-09-25	07:15:00	0
2008-09-25	07:16:00	0
2008-09-25	07:17:00	0
2008-09-25	07:18:00	0
2008-09-25	07:19:00	0
2008-09-25	07:20:00	0
2008-09-25	07:21:00	0
2008-09-25	07:22:00	0
2008-09-25	07:23:00	0
2008-09-25	07:24:00	0
2008-09-25	07:25:00	0
2008-09-25	07:26:00	0
2008-09-25	07:27:00	0
2008-09-25	07:28:00	0
2008-09-25	07:29:00	0
2008-09-25	07:30:00	0
2008-09-25	07:31:00	0
2008-09-25	07:32:00	0
2008-09-25	07:33:00	0
2008-09-25	07:34:00	0
2008-09-25	07:35:00	0
2008-09-25	07:36:00	0
2008-09-25	07:37:00	0
2008-09-25	07:38:00	0
2008-09-25	07:39:00	0
2008-09-25	07:40:00	0
2008-09-25	07:41:00	0
2008-09-25	07:42:00	0
2008-09-25	07:43:00	0
2008-09-25	07:44:00	0
2008-09-25	07:45:00	0
2008-09-25	07:46:00	0
2008-09-25	07:47:00	0
2008-09-25	07:48:00	0
2008-09-25	07:49:00	0
2008-09-25	07:50:00	0
2008-09-25	07:51:00	0
2008-09-25	07:52:00	0
2008-09-25	07:53:00	0
2008-09-25	07:54:00	0
2008-09-25	07:55:00	0
2008-09-25	07:56:00	0
2008-09-25	07:57:00	0
2008-09-25	07:58:00	0
2008-09-25	07:59:00	0
2008-09-25	08:00:00	0
2008-09-25	08:01:00	0
2008-09-25	08:02:00	0
2008-09-25	08:03:00	0
2008-09-25	08:04:00	0
2008-09-25	08:05:00	0
2008-09-25	08:06:00	0
2008-09-25	08:07:00	0
2008-09-25	08:08:00	0
2008-09-25	08:09:00	0
2008-09-25	08:10:00	0
2008-09-25	08:11:00	0
2008-09-25	08:12:00	0
2008-09-25	08:13:00	0
2008-09-25	08:14:00	0
2008-09-25	08:15:00	0
2008-09-25	08:16:00	0
2008-09-25	08:17:00	0
2008-09-25	08:18:00	0
2008-09-25	08:19:00	0
2008-09-25	08:20:00	0
2008-09-25	08:21:00	0
2008-09-25	08:22:00	0
2008-09-25	08:23:00	0
2008-09-25	08:24:00	0
2008-09-25	08:25:00	0
2008-09-25	08:26:00	0
2008-09-25	08:27:00	0
2008-09-25	08:28:00	0
2008-09-25	08:29:00	0
2008-09-25	08:30:00	0
2008-09-25	08:31:00	0
2008-09-25	08:32:00	0
2008-09-25	08:33:00	0
2008-09-25	08:34:00	0
2008-09-25	08:35:00	0
2008-09-25	08:36:00	0
2008-09-25	08:37:00	0
2008-09-25	08:38:00	0
2008-09-25	08:39:00	0
2008-09-25	08:40:00	0
2008-09-25	08:41:00	0
2008-09-25	08:42:00	0
2008-09-25	08:43:00	0
2008-09-25	08:44:00	0
2008-09-25	08:45:00	0
2008-09-25	08:46:00	0
2008-09-25	08:47:00	0
2008-09-25	08:48:00	0
2008-09-25	08:49:00	0
2008-09-25	08:50:00	0
2008-09-25	08:51:00	0
2008-09-25	08:52:00	0
2008-09-25	08:53:00	0
2008-09-25	08:54:00	0
2008-09-25	08:55:00	0
2008-09-25	08:56:00	0
2008-09-25	08:57:00	0
2008-09-25	08:58:00	0
2008-09-25	08:59:00	0
2008-09-25	09:00:00	0
2008-09-25	09:01:00	0
2008-09-25	09:02:00	0
2008-09-25	09:03:00	0
2008-09-25	09:04:00	0
2008-09-25	09:05:00	0
2008-09-25	09:06:00	0
2008-09-25	09:07:00	0
2008-09-25	09:08:00	0
2008-09-25	09:09:00	0
2008-09-25	09:10:00	0
2008-09-25	09:11:00	0
2008-09-25	09:12:00	0
2008-09-25	09:13:00	0
2008-09-25	09:14:00	0
2008-09-25	09:15:00	0
2008-09-25	09:16:00	0
2008-09-25	09:17:00	0
2008-09-25	09:18:00	0
2008-09-25	09:19:00	0
2008-09-25	09:20:00	0
2008-09-25	09:21:00	0
2008-09-25	09:22:00	0
2008-09-25	09:23:00	0
2008-09-25	09:24:00	0
2008-09-25	09:25:00	0
2008-09-25	09:26:00	0
2008-09-25	09:27:00	0
2008-09-25	09:28:00	0
2008-09-25	09:29:00	0
2008-09-25	09:30:00	0
2008-09-25	09:31:00	0
2008-09-25	09:32:00	0
2008-09-25	09:33:00	0
2008-09-25	09:34:00	0
2008-09-25	09:35:00	0
2008-09-25	09:36:00	0
2008-09-25	09:37:00	0
2008-09-25	09:38:00	0
2008-09-25	09:39:00	0
2008-09-25	09:40:00	0
2008-09-25	09:41:00	0
2008-09-25	09:42:00	0
2008-09-25	09:43:00	0
2008-09-25	09:44:00	0
2008-09-25	09:45:00	0
2008-09-25	09:46:00	0
2008-09-25	09:47:00	0
2008-09-25	09:48:00	0
2008-09-25	09:49:00	0
2008-09-25	09:50:00	0
2008-09-25	09:51:00	0
2008-09-25	09:52:00	0
2008-09-25	09:53:00	0
2008-09-25	09:54:00	0
2008-09-25	09:55:00	0
2008-09-25	09:56:00	0
2008-09-25	09:57:00	0
2008-09-25	09:58:00	0
2008-09-25	09:59:00	0
2008-09-25	10:00:00	0
2008-09-25	10:01:00	0
2008-09-25	10:02:00	0
2008-09-25	10:03:00	0
2008-09-25	10:04:00	0
2008-09-25	10:05:00	0
2008-09-25	10:06:00	0
2008-09-25	10:07:00	0
2008-09-25	10:08:00	0
2008-09-25	10:09:00	0
2008-09-25	10:10:00	0
2008-09-25	10:11:00	0
2008-09-25	10:12:00	0
2008-09-25	10:13:00	0
2008-09-25	10:14:00	0
2008-09-25	10:15:00	0
2008-09-25	10:16:00	0
2008-09-25	10:17:00	0
2008-09-25	10:18:00	0
2008-09-25	10:19:00	0
2008-09-25	10:20:00	0
2008-09-25	10:21:00	0
2008-09-25	10:22:00	0
2008-09-25	10:23:00	0
2008-09-25	10:24:00	0
2008-09-25	10:25:00	0
2008-09-25	10:26:00	0
2008-09-25	10:27:00	0
2008-09-25	10:28:00	0
2008-09-25	10:29:00	0
2008-09-25	10:30:00	0
2008-09-25	10:31:00	0
2008-09-25	10:32:00	0
2008-09-25	10:33:00	0
2008-09-25	10:34:00	0
2008-09-25	10:35:00	0
2008-09-25	10:36:00	0
2008-09-25	10:37:00	0
2008-09-25	10:38:00	0
2008-09-25	10:39:00	0
2008-09-25	10:40:00	0
2008-09-25	10:41:00	0
2008-09-25	10:42:00	0
2008-09-25	10:43:00	0
2008-09-25	10:44:00	0
2008-09-25	10:45:00	0
2008-09-25	10:46:00	0
2008-09-25	10:47:00	0
2008-09-25	10:48:00	0
2008-09-25	10:49:00	0
2008-09-25	10:50:00	0
2008-09-25	10:51:00	0
2008-09-25	10:52:00	0
2008-09-25	10:53:00	0
2008-09-25	10:54:00	0
2008-09-25	10:55:00	0
2008-09-25	10:56:00	0
2008-09-25	10:57:00	0
2008-09-25	10:58:00	0
2008-09-25	10:59:00	0
2008-09-25	11:00:00	0
2008-09-25	11:01:00	0
2008-09-25	11:02:00	0
2008-09-25	11:03:00	0
2008-09-25	11:04:00	0
2008-09-25	11:05:00	0
2008-09-25	11:06:00	0
2008-09-25	11:07:00	0
2008-09-25	11:08:00	0
2008-09-25	11:09:00	0
2008-09-25	11:10:00	0
2008-09-25	11:11:00	0
2008-09-25	11:12:00	0
2008-09-25	11:13:00	0
2008-09-25	11:14:00	0
2008-09-25	11:15:00	0
2008-09-25	11:16:00	0
2008-09-25	11:17:00	0
2008-09-25	11:18:00	0
2008-09-25	11:19:00	0
2008-09-25	11:20:00	0
2008-09-25	11:21:00	0
2008-09-25	11:22:00	0
2008-09-25	11:23:00	0
2008-09-25	11:24:00	0
2008-09-25	11:25:00	0
2008-09-25	11:26:00	0
2008-09-25	11:27:00	0
2008-09-25	11:28:00	0
2008-09-25	11:29:00	0
2008-09-25	11:30:00	0
2008-09-25	11:31:00	0
2008-09-25	11:32:00	0
2008-09-25	11:33:00	0
2008-09-25	11:34:00	0
2008-09-25	11:35:00	0
2008-09-25	11:36:00	0
2008-09-25	11:37:00	0
2008-09-25	11:38:00	0
2008-09-25	11:39:00	0
2008-09-25	11:40:00	0
2008-09-25	11:41:00	0
2008-09-25	11:42:00	0
2008-09-25	11:43:00	0
2008-09-25	11:44:00	0
2008-09-25	11:45:00	0
2008-09-25	11:46:00	0
2008-09-25	11:47:00	0
2008-09-25	11:48:00	0
2008-09-25	11:49:00	0
2008-09-25	11:50:00	0
2008-09-25	11:51:00	0
2008-09-25	11:52:00	0
2008-09-25	11:53:00	0
2008-09-25	11:54:00	0
2008-09-25	11:55:00	0
2008-09-25	11:56:00	0
2008-09-25	11:57:00	0
2008-09-25	11:58:00	0
2008-09-25	11:59:00	0
2008-09-25	12:00:00	0
2008-09-25	12:01:00	0
2008-09-25	12:02:00	0
2008-09-25	12:03:00	0
2008-09-25	12:04:00	0
2008-09-25	12:05:00	0
2008-09-25	12:06:00	0
2008-09-25	12:07:00	0
2008-09-25	12:08:00	0
2008-09-25	12:09:00	0
2008-09-25	12:10:00	0
2008-09-25	12:11:00	0
2008-09-25	12:12:00	0
2008-09-25	12:13:00	0
2008-09-25	12:14:00	0
2008-09-25	12:15:00	0
2008-09-25	12:16:00	0
2008-09-25	12:17:00	0
2008-09-25	12:18:00	0
2008-09-25	12:19:00	0
2008-09-25	12:20:00	0
2008-09-25	12:21:00	0
2008-09-25	12:22:00	0
2008-09-25	12:23:00	0
2008-09-25	12:24:00	0
2008-09-25	12:25:00	0
2008-09-25	12:26:00	0
2008-09-25	12:27:00	0
2008-09-25	12:28:00	0
2008-09-25	12:29:00	0
2008-09-25	12:30:00	0
2008-09-25	12:31:00	0
2008-09-25	12:32:00	0
2008-09-25	12:33:00	0
2008-09-25	12:34:00	0
2008-09-25	12:35:00	0
2008-09-25	12:36:00	0
2008-09-25	12:37:00	0
2008-09-25	12:38:00	0
2008-09-25	12:39:00	0
2008-09-25	12:40:00	0
2008-09-25	12:41:00	0
2008-09-25	12:42:00	0
2008-09-25	12:43:00	0
2008-09-25	12:44:00	0
2008-09-25	12:45:00	0
2008-09-25	12:46:00	0
2008-09-25	12:47:00	0
2008-09-25	12:48:00	0
2008-09-25	12:49:00	0
2008-09-25	12:50:00	0
2008-09-25	12:51:00	0
2008-09-25	12:52:00	0
2008-09-25	12:53:00	0
2008-09-25	12:54:00	0
2008-09-25	12:55:00	0
2008-09-25	12:56:00	0
2008-09-25	12:57:00	0
2008-09-25	12:58:00	0
2008-09-25	12:59:00	0
2008-09-25	13:00:00	0
2008-09-25	13:01:00	0
2008-09-25	13:02:00	0
2008-09-25	13:03:00	0
2008-09-25	13:04:00	0
2008-09-25	13:05:00	0
2008-09-25	13:06:00	0
2008-09-25	13:07:00	0
2008-09-25	13:08:00	0
2008-09-25	13:09:00	0
2008-09-25	13:10:00	0
2008-09-25	13:11:00	0
2008-09-25	13:12:00	0
2008-09-25	13:13:00	0
2008-09-25	13:14:00	0
2008-09-25	13:15:00	0
2008-09-25	13:16:00	0
2008-09-25	13:17:00	0
2008-09-25	13:18:00	0
2008-09-25	13:19:00	0
2008-09-25	13:20:00	0
2008-09-25	13:21:00	0
2008-09-25	13:22:00	0
2008-09-25	13:23:00	0
2008-09-25	13:24:00	0
2008-09-25	13:25:00	0
2008-09-25	13:26:00	0
2008-09-25	13:27:00	0
2008-09-25	13:28:00	0
2008-09-25	13:29:00	0
2008-09-25	13:30:00	0
2008-09-25	13:31:00	0
2008-09-25	13:32:00	0
2008-09-25	13:33:00	0
2008-09-25	13:34:00	0
2008-09-25	13:35:00	0
2008-09-25	13:36:00	0
2008-09-25	13:37:00	0
2008-09-25	13:38:00	0
2008-09-25	13:39:00	0
2008-09-25	13:40:00	0
2008-09-25	13:41:00	0
2008-09-25	13:42:00	0
2008-09-25	13:43:00	0
2008-09-25	13:44:00	0
2008-09-25	13:45:00	0
2008-09-25	13:46:00	0
2008-09-25	13:47:00	0
2008-09-25	13:48:00	0
2008-09-25	13:49:00	0
2008-09-25	13:50:00	0
2008-09-25	13:51:00	0
2008-09-25	13:52:00	0
2008-09-25	13:53:00	0
2008-09-25	13:54:00	0
2008-09-25	13:55:00	0
2008-09-25	13:56:00	0
2008-09-25	13:57:00	0
2008-09-25	13:58:00	0
2008-09-25	13:59:00	0
2008-09-25	14:00:00	0
2008-09-25	14:01:00	0
2008-09-25	14:02:00	0
2008-09-25	14:03:00	0
2008-09-25	14:04:00	0
2008-09-25	14:05:00	0
2008-09-25	14:06:00	0
2008-09-25	14:07:00	0
2008-09-25	14:08:00	0
2008-09-25	14:09:00	0
2008-09-25	14:10:00	0
2008-09-25	14:11:00	0
2008-09-25	14:12:00	0
2008-09-25	14:13:00	0
2008-09-25	14:14:00	0
2008-09-25	14:15:00	0
2008-09-25	14:16:00	0
2008-09-25	14:17:00	0
2008-09-25	14:18:00	0
2008-09-25	14:19:00	0
2008-09-25	14:20:00	0
2008-09-25	14:21:00	0
2008-09-25	14:22:00	0
2008-09-25	14:23:00	0
2008-09-25	14:24:00	0
2008-09-25	14:25:00	0
2008-09-25	14:26:00	0
2008-09-25	14:27:00	0
2008-09-25	14:28:00	0
2008-09-25	14:29:00	0
2008-09-25	14:30:00	0
2008-09-25	14:31:00	0
2008-09-25	14:32:00	0
2008-09-25	14:33:00	0
2008-09-25	14:34:00	0
2008-09-25	14:35:00	0
2008-09-25	14:36:00	0
2008-09-25	14:37:00	0
2008-09-25	14:38:00	0
2008-09-25	14:39:00	0
2008-09-25	14:40:00	0
2008-09-25	14:41:00	0
2008-09-25	14:42:00	0
2008-09-25	14:43:00	0
2008-09-25	14:44:00	0
2008-09-25	14:45:00	0
2008-09-25	14:46:00	0
2008-09-25	14:47:00	0
2008-09-25	14:48:00	0
2008-09-25	14:49:00	0
2008-09-25	14:50:00	0
2008-09-25	14:51:00	0
2008-09-25	14:52:00	0
2008-09-25	14:53:00	0
2008-09-25	14:54:00	0
2008-09-25	14:55:00	0
2008-09-25	14:56:00	0
2008-09-25	14:57:00	0
2008-09-25	14:58:00	0
2008-09-25	14:59:00	0
2008-09-25	15:00:00	0
2008-09-25	15:01:00	0
2008-09-25	15:02:00	0
2008-09-25	15:03:00	0
2008-09-25	15:04:00	0
2008-09-25	15:05:00	0
2008-09-25	15:06:00	0
2008-09-25	15:07:00	0
2008-09-25	15:08:00	0
2008-09-25	15:09:00	0
2008-09-25	15:10:00	0
2008-09-25	15:11:00	0
2008-09-25	15:12:00	0
2008-09-25	15:13:00	0
2008-09-25	15:14:00	0
2008-09-25	15:15:00	0
2008-09-25	15:16:00	0
2008-09-25	15:17:00	0
2008-09-25	15:18:00	0
2008-09-25	15:19:00	0
2008-09-25	15:20:00	0
2008-09-25	15:21:00	0
2008-09-25	15:22:00	0
2008-09-25	15:23:00	0
2008-09-25	15:24:00	0
2008-09-25	15:25:00	0
2008-09-25	15:26:00	0
2008-09-25	15:27:00	0
2008-09-25	15:28:00	0
2008-09-25	15:29:00	0
2008-09-25	15:30:00	0
2008-09-25	15:31:00	0
2008-09-25	15:32:00	0
2008-09-25	15:33:00	0
2008-09-25	15:34:00	0
2008-09-25	15:35:00	0
2008-09-25	15:36:00	0
2008-09-25	15:37:00	0
2008-09-25	15:38:00	0
2008-09-25	15:39:00	0
2008-09-25	15:40:00	0
2008-09-25	15:41:00	0
2008-09-25	15:42:00	0
2008-09-25	15:43:00	0
2008-09-25	15:44:00	0
2008-09-25	15:45:00	0
2008-09-25	15:46:00	0
2008-09-25	15:47:00	0
2008-09-25	15:48:00	0
2008-09-25	15:49:00	0
2008-09-25	15:50:00	0
2008-09-25	15:51:00	0
2008-09-25	15:52:00	0
2008-09-25	15:53:00	0
2008-09-25	15:54:00	0
2008-09-25	15:55:00	0
2008-09-25	15:56:00	0
2008-09-25	15:57:00	0
2008-09-25	15:58:00	0
2008-09-25	15:59:00	0
2008-09-25	16:00:00	0
2008-09-25	16:01:00	0
2008-09-25	16:02:00	0
2008-09-25	16:03:00	0
2008-09-25	16:04:00	0
2008-09-25	16:05:00	0
2008-09-25	16:06:00	0
2008-09-25	16:07:00	0
2008-09-25	16:08:00	0
2008-09-25	16:09:00	0
2008-09-25	16:10:00	0
2008-09-25	16:11:00	0
2008-09-25	16:12:00	0
2008-09-25	16:13:00	0
2008-09-25	16:14:00	0
2008-09-25	16:15:00	0
2008-09-25	16:16:00	0
2008-09-25	16:17:00	0
2008-09-25	16:18:00	0
2008-09-25	16:19:00	0
2008-09-25	16:20:00	0
2008-09-25	16:21:00	0
2008-09-25	16:22:00	0
2008-09-25	16:23:00	0
2008-09-25	16:24:00	0
2008-09-25	16:25:00	0
2008-09-25	16:26:00	0
2008-09-25	16:27:00	0
2008-09-25	16:28:00	0
2008-09-25	16:29:00	0
2008-09-25	16:30:00	0
2008-09-25	16:31:00	0
2008-09-25	16:32:00	0
2008-09-25	16:33:00	0
2008-09-25	16:34:00	0
2008-09-25	16:35:00	0
2008-09-25	16:36:00	0
2008-09-25	16:37:00	0
2008-09-25	16:38:00	0
2008-09-25	16:39:00	0
2008-09-25	16:40:00	0
2008-09-25	16:41:00	0
2008-09-25	16:42:00	0
2008-09-25	16:43:00	0
2008-09-25	16:44:00	0
2008-09-25	16:45:00	0
2008-09-25	16:46:00	0
2008-09-25	16:47:00	0
2008-09-25	16:48:00	0
2008-09-25	16:49:00	0
2008-09-25	16:50:00	0
2008-09-25	16:51:00	0
2008-09-25	16:52:00	0
2008-09-25	16:53:00	0
2008-09-25	16:54:00	0
2008-09-25	16:55:00	0
2008-09-25	16:56:00	0
2008-09-25	16:57:00	0
2008-09-25	16:58:00	0
2008-09-25	16:59:00	0
2008-09-25	17:00:00	0
2008-09-25	17:01:00	0
2008-09-25	17:02:00	0
2008-09-25	17:03:00	0
2008-09-25	17:04:00	0
2008-09-25	17:05:00	0
2008-09-25	17:06:00	0
2008-09-25	17:07:00	0
2008-09-25	17:08:00	144
2008-09-25	17:09:00	475
2008-09-25	17:10:00	230
2008-09-25	17:11:00	1386
2008-09-25	17:12:00	1825
2008-09-25	17:13:00	2020
2008-09-25	17:14:00	693
2008-09-25	17:15:00	81
2008-09-25	17:16:00	10
2008-09-25	17:17:00	61
2008-09-25	17:18:00	20
2008-09-25	17:19:00	30
2008-09-25	17:20:00	181
2008-09-25	17:21:00	20
2008-09-25	17:22:00	0
2008-09-25	17:23:00	20
2008-09-25	17:24:00	0
2008-09-25	17:25:00	20
2008-09-25	17:26:00	0
2008-09-25	17:27:00	10
2008-09-25	17:28:00	20
2008-09-25	17:29:00	0
2008-09-25	17:30:00	0
2008-09-25	17:31:00	102
2008-09-25	17:32:00	20
2008-09-25	17:33:00	0
2008-09-25	17:34:00	10
2008-09-25	17:35:00	20
2008-09-25	17:36:00	242
2008-09-25	17:37:00	1239
2008-09-25	17:38:00	1077
2008-09-25	17:39:00	1050
2008-09-25	17:40:00	51
2008-09-25	17:41:00	323
2008-09-25	17:42:00	122
2008-09-25	17:43:00	81
2008-09-25	17:44:00	41
2008-09-25	17:45:00	205
2008-09-25	17:46:00	30
2008-09-25	17:47:00	41
2008-09-25	17:48:00	61
2008-09-25	17:49:00	122
2008-09-25	17:50:00	181
2008-09-25	17:51:00	254
2008-09-25	17:52:00	410
2008-09-25	17:53:00	230
2008-09-25	17:54:00	51
2008-09-25	17:55:00	81
2008-09-25	17:56:00	71
2008-09-25	17:57:00	112
2008-09-25	17:58:00	20
2008-09-25	17:59:00	10
2008-09-25	18:00:00	0
2008-09-25	18:01:00	0
2008-09-25	18:02:00	0
2008-09-25	18:03:00	20
2008-09-25	18:04:00	0
2008-09-25	18:05:00	10
2008-09-25	18:06:00	30
2008-09-25	18:07:00	10
2008-09-25	18:08:00	0
2008-09-25	18:09:00	10
2008-09-25	18:10:00	41
2008-09-25	18:11:00	102
2008-09-25	18:12:00	51
2008-09-25	18:13:00	71
2008-09-25	18:14:00	242
2008-09-25	18:15:00	91
2008-09-25	18:16:00	71
2008-09-25	18:17:00	41
2008-09-25	18:18:00	30
2008-09-25	18:19:00	10
2008-09-25	18:20:00	102
2008-09-25	18:21:00	41
2008-09-25	18:22:00	122
2008-09-25	18:23:00	1002
2008-09-25	18:24:00	1863
2008-09-25	18:25:00	102
2008-09-25	18:26:00	351
2008-09-25	18:27:00	410
2008-09-25	18:28:00	0
2008-09-25	18:29:00	0
2008-09-25	18:30:00	10
2008-09-25	18:31:00	0
2008-09-25	18:32:00	0
2008-09-25	18:33:00	0
2008-09-25	18:34:00	0
2008-09-25	18:35:00	0
2008-09-25	18:36:00	0
2008-09-25	18:37:00	0
2008-09-25	18:38:00	0
2008-09-25	18:39:00	0
2008-09-25	18:40:00	0
2008-09-25	18:41:00	0
2008-09-25	18:42:00	0
2008-09-25	18:43:00	0
2008-09-25	18:44:00	0
2008-09-25	18:45:00	0
2008-09-25	18:46:00	0
2008-09-25	18:47:00	0
2008-09-25	18:48:00	0
2008-09-25	18:49:00	0
2008-09-25	18:50:00	0
2008-09-25	18:51:00	0
2008-09-25	18:52:00	0
2008-09-25	18:53:00	0
2008-09-25	18:54:00	0
2008-09-25	18:55:00	0
2008-09-25	18:56:00	0
2008-09-25	18:57:00	0
2008-09-25	18:58:00	0
2008-09-25	18:59:00	0
2008-09-25	19:00:00	0
2008-09-25	19:01:00	0
2008-09-25	19:02:00	0
2008-09-25	19:03:00	10
2008-09-25	19:04:00	0
2008-09-25	19:05:00	0
2008-09-25	19:06:00	351
2008-09-25	19:07:00	51
2008-09-25	19:08:00	794
2008-09-25	19:09:00	0
2008-09-25	19:10:00	0
2008-09-25	19:11:00	0
2008-09-25	19:12:00	0
2008-09-25	19:13:00	0
2008-09-25	19:14:00	351
2008-09-25	19:15:00	0
2008-09-25	19:16:00	0
2008-09-25	19:17:00	0
2008-09-25	19:18:00	242
2008-09-25	19:19:00	61
2008-09-25	19:20:00	366
2008-09-25	19:21:00	242
2008-09-25	19:22:00	280
2008-09-25	19:23:00	1002
2008-09-25	19:24:00	1002
2008-09-25	19:25:00	459
2008-09-25	19:26:00	254
2008-09-25	19:27:00	0
2008-09-25	19:28:00	0
2008-09-25	19:29:00	0
2008-09-25	19:30:00	0
2008-09-25	19:31:00	0
2008-09-25	19:32:00	0
2008-09-25	19:33:00	0
2008-09-25	19:34:00	266
2008-09-25	19:35:00	309
2008-09-25	19:36:00	10
2008-09-25	19:37:00	20
2008-09-25	19:38:00	0
2008-09-25	19:39:00	0
2008-09-25	19:40:00	0
2008-09-25	19:41:00	0
2008-09-25	19:42:00	0
2008-09-25	19:43:00	0
2008-09-25	19:44:00	10
2008-09-25	19:45:00	0
2008-09-25	19:46:00	0
2008-09-25	19:47:00	0
2008-09-25	19:48:00	0
2008-09-25	19:49:00	0
2008-09-25	19:50:00	0
2008-09-25	19:51:00	0
2008-09-25	19:52:00	61
2008-09-25	19:53:00	132
2008-09-25	19:54:00	132
2008-09-25	19:55:00	112
2008-09-25	19:56:00	30
2008-09-25	19:57:00	427
2008-09-25	19:58:00	20
2008-09-25	19:59:00	616
2008-09-25	20:00:00	1026
2008-09-25	20:01:00	394
2008-09-25	20:02:00	351
2008-09-25	20:03:00	102
2008-09-25	20:04:00	41
2008-09-25	20:05:00	144
2008-09-25	20:06:00	366
2008-09-25	20:07:00	0
2008-09-25	20:08:00	0
2008-09-25	20:09:00	0
2008-09-25	20:10:00	0
2008-09-25	20:11:00	0
2008-09-25	20:12:00	0
2008-09-25	20:13:00	0
2008-09-25	20:14:00	0
2008-09-25	20:15:00	0
2008-09-25	20:16:00	0
2008-09-25	20:17:00	0
2008-09-25	20:18:00	0
2008-09-25	20:19:00	0
2008-09-25	20:20:00	0
2008-09-25	20:21:00	0
2008-09-25	20:22:00	0
2008-09-25	20:23:00	0
2008-09-25	20:24:00	0
2008-09-25	20:25:00	0
2008-09-25	20:26:00	0
2008-09-25	20:27:00	0
2008-09-25	20:28:00	0
2008-09-25	20:29:00	0
2008-09-25	20:30:00	0
2008-09-25	20:31:00	0
2008-09-25	20:32:00	0
2008-09-25	20:33:00	0
2008-09-25	20:34:00	0
2008-09-25	20:35:00	0
2008-09-25	20:36:00	0
2008-09-25	20:37:00	0
2008-09-25	20:38:00	0
2008-09-25	20:39:00	0
2008-09-25	20:40:00	0
2008-09-25	20:41:00	0
2008-09-25	20:42:00	0
2008-09-25	20:43:00	0
2008-09-25	20:44:00	0
2008-09-25	20:45:00	0
2008-09-25	20:46:00	0
2008-09-25	20:47:00	0
2008-09-25	20:48:00	0
2008-09-25	20:49:00	51
2008-09-25	20:50:00	0
2008-09-25	20:51:00	0
2008-09-25	20:52:00	0
2008-09-25	20:53:00	0
2008-09-25	20:54:00	0
2008-09-25	20:55:00	0
2008-09-25	20:56:00	0
2008-09-25	20:57:00	0
2008-09-25	20:58:00	0
2008-09-25	20:59:00	0
2008-09-25	21:00:00	0
2008-09-25	21:01:00	0
2008-09-25	21:02:00	0
2008-09-25	21:03:00	0
2008-09-25	21:04:00	71
2008-09-25	21:05:00	0
2008-09-25	21:06:00	0
2008-09-25	21:07:00	0
2008-09-25	21:08:00	0
2008-09-25	21:09:00	0
2008-09-25	21:10:00	0
2008-09-25	21:11:00	0
2008-09-25	21:12:00	0
2008-09-25	21:13:00	0
2008-09-25	21:14:00	0
2008-09-25	21:15:00	0
2008-09-25	21:16:00	0
2008-09-25	21:17:00	0
2008-09-25	21:18:00	0
2008-09-25	21:19:00	0
2008-09-25	21:20:00	0
2008-09-25	21:21:00	0
2008-09-25	21:22:00	0
2008-09-25	21:23:00	0
2008-09-25	21:24:00	0
2008-09-25	21:25:00	0
2008-09-25	21:26:00	0
2008-09-25	21:27:00	0
2008-09-25	21:28:00	0
2008-09-25	21:29:00	0
2008-09-25	21:30:00	0
2008-09-25	21:31:00	0
2008-09-25	21:32:00	0
2008-09-25	21:33:00	0
2008-09-25	21:34:00	0
2008-09-25	21:35:00	0
2008-09-25	21:36:00	0
2008-09-25	21:37:00	0
2008-09-25	21:38:00	0
2008-09-25	21:39:00	0
2008-09-25	21:40:00	0
2008-09-25	21:41:00	0
2008-09-25	21:42:00	0
2008-09-25	21:43:00	0
2008-09-25	21:44:00	0
2008-09-25	21:45:00	0
2008-09-25	21:46:00	0
2008-09-25	21:47:00	0
2008-09-25	21:48:00	0
2008-09-25	21:49:00	0
2008-09-25	21:50:00	0
2008-09-25	21:51:00	0
2008-09-25	21:52:00	0
2008-09-25	21:53:00	0
2008-09-25	21:54:00	0
2008-09-25	21:55:00	0
2008-09-25	21:56:00	0
2008-09-25	21:57:00	20
2008-09-25	21:58:00	0
2008-09-25	21:59:00	0
2008-09-25	22:00:00	0
2008-09-25	22:01:00	0
2008-09-25	22:02:00	0
2008-09-25	22:03:00	0
2008-09-25	22:04:00	0
2008-09-25	22:05:00	0
2008-09-25	22:06:00	0
2008-09-25	22:07:00	0
2008-09-25	22:08:00	0
2008-09-25	22:09:00	0
2008-09-25	22:10:00	0
2008-09-25	22:11:00	0
2008-09-25	22:12:00	0
2008-09-25	22:13:00	0
2008-09-25	22:14:00	0
2008-09-25	22:15:00	0
2008-09-25	22:16:00	0
2008-09-25	22:17:00	156
2008-09-25	22:18:00	41
2008-09-25	22:19:00	0
2008-09-25	22:20:00	0
2008-09-25	22:21:00	0
2008-09-25	22:22:00	0
2008-09-25	22:23:00	0
2008-09-25	22:24:00	20
2008-09-25	22:25:00	20
2008-09-25	22:26:00	0
2008-09-25	22:27:00	0
2008-09-25	22:28:00	0
2008-09-25	22:29:00	10
2008-09-25	22:30:00	0
2008-09-25	22:31:00	0
2008-09-25	22:32:00	0
2008-09-25	22:33:00	0
2008-09-25	22:34:00	10
2008-09-25	22:35:00	10
2008-09-25	22:36:00	156
2008-09-25	22:37:00	10
2008-09-25	22:38:00	0
2008-09-25	22:39:00	0
2008-09-25	22:40:00	20
2008-09-25	22:41:00	0
2008-09-25	22:42:00	0
2008-09-25	22:43:00	0
2008-09-25	22:44:00	0
2008-09-25	22:45:00	0
2008-09-25	22:46:00	0
2008-09-25	22:47:00	0
2008-09-25	22:48:00	0
2008-09-25	22:49:00	0
2008-09-25	22:50:00	0
2008-09-25	22:51:00	0
2008-09-25	22:52:00	0
2008-09-25	22:53:00	0
2008-09-25	22:54:00	0
2008-09-25	22:55:00	0
2008-09-25	22:56:00	0
2008-09-25	22:57:00	0
2008-09-25	22:58:00	0
2008-09-25	22:59:00	0
2008-09-25	23:00:00	0
2008-09-25	23:01:00	0
2008-09-25	23:02:00	0
2008-09-25	23:03:00	0
2008-09-25	23:04:00	0
2008-09-25	23:05:00	0
2008-09-25	23:06:00	0
2008-09-25	23:07:00	0
2008-09-25	23:08:00	0
2008-09-25	23:09:00	0
2008-09-25	23:10:00	0
2008-09-25	23:11:00	0
2008-09-25	23:12:00	0
2008-09-25	23:13:00	0
2008-09-25	23:14:00	0
2008-09-25	23:15:00	0
2008-09-25	23:16:00	0
2008-09-25	23:17:00	0
2008-09-25	23:18:00	0
2008-09-25	23:19:00	0
2008-09-25	23:20:00	0
2008-09-25	23:21:00	0
2008-09-25	23:22:00	0
2008-09-25	23:23:00	0
2008-09-25	23:24:00	0
2008-09-25	23:25:00	0
2008-09-25	23:26:00	0
2008-09-25	23:27:00	0
2008-09-25	23:28:00	0
2008-09-25	23:29:00	0
2008-09-25	23:30:00	0
2008-09-25	23:31:00	0
2008-09-25	23:32:00	0
2008-09-25	23:33:00	0
2008-09-25	23:34:00	10
2008-09-25	23:35:00	0
2008-09-25	23:36:00	0
2008-09-25	23:37:00	0
2008-09-25	23:38:00	0
2008-09-25	23:39:00	0
2008-09-25	23:40:00	0
2008-09-25	23:41:00	0
2008-09-25	23:42:00	0
2008-09-25	23:43:00	0
2008-09-25	23:44:00	0
2008-09-25	23:45:00	0
2008-09-25	23:46:00	0
2008-09-25	23:47:00	0
2008-09-25	23:48:00	0
2008-09-25	23:49:00	0
2008-09-25	23:50:00	0
2008-09-25	23:51:00	0
2008-09-25	23:52:00	0
2008-09-25	23:53:00	0
2008-09-25	23:54:00	0
2008-09-25	23:55:00	0
2008-09-25	23:56:00	0
2008-09-25	23:57:00	0
2008-09-25	23:58:00	0
2008-09-25	23:59:00	0
2008-09-26	00:00:00	0
2008-09-26	00:01:00	0
2008-09-26	00:02:00	0
2008-09-26	00:03:00	0
2008-09-26	00:04:00	0
2008-09-26	00:05:00	0
2008-09-26	00:06:00	0
2008-09-26	00:07:00	0
2008-09-26	00:08:00	0
2008-09-26	00:09:00	0
2008-09-26	00:10:00	0
2008-09-26	00:11:00	0
2008-09-26	00:12:00	0
2008-09-26	00:13:00	0
2008-09-26	00:14:00	0
2008-09-26	00:15:00	0
2008-09-26	00:16:00	0
2008-09-26	00:17:00	0
2008-09-26	00:18:00	0
2008-09-26	00:19:00	0
2008-09-26	00:20:00	0
2008-09-26	00:21:00	0
2008-09-26	00:22:00	0
2008-09-26	00:23:00	0
2008-09-26	00:24:00	0
2008-09-26	00:25:00	0
2008-09-26	00:26:00	0
2008-09-26	00:27:00	0
2008-09-26	00:28:00	0
2008-09-26	00:29:00	0
2008-09-26	00:30:00	0
2008-09-26	00:31:00	0
2008-09-26	00:32:00	0
2008-09-26	00:33:00	0
2008-09-26	00:34:00	0
2008-09-26	00:35:00	0
2008-09-26	00:36:00	0
2008-09-26	00:37:00	0
2008-09-26	00:38:00	0
2008-09-26	00:39:00	0
2008-09-26	00:40:00	0
2008-09-26	00:41:00	0
2008-09-26	00:42:00	0
2008-09-26	00:43:00	10
2008-09-26	00:44:00	0
2008-09-26	00:45:00	0
2008-09-26	00:46:00	0
2008-09-26	00:47:00	0
2008-09-26	00:48:00	0
2008-09-26	00:49:00	0
2008-09-26	00:50:00	0
2008-09-26	00:51:00	0
2008-09-26	00:52:00	0
2008-09-26	00:53:00	0
2008-09-26	00:54:00	0
2008-09-26	00:55:00	0
2008-09-26	00:56:00	0
2008-09-26	00:57:00	0
2008-09-26	00:58:00	0
2008-09-26	00:59:00	0
2008-09-26	01:00:00	0
2008-09-26	01:01:00	0
2008-09-26	01:02:00	0
2008-09-26	01:03:00	0
2008-09-26	01:04:00	0
2008-09-26	01:05:00	0
2008-09-26	01:06:00	0
2008-09-26	01:07:00	0
2008-09-26	01:08:00	0
2008-09-26	01:09:00	0
2008-09-26	01:10:00	0
2008-09-26	01:11:00	0
2008-09-26	01:12:00	0
2008-09-26	01:13:00	0
2008-09-26	01:14:00	0
2008-09-26	01:15:00	0
2008-09-26	01:16:00	0
2008-09-26	01:17:00	0
2008-09-26	01:18:00	0
2008-09-26	01:19:00	0
2008-09-26	01:20:00	0
2008-09-26	01:21:00	0
2008-09-26	01:22:00	0
2008-09-26	01:23:00	0
2008-09-26	01:24:00	0
2008-09-26	01:25:00	0
2008-09-26	01:26:00	0
2008-09-26	01:27:00	0
2008-09-26	01:28:00	71
2008-09-26	01:29:00	0
2008-09-26	01:30:00	0
2008-09-26	01:31:00	10
2008-09-26	01:32:00	0
2008-09-26	01:33:00	0
2008-09-26	01:34:00	0
2008-09-26	01:35:00	0
2008-09-26	01:36:00	0
2008-09-26	01:37:00	0
2008-09-26	01:38:00	0
2008-09-26	01:39:00	0
2008-09-26	01:40:00	0
2008-09-26	01:41:00	0
2008-09-26	01:42:00	0
2008-09-26	01:43:00	0
2008-09-26	01:44:00	0
2008-09-26	01:45:00	0
2008-09-26	01:46:00	0
2008-09-26	01:47:00	0
2008-09-26	01:48:00	0
2008-09-26	01:49:00	0
2008-09-26	01:50:00	0
2008-09-26	01:51:00	0
2008-09-26	01:52:00	0
2008-09-26	01:53:00	0
2008-09-26	01:54:00	0
2008-09-26	01:55:00	0
2008-09-26	01:56:00	0
2008-09-26	01:57:00	0
2008-09-26	01:58:00	0
2008-09-26	01:59:00	0
2008-09-26	02:00:00	0
2008-09-26	02:01:00	0
2008-09-26	02:02:00	0
2008-09-26	02:03:00	0
2008-09-26	02:04:00	0
2008-09-26	02:05:00	0
2008-09-26	02:06:00	0
2008-09-26	02:07:00	0
2008-09-26	02:08:00	0
2008-09-26	02:09:00	0
2008-09-26	02:10:00	0
2008-09-26	02:11:00	0
2008-09-26	02:12:00	0
2008-09-26	02:13:00	0
2008-09-26	02:14:00	0
2008-09-26	02:15:00	0
2008-09-26	02:16:00	0
2008-09-26	02:17:00	0
2008-09-26	02:18:00	0
2008-09-26	02:19:00	0
2008-09-26	02:20:00	0
2008-09-26	02:21:00	0
2008-09-26	02:22:00	0
2008-09-26	02:23:00	0
2008-09-26	02:24:00	0
2008-09-26	02:25:00	0
2008-09-26	02:26:00	0
2008-09-26	02:27:00	0
2008-09-26	02:28:00	0
2008-09-26	02:29:00	0
2008-09-26	02:30:00	0
2008-09-26	02:31:00	0
2008-09-26	02:32:00	0
2008-09-26	02:33:00	0
2008-09-26	02:34:00	0
2008-09-26	02:35:00	0
2008-09-26	02:36:00	0
2008-09-26	02:37:00	0
2008-09-26	02:38:00	0
2008-09-26	02:39:00	0
2008-09-26	02:40:00	0
2008-09-26	02:41:00	0
2008-09-26	02:42:00	0
2008-09-26	02:43:00	0
2008-09-26	02:44:00	0
2008-09-26	02:45:00	0
2008-09-26	02:46:00	0
2008-09-26	02:47:00	10
2008-09-26	02:48:00	0
2008-09-26	02:49:00	0
2008-09-26	02:50:00	0
2008-09-26	02:51:00	0
2008-09-26	02:52:00	0
2008-09-26	02:53:00	0
2008-09-26	02:54:00	0
2008-09-26	02:55:00	10
2008-09-26	02:56:00	10
2008-09-26	02:57:00	0
2008-09-26	02:58:00	0
2008-09-26	02:59:00	0
2008-09-26	03:00:00	0
2008-09-26	03:01:00	0
2008-09-26	03:02:00	0
2008-09-26	03:03:00	0
2008-09-26	03:04:00	0
2008-09-26	03:05:00	0
2008-09-26	03:06:00	0
2008-09-26	03:07:00	0
2008-09-26	03:08:00	0
2008-09-26	03:09:00	0
2008-09-26	03:10:00	0
2008-09-26	03:11:00	0
2008-09-26	03:12:00	0
2008-09-26	03:13:00	0
2008-09-26	03:14:00	0
2008-09-26	03:15:00	0
2008-09-26	03:16:00	0
2008-09-26	03:17:00	0
2008-09-26	03:18:00	0
2008-09-26	03:19:00	0
2008-09-26	03:20:00	0
2008-09-26	03:21:00	0
2008-09-26	03:22:00	0
2008-09-26	03:23:00	0
2008-09-26	03:24:00	0
2008-09-26	03:25:00	0
2008-09-26	03:26:00	0
2008-09-26	03:27:00	0
2008-09-26	03:28:00	0
2008-09-26	03:29:00	0
2008-09-26	03:30:00	0
2008-09-26	03:31:00	10
2008-09-26	03:32:00	0
2008-09-26	03:33:00	0
2008-09-26	03:34:00	0
2008-09-26	03:35:00	0
2008-09-26	03:36:00	0
2008-09-26	03:37:00	0
2008-09-26	03:38:00	0
2008-09-26	03:39:00	0
2008-09-26	03:40:00	0
2008-09-26	03:41:00	0
2008-09-26	03:42:00	0
2008-09-26	03:43:00	0
2008-09-26	03:44:00	0
2008-09-26	03:45:00	10
2008-09-26	03:46:00	0
2008-09-26	03:47:00	0
2008-09-26	03:48:00	0
2008-09-26	03:49:00	0
2008-09-26	03:50:00	0
2008-09-26	03:51:00	0
2008-09-26	03:52:00	0
2008-09-26	03:53:00	0
2008-09-26	03:54:00	0
2008-09-26	03:55:00	0
2008-09-26	03:56:00	0
2008-09-26	03:57:00	0
2008-09-26	03:58:00	0
2008-09-26	03:59:00	0
2008-09-26	04:00:00	0
2008-09-26	04:01:00	0
2008-09-26	04:02:00	0
2008-09-26	04:03:00	0
2008-09-26	04:04:00	0
2008-09-26	04:05:00	0
2008-09-26	04:06:00	10
2008-09-26	04:07:00	0
2008-09-26	04:08:00	41
2008-09-26	04:09:00	10
2008-09-26	04:10:00	0
2008-09-26	04:11:00	0
2008-09-26	04:12:00	0
2008-09-26	04:13:00	0
2008-09-26	04:14:00	0
2008-09-26	04:15:00	0
2008-09-26	04:16:00	0
2008-09-26	04:17:00	0
2008-09-26	04:18:00	0
2008-09-26	04:19:00	0
2008-09-26	04:20:00	0
2008-09-26	04:21:00	0
2008-09-26	04:22:00	0
2008-09-26	04:23:00	0
2008-09-26	04:24:00	0
2008-09-26	04:25:00	0
2008-09-26	04:26:00	0
2008-09-26	04:27:00	0
2008-09-26	04:28:00	0
2008-09-26	04:29:00	0
2008-09-26	04:30:00	0
2008-09-26	04:31:00	0
2008-09-26	04:32:00	0
2008-09-26	04:33:00	0
2008-09-26	04:34:00	0
2008-09-26	04:35:00	0
2008-09-26	04:36:00	0
2008-09-26	04:37:00	0
2008-09-26	04:38:00	0
2008-09-26	04:39:00	0
2008-09-26	04:40:00	0
2008-09-26	04:41:00	0
2008-09-26	04:42:00	0
2008-09-26	04:43:00	0
2008-09-26	04:44:00	0
2008-09-26	04:45:00	0
2008-09-26	04:46:00	0
2008-09-26	04:47:00	0
2008-09-26	04:48:00	0
2008-09-26	04:49:00	0
2008-09-26	04:50:00	0
2008-09-26	04:51:00	0
2008-09-26	04:52:00	0
2008-09-26	04:53:00	0
2008-09-26	04:54:00	0
2008-09-26	04:55:00	0
2008-09-26	04:56:00	0
2008-09-26	04:57:00	0
2008-09-26	04:58:00	0
2008-09-26	04:59:00	0
2008-09-26	05:00:00	0
2008-09-26	05:01:00	0
2008-09-26	05:02:00	0
2008-09-26	05:03:00	0
2008-09-26	05:04:00	10
2008-09-26	05:05:00	0
2008-09-26	05:06:00	0
2008-09-26	05:07:00	0
2008-09-26	05:08:00	0
2008-09-26	05:09:00	0
2008-09-26	05:10:00	0
2008-09-26	05:11:00	0
2008-09-26	05:12:00	0
2008-09-26	05:13:00	0
2008-09-26	05:14:00	0
2008-09-26	05:15:00	0
2008-09-26	05:16:00	0
2008-09-26	05:17:00	0
2008-09-26	05:18:00	0
2008-09-26	05:19:00	0
2008-09-26	05:20:00	0
2008-09-26	05:21:00	0
2008-09-26	05:22:00	0
2008-09-26	05:23:00	0
2008-09-26	05:24:00	0
2008-09-26	05:25:00	0
2008-09-26	05:26:00	0
2008-09-26	05:27:00	0
2008-09-26	05:28:00	0
2008-09-26	05:29:00	0
2008-09-26	05:30:00	0
2008-09-26	05:31:00	0
2008-09-26	05:32:00	0
2008-09-26	05:33:00	0
2008-09-26	05:34:00	0
2008-09-26	05:35:00	0
2008-09-26	05:36:00	0
2008-09-26	05:37:00	0
2008-09-26	05:38:00	0
2008-09-26	05:39:00	0
2008-09-26	05:40:00	0
2008-09-26	05:41:00	0
2008-09-26	05:42:00	0
2008-09-26	05:43:00	0
2008-09-26	05:44:00	0
2008-09-26	05:45:00	0
2008-09-26	05:46:00	0
2008-09-26	05:47:00	0
2008-09-26	05:48:00	0
2008-09-26	05:49:00	0
2008-09-26	05:50:00	0
2008-09-26	05:51:00	0
2008-09-26	05:52:00	0
2008-09-26	05:53:00	0
2008-09-26	05:54:00	0
2008-09-26	05:55:00	0
2008-09-26	05:56:00	0
2008-09-26	05:57:00	0
2008-09-26	05:58:00	0
2008-09-26	05:59:00	0
2008-09-26	06:00:00	0
2008-09-26	06:01:00	0
2008-09-26	06:02:00	0
2008-09-26	06:03:00	0
2008-09-26	06:04:00	0
2008-09-26	06:05:00	51
2008-09-26	06:06:00	20
2008-09-26	06:07:00	0
2008-09-26	06:08:00	0
2008-09-26	06:09:00	0
2008-09-26	06:10:00	0
2008-09-26	06:11:00	0
2008-09-26	06:12:00	0
2008-09-26	06:13:00	0
2008-09-26	06:14:00	0
2008-09-26	06:15:00	0
2008-09-26	06:16:00	0
2008-09-26	06:17:00	0
2008-09-26	06:18:00	0
2008-09-26	06:19:00	0
2008-09-26	06:20:00	0
2008-09-26	06:21:00	0
2008-09-26	06:22:00	0
2008-09-26	06:23:00	0
2008-09-26	06:24:00	0
2008-09-26	06:25:00	0
2008-09-26	06:26:00	0
2008-09-26	06:27:00	0
2008-09-26	06:28:00	0
2008-09-26	06:29:00	0
2008-09-26	06:30:00	0
2008-09-26	06:31:00	0
2008-09-26	06:32:00	0
2008-09-26	06:33:00	0
2008-09-26	06:34:00	0
2008-09-26	06:35:00	323
2008-09-26	06:36:00	10
2008-09-26	06:37:00	0
2008-09-26	06:38:00	20
2008-09-26	06:39:00	0
2008-09-26	06:40:00	0
2008-09-26	06:41:00	0
2008-09-26	06:42:00	0
2008-09-26	06:43:00	0
2008-09-26	06:44:00	0
2008-09-26	06:45:00	0
2008-09-26	06:46:00	0
2008-09-26	06:47:00	0
2008-09-26	06:48:00	0
2008-09-26	06:49:00	0
2008-09-26	06:50:00	0
2008-09-26	06:51:00	0
2008-09-26	06:52:00	0
2008-09-26	06:53:00	0
2008-09-26	06:54:00	0
2008-09-26	06:55:00	0
2008-09-26	06:56:00	0
2008-09-26	06:57:00	0
2008-09-26	06:58:00	0
2008-09-26	06:59:00	0
2008-09-26	07:00:00	0
2008-09-26	07:01:00	0
2008-09-26	07:02:00	0
2008-09-26	07:03:00	0
2008-09-26	07:04:00	0
2008-09-26	07:05:00	0
2008-09-26	07:06:00	0
2008-09-26	07:07:00	0
2008-09-26	07:08:00	0
2008-09-26	07:09:00	0
2008-09-26	07:10:00	0
2008-09-26	07:11:00	0
2008-09-26	07:12:00	0
2008-09-26	07:13:00	0
2008-09-26	07:14:00	0
2008-09-26	07:15:00	0
2008-09-26	07:16:00	0
2008-09-26	07:17:00	0
2008-09-26	07:18:00	0
2008-09-26	07:19:00	0
2008-09-26	07:20:00	0
2008-09-26	07:21:00	0
2008-09-26	07:22:00	0
2008-09-26	07:23:00	0
2008-09-26	07:24:00	0
2008-09-26	07:25:00	0
2008-09-26	07:26:00	0
2008-09-26	07:27:00	0
2008-09-26	07:28:00	0
2008-09-26	07:29:00	0
2008-09-26	07:30:00	0
2008-09-26	07:31:00	0
2008-09-26	07:32:00	0
2008-09-26	07:33:00	0
2008-09-26	07:34:00	0
2008-09-26	07:35:00	10
2008-09-26	07:36:00	0
2008-09-26	07:37:00	0
2008-09-26	07:38:00	10
2008-09-26	07:39:00	0
2008-09-26	07:40:00	0
2008-09-26	07:41:00	0
2008-09-26	07:42:00	0
2008-09-26	07:43:00	0
2008-09-26	07:44:00	0
2008-09-26	07:45:00	0
2008-09-26	07:46:00	0
2008-09-26	07:47:00	0
2008-09-26	07:48:00	0
2008-09-26	07:49:00	0
2008-09-26	07:50:00	0
2008-09-26	07:51:00	0
2008-09-26	07:52:00	0
2008-09-26	07:53:00	0
2008-09-26	07:54:00	0
2008-09-26	07:55:00	10
2008-09-26	07:56:00	0
2008-09-26	07:57:00	0
2008-09-26	07:58:00	0
2008-09-26	07:59:00	0
2008-09-26	08:00:00	0
2008-09-26	08:01:00	0
2008-09-26	08:02:00	0
2008-09-26	08:03:00	0
2008-09-26	08:04:00	0
2008-09-26	08:05:00	0
2008-09-26	08:06:00	10
2008-09-26	08:07:00	0
2008-09-26	08:08:00	0
2008-09-26	08:09:00	10
2008-09-26	08:10:00	0
2008-09-26	08:11:00	0
2008-09-26	08:12:00	0
2008-09-26	08:13:00	0
2008-09-26	08:14:00	0
2008-09-26	08:15:00	0
2008-09-26	08:16:00	0
2008-09-26	08:17:00	0
2008-09-26	08:18:00	0
2008-09-26	08:19:00	0
2008-09-26	08:20:00	0
2008-09-26	08:21:00	309
2008-09-26	08:22:00	492
2008-09-26	08:23:00	394
2008-09-26	08:24:00	242
2008-09-26	08:25:00	410
2008-09-26	08:26:00	20
2008-09-26	08:27:00	0
2008-09-26	08:28:00	0
2008-09-26	08:29:00	309
2008-09-26	08:30:00	733
2008-09-26	08:31:00	410
2008-09-26	08:32:00	0
2008-09-26	08:33:00	0
2008-09-26	08:34:00	0
2008-09-26	08:35:00	0
2008-09-26	08:36:00	0
2008-09-26	08:37:00	0
2008-09-26	08:38:00	0
2008-09-26	08:39:00	0
2008-09-26	08:40:00	0
2008-09-26	08:41:00	0
2008-09-26	08:42:00	0
2008-09-26	08:43:00	0
2008-09-26	08:44:00	0
2008-09-26	08:45:00	0
2008-09-26	08:46:00	0
2008-09-26	08:47:00	0
2008-09-26	08:48:00	81
2008-09-26	08:49:00	41
2008-09-26	08:50:00	0
2008-09-26	08:51:00	0
2008-09-26	08:52:00	0
2008-09-26	08:53:00	0
2008-09-26	08:54:00	0
2008-09-26	08:55:00	0
2008-09-26	08:56:00	0
2008-09-26	08:57:00	0
2008-09-26	08:58:00	0
2008-09-26	08:59:00	0
2008-09-26	09:00:00	0
2008-09-26	09:01:00	0
2008-09-26	09:02:00	0
2008-09-26	09:03:00	0
2008-09-26	09:04:00	0
2008-09-26	09:05:00	0
2008-09-26	09:06:00	0
2008-09-26	09:07:00	0
2008-09-26	09:08:00	0
[truncated: 19,611 more rows]

## Sheet: 10.09.08
Actogram, Copy Raw Data, All Days
Identity:	Lena
Filename:	E:\Active Research Files\meloxicam titre canine\cases\lena\Lena 10.9.08.AWC
Gender:	F
Age:	9
Height:	40.6 cm	16.0 in
Weight:	21.8 kg	48.1 lbs
Start Date:	09-Oct-2008 (Thu)
Start Time:	17:00:00
Interval:	1.00 mins
Date Stamp:	Time Stamp:	Activity Data:	Marker Press:
2008-10-09	00:00:00	0
2008-10-09	00:01:00	0
2008-10-09	00:02:00	0
2008-10-09	00:03:00	0
2008-10-09	00:04:00	0
2008-10-09	00:05:00	0
2008-10-09	00:06:00	0
2008-10-09	00:07:00	0
2008-10-09	00:08:00	0
2008-10-09	00:09:00	0
2008-10-09	00:10:00	0
2008-10-09	00:11:00	0
2008-10-09	00:12:00	0
2008-10-09	00:13:00	0
2008-10-09	00:14:00	0
2008-10-09	00:15:00	0
2008-10-09	00:16:00	0
2008-10-09	00:17:00	0
2008-10-09	00:18:00	0
2008-10-09	00:19:00	0
2008-10-09	00:20:00	0
2008-10-09	00:21:00	0
2008-10-09	00:22:00	0
2008-10-09	00:23:00	0
2008-10-09	00:24:00	0
2008-10-09	00:25:00	0
2008-10-09	00:26:00	0
2008-10-09	00:27:00	0
2008-10-09	00:28:00	0
2008-10-09	00:29:00	0
2008-10-09	00:30:00	0
2008-10-09	00:31:00	0
2008-10-09	00:32:00	0
2008-10-09	00:33:00	0
2008-10-09	00:34:00	0
2008-10-09	00:35:00	0
2008-10-09	00:36:00	0
2008-10-09	00:37:00	0
2008-10-09	00:38:00	0
2008-10-09	00:39:00	0
2008-10-09	00:40:00	0
2008-10-09	00:41:00	0
2008-10-09	00:42:00	0
2008-10-09	00:43:00	0
2008-10-09	00:44:00	0
2008-10-09	00:45:00	0
2008-10-09	00:46:00	0
2008-10-09	00:47:00	0
2008-10-09	00:48:00	0
2008-10-09	00:49:00	0
2008-10-09	00:50:00	0
2008-10-09	00:51:00	0
2008-10-09	00:52:00	0
2008-10-09	00:53:00	0
2008-10-09	00:54:00	0
2008-10-09	00:55:00	0
2008-10-09	00:56:00	0
2008-10-09	00:57:00	0
2008-10-09	00:58:00	0
2008-10-09	00:59:00	0
2008-10-09	01:00:00	0
2008-10-09	01:01:00	0
2008-10-09	01:02:00	0
2008-10-09	01:03:00	0
2008-10-09	01:04:00	0
2008-10-09	01:05:00	0
2008-10-09	01:06:00	0
2008-10-09	01:07:00	0
2008-10-09	01:08:00	0
2008-10-09	01:09:00	0
2008-10-09	01:10:00	0
2008-10-09	01:11:00	0
2008-10-09	01:12:00	0
2008-10-09	01:13:00	0
2008-10-09	01:14:00	0
2008-10-09	01:15:00	0
2008-10-09	01:16:00	0
2008-10-09	01:17:00	0
2008-10-09	01:18:00	0
2008-10-09	01:19:00	0
2008-10-09	01:20:00	0
2008-10-09	01:21:00	0
2008-10-09	01:22:00	0
2008-10-09	01:23:00	0
2008-10-09	01:24:00	0
2008-10-09	01:25:00	0
2008-10-09	01:26:00	0
2008-10-09	01:27:00	0
2008-10-09	01:28:00	0
2008-10-09	01:29:00	0
2008-10-09	01:30:00	0
2008-10-09	01:31:00	0
2008-10-09	01:32:00	0
2008-10-09	01:33:00	0
2008-10-09	01:34:00	0
2008-10-09	01:35:00	0
2008-10-09	01:36:00	0
2008-10-09	01:37:00	0
2008-10-09	01:38:00	0
2008-10-09	01:39:00	0
2008-10-09	01:40:00	0
2008-10-09	01:41:00	0
2008-10-09	01:42:00	0
2008-10-09	01:43:00	0
2008-10-09	01:44:00	0
2008-10-09	01:45:00	0
2008-10-09	01:46:00	0
2008-10-09	01:47:00	0
2008-10-09	01:48:00	0
2008-10-09	01:49:00	0
2008-10-09	01:50:00	0
2008-10-09	01:51:00	0
2008-10-09	01:52:00	0
2008-10-09	01:53:00	0
2008-10-09	01:54:00	0
2008-10-09	01:55:00	0
2008-10-09	01:56:00	0
2008-10-09	01:57:00	0
2008-10-09	01:58:00	0
2008-10-09	01:59:00	0
2008-10-09	02:00:00	0
2008-10-09	02:01:00	0
2008-10-09	02:02:00	0
2008-10-09	02:03:00	0
2008-10-09	02:04:00	0
2008-10-09	02:05:00	0
2008-10-09	02:06:00	0
2008-10-09	02:07:00	0
2008-10-09	02:08:00	0
2008-10-09	02:09:00	0
2008-10-09	02:10:00	0
2008-10-09	02:11:00	0
2008-10-09	02:12:00	0
2008-10-09	02:13:00	0
2008-10-09	02:14:00	0
2008-10-09	02:15:00	0
2008-10-09	02:16:00	0
2008-10-09	02:17:00	0
2008-10-09	02:18:00	0
2008-10-09	02:19:00	0
2008-10-09	02:20:00	0
2008-10-09	02:21:00	0
2008-10-09	02:22:00	0
2008-10-09	02:23:00	0
2008-10-09	02:24:00	0
2008-10-09	02:25:00	0
2008-10-09	02:26:00	0
2008-10-09	02:27:00	0
2008-10-09	02:28:00	0
2008-10-09	02:29:00	0
2008-10-09	02:30:00	0
2008-10-09	02:31:00	0
2008-10-09	02:32:00	0
2008-10-09	02:33:00	0
2008-10-09	02:34:00	0
2008-10-09	02:35:00	0
2008-10-09	02:36:00	0
2008-10-09	02:37:00	0
2008-10-09	02:38:00	0
2008-10-09	02:39:00	0
2008-10-09	02:40:00	0
2008-10-09	02:41:00	0
2008-10-09	02:42:00	0
2008-10-09	02:43:00	0
2008-10-09	02:44:00	0
2008-10-09	02:45:00	0
2008-10-09	02:46:00	0
2008-10-09	02:47:00	0
2008-10-09	02:48:00	0
2008-10-09	02:49:00	0
2008-10-09	02:50:00	0
2008-10-09	02:51:00	0
2008-10-09	02:52:00	0
2008-10-09	02:53:00	0
2008-10-09	02:54:00	0
2008-10-09	02:55:00	0
2008-10-09	02:56:00	0
2008-10-09	02:57:00	0
2008-10-09	02:58:00	0
2008-10-09	02:59:00	0
2008-10-09	03:00:00	0
2008-10-09	03:01:00	0
2008-10-09	03:02:00	0
2008-10-09	03:03:00	0
2008-10-09	03:04:00	0
2008-10-09	03:05:00	0
2008-10-09	03:06:00	0
2008-10-09	03:07:00	0
2008-10-09	03:08:00	0
2008-10-09	03:09:00	0
2008-10-09	03:10:00	0
2008-10-09	03:11:00	0
2008-10-09	03:12:00	0
2008-10-09	03:13:00	0
2008-10-09	03:14:00	0
2008-10-09	03:15:00	0
2008-10-09	03:16:00	0
2008-10-09	03:17:00	0
2008-10-09	03:18:00	0
2008-10-09	03:19:00	0
2008-10-09	03:20:00	0
2008-10-09	03:21:00	0
2008-10-09	03:22:00	0
2008-10-09	03:23:00	0
2008-10-09	03:24:00	0
2008-10-09	03:25:00	0
2008-10-09	03:26:00	0
2008-10-09	03:27:00	0
2008-10-09	03:28:00	0
2008-10-09	03:29:00	0
2008-10-09	03:30:00	0
2008-10-09	03:31:00	0
2008-10-09	03:32:00	0
2008-10-09	03:33:00	0
2008-10-09	03:34:00	0
2008-10-09	03:35:00	0
2008-10-09	03:36:00	0
2008-10-09	03:37:00	0
2008-10-09	03:38:00	0
2008-10-09	03:39:00	0
2008-10-09	03:40:00	0
2008-10-09	03:41:00	0
2008-10-09	03:42:00	0
2008-10-09	03:43:00	0
2008-10-09	03:44:00	0
2008-10-09	03:45:00	0
2008-10-09	03:46:00	0
2008-10-09	03:47:00	0
2008-10-09	03:48:00	0
2008-10-09	03:49:00	0
2008-10-09	03:50:00	0
2008-10-09	03:51:00	0
2008-10-09	03:52:00	0
2008-10-09	03:53:00	0
2008-10-09	03:54:00	0
2008-10-09	03:55:00	0
2008-10-09	03:56:00	0
2008-10-09	03:57:00	0
2008-10-09	03:58:00	0
2008-10-09	03:59:00	0
2008-10-09	04:00:00	0
2008-10-09	04:01:00	0
2008-10-09	04:02:00	0
2008-10-09	04:03:00	0
2008-10-09	04:04:00	0
2008-10-09	04:05:00	0
2008-10-09	04:06:00	0
2008-10-09	04:07:00	0
2008-10-09	04:08:00	0
2008-10-09	04:09:00	0
2008-10-09	04:10:00	0
2008-10-09	04:11:00	0
2008-10-09	04:12:00	0
2008-10-09	04:13:00	0
2008-10-09	04:14:00	0
2008-10-09	04:15:00	0
2008-10-09	04:16:00	0
2008-10-09	04:17:00	0
2008-10-09	04:18:00	0
2008-10-09	04:19:00	0
2008-10-09	04:20:00	0
2008-10-09	04:21:00	0
2008-10-09	04:22:00	0
2008-10-09	04:23:00	0
2008-10-09	04:24:00	0
2008-10-09	04:25:00	0
2008-10-09	04:26:00	0
2008-10-09	04:27:00	0
2008-10-09	04:28:00	0
2008-10-09	04:29:00	0
2008-10-09	04:30:00	0
2008-10-09	04:31:00	0
2008-10-09	04:32:00	0
2008-10-09	04:33:00	0
2008-10-09	04:34:00	0
2008-10-09	04:35:00	0
2008-10-09	04:36:00	0
2008-10-09	04:37:00	0
2008-10-09	04:38:00	0
2008-10-09	04:39:00	0
2008-10-09	04:40:00	0
2008-10-09	04:41:00	0
2008-10-09	04:42:00	0
2008-10-09	04:43:00	0
2008-10-09	04:44:00	0
2008-10-09	04:45:00	0
2008-10-09	04:46:00	0
2008-10-09	04:47:00	0
2008-10-09	04:48:00	0
2008-10-09	04:49:00	0
2008-10-09	04:50:00	0
2008-10-09	04:51:00	0
2008-10-09	04:52:00	0
2008-10-09	04:53:00	0
2008-10-09	04:54:00	0
2008-10-09	04:55:00	0
2008-10-09	04:56:00	0
2008-10-09	04:57:00	0
2008-10-09	04:58:00	0
2008-10-09	04:59:00	0
2008-10-09	05:00:00	0
2008-10-09	05:01:00	0
2008-10-09	05:02:00	0
2008-10-09	05:03:00	0
2008-10-09	05:04:00	0
2008-10-09	05:05:00	0
2008-10-09	05:06:00	0
2008-10-09	05:07:00	0
2008-10-09	05:08:00	0
2008-10-09	05:09:00	0
2008-10-09	05:10:00	0
2008-10-09	05:11:00	0
2008-10-09	05:12:00	0
2008-10-09	05:13:00	0
2008-10-09	05:14:00	0
2008-10-09	05:15:00	0
2008-10-09	05:16:00	0
2008-10-09	05:17:00	0
2008-10-09	05:18:00	0
2008-10-09	05:19:00	0
2008-10-09	05:20:00	0
2008-10-09	05:21:00	0
2008-10-09	05:22:00	0
2008-10-09	05:23:00	0
2008-10-09	05:24:00	0
2008-10-09	05:25:00	0
2008-10-09	05:26:00	0
2008-10-09	05:27:00	0
2008-10-09	05:28:00	0
2008-10-09	05:29:00	0
2008-10-09	05:30:00	0
2008-10-09	05:31:00	0
2008-10-09	05:32:00	0
2008-10-09	05:33:00	0
2008-10-09	05:34:00	0
2008-10-09	05:35:00	0
2008-10-09	05:36:00	0
2008-10-09	05:37:00	0
2008-10-09	05:38:00	0
2008-10-09	05:39:00	0
2008-10-09	05:40:00	0
2008-10-09	05:41:00	0
2008-10-09	05:42:00	0
2008-10-09	05:43:00	0
2008-10-09	05:44:00	0
2008-10-09	05:45:00	0
2008-10-09	05:46:00	0
2008-10-09	05:47:00	0
2008-10-09	05:48:00	0
2008-10-09	05:49:00	0
2008-10-09	05:50:00	0
2008-10-09	05:51:00	0
2008-10-09	05:52:00	0
2008-10-09	05:53:00	0
2008-10-09	05:54:00	0
2008-10-09	05:55:00	0
2008-10-09	05:56:00	0
2008-10-09	05:57:00	0
2008-10-09	05:58:00	0
2008-10-09	05:59:00	0
2008-10-09	06:00:00	0
2008-10-09	06:01:00	0
2008-10-09	06:02:00	0
2008-10-09	06:03:00	0
2008-10-09	06:04:00	0
2008-10-09	06:05:00	0
2008-10-09	06:06:00	0
2008-10-09	06:07:00	0
2008-10-09	06:08:00	0
2008-10-09	06:09:00	0
2008-10-09	06:10:00	0
2008-10-09	06:11:00	0
2008-10-09	06:12:00	0
2008-10-09	06:13:00	0
2008-10-09	06:14:00	0
2008-10-09	06:15:00	0
2008-10-09	06:16:00	0
2008-10-09	06:17:00	0
2008-10-09	06:18:00	0
2008-10-09	06:19:00	0
2008-10-09	06:20:00	0
2008-10-09	06:21:00	0
2008-10-09	06:22:00	0
2008-10-09	06:23:00	0
2008-10-09	06:24:00	0
2008-10-09	06:25:00	0
2008-10-09	06:26:00	0
2008-10-09	06:27:00	0
2008-10-09	06:28:00	0
2008-10-09	06:29:00	0
2008-10-09	06:30:00	0
2008-10-09	06:31:00	0
2008-10-09	06:32:00	0
2008-10-09	06:33:00	0
2008-10-09	06:34:00	0
2008-10-09	06:35:00	0
2008-10-09	06:36:00	0
2008-10-09	06:37:00	0
2008-10-09	06:38:00	0
2008-10-09	06:39:00	0
2008-10-09	06:40:00	0
2008-10-09	06:41:00	0
2008-10-09	06:42:00	0
2008-10-09	06:43:00	0
2008-10-09	06:44:00	0
2008-10-09	06:45:00	0
2008-10-09	06:46:00	0
2008-10-09	06:47:00	0
2008-10-09	06:48:00	0
2008-10-09	06:49:00	0
2008-10-09	06:50:00	0
2008-10-09	06:51:00	0
2008-10-09	06:52:00	0
2008-10-09	06:53:00	0
2008-10-09	06:54:00	0
2008-10-09	06:55:00	0
2008-10-09	06:56:00	0
2008-10-09	06:57:00	0
2008-10-09	06:58:00	0
2008-10-09	06:59:00	0
2008-10-09	07:00:00	0
2008-10-09	07:01:00	0
2008-10-09	07:02:00	0
2008-10-09	07:03:00	0
2008-10-09	07:04:00	0
2008-10-09	07:05:00	0
2008-10-09	07:06:00	0
2008-10-09	07:07:00	0
2008-10-09	07:08:00	0
2008-10-09	07:09:00	0
2008-10-09	07:10:00	0
2008-10-09	07:11:00	0
2008-10-09	07:12:00	0
2008-10-09	07:13:00	0
2008-10-09	07:14:00	0
2008-10-09	07:15:00	0
2008-10-09	07:16:00	0
2008-10-09	07:17:00	0
2008-10-09	07:18:00	0
2008-10-09	07:19:00	0
2008-10-09	07:20:00	0
2008-10-09	07:21:00	0
2008-10-09	07:22:00	0
2008-10-09	07:23:00	0
2008-10-09	07:24:00	0
2008-10-09	07:25:00	0
2008-10-09	07:26:00	0
2008-10-09	07:27:00	0
2008-10-09	07:28:00	0
2008-10-09	07:29:00	0
2008-10-09	07:30:00	0
2008-10-09	07:31:00	0
2008-10-09	07:32:00	0
2008-10-09	07:33:00	0
2008-10-09	07:34:00	0
2008-10-09	07:35:00	0
2008-10-09	07:36:00	0
2008-10-09	07:37:00	0
2008-10-09	07:38:00	0
2008-10-09	07:39:00	0
2008-10-09	07:40:00	0
2008-10-09	07:41:00	0
2008-10-09	07:42:00	0
2008-10-09	07:43:00	0
2008-10-09	07:44:00	0
2008-10-09	07:45:00	0
2008-10-09	07:46:00	0
2008-10-09	07:47:00	0
2008-10-09	07:48:00	0
2008-10-09	07:49:00	0
2008-10-09	07:50:00	0
2008-10-09	07:51:00	0
2008-10-09	07:52:00	0
2008-10-09	07:53:00	0
2008-10-09	07:54:00	0
2008-10-09	07:55:00	0
2008-10-09	07:56:00	0
2008-10-09	07:57:00	0
2008-10-09	07:58:00	0
2008-10-09	07:59:00	0
2008-10-09	08:00:00	0
2008-10-09	08:01:00	0
2008-10-09	08:02:00	0
2008-10-09	08:03:00	0
2008-10-09	08:04:00	0
2008-10-09	08:05:00	0
2008-10-09	08:06:00	0
2008-10-09	08:07:00	0
2008-10-09	08:08:00	0
2008-10-09	08:09:00	0
2008-10-09	08:10:00	0
2008-10-09	08:11:00	0
2008-10-09	08:12:00	0
2008-10-09	08:13:00	0
2008-10-09	08:14:00	0
2008-10-09	08:15:00	0
2008-10-09	08:16:00	0
2008-10-09	08:17:00	0
2008-10-09	08:18:00	0
2008-10-09	08:19:00	0
2008-10-09	08:20:00	0
2008-10-09	08:21:00	0
2008-10-09	08:22:00	0
2008-10-09	08:23:00	0
2008-10-09	08:24:00	0
2008-10-09	08:25:00	0
2008-10-09	08:26:00	0
2008-10-09	08:27:00	0
2008-10-09	08:28:00	0
2008-10-09	08:29:00	0
2008-10-09	08:30:00	0
2008-10-09	08:31:00	0
2008-10-09	08:32:00	0
2008-10-09	08:33:00	0
2008-10-09	08:34:00	0
2008-10-09	08:35:00	0
2008-10-09	08:36:00	0
2008-10-09	08:37:00	0
2008-10-09	08:38:00	0
2008-10-09	08:39:00	0
2008-10-09	08:40:00	0
2008-10-09	08:41:00	0
2008-10-09	08:42:00	0
2008-10-09	08:43:00	0
2008-10-09	08:44:00	0
2008-10-09	08:45:00	0
2008-10-09	08:46:00	0
2008-10-09	08:47:00	0
2008-10-09	08:48:00	0
2008-10-09	08:49:00	0
2008-10-09	08:50:00	0
2008-10-09	08:51:00	0
2008-10-09	08:52:00	0
2008-10-09	08:53:00	0
2008-10-09	08:54:00	0
2008-10-09	08:55:00	0
2008-10-09	08:56:00	0
2008-10-09	08:57:00	0
2008-10-09	08:58:00	0
2008-10-09	08:59:00	0
2008-10-09	09:00:00	0
2008-10-09	09:01:00	0
2008-10-09	09:02:00	0
2008-10-09	09:03:00	0
2008-10-09	09:04:00	0
2008-10-09	09:05:00	0
2008-10-09	09:06:00	0
2008-10-09	09:07:00	0
2008-10-09	09:08:00	0
2008-10-09	09:09:00	0
2008-10-09	09:10:00	0
2008-10-09	09:11:00	0
2008-10-09	09:12:00	0
2008-10-09	09:13:00	0
2008-10-09	09:14:00	0
2008-10-09	09:15:00	0
2008-10-09	09:16:00	0
2008-10-09	09:17:00	0
2008-10-09	09:18:00	0
2008-10-09	09:19:00	0
2008-10-09	09:20:00	0
2008-10-09	09:21:00	0
2008-10-09	09:22:00	0
2008-10-09	09:23:00	0
2008-10-09	09:24:00	0
2008-10-09	09:25:00	0
2008-10-09	09:26:00	0
2008-10-09	09:27:00	0
2008-10-09	09:28:00	0
2008-10-09	09:29:00	0
2008-10-09	09:30:00	0
2008-10-09	09:31:00	0
2008-10-09	09:32:00	0
2008-10-09	09:33:00	0
2008-10-09	09:34:00	0
2008-10-09	09:35:00	0
2008-10-09	09:36:00	0
2008-10-09	09:37:00	0
2008-10-09	09:38:00	0
2008-10-09	09:39:00	0
2008-10-09	09:40:00	0
2008-10-09	09:41:00	0
2008-10-09	09:42:00	0
2008-10-09	09:43:00	0
2008-10-09	09:44:00	0
2008-10-09	09:45:00	0
2008-10-09	09:46:00	0
2008-10-09	09:47:00	0
2008-10-09	09:48:00	0
2008-10-09	09:49:00	0
2008-10-09	09:50:00	0
2008-10-09	09:51:00	0
2008-10-09	09:52:00	0
2008-10-09	09:53:00	0
2008-10-09	09:54:00	0
2008-10-09	09:55:00	0
2008-10-09	09:56:00	0
2008-10-09	09:57:00	0
2008-10-09	09:58:00	0
2008-10-09	09:59:00	0
2008-10-09	10:00:00	0
2008-10-09	10:01:00	0
2008-10-09	10:02:00	0
2008-10-09	10:03:00	0
2008-10-09	10:04:00	0
2008-10-09	10:05:00	0
2008-10-09	10:06:00	0
2008-10-09	10:07:00	0
2008-10-09	10:08:00	0
2008-10-09	10:09:00	0
2008-10-09	10:10:00	0
2008-10-09	10:11:00	0
2008-10-09	10:12:00	0
2008-10-09	10:13:00	0
2008-10-09	10:14:00	0
2008-10-09	10:15:00	0
2008-10-09	10:16:00	0
2008-10-09	10:17:00	0
2008-10-09	10:18:00	0
2008-10-09	10:19:00	0
2008-10-09	10:20:00	0
2008-10-09	10:21:00	0
2008-10-09	10:22:00	0
2008-10-09	10:23:00	0
2008-10-09	10:24:00	0
2008-10-09	10:25:00	0
2008-10-09	10:26:00	0
2008-10-09	10:27:00	0
2008-10-09	10:28:00	0
2008-10-09	10:29:00	0
2008-10-09	10:30:00	0
2008-10-09	10:31:00	0
2008-10-09	10:32:00	0
2008-10-09	10:33:00	0
2008-10-09	10:34:00	0
2008-10-09	10:35:00	0
2008-10-09	10:36:00	0
2008-10-09	10:37:00	0
2008-10-09	10:38:00	0
2008-10-09	10:39:00	0
2008-10-09	10:40:00	0
2008-10-09	10:41:00	0
2008-10-09	10:42:00	0
2008-10-09	10:43:00	0
2008-10-09	10:44:00	0
2008-10-09	10:45:00	0
2008-10-09	10:46:00	0
2008-10-09	10:47:00	0
2008-10-09	10:48:00	0
2008-10-09	10:49:00	0
2008-10-09	10:50:00	0
2008-10-09	10:51:00	0
2008-10-09	10:52:00	0
2008-10-09	10:53:00	0
2008-10-09	10:54:00	0
2008-10-09	10:55:00	0
2008-10-09	10:56:00	0
2008-10-09	10:57:00	0
2008-10-09	10:58:00	0
2008-10-09	10:59:00	0
2008-10-09	11:00:00	0
2008-10-09	11:01:00	0
2008-10-09	11:02:00	0
2008-10-09	11:03:00	0
2008-10-09	11:04:00	0
2008-10-09	11:05:00	0
2008-10-09	11:06:00	0
2008-10-09	11:07:00	0
2008-10-09	11:08:00	0
2008-10-09	11:09:00	0
2008-10-09	11:10:00	0
2008-10-09	11:11:00	0
2008-10-09	11:12:00	0
2008-10-09	11:13:00	0
2008-10-09	11:14:00	0
2008-10-09	11:15:00	0
2008-10-09	11:16:00	0
2008-10-09	11:17:00	0
2008-10-09	11:18:00	0
2008-10-09	11:19:00	0
2008-10-09	11:20:00	0
2008-10-09	11:21:00	0
2008-10-09	11:22:00	0
2008-10-09	11:23:00	0
2008-10-09	11:24:00	0
2008-10-09	11:25:00	0
2008-10-09	11:26:00	0
2008-10-09	11:27:00	0
2008-10-09	11:28:00	0
2008-10-09	11:29:00	0
2008-10-09	11:30:00	0
2008-10-09	11:31:00	0
2008-10-09	11:32:00	0
2008-10-09	11:33:00	0
2008-10-09	11:34:00	0
2008-10-09	11:35:00	0
2008-10-09	11:36:00	0
2008-10-09	11:37:00	0
2008-10-09	11:38:00	0
2008-10-09	11:39:00	0
2008-10-09	11:40:00	0
2008-10-09	11:41:00	0
2008-10-09	11:42:00	0
2008-10-09	11:43:00	0
2008-10-09	11:44:00	0
2008-10-09	11:45:00	0
2008-10-09	11:46:00	0
2008-10-09	11:47:00	0
2008-10-09	11:48:00	0
2008-10-09	11:49:00	0
2008-10-09	11:50:00	0
2008-10-09	11:51:00	0
2008-10-09	11:52:00	0
2008-10-09	11:53:00	0
2008-10-09	11:54:00	0
2008-10-09	11:55:00	0
2008-10-09	11:56:00	0
2008-10-09	11:57:00	0
2008-10-09	11:58:00	0
2008-10-09	11:59:00	0
2008-10-09	12:00:00	0
2008-10-09	12:01:00	0
2008-10-09	12:02:00	0
2008-10-09	12:03:00	0
2008-10-09	12:04:00	0
2008-10-09	12:05:00	0
2008-10-09	12:06:00	0
2008-10-09	12:07:00	0
2008-10-09	12:08:00	0
2008-10-09	12:09:00	0
2008-10-09	12:10:00	0
2008-10-09	12:11:00	0
2008-10-09	12:12:00	0
2008-10-09	12:13:00	0
2008-10-09	12:14:00	0
2008-10-09	12:15:00	0
2008-10-09	12:16:00	0
2008-10-09	12:17:00	0
2008-10-09	12:18:00	0
2008-10-09	12:19:00	0
2008-10-09	12:20:00	0
2008-10-09	12:21:00	0
2008-10-09	12:22:00	0
2008-10-09	12:23:00	0
2008-10-09	12:24:00	0
2008-10-09	12:25:00	0
2008-10-09	12:26:00	0
2008-10-09	12:27:00	0
2008-10-09	12:28:00	0
2008-10-09	12:29:00	0
2008-10-09	12:30:00	0
2008-10-09	12:31:00	0
2008-10-09	12:32:00	0
2008-10-09	12:33:00	0
2008-10-09	12:34:00	0
2008-10-09	12:35:00	0
2008-10-09	12:36:00	0
2008-10-09	12:37:00	0
2008-10-09	12:38:00	0
2008-10-09	12:39:00	0
2008-10-09	12:40:00	0
2008-10-09	12:41:00	0
2008-10-09	12:42:00	0
2008-10-09	12:43:00	0
2008-10-09	12:44:00	0
2008-10-09	12:45:00	0
2008-10-09	12:46:00	0
2008-10-09	12:47:00	0
2008-10-09	12:48:00	0
2008-10-09	12:49:00	0
2008-10-09	12:50:00	0
2008-10-09	12:51:00	0
2008-10-09	12:52:00	0
2008-10-09	12:53:00	0
2008-10-09	12:54:00	0
2008-10-09	12:55:00	0
2008-10-09	12:56:00	0
2008-10-09	12:57:00	0
2008-10-09	12:58:00	0
2008-10-09	12:59:00	0
2008-10-09	13:00:00	0
2008-10-09	13:01:00	0
2008-10-09	13:02:00	0
2008-10-09	13:03:00	0
2008-10-09	13:04:00	0
2008-10-09	13:05:00	0
2008-10-09	13:06:00	0
2008-10-09	13:07:00	0
2008-10-09	13:08:00	0
2008-10-09	13:09:00	0
2008-10-09	13:10:00	0
2008-10-09	13:11:00	0
2008-10-09	13:12:00	0
2008-10-09	13:13:00	0
2008-10-09	13:14:00	0
2008-10-09	13:15:00	0
2008-10-09	13:16:00	0
2008-10-09	13:17:00	0
2008-10-09	13:18:00	0
2008-10-09	13:19:00	0
2008-10-09	13:20:00	0
2008-10-09	13:21:00	0
2008-10-09	13:22:00	0
2008-10-09	13:23:00	0
2008-10-09	13:24:00	0
2008-10-09	13:25:00	0
2008-10-09	13:26:00	0
2008-10-09	13:27:00	0
2008-10-09	13:28:00	0
2008-10-09	13:29:00	0
2008-10-09	13:30:00	0
2008-10-09	13:31:00	0
2008-10-09	13:32:00	0
2008-10-09	13:33:00	0
2008-10-09	13:34:00	0
2008-10-09	13:35:00	0
2008-10-09	13:36:00	0
2008-10-09	13:37:00	0
2008-10-09	13:38:00	0
2008-10-09	13:39:00	0
2008-10-09	13:40:00	0
2008-10-09	13:41:00	0
2008-10-09	13:42:00	0
2008-10-09	13:43:00	0
2008-10-09	13:44:00	0
2008-10-09	13:45:00	0
2008-10-09	13:46:00	0
2008-10-09	13:47:00	0
2008-10-09	13:48:00	0
2008-10-09	13:49:00	0
2008-10-09	13:50:00	0
2008-10-09	13:51:00	0
2008-10-09	13:52:00	0
2008-10-09	13:53:00	0
2008-10-09	13:54:00	0
2008-10-09	13:55:00	0
2008-10-09	13:56:00	0
2008-10-09	13:57:00	0
2008-10-09	13:58:00	0
2008-10-09	13:59:00	0
2008-10-09	14:00:00	0
2008-10-09	14:01:00	0
2008-10-09	14:02:00	0
2008-10-09	14:03:00	0
2008-10-09	14:04:00	0
2008-10-09	14:05:00	0
2008-10-09	14:06:00	0
2008-10-09	14:07:00	0
2008-10-09	14:08:00	0
2008-10-09	14:09:00	0
2008-10-09	14:10:00	0
2008-10-09	14:11:00	0
2008-10-09	14:12:00	0
2008-10-09	14:13:00	0
2008-10-09	14:14:00	0
2008-10-09	14:15:00	0
2008-10-09	14:16:00	0
2008-10-09	14:17:00	0
2008-10-09	14:18:00	0
2008-10-09	14:19:00	0
2008-10-09	14:20:00	0
2008-10-09	14:21:00	0
2008-10-09	14:22:00	0
2008-10-09	14:23:00	0
2008-10-09	14:24:00	0
2008-10-09	14:25:00	0
2008-10-09	14:26:00	0
2008-10-09	14:27:00	0
2008-10-09	14:28:00	0
2008-10-09	14:29:00	0
2008-10-09	14:30:00	0
2008-10-09	14:31:00	0
2008-10-09	14:32:00	0
2008-10-09	14:33:00	0
2008-10-09	14:34:00	0
2008-10-09	14:35:00	0
2008-10-09	14:36:00	0
2008-10-09	14:37:00	0
2008-10-09	14:38:00	0
2008-10-09	14:39:00	0
2008-10-09	14:40:00	0
2008-10-09	14:41:00	0
2008-10-09	14:42:00	0
2008-10-09	14:43:00	0
2008-10-09	14:44:00	0
2008-10-09	14:45:00	0
2008-10-09	14:46:00	0
2008-10-09	14:47:00	0
2008-10-09	14:48:00	0
2008-10-09	14:49:00	0
2008-10-09	14:50:00	0
2008-10-09	14:51:00	0
2008-10-09	14:52:00	0
2008-10-09	14:53:00	0
2008-10-09	14:54:00	0
2008-10-09	14:55:00	0
2008-10-09	14:56:00	0
2008-10-09	14:57:00	0
2008-10-09	14:58:00	0
2008-10-09	14:59:00	0
2008-10-09	15:00:00	0
2008-10-09	15:01:00	0
2008-10-09	15:02:00	0
2008-10-09	15:03:00	0
2008-10-09	15:04:00	0
2008-10-09	15:05:00	0
2008-10-09	15:06:00	0
2008-10-09	15:07:00	0
2008-10-09	15:08:00	0
2008-10-09	15:09:00	0
2008-10-09	15:10:00	0
2008-10-09	15:11:00	0
2008-10-09	15:12:00	0
2008-10-09	15:13:00	0
2008-10-09	15:14:00	0
2008-10-09	15:15:00	0
2008-10-09	15:16:00	0
2008-10-09	15:17:00	0
2008-10-09	15:18:00	0
2008-10-09	15:19:00	0
2008-10-09	15:20:00	0
2008-10-09	15:21:00	0
2008-10-09	15:22:00	0
2008-10-09	15:23:00	0
2008-10-09	15:24:00	0
2008-10-09	15:25:00	0
2008-10-09	15:26:00	0
2008-10-09	15:27:00	0
2008-10-09	15:28:00	0
2008-10-09	15:29:00	0
2008-10-09	15:30:00	0
2008-10-09	15:31:00	0
2008-10-09	15:32:00	0
2008-10-09	15:33:00	0
2008-10-09	15:34:00	0
2008-10-09	15:35:00	0
2008-10-09	15:36:00	0
2008-10-09	15:37:00	0
2008-10-09	15:38:00	0
2008-10-09	15:39:00	0
2008-10-09	15:40:00	0
2008-10-09	15:41:00	0
2008-10-09	15:42:00	0
2008-10-09	15:43:00	0
2008-10-09	15:44:00	0
2008-10-09	15:45:00	0
2008-10-09	15:46:00	0
2008-10-09	15:47:00	0
2008-10-09	15:48:00	0
2008-10-09	15:49:00	0
2008-10-09	15:50:00	0
2008-10-09	15:51:00	0
2008-10-09	15:52:00	0
2008-10-09	15:53:00	0
2008-10-09	15:54:00	0
2008-10-09	15:55:00	0
2008-10-09	15:56:00	0
2008-10-09	15:57:00	0
2008-10-09	15:58:00	0
2008-10-09	15:59:00	0
2008-10-09	16:00:00	0
2008-10-09	16:01:00	0
2008-10-09	16:02:00	0
2008-10-09	16:03:00	0
2008-10-09	16:04:00	0
2008-10-09	16:05:00	0
2008-10-09	16:06:00	0
2008-10-09	16:07:00	0
2008-10-09	16:08:00	0
2008-10-09	16:09:00	0
2008-10-09	16:10:00	0
2008-10-09	16:11:00	0
2008-10-09	16:12:00	0
2008-10-09	16:13:00	0
2008-10-09	16:14:00	0
2008-10-09	16:15:00	0
2008-10-09	16:16:00	0
2008-10-09	16:17:00	0
2008-10-09	16:18:00	0
2008-10-09	16:19:00	0
2008-10-09	16:20:00	0
2008-10-09	16:21:00	0
2008-10-09	16:22:00	0
2008-10-09	16:23:00	0
2008-10-09	16:24:00	0
2008-10-09	16:25:00	0
2008-10-09	16:26:00	0
2008-10-09	16:27:00	0
2008-10-09	16:28:00	0
2008-10-09	16:29:00	0
2008-10-09	16:30:00	0
2008-10-09	16:31:00	0
2008-10-09	16:32:00	0
2008-10-09	16:33:00	0
2008-10-09	16:34:00	0
2008-10-09	16:35:00	0
2008-10-09	16:36:00	0
2008-10-09	16:37:00	0
2008-10-09	16:38:00	0
2008-10-09	16:39:00	0
2008-10-09	16:40:00	0
2008-10-09	16:41:00	0
2008-10-09	16:42:00	0
2008-10-09	16:43:00	0
2008-10-09	16:44:00	0
2008-10-09	16:45:00	0
2008-10-09	16:46:00	0
2008-10-09	16:47:00	0
2008-10-09	16:48:00	0
2008-10-09	16:49:00	0
2008-10-09	16:50:00	0
2008-10-09	16:51:00	0
2008-10-09	16:52:00	0
2008-10-09	16:53:00	0
2008-10-09	16:54:00	0
2008-10-09	16:55:00	0
2008-10-09	16:56:00	0
2008-10-09	16:57:00	0
2008-10-09	16:58:00	0
2008-10-09	16:59:00	0
2008-10-09	17:00:00	0
2008-10-09	17:01:00	0
2008-10-09	17:02:00	0
2008-10-09	17:03:00	0
2008-10-09	17:04:00	0
2008-10-09	17:05:00	0
2008-10-09	17:06:00	0
2008-10-09	17:07:00	0
2008-10-09	17:08:00	10
2008-10-09	17:09:00	0
2008-10-09	17:10:00	10
2008-10-09	17:11:00	0
2008-10-09	17:12:00	0
2008-10-09	17:13:00	0
2008-10-09	17:14:00	0
2008-10-09	17:15:00	0
2008-10-09	17:16:00	0
2008-10-09	17:17:00	0
2008-10-09	17:18:00	0
2008-10-09	17:19:00	0
2008-10-09	17:20:00	0
2008-10-09	17:21:00	10
2008-10-09	17:22:00	0
2008-10-09	17:23:00	0
2008-10-09	17:24:00	0
2008-10-09	17:25:00	10
2008-10-09	17:26:00	0
2008-10-09	17:27:00	0
2008-10-09	17:28:00	0
2008-10-09	17:29:00	1715
2008-10-09	17:30:00	1026
2008-10-09	17:31:00	1050
2008-10-09	17:32:00	1156
2008-10-09	17:33:00	492
2008-10-09	17:34:00	230
2008-10-09	17:35:00	443
2008-10-09	17:36:00	217
2008-10-09	17:37:00	280
2008-10-09	17:38:00	242
2008-10-09	17:39:00	242
2008-10-09	17:40:00	492
2008-10-09	17:41:00	230
2008-10-09	17:42:00	309
2008-10-09	17:43:00	295
2008-10-09	17:44:00	217
2008-10-09	17:45:00	10
2008-10-09	17:46:00	380
2008-10-09	17:47:00	132
2008-10-09	17:48:00	254
2008-10-09	17:49:00	51
2008-10-09	17:50:00	81
2008-10-09	17:51:00	122
2008-10-09	17:52:00	71
2008-10-09	17:53:00	51
2008-10-09	17:54:00	91
2008-10-09	17:55:00	20
2008-10-09	17:56:00	169
2008-10-09	17:57:00	323
2008-10-09	17:58:00	266
2008-10-09	17:59:00	81
2008-10-09	18:00:00	51
2008-10-09	18:01:00	266
2008-10-09	18:02:00	394
2008-10-09	18:03:00	81
2008-10-09	18:04:00	71
2008-10-09	18:05:00	230
2008-10-09	18:06:00	181
2008-10-09	18:07:00	230
2008-10-09	18:08:00	217
2008-10-09	18:09:00	122
2008-10-09	18:10:00	217
2008-10-09	18:11:00	102
2008-10-09	18:12:00	71
2008-10-09	18:13:00	122
2008-10-09	18:14:00	112
2008-10-09	18:15:00	20
2008-10-09	18:16:00	193
2008-10-09	18:17:00	112
2008-10-09	18:18:00	323
2008-10-09	18:19:00	443
2008-10-09	18:20:00	280
2008-10-09	18:21:00	1077
2008-10-09	18:22:00	217
2008-10-09	18:23:00	492
2008-10-09	18:24:00	634
2008-10-09	18:25:00	0
2008-10-09	18:26:00	0
2008-10-09	18:27:00	0
2008-10-09	18:28:00	0
2008-10-09	18:29:00	0
2008-10-09	18:30:00	230
2008-10-09	18:31:00	561
2008-10-09	18:32:00	0
2008-10-09	18:33:00	0
2008-10-09	18:34:00	0
2008-10-09	18:35:00	10
2008-10-09	18:36:00	0
2008-10-09	18:37:00	0
2008-10-09	18:38:00	61
2008-10-09	18:39:00	230
2008-10-09	18:40:00	0
2008-10-09	18:41:00	0
2008-10-09	18:42:00	280
2008-10-09	18:43:00	144
2008-10-09	18:44:00	0
2008-10-09	18:45:00	0
2008-10-09	18:46:00	0
2008-10-09	18:47:00	0
2008-10-09	18:48:00	0
2008-10-09	18:49:00	0
2008-10-09	18:50:00	0
2008-10-09	18:51:00	0
2008-10-09	18:52:00	0
2008-10-09	18:53:00	0
2008-10-09	18:54:00	0
2008-10-09	18:55:00	0
2008-10-09	18:56:00	0
2008-10-09	18:57:00	0
2008-10-09	18:58:00	0
2008-10-09	18:59:00	0
2008-10-09	19:00:00	0
2008-10-09	19:01:00	0
2008-10-09	19:02:00	0
2008-10-09	19:03:00	0
2008-10-09	19:04:00	0
2008-10-09	19:05:00	0
2008-10-09	19:06:00	0
2008-10-09	19:07:00	0
2008-10-09	19:08:00	0
2008-10-09	19:09:00	0
2008-10-09	19:10:00	0
2008-10-09	19:11:00	0
2008-10-09	19:12:00	0
2008-10-09	19:13:00	0
2008-10-09	19:14:00	0
2008-10-09	19:15:00	0
2008-10-09	19:16:00	0
2008-10-09	19:17:00	0
2008-10-09	19:18:00	0
2008-10-09	19:19:00	0
2008-10-09	19:20:00	0
2008-10-09	19:21:00	0
2008-10-09	19:22:00	0
2008-10-09	19:23:00	0
2008-10-09	19:24:00	0
2008-10-09	19:25:00	0
2008-10-09	19:26:00	0
2008-10-09	19:27:00	0
2008-10-09	19:28:00	0
2008-10-09	19:29:00	0
2008-10-09	19:30:00	0
2008-10-09	19:31:00	0
2008-10-09	19:32:00	0
2008-10-09	19:33:00	0
2008-10-09	19:34:00	0
2008-10-09	19:35:00	0
2008-10-09	19:36:00	0
2008-10-09	19:37:00	0
2008-10-09	19:38:00	0
2008-10-09	19:39:00	0
2008-10-09	19:40:00	0
2008-10-09	19:41:00	0
2008-10-09	19:42:00	0
2008-10-09	19:43:00	0
2008-10-09	19:44:00	0
2008-10-09	19:45:00	0
2008-10-09	19:46:00	0
2008-10-09	19:47:00	0
2008-10-09	19:48:00	0
2008-10-09	19:49:00	0
2008-10-09	19:50:00	0
2008-10-09	19:51:00	0
2008-10-09	19:52:00	0
2008-10-09	19:53:00	0
2008-10-09	19:54:00	0
2008-10-09	19:55:00	0
2008-10-09	19:56:00	0
2008-10-09	19:57:00	0
2008-10-09	19:58:00	0
2008-10-09	19:59:00	0
2008-10-09	20:00:00	0
2008-10-09	20:01:00	0
2008-10-09	20:02:00	0
2008-10-09	20:03:00	0
2008-10-09	20:04:00	0
2008-10-09	20:05:00	0
2008-10-09	20:06:00	0
2008-10-09	20:07:00	0
2008-10-09	20:08:00	0
2008-10-09	20:09:00	0
2008-10-09	20:10:00	0
2008-10-09	20:11:00	0
2008-10-09	20:12:00	0
2008-10-09	20:13:00	10
2008-10-09	20:14:00	0
2008-10-09	20:15:00	0
2008-10-09	20:16:00	0
2008-10-09	20:17:00	0
2008-10-09	20:18:00	0
2008-10-09	20:19:00	0
2008-10-09	20:20:00	0
2008-10-09	20:21:00	0
2008-10-09	20:22:00	0
2008-10-09	20:23:00	0
2008-10-09	20:24:00	0
2008-10-09	20:25:00	0
2008-10-09	20:26:00	0
2008-10-09	20:27:00	0
2008-10-09	20:28:00	0
2008-10-09	20:29:00	0
2008-10-09	20:30:00	0
2008-10-09	20:31:00	0
2008-10-09	20:32:00	0
2008-10-09	20:33:00	0
2008-10-09	20:34:00	0
2008-10-09	20:35:00	0
2008-10-09	20:36:00	0
2008-10-09	20:37:00	0
2008-10-09	20:38:00	0
2008-10-09	20:39:00	0
2008-10-09	20:40:00	0
2008-10-09	20:41:00	0
2008-10-09	20:42:00	0
2008-10-09	20:43:00	0
2008-10-09	20:44:00	0
2008-10-09	20:45:00	0
2008-10-09	20:46:00	0
2008-10-09	20:47:00	0
2008-10-09	20:48:00	0
2008-10-09	20:49:00	0
2008-10-09	20:50:00	0
2008-10-09	20:51:00	10
2008-10-09	20:52:00	0
2008-10-09	20:53:00	0
2008-10-09	20:54:00	0
2008-10-09	20:55:00	0
2008-10-09	20:56:00	0
2008-10-09	20:57:00	0
2008-10-09	20:58:00	0
2008-10-09	20:59:00	0
2008-10-09	21:00:00	0
2008-10-09	21:01:00	0
2008-10-09	21:02:00	0
2008-10-09	21:03:00	0
2008-10-09	21:04:00	0
2008-10-09	21:05:00	0
2008-10-09	21:06:00	0
2008-10-09	21:07:00	0
2008-10-09	21:08:00	0
2008-10-09	21:09:00	0
2008-10-09	21:10:00	0
2008-10-09	21:11:00	0
2008-10-09	21:12:00	0
2008-10-09	21:13:00	0
2008-10-09	21:14:00	0
2008-10-09	21:15:00	0
2008-10-09	21:16:00	0
2008-10-09	21:17:00	0
2008-10-09	21:18:00	0
2008-10-09	21:19:00	0
2008-10-09	21:20:00	0
2008-10-09	21:21:00	0
2008-10-09	21:22:00	0
2008-10-09	21:23:00	0
2008-10-09	21:24:00	0
2008-10-09	21:25:00	0
2008-10-09	21:26:00	0
2008-10-09	21:27:00	0
2008-10-09	21:28:00	0
2008-10-09	21:29:00	0
2008-10-09	21:30:00	0
2008-10-09	21:31:00	0
2008-10-09	21:32:00	0
2008-10-09	21:33:00	41
2008-10-09	21:34:00	597
2008-10-09	21:35:00	169
2008-10-09	21:36:00	230
2008-10-09	21:37:00	81
2008-10-09	21:38:00	0
2008-10-09	21:39:00	0
2008-10-09	21:40:00	0
2008-10-09	21:41:00	0
2008-10-09	21:42:00	0
2008-10-09	21:43:00	0
2008-10-09	21:44:00	0
2008-10-09	21:45:00	1130
2008-10-09	21:46:00	1050
2008-10-09	21:47:00	774
2008-10-09	21:48:00	634
2008-10-09	21:49:00	122
2008-10-09	21:50:00	132
2008-10-09	21:51:00	122
2008-10-09	21:52:00	193
2008-10-09	21:53:00	266
2008-10-09	21:54:00	20
2008-10-09	21:55:00	81
2008-10-09	21:56:00	41
2008-10-09	21:57:00	323
2008-10-09	21:58:00	242
2008-10-09	21:59:00	0
2008-10-09	22:00:00	0
2008-10-09	22:01:00	0
2008-10-09	22:02:00	0
2008-10-09	22:03:00	0
2008-10-09	22:04:00	0
2008-10-09	22:05:00	0
2008-10-09	22:06:00	61
2008-10-09	22:07:00	0
2008-10-09	22:08:00	10
2008-10-09	22:09:00	0
2008-10-09	22:10:00	0
2008-10-09	22:11:00	0
2008-10-09	22:12:00	0
2008-10-09	22:13:00	0
2008-10-09	22:14:00	0
2008-10-09	22:15:00	0
2008-10-09	22:16:00	0
2008-10-09	22:17:00	0
2008-10-09	22:18:00	0
2008-10-09	22:19:00	0
2008-10-09	22:20:00	10
2008-10-09	22:21:00	0
2008-10-09	22:22:00	10
2008-10-09	22:23:00	0
2008-10-09	22:24:00	0
2008-10-09	22:25:00	0
2008-10-09	22:26:00	0
2008-10-09	22:27:00	0
2008-10-09	22:28:00	0
2008-10-09	22:29:00	0
2008-10-09	22:30:00	0
2008-10-09	22:31:00	0
2008-10-09	22:32:00	0
2008-10-09	22:33:00	0
2008-10-09	22:34:00	0
2008-10-09	22:35:00	0
2008-10-09	22:36:00	0
2008-10-09	22:37:00	0
2008-10-09	22:38:00	0
2008-10-09	22:39:00	0
2008-10-09	22:40:00	0
2008-10-09	22:41:00	0
2008-10-09	22:42:00	0
2008-10-09	22:43:00	0
2008-10-09	22:44:00	0
2008-10-09	22:45:00	0
2008-10-09	22:46:00	0
2008-10-09	22:47:00	0
2008-10-09	22:48:00	0
2008-10-09	22:49:00	0
2008-10-09	22:50:00	0
2008-10-09	22:51:00	0
2008-10-09	22:52:00	0
2008-10-09	22:53:00	0
2008-10-09	22:54:00	0
2008-10-09	22:55:00	0
2008-10-09	22:56:00	0
2008-10-09	22:57:00	0
2008-10-09	22:58:00	0
2008-10-09	22:59:00	0
2008-10-09	23:00:00	0
2008-10-09	23:01:00	0
2008-10-09	23:02:00	0
2008-10-09	23:03:00	0
2008-10-09	23:04:00	0
2008-10-09	23:05:00	0
2008-10-09	23:06:00	0
2008-10-09	23:07:00	0
2008-10-09	23:08:00	30
2008-10-09	23:09:00	0
2008-10-09	23:10:00	0
2008-10-09	23:11:00	0
2008-10-09	23:12:00	0
2008-10-09	23:13:00	0
2008-10-09	23:14:00	0
2008-10-09	23:15:00	0
2008-10-09	23:16:00	0
2008-10-09	23:17:00	0
2008-10-09	23:18:00	0
2008-10-09	23:19:00	0
2008-10-09	23:20:00	0
2008-10-09	23:21:00	0
2008-10-09	23:22:00	0
2008-10-09	23:23:00	0
2008-10-09	23:24:00	0
2008-10-09	23:25:00	0
2008-10-09	23:26:00	0
2008-10-09	23:27:00	0
2008-10-09	23:28:00	0
2008-10-09	23:29:00	0
2008-10-09	23:30:00	0
2008-10-09	23:31:00	61
2008-10-09	23:32:00	0
2008-10-09	23:33:00	0
2008-10-09	23:34:00	0
2008-10-09	23:35:00	0
2008-10-09	23:36:00	0
2008-10-09	23:37:00	0
2008-10-09	23:38:00	0
2008-10-09	23:39:00	0
2008-10-09	23:40:00	0
2008-10-09	23:41:00	0
2008-10-09	23:42:00	0
2008-10-09	23:43:00	0
2008-10-09	23:44:00	0
2008-10-09	23:45:00	0
2008-10-09	23:46:00	0
2008-10-09	23:47:00	0
2008-10-09	23:48:00	0
2008-10-09	23:49:00	0
2008-10-09	23:50:00	0
2008-10-09	23:51:00	0
2008-10-09	23:52:00	0
2008-10-09	23:53:00	0
2008-10-09	23:54:00	0
2008-10-09	23:55:00	0
2008-10-09	23:56:00	0
2008-10-09	23:57:00	0
2008-10-09	23:58:00	0
2008-10-09	23:59:00	0
2008-10-10	00:00:00	0
2008-10-10	00:01:00	0
2008-10-10	00:02:00	0
2008-10-10	00:03:00	0
2008-10-10	00:04:00	0
2008-10-10	00:05:00	0
2008-10-10	00:06:00	0
2008-10-10	00:07:00	0
2008-10-10	00:08:00	0
2008-10-10	00:09:00	0
2008-10-10	00:10:00	0
2008-10-10	00:11:00	0
2008-10-10	00:12:00	0
2008-10-10	00:13:00	0
2008-10-10	00:14:00	0
2008-10-10	00:15:00	0
2008-10-10	00:16:00	0
2008-10-10	00:17:00	0
2008-10-10	00:18:00	0
2008-10-10	00:19:00	0
2008-10-10	00:20:00	0
2008-10-10	00:21:00	0
2008-10-10	00:22:00	0
2008-10-10	00:23:00	0
2008-10-10	00:24:00	0
2008-10-10	00:25:00	0
2008-10-10	00:26:00	0
2008-10-10	00:27:00	0
2008-10-10	00:28:00	0
2008-10-10	00:29:00	0
2008-10-10	00:30:00	0
2008-10-10	00:31:00	0
2008-10-10	00:32:00	0
2008-10-10	00:33:00	0
2008-10-10	00:34:00	0
2008-10-10	00:35:00	0
2008-10-10	00:36:00	0
2008-10-10	00:37:00	0
2008-10-10	00:38:00	0
2008-10-10	00:39:00	0
2008-10-10	00:40:00	0
2008-10-10	00:41:00	0
2008-10-10	00:42:00	0
2008-10-10	00:43:00	0
2008-10-10	00:44:00	0
2008-10-10	00:45:00	0
2008-10-10	00:46:00	0
2008-10-10	00:47:00	0
2008-10-10	00:48:00	0
2008-10-10	00:49:00	0
2008-10-10	00:50:00	0
2008-10-10	00:51:00	0
2008-10-10	00:52:00	0
2008-10-10	00:53:00	0
2008-10-10	00:54:00	0
2008-10-10	00:55:00	0
2008-10-10	00:56:00	0
2008-10-10	00:57:00	0
2008-10-10	00:58:00	0
2008-10-10	00:59:00	0
2008-10-10	01:00:00	0
2008-10-10	01:01:00	0
2008-10-10	01:02:00	0
2008-10-10	01:03:00	0
2008-10-10	01:04:00	0
2008-10-10	01:05:00	0
2008-10-10	01:06:00	0
2008-10-10	01:07:00	0
2008-10-10	01:08:00	0
2008-10-10	01:09:00	0
2008-10-10	01:10:00	0
2008-10-10	01:11:00	0
2008-10-10	01:12:00	0
2008-10-10	01:13:00	0
2008-10-10	01:14:00	0
2008-10-10	01:15:00	0
2008-10-10	01:16:00	0
2008-10-10	01:17:00	0
2008-10-10	01:18:00	0
2008-10-10	01:19:00	0
2008-10-10	01:20:00	0
2008-10-10	01:21:00	0
2008-10-10	01:22:00	0
2008-10-10	01:23:00	0
2008-10-10	01:24:00	0
2008-10-10	01:25:00	0
2008-10-10	01:26:00	0
2008-10-10	01:27:00	0
2008-10-10	01:28:00	0
2008-10-10	01:29:00	0
2008-10-10	01:30:00	0
2008-10-10	01:31:00	0
2008-10-10	01:32:00	0
2008-10-10	01:33:00	0
2008-10-10	01:34:00	0
2008-10-10	01:35:00	0
2008-10-10	01:36:00	0
2008-10-10	01:37:00	0
2008-10-10	01:38:00	0
2008-10-10	01:39:00	0
2008-10-10	01:40:00	0
2008-10-10	01:41:00	0
2008-10-10	01:42:00	0
2008-10-10	01:43:00	0
2008-10-10	01:44:00	0
2008-10-10	01:45:00	0
2008-10-10	01:46:00	0
2008-10-10	01:47:00	0
2008-10-10	01:48:00	0
2008-10-10	01:49:00	254
2008-10-10	01:50:00	0
2008-10-10	01:51:00	0
2008-10-10	01:52:00	0
2008-10-10	01:53:00	0
2008-10-10	01:54:00	0
2008-10-10	01:55:00	0
2008-10-10	01:56:00	0
2008-10-10	01:57:00	0
2008-10-10	01:58:00	0
2008-10-10	01:59:00	0
2008-10-10	02:00:00	0
2008-10-10	02:01:00	0
2008-10-10	02:02:00	0
2008-10-10	02:03:00	0
2008-10-10	02:04:00	0
2008-10-10	02:05:00	0
2008-10-10	02:06:00	0
2008-10-10	02:07:00	0
2008-10-10	02:08:00	0
2008-10-10	02:09:00	0
2008-10-10	02:10:00	0
2008-10-10	02:11:00	0
2008-10-10	02:12:00	0
2008-10-10	02:13:00	0
2008-10-10	02:14:00	0
2008-10-10	02:15:00	0
2008-10-10	02:16:00	0
2008-10-10	02:17:00	0
2008-10-10	02:18:00	0
2008-10-10	02:19:00	0
2008-10-10	02:20:00	0
2008-10-10	02:21:00	0
2008-10-10	02:22:00	0
2008-10-10	02:23:00	0
2008-10-10	02:24:00	0
2008-10-10	02:25:00	0
2008-10-10	02:26:00	0
2008-10-10	02:27:00	0
2008-10-10	02:28:00	71
2008-10-10	02:29:00	0
2008-10-10	02:30:00	10
2008-10-10	02:31:00	0
2008-10-10	02:32:00	0
2008-10-10	02:33:00	0
2008-10-10	02:34:00	0
2008-10-10	02:35:00	0
2008-10-10	02:36:00	0
2008-10-10	02:37:00	0
2008-10-10	02:38:00	0
2008-10-10	02:39:00	0
2008-10-10	02:40:00	0
2008-10-10	02:41:00	0
2008-10-10	02:42:00	0
2008-10-10	02:43:00	0
2008-10-10	02:44:00	0
2008-10-10	02:45:00	0
2008-10-10	02:46:00	0
2008-10-10	02:47:00	0
2008-10-10	02:48:00	0
2008-10-10	02:49:00	0
2008-10-10	02:50:00	0
2008-10-10	02:51:00	0
2008-10-10	02:52:00	0
2008-10-10	02:53:00	0
2008-10-10	02:54:00	0
2008-10-10	02:55:00	0
2008-10-10	02:56:00	0
2008-10-10	02:57:00	0
2008-10-10	02:58:00	0
2008-10-10	02:59:00	0
2008-10-10	03:00:00	0
2008-10-10	03:01:00	0
2008-10-10	03:02:00	0
2008-10-10	03:03:00	0
2008-10-10	03:04:00	0
2008-10-10	03:05:00	0
2008-10-10	03:06:00	0
2008-10-10	03:07:00	0
2008-10-10	03:08:00	0
2008-10-10	03:09:00	0
2008-10-10	03:10:00	0
2008-10-10	03:11:00	0
2008-10-10	03:12:00	0
2008-10-10	03:13:00	0
2008-10-10	03:14:00	0
2008-10-10	03:15:00	0
2008-10-10	03:16:00	0
2008-10-10	03:17:00	0
2008-10-10	03:18:00	0
2008-10-10	03:19:00	0
2008-10-10	03:20:00	0
2008-10-10	03:21:00	0
2008-10-10	03:22:00	0
2008-10-10	03:23:00	0
2008-10-10	03:24:00	0
2008-10-10	03:25:00	0
2008-10-10	03:26:00	0
2008-10-10	03:27:00	41
2008-10-10	03:28:00	61
2008-10-10	03:29:00	0
2008-10-10	03:30:00	0
2008-10-10	03:31:00	10
2008-10-10	03:32:00	0
2008-10-10	03:33:00	30
2008-10-10	03:34:00	0
2008-10-10	03:35:00	0
2008-10-10	03:36:00	10
2008-10-10	03:37:00	0
2008-10-10	03:38:00	0
2008-10-10	03:39:00	0
2008-10-10	03:40:00	0
2008-10-10	03:41:00	0
2008-10-10	03:42:00	0
2008-10-10	03:43:00	0
2008-10-10	03:44:00	0
2008-10-10	03:45:00	0
2008-10-10	03:46:00	0
2008-10-10	03:47:00	0
2008-10-10	03:48:00	0
2008-10-10	03:49:00	0
2008-10-10	03:50:00	0
2008-10-10	03:51:00	0
2008-10-10	03:52:00	0
2008-10-10	03:53:00	0
2008-10-10	03:54:00	0
2008-10-10	03:55:00	0
2008-10-10	03:56:00	0
2008-10-10	03:57:00	0
2008-10-10	03:58:00	0
2008-10-10	03:59:00	0
2008-10-10	04:00:00	0
2008-10-10	04:01:00	0
2008-10-10	04:02:00	0
2008-10-10	04:03:00	0
2008-10-10	04:04:00	0
2008-10-10	04:05:00	0
2008-10-10	04:06:00	0
2008-10-10	04:07:00	0
2008-10-10	04:08:00	0
2008-10-10	04:09:00	0
2008-10-10	04:10:00	0
2008-10-10	04:11:00	0
2008-10-10	04:12:00	0
2008-10-10	04:13:00	0
2008-10-10	04:14:00	0
2008-10-10	04:15:00	0
2008-10-10	04:16:00	0
2008-10-10	04:17:00	0
2008-10-10	04:18:00	0
2008-10-10	04:19:00	0
2008-10-10	04:20:00	0
2008-10-10	04:21:00	0
2008-10-10	04:22:00	0
2008-10-10	04:23:00	0
2008-10-10	04:24:00	0
2008-10-10	04:25:00	0
2008-10-10	04:26:00	0
2008-10-10	04:27:00	0
2008-10-10	04:28:00	0
2008-10-10	04:29:00	0
2008-10-10	04:30:00	0
2008-10-10	04:31:00	0
2008-10-10	04:32:00	0
2008-10-10	04:33:00	0
2008-10-10	04:34:00	0
2008-10-10	04:35:00	0
2008-10-10	04:36:00	0
2008-10-10	04:37:00	0
2008-10-10	04:38:00	0
2008-10-10	04:39:00	0
2008-10-10	04:40:00	0
2008-10-10	04:41:00	0
2008-10-10	04:42:00	0
2008-10-10	04:43:00	0
2008-10-10	04:44:00	0
2008-10-10	04:45:00	0
2008-10-10	04:46:00	0
2008-10-10	04:47:00	0
2008-10-10	04:48:00	0
2008-10-10	04:49:00	0
2008-10-10	04:50:00	0
2008-10-10	04:51:00	0
2008-10-10	04:52:00	0
2008-10-10	04:53:00	0
2008-10-10	04:54:00	0
2008-10-10	04:55:00	0
2008-10-10	04:56:00	0
2008-10-10	04:57:00	0
2008-10-10	04:58:00	0
2008-10-10	04:59:00	0
2008-10-10	05:00:00	0
2008-10-10	05:01:00	0
2008-10-10	05:02:00	0
2008-10-10	05:03:00	0
2008-10-10	05:04:00	0
2008-10-10	05:05:00	0
2008-10-10	05:06:00	0
2008-10-10	05:07:00	0
2008-10-10	05:08:00	0
2008-10-10	05:09:00	0
2008-10-10	05:10:00	0
2008-10-10	05:11:00	0
2008-10-10	05:12:00	10
2008-10-10	05:13:00	0
2008-10-10	05:14:00	0
2008-10-10	05:15:00	0
2008-10-10	05:16:00	0
2008-10-10	05:17:00	0
2008-10-10	05:18:00	0
2008-10-10	05:19:00	0
2008-10-10	05:20:00	0
2008-10-10	05:21:00	0
2008-10-10	05:22:00	0
2008-10-10	05:23:00	0
2008-10-10	05:24:00	0
2008-10-10	05:25:00	0
2008-10-10	05:26:00	0
2008-10-10	05:27:00	0
2008-10-10	05:28:00	0
2008-10-10	05:29:00	0
2008-10-10	05:30:00	0
2008-10-10	05:31:00	0
2008-10-10	05:32:00	0
2008-10-10	05:33:00	0
2008-10-10	05:34:00	0
2008-10-10	05:35:00	0
2008-10-10	05:36:00	0
2008-10-10	05:37:00	0
2008-10-10	05:38:00	0
2008-10-10	05:39:00	0
2008-10-10	05:40:00	0
2008-10-10	05:41:00	0
2008-10-10	05:42:00	0
2008-10-10	05:43:00	0
2008-10-10	05:44:00	0
2008-10-10	05:45:00	0
2008-10-10	05:46:00	0
2008-10-10	05:47:00	10
2008-10-10	05:48:00	0
2008-10-10	05:49:00	0
2008-10-10	05:50:00	0
2008-10-10	05:51:00	0
2008-10-10	05:52:00	0
2008-10-10	05:53:00	0
2008-10-10	05:54:00	0
2008-10-10	05:55:00	0
2008-10-10	05:56:00	0
2008-10-10	05:57:00	0
2008-10-10	05:58:00	0
2008-10-10	05:59:00	0
2008-10-10	06:00:00	0
2008-10-10	06:01:00	0
2008-10-10	06:02:00	0
2008-10-10	06:03:00	0
2008-10-10	06:04:00	0
2008-10-10	06:05:00	0
2008-10-10	06:06:00	0
2008-10-10	06:07:00	0
2008-10-10	06:08:00	0
2008-10-10	06:09:00	0
2008-10-10	06:10:00	0
2008-10-10	06:11:00	20
2008-10-10	06:12:00	0
2008-10-10	06:13:00	0
2008-10-10	06:14:00	10
2008-10-10	06:15:00	10
2008-10-10	06:16:00	0
2008-10-10	06:17:00	0
2008-10-10	06:18:00	0
2008-10-10	06:19:00	0
2008-10-10	06:20:00	0
2008-10-10	06:21:00	0
2008-10-10	06:22:00	0
2008-10-10	06:23:00	0
2008-10-10	06:24:00	0
2008-10-10	06:25:00	0
2008-10-10	06:26:00	0
2008-10-10	06:27:00	0
2008-10-10	06:28:00	0
2008-10-10	06:29:00	0
2008-10-10	06:30:00	0
2008-10-10	06:31:00	0
2008-10-10	06:32:00	0
2008-10-10	06:33:00	10
2008-10-10	06:34:00	0
2008-10-10	06:35:00	0
2008-10-10	06:36:00	0
2008-10-10	06:37:00	0
2008-10-10	06:38:00	0
2008-10-10	06:39:00	0
2008-10-10	06:40:00	0
2008-10-10	06:41:00	0
2008-10-10	06:42:00	0
2008-10-10	06:43:00	0
2008-10-10	06:44:00	0
2008-10-10	06:45:00	0
2008-10-10	06:46:00	0
2008-10-10	06:47:00	0
2008-10-10	06:48:00	0
2008-10-10	06:49:00	0
2008-10-10	06:50:00	0
2008-10-10	06:51:00	0
2008-10-10	06:52:00	0
2008-10-10	06:53:00	0
2008-10-10	06:54:00	0
2008-10-10	06:55:00	0
2008-10-10	06:56:00	0
2008-10-10	06:57:00	0
2008-10-10	06:58:00	0
2008-10-10	06:59:00	0
2008-10-10	07:00:00	0
2008-10-10	07:01:00	0
2008-10-10	07:02:00	0
2008-10-10	07:03:00	0
2008-10-10	07:04:00	0
2008-10-10	07:05:00	0
2008-10-10	07:06:00	0
2008-10-10	07:07:00	0
2008-10-10	07:08:00	0
2008-10-10	07:09:00	0
2008-10-10	07:10:00	0
2008-10-10	07:11:00	0
2008-10-10	07:12:00	0
2008-10-10	07:13:00	0
2008-10-10	07:14:00	0
2008-10-10	07:15:00	0
2008-10-10	07:16:00	0
2008-10-10	07:17:00	0
2008-10-10	07:18:00	0
2008-10-10	07:19:00	10
2008-10-10	07:20:00	0
2008-10-10	07:21:00	0
2008-10-10	07:22:00	10
2008-10-10	07:23:00	0
2008-10-10	07:24:00	0
2008-10-10	07:25:00	20
2008-10-10	07:26:00	0
2008-10-10	07:27:00	0
2008-10-10	07:28:00	0
2008-10-10	07:29:00	0
2008-10-10	07:30:00	0
2008-10-10	07:31:00	0
2008-10-10	07:32:00	0
2008-10-10	07:33:00	0
2008-10-10	07:34:00	0
2008-10-10	07:35:00	0
2008-10-10	07:36:00	0
2008-10-10	07:37:00	0
2008-10-10	07:38:00	0
2008-10-10	07:39:00	0
2008-10-10	07:40:00	0
2008-10-10	07:41:00	0
2008-10-10	07:42:00	10
2008-10-10	07:43:00	0
2008-10-10	07:44:00	0
2008-10-10	07:45:00	0
2008-10-10	07:46:00	0
2008-10-10	07:47:00	0
2008-10-10	07:48:00	0
2008-10-10	07:49:00	0
2008-10-10	07:50:00	0
2008-10-10	07:51:00	0
2008-10-10	07:52:00	0
2008-10-10	07:53:00	0
2008-10-10	07:54:00	0
2008-10-10	07:55:00	0
2008-10-10	07:56:00	0
2008-10-10	07:57:00	0
2008-10-10	07:58:00	0
2008-10-10	07:59:00	0
2008-10-10	08:00:00	0
2008-10-10	08:01:00	0
2008-10-10	08:02:00	0
2008-10-10	08:03:00	0
2008-10-10	08:04:00	0
2008-10-10	08:05:00	0
2008-10-10	08:06:00	0
2008-10-10	08:07:00	0
2008-10-10	08:08:00	0
2008-10-10	08:09:00	0
2008-10-10	08:10:00	0
2008-10-10	08:11:00	0
2008-10-10	08:12:00	0
2008-10-10	08:13:00	0
2008-10-10	08:14:00	0
2008-10-10	08:15:00	0
2008-10-10	08:16:00	10
2008-10-10	08:17:00	10
2008-10-10	08:18:00	41
2008-10-10	08:19:00	0
2008-10-10	08:20:00	10
2008-10-10	08:21:00	20
2008-10-10	08:22:00	309
2008-10-10	08:23:00	156
2008-10-10	08:24:00	61
2008-10-10	08:25:00	0
2008-10-10	08:26:00	0
2008-10-10	08:27:00	61
2008-10-10	08:28:00	193
2008-10-10	08:29:00	0
2008-10-10	08:30:00	0
2008-10-10	08:31:00	0
2008-10-10	08:32:00	0
2008-10-10	08:33:00	0
2008-10-10	08:34:00	0
2008-10-10	08:35:00	0
2008-10-10	08:36:00	0
2008-10-10	08:37:00	0
2008-10-10	08:38:00	0
2008-10-10	08:39:00	0
2008-10-10	08:40:00	0
2008-10-10	08:41:00	0
2008-10-10	08:42:00	0
2008-10-10	08:43:00	0
2008-10-10	08:44:00	0
2008-10-10	08:45:00	0
2008-10-10	08:46:00	0
2008-10-10	08:47:00	0
2008-10-10	08:48:00	0
2008-10-10	08:49:00	323
2008-10-10	08:50:00	91
2008-10-10	08:51:00	0
2008-10-10	08:52:00	0
2008-10-10	08:53:00	0
2008-10-10	08:54:00	0
2008-10-10	08:55:00	0
2008-10-10	08:56:00	0
2008-10-10	08:57:00	0
2008-10-10	08:58:00	0
2008-10-10	08:59:00	0
2008-10-10	09:00:00	205
2008-10-10	09:01:00	0
2008-10-10	09:02:00	0
2008-10-10	09:03:00	0
2008-10-10	09:04:00	0
2008-10-10	09:05:00	0
2008-10-10	09:06:00	0
2008-10-10	09:07:00	0
2008-10-10	09:08:00	0
[truncated: 18,171 more rows]

## Sheet: 10.22.08
Actogram, Copy Raw Data, All Days
Identity:	Lena
Filename:	E:\Active Research Files\meloxicam titre canine\cases\lena\Lena 10.22.08.AWC
Gender:	F
Age:	9
Height:	40.6 cm	16.0 in
Weight:	21.8 kg	48.1 lbs
Start Date:	22-Oct-2008 (Wed)
Start Time:	17:00:00
Interval:	1.00 mins
Date Stamp:	Time Stamp:	Activity Data:	Marker Press:
2008-10-22	00:00:00	0
2008-10-22	00:01:00	0
2008-10-22	00:02:00	0
2008-10-22	00:03:00	0
2008-10-22	00:04:00	0
2008-10-22	00:05:00	0
2008-10-22	00:06:00	0
2008-10-22	00:07:00	0
2008-10-22	00:08:00	0
2008-10-22	00:09:00	0
2008-10-22	00:10:00	0
2008-10-22	00:11:00	0
2008-10-22	00:12:00	0
2008-10-22	00:13:00	0
2008-10-22	00:14:00	0
2008-10-22	00:15:00	0
2008-10-22	00:16:00	0
2008-10-22	00:17:00	0
2008-10-22	00:18:00	0
2008-10-22	00:19:00	0
2008-10-22	00:20:00	0
2008-10-22	00:21:00	0
2008-10-22	00:22:00	0
2008-10-22	00:23:00	0
2008-10-22	00:24:00	0
2008-10-22	00:25:00	0
2008-10-22	00:26:00	0
2008-10-22	00:27:00	0
2008-10-22	00:28:00	0
2008-10-22	00:29:00	0
2008-10-22	00:30:00	0
2008-10-22	00:31:00	0
2008-10-22	00:32:00	0
2008-10-22	00:33:00	0
2008-10-22	00:34:00	0
2008-10-22	00:35:00	0
2008-10-22	00:36:00	0
2008-10-22	00:37:00	0
2008-10-22	00:38:00	0
2008-10-22	00:39:00	0
2008-10-22	00:40:00	0
2008-10-22	00:41:00	0
2008-10-22	00:42:00	0
2008-10-22	00:43:00	0
2008-10-22	00:44:00	0
2008-10-22	00:45:00	0
2008-10-22	00:46:00	0
2008-10-22	00:47:00	0
2008-10-22	00:48:00	0
2008-10-22	00:49:00	0
2008-10-22	00:50:00	0
2008-10-22	00:51:00	0
2008-10-22	00:52:00	0
2008-10-22	00:53:00	0
2008-10-22	00:54:00	0
2008-10-22	00:55:00	0
2008-10-22	00:56:00	0
2008-10-22	00:57:00	0
2008-10-22	00:58:00	0
2008-10-22	00:59:00	0
2008-10-22	01:00:00	0
2008-10-22	01:01:00	0
2008-10-22	01:02:00	0
2008-10-22	01:03:00	0
2008-10-22	01:04:00	0
2008-10-22	01:05:00	0
2008-10-22	01:06:00	0
2008-10-22	01:07:00	0
2008-10-22	01:08:00	0
2008-10-22	01:09:00	0
2008-10-22	01:10:00	0
2008-10-22	01:11:00	0
2008-10-22	01:12:00	0
2008-10-22	01:13:00	0
2008-10-22	01:14:00	0
2008-10-22	01:15:00	0
2008-10-22	01:16:00	0
2008-10-22	01:17:00	0
2008-10-22	01:18:00	0
2008-10-22	01:19:00	0
2008-10-22	01:20:00	0
2008-10-22	01:21:00	0
2008-10-22	01:22:00	0
2008-10-22	01:23:00	0
2008-10-22	01:24:00	0
2008-10-22	01:25:00	0
2008-10-22	01:26:00	0
2008-10-22	01:27:00	0
2008-10-22	01:28:00	0
2008-10-22	01:29:00	0
2008-10-22	01:30:00	0
2008-10-22	01:31:00	0
2008-10-22	01:32:00	0
2008-10-22	01:33:00	0
2008-10-22	01:34:00	0
2008-10-22	01:35:00	0
2008-10-22	01:36:00	0
2008-10-22	01:37:00	0
2008-10-22	01:38:00	0
2008-10-22	01:39:00	0
2008-10-22	01:40:00	0
2008-10-22	01:41:00	0
2008-10-22	01:42:00	0
2008-10-22	01:43:00	0
2008-10-22	01:44:00	0
2008-10-22	01:45:00	0
2008-10-22	01:46:00	0
2008-10-22	01:47:00	0
2008-10-22	01:48:00	0
2008-10-22	01:49:00	0
2008-10-22	01:50:00	0
2008-10-22	01:51:00	0
2008-10-22	01:52:00	0
2008-10-22	01:53:00	0
2008-10-22	01:54:00	0
2008-10-22	01:55:00	0
2008-10-22	01:56:00	0
2008-10-22	01:57:00	0
2008-10-22	01:58:00	0
2008-10-22	01:59:00	0
2008-10-22	02:00:00	0
2008-10-22	02:01:00	0
2008-10-22	02:02:00	0
2008-10-22	02:03:00	0
2008-10-22	02:04:00	0
2008-10-22	02:05:00	0
2008-10-22	02:06:00	0
2008-10-22	02:07:00	0
2008-10-22	02:08:00	0
2008-10-22	02:09:00	0
2008-10-22	02:10:00	0
2008-10-22	02:11:00	0
2008-10-22	02:12:00	0
2008-10-22	02:13:00	0
2008-10-22	02:14:00	0
2008-10-22	02:15:00	0
2008-10-22	02:16:00	0
2008-10-22	02:17:00	0
2008-10-22	02:18:00	0
2008-10-22	02:19:00	0
2008-10-22	02:20:00	0
2008-10-22	02:21:00	0
2008-10-22	02:22:00	0
2008-10-22	02:23:00	0
2008-10-22	02:24:00	0
2008-10-22	02:25:00	0
2008-10-22	02:26:00	0
2008-10-22	02:27:00	0
2008-10-22	02:28:00	0
2008-10-22	02:29:00	0
2008-10-22	02:30:00	0
2008-10-22	02:31:00	0
2008-10-22	02:32:00	0
2008-10-22	02:33:00	0
2008-10-22	02:34:00	0
2008-10-22	02:35:00	0
2008-10-22	02:36:00	0
2008-10-22	02:37:00	0
2008-10-22	02:38:00	0
2008-10-22	02:39:00	0
2008-10-22	02:40:00	0
2008-10-22	02:41:00	0
2008-10-22	02:42:00	0
2008-10-22	02:43:00	0
2008-10-22	02:44:00	0
2008-10-22	02:45:00	0
2008-10-22	02:46:00	0
2008-10-22	02:47:00	0
2008-10-22	02:48:00	0
2008-10-22	02:49:00	0
2008-10-22	02:50:00	0
2008-10-22	02:51:00	0
2008-10-22	02:52:00	0
2008-10-22	02:53:00	0
2008-10-22	02:54:00	0
2008-10-22	02:55:00	0
2008-10-22	02:56:00	0
2008-10-22	02:57:00	0
2008-10-22	02:58:00	0
2008-10-22	02:59:00	0
2008-10-22	03:00:00	0
2008-10-22	03:01:00	0
2008-10-22	03:02:00	0
2008-10-22	03:03:00	0
2008-10-22	03:04:00	0
2008-10-22	03:05:00	0
2008-10-22	03:06:00	0
2008-10-22	03:07:00	0
2008-10-22	03:08:00	0
2008-10-22	03:09:00	0
2008-10-22	03:10:00	0
2008-10-22	03:11:00	0
2008-10-22	03:12:00	0
2008-10-22	03:13:00	0
2008-10-22	03:14:00	0
2008-10-22	03:15:00	0
2008-10-22	03:16:00	0
2008-10-22	03:17:00	0
2008-10-22	03:18:00	0
2008-10-22	03:19:00	0
2008-10-22	03:20:00	0
2008-10-22	03:21:00	0
2008-10-22	03:22:00	0
2008-10-22	03:23:00	0
2008-10-22	03:24:00	0
2008-10-22	03:25:00	0
2008-10-22	03:26:00	0
2008-10-22	03:27:00	0
2008-10-22	03:28:00	0
2008-10-22	03:29:00	0
2008-10-22	03:30:00	0
2008-10-22	03:31:00	0
2008-10-22	03:32:00	0
2008-10-22	03:33:00	0
2008-10-22	03:34:00	0
2008-10-22	03:35:00	0
2008-10-22	03:36:00	0
2008-10-22	03:37:00	0
2008-10-22	03:38:00	0
2008-10-22	03:39:00	0
2008-10-22	03:40:00	0
2008-10-22	03:41:00	0
2008-10-22	03:42:00	0
2008-10-22	03:43:00	0
2008-10-22	03:44:00	0
2008-10-22	03:45:00	0
2008-10-22	03:46:00	0
2008-10-22	03:47:00	0
2008-10-22	03:48:00	0
2008-10-22	03:49:00	0
2008-10-22	03:50:00	0
2008-10-22	03:51:00	0
2008-10-22	03:52:00	0
2008-10-22	03:53:00	0
2008-10-22	03:54:00	0
2008-10-22	03:55:00	0
2008-10-22	03:56:00	0
2008-10-22	03:57:00	0
2008-10-22	03:58:00	0
2008-10-22	03:59:00	0
2008-10-22	04:00:00	0
2008-10-22	04:01:00	0
2008-10-22	04:02:00	0
2008-10-22	04:03:00	0
2008-10-22	04:04:00	0
2008-10-22	04:05:00	0
2008-10-22	04:06:00	0
2008-10-22	04:07:00	0
2008-10-22	04:08:00	0
2008-10-22	04:09:00	0
2008-10-22	04:10:00	0
2008-10-22	04:11:00	0
2008-10-22	04:12:00	0
2008-10-22	04:13:00	0
2008-10-22	04:14:00	0
2008-10-22	04:15:00	0
2008-10-22	04:16:00	0
2008-10-22	04:17:00	0
2008-10-22	04:18:00	0
2008-10-22	04:19:00	0
2008-10-22	04:20:00	0
2008-10-22	04:21:00	0
2008-10-22	04:22:00	0
2008-10-22	04:23:00	0
2008-10-22	04:24:00	0
2008-10-22	04:25:00	0
2008-10-22	04:26:00	0
2008-10-22	04:27:00	0
2008-10-22	04:28:00	0
2008-10-22	04:29:00	0
2008-10-22	04:30:00	0
2008-10-22	04:31:00	0
2008-10-22	04:32:00	0
2008-10-22	04:33:00	0
2008-10-22	04:34:00	0
2008-10-22	04:35:00	0
2008-10-22	04:36:00	0
2008-10-22	04:37:00	0
2008-10-22	04:38:00	0
2008-10-22	04:39:00	0
2008-10-22	04:40:00	0
2008-10-22	04:41:00	0
2008-10-22	04:42:00	0
2008-10-22	04:43:00	0
2008-10-22	04:44:00	0
2008-10-22	04:45:00	0
2008-10-22	04:46:00	0
2008-10-22	04:47:00	0
2008-10-22	04:48:00	0
2008-10-22	04:49:00	0
2008-10-22	04:50:00	0
2008-10-22	04:51:00	0
2008-10-22	04:52:00	0
2008-10-22	04:53:00	0
2008-10-22	04:54:00	0
2008-10-22	04:55:00	0
2008-10-22	04:56:00	0
2008-10-22	04:57:00	0
2008-10-22	04:58:00	0
2008-10-22	04:59:00	0
2008-10-22	05:00:00	0
2008-10-22	05:01:00	0
2008-10-22	05:02:00	0
2008-10-22	05:03:00	0
2008-10-22	05:04:00	0
2008-10-22	05:05:00	0
2008-10-22	05:06:00	0
2008-10-22	05:07:00	0
2008-10-22	05:08:00	0
2008-10-22	05:09:00	0
2008-10-22	05:10:00	0
2008-10-22	05:11:00	0
2008-10-22	05:12:00	0
2008-10-22	05:13:00	0
2008-10-22	05:14:00	0
2008-10-22	05:15:00	0
2008-10-22	05:16:00	0
2008-10-22	05:17:00	0
2008-10-22	05:18:00	0
2008-10-22	05:19:00	0
2008-10-22	05:20:00	0
2008-10-22	05:21:00	0
2008-10-22	05:22:00	0
2008-10-22	05:23:00	0
2008-10-22	05:24:00	0
2008-10-22	05:25:00	0
2008-10-22	05:26:00	0
2008-10-22	05:27:00	0
2008-10-22	05:28:00	0
2008-10-22	05:29:00	0
2008-10-22	05:30:00	0
2008-10-22	05:31:00	0
2008-10-22	05:32:00	0
2008-10-22	05:33:00	0
2008-10-22	05:34:00	0
2008-10-22	05:35:00	0
2008-10-22	05:36:00	0
2008-10-22	05:37:00	0
2008-10-22	05:38:00	0
2008-10-22	05:39:00	0
2008-10-22	05:40:00	0
2008-10-22	05:41:00	0
2008-10-22	05:42:00	0
2008-10-22	05:43:00	0
2008-10-22	05:44:00	0
2008-10-22	05:45:00	0
2008-10-22	05:46:00	0
2008-10-22	05:47:00	0
2008-10-22	05:48:00	0
2008-10-22	05:49:00	0
2008-10-22	05:50:00	0
2008-10-22	05:51:00	0
2008-10-22	05:52:00	0
2008-10-22	05:53:00	0
2008-10-22	05:54:00	0
2008-10-22	05:55:00	0
2008-10-22	05:56:00	0
2008-10-22	05:57:00	0
2008-10-22	05:58:00	0
2008-10-22	05:59:00	0
2008-10-22	06:00:00	0
2008-10-22	06:01:00	0
2008-10-22	06:02:00	0
2008-10-22	06:03:00	0
2008-10-22	06:04:00	0
2008-10-22	06:05:00	0
2008-10-22	06:06:00	0
2008-10-22	06:07:00	0
2008-10-22	06:08:00	0
2008-10-22	06:09:00	0
2008-10-22	06:10:00	0
2008-10-22	06:11:00	0
2008-10-22	06:12:00	0
2008-10-22	06:13:00	0
2008-10-22	06:14:00	0
2008-10-22	06:15:00	0
2008-10-22	06:16:00	0
2008-10-22	06:17:00	0
2008-10-22	06:18:00	0
2008-10-22	06:19:00	0
2008-10-22	06:20:00	0
2008-10-22	06:21:00	0
2008-10-22	06:22:00	0
2008-10-22	06:23:00	0
2008-10-22	06:24:00	0
2008-10-22	06:25:00	0
2008-10-22	06:26:00	0
2008-10-22	06:27:00	0
2008-10-22	06:28:00	0
2008-10-22	06:29:00	0
2008-10-22	06:30:00	0
2008-10-22	06:31:00	0
2008-10-22	06:32:00	0
2008-10-22	06:33:00	0
2008-10-22	06:34:00	0
2008-10-22	06:35:00	0
2008-10-22	06:36:00	0
2008-10-22	06:37:00	0
2008-10-22	06:38:00	0
2008-10-22	06:39:00	0
2008-10-22	06:40:00	0
2008-10-22	06:41:00	0
2008-10-22	06:42:00	0
2008-10-22	06:43:00	0
2008-10-22	06:44:00	0
2008-10-22	06:45:00	0
2008-10-22	06:46:00	0
2008-10-22	06:47:00	0
2008-10-22	06:48:00	0
2008-10-22	06:49:00	0
2008-10-22	06:50:00	0
2008-10-22	06:51:00	0
2008-10-22	06:52:00	0
2008-10-22	06:53:00	0
2008-10-22	06:54:00	0
2008-10-22	06:55:00	0
2008-10-22	06:56:00	0
2008-10-22	06:57:00	0
2008-10-22	06:58:00	0
2008-10-22	06:59:00	0
2008-10-22	07:00:00	0
2008-10-22	07:01:00	0
2008-10-22	07:02:00	0
2008-10-22	07:03:00	0
2008-10-22	07:04:00	0
2008-10-22	07:05:00	0
2008-10-22	07:06:00	0
2008-10-22	07:07:00	0
2008-10-22	07:08:00	0
2008-10-22	07:09:00	0
2008-10-22	07:10:00	0
2008-10-22	07:11:00	0
2008-10-22	07:12:00	0
2008-10-22	07:13:00	0
2008-10-22	07:14:00	0
2008-10-22	07:15:00	0
2008-10-22	07:16:00	0
2008-10-22	07:17:00	0
2008-10-22	07:18:00	0
2008-10-22	07:19:00	0
2008-10-22	07:20:00	0
2008-10-22	07:21:00	0
2008-10-22	07:22:00	0
2008-10-22	07:23:00	0
2008-10-22	07:24:00	0
2008-10-22	07:25:00	0
2008-10-22	07:26:00	0
2008-10-22	07:27:00	0
2008-10-22	07:28:00	0
2008-10-22	07:29:00	0
2008-10-22	07:30:00	0
2008-10-22	07:31:00	0
2008-10-22	07:32:00	0
2008-10-22	07:33:00	0
2008-10-22	07:34:00	0
2008-10-22	07:35:00	0
2008-10-22	07:36:00	0
2008-10-22	07:37:00	0
2008-10-22	07:38:00	0
2008-10-22	07:39:00	0
2008-10-22	07:40:00	0
2008-10-22	07:41:00	0
2008-10-22	07:42:00	0
2008-10-22	07:43:00	0
2008-10-22	07:44:00	0
2008-10-22	07:45:00	0
2008-10-22	07:46:00	0
2008-10-22	07:47:00	0
2008-10-22	07:48:00	0
2008-10-22	07:49:00	0
2008-10-22	07:50:00	0
2008-10-22	07:51:00	0
2008-10-22	07:52:00	0
2008-10-22	07:53:00	0
2008-10-22	07:54:00	0
2008-10-22	07:55:00	0
2008-10-22	07:56:00	0
2008-10-22	07:57:00	0
2008-10-22	07:58:00	0
2008-10-22	07:59:00	0
2008-10-22	08:00:00	0
2008-10-22	08:01:00	0
2008-10-22	08:02:00	0
2008-10-22	08:03:00	0
2008-10-22	08:04:00	0
2008-10-22	08:05:00	0
2008-10-22	08:06:00	0
2008-10-22	08:07:00	0
2008-10-22	08:08:00	0
2008-10-22	08:09:00	0
2008-10-22	08:10:00	0
2008-10-22	08:11:00	0
2008-10-22	08:12:00	0
2008-10-22	08:13:00	0
2008-10-22	08:14:00	0
2008-10-22	08:15:00	0
2008-10-22	08:16:00	0
2008-10-22	08:17:00	0
2008-10-22	08:18:00	0
2008-10-22	08:19:00	0
2008-10-22	08:20:00	0
2008-10-22	08:21:00	0
2008-10-22	08:22:00	0
2008-10-22	08:23:00	0
2008-10-22	08:24:00	0
2008-10-22	08:25:00	0
2008-10-22	08:26:00	0
2008-10-22	08:27:00	0
2008-10-22	08:28:00	0
2008-10-22	08:29:00	0
2008-10-22	08:30:00	0
2008-10-22	08:31:00	0
2008-10-22	08:32:00	0
2008-10-22	08:33:00	0
2008-10-22	08:34:00	0
2008-10-22	08:35:00	0
2008-10-22	08:36:00	0
2008-10-22	08:37:00	0
2008-10-22	08:38:00	0
2008-10-22	08:39:00	0
2008-10-22	08:40:00	0
2008-10-22	08:41:00	0
2008-10-22	08:42:00	0
2008-10-22	08:43:00	0
2008-10-22	08:44:00	0
2008-10-22	08:45:00	0
2008-10-22	08:46:00	0
2008-10-22	08:47:00	0
2008-10-22	08:48:00	0
2008-10-22	08:49:00	0
2008-10-22	08:50:00	0
2008-10-22	08:51:00	0
2008-10-22	08:52:00	0
2008-10-22	08:53:00	0
2008-10-22	08:54:00	0
2008-10-22	08:55:00	0
2008-10-22	08:56:00	0
2008-10-22	08:57:00	0
2008-10-22	08:58:00	0
2008-10-22	08:59:00	0
2008-10-22	09:00:00	0
2008-10-22	09:01:00	0
2008-10-22	09:02:00	0
2008-10-22	09:03:00	0
2008-10-22	09:04:00	0
2008-10-22	09:05:00	0
2008-10-22	09:06:00	0
2008-10-22	09:07:00	0
2008-10-22	09:08:00	0
2008-10-22	09:09:00	0
2008-10-22	09:10:00	0
2008-10-22	09:11:00	0
2008-10-22	09:12:00	0
2008-10-22	09:13:00	0
2008-10-22	09:14:00	0
2008-10-22	09:15:00	0
2008-10-22	09:16:00	0
2008-10-22	09:17:00	0
2008-10-22	09:18:00	0
2008-10-22	09:19:00	0
2008-10-22	09:20:00	0
2008-10-22	09:21:00	0
2008-10-22	09:22:00	0
2008-10-22	09:23:00	0
2008-10-22	09:24:00	0
2008-10-22	09:25:00	0
2008-10-22	09:26:00	0
2008-10-22	09:27:00	0
2008-10-22	09:28:00	0
2008-10-22	09:29:00	0
2008-10-22	09:30:00	0
2008-10-22	09:31:00	0
2008-10-22	09:32:00	0
2008-10-22	09:33:00	0
2008-10-22	09:34:00	0
2008-10-22	09:35:00	0
2008-10-22	09:36:00	0
2008-10-22	09:37:00	0
2008-10-22	09:38:00	0
2008-10-22	09:39:00	0
2008-10-22	09:40:00	0
2008-10-22	09:41:00	0
2008-10-22	09:42:00	0
2008-10-22	09:43:00	0
2008-10-22	09:44:00	0
2008-10-22	09:45:00	0
2008-10-22	09:46:00	0
2008-10-22	09:47:00	0
2008-10-22	09:48:00	0
2008-10-22	09:49:00	0
2008-10-22	09:50:00	0
2008-10-22	09:51:00	0
2008-10-22	09:52:00	0
2008-10-22	09:53:00	0
2008-10-22	09:54:00	0
2008-10-22	09:55:00	0
2008-10-22	09:56:00	0
2008-10-22	09:57:00	0
2008-10-22	09:58:00	0
2008-10-22	09:59:00	0
2008-10-22	10:00:00	0
2008-10-22	10:01:00	0
2008-10-22	10:02:00	0
2008-10-22	10:03:00	0
2008-10-22	10:04:00	0
2008-10-22	10:05:00	0
2008-10-22	10:06:00	0
2008-10-22	10:07:00	0
2008-10-22	10:08:00	0
2008-10-22	10:09:00	0
2008-10-22	10:10:00	0
2008-10-22	10:11:00	0
2008-10-22	10:12:00	0
2008-10-22	10:13:00	0
2008-10-22	10:14:00	0
2008-10-22	10:15:00	0
2008-10-22	10:16:00	0
2008-10-22	10:17:00	0
2008-10-22	10:18:00	0
2008-10-22	10:19:00	0
2008-10-22	10:20:00	0
2008-10-22	10:21:00	0
2008-10-22	10:22:00	0
2008-10-22	10:23:00	0
2008-10-22	10:24:00	0
2008-10-22	10:25:00	0
2008-10-22	10:26:00	0
2008-10-22	10:27:00	0
2008-10-22	10:28:00	0
2008-10-22	10:29:00	0
2008-10-22	10:30:00	0
2008-10-22	10:31:00	0
2008-10-22	10:32:00	0
2008-10-22	10:33:00	0
2008-10-22	10:34:00	0
2008-10-22	10:35:00	0
2008-10-22	10:36:00	0
2008-10-22	10:37:00	0
2008-10-22	10:38:00	0
2008-10-22	10:39:00	0
2008-10-22	10:40:00	0
2008-10-22	10:41:00	0
2008-10-22	10:42:00	0
2008-10-22	10:43:00	0
2008-10-22	10:44:00	0
2008-10-22	10:45:00	0
2008-10-22	10:46:00	0
2008-10-22	10:47:00	0
2008-10-22	10:48:00	0
2008-10-22	10:49:00	0
2008-10-22	10:50:00	0
2008-10-22	10:51:00	0
2008-10-22	10:52:00	0
2008-10-22	10:53:00	0
2008-10-22	10:54:00	0
2008-10-22	10:55:00	0
2008-10-22	10:56:00	0
2008-10-22	10:57:00	0
2008-10-22	10:58:00	0
2008-10-22	10:59:00	0
2008-10-22	11:00:00	0
2008-10-22	11:01:00	0
2008-10-22	11:02:00	0
2008-10-22	11:03:00	0
2008-10-22	11:04:00	0
2008-10-22	11:05:00	0
2008-10-22	11:06:00	0
2008-10-22	11:07:00	0
2008-10-22	11:08:00	0
2008-10-22	11:09:00	0
2008-10-22	11:10:00	0
2008-10-22	11:11:00	0
2008-10-22	11:12:00	0
2008-10-22	11:13:00	0
2008-10-22	11:14:00	0
2008-10-22	11:15:00	0
2008-10-22	11:16:00	0
2008-10-22	11:17:00	0
2008-10-22	11:18:00	0
2008-10-22	11:19:00	0
2008-10-22	11:20:00	0
2008-10-22	11:21:00	0
2008-10-22	11:22:00	0
2008-10-22	11:23:00	0
2008-10-22	11:24:00	0
2008-10-22	11:25:00	0
2008-10-22	11:26:00	0
2008-10-22	11:27:00	0
2008-10-22	11:28:00	0
2008-10-22	11:29:00	0
2008-10-22	11:30:00	0
2008-10-22	11:31:00	0
2008-10-22	11:32:00	0
2008-10-22	11:33:00	0
2008-10-22	11:34:00	0
2008-10-22	11:35:00	0
2008-10-22	11:36:00	0
2008-10-22	11:37:00	0
2008-10-22	11:38:00	0
2008-10-22	11:39:00	0
2008-10-22	11:40:00	0
2008-10-22	11:41:00	0
2008-10-22	11:42:00	0
2008-10-22	11:43:00	0
2008-10-22	11:44:00	0
2008-10-22	11:45:00	0
2008-10-22	11:46:00	0
2008-10-22	11:47:00	0
2008-10-22	11:48:00	0
2008-10-22	11:49:00	0
2008-10-22	11:50:00	0
2008-10-22	11:51:00	0
2008-10-22	11:52:00	0
2008-10-22	11:53:00	0
2008-10-22	11:54:00	0
2008-10-22	11:55:00	0
2008-10-22	11:56:00	0
2008-10-22	11:57:00	0
2008-10-22	11:58:00	0
2008-10-22	11:59:00	0
2008-10-22	12:00:00	0
2008-10-22	12:01:00	0
2008-10-22	12:02:00	0
2008-10-22	12:03:00	0
2008-10-22	12:04:00	0
2008-10-22	12:05:00	0
2008-10-22	12:06:00	0
2008-10-22	12:07:00	0
2008-10-22	12:08:00	0
2008-10-22	12:09:00	0
2008-10-22	12:10:00	0
2008-10-22	12:11:00	0
2008-10-22	12:12:00	0
2008-10-22	12:13:00	0
2008-10-22	12:14:00	0
2008-10-22	12:15:00	0
2008-10-22	12:16:00	0
2008-10-22	12:17:00	0
2008-10-22	12:18:00	0
2008-10-22	12:19:00	0
2008-10-22	12:20:00	0
2008-10-22	12:21:00	0
2008-10-22	12:22:00	0
2008-10-22	12:23:00	0
2008-10-22	12:24:00	0
2008-10-22	12:25:00	0
2008-10-22	12:26:00	0
2008-10-22	12:27:00	0
2008-10-22	12:28:00	0
2008-10-22	12:29:00	0
2008-10-22	12:30:00	0
2008-10-22	12:31:00	0
2008-10-22	12:32:00	0
2008-10-22	12:33:00	0
2008-10-22	12:34:00	0
2008-10-22	12:35:00	0
2008-10-22	12:36:00	0
2008-10-22	12:37:00	0
2008-10-22	12:38:00	0
2008-10-22	12:39:00	0
2008-10-22	12:40:00	0
2008-10-22	12:41:00	0
2008-10-22	12:42:00	0
2008-10-22	12:43:00	0
2008-10-22	12:44:00	0
2008-10-22	12:45:00	0
2008-10-22	12:46:00	0
2008-10-22	12:47:00	0
2008-10-22	12:48:00	0
2008-10-22	12:49:00	0
2008-10-22	12:50:00	0
2008-10-22	12:51:00	0
2008-10-22	12:52:00	0
2008-10-22	12:53:00	0
2008-10-22	12:54:00	0
2008-10-22	12:55:00	0
2008-10-22	12:56:00	0
2008-10-22	12:57:00	0
2008-10-22	12:58:00	0
2008-10-22	12:59:00	0
2008-10-22	13:00:00	0
2008-10-22	13:01:00	0
2008-10-22	13:02:00	0
2008-10-22	13:03:00	0
2008-10-22	13:04:00	0
2008-10-22	13:05:00	0
2008-10-22	13:06:00	0
2008-10-22	13:07:00	0
2008-10-22	13:08:00	0
2008-10-22	13:09:00	0
2008-10-22	13:10:00	0
2008-10-22	13:11:00	0
2008-10-22	13:12:00	0
2008-10-22	13:13:00	0
2008-10-22	13:14:00	0
2008-10-22	13:15:00	0
2008-10-22	13:16:00	0
2008-10-22	13:17:00	0
2008-10-22	13:18:00	0
2008-10-22	13:19:00	0
2008-10-22	13:20:00	0
2008-10-22	13:21:00	0
2008-10-22	13:22:00	0
2008-10-22	13:23:00	0
2008-10-22	13:24:00	0
2008-10-22	13:25:00	0
2008-10-22	13:26:00	0
2008-10-22	13:27:00	0
2008-10-22	13:28:00	0
2008-10-22	13:29:00	0
2008-10-22	13:30:00	0
2008-10-22	13:31:00	0
2008-10-22	13:32:00	0
2008-10-22	13:33:00	0
2008-10-22	13:34:00	0
2008-10-22	13:35:00	0
2008-10-22	13:36:00	0
2008-10-22	13:37:00	0
2008-10-22	13:38:00	0
2008-10-22	13:39:00	0
2008-10-22	13:40:00	0
2008-10-22	13:41:00	0
2008-10-22	13:42:00	0
2008-10-22	13:43:00	0
2008-10-22	13:44:00	0
2008-10-22	13:45:00	0
2008-10-22	13:46:00	0
2008-10-22	13:47:00	0
2008-10-22	13:48:00	0
2008-10-22	13:49:00	0
2008-10-22	13:50:00	0
2008-10-22	13:51:00	0
2008-10-22	13:52:00	0
2008-10-22	13:53:00	0
2008-10-22	13:54:00	0
2008-10-22	13:55:00	0
2008-10-22	13:56:00	0
2008-10-22	13:57:00	0
2008-10-22	13:58:00	0
2008-10-22	13:59:00	0
2008-10-22	14:00:00	0
2008-10-22	14:01:00	0
2008-10-22	14:02:00	0
2008-10-22	14:03:00	0
2008-10-22	14:04:00	0
2008-10-22	14:05:00	0
2008-10-22	14:06:00	0
2008-10-22	14:07:00	0
2008-10-22	14:08:00	0
2008-10-22	14:09:00	0
2008-10-22	14:10:00	0
2008-10-22	14:11:00	0
2008-10-22	14:12:00	0
2008-10-22	14:13:00	0
2008-10-22	14:14:00	0
2008-10-22	14:15:00	0
2008-10-22	14:16:00	0
2008-10-22	14:17:00	0
2008-10-22	14:18:00	0
2008-10-22	14:19:00	0
2008-10-22	14:20:00	0
2008-10-22	14:21:00	0
2008-10-22	14:22:00	0
2008-10-22	14:23:00	0
2008-10-22	14:24:00	0
2008-10-22	14:25:00	0
2008-10-22	14:26:00	0
2008-10-22	14:27:00	0
2008-10-22	14:28:00	0
2008-10-22	14:29:00	0
2008-10-22	14:30:00	0
2008-10-22	14:31:00	0
2008-10-22	14:32:00	0
2008-10-22	14:33:00	0
2008-10-22	14:34:00	0
2008-10-22	14:35:00	0
2008-10-22	14:36:00	0
2008-10-22	14:37:00	0
2008-10-22	14:38:00	0
2008-10-22	14:39:00	0
2008-10-22	14:40:00	0
2008-10-22	14:41:00	0
2008-10-22	14:42:00	0
2008-10-22	14:43:00	0
2008-10-22	14:44:00	0
2008-10-22	14:45:00	0
2008-10-22	14:46:00	0
2008-10-22	14:47:00	0
2008-10-22	14:48:00	0
2008-10-22	14:49:00	0
2008-10-22	14:50:00	0
2008-10-22	14:51:00	0
2008-10-22	14:52:00	0
2008-10-22	14:53:00	0
2008-10-22	14:54:00	0
2008-10-22	14:55:00	0
2008-10-22	14:56:00	0
2008-10-22	14:57:00	0
2008-10-22	14:58:00	0
2008-10-22	14:59:00	0
2008-10-22	15:00:00	0
2008-10-22	15:01:00	0
2008-10-22	15:02:00	0
2008-10-22	15:03:00	0
2008-10-22	15:04:00	0
2008-10-22	15:05:00	0
2008-10-22	15:06:00	0
2008-10-22	15:07:00	0
2008-10-22	15:08:00	0
2008-10-22	15:09:00	0
2008-10-22	15:10:00	0
2008-10-22	15:11:00	0
2008-10-22	15:12:00	0
2008-10-22	15:13:00	0
2008-10-22	15:14:00	0
2008-10-22	15:15:00	0
2008-10-22	15:16:00	0
2008-10-22	15:17:00	0
2008-10-22	15:18:00	0
2008-10-22	15:19:00	0
2008-10-22	15:20:00	0
2008-10-22	15:21:00	0
2008-10-22	15:22:00	0
2008-10-22	15:23:00	0
2008-10-22	15:24:00	0
2008-10-22	15:25:00	0
2008-10-22	15:26:00	0
2008-10-22	15:27:00	0
2008-10-22	15:28:00	0
2008-10-22	15:29:00	0
2008-10-22	15:30:00	0
2008-10-22	15:31:00	0
2008-10-22	15:32:00	0
2008-10-22	15:33:00	0
2008-10-22	15:34:00	0
2008-10-22	15:35:00	0
2008-10-22	15:36:00	0
2008-10-22	15:37:00	0
2008-10-22	15:38:00	0
2008-10-22	15:39:00	0
2008-10-22	15:40:00	0
2008-10-22	15:41:00	0
2008-10-22	15:42:00	0
2008-10-22	15:43:00	0
2008-10-22	15:44:00	0
2008-10-22	15:45:00	0
2008-10-22	15:46:00	0
2008-10-22	15:47:00	0
2008-10-22	15:48:00	0
2008-10-22	15:49:00	0
2008-10-22	15:50:00	0
2008-10-22	15:51:00	0
2008-10-22	15:52:00	0
2008-10-22	15:53:00	0
2008-10-22	15:54:00	0
2008-10-22	15:55:00	0
2008-10-22	15:56:00	0
2008-10-22	15:57:00	0
2008-10-22	15:58:00	0
2008-10-22	15:59:00	0
2008-10-22	16:00:00	0
2008-10-22	16:01:00	0
2008-10-22	16:02:00	0
2008-10-22	16:03:00	0
2008-10-22	16:04:00	0
2008-10-22	16:05:00	0
2008-10-22	16:06:00	0
2008-10-22	16:07:00	0
2008-10-22	16:08:00	0
2008-10-22	16:09:00	0
2008-10-22	16:10:00	0
2008-10-22	16:11:00	0
2008-10-22	16:12:00	0
2008-10-22	16:13:00	0
2008-10-22	16:14:00	0
2008-10-22	16:15:00	0
2008-10-22	16:16:00	0
2008-10-22	16:17:00	0
2008-10-22	16:18:00	0
2008-10-22	16:19:00	0
2008-10-22	16:20:00	0
2008-10-22	16:21:00	0
2008-10-22	16:22:00	0
2008-10-22	16:23:00	0
2008-10-22	16:24:00	0
2008-10-22	16:25:00	0
2008-10-22	16:26:00	0
2008-10-22	16:27:00	0
2008-10-22	16:28:00	0
2008-10-22	16:29:00	0
2008-10-22	16:30:00	0
2008-10-22	16:31:00	0
2008-10-22	16:32:00	0
2008-10-22	16:33:00	0
2008-10-22	16:34:00	0
2008-10-22	16:35:00	0
2008-10-22	16:36:00	0
2008-10-22	16:37:00	0
2008-10-22	16:38:00	0
2008-10-22	16:39:00	0
2008-10-22	16:40:00	0
2008-10-22	16:41:00	0
2008-10-22	16:42:00	0
2008-10-22	16:43:00	0
2008-10-22	16:44:00	0
2008-10-22	16:45:00	0
2008-10-22	16:46:00	0
2008-10-22	16:47:00	0
2008-10-22	16:48:00	0
2008-10-22	16:49:00	0
2008-10-22	16:50:00	0
2008-10-22	16:51:00	0
2008-10-22	16:52:00	0
2008-10-22	16:53:00	0
2008-10-22	16:54:00	0
2008-10-22	16:55:00	0
2008-10-22	16:56:00	0
2008-10-22	16:57:00	0
2008-10-22	16:58:00	0
2008-10-22	16:59:00	0
2008-10-22	17:00:00	0	M
2008-10-22	17:01:00	169
2008-10-22	17:02:00	81
2008-10-22	17:03:00	280
2008-10-22	17:04:00	122
2008-10-22	17:05:00	217
2008-10-22	17:06:00	0
2008-10-22	17:07:00	0
2008-10-22	17:08:00	0
2008-10-22	17:09:00	0
2008-10-22	17:10:00	0
2008-10-22	17:11:00	0
2008-10-22	17:12:00	0
2008-10-22	17:13:00	10
2008-10-22	17:14:00	0
2008-10-22	17:15:00	0
2008-10-22	17:16:00	0
2008-10-22	17:17:00	254
2008-10-22	17:18:00	20
2008-10-22	17:19:00	81
2008-10-22	17:20:00	112
2008-10-22	17:21:00	122
2008-10-22	17:22:00	122
2008-10-22	17:23:00	112
2008-10-22	17:24:00	10
2008-10-22	17:25:00	0
2008-10-22	17:26:00	0
2008-10-22	17:27:00	0
2008-10-22	17:28:00	0
2008-10-22	17:29:00	0
2008-10-22	17:30:00	81
2008-10-22	17:31:00	61
2008-10-22	17:32:00	0
2008-10-22	17:33:00	0
2008-10-22	17:34:00	0
2008-10-22	17:35:00	0
2008-10-22	17:36:00	0
2008-10-22	17:37:00	91
2008-10-22	17:38:00	41
2008-10-22	17:39:00	61
2008-10-22	17:40:00	30
2008-10-22	17:41:00	61
2008-10-22	17:42:00	91
2008-10-22	17:43:00	41
2008-10-22	17:44:00	0
2008-10-22	17:45:00	10
2008-10-22	17:46:00	51
2008-10-22	17:47:00	10
2008-10-22	17:48:00	0
2008-10-22	17:49:00	0
2008-10-22	17:50:00	0
2008-10-22	17:51:00	0
2008-10-22	17:52:00	0
2008-10-22	17:53:00	0
2008-10-22	17:54:00	0
2008-10-22	17:55:00	10
2008-10-22	17:56:00	0
2008-10-22	17:57:00	280
2008-10-22	17:58:00	2651
2008-10-22	17:59:00	1940
2008-10-22	18:00:00	492
2008-10-22	18:01:00	616
2008-10-22	18:02:00	443
2008-10-22	18:03:00	929
2008-10-22	18:04:00	1211
2008-10-22	18:05:00	1479
2008-10-22	18:06:00	616
2008-10-22	18:07:00	380
2008-10-22	18:08:00	71
2008-10-22	18:09:00	459
2008-10-22	18:10:00	230
2008-10-22	18:11:00	242
2008-10-22	18:12:00	242
2008-10-22	18:13:00	205
2008-10-22	18:14:00	71
2008-10-22	18:15:00	475
2008-10-22	18:16:00	193
2008-10-22	18:17:00	169
2008-10-22	18:18:00	61
2008-10-22	18:19:00	193
2008-10-22	18:20:00	266
2008-10-22	18:21:00	41
2008-10-22	18:22:00	394
2008-10-22	18:23:00	410
2008-10-22	18:24:00	144
2008-10-22	18:25:00	205
2008-10-22	18:26:00	193
2008-10-22	18:27:00	112
2008-10-22	18:28:00	217
2008-10-22	18:29:00	242
2008-10-22	18:30:00	169
2008-10-22	18:31:00	230
2008-10-22	18:32:00	443
2008-10-22	18:33:00	380
2008-10-22	18:34:00	181
2008-10-22	18:35:00	41
2008-10-22	18:36:00	20
2008-10-22	18:37:00	144
2008-10-22	18:38:00	102
2008-10-22	18:39:00	30
2008-10-22	18:40:00	112
2008-10-22	18:41:00	193
2008-10-22	18:42:00	217
2008-10-22	18:43:00	713
2008-10-22	18:44:00	1026
2008-10-22	18:45:00	1156
2008-10-22	18:46:00	20
2008-10-22	18:47:00	254
2008-10-22	18:48:00	193
2008-10-22	18:49:00	41
2008-10-22	18:50:00	41
2008-10-22	18:51:00	20
2008-10-22	18:52:00	10
2008-10-22	18:53:00	112
2008-10-22	18:54:00	30
2008-10-22	18:55:00	61
2008-10-22	18:56:00	10
2008-10-22	18:57:00	132
2008-10-22	18:58:00	542
2008-10-22	18:59:00	542
2008-10-22	19:00:00	254
2008-10-22	19:01:00	0
2008-10-22	19:02:00	0
2008-10-22	19:03:00	0
2008-10-22	19:04:00	0
2008-10-22	19:05:00	0
2008-10-22	19:06:00	0
2008-10-22	19:07:00	0
2008-10-22	19:08:00	0
2008-10-22	19:09:00	0
2008-10-22	19:10:00	0
2008-10-22	19:11:00	0
2008-10-22	19:12:00	0
2008-10-22	19:13:00	0
2008-10-22	19:14:00	0
2008-10-22	19:15:00	0
2008-10-22	19:16:00	0
2008-10-22	19:17:00	0
2008-10-22	19:18:00	0
2008-10-22	19:19:00	0
2008-10-22	19:20:00	0
2008-10-22	19:21:00	0
2008-10-22	19:22:00	0
2008-10-22	19:23:00	0
2008-10-22	19:24:00	0
2008-10-22	19:25:00	0
2008-10-22	19:26:00	0
2008-10-22	19:27:00	0
2008-10-22	19:28:00	0
2008-10-22	19:29:00	0
2008-10-22	19:30:00	0
2008-10-22	19:31:00	0
2008-10-22	19:32:00	0
2008-10-22	19:33:00	0
2008-10-22	19:34:00	0
2008-10-22	19:35:00	0
2008-10-22	19:36:00	0
2008-10-22	19:37:00	0
2008-10-22	19:38:00	0
2008-10-22	19:39:00	0
2008-10-22	19:40:00	20
2008-10-22	19:41:00	0
2008-10-22	19:42:00	0
2008-10-22	19:43:00	0
2008-10-22	19:44:00	0
2008-10-22	19:45:00	0
2008-10-22	19:46:00	0
2008-10-22	19:47:00	0
2008-10-22	19:48:00	0
2008-10-22	19:49:00	0
2008-10-22	19:50:00	0
2008-10-22	19:51:00	0
2008-10-22	19:52:00	0
2008-10-22	19:53:00	0
2008-10-22	19:54:00	0
2008-10-22	19:55:00	0
2008-10-22	19:56:00	0
2008-10-22	19:57:00	0
2008-10-22	19:58:00	0
2008-10-22	19:59:00	0
2008-10-22	20:00:00	0
2008-10-22	20:01:00	0
2008-10-22	20:02:00	0
2008-10-22	20:03:00	0
2008-10-22	20:04:00	0
2008-10-22	20:05:00	0
2008-10-22	20:06:00	0
2008-10-22	20:07:00	0
2008-10-22	20:08:00	0
2008-10-22	20:09:00	0
2008-10-22	20:10:00	0
2008-10-22	20:11:00	0
2008-10-22	20:12:00	0
2008-10-22	20:13:00	0
2008-10-22	20:14:00	0
2008-10-22	20:15:00	0
2008-10-22	20:16:00	0
2008-10-22	20:17:00	0
2008-10-22	20:18:00	0
2008-10-22	20:19:00	0
2008-10-22	20:20:00	0
2008-10-22	20:21:00	0
2008-10-22	20:22:00	0
2008-10-22	20:23:00	0
2008-10-22	20:24:00	0
2008-10-22	20:25:00	0
2008-10-22	20:26:00	0
2008-10-22	20:27:00	0
2008-10-22	20:28:00	0
2008-10-22	20:29:00	0
2008-10-22	20:30:00	0
2008-10-22	20:31:00	0
2008-10-22	20:32:00	0
2008-10-22	20:33:00	0
2008-10-22	20:34:00	0
2008-10-22	20:35:00	0
2008-10-22	20:36:00	0
2008-10-22	20:37:00	0
2008-10-22	20:38:00	0
2008-10-22	20:39:00	0
2008-10-22	20:40:00	0
2008-10-22	20:41:00	0
2008-10-22	20:42:00	0
2008-10-22	20:43:00	0
2008-10-22	20:44:00	0
2008-10-22	20:45:00	0
2008-10-22	20:46:00	0
2008-10-22	20:47:00	0
2008-10-22	20:48:00	0
2008-10-22	20:49:00	0
2008-10-22	20:50:00	0
2008-10-22	20:51:00	0
2008-10-22	20:52:00	0
2008-10-22	20:53:00	0
2008-10-22	20:54:00	0
2008-10-22	20:55:00	0
2008-10-22	20:56:00	0
2008-10-22	20:57:00	0
2008-10-22	20:58:00	51
2008-10-22	20:59:00	0
2008-10-22	21:00:00	0
2008-10-22	21:01:00	0
2008-10-22	21:02:00	41
2008-10-22	21:03:00	91
2008-10-22	21:04:00	754
2008-10-22	21:05:00	579
2008-10-22	21:06:00	394
2008-10-22	21:07:00	366
2008-10-22	21:08:00	475
2008-10-22	21:09:00	0
2008-10-22	21:10:00	0
2008-10-22	21:11:00	0
2008-10-22	21:12:00	0
2008-10-22	21:13:00	0
2008-10-22	21:14:00	0
2008-10-22	21:15:00	0
2008-10-22	21:16:00	0
2008-10-22	21:17:00	0
2008-10-22	21:18:00	0
2008-10-22	21:19:00	0
2008-10-22	21:20:00	0
2008-10-22	21:21:00	10
2008-10-22	21:22:00	0
2008-10-22	21:23:00	10
2008-10-22	21:24:00	0
2008-10-22	21:25:00	0
2008-10-22	21:26:00	0
2008-10-22	21:27:00	0
2008-10-22	21:28:00	10
2008-10-22	21:29:00	0
2008-10-22	21:30:00	0
2008-10-22	21:31:00	0
2008-10-22	21:32:00	0
2008-10-22	21:33:00	0
2008-10-22	21:34:00	0
2008-10-22	21:35:00	0
2008-10-22	21:36:00	0
2008-10-22	21:37:00	0
2008-10-22	21:38:00	0
2008-10-22	21:39:00	0
2008-10-22	21:40:00	337
2008-10-22	21:41:00	861
2008-10-22	21:42:00	112
2008-10-22	21:43:00	91
2008-10-22	21:44:00	30
2008-10-22	21:45:00	20
2008-10-22	21:46:00	443
2008-10-22	21:47:00	1325
2008-10-22	21:48:00	1715
2008-10-22	21:49:00	351
2008-10-22	21:50:00	693
2008-10-22	21:51:00	475
2008-10-22	21:52:00	20
2008-10-22	21:53:00	0
2008-10-22	21:54:00	10
2008-10-22	21:55:00	0
2008-10-22	21:56:00	0
2008-10-22	21:57:00	0
2008-10-22	21:58:00	0
2008-10-22	21:59:00	0
2008-10-22	22:00:00	0
2008-10-22	22:01:00	0
2008-10-22	22:02:00	0
2008-10-22	22:03:00	0
2008-10-22	22:04:00	10
2008-10-22	22:05:00	0
2008-10-22	22:06:00	0
2008-10-22	22:07:00	0
2008-10-22	22:08:00	0
2008-10-22	22:09:00	0
2008-10-22	22:10:00	0
2008-10-22	22:11:00	0
2008-10-22	22:12:00	0
2008-10-22	22:13:00	0
2008-10-22	22:14:00	0
2008-10-22	22:15:00	0
2008-10-22	22:16:00	0
2008-10-22	22:17:00	0
2008-10-22	22:18:00	0
2008-10-22	22:19:00	0
2008-10-22	22:20:00	0
2008-10-22	22:21:00	0
2008-10-22	22:22:00	0
2008-10-22	22:23:00	0
2008-10-22	22:24:00	0
2008-10-22	22:25:00	0
2008-10-22	22:26:00	0
2008-10-22	22:27:00	0
2008-10-22	22:28:00	0
2008-10-22	22:29:00	10
2008-10-22	22:30:00	0
2008-10-22	22:31:00	0
2008-10-22	22:32:00	0
2008-10-22	22:33:00	0
2008-10-22	22:34:00	0
2008-10-22	22:35:00	0
2008-10-22	22:36:00	0
2008-10-22	22:37:00	0
2008-10-22	22:38:00	0
2008-10-22	22:39:00	0
2008-10-22	22:40:00	0
2008-10-22	22:41:00	0
2008-10-22	22:42:00	0
2008-10-22	22:43:00	0
2008-10-22	22:44:00	0
2008-10-22	22:45:00	0
2008-10-22	22:46:00	0
2008-10-22	22:47:00	0
2008-10-22	22:48:00	0
2008-10-22	22:49:00	0
2008-10-22	22:50:00	0
2008-10-22	22:51:00	0
2008-10-22	22:52:00	0
2008-10-22	22:53:00	0
2008-10-22	22:54:00	0
2008-10-22	22:55:00	0
2008-10-22	22:56:00	0
2008-10-22	22:57:00	0
2008-10-22	22:58:00	0
2008-10-22	22:59:00	0
2008-10-22	23:00:00	0
2008-10-22	23:01:00	0
2008-10-22	23:02:00	0
2008-10-22	23:03:00	0
2008-10-22	23:04:00	0
2008-10-22	23:05:00	0
2008-10-22	23:06:00	0
2008-10-22	23:07:00	0
2008-10-22	23:08:00	0
2008-10-22	23:09:00	0
2008-10-22	23:10:00	10
2008-10-22	23:11:00	10
2008-10-22	23:12:00	20
2008-10-22	23:13:00	71
2008-10-22	23:14:00	0
2008-10-22	23:15:00	41
2008-10-22	23:16:00	51
2008-10-22	23:17:00	10
2008-10-22	23:18:00	10
2008-10-22	23:19:00	0
2008-10-22	23:20:00	0
2008-10-22	23:21:00	0
2008-10-22	23:22:00	0
2008-10-22	23:23:00	309
2008-10-22	23:24:00	71
2008-10-22	23:25:00	30
2008-10-22	23:26:00	0
2008-10-22	23:27:00	0
2008-10-22	23:28:00	0
2008-10-22	23:29:00	0
2008-10-22	23:30:00	0
2008-10-22	23:31:00	30
2008-10-22	23:32:00	0
2008-10-22	23:33:00	0
2008-10-22	23:34:00	0
2008-10-22	23:35:00	0
2008-10-22	23:36:00	0
2008-10-22	23:37:00	0
2008-10-22	23:38:00	0
2008-10-22	23:39:00	0
2008-10-22	23:40:00	0
2008-10-22	23:41:00	0
2008-10-22	23:42:00	0
2008-10-22	23:43:00	0
2008-10-22	23:44:00	0
2008-10-22	23:45:00	0
2008-10-22	23:46:00	0
2008-10-22	23:47:00	0
2008-10-22	23:48:00	0
2008-10-22	23:49:00	0
2008-10-22	23:50:00	0
2008-10-22	23:51:00	0
2008-10-22	23:52:00	0
2008-10-22	23:53:00	0
2008-10-22	23:54:00	0
2008-10-22	23:55:00	0
2008-10-22	23:56:00	0
2008-10-22	23:57:00	0
2008-10-22	23:58:00	0
2008-10-22	23:59:00	0
2008-10-23	00:00:00	0
2008-10-23	00:01:00	0
2008-10-23	00:02:00	0
2008-10-23	00:03:00	0
2008-10-23	00:04:00	0
2008-10-23	00:05:00	0
2008-10-23	00:06:00	0
2008-10-23	00:07:00	0
2008-10-23	00:08:00	0
2008-10-23	00:09:00	0
2008-10-23	00:10:00	0
2008-10-23	00:11:00	0
2008-10-23	00:12:00	0
2008-10-23	00:13:00	0
2008-10-23	00:14:00	0
2008-10-23	00:15:00	0
2008-10-23	00:16:00	0
2008-10-23	00:17:00	0
2008-10-23	00:18:00	0
2008-10-23	00:19:00	0
2008-10-23	00:20:00	0
2008-10-23	00:21:00	0
2008-10-23	00:22:00	0
2008-10-23	00:23:00	0
2008-10-23	00:24:00	0
2008-10-23	00:25:00	0
2008-10-23	00:26:00	0
2008-10-23	00:27:00	0
2008-10-23	00:28:00	0
2008-10-23	00:29:00	0
2008-10-23	00:30:00	0
2008-10-23	00:31:00	0
2008-10-23	00:32:00	0
2008-10-23	00:33:00	0
2008-10-23	00:34:00	0
2008-10-23	00:35:00	0
2008-10-23	00:36:00	0
2008-10-23	00:37:00	0
2008-10-23	00:38:00	0
2008-10-23	00:39:00	0
2008-10-23	00:40:00	0
2008-10-23	00:41:00	0
2008-10-23	00:42:00	0
2008-10-23	00:43:00	0
2008-10-23	00:44:00	0
2008-10-23	00:45:00	0
2008-10-23	00:46:00	0
2008-10-23	00:47:00	0
2008-10-23	00:48:00	0
2008-10-23	00:49:00	0
2008-10-23	00:50:00	0
2008-10-23	00:51:00	0
2008-10-23	00:52:00	0
2008-10-23	00:53:00	0
2008-10-23	00:54:00	0
2008-10-23	00:55:00	0
2008-10-23	00:56:00	0
2008-10-23	00:57:00	0
2008-10-23	00:58:00	0
2008-10-23	00:59:00	0
2008-10-23	01:00:00	0
2008-10-23	01:01:00	0
2008-10-23	01:02:00	0
2008-10-23	01:03:00	0
2008-10-23	01:04:00	0
2008-10-23	01:05:00	0
2008-10-23	01:06:00	0
2008-10-23	01:07:00	0
2008-10-23	01:08:00	0
2008-10-23	01:09:00	0
2008-10-23	01:10:00	0
2008-10-23	01:11:00	0
2008-10-23	01:12:00	0
2008-10-23	01:13:00	0
2008-10-23	01:14:00	0
2008-10-23	01:15:00	0
2008-10-23	01:16:00	0
2008-10-23	01:17:00	0
2008-10-23	01:18:00	0
2008-10-23	01:19:00	0
2008-10-23	01:20:00	0
2008-10-23	01:21:00	0
2008-10-23	01:22:00	0
2008-10-23	01:23:00	0
2008-10-23	01:24:00	0
2008-10-23	01:25:00	0
2008-10-23	01:26:00	0
2008-10-23	01:27:00	0
2008-10-23	01:28:00	0
2008-10-23	01:29:00	0
2008-10-23	01:30:00	0
2008-10-23	01:31:00	0
2008-10-23	01:32:00	0
2008-10-23	01:33:00	0
2008-10-23	01:34:00	0
2008-10-23	01:35:00	0
2008-10-23	01:36:00	0
2008-10-23	01:37:00	0
2008-10-23	01:38:00	0
2008-10-23	01:39:00	0
2008-10-23	01:40:00	0
2008-10-23	01:41:00	0
2008-10-23	01:42:00	0
2008-10-23	01:43:00	0
2008-10-23	01:44:00	0
2008-10-23	01:45:00	0
2008-10-23	01:46:00	0
2008-10-23	01:47:00	0
2008-10-23	01:48:00	0
2008-10-23	01:49:00	0
2008-10-23	01:50:00	0
2008-10-23	01:51:00	0
2008-10-23	01:52:00	0
2008-10-23	01:53:00	0
2008-10-23	01:54:00	0
2008-10-23	01:55:00	0
2008-10-23	01:56:00	0
2008-10-23	01:57:00	0
2008-10-23	01:58:00	0
2008-10-23	01:59:00	0
2008-10-23	02:00:00	0
2008-10-23	02:01:00	0
2008-10-23	02:02:00	0
2008-10-23	02:03:00	0
2008-10-23	02:04:00	0
2008-10-23	02:05:00	0
2008-10-23	02:06:00	0
2008-10-23	02:07:00	0
2008-10-23	02:08:00	0
2008-10-23	02:09:00	0
2008-10-23	02:10:00	0
2008-10-23	02:11:00	10
2008-10-23	02:12:00	0
2008-10-23	02:13:00	0
2008-10-23	02:14:00	0
2008-10-23	02:15:00	0
2008-10-23	02:16:00	0
2008-10-23	02:17:00	0
2008-10-23	02:18:00	0
2008-10-23	02:19:00	0
2008-10-23	02:20:00	0
2008-10-23	02:21:00	0
2008-10-23	02:22:00	0
2008-10-23	02:23:00	0
2008-10-23	02:24:00	0
2008-10-23	02:25:00	0
2008-10-23	02:26:00	0
2008-10-23	02:27:00	0
2008-10-23	02:28:00	0
2008-10-23	02:29:00	0
2008-10-23	02:30:00	0
2008-10-23	02:31:00	0
2008-10-23	02:32:00	0
2008-10-23	02:33:00	0
2008-10-23	02:34:00	0
2008-10-23	02:35:00	0
2008-10-23	02:36:00	0
2008-10-23	02:37:00	0
2008-10-23	02:38:00	0
2008-10-23	02:39:00	0
2008-10-23	02:40:00	0
2008-10-23	02:41:00	0
2008-10-23	02:42:00	0
2008-10-23	02:43:00	0
2008-10-23	02:44:00	0
2008-10-23	02:45:00	0
2008-10-23	02:46:00	0
2008-10-23	02:47:00	0
2008-10-23	02:48:00	0
2008-10-23	02:49:00	0
2008-10-23	02:50:00	0
2008-10-23	02:51:00	0
2008-10-23	02:52:00	0
2008-10-23	02:53:00	0
2008-10-23	02:54:00	0
2008-10-23	02:55:00	0
2008-10-23	02:56:00	0
2008-10-23	02:57:00	0
2008-10-23	02:58:00	0
2008-10-23	02:59:00	0
2008-10-23	03:00:00	0
2008-10-23	03:01:00	0
2008-10-23	03:02:00	0
2008-10-23	03:03:00	0
2008-10-23	03:04:00	0
2008-10-23	03:05:00	0
2008-10-23	03:06:00	0
2008-10-23	03:07:00	0
2008-10-23	03:08:00	0
2008-10-23	03:09:00	0
2008-10-23	03:10:00	0
2008-10-23	03:11:00	0
2008-10-23	03:12:00	0
2008-10-23	03:13:00	0
2008-10-23	03:14:00	10
2008-10-23	03:15:00	0
2008-10-23	03:16:00	10
2008-10-23	03:17:00	0
2008-10-23	03:18:00	0
2008-10-23	03:19:00	0
2008-10-23	03:20:00	0
2008-10-23	03:21:00	0
2008-10-23	03:22:00	0
2008-10-23	03:23:00	0
2008-10-23	03:24:00	0
2008-10-23	03:25:00	0
2008-10-23	03:26:00	0
2008-10-23	03:27:00	0
2008-10-23	03:28:00	0
2008-10-23	03:29:00	0
2008-10-23	03:30:00	0
2008-10-23	03:31:00	0
2008-10-23	03:32:00	0
2008-10-23	03:33:00	0
2008-10-23	03:34:00	0
2008-10-23	03:35:00	0
2008-10-23	03:36:00	0
2008-10-23	03:37:00	0
2008-10-23	03:38:00	0
2008-10-23	03:39:00	0
2008-10-23	03:40:00	0
2008-10-23	03:41:00	30
2008-10-23	03:42:00	0
2008-10-23	03:43:00	0
2008-10-23	03:44:00	0
2008-10-23	03:45:00	0
2008-10-23	03:46:00	0
2008-10-23	03:47:00	0
2008-10-23	03:48:00	0
2008-10-23	03:49:00	0
2008-10-23	03:50:00	0
2008-10-23	03:51:00	0
2008-10-23	03:52:00	0
2008-10-23	03:53:00	0
2008-10-23	03:54:00	0
2008-10-23	03:55:00	0
2008-10-23	03:56:00	0
2008-10-23	03:57:00	0
2008-10-23	03:58:00	0
2008-10-23	03:59:00	0
2008-10-23	04:00:00	0
2008-10-23	04:01:00	0
2008-10-23	04:02:00	0
2008-10-23	04:03:00	0
2008-10-23	04:04:00	0
2008-10-23	04:05:00	0
2008-10-23	04:06:00	0
2008-10-23	04:07:00	0
2008-10-23	04:08:00	0
2008-10-23	04:09:00	0
2008-10-23	04:10:00	0
2008-10-23	04:11:00	0
2008-10-23	04:12:00	0
2008-10-23	04:13:00	0
2008-10-23	04:14:00	0
2008-10-23	04:15:00	0
2008-10-23	04:16:00	0
2008-10-23	04:17:00	0
2008-10-23	04:18:00	0
2008-10-23	04:19:00	0
2008-10-23	04:20:00	0
2008-10-23	04:21:00	0
2008-10-23	04:22:00	0
2008-10-23	04:23:00	0
2008-10-23	04:24:00	0
2008-10-23	04:25:00	0
2008-10-23	04:26:00	0
2008-10-23	04:27:00	0
2008-10-23	04:28:00	0
2008-10-23	04:29:00	0
2008-10-23	04:30:00	0
2008-10-23	04:31:00	0
2008-10-23	04:32:00	0
2008-10-23	04:33:00	0
2008-10-23	04:34:00	0
2008-10-23	04:35:00	0
2008-10-23	04:36:00	0
2008-10-23	04:37:00	0
2008-10-23	04:38:00	0
2008-10-23	04:39:00	0
2008-10-23	04:40:00	0
2008-10-23	04:41:00	0
2008-10-23	04:42:00	10
2008-10-23	04:43:00	20
2008-10-23	04:44:00	20
2008-10-23	04:45:00	20
2008-10-23	04:46:00	0
2008-10-23	04:47:00	10
2008-10-23	04:48:00	0
2008-10-23	04:49:00	0
2008-10-23	04:50:00	0
2008-10-23	04:51:00	0
2008-10-23	04:52:00	0
2008-10-23	04:53:00	0
2008-10-23	04:54:00	0
2008-10-23	04:55:00	0
2008-10-23	04:56:00	0
2008-10-23	04:57:00	0
2008-10-23	04:58:00	0
2008-10-23	04:59:00	0
2008-10-23	05:00:00	0
2008-10-23	05:01:00	0
2008-10-23	05:02:00	0
2008-10-23	05:03:00	0
2008-10-23	05:04:00	0
2008-10-23	05:05:00	0
2008-10-23	05:06:00	0
2008-10-23	05:07:00	0
2008-10-23	05:08:00	0
2008-10-23	05:09:00	0
2008-10-23	05:10:00	0
2008-10-23	05:11:00	0
2008-10-23	05:12:00	0
2008-10-23	05:13:00	0
2008-10-23	05:14:00	0
2008-10-23	05:15:00	0
2008-10-23	05:16:00	0
2008-10-23	05:17:00	0
2008-10-23	05:18:00	0
2008-10-23	05:19:00	0
2008-10-23	05:20:00	0
2008-10-23	05:21:00	0
2008-10-23	05:22:00	0
2008-10-23	05:23:00	0
2008-10-23	05:24:00	0
2008-10-23	05:25:00	0
2008-10-23	05:26:00	0
2008-10-23	05:27:00	10
2008-10-23	05:28:00	10
2008-10-23	05:29:00	30
2008-10-23	05:30:00	0
2008-10-23	05:31:00	0
2008-10-23	05:32:00	169
2008-10-23	05:33:00	0
2008-10-23	05:34:00	0
2008-10-23	05:35:00	0
2008-10-23	05:36:00	0
2008-10-23	05:37:00	0
2008-10-23	05:38:00	0
2008-10-23	05:39:00	0
2008-10-23	05:40:00	0
2008-10-23	05:41:00	0
2008-10-23	05:42:00	0
2008-10-23	05:43:00	0
2008-10-23	05:44:00	0
2008-10-23	05:45:00	0
2008-10-23	05:46:00	0
2008-10-23	05:47:00	0
2008-10-23	05:48:00	0
2008-10-23	05:49:00	0
2008-10-23	05:50:00	0
2008-10-23	05:51:00	0
2008-10-23	05:52:00	0
2008-10-23	05:53:00	0
2008-10-23	05:54:00	0
2008-10-23	05:55:00	0
2008-10-23	05:56:00	0
2008-10-23	05:57:00	0
2008-10-23	05:58:00	0
2008-10-23	05:59:00	0
2008-10-23	06:00:00	0
2008-10-23	06:01:00	0
2008-10-23	06:02:00	0
2008-10-23	06:03:00	0
2008-10-23	06:04:00	0
2008-10-23	06:05:00	0
2008-10-23	06:06:00	0
2008-10-23	06:07:00	0
2008-10-23	06:08:00	0
2008-10-23	06:09:00	0
2008-10-23	06:10:00	0
2008-10-23	06:11:00	0
2008-10-23	06:12:00	0
2008-10-23	06:13:00	0
2008-10-23	06:14:00	0
2008-10-23	06:15:00	0
2008-10-23	06:16:00	0
2008-10-23	06:17:00	0
2008-10-23	06:18:00	0
2008-10-23	06:19:00	0
2008-10-23	06:20:00	0
2008-10-23	06:21:00	0
2008-10-23	06:22:00	0
2008-10-23	06:23:00	0
2008-10-23	06:24:00	0
2008-10-23	06:25:00	0
2008-10-23	06:26:00	0
2008-10-23	06:27:00	0
2008-10-23	06:28:00	0
2008-10-23	06:29:00	0
2008-10-23	06:30:00	0
2008-10-23	06:31:00	0
2008-10-23	06:32:00	0
2008-10-23	06:33:00	0
2008-10-23	06:34:00	0
2008-10-23	06:35:00	0
2008-10-23	06:36:00	0
2008-10-23	06:37:00	0
2008-10-23	06:38:00	0
2008-10-23	06:39:00	0
2008-10-23	06:40:00	0
2008-10-23	06:41:00	0
2008-10-23	06:42:00	0
2008-10-23	06:43:00	0
2008-10-23	06:44:00	0
2008-10-23	06:45:00	0
2008-10-23	06:46:00	0
2008-10-23	06:47:00	0
2008-10-23	06:48:00	0
2008-10-23	06:49:00	0
2008-10-23	06:50:00	0
2008-10-23	06:51:00	0
2008-10-23	06:52:00	0
2008-10-23	06:53:00	0
2008-10-23	06:54:00	0
2008-10-23	06:55:00	0
2008-10-23	06:56:00	0
2008-10-23	06:57:00	0
2008-10-23	06:58:00	0
2008-10-23	06:59:00	0
2008-10-23	07:00:00	0
2008-10-23	07:01:00	0
2008-10-23	07:02:00	0
2008-10-23	07:03:00	0
2008-10-23	07:04:00	0
2008-10-23	07:05:00	0
2008-10-23	07:06:00	0
2008-10-23	07:07:00	0
2008-10-23	07:08:00	0
2008-10-23	07:09:00	0
2008-10-23	07:10:00	0
2008-10-23	07:11:00	0
2008-10-23	07:12:00	0
2008-10-23	07:13:00	0
2008-10-23	07:14:00	0
2008-10-23	07:15:00	0
2008-10-23	07:16:00	0
2008-10-23	07:17:00	0
2008-10-23	07:18:00	0
2008-10-23	07:19:00	0
2008-10-23	07:20:00	0
2008-10-23	07:21:00	0
2008-10-23	07:22:00	0
2008-10-23	07:23:00	0
2008-10-23	07:24:00	0
2008-10-23	07:25:00	0
2008-10-23	07:26:00	0
2008-10-23	07:27:00	0
2008-10-23	07:28:00	0
2008-10-23	07:29:00	0
2008-10-23	07:30:00	0
2008-10-23	07:31:00	0
2008-10-23	07:32:00	0
2008-10-23	07:33:00	0
2008-10-23	07:34:00	0
2008-10-23	07:35:00	0
2008-10-23	07:36:00	0
2008-10-23	07:37:00	0
2008-10-23	07:38:00	0
2008-10-23	07:39:00	0
2008-10-23	07:40:00	0
2008-10-23	07:41:00	0
2008-10-23	07:42:00	0
2008-10-23	07:43:00	0
2008-10-23	07:44:00	0
2008-10-23	07:45:00	0
2008-10-23	07:46:00	0
2008-10-23	07:47:00	0
2008-10-23	07:48:00	0
2008-10-23	07:49:00	0
2008-10-23	07:50:00	0
2008-10-23	07:51:00	0
2008-10-23	07:52:00	0
2008-10-23	07:53:00	0
2008-10-23	07:54:00	20
2008-10-23	07:55:00	10
2008-10-23	07:56:00	0
2008-10-23	07:57:00	0
2008-10-23	07:58:00	122
2008-10-23	07:59:00	0
2008-10-23	08:00:00	30
2008-10-23	08:01:00	91
2008-10-23	08:02:00	0
2008-10-23	08:03:00	0
2008-10-23	08:04:00	0
2008-10-23	08:05:00	0
2008-10-23	08:06:00	0
2008-10-23	08:07:00	0
2008-10-23	08:08:00	0
2008-10-23	08:09:00	0
2008-10-23	08:10:00	0
2008-10-23	08:11:00	0
2008-10-23	08:12:00	0
2008-10-23	08:13:00	0
2008-10-23	08:14:00	0
2008-10-23	08:15:00	0
2008-10-23	08:16:00	459
2008-10-23	08:17:00	230
2008-10-23	08:18:00	0
2008-10-23	08:19:00	217
2008-10-23	08:20:00	542
2008-10-23	08:21:00	91
2008-10-23	08:22:00	0
2008-10-23	08:23:00	0
2008-10-23	08:24:00	0
2008-10-23	08:25:00	0
2008-10-23	08:26:00	0
2008-10-23	08:27:00	0
2008-10-23	08:28:00	0
2008-10-23	08:29:00	20
2008-10-23	08:30:00	102
2008-10-23	08:31:00	30
2008-10-23	08:32:00	0
2008-10-23	08:33:00	0
2008-10-23	08:34:00	0
2008-10-23	08:35:00	10
2008-10-23	08:36:00	0
2008-10-23	08:37:00	0
2008-10-23	08:38:00	0
2008-10-23	08:39:00	0
2008-10-23	08:40:00	30
2008-10-23	08:41:00	61
2008-10-23	08:42:00	0
2008-10-23	08:43:00	0
2008-10-23	08:44:00	0
2008-10-23	08:45:00	0
2008-10-23	08:46:00	0
2008-10-23	08:47:00	0
2008-10-23	08:48:00	0
2008-10-23	08:49:00	0
2008-10-23	08:50:00	0
2008-10-23	08:51:00	20
2008-10-23	08:52:00	51
2008-10-23	08:53:00	132
2008-10-23	08:54:00	30
2008-10-23	08:55:00	0
2008-10-23	08:56:00	0
2008-10-23	08:57:00	0
2008-10-23	08:58:00	0
2008-10-23	08:59:00	0
2008-10-23	09:00:00	0
2008-10-23	09:01:00	0
2008-10-23	09:02:00	0
2008-10-23	09:03:00	10
2008-10-23	09:04:00	0
2008-10-23	09:05:00	0
2008-10-23	09:06:00	0
2008-10-23	09:07:00	0
2008-10-23	09:08:00	112
[truncated: 21,051 more rows]

## Sheet: 11.6.08
Actogram, Copy Raw Data, All Days
Identity:	Lena
Filename:	E:\Active Research Files\meloxicam titre canine\cases\lena\Lena 11.6.08.AWC
Gender:	F
Age:	9
Height:	40.6 cm	16.0 in
Weight:	21.8 kg	48.1 lbs
Start Date:	06-Nov-2008 (Thu)
Start Time:	17:00:00
Interval:	1.00 mins
Date Stamp:	Time Stamp:	Activity Data:	Marker Press:
2008-11-06	00:00:00	0
2008-11-06	00:01:00	0
2008-11-06	00:02:00	0
2008-11-06	00:03:00	0
2008-11-06	00:04:00	0
2008-11-06	00:05:00	0
2008-11-06	00:06:00	0
2008-11-06	00:07:00	0
2008-11-06	00:08:00	0
2008-11-06	00:09:00	0
2008-11-06	00:10:00	0
2008-11-06	00:11:00	0
2008-11-06	00:12:00	0
2008-11-06	00:13:00	0
2008-11-06	00:14:00	0
2008-11-06	00:15:00	0
2008-11-06	00:16:00	0
2008-11-06	00:17:00	0
2008-11-06	00:18:00	0
2008-11-06	00:19:00	0
2008-11-06	00:20:00	0
2008-11-06	00:21:00	0
2008-11-06	00:22:00	0
2008-11-06	00:23:00	0
2008-11-06	00:24:00	0
2008-11-06	00:25:00	0
2008-11-06	00:26:00	0
2008-11-06	00:27:00	0
2008-11-06	00:28:00	0
2008-11-06	00:29:00	0
2008-11-06	00:30:00	0
2008-11-06	00:31:00	0
2008-11-06	00:32:00	0
2008-11-06	00:33:00	0
2008-11-06	00:34:00	0
2008-11-06	00:35:00	0
2008-11-06	00:36:00	0
2008-11-06	00:37:00	0
2008-11-06	00:38:00	0
2008-11-06	00:39:00	0
2008-11-06	00:40:00	0
2008-11-06	00:41:00	0
2008-11-06	00:42:00	0
2008-11-06	00:43:00	0
2008-11-06	00:44:00	0
2008-11-06	00:45:00	0
2008-11-06	00:46:00	0
2008-11-06	00:47:00	0
2008-11-06	00:48:00	0
2008-11-06	00:49:00	0
2008-11-06	00:50:00	0
2008-11-06	00:51:00	0
2008-11-06	00:52:00	0
2008-11-06	00:53:00	0
2008-11-06	00:54:00	0
2008-11-06	00:55:00	0
2008-11-06	00:56:00	0
2008-11-06	00:57:00	0
2008-11-06	00:58:00	0
2008-11-06	00:59:00	0
2008-11-06	01:00:00	0
2008-11-06	01:01:00	0
2008-11-06	01:02:00	0
2008-11-06	01:03:00	0
2008-11-06	01:04:00	0
2008-11-06	01:05:00	0
2008-11-06	01:06:00	0
2008-11-06	01:07:00	0
2008-11-06	01:08:00	0
2008-11-06	01:09:00	0
2008-11-06	01:10:00	0
2008-11-06	01:11:00	0
2008-11-06	01:12:00	0
2008-11-06	01:13:00	0
2008-11-06	01:14:00	0
2008-11-06	01:15:00	0
2008-11-06	01:16:00	0
2008-11-06	01:17:00	0
2008-11-06	01:18:00	0
2008-11-06	01:19:00	0
2008-11-06	01:20:00	0
2008-11-06	01:21:00	0
2008-11-06	01:22:00	0
2008-11-06	01:23:00	0
2008-11-06	01:24:00	0
2008-11-06	01:25:00	0
2008-11-06	01:26:00	0
2008-11-06	01:27:00	0
2008-11-06	01:28:00	0
2008-11-06	01:29:00	0
2008-11-06	01:30:00	0
2008-11-06	01:31:00	0
2008-11-06	01:32:00	0
2008-11-06	01:33:00	0
2008-11-06	01:34:00	0
2008-11-06	01:35:00	0
2008-11-06	01:36:00	0
2008-11-06	01:37:00	0
2008-11-06	01:38:00	0
2008-11-06	01:39:00	0
2008-11-06	01:40:00	0
2008-11-06	01:41:00	0
2008-11-06	01:42:00	0
2008-11-06	01:43:00	0
2008-11-06	01:44:00	0
2008-11-06	01:45:00	0
2008-11-06	01:46:00	0
2008-11-06	01:47:00	0
2008-11-06	01:48:00	0
2008-11-06	01:49:00	0
2008-11-06	01:50:00	0
2008-11-06	01:51:00	0
2008-11-06	01:52:00	0
2008-11-06	01:53:00	0
2008-11-06	01:54:00	0
2008-11-06	01:55:00	0
2008-11-06	01:56:00	0
2008-11-06	01:57:00	0
2008-11-06	01:58:00	0
2008-11-06	01:59:00	0
2008-11-06	02:00:00	0
2008-11-06	02:01:00	0
2008-11-06	02:02:00	0
2008-11-06	02:03:00	0
2008-11-06	02:04:00	0
2008-11-06	02:05:00	0
2008-11-06	02:06:00	0
2008-11-06	02:07:00	0
2008-11-06	02:08:00	0
2008-11-06	02:09:00	0
2008-11-06	02:10:00	0
2008-11-06	02:11:00	0
2008-11-06	02:12:00	0
2008-11-06	02:13:00	0
2008-11-06	02:14:00	0
2008-11-06	02:15:00	0
2008-11-06	02:16:00	0
2008-11-06	02:17:00	0
2008-11-06	02:18:00	0
2008-11-06	02:19:00	0
2008-11-06	02:20:00	0
2008-11-06	02:21:00	0
2008-11-06	02:22:00	0
2008-11-06	02:23:00	0
2008-11-06	02:24:00	0
2008-11-06	02:25:00	0
2008-11-06	02:26:00	0
2008-11-06	02:27:00	0
2008-11-06	02:28:00	0
2008-11-06	02:29:00	0
2008-11-06	02:30:00	0
2008-11-06	02:31:00	0
2008-11-06	02:32:00	0
2008-11-06	02:33:00	0
2008-11-06	02:34:00	0
2008-11-06	02:35:00	0
2008-11-06	02:36:00	0
2008-11-06	02:37:00	0
2008-11-06	02:38:00	0
2008-11-06	02:39:00	0
2008-11-06	02:40:00	0
2008-11-06	02:41:00	0
2008-11-06	02:42:00	0
2008-11-06	02:43:00	0
2008-11-06	02:44:00	0
2008-11-06	02:45:00	0
2008-11-06	02:46:00	0
2008-11-06	02:47:00	0
2008-11-06	02:48:00	0
2008-11-06	02:49:00	0
2008-11-06	02:50:00	0
2008-11-06	02:51:00	0
2008-11-06	02:52:00	0
2008-11-06	02:53:00	0
2008-11-06	02:54:00	0
2008-11-06	02:55:00	0
2008-11-06	02:56:00	0
2008-11-06	02:57:00	0
2008-11-06	02:58:00	0
2008-11-06	02:59:00	0
2008-11-06	03:00:00	0
2008-11-06	03:01:00	0
2008-11-06	03:02:00	0
2008-11-06	03:03:00	0
2008-11-06	03:04:00	0
2008-11-06	03:05:00	0
2008-11-06	03:06:00	0
2008-11-06	03:07:00	0
2008-11-06	03:08:00	0
2008-11-06	03:09:00	0
2008-11-06	03:10:00	0
2008-11-06	03:11:00	0
2008-11-06	03:12:00	0
2008-11-06	03:13:00	0
2008-11-06	03:14:00	0
2008-11-06	03:15:00	0
2008-11-06	03:16:00	0
2008-11-06	03:17:00	0
2008-11-06	03:18:00	0
2008-11-06	03:19:00	0
2008-11-06	03:20:00	0
2008-11-06	03:21:00	0
2008-11-06	03:22:00	0
2008-11-06	03:23:00	0
2008-11-06	03:24:00	0
2008-11-06	03:25:00	0
2008-11-06	03:26:00	0
2008-11-06	03:27:00	0
2008-11-06	03:28:00	0
2008-11-06	03:29:00	0
2008-11-06	03:30:00	0
2008-11-06	03:31:00	0
2008-11-06	03:32:00	0
2008-11-06	03:33:00	0
2008-11-06	03:34:00	0
2008-11-06	03:35:00	0
2008-11-06	03:36:00	0
2008-11-06	03:37:00	0
2008-11-06	03:38:00	0
2008-11-06	03:39:00	0
2008-11-06	03:40:00	0
2008-11-06	03:41:00	0
2008-11-06	03:42:00	0
2008-11-06	03:43:00	0
2008-11-06	03:44:00	0
2008-11-06	03:45:00	0
2008-11-06	03:46:00	0
2008-11-06	03:47:00	0
2008-11-06	03:48:00	0
2008-11-06	03:49:00	0
2008-11-06	03:50:00	0
2008-11-06	03:51:00	0
2008-11-06	03:52:00	0
2008-11-06	03:53:00	0
2008-11-06	03:54:00	0
2008-11-06	03:55:00	0
2008-11-06	03:56:00	0
2008-11-06	03:57:00	0
2008-11-06	03:58:00	0
2008-11-06	03:59:00	0
2008-11-06	04:00:00	0
2008-11-06	04:01:00	0
2008-11-06	04:02:00	0
2008-11-06	04:03:00	0
2008-11-06	04:04:00	0
2008-11-06	04:05:00	0
2008-11-06	04:06:00	0
2008-11-06	04:07:00	0
2008-11-06	04:08:00	0
2008-11-06	04:09:00	0
2008-11-06	04:10:00	0
2008-11-06	04:11:00	0
2008-11-06	04:12:00	0
2008-11-06	04:13:00	0
2008-11-06	04:14:00	0
2008-11-06	04:15:00	0
2008-11-06	04:16:00	0
2008-11-06	04:17:00	0
2008-11-06	04:18:00	0
2008-11-06	04:19:00	0
2008-11-06	04:20:00	0
2008-11-06	04:21:00	0
2008-11-06	04:22:00	0
2008-11-06	04:23:00	0
2008-11-06	04:24:00	0
2008-11-06	04:25:00	0
2008-11-06	04:26:00	0
2008-11-06	04:27:00	0
2008-11-06	04:28:00	0
2008-11-06	04:29:00	0
2008-11-06	04:30:00	0
2008-11-06	04:31:00	0
2008-11-06	04:32:00	0
2008-11-06	04:33:00	0
2008-11-06	04:34:00	0
2008-11-06	04:35:00	0
2008-11-06	04:36:00	0
2008-11-06	04:37:00	0
2008-11-06	04:38:00	0
2008-11-06	04:39:00	0
2008-11-06	04:40:00	0
2008-11-06	04:41:00	0
2008-11-06	04:42:00	0
2008-11-06	04:43:00	0
2008-11-06	04:44:00	0
2008-11-06	04:45:00	0
2008-11-06	04:46:00	0
2008-11-06	04:47:00	0
2008-11-06	04:48:00	0
2008-11-06	04:49:00	0
2008-11-06	04:50:00	0
2008-11-06	04:51:00	0
2008-11-06	04:52:00	0
2008-11-06	04:53:00	0
2008-11-06	04:54:00	0
2008-11-06	04:55:00	0
2008-11-06	04:56:00	0
2008-11-06	04:57:00	0
2008-11-06	04:58:00	0
2008-11-06	04:59:00	0
2008-11-06	05:00:00	0
2008-11-06	05:01:00	0
2008-11-06	05:02:00	0
2008-11-06	05:03:00	0
2008-11-06	05:04:00	0
2008-11-06	05:05:00	0
2008-11-06	05:06:00	0
2008-11-06	05:07:00	0
2008-11-06	05:08:00	0
2008-11-06	05:09:00	0
2008-11-06	05:10:00	0
2008-11-06	05:11:00	0
2008-11-06	05:12:00	0
2008-11-06	05:13:00	0
2008-11-06	05:14:00	0
2008-11-06	05:15:00	0
2008-11-06	05:16:00	0
2008-11-06	05:17:00	0
2008-11-06	05:18:00	0
2008-11-06	05:19:00	0
2008-11-06	05:20:00	0
2008-11-06	05:21:00	0
2008-11-06	05:22:00	0
2008-11-06	05:23:00	0
2008-11-06	05:24:00	0
2008-11-06	05:25:00	0
2008-11-06	05:26:00	0
2008-11-06	05:27:00	0
2008-11-06	05:28:00	0
2008-11-06	05:29:00	0
2008-11-06	05:30:00	0
2008-11-06	05:31:00	0
2008-11-06	05:32:00	0
2008-11-06	05:33:00	0
2008-11-06	05:34:00	0
2008-11-06	05:35:00	0
2008-11-06	05:36:00	0
2008-11-06	05:37:00	0
2008-11-06	05:38:00	0
2008-11-06	05:39:00	0
2008-11-06	05:40:00	0
2008-11-06	05:41:00	0
2008-11-06	05:42:00	0
2008-11-06	05:43:00	0
2008-11-06	05:44:00	0
2008-11-06	05:45:00	0
2008-11-06	05:46:00	0
2008-11-06	05:47:00	0
2008-11-06	05:48:00	0
2008-11-06	05:49:00	0
2008-11-06	05:50:00	0
2008-11-06	05:51:00	0
2008-11-06	05:52:00	0
2008-11-06	05:53:00	0
2008-11-06	05:54:00	0
2008-11-06	05:55:00	0
2008-11-06	05:56:00	0
2008-11-06	05:57:00	0
2008-11-06	05:58:00	0
2008-11-06	05:59:00	0
2008-11-06	06:00:00	0
2008-11-06	06:01:00	0
2008-11-06	06:02:00	0
2008-11-06	06:03:00	0
2008-11-06	06:04:00	0
2008-11-06	06:05:00	0
2008-11-06	06:06:00	0
2008-11-06	06:07:00	0
2008-11-06	06:08:00	0
2008-11-06	06:09:00	0
2008-11-06	06:10:00	0
2008-11-06	06:11:00	0
2008-11-06	06:12:00	0
2008-11-06	06:13:00	0
2008-11-06	06:14:00	0
2008-11-06	06:15:00	0
2008-11-06	06:16:00	0
2008-11-06	06:17:00	0
2008-11-06	06:18:00	0
2008-11-06	06:19:00	0
2008-11-06	06:20:00	0
2008-11-06	06:21:00	0
2008-11-06	06:22:00	0
2008-11-06	06:23:00	0
2008-11-06	06:24:00	0
2008-11-06	06:25:00	0
2008-11-06	06:26:00	0
2008-11-06	06:27:00	0
2008-11-06	06:28:00	0
2008-11-06	06:29:00	0
2008-11-06	06:30:00	0
2008-11-06	06:31:00	0
2008-11-06	06:32:00	0
2008-11-06	06:33:00	0
2008-11-06	06:34:00	0
2008-11-06	06:35:00	0
2008-11-06	06:36:00	0
2008-11-06	06:37:00	0
2008-11-06	06:38:00	0
2008-11-06	06:39:00	0
2008-11-06	06:40:00	0
2008-11-06	06:41:00	0
2008-11-06	06:42:00	0
2008-11-06	06:43:00	0
2008-11-06	06:44:00	0
2008-11-06	06:45:00	0
2008-11-06	06:46:00	0
2008-11-06	06:47:00	0
2008-11-06	06:48:00	0
2008-11-06	06:49:00	0
2008-11-06	06:50:00	0
2008-11-06	06:51:00	0
2008-11-06	06:52:00	0
2008-11-06	06:53:00	0
2008-11-06	06:54:00	0
2008-11-06	06:55:00	0
2008-11-06	06:56:00	0
2008-11-06	06:57:00	0
2008-11-06	06:58:00	0
2008-11-06	06:59:00	0
2008-11-06	07:00:00	0
2008-11-06	07:01:00	0
2008-11-06	07:02:00	0
2008-11-06	07:03:00	0
2008-11-06	07:04:00	0
2008-11-06	07:05:00	0
2008-11-06	07:06:00	0
2008-11-06	07:07:00	0
2008-11-06	07:08:00	0
2008-11-06	07:09:00	0
2008-11-06	07:10:00	0
2008-11-06	07:11:00	0
2008-11-06	07:12:00	0
2008-11-06	07:13:00	0
2008-11-06	07:14:00	0
2008-11-06	07:15:00	0
2008-11-06	07:16:00	0
2008-11-06	07:17:00	0
2008-11-06	07:18:00	0
2008-11-06	07:19:00	0
2008-11-06	07:20:00	0
2008-11-06	07:21:00	0
2008-11-06	07:22:00	0
2008-11-06	07:23:00	0
2008-11-06	07:24:00	0
2008-11-06	07:25:00	0
2008-11-06	07:26:00	0
2008-11-06	07:27:00	0
2008-11-06	07:28:00	0
2008-11-06	07:29:00	0
2008-11-06	07:30:00	0
2008-11-06	07:31:00	0
2008-11-06	07:32:00	0
2008-11-06	07:33:00	0
2008-11-06	07:34:00	0
2008-11-06	07:35:00	0
2008-11-06	07:36:00	0
2008-11-06	07:37:00	0
2008-11-06	07:38:00	0
2008-11-06	07:39:00	0
2008-11-06	07:40:00	0
2008-11-06	07:41:00	0
2008-11-06	07:42:00	0
2008-11-06	07:43:00	0
2008-11-06	07:44:00	0
2008-11-06	07:45:00	0
2008-11-06	07:46:00	0
2008-11-06	07:47:00	0
2008-11-06	07:48:00	0
2008-11-06	07:49:00	0
2008-11-06	07:50:00	0
2008-11-06	07:51:00	0
2008-11-06	07:52:00	0
2008-11-06	07:53:00	0
2008-11-06	07:54:00	0
2008-11-06	07:55:00	0
2008-11-06	07:56:00	0
2008-11-06	07:57:00	0
2008-11-06	07:58:00	0
2008-11-06	07:59:00	0
2008-11-06	08:00:00	0
2008-11-06	08:01:00	0
2008-11-06	08:02:00	0
2008-11-06	08:03:00	0
2008-11-06	08:04:00	0
2008-11-06	08:05:00	0
2008-11-06	08:06:00	0
2008-11-06	08:07:00	0
2008-11-06	08:08:00	0
2008-11-06	08:09:00	0
2008-11-06	08:10:00	0
2008-11-06	08:11:00	0
2008-11-06	08:12:00	0
2008-11-06	08:13:00	0
2008-11-06	08:14:00	0
2008-11-06	08:15:00	0
2008-11-06	08:16:00	0
2008-11-06	08:17:00	0
2008-11-06	08:18:00	0
2008-11-06	08:19:00	0
2008-11-06	08:20:00	0
2008-11-06	08:21:00	0
2008-11-06	08:22:00	0
2008-11-06	08:23:00	0
2008-11-06	08:24:00	0
2008-11-06	08:25:00	0
2008-11-06	08:26:00	0
2008-11-06	08:27:00	0
2008-11-06	08:28:00	0
2008-11-06	08:29:00	0
2008-11-06	08:30:00	0
2008-11-06	08:31:00	0
2008-11-06	08:32:00	0
2008-11-06	08:33:00	0
2008-11-06	08:34:00	0
2008-11-06	08:35:00	0
2008-11-06	08:36:00	0
2008-11-06	08:37:00	0
2008-11-06	08:38:00	0
2008-11-06	08:39:00	0
2008-11-06	08:40:00	0
2008-11-06	08:41:00	0
2008-11-06	08:42:00	0
2008-11-06	08:43:00	0
2008-11-06	08:44:00	0
2008-11-06	08:45:00	0
2008-11-06	08:46:00	0
2008-11-06	08:47:00	0
2008-11-06	08:48:00	0
2008-11-06	08:49:00	0
2008-11-06	08:50:00	0
2008-11-06	08:51:00	0
2008-11-06	08:52:00	0
2008-11-06	08:53:00	0
2008-11-06	08:54:00	0
2008-11-06	08:55:00	0
2008-11-06	08:56:00	0
2008-11-06	08:57:00	0
2008-11-06	08:58:00	0
2008-11-06	08:59:00	0
2008-11-06	09:00:00	0
2008-11-06	09:01:00	0
2008-11-06	09:02:00	0
2008-11-06	09:03:00	0
2008-11-06	09:04:00	0
2008-11-06	09:05:00	0
2008-11-06	09:06:00	0
2008-11-06	09:07:00	0
2008-11-06	09:08:00	0
2008-11-06	09:09:00	0
2008-11-06	09:10:00	0
2008-11-06	09:11:00	0
2008-11-06	09:12:00	0
2008-11-06	09:13:00	0
2008-11-06	09:14:00	0
2008-11-06	09:15:00	0
2008-11-06	09:16:00	0
2008-11-06	09:17:00	0
2008-11-06	09:18:00	0
2008-11-06	09:19:00	0
2008-11-06	09:20:00	0
2008-11-06	09:21:00	0
2008-11-06	09:22:00	0
2008-11-06	09:23:00	0
2008-11-06	09:24:00	0
2008-11-06	09:25:00	0
2008-11-06	09:26:00	0
2008-11-06	09:27:00	0
2008-11-06	09:28:00	0
2008-11-06	09:29:00	0
2008-11-06	09:30:00	0
2008-11-06	09:31:00	0
2008-11-06	09:32:00	0
2008-11-06	09:33:00	0
2008-11-06	09:34:00	0
2008-11-06	09:35:00	0
2008-11-06	09:36:00	0
2008-11-06	09:37:00	0
2008-11-06	09:38:00	0
2008-11-06	09:39:00	0
2008-11-06	09:40:00	0
2008-11-06	09:41:00	0
2008-11-06	09:42:00	0
2008-11-06	09:43:00	0
2008-11-06	09:44:00	0
2008-11-06	09:45:00	0
2008-11-06	09:46:00	0
2008-11-06	09:47:00	0
2008-11-06	09:48:00	0
2008-11-06	09:49:00	0
2008-11-06	09:50:00	0
2008-11-06	09:51:00	0
2008-11-06	09:52:00	0
2008-11-06	09:53:00	0
2008-11-06	09:54:00	0
2008-11-06	09:55:00	0
2008-11-06	09:56:00	0
2008-11-06	09:57:00	0
2008-11-06	09:58:00	0
2008-11-06	09:59:00	0
2008-11-06	10:00:00	0
2008-11-06	10:01:00	0
2008-11-06	10:02:00	0
2008-11-06	10:03:00	0
2008-11-06	10:04:00	0
2008-11-06	10:05:00	0
2008-11-06	10:06:00	0
2008-11-06	10:07:00	0
2008-11-06	10:08:00	0
2008-11-06	10:09:00	0
2008-11-06	10:10:00	0
2008-11-06	10:11:00	0
2008-11-06	10:12:00	0
2008-11-06	10:13:00	0
2008-11-06	10:14:00	0
2008-11-06	10:15:00	0
2008-11-06	10:16:00	0
2008-11-06	10:17:00	0
2008-11-06	10:18:00	0
2008-11-06	10:19:00	0
2008-11-06	10:20:00	0
2008-11-06	10:21:00	0
2008-11-06	10:22:00	0
2008-11-06	10:23:00	0
2008-11-06	10:24:00	0
2008-11-06	10:25:00	0
2008-11-06	10:26:00	0
2008-11-06	10:27:00	0
2008-11-06	10:28:00	0
2008-11-06	10:29:00	0
2008-11-06	10:30:00	0
2008-11-06	10:31:00	0
2008-11-06	10:32:00	0
2008-11-06	10:33:00	0
2008-11-06	10:34:00	0
2008-11-06	10:35:00	0
2008-11-06	10:36:00	0
2008-11-06	10:37:00	0
2008-11-06	10:38:00	0
2008-11-06	10:39:00	0
2008-11-06	10:40:00	0
2008-11-06	10:41:00	0
2008-11-06	10:42:00	0
2008-11-06	10:43:00	0
2008-11-06	10:44:00	0
2008-11-06	10:45:00	0
2008-11-06	10:46:00	0
2008-11-06	10:47:00	0
2008-11-06	10:48:00	0
2008-11-06	10:49:00	0
2008-11-06	10:50:00	0
2008-11-06	10:51:00	0
2008-11-06	10:52:00	0
2008-11-06	10:53:00	0
2008-11-06	10:54:00	0
2008-11-06	10:55:00	0
2008-11-06	10:56:00	0
2008-11-06	10:57:00	0
2008-11-06	10:58:00	0
2008-11-06	10:59:00	0
2008-11-06	11:00:00	0
2008-11-06	11:01:00	0
2008-11-06	11:02:00	0
2008-11-06	11:03:00	0
2008-11-06	11:04:00	0
2008-11-06	11:05:00	0
2008-11-06	11:06:00	0
2008-11-06	11:07:00	0
2008-11-06	11:08:00	0
2008-11-06	11:09:00	0
2008-11-06	11:10:00	0
2008-11-06	11:11:00	0
2008-11-06	11:12:00	0
2008-11-06	11:13:00	0
2008-11-06	11:14:00	0
2008-11-06	11:15:00	0
2008-11-06	11:16:00	0
2008-11-06	11:17:00	0
2008-11-06	11:18:00	0
2008-11-06	11:19:00	0
2008-11-06	11:20:00	0
2008-11-06	11:21:00	0
2008-11-06	11:22:00	0
2008-11-06	11:23:00	0
2008-11-06	11:24:00	0
2008-11-06	11:25:00	0
2008-11-06	11:26:00	0
2008-11-06	11:27:00	0
2008-11-06	11:28:00	0
2008-11-06	11:29:00	0
2008-11-06	11:30:00	0
2008-11-06	11:31:00	0
2008-11-06	11:32:00	0
2008-11-06	11:33:00	0
2008-11-06	11:34:00	0
2008-11-06	11:35:00	0
2008-11-06	11:36:00	0
2008-11-06	11:37:00	0
2008-11-06	11:38:00	0
2008-11-06	11:39:00	0
2008-11-06	11:40:00	0
2008-11-06	11:41:00	0
2008-11-06	11:42:00	0
2008-11-06	11:43:00	0
2008-11-06	11:44:00	0
2008-11-06	11:45:00	0
2008-11-06	11:46:00	0
2008-11-06	11:47:00	0
2008-11-06	11:48:00	0
2008-11-06	11:49:00	0
2008-11-06	11:50:00	0
2008-11-06	11:51:00	0
2008-11-06	11:52:00	0
2008-11-06	11:53:00	0
2008-11-06	11:54:00	0
2008-11-06	11:55:00	0
2008-11-06	11:56:00	0
2008-11-06	11:57:00	0
2008-11-06	11:58:00	0
2008-11-06	11:59:00	0
2008-11-06	12:00:00	0
2008-11-06	12:01:00	0
2008-11-06	12:02:00	0
2008-11-06	12:03:00	0
2008-11-06	12:04:00	0
2008-11-06	12:05:00	0
2008-11-06	12:06:00	0
2008-11-06	12:07:00	0
2008-11-06	12:08:00	0
2008-11-06	12:09:00	0
2008-11-06	12:10:00	0
2008-11-06	12:11:00	0
2008-11-06	12:12:00	0
2008-11-06	12:13:00	0
2008-11-06	12:14:00	0
2008-11-06	12:15:00	0
2008-11-06	12:16:00	0
2008-11-06	12:17:00	0
2008-11-06	12:18:00	0
2008-11-06	12:19:00	0
2008-11-06	12:20:00	0
2008-11-06	12:21:00	0
2008-11-06	12:22:00	0
2008-11-06	12:23:00	0
2008-11-06	12:24:00	0
2008-11-06	12:25:00	0
2008-11-06	12:26:00	0
2008-11-06	12:27:00	0
2008-11-06	12:28:00	0
2008-11-06	12:29:00	0
2008-11-06	12:30:00	0
2008-11-06	12:31:00	0
2008-11-06	12:32:00	0
2008-11-06	12:33:00	0
2008-11-06	12:34:00	0
2008-11-06	12:35:00	0
2008-11-06	12:36:00	0
2008-11-06	12:37:00	0
2008-11-06	12:38:00	0
2008-11-06	12:39:00	0
2008-11-06	12:40:00	0
2008-11-06	12:41:00	0
2008-11-06	12:42:00	0
2008-11-06	12:43:00	0
2008-11-06	12:44:00	0
2008-11-06	12:45:00	0
2008-11-06	12:46:00	0
2008-11-06	12:47:00	0
2008-11-06	12:48:00	0
2008-11-06	12:49:00	0
2008-11-06	12:50:00	0
2008-11-06	12:51:00	0
2008-11-06	12:52:00	0
2008-11-06	12:53:00	0
2008-11-06	12:54:00	0
2008-11-06	12:55:00	0
2008-11-06	12:56:00	0
2008-11-06	12:57:00	0
2008-11-06	12:58:00	0
2008-11-06	12:59:00	0
2008-11-06	13:00:00	0
2008-11-06	13:01:00	0
2008-11-06	13:02:00	0
2008-11-06	13:03:00	0
2008-11-06	13:04:00	0
2008-11-06	13:05:00	0
2008-11-06	13:06:00	0
2008-11-06	13:07:00	0
2008-11-06	13:08:00	0
2008-11-06	13:09:00	0
2008-11-06	13:10:00	0
2008-11-06	13:11:00	0
2008-11-06	13:12:00	0
2008-11-06	13:13:00	0
2008-11-06	13:14:00	0
2008-11-06	13:15:00	0
2008-11-06	13:16:00	0
2008-11-06	13:17:00	0
2008-11-06	13:18:00	0
2008-11-06	13:19:00	0
2008-11-06	13:20:00	0
2008-11-06	13:21:00	0
2008-11-06	13:22:00	0
2008-11-06	13:23:00	0
2008-11-06	13:24:00	0
2008-11-06	13:25:00	0
2008-11-06	13:26:00	0
2008-11-06	13:27:00	0
2008-11-06	13:28:00	0
2008-11-06	13:29:00	0
2008-11-06	13:30:00	0
2008-11-06	13:31:00	0
2008-11-06	13:32:00	0
2008-11-06	13:33:00	0
2008-11-06	13:34:00	0
2008-11-06	13:35:00	0
2008-11-06	13:36:00	0
2008-11-06	13:37:00	0
2008-11-06	13:38:00	0
2008-11-06	13:39:00	0
2008-11-06	13:40:00	0
2008-11-06	13:41:00	0
2008-11-06	13:42:00	0
2008-11-06	13:43:00	0
2008-11-06	13:44:00	0
2008-11-06	13:45:00	0
2008-11-06	13:46:00	0
2008-11-06	13:47:00	0
2008-11-06	13:48:00	0
2008-11-06	13:49:00	0
2008-11-06	13:50:00	0
2008-11-06	13:51:00	0
2008-11-06	13:52:00	0
2008-11-06	13:53:00	0
2008-11-06	13:54:00	0
2008-11-06	13:55:00	0
2008-11-06	13:56:00	0
2008-11-06	13:57:00	0
2008-11-06	13:58:00	0
2008-11-06	13:59:00	0
2008-11-06	14:00:00	0
2008-11-06	14:01:00	0
2008-11-06	14:02:00	0
2008-11-06	14:03:00	0
2008-11-06	14:04:00	0
2008-11-06	14:05:00	0
2008-11-06	14:06:00	0
2008-11-06	14:07:00	0
2008-11-06	14:08:00	0
2008-11-06	14:09:00	0
2008-11-06	14:10:00	0
2008-11-06	14:11:00	0
2008-11-06	14:12:00	0
2008-11-06	14:13:00	0
2008-11-06	14:14:00	0
2008-11-06	14:15:00	0
2008-11-06	14:16:00	0
2008-11-06	14:17:00	0
2008-11-06	14:18:00	0
2008-11-06	14:19:00	0
2008-11-06	14:20:00	0
2008-11-06	14:21:00	0
2008-11-06	14:22:00	0
2008-11-06	14:23:00	0
2008-11-06	14:24:00	0
2008-11-06	14:25:00	0
2008-11-06	14:26:00	0
2008-11-06	14:27:00	0
2008-11-06	14:28:00	0
2008-11-06	14:29:00	0
2008-11-06	14:30:00	0
2008-11-06	14:31:00	0
2008-11-06	14:32:00	0
2008-11-06	14:33:00	0
2008-11-06	14:34:00	0
2008-11-06	14:35:00	0
2008-11-06	14:36:00	0
2008-11-06	14:37:00	0
2008-11-06	14:38:00	0
2008-11-06	14:39:00	0
2008-11-06	14:40:00	0
2008-11-06	14:41:00	0
2008-11-06	14:42:00	0
2008-11-06	14:43:00	0
2008-11-06	14:44:00	0
2008-11-06	14:45:00	0
2008-11-06	14:46:00	0
2008-11-06	14:47:00	0
2008-11-06	14:48:00	0
2008-11-06	14:49:00	0
2008-11-06	14:50:00	0
2008-11-06	14:51:00	0
2008-11-06	14:52:00	0
2008-11-06	14:53:00	0
2008-11-06	14:54:00	0
2008-11-06	14:55:00	0
2008-11-06	14:56:00	0
2008-11-06	14:57:00	0
2008-11-06	14:58:00	0
2008-11-06	14:59:00	0
2008-11-06	15:00:00	0
2008-11-06	15:01:00	0
2008-11-06	15:02:00	0
2008-11-06	15:03:00	0
2008-11-06	15:04:00	0
2008-11-06	15:05:00	0
2008-11-06	15:06:00	0
2008-11-06	15:07:00	0
2008-11-06	15:08:00	0
2008-11-06	15:09:00	0
2008-11-06	15:10:00	0
2008-11-06	15:11:00	0
2008-11-06	15:12:00	0
2008-11-06	15:13:00	0
2008-11-06	15:14:00	0
2008-11-06	15:15:00	0
2008-11-06	15:16:00	0
2008-11-06	15:17:00	0
2008-11-06	15:18:00	0
2008-11-06	15:19:00	0
2008-11-06	15:20:00	0
2008-11-06	15:21:00	0
2008-11-06	15:22:00	0
2008-11-06	15:23:00	0
2008-11-06	15:24:00	0
2008-11-06	15:25:00	0
2008-11-06	15:26:00	0
2008-11-06	15:27:00	0
2008-11-06	15:28:00	0
2008-11-06	15:29:00	0
2008-11-06	15:30:00	0
2008-11-06	15:31:00	0
2008-11-06	15:32:00	0
2008-11-06	15:33:00	0
2008-11-06	15:34:00	0
2008-11-06	15:35:00	0
2008-11-06	15:36:00	0
2008-11-06	15:37:00	0
2008-11-06	15:38:00	0
2008-11-06	15:39:00	0
2008-11-06	15:40:00	0
2008-11-06	15:41:00	0
2008-11-06	15:42:00	0
2008-11-06	15:43:00	0
2008-11-06	15:44:00	0
2008-11-06	15:45:00	0
2008-11-06	15:46:00	0
2008-11-06	15:47:00	0
2008-11-06	15:48:00	0
2008-11-06	15:49:00	0
2008-11-06	15:50:00	0
2008-11-06	15:51:00	0
2008-11-06	15:52:00	0
2008-11-06	15:53:00	0
2008-11-06	15:54:00	0
2008-11-06	15:55:00	0
2008-11-06	15:56:00	0
2008-11-06	15:57:00	0
2008-11-06	15:58:00	0
2008-11-06	15:59:00	0
2008-11-06	16:00:00	0
2008-11-06	16:01:00	0
2008-11-06	16:02:00	0
2008-11-06	16:03:00	0
2008-11-06	16:04:00	0
2008-11-06	16:05:00	0
2008-11-06	16:06:00	0
2008-11-06	16:07:00	0
2008-11-06	16:08:00	0
2008-11-06	16:09:00	0
2008-11-06	16:10:00	0
2008-11-06	16:11:00	0
2008-11-06	16:12:00	0
2008-11-06	16:13:00	0
2008-11-06	16:14:00	0
2008-11-06	16:15:00	0
2008-11-06	16:16:00	0
2008-11-06	16:17:00	0
2008-11-06	16:18:00	0
2008-11-06	16:19:00	0
2008-11-06	16:20:00	0
2008-11-06	16:21:00	0
2008-11-06	16:22:00	0
2008-11-06	16:23:00	0
2008-11-06	16:24:00	0
2008-11-06	16:25:00	0
2008-11-06	16:26:00	0
2008-11-06	16:27:00	0
2008-11-06	16:28:00	0
2008-11-06	16:29:00	0
2008-11-06	16:30:00	0
2008-11-06	16:31:00	0
2008-11-06	16:32:00	0
2008-11-06	16:33:00	0
2008-11-06	16:34:00	0
2008-11-06	16:35:00	0
2008-11-06	16:36:00	0
2008-11-06	16:37:00	0
2008-11-06	16:38:00	0
2008-11-06	16:39:00	0
2008-11-06	16:40:00	0
2008-11-06	16:41:00	0
2008-11-06	16:42:00	0
2008-11-06	16:43:00	0
2008-11-06	16:44:00	0
2008-11-06	16:45:00	0
2008-11-06	16:46:00	0
2008-11-06	16:47:00	0
2008-11-06	16:48:00	0
2008-11-06	16:49:00	0
2008-11-06	16:50:00	0
2008-11-06	16:51:00	0
2008-11-06	16:52:00	0
2008-11-06	16:53:00	0
2008-11-06	16:54:00	0
2008-11-06	16:55:00	0
2008-11-06	16:56:00	0
2008-11-06	16:57:00	0
2008-11-06	16:58:00	0
2008-11-06	16:59:00	0
2008-11-06	17:00:00	0	M
2008-11-06	17:01:00	51
2008-11-06	17:02:00	280
2008-11-06	17:03:00	295
2008-11-06	17:04:00	122
2008-11-06	17:05:00	81
2008-11-06	17:06:00	61
2008-11-06	17:07:00	30
2008-11-06	17:08:00	41
2008-11-06	17:09:00	61
2008-11-06	17:10:00	10
2008-11-06	17:11:00	0
2008-11-06	17:12:00	41
2008-11-06	17:13:00	0
2008-11-06	17:14:00	30
2008-11-06	17:15:00	30
2008-11-06	17:16:00	492
2008-11-06	17:17:00	524
2008-11-06	17:18:00	181
2008-11-06	17:19:00	217
2008-11-06	17:20:00	193
2008-11-06	17:21:00	41
2008-11-06	17:22:00	81
2008-11-06	17:23:00	30
2008-11-06	17:24:00	61
2008-11-06	17:25:00	51
2008-11-06	17:26:00	30
2008-11-06	17:27:00	156
2008-11-06	17:28:00	181
2008-11-06	17:29:00	230
2008-11-06	17:30:00	132
2008-11-06	17:31:00	91
2008-11-06	17:32:00	144
2008-11-06	17:33:00	410
2008-11-06	17:34:00	41
2008-11-06	17:35:00	51
2008-11-06	17:36:00	169
2008-11-06	17:37:00	144
2008-11-06	17:38:00	122
2008-11-06	17:39:00	71
2008-11-06	17:40:00	51
2008-11-06	17:41:00	20
2008-11-06	17:42:00	10
2008-11-06	17:43:00	20
2008-11-06	17:44:00	71
2008-11-06	17:45:00	443
2008-11-06	17:46:00	1447
2008-11-06	17:47:00	713
2008-11-06	17:48:00	230
2008-11-06	17:49:00	217
2008-11-06	17:50:00	102
2008-11-06	17:51:00	20
2008-11-06	17:52:00	51
2008-11-06	17:53:00	102
2008-11-06	17:54:00	132
2008-11-06	17:55:00	351
2008-11-06	17:56:00	10
2008-11-06	17:57:00	41
2008-11-06	17:58:00	0
2008-11-06	17:59:00	10
2008-11-06	18:00:00	122
2008-11-06	18:01:00	41
2008-11-06	18:02:00	169
2008-11-06	18:03:00	41
2008-11-06	18:04:00	91
2008-11-06	18:05:00	20
2008-11-06	18:06:00	0
2008-11-06	18:07:00	0
2008-11-06	18:08:00	0
2008-11-06	18:09:00	0
2008-11-06	18:10:00	0
2008-11-06	18:11:00	156
2008-11-06	18:12:00	51
2008-11-06	18:13:00	30
2008-11-06	18:14:00	102
2008-11-06	18:15:00	102
2008-11-06	18:16:00	0
2008-11-06	18:17:00	0
2008-11-06	18:18:00	30
2008-11-06	18:19:00	10
2008-11-06	18:20:00	51
2008-11-06	18:21:00	337
2008-11-06	18:22:00	41
2008-11-06	18:23:00	132
2008-11-06	18:24:00	0
2008-11-06	18:25:00	0
2008-11-06	18:26:00	0
2008-11-06	18:27:00	0
2008-11-06	18:28:00	0
2008-11-06	18:29:00	0
2008-11-06	18:30:00	0
2008-11-06	18:31:00	0
2008-11-06	18:32:00	10
2008-11-06	18:33:00	0
2008-11-06	18:34:00	0
2008-11-06	18:35:00	0
2008-11-06	18:36:00	0
2008-11-06	18:37:00	0
2008-11-06	18:38:00	0
2008-11-06	18:39:00	295
2008-11-06	18:40:00	20
2008-11-06	18:41:00	0
2008-11-06	18:42:00	0
2008-11-06	18:43:00	0
2008-11-06	18:44:00	0
2008-11-06	18:45:00	0
2008-11-06	18:46:00	0
2008-11-06	18:47:00	0
2008-11-06	18:48:00	0
2008-11-06	18:49:00	0
2008-11-06	18:50:00	0
2008-11-06	18:51:00	0
2008-11-06	18:52:00	0
2008-11-06	18:53:00	0
2008-11-06	18:54:00	0
2008-11-06	18:55:00	0
2008-11-06	18:56:00	0
2008-11-06	18:57:00	0
2008-11-06	18:58:00	0
2008-11-06	18:59:00	0
2008-11-06	19:00:00	0
2008-11-06	19:01:00	0
2008-11-06	19:02:00	0
2008-11-06	19:03:00	0
2008-11-06	19:04:00	0
2008-11-06	19:05:00	0
2008-11-06	19:06:00	0
2008-11-06	19:07:00	0
2008-11-06	19:08:00	0
2008-11-06	19:09:00	0
2008-11-06	19:10:00	0
2008-11-06	19:11:00	0
2008-11-06	19:12:00	0
2008-11-06	19:13:00	10
2008-11-06	19:14:00	0
2008-11-06	19:15:00	0
2008-11-06	19:16:00	0
2008-11-06	19:17:00	0
2008-11-06	19:18:00	0
2008-11-06	19:19:00	0
2008-11-06	19:20:00	0
2008-11-06	19:21:00	0
2008-11-06	19:22:00	0
2008-11-06	19:23:00	0
2008-11-06	19:24:00	41
2008-11-06	19:25:00	0
2008-11-06	19:26:00	0
2008-11-06	19:27:00	0
2008-11-06	19:28:00	0
2008-11-06	19:29:00	0
2008-11-06	19:30:00	0
2008-11-06	19:31:00	0
2008-11-06	19:32:00	0
2008-11-06	19:33:00	0
2008-11-06	19:34:00	0
2008-11-06	19:35:00	0
2008-11-06	19:36:00	0
2008-11-06	19:37:00	0
2008-11-06	19:38:00	0
2008-11-06	19:39:00	0
2008-11-06	19:40:00	0
2008-11-06	19:41:00	0
2008-11-06	19:42:00	0
2008-11-06	19:43:00	0
2008-11-06	19:44:00	0
2008-11-06	19:45:00	0
2008-11-06	19:46:00	0
2008-11-06	19:47:00	0
2008-11-06	19:48:00	0
2008-11-06	19:49:00	0
2008-11-06	19:50:00	0
2008-11-06	19:51:00	0
2008-11-06	19:52:00	0
2008-11-06	19:53:00	0
2008-11-06	19:54:00	0
2008-11-06	19:55:00	0
2008-11-06	19:56:00	10
2008-11-06	19:57:00	0
2008-11-06	19:58:00	10
2008-11-06	19:59:00	0
2008-11-06	20:00:00	30
2008-11-06	20:01:00	81
2008-11-06	20:02:00	492
2008-11-06	20:03:00	181
2008-11-06	20:04:00	394
2008-11-06	20:05:00	181
2008-11-06	20:06:00	41
2008-11-06	20:07:00	0
2008-11-06	20:08:00	0
2008-11-06	20:09:00	0
2008-11-06	20:10:00	169
2008-11-06	20:11:00	132
2008-11-06	20:12:00	0
2008-11-06	20:13:00	0
2008-11-06	20:14:00	394
2008-11-06	20:15:00	230
2008-11-06	20:16:00	0
2008-11-06	20:17:00	0
2008-11-06	20:18:00	0
2008-11-06	20:19:00	0
2008-11-06	20:20:00	0
2008-11-06	20:21:00	10
2008-11-06	20:22:00	0
2008-11-06	20:23:00	0
2008-11-06	20:24:00	0
2008-11-06	20:25:00	0
2008-11-06	20:26:00	0
2008-11-06	20:27:00	0
2008-11-06	20:28:00	0
2008-11-06	20:29:00	0
2008-11-06	20:30:00	0
2008-11-06	20:31:00	0
2008-11-06	20:32:00	0
2008-11-06	20:33:00	0
2008-11-06	20:34:00	10
2008-11-06	20:35:00	0
2008-11-06	20:36:00	10
2008-11-06	20:37:00	0
2008-11-06	20:38:00	0
2008-11-06	20:39:00	0
2008-11-06	20:40:00	0
2008-11-06	20:41:00	91
2008-11-06	20:42:00	61
2008-11-06	20:43:00	0
2008-11-06	20:44:00	0
2008-11-06	20:45:00	10
2008-11-06	20:46:00	295
2008-11-06	20:47:00	0
2008-11-06	20:48:00	0
2008-11-06	20:49:00	0
2008-11-06	20:50:00	230
2008-11-06	20:51:00	20
2008-11-06	20:52:00	0
2008-11-06	20:53:00	0
2008-11-06	20:54:00	616
2008-11-06	20:55:00	0
2008-11-06	20:56:00	91
2008-11-06	20:57:00	230
2008-11-06	20:58:00	774
2008-11-06	20:59:00	205
2008-11-06	21:00:00	561
2008-11-06	21:01:00	953
2008-11-06	21:02:00	634
2008-11-06	21:03:00	616
2008-11-06	21:04:00	713
2008-11-06	21:05:00	443
2008-11-06	21:06:00	323
2008-11-06	21:07:00	144
2008-11-06	21:08:00	132
2008-11-06	21:09:00	132
2008-11-06	21:10:00	30
2008-11-06	21:11:00	242
2008-11-06	21:12:00	0
2008-11-06	21:13:00	394
2008-11-06	21:14:00	193
2008-11-06	21:15:00	0
2008-11-06	21:16:00	0
2008-11-06	21:17:00	0
2008-11-06	21:18:00	0
2008-11-06	21:19:00	0
2008-11-06	21:20:00	0
2008-11-06	21:21:00	0
2008-11-06	21:22:00	0
2008-11-06	21:23:00	0
2008-11-06	21:24:00	0
2008-11-06	21:25:00	0
2008-11-06	21:26:00	0
2008-11-06	21:27:00	0
2008-11-06	21:28:00	0
2008-11-06	21:29:00	0
2008-11-06	21:30:00	0
2008-11-06	21:31:00	0
2008-11-06	21:32:00	0
2008-11-06	21:33:00	0
2008-11-06	21:34:00	0
2008-11-06	21:35:00	0
2008-11-06	21:36:00	0
2008-11-06	21:37:00	0
2008-11-06	21:38:00	0
2008-11-06	21:39:00	20
2008-11-06	21:40:00	10
2008-11-06	21:41:00	0
2008-11-06	21:42:00	0
2008-11-06	21:43:00	0
2008-11-06	21:44:00	0
2008-11-06	21:45:00	0
2008-11-06	21:46:00	0
2008-11-06	21:47:00	0
2008-11-06	21:48:00	0
2008-11-06	21:49:00	0
2008-11-06	21:50:00	0
2008-11-06	21:51:00	0
2008-11-06	21:52:00	0
2008-11-06	21:53:00	0
2008-11-06	21:54:00	0
2008-11-06	21:55:00	0
2008-11-06	21:56:00	0
2008-11-06	21:57:00	0
2008-11-06	21:58:00	0
2008-11-06	21:59:00	0
2008-11-06	22:00:00	0
2008-11-06	22:01:00	0
2008-11-06	22:02:00	0
2008-11-06	22:03:00	0
2008-11-06	22:04:00	0
2008-11-06	22:05:00	0
2008-11-06	22:06:00	0
2008-11-06	22:07:00	0
2008-11-06	22:08:00	0
2008-11-06	22:09:00	0
2008-11-06	22:10:00	0
2008-11-06	22:11:00	0
2008-11-06	22:12:00	0
2008-11-06	22:13:00	0
2008-11-06	22:14:00	0
2008-11-06	22:15:00	0
2008-11-06	22:16:00	0
2008-11-06	22:17:00	0
2008-11-06	22:18:00	0
2008-11-06	22:19:00	0
2008-11-06	22:20:00	0
2008-11-06	22:21:00	0
2008-11-06	22:22:00	0
2008-11-06	22:23:00	0
2008-11-06	22:24:00	0
2008-11-06	22:25:00	0
2008-11-06	22:26:00	0
2008-11-06	22:27:00	0
2008-11-06	22:28:00	0
2008-11-06	22:29:00	0
2008-11-06	22:30:00	0
2008-11-06	22:31:00	0
2008-11-06	22:32:00	0
2008-11-06	22:33:00	0
2008-11-06	22:34:00	0
2008-11-06	22:35:00	0
2008-11-06	22:36:00	0
2008-11-06	22:37:00	0
2008-11-06	22:38:00	0
2008-11-06	22:39:00	0
2008-11-06	22:40:00	0
2008-11-06	22:41:00	0
2008-11-06	22:42:00	0
2008-11-06	22:43:00	0
2008-11-06	22:44:00	0
2008-11-06	22:45:00	0
2008-11-06	22:46:00	0
2008-11-06	22:47:00	0
2008-11-06	22:48:00	0
2008-11-06	22:49:00	0
2008-11-06	22:50:00	0
2008-11-06	22:51:00	0
2008-11-06	22:52:00	0
2008-11-06	22:53:00	0
2008-11-06	22:54:00	0
2008-11-06	22:55:00	0
2008-11-06	22:56:00	0
2008-11-06	22:57:00	0
2008-11-06	22:58:00	0
2008-11-06	22:59:00	0
2008-11-06	23:00:00	0
2008-11-06	23:01:00	0
2008-11-06	23:02:00	0
2008-11-06	23:03:00	0
2008-11-06	23:04:00	0
2008-11-06	23:05:00	0
2008-11-06	23:06:00	0
2008-11-06	23:07:00	0
2008-11-06	23:08:00	0
2008-11-06	23:09:00	0
2008-11-06	23:10:00	0
2008-11-06	23:11:00	0
2008-11-06	23:12:00	0
2008-11-06	23:13:00	0
2008-11-06	23:14:00	0
2008-11-06	23:15:00	0
2008-11-06	23:16:00	0
2008-11-06	23:17:00	0
2008-11-06	23:18:00	0
2008-11-06	23:19:00	0
2008-11-06	23:20:00	0
2008-11-06	23:21:00	0
2008-11-06	23:22:00	0
2008-11-06	23:23:00	0
2008-11-06	23:24:00	0
2008-11-06	23:25:00	0
2008-11-06	23:26:00	0
2008-11-06	23:27:00	0
2008-11-06	23:28:00	0
2008-11-06	23:29:00	0
2008-11-06	23:30:00	0
2008-11-06	23:31:00	0
2008-11-06	23:32:00	0
2008-11-06	23:33:00	0
2008-11-06	23:34:00	0
2008-11-06	23:35:00	0
2008-11-06	23:36:00	0
2008-11-06	23:37:00	0
2008-11-06	23:38:00	0
2008-11-06	23:39:00	0
2008-11-06	23:40:00	0
2008-11-06	23:41:00	0
2008-11-06	23:42:00	0
2008-11-06	23:43:00	0
2008-11-06	23:44:00	0
2008-11-06	23:45:00	0
2008-11-06	23:46:00	0
2008-11-06	23:47:00	0
2008-11-06	23:48:00	0
2008-11-06	23:49:00	0
2008-11-06	23:50:00	0
2008-11-06	23:51:00	0
2008-11-06	23:52:00	0
2008-11-06	23:53:00	0
2008-11-06	23:54:00	0
2008-11-06	23:55:00	0
2008-11-06	23:56:00	0
2008-11-06	23:57:00	0
2008-11-06	23:58:00	0
2008-11-06	23:59:00	0
2008-11-07	00:00:00	0
2008-11-07	00:01:00	0
2008-11-07	00:02:00	0
2008-11-07	00:03:00	0
2008-11-07	00:04:00	0
2008-11-07	00:05:00	0
2008-11-07	00:06:00	0
2008-11-07	00:07:00	0
2008-11-07	00:08:00	0
2008-11-07	00:09:00	81
2008-11-07	00:10:00	0
2008-11-07	00:11:00	0
2008-11-07	00:12:00	0
2008-11-07	00:13:00	0
2008-11-07	00:14:00	0
2008-11-07	00:15:00	0
2008-11-07	00:16:00	0
2008-11-07	00:17:00	0
2008-11-07	00:18:00	0
2008-11-07	00:19:00	0
2008-11-07	00:20:00	0
2008-11-07	00:21:00	0
2008-11-07	00:22:00	0
2008-11-07	00:23:00	0
2008-11-07	00:24:00	0
2008-11-07	00:25:00	0
2008-11-07	00:26:00	0
2008-11-07	00:27:00	0
2008-11-07	00:28:00	0
2008-11-07	00:29:00	0
2008-11-07	00:30:00	0
2008-11-07	00:31:00	0
2008-11-07	00:32:00	0
2008-11-07	00:33:00	0
2008-11-07	00:34:00	0
2008-11-07	00:35:00	0
2008-11-07	00:36:00	0
2008-11-07	00:37:00	0
2008-11-07	00:38:00	0
2008-11-07	00:39:00	0
2008-11-07	00:40:00	20
2008-11-07	00:41:00	0
2008-11-07	00:42:00	0
2008-11-07	00:43:00	0
2008-11-07	00:44:00	0
2008-11-07	00:45:00	0
2008-11-07	00:46:00	0
2008-11-07	00:47:00	0
2008-11-07	00:48:00	0
2008-11-07	00:49:00	0
2008-11-07	00:50:00	0
2008-11-07	00:51:00	0
2008-11-07	00:52:00	0
2008-11-07	00:53:00	0
2008-11-07	00:54:00	0
2008-11-07	00:55:00	0
2008-11-07	00:56:00	0
2008-11-07	00:57:00	0
2008-11-07	00:58:00	0
2008-11-07	00:59:00	0
2008-11-07	01:00:00	0
2008-11-07	01:01:00	0
2008-11-07	01:02:00	0
2008-11-07	01:03:00	0
2008-11-07	01:04:00	0
2008-11-07	01:05:00	0
2008-11-07	01:06:00	0
2008-11-07	01:07:00	0
2008-11-07	01:08:00	0
2008-11-07	01:09:00	10
2008-11-07	01:10:00	20
2008-11-07	01:11:00	51
2008-11-07	01:12:00	0
2008-11-07	01:13:00	0
2008-11-07	01:14:00	0
2008-11-07	01:15:00	20
2008-11-07	01:16:00	10
2008-11-07	01:17:00	30
2008-11-07	01:18:00	217
2008-11-07	01:19:00	0
2008-11-07	01:20:00	0
2008-11-07	01:21:00	0
2008-11-07	01:22:00	0
2008-11-07	01:23:00	0
2008-11-07	01:24:00	0
2008-11-07	01:25:00	0
2008-11-07	01:26:00	0
2008-11-07	01:27:00	0
2008-11-07	01:28:00	0
2008-11-07	01:29:00	0
2008-11-07	01:30:00	0
2008-11-07	01:31:00	0
2008-11-07	01:32:00	0
2008-11-07	01:33:00	0
2008-11-07	01:34:00	0
2008-11-07	01:35:00	0
2008-11-07	01:36:00	0
2008-11-07	01:37:00	0
2008-11-07	01:38:00	0
2008-11-07	01:39:00	0
2008-11-07	01:40:00	0
2008-11-07	01:41:00	0
2008-11-07	01:42:00	0
2008-11-07	01:43:00	0
2008-11-07	01:44:00	0
2008-11-07	01:45:00	0
2008-11-07	01:46:00	0
2008-11-07	01:47:00	0
2008-11-07	01:48:00	0
2008-11-07	01:49:00	0
2008-11-07	01:50:00	0
2008-11-07	01:51:00	0
2008-11-07	01:52:00	0
2008-11-07	01:53:00	0
2008-11-07	01:54:00	0
2008-11-07	01:55:00	0
2008-11-07	01:56:00	0
2008-11-07	01:57:00	0
2008-11-07	01:58:00	0
2008-11-07	01:59:00	0
2008-11-07	02:00:00	0
2008-11-07	02:01:00	0
2008-11-07	02:02:00	0
2008-11-07	02:03:00	0
2008-11-07	02:04:00	0
2008-11-07	02:05:00	0
2008-11-07	02:06:00	0
2008-11-07	02:07:00	0
2008-11-07	02:08:00	0
2008-11-07	02:09:00	0
2008-11-07	02:10:00	0
2008-11-07	02:11:00	0
2008-11-07	02:12:00	0
2008-11-07	02:13:00	0
2008-11-07	02:14:00	0
2008-11-07	02:15:00	0
2008-11-07	02:16:00	0
2008-11-07	02:17:00	0
2008-11-07	02:18:00	0
2008-11-07	02:19:00	0
2008-11-07	02:20:00	0
2008-11-07	02:21:00	0
2008-11-07	02:22:00	0
2008-11-07	02:23:00	0
2008-11-07	02:24:00	0
2008-11-07	02:25:00	0
2008-11-07	02:26:00	0
2008-11-07	02:27:00	10
2008-11-07	02:28:00	0
2008-11-07	02:29:00	0
2008-11-07	02:30:00	0
2008-11-07	02:31:00	0
2008-11-07	02:32:00	0
2008-11-07	02:33:00	0
2008-11-07	02:34:00	0
2008-11-07	02:35:00	0
2008-11-07	02:36:00	0
2008-11-07	02:37:00	0
2008-11-07	02:38:00	0
2008-11-07	02:39:00	0
2008-11-07	02:40:00	0
2008-11-07	02:41:00	0
2008-11-07	02:42:00	0
2008-11-07	02:43:00	0
2008-11-07	02:44:00	0
2008-11-07	02:45:00	0
2008-11-07	02:46:00	0
2008-11-07	02:47:00	0
2008-11-07	02:48:00	0
2008-11-07	02:49:00	0
2008-11-07	02:50:00	0
2008-11-07	02:51:00	0
2008-11-07	02:52:00	0
2008-11-07	02:53:00	0
2008-11-07	02:54:00	0
2008-11-07	02:55:00	0
2008-11-07	02:56:00	0
2008-11-07	02:57:00	0
2008-11-07	02:58:00	0
2008-11-07	02:59:00	0
2008-11-07	03:00:00	10
2008-11-07	03:01:00	0
2008-11-07	03:02:00	0
2008-11-07	03:03:00	20
2008-11-07	03:04:00	51
2008-11-07	03:05:00	10
2008-11-07	03:06:00	20
2008-11-07	03:07:00	10
2008-11-07	03:08:00	0
2008-11-07	03:09:00	0
2008-11-07	03:10:00	295
2008-11-07	03:11:00	10
2008-11-07	03:12:00	0
2008-11-07	03:13:00	0
2008-11-07	03:14:00	0
2008-11-07	03:15:00	0
2008-11-07	03:16:00	0
2008-11-07	03:17:00	0
2008-11-07	03:18:00	0
2008-11-07	03:19:00	0
2008-11-07	03:20:00	0
2008-11-07	03:21:00	0
2008-11-07	03:22:00	0
2008-11-07	03:23:00	0
2008-11-07	03:24:00	0
2008-11-07	03:25:00	0
2008-11-07	03:26:00	0
2008-11-07	03:27:00	0
2008-11-07	03:28:00	0
2008-11-07	03:29:00	0
2008-11-07	03:30:00	0
2008-11-07	03:31:00	0
2008-11-07	03:32:00	0
2008-11-07	03:33:00	0
2008-11-07	03:34:00	0
2008-11-07	03:35:00	0
2008-11-07	03:36:00	0
2008-11-07	03:37:00	0
2008-11-07	03:38:00	0
2008-11-07	03:39:00	10
2008-11-07	03:40:00	10
2008-11-07	03:41:00	0
2008-11-07	03:42:00	0
2008-11-07	03:43:00	0
2008-11-07	03:44:00	0
2008-11-07	03:45:00	0
2008-11-07	03:46:00	0
2008-11-07	03:47:00	0
2008-11-07	03:48:00	0
2008-11-07	03:49:00	0
2008-11-07	03:50:00	0
2008-11-07	03:51:00	0
2008-11-07	03:52:00	0
2008-11-07	03:53:00	0
2008-11-07	03:54:00	0
2008-11-07	03:55:00	0
2008-11-07	03:56:00	0
2008-11-07	03:57:00	0
2008-11-07	03:58:00	0
2008-11-07	03:59:00	0
2008-11-07	04:00:00	0
2008-11-07	04:01:00	0
2008-11-07	04:02:00	0
2008-11-07	04:03:00	0
2008-11-07	04:04:00	0
2008-11-07	04:05:00	0
2008-11-07	04:06:00	0
2008-11-07	04:07:00	0
2008-11-07	04:08:00	0
2008-11-07	04:09:00	0
2008-11-07	04:10:00	0
2008-11-07	04:11:00	0
2008-11-07	04:12:00	0
2008-11-07	04:13:00	0
2008-11-07	04:14:00	0
2008-11-07	04:15:00	0
2008-11-07	04:16:00	0
2008-11-07	04:17:00	0
2008-11-07	04:18:00	0
2008-11-07	04:19:00	0
2008-11-07	04:20:00	0
2008-11-07	04:21:00	0
2008-11-07	04:22:00	0
2008-11-07	04:23:00	0
2008-11-07	04:24:00	0
2008-11-07	04:25:00	0
2008-11-07	04:26:00	0
2008-11-07	04:27:00	0
2008-11-07	04:28:00	0
2008-11-07	04:29:00	0
2008-11-07	04:30:00	0
2008-11-07	04:31:00	0
2008-11-07	04:32:00	10
2008-11-07	04:33:00	0
2008-11-07	04:34:00	0
2008-11-07	04:35:00	0
2008-11-07	04:36:00	0
2008-11-07	04:37:00	0
2008-11-07	04:38:00	0
2008-11-07	04:39:00	0
2008-11-07	04:40:00	0
2008-11-07	04:41:00	0
2008-11-07	04:42:00	0
2008-11-07	04:43:00	0
2008-11-07	04:44:00	0
2008-11-07	04:45:00	0
2008-11-07	04:46:00	0
2008-11-07	04:47:00	0
2008-11-07	04:48:00	0
2008-11-07	04:49:00	0
2008-11-07	04:50:00	0
2008-11-07	04:51:00	0
2008-11-07	04:52:00	0
2008-11-07	04:53:00	0
2008-11-07	04:54:00	0
2008-11-07	04:55:00	0
2008-11-07	04:56:00	0
2008-11-07	04:57:00	0
2008-11-07	04:58:00	0
2008-11-07	04:59:00	0
2008-11-07	05:00:00	0
2008-11-07	05:01:00	0
2008-11-07	05:02:00	0
2008-11-07	05:03:00	0
2008-11-07	05:04:00	0
2008-11-07	05:05:00	0
2008-11-07	05:06:00	0
2008-11-07	05:07:00	0
2008-11-07	05:08:00	0
2008-11-07	05:09:00	0
2008-11-07	05:10:00	0
2008-11-07	05:11:00	0
2008-11-07	05:12:00	0
2008-11-07	05:13:00	0
2008-11-07	05:14:00	0
2008-11-07	05:15:00	0
2008-11-07	05:16:00	0
2008-11-07	05:17:00	0
2008-11-07	05:18:00	0
2008-11-07	05:19:00	0
2008-11-07	05:20:00	0
2008-11-07	05:21:00	0
2008-11-07	05:22:00	0
2008-11-07	05:23:00	0
2008-11-07	05:24:00	0
2008-11-07	05:25:00	0
2008-11-07	05:26:00	0
2008-11-07	05:27:00	0
2008-11-07	05:28:00	0
2008-11-07	05:29:00	0
2008-11-07	05:30:00	0
2008-11-07	05:31:00	0
2008-11-07	05:32:00	30
2008-11-07	05:33:00	0
2008-11-07	05:34:00	0
2008-11-07	05:35:00	0
2008-11-07	05:36:00	0
2008-11-07	05:37:00	0
2008-11-07	05:38:00	0
2008-11-07	05:39:00	71
2008-11-07	05:40:00	0
2008-11-07	05:41:00	0
2008-11-07	05:42:00	0
2008-11-07	05:43:00	0
2008-11-07	05:44:00	0
2008-11-07	05:45:00	0
2008-11-07	05:46:00	0
2008-11-07	05:47:00	0
2008-11-07	05:48:00	0
2008-11-07	05:49:00	0
2008-11-07	05:50:00	0
2008-11-07	05:51:00	0
2008-11-07	05:52:00	0
2008-11-07	05:53:00	0
2008-11-07	05:54:00	0
2008-11-07	05:55:00	0
2008-11-07	05:56:00	0
2008-11-07	05:57:00	0
2008-11-07	05:58:00	0
2008-11-07	05:59:00	0
2008-11-07	06:00:00	0
2008-11-07	06:01:00	0
2008-11-07	06:02:00	0
2008-11-07	06:03:00	0
2008-11-07	06:04:00	0
2008-11-07	06:05:00	0
2008-11-07	06:06:00	0
2008-11-07	06:07:00	0
2008-11-07	06:08:00	0
2008-11-07	06:09:00	0
2008-11-07	06:10:00	0
2008-11-07	06:11:00	0
2008-11-07	06:12:00	0
2008-11-07	06:13:00	0
2008-11-07	06:14:00	0
2008-11-07	06:15:00	0
2008-11-07	06:16:00	0
2008-11-07	06:17:00	0
2008-11-07	06:18:00	0
2008-11-07	06:19:00	0
2008-11-07	06:20:00	0
2008-11-07	06:21:00	0
2008-11-07	06:22:00	0
2008-11-07	06:23:00	0
2008-11-07	06:24:00	0
2008-11-07	06:25:00	0
2008-11-07	06:26:00	0
2008-11-07	06:27:00	0
2008-11-07	06:28:00	0
2008-11-07	06:29:00	0
2008-11-07	06:30:00	0
2008-11-07	06:31:00	0
2008-11-07	06:32:00	0
2008-11-07	06:33:00	0
2008-11-07	06:34:00	0
2008-11-07	06:35:00	0
2008-11-07	06:36:00	0
2008-11-07	06:37:00	0
2008-11-07	06:38:00	0
2008-11-07	06:39:00	0
2008-11-07	06:40:00	0
2008-11-07	06:41:00	0
2008-11-07	06:42:00	0
2008-11-07	06:43:00	0
2008-11-07	06:44:00	0
2008-11-07	06:45:00	0
2008-11-07	06:46:00	0
2008-11-07	06:47:00	0
2008-11-07	06:48:00	0
2008-11-07	06:49:00	0
2008-11-07	06:50:00	0
2008-11-07	06:51:00	0
2008-11-07	06:52:00	0
2008-11-07	06:53:00	0
2008-11-07	06:54:00	0
2008-11-07	06:55:00	0
2008-11-07	06:56:00	0
2008-11-07	06:57:00	0
2008-11-07	06:58:00	0
2008-11-07	06:59:00	0
2008-11-07	07:00:00	0
2008-11-07	07:01:00	0
2008-11-07	07:02:00	0
2008-11-07	07:03:00	0
2008-11-07	07:04:00	0
2008-11-07	07:05:00	0
2008-11-07	07:06:00	0
2008-11-07	07:07:00	0
2008-11-07	07:08:00	0
2008-11-07	07:09:00	0
2008-11-07	07:10:00	0
2008-11-07	07:11:00	0
2008-11-07	07:12:00	0
2008-11-07	07:13:00	0
2008-11-07	07:14:00	0
2008-11-07	07:15:00	0
2008-11-07	07:16:00	0
2008-11-07	07:17:00	0
2008-11-07	07:18:00	0
2008-11-07	07:19:00	0
2008-11-07	07:20:00	0
2008-11-07	07:21:00	0
2008-11-07	07:22:00	0
2008-11-07	07:23:00	0
2008-11-07	07:24:00	10
2008-11-07	07:25:00	0
2008-11-07	07:26:00	0
2008-11-07	07:27:00	0
2008-11-07	07:28:00	0
2008-11-07	07:29:00	10
2008-11-07	07:30:00	0
2008-11-07	07:31:00	0
2008-11-07	07:32:00	0
2008-11-07	07:33:00	0
2008-11-07	07:34:00	0
2008-11-07	07:35:00	0
2008-11-07	07:36:00	0
2008-11-07	07:37:00	0
2008-11-07	07:38:00	0
2008-11-07	07:39:00	0
2008-11-07	07:40:00	0
2008-11-07	07:41:00	0
2008-11-07	07:42:00	0
2008-11-07	07:43:00	0
2008-11-07	07:44:00	0
2008-11-07	07:45:00	0
2008-11-07	07:46:00	0
2008-11-07	07:47:00	0
2008-11-07	07:48:00	0
2008-11-07	07:49:00	0
2008-11-07	07:50:00	0
2008-11-07	07:51:00	0
2008-11-07	07:52:00	0
2008-11-07	07:53:00	0
2008-11-07	07:54:00	0
2008-11-07	07:55:00	0
2008-11-07	07:56:00	0
2008-11-07	07:57:00	0
2008-11-07	07:58:00	0
2008-11-07	07:59:00	0
2008-11-07	08:00:00	0
2008-11-07	08:01:00	0
2008-11-07	08:02:00	0
2008-11-07	08:03:00	0
2008-11-07	08:04:00	0
2008-11-07	08:05:00	0
2008-11-07	08:06:00	0
2008-11-07	08:07:00	0
2008-11-07	08:08:00	0
2008-11-07	08:09:00	0
2008-11-07	08:10:00	0
2008-11-07	08:11:00	0
2008-11-07	08:12:00	0
2008-11-07	08:13:00	0
2008-11-07	08:14:00	0
2008-11-07	08:15:00	0
2008-11-07	08:16:00	0
2008-11-07	08:17:00	0
2008-11-07	08:18:00	0
2008-11-07	08:19:00	0
2008-11-07	08:20:00	0
2008-11-07	08:21:00	0
2008-11-07	08:22:00	0
2008-11-07	08:23:00	0
2008-11-07	08:24:00	0
2008-11-07	08:25:00	0
2008-11-07	08:26:00	0
2008-11-07	08:27:00	0
2008-11-07	08:28:00	0
2008-11-07	08:29:00	0
2008-11-07	08:30:00	0
2008-11-07	08:31:00	0
2008-11-07	08:32:00	0
2008-11-07	08:33:00	0
2008-11-07	08:34:00	0
2008-11-07	08:35:00	0
2008-11-07	08:36:00	0
2008-11-07	08:37:00	0
2008-11-07	08:38:00	0
2008-11-07	08:39:00	0
2008-11-07	08:40:00	0
2008-11-07	08:41:00	0
2008-11-07	08:42:00	0
2008-11-07	08:43:00	0
2008-11-07	08:44:00	0
2008-11-07	08:45:00	0
2008-11-07	08:46:00	0
2008-11-07	08:47:00	0
2008-11-07	08:48:00	0
2008-11-07	08:49:00	0
2008-11-07	08:50:00	0
2008-11-07	08:51:00	0
2008-11-07	08:52:00	0
2008-11-07	08:53:00	30
2008-11-07	08:54:00	0
2008-11-07	08:55:00	0
2008-11-07	08:56:00	0
2008-11-07	08:57:00	0
2008-11-07	08:58:00	10
2008-11-07	08:59:00	0
2008-11-07	09:00:00	0
2008-11-07	09:01:00	0
2008-11-07	09:02:00	0
2008-11-07	09:03:00	0
2008-11-07	09:04:00	0
2008-11-07	09:05:00	0
2008-11-07	09:06:00	0
2008-11-07	09:07:00	0
2008-11-07	09:08:00	0
[truncated: 19,611 more rows]

[truncated: 1 more sheets: 11.20.08]
