# Supplementary material for: Initial evaluation of nighttime restlessness in a naturally occurring canine model of osteoarthritis pain
Source: PeerJ. 2015 Feb 17;3:e772. doi: 10.7717/peerj.772 (PMC4340376; doi:10.7717/peerj.772)
Supplement: Supplemental Information 16 [file peerj-03-772-s016.xlsx]

## Sheet: Office Visits
Visit Date	Visit Number
2008-11-18 06:00:00	1
2008-12-01 06:00:00	2
2008-12-15 06:00:00	3
2008-12-30 06:00:00	4
2009-01-13 06:00:00	5
2009-01-28 06:00:00	6
2009-02-10 06:00:00	7

## Sheet: 14_Data
Segment	DateTime	Activity	Hour	Quadrant	Study Day	Weekday
1	2008-11-24 06:01:00	0	6	2	6	2
1	2008-11-24 06:02:00	0	6	2	6	2
1	2008-11-24 06:03:00	0	6	2	6	2
1	2008-11-24 06:04:00	0	6	2	6	2
1	2008-11-24 06:05:00	0	6	2	6	2
1	2008-11-24 06:06:00	0	6	2	6	2
1	2008-11-24 06:07:00	24	6	2	6	2
1	2008-11-24 06:08:00	95	6	2	6	2
1	2008-11-24 06:09:00	24	6	2	6	2
1	2008-11-24 06:10:00	24	6	2	6	2
1	2008-11-24 06:11:00	0	6	2	6	2
1	2008-11-24 06:12:00	0	6	2	6	2
1	2008-11-24 06:13:00	0	6	2	6	2
1	2008-11-24 06:14:00	0	6	2	6	2
1	2008-11-24 06:15:00	0	6	2	6	2
1	2008-11-24 06:16:00	0	6	2	6	2
1	2008-11-24 06:17:00	0	6	2	6	2
1	2008-11-24 06:18:00	0	6	2	6	2
1	2008-11-24 06:19:00	0	6	2	6	2
1	2008-11-24 06:20:00	0	6	2	6	2
1	2008-11-24 06:21:00	0	6	2	6	2
1	2008-11-24 06:22:00	0	6	2	6	2
1	2008-11-24 06:23:00	0	6	2	6	2
1	2008-11-24 06:24:00	0	6	2	6	2
1	2008-11-24 06:25:00	0	6	2	6	2
1	2008-11-24 06:26:00	0	6	2	6	2
1	2008-11-24 06:27:00	0	6	2	6	2
1	2008-11-24 06:28:00	0	6	2	6	2
1	2008-11-24 06:29:00	0	6	2	6	2
1	2008-11-24 06:30:00	24	6	2	6	2
1	2008-11-24 06:31:00	24	6	2	6	2
1	2008-11-24 06:32:00	36	6	2	6	2
1	2008-11-24 06:33:00	71	6	2	6	2
1	2008-11-24 06:34:00	24	6	2	6	2
1	2008-11-24 06:35:00	0	6	2	6	2
1	2008-11-24 06:36:00	0	6	2	6	2
1	2008-11-24 06:37:00	0	6	2	6	2
1	2008-11-24 06:38:00	0	6	2	6	2
1	2008-11-24 06:39:00	0	6	2	6	2
1	2008-11-24 06:40:00	0	6	2	6	2
1	2008-11-24 06:41:00	0	6	2	6	2
1	2008-11-24 06:42:00	0	6	2	6	2
1	2008-11-24 06:43:00	0	6	2	6	2
1	2008-11-24 06:44:00	0	6	2	6	2
1	2008-11-24 06:45:00	0	6	2	6	2
1	2008-11-24 06:46:00	0	6	2	6	2
1	2008-11-24 06:47:00	0	6	2	6	2
1	2008-11-24 06:48:00	0	6	2	6	2
1	2008-11-24 06:49:00	0	6	2	6	2
1	2008-11-24 06:50:00	0	6	2	6	2
1	2008-11-24 06:51:00	0	6	2	6	2
1	2008-11-24 06:52:00	0	6	2	6	2
1	2008-11-24 06:53:00	0	6	2	6	2
1	2008-11-24 06:54:00	0	6	2	6	2
1	2008-11-24 06:55:00	0	6	2	6	2
1	2008-11-24 06:56:00	0	6	2	6	2
1	2008-11-24 06:57:00	0	6	2	6	2
1	2008-11-24 06:58:00	0	6	2	6	2
1	2008-11-24 06:59:00	0	6	2	6	2
1	2008-11-24 07:00:00	0	6	2	6	2
1	2008-11-24 07:01:00	0	7	2	6	2
1	2008-11-24 07:02:00	0	7	2	6	2
1	2008-11-24 07:03:00	0	7	2	6	2
1	2008-11-24 07:04:00	0	7	2	6	2
1	2008-11-24 07:05:00	0	7	2	6	2
1	2008-11-24 07:06:00	0	7	2	6	2
1	2008-11-24 07:07:00	59	7	2	6	2
1	2008-11-24 07:08:00	12	7	2	6	2
1	2008-11-24 07:09:00	0	7	2	6	2
1	2008-11-24 07:10:00	12	7	2	6	2
1	2008-11-24 07:11:00	12	7	2	6	2
1	2008-11-24 07:12:00	0	7	2	6	2
1	2008-11-24 07:13:00	377	7	2	6	2
1	2008-11-24 07:14:00	254	7	2	6	2
1	2008-11-24 07:15:00	377	7	2	6	2
1	2008-11-24 07:16:00	225	7	2	6	2
1	2008-11-24 07:17:00	479	7	2	6	2
1	2008-11-24 07:18:00	517	7	2	6	2
1	2008-11-24 07:19:00	197	7	2	6	2
1	2008-11-24 07:20:00	254	7	2	6	2
1	2008-11-24 07:21:00	130	7	2	6	2
1	2008-11-24 07:22:00	36	7	2	6	2
1	2008-11-24 07:23:00	0	7	2	6	2
1	2008-11-24 07:24:00	24	7	2	6	2
1	2008-11-24 07:25:00	12	7	2	6	2
1	2008-11-24 07:26:00	0	7	2	6	2
1	2008-11-24 07:27:00	12	7	2	6	2
1	2008-11-24 07:28:00	47	7	2	6	2
1	2008-11-24 07:29:00	225	7	2	6	2
1	2008-11-24 07:30:00	12	7	2	6	2
1	2008-11-24 07:31:00	0	7	2	6	2
1	2008-11-24 07:32:00	0	7	2	6	2
1	2008-11-24 07:33:00	0	7	2	6	2
1	2008-11-24 07:34:00	0	7	2	6	2
1	2008-11-24 07:35:00	0	7	2	6	2
1	2008-11-24 07:36:00	0	7	2	6	2
1	2008-11-24 07:37:00	0	7	2	6	2
1	2008-11-24 07:38:00	0	7	2	6	2
1	2008-11-24 07:39:00	0	7	2	6	2
1	2008-11-24 07:40:00	0	7	2	6	2
1	2008-11-24 07:41:00	0	7	2	6	2
1	2008-11-24 07:42:00	0	7	2	6	2
1	2008-11-24 07:43:00	0	7	2	6	2
1	2008-11-24 07:44:00	0	7	2	6	2
1	2008-11-24 07:45:00	0	7	2	6	2
1	2008-11-24 07:46:00	12	7	2	6	2
1	2008-11-24 07:47:00	47	7	2	6	2
1	2008-11-24 07:48:00	12	7	2	6	2
1	2008-11-24 07:49:00	24	7	2	6	2
1	2008-11-24 07:50:00	36	7	2	6	2
1	2008-11-24 07:51:00	0	7	2	6	2
1	2008-11-24 07:52:00	0	7	2	6	2
1	2008-11-24 07:53:00	0	7	2	6	2
1	2008-11-24 07:54:00	0	7	2	6	2
1	2008-11-24 07:55:00	0	7	2	6	2
1	2008-11-24 07:56:00	0	7	2	6	2
1	2008-11-24 07:57:00	0	7	2	6	2
1	2008-11-24 07:58:00	0	7	2	6	2
1	2008-11-24 07:59:00	0	7	2	6	2
1	2008-11-24 08:00:00	0	7	2	6	2
1	2008-11-24 08:01:00	0	8	2	6	2
1	2008-11-24 08:02:00	0	8	2	6	2
1	2008-11-24 08:03:00	0	8	2	6	2
1	2008-11-24 08:04:00	0	8	2	6	2
1	2008-11-24 08:05:00	0	8	2	6	2
1	2008-11-24 08:06:00	0	8	2	6	2
1	2008-11-24 08:07:00	0	8	2	6	2
1	2008-11-24 08:08:00	0	8	2	6	2
1	2008-11-24 08:09:00	0	8	2	6	2
1	2008-11-24 08:10:00	0	8	2	6	2
1	2008-11-24 08:11:00	0	8	2	6	2
1	2008-11-24 08:12:00	0	8	2	6	2
1	2008-11-24 08:13:00	0	8	2	6	2
1	2008-11-24 08:14:00	0	8	2	6	2
1	2008-11-24 08:15:00	24	8	2	6	2
1	2008-11-24 08:16:00	0	8	2	6	2
1	2008-11-24 08:17:00	12	8	2	6	2
1	2008-11-24 08:18:00	0	8	2	6	2
1	2008-11-24 08:19:00	12	8	2	6	2
1	2008-11-24 08:20:00	0	8	2	6	2
1	2008-11-24 08:21:00	12	8	2	6	2
1	2008-11-24 08:22:00	0	8	2	6	2
1	2008-11-24 08:23:00	0	8	2	6	2
1	2008-11-24 08:24:00	0	8	2	6	2
1	2008-11-24 08:25:00	0	8	2	6	2
1	2008-11-24 08:26:00	0	8	2	6	2
1	2008-11-24 08:27:00	0	8	2	6	2
1	2008-11-24 08:28:00	0	8	2	6	2
1	2008-11-24 08:29:00	0	8	2	6	2
1	2008-11-24 08:30:00	0	8	2	6	2
1	2008-11-24 08:31:00	0	8	2	6	2
1	2008-11-24 08:32:00	0	8	2	6	2
1	2008-11-24 08:33:00	0	8	2	6	2
1	2008-11-24 08:34:00	0	8	2	6	2
1	2008-11-24 08:35:00	0	8	2	6	2
1	2008-11-24 08:36:00	225	8	2	6	2
1	2008-11-24 08:37:00	197	8	2	6	2
1	2008-11-24 08:38:00	0	8	2	6	2
1	2008-11-24 08:39:00	0	8	2	6	2
1	2008-11-24 08:40:00	12	8	2	6	2
1	2008-11-24 08:41:00	0	8	2	6	2
1	2008-11-24 08:42:00	0	8	2	6	2
1	2008-11-24 08:43:00	0	8	2	6	2
1	2008-11-24 08:44:00	0	8	2	6	2
1	2008-11-24 08:45:00	24	8	2	6	2
1	2008-11-24 08:46:00	0	8	2	6	2
1	2008-11-24 08:47:00	0	8	2	6	2
1	2008-11-24 08:48:00	0	8	2	6	2
1	2008-11-24 08:49:00	0	8	2	6	2
1	2008-11-24 08:50:00	0	8	2	6	2
1	2008-11-24 08:51:00	0	8	2	6	2
1	2008-11-24 08:52:00	0	8	2	6	2
1	2008-11-24 08:53:00	0	8	2	6	2
1	2008-11-24 08:54:00	0	8	2	6	2
1	2008-11-24 08:55:00	0	8	2	6	2
1	2008-11-24 08:56:00	0	8	2	6	2
1	2008-11-24 08:57:00	0	8	2	6	2
1	2008-11-24 08:58:00	0	8	2	6	2
1	2008-11-24 08:59:00	0	8	2	6	2
1	2008-11-24 09:00:00	0	8	2	6	2
1	2008-11-24 09:01:00	0	9	2	6	2
1	2008-11-24 09:02:00	0	9	2	6	2
1	2008-11-24 09:03:00	0	9	2	6	2
1	2008-11-24 09:04:00	0	9	2	6	2
1	2008-11-24 09:05:00	0	9	2	6	2
1	2008-11-24 09:06:00	0	9	2	6	2
1	2008-11-24 09:07:00	0	9	2	6	2
1	2008-11-24 09:08:00	0	9	2	6	2
1	2008-11-24 09:09:00	0	9	2	6	2
1	2008-11-24 09:10:00	0	9	2	6	2
1	2008-11-24 09:11:00	0	9	2	6	2
1	2008-11-24 09:12:00	0	9	2	6	2
1	2008-11-24 09:13:00	0	9	2	6	2
1	2008-11-24 09:14:00	0	9	2	6	2
1	2008-11-24 09:15:00	0	9	2	6	2
1	2008-11-24 09:16:00	12	9	2	6	2
1	2008-11-24 09:17:00	0	9	2	6	2
1	2008-11-24 09:18:00	0	9	2	6	2
1	2008-11-24 09:19:00	0	9	2	6	2
1	2008-11-24 09:20:00	0	9	2	6	2
1	2008-11-24 09:21:00	0	9	2	6	2
1	2008-11-24 09:22:00	0	9	2	6	2
1	2008-11-24 09:23:00	12	9	2	6	2
1	2008-11-24 09:24:00	0	9	2	6	2
1	2008-11-24 09:25:00	0	9	2	6	2
1	2008-11-24 09:26:00	24	9	2	6	2
1	2008-11-24 09:27:00	12	9	2	6	2
1	2008-11-24 09:28:00	0	9	2	6	2
1	2008-11-24 09:29:00	0	9	2	6	2
1	2008-11-24 09:30:00	0	9	2	6	2
1	2008-11-24 09:31:00	0	9	2	6	2
1	2008-11-24 09:32:00	0	9	2	6	2
1	2008-11-24 09:33:00	0	9	2	6	2
1	2008-11-24 09:34:00	12	9	2	6	2
1	2008-11-24 09:35:00	0	9	2	6	2
1	2008-11-24 09:36:00	0	9	2	6	2
1	2008-11-24 09:37:00	0	9	2	6	2
1	2008-11-24 09:38:00	0	9	2	6	2
1	2008-11-24 09:39:00	0	9	2	6	2
1	2008-11-24 09:40:00	0	9	2	6	2
1	2008-11-24 09:41:00	0	9	2	6	2
1	2008-11-24 09:42:00	0	9	2	6	2
1	2008-11-24 09:43:00	0	9	2	6	2
1	2008-11-24 09:44:00	0	9	2	6	2
1	2008-11-24 09:45:00	0	9	2	6	2
1	2008-11-24 09:46:00	0	9	2	6	2
1	2008-11-24 09:47:00	0	9	2	6	2
1	2008-11-24 09:48:00	0	9	2	6	2
1	2008-11-24 09:49:00	0	9	2	6	2
1	2008-11-24 09:50:00	0	9	2	6	2
1	2008-11-24 09:51:00	0	9	2	6	2
1	2008-11-24 09:52:00	0	9	2	6	2
1	2008-11-24 09:53:00	0	9	2	6	2
1	2008-11-24 09:54:00	0	9	2	6	2
1	2008-11-24 09:55:00	0	9	2	6	2
1	2008-11-24 09:56:00	0	9	2	6	2
1	2008-11-24 09:57:00	0	9	2	6	2
1	2008-11-24 09:58:00	0	9	2	6	2
1	2008-11-24 09:59:00	0	9	2	6	2
1	2008-11-24 10:00:00	12	9	2	6	2
1	2008-11-24 10:01:00	0	10	2	6	2
1	2008-11-24 10:02:00	0	10	2	6	2
1	2008-11-24 10:03:00	0	10	2	6	2
1	2008-11-24 10:04:00	0	10	2	6	2
1	2008-11-24 10:05:00	0	10	2	6	2
1	2008-11-24 10:06:00	0	10	2	6	2
1	2008-11-24 10:07:00	0	10	2	6	2
1	2008-11-24 10:08:00	0	10	2	6	2
1	2008-11-24 10:09:00	0	10	2	6	2
1	2008-11-24 10:10:00	0	10	2	6	2
1	2008-11-24 10:11:00	0	10	2	6	2
1	2008-11-24 10:12:00	225	10	2	6	2
1	2008-11-24 10:13:00	168	10	2	6	2
1	2008-11-24 10:14:00	71	10	2	6	2
1	2008-11-24 10:15:00	0	10	2	6	2
1	2008-11-24 10:16:00	0	10	2	6	2
1	2008-11-24 10:17:00	0	10	2	6	2
1	2008-11-24 10:18:00	24	10	2	6	2
1	2008-11-24 10:19:00	0	10	2	6	2
1	2008-11-24 10:20:00	0	10	2	6	2
1	2008-11-24 10:21:00	0	10	2	6	2
1	2008-11-24 10:22:00	0	10	2	6	2
1	2008-11-24 10:23:00	0	10	2	6	2
1	2008-11-24 10:24:00	0	10	2	6	2
1	2008-11-24 10:25:00	0	10	2	6	2
1	2008-11-24 10:26:00	0	10	2	6	2
1	2008-11-24 10:27:00	12	10	2	6	2
1	2008-11-24 10:28:00	12	10	2	6	2
1	2008-11-24 10:29:00	59	10	2	6	2
1	2008-11-24 10:30:00	0	10	2	6	2
1	2008-11-24 10:31:00	0	10	2	6	2
1	2008-11-24 10:32:00	0	10	2	6	2
1	2008-11-24 10:33:00	0	10	2	6	2
1	2008-11-24 10:34:00	0	10	2	6	2
1	2008-11-24 10:35:00	59	10	2	6	2
1	2008-11-24 10:36:00	95	10	2	6	2
1	2008-11-24 10:37:00	0	10	2	6	2
1	2008-11-24 10:38:00	24	10	2	6	2
1	2008-11-24 10:39:00	0	10	2	6	2
1	2008-11-24 10:40:00	0	10	2	6	2
1	2008-11-24 10:41:00	0	10	2	6	2
1	2008-11-24 10:42:00	0	10	2	6	2
1	2008-11-24 10:43:00	0	10	2	6	2
1	2008-11-24 10:44:00	0	10	2	6	2
1	2008-11-24 10:45:00	0	10	2	6	2
1	2008-11-24 10:46:00	0	10	2	6	2
1	2008-11-24 10:47:00	0	10	2	6	2
1	2008-11-24 10:48:00	0	10	2	6	2
1	2008-11-24 10:49:00	0	10	2	6	2
1	2008-11-24 10:50:00	0	10	2	6	2
1	2008-11-24 10:51:00	0	10	2	6	2
1	2008-11-24 10:52:00	0	10	2	6	2
1	2008-11-24 10:53:00	0	10	2	6	2
1	2008-11-24 10:54:00	0	10	2	6	2
1	2008-11-24 10:55:00	24	10	2	6	2
1	2008-11-24 10:56:00	268	10	2	6	2
1	2008-11-24 10:57:00	296	10	2	6	2
1	2008-11-24 10:58:00	239	10	2	6	2
1	2008-11-24 10:59:00	107	10	2	6	2
1	2008-11-24 11:00:00	36	10	2	6	2
1	2008-11-24 11:01:00	107	11	2	6	2
1	2008-11-24 11:02:00	47	11	2	6	2
1	2008-11-24 11:03:00	47	11	2	6	2
1	2008-11-24 11:04:00	83	11	2	6	2
1	2008-11-24 11:05:00	393	11	2	6	2
1	2008-11-24 11:06:00	536	11	2	6	2
1	2008-11-24 11:07:00	377	11	2	6	2
1	2008-11-24 11:08:00	24	11	2	6	2
1	2008-11-24 11:09:00	0	11	2	6	2
1	2008-11-24 11:10:00	0	11	2	6	2
1	2008-11-24 11:11:00	0	11	2	6	2
1	2008-11-24 11:12:00	0	11	2	6	2
1	2008-11-24 11:13:00	0	11	2	6	2
1	2008-11-24 11:14:00	0	11	2	6	2
1	2008-11-24 11:15:00	0	11	2	6	2
1	2008-11-24 11:16:00	0	11	2	6	2
1	2008-11-24 11:17:00	0	11	2	6	2
1	2008-11-24 11:18:00	0	11	2	6	2
1	2008-11-24 11:19:00	0	11	2	6	2
1	2008-11-24 11:20:00	0	11	2	6	2
1	2008-11-24 11:21:00	0	11	2	6	2
1	2008-11-24 11:22:00	0	11	2	6	2
1	2008-11-24 11:23:00	0	11	2	6	2
1	2008-11-24 11:24:00	0	11	2	6	2
1	2008-11-24 11:25:00	0	11	2	6	2
1	2008-11-24 11:26:00	0	11	2	6	2
1	2008-11-24 11:27:00	0	11	2	6	2
1	2008-11-24 11:28:00	0	11	2	6	2
1	2008-11-24 11:29:00	0	11	2	6	2
1	2008-11-24 11:30:00	0	11	2	6	2
1	2008-11-24 11:31:00	0	11	2	6	2
1	2008-11-24 11:32:00	0	11	2	6	2
1	2008-11-24 11:33:00	0	11	2	6	2
1	2008-11-24 11:34:00	0	11	2	6	2
1	2008-11-24 11:35:00	0	11	2	6	2
1	2008-11-24 11:36:00	12	11	2	6	2
1	2008-11-24 11:37:00	12	11	2	6	2
1	2008-11-24 11:38:00	0	11	2	6	2
1	2008-11-24 11:39:00	36	11	2	6	2
1	2008-11-24 11:40:00	0	11	2	6	2
1	2008-11-24 11:41:00	0	11	2	6	2
1	2008-11-24 11:42:00	12	11	2	6	2
1	2008-11-24 11:43:00	0	11	2	6	2
1	2008-11-24 11:44:00	0	11	2	6	2
1	2008-11-24 11:45:00	0	11	2	6	2
1	2008-11-24 11:46:00	0	11	2	6	2
1	2008-11-24 11:47:00	0	11	2	6	2
1	2008-11-24 11:48:00	0	11	2	6	2
1	2008-11-24 11:49:00	0	11	2	6	2
1	2008-11-24 11:50:00	0	11	2	6	2
1	2008-11-24 11:51:00	0	11	2	6	2
1	2008-11-24 11:52:00	0	11	2	6	2
1	2008-11-24 11:53:00	0	11	2	6	2
1	2008-11-24 11:54:00	12	11	2	6	2
1	2008-11-24 11:55:00	12	11	2	6	2
1	2008-11-24 11:56:00	24	11	2	6	2
1	2008-11-24 11:57:00	0	11	2	6	2
1	2008-11-24 11:58:00	0	11	2	6	2
1	2008-11-24 11:59:00	0	11	2	6	2
1	2008-11-24 12:00:00	0	11	2	6	2
1	2008-11-24 12:01:00	0	12	3	6	2
1	2008-11-24 12:02:00	0	12	3	6	2
1	2008-11-24 12:03:00	0	12	3	6	2
1	2008-11-24 12:04:00	0	12	3	6	2
1	2008-11-24 12:05:00	0	12	3	6	2
1	2008-11-24 12:06:00	0	12	3	6	2
1	2008-11-24 12:07:00	0	12	3	6	2
1	2008-11-24 12:08:00	0	12	3	6	2
1	2008-11-24 12:09:00	0	12	3	6	2
1	2008-11-24 12:10:00	0	12	3	6	2
1	2008-11-24 12:11:00	0	12	3	6	2
1	2008-11-24 12:12:00	0	12	3	6	2
1	2008-11-24 12:13:00	0	12	3	6	2
1	2008-11-24 12:14:00	0	12	3	6	2
1	2008-11-24 12:15:00	0	12	3	6	2
1	2008-11-24 12:16:00	0	12	3	6	2
1	2008-11-24 12:17:00	59	12	3	6	2
1	2008-11-24 12:18:00	344	12	3	6	2
1	2008-11-24 12:19:00	211	12	3	6	2
1	2008-11-24 12:20:00	168	12	3	6	2
1	2008-11-24 12:21:00	183	12	3	6	2
1	2008-11-24 12:22:00	296	12	3	6	2
1	2008-11-24 12:23:00	59	12	3	6	2
1	2008-11-24 12:24:00	0	12	3	6	2
1	2008-11-24 12:25:00	142	12	3	6	2
1	2008-11-24 12:26:00	427	12	3	6	2
1	2008-11-24 12:27:00	71	12	3	6	2
1	2008-11-24 12:28:00	254	12	3	6	2
1	2008-11-24 12:29:00	142	12	3	6	2
1	2008-11-24 12:30:00	83	12	3	6	2
1	2008-11-24 12:31:00	254	12	3	6	2
1	2008-11-24 12:32:00	393	12	3	6	2
1	2008-11-24 12:33:00	130	12	3	6	2
1	2008-11-24 12:34:00	654	12	3	6	2
1	2008-11-24 12:35:00	555	12	3	6	2
1	2008-11-24 12:36:00	119	12	3	6	2
1	2008-11-24 12:37:00	83	12	3	6	2
1	2008-11-24 12:38:00	254	12	3	6	2
1	2008-11-24 12:39:00	130	12	3	6	2
1	2008-11-24 12:40:00	130	12	3	6	2
1	2008-11-24 12:41:00	0	12	3	6	2
1	2008-11-24 12:42:00	0	12	3	6	2
1	2008-11-24 12:43:00	0	12	3	6	2
1	2008-11-24 12:44:00	24	12	3	6	2
1	2008-11-24 12:45:00	12	12	3	6	2
1	2008-11-24 12:46:00	0	12	3	6	2
1	2008-11-24 12:47:00	0	12	3	6	2
1	2008-11-24 12:48:00	0	12	3	6	2
1	2008-11-24 12:49:00	0	12	3	6	2
1	2008-11-24 12:50:00	0	12	3	6	2
1	2008-11-24 12:51:00	0	12	3	6	2
1	2008-11-24 12:52:00	0	12	3	6	2
1	2008-11-24 12:53:00	0	12	3	6	2
1	2008-11-24 12:54:00	0	12	3	6	2
1	2008-11-24 12:55:00	0	12	3	6	2
1	2008-11-24 12:56:00	0	12	3	6	2
1	2008-11-24 12:57:00	83	12	3	6	2
1	2008-11-24 12:58:00	183	12	3	6	2
1	2008-11-24 12:59:00	211	12	3	6	2
1	2008-11-24 13:00:00	36	12	3	6	2
1	2008-11-24 13:01:00	282	13	3	6	2
1	2008-11-24 13:02:00	296	13	3	6	2
1	2008-11-24 13:03:00	154	13	3	6	2
1	2008-11-24 13:04:00	168	13	3	6	2
1	2008-11-24 13:05:00	47	13	3	6	2
1	2008-11-24 13:06:00	59	13	3	6	2
1	2008-11-24 13:07:00	168	13	3	6	2
1	2008-11-24 13:08:00	197	13	3	6	2
1	2008-11-24 13:09:00	83	13	3	6	2
1	2008-11-24 13:10:00	71	13	3	6	2
1	2008-11-24 13:11:00	47	13	3	6	2
1	2008-11-24 13:12:00	36	13	3	6	2
1	2008-11-24 13:13:00	327	13	3	6	2
1	2008-11-24 13:14:00	47	13	3	6	2
1	2008-11-24 13:15:00	12	13	3	6	2
1	2008-11-24 13:16:00	360	13	3	6	2
1	2008-11-24 13:17:00	47	13	3	6	2
1	2008-11-24 13:18:00	59	13	3	6	2
1	2008-11-24 13:19:00	393	13	3	6	2
1	2008-11-24 13:20:00	311	13	3	6	2
1	2008-11-24 13:21:00	183	13	3	6	2
1	2008-11-24 13:22:00	36	13	3	6	2
1	2008-11-24 13:23:00	0	13	3	6	2
1	2008-11-24 13:24:00	0	13	3	6	2
1	2008-11-24 13:25:00	0	13	3	6	2
1	2008-11-24 13:26:00	107	13	3	6	2
1	2008-11-24 13:27:00	36	13	3	6	2
1	2008-11-24 13:28:00	498	13	3	6	2
1	2008-11-24 13:29:00	197	13	3	6	2
1	2008-11-24 13:30:00	142	13	3	6	2
1	2008-11-24 13:31:00	183	13	3	6	2
1	2008-11-24 13:32:00	12	13	3	6	2
1	2008-11-24 13:33:00	0	13	3	6	2
1	2008-11-24 13:34:00	0	13	3	6	2
1	2008-11-24 13:35:00	0	13	3	6	2
1	2008-11-24 13:36:00	0	13	3	6	2
1	2008-11-24 13:37:00	0	13	3	6	2
1	2008-11-24 13:38:00	0	13	3	6	2
1	2008-11-24 13:39:00	0	13	3	6	2
1	2008-11-24 13:40:00	0	13	3	6	2
1	2008-11-24 13:41:00	0	13	3	6	2
1	2008-11-24 13:42:00	24	13	3	6	2
1	2008-11-24 13:43:00	0	13	3	6	2
1	2008-11-24 13:44:00	0	13	3	6	2
1	2008-11-24 13:45:00	0	13	3	6	2
1	2008-11-24 13:46:00	0	13	3	6	2
1	2008-11-24 13:47:00	0	13	3	6	2
1	2008-11-24 13:48:00	12	13	3	6	2
1	2008-11-24 13:49:00	0	13	3	6	2
1	2008-11-24 13:50:00	130	13	3	6	2
1	2008-11-24 13:51:00	197	13	3	6	2
1	2008-11-24 13:52:00	154	13	3	6	2
1	2008-11-24 13:53:00	154	13	3	6	2
1	2008-11-24 13:54:00	142	13	3	6	2
1	2008-11-24 13:55:00	344	13	3	6	2
1	2008-11-24 13:56:00	107	13	3	6	2
1	2008-11-24 13:57:00	130	13	3	6	2
1	2008-11-24 13:58:00	0	13	3	6	2
1	2008-11-24 13:59:00	0	13	3	6	2
1	2008-11-24 14:00:00	0	13	3	6	2
1	2008-11-24 14:01:00	0	14	3	6	2
1	2008-11-24 14:02:00	0	14	3	6	2
1	2008-11-24 14:03:00	0	14	3	6	2
1	2008-11-24 14:04:00	0	14	3	6	2
1	2008-11-24 14:05:00	0	14	3	6	2
1	2008-11-24 14:06:00	0	14	3	6	2
1	2008-11-24 14:07:00	0	14	3	6	2
1	2008-11-24 14:08:00	0	14	3	6	2
1	2008-11-24 14:09:00	0	14	3	6	2
1	2008-11-24 14:10:00	0	14	3	6	2
1	2008-11-24 14:11:00	0	14	3	6	2
1	2008-11-24 14:12:00	0	14	3	6	2
1	2008-11-24 14:13:00	0	14	3	6	2
1	2008-11-24 14:14:00	0	14	3	6	2
1	2008-11-24 14:15:00	0	14	3	6	2
1	2008-11-24 14:16:00	0	14	3	6	2
1	2008-11-24 14:17:00	0	14	3	6	2
1	2008-11-24 14:18:00	0	14	3	6	2
1	2008-11-24 14:19:00	12	14	3	6	2
1	2008-11-24 14:20:00	0	14	3	6	2
1	2008-11-24 14:21:00	0	14	3	6	2
1	2008-11-24 14:22:00	0	14	3	6	2
1	2008-11-24 14:23:00	0	14	3	6	2
1	2008-11-24 14:24:00	0	14	3	6	2
1	2008-11-24 14:25:00	0	14	3	6	2
1	2008-11-24 14:26:00	0	14	3	6	2
1	2008-11-24 14:27:00	0	14	3	6	2
1	2008-11-24 14:28:00	0	14	3	6	2
1	2008-11-24 14:29:00	24	14	3	6	2
1	2008-11-24 14:30:00	0	14	3	6	2
1	2008-11-24 14:31:00	0	14	3	6	2
1	2008-11-24 14:32:00	47	14	3	6	2
1	2008-11-24 14:33:00	0	14	3	6	2
1	2008-11-24 14:34:00	0	14	3	6	2
1	2008-11-24 14:35:00	0	14	3	6	2
1	2008-11-24 14:36:00	0	14	3	6	2
1	2008-11-24 14:37:00	0	14	3	6	2
1	2008-11-24 14:38:00	12	14	3	6	2
1	2008-11-24 14:39:00	0	14	3	6	2
1	2008-11-24 14:40:00	0	14	3	6	2
1	2008-11-24 14:41:00	0	14	3	6	2
1	2008-11-24 14:42:00	0	14	3	6	2
1	2008-11-24 14:43:00	12	14	3	6	2
1	2008-11-24 14:44:00	0	14	3	6	2
1	2008-11-24 14:45:00	0	14	3	6	2
1	2008-11-24 14:46:00	0	14	3	6	2
1	2008-11-24 14:47:00	0	14	3	6	2
1	2008-11-24 14:48:00	0	14	3	6	2
1	2008-11-24 14:49:00	0	14	3	6	2
1	2008-11-24 14:50:00	0	14	3	6	2
1	2008-11-24 14:51:00	12	14	3	6	2
1	2008-11-24 14:52:00	12	14	3	6	2
1	2008-11-24 14:53:00	0	14	3	6	2
1	2008-11-24 14:54:00	0	14	3	6	2
1	2008-11-24 14:55:00	0	14	3	6	2
1	2008-11-24 14:56:00	0	14	3	6	2
1	2008-11-24 14:57:00	197	14	3	6	2
1	2008-11-24 14:58:00	83	14	3	6	2
1	2008-11-24 14:59:00	254	14	3	6	2
1	2008-11-24 15:00:00	119	14	3	6	2
1	2008-11-24 15:01:00	142	15	3	6	2
1	2008-11-24 15:02:00	254	15	3	6	2
1	2008-11-24 15:03:00	154	15	3	6	2
1	2008-11-24 15:04:00	197	15	3	6	2
1	2008-11-24 15:05:00	377	15	3	6	2
1	2008-11-24 15:06:00	142	15	3	6	2
1	2008-11-24 15:07:00	12	15	3	6	2
1	2008-11-24 15:08:00	0	15	3	6	2
1	2008-11-24 15:09:00	0	15	3	6	2
1	2008-11-24 15:10:00	0	15	3	6	2
1	2008-11-24 15:11:00	0	15	3	6	2
1	2008-11-24 15:12:00	0	15	3	6	2
1	2008-11-24 15:13:00	0	15	3	6	2
1	2008-11-24 15:14:00	0	15	3	6	2
1	2008-11-24 15:15:00	225	15	3	6	2
1	2008-11-24 15:16:00	83	15	3	6	2
1	2008-11-24 15:17:00	327	15	3	6	2
1	2008-11-24 15:18:00	71	15	3	6	2
1	2008-11-24 15:19:00	0	15	3	6	2
1	2008-11-24 15:20:00	0	15	3	6	2
1	2008-11-24 15:21:00	0	15	3	6	2
1	2008-11-24 15:22:00	0	15	3	6	2
1	2008-11-24 15:23:00	0	15	3	6	2
1	2008-11-24 15:24:00	0	15	3	6	2
1	2008-11-24 15:25:00	239	15	3	6	2
1	2008-11-24 15:26:00	83	15	3	6	2
1	2008-11-24 15:27:00	225	15	3	6	2
1	2008-11-24 15:28:00	130	15	3	6	2
1	2008-11-24 15:29:00	154	15	3	6	2
1	2008-11-24 15:30:00	83	15	3	6	2
1	2008-11-24 15:31:00	0	15	3	6	2
1	2008-11-24 15:32:00	0	15	3	6	2
1	2008-11-24 15:33:00	0	15	3	6	2
1	2008-11-24 15:34:00	0	15	3	6	2
1	2008-11-24 15:35:00	0	15	3	6	2
1	2008-11-24 15:36:00	0	15	3	6	2
1	2008-11-24 15:37:00	0	15	3	6	2
1	2008-11-24 15:38:00	0	15	3	6	2
1	2008-11-24 15:39:00	0	15	3	6	2
1	2008-11-24 15:40:00	12	15	3	6	2
1	2008-11-24 15:41:00	0	15	3	6	2
1	2008-11-24 15:42:00	0	15	3	6	2
1	2008-11-24 15:43:00	0	15	3	6	2
1	2008-11-24 15:44:00	0	15	3	6	2
1	2008-11-24 15:45:00	83	15	3	6	2
1	2008-11-24 15:46:00	239	15	3	6	2
1	2008-11-24 15:47:00	142	15	3	6	2
1	2008-11-24 15:48:00	168	15	3	6	2
1	2008-11-24 15:49:00	83	15	3	6	2
1	2008-11-24 15:50:00	183	15	3	6	2
1	2008-11-24 15:51:00	0	15	3	6	2
1	2008-11-24 15:52:00	0	15	3	6	2
1	2008-11-24 15:53:00	0	15	3	6	2
1	2008-11-24 15:54:00	0	15	3	6	2
1	2008-11-24 15:55:00	0	15	3	6	2
1	2008-11-24 15:56:00	71	15	3	6	2
1	2008-11-24 15:57:00	183	15	3	6	2
1	2008-11-24 15:58:00	59	15	3	6	2
1	2008-11-24 15:59:00	142	15	3	6	2
1	2008-11-24 16:00:00	107	15	3	6	2
1	2008-11-24 16:01:00	119	16	3	6	2
1	2008-11-24 16:02:00	154	16	3	6	2
1	2008-11-24 16:03:00	24	16	3	6	2
1	2008-11-24 16:04:00	83	16	3	6	2
1	2008-11-24 16:05:00	268	16	3	6	2
1	2008-11-24 16:06:00	59	16	3	6	2
1	2008-11-24 16:07:00	0	16	3	6	2
1	2008-11-24 16:08:00	0	16	3	6	2
1	2008-11-24 16:09:00	0	16	3	6	2
1	2008-11-24 16:10:00	0	16	3	6	2
1	2008-11-24 16:11:00	0	16	3	6	2
1	2008-11-24 16:12:00	0	16	3	6	2
1	2008-11-24 16:13:00	12	16	3	6	2
1	2008-11-24 16:14:00	0	16	3	6	2
1	2008-11-24 16:15:00	0	16	3	6	2
1	2008-11-24 16:16:00	0	16	3	6	2
1	2008-11-24 16:17:00	0	16	3	6	2
1	2008-11-24 16:18:00	0	16	3	6	2
1	2008-11-24 16:19:00	0	16	3	6	2
1	2008-11-24 16:20:00	0	16	3	6	2
1	2008-11-24 16:21:00	0	16	3	6	2
1	2008-11-24 16:22:00	0	16	3	6	2
1	2008-11-24 16:23:00	0	16	3	6	2
1	2008-11-24 16:24:00	0	16	3	6	2
1	2008-11-24 16:25:00	0	16	3	6	2
1	2008-11-24 16:26:00	0	16	3	6	2
1	2008-11-24 16:27:00	0	16	3	6	2
1	2008-11-24 16:28:00	0	16	3	6	2
1	2008-11-24 16:29:00	0	16	3	6	2
1	2008-11-24 16:30:00	0	16	3	6	2
1	2008-11-24 16:31:00	0	16	3	6	2
1	2008-11-24 16:32:00	0	16	3	6	2
1	2008-11-24 16:33:00	0	16	3	6	2
1	2008-11-24 16:34:00	0	16	3	6	2
1	2008-11-24 16:35:00	0	16	3	6	2
1	2008-11-24 16:36:00	0	16	3	6	2
1	2008-11-24 16:37:00	0	16	3	6	2
1	2008-11-24 16:38:00	0	16	3	6	2
1	2008-11-24 16:39:00	0	16	3	6	2
1	2008-11-24 16:40:00	0	16	3	6	2
1	2008-11-24 16:41:00	0	16	3	6	2
1	2008-11-24 16:42:00	0	16	3	6	2
1	2008-11-24 16:43:00	0	16	3	6	2
1	2008-11-24 16:44:00	0	16	3	6	2
1	2008-11-24 16:45:00	0	16	3	6	2
1	2008-11-24 16:46:00	0	16	3	6	2
1	2008-11-24 16:47:00	0	16	3	6	2
1	2008-11-24 16:48:00	0	16	3	6	2
1	2008-11-24 16:49:00	0	16	3	6	2
1	2008-11-24 16:50:00	0	16	3	6	2
1	2008-11-24 16:51:00	0	16	3	6	2
1	2008-11-24 16:52:00	0	16	3	6	2
1	2008-11-24 16:53:00	0	16	3	6	2
1	2008-11-24 16:54:00	0	16	3	6	2
1	2008-11-24 16:55:00	47	16	3	6	2
1	2008-11-24 16:56:00	36	16	3	6	2
1	2008-11-24 16:57:00	0	16	3	6	2
1	2008-11-24 16:58:00	0	16	3	6	2
1	2008-11-24 16:59:00	0	16	3	6	2
1	2008-11-24 17:00:00	0	16	3	6	2
1	2008-11-24 17:01:00	0	17	3	6	2
1	2008-11-24 17:02:00	0	17	3	6	2
1	2008-11-24 17:03:00	0	17	3	6	2
1	2008-11-24 17:04:00	0	17	3	6	2
1	2008-11-24 17:05:00	0	17	3	6	2
1	2008-11-24 17:06:00	0	17	3	6	2
1	2008-11-24 17:07:00	0	17	3	6	2
1	2008-11-24 17:08:00	0	17	3	6	2
1	2008-11-24 17:09:00	0	17	3	6	2
1	2008-11-24 17:10:00	0	17	3	6	2
1	2008-11-24 17:11:00	0	17	3	6	2
1	2008-11-24 17:12:00	0	17	3	6	2
1	2008-11-24 17:13:00	0	17	3	6	2
1	2008-11-24 17:14:00	24	17	3	6	2
1	2008-11-24 17:15:00	0	17	3	6	2
1	2008-11-24 17:16:00	0	17	3	6	2
1	2008-11-24 17:17:00	0	17	3	6	2
1	2008-11-24 17:18:00	0	17	3	6	2
1	2008-11-24 17:19:00	12	17	3	6	2
1	2008-11-24 17:20:00	0	17	3	6	2
1	2008-11-24 17:21:00	0	17	3	6	2
1	2008-11-24 17:22:00	0	17	3	6	2
1	2008-11-24 17:23:00	0	17	3	6	2
1	2008-11-24 17:24:00	239	17	3	6	2
1	2008-11-24 17:25:00	83	17	3	6	2
1	2008-11-24 17:26:00	24	17	3	6	2
1	2008-11-24 17:27:00	71	17	3	6	2
1	2008-11-24 17:28:00	47	17	3	6	2
1	2008-11-24 17:29:00	59	17	3	6	2
1	2008-11-24 17:30:00	24	17	3	6	2
1	2008-11-24 17:31:00	47	17	3	6	2
1	2008-11-24 17:32:00	36	17	3	6	2
1	2008-11-24 17:33:00	95	17	3	6	2
1	2008-11-24 17:34:00	427	17	3	6	2
1	2008-11-24 17:35:00	344	17	3	6	2
1	2008-11-24 17:36:00	211	17	3	6	2
1	2008-11-24 17:37:00	360	17	3	6	2
1	2008-11-24 17:38:00	360	17	3	6	2
1	2008-11-24 17:39:00	83	17	3	6	2
1	2008-11-24 17:40:00	296	17	3	6	2
1	2008-11-24 17:41:00	296	17	3	6	2
1	2008-11-24 17:42:00	12	17	3	6	2
1	2008-11-24 17:43:00	154	17	3	6	2
1	2008-11-24 17:44:00	282	17	3	6	2
1	2008-11-24 17:45:00	107	17	3	6	2
1	2008-11-24 17:46:00	0	17	3	6	2
1	2008-11-24 17:47:00	0	17	3	6	2
1	2008-11-24 17:48:00	0	17	3	6	2
1	2008-11-24 17:49:00	95	17	3	6	2
1	2008-11-24 17:50:00	95	17	3	6	2
1	2008-11-24 17:51:00	142	17	3	6	2
1	2008-11-24 17:52:00	183	17	3	6	2
1	2008-11-24 17:53:00	225	17	3	6	2
1	2008-11-24 17:54:00	268	17	3	6	2
1	2008-11-24 17:55:00	239	17	3	6	2
1	2008-11-24 17:56:00	83	17	3	6	2
1	2008-11-24 17:57:00	24	17	3	6	2
1	2008-11-24 17:58:00	59	17	3	6	2
1	2008-11-24 17:59:00	36	17	3	6	2
1	2008-11-24 18:00:00	282	17	3	6	2
1	2008-11-24 18:01:00	183	18	4	6	2
1	2008-11-24 18:02:00	197	18	4	6	2
1	2008-11-24 18:03:00	47	18	4	6	2
1	2008-11-24 18:04:00	0	18	4	6	2
1	2008-11-24 18:05:00	0	18	4	6	2
1	2008-11-24 18:06:00	0	18	4	6	2
1	2008-11-24 18:07:00	0	18	4	6	2
1	2008-11-24 18:08:00	119	18	4	6	2
1	2008-11-24 18:09:00	71	18	4	6	2
1	2008-11-24 18:10:00	479	18	4	6	2
1	2008-11-24 18:11:00	296	18	4	6	2
1	2008-11-24 18:12:00	47	18	4	6	2
1	2008-11-24 18:13:00	83	18	4	6	2
1	2008-11-24 18:14:00	107	18	4	6	2
1	2008-11-24 18:15:00	47	18	4	6	2
1	2008-11-24 18:16:00	154	18	4	6	2
1	2008-11-24 18:17:00	197	18	4	6	2
1	2008-11-24 18:18:00	268	18	4	6	2
1	2008-11-24 18:19:00	95	18	4	6	2
1	2008-11-24 18:20:00	0	18	4	6	2
1	2008-11-24 18:21:00	0	18	4	6	2
1	2008-11-24 18:22:00	0	18	4	6	2
1	2008-11-24 18:23:00	0	18	4	6	2
1	2008-11-24 18:24:00	0	18	4	6	2
1	2008-11-24 18:25:00	0	18	4	6	2
1	2008-11-24 18:26:00	0	18	4	6	2
1	2008-11-24 18:27:00	0	18	4	6	2
1	2008-11-24 18:28:00	0	18	4	6	2
1	2008-11-24 18:29:00	36	18	4	6	2
1	2008-11-24 18:30:00	0	18	4	6	2
1	2008-11-24 18:31:00	0	18	4	6	2
1	2008-11-24 18:32:00	154	18	4	6	2
1	2008-11-24 18:33:00	197	18	4	6	2
1	2008-11-24 18:34:00	183	18	4	6	2
1	2008-11-24 18:35:00	225	18	4	6	2
1	2008-11-24 18:36:00	211	18	4	6	2
1	2008-11-24 18:37:00	47	18	4	6	2
1	2008-11-24 18:38:00	95	18	4	6	2
1	2008-11-24 18:39:00	197	18	4	6	2
1	2008-11-24 18:40:00	197	18	4	6	2
1	2008-11-24 18:41:00	47	18	4	6	2
1	2008-11-24 18:42:00	71	18	4	6	2
1	2008-11-24 18:43:00	119	18	4	6	2
1	2008-11-24 18:44:00	239	18	4	6	2
1	2008-11-24 18:45:00	168	18	4	6	2
1	2008-11-24 18:46:00	154	18	4	6	2
1	2008-11-24 18:47:00	197	18	4	6	2
1	2008-11-24 18:48:00	12	18	4	6	2
1	2008-11-24 18:49:00	36	18	4	6	2
1	2008-11-24 18:50:00	0	18	4	6	2
1	2008-11-24 18:51:00	0	18	4	6	2
1	2008-11-24 18:52:00	0	18	4	6	2
1	2008-11-24 18:53:00	36	18	4	6	2
1	2008-11-24 18:54:00	0	18	4	6	2
1	2008-11-24 18:55:00	0	18	4	6	2
1	2008-11-24 18:56:00	47	18	4	6	2
1	2008-11-24 18:57:00	225	18	4	6	2
1	2008-11-24 18:58:00	95	18	4	6	2
1	2008-11-24 18:59:00	0	18	4	6	2
1	2008-11-24 19:00:00	0	18	4	6	2
1	2008-11-24 19:01:00	0	19	4	6	2
1	2008-11-24 19:02:00	0	19	4	6	2
1	2008-11-24 19:03:00	0	19	4	6	2
1	2008-11-24 19:04:00	0	19	4	6	2
1	2008-11-24 19:05:00	24	19	4	6	2
1	2008-11-24 19:06:00	59	19	4	6	2
1	2008-11-24 19:07:00	71	19	4	6	2
1	2008-11-24 19:08:00	83	19	4	6	2
1	2008-11-24 19:09:00	130	19	4	6	2
1	2008-11-24 19:10:00	36	19	4	6	2
1	2008-11-24 19:11:00	95	19	4	6	2
1	2008-11-24 19:12:00	107	19	4	6	2
1	2008-11-24 19:13:00	0	19	4	6	2
1	2008-11-24 19:14:00	24	19	4	6	2
1	2008-11-24 19:15:00	0	19	4	6	2
1	2008-11-24 19:16:00	83	19	4	6	2
1	2008-11-24 19:17:00	24	19	4	6	2
1	2008-11-24 19:18:00	107	19	4	6	2
1	2008-11-24 19:19:00	12	19	4	6	2
1	2008-11-24 19:20:00	410	19	4	6	2
1	2008-11-24 19:21:00	0	19	4	6	2
1	2008-11-24 19:22:00	12	19	4	6	2
1	2008-11-24 19:23:00	12	19	4	6	2
1	2008-11-24 19:24:00	0	19	4	6	2
1	2008-11-24 19:25:00	0	19	4	6	2
1	2008-11-24 19:26:00	268	19	4	6	2
1	2008-11-24 19:27:00	427	19	4	6	2
1	2008-11-24 19:28:00	360	19	4	6	2
1	2008-11-24 19:29:00	740	19	4	6	2
1	2008-11-24 19:30:00	1197	19	4	6	2
1	2008-11-24 19:31:00	808	19	4	6	2
1	2008-11-24 19:32:00	574	19	4	6	2
1	2008-11-24 19:33:00	903	19	4	6	2
1	2008-11-24 19:34:00	761	19	4	6	2
1	2008-11-24 19:35:00	443	19	4	6	2
1	2008-11-24 19:36:00	498	19	4	6	2
1	2008-11-24 19:37:00	282	19	4	6	2
1	2008-11-24 19:38:00	296	19	4	6	2
1	2008-11-24 19:39:00	130	19	4	6	2
1	2008-11-24 19:40:00	71	19	4	6	2
1	2008-11-24 19:41:00	59	19	4	6	2
1	2008-11-24 19:42:00	12	19	4	6	2
1	2008-11-24 19:43:00	95	19	4	6	2
1	2008-11-24 19:44:00	0	19	4	6	2
1	2008-11-24 19:45:00	36	19	4	6	2
1	2008-11-24 19:46:00	0	19	4	6	2
1	2008-11-24 19:47:00	0	19	4	6	2
1	2008-11-24 19:48:00	0	19	4	6	2
1	2008-11-24 19:49:00	0	19	4	6	2
1	2008-11-24 19:50:00	36	19	4	6	2
1	2008-11-24 19:51:00	83	19	4	6	2
1	2008-11-24 19:52:00	59	19	4	6	2
1	2008-11-24 19:53:00	36	19	4	6	2
1	2008-11-24 19:54:00	0	19	4	6	2
1	2008-11-24 19:55:00	0	19	4	6	2
1	2008-11-24 19:56:00	0	19	4	6	2
1	2008-11-24 19:57:00	12	19	4	6	2
1	2008-11-24 19:58:00	0	19	4	6	2
1	2008-11-24 19:59:00	59	19	4	6	2
1	2008-11-24 20:00:00	12	19	4	6	2
1	2008-11-24 20:01:00	95	20	4	6	2
1	2008-11-24 20:02:00	12	20	4	6	2
1	2008-11-24 20:03:00	24	20	4	6	2
1	2008-11-24 20:04:00	24	20	4	6	2
1	2008-11-24 20:05:00	0	20	4	6	2
1	2008-11-24 20:06:00	95	20	4	6	2
1	2008-11-24 20:07:00	311	20	4	6	2
1	2008-11-24 20:08:00	654	20	4	6	2
1	2008-11-24 20:09:00	183	20	4	6	2
1	2008-11-24 20:10:00	12	20	4	6	2
1	2008-11-24 20:11:00	377	20	4	6	2
1	2008-11-24 20:12:00	95	20	4	6	2
1	2008-11-24 20:13:00	59	20	4	6	2
1	2008-11-24 20:14:00	393	20	4	6	2
1	2008-11-24 20:15:00	71	20	4	6	2
1	2008-11-24 20:16:00	0	20	4	6	2
1	2008-11-24 20:17:00	168	20	4	6	2
1	2008-11-24 20:18:00	344	20	4	6	2
1	2008-11-24 20:19:00	36	20	4	6	2
1	2008-11-24 20:20:00	0	20	4	6	2
1	2008-11-24 20:21:00	12	20	4	6	2
1	2008-11-24 20:22:00	0	20	4	6	2
1	2008-11-24 20:23:00	95	20	4	6	2
1	2008-11-24 20:24:00	12	20	4	6	2
1	2008-11-24 20:25:00	0	20	4	6	2
1	2008-11-24 20:26:00	12	20	4	6	2
1	2008-11-24 20:27:00	0	20	4	6	2
1	2008-11-24 20:28:00	0	20	4	6	2
1	2008-11-24 20:29:00	0	20	4	6	2
1	2008-11-24 20:30:00	47	20	4	6	2
1	2008-11-24 20:31:00	36	20	4	6	2
1	2008-11-24 20:32:00	24	20	4	6	2
1	2008-11-24 20:33:00	0	20	4	6	2
1	2008-11-24 20:34:00	0	20	4	6	2
1	2008-11-24 20:35:00	0	20	4	6	2
1	2008-11-24 20:36:00	0	20	4	6	2
1	2008-11-24 20:37:00	0	20	4	6	2
1	2008-11-24 20:38:00	59	20	4	6	2
1	2008-11-24 20:39:00	0	20	4	6	2
1	2008-11-24 20:40:00	0	20	4	6	2
1	2008-11-24 20:41:00	0	20	4	6	2
1	2008-11-24 20:42:00	0	20	4	6	2
1	2008-11-24 20:43:00	0	20	4	6	2
1	2008-11-24 20:44:00	0	20	4	6	2
1	2008-11-24 20:45:00	0	20	4	6	2
1	2008-11-24 20:46:00	0	20	4	6	2
1	2008-11-24 20:47:00	0	20	4	6	2
1	2008-11-24 20:48:00	0	20	4	6	2
1	2008-11-24 20:49:00	0	20	4	6	2
1	2008-11-24 20:50:00	0	20	4	6	2
1	2008-11-24 20:51:00	0	20	4	6	2
1	2008-11-24 20:52:00	0	20	4	6	2
1	2008-11-24 20:53:00	0	20	4	6	2
1	2008-11-24 20:54:00	0	20	4	6	2
1	2008-11-24 20:55:00	0	20	4	6	2
1	2008-11-24 20:56:00	0	20	4	6	2
1	2008-11-24 20:57:00	0	20	4	6	2
1	2008-11-24 20:58:00	0	20	4	6	2
1	2008-11-24 20:59:00	0	20	4	6	2
1	2008-11-24 21:00:00	0	20	4	6	2
1	2008-11-24 21:01:00	0	21	4	6	2
1	2008-11-24 21:02:00	0	21	4	6	2
1	2008-11-24 21:03:00	0	21	4	6	2
1	2008-11-24 21:04:00	0	21	4	6	2
1	2008-11-24 21:05:00	0	21	4	6	2
1	2008-11-24 21:06:00	0	21	4	6	2
1	2008-11-24 21:07:00	0	21	4	6	2
1	2008-11-24 21:08:00	0	21	4	6	2
1	2008-11-24 21:09:00	0	21	4	6	2
1	2008-11-24 21:10:00	0	21	4	6	2
1	2008-11-24 21:11:00	0	21	4	6	2
1	2008-11-24 21:12:00	0	21	4	6	2
1	2008-11-24 21:13:00	24	21	4	6	2
1	2008-11-24 21:14:00	0	21	4	6	2
1	2008-11-24 21:15:00	0	21	4	6	2
1	2008-11-24 21:16:00	0	21	4	6	2
1	2008-11-24 21:17:00	0	21	4	6	2
1	2008-11-24 21:18:00	0	21	4	6	2
1	2008-11-24 21:19:00	0	21	4	6	2
1	2008-11-24 21:20:00	0	21	4	6	2
1	2008-11-24 21:21:00	59	21	4	6	2
1	2008-11-24 21:22:00	24	21	4	6	2
1	2008-11-24 21:23:00	0	21	4	6	2
1	2008-11-24 21:24:00	47	21	4	6	2
1	2008-11-24 21:25:00	59	21	4	6	2
1	2008-11-24 21:26:00	0	21	4	6	2
1	2008-11-24 21:27:00	36	21	4	6	2
1	2008-11-24 21:28:00	59	21	4	6	2
1	2008-11-24 21:29:00	119	21	4	6	2
1	2008-11-24 21:30:00	239	21	4	6	2
1	2008-11-24 21:31:00	296	21	4	6	2
1	2008-11-24 21:32:00	197	21	4	6	2
1	2008-11-24 21:33:00	107	21	4	6	2
1	2008-11-24 21:34:00	12	21	4	6	2
1	2008-11-24 21:35:00	12	21	4	6	2
1	2008-11-24 21:36:00	47	21	4	6	2
1	2008-11-24 21:37:00	0	21	4	6	2
1	2008-11-24 21:38:00	0	21	4	6	2
1	2008-11-24 21:39:00	36	21	4	6	2
1	2008-11-24 21:40:00	24	21	4	6	2
1	2008-11-24 21:41:00	71	21	4	6	2
1	2008-11-24 21:42:00	12	21	4	6	2
1	2008-11-24 21:43:00	12	21	4	6	2
1	2008-11-24 21:44:00	47	21	4	6	2
1	2008-11-24 21:45:00	268	21	4	6	2
1	2008-11-24 21:46:00	130	21	4	6	2
1	2008-11-24 21:47:00	0	21	4	6	2
1	2008-11-24 21:48:00	0	21	4	6	2
1	2008-11-24 21:49:00	0	21	4	6	2
1	2008-11-24 21:50:00	0	21	4	6	2
1	2008-11-24 21:51:00	0	21	4	6	2
1	2008-11-24 21:52:00	36	21	4	6	2
1	2008-11-24 21:53:00	0	21	4	6	2
1	2008-11-24 21:54:00	0	21	4	6	2
1	2008-11-24 21:55:00	0	21	4	6	2
1	2008-11-24 21:56:00	0	21	4	6	2
1	2008-11-24 21:57:00	0	21	4	6	2
1	2008-11-24 21:58:00	0	21	4	6	2
1	2008-11-24 21:59:00	0	21	4	6	2
1	2008-11-24 22:00:00	0	21	4	6	2
1	2008-11-24 22:01:00	0	22	4	6	2
1	2008-11-24 22:02:00	95	22	4	6	2
1	2008-11-24 22:03:00	12	22	4	6	2
1	2008-11-24 22:04:00	0	22	4	6	2
1	2008-11-24 22:05:00	0	22	4	6	2
1	2008-11-24 22:06:00	0	22	4	6	2
1	2008-11-24 22:07:00	0	22	4	6	2
1	2008-11-24 22:08:00	0	22	4	6	2
1	2008-11-24 22:09:00	0	22	4	6	2
1	2008-11-24 22:10:00	0	22	4	6	2
1	2008-11-24 22:11:00	0	22	4	6	2
1	2008-11-24 22:12:00	36	22	4	6	2
1	2008-11-24 22:13:00	0	22	4	6	2
1	2008-11-24 22:14:00	12	22	4	6	2
1	2008-11-24 22:15:00	0	22	4	6	2
1	2008-11-24 22:16:00	47	22	4	6	2
1	2008-11-24 22:17:00	24	22	4	6	2
1	2008-11-24 22:18:00	36	22	4	6	2
1	2008-11-24 22:19:00	12	22	4	6	2
1	2008-11-24 22:20:00	0	22	4	6	2
1	2008-11-24 22:21:00	95	22	4	6	2
1	2008-11-24 22:22:00	460	22	4	6	2
1	2008-11-24 22:23:00	24	22	4	6	2
1	2008-11-24 22:24:00	427	22	4	6	2
1	2008-11-24 22:25:00	311	22	4	6	2
1	2008-11-24 22:26:00	183	22	4	6	2
1	2008-11-24 22:27:00	168	22	4	6	2
1	2008-11-24 22:28:00	311	22	4	6	2
1	2008-11-24 22:29:00	536	22	4	6	2
1	2008-11-24 22:30:00	142	22	4	6	2
1	2008-11-24 22:31:00	197	22	4	6	2
1	2008-11-24 22:32:00	168	22	4	6	2
1	2008-11-24 22:33:00	47	22	4	6	2
1	2008-11-24 22:34:00	36	22	4	6	2
1	2008-11-24 22:35:00	225	22	4	6	2
1	2008-11-24 22:36:00	168	22	4	6	2
1	2008-11-24 22:37:00	71	22	4	6	2
1	2008-11-24 22:38:00	36	22	4	6	2
1	2008-11-24 22:39:00	47	22	4	6	2
1	2008-11-24 22:40:00	24	22	4	6	2
1	2008-11-24 22:41:00	83	22	4	6	2
1	2008-11-24 22:42:00	12	22	4	6	2
1	2008-11-24 22:43:00	0	22	4	6	2
1	2008-11-24 22:44:00	24	22	4	6	2
1	2008-11-24 22:45:00	24	22	4	6	2
1	2008-11-24 22:46:00	0	22	4	6	2
1	2008-11-24 22:47:00	0	22	4	6	2
1	2008-11-24 22:48:00	517	22	4	6	2
1	2008-11-24 22:49:00	574	22	4	6	2
1	2008-11-24 22:50:00	154	22	4	6	2
1	2008-11-24 22:51:00	36	22	4	6	2
1	2008-11-24 22:52:00	83	22	4	6	2
1	2008-11-24 22:53:00	0	22	4	6	2
1	2008-11-24 22:54:00	0	22	4	6	2
1	2008-11-24 22:55:00	12	22	4	6	2
1	2008-11-24 22:56:00	0	22	4	6	2
1	2008-11-24 22:57:00	12	22	4	6	2
1	2008-11-24 22:58:00	0	22	4	6	2
1	2008-11-24 22:59:00	24	22	4	6	2
1	2008-11-24 23:00:00	24	22	4	6	2
1	2008-11-24 23:01:00	0	23	4	6	2
1	2008-11-24 23:02:00	0	23	4	6	2
1	2008-11-24 23:03:00	0	23	4	6	2
1	2008-11-24 23:04:00	24	23	4	6	2
1	2008-11-24 23:05:00	24	23	4	6	2
1	2008-11-24 23:06:00	12	23	4	6	2
1	2008-11-24 23:07:00	0	23	4	6	2
1	2008-11-24 23:08:00	154	23	4	6	2
1	2008-11-24 23:09:00	0	23	4	6	2
1	2008-11-24 23:10:00	0	23	4	6	2
1	2008-11-24 23:11:00	0	23	4	6	2
1	2008-11-24 23:12:00	0	23	4	6	2
1	2008-11-24 23:13:00	0	23	4	6	2
1	2008-11-24 23:14:00	0	23	4	6	2
1	2008-11-24 23:15:00	0	23	4	6	2
1	2008-11-24 23:16:00	0	23	4	6	2
1	2008-11-24 23:17:00	0	23	4	6	2
1	2008-11-24 23:18:00	0	23	4	6	2
1	2008-11-24 23:19:00	0	23	4	6	2
1	2008-11-24 23:20:00	0	23	4	6	2
1	2008-11-24 23:21:00	0	23	4	6	2
1	2008-11-24 23:22:00	0	23	4	6	2
1	2008-11-24 23:23:00	0	23	4	6	2
1	2008-11-24 23:24:00	0	23	4	6	2
1	2008-11-24 23:25:00	0	23	4	6	2
1	2008-11-24 23:26:00	0	23	4	6	2
1	2008-11-24 23:27:00	0	23	4	6	2
1	2008-11-24 23:28:00	0	23	4	6	2
1	2008-11-24 23:29:00	0	23	4	6	2
1	2008-11-24 23:30:00	0	23	4	6	2
1	2008-11-24 23:31:00	0	23	4	6	2
1	2008-11-24 23:32:00	0	23	4	6	2
1	2008-11-24 23:33:00	0	23	4	6	2
1	2008-11-24 23:34:00	0	23	4	6	2
1	2008-11-24 23:35:00	0	23	4	6	2
1	2008-11-24 23:36:00	0	23	4	6	2
1	2008-11-24 23:37:00	0	23	4	6	2
1	2008-11-24 23:38:00	0	23	4	6	2
1	2008-11-24 23:39:00	0	23	4	6	2
1	2008-11-24 23:40:00	0	23	4	6	2
1	2008-11-24 23:41:00	0	23	4	6	2
1	2008-11-24 23:42:00	0	23	4	6	2
1	2008-11-24 23:43:00	0	23	4	6	2
1	2008-11-24 23:44:00	0	23	4	6	2
1	2008-11-24 23:45:00	0	23	4	6	2
1	2008-11-24 23:46:00	0	23	4	6	2
1	2008-11-24 23:47:00	0	23	4	6	2
1	2008-11-24 23:48:00	0	23	4	6	2
1	2008-11-24 23:49:00	0	23	4	6	2
1	2008-11-24 23:50:00	0	23	4	6	2
1	2008-11-24 23:51:00	0	23	4	6	2
1	2008-11-24 23:52:00	0	23	4	6	2
1	2008-11-24 23:53:00	0	23	4	6	2
1	2008-11-24 23:54:00	0	23	4	6	2
1	2008-11-24 23:55:00	0	23	4	6	2
1	2008-11-24 23:56:00	0	23	4	6	2
1	2008-11-24 23:57:00	0	23	4	6	2
1	2008-11-24 23:58:00	0	23	4	6	2
1	2008-11-24 23:59:00	0	23	4	6	2
1	2008-11-25	0	23	4	6	2
1	2008-11-25 00:01:00	0	0	1	7	3
1	2008-11-25 00:02:00	0	0	1	7	3
1	2008-11-25 00:03:00	0	0	1	7	3
1	2008-11-25 00:04:00	71	0	1	7	3
1	2008-11-25 00:05:00	24	0	1	7	3
1	2008-11-25 00:06:00	0	0	1	7	3
1	2008-11-25 00:07:00	12	0	1	7	3
1	2008-11-25 00:08:00	0	0	1	7	3
1	2008-11-25 00:09:00	0	0	1	7	3
1	2008-11-25 00:10:00	0	0	1	7	3
1	2008-11-25 00:11:00	12	0	1	7	3
1	2008-11-25 00:12:00	0	0	1	7	3
1	2008-11-25 00:13:00	0	0	1	7	3
1	2008-11-25 00:14:00	0	0	1	7	3
1	2008-11-25 00:15:00	239	0	1	7	3
1	2008-11-25 00:16:00	154	0	1	7	3
1	2008-11-25 00:17:00	12	0	1	7	3
1	2008-11-25 00:18:00	12	0	1	7	3
1	2008-11-25 00:19:00	0	0	1	7	3
1	2008-11-25 00:20:00	36	0	1	7	3
1	2008-11-25 00:21:00	0	0	1	7	3
1	2008-11-25 00:22:00	0	0	1	7	3
1	2008-11-25 00:23:00	59	0	1	7	3
1	2008-11-25 00:24:00	0	0	1	7	3
1	2008-11-25 00:25:00	0	0	1	7	3
1	2008-11-25 00:26:00	0	0	1	7	3
1	2008-11-25 00:27:00	0	0	1	7	3
1	2008-11-25 00:28:00	0	0	1	7	3
1	2008-11-25 00:29:00	24	0	1	7	3
1	2008-11-25 00:30:00	0	0	1	7	3
1	2008-11-25 00:31:00	24	0	1	7	3
1	2008-11-25 00:32:00	0	0	1	7	3
1	2008-11-25 00:33:00	36	0	1	7	3
1	2008-11-25 00:34:00	0	0	1	7	3
1	2008-11-25 00:35:00	47	0	1	7	3
1	2008-11-25 00:36:00	0	0	1	7	3
1	2008-11-25 00:37:00	0	0	1	7	3
1	2008-11-25 00:38:00	0	0	1	7	3
1	2008-11-25 00:39:00	0	0	1	7	3
1	2008-11-25 00:40:00	0	0	1	7	3
1	2008-11-25 00:41:00	0	0	1	7	3
1	2008-11-25 00:42:00	0	0	1	7	3
1	2008-11-25 00:43:00	0	0	1	7	3
1	2008-11-25 00:44:00	0	0	1	7	3
1	2008-11-25 00:45:00	0	0	1	7	3
1	2008-11-25 00:46:00	0	0	1	7	3
1	2008-11-25 00:47:00	0	0	1	7	3
1	2008-11-25 00:48:00	0	0	1	7	3
1	2008-11-25 00:49:00	0	0	1	7	3
1	2008-11-25 00:50:00	0	0	1	7	3
1	2008-11-25 00:51:00	211	0	1	7	3
1	2008-11-25 00:52:00	856	0	1	7	3
1	2008-11-25 00:53:00	360	0	1	7	3
1	2008-11-25 00:54:00	168	0	1	7	3
1	2008-11-25 00:55:00	36	0	1	7	3
1	2008-11-25 00:56:00	311	0	1	7	3
1	2008-11-25 00:57:00	1169	0	1	7	3
1	2008-11-25 00:58:00	633	0	1	7	3
1	2008-11-25 00:59:00	536	0	1	7	3
1	2008-11-25 01:00:00	107	0	1	7	3
1	2008-11-25 01:01:00	36	1	1	7	3
1	2008-11-25 01:02:00	12	1	1	7	3
1	2008-11-25 01:03:00	0	1	1	7	3
1	2008-11-25 01:04:00	0	1	1	7	3
1	2008-11-25 01:05:00	47	1	1	7	3
1	2008-11-25 01:06:00	0	1	1	7	3
1	2008-11-25 01:07:00	0	1	1	7	3
1	2008-11-25 01:08:00	0	1	1	7	3
1	2008-11-25 01:09:00	83	1	1	7	3
1	2008-11-25 01:10:00	0	1	1	7	3
1	2008-11-25 01:11:00	0	1	1	7	3
1	2008-11-25 01:12:00	0	1	1	7	3
1	2008-11-25 01:13:00	0	1	1	7	3
1	2008-11-25 01:14:00	0	1	1	7	3
1	2008-11-25 01:15:00	0	1	1	7	3
1	2008-11-25 01:16:00	0	1	1	7	3
1	2008-11-25 01:17:00	24	1	1	7	3
1	2008-11-25 01:18:00	0	1	1	7	3
1	2008-11-25 01:19:00	0	1	1	7	3
1	2008-11-25 01:20:00	142	1	1	7	3
1	2008-11-25 01:21:00	47	1	1	7	3
1	2008-11-25 01:22:00	0	1	1	7	3
1	2008-11-25 01:23:00	0	1	1	7	3
1	2008-11-25 01:24:00	0	1	1	7	3
1	2008-11-25 01:25:00	0	1	1	7	3
1	2008-11-25 01:26:00	24	1	1	7	3
1	2008-11-25 01:27:00	0	1	1	7	3
1	2008-11-25 01:28:00	0	1	1	7	3
1	2008-11-25 01:29:00	0	1	1	7	3
1	2008-11-25 01:30:00	0	1	1	7	3
1	2008-11-25 01:31:00	0	1	1	7	3
1	2008-11-25 01:32:00	0	1	1	7	3
1	2008-11-25 01:33:00	0	1	1	7	3
1	2008-11-25 01:34:00	0	1	1	7	3
1	2008-11-25 01:35:00	0	1	1	7	3
1	2008-11-25 01:36:00	0	1	1	7	3
1	2008-11-25 01:37:00	0	1	1	7	3
1	2008-11-25 01:38:00	0	1	1	7	3
1	2008-11-25 01:39:00	0	1	1	7	3
1	2008-11-25 01:40:00	0	1	1	7	3
1	2008-11-25 01:41:00	0	1	1	7	3
1	2008-11-25 01:42:00	0	1	1	7	3
1	2008-11-25 01:43:00	0	1	1	7	3
1	2008-11-25 01:44:00	0	1	1	7	3
1	2008-11-25 01:45:00	0	1	1	7	3
1	2008-11-25 01:46:00	47	1	1	7	3
1	2008-11-25 01:47:00	0	1	1	7	3
1	2008-11-25 01:48:00	0	1	1	7	3
1	2008-11-25 01:49:00	71	1	1	7	3
1	2008-11-25 01:50:00	168	1	1	7	3
1	2008-11-25 01:51:00	479	1	1	7	3
1	2008-11-25 01:52:00	83	1	1	7	3
1	2008-11-25 01:53:00	24	1	1	7	3
1	2008-11-25 01:54:00	12	1	1	7	3
1	2008-11-25 01:55:00	12	1	1	7	3
1	2008-11-25 01:56:00	0	1	1	7	3
1	2008-11-25 01:57:00	24	1	1	7	3
1	2008-11-25 01:58:00	0	1	1	7	3
1	2008-11-25 01:59:00	0	1	1	7	3
1	2008-11-25 02:00:00	0	1	1	7	3
1	2008-11-25 02:01:00	0	2	1	7	3
1	2008-11-25 02:02:00	0	2	1	7	3
1	2008-11-25 02:03:00	12	2	1	7	3
1	2008-11-25 02:04:00	0	2	1	7	3
1	2008-11-25 02:05:00	12	2	1	7	3
1	2008-11-25 02:06:00	0	2	1	7	3
1	2008-11-25 02:07:00	0	2	1	7	3
1	2008-11-25 02:08:00	0	2	1	7	3
1	2008-11-25 02:09:00	0	2	1	7	3
1	2008-11-25 02:10:00	24	2	1	7	3
1	2008-11-25 02:11:00	24	2	1	7	3
1	2008-11-25 02:12:00	0	2	1	7	3
1	2008-11-25 02:13:00	0	2	1	7	3
1	2008-11-25 02:14:00	0	2	1	7	3
1	2008-11-25 02:15:00	0	2	1	7	3
1	2008-11-25 02:16:00	0	2	1	7	3
1	2008-11-25 02:17:00	0	2	1	7	3
1	2008-11-25 02:18:00	0	2	1	7	3
1	2008-11-25 02:19:00	0	2	1	7	3
1	2008-11-25 02:20:00	0	2	1	7	3
1	2008-11-25 02:21:00	0	2	1	7	3
1	2008-11-25 02:22:00	0	2	1	7	3
1	2008-11-25 02:23:00	0	2	1	7	3
1	2008-11-25 02:24:00	0	2	1	7	3
1	2008-11-25 02:25:00	0	2	1	7	3
1	2008-11-25 02:26:00	0	2	1	7	3
1	2008-11-25 02:27:00	0	2	1	7	3
1	2008-11-25 02:28:00	0	2	1	7	3
1	2008-11-25 02:29:00	0	2	1	7	3
1	2008-11-25 02:30:00	0	2	1	7	3
1	2008-11-25 02:31:00	12	2	1	7	3
1	2008-11-25 02:32:00	12	2	1	7	3
1	2008-11-25 02:33:00	0	2	1	7	3
1	2008-11-25 02:34:00	24	2	1	7	3
1	2008-11-25 02:35:00	0	2	1	7	3
1	2008-11-25 02:36:00	0	2	1	7	3
1	2008-11-25 02:37:00	0	2	1	7	3
1	2008-11-25 02:38:00	0	2	1	7	3
1	2008-11-25 02:39:00	0	2	1	7	3
1	2008-11-25 02:40:00	0	2	1	7	3
1	2008-11-25 02:41:00	0	2	1	7	3
1	2008-11-25 02:42:00	0	2	1	7	3
1	2008-11-25 02:43:00	0	2	1	7	3
1	2008-11-25 02:44:00	0	2	1	7	3
1	2008-11-25 02:45:00	0	2	1	7	3
1	2008-11-25 02:46:00	0	2	1	7	3
1	2008-11-25 02:47:00	0	2	1	7	3
1	2008-11-25 02:48:00	0	2	1	7	3
1	2008-11-25 02:49:00	0	2	1	7	3
1	2008-11-25 02:50:00	0	2	1	7	3
1	2008-11-25 02:51:00	0	2	1	7	3
1	2008-11-25 02:52:00	0	2	1	7	3
1	2008-11-25 02:53:00	0	2	1	7	3
1	2008-11-25 02:54:00	0	2	1	7	3
1	2008-11-25 02:55:00	0	2	1	7	3
1	2008-11-25 02:56:00	0	2	1	7	3
1	2008-11-25 02:57:00	0	2	1	7	3
1	2008-11-25 02:58:00	0	2	1	7	3
1	2008-11-25 02:59:00	0	2	1	7	3
1	2008-11-25 03:00:00	47	2	1	7	3
1	2008-11-25 03:01:00	0	3	1	7	3
1	2008-11-25 03:02:00	12	3	1	7	3
1	2008-11-25 03:03:00	0	3	1	7	3
1	2008-11-25 03:04:00	0	3	1	7	3
1	2008-11-25 03:05:00	0	3	1	7	3
1	2008-11-25 03:06:00	0	3	1	7	3
1	2008-11-25 03:07:00	0	3	1	7	3
1	2008-11-25 03:08:00	168	3	1	7	3
1	2008-11-25 03:09:00	0	3	1	7	3
1	2008-11-25 03:10:00	36	3	1	7	3
1	2008-11-25 03:11:00	12	3	1	7	3
1	2008-11-25 03:12:00	211	3	1	7	3
1	2008-11-25 03:13:00	59	3	1	7	3
1	2008-11-25 03:14:00	12	3	1	7	3
1	2008-11-25 03:15:00	12	3	1	7	3
1	2008-11-25 03:16:00	0	3	1	7	3
1	2008-11-25 03:17:00	0	3	1	7	3
1	2008-11-25 03:18:00	0	3	1	7	3
1	2008-11-25 03:19:00	0	3	1	7	3
1	2008-11-25 03:20:00	0	3	1	7	3
1	2008-11-25 03:21:00	0	3	1	7	3
1	2008-11-25 03:22:00	0	3	1	7	3
1	2008-11-25 03:23:00	0	3	1	7	3
1	2008-11-25 03:24:00	24	3	1	7	3
1	2008-11-25 03:25:00	0	3	1	7	3
1	2008-11-25 03:26:00	0	3	1	7	3
1	2008-11-25 03:27:00	0	3	1	7	3
1	2008-11-25 03:28:00	0	3	1	7	3
1	2008-11-25 03:29:00	0	3	1	7	3
1	2008-11-25 03:30:00	0	3	1	7	3
1	2008-11-25 03:31:00	0	3	1	7	3
1	2008-11-25 03:32:00	0	3	1	7	3
1	2008-11-25 03:33:00	0	3	1	7	3
1	2008-11-25 03:34:00	0	3	1	7	3
1	2008-11-25 03:35:00	0	3	1	7	3
1	2008-11-25 03:36:00	0	3	1	7	3
1	2008-11-25 03:37:00	0	3	1	7	3
1	2008-11-25 03:38:00	0	3	1	7	3
1	2008-11-25 03:39:00	0	3	1	7	3
1	2008-11-25 03:40:00	0	3	1	7	3
1	2008-11-25 03:41:00	0	3	1	7	3
1	2008-11-25 03:42:00	0	3	1	7	3
1	2008-11-25 03:43:00	0	3	1	7	3
1	2008-11-25 03:44:00	0	3	1	7	3
1	2008-11-25 03:45:00	0	3	1	7	3
1	2008-11-25 03:46:00	0	3	1	7	3
1	2008-11-25 03:47:00	0	3	1	7	3
1	2008-11-25 03:48:00	0	3	1	7	3
1	2008-11-25 03:49:00	0	3	1	7	3
1	2008-11-25 03:50:00	0	3	1	7	3
1	2008-11-25 03:51:00	0	3	1	7	3
1	2008-11-25 03:52:00	0	3	1	7	3
1	2008-11-25 03:53:00	0	3	1	7	3
1	2008-11-25 03:54:00	0	3	1	7	3
1	2008-11-25 03:55:00	0	3	1	7	3
1	2008-11-25 03:56:00	0	3	1	7	3
1	2008-11-25 03:57:00	0	3	1	7	3
1	2008-11-25 03:58:00	0	3	1	7	3
1	2008-11-25 03:59:00	0	3	1	7	3
1	2008-11-25 04:00:00	0	3	1	7	3
1	2008-11-25 04:01:00	0	4	1	7	3
1	2008-11-25 04:02:00	0	4	1	7	3
1	2008-11-25 04:03:00	0	4	1	7	3
1	2008-11-25 04:04:00	0	4	1	7	3
1	2008-11-25 04:05:00	0	4	1	7	3
1	2008-11-25 04:06:00	0	4	1	7	3
1	2008-11-25 04:07:00	0	4	1	7	3
1	2008-11-25 04:08:00	0	4	1	7	3
1	2008-11-25 04:09:00	0	4	1	7	3
1	2008-11-25 04:10:00	0	4	1	7	3
1	2008-11-25 04:11:00	0	4	1	7	3
1	2008-11-25 04:12:00	0	4	1	7	3
1	2008-11-25 04:13:00	0	4	1	7	3
1	2008-11-25 04:14:00	0	4	1	7	3
1	2008-11-25 04:15:00	0	4	1	7	3
1	2008-11-25 04:16:00	0	4	1	7	3
1	2008-11-25 04:17:00	0	4	1	7	3
1	2008-11-25 04:18:00	0	4	1	7	3
1	2008-11-25 04:19:00	0	4	1	7	3
1	2008-11-25 04:20:00	0	4	1	7	3
1	2008-11-25 04:21:00	0	4	1	7	3
1	2008-11-25 04:22:00	0	4	1	7	3
1	2008-11-25 04:23:00	0	4	1	7	3
1	2008-11-25 04:24:00	0	4	1	7	3
1	2008-11-25 04:25:00	0	4	1	7	3
1	2008-11-25 04:26:00	0	4	1	7	3
1	2008-11-25 04:27:00	0	4	1	7	3
1	2008-11-25 04:28:00	0	4	1	7	3
1	2008-11-25 04:29:00	0	4	1	7	3
1	2008-11-25 04:30:00	0	4	1	7	3
1	2008-11-25 04:31:00	0	4	1	7	3
1	2008-11-25 04:32:00	0	4	1	7	3
1	2008-11-25 04:33:00	0	4	1	7	3
1	2008-11-25 04:34:00	0	4	1	7	3
1	2008-11-25 04:35:00	0	4	1	7	3
1	2008-11-25 04:36:00	0	4	1	7	3
1	2008-11-25 04:37:00	0	4	1	7	3
1	2008-11-25 04:38:00	0	4	1	7	3
1	2008-11-25 04:39:00	0	4	1	7	3
1	2008-11-25 04:40:00	0	4	1	7	3
1	2008-11-25 04:41:00	0	4	1	7	3
1	2008-11-25 04:42:00	0	4	1	7	3
1	2008-11-25 04:43:00	0	4	1	7	3
1	2008-11-25 04:44:00	0	4	1	7	3
1	2008-11-25 04:45:00	0	4	1	7	3
1	2008-11-25 04:46:00	0	4	1	7	3
1	2008-11-25 04:47:00	0	4	1	7	3
1	2008-11-25 04:48:00	0	4	1	7	3
1	2008-11-25 04:49:00	0	4	1	7	3
1	2008-11-25 04:50:00	0	4	1	7	3
1	2008-11-25 04:51:00	0	4	1	7	3
1	2008-11-25 04:52:00	0	4	1	7	3
1	2008-11-25 04:53:00	0	4	1	7	3
1	2008-11-25 04:54:00	0	4	1	7	3
1	2008-11-25 04:55:00	0	4	1	7	3
1	2008-11-25 04:56:00	0	4	1	7	3
1	2008-11-25 04:57:00	0	4	1	7	3
1	2008-11-25 04:58:00	0	4	1	7	3
1	2008-11-25 04:59:00	0	4	1	7	3
1	2008-11-25 05:00:00	0	4	1	7	3
1	2008-11-25 05:01:00	0	5	1	7	3
1	2008-11-25 05:02:00	0	5	1	7	3
1	2008-11-25 05:03:00	0	5	1	7	3
1	2008-11-25 05:04:00	0	5	1	7	3
1	2008-11-25 05:05:00	0	5	1	7	3
1	2008-11-25 05:06:00	0	5	1	7	3
1	2008-11-25 05:07:00	0	5	1	7	3
1	2008-11-25 05:08:00	36	5	1	7	3
1	2008-11-25 05:09:00	47	5	1	7	3
1	2008-11-25 05:10:00	0	5	1	7	3
1	2008-11-25 05:11:00	0	5	1	7	3
1	2008-11-25 05:12:00	0	5	1	7	3
1	2008-11-25 05:13:00	0	5	1	7	3
1	2008-11-25 05:14:00	0	5	1	7	3
1	2008-11-25 05:15:00	0	5	1	7	3
1	2008-11-25 05:16:00	0	5	1	7	3
1	2008-11-25 05:17:00	0	5	1	7	3
1	2008-11-25 05:18:00	0	5	1	7	3
1	2008-11-25 05:19:00	0	5	1	7	3
1	2008-11-25 05:20:00	0	5	1	7	3
1	2008-11-25 05:21:00	0	5	1	7	3
1	2008-11-25 05:22:00	12	5	1	7	3
1	2008-11-25 05:23:00	0	5	1	7	3
1	2008-11-25 05:24:00	0	5	1	7	3
1	2008-11-25 05:25:00	0	5	1	7	3
1	2008-11-25 05:26:00	0	5	1	7	3
1	2008-11-25 05:27:00	0	5	1	7	3
1	2008-11-25 05:28:00	0	5	1	7	3
1	2008-11-25 05:29:00	0	5	1	7	3
1	2008-11-25 05:30:00	0	5	1	7	3
1	2008-11-25 05:31:00	0	5	1	7	3
1	2008-11-25 05:32:00	0	5	1	7	3
1	2008-11-25 05:33:00	0	5	1	7	3
1	2008-11-25 05:34:00	0	5	1	7	3
1	2008-11-25 05:35:00	0	5	1	7	3
1	2008-11-25 05:36:00	0	5	1	7	3
1	2008-11-25 05:37:00	0	5	1	7	3
1	2008-11-25 05:38:00	0	5	1	7	3
1	2008-11-25 05:39:00	0	5	1	7	3
1	2008-11-25 05:40:00	0	5	1	7	3
1	2008-11-25 05:41:00	0	5	1	7	3
1	2008-11-25 05:42:00	0	5	1	7	3
1	2008-11-25 05:43:00	0	5	1	7	3
1	2008-11-25 05:44:00	0	5	1	7	3
1	2008-11-25 05:45:00	0	5	1	7	3
1	2008-11-25 05:46:00	0	5	1	7	3
1	2008-11-25 05:47:00	0	5	1	7	3
1	2008-11-25 05:48:00	0	5	1	7	3
1	2008-11-25 05:49:00	0	5	1	7	3
1	2008-11-25 05:50:00	0	5	1	7	3
1	2008-11-25 05:51:00	0	5	1	7	3
1	2008-11-25 05:52:00	0	5	1	7	3
1	2008-11-25 05:53:00	0	5	1	7	3
1	2008-11-25 05:54:00	47	5	1	7	3
1	2008-11-25 05:55:00	95	5	1	7	3
1	2008-11-25 05:56:00	59	5	1	7	3
1	2008-11-25 05:57:00	0	5	1	7	3
1	2008-11-25 05:58:00	0	5	1	7	3
1	2008-11-25 05:59:00	0	5	1	7	3
1	2008-11-25 06:00:00	0	5	1	7	3
1	2008-11-25 06:01:00	0	6	2	7	3
1	2008-11-25 06:02:00	0	6	2	7	3
1	2008-11-25 06:03:00	0	6	2	7	3
1	2008-11-25 06:04:00	0	6	2	7	3
1	2008-11-25 06:05:00	0	6	2	7	3
1	2008-11-25 06:06:00	0	6	2	7	3
1	2008-11-25 06:07:00	0	6	2	7	3
1	2008-11-25 06:08:00	0	6	2	7	3
1	2008-11-25 06:09:00	0	6	2	7	3
1	2008-11-25 06:10:00	0	6	2	7	3
1	2008-11-25 06:11:00	0	6	2	7	3
1	2008-11-25 06:12:00	12	6	2	7	3
1	2008-11-25 06:13:00	24	6	2	7	3
1	2008-11-25 06:14:00	0	6	2	7	3
1	2008-11-25 06:15:00	0	6	2	7	3
1	2008-11-25 06:16:00	0	6	2	7	3
1	2008-11-25 06:17:00	0	6	2	7	3
1	2008-11-25 06:18:00	0	6	2	7	3
1	2008-11-25 06:19:00	0	6	2	7	3
1	2008-11-25 06:20:00	0	6	2	7	3
1	2008-11-25 06:21:00	0	6	2	7	3
1	2008-11-25 06:22:00	0	6	2	7	3
1	2008-11-25 06:23:00	0	6	2	7	3
1	2008-11-25 06:24:00	0	6	2	7	3
1	2008-11-25 06:25:00	0	6	2	7	3
1	2008-11-25 06:26:00	0	6	2	7	3
1	2008-11-25 06:27:00	0	6	2	7	3
1	2008-11-25 06:28:00	0	6	2	7	3
1	2008-11-25 06:29:00	0	6	2	7	3
1	2008-11-25 06:30:00	0	6	2	7	3
1	2008-11-25 06:31:00	0	6	2	7	3
1	2008-11-25 06:32:00	0	6	2	7	3
1	2008-11-25 06:33:00	0	6	2	7	3
1	2008-11-25 06:34:00	0	6	2	7	3
1	2008-11-25 06:35:00	0	6	2	7	3
1	2008-11-25 06:36:00	0	6	2	7	3
1	2008-11-25 06:37:00	0	6	2	7	3
1	2008-11-25 06:38:00	0	6	2	7	3
1	2008-11-25 06:39:00	0	6	2	7	3
1	2008-11-25 06:40:00	0	6	2	7	3
1	2008-11-25 06:41:00	0	6	2	7	3
1	2008-11-25 06:42:00	0	6	2	7	3
1	2008-11-25 06:43:00	0	6	2	7	3
1	2008-11-25 06:44:00	0	6	2	7	3
1	2008-11-25 06:45:00	0	6	2	7	3
1	2008-11-25 06:46:00	0	6	2	7	3
1	2008-11-25 06:47:00	0	6	2	7	3
1	2008-11-25 06:48:00	0	6	2	7	3
1	2008-11-25 06:49:00	0	6	2	7	3
1	2008-11-25 06:50:00	71	6	2	7	3
1	2008-11-25 06:51:00	0	6	2	7	3
1	2008-11-25 06:52:00	0	6	2	7	3
1	2008-11-25 06:53:00	0	6	2	7	3
1	2008-11-25 06:54:00	0	6	2	7	3
1	2008-11-25 06:55:00	0	6	2	7	3
1	2008-11-25 06:56:00	36	6	2	7	3
1	2008-11-25 06:57:00	197	6	2	7	3
1	2008-11-25 06:58:00	36	6	2	7	3
1	2008-11-25 06:59:00	47	6	2	7	3
1	2008-11-25 07:00:00	0	6	2	7	3
1	2008-11-25 07:01:00	59	7	2	7	3
1	2008-11-25 07:02:00	24	7	2	7	3
1	2008-11-25 07:03:00	154	7	2	7	3
1	2008-11-25 07:04:00	0	7	2	7	3
1	2008-11-25 07:05:00	0	7	2	7	3
1	2008-11-25 07:06:00	0	7	2	7	3
1	2008-11-25 07:07:00	0	7	2	7	3
1	2008-11-25 07:08:00	0	7	2	7	3
1	2008-11-25 07:09:00	0	7	2	7	3
1	2008-11-25 07:10:00	0	7	2	7	3
1	2008-11-25 07:11:00	0	7	2	7	3
1	2008-11-25 07:12:00	0	7	2	7	3
1	2008-11-25 07:13:00	0	7	2	7	3
1	2008-11-25 07:14:00	0	7	2	7	3
1	2008-11-25 07:15:00	0	7	2	7	3
1	2008-11-25 07:16:00	0	7	2	7	3
1	2008-11-25 07:17:00	0	7	2	7	3
1	2008-11-25 07:18:00	107	7	2	7	3
1	2008-11-25 07:19:00	24	7	2	7	3
1	2008-11-25 07:20:00	0	7	2	7	3
1	2008-11-25 07:21:00	0	7	2	7	3
1	2008-11-25 07:22:00	0	7	2	7	3
1	2008-11-25 07:23:00	0	7	2	7	3
1	2008-11-25 07:24:00	0	7	2	7	3
1	2008-11-25 07:25:00	0	7	2	7	3
1	2008-11-25 07:26:00	0	7	2	7	3
1	2008-11-25 07:27:00	0	7	2	7	3
1	2008-11-25 07:28:00	0	7	2	7	3
1	2008-11-25 07:29:00	0	7	2	7	3
1	2008-11-25 07:30:00	0	7	2	7	3
1	2008-11-25 07:31:00	36	7	2	7	3
1	2008-11-25 07:32:00	0	7	2	7	3
1	2008-11-25 07:33:00	0	7	2	7	3
1	2008-11-25 07:34:00	12	7	2	7	3
1	2008-11-25 07:35:00	59	7	2	7	3
1	2008-11-25 07:36:00	0	7	2	7	3
1	2008-11-25 07:37:00	83	7	2	7	3
1	2008-11-25 07:38:00	24	7	2	7	3
1	2008-11-25 07:39:00	393	7	2	7	3
1	2008-11-25 07:40:00	142	7	2	7	3
1	2008-11-25 07:41:00	130	7	2	7	3
1	2008-11-25 07:42:00	443	7	2	7	3
1	2008-11-25 07:43:00	168	7	2	7	3
1	2008-11-25 07:44:00	168	7	2	7	3
1	2008-11-25 07:45:00	377	7	2	7	3
1	2008-11-25 07:46:00	296	7	2	7	3
1	2008-11-25 07:47:00	119	7	2	7	3
1	2008-11-25 07:48:00	296	7	2	7	3
1	2008-11-25 07:49:00	59	7	2	7	3
1	2008-11-25 07:50:00	24	7	2	7	3
1	2008-11-25 07:51:00	168	7	2	7	3
1	2008-11-25 07:52:00	168	7	2	7	3
1	2008-11-25 07:53:00	393	7	2	7	3
1	2008-11-25 07:54:00	654	7	2	7	3
1	2008-11-25 07:55:00	377	7	2	7	3
1	2008-11-25 07:56:00	979	7	2	7	3
1	2008-11-25 07:57:00	517	7	2	7	3
1	2008-11-25 07:58:00	168	7	2	7	3
1	2008-11-25 07:59:00	211	7	2	7	3
1	2008-11-25 08:00:00	254	7	2	7	3
1	2008-11-25 08:01:00	393	8	2	7	3
1	2008-11-25 08:02:00	344	8	2	7	3
1	2008-11-25 08:03:00	12	8	2	7	3
1	2008-11-25 08:04:00	0	8	2	7	3
1	2008-11-25 08:05:00	0	8	2	7	3
1	2008-11-25 08:06:00	0	8	2	7	3
1	2008-11-25 08:07:00	12	8	2	7	3
1	2008-11-25 08:08:00	36	8	2	7	3
1	2008-11-25 08:09:00	12	8	2	7	3
1	2008-11-25 08:10:00	12	8	2	7	3
1	2008-11-25 08:11:00	0	8	2	7	3
1	2008-11-25 08:12:00	0	8	2	7	3
1	2008-11-25 08:13:00	0	8	2	7	3
1	2008-11-25 08:14:00	268	8	2	7	3
1	2008-11-25 08:15:00	427	8	2	7	3
1	2008-11-25 08:16:00	0	8	2	7	3
1	2008-11-25 08:17:00	0	8	2	7	3
1	2008-11-25 08:18:00	12	8	2	7	3
1	2008-11-25 08:19:00	0	8	2	7	3
1	2008-11-25 08:20:00	0	8	2	7	3
1	2008-11-25 08:21:00	0	8	2	7	3
1	2008-11-25 08:22:00	0	8	2	7	3
1	2008-11-25 08:23:00	0	8	2	7	3
1	2008-11-25 08:24:00	0	8	2	7	3
1	2008-11-25 08:25:00	0	8	2	7	3
1	2008-11-25 08:26:00	0	8	2	7	3
1	2008-11-25 08:27:00	0	8	2	7	3
1	2008-11-25 08:28:00	0	8	2	7	3
1	2008-11-25 08:29:00	0	8	2	7	3
1	2008-11-25 08:30:00	0	8	2	7	3
1	2008-11-25 08:31:00	0	8	2	7	3
1	2008-11-25 08:32:00	0	8	2	7	3
1	2008-11-25 08:33:00	0	8	2	7	3
1	2008-11-25 08:34:00	0	8	2	7	3
1	2008-11-25 08:35:00	0	8	2	7	3
1	2008-11-25 08:36:00	0	8	2	7	3
1	2008-11-25 08:37:00	0	8	2	7	3
1	2008-11-25 08:38:00	130	8	2	7	3
1	2008-11-25 08:39:00	225	8	2	7	3
1	2008-11-25 08:40:00	0	8	2	7	3
1	2008-11-25 08:41:00	0	8	2	7	3
1	2008-11-25 08:42:00	0	8	2	7	3
1	2008-11-25 08:43:00	0	8	2	7	3
1	2008-11-25 08:44:00	0	8	2	7	3
1	2008-11-25 08:45:00	0	8	2	7	3
1	2008-11-25 08:46:00	0	8	2	7	3
1	2008-11-25 08:47:00	12	8	2	7	3
1	2008-11-25 08:48:00	36	8	2	7	3
1	2008-11-25 08:49:00	0	8	2	7	3
1	2008-11-25 08:50:00	12	8	2	7	3
1	2008-11-25 08:51:00	0	8	2	7	3
1	2008-11-25 08:52:00	0	8	2	7	3
1	2008-11-25 08:53:00	0	8	2	7	3
1	2008-11-25 08:54:00	0	8	2	7	3
1	2008-11-25 08:55:00	0	8	2	7	3
1	2008-11-25 08:56:00	0	8	2	7	3
1	2008-11-25 08:57:00	0	8	2	7	3
1	2008-11-25 08:58:00	0	8	2	7	3
1	2008-11-25 08:59:00	0	8	2	7	3
1	2008-11-25 09:00:00	0	8	2	7	3
1	2008-11-25 09:01:00	0	9	2	7	3
1	2008-11-25 09:02:00	0	9	2	7	3
1	2008-11-25 09:03:00	0	9	2	7	3
1	2008-11-25 09:04:00	0	9	2	7	3
1	2008-11-25 09:05:00	0	9	2	7	3
1	2008-11-25 09:06:00	0	9	2	7	3
1	2008-11-25 09:07:00	0	9	2	7	3
1	2008-11-25 09:08:00	0	9	2	7	3
1	2008-11-25 09:09:00	0	9	2	7	3
1	2008-11-25 09:10:00	0	9	2	7	3
1	2008-11-25 09:11:00	0	9	2	7	3
1	2008-11-25 09:12:00	0	9	2	7	3
1	2008-11-25 09:13:00	0	9	2	7	3
1	2008-11-25 09:14:00	0	9	2	7	3
1	2008-11-25 09:15:00	0	9	2	7	3
1	2008-11-25 09:16:00	0	9	2	7	3
1	2008-11-25 09:17:00	0	9	2	7	3
1	2008-11-25 09:18:00	0	9	2	7	3
1	2008-11-25 09:19:00	0	9	2	7	3
1	2008-11-25 09:20:00	0	9	2	7	3
1	2008-11-25 09:21:00	12	9	2	7	3
1	2008-11-25 09:22:00	0	9	2	7	3
1	2008-11-25 09:23:00	47	9	2	7	3
1	2008-11-25 09:24:00	12	9	2	7	3
1	2008-11-25 09:25:00	0	9	2	7	3
1	2008-11-25 09:26:00	0	9	2	7	3
1	2008-11-25 09:27:00	0	9	2	7	3
1	2008-11-25 09:28:00	0	9	2	7	3
1	2008-11-25 09:29:00	0	9	2	7	3
1	2008-11-25 09:30:00	0	9	2	7	3
1	2008-11-25 09:31:00	0	9	2	7	3
1	2008-11-25 09:32:00	0	9	2	7	3
1	2008-11-25 09:33:00	0	9	2	7	3
1	2008-11-25 09:34:00	0	9	2	7	3
1	2008-11-25 09:35:00	0	9	2	7	3
1	2008-11-25 09:36:00	0	9	2	7	3
1	2008-11-25 09:37:00	0	9	2	7	3
1	2008-11-25 09:38:00	0	9	2	7	3
1	2008-11-25 09:39:00	0	9	2	7	3
1	2008-11-25 09:40:00	0	9	2	7	3
1	2008-11-25 09:41:00	12	9	2	7	3
1	2008-11-25 09:42:00	0	9	2	7	3
1	2008-11-25 09:43:00	0	9	2	7	3
1	2008-11-25 09:44:00	0	9	2	7	3
1	2008-11-25 09:45:00	0	9	2	7	3
1	2008-11-25 09:46:00	0	9	2	7	3
1	2008-11-25 09:47:00	12	9	2	7	3
1	2008-11-25 09:48:00	12	9	2	7	3
1	2008-11-25 09:49:00	0	9	2	7	3
1	2008-11-25 09:50:00	0	9	2	7	3
1	2008-11-25 09:51:00	0	9	2	7	3
1	2008-11-25 09:52:00	0	9	2	7	3
1	2008-11-25 09:53:00	0	9	2	7	3
1	2008-11-25 09:54:00	0	9	2	7	3
1	2008-11-25 09:55:00	0	9	2	7	3
1	2008-11-25 09:56:00	0	9	2	7	3
1	2008-11-25 09:57:00	0	9	2	7	3
1	2008-11-25 09:58:00	0	9	2	7	3
1	2008-11-25 09:59:00	0	9	2	7	3
1	2008-11-25 10:00:00	0	9	2	7	3
1	2008-11-25 10:01:00	0	10	2	7	3
1	2008-11-25 10:02:00	0	10	2	7	3
1	2008-11-25 10:03:00	0	10	2	7	3
1	2008-11-25 10:04:00	12	10	2	7	3
1	2008-11-25 10:05:00	0	10	2	7	3
1	2008-11-25 10:06:00	0	10	2	7	3
1	2008-11-25 10:07:00	0	10	2	7	3
1	2008-11-25 10:08:00	0	10	2	7	3
1	2008-11-25 10:09:00	0	10	2	7	3
1	2008-11-25 10:10:00	0	10	2	7	3
1	2008-11-25 10:11:00	0	10	2	7	3
1	2008-11-25 10:12:00	0	10	2	7	3
1	2008-11-25 10:13:00	0	10	2	7	3
1	2008-11-25 10:14:00	0	10	2	7	3
1	2008-11-25 10:15:00	0	10	2	7	3
1	2008-11-25 10:16:00	12	10	2	7	3
1	2008-11-25 10:17:00	12	10	2	7	3
1	2008-11-25 10:18:00	12	10	2	7	3
1	2008-11-25 10:19:00	0	10	2	7	3
1	2008-11-25 10:20:00	0	10	2	7	3
1	2008-11-25 10:21:00	0	10	2	7	3
1	2008-11-25 10:22:00	0	10	2	7	3
1	2008-11-25 10:23:00	0	10	2	7	3
1	2008-11-25 10:24:00	0	10	2	7	3
1	2008-11-25 10:25:00	0	10	2	7	3
1	2008-11-25 10:26:00	0	10	2	7	3
1	2008-11-25 10:27:00	0	10	2	7	3
1	2008-11-25 10:28:00	0	10	2	7	3
1	2008-11-25 10:29:00	0	10	2	7	3
1	2008-11-25 10:30:00	0	10	2	7	3
1	2008-11-25 10:31:00	0	10	2	7	3
1	2008-11-25 10:32:00	0	10	2	7	3
1	2008-11-25 10:33:00	0	10	2	7	3
1	2008-11-25 10:34:00	0	10	2	7	3
1	2008-11-25 10:35:00	0	10	2	7	3
1	2008-11-25 10:36:00	0	10	2	7	3
1	2008-11-25 10:37:00	0	10	2	7	3
1	2008-11-25 10:38:00	0	10	2	7	3
1	2008-11-25 10:39:00	0	10	2	7	3
1	2008-11-25 10:40:00	0	10	2	7	3
1	2008-11-25 10:41:00	12	10	2	7	3
1	2008-11-25 10:42:00	36	10	2	7	3
1	2008-11-25 10:43:00	36	10	2	7	3
1	2008-11-25 10:44:00	0	10	2	7	3
1	2008-11-25 10:45:00	0	10	2	7	3
1	2008-11-25 10:46:00	0	10	2	7	3
1	2008-11-25 10:47:00	0	10	2	7	3
1	2008-11-25 10:48:00	0	10	2	7	3
1	2008-11-25 10:49:00	0	10	2	7	3
1	2008-11-25 10:50:00	0	10	2	7	3
1	2008-11-25 10:51:00	0	10	2	7	3
1	2008-11-25 10:52:00	0	10	2	7	3
1	2008-11-25 10:53:00	0	10	2	7	3
1	2008-11-25 10:54:00	0	10	2	7	3
1	2008-11-25 10:55:00	0	10	2	7	3
1	2008-11-25 10:56:00	0	10	2	7	3
1	2008-11-25 10:57:00	0	10	2	7	3
1	2008-11-25 10:58:00	0	10	2	7	3
1	2008-11-25 10:59:00	0	10	2	7	3
1	2008-11-25 11:00:00	0	10	2	7	3
1	2008-11-25 11:01:00	0	11	2	7	3
1	2008-11-25 11:02:00	0	11	2	7	3
1	2008-11-25 11:03:00	0	11	2	7	3
1	2008-11-25 11:04:00	0	11	2	7	3
1	2008-11-25 11:05:00	0	11	2	7	3
1	2008-11-25 11:06:00	12	11	2	7	3
1	2008-11-25 11:07:00	0	11	2	7	3
1	2008-11-25 11:08:00	0	11	2	7	3
1	2008-11-25 11:09:00	0	11	2	7	3
1	2008-11-25 11:10:00	47	11	2	7	3
1	2008-11-25 11:11:00	0	11	2	7	3
1	2008-11-25 11:12:00	0	11	2	7	3
1	2008-11-25 11:13:00	0	11	2	7	3
1	2008-11-25 11:14:00	0	11	2	7	3
1	2008-11-25 11:15:00	0	11	2	7	3
1	2008-11-25 11:16:00	0	11	2	7	3
1	2008-11-25 11:17:00	574	11	2	7	3
1	2008-11-25 11:18:00	344	11	2	7	3
1	2008-11-25 11:19:00	197	11	2	7	3
1	2008-11-25 11:20:00	12	11	2	7	3
1	2008-11-25 11:21:00	225	11	2	7	3
1	2008-11-25 11:22:00	130	11	2	7	3
1	2008-11-25 11:23:00	107	11	2	7	3
1	2008-11-25 11:24:00	856	11	2	7	3
1	2008-11-25 11:25:00	410	11	2	7	3
1	2008-11-25 11:26:00	24	11	2	7	3
1	2008-11-25 11:27:00	24	11	2	7	3
1	2008-11-25 11:28:00	168	11	2	7	3
1	2008-11-25 11:29:00	197	11	2	7	3
1	2008-11-25 11:30:00	498	11	2	7	3
1	2008-11-25 11:31:00	377	11	2	7	3
1	2008-11-25 11:32:00	225	11	2	7	3
1	2008-11-25 11:33:00	0	11	2	7	3
1	2008-11-25 11:34:00	0	11	2	7	3
1	2008-11-25 11:35:00	0	11	2	7	3
1	2008-11-25 11:36:00	12	11	2	7	3
1	2008-11-25 11:37:00	0	11	2	7	3
1	2008-11-25 11:38:00	0	11	2	7	3
1	2008-11-25 11:39:00	0	11	2	7	3
1	2008-11-25 11:40:00	0	11	2	7	3
1	2008-11-25 11:41:00	36	11	2	7	3
1	2008-11-25 11:42:00	0	11	2	7	3
1	2008-11-25 11:43:00	0	11	2	7	3
1	2008-11-25 11:44:00	0	11	2	7	3
1	2008-11-25 11:45:00	0	11	2	7	3
1	2008-11-25 11:46:00	0	11	2	7	3
1	2008-11-25 11:47:00	0	11	2	7	3
1	2008-11-25 11:48:00	0	11	2	7	3
1	2008-11-25 11:49:00	0	11	2	7	3
1	2008-11-25 11:50:00	0	11	2	7	3
1	2008-11-25 11:51:00	0	11	2	7	3
1	2008-11-25 11:52:00	47	11	2	7	3
1	2008-11-25 11:53:00	12	11	2	7	3
1	2008-11-25 11:54:00	0	11	2	7	3
1	2008-11-25 11:55:00	47	11	2	7	3
1	2008-11-25 11:56:00	0	11	2	7	3
1	2008-11-25 11:57:00	0	11	2	7	3
1	2008-11-25 11:58:00	0	11	2	7	3
1	2008-11-25 11:59:00	0	11	2	7	3
1	2008-11-25 12:00:00	0	11	2	7	3
1	2008-11-25 12:01:00	0	12	3	7	3
1	2008-11-25 12:02:00	24	12	3	7	3
1	2008-11-25 12:03:00	12	12	3	7	3
1	2008-11-25 12:04:00	59	12	3	7	3
1	2008-11-25 12:05:00	0	12	3	7	3
1	2008-11-25 12:06:00	0	12	3	7	3
1	2008-11-25 12:07:00	142	12	3	7	3
1	2008-11-25 12:08:00	183	12	3	7	3
1	2008-11-25 12:09:00	0	12	3	7	3
1	2008-11-25 12:10:00	36	12	3	7	3
1	2008-11-25 12:11:00	0	12	3	7	3
1	2008-11-25 12:12:00	0	12	3	7	3
1	2008-11-25 12:13:00	0	12	3	7	3
1	2008-11-25 12:14:00	0	12	3	7	3
1	2008-11-25 12:15:00	0	12	3	7	3
1	2008-11-25 12:16:00	0	12	3	7	3
1	2008-11-25 12:17:00	0	12	3	7	3
1	2008-11-25 12:18:00	0	12	3	7	3
1	2008-11-25 12:19:00	0	12	3	7	3
1	2008-11-25 12:20:00	0	12	3	7	3
1	2008-11-25 12:21:00	0	12	3	7	3
1	2008-11-25 12:22:00	0	12	3	7	3
1	2008-11-25 12:23:00	0	12	3	7	3
1	2008-11-25 12:24:00	59	12	3	7	3
1	2008-11-25 12:25:00	0	12	3	7	3
1	2008-11-25 12:26:00	0	12	3	7	3
1	2008-11-25 12:27:00	0	12	3	7	3
1	2008-11-25 12:28:00	0	12	3	7	3
1	2008-11-25 12:29:00	0	12	3	7	3
1	2008-11-25 12:30:00	0	12	3	7	3
1	2008-11-25 12:31:00	0	12	3	7	3
1	2008-11-25 12:32:00	0	12	3	7	3
1	2008-11-25 12:33:00	0	12	3	7	3
1	2008-11-25 12:34:00	0	12	3	7	3
1	2008-11-25 12:35:00	0	12	3	7	3
1	2008-11-25 12:36:00	0	12	3	7	3
1	2008-11-25 12:37:00	0	12	3	7	3
1	2008-11-25 12:38:00	0	12	3	7	3
1	2008-11-25 12:39:00	0	12	3	7	3
1	2008-11-25 12:40:00	0	12	3	7	3
1	2008-11-25 12:41:00	0	12	3	7	3
1	2008-11-25 12:42:00	0	12	3	7	3
1	2008-11-25 12:43:00	0	12	3	7	3
1	2008-11-25 12:44:00	0	12	3	7	3
1	2008-11-25 12:45:00	0	12	3	7	3
1	2008-11-25 12:46:00	0	12	3	7	3
1	2008-11-25 12:47:00	0	12	3	7	3
1	2008-11-25 12:48:00	0	12	3	7	3
1	2008-11-25 12:49:00	0	12	3	7	3
1	2008-11-25 12:50:00	0	12	3	7	3
1	2008-11-25 12:51:00	0	12	3	7	3
1	2008-11-25 12:52:00	0	12	3	7	3
1	2008-11-25 12:53:00	0	12	3	7	3
1	2008-11-25 12:54:00	0	12	3	7	3
1	2008-11-25 12:55:00	0	12	3	7	3
1	2008-11-25 12:56:00	0	12	3	7	3
1	2008-11-25 12:57:00	0	12	3	7	3
1	2008-11-25 12:58:00	0	12	3	7	3
1	2008-11-25 12:59:00	0	12	3	7	3
1	2008-11-25 13:00:00	0	12	3	7	3
1	2008-11-25 13:01:00	0	13	3	7	3
1	2008-11-25 13:02:00	0	13	3	7	3
1	2008-11-25 13:03:00	0	13	3	7	3
1	2008-11-25 13:04:00	0	13	3	7	3
1	2008-11-25 13:05:00	0	13	3	7	3
1	2008-11-25 13:06:00	0	13	3	7	3
1	2008-11-25 13:07:00	0	13	3	7	3
1	2008-11-25 13:08:00	0	13	3	7	3
1	2008-11-25 13:09:00	0	13	3	7	3
1	2008-11-25 13:10:00	0	13	3	7	3
1	2008-11-25 13:11:00	0	13	3	7	3
1	2008-11-25 13:12:00	0	13	3	7	3
1	2008-11-25 13:13:00	0	13	3	7	3
1	2008-11-25 13:14:00	0	13	3	7	3
1	2008-11-25 13:15:00	0	13	3	7	3
1	2008-11-25 13:16:00	0	13	3	7	3
1	2008-11-25 13:17:00	0	13	3	7	3
1	2008-11-25 13:18:00	0	13	3	7	3
1	2008-11-25 13:19:00	0	13	3	7	3
1	2008-11-25 13:20:00	0	13	3	7	3
1	2008-11-25 13:21:00	0	13	3	7	3
1	2008-11-25 13:22:00	0	13	3	7	3
1	2008-11-25 13:23:00	12	13	3	7	3
1	2008-11-25 13:24:00	0	13	3	7	3
1	2008-11-25 13:25:00	239	13	3	7	3
1	2008-11-25 13:26:00	311	13	3	7	3
1	2008-11-25 13:27:00	47	13	3	7	3
1	2008-11-25 13:28:00	119	13	3	7	3
1	2008-11-25 13:29:00	211	13	3	7	3
1	2008-11-25 13:30:00	142	13	3	7	3
1	2008-11-25 13:31:00	676	13	3	7	3
1	2008-11-25 13:32:00	593	13	3	7	3
1	2008-11-25 13:33:00	197	13	3	7	3
1	2008-11-25 13:34:00	36	13	3	7	3
1	2008-11-25 13:35:00	0	13	3	7	3
1	2008-11-25 13:36:00	0	13	3	7	3
1	2008-11-25 13:37:00	36	13	3	7	3
1	2008-11-25 13:38:00	12	13	3	7	3
1	2008-11-25 13:39:00	0	13	3	7	3
1	2008-11-25 13:40:00	0	13	3	7	3
1	2008-11-25 13:41:00	0	13	3	7	3
1	2008-11-25 13:42:00	24	13	3	7	3
1	2008-11-25 13:43:00	254	13	3	7	3
1	2008-11-25 13:44:00	168	13	3	7	3
1	2008-11-25 13:45:00	59	13	3	7	3
1	2008-11-25 13:46:00	0	13	3	7	3
1	2008-11-25 13:47:00	0	13	3	7	3
1	2008-11-25 13:48:00	0	13	3	7	3
1	2008-11-25 13:49:00	0	13	3	7	3
1	2008-11-25 13:50:00	0	13	3	7	3
1	2008-11-25 13:51:00	0	13	3	7	3
1	2008-11-25 13:52:00	0	13	3	7	3
1	2008-11-25 13:53:00	168	13	3	7	3
1	2008-11-25 13:54:00	142	13	3	7	3
1	2008-11-25 13:55:00	311	13	3	7	3
1	2008-11-25 13:56:00	311	13	3	7	3
1	2008-11-25 13:57:00	296	13	3	7	3
1	2008-11-25 13:58:00	95	13	3	7	3
1	2008-11-25 13:59:00	24	13	3	7	3
1	2008-11-25 14:00:00	0	13	3	7	3
1	2008-11-25 14:01:00	0	14	3	7	3
1	2008-11-25 14:02:00	0	14	3	7	3
1	2008-11-25 14:03:00	0	14	3	7	3
1	2008-11-25 14:04:00	0	14	3	7	3
1	2008-11-25 14:05:00	0	14	3	7	3
1	2008-11-25 14:06:00	0	14	3	7	3
1	2008-11-25 14:07:00	0	14	3	7	3
1	2008-11-25 14:08:00	0	14	3	7	3
1	2008-11-25 14:09:00	0	14	3	7	3
1	2008-11-25 14:10:00	0	14	3	7	3
1	2008-11-25 14:11:00	0	14	3	7	3
1	2008-11-25 14:12:00	0	14	3	7	3
1	2008-11-25 14:13:00	0	14	3	7	3
1	2008-11-25 14:14:00	0	14	3	7	3
1	2008-11-25 14:15:00	0	14	3	7	3
1	2008-11-25 14:16:00	0	14	3	7	3
1	2008-11-25 14:17:00	0	14	3	7	3
1	2008-11-25 14:18:00	0	14	3	7	3
1	2008-11-25 14:19:00	0	14	3	7	3
1	2008-11-25 14:20:00	119	14	3	7	3
1	2008-11-25 14:21:00	154	14	3	7	3
1	2008-11-25 14:22:00	239	14	3	7	3
1	2008-11-25 14:23:00	311	14	3	7	3
1	2008-11-25 14:24:00	211	14	3	7	3
1	2008-11-25 14:25:00	311	14	3	7	3
1	2008-11-25 14:26:00	24	14	3	7	3
1	2008-11-25 14:27:00	0	14	3	7	3
1	2008-11-25 14:28:00	0	14	3	7	3
1	2008-11-25 14:29:00	0	14	3	7	3
1	2008-11-25 14:30:00	0	14	3	7	3
1	2008-11-25 14:31:00	0	14	3	7	3
1	2008-11-25 14:32:00	0	14	3	7	3
1	2008-11-25 14:33:00	0	14	3	7	3
1	2008-11-25 14:34:00	0	14	3	7	3
1	2008-11-25 14:35:00	0	14	3	7	3
1	2008-11-25 14:36:00	0	14	3	7	3
1	2008-11-25 14:37:00	0	14	3	7	3
1	2008-11-25 14:38:00	0	14	3	7	3
1	2008-11-25 14:39:00	0	14	3	7	3
1	2008-11-25 14:40:00	0	14	3	7	3
1	2008-11-25 14:41:00	0	14	3	7	3
1	2008-11-25 14:42:00	0	14	3	7	3
1	2008-11-25 14:43:00	0	14	3	7	3
1	2008-11-25 14:44:00	0	14	3	7	3
1	2008-11-25 14:45:00	0	14	3	7	3
1	2008-11-25 14:46:00	0	14	3	7	3
1	2008-11-25 14:47:00	0	14	3	7	3
1	2008-11-25 14:48:00	0	14	3	7	3
1	2008-11-25 14:49:00	0	14	3	7	3
1	2008-11-25 14:50:00	0	14	3	7	3
1	2008-11-25 14:51:00	0	14	3	7	3
1	2008-11-25 14:52:00	12	14	3	7	3
1	2008-11-25 14:53:00	0	14	3	7	3
1	2008-11-25 14:54:00	0	14	3	7	3
1	2008-11-25 14:55:00	0	14	3	7	3
1	2008-11-25 14:56:00	0	14	3	7	3
1	2008-11-25 14:57:00	0	14	3	7	3
1	2008-11-25 14:58:00	0	14	3	7	3
1	2008-11-25 14:59:00	0	14	3	7	3
1	2008-11-25 15:00:00	0	14	3	7	3
1	2008-11-25 15:01:00	0	15	3	7	3
1	2008-11-25 15:02:00	0	15	3	7	3
1	2008-11-25 15:03:00	0	15	3	7	3
1	2008-11-25 15:04:00	0	15	3	7	3
1	2008-11-25 15:05:00	0	15	3	7	3
1	2008-11-25 15:06:00	0	15	3	7	3
1	2008-11-25 15:07:00	0	15	3	7	3
1	2008-11-25 15:08:00	0	15	3	7	3
1	2008-11-25 15:09:00	0	15	3	7	3
1	2008-11-25 15:10:00	0	15	3	7	3
1	2008-11-25 15:11:00	0	15	3	7	3
1	2008-11-25 15:12:00	0	15	3	7	3
1	2008-11-25 15:13:00	0	15	3	7	3
1	2008-11-25 15:14:00	0	15	3	7	3
1	2008-11-25 15:15:00	0	15	3	7	3
1	2008-11-25 15:16:00	0	15	3	7	3
1	2008-11-25 15:17:00	0	15	3	7	3
1	2008-11-25 15:18:00	0	15	3	7	3
1	2008-11-25 15:19:00	0	15	3	7	3
[truncated: 58,481 more rows]

## Sheet: Pivot Segment
Multiplier	2
x (Low Intensity)	374.274
y (High Intensity)	365.183
	Column Labels
Values	1	2	3	4	5	6	Grand Total
Average of Activity	67.075	59.4665	59.2079	61.1208	65.4437	74.0438	64.3929
StdDev of Activity	153.6	152.858	142.53	167.336	166.238	181.072	161.166
Count of Activity	10080	10080	10080	10080	10080	10080	60480
Count Above x	566	536	487	578	633	758
% Above x	0.0561508	0.0531746	0.0483135	0.0573413	0.0627976	0.0751984
Count Above y		536	487	578	633	758
% Above y		0.0531746	0.0483135	0.0573413	0.0627976	0.0751984

## Sheet: Pivot Weekday
Sum of Activity	Column Labels
Row Labels	1	2	3	4	5	6	Grand Total
1	87320	92714	105681	105721	94725	196570	682731
2	66321	74418	106460	86464	83217	90362	507242
3	70398	69954	67750	73365	82993	80001	444461
4	72244	73525	72347	87618	94386	95219	495339
5	116176	70642	74464	66797	76677	69343	474099
6	120016	83324	86308	110237	128144	86318	614347
7	143641	134845	83806	85896	99530	128548	676266
Grand Total	676116	599422	596816	616098	659672	746361	3894485
Count of Activity	Column Labels
Row Labels	1	2	3	4	5	6	Grand Total
1	1440	1440	1440	1440	1440	1440	8640
2	1440	1440	1440	1440	1440	1440	8640
3	1440	1440	1440	1440	1440	1440	8640
4	1440	1440	1440	1440	1440	1440	8640
5	1440	1440	1440	1440	1440	1440	8640
6	1440	1440	1440	1440	1440	1440	8640
7	1440	1440	1440	1440	1440	1440	8640
Grand Total	10080	10080	10080	10080	10080	10080	60480

## Sheet: Pivot Quadrant
Sum of Activity	Column Labels
Row Labels	1	2	3	4	5	6	Grand Total
1	52748	91945	57426	87202	76546	81795	447662
2	125751	95657	131469	77695	126421	103179	660172
3	244421	191812	214043	177746	235376	315664	1379062
4	253196	220008	193878	273455	221329	245723	1407589
Grand Total	676116	599422	596816	616098	659672	746361	3894485
Average	169029	149856	149204	154024	164918	186590
Count of Activity	Column Labels
Row Labels	1	2	3	4	5	6	Grand Total
1	2520	2520	2520	2520	2520	2520	15120
2	2520	2520	2520	2520	2520	2520	15120
3	2520	2520	2520	2520	2520	2520	15120
4	2520	2520	2520	2520	2520	2520	15120
Grand Total	10080	10080	10080	10080	10080	10080	60480

## Sheet: 11.18.08
Actogram, Copy Raw Data, All Days
Identity:	Skye Begalla
Filename:	E:\Active Research Files\meloxicam titre canine\cases\skye\Skye Begalla 11.18.08.AWC
Gender:	F
Age:	13
Height:	61.0 cm	24.0 in
Weight:	22.4 kg	49.4 lbs
Start Date:	18-Nov-2008 (Tue)
Start Time:	13:00:00
Interval:	1.00 mins
Date Stamp:	Time Stamp:	Activity Data:	Marker Press:
2008-11-18	00:00:00	0
2008-11-18	00:01:00	0
2008-11-18	00:02:00	0
2008-11-18	00:03:00	0
2008-11-18	00:04:00	0
2008-11-18	00:05:00	0
2008-11-18	00:06:00	0
2008-11-18	00:07:00	0
2008-11-18	00:08:00	0
2008-11-18	00:09:00	0
2008-11-18	00:10:00	0
2008-11-18	00:11:00	0
2008-11-18	00:12:00	0
2008-11-18	00:13:00	0
2008-11-18	00:14:00	0
2008-11-18	00:15:00	0
2008-11-18	00:16:00	0
2008-11-18	00:17:00	0
2008-11-18	00:18:00	0
2008-11-18	00:19:00	0
2008-11-18	00:20:00	0
2008-11-18	00:21:00	0
2008-11-18	00:22:00	0
2008-11-18	00:23:00	0
2008-11-18	00:24:00	0
2008-11-18	00:25:00	0
2008-11-18	00:26:00	0
2008-11-18	00:27:00	0
2008-11-18	00:28:00	0
2008-11-18	00:29:00	0
2008-11-18	00:30:00	0
2008-11-18	00:31:00	0
2008-11-18	00:32:00	0
2008-11-18	00:33:00	0
2008-11-18	00:34:00	0
2008-11-18	00:35:00	0
2008-11-18	00:36:00	0
2008-11-18	00:37:00	0
2008-11-18	00:38:00	0
2008-11-18	00:39:00	0
2008-11-18	00:40:00	0
2008-11-18	00:41:00	0
2008-11-18	00:42:00	0
2008-11-18	00:43:00	0
2008-11-18	00:44:00	0
2008-11-18	00:45:00	0
2008-11-18	00:46:00	0
2008-11-18	00:47:00	0
2008-11-18	00:48:00	0
2008-11-18	00:49:00	0
2008-11-18	00:50:00	0
2008-11-18	00:51:00	0
2008-11-18	00:52:00	0
2008-11-18	00:53:00	0
2008-11-18	00:54:00	0
2008-11-18	00:55:00	0
2008-11-18	00:56:00	0
2008-11-18	00:57:00	0
2008-11-18	00:58:00	0
2008-11-18	00:59:00	0
2008-11-18	01:00:00	0
2008-11-18	01:01:00	0
2008-11-18	01:02:00	0
2008-11-18	01:03:00	0
2008-11-18	01:04:00	0
2008-11-18	01:05:00	0
2008-11-18	01:06:00	0
2008-11-18	01:07:00	0
2008-11-18	01:08:00	0
2008-11-18	01:09:00	0
2008-11-18	01:10:00	0
2008-11-18	01:11:00	0
2008-11-18	01:12:00	0
2008-11-18	01:13:00	0
2008-11-18	01:14:00	0
2008-11-18	01:15:00	0
2008-11-18	01:16:00	0
2008-11-18	01:17:00	0
2008-11-18	01:18:00	0
2008-11-18	01:19:00	0
2008-11-18	01:20:00	0
2008-11-18	01:21:00	0
2008-11-18	01:22:00	0
2008-11-18	01:23:00	0
2008-11-18	01:24:00	0
2008-11-18	01:25:00	0
2008-11-18	01:26:00	0
2008-11-18	01:27:00	0
2008-11-18	01:28:00	0
2008-11-18	01:29:00	0
2008-11-18	01:30:00	0
2008-11-18	01:31:00	0
2008-11-18	01:32:00	0
2008-11-18	01:33:00	0
2008-11-18	01:34:00	0
2008-11-18	01:35:00	0
2008-11-18	01:36:00	0
2008-11-18	01:37:00	0
2008-11-18	01:38:00	0
2008-11-18	01:39:00	0
2008-11-18	01:40:00	0
2008-11-18	01:41:00	0
2008-11-18	01:42:00	0
2008-11-18	01:43:00	0
2008-11-18	01:44:00	0
2008-11-18	01:45:00	0
2008-11-18	01:46:00	0
2008-11-18	01:47:00	0
2008-11-18	01:48:00	0
2008-11-18	01:49:00	0
2008-11-18	01:50:00	0
2008-11-18	01:51:00	0
2008-11-18	01:52:00	0
2008-11-18	01:53:00	0
2008-11-18	01:54:00	0
2008-11-18	01:55:00	0
2008-11-18	01:56:00	0
2008-11-18	01:57:00	0
2008-11-18	01:58:00	0
2008-11-18	01:59:00	0
2008-11-18	02:00:00	0
2008-11-18	02:01:00	0
2008-11-18	02:02:00	0
2008-11-18	02:03:00	0
2008-11-18	02:04:00	0
2008-11-18	02:05:00	0
2008-11-18	02:06:00	0
2008-11-18	02:07:00	0
2008-11-18	02:08:00	0
2008-11-18	02:09:00	0
2008-11-18	02:10:00	0
2008-11-18	02:11:00	0
2008-11-18	02:12:00	0
2008-11-18	02:13:00	0
2008-11-18	02:14:00	0
2008-11-18	02:15:00	0
2008-11-18	02:16:00	0
2008-11-18	02:17:00	0
2008-11-18	02:18:00	0
2008-11-18	02:19:00	0
2008-11-18	02:20:00	0
2008-11-18	02:21:00	0
2008-11-18	02:22:00	0
2008-11-18	02:23:00	0
2008-11-18	02:24:00	0
2008-11-18	02:25:00	0
2008-11-18	02:26:00	0
2008-11-18	02:27:00	0
2008-11-18	02:28:00	0
2008-11-18	02:29:00	0
2008-11-18	02:30:00	0
2008-11-18	02:31:00	0
2008-11-18	02:32:00	0
2008-11-18	02:33:00	0
2008-11-18	02:34:00	0
2008-11-18	02:35:00	0
2008-11-18	02:36:00	0
2008-11-18	02:37:00	0
2008-11-18	02:38:00	0
2008-11-18	02:39:00	0
2008-11-18	02:40:00	0
2008-11-18	02:41:00	0
2008-11-18	02:42:00	0
2008-11-18	02:43:00	0
2008-11-18	02:44:00	0
2008-11-18	02:45:00	0
2008-11-18	02:46:00	0
2008-11-18	02:47:00	0
2008-11-18	02:48:00	0
2008-11-18	02:49:00	0
2008-11-18	02:50:00	0
2008-11-18	02:51:00	0
2008-11-18	02:52:00	0
2008-11-18	02:53:00	0
2008-11-18	02:54:00	0
2008-11-18	02:55:00	0
2008-11-18	02:56:00	0
2008-11-18	02:57:00	0
2008-11-18	02:58:00	0
2008-11-18	02:59:00	0
2008-11-18	03:00:00	0
2008-11-18	03:01:00	0
2008-11-18	03:02:00	0
2008-11-18	03:03:00	0
2008-11-18	03:04:00	0
2008-11-18	03:05:00	0
2008-11-18	03:06:00	0
2008-11-18	03:07:00	0
2008-11-18	03:08:00	0
2008-11-18	03:09:00	0
2008-11-18	03:10:00	0
2008-11-18	03:11:00	0
2008-11-18	03:12:00	0
2008-11-18	03:13:00	0
2008-11-18	03:14:00	0
2008-11-18	03:15:00	0
2008-11-18	03:16:00	0
2008-11-18	03:17:00	0
2008-11-18	03:18:00	0
2008-11-18	03:19:00	0
2008-11-18	03:20:00	0
2008-11-18	03:21:00	0
2008-11-18	03:22:00	0
2008-11-18	03:23:00	0
2008-11-18	03:24:00	0
2008-11-18	03:25:00	0
2008-11-18	03:26:00	0
2008-11-18	03:27:00	0
2008-11-18	03:28:00	0
2008-11-18	03:29:00	0
2008-11-18	03:30:00	0
2008-11-18	03:31:00	0
2008-11-18	03:32:00	0
2008-11-18	03:33:00	0
2008-11-18	03:34:00	0
2008-11-18	03:35:00	0
2008-11-18	03:36:00	0
2008-11-18	03:37:00	0
2008-11-18	03:38:00	0
2008-11-18	03:39:00	0
2008-11-18	03:40:00	0
2008-11-18	03:41:00	0
2008-11-18	03:42:00	0
2008-11-18	03:43:00	0
2008-11-18	03:44:00	0
2008-11-18	03:45:00	0
2008-11-18	03:46:00	0
2008-11-18	03:47:00	0
2008-11-18	03:48:00	0
2008-11-18	03:49:00	0
2008-11-18	03:50:00	0
2008-11-18	03:51:00	0
2008-11-18	03:52:00	0
2008-11-18	03:53:00	0
2008-11-18	03:54:00	0
2008-11-18	03:55:00	0
2008-11-18	03:56:00	0
2008-11-18	03:57:00	0
2008-11-18	03:58:00	0
2008-11-18	03:59:00	0
2008-11-18	04:00:00	0
2008-11-18	04:01:00	0
2008-11-18	04:02:00	0
2008-11-18	04:03:00	0
2008-11-18	04:04:00	0
2008-11-18	04:05:00	0
2008-11-18	04:06:00	0
2008-11-18	04:07:00	0
2008-11-18	04:08:00	0
2008-11-18	04:09:00	0
2008-11-18	04:10:00	0
2008-11-18	04:11:00	0
2008-11-18	04:12:00	0
2008-11-18	04:13:00	0
2008-11-18	04:14:00	0
2008-11-18	04:15:00	0
2008-11-18	04:16:00	0
2008-11-18	04:17:00	0
2008-11-18	04:18:00	0
2008-11-18	04:19:00	0
2008-11-18	04:20:00	0
2008-11-18	04:21:00	0
2008-11-18	04:22:00	0
2008-11-18	04:23:00	0
2008-11-18	04:24:00	0
2008-11-18	04:25:00	0
2008-11-18	04:26:00	0
2008-11-18	04:27:00	0
2008-11-18	04:28:00	0
2008-11-18	04:29:00	0
2008-11-18	04:30:00	0
2008-11-18	04:31:00	0
2008-11-18	04:32:00	0
2008-11-18	04:33:00	0
2008-11-18	04:34:00	0
2008-11-18	04:35:00	0
2008-11-18	04:36:00	0
2008-11-18	04:37:00	0
2008-11-18	04:38:00	0
2008-11-18	04:39:00	0
2008-11-18	04:40:00	0
2008-11-18	04:41:00	0
2008-11-18	04:42:00	0
2008-11-18	04:43:00	0
2008-11-18	04:44:00	0
2008-11-18	04:45:00	0
2008-11-18	04:46:00	0
2008-11-18	04:47:00	0
2008-11-18	04:48:00	0
2008-11-18	04:49:00	0
2008-11-18	04:50:00	0
2008-11-18	04:51:00	0
2008-11-18	04:52:00	0
2008-11-18	04:53:00	0
2008-11-18	04:54:00	0
2008-11-18	04:55:00	0
2008-11-18	04:56:00	0
2008-11-18	04:57:00	0
2008-11-18	04:58:00	0
2008-11-18	04:59:00	0
2008-11-18	05:00:00	0
2008-11-18	05:01:00	0
2008-11-18	05:02:00	0
2008-11-18	05:03:00	0
2008-11-18	05:04:00	0
2008-11-18	05:05:00	0
2008-11-18	05:06:00	0
2008-11-18	05:07:00	0
2008-11-18	05:08:00	0
2008-11-18	05:09:00	0
2008-11-18	05:10:00	0
2008-11-18	05:11:00	0
2008-11-18	05:12:00	0
2008-11-18	05:13:00	0
2008-11-18	05:14:00	0
2008-11-18	05:15:00	0
2008-11-18	05:16:00	0
2008-11-18	05:17:00	0
2008-11-18	05:18:00	0
2008-11-18	05:19:00	0
2008-11-18	05:20:00	0
2008-11-18	05:21:00	0
2008-11-18	05:22:00	0
2008-11-18	05:23:00	0
2008-11-18	05:24:00	0
2008-11-18	05:25:00	0
2008-11-18	05:26:00	0
2008-11-18	05:27:00	0
2008-11-18	05:28:00	0
2008-11-18	05:29:00	0
2008-11-18	05:30:00	0
2008-11-18	05:31:00	0
2008-11-18	05:32:00	0
2008-11-18	05:33:00	0
2008-11-18	05:34:00	0
2008-11-18	05:35:00	0
2008-11-18	05:36:00	0
2008-11-18	05:37:00	0
2008-11-18	05:38:00	0
2008-11-18	05:39:00	0
2008-11-18	05:40:00	0
2008-11-18	05:41:00	0
2008-11-18	05:42:00	0
2008-11-18	05:43:00	0
2008-11-18	05:44:00	0
2008-11-18	05:45:00	0
2008-11-18	05:46:00	0
2008-11-18	05:47:00	0
2008-11-18	05:48:00	0
2008-11-18	05:49:00	0
2008-11-18	05:50:00	0
2008-11-18	05:51:00	0
2008-11-18	05:52:00	0
2008-11-18	05:53:00	0
2008-11-18	05:54:00	0
2008-11-18	05:55:00	0
2008-11-18	05:56:00	0
2008-11-18	05:57:00	0
2008-11-18	05:58:00	0
2008-11-18	05:59:00	0
2008-11-18	06:00:00	0
2008-11-18	06:01:00	0
2008-11-18	06:02:00	0
2008-11-18	06:03:00	0
2008-11-18	06:04:00	0
2008-11-18	06:05:00	0
2008-11-18	06:06:00	0
2008-11-18	06:07:00	0
2008-11-18	06:08:00	0
2008-11-18	06:09:00	0
2008-11-18	06:10:00	0
2008-11-18	06:11:00	0
2008-11-18	06:12:00	0
2008-11-18	06:13:00	0
2008-11-18	06:14:00	0
2008-11-18	06:15:00	0
2008-11-18	06:16:00	0
2008-11-18	06:17:00	0
2008-11-18	06:18:00	0
2008-11-18	06:19:00	0
2008-11-18	06:20:00	0
2008-11-18	06:21:00	0
2008-11-18	06:22:00	0
2008-11-18	06:23:00	0
2008-11-18	06:24:00	0
2008-11-18	06:25:00	0
2008-11-18	06:26:00	0
2008-11-18	06:27:00	0
2008-11-18	06:28:00	0
2008-11-18	06:29:00	0
2008-11-18	06:30:00	0
2008-11-18	06:31:00	0
2008-11-18	06:32:00	0
2008-11-18	06:33:00	0
2008-11-18	06:34:00	0
2008-11-18	06:35:00	0
2008-11-18	06:36:00	0
2008-11-18	06:37:00	0
2008-11-18	06:38:00	0
2008-11-18	06:39:00	0
2008-11-18	06:40:00	0
2008-11-18	06:41:00	0
2008-11-18	06:42:00	0
2008-11-18	06:43:00	0
2008-11-18	06:44:00	0
2008-11-18	06:45:00	0
2008-11-18	06:46:00	0
2008-11-18	06:47:00	0
2008-11-18	06:48:00	0
2008-11-18	06:49:00	0
2008-11-18	06:50:00	0
2008-11-18	06:51:00	0
2008-11-18	06:52:00	0
2008-11-18	06:53:00	0
2008-11-18	06:54:00	0
2008-11-18	06:55:00	0
2008-11-18	06:56:00	0
2008-11-18	06:57:00	0
2008-11-18	06:58:00	0
2008-11-18	06:59:00	0
2008-11-18	07:00:00	0
2008-11-18	07:01:00	0
2008-11-18	07:02:00	0
2008-11-18	07:03:00	0
2008-11-18	07:04:00	0
2008-11-18	07:05:00	0
2008-11-18	07:06:00	0
2008-11-18	07:07:00	0
2008-11-18	07:08:00	0
2008-11-18	07:09:00	0
2008-11-18	07:10:00	0
2008-11-18	07:11:00	0
2008-11-18	07:12:00	0
2008-11-18	07:13:00	0
2008-11-18	07:14:00	0
2008-11-18	07:15:00	0
2008-11-18	07:16:00	0
2008-11-18	07:17:00	0
2008-11-18	07:18:00	0
2008-11-18	07:19:00	0
2008-11-18	07:20:00	0
2008-11-18	07:21:00	0
2008-11-18	07:22:00	0
2008-11-18	07:23:00	0
2008-11-18	07:24:00	0
2008-11-18	07:25:00	0
2008-11-18	07:26:00	0
2008-11-18	07:27:00	0
2008-11-18	07:28:00	0
2008-11-18	07:29:00	0
2008-11-18	07:30:00	0
2008-11-18	07:31:00	0
2008-11-18	07:32:00	0
2008-11-18	07:33:00	0
2008-11-18	07:34:00	0
2008-11-18	07:35:00	0
2008-11-18	07:36:00	0
2008-11-18	07:37:00	0
2008-11-18	07:38:00	0
2008-11-18	07:39:00	0
2008-11-18	07:40:00	0
2008-11-18	07:41:00	0
2008-11-18	07:42:00	0
2008-11-18	07:43:00	0
2008-11-18	07:44:00	0
2008-11-18	07:45:00	0
2008-11-18	07:46:00	0
2008-11-18	07:47:00	0
2008-11-18	07:48:00	0
2008-11-18	07:49:00	0
2008-11-18	07:50:00	0
2008-11-18	07:51:00	0
2008-11-18	07:52:00	0
2008-11-18	07:53:00	0
2008-11-18	07:54:00	0
2008-11-18	07:55:00	0
2008-11-18	07:56:00	0
2008-11-18	07:57:00	0
2008-11-18	07:58:00	0
2008-11-18	07:59:00	0
2008-11-18	08:00:00	0
2008-11-18	08:01:00	0
2008-11-18	08:02:00	0
2008-11-18	08:03:00	0
2008-11-18	08:04:00	0
2008-11-18	08:05:00	0
2008-11-18	08:06:00	0
2008-11-18	08:07:00	0
2008-11-18	08:08:00	0
2008-11-18	08:09:00	0
2008-11-18	08:10:00	0
2008-11-18	08:11:00	0
2008-11-18	08:12:00	0
2008-11-18	08:13:00	0
2008-11-18	08:14:00	0
2008-11-18	08:15:00	0
2008-11-18	08:16:00	0
2008-11-18	08:17:00	0
2008-11-18	08:18:00	0
2008-11-18	08:19:00	0
2008-11-18	08:20:00	0
2008-11-18	08:21:00	0
2008-11-18	08:22:00	0
2008-11-18	08:23:00	0
2008-11-18	08:24:00	0
2008-11-18	08:25:00	0
2008-11-18	08:26:00	0
2008-11-18	08:27:00	0
2008-11-18	08:28:00	0
2008-11-18	08:29:00	0
2008-11-18	08:30:00	0
2008-11-18	08:31:00	0
2008-11-18	08:32:00	0
2008-11-18	08:33:00	0
2008-11-18	08:34:00	0
2008-11-18	08:35:00	0
2008-11-18	08:36:00	0
2008-11-18	08:37:00	0
2008-11-18	08:38:00	0
2008-11-18	08:39:00	0
2008-11-18	08:40:00	0
2008-11-18	08:41:00	0
2008-11-18	08:42:00	0
2008-11-18	08:43:00	0
2008-11-18	08:44:00	0
2008-11-18	08:45:00	0
2008-11-18	08:46:00	0
2008-11-18	08:47:00	0
2008-11-18	08:48:00	0
2008-11-18	08:49:00	0
2008-11-18	08:50:00	0
2008-11-18	08:51:00	0
2008-11-18	08:52:00	0
2008-11-18	08:53:00	0
2008-11-18	08:54:00	0
2008-11-18	08:55:00	0
2008-11-18	08:56:00	0
2008-11-18	08:57:00	0
2008-11-18	08:58:00	0
2008-11-18	08:59:00	0
2008-11-18	09:00:00	0
2008-11-18	09:01:00	0
2008-11-18	09:02:00	0
2008-11-18	09:03:00	0
2008-11-18	09:04:00	0
2008-11-18	09:05:00	0
2008-11-18	09:06:00	0
2008-11-18	09:07:00	0
2008-11-18	09:08:00	0
2008-11-18	09:09:00	0
2008-11-18	09:10:00	0
2008-11-18	09:11:00	0
2008-11-18	09:12:00	0
2008-11-18	09:13:00	0
2008-11-18	09:14:00	0
2008-11-18	09:15:00	0
2008-11-18	09:16:00	0
2008-11-18	09:17:00	0
2008-11-18	09:18:00	0
2008-11-18	09:19:00	0
2008-11-18	09:20:00	0
2008-11-18	09:21:00	0
2008-11-18	09:22:00	0
2008-11-18	09:23:00	0
2008-11-18	09:24:00	0
2008-11-18	09:25:00	0
2008-11-18	09:26:00	0
2008-11-18	09:27:00	0
2008-11-18	09:28:00	0
2008-11-18	09:29:00	0
2008-11-18	09:30:00	0
2008-11-18	09:31:00	0
2008-11-18	09:32:00	0
2008-11-18	09:33:00	0
2008-11-18	09:34:00	0
2008-11-18	09:35:00	0
2008-11-18	09:36:00	0
2008-11-18	09:37:00	0
2008-11-18	09:38:00	0
2008-11-18	09:39:00	0
2008-11-18	09:40:00	0
2008-11-18	09:41:00	0
2008-11-18	09:42:00	0
2008-11-18	09:43:00	0
2008-11-18	09:44:00	0
2008-11-18	09:45:00	0
2008-11-18	09:46:00	0
2008-11-18	09:47:00	0
2008-11-18	09:48:00	0
2008-11-18	09:49:00	0
2008-11-18	09:50:00	0
2008-11-18	09:51:00	0
2008-11-18	09:52:00	0
2008-11-18	09:53:00	0
2008-11-18	09:54:00	0
2008-11-18	09:55:00	0
2008-11-18	09:56:00	0
2008-11-18	09:57:00	0
2008-11-18	09:58:00	0
2008-11-18	09:59:00	0
2008-11-18	10:00:00	0
2008-11-18	10:01:00	0
2008-11-18	10:02:00	0
2008-11-18	10:03:00	0
2008-11-18	10:04:00	0
2008-11-18	10:05:00	0
2008-11-18	10:06:00	0
2008-11-18	10:07:00	0
2008-11-18	10:08:00	0
2008-11-18	10:09:00	0
2008-11-18	10:10:00	0
2008-11-18	10:11:00	0
2008-11-18	10:12:00	0
2008-11-18	10:13:00	0
2008-11-18	10:14:00	0
2008-11-18	10:15:00	0
2008-11-18	10:16:00	0
2008-11-18	10:17:00	0
2008-11-18	10:18:00	0
2008-11-18	10:19:00	0
2008-11-18	10:20:00	0
2008-11-18	10:21:00	0
2008-11-18	10:22:00	0
2008-11-18	10:23:00	0
2008-11-18	10:24:00	0
2008-11-18	10:25:00	0
2008-11-18	10:26:00	0
2008-11-18	10:27:00	0
2008-11-18	10:28:00	0
2008-11-18	10:29:00	0
2008-11-18	10:30:00	0
2008-11-18	10:31:00	0
2008-11-18	10:32:00	0
2008-11-18	10:33:00	0
2008-11-18	10:34:00	0
2008-11-18	10:35:00	0
2008-11-18	10:36:00	0
2008-11-18	10:37:00	0
2008-11-18	10:38:00	0
2008-11-18	10:39:00	0
2008-11-18	10:40:00	0
2008-11-18	10:41:00	0
2008-11-18	10:42:00	0
2008-11-18	10:43:00	0
2008-11-18	10:44:00	0
2008-11-18	10:45:00	0
2008-11-18	10:46:00	0
2008-11-18	10:47:00	0
2008-11-18	10:48:00	0
2008-11-18	10:49:00	0
2008-11-18	10:50:00	0
2008-11-18	10:51:00	0
2008-11-18	10:52:00	0
2008-11-18	10:53:00	0
2008-11-18	10:54:00	0
2008-11-18	10:55:00	0
2008-11-18	10:56:00	0
2008-11-18	10:57:00	0
2008-11-18	10:58:00	0
2008-11-18	10:59:00	0
2008-11-18	11:00:00	0
2008-11-18	11:01:00	0
2008-11-18	11:02:00	0
2008-11-18	11:03:00	0
2008-11-18	11:04:00	0
2008-11-18	11:05:00	0
2008-11-18	11:06:00	0
2008-11-18	11:07:00	0
2008-11-18	11:08:00	0
2008-11-18	11:09:00	0
2008-11-18	11:10:00	0
2008-11-18	11:11:00	0
2008-11-18	11:12:00	0
2008-11-18	11:13:00	0
2008-11-18	11:14:00	0
2008-11-18	11:15:00	0
2008-11-18	11:16:00	0
2008-11-18	11:17:00	0
2008-11-18	11:18:00	0
2008-11-18	11:19:00	0
2008-11-18	11:20:00	0
2008-11-18	11:21:00	0
2008-11-18	11:22:00	0
2008-11-18	11:23:00	0
2008-11-18	11:24:00	0
2008-11-18	11:25:00	0
2008-11-18	11:26:00	0
2008-11-18	11:27:00	0
2008-11-18	11:28:00	0
2008-11-18	11:29:00	0
2008-11-18	11:30:00	0
2008-11-18	11:31:00	0
2008-11-18	11:32:00	0
2008-11-18	11:33:00	0
2008-11-18	11:34:00	0
2008-11-18	11:35:00	0
2008-11-18	11:36:00	0
2008-11-18	11:37:00	0
2008-11-18	11:38:00	0
2008-11-18	11:39:00	0
2008-11-18	11:40:00	0
2008-11-18	11:41:00	0
2008-11-18	11:42:00	0
2008-11-18	11:43:00	0
2008-11-18	11:44:00	0
2008-11-18	11:45:00	0
2008-11-18	11:46:00	0
2008-11-18	11:47:00	0
2008-11-18	11:48:00	0
2008-11-18	11:49:00	0
2008-11-18	11:50:00	0
2008-11-18	11:51:00	0
2008-11-18	11:52:00	0
2008-11-18	11:53:00	0
2008-11-18	11:54:00	0
2008-11-18	11:55:00	0
2008-11-18	11:56:00	0
2008-11-18	11:57:00	0
2008-11-18	11:58:00	0
2008-11-18	11:59:00	0
2008-11-18	12:00:00	0
2008-11-18	12:01:00	0
2008-11-18	12:02:00	0
2008-11-18	12:03:00	0
2008-11-18	12:04:00	0
2008-11-18	12:05:00	0
2008-11-18	12:06:00	0
2008-11-18	12:07:00	0
2008-11-18	12:08:00	0
2008-11-18	12:09:00	0
2008-11-18	12:10:00	0
2008-11-18	12:11:00	0
2008-11-18	12:12:00	0
2008-11-18	12:13:00	0
2008-11-18	12:14:00	0
2008-11-18	12:15:00	0
2008-11-18	12:16:00	0
2008-11-18	12:17:00	0
2008-11-18	12:18:00	0
2008-11-18	12:19:00	0
2008-11-18	12:20:00	0
2008-11-18	12:21:00	0
2008-11-18	12:22:00	0
2008-11-18	12:23:00	0
2008-11-18	12:24:00	0
2008-11-18	12:25:00	0
2008-11-18	12:26:00	0
2008-11-18	12:27:00	0
2008-11-18	12:28:00	0
2008-11-18	12:29:00	0
2008-11-18	12:30:00	0
2008-11-18	12:31:00	0
2008-11-18	12:32:00	0
2008-11-18	12:33:00	0
2008-11-18	12:34:00	0
2008-11-18	12:35:00	0
2008-11-18	12:36:00	0
2008-11-18	12:37:00	0
2008-11-18	12:38:00	0
2008-11-18	12:39:00	0
2008-11-18	12:40:00	0
2008-11-18	12:41:00	0
2008-11-18	12:42:00	0
2008-11-18	12:43:00	0
2008-11-18	12:44:00	0
2008-11-18	12:45:00	0
2008-11-18	12:46:00	0
2008-11-18	12:47:00	0
2008-11-18	12:48:00	0
2008-11-18	12:49:00	0
2008-11-18	12:50:00	0
2008-11-18	12:51:00	0
2008-11-18	12:52:00	0
2008-11-18	12:53:00	0
2008-11-18	12:54:00	0
2008-11-18	12:55:00	0
2008-11-18	12:56:00	0
2008-11-18	12:57:00	0
2008-11-18	12:58:00	0
2008-11-18	12:59:00	0
2008-11-18	13:00:00	0	M
2008-11-18	13:01:00	0
2008-11-18	13:02:00	0
2008-11-18	13:03:00	0
2008-11-18	13:04:00	0
2008-11-18	13:05:00	0
2008-11-18	13:06:00	0
2008-11-18	13:07:00	0
2008-11-18	13:08:00	0
2008-11-18	13:09:00	0
2008-11-18	13:10:00	0
2008-11-18	13:11:00	0
2008-11-18	13:12:00	0
2008-11-18	13:13:00	0
2008-11-18	13:14:00	83
2008-11-18	13:15:00	107
2008-11-18	13:16:00	0
2008-11-18	13:17:00	0
2008-11-18	13:18:00	0
2008-11-18	13:19:00	0
2008-11-18	13:20:00	0
2008-11-18	13:21:00	0
2008-11-18	13:22:00	0
2008-11-18	13:23:00	0
2008-11-18	13:24:00	0
2008-11-18	13:25:00	0
2008-11-18	13:26:00	0
2008-11-18	13:27:00	0
2008-11-18	13:28:00	0
2008-11-18	13:29:00	0
2008-11-18	13:30:00	0
2008-11-18	13:31:00	0
2008-11-18	13:32:00	0
2008-11-18	13:33:00	0
2008-11-18	13:34:00	0
2008-11-18	13:35:00	0
2008-11-18	13:36:00	0
2008-11-18	13:37:00	0
2008-11-18	13:38:00	0
2008-11-18	13:39:00	0
2008-11-18	13:40:00	0
2008-11-18	13:41:00	0
2008-11-18	13:42:00	0
2008-11-18	13:43:00	0
2008-11-18	13:44:00	0
2008-11-18	13:45:00	0
2008-11-18	13:46:00	0
2008-11-18	13:47:00	0
2008-11-18	13:48:00	0
2008-11-18	13:49:00	0
2008-11-18	13:50:00	0
2008-11-18	13:51:00	0
2008-11-18	13:52:00	0
2008-11-18	13:53:00	0
2008-11-18	13:54:00	0
2008-11-18	13:55:00	0
2008-11-18	13:56:00	0
2008-11-18	13:57:00	0
2008-11-18	13:58:00	0
2008-11-18	13:59:00	0
2008-11-18	14:00:00	0
2008-11-18	14:01:00	0
2008-11-18	14:02:00	0
2008-11-18	14:03:00	0
2008-11-18	14:04:00	0
2008-11-18	14:05:00	0
2008-11-18	14:06:00	0
2008-11-18	14:07:00	0
2008-11-18	14:08:00	0
2008-11-18	14:09:00	0
2008-11-18	14:10:00	0
2008-11-18	14:11:00	0
2008-11-18	14:12:00	0
2008-11-18	14:13:00	0
2008-11-18	14:14:00	0
2008-11-18	14:15:00	0
2008-11-18	14:16:00	0
2008-11-18	14:17:00	0
2008-11-18	14:18:00	0
2008-11-18	14:19:00	0
2008-11-18	14:20:00	0
2008-11-18	14:21:00	0
2008-11-18	14:22:00	0
2008-11-18	14:23:00	0
2008-11-18	14:24:00	0
2008-11-18	14:25:00	0
2008-11-18	14:26:00	0
2008-11-18	14:27:00	0
2008-11-18	14:28:00	0
2008-11-18	14:29:00	0
2008-11-18	14:30:00	0
2008-11-18	14:31:00	0
2008-11-18	14:32:00	0
2008-11-18	14:33:00	0
2008-11-18	14:34:00	0
2008-11-18	14:35:00	0
2008-11-18	14:36:00	0
2008-11-18	14:37:00	0
2008-11-18	14:38:00	0
2008-11-18	14:39:00	0
2008-11-18	14:40:00	0
2008-11-18	14:41:00	0
2008-11-18	14:42:00	0
2008-11-18	14:43:00	0
2008-11-18	14:44:00	0
2008-11-18	14:45:00	0
2008-11-18	14:46:00	0
2008-11-18	14:47:00	0
2008-11-18	14:48:00	0
2008-11-18	14:49:00	0
2008-11-18	14:50:00	0
2008-11-18	14:51:00	0
2008-11-18	14:52:00	0
2008-11-18	14:53:00	0
2008-11-18	14:54:00	0
2008-11-18	14:55:00	0
2008-11-18	14:56:00	0
2008-11-18	14:57:00	0
2008-11-18	14:58:00	0
2008-11-18	14:59:00	0
2008-11-18	15:00:00	0
2008-11-18	15:01:00	0
2008-11-18	15:02:00	0
2008-11-18	15:03:00	0
2008-11-18	15:04:00	0
2008-11-18	15:05:00	0
2008-11-18	15:06:00	0
2008-11-18	15:07:00	0
2008-11-18	15:08:00	0
2008-11-18	15:09:00	0
2008-11-18	15:10:00	0
2008-11-18	15:11:00	0
2008-11-18	15:12:00	0
2008-11-18	15:13:00	0
2008-11-18	15:14:00	0
2008-11-18	15:15:00	0
2008-11-18	15:16:00	0
2008-11-18	15:17:00	0
2008-11-18	15:18:00	0
2008-11-18	15:19:00	0
2008-11-18	15:20:00	0
2008-11-18	15:21:00	0
2008-11-18	15:22:00	0
2008-11-18	15:23:00	0
2008-11-18	15:24:00	0
2008-11-18	15:25:00	0
2008-11-18	15:26:00	0
2008-11-18	15:27:00	0
2008-11-18	15:28:00	0
2008-11-18	15:29:00	0
2008-11-18	15:30:00	0
2008-11-18	15:31:00	0
2008-11-18	15:32:00	0
2008-11-18	15:33:00	0
2008-11-18	15:34:00	0
2008-11-18	15:35:00	0
2008-11-18	15:36:00	0
2008-11-18	15:37:00	0
2008-11-18	15:38:00	0
2008-11-18	15:39:00	0
2008-11-18	15:40:00	0
2008-11-18	15:41:00	0
2008-11-18	15:42:00	0
2008-11-18	15:43:00	0
2008-11-18	15:44:00	0
2008-11-18	15:45:00	0
2008-11-18	15:46:00	0
2008-11-18	15:47:00	0
2008-11-18	15:48:00	0
2008-11-18	15:49:00	0
2008-11-18	15:50:00	0
2008-11-18	15:51:00	0
2008-11-18	15:52:00	0
2008-11-18	15:53:00	0
2008-11-18	15:54:00	0
2008-11-18	15:55:00	0
2008-11-18	15:56:00	0
2008-11-18	15:57:00	0
2008-11-18	15:58:00	0
2008-11-18	15:59:00	0
2008-11-18	16:00:00	0
2008-11-18	16:01:00	0
2008-11-18	16:02:00	0
2008-11-18	16:03:00	0
2008-11-18	16:04:00	0
2008-11-18	16:05:00	0
2008-11-18	16:06:00	0
2008-11-18	16:07:00	0
2008-11-18	16:08:00	0
2008-11-18	16:09:00	0
2008-11-18	16:10:00	0
2008-11-18	16:11:00	0
2008-11-18	16:12:00	0
2008-11-18	16:13:00	0
2008-11-18	16:14:00	0
2008-11-18	16:15:00	0
2008-11-18	16:16:00	0
2008-11-18	16:17:00	0
2008-11-18	16:18:00	0
2008-11-18	16:19:00	0
2008-11-18	16:20:00	0
2008-11-18	16:21:00	0
2008-11-18	16:22:00	0
2008-11-18	16:23:00	0
2008-11-18	16:24:00	0
2008-11-18	16:25:00	0
2008-11-18	16:26:00	0
2008-11-18	16:27:00	0
2008-11-18	16:28:00	0
2008-11-18	16:29:00	0
2008-11-18	16:30:00	0
2008-11-18	16:31:00	0
2008-11-18	16:32:00	0
2008-11-18	16:33:00	0
2008-11-18	16:34:00	0
2008-11-18	16:35:00	0
2008-11-18	16:36:00	0
2008-11-18	16:37:00	0
2008-11-18	16:38:00	0
2008-11-18	16:39:00	0
2008-11-18	16:40:00	0
2008-11-18	16:41:00	0
2008-11-18	16:42:00	0
2008-11-18	16:43:00	0
2008-11-18	16:44:00	0
2008-11-18	16:45:00	0
2008-11-18	16:46:00	0
2008-11-18	16:47:00	0
2008-11-18	16:48:00	0
2008-11-18	16:49:00	0
2008-11-18	16:50:00	0
2008-11-18	16:51:00	0
2008-11-18	16:52:00	0
2008-11-18	16:53:00	0
2008-11-18	16:54:00	0
2008-11-18	16:55:00	0
2008-11-18	16:56:00	0
2008-11-18	16:57:00	0
2008-11-18	16:58:00	0
2008-11-18	16:59:00	0
2008-11-18	17:00:00	0
2008-11-18	17:01:00	0
2008-11-18	17:02:00	0
2008-11-18	17:03:00	0
2008-11-18	17:04:00	0
2008-11-18	17:05:00	0
2008-11-18	17:06:00	0
2008-11-18	17:07:00	0
2008-11-18	17:08:00	0
2008-11-18	17:09:00	0
2008-11-18	17:10:00	0
2008-11-18	17:11:00	0
2008-11-18	17:12:00	0
2008-11-18	17:13:00	0
2008-11-18	17:14:00	0
2008-11-18	17:15:00	0
2008-11-18	17:16:00	0
2008-11-18	17:17:00	0
2008-11-18	17:18:00	0
2008-11-18	17:19:00	0
2008-11-18	17:20:00	0
2008-11-18	17:21:00	0
2008-11-18	17:22:00	0
2008-11-18	17:23:00	0
2008-11-18	17:24:00	0
2008-11-18	17:25:00	0
2008-11-18	17:26:00	0
2008-11-18	17:27:00	0
2008-11-18	17:28:00	927
2008-11-18	17:29:00	154
2008-11-18	17:30:00	0
2008-11-18	17:31:00	0
2008-11-18	17:32:00	119
2008-11-18	17:33:00	555
2008-11-18	17:34:00	107
2008-11-18	17:35:00	12
2008-11-18	17:36:00	24
2008-11-18	17:37:00	0
2008-11-18	17:38:00	12
2008-11-18	17:39:00	0
2008-11-18	17:40:00	0
2008-11-18	17:41:00	0
2008-11-18	17:42:00	0
2008-11-18	17:43:00	0
2008-11-18	17:44:00	0
2008-11-18	17:45:00	0
2008-11-18	17:46:00	0
2008-11-18	17:47:00	0
2008-11-18	17:48:00	0
2008-11-18	17:49:00	0
2008-11-18	17:50:00	0
2008-11-18	17:51:00	0
2008-11-18	17:52:00	0
2008-11-18	17:53:00	0
2008-11-18	17:54:00	0
2008-11-18	17:55:00	0
2008-11-18	17:56:00	0
2008-11-18	17:57:00	0
2008-11-18	17:58:00	0
2008-11-18	17:59:00	0
2008-11-18	18:00:00	0
2008-11-18	18:01:00	0
2008-11-18	18:02:00	0
2008-11-18	18:03:00	0
2008-11-18	18:04:00	0
2008-11-18	18:05:00	0
2008-11-18	18:06:00	0
2008-11-18	18:07:00	0
2008-11-18	18:08:00	0
2008-11-18	18:09:00	0
2008-11-18	18:10:00	0
2008-11-18	18:11:00	0
2008-11-18	18:12:00	0
2008-11-18	18:13:00	0
2008-11-18	18:14:00	0
2008-11-18	18:15:00	0
2008-11-18	18:16:00	0
2008-11-18	18:17:00	0
2008-11-18	18:18:00	0
2008-11-18	18:19:00	0
2008-11-18	18:20:00	0
2008-11-18	18:21:00	0
2008-11-18	18:22:00	0
2008-11-18	18:23:00	0
2008-11-18	18:24:00	0
2008-11-18	18:25:00	0
2008-11-18	18:26:00	0
2008-11-18	18:27:00	0
2008-11-18	18:28:00	0
2008-11-18	18:29:00	0
2008-11-18	18:30:00	0
2008-11-18	18:31:00	0
2008-11-18	18:32:00	0
2008-11-18	18:33:00	83
2008-11-18	18:34:00	12
2008-11-18	18:35:00	12
2008-11-18	18:36:00	47
2008-11-18	18:37:00	168
2008-11-18	18:38:00	0
2008-11-18	18:39:00	0
2008-11-18	18:40:00	0
2008-11-18	18:41:00	0
2008-11-18	18:42:00	0
2008-11-18	18:43:00	0
2008-11-18	18:44:00	0
2008-11-18	18:45:00	0
2008-11-18	18:46:00	0
2008-11-18	18:47:00	0
2008-11-18	18:48:00	0
2008-11-18	18:49:00	0
2008-11-18	18:50:00	0
2008-11-18	18:51:00	0
2008-11-18	18:52:00	0
2008-11-18	18:53:00	0
2008-11-18	18:54:00	0
2008-11-18	18:55:00	0
2008-11-18	18:56:00	0
2008-11-18	18:57:00	0
2008-11-18	18:58:00	0
2008-11-18	18:59:00	0
2008-11-18	19:00:00	24
2008-11-18	19:01:00	311
2008-11-18	19:02:00	12
2008-11-18	19:03:00	0
2008-11-18	19:04:00	0
2008-11-18	19:05:00	0
2008-11-18	19:06:00	0
2008-11-18	19:07:00	0
2008-11-18	19:08:00	0
2008-11-18	19:09:00	0
2008-11-18	19:10:00	0
2008-11-18	19:11:00	0
2008-11-18	19:12:00	0
2008-11-18	19:13:00	0
2008-11-18	19:14:00	0
2008-11-18	19:15:00	0
2008-11-18	19:16:00	0
2008-11-18	19:17:00	0
2008-11-18	19:18:00	0
2008-11-18	19:19:00	0
2008-11-18	19:20:00	0
2008-11-18	19:21:00	0
2008-11-18	19:22:00	0
2008-11-18	19:23:00	12
2008-11-18	19:24:00	460
2008-11-18	19:25:00	979
2008-11-18	19:26:00	0
2008-11-18	19:27:00	0
2008-11-18	19:28:00	927
2008-11-18	19:29:00	879
2008-11-18	19:30:00	311
2008-11-18	19:31:00	393
2008-11-18	19:32:00	879
2008-11-18	19:33:00	654
2008-11-18	19:34:00	296
2008-11-18	19:35:00	107
2008-11-18	19:36:00	142
2008-11-18	19:37:00	83
2008-11-18	19:38:00	344
2008-11-18	19:39:00	536
2008-11-18	19:40:00	282
2008-11-18	19:41:00	377
2008-11-18	19:42:00	142
2008-11-18	19:43:00	239
2008-11-18	19:44:00	59
2008-11-18	19:45:00	12
2008-11-18	19:46:00	12
2008-11-18	19:47:00	0
2008-11-18	19:48:00	0
2008-11-18	19:49:00	12
2008-11-18	19:50:00	12
2008-11-18	19:51:00	0
2008-11-18	19:52:00	0
2008-11-18	19:53:00	0
2008-11-18	19:54:00	0
2008-11-18	19:55:00	0
2008-11-18	19:56:00	0
2008-11-18	19:57:00	12
2008-11-18	19:58:00	12
2008-11-18	19:59:00	0
2008-11-18	20:00:00	0
2008-11-18	20:01:00	12
2008-11-18	20:02:00	12
2008-11-18	20:03:00	12
2008-11-18	20:04:00	0
2008-11-18	20:05:00	0
2008-11-18	20:06:00	12
2008-11-18	20:07:00	12
2008-11-18	20:08:00	0
2008-11-18	20:09:00	24
2008-11-18	20:10:00	0
2008-11-18	20:11:00	59
2008-11-18	20:12:00	24
2008-11-18	20:13:00	12
2008-11-18	20:14:00	59
2008-11-18	20:15:00	24
2008-11-18	20:16:00	47
2008-11-18	20:17:00	24
2008-11-18	20:18:00	12
2008-11-18	20:19:00	0
2008-11-18	20:20:00	0
2008-11-18	20:21:00	0
2008-11-18	20:22:00	36
2008-11-18	20:23:00	24
2008-11-18	20:24:00	12
2008-11-18	20:25:00	12
2008-11-18	20:26:00	12
2008-11-18	20:27:00	83
2008-11-18	20:28:00	59
2008-11-18	20:29:00	142
2008-11-18	20:30:00	327
2008-11-18	20:31:00	12
2008-11-18	20:32:00	12
2008-11-18	20:33:00	0
2008-11-18	20:34:00	47
2008-11-18	20:35:00	24
2008-11-18	20:36:00	0
2008-11-18	20:37:00	0
2008-11-18	20:38:00	71
2008-11-18	20:39:00	36
2008-11-18	20:40:00	239
2008-11-18	20:41:00	211
2008-11-18	20:42:00	211
2008-11-18	20:43:00	268
2008-11-18	20:44:00	154
2008-11-18	20:45:00	95
2008-11-18	20:46:00	130
2008-11-18	20:47:00	83
2008-11-18	20:48:00	0
2008-11-18	20:49:00	47
2008-11-18	20:50:00	154
2008-11-18	20:51:00	311
2008-11-18	20:52:00	107
2008-11-18	20:53:00	377
2008-11-18	20:54:00	71
2008-11-18	20:55:00	377
2008-11-18	20:56:00	654
2008-11-18	20:57:00	130
2008-11-18	20:58:00	1083
2008-11-18	20:59:00	239
2008-11-18	21:00:00	479
2008-11-18	21:01:00	24
2008-11-18	21:02:00	24
2008-11-18	21:03:00	0
2008-11-18	21:04:00	12
2008-11-18	21:05:00	0
2008-11-18	21:06:00	0
2008-11-18	21:07:00	0
2008-11-18	21:08:00	0
2008-11-18	21:09:00	0
2008-11-18	21:10:00	0
2008-11-18	21:11:00	0
2008-11-18	21:12:00	0
2008-11-18	21:13:00	0
2008-11-18	21:14:00	0
2008-11-18	21:15:00	0
2008-11-18	21:16:00	0
2008-11-18	21:17:00	0
2008-11-18	21:18:00	0
2008-11-18	21:19:00	0
2008-11-18	21:20:00	0
2008-11-18	21:21:00	0
2008-11-18	21:22:00	0
2008-11-18	21:23:00	0
2008-11-18	21:24:00	0
2008-11-18	21:25:00	0
2008-11-18	21:26:00	0
2008-11-18	21:27:00	0
2008-11-18	21:28:00	0
2008-11-18	21:29:00	0
2008-11-18	21:30:00	12
2008-11-18	21:31:00	0
2008-11-18	21:32:00	0
2008-11-18	21:33:00	12
2008-11-18	21:34:00	0
2008-11-18	21:35:00	0
2008-11-18	21:36:00	0
2008-11-18	21:37:00	0
2008-11-18	21:38:00	0
2008-11-18	21:39:00	0
2008-11-18	21:40:00	0
2008-11-18	21:41:00	0
2008-11-18	21:42:00	0
2008-11-18	21:43:00	0
2008-11-18	21:44:00	0
2008-11-18	21:45:00	0
2008-11-18	21:46:00	0
2008-11-18	21:47:00	0
2008-11-18	21:48:00	0
2008-11-18	21:49:00	0
2008-11-18	21:50:00	0
2008-11-18	21:51:00	0
2008-11-18	21:52:00	0
2008-11-18	21:53:00	0
2008-11-18	21:54:00	0
2008-11-18	21:55:00	0
2008-11-18	21:56:00	0
2008-11-18	21:57:00	0
2008-11-18	21:58:00	0
2008-11-18	21:59:00	0
2008-11-18	22:00:00	0
2008-11-18	22:01:00	0
2008-11-18	22:02:00	12
2008-11-18	22:03:00	12
2008-11-18	22:04:00	0
2008-11-18	22:05:00	0
2008-11-18	22:06:00	0
2008-11-18	22:07:00	0
2008-11-18	22:08:00	0
2008-11-18	22:09:00	0
2008-11-18	22:10:00	0
2008-11-18	22:11:00	0
2008-11-18	22:12:00	0
2008-11-18	22:13:00	0
2008-11-18	22:14:00	0
2008-11-18	22:15:00	0
2008-11-18	22:16:00	0
2008-11-18	22:17:00	0
2008-11-18	22:18:00	36
2008-11-18	22:19:00	0
2008-11-18	22:20:00	12
2008-11-18	22:21:00	0
2008-11-18	22:22:00	0
2008-11-18	22:23:00	0
2008-11-18	22:24:00	0
2008-11-18	22:25:00	0
2008-11-18	22:26:00	0
2008-11-18	22:27:00	0
2008-11-18	22:28:00	0
2008-11-18	22:29:00	0
2008-11-18	22:30:00	0
2008-11-18	22:31:00	0
2008-11-18	22:32:00	0
2008-11-18	22:33:00	0
2008-11-18	22:34:00	0
2008-11-18	22:35:00	0
2008-11-18	22:36:00	0
2008-11-18	22:37:00	0
2008-11-18	22:38:00	0
2008-11-18	22:39:00	0
2008-11-18	22:40:00	0
2008-11-18	22:41:00	0
2008-11-18	22:42:00	0
2008-11-18	22:43:00	0
2008-11-18	22:44:00	0
2008-11-18	22:45:00	0
2008-11-18	22:46:00	0
2008-11-18	22:47:00	0
2008-11-18	22:48:00	12
2008-11-18	22:49:00	24
2008-11-18	22:50:00	59
2008-11-18	22:51:00	36
2008-11-18	22:52:00	24
2008-11-18	22:53:00	0
2008-11-18	22:54:00	24
2008-11-18	22:55:00	197
2008-11-18	22:56:00	168
2008-11-18	22:57:00	59
2008-11-18	22:58:00	555
2008-11-18	22:59:00	24
2008-11-18	23:00:00	142
2008-11-18	23:01:00	327
2008-11-18	23:02:00	296
2008-11-18	23:03:00	740
2008-11-18	23:04:00	443
2008-11-18	23:05:00	377
2008-11-18	23:06:00	344
2008-11-18	23:07:00	344
2008-11-18	23:08:00	1197
2008-11-18	23:09:00	574
2008-11-18	23:10:00	119
2008-11-18	23:11:00	36
2008-11-18	23:12:00	12
2008-11-18	23:13:00	12
2008-11-18	23:14:00	12
2008-11-18	23:15:00	0
2008-11-18	23:16:00	0
2008-11-18	23:17:00	12
2008-11-18	23:18:00	0
2008-11-18	23:19:00	59
2008-11-18	23:20:00	0
2008-11-18	23:21:00	12
2008-11-18	23:22:00	12
2008-11-18	23:23:00	0
2008-11-18	23:24:00	0
2008-11-18	23:25:00	59
2008-11-18	23:26:00	0
2008-11-18	23:27:00	12
2008-11-18	23:28:00	0
2008-11-18	23:29:00	0
2008-11-18	23:30:00	0
2008-11-18	23:31:00	12
2008-11-18	23:32:00	0
2008-11-18	23:33:00	12
2008-11-18	23:34:00	12
2008-11-18	23:35:00	0
2008-11-18	23:36:00	0
2008-11-18	23:37:00	0
2008-11-18	23:38:00	0
2008-11-18	23:39:00	0
2008-11-18	23:40:00	36
2008-11-18	23:41:00	59
2008-11-18	23:42:00	47
2008-11-18	23:43:00	36
2008-11-18	23:44:00	393
2008-11-18	23:45:00	498
2008-11-18	23:46:00	142
2008-11-18	23:47:00	59
2008-11-18	23:48:00	130
2008-11-18	23:49:00	24
2008-11-18	23:50:00	12
2008-11-18	23:51:00	24
2008-11-18	23:52:00	24
2008-11-18	23:53:00	24
2008-11-18	23:54:00	47
2008-11-18	23:55:00	0
2008-11-18	23:56:00	0
2008-11-18	23:57:00	0
2008-11-18	23:58:00	0
2008-11-18	23:59:00	168
2008-11-19	00:00:00	59
2008-11-19	00:01:00	0
2008-11-19	00:02:00	0
2008-11-19	00:03:00	0
2008-11-19	00:04:00	0
2008-11-19	00:05:00	0
2008-11-19	00:06:00	0
2008-11-19	00:07:00	0
2008-11-19	00:08:00	0
2008-11-19	00:09:00	0
2008-11-19	00:10:00	0
2008-11-19	00:11:00	71
2008-11-19	00:12:00	24
2008-11-19	00:13:00	0
2008-11-19	00:14:00	0
2008-11-19	00:15:00	0
2008-11-19	00:16:00	36
2008-11-19	00:17:00	36
2008-11-19	00:18:00	0
2008-11-19	00:19:00	0
2008-11-19	00:20:00	0
2008-11-19	00:21:00	24
2008-11-19	00:22:00	12
2008-11-19	00:23:00	0
2008-11-19	00:24:00	0
2008-11-19	00:25:00	59
2008-11-19	00:26:00	0
2008-11-19	00:27:00	0
2008-11-19	00:28:00	0
2008-11-19	00:29:00	24
2008-11-19	00:30:00	71
2008-11-19	00:31:00	676
2008-11-19	00:32:00	555
2008-11-19	00:33:00	410
2008-11-19	00:34:00	443
2008-11-19	00:35:00	498
2008-11-19	00:36:00	832
2008-11-19	00:37:00	517
2008-11-19	00:38:00	154
2008-11-19	00:39:00	12
2008-11-19	00:40:00	12
2008-11-19	00:41:00	24
2008-11-19	00:42:00	12
2008-11-19	00:43:00	24
2008-11-19	00:44:00	0
2008-11-19	00:45:00	12
2008-11-19	00:46:00	0
2008-11-19	00:47:00	0
2008-11-19	00:48:00	0
2008-11-19	00:49:00	0
2008-11-19	00:50:00	0
2008-11-19	00:51:00	0
2008-11-19	00:52:00	36
2008-11-19	00:53:00	12
2008-11-19	00:54:00	12
2008-11-19	00:55:00	0
2008-11-19	00:56:00	0
2008-11-19	00:57:00	47
2008-11-19	00:58:00	0
2008-11-19	00:59:00	12
2008-11-19	01:00:00	0
2008-11-19	01:01:00	0
2008-11-19	01:02:00	0
2008-11-19	01:03:00	0
2008-11-19	01:04:00	0
2008-11-19	01:05:00	12
2008-11-19	01:06:00	0
2008-11-19	01:07:00	12
2008-11-19	01:08:00	0
2008-11-19	01:09:00	0
2008-11-19	01:10:00	0
2008-11-19	01:11:00	59
2008-11-19	01:12:00	0
2008-11-19	01:13:00	24
2008-11-19	01:14:00	211
2008-11-19	01:15:00	71
2008-11-19	01:16:00	0
2008-11-19	01:17:00	12
2008-11-19	01:18:00	0
2008-11-19	01:19:00	0
2008-11-19	01:20:00	211
2008-11-19	01:21:00	71
2008-11-19	01:22:00	282
2008-11-19	01:23:00	377
2008-11-19	01:24:00	183
2008-11-19	01:25:00	197
2008-11-19	01:26:00	360
2008-11-19	01:27:00	59
2008-11-19	01:28:00	0
2008-11-19	01:29:00	0
2008-11-19	01:30:00	0
2008-11-19	01:31:00	427
2008-11-19	01:32:00	296
2008-11-19	01:33:00	239
2008-11-19	01:34:00	344
2008-11-19	01:35:00	979
2008-11-19	01:36:00	95
2008-11-19	01:37:00	183
2008-11-19	01:38:00	95
2008-11-19	01:39:00	24
2008-11-19	01:40:00	0
2008-11-19	01:41:00	12
2008-11-19	01:42:00	0
2008-11-19	01:43:00	12
2008-11-19	01:44:00	47
2008-11-19	01:45:00	0
2008-11-19	01:46:00	0
2008-11-19	01:47:00	0
2008-11-19	01:48:00	311
2008-11-19	01:49:00	154
2008-11-19	01:50:00	197
2008-11-19	01:51:00	282
2008-11-19	01:52:00	12
2008-11-19	01:53:00	0
2008-11-19	01:54:00	12
2008-11-19	01:55:00	0
2008-11-19	01:56:00	0
2008-11-19	01:57:00	12
2008-11-19	01:58:00	36
2008-11-19	01:59:00	0
2008-11-19	02:00:00	0
2008-11-19	02:01:00	12
2008-11-19	02:02:00	0
2008-11-19	02:03:00	12
2008-11-19	02:04:00	0
2008-11-19	02:05:00	0
2008-11-19	02:06:00	12
2008-11-19	02:07:00	0
2008-11-19	02:08:00	0
2008-11-19	02:09:00	12
2008-11-19	02:10:00	0
2008-11-19	02:11:00	12
2008-11-19	02:12:00	12
2008-11-19	02:13:00	0
2008-11-19	02:14:00	12
2008-11-19	02:15:00	225
2008-11-19	02:16:00	311
2008-11-19	02:17:00	95
2008-11-19	02:18:00	0
2008-11-19	02:19:00	0
2008-11-19	02:20:00	0
2008-11-19	02:21:00	0
2008-11-19	02:22:00	0
2008-11-19	02:23:00	0
2008-11-19	02:24:00	0
2008-11-19	02:25:00	0
2008-11-19	02:26:00	0
2008-11-19	02:27:00	0
2008-11-19	02:28:00	0
2008-11-19	02:29:00	0
2008-11-19	02:30:00	0
2008-11-19	02:31:00	0
2008-11-19	02:32:00	0
2008-11-19	02:33:00	12
2008-11-19	02:34:00	24
2008-11-19	02:35:00	36
2008-11-19	02:36:00	59
2008-11-19	02:37:00	0
2008-11-19	02:38:00	0
2008-11-19	02:39:00	0
2008-11-19	02:40:00	0
2008-11-19	02:41:00	0
2008-11-19	02:42:00	0
2008-11-19	02:43:00	0
2008-11-19	02:44:00	0
2008-11-19	02:45:00	0
2008-11-19	02:46:00	0
2008-11-19	02:47:00	0
2008-11-19	02:48:00	0
2008-11-19	02:49:00	0
2008-11-19	02:50:00	0
2008-11-19	02:51:00	0
2008-11-19	02:52:00	0
2008-11-19	02:53:00	0
2008-11-19	02:54:00	0
2008-11-19	02:55:00	0
2008-11-19	02:56:00	0
2008-11-19	02:57:00	0
2008-11-19	02:58:00	12
2008-11-19	02:59:00	0
2008-11-19	03:00:00	0
2008-11-19	03:01:00	0
2008-11-19	03:02:00	0
2008-11-19	03:03:00	0
2008-11-19	03:04:00	0
2008-11-19	03:05:00	0
2008-11-19	03:06:00	12
2008-11-19	03:07:00	154
2008-11-19	03:08:00	24
2008-11-19	03:09:00	0
2008-11-19	03:10:00	0
2008-11-19	03:11:00	0
2008-11-19	03:12:00	0
2008-11-19	03:13:00	0
2008-11-19	03:14:00	0
2008-11-19	03:15:00	0
2008-11-19	03:16:00	0
2008-11-19	03:17:00	0
2008-11-19	03:18:00	0
2008-11-19	03:19:00	0
2008-11-19	03:20:00	0
2008-11-19	03:21:00	0
2008-11-19	03:22:00	0
2008-11-19	03:23:00	12
2008-11-19	03:24:00	0
2008-11-19	03:25:00	12
2008-11-19	03:26:00	0
2008-11-19	03:27:00	0
2008-11-19	03:28:00	0
2008-11-19	03:29:00	0
2008-11-19	03:30:00	0
2008-11-19	03:31:00	0
2008-11-19	03:32:00	0
2008-11-19	03:33:00	0
2008-11-19	03:34:00	0
2008-11-19	03:35:00	0
2008-11-19	03:36:00	0
2008-11-19	03:37:00	0
2008-11-19	03:38:00	0
2008-11-19	03:39:00	0
2008-11-19	03:40:00	0
2008-11-19	03:41:00	0
2008-11-19	03:42:00	0
2008-11-19	03:43:00	0
2008-11-19	03:44:00	95
2008-11-19	03:45:00	0
2008-11-19	03:46:00	0
2008-11-19	03:47:00	0
2008-11-19	03:48:00	0
2008-11-19	03:49:00	0
2008-11-19	03:50:00	0
2008-11-19	03:51:00	0
2008-11-19	03:52:00	0
2008-11-19	03:53:00	0
2008-11-19	03:54:00	0
2008-11-19	03:55:00	0
2008-11-19	03:56:00	0
2008-11-19	03:57:00	0
2008-11-19	03:58:00	0
2008-11-19	03:59:00	0
2008-11-19	04:00:00	0
2008-11-19	04:01:00	0
2008-11-19	04:02:00	0
2008-11-19	04:03:00	0
2008-11-19	04:04:00	0
2008-11-19	04:05:00	0
2008-11-19	04:06:00	0
2008-11-19	04:07:00	0
2008-11-19	04:08:00	0
2008-11-19	04:09:00	24
2008-11-19	04:10:00	36
2008-11-19	04:11:00	24
2008-11-19	04:12:00	12
2008-11-19	04:13:00	239
2008-11-19	04:14:00	0
2008-11-19	04:15:00	12
2008-11-19	04:16:00	0
2008-11-19	04:17:00	59
2008-11-19	04:18:00	47
2008-11-19	04:19:00	0
2008-11-19	04:20:00	0
2008-11-19	04:21:00	0
2008-11-19	04:22:00	0
2008-11-19	04:23:00	47
2008-11-19	04:24:00	0
2008-11-19	04:25:00	0
2008-11-19	04:26:00	0
2008-11-19	04:27:00	0
2008-11-19	04:28:00	0
2008-11-19	04:29:00	0
2008-11-19	04:30:00	0
2008-11-19	04:31:00	0
2008-11-19	04:32:00	0
2008-11-19	04:33:00	0
2008-11-19	04:34:00	0
2008-11-19	04:35:00	0
2008-11-19	04:36:00	0
2008-11-19	04:37:00	0
2008-11-19	04:38:00	0
2008-11-19	04:39:00	0
2008-11-19	04:40:00	0
2008-11-19	04:41:00	0
2008-11-19	04:42:00	0
2008-11-19	04:43:00	0
2008-11-19	04:44:00	0
2008-11-19	04:45:00	0
2008-11-19	04:46:00	0
2008-11-19	04:47:00	0
2008-11-19	04:48:00	0
2008-11-19	04:49:00	0
2008-11-19	04:50:00	0
2008-11-19	04:51:00	0
2008-11-19	04:52:00	0
2008-11-19	04:53:00	0
2008-11-19	04:54:00	0
2008-11-19	04:55:00	0
2008-11-19	04:56:00	0
2008-11-19	04:57:00	0
2008-11-19	04:58:00	0
2008-11-19	04:59:00	0
2008-11-19	05:00:00	0
2008-11-19	05:01:00	0
2008-11-19	05:02:00	0
2008-11-19	05:03:00	0
2008-11-19	05:04:00	0
2008-11-19	05:05:00	0
2008-11-19	05:06:00	0
2008-11-19	05:07:00	0
2008-11-19	05:08:00	0
2008-11-19	05:09:00	0
2008-11-19	05:10:00	0
2008-11-19	05:11:00	0
2008-11-19	05:12:00	0
2008-11-19	05:13:00	0
2008-11-19	05:14:00	0
2008-11-19	05:15:00	0
2008-11-19	05:16:00	0
2008-11-19	05:17:00	0
2008-11-19	05:18:00	0
2008-11-19	05:19:00	0
2008-11-19	05:20:00	0
2008-11-19	05:21:00	0
2008-11-19	05:22:00	0
2008-11-19	05:23:00	0
2008-11-19	05:24:00	0
2008-11-19	05:25:00	0
2008-11-19	05:26:00	0
2008-11-19	05:27:00	0
2008-11-19	05:28:00	0
2008-11-19	05:29:00	0
2008-11-19	05:30:00	12
2008-11-19	05:31:00	0
2008-11-19	05:32:00	0
2008-11-19	05:33:00	0
2008-11-19	05:34:00	0
2008-11-19	05:35:00	0
2008-11-19	05:36:00	0
2008-11-19	05:37:00	0
2008-11-19	05:38:00	0
2008-11-19	05:39:00	0
2008-11-19	05:40:00	0
2008-11-19	05:41:00	0
2008-11-19	05:42:00	0
2008-11-19	05:43:00	0
2008-11-19	05:44:00	0
2008-11-19	05:45:00	0
2008-11-19	05:46:00	0
2008-11-19	05:47:00	0
2008-11-19	05:48:00	0
2008-11-19	05:49:00	0
2008-11-19	05:50:00	0
2008-11-19	05:51:00	0
2008-11-19	05:52:00	0
2008-11-19	05:53:00	0
2008-11-19	05:54:00	0
2008-11-19	05:55:00	0
2008-11-19	05:56:00	0
2008-11-19	05:57:00	0
2008-11-19	05:58:00	0
2008-11-19	05:59:00	0
2008-11-19	06:00:00	0
2008-11-19	06:01:00	0
2008-11-19	06:02:00	0
2008-11-19	06:03:00	0
2008-11-19	06:04:00	0
2008-11-19	06:05:00	0
2008-11-19	06:06:00	0
2008-11-19	06:07:00	0
2008-11-19	06:08:00	0
2008-11-19	06:09:00	0
2008-11-19	06:10:00	0
2008-11-19	06:11:00	0
2008-11-19	06:12:00	0
2008-11-19	06:13:00	0
2008-11-19	06:14:00	0
2008-11-19	06:15:00	0
2008-11-19	06:16:00	0
2008-11-19	06:17:00	0
2008-11-19	06:18:00	0
2008-11-19	06:19:00	0
2008-11-19	06:20:00	0
2008-11-19	06:21:00	0
2008-11-19	06:22:00	0
2008-11-19	06:23:00	0
2008-11-19	06:24:00	0
2008-11-19	06:25:00	0
2008-11-19	06:26:00	0
2008-11-19	06:27:00	0
2008-11-19	06:28:00	0
2008-11-19	06:29:00	0
2008-11-19	06:30:00	0
2008-11-19	06:31:00	0
2008-11-19	06:32:00	0
2008-11-19	06:33:00	0
2008-11-19	06:34:00	0
2008-11-19	06:35:00	0
2008-11-19	06:36:00	0
2008-11-19	06:37:00	0
2008-11-19	06:38:00	0
2008-11-19	06:39:00	0
2008-11-19	06:40:00	0
2008-11-19	06:41:00	0
2008-11-19	06:42:00	0
2008-11-19	06:43:00	47
2008-11-19	06:44:00	47
2008-11-19	06:45:00	47
2008-11-19	06:46:00	0
2008-11-19	06:47:00	0
2008-11-19	06:48:00	0
2008-11-19	06:49:00	0
2008-11-19	06:50:00	0
2008-11-19	06:51:00	0
2008-11-19	06:52:00	0
2008-11-19	06:53:00	0
2008-11-19	06:54:00	71
2008-11-19	06:55:00	0
2008-11-19	06:56:00	0
2008-11-19	06:57:00	0
2008-11-19	06:58:00	0
2008-11-19	06:59:00	0
2008-11-19	07:00:00	0
2008-11-19	07:01:00	0
2008-11-19	07:02:00	0
2008-11-19	07:03:00	0
2008-11-19	07:04:00	0
2008-11-19	07:05:00	0
2008-11-19	07:06:00	0
2008-11-19	07:07:00	0
2008-11-19	07:08:00	0
2008-11-19	07:09:00	0
2008-11-19	07:10:00	36
2008-11-19	07:11:00	12
2008-11-19	07:12:00	0
2008-11-19	07:13:00	0
2008-11-19	07:14:00	0
2008-11-19	07:15:00	47
2008-11-19	07:16:00	36
2008-11-19	07:17:00	0
2008-11-19	07:18:00	36
2008-11-19	07:19:00	0
2008-11-19	07:20:00	0
2008-11-19	07:21:00	0
2008-11-19	07:22:00	36
2008-11-19	07:23:00	83
2008-11-19	07:24:00	0
2008-11-19	07:25:00	47
2008-11-19	07:26:00	24
2008-11-19	07:27:00	0
2008-11-19	07:28:00	0
2008-11-19	07:29:00	0
2008-11-19	07:30:00	0
2008-11-19	07:31:00	0
2008-11-19	07:32:00	0
2008-11-19	07:33:00	47
2008-11-19	07:34:00	0
2008-11-19	07:35:00	12
2008-11-19	07:36:00	12
2008-11-19	07:37:00	0
2008-11-19	07:38:00	12
2008-11-19	07:39:00	0
2008-11-19	07:40:00	95
2008-11-19	07:41:00	633
2008-11-19	07:42:00	296
2008-11-19	07:43:00	71
2008-11-19	07:44:00	83
2008-11-19	07:45:00	107
2008-11-19	07:46:00	443
2008-11-19	07:47:00	119
2008-11-19	07:48:00	344
2008-11-19	07:49:00	24
2008-11-19	07:50:00	443
2008-11-19	07:51:00	443
2008-11-19	07:52:00	130
2008-11-19	07:53:00	142
2008-11-19	07:54:00	24
2008-11-19	07:55:00	0
2008-11-19	07:56:00	0
2008-11-19	07:57:00	0
2008-11-19	07:58:00	0
2008-11-19	07:59:00	0
2008-11-19	08:00:00	0
2008-11-19	08:01:00	12
2008-11-19	08:02:00	0
2008-11-19	08:03:00	24
2008-11-19	08:04:00	0
2008-11-19	08:05:00	0
2008-11-19	08:06:00	0
2008-11-19	08:07:00	0
2008-11-19	08:08:00	59
2008-11-19	08:09:00	0
2008-11-19	08:10:00	12
2008-11-19	08:11:00	0
2008-11-19	08:12:00	12
2008-11-19	08:13:00	59
2008-11-19	08:14:00	0
2008-11-19	08:15:00	0
2008-11-19	08:16:00	0
2008-11-19	08:17:00	0
2008-11-19	08:18:00	0
2008-11-19	08:19:00	0
2008-11-19	08:20:00	0
2008-11-19	08:21:00	0
2008-11-19	08:22:00	0
2008-11-19	08:23:00	0
2008-11-19	08:24:00	0
2008-11-19	08:25:00	0
2008-11-19	08:26:00	0
2008-11-19	08:27:00	12
2008-11-19	08:28:00	36
2008-11-19	08:29:00	0
2008-11-19	08:30:00	0
2008-11-19	08:31:00	0
2008-11-19	08:32:00	0
2008-11-19	08:33:00	0
2008-11-19	08:34:00	0
2008-11-19	08:35:00	0
2008-11-19	08:36:00	0
2008-11-19	08:37:00	0
2008-11-19	08:38:00	0
2008-11-19	08:39:00	0
2008-11-19	08:40:00	0
2008-11-19	08:41:00	0
2008-11-19	08:42:00	0
2008-11-19	08:43:00	0
2008-11-19	08:44:00	0
2008-11-19	08:45:00	0
2008-11-19	08:46:00	0
2008-11-19	08:47:00	0
2008-11-19	08:48:00	0
2008-11-19	08:49:00	0
2008-11-19	08:50:00	0
2008-11-19	08:51:00	0
2008-11-19	08:52:00	0
2008-11-19	08:53:00	0
2008-11-19	08:54:00	0
2008-11-19	08:55:00	0
2008-11-19	08:56:00	0
2008-11-19	08:57:00	0
2008-11-19	08:58:00	0
2008-11-19	08:59:00	0
2008-11-19	09:00:00	0
2008-11-19	09:01:00	0
2008-11-19	09:02:00	0
2008-11-19	09:03:00	0
2008-11-19	09:04:00	0
2008-11-19	09:05:00	0
2008-11-19	09:06:00	0
2008-11-19	09:07:00	0
2008-11-19	09:08:00	0
[truncated: 18,171 more rows]

## Sheet: 12.1.08
Actogram, Copy Raw Data, All Days
Identity:	Skye Begalla
Filename:	E:\Active Research Files\meloxicam titre canine\cases\skye\Skye Begalla 12.1.08.AWC
Gender:	F
Age:	13
Height:	61.0 cm	24.0 in
Weight:	22.0 kg	48.5 lbs
Start Date:	01-Dec-2008 (Mon)
Start Time:	17:00:00
Interval:	1.00 mins
Date Stamp:	Time Stamp:	Activity Data:	Marker Press:
2008-12-01	00:00:00	0
2008-12-01	00:01:00	0
2008-12-01	00:02:00	0
2008-12-01	00:03:00	0
2008-12-01	00:04:00	0
2008-12-01	00:05:00	0
2008-12-01	00:06:00	0
2008-12-01	00:07:00	0
2008-12-01	00:08:00	0
2008-12-01	00:09:00	0
2008-12-01	00:10:00	0
2008-12-01	00:11:00	0
2008-12-01	00:12:00	0
2008-12-01	00:13:00	0
2008-12-01	00:14:00	0
2008-12-01	00:15:00	0
2008-12-01	00:16:00	0
2008-12-01	00:17:00	0
2008-12-01	00:18:00	0
2008-12-01	00:19:00	0
2008-12-01	00:20:00	0
2008-12-01	00:21:00	0
2008-12-01	00:22:00	0
2008-12-01	00:23:00	0
2008-12-01	00:24:00	0
2008-12-01	00:25:00	0
2008-12-01	00:26:00	0
2008-12-01	00:27:00	0
2008-12-01	00:28:00	0
2008-12-01	00:29:00	0
2008-12-01	00:30:00	0
2008-12-01	00:31:00	0
2008-12-01	00:32:00	0
2008-12-01	00:33:00	0
2008-12-01	00:34:00	0
2008-12-01	00:35:00	0
2008-12-01	00:36:00	0
2008-12-01	00:37:00	0
2008-12-01	00:38:00	0
2008-12-01	00:39:00	0
2008-12-01	00:40:00	0
2008-12-01	00:41:00	0
2008-12-01	00:42:00	0
2008-12-01	00:43:00	0
2008-12-01	00:44:00	0
2008-12-01	00:45:00	0
2008-12-01	00:46:00	0
2008-12-01	00:47:00	0
2008-12-01	00:48:00	0
2008-12-01	00:49:00	0
2008-12-01	00:50:00	0
2008-12-01	00:51:00	0
2008-12-01	00:52:00	0
2008-12-01	00:53:00	0
2008-12-01	00:54:00	0
2008-12-01	00:55:00	0
2008-12-01	00:56:00	0
2008-12-01	00:57:00	0
2008-12-01	00:58:00	0
2008-12-01	00:59:00	0
2008-12-01	01:00:00	0
2008-12-01	01:01:00	0
2008-12-01	01:02:00	0
2008-12-01	01:03:00	0
2008-12-01	01:04:00	0
2008-12-01	01:05:00	0
2008-12-01	01:06:00	0
2008-12-01	01:07:00	0
2008-12-01	01:08:00	0
2008-12-01	01:09:00	0
2008-12-01	01:10:00	0
2008-12-01	01:11:00	0
2008-12-01	01:12:00	0
2008-12-01	01:13:00	0
2008-12-01	01:14:00	0
2008-12-01	01:15:00	0
2008-12-01	01:16:00	0
2008-12-01	01:17:00	0
2008-12-01	01:18:00	0
2008-12-01	01:19:00	0
2008-12-01	01:20:00	0
2008-12-01	01:21:00	0
2008-12-01	01:22:00	0
2008-12-01	01:23:00	0
2008-12-01	01:24:00	0
2008-12-01	01:25:00	0
2008-12-01	01:26:00	0
2008-12-01	01:27:00	0
2008-12-01	01:28:00	0
2008-12-01	01:29:00	0
2008-12-01	01:30:00	0
2008-12-01	01:31:00	0
2008-12-01	01:32:00	0
2008-12-01	01:33:00	0
2008-12-01	01:34:00	0
2008-12-01	01:35:00	0
2008-12-01	01:36:00	0
2008-12-01	01:37:00	0
2008-12-01	01:38:00	0
2008-12-01	01:39:00	0
2008-12-01	01:40:00	0
2008-12-01	01:41:00	0
2008-12-01	01:42:00	0
2008-12-01	01:43:00	0
2008-12-01	01:44:00	0
2008-12-01	01:45:00	0
2008-12-01	01:46:00	0
2008-12-01	01:47:00	0
2008-12-01	01:48:00	0
2008-12-01	01:49:00	0
2008-12-01	01:50:00	0
2008-12-01	01:51:00	0
2008-12-01	01:52:00	0
2008-12-01	01:53:00	0
2008-12-01	01:54:00	0
2008-12-01	01:55:00	0
2008-12-01	01:56:00	0
2008-12-01	01:57:00	0
2008-12-01	01:58:00	0
2008-12-01	01:59:00	0
2008-12-01	02:00:00	0
2008-12-01	02:01:00	0
2008-12-01	02:02:00	0
2008-12-01	02:03:00	0
2008-12-01	02:04:00	0
2008-12-01	02:05:00	0
2008-12-01	02:06:00	0
2008-12-01	02:07:00	0
2008-12-01	02:08:00	0
2008-12-01	02:09:00	0
2008-12-01	02:10:00	0
2008-12-01	02:11:00	0
2008-12-01	02:12:00	0
2008-12-01	02:13:00	0
2008-12-01	02:14:00	0
2008-12-01	02:15:00	0
2008-12-01	02:16:00	0
2008-12-01	02:17:00	0
2008-12-01	02:18:00	0
2008-12-01	02:19:00	0
2008-12-01	02:20:00	0
2008-12-01	02:21:00	0
2008-12-01	02:22:00	0
2008-12-01	02:23:00	0
2008-12-01	02:24:00	0
2008-12-01	02:25:00	0
2008-12-01	02:26:00	0
2008-12-01	02:27:00	0
2008-12-01	02:28:00	0
2008-12-01	02:29:00	0
2008-12-01	02:30:00	0
2008-12-01	02:31:00	0
2008-12-01	02:32:00	0
2008-12-01	02:33:00	0
2008-12-01	02:34:00	0
2008-12-01	02:35:00	0
2008-12-01	02:36:00	0
2008-12-01	02:37:00	0
2008-12-01	02:38:00	0
2008-12-01	02:39:00	0
2008-12-01	02:40:00	0
2008-12-01	02:41:00	0
2008-12-01	02:42:00	0
2008-12-01	02:43:00	0
2008-12-01	02:44:00	0
2008-12-01	02:45:00	0
2008-12-01	02:46:00	0
2008-12-01	02:47:00	0
2008-12-01	02:48:00	0
2008-12-01	02:49:00	0
2008-12-01	02:50:00	0
2008-12-01	02:51:00	0
2008-12-01	02:52:00	0
2008-12-01	02:53:00	0
2008-12-01	02:54:00	0
2008-12-01	02:55:00	0
2008-12-01	02:56:00	0
2008-12-01	02:57:00	0
2008-12-01	02:58:00	0
2008-12-01	02:59:00	0
2008-12-01	03:00:00	0
2008-12-01	03:01:00	0
2008-12-01	03:02:00	0
2008-12-01	03:03:00	0
2008-12-01	03:04:00	0
2008-12-01	03:05:00	0
2008-12-01	03:06:00	0
2008-12-01	03:07:00	0
2008-12-01	03:08:00	0
2008-12-01	03:09:00	0
2008-12-01	03:10:00	0
2008-12-01	03:11:00	0
2008-12-01	03:12:00	0
2008-12-01	03:13:00	0
2008-12-01	03:14:00	0
2008-12-01	03:15:00	0
2008-12-01	03:16:00	0
2008-12-01	03:17:00	0
2008-12-01	03:18:00	0
2008-12-01	03:19:00	0
2008-12-01	03:20:00	0
2008-12-01	03:21:00	0
2008-12-01	03:22:00	0
2008-12-01	03:23:00	0
2008-12-01	03:24:00	0
2008-12-01	03:25:00	0
2008-12-01	03:26:00	0
2008-12-01	03:27:00	0
2008-12-01	03:28:00	0
2008-12-01	03:29:00	0
2008-12-01	03:30:00	0
2008-12-01	03:31:00	0
2008-12-01	03:32:00	0
2008-12-01	03:33:00	0
2008-12-01	03:34:00	0
2008-12-01	03:35:00	0
2008-12-01	03:36:00	0
2008-12-01	03:37:00	0
2008-12-01	03:38:00	0
2008-12-01	03:39:00	0
2008-12-01	03:40:00	0
2008-12-01	03:41:00	0
2008-12-01	03:42:00	0
2008-12-01	03:43:00	0
2008-12-01	03:44:00	0
2008-12-01	03:45:00	0
2008-12-01	03:46:00	0
2008-12-01	03:47:00	0
2008-12-01	03:48:00	0
2008-12-01	03:49:00	0
2008-12-01	03:50:00	0
2008-12-01	03:51:00	0
2008-12-01	03:52:00	0
2008-12-01	03:53:00	0
2008-12-01	03:54:00	0
2008-12-01	03:55:00	0
2008-12-01	03:56:00	0
2008-12-01	03:57:00	0
2008-12-01	03:58:00	0
2008-12-01	03:59:00	0
2008-12-01	04:00:00	0
2008-12-01	04:01:00	0
2008-12-01	04:02:00	0
2008-12-01	04:03:00	0
2008-12-01	04:04:00	0
2008-12-01	04:05:00	0
2008-12-01	04:06:00	0
2008-12-01	04:07:00	0
2008-12-01	04:08:00	0
2008-12-01	04:09:00	0
2008-12-01	04:10:00	0
2008-12-01	04:11:00	0
2008-12-01	04:12:00	0
2008-12-01	04:13:00	0
2008-12-01	04:14:00	0
2008-12-01	04:15:00	0
2008-12-01	04:16:00	0
2008-12-01	04:17:00	0
2008-12-01	04:18:00	0
2008-12-01	04:19:00	0
2008-12-01	04:20:00	0
2008-12-01	04:21:00	0
2008-12-01	04:22:00	0
2008-12-01	04:23:00	0
2008-12-01	04:24:00	0
2008-12-01	04:25:00	0
2008-12-01	04:26:00	0
2008-12-01	04:27:00	0
2008-12-01	04:28:00	0
2008-12-01	04:29:00	0
2008-12-01	04:30:00	0
2008-12-01	04:31:00	0
2008-12-01	04:32:00	0
2008-12-01	04:33:00	0
2008-12-01	04:34:00	0
2008-12-01	04:35:00	0
2008-12-01	04:36:00	0
2008-12-01	04:37:00	0
2008-12-01	04:38:00	0
2008-12-01	04:39:00	0
2008-12-01	04:40:00	0
2008-12-01	04:41:00	0
2008-12-01	04:42:00	0
2008-12-01	04:43:00	0
2008-12-01	04:44:00	0
2008-12-01	04:45:00	0
2008-12-01	04:46:00	0
2008-12-01	04:47:00	0
2008-12-01	04:48:00	0
2008-12-01	04:49:00	0
2008-12-01	04:50:00	0
2008-12-01	04:51:00	0
2008-12-01	04:52:00	0
2008-12-01	04:53:00	0
2008-12-01	04:54:00	0
2008-12-01	04:55:00	0
2008-12-01	04:56:00	0
2008-12-01	04:57:00	0
2008-12-01	04:58:00	0
2008-12-01	04:59:00	0
2008-12-01	05:00:00	0
2008-12-01	05:01:00	0
2008-12-01	05:02:00	0
2008-12-01	05:03:00	0
2008-12-01	05:04:00	0
2008-12-01	05:05:00	0
2008-12-01	05:06:00	0
2008-12-01	05:07:00	0
2008-12-01	05:08:00	0
2008-12-01	05:09:00	0
2008-12-01	05:10:00	0
2008-12-01	05:11:00	0
2008-12-01	05:12:00	0
2008-12-01	05:13:00	0
2008-12-01	05:14:00	0
2008-12-01	05:15:00	0
2008-12-01	05:16:00	0
2008-12-01	05:17:00	0
2008-12-01	05:18:00	0
2008-12-01	05:19:00	0
2008-12-01	05:20:00	0
2008-12-01	05:21:00	0
2008-12-01	05:22:00	0
2008-12-01	05:23:00	0
2008-12-01	05:24:00	0
2008-12-01	05:25:00	0
2008-12-01	05:26:00	0
2008-12-01	05:27:00	0
2008-12-01	05:28:00	0
2008-12-01	05:29:00	0
2008-12-01	05:30:00	0
2008-12-01	05:31:00	0
2008-12-01	05:32:00	0
2008-12-01	05:33:00	0
2008-12-01	05:34:00	0
2008-12-01	05:35:00	0
2008-12-01	05:36:00	0
2008-12-01	05:37:00	0
2008-12-01	05:38:00	0
2008-12-01	05:39:00	0
2008-12-01	05:40:00	0
2008-12-01	05:41:00	0
2008-12-01	05:42:00	0
2008-12-01	05:43:00	0
2008-12-01	05:44:00	0
2008-12-01	05:45:00	0
2008-12-01	05:46:00	0
2008-12-01	05:47:00	0
2008-12-01	05:48:00	0
2008-12-01	05:49:00	0
2008-12-01	05:50:00	0
2008-12-01	05:51:00	0
2008-12-01	05:52:00	0
2008-12-01	05:53:00	0
2008-12-01	05:54:00	0
2008-12-01	05:55:00	0
2008-12-01	05:56:00	0
2008-12-01	05:57:00	0
2008-12-01	05:58:00	0
2008-12-01	05:59:00	0
2008-12-01	06:00:00	0
2008-12-01	06:01:00	0
2008-12-01	06:02:00	0
2008-12-01	06:03:00	0
2008-12-01	06:04:00	0
2008-12-01	06:05:00	0
2008-12-01	06:06:00	0
2008-12-01	06:07:00	0
2008-12-01	06:08:00	0
2008-12-01	06:09:00	0
2008-12-01	06:10:00	0
2008-12-01	06:11:00	0
2008-12-01	06:12:00	0
2008-12-01	06:13:00	0
2008-12-01	06:14:00	0
2008-12-01	06:15:00	0
2008-12-01	06:16:00	0
2008-12-01	06:17:00	0
2008-12-01	06:18:00	0
2008-12-01	06:19:00	0
2008-12-01	06:20:00	0
2008-12-01	06:21:00	0
2008-12-01	06:22:00	0
2008-12-01	06:23:00	0
2008-12-01	06:24:00	0
2008-12-01	06:25:00	0
2008-12-01	06:26:00	0
2008-12-01	06:27:00	0
2008-12-01	06:28:00	0
2008-12-01	06:29:00	0
2008-12-01	06:30:00	0
2008-12-01	06:31:00	0
2008-12-01	06:32:00	0
2008-12-01	06:33:00	0
2008-12-01	06:34:00	0
2008-12-01	06:35:00	0
2008-12-01	06:36:00	0
2008-12-01	06:37:00	0
2008-12-01	06:38:00	0
2008-12-01	06:39:00	0
2008-12-01	06:40:00	0
2008-12-01	06:41:00	0
2008-12-01	06:42:00	0
2008-12-01	06:43:00	0
2008-12-01	06:44:00	0
2008-12-01	06:45:00	0
2008-12-01	06:46:00	0
2008-12-01	06:47:00	0
2008-12-01	06:48:00	0
2008-12-01	06:49:00	0
2008-12-01	06:50:00	0
2008-12-01	06:51:00	0
2008-12-01	06:52:00	0
2008-12-01	06:53:00	0
2008-12-01	06:54:00	0
2008-12-01	06:55:00	0
2008-12-01	06:56:00	0
2008-12-01	06:57:00	0
2008-12-01	06:58:00	0
2008-12-01	06:59:00	0
2008-12-01	07:00:00	0
2008-12-01	07:01:00	0
2008-12-01	07:02:00	0
2008-12-01	07:03:00	0
2008-12-01	07:04:00	0
2008-12-01	07:05:00	0
2008-12-01	07:06:00	0
2008-12-01	07:07:00	0
2008-12-01	07:08:00	0
2008-12-01	07:09:00	0
2008-12-01	07:10:00	0
2008-12-01	07:11:00	0
2008-12-01	07:12:00	0
2008-12-01	07:13:00	0
2008-12-01	07:14:00	0
2008-12-01	07:15:00	0
2008-12-01	07:16:00	0
2008-12-01	07:17:00	0
2008-12-01	07:18:00	0
2008-12-01	07:19:00	0
2008-12-01	07:20:00	0
2008-12-01	07:21:00	0
2008-12-01	07:22:00	0
2008-12-01	07:23:00	0
2008-12-01	07:24:00	0
2008-12-01	07:25:00	0
2008-12-01	07:26:00	0
2008-12-01	07:27:00	0
2008-12-01	07:28:00	0
2008-12-01	07:29:00	0
2008-12-01	07:30:00	0
2008-12-01	07:31:00	0
2008-12-01	07:32:00	0
2008-12-01	07:33:00	0
2008-12-01	07:34:00	0
2008-12-01	07:35:00	0
2008-12-01	07:36:00	0
2008-12-01	07:37:00	0
2008-12-01	07:38:00	0
2008-12-01	07:39:00	0
2008-12-01	07:40:00	0
2008-12-01	07:41:00	0
2008-12-01	07:42:00	0
2008-12-01	07:43:00	0
2008-12-01	07:44:00	0
2008-12-01	07:45:00	0
2008-12-01	07:46:00	0
2008-12-01	07:47:00	0
2008-12-01	07:48:00	0
2008-12-01	07:49:00	0
2008-12-01	07:50:00	0
2008-12-01	07:51:00	0
2008-12-01	07:52:00	0
2008-12-01	07:53:00	0
2008-12-01	07:54:00	0
2008-12-01	07:55:00	0
2008-12-01	07:56:00	0
2008-12-01	07:57:00	0
2008-12-01	07:58:00	0
2008-12-01	07:59:00	0
2008-12-01	08:00:00	0
2008-12-01	08:01:00	0
2008-12-01	08:02:00	0
2008-12-01	08:03:00	0
2008-12-01	08:04:00	0
2008-12-01	08:05:00	0
2008-12-01	08:06:00	0
2008-12-01	08:07:00	0
2008-12-01	08:08:00	0
2008-12-01	08:09:00	0
2008-12-01	08:10:00	0
2008-12-01	08:11:00	0
2008-12-01	08:12:00	0
2008-12-01	08:13:00	0
2008-12-01	08:14:00	0
2008-12-01	08:15:00	0
2008-12-01	08:16:00	0
2008-12-01	08:17:00	0
2008-12-01	08:18:00	0
2008-12-01	08:19:00	0
2008-12-01	08:20:00	0
2008-12-01	08:21:00	0
2008-12-01	08:22:00	0
2008-12-01	08:23:00	0
2008-12-01	08:24:00	0
2008-12-01	08:25:00	0
2008-12-01	08:26:00	0
2008-12-01	08:27:00	0
2008-12-01	08:28:00	0
2008-12-01	08:29:00	0
2008-12-01	08:30:00	0
2008-12-01	08:31:00	0
2008-12-01	08:32:00	0
2008-12-01	08:33:00	0
2008-12-01	08:34:00	0
2008-12-01	08:35:00	0
2008-12-01	08:36:00	0
2008-12-01	08:37:00	0
2008-12-01	08:38:00	0
2008-12-01	08:39:00	0
2008-12-01	08:40:00	0
2008-12-01	08:41:00	0
2008-12-01	08:42:00	0
2008-12-01	08:43:00	0
2008-12-01	08:44:00	0
2008-12-01	08:45:00	0
2008-12-01	08:46:00	0
2008-12-01	08:47:00	0
2008-12-01	08:48:00	0
2008-12-01	08:49:00	0
2008-12-01	08:50:00	0
2008-12-01	08:51:00	0
2008-12-01	08:52:00	0
2008-12-01	08:53:00	0
2008-12-01	08:54:00	0
2008-12-01	08:55:00	0
2008-12-01	08:56:00	0
2008-12-01	08:57:00	0
2008-12-01	08:58:00	0
2008-12-01	08:59:00	0
2008-12-01	09:00:00	0
2008-12-01	09:01:00	0
2008-12-01	09:02:00	0
2008-12-01	09:03:00	0
2008-12-01	09:04:00	0
2008-12-01	09:05:00	0
2008-12-01	09:06:00	0
2008-12-01	09:07:00	0
2008-12-01	09:08:00	0
2008-12-01	09:09:00	0
2008-12-01	09:10:00	0
2008-12-01	09:11:00	0
2008-12-01	09:12:00	0
2008-12-01	09:13:00	0
2008-12-01	09:14:00	0
2008-12-01	09:15:00	0
2008-12-01	09:16:00	0
2008-12-01	09:17:00	0
2008-12-01	09:18:00	0
2008-12-01	09:19:00	0
2008-12-01	09:20:00	0
2008-12-01	09:21:00	0
2008-12-01	09:22:00	0
2008-12-01	09:23:00	0
2008-12-01	09:24:00	0
2008-12-01	09:25:00	0
2008-12-01	09:26:00	0
2008-12-01	09:27:00	0
2008-12-01	09:28:00	0
2008-12-01	09:29:00	0
2008-12-01	09:30:00	0
2008-12-01	09:31:00	0
2008-12-01	09:32:00	0
2008-12-01	09:33:00	0
2008-12-01	09:34:00	0
2008-12-01	09:35:00	0
2008-12-01	09:36:00	0
2008-12-01	09:37:00	0
2008-12-01	09:38:00	0
2008-12-01	09:39:00	0
2008-12-01	09:40:00	0
2008-12-01	09:41:00	0
2008-12-01	09:42:00	0
2008-12-01	09:43:00	0
2008-12-01	09:44:00	0
2008-12-01	09:45:00	0
2008-12-01	09:46:00	0
2008-12-01	09:47:00	0
2008-12-01	09:48:00	0
2008-12-01	09:49:00	0
2008-12-01	09:50:00	0
2008-12-01	09:51:00	0
2008-12-01	09:52:00	0
2008-12-01	09:53:00	0
2008-12-01	09:54:00	0
2008-12-01	09:55:00	0
2008-12-01	09:56:00	0
2008-12-01	09:57:00	0
2008-12-01	09:58:00	0
2008-12-01	09:59:00	0
2008-12-01	10:00:00	0
2008-12-01	10:01:00	0
2008-12-01	10:02:00	0
2008-12-01	10:03:00	0
2008-12-01	10:04:00	0
2008-12-01	10:05:00	0
2008-12-01	10:06:00	0
2008-12-01	10:07:00	0
2008-12-01	10:08:00	0
2008-12-01	10:09:00	0
2008-12-01	10:10:00	0
2008-12-01	10:11:00	0
2008-12-01	10:12:00	0
2008-12-01	10:13:00	0
2008-12-01	10:14:00	0
2008-12-01	10:15:00	0
2008-12-01	10:16:00	0
2008-12-01	10:17:00	0
2008-12-01	10:18:00	0
2008-12-01	10:19:00	0
2008-12-01	10:20:00	0
2008-12-01	10:21:00	0
2008-12-01	10:22:00	0
2008-12-01	10:23:00	0
2008-12-01	10:24:00	0
2008-12-01	10:25:00	0
2008-12-01	10:26:00	0
2008-12-01	10:27:00	0
2008-12-01	10:28:00	0
2008-12-01	10:29:00	0
2008-12-01	10:30:00	0
2008-12-01	10:31:00	0
2008-12-01	10:32:00	0
2008-12-01	10:33:00	0
2008-12-01	10:34:00	0
2008-12-01	10:35:00	0
2008-12-01	10:36:00	0
2008-12-01	10:37:00	0
2008-12-01	10:38:00	0
2008-12-01	10:39:00	0
2008-12-01	10:40:00	0
2008-12-01	10:41:00	0
2008-12-01	10:42:00	0
2008-12-01	10:43:00	0
2008-12-01	10:44:00	0
2008-12-01	10:45:00	0
2008-12-01	10:46:00	0
2008-12-01	10:47:00	0
2008-12-01	10:48:00	0
2008-12-01	10:49:00	0
2008-12-01	10:50:00	0
2008-12-01	10:51:00	0
2008-12-01	10:52:00	0
2008-12-01	10:53:00	0
2008-12-01	10:54:00	0
2008-12-01	10:55:00	0
2008-12-01	10:56:00	0
2008-12-01	10:57:00	0
2008-12-01	10:58:00	0
2008-12-01	10:59:00	0
2008-12-01	11:00:00	0
2008-12-01	11:01:00	0
2008-12-01	11:02:00	0
2008-12-01	11:03:00	0
2008-12-01	11:04:00	0
2008-12-01	11:05:00	0
2008-12-01	11:06:00	0
2008-12-01	11:07:00	0
2008-12-01	11:08:00	0
2008-12-01	11:09:00	0
2008-12-01	11:10:00	0
2008-12-01	11:11:00	0
2008-12-01	11:12:00	0
2008-12-01	11:13:00	0
2008-12-01	11:14:00	0
2008-12-01	11:15:00	0
2008-12-01	11:16:00	0
2008-12-01	11:17:00	0
2008-12-01	11:18:00	0
2008-12-01	11:19:00	0
2008-12-01	11:20:00	0
2008-12-01	11:21:00	0
2008-12-01	11:22:00	0
2008-12-01	11:23:00	0
2008-12-01	11:24:00	0
2008-12-01	11:25:00	0
2008-12-01	11:26:00	0
2008-12-01	11:27:00	0
2008-12-01	11:28:00	0
2008-12-01	11:29:00	0
2008-12-01	11:30:00	0
2008-12-01	11:31:00	0
2008-12-01	11:32:00	0
2008-12-01	11:33:00	0
2008-12-01	11:34:00	0
2008-12-01	11:35:00	0
2008-12-01	11:36:00	0
2008-12-01	11:37:00	0
2008-12-01	11:38:00	0
2008-12-01	11:39:00	0
2008-12-01	11:40:00	0
2008-12-01	11:41:00	0
2008-12-01	11:42:00	0
2008-12-01	11:43:00	0
2008-12-01	11:44:00	0
2008-12-01	11:45:00	0
2008-12-01	11:46:00	0
2008-12-01	11:47:00	0
2008-12-01	11:48:00	0
2008-12-01	11:49:00	0
2008-12-01	11:50:00	0
2008-12-01	11:51:00	0
2008-12-01	11:52:00	0
2008-12-01	11:53:00	0
2008-12-01	11:54:00	0
2008-12-01	11:55:00	0
2008-12-01	11:56:00	0
2008-12-01	11:57:00	0
2008-12-01	11:58:00	0
2008-12-01	11:59:00	0
2008-12-01	12:00:00	0
2008-12-01	12:01:00	0
2008-12-01	12:02:00	0
2008-12-01	12:03:00	0
2008-12-01	12:04:00	0
2008-12-01	12:05:00	0
2008-12-01	12:06:00	0
2008-12-01	12:07:00	0
2008-12-01	12:08:00	0
2008-12-01	12:09:00	0
2008-12-01	12:10:00	0
2008-12-01	12:11:00	0
2008-12-01	12:12:00	0
2008-12-01	12:13:00	0
2008-12-01	12:14:00	0
2008-12-01	12:15:00	0
2008-12-01	12:16:00	0
2008-12-01	12:17:00	0
2008-12-01	12:18:00	0
2008-12-01	12:19:00	0
2008-12-01	12:20:00	0
2008-12-01	12:21:00	0
2008-12-01	12:22:00	0
2008-12-01	12:23:00	0
2008-12-01	12:24:00	0
2008-12-01	12:25:00	0
2008-12-01	12:26:00	0
2008-12-01	12:27:00	0
2008-12-01	12:28:00	0
2008-12-01	12:29:00	0
2008-12-01	12:30:00	0
2008-12-01	12:31:00	0
2008-12-01	12:32:00	0
2008-12-01	12:33:00	0
2008-12-01	12:34:00	0
2008-12-01	12:35:00	0
2008-12-01	12:36:00	0
2008-12-01	12:37:00	0
2008-12-01	12:38:00	0
2008-12-01	12:39:00	0
2008-12-01	12:40:00	0
2008-12-01	12:41:00	0
2008-12-01	12:42:00	0
2008-12-01	12:43:00	0
2008-12-01	12:44:00	0
2008-12-01	12:45:00	0
2008-12-01	12:46:00	0
2008-12-01	12:47:00	0
2008-12-01	12:48:00	0
2008-12-01	12:49:00	0
2008-12-01	12:50:00	0
2008-12-01	12:51:00	0
2008-12-01	12:52:00	0
2008-12-01	12:53:00	0
2008-12-01	12:54:00	0
2008-12-01	12:55:00	0
2008-12-01	12:56:00	0
2008-12-01	12:57:00	0
2008-12-01	12:58:00	0
2008-12-01	12:59:00	0
2008-12-01	13:00:00	0
2008-12-01	13:01:00	0
2008-12-01	13:02:00	0
2008-12-01	13:03:00	0
2008-12-01	13:04:00	0
2008-12-01	13:05:00	0
2008-12-01	13:06:00	0
2008-12-01	13:07:00	0
2008-12-01	13:08:00	0
2008-12-01	13:09:00	0
2008-12-01	13:10:00	0
2008-12-01	13:11:00	0
2008-12-01	13:12:00	0
2008-12-01	13:13:00	0
2008-12-01	13:14:00	0
2008-12-01	13:15:00	0
2008-12-01	13:16:00	0
2008-12-01	13:17:00	0
2008-12-01	13:18:00	0
2008-12-01	13:19:00	0
2008-12-01	13:20:00	0
2008-12-01	13:21:00	0
2008-12-01	13:22:00	0
2008-12-01	13:23:00	0
2008-12-01	13:24:00	0
2008-12-01	13:25:00	0
2008-12-01	13:26:00	0
2008-12-01	13:27:00	0
2008-12-01	13:28:00	0
2008-12-01	13:29:00	0
2008-12-01	13:30:00	0
2008-12-01	13:31:00	0
2008-12-01	13:32:00	0
2008-12-01	13:33:00	0
2008-12-01	13:34:00	0
2008-12-01	13:35:00	0
2008-12-01	13:36:00	0
2008-12-01	13:37:00	0
2008-12-01	13:38:00	0
2008-12-01	13:39:00	0
2008-12-01	13:40:00	0
2008-12-01	13:41:00	0
2008-12-01	13:42:00	0
2008-12-01	13:43:00	0
2008-12-01	13:44:00	0
2008-12-01	13:45:00	0
2008-12-01	13:46:00	0
2008-12-01	13:47:00	0
2008-12-01	13:48:00	0
2008-12-01	13:49:00	0
2008-12-01	13:50:00	0
2008-12-01	13:51:00	0
2008-12-01	13:52:00	0
2008-12-01	13:53:00	0
2008-12-01	13:54:00	0
2008-12-01	13:55:00	0
2008-12-01	13:56:00	0
2008-12-01	13:57:00	0
2008-12-01	13:58:00	0
2008-12-01	13:59:00	0
2008-12-01	14:00:00	0
2008-12-01	14:01:00	0
2008-12-01	14:02:00	0
2008-12-01	14:03:00	0
2008-12-01	14:04:00	0
2008-12-01	14:05:00	0
2008-12-01	14:06:00	0
2008-12-01	14:07:00	0
2008-12-01	14:08:00	0
2008-12-01	14:09:00	0
2008-12-01	14:10:00	0
2008-12-01	14:11:00	0
2008-12-01	14:12:00	0
2008-12-01	14:13:00	0
2008-12-01	14:14:00	0
2008-12-01	14:15:00	0
2008-12-01	14:16:00	0
2008-12-01	14:17:00	0
2008-12-01	14:18:00	0
2008-12-01	14:19:00	0
2008-12-01	14:20:00	0
2008-12-01	14:21:00	0
2008-12-01	14:22:00	0
2008-12-01	14:23:00	0
2008-12-01	14:24:00	0
2008-12-01	14:25:00	0
2008-12-01	14:26:00	0
2008-12-01	14:27:00	0
2008-12-01	14:28:00	0
2008-12-01	14:29:00	0
2008-12-01	14:30:00	0
2008-12-01	14:31:00	0
2008-12-01	14:32:00	0
2008-12-01	14:33:00	0
2008-12-01	14:34:00	0
2008-12-01	14:35:00	0
2008-12-01	14:36:00	0
2008-12-01	14:37:00	0
2008-12-01	14:38:00	0
2008-12-01	14:39:00	0
2008-12-01	14:40:00	0
2008-12-01	14:41:00	0
2008-12-01	14:42:00	0
2008-12-01	14:43:00	0
2008-12-01	14:44:00	0
2008-12-01	14:45:00	0
2008-12-01	14:46:00	0
2008-12-01	14:47:00	0
2008-12-01	14:48:00	0
2008-12-01	14:49:00	0
2008-12-01	14:50:00	0
2008-12-01	14:51:00	0
2008-12-01	14:52:00	0
2008-12-01	14:53:00	0
2008-12-01	14:54:00	0
2008-12-01	14:55:00	0
2008-12-01	14:56:00	0
2008-12-01	14:57:00	0
2008-12-01	14:58:00	0
2008-12-01	14:59:00	0
2008-12-01	15:00:00	0
2008-12-01	15:01:00	0
2008-12-01	15:02:00	0
2008-12-01	15:03:00	0
2008-12-01	15:04:00	0
2008-12-01	15:05:00	0
2008-12-01	15:06:00	0
2008-12-01	15:07:00	0
2008-12-01	15:08:00	0
2008-12-01	15:09:00	0
2008-12-01	15:10:00	0
2008-12-01	15:11:00	0
2008-12-01	15:12:00	0
2008-12-01	15:13:00	0
2008-12-01	15:14:00	0
2008-12-01	15:15:00	0
2008-12-01	15:16:00	0
2008-12-01	15:17:00	0
2008-12-01	15:18:00	0
2008-12-01	15:19:00	0
2008-12-01	15:20:00	0
2008-12-01	15:21:00	0
2008-12-01	15:22:00	0
2008-12-01	15:23:00	0
2008-12-01	15:24:00	0
2008-12-01	15:25:00	0
2008-12-01	15:26:00	0
2008-12-01	15:27:00	0
2008-12-01	15:28:00	0
2008-12-01	15:29:00	0
2008-12-01	15:30:00	0
2008-12-01	15:31:00	0
2008-12-01	15:32:00	0
2008-12-01	15:33:00	0
2008-12-01	15:34:00	0
2008-12-01	15:35:00	0
2008-12-01	15:36:00	0
2008-12-01	15:37:00	0
2008-12-01	15:38:00	0
2008-12-01	15:39:00	0
2008-12-01	15:40:00	0
2008-12-01	15:41:00	0
2008-12-01	15:42:00	0
2008-12-01	15:43:00	0
2008-12-01	15:44:00	0
2008-12-01	15:45:00	0
2008-12-01	15:46:00	0
2008-12-01	15:47:00	0
2008-12-01	15:48:00	0
2008-12-01	15:49:00	0
2008-12-01	15:50:00	0
2008-12-01	15:51:00	0
2008-12-01	15:52:00	0
2008-12-01	15:53:00	0
2008-12-01	15:54:00	0
2008-12-01	15:55:00	0
2008-12-01	15:56:00	0
2008-12-01	15:57:00	0
2008-12-01	15:58:00	0
2008-12-01	15:59:00	0
2008-12-01	16:00:00	0
2008-12-01	16:01:00	0
2008-12-01	16:02:00	0
2008-12-01	16:03:00	0
2008-12-01	16:04:00	0
2008-12-01	16:05:00	0
2008-12-01	16:06:00	0
2008-12-01	16:07:00	0
2008-12-01	16:08:00	0
2008-12-01	16:09:00	0
2008-12-01	16:10:00	0
2008-12-01	16:11:00	0
2008-12-01	16:12:00	0
2008-12-01	16:13:00	0
2008-12-01	16:14:00	0
2008-12-01	16:15:00	0
2008-12-01	16:16:00	0
2008-12-01	16:17:00	0
2008-12-01	16:18:00	0
2008-12-01	16:19:00	0
2008-12-01	16:20:00	0
2008-12-01	16:21:00	0
2008-12-01	16:22:00	0
2008-12-01	16:23:00	0
2008-12-01	16:24:00	0
2008-12-01	16:25:00	0
2008-12-01	16:26:00	0
2008-12-01	16:27:00	0
2008-12-01	16:28:00	0
2008-12-01	16:29:00	0
2008-12-01	16:30:00	0
2008-12-01	16:31:00	0
2008-12-01	16:32:00	0
2008-12-01	16:33:00	0
2008-12-01	16:34:00	0
2008-12-01	16:35:00	0
2008-12-01	16:36:00	0
2008-12-01	16:37:00	0
2008-12-01	16:38:00	0
2008-12-01	16:39:00	0
2008-12-01	16:40:00	0
2008-12-01	16:41:00	0
2008-12-01	16:42:00	0
2008-12-01	16:43:00	0
2008-12-01	16:44:00	0
2008-12-01	16:45:00	0
2008-12-01	16:46:00	0
2008-12-01	16:47:00	0
2008-12-01	16:48:00	0
2008-12-01	16:49:00	0
2008-12-01	16:50:00	0
2008-12-01	16:51:00	0
2008-12-01	16:52:00	0
2008-12-01	16:53:00	0
2008-12-01	16:54:00	0
2008-12-01	16:55:00	0
2008-12-01	16:56:00	0
2008-12-01	16:57:00	0
2008-12-01	16:58:00	0
2008-12-01	16:59:00	0
2008-12-01	17:00:00	24
2008-12-01	17:01:00	0
2008-12-01	17:02:00	24
2008-12-01	17:03:00	0
2008-12-01	17:04:00	0
2008-12-01	17:05:00	0
2008-12-01	17:06:00	36
2008-12-01	17:07:00	24
2008-12-01	17:08:00	327
2008-12-01	17:09:00	254
2008-12-01	17:10:00	119
2008-12-01	17:11:00	377
2008-12-01	17:12:00	410
2008-12-01	17:13:00	393
2008-12-01	17:14:00	282
2008-12-01	17:15:00	479
2008-12-01	17:16:00	344
2008-12-01	17:17:00	183
2008-12-01	17:18:00	311
2008-12-01	17:19:00	427
2008-12-01	17:20:00	239
2008-12-01	17:21:00	268
2008-12-01	17:22:00	197
2008-12-01	17:23:00	168
2008-12-01	17:24:00	119
2008-12-01	17:25:00	327
2008-12-01	17:26:00	47
2008-12-01	17:27:00	410
2008-12-01	17:28:00	327
2008-12-01	17:29:00	574
2008-12-01	17:30:00	410
2008-12-01	17:31:00	197
2008-12-01	17:32:00	676
2008-12-01	17:33:00	785
2008-12-01	17:34:00	832
2008-12-01	17:35:00	856
2008-12-01	17:36:00	832
2008-12-01	17:37:00	654
2008-12-01	17:38:00	676
2008-12-01	17:39:00	197
2008-12-01	17:40:00	183
2008-12-01	17:41:00	225
2008-12-01	17:42:00	83
2008-12-01	17:43:00	498
2008-12-01	17:44:00	168
2008-12-01	17:45:00	183
2008-12-01	17:46:00	254
2008-12-01	17:47:00	12
2008-12-01	17:48:00	71
2008-12-01	17:49:00	12
2008-12-01	17:50:00	0
2008-12-01	17:51:00	197
2008-12-01	17:52:00	83
2008-12-01	17:53:00	130
2008-12-01	17:54:00	183
2008-12-01	17:55:00	979
2008-12-01	17:56:00	1413
2008-12-01	17:57:00	979
2008-12-01	17:58:00	311
2008-12-01	17:59:00	296
2008-12-01	18:00:00	59
2008-12-01	18:01:00	36
2008-12-01	18:02:00	12
2008-12-01	18:03:00	36
2008-12-01	18:04:00	59
2008-12-01	18:05:00	0
2008-12-01	18:06:00	12
2008-12-01	18:07:00	0
2008-12-01	18:08:00	24
2008-12-01	18:09:00	24
2008-12-01	18:10:00	24
2008-12-01	18:11:00	59
2008-12-01	18:12:00	36
2008-12-01	18:13:00	24
2008-12-01	18:14:00	83
2008-12-01	18:15:00	12
2008-12-01	18:16:00	0
2008-12-01	18:17:00	24
2008-12-01	18:18:00	24
2008-12-01	18:19:00	12
2008-12-01	18:20:00	12
2008-12-01	18:21:00	36
2008-12-01	18:22:00	12
2008-12-01	18:23:00	0
2008-12-01	18:24:00	12
2008-12-01	18:25:00	24
2008-12-01	18:26:00	36
2008-12-01	18:27:00	130
2008-12-01	18:28:00	953
2008-12-01	18:29:00	1083
2008-12-01	18:30:00	654
2008-12-01	18:31:00	311
2008-12-01	18:32:00	393
2008-12-01	18:33:00	239
2008-12-01	18:34:00	593
2008-12-01	18:35:00	633
2008-12-01	18:36:00	785
2008-12-01	18:37:00	443
2008-12-01	18:38:00	377
2008-12-01	18:39:00	360
2008-12-01	18:40:00	498
2008-12-01	18:41:00	377
2008-12-01	18:42:00	393
2008-12-01	18:43:00	479
2008-12-01	18:44:00	536
2008-12-01	18:45:00	36
2008-12-01	18:46:00	12
2008-12-01	18:47:00	0
2008-12-01	18:48:00	0
2008-12-01	18:49:00	0
2008-12-01	18:50:00	225
2008-12-01	18:51:00	410
2008-12-01	18:52:00	393
2008-12-01	18:53:00	183
2008-12-01	18:54:00	211
2008-12-01	18:55:00	393
2008-12-01	18:56:00	130
2008-12-01	18:57:00	95
2008-12-01	18:58:00	239
2008-12-01	18:59:00	555
2008-12-01	19:00:00	360
2008-12-01	19:01:00	377
2008-12-01	19:02:00	24
2008-12-01	19:03:00	0
2008-12-01	19:04:00	0
2008-12-01	19:05:00	24
2008-12-01	19:06:00	268
2008-12-01	19:07:00	168
2008-12-01	19:08:00	344
2008-12-01	19:09:00	239
2008-12-01	19:10:00	344
2008-12-01	19:11:00	24
2008-12-01	19:12:00	0
2008-12-01	19:13:00	0
2008-12-01	19:14:00	0
2008-12-01	19:15:00	0
2008-12-01	19:16:00	225
2008-12-01	19:17:00	427
2008-12-01	19:18:00	0
2008-12-01	19:19:00	0
2008-12-01	19:20:00	0
2008-12-01	19:21:00	0
2008-12-01	19:22:00	12
2008-12-01	19:23:00	0
2008-12-01	19:24:00	24
2008-12-01	19:25:00	254
2008-12-01	19:26:00	327
2008-12-01	19:27:00	0
2008-12-01	19:28:00	225
2008-12-01	19:29:00	197
2008-12-01	19:30:00	47
2008-12-01	19:31:00	47
2008-12-01	19:32:00	59
2008-12-01	19:33:00	0
2008-12-01	19:34:00	0
2008-12-01	19:35:00	0
2008-12-01	19:36:00	0
2008-12-01	19:37:00	0
2008-12-01	19:38:00	0
2008-12-01	19:39:00	0
2008-12-01	19:40:00	0
2008-12-01	19:41:00	0
2008-12-01	19:42:00	0
2008-12-01	19:43:00	0
2008-12-01	19:44:00	0
2008-12-01	19:45:00	0
2008-12-01	19:46:00	36
2008-12-01	19:47:00	0
2008-12-01	19:48:00	0
2008-12-01	19:49:00	0
2008-12-01	19:50:00	0
2008-12-01	19:51:00	0
2008-12-01	19:52:00	0
2008-12-01	19:53:00	0
2008-12-01	19:54:00	0
2008-12-01	19:55:00	0
2008-12-01	19:56:00	0
2008-12-01	19:57:00	24
2008-12-01	19:58:00	12
2008-12-01	19:59:00	24
2008-12-01	20:00:00	0
2008-12-01	20:01:00	0
2008-12-01	20:02:00	47
2008-12-01	20:03:00	12
2008-12-01	20:04:00	12
2008-12-01	20:05:00	0
2008-12-01	20:06:00	12
2008-12-01	20:07:00	327
2008-12-01	20:08:00	327
2008-12-01	20:09:00	95
2008-12-01	20:10:00	183
2008-12-01	20:11:00	0
2008-12-01	20:12:00	119
2008-12-01	20:13:00	410
2008-12-01	20:14:00	360
2008-12-01	20:15:00	119
2008-12-01	20:16:00	142
2008-12-01	20:17:00	344
2008-12-01	20:18:00	410
2008-12-01	20:19:00	168
2008-12-01	20:20:00	296
2008-12-01	20:21:00	154
2008-12-01	20:22:00	168
2008-12-01	20:23:00	654
2008-12-01	20:24:00	239
2008-12-01	20:25:00	225
2008-12-01	20:26:00	443
2008-12-01	20:27:00	119
2008-12-01	20:28:00	0
2008-12-01	20:29:00	24
2008-12-01	20:30:00	0
2008-12-01	20:31:00	0
2008-12-01	20:32:00	0
2008-12-01	20:33:00	24
2008-12-01	20:34:00	0
2008-12-01	20:35:00	12
2008-12-01	20:36:00	59
2008-12-01	20:37:00	0
2008-12-01	20:38:00	142
2008-12-01	20:39:00	344
2008-12-01	20:40:00	24
2008-12-01	20:41:00	12
2008-12-01	20:42:00	0
2008-12-01	20:43:00	0
2008-12-01	20:44:00	0
2008-12-01	20:45:00	24
2008-12-01	20:46:00	0
2008-12-01	20:47:00	0
2008-12-01	20:48:00	36
2008-12-01	20:49:00	24
2008-12-01	20:50:00	24
2008-12-01	20:51:00	0
2008-12-01	20:52:00	0
2008-12-01	20:53:00	0
2008-12-01	20:54:00	0
2008-12-01	20:55:00	0
2008-12-01	20:56:00	0
2008-12-01	20:57:00	0
2008-12-01	20:58:00	0
2008-12-01	20:59:00	0
2008-12-01	21:00:00	0
2008-12-01	21:01:00	0
2008-12-01	21:02:00	0
2008-12-01	21:03:00	36
2008-12-01	21:04:00	0
2008-12-01	21:05:00	0
2008-12-01	21:06:00	0
2008-12-01	21:07:00	0
2008-12-01	21:08:00	0
2008-12-01	21:09:00	0
2008-12-01	21:10:00	24
2008-12-01	21:11:00	0
2008-12-01	21:12:00	12
2008-12-01	21:13:00	0
2008-12-01	21:14:00	0
2008-12-01	21:15:00	24
2008-12-01	21:16:00	740
2008-12-01	21:17:00	517
2008-12-01	21:18:00	119
2008-12-01	21:19:00	47
2008-12-01	21:20:00	0
2008-12-01	21:21:00	0
2008-12-01	21:22:00	0
2008-12-01	21:23:00	24
2008-12-01	21:24:00	0
2008-12-01	21:25:00	0
2008-12-01	21:26:00	0
2008-12-01	21:27:00	0
2008-12-01	21:28:00	0
2008-12-01	21:29:00	0
2008-12-01	21:30:00	0
2008-12-01	21:31:00	0
2008-12-01	21:32:00	0
2008-12-01	21:33:00	0
2008-12-01	21:34:00	0
2008-12-01	21:35:00	0
2008-12-01	21:36:00	0
2008-12-01	21:37:00	0
2008-12-01	21:38:00	0
2008-12-01	21:39:00	0
2008-12-01	21:40:00	0
2008-12-01	21:41:00	59
2008-12-01	21:42:00	36
2008-12-01	21:43:00	95
2008-12-01	21:44:00	0
2008-12-01	21:45:00	0
2008-12-01	21:46:00	0
2008-12-01	21:47:00	12
2008-12-01	21:48:00	0
2008-12-01	21:49:00	0
2008-12-01	21:50:00	0
2008-12-01	21:51:00	0
2008-12-01	21:52:00	0
2008-12-01	21:53:00	0
2008-12-01	21:54:00	0
2008-12-01	21:55:00	0
2008-12-01	21:56:00	0
2008-12-01	21:57:00	0
2008-12-01	21:58:00	0
2008-12-01	21:59:00	0
2008-12-01	22:00:00	0
2008-12-01	22:01:00	0
2008-12-01	22:02:00	0
2008-12-01	22:03:00	0
2008-12-01	22:04:00	0
2008-12-01	22:05:00	0
2008-12-01	22:06:00	0
2008-12-01	22:07:00	0
2008-12-01	22:08:00	0
2008-12-01	22:09:00	0
2008-12-01	22:10:00	0
2008-12-01	22:11:00	0
2008-12-01	22:12:00	0
2008-12-01	22:13:00	0
2008-12-01	22:14:00	0
2008-12-01	22:15:00	0
2008-12-01	22:16:00	0
2008-12-01	22:17:00	0
2008-12-01	22:18:00	0
2008-12-01	22:19:00	12
2008-12-01	22:20:00	0
2008-12-01	22:21:00	0
2008-12-01	22:22:00	0
2008-12-01	22:23:00	0
2008-12-01	22:24:00	0
2008-12-01	22:25:00	0
2008-12-01	22:26:00	0
2008-12-01	22:27:00	0
2008-12-01	22:28:00	0
2008-12-01	22:29:00	0
2008-12-01	22:30:00	0
2008-12-01	22:31:00	0
2008-12-01	22:32:00	0
2008-12-01	22:33:00	0
2008-12-01	22:34:00	0
2008-12-01	22:35:00	0
2008-12-01	22:36:00	36
2008-12-01	22:37:00	107
2008-12-01	22:38:00	0
2008-12-01	22:39:00	0
2008-12-01	22:40:00	0
2008-12-01	22:41:00	0
2008-12-01	22:42:00	0
2008-12-01	22:43:00	0
2008-12-01	22:44:00	0
2008-12-01	22:45:00	12
2008-12-01	22:46:00	47
2008-12-01	22:47:00	154
2008-12-01	22:48:00	95
2008-12-01	22:49:00	0
2008-12-01	22:50:00	0
2008-12-01	22:51:00	0
2008-12-01	22:52:00	36
2008-12-01	22:53:00	36
2008-12-01	22:54:00	0
2008-12-01	22:55:00	0
2008-12-01	22:56:00	0
2008-12-01	22:57:00	0
2008-12-01	22:58:00	0
2008-12-01	22:59:00	0
2008-12-01	23:00:00	0
2008-12-01	23:01:00	0
2008-12-01	23:02:00	0
2008-12-01	23:03:00	0
2008-12-01	23:04:00	0
2008-12-01	23:05:00	0
2008-12-01	23:06:00	12
2008-12-01	23:07:00	36
2008-12-01	23:08:00	12
2008-12-01	23:09:00	268
2008-12-01	23:10:00	239
2008-12-01	23:11:00	183
2008-12-01	23:12:00	268
2008-12-01	23:13:00	36
2008-12-01	23:14:00	0
2008-12-01	23:15:00	0
2008-12-01	23:16:00	130
2008-12-01	23:17:00	36
2008-12-01	23:18:00	0
2008-12-01	23:19:00	0
2008-12-01	23:20:00	0
2008-12-01	23:21:00	0
2008-12-01	23:22:00	0
2008-12-01	23:23:00	0
2008-12-01	23:24:00	0
2008-12-01	23:25:00	0
2008-12-01	23:26:00	0
2008-12-01	23:27:00	0
2008-12-01	23:28:00	0
2008-12-01	23:29:00	0
2008-12-01	23:30:00	0
2008-12-01	23:31:00	0
2008-12-01	23:32:00	0
2008-12-01	23:33:00	0
2008-12-01	23:34:00	0
2008-12-01	23:35:00	0
2008-12-01	23:36:00	197
2008-12-01	23:37:00	12
2008-12-01	23:38:00	0
2008-12-01	23:39:00	0
2008-12-01	23:40:00	0
2008-12-01	23:41:00	0
2008-12-01	23:42:00	24
2008-12-01	23:43:00	24
2008-12-01	23:44:00	12
2008-12-01	23:45:00	0
2008-12-01	23:46:00	12
2008-12-01	23:47:00	24
2008-12-01	23:48:00	24
2008-12-01	23:49:00	24
2008-12-01	23:50:00	24
2008-12-01	23:51:00	12
2008-12-01	23:52:00	36
2008-12-01	23:53:00	12
2008-12-01	23:54:00	12
2008-12-01	23:55:00	12
2008-12-01	23:56:00	59
2008-12-01	23:57:00	0
2008-12-01	23:58:00	0
2008-12-01	23:59:00	239
2008-12-02	00:00:00	0
2008-12-02	00:01:00	142
2008-12-02	00:02:00	36
2008-12-02	00:03:00	83
2008-12-02	00:04:00	197
2008-12-02	00:05:00	12
2008-12-02	00:06:00	0
2008-12-02	00:07:00	0
2008-12-02	00:08:00	0
2008-12-02	00:09:00	0
2008-12-02	00:10:00	47
2008-12-02	00:11:00	0
2008-12-02	00:12:00	0
2008-12-02	00:13:00	0
2008-12-02	00:14:00	36
2008-12-02	00:15:00	59
2008-12-02	00:16:00	0
2008-12-02	00:17:00	0
2008-12-02	00:18:00	0
2008-12-02	00:19:00	12
2008-12-02	00:20:00	83
2008-12-02	00:21:00	12
2008-12-02	00:22:00	24
2008-12-02	00:23:00	12
2008-12-02	00:24:00	0
2008-12-02	00:25:00	0
2008-12-02	00:26:00	0
2008-12-02	00:27:00	36
2008-12-02	00:28:00	24
2008-12-02	00:29:00	0
2008-12-02	00:30:00	0
2008-12-02	00:31:00	0
2008-12-02	00:32:00	0
2008-12-02	00:33:00	12
2008-12-02	00:34:00	12
2008-12-02	00:35:00	0
2008-12-02	00:36:00	24
2008-12-02	00:37:00	12
2008-12-02	00:38:00	12
2008-12-02	00:39:00	12
2008-12-02	00:40:00	12
2008-12-02	00:41:00	71
2008-12-02	00:42:00	47
2008-12-02	00:43:00	119
2008-12-02	00:44:00	1031
2008-12-02	00:45:00	593
2008-12-02	00:46:00	555
2008-12-02	00:47:00	239
2008-12-02	00:48:00	393
2008-12-02	00:49:00	612
2008-12-02	00:50:00	808
2008-12-02	00:51:00	676
2008-12-02	00:52:00	344
2008-12-02	00:53:00	879
2008-12-02	00:54:00	95
2008-12-02	00:55:00	107
2008-12-02	00:56:00	410
2008-12-02	00:57:00	59
2008-12-02	00:58:00	479
2008-12-02	00:59:00	633
2008-12-02	01:00:00	83
2008-12-02	01:01:00	12
2008-12-02	01:02:00	0
2008-12-02	01:03:00	24
2008-12-02	01:04:00	24
2008-12-02	01:05:00	0
2008-12-02	01:06:00	0
2008-12-02	01:07:00	0
2008-12-02	01:08:00	36
2008-12-02	01:09:00	12
2008-12-02	01:10:00	0
2008-12-02	01:11:00	443
2008-12-02	01:12:00	0
2008-12-02	01:13:00	0
2008-12-02	01:14:00	0
2008-12-02	01:15:00	0
2008-12-02	01:16:00	24
2008-12-02	01:17:00	36
2008-12-02	01:18:00	24
2008-12-02	01:19:00	47
2008-12-02	01:20:00	0
2008-12-02	01:21:00	24
2008-12-02	01:22:00	0
2008-12-02	01:23:00	0
2008-12-02	01:24:00	0
2008-12-02	01:25:00	0
2008-12-02	01:26:00	0
2008-12-02	01:27:00	24
2008-12-02	01:28:00	0
2008-12-02	01:29:00	0
2008-12-02	01:30:00	0
2008-12-02	01:31:00	0
2008-12-02	01:32:00	0
2008-12-02	01:33:00	0
2008-12-02	01:34:00	0
2008-12-02	01:35:00	0
2008-12-02	01:36:00	0
2008-12-02	01:37:00	0
2008-12-02	01:38:00	0
2008-12-02	01:39:00	0
2008-12-02	01:40:00	0
2008-12-02	01:41:00	0
2008-12-02	01:42:00	0
2008-12-02	01:43:00	0
2008-12-02	01:44:00	0
2008-12-02	01:45:00	0
2008-12-02	01:46:00	0
2008-12-02	01:47:00	0
2008-12-02	01:48:00	0
2008-12-02	01:49:00	0
2008-12-02	01:50:00	0
2008-12-02	01:51:00	0
2008-12-02	01:52:00	0
2008-12-02	01:53:00	0
2008-12-02	01:54:00	0
2008-12-02	01:55:00	0
2008-12-02	01:56:00	0
2008-12-02	01:57:00	0
2008-12-02	01:58:00	0
2008-12-02	01:59:00	0
2008-12-02	02:00:00	0
2008-12-02	02:01:00	0
2008-12-02	02:02:00	0
2008-12-02	02:03:00	0
2008-12-02	02:04:00	0
2008-12-02	02:05:00	0
2008-12-02	02:06:00	0
2008-12-02	02:07:00	0
2008-12-02	02:08:00	0
2008-12-02	02:09:00	47
2008-12-02	02:10:00	24
2008-12-02	02:11:00	0
2008-12-02	02:12:00	0
2008-12-02	02:13:00	0
2008-12-02	02:14:00	0
2008-12-02	02:15:00	0
2008-12-02	02:16:00	0
2008-12-02	02:17:00	0
2008-12-02	02:18:00	0
2008-12-02	02:19:00	0
2008-12-02	02:20:00	12
2008-12-02	02:21:00	0
2008-12-02	02:22:00	0
2008-12-02	02:23:00	0
2008-12-02	02:24:00	0
2008-12-02	02:25:00	0
2008-12-02	02:26:00	0
2008-12-02	02:27:00	0
2008-12-02	02:28:00	0
2008-12-02	02:29:00	0
2008-12-02	02:30:00	0
2008-12-02	02:31:00	0
2008-12-02	02:32:00	0
2008-12-02	02:33:00	0
2008-12-02	02:34:00	0
2008-12-02	02:35:00	0
2008-12-02	02:36:00	0
2008-12-02	02:37:00	0
2008-12-02	02:38:00	0
2008-12-02	02:39:00	0
2008-12-02	02:40:00	0
2008-12-02	02:41:00	0
2008-12-02	02:42:00	0
2008-12-02	02:43:00	0
2008-12-02	02:44:00	0
2008-12-02	02:45:00	0
2008-12-02	02:46:00	0
2008-12-02	02:47:00	0
2008-12-02	02:48:00	0
2008-12-02	02:49:00	0
2008-12-02	02:50:00	0
2008-12-02	02:51:00	0
2008-12-02	02:52:00	0
2008-12-02	02:53:00	0
2008-12-02	02:54:00	0
2008-12-02	02:55:00	0
2008-12-02	02:56:00	0
2008-12-02	02:57:00	0
2008-12-02	02:58:00	0
2008-12-02	02:59:00	0
2008-12-02	03:00:00	0
2008-12-02	03:01:00	24
2008-12-02	03:02:00	0
2008-12-02	03:03:00	36
2008-12-02	03:04:00	0
2008-12-02	03:05:00	0
2008-12-02	03:06:00	0
2008-12-02	03:07:00	0
2008-12-02	03:08:00	0
2008-12-02	03:09:00	0
2008-12-02	03:10:00	0
2008-12-02	03:11:00	0
2008-12-02	03:12:00	0
2008-12-02	03:13:00	0
2008-12-02	03:14:00	0
2008-12-02	03:15:00	0
2008-12-02	03:16:00	0
2008-12-02	03:17:00	0
2008-12-02	03:18:00	0
2008-12-02	03:19:00	0
2008-12-02	03:20:00	0
2008-12-02	03:21:00	0
2008-12-02	03:22:00	0
2008-12-02	03:23:00	0
2008-12-02	03:24:00	0
2008-12-02	03:25:00	0
2008-12-02	03:26:00	0
2008-12-02	03:27:00	0
2008-12-02	03:28:00	0
2008-12-02	03:29:00	0
2008-12-02	03:30:00	0
2008-12-02	03:31:00	0
2008-12-02	03:32:00	0
2008-12-02	03:33:00	0
2008-12-02	03:34:00	0
2008-12-02	03:35:00	0
2008-12-02	03:36:00	0
2008-12-02	03:37:00	0
2008-12-02	03:38:00	0
2008-12-02	03:39:00	0
2008-12-02	03:40:00	0
2008-12-02	03:41:00	0
2008-12-02	03:42:00	0
2008-12-02	03:43:00	0
2008-12-02	03:44:00	0
2008-12-02	03:45:00	0
2008-12-02	03:46:00	0
2008-12-02	03:47:00	0
2008-12-02	03:48:00	0
2008-12-02	03:49:00	0
2008-12-02	03:50:00	0
2008-12-02	03:51:00	0
2008-12-02	03:52:00	0
2008-12-02	03:53:00	0
2008-12-02	03:54:00	0
2008-12-02	03:55:00	0
2008-12-02	03:56:00	0
2008-12-02	03:57:00	0
2008-12-02	03:58:00	0
2008-12-02	03:59:00	0
2008-12-02	04:00:00	0
2008-12-02	04:01:00	0
2008-12-02	04:02:00	0
2008-12-02	04:03:00	0
2008-12-02	04:04:00	0
2008-12-02	04:05:00	0
2008-12-02	04:06:00	0
2008-12-02	04:07:00	0
2008-12-02	04:08:00	0
2008-12-02	04:09:00	0
2008-12-02	04:10:00	0
2008-12-02	04:11:00	0
2008-12-02	04:12:00	0
2008-12-02	04:13:00	0
2008-12-02	04:14:00	0
2008-12-02	04:15:00	12
2008-12-02	04:16:00	0
2008-12-02	04:17:00	0
2008-12-02	04:18:00	0
2008-12-02	04:19:00	0
2008-12-02	04:20:00	0
2008-12-02	04:21:00	0
2008-12-02	04:22:00	0
2008-12-02	04:23:00	0
2008-12-02	04:24:00	0
2008-12-02	04:25:00	0
2008-12-02	04:26:00	0
2008-12-02	04:27:00	0
2008-12-02	04:28:00	0
2008-12-02	04:29:00	0
2008-12-02	04:30:00	36
2008-12-02	04:31:00	47
2008-12-02	04:32:00	59
2008-12-02	04:33:00	0
2008-12-02	04:34:00	0
2008-12-02	04:35:00	0
2008-12-02	04:36:00	0
2008-12-02	04:37:00	0
2008-12-02	04:38:00	0
2008-12-02	04:39:00	0
2008-12-02	04:40:00	0
2008-12-02	04:41:00	0
2008-12-02	04:42:00	0
2008-12-02	04:43:00	0
2008-12-02	04:44:00	0
2008-12-02	04:45:00	0
2008-12-02	04:46:00	0
2008-12-02	04:47:00	0
2008-12-02	04:48:00	0
2008-12-02	04:49:00	0
2008-12-02	04:50:00	47
2008-12-02	04:51:00	36
2008-12-02	04:52:00	718
2008-12-02	04:53:00	979
2008-12-02	04:54:00	410
2008-12-02	04:55:00	12
2008-12-02	04:56:00	0
2008-12-02	04:57:00	36
2008-12-02	04:58:00	0
2008-12-02	04:59:00	0
2008-12-02	05:00:00	0
2008-12-02	05:01:00	59
2008-12-02	05:02:00	0
2008-12-02	05:03:00	0
2008-12-02	05:04:00	83
2008-12-02	05:05:00	0
2008-12-02	05:06:00	0
2008-12-02	05:07:00	0
2008-12-02	05:08:00	0
2008-12-02	05:09:00	0
2008-12-02	05:10:00	0
2008-12-02	05:11:00	0
2008-12-02	05:12:00	0
2008-12-02	05:13:00	0
2008-12-02	05:14:00	47
2008-12-02	05:15:00	0
2008-12-02	05:16:00	0
2008-12-02	05:17:00	0
2008-12-02	05:18:00	0
2008-12-02	05:19:00	0
2008-12-02	05:20:00	0
2008-12-02	05:21:00	0
2008-12-02	05:22:00	0
2008-12-02	05:23:00	0
2008-12-02	05:24:00	0
2008-12-02	05:25:00	0
2008-12-02	05:26:00	0
2008-12-02	05:27:00	0
2008-12-02	05:28:00	59
2008-12-02	05:29:00	0
2008-12-02	05:30:00	0
2008-12-02	05:31:00	0
2008-12-02	05:32:00	0
2008-12-02	05:33:00	0
2008-12-02	05:34:00	0
2008-12-02	05:35:00	0
2008-12-02	05:36:00	0
2008-12-02	05:37:00	0
2008-12-02	05:38:00	0
2008-12-02	05:39:00	0
2008-12-02	05:40:00	0
2008-12-02	05:41:00	0
2008-12-02	05:42:00	0
2008-12-02	05:43:00	0
2008-12-02	05:44:00	0
2008-12-02	05:45:00	0
2008-12-02	05:46:00	0
2008-12-02	05:47:00	0
2008-12-02	05:48:00	0
2008-12-02	05:49:00	0
2008-12-02	05:50:00	0
2008-12-02	05:51:00	0
2008-12-02	05:52:00	0
2008-12-02	05:53:00	0
2008-12-02	05:54:00	12
2008-12-02	05:55:00	0
2008-12-02	05:56:00	0
2008-12-02	05:57:00	0
2008-12-02	05:58:00	0
2008-12-02	05:59:00	0
2008-12-02	06:00:00	0
2008-12-02	06:01:00	0
2008-12-02	06:02:00	0
2008-12-02	06:03:00	0
2008-12-02	06:04:00	0
2008-12-02	06:05:00	0
2008-12-02	06:06:00	0
2008-12-02	06:07:00	0
2008-12-02	06:08:00	0
2008-12-02	06:09:00	0
2008-12-02	06:10:00	0
2008-12-02	06:11:00	0
2008-12-02	06:12:00	0
2008-12-02	06:13:00	0
2008-12-02	06:14:00	0
2008-12-02	06:15:00	0
2008-12-02	06:16:00	0
2008-12-02	06:17:00	36
2008-12-02	06:18:00	95
2008-12-02	06:19:00	0
2008-12-02	06:20:00	0
2008-12-02	06:21:00	0
2008-12-02	06:22:00	0
2008-12-02	06:23:00	0
2008-12-02	06:24:00	0
2008-12-02	06:25:00	0
2008-12-02	06:26:00	0
2008-12-02	06:27:00	0
2008-12-02	06:28:00	0
2008-12-02	06:29:00	0
2008-12-02	06:30:00	0
2008-12-02	06:31:00	0
2008-12-02	06:32:00	0
2008-12-02	06:33:00	0
2008-12-02	06:34:00	0
2008-12-02	06:35:00	0
2008-12-02	06:36:00	0
2008-12-02	06:37:00	0
2008-12-02	06:38:00	0
2008-12-02	06:39:00	0
2008-12-02	06:40:00	0
2008-12-02	06:41:00	0
2008-12-02	06:42:00	0
2008-12-02	06:43:00	0
2008-12-02	06:44:00	0
2008-12-02	06:45:00	0
2008-12-02	06:46:00	107
2008-12-02	06:47:00	24
2008-12-02	06:48:00	0
2008-12-02	06:49:00	0
2008-12-02	06:50:00	0
2008-12-02	06:51:00	0
2008-12-02	06:52:00	0
2008-12-02	06:53:00	0
2008-12-02	06:54:00	0
2008-12-02	06:55:00	0
2008-12-02	06:56:00	0
2008-12-02	06:57:00	0
2008-12-02	06:58:00	0
2008-12-02	06:59:00	12
2008-12-02	07:00:00	36
2008-12-02	07:01:00	24
2008-12-02	07:02:00	24
2008-12-02	07:03:00	24
2008-12-02	07:04:00	47
2008-12-02	07:05:00	211
2008-12-02	07:06:00	71
2008-12-02	07:07:00	0
2008-12-02	07:08:00	24
2008-12-02	07:09:00	59
2008-12-02	07:10:00	59
2008-12-02	07:11:00	47
2008-12-02	07:12:00	0
2008-12-02	07:13:00	0
2008-12-02	07:14:00	0
2008-12-02	07:15:00	0
2008-12-02	07:16:00	0
2008-12-02	07:17:00	0
2008-12-02	07:18:00	0
2008-12-02	07:19:00	0
2008-12-02	07:20:00	0
2008-12-02	07:21:00	0
2008-12-02	07:22:00	0
2008-12-02	07:23:00	0
2008-12-02	07:24:00	0
2008-12-02	07:25:00	0
2008-12-02	07:26:00	0
2008-12-02	07:27:00	0
2008-12-02	07:28:00	0
2008-12-02	07:29:00	0
2008-12-02	07:30:00	12
2008-12-02	07:31:00	24
2008-12-02	07:32:00	0
2008-12-02	07:33:00	12
2008-12-02	07:34:00	612
2008-12-02	07:35:00	254
2008-12-02	07:36:00	443
2008-12-02	07:37:00	119
2008-12-02	07:38:00	593
2008-12-02	07:39:00	574
2008-12-02	07:40:00	168
2008-12-02	07:41:00	211
2008-12-02	07:42:00	239
2008-12-02	07:43:00	12
2008-12-02	07:44:00	12
2008-12-02	07:45:00	0
2008-12-02	07:46:00	0
2008-12-02	07:47:00	0
2008-12-02	07:48:00	0
2008-12-02	07:49:00	0
2008-12-02	07:50:00	0
2008-12-02	07:51:00	0
2008-12-02	07:52:00	0
2008-12-02	07:53:00	0
2008-12-02	07:54:00	0
2008-12-02	07:55:00	0
2008-12-02	07:56:00	0
2008-12-02	07:57:00	24
2008-12-02	07:58:00	0
2008-12-02	07:59:00	0
2008-12-02	08:00:00	0
2008-12-02	08:01:00	0
2008-12-02	08:02:00	47
2008-12-02	08:03:00	0
2008-12-02	08:04:00	0
2008-12-02	08:05:00	0
2008-12-02	08:06:00	0
2008-12-02	08:07:00	0
2008-12-02	08:08:00	0
2008-12-02	08:09:00	0
2008-12-02	08:10:00	0
2008-12-02	08:11:00	0
2008-12-02	08:12:00	0
2008-12-02	08:13:00	0
2008-12-02	08:14:00	0
2008-12-02	08:15:00	0
2008-12-02	08:16:00	0
2008-12-02	08:17:00	0
2008-12-02	08:18:00	0
2008-12-02	08:19:00	0
2008-12-02	08:20:00	0
2008-12-02	08:21:00	0
2008-12-02	08:22:00	0
2008-12-02	08:23:00	0
2008-12-02	08:24:00	0
2008-12-02	08:25:00	0
2008-12-02	08:26:00	0
2008-12-02	08:27:00	0
2008-12-02	08:28:00	0
2008-12-02	08:29:00	0
2008-12-02	08:30:00	0
2008-12-02	08:31:00	0
2008-12-02	08:32:00	0
2008-12-02	08:33:00	0
2008-12-02	08:34:00	0
2008-12-02	08:35:00	0
2008-12-02	08:36:00	0
2008-12-02	08:37:00	0
2008-12-02	08:38:00	0
2008-12-02	08:39:00	12
2008-12-02	08:40:00	0
2008-12-02	08:41:00	0
2008-12-02	08:42:00	0
2008-12-02	08:43:00	0
2008-12-02	08:44:00	0
2008-12-02	08:45:00	0
2008-12-02	08:46:00	0
2008-12-02	08:47:00	0
2008-12-02	08:48:00	0
2008-12-02	08:49:00	0
2008-12-02	08:50:00	0
2008-12-02	08:51:00	0
2008-12-02	08:52:00	0
2008-12-02	08:53:00	0
2008-12-02	08:54:00	0
2008-12-02	08:55:00	0
2008-12-02	08:56:00	0
2008-12-02	08:57:00	0
2008-12-02	08:58:00	0
2008-12-02	08:59:00	0
2008-12-02	09:00:00	0
2008-12-02	09:01:00	0
2008-12-02	09:02:00	0
2008-12-02	09:03:00	0
2008-12-02	09:04:00	0
2008-12-02	09:05:00	0
2008-12-02	09:06:00	0
2008-12-02	09:07:00	0
2008-12-02	09:08:00	0
[truncated: 19,611 more rows]

## Sheet: 12.15.08
Actogram, Copy Raw Data, All Days
Identity:	Skye Begalla
Filename:	E:\Active Research Files\meloxicam titre canine\cases\skye\Skye Begalla 12.15.08.AWC
Gender:	F
Age:	13
Height:	61.0 cm	24.0 in
Weight:	22.0 kg	48.5 lbs
Start Date:	15-Dec-2008 (Mon)
Start Time:	17:30:00
Interval:	1.00 mins
Date Stamp:	Time Stamp:	Activity Data:	Marker Press:
2008-12-15	00:00:00	0
2008-12-15	00:01:00	0
2008-12-15	00:02:00	0
2008-12-15	00:03:00	0
2008-12-15	00:04:00	0
2008-12-15	00:05:00	0
2008-12-15	00:06:00	0
2008-12-15	00:07:00	0
2008-12-15	00:08:00	0
2008-12-15	00:09:00	0
2008-12-15	00:10:00	0
2008-12-15	00:11:00	0
2008-12-15	00:12:00	0
2008-12-15	00:13:00	0
2008-12-15	00:14:00	0
2008-12-15	00:15:00	0
2008-12-15	00:16:00	0
2008-12-15	00:17:00	0
2008-12-15	00:18:00	0
2008-12-15	00:19:00	0
2008-12-15	00:20:00	0
2008-12-15	00:21:00	0
2008-12-15	00:22:00	0
2008-12-15	00:23:00	0
2008-12-15	00:24:00	0
2008-12-15	00:25:00	0
2008-12-15	00:26:00	0
2008-12-15	00:27:00	0
2008-12-15	00:28:00	0
2008-12-15	00:29:00	0
2008-12-15	00:30:00	0
2008-12-15	00:31:00	0
2008-12-15	00:32:00	0
2008-12-15	00:33:00	0
2008-12-15	00:34:00	0
2008-12-15	00:35:00	0
2008-12-15	00:36:00	0
2008-12-15	00:37:00	0
2008-12-15	00:38:00	0
2008-12-15	00:39:00	0
2008-12-15	00:40:00	0
2008-12-15	00:41:00	0
2008-12-15	00:42:00	0
2008-12-15	00:43:00	0
2008-12-15	00:44:00	0
2008-12-15	00:45:00	0
2008-12-15	00:46:00	0
2008-12-15	00:47:00	0
2008-12-15	00:48:00	0
2008-12-15	00:49:00	0
2008-12-15	00:50:00	0
2008-12-15	00:51:00	0
2008-12-15	00:52:00	0
2008-12-15	00:53:00	0
2008-12-15	00:54:00	0
2008-12-15	00:55:00	0
2008-12-15	00:56:00	0
2008-12-15	00:57:00	0
2008-12-15	00:58:00	0
2008-12-15	00:59:00	0
2008-12-15	01:00:00	0
2008-12-15	01:01:00	0
2008-12-15	01:02:00	0
2008-12-15	01:03:00	0
2008-12-15	01:04:00	0
2008-12-15	01:05:00	0
2008-12-15	01:06:00	0
2008-12-15	01:07:00	0
2008-12-15	01:08:00	0
2008-12-15	01:09:00	0
2008-12-15	01:10:00	0
2008-12-15	01:11:00	0
2008-12-15	01:12:00	0
2008-12-15	01:13:00	0
2008-12-15	01:14:00	0
2008-12-15	01:15:00	0
2008-12-15	01:16:00	0
2008-12-15	01:17:00	0
2008-12-15	01:18:00	0
2008-12-15	01:19:00	0
2008-12-15	01:20:00	0
2008-12-15	01:21:00	0
2008-12-15	01:22:00	0
2008-12-15	01:23:00	0
2008-12-15	01:24:00	0
2008-12-15	01:25:00	0
2008-12-15	01:26:00	0
2008-12-15	01:27:00	0
2008-12-15	01:28:00	0
2008-12-15	01:29:00	0
2008-12-15	01:30:00	0
2008-12-15	01:31:00	0
2008-12-15	01:32:00	0
2008-12-15	01:33:00	0
2008-12-15	01:34:00	0
2008-12-15	01:35:00	0
2008-12-15	01:36:00	0
2008-12-15	01:37:00	0
2008-12-15	01:38:00	0
2008-12-15	01:39:00	0
2008-12-15	01:40:00	0
2008-12-15	01:41:00	0
2008-12-15	01:42:00	0
2008-12-15	01:43:00	0
2008-12-15	01:44:00	0
2008-12-15	01:45:00	0
2008-12-15	01:46:00	0
2008-12-15	01:47:00	0
2008-12-15	01:48:00	0
2008-12-15	01:49:00	0
2008-12-15	01:50:00	0
2008-12-15	01:51:00	0
2008-12-15	01:52:00	0
2008-12-15	01:53:00	0
2008-12-15	01:54:00	0
2008-12-15	01:55:00	0
2008-12-15	01:56:00	0
2008-12-15	01:57:00	0
2008-12-15	01:58:00	0
2008-12-15	01:59:00	0
2008-12-15	02:00:00	0
2008-12-15	02:01:00	0
2008-12-15	02:02:00	0
2008-12-15	02:03:00	0
2008-12-15	02:04:00	0
2008-12-15	02:05:00	0
2008-12-15	02:06:00	0
2008-12-15	02:07:00	0
2008-12-15	02:08:00	0
2008-12-15	02:09:00	0
2008-12-15	02:10:00	0
2008-12-15	02:11:00	0
2008-12-15	02:12:00	0
2008-12-15	02:13:00	0
2008-12-15	02:14:00	0
2008-12-15	02:15:00	0
2008-12-15	02:16:00	0
2008-12-15	02:17:00	0
2008-12-15	02:18:00	0
2008-12-15	02:19:00	0
2008-12-15	02:20:00	0
2008-12-15	02:21:00	0
2008-12-15	02:22:00	0
2008-12-15	02:23:00	0
2008-12-15	02:24:00	0
2008-12-15	02:25:00	0
2008-12-15	02:26:00	0
2008-12-15	02:27:00	0
2008-12-15	02:28:00	0
2008-12-15	02:29:00	0
2008-12-15	02:30:00	0
2008-12-15	02:31:00	0
2008-12-15	02:32:00	0
2008-12-15	02:33:00	0
2008-12-15	02:34:00	0
2008-12-15	02:35:00	0
2008-12-15	02:36:00	0
2008-12-15	02:37:00	0
2008-12-15	02:38:00	0
2008-12-15	02:39:00	0
2008-12-15	02:40:00	0
2008-12-15	02:41:00	0
2008-12-15	02:42:00	0
2008-12-15	02:43:00	0
2008-12-15	02:44:00	0
2008-12-15	02:45:00	0
2008-12-15	02:46:00	0
2008-12-15	02:47:00	0
2008-12-15	02:48:00	0
2008-12-15	02:49:00	0
2008-12-15	02:50:00	0
2008-12-15	02:51:00	0
2008-12-15	02:52:00	0
2008-12-15	02:53:00	0
2008-12-15	02:54:00	0
2008-12-15	02:55:00	0
2008-12-15	02:56:00	0
2008-12-15	02:57:00	0
2008-12-15	02:58:00	0
2008-12-15	02:59:00	0
2008-12-15	03:00:00	0
2008-12-15	03:01:00	0
2008-12-15	03:02:00	0
2008-12-15	03:03:00	0
2008-12-15	03:04:00	0
2008-12-15	03:05:00	0
2008-12-15	03:06:00	0
2008-12-15	03:07:00	0
2008-12-15	03:08:00	0
2008-12-15	03:09:00	0
2008-12-15	03:10:00	0
2008-12-15	03:11:00	0
2008-12-15	03:12:00	0
2008-12-15	03:13:00	0
2008-12-15	03:14:00	0
2008-12-15	03:15:00	0
2008-12-15	03:16:00	0
2008-12-15	03:17:00	0
2008-12-15	03:18:00	0
2008-12-15	03:19:00	0
2008-12-15	03:20:00	0
2008-12-15	03:21:00	0
2008-12-15	03:22:00	0
2008-12-15	03:23:00	0
2008-12-15	03:24:00	0
2008-12-15	03:25:00	0
2008-12-15	03:26:00	0
2008-12-15	03:27:00	0
2008-12-15	03:28:00	0
2008-12-15	03:29:00	0
2008-12-15	03:30:00	0
2008-12-15	03:31:00	0
2008-12-15	03:32:00	0
2008-12-15	03:33:00	0
2008-12-15	03:34:00	0
2008-12-15	03:35:00	0
2008-12-15	03:36:00	0
2008-12-15	03:37:00	0
2008-12-15	03:38:00	0
2008-12-15	03:39:00	0
2008-12-15	03:40:00	0
2008-12-15	03:41:00	0
2008-12-15	03:42:00	0
2008-12-15	03:43:00	0
2008-12-15	03:44:00	0
2008-12-15	03:45:00	0
2008-12-15	03:46:00	0
2008-12-15	03:47:00	0
2008-12-15	03:48:00	0
2008-12-15	03:49:00	0
2008-12-15	03:50:00	0
2008-12-15	03:51:00	0
2008-12-15	03:52:00	0
2008-12-15	03:53:00	0
2008-12-15	03:54:00	0
2008-12-15	03:55:00	0
2008-12-15	03:56:00	0
2008-12-15	03:57:00	0
2008-12-15	03:58:00	0
2008-12-15	03:59:00	0
2008-12-15	04:00:00	0
2008-12-15	04:01:00	0
2008-12-15	04:02:00	0
2008-12-15	04:03:00	0
2008-12-15	04:04:00	0
2008-12-15	04:05:00	0
2008-12-15	04:06:00	0
2008-12-15	04:07:00	0
2008-12-15	04:08:00	0
2008-12-15	04:09:00	0
2008-12-15	04:10:00	0
2008-12-15	04:11:00	0
2008-12-15	04:12:00	0
2008-12-15	04:13:00	0
2008-12-15	04:14:00	0
2008-12-15	04:15:00	0
2008-12-15	04:16:00	0
2008-12-15	04:17:00	0
2008-12-15	04:18:00	0
2008-12-15	04:19:00	0
2008-12-15	04:20:00	0
2008-12-15	04:21:00	0
2008-12-15	04:22:00	0
2008-12-15	04:23:00	0
2008-12-15	04:24:00	0
2008-12-15	04:25:00	0
2008-12-15	04:26:00	0
2008-12-15	04:27:00	0
2008-12-15	04:28:00	0
2008-12-15	04:29:00	0
2008-12-15	04:30:00	0
2008-12-15	04:31:00	0
2008-12-15	04:32:00	0
2008-12-15	04:33:00	0
2008-12-15	04:34:00	0
2008-12-15	04:35:00	0
2008-12-15	04:36:00	0
2008-12-15	04:37:00	0
2008-12-15	04:38:00	0
2008-12-15	04:39:00	0
2008-12-15	04:40:00	0
2008-12-15	04:41:00	0
2008-12-15	04:42:00	0
2008-12-15	04:43:00	0
2008-12-15	04:44:00	0
2008-12-15	04:45:00	0
2008-12-15	04:46:00	0
2008-12-15	04:47:00	0
2008-12-15	04:48:00	0
2008-12-15	04:49:00	0
2008-12-15	04:50:00	0
2008-12-15	04:51:00	0
2008-12-15	04:52:00	0
2008-12-15	04:53:00	0
2008-12-15	04:54:00	0
2008-12-15	04:55:00	0
2008-12-15	04:56:00	0
2008-12-15	04:57:00	0
2008-12-15	04:58:00	0
2008-12-15	04:59:00	0
2008-12-15	05:00:00	0
2008-12-15	05:01:00	0
2008-12-15	05:02:00	0
2008-12-15	05:03:00	0
2008-12-15	05:04:00	0
2008-12-15	05:05:00	0
2008-12-15	05:06:00	0
2008-12-15	05:07:00	0
2008-12-15	05:08:00	0
2008-12-15	05:09:00	0
2008-12-15	05:10:00	0
2008-12-15	05:11:00	0
2008-12-15	05:12:00	0
2008-12-15	05:13:00	0
2008-12-15	05:14:00	0
2008-12-15	05:15:00	0
2008-12-15	05:16:00	0
2008-12-15	05:17:00	0
2008-12-15	05:18:00	0
2008-12-15	05:19:00	0
2008-12-15	05:20:00	0
2008-12-15	05:21:00	0
2008-12-15	05:22:00	0
2008-12-15	05:23:00	0
2008-12-15	05:24:00	0
2008-12-15	05:25:00	0
2008-12-15	05:26:00	0
2008-12-15	05:27:00	0
2008-12-15	05:28:00	0
2008-12-15	05:29:00	0
2008-12-15	05:30:00	0
2008-12-15	05:31:00	0
2008-12-15	05:32:00	0
2008-12-15	05:33:00	0
2008-12-15	05:34:00	0
2008-12-15	05:35:00	0
2008-12-15	05:36:00	0
2008-12-15	05:37:00	0
2008-12-15	05:38:00	0
2008-12-15	05:39:00	0
2008-12-15	05:40:00	0
2008-12-15	05:41:00	0
2008-12-15	05:42:00	0
2008-12-15	05:43:00	0
2008-12-15	05:44:00	0
2008-12-15	05:45:00	0
2008-12-15	05:46:00	0
2008-12-15	05:47:00	0
2008-12-15	05:48:00	0
2008-12-15	05:49:00	0
2008-12-15	05:50:00	0
2008-12-15	05:51:00	0
2008-12-15	05:52:00	0
2008-12-15	05:53:00	0
2008-12-15	05:54:00	0
2008-12-15	05:55:00	0
2008-12-15	05:56:00	0
2008-12-15	05:57:00	0
2008-12-15	05:58:00	0
2008-12-15	05:59:00	0
2008-12-15	06:00:00	0
2008-12-15	06:01:00	0
2008-12-15	06:02:00	0
2008-12-15	06:03:00	0
2008-12-15	06:04:00	0
2008-12-15	06:05:00	0
2008-12-15	06:06:00	0
2008-12-15	06:07:00	0
2008-12-15	06:08:00	0
2008-12-15	06:09:00	0
2008-12-15	06:10:00	0
2008-12-15	06:11:00	0
2008-12-15	06:12:00	0
2008-12-15	06:13:00	0
2008-12-15	06:14:00	0
2008-12-15	06:15:00	0
2008-12-15	06:16:00	0
2008-12-15	06:17:00	0
2008-12-15	06:18:00	0
2008-12-15	06:19:00	0
2008-12-15	06:20:00	0
2008-12-15	06:21:00	0
2008-12-15	06:22:00	0
2008-12-15	06:23:00	0
2008-12-15	06:24:00	0
2008-12-15	06:25:00	0
2008-12-15	06:26:00	0
2008-12-15	06:27:00	0
2008-12-15	06:28:00	0
2008-12-15	06:29:00	0
2008-12-15	06:30:00	0
2008-12-15	06:31:00	0
2008-12-15	06:32:00	0
2008-12-15	06:33:00	0
2008-12-15	06:34:00	0
2008-12-15	06:35:00	0
2008-12-15	06:36:00	0
2008-12-15	06:37:00	0
2008-12-15	06:38:00	0
2008-12-15	06:39:00	0
2008-12-15	06:40:00	0
2008-12-15	06:41:00	0
2008-12-15	06:42:00	0
2008-12-15	06:43:00	0
2008-12-15	06:44:00	0
2008-12-15	06:45:00	0
2008-12-15	06:46:00	0
2008-12-15	06:47:00	0
2008-12-15	06:48:00	0
2008-12-15	06:49:00	0
2008-12-15	06:50:00	0
2008-12-15	06:51:00	0
2008-12-15	06:52:00	0
2008-12-15	06:53:00	0
2008-12-15	06:54:00	0
2008-12-15	06:55:00	0
2008-12-15	06:56:00	0
2008-12-15	06:57:00	0
2008-12-15	06:58:00	0
2008-12-15	06:59:00	0
2008-12-15	07:00:00	0
2008-12-15	07:01:00	0
2008-12-15	07:02:00	0
2008-12-15	07:03:00	0
2008-12-15	07:04:00	0
2008-12-15	07:05:00	0
2008-12-15	07:06:00	0
2008-12-15	07:07:00	0
2008-12-15	07:08:00	0
2008-12-15	07:09:00	0
2008-12-15	07:10:00	0
2008-12-15	07:11:00	0
2008-12-15	07:12:00	0
2008-12-15	07:13:00	0
2008-12-15	07:14:00	0
2008-12-15	07:15:00	0
2008-12-15	07:16:00	0
2008-12-15	07:17:00	0
2008-12-15	07:18:00	0
2008-12-15	07:19:00	0
2008-12-15	07:20:00	0
2008-12-15	07:21:00	0
2008-12-15	07:22:00	0
2008-12-15	07:23:00	0
2008-12-15	07:24:00	0
2008-12-15	07:25:00	0
2008-12-15	07:26:00	0
2008-12-15	07:27:00	0
2008-12-15	07:28:00	0
2008-12-15	07:29:00	0
2008-12-15	07:30:00	0
2008-12-15	07:31:00	0
2008-12-15	07:32:00	0
2008-12-15	07:33:00	0
2008-12-15	07:34:00	0
2008-12-15	07:35:00	0
2008-12-15	07:36:00	0
2008-12-15	07:37:00	0
2008-12-15	07:38:00	0
2008-12-15	07:39:00	0
2008-12-15	07:40:00	0
2008-12-15	07:41:00	0
2008-12-15	07:42:00	0
2008-12-15	07:43:00	0
2008-12-15	07:44:00	0
2008-12-15	07:45:00	0
2008-12-15	07:46:00	0
2008-12-15	07:47:00	0
2008-12-15	07:48:00	0
2008-12-15	07:49:00	0
2008-12-15	07:50:00	0
2008-12-15	07:51:00	0
2008-12-15	07:52:00	0
2008-12-15	07:53:00	0
2008-12-15	07:54:00	0
2008-12-15	07:55:00	0
2008-12-15	07:56:00	0
2008-12-15	07:57:00	0
2008-12-15	07:58:00	0
2008-12-15	07:59:00	0
2008-12-15	08:00:00	0
2008-12-15	08:01:00	0
2008-12-15	08:02:00	0
2008-12-15	08:03:00	0
2008-12-15	08:04:00	0
2008-12-15	08:05:00	0
2008-12-15	08:06:00	0
2008-12-15	08:07:00	0
2008-12-15	08:08:00	0
2008-12-15	08:09:00	0
2008-12-15	08:10:00	0
2008-12-15	08:11:00	0
2008-12-15	08:12:00	0
2008-12-15	08:13:00	0
2008-12-15	08:14:00	0
2008-12-15	08:15:00	0
2008-12-15	08:16:00	0
2008-12-15	08:17:00	0
2008-12-15	08:18:00	0
2008-12-15	08:19:00	0
2008-12-15	08:20:00	0
2008-12-15	08:21:00	0
2008-12-15	08:22:00	0
2008-12-15	08:23:00	0
2008-12-15	08:24:00	0
2008-12-15	08:25:00	0
2008-12-15	08:26:00	0
2008-12-15	08:27:00	0
2008-12-15	08:28:00	0
2008-12-15	08:29:00	0
2008-12-15	08:30:00	0
2008-12-15	08:31:00	0
2008-12-15	08:32:00	0
2008-12-15	08:33:00	0
2008-12-15	08:34:00	0
2008-12-15	08:35:00	0
2008-12-15	08:36:00	0
2008-12-15	08:37:00	0
2008-12-15	08:38:00	0
2008-12-15	08:39:00	0
2008-12-15	08:40:00	0
2008-12-15	08:41:00	0
2008-12-15	08:42:00	0
2008-12-15	08:43:00	0
2008-12-15	08:44:00	0
2008-12-15	08:45:00	0
2008-12-15	08:46:00	0
2008-12-15	08:47:00	0
2008-12-15	08:48:00	0
2008-12-15	08:49:00	0
2008-12-15	08:50:00	0
2008-12-15	08:51:00	0
2008-12-15	08:52:00	0
2008-12-15	08:53:00	0
2008-12-15	08:54:00	0
2008-12-15	08:55:00	0
2008-12-15	08:56:00	0
2008-12-15	08:57:00	0
2008-12-15	08:58:00	0
2008-12-15	08:59:00	0
2008-12-15	09:00:00	0
2008-12-15	09:01:00	0
2008-12-15	09:02:00	0
2008-12-15	09:03:00	0
2008-12-15	09:04:00	0
2008-12-15	09:05:00	0
2008-12-15	09:06:00	0
2008-12-15	09:07:00	0
2008-12-15	09:08:00	0
2008-12-15	09:09:00	0
2008-12-15	09:10:00	0
2008-12-15	09:11:00	0
2008-12-15	09:12:00	0
2008-12-15	09:13:00	0
2008-12-15	09:14:00	0
2008-12-15	09:15:00	0
2008-12-15	09:16:00	0
2008-12-15	09:17:00	0
2008-12-15	09:18:00	0
2008-12-15	09:19:00	0
2008-12-15	09:20:00	0
2008-12-15	09:21:00	0
2008-12-15	09:22:00	0
2008-12-15	09:23:00	0
2008-12-15	09:24:00	0
2008-12-15	09:25:00	0
2008-12-15	09:26:00	0
2008-12-15	09:27:00	0
2008-12-15	09:28:00	0
2008-12-15	09:29:00	0
2008-12-15	09:30:00	0
2008-12-15	09:31:00	0
2008-12-15	09:32:00	0
2008-12-15	09:33:00	0
2008-12-15	09:34:00	0
2008-12-15	09:35:00	0
2008-12-15	09:36:00	0
2008-12-15	09:37:00	0
2008-12-15	09:38:00	0
2008-12-15	09:39:00	0
2008-12-15	09:40:00	0
2008-12-15	09:41:00	0
2008-12-15	09:42:00	0
2008-12-15	09:43:00	0
2008-12-15	09:44:00	0
2008-12-15	09:45:00	0
2008-12-15	09:46:00	0
2008-12-15	09:47:00	0
2008-12-15	09:48:00	0
2008-12-15	09:49:00	0
2008-12-15	09:50:00	0
2008-12-15	09:51:00	0
2008-12-15	09:52:00	0
2008-12-15	09:53:00	0
2008-12-15	09:54:00	0
2008-12-15	09:55:00	0
2008-12-15	09:56:00	0
2008-12-15	09:57:00	0
2008-12-15	09:58:00	0
2008-12-15	09:59:00	0
2008-12-15	10:00:00	0
2008-12-15	10:01:00	0
2008-12-15	10:02:00	0
2008-12-15	10:03:00	0
2008-12-15	10:04:00	0
2008-12-15	10:05:00	0
2008-12-15	10:06:00	0
2008-12-15	10:07:00	0
2008-12-15	10:08:00	0
2008-12-15	10:09:00	0
2008-12-15	10:10:00	0
2008-12-15	10:11:00	0
2008-12-15	10:12:00	0
2008-12-15	10:13:00	0
2008-12-15	10:14:00	0
2008-12-15	10:15:00	0
2008-12-15	10:16:00	0
2008-12-15	10:17:00	0
2008-12-15	10:18:00	0
2008-12-15	10:19:00	0
2008-12-15	10:20:00	0
2008-12-15	10:21:00	0
2008-12-15	10:22:00	0
2008-12-15	10:23:00	0
2008-12-15	10:24:00	0
2008-12-15	10:25:00	0
2008-12-15	10:26:00	0
2008-12-15	10:27:00	0
2008-12-15	10:28:00	0
2008-12-15	10:29:00	0
2008-12-15	10:30:00	0
2008-12-15	10:31:00	0
2008-12-15	10:32:00	0
2008-12-15	10:33:00	0
2008-12-15	10:34:00	0
2008-12-15	10:35:00	0
2008-12-15	10:36:00	0
2008-12-15	10:37:00	0
2008-12-15	10:38:00	0
2008-12-15	10:39:00	0
2008-12-15	10:40:00	0
2008-12-15	10:41:00	0
2008-12-15	10:42:00	0
2008-12-15	10:43:00	0
2008-12-15	10:44:00	0
2008-12-15	10:45:00	0
2008-12-15	10:46:00	0
2008-12-15	10:47:00	0
2008-12-15	10:48:00	0
2008-12-15	10:49:00	0
2008-12-15	10:50:00	0
2008-12-15	10:51:00	0
2008-12-15	10:52:00	0
2008-12-15	10:53:00	0
2008-12-15	10:54:00	0
2008-12-15	10:55:00	0
2008-12-15	10:56:00	0
2008-12-15	10:57:00	0
2008-12-15	10:58:00	0
2008-12-15	10:59:00	0
2008-12-15	11:00:00	0
2008-12-15	11:01:00	0
2008-12-15	11:02:00	0
2008-12-15	11:03:00	0
2008-12-15	11:04:00	0
2008-12-15	11:05:00	0
2008-12-15	11:06:00	0
2008-12-15	11:07:00	0
2008-12-15	11:08:00	0
2008-12-15	11:09:00	0
2008-12-15	11:10:00	0
2008-12-15	11:11:00	0
2008-12-15	11:12:00	0
2008-12-15	11:13:00	0
2008-12-15	11:14:00	0
2008-12-15	11:15:00	0
2008-12-15	11:16:00	0
2008-12-15	11:17:00	0
2008-12-15	11:18:00	0
2008-12-15	11:19:00	0
2008-12-15	11:20:00	0
2008-12-15	11:21:00	0
2008-12-15	11:22:00	0
2008-12-15	11:23:00	0
2008-12-15	11:24:00	0
2008-12-15	11:25:00	0
2008-12-15	11:26:00	0
2008-12-15	11:27:00	0
2008-12-15	11:28:00	0
2008-12-15	11:29:00	0
2008-12-15	11:30:00	0
2008-12-15	11:31:00	0
2008-12-15	11:32:00	0
2008-12-15	11:33:00	0
2008-12-15	11:34:00	0
2008-12-15	11:35:00	0
2008-12-15	11:36:00	0
2008-12-15	11:37:00	0
2008-12-15	11:38:00	0
2008-12-15	11:39:00	0
2008-12-15	11:40:00	0
2008-12-15	11:41:00	0
2008-12-15	11:42:00	0
2008-12-15	11:43:00	0
2008-12-15	11:44:00	0
2008-12-15	11:45:00	0
2008-12-15	11:46:00	0
2008-12-15	11:47:00	0
2008-12-15	11:48:00	0
2008-12-15	11:49:00	0
2008-12-15	11:50:00	0
2008-12-15	11:51:00	0
2008-12-15	11:52:00	0
2008-12-15	11:53:00	0
2008-12-15	11:54:00	0
2008-12-15	11:55:00	0
2008-12-15	11:56:00	0
2008-12-15	11:57:00	0
2008-12-15	11:58:00	0
2008-12-15	11:59:00	0
2008-12-15	12:00:00	0
2008-12-15	12:01:00	0
2008-12-15	12:02:00	0
2008-12-15	12:03:00	0
2008-12-15	12:04:00	0
2008-12-15	12:05:00	0
2008-12-15	12:06:00	0
2008-12-15	12:07:00	0
2008-12-15	12:08:00	0
2008-12-15	12:09:00	0
2008-12-15	12:10:00	0
2008-12-15	12:11:00	0
2008-12-15	12:12:00	0
2008-12-15	12:13:00	0
2008-12-15	12:14:00	0
2008-12-15	12:15:00	0
2008-12-15	12:16:00	0
2008-12-15	12:17:00	0
2008-12-15	12:18:00	0
2008-12-15	12:19:00	0
2008-12-15	12:20:00	0
2008-12-15	12:21:00	0
2008-12-15	12:22:00	0
2008-12-15	12:23:00	0
2008-12-15	12:24:00	0
2008-12-15	12:25:00	0
2008-12-15	12:26:00	0
2008-12-15	12:27:00	0
2008-12-15	12:28:00	0
2008-12-15	12:29:00	0
2008-12-15	12:30:00	0
2008-12-15	12:31:00	0
2008-12-15	12:32:00	0
2008-12-15	12:33:00	0
2008-12-15	12:34:00	0
2008-12-15	12:35:00	0
2008-12-15	12:36:00	0
2008-12-15	12:37:00	0
2008-12-15	12:38:00	0
2008-12-15	12:39:00	0
2008-12-15	12:40:00	0
2008-12-15	12:41:00	0
2008-12-15	12:42:00	0
2008-12-15	12:43:00	0
2008-12-15	12:44:00	0
2008-12-15	12:45:00	0
2008-12-15	12:46:00	0
2008-12-15	12:47:00	0
2008-12-15	12:48:00	0
2008-12-15	12:49:00	0
2008-12-15	12:50:00	0
2008-12-15	12:51:00	0
2008-12-15	12:52:00	0
2008-12-15	12:53:00	0
2008-12-15	12:54:00	0
2008-12-15	12:55:00	0
2008-12-15	12:56:00	0
2008-12-15	12:57:00	0
2008-12-15	12:58:00	0
2008-12-15	12:59:00	0
2008-12-15	13:00:00	0
2008-12-15	13:01:00	0
2008-12-15	13:02:00	0
2008-12-15	13:03:00	0
2008-12-15	13:04:00	0
2008-12-15	13:05:00	0
2008-12-15	13:06:00	0
2008-12-15	13:07:00	0
2008-12-15	13:08:00	0
2008-12-15	13:09:00	0
2008-12-15	13:10:00	0
2008-12-15	13:11:00	0
2008-12-15	13:12:00	0
2008-12-15	13:13:00	0
2008-12-15	13:14:00	0
2008-12-15	13:15:00	0
2008-12-15	13:16:00	0
2008-12-15	13:17:00	0
2008-12-15	13:18:00	0
2008-12-15	13:19:00	0
2008-12-15	13:20:00	0
2008-12-15	13:21:00	0
2008-12-15	13:22:00	0
2008-12-15	13:23:00	0
2008-12-15	13:24:00	0
2008-12-15	13:25:00	0
2008-12-15	13:26:00	0
2008-12-15	13:27:00	0
2008-12-15	13:28:00	0
2008-12-15	13:29:00	0
2008-12-15	13:30:00	0
2008-12-15	13:31:00	0
2008-12-15	13:32:00	0
2008-12-15	13:33:00	0
2008-12-15	13:34:00	0
2008-12-15	13:35:00	0
2008-12-15	13:36:00	0
2008-12-15	13:37:00	0
2008-12-15	13:38:00	0
2008-12-15	13:39:00	0
2008-12-15	13:40:00	0
2008-12-15	13:41:00	0
2008-12-15	13:42:00	0
2008-12-15	13:43:00	0
2008-12-15	13:44:00	0
2008-12-15	13:45:00	0
2008-12-15	13:46:00	0
2008-12-15	13:47:00	0
2008-12-15	13:48:00	0
2008-12-15	13:49:00	0
2008-12-15	13:50:00	0
2008-12-15	13:51:00	0
2008-12-15	13:52:00	0
2008-12-15	13:53:00	0
2008-12-15	13:54:00	0
2008-12-15	13:55:00	0
2008-12-15	13:56:00	0
2008-12-15	13:57:00	0
2008-12-15	13:58:00	0
2008-12-15	13:59:00	0
2008-12-15	14:00:00	0
2008-12-15	14:01:00	0
2008-12-15	14:02:00	0
2008-12-15	14:03:00	0
2008-12-15	14:04:00	0
2008-12-15	14:05:00	0
2008-12-15	14:06:00	0
2008-12-15	14:07:00	0
2008-12-15	14:08:00	0
2008-12-15	14:09:00	0
2008-12-15	14:10:00	0
2008-12-15	14:11:00	0
2008-12-15	14:12:00	0
2008-12-15	14:13:00	0
2008-12-15	14:14:00	0
2008-12-15	14:15:00	0
2008-12-15	14:16:00	0
2008-12-15	14:17:00	0
2008-12-15	14:18:00	0
2008-12-15	14:19:00	0
2008-12-15	14:20:00	0
2008-12-15	14:21:00	0
2008-12-15	14:22:00	0
2008-12-15	14:23:00	0
2008-12-15	14:24:00	0
2008-12-15	14:25:00	0
2008-12-15	14:26:00	0
2008-12-15	14:27:00	0
2008-12-15	14:28:00	0
2008-12-15	14:29:00	0
2008-12-15	14:30:00	0
2008-12-15	14:31:00	0
2008-12-15	14:32:00	0
2008-12-15	14:33:00	0
2008-12-15	14:34:00	0
2008-12-15	14:35:00	0
2008-12-15	14:36:00	0
2008-12-15	14:37:00	0
2008-12-15	14:38:00	0
2008-12-15	14:39:00	0
2008-12-15	14:40:00	0
2008-12-15	14:41:00	0
2008-12-15	14:42:00	0
2008-12-15	14:43:00	0
2008-12-15	14:44:00	0
2008-12-15	14:45:00	0
2008-12-15	14:46:00	0
2008-12-15	14:47:00	0
2008-12-15	14:48:00	0
2008-12-15	14:49:00	0
2008-12-15	14:50:00	0
2008-12-15	14:51:00	0
2008-12-15	14:52:00	0
2008-12-15	14:53:00	0
2008-12-15	14:54:00	0
2008-12-15	14:55:00	0
2008-12-15	14:56:00	0
2008-12-15	14:57:00	0
2008-12-15	14:58:00	0
2008-12-15	14:59:00	0
2008-12-15	15:00:00	0
2008-12-15	15:01:00	0
2008-12-15	15:02:00	0
2008-12-15	15:03:00	0
2008-12-15	15:04:00	0
2008-12-15	15:05:00	0
2008-12-15	15:06:00	0
2008-12-15	15:07:00	0
2008-12-15	15:08:00	0
2008-12-15	15:09:00	0
2008-12-15	15:10:00	0
2008-12-15	15:11:00	0
2008-12-15	15:12:00	0
2008-12-15	15:13:00	0
2008-12-15	15:14:00	0
2008-12-15	15:15:00	0
2008-12-15	15:16:00	0
2008-12-15	15:17:00	0
2008-12-15	15:18:00	0
2008-12-15	15:19:00	0
2008-12-15	15:20:00	0
2008-12-15	15:21:00	0
2008-12-15	15:22:00	0
2008-12-15	15:23:00	0
2008-12-15	15:24:00	0
2008-12-15	15:25:00	0
2008-12-15	15:26:00	0
2008-12-15	15:27:00	0
2008-12-15	15:28:00	0
2008-12-15	15:29:00	0
2008-12-15	15:30:00	0
2008-12-15	15:31:00	0
2008-12-15	15:32:00	0
2008-12-15	15:33:00	0
2008-12-15	15:34:00	0
2008-12-15	15:35:00	0
2008-12-15	15:36:00	0
2008-12-15	15:37:00	0
2008-12-15	15:38:00	0
2008-12-15	15:39:00	0
2008-12-15	15:40:00	0
2008-12-15	15:41:00	0
2008-12-15	15:42:00	0
2008-12-15	15:43:00	0
2008-12-15	15:44:00	0
2008-12-15	15:45:00	0
2008-12-15	15:46:00	0
2008-12-15	15:47:00	0
2008-12-15	15:48:00	0
2008-12-15	15:49:00	0
2008-12-15	15:50:00	0
2008-12-15	15:51:00	0
2008-12-15	15:52:00	0
2008-12-15	15:53:00	0
2008-12-15	15:54:00	0
2008-12-15	15:55:00	0
2008-12-15	15:56:00	0
2008-12-15	15:57:00	0
2008-12-15	15:58:00	0
2008-12-15	15:59:00	0
2008-12-15	16:00:00	0
2008-12-15	16:01:00	0
2008-12-15	16:02:00	0
2008-12-15	16:03:00	0
2008-12-15	16:04:00	0
2008-12-15	16:05:00	0
2008-12-15	16:06:00	0
2008-12-15	16:07:00	0
2008-12-15	16:08:00	0
2008-12-15	16:09:00	0
2008-12-15	16:10:00	0
2008-12-15	16:11:00	0
2008-12-15	16:12:00	0
2008-12-15	16:13:00	0
2008-12-15	16:14:00	0
2008-12-15	16:15:00	0
2008-12-15	16:16:00	0
2008-12-15	16:17:00	0
2008-12-15	16:18:00	0
2008-12-15	16:19:00	0
2008-12-15	16:20:00	0
2008-12-15	16:21:00	0
2008-12-15	16:22:00	0
2008-12-15	16:23:00	0
2008-12-15	16:24:00	0
2008-12-15	16:25:00	0
2008-12-15	16:26:00	0
2008-12-15	16:27:00	0
2008-12-15	16:28:00	0
2008-12-15	16:29:00	0
2008-12-15	16:30:00	0
2008-12-15	16:31:00	0
2008-12-15	16:32:00	0
2008-12-15	16:33:00	0
2008-12-15	16:34:00	0
2008-12-15	16:35:00	0
2008-12-15	16:36:00	0
2008-12-15	16:37:00	0
2008-12-15	16:38:00	0
2008-12-15	16:39:00	0
2008-12-15	16:40:00	0
2008-12-15	16:41:00	0
2008-12-15	16:42:00	0
2008-12-15	16:43:00	0
2008-12-15	16:44:00	0
2008-12-15	16:45:00	0
2008-12-15	16:46:00	0
2008-12-15	16:47:00	0
2008-12-15	16:48:00	0
2008-12-15	16:49:00	0
2008-12-15	16:50:00	0
2008-12-15	16:51:00	0
2008-12-15	16:52:00	0
2008-12-15	16:53:00	0
2008-12-15	16:54:00	0
2008-12-15	16:55:00	0
2008-12-15	16:56:00	0
2008-12-15	16:57:00	0
2008-12-15	16:58:00	0
2008-12-15	16:59:00	0
2008-12-15	17:00:00	0
2008-12-15	17:01:00	0
2008-12-15	17:02:00	0
2008-12-15	17:03:00	0
2008-12-15	17:04:00	0
2008-12-15	17:05:00	0
2008-12-15	17:06:00	0
2008-12-15	17:07:00	0
2008-12-15	17:08:00	0
2008-12-15	17:09:00	0
2008-12-15	17:10:00	0
2008-12-15	17:11:00	0
2008-12-15	17:12:00	0
2008-12-15	17:13:00	0
2008-12-15	17:14:00	0
2008-12-15	17:15:00	0
2008-12-15	17:16:00	0
2008-12-15	17:17:00	0
2008-12-15	17:18:00	0
2008-12-15	17:19:00	0
2008-12-15	17:20:00	0
2008-12-15	17:21:00	0
2008-12-15	17:22:00	0
2008-12-15	17:23:00	0
2008-12-15	17:24:00	0
2008-12-15	17:25:00	0
2008-12-15	17:26:00	0
2008-12-15	17:27:00	0
2008-12-15	17:28:00	0
2008-12-15	17:29:00	0
2008-12-15	17:30:00	0	M
2008-12-15	17:31:00	211
2008-12-15	17:32:00	154
2008-12-15	17:33:00	360
2008-12-15	17:34:00	410
2008-12-15	17:35:00	211
2008-12-15	17:36:00	282
2008-12-15	17:37:00	460
2008-12-15	17:38:00	443
2008-12-15	17:39:00	633
2008-12-15	17:40:00	296
2008-12-15	17:41:00	460
2008-12-15	17:42:00	536
2008-12-15	17:43:00	344
2008-12-15	17:44:00	296
2008-12-15	17:45:00	574
2008-12-15	17:46:00	517
2008-12-15	17:47:00	254
2008-12-15	17:48:00	427
2008-12-15	17:49:00	536
2008-12-15	17:50:00	344
2008-12-15	17:51:00	460
2008-12-15	17:52:00	517
2008-12-15	17:53:00	612
2008-12-15	17:54:00	593
2008-12-15	17:55:00	697
2008-12-15	17:56:00	555
2008-12-15	17:57:00	808
2008-12-15	17:58:00	393
2008-12-15	17:59:00	517
2008-12-15	18:00:00	268
2008-12-15	18:01:00	393
2008-12-15	18:02:00	517
2008-12-15	18:03:00	879
2008-12-15	18:04:00	1764
2008-12-15	18:05:00	1318
2008-12-15	18:06:00	377
2008-12-15	18:07:00	36
2008-12-15	18:08:00	83
2008-12-15	18:09:00	24
2008-12-15	18:10:00	197
2008-12-15	18:11:00	59
2008-12-15	18:12:00	0
2008-12-15	18:13:00	0
2008-12-15	18:14:00	59
2008-12-15	18:15:00	24
2008-12-15	18:16:00	12
2008-12-15	18:17:00	59
2008-12-15	18:18:00	59
2008-12-15	18:19:00	36
2008-12-15	18:20:00	197
2008-12-15	18:21:00	12
2008-12-15	18:22:00	36
2008-12-15	18:23:00	12
2008-12-15	18:24:00	107
2008-12-15	18:25:00	95
2008-12-15	18:26:00	119
2008-12-15	18:27:00	24
2008-12-15	18:28:00	12
2008-12-15	18:29:00	12
2008-12-15	18:30:00	95
2008-12-15	18:31:00	36
2008-12-15	18:32:00	517
2008-12-15	18:33:00	1726
2008-12-15	18:34:00	1197
2008-12-15	18:35:00	927
2008-12-15	18:36:00	1479
2008-12-15	18:37:00	953
2008-12-15	18:38:00	856
2008-12-15	18:39:00	282
2008-12-15	18:40:00	254
2008-12-15	18:41:00	344
2008-12-15	18:42:00	377
2008-12-15	18:43:00	197
2008-12-15	18:44:00	377
2008-12-15	18:45:00	808
2008-12-15	18:46:00	327
2008-12-15	18:47:00	443
2008-12-15	18:48:00	24
2008-12-15	18:49:00	12
2008-12-15	18:50:00	0
2008-12-15	18:51:00	0
2008-12-15	18:52:00	0
2008-12-15	18:53:00	12
2008-12-15	18:54:00	0
2008-12-15	18:55:00	0
2008-12-15	18:56:00	24
2008-12-15	18:57:00	0
2008-12-15	18:58:00	239
2008-12-15	18:59:00	254
2008-12-15	19:00:00	95
2008-12-15	19:01:00	168
2008-12-15	19:02:00	254
2008-12-15	19:03:00	593
2008-12-15	19:04:00	107
2008-12-15	19:05:00	327
2008-12-15	19:06:00	254
2008-12-15	19:07:00	24
2008-12-15	19:08:00	12
2008-12-15	19:09:00	12
2008-12-15	19:10:00	0
2008-12-15	19:11:00	24
2008-12-15	19:12:00	24
2008-12-15	19:13:00	0
2008-12-15	19:14:00	0
2008-12-15	19:15:00	0
2008-12-15	19:16:00	0
2008-12-15	19:17:00	12
2008-12-15	19:18:00	24
2008-12-15	19:19:00	0
2008-12-15	19:20:00	0
2008-12-15	19:21:00	12
2008-12-15	19:22:00	239
2008-12-15	19:23:00	393
2008-12-15	19:24:00	47
2008-12-15	19:25:00	555
2008-12-15	19:26:00	254
2008-12-15	19:27:00	183
2008-12-15	19:28:00	83
2008-12-15	19:29:00	107
2008-12-15	19:30:00	311
2008-12-15	19:31:00	225
2008-12-15	19:32:00	197
2008-12-15	19:33:00	225
2008-12-15	19:34:00	119
2008-12-15	19:35:00	142
2008-12-15	19:36:00	130
2008-12-15	19:37:00	282
2008-12-15	19:38:00	536
2008-12-15	19:39:00	254
2008-12-15	19:40:00	183
2008-12-15	19:41:00	183
2008-12-15	19:42:00	168
2008-12-15	19:43:00	119
2008-12-15	19:44:00	377
2008-12-15	19:45:00	344
2008-12-15	19:46:00	268
2008-12-15	19:47:00	427
2008-12-15	19:48:00	327
2008-12-15	19:49:00	83
2008-12-15	19:50:00	785
2008-12-15	19:51:00	1140
2008-12-15	19:52:00	296
2008-12-15	19:53:00	517
2008-12-15	19:54:00	47
2008-12-15	19:55:00	12
2008-12-15	19:56:00	0
2008-12-15	19:57:00	47
2008-12-15	19:58:00	12
2008-12-15	19:59:00	0
2008-12-15	20:00:00	676
2008-12-15	20:01:00	107
2008-12-15	20:02:00	0
2008-12-15	20:03:00	0
2008-12-15	20:04:00	0
2008-12-15	20:05:00	0
2008-12-15	20:06:00	0
2008-12-15	20:07:00	0
2008-12-15	20:08:00	0
2008-12-15	20:09:00	59
2008-12-15	20:10:00	0
2008-12-15	20:11:00	344
2008-12-15	20:12:00	879
2008-12-15	20:13:00	47
2008-12-15	20:14:00	0
2008-12-15	20:15:00	0
2008-12-15	20:16:00	0
2008-12-15	20:17:00	0
2008-12-15	20:18:00	0
2008-12-15	20:19:00	0
2008-12-15	20:20:00	0
2008-12-15	20:21:00	0
2008-12-15	20:22:00	36
2008-12-15	20:23:00	24
2008-12-15	20:24:00	0
2008-12-15	20:25:00	0
2008-12-15	20:26:00	0
2008-12-15	20:27:00	0
2008-12-15	20:28:00	0
2008-12-15	20:29:00	0
2008-12-15	20:30:00	0
2008-12-15	20:31:00	0
2008-12-15	20:32:00	0
2008-12-15	20:33:00	0
2008-12-15	20:34:00	0
2008-12-15	20:35:00	0
2008-12-15	20:36:00	0
2008-12-15	20:37:00	0
2008-12-15	20:38:00	0
2008-12-15	20:39:00	0
2008-12-15	20:40:00	36
2008-12-15	20:41:00	12
2008-12-15	20:42:00	0
2008-12-15	20:43:00	0
2008-12-15	20:44:00	0
2008-12-15	20:45:00	0
2008-12-15	20:46:00	0
2008-12-15	20:47:00	0
2008-12-15	20:48:00	0
2008-12-15	20:49:00	0
2008-12-15	20:50:00	0
2008-12-15	20:51:00	12
2008-12-15	20:52:00	0
2008-12-15	20:53:00	36
2008-12-15	20:54:00	0
2008-12-15	20:55:00	0
2008-12-15	20:56:00	0
2008-12-15	20:57:00	0
2008-12-15	20:58:00	0
2008-12-15	20:59:00	0
2008-12-15	21:00:00	24
2008-12-15	21:01:00	0
2008-12-15	21:02:00	0
2008-12-15	21:03:00	12
2008-12-15	21:04:00	0
2008-12-15	21:05:00	0
2008-12-15	21:06:00	0
2008-12-15	21:07:00	0
2008-12-15	21:08:00	0
2008-12-15	21:09:00	0
2008-12-15	21:10:00	0
2008-12-15	21:11:00	0
2008-12-15	21:12:00	0
2008-12-15	21:13:00	0
2008-12-15	21:14:00	0
2008-12-15	21:15:00	0
2008-12-15	21:16:00	36
2008-12-15	21:17:00	0
2008-12-15	21:18:00	0
2008-12-15	21:19:00	0
2008-12-15	21:20:00	0
2008-12-15	21:21:00	0
2008-12-15	21:22:00	0
2008-12-15	21:23:00	0
2008-12-15	21:24:00	0
2008-12-15	21:25:00	0
2008-12-15	21:26:00	0
2008-12-15	21:27:00	0
2008-12-15	21:28:00	0
2008-12-15	21:29:00	0
2008-12-15	21:30:00	0
2008-12-15	21:31:00	0
2008-12-15	21:32:00	0
2008-12-15	21:33:00	0
2008-12-15	21:34:00	0
2008-12-15	21:35:00	0
2008-12-15	21:36:00	0
2008-12-15	21:37:00	0
2008-12-15	21:38:00	0
2008-12-15	21:39:00	0
2008-12-15	21:40:00	0
2008-12-15	21:41:00	0
2008-12-15	21:42:00	0
2008-12-15	21:43:00	0
2008-12-15	21:44:00	0
2008-12-15	21:45:00	0
2008-12-15	21:46:00	0
2008-12-15	21:47:00	0
2008-12-15	21:48:00	0
2008-12-15	21:49:00	0
2008-12-15	21:50:00	0
2008-12-15	21:51:00	24
2008-12-15	21:52:00	0
2008-12-15	21:53:00	0
2008-12-15	21:54:00	0
2008-12-15	21:55:00	0
2008-12-15	21:56:00	12
2008-12-15	21:57:00	0
2008-12-15	21:58:00	0
2008-12-15	21:59:00	0
2008-12-15	22:00:00	0
2008-12-15	22:01:00	0
2008-12-15	22:02:00	0
2008-12-15	22:03:00	0
2008-12-15	22:04:00	0
2008-12-15	22:05:00	0
2008-12-15	22:06:00	0
2008-12-15	22:07:00	0
2008-12-15	22:08:00	47
2008-12-15	22:09:00	36
2008-12-15	22:10:00	12
2008-12-15	22:11:00	47
2008-12-15	22:12:00	12
2008-12-15	22:13:00	24
2008-12-15	22:14:00	12
2008-12-15	22:15:00	83
2008-12-15	22:16:00	59
2008-12-15	22:17:00	36
2008-12-15	22:18:00	327
2008-12-15	22:19:00	574
2008-12-15	22:20:00	24
2008-12-15	22:21:00	24
2008-12-15	22:22:00	0
2008-12-15	22:23:00	239
2008-12-15	22:24:00	12
2008-12-15	22:25:00	0
2008-12-15	22:26:00	410
2008-12-15	22:27:00	12
2008-12-15	22:28:00	12
2008-12-15	22:29:00	0
2008-12-15	22:30:00	410
2008-12-15	22:31:00	24
2008-12-15	22:32:00	268
2008-12-15	22:33:00	0
2008-12-15	22:34:00	24
2008-12-15	22:35:00	0
2008-12-15	22:36:00	0
2008-12-15	22:37:00	0
2008-12-15	22:38:00	0
2008-12-15	22:39:00	0
2008-12-15	22:40:00	0
2008-12-15	22:41:00	296
2008-12-15	22:42:00	296
2008-12-15	22:43:00	47
2008-12-15	22:44:00	0
2008-12-15	22:45:00	0
2008-12-15	22:46:00	0
2008-12-15	22:47:00	0
2008-12-15	22:48:00	0
2008-12-15	22:49:00	0
2008-12-15	22:50:00	0
2008-12-15	22:51:00	0
2008-12-15	22:52:00	0
2008-12-15	22:53:00	0
2008-12-15	22:54:00	0
2008-12-15	22:55:00	0
2008-12-15	22:56:00	0
2008-12-15	22:57:00	0
2008-12-15	22:58:00	0
2008-12-15	22:59:00	0
2008-12-15	23:00:00	0
2008-12-15	23:01:00	0
2008-12-15	23:02:00	59
2008-12-15	23:03:00	12
2008-12-15	23:04:00	555
2008-12-15	23:05:00	498
2008-12-15	23:06:00	1225
2008-12-15	23:07:00	377
2008-12-15	23:08:00	197
2008-12-15	23:09:00	718
2008-12-15	23:10:00	903
2008-12-15	23:11:00	479
2008-12-15	23:12:00	311
2008-12-15	23:13:00	211
2008-12-15	23:14:00	154
2008-12-15	23:15:00	0
2008-12-15	23:16:00	211
2008-12-15	23:17:00	0
2008-12-15	23:18:00	12
2008-12-15	23:19:00	0
2008-12-15	23:20:00	12
2008-12-15	23:21:00	47
2008-12-15	23:22:00	47
2008-12-15	23:23:00	59
2008-12-15	23:24:00	59
2008-12-15	23:25:00	0
2008-12-15	23:26:00	59
2008-12-15	23:27:00	12
2008-12-15	23:28:00	0
2008-12-15	23:29:00	95
2008-12-15	23:30:00	0
2008-12-15	23:31:00	0
2008-12-15	23:32:00	0
2008-12-15	23:33:00	0
2008-12-15	23:34:00	197
2008-12-15	23:35:00	130
2008-12-15	23:36:00	0
2008-12-15	23:37:00	59
2008-12-15	23:38:00	0
2008-12-15	23:39:00	24
2008-12-15	23:40:00	119
2008-12-15	23:41:00	119
2008-12-15	23:42:00	83
2008-12-15	23:43:00	142
2008-12-15	23:44:00	168
2008-12-15	23:45:00	0
2008-12-15	23:46:00	59
2008-12-15	23:47:00	36
2008-12-15	23:48:00	71
2008-12-15	23:49:00	0
2008-12-15	23:50:00	36
2008-12-15	23:51:00	71
2008-12-15	23:52:00	197
2008-12-15	23:53:00	0
2008-12-15	23:54:00	296
2008-12-15	23:55:00	142
2008-12-15	23:56:00	36
2008-12-15	23:57:00	59
2008-12-15	23:58:00	47
2008-12-15	23:59:00	47
2008-12-16	00:00:00	460
2008-12-16	00:01:00	498
2008-12-16	00:02:00	130
2008-12-16	00:03:00	47
2008-12-16	00:04:00	71
2008-12-16	00:05:00	47
2008-12-16	00:06:00	12
2008-12-16	00:07:00	12
2008-12-16	00:08:00	12
2008-12-16	00:09:00	0
2008-12-16	00:10:00	0
2008-12-16	00:11:00	0
2008-12-16	00:12:00	0
2008-12-16	00:13:00	0
2008-12-16	00:14:00	0
2008-12-16	00:15:00	0
2008-12-16	00:16:00	24
2008-12-16	00:17:00	555
2008-12-16	00:18:00	327
2008-12-16	00:19:00	83
2008-12-16	00:20:00	107
2008-12-16	00:21:00	254
2008-12-16	00:22:00	59
2008-12-16	00:23:00	0
2008-12-16	00:24:00	0
2008-12-16	00:25:00	327
2008-12-16	00:26:00	360
2008-12-16	00:27:00	282
2008-12-16	00:28:00	927
2008-12-16	00:29:00	154
2008-12-16	00:30:00	697
2008-12-16	00:31:00	443
2008-12-16	00:32:00	654
2008-12-16	00:33:00	344
2008-12-16	00:34:00	12
2008-12-16	00:35:00	12
2008-12-16	00:36:00	0
2008-12-16	00:37:00	0
2008-12-16	00:38:00	0
2008-12-16	00:39:00	0
2008-12-16	00:40:00	12
2008-12-16	00:41:00	36
2008-12-16	00:42:00	0
2008-12-16	00:43:00	0
2008-12-16	00:44:00	0
2008-12-16	00:45:00	0
2008-12-16	00:46:00	0
2008-12-16	00:47:00	0
2008-12-16	00:48:00	593
2008-12-16	00:49:00	239
2008-12-16	00:50:00	254
2008-12-16	00:51:00	0
2008-12-16	00:52:00	0
2008-12-16	00:53:00	36
2008-12-16	00:54:00	12
2008-12-16	00:55:00	12
2008-12-16	00:56:00	0
2008-12-16	00:57:00	0
2008-12-16	00:58:00	24
2008-12-16	00:59:00	0
2008-12-16	01:00:00	0
2008-12-16	01:01:00	0
2008-12-16	01:02:00	36
2008-12-16	01:03:00	0
2008-12-16	01:04:00	0
2008-12-16	01:05:00	0
2008-12-16	01:06:00	0
2008-12-16	01:07:00	0
2008-12-16	01:08:00	0
2008-12-16	01:09:00	0
2008-12-16	01:10:00	0
2008-12-16	01:11:00	0
2008-12-16	01:12:00	0
2008-12-16	01:13:00	0
2008-12-16	01:14:00	0
2008-12-16	01:15:00	0
2008-12-16	01:16:00	0
2008-12-16	01:17:00	0
2008-12-16	01:18:00	0
2008-12-16	01:19:00	0
2008-12-16	01:20:00	0
2008-12-16	01:21:00	0
2008-12-16	01:22:00	0
2008-12-16	01:23:00	0
2008-12-16	01:24:00	0
2008-12-16	01:25:00	0
2008-12-16	01:26:00	0
2008-12-16	01:27:00	0
2008-12-16	01:28:00	0
2008-12-16	01:29:00	0
2008-12-16	01:30:00	0
2008-12-16	01:31:00	0
2008-12-16	01:32:00	0
2008-12-16	01:33:00	47
2008-12-16	01:34:00	0
2008-12-16	01:35:00	0
2008-12-16	01:36:00	0
2008-12-16	01:37:00	0
2008-12-16	01:38:00	0
2008-12-16	01:39:00	0
2008-12-16	01:40:00	0
2008-12-16	01:41:00	0
2008-12-16	01:42:00	0
2008-12-16	01:43:00	0
2008-12-16	01:44:00	0
2008-12-16	01:45:00	0
2008-12-16	01:46:00	0
2008-12-16	01:47:00	0
2008-12-16	01:48:00	0
2008-12-16	01:49:00	0
2008-12-16	01:50:00	0
2008-12-16	01:51:00	0
2008-12-16	01:52:00	0
2008-12-16	01:53:00	0
2008-12-16	01:54:00	36
2008-12-16	01:55:00	0
2008-12-16	01:56:00	0
2008-12-16	01:57:00	0
2008-12-16	01:58:00	0
2008-12-16	01:59:00	0
2008-12-16	02:00:00	0
2008-12-16	02:01:00	0
2008-12-16	02:02:00	0
2008-12-16	02:03:00	0
2008-12-16	02:04:00	0
2008-12-16	02:05:00	0
2008-12-16	02:06:00	0
2008-12-16	02:07:00	0
2008-12-16	02:08:00	0
2008-12-16	02:09:00	12
2008-12-16	02:10:00	0
2008-12-16	02:11:00	0
2008-12-16	02:12:00	0
2008-12-16	02:13:00	0
2008-12-16	02:14:00	0
2008-12-16	02:15:00	0
2008-12-16	02:16:00	0
2008-12-16	02:17:00	0
2008-12-16	02:18:00	0
2008-12-16	02:19:00	0
2008-12-16	02:20:00	0
2008-12-16	02:21:00	0
2008-12-16	02:22:00	0
2008-12-16	02:23:00	0
2008-12-16	02:24:00	0
2008-12-16	02:25:00	0
2008-12-16	02:26:00	0
2008-12-16	02:27:00	0
2008-12-16	02:28:00	0
2008-12-16	02:29:00	0
2008-12-16	02:30:00	47
2008-12-16	02:31:00	24
2008-12-16	02:32:00	0
2008-12-16	02:33:00	83
2008-12-16	02:34:00	0
2008-12-16	02:35:00	0
2008-12-16	02:36:00	0
2008-12-16	02:37:00	0
2008-12-16	02:38:00	555
2008-12-16	02:39:00	1005
2008-12-16	02:40:00	740
2008-12-16	02:41:00	1140
2008-12-16	02:42:00	718
2008-12-16	02:43:00	83
2008-12-16	02:44:00	0
2008-12-16	02:45:00	12
2008-12-16	02:46:00	24
2008-12-16	02:47:00	119
2008-12-16	02:48:00	24
2008-12-16	02:49:00	0
2008-12-16	02:50:00	0
2008-12-16	02:51:00	59
2008-12-16	02:52:00	0
2008-12-16	02:53:00	0
2008-12-16	02:54:00	0
2008-12-16	02:55:00	0
2008-12-16	02:56:00	0
2008-12-16	02:57:00	0
2008-12-16	02:58:00	0
2008-12-16	02:59:00	0
2008-12-16	03:00:00	0
2008-12-16	03:01:00	0
2008-12-16	03:02:00	0
2008-12-16	03:03:00	0
2008-12-16	03:04:00	36
2008-12-16	03:05:00	0
2008-12-16	03:06:00	0
2008-12-16	03:07:00	0
2008-12-16	03:08:00	0
2008-12-16	03:09:00	0
2008-12-16	03:10:00	0
2008-12-16	03:11:00	0
2008-12-16	03:12:00	0
2008-12-16	03:13:00	24
2008-12-16	03:14:00	0
2008-12-16	03:15:00	0
2008-12-16	03:16:00	0
2008-12-16	03:17:00	0
2008-12-16	03:18:00	0
2008-12-16	03:19:00	0
2008-12-16	03:20:00	0
2008-12-16	03:21:00	0
2008-12-16	03:22:00	0
2008-12-16	03:23:00	0
2008-12-16	03:24:00	0
2008-12-16	03:25:00	0
2008-12-16	03:26:00	0
2008-12-16	03:27:00	0
2008-12-16	03:28:00	0
2008-12-16	03:29:00	0
2008-12-16	03:30:00	0
2008-12-16	03:31:00	0
2008-12-16	03:32:00	0
2008-12-16	03:33:00	0
2008-12-16	03:34:00	0
2008-12-16	03:35:00	0
2008-12-16	03:36:00	0
2008-12-16	03:37:00	0
2008-12-16	03:38:00	0
2008-12-16	03:39:00	0
2008-12-16	03:40:00	0
2008-12-16	03:41:00	0
2008-12-16	03:42:00	0
2008-12-16	03:43:00	0
2008-12-16	03:44:00	0
2008-12-16	03:45:00	0
2008-12-16	03:46:00	0
2008-12-16	03:47:00	0
2008-12-16	03:48:00	0
2008-12-16	03:49:00	0
2008-12-16	03:50:00	0
2008-12-16	03:51:00	0
2008-12-16	03:52:00	0
2008-12-16	03:53:00	0
2008-12-16	03:54:00	0
2008-12-16	03:55:00	0
2008-12-16	03:56:00	0
2008-12-16	03:57:00	0
2008-12-16	03:58:00	0
2008-12-16	03:59:00	0
2008-12-16	04:00:00	0
2008-12-16	04:01:00	0
2008-12-16	04:02:00	0
2008-12-16	04:03:00	0
2008-12-16	04:04:00	0
2008-12-16	04:05:00	0
2008-12-16	04:06:00	0
2008-12-16	04:07:00	0
2008-12-16	04:08:00	0
2008-12-16	04:09:00	0
2008-12-16	04:10:00	0
2008-12-16	04:11:00	0
2008-12-16	04:12:00	0
2008-12-16	04:13:00	0
2008-12-16	04:14:00	0
2008-12-16	04:15:00	0
2008-12-16	04:16:00	0
2008-12-16	04:17:00	0
2008-12-16	04:18:00	0
2008-12-16	04:19:00	0
2008-12-16	04:20:00	0
2008-12-16	04:21:00	0
2008-12-16	04:22:00	0
2008-12-16	04:23:00	0
2008-12-16	04:24:00	0
2008-12-16	04:25:00	0
2008-12-16	04:26:00	0
2008-12-16	04:27:00	0
2008-12-16	04:28:00	0
2008-12-16	04:29:00	0
2008-12-16	04:30:00	0
2008-12-16	04:31:00	0
2008-12-16	04:32:00	0
2008-12-16	04:33:00	0
2008-12-16	04:34:00	0
2008-12-16	04:35:00	0
2008-12-16	04:36:00	0
2008-12-16	04:37:00	0
2008-12-16	04:38:00	0
2008-12-16	04:39:00	0
2008-12-16	04:40:00	0
2008-12-16	04:41:00	0
2008-12-16	04:42:00	0
2008-12-16	04:43:00	0
2008-12-16	04:44:00	0
2008-12-16	04:45:00	0
2008-12-16	04:46:00	0
2008-12-16	04:47:00	0
2008-12-16	04:48:00	0
2008-12-16	04:49:00	0
2008-12-16	04:50:00	0
2008-12-16	04:51:00	0
2008-12-16	04:52:00	0
2008-12-16	04:53:00	0
2008-12-16	04:54:00	0
2008-12-16	04:55:00	0
2008-12-16	04:56:00	0
2008-12-16	04:57:00	0
2008-12-16	04:58:00	0
2008-12-16	04:59:00	0
2008-12-16	05:00:00	0
2008-12-16	05:01:00	0
2008-12-16	05:02:00	0
2008-12-16	05:03:00	0
2008-12-16	05:04:00	0
2008-12-16	05:05:00	0
2008-12-16	05:06:00	0
2008-12-16	05:07:00	0
2008-12-16	05:08:00	0
2008-12-16	05:09:00	0
2008-12-16	05:10:00	0
2008-12-16	05:11:00	0
2008-12-16	05:12:00	0
2008-12-16	05:13:00	0
2008-12-16	05:14:00	0
2008-12-16	05:15:00	0
2008-12-16	05:16:00	0
2008-12-16	05:17:00	0
2008-12-16	05:18:00	0
2008-12-16	05:19:00	0
2008-12-16	05:20:00	12
2008-12-16	05:21:00	12
2008-12-16	05:22:00	71
2008-12-16	05:23:00	0
2008-12-16	05:24:00	0
2008-12-16	05:25:00	0
2008-12-16	05:26:00	0
2008-12-16	05:27:00	0
2008-12-16	05:28:00	0
2008-12-16	05:29:00	0
2008-12-16	05:30:00	0
2008-12-16	05:31:00	0
2008-12-16	05:32:00	0
2008-12-16	05:33:00	0
2008-12-16	05:34:00	0
2008-12-16	05:35:00	0
2008-12-16	05:36:00	0
2008-12-16	05:37:00	0
2008-12-16	05:38:00	0
2008-12-16	05:39:00	0
2008-12-16	05:40:00	59
2008-12-16	05:41:00	0
2008-12-16	05:42:00	0
2008-12-16	05:43:00	0
2008-12-16	05:44:00	0
2008-12-16	05:45:00	0
2008-12-16	05:46:00	0
2008-12-16	05:47:00	0
2008-12-16	05:48:00	0
2008-12-16	05:49:00	0
2008-12-16	05:50:00	0
2008-12-16	05:51:00	0
2008-12-16	05:52:00	0
2008-12-16	05:53:00	0
2008-12-16	05:54:00	0
2008-12-16	05:55:00	0
2008-12-16	05:56:00	0
2008-12-16	05:57:00	0
2008-12-16	05:58:00	0
2008-12-16	05:59:00	0
2008-12-16	06:00:00	0
2008-12-16	06:01:00	0
2008-12-16	06:02:00	0
2008-12-16	06:03:00	0
2008-12-16	06:04:00	0
2008-12-16	06:05:00	0
2008-12-16	06:06:00	0
2008-12-16	06:07:00	0
2008-12-16	06:08:00	0
2008-12-16	06:09:00	0
2008-12-16	06:10:00	0
2008-12-16	06:11:00	0
2008-12-16	06:12:00	0
2008-12-16	06:13:00	0
2008-12-16	06:14:00	0
2008-12-16	06:15:00	0
2008-12-16	06:16:00	0
2008-12-16	06:17:00	0
2008-12-16	06:18:00	0
2008-12-16	06:19:00	0
2008-12-16	06:20:00	36
2008-12-16	06:21:00	0
2008-12-16	06:22:00	0
2008-12-16	06:23:00	0
2008-12-16	06:24:00	0
2008-12-16	06:25:00	0
2008-12-16	06:26:00	0
2008-12-16	06:27:00	0
2008-12-16	06:28:00	0
2008-12-16	06:29:00	0
2008-12-16	06:30:00	0
2008-12-16	06:31:00	12
2008-12-16	06:32:00	0
2008-12-16	06:33:00	0
2008-12-16	06:34:00	0
2008-12-16	06:35:00	0
2008-12-16	06:36:00	0
2008-12-16	06:37:00	0
2008-12-16	06:38:00	0
2008-12-16	06:39:00	47
2008-12-16	06:40:00	0
2008-12-16	06:41:00	0
2008-12-16	06:42:00	0
2008-12-16	06:43:00	0
2008-12-16	06:44:00	0
2008-12-16	06:45:00	0
2008-12-16	06:46:00	0
2008-12-16	06:47:00	0
2008-12-16	06:48:00	0
2008-12-16	06:49:00	0
2008-12-16	06:50:00	0
2008-12-16	06:51:00	0
2008-12-16	06:52:00	0
2008-12-16	06:53:00	0
2008-12-16	06:54:00	0
2008-12-16	06:55:00	0
2008-12-16	06:56:00	0
2008-12-16	06:57:00	0
2008-12-16	06:58:00	0
2008-12-16	06:59:00	0
2008-12-16	07:00:00	0
2008-12-16	07:01:00	0
2008-12-16	07:02:00	0
2008-12-16	07:03:00	0
2008-12-16	07:04:00	0
2008-12-16	07:05:00	0
2008-12-16	07:06:00	0
2008-12-16	07:07:00	0
2008-12-16	07:08:00	0
2008-12-16	07:09:00	0
2008-12-16	07:10:00	0
2008-12-16	07:11:00	0
2008-12-16	07:12:00	0
2008-12-16	07:13:00	0
2008-12-16	07:14:00	0
2008-12-16	07:15:00	0
2008-12-16	07:16:00	0
2008-12-16	07:17:00	0
2008-12-16	07:18:00	0
2008-12-16	07:19:00	59
2008-12-16	07:20:00	12
2008-12-16	07:21:00	0
2008-12-16	07:22:00	0
2008-12-16	07:23:00	0
2008-12-16	07:24:00	0
2008-12-16	07:25:00	0
2008-12-16	07:26:00	0
2008-12-16	07:27:00	0
2008-12-16	07:28:00	0
2008-12-16	07:29:00	12
2008-12-16	07:30:00	24
2008-12-16	07:31:00	0
2008-12-16	07:32:00	0
2008-12-16	07:33:00	0
2008-12-16	07:34:00	0
2008-12-16	07:35:00	0
2008-12-16	07:36:00	0
2008-12-16	07:37:00	0
2008-12-16	07:38:00	47
2008-12-16	07:39:00	0
2008-12-16	07:40:00	24
2008-12-16	07:41:00	12
2008-12-16	07:42:00	83
2008-12-16	07:43:00	59
2008-12-16	07:44:00	0
2008-12-16	07:45:00	36
2008-12-16	07:46:00	0
2008-12-16	07:47:00	36
2008-12-16	07:48:00	12
2008-12-16	07:49:00	0
2008-12-16	07:50:00	0
2008-12-16	07:51:00	12
2008-12-16	07:52:00	0
2008-12-16	07:53:00	47
2008-12-16	07:54:00	36
2008-12-16	07:55:00	0
2008-12-16	07:56:00	0
2008-12-16	07:57:00	36
2008-12-16	07:58:00	574
2008-12-16	07:59:00	311
2008-12-16	08:00:00	377
2008-12-16	08:01:00	460
2008-12-16	08:02:00	393
2008-12-16	08:03:00	536
2008-12-16	08:04:00	254
2008-12-16	08:05:00	697
2008-12-16	08:06:00	393
2008-12-16	08:07:00	225
2008-12-16	08:08:00	0
2008-12-16	08:09:00	36
2008-12-16	08:10:00	36
2008-12-16	08:11:00	0
2008-12-16	08:12:00	0
2008-12-16	08:13:00	0
2008-12-16	08:14:00	0
2008-12-16	08:15:00	0
2008-12-16	08:16:00	0
2008-12-16	08:17:00	0
2008-12-16	08:18:00	0
2008-12-16	08:19:00	0
2008-12-16	08:20:00	0
2008-12-16	08:21:00	0
2008-12-16	08:22:00	0
2008-12-16	08:23:00	0
2008-12-16	08:24:00	0
2008-12-16	08:25:00	0
2008-12-16	08:26:00	0
2008-12-16	08:27:00	0
2008-12-16	08:28:00	59
2008-12-16	08:29:00	0
2008-12-16	08:30:00	0
2008-12-16	08:31:00	0
2008-12-16	08:32:00	0
2008-12-16	08:33:00	0
2008-12-16	08:34:00	0
2008-12-16	08:35:00	0
2008-12-16	08:36:00	0
2008-12-16	08:37:00	0
2008-12-16	08:38:00	0
2008-12-16	08:39:00	0
2008-12-16	08:40:00	0
2008-12-16	08:41:00	0
2008-12-16	08:42:00	59
2008-12-16	08:43:00	0
2008-12-16	08:44:00	0
2008-12-16	08:45:00	0
2008-12-16	08:46:00	0
2008-12-16	08:47:00	0
2008-12-16	08:48:00	0
2008-12-16	08:49:00	0
2008-12-16	08:50:00	0
2008-12-16	08:51:00	0
2008-12-16	08:52:00	0
2008-12-16	08:53:00	0
2008-12-16	08:54:00	0
2008-12-16	08:55:00	0
2008-12-16	08:56:00	0
2008-12-16	08:57:00	0
2008-12-16	08:58:00	12
2008-12-16	08:59:00	0
2008-12-16	09:00:00	36
2008-12-16	09:01:00	0
2008-12-16	09:02:00	0
2008-12-16	09:03:00	0
2008-12-16	09:04:00	0
2008-12-16	09:05:00	47
2008-12-16	09:06:00	0
2008-12-16	09:07:00	0
2008-12-16	09:08:00	0
[truncated: 21,051 more rows]

## Sheet: 12.30.08
Actogram, Copy Raw Data, All Days
Identity:	Skye Begalla
Filename:	E:\Active Research Files\meloxicam titre canine\cases\skye\Skye Begalla 12.30.08.AWC
Gender:	F
Age:	13
Height:	61.0 cm	24.0 in
Weight:	22.0 kg	48.5 lbs
Start Date:	30-Dec-2008 (Tue)
Start Time:	17:00:00
Interval:	1.00 mins
Date Stamp:	Time Stamp:	Activity Data:	Marker Press:
2008-12-30	00:00:00	0
2008-12-30	00:01:00	0
2008-12-30	00:02:00	0
2008-12-30	00:03:00	0
2008-12-30	00:04:00	0
2008-12-30	00:05:00	0
2008-12-30	00:06:00	0
2008-12-30	00:07:00	0
2008-12-30	00:08:00	0
2008-12-30	00:09:00	0
2008-12-30	00:10:00	0
2008-12-30	00:11:00	0
2008-12-30	00:12:00	0
2008-12-30	00:13:00	0
2008-12-30	00:14:00	0
2008-12-30	00:15:00	0
2008-12-30	00:16:00	0
2008-12-30	00:17:00	0
2008-12-30	00:18:00	0
2008-12-30	00:19:00	0
2008-12-30	00:20:00	0
2008-12-30	00:21:00	0
2008-12-30	00:22:00	0
2008-12-30	00:23:00	0
2008-12-30	00:24:00	0
2008-12-30	00:25:00	0
2008-12-30	00:26:00	0
2008-12-30	00:27:00	0
2008-12-30	00:28:00	0
2008-12-30	00:29:00	0
2008-12-30	00:30:00	0
2008-12-30	00:31:00	0
2008-12-30	00:32:00	0
2008-12-30	00:33:00	0
2008-12-30	00:34:00	0
2008-12-30	00:35:00	0
2008-12-30	00:36:00	0
2008-12-30	00:37:00	0
2008-12-30	00:38:00	0
2008-12-30	00:39:00	0
2008-12-30	00:40:00	0
2008-12-30	00:41:00	0
2008-12-30	00:42:00	0
2008-12-30	00:43:00	0
2008-12-30	00:44:00	0
2008-12-30	00:45:00	0
2008-12-30	00:46:00	0
2008-12-30	00:47:00	0
2008-12-30	00:48:00	0
2008-12-30	00:49:00	0
2008-12-30	00:50:00	0
2008-12-30	00:51:00	0
2008-12-30	00:52:00	0
2008-12-30	00:53:00	0
2008-12-30	00:54:00	0
2008-12-30	00:55:00	0
2008-12-30	00:56:00	0
2008-12-30	00:57:00	0
2008-12-30	00:58:00	0
2008-12-30	00:59:00	0
2008-12-30	01:00:00	0
2008-12-30	01:01:00	0
2008-12-30	01:02:00	0
2008-12-30	01:03:00	0
2008-12-30	01:04:00	0
2008-12-30	01:05:00	0
2008-12-30	01:06:00	0
2008-12-30	01:07:00	0
2008-12-30	01:08:00	0
2008-12-30	01:09:00	0
2008-12-30	01:10:00	0
2008-12-30	01:11:00	0
2008-12-30	01:12:00	0
2008-12-30	01:13:00	0
2008-12-30	01:14:00	0
2008-12-30	01:15:00	0
2008-12-30	01:16:00	0
2008-12-30	01:17:00	0
2008-12-30	01:18:00	0
2008-12-30	01:19:00	0
2008-12-30	01:20:00	0
2008-12-30	01:21:00	0
2008-12-30	01:22:00	0
2008-12-30	01:23:00	0
2008-12-30	01:24:00	0
2008-12-30	01:25:00	0
2008-12-30	01:26:00	0
2008-12-30	01:27:00	0
2008-12-30	01:28:00	0
2008-12-30	01:29:00	0
2008-12-30	01:30:00	0
2008-12-30	01:31:00	0
2008-12-30	01:32:00	0
2008-12-30	01:33:00	0
2008-12-30	01:34:00	0
2008-12-30	01:35:00	0
2008-12-30	01:36:00	0
2008-12-30	01:37:00	0
2008-12-30	01:38:00	0
2008-12-30	01:39:00	0
2008-12-30	01:40:00	0
2008-12-30	01:41:00	0
2008-12-30	01:42:00	0
2008-12-30	01:43:00	0
2008-12-30	01:44:00	0
2008-12-30	01:45:00	0
2008-12-30	01:46:00	0
2008-12-30	01:47:00	0
2008-12-30	01:48:00	0
2008-12-30	01:49:00	0
2008-12-30	01:50:00	0
2008-12-30	01:51:00	0
2008-12-30	01:52:00	0
2008-12-30	01:53:00	0
2008-12-30	01:54:00	0
2008-12-30	01:55:00	0
2008-12-30	01:56:00	0
2008-12-30	01:57:00	0
2008-12-30	01:58:00	0
2008-12-30	01:59:00	0
2008-12-30	02:00:00	0
2008-12-30	02:01:00	0
2008-12-30	02:02:00	0
2008-12-30	02:03:00	0
2008-12-30	02:04:00	0
2008-12-30	02:05:00	0
2008-12-30	02:06:00	0
2008-12-30	02:07:00	0
2008-12-30	02:08:00	0
2008-12-30	02:09:00	0
2008-12-30	02:10:00	0
2008-12-30	02:11:00	0
2008-12-30	02:12:00	0
2008-12-30	02:13:00	0
2008-12-30	02:14:00	0
2008-12-30	02:15:00	0
2008-12-30	02:16:00	0
2008-12-30	02:17:00	0
2008-12-30	02:18:00	0
2008-12-30	02:19:00	0
2008-12-30	02:20:00	0
2008-12-30	02:21:00	0
2008-12-30	02:22:00	0
2008-12-30	02:23:00	0
2008-12-30	02:24:00	0
2008-12-30	02:25:00	0
2008-12-30	02:26:00	0
2008-12-30	02:27:00	0
2008-12-30	02:28:00	0
2008-12-30	02:29:00	0
2008-12-30	02:30:00	0
2008-12-30	02:31:00	0
2008-12-30	02:32:00	0
2008-12-30	02:33:00	0
2008-12-30	02:34:00	0
2008-12-30	02:35:00	0
2008-12-30	02:36:00	0
2008-12-30	02:37:00	0
2008-12-30	02:38:00	0
2008-12-30	02:39:00	0
2008-12-30	02:40:00	0
2008-12-30	02:41:00	0
2008-12-30	02:42:00	0
2008-12-30	02:43:00	0
2008-12-30	02:44:00	0
2008-12-30	02:45:00	0
2008-12-30	02:46:00	0
2008-12-30	02:47:00	0
2008-12-30	02:48:00	0
2008-12-30	02:49:00	0
2008-12-30	02:50:00	0
2008-12-30	02:51:00	0
2008-12-30	02:52:00	0
2008-12-30	02:53:00	0
2008-12-30	02:54:00	0
2008-12-30	02:55:00	0
2008-12-30	02:56:00	0
2008-12-30	02:57:00	0
2008-12-30	02:58:00	0
2008-12-30	02:59:00	0
2008-12-30	03:00:00	0
2008-12-30	03:01:00	0
2008-12-30	03:02:00	0
2008-12-30	03:03:00	0
2008-12-30	03:04:00	0
2008-12-30	03:05:00	0
2008-12-30	03:06:00	0
2008-12-30	03:07:00	0
2008-12-30	03:08:00	0
2008-12-30	03:09:00	0
2008-12-30	03:10:00	0
2008-12-30	03:11:00	0
2008-12-30	03:12:00	0
2008-12-30	03:13:00	0
2008-12-30	03:14:00	0
2008-12-30	03:15:00	0
2008-12-30	03:16:00	0
2008-12-30	03:17:00	0
2008-12-30	03:18:00	0
2008-12-30	03:19:00	0
2008-12-30	03:20:00	0
2008-12-30	03:21:00	0
2008-12-30	03:22:00	0
2008-12-30	03:23:00	0
2008-12-30	03:24:00	0
2008-12-30	03:25:00	0
2008-12-30	03:26:00	0
2008-12-30	03:27:00	0
2008-12-30	03:28:00	0
2008-12-30	03:29:00	0
2008-12-30	03:30:00	0
2008-12-30	03:31:00	0
2008-12-30	03:32:00	0
2008-12-30	03:33:00	0
2008-12-30	03:34:00	0
2008-12-30	03:35:00	0
2008-12-30	03:36:00	0
2008-12-30	03:37:00	0
2008-12-30	03:38:00	0
2008-12-30	03:39:00	0
2008-12-30	03:40:00	0
2008-12-30	03:41:00	0
2008-12-30	03:42:00	0
2008-12-30	03:43:00	0
2008-12-30	03:44:00	0
2008-12-30	03:45:00	0
2008-12-30	03:46:00	0
2008-12-30	03:47:00	0
2008-12-30	03:48:00	0
2008-12-30	03:49:00	0
2008-12-30	03:50:00	0
2008-12-30	03:51:00	0
2008-12-30	03:52:00	0
2008-12-30	03:53:00	0
2008-12-30	03:54:00	0
2008-12-30	03:55:00	0
2008-12-30	03:56:00	0
2008-12-30	03:57:00	0
2008-12-30	03:58:00	0
2008-12-30	03:59:00	0
2008-12-30	04:00:00	0
2008-12-30	04:01:00	0
2008-12-30	04:02:00	0
2008-12-30	04:03:00	0
2008-12-30	04:04:00	0
2008-12-30	04:05:00	0
2008-12-30	04:06:00	0
2008-12-30	04:07:00	0
2008-12-30	04:08:00	0
2008-12-30	04:09:00	0
2008-12-30	04:10:00	0
2008-12-30	04:11:00	0
2008-12-30	04:12:00	0
2008-12-30	04:13:00	0
2008-12-30	04:14:00	0
2008-12-30	04:15:00	0
2008-12-30	04:16:00	0
2008-12-30	04:17:00	0
2008-12-30	04:18:00	0
2008-12-30	04:19:00	0
2008-12-30	04:20:00	0
2008-12-30	04:21:00	0
2008-12-30	04:22:00	0
2008-12-30	04:23:00	0
2008-12-30	04:24:00	0
2008-12-30	04:25:00	0
2008-12-30	04:26:00	0
2008-12-30	04:27:00	0
2008-12-30	04:28:00	0
2008-12-30	04:29:00	0
2008-12-30	04:30:00	0
2008-12-30	04:31:00	0
2008-12-30	04:32:00	0
2008-12-30	04:33:00	0
2008-12-30	04:34:00	0
2008-12-30	04:35:00	0
2008-12-30	04:36:00	0
2008-12-30	04:37:00	0
2008-12-30	04:38:00	0
2008-12-30	04:39:00	0
2008-12-30	04:40:00	0
2008-12-30	04:41:00	0
2008-12-30	04:42:00	0
2008-12-30	04:43:00	0
2008-12-30	04:44:00	0
2008-12-30	04:45:00	0
2008-12-30	04:46:00	0
2008-12-30	04:47:00	0
2008-12-30	04:48:00	0
2008-12-30	04:49:00	0
2008-12-30	04:50:00	0
2008-12-30	04:51:00	0
2008-12-30	04:52:00	0
2008-12-30	04:53:00	0
2008-12-30	04:54:00	0
2008-12-30	04:55:00	0
2008-12-30	04:56:00	0
2008-12-30	04:57:00	0
2008-12-30	04:58:00	0
2008-12-30	04:59:00	0
2008-12-30	05:00:00	0
2008-12-30	05:01:00	0
2008-12-30	05:02:00	0
2008-12-30	05:03:00	0
2008-12-30	05:04:00	0
2008-12-30	05:05:00	0
2008-12-30	05:06:00	0
2008-12-30	05:07:00	0
2008-12-30	05:08:00	0
2008-12-30	05:09:00	0
2008-12-30	05:10:00	0
2008-12-30	05:11:00	0
2008-12-30	05:12:00	0
2008-12-30	05:13:00	0
2008-12-30	05:14:00	0
2008-12-30	05:15:00	0
2008-12-30	05:16:00	0
2008-12-30	05:17:00	0
2008-12-30	05:18:00	0
2008-12-30	05:19:00	0
2008-12-30	05:20:00	0
2008-12-30	05:21:00	0
2008-12-30	05:22:00	0
2008-12-30	05:23:00	0
2008-12-30	05:24:00	0
2008-12-30	05:25:00	0
2008-12-30	05:26:00	0
2008-12-30	05:27:00	0
2008-12-30	05:28:00	0
2008-12-30	05:29:00	0
2008-12-30	05:30:00	0
2008-12-30	05:31:00	0
2008-12-30	05:32:00	0
2008-12-30	05:33:00	0
2008-12-30	05:34:00	0
2008-12-30	05:35:00	0
2008-12-30	05:36:00	0
2008-12-30	05:37:00	0
2008-12-30	05:38:00	0
2008-12-30	05:39:00	0
2008-12-30	05:40:00	0
2008-12-30	05:41:00	0
2008-12-30	05:42:00	0
2008-12-30	05:43:00	0
2008-12-30	05:44:00	0
2008-12-30	05:45:00	0
2008-12-30	05:46:00	0
2008-12-30	05:47:00	0
2008-12-30	05:48:00	0
2008-12-30	05:49:00	0
2008-12-30	05:50:00	0
2008-12-30	05:51:00	0
2008-12-30	05:52:00	0
2008-12-30	05:53:00	0
2008-12-30	05:54:00	0
2008-12-30	05:55:00	0
2008-12-30	05:56:00	0
2008-12-30	05:57:00	0
2008-12-30	05:58:00	0
2008-12-30	05:59:00	0
2008-12-30	06:00:00	0
2008-12-30	06:01:00	0
2008-12-30	06:02:00	0
2008-12-30	06:03:00	0
2008-12-30	06:04:00	0
2008-12-30	06:05:00	0
2008-12-30	06:06:00	0
2008-12-30	06:07:00	0
2008-12-30	06:08:00	0
2008-12-30	06:09:00	0
2008-12-30	06:10:00	0
2008-12-30	06:11:00	0
2008-12-30	06:12:00	0
2008-12-30	06:13:00	0
2008-12-30	06:14:00	0
2008-12-30	06:15:00	0
2008-12-30	06:16:00	0
2008-12-30	06:17:00	0
2008-12-30	06:18:00	0
2008-12-30	06:19:00	0
2008-12-30	06:20:00	0
2008-12-30	06:21:00	0
2008-12-30	06:22:00	0
2008-12-30	06:23:00	0
2008-12-30	06:24:00	0
2008-12-30	06:25:00	0
2008-12-30	06:26:00	0
2008-12-30	06:27:00	0
2008-12-30	06:28:00	0
2008-12-30	06:29:00	0
2008-12-30	06:30:00	0
2008-12-30	06:31:00	0
2008-12-30	06:32:00	0
2008-12-30	06:33:00	0
2008-12-30	06:34:00	0
2008-12-30	06:35:00	0
2008-12-30	06:36:00	0
2008-12-30	06:37:00	0
2008-12-30	06:38:00	0
2008-12-30	06:39:00	0
2008-12-30	06:40:00	0
2008-12-30	06:41:00	0
2008-12-30	06:42:00	0
2008-12-30	06:43:00	0
2008-12-30	06:44:00	0
2008-12-30	06:45:00	0
2008-12-30	06:46:00	0
2008-12-30	06:47:00	0
2008-12-30	06:48:00	0
2008-12-30	06:49:00	0
2008-12-30	06:50:00	0
2008-12-30	06:51:00	0
2008-12-30	06:52:00	0
2008-12-30	06:53:00	0
2008-12-30	06:54:00	0
2008-12-30	06:55:00	0
2008-12-30	06:56:00	0
2008-12-30	06:57:00	0
2008-12-30	06:58:00	0
2008-12-30	06:59:00	0
2008-12-30	07:00:00	0
2008-12-30	07:01:00	0
2008-12-30	07:02:00	0
2008-12-30	07:03:00	0
2008-12-30	07:04:00	0
2008-12-30	07:05:00	0
2008-12-30	07:06:00	0
2008-12-30	07:07:00	0
2008-12-30	07:08:00	0
2008-12-30	07:09:00	0
2008-12-30	07:10:00	0
2008-12-30	07:11:00	0
2008-12-30	07:12:00	0
2008-12-30	07:13:00	0
2008-12-30	07:14:00	0
2008-12-30	07:15:00	0
2008-12-30	07:16:00	0
2008-12-30	07:17:00	0
2008-12-30	07:18:00	0
2008-12-30	07:19:00	0
2008-12-30	07:20:00	0
2008-12-30	07:21:00	0
2008-12-30	07:22:00	0
2008-12-30	07:23:00	0
2008-12-30	07:24:00	0
2008-12-30	07:25:00	0
2008-12-30	07:26:00	0
2008-12-30	07:27:00	0
2008-12-30	07:28:00	0
2008-12-30	07:29:00	0
2008-12-30	07:30:00	0
2008-12-30	07:31:00	0
2008-12-30	07:32:00	0
2008-12-30	07:33:00	0
2008-12-30	07:34:00	0
2008-12-30	07:35:00	0
2008-12-30	07:36:00	0
2008-12-30	07:37:00	0
2008-12-30	07:38:00	0
2008-12-30	07:39:00	0
2008-12-30	07:40:00	0
2008-12-30	07:41:00	0
2008-12-30	07:42:00	0
2008-12-30	07:43:00	0
2008-12-30	07:44:00	0
2008-12-30	07:45:00	0
2008-12-30	07:46:00	0
2008-12-30	07:47:00	0
2008-12-30	07:48:00	0
2008-12-30	07:49:00	0
2008-12-30	07:50:00	0
2008-12-30	07:51:00	0
2008-12-30	07:52:00	0
2008-12-30	07:53:00	0
2008-12-30	07:54:00	0
2008-12-30	07:55:00	0
2008-12-30	07:56:00	0
2008-12-30	07:57:00	0
2008-12-30	07:58:00	0
2008-12-30	07:59:00	0
2008-12-30	08:00:00	0
2008-12-30	08:01:00	0
2008-12-30	08:02:00	0
2008-12-30	08:03:00	0
2008-12-30	08:04:00	0
2008-12-30	08:05:00	0
2008-12-30	08:06:00	0
2008-12-30	08:07:00	0
2008-12-30	08:08:00	0
2008-12-30	08:09:00	0
2008-12-30	08:10:00	0
2008-12-30	08:11:00	0
2008-12-30	08:12:00	0
2008-12-30	08:13:00	0
2008-12-30	08:14:00	0
2008-12-30	08:15:00	0
2008-12-30	08:16:00	0
2008-12-30	08:17:00	0
2008-12-30	08:18:00	0
2008-12-30	08:19:00	0
2008-12-30	08:20:00	0
2008-12-30	08:21:00	0
2008-12-30	08:22:00	0
2008-12-30	08:23:00	0
2008-12-30	08:24:00	0
2008-12-30	08:25:00	0
2008-12-30	08:26:00	0
2008-12-30	08:27:00	0
2008-12-30	08:28:00	0
2008-12-30	08:29:00	0
2008-12-30	08:30:00	0
2008-12-30	08:31:00	0
2008-12-30	08:32:00	0
2008-12-30	08:33:00	0
2008-12-30	08:34:00	0
2008-12-30	08:35:00	0
2008-12-30	08:36:00	0
2008-12-30	08:37:00	0
2008-12-30	08:38:00	0
2008-12-30	08:39:00	0
2008-12-30	08:40:00	0
2008-12-30	08:41:00	0
2008-12-30	08:42:00	0
2008-12-30	08:43:00	0
2008-12-30	08:44:00	0
2008-12-30	08:45:00	0
2008-12-30	08:46:00	0
2008-12-30	08:47:00	0
2008-12-30	08:48:00	0
2008-12-30	08:49:00	0
2008-12-30	08:50:00	0
2008-12-30	08:51:00	0
2008-12-30	08:52:00	0
2008-12-30	08:53:00	0
2008-12-30	08:54:00	0
2008-12-30	08:55:00	0
2008-12-30	08:56:00	0
2008-12-30	08:57:00	0
2008-12-30	08:58:00	0
2008-12-30	08:59:00	0
2008-12-30	09:00:00	0
2008-12-30	09:01:00	0
2008-12-30	09:02:00	0
2008-12-30	09:03:00	0
2008-12-30	09:04:00	0
2008-12-30	09:05:00	0
2008-12-30	09:06:00	0
2008-12-30	09:07:00	0
2008-12-30	09:08:00	0
2008-12-30	09:09:00	0
2008-12-30	09:10:00	0
2008-12-30	09:11:00	0
2008-12-30	09:12:00	0
2008-12-30	09:13:00	0
2008-12-30	09:14:00	0
2008-12-30	09:15:00	0
2008-12-30	09:16:00	0
2008-12-30	09:17:00	0
2008-12-30	09:18:00	0
2008-12-30	09:19:00	0
2008-12-30	09:20:00	0
2008-12-30	09:21:00	0
2008-12-30	09:22:00	0
2008-12-30	09:23:00	0
2008-12-30	09:24:00	0
2008-12-30	09:25:00	0
2008-12-30	09:26:00	0
2008-12-30	09:27:00	0
2008-12-30	09:28:00	0
2008-12-30	09:29:00	0
2008-12-30	09:30:00	0
2008-12-30	09:31:00	0
2008-12-30	09:32:00	0
2008-12-30	09:33:00	0
2008-12-30	09:34:00	0
2008-12-30	09:35:00	0
2008-12-30	09:36:00	0
2008-12-30	09:37:00	0
2008-12-30	09:38:00	0
2008-12-30	09:39:00	0
2008-12-30	09:40:00	0
2008-12-30	09:41:00	0
2008-12-30	09:42:00	0
2008-12-30	09:43:00	0
2008-12-30	09:44:00	0
2008-12-30	09:45:00	0
2008-12-30	09:46:00	0
2008-12-30	09:47:00	0
2008-12-30	09:48:00	0
2008-12-30	09:49:00	0
2008-12-30	09:50:00	0
2008-12-30	09:51:00	0
2008-12-30	09:52:00	0
2008-12-30	09:53:00	0
2008-12-30	09:54:00	0
2008-12-30	09:55:00	0
2008-12-30	09:56:00	0
2008-12-30	09:57:00	0
2008-12-30	09:58:00	0
2008-12-30	09:59:00	0
2008-12-30	10:00:00	0
2008-12-30	10:01:00	0
2008-12-30	10:02:00	0
2008-12-30	10:03:00	0
2008-12-30	10:04:00	0
2008-12-30	10:05:00	0
2008-12-30	10:06:00	0
2008-12-30	10:07:00	0
2008-12-30	10:08:00	0
2008-12-30	10:09:00	0
2008-12-30	10:10:00	0
2008-12-30	10:11:00	0
2008-12-30	10:12:00	0
2008-12-30	10:13:00	0
2008-12-30	10:14:00	0
2008-12-30	10:15:00	0
2008-12-30	10:16:00	0
2008-12-30	10:17:00	0
2008-12-30	10:18:00	0
2008-12-30	10:19:00	0
2008-12-30	10:20:00	0
2008-12-30	10:21:00	0
2008-12-30	10:22:00	0
2008-12-30	10:23:00	0
2008-12-30	10:24:00	0
2008-12-30	10:25:00	0
2008-12-30	10:26:00	0
2008-12-30	10:27:00	0
2008-12-30	10:28:00	0
2008-12-30	10:29:00	0
2008-12-30	10:30:00	0
2008-12-30	10:31:00	0
2008-12-30	10:32:00	0
2008-12-30	10:33:00	0
2008-12-30	10:34:00	0
2008-12-30	10:35:00	0
2008-12-30	10:36:00	0
2008-12-30	10:37:00	0
2008-12-30	10:38:00	0
2008-12-30	10:39:00	0
2008-12-30	10:40:00	0
2008-12-30	10:41:00	0
2008-12-30	10:42:00	0
2008-12-30	10:43:00	0
2008-12-30	10:44:00	0
2008-12-30	10:45:00	0
2008-12-30	10:46:00	0
2008-12-30	10:47:00	0
2008-12-30	10:48:00	0
2008-12-30	10:49:00	0
2008-12-30	10:50:00	0
2008-12-30	10:51:00	0
2008-12-30	10:52:00	0
2008-12-30	10:53:00	0
2008-12-30	10:54:00	0
2008-12-30	10:55:00	0
2008-12-30	10:56:00	0
2008-12-30	10:57:00	0
2008-12-30	10:58:00	0
2008-12-30	10:59:00	0
2008-12-30	11:00:00	0
2008-12-30	11:01:00	0
2008-12-30	11:02:00	0
2008-12-30	11:03:00	0
2008-12-30	11:04:00	0
2008-12-30	11:05:00	0
2008-12-30	11:06:00	0
2008-12-30	11:07:00	0
2008-12-30	11:08:00	0
2008-12-30	11:09:00	0
2008-12-30	11:10:00	0
2008-12-30	11:11:00	0
2008-12-30	11:12:00	0
2008-12-30	11:13:00	0
2008-12-30	11:14:00	0
2008-12-30	11:15:00	0
2008-12-30	11:16:00	0
2008-12-30	11:17:00	0
2008-12-30	11:18:00	0
2008-12-30	11:19:00	0
2008-12-30	11:20:00	0
2008-12-30	11:21:00	0
2008-12-30	11:22:00	0
2008-12-30	11:23:00	0
2008-12-30	11:24:00	0
2008-12-30	11:25:00	0
2008-12-30	11:26:00	0
2008-12-30	11:27:00	0
2008-12-30	11:28:00	0
2008-12-30	11:29:00	0
2008-12-30	11:30:00	0
2008-12-30	11:31:00	0
2008-12-30	11:32:00	0
2008-12-30	11:33:00	0
2008-12-30	11:34:00	0
2008-12-30	11:35:00	0
2008-12-30	11:36:00	0
2008-12-30	11:37:00	0
2008-12-30	11:38:00	0
2008-12-30	11:39:00	0
2008-12-30	11:40:00	0
2008-12-30	11:41:00	0
2008-12-30	11:42:00	0
2008-12-30	11:43:00	0
2008-12-30	11:44:00	0
2008-12-30	11:45:00	0
2008-12-30	11:46:00	0
2008-12-30	11:47:00	0
2008-12-30	11:48:00	0
2008-12-30	11:49:00	0
2008-12-30	11:50:00	0
2008-12-30	11:51:00	0
2008-12-30	11:52:00	0
2008-12-30	11:53:00	0
2008-12-30	11:54:00	0
2008-12-30	11:55:00	0
2008-12-30	11:56:00	0
2008-12-30	11:57:00	0
2008-12-30	11:58:00	0
2008-12-30	11:59:00	0
2008-12-30	12:00:00	0
2008-12-30	12:01:00	0
2008-12-30	12:02:00	0
2008-12-30	12:03:00	0
2008-12-30	12:04:00	0
2008-12-30	12:05:00	0
2008-12-30	12:06:00	0
2008-12-30	12:07:00	0
2008-12-30	12:08:00	0
2008-12-30	12:09:00	0
2008-12-30	12:10:00	0
2008-12-30	12:11:00	0
2008-12-30	12:12:00	0
2008-12-30	12:13:00	0
2008-12-30	12:14:00	0
2008-12-30	12:15:00	0
2008-12-30	12:16:00	0
2008-12-30	12:17:00	0
2008-12-30	12:18:00	0
2008-12-30	12:19:00	0
2008-12-30	12:20:00	0
2008-12-30	12:21:00	0
2008-12-30	12:22:00	0
2008-12-30	12:23:00	0
2008-12-30	12:24:00	0
2008-12-30	12:25:00	0
2008-12-30	12:26:00	0
2008-12-30	12:27:00	0
2008-12-30	12:28:00	0
2008-12-30	12:29:00	0
2008-12-30	12:30:00	0
2008-12-30	12:31:00	0
2008-12-30	12:32:00	0
2008-12-30	12:33:00	0
2008-12-30	12:34:00	0
2008-12-30	12:35:00	0
2008-12-30	12:36:00	0
2008-12-30	12:37:00	0
2008-12-30	12:38:00	0
2008-12-30	12:39:00	0
2008-12-30	12:40:00	0
2008-12-30	12:41:00	0
2008-12-30	12:42:00	0
2008-12-30	12:43:00	0
2008-12-30	12:44:00	0
2008-12-30	12:45:00	0
2008-12-30	12:46:00	0
2008-12-30	12:47:00	0
2008-12-30	12:48:00	0
2008-12-30	12:49:00	0
2008-12-30	12:50:00	0
2008-12-30	12:51:00	0
2008-12-30	12:52:00	0
2008-12-30	12:53:00	0
2008-12-30	12:54:00	0
2008-12-30	12:55:00	0
2008-12-30	12:56:00	0
2008-12-30	12:57:00	0
2008-12-30	12:58:00	0
2008-12-30	12:59:00	0
2008-12-30	13:00:00	0
2008-12-30	13:01:00	0
2008-12-30	13:02:00	0
2008-12-30	13:03:00	0
2008-12-30	13:04:00	0
2008-12-30	13:05:00	0
2008-12-30	13:06:00	0
2008-12-30	13:07:00	0
2008-12-30	13:08:00	0
2008-12-30	13:09:00	0
2008-12-30	13:10:00	0
2008-12-30	13:11:00	0
2008-12-30	13:12:00	0
2008-12-30	13:13:00	0
2008-12-30	13:14:00	0
2008-12-30	13:15:00	0
2008-12-30	13:16:00	0
2008-12-30	13:17:00	0
2008-12-30	13:18:00	0
2008-12-30	13:19:00	0
2008-12-30	13:20:00	0
2008-12-30	13:21:00	0
2008-12-30	13:22:00	0
2008-12-30	13:23:00	0
2008-12-30	13:24:00	0
2008-12-30	13:25:00	0
2008-12-30	13:26:00	0
2008-12-30	13:27:00	0
2008-12-30	13:28:00	0
2008-12-30	13:29:00	0
2008-12-30	13:30:00	0
2008-12-30	13:31:00	0
2008-12-30	13:32:00	0
2008-12-30	13:33:00	0
2008-12-30	13:34:00	0
2008-12-30	13:35:00	0
2008-12-30	13:36:00	0
2008-12-30	13:37:00	0
2008-12-30	13:38:00	0
2008-12-30	13:39:00	0
2008-12-30	13:40:00	0
2008-12-30	13:41:00	0
2008-12-30	13:42:00	0
2008-12-30	13:43:00	0
2008-12-30	13:44:00	0
2008-12-30	13:45:00	0
2008-12-30	13:46:00	0
2008-12-30	13:47:00	0
2008-12-30	13:48:00	0
2008-12-30	13:49:00	0
2008-12-30	13:50:00	0
2008-12-30	13:51:00	0
2008-12-30	13:52:00	0
2008-12-30	13:53:00	0
2008-12-30	13:54:00	0
2008-12-30	13:55:00	0
2008-12-30	13:56:00	0
2008-12-30	13:57:00	0
2008-12-30	13:58:00	0
2008-12-30	13:59:00	0
2008-12-30	14:00:00	0
2008-12-30	14:01:00	0
2008-12-30	14:02:00	0
2008-12-30	14:03:00	0
2008-12-30	14:04:00	0
2008-12-30	14:05:00	0
2008-12-30	14:06:00	0
2008-12-30	14:07:00	0
2008-12-30	14:08:00	0
2008-12-30	14:09:00	0
2008-12-30	14:10:00	0
2008-12-30	14:11:00	0
2008-12-30	14:12:00	0
2008-12-30	14:13:00	0
2008-12-30	14:14:00	0
2008-12-30	14:15:00	0
2008-12-30	14:16:00	0
2008-12-30	14:17:00	0
2008-12-30	14:18:00	0
2008-12-30	14:19:00	0
2008-12-30	14:20:00	0
2008-12-30	14:21:00	0
2008-12-30	14:22:00	0
2008-12-30	14:23:00	0
2008-12-30	14:24:00	0
2008-12-30	14:25:00	0
2008-12-30	14:26:00	0
2008-12-30	14:27:00	0
2008-12-30	14:28:00	0
2008-12-30	14:29:00	0
2008-12-30	14:30:00	0
2008-12-30	14:31:00	0
2008-12-30	14:32:00	0
2008-12-30	14:33:00	0
2008-12-30	14:34:00	0
2008-12-30	14:35:00	0
2008-12-30	14:36:00	0
2008-12-30	14:37:00	0
2008-12-30	14:38:00	0
2008-12-30	14:39:00	0
2008-12-30	14:40:00	0
2008-12-30	14:41:00	0
2008-12-30	14:42:00	0
2008-12-30	14:43:00	0
2008-12-30	14:44:00	0
2008-12-30	14:45:00	0
2008-12-30	14:46:00	0
2008-12-30	14:47:00	0
2008-12-30	14:48:00	0
2008-12-30	14:49:00	0
2008-12-30	14:50:00	0
2008-12-30	14:51:00	0
2008-12-30	14:52:00	0
2008-12-30	14:53:00	0
2008-12-30	14:54:00	0
2008-12-30	14:55:00	0
2008-12-30	14:56:00	0
2008-12-30	14:57:00	0
2008-12-30	14:58:00	0
2008-12-30	14:59:00	0
2008-12-30	15:00:00	0
2008-12-30	15:01:00	0
2008-12-30	15:02:00	0
2008-12-30	15:03:00	0
2008-12-30	15:04:00	0
2008-12-30	15:05:00	0
2008-12-30	15:06:00	0
2008-12-30	15:07:00	0
2008-12-30	15:08:00	0
2008-12-30	15:09:00	0
2008-12-30	15:10:00	0
2008-12-30	15:11:00	0
2008-12-30	15:12:00	0
2008-12-30	15:13:00	0
2008-12-30	15:14:00	0
2008-12-30	15:15:00	0
2008-12-30	15:16:00	0
2008-12-30	15:17:00	0
2008-12-30	15:18:00	0
2008-12-30	15:19:00	0
2008-12-30	15:20:00	0
2008-12-30	15:21:00	0
2008-12-30	15:22:00	0
2008-12-30	15:23:00	0
2008-12-30	15:24:00	0
2008-12-30	15:25:00	0
2008-12-30	15:26:00	0
2008-12-30	15:27:00	0
2008-12-30	15:28:00	0
2008-12-30	15:29:00	0
2008-12-30	15:30:00	0
2008-12-30	15:31:00	0
2008-12-30	15:32:00	0
2008-12-30	15:33:00	0
2008-12-30	15:34:00	0
2008-12-30	15:35:00	0
2008-12-30	15:36:00	0
2008-12-30	15:37:00	0
2008-12-30	15:38:00	0
2008-12-30	15:39:00	0
2008-12-30	15:40:00	0
2008-12-30	15:41:00	0
2008-12-30	15:42:00	0
2008-12-30	15:43:00	0
2008-12-30	15:44:00	0
2008-12-30	15:45:00	0
2008-12-30	15:46:00	0
2008-12-30	15:47:00	0
2008-12-30	15:48:00	0
2008-12-30	15:49:00	0
2008-12-30	15:50:00	0
2008-12-30	15:51:00	0
2008-12-30	15:52:00	0
2008-12-30	15:53:00	0
2008-12-30	15:54:00	0
2008-12-30	15:55:00	0
2008-12-30	15:56:00	0
2008-12-30	15:57:00	0
2008-12-30	15:58:00	0
2008-12-30	15:59:00	0
2008-12-30	16:00:00	0
2008-12-30	16:01:00	0
2008-12-30	16:02:00	0
2008-12-30	16:03:00	0
2008-12-30	16:04:00	0
2008-12-30	16:05:00	0
2008-12-30	16:06:00	0
2008-12-30	16:07:00	0
2008-12-30	16:08:00	0
2008-12-30	16:09:00	0
2008-12-30	16:10:00	0
2008-12-30	16:11:00	0
2008-12-30	16:12:00	0
2008-12-30	16:13:00	0
2008-12-30	16:14:00	0
2008-12-30	16:15:00	0
2008-12-30	16:16:00	0
2008-12-30	16:17:00	0
2008-12-30	16:18:00	0
2008-12-30	16:19:00	0
2008-12-30	16:20:00	0
2008-12-30	16:21:00	0
2008-12-30	16:22:00	0
2008-12-30	16:23:00	0
2008-12-30	16:24:00	0
2008-12-30	16:25:00	0
2008-12-30	16:26:00	0
2008-12-30	16:27:00	0
2008-12-30	16:28:00	0
2008-12-30	16:29:00	0
2008-12-30	16:30:00	0
2008-12-30	16:31:00	0
2008-12-30	16:32:00	0
2008-12-30	16:33:00	0
2008-12-30	16:34:00	0
2008-12-30	16:35:00	0
2008-12-30	16:36:00	0
2008-12-30	16:37:00	0
2008-12-30	16:38:00	0
2008-12-30	16:39:00	0
2008-12-30	16:40:00	0
2008-12-30	16:41:00	0
2008-12-30	16:42:00	0
2008-12-30	16:43:00	0
2008-12-30	16:44:00	0
2008-12-30	16:45:00	0
2008-12-30	16:46:00	0
2008-12-30	16:47:00	0
2008-12-30	16:48:00	0
2008-12-30	16:49:00	0
2008-12-30	16:50:00	0
2008-12-30	16:51:00	0
2008-12-30	16:52:00	0
2008-12-30	16:53:00	0
2008-12-30	16:54:00	0
2008-12-30	16:55:00	0
2008-12-30	16:56:00	0
2008-12-30	16:57:00	0
2008-12-30	16:58:00	0
2008-12-30	16:59:00	0
2008-12-30	17:00:00	0	M
2008-12-30	17:01:00	393
2008-12-30	17:02:00	142
2008-12-30	17:03:00	498
2008-12-30	17:04:00	168
2008-12-30	17:05:00	377
2008-12-30	17:06:00	612
2008-12-30	17:07:00	536
2008-12-30	17:08:00	410
2008-12-30	17:09:00	311
2008-12-30	17:10:00	574
2008-12-30	17:11:00	311
2008-12-30	17:12:00	555
2008-12-30	17:13:00	460
2008-12-30	17:14:00	183
2008-12-30	17:15:00	593
2008-12-30	17:16:00	498
2008-12-30	17:17:00	633
2008-12-30	17:18:00	808
2008-12-30	17:19:00	785
2008-12-30	17:20:00	296
2008-12-30	17:21:00	517
2008-12-30	17:22:00	197
2008-12-30	17:23:00	443
2008-12-30	17:24:00	740
2008-12-30	17:25:00	856
2008-12-30	17:26:00	311
2008-12-30	17:27:00	377
2008-12-30	17:28:00	633
2008-12-30	17:29:00	427
2008-12-30	17:30:00	654
2008-12-30	17:31:00	593
2008-12-30	17:32:00	654
2008-12-30	17:33:00	633
2008-12-30	17:34:00	427
2008-12-30	17:35:00	574
2008-12-30	17:36:00	410
2008-12-30	17:37:00	427
2008-12-30	17:38:00	479
2008-12-30	17:39:00	427
2008-12-30	17:40:00	761
2008-12-30	17:41:00	536
2008-12-30	17:42:00	785
2008-12-30	17:43:00	377
2008-12-30	17:44:00	393
2008-12-30	17:45:00	517
2008-12-30	17:46:00	612
2008-12-30	17:47:00	517
2008-12-30	17:48:00	654
2008-12-30	17:49:00	740
2008-12-30	17:50:00	593
2008-12-30	17:51:00	574
2008-12-30	17:52:00	718
2008-12-30	17:53:00	443
2008-12-30	17:54:00	254
2008-12-30	17:55:00	393
2008-12-30	17:56:00	536
2008-12-30	17:57:00	311
2008-12-30	17:58:00	536
2008-12-30	17:59:00	479
2008-12-30	18:00:00	1617
2008-12-30	18:01:00	1652
2008-12-30	18:02:00	856
2008-12-30	18:03:00	239
2008-12-30	18:04:00	225
2008-12-30	18:05:00	574
2008-12-30	18:06:00	1764
2008-12-30	18:07:00	1380
2008-12-30	18:08:00	1581
2008-12-30	18:09:00	1005
2008-12-30	18:10:00	718
2008-12-30	18:11:00	36
2008-12-30	18:12:00	168
2008-12-30	18:13:00	107
2008-12-30	18:14:00	197
2008-12-30	18:15:00	47
2008-12-30	18:16:00	71
2008-12-30	18:17:00	12
2008-12-30	18:18:00	24
2008-12-30	18:19:00	12
2008-12-30	18:20:00	36
2008-12-30	18:21:00	24
2008-12-30	18:22:00	12
2008-12-30	18:23:00	12
2008-12-30	18:24:00	0
2008-12-30	18:25:00	0
2008-12-30	18:26:00	12
2008-12-30	18:27:00	0
2008-12-30	18:28:00	24
2008-12-30	18:29:00	36
2008-12-30	18:30:00	71
2008-12-30	18:31:00	36
2008-12-30	18:32:00	0
2008-12-30	18:33:00	0
2008-12-30	18:34:00	24
2008-12-30	18:35:00	154
2008-12-30	18:36:00	979
2008-12-30	18:37:00	1256
2008-12-30	18:38:00	1169
2008-12-30	18:39:00	856
2008-12-30	18:40:00	1112
2008-12-30	18:41:00	1617
2008-12-30	18:42:00	953
2008-12-30	18:43:00	676
2008-12-30	18:44:00	211
2008-12-30	18:45:00	282
2008-12-30	18:46:00	239
2008-12-30	18:47:00	612
2008-12-30	18:48:00	479
2008-12-30	18:49:00	311
2008-12-30	18:50:00	479
2008-12-30	18:51:00	327
2008-12-30	18:52:00	479
2008-12-30	18:53:00	197
2008-12-30	18:54:00	24
2008-12-30	18:55:00	12
2008-12-30	18:56:00	168
2008-12-30	18:57:00	785
2008-12-30	18:58:00	443
2008-12-30	18:59:00	718
2008-12-30	19:00:00	1287
2008-12-30	19:01:00	59
2008-12-30	19:02:00	12
2008-12-30	19:03:00	24
2008-12-30	19:04:00	0
2008-12-30	19:05:00	0
2008-12-30	19:06:00	0
2008-12-30	19:07:00	12
2008-12-30	19:08:00	0
2008-12-30	19:09:00	24
2008-12-30	19:10:00	327
2008-12-30	19:11:00	0
2008-12-30	19:12:00	0
2008-12-30	19:13:00	0
2008-12-30	19:14:00	0
2008-12-30	19:15:00	0
2008-12-30	19:16:00	517
2008-12-30	19:17:00	393
2008-12-30	19:18:00	360
2008-12-30	19:19:00	197
2008-12-30	19:20:00	71
2008-12-30	19:21:00	12
2008-12-30	19:22:00	0
2008-12-30	19:23:00	0
2008-12-30	19:24:00	0
2008-12-30	19:25:00	0
2008-12-30	19:26:00	0
2008-12-30	19:27:00	0
2008-12-30	19:28:00	0
2008-12-30	19:29:00	0
2008-12-30	19:30:00	0
2008-12-30	19:31:00	0
2008-12-30	19:32:00	0
2008-12-30	19:33:00	393
2008-12-30	19:34:00	12
2008-12-30	19:35:00	0
2008-12-30	19:36:00	0
2008-12-30	19:37:00	0
2008-12-30	19:38:00	0
2008-12-30	19:39:00	0
2008-12-30	19:40:00	36
2008-12-30	19:41:00	344
2008-12-30	19:42:00	0
2008-12-30	19:43:00	12
2008-12-30	19:44:00	95
2008-12-30	19:45:00	979
2008-12-30	19:46:00	612
2008-12-30	19:47:00	296
2008-12-30	19:48:00	460
2008-12-30	19:49:00	239
2008-12-30	19:50:00	95
2008-12-30	19:51:00	254
2008-12-30	19:52:00	24
2008-12-30	19:53:00	12
2008-12-30	19:54:00	36
2008-12-30	19:55:00	24
2008-12-30	19:56:00	47
2008-12-30	19:57:00	0
2008-12-30	19:58:00	12
2008-12-30	19:59:00	498
2008-12-30	20:00:00	0
2008-12-30	20:01:00	0
2008-12-30	20:02:00	0
2008-12-30	20:03:00	0
2008-12-30	20:04:00	0
2008-12-30	20:05:00	0
2008-12-30	20:06:00	0
2008-12-30	20:07:00	0
2008-12-30	20:08:00	0
2008-12-30	20:09:00	12
2008-12-30	20:10:00	0
2008-12-30	20:11:00	0
2008-12-30	20:12:00	0
2008-12-30	20:13:00	0
2008-12-30	20:14:00	0
2008-12-30	20:15:00	0
2008-12-30	20:16:00	0
2008-12-30	20:17:00	0
2008-12-30	20:18:00	0
2008-12-30	20:19:00	0
2008-12-30	20:20:00	0
2008-12-30	20:21:00	0
2008-12-30	20:22:00	0
2008-12-30	20:23:00	0
2008-12-30	20:24:00	0
2008-12-30	20:25:00	0
2008-12-30	20:26:00	0
2008-12-30	20:27:00	0
2008-12-30	20:28:00	0
2008-12-30	20:29:00	0
2008-12-30	20:30:00	0
2008-12-30	20:31:00	0
2008-12-30	20:32:00	0
2008-12-30	20:33:00	0
2008-12-30	20:34:00	0
2008-12-30	20:35:00	12
2008-12-30	20:36:00	0
2008-12-30	20:37:00	0
2008-12-30	20:38:00	0
2008-12-30	20:39:00	0
2008-12-30	20:40:00	0
2008-12-30	20:41:00	0
2008-12-30	20:42:00	0
2008-12-30	20:43:00	0
2008-12-30	20:44:00	0
2008-12-30	20:45:00	0
2008-12-30	20:46:00	0
2008-12-30	20:47:00	0
2008-12-30	20:48:00	0
2008-12-30	20:49:00	0
2008-12-30	20:50:00	0
2008-12-30	20:51:00	0
2008-12-30	20:52:00	0
2008-12-30	20:53:00	0
2008-12-30	20:54:00	0
2008-12-30	20:55:00	0
2008-12-30	20:56:00	0
2008-12-30	20:57:00	0
2008-12-30	20:58:00	0
2008-12-30	20:59:00	0
2008-12-30	21:00:00	0
2008-12-30	21:01:00	0
2008-12-30	21:02:00	0
2008-12-30	21:03:00	0
2008-12-30	21:04:00	0
2008-12-30	21:05:00	0
2008-12-30	21:06:00	0
2008-12-30	21:07:00	0
2008-12-30	21:08:00	0
2008-12-30	21:09:00	0
2008-12-30	21:10:00	0
2008-12-30	21:11:00	0
2008-12-30	21:12:00	0
2008-12-30	21:13:00	0
2008-12-30	21:14:00	0
2008-12-30	21:15:00	0
2008-12-30	21:16:00	0
2008-12-30	21:17:00	0
2008-12-30	21:18:00	0
2008-12-30	21:19:00	0
2008-12-30	21:20:00	0
2008-12-30	21:21:00	0
2008-12-30	21:22:00	0
2008-12-30	21:23:00	0
2008-12-30	21:24:00	0
2008-12-30	21:25:00	0
2008-12-30	21:26:00	0
2008-12-30	21:27:00	0
2008-12-30	21:28:00	0
2008-12-30	21:29:00	0
2008-12-30	21:30:00	0
2008-12-30	21:31:00	0
2008-12-30	21:32:00	0
2008-12-30	21:33:00	0
2008-12-30	21:34:00	0
2008-12-30	21:35:00	0
2008-12-30	21:36:00	0
2008-12-30	21:37:00	0
2008-12-30	21:38:00	0
2008-12-30	21:39:00	0
2008-12-30	21:40:00	0
2008-12-30	21:41:00	0
2008-12-30	21:42:00	0
2008-12-30	21:43:00	0
2008-12-30	21:44:00	0
2008-12-30	21:45:00	0
2008-12-30	21:46:00	12
2008-12-30	21:47:00	0
2008-12-30	21:48:00	0
2008-12-30	21:49:00	0
2008-12-30	21:50:00	0
2008-12-30	21:51:00	0
2008-12-30	21:52:00	0
2008-12-30	21:53:00	0
2008-12-30	21:54:00	0
2008-12-30	21:55:00	0
2008-12-30	21:56:00	0
2008-12-30	21:57:00	0
2008-12-30	21:58:00	0
2008-12-30	21:59:00	0
2008-12-30	22:00:00	0
2008-12-30	22:01:00	0
2008-12-30	22:02:00	0
2008-12-30	22:03:00	0
2008-12-30	22:04:00	0
2008-12-30	22:05:00	0
2008-12-30	22:06:00	0
2008-12-30	22:07:00	0
2008-12-30	22:08:00	0
2008-12-30	22:09:00	0
2008-12-30	22:10:00	0
2008-12-30	22:11:00	0
2008-12-30	22:12:00	0
2008-12-30	22:13:00	0
2008-12-30	22:14:00	633
2008-12-30	22:15:00	479
2008-12-30	22:16:00	443
2008-12-30	22:17:00	12
2008-12-30	22:18:00	12
2008-12-30	22:19:00	12
2008-12-30	22:20:00	36
2008-12-30	22:21:00	0
2008-12-30	22:22:00	12
2008-12-30	22:23:00	36
2008-12-30	22:24:00	239
2008-12-30	22:25:00	0
2008-12-30	22:26:00	12
2008-12-30	22:27:00	12
2008-12-30	22:28:00	12
2008-12-30	22:29:00	24
2008-12-30	22:30:00	24
2008-12-30	22:31:00	24
2008-12-30	22:32:00	197
2008-12-30	22:33:00	0
2008-12-30	22:34:00	24
2008-12-30	22:35:00	12
2008-12-30	22:36:00	12
2008-12-30	22:37:00	12
2008-12-30	22:38:00	0
2008-12-30	22:39:00	59
2008-12-30	22:40:00	24
2008-12-30	22:41:00	12
2008-12-30	22:42:00	12
2008-12-30	22:43:00	47
2008-12-30	22:44:00	0
2008-12-30	22:45:00	12
2008-12-30	22:46:00	0
2008-12-30	22:47:00	0
2008-12-30	22:48:00	107
2008-12-30	22:49:00	498
2008-12-30	22:50:00	197
2008-12-30	22:51:00	785
2008-12-30	22:52:00	517
2008-12-30	22:53:00	282
2008-12-30	22:54:00	282
2008-12-30	22:55:00	517
2008-12-30	22:56:00	1005
2008-12-30	22:57:00	536
2008-12-30	22:58:00	154
2008-12-30	22:59:00	24
2008-12-30	23:00:00	168
2008-12-30	23:01:00	393
2008-12-30	23:02:00	12
2008-12-30	23:03:00	0
2008-12-30	23:04:00	0
2008-12-30	23:05:00	24
2008-12-30	23:06:00	47
2008-12-30	23:07:00	0
2008-12-30	23:08:00	197
2008-12-30	23:09:00	154
2008-12-30	23:10:00	24
2008-12-30	23:11:00	36
2008-12-30	23:12:00	168
2008-12-30	23:13:00	24
2008-12-30	23:14:00	296
2008-12-30	23:15:00	460
2008-12-30	23:16:00	377
2008-12-30	23:17:00	498
2008-12-30	23:18:00	168
2008-12-30	23:19:00	12
2008-12-30	23:20:00	36
2008-12-30	23:21:00	12
2008-12-30	23:22:00	0
2008-12-30	23:23:00	0
2008-12-30	23:24:00	0
2008-12-30	23:25:00	0
2008-12-30	23:26:00	0
2008-12-30	23:27:00	0
2008-12-30	23:28:00	0
2008-12-30	23:29:00	0
2008-12-30	23:30:00	107
2008-12-30	23:31:00	59
2008-12-30	23:32:00	47
2008-12-30	23:33:00	254
2008-12-30	23:34:00	0
2008-12-30	23:35:00	0
2008-12-30	23:36:00	0
2008-12-30	23:37:00	0
2008-12-30	23:38:00	0
2008-12-30	23:39:00	0
2008-12-30	23:40:00	0
2008-12-30	23:41:00	0
2008-12-30	23:42:00	0
2008-12-30	23:43:00	0
2008-12-30	23:44:00	0
2008-12-30	23:45:00	0
2008-12-30	23:46:00	0
2008-12-30	23:47:00	0
2008-12-30	23:48:00	0
2008-12-30	23:49:00	0
2008-12-30	23:50:00	36
2008-12-30	23:51:00	12
2008-12-30	23:52:00	24
2008-12-30	23:53:00	59
2008-12-30	23:54:00	0
2008-12-30	23:55:00	59
2008-12-30	23:56:00	168
2008-12-30	23:57:00	107
2008-12-30	23:58:00	0
2008-12-30	23:59:00	0
2008-12-31	00:00:00	0
2008-12-31	00:01:00	0
2008-12-31	00:02:00	460
2008-12-31	00:03:00	360
2008-12-31	00:04:00	24
2008-12-31	00:05:00	0
2008-12-31	00:06:00	0
2008-12-31	00:07:00	24
2008-12-31	00:08:00	0
2008-12-31	00:09:00	0
2008-12-31	00:10:00	0
2008-12-31	00:11:00	0
2008-12-31	00:12:00	0
2008-12-31	00:13:00	0
2008-12-31	00:14:00	0
2008-12-31	00:15:00	0
2008-12-31	00:16:00	0
2008-12-31	00:17:00	0
2008-12-31	00:18:00	0
2008-12-31	00:19:00	0
2008-12-31	00:20:00	0
2008-12-31	00:21:00	0
2008-12-31	00:22:00	0
2008-12-31	00:23:00	0
2008-12-31	00:24:00	0
2008-12-31	00:25:00	0
2008-12-31	00:26:00	0
2008-12-31	00:27:00	0
2008-12-31	00:28:00	0
2008-12-31	00:29:00	0
2008-12-31	00:30:00	0
2008-12-31	00:31:00	0
2008-12-31	00:32:00	0
2008-12-31	00:33:00	0
2008-12-31	00:34:00	0
2008-12-31	00:35:00	0
2008-12-31	00:36:00	0
2008-12-31	00:37:00	0
2008-12-31	00:38:00	0
2008-12-31	00:39:00	0
2008-12-31	00:40:00	0
2008-12-31	00:41:00	0
2008-12-31	00:42:00	0
2008-12-31	00:43:00	0
2008-12-31	00:44:00	0
2008-12-31	00:45:00	0
2008-12-31	00:46:00	0
2008-12-31	00:47:00	0
2008-12-31	00:48:00	0
2008-12-31	00:49:00	0
2008-12-31	00:50:00	0
2008-12-31	00:51:00	0
2008-12-31	00:52:00	0
2008-12-31	00:53:00	0
2008-12-31	00:54:00	0
2008-12-31	00:55:00	0
2008-12-31	00:56:00	0
2008-12-31	00:57:00	0
2008-12-31	00:58:00	0
2008-12-31	00:59:00	0
2008-12-31	01:00:00	0
2008-12-31	01:01:00	0
2008-12-31	01:02:00	0
2008-12-31	01:03:00	0
2008-12-31	01:04:00	0
2008-12-31	01:05:00	0
2008-12-31	01:06:00	0
2008-12-31	01:07:00	0
2008-12-31	01:08:00	0
2008-12-31	01:09:00	0
2008-12-31	01:10:00	0
2008-12-31	01:11:00	0
2008-12-31	01:12:00	0
2008-12-31	01:13:00	0
2008-12-31	01:14:00	0
2008-12-31	01:15:00	0
2008-12-31	01:16:00	0
2008-12-31	01:17:00	0
2008-12-31	01:18:00	0
2008-12-31	01:19:00	0
2008-12-31	01:20:00	24
2008-12-31	01:21:00	0
2008-12-31	01:22:00	0
2008-12-31	01:23:00	24
2008-12-31	01:24:00	47
2008-12-31	01:25:00	24
2008-12-31	01:26:00	0
2008-12-31	01:27:00	1225
2008-12-31	01:28:00	761
2008-12-31	01:29:00	1140
2008-12-31	01:30:00	268
2008-12-31	01:31:00	593
2008-12-31	01:32:00	183
2008-12-31	01:33:00	239
2008-12-31	01:34:00	225
2008-12-31	01:35:00	410
2008-12-31	01:36:00	254
2008-12-31	01:37:00	0
2008-12-31	01:38:00	12
2008-12-31	01:39:00	12
2008-12-31	01:40:00	83
2008-12-31	01:41:00	59
2008-12-31	01:42:00	36
2008-12-31	01:43:00	59
2008-12-31	01:44:00	36
2008-12-31	01:45:00	36
2008-12-31	01:46:00	71
2008-12-31	01:47:00	36
2008-12-31	01:48:00	239
2008-12-31	01:49:00	12
2008-12-31	01:50:00	12
2008-12-31	01:51:00	47
2008-12-31	01:52:00	83
2008-12-31	01:53:00	24
2008-12-31	01:54:00	0
2008-12-31	01:55:00	0
2008-12-31	01:56:00	0
2008-12-31	01:57:00	0
2008-12-31	01:58:00	0
2008-12-31	01:59:00	0
2008-12-31	02:00:00	0
2008-12-31	02:01:00	0
2008-12-31	02:02:00	0
2008-12-31	02:03:00	0
2008-12-31	02:04:00	0
2008-12-31	02:05:00	0
2008-12-31	02:06:00	0
2008-12-31	02:07:00	0
2008-12-31	02:08:00	0
2008-12-31	02:09:00	0
2008-12-31	02:10:00	0
2008-12-31	02:11:00	107
2008-12-31	02:12:00	0
2008-12-31	02:13:00	0
2008-12-31	02:14:00	0
2008-12-31	02:15:00	0
2008-12-31	02:16:00	12
2008-12-31	02:17:00	0
2008-12-31	02:18:00	0
2008-12-31	02:19:00	0
2008-12-31	02:20:00	47
2008-12-31	02:21:00	377
2008-12-31	02:22:00	443
2008-12-31	02:23:00	12
2008-12-31	02:24:00	12
2008-12-31	02:25:00	0
2008-12-31	02:26:00	0
2008-12-31	02:27:00	0
2008-12-31	02:28:00	0
2008-12-31	02:29:00	0
2008-12-31	02:30:00	0
2008-12-31	02:31:00	0
2008-12-31	02:32:00	0
2008-12-31	02:33:00	0
2008-12-31	02:34:00	0
2008-12-31	02:35:00	0
2008-12-31	02:36:00	0
2008-12-31	02:37:00	0
2008-12-31	02:38:00	0
2008-12-31	02:39:00	0
2008-12-31	02:40:00	0
2008-12-31	02:41:00	0
2008-12-31	02:42:00	0
2008-12-31	02:43:00	24
2008-12-31	02:44:00	0
2008-12-31	02:45:00	0
2008-12-31	02:46:00	0
2008-12-31	02:47:00	0
2008-12-31	02:48:00	0
2008-12-31	02:49:00	0
2008-12-31	02:50:00	0
2008-12-31	02:51:00	0
2008-12-31	02:52:00	0
2008-12-31	02:53:00	0
2008-12-31	02:54:00	0
2008-12-31	02:55:00	0
2008-12-31	02:56:00	0
2008-12-31	02:57:00	0
2008-12-31	02:58:00	0
2008-12-31	02:59:00	0
2008-12-31	03:00:00	0
2008-12-31	03:01:00	0
2008-12-31	03:02:00	0
2008-12-31	03:03:00	0
2008-12-31	03:04:00	0
2008-12-31	03:05:00	0
2008-12-31	03:06:00	0
2008-12-31	03:07:00	0
2008-12-31	03:08:00	0
2008-12-31	03:09:00	0
2008-12-31	03:10:00	0
2008-12-31	03:11:00	0
2008-12-31	03:12:00	0
2008-12-31	03:13:00	0
2008-12-31	03:14:00	0
2008-12-31	03:15:00	0
2008-12-31	03:16:00	0
2008-12-31	03:17:00	0
2008-12-31	03:18:00	0
2008-12-31	03:19:00	0
2008-12-31	03:20:00	0
2008-12-31	03:21:00	0
2008-12-31	03:22:00	0
2008-12-31	03:23:00	0
2008-12-31	03:24:00	0
2008-12-31	03:25:00	0
2008-12-31	03:26:00	0
2008-12-31	03:27:00	0
2008-12-31	03:28:00	0
2008-12-31	03:29:00	0
2008-12-31	03:30:00	0
2008-12-31	03:31:00	0
2008-12-31	03:32:00	0
2008-12-31	03:33:00	0
2008-12-31	03:34:00	0
2008-12-31	03:35:00	0
2008-12-31	03:36:00	0
2008-12-31	03:37:00	0
2008-12-31	03:38:00	0
2008-12-31	03:39:00	0
2008-12-31	03:40:00	0
2008-12-31	03:41:00	0
2008-12-31	03:42:00	0
2008-12-31	03:43:00	0
2008-12-31	03:44:00	0
2008-12-31	03:45:00	0
2008-12-31	03:46:00	0
2008-12-31	03:47:00	0
2008-12-31	03:48:00	0
2008-12-31	03:49:00	0
2008-12-31	03:50:00	0
2008-12-31	03:51:00	0
2008-12-31	03:52:00	0
2008-12-31	03:53:00	0
2008-12-31	03:54:00	0
2008-12-31	03:55:00	0
2008-12-31	03:56:00	0
2008-12-31	03:57:00	0
2008-12-31	03:58:00	0
2008-12-31	03:59:00	0
2008-12-31	04:00:00	0
2008-12-31	04:01:00	0
2008-12-31	04:02:00	0
2008-12-31	04:03:00	0
2008-12-31	04:04:00	0
2008-12-31	04:05:00	0
2008-12-31	04:06:00	0
2008-12-31	04:07:00	0
2008-12-31	04:08:00	0
2008-12-31	04:09:00	0
2008-12-31	04:10:00	0
2008-12-31	04:11:00	0
2008-12-31	04:12:00	0
2008-12-31	04:13:00	0
2008-12-31	04:14:00	0
2008-12-31	04:15:00	0
2008-12-31	04:16:00	0
2008-12-31	04:17:00	0
2008-12-31	04:18:00	0
2008-12-31	04:19:00	0
2008-12-31	04:20:00	0
2008-12-31	04:21:00	0
2008-12-31	04:22:00	59
2008-12-31	04:23:00	59
2008-12-31	04:24:00	0
2008-12-31	04:25:00	0
2008-12-31	04:26:00	0
2008-12-31	04:27:00	0
2008-12-31	04:28:00	0
2008-12-31	04:29:00	0
2008-12-31	04:30:00	0
2008-12-31	04:31:00	0
2008-12-31	04:32:00	0
2008-12-31	04:33:00	0
2008-12-31	04:34:00	0
2008-12-31	04:35:00	0
2008-12-31	04:36:00	0
2008-12-31	04:37:00	0
2008-12-31	04:38:00	0
2008-12-31	04:39:00	0
2008-12-31	04:40:00	0
2008-12-31	04:41:00	0
2008-12-31	04:42:00	0
2008-12-31	04:43:00	0
2008-12-31	04:44:00	0
2008-12-31	04:45:00	0
2008-12-31	04:46:00	24
2008-12-31	04:47:00	0
2008-12-31	04:48:00	0
2008-12-31	04:49:00	0
2008-12-31	04:50:00	0
2008-12-31	04:51:00	0
2008-12-31	04:52:00	71
2008-12-31	04:53:00	0
2008-12-31	04:54:00	0
2008-12-31	04:55:00	0
2008-12-31	04:56:00	0
2008-12-31	04:57:00	0
2008-12-31	04:58:00	0
2008-12-31	04:59:00	0
2008-12-31	05:00:00	0
2008-12-31	05:01:00	0
2008-12-31	05:02:00	0
2008-12-31	05:03:00	0
2008-12-31	05:04:00	0
2008-12-31	05:05:00	0
2008-12-31	05:06:00	0
2008-12-31	05:07:00	0
2008-12-31	05:08:00	0
2008-12-31	05:09:00	0
2008-12-31	05:10:00	0
2008-12-31	05:11:00	0
2008-12-31	05:12:00	0
2008-12-31	05:13:00	0
2008-12-31	05:14:00	0
2008-12-31	05:15:00	0
2008-12-31	05:16:00	0
2008-12-31	05:17:00	0
2008-12-31	05:18:00	0
2008-12-31	05:19:00	0
2008-12-31	05:20:00	0
2008-12-31	05:21:00	0
2008-12-31	05:22:00	0
2008-12-31	05:23:00	0
2008-12-31	05:24:00	0
2008-12-31	05:25:00	0
2008-12-31	05:26:00	0
2008-12-31	05:27:00	0
2008-12-31	05:28:00	0
2008-12-31	05:29:00	0
2008-12-31	05:30:00	0
2008-12-31	05:31:00	0
2008-12-31	05:32:00	0
2008-12-31	05:33:00	0
2008-12-31	05:34:00	0
2008-12-31	05:35:00	0
2008-12-31	05:36:00	0
2008-12-31	05:37:00	0
2008-12-31	05:38:00	0
2008-12-31	05:39:00	0
2008-12-31	05:40:00	0
2008-12-31	05:41:00	0
2008-12-31	05:42:00	0
2008-12-31	05:43:00	0
2008-12-31	05:44:00	0
2008-12-31	05:45:00	0
2008-12-31	05:46:00	0
2008-12-31	05:47:00	0
2008-12-31	05:48:00	0
2008-12-31	05:49:00	0
2008-12-31	05:50:00	0
2008-12-31	05:51:00	0
2008-12-31	05:52:00	0
2008-12-31	05:53:00	0
2008-12-31	05:54:00	0
2008-12-31	05:55:00	0
2008-12-31	05:56:00	0
2008-12-31	05:57:00	0
2008-12-31	05:58:00	0
2008-12-31	05:59:00	0
2008-12-31	06:00:00	0
2008-12-31	06:01:00	0
2008-12-31	06:02:00	0
2008-12-31	06:03:00	0
2008-12-31	06:04:00	0
2008-12-31	06:05:00	0
2008-12-31	06:06:00	0
2008-12-31	06:07:00	0
2008-12-31	06:08:00	0
2008-12-31	06:09:00	0
2008-12-31	06:10:00	0
2008-12-31	06:11:00	0
2008-12-31	06:12:00	0
2008-12-31	06:13:00	0
2008-12-31	06:14:00	0
2008-12-31	06:15:00	0
2008-12-31	06:16:00	0
2008-12-31	06:17:00	0
2008-12-31	06:18:00	0
2008-12-31	06:19:00	0
2008-12-31	06:20:00	0
2008-12-31	06:21:00	0
2008-12-31	06:22:00	0
2008-12-31	06:23:00	0
2008-12-31	06:24:00	0
2008-12-31	06:25:00	0
2008-12-31	06:26:00	0
2008-12-31	06:27:00	0
2008-12-31	06:28:00	0
2008-12-31	06:29:00	0
2008-12-31	06:30:00	0
2008-12-31	06:31:00	0
2008-12-31	06:32:00	0
2008-12-31	06:33:00	0
2008-12-31	06:34:00	0
2008-12-31	06:35:00	0
2008-12-31	06:36:00	0
2008-12-31	06:37:00	0
2008-12-31	06:38:00	0
2008-12-31	06:39:00	0
2008-12-31	06:40:00	0
2008-12-31	06:41:00	0
2008-12-31	06:42:00	0
2008-12-31	06:43:00	24
2008-12-31	06:44:00	0
2008-12-31	06:45:00	0
2008-12-31	06:46:00	0
2008-12-31	06:47:00	0
2008-12-31	06:48:00	0
2008-12-31	06:49:00	0
2008-12-31	06:50:00	0
2008-12-31	06:51:00	0
2008-12-31	06:52:00	0
2008-12-31	06:53:00	24
2008-12-31	06:54:00	0
2008-12-31	06:55:00	0
2008-12-31	06:56:00	0
2008-12-31	06:57:00	0
2008-12-31	06:58:00	47
2008-12-31	06:59:00	95
2008-12-31	07:00:00	71
2008-12-31	07:01:00	0
2008-12-31	07:02:00	0
2008-12-31	07:03:00	0
2008-12-31	07:04:00	0
2008-12-31	07:05:00	130
2008-12-31	07:06:00	142
2008-12-31	07:07:00	71
2008-12-31	07:08:00	0
2008-12-31	07:09:00	0
2008-12-31	07:10:00	0
2008-12-31	07:11:00	0
2008-12-31	07:12:00	0
2008-12-31	07:13:00	0
2008-12-31	07:14:00	0
2008-12-31	07:15:00	0
2008-12-31	07:16:00	0
2008-12-31	07:17:00	0
2008-12-31	07:18:00	0
2008-12-31	07:19:00	0
2008-12-31	07:20:00	0
2008-12-31	07:21:00	0
2008-12-31	07:22:00	0
2008-12-31	07:23:00	0
2008-12-31	07:24:00	0
2008-12-31	07:25:00	0
2008-12-31	07:26:00	0
2008-12-31	07:27:00	0
2008-12-31	07:28:00	0
2008-12-31	07:29:00	0
2008-12-31	07:30:00	0
2008-12-31	07:31:00	0
2008-12-31	07:32:00	36
2008-12-31	07:33:00	0
2008-12-31	07:34:00	0
2008-12-31	07:35:00	0
2008-12-31	07:36:00	0
2008-12-31	07:37:00	0
2008-12-31	07:38:00	0
2008-12-31	07:39:00	0
2008-12-31	07:40:00	0
2008-12-31	07:41:00	0
2008-12-31	07:42:00	0
2008-12-31	07:43:00	0
2008-12-31	07:44:00	0
2008-12-31	07:45:00	0
2008-12-31	07:46:00	0
2008-12-31	07:47:00	0
2008-12-31	07:48:00	0
2008-12-31	07:49:00	0
2008-12-31	07:50:00	0
2008-12-31	07:51:00	0
2008-12-31	07:52:00	0
2008-12-31	07:53:00	0
2008-12-31	07:54:00	0
2008-12-31	07:55:00	0
2008-12-31	07:56:00	154
2008-12-31	07:57:00	71
2008-12-31	07:58:00	107
2008-12-31	07:59:00	47
2008-12-31	08:00:00	0
2008-12-31	08:01:00	377
2008-12-31	08:02:00	83
2008-12-31	08:03:00	0
2008-12-31	08:04:00	107
2008-12-31	08:05:00	107
2008-12-31	08:06:00	460
2008-12-31	08:07:00	183
2008-12-31	08:08:00	536
2008-12-31	08:09:00	142
2008-12-31	08:10:00	282
2008-12-31	08:11:00	808
2008-12-31	08:12:00	183
2008-12-31	08:13:00	12
2008-12-31	08:14:00	0
2008-12-31	08:15:00	12
2008-12-31	08:16:00	282
2008-12-31	08:17:00	71
2008-12-31	08:18:00	0
2008-12-31	08:19:00	0
2008-12-31	08:20:00	0
2008-12-31	08:21:00	0
2008-12-31	08:22:00	0
2008-12-31	08:23:00	0
2008-12-31	08:24:00	0
2008-12-31	08:25:00	0
2008-12-31	08:26:00	24
2008-12-31	08:27:00	0
2008-12-31	08:28:00	130
2008-12-31	08:29:00	296
2008-12-31	08:30:00	24
2008-12-31	08:31:00	36
2008-12-31	08:32:00	0
2008-12-31	08:33:00	142
2008-12-31	08:34:00	36
2008-12-31	08:35:00	24
2008-12-31	08:36:00	0
2008-12-31	08:37:00	59
2008-12-31	08:38:00	0
2008-12-31	08:39:00	0
2008-12-31	08:40:00	24
2008-12-31	08:41:00	47
2008-12-31	08:42:00	0
2008-12-31	08:43:00	36
2008-12-31	08:44:00	12
2008-12-31	08:45:00	12
2008-12-31	08:46:00	0
2008-12-31	08:47:00	0
2008-12-31	08:48:00	0
2008-12-31	08:49:00	0
2008-12-31	08:50:00	0
2008-12-31	08:51:00	0
2008-12-31	08:52:00	0
2008-12-31	08:53:00	0
2008-12-31	08:54:00	0
2008-12-31	08:55:00	0
2008-12-31	08:56:00	0
2008-12-31	08:57:00	0
2008-12-31	08:58:00	0
2008-12-31	08:59:00	0
2008-12-31	09:00:00	0
2008-12-31	09:01:00	0
2008-12-31	09:02:00	0
2008-12-31	09:03:00	0
2008-12-31	09:04:00	0
2008-12-31	09:05:00	12
2008-12-31	09:06:00	0
2008-12-31	09:07:00	0
2008-12-31	09:08:00	24
[truncated: 19,611 more rows]

## Sheet: 1.13.09
Actogram, Copy Raw Data, All Days
Identity:	Skye Begalla
Filename:	E:\Active Research Files\meloxicam titre canine\cases\skye\Skye Begalla 1.13.09.AWC
Gender:	F
Age:	13
Height:	61.0 cm	24.0 in
Weight:	22.0 kg	48.5 lbs
Start Date:	13-Jan-2009 (Tue)
Start Time:	17:00:00
Interval:	1.00 mins
Date Stamp:	Time Stamp:	Activity Data:	Marker Press:
2009-01-13	00:00:00	0
2009-01-13	00:01:00	0
2009-01-13	00:02:00	0
2009-01-13	00:03:00	0
2009-01-13	00:04:00	0
2009-01-13	00:05:00	0
2009-01-13	00:06:00	0
2009-01-13	00:07:00	0
2009-01-13	00:08:00	0
2009-01-13	00:09:00	0
2009-01-13	00:10:00	0
2009-01-13	00:11:00	0
2009-01-13	00:12:00	0
2009-01-13	00:13:00	0
2009-01-13	00:14:00	0
2009-01-13	00:15:00	0
2009-01-13	00:16:00	0
2009-01-13	00:17:00	0
2009-01-13	00:18:00	0
2009-01-13	00:19:00	0
2009-01-13	00:20:00	0
2009-01-13	00:21:00	0
2009-01-13	00:22:00	0
2009-01-13	00:23:00	0
2009-01-13	00:24:00	0
2009-01-13	00:25:00	0
2009-01-13	00:26:00	0
2009-01-13	00:27:00	0
2009-01-13	00:28:00	0
2009-01-13	00:29:00	0
2009-01-13	00:30:00	0
2009-01-13	00:31:00	0
2009-01-13	00:32:00	0
2009-01-13	00:33:00	0
2009-01-13	00:34:00	0
2009-01-13	00:35:00	0
2009-01-13	00:36:00	0
2009-01-13	00:37:00	0
2009-01-13	00:38:00	0
2009-01-13	00:39:00	0
2009-01-13	00:40:00	0
2009-01-13	00:41:00	0
2009-01-13	00:42:00	0
2009-01-13	00:43:00	0
2009-01-13	00:44:00	0
2009-01-13	00:45:00	0
2009-01-13	00:46:00	0
2009-01-13	00:47:00	0
2009-01-13	00:48:00	0
2009-01-13	00:49:00	0
2009-01-13	00:50:00	0
2009-01-13	00:51:00	0
2009-01-13	00:52:00	0
2009-01-13	00:53:00	0
2009-01-13	00:54:00	0
2009-01-13	00:55:00	0
2009-01-13	00:56:00	0
2009-01-13	00:57:00	0
2009-01-13	00:58:00	0
2009-01-13	00:59:00	0
2009-01-13	01:00:00	0
2009-01-13	01:01:00	0
2009-01-13	01:02:00	0
2009-01-13	01:03:00	0
2009-01-13	01:04:00	0
2009-01-13	01:05:00	0
2009-01-13	01:06:00	0
2009-01-13	01:07:00	0
2009-01-13	01:08:00	0
2009-01-13	01:09:00	0
2009-01-13	01:10:00	0
2009-01-13	01:11:00	0
2009-01-13	01:12:00	0
2009-01-13	01:13:00	0
2009-01-13	01:14:00	0
2009-01-13	01:15:00	0
2009-01-13	01:16:00	0
2009-01-13	01:17:00	0
2009-01-13	01:18:00	0
2009-01-13	01:19:00	0
2009-01-13	01:20:00	0
2009-01-13	01:21:00	0
2009-01-13	01:22:00	0
2009-01-13	01:23:00	0
2009-01-13	01:24:00	0
2009-01-13	01:25:00	0
2009-01-13	01:26:00	0
2009-01-13	01:27:00	0
2009-01-13	01:28:00	0
2009-01-13	01:29:00	0
2009-01-13	01:30:00	0
2009-01-13	01:31:00	0
2009-01-13	01:32:00	0
2009-01-13	01:33:00	0
2009-01-13	01:34:00	0
2009-01-13	01:35:00	0
2009-01-13	01:36:00	0
2009-01-13	01:37:00	0
2009-01-13	01:38:00	0
2009-01-13	01:39:00	0
2009-01-13	01:40:00	0
2009-01-13	01:41:00	0
2009-01-13	01:42:00	0
2009-01-13	01:43:00	0
2009-01-13	01:44:00	0
2009-01-13	01:45:00	0
2009-01-13	01:46:00	0
2009-01-13	01:47:00	0
2009-01-13	01:48:00	0
2009-01-13	01:49:00	0
2009-01-13	01:50:00	0
2009-01-13	01:51:00	0
2009-01-13	01:52:00	0
2009-01-13	01:53:00	0
2009-01-13	01:54:00	0
2009-01-13	01:55:00	0
2009-01-13	01:56:00	0
2009-01-13	01:57:00	0
2009-01-13	01:58:00	0
2009-01-13	01:59:00	0
2009-01-13	02:00:00	0
2009-01-13	02:01:00	0
2009-01-13	02:02:00	0
2009-01-13	02:03:00	0
2009-01-13	02:04:00	0
2009-01-13	02:05:00	0
2009-01-13	02:06:00	0
2009-01-13	02:07:00	0
2009-01-13	02:08:00	0
2009-01-13	02:09:00	0
2009-01-13	02:10:00	0
2009-01-13	02:11:00	0
2009-01-13	02:12:00	0
2009-01-13	02:13:00	0
2009-01-13	02:14:00	0
2009-01-13	02:15:00	0
2009-01-13	02:16:00	0
2009-01-13	02:17:00	0
2009-01-13	02:18:00	0
2009-01-13	02:19:00	0
2009-01-13	02:20:00	0
2009-01-13	02:21:00	0
2009-01-13	02:22:00	0
2009-01-13	02:23:00	0
2009-01-13	02:24:00	0
2009-01-13	02:25:00	0
2009-01-13	02:26:00	0
2009-01-13	02:27:00	0
2009-01-13	02:28:00	0
2009-01-13	02:29:00	0
2009-01-13	02:30:00	0
2009-01-13	02:31:00	0
2009-01-13	02:32:00	0
2009-01-13	02:33:00	0
2009-01-13	02:34:00	0
2009-01-13	02:35:00	0
2009-01-13	02:36:00	0
2009-01-13	02:37:00	0
2009-01-13	02:38:00	0
2009-01-13	02:39:00	0
2009-01-13	02:40:00	0
2009-01-13	02:41:00	0
2009-01-13	02:42:00	0
2009-01-13	02:43:00	0
2009-01-13	02:44:00	0
2009-01-13	02:45:00	0
2009-01-13	02:46:00	0
2009-01-13	02:47:00	0
2009-01-13	02:48:00	0
2009-01-13	02:49:00	0
2009-01-13	02:50:00	0
2009-01-13	02:51:00	0
2009-01-13	02:52:00	0
2009-01-13	02:53:00	0
2009-01-13	02:54:00	0
2009-01-13	02:55:00	0
2009-01-13	02:56:00	0
2009-01-13	02:57:00	0
2009-01-13	02:58:00	0
2009-01-13	02:59:00	0
2009-01-13	03:00:00	0
2009-01-13	03:01:00	0
2009-01-13	03:02:00	0
2009-01-13	03:03:00	0
2009-01-13	03:04:00	0
2009-01-13	03:05:00	0
2009-01-13	03:06:00	0
2009-01-13	03:07:00	0
2009-01-13	03:08:00	0
2009-01-13	03:09:00	0
2009-01-13	03:10:00	0
2009-01-13	03:11:00	0
2009-01-13	03:12:00	0
2009-01-13	03:13:00	0
2009-01-13	03:14:00	0
2009-01-13	03:15:00	0
2009-01-13	03:16:00	0
2009-01-13	03:17:00	0
2009-01-13	03:18:00	0
2009-01-13	03:19:00	0
2009-01-13	03:20:00	0
2009-01-13	03:21:00	0
2009-01-13	03:22:00	0
2009-01-13	03:23:00	0
2009-01-13	03:24:00	0
2009-01-13	03:25:00	0
2009-01-13	03:26:00	0
2009-01-13	03:27:00	0
2009-01-13	03:28:00	0
2009-01-13	03:29:00	0
2009-01-13	03:30:00	0
2009-01-13	03:31:00	0
2009-01-13	03:32:00	0
2009-01-13	03:33:00	0
2009-01-13	03:34:00	0
2009-01-13	03:35:00	0
2009-01-13	03:36:00	0
2009-01-13	03:37:00	0
2009-01-13	03:38:00	0
2009-01-13	03:39:00	0
2009-01-13	03:40:00	0
2009-01-13	03:41:00	0
2009-01-13	03:42:00	0
2009-01-13	03:43:00	0
2009-01-13	03:44:00	0
2009-01-13	03:45:00	0
2009-01-13	03:46:00	0
2009-01-13	03:47:00	0
2009-01-13	03:48:00	0
2009-01-13	03:49:00	0
2009-01-13	03:50:00	0
2009-01-13	03:51:00	0
2009-01-13	03:52:00	0
2009-01-13	03:53:00	0
2009-01-13	03:54:00	0
2009-01-13	03:55:00	0
2009-01-13	03:56:00	0
2009-01-13	03:57:00	0
2009-01-13	03:58:00	0
2009-01-13	03:59:00	0
2009-01-13	04:00:00	0
2009-01-13	04:01:00	0
2009-01-13	04:02:00	0
2009-01-13	04:03:00	0
2009-01-13	04:04:00	0
2009-01-13	04:05:00	0
2009-01-13	04:06:00	0
2009-01-13	04:07:00	0
2009-01-13	04:08:00	0
2009-01-13	04:09:00	0
2009-01-13	04:10:00	0
2009-01-13	04:11:00	0
2009-01-13	04:12:00	0
2009-01-13	04:13:00	0
2009-01-13	04:14:00	0
2009-01-13	04:15:00	0
2009-01-13	04:16:00	0
2009-01-13	04:17:00	0
2009-01-13	04:18:00	0
2009-01-13	04:19:00	0
2009-01-13	04:20:00	0
2009-01-13	04:21:00	0
2009-01-13	04:22:00	0
2009-01-13	04:23:00	0
2009-01-13	04:24:00	0
2009-01-13	04:25:00	0
2009-01-13	04:26:00	0
2009-01-13	04:27:00	0
2009-01-13	04:28:00	0
2009-01-13	04:29:00	0
2009-01-13	04:30:00	0
2009-01-13	04:31:00	0
2009-01-13	04:32:00	0
2009-01-13	04:33:00	0
2009-01-13	04:34:00	0
2009-01-13	04:35:00	0
2009-01-13	04:36:00	0
2009-01-13	04:37:00	0
2009-01-13	04:38:00	0
2009-01-13	04:39:00	0
2009-01-13	04:40:00	0
2009-01-13	04:41:00	0
2009-01-13	04:42:00	0
2009-01-13	04:43:00	0
2009-01-13	04:44:00	0
2009-01-13	04:45:00	0
2009-01-13	04:46:00	0
2009-01-13	04:47:00	0
2009-01-13	04:48:00	0
2009-01-13	04:49:00	0
2009-01-13	04:50:00	0
2009-01-13	04:51:00	0
2009-01-13	04:52:00	0
2009-01-13	04:53:00	0
2009-01-13	04:54:00	0
2009-01-13	04:55:00	0
2009-01-13	04:56:00	0
2009-01-13	04:57:00	0
2009-01-13	04:58:00	0
2009-01-13	04:59:00	0
2009-01-13	05:00:00	0
2009-01-13	05:01:00	0
2009-01-13	05:02:00	0
2009-01-13	05:03:00	0
2009-01-13	05:04:00	0
2009-01-13	05:05:00	0
2009-01-13	05:06:00	0
2009-01-13	05:07:00	0
2009-01-13	05:08:00	0
2009-01-13	05:09:00	0
2009-01-13	05:10:00	0
2009-01-13	05:11:00	0
2009-01-13	05:12:00	0
2009-01-13	05:13:00	0
2009-01-13	05:14:00	0
2009-01-13	05:15:00	0
2009-01-13	05:16:00	0
2009-01-13	05:17:00	0
2009-01-13	05:18:00	0
2009-01-13	05:19:00	0
2009-01-13	05:20:00	0
2009-01-13	05:21:00	0
2009-01-13	05:22:00	0
2009-01-13	05:23:00	0
2009-01-13	05:24:00	0
2009-01-13	05:25:00	0
2009-01-13	05:26:00	0
2009-01-13	05:27:00	0
2009-01-13	05:28:00	0
2009-01-13	05:29:00	0
2009-01-13	05:30:00	0
2009-01-13	05:31:00	0
2009-01-13	05:32:00	0
2009-01-13	05:33:00	0
2009-01-13	05:34:00	0
2009-01-13	05:35:00	0
2009-01-13	05:36:00	0
2009-01-13	05:37:00	0
2009-01-13	05:38:00	0
2009-01-13	05:39:00	0
2009-01-13	05:40:00	0
2009-01-13	05:41:00	0
2009-01-13	05:42:00	0
2009-01-13	05:43:00	0
2009-01-13	05:44:00	0
2009-01-13	05:45:00	0
2009-01-13	05:46:00	0
2009-01-13	05:47:00	0
2009-01-13	05:48:00	0
2009-01-13	05:49:00	0
2009-01-13	05:50:00	0
2009-01-13	05:51:00	0
2009-01-13	05:52:00	0
2009-01-13	05:53:00	0
2009-01-13	05:54:00	0
2009-01-13	05:55:00	0
2009-01-13	05:56:00	0
2009-01-13	05:57:00	0
2009-01-13	05:58:00	0
2009-01-13	05:59:00	0
2009-01-13	06:00:00	0
2009-01-13	06:01:00	0
2009-01-13	06:02:00	0
2009-01-13	06:03:00	0
2009-01-13	06:04:00	0
2009-01-13	06:05:00	0
2009-01-13	06:06:00	0
2009-01-13	06:07:00	0
2009-01-13	06:08:00	0
2009-01-13	06:09:00	0
2009-01-13	06:10:00	0
2009-01-13	06:11:00	0
2009-01-13	06:12:00	0
2009-01-13	06:13:00	0
2009-01-13	06:14:00	0
2009-01-13	06:15:00	0
2009-01-13	06:16:00	0
2009-01-13	06:17:00	0
2009-01-13	06:18:00	0
2009-01-13	06:19:00	0
2009-01-13	06:20:00	0
2009-01-13	06:21:00	0
2009-01-13	06:22:00	0
2009-01-13	06:23:00	0
2009-01-13	06:24:00	0
2009-01-13	06:25:00	0
2009-01-13	06:26:00	0
2009-01-13	06:27:00	0
2009-01-13	06:28:00	0
2009-01-13	06:29:00	0
2009-01-13	06:30:00	0
2009-01-13	06:31:00	0
2009-01-13	06:32:00	0
2009-01-13	06:33:00	0
2009-01-13	06:34:00	0
2009-01-13	06:35:00	0
2009-01-13	06:36:00	0
2009-01-13	06:37:00	0
2009-01-13	06:38:00	0
2009-01-13	06:39:00	0
2009-01-13	06:40:00	0
2009-01-13	06:41:00	0
2009-01-13	06:42:00	0
2009-01-13	06:43:00	0
2009-01-13	06:44:00	0
2009-01-13	06:45:00	0
2009-01-13	06:46:00	0
2009-01-13	06:47:00	0
2009-01-13	06:48:00	0
2009-01-13	06:49:00	0
2009-01-13	06:50:00	0
2009-01-13	06:51:00	0
2009-01-13	06:52:00	0
2009-01-13	06:53:00	0
2009-01-13	06:54:00	0
2009-01-13	06:55:00	0
2009-01-13	06:56:00	0
2009-01-13	06:57:00	0
2009-01-13	06:58:00	0
2009-01-13	06:59:00	0
2009-01-13	07:00:00	0
2009-01-13	07:01:00	0
2009-01-13	07:02:00	0
2009-01-13	07:03:00	0
2009-01-13	07:04:00	0
2009-01-13	07:05:00	0
2009-01-13	07:06:00	0
2009-01-13	07:07:00	0
2009-01-13	07:08:00	0
2009-01-13	07:09:00	0
2009-01-13	07:10:00	0
2009-01-13	07:11:00	0
2009-01-13	07:12:00	0
2009-01-13	07:13:00	0
2009-01-13	07:14:00	0
2009-01-13	07:15:00	0
2009-01-13	07:16:00	0
2009-01-13	07:17:00	0
2009-01-13	07:18:00	0
2009-01-13	07:19:00	0
2009-01-13	07:20:00	0
2009-01-13	07:21:00	0
2009-01-13	07:22:00	0
2009-01-13	07:23:00	0
2009-01-13	07:24:00	0
2009-01-13	07:25:00	0
2009-01-13	07:26:00	0
2009-01-13	07:27:00	0
2009-01-13	07:28:00	0
2009-01-13	07:29:00	0
2009-01-13	07:30:00	0
2009-01-13	07:31:00	0
2009-01-13	07:32:00	0
2009-01-13	07:33:00	0
2009-01-13	07:34:00	0
2009-01-13	07:35:00	0
2009-01-13	07:36:00	0
2009-01-13	07:37:00	0
2009-01-13	07:38:00	0
2009-01-13	07:39:00	0
2009-01-13	07:40:00	0
2009-01-13	07:41:00	0
2009-01-13	07:42:00	0
2009-01-13	07:43:00	0
2009-01-13	07:44:00	0
2009-01-13	07:45:00	0
2009-01-13	07:46:00	0
2009-01-13	07:47:00	0
2009-01-13	07:48:00	0
2009-01-13	07:49:00	0
2009-01-13	07:50:00	0
2009-01-13	07:51:00	0
2009-01-13	07:52:00	0
2009-01-13	07:53:00	0
2009-01-13	07:54:00	0
2009-01-13	07:55:00	0
2009-01-13	07:56:00	0
2009-01-13	07:57:00	0
2009-01-13	07:58:00	0
2009-01-13	07:59:00	0
2009-01-13	08:00:00	0
2009-01-13	08:01:00	0
2009-01-13	08:02:00	0
2009-01-13	08:03:00	0
2009-01-13	08:04:00	0
2009-01-13	08:05:00	0
2009-01-13	08:06:00	0
2009-01-13	08:07:00	0
2009-01-13	08:08:00	0
2009-01-13	08:09:00	0
2009-01-13	08:10:00	0
2009-01-13	08:11:00	0
2009-01-13	08:12:00	0
2009-01-13	08:13:00	0
2009-01-13	08:14:00	0
2009-01-13	08:15:00	0
2009-01-13	08:16:00	0
2009-01-13	08:17:00	0
2009-01-13	08:18:00	0
2009-01-13	08:19:00	0
2009-01-13	08:20:00	0
2009-01-13	08:21:00	0
2009-01-13	08:22:00	0
2009-01-13	08:23:00	0
2009-01-13	08:24:00	0
2009-01-13	08:25:00	0
2009-01-13	08:26:00	0
2009-01-13	08:27:00	0
2009-01-13	08:28:00	0
2009-01-13	08:29:00	0
2009-01-13	08:30:00	0
2009-01-13	08:31:00	0
2009-01-13	08:32:00	0
2009-01-13	08:33:00	0
2009-01-13	08:34:00	0
2009-01-13	08:35:00	0
2009-01-13	08:36:00	0
2009-01-13	08:37:00	0
2009-01-13	08:38:00	0
2009-01-13	08:39:00	0
2009-01-13	08:40:00	0
2009-01-13	08:41:00	0
2009-01-13	08:42:00	0
2009-01-13	08:43:00	0
2009-01-13	08:44:00	0
2009-01-13	08:45:00	0
2009-01-13	08:46:00	0
2009-01-13	08:47:00	0
2009-01-13	08:48:00	0
2009-01-13	08:49:00	0
2009-01-13	08:50:00	0
2009-01-13	08:51:00	0
2009-01-13	08:52:00	0
2009-01-13	08:53:00	0
2009-01-13	08:54:00	0
2009-01-13	08:55:00	0
2009-01-13	08:56:00	0
2009-01-13	08:57:00	0
2009-01-13	08:58:00	0
2009-01-13	08:59:00	0
2009-01-13	09:00:00	0
2009-01-13	09:01:00	0
2009-01-13	09:02:00	0
2009-01-13	09:03:00	0
2009-01-13	09:04:00	0
2009-01-13	09:05:00	0
2009-01-13	09:06:00	0
2009-01-13	09:07:00	0
2009-01-13	09:08:00	0
2009-01-13	09:09:00	0
2009-01-13	09:10:00	0
2009-01-13	09:11:00	0
2009-01-13	09:12:00	0
2009-01-13	09:13:00	0
2009-01-13	09:14:00	0
2009-01-13	09:15:00	0
2009-01-13	09:16:00	0
2009-01-13	09:17:00	0
2009-01-13	09:18:00	0
2009-01-13	09:19:00	0
2009-01-13	09:20:00	0
2009-01-13	09:21:00	0
2009-01-13	09:22:00	0
2009-01-13	09:23:00	0
2009-01-13	09:24:00	0
2009-01-13	09:25:00	0
2009-01-13	09:26:00	0
2009-01-13	09:27:00	0
2009-01-13	09:28:00	0
2009-01-13	09:29:00	0
2009-01-13	09:30:00	0
2009-01-13	09:31:00	0
2009-01-13	09:32:00	0
2009-01-13	09:33:00	0
2009-01-13	09:34:00	0
2009-01-13	09:35:00	0
2009-01-13	09:36:00	0
2009-01-13	09:37:00	0
2009-01-13	09:38:00	0
2009-01-13	09:39:00	0
2009-01-13	09:40:00	0
2009-01-13	09:41:00	0
2009-01-13	09:42:00	0
2009-01-13	09:43:00	0
2009-01-13	09:44:00	0
2009-01-13	09:45:00	0
2009-01-13	09:46:00	0
2009-01-13	09:47:00	0
2009-01-13	09:48:00	0
2009-01-13	09:49:00	0
2009-01-13	09:50:00	0
2009-01-13	09:51:00	0
2009-01-13	09:52:00	0
2009-01-13	09:53:00	0
2009-01-13	09:54:00	0
2009-01-13	09:55:00	0
2009-01-13	09:56:00	0
2009-01-13	09:57:00	0
2009-01-13	09:58:00	0
2009-01-13	09:59:00	0
2009-01-13	10:00:00	0
2009-01-13	10:01:00	0
2009-01-13	10:02:00	0
2009-01-13	10:03:00	0
2009-01-13	10:04:00	0
2009-01-13	10:05:00	0
2009-01-13	10:06:00	0
2009-01-13	10:07:00	0
2009-01-13	10:08:00	0
2009-01-13	10:09:00	0
2009-01-13	10:10:00	0
2009-01-13	10:11:00	0
2009-01-13	10:12:00	0
2009-01-13	10:13:00	0
2009-01-13	10:14:00	0
2009-01-13	10:15:00	0
2009-01-13	10:16:00	0
2009-01-13	10:17:00	0
2009-01-13	10:18:00	0
2009-01-13	10:19:00	0
2009-01-13	10:20:00	0
2009-01-13	10:21:00	0
2009-01-13	10:22:00	0
2009-01-13	10:23:00	0
2009-01-13	10:24:00	0
2009-01-13	10:25:00	0
2009-01-13	10:26:00	0
2009-01-13	10:27:00	0
2009-01-13	10:28:00	0
2009-01-13	10:29:00	0
2009-01-13	10:30:00	0
2009-01-13	10:31:00	0
2009-01-13	10:32:00	0
2009-01-13	10:33:00	0
2009-01-13	10:34:00	0
2009-01-13	10:35:00	0
2009-01-13	10:36:00	0
2009-01-13	10:37:00	0
2009-01-13	10:38:00	0
2009-01-13	10:39:00	0
2009-01-13	10:40:00	0
2009-01-13	10:41:00	0
2009-01-13	10:42:00	0
2009-01-13	10:43:00	0
2009-01-13	10:44:00	0
2009-01-13	10:45:00	0
2009-01-13	10:46:00	0
2009-01-13	10:47:00	0
2009-01-13	10:48:00	0
2009-01-13	10:49:00	0
2009-01-13	10:50:00	0
2009-01-13	10:51:00	0
2009-01-13	10:52:00	0
2009-01-13	10:53:00	0
2009-01-13	10:54:00	0
2009-01-13	10:55:00	0
2009-01-13	10:56:00	0
2009-01-13	10:57:00	0
2009-01-13	10:58:00	0
2009-01-13	10:59:00	0
2009-01-13	11:00:00	0
2009-01-13	11:01:00	0
2009-01-13	11:02:00	0
2009-01-13	11:03:00	0
2009-01-13	11:04:00	0
2009-01-13	11:05:00	0
2009-01-13	11:06:00	0
2009-01-13	11:07:00	0
2009-01-13	11:08:00	0
2009-01-13	11:09:00	0
2009-01-13	11:10:00	0
2009-01-13	11:11:00	0
2009-01-13	11:12:00	0
2009-01-13	11:13:00	0
2009-01-13	11:14:00	0
2009-01-13	11:15:00	0
2009-01-13	11:16:00	0
2009-01-13	11:17:00	0
2009-01-13	11:18:00	0
2009-01-13	11:19:00	0
2009-01-13	11:20:00	0
2009-01-13	11:21:00	0
2009-01-13	11:22:00	0
2009-01-13	11:23:00	0
2009-01-13	11:24:00	0
2009-01-13	11:25:00	0
2009-01-13	11:26:00	0
2009-01-13	11:27:00	0
2009-01-13	11:28:00	0
2009-01-13	11:29:00	0
2009-01-13	11:30:00	0
2009-01-13	11:31:00	0
2009-01-13	11:32:00	0
2009-01-13	11:33:00	0
2009-01-13	11:34:00	0
2009-01-13	11:35:00	0
2009-01-13	11:36:00	0
2009-01-13	11:37:00	0
2009-01-13	11:38:00	0
2009-01-13	11:39:00	0
2009-01-13	11:40:00	0
2009-01-13	11:41:00	0
2009-01-13	11:42:00	0
2009-01-13	11:43:00	0
2009-01-13	11:44:00	0
2009-01-13	11:45:00	0
2009-01-13	11:46:00	0
2009-01-13	11:47:00	0
2009-01-13	11:48:00	0
2009-01-13	11:49:00	0
2009-01-13	11:50:00	0
2009-01-13	11:51:00	0
2009-01-13	11:52:00	0
2009-01-13	11:53:00	0
2009-01-13	11:54:00	0
2009-01-13	11:55:00	0
2009-01-13	11:56:00	0
2009-01-13	11:57:00	0
2009-01-13	11:58:00	0
2009-01-13	11:59:00	0
2009-01-13	12:00:00	0
2009-01-13	12:01:00	0
2009-01-13	12:02:00	0
2009-01-13	12:03:00	0
2009-01-13	12:04:00	0
2009-01-13	12:05:00	0
2009-01-13	12:06:00	0
2009-01-13	12:07:00	0
2009-01-13	12:08:00	0
2009-01-13	12:09:00	0
2009-01-13	12:10:00	0
2009-01-13	12:11:00	0
2009-01-13	12:12:00	0
2009-01-13	12:13:00	0
2009-01-13	12:14:00	0
2009-01-13	12:15:00	0
2009-01-13	12:16:00	0
2009-01-13	12:17:00	0
2009-01-13	12:18:00	0
2009-01-13	12:19:00	0
2009-01-13	12:20:00	0
2009-01-13	12:21:00	0
2009-01-13	12:22:00	0
2009-01-13	12:23:00	0
2009-01-13	12:24:00	0
2009-01-13	12:25:00	0
2009-01-13	12:26:00	0
2009-01-13	12:27:00	0
2009-01-13	12:28:00	0
2009-01-13	12:29:00	0
2009-01-13	12:30:00	0
2009-01-13	12:31:00	0
2009-01-13	12:32:00	0
2009-01-13	12:33:00	0
2009-01-13	12:34:00	0
2009-01-13	12:35:00	0
2009-01-13	12:36:00	0
2009-01-13	12:37:00	0
2009-01-13	12:38:00	0
2009-01-13	12:39:00	0
2009-01-13	12:40:00	0
2009-01-13	12:41:00	0
2009-01-13	12:42:00	0
2009-01-13	12:43:00	0
2009-01-13	12:44:00	0
2009-01-13	12:45:00	0
2009-01-13	12:46:00	0
2009-01-13	12:47:00	0
2009-01-13	12:48:00	0
2009-01-13	12:49:00	0
2009-01-13	12:50:00	0
2009-01-13	12:51:00	0
2009-01-13	12:52:00	0
2009-01-13	12:53:00	0
2009-01-13	12:54:00	0
2009-01-13	12:55:00	0
2009-01-13	12:56:00	0
2009-01-13	12:57:00	0
2009-01-13	12:58:00	0
2009-01-13	12:59:00	0
2009-01-13	13:00:00	0
2009-01-13	13:01:00	0
2009-01-13	13:02:00	0
2009-01-13	13:03:00	0
2009-01-13	13:04:00	0
2009-01-13	13:05:00	0
2009-01-13	13:06:00	0
2009-01-13	13:07:00	0
2009-01-13	13:08:00	0
2009-01-13	13:09:00	0
2009-01-13	13:10:00	0
2009-01-13	13:11:00	0
2009-01-13	13:12:00	0
2009-01-13	13:13:00	0
2009-01-13	13:14:00	0
2009-01-13	13:15:00	0
2009-01-13	13:16:00	0
2009-01-13	13:17:00	0
2009-01-13	13:18:00	0
2009-01-13	13:19:00	0
2009-01-13	13:20:00	0
2009-01-13	13:21:00	0
2009-01-13	13:22:00	0
2009-01-13	13:23:00	0
2009-01-13	13:24:00	0
2009-01-13	13:25:00	0
2009-01-13	13:26:00	0
2009-01-13	13:27:00	0
2009-01-13	13:28:00	0
2009-01-13	13:29:00	0
2009-01-13	13:30:00	0
2009-01-13	13:31:00	0
2009-01-13	13:32:00	0
2009-01-13	13:33:00	0
2009-01-13	13:34:00	0
2009-01-13	13:35:00	0
2009-01-13	13:36:00	0
2009-01-13	13:37:00	0
2009-01-13	13:38:00	0
2009-01-13	13:39:00	0
2009-01-13	13:40:00	0
2009-01-13	13:41:00	0
2009-01-13	13:42:00	0
2009-01-13	13:43:00	0
2009-01-13	13:44:00	0
2009-01-13	13:45:00	0
2009-01-13	13:46:00	0
2009-01-13	13:47:00	0
2009-01-13	13:48:00	0
2009-01-13	13:49:00	0
2009-01-13	13:50:00	0
2009-01-13	13:51:00	0
2009-01-13	13:52:00	0
2009-01-13	13:53:00	0
2009-01-13	13:54:00	0
2009-01-13	13:55:00	0
2009-01-13	13:56:00	0
2009-01-13	13:57:00	0
2009-01-13	13:58:00	0
2009-01-13	13:59:00	0
2009-01-13	14:00:00	0
2009-01-13	14:01:00	0
2009-01-13	14:02:00	0
2009-01-13	14:03:00	0
2009-01-13	14:04:00	0
2009-01-13	14:05:00	0
2009-01-13	14:06:00	0
2009-01-13	14:07:00	0
2009-01-13	14:08:00	0
2009-01-13	14:09:00	0
2009-01-13	14:10:00	0
2009-01-13	14:11:00	0
2009-01-13	14:12:00	0
2009-01-13	14:13:00	0
2009-01-13	14:14:00	0
2009-01-13	14:15:00	0
2009-01-13	14:16:00	0
2009-01-13	14:17:00	0
2009-01-13	14:18:00	0
2009-01-13	14:19:00	0
2009-01-13	14:20:00	0
2009-01-13	14:21:00	0
2009-01-13	14:22:00	0
2009-01-13	14:23:00	0
2009-01-13	14:24:00	0
2009-01-13	14:25:00	0
2009-01-13	14:26:00	0
2009-01-13	14:27:00	0
2009-01-13	14:28:00	0
2009-01-13	14:29:00	0
2009-01-13	14:30:00	0
2009-01-13	14:31:00	0
2009-01-13	14:32:00	0
2009-01-13	14:33:00	0
2009-01-13	14:34:00	0
2009-01-13	14:35:00	0
2009-01-13	14:36:00	0
2009-01-13	14:37:00	0
2009-01-13	14:38:00	0
2009-01-13	14:39:00	0
2009-01-13	14:40:00	0
2009-01-13	14:41:00	0
2009-01-13	14:42:00	0
2009-01-13	14:43:00	0
2009-01-13	14:44:00	0
2009-01-13	14:45:00	0
2009-01-13	14:46:00	0
2009-01-13	14:47:00	0
2009-01-13	14:48:00	0
2009-01-13	14:49:00	0
2009-01-13	14:50:00	0
2009-01-13	14:51:00	0
2009-01-13	14:52:00	0
2009-01-13	14:53:00	0
2009-01-13	14:54:00	0
2009-01-13	14:55:00	0
2009-01-13	14:56:00	0
2009-01-13	14:57:00	0
2009-01-13	14:58:00	0
2009-01-13	14:59:00	0
2009-01-13	15:00:00	0
2009-01-13	15:01:00	0
2009-01-13	15:02:00	0
2009-01-13	15:03:00	0
2009-01-13	15:04:00	0
2009-01-13	15:05:00	0
2009-01-13	15:06:00	0
2009-01-13	15:07:00	0
2009-01-13	15:08:00	0
2009-01-13	15:09:00	0
2009-01-13	15:10:00	0
2009-01-13	15:11:00	0
2009-01-13	15:12:00	0
2009-01-13	15:13:00	0
2009-01-13	15:14:00	0
2009-01-13	15:15:00	0
2009-01-13	15:16:00	0
2009-01-13	15:17:00	0
2009-01-13	15:18:00	0
2009-01-13	15:19:00	0
2009-01-13	15:20:00	0
2009-01-13	15:21:00	0
2009-01-13	15:22:00	0
2009-01-13	15:23:00	0
2009-01-13	15:24:00	0
2009-01-13	15:25:00	0
2009-01-13	15:26:00	0
2009-01-13	15:27:00	0
2009-01-13	15:28:00	0
2009-01-13	15:29:00	0
2009-01-13	15:30:00	0
2009-01-13	15:31:00	0
2009-01-13	15:32:00	0
2009-01-13	15:33:00	0
2009-01-13	15:34:00	0
2009-01-13	15:35:00	0
2009-01-13	15:36:00	0
2009-01-13	15:37:00	0
2009-01-13	15:38:00	0
2009-01-13	15:39:00	0
2009-01-13	15:40:00	0
2009-01-13	15:41:00	0
2009-01-13	15:42:00	0
2009-01-13	15:43:00	0
2009-01-13	15:44:00	0
2009-01-13	15:45:00	0
2009-01-13	15:46:00	0
2009-01-13	15:47:00	0
2009-01-13	15:48:00	0
2009-01-13	15:49:00	0
2009-01-13	15:50:00	0
2009-01-13	15:51:00	0
2009-01-13	15:52:00	0
2009-01-13	15:53:00	0
2009-01-13	15:54:00	0
2009-01-13	15:55:00	0
2009-01-13	15:56:00	0
2009-01-13	15:57:00	0
2009-01-13	15:58:00	0
2009-01-13	15:59:00	0
2009-01-13	16:00:00	0
2009-01-13	16:01:00	0
2009-01-13	16:02:00	0
2009-01-13	16:03:00	0
2009-01-13	16:04:00	0
2009-01-13	16:05:00	0
2009-01-13	16:06:00	0
2009-01-13	16:07:00	0
2009-01-13	16:08:00	0
2009-01-13	16:09:00	0
2009-01-13	16:10:00	0
2009-01-13	16:11:00	0
2009-01-13	16:12:00	0
2009-01-13	16:13:00	0
2009-01-13	16:14:00	0
2009-01-13	16:15:00	0
2009-01-13	16:16:00	0
2009-01-13	16:17:00	0
2009-01-13	16:18:00	0
2009-01-13	16:19:00	0
2009-01-13	16:20:00	0
2009-01-13	16:21:00	0
2009-01-13	16:22:00	0
2009-01-13	16:23:00	0
2009-01-13	16:24:00	0
2009-01-13	16:25:00	0
2009-01-13	16:26:00	0
2009-01-13	16:27:00	0
2009-01-13	16:28:00	0
2009-01-13	16:29:00	0
2009-01-13	16:30:00	0
2009-01-13	16:31:00	0
2009-01-13	16:32:00	0
2009-01-13	16:33:00	0
2009-01-13	16:34:00	0
2009-01-13	16:35:00	0
2009-01-13	16:36:00	0
2009-01-13	16:37:00	0
2009-01-13	16:38:00	0
2009-01-13	16:39:00	0
2009-01-13	16:40:00	0
2009-01-13	16:41:00	0
2009-01-13	16:42:00	0
2009-01-13	16:43:00	0
2009-01-13	16:44:00	0
2009-01-13	16:45:00	0
2009-01-13	16:46:00	0
2009-01-13	16:47:00	0
2009-01-13	16:48:00	0
2009-01-13	16:49:00	0
2009-01-13	16:50:00	0
2009-01-13	16:51:00	0
2009-01-13	16:52:00	0
2009-01-13	16:53:00	0
2009-01-13	16:54:00	0
2009-01-13	16:55:00	0
2009-01-13	16:56:00	0
2009-01-13	16:57:00	0
2009-01-13	16:58:00	0
2009-01-13	16:59:00	0
2009-01-13	17:00:00	593
2009-01-13	17:01:00	443
2009-01-13	17:02:00	785
2009-01-13	17:03:00	808
2009-01-13	17:04:00	697
2009-01-13	17:05:00	427
2009-01-13	17:06:00	718
2009-01-13	17:07:00	498
2009-01-13	17:08:00	761
2009-01-13	17:09:00	718
2009-01-13	17:10:00	718
2009-01-13	17:11:00	785
2009-01-13	17:12:00	460
2009-01-13	17:13:00	360
2009-01-13	17:14:00	740
2009-01-13	17:15:00	808
2009-01-13	17:16:00	740
2009-01-13	17:17:00	517
2009-01-13	17:18:00	832
2009-01-13	17:19:00	633
2009-01-13	17:20:00	517
2009-01-13	17:21:00	785
2009-01-13	17:22:00	903
2009-01-13	17:23:00	377
2009-01-13	17:24:00	953
2009-01-13	17:25:00	718
2009-01-13	17:26:00	927
2009-01-13	17:27:00	718
2009-01-13	17:28:00	612
2009-01-13	17:29:00	740
2009-01-13	17:30:00	311
2009-01-13	17:31:00	536
2009-01-13	17:32:00	443
2009-01-13	17:33:00	697
2009-01-13	17:34:00	130
2009-01-13	17:35:00	555
2009-01-13	17:36:00	410
2009-01-13	17:37:00	676
2009-01-13	17:38:00	327
2009-01-13	17:39:00	633
2009-01-13	17:40:00	479
2009-01-13	17:41:00	697
2009-01-13	17:42:00	612
2009-01-13	17:43:00	427
2009-01-13	17:44:00	154
2009-01-13	17:45:00	633
2009-01-13	17:46:00	574
2009-01-13	17:47:00	410
2009-01-13	17:48:00	785
2009-01-13	17:49:00	808
2009-01-13	17:50:00	879
2009-01-13	17:51:00	785
2009-01-13	17:52:00	268
2009-01-13	17:53:00	593
2009-01-13	17:54:00	654
2009-01-13	17:55:00	654
2009-01-13	17:56:00	1545
2009-01-13	17:57:00	1380
2009-01-13	17:58:00	654
2009-01-13	17:59:00	1256
2009-01-13	18:00:00	1112
2009-01-13	18:01:00	879
2009-01-13	18:02:00	1057
2009-01-13	18:03:00	1169
2009-01-13	18:04:00	927
2009-01-13	18:05:00	517
2009-01-13	18:06:00	676
2009-01-13	18:07:00	1083
2009-01-13	18:08:00	856
2009-01-13	18:09:00	832
2009-01-13	18:10:00	1380
2009-01-13	18:11:00	1652
2009-01-13	18:12:00	377
2009-01-13	18:13:00	183
2009-01-13	18:14:00	47
2009-01-13	18:15:00	12
2009-01-13	18:16:00	0
2009-01-13	18:17:00	0
2009-01-13	18:18:00	0
2009-01-13	18:19:00	36
2009-01-13	18:20:00	12
2009-01-13	18:21:00	47
2009-01-13	18:22:00	12
2009-01-13	18:23:00	12
2009-01-13	18:24:00	12
2009-01-13	18:25:00	12
2009-01-13	18:26:00	311
2009-01-13	18:27:00	154
2009-01-13	18:28:00	0
2009-01-13	18:29:00	83
2009-01-13	18:30:00	107
2009-01-13	18:31:00	12
2009-01-13	18:32:00	142
2009-01-13	18:33:00	211
2009-01-13	18:34:00	697
2009-01-13	18:35:00	498
2009-01-13	18:36:00	268
2009-01-13	18:37:00	479
2009-01-13	18:38:00	344
2009-01-13	18:39:00	254
2009-01-13	18:40:00	12
2009-01-13	18:41:00	0
2009-01-13	18:42:00	24
2009-01-13	18:43:00	12
2009-01-13	18:44:00	59
2009-01-13	18:45:00	879
2009-01-13	18:46:00	654
2009-01-13	18:47:00	1225
2009-01-13	18:48:00	903
2009-01-13	18:49:00	654
2009-01-13	18:50:00	282
2009-01-13	18:51:00	296
2009-01-13	18:52:00	239
2009-01-13	18:53:00	536
2009-01-13	18:54:00	377
2009-01-13	18:55:00	254
2009-01-13	18:56:00	344
2009-01-13	18:57:00	154
2009-01-13	18:58:00	443
2009-01-13	18:59:00	142
2009-01-13	19:00:00	254
2009-01-13	19:01:00	536
2009-01-13	19:02:00	168
2009-01-13	19:03:00	83
2009-01-13	19:04:00	95
2009-01-13	19:05:00	211
2009-01-13	19:06:00	168
2009-01-13	19:07:00	95
2009-01-13	19:08:00	95
2009-01-13	19:09:00	282
2009-01-13	19:10:00	183
2009-01-13	19:11:00	612
2009-01-13	19:12:00	612
2009-01-13	19:13:00	0
2009-01-13	19:14:00	0
2009-01-13	19:15:00	0
2009-01-13	19:16:00	0
2009-01-13	19:17:00	0
2009-01-13	19:18:00	574
2009-01-13	19:19:00	168
2009-01-13	19:20:00	311
2009-01-13	19:21:00	197
2009-01-13	19:22:00	377
2009-01-13	19:23:00	574
2009-01-13	19:24:00	36
2009-01-13	19:25:00	296
2009-01-13	19:26:00	71
2009-01-13	19:27:00	168
2009-01-13	19:28:00	410
2009-01-13	19:29:00	344
2009-01-13	19:30:00	268
2009-01-13	19:31:00	393
2009-01-13	19:32:00	154
2009-01-13	19:33:00	296
2009-01-13	19:34:00	168
2009-01-13	19:35:00	168
2009-01-13	19:36:00	225
2009-01-13	19:37:00	24
2009-01-13	19:38:00	36
2009-01-13	19:39:00	12
2009-01-13	19:40:00	282
2009-01-13	19:41:00	24
2009-01-13	19:42:00	12
2009-01-13	19:43:00	197
2009-01-13	19:44:00	197
2009-01-13	19:45:00	0
2009-01-13	19:46:00	0
2009-01-13	19:47:00	12
2009-01-13	19:48:00	0
2009-01-13	19:49:00	0
2009-01-13	19:50:00	0
2009-01-13	19:51:00	12
2009-01-13	19:52:00	0
2009-01-13	19:53:00	0
2009-01-13	19:54:00	0
2009-01-13	19:55:00	0
2009-01-13	19:56:00	0
2009-01-13	19:57:00	0
2009-01-13	19:58:00	0
2009-01-13	19:59:00	12
2009-01-13	20:00:00	24
2009-01-13	20:01:00	0
2009-01-13	20:02:00	36
2009-01-13	20:03:00	282
2009-01-13	20:04:00	377
2009-01-13	20:05:00	130
2009-01-13	20:06:00	225
2009-01-13	20:07:00	268
2009-01-13	20:08:00	36
2009-01-13	20:09:00	24
2009-01-13	20:10:00	24
2009-01-13	20:11:00	0
2009-01-13	20:12:00	12
2009-01-13	20:13:00	0
2009-01-13	20:14:00	0
2009-01-13	20:15:00	12
2009-01-13	20:16:00	107
2009-01-13	20:17:00	0
2009-01-13	20:18:00	12
2009-01-13	20:19:00	0
2009-01-13	20:20:00	24
2009-01-13	20:21:00	0
2009-01-13	20:22:00	0
2009-01-13	20:23:00	0
2009-01-13	20:24:00	24
2009-01-13	20:25:00	0
2009-01-13	20:26:00	0
2009-01-13	20:27:00	0
2009-01-13	20:28:00	0
2009-01-13	20:29:00	0
2009-01-13	20:30:00	0
2009-01-13	20:31:00	12
2009-01-13	20:32:00	0
2009-01-13	20:33:00	0
2009-01-13	20:34:00	12
2009-01-13	20:35:00	0
2009-01-13	20:36:00	0
2009-01-13	20:37:00	0
2009-01-13	20:38:00	0
2009-01-13	20:39:00	0
2009-01-13	20:40:00	0
2009-01-13	20:41:00	12
2009-01-13	20:42:00	344
2009-01-13	20:43:00	360
2009-01-13	20:44:00	311
2009-01-13	20:45:00	0
2009-01-13	20:46:00	0
2009-01-13	20:47:00	0
2009-01-13	20:48:00	0
2009-01-13	20:49:00	0
2009-01-13	20:50:00	12
2009-01-13	20:51:00	0
2009-01-13	20:52:00	0
2009-01-13	20:53:00	0
2009-01-13	20:54:00	0
2009-01-13	20:55:00	12
2009-01-13	20:56:00	0
2009-01-13	20:57:00	0
2009-01-13	20:58:00	0
2009-01-13	20:59:00	0
2009-01-13	21:00:00	0
2009-01-13	21:01:00	0
2009-01-13	21:02:00	0
2009-01-13	21:03:00	0
2009-01-13	21:04:00	0
2009-01-13	21:05:00	0
2009-01-13	21:06:00	0
2009-01-13	21:07:00	0
2009-01-13	21:08:00	0
2009-01-13	21:09:00	0
2009-01-13	21:10:00	0
2009-01-13	21:11:00	0
2009-01-13	21:12:00	0
2009-01-13	21:13:00	0
2009-01-13	21:14:00	0
2009-01-13	21:15:00	0
2009-01-13	21:16:00	12
2009-01-13	21:17:00	0
2009-01-13	21:18:00	0
2009-01-13	21:19:00	0
2009-01-13	21:20:00	0
2009-01-13	21:21:00	0
2009-01-13	21:22:00	0
2009-01-13	21:23:00	0
2009-01-13	21:24:00	0
2009-01-13	21:25:00	0
2009-01-13	21:26:00	0
2009-01-13	21:27:00	0
2009-01-13	21:28:00	0
2009-01-13	21:29:00	0
2009-01-13	21:30:00	0
2009-01-13	21:31:00	0
2009-01-13	21:32:00	0
2009-01-13	21:33:00	0
2009-01-13	21:34:00	0
2009-01-13	21:35:00	0
2009-01-13	21:36:00	0
2009-01-13	21:37:00	0
2009-01-13	21:38:00	0
2009-01-13	21:39:00	0
2009-01-13	21:40:00	0
2009-01-13	21:41:00	0
2009-01-13	21:42:00	0
2009-01-13	21:43:00	0
2009-01-13	21:44:00	0
2009-01-13	21:45:00	0
2009-01-13	21:46:00	0
2009-01-13	21:47:00	0
2009-01-13	21:48:00	0
2009-01-13	21:49:00	0
2009-01-13	21:50:00	0
2009-01-13	21:51:00	0
2009-01-13	21:52:00	0
2009-01-13	21:53:00	0
2009-01-13	21:54:00	0
2009-01-13	21:55:00	0
2009-01-13	21:56:00	0
2009-01-13	21:57:00	0
2009-01-13	21:58:00	0
2009-01-13	21:59:00	0
2009-01-13	22:00:00	0
2009-01-13	22:01:00	0
2009-01-13	22:02:00	0
2009-01-13	22:03:00	0
2009-01-13	22:04:00	0
2009-01-13	22:05:00	0
2009-01-13	22:06:00	0
2009-01-13	22:07:00	0
2009-01-13	22:08:00	0
2009-01-13	22:09:00	0
2009-01-13	22:10:00	0
2009-01-13	22:11:00	0
2009-01-13	22:12:00	0
2009-01-13	22:13:00	0
2009-01-13	22:14:00	0
2009-01-13	22:15:00	0
2009-01-13	22:16:00	0
2009-01-13	22:17:00	0
2009-01-13	22:18:00	0
2009-01-13	22:19:00	0
2009-01-13	22:20:00	0
2009-01-13	22:21:00	0
2009-01-13	22:22:00	0
2009-01-13	22:23:00	0
2009-01-13	22:24:00	12
2009-01-13	22:25:00	0
2009-01-13	22:26:00	0
2009-01-13	22:27:00	0
2009-01-13	22:28:00	0
2009-01-13	22:29:00	0
2009-01-13	22:30:00	0
2009-01-13	22:31:00	0
2009-01-13	22:32:00	0
2009-01-13	22:33:00	0
2009-01-13	22:34:00	0
2009-01-13	22:35:00	12
2009-01-13	22:36:00	47
2009-01-13	22:37:00	0
2009-01-13	22:38:00	0
2009-01-13	22:39:00	239
2009-01-13	22:40:00	654
2009-01-13	22:41:00	311
2009-01-13	22:42:00	360
2009-01-13	22:43:00	239
2009-01-13	22:44:00	360
2009-01-13	22:45:00	697
2009-01-13	22:46:00	410
2009-01-13	22:47:00	536
2009-01-13	22:48:00	479
2009-01-13	22:49:00	327
2009-01-13	22:50:00	536
2009-01-13	22:51:00	1287
2009-01-13	22:52:00	168
2009-01-13	22:53:00	12
2009-01-13	22:54:00	0
2009-01-13	22:55:00	0
2009-01-13	22:56:00	95
2009-01-13	22:57:00	107
2009-01-13	22:58:00	12
2009-01-13	22:59:00	0
2009-01-13	23:00:00	0
2009-01-13	23:01:00	0
2009-01-13	23:02:00	0
2009-01-13	23:03:00	0
2009-01-13	23:04:00	460
2009-01-13	23:05:00	282
2009-01-13	23:06:00	0
2009-01-13	23:07:00	0
2009-01-13	23:08:00	0
2009-01-13	23:09:00	0
2009-01-13	23:10:00	36
2009-01-13	23:11:00	0
2009-01-13	23:12:00	0
2009-01-13	23:13:00	0
2009-01-13	23:14:00	0
2009-01-13	23:15:00	0
2009-01-13	23:16:00	0
2009-01-13	23:17:00	0
2009-01-13	23:18:00	0
2009-01-13	23:19:00	0
2009-01-13	23:20:00	0
2009-01-13	23:21:00	0
2009-01-13	23:22:00	0
2009-01-13	23:23:00	36
2009-01-13	23:24:00	107
2009-01-13	23:25:00	12
2009-01-13	23:26:00	24
2009-01-13	23:27:00	24
2009-01-13	23:28:00	0
2009-01-13	23:29:00	0
2009-01-13	23:30:00	71
2009-01-13	23:31:00	12
2009-01-13	23:32:00	12
2009-01-13	23:33:00	12
2009-01-13	23:34:00	12
2009-01-13	23:35:00	24
2009-01-13	23:36:00	517
2009-01-13	23:37:00	0
2009-01-13	23:38:00	0
2009-01-13	23:39:00	0
2009-01-13	23:40:00	0
2009-01-13	23:41:00	0
2009-01-13	23:42:00	0
2009-01-13	23:43:00	24
2009-01-13	23:44:00	12
2009-01-13	23:45:00	24
2009-01-13	23:46:00	0
2009-01-13	23:47:00	47
2009-01-13	23:48:00	0
2009-01-13	23:49:00	47
2009-01-13	23:50:00	12
2009-01-13	23:51:00	36
2009-01-13	23:52:00	0
2009-01-13	23:53:00	0
2009-01-13	23:54:00	0
2009-01-13	23:55:00	0
2009-01-13	23:56:00	0
2009-01-13	23:57:00	0
2009-01-13	23:58:00	0
2009-01-13	23:59:00	0
2009-01-14	00:00:00	0
2009-01-14	00:01:00	0
2009-01-14	00:02:00	0
2009-01-14	00:03:00	0
2009-01-14	00:04:00	0
2009-01-14	00:05:00	0
2009-01-14	00:06:00	0
2009-01-14	00:07:00	0
2009-01-14	00:08:00	0
2009-01-14	00:09:00	0
2009-01-14	00:10:00	0
2009-01-14	00:11:00	0
2009-01-14	00:12:00	0
2009-01-14	00:13:00	0
2009-01-14	00:14:00	0
2009-01-14	00:15:00	0
2009-01-14	00:16:00	0
2009-01-14	00:17:00	0
2009-01-14	00:18:00	0
2009-01-14	00:19:00	0
2009-01-14	00:20:00	0
2009-01-14	00:21:00	0
2009-01-14	00:22:00	0
2009-01-14	00:23:00	0
2009-01-14	00:24:00	0
2009-01-14	00:25:00	0
2009-01-14	00:26:00	0
2009-01-14	00:27:00	0
2009-01-14	00:28:00	0
2009-01-14	00:29:00	0
2009-01-14	00:30:00	0
2009-01-14	00:31:00	0
2009-01-14	00:32:00	0
2009-01-14	00:33:00	0
2009-01-14	00:34:00	0
2009-01-14	00:35:00	0
2009-01-14	00:36:00	0
2009-01-14	00:37:00	0
2009-01-14	00:38:00	0
2009-01-14	00:39:00	0
2009-01-14	00:40:00	0
2009-01-14	00:41:00	0
2009-01-14	00:42:00	0
2009-01-14	00:43:00	0
2009-01-14	00:44:00	0
2009-01-14	00:45:00	0
2009-01-14	00:46:00	0
2009-01-14	00:47:00	0
2009-01-14	00:48:00	0
2009-01-14	00:49:00	0
2009-01-14	00:50:00	0
2009-01-14	00:51:00	0
2009-01-14	00:52:00	0
2009-01-14	00:53:00	36
2009-01-14	00:54:00	47
2009-01-14	00:55:00	12
2009-01-14	00:56:00	211
2009-01-14	00:57:00	24
2009-01-14	00:58:00	0
2009-01-14	00:59:00	168
2009-01-14	01:00:00	36
2009-01-14	01:01:00	168
2009-01-14	01:02:00	612
2009-01-14	01:03:00	0
2009-01-14	01:04:00	12
2009-01-14	01:05:00	12
2009-01-14	01:06:00	24
2009-01-14	01:07:00	47
2009-01-14	01:08:00	0
2009-01-14	01:09:00	0
2009-01-14	01:10:00	0
2009-01-14	01:11:00	0
2009-01-14	01:12:00	0
2009-01-14	01:13:00	0
2009-01-14	01:14:00	0
2009-01-14	01:15:00	0
2009-01-14	01:16:00	0
2009-01-14	01:17:00	0
2009-01-14	01:18:00	0
2009-01-14	01:19:00	0
2009-01-14	01:20:00	0
2009-01-14	01:21:00	0
2009-01-14	01:22:00	0
2009-01-14	01:23:00	0
2009-01-14	01:24:00	0
2009-01-14	01:25:00	0
2009-01-14	01:26:00	0
2009-01-14	01:27:00	0
2009-01-14	01:28:00	0
2009-01-14	01:29:00	0
2009-01-14	01:30:00	24
2009-01-14	01:31:00	0
2009-01-14	01:32:00	0
2009-01-14	01:33:00	0
2009-01-14	01:34:00	0
2009-01-14	01:35:00	0
2009-01-14	01:36:00	0
2009-01-14	01:37:00	0
2009-01-14	01:38:00	0
2009-01-14	01:39:00	0
2009-01-14	01:40:00	0
2009-01-14	01:41:00	0
2009-01-14	01:42:00	0
2009-01-14	01:43:00	0
2009-01-14	01:44:00	0
2009-01-14	01:45:00	36
2009-01-14	01:46:00	377
2009-01-14	01:47:00	536
2009-01-14	01:48:00	344
2009-01-14	01:49:00	1169
2009-01-14	01:50:00	410
2009-01-14	01:51:00	59
2009-01-14	01:52:00	0
2009-01-14	01:53:00	0
2009-01-14	01:54:00	0
2009-01-14	01:55:00	0
2009-01-14	01:56:00	12
2009-01-14	01:57:00	12
2009-01-14	01:58:00	517
2009-01-14	01:59:00	1031
2009-01-14	02:00:00	612
2009-01-14	02:01:00	443
2009-01-14	02:02:00	142
2009-01-14	02:03:00	410
2009-01-14	02:04:00	296
2009-01-14	02:05:00	12
2009-01-14	02:06:00	0
2009-01-14	02:07:00	24
2009-01-14	02:08:00	24
2009-01-14	02:09:00	36
2009-01-14	02:10:00	12
2009-01-14	02:11:00	12
2009-01-14	02:12:00	24
2009-01-14	02:13:00	360
2009-01-14	02:14:00	12
2009-01-14	02:15:00	12
2009-01-14	02:16:00	0
2009-01-14	02:17:00	0
2009-01-14	02:18:00	0
2009-01-14	02:19:00	12
2009-01-14	02:20:00	0
2009-01-14	02:21:00	36
2009-01-14	02:22:00	0
2009-01-14	02:23:00	0
2009-01-14	02:24:00	360
2009-01-14	02:25:00	393
2009-01-14	02:26:00	12
2009-01-14	02:27:00	12
2009-01-14	02:28:00	0
2009-01-14	02:29:00	0
2009-01-14	02:30:00	0
2009-01-14	02:31:00	0
2009-01-14	02:32:00	0
2009-01-14	02:33:00	0
2009-01-14	02:34:00	0
2009-01-14	02:35:00	0
2009-01-14	02:36:00	12
2009-01-14	02:37:00	0
2009-01-14	02:38:00	12
2009-01-14	02:39:00	0
2009-01-14	02:40:00	0
2009-01-14	02:41:00	360
2009-01-14	02:42:00	393
2009-01-14	02:43:00	0
2009-01-14	02:44:00	24
2009-01-14	02:45:00	0
2009-01-14	02:46:00	0
2009-01-14	02:47:00	0
2009-01-14	02:48:00	0
2009-01-14	02:49:00	0
2009-01-14	02:50:00	0
2009-01-14	02:51:00	0
2009-01-14	02:52:00	0
2009-01-14	02:53:00	0
2009-01-14	02:54:00	0
2009-01-14	02:55:00	0
2009-01-14	02:56:00	0
2009-01-14	02:57:00	0
2009-01-14	02:58:00	0
2009-01-14	02:59:00	24
2009-01-14	03:00:00	0
2009-01-14	03:01:00	0
2009-01-14	03:02:00	0
2009-01-14	03:03:00	0
2009-01-14	03:04:00	0
2009-01-14	03:05:00	0
2009-01-14	03:06:00	0
2009-01-14	03:07:00	0
2009-01-14	03:08:00	0
2009-01-14	03:09:00	0
2009-01-14	03:10:00	0
2009-01-14	03:11:00	0
2009-01-14	03:12:00	0
2009-01-14	03:13:00	0
2009-01-14	03:14:00	0
2009-01-14	03:15:00	36
2009-01-14	03:16:00	0
2009-01-14	03:17:00	0
2009-01-14	03:18:00	0
2009-01-14	03:19:00	0
2009-01-14	03:20:00	0
2009-01-14	03:21:00	0
2009-01-14	03:22:00	0
2009-01-14	03:23:00	0
2009-01-14	03:24:00	0
2009-01-14	03:25:00	0
2009-01-14	03:26:00	0
2009-01-14	03:27:00	0
2009-01-14	03:28:00	0
2009-01-14	03:29:00	0
2009-01-14	03:30:00	0
2009-01-14	03:31:00	0
2009-01-14	03:32:00	0
2009-01-14	03:33:00	0
2009-01-14	03:34:00	0
2009-01-14	03:35:00	12
2009-01-14	03:36:00	0
2009-01-14	03:37:00	0
2009-01-14	03:38:00	0
2009-01-14	03:39:00	0
2009-01-14	03:40:00	0
2009-01-14	03:41:00	0
2009-01-14	03:42:00	0
2009-01-14	03:43:00	0
2009-01-14	03:44:00	0
2009-01-14	03:45:00	0
2009-01-14	03:46:00	0
2009-01-14	03:47:00	0
2009-01-14	03:48:00	0
2009-01-14	03:49:00	0
2009-01-14	03:50:00	0
2009-01-14	03:51:00	0
2009-01-14	03:52:00	0
2009-01-14	03:53:00	0
2009-01-14	03:54:00	0
2009-01-14	03:55:00	0
2009-01-14	03:56:00	0
2009-01-14	03:57:00	0
2009-01-14	03:58:00	0
2009-01-14	03:59:00	0
2009-01-14	04:00:00	0
2009-01-14	04:01:00	0
2009-01-14	04:02:00	0
2009-01-14	04:03:00	0
2009-01-14	04:04:00	0
2009-01-14	04:05:00	0
2009-01-14	04:06:00	0
2009-01-14	04:07:00	0
2009-01-14	04:08:00	0
2009-01-14	04:09:00	0
2009-01-14	04:10:00	0
2009-01-14	04:11:00	0
2009-01-14	04:12:00	0
2009-01-14	04:13:00	0
2009-01-14	04:14:00	0
2009-01-14	04:15:00	0
2009-01-14	04:16:00	0
2009-01-14	04:17:00	0
2009-01-14	04:18:00	0
2009-01-14	04:19:00	0
2009-01-14	04:20:00	0
2009-01-14	04:21:00	0
2009-01-14	04:22:00	0
2009-01-14	04:23:00	0
2009-01-14	04:24:00	0
2009-01-14	04:25:00	0
2009-01-14	04:26:00	0
2009-01-14	04:27:00	0
2009-01-14	04:28:00	0
2009-01-14	04:29:00	0
2009-01-14	04:30:00	0
2009-01-14	04:31:00	0
2009-01-14	04:32:00	0
2009-01-14	04:33:00	0
2009-01-14	04:34:00	0
2009-01-14	04:35:00	0
2009-01-14	04:36:00	0
2009-01-14	04:37:00	0
2009-01-14	04:38:00	0
2009-01-14	04:39:00	0
2009-01-14	04:40:00	0
2009-01-14	04:41:00	0
2009-01-14	04:42:00	0
2009-01-14	04:43:00	0
2009-01-14	04:44:00	0
2009-01-14	04:45:00	0
2009-01-14	04:46:00	0
2009-01-14	04:47:00	0
2009-01-14	04:48:00	0
2009-01-14	04:49:00	36
2009-01-14	04:50:00	24
2009-01-14	04:51:00	0
2009-01-14	04:52:00	0
2009-01-14	04:53:00	0
2009-01-14	04:54:00	0
2009-01-14	04:55:00	0
2009-01-14	04:56:00	0
2009-01-14	04:57:00	0
2009-01-14	04:58:00	0
2009-01-14	04:59:00	0
2009-01-14	05:00:00	0
2009-01-14	05:01:00	0
2009-01-14	05:02:00	0
2009-01-14	05:03:00	0
2009-01-14	05:04:00	0
2009-01-14	05:05:00	0
2009-01-14	05:06:00	0
2009-01-14	05:07:00	0
2009-01-14	05:08:00	0
2009-01-14	05:09:00	0
2009-01-14	05:10:00	0
2009-01-14	05:11:00	0
2009-01-14	05:12:00	0
2009-01-14	05:13:00	0
2009-01-14	05:14:00	0
2009-01-14	05:15:00	0
2009-01-14	05:16:00	0
2009-01-14	05:17:00	0
2009-01-14	05:18:00	0
2009-01-14	05:19:00	0
2009-01-14	05:20:00	0
2009-01-14	05:21:00	0
2009-01-14	05:22:00	0
2009-01-14	05:23:00	0
2009-01-14	05:24:00	0
2009-01-14	05:25:00	0
2009-01-14	05:26:00	0
2009-01-14	05:27:00	0
2009-01-14	05:28:00	0
2009-01-14	05:29:00	0
2009-01-14	05:30:00	0
2009-01-14	05:31:00	0
2009-01-14	05:32:00	0
2009-01-14	05:33:00	0
2009-01-14	05:34:00	0
2009-01-14	05:35:00	0
2009-01-14	05:36:00	0
2009-01-14	05:37:00	0
2009-01-14	05:38:00	0
2009-01-14	05:39:00	0
2009-01-14	05:40:00	0
2009-01-14	05:41:00	0
2009-01-14	05:42:00	0
2009-01-14	05:43:00	0
2009-01-14	05:44:00	0
2009-01-14	05:45:00	0
2009-01-14	05:46:00	0
2009-01-14	05:47:00	0
2009-01-14	05:48:00	0
2009-01-14	05:49:00	0
2009-01-14	05:50:00	0
2009-01-14	05:51:00	24
2009-01-14	05:52:00	0
2009-01-14	05:53:00	0
2009-01-14	05:54:00	0
2009-01-14	05:55:00	0
2009-01-14	05:56:00	0
2009-01-14	05:57:00	0
2009-01-14	05:58:00	0
2009-01-14	05:59:00	0
2009-01-14	06:00:00	0
2009-01-14	06:01:00	47
2009-01-14	06:02:00	36
2009-01-14	06:03:00	0
2009-01-14	06:04:00	0
2009-01-14	06:05:00	0
2009-01-14	06:06:00	0
2009-01-14	06:07:00	0
2009-01-14	06:08:00	0
2009-01-14	06:09:00	0
2009-01-14	06:10:00	0
2009-01-14	06:11:00	0
2009-01-14	06:12:00	0
2009-01-14	06:13:00	0
2009-01-14	06:14:00	0
2009-01-14	06:15:00	0
2009-01-14	06:16:00	0
2009-01-14	06:17:00	0
2009-01-14	06:18:00	0
2009-01-14	06:19:00	0
2009-01-14	06:20:00	0
2009-01-14	06:21:00	0
2009-01-14	06:22:00	0
2009-01-14	06:23:00	0
2009-01-14	06:24:00	0
2009-01-14	06:25:00	0
2009-01-14	06:26:00	0
2009-01-14	06:27:00	0
2009-01-14	06:28:00	0
2009-01-14	06:29:00	0
2009-01-14	06:30:00	0
2009-01-14	06:31:00	0
2009-01-14	06:32:00	0
2009-01-14	06:33:00	0
2009-01-14	06:34:00	0
2009-01-14	06:35:00	0
2009-01-14	06:36:00	0
2009-01-14	06:37:00	0
2009-01-14	06:38:00	0
2009-01-14	06:39:00	0
2009-01-14	06:40:00	282
2009-01-14	06:41:00	71
2009-01-14	06:42:00	0
2009-01-14	06:43:00	0
2009-01-14	06:44:00	0
2009-01-14	06:45:00	0
2009-01-14	06:46:00	0
2009-01-14	06:47:00	0
2009-01-14	06:48:00	0
2009-01-14	06:49:00	0
2009-01-14	06:50:00	0
2009-01-14	06:51:00	0
2009-01-14	06:52:00	0
2009-01-14	06:53:00	0
2009-01-14	06:54:00	0
2009-01-14	06:55:00	36
2009-01-14	06:56:00	0
2009-01-14	06:57:00	0
2009-01-14	06:58:00	0
2009-01-14	06:59:00	0
2009-01-14	07:00:00	0
2009-01-14	07:01:00	0
2009-01-14	07:02:00	0
2009-01-14	07:03:00	0
2009-01-14	07:04:00	0
2009-01-14	07:05:00	0
2009-01-14	07:06:00	0
2009-01-14	07:07:00	0
2009-01-14	07:08:00	0
2009-01-14	07:09:00	0
2009-01-14	07:10:00	0
2009-01-14	07:11:00	0
2009-01-14	07:12:00	0
2009-01-14	07:13:00	0
2009-01-14	07:14:00	0
2009-01-14	07:15:00	0
2009-01-14	07:16:00	0
2009-01-14	07:17:00	12
2009-01-14	07:18:00	0
2009-01-14	07:19:00	0
2009-01-14	07:20:00	24
2009-01-14	07:21:00	0
2009-01-14	07:22:00	0
2009-01-14	07:23:00	0
2009-01-14	07:24:00	0
2009-01-14	07:25:00	0
2009-01-14	07:26:00	0
2009-01-14	07:27:00	0
2009-01-14	07:28:00	0
2009-01-14	07:29:00	0
2009-01-14	07:30:00	0
2009-01-14	07:31:00	0
2009-01-14	07:32:00	0
2009-01-14	07:33:00	0
2009-01-14	07:34:00	0
2009-01-14	07:35:00	0
2009-01-14	07:36:00	0
2009-01-14	07:37:00	0
2009-01-14	07:38:00	0
2009-01-14	07:39:00	24
2009-01-14	07:40:00	0
2009-01-14	07:41:00	12
2009-01-14	07:42:00	239
2009-01-14	07:43:00	0
2009-01-14	07:44:00	119
2009-01-14	07:45:00	0
2009-01-14	07:46:00	119
2009-01-14	07:47:00	555
2009-01-14	07:48:00	311
2009-01-14	07:49:00	697
2009-01-14	07:50:00	593
2009-01-14	07:51:00	24
2009-01-14	07:52:00	0
2009-01-14	07:53:00	0
2009-01-14	07:54:00	0
2009-01-14	07:55:00	0
2009-01-14	07:56:00	0
2009-01-14	07:57:00	12
2009-01-14	07:58:00	0
2009-01-14	07:59:00	0
2009-01-14	08:00:00	12
2009-01-14	08:01:00	0
2009-01-14	08:02:00	0
2009-01-14	08:03:00	0
2009-01-14	08:04:00	0
2009-01-14	08:05:00	0
2009-01-14	08:06:00	0
2009-01-14	08:07:00	0
2009-01-14	08:08:00	377
2009-01-14	08:09:00	47
2009-01-14	08:10:00	0
2009-01-14	08:11:00	0
2009-01-14	08:12:00	0
2009-01-14	08:13:00	0
2009-01-14	08:14:00	0
2009-01-14	08:15:00	0
2009-01-14	08:16:00	24
2009-01-14	08:17:00	410
2009-01-14	08:18:00	268
2009-01-14	08:19:00	0
2009-01-14	08:20:00	0
2009-01-14	08:21:00	0
2009-01-14	08:22:00	0
2009-01-14	08:23:00	0
2009-01-14	08:24:00	0
2009-01-14	08:25:00	0
2009-01-14	08:26:00	0
2009-01-14	08:27:00	0
2009-01-14	08:28:00	0
2009-01-14	08:29:00	0
2009-01-14	08:30:00	0
2009-01-14	08:31:00	0
2009-01-14	08:32:00	0
2009-01-14	08:33:00	0
2009-01-14	08:34:00	0
2009-01-14	08:35:00	0
2009-01-14	08:36:00	0
2009-01-14	08:37:00	0
2009-01-14	08:38:00	0
2009-01-14	08:39:00	0
2009-01-14	08:40:00	0
2009-01-14	08:41:00	0
2009-01-14	08:42:00	0
2009-01-14	08:43:00	0
2009-01-14	08:44:00	0
2009-01-14	08:45:00	0
2009-01-14	08:46:00	0
2009-01-14	08:47:00	0
2009-01-14	08:48:00	0
2009-01-14	08:49:00	0
2009-01-14	08:50:00	24
2009-01-14	08:51:00	12
2009-01-14	08:52:00	36
2009-01-14	08:53:00	0
2009-01-14	08:54:00	0
2009-01-14	08:55:00	47
2009-01-14	08:56:00	0
2009-01-14	08:57:00	0
2009-01-14	08:58:00	0
2009-01-14	08:59:00	0
2009-01-14	09:00:00	24
2009-01-14	09:01:00	0
2009-01-14	09:02:00	0
2009-01-14	09:03:00	0
2009-01-14	09:04:00	59
2009-01-14	09:05:00	0
2009-01-14	09:06:00	0
2009-01-14	09:07:00	0
2009-01-14	09:08:00	0
[truncated: 21,051 more rows]

[truncated: 1 more sheets: 1.28.09]
