# Supplementary material for: Initial evaluation of nighttime restlessness in a naturally occurring canine model of osteoarthritis pain
Source: PeerJ. 2015 Feb 17;3:e772. doi: 10.7717/peerj.772 (PMC4340376; doi:10.7717/peerj.772)
Supplement: Supplemental Information 18 [file peerj-03-772-s018.xlsx]

## Sheet: Office Visits
Visit Date	Visit Number
2008-12-02 06:00:00	1
2008-12-16 06:00:00	2
2008-12-31 06:00:00	3
2009-01-14 06:00:00	4
2009-01-28 06:00:00	5
2009-02-11 06:00:00	6
2009-02-25 06:00:00	7
2009-03-11 06:00:00	8
2009-03-18 06:00:00	9

## Sheet: 16_Data
Segment	DateTime	Activity	Hour	Quadrant	Study Day	Weekday
1	2008-12-09 06:01:00	524	6	2	7	3
1	2008-12-09 06:02:00	351	6	2	7	3
1	2008-12-09 06:03:00	71	6	2	7	3
1	2008-12-09 06:04:00	0	6	2	7	3
1	2008-12-09 06:05:00	0	6	2	7	3
1	2008-12-09 06:06:00	280	6	2	7	3
1	2008-12-09 06:07:00	0	6	2	7	3
1	2008-12-09 06:08:00	0	6	2	7	3
1	2008-12-09 06:09:00	0	6	2	7	3
1	2008-12-09 06:10:00	0	6	2	7	3
1	2008-12-09 06:11:00	0	6	2	7	3
1	2008-12-09 06:12:00	0	6	2	7	3
1	2008-12-09 06:13:00	91	6	2	7	3
1	2008-12-09 06:14:00	144	6	2	7	3
1	2008-12-09 06:15:00	542	6	2	7	3
1	2008-12-09 06:16:00	542	6	2	7	3
1	2008-12-09 06:17:00	144	6	2	7	3
1	2008-12-09 06:18:00	61	6	2	7	3
1	2008-12-09 06:19:00	0	6	2	7	3
1	2008-12-09 06:20:00	0	6	2	7	3
1	2008-12-09 06:21:00	0	6	2	7	3
1	2008-12-09 06:22:00	0	6	2	7	3
1	2008-12-09 06:23:00	0	6	2	7	3
1	2008-12-09 06:24:00	0	6	2	7	3
1	2008-12-09 06:25:00	20	6	2	7	3
1	2008-12-09 06:26:00	0	6	2	7	3
1	2008-12-09 06:27:00	0	6	2	7	3
1	2008-12-09 06:28:00	0	6	2	7	3
1	2008-12-09 06:29:00	0	6	2	7	3
1	2008-12-09 06:30:00	0	6	2	7	3
1	2008-12-09 06:31:00	20	6	2	7	3
1	2008-12-09 06:32:00	0	6	2	7	3
1	2008-12-09 06:33:00	0	6	2	7	3
1	2008-12-09 06:34:00	0	6	2	7	3
1	2008-12-09 06:35:00	0	6	2	7	3
1	2008-12-09 06:36:00	0	6	2	7	3
1	2008-12-09 06:37:00	0	6	2	7	3
1	2008-12-09 06:38:00	0	6	2	7	3
1	2008-12-09 06:39:00	0	6	2	7	3
1	2008-12-09 06:40:00	0	6	2	7	3
1	2008-12-09 06:41:00	0	6	2	7	3
1	2008-12-09 06:42:00	0	6	2	7	3
1	2008-12-09 06:43:00	0	6	2	7	3
1	2008-12-09 06:44:00	0	6	2	7	3
1	2008-12-09 06:45:00	0	6	2	7	3
1	2008-12-09 06:46:00	0	6	2	7	3
1	2008-12-09 06:47:00	0	6	2	7	3
1	2008-12-09 06:48:00	41	6	2	7	3
1	2008-12-09 06:49:00	102	6	2	7	3
1	2008-12-09 06:50:00	91	6	2	7	3
1	2008-12-09 06:51:00	0	6	2	7	3
1	2008-12-09 06:52:00	0	6	2	7	3
1	2008-12-09 06:53:00	0	6	2	7	3
1	2008-12-09 06:54:00	0	6	2	7	3
1	2008-12-09 06:55:00	0	6	2	7	3
1	2008-12-09 06:56:00	0	6	2	7	3
1	2008-12-09 06:57:00	266	6	2	7	3
1	2008-12-09 06:58:00	41	6	2	7	3
1	2008-12-09 06:59:00	217	6	2	7	3
1	2008-12-09 07:00:00	30	6	2	7	3
1	2008-12-09 07:01:00	652	7	2	7	3
1	2008-12-09 07:02:00	1026	7	2	7	3
1	2008-12-09 07:03:00	181	7	2	7	3
1	2008-12-09 07:04:00	10	7	2	7	3
1	2008-12-09 07:05:00	20	7	2	7	3
1	2008-12-09 07:06:00	0	7	2	7	3
1	2008-12-09 07:07:00	0	7	2	7	3
1	2008-12-09 07:08:00	0	7	2	7	3
1	2008-12-09 07:09:00	0	7	2	7	3
1	2008-12-09 07:10:00	0	7	2	7	3
1	2008-12-09 07:11:00	0	7	2	7	3
1	2008-12-09 07:12:00	0	7	2	7	3
1	2008-12-09 07:13:00	0	7	2	7	3
1	2008-12-09 07:14:00	71	7	2	7	3
1	2008-12-09 07:15:00	144	7	2	7	3
1	2008-12-09 07:16:00	0	7	2	7	3
1	2008-12-09 07:17:00	0	7	2	7	3
1	2008-12-09 07:18:00	0	7	2	7	3
1	2008-12-09 07:19:00	122	7	2	7	3
1	2008-12-09 07:20:00	41	7	2	7	3
1	2008-12-09 07:21:00	144	7	2	7	3
1	2008-12-09 07:22:00	205	7	2	7	3
1	2008-12-09 07:23:00	0	7	2	7	3
1	2008-12-09 07:24:00	112	7	2	7	3
1	2008-12-09 07:25:00	205	7	2	7	3
1	2008-12-09 07:26:00	81	7	2	7	3
1	2008-12-09 07:27:00	61	7	2	7	3
1	2008-12-09 07:28:00	41	7	2	7	3
1	2008-12-09 07:29:00	30	7	2	7	3
1	2008-12-09 07:30:00	61	7	2	7	3
1	2008-12-09 07:31:00	81	7	2	7	3
1	2008-12-09 07:32:00	122	7	2	7	3
1	2008-12-09 07:33:00	10	7	2	7	3
1	2008-12-09 07:34:00	51	7	2	7	3
1	2008-12-09 07:35:00	0	7	2	7	3
1	2008-12-09 07:36:00	0	7	2	7	3
1	2008-12-09 07:37:00	0	7	2	7	3
1	2008-12-09 07:38:00	81	7	2	7	3
1	2008-12-09 07:39:00	929	7	2	7	3
1	2008-12-09 07:40:00	2101	7	2	7	3
1	2008-12-09 07:41:00	112	7	2	7	3
1	2008-12-09 07:42:00	156	7	2	7	3
1	2008-12-09 07:43:00	51	7	2	7	3
1	2008-12-09 07:44:00	144	7	2	7	3
1	2008-12-09 07:45:00	193	7	2	7	3
1	2008-12-09 07:46:00	156	7	2	7	3
1	2008-12-09 07:47:00	81	7	2	7	3
1	2008-12-09 07:48:00	81	7	2	7	3
1	2008-12-09 07:49:00	169	7	2	7	3
1	2008-12-09 07:50:00	977	7	2	7	3
1	2008-12-09 07:51:00	597	7	2	7	3
1	2008-12-09 07:52:00	230	7	2	7	3
1	2008-12-09 07:53:00	337	7	2	7	3
1	2008-12-09 07:54:00	524	7	2	7	3
1	2008-12-09 07:55:00	41	7	2	7	3
1	2008-12-09 07:56:00	30	7	2	7	3
1	2008-12-09 07:57:00	51	7	2	7	3
1	2008-12-09 07:58:00	774	7	2	7	3
1	2008-12-09 07:59:00	351	7	2	7	3
1	2008-12-09 08:00:00	443	7	2	7	3
1	2008-12-09 08:01:00	1156	8	2	7	3
1	2008-12-09 08:02:00	475	8	2	7	3
1	2008-12-09 08:03:00	839	8	2	7	3
1	2008-12-09 08:04:00	295	8	2	7	3
1	2008-12-09 08:05:00	230	8	2	7	3
1	2008-12-09 08:06:00	295	8	2	7	3
1	2008-12-09 08:07:00	266	8	2	7	3
1	2008-12-09 08:08:00	41	8	2	7	3
1	2008-12-09 08:09:00	30	8	2	7	3
1	2008-12-09 08:10:00	205	8	2	7	3
1	2008-12-09 08:11:00	102	8	2	7	3
1	2008-12-09 08:12:00	61	8	2	7	3
1	2008-12-09 08:13:00	169	8	2	7	3
1	2008-12-09 08:14:00	205	8	2	7	3
1	2008-12-09 08:15:00	10	8	2	7	3
1	2008-12-09 08:16:00	0	8	2	7	3
1	2008-12-09 08:17:00	0	8	2	7	3
1	2008-12-09 08:18:00	102	8	2	7	3
1	2008-12-09 08:19:00	169	8	2	7	3
1	2008-12-09 08:20:00	10	8	2	7	3
1	2008-12-09 08:21:00	0	8	2	7	3
1	2008-12-09 08:22:00	0	8	2	7	3
1	2008-12-09 08:23:00	0	8	2	7	3
1	2008-12-09 08:24:00	0	8	2	7	3
1	2008-12-09 08:25:00	71	8	2	7	3
1	2008-12-09 08:26:00	0	8	2	7	3
1	2008-12-09 08:27:00	0	8	2	7	3
1	2008-12-09 08:28:00	71	8	2	7	3
1	2008-12-09 08:29:00	10	8	2	7	3
1	2008-12-09 08:30:00	0	8	2	7	3
1	2008-12-09 08:31:00	0	8	2	7	3
1	2008-12-09 08:32:00	10	8	2	7	3
1	2008-12-09 08:33:00	0	8	2	7	3
1	2008-12-09 08:34:00	0	8	2	7	3
1	2008-12-09 08:35:00	0	8	2	7	3
1	2008-12-09 08:36:00	0	8	2	7	3
1	2008-12-09 08:37:00	0	8	2	7	3
1	2008-12-09 08:38:00	0	8	2	7	3
1	2008-12-09 08:39:00	0	8	2	7	3
1	2008-12-09 08:40:00	0	8	2	7	3
1	2008-12-09 08:41:00	10	8	2	7	3
1	2008-12-09 08:42:00	10	8	2	7	3
1	2008-12-09 08:43:00	10	8	2	7	3
1	2008-12-09 08:44:00	0	8	2	7	3
1	2008-12-09 08:45:00	91	8	2	7	3
1	2008-12-09 08:46:00	20	8	2	7	3
1	2008-12-09 08:47:00	10	8	2	7	3
1	2008-12-09 08:48:00	132	8	2	7	3
1	2008-12-09 08:49:00	0	8	2	7	3
1	2008-12-09 08:50:00	30	8	2	7	3
1	2008-12-09 08:51:00	0	8	2	7	3
1	2008-12-09 08:52:00	0	8	2	7	3
1	2008-12-09 08:53:00	0	8	2	7	3
1	2008-12-09 08:54:00	10	8	2	7	3
1	2008-12-09 08:55:00	0	8	2	7	3
1	2008-12-09 08:56:00	0	8	2	7	3
1	2008-12-09 08:57:00	0	8	2	7	3
1	2008-12-09 08:58:00	10	8	2	7	3
1	2008-12-09 08:59:00	337	8	2	7	3
1	2008-12-09 09:00:00	839	8	2	7	3
1	2008-12-09 09:01:00	579	9	2	7	3
1	2008-12-09 09:02:00	492	9	2	7	3
1	2008-12-09 09:03:00	169	9	2	7	3
1	2008-12-09 09:04:00	0	9	2	7	3
1	2008-12-09 09:05:00	0	9	2	7	3
1	2008-12-09 09:06:00	102	9	2	7	3
1	2008-12-09 09:07:00	0	9	2	7	3
1	2008-12-09 09:08:00	0	9	2	7	3
1	2008-12-09 09:09:00	0	9	2	7	3
1	2008-12-09 09:10:00	0	9	2	7	3
1	2008-12-09 09:11:00	0	9	2	7	3
1	2008-12-09 09:12:00	0	9	2	7	3
1	2008-12-09 09:13:00	0	9	2	7	3
1	2008-12-09 09:14:00	0	9	2	7	3
1	2008-12-09 09:15:00	0	9	2	7	3
1	2008-12-09 09:16:00	0	9	2	7	3
1	2008-12-09 09:17:00	0	9	2	7	3
1	2008-12-09 09:18:00	0	9	2	7	3
1	2008-12-09 09:19:00	0	9	2	7	3
1	2008-12-09 09:20:00	0	9	2	7	3
1	2008-12-09 09:21:00	0	9	2	7	3
1	2008-12-09 09:22:00	0	9	2	7	3
1	2008-12-09 09:23:00	0	9	2	7	3
1	2008-12-09 09:24:00	0	9	2	7	3
1	2008-12-09 09:25:00	0	9	2	7	3
1	2008-12-09 09:26:00	0	9	2	7	3
1	2008-12-09 09:27:00	0	9	2	7	3
1	2008-12-09 09:28:00	0	9	2	7	3
1	2008-12-09 09:29:00	0	9	2	7	3
1	2008-12-09 09:30:00	0	9	2	7	3
1	2008-12-09 09:31:00	30	9	2	7	3
1	2008-12-09 09:32:00	0	9	2	7	3
1	2008-12-09 09:33:00	0	9	2	7	3
1	2008-12-09 09:34:00	0	9	2	7	3
1	2008-12-09 09:35:00	0	9	2	7	3
1	2008-12-09 09:36:00	0	9	2	7	3
1	2008-12-09 09:37:00	0	9	2	7	3
1	2008-12-09 09:38:00	0	9	2	7	3
1	2008-12-09 09:39:00	0	9	2	7	3
1	2008-12-09 09:40:00	0	9	2	7	3
1	2008-12-09 09:41:00	0	9	2	7	3
1	2008-12-09 09:42:00	0	9	2	7	3
1	2008-12-09 09:43:00	0	9	2	7	3
1	2008-12-09 09:44:00	0	9	2	7	3
1	2008-12-09 09:45:00	0	9	2	7	3
1	2008-12-09 09:46:00	0	9	2	7	3
1	2008-12-09 09:47:00	0	9	2	7	3
1	2008-12-09 09:48:00	0	9	2	7	3
1	2008-12-09 09:49:00	0	9	2	7	3
1	2008-12-09 09:50:00	41	9	2	7	3
1	2008-12-09 09:51:00	0	9	2	7	3
1	2008-12-09 09:52:00	0	9	2	7	3
1	2008-12-09 09:53:00	0	9	2	7	3
1	2008-12-09 09:54:00	0	9	2	7	3
1	2008-12-09 09:55:00	0	9	2	7	3
1	2008-12-09 09:56:00	266	9	2	7	3
1	2008-12-09 09:57:00	122	9	2	7	3
1	2008-12-09 09:58:00	713	9	2	7	3
1	2008-12-09 09:59:00	1182	9	2	7	3
1	2008-12-09 10:00:00	953	9	2	7	3
1	2008-12-09 10:01:00	366	10	2	7	3
1	2008-12-09 10:02:00	0	10	2	7	3
1	2008-12-09 10:03:00	91	10	2	7	3
1	2008-12-09 10:04:00	122	10	2	7	3
1	2008-12-09 10:05:00	0	10	2	7	3
1	2008-12-09 10:06:00	0	10	2	7	3
1	2008-12-09 10:07:00	0	10	2	7	3
1	2008-12-09 10:08:00	0	10	2	7	3
1	2008-12-09 10:09:00	0	10	2	7	3
1	2008-12-09 10:10:00	0	10	2	7	3
1	2008-12-09 10:11:00	0	10	2	7	3
1	2008-12-09 10:12:00	0	10	2	7	3
1	2008-12-09 10:13:00	0	10	2	7	3
1	2008-12-09 10:14:00	0	10	2	7	3
1	2008-12-09 10:15:00	10	10	2	7	3
1	2008-12-09 10:16:00	61	10	2	7	3
1	2008-12-09 10:17:00	0	10	2	7	3
1	2008-12-09 10:18:00	0	10	2	7	3
1	2008-12-09 10:19:00	0	10	2	7	3
1	2008-12-09 10:20:00	0	10	2	7	3
1	2008-12-09 10:21:00	0	10	2	7	3
1	2008-12-09 10:22:00	0	10	2	7	3
1	2008-12-09 10:23:00	0	10	2	7	3
1	2008-12-09 10:24:00	0	10	2	7	3
1	2008-12-09 10:25:00	0	10	2	7	3
1	2008-12-09 10:26:00	0	10	2	7	3
1	2008-12-09 10:27:00	0	10	2	7	3
1	2008-12-09 10:28:00	0	10	2	7	3
1	2008-12-09 10:29:00	0	10	2	7	3
1	2008-12-09 10:30:00	0	10	2	7	3
1	2008-12-09 10:31:00	0	10	2	7	3
1	2008-12-09 10:32:00	0	10	2	7	3
1	2008-12-09 10:33:00	0	10	2	7	3
1	2008-12-09 10:34:00	0	10	2	7	3
1	2008-12-09 10:35:00	0	10	2	7	3
1	2008-12-09 10:36:00	0	10	2	7	3
1	2008-12-09 10:37:00	0	10	2	7	3
1	2008-12-09 10:38:00	0	10	2	7	3
1	2008-12-09 10:39:00	0	10	2	7	3
1	2008-12-09 10:40:00	10	10	2	7	3
1	2008-12-09 10:41:00	0	10	2	7	3
1	2008-12-09 10:42:00	0	10	2	7	3
1	2008-12-09 10:43:00	0	10	2	7	3
1	2008-12-09 10:44:00	0	10	2	7	3
1	2008-12-09 10:45:00	0	10	2	7	3
1	2008-12-09 10:46:00	0	10	2	7	3
1	2008-12-09 10:47:00	0	10	2	7	3
1	2008-12-09 10:48:00	0	10	2	7	3
1	2008-12-09 10:49:00	0	10	2	7	3
1	2008-12-09 10:50:00	0	10	2	7	3
1	2008-12-09 10:51:00	0	10	2	7	3
1	2008-12-09 10:52:00	0	10	2	7	3
1	2008-12-09 10:53:00	10	10	2	7	3
1	2008-12-09 10:54:00	0	10	2	7	3
1	2008-12-09 10:55:00	10	10	2	7	3
1	2008-12-09 10:56:00	20	10	2	7	3
1	2008-12-09 10:57:00	475	10	2	7	3
1	2008-12-09 10:58:00	713	10	2	7	3
1	2008-12-09 10:59:00	579	10	2	7	3
1	2008-12-09 11:00:00	652	10	2	7	3
1	2008-12-09 11:01:00	861	11	2	7	3
1	2008-12-09 11:02:00	132	11	2	7	3
1	2008-12-09 11:03:00	0	11	2	7	3
1	2008-12-09 11:04:00	0	11	2	7	3
1	2008-12-09 11:05:00	71	11	2	7	3
1	2008-12-09 11:06:00	0	11	2	7	3
1	2008-12-09 11:07:00	0	11	2	7	3
1	2008-12-09 11:08:00	0	11	2	7	3
1	2008-12-09 11:09:00	112	11	2	7	3
1	2008-12-09 11:10:00	0	11	2	7	3
1	2008-12-09 11:11:00	0	11	2	7	3
1	2008-12-09 11:12:00	0	11	2	7	3
1	2008-12-09 11:13:00	0	11	2	7	3
1	2008-12-09 11:14:00	0	11	2	7	3
1	2008-12-09 11:15:00	0	11	2	7	3
1	2008-12-09 11:16:00	0	11	2	7	3
1	2008-12-09 11:17:00	0	11	2	7	3
1	2008-12-09 11:18:00	0	11	2	7	3
1	2008-12-09 11:19:00	0	11	2	7	3
1	2008-12-09 11:20:00	0	11	2	7	3
1	2008-12-09 11:21:00	0	11	2	7	3
1	2008-12-09 11:22:00	0	11	2	7	3
1	2008-12-09 11:23:00	0	11	2	7	3
1	2008-12-09 11:24:00	0	11	2	7	3
1	2008-12-09 11:25:00	0	11	2	7	3
1	2008-12-09 11:26:00	0	11	2	7	3
1	2008-12-09 11:27:00	0	11	2	7	3
1	2008-12-09 11:28:00	0	11	2	7	3
1	2008-12-09 11:29:00	0	11	2	7	3
1	2008-12-09 11:30:00	0	11	2	7	3
1	2008-12-09 11:31:00	0	11	2	7	3
1	2008-12-09 11:32:00	0	11	2	7	3
1	2008-12-09 11:33:00	0	11	2	7	3
1	2008-12-09 11:34:00	20	11	2	7	3
1	2008-12-09 11:35:00	0	11	2	7	3
1	2008-12-09 11:36:00	0	11	2	7	3
1	2008-12-09 11:37:00	0	11	2	7	3
1	2008-12-09 11:38:00	0	11	2	7	3
1	2008-12-09 11:39:00	0	11	2	7	3
1	2008-12-09 11:40:00	0	11	2	7	3
1	2008-12-09 11:41:00	0	11	2	7	3
1	2008-12-09 11:42:00	0	11	2	7	3
1	2008-12-09 11:43:00	0	11	2	7	3
1	2008-12-09 11:44:00	0	11	2	7	3
1	2008-12-09 11:45:00	0	11	2	7	3
1	2008-12-09 11:46:00	0	11	2	7	3
1	2008-12-09 11:47:00	0	11	2	7	3
1	2008-12-09 11:48:00	0	11	2	7	3
1	2008-12-09 11:49:00	0	11	2	7	3
1	2008-12-09 11:50:00	0	11	2	7	3
1	2008-12-09 11:51:00	0	11	2	7	3
1	2008-12-09 11:52:00	0	11	2	7	3
1	2008-12-09 11:53:00	0	11	2	7	3
1	2008-12-09 11:54:00	0	11	2	7	3
1	2008-12-09 11:55:00	10	11	2	7	3
1	2008-12-09 11:56:00	132	11	2	7	3
1	2008-12-09 11:57:00	0	11	2	7	3
1	2008-12-09 11:58:00	0	11	2	7	3
1	2008-12-09 11:59:00	0	11	2	7	3
1	2008-12-09 12:00:00	0	11	2	7	3
1	2008-12-09 12:01:00	156	12	3	7	3
1	2008-12-09 12:02:00	0	12	3	7	3
1	2008-12-09 12:03:00	0	12	3	7	3
1	2008-12-09 12:04:00	0	12	3	7	3
1	2008-12-09 12:05:00	0	12	3	7	3
1	2008-12-09 12:06:00	0	12	3	7	3
1	2008-12-09 12:07:00	0	12	3	7	3
1	2008-12-09 12:08:00	0	12	3	7	3
1	2008-12-09 12:09:00	0	12	3	7	3
1	2008-12-09 12:10:00	0	12	3	7	3
1	2008-12-09 12:11:00	51	12	3	7	3
1	2008-12-09 12:12:00	0	12	3	7	3
1	2008-12-09 12:13:00	0	12	3	7	3
1	2008-12-09 12:14:00	0	12	3	7	3
1	2008-12-09 12:15:00	0	12	3	7	3
1	2008-12-09 12:16:00	0	12	3	7	3
1	2008-12-09 12:17:00	0	12	3	7	3
1	2008-12-09 12:18:00	0	12	3	7	3
1	2008-12-09 12:19:00	0	12	3	7	3
1	2008-12-09 12:20:00	0	12	3	7	3
1	2008-12-09 12:21:00	0	12	3	7	3
1	2008-12-09 12:22:00	0	12	3	7	3
1	2008-12-09 12:23:00	0	12	3	7	3
1	2008-12-09 12:24:00	0	12	3	7	3
1	2008-12-09 12:25:00	0	12	3	7	3
1	2008-12-09 12:26:00	0	12	3	7	3
1	2008-12-09 12:27:00	0	12	3	7	3
1	2008-12-09 12:28:00	0	12	3	7	3
1	2008-12-09 12:29:00	0	12	3	7	3
1	2008-12-09 12:30:00	0	12	3	7	3
1	2008-12-09 12:31:00	0	12	3	7	3
1	2008-12-09 12:32:00	0	12	3	7	3
1	2008-12-09 12:33:00	0	12	3	7	3
1	2008-12-09 12:34:00	0	12	3	7	3
1	2008-12-09 12:35:00	0	12	3	7	3
1	2008-12-09 12:36:00	0	12	3	7	3
1	2008-12-09 12:37:00	0	12	3	7	3
1	2008-12-09 12:38:00	156	12	3	7	3
1	2008-12-09 12:39:00	839	12	3	7	3
1	2008-12-09 12:40:00	351	12	3	7	3
1	2008-12-09 12:41:00	673	12	3	7	3
1	2008-12-09 12:42:00	323	12	3	7	3
1	2008-12-09 12:43:00	508	12	3	7	3
1	2008-12-09 12:44:00	309	12	3	7	3
1	2008-12-09 12:45:00	280	12	3	7	3
1	2008-12-09 12:46:00	410	12	3	7	3
1	2008-12-09 12:47:00	323	12	3	7	3
1	2008-12-09 12:48:00	394	12	3	7	3
1	2008-12-09 12:49:00	122	12	3	7	3
1	2008-12-09 12:50:00	61	12	3	7	3
1	2008-12-09 12:51:00	323	12	3	7	3
1	2008-12-09 12:52:00	266	12	3	7	3
1	2008-12-09 12:53:00	71	12	3	7	3
1	2008-12-09 12:54:00	652	12	3	7	3
1	2008-12-09 12:55:00	295	12	3	7	3
1	2008-12-09 12:56:00	542	12	3	7	3
1	2008-12-09 12:57:00	309	12	3	7	3
1	2008-12-09 12:58:00	193	12	3	7	3
1	2008-12-09 12:59:00	10	12	3	7	3
1	2008-12-09 13:00:00	122	12	3	7	3
1	2008-12-09 13:01:00	51	13	3	7	3
1	2008-12-09 13:02:00	693	13	3	7	3
1	2008-12-09 13:03:00	366	13	3	7	3
1	2008-12-09 13:04:00	102	13	3	7	3
1	2008-12-09 13:05:00	81	13	3	7	3
1	2008-12-09 13:06:00	30	13	3	7	3
1	2008-12-09 13:07:00	0	13	3	7	3
1	2008-12-09 13:08:00	0	13	3	7	3
1	2008-12-09 13:09:00	102	13	3	7	3
1	2008-12-09 13:10:00	91	13	3	7	3
1	2008-12-09 13:11:00	10	13	3	7	3
1	2008-12-09 13:12:00	10	13	3	7	3
1	2008-12-09 13:13:00	144	13	3	7	3
1	2008-12-09 13:14:00	0	13	3	7	3
1	2008-12-09 13:15:00	0	13	3	7	3
1	2008-12-09 13:16:00	0	13	3	7	3
1	2008-12-09 13:17:00	0	13	3	7	3
1	2008-12-09 13:18:00	0	13	3	7	3
1	2008-12-09 13:19:00	10	13	3	7	3
1	2008-12-09 13:20:00	132	13	3	7	3
1	2008-12-09 13:21:00	0	13	3	7	3
1	2008-12-09 13:22:00	91	13	3	7	3
1	2008-12-09 13:23:00	0	13	3	7	3
1	2008-12-09 13:24:00	0	13	3	7	3
1	2008-12-09 13:25:00	0	13	3	7	3
1	2008-12-09 13:26:00	0	13	3	7	3
1	2008-12-09 13:27:00	0	13	3	7	3
1	2008-12-09 13:28:00	0	13	3	7	3
1	2008-12-09 13:29:00	0	13	3	7	3
1	2008-12-09 13:30:00	0	13	3	7	3
1	2008-12-09 13:31:00	0	13	3	7	3
1	2008-12-09 13:32:00	10	13	3	7	3
1	2008-12-09 13:33:00	193	13	3	7	3
1	2008-12-09 13:34:00	81	13	3	7	3
1	2008-12-09 13:35:00	0	13	3	7	3
1	2008-12-09 13:36:00	0	13	3	7	3
1	2008-12-09 13:37:00	0	13	3	7	3
1	2008-12-09 13:38:00	122	13	3	7	3
1	2008-12-09 13:39:00	0	13	3	7	3
1	2008-12-09 13:40:00	410	13	3	7	3
1	2008-12-09 13:41:00	61	13	3	7	3
1	2008-12-09 13:42:00	0	13	3	7	3
1	2008-12-09 13:43:00	0	13	3	7	3
1	2008-12-09 13:44:00	0	13	3	7	3
1	2008-12-09 13:45:00	0	13	3	7	3
1	2008-12-09 13:46:00	0	13	3	7	3
1	2008-12-09 13:47:00	0	13	3	7	3
1	2008-12-09 13:48:00	0	13	3	7	3
1	2008-12-09 13:49:00	0	13	3	7	3
1	2008-12-09 13:50:00	0	13	3	7	3
1	2008-12-09 13:51:00	0	13	3	7	3
1	2008-12-09 13:52:00	20	13	3	7	3
1	2008-12-09 13:53:00	61	13	3	7	3
1	2008-12-09 13:54:00	861	13	3	7	3
1	2008-12-09 13:55:00	524	13	3	7	3
1	2008-12-09 13:56:00	144	13	3	7	3
1	2008-12-09 13:57:00	10	13	3	7	3
1	2008-12-09 13:58:00	193	13	3	7	3
1	2008-12-09 13:59:00	733	13	3	7	3
1	2008-12-09 14:00:00	41	13	3	7	3
1	2008-12-09 14:01:00	0	14	3	7	3
1	2008-12-09 14:02:00	0	14	3	7	3
1	2008-12-09 14:03:00	0	14	3	7	3
1	2008-12-09 14:04:00	0	14	3	7	3
1	2008-12-09 14:05:00	0	14	3	7	3
1	2008-12-09 14:06:00	0	14	3	7	3
1	2008-12-09 14:07:00	0	14	3	7	3
1	2008-12-09 14:08:00	0	14	3	7	3
1	2008-12-09 14:09:00	0	14	3	7	3
1	2008-12-09 14:10:00	0	14	3	7	3
1	2008-12-09 14:11:00	0	14	3	7	3
1	2008-12-09 14:12:00	0	14	3	7	3
1	2008-12-09 14:13:00	0	14	3	7	3
1	2008-12-09 14:14:00	0	14	3	7	3
1	2008-12-09 14:15:00	0	14	3	7	3
1	2008-12-09 14:16:00	0	14	3	7	3
1	2008-12-09 14:17:00	0	14	3	7	3
1	2008-12-09 14:18:00	20	14	3	7	3
1	2008-12-09 14:19:00	0	14	3	7	3
1	2008-12-09 14:20:00	0	14	3	7	3
1	2008-12-09 14:21:00	0	14	3	7	3
1	2008-12-09 14:22:00	0	14	3	7	3
1	2008-12-09 14:23:00	0	14	3	7	3
1	2008-12-09 14:24:00	0	14	3	7	3
1	2008-12-09 14:25:00	0	14	3	7	3
1	2008-12-09 14:26:00	0	14	3	7	3
1	2008-12-09 14:27:00	0	14	3	7	3
1	2008-12-09 14:28:00	0	14	3	7	3
1	2008-12-09 14:29:00	0	14	3	7	3
1	2008-12-09 14:30:00	0	14	3	7	3
1	2008-12-09 14:31:00	0	14	3	7	3
1	2008-12-09 14:32:00	0	14	3	7	3
1	2008-12-09 14:33:00	0	14	3	7	3
1	2008-12-09 14:34:00	0	14	3	7	3
1	2008-12-09 14:35:00	0	14	3	7	3
1	2008-12-09 14:36:00	0	14	3	7	3
1	2008-12-09 14:37:00	51	14	3	7	3
1	2008-12-09 14:38:00	51	14	3	7	3
1	2008-12-09 14:39:00	337	14	3	7	3
1	2008-12-09 14:40:00	181	14	3	7	3
1	2008-12-09 14:41:00	266	14	3	7	3
1	2008-12-09 14:42:00	673	14	3	7	3
1	2008-12-09 14:43:00	132	14	3	7	3
1	2008-12-09 14:44:00	0	14	3	7	3
1	2008-12-09 14:45:00	0	14	3	7	3
1	2008-12-09 14:46:00	0	14	3	7	3
1	2008-12-09 14:47:00	41	14	3	7	3
1	2008-12-09 14:48:00	0	14	3	7	3
1	2008-12-09 14:49:00	144	14	3	7	3
1	2008-12-09 14:50:00	169	14	3	7	3
1	2008-12-09 14:51:00	0	14	3	7	3
1	2008-12-09 14:52:00	0	14	3	7	3
1	2008-12-09 14:53:00	0	14	3	7	3
1	2008-12-09 14:54:00	0	14	3	7	3
1	2008-12-09 14:55:00	0	14	3	7	3
1	2008-12-09 14:56:00	0	14	3	7	3
1	2008-12-09 14:57:00	0	14	3	7	3
1	2008-12-09 14:58:00	30	14	3	7	3
1	2008-12-09 14:59:00	0	14	3	7	3
1	2008-12-09 15:00:00	0	14	3	7	3
1	2008-12-09 15:01:00	906	15	3	7	3
1	2008-12-09 15:02:00	132	15	3	7	3
1	2008-12-09 15:03:00	0	15	3	7	3
1	2008-12-09 15:04:00	427	15	3	7	3
1	2008-12-09 15:05:00	0	15	3	7	3
1	2008-12-09 15:06:00	20	15	3	7	3
1	2008-12-09 15:07:00	0	15	3	7	3
1	2008-12-09 15:08:00	0	15	3	7	3
1	2008-12-09 15:09:00	0	15	3	7	3
1	2008-12-09 15:10:00	41	15	3	7	3
1	2008-12-09 15:11:00	0	15	3	7	3
1	2008-12-09 15:12:00	0	15	3	7	3
1	2008-12-09 15:13:00	10	15	3	7	3
1	2008-12-09 15:14:00	0	15	3	7	3
1	2008-12-09 15:15:00	0	15	3	7	3
1	2008-12-09 15:16:00	0	15	3	7	3
1	2008-12-09 15:17:00	0	15	3	7	3
1	2008-12-09 15:18:00	0	15	3	7	3
1	2008-12-09 15:19:00	0	15	3	7	3
1	2008-12-09 15:20:00	10	15	3	7	3
1	2008-12-09 15:21:00	0	15	3	7	3
1	2008-12-09 15:22:00	0	15	3	7	3
1	2008-12-09 15:23:00	0	15	3	7	3
1	2008-12-09 15:24:00	0	15	3	7	3
1	2008-12-09 15:25:00	0	15	3	7	3
1	2008-12-09 15:26:00	597	15	3	7	3
1	2008-12-09 15:27:00	230	15	3	7	3
1	2008-12-09 15:28:00	0	15	3	7	3
1	2008-12-09 15:29:00	20	15	3	7	3
1	2008-12-09 15:30:00	30	15	3	7	3
1	2008-12-09 15:31:00	51	15	3	7	3
1	2008-12-09 15:32:00	0	15	3	7	3
1	2008-12-09 15:33:00	0	15	3	7	3
1	2008-12-09 15:34:00	10	15	3	7	3
1	2008-12-09 15:35:00	0	15	3	7	3
1	2008-12-09 15:36:00	181	15	3	7	3
1	2008-12-09 15:37:00	323	15	3	7	3
1	2008-12-09 15:38:00	217	15	3	7	3
1	2008-12-09 15:39:00	102	15	3	7	3
1	2008-12-09 15:40:00	906	15	3	7	3
1	2008-12-09 15:41:00	1182	15	3	7	3
1	2008-12-09 15:42:00	977	15	3	7	3
1	2008-12-09 15:43:00	20	15	3	7	3
1	2008-12-09 15:44:00	71	15	3	7	3
1	2008-12-09 15:45:00	0	15	3	7	3
1	2008-12-09 15:46:00	10	15	3	7	3
1	2008-12-09 15:47:00	51	15	3	7	3
1	2008-12-09 15:48:00	10	15	3	7	3
1	2008-12-09 15:49:00	0	15	3	7	3
1	2008-12-09 15:50:00	20	15	3	7	3
1	2008-12-09 15:51:00	10	15	3	7	3
1	2008-12-09 15:52:00	169	15	3	7	3
1	2008-12-09 15:53:00	366	15	3	7	3
1	2008-12-09 15:54:00	217	15	3	7	3
1	2008-12-09 15:55:00	20	15	3	7	3
1	2008-12-09 15:56:00	0	15	3	7	3
1	2008-12-09 15:57:00	0	15	3	7	3
1	2008-12-09 15:58:00	20	15	3	7	3
1	2008-12-09 15:59:00	51	15	3	7	3
1	2008-12-09 16:00:00	10	15	3	7	3
1	2008-12-09 16:01:00	10	16	3	7	3
1	2008-12-09 16:02:00	394	16	3	7	3
1	2008-12-09 16:03:00	132	16	3	7	3
1	2008-12-09 16:04:00	30	16	3	7	3
1	2008-12-09 16:05:00	0	16	3	7	3
1	2008-12-09 16:06:00	0	16	3	7	3
1	2008-12-09 16:07:00	10	16	3	7	3
1	2008-12-09 16:08:00	61	16	3	7	3
1	2008-12-09 16:09:00	20	16	3	7	3
1	2008-12-09 16:10:00	41	16	3	7	3
1	2008-12-09 16:11:00	30	16	3	7	3
1	2008-12-09 16:12:00	10	16	3	7	3
1	2008-12-09 16:13:00	351	16	3	7	3
1	2008-12-09 16:14:00	323	16	3	7	3
1	2008-12-09 16:15:00	351	16	3	7	3
1	2008-12-09 16:16:00	323	16	3	7	3
1	2008-12-09 16:17:00	41	16	3	7	3
1	2008-12-09 16:18:00	0	16	3	7	3
1	2008-12-09 16:19:00	10	16	3	7	3
1	2008-12-09 16:20:00	144	16	3	7	3
1	2008-12-09 16:21:00	774	16	3	7	3
1	2008-12-09 16:22:00	366	16	3	7	3
1	2008-12-09 16:23:00	266	16	3	7	3
1	2008-12-09 16:24:00	61	16	3	7	3
1	2008-12-09 16:25:00	61	16	3	7	3
1	2008-12-09 16:26:00	10	16	3	7	3
1	2008-12-09 16:27:00	10	16	3	7	3
1	2008-12-09 16:28:00	61	16	3	7	3
1	2008-12-09 16:29:00	41	16	3	7	3
1	2008-12-09 16:30:00	10	16	3	7	3
1	2008-12-09 16:31:00	242	16	3	7	3
1	2008-12-09 16:32:00	492	16	3	7	3
1	2008-12-09 16:33:00	217	16	3	7	3
1	2008-12-09 16:34:00	112	16	3	7	3
1	2008-12-09 16:35:00	242	16	3	7	3
1	2008-12-09 16:36:00	51	16	3	7	3
1	2008-12-09 16:37:00	30	16	3	7	3
1	2008-12-09 16:38:00	20	16	3	7	3
1	2008-12-09 16:39:00	0	16	3	7	3
1	2008-12-09 16:40:00	394	16	3	7	3
1	2008-12-09 16:41:00	673	16	3	7	3
1	2008-12-09 16:42:00	794	16	3	7	3
1	2008-12-09 16:43:00	754	16	3	7	3
1	2008-12-09 16:44:00	81	16	3	7	3
1	2008-12-09 16:45:00	295	16	3	7	3
1	2008-12-09 16:46:00	0	16	3	7	3
1	2008-12-09 16:47:00	953	16	3	7	3
1	2008-12-09 16:48:00	1680	16	3	7	3
1	2008-12-09 16:49:00	230	16	3	7	3
1	2008-12-09 16:50:00	1002	16	3	7	3
1	2008-12-09 16:51:00	1002	16	3	7	3
1	2008-12-09 16:52:00	337	16	3	7	3
1	2008-12-09 16:53:00	394	16	3	7	3
1	2008-12-09 16:54:00	309	16	3	7	3
1	2008-12-09 16:55:00	81	16	3	7	3
1	2008-12-09 16:56:00	616	16	3	7	3
1	2008-12-09 16:57:00	410	16	3	7	3
1	2008-12-09 16:58:00	20	16	3	7	3
1	2008-12-09 16:59:00	91	16	3	7	3
1	2008-12-09 17:00:00	169	16	3	7	3
1	2008-12-09 17:01:00	71	17	3	7	3
1	2008-12-09 17:02:00	71	17	3	7	3
1	2008-12-09 17:03:00	41	17	3	7	3
1	2008-12-09 17:04:00	61	17	3	7	3
1	2008-12-09 17:05:00	71	17	3	7	3
1	2008-12-09 17:06:00	266	17	3	7	3
1	2008-12-09 17:07:00	0	17	3	7	3
1	2008-12-09 17:08:00	61	17	3	7	3
1	2008-12-09 17:09:00	156	17	3	7	3
1	2008-12-09 17:10:00	20	17	3	7	3
1	2008-12-09 17:11:00	0	17	3	7	3
1	2008-12-09 17:12:00	561	17	3	7	3
1	2008-12-09 17:13:00	41	17	3	7	3
1	2008-12-09 17:14:00	380	17	3	7	3
1	2008-12-09 17:15:00	10	17	3	7	3
1	2008-12-09 17:16:00	0	17	3	7	3
1	2008-12-09 17:17:00	0	17	3	7	3
1	2008-12-09 17:18:00	0	17	3	7	3
1	2008-12-09 17:19:00	71	17	3	7	3
1	2008-12-09 17:20:00	0	17	3	7	3
1	2008-12-09 17:21:00	0	17	3	7	3
1	2008-12-09 17:22:00	0	17	3	7	3
1	2008-12-09 17:23:00	0	17	3	7	3
1	2008-12-09 17:24:00	10	17	3	7	3
1	2008-12-09 17:25:00	0	17	3	7	3
1	2008-12-09 17:26:00	0	17	3	7	3
1	2008-12-09 17:27:00	0	17	3	7	3
1	2008-12-09 17:28:00	0	17	3	7	3
1	2008-12-09 17:29:00	0	17	3	7	3
1	2008-12-09 17:30:00	0	17	3	7	3
1	2008-12-09 17:31:00	0	17	3	7	3
1	2008-12-09 17:32:00	0	17	3	7	3
1	2008-12-09 17:33:00	0	17	3	7	3
1	2008-12-09 17:34:00	10	17	3	7	3
1	2008-12-09 17:35:00	0	17	3	7	3
1	2008-12-09 17:36:00	0	17	3	7	3
1	2008-12-09 17:37:00	0	17	3	7	3
1	2008-12-09 17:38:00	0	17	3	7	3
1	2008-12-09 17:39:00	0	17	3	7	3
1	2008-12-09 17:40:00	0	17	3	7	3
1	2008-12-09 17:41:00	0	17	3	7	3
1	2008-12-09 17:42:00	0	17	3	7	3
1	2008-12-09 17:43:00	0	17	3	7	3
1	2008-12-09 17:44:00	0	17	3	7	3
1	2008-12-09 17:45:00	0	17	3	7	3
1	2008-12-09 17:46:00	0	17	3	7	3
1	2008-12-09 17:47:00	0	17	3	7	3
1	2008-12-09 17:48:00	0	17	3	7	3
1	2008-12-09 17:49:00	0	17	3	7	3
1	2008-12-09 17:50:00	0	17	3	7	3
1	2008-12-09 17:51:00	0	17	3	7	3
1	2008-12-09 17:52:00	20	17	3	7	3
1	2008-12-09 17:53:00	61	17	3	7	3
1	2008-12-09 17:54:00	0	17	3	7	3
1	2008-12-09 17:55:00	0	17	3	7	3
1	2008-12-09 17:56:00	0	17	3	7	3
1	2008-12-09 17:57:00	0	17	3	7	3
1	2008-12-09 17:58:00	0	17	3	7	3
1	2008-12-09 17:59:00	0	17	3	7	3
1	2008-12-09 18:00:00	0	17	3	7	3
1	2008-12-09 18:01:00	0	18	4	7	3
1	2008-12-09 18:02:00	0	18	4	7	3
1	2008-12-09 18:03:00	0	18	4	7	3
1	2008-12-09 18:04:00	0	18	4	7	3
1	2008-12-09 18:05:00	0	18	4	7	3
1	2008-12-09 18:06:00	0	18	4	7	3
1	2008-12-09 18:07:00	0	18	4	7	3
1	2008-12-09 18:08:00	0	18	4	7	3
1	2008-12-09 18:09:00	0	18	4	7	3
1	2008-12-09 18:10:00	0	18	4	7	3
1	2008-12-09 18:11:00	112	18	4	7	3
1	2008-12-09 18:12:00	51	18	4	7	3
1	2008-12-09 18:13:00	0	18	4	7	3
1	2008-12-09 18:14:00	0	18	4	7	3
1	2008-12-09 18:15:00	0	18	4	7	3
1	2008-12-09 18:16:00	0	18	4	7	3
1	2008-12-09 18:17:00	0	18	4	7	3
1	2008-12-09 18:18:00	0	18	4	7	3
1	2008-12-09 18:19:00	0	18	4	7	3
1	2008-12-09 18:20:00	0	18	4	7	3
1	2008-12-09 18:21:00	0	18	4	7	3
1	2008-12-09 18:22:00	0	18	4	7	3
1	2008-12-09 18:23:00	0	18	4	7	3
1	2008-12-09 18:24:00	0	18	4	7	3
1	2008-12-09 18:25:00	0	18	4	7	3
1	2008-12-09 18:26:00	0	18	4	7	3
1	2008-12-09 18:27:00	0	18	4	7	3
1	2008-12-09 18:28:00	0	18	4	7	3
1	2008-12-09 18:29:00	0	18	4	7	3
1	2008-12-09 18:30:00	0	18	4	7	3
1	2008-12-09 18:31:00	0	18	4	7	3
1	2008-12-09 18:32:00	0	18	4	7	3
1	2008-12-09 18:33:00	0	18	4	7	3
1	2008-12-09 18:34:00	0	18	4	7	3
1	2008-12-09 18:35:00	0	18	4	7	3
1	2008-12-09 18:36:00	0	18	4	7	3
1	2008-12-09 18:37:00	0	18	4	7	3
1	2008-12-09 18:38:00	0	18	4	7	3
1	2008-12-09 18:39:00	0	18	4	7	3
1	2008-12-09 18:40:00	0	18	4	7	3
1	2008-12-09 18:41:00	0	18	4	7	3
1	2008-12-09 18:42:00	0	18	4	7	3
1	2008-12-09 18:43:00	0	18	4	7	3
1	2008-12-09 18:44:00	102	18	4	7	3
1	2008-12-09 18:45:00	0	18	4	7	3
1	2008-12-09 18:46:00	10	18	4	7	3
1	2008-12-09 18:47:00	0	18	4	7	3
1	2008-12-09 18:48:00	0	18	4	7	3
1	2008-12-09 18:49:00	122	18	4	7	3
1	2008-12-09 18:50:00	112	18	4	7	3
1	2008-12-09 18:51:00	0	18	4	7	3
1	2008-12-09 18:52:00	0	18	4	7	3
1	2008-12-09 18:53:00	0	18	4	7	3
1	2008-12-09 18:54:00	0	18	4	7	3
1	2008-12-09 18:55:00	0	18	4	7	3
1	2008-12-09 18:56:00	0	18	4	7	3
1	2008-12-09 18:57:00	0	18	4	7	3
1	2008-12-09 18:58:00	0	18	4	7	3
1	2008-12-09 18:59:00	0	18	4	7	3
1	2008-12-09 19:00:00	0	18	4	7	3
1	2008-12-09 19:01:00	0	19	4	7	3
1	2008-12-09 19:02:00	0	19	4	7	3
1	2008-12-09 19:03:00	0	19	4	7	3
1	2008-12-09 19:04:00	0	19	4	7	3
1	2008-12-09 19:05:00	0	19	4	7	3
1	2008-12-09 19:06:00	0	19	4	7	3
1	2008-12-09 19:07:00	0	19	4	7	3
1	2008-12-09 19:08:00	0	19	4	7	3
1	2008-12-09 19:09:00	0	19	4	7	3
1	2008-12-09 19:10:00	0	19	4	7	3
1	2008-12-09 19:11:00	0	19	4	7	3
1	2008-12-09 19:12:00	0	19	4	7	3
1	2008-12-09 19:13:00	0	19	4	7	3
1	2008-12-09 19:14:00	0	19	4	7	3
1	2008-12-09 19:15:00	0	19	4	7	3
1	2008-12-09 19:16:00	10	19	4	7	3
1	2008-12-09 19:17:00	0	19	4	7	3
1	2008-12-09 19:18:00	0	19	4	7	3
1	2008-12-09 19:19:00	0	19	4	7	3
1	2008-12-09 19:20:00	0	19	4	7	3
1	2008-12-09 19:21:00	0	19	4	7	3
1	2008-12-09 19:22:00	0	19	4	7	3
1	2008-12-09 19:23:00	0	19	4	7	3
1	2008-12-09 19:24:00	0	19	4	7	3
1	2008-12-09 19:25:00	0	19	4	7	3
1	2008-12-09 19:26:00	0	19	4	7	3
1	2008-12-09 19:27:00	0	19	4	7	3
1	2008-12-09 19:28:00	0	19	4	7	3
1	2008-12-09 19:29:00	0	19	4	7	3
1	2008-12-09 19:30:00	0	19	4	7	3
1	2008-12-09 19:31:00	0	19	4	7	3
1	2008-12-09 19:32:00	0	19	4	7	3
1	2008-12-09 19:33:00	0	19	4	7	3
1	2008-12-09 19:34:00	0	19	4	7	3
1	2008-12-09 19:35:00	0	19	4	7	3
1	2008-12-09 19:36:00	0	19	4	7	3
1	2008-12-09 19:37:00	20	19	4	7	3
1	2008-12-09 19:38:00	20	19	4	7	3
1	2008-12-09 19:39:00	41	19	4	7	3
1	2008-12-09 19:40:00	0	19	4	7	3
1	2008-12-09 19:41:00	0	19	4	7	3
1	2008-12-09 19:42:00	144	19	4	7	3
1	2008-12-09 19:43:00	366	19	4	7	3
1	2008-12-09 19:44:00	794	19	4	7	3
1	2008-12-09 19:45:00	144	19	4	7	3
1	2008-12-09 19:46:00	0	19	4	7	3
1	2008-12-09 19:47:00	0	19	4	7	3
1	2008-12-09 19:48:00	0	19	4	7	3
1	2008-12-09 19:49:00	0	19	4	7	3
1	2008-12-09 19:50:00	0	19	4	7	3
1	2008-12-09 19:51:00	0	19	4	7	3
1	2008-12-09 19:52:00	0	19	4	7	3
1	2008-12-09 19:53:00	0	19	4	7	3
1	2008-12-09 19:54:00	0	19	4	7	3
1	2008-12-09 19:55:00	0	19	4	7	3
1	2008-12-09 19:56:00	0	19	4	7	3
1	2008-12-09 19:57:00	0	19	4	7	3
1	2008-12-09 19:58:00	0	19	4	7	3
1	2008-12-09 19:59:00	0	19	4	7	3
1	2008-12-09 20:00:00	0	19	4	7	3
1	2008-12-09 20:01:00	0	20	4	7	3
1	2008-12-09 20:02:00	0	20	4	7	3
1	2008-12-09 20:03:00	0	20	4	7	3
1	2008-12-09 20:04:00	0	20	4	7	3
1	2008-12-09 20:05:00	0	20	4	7	3
1	2008-12-09 20:06:00	0	20	4	7	3
1	2008-12-09 20:07:00	0	20	4	7	3
1	2008-12-09 20:08:00	0	20	4	7	3
1	2008-12-09 20:09:00	0	20	4	7	3
1	2008-12-09 20:10:00	0	20	4	7	3
1	2008-12-09 20:11:00	0	20	4	7	3
1	2008-12-09 20:12:00	0	20	4	7	3
1	2008-12-09 20:13:00	0	20	4	7	3
1	2008-12-09 20:14:00	0	20	4	7	3
1	2008-12-09 20:15:00	0	20	4	7	3
1	2008-12-09 20:16:00	0	20	4	7	3
1	2008-12-09 20:17:00	0	20	4	7	3
1	2008-12-09 20:18:00	0	20	4	7	3
1	2008-12-09 20:19:00	0	20	4	7	3
1	2008-12-09 20:20:00	0	20	4	7	3
1	2008-12-09 20:21:00	0	20	4	7	3
1	2008-12-09 20:22:00	0	20	4	7	3
1	2008-12-09 20:23:00	0	20	4	7	3
1	2008-12-09 20:24:00	0	20	4	7	3
1	2008-12-09 20:25:00	0	20	4	7	3
1	2008-12-09 20:26:00	0	20	4	7	3
1	2008-12-09 20:27:00	0	20	4	7	3
1	2008-12-09 20:28:00	10	20	4	7	3
1	2008-12-09 20:29:00	0	20	4	7	3
1	2008-12-09 20:30:00	0	20	4	7	3
1	2008-12-09 20:31:00	929	20	4	7	3
1	2008-12-09 20:32:00	51	20	4	7	3
1	2008-12-09 20:33:00	20	20	4	7	3
1	2008-12-09 20:34:00	0	20	4	7	3
1	2008-12-09 20:35:00	0	20	4	7	3
1	2008-12-09 20:36:00	0	20	4	7	3
1	2008-12-09 20:37:00	0	20	4	7	3
1	2008-12-09 20:38:00	0	20	4	7	3
1	2008-12-09 20:39:00	0	20	4	7	3
1	2008-12-09 20:40:00	0	20	4	7	3
1	2008-12-09 20:41:00	0	20	4	7	3
1	2008-12-09 20:42:00	0	20	4	7	3
1	2008-12-09 20:43:00	0	20	4	7	3
1	2008-12-09 20:44:00	0	20	4	7	3
1	2008-12-09 20:45:00	0	20	4	7	3
1	2008-12-09 20:46:00	0	20	4	7	3
1	2008-12-09 20:47:00	0	20	4	7	3
1	2008-12-09 20:48:00	0	20	4	7	3
1	2008-12-09 20:49:00	0	20	4	7	3
1	2008-12-09 20:50:00	0	20	4	7	3
1	2008-12-09 20:51:00	20	20	4	7	3
1	2008-12-09 20:52:00	41	20	4	7	3
1	2008-12-09 20:53:00	0	20	4	7	3
1	2008-12-09 20:54:00	0	20	4	7	3
1	2008-12-09 20:55:00	0	20	4	7	3
1	2008-12-09 20:56:00	0	20	4	7	3
1	2008-12-09 20:57:00	0	20	4	7	3
1	2008-12-09 20:58:00	0	20	4	7	3
1	2008-12-09 20:59:00	0	20	4	7	3
1	2008-12-09 21:00:00	0	20	4	7	3
1	2008-12-09 21:01:00	0	21	4	7	3
1	2008-12-09 21:02:00	0	21	4	7	3
1	2008-12-09 21:03:00	0	21	4	7	3
1	2008-12-09 21:04:00	0	21	4	7	3
1	2008-12-09 21:05:00	0	21	4	7	3
1	2008-12-09 21:06:00	0	21	4	7	3
1	2008-12-09 21:07:00	0	21	4	7	3
1	2008-12-09 21:08:00	0	21	4	7	3
1	2008-12-09 21:09:00	0	21	4	7	3
1	2008-12-09 21:10:00	0	21	4	7	3
1	2008-12-09 21:11:00	0	21	4	7	3
1	2008-12-09 21:12:00	0	21	4	7	3
1	2008-12-09 21:13:00	0	21	4	7	3
1	2008-12-09 21:14:00	0	21	4	7	3
1	2008-12-09 21:15:00	0	21	4	7	3
1	2008-12-09 21:16:00	0	21	4	7	3
1	2008-12-09 21:17:00	0	21	4	7	3
1	2008-12-09 21:18:00	0	21	4	7	3
1	2008-12-09 21:19:00	0	21	4	7	3
1	2008-12-09 21:20:00	0	21	4	7	3
1	2008-12-09 21:21:00	0	21	4	7	3
1	2008-12-09 21:22:00	0	21	4	7	3
1	2008-12-09 21:23:00	0	21	4	7	3
1	2008-12-09 21:24:00	0	21	4	7	3
1	2008-12-09 21:25:00	0	21	4	7	3
1	2008-12-09 21:26:00	0	21	4	7	3
1	2008-12-09 21:27:00	0	21	4	7	3
1	2008-12-09 21:28:00	0	21	4	7	3
1	2008-12-09 21:29:00	0	21	4	7	3
1	2008-12-09 21:30:00	0	21	4	7	3
1	2008-12-09 21:31:00	0	21	4	7	3
1	2008-12-09 21:32:00	0	21	4	7	3
1	2008-12-09 21:33:00	0	21	4	7	3
1	2008-12-09 21:34:00	0	21	4	7	3
1	2008-12-09 21:35:00	0	21	4	7	3
1	2008-12-09 21:36:00	0	21	4	7	3
1	2008-12-09 21:37:00	0	21	4	7	3
1	2008-12-09 21:38:00	0	21	4	7	3
1	2008-12-09 21:39:00	0	21	4	7	3
1	2008-12-09 21:40:00	0	21	4	7	3
1	2008-12-09 21:41:00	0	21	4	7	3
1	2008-12-09 21:42:00	0	21	4	7	3
1	2008-12-09 21:43:00	0	21	4	7	3
1	2008-12-09 21:44:00	0	21	4	7	3
1	2008-12-09 21:45:00	0	21	4	7	3
1	2008-12-09 21:46:00	0	21	4	7	3
1	2008-12-09 21:47:00	0	21	4	7	3
1	2008-12-09 21:48:00	0	21	4	7	3
1	2008-12-09 21:49:00	0	21	4	7	3
1	2008-12-09 21:50:00	20	21	4	7	3
1	2008-12-09 21:51:00	205	21	4	7	3
1	2008-12-09 21:52:00	181	21	4	7	3
1	2008-12-09 21:53:00	91	21	4	7	3
1	2008-12-09 21:54:00	10	21	4	7	3
1	2008-12-09 21:55:00	0	21	4	7	3
1	2008-12-09 21:56:00	30	21	4	7	3
1	2008-12-09 21:57:00	0	21	4	7	3
1	2008-12-09 21:58:00	0	21	4	7	3
1	2008-12-09 21:59:00	0	21	4	7	3
1	2008-12-09 22:00:00	20	21	4	7	3
1	2008-12-09 22:01:00	61	22	4	7	3
1	2008-12-09 22:02:00	10	22	4	7	3
1	2008-12-09 22:03:00	205	22	4	7	3
1	2008-12-09 22:04:00	20	22	4	7	3
1	2008-12-09 22:05:00	30	22	4	7	3
1	2008-12-09 22:06:00	102	22	4	7	3
1	2008-12-09 22:07:00	156	22	4	7	3
1	2008-12-09 22:08:00	0	22	4	7	3
1	2008-12-09 22:09:00	10	22	4	7	3
1	2008-12-09 22:10:00	0	22	4	7	3
1	2008-12-09 22:11:00	0	22	4	7	3
1	2008-12-09 22:12:00	1512	22	4	7	3
1	2008-12-09 22:13:00	774	22	4	7	3
1	2008-12-09 22:14:00	30	22	4	7	3
1	2008-12-09 22:15:00	475	22	4	7	3
1	2008-12-09 22:16:00	309	22	4	7	3
1	2008-12-09 22:17:00	254	22	4	7	3
1	2008-12-09 22:18:00	380	22	4	7	3
1	2008-12-09 22:19:00	71	22	4	7	3
1	2008-12-09 22:20:00	20	22	4	7	3
1	2008-12-09 22:21:00	280	22	4	7	3
1	2008-12-09 22:22:00	181	22	4	7	3
1	2008-12-09 22:23:00	242	22	4	7	3
1	2008-12-09 22:24:00	794	22	4	7	3
1	2008-12-09 22:25:00	266	22	4	7	3
1	2008-12-09 22:26:00	41	22	4	7	3
1	2008-12-09 22:27:00	861	22	4	7	3
1	2008-12-09 22:28:00	561	22	4	7	3
1	2008-12-09 22:29:00	144	22	4	7	3
1	2008-12-09 22:30:00	0	22	4	7	3
1	2008-12-09 22:31:00	0	22	4	7	3
1	2008-12-09 22:32:00	71	22	4	7	3
1	2008-12-09 22:33:00	0	22	4	7	3
1	2008-12-09 22:34:00	0	22	4	7	3
1	2008-12-09 22:35:00	0	22	4	7	3
1	2008-12-09 22:36:00	0	22	4	7	3
1	2008-12-09 22:37:00	0	22	4	7	3
1	2008-12-09 22:38:00	0	22	4	7	3
1	2008-12-09 22:39:00	0	22	4	7	3
1	2008-12-09 22:40:00	0	22	4	7	3
1	2008-12-09 22:41:00	323	22	4	7	3
1	2008-12-09 22:42:00	0	22	4	7	3
1	2008-12-09 22:43:00	81	22	4	7	3
1	2008-12-09 22:44:00	0	22	4	7	3
1	2008-12-09 22:45:00	0	22	4	7	3
1	2008-12-09 22:46:00	0	22	4	7	3
1	2008-12-09 22:47:00	0	22	4	7	3
1	2008-12-09 22:48:00	0	22	4	7	3
1	2008-12-09 22:49:00	0	22	4	7	3
1	2008-12-09 22:50:00	0	22	4	7	3
1	2008-12-09 22:51:00	0	22	4	7	3
1	2008-12-09 22:52:00	0	22	4	7	3
1	2008-12-09 22:53:00	0	22	4	7	3
1	2008-12-09 22:54:00	0	22	4	7	3
1	2008-12-09 22:55:00	0	22	4	7	3
1	2008-12-09 22:56:00	0	22	4	7	3
1	2008-12-09 22:57:00	0	22	4	7	3
1	2008-12-09 22:58:00	0	22	4	7	3
1	2008-12-09 22:59:00	0	22	4	7	3
1	2008-12-09 23:00:00	0	22	4	7	3
1	2008-12-09 23:01:00	0	23	4	7	3
1	2008-12-09 23:02:00	0	23	4	7	3
1	2008-12-09 23:03:00	0	23	4	7	3
1	2008-12-09 23:04:00	0	23	4	7	3
1	2008-12-09 23:05:00	0	23	4	7	3
1	2008-12-09 23:06:00	0	23	4	7	3
1	2008-12-09 23:07:00	0	23	4	7	3
1	2008-12-09 23:08:00	337	23	4	7	3
1	2008-12-09 23:09:00	51	23	4	7	3
1	2008-12-09 23:10:00	91	23	4	7	3
1	2008-12-09 23:11:00	0	23	4	7	3
1	2008-12-09 23:12:00	0	23	4	7	3
1	2008-12-09 23:13:00	0	23	4	7	3
1	2008-12-09 23:14:00	0	23	4	7	3
1	2008-12-09 23:15:00	0	23	4	7	3
1	2008-12-09 23:16:00	0	23	4	7	3
1	2008-12-09 23:17:00	0	23	4	7	3
1	2008-12-09 23:18:00	0	23	4	7	3
1	2008-12-09 23:19:00	0	23	4	7	3
1	2008-12-09 23:20:00	0	23	4	7	3
1	2008-12-09 23:21:00	0	23	4	7	3
1	2008-12-09 23:22:00	0	23	4	7	3
1	2008-12-09 23:23:00	0	23	4	7	3
1	2008-12-09 23:24:00	0	23	4	7	3
1	2008-12-09 23:25:00	0	23	4	7	3
1	2008-12-09 23:26:00	0	23	4	7	3
1	2008-12-09 23:27:00	0	23	4	7	3
1	2008-12-09 23:28:00	0	23	4	7	3
1	2008-12-09 23:29:00	0	23	4	7	3
1	2008-12-09 23:30:00	0	23	4	7	3
1	2008-12-09 23:31:00	0	23	4	7	3
1	2008-12-09 23:32:00	0	23	4	7	3
1	2008-12-09 23:33:00	0	23	4	7	3
1	2008-12-09 23:34:00	0	23	4	7	3
1	2008-12-09 23:35:00	0	23	4	7	3
1	2008-12-09 23:36:00	0	23	4	7	3
1	2008-12-09 23:37:00	0	23	4	7	3
1	2008-12-09 23:38:00	71	23	4	7	3
1	2008-12-09 23:39:00	0	23	4	7	3
1	2008-12-09 23:40:00	10	23	4	7	3
1	2008-12-09 23:41:00	0	23	4	7	3
1	2008-12-09 23:42:00	0	23	4	7	3
1	2008-12-09 23:43:00	0	23	4	7	3
1	2008-12-09 23:44:00	0	23	4	7	3
1	2008-12-09 23:45:00	0	23	4	7	3
1	2008-12-09 23:46:00	0	23	4	7	3
1	2008-12-09 23:47:00	0	23	4	7	3
1	2008-12-09 23:48:00	0	23	4	7	3
1	2008-12-09 23:49:00	0	23	4	7	3
1	2008-12-09 23:50:00	0	23	4	7	3
1	2008-12-09 23:51:00	0	23	4	7	3
1	2008-12-09 23:52:00	0	23	4	7	3
1	2008-12-09 23:53:00	0	23	4	7	3
1	2008-12-09 23:54:00	0	23	4	7	3
1	2008-12-09 23:55:00	0	23	4	7	3
1	2008-12-09 23:56:00	0	23	4	7	3
1	2008-12-09 23:57:00	0	23	4	7	3
1	2008-12-09 23:58:00	0	23	4	7	3
1	2008-12-09 23:59:00	0	23	4	7	3
1	2008-12-10	10	23	4	7	3
1	2008-12-10 00:01:00	0	0	1	8	4
1	2008-12-10 00:02:00	41	0	1	8	4
1	2008-12-10 00:03:00	102	0	1	8	4
1	2008-12-10 00:04:00	0	0	1	8	4
1	2008-12-10 00:05:00	0	0	1	8	4
1	2008-12-10 00:06:00	0	0	1	8	4
1	2008-12-10 00:07:00	0	0	1	8	4
1	2008-12-10 00:08:00	0	0	1	8	4
1	2008-12-10 00:09:00	0	0	1	8	4
1	2008-12-10 00:10:00	0	0	1	8	4
1	2008-12-10 00:11:00	0	0	1	8	4
1	2008-12-10 00:12:00	0	0	1	8	4
1	2008-12-10 00:13:00	0	0	1	8	4
1	2008-12-10 00:14:00	0	0	1	8	4
1	2008-12-10 00:15:00	0	0	1	8	4
1	2008-12-10 00:16:00	0	0	1	8	4
1	2008-12-10 00:17:00	0	0	1	8	4
1	2008-12-10 00:18:00	0	0	1	8	4
1	2008-12-10 00:19:00	0	0	1	8	4
1	2008-12-10 00:20:00	0	0	1	8	4
1	2008-12-10 00:21:00	0	0	1	8	4
1	2008-12-10 00:22:00	0	0	1	8	4
1	2008-12-10 00:23:00	0	0	1	8	4
1	2008-12-10 00:24:00	0	0	1	8	4
1	2008-12-10 00:25:00	0	0	1	8	4
1	2008-12-10 00:26:00	0	0	1	8	4
1	2008-12-10 00:27:00	0	0	1	8	4
1	2008-12-10 00:28:00	0	0	1	8	4
1	2008-12-10 00:29:00	0	0	1	8	4
1	2008-12-10 00:30:00	0	0	1	8	4
1	2008-12-10 00:31:00	0	0	1	8	4
1	2008-12-10 00:32:00	0	0	1	8	4
1	2008-12-10 00:33:00	0	0	1	8	4
1	2008-12-10 00:34:00	0	0	1	8	4
1	2008-12-10 00:35:00	0	0	1	8	4
1	2008-12-10 00:36:00	0	0	1	8	4
1	2008-12-10 00:37:00	0	0	1	8	4
1	2008-12-10 00:38:00	0	0	1	8	4
1	2008-12-10 00:39:00	0	0	1	8	4
1	2008-12-10 00:40:00	0	0	1	8	4
1	2008-12-10 00:41:00	0	0	1	8	4
1	2008-12-10 00:42:00	0	0	1	8	4
1	2008-12-10 00:43:00	0	0	1	8	4
1	2008-12-10 00:44:00	0	0	1	8	4
1	2008-12-10 00:45:00	0	0	1	8	4
1	2008-12-10 00:46:00	0	0	1	8	4
1	2008-12-10 00:47:00	0	0	1	8	4
1	2008-12-10 00:48:00	20	0	1	8	4
1	2008-12-10 00:49:00	0	0	1	8	4
1	2008-12-10 00:50:00	0	0	1	8	4
1	2008-12-10 00:51:00	0	0	1	8	4
1	2008-12-10 00:52:00	0	0	1	8	4
1	2008-12-10 00:53:00	0	0	1	8	4
1	2008-12-10 00:54:00	0	0	1	8	4
1	2008-12-10 00:55:00	0	0	1	8	4
1	2008-12-10 00:56:00	20	0	1	8	4
1	2008-12-10 00:57:00	91	0	1	8	4
1	2008-12-10 00:58:00	20	0	1	8	4
1	2008-12-10 00:59:00	81	0	1	8	4
1	2008-12-10 01:00:00	41	0	1	8	4
1	2008-12-10 01:01:00	754	1	1	8	4
1	2008-12-10 01:02:00	169	1	1	8	4
1	2008-12-10 01:03:00	10	1	1	8	4
1	2008-12-10 01:04:00	0	1	1	8	4
1	2008-12-10 01:05:00	0	1	1	8	4
1	2008-12-10 01:06:00	0	1	1	8	4
1	2008-12-10 01:07:00	0	1	1	8	4
1	2008-12-10 01:08:00	0	1	1	8	4
1	2008-12-10 01:09:00	0	1	1	8	4
1	2008-12-10 01:10:00	0	1	1	8	4
1	2008-12-10 01:11:00	0	1	1	8	4
1	2008-12-10 01:12:00	0	1	1	8	4
1	2008-12-10 01:13:00	0	1	1	8	4
1	2008-12-10 01:14:00	0	1	1	8	4
1	2008-12-10 01:15:00	0	1	1	8	4
1	2008-12-10 01:16:00	0	1	1	8	4
1	2008-12-10 01:17:00	0	1	1	8	4
1	2008-12-10 01:18:00	0	1	1	8	4
1	2008-12-10 01:19:00	0	1	1	8	4
1	2008-12-10 01:20:00	0	1	1	8	4
1	2008-12-10 01:21:00	0	1	1	8	4
1	2008-12-10 01:22:00	0	1	1	8	4
1	2008-12-10 01:23:00	0	1	1	8	4
1	2008-12-10 01:24:00	0	1	1	8	4
1	2008-12-10 01:25:00	0	1	1	8	4
1	2008-12-10 01:26:00	0	1	1	8	4
1	2008-12-10 01:27:00	0	1	1	8	4
1	2008-12-10 01:28:00	0	1	1	8	4
1	2008-12-10 01:29:00	0	1	1	8	4
1	2008-12-10 01:30:00	0	1	1	8	4
1	2008-12-10 01:31:00	0	1	1	8	4
1	2008-12-10 01:32:00	10	1	1	8	4
1	2008-12-10 01:33:00	0	1	1	8	4
1	2008-12-10 01:34:00	0	1	1	8	4
1	2008-12-10 01:35:00	0	1	1	8	4
1	2008-12-10 01:36:00	0	1	1	8	4
1	2008-12-10 01:37:00	20	1	1	8	4
1	2008-12-10 01:38:00	0	1	1	8	4
1	2008-12-10 01:39:00	0	1	1	8	4
1	2008-12-10 01:40:00	0	1	1	8	4
1	2008-12-10 01:41:00	0	1	1	8	4
1	2008-12-10 01:42:00	0	1	1	8	4
1	2008-12-10 01:43:00	0	1	1	8	4
1	2008-12-10 01:44:00	0	1	1	8	4
1	2008-12-10 01:45:00	0	1	1	8	4
1	2008-12-10 01:46:00	0	1	1	8	4
1	2008-12-10 01:47:00	0	1	1	8	4
1	2008-12-10 01:48:00	0	1	1	8	4
1	2008-12-10 01:49:00	0	1	1	8	4
1	2008-12-10 01:50:00	0	1	1	8	4
1	2008-12-10 01:51:00	0	1	1	8	4
1	2008-12-10 01:52:00	0	1	1	8	4
1	2008-12-10 01:53:00	0	1	1	8	4
1	2008-12-10 01:54:00	0	1	1	8	4
1	2008-12-10 01:55:00	0	1	1	8	4
1	2008-12-10 01:56:00	0	1	1	8	4
1	2008-12-10 01:57:00	0	1	1	8	4
1	2008-12-10 01:58:00	0	1	1	8	4
1	2008-12-10 01:59:00	0	1	1	8	4
1	2008-12-10 02:00:00	0	1	1	8	4
1	2008-12-10 02:01:00	0	2	1	8	4
1	2008-12-10 02:02:00	0	2	1	8	4
1	2008-12-10 02:03:00	0	2	1	8	4
1	2008-12-10 02:04:00	0	2	1	8	4
1	2008-12-10 02:05:00	0	2	1	8	4
1	2008-12-10 02:06:00	0	2	1	8	4
1	2008-12-10 02:07:00	0	2	1	8	4
1	2008-12-10 02:08:00	0	2	1	8	4
1	2008-12-10 02:09:00	0	2	1	8	4
1	2008-12-10 02:10:00	0	2	1	8	4
1	2008-12-10 02:11:00	0	2	1	8	4
1	2008-12-10 02:12:00	0	2	1	8	4
1	2008-12-10 02:13:00	0	2	1	8	4
1	2008-12-10 02:14:00	0	2	1	8	4
1	2008-12-10 02:15:00	0	2	1	8	4
1	2008-12-10 02:16:00	0	2	1	8	4
1	2008-12-10 02:17:00	0	2	1	8	4
1	2008-12-10 02:18:00	0	2	1	8	4
1	2008-12-10 02:19:00	0	2	1	8	4
1	2008-12-10 02:20:00	0	2	1	8	4
1	2008-12-10 02:21:00	0	2	1	8	4
1	2008-12-10 02:22:00	0	2	1	8	4
1	2008-12-10 02:23:00	0	2	1	8	4
1	2008-12-10 02:24:00	0	2	1	8	4
1	2008-12-10 02:25:00	0	2	1	8	4
1	2008-12-10 02:26:00	0	2	1	8	4
1	2008-12-10 02:27:00	0	2	1	8	4
1	2008-12-10 02:28:00	0	2	1	8	4
1	2008-12-10 02:29:00	0	2	1	8	4
1	2008-12-10 02:30:00	0	2	1	8	4
1	2008-12-10 02:31:00	0	2	1	8	4
1	2008-12-10 02:32:00	0	2	1	8	4
1	2008-12-10 02:33:00	0	2	1	8	4
1	2008-12-10 02:34:00	0	2	1	8	4
1	2008-12-10 02:35:00	0	2	1	8	4
1	2008-12-10 02:36:00	0	2	1	8	4
1	2008-12-10 02:37:00	0	2	1	8	4
1	2008-12-10 02:38:00	0	2	1	8	4
1	2008-12-10 02:39:00	0	2	1	8	4
1	2008-12-10 02:40:00	0	2	1	8	4
1	2008-12-10 02:41:00	0	2	1	8	4
1	2008-12-10 02:42:00	10	2	1	8	4
1	2008-12-10 02:43:00	0	2	1	8	4
1	2008-12-10 02:44:00	0	2	1	8	4
1	2008-12-10 02:45:00	0	2	1	8	4
1	2008-12-10 02:46:00	0	2	1	8	4
1	2008-12-10 02:47:00	0	2	1	8	4
1	2008-12-10 02:48:00	0	2	1	8	4
1	2008-12-10 02:49:00	0	2	1	8	4
1	2008-12-10 02:50:00	0	2	1	8	4
1	2008-12-10 02:51:00	0	2	1	8	4
1	2008-12-10 02:52:00	0	2	1	8	4
1	2008-12-10 02:53:00	0	2	1	8	4
1	2008-12-10 02:54:00	0	2	1	8	4
1	2008-12-10 02:55:00	0	2	1	8	4
1	2008-12-10 02:56:00	0	2	1	8	4
1	2008-12-10 02:57:00	0	2	1	8	4
1	2008-12-10 02:58:00	0	2	1	8	4
1	2008-12-10 02:59:00	0	2	1	8	4
1	2008-12-10 03:00:00	0	2	1	8	4
1	2008-12-10 03:01:00	0	3	1	8	4
1	2008-12-10 03:02:00	0	3	1	8	4
1	2008-12-10 03:03:00	0	3	1	8	4
1	2008-12-10 03:04:00	0	3	1	8	4
1	2008-12-10 03:05:00	0	3	1	8	4
1	2008-12-10 03:06:00	0	3	1	8	4
1	2008-12-10 03:07:00	0	3	1	8	4
1	2008-12-10 03:08:00	10	3	1	8	4
1	2008-12-10 03:09:00	0	3	1	8	4
1	2008-12-10 03:10:00	0	3	1	8	4
1	2008-12-10 03:11:00	0	3	1	8	4
1	2008-12-10 03:12:00	0	3	1	8	4
1	2008-12-10 03:13:00	0	3	1	8	4
1	2008-12-10 03:14:00	181	3	1	8	4
1	2008-12-10 03:15:00	266	3	1	8	4
1	2008-12-10 03:16:00	394	3	1	8	4
1	2008-12-10 03:17:00	443	3	1	8	4
1	2008-12-10 03:18:00	61	3	1	8	4
1	2008-12-10 03:19:00	0	3	1	8	4
1	2008-12-10 03:20:00	0	3	1	8	4
1	2008-12-10 03:21:00	0	3	1	8	4
1	2008-12-10 03:22:00	0	3	1	8	4
1	2008-12-10 03:23:00	30	3	1	8	4
1	2008-12-10 03:24:00	0	3	1	8	4
1	2008-12-10 03:25:00	0	3	1	8	4
1	2008-12-10 03:26:00	0	3	1	8	4
1	2008-12-10 03:27:00	0	3	1	8	4
1	2008-12-10 03:28:00	0	3	1	8	4
1	2008-12-10 03:29:00	10	3	1	8	4
1	2008-12-10 03:30:00	0	3	1	8	4
1	2008-12-10 03:31:00	0	3	1	8	4
1	2008-12-10 03:32:00	0	3	1	8	4
1	2008-12-10 03:33:00	0	3	1	8	4
1	2008-12-10 03:34:00	0	3	1	8	4
1	2008-12-10 03:35:00	0	3	1	8	4
1	2008-12-10 03:36:00	0	3	1	8	4
1	2008-12-10 03:37:00	0	3	1	8	4
1	2008-12-10 03:38:00	0	3	1	8	4
1	2008-12-10 03:39:00	41	3	1	8	4
1	2008-12-10 03:40:00	0	3	1	8	4
1	2008-12-10 03:41:00	0	3	1	8	4
1	2008-12-10 03:42:00	112	3	1	8	4
1	2008-12-10 03:43:00	0	3	1	8	4
1	2008-12-10 03:44:00	0	3	1	8	4
1	2008-12-10 03:45:00	0	3	1	8	4
1	2008-12-10 03:46:00	0	3	1	8	4
1	2008-12-10 03:47:00	0	3	1	8	4
1	2008-12-10 03:48:00	0	3	1	8	4
1	2008-12-10 03:49:00	0	3	1	8	4
1	2008-12-10 03:50:00	0	3	1	8	4
1	2008-12-10 03:51:00	0	3	1	8	4
1	2008-12-10 03:52:00	0	3	1	8	4
1	2008-12-10 03:53:00	0	3	1	8	4
1	2008-12-10 03:54:00	0	3	1	8	4
1	2008-12-10 03:55:00	0	3	1	8	4
1	2008-12-10 03:56:00	0	3	1	8	4
1	2008-12-10 03:57:00	0	3	1	8	4
1	2008-12-10 03:58:00	0	3	1	8	4
1	2008-12-10 03:59:00	0	3	1	8	4
1	2008-12-10 04:00:00	0	3	1	8	4
1	2008-12-10 04:01:00	0	4	1	8	4
1	2008-12-10 04:02:00	0	4	1	8	4
1	2008-12-10 04:03:00	0	4	1	8	4
1	2008-12-10 04:04:00	10	4	1	8	4
1	2008-12-10 04:05:00	0	4	1	8	4
1	2008-12-10 04:06:00	0	4	1	8	4
1	2008-12-10 04:07:00	0	4	1	8	4
1	2008-12-10 04:08:00	0	4	1	8	4
1	2008-12-10 04:09:00	0	4	1	8	4
1	2008-12-10 04:10:00	0	4	1	8	4
1	2008-12-10 04:11:00	0	4	1	8	4
1	2008-12-10 04:12:00	0	4	1	8	4
1	2008-12-10 04:13:00	0	4	1	8	4
1	2008-12-10 04:14:00	0	4	1	8	4
1	2008-12-10 04:15:00	0	4	1	8	4
1	2008-12-10 04:16:00	0	4	1	8	4
1	2008-12-10 04:17:00	0	4	1	8	4
1	2008-12-10 04:18:00	0	4	1	8	4
1	2008-12-10 04:19:00	0	4	1	8	4
1	2008-12-10 04:20:00	0	4	1	8	4
1	2008-12-10 04:21:00	0	4	1	8	4
1	2008-12-10 04:22:00	0	4	1	8	4
1	2008-12-10 04:23:00	0	4	1	8	4
1	2008-12-10 04:24:00	0	4	1	8	4
1	2008-12-10 04:25:00	0	4	1	8	4
1	2008-12-10 04:26:00	0	4	1	8	4
1	2008-12-10 04:27:00	0	4	1	8	4
1	2008-12-10 04:28:00	0	4	1	8	4
1	2008-12-10 04:29:00	0	4	1	8	4
1	2008-12-10 04:30:00	0	4	1	8	4
1	2008-12-10 04:31:00	0	4	1	8	4
1	2008-12-10 04:32:00	0	4	1	8	4
1	2008-12-10 04:33:00	0	4	1	8	4
1	2008-12-10 04:34:00	0	4	1	8	4
1	2008-12-10 04:35:00	181	4	1	8	4
1	2008-12-10 04:36:00	0	4	1	8	4
1	2008-12-10 04:37:00	0	4	1	8	4
1	2008-12-10 04:38:00	0	4	1	8	4
1	2008-12-10 04:39:00	0	4	1	8	4
1	2008-12-10 04:40:00	0	4	1	8	4
1	2008-12-10 04:41:00	0	4	1	8	4
1	2008-12-10 04:42:00	0	4	1	8	4
1	2008-12-10 04:43:00	0	4	1	8	4
1	2008-12-10 04:44:00	0	4	1	8	4
1	2008-12-10 04:45:00	0	4	1	8	4
1	2008-12-10 04:46:00	0	4	1	8	4
1	2008-12-10 04:47:00	0	4	1	8	4
1	2008-12-10 04:48:00	0	4	1	8	4
1	2008-12-10 04:49:00	0	4	1	8	4
1	2008-12-10 04:50:00	0	4	1	8	4
1	2008-12-10 04:51:00	0	4	1	8	4
1	2008-12-10 04:52:00	0	4	1	8	4
1	2008-12-10 04:53:00	0	4	1	8	4
1	2008-12-10 04:54:00	0	4	1	8	4
1	2008-12-10 04:55:00	0	4	1	8	4
1	2008-12-10 04:56:00	0	4	1	8	4
1	2008-12-10 04:57:00	0	4	1	8	4
1	2008-12-10 04:58:00	0	4	1	8	4
1	2008-12-10 04:59:00	0	4	1	8	4
1	2008-12-10 05:00:00	0	4	1	8	4
1	2008-12-10 05:01:00	0	5	1	8	4
1	2008-12-10 05:02:00	10	5	1	8	4
1	2008-12-10 05:03:00	61	5	1	8	4
1	2008-12-10 05:04:00	0	5	1	8	4
1	2008-12-10 05:05:00	0	5	1	8	4
1	2008-12-10 05:06:00	0	5	1	8	4
1	2008-12-10 05:07:00	0	5	1	8	4
1	2008-12-10 05:08:00	0	5	1	8	4
1	2008-12-10 05:09:00	0	5	1	8	4
1	2008-12-10 05:10:00	0	5	1	8	4
1	2008-12-10 05:11:00	0	5	1	8	4
1	2008-12-10 05:12:00	0	5	1	8	4
1	2008-12-10 05:13:00	0	5	1	8	4
1	2008-12-10 05:14:00	0	5	1	8	4
1	2008-12-10 05:15:00	0	5	1	8	4
1	2008-12-10 05:16:00	0	5	1	8	4
1	2008-12-10 05:17:00	0	5	1	8	4
1	2008-12-10 05:18:00	0	5	1	8	4
1	2008-12-10 05:19:00	91	5	1	8	4
1	2008-12-10 05:20:00	10	5	1	8	4
1	2008-12-10 05:21:00	0	5	1	8	4
1	2008-12-10 05:22:00	122	5	1	8	4
1	2008-12-10 05:23:00	112	5	1	8	4
1	2008-12-10 05:24:00	51	5	1	8	4
1	2008-12-10 05:25:00	0	5	1	8	4
1	2008-12-10 05:26:00	51	5	1	8	4
1	2008-12-10 05:27:00	81	5	1	8	4
1	2008-12-10 05:28:00	10	5	1	8	4
1	2008-12-10 05:29:00	51	5	1	8	4
1	2008-12-10 05:30:00	61	5	1	8	4
1	2008-12-10 05:31:00	193	5	1	8	4
1	2008-12-10 05:32:00	230	5	1	8	4
1	2008-12-10 05:33:00	579	5	1	8	4
1	2008-12-10 05:34:00	242	5	1	8	4
1	2008-12-10 05:35:00	10	5	1	8	4
1	2008-12-10 05:36:00	0	5	1	8	4
1	2008-12-10 05:37:00	0	5	1	8	4
1	2008-12-10 05:38:00	0	5	1	8	4
1	2008-12-10 05:39:00	0	5	1	8	4
1	2008-12-10 05:40:00	0	5	1	8	4
1	2008-12-10 05:41:00	0	5	1	8	4
1	2008-12-10 05:42:00	0	5	1	8	4
1	2008-12-10 05:43:00	0	5	1	8	4
1	2008-12-10 05:44:00	0	5	1	8	4
1	2008-12-10 05:45:00	0	5	1	8	4
1	2008-12-10 05:46:00	0	5	1	8	4
1	2008-12-10 05:47:00	0	5	1	8	4
1	2008-12-10 05:48:00	41	5	1	8	4
1	2008-12-10 05:49:00	0	5	1	8	4
1	2008-12-10 05:50:00	0	5	1	8	4
1	2008-12-10 05:51:00	10	5	1	8	4
1	2008-12-10 05:52:00	0	5	1	8	4
1	2008-12-10 05:53:00	0	5	1	8	4
1	2008-12-10 05:54:00	0	5	1	8	4
1	2008-12-10 05:55:00	0	5	1	8	4
1	2008-12-10 05:56:00	0	5	1	8	4
1	2008-12-10 05:57:00	0	5	1	8	4
1	2008-12-10 05:58:00	0	5	1	8	4
1	2008-12-10 05:59:00	0	5	1	8	4
1	2008-12-10 06:00:00	0	5	1	8	4
1	2008-12-10 06:01:00	0	6	2	8	4
1	2008-12-10 06:02:00	0	6	2	8	4
1	2008-12-10 06:03:00	0	6	2	8	4
1	2008-12-10 06:04:00	0	6	2	8	4
1	2008-12-10 06:05:00	0	6	2	8	4
1	2008-12-10 06:06:00	0	6	2	8	4
1	2008-12-10 06:07:00	0	6	2	8	4
1	2008-12-10 06:08:00	0	6	2	8	4
1	2008-12-10 06:09:00	0	6	2	8	4
1	2008-12-10 06:10:00	0	6	2	8	4
1	2008-12-10 06:11:00	394	6	2	8	4
1	2008-12-10 06:12:00	91	6	2	8	4
1	2008-12-10 06:13:00	41	6	2	8	4
1	2008-12-10 06:14:00	30	6	2	8	4
1	2008-12-10 06:15:00	217	6	2	8	4
1	2008-12-10 06:16:00	193	6	2	8	4
1	2008-12-10 06:17:00	169	6	2	8	4
1	2008-12-10 06:18:00	20	6	2	8	4
1	2008-12-10 06:19:00	20	6	2	8	4
1	2008-12-10 06:20:00	10	6	2	8	4
1	2008-12-10 06:21:00	0	6	2	8	4
1	2008-12-10 06:22:00	254	6	2	8	4
1	2008-12-10 06:23:00	380	6	2	8	4
1	2008-12-10 06:24:00	30	6	2	8	4
1	2008-12-10 06:25:00	0	6	2	8	4
1	2008-12-10 06:26:00	0	6	2	8	4
1	2008-12-10 06:27:00	0	6	2	8	4
1	2008-12-10 06:28:00	10	6	2	8	4
1	2008-12-10 06:29:00	0	6	2	8	4
1	2008-12-10 06:30:00	217	6	2	8	4
1	2008-12-10 06:31:00	102	6	2	8	4
1	2008-12-10 06:32:00	20	6	2	8	4
1	2008-12-10 06:33:00	0	6	2	8	4
1	2008-12-10 06:34:00	10	6	2	8	4
1	2008-12-10 06:35:00	0	6	2	8	4
1	2008-12-10 06:36:00	0	6	2	8	4
1	2008-12-10 06:37:00	0	6	2	8	4
1	2008-12-10 06:38:00	0	6	2	8	4
1	2008-12-10 06:39:00	0	6	2	8	4
1	2008-12-10 06:40:00	41	6	2	8	4
1	2008-12-10 06:41:00	10	6	2	8	4
1	2008-12-10 06:42:00	0	6	2	8	4
1	2008-12-10 06:43:00	0	6	2	8	4
1	2008-12-10 06:44:00	0	6	2	8	4
1	2008-12-10 06:45:00	0	6	2	8	4
1	2008-12-10 06:46:00	51	6	2	8	4
1	2008-12-10 06:47:00	394	6	2	8	4
1	2008-12-10 06:48:00	1512	6	2	8	4
1	2008-12-10 06:49:00	794	6	2	8	4
1	2008-12-10 06:50:00	242	6	2	8	4
1	2008-12-10 06:51:00	102	6	2	8	4
1	2008-12-10 06:52:00	122	6	2	8	4
1	2008-12-10 06:53:00	169	6	2	8	4
1	2008-12-10 06:54:00	132	6	2	8	4
1	2008-12-10 06:55:00	91	6	2	8	4
1	2008-12-10 06:56:00	427	6	2	8	4
1	2008-12-10 06:57:00	1325	6	2	8	4
1	2008-12-10 06:58:00	394	6	2	8	4
1	2008-12-10 06:59:00	41	6	2	8	4
1	2008-12-10 07:00:00	0	6	2	8	4
1	2008-12-10 07:01:00	122	7	2	8	4
1	2008-12-10 07:02:00	443	7	2	8	4
1	2008-12-10 07:03:00	242	7	2	8	4
1	2008-12-10 07:04:00	20	7	2	8	4
1	2008-12-10 07:05:00	144	7	2	8	4
1	2008-12-10 07:06:00	181	7	2	8	4
1	2008-12-10 07:07:00	295	7	2	8	4
1	2008-12-10 07:08:00	205	7	2	8	4
1	2008-12-10 07:09:00	561	7	2	8	4
1	2008-12-10 07:10:00	181	7	2	8	4
1	2008-12-10 07:11:00	10	7	2	8	4
1	2008-12-10 07:12:00	41	7	2	8	4
1	2008-12-10 07:13:00	380	7	2	8	4
1	2008-12-10 07:14:00	1026	7	2	8	4
1	2008-12-10 07:15:00	427	7	2	8	4
1	2008-12-10 07:16:00	0	7	2	8	4
1	2008-12-10 07:17:00	0	7	2	8	4
1	2008-12-10 07:18:00	41	7	2	8	4
1	2008-12-10 07:19:00	817	7	2	8	4
1	2008-12-10 07:20:00	693	7	2	8	4
1	2008-12-10 07:21:00	242	7	2	8	4
1	2008-12-10 07:22:00	380	7	2	8	4
1	2008-12-10 07:23:00	61	7	2	8	4
1	2008-12-10 07:24:00	144	7	2	8	4
1	2008-12-10 07:25:00	10	7	2	8	4
1	2008-12-10 07:26:00	20	7	2	8	4
1	2008-12-10 07:27:00	30	7	2	8	4
1	2008-12-10 07:28:00	30	7	2	8	4
1	2008-12-10 07:29:00	10	7	2	8	4
1	2008-12-10 07:30:00	51	7	2	8	4
1	2008-12-10 07:31:00	30	7	2	8	4
1	2008-12-10 07:32:00	30	7	2	8	4
1	2008-12-10 07:33:00	10	7	2	8	4
1	2008-12-10 07:34:00	20	7	2	8	4
1	2008-12-10 07:35:00	10	7	2	8	4
1	2008-12-10 07:36:00	30	7	2	8	4
1	2008-12-10 07:37:00	51	7	2	8	4
1	2008-12-10 07:38:00	51	7	2	8	4
1	2008-12-10 07:39:00	30	7	2	8	4
1	2008-12-10 07:40:00	41	7	2	8	4
1	2008-12-10 07:41:00	41	7	2	8	4
1	2008-12-10 07:42:00	51	7	2	8	4
1	2008-12-10 07:43:00	41	7	2	8	4
1	2008-12-10 07:44:00	51	7	2	8	4
1	2008-12-10 07:45:00	51	7	2	8	4
1	2008-12-10 07:46:00	10	7	2	8	4
1	2008-12-10 07:47:00	51	7	2	8	4
1	2008-12-10 07:48:00	754	7	2	8	4
1	2008-12-10 07:49:00	309	7	2	8	4
1	2008-12-10 07:50:00	20	7	2	8	4
1	2008-12-10 07:51:00	380	7	2	8	4
1	2008-12-10 07:52:00	20	7	2	8	4
1	2008-12-10 07:53:00	41	7	2	8	4
1	2008-12-10 07:54:00	254	7	2	8	4
1	2008-12-10 07:55:00	508	7	2	8	4
1	2008-12-10 07:56:00	280	7	2	8	4
1	2008-12-10 07:57:00	309	7	2	8	4
1	2008-12-10 07:58:00	443	7	2	8	4
1	2008-12-10 07:59:00	242	7	2	8	4
1	2008-12-10 08:00:00	380	7	2	8	4
1	2008-12-10 08:01:00	102	8	2	8	4
1	2008-12-10 08:02:00	81	8	2	8	4
1	2008-12-10 08:03:00	169	8	2	8	4
1	2008-12-10 08:04:00	309	8	2	8	4
1	2008-12-10 08:05:00	122	8	2	8	4
1	2008-12-10 08:06:00	459	8	2	8	4
1	2008-12-10 08:07:00	71	8	2	8	4
1	2008-12-10 08:08:00	71	8	2	8	4
1	2008-12-10 08:09:00	0	8	2	8	4
1	2008-12-10 08:10:00	0	8	2	8	4
1	2008-12-10 08:11:00	20	8	2	8	4
1	2008-12-10 08:12:00	10	8	2	8	4
1	2008-12-10 08:13:00	0	8	2	8	4
1	2008-12-10 08:14:00	0	8	2	8	4
1	2008-12-10 08:15:00	0	8	2	8	4
1	2008-12-10 08:16:00	91	8	2	8	4
1	2008-12-10 08:17:00	295	8	2	8	4
1	2008-12-10 08:18:00	205	8	2	8	4
1	2008-12-10 08:19:00	169	8	2	8	4
1	2008-12-10 08:20:00	30	8	2	8	4
1	2008-12-10 08:21:00	71	8	2	8	4
1	2008-12-10 08:22:00	61	8	2	8	4
1	2008-12-10 08:23:00	91	8	2	8	4
1	2008-12-10 08:24:00	0	8	2	8	4
1	2008-12-10 08:25:00	323	8	2	8	4
1	2008-12-10 08:26:00	254	8	2	8	4
1	2008-12-10 08:27:00	0	8	2	8	4
1	2008-12-10 08:28:00	366	8	2	8	4
1	2008-12-10 08:29:00	953	8	2	8	4
1	2008-12-10 08:30:00	230	8	2	8	4
1	2008-12-10 08:31:00	71	8	2	8	4
1	2008-12-10 08:32:00	30	8	2	8	4
1	2008-12-10 08:33:00	309	8	2	8	4
1	2008-12-10 08:34:00	230	8	2	8	4
1	2008-12-10 08:35:00	323	8	2	8	4
1	2008-12-10 08:36:00	242	8	2	8	4
1	2008-12-10 08:37:00	132	8	2	8	4
1	2008-12-10 08:38:00	51	8	2	8	4
1	2008-12-10 08:39:00	41	8	2	8	4
1	2008-12-10 08:40:00	41	8	2	8	4
1	2008-12-10 08:41:00	10	8	2	8	4
1	2008-12-10 08:42:00	10	8	2	8	4
1	2008-12-10 08:43:00	0	8	2	8	4
1	2008-12-10 08:44:00	10	8	2	8	4
1	2008-12-10 08:45:00	323	8	2	8	4
1	2008-12-10 08:46:00	242	8	2	8	4
1	2008-12-10 08:47:00	51	8	2	8	4
1	2008-12-10 08:48:00	30	8	2	8	4
1	2008-12-10 08:49:00	0	8	2	8	4
1	2008-12-10 08:50:00	10	8	2	8	4
1	2008-12-10 08:51:00	10	8	2	8	4
1	2008-12-10 08:52:00	20	8	2	8	4
1	2008-12-10 08:53:00	30	8	2	8	4
1	2008-12-10 08:54:00	0	8	2	8	4
1	2008-12-10 08:55:00	0	8	2	8	4
1	2008-12-10 08:56:00	20	8	2	8	4
1	2008-12-10 08:57:00	10	8	2	8	4
1	2008-12-10 08:58:00	51	8	2	8	4
1	2008-12-10 08:59:00	169	8	2	8	4
1	2008-12-10 09:00:00	132	8	2	8	4
1	2008-12-10 09:01:00	169	9	2	8	4
1	2008-12-10 09:02:00	61	9	2	8	4
1	2008-12-10 09:03:00	41	9	2	8	4
1	2008-12-10 09:04:00	91	9	2	8	4
1	2008-12-10 09:05:00	41	9	2	8	4
1	2008-12-10 09:06:00	30	9	2	8	4
1	2008-12-10 09:07:00	10	9	2	8	4
1	2008-12-10 09:08:00	10	9	2	8	4
1	2008-12-10 09:09:00	30	9	2	8	4
1	2008-12-10 09:10:00	41	9	2	8	4
1	2008-12-10 09:11:00	10	9	2	8	4
1	2008-12-10 09:12:00	0	9	2	8	4
1	2008-12-10 09:13:00	0	9	2	8	4
1	2008-12-10 09:14:00	20	9	2	8	4
1	2008-12-10 09:15:00	20	9	2	8	4
1	2008-12-10 09:16:00	0	9	2	8	4
1	2008-12-10 09:17:00	0	9	2	8	4
1	2008-12-10 09:18:00	81	9	2	8	4
1	2008-12-10 09:19:00	337	9	2	8	4
1	2008-12-10 09:20:00	492	9	2	8	4
1	2008-12-10 09:21:00	366	9	2	8	4
1	2008-12-10 09:22:00	0	9	2	8	4
1	2008-12-10 09:23:00	0	9	2	8	4
1	2008-12-10 09:24:00	0	9	2	8	4
1	2008-12-10 09:25:00	0	9	2	8	4
1	2008-12-10 09:26:00	0	9	2	8	4
1	2008-12-10 09:27:00	0	9	2	8	4
1	2008-12-10 09:28:00	0	9	2	8	4
1	2008-12-10 09:29:00	0	9	2	8	4
1	2008-12-10 09:30:00	0	9	2	8	4
1	2008-12-10 09:31:00	0	9	2	8	4
1	2008-12-10 09:32:00	0	9	2	8	4
1	2008-12-10 09:33:00	0	9	2	8	4
1	2008-12-10 09:34:00	20	9	2	8	4
1	2008-12-10 09:35:00	0	9	2	8	4
1	2008-12-10 09:36:00	0	9	2	8	4
1	2008-12-10 09:37:00	0	9	2	8	4
1	2008-12-10 09:38:00	0	9	2	8	4
1	2008-12-10 09:39:00	0	9	2	8	4
1	2008-12-10 09:40:00	0	9	2	8	4
1	2008-12-10 09:41:00	0	9	2	8	4
1	2008-12-10 09:42:00	0	9	2	8	4
1	2008-12-10 09:43:00	0	9	2	8	4
1	2008-12-10 09:44:00	0	9	2	8	4
1	2008-12-10 09:45:00	0	9	2	8	4
1	2008-12-10 09:46:00	0	9	2	8	4
1	2008-12-10 09:47:00	0	9	2	8	4
1	2008-12-10 09:48:00	0	9	2	8	4
1	2008-12-10 09:49:00	0	9	2	8	4
1	2008-12-10 09:50:00	0	9	2	8	4
1	2008-12-10 09:51:00	0	9	2	8	4
1	2008-12-10 09:52:00	0	9	2	8	4
1	2008-12-10 09:53:00	0	9	2	8	4
1	2008-12-10 09:54:00	0	9	2	8	4
1	2008-12-10 09:55:00	0	9	2	8	4
1	2008-12-10 09:56:00	0	9	2	8	4
1	2008-12-10 09:57:00	20	9	2	8	4
1	2008-12-10 09:58:00	0	9	2	8	4
1	2008-12-10 09:59:00	0	9	2	8	4
1	2008-12-10 10:00:00	0	9	2	8	4
1	2008-12-10 10:01:00	0	10	2	8	4
1	2008-12-10 10:02:00	0	10	2	8	4
1	2008-12-10 10:03:00	0	10	2	8	4
1	2008-12-10 10:04:00	0	10	2	8	4
1	2008-12-10 10:05:00	0	10	2	8	4
1	2008-12-10 10:06:00	10	10	2	8	4
1	2008-12-10 10:07:00	30	10	2	8	4
1	2008-12-10 10:08:00	30	10	2	8	4
1	2008-12-10 10:09:00	51	10	2	8	4
1	2008-12-10 10:10:00	0	10	2	8	4
1	2008-12-10 10:11:00	20	10	2	8	4
1	2008-12-10 10:12:00	0	10	2	8	4
1	2008-12-10 10:13:00	156	10	2	8	4
1	2008-12-10 10:14:00	0	10	2	8	4
1	2008-12-10 10:15:00	0	10	2	8	4
1	2008-12-10 10:16:00	0	10	2	8	4
1	2008-12-10 10:17:00	0	10	2	8	4
1	2008-12-10 10:18:00	0	10	2	8	4
1	2008-12-10 10:19:00	774	10	2	8	4
1	2008-12-10 10:20:00	230	10	2	8	4
1	2008-12-10 10:21:00	0	10	2	8	4
1	2008-12-10 10:22:00	0	10	2	8	4
1	2008-12-10 10:23:00	0	10	2	8	4
1	2008-12-10 10:24:00	0	10	2	8	4
1	2008-12-10 10:25:00	0	10	2	8	4
1	2008-12-10 10:26:00	0	10	2	8	4
1	2008-12-10 10:27:00	0	10	2	8	4
1	2008-12-10 10:28:00	0	10	2	8	4
1	2008-12-10 10:29:00	0	10	2	8	4
1	2008-12-10 10:30:00	0	10	2	8	4
1	2008-12-10 10:31:00	0	10	2	8	4
1	2008-12-10 10:32:00	0	10	2	8	4
1	2008-12-10 10:33:00	0	10	2	8	4
1	2008-12-10 10:34:00	0	10	2	8	4
1	2008-12-10 10:35:00	0	10	2	8	4
1	2008-12-10 10:36:00	0	10	2	8	4
1	2008-12-10 10:37:00	0	10	2	8	4
1	2008-12-10 10:38:00	0	10	2	8	4
1	2008-12-10 10:39:00	51	10	2	8	4
1	2008-12-10 10:40:00	30	10	2	8	4
1	2008-12-10 10:41:00	410	10	2	8	4
1	2008-12-10 10:42:00	394	10	2	8	4
1	2008-12-10 10:43:00	0	10	2	8	4
1	2008-12-10 10:44:00	91	10	2	8	4
1	2008-12-10 10:45:00	0	10	2	8	4
1	2008-12-10 10:46:00	0	10	2	8	4
1	2008-12-10 10:47:00	0	10	2	8	4
1	2008-12-10 10:48:00	10	10	2	8	4
1	2008-12-10 10:49:00	0	10	2	8	4
1	2008-12-10 10:50:00	0	10	2	8	4
1	2008-12-10 10:51:00	0	10	2	8	4
1	2008-12-10 10:52:00	0	10	2	8	4
1	2008-12-10 10:53:00	0	10	2	8	4
1	2008-12-10 10:54:00	0	10	2	8	4
1	2008-12-10 10:55:00	0	10	2	8	4
1	2008-12-10 10:56:00	0	10	2	8	4
1	2008-12-10 10:57:00	0	10	2	8	4
1	2008-12-10 10:58:00	61	10	2	8	4
1	2008-12-10 10:59:00	0	10	2	8	4
1	2008-12-10 11:00:00	0	10	2	8	4
1	2008-12-10 11:01:00	0	11	2	8	4
1	2008-12-10 11:02:00	0	11	2	8	4
1	2008-12-10 11:03:00	0	11	2	8	4
1	2008-12-10 11:04:00	0	11	2	8	4
1	2008-12-10 11:05:00	0	11	2	8	4
1	2008-12-10 11:06:00	0	11	2	8	4
1	2008-12-10 11:07:00	0	11	2	8	4
1	2008-12-10 11:08:00	0	11	2	8	4
1	2008-12-10 11:09:00	0	11	2	8	4
1	2008-12-10 11:10:00	0	11	2	8	4
1	2008-12-10 11:11:00	0	11	2	8	4
1	2008-12-10 11:12:00	0	11	2	8	4
1	2008-12-10 11:13:00	0	11	2	8	4
1	2008-12-10 11:14:00	0	11	2	8	4
1	2008-12-10 11:15:00	0	11	2	8	4
1	2008-12-10 11:16:00	0	11	2	8	4
1	2008-12-10 11:17:00	0	11	2	8	4
1	2008-12-10 11:18:00	0	11	2	8	4
1	2008-12-10 11:19:00	0	11	2	8	4
1	2008-12-10 11:20:00	0	11	2	8	4
1	2008-12-10 11:21:00	0	11	2	8	4
1	2008-12-10 11:22:00	0	11	2	8	4
1	2008-12-10 11:23:00	0	11	2	8	4
1	2008-12-10 11:24:00	112	11	2	8	4
1	2008-12-10 11:25:00	0	11	2	8	4
1	2008-12-10 11:26:00	0	11	2	8	4
1	2008-12-10 11:27:00	0	11	2	8	4
1	2008-12-10 11:28:00	0	11	2	8	4
1	2008-12-10 11:29:00	0	11	2	8	4
1	2008-12-10 11:30:00	0	11	2	8	4
1	2008-12-10 11:31:00	0	11	2	8	4
1	2008-12-10 11:32:00	0	11	2	8	4
1	2008-12-10 11:33:00	0	11	2	8	4
1	2008-12-10 11:34:00	0	11	2	8	4
1	2008-12-10 11:35:00	10	11	2	8	4
1	2008-12-10 11:36:00	0	11	2	8	4
1	2008-12-10 11:37:00	0	11	2	8	4
1	2008-12-10 11:38:00	0	11	2	8	4
1	2008-12-10 11:39:00	0	11	2	8	4
1	2008-12-10 11:40:00	0	11	2	8	4
1	2008-12-10 11:41:00	0	11	2	8	4
1	2008-12-10 11:42:00	0	11	2	8	4
1	2008-12-10 11:43:00	0	11	2	8	4
1	2008-12-10 11:44:00	10	11	2	8	4
1	2008-12-10 11:45:00	0	11	2	8	4
1	2008-12-10 11:46:00	0	11	2	8	4
1	2008-12-10 11:47:00	0	11	2	8	4
1	2008-12-10 11:48:00	0	11	2	8	4
1	2008-12-10 11:49:00	0	11	2	8	4
1	2008-12-10 11:50:00	0	11	2	8	4
1	2008-12-10 11:51:00	10	11	2	8	4
1	2008-12-10 11:52:00	0	11	2	8	4
1	2008-12-10 11:53:00	0	11	2	8	4
1	2008-12-10 11:54:00	51	11	2	8	4
1	2008-12-10 11:55:00	102	11	2	8	4
1	2008-12-10 11:56:00	10	11	2	8	4
1	2008-12-10 11:57:00	817	11	2	8	4
1	2008-12-10 11:58:00	61	11	2	8	4
1	2008-12-10 11:59:00	0	11	2	8	4
1	2008-12-10 12:00:00	0	11	2	8	4
1	2008-12-10 12:01:00	0	12	3	8	4
1	2008-12-10 12:02:00	0	12	3	8	4
1	2008-12-10 12:03:00	0	12	3	8	4
1	2008-12-10 12:04:00	0	12	3	8	4
1	2008-12-10 12:05:00	0	12	3	8	4
1	2008-12-10 12:06:00	0	12	3	8	4
1	2008-12-10 12:07:00	0	12	3	8	4
1	2008-12-10 12:08:00	0	12	3	8	4
1	2008-12-10 12:09:00	41	12	3	8	4
1	2008-12-10 12:10:00	0	12	3	8	4
1	2008-12-10 12:11:00	0	12	3	8	4
1	2008-12-10 12:12:00	0	12	3	8	4
1	2008-12-10 12:13:00	0	12	3	8	4
1	2008-12-10 12:14:00	0	12	3	8	4
1	2008-12-10 12:15:00	0	12	3	8	4
1	2008-12-10 12:16:00	0	12	3	8	4
1	2008-12-10 12:17:00	0	12	3	8	4
1	2008-12-10 12:18:00	0	12	3	8	4
1	2008-12-10 12:19:00	0	12	3	8	4
1	2008-12-10 12:20:00	0	12	3	8	4
1	2008-12-10 12:21:00	0	12	3	8	4
1	2008-12-10 12:22:00	0	12	3	8	4
1	2008-12-10 12:23:00	0	12	3	8	4
1	2008-12-10 12:24:00	0	12	3	8	4
1	2008-12-10 12:25:00	0	12	3	8	4
1	2008-12-10 12:26:00	20	12	3	8	4
1	2008-12-10 12:27:00	0	12	3	8	4
1	2008-12-10 12:28:00	0	12	3	8	4
1	2008-12-10 12:29:00	0	12	3	8	4
1	2008-12-10 12:30:00	0	12	3	8	4
1	2008-12-10 12:31:00	0	12	3	8	4
1	2008-12-10 12:32:00	0	12	3	8	4
1	2008-12-10 12:33:00	10	12	3	8	4
1	2008-12-10 12:34:00	122	12	3	8	4
1	2008-12-10 12:35:00	20	12	3	8	4
1	2008-12-10 12:36:00	0	12	3	8	4
1	2008-12-10 12:37:00	0	12	3	8	4
1	2008-12-10 12:38:00	0	12	3	8	4
1	2008-12-10 12:39:00	0	12	3	8	4
1	2008-12-10 12:40:00	0	12	3	8	4
1	2008-12-10 12:41:00	0	12	3	8	4
1	2008-12-10 12:42:00	0	12	3	8	4
1	2008-12-10 12:43:00	0	12	3	8	4
1	2008-12-10 12:44:00	0	12	3	8	4
1	2008-12-10 12:45:00	0	12	3	8	4
1	2008-12-10 12:46:00	0	12	3	8	4
1	2008-12-10 12:47:00	0	12	3	8	4
1	2008-12-10 12:48:00	51	12	3	8	4
1	2008-12-10 12:49:00	0	12	3	8	4
1	2008-12-10 12:50:00	41	12	3	8	4
1	2008-12-10 12:51:00	0	12	3	8	4
1	2008-12-10 12:52:00	0	12	3	8	4
1	2008-12-10 12:53:00	0	12	3	8	4
1	2008-12-10 12:54:00	0	12	3	8	4
1	2008-12-10 12:55:00	0	12	3	8	4
1	2008-12-10 12:56:00	144	12	3	8	4
1	2008-12-10 12:57:00	242	12	3	8	4
1	2008-12-10 12:58:00	0	12	3	8	4
1	2008-12-10 12:59:00	0	12	3	8	4
1	2008-12-10 13:00:00	0	12	3	8	4
1	2008-12-10 13:01:00	0	13	3	8	4
1	2008-12-10 13:02:00	0	13	3	8	4
1	2008-12-10 13:03:00	0	13	3	8	4
1	2008-12-10 13:04:00	0	13	3	8	4
1	2008-12-10 13:05:00	0	13	3	8	4
1	2008-12-10 13:06:00	0	13	3	8	4
1	2008-12-10 13:07:00	0	13	3	8	4
1	2008-12-10 13:08:00	0	13	3	8	4
1	2008-12-10 13:09:00	0	13	3	8	4
1	2008-12-10 13:10:00	0	13	3	8	4
1	2008-12-10 13:11:00	0	13	3	8	4
1	2008-12-10 13:12:00	0	13	3	8	4
1	2008-12-10 13:13:00	0	13	3	8	4
1	2008-12-10 13:14:00	0	13	3	8	4
1	2008-12-10 13:15:00	0	13	3	8	4
1	2008-12-10 13:16:00	0	13	3	8	4
1	2008-12-10 13:17:00	0	13	3	8	4
1	2008-12-10 13:18:00	0	13	3	8	4
1	2008-12-10 13:19:00	0	13	3	8	4
1	2008-12-10 13:20:00	0	13	3	8	4
1	2008-12-10 13:21:00	0	13	3	8	4
1	2008-12-10 13:22:00	0	13	3	8	4
1	2008-12-10 13:23:00	0	13	3	8	4
1	2008-12-10 13:24:00	0	13	3	8	4
1	2008-12-10 13:25:00	0	13	3	8	4
1	2008-12-10 13:26:00	0	13	3	8	4
1	2008-12-10 13:27:00	0	13	3	8	4
1	2008-12-10 13:28:00	0	13	3	8	4
1	2008-12-10 13:29:00	0	13	3	8	4
1	2008-12-10 13:30:00	0	13	3	8	4
1	2008-12-10 13:31:00	0	13	3	8	4
1	2008-12-10 13:32:00	0	13	3	8	4
1	2008-12-10 13:33:00	0	13	3	8	4
1	2008-12-10 13:34:00	10	13	3	8	4
1	2008-12-10 13:35:00	0	13	3	8	4
1	2008-12-10 13:36:00	0	13	3	8	4
1	2008-12-10 13:37:00	122	13	3	8	4
1	2008-12-10 13:38:00	30	13	3	8	4
1	2008-12-10 13:39:00	0	13	3	8	4
1	2008-12-10 13:40:00	0	13	3	8	4
1	2008-12-10 13:41:00	0	13	3	8	4
1	2008-12-10 13:42:00	0	13	3	8	4
1	2008-12-10 13:43:00	0	13	3	8	4
1	2008-12-10 13:44:00	0	13	3	8	4
1	2008-12-10 13:45:00	0	13	3	8	4
1	2008-12-10 13:46:00	0	13	3	8	4
1	2008-12-10 13:47:00	0	13	3	8	4
1	2008-12-10 13:48:00	0	13	3	8	4
1	2008-12-10 13:49:00	0	13	3	8	4
1	2008-12-10 13:50:00	0	13	3	8	4
1	2008-12-10 13:51:00	0	13	3	8	4
1	2008-12-10 13:52:00	0	13	3	8	4
1	2008-12-10 13:53:00	0	13	3	8	4
1	2008-12-10 13:54:00	0	13	3	8	4
1	2008-12-10 13:55:00	0	13	3	8	4
1	2008-12-10 13:56:00	0	13	3	8	4
1	2008-12-10 13:57:00	0	13	3	8	4
1	2008-12-10 13:58:00	0	13	3	8	4
1	2008-12-10 13:59:00	0	13	3	8	4
1	2008-12-10 14:00:00	0	13	3	8	4
1	2008-12-10 14:01:00	10	14	3	8	4
1	2008-12-10 14:02:00	0	14	3	8	4
1	2008-12-10 14:03:00	0	14	3	8	4
1	2008-12-10 14:04:00	0	14	3	8	4
1	2008-12-10 14:05:00	0	14	3	8	4
1	2008-12-10 14:06:00	0	14	3	8	4
1	2008-12-10 14:07:00	0	14	3	8	4
1	2008-12-10 14:08:00	0	14	3	8	4
1	2008-12-10 14:09:00	0	14	3	8	4
1	2008-12-10 14:10:00	733	14	3	8	4
1	2008-12-10 14:11:00	459	14	3	8	4
1	2008-12-10 14:12:00	524	14	3	8	4
1	2008-12-10 14:13:00	508	14	3	8	4
1	2008-12-10 14:14:00	616	14	3	8	4
1	2008-12-10 14:15:00	295	14	3	8	4
1	2008-12-10 14:16:00	0	14	3	8	4
1	2008-12-10 14:17:00	0	14	3	8	4
1	2008-12-10 14:18:00	132	14	3	8	4
1	2008-12-10 14:19:00	30	14	3	8	4
1	2008-12-10 14:20:00	91	14	3	8	4
1	2008-12-10 14:21:00	0	14	3	8	4
1	2008-12-10 14:22:00	0	14	3	8	4
1	2008-12-10 14:23:00	0	14	3	8	4
1	2008-12-10 14:24:00	0	14	3	8	4
1	2008-12-10 14:25:00	0	14	3	8	4
1	2008-12-10 14:26:00	0	14	3	8	4
1	2008-12-10 14:27:00	0	14	3	8	4
1	2008-12-10 14:28:00	0	14	3	8	4
1	2008-12-10 14:29:00	0	14	3	8	4
1	2008-12-10 14:30:00	0	14	3	8	4
1	2008-12-10 14:31:00	0	14	3	8	4
1	2008-12-10 14:32:00	0	14	3	8	4
1	2008-12-10 14:33:00	0	14	3	8	4
1	2008-12-10 14:34:00	0	14	3	8	4
1	2008-12-10 14:35:00	0	14	3	8	4
1	2008-12-10 14:36:00	0	14	3	8	4
1	2008-12-10 14:37:00	20	14	3	8	4
1	2008-12-10 14:38:00	0	14	3	8	4
1	2008-12-10 14:39:00	91	14	3	8	4
1	2008-12-10 14:40:00	0	14	3	8	4
1	2008-12-10 14:41:00	597	14	3	8	4
1	2008-12-10 14:42:00	122	14	3	8	4
1	2008-12-10 14:43:00	0	14	3	8	4
1	2008-12-10 14:44:00	0	14	3	8	4
1	2008-12-10 14:45:00	0	14	3	8	4
1	2008-12-10 14:46:00	0	14	3	8	4
1	2008-12-10 14:47:00	0	14	3	8	4
1	2008-12-10 14:48:00	0	14	3	8	4
1	2008-12-10 14:49:00	0	14	3	8	4
1	2008-12-10 14:50:00	0	14	3	8	4
1	2008-12-10 14:51:00	0	14	3	8	4
1	2008-12-10 14:52:00	0	14	3	8	4
1	2008-12-10 14:53:00	0	14	3	8	4
1	2008-12-10 14:54:00	0	14	3	8	4
1	2008-12-10 14:55:00	0	14	3	8	4
1	2008-12-10 14:56:00	0	14	3	8	4
1	2008-12-10 14:57:00	0	14	3	8	4
1	2008-12-10 14:58:00	0	14	3	8	4
1	2008-12-10 14:59:00	0	14	3	8	4
1	2008-12-10 15:00:00	0	14	3	8	4
1	2008-12-10 15:01:00	0	15	3	8	4
1	2008-12-10 15:02:00	0	15	3	8	4
1	2008-12-10 15:03:00	0	15	3	8	4
1	2008-12-10 15:04:00	0	15	3	8	4
1	2008-12-10 15:05:00	10	15	3	8	4
1	2008-12-10 15:06:00	10	15	3	8	4
1	2008-12-10 15:07:00	0	15	3	8	4
1	2008-12-10 15:08:00	10	15	3	8	4
1	2008-12-10 15:09:00	20	15	3	8	4
1	2008-12-10 15:10:00	20	15	3	8	4
1	2008-12-10 15:11:00	10	15	3	8	4
1	2008-12-10 15:12:00	10	15	3	8	4
1	2008-12-10 15:13:00	0	15	3	8	4
1	2008-12-10 15:14:00	0	15	3	8	4
1	2008-12-10 15:15:00	30	15	3	8	4
1	2008-12-10 15:16:00	144	15	3	8	4
1	2008-12-10 15:17:00	41	15	3	8	4
1	2008-12-10 15:18:00	254	15	3	8	4
1	2008-12-10 15:19:00	205	15	3	8	4
[truncated: 78,641 more rows]

## Sheet: Pivot Segment
Multiplier	2
x (Low Intensity)	415.053
y (High Intensity)	566.11
	Column Labels
Values	1	2	3	4	5	6	7	8	Grand Total
Average of Activity	58.7546	77.0548	69.2405	81.8998	67.9596	63.8538	59.4451	43.3785	65.276
StdDev of Activity	178.149	244.528	231.913	254.271	223.464	211.088	193.063	158.875	214.858
Count of Activity	9120	10080	10080	10080	10080	10080	10080	10080	79680
Count Above x	399	601	563	680	516	525	483	334
% Above x	0.04375	0.059623	0.0558532	0.0674603	0.0511905	0.0520833	0.0479167	0.0331349
Count Above y		449	402	496	372	348	306	229
% Above y		0.0445437	0.039881	0.0492063	0.0369048	0.0345238	0.0303571	0.0227183

## Sheet: Pivot Weekday
Sum of Activity	Column Labels
Row Labels	1	2	3	4	5	6	7	8	Grand Total
1	69434	87667	121429	141548	91644	110592	91170	71861	785345
2	83846	125190	105669	112679	101774	82191	63303	68226	742878
3	92311	137011	101051	104640	90019	92191	74934	72113	764270
4	81709	122635	90323	103073	105816	102916	82419	11094	699985
5	66557	106263	98850	121630	87906	84678	87305	81153	734342
6	69038	89691	94088	127115	111378	83694	114604	70037	759645
7	72947	108255	86534	114865	96496	87384	85472	62771	714724
Grand Total	535842	776712	697944	825550	685033	643646	599207	437255	5201189
Count of Activity	Column Labels
Row Labels	1	2	3	4	5	6	7	8	Grand Total
1	1080	1440	1440	1440	1440	1440	1440	1440	11160
2	1440	1440	1440	1440	1440	1440	1440	1440	11520
3	1440	1440	1440	1440	1440	1440	1440	1440	11520
4	1440	1440	1440	1440	1440	1440	1440	1440	11520
5	1440	1440	1440	1440	1440	1440	1440	1440	11520
6	1200	1440	1440	1440	1440	1440	1440	1440	11280
7	1080	1440	1440	1440	1440	1440	1440	1440	11160
Grand Total	9120	10080	10080	10080	10080	10080	10080	10080	79680

## Sheet: Pivot Quadrant
Sum of Activity	Column Labels
Row Labels	1	2	3	4	5	6	7	8	Grand Total
1	26170	43725	56456	57579	31784	28520	38616	31113	313963
2	200465	277734	258123	279635	247585	262828	239998	135975	1902343
3	248269	335616	251091	314254	327386	214731	197858	172390	2061595
4	60938	119637	132274	174082	78278	137567	122735	97777	923288
Grand Total	535842	776712	697944	825550	685033	643646	599207	437255	5201189
Average	133960	194178	174486	206388	171258	160912	149802	109314
Count of Activity	Column Labels
Row Labels	1	2	3	4	5	6	7	8	Grand Total
1	2160	2520	2520	2520	2520	2520	2520	2520	19800
2	2520	2520	2520	2520	2520	2520	2520	2520	20160
3	2520	2520	2520	2520	2520	2520	2520	2520	20160
4	1920	2520	2520	2520	2520	2520	2520	2520	19560
Grand Total	9120	10080	10080	10080	10080	10080	10080	10080	79680

## Sheet: 12.2.08
Actogram, Copy Raw Data, All Days
Identity:	Butler Schmidt
Filename:	E:\Active Research Files\meloxicam titre canine\cases\butler\Butler Schmidt 12.2.08.AWC
Gender:	M
Age:	12
Height:	50.8 cm	20.0 in
Weight:	24.6 kg	54.2 lbs
Start Date:	02-Dec-2008 (Tue)
Start Time:	17:00:00
Interval:	1.00 mins
Date Stamp:	Time Stamp:	Activity Data:	Marker Press:
2008-12-02	00:00:00	0
2008-12-02	00:01:00	0
2008-12-02	00:02:00	0
2008-12-02	00:03:00	0
2008-12-02	00:04:00	0
2008-12-02	00:05:00	0
2008-12-02	00:06:00	0
2008-12-02	00:07:00	0
2008-12-02	00:08:00	0
2008-12-02	00:09:00	0
2008-12-02	00:10:00	0
2008-12-02	00:11:00	0
2008-12-02	00:12:00	0
2008-12-02	00:13:00	0
2008-12-02	00:14:00	0
2008-12-02	00:15:00	0
2008-12-02	00:16:00	0
2008-12-02	00:17:00	0
2008-12-02	00:18:00	0
2008-12-02	00:19:00	0
2008-12-02	00:20:00	0
2008-12-02	00:21:00	0
2008-12-02	00:22:00	0
2008-12-02	00:23:00	0
2008-12-02	00:24:00	0
2008-12-02	00:25:00	0
2008-12-02	00:26:00	0
2008-12-02	00:27:00	0
2008-12-02	00:28:00	0
2008-12-02	00:29:00	0
2008-12-02	00:30:00	0
2008-12-02	00:31:00	0
2008-12-02	00:32:00	0
2008-12-02	00:33:00	0
2008-12-02	00:34:00	0
2008-12-02	00:35:00	0
2008-12-02	00:36:00	0
2008-12-02	00:37:00	0
2008-12-02	00:38:00	0
2008-12-02	00:39:00	0
2008-12-02	00:40:00	0
2008-12-02	00:41:00	0
2008-12-02	00:42:00	0
2008-12-02	00:43:00	0
2008-12-02	00:44:00	0
2008-12-02	00:45:00	0
2008-12-02	00:46:00	0
2008-12-02	00:47:00	0
2008-12-02	00:48:00	0
2008-12-02	00:49:00	0
2008-12-02	00:50:00	0
2008-12-02	00:51:00	0
2008-12-02	00:52:00	0
2008-12-02	00:53:00	0
2008-12-02	00:54:00	0
2008-12-02	00:55:00	0
2008-12-02	00:56:00	0
2008-12-02	00:57:00	0
2008-12-02	00:58:00	0
2008-12-02	00:59:00	0
2008-12-02	01:00:00	0
2008-12-02	01:01:00	0
2008-12-02	01:02:00	0
2008-12-02	01:03:00	0
2008-12-02	01:04:00	0
2008-12-02	01:05:00	0
2008-12-02	01:06:00	0
2008-12-02	01:07:00	0
2008-12-02	01:08:00	0
2008-12-02	01:09:00	0
2008-12-02	01:10:00	0
2008-12-02	01:11:00	0
2008-12-02	01:12:00	0
2008-12-02	01:13:00	0
2008-12-02	01:14:00	0
2008-12-02	01:15:00	0
2008-12-02	01:16:00	0
2008-12-02	01:17:00	0
2008-12-02	01:18:00	0
2008-12-02	01:19:00	0
2008-12-02	01:20:00	0
2008-12-02	01:21:00	0
2008-12-02	01:22:00	0
2008-12-02	01:23:00	0
2008-12-02	01:24:00	0
2008-12-02	01:25:00	0
2008-12-02	01:26:00	0
2008-12-02	01:27:00	0
2008-12-02	01:28:00	0
2008-12-02	01:29:00	0
2008-12-02	01:30:00	0
2008-12-02	01:31:00	0
2008-12-02	01:32:00	0
2008-12-02	01:33:00	0
2008-12-02	01:34:00	0
2008-12-02	01:35:00	0
2008-12-02	01:36:00	0
2008-12-02	01:37:00	0
2008-12-02	01:38:00	0
2008-12-02	01:39:00	0
2008-12-02	01:40:00	0
2008-12-02	01:41:00	0
2008-12-02	01:42:00	0
2008-12-02	01:43:00	0
2008-12-02	01:44:00	0
2008-12-02	01:45:00	0
2008-12-02	01:46:00	0
2008-12-02	01:47:00	0
2008-12-02	01:48:00	0
2008-12-02	01:49:00	0
2008-12-02	01:50:00	0
2008-12-02	01:51:00	0
2008-12-02	01:52:00	0
2008-12-02	01:53:00	0
2008-12-02	01:54:00	0
2008-12-02	01:55:00	0
2008-12-02	01:56:00	0
2008-12-02	01:57:00	0
2008-12-02	01:58:00	0
2008-12-02	01:59:00	0
2008-12-02	02:00:00	0
2008-12-02	02:01:00	0
2008-12-02	02:02:00	0
2008-12-02	02:03:00	0
2008-12-02	02:04:00	0
2008-12-02	02:05:00	0
2008-12-02	02:06:00	0
2008-12-02	02:07:00	0
2008-12-02	02:08:00	0
2008-12-02	02:09:00	0
2008-12-02	02:10:00	0
2008-12-02	02:11:00	0
2008-12-02	02:12:00	0
2008-12-02	02:13:00	0
2008-12-02	02:14:00	0
2008-12-02	02:15:00	0
2008-12-02	02:16:00	0
2008-12-02	02:17:00	0
2008-12-02	02:18:00	0
2008-12-02	02:19:00	0
2008-12-02	02:20:00	0
2008-12-02	02:21:00	0
2008-12-02	02:22:00	0
2008-12-02	02:23:00	0
2008-12-02	02:24:00	0
2008-12-02	02:25:00	0
2008-12-02	02:26:00	0
2008-12-02	02:27:00	0
2008-12-02	02:28:00	0
2008-12-02	02:29:00	0
2008-12-02	02:30:00	0
2008-12-02	02:31:00	0
2008-12-02	02:32:00	0
2008-12-02	02:33:00	0
2008-12-02	02:34:00	0
2008-12-02	02:35:00	0
2008-12-02	02:36:00	0
2008-12-02	02:37:00	0
2008-12-02	02:38:00	0
2008-12-02	02:39:00	0
2008-12-02	02:40:00	0
2008-12-02	02:41:00	0
2008-12-02	02:42:00	0
2008-12-02	02:43:00	0
2008-12-02	02:44:00	0
2008-12-02	02:45:00	0
2008-12-02	02:46:00	0
2008-12-02	02:47:00	0
2008-12-02	02:48:00	0
2008-12-02	02:49:00	0
2008-12-02	02:50:00	0
2008-12-02	02:51:00	0
2008-12-02	02:52:00	0
2008-12-02	02:53:00	0
2008-12-02	02:54:00	0
2008-12-02	02:55:00	0
2008-12-02	02:56:00	0
2008-12-02	02:57:00	0
2008-12-02	02:58:00	0
2008-12-02	02:59:00	0
2008-12-02	03:00:00	0
2008-12-02	03:01:00	0
2008-12-02	03:02:00	0
2008-12-02	03:03:00	0
2008-12-02	03:04:00	0
2008-12-02	03:05:00	0
2008-12-02	03:06:00	0
2008-12-02	03:07:00	0
2008-12-02	03:08:00	0
2008-12-02	03:09:00	0
2008-12-02	03:10:00	0
2008-12-02	03:11:00	0
2008-12-02	03:12:00	0
2008-12-02	03:13:00	0
2008-12-02	03:14:00	0
2008-12-02	03:15:00	0
2008-12-02	03:16:00	0
2008-12-02	03:17:00	0
2008-12-02	03:18:00	0
2008-12-02	03:19:00	0
2008-12-02	03:20:00	0
2008-12-02	03:21:00	0
2008-12-02	03:22:00	0
2008-12-02	03:23:00	0
2008-12-02	03:24:00	0
2008-12-02	03:25:00	0
2008-12-02	03:26:00	0
2008-12-02	03:27:00	0
2008-12-02	03:28:00	0
2008-12-02	03:29:00	0
2008-12-02	03:30:00	0
2008-12-02	03:31:00	0
2008-12-02	03:32:00	0
2008-12-02	03:33:00	0
2008-12-02	03:34:00	0
2008-12-02	03:35:00	0
2008-12-02	03:36:00	0
2008-12-02	03:37:00	0
2008-12-02	03:38:00	0
2008-12-02	03:39:00	0
2008-12-02	03:40:00	0
2008-12-02	03:41:00	0
2008-12-02	03:42:00	0
2008-12-02	03:43:00	0
2008-12-02	03:44:00	0
2008-12-02	03:45:00	0
2008-12-02	03:46:00	0
2008-12-02	03:47:00	0
2008-12-02	03:48:00	0
2008-12-02	03:49:00	0
2008-12-02	03:50:00	0
2008-12-02	03:51:00	0
2008-12-02	03:52:00	0
2008-12-02	03:53:00	0
2008-12-02	03:54:00	0
2008-12-02	03:55:00	0
2008-12-02	03:56:00	0
2008-12-02	03:57:00	0
2008-12-02	03:58:00	0
2008-12-02	03:59:00	0
2008-12-02	04:00:00	0
2008-12-02	04:01:00	0
2008-12-02	04:02:00	0
2008-12-02	04:03:00	0
2008-12-02	04:04:00	0
2008-12-02	04:05:00	0
2008-12-02	04:06:00	0
2008-12-02	04:07:00	0
2008-12-02	04:08:00	0
2008-12-02	04:09:00	0
2008-12-02	04:10:00	0
2008-12-02	04:11:00	0
2008-12-02	04:12:00	0
2008-12-02	04:13:00	0
2008-12-02	04:14:00	0
2008-12-02	04:15:00	0
2008-12-02	04:16:00	0
2008-12-02	04:17:00	0
2008-12-02	04:18:00	0
2008-12-02	04:19:00	0
2008-12-02	04:20:00	0
2008-12-02	04:21:00	0
2008-12-02	04:22:00	0
2008-12-02	04:23:00	0
2008-12-02	04:24:00	0
2008-12-02	04:25:00	0
2008-12-02	04:26:00	0
2008-12-02	04:27:00	0
2008-12-02	04:28:00	0
2008-12-02	04:29:00	0
2008-12-02	04:30:00	0
2008-12-02	04:31:00	0
2008-12-02	04:32:00	0
2008-12-02	04:33:00	0
2008-12-02	04:34:00	0
2008-12-02	04:35:00	0
2008-12-02	04:36:00	0
2008-12-02	04:37:00	0
2008-12-02	04:38:00	0
2008-12-02	04:39:00	0
2008-12-02	04:40:00	0
2008-12-02	04:41:00	0
2008-12-02	04:42:00	0
2008-12-02	04:43:00	0
2008-12-02	04:44:00	0
2008-12-02	04:45:00	0
2008-12-02	04:46:00	0
2008-12-02	04:47:00	0
2008-12-02	04:48:00	0
2008-12-02	04:49:00	0
2008-12-02	04:50:00	0
2008-12-02	04:51:00	0
2008-12-02	04:52:00	0
2008-12-02	04:53:00	0
2008-12-02	04:54:00	0
2008-12-02	04:55:00	0
2008-12-02	04:56:00	0
2008-12-02	04:57:00	0
2008-12-02	04:58:00	0
2008-12-02	04:59:00	0
2008-12-02	05:00:00	0
2008-12-02	05:01:00	0
2008-12-02	05:02:00	0
2008-12-02	05:03:00	0
2008-12-02	05:04:00	0
2008-12-02	05:05:00	0
2008-12-02	05:06:00	0
2008-12-02	05:07:00	0
2008-12-02	05:08:00	0
2008-12-02	05:09:00	0
2008-12-02	05:10:00	0
2008-12-02	05:11:00	0
2008-12-02	05:12:00	0
2008-12-02	05:13:00	0
2008-12-02	05:14:00	0
2008-12-02	05:15:00	0
2008-12-02	05:16:00	0
2008-12-02	05:17:00	0
2008-12-02	05:18:00	0
2008-12-02	05:19:00	0
2008-12-02	05:20:00	0
2008-12-02	05:21:00	0
2008-12-02	05:22:00	0
2008-12-02	05:23:00	0
2008-12-02	05:24:00	0
2008-12-02	05:25:00	0
2008-12-02	05:26:00	0
2008-12-02	05:27:00	0
2008-12-02	05:28:00	0
2008-12-02	05:29:00	0
2008-12-02	05:30:00	0
2008-12-02	05:31:00	0
2008-12-02	05:32:00	0
2008-12-02	05:33:00	0
2008-12-02	05:34:00	0
2008-12-02	05:35:00	0
2008-12-02	05:36:00	0
2008-12-02	05:37:00	0
2008-12-02	05:38:00	0
2008-12-02	05:39:00	0
2008-12-02	05:40:00	0
2008-12-02	05:41:00	0
2008-12-02	05:42:00	0
2008-12-02	05:43:00	0
2008-12-02	05:44:00	0
2008-12-02	05:45:00	0
2008-12-02	05:46:00	0
2008-12-02	05:47:00	0
2008-12-02	05:48:00	0
2008-12-02	05:49:00	0
2008-12-02	05:50:00	0
2008-12-02	05:51:00	0
2008-12-02	05:52:00	0
2008-12-02	05:53:00	0
2008-12-02	05:54:00	0
2008-12-02	05:55:00	0
2008-12-02	05:56:00	0
2008-12-02	05:57:00	0
2008-12-02	05:58:00	0
2008-12-02	05:59:00	0
2008-12-02	06:00:00	0
2008-12-02	06:01:00	0
2008-12-02	06:02:00	0
2008-12-02	06:03:00	0
2008-12-02	06:04:00	0
2008-12-02	06:05:00	0
2008-12-02	06:06:00	0
2008-12-02	06:07:00	0
2008-12-02	06:08:00	0
2008-12-02	06:09:00	0
2008-12-02	06:10:00	0
2008-12-02	06:11:00	0
2008-12-02	06:12:00	0
2008-12-02	06:13:00	0
2008-12-02	06:14:00	0
2008-12-02	06:15:00	0
2008-12-02	06:16:00	0
2008-12-02	06:17:00	0
2008-12-02	06:18:00	0
2008-12-02	06:19:00	0
2008-12-02	06:20:00	0
2008-12-02	06:21:00	0
2008-12-02	06:22:00	0
2008-12-02	06:23:00	0
2008-12-02	06:24:00	0
2008-12-02	06:25:00	0
2008-12-02	06:26:00	0
2008-12-02	06:27:00	0
2008-12-02	06:28:00	0
2008-12-02	06:29:00	0
2008-12-02	06:30:00	0
2008-12-02	06:31:00	0
2008-12-02	06:32:00	0
2008-12-02	06:33:00	0
2008-12-02	06:34:00	0
2008-12-02	06:35:00	0
2008-12-02	06:36:00	0
2008-12-02	06:37:00	0
2008-12-02	06:38:00	0
2008-12-02	06:39:00	0
2008-12-02	06:40:00	0
2008-12-02	06:41:00	0
2008-12-02	06:42:00	0
2008-12-02	06:43:00	0
2008-12-02	06:44:00	0
2008-12-02	06:45:00	0
2008-12-02	06:46:00	0
2008-12-02	06:47:00	0
2008-12-02	06:48:00	0
2008-12-02	06:49:00	0
2008-12-02	06:50:00	0
2008-12-02	06:51:00	0
2008-12-02	06:52:00	0
2008-12-02	06:53:00	0
2008-12-02	06:54:00	0
2008-12-02	06:55:00	0
2008-12-02	06:56:00	0
2008-12-02	06:57:00	0
2008-12-02	06:58:00	0
2008-12-02	06:59:00	0
2008-12-02	07:00:00	0
2008-12-02	07:01:00	0
2008-12-02	07:02:00	0
2008-12-02	07:03:00	0
2008-12-02	07:04:00	0
2008-12-02	07:05:00	0
2008-12-02	07:06:00	0
2008-12-02	07:07:00	0
2008-12-02	07:08:00	0
2008-12-02	07:09:00	0
2008-12-02	07:10:00	0
2008-12-02	07:11:00	0
2008-12-02	07:12:00	0
2008-12-02	07:13:00	0
2008-12-02	07:14:00	0
2008-12-02	07:15:00	0
2008-12-02	07:16:00	0
2008-12-02	07:17:00	0
2008-12-02	07:18:00	0
2008-12-02	07:19:00	0
2008-12-02	07:20:00	0
2008-12-02	07:21:00	0
2008-12-02	07:22:00	0
2008-12-02	07:23:00	0
2008-12-02	07:24:00	0
2008-12-02	07:25:00	0
2008-12-02	07:26:00	0
2008-12-02	07:27:00	0
2008-12-02	07:28:00	0
2008-12-02	07:29:00	0
2008-12-02	07:30:00	0
2008-12-02	07:31:00	0
2008-12-02	07:32:00	0
2008-12-02	07:33:00	0
2008-12-02	07:34:00	0
2008-12-02	07:35:00	0
2008-12-02	07:36:00	0
2008-12-02	07:37:00	0
2008-12-02	07:38:00	0
2008-12-02	07:39:00	0
2008-12-02	07:40:00	0
2008-12-02	07:41:00	0
2008-12-02	07:42:00	0
2008-12-02	07:43:00	0
2008-12-02	07:44:00	0
2008-12-02	07:45:00	0
2008-12-02	07:46:00	0
2008-12-02	07:47:00	0
2008-12-02	07:48:00	0
2008-12-02	07:49:00	0
2008-12-02	07:50:00	0
2008-12-02	07:51:00	0
2008-12-02	07:52:00	0
2008-12-02	07:53:00	0
2008-12-02	07:54:00	0
2008-12-02	07:55:00	0
2008-12-02	07:56:00	0
2008-12-02	07:57:00	0
2008-12-02	07:58:00	0
2008-12-02	07:59:00	0
2008-12-02	08:00:00	0
2008-12-02	08:01:00	0
2008-12-02	08:02:00	0
2008-12-02	08:03:00	0
2008-12-02	08:04:00	0
2008-12-02	08:05:00	0
2008-12-02	08:06:00	0
2008-12-02	08:07:00	0
2008-12-02	08:08:00	0
2008-12-02	08:09:00	0
2008-12-02	08:10:00	0
2008-12-02	08:11:00	0
2008-12-02	08:12:00	0
2008-12-02	08:13:00	0
2008-12-02	08:14:00	0
2008-12-02	08:15:00	0
2008-12-02	08:16:00	0
2008-12-02	08:17:00	0
2008-12-02	08:18:00	0
2008-12-02	08:19:00	0
2008-12-02	08:20:00	0
2008-12-02	08:21:00	0
2008-12-02	08:22:00	0
2008-12-02	08:23:00	0
2008-12-02	08:24:00	0
2008-12-02	08:25:00	0
2008-12-02	08:26:00	0
2008-12-02	08:27:00	0
2008-12-02	08:28:00	0
2008-12-02	08:29:00	0
2008-12-02	08:30:00	0
2008-12-02	08:31:00	0
2008-12-02	08:32:00	0
2008-12-02	08:33:00	0
2008-12-02	08:34:00	0
2008-12-02	08:35:00	0
2008-12-02	08:36:00	0
2008-12-02	08:37:00	0
2008-12-02	08:38:00	0
2008-12-02	08:39:00	0
2008-12-02	08:40:00	0
2008-12-02	08:41:00	0
2008-12-02	08:42:00	0
2008-12-02	08:43:00	0
2008-12-02	08:44:00	0
2008-12-02	08:45:00	0
2008-12-02	08:46:00	0
2008-12-02	08:47:00	0
2008-12-02	08:48:00	0
2008-12-02	08:49:00	0
2008-12-02	08:50:00	0
2008-12-02	08:51:00	0
2008-12-02	08:52:00	0
2008-12-02	08:53:00	0
2008-12-02	08:54:00	0
2008-12-02	08:55:00	0
2008-12-02	08:56:00	0
2008-12-02	08:57:00	0
2008-12-02	08:58:00	0
2008-12-02	08:59:00	0
2008-12-02	09:00:00	0
2008-12-02	09:01:00	0
2008-12-02	09:02:00	0
2008-12-02	09:03:00	0
2008-12-02	09:04:00	0
2008-12-02	09:05:00	0
2008-12-02	09:06:00	0
2008-12-02	09:07:00	0
2008-12-02	09:08:00	0
2008-12-02	09:09:00	0
2008-12-02	09:10:00	0
2008-12-02	09:11:00	0
2008-12-02	09:12:00	0
2008-12-02	09:13:00	0
2008-12-02	09:14:00	0
2008-12-02	09:15:00	0
2008-12-02	09:16:00	0
2008-12-02	09:17:00	0
2008-12-02	09:18:00	0
2008-12-02	09:19:00	0
2008-12-02	09:20:00	0
2008-12-02	09:21:00	0
2008-12-02	09:22:00	0
2008-12-02	09:23:00	0
2008-12-02	09:24:00	0
2008-12-02	09:25:00	0
2008-12-02	09:26:00	0
2008-12-02	09:27:00	0
2008-12-02	09:28:00	0
2008-12-02	09:29:00	0
2008-12-02	09:30:00	0
2008-12-02	09:31:00	0
2008-12-02	09:32:00	0
2008-12-02	09:33:00	0
2008-12-02	09:34:00	0
2008-12-02	09:35:00	0
2008-12-02	09:36:00	0
2008-12-02	09:37:00	0
2008-12-02	09:38:00	0
2008-12-02	09:39:00	0
2008-12-02	09:40:00	0
2008-12-02	09:41:00	0
2008-12-02	09:42:00	0
2008-12-02	09:43:00	0
2008-12-02	09:44:00	0
2008-12-02	09:45:00	0
2008-12-02	09:46:00	0
2008-12-02	09:47:00	0
2008-12-02	09:48:00	0
2008-12-02	09:49:00	0
2008-12-02	09:50:00	0
2008-12-02	09:51:00	0
2008-12-02	09:52:00	0
2008-12-02	09:53:00	0
2008-12-02	09:54:00	0
2008-12-02	09:55:00	0
2008-12-02	09:56:00	0
2008-12-02	09:57:00	0
2008-12-02	09:58:00	0
2008-12-02	09:59:00	0
2008-12-02	10:00:00	0
2008-12-02	10:01:00	0
2008-12-02	10:02:00	0
2008-12-02	10:03:00	0
2008-12-02	10:04:00	0
2008-12-02	10:05:00	0
2008-12-02	10:06:00	0
2008-12-02	10:07:00	0
2008-12-02	10:08:00	0
2008-12-02	10:09:00	0
2008-12-02	10:10:00	0
2008-12-02	10:11:00	0
2008-12-02	10:12:00	0
2008-12-02	10:13:00	0
2008-12-02	10:14:00	0
2008-12-02	10:15:00	0
2008-12-02	10:16:00	0
2008-12-02	10:17:00	0
2008-12-02	10:18:00	0
2008-12-02	10:19:00	0
2008-12-02	10:20:00	0
2008-12-02	10:21:00	0
2008-12-02	10:22:00	0
2008-12-02	10:23:00	0
2008-12-02	10:24:00	0
2008-12-02	10:25:00	0
2008-12-02	10:26:00	0
2008-12-02	10:27:00	0
2008-12-02	10:28:00	0
2008-12-02	10:29:00	0
2008-12-02	10:30:00	0
2008-12-02	10:31:00	0
2008-12-02	10:32:00	0
2008-12-02	10:33:00	0
2008-12-02	10:34:00	0
2008-12-02	10:35:00	0
2008-12-02	10:36:00	0
2008-12-02	10:37:00	0
2008-12-02	10:38:00	0
2008-12-02	10:39:00	0
2008-12-02	10:40:00	0
2008-12-02	10:41:00	0
2008-12-02	10:42:00	0
2008-12-02	10:43:00	0
2008-12-02	10:44:00	0
2008-12-02	10:45:00	0
2008-12-02	10:46:00	0
2008-12-02	10:47:00	0
2008-12-02	10:48:00	0
2008-12-02	10:49:00	0
2008-12-02	10:50:00	0
2008-12-02	10:51:00	0
2008-12-02	10:52:00	0
2008-12-02	10:53:00	0
2008-12-02	10:54:00	0
2008-12-02	10:55:00	0
2008-12-02	10:56:00	0
2008-12-02	10:57:00	0
2008-12-02	10:58:00	0
2008-12-02	10:59:00	0
2008-12-02	11:00:00	0
2008-12-02	11:01:00	0
2008-12-02	11:02:00	0
2008-12-02	11:03:00	0
2008-12-02	11:04:00	0
2008-12-02	11:05:00	0
2008-12-02	11:06:00	0
2008-12-02	11:07:00	0
2008-12-02	11:08:00	0
2008-12-02	11:09:00	0
2008-12-02	11:10:00	0
2008-12-02	11:11:00	0
2008-12-02	11:12:00	0
2008-12-02	11:13:00	0
2008-12-02	11:14:00	0
2008-12-02	11:15:00	0
2008-12-02	11:16:00	0
2008-12-02	11:17:00	0
2008-12-02	11:18:00	0
2008-12-02	11:19:00	0
2008-12-02	11:20:00	0
2008-12-02	11:21:00	0
2008-12-02	11:22:00	0
2008-12-02	11:23:00	0
2008-12-02	11:24:00	0
2008-12-02	11:25:00	0
2008-12-02	11:26:00	0
2008-12-02	11:27:00	0
2008-12-02	11:28:00	0
2008-12-02	11:29:00	0
2008-12-02	11:30:00	0
2008-12-02	11:31:00	0
2008-12-02	11:32:00	0
2008-12-02	11:33:00	0
2008-12-02	11:34:00	0
2008-12-02	11:35:00	0
2008-12-02	11:36:00	0
2008-12-02	11:37:00	0
2008-12-02	11:38:00	0
2008-12-02	11:39:00	0
2008-12-02	11:40:00	0
2008-12-02	11:41:00	0
2008-12-02	11:42:00	0
2008-12-02	11:43:00	0
2008-12-02	11:44:00	0
2008-12-02	11:45:00	0
2008-12-02	11:46:00	0
2008-12-02	11:47:00	0
2008-12-02	11:48:00	0
2008-12-02	11:49:00	0
2008-12-02	11:50:00	0
2008-12-02	11:51:00	0
2008-12-02	11:52:00	0
2008-12-02	11:53:00	0
2008-12-02	11:54:00	0
2008-12-02	11:55:00	0
2008-12-02	11:56:00	0
2008-12-02	11:57:00	0
2008-12-02	11:58:00	0
2008-12-02	11:59:00	0
2008-12-02	12:00:00	0
2008-12-02	12:01:00	0
2008-12-02	12:02:00	0
2008-12-02	12:03:00	0
2008-12-02	12:04:00	0
2008-12-02	12:05:00	0
2008-12-02	12:06:00	0
2008-12-02	12:07:00	0
2008-12-02	12:08:00	0
2008-12-02	12:09:00	0
2008-12-02	12:10:00	0
2008-12-02	12:11:00	0
2008-12-02	12:12:00	0
2008-12-02	12:13:00	0
2008-12-02	12:14:00	0
2008-12-02	12:15:00	0
2008-12-02	12:16:00	0
2008-12-02	12:17:00	0
2008-12-02	12:18:00	0
2008-12-02	12:19:00	0
2008-12-02	12:20:00	0
2008-12-02	12:21:00	0
2008-12-02	12:22:00	0
2008-12-02	12:23:00	0
2008-12-02	12:24:00	0
2008-12-02	12:25:00	0
2008-12-02	12:26:00	0
2008-12-02	12:27:00	0
2008-12-02	12:28:00	0
2008-12-02	12:29:00	0
2008-12-02	12:30:00	0
2008-12-02	12:31:00	0
2008-12-02	12:32:00	0
2008-12-02	12:33:00	0
2008-12-02	12:34:00	0
2008-12-02	12:35:00	0
2008-12-02	12:36:00	0
2008-12-02	12:37:00	0
2008-12-02	12:38:00	0
2008-12-02	12:39:00	0
2008-12-02	12:40:00	0
2008-12-02	12:41:00	0
2008-12-02	12:42:00	0
2008-12-02	12:43:00	0
2008-12-02	12:44:00	0
2008-12-02	12:45:00	0
2008-12-02	12:46:00	0
2008-12-02	12:47:00	0
2008-12-02	12:48:00	0
2008-12-02	12:49:00	0
2008-12-02	12:50:00	0
2008-12-02	12:51:00	0
2008-12-02	12:52:00	0
2008-12-02	12:53:00	0
2008-12-02	12:54:00	0
2008-12-02	12:55:00	0
2008-12-02	12:56:00	0
2008-12-02	12:57:00	0
2008-12-02	12:58:00	0
2008-12-02	12:59:00	0
2008-12-02	13:00:00	0
2008-12-02	13:01:00	0
2008-12-02	13:02:00	0
2008-12-02	13:03:00	0
2008-12-02	13:04:00	0
2008-12-02	13:05:00	0
2008-12-02	13:06:00	0
2008-12-02	13:07:00	0
2008-12-02	13:08:00	0
2008-12-02	13:09:00	0
2008-12-02	13:10:00	0
2008-12-02	13:11:00	0
2008-12-02	13:12:00	0
2008-12-02	13:13:00	0
2008-12-02	13:14:00	0
2008-12-02	13:15:00	0
2008-12-02	13:16:00	0
2008-12-02	13:17:00	0
2008-12-02	13:18:00	0
2008-12-02	13:19:00	0
2008-12-02	13:20:00	0
2008-12-02	13:21:00	0
2008-12-02	13:22:00	0
2008-12-02	13:23:00	0
2008-12-02	13:24:00	0
2008-12-02	13:25:00	0
2008-12-02	13:26:00	0
2008-12-02	13:27:00	0
2008-12-02	13:28:00	0
2008-12-02	13:29:00	0
2008-12-02	13:30:00	0
2008-12-02	13:31:00	0
2008-12-02	13:32:00	0
2008-12-02	13:33:00	0
2008-12-02	13:34:00	0
2008-12-02	13:35:00	0
2008-12-02	13:36:00	0
2008-12-02	13:37:00	0
2008-12-02	13:38:00	0
2008-12-02	13:39:00	0
2008-12-02	13:40:00	0
2008-12-02	13:41:00	0
2008-12-02	13:42:00	0
2008-12-02	13:43:00	0
2008-12-02	13:44:00	0
2008-12-02	13:45:00	0
2008-12-02	13:46:00	0
2008-12-02	13:47:00	0
2008-12-02	13:48:00	0
2008-12-02	13:49:00	0
2008-12-02	13:50:00	0
2008-12-02	13:51:00	0
2008-12-02	13:52:00	0
2008-12-02	13:53:00	0
2008-12-02	13:54:00	0
2008-12-02	13:55:00	0
2008-12-02	13:56:00	0
2008-12-02	13:57:00	0
2008-12-02	13:58:00	0
2008-12-02	13:59:00	0
2008-12-02	14:00:00	0
2008-12-02	14:01:00	0
2008-12-02	14:02:00	0
2008-12-02	14:03:00	0
2008-12-02	14:04:00	0
2008-12-02	14:05:00	0
2008-12-02	14:06:00	0
2008-12-02	14:07:00	0
2008-12-02	14:08:00	0
2008-12-02	14:09:00	0
2008-12-02	14:10:00	0
2008-12-02	14:11:00	0
2008-12-02	14:12:00	0
2008-12-02	14:13:00	0
2008-12-02	14:14:00	0
2008-12-02	14:15:00	0
2008-12-02	14:16:00	0
2008-12-02	14:17:00	0
2008-12-02	14:18:00	0
2008-12-02	14:19:00	0
2008-12-02	14:20:00	0
2008-12-02	14:21:00	0
2008-12-02	14:22:00	0
2008-12-02	14:23:00	0
2008-12-02	14:24:00	0
2008-12-02	14:25:00	0
2008-12-02	14:26:00	0
2008-12-02	14:27:00	0
2008-12-02	14:28:00	0
2008-12-02	14:29:00	0
2008-12-02	14:30:00	0
2008-12-02	14:31:00	0
2008-12-02	14:32:00	0
2008-12-02	14:33:00	0
2008-12-02	14:34:00	0
2008-12-02	14:35:00	0
2008-12-02	14:36:00	0
2008-12-02	14:37:00	0
2008-12-02	14:38:00	0
2008-12-02	14:39:00	0
2008-12-02	14:40:00	0
2008-12-02	14:41:00	0
2008-12-02	14:42:00	0
2008-12-02	14:43:00	0
2008-12-02	14:44:00	0
2008-12-02	14:45:00	0
2008-12-02	14:46:00	0
2008-12-02	14:47:00	0
2008-12-02	14:48:00	0
2008-12-02	14:49:00	0
2008-12-02	14:50:00	0
2008-12-02	14:51:00	0
2008-12-02	14:52:00	0
2008-12-02	14:53:00	0
2008-12-02	14:54:00	0
2008-12-02	14:55:00	0
2008-12-02	14:56:00	0
2008-12-02	14:57:00	0
2008-12-02	14:58:00	0
2008-12-02	14:59:00	0
2008-12-02	15:00:00	0
2008-12-02	15:01:00	0
2008-12-02	15:02:00	0
2008-12-02	15:03:00	0
2008-12-02	15:04:00	0
2008-12-02	15:05:00	0
2008-12-02	15:06:00	0
2008-12-02	15:07:00	0
2008-12-02	15:08:00	0
2008-12-02	15:09:00	0
2008-12-02	15:10:00	0
2008-12-02	15:11:00	0
2008-12-02	15:12:00	0
2008-12-02	15:13:00	0
2008-12-02	15:14:00	0
2008-12-02	15:15:00	0
2008-12-02	15:16:00	0
2008-12-02	15:17:00	0
2008-12-02	15:18:00	0
2008-12-02	15:19:00	0
2008-12-02	15:20:00	0
2008-12-02	15:21:00	0
2008-12-02	15:22:00	0
2008-12-02	15:23:00	0
2008-12-02	15:24:00	0
2008-12-02	15:25:00	0
2008-12-02	15:26:00	0
2008-12-02	15:27:00	0
2008-12-02	15:28:00	0
2008-12-02	15:29:00	0
2008-12-02	15:30:00	0
2008-12-02	15:31:00	0
2008-12-02	15:32:00	0
2008-12-02	15:33:00	0
2008-12-02	15:34:00	0
2008-12-02	15:35:00	0
2008-12-02	15:36:00	0
2008-12-02	15:37:00	0
2008-12-02	15:38:00	0
2008-12-02	15:39:00	0
2008-12-02	15:40:00	0
2008-12-02	15:41:00	0
2008-12-02	15:42:00	0
2008-12-02	15:43:00	0
2008-12-02	15:44:00	0
2008-12-02	15:45:00	0
2008-12-02	15:46:00	0
2008-12-02	15:47:00	0
2008-12-02	15:48:00	0
2008-12-02	15:49:00	0
2008-12-02	15:50:00	0
2008-12-02	15:51:00	0
2008-12-02	15:52:00	0
2008-12-02	15:53:00	0
2008-12-02	15:54:00	0
2008-12-02	15:55:00	0
2008-12-02	15:56:00	0
2008-12-02	15:57:00	0
2008-12-02	15:58:00	0
2008-12-02	15:59:00	0
2008-12-02	16:00:00	0
2008-12-02	16:01:00	0
2008-12-02	16:02:00	0
2008-12-02	16:03:00	0
2008-12-02	16:04:00	0
2008-12-02	16:05:00	0
2008-12-02	16:06:00	0
2008-12-02	16:07:00	0
2008-12-02	16:08:00	0
2008-12-02	16:09:00	0
2008-12-02	16:10:00	0
2008-12-02	16:11:00	0
2008-12-02	16:12:00	0
2008-12-02	16:13:00	0
2008-12-02	16:14:00	0
2008-12-02	16:15:00	0
2008-12-02	16:16:00	0
2008-12-02	16:17:00	0
2008-12-02	16:18:00	0
2008-12-02	16:19:00	0
2008-12-02	16:20:00	0
2008-12-02	16:21:00	0
2008-12-02	16:22:00	0
2008-12-02	16:23:00	0
2008-12-02	16:24:00	0
2008-12-02	16:25:00	0
2008-12-02	16:26:00	0
2008-12-02	16:27:00	0
2008-12-02	16:28:00	0
2008-12-02	16:29:00	0
2008-12-02	16:30:00	0
2008-12-02	16:31:00	0
2008-12-02	16:32:00	0
2008-12-02	16:33:00	0
2008-12-02	16:34:00	0
2008-12-02	16:35:00	0
2008-12-02	16:36:00	0
2008-12-02	16:37:00	0
2008-12-02	16:38:00	0
2008-12-02	16:39:00	0
2008-12-02	16:40:00	0
2008-12-02	16:41:00	0
2008-12-02	16:42:00	0
2008-12-02	16:43:00	0
2008-12-02	16:44:00	0
2008-12-02	16:45:00	0
2008-12-02	16:46:00	0
2008-12-02	16:47:00	0
2008-12-02	16:48:00	0
2008-12-02	16:49:00	0
2008-12-02	16:50:00	0
2008-12-02	16:51:00	0
2008-12-02	16:52:00	0
2008-12-02	16:53:00	0
2008-12-02	16:54:00	0
2008-12-02	16:55:00	0
2008-12-02	16:56:00	0
2008-12-02	16:57:00	0
2008-12-02	16:58:00	0
2008-12-02	16:59:00	0
2008-12-02	17:00:00	380
2008-12-02	17:01:00	71
2008-12-02	17:02:00	91
2008-12-02	17:03:00	122
2008-12-02	17:04:00	102
2008-12-02	17:05:00	193
2008-12-02	17:06:00	81
2008-12-02	17:07:00	51
2008-12-02	17:08:00	61
2008-12-02	17:09:00	205
2008-12-02	17:10:00	41
2008-12-02	17:11:00	91
2008-12-02	17:12:00	323
2008-12-02	17:13:00	193
2008-12-02	17:14:00	41
2008-12-02	17:15:00	132
2008-12-02	17:16:00	266
2008-12-02	17:17:00	112
2008-12-02	17:18:00	41
2008-12-02	17:19:00	112
2008-12-02	17:20:00	0
2008-12-02	17:21:00	217
2008-12-02	17:22:00	337
2008-12-02	17:23:00	193
2008-12-02	17:24:00	693
2008-12-02	17:25:00	1416
2008-12-02	17:26:00	205
2008-12-02	17:27:00	20
2008-12-02	17:28:00	122
2008-12-02	17:29:00	156
2008-12-02	17:30:00	91
2008-12-02	17:31:00	51
2008-12-02	17:32:00	81
2008-12-02	17:33:00	10
2008-12-02	17:34:00	156
2008-12-02	17:35:00	193
2008-12-02	17:36:00	0
2008-12-02	17:37:00	0
2008-12-02	17:38:00	0
2008-12-02	17:39:00	0
2008-12-02	17:40:00	20
2008-12-02	17:41:00	20
2008-12-02	17:42:00	71
2008-12-02	17:43:00	91
2008-12-02	17:44:00	81
2008-12-02	17:45:00	597
2008-12-02	17:46:00	597
2008-12-02	17:47:00	71
2008-12-02	17:48:00	20
2008-12-02	17:49:00	30
2008-12-02	17:50:00	0
2008-12-02	17:51:00	0
2008-12-02	17:52:00	0
2008-12-02	17:53:00	0
2008-12-02	17:54:00	0
2008-12-02	17:55:00	0
2008-12-02	17:56:00	0
2008-12-02	17:57:00	20
2008-12-02	17:58:00	0
2008-12-02	17:59:00	0
2008-12-02	18:00:00	0
2008-12-02	18:01:00	0
2008-12-02	18:02:00	0
2008-12-02	18:03:00	0
2008-12-02	18:04:00	91
2008-12-02	18:05:00	0
2008-12-02	18:06:00	0
2008-12-02	18:07:00	0
2008-12-02	18:08:00	0
2008-12-02	18:09:00	122
2008-12-02	18:10:00	0
2008-12-02	18:11:00	0
2008-12-02	18:12:00	0
2008-12-02	18:13:00	0
2008-12-02	18:14:00	0
2008-12-02	18:15:00	0
2008-12-02	18:16:00	0
2008-12-02	18:17:00	0
2008-12-02	18:18:00	0
2008-12-02	18:19:00	0
2008-12-02	18:20:00	0
2008-12-02	18:21:00	0
2008-12-02	18:22:00	0
2008-12-02	18:23:00	0
2008-12-02	18:24:00	0
2008-12-02	18:25:00	0
2008-12-02	18:26:00	0
2008-12-02	18:27:00	0
2008-12-02	18:28:00	0
2008-12-02	18:29:00	0
2008-12-02	18:30:00	0
2008-12-02	18:31:00	0
2008-12-02	18:32:00	0
2008-12-02	18:33:00	0
2008-12-02	18:34:00	0
2008-12-02	18:35:00	0
2008-12-02	18:36:00	0
2008-12-02	18:37:00	0
2008-12-02	18:38:00	0
2008-12-02	18:39:00	0
2008-12-02	18:40:00	0
2008-12-02	18:41:00	0
2008-12-02	18:42:00	0
2008-12-02	18:43:00	0
2008-12-02	18:44:00	0
2008-12-02	18:45:00	0
2008-12-02	18:46:00	0
2008-12-02	18:47:00	0
2008-12-02	18:48:00	0
2008-12-02	18:49:00	0
2008-12-02	18:50:00	0
2008-12-02	18:51:00	0
2008-12-02	18:52:00	0
2008-12-02	18:53:00	0
2008-12-02	18:54:00	0
2008-12-02	18:55:00	0
2008-12-02	18:56:00	0
2008-12-02	18:57:00	0
2008-12-02	18:58:00	0
2008-12-02	18:59:00	0
2008-12-02	19:00:00	0
2008-12-02	19:01:00	0
2008-12-02	19:02:00	0
2008-12-02	19:03:00	0
2008-12-02	19:04:00	0
2008-12-02	19:05:00	0
2008-12-02	19:06:00	0
2008-12-02	19:07:00	0
2008-12-02	19:08:00	0
2008-12-02	19:09:00	0
2008-12-02	19:10:00	0
2008-12-02	19:11:00	0
2008-12-02	19:12:00	0
2008-12-02	19:13:00	0
2008-12-02	19:14:00	0
2008-12-02	19:15:00	0
2008-12-02	19:16:00	0
2008-12-02	19:17:00	0
2008-12-02	19:18:00	0
2008-12-02	19:19:00	0
2008-12-02	19:20:00	0
2008-12-02	19:21:00	0
2008-12-02	19:22:00	0
2008-12-02	19:23:00	0
2008-12-02	19:24:00	0
2008-12-02	19:25:00	0
2008-12-02	19:26:00	0
2008-12-02	19:27:00	0
2008-12-02	19:28:00	0
2008-12-02	19:29:00	0
2008-12-02	19:30:00	0
2008-12-02	19:31:00	0
2008-12-02	19:32:00	0
2008-12-02	19:33:00	0
2008-12-02	19:34:00	0
2008-12-02	19:35:00	0
2008-12-02	19:36:00	0
2008-12-02	19:37:00	0
2008-12-02	19:38:00	0
2008-12-02	19:39:00	0
2008-12-02	19:40:00	0
2008-12-02	19:41:00	0
2008-12-02	19:42:00	0
2008-12-02	19:43:00	0
2008-12-02	19:44:00	0
2008-12-02	19:45:00	0
2008-12-02	19:46:00	0
2008-12-02	19:47:00	0
2008-12-02	19:48:00	0
2008-12-02	19:49:00	0
2008-12-02	19:50:00	0
2008-12-02	19:51:00	0
2008-12-02	19:52:00	0
2008-12-02	19:53:00	0
2008-12-02	19:54:00	0
2008-12-02	19:55:00	0
2008-12-02	19:56:00	0
2008-12-02	19:57:00	0
2008-12-02	19:58:00	0
2008-12-02	19:59:00	30
2008-12-02	20:00:00	10
2008-12-02	20:01:00	0
2008-12-02	20:02:00	20
2008-12-02	20:03:00	30
2008-12-02	20:04:00	30
2008-12-02	20:05:00	30
2008-12-02	20:06:00	10
2008-12-02	20:07:00	10
2008-12-02	20:08:00	0
2008-12-02	20:09:00	61
2008-12-02	20:10:00	20
2008-12-02	20:11:00	20
2008-12-02	20:12:00	41
2008-12-02	20:13:00	20
2008-12-02	20:14:00	0
2008-12-02	20:15:00	10
2008-12-02	20:16:00	0
2008-12-02	20:17:00	10
2008-12-02	20:18:00	0
2008-12-02	20:19:00	0
2008-12-02	20:20:00	0
2008-12-02	20:21:00	0
2008-12-02	20:22:00	0
2008-12-02	20:23:00	0
2008-12-02	20:24:00	0
2008-12-02	20:25:00	0
2008-12-02	20:26:00	0
2008-12-02	20:27:00	10
2008-12-02	20:28:00	71
2008-12-02	20:29:00	30
2008-12-02	20:30:00	0
2008-12-02	20:31:00	61
2008-12-02	20:32:00	0
2008-12-02	20:33:00	81
2008-12-02	20:34:00	51
2008-12-02	20:35:00	0
2008-12-02	20:36:00	81
2008-12-02	20:37:00	20
2008-12-02	20:38:00	0
2008-12-02	20:39:00	0
2008-12-02	20:40:00	0
2008-12-02	20:41:00	0
2008-12-02	20:42:00	0
2008-12-02	20:43:00	0
2008-12-02	20:44:00	0
2008-12-02	20:45:00	0
2008-12-02	20:46:00	0
2008-12-02	20:47:00	0
2008-12-02	20:48:00	0
2008-12-02	20:49:00	351
2008-12-02	20:50:00	30
2008-12-02	20:51:00	91
2008-12-02	20:52:00	51
2008-12-02	20:53:00	51
2008-12-02	20:54:00	10
2008-12-02	20:55:00	30
2008-12-02	20:56:00	410
2008-12-02	20:57:00	230
2008-12-02	20:58:00	0
2008-12-02	20:59:00	0
2008-12-02	21:00:00	0
2008-12-02	21:01:00	0
2008-12-02	21:02:00	0
2008-12-02	21:03:00	0
2008-12-02	21:04:00	0
2008-12-02	21:05:00	71
2008-12-02	21:06:00	0
2008-12-02	21:07:00	0
2008-12-02	21:08:00	0
2008-12-02	21:09:00	0
2008-12-02	21:10:00	1002
2008-12-02	21:11:00	1825
2008-12-02	21:12:00	443
2008-12-02	21:13:00	81
2008-12-02	21:14:00	10
2008-12-02	21:15:00	0
2008-12-02	21:16:00	10
2008-12-02	21:17:00	10
2008-12-02	21:18:00	0
2008-12-02	21:19:00	10
2008-12-02	21:20:00	0
2008-12-02	21:21:00	20
2008-12-02	21:22:00	10
2008-12-02	21:23:00	0
2008-12-02	21:24:00	0
2008-12-02	21:25:00	0
2008-12-02	21:26:00	0
2008-12-02	21:27:00	20
2008-12-02	21:28:00	0
2008-12-02	21:29:00	0
2008-12-02	21:30:00	0
2008-12-02	21:31:00	0
2008-12-02	21:32:00	0
2008-12-02	21:33:00	0
2008-12-02	21:34:00	0
2008-12-02	21:35:00	0
2008-12-02	21:36:00	0
2008-12-02	21:37:00	0
2008-12-02	21:38:00	0
2008-12-02	21:39:00	0
2008-12-02	21:40:00	0
2008-12-02	21:41:00	0
2008-12-02	21:42:00	0
2008-12-02	21:43:00	0
2008-12-02	21:44:00	0
2008-12-02	21:45:00	0
2008-12-02	21:46:00	0
2008-12-02	21:47:00	0
2008-12-02	21:48:00	0
2008-12-02	21:49:00	0
2008-12-02	21:50:00	0
2008-12-02	21:51:00	0
2008-12-02	21:52:00	0
2008-12-02	21:53:00	0
2008-12-02	21:54:00	0
2008-12-02	21:55:00	0
2008-12-02	21:56:00	0
2008-12-02	21:57:00	0
2008-12-02	21:58:00	0
2008-12-02	21:59:00	0
2008-12-02	22:00:00	0
2008-12-02	22:01:00	0
2008-12-02	22:02:00	0
2008-12-02	22:03:00	0
2008-12-02	22:04:00	0
2008-12-02	22:05:00	0
2008-12-02	22:06:00	0
2008-12-02	22:07:00	0
2008-12-02	22:08:00	0
2008-12-02	22:09:00	0
2008-12-02	22:10:00	0
2008-12-02	22:11:00	0
2008-12-02	22:12:00	0
2008-12-02	22:13:00	0
2008-12-02	22:14:00	0
2008-12-02	22:15:00	0
2008-12-02	22:16:00	0
2008-12-02	22:17:00	0
2008-12-02	22:18:00	0
2008-12-02	22:19:00	0
2008-12-02	22:20:00	0
2008-12-02	22:21:00	0
2008-12-02	22:22:00	0
2008-12-02	22:23:00	0
2008-12-02	22:24:00	0
2008-12-02	22:25:00	0
2008-12-02	22:26:00	0
2008-12-02	22:27:00	20
2008-12-02	22:28:00	10
2008-12-02	22:29:00	217
2008-12-02	22:30:00	0
2008-12-02	22:31:00	0
2008-12-02	22:32:00	0
2008-12-02	22:33:00	0
2008-12-02	22:34:00	0
2008-12-02	22:35:00	0
2008-12-02	22:36:00	0
2008-12-02	22:37:00	0
2008-12-02	22:38:00	0
2008-12-02	22:39:00	0
2008-12-02	22:40:00	0
2008-12-02	22:41:00	0
2008-12-02	22:42:00	0
2008-12-02	22:43:00	0
2008-12-02	22:44:00	0
2008-12-02	22:45:00	0
2008-12-02	22:46:00	0
2008-12-02	22:47:00	0
2008-12-02	22:48:00	0
2008-12-02	22:49:00	0
2008-12-02	22:50:00	0
2008-12-02	22:51:00	0
2008-12-02	22:52:00	0
2008-12-02	22:53:00	0
2008-12-02	22:54:00	0
2008-12-02	22:55:00	0
2008-12-02	22:56:00	0
2008-12-02	22:57:00	0
2008-12-02	22:58:00	0
2008-12-02	22:59:00	0
2008-12-02	23:00:00	0
2008-12-02	23:01:00	0
2008-12-02	23:02:00	0
2008-12-02	23:03:00	0
2008-12-02	23:04:00	0
2008-12-02	23:05:00	0
2008-12-02	23:06:00	0
2008-12-02	23:07:00	0
2008-12-02	23:08:00	0
2008-12-02	23:09:00	0
2008-12-02	23:10:00	0
2008-12-02	23:11:00	0
2008-12-02	23:12:00	0
2008-12-02	23:13:00	0
2008-12-02	23:14:00	0
2008-12-02	23:15:00	10
2008-12-02	23:16:00	0
2008-12-02	23:17:00	0
2008-12-02	23:18:00	0
2008-12-02	23:19:00	0
2008-12-02	23:20:00	0
2008-12-02	23:21:00	0
2008-12-02	23:22:00	0
2008-12-02	23:23:00	0
2008-12-02	23:24:00	0
2008-12-02	23:25:00	0
2008-12-02	23:26:00	0
2008-12-02	23:27:00	0
2008-12-02	23:28:00	0
2008-12-02	23:29:00	0
2008-12-02	23:30:00	0
2008-12-02	23:31:00	0
2008-12-02	23:32:00	0
2008-12-02	23:33:00	0
2008-12-02	23:34:00	0
2008-12-02	23:35:00	0
2008-12-02	23:36:00	0
2008-12-02	23:37:00	0
2008-12-02	23:38:00	0
2008-12-02	23:39:00	0
2008-12-02	23:40:00	0
2008-12-02	23:41:00	0
2008-12-02	23:42:00	0
2008-12-02	23:43:00	0
2008-12-02	23:44:00	0
2008-12-02	23:45:00	0
2008-12-02	23:46:00	0
2008-12-02	23:47:00	0
2008-12-02	23:48:00	0
2008-12-02	23:49:00	0
2008-12-02	23:50:00	0
2008-12-02	23:51:00	0
2008-12-02	23:52:00	0
2008-12-02	23:53:00	0
2008-12-02	23:54:00	10
2008-12-02	23:55:00	0
2008-12-02	23:56:00	10
2008-12-02	23:57:00	10
2008-12-02	23:58:00	0
2008-12-02	23:59:00	102
2008-12-03	00:00:00	71
2008-12-03	00:01:00	81
2008-12-03	00:02:00	41
2008-12-03	00:03:00	132
2008-12-03	00:04:00	20
2008-12-03	00:05:00	280
2008-12-03	00:06:00	193
2008-12-03	00:07:00	169
2008-12-03	00:08:00	20
2008-12-03	00:09:00	20
2008-12-03	00:10:00	132
2008-12-03	00:11:00	51
2008-12-03	00:12:00	20
2008-12-03	00:13:00	0
2008-12-03	00:14:00	323
2008-12-03	00:15:00	0
2008-12-03	00:16:00	0
2008-12-03	00:17:00	323
2008-12-03	00:18:00	0
2008-12-03	00:19:00	132
2008-12-03	00:20:00	0
2008-12-03	00:21:00	0
2008-12-03	00:22:00	0
2008-12-03	00:23:00	193
2008-12-03	00:24:00	0
2008-12-03	00:25:00	0
2008-12-03	00:26:00	0
2008-12-03	00:27:00	156
2008-12-03	00:28:00	20
2008-12-03	00:29:00	20
2008-12-03	00:30:00	0
2008-12-03	00:31:00	0
2008-12-03	00:32:00	0
2008-12-03	00:33:00	0
2008-12-03	00:34:00	0
2008-12-03	00:35:00	30
2008-12-03	00:36:00	0
2008-12-03	00:37:00	0
2008-12-03	00:38:00	0
2008-12-03	00:39:00	0
2008-12-03	00:40:00	0
2008-12-03	00:41:00	0
2008-12-03	00:42:00	0
2008-12-03	00:43:00	0
2008-12-03	00:44:00	0
2008-12-03	00:45:00	0
2008-12-03	00:46:00	0
2008-12-03	00:47:00	0
2008-12-03	00:48:00	0
2008-12-03	00:49:00	205
2008-12-03	00:50:00	61
2008-12-03	00:51:00	0
2008-12-03	00:52:00	0
2008-12-03	00:53:00	0
2008-12-03	00:54:00	0
2008-12-03	00:55:00	0
2008-12-03	00:56:00	0
2008-12-03	00:57:00	0
2008-12-03	00:58:00	0
2008-12-03	00:59:00	0
2008-12-03	01:00:00	0
2008-12-03	01:01:00	0
2008-12-03	01:02:00	0
2008-12-03	01:03:00	0
2008-12-03	01:04:00	0
2008-12-03	01:05:00	0
2008-12-03	01:06:00	0
2008-12-03	01:07:00	0
2008-12-03	01:08:00	0
2008-12-03	01:09:00	0
2008-12-03	01:10:00	0
2008-12-03	01:11:00	0
2008-12-03	01:12:00	0
2008-12-03	01:13:00	0
2008-12-03	01:14:00	0
2008-12-03	01:15:00	0
2008-12-03	01:16:00	0
2008-12-03	01:17:00	0
2008-12-03	01:18:00	0
2008-12-03	01:19:00	0
2008-12-03	01:20:00	0
2008-12-03	01:21:00	0
2008-12-03	01:22:00	0
2008-12-03	01:23:00	0
2008-12-03	01:24:00	0
2008-12-03	01:25:00	0
2008-12-03	01:26:00	0
2008-12-03	01:27:00	0
2008-12-03	01:28:00	0
2008-12-03	01:29:00	0
2008-12-03	01:30:00	0
2008-12-03	01:31:00	0
2008-12-03	01:32:00	0
2008-12-03	01:33:00	0
2008-12-03	01:34:00	0
2008-12-03	01:35:00	0
2008-12-03	01:36:00	0
2008-12-03	01:37:00	0
2008-12-03	01:38:00	0
2008-12-03	01:39:00	0
2008-12-03	01:40:00	0
2008-12-03	01:41:00	0
2008-12-03	01:42:00	0
2008-12-03	01:43:00	0
2008-12-03	01:44:00	0
2008-12-03	01:45:00	0
2008-12-03	01:46:00	0
2008-12-03	01:47:00	0
2008-12-03	01:48:00	0
2008-12-03	01:49:00	0
2008-12-03	01:50:00	0
2008-12-03	01:51:00	51
2008-12-03	01:52:00	102
2008-12-03	01:53:00	81
2008-12-03	01:54:00	10
2008-12-03	01:55:00	102
2008-12-03	01:56:00	61
2008-12-03	01:57:00	51
2008-12-03	01:58:00	0
2008-12-03	01:59:00	10
2008-12-03	02:00:00	0
2008-12-03	02:01:00	0
2008-12-03	02:02:00	0
2008-12-03	02:03:00	0
2008-12-03	02:04:00	0
2008-12-03	02:05:00	0
2008-12-03	02:06:00	0
2008-12-03	02:07:00	0
2008-12-03	02:08:00	0
2008-12-03	02:09:00	0
2008-12-03	02:10:00	0
2008-12-03	02:11:00	0
2008-12-03	02:12:00	0
2008-12-03	02:13:00	0
2008-12-03	02:14:00	0
2008-12-03	02:15:00	0
2008-12-03	02:16:00	0
2008-12-03	02:17:00	41
2008-12-03	02:18:00	91
2008-12-03	02:19:00	0
2008-12-03	02:20:00	0
2008-12-03	02:21:00	0
2008-12-03	02:22:00	0
2008-12-03	02:23:00	0
2008-12-03	02:24:00	0
2008-12-03	02:25:00	0
2008-12-03	02:26:00	0
2008-12-03	02:27:00	0
2008-12-03	02:28:00	30
2008-12-03	02:29:00	0
2008-12-03	02:30:00	0
2008-12-03	02:31:00	0
2008-12-03	02:32:00	0
2008-12-03	02:33:00	0
2008-12-03	02:34:00	0
2008-12-03	02:35:00	0
2008-12-03	02:36:00	0
2008-12-03	02:37:00	0
2008-12-03	02:38:00	0
2008-12-03	02:39:00	0
2008-12-03	02:40:00	0
2008-12-03	02:41:00	0
2008-12-03	02:42:00	0
2008-12-03	02:43:00	0
2008-12-03	02:44:00	0
2008-12-03	02:45:00	0
2008-12-03	02:46:00	0
2008-12-03	02:47:00	0
2008-12-03	02:48:00	0
2008-12-03	02:49:00	41
2008-12-03	02:50:00	0
2008-12-03	02:51:00	0
2008-12-03	02:52:00	0
2008-12-03	02:53:00	0
2008-12-03	02:54:00	0
2008-12-03	02:55:00	0
2008-12-03	02:56:00	20
2008-12-03	02:57:00	51
2008-12-03	02:58:00	61
2008-12-03	02:59:00	280
2008-12-03	03:00:00	169
2008-12-03	03:01:00	242
2008-12-03	03:02:00	0
2008-12-03	03:03:00	102
2008-12-03	03:04:00	20
2008-12-03	03:05:00	30
2008-12-03	03:06:00	10
2008-12-03	03:07:00	0
2008-12-03	03:08:00	323
2008-12-03	03:09:00	51
2008-12-03	03:10:00	30
2008-12-03	03:11:00	30
2008-12-03	03:12:00	132
2008-12-03	03:13:00	443
2008-12-03	03:14:00	156
2008-12-03	03:15:00	20
2008-12-03	03:16:00	81
2008-12-03	03:17:00	71
2008-12-03	03:18:00	51
2008-12-03	03:19:00	30
2008-12-03	03:20:00	0
2008-12-03	03:21:00	0
2008-12-03	03:22:00	0
2008-12-03	03:23:00	0
2008-12-03	03:24:00	10
2008-12-03	03:25:00	0
2008-12-03	03:26:00	0
2008-12-03	03:27:00	0
2008-12-03	03:28:00	0
2008-12-03	03:29:00	30
2008-12-03	03:30:00	10
2008-12-03	03:31:00	0
2008-12-03	03:32:00	0
2008-12-03	03:33:00	0
2008-12-03	03:34:00	0
2008-12-03	03:35:00	0
2008-12-03	03:36:00	0
2008-12-03	03:37:00	0
2008-12-03	03:38:00	0
2008-12-03	03:39:00	0
2008-12-03	03:40:00	0
2008-12-03	03:41:00	0
2008-12-03	03:42:00	0
2008-12-03	03:43:00	0
2008-12-03	03:44:00	0
2008-12-03	03:45:00	0
2008-12-03	03:46:00	0
2008-12-03	03:47:00	0
2008-12-03	03:48:00	0
2008-12-03	03:49:00	0
2008-12-03	03:50:00	0
2008-12-03	03:51:00	0
2008-12-03	03:52:00	0
2008-12-03	03:53:00	0
2008-12-03	03:54:00	0
2008-12-03	03:55:00	0
2008-12-03	03:56:00	0
2008-12-03	03:57:00	0
2008-12-03	03:58:00	0
2008-12-03	03:59:00	0
2008-12-03	04:00:00	0
2008-12-03	04:01:00	0
2008-12-03	04:02:00	0
2008-12-03	04:03:00	0
2008-12-03	04:04:00	10
2008-12-03	04:05:00	0
2008-12-03	04:06:00	0
2008-12-03	04:07:00	0
2008-12-03	04:08:00	0
2008-12-03	04:09:00	0
2008-12-03	04:10:00	0
2008-12-03	04:11:00	0
2008-12-03	04:12:00	0
2008-12-03	04:13:00	0
2008-12-03	04:14:00	0
2008-12-03	04:15:00	0
2008-12-03	04:16:00	0
2008-12-03	04:17:00	0
2008-12-03	04:18:00	0
2008-12-03	04:19:00	0
2008-12-03	04:20:00	0
2008-12-03	04:21:00	0
2008-12-03	04:22:00	0
2008-12-03	04:23:00	0
2008-12-03	04:24:00	0
2008-12-03	04:25:00	0
2008-12-03	04:26:00	0
2008-12-03	04:27:00	0
2008-12-03	04:28:00	0
2008-12-03	04:29:00	0
2008-12-03	04:30:00	0
2008-12-03	04:31:00	0
2008-12-03	04:32:00	0
2008-12-03	04:33:00	0
2008-12-03	04:34:00	81
2008-12-03	04:35:00	20
2008-12-03	04:36:00	10
2008-12-03	04:37:00	61
2008-12-03	04:38:00	132
2008-12-03	04:39:00	10
2008-12-03	04:40:00	169
2008-12-03	04:41:00	0
2008-12-03	04:42:00	61
2008-12-03	04:43:00	20
2008-12-03	04:44:00	30
2008-12-03	04:45:00	81
2008-12-03	04:46:00	280
2008-12-03	04:47:00	217
2008-12-03	04:48:00	30
2008-12-03	04:49:00	774
2008-12-03	04:50:00	122
2008-12-03	04:51:00	169
2008-12-03	04:52:00	71
2008-12-03	04:53:00	71
2008-12-03	04:54:00	112
2008-12-03	04:55:00	0
2008-12-03	04:56:00	0
2008-12-03	04:57:00	0
2008-12-03	04:58:00	0
2008-12-03	04:59:00	0
2008-12-03	05:00:00	0
2008-12-03	05:01:00	0
2008-12-03	05:02:00	0
2008-12-03	05:03:00	0
2008-12-03	05:04:00	0
2008-12-03	05:05:00	0
2008-12-03	05:06:00	0
2008-12-03	05:07:00	0
2008-12-03	05:08:00	0
2008-12-03	05:09:00	0
2008-12-03	05:10:00	0
2008-12-03	05:11:00	0
2008-12-03	05:12:00	0
2008-12-03	05:13:00	0
2008-12-03	05:14:00	0
2008-12-03	05:15:00	0
2008-12-03	05:16:00	0
2008-12-03	05:17:00	0
2008-12-03	05:18:00	0
2008-12-03	05:19:00	0
2008-12-03	05:20:00	0
2008-12-03	05:21:00	0
2008-12-03	05:22:00	0
2008-12-03	05:23:00	0
2008-12-03	05:24:00	0
2008-12-03	05:25:00	0
2008-12-03	05:26:00	0
2008-12-03	05:27:00	0
2008-12-03	05:28:00	0
2008-12-03	05:29:00	0
2008-12-03	05:30:00	0
2008-12-03	05:31:00	0
2008-12-03	05:32:00	0
2008-12-03	05:33:00	0
2008-12-03	05:34:00	0
2008-12-03	05:35:00	0
2008-12-03	05:36:00	0
2008-12-03	05:37:00	0
2008-12-03	05:38:00	0
2008-12-03	05:39:00	0
2008-12-03	05:40:00	0
2008-12-03	05:41:00	0
2008-12-03	05:42:00	0
2008-12-03	05:43:00	0
2008-12-03	05:44:00	0
2008-12-03	05:45:00	0
2008-12-03	05:46:00	0
2008-12-03	05:47:00	0
2008-12-03	05:48:00	0
2008-12-03	05:49:00	0
2008-12-03	05:50:00	61
2008-12-03	05:51:00	71
2008-12-03	05:52:00	10
2008-12-03	05:53:00	51
2008-12-03	05:54:00	71
2008-12-03	05:55:00	71
2008-12-03	05:56:00	41
2008-12-03	05:57:00	0
2008-12-03	05:58:00	0
2008-12-03	05:59:00	0
2008-12-03	06:00:00	0
2008-12-03	06:01:00	0
2008-12-03	06:02:00	0
2008-12-03	06:03:00	0
2008-12-03	06:04:00	0
2008-12-03	06:05:00	51
2008-12-03	06:06:00	309
2008-12-03	06:07:00	51
2008-12-03	06:08:00	41
2008-12-03	06:09:00	20
2008-12-03	06:10:00	71
2008-12-03	06:11:00	10
2008-12-03	06:12:00	61
2008-12-03	06:13:00	205
2008-12-03	06:14:00	0
2008-12-03	06:15:00	0
2008-12-03	06:16:00	0
2008-12-03	06:17:00	0
2008-12-03	06:18:00	0
2008-12-03	06:19:00	0
2008-12-03	06:20:00	0
2008-12-03	06:21:00	0
2008-12-03	06:22:00	0
2008-12-03	06:23:00	0
2008-12-03	06:24:00	0
2008-12-03	06:25:00	0
2008-12-03	06:26:00	0
2008-12-03	06:27:00	0
2008-12-03	06:28:00	295
2008-12-03	06:29:00	0
2008-12-03	06:30:00	30
2008-12-03	06:31:00	337
2008-12-03	06:32:00	112
2008-12-03	06:33:00	0
2008-12-03	06:34:00	0
2008-12-03	06:35:00	0
2008-12-03	06:36:00	10
2008-12-03	06:37:00	0
2008-12-03	06:38:00	0
2008-12-03	06:39:00	0
2008-12-03	06:40:00	0
2008-12-03	06:41:00	0
2008-12-03	06:42:00	0
2008-12-03	06:43:00	0
2008-12-03	06:44:00	0
2008-12-03	06:45:00	0
2008-12-03	06:46:00	0
2008-12-03	06:47:00	0
2008-12-03	06:48:00	0
2008-12-03	06:49:00	0
2008-12-03	06:50:00	0
2008-12-03	06:51:00	0
2008-12-03	06:52:00	0
2008-12-03	06:53:00	0
2008-12-03	06:54:00	0
2008-12-03	06:55:00	0
2008-12-03	06:56:00	0
2008-12-03	06:57:00	0
2008-12-03	06:58:00	0
2008-12-03	06:59:00	10
2008-12-03	07:00:00	10
2008-12-03	07:01:00	0
2008-12-03	07:02:00	0
2008-12-03	07:03:00	0
2008-12-03	07:04:00	0
2008-12-03	07:05:00	0
2008-12-03	07:06:00	0
2008-12-03	07:07:00	0
2008-12-03	07:08:00	0
2008-12-03	07:09:00	0
2008-12-03	07:10:00	0
2008-12-03	07:11:00	0
2008-12-03	07:12:00	0
2008-12-03	07:13:00	0
2008-12-03	07:14:00	0
2008-12-03	07:15:00	0
2008-12-03	07:16:00	0
2008-12-03	07:17:00	0
2008-12-03	07:18:00	10
2008-12-03	07:19:00	410
2008-12-03	07:20:00	1239
2008-12-03	07:21:00	794
2008-12-03	07:22:00	1050
2008-12-03	07:23:00	156
2008-12-03	07:24:00	181
2008-12-03	07:25:00	309
2008-12-03	07:26:00	542
2008-12-03	07:27:00	1512
2008-12-03	07:28:00	713
2008-12-03	07:29:00	337
2008-12-03	07:30:00	394
2008-12-03	07:31:00	754
2008-12-03	07:32:00	144
2008-12-03	07:33:00	144
2008-12-03	07:34:00	254
2008-12-03	07:35:00	91
2008-12-03	07:36:00	337
2008-12-03	07:37:00	1239
2008-12-03	07:38:00	1611
2008-12-03	07:39:00	1103
2008-12-03	07:40:00	102
2008-12-03	07:41:00	1751
2008-12-03	07:42:00	1355
2008-12-03	07:43:00	1788
2008-12-03	07:44:00	1646
2008-12-03	07:45:00	508
2008-12-03	07:46:00	1002
2008-12-03	07:47:00	1325
2008-12-03	07:48:00	884
2008-12-03	07:49:00	1002
2008-12-03	07:50:00	1544
2008-12-03	07:51:00	1386
2008-12-03	07:52:00	1103
2008-12-03	07:53:00	1544
2008-12-03	07:54:00	1077
2008-12-03	07:55:00	1447
2008-12-03	07:56:00	1182
2008-12-03	07:57:00	1077
2008-12-03	07:58:00	1026
2008-12-03	07:59:00	634
2008-12-03	08:00:00	459
2008-12-03	08:01:00	524
2008-12-03	08:02:00	673
2008-12-03	08:03:00	673
2008-12-03	08:04:00	579
2008-12-03	08:05:00	266
2008-12-03	08:06:00	597
2008-12-03	08:07:00	774
2008-12-03	08:08:00	693
2008-12-03	08:09:00	1325
2008-12-03	08:10:00	977
2008-12-03	08:11:00	266
2008-12-03	08:12:00	410
2008-12-03	08:13:00	309
2008-12-03	08:14:00	254
2008-12-03	08:15:00	169
2008-12-03	08:16:00	144
2008-12-03	08:17:00	597
2008-12-03	08:18:00	132
2008-12-03	08:19:00	91
2008-12-03	08:20:00	122
2008-12-03	08:21:00	112
2008-12-03	08:22:00	0
2008-12-03	08:23:00	10
2008-12-03	08:24:00	20
2008-12-03	08:25:00	0
2008-12-03	08:26:00	51
2008-12-03	08:27:00	41
2008-12-03	08:28:00	0
2008-12-03	08:29:00	10
2008-12-03	08:30:00	10
2008-12-03	08:31:00	61
2008-12-03	08:32:00	10
2008-12-03	08:33:00	0
2008-12-03	08:34:00	10
2008-12-03	08:35:00	10
2008-12-03	08:36:00	10
2008-12-03	08:37:00	0
2008-12-03	08:38:00	10
2008-12-03	08:39:00	839
2008-12-03	08:40:00	1002
2008-12-03	08:41:00	652
2008-12-03	08:42:00	242
2008-12-03	08:43:00	217
2008-12-03	08:44:00	230
2008-12-03	08:45:00	41
2008-12-03	08:46:00	254
2008-12-03	08:47:00	169
2008-12-03	08:48:00	380
2008-12-03	08:49:00	733
2008-12-03	08:50:00	693
2008-12-03	08:51:00	144
2008-12-03	08:52:00	156
2008-12-03	08:53:00	30
2008-12-03	08:54:00	10
2008-12-03	08:55:00	10
2008-12-03	08:56:00	561
2008-12-03	08:57:00	280
2008-12-03	08:58:00	427
2008-12-03	08:59:00	217
2008-12-03	09:00:00	156
2008-12-03	09:01:00	132
2008-12-03	09:02:00	323
2008-12-03	09:03:00	616
2008-12-03	09:04:00	366
2008-12-03	09:05:00	156
2008-12-03	09:06:00	217
2008-12-03	09:07:00	0
2008-12-03	09:08:00	0
[truncated: 19,611 more rows]

## Sheet: 12.16.08
Actogram, Copy Raw Data, All Days
Identity:	Butler Schmidt
Filename:	E:\Active Research Files\meloxicam titre canine\cases\butler\Butler Schmidt 12.16.08.AWC
Gender:	M
Age:	12
Height:	50.8 cm	20.0 in
Weight:	24.6 kg	54.2 lbs
Start Date:	16-Dec-2008 (Tue)
Start Time:	17:00:00
Interval:	1.00 mins
Date Stamp:	Time Stamp:	Activity Data:	Marker Press:
2008-12-16	00:00:00	0
2008-12-16	00:01:00	0
2008-12-16	00:02:00	0
2008-12-16	00:03:00	0
2008-12-16	00:04:00	0
2008-12-16	00:05:00	0
2008-12-16	00:06:00	0
2008-12-16	00:07:00	0
2008-12-16	00:08:00	0
2008-12-16	00:09:00	0
2008-12-16	00:10:00	0
2008-12-16	00:11:00	0
2008-12-16	00:12:00	0
2008-12-16	00:13:00	0
2008-12-16	00:14:00	0
2008-12-16	00:15:00	0
2008-12-16	00:16:00	0
2008-12-16	00:17:00	0
2008-12-16	00:18:00	0
2008-12-16	00:19:00	0
2008-12-16	00:20:00	0
2008-12-16	00:21:00	0
2008-12-16	00:22:00	0
2008-12-16	00:23:00	0
2008-12-16	00:24:00	0
2008-12-16	00:25:00	0
2008-12-16	00:26:00	0
2008-12-16	00:27:00	0
2008-12-16	00:28:00	0
2008-12-16	00:29:00	0
2008-12-16	00:30:00	0
2008-12-16	00:31:00	0
2008-12-16	00:32:00	0
2008-12-16	00:33:00	0
2008-12-16	00:34:00	0
2008-12-16	00:35:00	0
2008-12-16	00:36:00	0
2008-12-16	00:37:00	0
2008-12-16	00:38:00	0
2008-12-16	00:39:00	0
2008-12-16	00:40:00	0
2008-12-16	00:41:00	0
2008-12-16	00:42:00	0
2008-12-16	00:43:00	0
2008-12-16	00:44:00	0
2008-12-16	00:45:00	0
2008-12-16	00:46:00	0
2008-12-16	00:47:00	0
2008-12-16	00:48:00	0
2008-12-16	00:49:00	0
2008-12-16	00:50:00	0
2008-12-16	00:51:00	0
2008-12-16	00:52:00	0
2008-12-16	00:53:00	0
2008-12-16	00:54:00	0
2008-12-16	00:55:00	0
2008-12-16	00:56:00	0
2008-12-16	00:57:00	0
2008-12-16	00:58:00	0
2008-12-16	00:59:00	0
2008-12-16	01:00:00	0
2008-12-16	01:01:00	0
2008-12-16	01:02:00	0
2008-12-16	01:03:00	0
2008-12-16	01:04:00	0
2008-12-16	01:05:00	0
2008-12-16	01:06:00	0
2008-12-16	01:07:00	0
2008-12-16	01:08:00	0
2008-12-16	01:09:00	0
2008-12-16	01:10:00	0
2008-12-16	01:11:00	0
2008-12-16	01:12:00	0
2008-12-16	01:13:00	0
2008-12-16	01:14:00	0
2008-12-16	01:15:00	0
2008-12-16	01:16:00	0
2008-12-16	01:17:00	0
2008-12-16	01:18:00	0
2008-12-16	01:19:00	0
2008-12-16	01:20:00	0
2008-12-16	01:21:00	0
2008-12-16	01:22:00	0
2008-12-16	01:23:00	0
2008-12-16	01:24:00	0
2008-12-16	01:25:00	0
2008-12-16	01:26:00	0
2008-12-16	01:27:00	0
2008-12-16	01:28:00	0
2008-12-16	01:29:00	0
2008-12-16	01:30:00	0
2008-12-16	01:31:00	0
2008-12-16	01:32:00	0
2008-12-16	01:33:00	0
2008-12-16	01:34:00	0
2008-12-16	01:35:00	0
2008-12-16	01:36:00	0
2008-12-16	01:37:00	0
2008-12-16	01:38:00	0
2008-12-16	01:39:00	0
2008-12-16	01:40:00	0
2008-12-16	01:41:00	0
2008-12-16	01:42:00	0
2008-12-16	01:43:00	0
2008-12-16	01:44:00	0
2008-12-16	01:45:00	0
2008-12-16	01:46:00	0
2008-12-16	01:47:00	0
2008-12-16	01:48:00	0
2008-12-16	01:49:00	0
2008-12-16	01:50:00	0
2008-12-16	01:51:00	0
2008-12-16	01:52:00	0
2008-12-16	01:53:00	0
2008-12-16	01:54:00	0
2008-12-16	01:55:00	0
2008-12-16	01:56:00	0
2008-12-16	01:57:00	0
2008-12-16	01:58:00	0
2008-12-16	01:59:00	0
2008-12-16	02:00:00	0
2008-12-16	02:01:00	0
2008-12-16	02:02:00	0
2008-12-16	02:03:00	0
2008-12-16	02:04:00	0
2008-12-16	02:05:00	0
2008-12-16	02:06:00	0
2008-12-16	02:07:00	0
2008-12-16	02:08:00	0
2008-12-16	02:09:00	0
2008-12-16	02:10:00	0
2008-12-16	02:11:00	0
2008-12-16	02:12:00	0
2008-12-16	02:13:00	0
2008-12-16	02:14:00	0
2008-12-16	02:15:00	0
2008-12-16	02:16:00	0
2008-12-16	02:17:00	0
2008-12-16	02:18:00	0
2008-12-16	02:19:00	0
2008-12-16	02:20:00	0
2008-12-16	02:21:00	0
2008-12-16	02:22:00	0
2008-12-16	02:23:00	0
2008-12-16	02:24:00	0
2008-12-16	02:25:00	0
2008-12-16	02:26:00	0
2008-12-16	02:27:00	0
2008-12-16	02:28:00	0
2008-12-16	02:29:00	0
2008-12-16	02:30:00	0
2008-12-16	02:31:00	0
2008-12-16	02:32:00	0
2008-12-16	02:33:00	0
2008-12-16	02:34:00	0
2008-12-16	02:35:00	0
2008-12-16	02:36:00	0
2008-12-16	02:37:00	0
2008-12-16	02:38:00	0
2008-12-16	02:39:00	0
2008-12-16	02:40:00	0
2008-12-16	02:41:00	0
2008-12-16	02:42:00	0
2008-12-16	02:43:00	0
2008-12-16	02:44:00	0
2008-12-16	02:45:00	0
2008-12-16	02:46:00	0
2008-12-16	02:47:00	0
2008-12-16	02:48:00	0
2008-12-16	02:49:00	0
2008-12-16	02:50:00	0
2008-12-16	02:51:00	0
2008-12-16	02:52:00	0
2008-12-16	02:53:00	0
2008-12-16	02:54:00	0
2008-12-16	02:55:00	0
2008-12-16	02:56:00	0
2008-12-16	02:57:00	0
2008-12-16	02:58:00	0
2008-12-16	02:59:00	0
2008-12-16	03:00:00	0
2008-12-16	03:01:00	0
2008-12-16	03:02:00	0
2008-12-16	03:03:00	0
2008-12-16	03:04:00	0
2008-12-16	03:05:00	0
2008-12-16	03:06:00	0
2008-12-16	03:07:00	0
2008-12-16	03:08:00	0
2008-12-16	03:09:00	0
2008-12-16	03:10:00	0
2008-12-16	03:11:00	0
2008-12-16	03:12:00	0
2008-12-16	03:13:00	0
2008-12-16	03:14:00	0
2008-12-16	03:15:00	0
2008-12-16	03:16:00	0
2008-12-16	03:17:00	0
2008-12-16	03:18:00	0
2008-12-16	03:19:00	0
2008-12-16	03:20:00	0
2008-12-16	03:21:00	0
2008-12-16	03:22:00	0
2008-12-16	03:23:00	0
2008-12-16	03:24:00	0
2008-12-16	03:25:00	0
2008-12-16	03:26:00	0
2008-12-16	03:27:00	0
2008-12-16	03:28:00	0
2008-12-16	03:29:00	0
2008-12-16	03:30:00	0
2008-12-16	03:31:00	0
2008-12-16	03:32:00	0
2008-12-16	03:33:00	0
2008-12-16	03:34:00	0
2008-12-16	03:35:00	0
2008-12-16	03:36:00	0
2008-12-16	03:37:00	0
2008-12-16	03:38:00	0
2008-12-16	03:39:00	0
2008-12-16	03:40:00	0
2008-12-16	03:41:00	0
2008-12-16	03:42:00	0
2008-12-16	03:43:00	0
2008-12-16	03:44:00	0
2008-12-16	03:45:00	0
2008-12-16	03:46:00	0
2008-12-16	03:47:00	0
2008-12-16	03:48:00	0
2008-12-16	03:49:00	0
2008-12-16	03:50:00	0
2008-12-16	03:51:00	0
2008-12-16	03:52:00	0
2008-12-16	03:53:00	0
2008-12-16	03:54:00	0
2008-12-16	03:55:00	0
2008-12-16	03:56:00	0
2008-12-16	03:57:00	0
2008-12-16	03:58:00	0
2008-12-16	03:59:00	0
2008-12-16	04:00:00	0
2008-12-16	04:01:00	0
2008-12-16	04:02:00	0
2008-12-16	04:03:00	0
2008-12-16	04:04:00	0
2008-12-16	04:05:00	0
2008-12-16	04:06:00	0
2008-12-16	04:07:00	0
2008-12-16	04:08:00	0
2008-12-16	04:09:00	0
2008-12-16	04:10:00	0
2008-12-16	04:11:00	0
2008-12-16	04:12:00	0
2008-12-16	04:13:00	0
2008-12-16	04:14:00	0
2008-12-16	04:15:00	0
2008-12-16	04:16:00	0
2008-12-16	04:17:00	0
2008-12-16	04:18:00	0
2008-12-16	04:19:00	0
2008-12-16	04:20:00	0
2008-12-16	04:21:00	0
2008-12-16	04:22:00	0
2008-12-16	04:23:00	0
2008-12-16	04:24:00	0
2008-12-16	04:25:00	0
2008-12-16	04:26:00	0
2008-12-16	04:27:00	0
2008-12-16	04:28:00	0
2008-12-16	04:29:00	0
2008-12-16	04:30:00	0
2008-12-16	04:31:00	0
2008-12-16	04:32:00	0
2008-12-16	04:33:00	0
2008-12-16	04:34:00	0
2008-12-16	04:35:00	0
2008-12-16	04:36:00	0
2008-12-16	04:37:00	0
2008-12-16	04:38:00	0
2008-12-16	04:39:00	0
2008-12-16	04:40:00	0
2008-12-16	04:41:00	0
2008-12-16	04:42:00	0
2008-12-16	04:43:00	0
2008-12-16	04:44:00	0
2008-12-16	04:45:00	0
2008-12-16	04:46:00	0
2008-12-16	04:47:00	0
2008-12-16	04:48:00	0
2008-12-16	04:49:00	0
2008-12-16	04:50:00	0
2008-12-16	04:51:00	0
2008-12-16	04:52:00	0
2008-12-16	04:53:00	0
2008-12-16	04:54:00	0
2008-12-16	04:55:00	0
2008-12-16	04:56:00	0
2008-12-16	04:57:00	0
2008-12-16	04:58:00	0
2008-12-16	04:59:00	0
2008-12-16	05:00:00	0
2008-12-16	05:01:00	0
2008-12-16	05:02:00	0
2008-12-16	05:03:00	0
2008-12-16	05:04:00	0
2008-12-16	05:05:00	0
2008-12-16	05:06:00	0
2008-12-16	05:07:00	0
2008-12-16	05:08:00	0
2008-12-16	05:09:00	0
2008-12-16	05:10:00	0
2008-12-16	05:11:00	0
2008-12-16	05:12:00	0
2008-12-16	05:13:00	0
2008-12-16	05:14:00	0
2008-12-16	05:15:00	0
2008-12-16	05:16:00	0
2008-12-16	05:17:00	0
2008-12-16	05:18:00	0
2008-12-16	05:19:00	0
2008-12-16	05:20:00	0
2008-12-16	05:21:00	0
2008-12-16	05:22:00	0
2008-12-16	05:23:00	0
2008-12-16	05:24:00	0
2008-12-16	05:25:00	0
2008-12-16	05:26:00	0
2008-12-16	05:27:00	0
2008-12-16	05:28:00	0
2008-12-16	05:29:00	0
2008-12-16	05:30:00	0
2008-12-16	05:31:00	0
2008-12-16	05:32:00	0
2008-12-16	05:33:00	0
2008-12-16	05:34:00	0
2008-12-16	05:35:00	0
2008-12-16	05:36:00	0
2008-12-16	05:37:00	0
2008-12-16	05:38:00	0
2008-12-16	05:39:00	0
2008-12-16	05:40:00	0
2008-12-16	05:41:00	0
2008-12-16	05:42:00	0
2008-12-16	05:43:00	0
2008-12-16	05:44:00	0
2008-12-16	05:45:00	0
2008-12-16	05:46:00	0
2008-12-16	05:47:00	0
2008-12-16	05:48:00	0
2008-12-16	05:49:00	0
2008-12-16	05:50:00	0
2008-12-16	05:51:00	0
2008-12-16	05:52:00	0
2008-12-16	05:53:00	0
2008-12-16	05:54:00	0
2008-12-16	05:55:00	0
2008-12-16	05:56:00	0
2008-12-16	05:57:00	0
2008-12-16	05:58:00	0
2008-12-16	05:59:00	0
2008-12-16	06:00:00	0
2008-12-16	06:01:00	0
2008-12-16	06:02:00	0
2008-12-16	06:03:00	0
2008-12-16	06:04:00	0
2008-12-16	06:05:00	0
2008-12-16	06:06:00	0
2008-12-16	06:07:00	0
2008-12-16	06:08:00	0
2008-12-16	06:09:00	0
2008-12-16	06:10:00	0
2008-12-16	06:11:00	0
2008-12-16	06:12:00	0
2008-12-16	06:13:00	0
2008-12-16	06:14:00	0
2008-12-16	06:15:00	0
2008-12-16	06:16:00	0
2008-12-16	06:17:00	0
2008-12-16	06:18:00	0
2008-12-16	06:19:00	0
2008-12-16	06:20:00	0
2008-12-16	06:21:00	0
2008-12-16	06:22:00	0
2008-12-16	06:23:00	0
2008-12-16	06:24:00	0
2008-12-16	06:25:00	0
2008-12-16	06:26:00	0
2008-12-16	06:27:00	0
2008-12-16	06:28:00	0
2008-12-16	06:29:00	0
2008-12-16	06:30:00	0
2008-12-16	06:31:00	0
2008-12-16	06:32:00	0
2008-12-16	06:33:00	0
2008-12-16	06:34:00	0
2008-12-16	06:35:00	0
2008-12-16	06:36:00	0
2008-12-16	06:37:00	0
2008-12-16	06:38:00	0
2008-12-16	06:39:00	0
2008-12-16	06:40:00	0
2008-12-16	06:41:00	0
2008-12-16	06:42:00	0
2008-12-16	06:43:00	0
2008-12-16	06:44:00	0
2008-12-16	06:45:00	0
2008-12-16	06:46:00	0
2008-12-16	06:47:00	0
2008-12-16	06:48:00	0
2008-12-16	06:49:00	0
2008-12-16	06:50:00	0
2008-12-16	06:51:00	0
2008-12-16	06:52:00	0
2008-12-16	06:53:00	0
2008-12-16	06:54:00	0
2008-12-16	06:55:00	0
2008-12-16	06:56:00	0
2008-12-16	06:57:00	0
2008-12-16	06:58:00	0
2008-12-16	06:59:00	0
2008-12-16	07:00:00	0
2008-12-16	07:01:00	0
2008-12-16	07:02:00	0
2008-12-16	07:03:00	0
2008-12-16	07:04:00	0
2008-12-16	07:05:00	0
2008-12-16	07:06:00	0
2008-12-16	07:07:00	0
2008-12-16	07:08:00	0
2008-12-16	07:09:00	0
2008-12-16	07:10:00	0
2008-12-16	07:11:00	0
2008-12-16	07:12:00	0
2008-12-16	07:13:00	0
2008-12-16	07:14:00	0
2008-12-16	07:15:00	0
2008-12-16	07:16:00	0
2008-12-16	07:17:00	0
2008-12-16	07:18:00	0
2008-12-16	07:19:00	0
2008-12-16	07:20:00	0
2008-12-16	07:21:00	0
2008-12-16	07:22:00	0
2008-12-16	07:23:00	0
2008-12-16	07:24:00	0
2008-12-16	07:25:00	0
2008-12-16	07:26:00	0
2008-12-16	07:27:00	0
2008-12-16	07:28:00	0
2008-12-16	07:29:00	0
2008-12-16	07:30:00	0
2008-12-16	07:31:00	0
2008-12-16	07:32:00	0
2008-12-16	07:33:00	0
2008-12-16	07:34:00	0
2008-12-16	07:35:00	0
2008-12-16	07:36:00	0
2008-12-16	07:37:00	0
2008-12-16	07:38:00	0
2008-12-16	07:39:00	0
2008-12-16	07:40:00	0
2008-12-16	07:41:00	0
2008-12-16	07:42:00	0
2008-12-16	07:43:00	0
2008-12-16	07:44:00	0
2008-12-16	07:45:00	0
2008-12-16	07:46:00	0
2008-12-16	07:47:00	0
2008-12-16	07:48:00	0
2008-12-16	07:49:00	0
2008-12-16	07:50:00	0
2008-12-16	07:51:00	0
2008-12-16	07:52:00	0
2008-12-16	07:53:00	0
2008-12-16	07:54:00	0
2008-12-16	07:55:00	0
2008-12-16	07:56:00	0
2008-12-16	07:57:00	0
2008-12-16	07:58:00	0
2008-12-16	07:59:00	0
2008-12-16	08:00:00	0
2008-12-16	08:01:00	0
2008-12-16	08:02:00	0
2008-12-16	08:03:00	0
2008-12-16	08:04:00	0
2008-12-16	08:05:00	0
2008-12-16	08:06:00	0
2008-12-16	08:07:00	0
2008-12-16	08:08:00	0
2008-12-16	08:09:00	0
2008-12-16	08:10:00	0
2008-12-16	08:11:00	0
2008-12-16	08:12:00	0
2008-12-16	08:13:00	0
2008-12-16	08:14:00	0
2008-12-16	08:15:00	0
2008-12-16	08:16:00	0
2008-12-16	08:17:00	0
2008-12-16	08:18:00	0
2008-12-16	08:19:00	0
2008-12-16	08:20:00	0
2008-12-16	08:21:00	0
2008-12-16	08:22:00	0
2008-12-16	08:23:00	0
2008-12-16	08:24:00	0
2008-12-16	08:25:00	0
2008-12-16	08:26:00	0
2008-12-16	08:27:00	0
2008-12-16	08:28:00	0
2008-12-16	08:29:00	0
2008-12-16	08:30:00	0
2008-12-16	08:31:00	0
2008-12-16	08:32:00	0
2008-12-16	08:33:00	0
2008-12-16	08:34:00	0
2008-12-16	08:35:00	0
2008-12-16	08:36:00	0
2008-12-16	08:37:00	0
2008-12-16	08:38:00	0
2008-12-16	08:39:00	0
2008-12-16	08:40:00	0
2008-12-16	08:41:00	0
2008-12-16	08:42:00	0
2008-12-16	08:43:00	0
2008-12-16	08:44:00	0
2008-12-16	08:45:00	0
2008-12-16	08:46:00	0
2008-12-16	08:47:00	0
2008-12-16	08:48:00	0
2008-12-16	08:49:00	0
2008-12-16	08:50:00	0
2008-12-16	08:51:00	0
2008-12-16	08:52:00	0
2008-12-16	08:53:00	0
2008-12-16	08:54:00	0
2008-12-16	08:55:00	0
2008-12-16	08:56:00	0
2008-12-16	08:57:00	0
2008-12-16	08:58:00	0
2008-12-16	08:59:00	0
2008-12-16	09:00:00	0
2008-12-16	09:01:00	0
2008-12-16	09:02:00	0
2008-12-16	09:03:00	0
2008-12-16	09:04:00	0
2008-12-16	09:05:00	0
2008-12-16	09:06:00	0
2008-12-16	09:07:00	0
2008-12-16	09:08:00	0
2008-12-16	09:09:00	0
2008-12-16	09:10:00	0
2008-12-16	09:11:00	0
2008-12-16	09:12:00	0
2008-12-16	09:13:00	0
2008-12-16	09:14:00	0
2008-12-16	09:15:00	0
2008-12-16	09:16:00	0
2008-12-16	09:17:00	0
2008-12-16	09:18:00	0
2008-12-16	09:19:00	0
2008-12-16	09:20:00	0
2008-12-16	09:21:00	0
2008-12-16	09:22:00	0
2008-12-16	09:23:00	0
2008-12-16	09:24:00	0
2008-12-16	09:25:00	0
2008-12-16	09:26:00	0
2008-12-16	09:27:00	0
2008-12-16	09:28:00	0
2008-12-16	09:29:00	0
2008-12-16	09:30:00	0
2008-12-16	09:31:00	0
2008-12-16	09:32:00	0
2008-12-16	09:33:00	0
2008-12-16	09:34:00	0
2008-12-16	09:35:00	0
2008-12-16	09:36:00	0
2008-12-16	09:37:00	0
2008-12-16	09:38:00	0
2008-12-16	09:39:00	0
2008-12-16	09:40:00	0
2008-12-16	09:41:00	0
2008-12-16	09:42:00	0
2008-12-16	09:43:00	0
2008-12-16	09:44:00	0
2008-12-16	09:45:00	0
2008-12-16	09:46:00	0
2008-12-16	09:47:00	0
2008-12-16	09:48:00	0
2008-12-16	09:49:00	0
2008-12-16	09:50:00	0
2008-12-16	09:51:00	0
2008-12-16	09:52:00	0
2008-12-16	09:53:00	0
2008-12-16	09:54:00	0
2008-12-16	09:55:00	0
2008-12-16	09:56:00	0
2008-12-16	09:57:00	0
2008-12-16	09:58:00	0
2008-12-16	09:59:00	0
2008-12-16	10:00:00	0
2008-12-16	10:01:00	0
2008-12-16	10:02:00	0
2008-12-16	10:03:00	0
2008-12-16	10:04:00	0
2008-12-16	10:05:00	0
2008-12-16	10:06:00	0
2008-12-16	10:07:00	0
2008-12-16	10:08:00	0
2008-12-16	10:09:00	0
2008-12-16	10:10:00	0
2008-12-16	10:11:00	0
2008-12-16	10:12:00	0
2008-12-16	10:13:00	0
2008-12-16	10:14:00	0
2008-12-16	10:15:00	0
2008-12-16	10:16:00	0
2008-12-16	10:17:00	0
2008-12-16	10:18:00	0
2008-12-16	10:19:00	0
2008-12-16	10:20:00	0
2008-12-16	10:21:00	0
2008-12-16	10:22:00	0
2008-12-16	10:23:00	0
2008-12-16	10:24:00	0
2008-12-16	10:25:00	0
2008-12-16	10:26:00	0
2008-12-16	10:27:00	0
2008-12-16	10:28:00	0
2008-12-16	10:29:00	0
2008-12-16	10:30:00	0
2008-12-16	10:31:00	0
2008-12-16	10:32:00	0
2008-12-16	10:33:00	0
2008-12-16	10:34:00	0
2008-12-16	10:35:00	0
2008-12-16	10:36:00	0
2008-12-16	10:37:00	0
2008-12-16	10:38:00	0
2008-12-16	10:39:00	0
2008-12-16	10:40:00	0
2008-12-16	10:41:00	0
2008-12-16	10:42:00	0
2008-12-16	10:43:00	0
2008-12-16	10:44:00	0
2008-12-16	10:45:00	0
2008-12-16	10:46:00	0
2008-12-16	10:47:00	0
2008-12-16	10:48:00	0
2008-12-16	10:49:00	0
2008-12-16	10:50:00	0
2008-12-16	10:51:00	0
2008-12-16	10:52:00	0
2008-12-16	10:53:00	0
2008-12-16	10:54:00	0
2008-12-16	10:55:00	0
2008-12-16	10:56:00	0
2008-12-16	10:57:00	0
2008-12-16	10:58:00	0
2008-12-16	10:59:00	0
2008-12-16	11:00:00	0
2008-12-16	11:01:00	0
2008-12-16	11:02:00	0
2008-12-16	11:03:00	0
2008-12-16	11:04:00	0
2008-12-16	11:05:00	0
2008-12-16	11:06:00	0
2008-12-16	11:07:00	0
2008-12-16	11:08:00	0
2008-12-16	11:09:00	0
2008-12-16	11:10:00	0
2008-12-16	11:11:00	0
2008-12-16	11:12:00	0
2008-12-16	11:13:00	0
2008-12-16	11:14:00	0
2008-12-16	11:15:00	0
2008-12-16	11:16:00	0
2008-12-16	11:17:00	0
2008-12-16	11:18:00	0
2008-12-16	11:19:00	0
2008-12-16	11:20:00	0
2008-12-16	11:21:00	0
2008-12-16	11:22:00	0
2008-12-16	11:23:00	0
2008-12-16	11:24:00	0
2008-12-16	11:25:00	0
2008-12-16	11:26:00	0
2008-12-16	11:27:00	0
2008-12-16	11:28:00	0
2008-12-16	11:29:00	0
2008-12-16	11:30:00	0
2008-12-16	11:31:00	0
2008-12-16	11:32:00	0
2008-12-16	11:33:00	0
2008-12-16	11:34:00	0
2008-12-16	11:35:00	0
2008-12-16	11:36:00	0
2008-12-16	11:37:00	0
2008-12-16	11:38:00	0
2008-12-16	11:39:00	0
2008-12-16	11:40:00	0
2008-12-16	11:41:00	0
2008-12-16	11:42:00	0
2008-12-16	11:43:00	0
2008-12-16	11:44:00	0
2008-12-16	11:45:00	0
2008-12-16	11:46:00	0
2008-12-16	11:47:00	0
2008-12-16	11:48:00	0
2008-12-16	11:49:00	0
2008-12-16	11:50:00	0
2008-12-16	11:51:00	0
2008-12-16	11:52:00	0
2008-12-16	11:53:00	0
2008-12-16	11:54:00	0
2008-12-16	11:55:00	0
2008-12-16	11:56:00	0
2008-12-16	11:57:00	0
2008-12-16	11:58:00	0
2008-12-16	11:59:00	0
2008-12-16	12:00:00	0
2008-12-16	12:01:00	0
2008-12-16	12:02:00	0
2008-12-16	12:03:00	0
2008-12-16	12:04:00	0
2008-12-16	12:05:00	0
2008-12-16	12:06:00	0
2008-12-16	12:07:00	0
2008-12-16	12:08:00	0
2008-12-16	12:09:00	0
2008-12-16	12:10:00	0
2008-12-16	12:11:00	0
2008-12-16	12:12:00	0
2008-12-16	12:13:00	0
2008-12-16	12:14:00	0
2008-12-16	12:15:00	0
2008-12-16	12:16:00	0
2008-12-16	12:17:00	0
2008-12-16	12:18:00	0
2008-12-16	12:19:00	0
2008-12-16	12:20:00	0
2008-12-16	12:21:00	0
2008-12-16	12:22:00	0
2008-12-16	12:23:00	0
2008-12-16	12:24:00	0
2008-12-16	12:25:00	0
2008-12-16	12:26:00	0
2008-12-16	12:27:00	0
2008-12-16	12:28:00	0
2008-12-16	12:29:00	0
2008-12-16	12:30:00	0
2008-12-16	12:31:00	0
2008-12-16	12:32:00	0
2008-12-16	12:33:00	0
2008-12-16	12:34:00	0
2008-12-16	12:35:00	0
2008-12-16	12:36:00	0
2008-12-16	12:37:00	0
2008-12-16	12:38:00	0
2008-12-16	12:39:00	0
2008-12-16	12:40:00	0
2008-12-16	12:41:00	0
2008-12-16	12:42:00	0
2008-12-16	12:43:00	0
2008-12-16	12:44:00	0
2008-12-16	12:45:00	0
2008-12-16	12:46:00	0
2008-12-16	12:47:00	0
2008-12-16	12:48:00	0
2008-12-16	12:49:00	0
2008-12-16	12:50:00	0
2008-12-16	12:51:00	0
2008-12-16	12:52:00	0
2008-12-16	12:53:00	0
2008-12-16	12:54:00	0
2008-12-16	12:55:00	0
2008-12-16	12:56:00	0
2008-12-16	12:57:00	0
2008-12-16	12:58:00	0
2008-12-16	12:59:00	0
2008-12-16	13:00:00	0
2008-12-16	13:01:00	0
2008-12-16	13:02:00	0
2008-12-16	13:03:00	0
2008-12-16	13:04:00	0
2008-12-16	13:05:00	0
2008-12-16	13:06:00	0
2008-12-16	13:07:00	0
2008-12-16	13:08:00	0
2008-12-16	13:09:00	0
2008-12-16	13:10:00	0
2008-12-16	13:11:00	0
2008-12-16	13:12:00	0
2008-12-16	13:13:00	0
2008-12-16	13:14:00	0
2008-12-16	13:15:00	0
2008-12-16	13:16:00	0
2008-12-16	13:17:00	0
2008-12-16	13:18:00	0
2008-12-16	13:19:00	0
2008-12-16	13:20:00	0
2008-12-16	13:21:00	0
2008-12-16	13:22:00	0
2008-12-16	13:23:00	0
2008-12-16	13:24:00	0
2008-12-16	13:25:00	0
2008-12-16	13:26:00	0
2008-12-16	13:27:00	0
2008-12-16	13:28:00	0
2008-12-16	13:29:00	0
2008-12-16	13:30:00	0
2008-12-16	13:31:00	0
2008-12-16	13:32:00	0
2008-12-16	13:33:00	0
2008-12-16	13:34:00	0
2008-12-16	13:35:00	0
2008-12-16	13:36:00	0
2008-12-16	13:37:00	0
2008-12-16	13:38:00	0
2008-12-16	13:39:00	0
2008-12-16	13:40:00	0
2008-12-16	13:41:00	0
2008-12-16	13:42:00	0
2008-12-16	13:43:00	0
2008-12-16	13:44:00	0
2008-12-16	13:45:00	0
2008-12-16	13:46:00	0
2008-12-16	13:47:00	0
2008-12-16	13:48:00	0
2008-12-16	13:49:00	0
2008-12-16	13:50:00	0
2008-12-16	13:51:00	0
2008-12-16	13:52:00	0
2008-12-16	13:53:00	0
2008-12-16	13:54:00	0
2008-12-16	13:55:00	0
2008-12-16	13:56:00	0
2008-12-16	13:57:00	0
2008-12-16	13:58:00	0
2008-12-16	13:59:00	0
2008-12-16	14:00:00	0
2008-12-16	14:01:00	0
2008-12-16	14:02:00	0
2008-12-16	14:03:00	0
2008-12-16	14:04:00	0
2008-12-16	14:05:00	0
2008-12-16	14:06:00	0
2008-12-16	14:07:00	0
2008-12-16	14:08:00	0
2008-12-16	14:09:00	0
2008-12-16	14:10:00	0
2008-12-16	14:11:00	0
2008-12-16	14:12:00	0
2008-12-16	14:13:00	0
2008-12-16	14:14:00	0
2008-12-16	14:15:00	0
2008-12-16	14:16:00	0
2008-12-16	14:17:00	0
2008-12-16	14:18:00	0
2008-12-16	14:19:00	0
2008-12-16	14:20:00	0
2008-12-16	14:21:00	0
2008-12-16	14:22:00	0
2008-12-16	14:23:00	0
2008-12-16	14:24:00	0
2008-12-16	14:25:00	0
2008-12-16	14:26:00	0
2008-12-16	14:27:00	0
2008-12-16	14:28:00	0
2008-12-16	14:29:00	0
2008-12-16	14:30:00	0
2008-12-16	14:31:00	0
2008-12-16	14:32:00	0
2008-12-16	14:33:00	0
2008-12-16	14:34:00	0
2008-12-16	14:35:00	0
2008-12-16	14:36:00	0
2008-12-16	14:37:00	0
2008-12-16	14:38:00	0
2008-12-16	14:39:00	0
2008-12-16	14:40:00	0
2008-12-16	14:41:00	0
2008-12-16	14:42:00	0
2008-12-16	14:43:00	0
2008-12-16	14:44:00	0
2008-12-16	14:45:00	0
2008-12-16	14:46:00	0
2008-12-16	14:47:00	0
2008-12-16	14:48:00	0
2008-12-16	14:49:00	0
2008-12-16	14:50:00	0
2008-12-16	14:51:00	0
2008-12-16	14:52:00	0
2008-12-16	14:53:00	0
2008-12-16	14:54:00	0
2008-12-16	14:55:00	0
2008-12-16	14:56:00	0
2008-12-16	14:57:00	0
2008-12-16	14:58:00	0
2008-12-16	14:59:00	0
2008-12-16	15:00:00	0
2008-12-16	15:01:00	0
2008-12-16	15:02:00	0
2008-12-16	15:03:00	0
2008-12-16	15:04:00	0
2008-12-16	15:05:00	0
2008-12-16	15:06:00	0
2008-12-16	15:07:00	0
2008-12-16	15:08:00	0
2008-12-16	15:09:00	0
2008-12-16	15:10:00	0
2008-12-16	15:11:00	0
2008-12-16	15:12:00	0
2008-12-16	15:13:00	0
2008-12-16	15:14:00	0
2008-12-16	15:15:00	0
2008-12-16	15:16:00	0
2008-12-16	15:17:00	0
2008-12-16	15:18:00	0
2008-12-16	15:19:00	0
2008-12-16	15:20:00	0
2008-12-16	15:21:00	0
2008-12-16	15:22:00	0
2008-12-16	15:23:00	0
2008-12-16	15:24:00	0
2008-12-16	15:25:00	0
2008-12-16	15:26:00	0
2008-12-16	15:27:00	0
2008-12-16	15:28:00	0
2008-12-16	15:29:00	0
2008-12-16	15:30:00	0
2008-12-16	15:31:00	0
2008-12-16	15:32:00	0
2008-12-16	15:33:00	0
2008-12-16	15:34:00	0
2008-12-16	15:35:00	0
2008-12-16	15:36:00	0
2008-12-16	15:37:00	0
2008-12-16	15:38:00	0
2008-12-16	15:39:00	0
2008-12-16	15:40:00	0
2008-12-16	15:41:00	0
2008-12-16	15:42:00	0
2008-12-16	15:43:00	0
2008-12-16	15:44:00	0
2008-12-16	15:45:00	0
2008-12-16	15:46:00	0
2008-12-16	15:47:00	0
2008-12-16	15:48:00	0
2008-12-16	15:49:00	0
2008-12-16	15:50:00	0
2008-12-16	15:51:00	0
2008-12-16	15:52:00	0
2008-12-16	15:53:00	0
2008-12-16	15:54:00	0
2008-12-16	15:55:00	0
2008-12-16	15:56:00	0
2008-12-16	15:57:00	0
2008-12-16	15:58:00	0
2008-12-16	15:59:00	0
2008-12-16	16:00:00	0
2008-12-16	16:01:00	0
2008-12-16	16:02:00	0
2008-12-16	16:03:00	0
2008-12-16	16:04:00	0
2008-12-16	16:05:00	0
2008-12-16	16:06:00	0
2008-12-16	16:07:00	0
2008-12-16	16:08:00	0
2008-12-16	16:09:00	0
2008-12-16	16:10:00	0
2008-12-16	16:11:00	0
2008-12-16	16:12:00	0
2008-12-16	16:13:00	0
2008-12-16	16:14:00	0
2008-12-16	16:15:00	0
2008-12-16	16:16:00	0
2008-12-16	16:17:00	0
2008-12-16	16:18:00	0
2008-12-16	16:19:00	0
2008-12-16	16:20:00	0
2008-12-16	16:21:00	0
2008-12-16	16:22:00	0
2008-12-16	16:23:00	0
2008-12-16	16:24:00	0
2008-12-16	16:25:00	0
2008-12-16	16:26:00	0
2008-12-16	16:27:00	0
2008-12-16	16:28:00	0
2008-12-16	16:29:00	0
2008-12-16	16:30:00	0
2008-12-16	16:31:00	0
2008-12-16	16:32:00	0
2008-12-16	16:33:00	0
2008-12-16	16:34:00	0
2008-12-16	16:35:00	0
2008-12-16	16:36:00	0
2008-12-16	16:37:00	0
2008-12-16	16:38:00	0
2008-12-16	16:39:00	0
2008-12-16	16:40:00	0
2008-12-16	16:41:00	0
2008-12-16	16:42:00	0
2008-12-16	16:43:00	0
2008-12-16	16:44:00	0
2008-12-16	16:45:00	0
2008-12-16	16:46:00	0
2008-12-16	16:47:00	0
2008-12-16	16:48:00	0
2008-12-16	16:49:00	0
2008-12-16	16:50:00	0
2008-12-16	16:51:00	0
2008-12-16	16:52:00	0
2008-12-16	16:53:00	0
2008-12-16	16:54:00	0
2008-12-16	16:55:00	0
2008-12-16	16:56:00	0
2008-12-16	16:57:00	0
2008-12-16	16:58:00	0
2008-12-16	16:59:00	0
2008-12-16	17:00:00	10
2008-12-16	17:01:00	230
2008-12-16	17:02:00	81
2008-12-16	17:03:00	280
2008-12-16	17:04:00	20
2008-12-16	17:05:00	0
2008-12-16	17:06:00	295
2008-12-16	17:07:00	91
2008-12-16	17:08:00	20
2008-12-16	17:09:00	475
2008-12-16	17:10:00	205
2008-12-16	17:11:00	41
2008-12-16	17:12:00	0
2008-12-16	17:13:00	20
2008-12-16	17:14:00	41
2008-12-16	17:15:00	10
2008-12-16	17:16:00	0
2008-12-16	17:17:00	20
2008-12-16	17:18:00	205
2008-12-16	17:19:00	0
2008-12-16	17:20:00	10
2008-12-16	17:21:00	0
2008-12-16	17:22:00	30
2008-12-16	17:23:00	10
2008-12-16	17:24:00	579
2008-12-16	17:25:00	81
2008-12-16	17:26:00	10
2008-12-16	17:27:00	0
2008-12-16	17:28:00	0
2008-12-16	17:29:00	0
2008-12-16	17:30:00	41
2008-12-16	17:31:00	0
2008-12-16	17:32:00	0
2008-12-16	17:33:00	0
2008-12-16	17:34:00	0
2008-12-16	17:35:00	0
2008-12-16	17:36:00	0
2008-12-16	17:37:00	0
2008-12-16	17:38:00	0
2008-12-16	17:39:00	0
2008-12-16	17:40:00	0
2008-12-16	17:41:00	0
2008-12-16	17:42:00	0
2008-12-16	17:43:00	0
2008-12-16	17:44:00	0
2008-12-16	17:45:00	20
2008-12-16	17:46:00	0
2008-12-16	17:47:00	0
2008-12-16	17:48:00	0
2008-12-16	17:49:00	0
2008-12-16	17:50:00	0
2008-12-16	17:51:00	0
2008-12-16	17:52:00	0
2008-12-16	17:53:00	0
2008-12-16	17:54:00	0
2008-12-16	17:55:00	0
2008-12-16	17:56:00	0
2008-12-16	17:57:00	0
2008-12-16	17:58:00	0
2008-12-16	17:59:00	0
2008-12-16	18:00:00	0
2008-12-16	18:01:00	0
2008-12-16	18:02:00	0
2008-12-16	18:03:00	0
2008-12-16	18:04:00	0
2008-12-16	18:05:00	0
2008-12-16	18:06:00	0
2008-12-16	18:07:00	0
2008-12-16	18:08:00	0
2008-12-16	18:09:00	0
2008-12-16	18:10:00	0
2008-12-16	18:11:00	0
2008-12-16	18:12:00	0
2008-12-16	18:13:00	0
2008-12-16	18:14:00	10
2008-12-16	18:15:00	41
2008-12-16	18:16:00	0
2008-12-16	18:17:00	0
2008-12-16	18:18:00	0
2008-12-16	18:19:00	30
2008-12-16	18:20:00	0
2008-12-16	18:21:00	30
2008-12-16	18:22:00	91
2008-12-16	18:23:00	0
2008-12-16	18:24:00	0
2008-12-16	18:25:00	0
2008-12-16	18:26:00	0
2008-12-16	18:27:00	0
2008-12-16	18:28:00	0
2008-12-16	18:29:00	0
2008-12-16	18:30:00	0
2008-12-16	18:31:00	0
2008-12-16	18:32:00	0
2008-12-16	18:33:00	0
2008-12-16	18:34:00	0
2008-12-16	18:35:00	0
2008-12-16	18:36:00	0
2008-12-16	18:37:00	10
2008-12-16	18:38:00	0
2008-12-16	18:39:00	0
2008-12-16	18:40:00	754
2008-12-16	18:41:00	410
2008-12-16	18:42:00	0
2008-12-16	18:43:00	0
2008-12-16	18:44:00	102
2008-12-16	18:45:00	0
2008-12-16	18:46:00	0
2008-12-16	18:47:00	0
2008-12-16	18:48:00	0
2008-12-16	18:49:00	0
2008-12-16	18:50:00	0
2008-12-16	18:51:00	0
2008-12-16	18:52:00	0
2008-12-16	18:53:00	0
2008-12-16	18:54:00	0
2008-12-16	18:55:00	0
2008-12-16	18:56:00	0
2008-12-16	18:57:00	0
2008-12-16	18:58:00	71
2008-12-16	18:59:00	0
2008-12-16	19:00:00	0
2008-12-16	19:01:00	0
2008-12-16	19:02:00	0
2008-12-16	19:03:00	0
2008-12-16	19:04:00	0
2008-12-16	19:05:00	0
2008-12-16	19:06:00	0
2008-12-16	19:07:00	0
2008-12-16	19:08:00	0
2008-12-16	19:09:00	0
2008-12-16	19:10:00	0
2008-12-16	19:11:00	0
2008-12-16	19:12:00	0
2008-12-16	19:13:00	0
2008-12-16	19:14:00	0
2008-12-16	19:15:00	0
2008-12-16	19:16:00	10
2008-12-16	19:17:00	0
2008-12-16	19:18:00	0
2008-12-16	19:19:00	0
2008-12-16	19:20:00	0
2008-12-16	19:21:00	0
2008-12-16	19:22:00	10
2008-12-16	19:23:00	41
2008-12-16	19:24:00	774
2008-12-16	19:25:00	156
2008-12-16	19:26:00	41
2008-12-16	19:27:00	0
2008-12-16	19:28:00	0
2008-12-16	19:29:00	0
2008-12-16	19:30:00	0
2008-12-16	19:31:00	0
2008-12-16	19:32:00	0
2008-12-16	19:33:00	0
2008-12-16	19:34:00	0
2008-12-16	19:35:00	0
2008-12-16	19:36:00	0
2008-12-16	19:37:00	0
2008-12-16	19:38:00	0
2008-12-16	19:39:00	0
2008-12-16	19:40:00	0
2008-12-16	19:41:00	0
2008-12-16	19:42:00	0
2008-12-16	19:43:00	0
2008-12-16	19:44:00	0
2008-12-16	19:45:00	0
2008-12-16	19:46:00	0
2008-12-16	19:47:00	0
2008-12-16	19:48:00	0
2008-12-16	19:49:00	0
2008-12-16	19:50:00	0
2008-12-16	19:51:00	0
2008-12-16	19:52:00	0
2008-12-16	19:53:00	0
2008-12-16	19:54:00	0
2008-12-16	19:55:00	0
2008-12-16	19:56:00	0
2008-12-16	19:57:00	0
2008-12-16	19:58:00	0
2008-12-16	19:59:00	10
2008-12-16	20:00:00	0
2008-12-16	20:01:00	0
2008-12-16	20:02:00	0
2008-12-16	20:03:00	0
2008-12-16	20:04:00	1447
2008-12-16	20:05:00	754
2008-12-16	20:06:00	132
2008-12-16	20:07:00	0
2008-12-16	20:08:00	193
2008-12-16	20:09:00	266
2008-12-16	20:10:00	20
2008-12-16	20:11:00	41
2008-12-16	20:12:00	0
2008-12-16	20:13:00	0
2008-12-16	20:14:00	0
2008-12-16	20:15:00	0
2008-12-16	20:16:00	20
2008-12-16	20:17:00	0
2008-12-16	20:18:00	0
2008-12-16	20:19:00	0
2008-12-16	20:20:00	0
2008-12-16	20:21:00	0
2008-12-16	20:22:00	0
2008-12-16	20:23:00	0
2008-12-16	20:24:00	0
2008-12-16	20:25:00	0
2008-12-16	20:26:00	0
2008-12-16	20:27:00	0
2008-12-16	20:28:00	0
2008-12-16	20:29:00	0
2008-12-16	20:30:00	0
2008-12-16	20:31:00	0
2008-12-16	20:32:00	0
2008-12-16	20:33:00	0
2008-12-16	20:34:00	0
2008-12-16	20:35:00	0
2008-12-16	20:36:00	0
2008-12-16	20:37:00	0
2008-12-16	20:38:00	0
2008-12-16	20:39:00	0
2008-12-16	20:40:00	0
2008-12-16	20:41:00	0
2008-12-16	20:42:00	0
2008-12-16	20:43:00	0
2008-12-16	20:44:00	0
2008-12-16	20:45:00	0
2008-12-16	20:46:00	20
2008-12-16	20:47:00	0
2008-12-16	20:48:00	0
2008-12-16	20:49:00	0
2008-12-16	20:50:00	0
2008-12-16	20:51:00	0
2008-12-16	20:52:00	0
2008-12-16	20:53:00	0
2008-12-16	20:54:00	0
2008-12-16	20:55:00	0
2008-12-16	20:56:00	0
2008-12-16	20:57:00	0
2008-12-16	20:58:00	0
2008-12-16	20:59:00	0
2008-12-16	21:00:00	0
2008-12-16	21:01:00	0
2008-12-16	21:02:00	0
2008-12-16	21:03:00	0
2008-12-16	21:04:00	0
2008-12-16	21:05:00	0
2008-12-16	21:06:00	0
2008-12-16	21:07:00	0
2008-12-16	21:08:00	0
2008-12-16	21:09:00	0
2008-12-16	21:10:00	0
2008-12-16	21:11:00	0
2008-12-16	21:12:00	0
2008-12-16	21:13:00	0
2008-12-16	21:14:00	0
2008-12-16	21:15:00	10
2008-12-16	21:16:00	0
2008-12-16	21:17:00	0
2008-12-16	21:18:00	0
2008-12-16	21:19:00	0
2008-12-16	21:20:00	0
2008-12-16	21:21:00	0
2008-12-16	21:22:00	0
2008-12-16	21:23:00	0
2008-12-16	21:24:00	0
2008-12-16	21:25:00	0
2008-12-16	21:26:00	0
2008-12-16	21:27:00	0
2008-12-16	21:28:00	0
2008-12-16	21:29:00	0
2008-12-16	21:30:00	0
2008-12-16	21:31:00	0
2008-12-16	21:32:00	0
2008-12-16	21:33:00	0
2008-12-16	21:34:00	30
2008-12-16	21:35:00	30
2008-12-16	21:36:00	0
2008-12-16	21:37:00	0
2008-12-16	21:38:00	0
2008-12-16	21:39:00	0
2008-12-16	21:40:00	0
2008-12-16	21:41:00	0
2008-12-16	21:42:00	0
2008-12-16	21:43:00	0
2008-12-16	21:44:00	0
2008-12-16	21:45:00	0
2008-12-16	21:46:00	0
2008-12-16	21:47:00	0
2008-12-16	21:48:00	0
2008-12-16	21:49:00	20
2008-12-16	21:50:00	0
2008-12-16	21:51:00	102
2008-12-16	21:52:00	0
2008-12-16	21:53:00	0
2008-12-16	21:54:00	0
2008-12-16	21:55:00	0
2008-12-16	21:56:00	122
2008-12-16	21:57:00	144
2008-12-16	21:58:00	0
2008-12-16	21:59:00	144
2008-12-16	22:00:00	91
2008-12-16	22:01:00	0
2008-12-16	22:02:00	0
2008-12-16	22:03:00	0
2008-12-16	22:04:00	0
2008-12-16	22:05:00	0
2008-12-16	22:06:00	0
2008-12-16	22:07:00	0
2008-12-16	22:08:00	0
2008-12-16	22:09:00	0
2008-12-16	22:10:00	0
2008-12-16	22:11:00	0
2008-12-16	22:12:00	0
2008-12-16	22:13:00	0
2008-12-16	22:14:00	0
2008-12-16	22:15:00	0
2008-12-16	22:16:00	0
2008-12-16	22:17:00	0
2008-12-16	22:18:00	0
2008-12-16	22:19:00	0
2008-12-16	22:20:00	0
2008-12-16	22:21:00	0
2008-12-16	22:22:00	0
2008-12-16	22:23:00	0
2008-12-16	22:24:00	0
2008-12-16	22:25:00	0
2008-12-16	22:26:00	0
2008-12-16	22:27:00	0
2008-12-16	22:28:00	0
2008-12-16	22:29:00	0
2008-12-16	22:30:00	0
2008-12-16	22:31:00	0
2008-12-16	22:32:00	0
2008-12-16	22:33:00	0
2008-12-16	22:34:00	0
2008-12-16	22:35:00	0
2008-12-16	22:36:00	0
2008-12-16	22:37:00	0
2008-12-16	22:38:00	0
2008-12-16	22:39:00	0
2008-12-16	22:40:00	0
2008-12-16	22:41:00	0
2008-12-16	22:42:00	0
2008-12-16	22:43:00	0
2008-12-16	22:44:00	0
2008-12-16	22:45:00	20
2008-12-16	22:46:00	634
2008-12-16	22:47:00	953
2008-12-16	22:48:00	10
2008-12-16	22:49:00	20
2008-12-16	22:50:00	0
2008-12-16	22:51:00	0
2008-12-16	22:52:00	0
2008-12-16	22:53:00	10
2008-12-16	22:54:00	0
2008-12-16	22:55:00	0
2008-12-16	22:56:00	0
2008-12-16	22:57:00	0
2008-12-16	22:58:00	10
2008-12-16	22:59:00	0
2008-12-16	23:00:00	0
2008-12-16	23:01:00	0
2008-12-16	23:02:00	0
2008-12-16	23:03:00	0
2008-12-16	23:04:00	0
2008-12-16	23:05:00	0
2008-12-16	23:06:00	0
2008-12-16	23:07:00	0
2008-12-16	23:08:00	0
2008-12-16	23:09:00	0
2008-12-16	23:10:00	0
2008-12-16	23:11:00	0
2008-12-16	23:12:00	0
2008-12-16	23:13:00	0
2008-12-16	23:14:00	0
2008-12-16	23:15:00	0
2008-12-16	23:16:00	0
2008-12-16	23:17:00	0
2008-12-16	23:18:00	0
2008-12-16	23:19:00	0
2008-12-16	23:20:00	0
2008-12-16	23:21:00	0
2008-12-16	23:22:00	0
2008-12-16	23:23:00	0
2008-12-16	23:24:00	0
2008-12-16	23:25:00	0
2008-12-16	23:26:00	0
2008-12-16	23:27:00	0
2008-12-16	23:28:00	0
2008-12-16	23:29:00	0
2008-12-16	23:30:00	0
2008-12-16	23:31:00	0
2008-12-16	23:32:00	0
2008-12-16	23:33:00	0
2008-12-16	23:34:00	0
2008-12-16	23:35:00	0
2008-12-16	23:36:00	309
2008-12-16	23:37:00	112
2008-12-16	23:38:00	0
2008-12-16	23:39:00	10
2008-12-16	23:40:00	0
2008-12-16	23:41:00	0
2008-12-16	23:42:00	0
2008-12-16	23:43:00	0
2008-12-16	23:44:00	0
2008-12-16	23:45:00	0
2008-12-16	23:46:00	0
2008-12-16	23:47:00	0
2008-12-16	23:48:00	0
2008-12-16	23:49:00	0
2008-12-16	23:50:00	0
2008-12-16	23:51:00	0
2008-12-16	23:52:00	0
2008-12-16	23:53:00	0
2008-12-16	23:54:00	0
2008-12-16	23:55:00	0
2008-12-16	23:56:00	0
2008-12-16	23:57:00	0
2008-12-16	23:58:00	0
2008-12-16	23:59:00	0
2008-12-17	00:00:00	0
2008-12-17	00:01:00	0
2008-12-17	00:02:00	0
2008-12-17	00:03:00	20
2008-12-17	00:04:00	0
2008-12-17	00:05:00	0
2008-12-17	00:06:00	0
2008-12-17	00:07:00	0
2008-12-17	00:08:00	0
2008-12-17	00:09:00	0
2008-12-17	00:10:00	0
2008-12-17	00:11:00	0
2008-12-17	00:12:00	0
2008-12-17	00:13:00	0
2008-12-17	00:14:00	0
2008-12-17	00:15:00	0
2008-12-17	00:16:00	0
2008-12-17	00:17:00	0
2008-12-17	00:18:00	0
2008-12-17	00:19:00	0
2008-12-17	00:20:00	0
2008-12-17	00:21:00	0
2008-12-17	00:22:00	0
2008-12-17	00:23:00	0
2008-12-17	00:24:00	0
2008-12-17	00:25:00	0
2008-12-17	00:26:00	0
2008-12-17	00:27:00	0
2008-12-17	00:28:00	0
2008-12-17	00:29:00	0
2008-12-17	00:30:00	0
2008-12-17	00:31:00	0
2008-12-17	00:32:00	0
2008-12-17	00:33:00	0
2008-12-17	00:34:00	30
2008-12-17	00:35:00	0
2008-12-17	00:36:00	0
2008-12-17	00:37:00	0
2008-12-17	00:38:00	0
2008-12-17	00:39:00	0
2008-12-17	00:40:00	0
2008-12-17	00:41:00	0
2008-12-17	00:42:00	0
2008-12-17	00:43:00	0
2008-12-17	00:44:00	0
2008-12-17	00:45:00	0
2008-12-17	00:46:00	0
2008-12-17	00:47:00	10
2008-12-17	00:48:00	0
2008-12-17	00:49:00	0
2008-12-17	00:50:00	0
2008-12-17	00:51:00	0
2008-12-17	00:52:00	0
2008-12-17	00:53:00	0
2008-12-17	00:54:00	0
2008-12-17	00:55:00	0
2008-12-17	00:56:00	0
2008-12-17	00:57:00	0
2008-12-17	00:58:00	0
2008-12-17	00:59:00	0
2008-12-17	01:00:00	0
2008-12-17	01:01:00	0
2008-12-17	01:02:00	0
2008-12-17	01:03:00	0
2008-12-17	01:04:00	0
2008-12-17	01:05:00	0
2008-12-17	01:06:00	0
2008-12-17	01:07:00	0
2008-12-17	01:08:00	0
2008-12-17	01:09:00	0
2008-12-17	01:10:00	0
2008-12-17	01:11:00	0
2008-12-17	01:12:00	0
2008-12-17	01:13:00	0
2008-12-17	01:14:00	0
2008-12-17	01:15:00	0
2008-12-17	01:16:00	0
2008-12-17	01:17:00	0
2008-12-17	01:18:00	20
2008-12-17	01:19:00	41
2008-12-17	01:20:00	0
2008-12-17	01:21:00	0
2008-12-17	01:22:00	0
2008-12-17	01:23:00	0
2008-12-17	01:24:00	0
2008-12-17	01:25:00	0
2008-12-17	01:26:00	0
2008-12-17	01:27:00	0
2008-12-17	01:28:00	0
2008-12-17	01:29:00	0
2008-12-17	01:30:00	0
2008-12-17	01:31:00	0
2008-12-17	01:32:00	0
2008-12-17	01:33:00	0
2008-12-17	01:34:00	0
2008-12-17	01:35:00	0
2008-12-17	01:36:00	0
2008-12-17	01:37:00	0
2008-12-17	01:38:00	0
2008-12-17	01:39:00	0
2008-12-17	01:40:00	0
2008-12-17	01:41:00	0
2008-12-17	01:42:00	0
2008-12-17	01:43:00	0
2008-12-17	01:44:00	0
2008-12-17	01:45:00	0
2008-12-17	01:46:00	0
2008-12-17	01:47:00	0
2008-12-17	01:48:00	0
2008-12-17	01:49:00	0
2008-12-17	01:50:00	41
2008-12-17	01:51:00	41
2008-12-17	01:52:00	0
2008-12-17	01:53:00	0
2008-12-17	01:54:00	0
2008-12-17	01:55:00	0
2008-12-17	01:56:00	0
2008-12-17	01:57:00	0
2008-12-17	01:58:00	0
2008-12-17	01:59:00	0
2008-12-17	02:00:00	0
2008-12-17	02:01:00	0
2008-12-17	02:02:00	0
2008-12-17	02:03:00	0
2008-12-17	02:04:00	0
2008-12-17	02:05:00	0
2008-12-17	02:06:00	0
2008-12-17	02:07:00	0
2008-12-17	02:08:00	0
2008-12-17	02:09:00	0
2008-12-17	02:10:00	0
2008-12-17	02:11:00	0
2008-12-17	02:12:00	0
2008-12-17	02:13:00	0
2008-12-17	02:14:00	0
2008-12-17	02:15:00	0
2008-12-17	02:16:00	0
2008-12-17	02:17:00	0
2008-12-17	02:18:00	0
2008-12-17	02:19:00	0
2008-12-17	02:20:00	0
2008-12-17	02:21:00	0
2008-12-17	02:22:00	0
2008-12-17	02:23:00	0
2008-12-17	02:24:00	0
2008-12-17	02:25:00	0
2008-12-17	02:26:00	0
2008-12-17	02:27:00	0
2008-12-17	02:28:00	0
2008-12-17	02:29:00	0
2008-12-17	02:30:00	0
2008-12-17	02:31:00	0
2008-12-17	02:32:00	0
2008-12-17	02:33:00	0
2008-12-17	02:34:00	0
2008-12-17	02:35:00	0
2008-12-17	02:36:00	0
2008-12-17	02:37:00	0
2008-12-17	02:38:00	0
2008-12-17	02:39:00	0
2008-12-17	02:40:00	0
2008-12-17	02:41:00	0
2008-12-17	02:42:00	0
2008-12-17	02:43:00	0
2008-12-17	02:44:00	0
2008-12-17	02:45:00	0
2008-12-17	02:46:00	0
2008-12-17	02:47:00	0
2008-12-17	02:48:00	0
2008-12-17	02:49:00	0
2008-12-17	02:50:00	0
2008-12-17	02:51:00	0
2008-12-17	02:52:00	0
2008-12-17	02:53:00	0
2008-12-17	02:54:00	0
2008-12-17	02:55:00	0
2008-12-17	02:56:00	51
2008-12-17	02:57:00	0
2008-12-17	02:58:00	20
2008-12-17	02:59:00	0
2008-12-17	03:00:00	0
2008-12-17	03:01:00	10
2008-12-17	03:02:00	0
2008-12-17	03:03:00	0
2008-12-17	03:04:00	0
2008-12-17	03:05:00	0
2008-12-17	03:06:00	0
2008-12-17	03:07:00	0
2008-12-17	03:08:00	0
2008-12-17	03:09:00	0
2008-12-17	03:10:00	0
2008-12-17	03:11:00	0
2008-12-17	03:12:00	0
2008-12-17	03:13:00	0
2008-12-17	03:14:00	0
2008-12-17	03:15:00	0
2008-12-17	03:16:00	0
2008-12-17	03:17:00	0
2008-12-17	03:18:00	0
2008-12-17	03:19:00	0
2008-12-17	03:20:00	0
2008-12-17	03:21:00	0
2008-12-17	03:22:00	0
2008-12-17	03:23:00	0
2008-12-17	03:24:00	0
2008-12-17	03:25:00	0
2008-12-17	03:26:00	0
2008-12-17	03:27:00	0
2008-12-17	03:28:00	0
2008-12-17	03:29:00	0
2008-12-17	03:30:00	0
2008-12-17	03:31:00	0
2008-12-17	03:32:00	0
2008-12-17	03:33:00	0
2008-12-17	03:34:00	0
2008-12-17	03:35:00	0
2008-12-17	03:36:00	0
2008-12-17	03:37:00	0
2008-12-17	03:38:00	0
2008-12-17	03:39:00	0
2008-12-17	03:40:00	0
2008-12-17	03:41:00	0
2008-12-17	03:42:00	0
2008-12-17	03:43:00	0
2008-12-17	03:44:00	0
2008-12-17	03:45:00	0
2008-12-17	03:46:00	0
2008-12-17	03:47:00	0
2008-12-17	03:48:00	0
2008-12-17	03:49:00	0
2008-12-17	03:50:00	41
2008-12-17	03:51:00	71
2008-12-17	03:52:00	41
2008-12-17	03:53:00	0
2008-12-17	03:54:00	0
2008-12-17	03:55:00	0
2008-12-17	03:56:00	0
2008-12-17	03:57:00	0
2008-12-17	03:58:00	10
2008-12-17	03:59:00	0
2008-12-17	04:00:00	0
2008-12-17	04:01:00	0
2008-12-17	04:02:00	10
2008-12-17	04:03:00	205
2008-12-17	04:04:00	634
2008-12-17	04:05:00	410
2008-12-17	04:06:00	0
2008-12-17	04:07:00	10
2008-12-17	04:08:00	0
2008-12-17	04:09:00	0
2008-12-17	04:10:00	0
2008-12-17	04:11:00	0
2008-12-17	04:12:00	0
2008-12-17	04:13:00	0
2008-12-17	04:14:00	0
2008-12-17	04:15:00	0
2008-12-17	04:16:00	0
2008-12-17	04:17:00	0
2008-12-17	04:18:00	0
2008-12-17	04:19:00	0
2008-12-17	04:20:00	0
2008-12-17	04:21:00	0
2008-12-17	04:22:00	0
2008-12-17	04:23:00	0
2008-12-17	04:24:00	0
2008-12-17	04:25:00	0
2008-12-17	04:26:00	0
2008-12-17	04:27:00	0
2008-12-17	04:28:00	0
2008-12-17	04:29:00	0
2008-12-17	04:30:00	0
2008-12-17	04:31:00	81
2008-12-17	04:32:00	0
2008-12-17	04:33:00	0
2008-12-17	04:34:00	0
2008-12-17	04:35:00	0
2008-12-17	04:36:00	0
2008-12-17	04:37:00	0
2008-12-17	04:38:00	0
2008-12-17	04:39:00	0
2008-12-17	04:40:00	0
2008-12-17	04:41:00	0
2008-12-17	04:42:00	0
2008-12-17	04:43:00	0
2008-12-17	04:44:00	0
2008-12-17	04:45:00	0
2008-12-17	04:46:00	0
2008-12-17	04:47:00	0
2008-12-17	04:48:00	0
2008-12-17	04:49:00	112
2008-12-17	04:50:00	0
2008-12-17	04:51:00	0
2008-12-17	04:52:00	0
2008-12-17	04:53:00	0
2008-12-17	04:54:00	0
2008-12-17	04:55:00	0
2008-12-17	04:56:00	0
2008-12-17	04:57:00	0
2008-12-17	04:58:00	0
2008-12-17	04:59:00	0
2008-12-17	05:00:00	0
2008-12-17	05:01:00	0
2008-12-17	05:02:00	0
2008-12-17	05:03:00	0
2008-12-17	05:04:00	10
2008-12-17	05:05:00	0
2008-12-17	05:06:00	41
2008-12-17	05:07:00	71
2008-12-17	05:08:00	41
2008-12-17	05:09:00	0
2008-12-17	05:10:00	0
2008-12-17	05:11:00	0
2008-12-17	05:12:00	0
2008-12-17	05:13:00	0
2008-12-17	05:14:00	0
2008-12-17	05:15:00	0
2008-12-17	05:16:00	0
2008-12-17	05:17:00	0
2008-12-17	05:18:00	0
2008-12-17	05:19:00	0
2008-12-17	05:20:00	0
2008-12-17	05:21:00	0
2008-12-17	05:22:00	0
2008-12-17	05:23:00	0
2008-12-17	05:24:00	0
2008-12-17	05:25:00	0
2008-12-17	05:26:00	0
2008-12-17	05:27:00	0
2008-12-17	05:28:00	0
2008-12-17	05:29:00	0
2008-12-17	05:30:00	0
2008-12-17	05:31:00	0
2008-12-17	05:32:00	122
2008-12-17	05:33:00	0
2008-12-17	05:34:00	0
2008-12-17	05:35:00	0
2008-12-17	05:36:00	0
2008-12-17	05:37:00	0
2008-12-17	05:38:00	0
2008-12-17	05:39:00	0
2008-12-17	05:40:00	0
2008-12-17	05:41:00	0
2008-12-17	05:42:00	0
2008-12-17	05:43:00	0
2008-12-17	05:44:00	0
2008-12-17	05:45:00	0
2008-12-17	05:46:00	0
2008-12-17	05:47:00	0
2008-12-17	05:48:00	0
2008-12-17	05:49:00	0
2008-12-17	05:50:00	112
2008-12-17	05:51:00	0
2008-12-17	05:52:00	0
2008-12-17	05:53:00	0
2008-12-17	05:54:00	0
2008-12-17	05:55:00	0
2008-12-17	05:56:00	0
2008-12-17	05:57:00	0
2008-12-17	05:58:00	0
2008-12-17	05:59:00	0
2008-12-17	06:00:00	10
2008-12-17	06:01:00	0
2008-12-17	06:02:00	0
2008-12-17	06:03:00	0
2008-12-17	06:04:00	41
2008-12-17	06:05:00	0
2008-12-17	06:06:00	0
2008-12-17	06:07:00	0
2008-12-17	06:08:00	81
2008-12-17	06:09:00	10
2008-12-17	06:10:00	10
2008-12-17	06:11:00	102
2008-12-17	06:12:00	10
2008-12-17	06:13:00	10
2008-12-17	06:14:00	132
2008-12-17	06:15:00	41
2008-12-17	06:16:00	1479
2008-12-17	06:17:00	542
2008-12-17	06:18:00	634
2008-12-17	06:19:00	266
2008-12-17	06:20:00	794
2008-12-17	06:21:00	41
2008-12-17	06:22:00	0
2008-12-17	06:23:00	0
2008-12-17	06:24:00	0
2008-12-17	06:25:00	10
2008-12-17	06:26:00	0
2008-12-17	06:27:00	0
2008-12-17	06:28:00	0
2008-12-17	06:29:00	0
2008-12-17	06:30:00	0
2008-12-17	06:31:00	0
2008-12-17	06:32:00	0
2008-12-17	06:33:00	0
2008-12-17	06:34:00	0
2008-12-17	06:35:00	0
2008-12-17	06:36:00	0
2008-12-17	06:37:00	0
2008-12-17	06:38:00	0
2008-12-17	06:39:00	0
2008-12-17	06:40:00	0
2008-12-17	06:41:00	0
2008-12-17	06:42:00	0
2008-12-17	06:43:00	0
2008-12-17	06:44:00	0
2008-12-17	06:45:00	0
2008-12-17	06:46:00	0
2008-12-17	06:47:00	0
2008-12-17	06:48:00	0
2008-12-17	06:49:00	30
2008-12-17	06:50:00	112
2008-12-17	06:51:00	20
2008-12-17	06:52:00	51
2008-12-17	06:53:00	0
2008-12-17	06:54:00	41
2008-12-17	06:55:00	30
2008-12-17	06:56:00	30
2008-12-17	06:57:00	0
2008-12-17	06:58:00	0
2008-12-17	06:59:00	0
2008-12-17	07:00:00	0
2008-12-17	07:01:00	41
2008-12-17	07:02:00	0
2008-12-17	07:03:00	0
2008-12-17	07:04:00	0
2008-12-17	07:05:00	0
2008-12-17	07:06:00	0
2008-12-17	07:07:00	0
2008-12-17	07:08:00	0
2008-12-17	07:09:00	0
2008-12-17	07:10:00	0
2008-12-17	07:11:00	0
2008-12-17	07:12:00	0
2008-12-17	07:13:00	0
2008-12-17	07:14:00	0
2008-12-17	07:15:00	0
2008-12-17	07:16:00	0
2008-12-17	07:17:00	0
2008-12-17	07:18:00	0
2008-12-17	07:19:00	0
2008-12-17	07:20:00	0
2008-12-17	07:21:00	0
2008-12-17	07:22:00	0
2008-12-17	07:23:00	0
2008-12-17	07:24:00	0
2008-12-17	07:25:00	0
2008-12-17	07:26:00	0
2008-12-17	07:27:00	0
2008-12-17	07:28:00	0
2008-12-17	07:29:00	0
2008-12-17	07:30:00	0
2008-12-17	07:31:00	0
2008-12-17	07:32:00	0
2008-12-17	07:33:00	0
2008-12-17	07:34:00	0
2008-12-17	07:35:00	0
2008-12-17	07:36:00	0
2008-12-17	07:37:00	0
2008-12-17	07:38:00	0
2008-12-17	07:39:00	0
2008-12-17	07:40:00	0
2008-12-17	07:41:00	10
2008-12-17	07:42:00	0
2008-12-17	07:43:00	0
2008-12-17	07:44:00	0
2008-12-17	07:45:00	0
2008-12-17	07:46:00	0
2008-12-17	07:47:00	0
2008-12-17	07:48:00	10
2008-12-17	07:49:00	30
2008-12-17	07:50:00	0
2008-12-17	07:51:00	10
2008-12-17	07:52:00	0
2008-12-17	07:53:00	71
2008-12-17	07:54:00	10
2008-12-17	07:55:00	0
2008-12-17	07:56:00	0
2008-12-17	07:57:00	542
2008-12-17	07:58:00	380
2008-12-17	07:59:00	51
2008-12-17	08:00:00	0
2008-12-17	08:01:00	309
2008-12-17	08:02:00	2318
2008-12-17	08:03:00	2060
2008-12-17	08:04:00	953
2008-12-17	08:05:00	542
2008-12-17	08:06:00	634
2008-12-17	08:07:00	839
2008-12-17	08:08:00	1680
2008-12-17	08:09:00	2101
2008-12-17	08:10:00	817
2008-12-17	08:11:00	380
2008-12-17	08:12:00	410
2008-12-17	08:13:00	953
2008-12-17	08:14:00	542
2008-12-17	08:15:00	30
2008-12-17	08:16:00	156
2008-12-17	08:17:00	459
2008-12-17	08:18:00	579
2008-12-17	08:19:00	380
2008-12-17	08:20:00	102
2008-12-17	08:21:00	230
2008-12-17	08:22:00	71
2008-12-17	08:23:00	323
2008-12-17	08:24:00	41
2008-12-17	08:25:00	10
2008-12-17	08:26:00	323
2008-12-17	08:27:00	1611
2008-12-17	08:28:00	1479
2008-12-17	08:29:00	884
2008-12-17	08:30:00	953
2008-12-17	08:31:00	1902
2008-12-17	08:32:00	380
2008-12-17	08:33:00	524
2008-12-17	08:34:00	2229
2008-12-17	08:35:00	693
2008-12-17	08:36:00	217
2008-12-17	08:37:00	673
2008-12-17	08:38:00	524
2008-12-17	08:39:00	30
2008-12-17	08:40:00	30
2008-12-17	08:41:00	20
2008-12-17	08:42:00	20
2008-12-17	08:43:00	30
2008-12-17	08:44:00	475
2008-12-17	08:45:00	524
2008-12-17	08:46:00	20
2008-12-17	08:47:00	193
2008-12-17	08:48:00	10
2008-12-17	08:49:00	112
2008-12-17	08:50:00	10
2008-12-17	08:51:00	10
2008-12-17	08:52:00	20
2008-12-17	08:53:00	41
2008-12-17	08:54:00	20
2008-12-17	08:55:00	0
2008-12-17	08:56:00	61
2008-12-17	08:57:00	20
2008-12-17	08:58:00	61
2008-12-17	08:59:00	242
2008-12-17	09:00:00	30
2008-12-17	09:01:00	71
2008-12-17	09:02:00	30
2008-12-17	09:03:00	41
2008-12-17	09:04:00	20
2008-12-17	09:05:00	30
2008-12-17	09:06:00	0
2008-12-17	09:07:00	10
2008-12-17	09:08:00	10
[truncated: 21,051 more rows]

## Sheet: 12.31.08
Actogram, Copy Raw Data, All Days
Identity:	Butler Schmidt
Filename:	E:\Active Research Files\meloxicam titre canine\cases\butler\Butler Schmidt 12.31.08.AWC
Gender:	M
Age:	12
Height:	50.8 cm	20.0 in
Weight:	24.6 kg	54.2 lbs
Start Date:	31-Dec-2008 (Wed)
Start Time:	17:00:00
Interval:	1.00 mins
Date Stamp:	Time Stamp:	Activity Data:	Marker Press:
2008-12-31	00:00:00	0
2008-12-31	00:01:00	0
2008-12-31	00:02:00	0
2008-12-31	00:03:00	0
2008-12-31	00:04:00	0
2008-12-31	00:05:00	0
2008-12-31	00:06:00	0
2008-12-31	00:07:00	0
2008-12-31	00:08:00	0
2008-12-31	00:09:00	0
2008-12-31	00:10:00	0
2008-12-31	00:11:00	0
2008-12-31	00:12:00	0
2008-12-31	00:13:00	0
2008-12-31	00:14:00	0
2008-12-31	00:15:00	0
2008-12-31	00:16:00	0
2008-12-31	00:17:00	0
2008-12-31	00:18:00	0
2008-12-31	00:19:00	0
2008-12-31	00:20:00	0
2008-12-31	00:21:00	0
2008-12-31	00:22:00	0
2008-12-31	00:23:00	0
2008-12-31	00:24:00	0
2008-12-31	00:25:00	0
2008-12-31	00:26:00	0
2008-12-31	00:27:00	0
2008-12-31	00:28:00	0
2008-12-31	00:29:00	0
2008-12-31	00:30:00	0
2008-12-31	00:31:00	0
2008-12-31	00:32:00	0
2008-12-31	00:33:00	0
2008-12-31	00:34:00	0
2008-12-31	00:35:00	0
2008-12-31	00:36:00	0
2008-12-31	00:37:00	0
2008-12-31	00:38:00	0
2008-12-31	00:39:00	0
2008-12-31	00:40:00	0
2008-12-31	00:41:00	0
2008-12-31	00:42:00	0
2008-12-31	00:43:00	0
2008-12-31	00:44:00	0
2008-12-31	00:45:00	0
2008-12-31	00:46:00	0
2008-12-31	00:47:00	0
2008-12-31	00:48:00	0
2008-12-31	00:49:00	0
2008-12-31	00:50:00	0
2008-12-31	00:51:00	0
2008-12-31	00:52:00	0
2008-12-31	00:53:00	0
2008-12-31	00:54:00	0
2008-12-31	00:55:00	0
2008-12-31	00:56:00	0
2008-12-31	00:57:00	0
2008-12-31	00:58:00	0
2008-12-31	00:59:00	0
2008-12-31	01:00:00	0
2008-12-31	01:01:00	0
2008-12-31	01:02:00	0
2008-12-31	01:03:00	0
2008-12-31	01:04:00	0
2008-12-31	01:05:00	0
2008-12-31	01:06:00	0
2008-12-31	01:07:00	0
2008-12-31	01:08:00	0
2008-12-31	01:09:00	0
2008-12-31	01:10:00	0
2008-12-31	01:11:00	0
2008-12-31	01:12:00	0
2008-12-31	01:13:00	0
2008-12-31	01:14:00	0
2008-12-31	01:15:00	0
2008-12-31	01:16:00	0
2008-12-31	01:17:00	0
2008-12-31	01:18:00	0
2008-12-31	01:19:00	0
2008-12-31	01:20:00	0
2008-12-31	01:21:00	0
2008-12-31	01:22:00	0
2008-12-31	01:23:00	0
2008-12-31	01:24:00	0
2008-12-31	01:25:00	0
2008-12-31	01:26:00	0
2008-12-31	01:27:00	0
2008-12-31	01:28:00	0
2008-12-31	01:29:00	0
2008-12-31	01:30:00	0
2008-12-31	01:31:00	0
2008-12-31	01:32:00	0
2008-12-31	01:33:00	0
2008-12-31	01:34:00	0
2008-12-31	01:35:00	0
2008-12-31	01:36:00	0
2008-12-31	01:37:00	0
2008-12-31	01:38:00	0
2008-12-31	01:39:00	0
2008-12-31	01:40:00	0
2008-12-31	01:41:00	0
2008-12-31	01:42:00	0
2008-12-31	01:43:00	0
2008-12-31	01:44:00	0
2008-12-31	01:45:00	0
2008-12-31	01:46:00	0
2008-12-31	01:47:00	0
2008-12-31	01:48:00	0
2008-12-31	01:49:00	0
2008-12-31	01:50:00	0
2008-12-31	01:51:00	0
2008-12-31	01:52:00	0
2008-12-31	01:53:00	0
2008-12-31	01:54:00	0
2008-12-31	01:55:00	0
2008-12-31	01:56:00	0
2008-12-31	01:57:00	0
2008-12-31	01:58:00	0
2008-12-31	01:59:00	0
2008-12-31	02:00:00	0
2008-12-31	02:01:00	0
2008-12-31	02:02:00	0
2008-12-31	02:03:00	0
2008-12-31	02:04:00	0
2008-12-31	02:05:00	0
2008-12-31	02:06:00	0
2008-12-31	02:07:00	0
2008-12-31	02:08:00	0
2008-12-31	02:09:00	0
2008-12-31	02:10:00	0
2008-12-31	02:11:00	0
2008-12-31	02:12:00	0
2008-12-31	02:13:00	0
2008-12-31	02:14:00	0
2008-12-31	02:15:00	0
2008-12-31	02:16:00	0
2008-12-31	02:17:00	0
2008-12-31	02:18:00	0
2008-12-31	02:19:00	0
2008-12-31	02:20:00	0
2008-12-31	02:21:00	0
2008-12-31	02:22:00	0
2008-12-31	02:23:00	0
2008-12-31	02:24:00	0
2008-12-31	02:25:00	0
2008-12-31	02:26:00	0
2008-12-31	02:27:00	0
2008-12-31	02:28:00	0
2008-12-31	02:29:00	0
2008-12-31	02:30:00	0
2008-12-31	02:31:00	0
2008-12-31	02:32:00	0
2008-12-31	02:33:00	0
2008-12-31	02:34:00	0
2008-12-31	02:35:00	0
2008-12-31	02:36:00	0
2008-12-31	02:37:00	0
2008-12-31	02:38:00	0
2008-12-31	02:39:00	0
2008-12-31	02:40:00	0
2008-12-31	02:41:00	0
2008-12-31	02:42:00	0
2008-12-31	02:43:00	0
2008-12-31	02:44:00	0
2008-12-31	02:45:00	0
2008-12-31	02:46:00	0
2008-12-31	02:47:00	0
2008-12-31	02:48:00	0
2008-12-31	02:49:00	0
2008-12-31	02:50:00	0
2008-12-31	02:51:00	0
2008-12-31	02:52:00	0
2008-12-31	02:53:00	0
2008-12-31	02:54:00	0
2008-12-31	02:55:00	0
2008-12-31	02:56:00	0
2008-12-31	02:57:00	0
2008-12-31	02:58:00	0
2008-12-31	02:59:00	0
2008-12-31	03:00:00	0
2008-12-31	03:01:00	0
2008-12-31	03:02:00	0
2008-12-31	03:03:00	0
2008-12-31	03:04:00	0
2008-12-31	03:05:00	0
2008-12-31	03:06:00	0
2008-12-31	03:07:00	0
2008-12-31	03:08:00	0
2008-12-31	03:09:00	0
2008-12-31	03:10:00	0
2008-12-31	03:11:00	0
2008-12-31	03:12:00	0
2008-12-31	03:13:00	0
2008-12-31	03:14:00	0
2008-12-31	03:15:00	0
2008-12-31	03:16:00	0
2008-12-31	03:17:00	0
2008-12-31	03:18:00	0
2008-12-31	03:19:00	0
2008-12-31	03:20:00	0
2008-12-31	03:21:00	0
2008-12-31	03:22:00	0
2008-12-31	03:23:00	0
2008-12-31	03:24:00	0
2008-12-31	03:25:00	0
2008-12-31	03:26:00	0
2008-12-31	03:27:00	0
2008-12-31	03:28:00	0
2008-12-31	03:29:00	0
2008-12-31	03:30:00	0
2008-12-31	03:31:00	0
2008-12-31	03:32:00	0
2008-12-31	03:33:00	0
2008-12-31	03:34:00	0
2008-12-31	03:35:00	0
2008-12-31	03:36:00	0
2008-12-31	03:37:00	0
2008-12-31	03:38:00	0
2008-12-31	03:39:00	0
2008-12-31	03:40:00	0
2008-12-31	03:41:00	0
2008-12-31	03:42:00	0
2008-12-31	03:43:00	0
2008-12-31	03:44:00	0
2008-12-31	03:45:00	0
2008-12-31	03:46:00	0
2008-12-31	03:47:00	0
2008-12-31	03:48:00	0
2008-12-31	03:49:00	0
2008-12-31	03:50:00	0
2008-12-31	03:51:00	0
2008-12-31	03:52:00	0
2008-12-31	03:53:00	0
2008-12-31	03:54:00	0
2008-12-31	03:55:00	0
2008-12-31	03:56:00	0
2008-12-31	03:57:00	0
2008-12-31	03:58:00	0
2008-12-31	03:59:00	0
2008-12-31	04:00:00	0
2008-12-31	04:01:00	0
2008-12-31	04:02:00	0
2008-12-31	04:03:00	0
2008-12-31	04:04:00	0
2008-12-31	04:05:00	0
2008-12-31	04:06:00	0
2008-12-31	04:07:00	0
2008-12-31	04:08:00	0
2008-12-31	04:09:00	0
2008-12-31	04:10:00	0
2008-12-31	04:11:00	0
2008-12-31	04:12:00	0
2008-12-31	04:13:00	0
2008-12-31	04:14:00	0
2008-12-31	04:15:00	0
2008-12-31	04:16:00	0
2008-12-31	04:17:00	0
2008-12-31	04:18:00	0
2008-12-31	04:19:00	0
2008-12-31	04:20:00	0
2008-12-31	04:21:00	0
2008-12-31	04:22:00	0
2008-12-31	04:23:00	0
2008-12-31	04:24:00	0
2008-12-31	04:25:00	0
2008-12-31	04:26:00	0
2008-12-31	04:27:00	0
2008-12-31	04:28:00	0
2008-12-31	04:29:00	0
2008-12-31	04:30:00	0
2008-12-31	04:31:00	0
2008-12-31	04:32:00	0
2008-12-31	04:33:00	0
2008-12-31	04:34:00	0
2008-12-31	04:35:00	0
2008-12-31	04:36:00	0
2008-12-31	04:37:00	0
2008-12-31	04:38:00	0
2008-12-31	04:39:00	0
2008-12-31	04:40:00	0
2008-12-31	04:41:00	0
2008-12-31	04:42:00	0
2008-12-31	04:43:00	0
2008-12-31	04:44:00	0
2008-12-31	04:45:00	0
2008-12-31	04:46:00	0
2008-12-31	04:47:00	0
2008-12-31	04:48:00	0
2008-12-31	04:49:00	0
2008-12-31	04:50:00	0
2008-12-31	04:51:00	0
2008-12-31	04:52:00	0
2008-12-31	04:53:00	0
2008-12-31	04:54:00	0
2008-12-31	04:55:00	0
2008-12-31	04:56:00	0
2008-12-31	04:57:00	0
2008-12-31	04:58:00	0
2008-12-31	04:59:00	0
2008-12-31	05:00:00	0
2008-12-31	05:01:00	0
2008-12-31	05:02:00	0
2008-12-31	05:03:00	0
2008-12-31	05:04:00	0
2008-12-31	05:05:00	0
2008-12-31	05:06:00	0
2008-12-31	05:07:00	0
2008-12-31	05:08:00	0
2008-12-31	05:09:00	0
2008-12-31	05:10:00	0
2008-12-31	05:11:00	0
2008-12-31	05:12:00	0
2008-12-31	05:13:00	0
2008-12-31	05:14:00	0
2008-12-31	05:15:00	0
2008-12-31	05:16:00	0
2008-12-31	05:17:00	0
2008-12-31	05:18:00	0
2008-12-31	05:19:00	0
2008-12-31	05:20:00	0
2008-12-31	05:21:00	0
2008-12-31	05:22:00	0
2008-12-31	05:23:00	0
2008-12-31	05:24:00	0
2008-12-31	05:25:00	0
2008-12-31	05:26:00	0
2008-12-31	05:27:00	0
2008-12-31	05:28:00	0
2008-12-31	05:29:00	0
2008-12-31	05:30:00	0
2008-12-31	05:31:00	0
2008-12-31	05:32:00	0
2008-12-31	05:33:00	0
2008-12-31	05:34:00	0
2008-12-31	05:35:00	0
2008-12-31	05:36:00	0
2008-12-31	05:37:00	0
2008-12-31	05:38:00	0
2008-12-31	05:39:00	0
2008-12-31	05:40:00	0
2008-12-31	05:41:00	0
2008-12-31	05:42:00	0
2008-12-31	05:43:00	0
2008-12-31	05:44:00	0
2008-12-31	05:45:00	0
2008-12-31	05:46:00	0
2008-12-31	05:47:00	0
2008-12-31	05:48:00	0
2008-12-31	05:49:00	0
2008-12-31	05:50:00	0
2008-12-31	05:51:00	0
2008-12-31	05:52:00	0
2008-12-31	05:53:00	0
2008-12-31	05:54:00	0
2008-12-31	05:55:00	0
2008-12-31	05:56:00	0
2008-12-31	05:57:00	0
2008-12-31	05:58:00	0
2008-12-31	05:59:00	0
2008-12-31	06:00:00	0
2008-12-31	06:01:00	0
2008-12-31	06:02:00	0
2008-12-31	06:03:00	0
2008-12-31	06:04:00	0
2008-12-31	06:05:00	0
2008-12-31	06:06:00	0
2008-12-31	06:07:00	0
2008-12-31	06:08:00	0
2008-12-31	06:09:00	0
2008-12-31	06:10:00	0
2008-12-31	06:11:00	0
2008-12-31	06:12:00	0
2008-12-31	06:13:00	0
2008-12-31	06:14:00	0
2008-12-31	06:15:00	0
2008-12-31	06:16:00	0
2008-12-31	06:17:00	0
2008-12-31	06:18:00	0
2008-12-31	06:19:00	0
2008-12-31	06:20:00	0
2008-12-31	06:21:00	0
2008-12-31	06:22:00	0
2008-12-31	06:23:00	0
2008-12-31	06:24:00	0
2008-12-31	06:25:00	0
2008-12-31	06:26:00	0
2008-12-31	06:27:00	0
2008-12-31	06:28:00	0
2008-12-31	06:29:00	0
2008-12-31	06:30:00	0
2008-12-31	06:31:00	0
2008-12-31	06:32:00	0
2008-12-31	06:33:00	0
2008-12-31	06:34:00	0
2008-12-31	06:35:00	0
2008-12-31	06:36:00	0
2008-12-31	06:37:00	0
2008-12-31	06:38:00	0
2008-12-31	06:39:00	0
2008-12-31	06:40:00	0
2008-12-31	06:41:00	0
2008-12-31	06:42:00	0
2008-12-31	06:43:00	0
2008-12-31	06:44:00	0
2008-12-31	06:45:00	0
2008-12-31	06:46:00	0
2008-12-31	06:47:00	0
2008-12-31	06:48:00	0
2008-12-31	06:49:00	0
2008-12-31	06:50:00	0
2008-12-31	06:51:00	0
2008-12-31	06:52:00	0
2008-12-31	06:53:00	0
2008-12-31	06:54:00	0
2008-12-31	06:55:00	0
2008-12-31	06:56:00	0
2008-12-31	06:57:00	0
2008-12-31	06:58:00	0
2008-12-31	06:59:00	0
2008-12-31	07:00:00	0
2008-12-31	07:01:00	0
2008-12-31	07:02:00	0
2008-12-31	07:03:00	0
2008-12-31	07:04:00	0
2008-12-31	07:05:00	0
2008-12-31	07:06:00	0
2008-12-31	07:07:00	0
2008-12-31	07:08:00	0
2008-12-31	07:09:00	0
2008-12-31	07:10:00	0
2008-12-31	07:11:00	0
2008-12-31	07:12:00	0
2008-12-31	07:13:00	0
2008-12-31	07:14:00	0
2008-12-31	07:15:00	0
2008-12-31	07:16:00	0
2008-12-31	07:17:00	0
2008-12-31	07:18:00	0
2008-12-31	07:19:00	0
2008-12-31	07:20:00	0
2008-12-31	07:21:00	0
2008-12-31	07:22:00	0
2008-12-31	07:23:00	0
2008-12-31	07:24:00	0
2008-12-31	07:25:00	0
2008-12-31	07:26:00	0
2008-12-31	07:27:00	0
2008-12-31	07:28:00	0
2008-12-31	07:29:00	0
2008-12-31	07:30:00	0
2008-12-31	07:31:00	0
2008-12-31	07:32:00	0
2008-12-31	07:33:00	0
2008-12-31	07:34:00	0
2008-12-31	07:35:00	0
2008-12-31	07:36:00	0
2008-12-31	07:37:00	0
2008-12-31	07:38:00	0
2008-12-31	07:39:00	0
2008-12-31	07:40:00	0
2008-12-31	07:41:00	0
2008-12-31	07:42:00	0
2008-12-31	07:43:00	0
2008-12-31	07:44:00	0
2008-12-31	07:45:00	0
2008-12-31	07:46:00	0
2008-12-31	07:47:00	0
2008-12-31	07:48:00	0
2008-12-31	07:49:00	0
2008-12-31	07:50:00	0
2008-12-31	07:51:00	0
2008-12-31	07:52:00	0
2008-12-31	07:53:00	0
2008-12-31	07:54:00	0
2008-12-31	07:55:00	0
2008-12-31	07:56:00	0
2008-12-31	07:57:00	0
2008-12-31	07:58:00	0
2008-12-31	07:59:00	0
2008-12-31	08:00:00	0
2008-12-31	08:01:00	0
2008-12-31	08:02:00	0
2008-12-31	08:03:00	0
2008-12-31	08:04:00	0
2008-12-31	08:05:00	0
2008-12-31	08:06:00	0
2008-12-31	08:07:00	0
2008-12-31	08:08:00	0
2008-12-31	08:09:00	0
2008-12-31	08:10:00	0
2008-12-31	08:11:00	0
2008-12-31	08:12:00	0
2008-12-31	08:13:00	0
2008-12-31	08:14:00	0
2008-12-31	08:15:00	0
2008-12-31	08:16:00	0
2008-12-31	08:17:00	0
2008-12-31	08:18:00	0
2008-12-31	08:19:00	0
2008-12-31	08:20:00	0
2008-12-31	08:21:00	0
2008-12-31	08:22:00	0
2008-12-31	08:23:00	0
2008-12-31	08:24:00	0
2008-12-31	08:25:00	0
2008-12-31	08:26:00	0
2008-12-31	08:27:00	0
2008-12-31	08:28:00	0
2008-12-31	08:29:00	0
2008-12-31	08:30:00	0
2008-12-31	08:31:00	0
2008-12-31	08:32:00	0
2008-12-31	08:33:00	0
2008-12-31	08:34:00	0
2008-12-31	08:35:00	0
2008-12-31	08:36:00	0
2008-12-31	08:37:00	0
2008-12-31	08:38:00	0
2008-12-31	08:39:00	0
2008-12-31	08:40:00	0
2008-12-31	08:41:00	0
2008-12-31	08:42:00	0
2008-12-31	08:43:00	0
2008-12-31	08:44:00	0
2008-12-31	08:45:00	0
2008-12-31	08:46:00	0
2008-12-31	08:47:00	0
2008-12-31	08:48:00	0
2008-12-31	08:49:00	0
2008-12-31	08:50:00	0
2008-12-31	08:51:00	0
2008-12-31	08:52:00	0
2008-12-31	08:53:00	0
2008-12-31	08:54:00	0
2008-12-31	08:55:00	0
2008-12-31	08:56:00	0
2008-12-31	08:57:00	0
2008-12-31	08:58:00	0
2008-12-31	08:59:00	0
2008-12-31	09:00:00	0
2008-12-31	09:01:00	0
2008-12-31	09:02:00	0
2008-12-31	09:03:00	0
2008-12-31	09:04:00	0
2008-12-31	09:05:00	0
2008-12-31	09:06:00	0
2008-12-31	09:07:00	0
2008-12-31	09:08:00	0
2008-12-31	09:09:00	0
2008-12-31	09:10:00	0
2008-12-31	09:11:00	0
2008-12-31	09:12:00	0
2008-12-31	09:13:00	0
2008-12-31	09:14:00	0
2008-12-31	09:15:00	0
2008-12-31	09:16:00	0
2008-12-31	09:17:00	0
2008-12-31	09:18:00	0
2008-12-31	09:19:00	0
2008-12-31	09:20:00	0
2008-12-31	09:21:00	0
2008-12-31	09:22:00	0
2008-12-31	09:23:00	0
2008-12-31	09:24:00	0
2008-12-31	09:25:00	0
2008-12-31	09:26:00	0
2008-12-31	09:27:00	0
2008-12-31	09:28:00	0
2008-12-31	09:29:00	0
2008-12-31	09:30:00	0
2008-12-31	09:31:00	0
2008-12-31	09:32:00	0
2008-12-31	09:33:00	0
2008-12-31	09:34:00	0
2008-12-31	09:35:00	0
2008-12-31	09:36:00	0
2008-12-31	09:37:00	0
2008-12-31	09:38:00	0
2008-12-31	09:39:00	0
2008-12-31	09:40:00	0
2008-12-31	09:41:00	0
2008-12-31	09:42:00	0
2008-12-31	09:43:00	0
2008-12-31	09:44:00	0
2008-12-31	09:45:00	0
2008-12-31	09:46:00	0
2008-12-31	09:47:00	0
2008-12-31	09:48:00	0
2008-12-31	09:49:00	0
2008-12-31	09:50:00	0
2008-12-31	09:51:00	0
2008-12-31	09:52:00	0
2008-12-31	09:53:00	0
2008-12-31	09:54:00	0
2008-12-31	09:55:00	0
2008-12-31	09:56:00	0
2008-12-31	09:57:00	0
2008-12-31	09:58:00	0
2008-12-31	09:59:00	0
2008-12-31	10:00:00	0
2008-12-31	10:01:00	0
2008-12-31	10:02:00	0
2008-12-31	10:03:00	0
2008-12-31	10:04:00	0
2008-12-31	10:05:00	0
2008-12-31	10:06:00	0
2008-12-31	10:07:00	0
2008-12-31	10:08:00	0
2008-12-31	10:09:00	0
2008-12-31	10:10:00	0
2008-12-31	10:11:00	0
2008-12-31	10:12:00	0
2008-12-31	10:13:00	0
2008-12-31	10:14:00	0
2008-12-31	10:15:00	0
2008-12-31	10:16:00	0
2008-12-31	10:17:00	0
2008-12-31	10:18:00	0
2008-12-31	10:19:00	0
2008-12-31	10:20:00	0
2008-12-31	10:21:00	0
2008-12-31	10:22:00	0
2008-12-31	10:23:00	0
2008-12-31	10:24:00	0
2008-12-31	10:25:00	0
2008-12-31	10:26:00	0
2008-12-31	10:27:00	0
2008-12-31	10:28:00	0
2008-12-31	10:29:00	0
2008-12-31	10:30:00	0
2008-12-31	10:31:00	0
2008-12-31	10:32:00	0
2008-12-31	10:33:00	0
2008-12-31	10:34:00	0
2008-12-31	10:35:00	0
2008-12-31	10:36:00	0
2008-12-31	10:37:00	0
2008-12-31	10:38:00	0
2008-12-31	10:39:00	0
2008-12-31	10:40:00	0
2008-12-31	10:41:00	0
2008-12-31	10:42:00	0
2008-12-31	10:43:00	0
2008-12-31	10:44:00	0
2008-12-31	10:45:00	0
2008-12-31	10:46:00	0
2008-12-31	10:47:00	0
2008-12-31	10:48:00	0
2008-12-31	10:49:00	0
2008-12-31	10:50:00	0
2008-12-31	10:51:00	0
2008-12-31	10:52:00	0
2008-12-31	10:53:00	0
2008-12-31	10:54:00	0
2008-12-31	10:55:00	0
2008-12-31	10:56:00	0
2008-12-31	10:57:00	0
2008-12-31	10:58:00	0
2008-12-31	10:59:00	0
2008-12-31	11:00:00	0
2008-12-31	11:01:00	0
2008-12-31	11:02:00	0
2008-12-31	11:03:00	0
2008-12-31	11:04:00	0
2008-12-31	11:05:00	0
2008-12-31	11:06:00	0
2008-12-31	11:07:00	0
2008-12-31	11:08:00	0
2008-12-31	11:09:00	0
2008-12-31	11:10:00	0
2008-12-31	11:11:00	0
2008-12-31	11:12:00	0
2008-12-31	11:13:00	0
2008-12-31	11:14:00	0
2008-12-31	11:15:00	0
2008-12-31	11:16:00	0
2008-12-31	11:17:00	0
2008-12-31	11:18:00	0
2008-12-31	11:19:00	0
2008-12-31	11:20:00	0
2008-12-31	11:21:00	0
2008-12-31	11:22:00	0
2008-12-31	11:23:00	0
2008-12-31	11:24:00	0
2008-12-31	11:25:00	0
2008-12-31	11:26:00	0
2008-12-31	11:27:00	0
2008-12-31	11:28:00	0
2008-12-31	11:29:00	0
2008-12-31	11:30:00	0
2008-12-31	11:31:00	0
2008-12-31	11:32:00	0
2008-12-31	11:33:00	0
2008-12-31	11:34:00	0
2008-12-31	11:35:00	0
2008-12-31	11:36:00	0
2008-12-31	11:37:00	0
2008-12-31	11:38:00	0
2008-12-31	11:39:00	0
2008-12-31	11:40:00	0
2008-12-31	11:41:00	0
2008-12-31	11:42:00	0
2008-12-31	11:43:00	0
2008-12-31	11:44:00	0
2008-12-31	11:45:00	0
2008-12-31	11:46:00	0
2008-12-31	11:47:00	0
2008-12-31	11:48:00	0
2008-12-31	11:49:00	0
2008-12-31	11:50:00	0
2008-12-31	11:51:00	0
2008-12-31	11:52:00	0
2008-12-31	11:53:00	0
2008-12-31	11:54:00	0
2008-12-31	11:55:00	0
2008-12-31	11:56:00	0
2008-12-31	11:57:00	0
2008-12-31	11:58:00	0
2008-12-31	11:59:00	0
2008-12-31	12:00:00	0
2008-12-31	12:01:00	0
2008-12-31	12:02:00	0
2008-12-31	12:03:00	0
2008-12-31	12:04:00	0
2008-12-31	12:05:00	0
2008-12-31	12:06:00	0
2008-12-31	12:07:00	0
2008-12-31	12:08:00	0
2008-12-31	12:09:00	0
2008-12-31	12:10:00	0
2008-12-31	12:11:00	0
2008-12-31	12:12:00	0
2008-12-31	12:13:00	0
2008-12-31	12:14:00	0
2008-12-31	12:15:00	0
2008-12-31	12:16:00	0
2008-12-31	12:17:00	0
2008-12-31	12:18:00	0
2008-12-31	12:19:00	0
2008-12-31	12:20:00	0
2008-12-31	12:21:00	0
2008-12-31	12:22:00	0
2008-12-31	12:23:00	0
2008-12-31	12:24:00	0
2008-12-31	12:25:00	0
2008-12-31	12:26:00	0
2008-12-31	12:27:00	0
2008-12-31	12:28:00	0
2008-12-31	12:29:00	0
2008-12-31	12:30:00	0
2008-12-31	12:31:00	0
2008-12-31	12:32:00	0
2008-12-31	12:33:00	0
2008-12-31	12:34:00	0
2008-12-31	12:35:00	0
2008-12-31	12:36:00	0
2008-12-31	12:37:00	0
2008-12-31	12:38:00	0
2008-12-31	12:39:00	0
2008-12-31	12:40:00	0
2008-12-31	12:41:00	0
2008-12-31	12:42:00	0
2008-12-31	12:43:00	0
2008-12-31	12:44:00	0
2008-12-31	12:45:00	0
2008-12-31	12:46:00	0
2008-12-31	12:47:00	0
2008-12-31	12:48:00	0
2008-12-31	12:49:00	0
2008-12-31	12:50:00	0
2008-12-31	12:51:00	0
2008-12-31	12:52:00	0
2008-12-31	12:53:00	0
2008-12-31	12:54:00	0
2008-12-31	12:55:00	0
2008-12-31	12:56:00	0
2008-12-31	12:57:00	0
2008-12-31	12:58:00	0
2008-12-31	12:59:00	0
2008-12-31	13:00:00	0
2008-12-31	13:01:00	0
2008-12-31	13:02:00	0
2008-12-31	13:03:00	0
2008-12-31	13:04:00	0
2008-12-31	13:05:00	0
2008-12-31	13:06:00	0
2008-12-31	13:07:00	0
2008-12-31	13:08:00	0
2008-12-31	13:09:00	0
2008-12-31	13:10:00	0
2008-12-31	13:11:00	0
2008-12-31	13:12:00	0
2008-12-31	13:13:00	0
2008-12-31	13:14:00	0
2008-12-31	13:15:00	0
2008-12-31	13:16:00	0
2008-12-31	13:17:00	0
2008-12-31	13:18:00	0
2008-12-31	13:19:00	0
2008-12-31	13:20:00	0
2008-12-31	13:21:00	0
2008-12-31	13:22:00	0
2008-12-31	13:23:00	0
2008-12-31	13:24:00	0
2008-12-31	13:25:00	0
2008-12-31	13:26:00	0
2008-12-31	13:27:00	0
2008-12-31	13:28:00	0
2008-12-31	13:29:00	0
2008-12-31	13:30:00	0
2008-12-31	13:31:00	0
2008-12-31	13:32:00	0
2008-12-31	13:33:00	0
2008-12-31	13:34:00	0
2008-12-31	13:35:00	0
2008-12-31	13:36:00	0
2008-12-31	13:37:00	0
2008-12-31	13:38:00	0
2008-12-31	13:39:00	0
2008-12-31	13:40:00	0
2008-12-31	13:41:00	0
2008-12-31	13:42:00	0
2008-12-31	13:43:00	0
2008-12-31	13:44:00	0
2008-12-31	13:45:00	0
2008-12-31	13:46:00	0
2008-12-31	13:47:00	0
2008-12-31	13:48:00	0
2008-12-31	13:49:00	0
2008-12-31	13:50:00	0
2008-12-31	13:51:00	0
2008-12-31	13:52:00	0
2008-12-31	13:53:00	0
2008-12-31	13:54:00	0
2008-12-31	13:55:00	0
2008-12-31	13:56:00	0
2008-12-31	13:57:00	0
2008-12-31	13:58:00	0
2008-12-31	13:59:00	0
2008-12-31	14:00:00	0
2008-12-31	14:01:00	0
2008-12-31	14:02:00	0
2008-12-31	14:03:00	0
2008-12-31	14:04:00	0
2008-12-31	14:05:00	0
2008-12-31	14:06:00	0
2008-12-31	14:07:00	0
2008-12-31	14:08:00	0
2008-12-31	14:09:00	0
2008-12-31	14:10:00	0
2008-12-31	14:11:00	0
2008-12-31	14:12:00	0
2008-12-31	14:13:00	0
2008-12-31	14:14:00	0
2008-12-31	14:15:00	0
2008-12-31	14:16:00	0
2008-12-31	14:17:00	0
2008-12-31	14:18:00	0
2008-12-31	14:19:00	0
2008-12-31	14:20:00	0
2008-12-31	14:21:00	0
2008-12-31	14:22:00	0
2008-12-31	14:23:00	0
2008-12-31	14:24:00	0
2008-12-31	14:25:00	0
2008-12-31	14:26:00	0
2008-12-31	14:27:00	0
2008-12-31	14:28:00	0
2008-12-31	14:29:00	0
2008-12-31	14:30:00	0
2008-12-31	14:31:00	0
2008-12-31	14:32:00	0
2008-12-31	14:33:00	0
2008-12-31	14:34:00	0
2008-12-31	14:35:00	0
2008-12-31	14:36:00	0
2008-12-31	14:37:00	0
2008-12-31	14:38:00	0
2008-12-31	14:39:00	0
2008-12-31	14:40:00	0
2008-12-31	14:41:00	0
2008-12-31	14:42:00	0
2008-12-31	14:43:00	0
2008-12-31	14:44:00	0
2008-12-31	14:45:00	0
2008-12-31	14:46:00	0
2008-12-31	14:47:00	0
2008-12-31	14:48:00	0
2008-12-31	14:49:00	0
2008-12-31	14:50:00	0
2008-12-31	14:51:00	0
2008-12-31	14:52:00	0
2008-12-31	14:53:00	0
2008-12-31	14:54:00	0
2008-12-31	14:55:00	0
2008-12-31	14:56:00	0
2008-12-31	14:57:00	0
2008-12-31	14:58:00	0
2008-12-31	14:59:00	0
2008-12-31	15:00:00	0
2008-12-31	15:01:00	0
2008-12-31	15:02:00	0
2008-12-31	15:03:00	0
2008-12-31	15:04:00	0
2008-12-31	15:05:00	0
2008-12-31	15:06:00	0
2008-12-31	15:07:00	0
2008-12-31	15:08:00	0
2008-12-31	15:09:00	0
2008-12-31	15:10:00	0
2008-12-31	15:11:00	0
2008-12-31	15:12:00	0
2008-12-31	15:13:00	0
2008-12-31	15:14:00	0
2008-12-31	15:15:00	0
2008-12-31	15:16:00	0
2008-12-31	15:17:00	0
2008-12-31	15:18:00	0
2008-12-31	15:19:00	0
2008-12-31	15:20:00	0
2008-12-31	15:21:00	0
2008-12-31	15:22:00	0
2008-12-31	15:23:00	0
2008-12-31	15:24:00	0
2008-12-31	15:25:00	0
2008-12-31	15:26:00	0
2008-12-31	15:27:00	0
2008-12-31	15:28:00	0
2008-12-31	15:29:00	0
2008-12-31	15:30:00	0
2008-12-31	15:31:00	0
2008-12-31	15:32:00	0
2008-12-31	15:33:00	0
2008-12-31	15:34:00	0
2008-12-31	15:35:00	0
2008-12-31	15:36:00	0
2008-12-31	15:37:00	0
2008-12-31	15:38:00	0
2008-12-31	15:39:00	0
2008-12-31	15:40:00	0
2008-12-31	15:41:00	0
2008-12-31	15:42:00	0
2008-12-31	15:43:00	0
2008-12-31	15:44:00	0
2008-12-31	15:45:00	0
2008-12-31	15:46:00	0
2008-12-31	15:47:00	0
2008-12-31	15:48:00	0
2008-12-31	15:49:00	0
2008-12-31	15:50:00	0
2008-12-31	15:51:00	0
2008-12-31	15:52:00	0
2008-12-31	15:53:00	0
2008-12-31	15:54:00	0
2008-12-31	15:55:00	0
2008-12-31	15:56:00	0
2008-12-31	15:57:00	0
2008-12-31	15:58:00	0
2008-12-31	15:59:00	0
2008-12-31	16:00:00	0
2008-12-31	16:01:00	0
2008-12-31	16:02:00	0
2008-12-31	16:03:00	0
2008-12-31	16:04:00	0
2008-12-31	16:05:00	0
2008-12-31	16:06:00	0
2008-12-31	16:07:00	0
2008-12-31	16:08:00	0
2008-12-31	16:09:00	0
2008-12-31	16:10:00	0
2008-12-31	16:11:00	0
2008-12-31	16:12:00	0
2008-12-31	16:13:00	0
2008-12-31	16:14:00	0
2008-12-31	16:15:00	0
2008-12-31	16:16:00	0
2008-12-31	16:17:00	0
2008-12-31	16:18:00	0
2008-12-31	16:19:00	0
2008-12-31	16:20:00	0
2008-12-31	16:21:00	0
2008-12-31	16:22:00	0
2008-12-31	16:23:00	0
2008-12-31	16:24:00	0
2008-12-31	16:25:00	0
2008-12-31	16:26:00	0
2008-12-31	16:27:00	0
2008-12-31	16:28:00	0
2008-12-31	16:29:00	0
2008-12-31	16:30:00	0
2008-12-31	16:31:00	0
2008-12-31	16:32:00	0
2008-12-31	16:33:00	0
2008-12-31	16:34:00	0
2008-12-31	16:35:00	0
2008-12-31	16:36:00	0
2008-12-31	16:37:00	0
2008-12-31	16:38:00	0
2008-12-31	16:39:00	0
2008-12-31	16:40:00	0
2008-12-31	16:41:00	0
2008-12-31	16:42:00	0
2008-12-31	16:43:00	0
2008-12-31	16:44:00	0
2008-12-31	16:45:00	0
2008-12-31	16:46:00	0
2008-12-31	16:47:00	0
2008-12-31	16:48:00	0
2008-12-31	16:49:00	0
2008-12-31	16:50:00	0
2008-12-31	16:51:00	0
2008-12-31	16:52:00	0
2008-12-31	16:53:00	0
2008-12-31	16:54:00	0
2008-12-31	16:55:00	0
2008-12-31	16:56:00	0
2008-12-31	16:57:00	0
2008-12-31	16:58:00	0
2008-12-31	16:59:00	0
2008-12-31	17:00:00	906
2008-12-31	17:01:00	977
2008-12-31	17:02:00	906
2008-12-31	17:03:00	475
2008-12-31	17:04:00	51
2008-12-31	17:05:00	156
2008-12-31	17:06:00	508
2008-12-31	17:07:00	280
2008-12-31	17:08:00	309
2008-12-31	17:09:00	41
2008-12-31	17:10:00	30
2008-12-31	17:11:00	839
2008-12-31	17:12:00	309
2008-12-31	17:13:00	102
2008-12-31	17:14:00	953
2008-12-31	17:15:00	323
2008-12-31	17:16:00	41
2008-12-31	17:17:00	112
2008-12-31	17:18:00	112
2008-12-31	17:19:00	91
2008-12-31	17:20:00	542
2008-12-31	17:21:00	366
2008-12-31	17:22:00	10
2008-12-31	17:23:00	122
2008-12-31	17:24:00	309
2008-12-31	17:25:00	508
2008-12-31	17:26:00	0
2008-12-31	17:27:00	30
2008-12-31	17:28:00	0
2008-12-31	17:29:00	0
2008-12-31	17:30:00	0
2008-12-31	17:31:00	0
2008-12-31	17:32:00	0
2008-12-31	17:33:00	0
2008-12-31	17:34:00	30
2008-12-31	17:35:00	0
2008-12-31	17:36:00	0
2008-12-31	17:37:00	0
2008-12-31	17:38:00	0
2008-12-31	17:39:00	0
2008-12-31	17:40:00	0
2008-12-31	17:41:00	0
2008-12-31	17:42:00	0
2008-12-31	17:43:00	0
2008-12-31	17:44:00	0
2008-12-31	17:45:00	0
2008-12-31	17:46:00	0
2008-12-31	17:47:00	0
2008-12-31	17:48:00	0
2008-12-31	17:49:00	0
2008-12-31	17:50:00	0
2008-12-31	17:51:00	0
2008-12-31	17:52:00	0
2008-12-31	17:53:00	0
2008-12-31	17:54:00	0
2008-12-31	17:55:00	10
2008-12-31	17:56:00	0
2008-12-31	17:57:00	0
2008-12-31	17:58:00	0
2008-12-31	17:59:00	0
2008-12-31	18:00:00	0
2008-12-31	18:01:00	0
2008-12-31	18:02:00	0
2008-12-31	18:03:00	0
2008-12-31	18:04:00	0
2008-12-31	18:05:00	0
2008-12-31	18:06:00	0
2008-12-31	18:07:00	0
2008-12-31	18:08:00	0
2008-12-31	18:09:00	0
2008-12-31	18:10:00	0
2008-12-31	18:11:00	0
2008-12-31	18:12:00	0
2008-12-31	18:13:00	0
2008-12-31	18:14:00	0
2008-12-31	18:15:00	0
2008-12-31	18:16:00	0
2008-12-31	18:17:00	0
2008-12-31	18:18:00	0
2008-12-31	18:19:00	0
2008-12-31	18:20:00	0
2008-12-31	18:21:00	0
2008-12-31	18:22:00	0
2008-12-31	18:23:00	30
2008-12-31	18:24:00	0
2008-12-31	18:25:00	0
2008-12-31	18:26:00	30
2008-12-31	18:27:00	0
2008-12-31	18:28:00	0
2008-12-31	18:29:00	0
2008-12-31	18:30:00	0
2008-12-31	18:31:00	0
2008-12-31	18:32:00	0
2008-12-31	18:33:00	0
2008-12-31	18:34:00	0
2008-12-31	18:35:00	0
2008-12-31	18:36:00	0
2008-12-31	18:37:00	0
2008-12-31	18:38:00	0
2008-12-31	18:39:00	0
2008-12-31	18:40:00	0
2008-12-31	18:41:00	0
2008-12-31	18:42:00	0
2008-12-31	18:43:00	0
2008-12-31	18:44:00	0
2008-12-31	18:45:00	41
2008-12-31	18:46:00	0
2008-12-31	18:47:00	0
2008-12-31	18:48:00	0
2008-12-31	18:49:00	0
2008-12-31	18:50:00	0
2008-12-31	18:51:00	0
2008-12-31	18:52:00	0
2008-12-31	18:53:00	0
2008-12-31	18:54:00	0
2008-12-31	18:55:00	0
2008-12-31	18:56:00	0
2008-12-31	18:57:00	0
2008-12-31	18:58:00	0
2008-12-31	18:59:00	0
2008-12-31	19:00:00	0
2008-12-31	19:01:00	0
2008-12-31	19:02:00	0
2008-12-31	19:03:00	0
2008-12-31	19:04:00	0
2008-12-31	19:05:00	0
2008-12-31	19:06:00	0
2008-12-31	19:07:00	0
2008-12-31	19:08:00	0
2008-12-31	19:09:00	0
2008-12-31	19:10:00	0
2008-12-31	19:11:00	0
2008-12-31	19:12:00	0
2008-12-31	19:13:00	0
2008-12-31	19:14:00	0
2008-12-31	19:15:00	0
2008-12-31	19:16:00	0
2008-12-31	19:17:00	10
2008-12-31	19:18:00	61
2008-12-31	19:19:00	61
2008-12-31	19:20:00	71
2008-12-31	19:21:00	61
2008-12-31	19:22:00	673
2008-12-31	19:23:00	0
2008-12-31	19:24:00	0
2008-12-31	19:25:00	0
2008-12-31	19:26:00	0
2008-12-31	19:27:00	0
2008-12-31	19:28:00	0
2008-12-31	19:29:00	20
2008-12-31	19:30:00	0
2008-12-31	19:31:00	0
2008-12-31	19:32:00	0
2008-12-31	19:33:00	0
2008-12-31	19:34:00	0
2008-12-31	19:35:00	0
2008-12-31	19:36:00	0
2008-12-31	19:37:00	0
2008-12-31	19:38:00	0
2008-12-31	19:39:00	0
2008-12-31	19:40:00	0
2008-12-31	19:41:00	0
2008-12-31	19:42:00	0
2008-12-31	19:43:00	0
2008-12-31	19:44:00	0
2008-12-31	19:45:00	0
2008-12-31	19:46:00	0
2008-12-31	19:47:00	0
2008-12-31	19:48:00	0
2008-12-31	19:49:00	0
2008-12-31	19:50:00	0
2008-12-31	19:51:00	10
2008-12-31	19:52:00	0
2008-12-31	19:53:00	0
2008-12-31	19:54:00	0
2008-12-31	19:55:00	0
2008-12-31	19:56:00	0
2008-12-31	19:57:00	0
2008-12-31	19:58:00	0
2008-12-31	19:59:00	0
2008-12-31	20:00:00	71
2008-12-31	20:01:00	0
2008-12-31	20:02:00	0
2008-12-31	20:03:00	0
2008-12-31	20:04:00	0
2008-12-31	20:05:00	0
2008-12-31	20:06:00	20
2008-12-31	20:07:00	0
2008-12-31	20:08:00	0
2008-12-31	20:09:00	0
2008-12-31	20:10:00	0
2008-12-31	20:11:00	0
2008-12-31	20:12:00	0
2008-12-31	20:13:00	0
2008-12-31	20:14:00	0
2008-12-31	20:15:00	41
2008-12-31	20:16:00	0
2008-12-31	20:17:00	0
2008-12-31	20:18:00	0
2008-12-31	20:19:00	0
2008-12-31	20:20:00	51
2008-12-31	20:21:00	30
2008-12-31	20:22:00	0
2008-12-31	20:23:00	0
2008-12-31	20:24:00	0
2008-12-31	20:25:00	0
2008-12-31	20:26:00	0
2008-12-31	20:27:00	20
2008-12-31	20:28:00	0
2008-12-31	20:29:00	0
2008-12-31	20:30:00	0
2008-12-31	20:31:00	0
2008-12-31	20:32:00	0
2008-12-31	20:33:00	0
2008-12-31	20:34:00	0
2008-12-31	20:35:00	0
2008-12-31	20:36:00	0
2008-12-31	20:37:00	0
2008-12-31	20:38:00	0
2008-12-31	20:39:00	20
2008-12-31	20:40:00	0
2008-12-31	20:41:00	0
2008-12-31	20:42:00	0
2008-12-31	20:43:00	0
2008-12-31	20:44:00	0
2008-12-31	20:45:00	0
2008-12-31	20:46:00	0
2008-12-31	20:47:00	0
2008-12-31	20:48:00	0
2008-12-31	20:49:00	0
2008-12-31	20:50:00	91
2008-12-31	20:51:00	1715
2008-12-31	20:52:00	1182
2008-12-31	20:53:00	61
2008-12-31	20:54:00	30
2008-12-31	20:55:00	508
2008-12-31	20:56:00	508
2008-12-31	20:57:00	144
2008-12-31	20:58:00	169
2008-12-31	20:59:00	524
2008-12-31	21:00:00	61
2008-12-31	21:01:00	91
2008-12-31	21:02:00	0
2008-12-31	21:03:00	0
2008-12-31	21:04:00	0
2008-12-31	21:05:00	0
2008-12-31	21:06:00	0
2008-12-31	21:07:00	0
2008-12-31	21:08:00	0
2008-12-31	21:09:00	0
2008-12-31	21:10:00	0
2008-12-31	21:11:00	0
2008-12-31	21:12:00	0
2008-12-31	21:13:00	0
2008-12-31	21:14:00	0
2008-12-31	21:15:00	0
2008-12-31	21:16:00	0
2008-12-31	21:17:00	0
2008-12-31	21:18:00	0
2008-12-31	21:19:00	0
2008-12-31	21:20:00	0
2008-12-31	21:21:00	0
2008-12-31	21:22:00	0
2008-12-31	21:23:00	0
2008-12-31	21:24:00	0
2008-12-31	21:25:00	0
2008-12-31	21:26:00	0
2008-12-31	21:27:00	0
2008-12-31	21:28:00	0
2008-12-31	21:29:00	10
2008-12-31	21:30:00	0
2008-12-31	21:31:00	0
2008-12-31	21:32:00	41
2008-12-31	21:33:00	0
2008-12-31	21:34:00	0
2008-12-31	21:35:00	0
2008-12-31	21:36:00	0
2008-12-31	21:37:00	0
2008-12-31	21:38:00	0
2008-12-31	21:39:00	0
2008-12-31	21:40:00	0
2008-12-31	21:41:00	30
2008-12-31	21:42:00	0
2008-12-31	21:43:00	0
2008-12-31	21:44:00	0
2008-12-31	21:45:00	0
2008-12-31	21:46:00	0
2008-12-31	21:47:00	0
2008-12-31	21:48:00	0
2008-12-31	21:49:00	0
2008-12-31	21:50:00	0
2008-12-31	21:51:00	0
2008-12-31	21:52:00	0
2008-12-31	21:53:00	0
2008-12-31	21:54:00	30
2008-12-31	21:55:00	0
2008-12-31	21:56:00	20
2008-12-31	21:57:00	112
2008-12-31	21:58:00	0
2008-12-31	21:59:00	0
2008-12-31	22:00:00	0
2008-12-31	22:01:00	0
2008-12-31	22:02:00	309
2008-12-31	22:03:00	1130
2008-12-31	22:04:00	91
2008-12-31	22:05:00	20
2008-12-31	22:06:00	0
2008-12-31	22:07:00	10
2008-12-31	22:08:00	0
2008-12-31	22:09:00	30
2008-12-31	22:10:00	0
2008-12-31	22:11:00	0
2008-12-31	22:12:00	0
2008-12-31	22:13:00	0
2008-12-31	22:14:00	0
2008-12-31	22:15:00	0
2008-12-31	22:16:00	0
2008-12-31	22:17:00	0
2008-12-31	22:18:00	0
2008-12-31	22:19:00	0
2008-12-31	22:20:00	0
2008-12-31	22:21:00	0
2008-12-31	22:22:00	0
2008-12-31	22:23:00	0
2008-12-31	22:24:00	0
2008-12-31	22:25:00	0
2008-12-31	22:26:00	0
2008-12-31	22:27:00	0
2008-12-31	22:28:00	0
2008-12-31	22:29:00	0
2008-12-31	22:30:00	0
2008-12-31	22:31:00	0
2008-12-31	22:32:00	0
2008-12-31	22:33:00	0
2008-12-31	22:34:00	0
2008-12-31	22:35:00	0
2008-12-31	22:36:00	0
2008-12-31	22:37:00	0
2008-12-31	22:38:00	0
2008-12-31	22:39:00	0
2008-12-31	22:40:00	0
2008-12-31	22:41:00	0
2008-12-31	22:42:00	0
2008-12-31	22:43:00	0
2008-12-31	22:44:00	0
2008-12-31	22:45:00	0
2008-12-31	22:46:00	0
2008-12-31	22:47:00	0
2008-12-31	22:48:00	0
2008-12-31	22:49:00	0
2008-12-31	22:50:00	0
2008-12-31	22:51:00	0
2008-12-31	22:52:00	0
2008-12-31	22:53:00	0
2008-12-31	22:54:00	0
2008-12-31	22:55:00	0
2008-12-31	22:56:00	0
2008-12-31	22:57:00	0
2008-12-31	22:58:00	0
2008-12-31	22:59:00	0
2008-12-31	23:00:00	0
2008-12-31	23:01:00	0
2008-12-31	23:02:00	0
2008-12-31	23:03:00	0
2008-12-31	23:04:00	0
2008-12-31	23:05:00	0
2008-12-31	23:06:00	0
2008-12-31	23:07:00	0
2008-12-31	23:08:00	0
2008-12-31	23:09:00	0
2008-12-31	23:10:00	0
2008-12-31	23:11:00	0
2008-12-31	23:12:00	0
2008-12-31	23:13:00	0
2008-12-31	23:14:00	0
2008-12-31	23:15:00	0
2008-12-31	23:16:00	0
2008-12-31	23:17:00	0
2008-12-31	23:18:00	0
2008-12-31	23:19:00	0
2008-12-31	23:20:00	0
2008-12-31	23:21:00	0
2008-12-31	23:22:00	0
2008-12-31	23:23:00	0
2008-12-31	23:24:00	0
2008-12-31	23:25:00	0
2008-12-31	23:26:00	10
2008-12-31	23:27:00	0
2008-12-31	23:28:00	30
2008-12-31	23:29:00	0
2008-12-31	23:30:00	0
2008-12-31	23:31:00	0
2008-12-31	23:32:00	0
2008-12-31	23:33:00	0
2008-12-31	23:34:00	0
2008-12-31	23:35:00	0
2008-12-31	23:36:00	0
2008-12-31	23:37:00	0
2008-12-31	23:38:00	0
2008-12-31	23:39:00	0
2008-12-31	23:40:00	0
2008-12-31	23:41:00	0
2008-12-31	23:42:00	0
2008-12-31	23:43:00	0
2008-12-31	23:44:00	0
2008-12-31	23:45:00	0
2008-12-31	23:46:00	0
2008-12-31	23:47:00	0
2008-12-31	23:48:00	0
2008-12-31	23:49:00	0
2008-12-31	23:50:00	0
2008-12-31	23:51:00	0
2008-12-31	23:52:00	0
2008-12-31	23:53:00	0
2008-12-31	23:54:00	0
2008-12-31	23:55:00	0
2008-12-31	23:56:00	0
2008-12-31	23:57:00	0
2008-12-31	23:58:00	0
2008-12-31	23:59:00	0
2009-01-01	00:00:00	0
2009-01-01	00:01:00	0
2009-01-01	00:02:00	0
2009-01-01	00:03:00	0
2009-01-01	00:04:00	0
2009-01-01	00:05:00	0
2009-01-01	00:06:00	0
2009-01-01	00:07:00	0
2009-01-01	00:08:00	0
2009-01-01	00:09:00	0
2009-01-01	00:10:00	0
2009-01-01	00:11:00	0
2009-01-01	00:12:00	0
2009-01-01	00:13:00	0
2009-01-01	00:14:00	0
2009-01-01	00:15:00	0
2009-01-01	00:16:00	0
2009-01-01	00:17:00	10
2009-01-01	00:18:00	0
2009-01-01	00:19:00	0
2009-01-01	00:20:00	0
2009-01-01	00:21:00	0
2009-01-01	00:22:00	0
2009-01-01	00:23:00	0
2009-01-01	00:24:00	0
2009-01-01	00:25:00	0
2009-01-01	00:26:00	0
2009-01-01	00:27:00	0
2009-01-01	00:28:00	0
2009-01-01	00:29:00	0
2009-01-01	00:30:00	0
2009-01-01	00:31:00	0
2009-01-01	00:32:00	0
2009-01-01	00:33:00	0
2009-01-01	00:34:00	0
2009-01-01	00:35:00	0
2009-01-01	00:36:00	0
2009-01-01	00:37:00	0
2009-01-01	00:38:00	0
2009-01-01	00:39:00	0
2009-01-01	00:40:00	0
2009-01-01	00:41:00	10
2009-01-01	00:42:00	0
2009-01-01	00:43:00	0
2009-01-01	00:44:00	0
2009-01-01	00:45:00	0
2009-01-01	00:46:00	0
2009-01-01	00:47:00	0
2009-01-01	00:48:00	0
2009-01-01	00:49:00	0
2009-01-01	00:50:00	0
2009-01-01	00:51:00	0
2009-01-01	00:52:00	0
2009-01-01	00:53:00	0
2009-01-01	00:54:00	0
2009-01-01	00:55:00	0
2009-01-01	00:56:00	0
2009-01-01	00:57:00	0
2009-01-01	00:58:00	10
2009-01-01	00:59:00	20
2009-01-01	01:00:00	616
2009-01-01	01:01:00	337
2009-01-01	01:02:00	0
2009-01-01	01:03:00	41
2009-01-01	01:04:00	0
2009-01-01	01:05:00	0
2009-01-01	01:06:00	0
2009-01-01	01:07:00	0
2009-01-01	01:08:00	0
2009-01-01	01:09:00	0
2009-01-01	01:10:00	0
2009-01-01	01:11:00	0
2009-01-01	01:12:00	0
2009-01-01	01:13:00	0
2009-01-01	01:14:00	0
2009-01-01	01:15:00	0
2009-01-01	01:16:00	0
2009-01-01	01:17:00	0
2009-01-01	01:18:00	0
2009-01-01	01:19:00	0
2009-01-01	01:20:00	0
2009-01-01	01:21:00	0
2009-01-01	01:22:00	0
2009-01-01	01:23:00	0
2009-01-01	01:24:00	0
2009-01-01	01:25:00	0
2009-01-01	01:26:00	0
2009-01-01	01:27:00	0
2009-01-01	01:28:00	0
2009-01-01	01:29:00	0
2009-01-01	01:30:00	0
2009-01-01	01:31:00	0
2009-01-01	01:32:00	61
2009-01-01	01:33:00	0
2009-01-01	01:34:00	0
2009-01-01	01:35:00	0
2009-01-01	01:36:00	0
2009-01-01	01:37:00	0
2009-01-01	01:38:00	0
2009-01-01	01:39:00	0
2009-01-01	01:40:00	0
2009-01-01	01:41:00	0
2009-01-01	01:42:00	0
2009-01-01	01:43:00	0
2009-01-01	01:44:00	0
2009-01-01	01:45:00	0
2009-01-01	01:46:00	0
2009-01-01	01:47:00	0
2009-01-01	01:48:00	0
2009-01-01	01:49:00	0
2009-01-01	01:50:00	0
2009-01-01	01:51:00	0
2009-01-01	01:52:00	0
2009-01-01	01:53:00	0
2009-01-01	01:54:00	0
2009-01-01	01:55:00	0
2009-01-01	01:56:00	0
2009-01-01	01:57:00	0
2009-01-01	01:58:00	0
2009-01-01	01:59:00	0
2009-01-01	02:00:00	0
2009-01-01	02:01:00	0
2009-01-01	02:02:00	0
2009-01-01	02:03:00	0
2009-01-01	02:04:00	0
2009-01-01	02:05:00	0
2009-01-01	02:06:00	0
2009-01-01	02:07:00	0
2009-01-01	02:08:00	0
2009-01-01	02:09:00	0
2009-01-01	02:10:00	0
2009-01-01	02:11:00	0
2009-01-01	02:12:00	20
2009-01-01	02:13:00	0
2009-01-01	02:14:00	0
2009-01-01	02:15:00	0
2009-01-01	02:16:00	0
2009-01-01	02:17:00	0
2009-01-01	02:18:00	0
2009-01-01	02:19:00	0
2009-01-01	02:20:00	0
2009-01-01	02:21:00	0
2009-01-01	02:22:00	0
2009-01-01	02:23:00	0
2009-01-01	02:24:00	0
2009-01-01	02:25:00	0
2009-01-01	02:26:00	0
2009-01-01	02:27:00	0
2009-01-01	02:28:00	0
2009-01-01	02:29:00	0
2009-01-01	02:30:00	0
2009-01-01	02:31:00	0
2009-01-01	02:32:00	0
2009-01-01	02:33:00	0
2009-01-01	02:34:00	0
2009-01-01	02:35:00	0
2009-01-01	02:36:00	0
2009-01-01	02:37:00	0
2009-01-01	02:38:00	0
2009-01-01	02:39:00	0
2009-01-01	02:40:00	0
2009-01-01	02:41:00	0
2009-01-01	02:42:00	0
2009-01-01	02:43:00	0
2009-01-01	02:44:00	0
2009-01-01	02:45:00	0
2009-01-01	02:46:00	0
2009-01-01	02:47:00	10
2009-01-01	02:48:00	0
2009-01-01	02:49:00	0
2009-01-01	02:50:00	10
2009-01-01	02:51:00	0
2009-01-01	02:52:00	0
2009-01-01	02:53:00	0
2009-01-01	02:54:00	0
2009-01-01	02:55:00	0
2009-01-01	02:56:00	0
2009-01-01	02:57:00	0
2009-01-01	02:58:00	0
2009-01-01	02:59:00	0
2009-01-01	03:00:00	0
2009-01-01	03:01:00	0
2009-01-01	03:02:00	0
2009-01-01	03:03:00	0
2009-01-01	03:04:00	0
2009-01-01	03:05:00	0
2009-01-01	03:06:00	0
2009-01-01	03:07:00	0
2009-01-01	03:08:00	0
2009-01-01	03:09:00	0
2009-01-01	03:10:00	0
2009-01-01	03:11:00	0
2009-01-01	03:12:00	0
2009-01-01	03:13:00	0
2009-01-01	03:14:00	0
2009-01-01	03:15:00	0
2009-01-01	03:16:00	0
2009-01-01	03:17:00	0
2009-01-01	03:18:00	0
2009-01-01	03:19:00	0
2009-01-01	03:20:00	20
2009-01-01	03:21:00	0
2009-01-01	03:22:00	0
2009-01-01	03:23:00	0
2009-01-01	03:24:00	0
2009-01-01	03:25:00	0
2009-01-01	03:26:00	0
2009-01-01	03:27:00	20
2009-01-01	03:28:00	0
2009-01-01	03:29:00	0
2009-01-01	03:30:00	0
2009-01-01	03:31:00	0
2009-01-01	03:32:00	0
2009-01-01	03:33:00	0
2009-01-01	03:34:00	0
2009-01-01	03:35:00	0
2009-01-01	03:36:00	0
2009-01-01	03:37:00	0
2009-01-01	03:38:00	0
2009-01-01	03:39:00	0
2009-01-01	03:40:00	0
2009-01-01	03:41:00	0
2009-01-01	03:42:00	0
2009-01-01	03:43:00	0
2009-01-01	03:44:00	0
2009-01-01	03:45:00	0
2009-01-01	03:46:00	0
2009-01-01	03:47:00	0
2009-01-01	03:48:00	0
2009-01-01	03:49:00	0
2009-01-01	03:50:00	0
2009-01-01	03:51:00	0
2009-01-01	03:52:00	0
2009-01-01	03:53:00	0
2009-01-01	03:54:00	0
2009-01-01	03:55:00	0
2009-01-01	03:56:00	0
2009-01-01	03:57:00	0
2009-01-01	03:58:00	0
2009-01-01	03:59:00	0
2009-01-01	04:00:00	0
2009-01-01	04:01:00	10
2009-01-01	04:02:00	0
2009-01-01	04:03:00	0
2009-01-01	04:04:00	0
2009-01-01	04:05:00	0
2009-01-01	04:06:00	0
2009-01-01	04:07:00	0
2009-01-01	04:08:00	0
2009-01-01	04:09:00	0
2009-01-01	04:10:00	0
2009-01-01	04:11:00	0
2009-01-01	04:12:00	0
2009-01-01	04:13:00	0
2009-01-01	04:14:00	0
2009-01-01	04:15:00	0
2009-01-01	04:16:00	0
2009-01-01	04:17:00	0
2009-01-01	04:18:00	0
2009-01-01	04:19:00	0
2009-01-01	04:20:00	0
2009-01-01	04:21:00	0
2009-01-01	04:22:00	0
2009-01-01	04:23:00	0
2009-01-01	04:24:00	0
2009-01-01	04:25:00	0
2009-01-01	04:26:00	0
2009-01-01	04:27:00	0
2009-01-01	04:28:00	0
2009-01-01	04:29:00	0
2009-01-01	04:30:00	0
2009-01-01	04:31:00	0
2009-01-01	04:32:00	0
2009-01-01	04:33:00	10
2009-01-01	04:34:00	41
2009-01-01	04:35:00	0
2009-01-01	04:36:00	0
2009-01-01	04:37:00	0
2009-01-01	04:38:00	0
2009-01-01	04:39:00	112
2009-01-01	04:40:00	0
2009-01-01	04:41:00	0
2009-01-01	04:42:00	0
2009-01-01	04:43:00	0
2009-01-01	04:44:00	71
2009-01-01	04:45:00	0
2009-01-01	04:46:00	0
2009-01-01	04:47:00	0
2009-01-01	04:48:00	0
2009-01-01	04:49:00	0
2009-01-01	04:50:00	0
2009-01-01	04:51:00	0
2009-01-01	04:52:00	0
2009-01-01	04:53:00	0
2009-01-01	04:54:00	181
2009-01-01	04:55:00	0
2009-01-01	04:56:00	0
2009-01-01	04:57:00	0
2009-01-01	04:58:00	0
2009-01-01	04:59:00	0
2009-01-01	05:00:00	30
2009-01-01	05:01:00	0
2009-01-01	05:02:00	132
2009-01-01	05:03:00	0
2009-01-01	05:04:00	0
2009-01-01	05:05:00	0
2009-01-01	05:06:00	10
2009-01-01	05:07:00	0
2009-01-01	05:08:00	0
2009-01-01	05:09:00	754
2009-01-01	05:10:00	0
2009-01-01	05:11:00	0
2009-01-01	05:12:00	0
2009-01-01	05:13:00	0
2009-01-01	05:14:00	0
2009-01-01	05:15:00	0
2009-01-01	05:16:00	0
2009-01-01	05:17:00	0
2009-01-01	05:18:00	0
2009-01-01	05:19:00	0
2009-01-01	05:20:00	0
2009-01-01	05:21:00	0
2009-01-01	05:22:00	0
2009-01-01	05:23:00	0
2009-01-01	05:24:00	0
2009-01-01	05:25:00	0
2009-01-01	05:26:00	0
2009-01-01	05:27:00	0
2009-01-01	05:28:00	0
2009-01-01	05:29:00	0
2009-01-01	05:30:00	0
2009-01-01	05:31:00	0
2009-01-01	05:32:00	0
2009-01-01	05:33:00	0
2009-01-01	05:34:00	0
2009-01-01	05:35:00	0
2009-01-01	05:36:00	0
2009-01-01	05:37:00	0
2009-01-01	05:38:00	0
2009-01-01	05:39:00	0
2009-01-01	05:40:00	0
2009-01-01	05:41:00	0
2009-01-01	05:42:00	0
2009-01-01	05:43:00	0
2009-01-01	05:44:00	0
2009-01-01	05:45:00	0
2009-01-01	05:46:00	0
2009-01-01	05:47:00	0
2009-01-01	05:48:00	0
2009-01-01	05:49:00	0
2009-01-01	05:50:00	0
2009-01-01	05:51:00	0
2009-01-01	05:52:00	0
2009-01-01	05:53:00	0
2009-01-01	05:54:00	0
2009-01-01	05:55:00	0
2009-01-01	05:56:00	0
2009-01-01	05:57:00	0
2009-01-01	05:58:00	0
2009-01-01	05:59:00	10
2009-01-01	06:00:00	0
2009-01-01	06:01:00	0
2009-01-01	06:02:00	0
2009-01-01	06:03:00	0
2009-01-01	06:04:00	0
2009-01-01	06:05:00	0
2009-01-01	06:06:00	0
2009-01-01	06:07:00	0
2009-01-01	06:08:00	0
2009-01-01	06:09:00	0
2009-01-01	06:10:00	0
2009-01-01	06:11:00	0
2009-01-01	06:12:00	0
2009-01-01	06:13:00	0
2009-01-01	06:14:00	0
2009-01-01	06:15:00	0
2009-01-01	06:16:00	0
2009-01-01	06:17:00	351
2009-01-01	06:18:00	81
2009-01-01	06:19:00	144
2009-01-01	06:20:00	337
2009-01-01	06:21:00	10
2009-01-01	06:22:00	10
2009-01-01	06:23:00	41
2009-01-01	06:24:00	616
2009-01-01	06:25:00	217
2009-01-01	06:26:00	51
2009-01-01	06:27:00	0
2009-01-01	06:28:00	10
2009-01-01	06:29:00	41
2009-01-01	06:30:00	0
2009-01-01	06:31:00	10
2009-01-01	06:32:00	0
2009-01-01	06:33:00	0
2009-01-01	06:34:00	0
2009-01-01	06:35:00	0
2009-01-01	06:36:00	122
2009-01-01	06:37:00	41
2009-01-01	06:38:00	0
2009-01-01	06:39:00	0
2009-01-01	06:40:00	0
2009-01-01	06:41:00	0
2009-01-01	06:42:00	0
2009-01-01	06:43:00	0
2009-01-01	06:44:00	0
2009-01-01	06:45:00	0
2009-01-01	06:46:00	0
2009-01-01	06:47:00	0
2009-01-01	06:48:00	0
2009-01-01	06:49:00	0
2009-01-01	06:50:00	0
2009-01-01	06:51:00	0
2009-01-01	06:52:00	0
2009-01-01	06:53:00	81
2009-01-01	06:54:00	0
2009-01-01	06:55:00	0
2009-01-01	06:56:00	0
2009-01-01	06:57:00	81
2009-01-01	06:58:00	0
2009-01-01	06:59:00	0
2009-01-01	07:00:00	0
2009-01-01	07:01:00	0
2009-01-01	07:02:00	0
2009-01-01	07:03:00	0
2009-01-01	07:04:00	0
2009-01-01	07:05:00	0
2009-01-01	07:06:00	0
2009-01-01	07:07:00	0
2009-01-01	07:08:00	0
2009-01-01	07:09:00	0
2009-01-01	07:10:00	0
2009-01-01	07:11:00	0
2009-01-01	07:12:00	0
2009-01-01	07:13:00	0
2009-01-01	07:14:00	0
2009-01-01	07:15:00	0
2009-01-01	07:16:00	51
2009-01-01	07:17:00	1544
2009-01-01	07:18:00	475
2009-01-01	07:19:00	295
2009-01-01	07:20:00	0
2009-01-01	07:21:00	0
2009-01-01	07:22:00	0
2009-01-01	07:23:00	0
2009-01-01	07:24:00	0
2009-01-01	07:25:00	0
2009-01-01	07:26:00	0
2009-01-01	07:27:00	242
2009-01-01	07:28:00	10
2009-01-01	07:29:00	0
2009-01-01	07:30:00	41
2009-01-01	07:31:00	61
2009-01-01	07:32:00	0
2009-01-01	07:33:00	122
2009-01-01	07:34:00	91
2009-01-01	07:35:00	20
2009-01-01	07:36:00	71
2009-01-01	07:37:00	61
2009-01-01	07:38:00	266
2009-01-01	07:39:00	169
2009-01-01	07:40:00	51
2009-01-01	07:41:00	10
2009-01-01	07:42:00	30
2009-01-01	07:43:00	0
2009-01-01	07:44:00	10
2009-01-01	07:45:00	10
2009-01-01	07:46:00	0
2009-01-01	07:47:00	30
2009-01-01	07:48:00	20
2009-01-01	07:49:00	10
2009-01-01	07:50:00	0
2009-01-01	07:51:00	0
2009-01-01	07:52:00	30
2009-01-01	07:53:00	0
2009-01-01	07:54:00	0
2009-01-01	07:55:00	242
2009-01-01	07:56:00	0
2009-01-01	07:57:00	20
2009-01-01	07:58:00	0
2009-01-01	07:59:00	20
2009-01-01	08:00:00	81
2009-01-01	08:01:00	0
2009-01-01	08:02:00	0
2009-01-01	08:03:00	0
2009-01-01	08:04:00	30
2009-01-01	08:05:00	0
2009-01-01	08:06:00	41
2009-01-01	08:07:00	0
2009-01-01	08:08:00	0
2009-01-01	08:09:00	81
2009-01-01	08:10:00	61
2009-01-01	08:11:00	10
2009-01-01	08:12:00	71
2009-01-01	08:13:00	20
2009-01-01	08:14:00	61
2009-01-01	08:15:00	839
2009-01-01	08:16:00	1788
2009-01-01	08:17:00	713
2009-01-01	08:18:00	1479
2009-01-01	08:19:00	1050
2009-01-01	08:20:00	616
2009-01-01	08:21:00	542
2009-01-01	08:22:00	508
2009-01-01	08:23:00	1103
2009-01-01	08:24:00	794
2009-01-01	08:25:00	542
2009-01-01	08:26:00	71
2009-01-01	08:27:00	112
2009-01-01	08:28:00	427
2009-01-01	08:29:00	561
2009-01-01	08:30:00	266
2009-01-01	08:31:00	561
2009-01-01	08:32:00	122
2009-01-01	08:33:00	309
2009-01-01	08:34:00	217
2009-01-01	08:35:00	81
2009-01-01	08:36:00	20
2009-01-01	08:37:00	410
2009-01-01	08:38:00	774
2009-01-01	08:39:00	122
2009-01-01	08:40:00	266
2009-01-01	08:41:00	242
2009-01-01	08:42:00	102
2009-01-01	08:43:00	30
2009-01-01	08:44:00	0
2009-01-01	08:45:00	0
2009-01-01	08:46:00	81
2009-01-01	08:47:00	0
2009-01-01	08:48:00	144
2009-01-01	08:49:00	0
2009-01-01	08:50:00	20
2009-01-01	08:51:00	30
2009-01-01	08:52:00	0
2009-01-01	08:53:00	0
2009-01-01	08:54:00	0
2009-01-01	08:55:00	0
2009-01-01	08:56:00	0
2009-01-01	08:57:00	0
2009-01-01	08:58:00	0
2009-01-01	08:59:00	0
2009-01-01	09:00:00	0
2009-01-01	09:01:00	0
2009-01-01	09:02:00	0
2009-01-01	09:03:00	0
2009-01-01	09:04:00	0
2009-01-01	09:05:00	0
2009-01-01	09:06:00	0
2009-01-01	09:07:00	0
2009-01-01	09:08:00	0
[truncated: 19,611 more rows]

## Sheet: 1.14.09
Actogram, Copy Raw Data, All Days
Identity:	Butler Schmidt
Filename:	E:\Active Research Files\meloxicam titre canine\cases\butler\Butler Schmidt 1.14.09.AWC
Gender:	M
Age:	12
Height:	50.8 cm	20.0 in
Weight:	24.6 kg	54.2 lbs
Start Date:	14-Jan-2009 (Wed)
Start Time:	17:00:00
Interval:	1.00 mins
Date Stamp:	Time Stamp:	Activity Data:	Marker Press:
2009-01-14	00:00:00	0
2009-01-14	00:01:00	0
2009-01-14	00:02:00	0
2009-01-14	00:03:00	0
2009-01-14	00:04:00	0
2009-01-14	00:05:00	0
2009-01-14	00:06:00	0
2009-01-14	00:07:00	0
2009-01-14	00:08:00	0
2009-01-14	00:09:00	0
2009-01-14	00:10:00	0
2009-01-14	00:11:00	0
2009-01-14	00:12:00	0
2009-01-14	00:13:00	0
2009-01-14	00:14:00	0
2009-01-14	00:15:00	0
2009-01-14	00:16:00	0
2009-01-14	00:17:00	0
2009-01-14	00:18:00	0
2009-01-14	00:19:00	0
2009-01-14	00:20:00	0
2009-01-14	00:21:00	0
2009-01-14	00:22:00	0
2009-01-14	00:23:00	0
2009-01-14	00:24:00	0
2009-01-14	00:25:00	0
2009-01-14	00:26:00	0
2009-01-14	00:27:00	0
2009-01-14	00:28:00	0
2009-01-14	00:29:00	0
2009-01-14	00:30:00	0
2009-01-14	00:31:00	0
2009-01-14	00:32:00	0
2009-01-14	00:33:00	0
2009-01-14	00:34:00	0
2009-01-14	00:35:00	0
2009-01-14	00:36:00	0
2009-01-14	00:37:00	0
2009-01-14	00:38:00	0
2009-01-14	00:39:00	0
2009-01-14	00:40:00	0
2009-01-14	00:41:00	0
2009-01-14	00:42:00	0
2009-01-14	00:43:00	0
2009-01-14	00:44:00	0
2009-01-14	00:45:00	0
2009-01-14	00:46:00	0
2009-01-14	00:47:00	0
2009-01-14	00:48:00	0
2009-01-14	00:49:00	0
2009-01-14	00:50:00	0
2009-01-14	00:51:00	0
2009-01-14	00:52:00	0
2009-01-14	00:53:00	0
2009-01-14	00:54:00	0
2009-01-14	00:55:00	0
2009-01-14	00:56:00	0
2009-01-14	00:57:00	0
2009-01-14	00:58:00	0
2009-01-14	00:59:00	0
2009-01-14	01:00:00	0
2009-01-14	01:01:00	0
2009-01-14	01:02:00	0
2009-01-14	01:03:00	0
2009-01-14	01:04:00	0
2009-01-14	01:05:00	0
2009-01-14	01:06:00	0
2009-01-14	01:07:00	0
2009-01-14	01:08:00	0
2009-01-14	01:09:00	0
2009-01-14	01:10:00	0
2009-01-14	01:11:00	0
2009-01-14	01:12:00	0
2009-01-14	01:13:00	0
2009-01-14	01:14:00	0
2009-01-14	01:15:00	0
2009-01-14	01:16:00	0
2009-01-14	01:17:00	0
2009-01-14	01:18:00	0
2009-01-14	01:19:00	0
2009-01-14	01:20:00	0
2009-01-14	01:21:00	0
2009-01-14	01:22:00	0
2009-01-14	01:23:00	0
2009-01-14	01:24:00	0
2009-01-14	01:25:00	0
2009-01-14	01:26:00	0
2009-01-14	01:27:00	0
2009-01-14	01:28:00	0
2009-01-14	01:29:00	0
2009-01-14	01:30:00	0
2009-01-14	01:31:00	0
2009-01-14	01:32:00	0
2009-01-14	01:33:00	0
2009-01-14	01:34:00	0
2009-01-14	01:35:00	0
2009-01-14	01:36:00	0
2009-01-14	01:37:00	0
2009-01-14	01:38:00	0
2009-01-14	01:39:00	0
2009-01-14	01:40:00	0
2009-01-14	01:41:00	0
2009-01-14	01:42:00	0
2009-01-14	01:43:00	0
2009-01-14	01:44:00	0
2009-01-14	01:45:00	0
2009-01-14	01:46:00	0
2009-01-14	01:47:00	0
2009-01-14	01:48:00	0
2009-01-14	01:49:00	0
2009-01-14	01:50:00	0
2009-01-14	01:51:00	0
2009-01-14	01:52:00	0
2009-01-14	01:53:00	0
2009-01-14	01:54:00	0
2009-01-14	01:55:00	0
2009-01-14	01:56:00	0
2009-01-14	01:57:00	0
2009-01-14	01:58:00	0
2009-01-14	01:59:00	0
2009-01-14	02:00:00	0
2009-01-14	02:01:00	0
2009-01-14	02:02:00	0
2009-01-14	02:03:00	0
2009-01-14	02:04:00	0
2009-01-14	02:05:00	0
2009-01-14	02:06:00	0
2009-01-14	02:07:00	0
2009-01-14	02:08:00	0
2009-01-14	02:09:00	0
2009-01-14	02:10:00	0
2009-01-14	02:11:00	0
2009-01-14	02:12:00	0
2009-01-14	02:13:00	0
2009-01-14	02:14:00	0
2009-01-14	02:15:00	0
2009-01-14	02:16:00	0
2009-01-14	02:17:00	0
2009-01-14	02:18:00	0
2009-01-14	02:19:00	0
2009-01-14	02:20:00	0
2009-01-14	02:21:00	0
2009-01-14	02:22:00	0
2009-01-14	02:23:00	0
2009-01-14	02:24:00	0
2009-01-14	02:25:00	0
2009-01-14	02:26:00	0
2009-01-14	02:27:00	0
2009-01-14	02:28:00	0
2009-01-14	02:29:00	0
2009-01-14	02:30:00	0
2009-01-14	02:31:00	0
2009-01-14	02:32:00	0
2009-01-14	02:33:00	0
2009-01-14	02:34:00	0
2009-01-14	02:35:00	0
2009-01-14	02:36:00	0
2009-01-14	02:37:00	0
2009-01-14	02:38:00	0
2009-01-14	02:39:00	0
2009-01-14	02:40:00	0
2009-01-14	02:41:00	0
2009-01-14	02:42:00	0
2009-01-14	02:43:00	0
2009-01-14	02:44:00	0
2009-01-14	02:45:00	0
2009-01-14	02:46:00	0
2009-01-14	02:47:00	0
2009-01-14	02:48:00	0
2009-01-14	02:49:00	0
2009-01-14	02:50:00	0
2009-01-14	02:51:00	0
2009-01-14	02:52:00	0
2009-01-14	02:53:00	0
2009-01-14	02:54:00	0
2009-01-14	02:55:00	0
2009-01-14	02:56:00	0
2009-01-14	02:57:00	0
2009-01-14	02:58:00	0
2009-01-14	02:59:00	0
2009-01-14	03:00:00	0
2009-01-14	03:01:00	0
2009-01-14	03:02:00	0
2009-01-14	03:03:00	0
2009-01-14	03:04:00	0
2009-01-14	03:05:00	0
2009-01-14	03:06:00	0
2009-01-14	03:07:00	0
2009-01-14	03:08:00	0
2009-01-14	03:09:00	0
2009-01-14	03:10:00	0
2009-01-14	03:11:00	0
2009-01-14	03:12:00	0
2009-01-14	03:13:00	0
2009-01-14	03:14:00	0
2009-01-14	03:15:00	0
2009-01-14	03:16:00	0
2009-01-14	03:17:00	0
2009-01-14	03:18:00	0
2009-01-14	03:19:00	0
2009-01-14	03:20:00	0
2009-01-14	03:21:00	0
2009-01-14	03:22:00	0
2009-01-14	03:23:00	0
2009-01-14	03:24:00	0
2009-01-14	03:25:00	0
2009-01-14	03:26:00	0
2009-01-14	03:27:00	0
2009-01-14	03:28:00	0
2009-01-14	03:29:00	0
2009-01-14	03:30:00	0
2009-01-14	03:31:00	0
2009-01-14	03:32:00	0
2009-01-14	03:33:00	0
2009-01-14	03:34:00	0
2009-01-14	03:35:00	0
2009-01-14	03:36:00	0
2009-01-14	03:37:00	0
2009-01-14	03:38:00	0
2009-01-14	03:39:00	0
2009-01-14	03:40:00	0
2009-01-14	03:41:00	0
2009-01-14	03:42:00	0
2009-01-14	03:43:00	0
2009-01-14	03:44:00	0
2009-01-14	03:45:00	0
2009-01-14	03:46:00	0
2009-01-14	03:47:00	0
2009-01-14	03:48:00	0
2009-01-14	03:49:00	0
2009-01-14	03:50:00	0
2009-01-14	03:51:00	0
2009-01-14	03:52:00	0
2009-01-14	03:53:00	0
2009-01-14	03:54:00	0
2009-01-14	03:55:00	0
2009-01-14	03:56:00	0
2009-01-14	03:57:00	0
2009-01-14	03:58:00	0
2009-01-14	03:59:00	0
2009-01-14	04:00:00	0
2009-01-14	04:01:00	0
2009-01-14	04:02:00	0
2009-01-14	04:03:00	0
2009-01-14	04:04:00	0
2009-01-14	04:05:00	0
2009-01-14	04:06:00	0
2009-01-14	04:07:00	0
2009-01-14	04:08:00	0
2009-01-14	04:09:00	0
2009-01-14	04:10:00	0
2009-01-14	04:11:00	0
2009-01-14	04:12:00	0
2009-01-14	04:13:00	0
2009-01-14	04:14:00	0
2009-01-14	04:15:00	0
2009-01-14	04:16:00	0
2009-01-14	04:17:00	0
2009-01-14	04:18:00	0
2009-01-14	04:19:00	0
2009-01-14	04:20:00	0
2009-01-14	04:21:00	0
2009-01-14	04:22:00	0
2009-01-14	04:23:00	0
2009-01-14	04:24:00	0
2009-01-14	04:25:00	0
2009-01-14	04:26:00	0
2009-01-14	04:27:00	0
2009-01-14	04:28:00	0
2009-01-14	04:29:00	0
2009-01-14	04:30:00	0
2009-01-14	04:31:00	0
2009-01-14	04:32:00	0
2009-01-14	04:33:00	0
2009-01-14	04:34:00	0
2009-01-14	04:35:00	0
2009-01-14	04:36:00	0
2009-01-14	04:37:00	0
2009-01-14	04:38:00	0
2009-01-14	04:39:00	0
2009-01-14	04:40:00	0
2009-01-14	04:41:00	0
2009-01-14	04:42:00	0
2009-01-14	04:43:00	0
2009-01-14	04:44:00	0
2009-01-14	04:45:00	0
2009-01-14	04:46:00	0
2009-01-14	04:47:00	0
2009-01-14	04:48:00	0
2009-01-14	04:49:00	0
2009-01-14	04:50:00	0
2009-01-14	04:51:00	0
2009-01-14	04:52:00	0
2009-01-14	04:53:00	0
2009-01-14	04:54:00	0
2009-01-14	04:55:00	0
2009-01-14	04:56:00	0
2009-01-14	04:57:00	0
2009-01-14	04:58:00	0
2009-01-14	04:59:00	0
2009-01-14	05:00:00	0
2009-01-14	05:01:00	0
2009-01-14	05:02:00	0
2009-01-14	05:03:00	0
2009-01-14	05:04:00	0
2009-01-14	05:05:00	0
2009-01-14	05:06:00	0
2009-01-14	05:07:00	0
2009-01-14	05:08:00	0
2009-01-14	05:09:00	0
2009-01-14	05:10:00	0
2009-01-14	05:11:00	0
2009-01-14	05:12:00	0
2009-01-14	05:13:00	0
2009-01-14	05:14:00	0
2009-01-14	05:15:00	0
2009-01-14	05:16:00	0
2009-01-14	05:17:00	0
2009-01-14	05:18:00	0
2009-01-14	05:19:00	0
2009-01-14	05:20:00	0
2009-01-14	05:21:00	0
2009-01-14	05:22:00	0
2009-01-14	05:23:00	0
2009-01-14	05:24:00	0
2009-01-14	05:25:00	0
2009-01-14	05:26:00	0
2009-01-14	05:27:00	0
2009-01-14	05:28:00	0
2009-01-14	05:29:00	0
2009-01-14	05:30:00	0
2009-01-14	05:31:00	0
2009-01-14	05:32:00	0
2009-01-14	05:33:00	0
2009-01-14	05:34:00	0
2009-01-14	05:35:00	0
2009-01-14	05:36:00	0
2009-01-14	05:37:00	0
2009-01-14	05:38:00	0
2009-01-14	05:39:00	0
2009-01-14	05:40:00	0
2009-01-14	05:41:00	0
2009-01-14	05:42:00	0
2009-01-14	05:43:00	0
2009-01-14	05:44:00	0
2009-01-14	05:45:00	0
2009-01-14	05:46:00	0
2009-01-14	05:47:00	0
2009-01-14	05:48:00	0
2009-01-14	05:49:00	0
2009-01-14	05:50:00	0
2009-01-14	05:51:00	0
2009-01-14	05:52:00	0
2009-01-14	05:53:00	0
2009-01-14	05:54:00	0
2009-01-14	05:55:00	0
2009-01-14	05:56:00	0
2009-01-14	05:57:00	0
2009-01-14	05:58:00	0
2009-01-14	05:59:00	0
2009-01-14	06:00:00	0
2009-01-14	06:01:00	0
2009-01-14	06:02:00	0
2009-01-14	06:03:00	0
2009-01-14	06:04:00	0
2009-01-14	06:05:00	0
2009-01-14	06:06:00	0
2009-01-14	06:07:00	0
2009-01-14	06:08:00	0
2009-01-14	06:09:00	0
2009-01-14	06:10:00	0
2009-01-14	06:11:00	0
2009-01-14	06:12:00	0
2009-01-14	06:13:00	0
2009-01-14	06:14:00	0
2009-01-14	06:15:00	0
2009-01-14	06:16:00	0
2009-01-14	06:17:00	0
2009-01-14	06:18:00	0
2009-01-14	06:19:00	0
2009-01-14	06:20:00	0
2009-01-14	06:21:00	0
2009-01-14	06:22:00	0
2009-01-14	06:23:00	0
2009-01-14	06:24:00	0
2009-01-14	06:25:00	0
2009-01-14	06:26:00	0
2009-01-14	06:27:00	0
2009-01-14	06:28:00	0
2009-01-14	06:29:00	0
2009-01-14	06:30:00	0
2009-01-14	06:31:00	0
2009-01-14	06:32:00	0
2009-01-14	06:33:00	0
2009-01-14	06:34:00	0
2009-01-14	06:35:00	0
2009-01-14	06:36:00	0
2009-01-14	06:37:00	0
2009-01-14	06:38:00	0
2009-01-14	06:39:00	0
2009-01-14	06:40:00	0
2009-01-14	06:41:00	0
2009-01-14	06:42:00	0
2009-01-14	06:43:00	0
2009-01-14	06:44:00	0
2009-01-14	06:45:00	0
2009-01-14	06:46:00	0
2009-01-14	06:47:00	0
2009-01-14	06:48:00	0
2009-01-14	06:49:00	0
2009-01-14	06:50:00	0
2009-01-14	06:51:00	0
2009-01-14	06:52:00	0
2009-01-14	06:53:00	0
2009-01-14	06:54:00	0
2009-01-14	06:55:00	0
2009-01-14	06:56:00	0
2009-01-14	06:57:00	0
2009-01-14	06:58:00	0
2009-01-14	06:59:00	0
2009-01-14	07:00:00	0
2009-01-14	07:01:00	0
2009-01-14	07:02:00	0
2009-01-14	07:03:00	0
2009-01-14	07:04:00	0
2009-01-14	07:05:00	0
2009-01-14	07:06:00	0
2009-01-14	07:07:00	0
2009-01-14	07:08:00	0
2009-01-14	07:09:00	0
2009-01-14	07:10:00	0
2009-01-14	07:11:00	0
2009-01-14	07:12:00	0
2009-01-14	07:13:00	0
2009-01-14	07:14:00	0
2009-01-14	07:15:00	0
2009-01-14	07:16:00	0
2009-01-14	07:17:00	0
2009-01-14	07:18:00	0
2009-01-14	07:19:00	0
2009-01-14	07:20:00	0
2009-01-14	07:21:00	0
2009-01-14	07:22:00	0
2009-01-14	07:23:00	0
2009-01-14	07:24:00	0
2009-01-14	07:25:00	0
2009-01-14	07:26:00	0
2009-01-14	07:27:00	0
2009-01-14	07:28:00	0
2009-01-14	07:29:00	0
2009-01-14	07:30:00	0
2009-01-14	07:31:00	0
2009-01-14	07:32:00	0
2009-01-14	07:33:00	0
2009-01-14	07:34:00	0
2009-01-14	07:35:00	0
2009-01-14	07:36:00	0
2009-01-14	07:37:00	0
2009-01-14	07:38:00	0
2009-01-14	07:39:00	0
2009-01-14	07:40:00	0
2009-01-14	07:41:00	0
2009-01-14	07:42:00	0
2009-01-14	07:43:00	0
2009-01-14	07:44:00	0
2009-01-14	07:45:00	0
2009-01-14	07:46:00	0
2009-01-14	07:47:00	0
2009-01-14	07:48:00	0
2009-01-14	07:49:00	0
2009-01-14	07:50:00	0
2009-01-14	07:51:00	0
2009-01-14	07:52:00	0
2009-01-14	07:53:00	0
2009-01-14	07:54:00	0
2009-01-14	07:55:00	0
2009-01-14	07:56:00	0
2009-01-14	07:57:00	0
2009-01-14	07:58:00	0
2009-01-14	07:59:00	0
2009-01-14	08:00:00	0
2009-01-14	08:01:00	0
2009-01-14	08:02:00	0
2009-01-14	08:03:00	0
2009-01-14	08:04:00	0
2009-01-14	08:05:00	0
2009-01-14	08:06:00	0
2009-01-14	08:07:00	0
2009-01-14	08:08:00	0
2009-01-14	08:09:00	0
2009-01-14	08:10:00	0
2009-01-14	08:11:00	0
2009-01-14	08:12:00	0
2009-01-14	08:13:00	0
2009-01-14	08:14:00	0
2009-01-14	08:15:00	0
2009-01-14	08:16:00	0
2009-01-14	08:17:00	0
2009-01-14	08:18:00	0
2009-01-14	08:19:00	0
2009-01-14	08:20:00	0
2009-01-14	08:21:00	0
2009-01-14	08:22:00	0
2009-01-14	08:23:00	0
2009-01-14	08:24:00	0
2009-01-14	08:25:00	0
2009-01-14	08:26:00	0
2009-01-14	08:27:00	0
2009-01-14	08:28:00	0
2009-01-14	08:29:00	0
2009-01-14	08:30:00	0
2009-01-14	08:31:00	0
2009-01-14	08:32:00	0
2009-01-14	08:33:00	0
2009-01-14	08:34:00	0
2009-01-14	08:35:00	0
2009-01-14	08:36:00	0
2009-01-14	08:37:00	0
2009-01-14	08:38:00	0
2009-01-14	08:39:00	0
2009-01-14	08:40:00	0
2009-01-14	08:41:00	0
2009-01-14	08:42:00	0
2009-01-14	08:43:00	0
2009-01-14	08:44:00	0
2009-01-14	08:45:00	0
2009-01-14	08:46:00	0
2009-01-14	08:47:00	0
2009-01-14	08:48:00	0
2009-01-14	08:49:00	0
2009-01-14	08:50:00	0
2009-01-14	08:51:00	0
2009-01-14	08:52:00	0
2009-01-14	08:53:00	0
2009-01-14	08:54:00	0
2009-01-14	08:55:00	0
2009-01-14	08:56:00	0
2009-01-14	08:57:00	0
2009-01-14	08:58:00	0
2009-01-14	08:59:00	0
2009-01-14	09:00:00	0
2009-01-14	09:01:00	0
2009-01-14	09:02:00	0
2009-01-14	09:03:00	0
2009-01-14	09:04:00	0
2009-01-14	09:05:00	0
2009-01-14	09:06:00	0
2009-01-14	09:07:00	0
2009-01-14	09:08:00	0
2009-01-14	09:09:00	0
2009-01-14	09:10:00	0
2009-01-14	09:11:00	0
2009-01-14	09:12:00	0
2009-01-14	09:13:00	0
2009-01-14	09:14:00	0
2009-01-14	09:15:00	0
2009-01-14	09:16:00	0
2009-01-14	09:17:00	0
2009-01-14	09:18:00	0
2009-01-14	09:19:00	0
2009-01-14	09:20:00	0
2009-01-14	09:21:00	0
2009-01-14	09:22:00	0
2009-01-14	09:23:00	0
2009-01-14	09:24:00	0
2009-01-14	09:25:00	0
2009-01-14	09:26:00	0
2009-01-14	09:27:00	0
2009-01-14	09:28:00	0
2009-01-14	09:29:00	0
2009-01-14	09:30:00	0
2009-01-14	09:31:00	0
2009-01-14	09:32:00	0
2009-01-14	09:33:00	0
2009-01-14	09:34:00	0
2009-01-14	09:35:00	0
2009-01-14	09:36:00	0
2009-01-14	09:37:00	0
2009-01-14	09:38:00	0
2009-01-14	09:39:00	0
2009-01-14	09:40:00	0
2009-01-14	09:41:00	0
2009-01-14	09:42:00	0
2009-01-14	09:43:00	0
2009-01-14	09:44:00	0
2009-01-14	09:45:00	0
2009-01-14	09:46:00	0
2009-01-14	09:47:00	0
2009-01-14	09:48:00	0
2009-01-14	09:49:00	0
2009-01-14	09:50:00	0
2009-01-14	09:51:00	0
2009-01-14	09:52:00	0
2009-01-14	09:53:00	0
2009-01-14	09:54:00	0
2009-01-14	09:55:00	0
2009-01-14	09:56:00	0
2009-01-14	09:57:00	0
2009-01-14	09:58:00	0
2009-01-14	09:59:00	0
2009-01-14	10:00:00	0
2009-01-14	10:01:00	0
2009-01-14	10:02:00	0
2009-01-14	10:03:00	0
2009-01-14	10:04:00	0
2009-01-14	10:05:00	0
2009-01-14	10:06:00	0
2009-01-14	10:07:00	0
2009-01-14	10:08:00	0
2009-01-14	10:09:00	0
2009-01-14	10:10:00	0
2009-01-14	10:11:00	0
2009-01-14	10:12:00	0
2009-01-14	10:13:00	0
2009-01-14	10:14:00	0
2009-01-14	10:15:00	0
2009-01-14	10:16:00	0
2009-01-14	10:17:00	0
2009-01-14	10:18:00	0
2009-01-14	10:19:00	0
2009-01-14	10:20:00	0
2009-01-14	10:21:00	0
2009-01-14	10:22:00	0
2009-01-14	10:23:00	0
2009-01-14	10:24:00	0
2009-01-14	10:25:00	0
2009-01-14	10:26:00	0
2009-01-14	10:27:00	0
2009-01-14	10:28:00	0
2009-01-14	10:29:00	0
2009-01-14	10:30:00	0
2009-01-14	10:31:00	0
2009-01-14	10:32:00	0
2009-01-14	10:33:00	0
2009-01-14	10:34:00	0
2009-01-14	10:35:00	0
2009-01-14	10:36:00	0
2009-01-14	10:37:00	0
2009-01-14	10:38:00	0
2009-01-14	10:39:00	0
2009-01-14	10:40:00	0
2009-01-14	10:41:00	0
2009-01-14	10:42:00	0
2009-01-14	10:43:00	0
2009-01-14	10:44:00	0
2009-01-14	10:45:00	0
2009-01-14	10:46:00	0
2009-01-14	10:47:00	0
2009-01-14	10:48:00	0
2009-01-14	10:49:00	0
2009-01-14	10:50:00	0
2009-01-14	10:51:00	0
2009-01-14	10:52:00	0
2009-01-14	10:53:00	0
2009-01-14	10:54:00	0
2009-01-14	10:55:00	0
2009-01-14	10:56:00	0
2009-01-14	10:57:00	0
2009-01-14	10:58:00	0
2009-01-14	10:59:00	0
2009-01-14	11:00:00	0
2009-01-14	11:01:00	0
2009-01-14	11:02:00	0
2009-01-14	11:03:00	0
2009-01-14	11:04:00	0
2009-01-14	11:05:00	0
2009-01-14	11:06:00	0
2009-01-14	11:07:00	0
2009-01-14	11:08:00	0
2009-01-14	11:09:00	0
2009-01-14	11:10:00	0
2009-01-14	11:11:00	0
2009-01-14	11:12:00	0
2009-01-14	11:13:00	0
2009-01-14	11:14:00	0
2009-01-14	11:15:00	0
2009-01-14	11:16:00	0
2009-01-14	11:17:00	0
2009-01-14	11:18:00	0
2009-01-14	11:19:00	0
2009-01-14	11:20:00	0
2009-01-14	11:21:00	0
2009-01-14	11:22:00	0
2009-01-14	11:23:00	0
2009-01-14	11:24:00	0
2009-01-14	11:25:00	0
2009-01-14	11:26:00	0
2009-01-14	11:27:00	0
2009-01-14	11:28:00	0
2009-01-14	11:29:00	0
2009-01-14	11:30:00	0
2009-01-14	11:31:00	0
2009-01-14	11:32:00	0
2009-01-14	11:33:00	0
2009-01-14	11:34:00	0
2009-01-14	11:35:00	0
2009-01-14	11:36:00	0
2009-01-14	11:37:00	0
2009-01-14	11:38:00	0
2009-01-14	11:39:00	0
2009-01-14	11:40:00	0
2009-01-14	11:41:00	0
2009-01-14	11:42:00	0
2009-01-14	11:43:00	0
2009-01-14	11:44:00	0
2009-01-14	11:45:00	0
2009-01-14	11:46:00	0
2009-01-14	11:47:00	0
2009-01-14	11:48:00	0
2009-01-14	11:49:00	0
2009-01-14	11:50:00	0
2009-01-14	11:51:00	0
2009-01-14	11:52:00	0
2009-01-14	11:53:00	0
2009-01-14	11:54:00	0
2009-01-14	11:55:00	0
2009-01-14	11:56:00	0
2009-01-14	11:57:00	0
2009-01-14	11:58:00	0
2009-01-14	11:59:00	0
2009-01-14	12:00:00	0
2009-01-14	12:01:00	0
2009-01-14	12:02:00	0
2009-01-14	12:03:00	0
2009-01-14	12:04:00	0
2009-01-14	12:05:00	0
2009-01-14	12:06:00	0
2009-01-14	12:07:00	0
2009-01-14	12:08:00	0
2009-01-14	12:09:00	0
2009-01-14	12:10:00	0
2009-01-14	12:11:00	0
2009-01-14	12:12:00	0
2009-01-14	12:13:00	0
2009-01-14	12:14:00	0
2009-01-14	12:15:00	0
2009-01-14	12:16:00	0
2009-01-14	12:17:00	0
2009-01-14	12:18:00	0
2009-01-14	12:19:00	0
2009-01-14	12:20:00	0
2009-01-14	12:21:00	0
2009-01-14	12:22:00	0
2009-01-14	12:23:00	0
2009-01-14	12:24:00	0
2009-01-14	12:25:00	0
2009-01-14	12:26:00	0
2009-01-14	12:27:00	0
2009-01-14	12:28:00	0
2009-01-14	12:29:00	0
2009-01-14	12:30:00	0
2009-01-14	12:31:00	0
2009-01-14	12:32:00	0
2009-01-14	12:33:00	0
2009-01-14	12:34:00	0
2009-01-14	12:35:00	0
2009-01-14	12:36:00	0
2009-01-14	12:37:00	0
2009-01-14	12:38:00	0
2009-01-14	12:39:00	0
2009-01-14	12:40:00	0
2009-01-14	12:41:00	0
2009-01-14	12:42:00	0
2009-01-14	12:43:00	0
2009-01-14	12:44:00	0
2009-01-14	12:45:00	0
2009-01-14	12:46:00	0
2009-01-14	12:47:00	0
2009-01-14	12:48:00	0
2009-01-14	12:49:00	0
2009-01-14	12:50:00	0
2009-01-14	12:51:00	0
2009-01-14	12:52:00	0
2009-01-14	12:53:00	0
2009-01-14	12:54:00	0
2009-01-14	12:55:00	0
2009-01-14	12:56:00	0
2009-01-14	12:57:00	0
2009-01-14	12:58:00	0
2009-01-14	12:59:00	0
2009-01-14	13:00:00	0
2009-01-14	13:01:00	0
2009-01-14	13:02:00	0
2009-01-14	13:03:00	0
2009-01-14	13:04:00	0
2009-01-14	13:05:00	0
2009-01-14	13:06:00	0
2009-01-14	13:07:00	0
2009-01-14	13:08:00	0
2009-01-14	13:09:00	0
2009-01-14	13:10:00	0
2009-01-14	13:11:00	0
2009-01-14	13:12:00	0
2009-01-14	13:13:00	0
2009-01-14	13:14:00	0
2009-01-14	13:15:00	0
2009-01-14	13:16:00	0
2009-01-14	13:17:00	0
2009-01-14	13:18:00	0
2009-01-14	13:19:00	0
2009-01-14	13:20:00	0
2009-01-14	13:21:00	0
2009-01-14	13:22:00	0
2009-01-14	13:23:00	0
2009-01-14	13:24:00	0
2009-01-14	13:25:00	0
2009-01-14	13:26:00	0
2009-01-14	13:27:00	0
2009-01-14	13:28:00	0
2009-01-14	13:29:00	0
2009-01-14	13:30:00	0
2009-01-14	13:31:00	0
2009-01-14	13:32:00	0
2009-01-14	13:33:00	0
2009-01-14	13:34:00	0
2009-01-14	13:35:00	0
2009-01-14	13:36:00	0
2009-01-14	13:37:00	0
2009-01-14	13:38:00	0
2009-01-14	13:39:00	0
2009-01-14	13:40:00	0
2009-01-14	13:41:00	0
2009-01-14	13:42:00	0
2009-01-14	13:43:00	0
2009-01-14	13:44:00	0
2009-01-14	13:45:00	0
2009-01-14	13:46:00	0
2009-01-14	13:47:00	0
2009-01-14	13:48:00	0
2009-01-14	13:49:00	0
2009-01-14	13:50:00	0
2009-01-14	13:51:00	0
2009-01-14	13:52:00	0
2009-01-14	13:53:00	0
2009-01-14	13:54:00	0
2009-01-14	13:55:00	0
2009-01-14	13:56:00	0
2009-01-14	13:57:00	0
2009-01-14	13:58:00	0
2009-01-14	13:59:00	0
2009-01-14	14:00:00	0
2009-01-14	14:01:00	0
2009-01-14	14:02:00	0
2009-01-14	14:03:00	0
2009-01-14	14:04:00	0
2009-01-14	14:05:00	0
2009-01-14	14:06:00	0
2009-01-14	14:07:00	0
2009-01-14	14:08:00	0
2009-01-14	14:09:00	0
2009-01-14	14:10:00	0
2009-01-14	14:11:00	0
2009-01-14	14:12:00	0
2009-01-14	14:13:00	0
2009-01-14	14:14:00	0
2009-01-14	14:15:00	0
2009-01-14	14:16:00	0
2009-01-14	14:17:00	0
2009-01-14	14:18:00	0
2009-01-14	14:19:00	0
2009-01-14	14:20:00	0
2009-01-14	14:21:00	0
2009-01-14	14:22:00	0
2009-01-14	14:23:00	0
2009-01-14	14:24:00	0
2009-01-14	14:25:00	0
2009-01-14	14:26:00	0
2009-01-14	14:27:00	0
2009-01-14	14:28:00	0
2009-01-14	14:29:00	0
2009-01-14	14:30:00	0
2009-01-14	14:31:00	0
2009-01-14	14:32:00	0
2009-01-14	14:33:00	0
2009-01-14	14:34:00	0
2009-01-14	14:35:00	0
2009-01-14	14:36:00	0
2009-01-14	14:37:00	0
2009-01-14	14:38:00	0
2009-01-14	14:39:00	0
2009-01-14	14:40:00	0
2009-01-14	14:41:00	0
2009-01-14	14:42:00	0
2009-01-14	14:43:00	0
2009-01-14	14:44:00	0
2009-01-14	14:45:00	0
2009-01-14	14:46:00	0
2009-01-14	14:47:00	0
2009-01-14	14:48:00	0
2009-01-14	14:49:00	0
2009-01-14	14:50:00	0
2009-01-14	14:51:00	0
2009-01-14	14:52:00	0
2009-01-14	14:53:00	0
2009-01-14	14:54:00	0
2009-01-14	14:55:00	0
2009-01-14	14:56:00	0
2009-01-14	14:57:00	0
2009-01-14	14:58:00	0
2009-01-14	14:59:00	0
2009-01-14	15:00:00	0
2009-01-14	15:01:00	0
2009-01-14	15:02:00	0
2009-01-14	15:03:00	0
2009-01-14	15:04:00	0
2009-01-14	15:05:00	0
2009-01-14	15:06:00	0
2009-01-14	15:07:00	0
2009-01-14	15:08:00	0
2009-01-14	15:09:00	0
2009-01-14	15:10:00	0
2009-01-14	15:11:00	0
2009-01-14	15:12:00	0
2009-01-14	15:13:00	0
2009-01-14	15:14:00	0
2009-01-14	15:15:00	0
2009-01-14	15:16:00	0
2009-01-14	15:17:00	0
2009-01-14	15:18:00	0
2009-01-14	15:19:00	0
2009-01-14	15:20:00	0
2009-01-14	15:21:00	0
2009-01-14	15:22:00	0
2009-01-14	15:23:00	0
2009-01-14	15:24:00	0
2009-01-14	15:25:00	0
2009-01-14	15:26:00	0
2009-01-14	15:27:00	0
2009-01-14	15:28:00	0
2009-01-14	15:29:00	0
2009-01-14	15:30:00	0
2009-01-14	15:31:00	0
2009-01-14	15:32:00	0
2009-01-14	15:33:00	0
2009-01-14	15:34:00	0
2009-01-14	15:35:00	0
2009-01-14	15:36:00	0
2009-01-14	15:37:00	0
2009-01-14	15:38:00	0
2009-01-14	15:39:00	0
2009-01-14	15:40:00	0
2009-01-14	15:41:00	0
2009-01-14	15:42:00	0
2009-01-14	15:43:00	0
2009-01-14	15:44:00	0
2009-01-14	15:45:00	0
2009-01-14	15:46:00	0
2009-01-14	15:47:00	0
2009-01-14	15:48:00	0
2009-01-14	15:49:00	0
2009-01-14	15:50:00	0
2009-01-14	15:51:00	0
2009-01-14	15:52:00	0
2009-01-14	15:53:00	0
2009-01-14	15:54:00	0
2009-01-14	15:55:00	0
2009-01-14	15:56:00	0
2009-01-14	15:57:00	0
2009-01-14	15:58:00	0
2009-01-14	15:59:00	0
2009-01-14	16:00:00	0
2009-01-14	16:01:00	0
2009-01-14	16:02:00	0
2009-01-14	16:03:00	0
2009-01-14	16:04:00	0
2009-01-14	16:05:00	0
2009-01-14	16:06:00	0
2009-01-14	16:07:00	0
2009-01-14	16:08:00	0
2009-01-14	16:09:00	0
2009-01-14	16:10:00	0
2009-01-14	16:11:00	0
2009-01-14	16:12:00	0
2009-01-14	16:13:00	0
2009-01-14	16:14:00	0
2009-01-14	16:15:00	0
2009-01-14	16:16:00	0
2009-01-14	16:17:00	0
2009-01-14	16:18:00	0
2009-01-14	16:19:00	0
2009-01-14	16:20:00	0
2009-01-14	16:21:00	0
2009-01-14	16:22:00	0
2009-01-14	16:23:00	0
2009-01-14	16:24:00	0
2009-01-14	16:25:00	0
2009-01-14	16:26:00	0
2009-01-14	16:27:00	0
2009-01-14	16:28:00	0
2009-01-14	16:29:00	0
2009-01-14	16:30:00	0
2009-01-14	16:31:00	0
2009-01-14	16:32:00	0
2009-01-14	16:33:00	0
2009-01-14	16:34:00	0
2009-01-14	16:35:00	0
2009-01-14	16:36:00	0
2009-01-14	16:37:00	0
2009-01-14	16:38:00	0
2009-01-14	16:39:00	0
2009-01-14	16:40:00	0
2009-01-14	16:41:00	0
2009-01-14	16:42:00	0
2009-01-14	16:43:00	0
2009-01-14	16:44:00	0
2009-01-14	16:45:00	0
2009-01-14	16:46:00	0
2009-01-14	16:47:00	0
2009-01-14	16:48:00	0
2009-01-14	16:49:00	0
2009-01-14	16:50:00	0
2009-01-14	16:51:00	0
2009-01-14	16:52:00	0
2009-01-14	16:53:00	0
2009-01-14	16:54:00	0
2009-01-14	16:55:00	0
2009-01-14	16:56:00	0
2009-01-14	16:57:00	0
2009-01-14	16:58:00	0
2009-01-14	16:59:00	0
2009-01-14	17:00:00	309
2009-01-14	17:01:00	280
2009-01-14	17:02:00	230
2009-01-14	17:03:00	132
2009-01-14	17:04:00	102
2009-01-14	17:05:00	561
2009-01-14	17:06:00	51
2009-01-14	17:07:00	51
2009-01-14	17:08:00	0
2009-01-14	17:09:00	0
2009-01-14	17:10:00	144
2009-01-14	17:11:00	1544
2009-01-14	17:12:00	1863
2009-01-14	17:13:00	634
2009-01-14	17:14:00	861
2009-01-14	17:15:00	929
2009-01-14	17:16:00	542
2009-01-14	17:17:00	884
2009-01-14	17:18:00	205
2009-01-14	17:19:00	242
2009-01-14	17:20:00	122
2009-01-14	17:21:00	579
2009-01-14	17:22:00	61
2009-01-14	17:23:00	132
2009-01-14	17:24:00	30
2009-01-14	17:25:00	10
2009-01-14	17:26:00	0
2009-01-14	17:27:00	0
2009-01-14	17:28:00	0
2009-01-14	17:29:00	30
2009-01-14	17:30:00	0
2009-01-14	17:31:00	0
2009-01-14	17:32:00	0
2009-01-14	17:33:00	0
2009-01-14	17:34:00	30
2009-01-14	17:35:00	10
2009-01-14	17:36:00	0
2009-01-14	17:37:00	71
2009-01-14	17:38:00	0
2009-01-14	17:39:00	61
2009-01-14	17:40:00	10
2009-01-14	17:41:00	0
2009-01-14	17:42:00	10
2009-01-14	17:43:00	10
2009-01-14	17:44:00	10
2009-01-14	17:45:00	20
2009-01-14	17:46:00	217
2009-01-14	17:47:00	169
2009-01-14	17:48:00	30
2009-01-14	17:49:00	20
2009-01-14	17:50:00	10
2009-01-14	17:51:00	20
2009-01-14	17:52:00	10
2009-01-14	17:53:00	0
2009-01-14	17:54:00	0
2009-01-14	17:55:00	0
2009-01-14	17:56:00	410
2009-01-14	17:57:00	2060
2009-01-14	17:58:00	1239
2009-01-14	17:59:00	774
2009-01-14	18:00:00	906
2009-01-14	18:01:00	634
2009-01-14	18:02:00	774
2009-01-14	18:03:00	673
2009-01-14	18:04:00	492
2009-01-14	18:05:00	713
2009-01-14	18:06:00	122
2009-01-14	18:07:00	492
2009-01-14	18:08:00	410
2009-01-14	18:09:00	144
2009-01-14	18:10:00	51
2009-01-14	18:11:00	634
2009-01-14	18:12:00	217
2009-01-14	18:13:00	20
2009-01-14	18:14:00	30
2009-01-14	18:15:00	81
2009-01-14	18:16:00	10
2009-01-14	18:17:00	0
2009-01-14	18:18:00	91
2009-01-14	18:19:00	156
2009-01-14	18:20:00	156
2009-01-14	18:21:00	71
2009-01-14	18:22:00	156
2009-01-14	18:23:00	91
2009-01-14	18:24:00	0
2009-01-14	18:25:00	61
2009-01-14	18:26:00	10
2009-01-14	18:27:00	91
2009-01-14	18:28:00	20
2009-01-14	18:29:00	217
2009-01-14	18:30:00	0
2009-01-14	18:31:00	51
2009-01-14	18:32:00	0
2009-01-14	18:33:00	10
2009-01-14	18:34:00	10
2009-01-14	18:35:00	0
2009-01-14	18:36:00	0
2009-01-14	18:37:00	0
2009-01-14	18:38:00	144
2009-01-14	18:39:00	242
2009-01-14	18:40:00	579
2009-01-14	18:41:00	254
2009-01-14	18:42:00	10
2009-01-14	18:43:00	0
2009-01-14	18:44:00	0
2009-01-14	18:45:00	10
2009-01-14	18:46:00	0
2009-01-14	18:47:00	0
2009-01-14	18:48:00	0
2009-01-14	18:49:00	0
2009-01-14	18:50:00	0
2009-01-14	18:51:00	0
2009-01-14	18:52:00	0
2009-01-14	18:53:00	0
2009-01-14	18:54:00	0
2009-01-14	18:55:00	0
2009-01-14	18:56:00	0
2009-01-14	18:57:00	0
2009-01-14	18:58:00	0
2009-01-14	18:59:00	0
2009-01-14	19:00:00	0
2009-01-14	19:01:00	0
2009-01-14	19:02:00	0
2009-01-14	19:03:00	0
2009-01-14	19:04:00	0
2009-01-14	19:05:00	0
2009-01-14	19:06:00	0
2009-01-14	19:07:00	0
2009-01-14	19:08:00	0
2009-01-14	19:09:00	0
2009-01-14	19:10:00	0
2009-01-14	19:11:00	0
2009-01-14	19:12:00	0
2009-01-14	19:13:00	0
2009-01-14	19:14:00	0
2009-01-14	19:15:00	0
2009-01-14	19:16:00	10
2009-01-14	19:17:00	0
2009-01-14	19:18:00	0
2009-01-14	19:19:00	0
2009-01-14	19:20:00	0
2009-01-14	19:21:00	0
2009-01-14	19:22:00	0
2009-01-14	19:23:00	0
2009-01-14	19:24:00	0
2009-01-14	19:25:00	0
2009-01-14	19:26:00	0
2009-01-14	19:27:00	0
2009-01-14	19:28:00	0
2009-01-14	19:29:00	0
2009-01-14	19:30:00	0
2009-01-14	19:31:00	0
2009-01-14	19:32:00	0
2009-01-14	19:33:00	0
2009-01-14	19:34:00	0
2009-01-14	19:35:00	0
2009-01-14	19:36:00	30
2009-01-14	19:37:00	0
2009-01-14	19:38:00	0
2009-01-14	19:39:00	0
2009-01-14	19:40:00	0
2009-01-14	19:41:00	0
2009-01-14	19:42:00	0
2009-01-14	19:43:00	0
2009-01-14	19:44:00	0
2009-01-14	19:45:00	0
2009-01-14	19:46:00	0
2009-01-14	19:47:00	0
2009-01-14	19:48:00	81
2009-01-14	19:49:00	0
2009-01-14	19:50:00	0
2009-01-14	19:51:00	0
2009-01-14	19:52:00	0
2009-01-14	19:53:00	0
2009-01-14	19:54:00	0
2009-01-14	19:55:00	0
2009-01-14	19:56:00	0
2009-01-14	19:57:00	0
2009-01-14	19:58:00	0
2009-01-14	19:59:00	0
2009-01-14	20:00:00	0
2009-01-14	20:01:00	0
2009-01-14	20:02:00	0
2009-01-14	20:03:00	0
2009-01-14	20:04:00	0
2009-01-14	20:05:00	0
2009-01-14	20:06:00	0
2009-01-14	20:07:00	0
2009-01-14	20:08:00	0
2009-01-14	20:09:00	0
2009-01-14	20:10:00	0
2009-01-14	20:11:00	41
2009-01-14	20:12:00	71
2009-01-14	20:13:00	0
2009-01-14	20:14:00	0
2009-01-14	20:15:00	0
2009-01-14	20:16:00	0
2009-01-14	20:17:00	0
2009-01-14	20:18:00	0
2009-01-14	20:19:00	0
2009-01-14	20:20:00	0
2009-01-14	20:21:00	0
2009-01-14	20:22:00	0
2009-01-14	20:23:00	0
2009-01-14	20:24:00	0
2009-01-14	20:25:00	0
2009-01-14	20:26:00	1416
2009-01-14	20:27:00	1002
2009-01-14	20:28:00	132
2009-01-14	20:29:00	132
2009-01-14	20:30:00	169
2009-01-14	20:31:00	102
2009-01-14	20:32:00	41
2009-01-14	20:33:00	102
2009-01-14	20:34:00	144
2009-01-14	20:35:00	181
2009-01-14	20:36:00	280
2009-01-14	20:37:00	230
2009-01-14	20:38:00	41
2009-01-14	20:39:00	0
2009-01-14	20:40:00	0
2009-01-14	20:41:00	81
2009-01-14	20:42:00	0
2009-01-14	20:43:00	0
2009-01-14	20:44:00	0
2009-01-14	20:45:00	10
2009-01-14	20:46:00	0
2009-01-14	20:47:00	41
2009-01-14	20:48:00	0
2009-01-14	20:49:00	0
2009-01-14	20:50:00	0
2009-01-14	20:51:00	0
2009-01-14	20:52:00	51
2009-01-14	20:53:00	0
2009-01-14	20:54:00	0
2009-01-14	20:55:00	0
2009-01-14	20:56:00	0
2009-01-14	20:57:00	0
2009-01-14	20:58:00	0
2009-01-14	20:59:00	0
2009-01-14	21:00:00	0
2009-01-14	21:01:00	0
2009-01-14	21:02:00	0
2009-01-14	21:03:00	0
2009-01-14	21:04:00	0
2009-01-14	21:05:00	0
2009-01-14	21:06:00	0
2009-01-14	21:07:00	0
2009-01-14	21:08:00	0
2009-01-14	21:09:00	0
2009-01-14	21:10:00	0
2009-01-14	21:11:00	0
2009-01-14	21:12:00	0
2009-01-14	21:13:00	0
2009-01-14	21:14:00	0
2009-01-14	21:15:00	0
2009-01-14	21:16:00	0
2009-01-14	21:17:00	0
2009-01-14	21:18:00	0
2009-01-14	21:19:00	0
2009-01-14	21:20:00	0
2009-01-14	21:21:00	0
2009-01-14	21:22:00	0
2009-01-14	21:23:00	0
2009-01-14	21:24:00	0
2009-01-14	21:25:00	0
2009-01-14	21:26:00	0
2009-01-14	21:27:00	0
2009-01-14	21:28:00	0
2009-01-14	21:29:00	0
2009-01-14	21:30:00	0
2009-01-14	21:31:00	0
2009-01-14	21:32:00	0
2009-01-14	21:33:00	0
2009-01-14	21:34:00	0
2009-01-14	21:35:00	0
2009-01-14	21:36:00	0
2009-01-14	21:37:00	0
2009-01-14	21:38:00	0
2009-01-14	21:39:00	0
2009-01-14	21:40:00	0
2009-01-14	21:41:00	0
2009-01-14	21:42:00	0
2009-01-14	21:43:00	0
2009-01-14	21:44:00	0
2009-01-14	21:45:00	0
2009-01-14	21:46:00	0
2009-01-14	21:47:00	0
2009-01-14	21:48:00	0
2009-01-14	21:49:00	0
2009-01-14	21:50:00	0
2009-01-14	21:51:00	0
2009-01-14	21:52:00	0
2009-01-14	21:53:00	0
2009-01-14	21:54:00	0
2009-01-14	21:55:00	0
2009-01-14	21:56:00	61
2009-01-14	21:57:00	1239
2009-01-14	21:58:00	1182
2009-01-14	21:59:00	492
2009-01-14	22:00:00	0
2009-01-14	22:01:00	0
2009-01-14	22:02:00	0
2009-01-14	22:03:00	0
2009-01-14	22:04:00	0
2009-01-14	22:05:00	41
2009-01-14	22:06:00	0
2009-01-14	22:07:00	0
2009-01-14	22:08:00	30
2009-01-14	22:09:00	0
2009-01-14	22:10:00	0
2009-01-14	22:11:00	0
2009-01-14	22:12:00	0
2009-01-14	22:13:00	0
2009-01-14	22:14:00	0
2009-01-14	22:15:00	0
2009-01-14	22:16:00	0
2009-01-14	22:17:00	0
2009-01-14	22:18:00	0
2009-01-14	22:19:00	0
2009-01-14	22:20:00	0
2009-01-14	22:21:00	0
2009-01-14	22:22:00	0
2009-01-14	22:23:00	0
2009-01-14	22:24:00	0
2009-01-14	22:25:00	0
2009-01-14	22:26:00	0
2009-01-14	22:27:00	0
2009-01-14	22:28:00	0
2009-01-14	22:29:00	0
2009-01-14	22:30:00	0
2009-01-14	22:31:00	0
2009-01-14	22:32:00	0
2009-01-14	22:33:00	10
2009-01-14	22:34:00	0
2009-01-14	22:35:00	0
2009-01-14	22:36:00	30
2009-01-14	22:37:00	0
2009-01-14	22:38:00	0
2009-01-14	22:39:00	0
2009-01-14	22:40:00	0
2009-01-14	22:41:00	0
2009-01-14	22:42:00	0
2009-01-14	22:43:00	0
2009-01-14	22:44:00	0
2009-01-14	22:45:00	0
2009-01-14	22:46:00	0
2009-01-14	22:47:00	0
2009-01-14	22:48:00	0
2009-01-14	22:49:00	0
2009-01-14	22:50:00	0
2009-01-14	22:51:00	0
2009-01-14	22:52:00	0
2009-01-14	22:53:00	0
2009-01-14	22:54:00	41
2009-01-14	22:55:00	0
2009-01-14	22:56:00	0
2009-01-14	22:57:00	10
2009-01-14	22:58:00	0
2009-01-14	22:59:00	0
2009-01-14	23:00:00	0
2009-01-14	23:01:00	0
2009-01-14	23:02:00	0
2009-01-14	23:03:00	561
2009-01-14	23:04:00	1130
2009-01-14	23:05:00	579
2009-01-14	23:06:00	144
2009-01-14	23:07:00	0
2009-01-14	23:08:00	0
2009-01-14	23:09:00	0
2009-01-14	23:10:00	0
2009-01-14	23:11:00	0
2009-01-14	23:12:00	0
2009-01-14	23:13:00	0
2009-01-14	23:14:00	0
2009-01-14	23:15:00	0
2009-01-14	23:16:00	0
2009-01-14	23:17:00	0
2009-01-14	23:18:00	0
2009-01-14	23:19:00	0
2009-01-14	23:20:00	0
2009-01-14	23:21:00	0
2009-01-14	23:22:00	0
2009-01-14	23:23:00	0
2009-01-14	23:24:00	0
2009-01-14	23:25:00	0
2009-01-14	23:26:00	0
2009-01-14	23:27:00	0
2009-01-14	23:28:00	0
2009-01-14	23:29:00	10
2009-01-14	23:30:00	0
2009-01-14	23:31:00	0
2009-01-14	23:32:00	0
2009-01-14	23:33:00	0
2009-01-14	23:34:00	0
2009-01-14	23:35:00	0
2009-01-14	23:36:00	0
2009-01-14	23:37:00	0
2009-01-14	23:38:00	0
2009-01-14	23:39:00	0
2009-01-14	23:40:00	10
2009-01-14	23:41:00	0
2009-01-14	23:42:00	0
2009-01-14	23:43:00	0
2009-01-14	23:44:00	0
2009-01-14	23:45:00	0
2009-01-14	23:46:00	0
2009-01-14	23:47:00	0
2009-01-14	23:48:00	0
2009-01-14	23:49:00	0
2009-01-14	23:50:00	0
2009-01-14	23:51:00	0
2009-01-14	23:52:00	0
2009-01-14	23:53:00	0
2009-01-14	23:54:00	0
2009-01-14	23:55:00	0
2009-01-14	23:56:00	0
2009-01-14	23:57:00	0
2009-01-14	23:58:00	0
2009-01-14	23:59:00	0
2009-01-15	00:00:00	0
2009-01-15	00:01:00	0
2009-01-15	00:02:00	0
2009-01-15	00:03:00	0
2009-01-15	00:04:00	0
2009-01-15	00:05:00	0
2009-01-15	00:06:00	0
2009-01-15	00:07:00	0
2009-01-15	00:08:00	0
2009-01-15	00:09:00	0
2009-01-15	00:10:00	0
2009-01-15	00:11:00	0
2009-01-15	00:12:00	112
2009-01-15	00:13:00	0
2009-01-15	00:14:00	0
2009-01-15	00:15:00	0
2009-01-15	00:16:00	0
2009-01-15	00:17:00	0
2009-01-15	00:18:00	0
2009-01-15	00:19:00	0
2009-01-15	00:20:00	0
2009-01-15	00:21:00	0
2009-01-15	00:22:00	0
2009-01-15	00:23:00	0
2009-01-15	00:24:00	0
2009-01-15	00:25:00	0
2009-01-15	00:26:00	0
2009-01-15	00:27:00	0
2009-01-15	00:28:00	30
2009-01-15	00:29:00	10
2009-01-15	00:30:00	0
2009-01-15	00:31:00	0
2009-01-15	00:32:00	0
2009-01-15	00:33:00	0
2009-01-15	00:34:00	0
2009-01-15	00:35:00	81
2009-01-15	00:36:00	0
2009-01-15	00:37:00	0
2009-01-15	00:38:00	10
2009-01-15	00:39:00	0
2009-01-15	00:40:00	0
2009-01-15	00:41:00	0
2009-01-15	00:42:00	0
2009-01-15	00:43:00	0
2009-01-15	00:44:00	0
2009-01-15	00:45:00	0
2009-01-15	00:46:00	0
2009-01-15	00:47:00	0
2009-01-15	00:48:00	0
2009-01-15	00:49:00	0
2009-01-15	00:50:00	0
2009-01-15	00:51:00	0
2009-01-15	00:52:00	0
2009-01-15	00:53:00	0
2009-01-15	00:54:00	0
2009-01-15	00:55:00	0
2009-01-15	00:56:00	81
2009-01-15	00:57:00	0
2009-01-15	00:58:00	0
2009-01-15	00:59:00	0
2009-01-15	01:00:00	0
2009-01-15	01:01:00	0
2009-01-15	01:02:00	0
2009-01-15	01:03:00	0
2009-01-15	01:04:00	0
2009-01-15	01:05:00	0
2009-01-15	01:06:00	0
2009-01-15	01:07:00	0
2009-01-15	01:08:00	0
2009-01-15	01:09:00	0
2009-01-15	01:10:00	0
2009-01-15	01:11:00	0
2009-01-15	01:12:00	0
2009-01-15	01:13:00	0
2009-01-15	01:14:00	0
2009-01-15	01:15:00	0
2009-01-15	01:16:00	0
2009-01-15	01:17:00	0
2009-01-15	01:18:00	0
2009-01-15	01:19:00	0
2009-01-15	01:20:00	0
2009-01-15	01:21:00	0
2009-01-15	01:22:00	0
2009-01-15	01:23:00	112
2009-01-15	01:24:00	41
2009-01-15	01:25:00	0
2009-01-15	01:26:00	0
2009-01-15	01:27:00	0
2009-01-15	01:28:00	0
2009-01-15	01:29:00	0
2009-01-15	01:30:00	0
2009-01-15	01:31:00	0
2009-01-15	01:32:00	0
2009-01-15	01:33:00	0
2009-01-15	01:34:00	0
2009-01-15	01:35:00	0
2009-01-15	01:36:00	0
2009-01-15	01:37:00	0
2009-01-15	01:38:00	0
2009-01-15	01:39:00	0
2009-01-15	01:40:00	0
2009-01-15	01:41:00	0
2009-01-15	01:42:00	0
2009-01-15	01:43:00	102
2009-01-15	01:44:00	122
2009-01-15	01:45:00	30
2009-01-15	01:46:00	0
2009-01-15	01:47:00	0
2009-01-15	01:48:00	0
2009-01-15	01:49:00	51
2009-01-15	01:50:00	254
2009-01-15	01:51:00	410
2009-01-15	01:52:00	492
2009-01-15	01:53:00	1182
2009-01-15	01:54:00	181
2009-01-15	01:55:00	0
2009-01-15	01:56:00	0
2009-01-15	01:57:00	41
2009-01-15	01:58:00	0
2009-01-15	01:59:00	0
2009-01-15	02:00:00	0
2009-01-15	02:01:00	0
2009-01-15	02:02:00	0
2009-01-15	02:03:00	0
2009-01-15	02:04:00	0
2009-01-15	02:05:00	0
2009-01-15	02:06:00	0
2009-01-15	02:07:00	0
2009-01-15	02:08:00	0
2009-01-15	02:09:00	0
2009-01-15	02:10:00	0
2009-01-15	02:11:00	0
2009-01-15	02:12:00	0
2009-01-15	02:13:00	0
2009-01-15	02:14:00	0
2009-01-15	02:15:00	0
2009-01-15	02:16:00	0
2009-01-15	02:17:00	0
2009-01-15	02:18:00	0
2009-01-15	02:19:00	0
2009-01-15	02:20:00	0
2009-01-15	02:21:00	0
2009-01-15	02:22:00	0
2009-01-15	02:23:00	0
2009-01-15	02:24:00	0
2009-01-15	02:25:00	0
2009-01-15	02:26:00	20
2009-01-15	02:27:00	0
2009-01-15	02:28:00	0
2009-01-15	02:29:00	0
2009-01-15	02:30:00	0
2009-01-15	02:31:00	41
2009-01-15	02:32:00	0
2009-01-15	02:33:00	230
2009-01-15	02:34:00	10
2009-01-15	02:35:00	0
2009-01-15	02:36:00	0
2009-01-15	02:37:00	0
2009-01-15	02:38:00	443
2009-01-15	02:39:00	492
2009-01-15	02:40:00	0
2009-01-15	02:41:00	30
2009-01-15	02:42:00	61
2009-01-15	02:43:00	0
2009-01-15	02:44:00	0
2009-01-15	02:45:00	0
2009-01-15	02:46:00	0
2009-01-15	02:47:00	0
2009-01-15	02:48:00	0
2009-01-15	02:49:00	0
2009-01-15	02:50:00	0
2009-01-15	02:51:00	0
2009-01-15	02:52:00	0
2009-01-15	02:53:00	0
2009-01-15	02:54:00	0
2009-01-15	02:55:00	0
2009-01-15	02:56:00	0
2009-01-15	02:57:00	0
2009-01-15	02:58:00	0
2009-01-15	02:59:00	0
2009-01-15	03:00:00	0
2009-01-15	03:01:00	0
2009-01-15	03:02:00	0
2009-01-15	03:03:00	0
2009-01-15	03:04:00	0
2009-01-15	03:05:00	0
2009-01-15	03:06:00	0
2009-01-15	03:07:00	0
2009-01-15	03:08:00	0
2009-01-15	03:09:00	0
2009-01-15	03:10:00	0
2009-01-15	03:11:00	0
2009-01-15	03:12:00	0
2009-01-15	03:13:00	0
2009-01-15	03:14:00	0
2009-01-15	03:15:00	0
2009-01-15	03:16:00	0
2009-01-15	03:17:00	0
2009-01-15	03:18:00	0
2009-01-15	03:19:00	0
2009-01-15	03:20:00	51
2009-01-15	03:21:00	0
2009-01-15	03:22:00	0
2009-01-15	03:23:00	0
2009-01-15	03:24:00	0
2009-01-15	03:25:00	0
2009-01-15	03:26:00	0
2009-01-15	03:27:00	0
2009-01-15	03:28:00	0
2009-01-15	03:29:00	0
2009-01-15	03:30:00	0
2009-01-15	03:31:00	0
2009-01-15	03:32:00	20
2009-01-15	03:33:00	10
2009-01-15	03:34:00	0
2009-01-15	03:35:00	0
2009-01-15	03:36:00	0
2009-01-15	03:37:00	0
2009-01-15	03:38:00	0
2009-01-15	03:39:00	0
2009-01-15	03:40:00	0
2009-01-15	03:41:00	0
2009-01-15	03:42:00	30
2009-01-15	03:43:00	0
2009-01-15	03:44:00	0
2009-01-15	03:45:00	0
2009-01-15	03:46:00	0
2009-01-15	03:47:00	0
2009-01-15	03:48:00	0
2009-01-15	03:49:00	0
2009-01-15	03:50:00	0
2009-01-15	03:51:00	0
2009-01-15	03:52:00	0
2009-01-15	03:53:00	20
2009-01-15	03:54:00	0
2009-01-15	03:55:00	0
2009-01-15	03:56:00	0
2009-01-15	03:57:00	0
2009-01-15	03:58:00	0
2009-01-15	03:59:00	0
2009-01-15	04:00:00	0
2009-01-15	04:01:00	0
2009-01-15	04:02:00	0
2009-01-15	04:03:00	0
2009-01-15	04:04:00	0
2009-01-15	04:05:00	0
2009-01-15	04:06:00	0
2009-01-15	04:07:00	0
2009-01-15	04:08:00	0
2009-01-15	04:09:00	0
2009-01-15	04:10:00	0
2009-01-15	04:11:00	0
2009-01-15	04:12:00	20
2009-01-15	04:13:00	0
2009-01-15	04:14:00	0
2009-01-15	04:15:00	0
2009-01-15	04:16:00	0
2009-01-15	04:17:00	0
2009-01-15	04:18:00	0
2009-01-15	04:19:00	0
2009-01-15	04:20:00	0
2009-01-15	04:21:00	0
2009-01-15	04:22:00	0
2009-01-15	04:23:00	0
2009-01-15	04:24:00	0
2009-01-15	04:25:00	0
2009-01-15	04:26:00	0
2009-01-15	04:27:00	20
2009-01-15	04:28:00	41
2009-01-15	04:29:00	71
2009-01-15	04:30:00	0
2009-01-15	04:31:00	0
2009-01-15	04:32:00	0
2009-01-15	04:33:00	0
2009-01-15	04:34:00	0
2009-01-15	04:35:00	0
2009-01-15	04:36:00	0
2009-01-15	04:37:00	0
2009-01-15	04:38:00	0
2009-01-15	04:39:00	0
2009-01-15	04:40:00	0
2009-01-15	04:41:00	0
2009-01-15	04:42:00	0
2009-01-15	04:43:00	0
2009-01-15	04:44:00	0
2009-01-15	04:45:00	0
2009-01-15	04:46:00	0
2009-01-15	04:47:00	0
2009-01-15	04:48:00	0
2009-01-15	04:49:00	0
2009-01-15	04:50:00	0
2009-01-15	04:51:00	0
2009-01-15	04:52:00	0
2009-01-15	04:53:00	0
2009-01-15	04:54:00	0
2009-01-15	04:55:00	0
2009-01-15	04:56:00	0
2009-01-15	04:57:00	0
2009-01-15	04:58:00	0
2009-01-15	04:59:00	61
2009-01-15	05:00:00	0
2009-01-15	05:01:00	0
2009-01-15	05:02:00	0
2009-01-15	05:03:00	0
2009-01-15	05:04:00	0
2009-01-15	05:05:00	0
2009-01-15	05:06:00	0
2009-01-15	05:07:00	0
2009-01-15	05:08:00	0
2009-01-15	05:09:00	0
2009-01-15	05:10:00	0
2009-01-15	05:11:00	0
2009-01-15	05:12:00	0
2009-01-15	05:13:00	0
2009-01-15	05:14:00	10
2009-01-15	05:15:00	0
2009-01-15	05:16:00	0
2009-01-15	05:17:00	0
2009-01-15	05:18:00	0
2009-01-15	05:19:00	0
2009-01-15	05:20:00	0
2009-01-15	05:21:00	443
2009-01-15	05:22:00	81
2009-01-15	05:23:00	0
2009-01-15	05:24:00	0
2009-01-15	05:25:00	0
2009-01-15	05:26:00	0
2009-01-15	05:27:00	0
2009-01-15	05:28:00	0
2009-01-15	05:29:00	0
2009-01-15	05:30:00	0
2009-01-15	05:31:00	0
2009-01-15	05:32:00	0
2009-01-15	05:33:00	0
2009-01-15	05:34:00	0
2009-01-15	05:35:00	0
2009-01-15	05:36:00	0
2009-01-15	05:37:00	0
2009-01-15	05:38:00	0
2009-01-15	05:39:00	0
2009-01-15	05:40:00	0
2009-01-15	05:41:00	0
2009-01-15	05:42:00	0
2009-01-15	05:43:00	0
2009-01-15	05:44:00	71
2009-01-15	05:45:00	0
2009-01-15	05:46:00	0
2009-01-15	05:47:00	0
2009-01-15	05:48:00	217
2009-01-15	05:49:00	1182
2009-01-15	05:50:00	1130
2009-01-15	05:51:00	309
2009-01-15	05:52:00	30
2009-01-15	05:53:00	0
2009-01-15	05:54:00	81
2009-01-15	05:55:00	169
2009-01-15	05:56:00	817
2009-01-15	05:57:00	839
2009-01-15	05:58:00	0
2009-01-15	05:59:00	112
2009-01-15	06:00:00	0
2009-01-15	06:01:00	0
2009-01-15	06:02:00	0
2009-01-15	06:03:00	0
2009-01-15	06:04:00	0
2009-01-15	06:05:00	0
2009-01-15	06:06:00	0
2009-01-15	06:07:00	0
2009-01-15	06:08:00	10
2009-01-15	06:09:00	0
2009-01-15	06:10:00	0
2009-01-15	06:11:00	0
2009-01-15	06:12:00	0
2009-01-15	06:13:00	0
2009-01-15	06:14:00	0
2009-01-15	06:15:00	0
2009-01-15	06:16:00	0
2009-01-15	06:17:00	0
2009-01-15	06:18:00	0
2009-01-15	06:19:00	0
2009-01-15	06:20:00	0
2009-01-15	06:21:00	0
2009-01-15	06:22:00	0
2009-01-15	06:23:00	0
2009-01-15	06:24:00	0
2009-01-15	06:25:00	0
2009-01-15	06:26:00	41
2009-01-15	06:27:00	0
2009-01-15	06:28:00	0
2009-01-15	06:29:00	0
2009-01-15	06:30:00	0
2009-01-15	06:31:00	0
2009-01-15	06:32:00	0
2009-01-15	06:33:00	0
2009-01-15	06:34:00	0
2009-01-15	06:35:00	0
2009-01-15	06:36:00	0
2009-01-15	06:37:00	459
2009-01-15	06:38:00	61
2009-01-15	06:39:00	91
2009-01-15	06:40:00	20
2009-01-15	06:41:00	0
2009-01-15	06:42:00	0
2009-01-15	06:43:00	30
2009-01-15	06:44:00	0
2009-01-15	06:45:00	0
2009-01-15	06:46:00	0
2009-01-15	06:47:00	10
2009-01-15	06:48:00	0
2009-01-15	06:49:00	0
2009-01-15	06:50:00	0
2009-01-15	06:51:00	0
2009-01-15	06:52:00	0
2009-01-15	06:53:00	0
2009-01-15	06:54:00	0
2009-01-15	06:55:00	0
2009-01-15	06:56:00	20
2009-01-15	06:57:00	0
2009-01-15	06:58:00	20
2009-01-15	06:59:00	10
2009-01-15	07:00:00	0
2009-01-15	07:01:00	10
2009-01-15	07:02:00	0
2009-01-15	07:03:00	20
2009-01-15	07:04:00	0
2009-01-15	07:05:00	0
2009-01-15	07:06:00	10
2009-01-15	07:07:00	10
2009-01-15	07:08:00	0
2009-01-15	07:09:00	394
2009-01-15	07:10:00	0
2009-01-15	07:11:00	0
2009-01-15	07:12:00	323
2009-01-15	07:13:00	30
2009-01-15	07:14:00	10
2009-01-15	07:15:00	61
2009-01-15	07:16:00	10
2009-01-15	07:17:00	0
2009-01-15	07:18:00	0
2009-01-15	07:19:00	0
2009-01-15	07:20:00	0
2009-01-15	07:21:00	0
2009-01-15	07:22:00	0
2009-01-15	07:23:00	0
2009-01-15	07:24:00	0
2009-01-15	07:25:00	0
2009-01-15	07:26:00	0
2009-01-15	07:27:00	0
2009-01-15	07:28:00	30
2009-01-15	07:29:00	61
2009-01-15	07:30:00	10
2009-01-15	07:31:00	102
2009-01-15	07:32:00	10
2009-01-15	07:33:00	0
2009-01-15	07:34:00	0
2009-01-15	07:35:00	0
2009-01-15	07:36:00	0
2009-01-15	07:37:00	0
2009-01-15	07:38:00	0
2009-01-15	07:39:00	0
2009-01-15	07:40:00	0
2009-01-15	07:41:00	0
2009-01-15	07:42:00	30
2009-01-15	07:43:00	205
2009-01-15	07:44:00	1611
2009-01-15	07:45:00	693
2009-01-15	07:46:00	492
2009-01-15	07:47:00	693
2009-01-15	07:48:00	323
2009-01-15	07:49:00	169
2009-01-15	07:50:00	144
2009-01-15	07:51:00	351
2009-01-15	07:52:00	774
2009-01-15	07:53:00	561
2009-01-15	07:54:00	41
2009-01-15	07:55:00	295
2009-01-15	07:56:00	217
2009-01-15	07:57:00	10
2009-01-15	07:58:00	337
2009-01-15	07:59:00	337
2009-01-15	08:00:00	337
2009-01-15	08:01:00	977
2009-01-15	08:02:00	30
2009-01-15	08:03:00	230
2009-01-15	08:04:00	81
2009-01-15	08:05:00	51
2009-01-15	08:06:00	10
2009-01-15	08:07:00	91
2009-01-15	08:08:00	51
2009-01-15	08:09:00	754
2009-01-15	08:10:00	634
2009-01-15	08:11:00	112
2009-01-15	08:12:00	144
2009-01-15	08:13:00	10
2009-01-15	08:14:00	10
2009-01-15	08:15:00	81
2009-01-15	08:16:00	169
2009-01-15	08:17:00	230
2009-01-15	08:18:00	205
2009-01-15	08:19:00	0
2009-01-15	08:20:00	0
2009-01-15	08:21:00	0
2009-01-15	08:22:00	0
2009-01-15	08:23:00	0
2009-01-15	08:24:00	0
2009-01-15	08:25:00	0
2009-01-15	08:26:00	0
2009-01-15	08:27:00	0
2009-01-15	08:28:00	0
2009-01-15	08:29:00	156
2009-01-15	08:30:00	295
2009-01-15	08:31:00	20
2009-01-15	08:32:00	10
2009-01-15	08:33:00	280
2009-01-15	08:34:00	0
2009-01-15	08:35:00	0
2009-01-15	08:36:00	1825
2009-01-15	08:37:00	1050
2009-01-15	08:38:00	41
2009-01-15	08:39:00	30
2009-01-15	08:40:00	144
2009-01-15	08:41:00	91
2009-01-15	08:42:00	20
2009-01-15	08:43:00	30
2009-01-15	08:44:00	0
2009-01-15	08:45:00	144
2009-01-15	08:46:00	122
2009-01-15	08:47:00	91
2009-01-15	08:48:00	30
2009-01-15	08:49:00	10
2009-01-15	08:50:00	0
2009-01-15	08:51:00	0
2009-01-15	08:52:00	10
2009-01-15	08:53:00	0
2009-01-15	08:54:00	0
2009-01-15	08:55:00	0
2009-01-15	08:56:00	0
2009-01-15	08:57:00	20
2009-01-15	08:58:00	0
2009-01-15	08:59:00	20
2009-01-15	09:00:00	20
2009-01-15	09:01:00	10
2009-01-15	09:02:00	10
2009-01-15	09:03:00	20
2009-01-15	09:04:00	20
2009-01-15	09:05:00	41
2009-01-15	09:06:00	71
2009-01-15	09:07:00	20
2009-01-15	09:08:00	61
[truncated: 19,611 more rows]

## Sheet: 1.28.09
Actogram, Copy Raw Data, All Days
Identity:	Butler Schmidt
Filename:	E:\Active Research Files\meloxicam titre canine\cases\butler\Butler Schmidt 1.28.09.AWC
Gender:	M
Age:	12
Height:	50.8 cm	20.0 in
Weight:	26.0 kg	57.3 lbs
Start Date:	28-Jan-2009 (Wed)
Start Time:	17:00:00
Interval:	1.00 mins
Date Stamp:	Time Stamp:	Activity Data:	Marker Press:
2009-01-28	00:00:00	0
2009-01-28	00:01:00	0
2009-01-28	00:02:00	0
2009-01-28	00:03:00	0
2009-01-28	00:04:00	0
2009-01-28	00:05:00	0
2009-01-28	00:06:00	0
2009-01-28	00:07:00	0
2009-01-28	00:08:00	0
2009-01-28	00:09:00	0
2009-01-28	00:10:00	0
2009-01-28	00:11:00	0
2009-01-28	00:12:00	0
2009-01-28	00:13:00	0
2009-01-28	00:14:00	0
2009-01-28	00:15:00	0
2009-01-28	00:16:00	0
2009-01-28	00:17:00	0
2009-01-28	00:18:00	0
2009-01-28	00:19:00	0
2009-01-28	00:20:00	0
2009-01-28	00:21:00	0
2009-01-28	00:22:00	0
2009-01-28	00:23:00	0
2009-01-28	00:24:00	0
2009-01-28	00:25:00	0
2009-01-28	00:26:00	0
2009-01-28	00:27:00	0
2009-01-28	00:28:00	0
2009-01-28	00:29:00	0
2009-01-28	00:30:00	0
2009-01-28	00:31:00	0
2009-01-28	00:32:00	0
2009-01-28	00:33:00	0
2009-01-28	00:34:00	0
2009-01-28	00:35:00	0
2009-01-28	00:36:00	0
2009-01-28	00:37:00	0
2009-01-28	00:38:00	0
2009-01-28	00:39:00	0
2009-01-28	00:40:00	0
2009-01-28	00:41:00	0
2009-01-28	00:42:00	0
2009-01-28	00:43:00	0
2009-01-28	00:44:00	0
2009-01-28	00:45:00	0
2009-01-28	00:46:00	0
2009-01-28	00:47:00	0
2009-01-28	00:48:00	0
2009-01-28	00:49:00	0
2009-01-28	00:50:00	0
2009-01-28	00:51:00	0
2009-01-28	00:52:00	0
2009-01-28	00:53:00	0
2009-01-28	00:54:00	0
2009-01-28	00:55:00	0
2009-01-28	00:56:00	0
2009-01-28	00:57:00	0
2009-01-28	00:58:00	0
2009-01-28	00:59:00	0
2009-01-28	01:00:00	0
2009-01-28	01:01:00	0
2009-01-28	01:02:00	0
2009-01-28	01:03:00	0
2009-01-28	01:04:00	0
2009-01-28	01:05:00	0
2009-01-28	01:06:00	0
2009-01-28	01:07:00	0
2009-01-28	01:08:00	0
2009-01-28	01:09:00	0
2009-01-28	01:10:00	0
2009-01-28	01:11:00	0
2009-01-28	01:12:00	0
2009-01-28	01:13:00	0
2009-01-28	01:14:00	0
2009-01-28	01:15:00	0
2009-01-28	01:16:00	0
2009-01-28	01:17:00	0
2009-01-28	01:18:00	0
2009-01-28	01:19:00	0
2009-01-28	01:20:00	0
2009-01-28	01:21:00	0
2009-01-28	01:22:00	0
2009-01-28	01:23:00	0
2009-01-28	01:24:00	0
2009-01-28	01:25:00	0
2009-01-28	01:26:00	0
2009-01-28	01:27:00	0
2009-01-28	01:28:00	0
2009-01-28	01:29:00	0
2009-01-28	01:30:00	0
2009-01-28	01:31:00	0
2009-01-28	01:32:00	0
2009-01-28	01:33:00	0
2009-01-28	01:34:00	0
2009-01-28	01:35:00	0
2009-01-28	01:36:00	0
2009-01-28	01:37:00	0
2009-01-28	01:38:00	0
2009-01-28	01:39:00	0
2009-01-28	01:40:00	0
2009-01-28	01:41:00	0
2009-01-28	01:42:00	0
2009-01-28	01:43:00	0
2009-01-28	01:44:00	0
2009-01-28	01:45:00	0
2009-01-28	01:46:00	0
2009-01-28	01:47:00	0
2009-01-28	01:48:00	0
2009-01-28	01:49:00	0
2009-01-28	01:50:00	0
2009-01-28	01:51:00	0
2009-01-28	01:52:00	0
2009-01-28	01:53:00	0
2009-01-28	01:54:00	0
2009-01-28	01:55:00	0
2009-01-28	01:56:00	0
2009-01-28	01:57:00	0
2009-01-28	01:58:00	0
2009-01-28	01:59:00	0
2009-01-28	02:00:00	0
2009-01-28	02:01:00	0
2009-01-28	02:02:00	0
2009-01-28	02:03:00	0
2009-01-28	02:04:00	0
2009-01-28	02:05:00	0
2009-01-28	02:06:00	0
2009-01-28	02:07:00	0
2009-01-28	02:08:00	0
2009-01-28	02:09:00	0
2009-01-28	02:10:00	0
2009-01-28	02:11:00	0
2009-01-28	02:12:00	0
2009-01-28	02:13:00	0
2009-01-28	02:14:00	0
2009-01-28	02:15:00	0
2009-01-28	02:16:00	0
2009-01-28	02:17:00	0
2009-01-28	02:18:00	0
2009-01-28	02:19:00	0
2009-01-28	02:20:00	0
2009-01-28	02:21:00	0
2009-01-28	02:22:00	0
2009-01-28	02:23:00	0
2009-01-28	02:24:00	0
2009-01-28	02:25:00	0
2009-01-28	02:26:00	0
2009-01-28	02:27:00	0
2009-01-28	02:28:00	0
2009-01-28	02:29:00	0
2009-01-28	02:30:00	0
2009-01-28	02:31:00	0
2009-01-28	02:32:00	0
2009-01-28	02:33:00	0
2009-01-28	02:34:00	0
2009-01-28	02:35:00	0
2009-01-28	02:36:00	0
2009-01-28	02:37:00	0
2009-01-28	02:38:00	0
2009-01-28	02:39:00	0
2009-01-28	02:40:00	0
2009-01-28	02:41:00	0
2009-01-28	02:42:00	0
2009-01-28	02:43:00	0
2009-01-28	02:44:00	0
2009-01-28	02:45:00	0
2009-01-28	02:46:00	0
2009-01-28	02:47:00	0
2009-01-28	02:48:00	0
2009-01-28	02:49:00	0
2009-01-28	02:50:00	0
2009-01-28	02:51:00	0
2009-01-28	02:52:00	0
2009-01-28	02:53:00	0
2009-01-28	02:54:00	0
2009-01-28	02:55:00	0
2009-01-28	02:56:00	0
2009-01-28	02:57:00	0
2009-01-28	02:58:00	0
2009-01-28	02:59:00	0
2009-01-28	03:00:00	0
2009-01-28	03:01:00	0
2009-01-28	03:02:00	0
2009-01-28	03:03:00	0
2009-01-28	03:04:00	0
2009-01-28	03:05:00	0
2009-01-28	03:06:00	0
2009-01-28	03:07:00	0
2009-01-28	03:08:00	0
2009-01-28	03:09:00	0
2009-01-28	03:10:00	0
2009-01-28	03:11:00	0
2009-01-28	03:12:00	0
2009-01-28	03:13:00	0
2009-01-28	03:14:00	0
2009-01-28	03:15:00	0
2009-01-28	03:16:00	0
2009-01-28	03:17:00	0
2009-01-28	03:18:00	0
2009-01-28	03:19:00	0
2009-01-28	03:20:00	0
2009-01-28	03:21:00	0
2009-01-28	03:22:00	0
2009-01-28	03:23:00	0
2009-01-28	03:24:00	0
2009-01-28	03:25:00	0
2009-01-28	03:26:00	0
2009-01-28	03:27:00	0
2009-01-28	03:28:00	0
2009-01-28	03:29:00	0
2009-01-28	03:30:00	0
2009-01-28	03:31:00	0
2009-01-28	03:32:00	0
2009-01-28	03:33:00	0
2009-01-28	03:34:00	0
2009-01-28	03:35:00	0
2009-01-28	03:36:00	0
2009-01-28	03:37:00	0
2009-01-28	03:38:00	0
2009-01-28	03:39:00	0
2009-01-28	03:40:00	0
2009-01-28	03:41:00	0
2009-01-28	03:42:00	0
2009-01-28	03:43:00	0
2009-01-28	03:44:00	0
2009-01-28	03:45:00	0
2009-01-28	03:46:00	0
2009-01-28	03:47:00	0
2009-01-28	03:48:00	0
2009-01-28	03:49:00	0
2009-01-28	03:50:00	0
2009-01-28	03:51:00	0
2009-01-28	03:52:00	0
2009-01-28	03:53:00	0
2009-01-28	03:54:00	0
2009-01-28	03:55:00	0
2009-01-28	03:56:00	0
2009-01-28	03:57:00	0
2009-01-28	03:58:00	0
2009-01-28	03:59:00	0
2009-01-28	04:00:00	0
2009-01-28	04:01:00	0
2009-01-28	04:02:00	0
2009-01-28	04:03:00	0
2009-01-28	04:04:00	0
2009-01-28	04:05:00	0
2009-01-28	04:06:00	0
2009-01-28	04:07:00	0
2009-01-28	04:08:00	0
2009-01-28	04:09:00	0
2009-01-28	04:10:00	0
2009-01-28	04:11:00	0
2009-01-28	04:12:00	0
2009-01-28	04:13:00	0
2009-01-28	04:14:00	0
2009-01-28	04:15:00	0
2009-01-28	04:16:00	0
2009-01-28	04:17:00	0
2009-01-28	04:18:00	0
2009-01-28	04:19:00	0
2009-01-28	04:20:00	0
2009-01-28	04:21:00	0
2009-01-28	04:22:00	0
2009-01-28	04:23:00	0
2009-01-28	04:24:00	0
2009-01-28	04:25:00	0
2009-01-28	04:26:00	0
2009-01-28	04:27:00	0
2009-01-28	04:28:00	0
2009-01-28	04:29:00	0
2009-01-28	04:30:00	0
2009-01-28	04:31:00	0
2009-01-28	04:32:00	0
2009-01-28	04:33:00	0
2009-01-28	04:34:00	0
2009-01-28	04:35:00	0
2009-01-28	04:36:00	0
2009-01-28	04:37:00	0
2009-01-28	04:38:00	0
2009-01-28	04:39:00	0
2009-01-28	04:40:00	0
2009-01-28	04:41:00	0
2009-01-28	04:42:00	0
2009-01-28	04:43:00	0
2009-01-28	04:44:00	0
2009-01-28	04:45:00	0
2009-01-28	04:46:00	0
2009-01-28	04:47:00	0
2009-01-28	04:48:00	0
2009-01-28	04:49:00	0
2009-01-28	04:50:00	0
2009-01-28	04:51:00	0
2009-01-28	04:52:00	0
2009-01-28	04:53:00	0
2009-01-28	04:54:00	0
2009-01-28	04:55:00	0
2009-01-28	04:56:00	0
2009-01-28	04:57:00	0
2009-01-28	04:58:00	0
2009-01-28	04:59:00	0
2009-01-28	05:00:00	0
2009-01-28	05:01:00	0
2009-01-28	05:02:00	0
2009-01-28	05:03:00	0
2009-01-28	05:04:00	0
2009-01-28	05:05:00	0
2009-01-28	05:06:00	0
2009-01-28	05:07:00	0
2009-01-28	05:08:00	0
2009-01-28	05:09:00	0
2009-01-28	05:10:00	0
2009-01-28	05:11:00	0
2009-01-28	05:12:00	0
2009-01-28	05:13:00	0
2009-01-28	05:14:00	0
2009-01-28	05:15:00	0
2009-01-28	05:16:00	0
2009-01-28	05:17:00	0
2009-01-28	05:18:00	0
2009-01-28	05:19:00	0
2009-01-28	05:20:00	0
2009-01-28	05:21:00	0
2009-01-28	05:22:00	0
2009-01-28	05:23:00	0
2009-01-28	05:24:00	0
2009-01-28	05:25:00	0
2009-01-28	05:26:00	0
2009-01-28	05:27:00	0
2009-01-28	05:28:00	0
2009-01-28	05:29:00	0
2009-01-28	05:30:00	0
2009-01-28	05:31:00	0
2009-01-28	05:32:00	0
2009-01-28	05:33:00	0
2009-01-28	05:34:00	0
2009-01-28	05:35:00	0
2009-01-28	05:36:00	0
2009-01-28	05:37:00	0
2009-01-28	05:38:00	0
2009-01-28	05:39:00	0
2009-01-28	05:40:00	0
2009-01-28	05:41:00	0
2009-01-28	05:42:00	0
2009-01-28	05:43:00	0
2009-01-28	05:44:00	0
2009-01-28	05:45:00	0
2009-01-28	05:46:00	0
2009-01-28	05:47:00	0
2009-01-28	05:48:00	0
2009-01-28	05:49:00	0
2009-01-28	05:50:00	0
2009-01-28	05:51:00	0
2009-01-28	05:52:00	0
2009-01-28	05:53:00	0
2009-01-28	05:54:00	0
2009-01-28	05:55:00	0
2009-01-28	05:56:00	0
2009-01-28	05:57:00	0
2009-01-28	05:58:00	0
2009-01-28	05:59:00	0
2009-01-28	06:00:00	0
2009-01-28	06:01:00	0
2009-01-28	06:02:00	0
2009-01-28	06:03:00	0
2009-01-28	06:04:00	0
2009-01-28	06:05:00	0
2009-01-28	06:06:00	0
2009-01-28	06:07:00	0
2009-01-28	06:08:00	0
2009-01-28	06:09:00	0
2009-01-28	06:10:00	0
2009-01-28	06:11:00	0
2009-01-28	06:12:00	0
2009-01-28	06:13:00	0
2009-01-28	06:14:00	0
2009-01-28	06:15:00	0
2009-01-28	06:16:00	0
2009-01-28	06:17:00	0
2009-01-28	06:18:00	0
2009-01-28	06:19:00	0
2009-01-28	06:20:00	0
2009-01-28	06:21:00	0
2009-01-28	06:22:00	0
2009-01-28	06:23:00	0
2009-01-28	06:24:00	0
2009-01-28	06:25:00	0
2009-01-28	06:26:00	0
2009-01-28	06:27:00	0
2009-01-28	06:28:00	0
2009-01-28	06:29:00	0
2009-01-28	06:30:00	0
2009-01-28	06:31:00	0
2009-01-28	06:32:00	0
2009-01-28	06:33:00	0
2009-01-28	06:34:00	0
2009-01-28	06:35:00	0
2009-01-28	06:36:00	0
2009-01-28	06:37:00	0
2009-01-28	06:38:00	0
2009-01-28	06:39:00	0
2009-01-28	06:40:00	0
2009-01-28	06:41:00	0
2009-01-28	06:42:00	0
2009-01-28	06:43:00	0
2009-01-28	06:44:00	0
2009-01-28	06:45:00	0
2009-01-28	06:46:00	0
2009-01-28	06:47:00	0
2009-01-28	06:48:00	0
2009-01-28	06:49:00	0
2009-01-28	06:50:00	0
2009-01-28	06:51:00	0
2009-01-28	06:52:00	0
2009-01-28	06:53:00	0
2009-01-28	06:54:00	0
2009-01-28	06:55:00	0
2009-01-28	06:56:00	0
2009-01-28	06:57:00	0
2009-01-28	06:58:00	0
2009-01-28	06:59:00	0
2009-01-28	07:00:00	0
2009-01-28	07:01:00	0
2009-01-28	07:02:00	0
2009-01-28	07:03:00	0
2009-01-28	07:04:00	0
2009-01-28	07:05:00	0
2009-01-28	07:06:00	0
2009-01-28	07:07:00	0
2009-01-28	07:08:00	0
2009-01-28	07:09:00	0
2009-01-28	07:10:00	0
2009-01-28	07:11:00	0
2009-01-28	07:12:00	0
2009-01-28	07:13:00	0
2009-01-28	07:14:00	0
2009-01-28	07:15:00	0
2009-01-28	07:16:00	0
2009-01-28	07:17:00	0
2009-01-28	07:18:00	0
2009-01-28	07:19:00	0
2009-01-28	07:20:00	0
2009-01-28	07:21:00	0
2009-01-28	07:22:00	0
2009-01-28	07:23:00	0
2009-01-28	07:24:00	0
2009-01-28	07:25:00	0
2009-01-28	07:26:00	0
2009-01-28	07:27:00	0
2009-01-28	07:28:00	0
2009-01-28	07:29:00	0
2009-01-28	07:30:00	0
2009-01-28	07:31:00	0
2009-01-28	07:32:00	0
2009-01-28	07:33:00	0
2009-01-28	07:34:00	0
2009-01-28	07:35:00	0
2009-01-28	07:36:00	0
2009-01-28	07:37:00	0
2009-01-28	07:38:00	0
2009-01-28	07:39:00	0
2009-01-28	07:40:00	0
2009-01-28	07:41:00	0
2009-01-28	07:42:00	0
2009-01-28	07:43:00	0
2009-01-28	07:44:00	0
2009-01-28	07:45:00	0
2009-01-28	07:46:00	0
2009-01-28	07:47:00	0
2009-01-28	07:48:00	0
2009-01-28	07:49:00	0
2009-01-28	07:50:00	0
2009-01-28	07:51:00	0
2009-01-28	07:52:00	0
2009-01-28	07:53:00	0
2009-01-28	07:54:00	0
2009-01-28	07:55:00	0
2009-01-28	07:56:00	0
2009-01-28	07:57:00	0
2009-01-28	07:58:00	0
2009-01-28	07:59:00	0
2009-01-28	08:00:00	0
2009-01-28	08:01:00	0
2009-01-28	08:02:00	0
2009-01-28	08:03:00	0
2009-01-28	08:04:00	0
2009-01-28	08:05:00	0
2009-01-28	08:06:00	0
2009-01-28	08:07:00	0
2009-01-28	08:08:00	0
2009-01-28	08:09:00	0
2009-01-28	08:10:00	0
2009-01-28	08:11:00	0
2009-01-28	08:12:00	0
2009-01-28	08:13:00	0
2009-01-28	08:14:00	0
2009-01-28	08:15:00	0
2009-01-28	08:16:00	0
2009-01-28	08:17:00	0
2009-01-28	08:18:00	0
2009-01-28	08:19:00	0
2009-01-28	08:20:00	0
2009-01-28	08:21:00	0
2009-01-28	08:22:00	0
2009-01-28	08:23:00	0
2009-01-28	08:24:00	0
2009-01-28	08:25:00	0
2009-01-28	08:26:00	0
2009-01-28	08:27:00	0
2009-01-28	08:28:00	0
2009-01-28	08:29:00	0
2009-01-28	08:30:00	0
2009-01-28	08:31:00	0
2009-01-28	08:32:00	0
2009-01-28	08:33:00	0
2009-01-28	08:34:00	0
2009-01-28	08:35:00	0
2009-01-28	08:36:00	0
2009-01-28	08:37:00	0
2009-01-28	08:38:00	0
2009-01-28	08:39:00	0
2009-01-28	08:40:00	0
2009-01-28	08:41:00	0
2009-01-28	08:42:00	0
2009-01-28	08:43:00	0
2009-01-28	08:44:00	0
2009-01-28	08:45:00	0
2009-01-28	08:46:00	0
2009-01-28	08:47:00	0
2009-01-28	08:48:00	0
2009-01-28	08:49:00	0
2009-01-28	08:50:00	0
2009-01-28	08:51:00	0
2009-01-28	08:52:00	0
2009-01-28	08:53:00	0
2009-01-28	08:54:00	0
2009-01-28	08:55:00	0
2009-01-28	08:56:00	0
2009-01-28	08:57:00	0
2009-01-28	08:58:00	0
2009-01-28	08:59:00	0
2009-01-28	09:00:00	0
2009-01-28	09:01:00	0
2009-01-28	09:02:00	0
2009-01-28	09:03:00	0
2009-01-28	09:04:00	0
2009-01-28	09:05:00	0
2009-01-28	09:06:00	0
2009-01-28	09:07:00	0
2009-01-28	09:08:00	0
2009-01-28	09:09:00	0
2009-01-28	09:10:00	0
2009-01-28	09:11:00	0
2009-01-28	09:12:00	0
2009-01-28	09:13:00	0
2009-01-28	09:14:00	0
2009-01-28	09:15:00	0
2009-01-28	09:16:00	0
2009-01-28	09:17:00	0
2009-01-28	09:18:00	0
2009-01-28	09:19:00	0
2009-01-28	09:20:00	0
2009-01-28	09:21:00	0
2009-01-28	09:22:00	0
2009-01-28	09:23:00	0
2009-01-28	09:24:00	0
2009-01-28	09:25:00	0
2009-01-28	09:26:00	0
2009-01-28	09:27:00	0
2009-01-28	09:28:00	0
2009-01-28	09:29:00	0
2009-01-28	09:30:00	0
2009-01-28	09:31:00	0
2009-01-28	09:32:00	0
2009-01-28	09:33:00	0
2009-01-28	09:34:00	0
2009-01-28	09:35:00	0
2009-01-28	09:36:00	0
2009-01-28	09:37:00	0
2009-01-28	09:38:00	0
2009-01-28	09:39:00	0
2009-01-28	09:40:00	0
2009-01-28	09:41:00	0
2009-01-28	09:42:00	0
2009-01-28	09:43:00	0
2009-01-28	09:44:00	0
2009-01-28	09:45:00	0
2009-01-28	09:46:00	0
2009-01-28	09:47:00	0
2009-01-28	09:48:00	0
2009-01-28	09:49:00	0
2009-01-28	09:50:00	0
2009-01-28	09:51:00	0
2009-01-28	09:52:00	0
2009-01-28	09:53:00	0
2009-01-28	09:54:00	0
2009-01-28	09:55:00	0
2009-01-28	09:56:00	0
2009-01-28	09:57:00	0
2009-01-28	09:58:00	0
2009-01-28	09:59:00	0
2009-01-28	10:00:00	0
2009-01-28	10:01:00	0
2009-01-28	10:02:00	0
2009-01-28	10:03:00	0
2009-01-28	10:04:00	0
2009-01-28	10:05:00	0
2009-01-28	10:06:00	0
2009-01-28	10:07:00	0
2009-01-28	10:08:00	0
2009-01-28	10:09:00	0
2009-01-28	10:10:00	0
2009-01-28	10:11:00	0
2009-01-28	10:12:00	0
2009-01-28	10:13:00	0
2009-01-28	10:14:00	0
2009-01-28	10:15:00	0
2009-01-28	10:16:00	0
2009-01-28	10:17:00	0
2009-01-28	10:18:00	0
2009-01-28	10:19:00	0
2009-01-28	10:20:00	0
2009-01-28	10:21:00	0
2009-01-28	10:22:00	0
2009-01-28	10:23:00	0
2009-01-28	10:24:00	0
2009-01-28	10:25:00	0
2009-01-28	10:26:00	0
2009-01-28	10:27:00	0
2009-01-28	10:28:00	0
2009-01-28	10:29:00	0
2009-01-28	10:30:00	0
2009-01-28	10:31:00	0
2009-01-28	10:32:00	0
2009-01-28	10:33:00	0
2009-01-28	10:34:00	0
2009-01-28	10:35:00	0
2009-01-28	10:36:00	0
2009-01-28	10:37:00	0
2009-01-28	10:38:00	0
2009-01-28	10:39:00	0
2009-01-28	10:40:00	0
2009-01-28	10:41:00	0
2009-01-28	10:42:00	0
2009-01-28	10:43:00	0
2009-01-28	10:44:00	0
2009-01-28	10:45:00	0
2009-01-28	10:46:00	0
2009-01-28	10:47:00	0
2009-01-28	10:48:00	0
2009-01-28	10:49:00	0
2009-01-28	10:50:00	0
2009-01-28	10:51:00	0
2009-01-28	10:52:00	0
2009-01-28	10:53:00	0
2009-01-28	10:54:00	0
2009-01-28	10:55:00	0
2009-01-28	10:56:00	0
2009-01-28	10:57:00	0
2009-01-28	10:58:00	0
2009-01-28	10:59:00	0
2009-01-28	11:00:00	0
2009-01-28	11:01:00	0
2009-01-28	11:02:00	0
2009-01-28	11:03:00	0
2009-01-28	11:04:00	0
2009-01-28	11:05:00	0
2009-01-28	11:06:00	0
2009-01-28	11:07:00	0
2009-01-28	11:08:00	0
2009-01-28	11:09:00	0
2009-01-28	11:10:00	0
2009-01-28	11:11:00	0
2009-01-28	11:12:00	0
2009-01-28	11:13:00	0
2009-01-28	11:14:00	0
2009-01-28	11:15:00	0
2009-01-28	11:16:00	0
2009-01-28	11:17:00	0
2009-01-28	11:18:00	0
2009-01-28	11:19:00	0
2009-01-28	11:20:00	0
2009-01-28	11:21:00	0
2009-01-28	11:22:00	0
2009-01-28	11:23:00	0
2009-01-28	11:24:00	0
2009-01-28	11:25:00	0
2009-01-28	11:26:00	0
2009-01-28	11:27:00	0
2009-01-28	11:28:00	0
2009-01-28	11:29:00	0
2009-01-28	11:30:00	0
2009-01-28	11:31:00	0
2009-01-28	11:32:00	0
2009-01-28	11:33:00	0
2009-01-28	11:34:00	0
2009-01-28	11:35:00	0
2009-01-28	11:36:00	0
2009-01-28	11:37:00	0
2009-01-28	11:38:00	0
2009-01-28	11:39:00	0
2009-01-28	11:40:00	0
2009-01-28	11:41:00	0
2009-01-28	11:42:00	0
2009-01-28	11:43:00	0
2009-01-28	11:44:00	0
2009-01-28	11:45:00	0
2009-01-28	11:46:00	0
2009-01-28	11:47:00	0
2009-01-28	11:48:00	0
2009-01-28	11:49:00	0
2009-01-28	11:50:00	0
2009-01-28	11:51:00	0
2009-01-28	11:52:00	0
2009-01-28	11:53:00	0
2009-01-28	11:54:00	0
2009-01-28	11:55:00	0
2009-01-28	11:56:00	0
2009-01-28	11:57:00	0
2009-01-28	11:58:00	0
2009-01-28	11:59:00	0
2009-01-28	12:00:00	0
2009-01-28	12:01:00	0
2009-01-28	12:02:00	0
2009-01-28	12:03:00	0
2009-01-28	12:04:00	0
2009-01-28	12:05:00	0
2009-01-28	12:06:00	0
2009-01-28	12:07:00	0
2009-01-28	12:08:00	0
2009-01-28	12:09:00	0
2009-01-28	12:10:00	0
2009-01-28	12:11:00	0
2009-01-28	12:12:00	0
2009-01-28	12:13:00	0
2009-01-28	12:14:00	0
2009-01-28	12:15:00	0
2009-01-28	12:16:00	0
2009-01-28	12:17:00	0
2009-01-28	12:18:00	0
2009-01-28	12:19:00	0
2009-01-28	12:20:00	0
2009-01-28	12:21:00	0
2009-01-28	12:22:00	0
2009-01-28	12:23:00	0
2009-01-28	12:24:00	0
2009-01-28	12:25:00	0
2009-01-28	12:26:00	0
2009-01-28	12:27:00	0
2009-01-28	12:28:00	0
2009-01-28	12:29:00	0
2009-01-28	12:30:00	0
2009-01-28	12:31:00	0
2009-01-28	12:32:00	0
2009-01-28	12:33:00	0
2009-01-28	12:34:00	0
2009-01-28	12:35:00	0
2009-01-28	12:36:00	0
2009-01-28	12:37:00	0
2009-01-28	12:38:00	0
2009-01-28	12:39:00	0
2009-01-28	12:40:00	0
2009-01-28	12:41:00	0
2009-01-28	12:42:00	0
2009-01-28	12:43:00	0
2009-01-28	12:44:00	0
2009-01-28	12:45:00	0
2009-01-28	12:46:00	0
2009-01-28	12:47:00	0
2009-01-28	12:48:00	0
2009-01-28	12:49:00	0
2009-01-28	12:50:00	0
2009-01-28	12:51:00	0
2009-01-28	12:52:00	0
2009-01-28	12:53:00	0
2009-01-28	12:54:00	0
2009-01-28	12:55:00	0
2009-01-28	12:56:00	0
2009-01-28	12:57:00	0
2009-01-28	12:58:00	0
2009-01-28	12:59:00	0
2009-01-28	13:00:00	0
2009-01-28	13:01:00	0
2009-01-28	13:02:00	0
2009-01-28	13:03:00	0
2009-01-28	13:04:00	0
2009-01-28	13:05:00	0
2009-01-28	13:06:00	0
2009-01-28	13:07:00	0
2009-01-28	13:08:00	0
2009-01-28	13:09:00	0
2009-01-28	13:10:00	0
2009-01-28	13:11:00	0
2009-01-28	13:12:00	0
2009-01-28	13:13:00	0
2009-01-28	13:14:00	0
2009-01-28	13:15:00	0
2009-01-28	13:16:00	0
2009-01-28	13:17:00	0
2009-01-28	13:18:00	0
2009-01-28	13:19:00	0
2009-01-28	13:20:00	0
2009-01-28	13:21:00	0
2009-01-28	13:22:00	0
2009-01-28	13:23:00	0
2009-01-28	13:24:00	0
2009-01-28	13:25:00	0
2009-01-28	13:26:00	0
2009-01-28	13:27:00	0
2009-01-28	13:28:00	0
2009-01-28	13:29:00	0
2009-01-28	13:30:00	0
2009-01-28	13:31:00	0
2009-01-28	13:32:00	0
2009-01-28	13:33:00	0
2009-01-28	13:34:00	0
2009-01-28	13:35:00	0
2009-01-28	13:36:00	0
2009-01-28	13:37:00	0
2009-01-28	13:38:00	0
2009-01-28	13:39:00	0
2009-01-28	13:40:00	0
2009-01-28	13:41:00	0
2009-01-28	13:42:00	0
2009-01-28	13:43:00	0
2009-01-28	13:44:00	0
2009-01-28	13:45:00	0
2009-01-28	13:46:00	0
2009-01-28	13:47:00	0
2009-01-28	13:48:00	0
2009-01-28	13:49:00	0
2009-01-28	13:50:00	0
2009-01-28	13:51:00	0
2009-01-28	13:52:00	0
2009-01-28	13:53:00	0
2009-01-28	13:54:00	0
2009-01-28	13:55:00	0
2009-01-28	13:56:00	0
2009-01-28	13:57:00	0
2009-01-28	13:58:00	0
2009-01-28	13:59:00	0
2009-01-28	14:00:00	0
2009-01-28	14:01:00	0
2009-01-28	14:02:00	0
2009-01-28	14:03:00	0
2009-01-28	14:04:00	0
2009-01-28	14:05:00	0
2009-01-28	14:06:00	0
2009-01-28	14:07:00	0
2009-01-28	14:08:00	0
2009-01-28	14:09:00	0
2009-01-28	14:10:00	0
2009-01-28	14:11:00	0
2009-01-28	14:12:00	0
2009-01-28	14:13:00	0
2009-01-28	14:14:00	0
2009-01-28	14:15:00	0
2009-01-28	14:16:00	0
2009-01-28	14:17:00	0
2009-01-28	14:18:00	0
2009-01-28	14:19:00	0
2009-01-28	14:20:00	0
2009-01-28	14:21:00	0
2009-01-28	14:22:00	0
2009-01-28	14:23:00	0
2009-01-28	14:24:00	0
2009-01-28	14:25:00	0
2009-01-28	14:26:00	0
2009-01-28	14:27:00	0
2009-01-28	14:28:00	0
2009-01-28	14:29:00	0
2009-01-28	14:30:00	0
2009-01-28	14:31:00	0
2009-01-28	14:32:00	0
2009-01-28	14:33:00	0
2009-01-28	14:34:00	0
2009-01-28	14:35:00	0
2009-01-28	14:36:00	0
2009-01-28	14:37:00	0
2009-01-28	14:38:00	0
2009-01-28	14:39:00	0
2009-01-28	14:40:00	0
2009-01-28	14:41:00	0
2009-01-28	14:42:00	0
2009-01-28	14:43:00	0
2009-01-28	14:44:00	0
2009-01-28	14:45:00	0
2009-01-28	14:46:00	0
2009-01-28	14:47:00	0
2009-01-28	14:48:00	0
2009-01-28	14:49:00	0
2009-01-28	14:50:00	0
2009-01-28	14:51:00	0
2009-01-28	14:52:00	0
2009-01-28	14:53:00	0
2009-01-28	14:54:00	0
2009-01-28	14:55:00	0
2009-01-28	14:56:00	0
2009-01-28	14:57:00	0
2009-01-28	14:58:00	0
2009-01-28	14:59:00	0
2009-01-28	15:00:00	0
2009-01-28	15:01:00	0
2009-01-28	15:02:00	0
2009-01-28	15:03:00	0
2009-01-28	15:04:00	0
2009-01-28	15:05:00	0
2009-01-28	15:06:00	0
2009-01-28	15:07:00	0
2009-01-28	15:08:00	0
2009-01-28	15:09:00	0
2009-01-28	15:10:00	0
2009-01-28	15:11:00	0
2009-01-28	15:12:00	0
2009-01-28	15:13:00	0
2009-01-28	15:14:00	0
2009-01-28	15:15:00	0
2009-01-28	15:16:00	0
2009-01-28	15:17:00	0
2009-01-28	15:18:00	0
2009-01-28	15:19:00	0
2009-01-28	15:20:00	0
2009-01-28	15:21:00	0
2009-01-28	15:22:00	0
2009-01-28	15:23:00	0
2009-01-28	15:24:00	0
2009-01-28	15:25:00	0
2009-01-28	15:26:00	0
2009-01-28	15:27:00	0
2009-01-28	15:28:00	0
2009-01-28	15:29:00	0
2009-01-28	15:30:00	0
2009-01-28	15:31:00	0
2009-01-28	15:32:00	0
2009-01-28	15:33:00	0
2009-01-28	15:34:00	0
2009-01-28	15:35:00	0
2009-01-28	15:36:00	0
2009-01-28	15:37:00	0
2009-01-28	15:38:00	0
2009-01-28	15:39:00	0
2009-01-28	15:40:00	0
2009-01-28	15:41:00	0
2009-01-28	15:42:00	0
2009-01-28	15:43:00	0
2009-01-28	15:44:00	0
2009-01-28	15:45:00	0
2009-01-28	15:46:00	0
2009-01-28	15:47:00	0
2009-01-28	15:48:00	0
2009-01-28	15:49:00	0
2009-01-28	15:50:00	0
2009-01-28	15:51:00	0
2009-01-28	15:52:00	0
2009-01-28	15:53:00	0
2009-01-28	15:54:00	0
2009-01-28	15:55:00	0
2009-01-28	15:56:00	0
2009-01-28	15:57:00	0
2009-01-28	15:58:00	0
2009-01-28	15:59:00	0
2009-01-28	16:00:00	0
2009-01-28	16:01:00	0
2009-01-28	16:02:00	0
2009-01-28	16:03:00	0
2009-01-28	16:04:00	0
2009-01-28	16:05:00	0
2009-01-28	16:06:00	0
2009-01-28	16:07:00	0
2009-01-28	16:08:00	0
2009-01-28	16:09:00	0
2009-01-28	16:10:00	0
2009-01-28	16:11:00	0
2009-01-28	16:12:00	0
2009-01-28	16:13:00	0
2009-01-28	16:14:00	0
2009-01-28	16:15:00	0
2009-01-28	16:16:00	0
2009-01-28	16:17:00	0
2009-01-28	16:18:00	0
2009-01-28	16:19:00	0
2009-01-28	16:20:00	0
2009-01-28	16:21:00	0
2009-01-28	16:22:00	0
2009-01-28	16:23:00	0
2009-01-28	16:24:00	0
2009-01-28	16:25:00	0
2009-01-28	16:26:00	0
2009-01-28	16:27:00	0
2009-01-28	16:28:00	0
2009-01-28	16:29:00	0
2009-01-28	16:30:00	0
2009-01-28	16:31:00	0
2009-01-28	16:32:00	0
2009-01-28	16:33:00	0
2009-01-28	16:34:00	0
2009-01-28	16:35:00	0
2009-01-28	16:36:00	0
2009-01-28	16:37:00	0
2009-01-28	16:38:00	0
2009-01-28	16:39:00	0
2009-01-28	16:40:00	0
2009-01-28	16:41:00	0
2009-01-28	16:42:00	0
2009-01-28	16:43:00	0
2009-01-28	16:44:00	0
2009-01-28	16:45:00	0
2009-01-28	16:46:00	0
2009-01-28	16:47:00	0
2009-01-28	16:48:00	0
2009-01-28	16:49:00	0
2009-01-28	16:50:00	0
2009-01-28	16:51:00	0
2009-01-28	16:52:00	0
2009-01-28	16:53:00	0
2009-01-28	16:54:00	0
2009-01-28	16:55:00	0
2009-01-28	16:56:00	0
2009-01-28	16:57:00	0
2009-01-28	16:58:00	0
2009-01-28	16:59:00	0
2009-01-28	17:00:00	0
2009-01-28	17:01:00	0
2009-01-28	17:02:00	0
2009-01-28	17:03:00	0
2009-01-28	17:04:00	0
2009-01-28	17:05:00	0
2009-01-28	17:06:00	0
2009-01-28	17:07:00	0
2009-01-28	17:08:00	0
2009-01-28	17:09:00	0
2009-01-28	17:10:00	0
2009-01-28	17:11:00	0
2009-01-28	17:12:00	0
2009-01-28	17:13:00	0
2009-01-28	17:14:00	0
2009-01-28	17:15:00	0
2009-01-28	17:16:00	0
2009-01-28	17:17:00	0
2009-01-28	17:18:00	0
2009-01-28	17:19:00	0
2009-01-28	17:20:00	0
2009-01-28	17:21:00	0
2009-01-28	17:22:00	0
2009-01-28	17:23:00	0
2009-01-28	17:24:00	10
2009-01-28	17:25:00	0
2009-01-28	17:26:00	0
2009-01-28	17:27:00	0
2009-01-28	17:28:00	0
2009-01-28	17:29:00	0
2009-01-28	17:30:00	0
2009-01-28	17:31:00	0
2009-01-28	17:32:00	0
2009-01-28	17:33:00	0
2009-01-28	17:34:00	0
2009-01-28	17:35:00	0
2009-01-28	17:36:00	0
2009-01-28	17:37:00	0
2009-01-28	17:38:00	0
2009-01-28	17:39:00	0
2009-01-28	17:40:00	0
2009-01-28	17:41:00	0
2009-01-28	17:42:00	0
2009-01-28	17:43:00	0
2009-01-28	17:44:00	0
2009-01-28	17:45:00	0
2009-01-28	17:46:00	0
2009-01-28	17:47:00	0
2009-01-28	17:48:00	10
2009-01-28	17:49:00	91
2009-01-28	17:50:00	0
2009-01-28	17:51:00	0
2009-01-28	17:52:00	0
2009-01-28	17:53:00	0
2009-01-28	17:54:00	0
2009-01-28	17:55:00	0
2009-01-28	17:56:00	0
2009-01-28	17:57:00	0
2009-01-28	17:58:00	0
2009-01-28	17:59:00	1479
2009-01-28	18:00:00	1416
2009-01-28	18:01:00	61
2009-01-28	18:02:00	10
2009-01-28	18:03:00	41
2009-01-28	18:04:00	81
2009-01-28	18:05:00	754
2009-01-28	18:06:00	1325
2009-01-28	18:07:00	169
2009-01-28	18:08:00	156
2009-01-28	18:09:00	122
2009-01-28	18:10:00	30
2009-01-28	18:11:00	861
2009-01-28	18:12:00	1002
2009-01-28	18:13:00	1002
2009-01-28	18:14:00	366
2009-01-28	18:15:00	230
2009-01-28	18:16:00	156
2009-01-28	18:17:00	337
2009-01-28	18:18:00	524
2009-01-28	18:19:00	10
2009-01-28	18:20:00	0
2009-01-28	18:21:00	0
2009-01-28	18:22:00	0
2009-01-28	18:23:00	0
2009-01-28	18:24:00	0
2009-01-28	18:25:00	0
2009-01-28	18:26:00	0
2009-01-28	18:27:00	0
2009-01-28	18:28:00	0
2009-01-28	18:29:00	10
2009-01-28	18:30:00	20
2009-01-28	18:31:00	0
2009-01-28	18:32:00	10
2009-01-28	18:33:00	10
2009-01-28	18:34:00	0
2009-01-28	18:35:00	20
2009-01-28	18:36:00	41
2009-01-28	18:37:00	0
2009-01-28	18:38:00	0
2009-01-28	18:39:00	0
2009-01-28	18:40:00	0
2009-01-28	18:41:00	351
2009-01-28	18:42:00	41
2009-01-28	18:43:00	20
2009-01-28	18:44:00	30
2009-01-28	18:45:00	10
2009-01-28	18:46:00	0
2009-01-28	18:47:00	30
2009-01-28	18:48:00	41
2009-01-28	18:49:00	0
2009-01-28	18:50:00	0
2009-01-28	18:51:00	0
2009-01-28	18:52:00	0
2009-01-28	18:53:00	0
2009-01-28	18:54:00	0
2009-01-28	18:55:00	41
2009-01-28	18:56:00	0
2009-01-28	18:57:00	0
2009-01-28	18:58:00	0
2009-01-28	18:59:00	0
2009-01-28	19:00:00	0
2009-01-28	19:01:00	0
2009-01-28	19:02:00	0
2009-01-28	19:03:00	0
2009-01-28	19:04:00	20
2009-01-28	19:05:00	0
2009-01-28	19:06:00	0
2009-01-28	19:07:00	0
2009-01-28	19:08:00	0
2009-01-28	19:09:00	0
2009-01-28	19:10:00	0
2009-01-28	19:11:00	0
2009-01-28	19:12:00	0
2009-01-28	19:13:00	0
2009-01-28	19:14:00	0
2009-01-28	19:15:00	0
2009-01-28	19:16:00	0
2009-01-28	19:17:00	0
2009-01-28	19:18:00	0
2009-01-28	19:19:00	0
2009-01-28	19:20:00	0
2009-01-28	19:21:00	0
2009-01-28	19:22:00	0
2009-01-28	19:23:00	0
2009-01-28	19:24:00	0
2009-01-28	19:25:00	0
2009-01-28	19:26:00	0
2009-01-28	19:27:00	0
2009-01-28	19:28:00	0
2009-01-28	19:29:00	20
2009-01-28	19:30:00	51
2009-01-28	19:31:00	0
2009-01-28	19:32:00	0
2009-01-28	19:33:00	0
2009-01-28	19:34:00	0
2009-01-28	19:35:00	0
2009-01-28	19:36:00	0
2009-01-28	19:37:00	0
2009-01-28	19:38:00	0
2009-01-28	19:39:00	0
2009-01-28	19:40:00	20
2009-01-28	19:41:00	102
2009-01-28	19:42:00	0
2009-01-28	19:43:00	0
2009-01-28	19:44:00	0
2009-01-28	19:45:00	0
2009-01-28	19:46:00	0
2009-01-28	19:47:00	0
2009-01-28	19:48:00	0
2009-01-28	19:49:00	0
2009-01-28	19:50:00	0
2009-01-28	19:51:00	0
2009-01-28	19:52:00	0
2009-01-28	19:53:00	0
2009-01-28	19:54:00	0
2009-01-28	19:55:00	0
2009-01-28	19:56:00	0
2009-01-28	19:57:00	0
2009-01-28	19:58:00	0
2009-01-28	19:59:00	0
2009-01-28	20:00:00	0
2009-01-28	20:01:00	0
2009-01-28	20:02:00	0
2009-01-28	20:03:00	0
2009-01-28	20:04:00	0
2009-01-28	20:05:00	0
2009-01-28	20:06:00	0
2009-01-28	20:07:00	0
2009-01-28	20:08:00	0
2009-01-28	20:09:00	0
2009-01-28	20:10:00	0
2009-01-28	20:11:00	0
2009-01-28	20:12:00	0
2009-01-28	20:13:00	0
2009-01-28	20:14:00	0
2009-01-28	20:15:00	0
2009-01-28	20:16:00	0
2009-01-28	20:17:00	0
2009-01-28	20:18:00	0
2009-01-28	20:19:00	0
2009-01-28	20:20:00	0
2009-01-28	20:21:00	0
2009-01-28	20:22:00	0
2009-01-28	20:23:00	0
2009-01-28	20:24:00	0
2009-01-28	20:25:00	122
2009-01-28	20:26:00	0
2009-01-28	20:27:00	0
2009-01-28	20:28:00	0
2009-01-28	20:29:00	0
2009-01-28	20:30:00	0
2009-01-28	20:31:00	0
2009-01-28	20:32:00	0
2009-01-28	20:33:00	0
2009-01-28	20:34:00	0
2009-01-28	20:35:00	0
2009-01-28	20:36:00	0
2009-01-28	20:37:00	0
2009-01-28	20:38:00	0
2009-01-28	20:39:00	0
2009-01-28	20:40:00	0
2009-01-28	20:41:00	0
2009-01-28	20:42:00	0
2009-01-28	20:43:00	0
2009-01-28	20:44:00	0
2009-01-28	20:45:00	0
2009-01-28	20:46:00	0
2009-01-28	20:47:00	0
2009-01-28	20:48:00	0
2009-01-28	20:49:00	0
2009-01-28	20:50:00	817
2009-01-28	20:51:00	906
2009-01-28	20:52:00	323
2009-01-28	20:53:00	169
2009-01-28	20:54:00	20
2009-01-28	20:55:00	0
2009-01-28	20:56:00	0
2009-01-28	20:57:00	132
2009-01-28	20:58:00	205
2009-01-28	20:59:00	597
2009-01-28	21:00:00	693
2009-01-28	21:01:00	0
2009-01-28	21:02:00	0
2009-01-28	21:03:00	10
2009-01-28	21:04:00	10
2009-01-28	21:05:00	51
2009-01-28	21:06:00	10
2009-01-28	21:07:00	0
2009-01-28	21:08:00	10
2009-01-28	21:09:00	61
2009-01-28	21:10:00	112
2009-01-28	21:11:00	10
2009-01-28	21:12:00	0
2009-01-28	21:13:00	132
2009-01-28	21:14:00	0
2009-01-28	21:15:00	0
2009-01-28	21:16:00	132
2009-01-28	21:17:00	0
2009-01-28	21:18:00	0
2009-01-28	21:19:00	0
2009-01-28	21:20:00	0
2009-01-28	21:21:00	0
2009-01-28	21:22:00	0
2009-01-28	21:23:00	0
2009-01-28	21:24:00	0
2009-01-28	21:25:00	0
2009-01-28	21:26:00	0
2009-01-28	21:27:00	0
2009-01-28	21:28:00	0
2009-01-28	21:29:00	0
2009-01-28	21:30:00	0
2009-01-28	21:31:00	0
2009-01-28	21:32:00	0
2009-01-28	21:33:00	0
2009-01-28	21:34:00	0
2009-01-28	21:35:00	0
2009-01-28	21:36:00	0
2009-01-28	21:37:00	0
2009-01-28	21:38:00	0
2009-01-28	21:39:00	0
2009-01-28	21:40:00	0
2009-01-28	21:41:00	0
2009-01-28	21:42:00	0
2009-01-28	21:43:00	0
2009-01-28	21:44:00	0
2009-01-28	21:45:00	0
2009-01-28	21:46:00	0
2009-01-28	21:47:00	0
2009-01-28	21:48:00	0
2009-01-28	21:49:00	0
2009-01-28	21:50:00	0
2009-01-28	21:51:00	0
2009-01-28	21:52:00	0
2009-01-28	21:53:00	0
2009-01-28	21:54:00	0
2009-01-28	21:55:00	0
2009-01-28	21:56:00	0
2009-01-28	21:57:00	0
2009-01-28	21:58:00	0
2009-01-28	21:59:00	0
2009-01-28	22:00:00	0
2009-01-28	22:01:00	0
2009-01-28	22:02:00	10
2009-01-28	22:03:00	0
2009-01-28	22:04:00	0
2009-01-28	22:05:00	0
2009-01-28	22:06:00	0
2009-01-28	22:07:00	0
2009-01-28	22:08:00	0
2009-01-28	22:09:00	0
2009-01-28	22:10:00	0
2009-01-28	22:11:00	0
2009-01-28	22:12:00	0
2009-01-28	22:13:00	0
2009-01-28	22:14:00	0
2009-01-28	22:15:00	0
2009-01-28	22:16:00	0
2009-01-28	22:17:00	0
2009-01-28	22:18:00	0
2009-01-28	22:19:00	0
2009-01-28	22:20:00	0
2009-01-28	22:21:00	0
2009-01-28	22:22:00	0
2009-01-28	22:23:00	30
2009-01-28	22:24:00	132
2009-01-28	22:25:00	81
2009-01-28	22:26:00	0
2009-01-28	22:27:00	0
2009-01-28	22:28:00	0
2009-01-28	22:29:00	0
2009-01-28	22:30:00	0
2009-01-28	22:31:00	0
2009-01-28	22:32:00	0
2009-01-28	22:33:00	0
2009-01-28	22:34:00	0
2009-01-28	22:35:00	0
2009-01-28	22:36:00	0
2009-01-28	22:37:00	0
2009-01-28	22:38:00	0
2009-01-28	22:39:00	0
2009-01-28	22:40:00	0
2009-01-28	22:41:00	0
2009-01-28	22:42:00	0
2009-01-28	22:43:00	0
2009-01-28	22:44:00	0
2009-01-28	22:45:00	0
2009-01-28	22:46:00	0
2009-01-28	22:47:00	0
2009-01-28	22:48:00	0
2009-01-28	22:49:00	0
2009-01-28	22:50:00	0
2009-01-28	22:51:00	0
2009-01-28	22:52:00	0
2009-01-28	22:53:00	0
2009-01-28	22:54:00	0
2009-01-28	22:55:00	0
2009-01-28	22:56:00	0
2009-01-28	22:57:00	0
2009-01-28	22:58:00	0
2009-01-28	22:59:00	0
2009-01-28	23:00:00	0
2009-01-28	23:01:00	0
2009-01-28	23:02:00	0
2009-01-28	23:03:00	0
2009-01-28	23:04:00	0
2009-01-28	23:05:00	0
2009-01-28	23:06:00	0
2009-01-28	23:07:00	0
2009-01-28	23:08:00	0
2009-01-28	23:09:00	0
2009-01-28	23:10:00	0
2009-01-28	23:11:00	0
2009-01-28	23:12:00	0
2009-01-28	23:13:00	0
2009-01-28	23:14:00	0
2009-01-28	23:15:00	0
2009-01-28	23:16:00	0
2009-01-28	23:17:00	0
2009-01-28	23:18:00	0
2009-01-28	23:19:00	0
2009-01-28	23:20:00	0
2009-01-28	23:21:00	0
2009-01-28	23:22:00	0
2009-01-28	23:23:00	0
2009-01-28	23:24:00	0
2009-01-28	23:25:00	0
2009-01-28	23:26:00	0
2009-01-28	23:27:00	0
2009-01-28	23:28:00	0
2009-01-28	23:29:00	0
2009-01-28	23:30:00	0
2009-01-28	23:31:00	0
2009-01-28	23:32:00	0
2009-01-28	23:33:00	0
2009-01-28	23:34:00	0
2009-01-28	23:35:00	0
2009-01-28	23:36:00	0
2009-01-28	23:37:00	0
2009-01-28	23:38:00	0
2009-01-28	23:39:00	0
2009-01-28	23:40:00	0
2009-01-28	23:41:00	0
2009-01-28	23:42:00	0
2009-01-28	23:43:00	10
2009-01-28	23:44:00	0
2009-01-28	23:45:00	0
2009-01-28	23:46:00	0
2009-01-28	23:47:00	0
2009-01-28	23:48:00	242
2009-01-28	23:49:00	309
2009-01-28	23:50:00	542
2009-01-28	23:51:00	1239
2009-01-28	23:52:00	193
2009-01-28	23:53:00	394
2009-01-28	23:54:00	579
2009-01-28	23:55:00	693
2009-01-28	23:56:00	1611
2009-01-28	23:57:00	906
2009-01-28	23:58:00	81
2009-01-28	23:59:00	0
2009-01-29	00:00:00	0
2009-01-29	00:01:00	91
2009-01-29	00:02:00	0
2009-01-29	00:03:00	0
2009-01-29	00:04:00	41
2009-01-29	00:05:00	0
2009-01-29	00:06:00	0
2009-01-29	00:07:00	0
2009-01-29	00:08:00	0
2009-01-29	00:09:00	51
2009-01-29	00:10:00	0
2009-01-29	00:11:00	0
2009-01-29	00:12:00	0
2009-01-29	00:13:00	0
2009-01-29	00:14:00	0
2009-01-29	00:15:00	0
2009-01-29	00:16:00	0
2009-01-29	00:17:00	0
2009-01-29	00:18:00	0
2009-01-29	00:19:00	0
2009-01-29	00:20:00	0
2009-01-29	00:21:00	0
2009-01-29	00:22:00	0
2009-01-29	00:23:00	0
2009-01-29	00:24:00	0
2009-01-29	00:25:00	0
2009-01-29	00:26:00	0
2009-01-29	00:27:00	0
2009-01-29	00:28:00	0
2009-01-29	00:29:00	0
2009-01-29	00:30:00	0
2009-01-29	00:31:00	0
2009-01-29	00:32:00	0
2009-01-29	00:33:00	0
2009-01-29	00:34:00	0
2009-01-29	00:35:00	0
2009-01-29	00:36:00	0
2009-01-29	00:37:00	0
2009-01-29	00:38:00	0
2009-01-29	00:39:00	0
2009-01-29	00:40:00	61
2009-01-29	00:41:00	0
2009-01-29	00:42:00	0
2009-01-29	00:43:00	0
2009-01-29	00:44:00	10
2009-01-29	00:45:00	0
2009-01-29	00:46:00	0
2009-01-29	00:47:00	230
2009-01-29	00:48:00	0
2009-01-29	00:49:00	0
2009-01-29	00:50:00	0
2009-01-29	00:51:00	0
2009-01-29	00:52:00	0
2009-01-29	00:53:00	0
2009-01-29	00:54:00	0
2009-01-29	00:55:00	0
2009-01-29	00:56:00	0
2009-01-29	00:57:00	0
2009-01-29	00:58:00	0
2009-01-29	00:59:00	0
2009-01-29	01:00:00	0
2009-01-29	01:01:00	0
2009-01-29	01:02:00	0
2009-01-29	01:03:00	0
2009-01-29	01:04:00	0
2009-01-29	01:05:00	0
2009-01-29	01:06:00	0
2009-01-29	01:07:00	0
2009-01-29	01:08:00	0
2009-01-29	01:09:00	30
2009-01-29	01:10:00	0
2009-01-29	01:11:00	0
2009-01-29	01:12:00	0
2009-01-29	01:13:00	0
2009-01-29	01:14:00	0
2009-01-29	01:15:00	41
2009-01-29	01:16:00	20
2009-01-29	01:17:00	30
2009-01-29	01:18:00	10
2009-01-29	01:19:00	0
2009-01-29	01:20:00	0
2009-01-29	01:21:00	0
2009-01-29	01:22:00	10
2009-01-29	01:23:00	51
2009-01-29	01:24:00	0
2009-01-29	01:25:00	0
2009-01-29	01:26:00	0
2009-01-29	01:27:00	0
2009-01-29	01:28:00	0
2009-01-29	01:29:00	0
2009-01-29	01:30:00	0
2009-01-29	01:31:00	0
2009-01-29	01:32:00	0
2009-01-29	01:33:00	0
2009-01-29	01:34:00	0
2009-01-29	01:35:00	0
2009-01-29	01:36:00	0
2009-01-29	01:37:00	0
2009-01-29	01:38:00	0
2009-01-29	01:39:00	0
2009-01-29	01:40:00	0
2009-01-29	01:41:00	0
2009-01-29	01:42:00	0
2009-01-29	01:43:00	0
2009-01-29	01:44:00	0
2009-01-29	01:45:00	0
2009-01-29	01:46:00	0
2009-01-29	01:47:00	0
2009-01-29	01:48:00	0
2009-01-29	01:49:00	30
2009-01-29	01:50:00	0
2009-01-29	01:51:00	20
2009-01-29	01:52:00	205
2009-01-29	01:53:00	861
2009-01-29	01:54:00	817
2009-01-29	01:55:00	20
2009-01-29	01:56:00	51
2009-01-29	01:57:00	10
2009-01-29	01:58:00	61
2009-01-29	01:59:00	0
2009-01-29	02:00:00	0
2009-01-29	02:01:00	0
2009-01-29	02:02:00	0
2009-01-29	02:03:00	0
2009-01-29	02:04:00	0
2009-01-29	02:05:00	0
2009-01-29	02:06:00	0
2009-01-29	02:07:00	20
2009-01-29	02:08:00	0
2009-01-29	02:09:00	0
2009-01-29	02:10:00	0
2009-01-29	02:11:00	0
2009-01-29	02:12:00	0
2009-01-29	02:13:00	0
2009-01-29	02:14:00	0
2009-01-29	02:15:00	0
2009-01-29	02:16:00	0
2009-01-29	02:17:00	0
2009-01-29	02:18:00	0
2009-01-29	02:19:00	0
2009-01-29	02:20:00	0
2009-01-29	02:21:00	0
2009-01-29	02:22:00	0
2009-01-29	02:23:00	0
2009-01-29	02:24:00	0
2009-01-29	02:25:00	0
2009-01-29	02:26:00	0
2009-01-29	02:27:00	0
2009-01-29	02:28:00	0
2009-01-29	02:29:00	10
2009-01-29	02:30:00	0
2009-01-29	02:31:00	0
2009-01-29	02:32:00	0
2009-01-29	02:33:00	41
2009-01-29	02:34:00	41
2009-01-29	02:35:00	0
2009-01-29	02:36:00	0
2009-01-29	02:37:00	0
2009-01-29	02:38:00	0
2009-01-29	02:39:00	0
2009-01-29	02:40:00	0
2009-01-29	02:41:00	0
2009-01-29	02:42:00	0
2009-01-29	02:43:00	0
2009-01-29	02:44:00	0
2009-01-29	02:45:00	0
2009-01-29	02:46:00	0
2009-01-29	02:47:00	0
2009-01-29	02:48:00	0
2009-01-29	02:49:00	0
2009-01-29	02:50:00	0
2009-01-29	02:51:00	0
2009-01-29	02:52:00	0
2009-01-29	02:53:00	0
2009-01-29	02:54:00	0
2009-01-29	02:55:00	0
2009-01-29	02:56:00	0
2009-01-29	02:57:00	0
2009-01-29	02:58:00	10
2009-01-29	02:59:00	71
2009-01-29	03:00:00	0
2009-01-29	03:01:00	20
2009-01-29	03:02:00	0
2009-01-29	03:03:00	0
2009-01-29	03:04:00	0
2009-01-29	03:05:00	0
2009-01-29	03:06:00	0
2009-01-29	03:07:00	0
2009-01-29	03:08:00	10
2009-01-29	03:09:00	0
2009-01-29	03:10:00	0
2009-01-29	03:11:00	0
2009-01-29	03:12:00	0
2009-01-29	03:13:00	0
2009-01-29	03:14:00	0
2009-01-29	03:15:00	0
2009-01-29	03:16:00	0
2009-01-29	03:17:00	0
2009-01-29	03:18:00	10
2009-01-29	03:19:00	0
2009-01-29	03:20:00	0
2009-01-29	03:21:00	0
2009-01-29	03:22:00	0
2009-01-29	03:23:00	0
2009-01-29	03:24:00	0
2009-01-29	03:25:00	0
2009-01-29	03:26:00	0
2009-01-29	03:27:00	20
2009-01-29	03:28:00	0
2009-01-29	03:29:00	0
2009-01-29	03:30:00	0
2009-01-29	03:31:00	0
2009-01-29	03:32:00	0
2009-01-29	03:33:00	10
2009-01-29	03:34:00	0
2009-01-29	03:35:00	0
2009-01-29	03:36:00	0
2009-01-29	03:37:00	0
2009-01-29	03:38:00	0
2009-01-29	03:39:00	10
2009-01-29	03:40:00	0
2009-01-29	03:41:00	91
2009-01-29	03:42:00	0
2009-01-29	03:43:00	0
2009-01-29	03:44:00	0
2009-01-29	03:45:00	0
2009-01-29	03:46:00	0
2009-01-29	03:47:00	0
2009-01-29	03:48:00	0
2009-01-29	03:49:00	0
2009-01-29	03:50:00	0
2009-01-29	03:51:00	0
2009-01-29	03:52:00	0
2009-01-29	03:53:00	0
2009-01-29	03:54:00	10
2009-01-29	03:55:00	579
2009-01-29	03:56:00	0
2009-01-29	03:57:00	0
2009-01-29	03:58:00	0
2009-01-29	03:59:00	169
2009-01-29	04:00:00	0
2009-01-29	04:01:00	0
2009-01-29	04:02:00	0
2009-01-29	04:03:00	0
2009-01-29	04:04:00	0
2009-01-29	04:05:00	0
2009-01-29	04:06:00	0
2009-01-29	04:07:00	0
2009-01-29	04:08:00	0
2009-01-29	04:09:00	0
2009-01-29	04:10:00	0
2009-01-29	04:11:00	0
2009-01-29	04:12:00	0
2009-01-29	04:13:00	0
2009-01-29	04:14:00	51
2009-01-29	04:15:00	0
2009-01-29	04:16:00	0
2009-01-29	04:17:00	0
2009-01-29	04:18:00	0
2009-01-29	04:19:00	0
2009-01-29	04:20:00	0
2009-01-29	04:21:00	0
2009-01-29	04:22:00	122
2009-01-29	04:23:00	0
2009-01-29	04:24:00	0
2009-01-29	04:25:00	0
2009-01-29	04:26:00	0
2009-01-29	04:27:00	0
2009-01-29	04:28:00	0
2009-01-29	04:29:00	0
2009-01-29	04:30:00	0
2009-01-29	04:31:00	0
2009-01-29	04:32:00	0
2009-01-29	04:33:00	0
2009-01-29	04:34:00	0
2009-01-29	04:35:00	102
2009-01-29	04:36:00	0
2009-01-29	04:37:00	0
2009-01-29	04:38:00	0
2009-01-29	04:39:00	0
2009-01-29	04:40:00	181
2009-01-29	04:41:00	0
2009-01-29	04:42:00	0
2009-01-29	04:43:00	0
2009-01-29	04:44:00	0
2009-01-29	04:45:00	0
2009-01-29	04:46:00	0
2009-01-29	04:47:00	0
2009-01-29	04:48:00	0
2009-01-29	04:49:00	0
2009-01-29	04:50:00	0
2009-01-29	04:51:00	0
2009-01-29	04:52:00	0
2009-01-29	04:53:00	0
2009-01-29	04:54:00	0
2009-01-29	04:55:00	0
2009-01-29	04:56:00	0
2009-01-29	04:57:00	0
2009-01-29	04:58:00	0
2009-01-29	04:59:00	0
2009-01-29	05:00:00	0
2009-01-29	05:01:00	0
2009-01-29	05:02:00	0
2009-01-29	05:03:00	0
2009-01-29	05:04:00	0
2009-01-29	05:05:00	0
2009-01-29	05:06:00	0
2009-01-29	05:07:00	0
2009-01-29	05:08:00	0
2009-01-29	05:09:00	0
2009-01-29	05:10:00	0
2009-01-29	05:11:00	0
2009-01-29	05:12:00	0
2009-01-29	05:13:00	0
2009-01-29	05:14:00	0
2009-01-29	05:15:00	0
2009-01-29	05:16:00	0
2009-01-29	05:17:00	0
2009-01-29	05:18:00	0
2009-01-29	05:19:00	0
2009-01-29	05:20:00	0
2009-01-29	05:21:00	0
2009-01-29	05:22:00	0
2009-01-29	05:23:00	0
2009-01-29	05:24:00	0
2009-01-29	05:25:00	10
2009-01-29	05:26:00	0
2009-01-29	05:27:00	0
2009-01-29	05:28:00	0
2009-01-29	05:29:00	0
2009-01-29	05:30:00	0
2009-01-29	05:31:00	20
2009-01-29	05:32:00	0
2009-01-29	05:33:00	0
2009-01-29	05:34:00	0
2009-01-29	05:35:00	0
2009-01-29	05:36:00	0
2009-01-29	05:37:00	0
2009-01-29	05:38:00	0
2009-01-29	05:39:00	0
2009-01-29	05:40:00	0
2009-01-29	05:41:00	0
2009-01-29	05:42:00	0
2009-01-29	05:43:00	193
2009-01-29	05:44:00	579
2009-01-29	05:45:00	794
2009-01-29	05:46:00	71
2009-01-29	05:47:00	144
2009-01-29	05:48:00	30
2009-01-29	05:49:00	41
2009-01-29	05:50:00	41
2009-01-29	05:51:00	181
2009-01-29	05:52:00	254
2009-01-29	05:53:00	394
2009-01-29	05:54:00	169
2009-01-29	05:55:00	156
2009-01-29	05:56:00	0
2009-01-29	05:57:00	10
2009-01-29	05:58:00	0
2009-01-29	05:59:00	0
2009-01-29	06:00:00	0
2009-01-29	06:01:00	91
2009-01-29	06:02:00	0
2009-01-29	06:03:00	0
2009-01-29	06:04:00	102
2009-01-29	06:05:00	112
2009-01-29	06:06:00	205
2009-01-29	06:07:00	0
2009-01-29	06:08:00	0
2009-01-29	06:09:00	0
2009-01-29	06:10:00	0
2009-01-29	06:11:00	0
2009-01-29	06:12:00	0
2009-01-29	06:13:00	0
2009-01-29	06:14:00	0
2009-01-29	06:15:00	0
2009-01-29	06:16:00	0
2009-01-29	06:17:00	0
2009-01-29	06:18:00	0
2009-01-29	06:19:00	0
2009-01-29	06:20:00	0
2009-01-29	06:21:00	0
2009-01-29	06:22:00	0
2009-01-29	06:23:00	0
2009-01-29	06:24:00	0
2009-01-29	06:25:00	0
2009-01-29	06:26:00	0
2009-01-29	06:27:00	0
2009-01-29	06:28:00	0
2009-01-29	06:29:00	112
2009-01-29	06:30:00	10
2009-01-29	06:31:00	443
2009-01-29	06:32:00	977
2009-01-29	06:33:00	156
2009-01-29	06:34:00	181
2009-01-29	06:35:00	0
2009-01-29	06:36:00	0
2009-01-29	06:37:00	0
2009-01-29	06:38:00	0
2009-01-29	06:39:00	0
2009-01-29	06:40:00	0
2009-01-29	06:41:00	0
2009-01-29	06:42:00	0
2009-01-29	06:43:00	0
2009-01-29	06:44:00	0
2009-01-29	06:45:00	0
2009-01-29	06:46:00	51
2009-01-29	06:47:00	10
2009-01-29	06:48:00	81
2009-01-29	06:49:00	81
2009-01-29	06:50:00	91
2009-01-29	06:51:00	0
2009-01-29	06:52:00	0
2009-01-29	06:53:00	0
2009-01-29	06:54:00	0
2009-01-29	06:55:00	0
2009-01-29	06:56:00	51
2009-01-29	06:57:00	61
2009-01-29	06:58:00	217
2009-01-29	06:59:00	91
2009-01-29	07:00:00	280
2009-01-29	07:01:00	366
2009-01-29	07:02:00	205
2009-01-29	07:03:00	295
2009-01-29	07:04:00	508
2009-01-29	07:05:00	475
2009-01-29	07:06:00	205
2009-01-29	07:07:00	30
2009-01-29	07:08:00	295
2009-01-29	07:09:00	81
2009-01-29	07:10:00	839
2009-01-29	07:11:00	1156
2009-01-29	07:12:00	2651
2009-01-29	07:13:00	542
2009-01-29	07:14:00	20
2009-01-29	07:15:00	20
2009-01-29	07:16:00	1940
2009-01-29	07:17:00	2229
2009-01-29	07:18:00	1239
2009-01-29	07:19:00	634
2009-01-29	07:20:00	475
2009-01-29	07:21:00	597
2009-01-29	07:22:00	524
2009-01-29	07:23:00	427
2009-01-29	07:24:00	144
2009-01-29	07:25:00	61
2009-01-29	07:26:00	906
2009-01-29	07:27:00	242
2009-01-29	07:28:00	112
2009-01-29	07:29:00	280
2009-01-29	07:30:00	112
2009-01-29	07:31:00	309
2009-01-29	07:32:00	616
2009-01-29	07:33:00	542
2009-01-29	07:34:00	205
2009-01-29	07:35:00	61
2009-01-29	07:36:00	230
2009-01-29	07:37:00	132
2009-01-29	07:38:00	30
2009-01-29	07:39:00	51
2009-01-29	07:40:00	51
2009-01-29	07:41:00	20
2009-01-29	07:42:00	0
2009-01-29	07:43:00	242
2009-01-29	07:44:00	30
2009-01-29	07:45:00	41
2009-01-29	07:46:00	30
2009-01-29	07:47:00	51
2009-01-29	07:48:00	41
2009-01-29	07:49:00	30
2009-01-29	07:50:00	0
2009-01-29	07:51:00	280
2009-01-29	07:52:00	884
2009-01-29	07:53:00	693
2009-01-29	07:54:00	169
2009-01-29	07:55:00	61
2009-01-29	07:56:00	81
2009-01-29	07:57:00	41
2009-01-29	07:58:00	30
2009-01-29	07:59:00	102
2009-01-29	08:00:00	169
2009-01-29	08:01:00	51
2009-01-29	08:02:00	71
2009-01-29	08:03:00	41
2009-01-29	08:04:00	81
2009-01-29	08:05:00	10
2009-01-29	08:06:00	156
2009-01-29	08:07:00	102
2009-01-29	08:08:00	61
2009-01-29	08:09:00	41
2009-01-29	08:10:00	71
2009-01-29	08:11:00	41
2009-01-29	08:12:00	91
2009-01-29	08:13:00	51
2009-01-29	08:14:00	20
2009-01-29	08:15:00	30
2009-01-29	08:16:00	51
2009-01-29	08:17:00	41
2009-01-29	08:18:00	41
2009-01-29	08:19:00	30
2009-01-29	08:20:00	10
2009-01-29	08:21:00	41
2009-01-29	08:22:00	20
2009-01-29	08:23:00	30
2009-01-29	08:24:00	20
2009-01-29	08:25:00	10
2009-01-29	08:26:00	10
2009-01-29	08:27:00	0
2009-01-29	08:28:00	351
2009-01-29	08:29:00	323
2009-01-29	08:30:00	1325
2009-01-29	08:31:00	217
2009-01-29	08:32:00	0
2009-01-29	08:33:00	266
2009-01-29	08:34:00	41
2009-01-29	08:35:00	102
2009-01-29	08:36:00	144
2009-01-29	08:37:00	91
2009-01-29	08:38:00	91
2009-01-29	08:39:00	181
2009-01-29	08:40:00	122
2009-01-29	08:41:00	112
2009-01-29	08:42:00	41
2009-01-29	08:43:00	0
2009-01-29	08:44:00	10
2009-01-29	08:45:00	122
2009-01-29	08:46:00	144
2009-01-29	08:47:00	132
2009-01-29	08:48:00	112
2009-01-29	08:49:00	193
2009-01-29	08:50:00	410
2009-01-29	08:51:00	193
2009-01-29	08:52:00	41
2009-01-29	08:53:00	51
2009-01-29	08:54:00	112
2009-01-29	08:55:00	205
2009-01-29	08:56:00	122
2009-01-29	08:57:00	81
2009-01-29	08:58:00	81
2009-01-29	08:59:00	122
2009-01-29	09:00:00	132
2009-01-29	09:01:00	81
2009-01-29	09:02:00	122
2009-01-29	09:03:00	132
2009-01-29	09:04:00	41
2009-01-29	09:05:00	10
2009-01-29	09:06:00	102
2009-01-29	09:07:00	61
2009-01-29	09:08:00	20
[truncated: 19,611 more rows]

[truncated: 3 more sheets: 2.11.09, 2.25.09, 3.11.09]
