# Supplementary material for: Initial evaluation of nighttime restlessness in a naturally occurring canine model of osteoarthritis pain
Source: PeerJ. 2015 Feb 17;3:e772. doi: 10.7717/peerj.772 (PMC4340376; doi:10.7717/peerj.772)
Supplement: Supplemental Information 20 [file peerj-03-772-s020.xlsx]

## Sheet: Office Visits
Visit Date	Visit Number
2008-12-03 06:00:00	1
2008-12-17 06:00:00	2
2009-01-05 06:00:00	3
2009-01-19 06:00:00	4
2009-02-13 06:00:00	5

## Sheet: 19_Data
Segment	DateTime	Activity	Hour	Quadrant	Study Day	Weekday
1	2008-12-10 06:01:00	0	6	2	7	4
1	2008-12-10 06:02:00	0	6	2	7	4
1	2008-12-10 06:03:00	0	6	2	7	4
1	2008-12-10 06:04:00	0	6	2	7	4
1	2008-12-10 06:05:00	0	6	2	7	4
1	2008-12-10 06:06:00	0	6	2	7	4
1	2008-12-10 06:07:00	0	6	2	7	4
1	2008-12-10 06:08:00	0	6	2	7	4
1	2008-12-10 06:09:00	0	6	2	7	4
1	2008-12-10 06:10:00	0	6	2	7	4
1	2008-12-10 06:11:00	0	6	2	7	4
1	2008-12-10 06:12:00	52	6	2	7	4
1	2008-12-10 06:13:00	0	6	2	7	4
1	2008-12-10 06:14:00	0	6	2	7	4
1	2008-12-10 06:15:00	0	6	2	7	4
1	2008-12-10 06:16:00	21	6	2	7	4
1	2008-12-10 06:17:00	0	6	2	7	4
1	2008-12-10 06:18:00	0	6	2	7	4
1	2008-12-10 06:19:00	5	6	2	7	4
1	2008-12-10 06:20:00	0	6	2	7	4
1	2008-12-10 06:21:00	0	6	2	7	4
1	2008-12-10 06:22:00	0	6	2	7	4
1	2008-12-10 06:23:00	0	6	2	7	4
1	2008-12-10 06:24:00	0	6	2	7	4
1	2008-12-10 06:25:00	0	6	2	7	4
1	2008-12-10 06:26:00	0	6	2	7	4
1	2008-12-10 06:27:00	0	6	2	7	4
1	2008-12-10 06:28:00	93	6	2	7	4
1	2008-12-10 06:29:00	10	6	2	7	4
1	2008-12-10 06:30:00	99	6	2	7	4
1	2008-12-10 06:31:00	0	6	2	7	4
1	2008-12-10 06:32:00	10	6	2	7	4
1	2008-12-10 06:33:00	0	6	2	7	4
1	2008-12-10 06:34:00	0	6	2	7	4
1	2008-12-10 06:35:00	0	6	2	7	4
1	2008-12-10 06:36:00	0	6	2	7	4
1	2008-12-10 06:37:00	0	6	2	7	4
1	2008-12-10 06:38:00	0	6	2	7	4
1	2008-12-10 06:39:00	0	6	2	7	4
1	2008-12-10 06:40:00	99	6	2	7	4
1	2008-12-10 06:41:00	0	6	2	7	4
1	2008-12-10 06:42:00	0	6	2	7	4
1	2008-12-10 06:43:00	0	6	2	7	4
1	2008-12-10 06:44:00	758	6	2	7	4
1	2008-12-10 06:45:00	1034	6	2	7	4
1	2008-12-10 06:46:00	260	6	2	7	4
1	2008-12-10 06:47:00	21	6	2	7	4
1	2008-12-10 06:48:00	16	6	2	7	4
1	2008-12-10 06:49:00	344	6	2	7	4
1	2008-12-10 06:50:00	99	6	2	7	4
1	2008-12-10 06:51:00	1464	6	2	7	4
1	2008-12-10 06:52:00	1384	6	2	7	4
1	2008-12-10 06:53:00	180	6	2	7	4
1	2008-12-10 06:54:00	306	6	2	7	4
1	2008-12-10 06:55:00	355	6	2	7	4
1	2008-12-10 06:56:00	396	6	2	7	4
1	2008-12-10 06:57:00	344	6	2	7	4
1	2008-12-10 06:58:00	552	6	2	7	4
1	2008-12-10 06:59:00	552	6	2	7	4
1	2008-12-10 07:00:00	325	6	2	7	4
1	2008-12-10 07:01:00	219	7	2	7	4
1	2008-12-10 07:02:00	252	7	2	7	4
1	2008-12-10 07:03:00	453	7	2	7	4
1	2008-12-10 07:04:00	16	7	2	7	4
1	2008-12-10 07:05:00	0	7	2	7	4
1	2008-12-10 07:06:00	0	7	2	7	4
1	2008-12-10 07:07:00	10	7	2	7	4
1	2008-12-10 07:08:00	0	7	2	7	4
1	2008-12-10 07:09:00	42	7	2	7	4
1	2008-12-10 07:10:00	0	7	2	7	4
1	2008-12-10 07:11:00	0	7	2	7	4
1	2008-12-10 07:12:00	0	7	2	7	4
1	2008-12-10 07:13:00	0	7	2	7	4
1	2008-12-10 07:14:00	0	7	2	7	4
1	2008-12-10 07:15:00	0	7	2	7	4
1	2008-12-10 07:16:00	0	7	2	7	4
1	2008-12-10 07:17:00	0	7	2	7	4
1	2008-12-10 07:18:00	26	7	2	7	4
1	2008-12-10 07:19:00	10	7	2	7	4
1	2008-12-10 07:20:00	0	7	2	7	4
1	2008-12-10 07:21:00	0	7	2	7	4
1	2008-12-10 07:22:00	0	7	2	7	4
1	2008-12-10 07:23:00	0	7	2	7	4
1	2008-12-10 07:24:00	16	7	2	7	4
1	2008-12-10 07:25:00	5	7	2	7	4
1	2008-12-10 07:26:00	0	7	2	7	4
1	2008-12-10 07:27:00	538	7	2	7	4
1	2008-12-10 07:28:00	47	7	2	7	4
1	2008-12-10 07:29:00	278	7	2	7	4
1	2008-12-10 07:30:00	80	7	2	7	4
1	2008-12-10 07:31:00	31	7	2	7	4
1	2008-12-10 07:32:00	21	7	2	7	4
1	2008-12-10 07:33:00	105	7	2	7	4
1	2008-12-10 07:34:00	10	7	2	7	4
1	2008-12-10 07:35:00	227	7	2	7	4
1	2008-12-10 07:36:00	5	7	2	7	4
1	2008-12-10 07:37:00	16	7	2	7	4
1	2008-12-10 07:38:00	52	7	2	7	4
1	2008-12-10 07:39:00	649	7	2	7	4
1	2008-12-10 07:40:00	36	7	2	7	4
1	2008-12-10 07:41:00	187	7	2	7	4
1	2008-12-10 07:42:00	16	7	2	7	4
1	2008-12-10 07:43:00	252	7	2	7	4
1	2008-12-10 07:44:00	260	7	2	7	4
1	2008-12-10 07:45:00	187	7	2	7	4
1	2008-12-10 07:46:00	93	7	2	7	4
1	2008-12-10 07:47:00	144	7	2	7	4
1	2008-12-10 07:48:00	180	7	2	7	4
1	2008-12-10 07:49:00	93	7	2	7	4
1	2008-12-10 07:50:00	325	7	2	7	4
1	2008-12-10 07:51:00	47	7	2	7	4
1	2008-12-10 07:52:00	0	7	2	7	4
1	2008-12-10 07:53:00	21	7	2	7	4
1	2008-12-10 07:54:00	0	7	2	7	4
1	2008-12-10 07:55:00	0	7	2	7	4
1	2008-12-10 07:56:00	124	7	2	7	4
1	2008-12-10 07:57:00	47	7	2	7	4
1	2008-12-10 07:58:00	0	7	2	7	4
1	2008-12-10 07:59:00	0	7	2	7	4
1	2008-12-10 08:00:00	0	7	2	7	4
1	2008-12-10 08:01:00	0	8	2	7	4
1	2008-12-10 08:02:00	5	8	2	7	4
1	2008-12-10 08:03:00	0	8	2	7	4
1	2008-12-10 08:04:00	80	8	2	7	4
1	2008-12-10 08:05:00	130	8	2	7	4
1	2008-12-10 08:06:00	0	8	2	7	4
1	2008-12-10 08:07:00	0	8	2	7	4
1	2008-12-10 08:08:00	0	8	2	7	4
1	2008-12-10 08:09:00	227	8	2	7	4
1	2008-12-10 08:10:00	118	8	2	7	4
1	2008-12-10 08:11:00	99	8	2	7	4
1	2008-12-10 08:12:00	80	8	2	7	4
1	2008-12-10 08:13:00	93	8	2	7	4
1	2008-12-10 08:14:00	173	8	2	7	4
1	2008-12-10 08:15:00	16	8	2	7	4
1	2008-12-10 08:16:00	93	8	2	7	4
1	2008-12-10 08:17:00	21	8	2	7	4
1	2008-12-10 08:18:00	68	8	2	7	4
1	2008-12-10 08:19:00	130	8	2	7	4
1	2008-12-10 08:20:00	0	8	2	7	4
1	2008-12-10 08:21:00	0	8	2	7	4
1	2008-12-10 08:22:00	0	8	2	7	4
1	2008-12-10 08:23:00	0	8	2	7	4
1	2008-12-10 08:24:00	0	8	2	7	4
1	2008-12-10 08:25:00	0	8	2	7	4
1	2008-12-10 08:26:00	0	8	2	7	4
1	2008-12-10 08:27:00	0	8	2	7	4
1	2008-12-10 08:28:00	180	8	2	7	4
1	2008-12-10 08:29:00	144	8	2	7	4
1	2008-12-10 08:30:00	0	8	2	7	4
1	2008-12-10 08:31:00	0	8	2	7	4
1	2008-12-10 08:32:00	0	8	2	7	4
1	2008-12-10 08:33:00	0	8	2	7	4
1	2008-12-10 08:34:00	5	8	2	7	4
1	2008-12-10 08:35:00	0	8	2	7	4
1	2008-12-10 08:36:00	0	8	2	7	4
1	2008-12-10 08:37:00	0	8	2	7	4
1	2008-12-10 08:38:00	5	8	2	7	4
1	2008-12-10 08:39:00	0	8	2	7	4
1	2008-12-10 08:40:00	0	8	2	7	4
1	2008-12-10 08:41:00	74	8	2	7	4
1	2008-12-10 08:42:00	21	8	2	7	4
1	2008-12-10 08:43:00	0	8	2	7	4
1	2008-12-10 08:44:00	5	8	2	7	4
1	2008-12-10 08:45:00	1098	8	2	7	4
1	2008-12-10 08:46:00	1034	8	2	7	4
1	2008-12-10 08:47:00	325	8	2	7	4
1	2008-12-10 08:48:00	136	8	2	7	4
1	2008-12-10 08:49:00	111	8	2	7	4
1	2008-12-10 08:50:00	235	8	2	7	4
1	2008-12-10 08:51:00	0	8	2	7	4
1	2008-12-10 08:52:00	0	8	2	7	4
1	2008-12-10 08:53:00	0	8	2	7	4
1	2008-12-10 08:54:00	0	8	2	7	4
1	2008-12-10 08:55:00	57	8	2	7	4
1	2008-12-10 08:56:00	158	8	2	7	4
1	2008-12-10 08:57:00	0	8	2	7	4
1	2008-12-10 08:58:00	0	8	2	7	4
1	2008-12-10 08:59:00	0	8	2	7	4
1	2008-12-10 09:00:00	165	8	2	7	4
1	2008-12-10 09:01:00	210	9	2	7	4
1	2008-12-10 09:02:00	47	9	2	7	4
1	2008-12-10 09:03:00	252	9	2	7	4
1	2008-12-10 09:04:00	0	9	2	7	4
1	2008-12-10 09:05:00	0	9	2	7	4
1	2008-12-10 09:06:00	0	9	2	7	4
1	2008-12-10 09:07:00	0	9	2	7	4
1	2008-12-10 09:08:00	0	9	2	7	4
1	2008-12-10 09:09:00	0	9	2	7	4
1	2008-12-10 09:10:00	0	9	2	7	4
1	2008-12-10 09:11:00	0	9	2	7	4
1	2008-12-10 09:12:00	0	9	2	7	4
1	2008-12-10 09:13:00	36	9	2	7	4
1	2008-12-10 09:14:00	52	9	2	7	4
1	2008-12-10 09:15:00	52	9	2	7	4
1	2008-12-10 09:16:00	195	9	2	7	4
1	2008-12-10 09:17:00	0	9	2	7	4
1	2008-12-10 09:18:00	0	9	2	7	4
1	2008-12-10 09:19:00	0	9	2	7	4
1	2008-12-10 09:20:00	0	9	2	7	4
1	2008-12-10 09:21:00	0	9	2	7	4
1	2008-12-10 09:22:00	0	9	2	7	4
1	2008-12-10 09:23:00	0	9	2	7	4
1	2008-12-10 09:24:00	0	9	2	7	4
1	2008-12-10 09:25:00	36	9	2	7	4
1	2008-12-10 09:26:00	0	9	2	7	4
1	2008-12-10 09:27:00	0	9	2	7	4
1	2008-12-10 09:28:00	0	9	2	7	4
1	2008-12-10 09:29:00	0	9	2	7	4
1	2008-12-10 09:30:00	0	9	2	7	4
1	2008-12-10 09:31:00	476	9	2	7	4
1	2008-12-10 09:32:00	0	9	2	7	4
1	2008-12-10 09:33:00	0	9	2	7	4
1	2008-12-10 09:34:00	0	9	2	7	4
1	2008-12-10 09:35:00	0	9	2	7	4
1	2008-12-10 09:36:00	0	9	2	7	4
1	2008-12-10 09:37:00	0	9	2	7	4
1	2008-12-10 09:38:00	0	9	2	7	4
1	2008-12-10 09:39:00	0	9	2	7	4
1	2008-12-10 09:40:00	0	9	2	7	4
1	2008-12-10 09:41:00	0	9	2	7	4
1	2008-12-10 09:42:00	0	9	2	7	4
1	2008-12-10 09:43:00	0	9	2	7	4
1	2008-12-10 09:44:00	0	9	2	7	4
1	2008-12-10 09:45:00	0	9	2	7	4
1	2008-12-10 09:46:00	0	9	2	7	4
1	2008-12-10 09:47:00	0	9	2	7	4
1	2008-12-10 09:48:00	0	9	2	7	4
1	2008-12-10 09:49:00	0	9	2	7	4
1	2008-12-10 09:50:00	0	9	2	7	4
1	2008-12-10 09:51:00	0	9	2	7	4
1	2008-12-10 09:52:00	0	9	2	7	4
1	2008-12-10 09:53:00	0	9	2	7	4
1	2008-12-10 09:54:00	0	9	2	7	4
1	2008-12-10 09:55:00	0	9	2	7	4
1	2008-12-10 09:56:00	0	9	2	7	4
1	2008-12-10 09:57:00	0	9	2	7	4
1	2008-12-10 09:58:00	0	9	2	7	4
1	2008-12-10 09:59:00	0	9	2	7	4
1	2008-12-10 10:00:00	0	9	2	7	4
1	2008-12-10 10:01:00	0	10	2	7	4
1	2008-12-10 10:02:00	0	10	2	7	4
1	2008-12-10 10:03:00	0	10	2	7	4
1	2008-12-10 10:04:00	0	10	2	7	4
1	2008-12-10 10:05:00	0	10	2	7	4
1	2008-12-10 10:06:00	0	10	2	7	4
1	2008-12-10 10:07:00	0	10	2	7	4
1	2008-12-10 10:08:00	355	10	2	7	4
1	2008-12-10 10:09:00	1055	10	2	7	4
1	2008-12-10 10:10:00	592	10	2	7	4
1	2008-12-10 10:11:00	180	10	2	7	4
1	2008-12-10 10:12:00	0	10	2	7	4
1	2008-12-10 10:13:00	453	10	2	7	4
1	2008-12-10 10:14:00	430	10	2	7	4
1	2008-12-10 10:15:00	1519	10	2	7	4
1	2008-12-10 10:16:00	878	10	2	7	4
1	2008-12-10 10:17:00	105	10	2	7	4
1	2008-12-10 10:18:00	26	10	2	7	4
1	2008-12-10 10:19:00	0	10	2	7	4
1	2008-12-10 10:20:00	0	10	2	7	4
1	2008-12-10 10:21:00	0	10	2	7	4
1	2008-12-10 10:22:00	0	10	2	7	4
1	2008-12-10 10:23:00	0	10	2	7	4
1	2008-12-10 10:24:00	0	10	2	7	4
1	2008-12-10 10:25:00	0	10	2	7	4
1	2008-12-10 10:26:00	0	10	2	7	4
1	2008-12-10 10:27:00	0	10	2	7	4
1	2008-12-10 10:28:00	0	10	2	7	4
1	2008-12-10 10:29:00	0	10	2	7	4
1	2008-12-10 10:30:00	0	10	2	7	4
1	2008-12-10 10:31:00	0	10	2	7	4
1	2008-12-10 10:32:00	0	10	2	7	4
1	2008-12-10 10:33:00	0	10	2	7	4
1	2008-12-10 10:34:00	68	10	2	7	4
1	2008-12-10 10:35:00	418	10	2	7	4
1	2008-12-10 10:36:00	151	10	2	7	4
1	2008-12-10 10:37:00	0	10	2	7	4
1	2008-12-10 10:38:00	0	10	2	7	4
1	2008-12-10 10:39:00	0	10	2	7	4
1	2008-12-10 10:40:00	5	10	2	7	4
1	2008-12-10 10:41:00	0	10	2	7	4
1	2008-12-10 10:42:00	0	10	2	7	4
1	2008-12-10 10:43:00	0	10	2	7	4
1	2008-12-10 10:44:00	0	10	2	7	4
1	2008-12-10 10:45:00	0	10	2	7	4
1	2008-12-10 10:46:00	0	10	2	7	4
1	2008-12-10 10:47:00	0	10	2	7	4
1	2008-12-10 10:48:00	0	10	2	7	4
1	2008-12-10 10:49:00	0	10	2	7	4
1	2008-12-10 10:50:00	0	10	2	7	4
1	2008-12-10 10:51:00	0	10	2	7	4
1	2008-12-10 10:52:00	0	10	2	7	4
1	2008-12-10 10:53:00	0	10	2	7	4
1	2008-12-10 10:54:00	0	10	2	7	4
1	2008-12-10 10:55:00	0	10	2	7	4
1	2008-12-10 10:56:00	0	10	2	7	4
1	2008-12-10 10:57:00	0	10	2	7	4
1	2008-12-10 10:58:00	0	10	2	7	4
1	2008-12-10 10:59:00	0	10	2	7	4
1	2008-12-10 11:00:00	16	10	2	7	4
1	2008-12-10 11:01:00	0	11	2	7	4
1	2008-12-10 11:02:00	0	11	2	7	4
1	2008-12-10 11:03:00	0	11	2	7	4
1	2008-12-10 11:04:00	0	11	2	7	4
1	2008-12-10 11:05:00	0	11	2	7	4
1	2008-12-10 11:06:00	0	11	2	7	4
1	2008-12-10 11:07:00	0	11	2	7	4
1	2008-12-10 11:08:00	0	11	2	7	4
1	2008-12-10 11:09:00	0	11	2	7	4
1	2008-12-10 11:10:00	0	11	2	7	4
1	2008-12-10 11:11:00	0	11	2	7	4
1	2008-12-10 11:12:00	0	11	2	7	4
1	2008-12-10 11:13:00	0	11	2	7	4
1	2008-12-10 11:14:00	0	11	2	7	4
1	2008-12-10 11:15:00	0	11	2	7	4
1	2008-12-10 11:16:00	0	11	2	7	4
1	2008-12-10 11:17:00	0	11	2	7	4
1	2008-12-10 11:18:00	0	11	2	7	4
1	2008-12-10 11:19:00	0	11	2	7	4
1	2008-12-10 11:20:00	0	11	2	7	4
1	2008-12-10 11:21:00	0	11	2	7	4
1	2008-12-10 11:22:00	52	11	2	7	4
1	2008-12-10 11:23:00	0	11	2	7	4
1	2008-12-10 11:24:00	0	11	2	7	4
1	2008-12-10 11:25:00	0	11	2	7	4
1	2008-12-10 11:26:00	0	11	2	7	4
1	2008-12-10 11:27:00	0	11	2	7	4
1	2008-12-10 11:28:00	0	11	2	7	4
1	2008-12-10 11:29:00	0	11	2	7	4
1	2008-12-10 11:30:00	0	11	2	7	4
1	2008-12-10 11:31:00	0	11	2	7	4
1	2008-12-10 11:32:00	0	11	2	7	4
1	2008-12-10 11:33:00	0	11	2	7	4
1	2008-12-10 11:34:00	210	11	2	7	4
1	2008-12-10 11:35:00	0	11	2	7	4
1	2008-12-10 11:36:00	0	11	2	7	4
1	2008-12-10 11:37:00	0	11	2	7	4
1	2008-12-10 11:38:00	0	11	2	7	4
1	2008-12-10 11:39:00	0	11	2	7	4
1	2008-12-10 11:40:00	0	11	2	7	4
1	2008-12-10 11:41:00	0	11	2	7	4
1	2008-12-10 11:42:00	0	11	2	7	4
1	2008-12-10 11:43:00	36	11	2	7	4
1	2008-12-10 11:44:00	0	11	2	7	4
1	2008-12-10 11:45:00	0	11	2	7	4
1	2008-12-10 11:46:00	0	11	2	7	4
1	2008-12-10 11:47:00	0	11	2	7	4
1	2008-12-10 11:48:00	0	11	2	7	4
1	2008-12-10 11:49:00	0	11	2	7	4
1	2008-12-10 11:50:00	0	11	2	7	4
1	2008-12-10 11:51:00	0	11	2	7	4
1	2008-12-10 11:52:00	0	11	2	7	4
1	2008-12-10 11:53:00	0	11	2	7	4
1	2008-12-10 11:54:00	210	11	2	7	4
1	2008-12-10 11:55:00	5	11	2	7	4
1	2008-12-10 11:56:00	0	11	2	7	4
1	2008-12-10 11:57:00	0	11	2	7	4
1	2008-12-10 11:58:00	0	11	2	7	4
1	2008-12-10 11:59:00	0	11	2	7	4
1	2008-12-10 12:00:00	0	11	2	7	4
1	2008-12-10 12:01:00	0	12	3	7	4
1	2008-12-10 12:02:00	0	12	3	7	4
1	2008-12-10 12:03:00	0	12	3	7	4
1	2008-12-10 12:04:00	0	12	3	7	4
1	2008-12-10 12:05:00	0	12	3	7	4
1	2008-12-10 12:06:00	0	12	3	7	4
1	2008-12-10 12:07:00	0	12	3	7	4
1	2008-12-10 12:08:00	538	12	3	7	4
1	2008-12-10 12:09:00	0	12	3	7	4
1	2008-12-10 12:10:00	0	12	3	7	4
1	2008-12-10 12:11:00	0	12	3	7	4
1	2008-12-10 12:12:00	0	12	3	7	4
1	2008-12-10 12:13:00	0	12	3	7	4
1	2008-12-10 12:14:00	10	12	3	7	4
1	2008-12-10 12:15:00	31	12	3	7	4
1	2008-12-10 12:16:00	0	12	3	7	4
1	2008-12-10 12:17:00	0	12	3	7	4
1	2008-12-10 12:18:00	0	12	3	7	4
1	2008-12-10 12:19:00	21	12	3	7	4
1	2008-12-10 12:20:00	0	12	3	7	4
1	2008-12-10 12:21:00	10	12	3	7	4
1	2008-12-10 12:22:00	68	12	3	7	4
1	2008-12-10 12:23:00	158	12	3	7	4
1	2008-12-10 12:24:00	0	12	3	7	4
1	2008-12-10 12:25:00	0	12	3	7	4
1	2008-12-10 12:26:00	0	12	3	7	4
1	2008-12-10 12:27:00	0	12	3	7	4
1	2008-12-10 12:28:00	0	12	3	7	4
1	2008-12-10 12:29:00	144	12	3	7	4
1	2008-12-10 12:30:00	99	12	3	7	4
1	2008-12-10 12:31:00	173	12	3	7	4
1	2008-12-10 12:32:00	0	12	3	7	4
1	2008-12-10 12:33:00	0	12	3	7	4
1	2008-12-10 12:34:00	0	12	3	7	4
1	2008-12-10 12:35:00	0	12	3	7	4
1	2008-12-10 12:36:00	0	12	3	7	4
1	2008-12-10 12:37:00	0	12	3	7	4
1	2008-12-10 12:38:00	118	12	3	7	4
1	2008-12-10 12:39:00	144	12	3	7	4
1	2008-12-10 12:40:00	0	12	3	7	4
1	2008-12-10 12:41:00	5	12	3	7	4
1	2008-12-10 12:42:00	1307	12	3	7	4
1	2008-12-10 12:43:00	93	12	3	7	4
1	2008-12-10 12:44:00	86	12	3	7	4
1	2008-12-10 12:45:00	5	12	3	7	4
1	2008-12-10 12:46:00	0	12	3	7	4
1	2008-12-10 12:47:00	187	12	3	7	4
1	2008-12-10 12:48:00	130	12	3	7	4
1	2008-12-10 12:49:00	62	12	3	7	4
1	2008-12-10 12:50:00	0	12	3	7	4
1	2008-12-10 12:51:00	0	12	3	7	4
1	2008-12-10 12:52:00	31	12	3	7	4
1	2008-12-10 12:53:00	187	12	3	7	4
1	2008-12-10 12:54:00	195	12	3	7	4
1	2008-12-10 12:55:00	0	12	3	7	4
1	2008-12-10 12:56:00	0	12	3	7	4
1	2008-12-10 12:57:00	0	12	3	7	4
1	2008-12-10 12:58:00	10	12	3	7	4
1	2008-12-10 12:59:00	0	12	3	7	4
1	2008-12-10 13:00:00	1187	12	3	7	4
1	2008-12-10 13:01:00	679	13	3	7	4
1	2008-12-10 13:02:00	165	13	3	7	4
1	2008-12-10 13:03:00	0	13	3	7	4
1	2008-12-10 13:04:00	5	13	3	7	4
1	2008-12-10 13:05:00	0	13	3	7	4
1	2008-12-10 13:06:00	62	13	3	7	4
1	2008-12-10 13:07:00	1234	13	3	7	4
1	2008-12-10 13:08:00	165	13	3	7	4
1	2008-12-10 13:09:00	418	13	3	7	4
1	2008-12-10 13:10:00	124	13	3	7	4
1	2008-12-10 13:11:00	10	13	3	7	4
1	2008-12-10 13:12:00	21	13	3	7	4
1	2008-12-10 13:13:00	0	13	3	7	4
1	2008-12-10 13:14:00	0	13	3	7	4
1	2008-12-10 13:15:00	99	13	3	7	4
1	2008-12-10 13:16:00	5	13	3	7	4
1	2008-12-10 13:17:00	26	13	3	7	4
1	2008-12-10 13:18:00	386	13	3	7	4
1	2008-12-10 13:19:00	244	13	3	7	4
1	2008-12-10 13:20:00	0	13	3	7	4
1	2008-12-10 13:21:00	592	13	3	7	4
1	2008-12-10 13:22:00	464	13	3	7	4
1	2008-12-10 13:23:00	0	13	3	7	4
1	2008-12-10 13:24:00	26	13	3	7	4
1	2008-12-10 13:25:00	74	13	3	7	4
1	2008-12-10 13:26:00	0	13	3	7	4
1	2008-12-10 13:27:00	0	13	3	7	4
1	2008-12-10 13:28:00	0	13	3	7	4
1	2008-12-10 13:29:00	0	13	3	7	4
1	2008-12-10 13:30:00	0	13	3	7	4
1	2008-12-10 13:31:00	0	13	3	7	4
1	2008-12-10 13:32:00	0	13	3	7	4
1	2008-12-10 13:33:00	144	13	3	7	4
1	2008-12-10 13:34:00	1187	13	3	7	4
1	2008-12-10 13:35:00	278	13	3	7	4
1	2008-12-10 13:36:00	0	13	3	7	4
1	2008-12-10 13:37:00	0	13	3	7	4
1	2008-12-10 13:38:00	0	13	3	7	4
1	2008-12-10 13:39:00	0	13	3	7	4
1	2008-12-10 13:40:00	0	13	3	7	4
1	2008-12-10 13:41:00	0	13	3	7	4
1	2008-12-10 13:42:00	0	13	3	7	4
1	2008-12-10 13:43:00	244	13	3	7	4
1	2008-12-10 13:44:00	180	13	3	7	4
1	2008-12-10 13:45:00	86	13	3	7	4
1	2008-12-10 13:46:00	151	13	3	7	4
1	2008-12-10 13:47:00	165	13	3	7	4
1	2008-12-10 13:48:00	0	13	3	7	4
1	2008-12-10 13:49:00	0	13	3	7	4
1	2008-12-10 13:50:00	0	13	3	7	4
1	2008-12-10 13:51:00	26	13	3	7	4
1	2008-12-10 13:52:00	0	13	3	7	4
1	2008-12-10 13:53:00	0	13	3	7	4
1	2008-12-10 13:54:00	57	13	3	7	4
1	2008-12-10 13:55:00	136	13	3	7	4
1	2008-12-10 13:56:00	0	13	3	7	4
1	2008-12-10 13:57:00	99	13	3	7	4
1	2008-12-10 13:58:00	52	13	3	7	4
1	2008-12-10 13:59:00	0	13	3	7	4
1	2008-12-10 14:00:00	0	13	3	7	4
1	2008-12-10 14:01:00	0	14	3	7	4
1	2008-12-10 14:02:00	57	14	3	7	4
1	2008-12-10 14:03:00	0	14	3	7	4
1	2008-12-10 14:04:00	0	14	3	7	4
1	2008-12-10 14:05:00	0	14	3	7	4
1	2008-12-10 14:06:00	0	14	3	7	4
1	2008-12-10 14:07:00	42	14	3	7	4
1	2008-12-10 14:08:00	0	14	3	7	4
1	2008-12-10 14:09:00	0	14	3	7	4
1	2008-12-10 14:10:00	0	14	3	7	4
1	2008-12-10 14:11:00	0	14	3	7	4
1	2008-12-10 14:12:00	0	14	3	7	4
1	2008-12-10 14:13:00	0	14	3	7	4
1	2008-12-10 14:14:00	31	14	3	7	4
1	2008-12-10 14:15:00	0	14	3	7	4
1	2008-12-10 14:16:00	86	14	3	7	4
1	2008-12-10 14:17:00	68	14	3	7	4
1	2008-12-10 14:18:00	10	14	3	7	4
1	2008-12-10 14:19:00	0	14	3	7	4
1	2008-12-10 14:20:00	0	14	3	7	4
1	2008-12-10 14:21:00	0	14	3	7	4
1	2008-12-10 14:22:00	5	14	3	7	4
1	2008-12-10 14:23:00	0	14	3	7	4
1	2008-12-10 14:24:00	16	14	3	7	4
1	2008-12-10 14:25:00	0	14	3	7	4
1	2008-12-10 14:26:00	0	14	3	7	4
1	2008-12-10 14:27:00	68	14	3	7	4
1	2008-12-10 14:28:00	0	14	3	7	4
1	2008-12-10 14:29:00	0	14	3	7	4
1	2008-12-10 14:30:00	0	14	3	7	4
1	2008-12-10 14:31:00	0	14	3	7	4
1	2008-12-10 14:32:00	31	14	3	7	4
1	2008-12-10 14:33:00	5	14	3	7	4
1	2008-12-10 14:34:00	0	14	3	7	4
1	2008-12-10 14:35:00	0	14	3	7	4
1	2008-12-10 14:36:00	0	14	3	7	4
1	2008-12-10 14:37:00	0	14	3	7	4
1	2008-12-10 14:38:00	0	14	3	7	4
1	2008-12-10 14:39:00	0	14	3	7	4
1	2008-12-10 14:40:00	26	14	3	7	4
1	2008-12-10 14:41:00	0	14	3	7	4
1	2008-12-10 14:42:00	1824	14	3	7	4
1	2008-12-10 14:43:00	825	14	3	7	4
1	2008-12-10 14:44:00	418	14	3	7	4
1	2008-12-10 14:45:00	68	14	3	7	4
1	2008-12-10 14:46:00	5	14	3	7	4
1	2008-12-10 14:47:00	0	14	3	7	4
1	2008-12-10 14:48:00	0	14	3	7	4
1	2008-12-10 14:49:00	0	14	3	7	4
1	2008-12-10 14:50:00	21	14	3	7	4
1	2008-12-10 14:51:00	36	14	3	7	4
1	2008-12-10 14:52:00	52	14	3	7	4
1	2008-12-10 14:53:00	26	14	3	7	4
1	2008-12-10 14:54:00	0	14	3	7	4
1	2008-12-10 14:55:00	0	14	3	7	4
1	2008-12-10 14:56:00	165	14	3	7	4
1	2008-12-10 14:57:00	74	14	3	7	4
1	2008-12-10 14:58:00	130	14	3	7	4
1	2008-12-10 14:59:00	144	14	3	7	4
1	2008-12-10 15:00:00	80	14	3	7	4
1	2008-12-10 15:01:00	0	15	3	7	4
1	2008-12-10 15:02:00	0	15	3	7	4
1	2008-12-10 15:03:00	0	15	3	7	4
1	2008-12-10 15:04:00	0	15	3	7	4
1	2008-12-10 15:05:00	0	15	3	7	4
1	2008-12-10 15:06:00	0	15	3	7	4
1	2008-12-10 15:07:00	0	15	3	7	4
1	2008-12-10 15:08:00	158	15	3	7	4
1	2008-12-10 15:09:00	897	15	3	7	4
1	2008-12-10 15:10:00	592	15	3	7	4
1	2008-12-10 15:11:00	464	15	3	7	4
1	2008-12-10 15:12:00	158	15	3	7	4
1	2008-12-10 15:13:00	5	15	3	7	4
1	2008-12-10 15:14:00	0	15	3	7	4
1	2008-12-10 15:15:00	0	15	3	7	4
1	2008-12-10 15:16:00	1098	15	3	7	4
1	2008-12-10 15:17:00	488	15	3	7	4
1	2008-12-10 15:18:00	118	15	3	7	4
1	2008-12-10 15:19:00	5	15	3	7	4
1	2008-12-10 15:20:00	0	15	3	7	4
1	2008-12-10 15:21:00	0	15	3	7	4
1	2008-12-10 15:22:00	0	15	3	7	4
1	2008-12-10 15:23:00	0	15	3	7	4
1	2008-12-10 15:24:00	0	15	3	7	4
1	2008-12-10 15:25:00	0	15	3	7	4
1	2008-12-10 15:26:00	0	15	3	7	4
1	2008-12-10 15:27:00	0	15	3	7	4
1	2008-12-10 15:28:00	0	15	3	7	4
1	2008-12-10 15:29:00	0	15	3	7	4
1	2008-12-10 15:30:00	0	15	3	7	4
1	2008-12-10 15:31:00	2380	15	3	7	4
1	2008-12-10 15:32:00	2928	15	3	7	4
1	2008-12-10 15:33:00	165	15	3	7	4
1	2008-12-10 15:34:00	105	15	3	7	4
1	2008-12-10 15:35:00	57	15	3	7	4
1	2008-12-10 15:36:00	99	15	3	7	4
1	2008-12-10 15:37:00	0	15	3	7	4
1	2008-12-10 15:38:00	0	15	3	7	4
1	2008-12-10 15:39:00	0	15	3	7	4
1	2008-12-10 15:40:00	10	15	3	7	4
1	2008-12-10 15:41:00	1384	15	3	7	4
1	2008-12-10 15:42:00	2298	15	3	7	4
1	2008-12-10 15:43:00	1142	15	3	7	4
1	2008-12-10 15:44:00	306	15	3	7	4
1	2008-12-10 15:45:00	99	15	3	7	4
1	2008-12-10 15:46:00	31	15	3	7	4
1	2008-12-10 15:47:00	10	15	3	7	4
1	2008-12-10 15:48:00	0	15	3	7	4
1	2008-12-10 15:49:00	0	15	3	7	4
1	2008-12-10 15:50:00	21	15	3	7	4
1	2008-12-10 15:51:00	0	15	3	7	4
1	2008-12-10 15:52:00	0	15	3	7	4
1	2008-12-10 15:53:00	1491	15	3	7	4
1	2008-12-10 15:54:00	565	15	3	7	4
1	2008-12-10 15:55:00	80	15	3	7	4
1	2008-12-10 15:56:00	0	15	3	7	4
1	2008-12-10 15:57:00	0	15	3	7	4
1	2008-12-10 15:58:00	99	15	3	7	4
1	2008-12-10 15:59:00	219	15	3	7	4
1	2008-12-10 16:00:00	0	15	3	7	4
1	2008-12-10 16:01:00	0	16	3	7	4
1	2008-12-10 16:02:00	0	16	3	7	4
1	2008-12-10 16:03:00	31	16	3	7	4
1	2008-12-10 16:04:00	0	16	3	7	4
1	2008-12-10 16:05:00	0	16	3	7	4
1	2008-12-10 16:06:00	0	16	3	7	4
1	2008-12-10 16:07:00	0	16	3	7	4
1	2008-12-10 16:08:00	0	16	3	7	4
1	2008-12-10 16:09:00	0	16	3	7	4
1	2008-12-10 16:10:00	47	16	3	7	4
1	2008-12-10 16:11:00	26	16	3	7	4
1	2008-12-10 16:12:00	0	16	3	7	4
1	2008-12-10 16:13:00	0	16	3	7	4
1	2008-12-10 16:14:00	0	16	3	7	4
1	2008-12-10 16:15:00	0	16	3	7	4
1	2008-12-10 16:16:00	0	16	3	7	4
1	2008-12-10 16:17:00	0	16	3	7	4
1	2008-12-10 16:18:00	0	16	3	7	4
1	2008-12-10 16:19:00	0	16	3	7	4
1	2008-12-10 16:20:00	0	16	3	7	4
1	2008-12-10 16:21:00	0	16	3	7	4
1	2008-12-10 16:22:00	0	16	3	7	4
1	2008-12-10 16:23:00	0	16	3	7	4
1	2008-12-10 16:24:00	0	16	3	7	4
1	2008-12-10 16:25:00	0	16	3	7	4
1	2008-12-10 16:26:00	0	16	3	7	4
1	2008-12-10 16:27:00	0	16	3	7	4
1	2008-12-10 16:28:00	0	16	3	7	4
1	2008-12-10 16:29:00	0	16	3	7	4
1	2008-12-10 16:30:00	0	16	3	7	4
1	2008-12-10 16:31:00	0	16	3	7	4
1	2008-12-10 16:32:00	0	16	3	7	4
1	2008-12-10 16:33:00	93	16	3	7	4
1	2008-12-10 16:34:00	0	16	3	7	4
1	2008-12-10 16:35:00	0	16	3	7	4
1	2008-12-10 16:36:00	0	16	3	7	4
1	2008-12-10 16:37:00	0	16	3	7	4
1	2008-12-10 16:38:00	0	16	3	7	4
1	2008-12-10 16:39:00	0	16	3	7	4
1	2008-12-10 16:40:00	0	16	3	7	4
1	2008-12-10 16:41:00	0	16	3	7	4
1	2008-12-10 16:42:00	0	16	3	7	4
1	2008-12-10 16:43:00	0	16	3	7	4
1	2008-12-10 16:44:00	0	16	3	7	4
1	2008-12-10 16:45:00	0	16	3	7	4
1	2008-12-10 16:46:00	0	16	3	7	4
1	2008-12-10 16:47:00	0	16	3	7	4
1	2008-12-10 16:48:00	0	16	3	7	4
1	2008-12-10 16:49:00	0	16	3	7	4
1	2008-12-10 16:50:00	47	16	3	7	4
1	2008-12-10 16:51:00	5	16	3	7	4
1	2008-12-10 16:52:00	0	16	3	7	4
1	2008-12-10 16:53:00	0	16	3	7	4
1	2008-12-10 16:54:00	36	16	3	7	4
1	2008-12-10 16:55:00	579	16	3	7	4
1	2008-12-10 16:56:00	93	16	3	7	4
1	2008-12-10 16:57:00	16	16	3	7	4
1	2008-12-10 16:58:00	0	16	3	7	4
1	2008-12-10 16:59:00	0	16	3	7	4
1	2008-12-10 17:00:00	0	16	3	7	4
1	2008-12-10 17:01:00	0	17	3	7	4
1	2008-12-10 17:02:00	396	17	3	7	4
1	2008-12-10 17:03:00	365	17	3	7	4
1	2008-12-10 17:04:00	111	17	3	7	4
1	2008-12-10 17:05:00	0	17	3	7	4
1	2008-12-10 17:06:00	0	17	3	7	4
1	2008-12-10 17:07:00	0	17	3	7	4
1	2008-12-10 17:08:00	0	17	3	7	4
1	2008-12-10 17:09:00	0	17	3	7	4
1	2008-12-10 17:10:00	0	17	3	7	4
1	2008-12-10 17:11:00	26	17	3	7	4
1	2008-12-10 17:12:00	0	17	3	7	4
1	2008-12-10 17:13:00	0	17	3	7	4
1	2008-12-10 17:14:00	0	17	3	7	4
1	2008-12-10 17:15:00	0	17	3	7	4
1	2008-12-10 17:16:00	0	17	3	7	4
1	2008-12-10 17:17:00	0	17	3	7	4
1	2008-12-10 17:18:00	5	17	3	7	4
1	2008-12-10 17:19:00	0	17	3	7	4
1	2008-12-10 17:20:00	0	17	3	7	4
1	2008-12-10 17:21:00	513	17	3	7	4
1	2008-12-10 17:22:00	649	17	3	7	4
1	2008-12-10 17:23:00	808	17	3	7	4
1	2008-12-10 17:24:00	1960	17	3	7	4
1	2008-12-10 17:25:00	861	17	3	7	4
1	2008-12-10 17:26:00	287	17	3	7	4
1	2008-12-10 17:27:00	386	17	3	7	4
1	2008-12-10 17:28:00	1358	17	3	7	4
1	2008-12-10 17:29:00	1014	17	3	7	4
1	2008-12-10 17:30:00	954	17	3	7	4
1	2008-12-10 17:31:00	260	17	3	7	4
1	2008-12-10 17:32:00	344	17	3	7	4
1	2008-12-10 17:33:00	441	17	3	7	4
1	2008-12-10 17:34:00	565	17	3	7	4
1	2008-12-10 17:35:00	649	17	3	7	4
1	2008-12-10 17:36:00	565	17	3	7	4
1	2008-12-10 17:37:00	344	17	3	7	4
1	2008-12-10 17:38:00	355	17	3	7	4
1	2008-12-10 17:39:00	74	17	3	7	4
1	2008-12-10 17:40:00	278	17	3	7	4
1	2008-12-10 17:41:00	306	17	3	7	4
1	2008-12-10 17:42:00	315	17	3	7	4
1	2008-12-10 17:43:00	210	17	3	7	4
1	2008-12-10 17:44:00	565	17	3	7	4
1	2008-12-10 17:45:00	111	17	3	7	4
1	2008-12-10 17:46:00	0	17	3	7	4
1	2008-12-10 17:47:00	0	17	3	7	4
1	2008-12-10 17:48:00	0	17	3	7	4
1	2008-12-10 17:49:00	0	17	3	7	4
1	2008-12-10 17:50:00	0	17	3	7	4
1	2008-12-10 17:51:00	0	17	3	7	4
1	2008-12-10 17:52:00	0	17	3	7	4
1	2008-12-10 17:53:00	0	17	3	7	4
1	2008-12-10 17:54:00	0	17	3	7	4
1	2008-12-10 17:55:00	26	17	3	7	4
1	2008-12-10 17:56:00	0	17	3	7	4
1	2008-12-10 17:57:00	0	17	3	7	4
1	2008-12-10 17:58:00	21	17	3	7	4
1	2008-12-10 17:59:00	0	17	3	7	4
1	2008-12-10 18:00:00	0	17	3	7	4
1	2008-12-10 18:01:00	0	18	4	7	4
1	2008-12-10 18:02:00	0	18	4	7	4
1	2008-12-10 18:03:00	355	18	4	7	4
1	2008-12-10 18:04:00	488	18	4	7	4
1	2008-12-10 18:05:00	68	18	4	7	4
1	2008-12-10 18:06:00	52	18	4	7	4
1	2008-12-10 18:07:00	42	18	4	7	4
1	2008-12-10 18:08:00	235	18	4	7	4
1	2008-12-10 18:09:00	355	18	4	7	4
1	2008-12-10 18:10:00	21	18	4	7	4
1	2008-12-10 18:11:00	0	18	4	7	4
1	2008-12-10 18:12:00	0	18	4	7	4
1	2008-12-10 18:13:00	0	18	4	7	4
1	2008-12-10 18:14:00	0	18	4	7	4
1	2008-12-10 18:15:00	0	18	4	7	4
1	2008-12-10 18:16:00	0	18	4	7	4
1	2008-12-10 18:17:00	0	18	4	7	4
1	2008-12-10 18:18:00	0	18	4	7	4
1	2008-12-10 18:19:00	0	18	4	7	4
1	2008-12-10 18:20:00	0	18	4	7	4
1	2008-12-10 18:21:00	0	18	4	7	4
1	2008-12-10 18:22:00	26	18	4	7	4
1	2008-12-10 18:23:00	0	18	4	7	4
1	2008-12-10 18:24:00	0	18	4	7	4
1	2008-12-10 18:25:00	0	18	4	7	4
1	2008-12-10 18:26:00	0	18	4	7	4
1	2008-12-10 18:27:00	0	18	4	7	4
1	2008-12-10 18:28:00	0	18	4	7	4
1	2008-12-10 18:29:00	0	18	4	7	4
1	2008-12-10 18:30:00	0	18	4	7	4
1	2008-12-10 18:31:00	86	18	4	7	4
1	2008-12-10 18:32:00	0	18	4	7	4
1	2008-12-10 18:33:00	0	18	4	7	4
1	2008-12-10 18:34:00	0	18	4	7	4
1	2008-12-10 18:35:00	0	18	4	7	4
1	2008-12-10 18:36:00	0	18	4	7	4
1	2008-12-10 18:37:00	10	18	4	7	4
1	2008-12-10 18:38:00	5	18	4	7	4
1	2008-12-10 18:39:00	0	18	4	7	4
1	2008-12-10 18:40:00	0	18	4	7	4
1	2008-12-10 18:41:00	0	18	4	7	4
1	2008-12-10 18:42:00	0	18	4	7	4
1	2008-12-10 18:43:00	0	18	4	7	4
1	2008-12-10 18:44:00	0	18	4	7	4
1	2008-12-10 18:45:00	0	18	4	7	4
1	2008-12-10 18:46:00	0	18	4	7	4
1	2008-12-10 18:47:00	0	18	4	7	4
1	2008-12-10 18:48:00	0	18	4	7	4
1	2008-12-10 18:49:00	0	18	4	7	4
1	2008-12-10 18:50:00	501	18	4	7	4
1	2008-12-10 18:51:00	244	18	4	7	4
1	2008-12-10 18:52:00	0	18	4	7	4
1	2008-12-10 18:53:00	42	18	4	7	4
1	2008-12-10 18:54:00	57	18	4	7	4
1	2008-12-10 18:55:00	62	18	4	7	4
1	2008-12-10 18:56:00	21	18	4	7	4
1	2008-12-10 18:57:00	0	18	4	7	4
1	2008-12-10 18:58:00	0	18	4	7	4
1	2008-12-10 18:59:00	0	18	4	7	4
1	2008-12-10 19:00:00	0	18	4	7	4
1	2008-12-10 19:01:00	0	19	4	7	4
1	2008-12-10 19:02:00	0	19	4	7	4
1	2008-12-10 19:03:00	0	19	4	7	4
1	2008-12-10 19:04:00	74	19	4	7	4
1	2008-12-10 19:05:00	0	19	4	7	4
1	2008-12-10 19:06:00	0	19	4	7	4
1	2008-12-10 19:07:00	68	19	4	7	4
1	2008-12-10 19:08:00	36	19	4	7	4
1	2008-12-10 19:09:00	325	19	4	7	4
1	2008-12-10 19:10:00	36	19	4	7	4
1	2008-12-10 19:11:00	187	19	4	7	4
1	2008-12-10 19:12:00	325	19	4	7	4
1	2008-12-10 19:13:00	260	19	4	7	4
1	2008-12-10 19:14:00	0	19	4	7	4
1	2008-12-10 19:15:00	0	19	4	7	4
1	2008-12-10 19:16:00	21	19	4	7	4
1	2008-12-10 19:17:00	0	19	4	7	4
1	2008-12-10 19:18:00	476	19	4	7	4
1	2008-12-10 19:19:00	260	19	4	7	4
1	2008-12-10 19:20:00	260	19	4	7	4
1	2008-12-10 19:21:00	0	19	4	7	4
1	2008-12-10 19:22:00	10	19	4	7	4
1	2008-12-10 19:23:00	287	19	4	7	4
1	2008-12-10 19:24:00	21	19	4	7	4
1	2008-12-10 19:25:00	227	19	4	7	4
1	2008-12-10 19:26:00	1491	19	4	7	4
1	2008-12-10 19:27:00	396	19	4	7	4
1	2008-12-10 19:28:00	526	19	4	7	4
1	2008-12-10 19:29:00	1358	19	4	7	4
1	2008-12-10 19:30:00	664	19	4	7	4
1	2008-12-10 19:31:00	694	19	4	7	4
1	2008-12-10 19:32:00	710	19	4	7	4
1	2008-12-10 19:33:00	180	19	4	7	4
1	2008-12-10 19:34:00	334	19	4	7	4
1	2008-12-10 19:35:00	453	19	4	7	4
1	2008-12-10 19:36:00	513	19	4	7	4
1	2008-12-10 19:37:00	252	19	4	7	4
1	2008-12-10 19:38:00	74	19	4	7	4
1	2008-12-10 19:39:00	219	19	4	7	4
1	2008-12-10 19:40:00	1358	19	4	7	4
1	2008-12-10 19:41:00	268	19	4	7	4
1	2008-12-10 19:42:00	441	19	4	7	4
1	2008-12-10 19:43:00	1142	19	4	7	4
1	2008-12-10 19:44:00	144	19	4	7	4
1	2008-12-10 19:45:00	453	19	4	7	4
1	2008-12-10 19:46:00	31	19	4	7	4
1	2008-12-10 19:47:00	396	19	4	7	4
1	2008-12-10 19:48:00	130	19	4	7	4
1	2008-12-10 19:49:00	227	19	4	7	4
1	2008-12-10 19:50:00	334	19	4	7	4
1	2008-12-10 19:51:00	344	19	4	7	4
1	2008-12-10 19:52:00	124	19	4	7	4
1	2008-12-10 19:53:00	565	19	4	7	4
1	2008-12-10 19:54:00	552	19	4	7	4
1	2008-12-10 19:55:00	158	19	4	7	4
1	2008-12-10 19:56:00	464	19	4	7	4
1	2008-12-10 19:57:00	195	19	4	7	4
1	2008-12-10 19:58:00	0	19	4	7	4
1	2008-12-10 19:59:00	0	19	4	7	4
1	2008-12-10 20:00:00	0	19	4	7	4
1	2008-12-10 20:01:00	0	20	4	7	4
1	2008-12-10 20:02:00	21	20	4	7	4
1	2008-12-10 20:03:00	5	20	4	7	4
1	2008-12-10 20:04:00	0	20	4	7	4
1	2008-12-10 20:05:00	0	20	4	7	4
1	2008-12-10 20:06:00	0	20	4	7	4
1	2008-12-10 20:07:00	21	20	4	7	4
1	2008-12-10 20:08:00	5	20	4	7	4
1	2008-12-10 20:09:00	21	20	4	7	4
1	2008-12-10 20:10:00	0	20	4	7	4
1	2008-12-10 20:11:00	0	20	4	7	4
1	2008-12-10 20:12:00	0	20	4	7	4
1	2008-12-10 20:13:00	10	20	4	7	4
1	2008-12-10 20:14:00	5	20	4	7	4
1	2008-12-10 20:15:00	235	20	4	7	4
1	2008-12-10 20:16:00	464	20	4	7	4
1	2008-12-10 20:17:00	297	20	4	7	4
1	2008-12-10 20:18:00	635	20	4	7	4
1	2008-12-10 20:19:00	306	20	4	7	4
1	2008-12-10 20:20:00	325	20	4	7	4
1	2008-12-10 20:21:00	5	20	4	7	4
1	2008-12-10 20:22:00	0	20	4	7	4
1	2008-12-10 20:23:00	0	20	4	7	4
1	2008-12-10 20:24:00	0	20	4	7	4
1	2008-12-10 20:25:00	0	20	4	7	4
1	2008-12-10 20:26:00	0	20	4	7	4
1	2008-12-10 20:27:00	0	20	4	7	4
1	2008-12-10 20:28:00	0	20	4	7	4
1	2008-12-10 20:29:00	0	20	4	7	4
1	2008-12-10 20:30:00	0	20	4	7	4
1	2008-12-10 20:31:00	0	20	4	7	4
1	2008-12-10 20:32:00	344	20	4	7	4
1	2008-12-10 20:33:00	93	20	4	7	4
1	2008-12-10 20:34:00	0	20	4	7	4
1	2008-12-10 20:35:00	0	20	4	7	4
1	2008-12-10 20:36:00	0	20	4	7	4
1	2008-12-10 20:37:00	31	20	4	7	4
1	2008-12-10 20:38:00	0	20	4	7	4
1	2008-12-10 20:39:00	21	20	4	7	4
1	2008-12-10 20:40:00	99	20	4	7	4
1	2008-12-10 20:41:00	365	20	4	7	4
1	2008-12-10 20:42:00	151	20	4	7	4
1	2008-12-10 20:43:00	464	20	4	7	4
1	2008-12-10 20:44:00	396	20	4	7	4
1	2008-12-10 20:45:00	151	20	4	7	4
1	2008-12-10 20:46:00	235	20	4	7	4
1	2008-12-10 20:47:00	694	20	4	7	4
1	2008-12-10 20:48:00	365	20	4	7	4
1	2008-12-10 20:49:00	165	20	4	7	4
1	2008-12-10 20:50:00	80	20	4	7	4
1	2008-12-10 20:51:00	10	20	4	7	4
1	2008-12-10 20:52:00	0	20	4	7	4
1	2008-12-10 20:53:00	93	20	4	7	4
1	2008-12-10 20:54:00	47	20	4	7	4
1	2008-12-10 20:55:00	0	20	4	7	4
1	2008-12-10 20:56:00	0	20	4	7	4
1	2008-12-10 20:57:00	252	20	4	7	4
1	2008-12-10 20:58:00	1034	20	4	7	4
1	2008-12-10 20:59:00	758	20	4	7	4
1	2008-12-10 21:00:00	355	20	4	7	4
1	2008-12-10 21:01:00	620	21	4	7	4
1	2008-12-10 21:02:00	488	21	4	7	4
1	2008-12-10 21:03:00	105	21	4	7	4
1	2008-12-10 21:04:00	268	21	4	7	4
1	2008-12-10 21:05:00	376	21	4	7	4
1	2008-12-10 21:06:00	1282	21	4	7	4
1	2008-12-10 21:07:00	2422	21	4	7	4
1	2008-12-10 21:08:00	365	21	4	7	4
1	2008-12-10 21:09:00	501	21	4	7	4
1	2008-12-10 21:10:00	31	21	4	7	4
1	2008-12-10 21:11:00	144	21	4	7	4
1	2008-12-10 21:12:00	52	21	4	7	4
1	2008-12-10 21:13:00	5	21	4	7	4
1	2008-12-10 21:14:00	21	21	4	7	4
1	2008-12-10 21:15:00	62	21	4	7	4
1	2008-12-10 21:16:00	0	21	4	7	4
1	2008-12-10 21:17:00	136	21	4	7	4
1	2008-12-10 21:18:00	501	21	4	7	4
1	2008-12-10 21:19:00	334	21	4	7	4
1	2008-12-10 21:20:00	453	21	4	7	4
1	2008-12-10 21:21:00	453	21	4	7	4
1	2008-12-10 21:22:00	694	21	4	7	4
1	2008-12-10 21:23:00	227	21	4	7	4
1	2008-12-10 21:24:00	1358	21	4	7	4
1	2008-12-10 21:25:00	430	21	4	7	4
1	2008-12-10 21:26:00	453	21	4	7	4
1	2008-12-10 21:27:00	791	21	4	7	4
1	2008-12-10 21:28:00	526	21	4	7	4
1	2008-12-10 21:29:00	453	21	4	7	4
1	2008-12-10 21:30:00	86	21	4	7	4
1	2008-12-10 21:31:00	136	21	4	7	4
1	2008-12-10 21:32:00	453	21	4	7	4
1	2008-12-10 21:33:00	21	21	4	7	4
1	2008-12-10 21:34:00	0	21	4	7	4
1	2008-12-10 21:35:00	0	21	4	7	4
1	2008-12-10 21:36:00	180	21	4	7	4
1	2008-12-10 21:37:00	365	21	4	7	4
1	2008-12-10 21:38:00	219	21	4	7	4
1	2008-12-10 21:39:00	0	21	4	7	4
1	2008-12-10 21:40:00	0	21	4	7	4
1	2008-12-10 21:41:00	0	21	4	7	4
1	2008-12-10 21:42:00	0	21	4	7	4
1	2008-12-10 21:43:00	99	21	4	7	4
1	2008-12-10 21:44:00	268	21	4	7	4
1	2008-12-10 21:45:00	513	21	4	7	4
1	2008-12-10 21:46:00	21	21	4	7	4
1	2008-12-10 21:47:00	0	21	4	7	4
1	2008-12-10 21:48:00	0	21	4	7	4
1	2008-12-10 21:49:00	0	21	4	7	4
1	2008-12-10 21:50:00	10	21	4	7	4
1	2008-12-10 21:51:00	0	21	4	7	4
1	2008-12-10 21:52:00	0	21	4	7	4
1	2008-12-10 21:53:00	0	21	4	7	4
1	2008-12-10 21:54:00	0	21	4	7	4
1	2008-12-10 21:55:00	0	21	4	7	4
1	2008-12-10 21:56:00	0	21	4	7	4
1	2008-12-10 21:57:00	0	21	4	7	4
1	2008-12-10 21:58:00	5	21	4	7	4
1	2008-12-10 21:59:00	0	21	4	7	4
1	2008-12-10 22:00:00	0	21	4	7	4
1	2008-12-10 22:01:00	0	22	4	7	4
1	2008-12-10 22:02:00	0	22	4	7	4
1	2008-12-10 22:03:00	0	22	4	7	4
1	2008-12-10 22:04:00	0	22	4	7	4
1	2008-12-10 22:05:00	0	22	4	7	4
1	2008-12-10 22:06:00	0	22	4	7	4
1	2008-12-10 22:07:00	0	22	4	7	4
1	2008-12-10 22:08:00	0	22	4	7	4
1	2008-12-10 22:09:00	0	22	4	7	4
1	2008-12-10 22:10:00	180	22	4	7	4
1	2008-12-10 22:11:00	430	22	4	7	4
1	2008-12-10 22:12:00	16	22	4	7	4
1	2008-12-10 22:13:00	26	22	4	7	4
1	2008-12-10 22:14:00	0	22	4	7	4
1	2008-12-10 22:15:00	0	22	4	7	4
1	2008-12-10 22:16:00	0	22	4	7	4
1	2008-12-10 22:17:00	0	22	4	7	4
1	2008-12-10 22:18:00	10	22	4	7	4
1	2008-12-10 22:19:00	0	22	4	7	4
1	2008-12-10 22:20:00	0	22	4	7	4
1	2008-12-10 22:21:00	297	22	4	7	4
1	2008-12-10 22:22:00	99	22	4	7	4
1	2008-12-10 22:23:00	954	22	4	7	4
1	2008-12-10 22:24:00	679	22	4	7	4
1	2008-12-10 22:25:00	606	22	4	7	4
1	2008-12-10 22:26:00	606	22	4	7	4
1	2008-12-10 22:27:00	278	22	4	7	4
1	2008-12-10 22:28:00	86	22	4	7	4
1	2008-12-10 22:29:00	130	22	4	7	4
1	2008-12-10 22:30:00	16	22	4	7	4
1	2008-12-10 22:31:00	80	22	4	7	4
1	2008-12-10 22:32:00	47	22	4	7	4
1	2008-12-10 22:33:00	202	22	4	7	4
1	2008-12-10 22:34:00	227	22	4	7	4
1	2008-12-10 22:35:00	99	22	4	7	4
1	2008-12-10 22:36:00	0	22	4	7	4
1	2008-12-10 22:37:00	464	22	4	7	4
1	2008-12-10 22:38:00	552	22	4	7	4
1	2008-12-10 22:39:00	42	22	4	7	4
1	2008-12-10 22:40:00	62	22	4	7	4
1	2008-12-10 22:41:00	21	22	4	7	4
1	2008-12-10 22:42:00	0	22	4	7	4
1	2008-12-10 22:43:00	21	22	4	7	4
1	2008-12-10 22:44:00	31	22	4	7	4
1	2008-12-10 22:45:00	0	22	4	7	4
1	2008-12-10 22:46:00	5	22	4	7	4
1	2008-12-10 22:47:00	0	22	4	7	4
1	2008-12-10 22:48:00	0	22	4	7	4
1	2008-12-10 22:49:00	10	22	4	7	4
1	2008-12-10 22:50:00	0	22	4	7	4
1	2008-12-10 22:51:00	0	22	4	7	4
1	2008-12-10 22:52:00	0	22	4	7	4
1	2008-12-10 22:53:00	0	22	4	7	4
1	2008-12-10 22:54:00	0	22	4	7	4
1	2008-12-10 22:55:00	5	22	4	7	4
1	2008-12-10 22:56:00	5	22	4	7	4
1	2008-12-10 22:57:00	0	22	4	7	4
1	2008-12-10 22:58:00	0	22	4	7	4
1	2008-12-10 22:59:00	0	22	4	7	4
1	2008-12-10 23:00:00	0	22	4	7	4
1	2008-12-10 23:01:00	0	23	4	7	4
1	2008-12-10 23:02:00	0	23	4	7	4
1	2008-12-10 23:03:00	0	23	4	7	4
1	2008-12-10 23:04:00	26	23	4	7	4
1	2008-12-10 23:05:00	0	23	4	7	4
1	2008-12-10 23:06:00	0	23	4	7	4
1	2008-12-10 23:07:00	0	23	4	7	4
1	2008-12-10 23:08:00	0	23	4	7	4
1	2008-12-10 23:09:00	0	23	4	7	4
1	2008-12-10 23:10:00	0	23	4	7	4
1	2008-12-10 23:11:00	0	23	4	7	4
1	2008-12-10 23:12:00	0	23	4	7	4
1	2008-12-10 23:13:00	0	23	4	7	4
1	2008-12-10 23:14:00	0	23	4	7	4
1	2008-12-10 23:15:00	0	23	4	7	4
1	2008-12-10 23:16:00	0	23	4	7	4
1	2008-12-10 23:17:00	0	23	4	7	4
1	2008-12-10 23:18:00	0	23	4	7	4
1	2008-12-10 23:19:00	0	23	4	7	4
1	2008-12-10 23:20:00	0	23	4	7	4
1	2008-12-10 23:21:00	0	23	4	7	4
1	2008-12-10 23:22:00	0	23	4	7	4
1	2008-12-10 23:23:00	0	23	4	7	4
1	2008-12-10 23:24:00	0	23	4	7	4
1	2008-12-10 23:25:00	0	23	4	7	4
1	2008-12-10 23:26:00	0	23	4	7	4
1	2008-12-10 23:27:00	0	23	4	7	4
1	2008-12-10 23:28:00	0	23	4	7	4
1	2008-12-10 23:29:00	0	23	4	7	4
1	2008-12-10 23:30:00	0	23	4	7	4
1	2008-12-10 23:31:00	0	23	4	7	4
1	2008-12-10 23:32:00	0	23	4	7	4
1	2008-12-10 23:33:00	0	23	4	7	4
1	2008-12-10 23:34:00	0	23	4	7	4
1	2008-12-10 23:35:00	0	23	4	7	4
1	2008-12-10 23:36:00	0	23	4	7	4
1	2008-12-10 23:37:00	0	23	4	7	4
1	2008-12-10 23:38:00	0	23	4	7	4
1	2008-12-10 23:39:00	0	23	4	7	4
1	2008-12-10 23:40:00	0	23	4	7	4
1	2008-12-10 23:41:00	0	23	4	7	4
1	2008-12-10 23:42:00	0	23	4	7	4
1	2008-12-10 23:43:00	0	23	4	7	4
1	2008-12-10 23:44:00	0	23	4	7	4
1	2008-12-10 23:45:00	0	23	4	7	4
1	2008-12-10 23:46:00	0	23	4	7	4
1	2008-12-10 23:47:00	5	23	4	7	4
1	2008-12-10 23:48:00	21	23	4	7	4
1	2008-12-10 23:49:00	0	23	4	7	4
1	2008-12-10 23:50:00	0	23	4	7	4
1	2008-12-10 23:51:00	0	23	4	7	4
1	2008-12-10 23:52:00	0	23	4	7	4
1	2008-12-10 23:53:00	0	23	4	7	4
1	2008-12-10 23:54:00	0	23	4	7	4
1	2008-12-10 23:55:00	0	23	4	7	4
1	2008-12-10 23:56:00	0	23	4	7	4
1	2008-12-10 23:57:00	0	23	4	7	4
1	2008-12-10 23:58:00	0	23	4	7	4
1	2008-12-10 23:59:00	0	23	4	7	4
1	2008-12-11	0	23	4	7	4
1	2008-12-11 00:01:00	0	0	1	8	5
1	2008-12-11 00:02:00	0	0	1	8	5
1	2008-12-11 00:03:00	0	0	1	8	5
1	2008-12-11 00:04:00	0	0	1	8	5
1	2008-12-11 00:05:00	0	0	1	8	5
1	2008-12-11 00:06:00	0	0	1	8	5
1	2008-12-11 00:07:00	0	0	1	8	5
1	2008-12-11 00:08:00	0	0	1	8	5
1	2008-12-11 00:09:00	0	0	1	8	5
1	2008-12-11 00:10:00	0	0	1	8	5
1	2008-12-11 00:11:00	0	0	1	8	5
1	2008-12-11 00:12:00	0	0	1	8	5
1	2008-12-11 00:13:00	0	0	1	8	5
1	2008-12-11 00:14:00	0	0	1	8	5
1	2008-12-11 00:15:00	0	0	1	8	5
1	2008-12-11 00:16:00	0	0	1	8	5
1	2008-12-11 00:17:00	0	0	1	8	5
1	2008-12-11 00:18:00	0	0	1	8	5
1	2008-12-11 00:19:00	0	0	1	8	5
1	2008-12-11 00:20:00	0	0	1	8	5
1	2008-12-11 00:21:00	0	0	1	8	5
1	2008-12-11 00:22:00	0	0	1	8	5
1	2008-12-11 00:23:00	0	0	1	8	5
1	2008-12-11 00:24:00	80	0	1	8	5
1	2008-12-11 00:25:00	0	0	1	8	5
1	2008-12-11 00:26:00	10	0	1	8	5
1	2008-12-11 00:27:00	418	0	1	8	5
1	2008-12-11 00:28:00	0	0	1	8	5
1	2008-12-11 00:29:00	0	0	1	8	5
1	2008-12-11 00:30:00	0	0	1	8	5
1	2008-12-11 00:31:00	0	0	1	8	5
1	2008-12-11 00:32:00	0	0	1	8	5
1	2008-12-11 00:33:00	0	0	1	8	5
1	2008-12-11 00:34:00	0	0	1	8	5
1	2008-12-11 00:35:00	0	0	1	8	5
1	2008-12-11 00:36:00	0	0	1	8	5
1	2008-12-11 00:37:00	0	0	1	8	5
1	2008-12-11 00:38:00	0	0	1	8	5
1	2008-12-11 00:39:00	0	0	1	8	5
1	2008-12-11 00:40:00	0	0	1	8	5
1	2008-12-11 00:41:00	0	0	1	8	5
1	2008-12-11 00:42:00	0	0	1	8	5
1	2008-12-11 00:43:00	0	0	1	8	5
1	2008-12-11 00:44:00	0	0	1	8	5
1	2008-12-11 00:45:00	0	0	1	8	5
1	2008-12-11 00:46:00	0	0	1	8	5
1	2008-12-11 00:47:00	0	0	1	8	5
1	2008-12-11 00:48:00	0	0	1	8	5
1	2008-12-11 00:49:00	0	0	1	8	5
1	2008-12-11 00:50:00	86	0	1	8	5
1	2008-12-11 00:51:00	0	0	1	8	5
1	2008-12-11 00:52:00	0	0	1	8	5
1	2008-12-11 00:53:00	0	0	1	8	5
1	2008-12-11 00:54:00	0	0	1	8	5
1	2008-12-11 00:55:00	26	0	1	8	5
1	2008-12-11 00:56:00	0	0	1	8	5
1	2008-12-11 00:57:00	0	0	1	8	5
1	2008-12-11 00:58:00	0	0	1	8	5
1	2008-12-11 00:59:00	0	0	1	8	5
1	2008-12-11 01:00:00	0	0	1	8	5
1	2008-12-11 01:01:00	0	1	1	8	5
1	2008-12-11 01:02:00	0	1	1	8	5
1	2008-12-11 01:03:00	0	1	1	8	5
1	2008-12-11 01:04:00	57	1	1	8	5
1	2008-12-11 01:05:00	10	1	1	8	5
1	2008-12-11 01:06:00	0	1	1	8	5
1	2008-12-11 01:07:00	0	1	1	8	5
1	2008-12-11 01:08:00	0	1	1	8	5
1	2008-12-11 01:09:00	0	1	1	8	5
1	2008-12-11 01:10:00	0	1	1	8	5
1	2008-12-11 01:11:00	0	1	1	8	5
1	2008-12-11 01:12:00	0	1	1	8	5
1	2008-12-11 01:13:00	0	1	1	8	5
1	2008-12-11 01:14:00	0	1	1	8	5
1	2008-12-11 01:15:00	0	1	1	8	5
1	2008-12-11 01:16:00	0	1	1	8	5
1	2008-12-11 01:17:00	0	1	1	8	5
1	2008-12-11 01:18:00	0	1	1	8	5
1	2008-12-11 01:19:00	0	1	1	8	5
1	2008-12-11 01:20:00	0	1	1	8	5
1	2008-12-11 01:21:00	0	1	1	8	5
1	2008-12-11 01:22:00	0	1	1	8	5
1	2008-12-11 01:23:00	0	1	1	8	5
1	2008-12-11 01:24:00	0	1	1	8	5
1	2008-12-11 01:25:00	0	1	1	8	5
1	2008-12-11 01:26:00	0	1	1	8	5
1	2008-12-11 01:27:00	0	1	1	8	5
1	2008-12-11 01:28:00	0	1	1	8	5
1	2008-12-11 01:29:00	0	1	1	8	5
1	2008-12-11 01:30:00	0	1	1	8	5
1	2008-12-11 01:31:00	0	1	1	8	5
1	2008-12-11 01:32:00	0	1	1	8	5
1	2008-12-11 01:33:00	0	1	1	8	5
1	2008-12-11 01:34:00	0	1	1	8	5
1	2008-12-11 01:35:00	0	1	1	8	5
1	2008-12-11 01:36:00	0	1	1	8	5
1	2008-12-11 01:37:00	0	1	1	8	5
1	2008-12-11 01:38:00	0	1	1	8	5
1	2008-12-11 01:39:00	42	1	1	8	5
1	2008-12-11 01:40:00	0	1	1	8	5
1	2008-12-11 01:41:00	0	1	1	8	5
1	2008-12-11 01:42:00	0	1	1	8	5
1	2008-12-11 01:43:00	5	1	1	8	5
1	2008-12-11 01:44:00	0	1	1	8	5
1	2008-12-11 01:45:00	0	1	1	8	5
1	2008-12-11 01:46:00	0	1	1	8	5
1	2008-12-11 01:47:00	0	1	1	8	5
1	2008-12-11 01:48:00	0	1	1	8	5
1	2008-12-11 01:49:00	0	1	1	8	5
1	2008-12-11 01:50:00	86	1	1	8	5
1	2008-12-11 01:51:00	0	1	1	8	5
1	2008-12-11 01:52:00	0	1	1	8	5
1	2008-12-11 01:53:00	0	1	1	8	5
1	2008-12-11 01:54:00	0	1	1	8	5
1	2008-12-11 01:55:00	0	1	1	8	5
1	2008-12-11 01:56:00	0	1	1	8	5
1	2008-12-11 01:57:00	0	1	1	8	5
1	2008-12-11 01:58:00	0	1	1	8	5
1	2008-12-11 01:59:00	0	1	1	8	5
1	2008-12-11 02:00:00	0	1	1	8	5
1	2008-12-11 02:01:00	0	2	1	8	5
1	2008-12-11 02:02:00	0	2	1	8	5
1	2008-12-11 02:03:00	0	2	1	8	5
1	2008-12-11 02:04:00	0	2	1	8	5
1	2008-12-11 02:05:00	0	2	1	8	5
1	2008-12-11 02:06:00	0	2	1	8	5
1	2008-12-11 02:07:00	0	2	1	8	5
1	2008-12-11 02:08:00	0	2	1	8	5
1	2008-12-11 02:09:00	0	2	1	8	5
1	2008-12-11 02:10:00	0	2	1	8	5
1	2008-12-11 02:11:00	0	2	1	8	5
1	2008-12-11 02:12:00	0	2	1	8	5
1	2008-12-11 02:13:00	0	2	1	8	5
1	2008-12-11 02:14:00	0	2	1	8	5
1	2008-12-11 02:15:00	0	2	1	8	5
1	2008-12-11 02:16:00	0	2	1	8	5
1	2008-12-11 02:17:00	165	2	1	8	5
1	2008-12-11 02:18:00	26	2	1	8	5
1	2008-12-11 02:19:00	0	2	1	8	5
1	2008-12-11 02:20:00	0	2	1	8	5
1	2008-12-11 02:21:00	0	2	1	8	5
1	2008-12-11 02:22:00	0	2	1	8	5
1	2008-12-11 02:23:00	0	2	1	8	5
1	2008-12-11 02:24:00	0	2	1	8	5
1	2008-12-11 02:25:00	0	2	1	8	5
1	2008-12-11 02:26:00	0	2	1	8	5
1	2008-12-11 02:27:00	0	2	1	8	5
1	2008-12-11 02:28:00	0	2	1	8	5
1	2008-12-11 02:29:00	0	2	1	8	5
1	2008-12-11 02:30:00	0	2	1	8	5
1	2008-12-11 02:31:00	0	2	1	8	5
1	2008-12-11 02:32:00	0	2	1	8	5
1	2008-12-11 02:33:00	0	2	1	8	5
1	2008-12-11 02:34:00	0	2	1	8	5
1	2008-12-11 02:35:00	0	2	1	8	5
1	2008-12-11 02:36:00	0	2	1	8	5
1	2008-12-11 02:37:00	0	2	1	8	5
1	2008-12-11 02:38:00	0	2	1	8	5
1	2008-12-11 02:39:00	52	2	1	8	5
1	2008-12-11 02:40:00	0	2	1	8	5
1	2008-12-11 02:41:00	0	2	1	8	5
1	2008-12-11 02:42:00	0	2	1	8	5
1	2008-12-11 02:43:00	0	2	1	8	5
1	2008-12-11 02:44:00	0	2	1	8	5
1	2008-12-11 02:45:00	0	2	1	8	5
1	2008-12-11 02:46:00	0	2	1	8	5
1	2008-12-11 02:47:00	0	2	1	8	5
1	2008-12-11 02:48:00	0	2	1	8	5
1	2008-12-11 02:49:00	0	2	1	8	5
1	2008-12-11 02:50:00	0	2	1	8	5
1	2008-12-11 02:51:00	0	2	1	8	5
1	2008-12-11 02:52:00	0	2	1	8	5
1	2008-12-11 02:53:00	0	2	1	8	5
1	2008-12-11 02:54:00	0	2	1	8	5
1	2008-12-11 02:55:00	0	2	1	8	5
1	2008-12-11 02:56:00	0	2	1	8	5
1	2008-12-11 02:57:00	0	2	1	8	5
1	2008-12-11 02:58:00	10	2	1	8	5
1	2008-12-11 02:59:00	0	2	1	8	5
1	2008-12-11 03:00:00	0	2	1	8	5
1	2008-12-11 03:01:00	0	3	1	8	5
1	2008-12-11 03:02:00	0	3	1	8	5
1	2008-12-11 03:03:00	0	3	1	8	5
1	2008-12-11 03:04:00	0	3	1	8	5
1	2008-12-11 03:05:00	0	3	1	8	5
1	2008-12-11 03:06:00	16	3	1	8	5
1	2008-12-11 03:07:00	5	3	1	8	5
1	2008-12-11 03:08:00	0	3	1	8	5
1	2008-12-11 03:09:00	0	3	1	8	5
1	2008-12-11 03:10:00	0	3	1	8	5
1	2008-12-11 03:11:00	0	3	1	8	5
1	2008-12-11 03:12:00	0	3	1	8	5
1	2008-12-11 03:13:00	0	3	1	8	5
1	2008-12-11 03:14:00	0	3	1	8	5
1	2008-12-11 03:15:00	0	3	1	8	5
1	2008-12-11 03:16:00	0	3	1	8	5
1	2008-12-11 03:17:00	0	3	1	8	5
1	2008-12-11 03:18:00	0	3	1	8	5
1	2008-12-11 03:19:00	0	3	1	8	5
1	2008-12-11 03:20:00	0	3	1	8	5
1	2008-12-11 03:21:00	0	3	1	8	5
1	2008-12-11 03:22:00	0	3	1	8	5
1	2008-12-11 03:23:00	0	3	1	8	5
1	2008-12-11 03:24:00	0	3	1	8	5
1	2008-12-11 03:25:00	0	3	1	8	5
1	2008-12-11 03:26:00	0	3	1	8	5
1	2008-12-11 03:27:00	0	3	1	8	5
1	2008-12-11 03:28:00	0	3	1	8	5
1	2008-12-11 03:29:00	0	3	1	8	5
1	2008-12-11 03:30:00	0	3	1	8	5
1	2008-12-11 03:31:00	0	3	1	8	5
1	2008-12-11 03:32:00	0	3	1	8	5
1	2008-12-11 03:33:00	0	3	1	8	5
1	2008-12-11 03:34:00	0	3	1	8	5
1	2008-12-11 03:35:00	0	3	1	8	5
1	2008-12-11 03:36:00	0	3	1	8	5
1	2008-12-11 03:37:00	0	3	1	8	5
1	2008-12-11 03:38:00	0	3	1	8	5
1	2008-12-11 03:39:00	0	3	1	8	5
1	2008-12-11 03:40:00	0	3	1	8	5
1	2008-12-11 03:41:00	36	3	1	8	5
1	2008-12-11 03:42:00	0	3	1	8	5
1	2008-12-11 03:43:00	21	3	1	8	5
1	2008-12-11 03:44:00	16	3	1	8	5
1	2008-12-11 03:45:00	0	3	1	8	5
1	2008-12-11 03:46:00	0	3	1	8	5
1	2008-12-11 03:47:00	0	3	1	8	5
1	2008-12-11 03:48:00	0	3	1	8	5
1	2008-12-11 03:49:00	0	3	1	8	5
1	2008-12-11 03:50:00	0	3	1	8	5
1	2008-12-11 03:51:00	0	3	1	8	5
1	2008-12-11 03:52:00	0	3	1	8	5
1	2008-12-11 03:53:00	0	3	1	8	5
1	2008-12-11 03:54:00	0	3	1	8	5
1	2008-12-11 03:55:00	0	3	1	8	5
1	2008-12-11 03:56:00	0	3	1	8	5
1	2008-12-11 03:57:00	0	3	1	8	5
1	2008-12-11 03:58:00	0	3	1	8	5
1	2008-12-11 03:59:00	0	3	1	8	5
1	2008-12-11 04:00:00	0	3	1	8	5
1	2008-12-11 04:01:00	0	4	1	8	5
1	2008-12-11 04:02:00	0	4	1	8	5
1	2008-12-11 04:03:00	0	4	1	8	5
1	2008-12-11 04:04:00	5	4	1	8	5
1	2008-12-11 04:05:00	74	4	1	8	5
1	2008-12-11 04:06:00	0	4	1	8	5
1	2008-12-11 04:07:00	0	4	1	8	5
1	2008-12-11 04:08:00	0	4	1	8	5
1	2008-12-11 04:09:00	0	4	1	8	5
1	2008-12-11 04:10:00	0	4	1	8	5
1	2008-12-11 04:11:00	0	4	1	8	5
1	2008-12-11 04:12:00	0	4	1	8	5
1	2008-12-11 04:13:00	0	4	1	8	5
1	2008-12-11 04:14:00	0	4	1	8	5
1	2008-12-11 04:15:00	0	4	1	8	5
1	2008-12-11 04:16:00	0	4	1	8	5
1	2008-12-11 04:17:00	0	4	1	8	5
1	2008-12-11 04:18:00	0	4	1	8	5
1	2008-12-11 04:19:00	0	4	1	8	5
1	2008-12-11 04:20:00	0	4	1	8	5
1	2008-12-11 04:21:00	0	4	1	8	5
1	2008-12-11 04:22:00	47	4	1	8	5
1	2008-12-11 04:23:00	0	4	1	8	5
1	2008-12-11 04:24:00	0	4	1	8	5
1	2008-12-11 04:25:00	86	4	1	8	5
1	2008-12-11 04:26:00	0	4	1	8	5
1	2008-12-11 04:27:00	0	4	1	8	5
1	2008-12-11 04:28:00	0	4	1	8	5
1	2008-12-11 04:29:00	5	4	1	8	5
1	2008-12-11 04:30:00	0	4	1	8	5
1	2008-12-11 04:31:00	0	4	1	8	5
1	2008-12-11 04:32:00	0	4	1	8	5
1	2008-12-11 04:33:00	124	4	1	8	5
1	2008-12-11 04:34:00	74	4	1	8	5
1	2008-12-11 04:35:00	0	4	1	8	5
1	2008-12-11 04:36:00	10	4	1	8	5
1	2008-12-11 04:37:00	21	4	1	8	5
1	2008-12-11 04:38:00	0	4	1	8	5
1	2008-12-11 04:39:00	0	4	1	8	5
1	2008-12-11 04:40:00	0	4	1	8	5
1	2008-12-11 04:41:00	0	4	1	8	5
1	2008-12-11 04:42:00	0	4	1	8	5
1	2008-12-11 04:43:00	0	4	1	8	5
1	2008-12-11 04:44:00	0	4	1	8	5
1	2008-12-11 04:45:00	0	4	1	8	5
1	2008-12-11 04:46:00	0	4	1	8	5
1	2008-12-11 04:47:00	0	4	1	8	5
1	2008-12-11 04:48:00	0	4	1	8	5
1	2008-12-11 04:49:00	0	4	1	8	5
1	2008-12-11 04:50:00	0	4	1	8	5
1	2008-12-11 04:51:00	0	4	1	8	5
1	2008-12-11 04:52:00	0	4	1	8	5
1	2008-12-11 04:53:00	0	4	1	8	5
1	2008-12-11 04:54:00	0	4	1	8	5
1	2008-12-11 04:55:00	0	4	1	8	5
1	2008-12-11 04:56:00	0	4	1	8	5
1	2008-12-11 04:57:00	0	4	1	8	5
1	2008-12-11 04:58:00	0	4	1	8	5
1	2008-12-11 04:59:00	0	4	1	8	5
1	2008-12-11 05:00:00	0	4	1	8	5
1	2008-12-11 05:01:00	0	5	1	8	5
1	2008-12-11 05:02:00	0	5	1	8	5
1	2008-12-11 05:03:00	0	5	1	8	5
1	2008-12-11 05:04:00	0	5	1	8	5
1	2008-12-11 05:05:00	0	5	1	8	5
1	2008-12-11 05:06:00	0	5	1	8	5
1	2008-12-11 05:07:00	0	5	1	8	5
1	2008-12-11 05:08:00	0	5	1	8	5
1	2008-12-11 05:09:00	0	5	1	8	5
1	2008-12-11 05:10:00	0	5	1	8	5
1	2008-12-11 05:11:00	21	5	1	8	5
1	2008-12-11 05:12:00	26	5	1	8	5
1	2008-12-11 05:13:00	0	5	1	8	5
1	2008-12-11 05:14:00	0	5	1	8	5
1	2008-12-11 05:15:00	0	5	1	8	5
1	2008-12-11 05:16:00	0	5	1	8	5
1	2008-12-11 05:17:00	0	5	1	8	5
1	2008-12-11 05:18:00	0	5	1	8	5
1	2008-12-11 05:19:00	0	5	1	8	5
1	2008-12-11 05:20:00	0	5	1	8	5
1	2008-12-11 05:21:00	0	5	1	8	5
1	2008-12-11 05:22:00	0	5	1	8	5
1	2008-12-11 05:23:00	0	5	1	8	5
1	2008-12-11 05:24:00	0	5	1	8	5
1	2008-12-11 05:25:00	10	5	1	8	5
1	2008-12-11 05:26:00	0	5	1	8	5
1	2008-12-11 05:27:00	0	5	1	8	5
1	2008-12-11 05:28:00	0	5	1	8	5
1	2008-12-11 05:29:00	0	5	1	8	5
1	2008-12-11 05:30:00	0	5	1	8	5
1	2008-12-11 05:31:00	0	5	1	8	5
1	2008-12-11 05:32:00	0	5	1	8	5
1	2008-12-11 05:33:00	0	5	1	8	5
1	2008-12-11 05:34:00	0	5	1	8	5
1	2008-12-11 05:35:00	0	5	1	8	5
1	2008-12-11 05:36:00	31	5	1	8	5
1	2008-12-11 05:37:00	0	5	1	8	5
1	2008-12-11 05:38:00	0	5	1	8	5
1	2008-12-11 05:39:00	0	5	1	8	5
1	2008-12-11 05:40:00	0	5	1	8	5
1	2008-12-11 05:41:00	0	5	1	8	5
1	2008-12-11 05:42:00	0	5	1	8	5
1	2008-12-11 05:43:00	0	5	1	8	5
1	2008-12-11 05:44:00	0	5	1	8	5
1	2008-12-11 05:45:00	16	5	1	8	5
1	2008-12-11 05:46:00	10	5	1	8	5
1	2008-12-11 05:47:00	5	5	1	8	5
1	2008-12-11 05:48:00	0	5	1	8	5
1	2008-12-11 05:49:00	130	5	1	8	5
1	2008-12-11 05:50:00	68	5	1	8	5
1	2008-12-11 05:51:00	5	5	1	8	5
1	2008-12-11 05:52:00	111	5	1	8	5
1	2008-12-11 05:53:00	464	5	1	8	5
1	2008-12-11 05:54:00	538	5	1	8	5
1	2008-12-11 05:55:00	74	5	1	8	5
1	2008-12-11 05:56:00	5	5	1	8	5
1	2008-12-11 05:57:00	0	5	1	8	5
1	2008-12-11 05:58:00	118	5	1	8	5
1	2008-12-11 05:59:00	0	5	1	8	5
1	2008-12-11 06:00:00	219	5	1	8	5
1	2008-12-11 06:01:00	99	6	2	8	5
1	2008-12-11 06:02:00	1014	6	2	8	5
1	2008-12-11 06:03:00	1358	6	2	8	5
1	2008-12-11 06:04:00	897	6	2	8	5
1	2008-12-11 06:05:00	441	6	2	8	5
1	2008-12-11 06:06:00	365	6	2	8	5
1	2008-12-11 06:07:00	526	6	2	8	5
1	2008-12-11 06:08:00	453	6	2	8	5
1	2008-12-11 06:09:00	396	6	2	8	5
1	2008-12-11 06:10:00	488	6	2	8	5
1	2008-12-11 06:11:00	464	6	2	8	5
1	2008-12-11 06:12:00	843	6	2	8	5
1	2008-12-11 06:13:00	344	6	2	8	5
1	2008-12-11 06:14:00	0	6	2	8	5
1	2008-12-11 06:15:00	0	6	2	8	5
1	2008-12-11 06:16:00	5	6	2	8	5
1	2008-12-11 06:17:00	0	6	2	8	5
1	2008-12-11 06:18:00	10	6	2	8	5
1	2008-12-11 06:19:00	0	6	2	8	5
1	2008-12-11 06:20:00	0	6	2	8	5
1	2008-12-11 06:21:00	0	6	2	8	5
1	2008-12-11 06:22:00	0	6	2	8	5
1	2008-12-11 06:23:00	0	6	2	8	5
1	2008-12-11 06:24:00	0	6	2	8	5
1	2008-12-11 06:25:00	0	6	2	8	5
1	2008-12-11 06:26:00	0	6	2	8	5
1	2008-12-11 06:27:00	0	6	2	8	5
1	2008-12-11 06:28:00	5	6	2	8	5
1	2008-12-11 06:29:00	0	6	2	8	5
1	2008-12-11 06:30:00	0	6	2	8	5
1	2008-12-11 06:31:00	0	6	2	8	5
1	2008-12-11 06:32:00	0	6	2	8	5
1	2008-12-11 06:33:00	0	6	2	8	5
1	2008-12-11 06:34:00	21	6	2	8	5
1	2008-12-11 06:35:00	0	6	2	8	5
1	2008-12-11 06:36:00	0	6	2	8	5
1	2008-12-11 06:37:00	0	6	2	8	5
1	2008-12-11 06:38:00	0	6	2	8	5
1	2008-12-11 06:39:00	0	6	2	8	5
1	2008-12-11 06:40:00	0	6	2	8	5
1	2008-12-11 06:41:00	0	6	2	8	5
1	2008-12-11 06:42:00	501	6	2	8	5
1	2008-12-11 06:43:00	287	6	2	8	5
1	2008-12-11 06:44:00	2422	6	2	8	5
1	2008-12-11 06:45:00	136	6	2	8	5
1	2008-12-11 06:46:00	0	6	2	8	5
1	2008-12-11 06:47:00	0	6	2	8	5
1	2008-12-11 06:48:00	1577	6	2	8	5
1	2008-12-11 06:49:00	453	6	2	8	5
1	2008-12-11 06:50:00	16	6	2	8	5
1	2008-12-11 06:51:00	57	6	2	8	5
1	2008-12-11 06:52:00	36	6	2	8	5
1	2008-12-11 06:53:00	407	6	2	8	5
1	2008-12-11 06:54:00	0	6	2	8	5
1	2008-12-11 06:55:00	26	6	2	8	5
1	2008-12-11 06:56:00	93	6	2	8	5
1	2008-12-11 06:57:00	453	6	2	8	5
1	2008-12-11 06:58:00	741	6	2	8	5
1	2008-12-11 06:59:00	0	6	2	8	5
1	2008-12-11 07:00:00	0	6	2	8	5
1	2008-12-11 07:01:00	0	7	2	8	5
1	2008-12-11 07:02:00	0	7	2	8	5
1	2008-12-11 07:03:00	0	7	2	8	5
1	2008-12-11 07:04:00	0	7	2	8	5
1	2008-12-11 07:05:00	0	7	2	8	5
1	2008-12-11 07:06:00	165	7	2	8	5
1	2008-12-11 07:07:00	187	7	2	8	5
1	2008-12-11 07:08:00	0	7	2	8	5
1	2008-12-11 07:09:00	0	7	2	8	5
1	2008-12-11 07:10:00	0	7	2	8	5
1	2008-12-11 07:11:00	0	7	2	8	5
1	2008-12-11 07:12:00	0	7	2	8	5
1	2008-12-11 07:13:00	0	7	2	8	5
1	2008-12-11 07:14:00	365	7	2	8	5
1	2008-12-11 07:15:00	260	7	2	8	5
1	2008-12-11 07:16:00	111	7	2	8	5
1	2008-12-11 07:17:00	0	7	2	8	5
1	2008-12-11 07:18:00	0	7	2	8	5
1	2008-12-11 07:19:00	0	7	2	8	5
1	2008-12-11 07:20:00	0	7	2	8	5
1	2008-12-11 07:21:00	0	7	2	8	5
1	2008-12-11 07:22:00	0	7	2	8	5
1	2008-12-11 07:23:00	26	7	2	8	5
1	2008-12-11 07:24:00	0	7	2	8	5
1	2008-12-11 07:25:00	0	7	2	8	5
1	2008-12-11 07:26:00	0	7	2	8	5
1	2008-12-11 07:27:00	0	7	2	8	5
1	2008-12-11 07:28:00	0	7	2	8	5
1	2008-12-11 07:29:00	0	7	2	8	5
1	2008-12-11 07:30:00	0	7	2	8	5
1	2008-12-11 07:31:00	0	7	2	8	5
1	2008-12-11 07:32:00	0	7	2	8	5
1	2008-12-11 07:33:00	0	7	2	8	5
1	2008-12-11 07:34:00	0	7	2	8	5
1	2008-12-11 07:35:00	0	7	2	8	5
1	2008-12-11 07:36:00	0	7	2	8	5
1	2008-12-11 07:37:00	0	7	2	8	5
1	2008-12-11 07:38:00	0	7	2	8	5
1	2008-12-11 07:39:00	0	7	2	8	5
1	2008-12-11 07:40:00	0	7	2	8	5
1	2008-12-11 07:41:00	0	7	2	8	5
1	2008-12-11 07:42:00	0	7	2	8	5
1	2008-12-11 07:43:00	0	7	2	8	5
1	2008-12-11 07:44:00	0	7	2	8	5
1	2008-12-11 07:45:00	0	7	2	8	5
1	2008-12-11 07:46:00	0	7	2	8	5
1	2008-12-11 07:47:00	16	7	2	8	5
1	2008-12-11 07:48:00	5	7	2	8	5
1	2008-12-11 07:49:00	0	7	2	8	5
1	2008-12-11 07:50:00	0	7	2	8	5
1	2008-12-11 07:51:00	0	7	2	8	5
1	2008-12-11 07:52:00	124	7	2	8	5
1	2008-12-11 07:53:00	0	7	2	8	5
1	2008-12-11 07:54:00	0	7	2	8	5
1	2008-12-11 07:55:00	0	7	2	8	5
1	2008-12-11 07:56:00	0	7	2	8	5
1	2008-12-11 07:57:00	0	7	2	8	5
1	2008-12-11 07:58:00	0	7	2	8	5
1	2008-12-11 07:59:00	0	7	2	8	5
1	2008-12-11 08:00:00	0	7	2	8	5
1	2008-12-11 08:01:00	0	8	2	8	5
1	2008-12-11 08:02:00	0	8	2	8	5
1	2008-12-11 08:03:00	0	8	2	8	5
1	2008-12-11 08:04:00	0	8	2	8	5
1	2008-12-11 08:05:00	0	8	2	8	5
1	2008-12-11 08:06:00	0	8	2	8	5
1	2008-12-11 08:07:00	0	8	2	8	5
1	2008-12-11 08:08:00	0	8	2	8	5
1	2008-12-11 08:09:00	0	8	2	8	5
1	2008-12-11 08:10:00	0	8	2	8	5
1	2008-12-11 08:11:00	0	8	2	8	5
1	2008-12-11 08:12:00	0	8	2	8	5
1	2008-12-11 08:13:00	0	8	2	8	5
1	2008-12-11 08:14:00	0	8	2	8	5
1	2008-12-11 08:15:00	0	8	2	8	5
1	2008-12-11 08:16:00	0	8	2	8	5
1	2008-12-11 08:17:00	0	8	2	8	5
1	2008-12-11 08:18:00	0	8	2	8	5
1	2008-12-11 08:19:00	0	8	2	8	5
1	2008-12-11 08:20:00	0	8	2	8	5
1	2008-12-11 08:21:00	0	8	2	8	5
1	2008-12-11 08:22:00	0	8	2	8	5
1	2008-12-11 08:23:00	0	8	2	8	5
1	2008-12-11 08:24:00	0	8	2	8	5
1	2008-12-11 08:25:00	0	8	2	8	5
1	2008-12-11 08:26:00	0	8	2	8	5
1	2008-12-11 08:27:00	0	8	2	8	5
1	2008-12-11 08:28:00	0	8	2	8	5
1	2008-12-11 08:29:00	0	8	2	8	5
1	2008-12-11 08:30:00	5	8	2	8	5
1	2008-12-11 08:31:00	0	8	2	8	5
1	2008-12-11 08:32:00	0	8	2	8	5
1	2008-12-11 08:33:00	0	8	2	8	5
1	2008-12-11 08:34:00	0	8	2	8	5
1	2008-12-11 08:35:00	0	8	2	8	5
1	2008-12-11 08:36:00	5	8	2	8	5
1	2008-12-11 08:37:00	0	8	2	8	5
1	2008-12-11 08:38:00	0	8	2	8	5
1	2008-12-11 08:39:00	0	8	2	8	5
1	2008-12-11 08:40:00	0	8	2	8	5
1	2008-12-11 08:41:00	0	8	2	8	5
1	2008-12-11 08:42:00	0	8	2	8	5
1	2008-12-11 08:43:00	0	8	2	8	5
1	2008-12-11 08:44:00	0	8	2	8	5
1	2008-12-11 08:45:00	31	8	2	8	5
1	2008-12-11 08:46:00	0	8	2	8	5
1	2008-12-11 08:47:00	0	8	2	8	5
1	2008-12-11 08:48:00	0	8	2	8	5
1	2008-12-11 08:49:00	0	8	2	8	5
1	2008-12-11 08:50:00	0	8	2	8	5
1	2008-12-11 08:51:00	62	8	2	8	5
1	2008-12-11 08:52:00	0	8	2	8	5
1	2008-12-11 08:53:00	0	8	2	8	5
1	2008-12-11 08:54:00	0	8	2	8	5
1	2008-12-11 08:55:00	0	8	2	8	5
1	2008-12-11 08:56:00	0	8	2	8	5
1	2008-12-11 08:57:00	0	8	2	8	5
1	2008-12-11 08:58:00	0	8	2	8	5
1	2008-12-11 08:59:00	0	8	2	8	5
1	2008-12-11 09:00:00	0	8	2	8	5
1	2008-12-11 09:01:00	0	9	2	8	5
1	2008-12-11 09:02:00	0	9	2	8	5
1	2008-12-11 09:03:00	0	9	2	8	5
1	2008-12-11 09:04:00	0	9	2	8	5
1	2008-12-11 09:05:00	0	9	2	8	5
1	2008-12-11 09:06:00	0	9	2	8	5
1	2008-12-11 09:07:00	42	9	2	8	5
1	2008-12-11 09:08:00	0	9	2	8	5
1	2008-12-11 09:09:00	21	9	2	8	5
1	2008-12-11 09:10:00	16	9	2	8	5
1	2008-12-11 09:11:00	0	9	2	8	5
1	2008-12-11 09:12:00	315	9	2	8	5
1	2008-12-11 09:13:00	0	9	2	8	5
1	2008-12-11 09:14:00	0	9	2	8	5
1	2008-12-11 09:15:00	0	9	2	8	5
1	2008-12-11 09:16:00	0	9	2	8	5
1	2008-12-11 09:17:00	0	9	2	8	5
1	2008-12-11 09:18:00	0	9	2	8	5
1	2008-12-11 09:19:00	0	9	2	8	5
1	2008-12-11 09:20:00	0	9	2	8	5
1	2008-12-11 09:21:00	0	9	2	8	5
1	2008-12-11 09:22:00	0	9	2	8	5
1	2008-12-11 09:23:00	0	9	2	8	5
1	2008-12-11 09:24:00	0	9	2	8	5
1	2008-12-11 09:25:00	0	9	2	8	5
1	2008-12-11 09:26:00	62	9	2	8	5
1	2008-12-11 09:27:00	42	9	2	8	5
1	2008-12-11 09:28:00	741	9	2	8	5
1	2008-12-11 09:29:00	210	9	2	8	5
1	2008-12-11 09:30:00	93	9	2	8	5
1	2008-12-11 09:31:00	325	9	2	8	5
1	2008-12-11 09:32:00	47	9	2	8	5
1	2008-12-11 09:33:00	26	9	2	8	5
1	2008-12-11 09:34:00	26	9	2	8	5
1	2008-12-11 09:35:00	244	9	2	8	5
1	2008-12-11 09:36:00	173	9	2	8	5
1	2008-12-11 09:37:00	93	9	2	8	5
1	2008-12-11 09:38:00	0	9	2	8	5
1	2008-12-11 09:39:00	0	9	2	8	5
1	2008-12-11 09:40:00	0	9	2	8	5
1	2008-12-11 09:41:00	0	9	2	8	5
1	2008-12-11 09:42:00	0	9	2	8	5
1	2008-12-11 09:43:00	62	9	2	8	5
1	2008-12-11 09:44:00	0	9	2	8	5
1	2008-12-11 09:45:00	0	9	2	8	5
1	2008-12-11 09:46:00	0	9	2	8	5
1	2008-12-11 09:47:00	26	9	2	8	5
1	2008-12-11 09:48:00	0	9	2	8	5
1	2008-12-11 09:49:00	10	9	2	8	5
1	2008-12-11 09:50:00	0	9	2	8	5
1	2008-12-11 09:51:00	21	9	2	8	5
1	2008-12-11 09:52:00	0	9	2	8	5
1	2008-12-11 09:53:00	26	9	2	8	5
1	2008-12-11 09:54:00	10	9	2	8	5
1	2008-12-11 09:55:00	16	9	2	8	5
1	2008-12-11 09:56:00	0	9	2	8	5
1	2008-12-11 09:57:00	0	9	2	8	5
1	2008-12-11 09:58:00	0	9	2	8	5
1	2008-12-11 09:59:00	118	9	2	8	5
1	2008-12-11 10:00:00	278	9	2	8	5
1	2008-12-11 10:01:00	42	10	2	8	5
1	2008-12-11 10:02:00	31	10	2	8	5
1	2008-12-11 10:03:00	52	10	2	8	5
1	2008-12-11 10:04:00	0	10	2	8	5
1	2008-12-11 10:05:00	0	10	2	8	5
1	2008-12-11 10:06:00	0	10	2	8	5
1	2008-12-11 10:07:00	0	10	2	8	5
1	2008-12-11 10:08:00	47	10	2	8	5
1	2008-12-11 10:09:00	52	10	2	8	5
1	2008-12-11 10:10:00	0	10	2	8	5
1	2008-12-11 10:11:00	0	10	2	8	5
1	2008-12-11 10:12:00	0	10	2	8	5
1	2008-12-11 10:13:00	68	10	2	8	5
1	2008-12-11 10:14:00	21	10	2	8	5
1	2008-12-11 10:15:00	0	10	2	8	5
1	2008-12-11 10:16:00	0	10	2	8	5
1	2008-12-11 10:17:00	31	10	2	8	5
1	2008-12-11 10:18:00	10	10	2	8	5
1	2008-12-11 10:19:00	0	10	2	8	5
1	2008-12-11 10:20:00	5	10	2	8	5
1	2008-12-11 10:21:00	0	10	2	8	5
1	2008-12-11 10:22:00	5	10	2	8	5
1	2008-12-11 10:23:00	0	10	2	8	5
1	2008-12-11 10:24:00	16	10	2	8	5
1	2008-12-11 10:25:00	47	10	2	8	5
1	2008-12-11 10:26:00	0	10	2	8	5
1	2008-12-11 10:27:00	111	10	2	8	5
1	2008-12-11 10:28:00	0	10	2	8	5
1	2008-12-11 10:29:00	0	10	2	8	5
1	2008-12-11 10:30:00	0	10	2	8	5
1	2008-12-11 10:31:00	0	10	2	8	5
1	2008-12-11 10:32:00	0	10	2	8	5
1	2008-12-11 10:33:00	86	10	2	8	5
1	2008-12-11 10:34:00	31	10	2	8	5
1	2008-12-11 10:35:00	26	10	2	8	5
1	2008-12-11 10:36:00	124	10	2	8	5
1	2008-12-11 10:37:00	0	10	2	8	5
1	2008-12-11 10:38:00	0	10	2	8	5
1	2008-12-11 10:39:00	0	10	2	8	5
1	2008-12-11 10:40:00	0	10	2	8	5
1	2008-12-11 10:41:00	0	10	2	8	5
1	2008-12-11 10:42:00	0	10	2	8	5
1	2008-12-11 10:43:00	0	10	2	8	5
1	2008-12-11 10:44:00	0	10	2	8	5
1	2008-12-11 10:45:00	0	10	2	8	5
1	2008-12-11 10:46:00	0	10	2	8	5
1	2008-12-11 10:47:00	0	10	2	8	5
1	2008-12-11 10:48:00	10	10	2	8	5
1	2008-12-11 10:49:00	42	10	2	8	5
1	2008-12-11 10:50:00	0	10	2	8	5
1	2008-12-11 10:51:00	0	10	2	8	5
1	2008-12-11 10:52:00	0	10	2	8	5
1	2008-12-11 10:53:00	0	10	2	8	5
1	2008-12-11 10:54:00	0	10	2	8	5
1	2008-12-11 10:55:00	16	10	2	8	5
1	2008-12-11 10:56:00	47	10	2	8	5
1	2008-12-11 10:57:00	26	10	2	8	5
1	2008-12-11 10:58:00	26	10	2	8	5
1	2008-12-11 10:59:00	21	10	2	8	5
1	2008-12-11 11:00:00	0	10	2	8	5
1	2008-12-11 11:01:00	16	11	2	8	5
1	2008-12-11 11:02:00	21	11	2	8	5
1	2008-12-11 11:03:00	0	11	2	8	5
1	2008-12-11 11:04:00	0	11	2	8	5
1	2008-12-11 11:05:00	0	11	2	8	5
1	2008-12-11 11:06:00	0	11	2	8	5
1	2008-12-11 11:07:00	0	11	2	8	5
1	2008-12-11 11:08:00	0	11	2	8	5
1	2008-12-11 11:09:00	0	11	2	8	5
1	2008-12-11 11:10:00	0	11	2	8	5
1	2008-12-11 11:11:00	0	11	2	8	5
1	2008-12-11 11:12:00	0	11	2	8	5
1	2008-12-11 11:13:00	0	11	2	8	5
1	2008-12-11 11:14:00	0	11	2	8	5
1	2008-12-11 11:15:00	0	11	2	8	5
1	2008-12-11 11:16:00	0	11	2	8	5
1	2008-12-11 11:17:00	0	11	2	8	5
1	2008-12-11 11:18:00	0	11	2	8	5
1	2008-12-11 11:19:00	0	11	2	8	5
1	2008-12-11 11:20:00	0	11	2	8	5
1	2008-12-11 11:21:00	0	11	2	8	5
1	2008-12-11 11:22:00	0	11	2	8	5
1	2008-12-11 11:23:00	0	11	2	8	5
1	2008-12-11 11:24:00	0	11	2	8	5
1	2008-12-11 11:25:00	0	11	2	8	5
1	2008-12-11 11:26:00	0	11	2	8	5
1	2008-12-11 11:27:00	0	11	2	8	5
1	2008-12-11 11:28:00	0	11	2	8	5
1	2008-12-11 11:29:00	0	11	2	8	5
1	2008-12-11 11:30:00	0	11	2	8	5
1	2008-12-11 11:31:00	0	11	2	8	5
1	2008-12-11 11:32:00	0	11	2	8	5
1	2008-12-11 11:33:00	0	11	2	8	5
1	2008-12-11 11:34:00	0	11	2	8	5
1	2008-12-11 11:35:00	0	11	2	8	5
1	2008-12-11 11:36:00	0	11	2	8	5
1	2008-12-11 11:37:00	0	11	2	8	5
1	2008-12-11 11:38:00	0	11	2	8	5
1	2008-12-11 11:39:00	10	11	2	8	5
1	2008-12-11 11:40:00	0	11	2	8	5
1	2008-12-11 11:41:00	0	11	2	8	5
1	2008-12-11 11:42:00	0	11	2	8	5
1	2008-12-11 11:43:00	0	11	2	8	5
1	2008-12-11 11:44:00	0	11	2	8	5
1	2008-12-11 11:45:00	0	11	2	8	5
1	2008-12-11 11:46:00	0	11	2	8	5
1	2008-12-11 11:47:00	0	11	2	8	5
1	2008-12-11 11:48:00	0	11	2	8	5
1	2008-12-11 11:49:00	0	11	2	8	5
1	2008-12-11 11:50:00	0	11	2	8	5
1	2008-12-11 11:51:00	0	11	2	8	5
1	2008-12-11 11:52:00	0	11	2	8	5
1	2008-12-11 11:53:00	0	11	2	8	5
1	2008-12-11 11:54:00	0	11	2	8	5
1	2008-12-11 11:55:00	0	11	2	8	5
1	2008-12-11 11:56:00	0	11	2	8	5
1	2008-12-11 11:57:00	0	11	2	8	5
1	2008-12-11 11:58:00	0	11	2	8	5
1	2008-12-11 11:59:00	0	11	2	8	5
1	2008-12-11 12:00:00	0	11	2	8	5
1	2008-12-11 12:01:00	0	12	3	8	5
1	2008-12-11 12:02:00	0	12	3	8	5
1	2008-12-11 12:03:00	0	12	3	8	5
1	2008-12-11 12:04:00	0	12	3	8	5
1	2008-12-11 12:05:00	0	12	3	8	5
1	2008-12-11 12:06:00	0	12	3	8	5
1	2008-12-11 12:07:00	0	12	3	8	5
1	2008-12-11 12:08:00	0	12	3	8	5
1	2008-12-11 12:09:00	0	12	3	8	5
1	2008-12-11 12:10:00	0	12	3	8	5
1	2008-12-11 12:11:00	0	12	3	8	5
1	2008-12-11 12:12:00	0	12	3	8	5
1	2008-12-11 12:13:00	0	12	3	8	5
1	2008-12-11 12:14:00	0	12	3	8	5
1	2008-12-11 12:15:00	0	12	3	8	5
1	2008-12-11 12:16:00	0	12	3	8	5
1	2008-12-11 12:17:00	0	12	3	8	5
1	2008-12-11 12:18:00	0	12	3	8	5
1	2008-12-11 12:19:00	0	12	3	8	5
1	2008-12-11 12:20:00	0	12	3	8	5
1	2008-12-11 12:21:00	0	12	3	8	5
1	2008-12-11 12:22:00	0	12	3	8	5
1	2008-12-11 12:23:00	0	12	3	8	5
1	2008-12-11 12:24:00	0	12	3	8	5
1	2008-12-11 12:25:00	0	12	3	8	5
1	2008-12-11 12:26:00	0	12	3	8	5
1	2008-12-11 12:27:00	0	12	3	8	5
1	2008-12-11 12:28:00	26	12	3	8	5
1	2008-12-11 12:29:00	0	12	3	8	5
1	2008-12-11 12:30:00	0	12	3	8	5
1	2008-12-11 12:31:00	0	12	3	8	5
1	2008-12-11 12:32:00	0	12	3	8	5
1	2008-12-11 12:33:00	0	12	3	8	5
1	2008-12-11 12:34:00	0	12	3	8	5
1	2008-12-11 12:35:00	0	12	3	8	5
1	2008-12-11 12:36:00	0	12	3	8	5
1	2008-12-11 12:37:00	0	12	3	8	5
1	2008-12-11 12:38:00	0	12	3	8	5
1	2008-12-11 12:39:00	0	12	3	8	5
1	2008-12-11 12:40:00	0	12	3	8	5
1	2008-12-11 12:41:00	0	12	3	8	5
1	2008-12-11 12:42:00	0	12	3	8	5
1	2008-12-11 12:43:00	10	12	3	8	5
1	2008-12-11 12:44:00	0	12	3	8	5
1	2008-12-11 12:45:00	0	12	3	8	5
1	2008-12-11 12:46:00	0	12	3	8	5
1	2008-12-11 12:47:00	0	12	3	8	5
1	2008-12-11 12:48:00	36	12	3	8	5
1	2008-12-11 12:49:00	5	12	3	8	5
1	2008-12-11 12:50:00	0	12	3	8	5
1	2008-12-11 12:51:00	0	12	3	8	5
1	2008-12-11 12:52:00	260	12	3	8	5
1	2008-12-11 12:53:00	0	12	3	8	5
1	2008-12-11 12:54:00	0	12	3	8	5
1	2008-12-11 12:55:00	0	12	3	8	5
1	2008-12-11 12:56:00	0	12	3	8	5
1	2008-12-11 12:57:00	0	12	3	8	5
1	2008-12-11 12:58:00	0	12	3	8	5
1	2008-12-11 12:59:00	0	12	3	8	5
1	2008-12-11 13:00:00	0	12	3	8	5
1	2008-12-11 13:01:00	0	13	3	8	5
1	2008-12-11 13:02:00	0	13	3	8	5
1	2008-12-11 13:03:00	0	13	3	8	5
1	2008-12-11 13:04:00	0	13	3	8	5
1	2008-12-11 13:05:00	0	13	3	8	5
1	2008-12-11 13:06:00	0	13	3	8	5
1	2008-12-11 13:07:00	0	13	3	8	5
1	2008-12-11 13:08:00	0	13	3	8	5
1	2008-12-11 13:09:00	0	13	3	8	5
1	2008-12-11 13:10:00	0	13	3	8	5
1	2008-12-11 13:11:00	0	13	3	8	5
1	2008-12-11 13:12:00	0	13	3	8	5
1	2008-12-11 13:13:00	68	13	3	8	5
1	2008-12-11 13:14:00	5	13	3	8	5
1	2008-12-11 13:15:00	0	13	3	8	5
1	2008-12-11 13:16:00	0	13	3	8	5
1	2008-12-11 13:17:00	0	13	3	8	5
1	2008-12-11 13:18:00	0	13	3	8	5
1	2008-12-11 13:19:00	0	13	3	8	5
1	2008-12-11 13:20:00	0	13	3	8	5
1	2008-12-11 13:21:00	0	13	3	8	5
1	2008-12-11 13:22:00	0	13	3	8	5
1	2008-12-11 13:23:00	0	13	3	8	5
1	2008-12-11 13:24:00	0	13	3	8	5
1	2008-12-11 13:25:00	0	13	3	8	5
1	2008-12-11 13:26:00	0	13	3	8	5
1	2008-12-11 13:27:00	0	13	3	8	5
1	2008-12-11 13:28:00	0	13	3	8	5
1	2008-12-11 13:29:00	0	13	3	8	5
1	2008-12-11 13:30:00	0	13	3	8	5
1	2008-12-11 13:31:00	0	13	3	8	5
1	2008-12-11 13:32:00	0	13	3	8	5
1	2008-12-11 13:33:00	0	13	3	8	5
1	2008-12-11 13:34:00	0	13	3	8	5
1	2008-12-11 13:35:00	0	13	3	8	5
1	2008-12-11 13:36:00	10	13	3	8	5
1	2008-12-11 13:37:00	0	13	3	8	5
1	2008-12-11 13:38:00	0	13	3	8	5
1	2008-12-11 13:39:00	0	13	3	8	5
1	2008-12-11 13:40:00	0	13	3	8	5
1	2008-12-11 13:41:00	0	13	3	8	5
1	2008-12-11 13:42:00	0	13	3	8	5
1	2008-12-11 13:43:00	0	13	3	8	5
1	2008-12-11 13:44:00	0	13	3	8	5
1	2008-12-11 13:45:00	0	13	3	8	5
1	2008-12-11 13:46:00	0	13	3	8	5
1	2008-12-11 13:47:00	0	13	3	8	5
1	2008-12-11 13:48:00	0	13	3	8	5
1	2008-12-11 13:49:00	0	13	3	8	5
1	2008-12-11 13:50:00	16	13	3	8	5
1	2008-12-11 13:51:00	68	13	3	8	5
1	2008-12-11 13:52:00	42	13	3	8	5
1	2008-12-11 13:53:00	0	13	3	8	5
1	2008-12-11 13:54:00	0	13	3	8	5
1	2008-12-11 13:55:00	74	13	3	8	5
1	2008-12-11 13:56:00	10	13	3	8	5
1	2008-12-11 13:57:00	26	13	3	8	5
1	2008-12-11 13:58:00	0	13	3	8	5
1	2008-12-11 13:59:00	210	13	3	8	5
1	2008-12-11 14:00:00	16	13	3	8	5
1	2008-12-11 14:01:00	0	14	3	8	5
1	2008-12-11 14:02:00	0	14	3	8	5
1	2008-12-11 14:03:00	0	14	3	8	5
1	2008-12-11 14:04:00	0	14	3	8	5
1	2008-12-11 14:05:00	0	14	3	8	5
1	2008-12-11 14:06:00	0	14	3	8	5
1	2008-12-11 14:07:00	0	14	3	8	5
1	2008-12-11 14:08:00	0	14	3	8	5
1	2008-12-11 14:09:00	0	14	3	8	5
1	2008-12-11 14:10:00	0	14	3	8	5
1	2008-12-11 14:11:00	0	14	3	8	5
1	2008-12-11 14:12:00	0	14	3	8	5
1	2008-12-11 14:13:00	0	14	3	8	5
1	2008-12-11 14:14:00	26	14	3	8	5
1	2008-12-11 14:15:00	68	14	3	8	5
1	2008-12-11 14:16:00	118	14	3	8	5
1	2008-12-11 14:17:00	57	14	3	8	5
1	2008-12-11 14:18:00	21	14	3	8	5
1	2008-12-11 14:19:00	36	14	3	8	5
1	2008-12-11 14:20:00	0	14	3	8	5
1	2008-12-11 14:21:00	0	14	3	8	5
1	2008-12-11 14:22:00	0	14	3	8	5
1	2008-12-11 14:23:00	0	14	3	8	5
1	2008-12-11 14:24:00	52	14	3	8	5
1	2008-12-11 14:25:00	0	14	3	8	5
1	2008-12-11 14:26:00	0	14	3	8	5
1	2008-12-11 14:27:00	0	14	3	8	5
1	2008-12-11 14:28:00	0	14	3	8	5
1	2008-12-11 14:29:00	0	14	3	8	5
1	2008-12-11 14:30:00	0	14	3	8	5
1	2008-12-11 14:31:00	0	14	3	8	5
1	2008-12-11 14:32:00	0	14	3	8	5
1	2008-12-11 14:33:00	0	14	3	8	5
1	2008-12-11 14:34:00	0	14	3	8	5
1	2008-12-11 14:35:00	0	14	3	8	5
1	2008-12-11 14:36:00	0	14	3	8	5
1	2008-12-11 14:37:00	0	14	3	8	5
1	2008-12-11 14:38:00	0	14	3	8	5
1	2008-12-11 14:39:00	0	14	3	8	5
1	2008-12-11 14:40:00	0	14	3	8	5
1	2008-12-11 14:41:00	0	14	3	8	5
1	2008-12-11 14:42:00	0	14	3	8	5
1	2008-12-11 14:43:00	0	14	3	8	5
1	2008-12-11 14:44:00	0	14	3	8	5
1	2008-12-11 14:45:00	0	14	3	8	5
1	2008-12-11 14:46:00	0	14	3	8	5
1	2008-12-11 14:47:00	130	14	3	8	5
1	2008-12-11 14:48:00	62	14	3	8	5
1	2008-12-11 14:49:00	62	14	3	8	5
1	2008-12-11 14:50:00	10	14	3	8	5
1	2008-12-11 14:51:00	0	14	3	8	5
1	2008-12-11 14:52:00	26	14	3	8	5
1	2008-12-11 14:53:00	0	14	3	8	5
1	2008-12-11 14:54:00	5	14	3	8	5
1	2008-12-11 14:55:00	36	14	3	8	5
1	2008-12-11 14:56:00	0	14	3	8	5
1	2008-12-11 14:57:00	0	14	3	8	5
1	2008-12-11 14:58:00	0	14	3	8	5
1	2008-12-11 14:59:00	0	14	3	8	5
1	2008-12-11 15:00:00	0	14	3	8	5
1	2008-12-11 15:01:00	0	15	3	8	5
1	2008-12-11 15:02:00	0	15	3	8	5
1	2008-12-11 15:03:00	0	15	3	8	5
1	2008-12-11 15:04:00	0	15	3	8	5
1	2008-12-11 15:05:00	5	15	3	8	5
1	2008-12-11 15:06:00	0	15	3	8	5
1	2008-12-11 15:07:00	0	15	3	8	5
1	2008-12-11 15:08:00	0	15	3	8	5
1	2008-12-11 15:09:00	0	15	3	8	5
1	2008-12-11 15:10:00	0	15	3	8	5
1	2008-12-11 15:11:00	21	15	3	8	5
1	2008-12-11 15:12:00	26	15	3	8	5
1	2008-12-11 15:13:00	0	15	3	8	5
1	2008-12-11 15:14:00	0	15	3	8	5
1	2008-12-11 15:15:00	0	15	3	8	5
1	2008-12-11 15:16:00	0	15	3	8	5
1	2008-12-11 15:17:00	0	15	3	8	5
1	2008-12-11 15:18:00	0	15	3	8	5
1	2008-12-11 15:19:00	0	15	3	8	5
[truncated: 38,321 more rows]

## Sheet: Pivot Segment
Multiplier	2
x (Low Intensity)	621.802
y (High Intensity)	1045.29
	Column Labels
Values	1	2	3	4	Grand Total
Average of Activity	79.173	124.382	117.516	176.838	123.433
StdDev of Activity	271.315	460.452	382.903	505.207	413.39
Count of Activity	10080	9600	10080	9300	39060
Count Above x	320	416	485	738
% Above x	0.031746	0.0433333	0.0481151	0.0793548
Count Above y		291	250	450
% Above y		0.0303125	0.0248016	0.0483871

## Sheet: Pivot Weekday
Sum of Activity	Column Labels
Row Labels	1	2	3	4	Grand Total
1	93339	112354	175454	270940	652087
2	114757	95266	182630	212225	604878
3	107937	189134	160254	185823	643148
4	130293	223536	214113	134895	702837
5	74210	195911	163439	82482	516042
6	175609	150487	166307	372426	864829
7	101919	227380	122364	385803	837466
Grand Total	798064	1194068	1184561	1644594	4821287
Count of Activity	Column Labels
Row Labels	1	2	3	4	Grand Total
1	1440	1440	1440	1440	5760
2	1440	1440	1440	1440	5760
3	1440	960	1440	1440	5280
4	1440	1440	1440	1440	5760
5	1440	1440	1440	1020	5340
6	1440	1440	1440	1080	5400
7	1440	1440	1440	1440	5760
Grand Total	10080	9600	10080	9300	39060

## Sheet: Pivot Quadrant
Sum of Activity	Column Labels
Row Labels	1	2	3	4	Grand Total
1	11904	53137	13912	36163	115116
2	288514	186921	281694	647560	1404689
3	168657	757372	467250	647690	2040969
4	328989	196638	421705	313181	1260513
Grand Total	798064	1194068	1184561	1644594	4821287
Average	199516	298517	296140	411148
Count of Activity	Column Labels
Row Labels	1	2	3	4	Grand Total
1	2520	2520	2520	2160	9720
2	2520	2520	2520	2520	10080
3	2520	2340	2520	2460	9840
4	2520	2220	2520	2160	9420
Grand Total	10080	9600	10080	9300	39060

## Sheet: 12.3.08
Actogram, Copy Raw Data, All Days
Identity:	Shelby Moyer
Filename:	E:\Active Research Files\meloxicam titre canine\cases\shelby\Shelby Moyer 12.3.08.AWC
Gender:	F
Age:	5
Height:	40.6 cm	16.0 in
Weight:	15.0 kg	33.1 lbs
Start Date:	03-Dec-2008 (Wed)
Start Time:	17:00:00
Interval:	1.00 mins
Date Stamp:	Time Stamp:	Activity Data:	Marker Press:
2008-12-03	00:00:00	0
2008-12-03	00:01:00	0
2008-12-03	00:02:00	0
2008-12-03	00:03:00	0
2008-12-03	00:04:00	0
2008-12-03	00:05:00	0
2008-12-03	00:06:00	0
2008-12-03	00:07:00	0
2008-12-03	00:08:00	0
2008-12-03	00:09:00	0
2008-12-03	00:10:00	0
2008-12-03	00:11:00	0
2008-12-03	00:12:00	0
2008-12-03	00:13:00	0
2008-12-03	00:14:00	0
2008-12-03	00:15:00	0
2008-12-03	00:16:00	0
2008-12-03	00:17:00	0
2008-12-03	00:18:00	0
2008-12-03	00:19:00	0
2008-12-03	00:20:00	0
2008-12-03	00:21:00	0
2008-12-03	00:22:00	0
2008-12-03	00:23:00	0
2008-12-03	00:24:00	0
2008-12-03	00:25:00	0
2008-12-03	00:26:00	0
2008-12-03	00:27:00	0
2008-12-03	00:28:00	0
2008-12-03	00:29:00	0
2008-12-03	00:30:00	0
2008-12-03	00:31:00	0
2008-12-03	00:32:00	0
2008-12-03	00:33:00	0
2008-12-03	00:34:00	0
2008-12-03	00:35:00	0
2008-12-03	00:36:00	0
2008-12-03	00:37:00	0
2008-12-03	00:38:00	0
2008-12-03	00:39:00	0
2008-12-03	00:40:00	0
2008-12-03	00:41:00	0
2008-12-03	00:42:00	0
2008-12-03	00:43:00	0
2008-12-03	00:44:00	0
2008-12-03	00:45:00	0
2008-12-03	00:46:00	0
2008-12-03	00:47:00	0
2008-12-03	00:48:00	0
2008-12-03	00:49:00	0
2008-12-03	00:50:00	0
2008-12-03	00:51:00	0
2008-12-03	00:52:00	0
2008-12-03	00:53:00	0
2008-12-03	00:54:00	0
2008-12-03	00:55:00	0
2008-12-03	00:56:00	0
2008-12-03	00:57:00	0
2008-12-03	00:58:00	0
2008-12-03	00:59:00	0
2008-12-03	01:00:00	0
2008-12-03	01:01:00	0
2008-12-03	01:02:00	0
2008-12-03	01:03:00	0
2008-12-03	01:04:00	0
2008-12-03	01:05:00	0
2008-12-03	01:06:00	0
2008-12-03	01:07:00	0
2008-12-03	01:08:00	0
2008-12-03	01:09:00	0
2008-12-03	01:10:00	0
2008-12-03	01:11:00	0
2008-12-03	01:12:00	0
2008-12-03	01:13:00	0
2008-12-03	01:14:00	0
2008-12-03	01:15:00	0
2008-12-03	01:16:00	0
2008-12-03	01:17:00	0
2008-12-03	01:18:00	0
2008-12-03	01:19:00	0
2008-12-03	01:20:00	0
2008-12-03	01:21:00	0
2008-12-03	01:22:00	0
2008-12-03	01:23:00	0
2008-12-03	01:24:00	0
2008-12-03	01:25:00	0
2008-12-03	01:26:00	0
2008-12-03	01:27:00	0
2008-12-03	01:28:00	0
2008-12-03	01:29:00	0
2008-12-03	01:30:00	0
2008-12-03	01:31:00	0
2008-12-03	01:32:00	0
2008-12-03	01:33:00	0
2008-12-03	01:34:00	0
2008-12-03	01:35:00	0
2008-12-03	01:36:00	0
2008-12-03	01:37:00	0
2008-12-03	01:38:00	0
2008-12-03	01:39:00	0
2008-12-03	01:40:00	0
2008-12-03	01:41:00	0
2008-12-03	01:42:00	0
2008-12-03	01:43:00	0
2008-12-03	01:44:00	0
2008-12-03	01:45:00	0
2008-12-03	01:46:00	0
2008-12-03	01:47:00	0
2008-12-03	01:48:00	0
2008-12-03	01:49:00	0
2008-12-03	01:50:00	0
2008-12-03	01:51:00	0
2008-12-03	01:52:00	0
2008-12-03	01:53:00	0
2008-12-03	01:54:00	0
2008-12-03	01:55:00	0
2008-12-03	01:56:00	0
2008-12-03	01:57:00	0
2008-12-03	01:58:00	0
2008-12-03	01:59:00	0
2008-12-03	02:00:00	0
2008-12-03	02:01:00	0
2008-12-03	02:02:00	0
2008-12-03	02:03:00	0
2008-12-03	02:04:00	0
2008-12-03	02:05:00	0
2008-12-03	02:06:00	0
2008-12-03	02:07:00	0
2008-12-03	02:08:00	0
2008-12-03	02:09:00	0
2008-12-03	02:10:00	0
2008-12-03	02:11:00	0
2008-12-03	02:12:00	0
2008-12-03	02:13:00	0
2008-12-03	02:14:00	0
2008-12-03	02:15:00	0
2008-12-03	02:16:00	0
2008-12-03	02:17:00	0
2008-12-03	02:18:00	0
2008-12-03	02:19:00	0
2008-12-03	02:20:00	0
2008-12-03	02:21:00	0
2008-12-03	02:22:00	0
2008-12-03	02:23:00	0
2008-12-03	02:24:00	0
2008-12-03	02:25:00	0
2008-12-03	02:26:00	0
2008-12-03	02:27:00	0
2008-12-03	02:28:00	0
2008-12-03	02:29:00	0
2008-12-03	02:30:00	0
2008-12-03	02:31:00	0
2008-12-03	02:32:00	0
2008-12-03	02:33:00	0
2008-12-03	02:34:00	0
2008-12-03	02:35:00	0
2008-12-03	02:36:00	0
2008-12-03	02:37:00	0
2008-12-03	02:38:00	0
2008-12-03	02:39:00	0
2008-12-03	02:40:00	0
2008-12-03	02:41:00	0
2008-12-03	02:42:00	0
2008-12-03	02:43:00	0
2008-12-03	02:44:00	0
2008-12-03	02:45:00	0
2008-12-03	02:46:00	0
2008-12-03	02:47:00	0
2008-12-03	02:48:00	0
2008-12-03	02:49:00	0
2008-12-03	02:50:00	0
2008-12-03	02:51:00	0
2008-12-03	02:52:00	0
2008-12-03	02:53:00	0
2008-12-03	02:54:00	0
2008-12-03	02:55:00	0
2008-12-03	02:56:00	0
2008-12-03	02:57:00	0
2008-12-03	02:58:00	0
2008-12-03	02:59:00	0
2008-12-03	03:00:00	0
2008-12-03	03:01:00	0
2008-12-03	03:02:00	0
2008-12-03	03:03:00	0
2008-12-03	03:04:00	0
2008-12-03	03:05:00	0
2008-12-03	03:06:00	0
2008-12-03	03:07:00	0
2008-12-03	03:08:00	0
2008-12-03	03:09:00	0
2008-12-03	03:10:00	0
2008-12-03	03:11:00	0
2008-12-03	03:12:00	0
2008-12-03	03:13:00	0
2008-12-03	03:14:00	0
2008-12-03	03:15:00	0
2008-12-03	03:16:00	0
2008-12-03	03:17:00	0
2008-12-03	03:18:00	0
2008-12-03	03:19:00	0
2008-12-03	03:20:00	0
2008-12-03	03:21:00	0
2008-12-03	03:22:00	0
2008-12-03	03:23:00	0
2008-12-03	03:24:00	0
2008-12-03	03:25:00	0
2008-12-03	03:26:00	0
2008-12-03	03:27:00	0
2008-12-03	03:28:00	0
2008-12-03	03:29:00	0
2008-12-03	03:30:00	0
2008-12-03	03:31:00	0
2008-12-03	03:32:00	0
2008-12-03	03:33:00	0
2008-12-03	03:34:00	0
2008-12-03	03:35:00	0
2008-12-03	03:36:00	0
2008-12-03	03:37:00	0
2008-12-03	03:38:00	0
2008-12-03	03:39:00	0
2008-12-03	03:40:00	0
2008-12-03	03:41:00	0
2008-12-03	03:42:00	0
2008-12-03	03:43:00	0
2008-12-03	03:44:00	0
2008-12-03	03:45:00	0
2008-12-03	03:46:00	0
2008-12-03	03:47:00	0
2008-12-03	03:48:00	0
2008-12-03	03:49:00	0
2008-12-03	03:50:00	0
2008-12-03	03:51:00	0
2008-12-03	03:52:00	0
2008-12-03	03:53:00	0
2008-12-03	03:54:00	0
2008-12-03	03:55:00	0
2008-12-03	03:56:00	0
2008-12-03	03:57:00	0
2008-12-03	03:58:00	0
2008-12-03	03:59:00	0
2008-12-03	04:00:00	0
2008-12-03	04:01:00	0
2008-12-03	04:02:00	0
2008-12-03	04:03:00	0
2008-12-03	04:04:00	0
2008-12-03	04:05:00	0
2008-12-03	04:06:00	0
2008-12-03	04:07:00	0
2008-12-03	04:08:00	0
2008-12-03	04:09:00	0
2008-12-03	04:10:00	0
2008-12-03	04:11:00	0
2008-12-03	04:12:00	0
2008-12-03	04:13:00	0
2008-12-03	04:14:00	0
2008-12-03	04:15:00	0
2008-12-03	04:16:00	0
2008-12-03	04:17:00	0
2008-12-03	04:18:00	0
2008-12-03	04:19:00	0
2008-12-03	04:20:00	0
2008-12-03	04:21:00	0
2008-12-03	04:22:00	0
2008-12-03	04:23:00	0
2008-12-03	04:24:00	0
2008-12-03	04:25:00	0
2008-12-03	04:26:00	0
2008-12-03	04:27:00	0
2008-12-03	04:28:00	0
2008-12-03	04:29:00	0
2008-12-03	04:30:00	0
2008-12-03	04:31:00	0
2008-12-03	04:32:00	0
2008-12-03	04:33:00	0
2008-12-03	04:34:00	0
2008-12-03	04:35:00	0
2008-12-03	04:36:00	0
2008-12-03	04:37:00	0
2008-12-03	04:38:00	0
2008-12-03	04:39:00	0
2008-12-03	04:40:00	0
2008-12-03	04:41:00	0
2008-12-03	04:42:00	0
2008-12-03	04:43:00	0
2008-12-03	04:44:00	0
2008-12-03	04:45:00	0
2008-12-03	04:46:00	0
2008-12-03	04:47:00	0
2008-12-03	04:48:00	0
2008-12-03	04:49:00	0
2008-12-03	04:50:00	0
2008-12-03	04:51:00	0
2008-12-03	04:52:00	0
2008-12-03	04:53:00	0
2008-12-03	04:54:00	0
2008-12-03	04:55:00	0
2008-12-03	04:56:00	0
2008-12-03	04:57:00	0
2008-12-03	04:58:00	0
2008-12-03	04:59:00	0
2008-12-03	05:00:00	0
2008-12-03	05:01:00	0
2008-12-03	05:02:00	0
2008-12-03	05:03:00	0
2008-12-03	05:04:00	0
2008-12-03	05:05:00	0
2008-12-03	05:06:00	0
2008-12-03	05:07:00	0
2008-12-03	05:08:00	0
2008-12-03	05:09:00	0
2008-12-03	05:10:00	0
2008-12-03	05:11:00	0
2008-12-03	05:12:00	0
2008-12-03	05:13:00	0
2008-12-03	05:14:00	0
2008-12-03	05:15:00	0
2008-12-03	05:16:00	0
2008-12-03	05:17:00	0
2008-12-03	05:18:00	0
2008-12-03	05:19:00	0
2008-12-03	05:20:00	0
2008-12-03	05:21:00	0
2008-12-03	05:22:00	0
2008-12-03	05:23:00	0
2008-12-03	05:24:00	0
2008-12-03	05:25:00	0
2008-12-03	05:26:00	0
2008-12-03	05:27:00	0
2008-12-03	05:28:00	0
2008-12-03	05:29:00	0
2008-12-03	05:30:00	0
2008-12-03	05:31:00	0
2008-12-03	05:32:00	0
2008-12-03	05:33:00	0
2008-12-03	05:34:00	0
2008-12-03	05:35:00	0
2008-12-03	05:36:00	0
2008-12-03	05:37:00	0
2008-12-03	05:38:00	0
2008-12-03	05:39:00	0
2008-12-03	05:40:00	0
2008-12-03	05:41:00	0
2008-12-03	05:42:00	0
2008-12-03	05:43:00	0
2008-12-03	05:44:00	0
2008-12-03	05:45:00	0
2008-12-03	05:46:00	0
2008-12-03	05:47:00	0
2008-12-03	05:48:00	0
2008-12-03	05:49:00	0
2008-12-03	05:50:00	0
2008-12-03	05:51:00	0
2008-12-03	05:52:00	0
2008-12-03	05:53:00	0
2008-12-03	05:54:00	0
2008-12-03	05:55:00	0
2008-12-03	05:56:00	0
2008-12-03	05:57:00	0
2008-12-03	05:58:00	0
2008-12-03	05:59:00	0
2008-12-03	06:00:00	0
2008-12-03	06:01:00	0
2008-12-03	06:02:00	0
2008-12-03	06:03:00	0
2008-12-03	06:04:00	0
2008-12-03	06:05:00	0
2008-12-03	06:06:00	0
2008-12-03	06:07:00	0
2008-12-03	06:08:00	0
2008-12-03	06:09:00	0
2008-12-03	06:10:00	0
2008-12-03	06:11:00	0
2008-12-03	06:12:00	0
2008-12-03	06:13:00	0
2008-12-03	06:14:00	0
2008-12-03	06:15:00	0
2008-12-03	06:16:00	0
2008-12-03	06:17:00	0
2008-12-03	06:18:00	0
2008-12-03	06:19:00	0
2008-12-03	06:20:00	0
2008-12-03	06:21:00	0
2008-12-03	06:22:00	0
2008-12-03	06:23:00	0
2008-12-03	06:24:00	0
2008-12-03	06:25:00	0
2008-12-03	06:26:00	0
2008-12-03	06:27:00	0
2008-12-03	06:28:00	0
2008-12-03	06:29:00	0
2008-12-03	06:30:00	0
2008-12-03	06:31:00	0
2008-12-03	06:32:00	0
2008-12-03	06:33:00	0
2008-12-03	06:34:00	0
2008-12-03	06:35:00	0
2008-12-03	06:36:00	0
2008-12-03	06:37:00	0
2008-12-03	06:38:00	0
2008-12-03	06:39:00	0
2008-12-03	06:40:00	0
2008-12-03	06:41:00	0
2008-12-03	06:42:00	0
2008-12-03	06:43:00	0
2008-12-03	06:44:00	0
2008-12-03	06:45:00	0
2008-12-03	06:46:00	0
2008-12-03	06:47:00	0
2008-12-03	06:48:00	0
2008-12-03	06:49:00	0
2008-12-03	06:50:00	0
2008-12-03	06:51:00	0
2008-12-03	06:52:00	0
2008-12-03	06:53:00	0
2008-12-03	06:54:00	0
2008-12-03	06:55:00	0
2008-12-03	06:56:00	0
2008-12-03	06:57:00	0
2008-12-03	06:58:00	0
2008-12-03	06:59:00	0
2008-12-03	07:00:00	0
2008-12-03	07:01:00	0
2008-12-03	07:02:00	0
2008-12-03	07:03:00	0
2008-12-03	07:04:00	0
2008-12-03	07:05:00	0
2008-12-03	07:06:00	0
2008-12-03	07:07:00	0
2008-12-03	07:08:00	0
2008-12-03	07:09:00	0
2008-12-03	07:10:00	0
2008-12-03	07:11:00	0
2008-12-03	07:12:00	0
2008-12-03	07:13:00	0
2008-12-03	07:14:00	0
2008-12-03	07:15:00	0
2008-12-03	07:16:00	0
2008-12-03	07:17:00	0
2008-12-03	07:18:00	0
2008-12-03	07:19:00	0
2008-12-03	07:20:00	0
2008-12-03	07:21:00	0
2008-12-03	07:22:00	0
2008-12-03	07:23:00	0
2008-12-03	07:24:00	0
2008-12-03	07:25:00	0
2008-12-03	07:26:00	0
2008-12-03	07:27:00	0
2008-12-03	07:28:00	0
2008-12-03	07:29:00	0
2008-12-03	07:30:00	0
2008-12-03	07:31:00	0
2008-12-03	07:32:00	0
2008-12-03	07:33:00	0
2008-12-03	07:34:00	0
2008-12-03	07:35:00	0
2008-12-03	07:36:00	0
2008-12-03	07:37:00	0
2008-12-03	07:38:00	0
2008-12-03	07:39:00	0
2008-12-03	07:40:00	0
2008-12-03	07:41:00	0
2008-12-03	07:42:00	0
2008-12-03	07:43:00	0
2008-12-03	07:44:00	0
2008-12-03	07:45:00	0
2008-12-03	07:46:00	0
2008-12-03	07:47:00	0
2008-12-03	07:48:00	0
2008-12-03	07:49:00	0
2008-12-03	07:50:00	0
2008-12-03	07:51:00	0
2008-12-03	07:52:00	0
2008-12-03	07:53:00	0
2008-12-03	07:54:00	0
2008-12-03	07:55:00	0
2008-12-03	07:56:00	0
2008-12-03	07:57:00	0
2008-12-03	07:58:00	0
2008-12-03	07:59:00	0
2008-12-03	08:00:00	0
2008-12-03	08:01:00	0
2008-12-03	08:02:00	0
2008-12-03	08:03:00	0
2008-12-03	08:04:00	0
2008-12-03	08:05:00	0
2008-12-03	08:06:00	0
2008-12-03	08:07:00	0
2008-12-03	08:08:00	0
2008-12-03	08:09:00	0
2008-12-03	08:10:00	0
2008-12-03	08:11:00	0
2008-12-03	08:12:00	0
2008-12-03	08:13:00	0
2008-12-03	08:14:00	0
2008-12-03	08:15:00	0
2008-12-03	08:16:00	0
2008-12-03	08:17:00	0
2008-12-03	08:18:00	0
2008-12-03	08:19:00	0
2008-12-03	08:20:00	0
2008-12-03	08:21:00	0
2008-12-03	08:22:00	0
2008-12-03	08:23:00	0
2008-12-03	08:24:00	0
2008-12-03	08:25:00	0
2008-12-03	08:26:00	0
2008-12-03	08:27:00	0
2008-12-03	08:28:00	0
2008-12-03	08:29:00	0
2008-12-03	08:30:00	0
2008-12-03	08:31:00	0
2008-12-03	08:32:00	0
2008-12-03	08:33:00	0
2008-12-03	08:34:00	0
2008-12-03	08:35:00	0
2008-12-03	08:36:00	0
2008-12-03	08:37:00	0
2008-12-03	08:38:00	0
2008-12-03	08:39:00	0
2008-12-03	08:40:00	0
2008-12-03	08:41:00	0
2008-12-03	08:42:00	0
2008-12-03	08:43:00	0
2008-12-03	08:44:00	0
2008-12-03	08:45:00	0
2008-12-03	08:46:00	0
2008-12-03	08:47:00	0
2008-12-03	08:48:00	0
2008-12-03	08:49:00	0
2008-12-03	08:50:00	0
2008-12-03	08:51:00	0
2008-12-03	08:52:00	0
2008-12-03	08:53:00	0
2008-12-03	08:54:00	0
2008-12-03	08:55:00	0
2008-12-03	08:56:00	0
2008-12-03	08:57:00	0
2008-12-03	08:58:00	0
2008-12-03	08:59:00	0
2008-12-03	09:00:00	0
2008-12-03	09:01:00	0
2008-12-03	09:02:00	0
2008-12-03	09:03:00	0
2008-12-03	09:04:00	0
2008-12-03	09:05:00	0
2008-12-03	09:06:00	0
2008-12-03	09:07:00	0
2008-12-03	09:08:00	0
2008-12-03	09:09:00	0
2008-12-03	09:10:00	0
2008-12-03	09:11:00	0
2008-12-03	09:12:00	0
2008-12-03	09:13:00	0
2008-12-03	09:14:00	0
2008-12-03	09:15:00	0
2008-12-03	09:16:00	0
2008-12-03	09:17:00	0
2008-12-03	09:18:00	0
2008-12-03	09:19:00	0
2008-12-03	09:20:00	0
2008-12-03	09:21:00	0
2008-12-03	09:22:00	0
2008-12-03	09:23:00	0
2008-12-03	09:24:00	0
2008-12-03	09:25:00	0
2008-12-03	09:26:00	0
2008-12-03	09:27:00	0
2008-12-03	09:28:00	0
2008-12-03	09:29:00	0
2008-12-03	09:30:00	0
2008-12-03	09:31:00	0
2008-12-03	09:32:00	0
2008-12-03	09:33:00	0
2008-12-03	09:34:00	0
2008-12-03	09:35:00	0
2008-12-03	09:36:00	0
2008-12-03	09:37:00	0
2008-12-03	09:38:00	0
2008-12-03	09:39:00	0
2008-12-03	09:40:00	0
2008-12-03	09:41:00	0
2008-12-03	09:42:00	0
2008-12-03	09:43:00	0
2008-12-03	09:44:00	0
2008-12-03	09:45:00	0
2008-12-03	09:46:00	0
2008-12-03	09:47:00	0
2008-12-03	09:48:00	0
2008-12-03	09:49:00	0
2008-12-03	09:50:00	0
2008-12-03	09:51:00	0
2008-12-03	09:52:00	0
2008-12-03	09:53:00	0
2008-12-03	09:54:00	0
2008-12-03	09:55:00	0
2008-12-03	09:56:00	0
2008-12-03	09:57:00	0
2008-12-03	09:58:00	0
2008-12-03	09:59:00	0
2008-12-03	10:00:00	0
2008-12-03	10:01:00	0
2008-12-03	10:02:00	0
2008-12-03	10:03:00	0
2008-12-03	10:04:00	0
2008-12-03	10:05:00	0
2008-12-03	10:06:00	0
2008-12-03	10:07:00	0
2008-12-03	10:08:00	0
2008-12-03	10:09:00	0
2008-12-03	10:10:00	0
2008-12-03	10:11:00	0
2008-12-03	10:12:00	0
2008-12-03	10:13:00	0
2008-12-03	10:14:00	0
2008-12-03	10:15:00	0
2008-12-03	10:16:00	0
2008-12-03	10:17:00	0
2008-12-03	10:18:00	0
2008-12-03	10:19:00	0
2008-12-03	10:20:00	0
2008-12-03	10:21:00	0
2008-12-03	10:22:00	0
2008-12-03	10:23:00	0
2008-12-03	10:24:00	0
2008-12-03	10:25:00	0
2008-12-03	10:26:00	0
2008-12-03	10:27:00	0
2008-12-03	10:28:00	0
2008-12-03	10:29:00	0
2008-12-03	10:30:00	0
2008-12-03	10:31:00	0
2008-12-03	10:32:00	0
2008-12-03	10:33:00	0
2008-12-03	10:34:00	0
2008-12-03	10:35:00	0
2008-12-03	10:36:00	0
2008-12-03	10:37:00	0
2008-12-03	10:38:00	0
2008-12-03	10:39:00	0
2008-12-03	10:40:00	0
2008-12-03	10:41:00	0
2008-12-03	10:42:00	0
2008-12-03	10:43:00	0
2008-12-03	10:44:00	0
2008-12-03	10:45:00	0
2008-12-03	10:46:00	0
2008-12-03	10:47:00	0
2008-12-03	10:48:00	0
2008-12-03	10:49:00	0
2008-12-03	10:50:00	0
2008-12-03	10:51:00	0
2008-12-03	10:52:00	0
2008-12-03	10:53:00	0
2008-12-03	10:54:00	0
2008-12-03	10:55:00	0
2008-12-03	10:56:00	0
2008-12-03	10:57:00	0
2008-12-03	10:58:00	0
2008-12-03	10:59:00	0
2008-12-03	11:00:00	0
2008-12-03	11:01:00	0
2008-12-03	11:02:00	0
2008-12-03	11:03:00	0
2008-12-03	11:04:00	0
2008-12-03	11:05:00	0
2008-12-03	11:06:00	0
2008-12-03	11:07:00	0
2008-12-03	11:08:00	0
2008-12-03	11:09:00	0
2008-12-03	11:10:00	0
2008-12-03	11:11:00	0
2008-12-03	11:12:00	0
2008-12-03	11:13:00	0
2008-12-03	11:14:00	0
2008-12-03	11:15:00	0
2008-12-03	11:16:00	0
2008-12-03	11:17:00	0
2008-12-03	11:18:00	0
2008-12-03	11:19:00	0
2008-12-03	11:20:00	0
2008-12-03	11:21:00	0
2008-12-03	11:22:00	0
2008-12-03	11:23:00	0
2008-12-03	11:24:00	0
2008-12-03	11:25:00	0
2008-12-03	11:26:00	0
2008-12-03	11:27:00	0
2008-12-03	11:28:00	0
2008-12-03	11:29:00	0
2008-12-03	11:30:00	0
2008-12-03	11:31:00	0
2008-12-03	11:32:00	0
2008-12-03	11:33:00	0
2008-12-03	11:34:00	0
2008-12-03	11:35:00	0
2008-12-03	11:36:00	0
2008-12-03	11:37:00	0
2008-12-03	11:38:00	0
2008-12-03	11:39:00	0
2008-12-03	11:40:00	0
2008-12-03	11:41:00	0
2008-12-03	11:42:00	0
2008-12-03	11:43:00	0
2008-12-03	11:44:00	0
2008-12-03	11:45:00	0
2008-12-03	11:46:00	0
2008-12-03	11:47:00	0
2008-12-03	11:48:00	0
2008-12-03	11:49:00	0
2008-12-03	11:50:00	0
2008-12-03	11:51:00	0
2008-12-03	11:52:00	0
2008-12-03	11:53:00	0
2008-12-03	11:54:00	0
2008-12-03	11:55:00	0
2008-12-03	11:56:00	0
2008-12-03	11:57:00	0
2008-12-03	11:58:00	0
2008-12-03	11:59:00	0
2008-12-03	12:00:00	0
2008-12-03	12:01:00	0
2008-12-03	12:02:00	0
2008-12-03	12:03:00	0
2008-12-03	12:04:00	0
2008-12-03	12:05:00	0
2008-12-03	12:06:00	0
2008-12-03	12:07:00	0
2008-12-03	12:08:00	0
2008-12-03	12:09:00	0
2008-12-03	12:10:00	0
2008-12-03	12:11:00	0
2008-12-03	12:12:00	0
2008-12-03	12:13:00	0
2008-12-03	12:14:00	0
2008-12-03	12:15:00	0
2008-12-03	12:16:00	0
2008-12-03	12:17:00	0
2008-12-03	12:18:00	0
2008-12-03	12:19:00	0
2008-12-03	12:20:00	0
2008-12-03	12:21:00	0
2008-12-03	12:22:00	0
2008-12-03	12:23:00	0
2008-12-03	12:24:00	0
2008-12-03	12:25:00	0
2008-12-03	12:26:00	0
2008-12-03	12:27:00	0
2008-12-03	12:28:00	0
2008-12-03	12:29:00	0
2008-12-03	12:30:00	0
2008-12-03	12:31:00	0
2008-12-03	12:32:00	0
2008-12-03	12:33:00	0
2008-12-03	12:34:00	0
2008-12-03	12:35:00	0
2008-12-03	12:36:00	0
2008-12-03	12:37:00	0
2008-12-03	12:38:00	0
2008-12-03	12:39:00	0
2008-12-03	12:40:00	0
2008-12-03	12:41:00	0
2008-12-03	12:42:00	0
2008-12-03	12:43:00	0
2008-12-03	12:44:00	0
2008-12-03	12:45:00	0
2008-12-03	12:46:00	0
2008-12-03	12:47:00	0
2008-12-03	12:48:00	0
2008-12-03	12:49:00	0
2008-12-03	12:50:00	0
2008-12-03	12:51:00	0
2008-12-03	12:52:00	0
2008-12-03	12:53:00	0
2008-12-03	12:54:00	0
2008-12-03	12:55:00	0
2008-12-03	12:56:00	0
2008-12-03	12:57:00	0
2008-12-03	12:58:00	0
2008-12-03	12:59:00	0
2008-12-03	13:00:00	0
2008-12-03	13:01:00	0
2008-12-03	13:02:00	0
2008-12-03	13:03:00	0
2008-12-03	13:04:00	0
2008-12-03	13:05:00	0
2008-12-03	13:06:00	0
2008-12-03	13:07:00	0
2008-12-03	13:08:00	0
2008-12-03	13:09:00	0
2008-12-03	13:10:00	0
2008-12-03	13:11:00	0
2008-12-03	13:12:00	0
2008-12-03	13:13:00	0
2008-12-03	13:14:00	0
2008-12-03	13:15:00	0
2008-12-03	13:16:00	0
2008-12-03	13:17:00	0
2008-12-03	13:18:00	0
2008-12-03	13:19:00	0
2008-12-03	13:20:00	0
2008-12-03	13:21:00	0
2008-12-03	13:22:00	0
2008-12-03	13:23:00	0
2008-12-03	13:24:00	0
2008-12-03	13:25:00	0
2008-12-03	13:26:00	0
2008-12-03	13:27:00	0
2008-12-03	13:28:00	0
2008-12-03	13:29:00	0
2008-12-03	13:30:00	0
2008-12-03	13:31:00	0
2008-12-03	13:32:00	0
2008-12-03	13:33:00	0
2008-12-03	13:34:00	0
2008-12-03	13:35:00	0
2008-12-03	13:36:00	0
2008-12-03	13:37:00	0
2008-12-03	13:38:00	0
2008-12-03	13:39:00	0
2008-12-03	13:40:00	0
2008-12-03	13:41:00	0
2008-12-03	13:42:00	0
2008-12-03	13:43:00	0
2008-12-03	13:44:00	0
2008-12-03	13:45:00	0
2008-12-03	13:46:00	0
2008-12-03	13:47:00	0
2008-12-03	13:48:00	0
2008-12-03	13:49:00	0
2008-12-03	13:50:00	0
2008-12-03	13:51:00	0
2008-12-03	13:52:00	0
2008-12-03	13:53:00	0
2008-12-03	13:54:00	0
2008-12-03	13:55:00	0
2008-12-03	13:56:00	0
2008-12-03	13:57:00	0
2008-12-03	13:58:00	0
2008-12-03	13:59:00	0
2008-12-03	14:00:00	0
2008-12-03	14:01:00	0
2008-12-03	14:02:00	0
2008-12-03	14:03:00	0
2008-12-03	14:04:00	0
2008-12-03	14:05:00	0
2008-12-03	14:06:00	0
2008-12-03	14:07:00	0
2008-12-03	14:08:00	0
2008-12-03	14:09:00	0
2008-12-03	14:10:00	0
2008-12-03	14:11:00	0
2008-12-03	14:12:00	0
2008-12-03	14:13:00	0
2008-12-03	14:14:00	0
2008-12-03	14:15:00	0
2008-12-03	14:16:00	0
2008-12-03	14:17:00	0
2008-12-03	14:18:00	0
2008-12-03	14:19:00	0
2008-12-03	14:20:00	0
2008-12-03	14:21:00	0
2008-12-03	14:22:00	0
2008-12-03	14:23:00	0
2008-12-03	14:24:00	0
2008-12-03	14:25:00	0
2008-12-03	14:26:00	0
2008-12-03	14:27:00	0
2008-12-03	14:28:00	0
2008-12-03	14:29:00	0
2008-12-03	14:30:00	0
2008-12-03	14:31:00	0
2008-12-03	14:32:00	0
2008-12-03	14:33:00	0
2008-12-03	14:34:00	0
2008-12-03	14:35:00	0
2008-12-03	14:36:00	0
2008-12-03	14:37:00	0
2008-12-03	14:38:00	0
2008-12-03	14:39:00	0
2008-12-03	14:40:00	0
2008-12-03	14:41:00	0
2008-12-03	14:42:00	0
2008-12-03	14:43:00	0
2008-12-03	14:44:00	0
2008-12-03	14:45:00	0
2008-12-03	14:46:00	0
2008-12-03	14:47:00	0
2008-12-03	14:48:00	0
2008-12-03	14:49:00	0
2008-12-03	14:50:00	0
2008-12-03	14:51:00	0
2008-12-03	14:52:00	0
2008-12-03	14:53:00	0
2008-12-03	14:54:00	0
2008-12-03	14:55:00	0
2008-12-03	14:56:00	0
2008-12-03	14:57:00	0
2008-12-03	14:58:00	0
2008-12-03	14:59:00	0
2008-12-03	15:00:00	0
2008-12-03	15:01:00	0
2008-12-03	15:02:00	0
2008-12-03	15:03:00	0
2008-12-03	15:04:00	0
2008-12-03	15:05:00	0
2008-12-03	15:06:00	0
2008-12-03	15:07:00	0
2008-12-03	15:08:00	0
2008-12-03	15:09:00	0
2008-12-03	15:10:00	0
2008-12-03	15:11:00	0
2008-12-03	15:12:00	0
2008-12-03	15:13:00	0
2008-12-03	15:14:00	0
2008-12-03	15:15:00	0
2008-12-03	15:16:00	0
2008-12-03	15:17:00	0
2008-12-03	15:18:00	0
2008-12-03	15:19:00	0
2008-12-03	15:20:00	0
2008-12-03	15:21:00	0
2008-12-03	15:22:00	0
2008-12-03	15:23:00	0
2008-12-03	15:24:00	0
2008-12-03	15:25:00	0
2008-12-03	15:26:00	0
2008-12-03	15:27:00	0
2008-12-03	15:28:00	0
2008-12-03	15:29:00	0
2008-12-03	15:30:00	0
2008-12-03	15:31:00	0
2008-12-03	15:32:00	0
2008-12-03	15:33:00	0
2008-12-03	15:34:00	0
2008-12-03	15:35:00	0
2008-12-03	15:36:00	0
2008-12-03	15:37:00	0
2008-12-03	15:38:00	0
2008-12-03	15:39:00	0
2008-12-03	15:40:00	0
2008-12-03	15:41:00	0
2008-12-03	15:42:00	0
2008-12-03	15:43:00	0
2008-12-03	15:44:00	0
2008-12-03	15:45:00	0
2008-12-03	15:46:00	0
2008-12-03	15:47:00	0
2008-12-03	15:48:00	0
2008-12-03	15:49:00	0
2008-12-03	15:50:00	0
2008-12-03	15:51:00	0
2008-12-03	15:52:00	0
2008-12-03	15:53:00	0
2008-12-03	15:54:00	0
2008-12-03	15:55:00	0
2008-12-03	15:56:00	0
2008-12-03	15:57:00	0
2008-12-03	15:58:00	0
2008-12-03	15:59:00	0
2008-12-03	16:00:00	0
2008-12-03	16:01:00	0
2008-12-03	16:02:00	0
2008-12-03	16:03:00	0
2008-12-03	16:04:00	0
2008-12-03	16:05:00	0
2008-12-03	16:06:00	0
2008-12-03	16:07:00	0
2008-12-03	16:08:00	0
2008-12-03	16:09:00	0
2008-12-03	16:10:00	0
2008-12-03	16:11:00	0
2008-12-03	16:12:00	0
2008-12-03	16:13:00	0
2008-12-03	16:14:00	0
2008-12-03	16:15:00	0
2008-12-03	16:16:00	0
2008-12-03	16:17:00	0
2008-12-03	16:18:00	0
2008-12-03	16:19:00	0
2008-12-03	16:20:00	0
2008-12-03	16:21:00	0
2008-12-03	16:22:00	0
2008-12-03	16:23:00	0
2008-12-03	16:24:00	0
2008-12-03	16:25:00	0
2008-12-03	16:26:00	0
2008-12-03	16:27:00	0
2008-12-03	16:28:00	0
2008-12-03	16:29:00	0
2008-12-03	16:30:00	0
2008-12-03	16:31:00	0
2008-12-03	16:32:00	0
2008-12-03	16:33:00	0
2008-12-03	16:34:00	0
2008-12-03	16:35:00	0
2008-12-03	16:36:00	0
2008-12-03	16:37:00	0
2008-12-03	16:38:00	0
2008-12-03	16:39:00	0
2008-12-03	16:40:00	0
2008-12-03	16:41:00	0
2008-12-03	16:42:00	0
2008-12-03	16:43:00	0
2008-12-03	16:44:00	0
2008-12-03	16:45:00	0
2008-12-03	16:46:00	0
2008-12-03	16:47:00	0
2008-12-03	16:48:00	0
2008-12-03	16:49:00	0
2008-12-03	16:50:00	0
2008-12-03	16:51:00	0
2008-12-03	16:52:00	0
2008-12-03	16:53:00	0
2008-12-03	16:54:00	0
2008-12-03	16:55:00	0
2008-12-03	16:56:00	0
2008-12-03	16:57:00	0
2008-12-03	16:58:00	0
2008-12-03	16:59:00	0
2008-12-03	17:00:00	0
2008-12-03	17:01:00	47
2008-12-03	17:02:00	297
2008-12-03	17:03:00	268
2008-12-03	17:04:00	260
2008-12-03	17:05:00	0
2008-12-03	17:06:00	202
2008-12-03	17:07:00	173
2008-12-03	17:08:00	202
2008-12-03	17:09:00	52
2008-12-03	17:10:00	0
2008-12-03	17:11:00	0
2008-12-03	17:12:00	0
2008-12-03	17:13:00	0
2008-12-03	17:14:00	10
2008-12-03	17:15:00	0
2008-12-03	17:16:00	0
2008-12-03	17:17:00	315
2008-12-03	17:18:00	0
2008-12-03	17:19:00	16
2008-12-03	17:20:00	16
2008-12-03	17:21:00	219
2008-12-03	17:22:00	187
2008-12-03	17:23:00	0
2008-12-03	17:24:00	0
2008-12-03	17:25:00	0
2008-12-03	17:26:00	36
2008-12-03	17:27:00	42
2008-12-03	17:28:00	0
2008-12-03	17:29:00	287
2008-12-03	17:30:00	118
2008-12-03	17:31:00	0
2008-12-03	17:32:00	26
2008-12-03	17:33:00	0
2008-12-03	17:34:00	5
2008-12-03	17:35:00	118
2008-12-03	17:36:00	365
2008-12-03	17:37:00	42
2008-12-03	17:38:00	5
2008-12-03	17:39:00	0
2008-12-03	17:40:00	5
2008-12-03	17:41:00	0
2008-12-03	17:42:00	5
2008-12-03	17:43:00	5
2008-12-03	17:44:00	16
2008-12-03	17:45:00	42
2008-12-03	17:46:00	47
2008-12-03	17:47:00	235
2008-12-03	17:48:00	26
2008-12-03	17:49:00	0
2008-12-03	17:50:00	31
2008-12-03	17:51:00	5
2008-12-03	17:52:00	10
2008-12-03	17:53:00	252
2008-12-03	17:54:00	0
2008-12-03	17:55:00	0
2008-12-03	17:56:00	42
2008-12-03	17:57:00	5
2008-12-03	17:58:00	31
2008-12-03	17:59:00	5
2008-12-03	18:00:00	0
2008-12-03	18:01:00	0
2008-12-03	18:02:00	0
2008-12-03	18:03:00	21
2008-12-03	18:04:00	202
2008-12-03	18:05:00	227
2008-12-03	18:06:00	0
2008-12-03	18:07:00	0
2008-12-03	18:08:00	315
2008-12-03	18:09:00	118
2008-12-03	18:10:00	0
2008-12-03	18:11:00	0
2008-12-03	18:12:00	0
2008-12-03	18:13:00	26
2008-12-03	18:14:00	26
2008-12-03	18:15:00	42
2008-12-03	18:16:00	10
2008-12-03	18:17:00	0
2008-12-03	18:18:00	16
2008-12-03	18:19:00	5
2008-12-03	18:20:00	0
2008-12-03	18:21:00	99
2008-12-03	18:22:00	52
2008-12-03	18:23:00	0
2008-12-03	18:24:00	0
2008-12-03	18:25:00	118
2008-12-03	18:26:00	99
2008-12-03	18:27:00	47
2008-12-03	18:28:00	0
2008-12-03	18:29:00	0
2008-12-03	18:30:00	42
2008-12-03	18:31:00	26
2008-12-03	18:32:00	31
2008-12-03	18:33:00	57
2008-12-03	18:34:00	0
2008-12-03	18:35:00	144
2008-12-03	18:36:00	0
2008-12-03	18:37:00	0
2008-12-03	18:38:00	0
2008-12-03	18:39:00	10
2008-12-03	18:40:00	0
2008-12-03	18:41:00	0
2008-12-03	18:42:00	57
2008-12-03	18:43:00	47
2008-12-03	18:44:00	0
2008-12-03	18:45:00	0
2008-12-03	18:46:00	365
2008-12-03	18:47:00	10
2008-12-03	18:48:00	62
2008-12-03	18:49:00	52
2008-12-03	18:50:00	26
2008-12-03	18:51:00	0
2008-12-03	18:52:00	0
2008-12-03	18:53:00	36
2008-12-03	18:54:00	0
2008-12-03	18:55:00	0
2008-12-03	18:56:00	0
2008-12-03	18:57:00	52
2008-12-03	18:58:00	0
2008-12-03	18:59:00	0
2008-12-03	19:00:00	441
2008-12-03	19:01:00	315
2008-12-03	19:02:00	144
2008-12-03	19:03:00	355
2008-12-03	19:04:00	47
2008-12-03	19:05:00	210
2008-12-03	19:06:00	0
2008-12-03	19:07:00	26
2008-12-03	19:08:00	10
2008-12-03	19:09:00	344
2008-12-03	19:10:00	31
2008-12-03	19:11:00	68
2008-12-03	19:12:00	158
2008-12-03	19:13:00	144
2008-12-03	19:14:00	325
2008-12-03	19:15:00	297
2008-12-03	19:16:00	180
2008-12-03	19:17:00	210
2008-12-03	19:18:00	80
2008-12-03	19:19:00	93
2008-12-03	19:20:00	315
2008-12-03	19:21:00	31
2008-12-03	19:22:00	5
2008-12-03	19:23:00	5
2008-12-03	19:24:00	0
2008-12-03	19:25:00	26
2008-12-03	19:26:00	0
2008-12-03	19:27:00	124
2008-12-03	19:28:00	202
2008-12-03	19:29:00	80
2008-12-03	19:30:00	0
2008-12-03	19:31:00	62
2008-12-03	19:32:00	5
2008-12-03	19:33:00	21
2008-12-03	19:34:00	5
2008-12-03	19:35:00	21
2008-12-03	19:36:00	68
2008-12-03	19:37:00	0
2008-12-03	19:38:00	0
2008-12-03	19:39:00	62
2008-12-03	19:40:00	144
2008-12-03	19:41:00	173
2008-12-03	19:42:00	47
2008-12-03	19:43:00	0
2008-12-03	19:44:00	36
2008-12-03	19:45:00	99
2008-12-03	19:46:00	0
2008-12-03	19:47:00	0
2008-12-03	19:48:00	0
2008-12-03	19:49:00	0
2008-12-03	19:50:00	0
2008-12-03	19:51:00	0
2008-12-03	19:52:00	5
2008-12-03	19:53:00	10
2008-12-03	19:54:00	68
2008-12-03	19:55:00	80
2008-12-03	19:56:00	0
2008-12-03	19:57:00	0
2008-12-03	19:58:00	0
2008-12-03	19:59:00	10
2008-12-03	20:00:00	52
2008-12-03	20:01:00	0
2008-12-03	20:02:00	31
2008-12-03	20:03:00	21
2008-12-03	20:04:00	0
2008-12-03	20:05:00	0
2008-12-03	20:06:00	0
2008-12-03	20:07:00	21
2008-12-03	20:08:00	31
2008-12-03	20:09:00	0
2008-12-03	20:10:00	0
2008-12-03	20:11:00	0
2008-12-03	20:12:00	62
2008-12-03	20:13:00	99
2008-12-03	20:14:00	36
2008-12-03	20:15:00	36
2008-12-03	20:16:00	5
2008-12-03	20:17:00	0
2008-12-03	20:18:00	1142
2008-12-03	20:19:00	1410
2008-12-03	20:20:00	4169
2008-12-03	20:21:00	3470
2008-12-03	20:22:00	3189
2008-12-03	20:23:00	2422
2008-12-03	20:24:00	1792
2008-12-03	20:25:00	252
2008-12-03	20:26:00	244
2008-12-03	20:27:00	130
2008-12-03	20:28:00	130
2008-12-03	20:29:00	105
2008-12-03	20:30:00	202
2008-12-03	20:31:00	31
2008-12-03	20:32:00	165
2008-12-03	20:33:00	10
2008-12-03	20:34:00	202
2008-12-03	20:35:00	235
2008-12-03	20:36:00	111
2008-12-03	20:37:00	173
2008-12-03	20:38:00	1187
2008-12-03	20:39:00	180
2008-12-03	20:40:00	86
2008-12-03	20:41:00	10
2008-12-03	20:42:00	210
2008-12-03	20:43:00	252
2008-12-03	20:44:00	268
2008-12-03	20:45:00	158
2008-12-03	20:46:00	111
2008-12-03	20:47:00	5
2008-12-03	20:48:00	158
2008-12-03	20:49:00	325
2008-12-03	20:50:00	464
2008-12-03	20:51:00	344
2008-12-03	20:52:00	287
2008-12-03	20:53:00	935
2008-12-03	20:54:00	1120
2008-12-03	20:55:00	579
2008-12-03	20:56:00	144
2008-12-03	20:57:00	355
2008-12-03	20:58:00	365
2008-12-03	20:59:00	664
2008-12-03	21:00:00	227
2008-12-03	21:01:00	0
2008-12-03	21:02:00	0
2008-12-03	21:03:00	0
2008-12-03	21:04:00	0
2008-12-03	21:05:00	0
2008-12-03	21:06:00	0
2008-12-03	21:07:00	0
2008-12-03	21:08:00	165
2008-12-03	21:09:00	365
2008-12-03	21:10:00	5
2008-12-03	21:11:00	0
2008-12-03	21:12:00	0
2008-12-03	21:13:00	0
2008-12-03	21:14:00	0
2008-12-03	21:15:00	0
2008-12-03	21:16:00	0
2008-12-03	21:17:00	16
2008-12-03	21:18:00	5
2008-12-03	21:19:00	57
2008-12-03	21:20:00	31
2008-12-03	21:21:00	0
2008-12-03	21:22:00	0
2008-12-03	21:23:00	664
2008-12-03	21:24:00	26
2008-12-03	21:25:00	21
2008-12-03	21:26:00	396
2008-12-03	21:27:00	344
2008-12-03	21:28:00	158
2008-12-03	21:29:00	365
2008-12-03	21:30:00	526
2008-12-03	21:31:00	26
2008-12-03	21:32:00	57
2008-12-03	21:33:00	0
2008-12-03	21:34:00	0
2008-12-03	21:35:00	0
2008-12-03	21:36:00	5
2008-12-03	21:37:00	0
2008-12-03	21:38:00	5
2008-12-03	21:39:00	0
2008-12-03	21:40:00	0
2008-12-03	21:41:00	0
2008-12-03	21:42:00	0
2008-12-03	21:43:00	386
2008-12-03	21:44:00	136
2008-12-03	21:45:00	0
2008-12-03	21:46:00	0
2008-12-03	21:47:00	0
2008-12-03	21:48:00	0
2008-12-03	21:49:00	0
2008-12-03	21:50:00	488
2008-12-03	21:51:00	306
2008-12-03	21:52:00	791
2008-12-03	21:53:00	396
2008-12-03	21:54:00	0
2008-12-03	21:55:00	0
2008-12-03	21:56:00	0
2008-12-03	21:57:00	0
2008-12-03	21:58:00	0
2008-12-03	21:59:00	0
2008-12-03	22:00:00	0
2008-12-03	22:01:00	0
2008-12-03	22:02:00	5
2008-12-03	22:03:00	0
2008-12-03	22:04:00	0
2008-12-03	22:05:00	0
2008-12-03	22:06:00	0
2008-12-03	22:07:00	0
2008-12-03	22:08:00	0
2008-12-03	22:09:00	31
2008-12-03	22:10:00	42
2008-12-03	22:11:00	0
2008-12-03	22:12:00	0
2008-12-03	22:13:00	0
2008-12-03	22:14:00	0
2008-12-03	22:15:00	0
2008-12-03	22:16:00	0
2008-12-03	22:17:00	0
2008-12-03	22:18:00	0
2008-12-03	22:19:00	0
2008-12-03	22:20:00	0
2008-12-03	22:21:00	0
2008-12-03	22:22:00	0
2008-12-03	22:23:00	0
2008-12-03	22:24:00	0
2008-12-03	22:25:00	0
2008-12-03	22:26:00	0
2008-12-03	22:27:00	0
2008-12-03	22:28:00	0
2008-12-03	22:29:00	0
2008-12-03	22:30:00	0
2008-12-03	22:31:00	0
2008-12-03	22:32:00	0
2008-12-03	22:33:00	0
2008-12-03	22:34:00	0
2008-12-03	22:35:00	0
2008-12-03	22:36:00	10
2008-12-03	22:37:00	0
2008-12-03	22:38:00	0
2008-12-03	22:39:00	0
2008-12-03	22:40:00	0
2008-12-03	22:41:00	0
2008-12-03	22:42:00	0
2008-12-03	22:43:00	0
2008-12-03	22:44:00	0
2008-12-03	22:45:00	0
2008-12-03	22:46:00	0
2008-12-03	22:47:00	0
2008-12-03	22:48:00	0
2008-12-03	22:49:00	0
2008-12-03	22:50:00	0
2008-12-03	22:51:00	0
2008-12-03	22:52:00	0
2008-12-03	22:53:00	0
2008-12-03	22:54:00	0
2008-12-03	22:55:00	0
2008-12-03	22:56:00	0
2008-12-03	22:57:00	0
2008-12-03	22:58:00	0
2008-12-03	22:59:00	0
2008-12-03	23:00:00	0
2008-12-03	23:01:00	0
2008-12-03	23:02:00	0
2008-12-03	23:03:00	0
2008-12-03	23:04:00	36
2008-12-03	23:05:00	0
2008-12-03	23:06:00	0
2008-12-03	23:07:00	0
2008-12-03	23:08:00	0
2008-12-03	23:09:00	26
2008-12-03	23:10:00	31
2008-12-03	23:11:00	0
2008-12-03	23:12:00	0
2008-12-03	23:13:00	0
2008-12-03	23:14:00	0
2008-12-03	23:15:00	0
2008-12-03	23:16:00	0
2008-12-03	23:17:00	0
2008-12-03	23:18:00	0
2008-12-03	23:19:00	0
2008-12-03	23:20:00	0
2008-12-03	23:21:00	0
2008-12-03	23:22:00	0
2008-12-03	23:23:00	0
2008-12-03	23:24:00	0
2008-12-03	23:25:00	0
2008-12-03	23:26:00	0
2008-12-03	23:27:00	0
2008-12-03	23:28:00	0
2008-12-03	23:29:00	0
2008-12-03	23:30:00	0
2008-12-03	23:31:00	0
2008-12-03	23:32:00	36
2008-12-03	23:33:00	0
2008-12-03	23:34:00	0
2008-12-03	23:35:00	0
2008-12-03	23:36:00	0
2008-12-03	23:37:00	0
2008-12-03	23:38:00	0
2008-12-03	23:39:00	0
2008-12-03	23:40:00	0
2008-12-03	23:41:00	0
2008-12-03	23:42:00	0
2008-12-03	23:43:00	0
2008-12-03	23:44:00	0
2008-12-03	23:45:00	0
2008-12-03	23:46:00	0
2008-12-03	23:47:00	0
2008-12-03	23:48:00	0
2008-12-03	23:49:00	0
2008-12-03	23:50:00	0
2008-12-03	23:51:00	0
2008-12-03	23:52:00	0
2008-12-03	23:53:00	0
2008-12-03	23:54:00	0
2008-12-03	23:55:00	0
2008-12-03	23:56:00	0
2008-12-03	23:57:00	36
2008-12-03	23:58:00	0
2008-12-03	23:59:00	16
2008-12-04	00:00:00	0
2008-12-04	00:01:00	0
2008-12-04	00:02:00	0
2008-12-04	00:03:00	5
2008-12-04	00:04:00	0
2008-12-04	00:05:00	0
2008-12-04	00:06:00	5
2008-12-04	00:07:00	0
2008-12-04	00:08:00	0
2008-12-04	00:09:00	0
2008-12-04	00:10:00	0
2008-12-04	00:11:00	10
2008-12-04	00:12:00	0
2008-12-04	00:13:00	0
2008-12-04	00:14:00	0
2008-12-04	00:15:00	0
2008-12-04	00:16:00	0
2008-12-04	00:17:00	0
2008-12-04	00:18:00	0
2008-12-04	00:19:00	0
2008-12-04	00:20:00	0
2008-12-04	00:21:00	26
2008-12-04	00:22:00	5
2008-12-04	00:23:00	10
2008-12-04	00:24:00	0
2008-12-04	00:25:00	10
2008-12-04	00:26:00	5
2008-12-04	00:27:00	0
2008-12-04	00:28:00	0
2008-12-04	00:29:00	0
2008-12-04	00:30:00	5
2008-12-04	00:31:00	0
2008-12-04	00:32:00	0
2008-12-04	00:33:00	16
2008-12-04	00:34:00	42
2008-12-04	00:35:00	0
2008-12-04	00:36:00	0
2008-12-04	00:37:00	0
2008-12-04	00:38:00	0
2008-12-04	00:39:00	0
2008-12-04	00:40:00	0
2008-12-04	00:41:00	0
2008-12-04	00:42:00	0
2008-12-04	00:43:00	0
2008-12-04	00:44:00	0
2008-12-04	00:45:00	0
2008-12-04	00:46:00	0
2008-12-04	00:47:00	5
2008-12-04	00:48:00	36
2008-12-04	00:49:00	5
2008-12-04	00:50:00	0
2008-12-04	00:51:00	21
2008-12-04	00:52:00	5
2008-12-04	00:53:00	0
2008-12-04	00:54:00	0
2008-12-04	00:55:00	5
2008-12-04	00:56:00	0
2008-12-04	00:57:00	0
2008-12-04	00:58:00	0
2008-12-04	00:59:00	5
2008-12-04	01:00:00	0
2008-12-04	01:01:00	0
2008-12-04	01:02:00	5
2008-12-04	01:03:00	0
2008-12-04	01:04:00	0
2008-12-04	01:05:00	0
2008-12-04	01:06:00	0
2008-12-04	01:07:00	10
2008-12-04	01:08:00	0
2008-12-04	01:09:00	0
2008-12-04	01:10:00	0
2008-12-04	01:11:00	0
2008-12-04	01:12:00	0
2008-12-04	01:13:00	0
2008-12-04	01:14:00	0
2008-12-04	01:15:00	0
2008-12-04	01:16:00	0
2008-12-04	01:17:00	16
2008-12-04	01:18:00	0
2008-12-04	01:19:00	0
2008-12-04	01:20:00	0
2008-12-04	01:21:00	0
2008-12-04	01:22:00	0
2008-12-04	01:23:00	0
2008-12-04	01:24:00	0
2008-12-04	01:25:00	0
2008-12-04	01:26:00	0
2008-12-04	01:27:00	0
2008-12-04	01:28:00	0
2008-12-04	01:29:00	0
2008-12-04	01:30:00	0
2008-12-04	01:31:00	0
2008-12-04	01:32:00	0
2008-12-04	01:33:00	0
2008-12-04	01:34:00	0
2008-12-04	01:35:00	21
2008-12-04	01:36:00	0
2008-12-04	01:37:00	0
2008-12-04	01:38:00	0
2008-12-04	01:39:00	0
2008-12-04	01:40:00	124
2008-12-04	01:41:00	10
2008-12-04	01:42:00	0
2008-12-04	01:43:00	0
2008-12-04	01:44:00	0
2008-12-04	01:45:00	0
2008-12-04	01:46:00	0
2008-12-04	01:47:00	0
2008-12-04	01:48:00	0
2008-12-04	01:49:00	52
2008-12-04	01:50:00	0
2008-12-04	01:51:00	0
2008-12-04	01:52:00	0
2008-12-04	01:53:00	0
2008-12-04	01:54:00	0
2008-12-04	01:55:00	0
2008-12-04	01:56:00	0
2008-12-04	01:57:00	0
2008-12-04	01:58:00	0
2008-12-04	01:59:00	0
2008-12-04	02:00:00	42
2008-12-04	02:01:00	0
2008-12-04	02:02:00	0
2008-12-04	02:03:00	0
2008-12-04	02:04:00	0
2008-12-04	02:05:00	0
2008-12-04	02:06:00	0
2008-12-04	02:07:00	278
2008-12-04	02:08:00	0
2008-12-04	02:09:00	0
2008-12-04	02:10:00	0
2008-12-04	02:11:00	0
2008-12-04	02:12:00	0
2008-12-04	02:13:00	36
2008-12-04	02:14:00	5
2008-12-04	02:15:00	10
2008-12-04	02:16:00	0
2008-12-04	02:17:00	0
2008-12-04	02:18:00	0
2008-12-04	02:19:00	0
2008-12-04	02:20:00	0
2008-12-04	02:21:00	0
2008-12-04	02:22:00	0
2008-12-04	02:23:00	0
2008-12-04	02:24:00	0
2008-12-04	02:25:00	0
2008-12-04	02:26:00	0
2008-12-04	02:27:00	0
2008-12-04	02:28:00	0
2008-12-04	02:29:00	0
2008-12-04	02:30:00	0
2008-12-04	02:31:00	0
2008-12-04	02:32:00	0
2008-12-04	02:33:00	0
2008-12-04	02:34:00	57
2008-12-04	02:35:00	0
2008-12-04	02:36:00	0
2008-12-04	02:37:00	0
2008-12-04	02:38:00	0
2008-12-04	02:39:00	0
2008-12-04	02:40:00	0
2008-12-04	02:41:00	0
2008-12-04	02:42:00	0
2008-12-04	02:43:00	0
2008-12-04	02:44:00	0
2008-12-04	02:45:00	0
2008-12-04	02:46:00	0
2008-12-04	02:47:00	0
2008-12-04	02:48:00	0
2008-12-04	02:49:00	0
2008-12-04	02:50:00	0
2008-12-04	02:51:00	0
2008-12-04	02:52:00	0
2008-12-04	02:53:00	0
2008-12-04	02:54:00	0
2008-12-04	02:55:00	0
2008-12-04	02:56:00	0
2008-12-04	02:57:00	0
2008-12-04	02:58:00	0
2008-12-04	02:59:00	0
2008-12-04	03:00:00	0
2008-12-04	03:01:00	0
2008-12-04	03:02:00	0
2008-12-04	03:03:00	0
2008-12-04	03:04:00	0
2008-12-04	03:05:00	0
2008-12-04	03:06:00	0
2008-12-04	03:07:00	0
2008-12-04	03:08:00	0
2008-12-04	03:09:00	0
2008-12-04	03:10:00	0
2008-12-04	03:11:00	0
2008-12-04	03:12:00	0
2008-12-04	03:13:00	0
2008-12-04	03:14:00	130
2008-12-04	03:15:00	10
2008-12-04	03:16:00	0
2008-12-04	03:17:00	0
2008-12-04	03:18:00	0
2008-12-04	03:19:00	0
2008-12-04	03:20:00	0
2008-12-04	03:21:00	0
2008-12-04	03:22:00	0
2008-12-04	03:23:00	0
2008-12-04	03:24:00	0
2008-12-04	03:25:00	0
2008-12-04	03:26:00	0
2008-12-04	03:27:00	0
2008-12-04	03:28:00	0
2008-12-04	03:29:00	0
2008-12-04	03:30:00	0
2008-12-04	03:31:00	0
2008-12-04	03:32:00	0
2008-12-04	03:33:00	0
2008-12-04	03:34:00	0
2008-12-04	03:35:00	0
2008-12-04	03:36:00	31
2008-12-04	03:37:00	287
2008-12-04	03:38:00	16
2008-12-04	03:39:00	0
2008-12-04	03:40:00	0
2008-12-04	03:41:00	0
2008-12-04	03:42:00	0
2008-12-04	03:43:00	0
2008-12-04	03:44:00	0
2008-12-04	03:45:00	0
2008-12-04	03:46:00	0
2008-12-04	03:47:00	0
2008-12-04	03:48:00	0
2008-12-04	03:49:00	0
2008-12-04	03:50:00	0
2008-12-04	03:51:00	0
2008-12-04	03:52:00	0
2008-12-04	03:53:00	0
2008-12-04	03:54:00	0
2008-12-04	03:55:00	0
2008-12-04	03:56:00	0
2008-12-04	03:57:00	0
2008-12-04	03:58:00	0
2008-12-04	03:59:00	0
2008-12-04	04:00:00	0
2008-12-04	04:01:00	0
2008-12-04	04:02:00	0
2008-12-04	04:03:00	0
2008-12-04	04:04:00	0
2008-12-04	04:05:00	0
2008-12-04	04:06:00	0
2008-12-04	04:07:00	0
2008-12-04	04:08:00	0
2008-12-04	04:09:00	0
2008-12-04	04:10:00	0
2008-12-04	04:11:00	0
2008-12-04	04:12:00	0
2008-12-04	04:13:00	0
2008-12-04	04:14:00	0
2008-12-04	04:15:00	68
2008-12-04	04:16:00	0
2008-12-04	04:17:00	0
2008-12-04	04:18:00	0
2008-12-04	04:19:00	0
2008-12-04	04:20:00	0
2008-12-04	04:21:00	0
2008-12-04	04:22:00	0
2008-12-04	04:23:00	0
2008-12-04	04:24:00	0
2008-12-04	04:25:00	0
2008-12-04	04:26:00	0
2008-12-04	04:27:00	0
2008-12-04	04:28:00	0
2008-12-04	04:29:00	0
2008-12-04	04:30:00	0
2008-12-04	04:31:00	5
2008-12-04	04:32:00	86
2008-12-04	04:33:00	36
2008-12-04	04:34:00	0
2008-12-04	04:35:00	0
2008-12-04	04:36:00	0
2008-12-04	04:37:00	0
2008-12-04	04:38:00	0
2008-12-04	04:39:00	0
2008-12-04	04:40:00	0
2008-12-04	04:41:00	0
2008-12-04	04:42:00	0
2008-12-04	04:43:00	0
2008-12-04	04:44:00	0
2008-12-04	04:45:00	0
2008-12-04	04:46:00	0
2008-12-04	04:47:00	0
2008-12-04	04:48:00	0
2008-12-04	04:49:00	0
2008-12-04	04:50:00	0
2008-12-04	04:51:00	0
2008-12-04	04:52:00	0
2008-12-04	04:53:00	0
2008-12-04	04:54:00	0
2008-12-04	04:55:00	0
2008-12-04	04:56:00	0
2008-12-04	04:57:00	0
2008-12-04	04:58:00	0
2008-12-04	04:59:00	0
2008-12-04	05:00:00	0
2008-12-04	05:01:00	52
2008-12-04	05:02:00	0
2008-12-04	05:03:00	0
2008-12-04	05:04:00	0
2008-12-04	05:05:00	0
2008-12-04	05:06:00	0
2008-12-04	05:07:00	0
2008-12-04	05:08:00	0
2008-12-04	05:09:00	0
2008-12-04	05:10:00	0
2008-12-04	05:11:00	0
2008-12-04	05:12:00	0
2008-12-04	05:13:00	0
2008-12-04	05:14:00	0
2008-12-04	05:15:00	0
2008-12-04	05:16:00	0
2008-12-04	05:17:00	0
2008-12-04	05:18:00	0
2008-12-04	05:19:00	0
2008-12-04	05:20:00	0
2008-12-04	05:21:00	47
2008-12-04	05:22:00	0
2008-12-04	05:23:00	0
2008-12-04	05:24:00	0
2008-12-04	05:25:00	0
2008-12-04	05:26:00	0
2008-12-04	05:27:00	0
2008-12-04	05:28:00	0
2008-12-04	05:29:00	0
2008-12-04	05:30:00	0
2008-12-04	05:31:00	0
2008-12-04	05:32:00	0
2008-12-04	05:33:00	0
2008-12-04	05:34:00	0
2008-12-04	05:35:00	0
2008-12-04	05:36:00	0
2008-12-04	05:37:00	0
2008-12-04	05:38:00	0
2008-12-04	05:39:00	0
2008-12-04	05:40:00	0
2008-12-04	05:41:00	0
2008-12-04	05:42:00	0
2008-12-04	05:43:00	0
2008-12-04	05:44:00	0
2008-12-04	05:45:00	0
2008-12-04	05:46:00	0
2008-12-04	05:47:00	0
2008-12-04	05:48:00	0
2008-12-04	05:49:00	0
2008-12-04	05:50:00	0
2008-12-04	05:51:00	0
2008-12-04	05:52:00	0
2008-12-04	05:53:00	36
2008-12-04	05:54:00	47
2008-12-04	05:55:00	74
2008-12-04	05:56:00	0
2008-12-04	05:57:00	5
2008-12-04	05:58:00	42
2008-12-04	05:59:00	0
2008-12-04	06:00:00	0
2008-12-04	06:01:00	0
2008-12-04	06:02:00	5
2008-12-04	06:03:00	0
2008-12-04	06:04:00	0
2008-12-04	06:05:00	0
2008-12-04	06:06:00	0
2008-12-04	06:07:00	0
2008-12-04	06:08:00	0
2008-12-04	06:09:00	0
2008-12-04	06:10:00	0
2008-12-04	06:11:00	0
2008-12-04	06:12:00	0
2008-12-04	06:13:00	0
2008-12-04	06:14:00	10
2008-12-04	06:15:00	0
2008-12-04	06:16:00	0
2008-12-04	06:17:00	0
2008-12-04	06:18:00	0
2008-12-04	06:19:00	0
2008-12-04	06:20:00	5
2008-12-04	06:21:00	0
2008-12-04	06:22:00	52
2008-12-04	06:23:00	16
2008-12-04	06:24:00	31
2008-12-04	06:25:00	180
2008-12-04	06:26:00	36
2008-12-04	06:27:00	0
2008-12-04	06:28:00	180
2008-12-04	06:29:00	2687
2008-12-04	06:30:00	1437
2008-12-04	06:31:00	325
2008-12-04	06:32:00	10
2008-12-04	06:33:00	62
2008-12-04	06:34:00	31
2008-12-04	06:35:00	5
2008-12-04	06:36:00	26
2008-12-04	06:37:00	1437
2008-12-04	06:38:00	843
2008-12-04	06:39:00	513
2008-12-04	06:40:00	843
2008-12-04	06:41:00	513
2008-12-04	06:42:00	620
2008-12-04	06:43:00	579
2008-12-04	06:44:00	315
2008-12-04	06:45:00	315
2008-12-04	06:46:00	158
2008-12-04	06:47:00	111
2008-12-04	06:48:00	111
2008-12-04	06:49:00	0
2008-12-04	06:50:00	0
2008-12-04	06:51:00	0
2008-12-04	06:52:00	36
2008-12-04	06:53:00	0
2008-12-04	06:54:00	0
2008-12-04	06:55:00	0
2008-12-04	06:56:00	0
2008-12-04	06:57:00	0
2008-12-04	06:58:00	0
2008-12-04	06:59:00	0
2008-12-04	07:00:00	16
2008-12-04	07:01:00	21
2008-12-04	07:02:00	144
2008-12-04	07:03:00	0
2008-12-04	07:04:00	0
2008-12-04	07:05:00	297
2008-12-04	07:06:00	42
2008-12-04	07:07:00	235
2008-12-04	07:08:00	620
2008-12-04	07:09:00	62
2008-12-04	07:10:00	0
2008-12-04	07:11:00	36
2008-12-04	07:12:00	0
2008-12-04	07:13:00	0
2008-12-04	07:14:00	0
2008-12-04	07:15:00	202
2008-12-04	07:16:00	649
2008-12-04	07:17:00	694
2008-12-04	07:18:00	219
2008-12-04	07:19:00	93
2008-12-04	07:20:00	52
2008-12-04	07:21:00	0
2008-12-04	07:22:00	0
2008-12-04	07:23:00	0
2008-12-04	07:24:00	0
2008-12-04	07:25:00	0
2008-12-04	07:26:00	306
2008-12-04	07:27:00	210
2008-12-04	07:28:00	0
2008-12-04	07:29:00	62
2008-12-04	07:30:00	0
2008-12-04	07:31:00	0
2008-12-04	07:32:00	0
2008-12-04	07:33:00	0
2008-12-04	07:34:00	5
2008-12-04	07:35:00	0
2008-12-04	07:36:00	0
2008-12-04	07:37:00	0
2008-12-04	07:38:00	0
2008-12-04	07:39:00	0
2008-12-04	07:40:00	0
2008-12-04	07:41:00	16
2008-12-04	07:42:00	0
2008-12-04	07:43:00	0
2008-12-04	07:44:00	0
2008-12-04	07:45:00	0
2008-12-04	07:46:00	10
2008-12-04	07:47:00	0
2008-12-04	07:48:00	0
2008-12-04	07:49:00	0
2008-12-04	07:50:00	36
2008-12-04	07:51:00	0
2008-12-04	07:52:00	42
2008-12-04	07:53:00	36
2008-12-04	07:54:00	315
2008-12-04	07:55:00	21
2008-12-04	07:56:00	0
2008-12-04	07:57:00	0
2008-12-04	07:58:00	0
2008-12-04	07:59:00	0
2008-12-04	08:00:00	0
2008-12-04	08:01:00	0
2008-12-04	08:02:00	0
2008-12-04	08:03:00	0
2008-12-04	08:04:00	0
2008-12-04	08:05:00	0
2008-12-04	08:06:00	0
2008-12-04	08:07:00	0
2008-12-04	08:08:00	0
2008-12-04	08:09:00	0
2008-12-04	08:10:00	0
2008-12-04	08:11:00	0
2008-12-04	08:12:00	31
2008-12-04	08:13:00	0
2008-12-04	08:14:00	0
2008-12-04	08:15:00	0
2008-12-04	08:16:00	0
2008-12-04	08:17:00	0
2008-12-04	08:18:00	0
2008-12-04	08:19:00	47
2008-12-04	08:20:00	0
2008-12-04	08:21:00	0
2008-12-04	08:22:00	0
2008-12-04	08:23:00	0
2008-12-04	08:24:00	0
2008-12-04	08:25:00	0
2008-12-04	08:26:00	0
2008-12-04	08:27:00	0
2008-12-04	08:28:00	0
2008-12-04	08:29:00	0
2008-12-04	08:30:00	0
2008-12-04	08:31:00	0
2008-12-04	08:32:00	47
2008-12-04	08:33:00	0
2008-12-04	08:34:00	0
2008-12-04	08:35:00	0
2008-12-04	08:36:00	0
2008-12-04	08:37:00	26
2008-12-04	08:38:00	0
2008-12-04	08:39:00	0
2008-12-04	08:40:00	0
2008-12-04	08:41:00	0
2008-12-04	08:42:00	0
2008-12-04	08:43:00	0
2008-12-04	08:44:00	0
2008-12-04	08:45:00	0
2008-12-04	08:46:00	0
2008-12-04	08:47:00	0
2008-12-04	08:48:00	0
2008-12-04	08:49:00	0
2008-12-04	08:50:00	0
2008-12-04	08:51:00	0
2008-12-04	08:52:00	0
2008-12-04	08:53:00	0
2008-12-04	08:54:00	0
2008-12-04	08:55:00	0
2008-12-04	08:56:00	0
2008-12-04	08:57:00	0
2008-12-04	08:58:00	0
2008-12-04	08:59:00	0
2008-12-04	09:00:00	0
2008-12-04	09:01:00	0
2008-12-04	09:02:00	0
2008-12-04	09:03:00	0
2008-12-04	09:04:00	0
2008-12-04	09:05:00	0
2008-12-04	09:06:00	0
2008-12-04	09:07:00	0
2008-12-04	09:08:00	0
[truncated: 19,611 more rows]

## Sheet: 12.17.08
Actogram, Copy Raw Data, All Days
Identity:	Shelby Moyer
Filename:	E:\Active Research Files\meloxicam titre canine\cases\shelby\Shelby Moyer 12.17.08.AWC
Gender:	F
Age:	5
Height:	40.6 cm	16.0 in
Weight:	15.0 kg	33.1 lbs
Start Date:	17-Dec-2008 (Wed)
Start Time:	17:00:00
Interval:	1.00 mins
Date Stamp:	Time Stamp:	Activity Data:	Marker Press:
2008-12-17	00:00:00	0
2008-12-17	00:01:00	0
2008-12-17	00:02:00	0
2008-12-17	00:03:00	0
2008-12-17	00:04:00	0
2008-12-17	00:05:00	0
2008-12-17	00:06:00	0
2008-12-17	00:07:00	0
2008-12-17	00:08:00	0
2008-12-17	00:09:00	0
2008-12-17	00:10:00	0
2008-12-17	00:11:00	0
2008-12-17	00:12:00	0
2008-12-17	00:13:00	0
2008-12-17	00:14:00	0
2008-12-17	00:15:00	0
2008-12-17	00:16:00	0
2008-12-17	00:17:00	0
2008-12-17	00:18:00	0
2008-12-17	00:19:00	0
2008-12-17	00:20:00	0
2008-12-17	00:21:00	0
2008-12-17	00:22:00	0
2008-12-17	00:23:00	0
2008-12-17	00:24:00	0
2008-12-17	00:25:00	0
2008-12-17	00:26:00	0
2008-12-17	00:27:00	0
2008-12-17	00:28:00	0
2008-12-17	00:29:00	0
2008-12-17	00:30:00	0
2008-12-17	00:31:00	0
2008-12-17	00:32:00	0
2008-12-17	00:33:00	0
2008-12-17	00:34:00	0
2008-12-17	00:35:00	0
2008-12-17	00:36:00	0
2008-12-17	00:37:00	0
2008-12-17	00:38:00	0
2008-12-17	00:39:00	0
2008-12-17	00:40:00	0
2008-12-17	00:41:00	0
2008-12-17	00:42:00	0
2008-12-17	00:43:00	0
2008-12-17	00:44:00	0
2008-12-17	00:45:00	0
2008-12-17	00:46:00	0
2008-12-17	00:47:00	0
2008-12-17	00:48:00	0
2008-12-17	00:49:00	0
2008-12-17	00:50:00	0
2008-12-17	00:51:00	0
2008-12-17	00:52:00	0
2008-12-17	00:53:00	0
2008-12-17	00:54:00	0
2008-12-17	00:55:00	0
2008-12-17	00:56:00	0
2008-12-17	00:57:00	0
2008-12-17	00:58:00	0
2008-12-17	00:59:00	0
2008-12-17	01:00:00	0
2008-12-17	01:01:00	0
2008-12-17	01:02:00	0
2008-12-17	01:03:00	0
2008-12-17	01:04:00	0
2008-12-17	01:05:00	0
2008-12-17	01:06:00	0
2008-12-17	01:07:00	0
2008-12-17	01:08:00	0
2008-12-17	01:09:00	0
2008-12-17	01:10:00	0
2008-12-17	01:11:00	0
2008-12-17	01:12:00	0
2008-12-17	01:13:00	0
2008-12-17	01:14:00	0
2008-12-17	01:15:00	0
2008-12-17	01:16:00	0
2008-12-17	01:17:00	0
2008-12-17	01:18:00	0
2008-12-17	01:19:00	0
2008-12-17	01:20:00	0
2008-12-17	01:21:00	0
2008-12-17	01:22:00	0
2008-12-17	01:23:00	0
2008-12-17	01:24:00	0
2008-12-17	01:25:00	0
2008-12-17	01:26:00	0
2008-12-17	01:27:00	0
2008-12-17	01:28:00	0
2008-12-17	01:29:00	0
2008-12-17	01:30:00	0
2008-12-17	01:31:00	0
2008-12-17	01:32:00	0
2008-12-17	01:33:00	0
2008-12-17	01:34:00	0
2008-12-17	01:35:00	0
2008-12-17	01:36:00	0
2008-12-17	01:37:00	0
2008-12-17	01:38:00	0
2008-12-17	01:39:00	0
2008-12-17	01:40:00	0
2008-12-17	01:41:00	0
2008-12-17	01:42:00	0
2008-12-17	01:43:00	0
2008-12-17	01:44:00	0
2008-12-17	01:45:00	0
2008-12-17	01:46:00	0
2008-12-17	01:47:00	0
2008-12-17	01:48:00	0
2008-12-17	01:49:00	0
2008-12-17	01:50:00	0
2008-12-17	01:51:00	0
2008-12-17	01:52:00	0
2008-12-17	01:53:00	0
2008-12-17	01:54:00	0
2008-12-17	01:55:00	0
2008-12-17	01:56:00	0
2008-12-17	01:57:00	0
2008-12-17	01:58:00	0
2008-12-17	01:59:00	0
2008-12-17	02:00:00	0
2008-12-17	02:01:00	0
2008-12-17	02:02:00	0
2008-12-17	02:03:00	0
2008-12-17	02:04:00	0
2008-12-17	02:05:00	0
2008-12-17	02:06:00	0
2008-12-17	02:07:00	0
2008-12-17	02:08:00	0
2008-12-17	02:09:00	0
2008-12-17	02:10:00	0
2008-12-17	02:11:00	0
2008-12-17	02:12:00	0
2008-12-17	02:13:00	0
2008-12-17	02:14:00	0
2008-12-17	02:15:00	0
2008-12-17	02:16:00	0
2008-12-17	02:17:00	0
2008-12-17	02:18:00	0
2008-12-17	02:19:00	0
2008-12-17	02:20:00	0
2008-12-17	02:21:00	0
2008-12-17	02:22:00	0
2008-12-17	02:23:00	0
2008-12-17	02:24:00	0
2008-12-17	02:25:00	0
2008-12-17	02:26:00	0
2008-12-17	02:27:00	0
2008-12-17	02:28:00	0
2008-12-17	02:29:00	0
2008-12-17	02:30:00	0
2008-12-17	02:31:00	0
2008-12-17	02:32:00	0
2008-12-17	02:33:00	0
2008-12-17	02:34:00	0
2008-12-17	02:35:00	0
2008-12-17	02:36:00	0
2008-12-17	02:37:00	0
2008-12-17	02:38:00	0
2008-12-17	02:39:00	0
2008-12-17	02:40:00	0
2008-12-17	02:41:00	0
2008-12-17	02:42:00	0
2008-12-17	02:43:00	0
2008-12-17	02:44:00	0
2008-12-17	02:45:00	0
2008-12-17	02:46:00	0
2008-12-17	02:47:00	0
2008-12-17	02:48:00	0
2008-12-17	02:49:00	0
2008-12-17	02:50:00	0
2008-12-17	02:51:00	0
2008-12-17	02:52:00	0
2008-12-17	02:53:00	0
2008-12-17	02:54:00	0
2008-12-17	02:55:00	0
2008-12-17	02:56:00	0
2008-12-17	02:57:00	0
2008-12-17	02:58:00	0
2008-12-17	02:59:00	0
2008-12-17	03:00:00	0
2008-12-17	03:01:00	0
2008-12-17	03:02:00	0
2008-12-17	03:03:00	0
2008-12-17	03:04:00	0
2008-12-17	03:05:00	0
2008-12-17	03:06:00	0
2008-12-17	03:07:00	0
2008-12-17	03:08:00	0
2008-12-17	03:09:00	0
2008-12-17	03:10:00	0
2008-12-17	03:11:00	0
2008-12-17	03:12:00	0
2008-12-17	03:13:00	0
2008-12-17	03:14:00	0
2008-12-17	03:15:00	0
2008-12-17	03:16:00	0
2008-12-17	03:17:00	0
2008-12-17	03:18:00	0
2008-12-17	03:19:00	0
2008-12-17	03:20:00	0
2008-12-17	03:21:00	0
2008-12-17	03:22:00	0
2008-12-17	03:23:00	0
2008-12-17	03:24:00	0
2008-12-17	03:25:00	0
2008-12-17	03:26:00	0
2008-12-17	03:27:00	0
2008-12-17	03:28:00	0
2008-12-17	03:29:00	0
2008-12-17	03:30:00	0
2008-12-17	03:31:00	0
2008-12-17	03:32:00	0
2008-12-17	03:33:00	0
2008-12-17	03:34:00	0
2008-12-17	03:35:00	0
2008-12-17	03:36:00	0
2008-12-17	03:37:00	0
2008-12-17	03:38:00	0
2008-12-17	03:39:00	0
2008-12-17	03:40:00	0
2008-12-17	03:41:00	0
2008-12-17	03:42:00	0
2008-12-17	03:43:00	0
2008-12-17	03:44:00	0
2008-12-17	03:45:00	0
2008-12-17	03:46:00	0
2008-12-17	03:47:00	0
2008-12-17	03:48:00	0
2008-12-17	03:49:00	0
2008-12-17	03:50:00	0
2008-12-17	03:51:00	0
2008-12-17	03:52:00	0
2008-12-17	03:53:00	0
2008-12-17	03:54:00	0
2008-12-17	03:55:00	0
2008-12-17	03:56:00	0
2008-12-17	03:57:00	0
2008-12-17	03:58:00	0
2008-12-17	03:59:00	0
2008-12-17	04:00:00	0
2008-12-17	04:01:00	0
2008-12-17	04:02:00	0
2008-12-17	04:03:00	0
2008-12-17	04:04:00	0
2008-12-17	04:05:00	0
2008-12-17	04:06:00	0
2008-12-17	04:07:00	0
2008-12-17	04:08:00	0
2008-12-17	04:09:00	0
2008-12-17	04:10:00	0
2008-12-17	04:11:00	0
2008-12-17	04:12:00	0
2008-12-17	04:13:00	0
2008-12-17	04:14:00	0
2008-12-17	04:15:00	0
2008-12-17	04:16:00	0
2008-12-17	04:17:00	0
2008-12-17	04:18:00	0
2008-12-17	04:19:00	0
2008-12-17	04:20:00	0
2008-12-17	04:21:00	0
2008-12-17	04:22:00	0
2008-12-17	04:23:00	0
2008-12-17	04:24:00	0
2008-12-17	04:25:00	0
2008-12-17	04:26:00	0
2008-12-17	04:27:00	0
2008-12-17	04:28:00	0
2008-12-17	04:29:00	0
2008-12-17	04:30:00	0
2008-12-17	04:31:00	0
2008-12-17	04:32:00	0
2008-12-17	04:33:00	0
2008-12-17	04:34:00	0
2008-12-17	04:35:00	0
2008-12-17	04:36:00	0
2008-12-17	04:37:00	0
2008-12-17	04:38:00	0
2008-12-17	04:39:00	0
2008-12-17	04:40:00	0
2008-12-17	04:41:00	0
2008-12-17	04:42:00	0
2008-12-17	04:43:00	0
2008-12-17	04:44:00	0
2008-12-17	04:45:00	0
2008-12-17	04:46:00	0
2008-12-17	04:47:00	0
2008-12-17	04:48:00	0
2008-12-17	04:49:00	0
2008-12-17	04:50:00	0
2008-12-17	04:51:00	0
2008-12-17	04:52:00	0
2008-12-17	04:53:00	0
2008-12-17	04:54:00	0
2008-12-17	04:55:00	0
2008-12-17	04:56:00	0
2008-12-17	04:57:00	0
2008-12-17	04:58:00	0
2008-12-17	04:59:00	0
2008-12-17	05:00:00	0
2008-12-17	05:01:00	0
2008-12-17	05:02:00	0
2008-12-17	05:03:00	0
2008-12-17	05:04:00	0
2008-12-17	05:05:00	0
2008-12-17	05:06:00	0
2008-12-17	05:07:00	0
2008-12-17	05:08:00	0
2008-12-17	05:09:00	0
2008-12-17	05:10:00	0
2008-12-17	05:11:00	0
2008-12-17	05:12:00	0
2008-12-17	05:13:00	0
2008-12-17	05:14:00	0
2008-12-17	05:15:00	0
2008-12-17	05:16:00	0
2008-12-17	05:17:00	0
2008-12-17	05:18:00	0
2008-12-17	05:19:00	0
2008-12-17	05:20:00	0
2008-12-17	05:21:00	0
2008-12-17	05:22:00	0
2008-12-17	05:23:00	0
2008-12-17	05:24:00	0
2008-12-17	05:25:00	0
2008-12-17	05:26:00	0
2008-12-17	05:27:00	0
2008-12-17	05:28:00	0
2008-12-17	05:29:00	0
2008-12-17	05:30:00	0
2008-12-17	05:31:00	0
2008-12-17	05:32:00	0
2008-12-17	05:33:00	0
2008-12-17	05:34:00	0
2008-12-17	05:35:00	0
2008-12-17	05:36:00	0
2008-12-17	05:37:00	0
2008-12-17	05:38:00	0
2008-12-17	05:39:00	0
2008-12-17	05:40:00	0
2008-12-17	05:41:00	0
2008-12-17	05:42:00	0
2008-12-17	05:43:00	0
2008-12-17	05:44:00	0
2008-12-17	05:45:00	0
2008-12-17	05:46:00	0
2008-12-17	05:47:00	0
2008-12-17	05:48:00	0
2008-12-17	05:49:00	0
2008-12-17	05:50:00	0
2008-12-17	05:51:00	0
2008-12-17	05:52:00	0
2008-12-17	05:53:00	0
2008-12-17	05:54:00	0
2008-12-17	05:55:00	0
2008-12-17	05:56:00	0
2008-12-17	05:57:00	0
2008-12-17	05:58:00	0
2008-12-17	05:59:00	0
2008-12-17	06:00:00	0
2008-12-17	06:01:00	0
2008-12-17	06:02:00	0
2008-12-17	06:03:00	0
2008-12-17	06:04:00	0
2008-12-17	06:05:00	0
2008-12-17	06:06:00	0
2008-12-17	06:07:00	0
2008-12-17	06:08:00	0
2008-12-17	06:09:00	0
2008-12-17	06:10:00	0
2008-12-17	06:11:00	0
2008-12-17	06:12:00	0
2008-12-17	06:13:00	0
2008-12-17	06:14:00	0
2008-12-17	06:15:00	0
2008-12-17	06:16:00	0
2008-12-17	06:17:00	0
2008-12-17	06:18:00	0
2008-12-17	06:19:00	0
2008-12-17	06:20:00	0
2008-12-17	06:21:00	0
2008-12-17	06:22:00	0
2008-12-17	06:23:00	0
2008-12-17	06:24:00	0
2008-12-17	06:25:00	0
2008-12-17	06:26:00	0
2008-12-17	06:27:00	0
2008-12-17	06:28:00	0
2008-12-17	06:29:00	0
2008-12-17	06:30:00	0
2008-12-17	06:31:00	0
2008-12-17	06:32:00	0
2008-12-17	06:33:00	0
2008-12-17	06:34:00	0
2008-12-17	06:35:00	0
2008-12-17	06:36:00	0
2008-12-17	06:37:00	0
2008-12-17	06:38:00	0
2008-12-17	06:39:00	0
2008-12-17	06:40:00	0
2008-12-17	06:41:00	0
2008-12-17	06:42:00	0
2008-12-17	06:43:00	0
2008-12-17	06:44:00	0
2008-12-17	06:45:00	0
2008-12-17	06:46:00	0
2008-12-17	06:47:00	0
2008-12-17	06:48:00	0
2008-12-17	06:49:00	0
2008-12-17	06:50:00	0
2008-12-17	06:51:00	0
2008-12-17	06:52:00	0
2008-12-17	06:53:00	0
2008-12-17	06:54:00	0
2008-12-17	06:55:00	0
2008-12-17	06:56:00	0
2008-12-17	06:57:00	0
2008-12-17	06:58:00	0
2008-12-17	06:59:00	0
2008-12-17	07:00:00	0
2008-12-17	07:01:00	0
2008-12-17	07:02:00	0
2008-12-17	07:03:00	0
2008-12-17	07:04:00	0
2008-12-17	07:05:00	0
2008-12-17	07:06:00	0
2008-12-17	07:07:00	0
2008-12-17	07:08:00	0
2008-12-17	07:09:00	0
2008-12-17	07:10:00	0
2008-12-17	07:11:00	0
2008-12-17	07:12:00	0
2008-12-17	07:13:00	0
2008-12-17	07:14:00	0
2008-12-17	07:15:00	0
2008-12-17	07:16:00	0
2008-12-17	07:17:00	0
2008-12-17	07:18:00	0
2008-12-17	07:19:00	0
2008-12-17	07:20:00	0
2008-12-17	07:21:00	0
2008-12-17	07:22:00	0
2008-12-17	07:23:00	0
2008-12-17	07:24:00	0
2008-12-17	07:25:00	0
2008-12-17	07:26:00	0
2008-12-17	07:27:00	0
2008-12-17	07:28:00	0
2008-12-17	07:29:00	0
2008-12-17	07:30:00	0
2008-12-17	07:31:00	0
2008-12-17	07:32:00	0
2008-12-17	07:33:00	0
2008-12-17	07:34:00	0
2008-12-17	07:35:00	0
2008-12-17	07:36:00	0
2008-12-17	07:37:00	0
2008-12-17	07:38:00	0
2008-12-17	07:39:00	0
2008-12-17	07:40:00	0
2008-12-17	07:41:00	0
2008-12-17	07:42:00	0
2008-12-17	07:43:00	0
2008-12-17	07:44:00	0
2008-12-17	07:45:00	0
2008-12-17	07:46:00	0
2008-12-17	07:47:00	0
2008-12-17	07:48:00	0
2008-12-17	07:49:00	0
2008-12-17	07:50:00	0
2008-12-17	07:51:00	0
2008-12-17	07:52:00	0
2008-12-17	07:53:00	0
2008-12-17	07:54:00	0
2008-12-17	07:55:00	0
2008-12-17	07:56:00	0
2008-12-17	07:57:00	0
2008-12-17	07:58:00	0
2008-12-17	07:59:00	0
2008-12-17	08:00:00	0
2008-12-17	08:01:00	0
2008-12-17	08:02:00	0
2008-12-17	08:03:00	0
2008-12-17	08:04:00	0
2008-12-17	08:05:00	0
2008-12-17	08:06:00	0
2008-12-17	08:07:00	0
2008-12-17	08:08:00	0
2008-12-17	08:09:00	0
2008-12-17	08:10:00	0
2008-12-17	08:11:00	0
2008-12-17	08:12:00	0
2008-12-17	08:13:00	0
2008-12-17	08:14:00	0
2008-12-17	08:15:00	0
2008-12-17	08:16:00	0
2008-12-17	08:17:00	0
2008-12-17	08:18:00	0
2008-12-17	08:19:00	0
2008-12-17	08:20:00	0
2008-12-17	08:21:00	0
2008-12-17	08:22:00	0
2008-12-17	08:23:00	0
2008-12-17	08:24:00	0
2008-12-17	08:25:00	0
2008-12-17	08:26:00	0
2008-12-17	08:27:00	0
2008-12-17	08:28:00	0
2008-12-17	08:29:00	0
2008-12-17	08:30:00	0
2008-12-17	08:31:00	0
2008-12-17	08:32:00	0
2008-12-17	08:33:00	0
2008-12-17	08:34:00	0
2008-12-17	08:35:00	0
2008-12-17	08:36:00	0
2008-12-17	08:37:00	0
2008-12-17	08:38:00	0
2008-12-17	08:39:00	0
2008-12-17	08:40:00	0
2008-12-17	08:41:00	0
2008-12-17	08:42:00	0
2008-12-17	08:43:00	0
2008-12-17	08:44:00	0
2008-12-17	08:45:00	0
2008-12-17	08:46:00	0
2008-12-17	08:47:00	0
2008-12-17	08:48:00	0
2008-12-17	08:49:00	0
2008-12-17	08:50:00	0
2008-12-17	08:51:00	0
2008-12-17	08:52:00	0
2008-12-17	08:53:00	0
2008-12-17	08:54:00	0
2008-12-17	08:55:00	0
2008-12-17	08:56:00	0
2008-12-17	08:57:00	0
2008-12-17	08:58:00	0
2008-12-17	08:59:00	0
2008-12-17	09:00:00	0
2008-12-17	09:01:00	0
2008-12-17	09:02:00	0
2008-12-17	09:03:00	0
2008-12-17	09:04:00	0
2008-12-17	09:05:00	0
2008-12-17	09:06:00	0
2008-12-17	09:07:00	0
2008-12-17	09:08:00	0
2008-12-17	09:09:00	0
2008-12-17	09:10:00	0
2008-12-17	09:11:00	0
2008-12-17	09:12:00	0
2008-12-17	09:13:00	0
2008-12-17	09:14:00	0
2008-12-17	09:15:00	0
2008-12-17	09:16:00	0
2008-12-17	09:17:00	0
2008-12-17	09:18:00	0
2008-12-17	09:19:00	0
2008-12-17	09:20:00	0
2008-12-17	09:21:00	0
2008-12-17	09:22:00	0
2008-12-17	09:23:00	0
2008-12-17	09:24:00	0
2008-12-17	09:25:00	0
2008-12-17	09:26:00	0
2008-12-17	09:27:00	0
2008-12-17	09:28:00	0
2008-12-17	09:29:00	0
2008-12-17	09:30:00	0
2008-12-17	09:31:00	0
2008-12-17	09:32:00	0
2008-12-17	09:33:00	0
2008-12-17	09:34:00	0
2008-12-17	09:35:00	0
2008-12-17	09:36:00	0
2008-12-17	09:37:00	0
2008-12-17	09:38:00	0
2008-12-17	09:39:00	0
2008-12-17	09:40:00	0
2008-12-17	09:41:00	0
2008-12-17	09:42:00	0
2008-12-17	09:43:00	0
2008-12-17	09:44:00	0
2008-12-17	09:45:00	0
2008-12-17	09:46:00	0
2008-12-17	09:47:00	0
2008-12-17	09:48:00	0
2008-12-17	09:49:00	0
2008-12-17	09:50:00	0
2008-12-17	09:51:00	0
2008-12-17	09:52:00	0
2008-12-17	09:53:00	0
2008-12-17	09:54:00	0
2008-12-17	09:55:00	0
2008-12-17	09:56:00	0
2008-12-17	09:57:00	0
2008-12-17	09:58:00	0
2008-12-17	09:59:00	0
2008-12-17	10:00:00	0
2008-12-17	10:01:00	0
2008-12-17	10:02:00	0
2008-12-17	10:03:00	0
2008-12-17	10:04:00	0
2008-12-17	10:05:00	0
2008-12-17	10:06:00	0
2008-12-17	10:07:00	0
2008-12-17	10:08:00	0
2008-12-17	10:09:00	0
2008-12-17	10:10:00	0
2008-12-17	10:11:00	0
2008-12-17	10:12:00	0
2008-12-17	10:13:00	0
2008-12-17	10:14:00	0
2008-12-17	10:15:00	0
2008-12-17	10:16:00	0
2008-12-17	10:17:00	0
2008-12-17	10:18:00	0
2008-12-17	10:19:00	0
2008-12-17	10:20:00	0
2008-12-17	10:21:00	0
2008-12-17	10:22:00	0
2008-12-17	10:23:00	0
2008-12-17	10:24:00	0
2008-12-17	10:25:00	0
2008-12-17	10:26:00	0
2008-12-17	10:27:00	0
2008-12-17	10:28:00	0
2008-12-17	10:29:00	0
2008-12-17	10:30:00	0
2008-12-17	10:31:00	0
2008-12-17	10:32:00	0
2008-12-17	10:33:00	0
2008-12-17	10:34:00	0
2008-12-17	10:35:00	0
2008-12-17	10:36:00	0
2008-12-17	10:37:00	0
2008-12-17	10:38:00	0
2008-12-17	10:39:00	0
2008-12-17	10:40:00	0
2008-12-17	10:41:00	0
2008-12-17	10:42:00	0
2008-12-17	10:43:00	0
2008-12-17	10:44:00	0
2008-12-17	10:45:00	0
2008-12-17	10:46:00	0
2008-12-17	10:47:00	0
2008-12-17	10:48:00	0
2008-12-17	10:49:00	0
2008-12-17	10:50:00	0
2008-12-17	10:51:00	0
2008-12-17	10:52:00	0
2008-12-17	10:53:00	0
2008-12-17	10:54:00	0
2008-12-17	10:55:00	0
2008-12-17	10:56:00	0
2008-12-17	10:57:00	0
2008-12-17	10:58:00	0
2008-12-17	10:59:00	0
2008-12-17	11:00:00	0
2008-12-17	11:01:00	0
2008-12-17	11:02:00	0
2008-12-17	11:03:00	0
2008-12-17	11:04:00	0
2008-12-17	11:05:00	0
2008-12-17	11:06:00	0
2008-12-17	11:07:00	0
2008-12-17	11:08:00	0
2008-12-17	11:09:00	0
2008-12-17	11:10:00	0
2008-12-17	11:11:00	0
2008-12-17	11:12:00	0
2008-12-17	11:13:00	0
2008-12-17	11:14:00	0
2008-12-17	11:15:00	0
2008-12-17	11:16:00	0
2008-12-17	11:17:00	0
2008-12-17	11:18:00	0
2008-12-17	11:19:00	0
2008-12-17	11:20:00	0
2008-12-17	11:21:00	0
2008-12-17	11:22:00	0
2008-12-17	11:23:00	0
2008-12-17	11:24:00	0
2008-12-17	11:25:00	0
2008-12-17	11:26:00	0
2008-12-17	11:27:00	0
2008-12-17	11:28:00	0
2008-12-17	11:29:00	0
2008-12-17	11:30:00	0
2008-12-17	11:31:00	0
2008-12-17	11:32:00	0
2008-12-17	11:33:00	0
2008-12-17	11:34:00	0
2008-12-17	11:35:00	0
2008-12-17	11:36:00	0
2008-12-17	11:37:00	0
2008-12-17	11:38:00	0
2008-12-17	11:39:00	0
2008-12-17	11:40:00	0
2008-12-17	11:41:00	0
2008-12-17	11:42:00	0
2008-12-17	11:43:00	0
2008-12-17	11:44:00	0
2008-12-17	11:45:00	0
2008-12-17	11:46:00	0
2008-12-17	11:47:00	0
2008-12-17	11:48:00	0
2008-12-17	11:49:00	0
2008-12-17	11:50:00	0
2008-12-17	11:51:00	0
2008-12-17	11:52:00	0
2008-12-17	11:53:00	0
2008-12-17	11:54:00	0
2008-12-17	11:55:00	0
2008-12-17	11:56:00	0
2008-12-17	11:57:00	0
2008-12-17	11:58:00	0
2008-12-17	11:59:00	0
2008-12-17	12:00:00	0
2008-12-17	12:01:00	0
2008-12-17	12:02:00	0
2008-12-17	12:03:00	0
2008-12-17	12:04:00	0
2008-12-17	12:05:00	0
2008-12-17	12:06:00	0
2008-12-17	12:07:00	0
2008-12-17	12:08:00	0
2008-12-17	12:09:00	0
2008-12-17	12:10:00	0
2008-12-17	12:11:00	0
2008-12-17	12:12:00	0
2008-12-17	12:13:00	0
2008-12-17	12:14:00	0
2008-12-17	12:15:00	0
2008-12-17	12:16:00	0
2008-12-17	12:17:00	0
2008-12-17	12:18:00	0
2008-12-17	12:19:00	0
2008-12-17	12:20:00	0
2008-12-17	12:21:00	0
2008-12-17	12:22:00	0
2008-12-17	12:23:00	0
2008-12-17	12:24:00	0
2008-12-17	12:25:00	0
2008-12-17	12:26:00	0
2008-12-17	12:27:00	0
2008-12-17	12:28:00	0
2008-12-17	12:29:00	0
2008-12-17	12:30:00	0
2008-12-17	12:31:00	0
2008-12-17	12:32:00	0
2008-12-17	12:33:00	0
2008-12-17	12:34:00	0
2008-12-17	12:35:00	0
2008-12-17	12:36:00	0
2008-12-17	12:37:00	0
2008-12-17	12:38:00	0
2008-12-17	12:39:00	0
2008-12-17	12:40:00	0
2008-12-17	12:41:00	0
2008-12-17	12:42:00	0
2008-12-17	12:43:00	0
2008-12-17	12:44:00	0
2008-12-17	12:45:00	0
2008-12-17	12:46:00	0
2008-12-17	12:47:00	0
2008-12-17	12:48:00	0
2008-12-17	12:49:00	0
2008-12-17	12:50:00	0
2008-12-17	12:51:00	0
2008-12-17	12:52:00	0
2008-12-17	12:53:00	0
2008-12-17	12:54:00	0
2008-12-17	12:55:00	0
2008-12-17	12:56:00	0
2008-12-17	12:57:00	0
2008-12-17	12:58:00	0
2008-12-17	12:59:00	0
2008-12-17	13:00:00	0
2008-12-17	13:01:00	0
2008-12-17	13:02:00	0
2008-12-17	13:03:00	0
2008-12-17	13:04:00	0
2008-12-17	13:05:00	0
2008-12-17	13:06:00	0
2008-12-17	13:07:00	0
2008-12-17	13:08:00	0
2008-12-17	13:09:00	0
2008-12-17	13:10:00	0
2008-12-17	13:11:00	0
2008-12-17	13:12:00	0
2008-12-17	13:13:00	0
2008-12-17	13:14:00	0
2008-12-17	13:15:00	0
2008-12-17	13:16:00	0
2008-12-17	13:17:00	0
2008-12-17	13:18:00	0
2008-12-17	13:19:00	0
2008-12-17	13:20:00	0
2008-12-17	13:21:00	0
2008-12-17	13:22:00	0
2008-12-17	13:23:00	0
2008-12-17	13:24:00	0
2008-12-17	13:25:00	0
2008-12-17	13:26:00	0
2008-12-17	13:27:00	0
2008-12-17	13:28:00	0
2008-12-17	13:29:00	0
2008-12-17	13:30:00	0
2008-12-17	13:31:00	0
2008-12-17	13:32:00	0
2008-12-17	13:33:00	0
2008-12-17	13:34:00	0
2008-12-17	13:35:00	0
2008-12-17	13:36:00	0
2008-12-17	13:37:00	0
2008-12-17	13:38:00	0
2008-12-17	13:39:00	0
2008-12-17	13:40:00	0
2008-12-17	13:41:00	0
2008-12-17	13:42:00	0
2008-12-17	13:43:00	0
2008-12-17	13:44:00	0
2008-12-17	13:45:00	0
2008-12-17	13:46:00	0
2008-12-17	13:47:00	0
2008-12-17	13:48:00	0
2008-12-17	13:49:00	0
2008-12-17	13:50:00	0
2008-12-17	13:51:00	0
2008-12-17	13:52:00	0
2008-12-17	13:53:00	0
2008-12-17	13:54:00	0
2008-12-17	13:55:00	0
2008-12-17	13:56:00	0
2008-12-17	13:57:00	0
2008-12-17	13:58:00	0
2008-12-17	13:59:00	0
2008-12-17	14:00:00	0
2008-12-17	14:01:00	0
2008-12-17	14:02:00	0
2008-12-17	14:03:00	0
2008-12-17	14:04:00	0
2008-12-17	14:05:00	0
2008-12-17	14:06:00	0
2008-12-17	14:07:00	0
2008-12-17	14:08:00	0
2008-12-17	14:09:00	0
2008-12-17	14:10:00	0
2008-12-17	14:11:00	0
2008-12-17	14:12:00	0
2008-12-17	14:13:00	0
2008-12-17	14:14:00	0
2008-12-17	14:15:00	0
2008-12-17	14:16:00	0
2008-12-17	14:17:00	0
2008-12-17	14:18:00	0
2008-12-17	14:19:00	0
2008-12-17	14:20:00	0
2008-12-17	14:21:00	0
2008-12-17	14:22:00	0
2008-12-17	14:23:00	0
2008-12-17	14:24:00	0
2008-12-17	14:25:00	0
2008-12-17	14:26:00	0
2008-12-17	14:27:00	0
2008-12-17	14:28:00	0
2008-12-17	14:29:00	0
2008-12-17	14:30:00	0
2008-12-17	14:31:00	0
2008-12-17	14:32:00	0
2008-12-17	14:33:00	0
2008-12-17	14:34:00	0
2008-12-17	14:35:00	0
2008-12-17	14:36:00	0
2008-12-17	14:37:00	0
2008-12-17	14:38:00	0
2008-12-17	14:39:00	0
2008-12-17	14:40:00	0
2008-12-17	14:41:00	0
2008-12-17	14:42:00	0
2008-12-17	14:43:00	0
2008-12-17	14:44:00	0
2008-12-17	14:45:00	0
2008-12-17	14:46:00	0
2008-12-17	14:47:00	0
2008-12-17	14:48:00	0
2008-12-17	14:49:00	0
2008-12-17	14:50:00	0
2008-12-17	14:51:00	0
2008-12-17	14:52:00	0
2008-12-17	14:53:00	0
2008-12-17	14:54:00	0
2008-12-17	14:55:00	0
2008-12-17	14:56:00	0
2008-12-17	14:57:00	0
2008-12-17	14:58:00	0
2008-12-17	14:59:00	0
2008-12-17	15:00:00	0
2008-12-17	15:01:00	0
2008-12-17	15:02:00	0
2008-12-17	15:03:00	0
2008-12-17	15:04:00	0
2008-12-17	15:05:00	0
2008-12-17	15:06:00	0
2008-12-17	15:07:00	0
2008-12-17	15:08:00	0
2008-12-17	15:09:00	0
2008-12-17	15:10:00	0
2008-12-17	15:11:00	0
2008-12-17	15:12:00	0
2008-12-17	15:13:00	0
2008-12-17	15:14:00	0
2008-12-17	15:15:00	0
2008-12-17	15:16:00	0
2008-12-17	15:17:00	0
2008-12-17	15:18:00	0
2008-12-17	15:19:00	0
2008-12-17	15:20:00	0
2008-12-17	15:21:00	0
2008-12-17	15:22:00	0
2008-12-17	15:23:00	0
2008-12-17	15:24:00	0
2008-12-17	15:25:00	0
2008-12-17	15:26:00	0
2008-12-17	15:27:00	0
2008-12-17	15:28:00	0
2008-12-17	15:29:00	0
2008-12-17	15:30:00	0
2008-12-17	15:31:00	0
2008-12-17	15:32:00	0
2008-12-17	15:33:00	0
2008-12-17	15:34:00	0
2008-12-17	15:35:00	0
2008-12-17	15:36:00	0
2008-12-17	15:37:00	0
2008-12-17	15:38:00	0
2008-12-17	15:39:00	0
2008-12-17	15:40:00	0
2008-12-17	15:41:00	0
2008-12-17	15:42:00	0
2008-12-17	15:43:00	0
2008-12-17	15:44:00	0
2008-12-17	15:45:00	0
2008-12-17	15:46:00	0
2008-12-17	15:47:00	0
2008-12-17	15:48:00	0
2008-12-17	15:49:00	0
2008-12-17	15:50:00	0
2008-12-17	15:51:00	0
2008-12-17	15:52:00	0
2008-12-17	15:53:00	0
2008-12-17	15:54:00	0
2008-12-17	15:55:00	0
2008-12-17	15:56:00	0
2008-12-17	15:57:00	0
2008-12-17	15:58:00	0
2008-12-17	15:59:00	0
2008-12-17	16:00:00	0
2008-12-17	16:01:00	0
2008-12-17	16:02:00	0
2008-12-17	16:03:00	0
2008-12-17	16:04:00	0
2008-12-17	16:05:00	0
2008-12-17	16:06:00	0
2008-12-17	16:07:00	0
2008-12-17	16:08:00	0
2008-12-17	16:09:00	0
2008-12-17	16:10:00	0
2008-12-17	16:11:00	0
2008-12-17	16:12:00	0
2008-12-17	16:13:00	0
2008-12-17	16:14:00	0
2008-12-17	16:15:00	0
2008-12-17	16:16:00	0
2008-12-17	16:17:00	0
2008-12-17	16:18:00	0
2008-12-17	16:19:00	0
2008-12-17	16:20:00	0
2008-12-17	16:21:00	0
2008-12-17	16:22:00	0
2008-12-17	16:23:00	0
2008-12-17	16:24:00	0
2008-12-17	16:25:00	0
2008-12-17	16:26:00	0
2008-12-17	16:27:00	0
2008-12-17	16:28:00	0
2008-12-17	16:29:00	0
2008-12-17	16:30:00	0
2008-12-17	16:31:00	0
2008-12-17	16:32:00	0
2008-12-17	16:33:00	0
2008-12-17	16:34:00	0
2008-12-17	16:35:00	0
2008-12-17	16:36:00	0
2008-12-17	16:37:00	0
2008-12-17	16:38:00	0
2008-12-17	16:39:00	0
2008-12-17	16:40:00	0
2008-12-17	16:41:00	0
2008-12-17	16:42:00	0
2008-12-17	16:43:00	0
2008-12-17	16:44:00	0
2008-12-17	16:45:00	0
2008-12-17	16:46:00	0
2008-12-17	16:47:00	0
2008-12-17	16:48:00	0
2008-12-17	16:49:00	0
2008-12-17	16:50:00	0
2008-12-17	16:51:00	0
2008-12-17	16:52:00	0
2008-12-17	16:53:00	0
2008-12-17	16:54:00	0
2008-12-17	16:55:00	0
2008-12-17	16:56:00	0
2008-12-17	16:57:00	0
2008-12-17	16:58:00	0
2008-12-17	16:59:00	0
2008-12-17	17:00:00	0
2008-12-17	17:01:00	0
2008-12-17	17:02:00	0
2008-12-17	17:03:00	5
2008-12-17	17:04:00	0
2008-12-17	17:05:00	0
2008-12-17	17:06:00	0
2008-12-17	17:07:00	0
2008-12-17	17:08:00	5
2008-12-17	17:09:00	0
2008-12-17	17:10:00	0
2008-12-17	17:11:00	0
2008-12-17	17:12:00	0
2008-12-17	17:13:00	210
2008-12-17	17:14:00	10
2008-12-17	17:15:00	0
2008-12-17	17:16:00	10
2008-12-17	17:17:00	0
2008-12-17	17:18:00	26
2008-12-17	17:19:00	0
2008-12-17	17:20:00	5
2008-12-17	17:21:00	31
2008-12-17	17:22:00	0
2008-12-17	17:23:00	0
2008-12-17	17:24:00	0
2008-12-17	17:25:00	0
2008-12-17	17:26:00	36
2008-12-17	17:27:00	5
2008-12-17	17:28:00	0
2008-12-17	17:29:00	0
2008-12-17	17:30:00	0
2008-12-17	17:31:00	0
2008-12-17	17:32:00	0
2008-12-17	17:33:00	0
2008-12-17	17:34:00	0
2008-12-17	17:35:00	5
2008-12-17	17:36:00	1014
2008-12-17	17:37:00	1034
2008-12-17	17:38:00	144
2008-12-17	17:39:00	68
2008-12-17	17:40:00	0
2008-12-17	17:41:00	10
2008-12-17	17:42:00	0
2008-12-17	17:43:00	0
2008-12-17	17:44:00	0
2008-12-17	17:45:00	0
2008-12-17	17:46:00	0
2008-12-17	17:47:00	0
2008-12-17	17:48:00	0
2008-12-17	17:49:00	0
2008-12-17	17:50:00	0
2008-12-17	17:51:00	111
2008-12-17	17:52:00	0
2008-12-17	17:53:00	0
2008-12-17	17:54:00	0
2008-12-17	17:55:00	0
2008-12-17	17:56:00	0
2008-12-17	17:57:00	0
2008-12-17	17:58:00	268
2008-12-17	17:59:00	124
2008-12-17	18:00:00	165
2008-12-17	18:01:00	0
2008-12-17	18:02:00	0
2008-12-17	18:03:00	0
2008-12-17	18:04:00	0
2008-12-17	18:05:00	0
2008-12-17	18:06:00	0
2008-12-17	18:07:00	0
2008-12-17	18:08:00	0
2008-12-17	18:09:00	0
2008-12-17	18:10:00	0
2008-12-17	18:11:00	36
2008-12-17	18:12:00	0
2008-12-17	18:13:00	16
2008-12-17	18:14:00	5
2008-12-17	18:15:00	42
2008-12-17	18:16:00	5
2008-12-17	18:17:00	10
2008-12-17	18:18:00	16
2008-12-17	18:19:00	0
2008-12-17	18:20:00	0
2008-12-17	18:21:00	0
2008-12-17	18:22:00	0
2008-12-17	18:23:00	0
2008-12-17	18:24:00	1384
2008-12-17	18:25:00	1925
2008-12-17	18:26:00	3134
2008-12-17	18:27:00	3529
2008-12-17	18:28:00	1358
2008-12-17	18:29:00	1729
2008-12-17	18:30:00	1307
2008-12-17	18:31:00	2338
2008-12-17	18:32:00	1792
2008-12-17	18:33:00	2782
2008-12-17	18:34:00	3900
2008-12-17	18:35:00	3836
2008-12-17	18:36:00	3134
2008-12-17	18:37:00	2734
2008-12-17	18:38:00	526
2008-12-17	18:39:00	565
2008-12-17	18:40:00	80
2008-12-17	18:41:00	365
2008-12-17	18:42:00	10
2008-12-17	18:43:00	287
2008-12-17	18:44:00	187
2008-12-17	18:45:00	105
2008-12-17	18:46:00	130
2008-12-17	18:47:00	235
2008-12-17	18:48:00	130
2008-12-17	18:49:00	268
2008-12-17	18:50:00	118
2008-12-17	18:51:00	278
2008-12-17	18:52:00	195
2008-12-17	18:53:00	325
2008-12-17	18:54:00	1258
2008-12-17	18:55:00	476
2008-12-17	18:56:00	165
2008-12-17	18:57:00	344
2008-12-17	18:58:00	151
2008-12-17	18:59:00	130
2008-12-17	19:00:00	825
2008-12-17	19:01:00	136
2008-12-17	19:02:00	334
2008-12-17	19:03:00	130
2008-12-17	19:04:00	144
2008-12-17	19:05:00	287
2008-12-17	19:06:00	501
2008-12-17	19:07:00	355
2008-12-17	19:08:00	365
2008-12-17	19:09:00	453
2008-12-17	19:10:00	386
2008-12-17	19:11:00	464
2008-12-17	19:12:00	649
2008-12-17	19:13:00	325
2008-12-17	19:14:00	453
2008-12-17	19:15:00	579
2008-12-17	19:16:00	441
2008-12-17	19:17:00	260
2008-12-17	19:18:00	538
2008-12-17	19:19:00	418
2008-12-17	19:20:00	386
2008-12-17	19:21:00	47
2008-12-17	19:22:00	52
2008-12-17	19:23:00	187
2008-12-17	19:24:00	297
2008-12-17	19:25:00	173
2008-12-17	19:26:00	0
2008-12-17	19:27:00	31
2008-12-17	19:28:00	219
2008-12-17	19:29:00	741
2008-12-17	19:30:00	565
2008-12-17	19:31:00	268
2008-12-17	19:32:00	57
2008-12-17	19:33:00	80
2008-12-17	19:34:00	68
2008-12-17	19:35:00	80
2008-12-17	19:36:00	0
2008-12-17	19:37:00	10
2008-12-17	19:38:00	0
2008-12-17	19:39:00	0
2008-12-17	19:40:00	10
2008-12-17	19:41:00	10
2008-12-17	19:42:00	16
2008-12-17	19:43:00	42
2008-12-17	19:44:00	99
2008-12-17	19:45:00	235
2008-12-17	19:46:00	31
2008-12-17	19:47:00	0
2008-12-17	19:48:00	26
2008-12-17	19:49:00	36
2008-12-17	19:50:00	0
2008-12-17	19:51:00	0
2008-12-17	19:52:00	210
2008-12-17	19:53:00	260
2008-12-17	19:54:00	861
2008-12-17	19:55:00	464
2008-12-17	19:56:00	407
2008-12-17	19:57:00	36
2008-12-17	19:58:00	5
2008-12-17	19:59:00	0
2008-12-17	20:00:00	0
2008-12-17	20:01:00	235
2008-12-17	20:02:00	0
2008-12-17	20:03:00	0
2008-12-17	20:04:00	0
2008-12-17	20:05:00	0
2008-12-17	20:06:00	0
2008-12-17	20:07:00	0
2008-12-17	20:08:00	0
2008-12-17	20:09:00	0
2008-12-17	20:10:00	0
2008-12-17	20:11:00	0
2008-12-17	20:12:00	0
2008-12-17	20:13:00	0
2008-12-17	20:14:00	0
2008-12-17	20:15:00	0
2008-12-17	20:16:00	0
2008-12-17	20:17:00	0
2008-12-17	20:18:00	0
2008-12-17	20:19:00	0
2008-12-17	20:20:00	0
2008-12-17	20:21:00	0
2008-12-17	20:22:00	0
2008-12-17	20:23:00	0
2008-12-17	20:24:00	0
2008-12-17	20:25:00	0
2008-12-17	20:26:00	0
2008-12-17	20:27:00	0
2008-12-17	20:28:00	0
2008-12-17	20:29:00	0
2008-12-17	20:30:00	0
2008-12-17	20:31:00	0
2008-12-17	20:32:00	0
2008-12-17	20:33:00	0
2008-12-17	20:34:00	16
2008-12-17	20:35:00	0
2008-12-17	20:36:00	0
2008-12-17	20:37:00	0
2008-12-17	20:38:00	0
2008-12-17	20:39:00	0
2008-12-17	20:40:00	0
2008-12-17	20:41:00	0
2008-12-17	20:42:00	0
2008-12-17	20:43:00	0
2008-12-17	20:44:00	0
2008-12-17	20:45:00	0
2008-12-17	20:46:00	0
2008-12-17	20:47:00	0
2008-12-17	20:48:00	47
2008-12-17	20:49:00	16
2008-12-17	20:50:00	244
2008-12-17	20:51:00	825
2008-12-17	20:52:00	538
2008-12-17	20:53:00	476
2008-12-17	20:54:00	579
2008-12-17	20:55:00	21
2008-12-17	20:56:00	0
2008-12-17	20:57:00	0
2008-12-17	20:58:00	99
2008-12-17	20:59:00	278
2008-12-17	21:00:00	52
2008-12-17	21:01:00	136
2008-12-17	21:02:00	21
2008-12-17	21:03:00	16
2008-12-17	21:04:00	5
2008-12-17	21:05:00	0
2008-12-17	21:06:00	0
2008-12-17	21:07:00	0
2008-12-17	21:08:00	0
2008-12-17	21:09:00	0
2008-12-17	21:10:00	10
2008-12-17	21:11:00	355
2008-12-17	21:12:00	306
2008-12-17	21:13:00	105
2008-12-17	21:14:00	0
2008-12-17	21:15:00	10
2008-12-17	21:16:00	10
2008-12-17	21:17:00	0
2008-12-17	21:18:00	0
2008-12-17	21:19:00	21
2008-12-17	21:20:00	0
2008-12-17	21:21:00	0
2008-12-17	21:22:00	227
2008-12-17	21:23:00	244
2008-12-17	21:24:00	297
2008-12-17	21:25:00	407
2008-12-17	21:26:00	86
2008-12-17	21:27:00	0
2008-12-17	21:28:00	0
2008-12-17	21:29:00	26
2008-12-17	21:30:00	0
2008-12-17	21:31:00	10
2008-12-17	21:32:00	0
2008-12-17	21:33:00	0
2008-12-17	21:34:00	0
2008-12-17	21:35:00	0
2008-12-17	21:36:00	0
2008-12-17	21:37:00	0
2008-12-17	21:38:00	0
2008-12-17	21:39:00	0
2008-12-17	21:40:00	0
2008-12-17	21:41:00	0
2008-12-17	21:42:00	0
2008-12-17	21:43:00	0
2008-12-17	21:44:00	0
2008-12-17	21:45:00	0
2008-12-17	21:46:00	0
2008-12-17	21:47:00	0
2008-12-17	21:48:00	144
2008-12-17	21:49:00	306
2008-12-17	21:50:00	376
2008-12-17	21:51:00	0
2008-12-17	21:52:00	5
2008-12-17	21:53:00	0
2008-12-17	21:54:00	0
2008-12-17	21:55:00	0
2008-12-17	21:56:00	0
2008-12-17	21:57:00	0
2008-12-17	21:58:00	0
2008-12-17	21:59:00	0
2008-12-17	22:00:00	513
2008-12-17	22:01:00	268
2008-12-17	22:02:00	210
2008-12-17	22:03:00	1076
2008-12-17	22:04:00	935
2008-12-17	22:05:00	151
2008-12-17	22:06:00	244
2008-12-17	22:07:00	0
2008-12-17	22:08:00	195
2008-12-17	22:09:00	0
2008-12-17	22:10:00	0
2008-12-17	22:11:00	0
2008-12-17	22:12:00	0
2008-12-17	22:13:00	0
2008-12-17	22:14:00	386
2008-12-17	22:15:00	441
2008-12-17	22:16:00	195
2008-12-17	22:17:00	808
2008-12-17	22:18:00	878
2008-12-17	22:19:00	158
2008-12-17	22:20:00	725
2008-12-17	22:21:00	244
2008-12-17	22:22:00	0
2008-12-17	22:23:00	0
2008-12-17	22:24:00	210
2008-12-17	22:25:00	210
2008-12-17	22:26:00	26
2008-12-17	22:27:00	0
2008-12-17	22:28:00	0
2008-12-17	22:29:00	0
2008-12-17	22:30:00	5
2008-12-17	22:31:00	0
2008-12-17	22:32:00	0
2008-12-17	22:33:00	0
2008-12-17	22:34:00	16
2008-12-17	22:35:00	0
2008-12-17	22:36:00	0
2008-12-17	22:37:00	0
2008-12-17	22:38:00	0
2008-12-17	22:39:00	0
2008-12-17	22:40:00	0
2008-12-17	22:41:00	0
2008-12-17	22:42:00	0
2008-12-17	22:43:00	0
2008-12-17	22:44:00	0
2008-12-17	22:45:00	0
2008-12-17	22:46:00	0
2008-12-17	22:47:00	0
2008-12-17	22:48:00	0
2008-12-17	22:49:00	0
2008-12-17	22:50:00	0
2008-12-17	22:51:00	0
2008-12-17	22:52:00	0
2008-12-17	22:53:00	0
2008-12-17	22:54:00	0
2008-12-17	22:55:00	0
2008-12-17	22:56:00	0
2008-12-17	22:57:00	0
2008-12-17	22:58:00	0
2008-12-17	22:59:00	0
2008-12-17	23:00:00	0
2008-12-17	23:01:00	0
2008-12-17	23:02:00	0
2008-12-17	23:03:00	0
2008-12-17	23:04:00	0
2008-12-17	23:05:00	0
2008-12-17	23:06:00	0
2008-12-17	23:07:00	0
2008-12-17	23:08:00	0
2008-12-17	23:09:00	0
2008-12-17	23:10:00	0
2008-12-17	23:11:00	0
2008-12-17	23:12:00	0
2008-12-17	23:13:00	0
2008-12-17	23:14:00	0
2008-12-17	23:15:00	0
2008-12-17	23:16:00	0
2008-12-17	23:17:00	0
2008-12-17	23:18:00	0
2008-12-17	23:19:00	0
2008-12-17	23:20:00	0
2008-12-17	23:21:00	0
2008-12-17	23:22:00	10
2008-12-17	23:23:00	0
2008-12-17	23:24:00	0
2008-12-17	23:25:00	0
2008-12-17	23:26:00	0
2008-12-17	23:27:00	0
2008-12-17	23:28:00	0
2008-12-17	23:29:00	0
2008-12-17	23:30:00	0
2008-12-17	23:31:00	0
2008-12-17	23:32:00	0
2008-12-17	23:33:00	0
2008-12-17	23:34:00	0
2008-12-17	23:35:00	0
2008-12-17	23:36:00	0
2008-12-17	23:37:00	0
2008-12-17	23:38:00	0
2008-12-17	23:39:00	0
2008-12-17	23:40:00	0
2008-12-17	23:41:00	0
2008-12-17	23:42:00	0
2008-12-17	23:43:00	0
2008-12-17	23:44:00	0
2008-12-17	23:45:00	0
2008-12-17	23:46:00	0
2008-12-17	23:47:00	0
2008-12-17	23:48:00	0
2008-12-17	23:49:00	0
2008-12-17	23:50:00	0
2008-12-17	23:51:00	0
2008-12-17	23:52:00	0
2008-12-17	23:53:00	0
2008-12-17	23:54:00	0
2008-12-17	23:55:00	0
2008-12-17	23:56:00	0
2008-12-17	23:57:00	0
2008-12-17	23:58:00	0
2008-12-17	23:59:00	0
2008-12-18	00:00:00	0
2008-12-18	00:01:00	0
2008-12-18	00:02:00	0
2008-12-18	00:03:00	0
2008-12-18	00:04:00	0
2008-12-18	00:05:00	0
2008-12-18	00:06:00	0
2008-12-18	00:07:00	0
2008-12-18	00:08:00	0
2008-12-18	00:09:00	0
2008-12-18	00:10:00	0
2008-12-18	00:11:00	0
2008-12-18	00:12:00	0
2008-12-18	00:13:00	0
2008-12-18	00:14:00	0
2008-12-18	00:15:00	0
2008-12-18	00:16:00	0
2008-12-18	00:17:00	16
2008-12-18	00:18:00	0
2008-12-18	00:19:00	0
2008-12-18	00:20:00	0
2008-12-18	00:21:00	0
2008-12-18	00:22:00	0
2008-12-18	00:23:00	0
2008-12-18	00:24:00	0
2008-12-18	00:25:00	0
2008-12-18	00:26:00	0
2008-12-18	00:27:00	0
2008-12-18	00:28:00	0
2008-12-18	00:29:00	0
2008-12-18	00:30:00	0
2008-12-18	00:31:00	0
2008-12-18	00:32:00	0
2008-12-18	00:33:00	0
2008-12-18	00:34:00	0
2008-12-18	00:35:00	0
2008-12-18	00:36:00	0
2008-12-18	00:37:00	0
2008-12-18	00:38:00	0
2008-12-18	00:39:00	0
2008-12-18	00:40:00	0
2008-12-18	00:41:00	0
2008-12-18	00:42:00	0
2008-12-18	00:43:00	0
2008-12-18	00:44:00	0
2008-12-18	00:45:00	464
2008-12-18	00:46:00	0
2008-12-18	00:47:00	0
2008-12-18	00:48:00	0
2008-12-18	00:49:00	0
2008-12-18	00:50:00	0
2008-12-18	00:51:00	0
2008-12-18	00:52:00	0
2008-12-18	00:53:00	0
2008-12-18	00:54:00	0
2008-12-18	00:55:00	0
2008-12-18	00:56:00	0
2008-12-18	00:57:00	0
2008-12-18	00:58:00	0
2008-12-18	00:59:00	0
2008-12-18	01:00:00	0
2008-12-18	01:01:00	0
2008-12-18	01:02:00	0
2008-12-18	01:03:00	0
2008-12-18	01:04:00	0
2008-12-18	01:05:00	0
2008-12-18	01:06:00	0
2008-12-18	01:07:00	0
2008-12-18	01:08:00	21
2008-12-18	01:09:00	68
2008-12-18	01:10:00	0
2008-12-18	01:11:00	0
2008-12-18	01:12:00	0
2008-12-18	01:13:00	0
2008-12-18	01:14:00	0
2008-12-18	01:15:00	0
2008-12-18	01:16:00	0
2008-12-18	01:17:00	0
2008-12-18	01:18:00	0
2008-12-18	01:19:00	0
2008-12-18	01:20:00	0
2008-12-18	01:21:00	0
2008-12-18	01:22:00	0
2008-12-18	01:23:00	0
2008-12-18	01:24:00	0
2008-12-18	01:25:00	0
2008-12-18	01:26:00	0
2008-12-18	01:27:00	0
2008-12-18	01:28:00	0
2008-12-18	01:29:00	0
2008-12-18	01:30:00	0
2008-12-18	01:31:00	0
2008-12-18	01:32:00	0
2008-12-18	01:33:00	0
2008-12-18	01:34:00	195
2008-12-18	01:35:00	0
2008-12-18	01:36:00	0
2008-12-18	01:37:00	0
2008-12-18	01:38:00	0
2008-12-18	01:39:00	0
2008-12-18	01:40:00	0
2008-12-18	01:41:00	0
2008-12-18	01:42:00	0
2008-12-18	01:43:00	0
2008-12-18	01:44:00	0
2008-12-18	01:45:00	0
2008-12-18	01:46:00	0
2008-12-18	01:47:00	0
2008-12-18	01:48:00	0
2008-12-18	01:49:00	0
2008-12-18	01:50:00	0
2008-12-18	01:51:00	0
2008-12-18	01:52:00	0
2008-12-18	01:53:00	0
2008-12-18	01:54:00	0
2008-12-18	01:55:00	0
2008-12-18	01:56:00	219
2008-12-18	01:57:00	0
2008-12-18	01:58:00	0
2008-12-18	01:59:00	0
2008-12-18	02:00:00	0
2008-12-18	02:01:00	0
2008-12-18	02:02:00	0
2008-12-18	02:03:00	227
2008-12-18	02:04:00	68
2008-12-18	02:05:00	0
2008-12-18	02:06:00	0
2008-12-18	02:07:00	0
2008-12-18	02:08:00	0
2008-12-18	02:09:00	0
2008-12-18	02:10:00	0
2008-12-18	02:11:00	0
2008-12-18	02:12:00	0
2008-12-18	02:13:00	0
2008-12-18	02:14:00	0
2008-12-18	02:15:00	0
2008-12-18	02:16:00	0
2008-12-18	02:17:00	0
2008-12-18	02:18:00	0
2008-12-18	02:19:00	0
2008-12-18	02:20:00	0
2008-12-18	02:21:00	0
2008-12-18	02:22:00	0
2008-12-18	02:23:00	47
2008-12-18	02:24:00	0
2008-12-18	02:25:00	0
2008-12-18	02:26:00	0
2008-12-18	02:27:00	0
2008-12-18	02:28:00	0
2008-12-18	02:29:00	0
2008-12-18	02:30:00	0
2008-12-18	02:31:00	0
2008-12-18	02:32:00	0
2008-12-18	02:33:00	0
2008-12-18	02:34:00	0
2008-12-18	02:35:00	0
2008-12-18	02:36:00	0
2008-12-18	02:37:00	0
2008-12-18	02:38:00	0
2008-12-18	02:39:00	0
2008-12-18	02:40:00	0
2008-12-18	02:41:00	0
2008-12-18	02:42:00	0
2008-12-18	02:43:00	0
2008-12-18	02:44:00	0
2008-12-18	02:45:00	0
2008-12-18	02:46:00	21
2008-12-18	02:47:00	36
2008-12-18	02:48:00	0
2008-12-18	02:49:00	0
2008-12-18	02:50:00	0
2008-12-18	02:51:00	0
2008-12-18	02:52:00	0
2008-12-18	02:53:00	0
2008-12-18	02:54:00	0
2008-12-18	02:55:00	0
2008-12-18	02:56:00	0
2008-12-18	02:57:00	0
2008-12-18	02:58:00	0
2008-12-18	02:59:00	0
2008-12-18	03:00:00	0
2008-12-18	03:01:00	0
2008-12-18	03:02:00	0
2008-12-18	03:03:00	0
2008-12-18	03:04:00	0
2008-12-18	03:05:00	0
2008-12-18	03:06:00	0
2008-12-18	03:07:00	0
2008-12-18	03:08:00	0
2008-12-18	03:09:00	0
2008-12-18	03:10:00	0
2008-12-18	03:11:00	0
2008-12-18	03:12:00	0
2008-12-18	03:13:00	0
2008-12-18	03:14:00	16
2008-12-18	03:15:00	0
2008-12-18	03:16:00	0
2008-12-18	03:17:00	0
2008-12-18	03:18:00	268
2008-12-18	03:19:00	16
2008-12-18	03:20:00	0
2008-12-18	03:21:00	0
2008-12-18	03:22:00	0
2008-12-18	03:23:00	0
2008-12-18	03:24:00	0
2008-12-18	03:25:00	0
2008-12-18	03:26:00	0
2008-12-18	03:27:00	0
2008-12-18	03:28:00	0
2008-12-18	03:29:00	0
2008-12-18	03:30:00	0
2008-12-18	03:31:00	31
2008-12-18	03:32:00	0
2008-12-18	03:33:00	0
2008-12-18	03:34:00	0
2008-12-18	03:35:00	0
2008-12-18	03:36:00	0
2008-12-18	03:37:00	0
2008-12-18	03:38:00	0
2008-12-18	03:39:00	0
2008-12-18	03:40:00	0
2008-12-18	03:41:00	0
2008-12-18	03:42:00	0
2008-12-18	03:43:00	0
2008-12-18	03:44:00	0
2008-12-18	03:45:00	0
2008-12-18	03:46:00	0
2008-12-18	03:47:00	0
2008-12-18	03:48:00	0
2008-12-18	03:49:00	0
2008-12-18	03:50:00	0
2008-12-18	03:51:00	0
2008-12-18	03:52:00	0
2008-12-18	03:53:00	0
2008-12-18	03:54:00	68
2008-12-18	03:55:00	0
2008-12-18	03:56:00	0
2008-12-18	03:57:00	0
2008-12-18	03:58:00	0
2008-12-18	03:59:00	0
2008-12-18	04:00:00	0
2008-12-18	04:01:00	0
2008-12-18	04:02:00	0
2008-12-18	04:03:00	0
2008-12-18	04:04:00	0
2008-12-18	04:05:00	0
2008-12-18	04:06:00	0
2008-12-18	04:07:00	0
2008-12-18	04:08:00	0
2008-12-18	04:09:00	0
2008-12-18	04:10:00	0
2008-12-18	04:11:00	0
2008-12-18	04:12:00	0
2008-12-18	04:13:00	0
2008-12-18	04:14:00	0
2008-12-18	04:15:00	0
2008-12-18	04:16:00	0
2008-12-18	04:17:00	36
2008-12-18	04:18:00	0
2008-12-18	04:19:00	0
2008-12-18	04:20:00	0
2008-12-18	04:21:00	0
2008-12-18	04:22:00	0
2008-12-18	04:23:00	0
2008-12-18	04:24:00	0
2008-12-18	04:25:00	0
2008-12-18	04:26:00	0
2008-12-18	04:27:00	0
2008-12-18	04:28:00	0
2008-12-18	04:29:00	0
2008-12-18	04:30:00	0
2008-12-18	04:31:00	0
2008-12-18	04:32:00	47
2008-12-18	04:33:00	0
2008-12-18	04:34:00	0
2008-12-18	04:35:00	0
2008-12-18	04:36:00	0
2008-12-18	04:37:00	0
2008-12-18	04:38:00	0
2008-12-18	04:39:00	0
2008-12-18	04:40:00	0
2008-12-18	04:41:00	0
2008-12-18	04:42:00	0
2008-12-18	04:43:00	0
2008-12-18	04:44:00	0
2008-12-18	04:45:00	0
2008-12-18	04:46:00	0
2008-12-18	04:47:00	93
2008-12-18	04:48:00	0
2008-12-18	04:49:00	0
2008-12-18	04:50:00	165
2008-12-18	04:51:00	0
2008-12-18	04:52:00	0
2008-12-18	04:53:00	0
2008-12-18	04:54:00	0
2008-12-18	04:55:00	0
2008-12-18	04:56:00	0
2008-12-18	04:57:00	0
2008-12-18	04:58:00	0
2008-12-18	04:59:00	0
2008-12-18	05:00:00	0
2008-12-18	05:01:00	0
2008-12-18	05:02:00	0
2008-12-18	05:03:00	0
2008-12-18	05:04:00	0
2008-12-18	05:05:00	0
2008-12-18	05:06:00	0
2008-12-18	05:07:00	0
2008-12-18	05:08:00	0
2008-12-18	05:09:00	0
2008-12-18	05:10:00	0
2008-12-18	05:11:00	0
2008-12-18	05:12:00	0
2008-12-18	05:13:00	0
2008-12-18	05:14:00	0
2008-12-18	05:15:00	0
2008-12-18	05:16:00	0
2008-12-18	05:17:00	0
2008-12-18	05:18:00	0
2008-12-18	05:19:00	0
2008-12-18	05:20:00	0
2008-12-18	05:21:00	0
2008-12-18	05:22:00	0
2008-12-18	05:23:00	0
2008-12-18	05:24:00	0
2008-12-18	05:25:00	0
2008-12-18	05:26:00	0
2008-12-18	05:27:00	0
2008-12-18	05:28:00	0
2008-12-18	05:29:00	0
2008-12-18	05:30:00	10
2008-12-18	05:31:00	0
2008-12-18	05:32:00	0
2008-12-18	05:33:00	0
2008-12-18	05:34:00	0
2008-12-18	05:35:00	0
2008-12-18	05:36:00	0
2008-12-18	05:37:00	0
2008-12-18	05:38:00	0
2008-12-18	05:39:00	0
2008-12-18	05:40:00	0
2008-12-18	05:41:00	0
2008-12-18	05:42:00	0
2008-12-18	05:43:00	0
2008-12-18	05:44:00	0
2008-12-18	05:45:00	0
2008-12-18	05:46:00	0
2008-12-18	05:47:00	0
2008-12-18	05:48:00	0
2008-12-18	05:49:00	0
2008-12-18	05:50:00	0
2008-12-18	05:51:00	0
2008-12-18	05:52:00	0
2008-12-18	05:53:00	0
2008-12-18	05:54:00	0
2008-12-18	05:55:00	0
2008-12-18	05:56:00	0
2008-12-18	05:57:00	0
2008-12-18	05:58:00	0
2008-12-18	05:59:00	0
2008-12-18	06:00:00	0
2008-12-18	06:01:00	0
2008-12-18	06:02:00	0
2008-12-18	06:03:00	0
2008-12-18	06:04:00	0
2008-12-18	06:05:00	0
2008-12-18	06:06:00	0
2008-12-18	06:07:00	0
2008-12-18	06:08:00	0
2008-12-18	06:09:00	0
2008-12-18	06:10:00	0
2008-12-18	06:11:00	0
2008-12-18	06:12:00	62
2008-12-18	06:13:00	151
2008-12-18	06:14:00	21
2008-12-18	06:15:00	0
2008-12-18	06:16:00	93
2008-12-18	06:17:00	0
2008-12-18	06:18:00	42
2008-12-18	06:19:00	0
2008-12-18	06:20:00	0
2008-12-18	06:21:00	260
2008-12-18	06:22:00	21
2008-12-18	06:23:00	47
2008-12-18	06:24:00	0
2008-12-18	06:25:00	0
2008-12-18	06:26:00	0
2008-12-18	06:27:00	5
2008-12-18	06:28:00	0
2008-12-18	06:29:00	0
2008-12-18	06:30:00	10
2008-12-18	06:31:00	10
2008-12-18	06:32:00	26
2008-12-18	06:33:00	52
2008-12-18	06:34:00	74
2008-12-18	06:35:00	47
2008-12-18	06:36:00	62
2008-12-18	06:37:00	244
2008-12-18	06:38:00	52
2008-12-18	06:39:00	219
2008-12-18	06:40:00	287
2008-12-18	06:41:00	86
2008-12-18	06:42:00	52
2008-12-18	06:43:00	1120
2008-12-18	06:44:00	1234
2008-12-18	06:45:00	453
2008-12-18	06:46:00	0
2008-12-18	06:47:00	1142
2008-12-18	06:48:00	453
2008-12-18	06:49:00	430
2008-12-18	06:50:00	679
2008-12-18	06:51:00	334
2008-12-18	06:52:00	268
2008-12-18	06:53:00	376
2008-12-18	06:54:00	386
2008-12-18	06:55:00	227
2008-12-18	06:56:00	488
2008-12-18	06:57:00	386
2008-12-18	06:58:00	396
2008-12-18	06:59:00	315
2008-12-18	07:00:00	441
2008-12-18	07:01:00	418
2008-12-18	07:02:00	386
2008-12-18	07:03:00	111
2008-12-18	07:04:00	173
2008-12-18	07:05:00	74
2008-12-18	07:06:00	10
2008-12-18	07:07:00	10
2008-12-18	07:08:00	396
2008-12-18	07:09:00	151
2008-12-18	07:10:00	5
2008-12-18	07:11:00	151
2008-12-18	07:12:00	144
2008-12-18	07:13:00	0
2008-12-18	07:14:00	278
2008-12-18	07:15:00	16
2008-12-18	07:16:00	0
2008-12-18	07:17:00	0
2008-12-18	07:18:00	0
2008-12-18	07:19:00	0
2008-12-18	07:20:00	0
2008-12-18	07:21:00	0
2008-12-18	07:22:00	0
2008-12-18	07:23:00	21
2008-12-18	07:24:00	80
2008-12-18	07:25:00	260
2008-12-18	07:26:00	235
2008-12-18	07:27:00	74
2008-12-18	07:28:00	334
2008-12-18	07:29:00	396
2008-12-18	07:30:00	441
2008-12-18	07:31:00	453
2008-12-18	07:32:00	994
2008-12-18	07:33:00	453
2008-12-18	07:34:00	10
2008-12-18	07:35:00	0
2008-12-18	07:36:00	165
2008-12-18	07:37:00	418
2008-12-18	07:38:00	16
2008-12-18	07:39:00	10
2008-12-18	07:40:00	16
2008-12-18	07:41:00	42
2008-12-18	07:42:00	165
2008-12-18	07:43:00	396
2008-12-18	07:44:00	80
2008-12-18	07:45:00	219
2008-12-18	07:46:00	173
2008-12-18	07:47:00	315
2008-12-18	07:48:00	679
2008-12-18	07:49:00	80
2008-12-18	07:50:00	0
2008-12-18	07:51:00	173
2008-12-18	07:52:00	210
2008-12-18	07:53:00	710
2008-12-18	07:54:00	606
2008-12-18	07:55:00	1120
2008-12-18	07:56:00	325
2008-12-18	07:57:00	0
2008-12-18	07:58:00	10
2008-12-18	07:59:00	10
2008-12-18	08:00:00	21
2008-12-18	08:01:00	173
2008-12-18	08:02:00	202
2008-12-18	08:03:00	268
2008-12-18	08:04:00	42
2008-12-18	08:05:00	861
2008-12-18	08:06:00	31
2008-12-18	08:07:00	36
2008-12-18	08:08:00	86
2008-12-18	08:09:00	538
2008-12-18	08:10:00	118
2008-12-18	08:11:00	144
2008-12-18	08:12:00	52
2008-12-18	08:13:00	124
2008-12-18	08:14:00	297
2008-12-18	08:15:00	219
2008-12-18	08:16:00	124
2008-12-18	08:17:00	31
2008-12-18	08:18:00	99
2008-12-18	08:19:00	47
2008-12-18	08:20:00	297
2008-12-18	08:21:00	5
2008-12-18	08:22:00	0
2008-12-18	08:23:00	0
2008-12-18	08:24:00	0
2008-12-18	08:25:00	5
2008-12-18	08:26:00	0
2008-12-18	08:27:00	105
2008-12-18	08:28:00	825
2008-12-18	08:29:00	758
2008-12-18	08:30:00	10
2008-12-18	08:31:00	5
2008-12-18	08:32:00	52
2008-12-18	08:33:00	80
2008-12-18	08:34:00	0
2008-12-18	08:35:00	0
2008-12-18	08:36:00	31
2008-12-18	08:37:00	0
2008-12-18	08:38:00	0
2008-12-18	08:39:00	0
2008-12-18	08:40:00	0
2008-12-18	08:41:00	0
2008-12-18	08:42:00	0
2008-12-18	08:43:00	0
2008-12-18	08:44:00	0
2008-12-18	08:45:00	0
2008-12-18	08:46:00	0
2008-12-18	08:47:00	0
2008-12-18	08:48:00	0
2008-12-18	08:49:00	0
2008-12-18	08:50:00	0
2008-12-18	08:51:00	344
2008-12-18	08:52:00	365
2008-12-18	08:53:00	130
2008-12-18	08:54:00	0
2008-12-18	08:55:00	16
2008-12-18	08:56:00	111
2008-12-18	08:57:00	86
2008-12-18	08:58:00	36
2008-12-18	08:59:00	227
2008-12-18	09:00:00	36
2008-12-18	09:01:00	219
2008-12-18	09:02:00	344
2008-12-18	09:03:00	334
2008-12-18	09:04:00	26
2008-12-18	09:05:00	0
2008-12-18	09:06:00	0
2008-12-18	09:07:00	0
2008-12-18	09:08:00	244
[truncated: 26,811 more rows]

## Sheet: 1.5.09
Actogram, Copy Raw Data, All Days
Identity:	Shelby Moyer
Filename:	E:\Active Research Files\meloxicam titre canine\cases\shelby\Shelby Moyer 01.05.09.AWC
Gender:	F
Age:	5
Height:	40.6 cm	16.0 in
Weight:	15.0 kg	33.1 lbs
Start Date:	05-Jan-2009 (Mon)
Start Time:	17:00:00
Interval:	1.00 mins
Date Stamp:	Time Stamp:	Activity Data:	Marker Press:
2009-01-05	00:00:00	0
2009-01-05	00:01:00	0
2009-01-05	00:02:00	0
2009-01-05	00:03:00	0
2009-01-05	00:04:00	0
2009-01-05	00:05:00	0
2009-01-05	00:06:00	0
2009-01-05	00:07:00	0
2009-01-05	00:08:00	0
2009-01-05	00:09:00	0
2009-01-05	00:10:00	0
2009-01-05	00:11:00	0
2009-01-05	00:12:00	0
2009-01-05	00:13:00	0
2009-01-05	00:14:00	0
2009-01-05	00:15:00	0
2009-01-05	00:16:00	0
2009-01-05	00:17:00	0
2009-01-05	00:18:00	0
2009-01-05	00:19:00	0
2009-01-05	00:20:00	0
2009-01-05	00:21:00	0
2009-01-05	00:22:00	0
2009-01-05	00:23:00	0
2009-01-05	00:24:00	0
2009-01-05	00:25:00	0
2009-01-05	00:26:00	0
2009-01-05	00:27:00	0
2009-01-05	00:28:00	0
2009-01-05	00:29:00	0
2009-01-05	00:30:00	0
2009-01-05	00:31:00	0
2009-01-05	00:32:00	0
2009-01-05	00:33:00	0
2009-01-05	00:34:00	0
2009-01-05	00:35:00	0
2009-01-05	00:36:00	0
2009-01-05	00:37:00	0
2009-01-05	00:38:00	0
2009-01-05	00:39:00	0
2009-01-05	00:40:00	0
2009-01-05	00:41:00	0
2009-01-05	00:42:00	0
2009-01-05	00:43:00	0
2009-01-05	00:44:00	0
2009-01-05	00:45:00	0
2009-01-05	00:46:00	0
2009-01-05	00:47:00	0
2009-01-05	00:48:00	0
2009-01-05	00:49:00	0
2009-01-05	00:50:00	0
2009-01-05	00:51:00	0
2009-01-05	00:52:00	0
2009-01-05	00:53:00	0
2009-01-05	00:54:00	0
2009-01-05	00:55:00	0
2009-01-05	00:56:00	0
2009-01-05	00:57:00	0
2009-01-05	00:58:00	0
2009-01-05	00:59:00	0
2009-01-05	01:00:00	0
2009-01-05	01:01:00	0
2009-01-05	01:02:00	0
2009-01-05	01:03:00	0
2009-01-05	01:04:00	0
2009-01-05	01:05:00	0
2009-01-05	01:06:00	0
2009-01-05	01:07:00	0
2009-01-05	01:08:00	0
2009-01-05	01:09:00	0
2009-01-05	01:10:00	0
2009-01-05	01:11:00	0
2009-01-05	01:12:00	0
2009-01-05	01:13:00	0
2009-01-05	01:14:00	0
2009-01-05	01:15:00	0
2009-01-05	01:16:00	0
2009-01-05	01:17:00	0
2009-01-05	01:18:00	0
2009-01-05	01:19:00	0
2009-01-05	01:20:00	0
2009-01-05	01:21:00	0
2009-01-05	01:22:00	0
2009-01-05	01:23:00	0
2009-01-05	01:24:00	0
2009-01-05	01:25:00	0
2009-01-05	01:26:00	0
2009-01-05	01:27:00	0
2009-01-05	01:28:00	0
2009-01-05	01:29:00	0
2009-01-05	01:30:00	0
2009-01-05	01:31:00	0
2009-01-05	01:32:00	0
2009-01-05	01:33:00	0
2009-01-05	01:34:00	0
2009-01-05	01:35:00	0
2009-01-05	01:36:00	0
2009-01-05	01:37:00	0
2009-01-05	01:38:00	0
2009-01-05	01:39:00	0
2009-01-05	01:40:00	0
2009-01-05	01:41:00	0
2009-01-05	01:42:00	0
2009-01-05	01:43:00	0
2009-01-05	01:44:00	0
2009-01-05	01:45:00	0
2009-01-05	01:46:00	0
2009-01-05	01:47:00	0
2009-01-05	01:48:00	0
2009-01-05	01:49:00	0
2009-01-05	01:50:00	0
2009-01-05	01:51:00	0
2009-01-05	01:52:00	0
2009-01-05	01:53:00	0
2009-01-05	01:54:00	0
2009-01-05	01:55:00	0
2009-01-05	01:56:00	0
2009-01-05	01:57:00	0
2009-01-05	01:58:00	0
2009-01-05	01:59:00	0
2009-01-05	02:00:00	0
2009-01-05	02:01:00	0
2009-01-05	02:02:00	0
2009-01-05	02:03:00	0
2009-01-05	02:04:00	0
2009-01-05	02:05:00	0
2009-01-05	02:06:00	0
2009-01-05	02:07:00	0
2009-01-05	02:08:00	0
2009-01-05	02:09:00	0
2009-01-05	02:10:00	0
2009-01-05	02:11:00	0
2009-01-05	02:12:00	0
2009-01-05	02:13:00	0
2009-01-05	02:14:00	0
2009-01-05	02:15:00	0
2009-01-05	02:16:00	0
2009-01-05	02:17:00	0
2009-01-05	02:18:00	0
2009-01-05	02:19:00	0
2009-01-05	02:20:00	0
2009-01-05	02:21:00	0
2009-01-05	02:22:00	0
2009-01-05	02:23:00	0
2009-01-05	02:24:00	0
2009-01-05	02:25:00	0
2009-01-05	02:26:00	0
2009-01-05	02:27:00	0
2009-01-05	02:28:00	0
2009-01-05	02:29:00	0
2009-01-05	02:30:00	0
2009-01-05	02:31:00	0
2009-01-05	02:32:00	0
2009-01-05	02:33:00	0
2009-01-05	02:34:00	0
2009-01-05	02:35:00	0
2009-01-05	02:36:00	0
2009-01-05	02:37:00	0
2009-01-05	02:38:00	0
2009-01-05	02:39:00	0
2009-01-05	02:40:00	0
2009-01-05	02:41:00	0
2009-01-05	02:42:00	0
2009-01-05	02:43:00	0
2009-01-05	02:44:00	0
2009-01-05	02:45:00	0
2009-01-05	02:46:00	0
2009-01-05	02:47:00	0
2009-01-05	02:48:00	0
2009-01-05	02:49:00	0
2009-01-05	02:50:00	0
2009-01-05	02:51:00	0
2009-01-05	02:52:00	0
2009-01-05	02:53:00	0
2009-01-05	02:54:00	0
2009-01-05	02:55:00	0
2009-01-05	02:56:00	0
2009-01-05	02:57:00	0
2009-01-05	02:58:00	0
2009-01-05	02:59:00	0
2009-01-05	03:00:00	0
2009-01-05	03:01:00	0
2009-01-05	03:02:00	0
2009-01-05	03:03:00	0
2009-01-05	03:04:00	0
2009-01-05	03:05:00	0
2009-01-05	03:06:00	0
2009-01-05	03:07:00	0
2009-01-05	03:08:00	0
2009-01-05	03:09:00	0
2009-01-05	03:10:00	0
2009-01-05	03:11:00	0
2009-01-05	03:12:00	0
2009-01-05	03:13:00	0
2009-01-05	03:14:00	0
2009-01-05	03:15:00	0
2009-01-05	03:16:00	0
2009-01-05	03:17:00	0
2009-01-05	03:18:00	0
2009-01-05	03:19:00	0
2009-01-05	03:20:00	0
2009-01-05	03:21:00	0
2009-01-05	03:22:00	0
2009-01-05	03:23:00	0
2009-01-05	03:24:00	0
2009-01-05	03:25:00	0
2009-01-05	03:26:00	0
2009-01-05	03:27:00	0
2009-01-05	03:28:00	0
2009-01-05	03:29:00	0
2009-01-05	03:30:00	0
2009-01-05	03:31:00	0
2009-01-05	03:32:00	0
2009-01-05	03:33:00	0
2009-01-05	03:34:00	0
2009-01-05	03:35:00	0
2009-01-05	03:36:00	0
2009-01-05	03:37:00	0
2009-01-05	03:38:00	0
2009-01-05	03:39:00	0
2009-01-05	03:40:00	0
2009-01-05	03:41:00	0
2009-01-05	03:42:00	0
2009-01-05	03:43:00	0
2009-01-05	03:44:00	0
2009-01-05	03:45:00	0
2009-01-05	03:46:00	0
2009-01-05	03:47:00	0
2009-01-05	03:48:00	0
2009-01-05	03:49:00	0
2009-01-05	03:50:00	0
2009-01-05	03:51:00	0
2009-01-05	03:52:00	0
2009-01-05	03:53:00	0
2009-01-05	03:54:00	0
2009-01-05	03:55:00	0
2009-01-05	03:56:00	0
2009-01-05	03:57:00	0
2009-01-05	03:58:00	0
2009-01-05	03:59:00	0
2009-01-05	04:00:00	0
2009-01-05	04:01:00	0
2009-01-05	04:02:00	0
2009-01-05	04:03:00	0
2009-01-05	04:04:00	0
2009-01-05	04:05:00	0
2009-01-05	04:06:00	0
2009-01-05	04:07:00	0
2009-01-05	04:08:00	0
2009-01-05	04:09:00	0
2009-01-05	04:10:00	0
2009-01-05	04:11:00	0
2009-01-05	04:12:00	0
2009-01-05	04:13:00	0
2009-01-05	04:14:00	0
2009-01-05	04:15:00	0
2009-01-05	04:16:00	0
2009-01-05	04:17:00	0
2009-01-05	04:18:00	0
2009-01-05	04:19:00	0
2009-01-05	04:20:00	0
2009-01-05	04:21:00	0
2009-01-05	04:22:00	0
2009-01-05	04:23:00	0
2009-01-05	04:24:00	0
2009-01-05	04:25:00	0
2009-01-05	04:26:00	0
2009-01-05	04:27:00	0
2009-01-05	04:28:00	0
2009-01-05	04:29:00	0
2009-01-05	04:30:00	0
2009-01-05	04:31:00	0
2009-01-05	04:32:00	0
2009-01-05	04:33:00	0
2009-01-05	04:34:00	0
2009-01-05	04:35:00	0
2009-01-05	04:36:00	0
2009-01-05	04:37:00	0
2009-01-05	04:38:00	0
2009-01-05	04:39:00	0
2009-01-05	04:40:00	0
2009-01-05	04:41:00	0
2009-01-05	04:42:00	0
2009-01-05	04:43:00	0
2009-01-05	04:44:00	0
2009-01-05	04:45:00	0
2009-01-05	04:46:00	0
2009-01-05	04:47:00	0
2009-01-05	04:48:00	0
2009-01-05	04:49:00	0
2009-01-05	04:50:00	0
2009-01-05	04:51:00	0
2009-01-05	04:52:00	0
2009-01-05	04:53:00	0
2009-01-05	04:54:00	0
2009-01-05	04:55:00	0
2009-01-05	04:56:00	0
2009-01-05	04:57:00	0
2009-01-05	04:58:00	0
2009-01-05	04:59:00	0
2009-01-05	05:00:00	0
2009-01-05	05:01:00	0
2009-01-05	05:02:00	0
2009-01-05	05:03:00	0
2009-01-05	05:04:00	0
2009-01-05	05:05:00	0
2009-01-05	05:06:00	0
2009-01-05	05:07:00	0
2009-01-05	05:08:00	0
2009-01-05	05:09:00	0
2009-01-05	05:10:00	0
2009-01-05	05:11:00	0
2009-01-05	05:12:00	0
2009-01-05	05:13:00	0
2009-01-05	05:14:00	0
2009-01-05	05:15:00	0
2009-01-05	05:16:00	0
2009-01-05	05:17:00	0
2009-01-05	05:18:00	0
2009-01-05	05:19:00	0
2009-01-05	05:20:00	0
2009-01-05	05:21:00	0
2009-01-05	05:22:00	0
2009-01-05	05:23:00	0
2009-01-05	05:24:00	0
2009-01-05	05:25:00	0
2009-01-05	05:26:00	0
2009-01-05	05:27:00	0
2009-01-05	05:28:00	0
2009-01-05	05:29:00	0
2009-01-05	05:30:00	0
2009-01-05	05:31:00	0
2009-01-05	05:32:00	0
2009-01-05	05:33:00	0
2009-01-05	05:34:00	0
2009-01-05	05:35:00	0
2009-01-05	05:36:00	0
2009-01-05	05:37:00	0
2009-01-05	05:38:00	0
2009-01-05	05:39:00	0
2009-01-05	05:40:00	0
2009-01-05	05:41:00	0
2009-01-05	05:42:00	0
2009-01-05	05:43:00	0
2009-01-05	05:44:00	0
2009-01-05	05:45:00	0
2009-01-05	05:46:00	0
2009-01-05	05:47:00	0
2009-01-05	05:48:00	0
2009-01-05	05:49:00	0
2009-01-05	05:50:00	0
2009-01-05	05:51:00	0
2009-01-05	05:52:00	0
2009-01-05	05:53:00	0
2009-01-05	05:54:00	0
2009-01-05	05:55:00	0
2009-01-05	05:56:00	0
2009-01-05	05:57:00	0
2009-01-05	05:58:00	0
2009-01-05	05:59:00	0
2009-01-05	06:00:00	0
2009-01-05	06:01:00	0
2009-01-05	06:02:00	0
2009-01-05	06:03:00	0
2009-01-05	06:04:00	0
2009-01-05	06:05:00	0
2009-01-05	06:06:00	0
2009-01-05	06:07:00	0
2009-01-05	06:08:00	0
2009-01-05	06:09:00	0
2009-01-05	06:10:00	0
2009-01-05	06:11:00	0
2009-01-05	06:12:00	0
2009-01-05	06:13:00	0
2009-01-05	06:14:00	0
2009-01-05	06:15:00	0
2009-01-05	06:16:00	0
2009-01-05	06:17:00	0
2009-01-05	06:18:00	0
2009-01-05	06:19:00	0
2009-01-05	06:20:00	0
2009-01-05	06:21:00	0
2009-01-05	06:22:00	0
2009-01-05	06:23:00	0
2009-01-05	06:24:00	0
2009-01-05	06:25:00	0
2009-01-05	06:26:00	0
2009-01-05	06:27:00	0
2009-01-05	06:28:00	0
2009-01-05	06:29:00	0
2009-01-05	06:30:00	0
2009-01-05	06:31:00	0
2009-01-05	06:32:00	0
2009-01-05	06:33:00	0
2009-01-05	06:34:00	0
2009-01-05	06:35:00	0
2009-01-05	06:36:00	0
2009-01-05	06:37:00	0
2009-01-05	06:38:00	0
2009-01-05	06:39:00	0
2009-01-05	06:40:00	0
2009-01-05	06:41:00	0
2009-01-05	06:42:00	0
2009-01-05	06:43:00	0
2009-01-05	06:44:00	0
2009-01-05	06:45:00	0
2009-01-05	06:46:00	0
2009-01-05	06:47:00	0
2009-01-05	06:48:00	0
2009-01-05	06:49:00	0
2009-01-05	06:50:00	0
2009-01-05	06:51:00	0
2009-01-05	06:52:00	0
2009-01-05	06:53:00	0
2009-01-05	06:54:00	0
2009-01-05	06:55:00	0
2009-01-05	06:56:00	0
2009-01-05	06:57:00	0
2009-01-05	06:58:00	0
2009-01-05	06:59:00	0
2009-01-05	07:00:00	0
2009-01-05	07:01:00	0
2009-01-05	07:02:00	0
2009-01-05	07:03:00	0
2009-01-05	07:04:00	0
2009-01-05	07:05:00	0
2009-01-05	07:06:00	0
2009-01-05	07:07:00	0
2009-01-05	07:08:00	0
2009-01-05	07:09:00	0
2009-01-05	07:10:00	0
2009-01-05	07:11:00	0
2009-01-05	07:12:00	0
2009-01-05	07:13:00	0
2009-01-05	07:14:00	0
2009-01-05	07:15:00	0
2009-01-05	07:16:00	0
2009-01-05	07:17:00	0
2009-01-05	07:18:00	0
2009-01-05	07:19:00	0
2009-01-05	07:20:00	0
2009-01-05	07:21:00	0
2009-01-05	07:22:00	0
2009-01-05	07:23:00	0
2009-01-05	07:24:00	0
2009-01-05	07:25:00	0
2009-01-05	07:26:00	0
2009-01-05	07:27:00	0
2009-01-05	07:28:00	0
2009-01-05	07:29:00	0
2009-01-05	07:30:00	0
2009-01-05	07:31:00	0
2009-01-05	07:32:00	0
2009-01-05	07:33:00	0
2009-01-05	07:34:00	0
2009-01-05	07:35:00	0
2009-01-05	07:36:00	0
2009-01-05	07:37:00	0
2009-01-05	07:38:00	0
2009-01-05	07:39:00	0
2009-01-05	07:40:00	0
2009-01-05	07:41:00	0
2009-01-05	07:42:00	0
2009-01-05	07:43:00	0
2009-01-05	07:44:00	0
2009-01-05	07:45:00	0
2009-01-05	07:46:00	0
2009-01-05	07:47:00	0
2009-01-05	07:48:00	0
2009-01-05	07:49:00	0
2009-01-05	07:50:00	0
2009-01-05	07:51:00	0
2009-01-05	07:52:00	0
2009-01-05	07:53:00	0
2009-01-05	07:54:00	0
2009-01-05	07:55:00	0
2009-01-05	07:56:00	0
2009-01-05	07:57:00	0
2009-01-05	07:58:00	0
2009-01-05	07:59:00	0
2009-01-05	08:00:00	0
2009-01-05	08:01:00	0
2009-01-05	08:02:00	0
2009-01-05	08:03:00	0
2009-01-05	08:04:00	0
2009-01-05	08:05:00	0
2009-01-05	08:06:00	0
2009-01-05	08:07:00	0
2009-01-05	08:08:00	0
2009-01-05	08:09:00	0
2009-01-05	08:10:00	0
2009-01-05	08:11:00	0
2009-01-05	08:12:00	0
2009-01-05	08:13:00	0
2009-01-05	08:14:00	0
2009-01-05	08:15:00	0
2009-01-05	08:16:00	0
2009-01-05	08:17:00	0
2009-01-05	08:18:00	0
2009-01-05	08:19:00	0
2009-01-05	08:20:00	0
2009-01-05	08:21:00	0
2009-01-05	08:22:00	0
2009-01-05	08:23:00	0
2009-01-05	08:24:00	0
2009-01-05	08:25:00	0
2009-01-05	08:26:00	0
2009-01-05	08:27:00	0
2009-01-05	08:28:00	0
2009-01-05	08:29:00	0
2009-01-05	08:30:00	0
2009-01-05	08:31:00	0
2009-01-05	08:32:00	0
2009-01-05	08:33:00	0
2009-01-05	08:34:00	0
2009-01-05	08:35:00	0
2009-01-05	08:36:00	0
2009-01-05	08:37:00	0
2009-01-05	08:38:00	0
2009-01-05	08:39:00	0
2009-01-05	08:40:00	0
2009-01-05	08:41:00	0
2009-01-05	08:42:00	0
2009-01-05	08:43:00	0
2009-01-05	08:44:00	0
2009-01-05	08:45:00	0
2009-01-05	08:46:00	0
2009-01-05	08:47:00	0
2009-01-05	08:48:00	0
2009-01-05	08:49:00	0
2009-01-05	08:50:00	0
2009-01-05	08:51:00	0
2009-01-05	08:52:00	0
2009-01-05	08:53:00	0
2009-01-05	08:54:00	0
2009-01-05	08:55:00	0
2009-01-05	08:56:00	0
2009-01-05	08:57:00	0
2009-01-05	08:58:00	0
2009-01-05	08:59:00	0
2009-01-05	09:00:00	0
2009-01-05	09:01:00	0
2009-01-05	09:02:00	0
2009-01-05	09:03:00	0
2009-01-05	09:04:00	0
2009-01-05	09:05:00	0
2009-01-05	09:06:00	0
2009-01-05	09:07:00	0
2009-01-05	09:08:00	0
2009-01-05	09:09:00	0
2009-01-05	09:10:00	0
2009-01-05	09:11:00	0
2009-01-05	09:12:00	0
2009-01-05	09:13:00	0
2009-01-05	09:14:00	0
2009-01-05	09:15:00	0
2009-01-05	09:16:00	0
2009-01-05	09:17:00	0
2009-01-05	09:18:00	0
2009-01-05	09:19:00	0
2009-01-05	09:20:00	0
2009-01-05	09:21:00	0
2009-01-05	09:22:00	0
2009-01-05	09:23:00	0
2009-01-05	09:24:00	0
2009-01-05	09:25:00	0
2009-01-05	09:26:00	0
2009-01-05	09:27:00	0
2009-01-05	09:28:00	0
2009-01-05	09:29:00	0
2009-01-05	09:30:00	0
2009-01-05	09:31:00	0
2009-01-05	09:32:00	0
2009-01-05	09:33:00	0
2009-01-05	09:34:00	0
2009-01-05	09:35:00	0
2009-01-05	09:36:00	0
2009-01-05	09:37:00	0
2009-01-05	09:38:00	0
2009-01-05	09:39:00	0
2009-01-05	09:40:00	0
2009-01-05	09:41:00	0
2009-01-05	09:42:00	0
2009-01-05	09:43:00	0
2009-01-05	09:44:00	0
2009-01-05	09:45:00	0
2009-01-05	09:46:00	0
2009-01-05	09:47:00	0
2009-01-05	09:48:00	0
2009-01-05	09:49:00	0
2009-01-05	09:50:00	0
2009-01-05	09:51:00	0
2009-01-05	09:52:00	0
2009-01-05	09:53:00	0
2009-01-05	09:54:00	0
2009-01-05	09:55:00	0
2009-01-05	09:56:00	0
2009-01-05	09:57:00	0
2009-01-05	09:58:00	0
2009-01-05	09:59:00	0
2009-01-05	10:00:00	0
2009-01-05	10:01:00	0
2009-01-05	10:02:00	0
2009-01-05	10:03:00	0
2009-01-05	10:04:00	0
2009-01-05	10:05:00	0
2009-01-05	10:06:00	0
2009-01-05	10:07:00	0
2009-01-05	10:08:00	0
2009-01-05	10:09:00	0
2009-01-05	10:10:00	0
2009-01-05	10:11:00	0
2009-01-05	10:12:00	0
2009-01-05	10:13:00	0
2009-01-05	10:14:00	0
2009-01-05	10:15:00	0
2009-01-05	10:16:00	0
2009-01-05	10:17:00	0
2009-01-05	10:18:00	0
2009-01-05	10:19:00	0
2009-01-05	10:20:00	0
2009-01-05	10:21:00	0
2009-01-05	10:22:00	0
2009-01-05	10:23:00	0
2009-01-05	10:24:00	0
2009-01-05	10:25:00	0
2009-01-05	10:26:00	0
2009-01-05	10:27:00	0
2009-01-05	10:28:00	0
2009-01-05	10:29:00	0
2009-01-05	10:30:00	0
2009-01-05	10:31:00	0
2009-01-05	10:32:00	0
2009-01-05	10:33:00	0
2009-01-05	10:34:00	0
2009-01-05	10:35:00	0
2009-01-05	10:36:00	0
2009-01-05	10:37:00	0
2009-01-05	10:38:00	0
2009-01-05	10:39:00	0
2009-01-05	10:40:00	0
2009-01-05	10:41:00	0
2009-01-05	10:42:00	0
2009-01-05	10:43:00	0
2009-01-05	10:44:00	0
2009-01-05	10:45:00	0
2009-01-05	10:46:00	0
2009-01-05	10:47:00	0
2009-01-05	10:48:00	0
2009-01-05	10:49:00	0
2009-01-05	10:50:00	0
2009-01-05	10:51:00	0
2009-01-05	10:52:00	0
2009-01-05	10:53:00	0
2009-01-05	10:54:00	0
2009-01-05	10:55:00	0
2009-01-05	10:56:00	0
2009-01-05	10:57:00	0
2009-01-05	10:58:00	0
2009-01-05	10:59:00	0
2009-01-05	11:00:00	0
2009-01-05	11:01:00	0
2009-01-05	11:02:00	0
2009-01-05	11:03:00	0
2009-01-05	11:04:00	0
2009-01-05	11:05:00	0
2009-01-05	11:06:00	0
2009-01-05	11:07:00	0
2009-01-05	11:08:00	0
2009-01-05	11:09:00	0
2009-01-05	11:10:00	0
2009-01-05	11:11:00	0
2009-01-05	11:12:00	0
2009-01-05	11:13:00	0
2009-01-05	11:14:00	0
2009-01-05	11:15:00	0
2009-01-05	11:16:00	0
2009-01-05	11:17:00	0
2009-01-05	11:18:00	0
2009-01-05	11:19:00	0
2009-01-05	11:20:00	0
2009-01-05	11:21:00	0
2009-01-05	11:22:00	0
2009-01-05	11:23:00	0
2009-01-05	11:24:00	0
2009-01-05	11:25:00	0
2009-01-05	11:26:00	0
2009-01-05	11:27:00	0
2009-01-05	11:28:00	0
2009-01-05	11:29:00	0
2009-01-05	11:30:00	0
2009-01-05	11:31:00	0
2009-01-05	11:32:00	0
2009-01-05	11:33:00	0
2009-01-05	11:34:00	0
2009-01-05	11:35:00	0
2009-01-05	11:36:00	0
2009-01-05	11:37:00	0
2009-01-05	11:38:00	0
2009-01-05	11:39:00	0
2009-01-05	11:40:00	0
2009-01-05	11:41:00	0
2009-01-05	11:42:00	0
2009-01-05	11:43:00	0
2009-01-05	11:44:00	0
2009-01-05	11:45:00	0
2009-01-05	11:46:00	0
2009-01-05	11:47:00	0
2009-01-05	11:48:00	0
2009-01-05	11:49:00	0
2009-01-05	11:50:00	0
2009-01-05	11:51:00	0
2009-01-05	11:52:00	0
2009-01-05	11:53:00	0
2009-01-05	11:54:00	0
2009-01-05	11:55:00	0
2009-01-05	11:56:00	0
2009-01-05	11:57:00	0
2009-01-05	11:58:00	0
2009-01-05	11:59:00	0
2009-01-05	12:00:00	0
2009-01-05	12:01:00	0
2009-01-05	12:02:00	0
2009-01-05	12:03:00	0
2009-01-05	12:04:00	0
2009-01-05	12:05:00	0
2009-01-05	12:06:00	0
2009-01-05	12:07:00	0
2009-01-05	12:08:00	0
2009-01-05	12:09:00	0
2009-01-05	12:10:00	0
2009-01-05	12:11:00	0
2009-01-05	12:12:00	0
2009-01-05	12:13:00	0
2009-01-05	12:14:00	0
2009-01-05	12:15:00	0
2009-01-05	12:16:00	0
2009-01-05	12:17:00	0
2009-01-05	12:18:00	0
2009-01-05	12:19:00	0
2009-01-05	12:20:00	0
2009-01-05	12:21:00	0
2009-01-05	12:22:00	0
2009-01-05	12:23:00	0
2009-01-05	12:24:00	0
2009-01-05	12:25:00	0
2009-01-05	12:26:00	0
2009-01-05	12:27:00	0
2009-01-05	12:28:00	0
2009-01-05	12:29:00	0
2009-01-05	12:30:00	0
2009-01-05	12:31:00	0
2009-01-05	12:32:00	0
2009-01-05	12:33:00	0
2009-01-05	12:34:00	0
2009-01-05	12:35:00	0
2009-01-05	12:36:00	0
2009-01-05	12:37:00	0
2009-01-05	12:38:00	0
2009-01-05	12:39:00	0
2009-01-05	12:40:00	0
2009-01-05	12:41:00	0
2009-01-05	12:42:00	0
2009-01-05	12:43:00	0
2009-01-05	12:44:00	0
2009-01-05	12:45:00	0
2009-01-05	12:46:00	0
2009-01-05	12:47:00	0
2009-01-05	12:48:00	0
2009-01-05	12:49:00	0
2009-01-05	12:50:00	0
2009-01-05	12:51:00	0
2009-01-05	12:52:00	0
2009-01-05	12:53:00	0
2009-01-05	12:54:00	0
2009-01-05	12:55:00	0
2009-01-05	12:56:00	0
2009-01-05	12:57:00	0
2009-01-05	12:58:00	0
2009-01-05	12:59:00	0
2009-01-05	13:00:00	0
2009-01-05	13:01:00	0
2009-01-05	13:02:00	0
2009-01-05	13:03:00	0
2009-01-05	13:04:00	0
2009-01-05	13:05:00	0
2009-01-05	13:06:00	0
2009-01-05	13:07:00	0
2009-01-05	13:08:00	0
2009-01-05	13:09:00	0
2009-01-05	13:10:00	0
2009-01-05	13:11:00	0
2009-01-05	13:12:00	0
2009-01-05	13:13:00	0
2009-01-05	13:14:00	0
2009-01-05	13:15:00	0
2009-01-05	13:16:00	0
2009-01-05	13:17:00	0
2009-01-05	13:18:00	0
2009-01-05	13:19:00	0
2009-01-05	13:20:00	0
2009-01-05	13:21:00	0
2009-01-05	13:22:00	0
2009-01-05	13:23:00	0
2009-01-05	13:24:00	0
2009-01-05	13:25:00	0
2009-01-05	13:26:00	0
2009-01-05	13:27:00	0
2009-01-05	13:28:00	0
2009-01-05	13:29:00	0
2009-01-05	13:30:00	0
2009-01-05	13:31:00	0
2009-01-05	13:32:00	0
2009-01-05	13:33:00	0
2009-01-05	13:34:00	0
2009-01-05	13:35:00	0
2009-01-05	13:36:00	0
2009-01-05	13:37:00	0
2009-01-05	13:38:00	0
2009-01-05	13:39:00	0
2009-01-05	13:40:00	0
2009-01-05	13:41:00	0
2009-01-05	13:42:00	0
2009-01-05	13:43:00	0
2009-01-05	13:44:00	0
2009-01-05	13:45:00	0
2009-01-05	13:46:00	0
2009-01-05	13:47:00	0
2009-01-05	13:48:00	0
2009-01-05	13:49:00	0
2009-01-05	13:50:00	0
2009-01-05	13:51:00	0
2009-01-05	13:52:00	0
2009-01-05	13:53:00	0
2009-01-05	13:54:00	0
2009-01-05	13:55:00	0
2009-01-05	13:56:00	0
2009-01-05	13:57:00	0
2009-01-05	13:58:00	0
2009-01-05	13:59:00	0
2009-01-05	14:00:00	0
2009-01-05	14:01:00	0
2009-01-05	14:02:00	0
2009-01-05	14:03:00	0
2009-01-05	14:04:00	0
2009-01-05	14:05:00	0
2009-01-05	14:06:00	0
2009-01-05	14:07:00	0
2009-01-05	14:08:00	0
2009-01-05	14:09:00	0
2009-01-05	14:10:00	0
2009-01-05	14:11:00	0
2009-01-05	14:12:00	0
2009-01-05	14:13:00	0
2009-01-05	14:14:00	0
2009-01-05	14:15:00	0
2009-01-05	14:16:00	0
2009-01-05	14:17:00	0
2009-01-05	14:18:00	0
2009-01-05	14:19:00	0
2009-01-05	14:20:00	0
2009-01-05	14:21:00	0
2009-01-05	14:22:00	0
2009-01-05	14:23:00	0
2009-01-05	14:24:00	0
2009-01-05	14:25:00	0
2009-01-05	14:26:00	0
2009-01-05	14:27:00	0
2009-01-05	14:28:00	0
2009-01-05	14:29:00	0
2009-01-05	14:30:00	0
2009-01-05	14:31:00	0
2009-01-05	14:32:00	0
2009-01-05	14:33:00	0
2009-01-05	14:34:00	0
2009-01-05	14:35:00	0
2009-01-05	14:36:00	0
2009-01-05	14:37:00	0
2009-01-05	14:38:00	0
2009-01-05	14:39:00	0
2009-01-05	14:40:00	0
2009-01-05	14:41:00	0
2009-01-05	14:42:00	0
2009-01-05	14:43:00	0
2009-01-05	14:44:00	0
2009-01-05	14:45:00	0
2009-01-05	14:46:00	0
2009-01-05	14:47:00	0
2009-01-05	14:48:00	0
2009-01-05	14:49:00	0
2009-01-05	14:50:00	0
2009-01-05	14:51:00	0
2009-01-05	14:52:00	0
2009-01-05	14:53:00	0
2009-01-05	14:54:00	0
2009-01-05	14:55:00	0
2009-01-05	14:56:00	0
2009-01-05	14:57:00	0
2009-01-05	14:58:00	0
2009-01-05	14:59:00	0
2009-01-05	15:00:00	0
2009-01-05	15:01:00	0
2009-01-05	15:02:00	0
2009-01-05	15:03:00	0
2009-01-05	15:04:00	0
2009-01-05	15:05:00	0
2009-01-05	15:06:00	0
2009-01-05	15:07:00	0
2009-01-05	15:08:00	0
2009-01-05	15:09:00	0
2009-01-05	15:10:00	0
2009-01-05	15:11:00	0
2009-01-05	15:12:00	0
2009-01-05	15:13:00	0
2009-01-05	15:14:00	0
2009-01-05	15:15:00	0
2009-01-05	15:16:00	0
2009-01-05	15:17:00	0
2009-01-05	15:18:00	0
2009-01-05	15:19:00	0
2009-01-05	15:20:00	0
2009-01-05	15:21:00	0
2009-01-05	15:22:00	0
2009-01-05	15:23:00	0
2009-01-05	15:24:00	0
2009-01-05	15:25:00	0
2009-01-05	15:26:00	0
2009-01-05	15:27:00	0
2009-01-05	15:28:00	0
2009-01-05	15:29:00	0
2009-01-05	15:30:00	0
2009-01-05	15:31:00	0
2009-01-05	15:32:00	0
2009-01-05	15:33:00	0
2009-01-05	15:34:00	0
2009-01-05	15:35:00	0
2009-01-05	15:36:00	0
2009-01-05	15:37:00	0
2009-01-05	15:38:00	0
2009-01-05	15:39:00	0
2009-01-05	15:40:00	0
2009-01-05	15:41:00	0
2009-01-05	15:42:00	0
2009-01-05	15:43:00	0
2009-01-05	15:44:00	0
2009-01-05	15:45:00	0
2009-01-05	15:46:00	0
2009-01-05	15:47:00	0
2009-01-05	15:48:00	0
2009-01-05	15:49:00	0
2009-01-05	15:50:00	0
2009-01-05	15:51:00	0
2009-01-05	15:52:00	0
2009-01-05	15:53:00	0
2009-01-05	15:54:00	0
2009-01-05	15:55:00	0
2009-01-05	15:56:00	0
2009-01-05	15:57:00	0
2009-01-05	15:58:00	0
2009-01-05	15:59:00	0
2009-01-05	16:00:00	0
2009-01-05	16:01:00	0
2009-01-05	16:02:00	0
2009-01-05	16:03:00	0
2009-01-05	16:04:00	0
2009-01-05	16:05:00	0
2009-01-05	16:06:00	0
2009-01-05	16:07:00	0
2009-01-05	16:08:00	0
2009-01-05	16:09:00	0
2009-01-05	16:10:00	0
2009-01-05	16:11:00	0
2009-01-05	16:12:00	0
2009-01-05	16:13:00	0
2009-01-05	16:14:00	0
2009-01-05	16:15:00	0
2009-01-05	16:16:00	0
2009-01-05	16:17:00	0
2009-01-05	16:18:00	0
2009-01-05	16:19:00	0
2009-01-05	16:20:00	0
2009-01-05	16:21:00	0
2009-01-05	16:22:00	0
2009-01-05	16:23:00	0
2009-01-05	16:24:00	0
2009-01-05	16:25:00	0
2009-01-05	16:26:00	0
2009-01-05	16:27:00	0
2009-01-05	16:28:00	0
2009-01-05	16:29:00	0
2009-01-05	16:30:00	0
2009-01-05	16:31:00	0
2009-01-05	16:32:00	0
2009-01-05	16:33:00	0
2009-01-05	16:34:00	0
2009-01-05	16:35:00	0
2009-01-05	16:36:00	0
2009-01-05	16:37:00	0
2009-01-05	16:38:00	0
2009-01-05	16:39:00	0
2009-01-05	16:40:00	0
2009-01-05	16:41:00	0
2009-01-05	16:42:00	0
2009-01-05	16:43:00	0
2009-01-05	16:44:00	0
2009-01-05	16:45:00	0
2009-01-05	16:46:00	0
2009-01-05	16:47:00	0
2009-01-05	16:48:00	0
2009-01-05	16:49:00	0
2009-01-05	16:50:00	0
2009-01-05	16:51:00	0
2009-01-05	16:52:00	0
2009-01-05	16:53:00	0
2009-01-05	16:54:00	0
2009-01-05	16:55:00	0
2009-01-05	16:56:00	0
2009-01-05	16:57:00	0
2009-01-05	16:58:00	0
2009-01-05	16:59:00	0
2009-01-05	17:00:00	0
2009-01-05	17:01:00	0
2009-01-05	17:02:00	0
2009-01-05	17:03:00	0
2009-01-05	17:04:00	31
2009-01-05	17:05:00	36
2009-01-05	17:06:00	10
2009-01-05	17:07:00	26
2009-01-05	17:08:00	118
2009-01-05	17:09:00	21
2009-01-05	17:10:00	26
2009-01-05	17:11:00	0
2009-01-05	17:12:00	0
2009-01-05	17:13:00	26
2009-01-05	17:14:00	21
2009-01-05	17:15:00	187
2009-01-05	17:16:00	57
2009-01-05	17:17:00	10
2009-01-05	17:18:00	42
2009-01-05	17:19:00	26
2009-01-05	17:20:00	47
2009-01-05	17:21:00	80
2009-01-05	17:22:00	0
2009-01-05	17:23:00	0
2009-01-05	17:24:00	52
2009-01-05	17:25:00	0
2009-01-05	17:26:00	10
2009-01-05	17:27:00	21
2009-01-05	17:28:00	16
2009-01-05	17:29:00	0
2009-01-05	17:30:00	0
2009-01-05	17:31:00	0
2009-01-05	17:32:00	0
2009-01-05	17:33:00	0
2009-01-05	17:34:00	21
2009-01-05	17:35:00	501
2009-01-05	17:36:00	0
2009-01-05	17:37:00	5
2009-01-05	17:38:00	0
2009-01-05	17:39:00	0
2009-01-05	17:40:00	26
2009-01-05	17:41:00	0
2009-01-05	17:42:00	0
2009-01-05	17:43:00	0
2009-01-05	17:44:00	5
2009-01-05	17:45:00	0
2009-01-05	17:46:00	0
2009-01-05	17:47:00	0
2009-01-05	17:48:00	0
2009-01-05	17:49:00	10
2009-01-05	17:50:00	52
2009-01-05	17:51:00	0
2009-01-05	17:52:00	21
2009-01-05	17:53:00	0
2009-01-05	17:54:00	219
2009-01-05	17:55:00	16
2009-01-05	17:56:00	0
2009-01-05	17:57:00	36
2009-01-05	17:58:00	99
2009-01-05	17:59:00	0
2009-01-05	18:00:00	0
2009-01-05	18:01:00	0
2009-01-05	18:02:00	0
2009-01-05	18:03:00	0
2009-01-05	18:04:00	0
2009-01-05	18:05:00	0
2009-01-05	18:06:00	0
2009-01-05	18:07:00	0
2009-01-05	18:08:00	0
2009-01-05	18:09:00	0
2009-01-05	18:10:00	0
2009-01-05	18:11:00	0
2009-01-05	18:12:00	0
2009-01-05	18:13:00	130
2009-01-05	18:14:00	36
2009-01-05	18:15:00	187
2009-01-05	18:16:00	0
2009-01-05	18:17:00	0
2009-01-05	18:18:00	0
2009-01-05	18:19:00	47
2009-01-05	18:20:00	47
2009-01-05	18:21:00	80
2009-01-05	18:22:00	144
2009-01-05	18:23:00	0
2009-01-05	18:24:00	105
2009-01-05	18:25:00	0
2009-01-05	18:26:00	0
2009-01-05	18:27:00	0
2009-01-05	18:28:00	0
2009-01-05	18:29:00	0
2009-01-05	18:30:00	0
2009-01-05	18:31:00	0
2009-01-05	18:32:00	0
2009-01-05	18:33:00	916
2009-01-05	18:34:00	2596
2009-01-05	18:35:00	2830
2009-01-05	18:36:00	2878
2009-01-05	18:37:00	2928
2009-01-05	18:38:00	2830
2009-01-05	18:39:00	1120
2009-01-05	18:40:00	355
2009-01-05	18:41:00	93
2009-01-05	18:42:00	151
2009-01-05	18:43:00	136
2009-01-05	18:44:00	386
2009-01-05	18:45:00	124
2009-01-05	18:46:00	93
2009-01-05	18:47:00	80
2009-01-05	18:48:00	195
2009-01-05	18:49:00	180
2009-01-05	18:50:00	158
2009-01-05	18:51:00	235
2009-01-05	18:52:00	325
2009-01-05	18:53:00	1410
2009-01-05	18:54:00	954
2009-01-05	18:55:00	1925
2009-01-05	18:56:00	974
2009-01-05	18:57:00	1577
2009-01-05	18:58:00	99
2009-01-05	18:59:00	825
2009-01-05	19:00:00	1729
2009-01-05	19:01:00	2552
2009-01-05	19:02:00	2830
2009-01-05	19:03:00	1234
2009-01-05	19:04:00	974
2009-01-05	19:05:00	620
2009-01-05	19:06:00	664
2009-01-05	19:07:00	210
2009-01-05	19:08:00	210
2009-01-05	19:09:00	1034
2009-01-05	19:10:00	187
2009-01-05	19:11:00	464
2009-01-05	19:12:00	664
2009-01-05	19:13:00	476
2009-01-05	19:14:00	592
2009-01-05	19:15:00	758
2009-01-05	19:16:00	453
2009-01-05	19:17:00	187
2009-01-05	19:18:00	93
2009-01-05	19:19:00	68
2009-01-05	19:20:00	195
2009-01-05	19:21:00	158
2009-01-05	19:22:00	21
2009-01-05	19:23:00	0
2009-01-05	19:24:00	151
2009-01-05	19:25:00	165
2009-01-05	19:26:00	105
2009-01-05	19:27:00	5
2009-01-05	19:28:00	0
2009-01-05	19:29:00	26
2009-01-05	19:30:00	0
2009-01-05	19:31:00	26
2009-01-05	19:32:00	105
2009-01-05	19:33:00	57
2009-01-05	19:34:00	0
2009-01-05	19:35:00	0
2009-01-05	19:36:00	0
2009-01-05	19:37:00	5
2009-01-05	19:38:00	219
2009-01-05	19:39:00	244
2009-01-05	19:40:00	144
2009-01-05	19:41:00	334
2009-01-05	19:42:00	57
2009-01-05	19:43:00	0
2009-01-05	19:44:00	26
2009-01-05	19:45:00	21
2009-01-05	19:46:00	376
2009-01-05	19:47:00	315
2009-01-05	19:48:00	0
2009-01-05	19:49:00	0
2009-01-05	19:50:00	0
2009-01-05	19:51:00	0
2009-01-05	19:52:00	0
2009-01-05	19:53:00	0
2009-01-05	19:54:00	10
2009-01-05	19:55:00	0
2009-01-05	19:56:00	0
2009-01-05	19:57:00	0
2009-01-05	19:58:00	16
2009-01-05	19:59:00	0
2009-01-05	20:00:00	0
2009-01-05	20:01:00	0
2009-01-05	20:02:00	365
2009-01-05	20:03:00	219
2009-01-05	20:04:00	10
2009-01-05	20:05:00	57
2009-01-05	20:06:00	365
2009-01-05	20:07:00	99
2009-01-05	20:08:00	0
2009-01-05	20:09:00	210
2009-01-05	20:10:00	93
2009-01-05	20:11:00	0
2009-01-05	20:12:00	0
2009-01-05	20:13:00	0
2009-01-05	20:14:00	0
2009-01-05	20:15:00	0
2009-01-05	20:16:00	0
2009-01-05	20:17:00	0
2009-01-05	20:18:00	0
2009-01-05	20:19:00	0
2009-01-05	20:20:00	0
2009-01-05	20:21:00	0
2009-01-05	20:22:00	0
2009-01-05	20:23:00	0
2009-01-05	20:24:00	0
2009-01-05	20:25:00	0
2009-01-05	20:26:00	0
2009-01-05	20:27:00	0
2009-01-05	20:28:00	0
2009-01-05	20:29:00	0
2009-01-05	20:30:00	0
2009-01-05	20:31:00	0
2009-01-05	20:32:00	0
2009-01-05	20:33:00	0
2009-01-05	20:34:00	0
2009-01-05	20:35:00	0
2009-01-05	20:36:00	0
2009-01-05	20:37:00	0
2009-01-05	20:38:00	0
2009-01-05	20:39:00	26
2009-01-05	20:40:00	0
2009-01-05	20:41:00	0
2009-01-05	20:42:00	0
2009-01-05	20:43:00	0
2009-01-05	20:44:00	0
2009-01-05	20:45:00	0
2009-01-05	20:46:00	0
2009-01-05	20:47:00	0
2009-01-05	20:48:00	0
2009-01-05	20:49:00	0
2009-01-05	20:50:00	0
2009-01-05	20:51:00	0
2009-01-05	20:52:00	0
2009-01-05	20:53:00	0
2009-01-05	20:54:00	365
2009-01-05	20:55:00	252
2009-01-05	20:56:00	453
2009-01-05	20:57:00	315
2009-01-05	20:58:00	74
2009-01-05	20:59:00	0
2009-01-05	21:00:00	16
2009-01-05	21:01:00	21
2009-01-05	21:02:00	0
2009-01-05	21:03:00	5
2009-01-05	21:04:00	5
2009-01-05	21:05:00	0
2009-01-05	21:06:00	0
2009-01-05	21:07:00	0
2009-01-05	21:08:00	0
2009-01-05	21:09:00	0
2009-01-05	21:10:00	0
2009-01-05	21:11:00	0
2009-01-05	21:12:00	0
2009-01-05	21:13:00	0
2009-01-05	21:14:00	0
2009-01-05	21:15:00	0
2009-01-05	21:16:00	0
2009-01-05	21:17:00	0
2009-01-05	21:18:00	165
2009-01-05	21:19:00	0
2009-01-05	21:20:00	0
2009-01-05	21:21:00	0
2009-01-05	21:22:00	0
2009-01-05	21:23:00	0
2009-01-05	21:24:00	0
2009-01-05	21:25:00	0
2009-01-05	21:26:00	80
2009-01-05	21:27:00	0
2009-01-05	21:28:00	0
2009-01-05	21:29:00	0
2009-01-05	21:30:00	0
2009-01-05	21:31:00	0
2009-01-05	21:32:00	0
2009-01-05	21:33:00	0
2009-01-05	21:34:00	0
2009-01-05	21:35:00	0
2009-01-05	21:36:00	0
2009-01-05	21:37:00	0
2009-01-05	21:38:00	0
2009-01-05	21:39:00	0
2009-01-05	21:40:00	0
2009-01-05	21:41:00	0
2009-01-05	21:42:00	0
2009-01-05	21:43:00	0
2009-01-05	21:44:00	0
2009-01-05	21:45:00	0
2009-01-05	21:46:00	158
2009-01-05	21:47:00	278
2009-01-05	21:48:00	158
2009-01-05	21:49:00	0
2009-01-05	21:50:00	0
2009-01-05	21:51:00	0
2009-01-05	21:52:00	0
2009-01-05	21:53:00	0
2009-01-05	21:54:00	0
2009-01-05	21:55:00	0
2009-01-05	21:56:00	0
2009-01-05	21:57:00	0
2009-01-05	21:58:00	0
2009-01-05	21:59:00	0
2009-01-05	22:00:00	0
2009-01-05	22:01:00	0
2009-01-05	22:02:00	0
2009-01-05	22:03:00	21
2009-01-05	22:04:00	0
2009-01-05	22:05:00	0
2009-01-05	22:06:00	0
2009-01-05	22:07:00	0
2009-01-05	22:08:00	0
2009-01-05	22:09:00	620
2009-01-05	22:10:00	1055
2009-01-05	22:11:00	592
2009-01-05	22:12:00	297
2009-01-05	22:13:00	124
2009-01-05	22:14:00	26
2009-01-05	22:15:00	0
2009-01-05	22:16:00	10
2009-01-05	22:17:00	0
2009-01-05	22:18:00	16
2009-01-05	22:19:00	355
2009-01-05	22:20:00	105
2009-01-05	22:21:00	86
2009-01-05	22:22:00	151
2009-01-05	22:23:00	268
2009-01-05	22:24:00	151
2009-01-05	22:25:00	173
2009-01-05	22:26:00	130
2009-01-05	22:27:00	31
2009-01-05	22:28:00	136
2009-01-05	22:29:00	62
2009-01-05	22:30:00	26
2009-01-05	22:31:00	0
2009-01-05	22:32:00	10
2009-01-05	22:33:00	0
2009-01-05	22:34:00	0
2009-01-05	22:35:00	0
2009-01-05	22:36:00	74
2009-01-05	22:37:00	21
2009-01-05	22:38:00	202
2009-01-05	22:39:00	334
2009-01-05	22:40:00	158
2009-01-05	22:41:00	47
2009-01-05	22:42:00	0
2009-01-05	22:43:00	0
2009-01-05	22:44:00	5
2009-01-05	22:45:00	0
2009-01-05	22:46:00	111
2009-01-05	22:47:00	365
2009-01-05	22:48:00	407
2009-01-05	22:49:00	0
2009-01-05	22:50:00	31
2009-01-05	22:51:00	0
2009-01-05	22:52:00	195
2009-01-05	22:53:00	202
2009-01-05	22:54:00	86
2009-01-05	22:55:00	74
2009-01-05	22:56:00	187
2009-01-05	22:57:00	202
2009-01-05	22:58:00	173
2009-01-05	22:59:00	165
2009-01-05	23:00:00	26
2009-01-05	23:01:00	52
2009-01-05	23:02:00	124
2009-01-05	23:03:00	47
2009-01-05	23:04:00	151
2009-01-05	23:05:00	0
2009-01-05	23:06:00	365
2009-01-05	23:07:00	31
2009-01-05	23:08:00	42
2009-01-05	23:09:00	0
2009-01-05	23:10:00	0
2009-01-05	23:11:00	0
2009-01-05	23:12:00	0
2009-01-05	23:13:00	0
2009-01-05	23:14:00	0
2009-01-05	23:15:00	0
2009-01-05	23:16:00	0
2009-01-05	23:17:00	306
2009-01-05	23:18:00	278
2009-01-05	23:19:00	74
2009-01-05	23:20:00	0
2009-01-05	23:21:00	5
2009-01-05	23:22:00	0
2009-01-05	23:23:00	0
2009-01-05	23:24:00	0
2009-01-05	23:25:00	0
2009-01-05	23:26:00	0
2009-01-05	23:27:00	0
2009-01-05	23:28:00	0
2009-01-05	23:29:00	0
2009-01-05	23:30:00	0
2009-01-05	23:31:00	0
2009-01-05	23:32:00	0
2009-01-05	23:33:00	0
2009-01-05	23:34:00	180
2009-01-05	23:35:00	36
2009-01-05	23:36:00	0
2009-01-05	23:37:00	0
2009-01-05	23:38:00	99
2009-01-05	23:39:00	130
2009-01-05	23:40:00	252
2009-01-05	23:41:00	0
2009-01-05	23:42:00	0
2009-01-05	23:43:00	0
2009-01-05	23:44:00	0
2009-01-05	23:45:00	0
2009-01-05	23:46:00	0
2009-01-05	23:47:00	0
2009-01-05	23:48:00	0
2009-01-05	23:49:00	0
2009-01-05	23:50:00	0
2009-01-05	23:51:00	5
2009-01-05	23:52:00	0
2009-01-05	23:53:00	16
2009-01-05	23:54:00	0
2009-01-05	23:55:00	0
2009-01-05	23:56:00	0
2009-01-05	23:57:00	0
2009-01-05	23:58:00	0
2009-01-05	23:59:00	0
2009-01-06	00:00:00	0
2009-01-06	00:01:00	0
2009-01-06	00:02:00	0
2009-01-06	00:03:00	0
2009-01-06	00:04:00	0
2009-01-06	00:05:00	0
2009-01-06	00:06:00	0
2009-01-06	00:07:00	0
2009-01-06	00:08:00	0
2009-01-06	00:09:00	0
2009-01-06	00:10:00	0
2009-01-06	00:11:00	0
2009-01-06	00:12:00	0
2009-01-06	00:13:00	0
2009-01-06	00:14:00	0
2009-01-06	00:15:00	0
2009-01-06	00:16:00	0
2009-01-06	00:17:00	0
2009-01-06	00:18:00	0
2009-01-06	00:19:00	0
2009-01-06	00:20:00	0
2009-01-06	00:21:00	0
2009-01-06	00:22:00	0
2009-01-06	00:23:00	5
2009-01-06	00:24:00	0
2009-01-06	00:25:00	0
2009-01-06	00:26:00	0
2009-01-06	00:27:00	0
2009-01-06	00:28:00	0
2009-01-06	00:29:00	0
2009-01-06	00:30:00	0
2009-01-06	00:31:00	0
2009-01-06	00:32:00	0
2009-01-06	00:33:00	0
2009-01-06	00:34:00	0
2009-01-06	00:35:00	0
2009-01-06	00:36:00	0
2009-01-06	00:37:00	0
2009-01-06	00:38:00	0
2009-01-06	00:39:00	0
2009-01-06	00:40:00	0
2009-01-06	00:41:00	0
2009-01-06	00:42:00	0
2009-01-06	00:43:00	0
2009-01-06	00:44:00	0
2009-01-06	00:45:00	0
2009-01-06	00:46:00	0
2009-01-06	00:47:00	0
2009-01-06	00:48:00	0
2009-01-06	00:49:00	0
2009-01-06	00:50:00	0
2009-01-06	00:51:00	0
2009-01-06	00:52:00	0
2009-01-06	00:53:00	0
2009-01-06	00:54:00	0
2009-01-06	00:55:00	5
2009-01-06	00:56:00	10
2009-01-06	00:57:00	0
2009-01-06	00:58:00	0
2009-01-06	00:59:00	0
2009-01-06	01:00:00	0
2009-01-06	01:01:00	0
2009-01-06	01:02:00	0
2009-01-06	01:03:00	0
2009-01-06	01:04:00	0
2009-01-06	01:05:00	0
2009-01-06	01:06:00	0
2009-01-06	01:07:00	0
2009-01-06	01:08:00	0
2009-01-06	01:09:00	0
2009-01-06	01:10:00	0
2009-01-06	01:11:00	0
2009-01-06	01:12:00	0
2009-01-06	01:13:00	0
2009-01-06	01:14:00	0
2009-01-06	01:15:00	0
2009-01-06	01:16:00	0
2009-01-06	01:17:00	0
2009-01-06	01:18:00	0
2009-01-06	01:19:00	0
2009-01-06	01:20:00	0
2009-01-06	01:21:00	0
2009-01-06	01:22:00	0
2009-01-06	01:23:00	0
2009-01-06	01:24:00	0
2009-01-06	01:25:00	0
2009-01-06	01:26:00	0
2009-01-06	01:27:00	0
2009-01-06	01:28:00	0
2009-01-06	01:29:00	0
2009-01-06	01:30:00	0
2009-01-06	01:31:00	0
2009-01-06	01:32:00	5
2009-01-06	01:33:00	0
2009-01-06	01:34:00	0
2009-01-06	01:35:00	0
2009-01-06	01:36:00	0
2009-01-06	01:37:00	0
2009-01-06	01:38:00	0
2009-01-06	01:39:00	0
2009-01-06	01:40:00	0
2009-01-06	01:41:00	0
2009-01-06	01:42:00	0
2009-01-06	01:43:00	0
2009-01-06	01:44:00	0
2009-01-06	01:45:00	0
2009-01-06	01:46:00	21
2009-01-06	01:47:00	0
2009-01-06	01:48:00	0
2009-01-06	01:49:00	0
2009-01-06	01:50:00	0
2009-01-06	01:51:00	0
2009-01-06	01:52:00	0
2009-01-06	01:53:00	0
2009-01-06	01:54:00	0
2009-01-06	01:55:00	0
2009-01-06	01:56:00	0
2009-01-06	01:57:00	0
2009-01-06	01:58:00	0
2009-01-06	01:59:00	0
2009-01-06	02:00:00	0
2009-01-06	02:01:00	0
2009-01-06	02:02:00	0
2009-01-06	02:03:00	0
2009-01-06	02:04:00	0
2009-01-06	02:05:00	0
2009-01-06	02:06:00	0
2009-01-06	02:07:00	0
2009-01-06	02:08:00	0
2009-01-06	02:09:00	0
2009-01-06	02:10:00	0
2009-01-06	02:11:00	0
2009-01-06	02:12:00	0
2009-01-06	02:13:00	0
2009-01-06	02:14:00	0
2009-01-06	02:15:00	0
2009-01-06	02:16:00	0
2009-01-06	02:17:00	0
2009-01-06	02:18:00	0
2009-01-06	02:19:00	0
2009-01-06	02:20:00	0
2009-01-06	02:21:00	0
2009-01-06	02:22:00	0
2009-01-06	02:23:00	0
2009-01-06	02:24:00	0
2009-01-06	02:25:00	0
2009-01-06	02:26:00	0
2009-01-06	02:27:00	0
2009-01-06	02:28:00	0
2009-01-06	02:29:00	31
2009-01-06	02:30:00	10
2009-01-06	02:31:00	0
2009-01-06	02:32:00	0
2009-01-06	02:33:00	151
2009-01-06	02:34:00	57
2009-01-06	02:35:00	5
2009-01-06	02:36:00	0
2009-01-06	02:37:00	0
2009-01-06	02:38:00	0
2009-01-06	02:39:00	0
2009-01-06	02:40:00	0
2009-01-06	02:41:00	0
2009-01-06	02:42:00	0
2009-01-06	02:43:00	0
2009-01-06	02:44:00	0
2009-01-06	02:45:00	0
2009-01-06	02:46:00	0
2009-01-06	02:47:00	0
2009-01-06	02:48:00	0
2009-01-06	02:49:00	0
2009-01-06	02:50:00	0
2009-01-06	02:51:00	0
2009-01-06	02:52:00	0
2009-01-06	02:53:00	0
2009-01-06	02:54:00	36
2009-01-06	02:55:00	0
2009-01-06	02:56:00	0
2009-01-06	02:57:00	0
2009-01-06	02:58:00	0
2009-01-06	02:59:00	0
2009-01-06	03:00:00	0
2009-01-06	03:01:00	0
2009-01-06	03:02:00	0
2009-01-06	03:03:00	0
2009-01-06	03:04:00	0
2009-01-06	03:05:00	0
2009-01-06	03:06:00	0
2009-01-06	03:07:00	0
2009-01-06	03:08:00	0
2009-01-06	03:09:00	0
2009-01-06	03:10:00	0
2009-01-06	03:11:00	0
2009-01-06	03:12:00	0
2009-01-06	03:13:00	0
2009-01-06	03:14:00	0
2009-01-06	03:15:00	0
2009-01-06	03:16:00	42
2009-01-06	03:17:00	0
2009-01-06	03:18:00	0
2009-01-06	03:19:00	0
2009-01-06	03:20:00	0
2009-01-06	03:21:00	0
2009-01-06	03:22:00	0
2009-01-06	03:23:00	0
2009-01-06	03:24:00	0
2009-01-06	03:25:00	0
2009-01-06	03:26:00	268
2009-01-06	03:27:00	260
2009-01-06	03:28:00	0
2009-01-06	03:29:00	0
2009-01-06	03:30:00	0
2009-01-06	03:31:00	0
2009-01-06	03:32:00	0
2009-01-06	03:33:00	0
2009-01-06	03:34:00	0
2009-01-06	03:35:00	0
2009-01-06	03:36:00	0
2009-01-06	03:37:00	0
2009-01-06	03:38:00	0
2009-01-06	03:39:00	0
2009-01-06	03:40:00	0
2009-01-06	03:41:00	0
2009-01-06	03:42:00	0
2009-01-06	03:43:00	0
2009-01-06	03:44:00	0
2009-01-06	03:45:00	0
2009-01-06	03:46:00	0
2009-01-06	03:47:00	0
2009-01-06	03:48:00	0
2009-01-06	03:49:00	0
2009-01-06	03:50:00	0
2009-01-06	03:51:00	0
2009-01-06	03:52:00	0
2009-01-06	03:53:00	0
2009-01-06	03:54:00	0
2009-01-06	03:55:00	0
2009-01-06	03:56:00	0
2009-01-06	03:57:00	0
2009-01-06	03:58:00	0
2009-01-06	03:59:00	0
2009-01-06	04:00:00	0
2009-01-06	04:01:00	0
2009-01-06	04:02:00	0
2009-01-06	04:03:00	0
2009-01-06	04:04:00	0
2009-01-06	04:05:00	0
2009-01-06	04:06:00	0
2009-01-06	04:07:00	0
2009-01-06	04:08:00	0
2009-01-06	04:09:00	0
2009-01-06	04:10:00	0
2009-01-06	04:11:00	0
2009-01-06	04:12:00	0
2009-01-06	04:13:00	0
2009-01-06	04:14:00	0
2009-01-06	04:15:00	0
2009-01-06	04:16:00	0
2009-01-06	04:17:00	0
2009-01-06	04:18:00	0
2009-01-06	04:19:00	0
2009-01-06	04:20:00	0
2009-01-06	04:21:00	0
2009-01-06	04:22:00	0
2009-01-06	04:23:00	0
2009-01-06	04:24:00	195
2009-01-06	04:25:00	16
2009-01-06	04:26:00	0
2009-01-06	04:27:00	0
2009-01-06	04:28:00	0
2009-01-06	04:29:00	0
2009-01-06	04:30:00	62
2009-01-06	04:31:00	0
2009-01-06	04:32:00	0
2009-01-06	04:33:00	0
2009-01-06	04:34:00	0
2009-01-06	04:35:00	21
2009-01-06	04:36:00	0
2009-01-06	04:37:00	0
2009-01-06	04:38:00	0
2009-01-06	04:39:00	0
2009-01-06	04:40:00	0
2009-01-06	04:41:00	0
2009-01-06	04:42:00	0
2009-01-06	04:43:00	0
2009-01-06	04:44:00	0
2009-01-06	04:45:00	0
2009-01-06	04:46:00	0
2009-01-06	04:47:00	0
2009-01-06	04:48:00	0
2009-01-06	04:49:00	0
2009-01-06	04:50:00	0
2009-01-06	04:51:00	0
2009-01-06	04:52:00	0
2009-01-06	04:53:00	0
2009-01-06	04:54:00	0
2009-01-06	04:55:00	0
2009-01-06	04:56:00	0
2009-01-06	04:57:00	0
2009-01-06	04:58:00	0
2009-01-06	04:59:00	0
2009-01-06	05:00:00	0
2009-01-06	05:01:00	0
2009-01-06	05:02:00	0
2009-01-06	05:03:00	0
2009-01-06	05:04:00	0
2009-01-06	05:05:00	0
2009-01-06	05:06:00	0
2009-01-06	05:07:00	0
2009-01-06	05:08:00	0
2009-01-06	05:09:00	0
2009-01-06	05:10:00	0
2009-01-06	05:11:00	0
2009-01-06	05:12:00	80
2009-01-06	05:13:00	0
2009-01-06	05:14:00	0
2009-01-06	05:15:00	0
2009-01-06	05:16:00	0
2009-01-06	05:17:00	0
2009-01-06	05:18:00	0
2009-01-06	05:19:00	0
2009-01-06	05:20:00	0
2009-01-06	05:21:00	0
2009-01-06	05:22:00	0
2009-01-06	05:23:00	0
2009-01-06	05:24:00	0
2009-01-06	05:25:00	0
2009-01-06	05:26:00	0
2009-01-06	05:27:00	0
2009-01-06	05:28:00	0
2009-01-06	05:29:00	0
2009-01-06	05:30:00	10
2009-01-06	05:31:00	0
2009-01-06	05:32:00	80
2009-01-06	05:33:00	10
2009-01-06	05:34:00	0
2009-01-06	05:35:00	0
2009-01-06	05:36:00	0
2009-01-06	05:37:00	68
2009-01-06	05:38:00	0
2009-01-06	05:39:00	0
2009-01-06	05:40:00	0
2009-01-06	05:41:00	244
2009-01-06	05:42:00	10
2009-01-06	05:43:00	0
2009-01-06	05:44:00	0
2009-01-06	05:45:00	0
2009-01-06	05:46:00	0
2009-01-06	05:47:00	0
2009-01-06	05:48:00	0
2009-01-06	05:49:00	31
2009-01-06	05:50:00	74
2009-01-06	05:51:00	124
2009-01-06	05:52:00	136
2009-01-06	05:53:00	0
2009-01-06	05:54:00	0
2009-01-06	05:55:00	1577
2009-01-06	05:56:00	441
2009-01-06	05:57:00	219
2009-01-06	05:58:00	227
2009-01-06	05:59:00	1258
2009-01-06	06:00:00	513
2009-01-06	06:01:00	365
2009-01-06	06:02:00	144
2009-01-06	06:03:00	935
2009-01-06	06:04:00	334
2009-01-06	06:05:00	344
2009-01-06	06:06:00	565
2009-01-06	06:07:00	565
2009-01-06	06:08:00	1120
2009-01-06	06:09:00	916
2009-01-06	06:10:00	278
2009-01-06	06:11:00	0
2009-01-06	06:12:00	0
2009-01-06	06:13:00	86
2009-01-06	06:14:00	111
2009-01-06	06:15:00	0
2009-01-06	06:16:00	0
2009-01-06	06:17:00	0
2009-01-06	06:18:00	10
2009-01-06	06:19:00	5
2009-01-06	06:20:00	297
2009-01-06	06:21:00	526
2009-01-06	06:22:00	620
2009-01-06	06:23:00	476
2009-01-06	06:24:00	278
2009-01-06	06:25:00	297
2009-01-06	06:26:00	26
2009-01-06	06:27:00	0
2009-01-06	06:28:00	0
2009-01-06	06:29:00	0
2009-01-06	06:30:00	0
2009-01-06	06:31:00	0
2009-01-06	06:32:00	0
2009-01-06	06:33:00	26
2009-01-06	06:34:00	42
2009-01-06	06:35:00	430
2009-01-06	06:36:00	173
2009-01-06	06:37:00	31
2009-01-06	06:38:00	26
2009-01-06	06:39:00	0
2009-01-06	06:40:00	0
2009-01-06	06:41:00	0
2009-01-06	06:42:00	0
2009-01-06	06:43:00	0
2009-01-06	06:44:00	0
2009-01-06	06:45:00	0
2009-01-06	06:46:00	0
2009-01-06	06:47:00	0
2009-01-06	06:48:00	0
2009-01-06	06:49:00	5
2009-01-06	06:50:00	0
2009-01-06	06:51:00	0
2009-01-06	06:52:00	0
2009-01-06	06:53:00	0
2009-01-06	06:54:00	0
2009-01-06	06:55:00	0
2009-01-06	06:56:00	0
2009-01-06	06:57:00	0
2009-01-06	06:58:00	0
2009-01-06	06:59:00	0
2009-01-06	07:00:00	0
2009-01-06	07:01:00	0
2009-01-06	07:02:00	0
2009-01-06	07:03:00	0
2009-01-06	07:04:00	0
2009-01-06	07:05:00	21
2009-01-06	07:06:00	0
2009-01-06	07:07:00	0
2009-01-06	07:08:00	0
2009-01-06	07:09:00	0
2009-01-06	07:10:00	0
2009-01-06	07:11:00	0
2009-01-06	07:12:00	0
2009-01-06	07:13:00	0
2009-01-06	07:14:00	5
2009-01-06	07:15:00	0
2009-01-06	07:16:00	0
2009-01-06	07:17:00	0
2009-01-06	07:18:00	99
2009-01-06	07:19:00	252
2009-01-06	07:20:00	0
2009-01-06	07:21:00	0
2009-01-06	07:22:00	0
2009-01-06	07:23:00	5
2009-01-06	07:24:00	0
2009-01-06	07:25:00	0
2009-01-06	07:26:00	0
2009-01-06	07:27:00	0
2009-01-06	07:28:00	0
2009-01-06	07:29:00	0
2009-01-06	07:30:00	0
2009-01-06	07:31:00	0
2009-01-06	07:32:00	0
2009-01-06	07:33:00	16
2009-01-06	07:34:00	0
2009-01-06	07:35:00	0
2009-01-06	07:36:00	325
2009-01-06	07:37:00	679
2009-01-06	07:38:00	954
2009-01-06	07:39:00	244
2009-01-06	07:40:00	16
2009-01-06	07:41:00	36
2009-01-06	07:42:00	47
2009-01-06	07:43:00	287
2009-01-06	07:44:00	62
2009-01-06	07:45:00	173
2009-01-06	07:46:00	0
2009-01-06	07:47:00	407
2009-01-06	07:48:00	5
2009-01-06	07:49:00	0
2009-01-06	07:50:00	0
2009-01-06	07:51:00	16
2009-01-06	07:52:00	5
2009-01-06	07:53:00	0
2009-01-06	07:54:00	80
2009-01-06	07:55:00	725
2009-01-06	07:56:00	287
2009-01-06	07:57:00	57
2009-01-06	07:58:00	1258
2009-01-06	07:59:00	1098
2009-01-06	08:00:00	916
2009-01-06	08:01:00	124
2009-01-06	08:02:00	287
2009-01-06	08:03:00	21
2009-01-06	08:04:00	0
2009-01-06	08:05:00	10
2009-01-06	08:06:00	68
2009-01-06	08:07:00	21
2009-01-06	08:08:00	62
2009-01-06	08:09:00	80
2009-01-06	08:10:00	10
2009-01-06	08:11:00	165
2009-01-06	08:12:00	0
2009-01-06	08:13:00	99
2009-01-06	08:14:00	0
2009-01-06	08:15:00	210
2009-01-06	08:16:00	306
2009-01-06	08:17:00	52
2009-01-06	08:18:00	252
2009-01-06	08:19:00	0
2009-01-06	08:20:00	0
2009-01-06	08:21:00	0
2009-01-06	08:22:00	173
2009-01-06	08:23:00	93
2009-01-06	08:24:00	31
2009-01-06	08:25:00	99
2009-01-06	08:26:00	21
2009-01-06	08:27:00	0
2009-01-06	08:28:00	36
2009-01-06	08:29:00	165
2009-01-06	08:30:00	47
2009-01-06	08:31:00	5
2009-01-06	08:32:00	26
2009-01-06	08:33:00	0
2009-01-06	08:34:00	0
2009-01-06	08:35:00	552
2009-01-06	08:36:00	407
2009-01-06	08:37:00	5
2009-01-06	08:38:00	5
2009-01-06	08:39:00	0
2009-01-06	08:40:00	0
2009-01-06	08:41:00	5
2009-01-06	08:42:00	5
2009-01-06	08:43:00	0
2009-01-06	08:44:00	0
2009-01-06	08:45:00	47
2009-01-06	08:46:00	151
2009-01-06	08:47:00	42
2009-01-06	08:48:00	118
2009-01-06	08:49:00	0
2009-01-06	08:50:00	16
2009-01-06	08:51:00	0
2009-01-06	08:52:00	0
2009-01-06	08:53:00	111
2009-01-06	08:54:00	173
2009-01-06	08:55:00	210
2009-01-06	08:56:00	306
2009-01-06	08:57:00	538
2009-01-06	08:58:00	396
2009-01-06	08:59:00	244
2009-01-06	09:00:00	0
2009-01-06	09:01:00	0
2009-01-06	09:02:00	0
2009-01-06	09:03:00	0
2009-01-06	09:04:00	124
2009-01-06	09:05:00	158
2009-01-06	09:06:00	0
2009-01-06	09:07:00	565
2009-01-06	09:08:00	679
[truncated: 19,611 more rows]

## Sheet: 1.19.09
Actogram, Copy Raw Data, All Displayed Days
Identity:	Shelby Moyer
Filename:	E:\Active Research Files\meloxicam titre canine\cases\shelby\Shelby Moyer 1.19.09.AWC
Gender:	F
Age:	5
Height:	40.6 cm	16.0 in
Weight:	15.0 kg	33.1 lbs
Start Date:	19-Jan-2009 (Mon)
Start Time:	17:00:00
Interval:	1.00 mins
Date Stamp:	Time Stamp:	Activity Data:	Marker Press:
2009-01-19	00:00:00
2009-01-19	00:01:00
2009-01-19	00:02:00
2009-01-19	00:03:00
2009-01-19	00:04:00
2009-01-19	00:05:00
2009-01-19	00:06:00
2009-01-19	00:07:00
2009-01-19	00:08:00
2009-01-19	00:09:00
2009-01-19	00:10:00
2009-01-19	00:11:00
2009-01-19	00:12:00
2009-01-19	00:13:00
2009-01-19	00:14:00
2009-01-19	00:15:00
2009-01-19	00:16:00
2009-01-19	00:17:00
2009-01-19	00:18:00
2009-01-19	00:19:00
2009-01-19	00:20:00
2009-01-19	00:21:00
2009-01-19	00:22:00
2009-01-19	00:23:00
2009-01-19	00:24:00
2009-01-19	00:25:00
2009-01-19	00:26:00
2009-01-19	00:27:00
2009-01-19	00:28:00
2009-01-19	00:29:00
2009-01-19	00:30:00
2009-01-19	00:31:00
2009-01-19	00:32:00
2009-01-19	00:33:00
2009-01-19	00:34:00
2009-01-19	00:35:00
2009-01-19	00:36:00
2009-01-19	00:37:00
2009-01-19	00:38:00
2009-01-19	00:39:00
2009-01-19	00:40:00
2009-01-19	00:41:00
2009-01-19	00:42:00
2009-01-19	00:43:00
2009-01-19	00:44:00
2009-01-19	00:45:00
2009-01-19	00:46:00
2009-01-19	00:47:00
2009-01-19	00:48:00
2009-01-19	00:49:00
2009-01-19	00:50:00
2009-01-19	00:51:00
2009-01-19	00:52:00
2009-01-19	00:53:00
2009-01-19	00:54:00
2009-01-19	00:55:00
2009-01-19	00:56:00
2009-01-19	00:57:00
2009-01-19	00:58:00
2009-01-19	00:59:00
2009-01-19	01:00:00
2009-01-19	01:01:00
2009-01-19	01:02:00
2009-01-19	01:03:00
2009-01-19	01:04:00
2009-01-19	01:05:00
2009-01-19	01:06:00
2009-01-19	01:07:00
2009-01-19	01:08:00
2009-01-19	01:09:00
2009-01-19	01:10:00
2009-01-19	01:11:00
2009-01-19	01:12:00
2009-01-19	01:13:00
2009-01-19	01:14:00
2009-01-19	01:15:00
2009-01-19	01:16:00
2009-01-19	01:17:00
2009-01-19	01:18:00
2009-01-19	01:19:00
2009-01-19	01:20:00
2009-01-19	01:21:00
2009-01-19	01:22:00
2009-01-19	01:23:00
2009-01-19	01:24:00
2009-01-19	01:25:00
2009-01-19	01:26:00
2009-01-19	01:27:00
2009-01-19	01:28:00
2009-01-19	01:29:00
2009-01-19	01:30:00
2009-01-19	01:31:00
2009-01-19	01:32:00
2009-01-19	01:33:00
2009-01-19	01:34:00
2009-01-19	01:35:00
2009-01-19	01:36:00
2009-01-19	01:37:00
2009-01-19	01:38:00
2009-01-19	01:39:00
2009-01-19	01:40:00
2009-01-19	01:41:00
2009-01-19	01:42:00
2009-01-19	01:43:00
2009-01-19	01:44:00
2009-01-19	01:45:00
2009-01-19	01:46:00
2009-01-19	01:47:00
2009-01-19	01:48:00
2009-01-19	01:49:00
2009-01-19	01:50:00
2009-01-19	01:51:00
2009-01-19	01:52:00
2009-01-19	01:53:00
2009-01-19	01:54:00
2009-01-19	01:55:00
2009-01-19	01:56:00
2009-01-19	01:57:00
2009-01-19	01:58:00
2009-01-19	01:59:00
2009-01-19	02:00:00
2009-01-19	02:01:00
2009-01-19	02:02:00
2009-01-19	02:03:00
2009-01-19	02:04:00
2009-01-19	02:05:00
2009-01-19	02:06:00
2009-01-19	02:07:00
2009-01-19	02:08:00
2009-01-19	02:09:00
2009-01-19	02:10:00
2009-01-19	02:11:00
2009-01-19	02:12:00
2009-01-19	02:13:00
2009-01-19	02:14:00
2009-01-19	02:15:00
2009-01-19	02:16:00
2009-01-19	02:17:00
2009-01-19	02:18:00
2009-01-19	02:19:00
2009-01-19	02:20:00
2009-01-19	02:21:00
2009-01-19	02:22:00
2009-01-19	02:23:00
2009-01-19	02:24:00
2009-01-19	02:25:00
2009-01-19	02:26:00
2009-01-19	02:27:00
2009-01-19	02:28:00
2009-01-19	02:29:00
2009-01-19	02:30:00
2009-01-19	02:31:00
2009-01-19	02:32:00
2009-01-19	02:33:00
2009-01-19	02:34:00
2009-01-19	02:35:00
2009-01-19	02:36:00
2009-01-19	02:37:00
2009-01-19	02:38:00
2009-01-19	02:39:00
2009-01-19	02:40:00
2009-01-19	02:41:00
2009-01-19	02:42:00
2009-01-19	02:43:00
2009-01-19	02:44:00
2009-01-19	02:45:00
2009-01-19	02:46:00
2009-01-19	02:47:00
2009-01-19	02:48:00
2009-01-19	02:49:00
2009-01-19	02:50:00
2009-01-19	02:51:00
2009-01-19	02:52:00
2009-01-19	02:53:00
2009-01-19	02:54:00
2009-01-19	02:55:00
2009-01-19	02:56:00
2009-01-19	02:57:00
2009-01-19	02:58:00
2009-01-19	02:59:00
2009-01-19	03:00:00
2009-01-19	03:01:00
2009-01-19	03:02:00
2009-01-19	03:03:00
2009-01-19	03:04:00
2009-01-19	03:05:00
2009-01-19	03:06:00
2009-01-19	03:07:00
2009-01-19	03:08:00
2009-01-19	03:09:00
2009-01-19	03:10:00
2009-01-19	03:11:00
2009-01-19	03:12:00
2009-01-19	03:13:00
2009-01-19	03:14:00
2009-01-19	03:15:00
2009-01-19	03:16:00
2009-01-19	03:17:00
2009-01-19	03:18:00
2009-01-19	03:19:00
2009-01-19	03:20:00
2009-01-19	03:21:00
2009-01-19	03:22:00
2009-01-19	03:23:00
2009-01-19	03:24:00
2009-01-19	03:25:00
2009-01-19	03:26:00
2009-01-19	03:27:00
2009-01-19	03:28:00
2009-01-19	03:29:00
2009-01-19	03:30:00
2009-01-19	03:31:00
2009-01-19	03:32:00
2009-01-19	03:33:00
2009-01-19	03:34:00
2009-01-19	03:35:00
2009-01-19	03:36:00
2009-01-19	03:37:00
2009-01-19	03:38:00
2009-01-19	03:39:00
2009-01-19	03:40:00
2009-01-19	03:41:00
2009-01-19	03:42:00
2009-01-19	03:43:00
2009-01-19	03:44:00
2009-01-19	03:45:00
2009-01-19	03:46:00
2009-01-19	03:47:00
2009-01-19	03:48:00
2009-01-19	03:49:00
2009-01-19	03:50:00
2009-01-19	03:51:00
2009-01-19	03:52:00
2009-01-19	03:53:00
2009-01-19	03:54:00
2009-01-19	03:55:00
2009-01-19	03:56:00
2009-01-19	03:57:00
2009-01-19	03:58:00
2009-01-19	03:59:00
2009-01-19	04:00:00
2009-01-19	04:01:00
2009-01-19	04:02:00
2009-01-19	04:03:00
2009-01-19	04:04:00
2009-01-19	04:05:00
2009-01-19	04:06:00
2009-01-19	04:07:00
2009-01-19	04:08:00
2009-01-19	04:09:00
2009-01-19	04:10:00
2009-01-19	04:11:00
2009-01-19	04:12:00
2009-01-19	04:13:00
2009-01-19	04:14:00
2009-01-19	04:15:00
2009-01-19	04:16:00
2009-01-19	04:17:00
2009-01-19	04:18:00
2009-01-19	04:19:00
2009-01-19	04:20:00
2009-01-19	04:21:00
2009-01-19	04:22:00
2009-01-19	04:23:00
2009-01-19	04:24:00
2009-01-19	04:25:00
2009-01-19	04:26:00
2009-01-19	04:27:00
2009-01-19	04:28:00
2009-01-19	04:29:00
2009-01-19	04:30:00
2009-01-19	04:31:00
2009-01-19	04:32:00
2009-01-19	04:33:00
2009-01-19	04:34:00
2009-01-19	04:35:00
2009-01-19	04:36:00
2009-01-19	04:37:00
2009-01-19	04:38:00
2009-01-19	04:39:00
2009-01-19	04:40:00
2009-01-19	04:41:00
2009-01-19	04:42:00
2009-01-19	04:43:00
2009-01-19	04:44:00
2009-01-19	04:45:00
2009-01-19	04:46:00
2009-01-19	04:47:00
2009-01-19	04:48:00
2009-01-19	04:49:00
2009-01-19	04:50:00
2009-01-19	04:51:00
2009-01-19	04:52:00
2009-01-19	04:53:00
2009-01-19	04:54:00
2009-01-19	04:55:00
2009-01-19	04:56:00
2009-01-19	04:57:00
2009-01-19	04:58:00
2009-01-19	04:59:00
2009-01-19	05:00:00
2009-01-19	05:01:00
2009-01-19	05:02:00
2009-01-19	05:03:00
2009-01-19	05:04:00
2009-01-19	05:05:00
2009-01-19	05:06:00
2009-01-19	05:07:00
2009-01-19	05:08:00
2009-01-19	05:09:00
2009-01-19	05:10:00
2009-01-19	05:11:00
2009-01-19	05:12:00
2009-01-19	05:13:00
2009-01-19	05:14:00
2009-01-19	05:15:00
2009-01-19	05:16:00
2009-01-19	05:17:00
2009-01-19	05:18:00
2009-01-19	05:19:00
2009-01-19	05:20:00
2009-01-19	05:21:00
2009-01-19	05:22:00
2009-01-19	05:23:00
2009-01-19	05:24:00
2009-01-19	05:25:00
2009-01-19	05:26:00
2009-01-19	05:27:00
2009-01-19	05:28:00
2009-01-19	05:29:00
2009-01-19	05:30:00
2009-01-19	05:31:00
2009-01-19	05:32:00
2009-01-19	05:33:00
2009-01-19	05:34:00
2009-01-19	05:35:00
2009-01-19	05:36:00
2009-01-19	05:37:00
2009-01-19	05:38:00
2009-01-19	05:39:00
2009-01-19	05:40:00
2009-01-19	05:41:00
2009-01-19	05:42:00
2009-01-19	05:43:00
2009-01-19	05:44:00
2009-01-19	05:45:00
2009-01-19	05:46:00
2009-01-19	05:47:00
2009-01-19	05:48:00
2009-01-19	05:49:00
2009-01-19	05:50:00
2009-01-19	05:51:00
2009-01-19	05:52:00
2009-01-19	05:53:00
2009-01-19	05:54:00
2009-01-19	05:55:00
2009-01-19	05:56:00
2009-01-19	05:57:00
2009-01-19	05:58:00
2009-01-19	05:59:00
2009-01-19	06:00:00
2009-01-19	06:01:00
2009-01-19	06:02:00
2009-01-19	06:03:00
2009-01-19	06:04:00
2009-01-19	06:05:00
2009-01-19	06:06:00
2009-01-19	06:07:00
2009-01-19	06:08:00
2009-01-19	06:09:00
2009-01-19	06:10:00
2009-01-19	06:11:00
2009-01-19	06:12:00
2009-01-19	06:13:00
2009-01-19	06:14:00
2009-01-19	06:15:00
2009-01-19	06:16:00
2009-01-19	06:17:00
2009-01-19	06:18:00
2009-01-19	06:19:00
2009-01-19	06:20:00
2009-01-19	06:21:00
2009-01-19	06:22:00
2009-01-19	06:23:00
2009-01-19	06:24:00
2009-01-19	06:25:00
2009-01-19	06:26:00
2009-01-19	06:27:00
2009-01-19	06:28:00
2009-01-19	06:29:00
2009-01-19	06:30:00
2009-01-19	06:31:00
2009-01-19	06:32:00
2009-01-19	06:33:00
2009-01-19	06:34:00
2009-01-19	06:35:00
2009-01-19	06:36:00
2009-01-19	06:37:00
2009-01-19	06:38:00
2009-01-19	06:39:00
2009-01-19	06:40:00
2009-01-19	06:41:00
2009-01-19	06:42:00
2009-01-19	06:43:00
2009-01-19	06:44:00
2009-01-19	06:45:00
2009-01-19	06:46:00
2009-01-19	06:47:00
2009-01-19	06:48:00
2009-01-19	06:49:00
2009-01-19	06:50:00
2009-01-19	06:51:00
2009-01-19	06:52:00
2009-01-19	06:53:00
2009-01-19	06:54:00
2009-01-19	06:55:00
2009-01-19	06:56:00
2009-01-19	06:57:00
2009-01-19	06:58:00
2009-01-19	06:59:00
2009-01-19	07:00:00
2009-01-19	07:01:00
2009-01-19	07:02:00
2009-01-19	07:03:00
2009-01-19	07:04:00
2009-01-19	07:05:00
2009-01-19	07:06:00
2009-01-19	07:07:00
2009-01-19	07:08:00
2009-01-19	07:09:00
2009-01-19	07:10:00
2009-01-19	07:11:00
2009-01-19	07:12:00
2009-01-19	07:13:00
2009-01-19	07:14:00
2009-01-19	07:15:00
2009-01-19	07:16:00
2009-01-19	07:17:00
2009-01-19	07:18:00
2009-01-19	07:19:00
2009-01-19	07:20:00
2009-01-19	07:21:00
2009-01-19	07:22:00
2009-01-19	07:23:00
2009-01-19	07:24:00
2009-01-19	07:25:00
2009-01-19	07:26:00
2009-01-19	07:27:00
2009-01-19	07:28:00
2009-01-19	07:29:00
2009-01-19	07:30:00
2009-01-19	07:31:00
2009-01-19	07:32:00
2009-01-19	07:33:00
2009-01-19	07:34:00
2009-01-19	07:35:00
2009-01-19	07:36:00
2009-01-19	07:37:00
2009-01-19	07:38:00
2009-01-19	07:39:00
2009-01-19	07:40:00
2009-01-19	07:41:00
2009-01-19	07:42:00
2009-01-19	07:43:00
2009-01-19	07:44:00
2009-01-19	07:45:00
2009-01-19	07:46:00
2009-01-19	07:47:00
2009-01-19	07:48:00
2009-01-19	07:49:00
2009-01-19	07:50:00
2009-01-19	07:51:00
2009-01-19	07:52:00
2009-01-19	07:53:00
2009-01-19	07:54:00
2009-01-19	07:55:00
2009-01-19	07:56:00
2009-01-19	07:57:00
2009-01-19	07:58:00
2009-01-19	07:59:00
2009-01-19	08:00:00
2009-01-19	08:01:00
2009-01-19	08:02:00
2009-01-19	08:03:00
2009-01-19	08:04:00
2009-01-19	08:05:00
2009-01-19	08:06:00
2009-01-19	08:07:00
2009-01-19	08:08:00
2009-01-19	08:09:00
2009-01-19	08:10:00
2009-01-19	08:11:00
2009-01-19	08:12:00
2009-01-19	08:13:00
2009-01-19	08:14:00
2009-01-19	08:15:00
2009-01-19	08:16:00
2009-01-19	08:17:00
2009-01-19	08:18:00
2009-01-19	08:19:00
2009-01-19	08:20:00
2009-01-19	08:21:00
2009-01-19	08:22:00
2009-01-19	08:23:00
2009-01-19	08:24:00
2009-01-19	08:25:00
2009-01-19	08:26:00
2009-01-19	08:27:00
2009-01-19	08:28:00
2009-01-19	08:29:00
2009-01-19	08:30:00
2009-01-19	08:31:00
2009-01-19	08:32:00
2009-01-19	08:33:00
2009-01-19	08:34:00
2009-01-19	08:35:00
2009-01-19	08:36:00
2009-01-19	08:37:00
2009-01-19	08:38:00
2009-01-19	08:39:00
2009-01-19	08:40:00
2009-01-19	08:41:00
2009-01-19	08:42:00
2009-01-19	08:43:00
2009-01-19	08:44:00
2009-01-19	08:45:00
2009-01-19	08:46:00
2009-01-19	08:47:00
2009-01-19	08:48:00
2009-01-19	08:49:00
2009-01-19	08:50:00
2009-01-19	08:51:00
2009-01-19	08:52:00
2009-01-19	08:53:00
2009-01-19	08:54:00
2009-01-19	08:55:00
2009-01-19	08:56:00
2009-01-19	08:57:00
2009-01-19	08:58:00
2009-01-19	08:59:00
2009-01-19	09:00:00
2009-01-19	09:01:00
2009-01-19	09:02:00
2009-01-19	09:03:00
2009-01-19	09:04:00
2009-01-19	09:05:00
2009-01-19	09:06:00
2009-01-19	09:07:00
2009-01-19	09:08:00
2009-01-19	09:09:00
2009-01-19	09:10:00
2009-01-19	09:11:00
2009-01-19	09:12:00
2009-01-19	09:13:00
2009-01-19	09:14:00
2009-01-19	09:15:00
2009-01-19	09:16:00
2009-01-19	09:17:00
2009-01-19	09:18:00
2009-01-19	09:19:00
2009-01-19	09:20:00
2009-01-19	09:21:00
2009-01-19	09:22:00
2009-01-19	09:23:00
2009-01-19	09:24:00
2009-01-19	09:25:00
2009-01-19	09:26:00
2009-01-19	09:27:00
2009-01-19	09:28:00
2009-01-19	09:29:00
2009-01-19	09:30:00
2009-01-19	09:31:00
2009-01-19	09:32:00
2009-01-19	09:33:00
2009-01-19	09:34:00
2009-01-19	09:35:00
2009-01-19	09:36:00
2009-01-19	09:37:00
2009-01-19	09:38:00
2009-01-19	09:39:00
2009-01-19	09:40:00
2009-01-19	09:41:00
2009-01-19	09:42:00
2009-01-19	09:43:00
2009-01-19	09:44:00
2009-01-19	09:45:00
2009-01-19	09:46:00
2009-01-19	09:47:00
2009-01-19	09:48:00
2009-01-19	09:49:00
2009-01-19	09:50:00
2009-01-19	09:51:00
2009-01-19	09:52:00
2009-01-19	09:53:00
2009-01-19	09:54:00
2009-01-19	09:55:00
2009-01-19	09:56:00
2009-01-19	09:57:00
2009-01-19	09:58:00
2009-01-19	09:59:00
2009-01-19	10:00:00
2009-01-19	10:01:00
2009-01-19	10:02:00
2009-01-19	10:03:00
2009-01-19	10:04:00
2009-01-19	10:05:00
2009-01-19	10:06:00
2009-01-19	10:07:00
2009-01-19	10:08:00
2009-01-19	10:09:00
2009-01-19	10:10:00
2009-01-19	10:11:00
2009-01-19	10:12:00
2009-01-19	10:13:00
2009-01-19	10:14:00
2009-01-19	10:15:00
2009-01-19	10:16:00
2009-01-19	10:17:00
2009-01-19	10:18:00
2009-01-19	10:19:00
2009-01-19	10:20:00
2009-01-19	10:21:00
2009-01-19	10:22:00
2009-01-19	10:23:00
2009-01-19	10:24:00
2009-01-19	10:25:00
2009-01-19	10:26:00
2009-01-19	10:27:00
2009-01-19	10:28:00
2009-01-19	10:29:00
2009-01-19	10:30:00
2009-01-19	10:31:00
2009-01-19	10:32:00
2009-01-19	10:33:00
2009-01-19	10:34:00
2009-01-19	10:35:00
2009-01-19	10:36:00
2009-01-19	10:37:00
2009-01-19	10:38:00
2009-01-19	10:39:00
2009-01-19	10:40:00
2009-01-19	10:41:00
2009-01-19	10:42:00
2009-01-19	10:43:00
2009-01-19	10:44:00
2009-01-19	10:45:00
2009-01-19	10:46:00
2009-01-19	10:47:00
2009-01-19	10:48:00
2009-01-19	10:49:00
2009-01-19	10:50:00
2009-01-19	10:51:00
2009-01-19	10:52:00
2009-01-19	10:53:00
2009-01-19	10:54:00
2009-01-19	10:55:00
2009-01-19	10:56:00
2009-01-19	10:57:00
2009-01-19	10:58:00
2009-01-19	10:59:00
2009-01-19	11:00:00
2009-01-19	11:01:00
2009-01-19	11:02:00
2009-01-19	11:03:00
2009-01-19	11:04:00
2009-01-19	11:05:00
2009-01-19	11:06:00
2009-01-19	11:07:00
2009-01-19	11:08:00
2009-01-19	11:09:00
2009-01-19	11:10:00
2009-01-19	11:11:00
2009-01-19	11:12:00
2009-01-19	11:13:00
2009-01-19	11:14:00
2009-01-19	11:15:00
2009-01-19	11:16:00
2009-01-19	11:17:00
2009-01-19	11:18:00
2009-01-19	11:19:00
2009-01-19	11:20:00
2009-01-19	11:21:00
2009-01-19	11:22:00
2009-01-19	11:23:00
2009-01-19	11:24:00
2009-01-19	11:25:00
2009-01-19	11:26:00
2009-01-19	11:27:00
2009-01-19	11:28:00
2009-01-19	11:29:00
2009-01-19	11:30:00
2009-01-19	11:31:00
2009-01-19	11:32:00
2009-01-19	11:33:00
2009-01-19	11:34:00
2009-01-19	11:35:00
2009-01-19	11:36:00
2009-01-19	11:37:00
2009-01-19	11:38:00
2009-01-19	11:39:00
2009-01-19	11:40:00
2009-01-19	11:41:00
2009-01-19	11:42:00
2009-01-19	11:43:00
2009-01-19	11:44:00
2009-01-19	11:45:00
2009-01-19	11:46:00
2009-01-19	11:47:00
2009-01-19	11:48:00
2009-01-19	11:49:00
2009-01-19	11:50:00
2009-01-19	11:51:00
2009-01-19	11:52:00
2009-01-19	11:53:00
2009-01-19	11:54:00
2009-01-19	11:55:00
2009-01-19	11:56:00
2009-01-19	11:57:00
2009-01-19	11:58:00
2009-01-19	11:59:00
2009-01-19	12:00:00
2009-01-19	12:01:00
2009-01-19	12:02:00
2009-01-19	12:03:00
2009-01-19	12:04:00
2009-01-19	12:05:00
2009-01-19	12:06:00
2009-01-19	12:07:00
2009-01-19	12:08:00
2009-01-19	12:09:00
2009-01-19	12:10:00
2009-01-19	12:11:00
2009-01-19	12:12:00
2009-01-19	12:13:00
2009-01-19	12:14:00
2009-01-19	12:15:00
2009-01-19	12:16:00
2009-01-19	12:17:00
2009-01-19	12:18:00
2009-01-19	12:19:00
2009-01-19	12:20:00
2009-01-19	12:21:00
2009-01-19	12:22:00
2009-01-19	12:23:00
2009-01-19	12:24:00
2009-01-19	12:25:00
2009-01-19	12:26:00
2009-01-19	12:27:00
2009-01-19	12:28:00
2009-01-19	12:29:00
2009-01-19	12:30:00
2009-01-19	12:31:00
2009-01-19	12:32:00
2009-01-19	12:33:00
2009-01-19	12:34:00
2009-01-19	12:35:00
2009-01-19	12:36:00
2009-01-19	12:37:00
2009-01-19	12:38:00
2009-01-19	12:39:00
2009-01-19	12:40:00
2009-01-19	12:41:00
2009-01-19	12:42:00
2009-01-19	12:43:00
2009-01-19	12:44:00
2009-01-19	12:45:00
2009-01-19	12:46:00
2009-01-19	12:47:00
2009-01-19	12:48:00
2009-01-19	12:49:00
2009-01-19	12:50:00
2009-01-19	12:51:00
2009-01-19	12:52:00
2009-01-19	12:53:00
2009-01-19	12:54:00
2009-01-19	12:55:00
2009-01-19	12:56:00
2009-01-19	12:57:00
2009-01-19	12:58:00
2009-01-19	12:59:00
2009-01-19	13:00:00
2009-01-19	13:01:00
2009-01-19	13:02:00
2009-01-19	13:03:00
2009-01-19	13:04:00
2009-01-19	13:05:00
2009-01-19	13:06:00
2009-01-19	13:07:00
2009-01-19	13:08:00
2009-01-19	13:09:00
2009-01-19	13:10:00
2009-01-19	13:11:00
2009-01-19	13:12:00
2009-01-19	13:13:00
2009-01-19	13:14:00
2009-01-19	13:15:00
2009-01-19	13:16:00
2009-01-19	13:17:00
2009-01-19	13:18:00
2009-01-19	13:19:00
2009-01-19	13:20:00
2009-01-19	13:21:00
2009-01-19	13:22:00
2009-01-19	13:23:00
2009-01-19	13:24:00
2009-01-19	13:25:00
2009-01-19	13:26:00
2009-01-19	13:27:00
2009-01-19	13:28:00
2009-01-19	13:29:00
2009-01-19	13:30:00
2009-01-19	13:31:00
2009-01-19	13:32:00
2009-01-19	13:33:00
2009-01-19	13:34:00
2009-01-19	13:35:00
2009-01-19	13:36:00
2009-01-19	13:37:00
2009-01-19	13:38:00
2009-01-19	13:39:00
2009-01-19	13:40:00
2009-01-19	13:41:00
2009-01-19	13:42:00
2009-01-19	13:43:00
2009-01-19	13:44:00
2009-01-19	13:45:00
2009-01-19	13:46:00
2009-01-19	13:47:00
2009-01-19	13:48:00
2009-01-19	13:49:00
2009-01-19	13:50:00
2009-01-19	13:51:00
2009-01-19	13:52:00
2009-01-19	13:53:00
2009-01-19	13:54:00
2009-01-19	13:55:00
2009-01-19	13:56:00
2009-01-19	13:57:00
2009-01-19	13:58:00
2009-01-19	13:59:00
2009-01-19	14:00:00
2009-01-19	14:01:00
2009-01-19	14:02:00
2009-01-19	14:03:00
2009-01-19	14:04:00
2009-01-19	14:05:00
2009-01-19	14:06:00
2009-01-19	14:07:00
2009-01-19	14:08:00
2009-01-19	14:09:00
2009-01-19	14:10:00
2009-01-19	14:11:00
2009-01-19	14:12:00
2009-01-19	14:13:00
2009-01-19	14:14:00
2009-01-19	14:15:00
2009-01-19	14:16:00
2009-01-19	14:17:00
2009-01-19	14:18:00
2009-01-19	14:19:00
2009-01-19	14:20:00
2009-01-19	14:21:00
2009-01-19	14:22:00
2009-01-19	14:23:00
2009-01-19	14:24:00
2009-01-19	14:25:00
2009-01-19	14:26:00
2009-01-19	14:27:00
2009-01-19	14:28:00
2009-01-19	14:29:00
2009-01-19	14:30:00
2009-01-19	14:31:00
2009-01-19	14:32:00
2009-01-19	14:33:00
2009-01-19	14:34:00
2009-01-19	14:35:00
2009-01-19	14:36:00
2009-01-19	14:37:00
2009-01-19	14:38:00
2009-01-19	14:39:00
2009-01-19	14:40:00
2009-01-19	14:41:00
2009-01-19	14:42:00
2009-01-19	14:43:00
2009-01-19	14:44:00
2009-01-19	14:45:00
2009-01-19	14:46:00
2009-01-19	14:47:00
2009-01-19	14:48:00
2009-01-19	14:49:00
2009-01-19	14:50:00
2009-01-19	14:51:00
2009-01-19	14:52:00
2009-01-19	14:53:00
2009-01-19	14:54:00
2009-01-19	14:55:00
2009-01-19	14:56:00
2009-01-19	14:57:00
2009-01-19	14:58:00
2009-01-19	14:59:00
2009-01-19	15:00:00
2009-01-19	15:01:00
2009-01-19	15:02:00
2009-01-19	15:03:00
2009-01-19	15:04:00
2009-01-19	15:05:00
2009-01-19	15:06:00
2009-01-19	15:07:00
2009-01-19	15:08:00
2009-01-19	15:09:00
2009-01-19	15:10:00
2009-01-19	15:11:00
2009-01-19	15:12:00
2009-01-19	15:13:00
2009-01-19	15:14:00
2009-01-19	15:15:00
2009-01-19	15:16:00
2009-01-19	15:17:00
2009-01-19	15:18:00
2009-01-19	15:19:00
2009-01-19	15:20:00
2009-01-19	15:21:00
2009-01-19	15:22:00
2009-01-19	15:23:00
2009-01-19	15:24:00
2009-01-19	15:25:00
2009-01-19	15:26:00
2009-01-19	15:27:00
2009-01-19	15:28:00
2009-01-19	15:29:00
2009-01-19	15:30:00
2009-01-19	15:31:00
2009-01-19	15:32:00
2009-01-19	15:33:00
2009-01-19	15:34:00
2009-01-19	15:35:00
2009-01-19	15:36:00
2009-01-19	15:37:00
2009-01-19	15:38:00
2009-01-19	15:39:00
2009-01-19	15:40:00
2009-01-19	15:41:00
2009-01-19	15:42:00
2009-01-19	15:43:00
2009-01-19	15:44:00
2009-01-19	15:45:00
2009-01-19	15:46:00
2009-01-19	15:47:00
2009-01-19	15:48:00
2009-01-19	15:49:00
2009-01-19	15:50:00
2009-01-19	15:51:00
2009-01-19	15:52:00
2009-01-19	15:53:00
2009-01-19	15:54:00
2009-01-19	15:55:00
2009-01-19	15:56:00
2009-01-19	15:57:00
2009-01-19	15:58:00
2009-01-19	15:59:00
2009-01-19	16:00:00
2009-01-19	16:01:00
2009-01-19	16:02:00
2009-01-19	16:03:00
2009-01-19	16:04:00
2009-01-19	16:05:00
2009-01-19	16:06:00
2009-01-19	16:07:00
2009-01-19	16:08:00
2009-01-19	16:09:00
2009-01-19	16:10:00
2009-01-19	16:11:00
2009-01-19	16:12:00
2009-01-19	16:13:00
2009-01-19	16:14:00
2009-01-19	16:15:00
2009-01-19	16:16:00
2009-01-19	16:17:00
2009-01-19	16:18:00
2009-01-19	16:19:00
2009-01-19	16:20:00
2009-01-19	16:21:00
2009-01-19	16:22:00
2009-01-19	16:23:00
2009-01-19	16:24:00
2009-01-19	16:25:00
2009-01-19	16:26:00
2009-01-19	16:27:00
2009-01-19	16:28:00
2009-01-19	16:29:00
2009-01-19	16:30:00
2009-01-19	16:31:00
2009-01-19	16:32:00
2009-01-19	16:33:00
2009-01-19	16:34:00
2009-01-19	16:35:00
2009-01-19	16:36:00
2009-01-19	16:37:00
2009-01-19	16:38:00
2009-01-19	16:39:00
2009-01-19	16:40:00
2009-01-19	16:41:00
2009-01-19	16:42:00
2009-01-19	16:43:00
2009-01-19	16:44:00
2009-01-19	16:45:00
2009-01-19	16:46:00
2009-01-19	16:47:00
2009-01-19	16:48:00
2009-01-19	16:49:00
2009-01-19	16:50:00
2009-01-19	16:51:00
2009-01-19	16:52:00
2009-01-19	16:53:00
2009-01-19	16:54:00
2009-01-19	16:55:00
2009-01-19	16:56:00
2009-01-19	16:57:00
2009-01-19	16:58:00
2009-01-19	16:59:00
2009-01-19	17:00:00
2009-01-19	17:01:00
2009-01-19	17:02:00
2009-01-19	17:03:00
2009-01-19	17:04:00
2009-01-19	17:05:00
2009-01-19	17:06:00
2009-01-19	17:07:00
2009-01-19	17:08:00
2009-01-19	17:09:00
2009-01-19	17:10:00
2009-01-19	17:11:00
2009-01-19	17:12:00
2009-01-19	17:13:00
2009-01-19	17:14:00
2009-01-19	17:15:00
2009-01-19	17:16:00
2009-01-19	17:17:00
2009-01-19	17:18:00
2009-01-19	17:19:00
2009-01-19	17:20:00
2009-01-19	17:21:00
2009-01-19	17:22:00
2009-01-19	17:23:00
2009-01-19	17:24:00
2009-01-19	17:25:00
2009-01-19	17:26:00
2009-01-19	17:27:00
2009-01-19	17:28:00
2009-01-19	17:29:00
2009-01-19	17:30:00
2009-01-19	17:31:00
2009-01-19	17:32:00
2009-01-19	17:33:00
2009-01-19	17:34:00
2009-01-19	17:35:00
2009-01-19	17:36:00
2009-01-19	17:37:00
2009-01-19	17:38:00
2009-01-19	17:39:00
2009-01-19	17:40:00
2009-01-19	17:41:00
2009-01-19	17:42:00
2009-01-19	17:43:00
2009-01-19	17:44:00
2009-01-19	17:45:00
2009-01-19	17:46:00
2009-01-19	17:47:00
2009-01-19	17:48:00
2009-01-19	17:49:00
2009-01-19	17:50:00
2009-01-19	17:51:00
2009-01-19	17:52:00
2009-01-19	17:53:00
2009-01-19	17:54:00
2009-01-19	17:55:00
2009-01-19	17:56:00
2009-01-19	17:57:00
2009-01-19	17:58:00
2009-01-19	17:59:00
2009-01-19	18:00:00
2009-01-19	18:01:00
2009-01-19	18:02:00
2009-01-19	18:03:00
2009-01-19	18:04:00
2009-01-19	18:05:00
2009-01-19	18:06:00
2009-01-19	18:07:00
2009-01-19	18:08:00
2009-01-19	18:09:00
2009-01-19	18:10:00
2009-01-19	18:11:00
2009-01-19	18:12:00
2009-01-19	18:13:00
2009-01-19	18:14:00
2009-01-19	18:15:00
2009-01-19	18:16:00
2009-01-19	18:17:00
2009-01-19	18:18:00
2009-01-19	18:19:00
2009-01-19	18:20:00
2009-01-19	18:21:00
2009-01-19	18:22:00
2009-01-19	18:23:00
2009-01-19	18:24:00
2009-01-19	18:25:00
2009-01-19	18:26:00
2009-01-19	18:27:00
2009-01-19	18:28:00
2009-01-19	18:29:00
2009-01-19	18:30:00
2009-01-19	18:31:00
2009-01-19	18:32:00
2009-01-19	18:33:00
2009-01-19	18:34:00
2009-01-19	18:35:00
2009-01-19	18:36:00
2009-01-19	18:37:00
2009-01-19	18:38:00
2009-01-19	18:39:00
2009-01-19	18:40:00
2009-01-19	18:41:00
2009-01-19	18:42:00
2009-01-19	18:43:00
2009-01-19	18:44:00
2009-01-19	18:45:00
2009-01-19	18:46:00
2009-01-19	18:47:00
2009-01-19	18:48:00
2009-01-19	18:49:00
2009-01-19	18:50:00
2009-01-19	18:51:00
2009-01-19	18:52:00
2009-01-19	18:53:00
2009-01-19	18:54:00
2009-01-19	18:55:00
2009-01-19	18:56:00
2009-01-19	18:57:00
2009-01-19	18:58:00
2009-01-19	18:59:00
2009-01-19	19:00:00
2009-01-19	19:01:00
2009-01-19	19:02:00
2009-01-19	19:03:00
2009-01-19	19:04:00
2009-01-19	19:05:00
2009-01-19	19:06:00
2009-01-19	19:07:00
2009-01-19	19:08:00
2009-01-19	19:09:00
2009-01-19	19:10:00
2009-01-19	19:11:00
2009-01-19	19:12:00
2009-01-19	19:13:00
2009-01-19	19:14:00
2009-01-19	19:15:00
2009-01-19	19:16:00
2009-01-19	19:17:00
2009-01-19	19:18:00
2009-01-19	19:19:00
2009-01-19	19:20:00
2009-01-19	19:21:00
2009-01-19	19:22:00
2009-01-19	19:23:00
2009-01-19	19:24:00
2009-01-19	19:25:00
2009-01-19	19:26:00
2009-01-19	19:27:00
2009-01-19	19:28:00
2009-01-19	19:29:00
2009-01-19	19:30:00
2009-01-19	19:31:00
2009-01-19	19:32:00
2009-01-19	19:33:00
2009-01-19	19:34:00
2009-01-19	19:35:00
2009-01-19	19:36:00
2009-01-19	19:37:00
2009-01-19	19:38:00
2009-01-19	19:39:00
2009-01-19	19:40:00
2009-01-19	19:41:00
2009-01-19	19:42:00
2009-01-19	19:43:00
2009-01-19	19:44:00
2009-01-19	19:45:00
2009-01-19	19:46:00
2009-01-19	19:47:00
2009-01-19	19:48:00
2009-01-19	19:49:00
2009-01-19	19:50:00
2009-01-19	19:51:00
2009-01-19	19:52:00
2009-01-19	19:53:00
2009-01-19	19:54:00
2009-01-19	19:55:00
2009-01-19	19:56:00
2009-01-19	19:57:00
2009-01-19	19:58:00
2009-01-19	19:59:00
2009-01-19	20:00:00
2009-01-19	20:01:00
2009-01-19	20:02:00
2009-01-19	20:03:00
2009-01-19	20:04:00
2009-01-19	20:05:00
2009-01-19	20:06:00
2009-01-19	20:07:00
2009-01-19	20:08:00
2009-01-19	20:09:00
2009-01-19	20:10:00
2009-01-19	20:11:00
2009-01-19	20:12:00
2009-01-19	20:13:00
2009-01-19	20:14:00
2009-01-19	20:15:00
2009-01-19	20:16:00
2009-01-19	20:17:00
2009-01-19	20:18:00
2009-01-19	20:19:00
2009-01-19	20:20:00
2009-01-19	20:21:00
2009-01-19	20:22:00
2009-01-19	20:23:00
2009-01-19	20:24:00
2009-01-19	20:25:00
2009-01-19	20:26:00
2009-01-19	20:27:00
2009-01-19	20:28:00
2009-01-19	20:29:00
2009-01-19	20:30:00
2009-01-19	20:31:00
2009-01-19	20:32:00
2009-01-19	20:33:00
2009-01-19	20:34:00
2009-01-19	20:35:00
2009-01-19	20:36:00
2009-01-19	20:37:00
2009-01-19	20:38:00
2009-01-19	20:39:00
2009-01-19	20:40:00
2009-01-19	20:41:00
2009-01-19	20:42:00
2009-01-19	20:43:00
2009-01-19	20:44:00
2009-01-19	20:45:00
2009-01-19	20:46:00
2009-01-19	20:47:00
2009-01-19	20:48:00
2009-01-19	20:49:00
2009-01-19	20:50:00
2009-01-19	20:51:00
2009-01-19	20:52:00
2009-01-19	20:53:00
2009-01-19	20:54:00
2009-01-19	20:55:00
2009-01-19	20:56:00
2009-01-19	20:57:00
2009-01-19	20:58:00
2009-01-19	20:59:00
2009-01-19	21:00:00
2009-01-19	21:01:00
2009-01-19	21:02:00
2009-01-19	21:03:00
2009-01-19	21:04:00
2009-01-19	21:05:00
2009-01-19	21:06:00
2009-01-19	21:07:00
2009-01-19	21:08:00
2009-01-19	21:09:00
2009-01-19	21:10:00
2009-01-19	21:11:00
2009-01-19	21:12:00
2009-01-19	21:13:00
2009-01-19	21:14:00
2009-01-19	21:15:00
2009-01-19	21:16:00
2009-01-19	21:17:00
2009-01-19	21:18:00
2009-01-19	21:19:00
2009-01-19	21:20:00
2009-01-19	21:21:00
2009-01-19	21:22:00
2009-01-19	21:23:00
2009-01-19	21:24:00
2009-01-19	21:25:00
2009-01-19	21:26:00
2009-01-19	21:27:00
2009-01-19	21:28:00
2009-01-19	21:29:00
2009-01-19	21:30:00
2009-01-19	21:31:00
2009-01-19	21:32:00
2009-01-19	21:33:00
2009-01-19	21:34:00
2009-01-19	21:35:00
2009-01-19	21:36:00
2009-01-19	21:37:00
2009-01-19	21:38:00
2009-01-19	21:39:00
2009-01-19	21:40:00
2009-01-19	21:41:00
2009-01-19	21:42:00
2009-01-19	21:43:00
2009-01-19	21:44:00
2009-01-19	21:45:00
2009-01-19	21:46:00
2009-01-19	21:47:00
2009-01-19	21:48:00
2009-01-19	21:49:00
2009-01-19	21:50:00
2009-01-19	21:51:00
2009-01-19	21:52:00
2009-01-19	21:53:00
2009-01-19	21:54:00
2009-01-19	21:55:00
2009-01-19	21:56:00
2009-01-19	21:57:00
2009-01-19	21:58:00
2009-01-19	21:59:00
2009-01-19	22:00:00
2009-01-19	22:01:00
2009-01-19	22:02:00
2009-01-19	22:03:00
2009-01-19	22:04:00
2009-01-19	22:05:00
2009-01-19	22:06:00
2009-01-19	22:07:00
2009-01-19	22:08:00
2009-01-19	22:09:00
2009-01-19	22:10:00
2009-01-19	22:11:00
2009-01-19	22:12:00
2009-01-19	22:13:00
2009-01-19	22:14:00
2009-01-19	22:15:00
2009-01-19	22:16:00
2009-01-19	22:17:00
2009-01-19	22:18:00
2009-01-19	22:19:00
2009-01-19	22:20:00
2009-01-19	22:21:00
2009-01-19	22:22:00
2009-01-19	22:23:00
2009-01-19	22:24:00
2009-01-19	22:25:00
2009-01-19	22:26:00
2009-01-19	22:27:00
2009-01-19	22:28:00
2009-01-19	22:29:00
2009-01-19	22:30:00
2009-01-19	22:31:00
2009-01-19	22:32:00
2009-01-19	22:33:00
2009-01-19	22:34:00
2009-01-19	22:35:00
2009-01-19	22:36:00
2009-01-19	22:37:00
2009-01-19	22:38:00
2009-01-19	22:39:00
2009-01-19	22:40:00
2009-01-19	22:41:00
2009-01-19	22:42:00
2009-01-19	22:43:00
2009-01-19	22:44:00
2009-01-19	22:45:00
2009-01-19	22:46:00
2009-01-19	22:47:00
2009-01-19	22:48:00
2009-01-19	22:49:00
2009-01-19	22:50:00
2009-01-19	22:51:00
2009-01-19	22:52:00
2009-01-19	22:53:00
2009-01-19	22:54:00
2009-01-19	22:55:00
2009-01-19	22:56:00
2009-01-19	22:57:00
2009-01-19	22:58:00
2009-01-19	22:59:00
2009-01-19	23:00:00
2009-01-19	23:01:00
2009-01-19	23:02:00
2009-01-19	23:03:00
2009-01-19	23:04:00
2009-01-19	23:05:00
2009-01-19	23:06:00
2009-01-19	23:07:00
2009-01-19	23:08:00
2009-01-19	23:09:00
2009-01-19	23:10:00
2009-01-19	23:11:00
2009-01-19	23:12:00
2009-01-19	23:13:00
2009-01-19	23:14:00
2009-01-19	23:15:00
2009-01-19	23:16:00
2009-01-19	23:17:00
2009-01-19	23:18:00
2009-01-19	23:19:00
2009-01-19	23:20:00
2009-01-19	23:21:00
2009-01-19	23:22:00
2009-01-19	23:23:00
2009-01-19	23:24:00
2009-01-19	23:25:00
2009-01-19	23:26:00
2009-01-19	23:27:00
2009-01-19	23:28:00
2009-01-19	23:29:00
2009-01-19	23:30:00
2009-01-19	23:31:00
2009-01-19	23:32:00
2009-01-19	23:33:00
2009-01-19	23:34:00
2009-01-19	23:35:00
2009-01-19	23:36:00
2009-01-19	23:37:00
2009-01-19	23:38:00
2009-01-19	23:39:00
2009-01-19	23:40:00
2009-01-19	23:41:00
2009-01-19	23:42:00
2009-01-19	23:43:00
2009-01-19	23:44:00
2009-01-19	23:45:00
2009-01-19	23:46:00
2009-01-19	23:47:00
2009-01-19	23:48:00
2009-01-19	23:49:00
2009-01-19	23:50:00
2009-01-19	23:51:00
2009-01-19	23:52:00
2009-01-19	23:53:00
2009-01-19	23:54:00
2009-01-19	23:55:00
2009-01-19	23:56:00
2009-01-19	23:57:00
2009-01-19	23:58:00
2009-01-19	23:59:00
2009-01-20	00:00:00
2009-01-20	00:01:00
2009-01-20	00:02:00
2009-01-20	00:03:00
2009-01-20	00:04:00
2009-01-20	00:05:00
2009-01-20	00:06:00
2009-01-20	00:07:00
2009-01-20	00:08:00
2009-01-20	00:09:00
2009-01-20	00:10:00
2009-01-20	00:11:00
2009-01-20	00:12:00
2009-01-20	00:13:00
2009-01-20	00:14:00
2009-01-20	00:15:00
2009-01-20	00:16:00
2009-01-20	00:17:00
2009-01-20	00:18:00
2009-01-20	00:19:00
2009-01-20	00:20:00
2009-01-20	00:21:00
2009-01-20	00:22:00
2009-01-20	00:23:00
2009-01-20	00:24:00
2009-01-20	00:25:00
2009-01-20	00:26:00
2009-01-20	00:27:00
2009-01-20	00:28:00
2009-01-20	00:29:00
2009-01-20	00:30:00
2009-01-20	00:31:00
2009-01-20	00:32:00
2009-01-20	00:33:00
2009-01-20	00:34:00
2009-01-20	00:35:00
2009-01-20	00:36:00
2009-01-20	00:37:00
2009-01-20	00:38:00
2009-01-20	00:39:00
2009-01-20	00:40:00
2009-01-20	00:41:00
2009-01-20	00:42:00
2009-01-20	00:43:00
2009-01-20	00:44:00
2009-01-20	00:45:00
2009-01-20	00:46:00
2009-01-20	00:47:00
2009-01-20	00:48:00
2009-01-20	00:49:00
2009-01-20	00:50:00
2009-01-20	00:51:00
2009-01-20	00:52:00
2009-01-20	00:53:00
2009-01-20	00:54:00
2009-01-20	00:55:00
2009-01-20	00:56:00
2009-01-20	00:57:00
2009-01-20	00:58:00
2009-01-20	00:59:00
2009-01-20	01:00:00
2009-01-20	01:01:00
2009-01-20	01:02:00
2009-01-20	01:03:00
2009-01-20	01:04:00
2009-01-20	01:05:00
2009-01-20	01:06:00
2009-01-20	01:07:00
2009-01-20	01:08:00
2009-01-20	01:09:00
2009-01-20	01:10:00
2009-01-20	01:11:00
2009-01-20	01:12:00
2009-01-20	01:13:00
2009-01-20	01:14:00
2009-01-20	01:15:00
2009-01-20	01:16:00
2009-01-20	01:17:00
2009-01-20	01:18:00
2009-01-20	01:19:00
2009-01-20	01:20:00
2009-01-20	01:21:00
2009-01-20	01:22:00
2009-01-20	01:23:00
2009-01-20	01:24:00
2009-01-20	01:25:00
2009-01-20	01:26:00
2009-01-20	01:27:00
2009-01-20	01:28:00
2009-01-20	01:29:00
2009-01-20	01:30:00
2009-01-20	01:31:00
2009-01-20	01:32:00
2009-01-20	01:33:00
2009-01-20	01:34:00
2009-01-20	01:35:00
2009-01-20	01:36:00
2009-01-20	01:37:00
2009-01-20	01:38:00
2009-01-20	01:39:00
2009-01-20	01:40:00
2009-01-20	01:41:00
2009-01-20	01:42:00
2009-01-20	01:43:00
2009-01-20	01:44:00
2009-01-20	01:45:00
2009-01-20	01:46:00
2009-01-20	01:47:00
2009-01-20	01:48:00
2009-01-20	01:49:00
2009-01-20	01:50:00
2009-01-20	01:51:00
2009-01-20	01:52:00
2009-01-20	01:53:00
2009-01-20	01:54:00
2009-01-20	01:55:00
2009-01-20	01:56:00
2009-01-20	01:57:00
2009-01-20	01:58:00
2009-01-20	01:59:00
2009-01-20	02:00:00
2009-01-20	02:01:00
2009-01-20	02:02:00
2009-01-20	02:03:00
2009-01-20	02:04:00
2009-01-20	02:05:00
2009-01-20	02:06:00
2009-01-20	02:07:00
2009-01-20	02:08:00
2009-01-20	02:09:00
2009-01-20	02:10:00
2009-01-20	02:11:00
2009-01-20	02:12:00
2009-01-20	02:13:00
2009-01-20	02:14:00
2009-01-20	02:15:00
2009-01-20	02:16:00
2009-01-20	02:17:00
2009-01-20	02:18:00
2009-01-20	02:19:00
2009-01-20	02:20:00
2009-01-20	02:21:00
2009-01-20	02:22:00
2009-01-20	02:23:00
2009-01-20	02:24:00
2009-01-20	02:25:00
2009-01-20	02:26:00
2009-01-20	02:27:00
2009-01-20	02:28:00
2009-01-20	02:29:00
2009-01-20	02:30:00
2009-01-20	02:31:00
2009-01-20	02:32:00
2009-01-20	02:33:00
2009-01-20	02:34:00
2009-01-20	02:35:00
2009-01-20	02:36:00
2009-01-20	02:37:00
2009-01-20	02:38:00
2009-01-20	02:39:00
2009-01-20	02:40:00
2009-01-20	02:41:00
2009-01-20	02:42:00
2009-01-20	02:43:00
2009-01-20	02:44:00
2009-01-20	02:45:00
2009-01-20	02:46:00
2009-01-20	02:47:00
2009-01-20	02:48:00
2009-01-20	02:49:00
2009-01-20	02:50:00
2009-01-20	02:51:00
2009-01-20	02:52:00
2009-01-20	02:53:00
2009-01-20	02:54:00
2009-01-20	02:55:00
2009-01-20	02:56:00
2009-01-20	02:57:00
2009-01-20	02:58:00
2009-01-20	02:59:00
2009-01-20	03:00:00
2009-01-20	03:01:00
2009-01-20	03:02:00
2009-01-20	03:03:00
2009-01-20	03:04:00
2009-01-20	03:05:00
2009-01-20	03:06:00
2009-01-20	03:07:00
2009-01-20	03:08:00
2009-01-20	03:09:00
2009-01-20	03:10:00
2009-01-20	03:11:00
2009-01-20	03:12:00
2009-01-20	03:13:00
2009-01-20	03:14:00
2009-01-20	03:15:00
2009-01-20	03:16:00
2009-01-20	03:17:00
2009-01-20	03:18:00
2009-01-20	03:19:00
2009-01-20	03:20:00
2009-01-20	03:21:00
2009-01-20	03:22:00
2009-01-20	03:23:00
2009-01-20	03:24:00
2009-01-20	03:25:00
2009-01-20	03:26:00
2009-01-20	03:27:00
2009-01-20	03:28:00
2009-01-20	03:29:00
2009-01-20	03:30:00
2009-01-20	03:31:00
2009-01-20	03:32:00
2009-01-20	03:33:00
2009-01-20	03:34:00
2009-01-20	03:35:00
2009-01-20	03:36:00
2009-01-20	03:37:00
2009-01-20	03:38:00
2009-01-20	03:39:00
2009-01-20	03:40:00
2009-01-20	03:41:00
2009-01-20	03:42:00
2009-01-20	03:43:00
2009-01-20	03:44:00
2009-01-20	03:45:00
2009-01-20	03:46:00
2009-01-20	03:47:00
2009-01-20	03:48:00
2009-01-20	03:49:00
2009-01-20	03:50:00
2009-01-20	03:51:00
2009-01-20	03:52:00
2009-01-20	03:53:00
2009-01-20	03:54:00
2009-01-20	03:55:00
2009-01-20	03:56:00
2009-01-20	03:57:00
2009-01-20	03:58:00
2009-01-20	03:59:00
2009-01-20	04:00:00
2009-01-20	04:01:00
2009-01-20	04:02:00
2009-01-20	04:03:00
2009-01-20	04:04:00
2009-01-20	04:05:00
2009-01-20	04:06:00
2009-01-20	04:07:00
2009-01-20	04:08:00
2009-01-20	04:09:00
2009-01-20	04:10:00
2009-01-20	04:11:00
2009-01-20	04:12:00
2009-01-20	04:13:00
2009-01-20	04:14:00
2009-01-20	04:15:00
2009-01-20	04:16:00
2009-01-20	04:17:00
2009-01-20	04:18:00
2009-01-20	04:19:00
2009-01-20	04:20:00
2009-01-20	04:21:00
2009-01-20	04:22:00
2009-01-20	04:23:00
2009-01-20	04:24:00
2009-01-20	04:25:00
2009-01-20	04:26:00
2009-01-20	04:27:00
2009-01-20	04:28:00
2009-01-20	04:29:00
2009-01-20	04:30:00
2009-01-20	04:31:00
2009-01-20	04:32:00
2009-01-20	04:33:00
2009-01-20	04:34:00
2009-01-20	04:35:00
2009-01-20	04:36:00
2009-01-20	04:37:00
2009-01-20	04:38:00
2009-01-20	04:39:00
2009-01-20	04:40:00
2009-01-20	04:41:00
2009-01-20	04:42:00
2009-01-20	04:43:00
2009-01-20	04:44:00
2009-01-20	04:45:00
2009-01-20	04:46:00
2009-01-20	04:47:00
2009-01-20	04:48:00
2009-01-20	04:49:00
2009-01-20	04:50:00
2009-01-20	04:51:00
2009-01-20	04:52:00
2009-01-20	04:53:00
2009-01-20	04:54:00
2009-01-20	04:55:00
2009-01-20	04:56:00
2009-01-20	04:57:00
2009-01-20	04:58:00
2009-01-20	04:59:00
2009-01-20	05:00:00
2009-01-20	05:01:00
2009-01-20	05:02:00
2009-01-20	05:03:00
2009-01-20	05:04:00
2009-01-20	05:05:00
2009-01-20	05:06:00
2009-01-20	05:07:00
2009-01-20	05:08:00
2009-01-20	05:09:00
2009-01-20	05:10:00
2009-01-20	05:11:00
2009-01-20	05:12:00
2009-01-20	05:13:00
2009-01-20	05:14:00
2009-01-20	05:15:00
2009-01-20	05:16:00
2009-01-20	05:17:00
2009-01-20	05:18:00
2009-01-20	05:19:00
2009-01-20	05:20:00
2009-01-20	05:21:00
2009-01-20	05:22:00
2009-01-20	05:23:00
2009-01-20	05:24:00
2009-01-20	05:25:00
2009-01-20	05:26:00
2009-01-20	05:27:00
2009-01-20	05:28:00
2009-01-20	05:29:00
2009-01-20	05:30:00
2009-01-20	05:31:00
2009-01-20	05:32:00
2009-01-20	05:33:00
2009-01-20	05:34:00
2009-01-20	05:35:00
2009-01-20	05:36:00
2009-01-20	05:37:00
2009-01-20	05:38:00
2009-01-20	05:39:00
2009-01-20	05:40:00
2009-01-20	05:41:00
2009-01-20	05:42:00
2009-01-20	05:43:00
2009-01-20	05:44:00
2009-01-20	05:45:00
2009-01-20	05:46:00
2009-01-20	05:47:00
2009-01-20	05:48:00
2009-01-20	05:49:00
2009-01-20	05:50:00
2009-01-20	05:51:00
2009-01-20	05:52:00
2009-01-20	05:53:00
2009-01-20	05:54:00
2009-01-20	05:55:00
2009-01-20	05:56:00
2009-01-20	05:57:00
2009-01-20	05:58:00
2009-01-20	05:59:00
2009-01-20	06:00:00
2009-01-20	06:01:00
2009-01-20	06:02:00
2009-01-20	06:03:00
2009-01-20	06:04:00
2009-01-20	06:05:00
2009-01-20	06:06:00
2009-01-20	06:07:00
2009-01-20	06:08:00
2009-01-20	06:09:00
2009-01-20	06:10:00
2009-01-20	06:11:00
2009-01-20	06:12:00
2009-01-20	06:13:00
2009-01-20	06:14:00
2009-01-20	06:15:00
2009-01-20	06:16:00
2009-01-20	06:17:00
2009-01-20	06:18:00
2009-01-20	06:19:00
2009-01-20	06:20:00
2009-01-20	06:21:00
2009-01-20	06:22:00
2009-01-20	06:23:00
2009-01-20	06:24:00
2009-01-20	06:25:00
2009-01-20	06:26:00
2009-01-20	06:27:00
2009-01-20	06:28:00
2009-01-20	06:29:00
2009-01-20	06:30:00
2009-01-20	06:31:00
2009-01-20	06:32:00
2009-01-20	06:33:00
2009-01-20	06:34:00
2009-01-20	06:35:00
2009-01-20	06:36:00
2009-01-20	06:37:00
2009-01-20	06:38:00
2009-01-20	06:39:00
2009-01-20	06:40:00
2009-01-20	06:41:00
2009-01-20	06:42:00
2009-01-20	06:43:00
2009-01-20	06:44:00
2009-01-20	06:45:00
2009-01-20	06:46:00
2009-01-20	06:47:00
2009-01-20	06:48:00
2009-01-20	06:49:00
2009-01-20	06:50:00
2009-01-20	06:51:00
2009-01-20	06:52:00
2009-01-20	06:53:00
2009-01-20	06:54:00
2009-01-20	06:55:00
2009-01-20	06:56:00
2009-01-20	06:57:00
2009-01-20	06:58:00
2009-01-20	06:59:00
2009-01-20	07:00:00
2009-01-20	07:01:00
2009-01-20	07:02:00
2009-01-20	07:03:00
2009-01-20	07:04:00
2009-01-20	07:05:00
2009-01-20	07:06:00
2009-01-20	07:07:00
2009-01-20	07:08:00
2009-01-20	07:09:00
2009-01-20	07:10:00
2009-01-20	07:11:00
2009-01-20	07:12:00
2009-01-20	07:13:00
2009-01-20	07:14:00
2009-01-20	07:15:00
2009-01-20	07:16:00
2009-01-20	07:17:00
2009-01-20	07:18:00
2009-01-20	07:19:00
2009-01-20	07:20:00
2009-01-20	07:21:00
2009-01-20	07:22:00
2009-01-20	07:23:00
2009-01-20	07:24:00
2009-01-20	07:25:00
2009-01-20	07:26:00
2009-01-20	07:27:00
2009-01-20	07:28:00
2009-01-20	07:29:00
2009-01-20	07:30:00
2009-01-20	07:31:00
2009-01-20	07:32:00
2009-01-20	07:33:00
2009-01-20	07:34:00
2009-01-20	07:35:00
2009-01-20	07:36:00
2009-01-20	07:37:00
2009-01-20	07:38:00
2009-01-20	07:39:00
2009-01-20	07:40:00
2009-01-20	07:41:00
2009-01-20	07:42:00
2009-01-20	07:43:00
2009-01-20	07:44:00
2009-01-20	07:45:00
2009-01-20	07:46:00
2009-01-20	07:47:00
2009-01-20	07:48:00
2009-01-20	07:49:00
2009-01-20	07:50:00
2009-01-20	07:51:00
2009-01-20	07:52:00
2009-01-20	07:53:00
2009-01-20	07:54:00
2009-01-20	07:55:00
2009-01-20	07:56:00
2009-01-20	07:57:00
2009-01-20	07:58:00
2009-01-20	07:59:00
2009-01-20	08:00:00
2009-01-20	08:01:00
2009-01-20	08:02:00
2009-01-20	08:03:00
2009-01-20	08:04:00
2009-01-20	08:05:00
2009-01-20	08:06:00
2009-01-20	08:07:00
2009-01-20	08:08:00
2009-01-20	08:09:00
2009-01-20	08:10:00
2009-01-20	08:11:00
2009-01-20	08:12:00
2009-01-20	08:13:00
2009-01-20	08:14:00
2009-01-20	08:15:00
2009-01-20	08:16:00
2009-01-20	08:17:00
2009-01-20	08:18:00
2009-01-20	08:19:00
2009-01-20	08:20:00
2009-01-20	08:21:00
2009-01-20	08:22:00
2009-01-20	08:23:00
2009-01-20	08:24:00
2009-01-20	08:25:00
2009-01-20	08:26:00
2009-01-20	08:27:00
2009-01-20	08:28:00
2009-01-20	08:29:00
2009-01-20	08:30:00
2009-01-20	08:31:00
2009-01-20	08:32:00
2009-01-20	08:33:00
2009-01-20	08:34:00
2009-01-20	08:35:00
2009-01-20	08:36:00
2009-01-20	08:37:00
2009-01-20	08:38:00
2009-01-20	08:39:00
2009-01-20	08:40:00
2009-01-20	08:41:00
2009-01-20	08:42:00
2009-01-20	08:43:00
2009-01-20	08:44:00
2009-01-20	08:45:00
2009-01-20	08:46:00
2009-01-20	08:47:00
2009-01-20	08:48:00
2009-01-20	08:49:00
2009-01-20	08:50:00
2009-01-20	08:51:00
2009-01-20	08:52:00
2009-01-20	08:53:00
2009-01-20	08:54:00
2009-01-20	08:55:00
2009-01-20	08:56:00
2009-01-20	08:57:00
2009-01-20	08:58:00
2009-01-20	08:59:00
2009-01-20	09:00:00
2009-01-20	09:01:00
2009-01-20	09:02:00
2009-01-20	09:03:00
2009-01-20	09:04:00
2009-01-20	09:05:00
2009-01-20	09:06:00
2009-01-20	09:07:00
2009-01-20	09:08:00
[truncated: 35,453 more rows]
