# Supplementary material for: Initial evaluation of nighttime restlessness in a naturally occurring canine model of osteoarthritis pain
Source: PeerJ. 2015 Feb 17;3:e772. doi: 10.7717/peerj.772 (PMC4340376; doi:10.7717/peerj.772)
Supplement: Supplemental Information 22 [file peerj-03-772-s022.xlsx]

## Sheet: Office Visits
Visit Date	Visit Number
2009-01-16 06:00:00	1
2009-01-30 06:00:00	2
2009-02-13 06:00:00	3
2009-02-27 06:00:00	4
2009-03-13 06:00:00	5
2009-03-27 06:00:00	6
2009-04-13 06:00:00	7
2009-04-27 06:00:00	8

## Sheet: 22_Data
Segment	DateTime	Activity	Hour	Quadrant	Study Day	Weekday
1	2009-01-23 06:01:00	0	6	2	7	6
1	2009-01-23 06:02:00	0	6	2	7	6
1	2009-01-23 06:03:00	0	6	2	7	6
1	2009-01-23 06:04:00	0	6	2	7	6
1	2009-01-23 06:05:00	0	6	2	7	6
1	2009-01-23 06:06:00	0	6	2	7	6
1	2009-01-23 06:07:00	200	6	2	7	6
1	2009-01-23 06:08:00	244	6	2	7	6
1	2009-01-23 06:09:00	121	6	2	7	6
1	2009-01-23 06:10:00	145	6	2	7	6
1	2009-01-23 06:11:00	36	6	2	7	6
1	2009-01-23 06:12:00	0	6	2	7	6
1	2009-01-23 06:13:00	0	6	2	7	6
1	2009-01-23 06:14:00	0	6	2	7	6
1	2009-01-23 06:15:00	12	6	2	7	6
1	2009-01-23 06:16:00	0	6	2	7	6
1	2009-01-23 06:17:00	0	6	2	7	6
1	2009-01-23 06:18:00	0	6	2	7	6
1	2009-01-23 06:19:00	244	6	2	7	6
1	2009-01-23 06:20:00	0	6	2	7	6
1	2009-01-23 06:21:00	12	6	2	7	6
1	2009-01-23 06:22:00	0	6	2	7	6
1	2009-01-23 06:23:00	0	6	2	7	6
1	2009-01-23 06:24:00	0	6	2	7	6
1	2009-01-23 06:25:00	0	6	2	7	6
1	2009-01-23 06:26:00	0	6	2	7	6
1	2009-01-23 06:27:00	0	6	2	7	6
1	2009-01-23 06:28:00	0	6	2	7	6
1	2009-01-23 06:29:00	0	6	2	7	6
1	2009-01-23 06:30:00	0	6	2	7	6
1	2009-01-23 06:31:00	0	6	2	7	6
1	2009-01-23 06:32:00	0	6	2	7	6
1	2009-01-23 06:33:00	0	6	2	7	6
1	2009-01-23 06:34:00	0	6	2	7	6
1	2009-01-23 06:35:00	12	6	2	7	6
1	2009-01-23 06:36:00	0	6	2	7	6
1	2009-01-23 06:37:00	0	6	2	7	6
1	2009-01-23 06:38:00	0	6	2	7	6
1	2009-01-23 06:39:00	0	6	2	7	6
1	2009-01-23 06:40:00	12	6	2	7	6
1	2009-01-23 06:41:00	0	6	2	7	6
1	2009-01-23 06:42:00	0	6	2	7	6
1	2009-01-23 06:43:00	0	6	2	7	6
1	2009-01-23 06:44:00	0	6	2	7	6
1	2009-01-23 06:45:00	0	6	2	7	6
1	2009-01-23 06:46:00	0	6	2	7	6
1	2009-01-23 06:47:00	0	6	2	7	6
1	2009-01-23 06:48:00	0	6	2	7	6
1	2009-01-23 06:49:00	0	6	2	7	6
1	2009-01-23 06:50:00	0	6	2	7	6
1	2009-01-23 06:51:00	0	6	2	7	6
1	2009-01-23 06:52:00	0	6	2	7	6
1	2009-01-23 06:53:00	0	6	2	7	6
1	2009-01-23 06:54:00	12	6	2	7	6
1	2009-01-23 06:55:00	0	6	2	7	6
1	2009-01-23 06:56:00	0	6	2	7	6
1	2009-01-23 06:57:00	12	6	2	7	6
1	2009-01-23 06:58:00	0	6	2	7	6
1	2009-01-23 06:59:00	0	6	2	7	6
1	2009-01-23 07:00:00	0	6	2	7	6
1	2009-01-23 07:01:00	0	7	2	7	6
1	2009-01-23 07:02:00	0	7	2	7	6
1	2009-01-23 07:03:00	0	7	2	7	6
1	2009-01-23 07:04:00	0	7	2	7	6
1	2009-01-23 07:05:00	0	7	2	7	6
1	2009-01-23 07:06:00	0	7	2	7	6
1	2009-01-23 07:07:00	0	7	2	7	6
1	2009-01-23 07:08:00	0	7	2	7	6
1	2009-01-23 07:09:00	0	7	2	7	6
1	2009-01-23 07:10:00	0	7	2	7	6
1	2009-01-23 07:11:00	0	7	2	7	6
1	2009-01-23 07:12:00	24	7	2	7	6
1	2009-01-23 07:13:00	48	7	2	7	6
1	2009-01-23 07:14:00	273	7	2	7	6
1	2009-01-23 07:15:00	333	7	2	7	6
1	2009-01-23 07:16:00	824	7	2	7	6
1	2009-01-23 07:17:00	799	7	2	7	6
1	2009-01-23 07:18:00	920	7	2	7	6
1	2009-01-23 07:19:00	824	7	2	7	6
1	2009-01-23 07:20:00	710	7	2	7	6
1	2009-01-23 07:21:00	848	7	2	7	6
1	2009-01-23 07:22:00	1051	7	2	7	6
1	2009-01-23 07:23:00	488	7	2	7	6
1	2009-01-23 07:24:00	469	7	2	7	6
1	2009-01-23 07:25:00	452	7	2	7	6
1	2009-01-23 07:26:00	469	7	2	7	6
1	2009-01-23 07:27:00	273	7	2	7	6
1	2009-01-23 07:28:00	97	7	2	7	6
1	2009-01-23 07:29:00	97	7	2	7	6
1	2009-01-23 07:30:00	0	7	2	7	6
1	2009-01-23 07:31:00	0	7	2	7	6
1	2009-01-23 07:32:00	0	7	2	7	6
1	2009-01-23 07:33:00	0	7	2	7	6
1	2009-01-23 07:34:00	0	7	2	7	6
1	2009-01-23 07:35:00	0	7	2	7	6
1	2009-01-23 07:36:00	0	7	2	7	6
1	2009-01-23 07:37:00	0	7	2	7	6
1	2009-01-23 07:38:00	0	7	2	7	6
1	2009-01-23 07:39:00	0	7	2	7	6
1	2009-01-23 07:40:00	0	7	2	7	6
1	2009-01-23 07:41:00	0	7	2	7	6
1	2009-01-23 07:42:00	0	7	2	7	6
1	2009-01-23 07:43:00	12	7	2	7	6
1	2009-01-23 07:44:00	12	7	2	7	6
1	2009-01-23 07:45:00	48	7	2	7	6
1	2009-01-23 07:46:00	12	7	2	7	6
1	2009-01-23 07:47:00	0	7	2	7	6
1	2009-01-23 07:48:00	0	7	2	7	6
1	2009-01-23 07:49:00	0	7	2	7	6
1	2009-01-23 07:50:00	0	7	2	7	6
1	2009-01-23 07:51:00	36	7	2	7	6
1	2009-01-23 07:52:00	0	7	2	7	6
1	2009-01-23 07:53:00	0	7	2	7	6
1	2009-01-23 07:54:00	0	7	2	7	6
1	2009-01-23 07:55:00	0	7	2	7	6
1	2009-01-23 07:56:00	0	7	2	7	6
1	2009-01-23 07:57:00	0	7	2	7	6
1	2009-01-23 07:58:00	0	7	2	7	6
1	2009-01-23 07:59:00	0	7	2	7	6
1	2009-01-23 08:00:00	0	7	2	7	6
1	2009-01-23 08:01:00	0	8	2	7	6
1	2009-01-23 08:02:00	0	8	2	7	6
1	2009-01-23 08:03:00	0	8	2	7	6
1	2009-01-23 08:04:00	0	8	2	7	6
1	2009-01-23 08:05:00	12	8	2	7	6
1	2009-01-23 08:06:00	12	8	2	7	6
1	2009-01-23 08:07:00	0	8	2	7	6
1	2009-01-23 08:08:00	85	8	2	7	6
1	2009-01-23 08:09:00	0	8	2	7	6
1	2009-01-23 08:10:00	0	8	2	7	6
1	2009-01-23 08:11:00	0	8	2	7	6
1	2009-01-23 08:12:00	0	8	2	7	6
1	2009-01-23 08:13:00	0	8	2	7	6
1	2009-01-23 08:14:00	0	8	2	7	6
1	2009-01-23 08:15:00	0	8	2	7	6
1	2009-01-23 08:16:00	0	8	2	7	6
1	2009-01-23 08:17:00	12	8	2	7	6
1	2009-01-23 08:18:00	0	8	2	7	6
1	2009-01-23 08:19:00	0	8	2	7	6
1	2009-01-23 08:20:00	0	8	2	7	6
1	2009-01-23 08:21:00	0	8	2	7	6
1	2009-01-23 08:22:00	0	8	2	7	6
1	2009-01-23 08:23:00	0	8	2	7	6
1	2009-01-23 08:24:00	0	8	2	7	6
1	2009-01-23 08:25:00	0	8	2	7	6
1	2009-01-23 08:26:00	24	8	2	7	6
1	2009-01-23 08:27:00	0	8	2	7	6
1	2009-01-23 08:28:00	0	8	2	7	6
1	2009-01-23 08:29:00	0	8	2	7	6
1	2009-01-23 08:30:00	0	8	2	7	6
1	2009-01-23 08:31:00	0	8	2	7	6
1	2009-01-23 08:32:00	0	8	2	7	6
1	2009-01-23 08:33:00	0	8	2	7	6
1	2009-01-23 08:34:00	0	8	2	7	6
1	2009-01-23 08:35:00	0	8	2	7	6
1	2009-01-23 08:36:00	0	8	2	7	6
1	2009-01-23 08:37:00	0	8	2	7	6
1	2009-01-23 08:38:00	0	8	2	7	6
1	2009-01-23 08:39:00	0	8	2	7	6
1	2009-01-23 08:40:00	0	8	2	7	6
1	2009-01-23 08:41:00	0	8	2	7	6
1	2009-01-23 08:42:00	0	8	2	7	6
1	2009-01-23 08:43:00	12	8	2	7	6
1	2009-01-23 08:44:00	0	8	2	7	6
1	2009-01-23 08:45:00	0	8	2	7	6
1	2009-01-23 08:46:00	0	8	2	7	6
1	2009-01-23 08:47:00	0	8	2	7	6
1	2009-01-23 08:48:00	0	8	2	7	6
1	2009-01-23 08:49:00	0	8	2	7	6
1	2009-01-23 08:50:00	0	8	2	7	6
1	2009-01-23 08:51:00	0	8	2	7	6
1	2009-01-23 08:52:00	0	8	2	7	6
1	2009-01-23 08:53:00	0	8	2	7	6
1	2009-01-23 08:54:00	0	8	2	7	6
1	2009-01-23 08:55:00	0	8	2	7	6
1	2009-01-23 08:56:00	0	8	2	7	6
1	2009-01-23 08:57:00	0	8	2	7	6
1	2009-01-23 08:58:00	0	8	2	7	6
1	2009-01-23 08:59:00	0	8	2	7	6
1	2009-01-23 09:00:00	0	8	2	7	6
1	2009-01-23 09:01:00	24	9	2	7	6
1	2009-01-23 09:02:00	0	9	2	7	6
1	2009-01-23 09:03:00	0	9	2	7	6
1	2009-01-23 09:04:00	12	9	2	7	6
1	2009-01-23 09:05:00	0	9	2	7	6
1	2009-01-23 09:06:00	0	9	2	7	6
1	2009-01-23 09:07:00	12	9	2	7	6
1	2009-01-23 09:08:00	0	9	2	7	6
1	2009-01-23 09:09:00	12	9	2	7	6
1	2009-01-23 09:10:00	0	9	2	7	6
1	2009-01-23 09:11:00	0	9	2	7	6
1	2009-01-23 09:12:00	0	9	2	7	6
1	2009-01-23 09:13:00	0	9	2	7	6
1	2009-01-23 09:14:00	12	9	2	7	6
1	2009-01-23 09:15:00	0	9	2	7	6
1	2009-01-23 09:16:00	0	9	2	7	6
1	2009-01-23 09:17:00	0	9	2	7	6
1	2009-01-23 09:18:00	0	9	2	7	6
1	2009-01-23 09:19:00	0	9	2	7	6
1	2009-01-23 09:20:00	0	9	2	7	6
1	2009-01-23 09:21:00	0	9	2	7	6
1	2009-01-23 09:22:00	0	9	2	7	6
1	2009-01-23 09:23:00	0	9	2	7	6
1	2009-01-23 09:24:00	0	9	2	7	6
1	2009-01-23 09:25:00	0	9	2	7	6
1	2009-01-23 09:26:00	0	9	2	7	6
1	2009-01-23 09:27:00	0	9	2	7	6
1	2009-01-23 09:28:00	0	9	2	7	6
1	2009-01-23 09:29:00	0	9	2	7	6
1	2009-01-23 09:30:00	0	9	2	7	6
1	2009-01-23 09:31:00	0	9	2	7	6
1	2009-01-23 09:32:00	0	9	2	7	6
1	2009-01-23 09:33:00	0	9	2	7	6
1	2009-01-23 09:34:00	0	9	2	7	6
1	2009-01-23 09:35:00	0	9	2	7	6
1	2009-01-23 09:36:00	0	9	2	7	6
1	2009-01-23 09:37:00	0	9	2	7	6
1	2009-01-23 09:38:00	0	9	2	7	6
1	2009-01-23 09:39:00	0	9	2	7	6
1	2009-01-23 09:40:00	0	9	2	7	6
1	2009-01-23 09:41:00	0	9	2	7	6
1	2009-01-23 09:42:00	0	9	2	7	6
1	2009-01-23 09:43:00	0	9	2	7	6
1	2009-01-23 09:44:00	0	9	2	7	6
1	2009-01-23 09:45:00	0	9	2	7	6
1	2009-01-23 09:46:00	0	9	2	7	6
1	2009-01-23 09:47:00	0	9	2	7	6
1	2009-01-23 09:48:00	0	9	2	7	6
1	2009-01-23 09:49:00	0	9	2	7	6
1	2009-01-23 09:50:00	0	9	2	7	6
1	2009-01-23 09:51:00	0	9	2	7	6
1	2009-01-23 09:52:00	0	9	2	7	6
1	2009-01-23 09:53:00	0	9	2	7	6
1	2009-01-23 09:54:00	0	9	2	7	6
1	2009-01-23 09:55:00	12	9	2	7	6
1	2009-01-23 09:56:00	12	9	2	7	6
1	2009-01-23 09:57:00	12	9	2	7	6
1	2009-01-23 09:58:00	0	9	2	7	6
1	2009-01-23 09:59:00	0	9	2	7	6
1	2009-01-23 10:00:00	0	9	2	7	6
1	2009-01-23 10:01:00	0	10	2	7	6
1	2009-01-23 10:02:00	0	10	2	7	6
1	2009-01-23 10:03:00	12	10	2	7	6
1	2009-01-23 10:04:00	0	10	2	7	6
1	2009-01-23 10:05:00	0	10	2	7	6
1	2009-01-23 10:06:00	0	10	2	7	6
1	2009-01-23 10:07:00	0	10	2	7	6
1	2009-01-23 10:08:00	0	10	2	7	6
1	2009-01-23 10:09:00	36	10	2	7	6
1	2009-01-23 10:10:00	0	10	2	7	6
1	2009-01-23 10:11:00	0	10	2	7	6
1	2009-01-23 10:12:00	0	10	2	7	6
1	2009-01-23 10:13:00	0	10	2	7	6
1	2009-01-23 10:14:00	0	10	2	7	6
1	2009-01-23 10:15:00	0	10	2	7	6
1	2009-01-23 10:16:00	0	10	2	7	6
1	2009-01-23 10:17:00	0	10	2	7	6
1	2009-01-23 10:18:00	0	10	2	7	6
1	2009-01-23 10:19:00	0	10	2	7	6
1	2009-01-23 10:20:00	0	10	2	7	6
1	2009-01-23 10:21:00	0	10	2	7	6
1	2009-01-23 10:22:00	0	10	2	7	6
1	2009-01-23 10:23:00	0	10	2	7	6
1	2009-01-23 10:24:00	0	10	2	7	6
1	2009-01-23 10:25:00	0	10	2	7	6
1	2009-01-23 10:26:00	0	10	2	7	6
1	2009-01-23 10:27:00	12	10	2	7	6
1	2009-01-23 10:28:00	0	10	2	7	6
1	2009-01-23 10:29:00	0	10	2	7	6
1	2009-01-23 10:30:00	0	10	2	7	6
1	2009-01-23 10:31:00	0	10	2	7	6
1	2009-01-23 10:32:00	0	10	2	7	6
1	2009-01-23 10:33:00	0	10	2	7	6
1	2009-01-23 10:34:00	0	10	2	7	6
1	2009-01-23 10:35:00	0	10	2	7	6
1	2009-01-23 10:36:00	0	10	2	7	6
1	2009-01-23 10:37:00	0	10	2	7	6
1	2009-01-23 10:38:00	0	10	2	7	6
1	2009-01-23 10:39:00	0	10	2	7	6
1	2009-01-23 10:40:00	0	10	2	7	6
1	2009-01-23 10:41:00	0	10	2	7	6
1	2009-01-23 10:42:00	0	10	2	7	6
1	2009-01-23 10:43:00	0	10	2	7	6
1	2009-01-23 10:44:00	0	10	2	7	6
1	2009-01-23 10:45:00	0	10	2	7	6
1	2009-01-23 10:46:00	0	10	2	7	6
1	2009-01-23 10:47:00	0	10	2	7	6
1	2009-01-23 10:48:00	0	10	2	7	6
1	2009-01-23 10:49:00	0	10	2	7	6
1	2009-01-23 10:50:00	0	10	2	7	6
1	2009-01-23 10:51:00	0	10	2	7	6
1	2009-01-23 10:52:00	0	10	2	7	6
1	2009-01-23 10:53:00	0	10	2	7	6
1	2009-01-23 10:54:00	0	10	2	7	6
1	2009-01-23 10:55:00	0	10	2	7	6
1	2009-01-23 10:56:00	0	10	2	7	6
1	2009-01-23 10:57:00	0	10	2	7	6
1	2009-01-23 10:58:00	0	10	2	7	6
1	2009-01-23 10:59:00	0	10	2	7	6
1	2009-01-23 11:00:00	0	10	2	7	6
1	2009-01-23 11:01:00	0	11	2	7	6
1	2009-01-23 11:02:00	0	11	2	7	6
1	2009-01-23 11:03:00	0	11	2	7	6
1	2009-01-23 11:04:00	0	11	2	7	6
1	2009-01-23 11:05:00	0	11	2	7	6
1	2009-01-23 11:06:00	0	11	2	7	6
1	2009-01-23 11:07:00	0	11	2	7	6
1	2009-01-23 11:08:00	0	11	2	7	6
1	2009-01-23 11:09:00	0	11	2	7	6
1	2009-01-23 11:10:00	0	11	2	7	6
1	2009-01-23 11:11:00	0	11	2	7	6
1	2009-01-23 11:12:00	0	11	2	7	6
1	2009-01-23 11:13:00	0	11	2	7	6
1	2009-01-23 11:14:00	0	11	2	7	6
1	2009-01-23 11:15:00	0	11	2	7	6
1	2009-01-23 11:16:00	0	11	2	7	6
1	2009-01-23 11:17:00	0	11	2	7	6
1	2009-01-23 11:18:00	0	11	2	7	6
1	2009-01-23 11:19:00	0	11	2	7	6
1	2009-01-23 11:20:00	0	11	2	7	6
1	2009-01-23 11:21:00	0	11	2	7	6
1	2009-01-23 11:22:00	0	11	2	7	6
1	2009-01-23 11:23:00	0	11	2	7	6
1	2009-01-23 11:24:00	0	11	2	7	6
1	2009-01-23 11:25:00	0	11	2	7	6
1	2009-01-23 11:26:00	0	11	2	7	6
1	2009-01-23 11:27:00	0	11	2	7	6
1	2009-01-23 11:28:00	0	11	2	7	6
1	2009-01-23 11:29:00	0	11	2	7	6
1	2009-01-23 11:30:00	0	11	2	7	6
1	2009-01-23 11:31:00	0	11	2	7	6
1	2009-01-23 11:32:00	0	11	2	7	6
1	2009-01-23 11:33:00	0	11	2	7	6
1	2009-01-23 11:34:00	0	11	2	7	6
1	2009-01-23 11:35:00	0	11	2	7	6
1	2009-01-23 11:36:00	0	11	2	7	6
1	2009-01-23 11:37:00	0	11	2	7	6
1	2009-01-23 11:38:00	0	11	2	7	6
1	2009-01-23 11:39:00	0	11	2	7	6
1	2009-01-23 11:40:00	0	11	2	7	6
1	2009-01-23 11:41:00	0	11	2	7	6
1	2009-01-23 11:42:00	0	11	2	7	6
1	2009-01-23 11:43:00	0	11	2	7	6
1	2009-01-23 11:44:00	0	11	2	7	6
1	2009-01-23 11:45:00	0	11	2	7	6
1	2009-01-23 11:46:00	0	11	2	7	6
1	2009-01-23 11:47:00	0	11	2	7	6
1	2009-01-23 11:48:00	0	11	2	7	6
1	2009-01-23 11:49:00	0	11	2	7	6
1	2009-01-23 11:50:00	0	11	2	7	6
1	2009-01-23 11:51:00	0	11	2	7	6
1	2009-01-23 11:52:00	0	11	2	7	6
1	2009-01-23 11:53:00	0	11	2	7	6
1	2009-01-23 11:54:00	0	11	2	7	6
1	2009-01-23 11:55:00	0	11	2	7	6
1	2009-01-23 11:56:00	12	11	2	7	6
1	2009-01-23 11:57:00	48	11	2	7	6
1	2009-01-23 11:58:00	24	11	2	7	6
1	2009-01-23 11:59:00	0	11	2	7	6
1	2009-01-23 12:00:00	0	11	2	7	6
1	2009-01-23 12:01:00	0	12	3	7	6
1	2009-01-23 12:02:00	0	12	3	7	6
1	2009-01-23 12:03:00	0	12	3	7	6
1	2009-01-23 12:04:00	0	12	3	7	6
1	2009-01-23 12:05:00	0	12	3	7	6
1	2009-01-23 12:06:00	0	12	3	7	6
1	2009-01-23 12:07:00	0	12	3	7	6
1	2009-01-23 12:08:00	0	12	3	7	6
1	2009-01-23 12:09:00	0	12	3	7	6
1	2009-01-23 12:10:00	12	12	3	7	6
1	2009-01-23 12:11:00	0	12	3	7	6
1	2009-01-23 12:12:00	0	12	3	7	6
1	2009-01-23 12:13:00	0	12	3	7	6
1	2009-01-23 12:14:00	0	12	3	7	6
1	2009-01-23 12:15:00	0	12	3	7	6
1	2009-01-23 12:16:00	12	12	3	7	6
1	2009-01-23 12:17:00	24	12	3	7	6
1	2009-01-23 12:18:00	0	12	3	7	6
1	2009-01-23 12:19:00	0	12	3	7	6
1	2009-01-23 12:20:00	0	12	3	7	6
1	2009-01-23 12:21:00	0	12	3	7	6
1	2009-01-23 12:22:00	0	12	3	7	6
1	2009-01-23 12:23:00	0	12	3	7	6
1	2009-01-23 12:24:00	0	12	3	7	6
1	2009-01-23 12:25:00	0	12	3	7	6
1	2009-01-23 12:26:00	0	12	3	7	6
1	2009-01-23 12:27:00	0	12	3	7	6
1	2009-01-23 12:28:00	24	12	3	7	6
1	2009-01-23 12:29:00	12	12	3	7	6
1	2009-01-23 12:30:00	0	12	3	7	6
1	2009-01-23 12:31:00	0	12	3	7	6
1	2009-01-23 12:32:00	0	12	3	7	6
1	2009-01-23 12:33:00	0	12	3	7	6
1	2009-01-23 12:34:00	0	12	3	7	6
1	2009-01-23 12:35:00	0	12	3	7	6
1	2009-01-23 12:36:00	0	12	3	7	6
1	2009-01-23 12:37:00	0	12	3	7	6
1	2009-01-23 12:38:00	0	12	3	7	6
1	2009-01-23 12:39:00	0	12	3	7	6
1	2009-01-23 12:40:00	0	12	3	7	6
1	2009-01-23 12:41:00	0	12	3	7	6
1	2009-01-23 12:42:00	0	12	3	7	6
1	2009-01-23 12:43:00	0	12	3	7	6
1	2009-01-23 12:44:00	0	12	3	7	6
1	2009-01-23 12:45:00	0	12	3	7	6
1	2009-01-23 12:46:00	0	12	3	7	6
1	2009-01-23 12:47:00	12	12	3	7	6
1	2009-01-23 12:48:00	0	12	3	7	6
1	2009-01-23 12:49:00	0	12	3	7	6
1	2009-01-23 12:50:00	0	12	3	7	6
1	2009-01-23 12:51:00	0	12	3	7	6
1	2009-01-23 12:52:00	0	12	3	7	6
1	2009-01-23 12:53:00	0	12	3	7	6
1	2009-01-23 12:54:00	0	12	3	7	6
1	2009-01-23 12:55:00	0	12	3	7	6
1	2009-01-23 12:56:00	0	12	3	7	6
1	2009-01-23 12:57:00	0	12	3	7	6
1	2009-01-23 12:58:00	0	12	3	7	6
1	2009-01-23 12:59:00	0	12	3	7	6
1	2009-01-23 13:00:00	0	12	3	7	6
1	2009-01-23 13:01:00	0	13	3	7	6
1	2009-01-23 13:02:00	0	13	3	7	6
1	2009-01-23 13:03:00	0	13	3	7	6
1	2009-01-23 13:04:00	12	13	3	7	6
1	2009-01-23 13:05:00	0	13	3	7	6
1	2009-01-23 13:06:00	0	13	3	7	6
1	2009-01-23 13:07:00	72	13	3	7	6
1	2009-01-23 13:08:00	36	13	3	7	6
1	2009-01-23 13:09:00	36	13	3	7	6
1	2009-01-23 13:10:00	0	13	3	7	6
1	2009-01-23 13:11:00	0	13	3	7	6
1	2009-01-23 13:12:00	0	13	3	7	6
1	2009-01-23 13:13:00	0	13	3	7	6
1	2009-01-23 13:14:00	0	13	3	7	6
1	2009-01-23 13:15:00	0	13	3	7	6
1	2009-01-23 13:16:00	0	13	3	7	6
1	2009-01-23 13:17:00	0	13	3	7	6
1	2009-01-23 13:18:00	0	13	3	7	6
1	2009-01-23 13:19:00	0	13	3	7	6
1	2009-01-23 13:20:00	97	13	3	7	6
1	2009-01-23 13:21:00	0	13	3	7	6
1	2009-01-23 13:22:00	0	13	3	7	6
1	2009-01-23 13:23:00	0	13	3	7	6
1	2009-01-23 13:24:00	0	13	3	7	6
1	2009-01-23 13:25:00	0	13	3	7	6
1	2009-01-23 13:26:00	0	13	3	7	6
1	2009-01-23 13:27:00	0	13	3	7	6
1	2009-01-23 13:28:00	0	13	3	7	6
1	2009-01-23 13:29:00	0	13	3	7	6
1	2009-01-23 13:30:00	0	13	3	7	6
1	2009-01-23 13:31:00	0	13	3	7	6
1	2009-01-23 13:32:00	0	13	3	7	6
1	2009-01-23 13:33:00	0	13	3	7	6
1	2009-01-23 13:34:00	0	13	3	7	6
1	2009-01-23 13:35:00	0	13	3	7	6
1	2009-01-23 13:36:00	0	13	3	7	6
1	2009-01-23 13:37:00	0	13	3	7	6
1	2009-01-23 13:38:00	0	13	3	7	6
1	2009-01-23 13:39:00	0	13	3	7	6
1	2009-01-23 13:40:00	0	13	3	7	6
1	2009-01-23 13:41:00	0	13	3	7	6
1	2009-01-23 13:42:00	0	13	3	7	6
1	2009-01-23 13:43:00	0	13	3	7	6
1	2009-01-23 13:44:00	0	13	3	7	6
1	2009-01-23 13:45:00	12	13	3	7	6
1	2009-01-23 13:46:00	0	13	3	7	6
1	2009-01-23 13:47:00	0	13	3	7	6
1	2009-01-23 13:48:00	0	13	3	7	6
1	2009-01-23 13:49:00	0	13	3	7	6
1	2009-01-23 13:50:00	0	13	3	7	6
1	2009-01-23 13:51:00	0	13	3	7	6
1	2009-01-23 13:52:00	0	13	3	7	6
1	2009-01-23 13:53:00	0	13	3	7	6
1	2009-01-23 13:54:00	0	13	3	7	6
1	2009-01-23 13:55:00	0	13	3	7	6
1	2009-01-23 13:56:00	0	13	3	7	6
1	2009-01-23 13:57:00	0	13	3	7	6
1	2009-01-23 13:58:00	0	13	3	7	6
1	2009-01-23 13:59:00	0	13	3	7	6
1	2009-01-23 14:00:00	0	13	3	7	6
1	2009-01-23 14:01:00	0	14	3	7	6
1	2009-01-23 14:02:00	0	14	3	7	6
1	2009-01-23 14:03:00	0	14	3	7	6
1	2009-01-23 14:04:00	0	14	3	7	6
1	2009-01-23 14:05:00	0	14	3	7	6
1	2009-01-23 14:06:00	0	14	3	7	6
1	2009-01-23 14:07:00	0	14	3	7	6
1	2009-01-23 14:08:00	0	14	3	7	6
1	2009-01-23 14:09:00	24	14	3	7	6
1	2009-01-23 14:10:00	0	14	3	7	6
1	2009-01-23 14:11:00	0	14	3	7	6
1	2009-01-23 14:12:00	0	14	3	7	6
1	2009-01-23 14:13:00	0	14	3	7	6
1	2009-01-23 14:14:00	0	14	3	7	6
1	2009-01-23 14:15:00	0	14	3	7	6
1	2009-01-23 14:16:00	0	14	3	7	6
1	2009-01-23 14:17:00	0	14	3	7	6
1	2009-01-23 14:18:00	0	14	3	7	6
1	2009-01-23 14:19:00	0	14	3	7	6
1	2009-01-23 14:20:00	0	14	3	7	6
1	2009-01-23 14:21:00	0	14	3	7	6
1	2009-01-23 14:22:00	0	14	3	7	6
1	2009-01-23 14:23:00	0	14	3	7	6
1	2009-01-23 14:24:00	0	14	3	7	6
1	2009-01-23 14:25:00	0	14	3	7	6
1	2009-01-23 14:26:00	0	14	3	7	6
1	2009-01-23 14:27:00	0	14	3	7	6
1	2009-01-23 14:28:00	0	14	3	7	6
1	2009-01-23 14:29:00	0	14	3	7	6
1	2009-01-23 14:30:00	0	14	3	7	6
1	2009-01-23 14:31:00	0	14	3	7	6
1	2009-01-23 14:32:00	0	14	3	7	6
1	2009-01-23 14:33:00	0	14	3	7	6
1	2009-01-23 14:34:00	0	14	3	7	6
1	2009-01-23 14:35:00	0	14	3	7	6
1	2009-01-23 14:36:00	0	14	3	7	6
1	2009-01-23 14:37:00	0	14	3	7	6
1	2009-01-23 14:38:00	0	14	3	7	6
1	2009-01-23 14:39:00	0	14	3	7	6
1	2009-01-23 14:40:00	12	14	3	7	6
1	2009-01-23 14:41:00	0	14	3	7	6
1	2009-01-23 14:42:00	0	14	3	7	6
1	2009-01-23 14:43:00	0	14	3	7	6
1	2009-01-23 14:44:00	0	14	3	7	6
1	2009-01-23 14:45:00	0	14	3	7	6
1	2009-01-23 14:46:00	0	14	3	7	6
1	2009-01-23 14:47:00	0	14	3	7	6
1	2009-01-23 14:48:00	0	14	3	7	6
1	2009-01-23 14:49:00	0	14	3	7	6
1	2009-01-23 14:50:00	0	14	3	7	6
1	2009-01-23 14:51:00	0	14	3	7	6
1	2009-01-23 14:52:00	0	14	3	7	6
1	2009-01-23 14:53:00	0	14	3	7	6
1	2009-01-23 14:54:00	0	14	3	7	6
1	2009-01-23 14:55:00	0	14	3	7	6
1	2009-01-23 14:56:00	0	14	3	7	6
1	2009-01-23 14:57:00	0	14	3	7	6
1	2009-01-23 14:58:00	0	14	3	7	6
1	2009-01-23 14:59:00	12	14	3	7	6
1	2009-01-23 15:00:00	48	14	3	7	6
1	2009-01-23 15:01:00	36	15	3	7	6
1	2009-01-23 15:02:00	0	15	3	7	6
1	2009-01-23 15:03:00	0	15	3	7	6
1	2009-01-23 15:04:00	0	15	3	7	6
1	2009-01-23 15:05:00	0	15	3	7	6
1	2009-01-23 15:06:00	0	15	3	7	6
1	2009-01-23 15:07:00	0	15	3	7	6
1	2009-01-23 15:08:00	0	15	3	7	6
1	2009-01-23 15:09:00	0	15	3	7	6
1	2009-01-23 15:10:00	12	15	3	7	6
1	2009-01-23 15:11:00	0	15	3	7	6
1	2009-01-23 15:12:00	0	15	3	7	6
1	2009-01-23 15:13:00	0	15	3	7	6
1	2009-01-23 15:14:00	0	15	3	7	6
1	2009-01-23 15:15:00	0	15	3	7	6
1	2009-01-23 15:16:00	12	15	3	7	6
1	2009-01-23 15:17:00	0	15	3	7	6
1	2009-01-23 15:18:00	0	15	3	7	6
1	2009-01-23 15:19:00	12	15	3	7	6
1	2009-01-23 15:20:00	12	15	3	7	6
1	2009-01-23 15:21:00	0	15	3	7	6
1	2009-01-23 15:22:00	0	15	3	7	6
1	2009-01-23 15:23:00	0	15	3	7	6
1	2009-01-23 15:24:00	0	15	3	7	6
1	2009-01-23 15:25:00	0	15	3	7	6
1	2009-01-23 15:26:00	0	15	3	7	6
1	2009-01-23 15:27:00	0	15	3	7	6
1	2009-01-23 15:28:00	12	15	3	7	6
1	2009-01-23 15:29:00	0	15	3	7	6
1	2009-01-23 15:30:00	0	15	3	7	6
1	2009-01-23 15:31:00	12	15	3	7	6
1	2009-01-23 15:32:00	0	15	3	7	6
1	2009-01-23 15:33:00	0	15	3	7	6
1	2009-01-23 15:34:00	0	15	3	7	6
1	2009-01-23 15:35:00	0	15	3	7	6
1	2009-01-23 15:36:00	0	15	3	7	6
1	2009-01-23 15:37:00	0	15	3	7	6
1	2009-01-23 15:38:00	0	15	3	7	6
1	2009-01-23 15:39:00	0	15	3	7	6
1	2009-01-23 15:40:00	0	15	3	7	6
1	2009-01-23 15:41:00	24	15	3	7	6
1	2009-01-23 15:42:00	0	15	3	7	6
1	2009-01-23 15:43:00	12	15	3	7	6
1	2009-01-23 15:44:00	24	15	3	7	6
1	2009-01-23 15:45:00	0	15	3	7	6
1	2009-01-23 15:46:00	48	15	3	7	6
1	2009-01-23 15:47:00	0	15	3	7	6
1	2009-01-23 15:48:00	0	15	3	7	6
1	2009-01-23 15:49:00	48	15	3	7	6
1	2009-01-23 15:50:00	0	15	3	7	6
1	2009-01-23 15:51:00	0	15	3	7	6
1	2009-01-23 15:52:00	0	15	3	7	6
1	2009-01-23 15:53:00	0	15	3	7	6
1	2009-01-23 15:54:00	0	15	3	7	6
1	2009-01-23 15:55:00	0	15	3	7	6
1	2009-01-23 15:56:00	24	15	3	7	6
1	2009-01-23 15:57:00	0	15	3	7	6
1	2009-01-23 15:58:00	48	15	3	7	6
1	2009-01-23 15:59:00	12	15	3	7	6
1	2009-01-23 16:00:00	0	15	3	7	6
1	2009-01-23 16:01:00	0	16	3	7	6
1	2009-01-23 16:02:00	0	16	3	7	6
1	2009-01-23 16:03:00	0	16	3	7	6
1	2009-01-23 16:04:00	0	16	3	7	6
1	2009-01-23 16:05:00	0	16	3	7	6
1	2009-01-23 16:06:00	24	16	3	7	6
1	2009-01-23 16:07:00	0	16	3	7	6
1	2009-01-23 16:08:00	0	16	3	7	6
1	2009-01-23 16:09:00	0	16	3	7	6
1	2009-01-23 16:10:00	24	16	3	7	6
1	2009-01-23 16:11:00	12	16	3	7	6
1	2009-01-23 16:12:00	258	16	3	7	6
1	2009-01-23 16:13:00	273	16	3	7	6
1	2009-01-23 16:14:00	273	16	3	7	6
1	2009-01-23 16:15:00	121	16	3	7	6
1	2009-01-23 16:16:00	12	16	3	7	6
1	2009-01-23 16:17:00	24	16	3	7	6
1	2009-01-23 16:18:00	0	16	3	7	6
1	2009-01-23 16:19:00	0	16	3	7	6
1	2009-01-23 16:20:00	0	16	3	7	6
1	2009-01-23 16:21:00	0	16	3	7	6
1	2009-01-23 16:22:00	0	16	3	7	6
1	2009-01-23 16:23:00	0	16	3	7	6
1	2009-01-23 16:24:00	12	16	3	7	6
1	2009-01-23 16:25:00	0	16	3	7	6
1	2009-01-23 16:26:00	0	16	3	7	6
1	2009-01-23 16:27:00	0	16	3	7	6
1	2009-01-23 16:28:00	0	16	3	7	6
1	2009-01-23 16:29:00	0	16	3	7	6
1	2009-01-23 16:30:00	0	16	3	7	6
1	2009-01-23 16:31:00	0	16	3	7	6
1	2009-01-23 16:32:00	0	16	3	7	6
1	2009-01-23 16:33:00	0	16	3	7	6
1	2009-01-23 16:34:00	0	16	3	7	6
1	2009-01-23 16:35:00	0	16	3	7	6
1	2009-01-23 16:36:00	0	16	3	7	6
1	2009-01-23 16:37:00	0	16	3	7	6
1	2009-01-23 16:38:00	0	16	3	7	6
1	2009-01-23 16:39:00	0	16	3	7	6
1	2009-01-23 16:40:00	0	16	3	7	6
1	2009-01-23 16:41:00	0	16	3	7	6
1	2009-01-23 16:42:00	0	16	3	7	6
1	2009-01-23 16:43:00	0	16	3	7	6
1	2009-01-23 16:44:00	0	16	3	7	6
1	2009-01-23 16:45:00	0	16	3	7	6
1	2009-01-23 16:46:00	0	16	3	7	6
1	2009-01-23 16:47:00	0	16	3	7	6
1	2009-01-23 16:48:00	0	16	3	7	6
1	2009-01-23 16:49:00	0	16	3	7	6
1	2009-01-23 16:50:00	0	16	3	7	6
1	2009-01-23 16:51:00	0	16	3	7	6
1	2009-01-23 16:52:00	12	16	3	7	6
1	2009-01-23 16:53:00	0	16	3	7	6
1	2009-01-23 16:54:00	0	16	3	7	6
1	2009-01-23 16:55:00	12	16	3	7	6
1	2009-01-23 16:56:00	0	16	3	7	6
1	2009-01-23 16:57:00	0	16	3	7	6
1	2009-01-23 16:58:00	0	16	3	7	6
1	2009-01-23 16:59:00	0	16	3	7	6
1	2009-01-23 17:00:00	0	16	3	7	6
1	2009-01-23 17:01:00	0	17	3	7	6
1	2009-01-23 17:02:00	258	17	3	7	6
1	2009-01-23 17:03:00	316	17	3	7	6
1	2009-01-23 17:04:00	488	17	3	7	6
1	2009-01-23 17:05:00	367	17	3	7	6
1	2009-01-23 17:06:00	12	17	3	7	6
1	2009-01-23 17:07:00	0	17	3	7	6
1	2009-01-23 17:08:00	0	17	3	7	6
1	2009-01-23 17:09:00	0	17	3	7	6
1	2009-01-23 17:10:00	0	17	3	7	6
1	2009-01-23 17:11:00	0	17	3	7	6
1	2009-01-23 17:12:00	0	17	3	7	6
1	2009-01-23 17:13:00	0	17	3	7	6
1	2009-01-23 17:14:00	0	17	3	7	6
1	2009-01-23 17:15:00	171	17	3	7	6
1	2009-01-23 17:16:00	1162	17	3	7	6
1	2009-01-23 17:17:00	452	17	3	7	6
1	2009-01-23 17:18:00	333	17	3	7	6
1	2009-01-23 17:19:00	302	17	3	7	6
1	2009-01-23 17:20:00	333	17	3	7	6
1	2009-01-23 17:21:00	12	17	3	7	6
1	2009-01-23 17:22:00	0	17	3	7	6
1	2009-01-23 17:23:00	0	17	3	7	6
1	2009-01-23 17:24:00	171	17	3	7	6
1	2009-01-23 17:25:00	0	17	3	7	6
1	2009-01-23 17:26:00	72	17	3	7	6
1	2009-01-23 17:27:00	0	17	3	7	6
1	2009-01-23 17:28:00	0	17	3	7	6
1	2009-01-23 17:29:00	0	17	3	7	6
1	2009-01-23 17:30:00	0	17	3	7	6
1	2009-01-23 17:31:00	0	17	3	7	6
1	2009-01-23 17:32:00	0	17	3	7	6
1	2009-01-23 17:33:00	0	17	3	7	6
1	2009-01-23 17:34:00	0	17	3	7	6
1	2009-01-23 17:35:00	0	17	3	7	6
1	2009-01-23 17:36:00	0	17	3	7	6
1	2009-01-23 17:37:00	0	17	3	7	6
1	2009-01-23 17:38:00	0	17	3	7	6
1	2009-01-23 17:39:00	0	17	3	7	6
1	2009-01-23 17:40:00	0	17	3	7	6
1	2009-01-23 17:41:00	0	17	3	7	6
1	2009-01-23 17:42:00	97	17	3	7	6
1	2009-01-23 17:43:00	667	17	3	7	6
1	2009-01-23 17:44:00	384	17	3	7	6
1	2009-01-23 17:45:00	799	17	3	7	6
1	2009-01-23 17:46:00	896	17	3	7	6
1	2009-01-23 17:47:00	848	17	3	7	6
1	2009-01-23 17:48:00	1133	17	3	7	6
1	2009-01-23 17:49:00	1077	17	3	7	6
1	2009-01-23 17:50:00	645	17	3	7	6
1	2009-01-23 17:51:00	824	17	3	7	6
1	2009-01-23 17:52:00	667	17	3	7	6
1	2009-01-23 17:53:00	799	17	3	7	6
1	2009-01-23 17:54:00	546	17	3	7	6
1	2009-01-23 17:55:00	1104	17	3	7	6
1	2009-01-23 17:56:00	775	17	3	7	6
1	2009-01-23 17:57:00	604	17	3	7	6
1	2009-01-23 17:58:00	848	17	3	7	6
1	2009-01-23 17:59:00	799	17	3	7	6
1	2009-01-23 18:00:00	799	17	3	7	6
1	2009-01-23 18:01:00	732	18	4	7	6
1	2009-01-23 18:02:00	799	18	4	7	6
1	2009-01-23 18:03:00	732	18	4	7	6
1	2009-01-23 18:04:00	604	18	4	7	6
1	2009-01-23 18:05:00	623	18	4	7	6
1	2009-01-23 18:06:00	384	18	4	7	6
1	2009-01-23 18:07:00	333	18	4	7	6
1	2009-01-23 18:08:00	273	18	4	7	6
1	2009-01-23 18:09:00	367	18	4	7	6
1	2009-01-23 18:10:00	302	18	4	7	6
1	2009-01-23 18:11:00	109	18	4	7	6
1	2009-01-23 18:12:00	0	18	4	7	6
1	2009-01-23 18:13:00	200	18	4	7	6
1	2009-01-23 18:14:00	0	18	4	7	6
1	2009-01-23 18:15:00	0	18	4	7	6
1	2009-01-23 18:16:00	0	18	4	7	6
1	2009-01-23 18:17:00	0	18	4	7	6
1	2009-01-23 18:18:00	0	18	4	7	6
1	2009-01-23 18:19:00	0	18	4	7	6
1	2009-01-23 18:20:00	0	18	4	7	6
1	2009-01-23 18:21:00	0	18	4	7	6
1	2009-01-23 18:22:00	0	18	4	7	6
1	2009-01-23 18:23:00	0	18	4	7	6
1	2009-01-23 18:24:00	0	18	4	7	6
1	2009-01-23 18:25:00	145	18	4	7	6
1	2009-01-23 18:26:00	244	18	4	7	6
1	2009-01-23 18:27:00	109	18	4	7	6
1	2009-01-23 18:28:00	85	18	4	7	6
1	2009-01-23 18:29:00	0	18	4	7	6
1	2009-01-23 18:30:00	0	18	4	7	6
1	2009-01-23 18:31:00	0	18	4	7	6
1	2009-01-23 18:32:00	0	18	4	7	6
1	2009-01-23 18:33:00	0	18	4	7	6
1	2009-01-23 18:34:00	0	18	4	7	6
1	2009-01-23 18:35:00	0	18	4	7	6
1	2009-01-23 18:36:00	0	18	4	7	6
1	2009-01-23 18:37:00	0	18	4	7	6
1	2009-01-23 18:38:00	0	18	4	7	6
1	2009-01-23 18:39:00	0	18	4	7	6
1	2009-01-23 18:40:00	0	18	4	7	6
1	2009-01-23 18:41:00	0	18	4	7	6
1	2009-01-23 18:42:00	0	18	4	7	6
1	2009-01-23 18:43:00	0	18	4	7	6
1	2009-01-23 18:44:00	0	18	4	7	6
1	2009-01-23 18:45:00	0	18	4	7	6
1	2009-01-23 18:46:00	12	18	4	7	6
1	2009-01-23 18:47:00	0	18	4	7	6
1	2009-01-23 18:48:00	12	18	4	7	6
1	2009-01-23 18:49:00	0	18	4	7	6
1	2009-01-23 18:50:00	0	18	4	7	6
1	2009-01-23 18:51:00	0	18	4	7	6
1	2009-01-23 18:52:00	0	18	4	7	6
1	2009-01-23 18:53:00	12	18	4	7	6
1	2009-01-23 18:54:00	0	18	4	7	6
1	2009-01-23 18:55:00	0	18	4	7	6
1	2009-01-23 18:56:00	0	18	4	7	6
1	2009-01-23 18:57:00	0	18	4	7	6
1	2009-01-23 18:58:00	36	18	4	7	6
1	2009-01-23 18:59:00	0	18	4	7	6
1	2009-01-23 19:00:00	0	18	4	7	6
1	2009-01-23 19:01:00	48	19	4	7	6
1	2009-01-23 19:02:00	0	19	4	7	6
1	2009-01-23 19:03:00	0	19	4	7	6
1	2009-01-23 19:04:00	0	19	4	7	6
1	2009-01-23 19:05:00	0	19	4	7	6
1	2009-01-23 19:06:00	24	19	4	7	6
1	2009-01-23 19:07:00	0	19	4	7	6
1	2009-01-23 19:08:00	0	19	4	7	6
1	2009-01-23 19:09:00	0	19	4	7	6
1	2009-01-23 19:10:00	0	19	4	7	6
1	2009-01-23 19:11:00	0	19	4	7	6
1	2009-01-23 19:12:00	0	19	4	7	6
1	2009-01-23 19:13:00	0	19	4	7	6
1	2009-01-23 19:14:00	0	19	4	7	6
1	2009-01-23 19:15:00	0	19	4	7	6
1	2009-01-23 19:16:00	0	19	4	7	6
1	2009-01-23 19:17:00	0	19	4	7	6
1	2009-01-23 19:18:00	0	19	4	7	6
1	2009-01-23 19:19:00	0	19	4	7	6
1	2009-01-23 19:20:00	0	19	4	7	6
1	2009-01-23 19:21:00	0	19	4	7	6
1	2009-01-23 19:22:00	0	19	4	7	6
1	2009-01-23 19:23:00	0	19	4	7	6
1	2009-01-23 19:24:00	0	19	4	7	6
1	2009-01-23 19:25:00	12	19	4	7	6
1	2009-01-23 19:26:00	0	19	4	7	6
1	2009-01-23 19:27:00	0	19	4	7	6
1	2009-01-23 19:28:00	0	19	4	7	6
1	2009-01-23 19:29:00	0	19	4	7	6
1	2009-01-23 19:30:00	0	19	4	7	6
1	2009-01-23 19:31:00	0	19	4	7	6
1	2009-01-23 19:32:00	0	19	4	7	6
1	2009-01-23 19:33:00	0	19	4	7	6
1	2009-01-23 19:34:00	0	19	4	7	6
1	2009-01-23 19:35:00	0	19	4	7	6
1	2009-01-23 19:36:00	0	19	4	7	6
1	2009-01-23 19:37:00	0	19	4	7	6
1	2009-01-23 19:38:00	0	19	4	7	6
1	2009-01-23 19:39:00	0	19	4	7	6
1	2009-01-23 19:40:00	0	19	4	7	6
1	2009-01-23 19:41:00	12	19	4	7	6
1	2009-01-23 19:42:00	0	19	4	7	6
1	2009-01-23 19:43:00	0	19	4	7	6
1	2009-01-23 19:44:00	24	19	4	7	6
1	2009-01-23 19:45:00	0	19	4	7	6
1	2009-01-23 19:46:00	0	19	4	7	6
1	2009-01-23 19:47:00	0	19	4	7	6
1	2009-01-23 19:48:00	0	19	4	7	6
1	2009-01-23 19:49:00	0	19	4	7	6
1	2009-01-23 19:50:00	0	19	4	7	6
1	2009-01-23 19:51:00	0	19	4	7	6
1	2009-01-23 19:52:00	0	19	4	7	6
1	2009-01-23 19:53:00	0	19	4	7	6
1	2009-01-23 19:54:00	0	19	4	7	6
1	2009-01-23 19:55:00	36	19	4	7	6
1	2009-01-23 19:56:00	12	19	4	7	6
1	2009-01-23 19:57:00	0	19	4	7	6
1	2009-01-23 19:58:00	12	19	4	7	6
1	2009-01-23 19:59:00	0	19	4	7	6
1	2009-01-23 20:00:00	0	19	4	7	6
1	2009-01-23 20:01:00	0	20	4	7	6
1	2009-01-23 20:02:00	0	20	4	7	6
1	2009-01-23 20:03:00	0	20	4	7	6
1	2009-01-23 20:04:00	24	20	4	7	6
1	2009-01-23 20:05:00	0	20	4	7	6
1	2009-01-23 20:06:00	0	20	4	7	6
1	2009-01-23 20:07:00	0	20	4	7	6
1	2009-01-23 20:08:00	0	20	4	7	6
1	2009-01-23 20:09:00	0	20	4	7	6
1	2009-01-23 20:10:00	0	20	4	7	6
1	2009-01-23 20:11:00	0	20	4	7	6
1	2009-01-23 20:12:00	0	20	4	7	6
1	2009-01-23 20:13:00	0	20	4	7	6
1	2009-01-23 20:14:00	0	20	4	7	6
1	2009-01-23 20:15:00	0	20	4	7	6
1	2009-01-23 20:16:00	0	20	4	7	6
1	2009-01-23 20:17:00	0	20	4	7	6
1	2009-01-23 20:18:00	0	20	4	7	6
1	2009-01-23 20:19:00	0	20	4	7	6
1	2009-01-23 20:20:00	0	20	4	7	6
1	2009-01-23 20:21:00	12	20	4	7	6
1	2009-01-23 20:22:00	0	20	4	7	6
1	2009-01-23 20:23:00	0	20	4	7	6
1	2009-01-23 20:24:00	0	20	4	7	6
1	2009-01-23 20:25:00	0	20	4	7	6
1	2009-01-23 20:26:00	0	20	4	7	6
1	2009-01-23 20:27:00	0	20	4	7	6
1	2009-01-23 20:28:00	0	20	4	7	6
1	2009-01-23 20:29:00	0	20	4	7	6
1	2009-01-23 20:30:00	0	20	4	7	6
1	2009-01-23 20:31:00	0	20	4	7	6
1	2009-01-23 20:32:00	0	20	4	7	6
1	2009-01-23 20:33:00	0	20	4	7	6
1	2009-01-23 20:34:00	0	20	4	7	6
1	2009-01-23 20:35:00	0	20	4	7	6
1	2009-01-23 20:36:00	0	20	4	7	6
1	2009-01-23 20:37:00	0	20	4	7	6
1	2009-01-23 20:38:00	0	20	4	7	6
1	2009-01-23 20:39:00	0	20	4	7	6
1	2009-01-23 20:40:00	0	20	4	7	6
1	2009-01-23 20:41:00	0	20	4	7	6
1	2009-01-23 20:42:00	0	20	4	7	6
1	2009-01-23 20:43:00	0	20	4	7	6
1	2009-01-23 20:44:00	0	20	4	7	6
1	2009-01-23 20:45:00	0	20	4	7	6
1	2009-01-23 20:46:00	0	20	4	7	6
1	2009-01-23 20:47:00	0	20	4	7	6
1	2009-01-23 20:48:00	0	20	4	7	6
1	2009-01-23 20:49:00	0	20	4	7	6
1	2009-01-23 20:50:00	0	20	4	7	6
1	2009-01-23 20:51:00	0	20	4	7	6
1	2009-01-23 20:52:00	0	20	4	7	6
1	2009-01-23 20:53:00	0	20	4	7	6
1	2009-01-23 20:54:00	0	20	4	7	6
1	2009-01-23 20:55:00	0	20	4	7	6
1	2009-01-23 20:56:00	0	20	4	7	6
1	2009-01-23 20:57:00	0	20	4	7	6
1	2009-01-23 20:58:00	0	20	4	7	6
1	2009-01-23 20:59:00	0	20	4	7	6
1	2009-01-23 21:00:00	0	20	4	7	6
1	2009-01-23 21:01:00	0	21	4	7	6
1	2009-01-23 21:02:00	0	21	4	7	6
1	2009-01-23 21:03:00	0	21	4	7	6
1	2009-01-23 21:04:00	0	21	4	7	6
1	2009-01-23 21:05:00	0	21	4	7	6
1	2009-01-23 21:06:00	0	21	4	7	6
1	2009-01-23 21:07:00	0	21	4	7	6
1	2009-01-23 21:08:00	0	21	4	7	6
1	2009-01-23 21:09:00	0	21	4	7	6
1	2009-01-23 21:10:00	0	21	4	7	6
1	2009-01-23 21:11:00	0	21	4	7	6
1	2009-01-23 21:12:00	0	21	4	7	6
1	2009-01-23 21:13:00	0	21	4	7	6
1	2009-01-23 21:14:00	0	21	4	7	6
1	2009-01-23 21:15:00	0	21	4	7	6
1	2009-01-23 21:16:00	0	21	4	7	6
1	2009-01-23 21:17:00	0	21	4	7	6
1	2009-01-23 21:18:00	0	21	4	7	6
1	2009-01-23 21:19:00	0	21	4	7	6
1	2009-01-23 21:20:00	0	21	4	7	6
1	2009-01-23 21:21:00	48	21	4	7	6
1	2009-01-23 21:22:00	12	21	4	7	6
1	2009-01-23 21:23:00	12	21	4	7	6
1	2009-01-23 21:24:00	0	21	4	7	6
1	2009-01-23 21:25:00	0	21	4	7	6
1	2009-01-23 21:26:00	0	21	4	7	6
1	2009-01-23 21:27:00	12	21	4	7	6
1	2009-01-23 21:28:00	0	21	4	7	6
1	2009-01-23 21:29:00	12	21	4	7	6
1	2009-01-23 21:30:00	97	21	4	7	6
1	2009-01-23 21:31:00	0	21	4	7	6
1	2009-01-23 21:32:00	0	21	4	7	6
1	2009-01-23 21:33:00	0	21	4	7	6
1	2009-01-23 21:34:00	121	21	4	7	6
1	2009-01-23 21:35:00	754	21	4	7	6
1	2009-01-23 21:36:00	997	21	4	7	6
1	2009-01-23 21:37:00	488	21	4	7	6
1	2009-01-23 21:38:00	667	21	4	7	6
1	2009-01-23 21:39:00	333	21	4	7	6
1	2009-01-23 21:40:00	488	21	4	7	6
1	2009-01-23 21:41:00	72	21	4	7	6
1	2009-01-23 21:42:00	0	21	4	7	6
1	2009-01-23 21:43:00	0	21	4	7	6
1	2009-01-23 21:44:00	0	21	4	7	6
1	2009-01-23 21:45:00	0	21	4	7	6
1	2009-01-23 21:46:00	0	21	4	7	6
1	2009-01-23 21:47:00	0	21	4	7	6
1	2009-01-23 21:48:00	0	21	4	7	6
1	2009-01-23 21:49:00	0	21	4	7	6
1	2009-01-23 21:50:00	0	21	4	7	6
1	2009-01-23 21:51:00	0	21	4	7	6
1	2009-01-23 21:52:00	0	21	4	7	6
1	2009-01-23 21:53:00	12	21	4	7	6
1	2009-01-23 21:54:00	0	21	4	7	6
1	2009-01-23 21:55:00	0	21	4	7	6
1	2009-01-23 21:56:00	0	21	4	7	6
1	2009-01-23 21:57:00	0	21	4	7	6
1	2009-01-23 21:58:00	0	21	4	7	6
1	2009-01-23 21:59:00	0	21	4	7	6
1	2009-01-23 22:00:00	0	21	4	7	6
1	2009-01-23 22:01:00	0	22	4	7	6
1	2009-01-23 22:02:00	0	22	4	7	6
1	2009-01-23 22:03:00	36	22	4	7	6
1	2009-01-23 22:04:00	0	22	4	7	6
1	2009-01-23 22:05:00	0	22	4	7	6
1	2009-01-23 22:06:00	0	22	4	7	6
1	2009-01-23 22:07:00	0	22	4	7	6
1	2009-01-23 22:08:00	0	22	4	7	6
1	2009-01-23 22:09:00	0	22	4	7	6
1	2009-01-23 22:10:00	0	22	4	7	6
1	2009-01-23 22:11:00	0	22	4	7	6
1	2009-01-23 22:12:00	0	22	4	7	6
1	2009-01-23 22:13:00	0	22	4	7	6
1	2009-01-23 22:14:00	12	22	4	7	6
1	2009-01-23 22:15:00	0	22	4	7	6
1	2009-01-23 22:16:00	0	22	4	7	6
1	2009-01-23 22:17:00	0	22	4	7	6
1	2009-01-23 22:18:00	0	22	4	7	6
1	2009-01-23 22:19:00	0	22	4	7	6
1	2009-01-23 22:20:00	0	22	4	7	6
1	2009-01-23 22:21:00	0	22	4	7	6
1	2009-01-23 22:22:00	0	22	4	7	6
1	2009-01-23 22:23:00	0	22	4	7	6
1	2009-01-23 22:24:00	0	22	4	7	6
1	2009-01-23 22:25:00	0	22	4	7	6
1	2009-01-23 22:26:00	0	22	4	7	6
1	2009-01-23 22:27:00	0	22	4	7	6
1	2009-01-23 22:28:00	36	22	4	7	6
1	2009-01-23 22:29:00	0	22	4	7	6
1	2009-01-23 22:30:00	0	22	4	7	6
1	2009-01-23 22:31:00	72	22	4	7	6
1	2009-01-23 22:32:00	0	22	4	7	6
1	2009-01-23 22:33:00	0	22	4	7	6
1	2009-01-23 22:34:00	0	22	4	7	6
1	2009-01-23 22:35:00	0	22	4	7	6
1	2009-01-23 22:36:00	0	22	4	7	6
1	2009-01-23 22:37:00	0	22	4	7	6
1	2009-01-23 22:38:00	0	22	4	7	6
1	2009-01-23 22:39:00	0	22	4	7	6
1	2009-01-23 22:40:00	0	22	4	7	6
1	2009-01-23 22:41:00	0	22	4	7	6
1	2009-01-23 22:42:00	36	22	4	7	6
1	2009-01-23 22:43:00	0	22	4	7	6
1	2009-01-23 22:44:00	0	22	4	7	6
1	2009-01-23 22:45:00	0	22	4	7	6
1	2009-01-23 22:46:00	0	22	4	7	6
1	2009-01-23 22:47:00	0	22	4	7	6
1	2009-01-23 22:48:00	0	22	4	7	6
1	2009-01-23 22:49:00	0	22	4	7	6
1	2009-01-23 22:50:00	0	22	4	7	6
1	2009-01-23 22:51:00	0	22	4	7	6
1	2009-01-23 22:52:00	0	22	4	7	6
1	2009-01-23 22:53:00	0	22	4	7	6
1	2009-01-23 22:54:00	0	22	4	7	6
1	2009-01-23 22:55:00	0	22	4	7	6
1	2009-01-23 22:56:00	0	22	4	7	6
1	2009-01-23 22:57:00	0	22	4	7	6
1	2009-01-23 22:58:00	0	22	4	7	6
1	2009-01-23 22:59:00	0	22	4	7	6
1	2009-01-23 23:00:00	0	22	4	7	6
1	2009-01-23 23:01:00	0	23	4	7	6
1	2009-01-23 23:02:00	24	23	4	7	6
1	2009-01-23 23:03:00	12	23	4	7	6
1	2009-01-23 23:04:00	0	23	4	7	6
1	2009-01-23 23:05:00	0	23	4	7	6
1	2009-01-23 23:06:00	0	23	4	7	6
1	2009-01-23 23:07:00	0	23	4	7	6
1	2009-01-23 23:08:00	0	23	4	7	6
1	2009-01-23 23:09:00	24	23	4	7	6
1	2009-01-23 23:10:00	0	23	4	7	6
1	2009-01-23 23:11:00	0	23	4	7	6
1	2009-01-23 23:12:00	0	23	4	7	6
1	2009-01-23 23:13:00	0	23	4	7	6
1	2009-01-23 23:14:00	0	23	4	7	6
1	2009-01-23 23:15:00	12	23	4	7	6
1	2009-01-23 23:16:00	0	23	4	7	6
1	2009-01-23 23:17:00	0	23	4	7	6
1	2009-01-23 23:18:00	24	23	4	7	6
1	2009-01-23 23:19:00	0	23	4	7	6
1	2009-01-23 23:20:00	36	23	4	7	6
1	2009-01-23 23:21:00	0	23	4	7	6
1	2009-01-23 23:22:00	0	23	4	7	6
1	2009-01-23 23:23:00	0	23	4	7	6
1	2009-01-23 23:24:00	133	23	4	7	6
1	2009-01-23 23:25:00	97	23	4	7	6
1	2009-01-23 23:26:00	0	23	4	7	6
1	2009-01-23 23:27:00	36	23	4	7	6
1	2009-01-23 23:28:00	0	23	4	7	6
1	2009-01-23 23:29:00	60	23	4	7	6
1	2009-01-23 23:30:00	48	23	4	7	6
1	2009-01-23 23:31:00	0	23	4	7	6
1	2009-01-23 23:32:00	0	23	4	7	6
1	2009-01-23 23:33:00	0	23	4	7	6
1	2009-01-23 23:34:00	12	23	4	7	6
1	2009-01-23 23:35:00	0	23	4	7	6
1	2009-01-23 23:36:00	0	23	4	7	6
1	2009-01-23 23:37:00	0	23	4	7	6
1	2009-01-23 23:38:00	0	23	4	7	6
1	2009-01-23 23:39:00	0	23	4	7	6
1	2009-01-23 23:40:00	0	23	4	7	6
1	2009-01-23 23:41:00	0	23	4	7	6
1	2009-01-23 23:42:00	0	23	4	7	6
1	2009-01-23 23:43:00	0	23	4	7	6
1	2009-01-23 23:44:00	0	23	4	7	6
1	2009-01-23 23:45:00	0	23	4	7	6
1	2009-01-23 23:46:00	0	23	4	7	6
1	2009-01-23 23:47:00	0	23	4	7	6
1	2009-01-23 23:48:00	0	23	4	7	6
1	2009-01-23 23:49:00	0	23	4	7	6
1	2009-01-23 23:50:00	0	23	4	7	6
1	2009-01-23 23:51:00	0	23	4	7	6
1	2009-01-23 23:52:00	0	23	4	7	6
1	2009-01-23 23:53:00	0	23	4	7	6
1	2009-01-23 23:54:00	0	23	4	7	6
1	2009-01-23 23:55:00	0	23	4	7	6
1	2009-01-23 23:56:00	0	23	4	7	6
1	2009-01-23 23:57:00	0	23	4	7	6
1	2009-01-23 23:58:00	0	23	4	7	6
1	2009-01-23 23:59:00	0	23	4	7	6
1	2009-01-24	0	23	4	7	6
1	2009-01-24 00:01:00	0	0	1	8	7
1	2009-01-24 00:02:00	0	0	1	8	7
1	2009-01-24 00:03:00	0	0	1	8	7
1	2009-01-24 00:04:00	0	0	1	8	7
1	2009-01-24 00:05:00	0	0	1	8	7
1	2009-01-24 00:06:00	0	0	1	8	7
1	2009-01-24 00:07:00	0	0	1	8	7
1	2009-01-24 00:08:00	0	0	1	8	7
1	2009-01-24 00:09:00	0	0	1	8	7
1	2009-01-24 00:10:00	0	0	1	8	7
1	2009-01-24 00:11:00	0	0	1	8	7
1	2009-01-24 00:12:00	0	0	1	8	7
1	2009-01-24 00:13:00	0	0	1	8	7
1	2009-01-24 00:14:00	0	0	1	8	7
1	2009-01-24 00:15:00	0	0	1	8	7
1	2009-01-24 00:16:00	0	0	1	8	7
1	2009-01-24 00:17:00	0	0	1	8	7
1	2009-01-24 00:18:00	0	0	1	8	7
1	2009-01-24 00:19:00	0	0	1	8	7
1	2009-01-24 00:20:00	0	0	1	8	7
1	2009-01-24 00:21:00	0	0	1	8	7
1	2009-01-24 00:22:00	0	0	1	8	7
1	2009-01-24 00:23:00	0	0	1	8	7
1	2009-01-24 00:24:00	0	0	1	8	7
1	2009-01-24 00:25:00	0	0	1	8	7
1	2009-01-24 00:26:00	0	0	1	8	7
1	2009-01-24 00:27:00	0	0	1	8	7
1	2009-01-24 00:28:00	0	0	1	8	7
1	2009-01-24 00:29:00	0	0	1	8	7
1	2009-01-24 00:30:00	0	0	1	8	7
1	2009-01-24 00:31:00	0	0	1	8	7
1	2009-01-24 00:32:00	0	0	1	8	7
1	2009-01-24 00:33:00	0	0	1	8	7
1	2009-01-24 00:34:00	0	0	1	8	7
1	2009-01-24 00:35:00	0	0	1	8	7
1	2009-01-24 00:36:00	0	0	1	8	7
1	2009-01-24 00:37:00	0	0	1	8	7
1	2009-01-24 00:38:00	0	0	1	8	7
1	2009-01-24 00:39:00	0	0	1	8	7
1	2009-01-24 00:40:00	0	0	1	8	7
1	2009-01-24 00:41:00	0	0	1	8	7
1	2009-01-24 00:42:00	0	0	1	8	7
1	2009-01-24 00:43:00	0	0	1	8	7
1	2009-01-24 00:44:00	0	0	1	8	7
1	2009-01-24 00:45:00	0	0	1	8	7
1	2009-01-24 00:46:00	0	0	1	8	7
1	2009-01-24 00:47:00	0	0	1	8	7
1	2009-01-24 00:48:00	0	0	1	8	7
1	2009-01-24 00:49:00	0	0	1	8	7
1	2009-01-24 00:50:00	0	0	1	8	7
1	2009-01-24 00:51:00	0	0	1	8	7
1	2009-01-24 00:52:00	0	0	1	8	7
1	2009-01-24 00:53:00	0	0	1	8	7
1	2009-01-24 00:54:00	0	0	1	8	7
1	2009-01-24 00:55:00	0	0	1	8	7
1	2009-01-24 00:56:00	0	0	1	8	7
1	2009-01-24 00:57:00	0	0	1	8	7
1	2009-01-24 00:58:00	0	0	1	8	7
1	2009-01-24 00:59:00	0	0	1	8	7
1	2009-01-24 01:00:00	0	0	1	8	7
1	2009-01-24 01:01:00	0	1	1	8	7
1	2009-01-24 01:02:00	0	1	1	8	7
1	2009-01-24 01:03:00	0	1	1	8	7
1	2009-01-24 01:04:00	0	1	1	8	7
1	2009-01-24 01:05:00	0	1	1	8	7
1	2009-01-24 01:06:00	0	1	1	8	7
1	2009-01-24 01:07:00	0	1	1	8	7
1	2009-01-24 01:08:00	0	1	1	8	7
1	2009-01-24 01:09:00	0	1	1	8	7
1	2009-01-24 01:10:00	0	1	1	8	7
1	2009-01-24 01:11:00	0	1	1	8	7
1	2009-01-24 01:12:00	12	1	1	8	7
1	2009-01-24 01:13:00	0	1	1	8	7
1	2009-01-24 01:14:00	0	1	1	8	7
1	2009-01-24 01:15:00	0	1	1	8	7
1	2009-01-24 01:16:00	0	1	1	8	7
1	2009-01-24 01:17:00	0	1	1	8	7
1	2009-01-24 01:18:00	0	1	1	8	7
1	2009-01-24 01:19:00	0	1	1	8	7
1	2009-01-24 01:20:00	0	1	1	8	7
1	2009-01-24 01:21:00	0	1	1	8	7
1	2009-01-24 01:22:00	12	1	1	8	7
1	2009-01-24 01:23:00	0	1	1	8	7
1	2009-01-24 01:24:00	0	1	1	8	7
1	2009-01-24 01:25:00	0	1	1	8	7
1	2009-01-24 01:26:00	0	1	1	8	7
1	2009-01-24 01:27:00	0	1	1	8	7
1	2009-01-24 01:28:00	0	1	1	8	7
1	2009-01-24 01:29:00	0	1	1	8	7
1	2009-01-24 01:30:00	0	1	1	8	7
1	2009-01-24 01:31:00	0	1	1	8	7
1	2009-01-24 01:32:00	0	1	1	8	7
1	2009-01-24 01:33:00	0	1	1	8	7
1	2009-01-24 01:34:00	0	1	1	8	7
1	2009-01-24 01:35:00	0	1	1	8	7
1	2009-01-24 01:36:00	0	1	1	8	7
1	2009-01-24 01:37:00	0	1	1	8	7
1	2009-01-24 01:38:00	0	1	1	8	7
1	2009-01-24 01:39:00	0	1	1	8	7
1	2009-01-24 01:40:00	0	1	1	8	7
1	2009-01-24 01:41:00	0	1	1	8	7
1	2009-01-24 01:42:00	0	1	1	8	7
1	2009-01-24 01:43:00	0	1	1	8	7
1	2009-01-24 01:44:00	0	1	1	8	7
1	2009-01-24 01:45:00	0	1	1	8	7
1	2009-01-24 01:46:00	0	1	1	8	7
1	2009-01-24 01:47:00	0	1	1	8	7
1	2009-01-24 01:48:00	0	1	1	8	7
1	2009-01-24 01:49:00	0	1	1	8	7
1	2009-01-24 01:50:00	0	1	1	8	7
1	2009-01-24 01:51:00	0	1	1	8	7
1	2009-01-24 01:52:00	0	1	1	8	7
1	2009-01-24 01:53:00	0	1	1	8	7
1	2009-01-24 01:54:00	0	1	1	8	7
1	2009-01-24 01:55:00	0	1	1	8	7
1	2009-01-24 01:56:00	0	1	1	8	7
1	2009-01-24 01:57:00	0	1	1	8	7
1	2009-01-24 01:58:00	0	1	1	8	7
1	2009-01-24 01:59:00	0	1	1	8	7
1	2009-01-24 02:00:00	0	1	1	8	7
1	2009-01-24 02:01:00	0	2	1	8	7
1	2009-01-24 02:02:00	0	2	1	8	7
1	2009-01-24 02:03:00	0	2	1	8	7
1	2009-01-24 02:04:00	0	2	1	8	7
1	2009-01-24 02:05:00	0	2	1	8	7
1	2009-01-24 02:06:00	0	2	1	8	7
1	2009-01-24 02:07:00	0	2	1	8	7
1	2009-01-24 02:08:00	0	2	1	8	7
1	2009-01-24 02:09:00	0	2	1	8	7
1	2009-01-24 02:10:00	0	2	1	8	7
1	2009-01-24 02:11:00	0	2	1	8	7
1	2009-01-24 02:12:00	0	2	1	8	7
1	2009-01-24 02:13:00	0	2	1	8	7
1	2009-01-24 02:14:00	0	2	1	8	7
1	2009-01-24 02:15:00	12	2	1	8	7
1	2009-01-24 02:16:00	0	2	1	8	7
1	2009-01-24 02:17:00	0	2	1	8	7
1	2009-01-24 02:18:00	0	2	1	8	7
1	2009-01-24 02:19:00	0	2	1	8	7
1	2009-01-24 02:20:00	0	2	1	8	7
1	2009-01-24 02:21:00	0	2	1	8	7
1	2009-01-24 02:22:00	0	2	1	8	7
1	2009-01-24 02:23:00	0	2	1	8	7
1	2009-01-24 02:24:00	0	2	1	8	7
1	2009-01-24 02:25:00	0	2	1	8	7
1	2009-01-24 02:26:00	0	2	1	8	7
1	2009-01-24 02:27:00	0	2	1	8	7
1	2009-01-24 02:28:00	0	2	1	8	7
1	2009-01-24 02:29:00	0	2	1	8	7
1	2009-01-24 02:30:00	0	2	1	8	7
1	2009-01-24 02:31:00	0	2	1	8	7
1	2009-01-24 02:32:00	0	2	1	8	7
1	2009-01-24 02:33:00	0	2	1	8	7
1	2009-01-24 02:34:00	0	2	1	8	7
1	2009-01-24 02:35:00	0	2	1	8	7
1	2009-01-24 02:36:00	0	2	1	8	7
1	2009-01-24 02:37:00	12	2	1	8	7
1	2009-01-24 02:38:00	12	2	1	8	7
1	2009-01-24 02:39:00	0	2	1	8	7
1	2009-01-24 02:40:00	0	2	1	8	7
1	2009-01-24 02:41:00	0	2	1	8	7
1	2009-01-24 02:42:00	12	2	1	8	7
1	2009-01-24 02:43:00	0	2	1	8	7
1	2009-01-24 02:44:00	0	2	1	8	7
1	2009-01-24 02:45:00	0	2	1	8	7
1	2009-01-24 02:46:00	0	2	1	8	7
1	2009-01-24 02:47:00	0	2	1	8	7
1	2009-01-24 02:48:00	0	2	1	8	7
1	2009-01-24 02:49:00	0	2	1	8	7
1	2009-01-24 02:50:00	0	2	1	8	7
1	2009-01-24 02:51:00	0	2	1	8	7
1	2009-01-24 02:52:00	0	2	1	8	7
1	2009-01-24 02:53:00	0	2	1	8	7
1	2009-01-24 02:54:00	0	2	1	8	7
1	2009-01-24 02:55:00	0	2	1	8	7
1	2009-01-24 02:56:00	0	2	1	8	7
1	2009-01-24 02:57:00	0	2	1	8	7
1	2009-01-24 02:58:00	0	2	1	8	7
1	2009-01-24 02:59:00	12	2	1	8	7
1	2009-01-24 03:00:00	0	2	1	8	7
1	2009-01-24 03:01:00	0	3	1	8	7
1	2009-01-24 03:02:00	0	3	1	8	7
1	2009-01-24 03:03:00	0	3	1	8	7
1	2009-01-24 03:04:00	0	3	1	8	7
1	2009-01-24 03:05:00	0	3	1	8	7
1	2009-01-24 03:06:00	0	3	1	8	7
1	2009-01-24 03:07:00	0	3	1	8	7
1	2009-01-24 03:08:00	0	3	1	8	7
1	2009-01-24 03:09:00	0	3	1	8	7
1	2009-01-24 03:10:00	0	3	1	8	7
1	2009-01-24 03:11:00	0	3	1	8	7
1	2009-01-24 03:12:00	0	3	1	8	7
1	2009-01-24 03:13:00	0	3	1	8	7
1	2009-01-24 03:14:00	0	3	1	8	7
1	2009-01-24 03:15:00	0	3	1	8	7
1	2009-01-24 03:16:00	0	3	1	8	7
1	2009-01-24 03:17:00	0	3	1	8	7
1	2009-01-24 03:18:00	0	3	1	8	7
1	2009-01-24 03:19:00	0	3	1	8	7
1	2009-01-24 03:20:00	0	3	1	8	7
1	2009-01-24 03:21:00	0	3	1	8	7
1	2009-01-24 03:22:00	0	3	1	8	7
1	2009-01-24 03:23:00	0	3	1	8	7
1	2009-01-24 03:24:00	0	3	1	8	7
1	2009-01-24 03:25:00	0	3	1	8	7
1	2009-01-24 03:26:00	0	3	1	8	7
1	2009-01-24 03:27:00	0	3	1	8	7
1	2009-01-24 03:28:00	0	3	1	8	7
1	2009-01-24 03:29:00	0	3	1	8	7
1	2009-01-24 03:30:00	0	3	1	8	7
1	2009-01-24 03:31:00	0	3	1	8	7
1	2009-01-24 03:32:00	0	3	1	8	7
1	2009-01-24 03:33:00	0	3	1	8	7
1	2009-01-24 03:34:00	0	3	1	8	7
1	2009-01-24 03:35:00	0	3	1	8	7
1	2009-01-24 03:36:00	0	3	1	8	7
1	2009-01-24 03:37:00	0	3	1	8	7
1	2009-01-24 03:38:00	0	3	1	8	7
1	2009-01-24 03:39:00	0	3	1	8	7
1	2009-01-24 03:40:00	0	3	1	8	7
1	2009-01-24 03:41:00	0	3	1	8	7
1	2009-01-24 03:42:00	0	3	1	8	7
1	2009-01-24 03:43:00	0	3	1	8	7
1	2009-01-24 03:44:00	0	3	1	8	7
1	2009-01-24 03:45:00	0	3	1	8	7
1	2009-01-24 03:46:00	0	3	1	8	7
1	2009-01-24 03:47:00	0	3	1	8	7
1	2009-01-24 03:48:00	0	3	1	8	7
1	2009-01-24 03:49:00	0	3	1	8	7
1	2009-01-24 03:50:00	0	3	1	8	7
1	2009-01-24 03:51:00	0	3	1	8	7
1	2009-01-24 03:52:00	0	3	1	8	7
1	2009-01-24 03:53:00	0	3	1	8	7
1	2009-01-24 03:54:00	0	3	1	8	7
1	2009-01-24 03:55:00	0	3	1	8	7
1	2009-01-24 03:56:00	12	3	1	8	7
1	2009-01-24 03:57:00	0	3	1	8	7
1	2009-01-24 03:58:00	0	3	1	8	7
1	2009-01-24 03:59:00	0	3	1	8	7
1	2009-01-24 04:00:00	0	3	1	8	7
1	2009-01-24 04:01:00	0	4	1	8	7
1	2009-01-24 04:02:00	24	4	1	8	7
1	2009-01-24 04:03:00	0	4	1	8	7
1	2009-01-24 04:04:00	0	4	1	8	7
1	2009-01-24 04:05:00	36	4	1	8	7
1	2009-01-24 04:06:00	0	4	1	8	7
1	2009-01-24 04:07:00	0	4	1	8	7
1	2009-01-24 04:08:00	0	4	1	8	7
1	2009-01-24 04:09:00	0	4	1	8	7
1	2009-01-24 04:10:00	0	4	1	8	7
1	2009-01-24 04:11:00	0	4	1	8	7
1	2009-01-24 04:12:00	0	4	1	8	7
1	2009-01-24 04:13:00	0	4	1	8	7
1	2009-01-24 04:14:00	0	4	1	8	7
1	2009-01-24 04:15:00	0	4	1	8	7
1	2009-01-24 04:16:00	0	4	1	8	7
1	2009-01-24 04:17:00	0	4	1	8	7
1	2009-01-24 04:18:00	0	4	1	8	7
1	2009-01-24 04:19:00	0	4	1	8	7
1	2009-01-24 04:20:00	0	4	1	8	7
1	2009-01-24 04:21:00	0	4	1	8	7
1	2009-01-24 04:22:00	0	4	1	8	7
1	2009-01-24 04:23:00	0	4	1	8	7
1	2009-01-24 04:24:00	0	4	1	8	7
1	2009-01-24 04:25:00	0	4	1	8	7
1	2009-01-24 04:26:00	12	4	1	8	7
1	2009-01-24 04:27:00	0	4	1	8	7
1	2009-01-24 04:28:00	0	4	1	8	7
1	2009-01-24 04:29:00	0	4	1	8	7
1	2009-01-24 04:30:00	0	4	1	8	7
1	2009-01-24 04:31:00	0	4	1	8	7
1	2009-01-24 04:32:00	0	4	1	8	7
1	2009-01-24 04:33:00	0	4	1	8	7
1	2009-01-24 04:34:00	0	4	1	8	7
1	2009-01-24 04:35:00	0	4	1	8	7
1	2009-01-24 04:36:00	0	4	1	8	7
1	2009-01-24 04:37:00	0	4	1	8	7
1	2009-01-24 04:38:00	0	4	1	8	7
1	2009-01-24 04:39:00	0	4	1	8	7
1	2009-01-24 04:40:00	0	4	1	8	7
1	2009-01-24 04:41:00	0	4	1	8	7
1	2009-01-24 04:42:00	0	4	1	8	7
1	2009-01-24 04:43:00	36	4	1	8	7
1	2009-01-24 04:44:00	0	4	1	8	7
1	2009-01-24 04:45:00	0	4	1	8	7
1	2009-01-24 04:46:00	12	4	1	8	7
1	2009-01-24 04:47:00	0	4	1	8	7
1	2009-01-24 04:48:00	0	4	1	8	7
1	2009-01-24 04:49:00	0	4	1	8	7
1	2009-01-24 04:50:00	0	4	1	8	7
1	2009-01-24 04:51:00	0	4	1	8	7
1	2009-01-24 04:52:00	0	4	1	8	7
1	2009-01-24 04:53:00	0	4	1	8	7
1	2009-01-24 04:54:00	0	4	1	8	7
1	2009-01-24 04:55:00	0	4	1	8	7
1	2009-01-24 04:56:00	0	4	1	8	7
1	2009-01-24 04:57:00	0	4	1	8	7
1	2009-01-24 04:58:00	0	4	1	8	7
1	2009-01-24 04:59:00	0	4	1	8	7
1	2009-01-24 05:00:00	0	4	1	8	7
1	2009-01-24 05:01:00	0	5	1	8	7
1	2009-01-24 05:02:00	0	5	1	8	7
1	2009-01-24 05:03:00	0	5	1	8	7
1	2009-01-24 05:04:00	36	5	1	8	7
1	2009-01-24 05:05:00	24	5	1	8	7
1	2009-01-24 05:06:00	12	5	1	8	7
1	2009-01-24 05:07:00	133	5	1	8	7
1	2009-01-24 05:08:00	0	5	1	8	7
1	2009-01-24 05:09:00	0	5	1	8	7
1	2009-01-24 05:10:00	0	5	1	8	7
1	2009-01-24 05:11:00	0	5	1	8	7
1	2009-01-24 05:12:00	12	5	1	8	7
1	2009-01-24 05:13:00	0	5	1	8	7
1	2009-01-24 05:14:00	0	5	1	8	7
1	2009-01-24 05:15:00	0	5	1	8	7
1	2009-01-24 05:16:00	0	5	1	8	7
1	2009-01-24 05:17:00	0	5	1	8	7
1	2009-01-24 05:18:00	0	5	1	8	7
1	2009-01-24 05:19:00	12	5	1	8	7
1	2009-01-24 05:20:00	0	5	1	8	7
1	2009-01-24 05:21:00	0	5	1	8	7
1	2009-01-24 05:22:00	36	5	1	8	7
1	2009-01-24 05:23:00	0	5	1	8	7
1	2009-01-24 05:24:00	0	5	1	8	7
1	2009-01-24 05:25:00	0	5	1	8	7
1	2009-01-24 05:26:00	0	5	1	8	7
1	2009-01-24 05:27:00	0	5	1	8	7
1	2009-01-24 05:28:00	0	5	1	8	7
1	2009-01-24 05:29:00	0	5	1	8	7
1	2009-01-24 05:30:00	0	5	1	8	7
1	2009-01-24 05:31:00	0	5	1	8	7
1	2009-01-24 05:32:00	0	5	1	8	7
1	2009-01-24 05:33:00	0	5	1	8	7
1	2009-01-24 05:34:00	0	5	1	8	7
1	2009-01-24 05:35:00	0	5	1	8	7
1	2009-01-24 05:36:00	0	5	1	8	7
1	2009-01-24 05:37:00	0	5	1	8	7
1	2009-01-24 05:38:00	0	5	1	8	7
1	2009-01-24 05:39:00	0	5	1	8	7
1	2009-01-24 05:40:00	0	5	1	8	7
1	2009-01-24 05:41:00	0	5	1	8	7
1	2009-01-24 05:42:00	0	5	1	8	7
1	2009-01-24 05:43:00	0	5	1	8	7
1	2009-01-24 05:44:00	0	5	1	8	7
1	2009-01-24 05:45:00	0	5	1	8	7
1	2009-01-24 05:46:00	0	5	1	8	7
1	2009-01-24 05:47:00	0	5	1	8	7
1	2009-01-24 05:48:00	0	5	1	8	7
1	2009-01-24 05:49:00	48	5	1	8	7
1	2009-01-24 05:50:00	12	5	1	8	7
1	2009-01-24 05:51:00	0	5	1	8	7
1	2009-01-24 05:52:00	0	5	1	8	7
1	2009-01-24 05:53:00	0	5	1	8	7
1	2009-01-24 05:54:00	0	5	1	8	7
1	2009-01-24 05:55:00	0	5	1	8	7
1	2009-01-24 05:56:00	0	5	1	8	7
1	2009-01-24 05:57:00	0	5	1	8	7
1	2009-01-24 05:58:00	0	5	1	8	7
1	2009-01-24 05:59:00	0	5	1	8	7
1	2009-01-24 06:00:00	0	5	1	8	7
1	2009-01-24 06:01:00	36	6	2	8	7
1	2009-01-24 06:02:00	12	6	2	8	7
1	2009-01-24 06:03:00	0	6	2	8	7
1	2009-01-24 06:04:00	0	6	2	8	7
1	2009-01-24 06:05:00	316	6	2	8	7
1	2009-01-24 06:06:00	85	6	2	8	7
1	2009-01-24 06:07:00	418	6	2	8	7
1	2009-01-24 06:08:00	710	6	2	8	7
1	2009-01-24 06:09:00	546	6	2	8	7
1	2009-01-24 06:10:00	710	6	2	8	7
1	2009-01-24 06:11:00	367	6	2	8	7
1	2009-01-24 06:12:00	507	6	2	8	7
1	2009-01-24 06:13:00	258	6	2	8	7
1	2009-01-24 06:14:00	24	6	2	8	7
1	2009-01-24 06:15:00	0	6	2	8	7
1	2009-01-24 06:16:00	0	6	2	8	7
1	2009-01-24 06:17:00	0	6	2	8	7
1	2009-01-24 06:18:00	0	6	2	8	7
1	2009-01-24 06:19:00	0	6	2	8	7
1	2009-01-24 06:20:00	0	6	2	8	7
1	2009-01-24 06:21:00	0	6	2	8	7
1	2009-01-24 06:22:00	0	6	2	8	7
1	2009-01-24 06:23:00	0	6	2	8	7
1	2009-01-24 06:24:00	0	6	2	8	7
1	2009-01-24 06:25:00	0	6	2	8	7
1	2009-01-24 06:26:00	97	6	2	8	7
1	2009-01-24 06:27:00	258	6	2	8	7
1	2009-01-24 06:28:00	109	6	2	8	7
1	2009-01-24 06:29:00	12	6	2	8	7
1	2009-01-24 06:30:00	0	6	2	8	7
1	2009-01-24 06:31:00	0	6	2	8	7
1	2009-01-24 06:32:00	0	6	2	8	7
1	2009-01-24 06:33:00	0	6	2	8	7
1	2009-01-24 06:34:00	0	6	2	8	7
1	2009-01-24 06:35:00	0	6	2	8	7
1	2009-01-24 06:36:00	0	6	2	8	7
1	2009-01-24 06:37:00	0	6	2	8	7
1	2009-01-24 06:38:00	0	6	2	8	7
1	2009-01-24 06:39:00	0	6	2	8	7
1	2009-01-24 06:40:00	0	6	2	8	7
1	2009-01-24 06:41:00	0	6	2	8	7
1	2009-01-24 06:42:00	12	6	2	8	7
1	2009-01-24 06:43:00	0	6	2	8	7
1	2009-01-24 06:44:00	0	6	2	8	7
1	2009-01-24 06:45:00	0	6	2	8	7
1	2009-01-24 06:46:00	0	6	2	8	7
1	2009-01-24 06:47:00	0	6	2	8	7
1	2009-01-24 06:48:00	0	6	2	8	7
1	2009-01-24 06:49:00	0	6	2	8	7
1	2009-01-24 06:50:00	0	6	2	8	7
1	2009-01-24 06:51:00	12	6	2	8	7
1	2009-01-24 06:52:00	0	6	2	8	7
1	2009-01-24 06:53:00	0	6	2	8	7
1	2009-01-24 06:54:00	0	6	2	8	7
1	2009-01-24 06:55:00	0	6	2	8	7
1	2009-01-24 06:56:00	0	6	2	8	7
1	2009-01-24 06:57:00	0	6	2	8	7
1	2009-01-24 06:58:00	0	6	2	8	7
1	2009-01-24 06:59:00	0	6	2	8	7
1	2009-01-24 07:00:00	0	6	2	8	7
1	2009-01-24 07:01:00	0	7	2	8	7
1	2009-01-24 07:02:00	0	7	2	8	7
1	2009-01-24 07:03:00	0	7	2	8	7
1	2009-01-24 07:04:00	0	7	2	8	7
1	2009-01-24 07:05:00	0	7	2	8	7
1	2009-01-24 07:06:00	0	7	2	8	7
1	2009-01-24 07:07:00	0	7	2	8	7
1	2009-01-24 07:08:00	0	7	2	8	7
1	2009-01-24 07:09:00	0	7	2	8	7
1	2009-01-24 07:10:00	0	7	2	8	7
1	2009-01-24 07:11:00	0	7	2	8	7
1	2009-01-24 07:12:00	229	7	2	8	7
1	2009-01-24 07:13:00	36	7	2	8	7
1	2009-01-24 07:14:00	12	7	2	8	7
1	2009-01-24 07:15:00	0	7	2	8	7
1	2009-01-24 07:16:00	0	7	2	8	7
1	2009-01-24 07:17:00	0	7	2	8	7
1	2009-01-24 07:18:00	0	7	2	8	7
1	2009-01-24 07:19:00	0	7	2	8	7
1	2009-01-24 07:20:00	0	7	2	8	7
1	2009-01-24 07:21:00	0	7	2	8	7
1	2009-01-24 07:22:00	0	7	2	8	7
1	2009-01-24 07:23:00	0	7	2	8	7
1	2009-01-24 07:24:00	0	7	2	8	7
1	2009-01-24 07:25:00	0	7	2	8	7
1	2009-01-24 07:26:00	24	7	2	8	7
1	2009-01-24 07:27:00	0	7	2	8	7
1	2009-01-24 07:28:00	0	7	2	8	7
1	2009-01-24 07:29:00	0	7	2	8	7
1	2009-01-24 07:30:00	0	7	2	8	7
1	2009-01-24 07:31:00	0	7	2	8	7
1	2009-01-24 07:32:00	0	7	2	8	7
1	2009-01-24 07:33:00	0	7	2	8	7
1	2009-01-24 07:34:00	0	7	2	8	7
1	2009-01-24 07:35:00	0	7	2	8	7
1	2009-01-24 07:36:00	12	7	2	8	7
1	2009-01-24 07:37:00	0	7	2	8	7
1	2009-01-24 07:38:00	0	7	2	8	7
1	2009-01-24 07:39:00	0	7	2	8	7
1	2009-01-24 07:40:00	0	7	2	8	7
1	2009-01-24 07:41:00	0	7	2	8	7
1	2009-01-24 07:42:00	0	7	2	8	7
1	2009-01-24 07:43:00	0	7	2	8	7
1	2009-01-24 07:44:00	0	7	2	8	7
1	2009-01-24 07:45:00	0	7	2	8	7
1	2009-01-24 07:46:00	0	7	2	8	7
1	2009-01-24 07:47:00	0	7	2	8	7
1	2009-01-24 07:48:00	0	7	2	8	7
1	2009-01-24 07:49:00	0	7	2	8	7
1	2009-01-24 07:50:00	0	7	2	8	7
1	2009-01-24 07:51:00	0	7	2	8	7
1	2009-01-24 07:52:00	0	7	2	8	7
1	2009-01-24 07:53:00	0	7	2	8	7
1	2009-01-24 07:54:00	0	7	2	8	7
1	2009-01-24 07:55:00	0	7	2	8	7
1	2009-01-24 07:56:00	0	7	2	8	7
1	2009-01-24 07:57:00	0	7	2	8	7
1	2009-01-24 07:58:00	0	7	2	8	7
1	2009-01-24 07:59:00	0	7	2	8	7
1	2009-01-24 08:00:00	24	7	2	8	7
1	2009-01-24 08:01:00	0	8	2	8	7
1	2009-01-24 08:02:00	0	8	2	8	7
1	2009-01-24 08:03:00	0	8	2	8	7
1	2009-01-24 08:04:00	0	8	2	8	7
1	2009-01-24 08:05:00	0	8	2	8	7
1	2009-01-24 08:06:00	0	8	2	8	7
1	2009-01-24 08:07:00	0	8	2	8	7
1	2009-01-24 08:08:00	0	8	2	8	7
1	2009-01-24 08:09:00	0	8	2	8	7
1	2009-01-24 08:10:00	0	8	2	8	7
1	2009-01-24 08:11:00	0	8	2	8	7
1	2009-01-24 08:12:00	0	8	2	8	7
1	2009-01-24 08:13:00	0	8	2	8	7
1	2009-01-24 08:14:00	0	8	2	8	7
1	2009-01-24 08:15:00	0	8	2	8	7
1	2009-01-24 08:16:00	0	8	2	8	7
1	2009-01-24 08:17:00	0	8	2	8	7
1	2009-01-24 08:18:00	0	8	2	8	7
1	2009-01-24 08:19:00	0	8	2	8	7
1	2009-01-24 08:20:00	0	8	2	8	7
1	2009-01-24 08:21:00	0	8	2	8	7
1	2009-01-24 08:22:00	12	8	2	8	7
1	2009-01-24 08:23:00	0	8	2	8	7
1	2009-01-24 08:24:00	0	8	2	8	7
1	2009-01-24 08:25:00	0	8	2	8	7
1	2009-01-24 08:26:00	0	8	2	8	7
1	2009-01-24 08:27:00	0	8	2	8	7
1	2009-01-24 08:28:00	0	8	2	8	7
1	2009-01-24 08:29:00	24	8	2	8	7
1	2009-01-24 08:30:00	24	8	2	8	7
1	2009-01-24 08:31:00	0	8	2	8	7
1	2009-01-24 08:32:00	0	8	2	8	7
1	2009-01-24 08:33:00	0	8	2	8	7
1	2009-01-24 08:34:00	0	8	2	8	7
1	2009-01-24 08:35:00	0	8	2	8	7
1	2009-01-24 08:36:00	0	8	2	8	7
1	2009-01-24 08:37:00	12	8	2	8	7
1	2009-01-24 08:38:00	0	8	2	8	7
1	2009-01-24 08:39:00	0	8	2	8	7
1	2009-01-24 08:40:00	36	8	2	8	7
1	2009-01-24 08:41:00	0	8	2	8	7
1	2009-01-24 08:42:00	24	8	2	8	7
1	2009-01-24 08:43:00	452	8	2	8	7
1	2009-01-24 08:44:00	85	8	2	8	7
1	2009-01-24 08:45:00	215	8	2	8	7
1	2009-01-24 08:46:00	0	8	2	8	7
1	2009-01-24 08:47:00	0	8	2	8	7
1	2009-01-24 08:48:00	0	8	2	8	7
1	2009-01-24 08:49:00	0	8	2	8	7
1	2009-01-24 08:50:00	0	8	2	8	7
1	2009-01-24 08:51:00	0	8	2	8	7
1	2009-01-24 08:52:00	0	8	2	8	7
1	2009-01-24 08:53:00	0	8	2	8	7
1	2009-01-24 08:54:00	273	8	2	8	7
1	2009-01-24 08:55:00	0	8	2	8	7
1	2009-01-24 08:56:00	0	8	2	8	7
1	2009-01-24 08:57:00	0	8	2	8	7
1	2009-01-24 08:58:00	0	8	2	8	7
1	2009-01-24 08:59:00	0	8	2	8	7
1	2009-01-24 09:00:00	0	8	2	8	7
1	2009-01-24 09:01:00	0	9	2	8	7
1	2009-01-24 09:02:00	0	9	2	8	7
1	2009-01-24 09:03:00	0	9	2	8	7
1	2009-01-24 09:04:00	0	9	2	8	7
1	2009-01-24 09:05:00	0	9	2	8	7
1	2009-01-24 09:06:00	0	9	2	8	7
1	2009-01-24 09:07:00	0	9	2	8	7
1	2009-01-24 09:08:00	0	9	2	8	7
1	2009-01-24 09:09:00	0	9	2	8	7
1	2009-01-24 09:10:00	0	9	2	8	7
1	2009-01-24 09:11:00	24	9	2	8	7
1	2009-01-24 09:12:00	0	9	2	8	7
1	2009-01-24 09:13:00	0	9	2	8	7
1	2009-01-24 09:14:00	0	9	2	8	7
1	2009-01-24 09:15:00	0	9	2	8	7
1	2009-01-24 09:16:00	0	9	2	8	7
1	2009-01-24 09:17:00	0	9	2	8	7
1	2009-01-24 09:18:00	0	9	2	8	7
1	2009-01-24 09:19:00	0	9	2	8	7
1	2009-01-24 09:20:00	0	9	2	8	7
1	2009-01-24 09:21:00	0	9	2	8	7
1	2009-01-24 09:22:00	526	9	2	8	7
1	2009-01-24 09:23:00	333	9	2	8	7
1	2009-01-24 09:24:00	215	9	2	8	7
1	2009-01-24 09:25:00	0	9	2	8	7
1	2009-01-24 09:26:00	0	9	2	8	7
1	2009-01-24 09:27:00	0	9	2	8	7
1	2009-01-24 09:28:00	0	9	2	8	7
1	2009-01-24 09:29:00	0	9	2	8	7
1	2009-01-24 09:30:00	0	9	2	8	7
1	2009-01-24 09:31:00	0	9	2	8	7
1	2009-01-24 09:32:00	0	9	2	8	7
1	2009-01-24 09:33:00	72	9	2	8	7
1	2009-01-24 09:34:00	171	9	2	8	7
1	2009-01-24 09:35:00	0	9	2	8	7
1	2009-01-24 09:36:00	0	9	2	8	7
1	2009-01-24 09:37:00	0	9	2	8	7
1	2009-01-24 09:38:00	0	9	2	8	7
1	2009-01-24 09:39:00	0	9	2	8	7
1	2009-01-24 09:40:00	0	9	2	8	7
1	2009-01-24 09:41:00	0	9	2	8	7
1	2009-01-24 09:42:00	0	9	2	8	7
1	2009-01-24 09:43:00	0	9	2	8	7
1	2009-01-24 09:44:00	0	9	2	8	7
1	2009-01-24 09:45:00	0	9	2	8	7
1	2009-01-24 09:46:00	0	9	2	8	7
1	2009-01-24 09:47:00	0	9	2	8	7
1	2009-01-24 09:48:00	0	9	2	8	7
1	2009-01-24 09:49:00	0	9	2	8	7
1	2009-01-24 09:50:00	0	9	2	8	7
1	2009-01-24 09:51:00	0	9	2	8	7
1	2009-01-24 09:52:00	60	9	2	8	7
1	2009-01-24 09:53:00	200	9	2	8	7
1	2009-01-24 09:54:00	316	9	2	8	7
1	2009-01-24 09:55:00	667	9	2	8	7
1	2009-01-24 09:56:00	872	9	2	8	7
1	2009-01-24 09:57:00	623	9	2	8	7
1	2009-01-24 09:58:00	623	9	2	8	7
1	2009-01-24 09:59:00	688	9	2	8	7
1	2009-01-24 10:00:00	302	9	2	8	7
1	2009-01-24 10:01:00	384	10	2	8	7
1	2009-01-24 10:02:00	452	10	2	8	7
1	2009-01-24 10:03:00	623	10	2	8	7
1	2009-01-24 10:04:00	710	10	2	8	7
1	2009-01-24 10:05:00	435	10	2	8	7
1	2009-01-24 10:06:00	302	10	2	8	7
1	2009-01-24 10:07:00	333	10	2	8	7
1	2009-01-24 10:08:00	273	10	2	8	7
1	2009-01-24 10:09:00	273	10	2	8	7
1	2009-01-24 10:10:00	287	10	2	8	7
1	2009-01-24 10:11:00	273	10	2	8	7
1	2009-01-24 10:12:00	186	10	2	8	7
1	2009-01-24 10:13:00	0	10	2	8	7
1	2009-01-24 10:14:00	0	10	2	8	7
1	2009-01-24 10:15:00	0	10	2	8	7
1	2009-01-24 10:16:00	0	10	2	8	7
1	2009-01-24 10:17:00	0	10	2	8	7
1	2009-01-24 10:18:00	0	10	2	8	7
1	2009-01-24 10:19:00	0	10	2	8	7
1	2009-01-24 10:20:00	0	10	2	8	7
1	2009-01-24 10:21:00	48	10	2	8	7
1	2009-01-24 10:22:00	24	10	2	8	7
1	2009-01-24 10:23:00	0	10	2	8	7
1	2009-01-24 10:24:00	0	10	2	8	7
1	2009-01-24 10:25:00	0	10	2	8	7
1	2009-01-24 10:26:00	0	10	2	8	7
1	2009-01-24 10:27:00	12	10	2	8	7
1	2009-01-24 10:28:00	0	10	2	8	7
1	2009-01-24 10:29:00	0	10	2	8	7
1	2009-01-24 10:30:00	12	10	2	8	7
1	2009-01-24 10:31:00	0	10	2	8	7
1	2009-01-24 10:32:00	0	10	2	8	7
1	2009-01-24 10:33:00	0	10	2	8	7
1	2009-01-24 10:34:00	0	10	2	8	7
1	2009-01-24 10:35:00	0	10	2	8	7
1	2009-01-24 10:36:00	0	10	2	8	7
1	2009-01-24 10:37:00	0	10	2	8	7
1	2009-01-24 10:38:00	12	10	2	8	7
1	2009-01-24 10:39:00	0	10	2	8	7
1	2009-01-24 10:40:00	0	10	2	8	7
1	2009-01-24 10:41:00	0	10	2	8	7
1	2009-01-24 10:42:00	0	10	2	8	7
1	2009-01-24 10:43:00	0	10	2	8	7
1	2009-01-24 10:44:00	24	10	2	8	7
1	2009-01-24 10:45:00	24	10	2	8	7
1	2009-01-24 10:46:00	0	10	2	8	7
1	2009-01-24 10:47:00	0	10	2	8	7
1	2009-01-24 10:48:00	12	10	2	8	7
1	2009-01-24 10:49:00	0	10	2	8	7
1	2009-01-24 10:50:00	0	10	2	8	7
1	2009-01-24 10:51:00	24	10	2	8	7
1	2009-01-24 10:52:00	0	10	2	8	7
1	2009-01-24 10:53:00	0	10	2	8	7
1	2009-01-24 10:54:00	0	10	2	8	7
1	2009-01-24 10:55:00	0	10	2	8	7
1	2009-01-24 10:56:00	0	10	2	8	7
1	2009-01-24 10:57:00	24	10	2	8	7
1	2009-01-24 10:58:00	0	10	2	8	7
1	2009-01-24 10:59:00	0	10	2	8	7
1	2009-01-24 11:00:00	0	10	2	8	7
1	2009-01-24 11:01:00	0	11	2	8	7
1	2009-01-24 11:02:00	12	11	2	8	7
1	2009-01-24 11:03:00	0	11	2	8	7
1	2009-01-24 11:04:00	0	11	2	8	7
1	2009-01-24 11:05:00	0	11	2	8	7
1	2009-01-24 11:06:00	0	11	2	8	7
1	2009-01-24 11:07:00	0	11	2	8	7
1	2009-01-24 11:08:00	0	11	2	8	7
1	2009-01-24 11:09:00	0	11	2	8	7
1	2009-01-24 11:10:00	0	11	2	8	7
1	2009-01-24 11:11:00	0	11	2	8	7
1	2009-01-24 11:12:00	0	11	2	8	7
1	2009-01-24 11:13:00	0	11	2	8	7
1	2009-01-24 11:14:00	0	11	2	8	7
1	2009-01-24 11:15:00	0	11	2	8	7
1	2009-01-24 11:16:00	0	11	2	8	7
1	2009-01-24 11:17:00	0	11	2	8	7
1	2009-01-24 11:18:00	0	11	2	8	7
1	2009-01-24 11:19:00	0	11	2	8	7
1	2009-01-24 11:20:00	0	11	2	8	7
1	2009-01-24 11:21:00	0	11	2	8	7
1	2009-01-24 11:22:00	0	11	2	8	7
1	2009-01-24 11:23:00	12	11	2	8	7
1	2009-01-24 11:24:00	0	11	2	8	7
1	2009-01-24 11:25:00	0	11	2	8	7
1	2009-01-24 11:26:00	0	11	2	8	7
1	2009-01-24 11:27:00	0	11	2	8	7
1	2009-01-24 11:28:00	0	11	2	8	7
1	2009-01-24 11:29:00	0	11	2	8	7
1	2009-01-24 11:30:00	0	11	2	8	7
1	2009-01-24 11:31:00	0	11	2	8	7
1	2009-01-24 11:32:00	0	11	2	8	7
1	2009-01-24 11:33:00	0	11	2	8	7
1	2009-01-24 11:34:00	0	11	2	8	7
1	2009-01-24 11:35:00	0	11	2	8	7
1	2009-01-24 11:36:00	0	11	2	8	7
1	2009-01-24 11:37:00	0	11	2	8	7
1	2009-01-24 11:38:00	0	11	2	8	7
1	2009-01-24 11:39:00	0	11	2	8	7
1	2009-01-24 11:40:00	0	11	2	8	7
1	2009-01-24 11:41:00	0	11	2	8	7
1	2009-01-24 11:42:00	0	11	2	8	7
1	2009-01-24 11:43:00	0	11	2	8	7
1	2009-01-24 11:44:00	0	11	2	8	7
1	2009-01-24 11:45:00	0	11	2	8	7
1	2009-01-24 11:46:00	0	11	2	8	7
1	2009-01-24 11:47:00	0	11	2	8	7
1	2009-01-24 11:48:00	0	11	2	8	7
1	2009-01-24 11:49:00	12	11	2	8	7
1	2009-01-24 11:50:00	0	11	2	8	7
1	2009-01-24 11:51:00	0	11	2	8	7
1	2009-01-24 11:52:00	0	11	2	8	7
1	2009-01-24 11:53:00	0	11	2	8	7
1	2009-01-24 11:54:00	0	11	2	8	7
1	2009-01-24 11:55:00	0	11	2	8	7
1	2009-01-24 11:56:00	0	11	2	8	7
1	2009-01-24 11:57:00	0	11	2	8	7
1	2009-01-24 11:58:00	0	11	2	8	7
1	2009-01-24 11:59:00	0	11	2	8	7
1	2009-01-24 12:00:00	0	11	2	8	7
1	2009-01-24 12:01:00	0	12	3	8	7
1	2009-01-24 12:02:00	0	12	3	8	7
1	2009-01-24 12:03:00	0	12	3	8	7
1	2009-01-24 12:04:00	0	12	3	8	7
1	2009-01-24 12:05:00	0	12	3	8	7
1	2009-01-24 12:06:00	0	12	3	8	7
1	2009-01-24 12:07:00	0	12	3	8	7
1	2009-01-24 12:08:00	12	12	3	8	7
1	2009-01-24 12:09:00	0	12	3	8	7
1	2009-01-24 12:10:00	0	12	3	8	7
1	2009-01-24 12:11:00	0	12	3	8	7
1	2009-01-24 12:12:00	0	12	3	8	7
1	2009-01-24 12:13:00	0	12	3	8	7
1	2009-01-24 12:14:00	0	12	3	8	7
1	2009-01-24 12:15:00	0	12	3	8	7
1	2009-01-24 12:16:00	0	12	3	8	7
1	2009-01-24 12:17:00	0	12	3	8	7
1	2009-01-24 12:18:00	0	12	3	8	7
1	2009-01-24 12:19:00	0	12	3	8	7
1	2009-01-24 12:20:00	0	12	3	8	7
1	2009-01-24 12:21:00	0	12	3	8	7
1	2009-01-24 12:22:00	0	12	3	8	7
1	2009-01-24 12:23:00	0	12	3	8	7
1	2009-01-24 12:24:00	0	12	3	8	7
1	2009-01-24 12:25:00	0	12	3	8	7
1	2009-01-24 12:26:00	0	12	3	8	7
1	2009-01-24 12:27:00	0	12	3	8	7
1	2009-01-24 12:28:00	0	12	3	8	7
1	2009-01-24 12:29:00	0	12	3	8	7
1	2009-01-24 12:30:00	0	12	3	8	7
1	2009-01-24 12:31:00	0	12	3	8	7
1	2009-01-24 12:32:00	0	12	3	8	7
1	2009-01-24 12:33:00	0	12	3	8	7
1	2009-01-24 12:34:00	0	12	3	8	7
1	2009-01-24 12:35:00	0	12	3	8	7
1	2009-01-24 12:36:00	12	12	3	8	7
1	2009-01-24 12:37:00	12	12	3	8	7
1	2009-01-24 12:38:00	0	12	3	8	7
1	2009-01-24 12:39:00	0	12	3	8	7
1	2009-01-24 12:40:00	12	12	3	8	7
1	2009-01-24 12:41:00	0	12	3	8	7
1	2009-01-24 12:42:00	0	12	3	8	7
1	2009-01-24 12:43:00	0	12	3	8	7
1	2009-01-24 12:44:00	0	12	3	8	7
1	2009-01-24 12:45:00	0	12	3	8	7
1	2009-01-24 12:46:00	0	12	3	8	7
1	2009-01-24 12:47:00	0	12	3	8	7
1	2009-01-24 12:48:00	0	12	3	8	7
1	2009-01-24 12:49:00	0	12	3	8	7
1	2009-01-24 12:50:00	12	12	3	8	7
1	2009-01-24 12:51:00	12	12	3	8	7
1	2009-01-24 12:52:00	0	12	3	8	7
1	2009-01-24 12:53:00	0	12	3	8	7
1	2009-01-24 12:54:00	0	12	3	8	7
1	2009-01-24 12:55:00	0	12	3	8	7
1	2009-01-24 12:56:00	0	12	3	8	7
1	2009-01-24 12:57:00	0	12	3	8	7
1	2009-01-24 12:58:00	0	12	3	8	7
1	2009-01-24 12:59:00	0	12	3	8	7
1	2009-01-24 13:00:00	0	12	3	8	7
1	2009-01-24 13:01:00	0	13	3	8	7
1	2009-01-24 13:02:00	0	13	3	8	7
1	2009-01-24 13:03:00	0	13	3	8	7
1	2009-01-24 13:04:00	0	13	3	8	7
1	2009-01-24 13:05:00	0	13	3	8	7
1	2009-01-24 13:06:00	0	13	3	8	7
1	2009-01-24 13:07:00	0	13	3	8	7
1	2009-01-24 13:08:00	0	13	3	8	7
1	2009-01-24 13:09:00	0	13	3	8	7
1	2009-01-24 13:10:00	0	13	3	8	7
1	2009-01-24 13:11:00	0	13	3	8	7
1	2009-01-24 13:12:00	0	13	3	8	7
1	2009-01-24 13:13:00	0	13	3	8	7
1	2009-01-24 13:14:00	0	13	3	8	7
1	2009-01-24 13:15:00	0	13	3	8	7
1	2009-01-24 13:16:00	0	13	3	8	7
1	2009-01-24 13:17:00	0	13	3	8	7
1	2009-01-24 13:18:00	0	13	3	8	7
1	2009-01-24 13:19:00	0	13	3	8	7
1	2009-01-24 13:20:00	0	13	3	8	7
1	2009-01-24 13:21:00	0	13	3	8	7
1	2009-01-24 13:22:00	0	13	3	8	7
1	2009-01-24 13:23:00	0	13	3	8	7
1	2009-01-24 13:24:00	0	13	3	8	7
1	2009-01-24 13:25:00	0	13	3	8	7
1	2009-01-24 13:26:00	0	13	3	8	7
1	2009-01-24 13:27:00	0	13	3	8	7
1	2009-01-24 13:28:00	0	13	3	8	7
1	2009-01-24 13:29:00	0	13	3	8	7
1	2009-01-24 13:30:00	0	13	3	8	7
1	2009-01-24 13:31:00	0	13	3	8	7
1	2009-01-24 13:32:00	0	13	3	8	7
1	2009-01-24 13:33:00	0	13	3	8	7
1	2009-01-24 13:34:00	0	13	3	8	7
1	2009-01-24 13:35:00	0	13	3	8	7
1	2009-01-24 13:36:00	0	13	3	8	7
1	2009-01-24 13:37:00	0	13	3	8	7
1	2009-01-24 13:38:00	0	13	3	8	7
1	2009-01-24 13:39:00	0	13	3	8	7
1	2009-01-24 13:40:00	0	13	3	8	7
1	2009-01-24 13:41:00	0	13	3	8	7
1	2009-01-24 13:42:00	0	13	3	8	7
1	2009-01-24 13:43:00	0	13	3	8	7
1	2009-01-24 13:44:00	0	13	3	8	7
1	2009-01-24 13:45:00	0	13	3	8	7
1	2009-01-24 13:46:00	0	13	3	8	7
1	2009-01-24 13:47:00	0	13	3	8	7
1	2009-01-24 13:48:00	0	13	3	8	7
1	2009-01-24 13:49:00	0	13	3	8	7
1	2009-01-24 13:50:00	0	13	3	8	7
1	2009-01-24 13:51:00	0	13	3	8	7
1	2009-01-24 13:52:00	0	13	3	8	7
1	2009-01-24 13:53:00	0	13	3	8	7
1	2009-01-24 13:54:00	0	13	3	8	7
1	2009-01-24 13:55:00	0	13	3	8	7
1	2009-01-24 13:56:00	0	13	3	8	7
1	2009-01-24 13:57:00	0	13	3	8	7
1	2009-01-24 13:58:00	0	13	3	8	7
1	2009-01-24 13:59:00	0	13	3	8	7
1	2009-01-24 14:00:00	0	13	3	8	7
1	2009-01-24 14:01:00	0	14	3	8	7
1	2009-01-24 14:02:00	0	14	3	8	7
1	2009-01-24 14:03:00	0	14	3	8	7
1	2009-01-24 14:04:00	0	14	3	8	7
1	2009-01-24 14:05:00	0	14	3	8	7
1	2009-01-24 14:06:00	0	14	3	8	7
1	2009-01-24 14:07:00	0	14	3	8	7
1	2009-01-24 14:08:00	0	14	3	8	7
1	2009-01-24 14:09:00	0	14	3	8	7
1	2009-01-24 14:10:00	0	14	3	8	7
1	2009-01-24 14:11:00	0	14	3	8	7
1	2009-01-24 14:12:00	0	14	3	8	7
1	2009-01-24 14:13:00	0	14	3	8	7
1	2009-01-24 14:14:00	0	14	3	8	7
1	2009-01-24 14:15:00	0	14	3	8	7
1	2009-01-24 14:16:00	0	14	3	8	7
1	2009-01-24 14:17:00	0	14	3	8	7
1	2009-01-24 14:18:00	0	14	3	8	7
1	2009-01-24 14:19:00	12	14	3	8	7
1	2009-01-24 14:20:00	0	14	3	8	7
1	2009-01-24 14:21:00	0	14	3	8	7
1	2009-01-24 14:22:00	0	14	3	8	7
1	2009-01-24 14:23:00	0	14	3	8	7
1	2009-01-24 14:24:00	0	14	3	8	7
1	2009-01-24 14:25:00	0	14	3	8	7
1	2009-01-24 14:26:00	0	14	3	8	7
1	2009-01-24 14:27:00	0	14	3	8	7
1	2009-01-24 14:28:00	0	14	3	8	7
1	2009-01-24 14:29:00	0	14	3	8	7
1	2009-01-24 14:30:00	24	14	3	8	7
1	2009-01-24 14:31:00	0	14	3	8	7
1	2009-01-24 14:32:00	60	14	3	8	7
1	2009-01-24 14:33:00	36	14	3	8	7
1	2009-01-24 14:34:00	0	14	3	8	7
1	2009-01-24 14:35:00	0	14	3	8	7
1	2009-01-24 14:36:00	0	14	3	8	7
1	2009-01-24 14:37:00	0	14	3	8	7
1	2009-01-24 14:38:00	0	14	3	8	7
1	2009-01-24 14:39:00	0	14	3	8	7
1	2009-01-24 14:40:00	0	14	3	8	7
1	2009-01-24 14:41:00	0	14	3	8	7
1	2009-01-24 14:42:00	0	14	3	8	7
1	2009-01-24 14:43:00	0	14	3	8	7
1	2009-01-24 14:44:00	0	14	3	8	7
1	2009-01-24 14:45:00	0	14	3	8	7
1	2009-01-24 14:46:00	0	14	3	8	7
1	2009-01-24 14:47:00	0	14	3	8	7
1	2009-01-24 14:48:00	0	14	3	8	7
1	2009-01-24 14:49:00	0	14	3	8	7
1	2009-01-24 14:50:00	0	14	3	8	7
1	2009-01-24 14:51:00	0	14	3	8	7
1	2009-01-24 14:52:00	0	14	3	8	7
1	2009-01-24 14:53:00	0	14	3	8	7
1	2009-01-24 14:54:00	0	14	3	8	7
1	2009-01-24 14:55:00	0	14	3	8	7
1	2009-01-24 14:56:00	0	14	3	8	7
1	2009-01-24 14:57:00	0	14	3	8	7
1	2009-01-24 14:58:00	0	14	3	8	7
1	2009-01-24 14:59:00	0	14	3	8	7
1	2009-01-24 15:00:00	0	14	3	8	7
1	2009-01-24 15:01:00	36	15	3	8	7
1	2009-01-24 15:02:00	0	15	3	8	7
1	2009-01-24 15:03:00	0	15	3	8	7
1	2009-01-24 15:04:00	0	15	3	8	7
1	2009-01-24 15:05:00	0	15	3	8	7
1	2009-01-24 15:06:00	0	15	3	8	7
1	2009-01-24 15:07:00	0	15	3	8	7
1	2009-01-24 15:08:00	0	15	3	8	7
1	2009-01-24 15:09:00	0	15	3	8	7
1	2009-01-24 15:10:00	0	15	3	8	7
1	2009-01-24 15:11:00	0	15	3	8	7
1	2009-01-24 15:12:00	0	15	3	8	7
1	2009-01-24 15:13:00	0	15	3	8	7
1	2009-01-24 15:14:00	0	15	3	8	7
1	2009-01-24 15:15:00	24	15	3	8	7
1	2009-01-24 15:16:00	12	15	3	8	7
1	2009-01-24 15:17:00	0	15	3	8	7
1	2009-01-24 15:18:00	0	15	3	8	7
1	2009-01-24 15:19:00	0	15	3	8	7
[truncated: 68,561 more rows]

## Sheet: Pivot Segment
Multiplier	2
x (Low Intensity)	282.986
y (High Intensity)	294.794
	Column Labels
Values	1	2	3	4	5	6	7	Grand Total
Average of Activity	29.3318	33.1868	31.8852	33.0654	25.8221	37.4678	31.3819	31.7344
StdDev of Activity	126.827	130.804	130.751	131.032	106.609	143.637	120.298	127.614
Count of Activity	10080	10080	10080	10080	10080	10080	10080	70560
Count Above x	397	451	435	454	357	517	439
% Above x	0.0393849	0.0447421	0.0431548	0.0450397	0.0354167	0.0512897	0.0435516
Count Above y		436	421	432	336	496	421
% Above y		0.043254	0.0417659	0.0428571	0.0333333	0.0492063	0.0417659

## Sheet: Pivot Weekday
Sum of Activity	Column Labels
Row Labels	1	2	3	4	5	6	7	Grand Total
1	46296	48488	53370	53813	36608	56164	47316	342055
2	28030	42340	44586	49781	30937	51810	43975	291459
3	63057	50343	35333	46239	47352	59499	51941	353764
4	28249	56500	42194	42360	37462	39674	48644	295083
5	42718	52312	53507	37844	23954	39830	49956	300121
6	47881	33573	38807	68817	36936	71372	37322	334708
7	39434	50967	53606	34445	47038	59326	37176	321992
Grand Total	295665	334523	321403	333299	260287	377675	316330	2239182
Count of Activity	Column Labels
Row Labels	1	2	3	4	5	6	7	Grand Total
1	1440	1440	1440	1440	1440	1440	1440	10080
2	1440	1440	1440	1440	1440	1440	1440	10080
3	1440	1440	1440	1440	1440	1440	1440	10080
4	1440	1440	1440	1440	1440	1440	1440	10080
5	1440	1440	1440	1440	1440	1440	1440	10080
6	1440	1440	1440	1440	1440	1440	1440	10080
7	1440	1440	1440	1440	1440	1440	1440	10080
Grand Total	10080	10080	10080	10080	10080	10080	10080	70560

## Sheet: Pivot Quadrant
Sum of Activity	Column Labels
Row Labels	1	2	3	4	5	6	7	Grand Total
1	27347	27485	33563	31259	25443	30403	54667	230167
2	80626	109003	72622	68148	49991	116716	78529	575635
3	97678	122380	110449	151948	87911	142298	77257	789921
4	90014	75655	104769	81944	96942	88258	105877	643459
Grand Total	295665	334523	321403	333299	260287	377675	316330	2239182
Average	73916.2	83630.8	80350.8	83324.8	65071.8	94418.8	79082.5
Count of Activity	Column Labels
Row Labels	1	2	3	4	5	6	7	Grand Total
1	2520	2520	2520	2520	2520	2520	2520	17640
2	2520	2520	2520	2520	2520	2520	2520	17640
3	2520	2520	2520	2520	2520	2520	2520	17640
4	2520	2520	2520	2520	2520	2520	2520	17640
Grand Total	10080	10080	10080	10080	10080	10080	10080	70560

## Sheet: 1.16.09
Actogram, Copy Raw Data, All Days
Identity:	Emerald
Filename:	E:\Active Research Files\meloxicam titre canine\cases\emerald\Emerald 01.16.09.AWC
Gender:	F
Age:	13
Height:	2.5 cm	1.0 in
Weight:	35.6 kg	78.5 lbs
Start Date:	16-Jan-2009 (Fri)
Start Time:	17:00:00
Interval:	1.00 mins
Date Stamp:	Time Stamp:	Activity Data:	Marker Press:
2009-01-16	00:00:00	0
2009-01-16	00:01:00	0
2009-01-16	00:02:00	0
2009-01-16	00:03:00	0
2009-01-16	00:04:00	0
2009-01-16	00:05:00	0
2009-01-16	00:06:00	0
2009-01-16	00:07:00	0
2009-01-16	00:08:00	0
2009-01-16	00:09:00	0
2009-01-16	00:10:00	0
2009-01-16	00:11:00	0
2009-01-16	00:12:00	0
2009-01-16	00:13:00	0
2009-01-16	00:14:00	0
2009-01-16	00:15:00	0
2009-01-16	00:16:00	0
2009-01-16	00:17:00	0
2009-01-16	00:18:00	0
2009-01-16	00:19:00	0
2009-01-16	00:20:00	0
2009-01-16	00:21:00	0
2009-01-16	00:22:00	0
2009-01-16	00:23:00	0
2009-01-16	00:24:00	0
2009-01-16	00:25:00	0
2009-01-16	00:26:00	0
2009-01-16	00:27:00	0
2009-01-16	00:28:00	0
2009-01-16	00:29:00	0
2009-01-16	00:30:00	0
2009-01-16	00:31:00	0
2009-01-16	00:32:00	0
2009-01-16	00:33:00	0
2009-01-16	00:34:00	0
2009-01-16	00:35:00	0
2009-01-16	00:36:00	0
2009-01-16	00:37:00	0
2009-01-16	00:38:00	0
2009-01-16	00:39:00	0
2009-01-16	00:40:00	0
2009-01-16	00:41:00	0
2009-01-16	00:42:00	0
2009-01-16	00:43:00	0
2009-01-16	00:44:00	0
2009-01-16	00:45:00	0
2009-01-16	00:46:00	0
2009-01-16	00:47:00	0
2009-01-16	00:48:00	0
2009-01-16	00:49:00	0
2009-01-16	00:50:00	0
2009-01-16	00:51:00	0
2009-01-16	00:52:00	0
2009-01-16	00:53:00	0
2009-01-16	00:54:00	0
2009-01-16	00:55:00	0
2009-01-16	00:56:00	0
2009-01-16	00:57:00	0
2009-01-16	00:58:00	0
2009-01-16	00:59:00	0
2009-01-16	01:00:00	0
2009-01-16	01:01:00	0
2009-01-16	01:02:00	0
2009-01-16	01:03:00	0
2009-01-16	01:04:00	0
2009-01-16	01:05:00	0
2009-01-16	01:06:00	0
2009-01-16	01:07:00	0
2009-01-16	01:08:00	0
2009-01-16	01:09:00	0
2009-01-16	01:10:00	0
2009-01-16	01:11:00	0
2009-01-16	01:12:00	0
2009-01-16	01:13:00	0
2009-01-16	01:14:00	0
2009-01-16	01:15:00	0
2009-01-16	01:16:00	0
2009-01-16	01:17:00	0
2009-01-16	01:18:00	0
2009-01-16	01:19:00	0
2009-01-16	01:20:00	0
2009-01-16	01:21:00	0
2009-01-16	01:22:00	0
2009-01-16	01:23:00	0
2009-01-16	01:24:00	0
2009-01-16	01:25:00	0
2009-01-16	01:26:00	0
2009-01-16	01:27:00	0
2009-01-16	01:28:00	0
2009-01-16	01:29:00	0
2009-01-16	01:30:00	0
2009-01-16	01:31:00	0
2009-01-16	01:32:00	0
2009-01-16	01:33:00	0
2009-01-16	01:34:00	0
2009-01-16	01:35:00	0
2009-01-16	01:36:00	0
2009-01-16	01:37:00	0
2009-01-16	01:38:00	0
2009-01-16	01:39:00	0
2009-01-16	01:40:00	0
2009-01-16	01:41:00	0
2009-01-16	01:42:00	0
2009-01-16	01:43:00	0
2009-01-16	01:44:00	0
2009-01-16	01:45:00	0
2009-01-16	01:46:00	0
2009-01-16	01:47:00	0
2009-01-16	01:48:00	0
2009-01-16	01:49:00	0
2009-01-16	01:50:00	0
2009-01-16	01:51:00	0
2009-01-16	01:52:00	0
2009-01-16	01:53:00	0
2009-01-16	01:54:00	0
2009-01-16	01:55:00	0
2009-01-16	01:56:00	0
2009-01-16	01:57:00	0
2009-01-16	01:58:00	0
2009-01-16	01:59:00	0
2009-01-16	02:00:00	0
2009-01-16	02:01:00	0
2009-01-16	02:02:00	0
2009-01-16	02:03:00	0
2009-01-16	02:04:00	0
2009-01-16	02:05:00	0
2009-01-16	02:06:00	0
2009-01-16	02:07:00	0
2009-01-16	02:08:00	0
2009-01-16	02:09:00	0
2009-01-16	02:10:00	0
2009-01-16	02:11:00	0
2009-01-16	02:12:00	0
2009-01-16	02:13:00	0
2009-01-16	02:14:00	0
2009-01-16	02:15:00	0
2009-01-16	02:16:00	0
2009-01-16	02:17:00	0
2009-01-16	02:18:00	0
2009-01-16	02:19:00	0
2009-01-16	02:20:00	0
2009-01-16	02:21:00	0
2009-01-16	02:22:00	0
2009-01-16	02:23:00	0
2009-01-16	02:24:00	0
2009-01-16	02:25:00	0
2009-01-16	02:26:00	0
2009-01-16	02:27:00	0
2009-01-16	02:28:00	0
2009-01-16	02:29:00	0
2009-01-16	02:30:00	0
2009-01-16	02:31:00	0
2009-01-16	02:32:00	0
2009-01-16	02:33:00	0
2009-01-16	02:34:00	0
2009-01-16	02:35:00	0
2009-01-16	02:36:00	0
2009-01-16	02:37:00	0
2009-01-16	02:38:00	0
2009-01-16	02:39:00	0
2009-01-16	02:40:00	0
2009-01-16	02:41:00	0
2009-01-16	02:42:00	0
2009-01-16	02:43:00	0
2009-01-16	02:44:00	0
2009-01-16	02:45:00	0
2009-01-16	02:46:00	0
2009-01-16	02:47:00	0
2009-01-16	02:48:00	0
2009-01-16	02:49:00	0
2009-01-16	02:50:00	0
2009-01-16	02:51:00	0
2009-01-16	02:52:00	0
2009-01-16	02:53:00	0
2009-01-16	02:54:00	0
2009-01-16	02:55:00	0
2009-01-16	02:56:00	0
2009-01-16	02:57:00	0
2009-01-16	02:58:00	0
2009-01-16	02:59:00	0
2009-01-16	03:00:00	0
2009-01-16	03:01:00	0
2009-01-16	03:02:00	0
2009-01-16	03:03:00	0
2009-01-16	03:04:00	0
2009-01-16	03:05:00	0
2009-01-16	03:06:00	0
2009-01-16	03:07:00	0
2009-01-16	03:08:00	0
2009-01-16	03:09:00	0
2009-01-16	03:10:00	0
2009-01-16	03:11:00	0
2009-01-16	03:12:00	0
2009-01-16	03:13:00	0
2009-01-16	03:14:00	0
2009-01-16	03:15:00	0
2009-01-16	03:16:00	0
2009-01-16	03:17:00	0
2009-01-16	03:18:00	0
2009-01-16	03:19:00	0
2009-01-16	03:20:00	0
2009-01-16	03:21:00	0
2009-01-16	03:22:00	0
2009-01-16	03:23:00	0
2009-01-16	03:24:00	0
2009-01-16	03:25:00	0
2009-01-16	03:26:00	0
2009-01-16	03:27:00	0
2009-01-16	03:28:00	0
2009-01-16	03:29:00	0
2009-01-16	03:30:00	0
2009-01-16	03:31:00	0
2009-01-16	03:32:00	0
2009-01-16	03:33:00	0
2009-01-16	03:34:00	0
2009-01-16	03:35:00	0
2009-01-16	03:36:00	0
2009-01-16	03:37:00	0
2009-01-16	03:38:00	0
2009-01-16	03:39:00	0
2009-01-16	03:40:00	0
2009-01-16	03:41:00	0
2009-01-16	03:42:00	0
2009-01-16	03:43:00	0
2009-01-16	03:44:00	0
2009-01-16	03:45:00	0
2009-01-16	03:46:00	0
2009-01-16	03:47:00	0
2009-01-16	03:48:00	0
2009-01-16	03:49:00	0
2009-01-16	03:50:00	0
2009-01-16	03:51:00	0
2009-01-16	03:52:00	0
2009-01-16	03:53:00	0
2009-01-16	03:54:00	0
2009-01-16	03:55:00	0
2009-01-16	03:56:00	0
2009-01-16	03:57:00	0
2009-01-16	03:58:00	0
2009-01-16	03:59:00	0
2009-01-16	04:00:00	0
2009-01-16	04:01:00	0
2009-01-16	04:02:00	0
2009-01-16	04:03:00	0
2009-01-16	04:04:00	0
2009-01-16	04:05:00	0
2009-01-16	04:06:00	0
2009-01-16	04:07:00	0
2009-01-16	04:08:00	0
2009-01-16	04:09:00	0
2009-01-16	04:10:00	0
2009-01-16	04:11:00	0
2009-01-16	04:12:00	0
2009-01-16	04:13:00	0
2009-01-16	04:14:00	0
2009-01-16	04:15:00	0
2009-01-16	04:16:00	0
2009-01-16	04:17:00	0
2009-01-16	04:18:00	0
2009-01-16	04:19:00	0
2009-01-16	04:20:00	0
2009-01-16	04:21:00	0
2009-01-16	04:22:00	0
2009-01-16	04:23:00	0
2009-01-16	04:24:00	0
2009-01-16	04:25:00	0
2009-01-16	04:26:00	0
2009-01-16	04:27:00	0
2009-01-16	04:28:00	0
2009-01-16	04:29:00	0
2009-01-16	04:30:00	0
2009-01-16	04:31:00	0
2009-01-16	04:32:00	0
2009-01-16	04:33:00	0
2009-01-16	04:34:00	0
2009-01-16	04:35:00	0
2009-01-16	04:36:00	0
2009-01-16	04:37:00	0
2009-01-16	04:38:00	0
2009-01-16	04:39:00	0
2009-01-16	04:40:00	0
2009-01-16	04:41:00	0
2009-01-16	04:42:00	0
2009-01-16	04:43:00	0
2009-01-16	04:44:00	0
2009-01-16	04:45:00	0
2009-01-16	04:46:00	0
2009-01-16	04:47:00	0
2009-01-16	04:48:00	0
2009-01-16	04:49:00	0
2009-01-16	04:50:00	0
2009-01-16	04:51:00	0
2009-01-16	04:52:00	0
2009-01-16	04:53:00	0
2009-01-16	04:54:00	0
2009-01-16	04:55:00	0
2009-01-16	04:56:00	0
2009-01-16	04:57:00	0
2009-01-16	04:58:00	0
2009-01-16	04:59:00	0
2009-01-16	05:00:00	0
2009-01-16	05:01:00	0
2009-01-16	05:02:00	0
2009-01-16	05:03:00	0
2009-01-16	05:04:00	0
2009-01-16	05:05:00	0
2009-01-16	05:06:00	0
2009-01-16	05:07:00	0
2009-01-16	05:08:00	0
2009-01-16	05:09:00	0
2009-01-16	05:10:00	0
2009-01-16	05:11:00	0
2009-01-16	05:12:00	0
2009-01-16	05:13:00	0
2009-01-16	05:14:00	0
2009-01-16	05:15:00	0
2009-01-16	05:16:00	0
2009-01-16	05:17:00	0
2009-01-16	05:18:00	0
2009-01-16	05:19:00	0
2009-01-16	05:20:00	0
2009-01-16	05:21:00	0
2009-01-16	05:22:00	0
2009-01-16	05:23:00	0
2009-01-16	05:24:00	0
2009-01-16	05:25:00	0
2009-01-16	05:26:00	0
2009-01-16	05:27:00	0
2009-01-16	05:28:00	0
2009-01-16	05:29:00	0
2009-01-16	05:30:00	0
2009-01-16	05:31:00	0
2009-01-16	05:32:00	0
2009-01-16	05:33:00	0
2009-01-16	05:34:00	0
2009-01-16	05:35:00	0
2009-01-16	05:36:00	0
2009-01-16	05:37:00	0
2009-01-16	05:38:00	0
2009-01-16	05:39:00	0
2009-01-16	05:40:00	0
2009-01-16	05:41:00	0
2009-01-16	05:42:00	0
2009-01-16	05:43:00	0
2009-01-16	05:44:00	0
2009-01-16	05:45:00	0
2009-01-16	05:46:00	0
2009-01-16	05:47:00	0
2009-01-16	05:48:00	0
2009-01-16	05:49:00	0
2009-01-16	05:50:00	0
2009-01-16	05:51:00	0
2009-01-16	05:52:00	0
2009-01-16	05:53:00	0
2009-01-16	05:54:00	0
2009-01-16	05:55:00	0
2009-01-16	05:56:00	0
2009-01-16	05:57:00	0
2009-01-16	05:58:00	0
2009-01-16	05:59:00	0
2009-01-16	06:00:00	0
2009-01-16	06:01:00	0
2009-01-16	06:02:00	0
2009-01-16	06:03:00	0
2009-01-16	06:04:00	0
2009-01-16	06:05:00	0
2009-01-16	06:06:00	0
2009-01-16	06:07:00	0
2009-01-16	06:08:00	0
2009-01-16	06:09:00	0
2009-01-16	06:10:00	0
2009-01-16	06:11:00	0
2009-01-16	06:12:00	0
2009-01-16	06:13:00	0
2009-01-16	06:14:00	0
2009-01-16	06:15:00	0
2009-01-16	06:16:00	0
2009-01-16	06:17:00	0
2009-01-16	06:18:00	0
2009-01-16	06:19:00	0
2009-01-16	06:20:00	0
2009-01-16	06:21:00	0
2009-01-16	06:22:00	0
2009-01-16	06:23:00	0
2009-01-16	06:24:00	0
2009-01-16	06:25:00	0
2009-01-16	06:26:00	0
2009-01-16	06:27:00	0
2009-01-16	06:28:00	0
2009-01-16	06:29:00	0
2009-01-16	06:30:00	0
2009-01-16	06:31:00	0
2009-01-16	06:32:00	0
2009-01-16	06:33:00	0
2009-01-16	06:34:00	0
2009-01-16	06:35:00	0
2009-01-16	06:36:00	0
2009-01-16	06:37:00	0
2009-01-16	06:38:00	0
2009-01-16	06:39:00	0
2009-01-16	06:40:00	0
2009-01-16	06:41:00	0
2009-01-16	06:42:00	0
2009-01-16	06:43:00	0
2009-01-16	06:44:00	0
2009-01-16	06:45:00	0
2009-01-16	06:46:00	0
2009-01-16	06:47:00	0
2009-01-16	06:48:00	0
2009-01-16	06:49:00	0
2009-01-16	06:50:00	0
2009-01-16	06:51:00	0
2009-01-16	06:52:00	0
2009-01-16	06:53:00	0
2009-01-16	06:54:00	0
2009-01-16	06:55:00	0
2009-01-16	06:56:00	0
2009-01-16	06:57:00	0
2009-01-16	06:58:00	0
2009-01-16	06:59:00	0
2009-01-16	07:00:00	0
2009-01-16	07:01:00	0
2009-01-16	07:02:00	0
2009-01-16	07:03:00	0
2009-01-16	07:04:00	0
2009-01-16	07:05:00	0
2009-01-16	07:06:00	0
2009-01-16	07:07:00	0
2009-01-16	07:08:00	0
2009-01-16	07:09:00	0
2009-01-16	07:10:00	0
2009-01-16	07:11:00	0
2009-01-16	07:12:00	0
2009-01-16	07:13:00	0
2009-01-16	07:14:00	0
2009-01-16	07:15:00	0
2009-01-16	07:16:00	0
2009-01-16	07:17:00	0
2009-01-16	07:18:00	0
2009-01-16	07:19:00	0
2009-01-16	07:20:00	0
2009-01-16	07:21:00	0
2009-01-16	07:22:00	0
2009-01-16	07:23:00	0
2009-01-16	07:24:00	0
2009-01-16	07:25:00	0
2009-01-16	07:26:00	0
2009-01-16	07:27:00	0
2009-01-16	07:28:00	0
2009-01-16	07:29:00	0
2009-01-16	07:30:00	0
2009-01-16	07:31:00	0
2009-01-16	07:32:00	0
2009-01-16	07:33:00	0
2009-01-16	07:34:00	0
2009-01-16	07:35:00	0
2009-01-16	07:36:00	0
2009-01-16	07:37:00	0
2009-01-16	07:38:00	0
2009-01-16	07:39:00	0
2009-01-16	07:40:00	0
2009-01-16	07:41:00	0
2009-01-16	07:42:00	0
2009-01-16	07:43:00	0
2009-01-16	07:44:00	0
2009-01-16	07:45:00	0
2009-01-16	07:46:00	0
2009-01-16	07:47:00	0
2009-01-16	07:48:00	0
2009-01-16	07:49:00	0
2009-01-16	07:50:00	0
2009-01-16	07:51:00	0
2009-01-16	07:52:00	0
2009-01-16	07:53:00	0
2009-01-16	07:54:00	0
2009-01-16	07:55:00	0
2009-01-16	07:56:00	0
2009-01-16	07:57:00	0
2009-01-16	07:58:00	0
2009-01-16	07:59:00	0
2009-01-16	08:00:00	0
2009-01-16	08:01:00	0
2009-01-16	08:02:00	0
2009-01-16	08:03:00	0
2009-01-16	08:04:00	0
2009-01-16	08:05:00	0
2009-01-16	08:06:00	0
2009-01-16	08:07:00	0
2009-01-16	08:08:00	0
2009-01-16	08:09:00	0
2009-01-16	08:10:00	0
2009-01-16	08:11:00	0
2009-01-16	08:12:00	0
2009-01-16	08:13:00	0
2009-01-16	08:14:00	0
2009-01-16	08:15:00	0
2009-01-16	08:16:00	0
2009-01-16	08:17:00	0
2009-01-16	08:18:00	0
2009-01-16	08:19:00	0
2009-01-16	08:20:00	0
2009-01-16	08:21:00	0
2009-01-16	08:22:00	0
2009-01-16	08:23:00	0
2009-01-16	08:24:00	0
2009-01-16	08:25:00	0
2009-01-16	08:26:00	0
2009-01-16	08:27:00	0
2009-01-16	08:28:00	0
2009-01-16	08:29:00	0
2009-01-16	08:30:00	0
2009-01-16	08:31:00	0
2009-01-16	08:32:00	0
2009-01-16	08:33:00	0
2009-01-16	08:34:00	0
2009-01-16	08:35:00	0
2009-01-16	08:36:00	0
2009-01-16	08:37:00	0
2009-01-16	08:38:00	0
2009-01-16	08:39:00	0
2009-01-16	08:40:00	0
2009-01-16	08:41:00	0
2009-01-16	08:42:00	0
2009-01-16	08:43:00	0
2009-01-16	08:44:00	0
2009-01-16	08:45:00	0
2009-01-16	08:46:00	0
2009-01-16	08:47:00	0
2009-01-16	08:48:00	0
2009-01-16	08:49:00	0
2009-01-16	08:50:00	0
2009-01-16	08:51:00	0
2009-01-16	08:52:00	0
2009-01-16	08:53:00	0
2009-01-16	08:54:00	0
2009-01-16	08:55:00	0
2009-01-16	08:56:00	0
2009-01-16	08:57:00	0
2009-01-16	08:58:00	0
2009-01-16	08:59:00	0
2009-01-16	09:00:00	0
2009-01-16	09:01:00	0
2009-01-16	09:02:00	0
2009-01-16	09:03:00	0
2009-01-16	09:04:00	0
2009-01-16	09:05:00	0
2009-01-16	09:06:00	0
2009-01-16	09:07:00	0
2009-01-16	09:08:00	0
2009-01-16	09:09:00	0
2009-01-16	09:10:00	0
2009-01-16	09:11:00	0
2009-01-16	09:12:00	0
2009-01-16	09:13:00	0
2009-01-16	09:14:00	0
2009-01-16	09:15:00	0
2009-01-16	09:16:00	0
2009-01-16	09:17:00	0
2009-01-16	09:18:00	0
2009-01-16	09:19:00	0
2009-01-16	09:20:00	0
2009-01-16	09:21:00	0
2009-01-16	09:22:00	0
2009-01-16	09:23:00	0
2009-01-16	09:24:00	0
2009-01-16	09:25:00	0
2009-01-16	09:26:00	0
2009-01-16	09:27:00	0
2009-01-16	09:28:00	0
2009-01-16	09:29:00	0
2009-01-16	09:30:00	0
2009-01-16	09:31:00	0
2009-01-16	09:32:00	0
2009-01-16	09:33:00	0
2009-01-16	09:34:00	0
2009-01-16	09:35:00	0
2009-01-16	09:36:00	0
2009-01-16	09:37:00	0
2009-01-16	09:38:00	0
2009-01-16	09:39:00	0
2009-01-16	09:40:00	0
2009-01-16	09:41:00	0
2009-01-16	09:42:00	0
2009-01-16	09:43:00	0
2009-01-16	09:44:00	0
2009-01-16	09:45:00	0
2009-01-16	09:46:00	0
2009-01-16	09:47:00	0
2009-01-16	09:48:00	0
2009-01-16	09:49:00	0
2009-01-16	09:50:00	0
2009-01-16	09:51:00	0
2009-01-16	09:52:00	0
2009-01-16	09:53:00	0
2009-01-16	09:54:00	0
2009-01-16	09:55:00	0
2009-01-16	09:56:00	0
2009-01-16	09:57:00	0
2009-01-16	09:58:00	0
2009-01-16	09:59:00	0
2009-01-16	10:00:00	0
2009-01-16	10:01:00	0
2009-01-16	10:02:00	0
2009-01-16	10:03:00	0
2009-01-16	10:04:00	0
2009-01-16	10:05:00	0
2009-01-16	10:06:00	0
2009-01-16	10:07:00	0
2009-01-16	10:08:00	0
2009-01-16	10:09:00	0
2009-01-16	10:10:00	0
2009-01-16	10:11:00	0
2009-01-16	10:12:00	0
2009-01-16	10:13:00	0
2009-01-16	10:14:00	0
2009-01-16	10:15:00	0
2009-01-16	10:16:00	0
2009-01-16	10:17:00	0
2009-01-16	10:18:00	0
2009-01-16	10:19:00	0
2009-01-16	10:20:00	0
2009-01-16	10:21:00	0
2009-01-16	10:22:00	0
2009-01-16	10:23:00	0
2009-01-16	10:24:00	0
2009-01-16	10:25:00	0
2009-01-16	10:26:00	0
2009-01-16	10:27:00	0
2009-01-16	10:28:00	0
2009-01-16	10:29:00	0
2009-01-16	10:30:00	0
2009-01-16	10:31:00	0
2009-01-16	10:32:00	0
2009-01-16	10:33:00	0
2009-01-16	10:34:00	0
2009-01-16	10:35:00	0
2009-01-16	10:36:00	0
2009-01-16	10:37:00	0
2009-01-16	10:38:00	0
2009-01-16	10:39:00	0
2009-01-16	10:40:00	0
2009-01-16	10:41:00	0
2009-01-16	10:42:00	0
2009-01-16	10:43:00	0
2009-01-16	10:44:00	0
2009-01-16	10:45:00	0
2009-01-16	10:46:00	0
2009-01-16	10:47:00	0
2009-01-16	10:48:00	0
2009-01-16	10:49:00	0
2009-01-16	10:50:00	0
2009-01-16	10:51:00	0
2009-01-16	10:52:00	0
2009-01-16	10:53:00	0
2009-01-16	10:54:00	0
2009-01-16	10:55:00	0
2009-01-16	10:56:00	0
2009-01-16	10:57:00	0
2009-01-16	10:58:00	0
2009-01-16	10:59:00	0
2009-01-16	11:00:00	0
2009-01-16	11:01:00	0
2009-01-16	11:02:00	0
2009-01-16	11:03:00	0
2009-01-16	11:04:00	0
2009-01-16	11:05:00	0
2009-01-16	11:06:00	0
2009-01-16	11:07:00	0
2009-01-16	11:08:00	0
2009-01-16	11:09:00	0
2009-01-16	11:10:00	0
2009-01-16	11:11:00	0
2009-01-16	11:12:00	0
2009-01-16	11:13:00	0
2009-01-16	11:14:00	0
2009-01-16	11:15:00	0
2009-01-16	11:16:00	0
2009-01-16	11:17:00	0
2009-01-16	11:18:00	0
2009-01-16	11:19:00	0
2009-01-16	11:20:00	0
2009-01-16	11:21:00	0
2009-01-16	11:22:00	0
2009-01-16	11:23:00	0
2009-01-16	11:24:00	0
2009-01-16	11:25:00	0
2009-01-16	11:26:00	0
2009-01-16	11:27:00	0
2009-01-16	11:28:00	0
2009-01-16	11:29:00	0
2009-01-16	11:30:00	0
2009-01-16	11:31:00	0
2009-01-16	11:32:00	0
2009-01-16	11:33:00	0
2009-01-16	11:34:00	0
2009-01-16	11:35:00	0
2009-01-16	11:36:00	0
2009-01-16	11:37:00	0
2009-01-16	11:38:00	0
2009-01-16	11:39:00	0
2009-01-16	11:40:00	0
2009-01-16	11:41:00	0
2009-01-16	11:42:00	0
2009-01-16	11:43:00	0
2009-01-16	11:44:00	0
2009-01-16	11:45:00	0
2009-01-16	11:46:00	0
2009-01-16	11:47:00	0
2009-01-16	11:48:00	0
2009-01-16	11:49:00	0
2009-01-16	11:50:00	0
2009-01-16	11:51:00	0
2009-01-16	11:52:00	0
2009-01-16	11:53:00	0
2009-01-16	11:54:00	0
2009-01-16	11:55:00	0
2009-01-16	11:56:00	0
2009-01-16	11:57:00	0
2009-01-16	11:58:00	0
2009-01-16	11:59:00	0
2009-01-16	12:00:00	0
2009-01-16	12:01:00	0
2009-01-16	12:02:00	0
2009-01-16	12:03:00	0
2009-01-16	12:04:00	0
2009-01-16	12:05:00	0
2009-01-16	12:06:00	0
2009-01-16	12:07:00	0
2009-01-16	12:08:00	0
2009-01-16	12:09:00	0
2009-01-16	12:10:00	0
2009-01-16	12:11:00	0
2009-01-16	12:12:00	0
2009-01-16	12:13:00	0
2009-01-16	12:14:00	0
2009-01-16	12:15:00	0
2009-01-16	12:16:00	0
2009-01-16	12:17:00	0
2009-01-16	12:18:00	0
2009-01-16	12:19:00	0
2009-01-16	12:20:00	0
2009-01-16	12:21:00	0
2009-01-16	12:22:00	0
2009-01-16	12:23:00	0
2009-01-16	12:24:00	0
2009-01-16	12:25:00	0
2009-01-16	12:26:00	0
2009-01-16	12:27:00	0
2009-01-16	12:28:00	0
2009-01-16	12:29:00	0
2009-01-16	12:30:00	0
2009-01-16	12:31:00	0
2009-01-16	12:32:00	0
2009-01-16	12:33:00	0
2009-01-16	12:34:00	0
2009-01-16	12:35:00	0
2009-01-16	12:36:00	0
2009-01-16	12:37:00	0
2009-01-16	12:38:00	0
2009-01-16	12:39:00	0
2009-01-16	12:40:00	0
2009-01-16	12:41:00	0
2009-01-16	12:42:00	0
2009-01-16	12:43:00	0
2009-01-16	12:44:00	0
2009-01-16	12:45:00	0
2009-01-16	12:46:00	0
2009-01-16	12:47:00	0
2009-01-16	12:48:00	0
2009-01-16	12:49:00	0
2009-01-16	12:50:00	0
2009-01-16	12:51:00	0
2009-01-16	12:52:00	0
2009-01-16	12:53:00	0
2009-01-16	12:54:00	0
2009-01-16	12:55:00	0
2009-01-16	12:56:00	0
2009-01-16	12:57:00	0
2009-01-16	12:58:00	0
2009-01-16	12:59:00	0
2009-01-16	13:00:00	0
2009-01-16	13:01:00	0
2009-01-16	13:02:00	0
2009-01-16	13:03:00	0
2009-01-16	13:04:00	0
2009-01-16	13:05:00	0
2009-01-16	13:06:00	0
2009-01-16	13:07:00	0
2009-01-16	13:08:00	0
2009-01-16	13:09:00	0
2009-01-16	13:10:00	0
2009-01-16	13:11:00	0
2009-01-16	13:12:00	0
2009-01-16	13:13:00	0
2009-01-16	13:14:00	0
2009-01-16	13:15:00	0
2009-01-16	13:16:00	0
2009-01-16	13:17:00	0
2009-01-16	13:18:00	0
2009-01-16	13:19:00	0
2009-01-16	13:20:00	0
2009-01-16	13:21:00	0
2009-01-16	13:22:00	0
2009-01-16	13:23:00	0
2009-01-16	13:24:00	0
2009-01-16	13:25:00	0
2009-01-16	13:26:00	0
2009-01-16	13:27:00	0
2009-01-16	13:28:00	0
2009-01-16	13:29:00	0
2009-01-16	13:30:00	0
2009-01-16	13:31:00	0
2009-01-16	13:32:00	0
2009-01-16	13:33:00	0
2009-01-16	13:34:00	0
2009-01-16	13:35:00	0
2009-01-16	13:36:00	0
2009-01-16	13:37:00	0
2009-01-16	13:38:00	0
2009-01-16	13:39:00	0
2009-01-16	13:40:00	0
2009-01-16	13:41:00	0
2009-01-16	13:42:00	0
2009-01-16	13:43:00	0
2009-01-16	13:44:00	0
2009-01-16	13:45:00	0
2009-01-16	13:46:00	0
2009-01-16	13:47:00	0
2009-01-16	13:48:00	0
2009-01-16	13:49:00	0
2009-01-16	13:50:00	0
2009-01-16	13:51:00	0
2009-01-16	13:52:00	0
2009-01-16	13:53:00	0
2009-01-16	13:54:00	0
2009-01-16	13:55:00	0
2009-01-16	13:56:00	0
2009-01-16	13:57:00	0
2009-01-16	13:58:00	0
2009-01-16	13:59:00	0
2009-01-16	14:00:00	0
2009-01-16	14:01:00	0
2009-01-16	14:02:00	0
2009-01-16	14:03:00	0
2009-01-16	14:04:00	0
2009-01-16	14:05:00	0
2009-01-16	14:06:00	0
2009-01-16	14:07:00	0
2009-01-16	14:08:00	0
2009-01-16	14:09:00	0
2009-01-16	14:10:00	0
2009-01-16	14:11:00	0
2009-01-16	14:12:00	0
2009-01-16	14:13:00	0
2009-01-16	14:14:00	0
2009-01-16	14:15:00	0
2009-01-16	14:16:00	0
2009-01-16	14:17:00	0
2009-01-16	14:18:00	0
2009-01-16	14:19:00	0
2009-01-16	14:20:00	0
2009-01-16	14:21:00	0
2009-01-16	14:22:00	0
2009-01-16	14:23:00	0
2009-01-16	14:24:00	0
2009-01-16	14:25:00	0
2009-01-16	14:26:00	0
2009-01-16	14:27:00	0
2009-01-16	14:28:00	0
2009-01-16	14:29:00	0
2009-01-16	14:30:00	0
2009-01-16	14:31:00	0
2009-01-16	14:32:00	0
2009-01-16	14:33:00	0
2009-01-16	14:34:00	0
2009-01-16	14:35:00	0
2009-01-16	14:36:00	0
2009-01-16	14:37:00	0
2009-01-16	14:38:00	0
2009-01-16	14:39:00	0
2009-01-16	14:40:00	0
2009-01-16	14:41:00	0
2009-01-16	14:42:00	0
2009-01-16	14:43:00	0
2009-01-16	14:44:00	0
2009-01-16	14:45:00	0
2009-01-16	14:46:00	0
2009-01-16	14:47:00	0
2009-01-16	14:48:00	0
2009-01-16	14:49:00	0
2009-01-16	14:50:00	0
2009-01-16	14:51:00	0
2009-01-16	14:52:00	0
2009-01-16	14:53:00	0
2009-01-16	14:54:00	0
2009-01-16	14:55:00	0
2009-01-16	14:56:00	0
2009-01-16	14:57:00	0
2009-01-16	14:58:00	0
2009-01-16	14:59:00	0
2009-01-16	15:00:00	0
2009-01-16	15:01:00	0
2009-01-16	15:02:00	0
2009-01-16	15:03:00	0
2009-01-16	15:04:00	0
2009-01-16	15:05:00	0
2009-01-16	15:06:00	0
2009-01-16	15:07:00	0
2009-01-16	15:08:00	0
2009-01-16	15:09:00	0
2009-01-16	15:10:00	0
2009-01-16	15:11:00	0
2009-01-16	15:12:00	0
2009-01-16	15:13:00	0
2009-01-16	15:14:00	0
2009-01-16	15:15:00	0
2009-01-16	15:16:00	0
2009-01-16	15:17:00	0
2009-01-16	15:18:00	0
2009-01-16	15:19:00	0
2009-01-16	15:20:00	0
2009-01-16	15:21:00	0
2009-01-16	15:22:00	0
2009-01-16	15:23:00	0
2009-01-16	15:24:00	0
2009-01-16	15:25:00	0
2009-01-16	15:26:00	0
2009-01-16	15:27:00	0
2009-01-16	15:28:00	0
2009-01-16	15:29:00	0
2009-01-16	15:30:00	0
2009-01-16	15:31:00	0
2009-01-16	15:32:00	0
2009-01-16	15:33:00	0
2009-01-16	15:34:00	0
2009-01-16	15:35:00	0
2009-01-16	15:36:00	0
2009-01-16	15:37:00	0
2009-01-16	15:38:00	0
2009-01-16	15:39:00	0
2009-01-16	15:40:00	0
2009-01-16	15:41:00	0
2009-01-16	15:42:00	0
2009-01-16	15:43:00	0
2009-01-16	15:44:00	0
2009-01-16	15:45:00	0
2009-01-16	15:46:00	0
2009-01-16	15:47:00	0
2009-01-16	15:48:00	0
2009-01-16	15:49:00	0
2009-01-16	15:50:00	0
2009-01-16	15:51:00	0
2009-01-16	15:52:00	0
2009-01-16	15:53:00	0
2009-01-16	15:54:00	0
2009-01-16	15:55:00	0
2009-01-16	15:56:00	0
2009-01-16	15:57:00	0
2009-01-16	15:58:00	0
2009-01-16	15:59:00	0
2009-01-16	16:00:00	0
2009-01-16	16:01:00	0
2009-01-16	16:02:00	0
2009-01-16	16:03:00	0
2009-01-16	16:04:00	0
2009-01-16	16:05:00	0
2009-01-16	16:06:00	0
2009-01-16	16:07:00	0
2009-01-16	16:08:00	0
2009-01-16	16:09:00	0
2009-01-16	16:10:00	0
2009-01-16	16:11:00	0
2009-01-16	16:12:00	0
2009-01-16	16:13:00	0
2009-01-16	16:14:00	0
2009-01-16	16:15:00	0
2009-01-16	16:16:00	0
2009-01-16	16:17:00	0
2009-01-16	16:18:00	0
2009-01-16	16:19:00	0
2009-01-16	16:20:00	0
2009-01-16	16:21:00	0
2009-01-16	16:22:00	0
2009-01-16	16:23:00	0
2009-01-16	16:24:00	0
2009-01-16	16:25:00	0
2009-01-16	16:26:00	0
2009-01-16	16:27:00	0
2009-01-16	16:28:00	0
2009-01-16	16:29:00	0
2009-01-16	16:30:00	0
2009-01-16	16:31:00	0
2009-01-16	16:32:00	0
2009-01-16	16:33:00	0
2009-01-16	16:34:00	0
2009-01-16	16:35:00	0
2009-01-16	16:36:00	0
2009-01-16	16:37:00	0
2009-01-16	16:38:00	0
2009-01-16	16:39:00	0
2009-01-16	16:40:00	0
2009-01-16	16:41:00	0
2009-01-16	16:42:00	0
2009-01-16	16:43:00	0
2009-01-16	16:44:00	0
2009-01-16	16:45:00	0
2009-01-16	16:46:00	0
2009-01-16	16:47:00	0
2009-01-16	16:48:00	0
2009-01-16	16:49:00	0
2009-01-16	16:50:00	0
2009-01-16	16:51:00	0
2009-01-16	16:52:00	0
2009-01-16	16:53:00	0
2009-01-16	16:54:00	0
2009-01-16	16:55:00	0
2009-01-16	16:56:00	0
2009-01-16	16:57:00	0
2009-01-16	16:58:00	0
2009-01-16	16:59:00	0
2009-01-16	17:00:00	0
2009-01-16	17:01:00	0
2009-01-16	17:02:00	0
2009-01-16	17:03:00	0
2009-01-16	17:04:00	0
2009-01-16	17:05:00	0
2009-01-16	17:06:00	0
2009-01-16	17:07:00	0
2009-01-16	17:08:00	0
2009-01-16	17:09:00	0
2009-01-16	17:10:00	0
2009-01-16	17:11:00	0
2009-01-16	17:12:00	0
2009-01-16	17:13:00	0
2009-01-16	17:14:00	0
2009-01-16	17:15:00	0
2009-01-16	17:16:00	0
2009-01-16	17:17:00	0
2009-01-16	17:18:00	0
2009-01-16	17:19:00	85
2009-01-16	17:20:00	0
2009-01-16	17:21:00	36
2009-01-16	17:22:00	12
2009-01-16	17:23:00	12
2009-01-16	17:24:00	565
2009-01-16	17:25:00	1406
2009-01-16	17:26:00	1311
2009-01-16	17:27:00	1133
2009-01-16	17:28:00	48
2009-01-16	17:29:00	0
2009-01-16	17:30:00	12
2009-01-16	17:31:00	0
2009-01-16	17:32:00	0
2009-01-16	17:33:00	0
2009-01-16	17:34:00	0
2009-01-16	17:35:00	0
2009-01-16	17:36:00	0
2009-01-16	17:37:00	0
2009-01-16	17:38:00	0
2009-01-16	17:39:00	0
2009-01-16	17:40:00	12
2009-01-16	17:41:00	0
2009-01-16	17:42:00	0
2009-01-16	17:43:00	171
2009-01-16	17:44:00	72
2009-01-16	17:45:00	24
2009-01-16	17:46:00	0
2009-01-16	17:47:00	36
2009-01-16	17:48:00	12
2009-01-16	17:49:00	0
2009-01-16	17:50:00	0
2009-01-16	17:51:00	0
2009-01-16	17:52:00	0
2009-01-16	17:53:00	0
2009-01-16	17:54:00	12
2009-01-16	17:55:00	0
2009-01-16	17:56:00	0
2009-01-16	17:57:00	0
2009-01-16	17:58:00	0
2009-01-16	17:59:00	0
2009-01-16	18:00:00	0
2009-01-16	18:01:00	0
2009-01-16	18:02:00	0
2009-01-16	18:03:00	0
2009-01-16	18:04:00	0
2009-01-16	18:05:00	0
2009-01-16	18:06:00	0
2009-01-16	18:07:00	36
2009-01-16	18:08:00	565
2009-01-16	18:09:00	872
2009-01-16	18:10:00	688
2009-01-16	18:11:00	121
2009-01-16	18:12:00	0
2009-01-16	18:13:00	12
2009-01-16	18:14:00	24
2009-01-16	18:15:00	36
2009-01-16	18:16:00	12
2009-01-16	18:17:00	12
2009-01-16	18:18:00	36
2009-01-16	18:19:00	85
2009-01-16	18:20:00	24
2009-01-16	18:21:00	24
2009-01-16	18:22:00	12
2009-01-16	18:23:00	0
2009-01-16	18:24:00	0
2009-01-16	18:25:00	0
2009-01-16	18:26:00	0
2009-01-16	18:27:00	0
2009-01-16	18:28:00	12
2009-01-16	18:29:00	133
2009-01-16	18:30:00	60
2009-01-16	18:31:00	12
2009-01-16	18:32:00	24
2009-01-16	18:33:00	24
2009-01-16	18:34:00	48
2009-01-16	18:35:00	12
2009-01-16	18:36:00	12
2009-01-16	18:37:00	12
2009-01-16	18:38:00	24
2009-01-16	18:39:00	24
2009-01-16	18:40:00	24
2009-01-16	18:41:00	24
2009-01-16	18:42:00	36
2009-01-16	18:43:00	72
2009-01-16	18:44:00	12
2009-01-16	18:45:00	229
2009-01-16	18:46:00	401
2009-01-16	18:47:00	350
2009-01-16	18:48:00	401
2009-01-16	18:49:00	24
2009-01-16	18:50:00	200
2009-01-16	18:51:00	12
2009-01-16	18:52:00	121
2009-01-16	18:53:00	97
2009-01-16	18:54:00	48
2009-01-16	18:55:00	72
2009-01-16	18:56:00	0
2009-01-16	18:57:00	0
2009-01-16	18:58:00	0
2009-01-16	18:59:00	0
2009-01-16	19:00:00	0
2009-01-16	19:01:00	0
2009-01-16	19:02:00	0
2009-01-16	19:03:00	0
2009-01-16	19:04:00	0
2009-01-16	19:05:00	0
2009-01-16	19:06:00	0
2009-01-16	19:07:00	0
2009-01-16	19:08:00	0
2009-01-16	19:09:00	0
2009-01-16	19:10:00	0
2009-01-16	19:11:00	0
2009-01-16	19:12:00	0
2009-01-16	19:13:00	0
2009-01-16	19:14:00	0
2009-01-16	19:15:00	0
2009-01-16	19:16:00	0
2009-01-16	19:17:00	0
2009-01-16	19:18:00	0
2009-01-16	19:19:00	0
2009-01-16	19:20:00	0
2009-01-16	19:21:00	0
2009-01-16	19:22:00	0
2009-01-16	19:23:00	0
2009-01-16	19:24:00	0
2009-01-16	19:25:00	0
2009-01-16	19:26:00	0
2009-01-16	19:27:00	0
2009-01-16	19:28:00	0
2009-01-16	19:29:00	0
2009-01-16	19:30:00	0
2009-01-16	19:31:00	0
2009-01-16	19:32:00	0
2009-01-16	19:33:00	0
2009-01-16	19:34:00	0
2009-01-16	19:35:00	0
2009-01-16	19:36:00	0
2009-01-16	19:37:00	0
2009-01-16	19:38:00	0
2009-01-16	19:39:00	0
2009-01-16	19:40:00	0
2009-01-16	19:41:00	0
2009-01-16	19:42:00	0
2009-01-16	19:43:00	0
2009-01-16	19:44:00	0
2009-01-16	19:45:00	0
2009-01-16	19:46:00	36
2009-01-16	19:47:00	0
2009-01-16	19:48:00	0
2009-01-16	19:49:00	0
2009-01-16	19:50:00	0
2009-01-16	19:51:00	0
2009-01-16	19:52:00	0
2009-01-16	19:53:00	0
2009-01-16	19:54:00	0
2009-01-16	19:55:00	0
2009-01-16	19:56:00	0
2009-01-16	19:57:00	0
2009-01-16	19:58:00	0
2009-01-16	19:59:00	0
2009-01-16	20:00:00	0
2009-01-16	20:01:00	0
2009-01-16	20:02:00	12
2009-01-16	20:03:00	0
2009-01-16	20:04:00	0
2009-01-16	20:05:00	0
2009-01-16	20:06:00	0
2009-01-16	20:07:00	0
2009-01-16	20:08:00	0
2009-01-16	20:09:00	0
2009-01-16	20:10:00	0
2009-01-16	20:11:00	0
2009-01-16	20:12:00	0
2009-01-16	20:13:00	0
2009-01-16	20:14:00	0
2009-01-16	20:15:00	0
2009-01-16	20:16:00	0
2009-01-16	20:17:00	48
2009-01-16	20:18:00	0
2009-01-16	20:19:00	0
2009-01-16	20:20:00	0
2009-01-16	20:21:00	0
2009-01-16	20:22:00	0
2009-01-16	20:23:00	0
2009-01-16	20:24:00	0
2009-01-16	20:25:00	0
2009-01-16	20:26:00	0
2009-01-16	20:27:00	0
2009-01-16	20:28:00	0
2009-01-16	20:29:00	0
2009-01-16	20:30:00	0
2009-01-16	20:31:00	0
2009-01-16	20:32:00	0
2009-01-16	20:33:00	36
2009-01-16	20:34:00	0
2009-01-16	20:35:00	0
2009-01-16	20:36:00	0
2009-01-16	20:37:00	0
2009-01-16	20:38:00	12
2009-01-16	20:39:00	0
2009-01-16	20:40:00	12
2009-01-16	20:41:00	0
2009-01-16	20:42:00	12
2009-01-16	20:43:00	0
2009-01-16	20:44:00	0
2009-01-16	20:45:00	0
2009-01-16	20:46:00	0
2009-01-16	20:47:00	0
2009-01-16	20:48:00	0
2009-01-16	20:49:00	24
2009-01-16	20:50:00	0
2009-01-16	20:51:00	60
2009-01-16	20:52:00	0
2009-01-16	20:53:00	350
2009-01-16	20:54:00	133
2009-01-16	20:55:00	488
2009-01-16	20:56:00	333
2009-01-16	20:57:00	384
2009-01-16	20:58:00	229
2009-01-16	20:59:00	171
2009-01-16	21:00:00	418
2009-01-16	21:01:00	48
2009-01-16	21:02:00	48
2009-01-16	21:03:00	48
2009-01-16	21:04:00	121
2009-01-16	21:05:00	48
2009-01-16	21:06:00	0
2009-01-16	21:07:00	0
2009-01-16	21:08:00	0
2009-01-16	21:09:00	0
2009-01-16	21:10:00	0
2009-01-16	21:11:00	0
2009-01-16	21:12:00	0
2009-01-16	21:13:00	0
2009-01-16	21:14:00	0
2009-01-16	21:15:00	12
2009-01-16	21:16:00	0
2009-01-16	21:17:00	0
2009-01-16	21:18:00	0
2009-01-16	21:19:00	0
2009-01-16	21:20:00	0
2009-01-16	21:21:00	0
2009-01-16	21:22:00	0
2009-01-16	21:23:00	0
2009-01-16	21:24:00	0
2009-01-16	21:25:00	0
2009-01-16	21:26:00	0
2009-01-16	21:27:00	0
2009-01-16	21:28:00	0
2009-01-16	21:29:00	0
2009-01-16	21:30:00	0
2009-01-16	21:31:00	0
2009-01-16	21:32:00	0
2009-01-16	21:33:00	0
2009-01-16	21:34:00	0
2009-01-16	21:35:00	0
2009-01-16	21:36:00	0
2009-01-16	21:37:00	0
2009-01-16	21:38:00	0
2009-01-16	21:39:00	0
2009-01-16	21:40:00	0
2009-01-16	21:41:00	0
2009-01-16	21:42:00	0
2009-01-16	21:43:00	0
2009-01-16	21:44:00	0
2009-01-16	21:45:00	0
2009-01-16	21:46:00	0
2009-01-16	21:47:00	0
2009-01-16	21:48:00	0
2009-01-16	21:49:00	0
2009-01-16	21:50:00	0
2009-01-16	21:51:00	0
2009-01-16	21:52:00	0
2009-01-16	21:53:00	0
2009-01-16	21:54:00	0
2009-01-16	21:55:00	0
2009-01-16	21:56:00	0
2009-01-16	21:57:00	0
2009-01-16	21:58:00	0
2009-01-16	21:59:00	0
2009-01-16	22:00:00	0
2009-01-16	22:01:00	0
2009-01-16	22:02:00	0
2009-01-16	22:03:00	0
2009-01-16	22:04:00	0
2009-01-16	22:05:00	0
2009-01-16	22:06:00	0
2009-01-16	22:07:00	0
2009-01-16	22:08:00	0
2009-01-16	22:09:00	0
2009-01-16	22:10:00	0
2009-01-16	22:11:00	229
2009-01-16	22:12:00	24
2009-01-16	22:13:00	72
2009-01-16	22:14:00	24
2009-01-16	22:15:00	0
2009-01-16	22:16:00	0
2009-01-16	22:17:00	0
2009-01-16	22:18:00	0
2009-01-16	22:19:00	0
2009-01-16	22:20:00	0
2009-01-16	22:21:00	0
2009-01-16	22:22:00	0
2009-01-16	22:23:00	0
2009-01-16	22:24:00	0
2009-01-16	22:25:00	0
2009-01-16	22:26:00	0
2009-01-16	22:27:00	0
2009-01-16	22:28:00	0
2009-01-16	22:29:00	0
2009-01-16	22:30:00	0
2009-01-16	22:31:00	0
2009-01-16	22:32:00	0
2009-01-16	22:33:00	0
2009-01-16	22:34:00	0
2009-01-16	22:35:00	0
2009-01-16	22:36:00	0
2009-01-16	22:37:00	0
2009-01-16	22:38:00	0
2009-01-16	22:39:00	0
2009-01-16	22:40:00	0
2009-01-16	22:41:00	0
2009-01-16	22:42:00	0
2009-01-16	22:43:00	0
2009-01-16	22:44:00	12
2009-01-16	22:45:00	0
2009-01-16	22:46:00	0
2009-01-16	22:47:00	12
2009-01-16	22:48:00	0
2009-01-16	22:49:00	0
2009-01-16	22:50:00	0
2009-01-16	22:51:00	0
2009-01-16	22:52:00	0
2009-01-16	22:53:00	0
2009-01-16	22:54:00	0
2009-01-16	22:55:00	0
2009-01-16	22:56:00	0
2009-01-16	22:57:00	0
2009-01-16	22:58:00	0
2009-01-16	22:59:00	0
2009-01-16	23:00:00	0
2009-01-16	23:01:00	0
2009-01-16	23:02:00	0
2009-01-16	23:03:00	0
2009-01-16	23:04:00	0
2009-01-16	23:05:00	0
2009-01-16	23:06:00	0
2009-01-16	23:07:00	0
2009-01-16	23:08:00	0
2009-01-16	23:09:00	0
2009-01-16	23:10:00	0
2009-01-16	23:11:00	12
2009-01-16	23:12:00	12
2009-01-16	23:13:00	0
2009-01-16	23:14:00	0
2009-01-16	23:15:00	0
2009-01-16	23:16:00	0
2009-01-16	23:17:00	0
2009-01-16	23:18:00	0
2009-01-16	23:19:00	0
2009-01-16	23:20:00	0
2009-01-16	23:21:00	0
2009-01-16	23:22:00	0
2009-01-16	23:23:00	0
2009-01-16	23:24:00	0
2009-01-16	23:25:00	0
2009-01-16	23:26:00	0
2009-01-16	23:27:00	0
2009-01-16	23:28:00	0
2009-01-16	23:29:00	0
2009-01-16	23:30:00	0
2009-01-16	23:31:00	0
2009-01-16	23:32:00	0
2009-01-16	23:33:00	0
2009-01-16	23:34:00	0
2009-01-16	23:35:00	0
2009-01-16	23:36:00	0
2009-01-16	23:37:00	0
2009-01-16	23:38:00	0
2009-01-16	23:39:00	0
2009-01-16	23:40:00	0
2009-01-16	23:41:00	0
2009-01-16	23:42:00	0
2009-01-16	23:43:00	0
2009-01-16	23:44:00	0
2009-01-16	23:45:00	0
2009-01-16	23:46:00	0
2009-01-16	23:47:00	0
2009-01-16	23:48:00	0
2009-01-16	23:49:00	0
2009-01-16	23:50:00	0
2009-01-16	23:51:00	0
2009-01-16	23:52:00	12
2009-01-16	23:53:00	0
2009-01-16	23:54:00	0
2009-01-16	23:55:00	0
2009-01-16	23:56:00	0
2009-01-16	23:57:00	0
2009-01-16	23:58:00	0
2009-01-16	23:59:00	0
2009-01-17	00:00:00	0
2009-01-17	00:01:00	0
2009-01-17	00:02:00	0
2009-01-17	00:03:00	0
2009-01-17	00:04:00	0
2009-01-17	00:05:00	0
2009-01-17	00:06:00	0
2009-01-17	00:07:00	0
2009-01-17	00:08:00	0
2009-01-17	00:09:00	0
2009-01-17	00:10:00	0
2009-01-17	00:11:00	0
2009-01-17	00:12:00	0
2009-01-17	00:13:00	0
2009-01-17	00:14:00	0
2009-01-17	00:15:00	0
2009-01-17	00:16:00	0
2009-01-17	00:17:00	0
2009-01-17	00:18:00	0
2009-01-17	00:19:00	0
2009-01-17	00:20:00	0
2009-01-17	00:21:00	0
2009-01-17	00:22:00	0
2009-01-17	00:23:00	0
2009-01-17	00:24:00	0
2009-01-17	00:25:00	0
2009-01-17	00:26:00	0
2009-01-17	00:27:00	0
2009-01-17	00:28:00	0
2009-01-17	00:29:00	0
2009-01-17	00:30:00	0
2009-01-17	00:31:00	0
2009-01-17	00:32:00	0
2009-01-17	00:33:00	0
2009-01-17	00:34:00	0
2009-01-17	00:35:00	0
2009-01-17	00:36:00	0
2009-01-17	00:37:00	0
2009-01-17	00:38:00	0
2009-01-17	00:39:00	36
2009-01-17	00:40:00	0
2009-01-17	00:41:00	0
2009-01-17	00:42:00	0
2009-01-17	00:43:00	0
2009-01-17	00:44:00	0
2009-01-17	00:45:00	0
2009-01-17	00:46:00	0
2009-01-17	00:47:00	0
2009-01-17	00:48:00	0
2009-01-17	00:49:00	0
2009-01-17	00:50:00	0
2009-01-17	00:51:00	0
2009-01-17	00:52:00	0
2009-01-17	00:53:00	0
2009-01-17	00:54:00	0
2009-01-17	00:55:00	0
2009-01-17	00:56:00	0
2009-01-17	00:57:00	0
2009-01-17	00:58:00	0
2009-01-17	00:59:00	0
2009-01-17	01:00:00	0
2009-01-17	01:01:00	0
2009-01-17	01:02:00	0
2009-01-17	01:03:00	0
2009-01-17	01:04:00	0
2009-01-17	01:05:00	0
2009-01-17	01:06:00	0
2009-01-17	01:07:00	0
2009-01-17	01:08:00	0
2009-01-17	01:09:00	0
2009-01-17	01:10:00	0
2009-01-17	01:11:00	0
2009-01-17	01:12:00	0
2009-01-17	01:13:00	0
2009-01-17	01:14:00	0
2009-01-17	01:15:00	0
2009-01-17	01:16:00	0
2009-01-17	01:17:00	0
2009-01-17	01:18:00	0
2009-01-17	01:19:00	0
2009-01-17	01:20:00	0
2009-01-17	01:21:00	0
2009-01-17	01:22:00	0
2009-01-17	01:23:00	0
2009-01-17	01:24:00	0
2009-01-17	01:25:00	0
2009-01-17	01:26:00	0
2009-01-17	01:27:00	0
2009-01-17	01:28:00	0
2009-01-17	01:29:00	0
2009-01-17	01:30:00	0
2009-01-17	01:31:00	0
2009-01-17	01:32:00	0
2009-01-17	01:33:00	0
2009-01-17	01:34:00	0
2009-01-17	01:35:00	0
2009-01-17	01:36:00	0
2009-01-17	01:37:00	0
2009-01-17	01:38:00	0
2009-01-17	01:39:00	0
2009-01-17	01:40:00	0
2009-01-17	01:41:00	0
2009-01-17	01:42:00	0
2009-01-17	01:43:00	0
2009-01-17	01:44:00	0
2009-01-17	01:45:00	0
2009-01-17	01:46:00	0
2009-01-17	01:47:00	0
2009-01-17	01:48:00	0
2009-01-17	01:49:00	0
2009-01-17	01:50:00	0
2009-01-17	01:51:00	0
2009-01-17	01:52:00	0
2009-01-17	01:53:00	0
2009-01-17	01:54:00	0
2009-01-17	01:55:00	0
2009-01-17	01:56:00	0
2009-01-17	01:57:00	0
2009-01-17	01:58:00	0
2009-01-17	01:59:00	0
2009-01-17	02:00:00	0
2009-01-17	02:01:00	0
2009-01-17	02:02:00	0
2009-01-17	02:03:00	0
2009-01-17	02:04:00	0
2009-01-17	02:05:00	0
2009-01-17	02:06:00	0
2009-01-17	02:07:00	12
2009-01-17	02:08:00	36
2009-01-17	02:09:00	24
2009-01-17	02:10:00	0
2009-01-17	02:11:00	0
2009-01-17	02:12:00	0
2009-01-17	02:13:00	12
2009-01-17	02:14:00	0
2009-01-17	02:15:00	0
2009-01-17	02:16:00	0
2009-01-17	02:17:00	0
2009-01-17	02:18:00	0
2009-01-17	02:19:00	0
2009-01-17	02:20:00	0
2009-01-17	02:21:00	0
2009-01-17	02:22:00	0
2009-01-17	02:23:00	0
2009-01-17	02:24:00	0
2009-01-17	02:25:00	0
2009-01-17	02:26:00	0
2009-01-17	02:27:00	0
2009-01-17	02:28:00	0
2009-01-17	02:29:00	0
2009-01-17	02:30:00	0
2009-01-17	02:31:00	0
2009-01-17	02:32:00	0
2009-01-17	02:33:00	0
2009-01-17	02:34:00	0
2009-01-17	02:35:00	0
2009-01-17	02:36:00	0
2009-01-17	02:37:00	0
2009-01-17	02:38:00	0
2009-01-17	02:39:00	0
2009-01-17	02:40:00	0
2009-01-17	02:41:00	0
2009-01-17	02:42:00	0
2009-01-17	02:43:00	0
2009-01-17	02:44:00	0
2009-01-17	02:45:00	0
2009-01-17	02:46:00	0
2009-01-17	02:47:00	0
2009-01-17	02:48:00	0
2009-01-17	02:49:00	0
2009-01-17	02:50:00	0
2009-01-17	02:51:00	0
2009-01-17	02:52:00	0
2009-01-17	02:53:00	0
2009-01-17	02:54:00	0
2009-01-17	02:55:00	0
2009-01-17	02:56:00	0
2009-01-17	02:57:00	0
2009-01-17	02:58:00	0
2009-01-17	02:59:00	0
2009-01-17	03:00:00	0
2009-01-17	03:01:00	0
2009-01-17	03:02:00	0
2009-01-17	03:03:00	0
2009-01-17	03:04:00	0
2009-01-17	03:05:00	0
2009-01-17	03:06:00	0
2009-01-17	03:07:00	0
2009-01-17	03:08:00	0
2009-01-17	03:09:00	0
2009-01-17	03:10:00	0
2009-01-17	03:11:00	0
2009-01-17	03:12:00	0
2009-01-17	03:13:00	0
2009-01-17	03:14:00	0
2009-01-17	03:15:00	0
2009-01-17	03:16:00	0
2009-01-17	03:17:00	0
2009-01-17	03:18:00	0
2009-01-17	03:19:00	0
2009-01-17	03:20:00	0
2009-01-17	03:21:00	0
2009-01-17	03:22:00	0
2009-01-17	03:23:00	0
2009-01-17	03:24:00	0
2009-01-17	03:25:00	24
2009-01-17	03:26:00	0
2009-01-17	03:27:00	0
2009-01-17	03:28:00	0
2009-01-17	03:29:00	0
2009-01-17	03:30:00	0
2009-01-17	03:31:00	0
2009-01-17	03:32:00	0
2009-01-17	03:33:00	0
2009-01-17	03:34:00	0
2009-01-17	03:35:00	0
2009-01-17	03:36:00	0
2009-01-17	03:37:00	0
2009-01-17	03:38:00	0
2009-01-17	03:39:00	0
2009-01-17	03:40:00	0
2009-01-17	03:41:00	0
2009-01-17	03:42:00	0
2009-01-17	03:43:00	0
2009-01-17	03:44:00	0
2009-01-17	03:45:00	0
2009-01-17	03:46:00	0
2009-01-17	03:47:00	0
2009-01-17	03:48:00	0
2009-01-17	03:49:00	0
2009-01-17	03:50:00	0
2009-01-17	03:51:00	0
2009-01-17	03:52:00	0
2009-01-17	03:53:00	0
2009-01-17	03:54:00	0
2009-01-17	03:55:00	0
2009-01-17	03:56:00	0
2009-01-17	03:57:00	0
2009-01-17	03:58:00	0
2009-01-17	03:59:00	0
2009-01-17	04:00:00	0
2009-01-17	04:01:00	0
2009-01-17	04:02:00	0
2009-01-17	04:03:00	0
2009-01-17	04:04:00	0
2009-01-17	04:05:00	0
2009-01-17	04:06:00	0
2009-01-17	04:07:00	12
2009-01-17	04:08:00	0
2009-01-17	04:09:00	0
2009-01-17	04:10:00	12
2009-01-17	04:11:00	0
2009-01-17	04:12:00	0
2009-01-17	04:13:00	0
2009-01-17	04:14:00	0
2009-01-17	04:15:00	0
2009-01-17	04:16:00	0
2009-01-17	04:17:00	0
2009-01-17	04:18:00	0
2009-01-17	04:19:00	0
2009-01-17	04:20:00	0
2009-01-17	04:21:00	0
2009-01-17	04:22:00	0
2009-01-17	04:23:00	0
2009-01-17	04:24:00	0
2009-01-17	04:25:00	0
2009-01-17	04:26:00	0
2009-01-17	04:27:00	0
2009-01-17	04:28:00	0
2009-01-17	04:29:00	0
2009-01-17	04:30:00	0
2009-01-17	04:31:00	0
2009-01-17	04:32:00	0
2009-01-17	04:33:00	0
2009-01-17	04:34:00	0
2009-01-17	04:35:00	0
2009-01-17	04:36:00	0
2009-01-17	04:37:00	0
2009-01-17	04:38:00	0
2009-01-17	04:39:00	0
2009-01-17	04:40:00	0
2009-01-17	04:41:00	0
2009-01-17	04:42:00	0
2009-01-17	04:43:00	0
2009-01-17	04:44:00	0
2009-01-17	04:45:00	0
2009-01-17	04:46:00	0
2009-01-17	04:47:00	0
2009-01-17	04:48:00	0
2009-01-17	04:49:00	0
2009-01-17	04:50:00	0
2009-01-17	04:51:00	0
2009-01-17	04:52:00	0
2009-01-17	04:53:00	0
2009-01-17	04:54:00	0
2009-01-17	04:55:00	0
2009-01-17	04:56:00	0
2009-01-17	04:57:00	12
2009-01-17	04:58:00	0
2009-01-17	04:59:00	36
2009-01-17	05:00:00	24
2009-01-17	05:01:00	0
2009-01-17	05:02:00	0
2009-01-17	05:03:00	0
2009-01-17	05:04:00	0
2009-01-17	05:05:00	0
2009-01-17	05:06:00	0
2009-01-17	05:07:00	0
2009-01-17	05:08:00	0
2009-01-17	05:09:00	0
2009-01-17	05:10:00	0
2009-01-17	05:11:00	0
2009-01-17	05:12:00	0
2009-01-17	05:13:00	0
2009-01-17	05:14:00	0
2009-01-17	05:15:00	0
2009-01-17	05:16:00	0
2009-01-17	05:17:00	0
2009-01-17	05:18:00	0
2009-01-17	05:19:00	0
2009-01-17	05:20:00	0
2009-01-17	05:21:00	0
2009-01-17	05:22:00	0
2009-01-17	05:23:00	0
2009-01-17	05:24:00	0
2009-01-17	05:25:00	0
2009-01-17	05:26:00	0
2009-01-17	05:27:00	0
2009-01-17	05:28:00	0
2009-01-17	05:29:00	36
2009-01-17	05:30:00	12
2009-01-17	05:31:00	287
2009-01-17	05:32:00	229
2009-01-17	05:33:00	384
2009-01-17	05:34:00	215
2009-01-17	05:35:00	754
2009-01-17	05:36:00	333
2009-01-17	05:37:00	971
2009-01-17	05:38:00	1051
2009-01-17	05:39:00	488
2009-01-17	05:40:00	244
2009-01-17	05:41:00	507
2009-01-17	05:42:00	0
2009-01-17	05:43:00	0
2009-01-17	05:44:00	12
2009-01-17	05:45:00	0
2009-01-17	05:46:00	0
2009-01-17	05:47:00	0
2009-01-17	05:48:00	333
2009-01-17	05:49:00	24
2009-01-17	05:50:00	72
2009-01-17	05:51:00	109
2009-01-17	05:52:00	0
2009-01-17	05:53:00	12
2009-01-17	05:54:00	0
2009-01-17	05:55:00	0
2009-01-17	05:56:00	0
2009-01-17	05:57:00	24
2009-01-17	05:58:00	12
2009-01-17	05:59:00	0
2009-01-17	06:00:00	0
2009-01-17	06:01:00	0
2009-01-17	06:02:00	186
2009-01-17	06:03:00	109
2009-01-17	06:04:00	0
2009-01-17	06:05:00	0
2009-01-17	06:06:00	0
2009-01-17	06:07:00	0
2009-01-17	06:08:00	0
2009-01-17	06:09:00	0
2009-01-17	06:10:00	36
2009-01-17	06:11:00	0
2009-01-17	06:12:00	24
2009-01-17	06:13:00	0
2009-01-17	06:14:00	0
2009-01-17	06:15:00	0
2009-01-17	06:16:00	0
2009-01-17	06:17:00	0
2009-01-17	06:18:00	0
2009-01-17	06:19:00	0
2009-01-17	06:20:00	0
2009-01-17	06:21:00	0
2009-01-17	06:22:00	0
2009-01-17	06:23:00	0
2009-01-17	06:24:00	0
2009-01-17	06:25:00	0
2009-01-17	06:26:00	0
2009-01-17	06:27:00	0
2009-01-17	06:28:00	0
2009-01-17	06:29:00	0
2009-01-17	06:30:00	0
2009-01-17	06:31:00	0
2009-01-17	06:32:00	0
2009-01-17	06:33:00	0
2009-01-17	06:34:00	0
2009-01-17	06:35:00	0
2009-01-17	06:36:00	0
2009-01-17	06:37:00	0
2009-01-17	06:38:00	0
2009-01-17	06:39:00	0
2009-01-17	06:40:00	0
2009-01-17	06:41:00	0
2009-01-17	06:42:00	0
2009-01-17	06:43:00	0
2009-01-17	06:44:00	0
2009-01-17	06:45:00	0
2009-01-17	06:46:00	0
2009-01-17	06:47:00	0
2009-01-17	06:48:00	0
2009-01-17	06:49:00	0
2009-01-17	06:50:00	0
2009-01-17	06:51:00	0
2009-01-17	06:52:00	0
2009-01-17	06:53:00	0
2009-01-17	06:54:00	0
2009-01-17	06:55:00	0
2009-01-17	06:56:00	0
2009-01-17	06:57:00	0
2009-01-17	06:58:00	0
2009-01-17	06:59:00	0
2009-01-17	07:00:00	0
2009-01-17	07:01:00	0
2009-01-17	07:02:00	48
2009-01-17	07:03:00	60
2009-01-17	07:04:00	200
2009-01-17	07:05:00	667
2009-01-17	07:06:00	1077
2009-01-17	07:07:00	526
2009-01-17	07:08:00	186
2009-01-17	07:09:00	215
2009-01-17	07:10:00	565
2009-01-17	07:11:00	435
2009-01-17	07:12:00	418
2009-01-17	07:13:00	754
2009-01-17	07:14:00	971
2009-01-17	07:15:00	48
2009-01-17	07:16:00	435
2009-01-17	07:17:00	215
2009-01-17	07:18:00	0
2009-01-17	07:19:00	0
2009-01-17	07:20:00	0
2009-01-17	07:21:00	0
2009-01-17	07:22:00	48
2009-01-17	07:23:00	24
2009-01-17	07:24:00	0
2009-01-17	07:25:00	0
2009-01-17	07:26:00	0
2009-01-17	07:27:00	0
2009-01-17	07:28:00	0
2009-01-17	07:29:00	0
2009-01-17	07:30:00	0
2009-01-17	07:31:00	0
2009-01-17	07:32:00	0
2009-01-17	07:33:00	0
2009-01-17	07:34:00	0
2009-01-17	07:35:00	0
2009-01-17	07:36:00	0
2009-01-17	07:37:00	12
2009-01-17	07:38:00	36
2009-01-17	07:39:00	24
2009-01-17	07:40:00	0
2009-01-17	07:41:00	0
2009-01-17	07:42:00	0
2009-01-17	07:43:00	0
2009-01-17	07:44:00	12
2009-01-17	07:45:00	0
2009-01-17	07:46:00	36
2009-01-17	07:47:00	0
2009-01-17	07:48:00	0
2009-01-17	07:49:00	0
2009-01-17	07:50:00	0
2009-01-17	07:51:00	0
2009-01-17	07:52:00	0
2009-01-17	07:53:00	0
2009-01-17	07:54:00	12
2009-01-17	07:55:00	0
2009-01-17	07:56:00	0
2009-01-17	07:57:00	0
2009-01-17	07:58:00	0
2009-01-17	07:59:00	0
2009-01-17	08:00:00	0
2009-01-17	08:01:00	0
2009-01-17	08:02:00	0
2009-01-17	08:03:00	0
2009-01-17	08:04:00	0
2009-01-17	08:05:00	0
2009-01-17	08:06:00	0
2009-01-17	08:07:00	0
2009-01-17	08:08:00	0
2009-01-17	08:09:00	0
2009-01-17	08:10:00	0
2009-01-17	08:11:00	12
2009-01-17	08:12:00	12
2009-01-17	08:13:00	0
2009-01-17	08:14:00	0
2009-01-17	08:15:00	0
2009-01-17	08:16:00	0
2009-01-17	08:17:00	0
2009-01-17	08:18:00	12
2009-01-17	08:19:00	0
2009-01-17	08:20:00	0
2009-01-17	08:21:00	0
2009-01-17	08:22:00	0
2009-01-17	08:23:00	0
2009-01-17	08:24:00	0
2009-01-17	08:25:00	0
2009-01-17	08:26:00	0
2009-01-17	08:27:00	0
2009-01-17	08:28:00	0
2009-01-17	08:29:00	0
2009-01-17	08:30:00	0
2009-01-17	08:31:00	0
2009-01-17	08:32:00	0
2009-01-17	08:33:00	0
2009-01-17	08:34:00	0
2009-01-17	08:35:00	12
2009-01-17	08:36:00	48
2009-01-17	08:37:00	60
2009-01-17	08:38:00	0
2009-01-17	08:39:00	0
2009-01-17	08:40:00	0
2009-01-17	08:41:00	0
2009-01-17	08:42:00	0
2009-01-17	08:43:00	36
2009-01-17	08:44:00	85
2009-01-17	08:45:00	0
2009-01-17	08:46:00	0
2009-01-17	08:47:00	0
2009-01-17	08:48:00	0
2009-01-17	08:49:00	0
2009-01-17	08:50:00	0
2009-01-17	08:51:00	0
2009-01-17	08:52:00	0
2009-01-17	08:53:00	0
2009-01-17	08:54:00	0
2009-01-17	08:55:00	0
2009-01-17	08:56:00	0
2009-01-17	08:57:00	0
2009-01-17	08:58:00	0
2009-01-17	08:59:00	0
2009-01-17	09:00:00	0
2009-01-17	09:01:00	0
2009-01-17	09:02:00	0
2009-01-17	09:03:00	0
2009-01-17	09:04:00	0
2009-01-17	09:05:00	0
2009-01-17	09:06:00	0
2009-01-17	09:07:00	0
2009-01-17	09:08:00	0
[truncated: 19,611 more rows]

## Sheet: 1.30.09
Actogram, Copy Raw Data, All Days
Identity:	Emerald
Filename:	E:\Active Research Files\meloxicam titre canine\cases\emerald\Emerald 1.30.09.AWC
Gender:	F
Age:	13
Height:	2.5 cm	1.0 in
Weight:	35.6 kg	78.5 lbs
Start Date:	30-Jan-2009 (Fri)
Start Time:	17:00:00
Interval:	1.00 mins
Date Stamp:	Time Stamp:	Activity Data:	Marker Press:
2009-01-30	00:00:00	0
2009-01-30	00:01:00	0
2009-01-30	00:02:00	0
2009-01-30	00:03:00	0
2009-01-30	00:04:00	0
2009-01-30	00:05:00	0
2009-01-30	00:06:00	0
2009-01-30	00:07:00	0
2009-01-30	00:08:00	0
2009-01-30	00:09:00	0
2009-01-30	00:10:00	0
2009-01-30	00:11:00	0
2009-01-30	00:12:00	0
2009-01-30	00:13:00	0
2009-01-30	00:14:00	0
2009-01-30	00:15:00	0
2009-01-30	00:16:00	0
2009-01-30	00:17:00	0
2009-01-30	00:18:00	0
2009-01-30	00:19:00	0
2009-01-30	00:20:00	0
2009-01-30	00:21:00	0
2009-01-30	00:22:00	0
2009-01-30	00:23:00	0
2009-01-30	00:24:00	0
2009-01-30	00:25:00	0
2009-01-30	00:26:00	0
2009-01-30	00:27:00	0
2009-01-30	00:28:00	0
2009-01-30	00:29:00	0
2009-01-30	00:30:00	0
2009-01-30	00:31:00	0
2009-01-30	00:32:00	0
2009-01-30	00:33:00	0
2009-01-30	00:34:00	0
2009-01-30	00:35:00	0
2009-01-30	00:36:00	0
2009-01-30	00:37:00	0
2009-01-30	00:38:00	0
2009-01-30	00:39:00	0
2009-01-30	00:40:00	0
2009-01-30	00:41:00	0
2009-01-30	00:42:00	0
2009-01-30	00:43:00	0
2009-01-30	00:44:00	0
2009-01-30	00:45:00	0
2009-01-30	00:46:00	0
2009-01-30	00:47:00	0
2009-01-30	00:48:00	0
2009-01-30	00:49:00	0
2009-01-30	00:50:00	0
2009-01-30	00:51:00	0
2009-01-30	00:52:00	0
2009-01-30	00:53:00	0
2009-01-30	00:54:00	0
2009-01-30	00:55:00	0
2009-01-30	00:56:00	0
2009-01-30	00:57:00	0
2009-01-30	00:58:00	0
2009-01-30	00:59:00	0
2009-01-30	01:00:00	0
2009-01-30	01:01:00	0
2009-01-30	01:02:00	0
2009-01-30	01:03:00	0
2009-01-30	01:04:00	0
2009-01-30	01:05:00	0
2009-01-30	01:06:00	0
2009-01-30	01:07:00	0
2009-01-30	01:08:00	0
2009-01-30	01:09:00	0
2009-01-30	01:10:00	0
2009-01-30	01:11:00	0
2009-01-30	01:12:00	0
2009-01-30	01:13:00	0
2009-01-30	01:14:00	0
2009-01-30	01:15:00	0
2009-01-30	01:16:00	0
2009-01-30	01:17:00	0
2009-01-30	01:18:00	0
2009-01-30	01:19:00	0
2009-01-30	01:20:00	0
2009-01-30	01:21:00	0
2009-01-30	01:22:00	0
2009-01-30	01:23:00	0
2009-01-30	01:24:00	0
2009-01-30	01:25:00	0
2009-01-30	01:26:00	0
2009-01-30	01:27:00	0
2009-01-30	01:28:00	0
2009-01-30	01:29:00	0
2009-01-30	01:30:00	0
2009-01-30	01:31:00	0
2009-01-30	01:32:00	0
2009-01-30	01:33:00	0
2009-01-30	01:34:00	0
2009-01-30	01:35:00	0
2009-01-30	01:36:00	0
2009-01-30	01:37:00	0
2009-01-30	01:38:00	0
2009-01-30	01:39:00	0
2009-01-30	01:40:00	0
2009-01-30	01:41:00	0
2009-01-30	01:42:00	0
2009-01-30	01:43:00	0
2009-01-30	01:44:00	0
2009-01-30	01:45:00	0
2009-01-30	01:46:00	0
2009-01-30	01:47:00	0
2009-01-30	01:48:00	0
2009-01-30	01:49:00	0
2009-01-30	01:50:00	0
2009-01-30	01:51:00	0
2009-01-30	01:52:00	0
2009-01-30	01:53:00	0
2009-01-30	01:54:00	0
2009-01-30	01:55:00	0
2009-01-30	01:56:00	0
2009-01-30	01:57:00	0
2009-01-30	01:58:00	0
2009-01-30	01:59:00	0
2009-01-30	02:00:00	0
2009-01-30	02:01:00	0
2009-01-30	02:02:00	0
2009-01-30	02:03:00	0
2009-01-30	02:04:00	0
2009-01-30	02:05:00	0
2009-01-30	02:06:00	0
2009-01-30	02:07:00	0
2009-01-30	02:08:00	0
2009-01-30	02:09:00	0
2009-01-30	02:10:00	0
2009-01-30	02:11:00	0
2009-01-30	02:12:00	0
2009-01-30	02:13:00	0
2009-01-30	02:14:00	0
2009-01-30	02:15:00	0
2009-01-30	02:16:00	0
2009-01-30	02:17:00	0
2009-01-30	02:18:00	0
2009-01-30	02:19:00	0
2009-01-30	02:20:00	0
2009-01-30	02:21:00	0
2009-01-30	02:22:00	0
2009-01-30	02:23:00	0
2009-01-30	02:24:00	0
2009-01-30	02:25:00	0
2009-01-30	02:26:00	0
2009-01-30	02:27:00	0
2009-01-30	02:28:00	0
2009-01-30	02:29:00	0
2009-01-30	02:30:00	0
2009-01-30	02:31:00	0
2009-01-30	02:32:00	0
2009-01-30	02:33:00	0
2009-01-30	02:34:00	0
2009-01-30	02:35:00	0
2009-01-30	02:36:00	0
2009-01-30	02:37:00	0
2009-01-30	02:38:00	0
2009-01-30	02:39:00	0
2009-01-30	02:40:00	0
2009-01-30	02:41:00	0
2009-01-30	02:42:00	0
2009-01-30	02:43:00	0
2009-01-30	02:44:00	0
2009-01-30	02:45:00	0
2009-01-30	02:46:00	0
2009-01-30	02:47:00	0
2009-01-30	02:48:00	0
2009-01-30	02:49:00	0
2009-01-30	02:50:00	0
2009-01-30	02:51:00	0
2009-01-30	02:52:00	0
2009-01-30	02:53:00	0
2009-01-30	02:54:00	0
2009-01-30	02:55:00	0
2009-01-30	02:56:00	0
2009-01-30	02:57:00	0
2009-01-30	02:58:00	0
2009-01-30	02:59:00	0
2009-01-30	03:00:00	0
2009-01-30	03:01:00	0
2009-01-30	03:02:00	0
2009-01-30	03:03:00	0
2009-01-30	03:04:00	0
2009-01-30	03:05:00	0
2009-01-30	03:06:00	0
2009-01-30	03:07:00	0
2009-01-30	03:08:00	0
2009-01-30	03:09:00	0
2009-01-30	03:10:00	0
2009-01-30	03:11:00	0
2009-01-30	03:12:00	0
2009-01-30	03:13:00	0
2009-01-30	03:14:00	0
2009-01-30	03:15:00	0
2009-01-30	03:16:00	0
2009-01-30	03:17:00	0
2009-01-30	03:18:00	0
2009-01-30	03:19:00	0
2009-01-30	03:20:00	0
2009-01-30	03:21:00	0
2009-01-30	03:22:00	0
2009-01-30	03:23:00	0
2009-01-30	03:24:00	0
2009-01-30	03:25:00	0
2009-01-30	03:26:00	0
2009-01-30	03:27:00	0
2009-01-30	03:28:00	0
2009-01-30	03:29:00	0
2009-01-30	03:30:00	0
2009-01-30	03:31:00	0
2009-01-30	03:32:00	0
2009-01-30	03:33:00	0
2009-01-30	03:34:00	0
2009-01-30	03:35:00	0
2009-01-30	03:36:00	0
2009-01-30	03:37:00	0
2009-01-30	03:38:00	0
2009-01-30	03:39:00	0
2009-01-30	03:40:00	0
2009-01-30	03:41:00	0
2009-01-30	03:42:00	0
2009-01-30	03:43:00	0
2009-01-30	03:44:00	0
2009-01-30	03:45:00	0
2009-01-30	03:46:00	0
2009-01-30	03:47:00	0
2009-01-30	03:48:00	0
2009-01-30	03:49:00	0
2009-01-30	03:50:00	0
2009-01-30	03:51:00	0
2009-01-30	03:52:00	0
2009-01-30	03:53:00	0
2009-01-30	03:54:00	0
2009-01-30	03:55:00	0
2009-01-30	03:56:00	0
2009-01-30	03:57:00	0
2009-01-30	03:58:00	0
2009-01-30	03:59:00	0
2009-01-30	04:00:00	0
2009-01-30	04:01:00	0
2009-01-30	04:02:00	0
2009-01-30	04:03:00	0
2009-01-30	04:04:00	0
2009-01-30	04:05:00	0
2009-01-30	04:06:00	0
2009-01-30	04:07:00	0
2009-01-30	04:08:00	0
2009-01-30	04:09:00	0
2009-01-30	04:10:00	0
2009-01-30	04:11:00	0
2009-01-30	04:12:00	0
2009-01-30	04:13:00	0
2009-01-30	04:14:00	0
2009-01-30	04:15:00	0
2009-01-30	04:16:00	0
2009-01-30	04:17:00	0
2009-01-30	04:18:00	0
2009-01-30	04:19:00	0
2009-01-30	04:20:00	0
2009-01-30	04:21:00	0
2009-01-30	04:22:00	0
2009-01-30	04:23:00	0
2009-01-30	04:24:00	0
2009-01-30	04:25:00	0
2009-01-30	04:26:00	0
2009-01-30	04:27:00	0
2009-01-30	04:28:00	0
2009-01-30	04:29:00	0
2009-01-30	04:30:00	0
2009-01-30	04:31:00	0
2009-01-30	04:32:00	0
2009-01-30	04:33:00	0
2009-01-30	04:34:00	0
2009-01-30	04:35:00	0
2009-01-30	04:36:00	0
2009-01-30	04:37:00	0
2009-01-30	04:38:00	0
2009-01-30	04:39:00	0
2009-01-30	04:40:00	0
2009-01-30	04:41:00	0
2009-01-30	04:42:00	0
2009-01-30	04:43:00	0
2009-01-30	04:44:00	0
2009-01-30	04:45:00	0
2009-01-30	04:46:00	0
2009-01-30	04:47:00	0
2009-01-30	04:48:00	0
2009-01-30	04:49:00	0
2009-01-30	04:50:00	0
2009-01-30	04:51:00	0
2009-01-30	04:52:00	0
2009-01-30	04:53:00	0
2009-01-30	04:54:00	0
2009-01-30	04:55:00	0
2009-01-30	04:56:00	0
2009-01-30	04:57:00	0
2009-01-30	04:58:00	0
2009-01-30	04:59:00	0
2009-01-30	05:00:00	0
2009-01-30	05:01:00	0
2009-01-30	05:02:00	0
2009-01-30	05:03:00	0
2009-01-30	05:04:00	0
2009-01-30	05:05:00	0
2009-01-30	05:06:00	0
2009-01-30	05:07:00	0
2009-01-30	05:08:00	0
2009-01-30	05:09:00	0
2009-01-30	05:10:00	0
2009-01-30	05:11:00	0
2009-01-30	05:12:00	0
2009-01-30	05:13:00	0
2009-01-30	05:14:00	0
2009-01-30	05:15:00	0
2009-01-30	05:16:00	0
2009-01-30	05:17:00	0
2009-01-30	05:18:00	0
2009-01-30	05:19:00	0
2009-01-30	05:20:00	0
2009-01-30	05:21:00	0
2009-01-30	05:22:00	0
2009-01-30	05:23:00	0
2009-01-30	05:24:00	0
2009-01-30	05:25:00	0
2009-01-30	05:26:00	0
2009-01-30	05:27:00	0
2009-01-30	05:28:00	0
2009-01-30	05:29:00	0
2009-01-30	05:30:00	0
2009-01-30	05:31:00	0
2009-01-30	05:32:00	0
2009-01-30	05:33:00	0
2009-01-30	05:34:00	0
2009-01-30	05:35:00	0
2009-01-30	05:36:00	0
2009-01-30	05:37:00	0
2009-01-30	05:38:00	0
2009-01-30	05:39:00	0
2009-01-30	05:40:00	0
2009-01-30	05:41:00	0
2009-01-30	05:42:00	0
2009-01-30	05:43:00	0
2009-01-30	05:44:00	0
2009-01-30	05:45:00	0
2009-01-30	05:46:00	0
2009-01-30	05:47:00	0
2009-01-30	05:48:00	0
2009-01-30	05:49:00	0
2009-01-30	05:50:00	0
2009-01-30	05:51:00	0
2009-01-30	05:52:00	0
2009-01-30	05:53:00	0
2009-01-30	05:54:00	0
2009-01-30	05:55:00	0
2009-01-30	05:56:00	0
2009-01-30	05:57:00	0
2009-01-30	05:58:00	0
2009-01-30	05:59:00	0
2009-01-30	06:00:00	0
2009-01-30	06:01:00	0
2009-01-30	06:02:00	0
2009-01-30	06:03:00	0
2009-01-30	06:04:00	0
2009-01-30	06:05:00	0
2009-01-30	06:06:00	0
2009-01-30	06:07:00	0
2009-01-30	06:08:00	0
2009-01-30	06:09:00	0
2009-01-30	06:10:00	0
2009-01-30	06:11:00	0
2009-01-30	06:12:00	0
2009-01-30	06:13:00	0
2009-01-30	06:14:00	0
2009-01-30	06:15:00	0
2009-01-30	06:16:00	0
2009-01-30	06:17:00	0
2009-01-30	06:18:00	0
2009-01-30	06:19:00	0
2009-01-30	06:20:00	0
2009-01-30	06:21:00	0
2009-01-30	06:22:00	0
2009-01-30	06:23:00	0
2009-01-30	06:24:00	0
2009-01-30	06:25:00	0
2009-01-30	06:26:00	0
2009-01-30	06:27:00	0
2009-01-30	06:28:00	0
2009-01-30	06:29:00	0
2009-01-30	06:30:00	0
2009-01-30	06:31:00	0
2009-01-30	06:32:00	0
2009-01-30	06:33:00	0
2009-01-30	06:34:00	0
2009-01-30	06:35:00	0
2009-01-30	06:36:00	0
2009-01-30	06:37:00	0
2009-01-30	06:38:00	0
2009-01-30	06:39:00	0
2009-01-30	06:40:00	0
2009-01-30	06:41:00	0
2009-01-30	06:42:00	0
2009-01-30	06:43:00	0
2009-01-30	06:44:00	0
2009-01-30	06:45:00	0
2009-01-30	06:46:00	0
2009-01-30	06:47:00	0
2009-01-30	06:48:00	0
2009-01-30	06:49:00	0
2009-01-30	06:50:00	0
2009-01-30	06:51:00	0
2009-01-30	06:52:00	0
2009-01-30	06:53:00	0
2009-01-30	06:54:00	0
2009-01-30	06:55:00	0
2009-01-30	06:56:00	0
2009-01-30	06:57:00	0
2009-01-30	06:58:00	0
2009-01-30	06:59:00	0
2009-01-30	07:00:00	0
2009-01-30	07:01:00	0
2009-01-30	07:02:00	0
2009-01-30	07:03:00	0
2009-01-30	07:04:00	0
2009-01-30	07:05:00	0
2009-01-30	07:06:00	0
2009-01-30	07:07:00	0
2009-01-30	07:08:00	0
2009-01-30	07:09:00	0
2009-01-30	07:10:00	0
2009-01-30	07:11:00	0
2009-01-30	07:12:00	0
2009-01-30	07:13:00	0
2009-01-30	07:14:00	0
2009-01-30	07:15:00	0
2009-01-30	07:16:00	0
2009-01-30	07:17:00	0
2009-01-30	07:18:00	0
2009-01-30	07:19:00	0
2009-01-30	07:20:00	0
2009-01-30	07:21:00	0
2009-01-30	07:22:00	0
2009-01-30	07:23:00	0
2009-01-30	07:24:00	0
2009-01-30	07:25:00	0
2009-01-30	07:26:00	0
2009-01-30	07:27:00	0
2009-01-30	07:28:00	0
2009-01-30	07:29:00	0
2009-01-30	07:30:00	0
2009-01-30	07:31:00	0
2009-01-30	07:32:00	0
2009-01-30	07:33:00	0
2009-01-30	07:34:00	0
2009-01-30	07:35:00	0
2009-01-30	07:36:00	0
2009-01-30	07:37:00	0
2009-01-30	07:38:00	0
2009-01-30	07:39:00	0
2009-01-30	07:40:00	0
2009-01-30	07:41:00	0
2009-01-30	07:42:00	0
2009-01-30	07:43:00	0
2009-01-30	07:44:00	0
2009-01-30	07:45:00	0
2009-01-30	07:46:00	0
2009-01-30	07:47:00	0
2009-01-30	07:48:00	0
2009-01-30	07:49:00	0
2009-01-30	07:50:00	0
2009-01-30	07:51:00	0
2009-01-30	07:52:00	0
2009-01-30	07:53:00	0
2009-01-30	07:54:00	0
2009-01-30	07:55:00	0
2009-01-30	07:56:00	0
2009-01-30	07:57:00	0
2009-01-30	07:58:00	0
2009-01-30	07:59:00	0
2009-01-30	08:00:00	0
2009-01-30	08:01:00	0
2009-01-30	08:02:00	0
2009-01-30	08:03:00	0
2009-01-30	08:04:00	0
2009-01-30	08:05:00	0
2009-01-30	08:06:00	0
2009-01-30	08:07:00	0
2009-01-30	08:08:00	0
2009-01-30	08:09:00	0
2009-01-30	08:10:00	0
2009-01-30	08:11:00	0
2009-01-30	08:12:00	0
2009-01-30	08:13:00	0
2009-01-30	08:14:00	0
2009-01-30	08:15:00	0
2009-01-30	08:16:00	0
2009-01-30	08:17:00	0
2009-01-30	08:18:00	0
2009-01-30	08:19:00	0
2009-01-30	08:20:00	0
2009-01-30	08:21:00	0
2009-01-30	08:22:00	0
2009-01-30	08:23:00	0
2009-01-30	08:24:00	0
2009-01-30	08:25:00	0
2009-01-30	08:26:00	0
2009-01-30	08:27:00	0
2009-01-30	08:28:00	0
2009-01-30	08:29:00	0
2009-01-30	08:30:00	0
2009-01-30	08:31:00	0
2009-01-30	08:32:00	0
2009-01-30	08:33:00	0
2009-01-30	08:34:00	0
2009-01-30	08:35:00	0
2009-01-30	08:36:00	0
2009-01-30	08:37:00	0
2009-01-30	08:38:00	0
2009-01-30	08:39:00	0
2009-01-30	08:40:00	0
2009-01-30	08:41:00	0
2009-01-30	08:42:00	0
2009-01-30	08:43:00	0
2009-01-30	08:44:00	0
2009-01-30	08:45:00	0
2009-01-30	08:46:00	0
2009-01-30	08:47:00	0
2009-01-30	08:48:00	0
2009-01-30	08:49:00	0
2009-01-30	08:50:00	0
2009-01-30	08:51:00	0
2009-01-30	08:52:00	0
2009-01-30	08:53:00	0
2009-01-30	08:54:00	0
2009-01-30	08:55:00	0
2009-01-30	08:56:00	0
2009-01-30	08:57:00	0
2009-01-30	08:58:00	0
2009-01-30	08:59:00	0
2009-01-30	09:00:00	0
2009-01-30	09:01:00	0
2009-01-30	09:02:00	0
2009-01-30	09:03:00	0
2009-01-30	09:04:00	0
2009-01-30	09:05:00	0
2009-01-30	09:06:00	0
2009-01-30	09:07:00	0
2009-01-30	09:08:00	0
2009-01-30	09:09:00	0
2009-01-30	09:10:00	0
2009-01-30	09:11:00	0
2009-01-30	09:12:00	0
2009-01-30	09:13:00	0
2009-01-30	09:14:00	0
2009-01-30	09:15:00	0
2009-01-30	09:16:00	0
2009-01-30	09:17:00	0
2009-01-30	09:18:00	0
2009-01-30	09:19:00	0
2009-01-30	09:20:00	0
2009-01-30	09:21:00	0
2009-01-30	09:22:00	0
2009-01-30	09:23:00	0
2009-01-30	09:24:00	0
2009-01-30	09:25:00	0
2009-01-30	09:26:00	0
2009-01-30	09:27:00	0
2009-01-30	09:28:00	0
2009-01-30	09:29:00	0
2009-01-30	09:30:00	0
2009-01-30	09:31:00	0
2009-01-30	09:32:00	0
2009-01-30	09:33:00	0
2009-01-30	09:34:00	0
2009-01-30	09:35:00	0
2009-01-30	09:36:00	0
2009-01-30	09:37:00	0
2009-01-30	09:38:00	0
2009-01-30	09:39:00	0
2009-01-30	09:40:00	0
2009-01-30	09:41:00	0
2009-01-30	09:42:00	0
2009-01-30	09:43:00	0
2009-01-30	09:44:00	0
2009-01-30	09:45:00	0
2009-01-30	09:46:00	0
2009-01-30	09:47:00	0
2009-01-30	09:48:00	0
2009-01-30	09:49:00	0
2009-01-30	09:50:00	0
2009-01-30	09:51:00	0
2009-01-30	09:52:00	0
2009-01-30	09:53:00	0
2009-01-30	09:54:00	0
2009-01-30	09:55:00	0
2009-01-30	09:56:00	0
2009-01-30	09:57:00	0
2009-01-30	09:58:00	0
2009-01-30	09:59:00	0
2009-01-30	10:00:00	0
2009-01-30	10:01:00	0
2009-01-30	10:02:00	0
2009-01-30	10:03:00	0
2009-01-30	10:04:00	0
2009-01-30	10:05:00	0
2009-01-30	10:06:00	0
2009-01-30	10:07:00	0
2009-01-30	10:08:00	0
2009-01-30	10:09:00	0
2009-01-30	10:10:00	0
2009-01-30	10:11:00	0
2009-01-30	10:12:00	0
2009-01-30	10:13:00	0
2009-01-30	10:14:00	0
2009-01-30	10:15:00	0
2009-01-30	10:16:00	0
2009-01-30	10:17:00	0
2009-01-30	10:18:00	0
2009-01-30	10:19:00	0
2009-01-30	10:20:00	0
2009-01-30	10:21:00	0
2009-01-30	10:22:00	0
2009-01-30	10:23:00	0
2009-01-30	10:24:00	0
2009-01-30	10:25:00	0
2009-01-30	10:26:00	0
2009-01-30	10:27:00	0
2009-01-30	10:28:00	0
2009-01-30	10:29:00	0
2009-01-30	10:30:00	0
2009-01-30	10:31:00	0
2009-01-30	10:32:00	0
2009-01-30	10:33:00	0
2009-01-30	10:34:00	0
2009-01-30	10:35:00	0
2009-01-30	10:36:00	0
2009-01-30	10:37:00	0
2009-01-30	10:38:00	0
2009-01-30	10:39:00	0
2009-01-30	10:40:00	0
2009-01-30	10:41:00	0
2009-01-30	10:42:00	0
2009-01-30	10:43:00	0
2009-01-30	10:44:00	0
2009-01-30	10:45:00	0
2009-01-30	10:46:00	0
2009-01-30	10:47:00	0
2009-01-30	10:48:00	0
2009-01-30	10:49:00	0
2009-01-30	10:50:00	0
2009-01-30	10:51:00	0
2009-01-30	10:52:00	0
2009-01-30	10:53:00	0
2009-01-30	10:54:00	0
2009-01-30	10:55:00	0
2009-01-30	10:56:00	0
2009-01-30	10:57:00	0
2009-01-30	10:58:00	0
2009-01-30	10:59:00	0
2009-01-30	11:00:00	0
2009-01-30	11:01:00	0
2009-01-30	11:02:00	0
2009-01-30	11:03:00	0
2009-01-30	11:04:00	0
2009-01-30	11:05:00	0
2009-01-30	11:06:00	0
2009-01-30	11:07:00	0
2009-01-30	11:08:00	0
2009-01-30	11:09:00	0
2009-01-30	11:10:00	0
2009-01-30	11:11:00	0
2009-01-30	11:12:00	0
2009-01-30	11:13:00	0
2009-01-30	11:14:00	0
2009-01-30	11:15:00	0
2009-01-30	11:16:00	0
2009-01-30	11:17:00	0
2009-01-30	11:18:00	0
2009-01-30	11:19:00	0
2009-01-30	11:20:00	0
2009-01-30	11:21:00	0
2009-01-30	11:22:00	0
2009-01-30	11:23:00	0
2009-01-30	11:24:00	0
2009-01-30	11:25:00	0
2009-01-30	11:26:00	0
2009-01-30	11:27:00	0
2009-01-30	11:28:00	0
2009-01-30	11:29:00	0
2009-01-30	11:30:00	0
2009-01-30	11:31:00	0
2009-01-30	11:32:00	0
2009-01-30	11:33:00	0
2009-01-30	11:34:00	0
2009-01-30	11:35:00	0
2009-01-30	11:36:00	0
2009-01-30	11:37:00	0
2009-01-30	11:38:00	0
2009-01-30	11:39:00	0
2009-01-30	11:40:00	0
2009-01-30	11:41:00	0
2009-01-30	11:42:00	0
2009-01-30	11:43:00	0
2009-01-30	11:44:00	0
2009-01-30	11:45:00	0
2009-01-30	11:46:00	0
2009-01-30	11:47:00	0
2009-01-30	11:48:00	0
2009-01-30	11:49:00	0
2009-01-30	11:50:00	0
2009-01-30	11:51:00	0
2009-01-30	11:52:00	0
2009-01-30	11:53:00	0
2009-01-30	11:54:00	0
2009-01-30	11:55:00	0
2009-01-30	11:56:00	0
2009-01-30	11:57:00	0
2009-01-30	11:58:00	0
2009-01-30	11:59:00	0
2009-01-30	12:00:00	0
2009-01-30	12:01:00	0
2009-01-30	12:02:00	0
2009-01-30	12:03:00	0
2009-01-30	12:04:00	0
2009-01-30	12:05:00	0
2009-01-30	12:06:00	0
2009-01-30	12:07:00	0
2009-01-30	12:08:00	0
2009-01-30	12:09:00	0
2009-01-30	12:10:00	0
2009-01-30	12:11:00	0
2009-01-30	12:12:00	0
2009-01-30	12:13:00	0
2009-01-30	12:14:00	0
2009-01-30	12:15:00	0
2009-01-30	12:16:00	0
2009-01-30	12:17:00	0
2009-01-30	12:18:00	0
2009-01-30	12:19:00	0
2009-01-30	12:20:00	0
2009-01-30	12:21:00	0
2009-01-30	12:22:00	0
2009-01-30	12:23:00	0
2009-01-30	12:24:00	0
2009-01-30	12:25:00	0
2009-01-30	12:26:00	0
2009-01-30	12:27:00	0
2009-01-30	12:28:00	0
2009-01-30	12:29:00	0
2009-01-30	12:30:00	0
2009-01-30	12:31:00	0
2009-01-30	12:32:00	0
2009-01-30	12:33:00	0
2009-01-30	12:34:00	0
2009-01-30	12:35:00	0
2009-01-30	12:36:00	0
2009-01-30	12:37:00	0
2009-01-30	12:38:00	0
2009-01-30	12:39:00	0
2009-01-30	12:40:00	0
2009-01-30	12:41:00	0
2009-01-30	12:42:00	0
2009-01-30	12:43:00	0
2009-01-30	12:44:00	0
2009-01-30	12:45:00	0
2009-01-30	12:46:00	0
2009-01-30	12:47:00	0
2009-01-30	12:48:00	0
2009-01-30	12:49:00	0
2009-01-30	12:50:00	0
2009-01-30	12:51:00	0
2009-01-30	12:52:00	0
2009-01-30	12:53:00	0
2009-01-30	12:54:00	0
2009-01-30	12:55:00	0
2009-01-30	12:56:00	0
2009-01-30	12:57:00	0
2009-01-30	12:58:00	0
2009-01-30	12:59:00	0
2009-01-30	13:00:00	0
2009-01-30	13:01:00	0
2009-01-30	13:02:00	0
2009-01-30	13:03:00	0
2009-01-30	13:04:00	0
2009-01-30	13:05:00	0
2009-01-30	13:06:00	0
2009-01-30	13:07:00	0
2009-01-30	13:08:00	0
2009-01-30	13:09:00	0
2009-01-30	13:10:00	0
2009-01-30	13:11:00	0
2009-01-30	13:12:00	0
2009-01-30	13:13:00	0
2009-01-30	13:14:00	0
2009-01-30	13:15:00	0
2009-01-30	13:16:00	0
2009-01-30	13:17:00	0
2009-01-30	13:18:00	0
2009-01-30	13:19:00	0
2009-01-30	13:20:00	0
2009-01-30	13:21:00	0
2009-01-30	13:22:00	0
2009-01-30	13:23:00	0
2009-01-30	13:24:00	0
2009-01-30	13:25:00	0
2009-01-30	13:26:00	0
2009-01-30	13:27:00	0
2009-01-30	13:28:00	0
2009-01-30	13:29:00	0
2009-01-30	13:30:00	0
2009-01-30	13:31:00	0
2009-01-30	13:32:00	0
2009-01-30	13:33:00	0
2009-01-30	13:34:00	0
2009-01-30	13:35:00	0
2009-01-30	13:36:00	0
2009-01-30	13:37:00	0
2009-01-30	13:38:00	0
2009-01-30	13:39:00	0
2009-01-30	13:40:00	0
2009-01-30	13:41:00	0
2009-01-30	13:42:00	0
2009-01-30	13:43:00	0
2009-01-30	13:44:00	0
2009-01-30	13:45:00	0
2009-01-30	13:46:00	0
2009-01-30	13:47:00	0
2009-01-30	13:48:00	0
2009-01-30	13:49:00	0
2009-01-30	13:50:00	0
2009-01-30	13:51:00	0
2009-01-30	13:52:00	0
2009-01-30	13:53:00	0
2009-01-30	13:54:00	0
2009-01-30	13:55:00	0
2009-01-30	13:56:00	0
2009-01-30	13:57:00	0
2009-01-30	13:58:00	0
2009-01-30	13:59:00	0
2009-01-30	14:00:00	0
2009-01-30	14:01:00	0
2009-01-30	14:02:00	0
2009-01-30	14:03:00	0
2009-01-30	14:04:00	0
2009-01-30	14:05:00	0
2009-01-30	14:06:00	0
2009-01-30	14:07:00	0
2009-01-30	14:08:00	0
2009-01-30	14:09:00	0
2009-01-30	14:10:00	0
2009-01-30	14:11:00	0
2009-01-30	14:12:00	0
2009-01-30	14:13:00	0
2009-01-30	14:14:00	0
2009-01-30	14:15:00	0
2009-01-30	14:16:00	0
2009-01-30	14:17:00	0
2009-01-30	14:18:00	0
2009-01-30	14:19:00	0
2009-01-30	14:20:00	0
2009-01-30	14:21:00	0
2009-01-30	14:22:00	0
2009-01-30	14:23:00	0
2009-01-30	14:24:00	0
2009-01-30	14:25:00	0
2009-01-30	14:26:00	0
2009-01-30	14:27:00	0
2009-01-30	14:28:00	0
2009-01-30	14:29:00	0
2009-01-30	14:30:00	0
2009-01-30	14:31:00	0
2009-01-30	14:32:00	0
2009-01-30	14:33:00	0
2009-01-30	14:34:00	0
2009-01-30	14:35:00	0
2009-01-30	14:36:00	0
2009-01-30	14:37:00	0
2009-01-30	14:38:00	0
2009-01-30	14:39:00	0
2009-01-30	14:40:00	0
2009-01-30	14:41:00	0
2009-01-30	14:42:00	0
2009-01-30	14:43:00	0
2009-01-30	14:44:00	0
2009-01-30	14:45:00	0
2009-01-30	14:46:00	0
2009-01-30	14:47:00	0
2009-01-30	14:48:00	0
2009-01-30	14:49:00	0
2009-01-30	14:50:00	0
2009-01-30	14:51:00	0
2009-01-30	14:52:00	0
2009-01-30	14:53:00	0
2009-01-30	14:54:00	0
2009-01-30	14:55:00	0
2009-01-30	14:56:00	0
2009-01-30	14:57:00	0
2009-01-30	14:58:00	0
2009-01-30	14:59:00	0
2009-01-30	15:00:00	0
2009-01-30	15:01:00	0
2009-01-30	15:02:00	0
2009-01-30	15:03:00	0
2009-01-30	15:04:00	0
2009-01-30	15:05:00	0
2009-01-30	15:06:00	0
2009-01-30	15:07:00	0
2009-01-30	15:08:00	0
2009-01-30	15:09:00	0
2009-01-30	15:10:00	0
2009-01-30	15:11:00	0
2009-01-30	15:12:00	0
2009-01-30	15:13:00	0
2009-01-30	15:14:00	0
2009-01-30	15:15:00	0
2009-01-30	15:16:00	0
2009-01-30	15:17:00	0
2009-01-30	15:18:00	0
2009-01-30	15:19:00	0
2009-01-30	15:20:00	0
2009-01-30	15:21:00	0
2009-01-30	15:22:00	0
2009-01-30	15:23:00	0
2009-01-30	15:24:00	0
2009-01-30	15:25:00	0
2009-01-30	15:26:00	0
2009-01-30	15:27:00	0
2009-01-30	15:28:00	0
2009-01-30	15:29:00	0
2009-01-30	15:30:00	0
2009-01-30	15:31:00	0
2009-01-30	15:32:00	0
2009-01-30	15:33:00	0
2009-01-30	15:34:00	0
2009-01-30	15:35:00	0
2009-01-30	15:36:00	0
2009-01-30	15:37:00	0
2009-01-30	15:38:00	0
2009-01-30	15:39:00	0
2009-01-30	15:40:00	0
2009-01-30	15:41:00	0
2009-01-30	15:42:00	0
2009-01-30	15:43:00	0
2009-01-30	15:44:00	0
2009-01-30	15:45:00	0
2009-01-30	15:46:00	0
2009-01-30	15:47:00	0
2009-01-30	15:48:00	0
2009-01-30	15:49:00	0
2009-01-30	15:50:00	0
2009-01-30	15:51:00	0
2009-01-30	15:52:00	0
2009-01-30	15:53:00	0
2009-01-30	15:54:00	0
2009-01-30	15:55:00	0
2009-01-30	15:56:00	0
2009-01-30	15:57:00	0
2009-01-30	15:58:00	0
2009-01-30	15:59:00	0
2009-01-30	16:00:00	0
2009-01-30	16:01:00	0
2009-01-30	16:02:00	0
2009-01-30	16:03:00	0
2009-01-30	16:04:00	0
2009-01-30	16:05:00	0
2009-01-30	16:06:00	0
2009-01-30	16:07:00	0
2009-01-30	16:08:00	0
2009-01-30	16:09:00	0
2009-01-30	16:10:00	0
2009-01-30	16:11:00	0
2009-01-30	16:12:00	0
2009-01-30	16:13:00	0
2009-01-30	16:14:00	0
2009-01-30	16:15:00	0
2009-01-30	16:16:00	0
2009-01-30	16:17:00	0
2009-01-30	16:18:00	0
2009-01-30	16:19:00	0
2009-01-30	16:20:00	0
2009-01-30	16:21:00	0
2009-01-30	16:22:00	0
2009-01-30	16:23:00	0
2009-01-30	16:24:00	0
2009-01-30	16:25:00	0
2009-01-30	16:26:00	0
2009-01-30	16:27:00	0
2009-01-30	16:28:00	0
2009-01-30	16:29:00	0
2009-01-30	16:30:00	0
2009-01-30	16:31:00	0
2009-01-30	16:32:00	0
2009-01-30	16:33:00	0
2009-01-30	16:34:00	0
2009-01-30	16:35:00	0
2009-01-30	16:36:00	0
2009-01-30	16:37:00	0
2009-01-30	16:38:00	0
2009-01-30	16:39:00	0
2009-01-30	16:40:00	0
2009-01-30	16:41:00	0
2009-01-30	16:42:00	0
2009-01-30	16:43:00	0
2009-01-30	16:44:00	0
2009-01-30	16:45:00	0
2009-01-30	16:46:00	0
2009-01-30	16:47:00	0
2009-01-30	16:48:00	0
2009-01-30	16:49:00	0
2009-01-30	16:50:00	0
2009-01-30	16:51:00	0
2009-01-30	16:52:00	0
2009-01-30	16:53:00	0
2009-01-30	16:54:00	0
2009-01-30	16:55:00	0
2009-01-30	16:56:00	0
2009-01-30	16:57:00	0
2009-01-30	16:58:00	0
2009-01-30	16:59:00	0
2009-01-30	17:00:00	0
2009-01-30	17:01:00	0
2009-01-30	17:02:00	0
2009-01-30	17:03:00	0
2009-01-30	17:04:00	0
2009-01-30	17:05:00	0
2009-01-30	17:06:00	0
2009-01-30	17:07:00	0
2009-01-30	17:08:00	0
2009-01-30	17:09:00	0
2009-01-30	17:10:00	0
2009-01-30	17:11:00	0
2009-01-30	17:12:00	0
2009-01-30	17:13:00	0
2009-01-30	17:14:00	0
2009-01-30	17:15:00	0
2009-01-30	17:16:00	0
2009-01-30	17:17:00	0
2009-01-30	17:18:00	0
2009-01-30	17:19:00	0
2009-01-30	17:20:00	0
2009-01-30	17:21:00	0
2009-01-30	17:22:00	60
2009-01-30	17:23:00	0
2009-01-30	17:24:00	0
2009-01-30	17:25:00	0
2009-01-30	17:26:00	0
2009-01-30	17:27:00	0
2009-01-30	17:28:00	0
2009-01-30	17:29:00	12
2009-01-30	17:30:00	0
2009-01-30	17:31:00	60
2009-01-30	17:32:00	0
2009-01-30	17:33:00	0
2009-01-30	17:34:00	72
2009-01-30	17:35:00	0
2009-01-30	17:36:00	48
2009-01-30	17:37:00	200
2009-01-30	17:38:00	12
2009-01-30	17:39:00	97
2009-01-30	17:40:00	0
2009-01-30	17:41:00	0
2009-01-30	17:42:00	0
2009-01-30	17:43:00	36
2009-01-30	17:44:00	0
2009-01-30	17:45:00	0
2009-01-30	17:46:00	0
2009-01-30	17:47:00	0
2009-01-30	17:48:00	0
2009-01-30	17:49:00	12
2009-01-30	17:50:00	0
2009-01-30	17:51:00	0
2009-01-30	17:52:00	0
2009-01-30	17:53:00	0
2009-01-30	17:54:00	12
2009-01-30	17:55:00	12
2009-01-30	17:56:00	12
2009-01-30	17:57:00	0
2009-01-30	17:58:00	121
2009-01-30	17:59:00	333
2009-01-30	18:00:00	316
2009-01-30	18:01:00	350
2009-01-30	18:02:00	367
2009-01-30	18:03:00	435
2009-01-30	18:04:00	316
2009-01-30	18:05:00	215
2009-01-30	18:06:00	171
2009-01-30	18:07:00	145
2009-01-30	18:08:00	0
2009-01-30	18:09:00	12
2009-01-30	18:10:00	0
2009-01-30	18:11:00	12
2009-01-30	18:12:00	0
2009-01-30	18:13:00	12
2009-01-30	18:14:00	0
2009-01-30	18:15:00	36
2009-01-30	18:16:00	0
2009-01-30	18:17:00	24
2009-01-30	18:18:00	72
2009-01-30	18:19:00	24
2009-01-30	18:20:00	0
2009-01-30	18:21:00	0
2009-01-30	18:22:00	0
2009-01-30	18:23:00	0
2009-01-30	18:24:00	0
2009-01-30	18:25:00	0
2009-01-30	18:26:00	0
2009-01-30	18:27:00	0
2009-01-30	18:28:00	0
2009-01-30	18:29:00	0
2009-01-30	18:30:00	0
2009-01-30	18:31:00	0
2009-01-30	18:32:00	0
2009-01-30	18:33:00	0
2009-01-30	18:34:00	0
2009-01-30	18:35:00	0
2009-01-30	18:36:00	0
2009-01-30	18:37:00	0
2009-01-30	18:38:00	0
2009-01-30	18:39:00	0
2009-01-30	18:40:00	0
2009-01-30	18:41:00	0
2009-01-30	18:42:00	0
2009-01-30	18:43:00	0
2009-01-30	18:44:00	0
2009-01-30	18:45:00	0
2009-01-30	18:46:00	0
2009-01-30	18:47:00	0
2009-01-30	18:48:00	0
2009-01-30	18:49:00	0
2009-01-30	18:50:00	0
2009-01-30	18:51:00	0
2009-01-30	18:52:00	0
2009-01-30	18:53:00	0
2009-01-30	18:54:00	0
2009-01-30	18:55:00	0
2009-01-30	18:56:00	0
2009-01-30	18:57:00	0
2009-01-30	18:58:00	0
2009-01-30	18:59:00	0
2009-01-30	19:00:00	0
2009-01-30	19:01:00	0
2009-01-30	19:02:00	0
2009-01-30	19:03:00	0
2009-01-30	19:04:00	0
2009-01-30	19:05:00	0
2009-01-30	19:06:00	0
2009-01-30	19:07:00	0
2009-01-30	19:08:00	0
2009-01-30	19:09:00	0
2009-01-30	19:10:00	0
2009-01-30	19:11:00	0
2009-01-30	19:12:00	0
2009-01-30	19:13:00	0
2009-01-30	19:14:00	12
2009-01-30	19:15:00	0
2009-01-30	19:16:00	12
2009-01-30	19:17:00	0
2009-01-30	19:18:00	0
2009-01-30	19:19:00	0
2009-01-30	19:20:00	0
2009-01-30	19:21:00	0
2009-01-30	19:22:00	0
2009-01-30	19:23:00	0
2009-01-30	19:24:00	0
2009-01-30	19:25:00	0
2009-01-30	19:26:00	0
2009-01-30	19:27:00	0
2009-01-30	19:28:00	0
2009-01-30	19:29:00	0
2009-01-30	19:30:00	0
2009-01-30	19:31:00	0
2009-01-30	19:32:00	0
2009-01-30	19:33:00	0
2009-01-30	19:34:00	0
2009-01-30	19:35:00	0
2009-01-30	19:36:00	0
2009-01-30	19:37:00	0
2009-01-30	19:38:00	0
2009-01-30	19:39:00	0
2009-01-30	19:40:00	0
2009-01-30	19:41:00	0
2009-01-30	19:42:00	0
2009-01-30	19:43:00	0
2009-01-30	19:44:00	0
2009-01-30	19:45:00	0
2009-01-30	19:46:00	0
2009-01-30	19:47:00	0
2009-01-30	19:48:00	0
2009-01-30	19:49:00	0
2009-01-30	19:50:00	0
2009-01-30	19:51:00	0
2009-01-30	19:52:00	0
2009-01-30	19:53:00	0
2009-01-30	19:54:00	0
2009-01-30	19:55:00	0
2009-01-30	19:56:00	0
2009-01-30	19:57:00	0
2009-01-30	19:58:00	0
2009-01-30	19:59:00	0
2009-01-30	20:00:00	0
2009-01-30	20:01:00	0
2009-01-30	20:02:00	0
2009-01-30	20:03:00	0
2009-01-30	20:04:00	0
2009-01-30	20:05:00	0
2009-01-30	20:06:00	0
2009-01-30	20:07:00	0
2009-01-30	20:08:00	0
2009-01-30	20:09:00	0
2009-01-30	20:10:00	0
2009-01-30	20:11:00	0
2009-01-30	20:12:00	12
2009-01-30	20:13:00	36
2009-01-30	20:14:00	36
2009-01-30	20:15:00	48
2009-01-30	20:16:00	12
2009-01-30	20:17:00	0
2009-01-30	20:18:00	0
2009-01-30	20:19:00	12
2009-01-30	20:20:00	0
2009-01-30	20:21:00	0
2009-01-30	20:22:00	0
2009-01-30	20:23:00	0
2009-01-30	20:24:00	60
2009-01-30	20:25:00	0
2009-01-30	20:26:00	0
2009-01-30	20:27:00	12
2009-01-30	20:28:00	0
2009-01-30	20:29:00	418
2009-01-30	20:30:00	72
2009-01-30	20:31:00	452
2009-01-30	20:32:00	258
2009-01-30	20:33:00	157
2009-01-30	20:34:00	0
2009-01-30	20:35:00	36
2009-01-30	20:36:00	0
2009-01-30	20:37:00	0
2009-01-30	20:38:00	0
2009-01-30	20:39:00	0
2009-01-30	20:40:00	0
2009-01-30	20:41:00	0
2009-01-30	20:42:00	0
2009-01-30	20:43:00	0
2009-01-30	20:44:00	0
2009-01-30	20:45:00	36
2009-01-30	20:46:00	0
2009-01-30	20:47:00	0
2009-01-30	20:48:00	0
2009-01-30	20:49:00	12
2009-01-30	20:50:00	0
2009-01-30	20:51:00	0
2009-01-30	20:52:00	0
2009-01-30	20:53:00	0
2009-01-30	20:54:00	24
2009-01-30	20:55:00	12
2009-01-30	20:56:00	60
2009-01-30	20:57:00	0
2009-01-30	20:58:00	109
2009-01-30	20:59:00	12
2009-01-30	21:00:00	0
2009-01-30	21:01:00	0
2009-01-30	21:02:00	0
2009-01-30	21:03:00	0
2009-01-30	21:04:00	0
2009-01-30	21:05:00	0
2009-01-30	21:06:00	0
2009-01-30	21:07:00	0
2009-01-30	21:08:00	0
2009-01-30	21:09:00	0
2009-01-30	21:10:00	0
2009-01-30	21:11:00	0
2009-01-30	21:12:00	0
2009-01-30	21:13:00	0
2009-01-30	21:14:00	0
2009-01-30	21:15:00	0
2009-01-30	21:16:00	0
2009-01-30	21:17:00	0
2009-01-30	21:18:00	0
2009-01-30	21:19:00	0
2009-01-30	21:20:00	0
2009-01-30	21:21:00	0
2009-01-30	21:22:00	0
2009-01-30	21:23:00	0
2009-01-30	21:24:00	0
2009-01-30	21:25:00	0
2009-01-30	21:26:00	0
2009-01-30	21:27:00	0
2009-01-30	21:28:00	0
2009-01-30	21:29:00	0
2009-01-30	21:30:00	0
2009-01-30	21:31:00	0
2009-01-30	21:32:00	0
2009-01-30	21:33:00	0
2009-01-30	21:34:00	0
2009-01-30	21:35:00	0
2009-01-30	21:36:00	0
2009-01-30	21:37:00	0
2009-01-30	21:38:00	0
2009-01-30	21:39:00	0
2009-01-30	21:40:00	0
2009-01-30	21:41:00	0
2009-01-30	21:42:00	0
2009-01-30	21:43:00	0
2009-01-30	21:44:00	0
2009-01-30	21:45:00	0
2009-01-30	21:46:00	0
2009-01-30	21:47:00	0
2009-01-30	21:48:00	0
2009-01-30	21:49:00	0
2009-01-30	21:50:00	0
2009-01-30	21:51:00	0
2009-01-30	21:52:00	0
2009-01-30	21:53:00	0
2009-01-30	21:54:00	0
2009-01-30	21:55:00	0
2009-01-30	21:56:00	0
2009-01-30	21:57:00	0
2009-01-30	21:58:00	0
2009-01-30	21:59:00	0
2009-01-30	22:00:00	0
2009-01-30	22:01:00	0
2009-01-30	22:02:00	0
2009-01-30	22:03:00	0
2009-01-30	22:04:00	0
2009-01-30	22:05:00	0
2009-01-30	22:06:00	0
2009-01-30	22:07:00	0
2009-01-30	22:08:00	0
2009-01-30	22:09:00	0
2009-01-30	22:10:00	0
2009-01-30	22:11:00	0
2009-01-30	22:12:00	0
2009-01-30	22:13:00	0
2009-01-30	22:14:00	24
2009-01-30	22:15:00	0
2009-01-30	22:16:00	12
2009-01-30	22:17:00	0
2009-01-30	22:18:00	48
2009-01-30	22:19:00	401
2009-01-30	22:20:00	645
2009-01-30	22:21:00	920
2009-01-30	22:22:00	710
2009-01-30	22:23:00	384
2009-01-30	22:24:00	12
2009-01-30	22:25:00	12
2009-01-30	22:26:00	0
2009-01-30	22:27:00	0
2009-01-30	22:28:00	24
2009-01-30	22:29:00	0
2009-01-30	22:30:00	24
2009-01-30	22:31:00	0
2009-01-30	22:32:00	0
2009-01-30	22:33:00	0
2009-01-30	22:34:00	0
2009-01-30	22:35:00	0
2009-01-30	22:36:00	0
2009-01-30	22:37:00	0
2009-01-30	22:38:00	0
2009-01-30	22:39:00	0
2009-01-30	22:40:00	0
2009-01-30	22:41:00	0
2009-01-30	22:42:00	0
2009-01-30	22:43:00	0
2009-01-30	22:44:00	0
2009-01-30	22:45:00	0
2009-01-30	22:46:00	0
2009-01-30	22:47:00	0
2009-01-30	22:48:00	0
2009-01-30	22:49:00	0
2009-01-30	22:50:00	0
2009-01-30	22:51:00	0
2009-01-30	22:52:00	36
2009-01-30	22:53:00	0
2009-01-30	22:54:00	12
2009-01-30	22:55:00	0
2009-01-30	22:56:00	0
2009-01-30	22:57:00	0
2009-01-30	22:58:00	0
2009-01-30	22:59:00	0
2009-01-30	23:00:00	0
2009-01-30	23:01:00	0
2009-01-30	23:02:00	0
2009-01-30	23:03:00	0
2009-01-30	23:04:00	0
2009-01-30	23:05:00	0
2009-01-30	23:06:00	0
2009-01-30	23:07:00	0
2009-01-30	23:08:00	0
2009-01-30	23:09:00	0
2009-01-30	23:10:00	0
2009-01-30	23:11:00	0
2009-01-30	23:12:00	0
2009-01-30	23:13:00	0
2009-01-30	23:14:00	0
2009-01-30	23:15:00	0
2009-01-30	23:16:00	0
2009-01-30	23:17:00	0
2009-01-30	23:18:00	12
2009-01-30	23:19:00	109
2009-01-30	23:20:00	60
2009-01-30	23:21:00	0
2009-01-30	23:22:00	0
2009-01-30	23:23:00	0
2009-01-30	23:24:00	0
2009-01-30	23:25:00	0
2009-01-30	23:26:00	0
2009-01-30	23:27:00	0
2009-01-30	23:28:00	0
2009-01-30	23:29:00	0
2009-01-30	23:30:00	0
2009-01-30	23:31:00	0
2009-01-30	23:32:00	0
2009-01-30	23:33:00	0
2009-01-30	23:34:00	0
2009-01-30	23:35:00	0
2009-01-30	23:36:00	0
2009-01-30	23:37:00	0
2009-01-30	23:38:00	0
2009-01-30	23:39:00	0
2009-01-30	23:40:00	0
2009-01-30	23:41:00	0
2009-01-30	23:42:00	0
2009-01-30	23:43:00	0
2009-01-30	23:44:00	0
2009-01-30	23:45:00	0
2009-01-30	23:46:00	0
2009-01-30	23:47:00	12
2009-01-30	23:48:00	0
2009-01-30	23:49:00	0
2009-01-30	23:50:00	0
2009-01-30	23:51:00	0
2009-01-30	23:52:00	0
2009-01-30	23:53:00	0
2009-01-30	23:54:00	0
2009-01-30	23:55:00	0
2009-01-30	23:56:00	0
2009-01-30	23:57:00	0
2009-01-30	23:58:00	0
2009-01-30	23:59:00	0
2009-01-31	00:00:00	0
2009-01-31	00:01:00	0
2009-01-31	00:02:00	0
2009-01-31	00:03:00	0
2009-01-31	00:04:00	0
2009-01-31	00:05:00	0
2009-01-31	00:06:00	0
2009-01-31	00:07:00	0
2009-01-31	00:08:00	0
2009-01-31	00:09:00	0
2009-01-31	00:10:00	0
2009-01-31	00:11:00	0
2009-01-31	00:12:00	0
2009-01-31	00:13:00	0
2009-01-31	00:14:00	0
2009-01-31	00:15:00	0
2009-01-31	00:16:00	0
2009-01-31	00:17:00	0
2009-01-31	00:18:00	0
2009-01-31	00:19:00	0
2009-01-31	00:20:00	0
2009-01-31	00:21:00	0
2009-01-31	00:22:00	0
2009-01-31	00:23:00	0
2009-01-31	00:24:00	0
2009-01-31	00:25:00	0
2009-01-31	00:26:00	0
2009-01-31	00:27:00	0
2009-01-31	00:28:00	0
2009-01-31	00:29:00	0
2009-01-31	00:30:00	0
2009-01-31	00:31:00	0
2009-01-31	00:32:00	0
2009-01-31	00:33:00	0
2009-01-31	00:34:00	0
2009-01-31	00:35:00	0
2009-01-31	00:36:00	0
2009-01-31	00:37:00	0
2009-01-31	00:38:00	0
2009-01-31	00:39:00	0
2009-01-31	00:40:00	0
2009-01-31	00:41:00	0
2009-01-31	00:42:00	0
2009-01-31	00:43:00	0
2009-01-31	00:44:00	0
2009-01-31	00:45:00	0
2009-01-31	00:46:00	24
2009-01-31	00:47:00	12
2009-01-31	00:48:00	48
2009-01-31	00:49:00	0
2009-01-31	00:50:00	0
2009-01-31	00:51:00	0
2009-01-31	00:52:00	0
2009-01-31	00:53:00	0
2009-01-31	00:54:00	0
2009-01-31	00:55:00	0
2009-01-31	00:56:00	0
2009-01-31	00:57:00	0
2009-01-31	00:58:00	0
2009-01-31	00:59:00	0
2009-01-31	01:00:00	0
2009-01-31	01:01:00	0
2009-01-31	01:02:00	0
2009-01-31	01:03:00	0
2009-01-31	01:04:00	0
2009-01-31	01:05:00	0
2009-01-31	01:06:00	0
2009-01-31	01:07:00	0
2009-01-31	01:08:00	0
2009-01-31	01:09:00	0
2009-01-31	01:10:00	0
2009-01-31	01:11:00	0
2009-01-31	01:12:00	0
2009-01-31	01:13:00	0
2009-01-31	01:14:00	0
2009-01-31	01:15:00	0
2009-01-31	01:16:00	0
2009-01-31	01:17:00	0
2009-01-31	01:18:00	0
2009-01-31	01:19:00	0
2009-01-31	01:20:00	0
2009-01-31	01:21:00	0
2009-01-31	01:22:00	0
2009-01-31	01:23:00	0
2009-01-31	01:24:00	0
2009-01-31	01:25:00	0
2009-01-31	01:26:00	0
2009-01-31	01:27:00	0
2009-01-31	01:28:00	0
2009-01-31	01:29:00	0
2009-01-31	01:30:00	0
2009-01-31	01:31:00	0
2009-01-31	01:32:00	0
2009-01-31	01:33:00	0
2009-01-31	01:34:00	0
2009-01-31	01:35:00	0
2009-01-31	01:36:00	0
2009-01-31	01:37:00	0
2009-01-31	01:38:00	0
2009-01-31	01:39:00	0
2009-01-31	01:40:00	0
2009-01-31	01:41:00	0
2009-01-31	01:42:00	0
2009-01-31	01:43:00	0
2009-01-31	01:44:00	0
2009-01-31	01:45:00	0
2009-01-31	01:46:00	0
2009-01-31	01:47:00	0
2009-01-31	01:48:00	0
2009-01-31	01:49:00	24
2009-01-31	01:50:00	0
2009-01-31	01:51:00	0
2009-01-31	01:52:00	0
2009-01-31	01:53:00	0
2009-01-31	01:54:00	0
2009-01-31	01:55:00	0
2009-01-31	01:56:00	0
2009-01-31	01:57:00	0
2009-01-31	01:58:00	0
2009-01-31	01:59:00	0
2009-01-31	02:00:00	0
2009-01-31	02:01:00	0
2009-01-31	02:02:00	0
2009-01-31	02:03:00	0
2009-01-31	02:04:00	0
2009-01-31	02:05:00	0
2009-01-31	02:06:00	0
2009-01-31	02:07:00	0
2009-01-31	02:08:00	0
2009-01-31	02:09:00	0
2009-01-31	02:10:00	0
2009-01-31	02:11:00	0
2009-01-31	02:12:00	0
2009-01-31	02:13:00	0
2009-01-31	02:14:00	0
2009-01-31	02:15:00	0
2009-01-31	02:16:00	0
2009-01-31	02:17:00	0
2009-01-31	02:18:00	0
2009-01-31	02:19:00	0
2009-01-31	02:20:00	0
2009-01-31	02:21:00	0
2009-01-31	02:22:00	0
2009-01-31	02:23:00	0
2009-01-31	02:24:00	0
2009-01-31	02:25:00	0
2009-01-31	02:26:00	0
2009-01-31	02:27:00	0
2009-01-31	02:28:00	0
2009-01-31	02:29:00	0
2009-01-31	02:30:00	0
2009-01-31	02:31:00	0
2009-01-31	02:32:00	0
2009-01-31	02:33:00	0
2009-01-31	02:34:00	0
2009-01-31	02:35:00	0
2009-01-31	02:36:00	0
2009-01-31	02:37:00	0
2009-01-31	02:38:00	0
2009-01-31	02:39:00	0
2009-01-31	02:40:00	0
2009-01-31	02:41:00	0
2009-01-31	02:42:00	0
2009-01-31	02:43:00	0
2009-01-31	02:44:00	0
2009-01-31	02:45:00	0
2009-01-31	02:46:00	0
2009-01-31	02:47:00	0
2009-01-31	02:48:00	0
2009-01-31	02:49:00	0
2009-01-31	02:50:00	0
2009-01-31	02:51:00	0
2009-01-31	02:52:00	0
2009-01-31	02:53:00	0
2009-01-31	02:54:00	0
2009-01-31	02:55:00	0
2009-01-31	02:56:00	0
2009-01-31	02:57:00	0
2009-01-31	02:58:00	0
2009-01-31	02:59:00	0
2009-01-31	03:00:00	0
2009-01-31	03:01:00	0
2009-01-31	03:02:00	0
2009-01-31	03:03:00	0
2009-01-31	03:04:00	0
2009-01-31	03:05:00	0
2009-01-31	03:06:00	0
2009-01-31	03:07:00	0
2009-01-31	03:08:00	36
2009-01-31	03:09:00	0
2009-01-31	03:10:00	12
2009-01-31	03:11:00	0
2009-01-31	03:12:00	0
2009-01-31	03:13:00	0
2009-01-31	03:14:00	0
2009-01-31	03:15:00	0
2009-01-31	03:16:00	0
2009-01-31	03:17:00	0
2009-01-31	03:18:00	0
2009-01-31	03:19:00	0
2009-01-31	03:20:00	0
2009-01-31	03:21:00	0
2009-01-31	03:22:00	0
2009-01-31	03:23:00	0
2009-01-31	03:24:00	0
2009-01-31	03:25:00	60
2009-01-31	03:26:00	0
2009-01-31	03:27:00	0
2009-01-31	03:28:00	0
2009-01-31	03:29:00	12
2009-01-31	03:30:00	0
2009-01-31	03:31:00	0
2009-01-31	03:32:00	0
2009-01-31	03:33:00	0
2009-01-31	03:34:00	0
2009-01-31	03:35:00	0
2009-01-31	03:36:00	0
2009-01-31	03:37:00	0
2009-01-31	03:38:00	0
2009-01-31	03:39:00	0
2009-01-31	03:40:00	0
2009-01-31	03:41:00	0
2009-01-31	03:42:00	0
2009-01-31	03:43:00	0
2009-01-31	03:44:00	0
2009-01-31	03:45:00	0
2009-01-31	03:46:00	0
2009-01-31	03:47:00	0
2009-01-31	03:48:00	0
2009-01-31	03:49:00	0
2009-01-31	03:50:00	0
2009-01-31	03:51:00	0
2009-01-31	03:52:00	0
2009-01-31	03:53:00	0
2009-01-31	03:54:00	0
2009-01-31	03:55:00	0
2009-01-31	03:56:00	12
2009-01-31	03:57:00	60
2009-01-31	03:58:00	12
2009-01-31	03:59:00	0
2009-01-31	04:00:00	0
2009-01-31	04:01:00	0
2009-01-31	04:02:00	0
2009-01-31	04:03:00	0
2009-01-31	04:04:00	0
2009-01-31	04:05:00	0
2009-01-31	04:06:00	0
2009-01-31	04:07:00	0
2009-01-31	04:08:00	0
2009-01-31	04:09:00	0
2009-01-31	04:10:00	0
2009-01-31	04:11:00	0
2009-01-31	04:12:00	0
2009-01-31	04:13:00	0
2009-01-31	04:14:00	0
2009-01-31	04:15:00	0
2009-01-31	04:16:00	0
2009-01-31	04:17:00	0
2009-01-31	04:18:00	0
2009-01-31	04:19:00	0
2009-01-31	04:20:00	0
2009-01-31	04:21:00	0
2009-01-31	04:22:00	0
2009-01-31	04:23:00	0
2009-01-31	04:24:00	0
2009-01-31	04:25:00	0
2009-01-31	04:26:00	0
2009-01-31	04:27:00	0
2009-01-31	04:28:00	0
2009-01-31	04:29:00	0
2009-01-31	04:30:00	0
2009-01-31	04:31:00	0
2009-01-31	04:32:00	0
2009-01-31	04:33:00	0
2009-01-31	04:34:00	0
2009-01-31	04:35:00	0
2009-01-31	04:36:00	0
2009-01-31	04:37:00	0
2009-01-31	04:38:00	0
2009-01-31	04:39:00	0
2009-01-31	04:40:00	0
2009-01-31	04:41:00	0
2009-01-31	04:42:00	0
2009-01-31	04:43:00	0
2009-01-31	04:44:00	0
2009-01-31	04:45:00	0
2009-01-31	04:46:00	0
2009-01-31	04:47:00	0
2009-01-31	04:48:00	0
2009-01-31	04:49:00	0
2009-01-31	04:50:00	0
2009-01-31	04:51:00	0
2009-01-31	04:52:00	0
2009-01-31	04:53:00	0
2009-01-31	04:54:00	0
2009-01-31	04:55:00	0
2009-01-31	04:56:00	0
2009-01-31	04:57:00	0
2009-01-31	04:58:00	0
2009-01-31	04:59:00	0
2009-01-31	05:00:00	0
2009-01-31	05:01:00	0
2009-01-31	05:02:00	0
2009-01-31	05:03:00	0
2009-01-31	05:04:00	0
2009-01-31	05:05:00	0
2009-01-31	05:06:00	0
2009-01-31	05:07:00	0
2009-01-31	05:08:00	0
2009-01-31	05:09:00	0
2009-01-31	05:10:00	0
2009-01-31	05:11:00	0
2009-01-31	05:12:00	0
2009-01-31	05:13:00	0
2009-01-31	05:14:00	0
2009-01-31	05:15:00	12
2009-01-31	05:16:00	0
2009-01-31	05:17:00	0
2009-01-31	05:18:00	0
2009-01-31	05:19:00	0
2009-01-31	05:20:00	0
2009-01-31	05:21:00	0
2009-01-31	05:22:00	0
2009-01-31	05:23:00	0
2009-01-31	05:24:00	0
2009-01-31	05:25:00	0
2009-01-31	05:26:00	0
2009-01-31	05:27:00	0
2009-01-31	05:28:00	0
2009-01-31	05:29:00	0
2009-01-31	05:30:00	0
2009-01-31	05:31:00	0
2009-01-31	05:32:00	0
2009-01-31	05:33:00	0
2009-01-31	05:34:00	0
2009-01-31	05:35:00	0
2009-01-31	05:36:00	0
2009-01-31	05:37:00	0
2009-01-31	05:38:00	0
2009-01-31	05:39:00	0
2009-01-31	05:40:00	0
2009-01-31	05:41:00	0
2009-01-31	05:42:00	0
2009-01-31	05:43:00	0
2009-01-31	05:44:00	0
2009-01-31	05:45:00	0
2009-01-31	05:46:00	0
2009-01-31	05:47:00	12
2009-01-31	05:48:00	36
2009-01-31	05:49:00	0
2009-01-31	05:50:00	0
2009-01-31	05:51:00	72
2009-01-31	05:52:00	171
2009-01-31	05:53:00	72
2009-01-31	05:54:00	0
2009-01-31	05:55:00	0
2009-01-31	05:56:00	0
2009-01-31	05:57:00	0
2009-01-31	05:58:00	12
2009-01-31	05:59:00	401
2009-01-31	06:00:00	384
2009-01-31	06:01:00	452
2009-01-31	06:02:00	546
2009-01-31	06:03:00	645
2009-01-31	06:04:00	710
2009-01-31	06:05:00	469
2009-01-31	06:06:00	12
2009-01-31	06:07:00	0
2009-01-31	06:08:00	0
2009-01-31	06:09:00	0
2009-01-31	06:10:00	0
2009-01-31	06:11:00	0
2009-01-31	06:12:00	0
2009-01-31	06:13:00	0
2009-01-31	06:14:00	0
2009-01-31	06:15:00	0
2009-01-31	06:16:00	0
2009-01-31	06:17:00	0
2009-01-31	06:18:00	0
2009-01-31	06:19:00	0
2009-01-31	06:20:00	0
2009-01-31	06:21:00	0
2009-01-31	06:22:00	316
2009-01-31	06:23:00	60
2009-01-31	06:24:00	469
2009-01-31	06:25:00	109
2009-01-31	06:26:00	97
2009-01-31	06:27:00	12
2009-01-31	06:28:00	0
2009-01-31	06:29:00	0
2009-01-31	06:30:00	0
2009-01-31	06:31:00	0
2009-01-31	06:32:00	0
2009-01-31	06:33:00	0
2009-01-31	06:34:00	36
2009-01-31	06:35:00	12
2009-01-31	06:36:00	0
2009-01-31	06:37:00	12
2009-01-31	06:38:00	0
2009-01-31	06:39:00	0
2009-01-31	06:40:00	24
2009-01-31	06:41:00	0
2009-01-31	06:42:00	0
2009-01-31	06:43:00	0
2009-01-31	06:44:00	12
2009-01-31	06:45:00	0
2009-01-31	06:46:00	0
2009-01-31	06:47:00	0
2009-01-31	06:48:00	0
2009-01-31	06:49:00	0
2009-01-31	06:50:00	0
2009-01-31	06:51:00	0
2009-01-31	06:52:00	24
2009-01-31	06:53:00	0
2009-01-31	06:54:00	0
2009-01-31	06:55:00	0
2009-01-31	06:56:00	0
2009-01-31	06:57:00	0
2009-01-31	06:58:00	12
2009-01-31	06:59:00	0
2009-01-31	07:00:00	0
2009-01-31	07:01:00	0
2009-01-31	07:02:00	0
2009-01-31	07:03:00	0
2009-01-31	07:04:00	12
2009-01-31	07:05:00	0
2009-01-31	07:06:00	0
2009-01-31	07:07:00	0
2009-01-31	07:08:00	0
2009-01-31	07:09:00	0
2009-01-31	07:10:00	0
2009-01-31	07:11:00	12
2009-01-31	07:12:00	0
2009-01-31	07:13:00	0
2009-01-31	07:14:00	0
2009-01-31	07:15:00	0
2009-01-31	07:16:00	0
2009-01-31	07:17:00	0
2009-01-31	07:18:00	0
2009-01-31	07:19:00	0
2009-01-31	07:20:00	0
2009-01-31	07:21:00	0
2009-01-31	07:22:00	0
2009-01-31	07:23:00	36
2009-01-31	07:24:00	0
2009-01-31	07:25:00	0
2009-01-31	07:26:00	0
2009-01-31	07:27:00	0
2009-01-31	07:28:00	0
2009-01-31	07:29:00	0
2009-01-31	07:30:00	0
2009-01-31	07:31:00	48
2009-01-31	07:32:00	367
2009-01-31	07:33:00	273
2009-01-31	07:34:00	710
2009-01-31	07:35:00	604
2009-01-31	07:36:00	401
2009-01-31	07:37:00	384
2009-01-31	07:38:00	526
2009-01-31	07:39:00	244
2009-01-31	07:40:00	710
2009-01-31	07:41:00	710
2009-01-31	07:42:00	526
2009-01-31	07:43:00	507
2009-01-31	07:44:00	546
2009-01-31	07:45:00	350
2009-01-31	07:46:00	350
2009-01-31	07:47:00	452
2009-01-31	07:48:00	215
2009-01-31	07:49:00	350
2009-01-31	07:50:00	435
2009-01-31	07:51:00	258
2009-01-31	07:52:00	85
2009-01-31	07:53:00	0
2009-01-31	07:54:00	0
2009-01-31	07:55:00	0
2009-01-31	07:56:00	0
2009-01-31	07:57:00	0
2009-01-31	07:58:00	0
2009-01-31	07:59:00	0
2009-01-31	08:00:00	0
2009-01-31	08:01:00	0
2009-01-31	08:02:00	0
2009-01-31	08:03:00	0
2009-01-31	08:04:00	0
2009-01-31	08:05:00	12
2009-01-31	08:06:00	0
2009-01-31	08:07:00	0
2009-01-31	08:08:00	0
2009-01-31	08:09:00	0
2009-01-31	08:10:00	0
2009-01-31	08:11:00	0
2009-01-31	08:12:00	0
2009-01-31	08:13:00	0
2009-01-31	08:14:00	0
2009-01-31	08:15:00	0
2009-01-31	08:16:00	24
2009-01-31	08:17:00	0
2009-01-31	08:18:00	0
2009-01-31	08:19:00	0
2009-01-31	08:20:00	0
2009-01-31	08:21:00	0
2009-01-31	08:22:00	133
2009-01-31	08:23:00	186
2009-01-31	08:24:00	48
2009-01-31	08:25:00	452
2009-01-31	08:26:00	287
2009-01-31	08:27:00	302
2009-01-31	08:28:00	287
2009-01-31	08:29:00	0
2009-01-31	08:30:00	48
2009-01-31	08:31:00	0
2009-01-31	08:32:00	0
2009-01-31	08:33:00	48
2009-01-31	08:34:00	186
2009-01-31	08:35:00	186
2009-01-31	08:36:00	12
2009-01-31	08:37:00	0
2009-01-31	08:38:00	0
2009-01-31	08:39:00	0
2009-01-31	08:40:00	12
2009-01-31	08:41:00	0
2009-01-31	08:42:00	0
2009-01-31	08:43:00	0
2009-01-31	08:44:00	0
2009-01-31	08:45:00	0
2009-01-31	08:46:00	0
2009-01-31	08:47:00	0
2009-01-31	08:48:00	0
2009-01-31	08:49:00	0
2009-01-31	08:50:00	0
2009-01-31	08:51:00	0
2009-01-31	08:52:00	0
2009-01-31	08:53:00	0
2009-01-31	08:54:00	0
2009-01-31	08:55:00	0
2009-01-31	08:56:00	0
2009-01-31	08:57:00	0
2009-01-31	08:58:00	0
2009-01-31	08:59:00	0
2009-01-31	09:00:00	0
2009-01-31	09:01:00	0
2009-01-31	09:02:00	0
2009-01-31	09:03:00	0
2009-01-31	09:04:00	0
2009-01-31	09:05:00	0
2009-01-31	09:06:00	0
2009-01-31	09:07:00	0
2009-01-31	09:08:00	0
[truncated: 19,611 more rows]

## Sheet: 2.13.09
Actogram, Copy Raw Data, All Days
Identity:	Emerald
Filename:	E:\Active Research Files\meloxicam titre canine\cases\emerald\Emerald 2.13.09.AWC
Gender:	F
Age:	13
Height:	2.5 cm	1.0 in
Weight:	35.6 kg	78.5 lbs
Start Date:	13-Feb-2009 (Fri)
Start Time:	18:00:00
Interval:	1.00 mins
Date Stamp:	Time Stamp:	Activity Data:	Marker Press:
2009-02-13	00:00:00	0
2009-02-13	00:01:00	0
2009-02-13	00:02:00	0
2009-02-13	00:03:00	0
2009-02-13	00:04:00	0
2009-02-13	00:05:00	0
2009-02-13	00:06:00	0
2009-02-13	00:07:00	0
2009-02-13	00:08:00	0
2009-02-13	00:09:00	0
2009-02-13	00:10:00	0
2009-02-13	00:11:00	0
2009-02-13	00:12:00	0
2009-02-13	00:13:00	0
2009-02-13	00:14:00	0
2009-02-13	00:15:00	0
2009-02-13	00:16:00	0
2009-02-13	00:17:00	0
2009-02-13	00:18:00	0
2009-02-13	00:19:00	0
2009-02-13	00:20:00	0
2009-02-13	00:21:00	0
2009-02-13	00:22:00	0
2009-02-13	00:23:00	0
2009-02-13	00:24:00	0
2009-02-13	00:25:00	0
2009-02-13	00:26:00	0
2009-02-13	00:27:00	0
2009-02-13	00:28:00	0
2009-02-13	00:29:00	0
2009-02-13	00:30:00	0
2009-02-13	00:31:00	0
2009-02-13	00:32:00	0
2009-02-13	00:33:00	0
2009-02-13	00:34:00	0
2009-02-13	00:35:00	0
2009-02-13	00:36:00	0
2009-02-13	00:37:00	0
2009-02-13	00:38:00	0
2009-02-13	00:39:00	0
2009-02-13	00:40:00	0
2009-02-13	00:41:00	0
2009-02-13	00:42:00	0
2009-02-13	00:43:00	0
2009-02-13	00:44:00	0
2009-02-13	00:45:00	0
2009-02-13	00:46:00	0
2009-02-13	00:47:00	0
2009-02-13	00:48:00	0
2009-02-13	00:49:00	0
2009-02-13	00:50:00	0
2009-02-13	00:51:00	0
2009-02-13	00:52:00	0
2009-02-13	00:53:00	0
2009-02-13	00:54:00	0
2009-02-13	00:55:00	0
2009-02-13	00:56:00	0
2009-02-13	00:57:00	0
2009-02-13	00:58:00	0
2009-02-13	00:59:00	0
2009-02-13	01:00:00	0
2009-02-13	01:01:00	0
2009-02-13	01:02:00	0
2009-02-13	01:03:00	0
2009-02-13	01:04:00	0
2009-02-13	01:05:00	0
2009-02-13	01:06:00	0
2009-02-13	01:07:00	0
2009-02-13	01:08:00	0
2009-02-13	01:09:00	0
2009-02-13	01:10:00	0
2009-02-13	01:11:00	0
2009-02-13	01:12:00	0
2009-02-13	01:13:00	0
2009-02-13	01:14:00	0
2009-02-13	01:15:00	0
2009-02-13	01:16:00	0
2009-02-13	01:17:00	0
2009-02-13	01:18:00	0
2009-02-13	01:19:00	0
2009-02-13	01:20:00	0
2009-02-13	01:21:00	0
2009-02-13	01:22:00	0
2009-02-13	01:23:00	0
2009-02-13	01:24:00	0
2009-02-13	01:25:00	0
2009-02-13	01:26:00	0
2009-02-13	01:27:00	0
2009-02-13	01:28:00	0
2009-02-13	01:29:00	0
2009-02-13	01:30:00	0
2009-02-13	01:31:00	0
2009-02-13	01:32:00	0
2009-02-13	01:33:00	0
2009-02-13	01:34:00	0
2009-02-13	01:35:00	0
2009-02-13	01:36:00	0
2009-02-13	01:37:00	0
2009-02-13	01:38:00	0
2009-02-13	01:39:00	0
2009-02-13	01:40:00	0
2009-02-13	01:41:00	0
2009-02-13	01:42:00	0
2009-02-13	01:43:00	0
2009-02-13	01:44:00	0
2009-02-13	01:45:00	0
2009-02-13	01:46:00	0
2009-02-13	01:47:00	0
2009-02-13	01:48:00	0
2009-02-13	01:49:00	0
2009-02-13	01:50:00	0
2009-02-13	01:51:00	0
2009-02-13	01:52:00	0
2009-02-13	01:53:00	0
2009-02-13	01:54:00	0
2009-02-13	01:55:00	0
2009-02-13	01:56:00	0
2009-02-13	01:57:00	0
2009-02-13	01:58:00	0
2009-02-13	01:59:00	0
2009-02-13	02:00:00	0
2009-02-13	02:01:00	0
2009-02-13	02:02:00	0
2009-02-13	02:03:00	0
2009-02-13	02:04:00	0
2009-02-13	02:05:00	0
2009-02-13	02:06:00	0
2009-02-13	02:07:00	0
2009-02-13	02:08:00	0
2009-02-13	02:09:00	0
2009-02-13	02:10:00	0
2009-02-13	02:11:00	0
2009-02-13	02:12:00	0
2009-02-13	02:13:00	0
2009-02-13	02:14:00	0
2009-02-13	02:15:00	0
2009-02-13	02:16:00	0
2009-02-13	02:17:00	0
2009-02-13	02:18:00	0
2009-02-13	02:19:00	0
2009-02-13	02:20:00	0
2009-02-13	02:21:00	0
2009-02-13	02:22:00	0
2009-02-13	02:23:00	0
2009-02-13	02:24:00	0
2009-02-13	02:25:00	0
2009-02-13	02:26:00	0
2009-02-13	02:27:00	0
2009-02-13	02:28:00	0
2009-02-13	02:29:00	0
2009-02-13	02:30:00	0
2009-02-13	02:31:00	0
2009-02-13	02:32:00	0
2009-02-13	02:33:00	0
2009-02-13	02:34:00	0
2009-02-13	02:35:00	0
2009-02-13	02:36:00	0
2009-02-13	02:37:00	0
2009-02-13	02:38:00	0
2009-02-13	02:39:00	0
2009-02-13	02:40:00	0
2009-02-13	02:41:00	0
2009-02-13	02:42:00	0
2009-02-13	02:43:00	0
2009-02-13	02:44:00	0
2009-02-13	02:45:00	0
2009-02-13	02:46:00	0
2009-02-13	02:47:00	0
2009-02-13	02:48:00	0
2009-02-13	02:49:00	0
2009-02-13	02:50:00	0
2009-02-13	02:51:00	0
2009-02-13	02:52:00	0
2009-02-13	02:53:00	0
2009-02-13	02:54:00	0
2009-02-13	02:55:00	0
2009-02-13	02:56:00	0
2009-02-13	02:57:00	0
2009-02-13	02:58:00	0
2009-02-13	02:59:00	0
2009-02-13	03:00:00	0
2009-02-13	03:01:00	0
2009-02-13	03:02:00	0
2009-02-13	03:03:00	0
2009-02-13	03:04:00	0
2009-02-13	03:05:00	0
2009-02-13	03:06:00	0
2009-02-13	03:07:00	0
2009-02-13	03:08:00	0
2009-02-13	03:09:00	0
2009-02-13	03:10:00	0
2009-02-13	03:11:00	0
2009-02-13	03:12:00	0
2009-02-13	03:13:00	0
2009-02-13	03:14:00	0
2009-02-13	03:15:00	0
2009-02-13	03:16:00	0
2009-02-13	03:17:00	0
2009-02-13	03:18:00	0
2009-02-13	03:19:00	0
2009-02-13	03:20:00	0
2009-02-13	03:21:00	0
2009-02-13	03:22:00	0
2009-02-13	03:23:00	0
2009-02-13	03:24:00	0
2009-02-13	03:25:00	0
2009-02-13	03:26:00	0
2009-02-13	03:27:00	0
2009-02-13	03:28:00	0
2009-02-13	03:29:00	0
2009-02-13	03:30:00	0
2009-02-13	03:31:00	0
2009-02-13	03:32:00	0
2009-02-13	03:33:00	0
2009-02-13	03:34:00	0
2009-02-13	03:35:00	0
2009-02-13	03:36:00	0
2009-02-13	03:37:00	0
2009-02-13	03:38:00	0
2009-02-13	03:39:00	0
2009-02-13	03:40:00	0
2009-02-13	03:41:00	0
2009-02-13	03:42:00	0
2009-02-13	03:43:00	0
2009-02-13	03:44:00	0
2009-02-13	03:45:00	0
2009-02-13	03:46:00	0
2009-02-13	03:47:00	0
2009-02-13	03:48:00	0
2009-02-13	03:49:00	0
2009-02-13	03:50:00	0
2009-02-13	03:51:00	0
2009-02-13	03:52:00	0
2009-02-13	03:53:00	0
2009-02-13	03:54:00	0
2009-02-13	03:55:00	0
2009-02-13	03:56:00	0
2009-02-13	03:57:00	0
2009-02-13	03:58:00	0
2009-02-13	03:59:00	0
2009-02-13	04:00:00	0
2009-02-13	04:01:00	0
2009-02-13	04:02:00	0
2009-02-13	04:03:00	0
2009-02-13	04:04:00	0
2009-02-13	04:05:00	0
2009-02-13	04:06:00	0
2009-02-13	04:07:00	0
2009-02-13	04:08:00	0
2009-02-13	04:09:00	0
2009-02-13	04:10:00	0
2009-02-13	04:11:00	0
2009-02-13	04:12:00	0
2009-02-13	04:13:00	0
2009-02-13	04:14:00	0
2009-02-13	04:15:00	0
2009-02-13	04:16:00	0
2009-02-13	04:17:00	0
2009-02-13	04:18:00	0
2009-02-13	04:19:00	0
2009-02-13	04:20:00	0
2009-02-13	04:21:00	0
2009-02-13	04:22:00	0
2009-02-13	04:23:00	0
2009-02-13	04:24:00	0
2009-02-13	04:25:00	0
2009-02-13	04:26:00	0
2009-02-13	04:27:00	0
2009-02-13	04:28:00	0
2009-02-13	04:29:00	0
2009-02-13	04:30:00	0
2009-02-13	04:31:00	0
2009-02-13	04:32:00	0
2009-02-13	04:33:00	0
2009-02-13	04:34:00	0
2009-02-13	04:35:00	0
2009-02-13	04:36:00	0
2009-02-13	04:37:00	0
2009-02-13	04:38:00	0
2009-02-13	04:39:00	0
2009-02-13	04:40:00	0
2009-02-13	04:41:00	0
2009-02-13	04:42:00	0
2009-02-13	04:43:00	0
2009-02-13	04:44:00	0
2009-02-13	04:45:00	0
2009-02-13	04:46:00	0
2009-02-13	04:47:00	0
2009-02-13	04:48:00	0
2009-02-13	04:49:00	0
2009-02-13	04:50:00	0
2009-02-13	04:51:00	0
2009-02-13	04:52:00	0
2009-02-13	04:53:00	0
2009-02-13	04:54:00	0
2009-02-13	04:55:00	0
2009-02-13	04:56:00	0
2009-02-13	04:57:00	0
2009-02-13	04:58:00	0
2009-02-13	04:59:00	0
2009-02-13	05:00:00	0
2009-02-13	05:01:00	0
2009-02-13	05:02:00	0
2009-02-13	05:03:00	0
2009-02-13	05:04:00	0
2009-02-13	05:05:00	0
2009-02-13	05:06:00	0
2009-02-13	05:07:00	0
2009-02-13	05:08:00	0
2009-02-13	05:09:00	0
2009-02-13	05:10:00	0
2009-02-13	05:11:00	0
2009-02-13	05:12:00	0
2009-02-13	05:13:00	0
2009-02-13	05:14:00	0
2009-02-13	05:15:00	0
2009-02-13	05:16:00	0
2009-02-13	05:17:00	0
2009-02-13	05:18:00	0
2009-02-13	05:19:00	0
2009-02-13	05:20:00	0
2009-02-13	05:21:00	0
2009-02-13	05:22:00	0
2009-02-13	05:23:00	0
2009-02-13	05:24:00	0
2009-02-13	05:25:00	0
2009-02-13	05:26:00	0
2009-02-13	05:27:00	0
2009-02-13	05:28:00	0
2009-02-13	05:29:00	0
2009-02-13	05:30:00	0
2009-02-13	05:31:00	0
2009-02-13	05:32:00	0
2009-02-13	05:33:00	0
2009-02-13	05:34:00	0
2009-02-13	05:35:00	0
2009-02-13	05:36:00	0
2009-02-13	05:37:00	0
2009-02-13	05:38:00	0
2009-02-13	05:39:00	0
2009-02-13	05:40:00	0
2009-02-13	05:41:00	0
2009-02-13	05:42:00	0
2009-02-13	05:43:00	0
2009-02-13	05:44:00	0
2009-02-13	05:45:00	0
2009-02-13	05:46:00	0
2009-02-13	05:47:00	0
2009-02-13	05:48:00	0
2009-02-13	05:49:00	0
2009-02-13	05:50:00	0
2009-02-13	05:51:00	0
2009-02-13	05:52:00	0
2009-02-13	05:53:00	0
2009-02-13	05:54:00	0
2009-02-13	05:55:00	0
2009-02-13	05:56:00	0
2009-02-13	05:57:00	0
2009-02-13	05:58:00	0
2009-02-13	05:59:00	0
2009-02-13	06:00:00	0
2009-02-13	06:01:00	0
2009-02-13	06:02:00	0
2009-02-13	06:03:00	0
2009-02-13	06:04:00	0
2009-02-13	06:05:00	0
2009-02-13	06:06:00	0
2009-02-13	06:07:00	0
2009-02-13	06:08:00	0
2009-02-13	06:09:00	0
2009-02-13	06:10:00	0
2009-02-13	06:11:00	0
2009-02-13	06:12:00	0
2009-02-13	06:13:00	0
2009-02-13	06:14:00	0
2009-02-13	06:15:00	0
2009-02-13	06:16:00	0
2009-02-13	06:17:00	0
2009-02-13	06:18:00	0
2009-02-13	06:19:00	0
2009-02-13	06:20:00	0
2009-02-13	06:21:00	0
2009-02-13	06:22:00	0
2009-02-13	06:23:00	0
2009-02-13	06:24:00	0
2009-02-13	06:25:00	0
2009-02-13	06:26:00	0
2009-02-13	06:27:00	0
2009-02-13	06:28:00	0
2009-02-13	06:29:00	0
2009-02-13	06:30:00	0
2009-02-13	06:31:00	0
2009-02-13	06:32:00	0
2009-02-13	06:33:00	0
2009-02-13	06:34:00	0
2009-02-13	06:35:00	0
2009-02-13	06:36:00	0
2009-02-13	06:37:00	0
2009-02-13	06:38:00	0
2009-02-13	06:39:00	0
2009-02-13	06:40:00	0
2009-02-13	06:41:00	0
2009-02-13	06:42:00	0
2009-02-13	06:43:00	0
2009-02-13	06:44:00	0
2009-02-13	06:45:00	0
2009-02-13	06:46:00	0
2009-02-13	06:47:00	0
2009-02-13	06:48:00	0
2009-02-13	06:49:00	0
2009-02-13	06:50:00	0
2009-02-13	06:51:00	0
2009-02-13	06:52:00	0
2009-02-13	06:53:00	0
2009-02-13	06:54:00	0
2009-02-13	06:55:00	0
2009-02-13	06:56:00	0
2009-02-13	06:57:00	0
2009-02-13	06:58:00	0
2009-02-13	06:59:00	0
2009-02-13	07:00:00	0
2009-02-13	07:01:00	0
2009-02-13	07:02:00	0
2009-02-13	07:03:00	0
2009-02-13	07:04:00	0
2009-02-13	07:05:00	0
2009-02-13	07:06:00	0
2009-02-13	07:07:00	0
2009-02-13	07:08:00	0
2009-02-13	07:09:00	0
2009-02-13	07:10:00	0
2009-02-13	07:11:00	0
2009-02-13	07:12:00	0
2009-02-13	07:13:00	0
2009-02-13	07:14:00	0
2009-02-13	07:15:00	0
2009-02-13	07:16:00	0
2009-02-13	07:17:00	0
2009-02-13	07:18:00	0
2009-02-13	07:19:00	0
2009-02-13	07:20:00	0
2009-02-13	07:21:00	0
2009-02-13	07:22:00	0
2009-02-13	07:23:00	0
2009-02-13	07:24:00	0
2009-02-13	07:25:00	0
2009-02-13	07:26:00	0
2009-02-13	07:27:00	0
2009-02-13	07:28:00	0
2009-02-13	07:29:00	0
2009-02-13	07:30:00	0
2009-02-13	07:31:00	0
2009-02-13	07:32:00	0
2009-02-13	07:33:00	0
2009-02-13	07:34:00	0
2009-02-13	07:35:00	0
2009-02-13	07:36:00	0
2009-02-13	07:37:00	0
2009-02-13	07:38:00	0
2009-02-13	07:39:00	0
2009-02-13	07:40:00	0
2009-02-13	07:41:00	0
2009-02-13	07:42:00	0
2009-02-13	07:43:00	0
2009-02-13	07:44:00	0
2009-02-13	07:45:00	0
2009-02-13	07:46:00	0
2009-02-13	07:47:00	0
2009-02-13	07:48:00	0
2009-02-13	07:49:00	0
2009-02-13	07:50:00	0
2009-02-13	07:51:00	0
2009-02-13	07:52:00	0
2009-02-13	07:53:00	0
2009-02-13	07:54:00	0
2009-02-13	07:55:00	0
2009-02-13	07:56:00	0
2009-02-13	07:57:00	0
2009-02-13	07:58:00	0
2009-02-13	07:59:00	0
2009-02-13	08:00:00	0
2009-02-13	08:01:00	0
2009-02-13	08:02:00	0
2009-02-13	08:03:00	0
2009-02-13	08:04:00	0
2009-02-13	08:05:00	0
2009-02-13	08:06:00	0
2009-02-13	08:07:00	0
2009-02-13	08:08:00	0
2009-02-13	08:09:00	0
2009-02-13	08:10:00	0
2009-02-13	08:11:00	0
2009-02-13	08:12:00	0
2009-02-13	08:13:00	0
2009-02-13	08:14:00	0
2009-02-13	08:15:00	0
2009-02-13	08:16:00	0
2009-02-13	08:17:00	0
2009-02-13	08:18:00	0
2009-02-13	08:19:00	0
2009-02-13	08:20:00	0
2009-02-13	08:21:00	0
2009-02-13	08:22:00	0
2009-02-13	08:23:00	0
2009-02-13	08:24:00	0
2009-02-13	08:25:00	0
2009-02-13	08:26:00	0
2009-02-13	08:27:00	0
2009-02-13	08:28:00	0
2009-02-13	08:29:00	0
2009-02-13	08:30:00	0
2009-02-13	08:31:00	0
2009-02-13	08:32:00	0
2009-02-13	08:33:00	0
2009-02-13	08:34:00	0
2009-02-13	08:35:00	0
2009-02-13	08:36:00	0
2009-02-13	08:37:00	0
2009-02-13	08:38:00	0
2009-02-13	08:39:00	0
2009-02-13	08:40:00	0
2009-02-13	08:41:00	0
2009-02-13	08:42:00	0
2009-02-13	08:43:00	0
2009-02-13	08:44:00	0
2009-02-13	08:45:00	0
2009-02-13	08:46:00	0
2009-02-13	08:47:00	0
2009-02-13	08:48:00	0
2009-02-13	08:49:00	0
2009-02-13	08:50:00	0
2009-02-13	08:51:00	0
2009-02-13	08:52:00	0
2009-02-13	08:53:00	0
2009-02-13	08:54:00	0
2009-02-13	08:55:00	0
2009-02-13	08:56:00	0
2009-02-13	08:57:00	0
2009-02-13	08:58:00	0
2009-02-13	08:59:00	0
2009-02-13	09:00:00	0
2009-02-13	09:01:00	0
2009-02-13	09:02:00	0
2009-02-13	09:03:00	0
2009-02-13	09:04:00	0
2009-02-13	09:05:00	0
2009-02-13	09:06:00	0
2009-02-13	09:07:00	0
2009-02-13	09:08:00	0
2009-02-13	09:09:00	0
2009-02-13	09:10:00	0
2009-02-13	09:11:00	0
2009-02-13	09:12:00	0
2009-02-13	09:13:00	0
2009-02-13	09:14:00	0
2009-02-13	09:15:00	0
2009-02-13	09:16:00	0
2009-02-13	09:17:00	0
2009-02-13	09:18:00	0
2009-02-13	09:19:00	0
2009-02-13	09:20:00	0
2009-02-13	09:21:00	0
2009-02-13	09:22:00	0
2009-02-13	09:23:00	0
2009-02-13	09:24:00	0
2009-02-13	09:25:00	0
2009-02-13	09:26:00	0
2009-02-13	09:27:00	0
2009-02-13	09:28:00	0
2009-02-13	09:29:00	0
2009-02-13	09:30:00	0
2009-02-13	09:31:00	0
2009-02-13	09:32:00	0
2009-02-13	09:33:00	0
2009-02-13	09:34:00	0
2009-02-13	09:35:00	0
2009-02-13	09:36:00	0
2009-02-13	09:37:00	0
2009-02-13	09:38:00	0
2009-02-13	09:39:00	0
2009-02-13	09:40:00	0
2009-02-13	09:41:00	0
2009-02-13	09:42:00	0
2009-02-13	09:43:00	0
2009-02-13	09:44:00	0
2009-02-13	09:45:00	0
2009-02-13	09:46:00	0
2009-02-13	09:47:00	0
2009-02-13	09:48:00	0
2009-02-13	09:49:00	0
2009-02-13	09:50:00	0
2009-02-13	09:51:00	0
2009-02-13	09:52:00	0
2009-02-13	09:53:00	0
2009-02-13	09:54:00	0
2009-02-13	09:55:00	0
2009-02-13	09:56:00	0
2009-02-13	09:57:00	0
2009-02-13	09:58:00	0
2009-02-13	09:59:00	0
2009-02-13	10:00:00	0
2009-02-13	10:01:00	0
2009-02-13	10:02:00	0
2009-02-13	10:03:00	0
2009-02-13	10:04:00	0
2009-02-13	10:05:00	0
2009-02-13	10:06:00	0
2009-02-13	10:07:00	0
2009-02-13	10:08:00	0
2009-02-13	10:09:00	0
2009-02-13	10:10:00	0
2009-02-13	10:11:00	0
2009-02-13	10:12:00	0
2009-02-13	10:13:00	0
2009-02-13	10:14:00	0
2009-02-13	10:15:00	0
2009-02-13	10:16:00	0
2009-02-13	10:17:00	0
2009-02-13	10:18:00	0
2009-02-13	10:19:00	0
2009-02-13	10:20:00	0
2009-02-13	10:21:00	0
2009-02-13	10:22:00	0
2009-02-13	10:23:00	0
2009-02-13	10:24:00	0
2009-02-13	10:25:00	0
2009-02-13	10:26:00	0
2009-02-13	10:27:00	0
2009-02-13	10:28:00	0
2009-02-13	10:29:00	0
2009-02-13	10:30:00	0
2009-02-13	10:31:00	0
2009-02-13	10:32:00	0
2009-02-13	10:33:00	0
2009-02-13	10:34:00	0
2009-02-13	10:35:00	0
2009-02-13	10:36:00	0
2009-02-13	10:37:00	0
2009-02-13	10:38:00	0
2009-02-13	10:39:00	0
2009-02-13	10:40:00	0
2009-02-13	10:41:00	0
2009-02-13	10:42:00	0
2009-02-13	10:43:00	0
2009-02-13	10:44:00	0
2009-02-13	10:45:00	0
2009-02-13	10:46:00	0
2009-02-13	10:47:00	0
2009-02-13	10:48:00	0
2009-02-13	10:49:00	0
2009-02-13	10:50:00	0
2009-02-13	10:51:00	0
2009-02-13	10:52:00	0
2009-02-13	10:53:00	0
2009-02-13	10:54:00	0
2009-02-13	10:55:00	0
2009-02-13	10:56:00	0
2009-02-13	10:57:00	0
2009-02-13	10:58:00	0
2009-02-13	10:59:00	0
2009-02-13	11:00:00	0
2009-02-13	11:01:00	0
2009-02-13	11:02:00	0
2009-02-13	11:03:00	0
2009-02-13	11:04:00	0
2009-02-13	11:05:00	0
2009-02-13	11:06:00	0
2009-02-13	11:07:00	0
2009-02-13	11:08:00	0
2009-02-13	11:09:00	0
2009-02-13	11:10:00	0
2009-02-13	11:11:00	0
2009-02-13	11:12:00	0
2009-02-13	11:13:00	0
2009-02-13	11:14:00	0
2009-02-13	11:15:00	0
2009-02-13	11:16:00	0
2009-02-13	11:17:00	0
2009-02-13	11:18:00	0
2009-02-13	11:19:00	0
2009-02-13	11:20:00	0
2009-02-13	11:21:00	0
2009-02-13	11:22:00	0
2009-02-13	11:23:00	0
2009-02-13	11:24:00	0
2009-02-13	11:25:00	0
2009-02-13	11:26:00	0
2009-02-13	11:27:00	0
2009-02-13	11:28:00	0
2009-02-13	11:29:00	0
2009-02-13	11:30:00	0
2009-02-13	11:31:00	0
2009-02-13	11:32:00	0
2009-02-13	11:33:00	0
2009-02-13	11:34:00	0
2009-02-13	11:35:00	0
2009-02-13	11:36:00	0
2009-02-13	11:37:00	0
2009-02-13	11:38:00	0
2009-02-13	11:39:00	0
2009-02-13	11:40:00	0
2009-02-13	11:41:00	0
2009-02-13	11:42:00	0
2009-02-13	11:43:00	0
2009-02-13	11:44:00	0
2009-02-13	11:45:00	0
2009-02-13	11:46:00	0
2009-02-13	11:47:00	0
2009-02-13	11:48:00	0
2009-02-13	11:49:00	0
2009-02-13	11:50:00	0
2009-02-13	11:51:00	0
2009-02-13	11:52:00	0
2009-02-13	11:53:00	0
2009-02-13	11:54:00	0
2009-02-13	11:55:00	0
2009-02-13	11:56:00	0
2009-02-13	11:57:00	0
2009-02-13	11:58:00	0
2009-02-13	11:59:00	0
2009-02-13	12:00:00	0
2009-02-13	12:01:00	0
2009-02-13	12:02:00	0
2009-02-13	12:03:00	0
2009-02-13	12:04:00	0
2009-02-13	12:05:00	0
2009-02-13	12:06:00	0
2009-02-13	12:07:00	0
2009-02-13	12:08:00	0
2009-02-13	12:09:00	0
2009-02-13	12:10:00	0
2009-02-13	12:11:00	0
2009-02-13	12:12:00	0
2009-02-13	12:13:00	0
2009-02-13	12:14:00	0
2009-02-13	12:15:00	0
2009-02-13	12:16:00	0
2009-02-13	12:17:00	0
2009-02-13	12:18:00	0
2009-02-13	12:19:00	0
2009-02-13	12:20:00	0
2009-02-13	12:21:00	0
2009-02-13	12:22:00	0
2009-02-13	12:23:00	0
2009-02-13	12:24:00	0
2009-02-13	12:25:00	0
2009-02-13	12:26:00	0
2009-02-13	12:27:00	0
2009-02-13	12:28:00	0
2009-02-13	12:29:00	0
2009-02-13	12:30:00	0
2009-02-13	12:31:00	0
2009-02-13	12:32:00	0
2009-02-13	12:33:00	0
2009-02-13	12:34:00	0
2009-02-13	12:35:00	0
2009-02-13	12:36:00	0
2009-02-13	12:37:00	0
2009-02-13	12:38:00	0
2009-02-13	12:39:00	0
2009-02-13	12:40:00	0
2009-02-13	12:41:00	0
2009-02-13	12:42:00	0
2009-02-13	12:43:00	0
2009-02-13	12:44:00	0
2009-02-13	12:45:00	0
2009-02-13	12:46:00	0
2009-02-13	12:47:00	0
2009-02-13	12:48:00	0
2009-02-13	12:49:00	0
2009-02-13	12:50:00	0
2009-02-13	12:51:00	0
2009-02-13	12:52:00	0
2009-02-13	12:53:00	0
2009-02-13	12:54:00	0
2009-02-13	12:55:00	0
2009-02-13	12:56:00	0
2009-02-13	12:57:00	0
2009-02-13	12:58:00	0
2009-02-13	12:59:00	0
2009-02-13	13:00:00	0
2009-02-13	13:01:00	0
2009-02-13	13:02:00	0
2009-02-13	13:03:00	0
2009-02-13	13:04:00	0
2009-02-13	13:05:00	0
2009-02-13	13:06:00	0
2009-02-13	13:07:00	0
2009-02-13	13:08:00	0
2009-02-13	13:09:00	0
2009-02-13	13:10:00	0
2009-02-13	13:11:00	0
2009-02-13	13:12:00	0
2009-02-13	13:13:00	0
2009-02-13	13:14:00	0
2009-02-13	13:15:00	0
2009-02-13	13:16:00	0
2009-02-13	13:17:00	0
2009-02-13	13:18:00	0
2009-02-13	13:19:00	0
2009-02-13	13:20:00	0
2009-02-13	13:21:00	0
2009-02-13	13:22:00	0
2009-02-13	13:23:00	0
2009-02-13	13:24:00	0
2009-02-13	13:25:00	0
2009-02-13	13:26:00	0
2009-02-13	13:27:00	0
2009-02-13	13:28:00	0
2009-02-13	13:29:00	0
2009-02-13	13:30:00	0
2009-02-13	13:31:00	0
2009-02-13	13:32:00	0
2009-02-13	13:33:00	0
2009-02-13	13:34:00	0
2009-02-13	13:35:00	0
2009-02-13	13:36:00	0
2009-02-13	13:37:00	0
2009-02-13	13:38:00	0
2009-02-13	13:39:00	0
2009-02-13	13:40:00	0
2009-02-13	13:41:00	0
2009-02-13	13:42:00	0
2009-02-13	13:43:00	0
2009-02-13	13:44:00	0
2009-02-13	13:45:00	0
2009-02-13	13:46:00	0
2009-02-13	13:47:00	0
2009-02-13	13:48:00	0
2009-02-13	13:49:00	0
2009-02-13	13:50:00	0
2009-02-13	13:51:00	0
2009-02-13	13:52:00	0
2009-02-13	13:53:00	0
2009-02-13	13:54:00	0
2009-02-13	13:55:00	0
2009-02-13	13:56:00	0
2009-02-13	13:57:00	0
2009-02-13	13:58:00	0
2009-02-13	13:59:00	0
2009-02-13	14:00:00	0
2009-02-13	14:01:00	0
2009-02-13	14:02:00	0
2009-02-13	14:03:00	0
2009-02-13	14:04:00	0
2009-02-13	14:05:00	0
2009-02-13	14:06:00	0
2009-02-13	14:07:00	0
2009-02-13	14:08:00	0
2009-02-13	14:09:00	0
2009-02-13	14:10:00	0
2009-02-13	14:11:00	0
2009-02-13	14:12:00	0
2009-02-13	14:13:00	0
2009-02-13	14:14:00	0
2009-02-13	14:15:00	0
2009-02-13	14:16:00	0
2009-02-13	14:17:00	0
2009-02-13	14:18:00	0
2009-02-13	14:19:00	0
2009-02-13	14:20:00	0
2009-02-13	14:21:00	0
2009-02-13	14:22:00	0
2009-02-13	14:23:00	0
2009-02-13	14:24:00	0
2009-02-13	14:25:00	0
2009-02-13	14:26:00	0
2009-02-13	14:27:00	0
2009-02-13	14:28:00	0
2009-02-13	14:29:00	0
2009-02-13	14:30:00	0
2009-02-13	14:31:00	0
2009-02-13	14:32:00	0
2009-02-13	14:33:00	0
2009-02-13	14:34:00	0
2009-02-13	14:35:00	0
2009-02-13	14:36:00	0
2009-02-13	14:37:00	0
2009-02-13	14:38:00	0
2009-02-13	14:39:00	0
2009-02-13	14:40:00	0
2009-02-13	14:41:00	0
2009-02-13	14:42:00	0
2009-02-13	14:43:00	0
2009-02-13	14:44:00	0
2009-02-13	14:45:00	0
2009-02-13	14:46:00	0
2009-02-13	14:47:00	0
2009-02-13	14:48:00	0
2009-02-13	14:49:00	0
2009-02-13	14:50:00	0
2009-02-13	14:51:00	0
2009-02-13	14:52:00	0
2009-02-13	14:53:00	0
2009-02-13	14:54:00	0
2009-02-13	14:55:00	0
2009-02-13	14:56:00	0
2009-02-13	14:57:00	0
2009-02-13	14:58:00	0
2009-02-13	14:59:00	0
2009-02-13	15:00:00	0
2009-02-13	15:01:00	0
2009-02-13	15:02:00	0
2009-02-13	15:03:00	0
2009-02-13	15:04:00	0
2009-02-13	15:05:00	0
2009-02-13	15:06:00	0
2009-02-13	15:07:00	0
2009-02-13	15:08:00	0
2009-02-13	15:09:00	0
2009-02-13	15:10:00	0
2009-02-13	15:11:00	0
2009-02-13	15:12:00	0
2009-02-13	15:13:00	0
2009-02-13	15:14:00	0
2009-02-13	15:15:00	0
2009-02-13	15:16:00	0
2009-02-13	15:17:00	0
2009-02-13	15:18:00	0
2009-02-13	15:19:00	0
2009-02-13	15:20:00	0
2009-02-13	15:21:00	0
2009-02-13	15:22:00	0
2009-02-13	15:23:00	0
2009-02-13	15:24:00	0
2009-02-13	15:25:00	0
2009-02-13	15:26:00	0
2009-02-13	15:27:00	0
2009-02-13	15:28:00	0
2009-02-13	15:29:00	0
2009-02-13	15:30:00	0
2009-02-13	15:31:00	0
2009-02-13	15:32:00	0
2009-02-13	15:33:00	0
2009-02-13	15:34:00	0
2009-02-13	15:35:00	0
2009-02-13	15:36:00	0
2009-02-13	15:37:00	0
2009-02-13	15:38:00	0
2009-02-13	15:39:00	0
2009-02-13	15:40:00	0
2009-02-13	15:41:00	0
2009-02-13	15:42:00	0
2009-02-13	15:43:00	0
2009-02-13	15:44:00	0
2009-02-13	15:45:00	0
2009-02-13	15:46:00	0
2009-02-13	15:47:00	0
2009-02-13	15:48:00	0
2009-02-13	15:49:00	0
2009-02-13	15:50:00	0
2009-02-13	15:51:00	0
2009-02-13	15:52:00	0
2009-02-13	15:53:00	0
2009-02-13	15:54:00	0
2009-02-13	15:55:00	0
2009-02-13	15:56:00	0
2009-02-13	15:57:00	0
2009-02-13	15:58:00	0
2009-02-13	15:59:00	0
2009-02-13	16:00:00	0
2009-02-13	16:01:00	0
2009-02-13	16:02:00	0
2009-02-13	16:03:00	0
2009-02-13	16:04:00	0
2009-02-13	16:05:00	0
2009-02-13	16:06:00	0
2009-02-13	16:07:00	0
2009-02-13	16:08:00	0
2009-02-13	16:09:00	0
2009-02-13	16:10:00	0
2009-02-13	16:11:00	0
2009-02-13	16:12:00	0
2009-02-13	16:13:00	0
2009-02-13	16:14:00	0
2009-02-13	16:15:00	0
2009-02-13	16:16:00	0
2009-02-13	16:17:00	0
2009-02-13	16:18:00	0
2009-02-13	16:19:00	0
2009-02-13	16:20:00	0
2009-02-13	16:21:00	0
2009-02-13	16:22:00	0
2009-02-13	16:23:00	0
2009-02-13	16:24:00	0
2009-02-13	16:25:00	0
2009-02-13	16:26:00	0
2009-02-13	16:27:00	0
2009-02-13	16:28:00	0
2009-02-13	16:29:00	0
2009-02-13	16:30:00	0
2009-02-13	16:31:00	0
2009-02-13	16:32:00	0
2009-02-13	16:33:00	0
2009-02-13	16:34:00	0
2009-02-13	16:35:00	0
2009-02-13	16:36:00	0
2009-02-13	16:37:00	0
2009-02-13	16:38:00	0
2009-02-13	16:39:00	0
2009-02-13	16:40:00	0
2009-02-13	16:41:00	0
2009-02-13	16:42:00	0
2009-02-13	16:43:00	0
2009-02-13	16:44:00	0
2009-02-13	16:45:00	0
2009-02-13	16:46:00	0
2009-02-13	16:47:00	0
2009-02-13	16:48:00	0
2009-02-13	16:49:00	0
2009-02-13	16:50:00	0
2009-02-13	16:51:00	0
2009-02-13	16:52:00	0
2009-02-13	16:53:00	0
2009-02-13	16:54:00	0
2009-02-13	16:55:00	0
2009-02-13	16:56:00	0
2009-02-13	16:57:00	0
2009-02-13	16:58:00	0
2009-02-13	16:59:00	0
2009-02-13	17:00:00	0
2009-02-13	17:01:00	0
2009-02-13	17:02:00	0
2009-02-13	17:03:00	0
2009-02-13	17:04:00	0
2009-02-13	17:05:00	0
2009-02-13	17:06:00	0
2009-02-13	17:07:00	0
2009-02-13	17:08:00	0
2009-02-13	17:09:00	0
2009-02-13	17:10:00	0
2009-02-13	17:11:00	0
2009-02-13	17:12:00	0
2009-02-13	17:13:00	0
2009-02-13	17:14:00	0
2009-02-13	17:15:00	0
2009-02-13	17:16:00	0
2009-02-13	17:17:00	0
2009-02-13	17:18:00	0
2009-02-13	17:19:00	0
2009-02-13	17:20:00	0
2009-02-13	17:21:00	0
2009-02-13	17:22:00	0
2009-02-13	17:23:00	0
2009-02-13	17:24:00	0
2009-02-13	17:25:00	0
2009-02-13	17:26:00	0
2009-02-13	17:27:00	0
2009-02-13	17:28:00	0
2009-02-13	17:29:00	0
2009-02-13	17:30:00	0
2009-02-13	17:31:00	0
2009-02-13	17:32:00	0
2009-02-13	17:33:00	0
2009-02-13	17:34:00	0
2009-02-13	17:35:00	0
2009-02-13	17:36:00	0
2009-02-13	17:37:00	0
2009-02-13	17:38:00	0
2009-02-13	17:39:00	0
2009-02-13	17:40:00	0
2009-02-13	17:41:00	0
2009-02-13	17:42:00	0
2009-02-13	17:43:00	0
2009-02-13	17:44:00	0
2009-02-13	17:45:00	0
2009-02-13	17:46:00	0
2009-02-13	17:47:00	0
2009-02-13	17:48:00	0
2009-02-13	17:49:00	0
2009-02-13	17:50:00	0
2009-02-13	17:51:00	0
2009-02-13	17:52:00	0
2009-02-13	17:53:00	0
2009-02-13	17:54:00	0
2009-02-13	17:55:00	0
2009-02-13	17:56:00	0
2009-02-13	17:57:00	0
2009-02-13	17:58:00	0
2009-02-13	17:59:00	0
2009-02-13	18:00:00	0
2009-02-13	18:01:00	0
2009-02-13	18:02:00	0
2009-02-13	18:03:00	0
2009-02-13	18:04:00	0
2009-02-13	18:05:00	0
2009-02-13	18:06:00	0
2009-02-13	18:07:00	0
2009-02-13	18:08:00	0
2009-02-13	18:09:00	0
2009-02-13	18:10:00	0
2009-02-13	18:11:00	0
2009-02-13	18:12:00	0
2009-02-13	18:13:00	0
2009-02-13	18:14:00	0
2009-02-13	18:15:00	0
2009-02-13	18:16:00	0
2009-02-13	18:17:00	0
2009-02-13	18:18:00	12
2009-02-13	18:19:00	0
2009-02-13	18:20:00	0
2009-02-13	18:21:00	0
2009-02-13	18:22:00	97
2009-02-13	18:23:00	121
2009-02-13	18:24:00	12
2009-02-13	18:25:00	0
2009-02-13	18:26:00	0
2009-02-13	18:27:00	0
2009-02-13	18:28:00	0
2009-02-13	18:29:00	0
2009-02-13	18:30:00	0
2009-02-13	18:31:00	0
2009-02-13	18:32:00	0
2009-02-13	18:33:00	0
2009-02-13	18:34:00	0
2009-02-13	18:35:00	0
2009-02-13	18:36:00	0
2009-02-13	18:37:00	0
2009-02-13	18:38:00	0
2009-02-13	18:39:00	0
2009-02-13	18:40:00	0
2009-02-13	18:41:00	0
2009-02-13	18:42:00	0
2009-02-13	18:43:00	0
2009-02-13	18:44:00	0
2009-02-13	18:45:00	0
2009-02-13	18:46:00	0
2009-02-13	18:47:00	0
2009-02-13	18:48:00	0
2009-02-13	18:49:00	0
2009-02-13	18:50:00	0
2009-02-13	18:51:00	0
2009-02-13	18:52:00	0
2009-02-13	18:53:00	0
2009-02-13	18:54:00	0
2009-02-13	18:55:00	0
2009-02-13	18:56:00	0
2009-02-13	18:57:00	0
2009-02-13	18:58:00	0
2009-02-13	18:59:00	0
2009-02-13	19:00:00	0
2009-02-13	19:01:00	0
2009-02-13	19:02:00	0
2009-02-13	19:03:00	0
2009-02-13	19:04:00	0
2009-02-13	19:05:00	0
2009-02-13	19:06:00	0
2009-02-13	19:07:00	0
2009-02-13	19:08:00	0
2009-02-13	19:09:00	0
2009-02-13	19:10:00	0
2009-02-13	19:11:00	0
2009-02-13	19:12:00	0
2009-02-13	19:13:00	0
2009-02-13	19:14:00	0
2009-02-13	19:15:00	0
2009-02-13	19:16:00	0
2009-02-13	19:17:00	0
2009-02-13	19:18:00	0
2009-02-13	19:19:00	0
2009-02-13	19:20:00	0
2009-02-13	19:21:00	0
2009-02-13	19:22:00	0
2009-02-13	19:23:00	0
2009-02-13	19:24:00	0
2009-02-13	19:25:00	0
2009-02-13	19:26:00	0
2009-02-13	19:27:00	0
2009-02-13	19:28:00	0
2009-02-13	19:29:00	0
2009-02-13	19:30:00	0
2009-02-13	19:31:00	0
2009-02-13	19:32:00	0
2009-02-13	19:33:00	0
2009-02-13	19:34:00	0
2009-02-13	19:35:00	0
2009-02-13	19:36:00	0
2009-02-13	19:37:00	0
2009-02-13	19:38:00	24
2009-02-13	19:39:00	0
2009-02-13	19:40:00	0
2009-02-13	19:41:00	0
2009-02-13	19:42:00	0
2009-02-13	19:43:00	0
2009-02-13	19:44:00	0
2009-02-13	19:45:00	0
2009-02-13	19:46:00	0
2009-02-13	19:47:00	0
2009-02-13	19:48:00	0
2009-02-13	19:49:00	0
2009-02-13	19:50:00	24
2009-02-13	19:51:00	60
2009-02-13	19:52:00	0
2009-02-13	19:53:00	24
2009-02-13	19:54:00	12
2009-02-13	19:55:00	0
2009-02-13	19:56:00	12
2009-02-13	19:57:00	0
2009-02-13	19:58:00	0
2009-02-13	19:59:00	0
2009-02-13	20:00:00	350
2009-02-13	20:01:00	316
2009-02-13	20:02:00	12
2009-02-13	20:03:00	12
2009-02-13	20:04:00	0
2009-02-13	20:05:00	0
2009-02-13	20:06:00	0
2009-02-13	20:07:00	0
2009-02-13	20:08:00	0
2009-02-13	20:09:00	0
2009-02-13	20:10:00	0
2009-02-13	20:11:00	0
2009-02-13	20:12:00	0
2009-02-13	20:13:00	0
2009-02-13	20:14:00	0
2009-02-13	20:15:00	0
2009-02-13	20:16:00	0
2009-02-13	20:17:00	0
2009-02-13	20:18:00	0
2009-02-13	20:19:00	0
2009-02-13	20:20:00	0
2009-02-13	20:21:00	0
2009-02-13	20:22:00	0
2009-02-13	20:23:00	0
2009-02-13	20:24:00	0
2009-02-13	20:25:00	0
2009-02-13	20:26:00	0
2009-02-13	20:27:00	0
2009-02-13	20:28:00	0
2009-02-13	20:29:00	0
2009-02-13	20:30:00	0
2009-02-13	20:31:00	0
2009-02-13	20:32:00	0
2009-02-13	20:33:00	0
2009-02-13	20:34:00	0
2009-02-13	20:35:00	0
2009-02-13	20:36:00	0
2009-02-13	20:37:00	0
2009-02-13	20:38:00	0
2009-02-13	20:39:00	0
2009-02-13	20:40:00	12
2009-02-13	20:41:00	0
2009-02-13	20:42:00	0
2009-02-13	20:43:00	0
2009-02-13	20:44:00	0
2009-02-13	20:45:00	24
2009-02-13	20:46:00	0
2009-02-13	20:47:00	24
2009-02-13	20:48:00	72
2009-02-13	20:49:00	0
2009-02-13	20:50:00	0
2009-02-13	20:51:00	0
2009-02-13	20:52:00	0
2009-02-13	20:53:00	0
2009-02-13	20:54:00	0
2009-02-13	20:55:00	0
2009-02-13	20:56:00	12
2009-02-13	20:57:00	0
2009-02-13	20:58:00	0
2009-02-13	20:59:00	85
2009-02-13	21:00:00	0
2009-02-13	21:01:00	0
2009-02-13	21:02:00	0
2009-02-13	21:03:00	0
2009-02-13	21:04:00	0
2009-02-13	21:05:00	0
2009-02-13	21:06:00	0
2009-02-13	21:07:00	0
2009-02-13	21:08:00	0
2009-02-13	21:09:00	0
2009-02-13	21:10:00	0
2009-02-13	21:11:00	12
2009-02-13	21:12:00	0
2009-02-13	21:13:00	0
2009-02-13	21:14:00	24
2009-02-13	21:15:00	350
2009-02-13	21:16:00	1077
2009-02-13	21:17:00	435
2009-02-13	21:18:00	435
2009-02-13	21:19:00	367
2009-02-13	21:20:00	316
2009-02-13	21:21:00	157
2009-02-13	21:22:00	171
2009-02-13	21:23:00	229
2009-02-13	21:24:00	0
2009-02-13	21:25:00	0
2009-02-13	21:26:00	0
2009-02-13	21:27:00	36
2009-02-13	21:28:00	24
2009-02-13	21:29:00	0
2009-02-13	21:30:00	0
2009-02-13	21:31:00	0
2009-02-13	21:32:00	0
2009-02-13	21:33:00	0
2009-02-13	21:34:00	0
2009-02-13	21:35:00	0
2009-02-13	21:36:00	12
2009-02-13	21:37:00	0
2009-02-13	21:38:00	0
2009-02-13	21:39:00	0
2009-02-13	21:40:00	0
2009-02-13	21:41:00	0
2009-02-13	21:42:00	0
2009-02-13	21:43:00	0
2009-02-13	21:44:00	0
2009-02-13	21:45:00	0
2009-02-13	21:46:00	0
2009-02-13	21:47:00	0
2009-02-13	21:48:00	0
2009-02-13	21:49:00	0
2009-02-13	21:50:00	0
2009-02-13	21:51:00	0
2009-02-13	21:52:00	0
2009-02-13	21:53:00	0
2009-02-13	21:54:00	0
2009-02-13	21:55:00	0
2009-02-13	21:56:00	0
2009-02-13	21:57:00	0
2009-02-13	21:58:00	0
2009-02-13	21:59:00	0
2009-02-13	22:00:00	0
2009-02-13	22:01:00	0
2009-02-13	22:02:00	0
2009-02-13	22:03:00	0
2009-02-13	22:04:00	0
2009-02-13	22:05:00	0
2009-02-13	22:06:00	0
2009-02-13	22:07:00	0
2009-02-13	22:08:00	0
2009-02-13	22:09:00	0
2009-02-13	22:10:00	0
2009-02-13	22:11:00	0
2009-02-13	22:12:00	0
2009-02-13	22:13:00	12
2009-02-13	22:14:00	0
2009-02-13	22:15:00	0
2009-02-13	22:16:00	0
2009-02-13	22:17:00	0
2009-02-13	22:18:00	0
2009-02-13	22:19:00	0
2009-02-13	22:20:00	0
2009-02-13	22:21:00	0
2009-02-13	22:22:00	0
2009-02-13	22:23:00	0
2009-02-13	22:24:00	0
2009-02-13	22:25:00	0
2009-02-13	22:26:00	0
2009-02-13	22:27:00	0
2009-02-13	22:28:00	0
2009-02-13	22:29:00	0
2009-02-13	22:30:00	0
2009-02-13	22:31:00	0
2009-02-13	22:32:00	0
2009-02-13	22:33:00	0
2009-02-13	22:34:00	0
2009-02-13	22:35:00	0
2009-02-13	22:36:00	0
2009-02-13	22:37:00	0
2009-02-13	22:38:00	0
2009-02-13	22:39:00	0
2009-02-13	22:40:00	0
2009-02-13	22:41:00	0
2009-02-13	22:42:00	0
2009-02-13	22:43:00	0
2009-02-13	22:44:00	0
2009-02-13	22:45:00	12
2009-02-13	22:46:00	0
2009-02-13	22:47:00	0
2009-02-13	22:48:00	0
2009-02-13	22:49:00	0
2009-02-13	22:50:00	0
2009-02-13	22:51:00	0
2009-02-13	22:52:00	0
2009-02-13	22:53:00	0
2009-02-13	22:54:00	0
2009-02-13	22:55:00	0
2009-02-13	22:56:00	171
2009-02-13	22:57:00	24
2009-02-13	22:58:00	24
2009-02-13	22:59:00	0
2009-02-13	23:00:00	0
2009-02-13	23:01:00	0
2009-02-13	23:02:00	0
2009-02-13	23:03:00	0
2009-02-13	23:04:00	0
2009-02-13	23:05:00	0
2009-02-13	23:06:00	0
2009-02-13	23:07:00	0
2009-02-13	23:08:00	0
2009-02-13	23:09:00	0
2009-02-13	23:10:00	0
2009-02-13	23:11:00	0
2009-02-13	23:12:00	0
2009-02-13	23:13:00	0
2009-02-13	23:14:00	0
2009-02-13	23:15:00	0
2009-02-13	23:16:00	0
2009-02-13	23:17:00	0
2009-02-13	23:18:00	0
2009-02-13	23:19:00	0
2009-02-13	23:20:00	0
2009-02-13	23:21:00	0
2009-02-13	23:22:00	0
2009-02-13	23:23:00	0
2009-02-13	23:24:00	0
2009-02-13	23:25:00	0
2009-02-13	23:26:00	0
2009-02-13	23:27:00	0
2009-02-13	23:28:00	0
2009-02-13	23:29:00	0
2009-02-13	23:30:00	0
2009-02-13	23:31:00	0
2009-02-13	23:32:00	0
2009-02-13	23:33:00	0
2009-02-13	23:34:00	0
2009-02-13	23:35:00	0
2009-02-13	23:36:00	0
2009-02-13	23:37:00	0
2009-02-13	23:38:00	0
2009-02-13	23:39:00	0
2009-02-13	23:40:00	0
2009-02-13	23:41:00	0
2009-02-13	23:42:00	0
2009-02-13	23:43:00	0
2009-02-13	23:44:00	0
2009-02-13	23:45:00	0
2009-02-13	23:46:00	0
2009-02-13	23:47:00	0
2009-02-13	23:48:00	0
2009-02-13	23:49:00	0
2009-02-13	23:50:00	0
2009-02-13	23:51:00	0
2009-02-13	23:52:00	0
2009-02-13	23:53:00	0
2009-02-13	23:54:00	0
2009-02-13	23:55:00	0
2009-02-13	23:56:00	0
2009-02-13	23:57:00	12
2009-02-13	23:58:00	0
2009-02-13	23:59:00	12
2009-02-14	00:00:00	12
2009-02-14	00:01:00	0
2009-02-14	00:02:00	0
2009-02-14	00:03:00	0
2009-02-14	00:04:00	0
2009-02-14	00:05:00	85
2009-02-14	00:06:00	121
2009-02-14	00:07:00	0
2009-02-14	00:08:00	0
2009-02-14	00:09:00	0
2009-02-14	00:10:00	24
2009-02-14	00:11:00	0
2009-02-14	00:12:00	0
2009-02-14	00:13:00	0
2009-02-14	00:14:00	0
2009-02-14	00:15:00	0
2009-02-14	00:16:00	0
2009-02-14	00:17:00	0
2009-02-14	00:18:00	0
2009-02-14	00:19:00	0
2009-02-14	00:20:00	0
2009-02-14	00:21:00	0
2009-02-14	00:22:00	0
2009-02-14	00:23:00	0
2009-02-14	00:24:00	0
2009-02-14	00:25:00	0
2009-02-14	00:26:00	0
2009-02-14	00:27:00	0
2009-02-14	00:28:00	0
2009-02-14	00:29:00	0
2009-02-14	00:30:00	0
2009-02-14	00:31:00	0
2009-02-14	00:32:00	0
2009-02-14	00:33:00	0
2009-02-14	00:34:00	0
2009-02-14	00:35:00	0
2009-02-14	00:36:00	0
2009-02-14	00:37:00	0
2009-02-14	00:38:00	0
2009-02-14	00:39:00	0
2009-02-14	00:40:00	0
2009-02-14	00:41:00	0
2009-02-14	00:42:00	0
2009-02-14	00:43:00	0
2009-02-14	00:44:00	0
2009-02-14	00:45:00	12
2009-02-14	00:46:00	0
2009-02-14	00:47:00	0
2009-02-14	00:48:00	0
2009-02-14	00:49:00	0
2009-02-14	00:50:00	0
2009-02-14	00:51:00	0
2009-02-14	00:52:00	0
2009-02-14	00:53:00	0
2009-02-14	00:54:00	0
2009-02-14	00:55:00	0
2009-02-14	00:56:00	0
2009-02-14	00:57:00	0
2009-02-14	00:58:00	0
2009-02-14	00:59:00	0
2009-02-14	01:00:00	0
2009-02-14	01:01:00	0
2009-02-14	01:02:00	0
2009-02-14	01:03:00	0
2009-02-14	01:04:00	0
2009-02-14	01:05:00	0
2009-02-14	01:06:00	0
2009-02-14	01:07:00	0
2009-02-14	01:08:00	0
2009-02-14	01:09:00	0
2009-02-14	01:10:00	12
2009-02-14	01:11:00	0
2009-02-14	01:12:00	0
2009-02-14	01:13:00	0
2009-02-14	01:14:00	0
2009-02-14	01:15:00	0
2009-02-14	01:16:00	0
2009-02-14	01:17:00	0
2009-02-14	01:18:00	0
2009-02-14	01:19:00	0
2009-02-14	01:20:00	0
2009-02-14	01:21:00	0
2009-02-14	01:22:00	0
2009-02-14	01:23:00	0
2009-02-14	01:24:00	0
2009-02-14	01:25:00	24
2009-02-14	01:26:00	36
2009-02-14	01:27:00	12
2009-02-14	01:28:00	0
2009-02-14	01:29:00	36
2009-02-14	01:30:00	0
2009-02-14	01:31:00	0
2009-02-14	01:32:00	0
2009-02-14	01:33:00	36
2009-02-14	01:34:00	0
2009-02-14	01:35:00	36
2009-02-14	01:36:00	452
2009-02-14	01:37:00	133
2009-02-14	01:38:00	333
2009-02-14	01:39:00	333
2009-02-14	01:40:00	667
2009-02-14	01:41:00	944
2009-02-14	01:42:00	244
2009-02-14	01:43:00	215
2009-02-14	01:44:00	350
2009-02-14	01:45:00	60
2009-02-14	01:46:00	0
2009-02-14	01:47:00	0
2009-02-14	01:48:00	0
2009-02-14	01:49:00	0
2009-02-14	01:50:00	0
2009-02-14	01:51:00	0
2009-02-14	01:52:00	0
2009-02-14	01:53:00	0
2009-02-14	01:54:00	0
2009-02-14	01:55:00	0
2009-02-14	01:56:00	0
2009-02-14	01:57:00	12
2009-02-14	01:58:00	0
2009-02-14	01:59:00	0
2009-02-14	02:00:00	0
2009-02-14	02:01:00	0
2009-02-14	02:02:00	0
2009-02-14	02:03:00	0
2009-02-14	02:04:00	0
2009-02-14	02:05:00	0
2009-02-14	02:06:00	0
2009-02-14	02:07:00	24
2009-02-14	02:08:00	0
2009-02-14	02:09:00	0
2009-02-14	02:10:00	0
2009-02-14	02:11:00	0
2009-02-14	02:12:00	0
2009-02-14	02:13:00	0
2009-02-14	02:14:00	0
2009-02-14	02:15:00	0
2009-02-14	02:16:00	0
2009-02-14	02:17:00	0
2009-02-14	02:18:00	0
2009-02-14	02:19:00	0
2009-02-14	02:20:00	0
2009-02-14	02:21:00	0
2009-02-14	02:22:00	0
2009-02-14	02:23:00	0
2009-02-14	02:24:00	0
2009-02-14	02:25:00	0
2009-02-14	02:26:00	0
2009-02-14	02:27:00	0
2009-02-14	02:28:00	0
2009-02-14	02:29:00	0
2009-02-14	02:30:00	0
2009-02-14	02:31:00	0
2009-02-14	02:32:00	0
2009-02-14	02:33:00	0
2009-02-14	02:34:00	0
2009-02-14	02:35:00	0
2009-02-14	02:36:00	0
2009-02-14	02:37:00	0
2009-02-14	02:38:00	0
2009-02-14	02:39:00	0
2009-02-14	02:40:00	0
2009-02-14	02:41:00	0
2009-02-14	02:42:00	0
2009-02-14	02:43:00	0
2009-02-14	02:44:00	0
2009-02-14	02:45:00	0
2009-02-14	02:46:00	0
2009-02-14	02:47:00	0
2009-02-14	02:48:00	0
2009-02-14	02:49:00	0
2009-02-14	02:50:00	0
2009-02-14	02:51:00	0
2009-02-14	02:52:00	0
2009-02-14	02:53:00	0
2009-02-14	02:54:00	0
2009-02-14	02:55:00	0
2009-02-14	02:56:00	0
2009-02-14	02:57:00	0
2009-02-14	02:58:00	0
2009-02-14	02:59:00	0
2009-02-14	03:00:00	0
2009-02-14	03:01:00	0
2009-02-14	03:02:00	0
2009-02-14	03:03:00	0
2009-02-14	03:04:00	0
2009-02-14	03:05:00	0
2009-02-14	03:06:00	0
2009-02-14	03:07:00	0
2009-02-14	03:08:00	0
2009-02-14	03:09:00	0
2009-02-14	03:10:00	0
2009-02-14	03:11:00	0
2009-02-14	03:12:00	0
2009-02-14	03:13:00	0
2009-02-14	03:14:00	0
2009-02-14	03:15:00	0
2009-02-14	03:16:00	0
2009-02-14	03:17:00	0
2009-02-14	03:18:00	0
2009-02-14	03:19:00	0
2009-02-14	03:20:00	0
2009-02-14	03:21:00	0
2009-02-14	03:22:00	0
2009-02-14	03:23:00	0
2009-02-14	03:24:00	0
2009-02-14	03:25:00	0
2009-02-14	03:26:00	0
2009-02-14	03:27:00	0
2009-02-14	03:28:00	0
2009-02-14	03:29:00	0
2009-02-14	03:30:00	0
2009-02-14	03:31:00	0
2009-02-14	03:32:00	0
2009-02-14	03:33:00	0
2009-02-14	03:34:00	0
2009-02-14	03:35:00	0
2009-02-14	03:36:00	0
2009-02-14	03:37:00	0
2009-02-14	03:38:00	0
2009-02-14	03:39:00	0
2009-02-14	03:40:00	0
2009-02-14	03:41:00	0
2009-02-14	03:42:00	0
2009-02-14	03:43:00	0
2009-02-14	03:44:00	0
2009-02-14	03:45:00	0
2009-02-14	03:46:00	0
2009-02-14	03:47:00	0
2009-02-14	03:48:00	0
2009-02-14	03:49:00	0
2009-02-14	03:50:00	0
2009-02-14	03:51:00	0
2009-02-14	03:52:00	0
2009-02-14	03:53:00	0
2009-02-14	03:54:00	12
2009-02-14	03:55:00	0
2009-02-14	03:56:00	0
2009-02-14	03:57:00	0
2009-02-14	03:58:00	0
2009-02-14	03:59:00	0
2009-02-14	04:00:00	0
2009-02-14	04:01:00	0
2009-02-14	04:02:00	0
2009-02-14	04:03:00	0
2009-02-14	04:04:00	0
2009-02-14	04:05:00	12
2009-02-14	04:06:00	0
2009-02-14	04:07:00	0
2009-02-14	04:08:00	0
2009-02-14	04:09:00	0
2009-02-14	04:10:00	0
2009-02-14	04:11:00	0
2009-02-14	04:12:00	0
2009-02-14	04:13:00	0
2009-02-14	04:14:00	0
2009-02-14	04:15:00	0
2009-02-14	04:16:00	0
2009-02-14	04:17:00	0
2009-02-14	04:18:00	0
2009-02-14	04:19:00	0
2009-02-14	04:20:00	24
2009-02-14	04:21:00	0
2009-02-14	04:22:00	0
2009-02-14	04:23:00	0
2009-02-14	04:24:00	0
2009-02-14	04:25:00	0
2009-02-14	04:26:00	0
2009-02-14	04:27:00	0
2009-02-14	04:28:00	12
2009-02-14	04:29:00	24
2009-02-14	04:30:00	0
2009-02-14	04:31:00	0
2009-02-14	04:32:00	0
2009-02-14	04:33:00	0
2009-02-14	04:34:00	0
2009-02-14	04:35:00	0
2009-02-14	04:36:00	0
2009-02-14	04:37:00	0
2009-02-14	04:38:00	0
2009-02-14	04:39:00	0
2009-02-14	04:40:00	0
2009-02-14	04:41:00	0
2009-02-14	04:42:00	0
2009-02-14	04:43:00	0
2009-02-14	04:44:00	0
2009-02-14	04:45:00	0
2009-02-14	04:46:00	0
2009-02-14	04:47:00	0
2009-02-14	04:48:00	0
2009-02-14	04:49:00	0
2009-02-14	04:50:00	0
2009-02-14	04:51:00	0
2009-02-14	04:52:00	0
2009-02-14	04:53:00	0
2009-02-14	04:54:00	0
2009-02-14	04:55:00	0
2009-02-14	04:56:00	0
2009-02-14	04:57:00	0
2009-02-14	04:58:00	0
2009-02-14	04:59:00	0
2009-02-14	05:00:00	0
2009-02-14	05:01:00	0
2009-02-14	05:02:00	0
2009-02-14	05:03:00	0
2009-02-14	05:04:00	0
2009-02-14	05:05:00	0
2009-02-14	05:06:00	0
2009-02-14	05:07:00	36
2009-02-14	05:08:00	0
2009-02-14	05:09:00	0
2009-02-14	05:10:00	0
2009-02-14	05:11:00	0
2009-02-14	05:12:00	0
2009-02-14	05:13:00	0
2009-02-14	05:14:00	0
2009-02-14	05:15:00	0
2009-02-14	05:16:00	48
2009-02-14	05:17:00	0
2009-02-14	05:18:00	0
2009-02-14	05:19:00	72
2009-02-14	05:20:00	0
2009-02-14	05:21:00	0
2009-02-14	05:22:00	0
2009-02-14	05:23:00	0
2009-02-14	05:24:00	12
2009-02-14	05:25:00	0
2009-02-14	05:26:00	24
2009-02-14	05:27:00	36
2009-02-14	05:28:00	0
2009-02-14	05:29:00	0
2009-02-14	05:30:00	0
2009-02-14	05:31:00	0
2009-02-14	05:32:00	0
2009-02-14	05:33:00	0
2009-02-14	05:34:00	0
2009-02-14	05:35:00	12
2009-02-14	05:36:00	72
2009-02-14	05:37:00	0
2009-02-14	05:38:00	0
2009-02-14	05:39:00	12
2009-02-14	05:40:00	12
2009-02-14	05:41:00	0
2009-02-14	05:42:00	0
2009-02-14	05:43:00	0
2009-02-14	05:44:00	0
2009-02-14	05:45:00	0
2009-02-14	05:46:00	0
2009-02-14	05:47:00	0
2009-02-14	05:48:00	0
2009-02-14	05:49:00	0
2009-02-14	05:50:00	36
2009-02-14	05:51:00	121
2009-02-14	05:52:00	0
2009-02-14	05:53:00	0
2009-02-14	05:54:00	258
2009-02-14	05:55:00	507
2009-02-14	05:56:00	920
2009-02-14	05:57:00	1051
2009-02-14	05:58:00	872
2009-02-14	05:59:00	171
2009-02-14	06:00:00	799
2009-02-14	06:01:00	623
2009-02-14	06:02:00	775
2009-02-14	06:03:00	584
2009-02-14	06:04:00	60
2009-02-14	06:05:00	0
2009-02-14	06:06:00	24
2009-02-14	06:07:00	215
2009-02-14	06:08:00	48
2009-02-14	06:09:00	186
2009-02-14	06:10:00	157
2009-02-14	06:11:00	133
2009-02-14	06:12:00	0
2009-02-14	06:13:00	36
2009-02-14	06:14:00	36
2009-02-14	06:15:00	0
2009-02-14	06:16:00	24
2009-02-14	06:17:00	0
2009-02-14	06:18:00	0
2009-02-14	06:19:00	0
2009-02-14	06:20:00	0
2009-02-14	06:21:00	0
2009-02-14	06:22:00	0
2009-02-14	06:23:00	0
2009-02-14	06:24:00	12
2009-02-14	06:25:00	12
2009-02-14	06:26:00	0
2009-02-14	06:27:00	0
2009-02-14	06:28:00	0
2009-02-14	06:29:00	0
2009-02-14	06:30:00	0
2009-02-14	06:31:00	0
2009-02-14	06:32:00	0
2009-02-14	06:33:00	0
2009-02-14	06:34:00	0
2009-02-14	06:35:00	0
2009-02-14	06:36:00	0
2009-02-14	06:37:00	0
2009-02-14	06:38:00	0
2009-02-14	06:39:00	0
2009-02-14	06:40:00	0
2009-02-14	06:41:00	0
2009-02-14	06:42:00	0
2009-02-14	06:43:00	0
2009-02-14	06:44:00	0
2009-02-14	06:45:00	0
2009-02-14	06:46:00	0
2009-02-14	06:47:00	0
2009-02-14	06:48:00	0
2009-02-14	06:49:00	0
2009-02-14	06:50:00	0
2009-02-14	06:51:00	0
2009-02-14	06:52:00	0
2009-02-14	06:53:00	0
2009-02-14	06:54:00	0
2009-02-14	06:55:00	0
2009-02-14	06:56:00	0
2009-02-14	06:57:00	12
2009-02-14	06:58:00	0
2009-02-14	06:59:00	0
2009-02-14	07:00:00	0
2009-02-14	07:01:00	0
2009-02-14	07:02:00	0
2009-02-14	07:03:00	0
2009-02-14	07:04:00	0
2009-02-14	07:05:00	0
2009-02-14	07:06:00	0
2009-02-14	07:07:00	0
2009-02-14	07:08:00	0
2009-02-14	07:09:00	0
2009-02-14	07:10:00	0
2009-02-14	07:11:00	0
2009-02-14	07:12:00	0
2009-02-14	07:13:00	0
2009-02-14	07:14:00	0
2009-02-14	07:15:00	0
2009-02-14	07:16:00	0
2009-02-14	07:17:00	0
2009-02-14	07:18:00	0
2009-02-14	07:19:00	0
2009-02-14	07:20:00	0
2009-02-14	07:21:00	24
2009-02-14	07:22:00	0
2009-02-14	07:23:00	435
2009-02-14	07:24:00	72
2009-02-14	07:25:00	36
2009-02-14	07:26:00	72
2009-02-14	07:27:00	229
2009-02-14	07:28:00	1133
2009-02-14	07:29:00	1191
2009-02-14	07:30:00	1611
2009-02-14	07:31:00	2082
2009-02-14	07:32:00	2261
2009-02-14	07:33:00	872
2009-02-14	07:34:00	1311
2009-02-14	07:35:00	1343
2009-02-14	07:36:00	1507
2009-02-14	07:37:00	1473
2009-02-14	07:38:00	1162
2009-02-14	07:39:00	872
2009-02-14	07:40:00	997
2009-02-14	07:41:00	824
2009-02-14	07:42:00	584
2009-02-14	07:43:00	944
2009-02-14	07:44:00	1575
2009-02-14	07:45:00	1647
2009-02-14	07:46:00	1915
2009-02-14	07:47:00	1874
2009-02-14	07:48:00	1280
2009-02-14	07:49:00	1797
2009-02-14	07:50:00	1104
2009-02-14	07:51:00	1162
2009-02-14	07:52:00	754
2009-02-14	07:53:00	1104
2009-02-14	07:54:00	350
2009-02-14	07:55:00	215
2009-02-14	07:56:00	896
2009-02-14	07:57:00	384
2009-02-14	07:58:00	1473
2009-02-14	07:59:00	799
2009-02-14	08:00:00	1473
2009-02-14	08:01:00	824
2009-02-14	08:02:00	1024
2009-02-14	08:03:00	896
2009-02-14	08:04:00	401
2009-02-14	08:05:00	488
2009-02-14	08:06:00	565
2009-02-14	08:07:00	1051
2009-02-14	08:08:00	971
2009-02-14	08:09:00	367
2009-02-14	08:10:00	157
2009-02-14	08:11:00	200
2009-02-14	08:12:00	72
2009-02-14	08:13:00	244
2009-02-14	08:14:00	97
2009-02-14	08:15:00	36
2009-02-14	08:16:00	36
2009-02-14	08:17:00	12
2009-02-14	08:18:00	12
2009-02-14	08:19:00	0
2009-02-14	08:20:00	0
2009-02-14	08:21:00	0
2009-02-14	08:22:00	0
2009-02-14	08:23:00	12
2009-02-14	08:24:00	0
2009-02-14	08:25:00	0
2009-02-14	08:26:00	0
2009-02-14	08:27:00	0
2009-02-14	08:28:00	12
2009-02-14	08:29:00	12
2009-02-14	08:30:00	0
2009-02-14	08:31:00	12
2009-02-14	08:32:00	0
2009-02-14	08:33:00	12
2009-02-14	08:34:00	0
2009-02-14	08:35:00	0
2009-02-14	08:36:00	12
2009-02-14	08:37:00	0
2009-02-14	08:38:00	0
2009-02-14	08:39:00	24
2009-02-14	08:40:00	0
2009-02-14	08:41:00	0
2009-02-14	08:42:00	0
2009-02-14	08:43:00	0
2009-02-14	08:44:00	0
2009-02-14	08:45:00	0
2009-02-14	08:46:00	0
2009-02-14	08:47:00	0
2009-02-14	08:48:00	0
2009-02-14	08:49:00	0
2009-02-14	08:50:00	0
2009-02-14	08:51:00	0
2009-02-14	08:52:00	0
2009-02-14	08:53:00	171
2009-02-14	08:54:00	0
2009-02-14	08:55:00	0
2009-02-14	08:56:00	0
2009-02-14	08:57:00	12
2009-02-14	08:58:00	0
2009-02-14	08:59:00	0
2009-02-14	09:00:00	0
2009-02-14	09:01:00	0
2009-02-14	09:02:00	36
2009-02-14	09:03:00	0
2009-02-14	09:04:00	0
2009-02-14	09:05:00	0
2009-02-14	09:06:00	0
2009-02-14	09:07:00	0
2009-02-14	09:08:00	0
[truncated: 19,611 more rows]

## Sheet: 2.27.09
Actogram, Copy Raw Data, All Days
Identity:	Emerald
Filename:	E:\Active Research Files\meloxicam titre canine\cases\emerald\Emerald 2.27.09.AWC
Gender:	F
Age:	13
Height:	76.2 cm	30.0 in
Weight:	35.6 kg	78.5 lbs
Start Date:	27-Feb-2009 (Fri)
Start Time:	18:00:00
Interval:	1.00 mins
Date Stamp:	Time Stamp:	Activity Data:	Marker Press:
2009-02-27	00:00:00	0
2009-02-27	00:01:00	0
2009-02-27	00:02:00	0
2009-02-27	00:03:00	0
2009-02-27	00:04:00	0
2009-02-27	00:05:00	0
2009-02-27	00:06:00	0
2009-02-27	00:07:00	0
2009-02-27	00:08:00	0
2009-02-27	00:09:00	0
2009-02-27	00:10:00	0
2009-02-27	00:11:00	0
2009-02-27	00:12:00	0
2009-02-27	00:13:00	0
2009-02-27	00:14:00	0
2009-02-27	00:15:00	0
2009-02-27	00:16:00	0
2009-02-27	00:17:00	0
2009-02-27	00:18:00	0
2009-02-27	00:19:00	0
2009-02-27	00:20:00	0
2009-02-27	00:21:00	0
2009-02-27	00:22:00	0
2009-02-27	00:23:00	0
2009-02-27	00:24:00	0
2009-02-27	00:25:00	0
2009-02-27	00:26:00	0
2009-02-27	00:27:00	0
2009-02-27	00:28:00	0
2009-02-27	00:29:00	0
2009-02-27	00:30:00	0
2009-02-27	00:31:00	0
2009-02-27	00:32:00	0
2009-02-27	00:33:00	0
2009-02-27	00:34:00	0
2009-02-27	00:35:00	0
2009-02-27	00:36:00	0
2009-02-27	00:37:00	0
2009-02-27	00:38:00	0
2009-02-27	00:39:00	0
2009-02-27	00:40:00	0
2009-02-27	00:41:00	0
2009-02-27	00:42:00	0
2009-02-27	00:43:00	0
2009-02-27	00:44:00	0
2009-02-27	00:45:00	0
2009-02-27	00:46:00	0
2009-02-27	00:47:00	0
2009-02-27	00:48:00	0
2009-02-27	00:49:00	0
2009-02-27	00:50:00	0
2009-02-27	00:51:00	0
2009-02-27	00:52:00	0
2009-02-27	00:53:00	0
2009-02-27	00:54:00	0
2009-02-27	00:55:00	0
2009-02-27	00:56:00	0
2009-02-27	00:57:00	0
2009-02-27	00:58:00	0
2009-02-27	00:59:00	0
2009-02-27	01:00:00	0
2009-02-27	01:01:00	0
2009-02-27	01:02:00	0
2009-02-27	01:03:00	0
2009-02-27	01:04:00	0
2009-02-27	01:05:00	0
2009-02-27	01:06:00	0
2009-02-27	01:07:00	0
2009-02-27	01:08:00	0
2009-02-27	01:09:00	0
2009-02-27	01:10:00	0
2009-02-27	01:11:00	0
2009-02-27	01:12:00	0
2009-02-27	01:13:00	0
2009-02-27	01:14:00	0
2009-02-27	01:15:00	0
2009-02-27	01:16:00	0
2009-02-27	01:17:00	0
2009-02-27	01:18:00	0
2009-02-27	01:19:00	0
2009-02-27	01:20:00	0
2009-02-27	01:21:00	0
2009-02-27	01:22:00	0
2009-02-27	01:23:00	0
2009-02-27	01:24:00	0
2009-02-27	01:25:00	0
2009-02-27	01:26:00	0
2009-02-27	01:27:00	0
2009-02-27	01:28:00	0
2009-02-27	01:29:00	0
2009-02-27	01:30:00	0
2009-02-27	01:31:00	0
2009-02-27	01:32:00	0
2009-02-27	01:33:00	0
2009-02-27	01:34:00	0
2009-02-27	01:35:00	0
2009-02-27	01:36:00	0
2009-02-27	01:37:00	0
2009-02-27	01:38:00	0
2009-02-27	01:39:00	0
2009-02-27	01:40:00	0
2009-02-27	01:41:00	0
2009-02-27	01:42:00	0
2009-02-27	01:43:00	0
2009-02-27	01:44:00	0
2009-02-27	01:45:00	0
2009-02-27	01:46:00	0
2009-02-27	01:47:00	0
2009-02-27	01:48:00	0
2009-02-27	01:49:00	0
2009-02-27	01:50:00	0
2009-02-27	01:51:00	0
2009-02-27	01:52:00	0
2009-02-27	01:53:00	0
2009-02-27	01:54:00	0
2009-02-27	01:55:00	0
2009-02-27	01:56:00	0
2009-02-27	01:57:00	0
2009-02-27	01:58:00	0
2009-02-27	01:59:00	0
2009-02-27	02:00:00	0
2009-02-27	02:01:00	0
2009-02-27	02:02:00	0
2009-02-27	02:03:00	0
2009-02-27	02:04:00	0
2009-02-27	02:05:00	0
2009-02-27	02:06:00	0
2009-02-27	02:07:00	0
2009-02-27	02:08:00	0
2009-02-27	02:09:00	0
2009-02-27	02:10:00	0
2009-02-27	02:11:00	0
2009-02-27	02:12:00	0
2009-02-27	02:13:00	0
2009-02-27	02:14:00	0
2009-02-27	02:15:00	0
2009-02-27	02:16:00	0
2009-02-27	02:17:00	0
2009-02-27	02:18:00	0
2009-02-27	02:19:00	0
2009-02-27	02:20:00	0
2009-02-27	02:21:00	0
2009-02-27	02:22:00	0
2009-02-27	02:23:00	0
2009-02-27	02:24:00	0
2009-02-27	02:25:00	0
2009-02-27	02:26:00	0
2009-02-27	02:27:00	0
2009-02-27	02:28:00	0
2009-02-27	02:29:00	0
2009-02-27	02:30:00	0
2009-02-27	02:31:00	0
2009-02-27	02:32:00	0
2009-02-27	02:33:00	0
2009-02-27	02:34:00	0
2009-02-27	02:35:00	0
2009-02-27	02:36:00	0
2009-02-27	02:37:00	0
2009-02-27	02:38:00	0
2009-02-27	02:39:00	0
2009-02-27	02:40:00	0
2009-02-27	02:41:00	0
2009-02-27	02:42:00	0
2009-02-27	02:43:00	0
2009-02-27	02:44:00	0
2009-02-27	02:45:00	0
2009-02-27	02:46:00	0
2009-02-27	02:47:00	0
2009-02-27	02:48:00	0
2009-02-27	02:49:00	0
2009-02-27	02:50:00	0
2009-02-27	02:51:00	0
2009-02-27	02:52:00	0
2009-02-27	02:53:00	0
2009-02-27	02:54:00	0
2009-02-27	02:55:00	0
2009-02-27	02:56:00	0
2009-02-27	02:57:00	0
2009-02-27	02:58:00	0
2009-02-27	02:59:00	0
2009-02-27	03:00:00	0
2009-02-27	03:01:00	0
2009-02-27	03:02:00	0
2009-02-27	03:03:00	0
2009-02-27	03:04:00	0
2009-02-27	03:05:00	0
2009-02-27	03:06:00	0
2009-02-27	03:07:00	0
2009-02-27	03:08:00	0
2009-02-27	03:09:00	0
2009-02-27	03:10:00	0
2009-02-27	03:11:00	0
2009-02-27	03:12:00	0
2009-02-27	03:13:00	0
2009-02-27	03:14:00	0
2009-02-27	03:15:00	0
2009-02-27	03:16:00	0
2009-02-27	03:17:00	0
2009-02-27	03:18:00	0
2009-02-27	03:19:00	0
2009-02-27	03:20:00	0
2009-02-27	03:21:00	0
2009-02-27	03:22:00	0
2009-02-27	03:23:00	0
2009-02-27	03:24:00	0
2009-02-27	03:25:00	0
2009-02-27	03:26:00	0
2009-02-27	03:27:00	0
2009-02-27	03:28:00	0
2009-02-27	03:29:00	0
2009-02-27	03:30:00	0
2009-02-27	03:31:00	0
2009-02-27	03:32:00	0
2009-02-27	03:33:00	0
2009-02-27	03:34:00	0
2009-02-27	03:35:00	0
2009-02-27	03:36:00	0
2009-02-27	03:37:00	0
2009-02-27	03:38:00	0
2009-02-27	03:39:00	0
2009-02-27	03:40:00	0
2009-02-27	03:41:00	0
2009-02-27	03:42:00	0
2009-02-27	03:43:00	0
2009-02-27	03:44:00	0
2009-02-27	03:45:00	0
2009-02-27	03:46:00	0
2009-02-27	03:47:00	0
2009-02-27	03:48:00	0
2009-02-27	03:49:00	0
2009-02-27	03:50:00	0
2009-02-27	03:51:00	0
2009-02-27	03:52:00	0
2009-02-27	03:53:00	0
2009-02-27	03:54:00	0
2009-02-27	03:55:00	0
2009-02-27	03:56:00	0
2009-02-27	03:57:00	0
2009-02-27	03:58:00	0
2009-02-27	03:59:00	0
2009-02-27	04:00:00	0
2009-02-27	04:01:00	0
2009-02-27	04:02:00	0
2009-02-27	04:03:00	0
2009-02-27	04:04:00	0
2009-02-27	04:05:00	0
2009-02-27	04:06:00	0
2009-02-27	04:07:00	0
2009-02-27	04:08:00	0
2009-02-27	04:09:00	0
2009-02-27	04:10:00	0
2009-02-27	04:11:00	0
2009-02-27	04:12:00	0
2009-02-27	04:13:00	0
2009-02-27	04:14:00	0
2009-02-27	04:15:00	0
2009-02-27	04:16:00	0
2009-02-27	04:17:00	0
2009-02-27	04:18:00	0
2009-02-27	04:19:00	0
2009-02-27	04:20:00	0
2009-02-27	04:21:00	0
2009-02-27	04:22:00	0
2009-02-27	04:23:00	0
2009-02-27	04:24:00	0
2009-02-27	04:25:00	0
2009-02-27	04:26:00	0
2009-02-27	04:27:00	0
2009-02-27	04:28:00	0
2009-02-27	04:29:00	0
2009-02-27	04:30:00	0
2009-02-27	04:31:00	0
2009-02-27	04:32:00	0
2009-02-27	04:33:00	0
2009-02-27	04:34:00	0
2009-02-27	04:35:00	0
2009-02-27	04:36:00	0
2009-02-27	04:37:00	0
2009-02-27	04:38:00	0
2009-02-27	04:39:00	0
2009-02-27	04:40:00	0
2009-02-27	04:41:00	0
2009-02-27	04:42:00	0
2009-02-27	04:43:00	0
2009-02-27	04:44:00	0
2009-02-27	04:45:00	0
2009-02-27	04:46:00	0
2009-02-27	04:47:00	0
2009-02-27	04:48:00	0
2009-02-27	04:49:00	0
2009-02-27	04:50:00	0
2009-02-27	04:51:00	0
2009-02-27	04:52:00	0
2009-02-27	04:53:00	0
2009-02-27	04:54:00	0
2009-02-27	04:55:00	0
2009-02-27	04:56:00	0
2009-02-27	04:57:00	0
2009-02-27	04:58:00	0
2009-02-27	04:59:00	0
2009-02-27	05:00:00	0
2009-02-27	05:01:00	0
2009-02-27	05:02:00	0
2009-02-27	05:03:00	0
2009-02-27	05:04:00	0
2009-02-27	05:05:00	0
2009-02-27	05:06:00	0
2009-02-27	05:07:00	0
2009-02-27	05:08:00	0
2009-02-27	05:09:00	0
2009-02-27	05:10:00	0
2009-02-27	05:11:00	0
2009-02-27	05:12:00	0
2009-02-27	05:13:00	0
2009-02-27	05:14:00	0
2009-02-27	05:15:00	0
2009-02-27	05:16:00	0
2009-02-27	05:17:00	0
2009-02-27	05:18:00	0
2009-02-27	05:19:00	0
2009-02-27	05:20:00	0
2009-02-27	05:21:00	0
2009-02-27	05:22:00	0
2009-02-27	05:23:00	0
2009-02-27	05:24:00	0
2009-02-27	05:25:00	0
2009-02-27	05:26:00	0
2009-02-27	05:27:00	0
2009-02-27	05:28:00	0
2009-02-27	05:29:00	0
2009-02-27	05:30:00	0
2009-02-27	05:31:00	0
2009-02-27	05:32:00	0
2009-02-27	05:33:00	0
2009-02-27	05:34:00	0
2009-02-27	05:35:00	0
2009-02-27	05:36:00	0
2009-02-27	05:37:00	0
2009-02-27	05:38:00	0
2009-02-27	05:39:00	0
2009-02-27	05:40:00	0
2009-02-27	05:41:00	0
2009-02-27	05:42:00	0
2009-02-27	05:43:00	0
2009-02-27	05:44:00	0
2009-02-27	05:45:00	0
2009-02-27	05:46:00	0
2009-02-27	05:47:00	0
2009-02-27	05:48:00	0
2009-02-27	05:49:00	0
2009-02-27	05:50:00	0
2009-02-27	05:51:00	0
2009-02-27	05:52:00	0
2009-02-27	05:53:00	0
2009-02-27	05:54:00	0
2009-02-27	05:55:00	0
2009-02-27	05:56:00	0
2009-02-27	05:57:00	0
2009-02-27	05:58:00	0
2009-02-27	05:59:00	0
2009-02-27	06:00:00	0
2009-02-27	06:01:00	0
2009-02-27	06:02:00	0
2009-02-27	06:03:00	0
2009-02-27	06:04:00	0
2009-02-27	06:05:00	0
2009-02-27	06:06:00	0
2009-02-27	06:07:00	0
2009-02-27	06:08:00	0
2009-02-27	06:09:00	0
2009-02-27	06:10:00	0
2009-02-27	06:11:00	0
2009-02-27	06:12:00	0
2009-02-27	06:13:00	0
2009-02-27	06:14:00	0
2009-02-27	06:15:00	0
2009-02-27	06:16:00	0
2009-02-27	06:17:00	0
2009-02-27	06:18:00	0
2009-02-27	06:19:00	0
2009-02-27	06:20:00	0
2009-02-27	06:21:00	0
2009-02-27	06:22:00	0
2009-02-27	06:23:00	0
2009-02-27	06:24:00	0
2009-02-27	06:25:00	0
2009-02-27	06:26:00	0
2009-02-27	06:27:00	0
2009-02-27	06:28:00	0
2009-02-27	06:29:00	0
2009-02-27	06:30:00	0
2009-02-27	06:31:00	0
2009-02-27	06:32:00	0
2009-02-27	06:33:00	0
2009-02-27	06:34:00	0
2009-02-27	06:35:00	0
2009-02-27	06:36:00	0
2009-02-27	06:37:00	0
2009-02-27	06:38:00	0
2009-02-27	06:39:00	0
2009-02-27	06:40:00	0
2009-02-27	06:41:00	0
2009-02-27	06:42:00	0
2009-02-27	06:43:00	0
2009-02-27	06:44:00	0
2009-02-27	06:45:00	0
2009-02-27	06:46:00	0
2009-02-27	06:47:00	0
2009-02-27	06:48:00	0
2009-02-27	06:49:00	0
2009-02-27	06:50:00	0
2009-02-27	06:51:00	0
2009-02-27	06:52:00	0
2009-02-27	06:53:00	0
2009-02-27	06:54:00	0
2009-02-27	06:55:00	0
2009-02-27	06:56:00	0
2009-02-27	06:57:00	0
2009-02-27	06:58:00	0
2009-02-27	06:59:00	0
2009-02-27	07:00:00	0
2009-02-27	07:01:00	0
2009-02-27	07:02:00	0
2009-02-27	07:03:00	0
2009-02-27	07:04:00	0
2009-02-27	07:05:00	0
2009-02-27	07:06:00	0
2009-02-27	07:07:00	0
2009-02-27	07:08:00	0
2009-02-27	07:09:00	0
2009-02-27	07:10:00	0
2009-02-27	07:11:00	0
2009-02-27	07:12:00	0
2009-02-27	07:13:00	0
2009-02-27	07:14:00	0
2009-02-27	07:15:00	0
2009-02-27	07:16:00	0
2009-02-27	07:17:00	0
2009-02-27	07:18:00	0
2009-02-27	07:19:00	0
2009-02-27	07:20:00	0
2009-02-27	07:21:00	0
2009-02-27	07:22:00	0
2009-02-27	07:23:00	0
2009-02-27	07:24:00	0
2009-02-27	07:25:00	0
2009-02-27	07:26:00	0
2009-02-27	07:27:00	0
2009-02-27	07:28:00	0
2009-02-27	07:29:00	0
2009-02-27	07:30:00	0
2009-02-27	07:31:00	0
2009-02-27	07:32:00	0
2009-02-27	07:33:00	0
2009-02-27	07:34:00	0
2009-02-27	07:35:00	0
2009-02-27	07:36:00	0
2009-02-27	07:37:00	0
2009-02-27	07:38:00	0
2009-02-27	07:39:00	0
2009-02-27	07:40:00	0
2009-02-27	07:41:00	0
2009-02-27	07:42:00	0
2009-02-27	07:43:00	0
2009-02-27	07:44:00	0
2009-02-27	07:45:00	0
2009-02-27	07:46:00	0
2009-02-27	07:47:00	0
2009-02-27	07:48:00	0
2009-02-27	07:49:00	0
2009-02-27	07:50:00	0
2009-02-27	07:51:00	0
2009-02-27	07:52:00	0
2009-02-27	07:53:00	0
2009-02-27	07:54:00	0
2009-02-27	07:55:00	0
2009-02-27	07:56:00	0
2009-02-27	07:57:00	0
2009-02-27	07:58:00	0
2009-02-27	07:59:00	0
2009-02-27	08:00:00	0
2009-02-27	08:01:00	0
2009-02-27	08:02:00	0
2009-02-27	08:03:00	0
2009-02-27	08:04:00	0
2009-02-27	08:05:00	0
2009-02-27	08:06:00	0
2009-02-27	08:07:00	0
2009-02-27	08:08:00	0
2009-02-27	08:09:00	0
2009-02-27	08:10:00	0
2009-02-27	08:11:00	0
2009-02-27	08:12:00	0
2009-02-27	08:13:00	0
2009-02-27	08:14:00	0
2009-02-27	08:15:00	0
2009-02-27	08:16:00	0
2009-02-27	08:17:00	0
2009-02-27	08:18:00	0
2009-02-27	08:19:00	0
2009-02-27	08:20:00	0
2009-02-27	08:21:00	0
2009-02-27	08:22:00	0
2009-02-27	08:23:00	0
2009-02-27	08:24:00	0
2009-02-27	08:25:00	0
2009-02-27	08:26:00	0
2009-02-27	08:27:00	0
2009-02-27	08:28:00	0
2009-02-27	08:29:00	0
2009-02-27	08:30:00	0
2009-02-27	08:31:00	0
2009-02-27	08:32:00	0
2009-02-27	08:33:00	0
2009-02-27	08:34:00	0
2009-02-27	08:35:00	0
2009-02-27	08:36:00	0
2009-02-27	08:37:00	0
2009-02-27	08:38:00	0
2009-02-27	08:39:00	0
2009-02-27	08:40:00	0
2009-02-27	08:41:00	0
2009-02-27	08:42:00	0
2009-02-27	08:43:00	0
2009-02-27	08:44:00	0
2009-02-27	08:45:00	0
2009-02-27	08:46:00	0
2009-02-27	08:47:00	0
2009-02-27	08:48:00	0
2009-02-27	08:49:00	0
2009-02-27	08:50:00	0
2009-02-27	08:51:00	0
2009-02-27	08:52:00	0
2009-02-27	08:53:00	0
2009-02-27	08:54:00	0
2009-02-27	08:55:00	0
2009-02-27	08:56:00	0
2009-02-27	08:57:00	0
2009-02-27	08:58:00	0
2009-02-27	08:59:00	0
2009-02-27	09:00:00	0
2009-02-27	09:01:00	0
2009-02-27	09:02:00	0
2009-02-27	09:03:00	0
2009-02-27	09:04:00	0
2009-02-27	09:05:00	0
2009-02-27	09:06:00	0
2009-02-27	09:07:00	0
2009-02-27	09:08:00	0
2009-02-27	09:09:00	0
2009-02-27	09:10:00	0
2009-02-27	09:11:00	0
2009-02-27	09:12:00	0
2009-02-27	09:13:00	0
2009-02-27	09:14:00	0
2009-02-27	09:15:00	0
2009-02-27	09:16:00	0
2009-02-27	09:17:00	0
2009-02-27	09:18:00	0
2009-02-27	09:19:00	0
2009-02-27	09:20:00	0
2009-02-27	09:21:00	0
2009-02-27	09:22:00	0
2009-02-27	09:23:00	0
2009-02-27	09:24:00	0
2009-02-27	09:25:00	0
2009-02-27	09:26:00	0
2009-02-27	09:27:00	0
2009-02-27	09:28:00	0
2009-02-27	09:29:00	0
2009-02-27	09:30:00	0
2009-02-27	09:31:00	0
2009-02-27	09:32:00	0
2009-02-27	09:33:00	0
2009-02-27	09:34:00	0
2009-02-27	09:35:00	0
2009-02-27	09:36:00	0
2009-02-27	09:37:00	0
2009-02-27	09:38:00	0
2009-02-27	09:39:00	0
2009-02-27	09:40:00	0
2009-02-27	09:41:00	0
2009-02-27	09:42:00	0
2009-02-27	09:43:00	0
2009-02-27	09:44:00	0
2009-02-27	09:45:00	0
2009-02-27	09:46:00	0
2009-02-27	09:47:00	0
2009-02-27	09:48:00	0
2009-02-27	09:49:00	0
2009-02-27	09:50:00	0
2009-02-27	09:51:00	0
2009-02-27	09:52:00	0
2009-02-27	09:53:00	0
2009-02-27	09:54:00	0
2009-02-27	09:55:00	0
2009-02-27	09:56:00	0
2009-02-27	09:57:00	0
2009-02-27	09:58:00	0
2009-02-27	09:59:00	0
2009-02-27	10:00:00	0
2009-02-27	10:01:00	0
2009-02-27	10:02:00	0
2009-02-27	10:03:00	0
2009-02-27	10:04:00	0
2009-02-27	10:05:00	0
2009-02-27	10:06:00	0
2009-02-27	10:07:00	0
2009-02-27	10:08:00	0
2009-02-27	10:09:00	0
2009-02-27	10:10:00	0
2009-02-27	10:11:00	0
2009-02-27	10:12:00	0
2009-02-27	10:13:00	0
2009-02-27	10:14:00	0
2009-02-27	10:15:00	0
2009-02-27	10:16:00	0
2009-02-27	10:17:00	0
2009-02-27	10:18:00	0
2009-02-27	10:19:00	0
2009-02-27	10:20:00	0
2009-02-27	10:21:00	0
2009-02-27	10:22:00	0
2009-02-27	10:23:00	0
2009-02-27	10:24:00	0
2009-02-27	10:25:00	0
2009-02-27	10:26:00	0
2009-02-27	10:27:00	0
2009-02-27	10:28:00	0
2009-02-27	10:29:00	0
2009-02-27	10:30:00	0
2009-02-27	10:31:00	0
2009-02-27	10:32:00	0
2009-02-27	10:33:00	0
2009-02-27	10:34:00	0
2009-02-27	10:35:00	0
2009-02-27	10:36:00	0
2009-02-27	10:37:00	0
2009-02-27	10:38:00	0
2009-02-27	10:39:00	0
2009-02-27	10:40:00	0
2009-02-27	10:41:00	0
2009-02-27	10:42:00	0
2009-02-27	10:43:00	0
2009-02-27	10:44:00	0
2009-02-27	10:45:00	0
2009-02-27	10:46:00	0
2009-02-27	10:47:00	0
2009-02-27	10:48:00	0
2009-02-27	10:49:00	0
2009-02-27	10:50:00	0
2009-02-27	10:51:00	0
2009-02-27	10:52:00	0
2009-02-27	10:53:00	0
2009-02-27	10:54:00	0
2009-02-27	10:55:00	0
2009-02-27	10:56:00	0
2009-02-27	10:57:00	0
2009-02-27	10:58:00	0
2009-02-27	10:59:00	0
2009-02-27	11:00:00	0
2009-02-27	11:01:00	0
2009-02-27	11:02:00	0
2009-02-27	11:03:00	0
2009-02-27	11:04:00	0
2009-02-27	11:05:00	0
2009-02-27	11:06:00	0
2009-02-27	11:07:00	0
2009-02-27	11:08:00	0
2009-02-27	11:09:00	0
2009-02-27	11:10:00	0
2009-02-27	11:11:00	0
2009-02-27	11:12:00	0
2009-02-27	11:13:00	0
2009-02-27	11:14:00	0
2009-02-27	11:15:00	0
2009-02-27	11:16:00	0
2009-02-27	11:17:00	0
2009-02-27	11:18:00	0
2009-02-27	11:19:00	0
2009-02-27	11:20:00	0
2009-02-27	11:21:00	0
2009-02-27	11:22:00	0
2009-02-27	11:23:00	0
2009-02-27	11:24:00	0
2009-02-27	11:25:00	0
2009-02-27	11:26:00	0
2009-02-27	11:27:00	0
2009-02-27	11:28:00	0
2009-02-27	11:29:00	0
2009-02-27	11:30:00	0
2009-02-27	11:31:00	0
2009-02-27	11:32:00	0
2009-02-27	11:33:00	0
2009-02-27	11:34:00	0
2009-02-27	11:35:00	0
2009-02-27	11:36:00	0
2009-02-27	11:37:00	0
2009-02-27	11:38:00	0
2009-02-27	11:39:00	0
2009-02-27	11:40:00	0
2009-02-27	11:41:00	0
2009-02-27	11:42:00	0
2009-02-27	11:43:00	0
2009-02-27	11:44:00	0
2009-02-27	11:45:00	0
2009-02-27	11:46:00	0
2009-02-27	11:47:00	0
2009-02-27	11:48:00	0
2009-02-27	11:49:00	0
2009-02-27	11:50:00	0
2009-02-27	11:51:00	0
2009-02-27	11:52:00	0
2009-02-27	11:53:00	0
2009-02-27	11:54:00	0
2009-02-27	11:55:00	0
2009-02-27	11:56:00	0
2009-02-27	11:57:00	0
2009-02-27	11:58:00	0
2009-02-27	11:59:00	0
2009-02-27	12:00:00	0
2009-02-27	12:01:00	0
2009-02-27	12:02:00	0
2009-02-27	12:03:00	0
2009-02-27	12:04:00	0
2009-02-27	12:05:00	0
2009-02-27	12:06:00	0
2009-02-27	12:07:00	0
2009-02-27	12:08:00	0
2009-02-27	12:09:00	0
2009-02-27	12:10:00	0
2009-02-27	12:11:00	0
2009-02-27	12:12:00	0
2009-02-27	12:13:00	0
2009-02-27	12:14:00	0
2009-02-27	12:15:00	0
2009-02-27	12:16:00	0
2009-02-27	12:17:00	0
2009-02-27	12:18:00	0
2009-02-27	12:19:00	0
2009-02-27	12:20:00	0
2009-02-27	12:21:00	0
2009-02-27	12:22:00	0
2009-02-27	12:23:00	0
2009-02-27	12:24:00	0
2009-02-27	12:25:00	0
2009-02-27	12:26:00	0
2009-02-27	12:27:00	0
2009-02-27	12:28:00	0
2009-02-27	12:29:00	0
2009-02-27	12:30:00	0
2009-02-27	12:31:00	0
2009-02-27	12:32:00	0
2009-02-27	12:33:00	0
2009-02-27	12:34:00	0
2009-02-27	12:35:00	0
2009-02-27	12:36:00	0
2009-02-27	12:37:00	0
2009-02-27	12:38:00	0
2009-02-27	12:39:00	0
2009-02-27	12:40:00	0
2009-02-27	12:41:00	0
2009-02-27	12:42:00	0
2009-02-27	12:43:00	0
2009-02-27	12:44:00	0
2009-02-27	12:45:00	0
2009-02-27	12:46:00	0
2009-02-27	12:47:00	0
2009-02-27	12:48:00	0
2009-02-27	12:49:00	0
2009-02-27	12:50:00	0
2009-02-27	12:51:00	0
2009-02-27	12:52:00	0
2009-02-27	12:53:00	0
2009-02-27	12:54:00	0
2009-02-27	12:55:00	0
2009-02-27	12:56:00	0
2009-02-27	12:57:00	0
2009-02-27	12:58:00	0
2009-02-27	12:59:00	0
2009-02-27	13:00:00	0
2009-02-27	13:01:00	0
2009-02-27	13:02:00	0
2009-02-27	13:03:00	0
2009-02-27	13:04:00	0
2009-02-27	13:05:00	0
2009-02-27	13:06:00	0
2009-02-27	13:07:00	0
2009-02-27	13:08:00	0
2009-02-27	13:09:00	0
2009-02-27	13:10:00	0
2009-02-27	13:11:00	0
2009-02-27	13:12:00	0
2009-02-27	13:13:00	0
2009-02-27	13:14:00	0
2009-02-27	13:15:00	0
2009-02-27	13:16:00	0
2009-02-27	13:17:00	0
2009-02-27	13:18:00	0
2009-02-27	13:19:00	0
2009-02-27	13:20:00	0
2009-02-27	13:21:00	0
2009-02-27	13:22:00	0
2009-02-27	13:23:00	0
2009-02-27	13:24:00	0
2009-02-27	13:25:00	0
2009-02-27	13:26:00	0
2009-02-27	13:27:00	0
2009-02-27	13:28:00	0
2009-02-27	13:29:00	0
2009-02-27	13:30:00	0
2009-02-27	13:31:00	0
2009-02-27	13:32:00	0
2009-02-27	13:33:00	0
2009-02-27	13:34:00	0
2009-02-27	13:35:00	0
2009-02-27	13:36:00	0
2009-02-27	13:37:00	0
2009-02-27	13:38:00	0
2009-02-27	13:39:00	0
2009-02-27	13:40:00	0
2009-02-27	13:41:00	0
2009-02-27	13:42:00	0
2009-02-27	13:43:00	0
2009-02-27	13:44:00	0
2009-02-27	13:45:00	0
2009-02-27	13:46:00	0
2009-02-27	13:47:00	0
2009-02-27	13:48:00	0
2009-02-27	13:49:00	0
2009-02-27	13:50:00	0
2009-02-27	13:51:00	0
2009-02-27	13:52:00	0
2009-02-27	13:53:00	0
2009-02-27	13:54:00	0
2009-02-27	13:55:00	0
2009-02-27	13:56:00	0
2009-02-27	13:57:00	0
2009-02-27	13:58:00	0
2009-02-27	13:59:00	0
2009-02-27	14:00:00	0
2009-02-27	14:01:00	0
2009-02-27	14:02:00	0
2009-02-27	14:03:00	0
2009-02-27	14:04:00	0
2009-02-27	14:05:00	0
2009-02-27	14:06:00	0
2009-02-27	14:07:00	0
2009-02-27	14:08:00	0
2009-02-27	14:09:00	0
2009-02-27	14:10:00	0
2009-02-27	14:11:00	0
2009-02-27	14:12:00	0
2009-02-27	14:13:00	0
2009-02-27	14:14:00	0
2009-02-27	14:15:00	0
2009-02-27	14:16:00	0
2009-02-27	14:17:00	0
2009-02-27	14:18:00	0
2009-02-27	14:19:00	0
2009-02-27	14:20:00	0
2009-02-27	14:21:00	0
2009-02-27	14:22:00	0
2009-02-27	14:23:00	0
2009-02-27	14:24:00	0
2009-02-27	14:25:00	0
2009-02-27	14:26:00	0
2009-02-27	14:27:00	0
2009-02-27	14:28:00	0
2009-02-27	14:29:00	0
2009-02-27	14:30:00	0
2009-02-27	14:31:00	0
2009-02-27	14:32:00	0
2009-02-27	14:33:00	0
2009-02-27	14:34:00	0
2009-02-27	14:35:00	0
2009-02-27	14:36:00	0
2009-02-27	14:37:00	0
2009-02-27	14:38:00	0
2009-02-27	14:39:00	0
2009-02-27	14:40:00	0
2009-02-27	14:41:00	0
2009-02-27	14:42:00	0
2009-02-27	14:43:00	0
2009-02-27	14:44:00	0
2009-02-27	14:45:00	0
2009-02-27	14:46:00	0
2009-02-27	14:47:00	0
2009-02-27	14:48:00	0
2009-02-27	14:49:00	0
2009-02-27	14:50:00	0
2009-02-27	14:51:00	0
2009-02-27	14:52:00	0
2009-02-27	14:53:00	0
2009-02-27	14:54:00	0
2009-02-27	14:55:00	0
2009-02-27	14:56:00	0
2009-02-27	14:57:00	0
2009-02-27	14:58:00	0
2009-02-27	14:59:00	0
2009-02-27	15:00:00	0
2009-02-27	15:01:00	0
2009-02-27	15:02:00	0
2009-02-27	15:03:00	0
2009-02-27	15:04:00	0
2009-02-27	15:05:00	0
2009-02-27	15:06:00	0
2009-02-27	15:07:00	0
2009-02-27	15:08:00	0
2009-02-27	15:09:00	0
2009-02-27	15:10:00	0
2009-02-27	15:11:00	0
2009-02-27	15:12:00	0
2009-02-27	15:13:00	0
2009-02-27	15:14:00	0
2009-02-27	15:15:00	0
2009-02-27	15:16:00	0
2009-02-27	15:17:00	0
2009-02-27	15:18:00	0
2009-02-27	15:19:00	0
2009-02-27	15:20:00	0
2009-02-27	15:21:00	0
2009-02-27	15:22:00	0
2009-02-27	15:23:00	0
2009-02-27	15:24:00	0
2009-02-27	15:25:00	0
2009-02-27	15:26:00	0
2009-02-27	15:27:00	0
2009-02-27	15:28:00	0
2009-02-27	15:29:00	0
2009-02-27	15:30:00	0
2009-02-27	15:31:00	0
2009-02-27	15:32:00	0
2009-02-27	15:33:00	0
2009-02-27	15:34:00	0
2009-02-27	15:35:00	0
2009-02-27	15:36:00	0
2009-02-27	15:37:00	0
2009-02-27	15:38:00	0
2009-02-27	15:39:00	0
2009-02-27	15:40:00	0
2009-02-27	15:41:00	0
2009-02-27	15:42:00	0
2009-02-27	15:43:00	0
2009-02-27	15:44:00	0
2009-02-27	15:45:00	0
2009-02-27	15:46:00	0
2009-02-27	15:47:00	0
2009-02-27	15:48:00	0
2009-02-27	15:49:00	0
2009-02-27	15:50:00	0
2009-02-27	15:51:00	0
2009-02-27	15:52:00	0
2009-02-27	15:53:00	0
2009-02-27	15:54:00	0
2009-02-27	15:55:00	0
2009-02-27	15:56:00	0
2009-02-27	15:57:00	0
2009-02-27	15:58:00	0
2009-02-27	15:59:00	0
2009-02-27	16:00:00	0
2009-02-27	16:01:00	0
2009-02-27	16:02:00	0
2009-02-27	16:03:00	0
2009-02-27	16:04:00	0
2009-02-27	16:05:00	0
2009-02-27	16:06:00	0
2009-02-27	16:07:00	0
2009-02-27	16:08:00	0
2009-02-27	16:09:00	0
2009-02-27	16:10:00	0
2009-02-27	16:11:00	0
2009-02-27	16:12:00	0
2009-02-27	16:13:00	0
2009-02-27	16:14:00	0
2009-02-27	16:15:00	0
2009-02-27	16:16:00	0
2009-02-27	16:17:00	0
2009-02-27	16:18:00	0
2009-02-27	16:19:00	0
2009-02-27	16:20:00	0
2009-02-27	16:21:00	0
2009-02-27	16:22:00	0
2009-02-27	16:23:00	0
2009-02-27	16:24:00	0
2009-02-27	16:25:00	0
2009-02-27	16:26:00	0
2009-02-27	16:27:00	0
2009-02-27	16:28:00	0
2009-02-27	16:29:00	0
2009-02-27	16:30:00	0
2009-02-27	16:31:00	0
2009-02-27	16:32:00	0
2009-02-27	16:33:00	0
2009-02-27	16:34:00	0
2009-02-27	16:35:00	0
2009-02-27	16:36:00	0
2009-02-27	16:37:00	0
2009-02-27	16:38:00	0
2009-02-27	16:39:00	0
2009-02-27	16:40:00	0
2009-02-27	16:41:00	0
2009-02-27	16:42:00	0
2009-02-27	16:43:00	0
2009-02-27	16:44:00	0
2009-02-27	16:45:00	0
2009-02-27	16:46:00	0
2009-02-27	16:47:00	0
2009-02-27	16:48:00	0
2009-02-27	16:49:00	0
2009-02-27	16:50:00	0
2009-02-27	16:51:00	0
2009-02-27	16:52:00	0
2009-02-27	16:53:00	0
2009-02-27	16:54:00	0
2009-02-27	16:55:00	0
2009-02-27	16:56:00	0
2009-02-27	16:57:00	0
2009-02-27	16:58:00	0
2009-02-27	16:59:00	0
2009-02-27	17:00:00	0
2009-02-27	17:01:00	0
2009-02-27	17:02:00	0
2009-02-27	17:03:00	0
2009-02-27	17:04:00	0
2009-02-27	17:05:00	0
2009-02-27	17:06:00	0
2009-02-27	17:07:00	0
2009-02-27	17:08:00	0
2009-02-27	17:09:00	0
2009-02-27	17:10:00	0
2009-02-27	17:11:00	0
2009-02-27	17:12:00	0
2009-02-27	17:13:00	0
2009-02-27	17:14:00	0
2009-02-27	17:15:00	0
2009-02-27	17:16:00	0
2009-02-27	17:17:00	0
2009-02-27	17:18:00	0
2009-02-27	17:19:00	0
2009-02-27	17:20:00	0
2009-02-27	17:21:00	0
2009-02-27	17:22:00	0
2009-02-27	17:23:00	0
2009-02-27	17:24:00	0
2009-02-27	17:25:00	0
2009-02-27	17:26:00	0
2009-02-27	17:27:00	0
2009-02-27	17:28:00	0
2009-02-27	17:29:00	0
2009-02-27	17:30:00	0
2009-02-27	17:31:00	0
2009-02-27	17:32:00	0
2009-02-27	17:33:00	0
2009-02-27	17:34:00	0
2009-02-27	17:35:00	0
2009-02-27	17:36:00	0
2009-02-27	17:37:00	0
2009-02-27	17:38:00	0
2009-02-27	17:39:00	0
2009-02-27	17:40:00	0
2009-02-27	17:41:00	0
2009-02-27	17:42:00	0
2009-02-27	17:43:00	0
2009-02-27	17:44:00	0
2009-02-27	17:45:00	0
2009-02-27	17:46:00	0
2009-02-27	17:47:00	0
2009-02-27	17:48:00	0
2009-02-27	17:49:00	0
2009-02-27	17:50:00	0
2009-02-27	17:51:00	0
2009-02-27	17:52:00	0
2009-02-27	17:53:00	0
2009-02-27	17:54:00	0
2009-02-27	17:55:00	0
2009-02-27	17:56:00	0
2009-02-27	17:57:00	0
2009-02-27	17:58:00	0
2009-02-27	17:59:00	0
2009-02-27	18:00:00	0
2009-02-27	18:01:00	0
2009-02-27	18:02:00	0
2009-02-27	18:03:00	0
2009-02-27	18:04:00	0
2009-02-27	18:05:00	24
2009-02-27	18:06:00	12
2009-02-27	18:07:00	0
2009-02-27	18:08:00	0
2009-02-27	18:09:00	0
2009-02-27	18:10:00	12
2009-02-27	18:11:00	0
2009-02-27	18:12:00	24
2009-02-27	18:13:00	48
2009-02-27	18:14:00	109
2009-02-27	18:15:00	157
2009-02-27	18:16:00	171
2009-02-27	18:17:00	171
2009-02-27	18:18:00	72
2009-02-27	18:19:00	0
2009-02-27	18:20:00	0
2009-02-27	18:21:00	0
2009-02-27	18:22:00	0
2009-02-27	18:23:00	0
2009-02-27	18:24:00	0
2009-02-27	18:25:00	0
2009-02-27	18:26:00	0
2009-02-27	18:27:00	0
2009-02-27	18:28:00	0
2009-02-27	18:29:00	0
2009-02-27	18:30:00	0
2009-02-27	18:31:00	0
2009-02-27	18:32:00	0
2009-02-27	18:33:00	0
2009-02-27	18:34:00	0
2009-02-27	18:35:00	0
2009-02-27	18:36:00	0
2009-02-27	18:37:00	12
2009-02-27	18:38:00	0
2009-02-27	18:39:00	0
2009-02-27	18:40:00	0
2009-02-27	18:41:00	0
2009-02-27	18:42:00	0
2009-02-27	18:43:00	24
2009-02-27	18:44:00	0
2009-02-27	18:45:00	0
2009-02-27	18:46:00	0
2009-02-27	18:47:00	0
2009-02-27	18:48:00	0
2009-02-27	18:49:00	0
2009-02-27	18:50:00	0
2009-02-27	18:51:00	0
2009-02-27	18:52:00	12
2009-02-27	18:53:00	0
2009-02-27	18:54:00	0
2009-02-27	18:55:00	0
2009-02-27	18:56:00	0
2009-02-27	18:57:00	0
2009-02-27	18:58:00	0
2009-02-27	18:59:00	0
2009-02-27	19:00:00	60
2009-02-27	19:01:00	0
2009-02-27	19:02:00	85
2009-02-27	19:03:00	12
2009-02-27	19:04:00	12
2009-02-27	19:05:00	0
2009-02-27	19:06:00	12
2009-02-27	19:07:00	0
2009-02-27	19:08:00	0
2009-02-27	19:09:00	0
2009-02-27	19:10:00	0
2009-02-27	19:11:00	0
2009-02-27	19:12:00	24
2009-02-27	19:13:00	24
2009-02-27	19:14:00	97
2009-02-27	19:15:00	0
2009-02-27	19:16:00	0
2009-02-27	19:17:00	12
2009-02-27	19:18:00	12
2009-02-27	19:19:00	48
2009-02-27	19:20:00	85
2009-02-27	19:21:00	12
2009-02-27	19:22:00	48
2009-02-27	19:23:00	12
2009-02-27	19:24:00	688
2009-02-27	19:25:00	469
2009-02-27	19:26:00	72
2009-02-27	19:27:00	0
2009-02-27	19:28:00	0
2009-02-27	19:29:00	0
2009-02-27	19:30:00	0
2009-02-27	19:31:00	0
2009-02-27	19:32:00	0
2009-02-27	19:33:00	0
2009-02-27	19:34:00	0
2009-02-27	19:35:00	0
2009-02-27	19:36:00	0
2009-02-27	19:37:00	0
2009-02-27	19:38:00	0
2009-02-27	19:39:00	0
2009-02-27	19:40:00	0
2009-02-27	19:41:00	0
2009-02-27	19:42:00	0
2009-02-27	19:43:00	0
2009-02-27	19:44:00	12
2009-02-27	19:45:00	0
2009-02-27	19:46:00	0
2009-02-27	19:47:00	0
2009-02-27	19:48:00	0
2009-02-27	19:49:00	0
2009-02-27	19:50:00	0
2009-02-27	19:51:00	0
2009-02-27	19:52:00	0
2009-02-27	19:53:00	0
2009-02-27	19:54:00	0
2009-02-27	19:55:00	0
2009-02-27	19:56:00	12
2009-02-27	19:57:00	0
2009-02-27	19:58:00	0
2009-02-27	19:59:00	0
2009-02-27	20:00:00	0
2009-02-27	20:01:00	0
2009-02-27	20:02:00	0
2009-02-27	20:03:00	0
2009-02-27	20:04:00	0
2009-02-27	20:05:00	0
2009-02-27	20:06:00	0
2009-02-27	20:07:00	0
2009-02-27	20:08:00	0
2009-02-27	20:09:00	0
2009-02-27	20:10:00	0
2009-02-27	20:11:00	0
2009-02-27	20:12:00	0
2009-02-27	20:13:00	12
2009-02-27	20:14:00	0
2009-02-27	20:15:00	0
2009-02-27	20:16:00	0
2009-02-27	20:17:00	0
2009-02-27	20:18:00	0
2009-02-27	20:19:00	0
2009-02-27	20:20:00	0
2009-02-27	20:21:00	0
2009-02-27	20:22:00	0
2009-02-27	20:23:00	0
2009-02-27	20:24:00	0
2009-02-27	20:25:00	0
2009-02-27	20:26:00	0
2009-02-27	20:27:00	0
2009-02-27	20:28:00	0
2009-02-27	20:29:00	0
2009-02-27	20:30:00	0
2009-02-27	20:31:00	0
2009-02-27	20:32:00	0
2009-02-27	20:33:00	0
2009-02-27	20:34:00	0
2009-02-27	20:35:00	0
2009-02-27	20:36:00	0
2009-02-27	20:37:00	0
2009-02-27	20:38:00	0
2009-02-27	20:39:00	0
2009-02-27	20:40:00	0
2009-02-27	20:41:00	0
2009-02-27	20:42:00	0
2009-02-27	20:43:00	0
2009-02-27	20:44:00	0
2009-02-27	20:45:00	36
2009-02-27	20:46:00	0
2009-02-27	20:47:00	0
2009-02-27	20:48:00	0
2009-02-27	20:49:00	0
2009-02-27	20:50:00	0
2009-02-27	20:51:00	12
2009-02-27	20:52:00	0
2009-02-27	20:53:00	0
2009-02-27	20:54:00	0
2009-02-27	20:55:00	97
2009-02-27	20:56:00	186
2009-02-27	20:57:00	171
2009-02-27	20:58:00	229
2009-02-27	20:59:00	171
2009-02-27	21:00:00	157
2009-02-27	21:01:00	145
2009-02-27	21:02:00	215
2009-02-27	21:03:00	215
2009-02-27	21:04:00	186
2009-02-27	21:05:00	287
2009-02-27	21:06:00	48
2009-02-27	21:07:00	24
2009-02-27	21:08:00	0
2009-02-27	21:09:00	0
2009-02-27	21:10:00	0
2009-02-27	21:11:00	0
2009-02-27	21:12:00	60
2009-02-27	21:13:00	0
2009-02-27	21:14:00	0
2009-02-27	21:15:00	0
2009-02-27	21:16:00	0
2009-02-27	21:17:00	0
2009-02-27	21:18:00	0
2009-02-27	21:19:00	0
2009-02-27	21:20:00	0
2009-02-27	21:21:00	0
2009-02-27	21:22:00	0
2009-02-27	21:23:00	0
2009-02-27	21:24:00	0
2009-02-27	21:25:00	0
2009-02-27	21:26:00	0
2009-02-27	21:27:00	0
2009-02-27	21:28:00	0
2009-02-27	21:29:00	0
2009-02-27	21:30:00	0
2009-02-27	21:31:00	0
2009-02-27	21:32:00	0
2009-02-27	21:33:00	0
2009-02-27	21:34:00	0
2009-02-27	21:35:00	12
2009-02-27	21:36:00	0
2009-02-27	21:37:00	24
2009-02-27	21:38:00	0
2009-02-27	21:39:00	0
2009-02-27	21:40:00	0
2009-02-27	21:41:00	0
2009-02-27	21:42:00	0
2009-02-27	21:43:00	0
2009-02-27	21:44:00	0
2009-02-27	21:45:00	0
2009-02-27	21:46:00	0
2009-02-27	21:47:00	0
2009-02-27	21:48:00	0
2009-02-27	21:49:00	0
2009-02-27	21:50:00	0
2009-02-27	21:51:00	0
2009-02-27	21:52:00	12
2009-02-27	21:53:00	12
2009-02-27	21:54:00	0
2009-02-27	21:55:00	36
2009-02-27	21:56:00	0
2009-02-27	21:57:00	60
2009-02-27	21:58:00	0
2009-02-27	21:59:00	0
2009-02-27	22:00:00	85
2009-02-27	22:01:00	1575
2009-02-27	22:02:00	754
2009-02-27	22:03:00	350
2009-02-27	22:04:00	623
2009-02-27	22:05:00	333
2009-02-27	22:06:00	488
2009-02-27	22:07:00	452
2009-02-27	22:08:00	273
2009-02-27	22:09:00	546
2009-02-27	22:10:00	401
2009-02-27	22:11:00	121
2009-02-27	22:12:00	157
2009-02-27	22:13:00	121
2009-02-27	22:14:00	0
2009-02-27	22:15:00	0
2009-02-27	22:16:00	0
2009-02-27	22:17:00	0
2009-02-27	22:18:00	0
2009-02-27	22:19:00	0
2009-02-27	22:20:00	0
2009-02-27	22:21:00	0
2009-02-27	22:22:00	0
2009-02-27	22:23:00	0
2009-02-27	22:24:00	0
2009-02-27	22:25:00	12
2009-02-27	22:26:00	0
2009-02-27	22:27:00	0
2009-02-27	22:28:00	0
2009-02-27	22:29:00	0
2009-02-27	22:30:00	24
2009-02-27	22:31:00	0
2009-02-27	22:32:00	0
2009-02-27	22:33:00	0
2009-02-27	22:34:00	0
2009-02-27	22:35:00	0
2009-02-27	22:36:00	0
2009-02-27	22:37:00	60
2009-02-27	22:38:00	0
2009-02-27	22:39:00	0
2009-02-27	22:40:00	0
2009-02-27	22:41:00	0
2009-02-27	22:42:00	0
2009-02-27	22:43:00	0
2009-02-27	22:44:00	0
2009-02-27	22:45:00	0
2009-02-27	22:46:00	0
2009-02-27	22:47:00	0
2009-02-27	22:48:00	0
2009-02-27	22:49:00	0
2009-02-27	22:50:00	0
2009-02-27	22:51:00	0
2009-02-27	22:52:00	0
2009-02-27	22:53:00	0
2009-02-27	22:54:00	0
2009-02-27	22:55:00	0
2009-02-27	22:56:00	0
2009-02-27	22:57:00	0
2009-02-27	22:58:00	0
2009-02-27	22:59:00	0
2009-02-27	23:00:00	0
2009-02-27	23:01:00	0
2009-02-27	23:02:00	0
2009-02-27	23:03:00	0
2009-02-27	23:04:00	0
2009-02-27	23:05:00	0
2009-02-27	23:06:00	0
2009-02-27	23:07:00	0
2009-02-27	23:08:00	24
2009-02-27	23:09:00	0
2009-02-27	23:10:00	0
2009-02-27	23:11:00	0
2009-02-27	23:12:00	109
2009-02-27	23:13:00	0
2009-02-27	23:14:00	0
2009-02-27	23:15:00	0
2009-02-27	23:16:00	0
2009-02-27	23:17:00	0
2009-02-27	23:18:00	0
2009-02-27	23:19:00	0
2009-02-27	23:20:00	0
2009-02-27	23:21:00	0
2009-02-27	23:22:00	0
2009-02-27	23:23:00	0
2009-02-27	23:24:00	0
2009-02-27	23:25:00	0
2009-02-27	23:26:00	24
2009-02-27	23:27:00	0
2009-02-27	23:28:00	0
2009-02-27	23:29:00	0
2009-02-27	23:30:00	0
2009-02-27	23:31:00	0
2009-02-27	23:32:00	0
2009-02-27	23:33:00	0
2009-02-27	23:34:00	0
2009-02-27	23:35:00	0
2009-02-27	23:36:00	0
2009-02-27	23:37:00	0
2009-02-27	23:38:00	0
2009-02-27	23:39:00	0
2009-02-27	23:40:00	0
2009-02-27	23:41:00	0
2009-02-27	23:42:00	0
2009-02-27	23:43:00	0
2009-02-27	23:44:00	0
2009-02-27	23:45:00	0
2009-02-27	23:46:00	0
2009-02-27	23:47:00	12
2009-02-27	23:48:00	0
2009-02-27	23:49:00	0
2009-02-27	23:50:00	12
2009-02-27	23:51:00	24
2009-02-27	23:52:00	12
2009-02-27	23:53:00	316
2009-02-27	23:54:00	0
2009-02-27	23:55:00	0
2009-02-27	23:56:00	0
2009-02-27	23:57:00	0
2009-02-27	23:58:00	0
2009-02-27	23:59:00	0
2009-02-28	00:00:00	0
2009-02-28	00:01:00	0
2009-02-28	00:02:00	0
2009-02-28	00:03:00	0
2009-02-28	00:04:00	0
2009-02-28	00:05:00	0
2009-02-28	00:06:00	0
2009-02-28	00:07:00	0
2009-02-28	00:08:00	0
2009-02-28	00:09:00	0
2009-02-28	00:10:00	0
2009-02-28	00:11:00	0
2009-02-28	00:12:00	0
2009-02-28	00:13:00	0
2009-02-28	00:14:00	36
2009-02-28	00:15:00	0
2009-02-28	00:16:00	0
2009-02-28	00:17:00	0
2009-02-28	00:18:00	0
2009-02-28	00:19:00	0
2009-02-28	00:20:00	0
2009-02-28	00:21:00	0
2009-02-28	00:22:00	0
2009-02-28	00:23:00	0
2009-02-28	00:24:00	0
2009-02-28	00:25:00	0
2009-02-28	00:26:00	0
2009-02-28	00:27:00	0
2009-02-28	00:28:00	0
2009-02-28	00:29:00	0
2009-02-28	00:30:00	0
2009-02-28	00:31:00	0
2009-02-28	00:32:00	0
2009-02-28	00:33:00	0
2009-02-28	00:34:00	0
2009-02-28	00:35:00	0
2009-02-28	00:36:00	0
2009-02-28	00:37:00	0
2009-02-28	00:38:00	0
2009-02-28	00:39:00	0
2009-02-28	00:40:00	0
2009-02-28	00:41:00	0
2009-02-28	00:42:00	0
2009-02-28	00:43:00	0
2009-02-28	00:44:00	0
2009-02-28	00:45:00	0
2009-02-28	00:46:00	0
2009-02-28	00:47:00	0
2009-02-28	00:48:00	0
2009-02-28	00:49:00	0
2009-02-28	00:50:00	0
2009-02-28	00:51:00	24
2009-02-28	00:52:00	0
2009-02-28	00:53:00	0
2009-02-28	00:54:00	0
2009-02-28	00:55:00	0
2009-02-28	00:56:00	0
2009-02-28	00:57:00	0
2009-02-28	00:58:00	0
2009-02-28	00:59:00	0
2009-02-28	01:00:00	0
2009-02-28	01:01:00	0
2009-02-28	01:02:00	0
2009-02-28	01:03:00	0
2009-02-28	01:04:00	0
2009-02-28	01:05:00	0
2009-02-28	01:06:00	0
2009-02-28	01:07:00	0
2009-02-28	01:08:00	0
2009-02-28	01:09:00	24
2009-02-28	01:10:00	0
2009-02-28	01:11:00	0
2009-02-28	01:12:00	0
2009-02-28	01:13:00	0
2009-02-28	01:14:00	0
2009-02-28	01:15:00	0
2009-02-28	01:16:00	0
2009-02-28	01:17:00	0
2009-02-28	01:18:00	0
2009-02-28	01:19:00	0
2009-02-28	01:20:00	0
2009-02-28	01:21:00	0
2009-02-28	01:22:00	0
2009-02-28	01:23:00	0
2009-02-28	01:24:00	0
2009-02-28	01:25:00	0
2009-02-28	01:26:00	0
2009-02-28	01:27:00	0
2009-02-28	01:28:00	0
2009-02-28	01:29:00	0
2009-02-28	01:30:00	0
2009-02-28	01:31:00	0
2009-02-28	01:32:00	0
2009-02-28	01:33:00	0
2009-02-28	01:34:00	0
2009-02-28	01:35:00	0
2009-02-28	01:36:00	0
2009-02-28	01:37:00	0
2009-02-28	01:38:00	0
2009-02-28	01:39:00	12
2009-02-28	01:40:00	12
2009-02-28	01:41:00	0
2009-02-28	01:42:00	0
2009-02-28	01:43:00	0
2009-02-28	01:44:00	0
2009-02-28	01:45:00	0
2009-02-28	01:46:00	0
2009-02-28	01:47:00	0
2009-02-28	01:48:00	0
2009-02-28	01:49:00	0
2009-02-28	01:50:00	0
2009-02-28	01:51:00	0
2009-02-28	01:52:00	0
2009-02-28	01:53:00	0
2009-02-28	01:54:00	0
2009-02-28	01:55:00	0
2009-02-28	01:56:00	0
2009-02-28	01:57:00	0
2009-02-28	01:58:00	0
2009-02-28	01:59:00	0
2009-02-28	02:00:00	0
2009-02-28	02:01:00	0
2009-02-28	02:02:00	0
2009-02-28	02:03:00	0
2009-02-28	02:04:00	0
2009-02-28	02:05:00	0
2009-02-28	02:06:00	0
2009-02-28	02:07:00	0
2009-02-28	02:08:00	0
2009-02-28	02:09:00	0
2009-02-28	02:10:00	0
2009-02-28	02:11:00	24
2009-02-28	02:12:00	0
2009-02-28	02:13:00	0
2009-02-28	02:14:00	12
2009-02-28	02:15:00	24
2009-02-28	02:16:00	12
2009-02-28	02:17:00	0
2009-02-28	02:18:00	0
2009-02-28	02:19:00	0
2009-02-28	02:20:00	0
2009-02-28	02:21:00	0
2009-02-28	02:22:00	0
2009-02-28	02:23:00	0
2009-02-28	02:24:00	0
2009-02-28	02:25:00	0
2009-02-28	02:26:00	0
2009-02-28	02:27:00	0
2009-02-28	02:28:00	0
2009-02-28	02:29:00	0
2009-02-28	02:30:00	0
2009-02-28	02:31:00	0
2009-02-28	02:32:00	0
2009-02-28	02:33:00	0
2009-02-28	02:34:00	0
2009-02-28	02:35:00	0
2009-02-28	02:36:00	0
2009-02-28	02:37:00	0
2009-02-28	02:38:00	0
2009-02-28	02:39:00	24
2009-02-28	02:40:00	0
2009-02-28	02:41:00	0
2009-02-28	02:42:00	0
2009-02-28	02:43:00	0
2009-02-28	02:44:00	0
2009-02-28	02:45:00	0
2009-02-28	02:46:00	0
2009-02-28	02:47:00	0
2009-02-28	02:48:00	0
2009-02-28	02:49:00	0
2009-02-28	02:50:00	0
2009-02-28	02:51:00	0
2009-02-28	02:52:00	0
2009-02-28	02:53:00	0
2009-02-28	02:54:00	0
2009-02-28	02:55:00	0
2009-02-28	02:56:00	0
2009-02-28	02:57:00	0
2009-02-28	02:58:00	0
2009-02-28	02:59:00	0
2009-02-28	03:00:00	0
2009-02-28	03:01:00	0
2009-02-28	03:02:00	0
2009-02-28	03:03:00	0
2009-02-28	03:04:00	0
2009-02-28	03:05:00	0
2009-02-28	03:06:00	0
2009-02-28	03:07:00	24
2009-02-28	03:08:00	0
2009-02-28	03:09:00	0
2009-02-28	03:10:00	12
2009-02-28	03:11:00	0
2009-02-28	03:12:00	0
2009-02-28	03:13:00	0
2009-02-28	03:14:00	0
2009-02-28	03:15:00	0
2009-02-28	03:16:00	0
2009-02-28	03:17:00	0
2009-02-28	03:18:00	0
2009-02-28	03:19:00	0
2009-02-28	03:20:00	0
2009-02-28	03:21:00	0
2009-02-28	03:22:00	0
2009-02-28	03:23:00	0
2009-02-28	03:24:00	0
2009-02-28	03:25:00	0
2009-02-28	03:26:00	0
2009-02-28	03:27:00	12
2009-02-28	03:28:00	0
2009-02-28	03:29:00	0
2009-02-28	03:30:00	0
2009-02-28	03:31:00	0
2009-02-28	03:32:00	0
2009-02-28	03:33:00	0
2009-02-28	03:34:00	0
2009-02-28	03:35:00	0
2009-02-28	03:36:00	0
2009-02-28	03:37:00	0
2009-02-28	03:38:00	0
2009-02-28	03:39:00	0
2009-02-28	03:40:00	0
2009-02-28	03:41:00	0
2009-02-28	03:42:00	36
2009-02-28	03:43:00	12
2009-02-28	03:44:00	0
2009-02-28	03:45:00	0
2009-02-28	03:46:00	0
2009-02-28	03:47:00	0
2009-02-28	03:48:00	24
2009-02-28	03:49:00	0
2009-02-28	03:50:00	0
2009-02-28	03:51:00	0
2009-02-28	03:52:00	0
2009-02-28	03:53:00	0
2009-02-28	03:54:00	0
2009-02-28	03:55:00	0
2009-02-28	03:56:00	0
2009-02-28	03:57:00	0
2009-02-28	03:58:00	0
2009-02-28	03:59:00	0
2009-02-28	04:00:00	0
2009-02-28	04:01:00	0
2009-02-28	04:02:00	0
2009-02-28	04:03:00	0
2009-02-28	04:04:00	0
2009-02-28	04:05:00	0
2009-02-28	04:06:00	12
2009-02-28	04:07:00	0
2009-02-28	04:08:00	72
2009-02-28	04:09:00	0
2009-02-28	04:10:00	0
2009-02-28	04:11:00	0
2009-02-28	04:12:00	0
2009-02-28	04:13:00	0
2009-02-28	04:14:00	0
2009-02-28	04:15:00	0
2009-02-28	04:16:00	0
2009-02-28	04:17:00	0
2009-02-28	04:18:00	0
2009-02-28	04:19:00	0
2009-02-28	04:20:00	0
2009-02-28	04:21:00	0
2009-02-28	04:22:00	0
2009-02-28	04:23:00	12
2009-02-28	04:24:00	0
2009-02-28	04:25:00	0
2009-02-28	04:26:00	0
2009-02-28	04:27:00	0
2009-02-28	04:28:00	0
2009-02-28	04:29:00	0
2009-02-28	04:30:00	0
2009-02-28	04:31:00	0
2009-02-28	04:32:00	0
2009-02-28	04:33:00	0
2009-02-28	04:34:00	0
2009-02-28	04:35:00	0
2009-02-28	04:36:00	0
2009-02-28	04:37:00	0
2009-02-28	04:38:00	0
2009-02-28	04:39:00	0
2009-02-28	04:40:00	0
2009-02-28	04:41:00	0
2009-02-28	04:42:00	0
2009-02-28	04:43:00	0
2009-02-28	04:44:00	0
2009-02-28	04:45:00	0
2009-02-28	04:46:00	0
2009-02-28	04:47:00	0
2009-02-28	04:48:00	0
2009-02-28	04:49:00	0
2009-02-28	04:50:00	0
2009-02-28	04:51:00	0
2009-02-28	04:52:00	0
2009-02-28	04:53:00	0
2009-02-28	04:54:00	0
2009-02-28	04:55:00	0
2009-02-28	04:56:00	0
2009-02-28	04:57:00	0
2009-02-28	04:58:00	0
2009-02-28	04:59:00	0
2009-02-28	05:00:00	0
2009-02-28	05:01:00	0
2009-02-28	05:02:00	0
2009-02-28	05:03:00	0
2009-02-28	05:04:00	0
2009-02-28	05:05:00	0
2009-02-28	05:06:00	0
2009-02-28	05:07:00	0
2009-02-28	05:08:00	0
2009-02-28	05:09:00	12
2009-02-28	05:10:00	0
2009-02-28	05:11:00	0
2009-02-28	05:12:00	85
2009-02-28	05:13:00	0
2009-02-28	05:14:00	0
2009-02-28	05:15:00	0
2009-02-28	05:16:00	0
2009-02-28	05:17:00	0
2009-02-28	05:18:00	0
2009-02-28	05:19:00	0
2009-02-28	05:20:00	0
2009-02-28	05:21:00	0
2009-02-28	05:22:00	0
2009-02-28	05:23:00	0
2009-02-28	05:24:00	0
2009-02-28	05:25:00	0
2009-02-28	05:26:00	0
2009-02-28	05:27:00	0
2009-02-28	05:28:00	0
2009-02-28	05:29:00	0
2009-02-28	05:30:00	0
2009-02-28	05:31:00	0
2009-02-28	05:32:00	0
2009-02-28	05:33:00	0
2009-02-28	05:34:00	0
2009-02-28	05:35:00	0
2009-02-28	05:36:00	24
2009-02-28	05:37:00	0
2009-02-28	05:38:00	0
2009-02-28	05:39:00	0
2009-02-28	05:40:00	0
2009-02-28	05:41:00	0
2009-02-28	05:42:00	0
2009-02-28	05:43:00	0
2009-02-28	05:44:00	0
2009-02-28	05:45:00	12
2009-02-28	05:46:00	0
2009-02-28	05:47:00	0
2009-02-28	05:48:00	12
2009-02-28	05:49:00	0
2009-02-28	05:50:00	0
2009-02-28	05:51:00	12
2009-02-28	05:52:00	12
2009-02-28	05:53:00	36
2009-02-28	05:54:00	0
2009-02-28	05:55:00	0
2009-02-28	05:56:00	0
2009-02-28	05:57:00	0
2009-02-28	05:58:00	0
2009-02-28	05:59:00	0
2009-02-28	06:00:00	24
2009-02-28	06:01:00	12
2009-02-28	06:02:00	384
2009-02-28	06:03:00	200
2009-02-28	06:04:00	604
2009-02-28	06:05:00	604
2009-02-28	06:06:00	435
2009-02-28	06:07:00	754
2009-02-28	06:08:00	710
2009-02-28	06:09:00	584
2009-02-28	06:10:00	546
2009-02-28	06:11:00	526
2009-02-28	06:12:00	244
2009-02-28	06:13:00	157
2009-02-28	06:14:00	732
2009-02-28	06:15:00	507
2009-02-28	06:16:00	0
2009-02-28	06:17:00	0
2009-02-28	06:18:00	12
2009-02-28	06:19:00	0
2009-02-28	06:20:00	0
2009-02-28	06:21:00	0
2009-02-28	06:22:00	0
2009-02-28	06:23:00	0
2009-02-28	06:24:00	0
2009-02-28	06:25:00	0
2009-02-28	06:26:00	0
2009-02-28	06:27:00	0
2009-02-28	06:28:00	0
2009-02-28	06:29:00	0
2009-02-28	06:30:00	229
2009-02-28	06:31:00	36
2009-02-28	06:32:00	287
2009-02-28	06:33:00	469
2009-02-28	06:34:00	273
2009-02-28	06:35:00	367
2009-02-28	06:36:00	452
2009-02-28	06:37:00	824
2009-02-28	06:38:00	507
2009-02-28	06:39:00	435
2009-02-28	06:40:00	604
2009-02-28	06:41:00	273
2009-02-28	06:42:00	384
2009-02-28	06:43:00	732
2009-02-28	06:44:00	452
2009-02-28	06:45:00	171
2009-02-28	06:46:00	333
2009-02-28	06:47:00	546
2009-02-28	06:48:00	688
2009-02-28	06:49:00	604
2009-02-28	06:50:00	584
2009-02-28	06:51:00	145
2009-02-28	06:52:00	0
2009-02-28	06:53:00	0
2009-02-28	06:54:00	0
2009-02-28	06:55:00	0
2009-02-28	06:56:00	12
2009-02-28	06:57:00	0
2009-02-28	06:58:00	24
2009-02-28	06:59:00	0
2009-02-28	07:00:00	0
2009-02-28	07:01:00	0
2009-02-28	07:02:00	316
2009-02-28	07:03:00	72
2009-02-28	07:04:00	0
2009-02-28	07:05:00	0
2009-02-28	07:06:00	0
2009-02-28	07:07:00	0
2009-02-28	07:08:00	0
2009-02-28	07:09:00	0
2009-02-28	07:10:00	0
2009-02-28	07:11:00	0
2009-02-28	07:12:00	0
2009-02-28	07:13:00	0
2009-02-28	07:14:00	0
2009-02-28	07:15:00	0
2009-02-28	07:16:00	0
2009-02-28	07:17:00	0
2009-02-28	07:18:00	0
2009-02-28	07:19:00	0
2009-02-28	07:20:00	0
2009-02-28	07:21:00	0
2009-02-28	07:22:00	0
2009-02-28	07:23:00	0
2009-02-28	07:24:00	0
2009-02-28	07:25:00	0
2009-02-28	07:26:00	0
2009-02-28	07:27:00	0
2009-02-28	07:28:00	0
2009-02-28	07:29:00	0
2009-02-28	07:30:00	0
2009-02-28	07:31:00	0
2009-02-28	07:32:00	0
2009-02-28	07:33:00	0
2009-02-28	07:34:00	0
2009-02-28	07:35:00	0
2009-02-28	07:36:00	0
2009-02-28	07:37:00	0
2009-02-28	07:38:00	0
2009-02-28	07:39:00	0
2009-02-28	07:40:00	0
2009-02-28	07:41:00	0
2009-02-28	07:42:00	0
2009-02-28	07:43:00	0
2009-02-28	07:44:00	0
2009-02-28	07:45:00	0
2009-02-28	07:46:00	0
2009-02-28	07:47:00	0
2009-02-28	07:48:00	0
2009-02-28	07:49:00	0
2009-02-28	07:50:00	0
2009-02-28	07:51:00	0
2009-02-28	07:52:00	0
2009-02-28	07:53:00	0
2009-02-28	07:54:00	0
2009-02-28	07:55:00	0
2009-02-28	07:56:00	0
2009-02-28	07:57:00	0
2009-02-28	07:58:00	0
2009-02-28	07:59:00	0
2009-02-28	08:00:00	48
2009-02-28	08:01:00	0
2009-02-28	08:02:00	0
2009-02-28	08:03:00	0
2009-02-28	08:04:00	0
2009-02-28	08:05:00	0
2009-02-28	08:06:00	0
2009-02-28	08:07:00	0
2009-02-28	08:08:00	0
2009-02-28	08:09:00	0
2009-02-28	08:10:00	0
2009-02-28	08:11:00	0
2009-02-28	08:12:00	0
2009-02-28	08:13:00	0
2009-02-28	08:14:00	0
2009-02-28	08:15:00	0
2009-02-28	08:16:00	0
2009-02-28	08:17:00	0
2009-02-28	08:18:00	0
2009-02-28	08:19:00	0
2009-02-28	08:20:00	12
2009-02-28	08:21:00	48
2009-02-28	08:22:00	258
2009-02-28	08:23:00	157
2009-02-28	08:24:00	200
2009-02-28	08:25:00	24
2009-02-28	08:26:00	0
2009-02-28	08:27:00	0
2009-02-28	08:28:00	0
2009-02-28	08:29:00	0
2009-02-28	08:30:00	0
2009-02-28	08:31:00	0
2009-02-28	08:32:00	24
2009-02-28	08:33:00	0
2009-02-28	08:34:00	0
2009-02-28	08:35:00	0
2009-02-28	08:36:00	0
2009-02-28	08:37:00	12
2009-02-28	08:38:00	0
2009-02-28	08:39:00	0
2009-02-28	08:40:00	0
2009-02-28	08:41:00	0
2009-02-28	08:42:00	0
2009-02-28	08:43:00	36
2009-02-28	08:44:00	24
2009-02-28	08:45:00	0
2009-02-28	08:46:00	0
2009-02-28	08:47:00	0
2009-02-28	08:48:00	0
2009-02-28	08:49:00	0
2009-02-28	08:50:00	0
2009-02-28	08:51:00	0
2009-02-28	08:52:00	0
2009-02-28	08:53:00	12
2009-02-28	08:54:00	0
2009-02-28	08:55:00	0
2009-02-28	08:56:00	0
2009-02-28	08:57:00	36
2009-02-28	08:58:00	24
2009-02-28	08:59:00	0
2009-02-28	09:00:00	0
2009-02-28	09:01:00	0
2009-02-28	09:02:00	12
2009-02-28	09:03:00	0
2009-02-28	09:04:00	0
2009-02-28	09:05:00	0
2009-02-28	09:06:00	36
2009-02-28	09:07:00	0
2009-02-28	09:08:00	0
[truncated: 19,611 more rows]

## Sheet: 3.13.09
Actogram, Copy Raw Data, All Days
Identity:	Emerald
Filename:	E:\Active Research Files\meloxicam titre canine\cases\emerald\Emerald 3.13.09.AWC
Gender:	F
Age:	13
Height:	76.2 cm	30.0 in
Weight:	35.6 kg	78.5 lbs
Start Date:	13-Mar-2009 (Fri)
Start Time:	18:00:00
Interval:	1.00 mins
Date Stamp:	Time Stamp:	Activity Data:	Marker Press:
2009-03-13	00:00:00	0
2009-03-13	00:01:00	0
2009-03-13	00:02:00	0
2009-03-13	00:03:00	0
2009-03-13	00:04:00	0
2009-03-13	00:05:00	0
2009-03-13	00:06:00	0
2009-03-13	00:07:00	0
2009-03-13	00:08:00	0
2009-03-13	00:09:00	0
2009-03-13	00:10:00	0
2009-03-13	00:11:00	0
2009-03-13	00:12:00	0
2009-03-13	00:13:00	0
2009-03-13	00:14:00	0
2009-03-13	00:15:00	0
2009-03-13	00:16:00	0
2009-03-13	00:17:00	0
2009-03-13	00:18:00	0
2009-03-13	00:19:00	0
2009-03-13	00:20:00	0
2009-03-13	00:21:00	0
2009-03-13	00:22:00	0
2009-03-13	00:23:00	0
2009-03-13	00:24:00	0
2009-03-13	00:25:00	0
2009-03-13	00:26:00	0
2009-03-13	00:27:00	0
2009-03-13	00:28:00	0
2009-03-13	00:29:00	0
2009-03-13	00:30:00	0
2009-03-13	00:31:00	0
2009-03-13	00:32:00	0
2009-03-13	00:33:00	0
2009-03-13	00:34:00	0
2009-03-13	00:35:00	0
2009-03-13	00:36:00	0
2009-03-13	00:37:00	0
2009-03-13	00:38:00	0
2009-03-13	00:39:00	0
2009-03-13	00:40:00	0
2009-03-13	00:41:00	0
2009-03-13	00:42:00	0
2009-03-13	00:43:00	0
2009-03-13	00:44:00	0
2009-03-13	00:45:00	0
2009-03-13	00:46:00	0
2009-03-13	00:47:00	0
2009-03-13	00:48:00	0
2009-03-13	00:49:00	0
2009-03-13	00:50:00	0
2009-03-13	00:51:00	0
2009-03-13	00:52:00	0
2009-03-13	00:53:00	0
2009-03-13	00:54:00	0
2009-03-13	00:55:00	0
2009-03-13	00:56:00	0
2009-03-13	00:57:00	0
2009-03-13	00:58:00	0
2009-03-13	00:59:00	0
2009-03-13	01:00:00	0
2009-03-13	01:01:00	0
2009-03-13	01:02:00	0
2009-03-13	01:03:00	0
2009-03-13	01:04:00	0
2009-03-13	01:05:00	0
2009-03-13	01:06:00	0
2009-03-13	01:07:00	0
2009-03-13	01:08:00	0
2009-03-13	01:09:00	0
2009-03-13	01:10:00	0
2009-03-13	01:11:00	0
2009-03-13	01:12:00	0
2009-03-13	01:13:00	0
2009-03-13	01:14:00	0
2009-03-13	01:15:00	0
2009-03-13	01:16:00	0
2009-03-13	01:17:00	0
2009-03-13	01:18:00	0
2009-03-13	01:19:00	0
2009-03-13	01:20:00	0
2009-03-13	01:21:00	0
2009-03-13	01:22:00	0
2009-03-13	01:23:00	0
2009-03-13	01:24:00	0
2009-03-13	01:25:00	0
2009-03-13	01:26:00	0
2009-03-13	01:27:00	0
2009-03-13	01:28:00	0
2009-03-13	01:29:00	0
2009-03-13	01:30:00	0
2009-03-13	01:31:00	0
2009-03-13	01:32:00	0
2009-03-13	01:33:00	0
2009-03-13	01:34:00	0
2009-03-13	01:35:00	0
2009-03-13	01:36:00	0
2009-03-13	01:37:00	0
2009-03-13	01:38:00	0
2009-03-13	01:39:00	0
2009-03-13	01:40:00	0
2009-03-13	01:41:00	0
2009-03-13	01:42:00	0
2009-03-13	01:43:00	0
2009-03-13	01:44:00	0
2009-03-13	01:45:00	0
2009-03-13	01:46:00	0
2009-03-13	01:47:00	0
2009-03-13	01:48:00	0
2009-03-13	01:49:00	0
2009-03-13	01:50:00	0
2009-03-13	01:51:00	0
2009-03-13	01:52:00	0
2009-03-13	01:53:00	0
2009-03-13	01:54:00	0
2009-03-13	01:55:00	0
2009-03-13	01:56:00	0
2009-03-13	01:57:00	0
2009-03-13	01:58:00	0
2009-03-13	01:59:00	0
2009-03-13	02:00:00	0
2009-03-13	02:01:00	0
2009-03-13	02:02:00	0
2009-03-13	02:03:00	0
2009-03-13	02:04:00	0
2009-03-13	02:05:00	0
2009-03-13	02:06:00	0
2009-03-13	02:07:00	0
2009-03-13	02:08:00	0
2009-03-13	02:09:00	0
2009-03-13	02:10:00	0
2009-03-13	02:11:00	0
2009-03-13	02:12:00	0
2009-03-13	02:13:00	0
2009-03-13	02:14:00	0
2009-03-13	02:15:00	0
2009-03-13	02:16:00	0
2009-03-13	02:17:00	0
2009-03-13	02:18:00	0
2009-03-13	02:19:00	0
2009-03-13	02:20:00	0
2009-03-13	02:21:00	0
2009-03-13	02:22:00	0
2009-03-13	02:23:00	0
2009-03-13	02:24:00	0
2009-03-13	02:25:00	0
2009-03-13	02:26:00	0
2009-03-13	02:27:00	0
2009-03-13	02:28:00	0
2009-03-13	02:29:00	0
2009-03-13	02:30:00	0
2009-03-13	02:31:00	0
2009-03-13	02:32:00	0
2009-03-13	02:33:00	0
2009-03-13	02:34:00	0
2009-03-13	02:35:00	0
2009-03-13	02:36:00	0
2009-03-13	02:37:00	0
2009-03-13	02:38:00	0
2009-03-13	02:39:00	0
2009-03-13	02:40:00	0
2009-03-13	02:41:00	0
2009-03-13	02:42:00	0
2009-03-13	02:43:00	0
2009-03-13	02:44:00	0
2009-03-13	02:45:00	0
2009-03-13	02:46:00	0
2009-03-13	02:47:00	0
2009-03-13	02:48:00	0
2009-03-13	02:49:00	0
2009-03-13	02:50:00	0
2009-03-13	02:51:00	0
2009-03-13	02:52:00	0
2009-03-13	02:53:00	0
2009-03-13	02:54:00	0
2009-03-13	02:55:00	0
2009-03-13	02:56:00	0
2009-03-13	02:57:00	0
2009-03-13	02:58:00	0
2009-03-13	02:59:00	0
2009-03-13	03:00:00	0
2009-03-13	03:01:00	0
2009-03-13	03:02:00	0
2009-03-13	03:03:00	0
2009-03-13	03:04:00	0
2009-03-13	03:05:00	0
2009-03-13	03:06:00	0
2009-03-13	03:07:00	0
2009-03-13	03:08:00	0
2009-03-13	03:09:00	0
2009-03-13	03:10:00	0
2009-03-13	03:11:00	0
2009-03-13	03:12:00	0
2009-03-13	03:13:00	0
2009-03-13	03:14:00	0
2009-03-13	03:15:00	0
2009-03-13	03:16:00	0
2009-03-13	03:17:00	0
2009-03-13	03:18:00	0
2009-03-13	03:19:00	0
2009-03-13	03:20:00	0
2009-03-13	03:21:00	0
2009-03-13	03:22:00	0
2009-03-13	03:23:00	0
2009-03-13	03:24:00	0
2009-03-13	03:25:00	0
2009-03-13	03:26:00	0
2009-03-13	03:27:00	0
2009-03-13	03:28:00	0
2009-03-13	03:29:00	0
2009-03-13	03:30:00	0
2009-03-13	03:31:00	0
2009-03-13	03:32:00	0
2009-03-13	03:33:00	0
2009-03-13	03:34:00	0
2009-03-13	03:35:00	0
2009-03-13	03:36:00	0
2009-03-13	03:37:00	0
2009-03-13	03:38:00	0
2009-03-13	03:39:00	0
2009-03-13	03:40:00	0
2009-03-13	03:41:00	0
2009-03-13	03:42:00	0
2009-03-13	03:43:00	0
2009-03-13	03:44:00	0
2009-03-13	03:45:00	0
2009-03-13	03:46:00	0
2009-03-13	03:47:00	0
2009-03-13	03:48:00	0
2009-03-13	03:49:00	0
2009-03-13	03:50:00	0
2009-03-13	03:51:00	0
2009-03-13	03:52:00	0
2009-03-13	03:53:00	0
2009-03-13	03:54:00	0
2009-03-13	03:55:00	0
2009-03-13	03:56:00	0
2009-03-13	03:57:00	0
2009-03-13	03:58:00	0
2009-03-13	03:59:00	0
2009-03-13	04:00:00	0
2009-03-13	04:01:00	0
2009-03-13	04:02:00	0
2009-03-13	04:03:00	0
2009-03-13	04:04:00	0
2009-03-13	04:05:00	0
2009-03-13	04:06:00	0
2009-03-13	04:07:00	0
2009-03-13	04:08:00	0
2009-03-13	04:09:00	0
2009-03-13	04:10:00	0
2009-03-13	04:11:00	0
2009-03-13	04:12:00	0
2009-03-13	04:13:00	0
2009-03-13	04:14:00	0
2009-03-13	04:15:00	0
2009-03-13	04:16:00	0
2009-03-13	04:17:00	0
2009-03-13	04:18:00	0
2009-03-13	04:19:00	0
2009-03-13	04:20:00	0
2009-03-13	04:21:00	0
2009-03-13	04:22:00	0
2009-03-13	04:23:00	0
2009-03-13	04:24:00	0
2009-03-13	04:25:00	0
2009-03-13	04:26:00	0
2009-03-13	04:27:00	0
2009-03-13	04:28:00	0
2009-03-13	04:29:00	0
2009-03-13	04:30:00	0
2009-03-13	04:31:00	0
2009-03-13	04:32:00	0
2009-03-13	04:33:00	0
2009-03-13	04:34:00	0
2009-03-13	04:35:00	0
2009-03-13	04:36:00	0
2009-03-13	04:37:00	0
2009-03-13	04:38:00	0
2009-03-13	04:39:00	0
2009-03-13	04:40:00	0
2009-03-13	04:41:00	0
2009-03-13	04:42:00	0
2009-03-13	04:43:00	0
2009-03-13	04:44:00	0
2009-03-13	04:45:00	0
2009-03-13	04:46:00	0
2009-03-13	04:47:00	0
2009-03-13	04:48:00	0
2009-03-13	04:49:00	0
2009-03-13	04:50:00	0
2009-03-13	04:51:00	0
2009-03-13	04:52:00	0
2009-03-13	04:53:00	0
2009-03-13	04:54:00	0
2009-03-13	04:55:00	0
2009-03-13	04:56:00	0
2009-03-13	04:57:00	0
2009-03-13	04:58:00	0
2009-03-13	04:59:00	0
2009-03-13	05:00:00	0
2009-03-13	05:01:00	0
2009-03-13	05:02:00	0
2009-03-13	05:03:00	0
2009-03-13	05:04:00	0
2009-03-13	05:05:00	0
2009-03-13	05:06:00	0
2009-03-13	05:07:00	0
2009-03-13	05:08:00	0
2009-03-13	05:09:00	0
2009-03-13	05:10:00	0
2009-03-13	05:11:00	0
2009-03-13	05:12:00	0
2009-03-13	05:13:00	0
2009-03-13	05:14:00	0
2009-03-13	05:15:00	0
2009-03-13	05:16:00	0
2009-03-13	05:17:00	0
2009-03-13	05:18:00	0
2009-03-13	05:19:00	0
2009-03-13	05:20:00	0
2009-03-13	05:21:00	0
2009-03-13	05:22:00	0
2009-03-13	05:23:00	0
2009-03-13	05:24:00	0
2009-03-13	05:25:00	0
2009-03-13	05:26:00	0
2009-03-13	05:27:00	0
2009-03-13	05:28:00	0
2009-03-13	05:29:00	0
2009-03-13	05:30:00	0
2009-03-13	05:31:00	0
2009-03-13	05:32:00	0
2009-03-13	05:33:00	0
2009-03-13	05:34:00	0
2009-03-13	05:35:00	0
2009-03-13	05:36:00	0
2009-03-13	05:37:00	0
2009-03-13	05:38:00	0
2009-03-13	05:39:00	0
2009-03-13	05:40:00	0
2009-03-13	05:41:00	0
2009-03-13	05:42:00	0
2009-03-13	05:43:00	0
2009-03-13	05:44:00	0
2009-03-13	05:45:00	0
2009-03-13	05:46:00	0
2009-03-13	05:47:00	0
2009-03-13	05:48:00	0
2009-03-13	05:49:00	0
2009-03-13	05:50:00	0
2009-03-13	05:51:00	0
2009-03-13	05:52:00	0
2009-03-13	05:53:00	0
2009-03-13	05:54:00	0
2009-03-13	05:55:00	0
2009-03-13	05:56:00	0
2009-03-13	05:57:00	0
2009-03-13	05:58:00	0
2009-03-13	05:59:00	0
2009-03-13	06:00:00	0
2009-03-13	06:01:00	0
2009-03-13	06:02:00	0
2009-03-13	06:03:00	0
2009-03-13	06:04:00	0
2009-03-13	06:05:00	0
2009-03-13	06:06:00	0
2009-03-13	06:07:00	0
2009-03-13	06:08:00	0
2009-03-13	06:09:00	0
2009-03-13	06:10:00	0
2009-03-13	06:11:00	0
2009-03-13	06:12:00	0
2009-03-13	06:13:00	0
2009-03-13	06:14:00	0
2009-03-13	06:15:00	0
2009-03-13	06:16:00	0
2009-03-13	06:17:00	0
2009-03-13	06:18:00	0
2009-03-13	06:19:00	0
2009-03-13	06:20:00	0
2009-03-13	06:21:00	0
2009-03-13	06:22:00	0
2009-03-13	06:23:00	0
2009-03-13	06:24:00	0
2009-03-13	06:25:00	0
2009-03-13	06:26:00	0
2009-03-13	06:27:00	0
2009-03-13	06:28:00	0
2009-03-13	06:29:00	0
2009-03-13	06:30:00	0
2009-03-13	06:31:00	0
2009-03-13	06:32:00	0
2009-03-13	06:33:00	0
2009-03-13	06:34:00	0
2009-03-13	06:35:00	0
2009-03-13	06:36:00	0
2009-03-13	06:37:00	0
2009-03-13	06:38:00	0
2009-03-13	06:39:00	0
2009-03-13	06:40:00	0
2009-03-13	06:41:00	0
2009-03-13	06:42:00	0
2009-03-13	06:43:00	0
2009-03-13	06:44:00	0
2009-03-13	06:45:00	0
2009-03-13	06:46:00	0
2009-03-13	06:47:00	0
2009-03-13	06:48:00	0
2009-03-13	06:49:00	0
2009-03-13	06:50:00	0
2009-03-13	06:51:00	0
2009-03-13	06:52:00	0
2009-03-13	06:53:00	0
2009-03-13	06:54:00	0
2009-03-13	06:55:00	0
2009-03-13	06:56:00	0
2009-03-13	06:57:00	0
2009-03-13	06:58:00	0
2009-03-13	06:59:00	0
2009-03-13	07:00:00	0
2009-03-13	07:01:00	0
2009-03-13	07:02:00	0
2009-03-13	07:03:00	0
2009-03-13	07:04:00	0
2009-03-13	07:05:00	0
2009-03-13	07:06:00	0
2009-03-13	07:07:00	0
2009-03-13	07:08:00	0
2009-03-13	07:09:00	0
2009-03-13	07:10:00	0
2009-03-13	07:11:00	0
2009-03-13	07:12:00	0
2009-03-13	07:13:00	0
2009-03-13	07:14:00	0
2009-03-13	07:15:00	0
2009-03-13	07:16:00	0
2009-03-13	07:17:00	0
2009-03-13	07:18:00	0
2009-03-13	07:19:00	0
2009-03-13	07:20:00	0
2009-03-13	07:21:00	0
2009-03-13	07:22:00	0
2009-03-13	07:23:00	0
2009-03-13	07:24:00	0
2009-03-13	07:25:00	0
2009-03-13	07:26:00	0
2009-03-13	07:27:00	0
2009-03-13	07:28:00	0
2009-03-13	07:29:00	0
2009-03-13	07:30:00	0
2009-03-13	07:31:00	0
2009-03-13	07:32:00	0
2009-03-13	07:33:00	0
2009-03-13	07:34:00	0
2009-03-13	07:35:00	0
2009-03-13	07:36:00	0
2009-03-13	07:37:00	0
2009-03-13	07:38:00	0
2009-03-13	07:39:00	0
2009-03-13	07:40:00	0
2009-03-13	07:41:00	0
2009-03-13	07:42:00	0
2009-03-13	07:43:00	0
2009-03-13	07:44:00	0
2009-03-13	07:45:00	0
2009-03-13	07:46:00	0
2009-03-13	07:47:00	0
2009-03-13	07:48:00	0
2009-03-13	07:49:00	0
2009-03-13	07:50:00	0
2009-03-13	07:51:00	0
2009-03-13	07:52:00	0
2009-03-13	07:53:00	0
2009-03-13	07:54:00	0
2009-03-13	07:55:00	0
2009-03-13	07:56:00	0
2009-03-13	07:57:00	0
2009-03-13	07:58:00	0
2009-03-13	07:59:00	0
2009-03-13	08:00:00	0
2009-03-13	08:01:00	0
2009-03-13	08:02:00	0
2009-03-13	08:03:00	0
2009-03-13	08:04:00	0
2009-03-13	08:05:00	0
2009-03-13	08:06:00	0
2009-03-13	08:07:00	0
2009-03-13	08:08:00	0
2009-03-13	08:09:00	0
2009-03-13	08:10:00	0
2009-03-13	08:11:00	0
2009-03-13	08:12:00	0
2009-03-13	08:13:00	0
2009-03-13	08:14:00	0
2009-03-13	08:15:00	0
2009-03-13	08:16:00	0
2009-03-13	08:17:00	0
2009-03-13	08:18:00	0
2009-03-13	08:19:00	0
2009-03-13	08:20:00	0
2009-03-13	08:21:00	0
2009-03-13	08:22:00	0
2009-03-13	08:23:00	0
2009-03-13	08:24:00	0
2009-03-13	08:25:00	0
2009-03-13	08:26:00	0
2009-03-13	08:27:00	0
2009-03-13	08:28:00	0
2009-03-13	08:29:00	0
2009-03-13	08:30:00	0
2009-03-13	08:31:00	0
2009-03-13	08:32:00	0
2009-03-13	08:33:00	0
2009-03-13	08:34:00	0
2009-03-13	08:35:00	0
2009-03-13	08:36:00	0
2009-03-13	08:37:00	0
2009-03-13	08:38:00	0
2009-03-13	08:39:00	0
2009-03-13	08:40:00	0
2009-03-13	08:41:00	0
2009-03-13	08:42:00	0
2009-03-13	08:43:00	0
2009-03-13	08:44:00	0
2009-03-13	08:45:00	0
2009-03-13	08:46:00	0
2009-03-13	08:47:00	0
2009-03-13	08:48:00	0
2009-03-13	08:49:00	0
2009-03-13	08:50:00	0
2009-03-13	08:51:00	0
2009-03-13	08:52:00	0
2009-03-13	08:53:00	0
2009-03-13	08:54:00	0
2009-03-13	08:55:00	0
2009-03-13	08:56:00	0
2009-03-13	08:57:00	0
2009-03-13	08:58:00	0
2009-03-13	08:59:00	0
2009-03-13	09:00:00	0
2009-03-13	09:01:00	0
2009-03-13	09:02:00	0
2009-03-13	09:03:00	0
2009-03-13	09:04:00	0
2009-03-13	09:05:00	0
2009-03-13	09:06:00	0
2009-03-13	09:07:00	0
2009-03-13	09:08:00	0
2009-03-13	09:09:00	0
2009-03-13	09:10:00	0
2009-03-13	09:11:00	0
2009-03-13	09:12:00	0
2009-03-13	09:13:00	0
2009-03-13	09:14:00	0
2009-03-13	09:15:00	0
2009-03-13	09:16:00	0
2009-03-13	09:17:00	0
2009-03-13	09:18:00	0
2009-03-13	09:19:00	0
2009-03-13	09:20:00	0
2009-03-13	09:21:00	0
2009-03-13	09:22:00	0
2009-03-13	09:23:00	0
2009-03-13	09:24:00	0
2009-03-13	09:25:00	0
2009-03-13	09:26:00	0
2009-03-13	09:27:00	0
2009-03-13	09:28:00	0
2009-03-13	09:29:00	0
2009-03-13	09:30:00	0
2009-03-13	09:31:00	0
2009-03-13	09:32:00	0
2009-03-13	09:33:00	0
2009-03-13	09:34:00	0
2009-03-13	09:35:00	0
2009-03-13	09:36:00	0
2009-03-13	09:37:00	0
2009-03-13	09:38:00	0
2009-03-13	09:39:00	0
2009-03-13	09:40:00	0
2009-03-13	09:41:00	0
2009-03-13	09:42:00	0
2009-03-13	09:43:00	0
2009-03-13	09:44:00	0
2009-03-13	09:45:00	0
2009-03-13	09:46:00	0
2009-03-13	09:47:00	0
2009-03-13	09:48:00	0
2009-03-13	09:49:00	0
2009-03-13	09:50:00	0
2009-03-13	09:51:00	0
2009-03-13	09:52:00	0
2009-03-13	09:53:00	0
2009-03-13	09:54:00	0
2009-03-13	09:55:00	0
2009-03-13	09:56:00	0
2009-03-13	09:57:00	0
2009-03-13	09:58:00	0
2009-03-13	09:59:00	0
2009-03-13	10:00:00	0
2009-03-13	10:01:00	0
2009-03-13	10:02:00	0
2009-03-13	10:03:00	0
2009-03-13	10:04:00	0
2009-03-13	10:05:00	0
2009-03-13	10:06:00	0
2009-03-13	10:07:00	0
2009-03-13	10:08:00	0
2009-03-13	10:09:00	0
2009-03-13	10:10:00	0
2009-03-13	10:11:00	0
2009-03-13	10:12:00	0
2009-03-13	10:13:00	0
2009-03-13	10:14:00	0
2009-03-13	10:15:00	0
2009-03-13	10:16:00	0
2009-03-13	10:17:00	0
2009-03-13	10:18:00	0
2009-03-13	10:19:00	0
2009-03-13	10:20:00	0
2009-03-13	10:21:00	0
2009-03-13	10:22:00	0
2009-03-13	10:23:00	0
2009-03-13	10:24:00	0
2009-03-13	10:25:00	0
2009-03-13	10:26:00	0
2009-03-13	10:27:00	0
2009-03-13	10:28:00	0
2009-03-13	10:29:00	0
2009-03-13	10:30:00	0
2009-03-13	10:31:00	0
2009-03-13	10:32:00	0
2009-03-13	10:33:00	0
2009-03-13	10:34:00	0
2009-03-13	10:35:00	0
2009-03-13	10:36:00	0
2009-03-13	10:37:00	0
2009-03-13	10:38:00	0
2009-03-13	10:39:00	0
2009-03-13	10:40:00	0
2009-03-13	10:41:00	0
2009-03-13	10:42:00	0
2009-03-13	10:43:00	0
2009-03-13	10:44:00	0
2009-03-13	10:45:00	0
2009-03-13	10:46:00	0
2009-03-13	10:47:00	0
2009-03-13	10:48:00	0
2009-03-13	10:49:00	0
2009-03-13	10:50:00	0
2009-03-13	10:51:00	0
2009-03-13	10:52:00	0
2009-03-13	10:53:00	0
2009-03-13	10:54:00	0
2009-03-13	10:55:00	0
2009-03-13	10:56:00	0
2009-03-13	10:57:00	0
2009-03-13	10:58:00	0
2009-03-13	10:59:00	0
2009-03-13	11:00:00	0
2009-03-13	11:01:00	0
2009-03-13	11:02:00	0
2009-03-13	11:03:00	0
2009-03-13	11:04:00	0
2009-03-13	11:05:00	0
2009-03-13	11:06:00	0
2009-03-13	11:07:00	0
2009-03-13	11:08:00	0
2009-03-13	11:09:00	0
2009-03-13	11:10:00	0
2009-03-13	11:11:00	0
2009-03-13	11:12:00	0
2009-03-13	11:13:00	0
2009-03-13	11:14:00	0
2009-03-13	11:15:00	0
2009-03-13	11:16:00	0
2009-03-13	11:17:00	0
2009-03-13	11:18:00	0
2009-03-13	11:19:00	0
2009-03-13	11:20:00	0
2009-03-13	11:21:00	0
2009-03-13	11:22:00	0
2009-03-13	11:23:00	0
2009-03-13	11:24:00	0
2009-03-13	11:25:00	0
2009-03-13	11:26:00	0
2009-03-13	11:27:00	0
2009-03-13	11:28:00	0
2009-03-13	11:29:00	0
2009-03-13	11:30:00	0
2009-03-13	11:31:00	0
2009-03-13	11:32:00	0
2009-03-13	11:33:00	0
2009-03-13	11:34:00	0
2009-03-13	11:35:00	0
2009-03-13	11:36:00	0
2009-03-13	11:37:00	0
2009-03-13	11:38:00	0
2009-03-13	11:39:00	0
2009-03-13	11:40:00	0
2009-03-13	11:41:00	0
2009-03-13	11:42:00	0
2009-03-13	11:43:00	0
2009-03-13	11:44:00	0
2009-03-13	11:45:00	0
2009-03-13	11:46:00	0
2009-03-13	11:47:00	0
2009-03-13	11:48:00	0
2009-03-13	11:49:00	0
2009-03-13	11:50:00	0
2009-03-13	11:51:00	0
2009-03-13	11:52:00	0
2009-03-13	11:53:00	0
2009-03-13	11:54:00	0
2009-03-13	11:55:00	0
2009-03-13	11:56:00	0
2009-03-13	11:57:00	0
2009-03-13	11:58:00	0
2009-03-13	11:59:00	0
2009-03-13	12:00:00	0
2009-03-13	12:01:00	0
2009-03-13	12:02:00	0
2009-03-13	12:03:00	0
2009-03-13	12:04:00	0
2009-03-13	12:05:00	0
2009-03-13	12:06:00	0
2009-03-13	12:07:00	0
2009-03-13	12:08:00	0
2009-03-13	12:09:00	0
2009-03-13	12:10:00	0
2009-03-13	12:11:00	0
2009-03-13	12:12:00	0
2009-03-13	12:13:00	0
2009-03-13	12:14:00	0
2009-03-13	12:15:00	0
2009-03-13	12:16:00	0
2009-03-13	12:17:00	0
2009-03-13	12:18:00	0
2009-03-13	12:19:00	0
2009-03-13	12:20:00	0
2009-03-13	12:21:00	0
2009-03-13	12:22:00	0
2009-03-13	12:23:00	0
2009-03-13	12:24:00	0
2009-03-13	12:25:00	0
2009-03-13	12:26:00	0
2009-03-13	12:27:00	0
2009-03-13	12:28:00	0
2009-03-13	12:29:00	0
2009-03-13	12:30:00	0
2009-03-13	12:31:00	0
2009-03-13	12:32:00	0
2009-03-13	12:33:00	0
2009-03-13	12:34:00	0
2009-03-13	12:35:00	0
2009-03-13	12:36:00	0
2009-03-13	12:37:00	0
2009-03-13	12:38:00	0
2009-03-13	12:39:00	0
2009-03-13	12:40:00	0
2009-03-13	12:41:00	0
2009-03-13	12:42:00	0
2009-03-13	12:43:00	0
2009-03-13	12:44:00	0
2009-03-13	12:45:00	0
2009-03-13	12:46:00	0
2009-03-13	12:47:00	0
2009-03-13	12:48:00	0
2009-03-13	12:49:00	0
2009-03-13	12:50:00	0
2009-03-13	12:51:00	0
2009-03-13	12:52:00	0
2009-03-13	12:53:00	0
2009-03-13	12:54:00	0
2009-03-13	12:55:00	0
2009-03-13	12:56:00	0
2009-03-13	12:57:00	0
2009-03-13	12:58:00	0
2009-03-13	12:59:00	0
2009-03-13	13:00:00	0
2009-03-13	13:01:00	0
2009-03-13	13:02:00	0
2009-03-13	13:03:00	0
2009-03-13	13:04:00	0
2009-03-13	13:05:00	0
2009-03-13	13:06:00	0
2009-03-13	13:07:00	0
2009-03-13	13:08:00	0
2009-03-13	13:09:00	0
2009-03-13	13:10:00	0
2009-03-13	13:11:00	0
2009-03-13	13:12:00	0
2009-03-13	13:13:00	0
2009-03-13	13:14:00	0
2009-03-13	13:15:00	0
2009-03-13	13:16:00	0
2009-03-13	13:17:00	0
2009-03-13	13:18:00	0
2009-03-13	13:19:00	0
2009-03-13	13:20:00	0
2009-03-13	13:21:00	0
2009-03-13	13:22:00	0
2009-03-13	13:23:00	0
2009-03-13	13:24:00	0
2009-03-13	13:25:00	0
2009-03-13	13:26:00	0
2009-03-13	13:27:00	0
2009-03-13	13:28:00	0
2009-03-13	13:29:00	0
2009-03-13	13:30:00	0
2009-03-13	13:31:00	0
2009-03-13	13:32:00	0
2009-03-13	13:33:00	0
2009-03-13	13:34:00	0
2009-03-13	13:35:00	0
2009-03-13	13:36:00	0
2009-03-13	13:37:00	0
2009-03-13	13:38:00	0
2009-03-13	13:39:00	0
2009-03-13	13:40:00	0
2009-03-13	13:41:00	0
2009-03-13	13:42:00	0
2009-03-13	13:43:00	0
2009-03-13	13:44:00	0
2009-03-13	13:45:00	0
2009-03-13	13:46:00	0
2009-03-13	13:47:00	0
2009-03-13	13:48:00	0
2009-03-13	13:49:00	0
2009-03-13	13:50:00	0
2009-03-13	13:51:00	0
2009-03-13	13:52:00	0
2009-03-13	13:53:00	0
2009-03-13	13:54:00	0
2009-03-13	13:55:00	0
2009-03-13	13:56:00	0
2009-03-13	13:57:00	0
2009-03-13	13:58:00	0
2009-03-13	13:59:00	0
2009-03-13	14:00:00	0
2009-03-13	14:01:00	0
2009-03-13	14:02:00	0
2009-03-13	14:03:00	0
2009-03-13	14:04:00	0
2009-03-13	14:05:00	0
2009-03-13	14:06:00	0
2009-03-13	14:07:00	0
2009-03-13	14:08:00	0
2009-03-13	14:09:00	0
2009-03-13	14:10:00	0
2009-03-13	14:11:00	0
2009-03-13	14:12:00	0
2009-03-13	14:13:00	0
2009-03-13	14:14:00	0
2009-03-13	14:15:00	0
2009-03-13	14:16:00	0
2009-03-13	14:17:00	0
2009-03-13	14:18:00	0
2009-03-13	14:19:00	0
2009-03-13	14:20:00	0
2009-03-13	14:21:00	0
2009-03-13	14:22:00	0
2009-03-13	14:23:00	0
2009-03-13	14:24:00	0
2009-03-13	14:25:00	0
2009-03-13	14:26:00	0
2009-03-13	14:27:00	0
2009-03-13	14:28:00	0
2009-03-13	14:29:00	0
2009-03-13	14:30:00	0
2009-03-13	14:31:00	0
2009-03-13	14:32:00	0
2009-03-13	14:33:00	0
2009-03-13	14:34:00	0
2009-03-13	14:35:00	0
2009-03-13	14:36:00	0
2009-03-13	14:37:00	0
2009-03-13	14:38:00	0
2009-03-13	14:39:00	0
2009-03-13	14:40:00	0
2009-03-13	14:41:00	0
2009-03-13	14:42:00	0
2009-03-13	14:43:00	0
2009-03-13	14:44:00	0
2009-03-13	14:45:00	0
2009-03-13	14:46:00	0
2009-03-13	14:47:00	0
2009-03-13	14:48:00	0
2009-03-13	14:49:00	0
2009-03-13	14:50:00	0
2009-03-13	14:51:00	0
2009-03-13	14:52:00	0
2009-03-13	14:53:00	0
2009-03-13	14:54:00	0
2009-03-13	14:55:00	0
2009-03-13	14:56:00	0
2009-03-13	14:57:00	0
2009-03-13	14:58:00	0
2009-03-13	14:59:00	0
2009-03-13	15:00:00	0
2009-03-13	15:01:00	0
2009-03-13	15:02:00	0
2009-03-13	15:03:00	0
2009-03-13	15:04:00	0
2009-03-13	15:05:00	0
2009-03-13	15:06:00	0
2009-03-13	15:07:00	0
2009-03-13	15:08:00	0
2009-03-13	15:09:00	0
2009-03-13	15:10:00	0
2009-03-13	15:11:00	0
2009-03-13	15:12:00	0
2009-03-13	15:13:00	0
2009-03-13	15:14:00	0
2009-03-13	15:15:00	0
2009-03-13	15:16:00	0
2009-03-13	15:17:00	0
2009-03-13	15:18:00	0
2009-03-13	15:19:00	0
2009-03-13	15:20:00	0
2009-03-13	15:21:00	0
2009-03-13	15:22:00	0
2009-03-13	15:23:00	0
2009-03-13	15:24:00	0
2009-03-13	15:25:00	0
2009-03-13	15:26:00	0
2009-03-13	15:27:00	0
2009-03-13	15:28:00	0
2009-03-13	15:29:00	0
2009-03-13	15:30:00	0
2009-03-13	15:31:00	0
2009-03-13	15:32:00	0
2009-03-13	15:33:00	0
2009-03-13	15:34:00	0
2009-03-13	15:35:00	0
2009-03-13	15:36:00	0
2009-03-13	15:37:00	0
2009-03-13	15:38:00	0
2009-03-13	15:39:00	0
2009-03-13	15:40:00	0
2009-03-13	15:41:00	0
2009-03-13	15:42:00	0
2009-03-13	15:43:00	0
2009-03-13	15:44:00	0
2009-03-13	15:45:00	0
2009-03-13	15:46:00	0
2009-03-13	15:47:00	0
2009-03-13	15:48:00	0
2009-03-13	15:49:00	0
2009-03-13	15:50:00	0
2009-03-13	15:51:00	0
2009-03-13	15:52:00	0
2009-03-13	15:53:00	0
2009-03-13	15:54:00	0
2009-03-13	15:55:00	0
2009-03-13	15:56:00	0
2009-03-13	15:57:00	0
2009-03-13	15:58:00	0
2009-03-13	15:59:00	0
2009-03-13	16:00:00	0
2009-03-13	16:01:00	0
2009-03-13	16:02:00	0
2009-03-13	16:03:00	0
2009-03-13	16:04:00	0
2009-03-13	16:05:00	0
2009-03-13	16:06:00	0
2009-03-13	16:07:00	0
2009-03-13	16:08:00	0
2009-03-13	16:09:00	0
2009-03-13	16:10:00	0
2009-03-13	16:11:00	0
2009-03-13	16:12:00	0
2009-03-13	16:13:00	0
2009-03-13	16:14:00	0
2009-03-13	16:15:00	0
2009-03-13	16:16:00	0
2009-03-13	16:17:00	0
2009-03-13	16:18:00	0
2009-03-13	16:19:00	0
2009-03-13	16:20:00	0
2009-03-13	16:21:00	0
2009-03-13	16:22:00	0
2009-03-13	16:23:00	0
2009-03-13	16:24:00	0
2009-03-13	16:25:00	0
2009-03-13	16:26:00	0
2009-03-13	16:27:00	0
2009-03-13	16:28:00	0
2009-03-13	16:29:00	0
2009-03-13	16:30:00	0
2009-03-13	16:31:00	0
2009-03-13	16:32:00	0
2009-03-13	16:33:00	0
2009-03-13	16:34:00	0
2009-03-13	16:35:00	0
2009-03-13	16:36:00	0
2009-03-13	16:37:00	0
2009-03-13	16:38:00	0
2009-03-13	16:39:00	0
2009-03-13	16:40:00	0
2009-03-13	16:41:00	0
2009-03-13	16:42:00	0
2009-03-13	16:43:00	0
2009-03-13	16:44:00	0
2009-03-13	16:45:00	0
2009-03-13	16:46:00	0
2009-03-13	16:47:00	0
2009-03-13	16:48:00	0
2009-03-13	16:49:00	0
2009-03-13	16:50:00	0
2009-03-13	16:51:00	0
2009-03-13	16:52:00	0
2009-03-13	16:53:00	0
2009-03-13	16:54:00	0
2009-03-13	16:55:00	0
2009-03-13	16:56:00	0
2009-03-13	16:57:00	0
2009-03-13	16:58:00	0
2009-03-13	16:59:00	0
2009-03-13	17:00:00	0
2009-03-13	17:01:00	0
2009-03-13	17:02:00	0
2009-03-13	17:03:00	0
2009-03-13	17:04:00	0
2009-03-13	17:05:00	0
2009-03-13	17:06:00	0
2009-03-13	17:07:00	0
2009-03-13	17:08:00	0
2009-03-13	17:09:00	0
2009-03-13	17:10:00	0
2009-03-13	17:11:00	0
2009-03-13	17:12:00	0
2009-03-13	17:13:00	0
2009-03-13	17:14:00	0
2009-03-13	17:15:00	0
2009-03-13	17:16:00	0
2009-03-13	17:17:00	0
2009-03-13	17:18:00	0
2009-03-13	17:19:00	0
2009-03-13	17:20:00	0
2009-03-13	17:21:00	0
2009-03-13	17:22:00	0
2009-03-13	17:23:00	0
2009-03-13	17:24:00	0
2009-03-13	17:25:00	0
2009-03-13	17:26:00	0
2009-03-13	17:27:00	0
2009-03-13	17:28:00	0
2009-03-13	17:29:00	0
2009-03-13	17:30:00	0
2009-03-13	17:31:00	0
2009-03-13	17:32:00	0
2009-03-13	17:33:00	0
2009-03-13	17:34:00	0
2009-03-13	17:35:00	0
2009-03-13	17:36:00	0
2009-03-13	17:37:00	0
2009-03-13	17:38:00	0
2009-03-13	17:39:00	0
2009-03-13	17:40:00	0
2009-03-13	17:41:00	0
2009-03-13	17:42:00	0
2009-03-13	17:43:00	0
2009-03-13	17:44:00	0
2009-03-13	17:45:00	0
2009-03-13	17:46:00	0
2009-03-13	17:47:00	0
2009-03-13	17:48:00	0
2009-03-13	17:49:00	0
2009-03-13	17:50:00	0
2009-03-13	17:51:00	0
2009-03-13	17:52:00	0
2009-03-13	17:53:00	0
2009-03-13	17:54:00	0
2009-03-13	17:55:00	0
2009-03-13	17:56:00	0
2009-03-13	17:57:00	0
2009-03-13	17:58:00	0
2009-03-13	17:59:00	0
2009-03-13	18:00:00	12
2009-03-13	18:01:00	48
2009-03-13	18:02:00	133
2009-03-13	18:03:00	72
2009-03-13	18:04:00	799
2009-03-13	18:05:00	546
2009-03-13	18:06:00	452
2009-03-13	18:07:00	350
2009-03-13	18:08:00	623
2009-03-13	18:09:00	186
2009-03-13	18:10:00	12
2009-03-13	18:11:00	0
2009-03-13	18:12:00	0
2009-03-13	18:13:00	0
2009-03-13	18:14:00	12
2009-03-13	18:15:00	72
2009-03-13	18:16:00	97
2009-03-13	18:17:00	350
2009-03-13	18:18:00	604
2009-03-13	18:19:00	200
2009-03-13	18:20:00	36
2009-03-13	18:21:00	97
2009-03-13	18:22:00	186
2009-03-13	18:23:00	186
2009-03-13	18:24:00	526
2009-03-13	18:25:00	604
2009-03-13	18:26:00	0
2009-03-13	18:27:00	133
2009-03-13	18:28:00	186
2009-03-13	18:29:00	109
2009-03-13	18:30:00	36
2009-03-13	18:31:00	0
2009-03-13	18:32:00	0
2009-03-13	18:33:00	0
2009-03-13	18:34:00	24
2009-03-13	18:35:00	0
2009-03-13	18:36:00	0
2009-03-13	18:37:00	12
2009-03-13	18:38:00	0
2009-03-13	18:39:00	36
2009-03-13	18:40:00	12
2009-03-13	18:41:00	24
2009-03-13	18:42:00	0
2009-03-13	18:43:00	48
2009-03-13	18:44:00	60
2009-03-13	18:45:00	121
2009-03-13	18:46:00	302
2009-03-13	18:47:00	367
2009-03-13	18:48:00	469
2009-03-13	18:49:00	565
2009-03-13	18:50:00	710
2009-03-13	18:51:00	775
2009-03-13	18:52:00	848
2009-03-13	18:53:00	710
2009-03-13	18:54:00	546
2009-03-13	18:55:00	215
2009-03-13	18:56:00	72
2009-03-13	18:57:00	0
2009-03-13	18:58:00	0
2009-03-13	18:59:00	0
2009-03-13	19:00:00	24
2009-03-13	19:01:00	0
2009-03-13	19:02:00	0
2009-03-13	19:03:00	0
2009-03-13	19:04:00	60
2009-03-13	19:05:00	0
2009-03-13	19:06:00	0
2009-03-13	19:07:00	0
2009-03-13	19:08:00	0
2009-03-13	19:09:00	0
2009-03-13	19:10:00	0
2009-03-13	19:11:00	0
2009-03-13	19:12:00	0
2009-03-13	19:13:00	0
2009-03-13	19:14:00	0
2009-03-13	19:15:00	0
2009-03-13	19:16:00	0
2009-03-13	19:17:00	0
2009-03-13	19:18:00	0
2009-03-13	19:19:00	0
2009-03-13	19:20:00	0
2009-03-13	19:21:00	0
2009-03-13	19:22:00	0
2009-03-13	19:23:00	0
2009-03-13	19:24:00	0
2009-03-13	19:25:00	0
2009-03-13	19:26:00	0
2009-03-13	19:27:00	0
2009-03-13	19:28:00	0
2009-03-13	19:29:00	0
2009-03-13	19:30:00	0
2009-03-13	19:31:00	0
2009-03-13	19:32:00	0
2009-03-13	19:33:00	0
2009-03-13	19:34:00	0
2009-03-13	19:35:00	0
2009-03-13	19:36:00	0
2009-03-13	19:37:00	0
2009-03-13	19:38:00	0
2009-03-13	19:39:00	72
2009-03-13	19:40:00	0
2009-03-13	19:41:00	48
2009-03-13	19:42:00	0
2009-03-13	19:43:00	0
2009-03-13	19:44:00	0
2009-03-13	19:45:00	0
2009-03-13	19:46:00	0
2009-03-13	19:47:00	0
2009-03-13	19:48:00	0
2009-03-13	19:49:00	0
2009-03-13	19:50:00	0
2009-03-13	19:51:00	12
2009-03-13	19:52:00	0
2009-03-13	19:53:00	0
2009-03-13	19:54:00	0
2009-03-13	19:55:00	0
2009-03-13	19:56:00	0
2009-03-13	19:57:00	0
2009-03-13	19:58:00	0
2009-03-13	19:59:00	186
2009-03-13	20:00:00	872
2009-03-13	20:01:00	229
2009-03-13	20:02:00	418
2009-03-13	20:03:00	302
2009-03-13	20:04:00	0
2009-03-13	20:05:00	12
2009-03-13	20:06:00	0
2009-03-13	20:07:00	0
2009-03-13	20:08:00	0
2009-03-13	20:09:00	0
2009-03-13	20:10:00	0
2009-03-13	20:11:00	0
2009-03-13	20:12:00	0
2009-03-13	20:13:00	0
2009-03-13	20:14:00	12
2009-03-13	20:15:00	60
2009-03-13	20:16:00	0
2009-03-13	20:17:00	452
2009-03-13	20:18:00	157
2009-03-13	20:19:00	186
2009-03-13	20:20:00	273
2009-03-13	20:21:00	121
2009-03-13	20:22:00	0
2009-03-13	20:23:00	0
2009-03-13	20:24:00	0
2009-03-13	20:25:00	0
2009-03-13	20:26:00	0
2009-03-13	20:27:00	12
2009-03-13	20:28:00	0
2009-03-13	20:29:00	0
2009-03-13	20:30:00	0
2009-03-13	20:31:00	0
2009-03-13	20:32:00	0
2009-03-13	20:33:00	0
2009-03-13	20:34:00	0
2009-03-13	20:35:00	0
2009-03-13	20:36:00	0
2009-03-13	20:37:00	0
2009-03-13	20:38:00	0
2009-03-13	20:39:00	0
2009-03-13	20:40:00	0
2009-03-13	20:41:00	0
2009-03-13	20:42:00	0
2009-03-13	20:43:00	0
2009-03-13	20:44:00	0
2009-03-13	20:45:00	0
2009-03-13	20:46:00	0
2009-03-13	20:47:00	0
2009-03-13	20:48:00	0
2009-03-13	20:49:00	0
2009-03-13	20:50:00	0
2009-03-13	20:51:00	12
2009-03-13	20:52:00	0
2009-03-13	20:53:00	0
2009-03-13	20:54:00	0
2009-03-13	20:55:00	0
2009-03-13	20:56:00	0
2009-03-13	20:57:00	0
2009-03-13	20:58:00	0
2009-03-13	20:59:00	0
2009-03-13	21:00:00	0
2009-03-13	21:01:00	0
2009-03-13	21:02:00	0
2009-03-13	21:03:00	0
2009-03-13	21:04:00	0
2009-03-13	21:05:00	0
2009-03-13	21:06:00	0
2009-03-13	21:07:00	0
2009-03-13	21:08:00	0
2009-03-13	21:09:00	0
2009-03-13	21:10:00	0
2009-03-13	21:11:00	0
2009-03-13	21:12:00	0
2009-03-13	21:13:00	0
2009-03-13	21:14:00	0
2009-03-13	21:15:00	0
2009-03-13	21:16:00	0
2009-03-13	21:17:00	0
2009-03-13	21:18:00	0
2009-03-13	21:19:00	12
2009-03-13	21:20:00	0
2009-03-13	21:21:00	0
2009-03-13	21:22:00	0
2009-03-13	21:23:00	0
2009-03-13	21:24:00	0
2009-03-13	21:25:00	0
2009-03-13	21:26:00	0
2009-03-13	21:27:00	0
2009-03-13	21:28:00	0
2009-03-13	21:29:00	12
2009-03-13	21:30:00	0
2009-03-13	21:31:00	24
2009-03-13	21:32:00	0
2009-03-13	21:33:00	0
2009-03-13	21:34:00	12
2009-03-13	21:35:00	0
2009-03-13	21:36:00	0
2009-03-13	21:37:00	0
2009-03-13	21:38:00	0
2009-03-13	21:39:00	0
2009-03-13	21:40:00	0
2009-03-13	21:41:00	0
2009-03-13	21:42:00	0
2009-03-13	21:43:00	0
2009-03-13	21:44:00	12
2009-03-13	21:45:00	0
2009-03-13	21:46:00	0
2009-03-13	21:47:00	0
2009-03-13	21:48:00	0
2009-03-13	21:49:00	0
2009-03-13	21:50:00	0
2009-03-13	21:51:00	0
2009-03-13	21:52:00	0
2009-03-13	21:53:00	0
2009-03-13	21:54:00	0
2009-03-13	21:55:00	0
2009-03-13	21:56:00	0
2009-03-13	21:57:00	0
2009-03-13	21:58:00	0
2009-03-13	21:59:00	0
2009-03-13	22:00:00	0
2009-03-13	22:01:00	0
2009-03-13	22:02:00	0
2009-03-13	22:03:00	0
2009-03-13	22:04:00	0
2009-03-13	22:05:00	0
2009-03-13	22:06:00	0
2009-03-13	22:07:00	0
2009-03-13	22:08:00	0
2009-03-13	22:09:00	0
2009-03-13	22:10:00	0
2009-03-13	22:11:00	0
2009-03-13	22:12:00	0
2009-03-13	22:13:00	0
2009-03-13	22:14:00	0
2009-03-13	22:15:00	0
2009-03-13	22:16:00	0
2009-03-13	22:17:00	0
2009-03-13	22:18:00	0
2009-03-13	22:19:00	12
2009-03-13	22:20:00	97
2009-03-13	22:21:00	24
2009-03-13	22:22:00	0
2009-03-13	22:23:00	0
2009-03-13	22:24:00	0
2009-03-13	22:25:00	0
2009-03-13	22:26:00	0
2009-03-13	22:27:00	0
2009-03-13	22:28:00	0
2009-03-13	22:29:00	0
2009-03-13	22:30:00	0
2009-03-13	22:31:00	0
2009-03-13	22:32:00	0
2009-03-13	22:33:00	0
2009-03-13	22:34:00	0
2009-03-13	22:35:00	0
2009-03-13	22:36:00	0
2009-03-13	22:37:00	0
2009-03-13	22:38:00	0
2009-03-13	22:39:00	0
2009-03-13	22:40:00	0
2009-03-13	22:41:00	0
2009-03-13	22:42:00	12
2009-03-13	22:43:00	12
2009-03-13	22:44:00	145
2009-03-13	22:45:00	215
2009-03-13	22:46:00	710
2009-03-13	22:47:00	565
2009-03-13	22:48:00	350
2009-03-13	22:49:00	350
2009-03-13	22:50:00	109
2009-03-13	22:51:00	48
2009-03-13	22:52:00	0
2009-03-13	22:53:00	0
2009-03-13	22:54:00	0
2009-03-13	22:55:00	0
2009-03-13	22:56:00	0
2009-03-13	22:57:00	0
2009-03-13	22:58:00	0
2009-03-13	22:59:00	0
2009-03-13	23:00:00	0
2009-03-13	23:01:00	0
2009-03-13	23:02:00	60
2009-03-13	23:03:00	24
2009-03-13	23:04:00	0
2009-03-13	23:05:00	0
2009-03-13	23:06:00	0
2009-03-13	23:07:00	0
2009-03-13	23:08:00	0
2009-03-13	23:09:00	0
2009-03-13	23:10:00	0
2009-03-13	23:11:00	0
2009-03-13	23:12:00	0
2009-03-13	23:13:00	0
2009-03-13	23:14:00	0
2009-03-13	23:15:00	0
2009-03-13	23:16:00	0
2009-03-13	23:17:00	0
2009-03-13	23:18:00	0
2009-03-13	23:19:00	0
2009-03-13	23:20:00	0
2009-03-13	23:21:00	0
2009-03-13	23:22:00	0
2009-03-13	23:23:00	0
2009-03-13	23:24:00	0
2009-03-13	23:25:00	0
2009-03-13	23:26:00	0
2009-03-13	23:27:00	0
2009-03-13	23:28:00	0
2009-03-13	23:29:00	0
2009-03-13	23:30:00	0
2009-03-13	23:31:00	0
2009-03-13	23:32:00	0
2009-03-13	23:33:00	0
2009-03-13	23:34:00	0
2009-03-13	23:35:00	0
2009-03-13	23:36:00	0
2009-03-13	23:37:00	0
2009-03-13	23:38:00	0
2009-03-13	23:39:00	0
2009-03-13	23:40:00	0
2009-03-13	23:41:00	0
2009-03-13	23:42:00	0
2009-03-13	23:43:00	0
2009-03-13	23:44:00	0
2009-03-13	23:45:00	0
2009-03-13	23:46:00	0
2009-03-13	23:47:00	0
2009-03-13	23:48:00	0
2009-03-13	23:49:00	0
2009-03-13	23:50:00	0
2009-03-13	23:51:00	0
2009-03-13	23:52:00	0
2009-03-13	23:53:00	0
2009-03-13	23:54:00	0
2009-03-13	23:55:00	0
2009-03-13	23:56:00	0
2009-03-13	23:57:00	0
2009-03-13	23:58:00	0
2009-03-13	23:59:00	24
2009-03-14	00:00:00	24
2009-03-14	00:01:00	0
2009-03-14	00:02:00	0
2009-03-14	00:03:00	0
2009-03-14	00:04:00	12
2009-03-14	00:05:00	24
2009-03-14	00:06:00	0
2009-03-14	00:07:00	0
2009-03-14	00:08:00	0
2009-03-14	00:09:00	0
2009-03-14	00:10:00	0
2009-03-14	00:11:00	0
2009-03-14	00:12:00	0
2009-03-14	00:13:00	0
2009-03-14	00:14:00	0
2009-03-14	00:15:00	0
2009-03-14	00:16:00	0
2009-03-14	00:17:00	0
2009-03-14	00:18:00	0
2009-03-14	00:19:00	0
2009-03-14	00:20:00	0
2009-03-14	00:21:00	0
2009-03-14	00:22:00	0
2009-03-14	00:23:00	0
2009-03-14	00:24:00	0
2009-03-14	00:25:00	0
2009-03-14	00:26:00	0
2009-03-14	00:27:00	0
2009-03-14	00:28:00	0
2009-03-14	00:29:00	0
2009-03-14	00:30:00	0
2009-03-14	00:31:00	0
2009-03-14	00:32:00	0
2009-03-14	00:33:00	0
2009-03-14	00:34:00	0
2009-03-14	00:35:00	0
2009-03-14	00:36:00	0
2009-03-14	00:37:00	0
2009-03-14	00:38:00	0
2009-03-14	00:39:00	12
2009-03-14	00:40:00	0
2009-03-14	00:41:00	0
2009-03-14	00:42:00	0
2009-03-14	00:43:00	0
2009-03-14	00:44:00	0
2009-03-14	00:45:00	0
2009-03-14	00:46:00	0
2009-03-14	00:47:00	0
2009-03-14	00:48:00	0
2009-03-14	00:49:00	0
2009-03-14	00:50:00	0
2009-03-14	00:51:00	0
2009-03-14	00:52:00	0
2009-03-14	00:53:00	0
2009-03-14	00:54:00	0
2009-03-14	00:55:00	0
2009-03-14	00:56:00	0
2009-03-14	00:57:00	0
2009-03-14	00:58:00	0
2009-03-14	00:59:00	0
2009-03-14	01:00:00	0
2009-03-14	01:01:00	0
2009-03-14	01:02:00	0
2009-03-14	01:03:00	0
2009-03-14	01:04:00	0
2009-03-14	01:05:00	0
2009-03-14	01:06:00	0
2009-03-14	01:07:00	0
2009-03-14	01:08:00	0
2009-03-14	01:09:00	24
2009-03-14	01:10:00	12
2009-03-14	01:11:00	48
2009-03-14	01:12:00	0
2009-03-14	01:13:00	0
2009-03-14	01:14:00	0
2009-03-14	01:15:00	0
2009-03-14	01:16:00	0
2009-03-14	01:17:00	0
2009-03-14	01:18:00	0
2009-03-14	01:19:00	0
2009-03-14	01:20:00	0
2009-03-14	01:21:00	0
2009-03-14	01:22:00	0
2009-03-14	01:23:00	0
2009-03-14	01:24:00	0
2009-03-14	01:25:00	0
2009-03-14	01:26:00	0
2009-03-14	01:27:00	0
2009-03-14	01:28:00	0
2009-03-14	01:29:00	0
2009-03-14	01:30:00	0
2009-03-14	01:31:00	0
2009-03-14	01:32:00	24
2009-03-14	01:33:00	0
2009-03-14	01:34:00	0
2009-03-14	01:35:00	0
2009-03-14	01:36:00	0
2009-03-14	01:37:00	0
2009-03-14	01:38:00	0
2009-03-14	01:39:00	0
2009-03-14	01:40:00	0
2009-03-14	01:41:00	0
2009-03-14	01:42:00	0
2009-03-14	01:43:00	0
2009-03-14	01:44:00	0
2009-03-14	01:45:00	0
2009-03-14	01:46:00	0
2009-03-14	01:47:00	0
2009-03-14	01:48:00	0
2009-03-14	01:49:00	0
2009-03-14	01:50:00	0
2009-03-14	01:51:00	0
2009-03-14	01:52:00	0
2009-03-14	01:53:00	0
2009-03-14	01:54:00	0
2009-03-14	01:55:00	0
2009-03-14	01:56:00	0
2009-03-14	01:57:00	0
2009-03-14	01:58:00	0
2009-03-14	01:59:00	0
2009-03-14	02:00:00	0
2009-03-14	02:01:00	0
2009-03-14	02:02:00	48
2009-03-14	02:03:00	0
2009-03-14	02:04:00	0
2009-03-14	02:05:00	0
2009-03-14	02:06:00	12
2009-03-14	02:07:00	0
2009-03-14	02:08:00	0
2009-03-14	02:09:00	0
2009-03-14	02:10:00	0
2009-03-14	02:11:00	0
2009-03-14	02:12:00	0
2009-03-14	02:13:00	0
2009-03-14	02:14:00	0
2009-03-14	02:15:00	0
2009-03-14	02:16:00	0
2009-03-14	02:17:00	0
2009-03-14	02:18:00	0
2009-03-14	02:19:00	0
2009-03-14	02:20:00	0
2009-03-14	02:21:00	0
2009-03-14	02:22:00	0
2009-03-14	02:23:00	0
2009-03-14	02:24:00	0
2009-03-14	02:25:00	0
2009-03-14	02:26:00	0
2009-03-14	02:27:00	0
2009-03-14	02:28:00	0
2009-03-14	02:29:00	0
2009-03-14	02:30:00	0
2009-03-14	02:31:00	0
2009-03-14	02:32:00	0
2009-03-14	02:33:00	0
2009-03-14	02:34:00	0
2009-03-14	02:35:00	0
2009-03-14	02:36:00	0
2009-03-14	02:37:00	0
2009-03-14	02:38:00	0
2009-03-14	02:39:00	0
2009-03-14	02:40:00	0
2009-03-14	02:41:00	0
2009-03-14	02:42:00	0
2009-03-14	02:43:00	36
2009-03-14	02:44:00	36
2009-03-14	02:45:00	97
2009-03-14	02:46:00	171
2009-03-14	02:47:00	0
2009-03-14	02:48:00	12
2009-03-14	02:49:00	12
2009-03-14	02:50:00	0
2009-03-14	02:51:00	0
2009-03-14	02:52:00	0
2009-03-14	02:53:00	85
2009-03-14	02:54:00	0
2009-03-14	02:55:00	0
2009-03-14	02:56:00	0
2009-03-14	02:57:00	0
2009-03-14	02:58:00	0
2009-03-14	02:59:00	0
2009-03-14	03:00:00	0
2009-03-14	03:01:00	0
2009-03-14	03:02:00	0
2009-03-14	03:03:00	0
2009-03-14	03:04:00	0
2009-03-14	03:05:00	0
2009-03-14	03:06:00	0
2009-03-14	03:07:00	0
2009-03-14	03:08:00	0
2009-03-14	03:09:00	0
2009-03-14	03:10:00	0
2009-03-14	03:11:00	72
2009-03-14	03:12:00	0
2009-03-14	03:13:00	0
2009-03-14	03:14:00	0
2009-03-14	03:15:00	0
2009-03-14	03:16:00	0
2009-03-14	03:17:00	0
2009-03-14	03:18:00	0
2009-03-14	03:19:00	0
2009-03-14	03:20:00	0
2009-03-14	03:21:00	0
2009-03-14	03:22:00	0
2009-03-14	03:23:00	0
2009-03-14	03:24:00	0
2009-03-14	03:25:00	0
2009-03-14	03:26:00	0
2009-03-14	03:27:00	0
2009-03-14	03:28:00	0
2009-03-14	03:29:00	0
2009-03-14	03:30:00	0
2009-03-14	03:31:00	0
2009-03-14	03:32:00	0
2009-03-14	03:33:00	0
2009-03-14	03:34:00	0
2009-03-14	03:35:00	0
2009-03-14	03:36:00	12
2009-03-14	03:37:00	0
2009-03-14	03:38:00	0
2009-03-14	03:39:00	0
2009-03-14	03:40:00	0
2009-03-14	03:41:00	0
2009-03-14	03:42:00	0
2009-03-14	03:43:00	0
2009-03-14	03:44:00	0
2009-03-14	03:45:00	0
2009-03-14	03:46:00	0
2009-03-14	03:47:00	0
2009-03-14	03:48:00	0
2009-03-14	03:49:00	0
2009-03-14	03:50:00	0
2009-03-14	03:51:00	0
2009-03-14	03:52:00	0
2009-03-14	03:53:00	0
2009-03-14	03:54:00	0
2009-03-14	03:55:00	0
2009-03-14	03:56:00	0
2009-03-14	03:57:00	0
2009-03-14	03:58:00	0
2009-03-14	03:59:00	0
2009-03-14	04:00:00	0
2009-03-14	04:01:00	0
2009-03-14	04:02:00	0
2009-03-14	04:03:00	0
2009-03-14	04:04:00	0
2009-03-14	04:05:00	0
2009-03-14	04:06:00	0
2009-03-14	04:07:00	0
2009-03-14	04:08:00	0
2009-03-14	04:09:00	24
2009-03-14	04:10:00	0
2009-03-14	04:11:00	0
2009-03-14	04:12:00	0
2009-03-14	04:13:00	0
2009-03-14	04:14:00	24
2009-03-14	04:15:00	0
2009-03-14	04:16:00	0
2009-03-14	04:17:00	0
2009-03-14	04:18:00	0
2009-03-14	04:19:00	0
2009-03-14	04:20:00	0
2009-03-14	04:21:00	0
2009-03-14	04:22:00	0
2009-03-14	04:23:00	0
2009-03-14	04:24:00	0
2009-03-14	04:25:00	0
2009-03-14	04:26:00	0
2009-03-14	04:27:00	0
2009-03-14	04:28:00	0
2009-03-14	04:29:00	0
2009-03-14	04:30:00	0
2009-03-14	04:31:00	0
2009-03-14	04:32:00	0
2009-03-14	04:33:00	0
2009-03-14	04:34:00	0
2009-03-14	04:35:00	0
2009-03-14	04:36:00	0
2009-03-14	04:37:00	0
2009-03-14	04:38:00	0
2009-03-14	04:39:00	0
2009-03-14	04:40:00	0
2009-03-14	04:41:00	0
2009-03-14	04:42:00	0
2009-03-14	04:43:00	0
2009-03-14	04:44:00	0
2009-03-14	04:45:00	0
2009-03-14	04:46:00	0
2009-03-14	04:47:00	0
2009-03-14	04:48:00	0
2009-03-14	04:49:00	0
2009-03-14	04:50:00	0
2009-03-14	04:51:00	0
2009-03-14	04:52:00	0
2009-03-14	04:53:00	0
2009-03-14	04:54:00	0
2009-03-14	04:55:00	0
2009-03-14	04:56:00	0
2009-03-14	04:57:00	0
2009-03-14	04:58:00	0
2009-03-14	04:59:00	0
2009-03-14	05:00:00	0
2009-03-14	05:01:00	0
2009-03-14	05:02:00	36
2009-03-14	05:03:00	60
2009-03-14	05:04:00	0
2009-03-14	05:05:00	0
2009-03-14	05:06:00	0
2009-03-14	05:07:00	0
2009-03-14	05:08:00	0
2009-03-14	05:09:00	0
2009-03-14	05:10:00	0
2009-03-14	05:11:00	0
2009-03-14	05:12:00	0
2009-03-14	05:13:00	0
2009-03-14	05:14:00	0
2009-03-14	05:15:00	0
2009-03-14	05:16:00	0
2009-03-14	05:17:00	0
2009-03-14	05:18:00	0
2009-03-14	05:19:00	0
2009-03-14	05:20:00	0
2009-03-14	05:21:00	0
2009-03-14	05:22:00	0
2009-03-14	05:23:00	0
2009-03-14	05:24:00	0
2009-03-14	05:25:00	0
2009-03-14	05:26:00	0
2009-03-14	05:27:00	0
2009-03-14	05:28:00	0
2009-03-14	05:29:00	0
2009-03-14	05:30:00	0
2009-03-14	05:31:00	0
2009-03-14	05:32:00	0
2009-03-14	05:33:00	0
2009-03-14	05:34:00	0
2009-03-14	05:35:00	0
2009-03-14	05:36:00	0
2009-03-14	05:37:00	0
2009-03-14	05:38:00	12
2009-03-14	05:39:00	0
2009-03-14	05:40:00	109
2009-03-14	05:41:00	0
2009-03-14	05:42:00	0
2009-03-14	05:43:00	0
2009-03-14	05:44:00	0
2009-03-14	05:45:00	0
2009-03-14	05:46:00	0
2009-03-14	05:47:00	0
2009-03-14	05:48:00	0
2009-03-14	05:49:00	0
2009-03-14	05:50:00	0
2009-03-14	05:51:00	0
2009-03-14	05:52:00	0
2009-03-14	05:53:00	12
2009-03-14	05:54:00	0
2009-03-14	05:55:00	0
2009-03-14	05:56:00	0
2009-03-14	05:57:00	97
2009-03-14	05:58:00	244
2009-03-14	05:59:00	645
2009-03-14	06:00:00	526
2009-03-14	06:01:00	401
2009-03-14	06:02:00	384
2009-03-14	06:03:00	200
2009-03-14	06:04:00	258
2009-03-14	06:05:00	36
2009-03-14	06:06:00	0
2009-03-14	06:07:00	0
2009-03-14	06:08:00	0
2009-03-14	06:09:00	0
2009-03-14	06:10:00	0
2009-03-14	06:11:00	0
2009-03-14	06:12:00	0
2009-03-14	06:13:00	0
2009-03-14	06:14:00	60
2009-03-14	06:15:00	273
2009-03-14	06:16:00	121
2009-03-14	06:17:00	60
2009-03-14	06:18:00	0
2009-03-14	06:19:00	0
2009-03-14	06:20:00	0
2009-03-14	06:21:00	0
2009-03-14	06:22:00	0
2009-03-14	06:23:00	0
2009-03-14	06:24:00	48
2009-03-14	06:25:00	145
2009-03-14	06:26:00	12
2009-03-14	06:27:00	0
2009-03-14	06:28:00	0
2009-03-14	06:29:00	12
2009-03-14	06:30:00	0
2009-03-14	06:31:00	0
2009-03-14	06:32:00	0
2009-03-14	06:33:00	12
2009-03-14	06:34:00	0
2009-03-14	06:35:00	0
2009-03-14	06:36:00	0
2009-03-14	06:37:00	0
2009-03-14	06:38:00	0
2009-03-14	06:39:00	0
2009-03-14	06:40:00	0
2009-03-14	06:41:00	0
2009-03-14	06:42:00	0
2009-03-14	06:43:00	0
2009-03-14	06:44:00	0
2009-03-14	06:45:00	12
2009-03-14	06:46:00	0
2009-03-14	06:47:00	0
2009-03-14	06:48:00	0
2009-03-14	06:49:00	0
2009-03-14	06:50:00	0
2009-03-14	06:51:00	0
2009-03-14	06:52:00	0
2009-03-14	06:53:00	0
2009-03-14	06:54:00	0
2009-03-14	06:55:00	0
2009-03-14	06:56:00	0
2009-03-14	06:57:00	0
2009-03-14	06:58:00	0
2009-03-14	06:59:00	0
2009-03-14	07:00:00	0
2009-03-14	07:01:00	0
2009-03-14	07:02:00	0
2009-03-14	07:03:00	0
2009-03-14	07:04:00	0
2009-03-14	07:05:00	0
2009-03-14	07:06:00	0
2009-03-14	07:07:00	0
2009-03-14	07:08:00	0
2009-03-14	07:09:00	0
2009-03-14	07:10:00	0
2009-03-14	07:11:00	36
2009-03-14	07:12:00	0
2009-03-14	07:13:00	302
2009-03-14	07:14:00	258
2009-03-14	07:15:00	384
2009-03-14	07:16:00	997
2009-03-14	07:17:00	526
2009-03-14	07:18:00	604
2009-03-14	07:19:00	469
2009-03-14	07:20:00	302
2009-03-14	07:21:00	186
2009-03-14	07:22:00	60
2009-03-14	07:23:00	200
2009-03-14	07:24:00	24
2009-03-14	07:25:00	121
2009-03-14	07:26:00	109
2009-03-14	07:27:00	0
2009-03-14	07:28:00	0
2009-03-14	07:29:00	12
2009-03-14	07:30:00	0
2009-03-14	07:31:00	0
2009-03-14	07:32:00	0
2009-03-14	07:33:00	0
2009-03-14	07:34:00	0
2009-03-14	07:35:00	0
2009-03-14	07:36:00	0
2009-03-14	07:37:00	0
2009-03-14	07:38:00	0
2009-03-14	07:39:00	0
2009-03-14	07:40:00	0
2009-03-14	07:41:00	0
2009-03-14	07:42:00	0
2009-03-14	07:43:00	0
2009-03-14	07:44:00	0
2009-03-14	07:45:00	0
2009-03-14	07:46:00	0
2009-03-14	07:47:00	0
2009-03-14	07:48:00	0
2009-03-14	07:49:00	0
2009-03-14	07:50:00	0
2009-03-14	07:51:00	0
2009-03-14	07:52:00	0
2009-03-14	07:53:00	0
2009-03-14	07:54:00	12
2009-03-14	07:55:00	0
2009-03-14	07:56:00	0
2009-03-14	07:57:00	12
2009-03-14	07:58:00	0
2009-03-14	07:59:00	0
2009-03-14	08:00:00	0
2009-03-14	08:01:00	0
2009-03-14	08:02:00	12
2009-03-14	08:03:00	0
2009-03-14	08:04:00	0
2009-03-14	08:05:00	0
2009-03-14	08:06:00	0
2009-03-14	08:07:00	12
2009-03-14	08:08:00	0
2009-03-14	08:09:00	0
2009-03-14	08:10:00	0
2009-03-14	08:11:00	0
2009-03-14	08:12:00	24
2009-03-14	08:13:00	0
2009-03-14	08:14:00	0
2009-03-14	08:15:00	0
2009-03-14	08:16:00	0
2009-03-14	08:17:00	0
2009-03-14	08:18:00	0
2009-03-14	08:19:00	0
2009-03-14	08:20:00	0
2009-03-14	08:21:00	0
2009-03-14	08:22:00	0
2009-03-14	08:23:00	0
2009-03-14	08:24:00	0
2009-03-14	08:25:00	0
2009-03-14	08:26:00	0
2009-03-14	08:27:00	0
2009-03-14	08:28:00	0
2009-03-14	08:29:00	0
2009-03-14	08:30:00	0
2009-03-14	08:31:00	0
2009-03-14	08:32:00	0
2009-03-14	08:33:00	0
2009-03-14	08:34:00	0
2009-03-14	08:35:00	0
2009-03-14	08:36:00	0
2009-03-14	08:37:00	0
2009-03-14	08:38:00	0
2009-03-14	08:39:00	0
2009-03-14	08:40:00	0
2009-03-14	08:41:00	0
2009-03-14	08:42:00	0
2009-03-14	08:43:00	0
2009-03-14	08:44:00	0
2009-03-14	08:45:00	0
2009-03-14	08:46:00	0
2009-03-14	08:47:00	0
2009-03-14	08:48:00	0
2009-03-14	08:49:00	0
2009-03-14	08:50:00	0
2009-03-14	08:51:00	0
2009-03-14	08:52:00	0
2009-03-14	08:53:00	0
2009-03-14	08:54:00	0
2009-03-14	08:55:00	0
2009-03-14	08:56:00	0
2009-03-14	08:57:00	0
2009-03-14	08:58:00	0
2009-03-14	08:59:00	0
2009-03-14	09:00:00	0
2009-03-14	09:01:00	0
2009-03-14	09:02:00	0
2009-03-14	09:03:00	0
2009-03-14	09:04:00	0
2009-03-14	09:05:00	0
2009-03-14	09:06:00	0
2009-03-14	09:07:00	0
2009-03-14	09:08:00	0
[truncated: 19,611 more rows]

[truncated: 2 more sheets: 3.27.09, 4.13.09]
