# Supplementary material for: Initial evaluation of nighttime restlessness in a naturally occurring canine model of osteoarthritis pain
Source: PeerJ. 2015 Feb 17;3:e772. doi: 10.7717/peerj.772 (PMC4340376; doi:10.7717/peerj.772)
Supplement: Supplemental Information 27 [file peerj-03-772-s027.xlsx]

## Sheet: Office Visits
Visit Date	Visit Number
2009-02-25 06:00:00	1
2009-03-04 06:00:00	2
2009-03-11 06:00:00	3
2009-03-25 06:00:00	4
2009-04-08 06:00:00	5
2009-04-22 06:00:00	6
2009-05-06 06:00:00	7
2009-05-20 06:00:00	8
2009-06-04 06:00:00	9
2009-06-17 06:00:00	10

## Sheet: 27_Data
Segment	DateTime	Activity	Hour	Quadrant	Study Day	Weekday
1	2009-02-25 06:01:00	0	6	2	0	4
1	2009-02-25 06:02:00	0	6	2	0	4
1	2009-02-25 06:03:00	0	6	2	0	4
1	2009-02-25 06:04:00	0	6	2	0	4
1	2009-02-25 06:05:00	0	6	2	0	4
1	2009-02-25 06:06:00	0	6	2	0	4
1	2009-02-25 06:07:00	0	6	2	0	4
1	2009-02-25 06:08:00	0	6	2	0	4
1	2009-02-25 06:09:00	0	6	2	0	4
1	2009-02-25 06:10:00	0	6	2	0	4
1	2009-02-25 06:11:00	0	6	2	0	4
1	2009-02-25 06:12:00	0	6	2	0	4
1	2009-02-25 06:13:00	0	6	2	0	4
1	2009-02-25 06:14:00	0	6	2	0	4
1	2009-02-25 06:15:00	0	6	2	0	4
1	2009-02-25 06:16:00	0	6	2	0	4
1	2009-02-25 06:17:00	0	6	2	0	4
1	2009-02-25 06:18:00	0	6	2	0	4
1	2009-02-25 06:19:00	0	6	2	0	4
1	2009-02-25 06:20:00	0	6	2	0	4
1	2009-02-25 06:21:00	0	6	2	0	4
1	2009-02-25 06:22:00	0	6	2	0	4
1	2009-02-25 06:23:00	0	6	2	0	4
1	2009-02-25 06:24:00	0	6	2	0	4
1	2009-02-25 06:25:00	0	6	2	0	4
1	2009-02-25 06:26:00	0	6	2	0	4
1	2009-02-25 06:27:00	0	6	2	0	4
1	2009-02-25 06:28:00	0	6	2	0	4
1	2009-02-25 06:29:00	0	6	2	0	4
1	2009-02-25 06:30:00	0	6	2	0	4
1	2009-02-25 06:31:00	0	6	2	0	4
1	2009-02-25 06:32:00	0	6	2	0	4
1	2009-02-25 06:33:00	144	6	2	0	4
1	2009-02-25 06:34:00	10	6	2	0	4
1	2009-02-25 06:35:00	0	6	2	0	4
1	2009-02-25 06:36:00	0	6	2	0	4
1	2009-02-25 06:37:00	0	6	2	0	4
1	2009-02-25 06:38:00	0	6	2	0	4
1	2009-02-25 06:39:00	20	6	2	0	4
1	2009-02-25 06:40:00	0	6	2	0	4
1	2009-02-25 06:41:00	0	6	2	0	4
1	2009-02-25 06:42:00	0	6	2	0	4
1	2009-02-25 06:43:00	0	6	2	0	4
1	2009-02-25 06:44:00	0	6	2	0	4
1	2009-02-25 06:45:00	0	6	2	0	4
1	2009-02-25 06:46:00	0	6	2	0	4
1	2009-02-25 06:47:00	0	6	2	0	4
1	2009-02-25 06:48:00	0	6	2	0	4
1	2009-02-25 06:49:00	0	6	2	0	4
1	2009-02-25 06:50:00	10	6	2	0	4
1	2009-02-25 06:51:00	0	6	2	0	4
1	2009-02-25 06:52:00	144	6	2	0	4
1	2009-02-25 06:53:00	20	6	2	0	4
1	2009-02-25 06:54:00	30	6	2	0	4
1	2009-02-25 06:55:00	0	6	2	0	4
1	2009-02-25 06:56:00	122	6	2	0	4
1	2009-02-25 06:57:00	0	6	2	0	4
1	2009-02-25 06:58:00	0	6	2	0	4
1	2009-02-25 06:59:00	0	6	2	0	4
1	2009-02-25 07:00:00	0	6	2	0	4
1	2009-02-25 07:01:00	0	7	2	0	4
1	2009-02-25 07:02:00	0	7	2	0	4
1	2009-02-25 07:03:00	0	7	2	0	4
1	2009-02-25 07:04:00	0	7	2	0	4
1	2009-02-25 07:05:00	0	7	2	0	4
1	2009-02-25 07:06:00	0	7	2	0	4
1	2009-02-25 07:07:00	0	7	2	0	4
1	2009-02-25 07:08:00	0	7	2	0	4
1	2009-02-25 07:09:00	427	7	2	0	4
1	2009-02-25 07:10:00	0	7	2	0	4
1	2009-02-25 07:11:00	0	7	2	0	4
1	2009-02-25 07:12:00	0	7	2	0	4
1	2009-02-25 07:13:00	0	7	2	0	4
1	2009-02-25 07:14:00	0	7	2	0	4
1	2009-02-25 07:15:00	0	7	2	0	4
1	2009-02-25 07:16:00	0	7	2	0	4
1	2009-02-25 07:17:00	0	7	2	0	4
1	2009-02-25 07:18:00	0	7	2	0	4
1	2009-02-25 07:19:00	0	7	2	0	4
1	2009-02-25 07:20:00	0	7	2	0	4
1	2009-02-25 07:21:00	0	7	2	0	4
1	2009-02-25 07:22:00	0	7	2	0	4
1	2009-02-25 07:23:00	0	7	2	0	4
1	2009-02-25 07:24:00	0	7	2	0	4
1	2009-02-25 07:25:00	0	7	2	0	4
1	2009-02-25 07:26:00	0	7	2	0	4
1	2009-02-25 07:27:00	0	7	2	0	4
1	2009-02-25 07:28:00	0	7	2	0	4
1	2009-02-25 07:29:00	0	7	2	0	4
1	2009-02-25 07:30:00	0	7	2	0	4
1	2009-02-25 07:31:00	0	7	2	0	4
1	2009-02-25 07:32:00	0	7	2	0	4
1	2009-02-25 07:33:00	0	7	2	0	4
1	2009-02-25 07:34:00	20	7	2	0	4
1	2009-02-25 07:35:00	0	7	2	0	4
1	2009-02-25 07:36:00	0	7	2	0	4
1	2009-02-25 07:37:00	0	7	2	0	4
1	2009-02-25 07:38:00	0	7	2	0	4
1	2009-02-25 07:39:00	10	7	2	0	4
1	2009-02-25 07:40:00	0	7	2	0	4
1	2009-02-25 07:41:00	0	7	2	0	4
1	2009-02-25 07:42:00	0	7	2	0	4
1	2009-02-25 07:43:00	0	7	2	0	4
1	2009-02-25 07:44:00	0	7	2	0	4
1	2009-02-25 07:45:00	0	7	2	0	4
1	2009-02-25 07:46:00	0	7	2	0	4
1	2009-02-25 07:47:00	794	7	2	0	4
1	2009-02-25 07:48:00	0	7	2	0	4
1	2009-02-25 07:49:00	0	7	2	0	4
1	2009-02-25 07:50:00	10	7	2	0	4
1	2009-02-25 07:51:00	10	7	2	0	4
1	2009-02-25 07:52:00	61	7	2	0	4
1	2009-02-25 07:53:00	3692	7	2	0	4
1	2009-02-25 07:54:00	2274	7	2	0	4
1	2009-02-25 07:55:00	929	7	2	0	4
1	2009-02-25 07:56:00	929	7	2	0	4
1	2009-02-25 07:57:00	673	7	2	0	4
1	2009-02-25 07:58:00	1130	7	2	0	4
1	2009-02-25 07:59:00	713	7	2	0	4
1	2009-02-25 08:00:00	597	7	2	0	4
1	2009-02-25 08:01:00	1103	8	2	0	4
1	2009-02-25 08:02:00	410	8	2	0	4
1	2009-02-25 08:03:00	427	8	2	0	4
1	2009-02-25 08:04:00	351	8	2	0	4
1	2009-02-25 08:05:00	754	8	2	0	4
1	2009-02-25 08:06:00	30	8	2	0	4
1	2009-02-25 08:07:00	132	8	2	0	4
1	2009-02-25 08:08:00	0	8	2	0	4
1	2009-02-25 08:09:00	0	8	2	0	4
1	2009-02-25 08:10:00	0	8	2	0	4
1	2009-02-25 08:11:00	0	8	2	0	4
1	2009-02-25 08:12:00	0	8	2	0	4
1	2009-02-25 08:13:00	0	8	2	0	4
1	2009-02-25 08:14:00	0	8	2	0	4
1	2009-02-25 08:15:00	0	8	2	0	4
1	2009-02-25 08:16:00	0	8	2	0	4
1	2009-02-25 08:17:00	20	8	2	0	4
1	2009-02-25 08:18:00	0	8	2	0	4
1	2009-02-25 08:19:00	0	8	2	0	4
1	2009-02-25 08:20:00	0	8	2	0	4
1	2009-02-25 08:21:00	0	8	2	0	4
1	2009-02-25 08:22:00	0	8	2	0	4
1	2009-02-25 08:23:00	0	8	2	0	4
1	2009-02-25 08:24:00	0	8	2	0	4
1	2009-02-25 08:25:00	0	8	2	0	4
1	2009-02-25 08:26:00	0	8	2	0	4
1	2009-02-25 08:27:00	0	8	2	0	4
1	2009-02-25 08:28:00	0	8	2	0	4
1	2009-02-25 08:29:00	0	8	2	0	4
1	2009-02-25 08:30:00	0	8	2	0	4
1	2009-02-25 08:31:00	0	8	2	0	4
1	2009-02-25 08:32:00	0	8	2	0	4
1	2009-02-25 08:33:00	10	8	2	0	4
1	2009-02-25 08:34:00	0	8	2	0	4
1	2009-02-25 08:35:00	0	8	2	0	4
1	2009-02-25 08:36:00	0	8	2	0	4
1	2009-02-25 08:37:00	20	8	2	0	4
1	2009-02-25 08:38:00	0	8	2	0	4
1	2009-02-25 08:39:00	0	8	2	0	4
1	2009-02-25 08:40:00	0	8	2	0	4
1	2009-02-25 08:41:00	0	8	2	0	4
1	2009-02-25 08:42:00	0	8	2	0	4
1	2009-02-25 08:43:00	0	8	2	0	4
1	2009-02-25 08:44:00	0	8	2	0	4
1	2009-02-25 08:45:00	0	8	2	0	4
1	2009-02-25 08:46:00	41	8	2	0	4
1	2009-02-25 08:47:00	0	8	2	0	4
1	2009-02-25 08:48:00	30	8	2	0	4
1	2009-02-25 08:49:00	10	8	2	0	4
1	2009-02-25 08:50:00	0	8	2	0	4
1	2009-02-25 08:51:00	10	8	2	0	4
1	2009-02-25 08:52:00	0	8	2	0	4
1	2009-02-25 08:53:00	217	8	2	0	4
1	2009-02-25 08:54:00	230	8	2	0	4
1	2009-02-25 08:55:00	0	8	2	0	4
1	2009-02-25 08:56:00	10	8	2	0	4
1	2009-02-25 08:57:00	579	8	2	0	4
1	2009-02-25 08:58:00	754	8	2	0	4
1	2009-02-25 08:59:00	132	8	2	0	4
1	2009-02-25 09:00:00	81	8	2	0	4
1	2009-02-25 09:01:00	10	9	2	0	4
1	2009-02-25 09:02:00	144	9	2	0	4
1	2009-02-25 09:03:00	51	9	2	0	4
1	2009-02-25 09:04:00	30	9	2	0	4
1	2009-02-25 09:05:00	112	9	2	0	4
1	2009-02-25 09:06:00	634	9	2	0	4
1	2009-02-25 09:07:00	459	9	2	0	4
1	2009-02-25 09:08:00	884	9	2	0	4
1	2009-02-25 09:09:00	380	9	2	0	4
1	2009-02-25 09:10:00	30	9	2	0	4
1	2009-02-25 09:11:00	0	9	2	0	4
1	2009-02-25 09:12:00	0	9	2	0	4
1	2009-02-25 09:13:00	0	9	2	0	4
1	2009-02-25 09:14:00	0	9	2	0	4
1	2009-02-25 09:15:00	0	9	2	0	4
1	2009-02-25 09:16:00	0	9	2	0	4
1	2009-02-25 09:17:00	132	9	2	0	4
1	2009-02-25 09:18:00	266	9	2	0	4
1	2009-02-25 09:19:00	0	9	2	0	4
1	2009-02-25 09:20:00	71	9	2	0	4
1	2009-02-25 09:21:00	91	9	2	0	4
1	2009-02-25 09:22:00	10	9	2	0	4
1	2009-02-25 09:23:00	0	9	2	0	4
1	2009-02-25 09:24:00	0	9	2	0	4
1	2009-02-25 09:25:00	0	9	2	0	4
1	2009-02-25 09:26:00	0	9	2	0	4
1	2009-02-25 09:27:00	0	9	2	0	4
1	2009-02-25 09:28:00	0	9	2	0	4
1	2009-02-25 09:29:00	144	9	2	0	4
1	2009-02-25 09:30:00	839	9	2	0	4
1	2009-02-25 09:31:00	193	9	2	0	4
1	2009-02-25 09:32:00	0	9	2	0	4
1	2009-02-25 09:33:00	459	9	2	0	4
1	2009-02-25 09:34:00	579	9	2	0	4
1	2009-02-25 09:35:00	1447	9	2	0	4
1	2009-02-25 09:36:00	542	9	2	0	4
1	2009-02-25 09:37:00	337	9	2	0	4
1	2009-02-25 09:38:00	1863	9	2	0	4
1	2009-02-25 09:39:00	1479	9	2	0	4
1	2009-02-25 09:40:00	929	9	2	0	4
1	2009-02-25 09:41:00	616	9	2	0	4
1	2009-02-25 09:42:00	1680	9	2	0	4
1	2009-02-25 09:43:00	156	9	2	0	4
1	2009-02-25 09:44:00	20	9	2	0	4
1	2009-02-25 09:45:00	0	9	2	0	4
1	2009-02-25 09:46:00	0	9	2	0	4
1	2009-02-25 09:47:00	0	9	2	0	4
1	2009-02-25 09:48:00	0	9	2	0	4
1	2009-02-25 09:49:00	10	9	2	0	4
1	2009-02-25 09:50:00	217	9	2	0	4
1	2009-02-25 09:51:00	351	9	2	0	4
1	2009-02-25 09:52:00	41	9	2	0	4
1	2009-02-25 09:53:00	0	9	2	0	4
1	2009-02-25 09:54:00	0	9	2	0	4
1	2009-02-25 09:55:00	0	9	2	0	4
1	2009-02-25 09:56:00	81	9	2	0	4
1	2009-02-25 09:57:00	0	9	2	0	4
1	2009-02-25 09:58:00	0	9	2	0	4
1	2009-02-25 09:59:00	0	9	2	0	4
1	2009-02-25 10:00:00	10	9	2	0	4
1	2009-02-25 10:01:00	0	10	2	0	4
1	2009-02-25 10:02:00	217	10	2	0	4
1	2009-02-25 10:03:00	0	10	2	0	4
1	2009-02-25 10:04:00	169	10	2	0	4
1	2009-02-25 10:05:00	10	10	2	0	4
1	2009-02-25 10:06:00	0	10	2	0	4
1	2009-02-25 10:07:00	112	10	2	0	4
1	2009-02-25 10:08:00	0	10	2	0	4
1	2009-02-25 10:09:00	0	10	2	0	4
1	2009-02-25 10:10:00	0	10	2	0	4
1	2009-02-25 10:11:00	0	10	2	0	4
1	2009-02-25 10:12:00	0	10	2	0	4
1	2009-02-25 10:13:00	10	10	2	0	4
1	2009-02-25 10:14:00	0	10	2	0	4
1	2009-02-25 10:15:00	0	10	2	0	4
1	2009-02-25 10:16:00	0	10	2	0	4
1	2009-02-25 10:17:00	0	10	2	0	4
1	2009-02-25 10:18:00	10	10	2	0	4
1	2009-02-25 10:19:00	51	10	2	0	4
1	2009-02-25 10:20:00	193	10	2	0	4
1	2009-02-25 10:21:00	102	10	2	0	4
1	2009-02-25 10:22:00	0	10	2	0	4
1	2009-02-25 10:23:00	20	10	2	0	4
1	2009-02-25 10:24:00	0	10	2	0	4
1	2009-02-25 10:25:00	0	10	2	0	4
1	2009-02-25 10:26:00	0	10	2	0	4
1	2009-02-25 10:27:00	0	10	2	0	4
1	2009-02-25 10:28:00	0	10	2	0	4
1	2009-02-25 10:29:00	0	10	2	0	4
1	2009-02-25 10:30:00	0	10	2	0	4
1	2009-02-25 10:31:00	0	10	2	0	4
1	2009-02-25 10:32:00	51	10	2	0	4
1	2009-02-25 10:33:00	0	10	2	0	4
1	2009-02-25 10:34:00	0	10	2	0	4
1	2009-02-25 10:35:00	0	10	2	0	4
1	2009-02-25 10:36:00	41	10	2	0	4
1	2009-02-25 10:37:00	0	10	2	0	4
1	2009-02-25 10:38:00	0	10	2	0	4
1	2009-02-25 10:39:00	0	10	2	0	4
1	2009-02-25 10:40:00	91	10	2	0	4
1	2009-02-25 10:41:00	51	10	2	0	4
1	2009-02-25 10:42:00	0	10	2	0	4
1	2009-02-25 10:43:00	0	10	2	0	4
1	2009-02-25 10:44:00	10	10	2	0	4
1	2009-02-25 10:45:00	0	10	2	0	4
1	2009-02-25 10:46:00	0	10	2	0	4
1	2009-02-25 10:47:00	0	10	2	0	4
1	2009-02-25 10:48:00	41	10	2	0	4
1	2009-02-25 10:49:00	10	10	2	0	4
1	2009-02-25 10:50:00	20	10	2	0	4
1	2009-02-25 10:51:00	0	10	2	0	4
1	2009-02-25 10:52:00	0	10	2	0	4
1	2009-02-25 10:53:00	10	10	2	0	4
1	2009-02-25 10:54:00	0	10	2	0	4
1	2009-02-25 10:55:00	0	10	2	0	4
1	2009-02-25 10:56:00	0	10	2	0	4
1	2009-02-25 10:57:00	0	10	2	0	4
1	2009-02-25 10:58:00	0	10	2	0	4
1	2009-02-25 10:59:00	0	10	2	0	4
1	2009-02-25 11:00:00	0	10	2	0	4
1	2009-02-25 11:01:00	0	11	2	0	4
1	2009-02-25 11:02:00	0	11	2	0	4
1	2009-02-25 11:03:00	0	11	2	0	4
1	2009-02-25 11:04:00	0	11	2	0	4
1	2009-02-25 11:05:00	0	11	2	0	4
1	2009-02-25 11:06:00	0	11	2	0	4
1	2009-02-25 11:07:00	0	11	2	0	4
1	2009-02-25 11:08:00	0	11	2	0	4
1	2009-02-25 11:09:00	0	11	2	0	4
1	2009-02-25 11:10:00	0	11	2	0	4
1	2009-02-25 11:11:00	0	11	2	0	4
1	2009-02-25 11:12:00	0	11	2	0	4
1	2009-02-25 11:13:00	0	11	2	0	4
1	2009-02-25 11:14:00	0	11	2	0	4
1	2009-02-25 11:15:00	0	11	2	0	4
1	2009-02-25 11:16:00	0	11	2	0	4
1	2009-02-25 11:17:00	0	11	2	0	4
1	2009-02-25 11:18:00	0	11	2	0	4
1	2009-02-25 11:19:00	10	11	2	0	4
1	2009-02-25 11:20:00	0	11	2	0	4
1	2009-02-25 11:21:00	0	11	2	0	4
1	2009-02-25 11:22:00	0	11	2	0	4
1	2009-02-25 11:23:00	10	11	2	0	4
1	2009-02-25 11:24:00	0	11	2	0	4
1	2009-02-25 11:25:00	102	11	2	0	4
1	2009-02-25 11:26:00	280	11	2	0	4
1	2009-02-25 11:27:00	10	11	2	0	4
1	2009-02-25 11:28:00	0	11	2	0	4
1	2009-02-25 11:29:00	0	11	2	0	4
1	2009-02-25 11:30:00	0	11	2	0	4
1	2009-02-25 11:31:00	0	11	2	0	4
1	2009-02-25 11:32:00	0	11	2	0	4
1	2009-02-25 11:33:00	0	11	2	0	4
1	2009-02-25 11:34:00	0	11	2	0	4
1	2009-02-25 11:35:00	0	11	2	0	4
1	2009-02-25 11:36:00	0	11	2	0	4
1	2009-02-25 11:37:00	0	11	2	0	4
1	2009-02-25 11:38:00	0	11	2	0	4
1	2009-02-25 11:39:00	0	11	2	0	4
1	2009-02-25 11:40:00	10	11	2	0	4
1	2009-02-25 11:41:00	0	11	2	0	4
1	2009-02-25 11:42:00	91	11	2	0	4
1	2009-02-25 11:43:00	20	11	2	0	4
1	2009-02-25 11:44:00	10	11	2	0	4
1	2009-02-25 11:45:00	10	11	2	0	4
1	2009-02-25 11:46:00	10	11	2	0	4
1	2009-02-25 11:47:00	0	11	2	0	4
1	2009-02-25 11:48:00	10	11	2	0	4
1	2009-02-25 11:49:00	51	11	2	0	4
1	2009-02-25 11:50:00	10	11	2	0	4
1	2009-02-25 11:51:00	10	11	2	0	4
1	2009-02-25 11:52:00	0	11	2	0	4
1	2009-02-25 11:53:00	0	11	2	0	4
1	2009-02-25 11:54:00	10	11	2	0	4
1	2009-02-25 11:55:00	0	11	2	0	4
1	2009-02-25 11:56:00	0	11	2	0	4
1	2009-02-25 11:57:00	0	11	2	0	4
1	2009-02-25 11:58:00	0	11	2	0	4
1	2009-02-25 11:59:00	0	11	2	0	4
1	2009-02-25 12:00:00	295	11	2	0	4
1	2009-02-25 12:01:00	309	12	3	0	4
1	2009-02-25 12:02:00	181	12	3	0	4
1	2009-02-25 12:03:00	205	12	3	0	4
1	2009-02-25 12:04:00	51	12	3	0	4
1	2009-02-25 12:05:00	132	12	3	0	4
1	2009-02-25 12:06:00	410	12	3	0	4
1	2009-02-25 12:07:00	156	12	3	0	4
1	2009-02-25 12:08:00	81	12	3	0	4
1	2009-02-25 12:09:00	144	12	3	0	4
1	2009-02-25 12:10:00	459	12	3	0	4
1	2009-02-25 12:11:00	132	12	3	0	4
1	2009-02-25 12:12:00	205	12	3	0	4
1	2009-02-25 12:13:00	266	12	3	0	4
1	2009-02-25 12:14:00	71	12	3	0	4
1	2009-02-25 12:15:00	0	12	3	0	4
1	2009-02-25 12:16:00	0	12	3	0	4
1	2009-02-25 12:17:00	112	12	3	0	4
1	2009-02-25 12:18:00	0	12	3	0	4
1	2009-02-25 12:19:00	144	12	3	0	4
1	2009-02-25 12:20:00	0	12	3	0	4
1	2009-02-25 12:21:00	0	12	3	0	4
1	2009-02-25 12:22:00	0	12	3	0	4
1	2009-02-25 12:23:00	0	12	3	0	4
1	2009-02-25 12:24:00	0	12	3	0	4
1	2009-02-25 12:25:00	0	12	3	0	4
1	2009-02-25 12:26:00	0	12	3	0	4
1	2009-02-25 12:27:00	156	12	3	0	4
1	2009-02-25 12:28:00	71	12	3	0	4
1	2009-02-25 12:29:00	0	12	3	0	4
1	2009-02-25 12:30:00	0	12	3	0	4
1	2009-02-25 12:31:00	0	12	3	0	4
1	2009-02-25 12:32:00	0	12	3	0	4
1	2009-02-25 12:33:00	0	12	3	0	4
1	2009-02-25 12:34:00	0	12	3	0	4
1	2009-02-25 12:35:00	41	12	3	0	4
1	2009-02-25 12:36:00	61	12	3	0	4
1	2009-02-25 12:37:00	132	12	3	0	4
1	2009-02-25 12:38:00	217	12	3	0	4
1	2009-02-25 12:39:00	81	12	3	0	4
1	2009-02-25 12:40:00	61	12	3	0	4
1	2009-02-25 12:41:00	122	12	3	0	4
1	2009-02-25 12:42:00	295	12	3	0	4
1	2009-02-25 12:43:00	181	12	3	0	4
1	2009-02-25 12:44:00	0	12	3	0	4
1	2009-02-25 12:45:00	0	12	3	0	4
1	2009-02-25 12:46:00	0	12	3	0	4
1	2009-02-25 12:47:00	0	12	3	0	4
1	2009-02-25 12:48:00	41	12	3	0	4
1	2009-02-25 12:49:00	156	12	3	0	4
1	2009-02-25 12:50:00	266	12	3	0	4
1	2009-02-25 12:51:00	410	12	3	0	4
1	2009-02-25 12:52:00	380	12	3	0	4
1	2009-02-25 12:53:00	20	12	3	0	4
1	2009-02-25 12:54:00	71	12	3	0	4
1	2009-02-25 12:55:00	41	12	3	0	4
1	2009-02-25 12:56:00	169	12	3	0	4
1	2009-02-25 12:57:00	0	12	3	0	4
1	2009-02-25 12:58:00	230	12	3	0	4
1	2009-02-25 12:59:00	380	12	3	0	4
1	2009-02-25 13:00:00	10	12	3	0	4
1	2009-02-25 13:01:00	61	13	3	0	4
1	2009-02-25 13:02:00	774	13	3	0	4
1	2009-02-25 13:03:00	713	13	3	0	4
1	2009-02-25 13:04:00	774	13	3	0	4
1	2009-02-25 13:05:00	351	13	3	0	4
1	2009-02-25 13:06:00	0	13	3	0	4
1	2009-02-25 13:07:00	0	13	3	0	4
1	2009-02-25 13:08:00	295	13	3	0	4
1	2009-02-25 13:09:00	169	13	3	0	4
1	2009-02-25 13:10:00	230	13	3	0	4
1	2009-02-25 13:11:00	0	13	3	0	4
1	2009-02-25 13:12:00	0	13	3	0	4
1	2009-02-25 13:13:00	295	13	3	0	4
1	2009-02-25 13:14:00	81	13	3	0	4
1	2009-02-25 13:15:00	0	13	3	0	4
1	2009-02-25 13:16:00	0	13	3	0	4
1	2009-02-25 13:17:00	0	13	3	0	4
1	2009-02-25 13:18:00	0	13	3	0	4
1	2009-02-25 13:19:00	10	13	3	0	4
1	2009-02-25 13:20:00	156	13	3	0	4
1	2009-02-25 13:21:00	0	13	3	0	4
1	2009-02-25 13:22:00	230	13	3	0	4
1	2009-02-25 13:23:00	492	13	3	0	4
1	2009-02-25 13:24:00	30	13	3	0	4
1	2009-02-25 13:25:00	169	13	3	0	4
1	2009-02-25 13:26:00	0	13	3	0	4
1	2009-02-25 13:27:00	144	13	3	0	4
1	2009-02-25 13:28:00	102	13	3	0	4
1	2009-02-25 13:29:00	0	13	3	0	4
1	2009-02-25 13:30:00	0	13	3	0	4
1	2009-02-25 13:31:00	0	13	3	0	4
1	2009-02-25 13:32:00	0	13	3	0	4
1	2009-02-25 13:33:00	0	13	3	0	4
1	2009-02-25 13:34:00	0	13	3	0	4
1	2009-02-25 13:35:00	41	13	3	0	4
1	2009-02-25 13:36:00	102	13	3	0	4
1	2009-02-25 13:37:00	0	13	3	0	4
1	2009-02-25 13:38:00	112	13	3	0	4
1	2009-02-25 13:39:00	41	13	3	0	4
1	2009-02-25 13:40:00	71	13	3	0	4
1	2009-02-25 13:41:00	71	13	3	0	4
1	2009-02-25 13:42:00	0	13	3	0	4
1	2009-02-25 13:43:00	0	13	3	0	4
1	2009-02-25 13:44:00	102	13	3	0	4
1	2009-02-25 13:45:00	427	13	3	0	4
1	2009-02-25 13:46:00	309	13	3	0	4
1	2009-02-25 13:47:00	10	13	3	0	4
1	2009-02-25 13:48:00	0	13	3	0	4
1	2009-02-25 13:49:00	366	13	3	0	4
1	2009-02-25 13:50:00	51	13	3	0	4
1	2009-02-25 13:51:00	323	13	3	0	4
1	2009-02-25 13:52:00	0	13	3	0	4
1	2009-02-25 13:53:00	0	13	3	0	4
1	2009-02-25 13:54:00	0	13	3	0	4
1	2009-02-25 13:55:00	0	13	3	0	4
1	2009-02-25 13:56:00	0	13	3	0	4
1	2009-02-25 13:57:00	0	13	3	0	4
1	2009-02-25 13:58:00	156	13	3	0	4
1	2009-02-25 13:59:00	132	13	3	0	4
1	2009-02-25 14:00:00	156	13	3	0	4
1	2009-02-25 14:01:00	0	14	3	0	4
1	2009-02-25 14:02:00	41	14	3	0	4
1	2009-02-25 14:03:00	132	14	3	0	4
1	2009-02-25 14:04:00	71	14	3	0	4
1	2009-02-25 14:05:00	20	14	3	0	4
1	2009-02-25 14:06:00	0	14	3	0	4
1	2009-02-25 14:07:00	0	14	3	0	4
1	2009-02-25 14:08:00	0	14	3	0	4
1	2009-02-25 14:09:00	0	14	3	0	4
1	2009-02-25 14:10:00	81	14	3	0	4
1	2009-02-25 14:11:00	10	14	3	0	4
1	2009-02-25 14:12:00	217	14	3	0	4
1	2009-02-25 14:13:00	0	14	3	0	4
1	2009-02-25 14:14:00	102	14	3	0	4
1	2009-02-25 14:15:00	102	14	3	0	4
1	2009-02-25 14:16:00	156	14	3	0	4
1	2009-02-25 14:17:00	0	14	3	0	4
1	2009-02-25 14:18:00	0	14	3	0	4
1	2009-02-25 14:19:00	0	14	3	0	4
1	2009-02-25 14:20:00	0	14	3	0	4
1	2009-02-25 14:21:00	0	14	3	0	4
1	2009-02-25 14:22:00	0	14	3	0	4
1	2009-02-25 14:23:00	10	14	3	0	4
1	2009-02-25 14:24:00	0	14	3	0	4
1	2009-02-25 14:25:00	0	14	3	0	4
1	2009-02-25 14:26:00	0	14	3	0	4
1	2009-02-25 14:27:00	0	14	3	0	4
1	2009-02-25 14:28:00	0	14	3	0	4
1	2009-02-25 14:29:00	10	14	3	0	4
1	2009-02-25 14:30:00	242	14	3	0	4
1	2009-02-25 14:31:00	91	14	3	0	4
1	2009-02-25 14:32:00	20	14	3	0	4
1	2009-02-25 14:33:00	30	14	3	0	4
1	2009-02-25 14:34:00	10	14	3	0	4
1	2009-02-25 14:35:00	0	14	3	0	4
1	2009-02-25 14:36:00	10	14	3	0	4
1	2009-02-25 14:37:00	0	14	3	0	4
1	2009-02-25 14:38:00	0	14	3	0	4
1	2009-02-25 14:39:00	112	14	3	0	4
1	2009-02-25 14:40:00	181	14	3	0	4
1	2009-02-25 14:41:00	102	14	3	0	4
1	2009-02-25 14:42:00	0	14	3	0	4
1	2009-02-25 14:43:00	20	14	3	0	4
1	2009-02-25 14:44:00	122	14	3	0	4
1	2009-02-25 14:45:00	122	14	3	0	4
1	2009-02-25 14:46:00	0	14	3	0	4
1	2009-02-25 14:47:00	0	14	3	0	4
1	2009-02-25 14:48:00	0	14	3	0	4
1	2009-02-25 14:49:00	0	14	3	0	4
1	2009-02-25 14:50:00	0	14	3	0	4
1	2009-02-25 14:51:00	10	14	3	0	4
1	2009-02-25 14:52:00	10	14	3	0	4
1	2009-02-25 14:53:00	254	14	3	0	4
1	2009-02-25 14:54:00	132	14	3	0	4
1	2009-02-25 14:55:00	230	14	3	0	4
1	2009-02-25 14:56:00	20	14	3	0	4
1	2009-02-25 14:57:00	242	14	3	0	4
1	2009-02-25 14:58:00	205	14	3	0	4
1	2009-02-25 14:59:00	91	14	3	0	4
1	2009-02-25 15:00:00	351	14	3	0	4
1	2009-02-25 15:01:00	0	15	3	0	4
1	2009-02-25 15:02:00	0	15	3	0	4
1	2009-02-25 15:03:00	0	15	3	0	4
1	2009-02-25 15:04:00	0	15	3	0	4
1	2009-02-25 15:05:00	0	15	3	0	4
1	2009-02-25 15:06:00	0	15	3	0	4
1	2009-02-25 15:07:00	0	15	3	0	4
1	2009-02-25 15:08:00	20	15	3	0	4
1	2009-02-25 15:09:00	91	15	3	0	4
1	2009-02-25 15:10:00	112	15	3	0	4
1	2009-02-25 15:11:00	91	15	3	0	4
1	2009-02-25 15:12:00	459	15	3	0	4
1	2009-02-25 15:13:00	1103	15	3	0	4
1	2009-02-25 15:14:00	242	15	3	0	4
1	2009-02-25 15:15:00	71	15	3	0	4
1	2009-02-25 15:16:00	41	15	3	0	4
1	2009-02-25 15:17:00	193	15	3	0	4
1	2009-02-25 15:18:00	309	15	3	0	4
1	2009-02-25 15:19:00	1103	15	3	0	4
1	2009-02-25 15:20:00	1156	15	3	0	4
1	2009-02-25 15:21:00	634	15	3	0	4
1	2009-02-25 15:22:00	295	15	3	0	4
1	2009-02-25 15:23:00	20	15	3	0	4
1	2009-02-25 15:24:00	0	15	3	0	4
1	2009-02-25 15:25:00	0	15	3	0	4
1	2009-02-25 15:26:00	0	15	3	0	4
1	2009-02-25 15:27:00	0	15	3	0	4
1	2009-02-25 15:28:00	1788	15	3	0	4
1	2009-02-25 15:29:00	242	15	3	0	4
1	2009-02-25 15:30:00	280	15	3	0	4
1	2009-02-25 15:31:00	41	15	3	0	4
1	2009-02-25 15:32:00	51	15	3	0	4
1	2009-02-25 15:33:00	20	15	3	0	4
1	2009-02-25 15:34:00	597	15	3	0	4
1	2009-02-25 15:35:00	524	15	3	0	4
1	2009-02-25 15:36:00	0	15	3	0	4
1	2009-02-25 15:37:00	492	15	3	0	4
1	2009-02-25 15:38:00	217	15	3	0	4
1	2009-02-25 15:39:00	10	15	3	0	4
1	2009-02-25 15:40:00	266	15	3	0	4
1	2009-02-25 15:41:00	394	15	3	0	4
1	2009-02-25 15:42:00	410	15	3	0	4
1	2009-02-25 15:43:00	337	15	3	0	4
1	2009-02-25 15:44:00	427	15	3	0	4
1	2009-02-25 15:45:00	0	15	3	0	4
1	2009-02-25 15:46:00	10	15	3	0	4
1	2009-02-25 15:47:00	0	15	3	0	4
1	2009-02-25 15:48:00	81	15	3	0	4
1	2009-02-25 15:49:00	61	15	3	0	4
1	2009-02-25 15:50:00	205	15	3	0	4
1	2009-02-25 15:51:00	61	15	3	0	4
1	2009-02-25 15:52:00	102	15	3	0	4
1	2009-02-25 15:53:00	0	15	3	0	4
1	2009-02-25 15:54:00	102	15	3	0	4
1	2009-02-25 15:55:00	10	15	3	0	4
1	2009-02-25 15:56:00	156	15	3	0	4
1	2009-02-25 15:57:00	91	15	3	0	4
1	2009-02-25 15:58:00	41	15	3	0	4
1	2009-02-25 15:59:00	0	15	3	0	4
1	2009-02-25 16:00:00	51	15	3	0	4
1	2009-02-25 16:01:00	112	16	3	0	4
1	2009-02-25 16:02:00	10	16	3	0	4
1	2009-02-25 16:03:00	0	16	3	0	4
1	2009-02-25 16:04:00	0	16	3	0	4
1	2009-02-25 16:05:00	10	16	3	0	4
1	2009-02-25 16:06:00	0	16	3	0	4
1	2009-02-25 16:07:00	0	16	3	0	4
1	2009-02-25 16:08:00	122	16	3	0	4
1	2009-02-25 16:09:00	380	16	3	0	4
1	2009-02-25 16:10:00	459	16	3	0	4
1	2009-02-25 16:11:00	10	16	3	0	4
1	2009-02-25 16:12:00	10	16	3	0	4
1	2009-02-25 16:13:00	0	16	3	0	4
1	2009-02-25 16:14:00	0	16	3	0	4
1	2009-02-25 16:15:00	0	16	3	0	4
1	2009-02-25 16:16:00	0	16	3	0	4
1	2009-02-25 16:17:00	112	16	3	0	4
1	2009-02-25 16:18:00	10	16	3	0	4
1	2009-02-25 16:19:00	0	16	3	0	4
1	2009-02-25 16:20:00	0	16	3	0	4
1	2009-02-25 16:21:00	0	16	3	0	4
1	2009-02-25 16:22:00	217	16	3	0	4
1	2009-02-25 16:23:00	443	16	3	0	4
1	2009-02-25 16:24:00	394	16	3	0	4
1	2009-02-25 16:25:00	20	16	3	0	4
1	2009-02-25 16:26:00	41	16	3	0	4
1	2009-02-25 16:27:00	0	16	3	0	4
1	2009-02-25 16:28:00	410	16	3	0	4
1	2009-02-25 16:29:00	0	16	3	0	4
1	2009-02-25 16:30:00	254	16	3	0	4
1	2009-02-25 16:31:00	0	16	3	0	4
1	2009-02-25 16:32:00	0	16	3	0	4
1	2009-02-25 16:33:00	0	16	3	0	4
1	2009-02-25 16:34:00	0	16	3	0	4
1	2009-02-25 16:35:00	0	16	3	0	4
1	2009-02-25 16:36:00	561	16	3	0	4
1	2009-02-25 16:37:00	459	16	3	0	4
1	2009-02-25 16:38:00	20	16	3	0	4
1	2009-02-25 16:39:00	156	16	3	0	4
1	2009-02-25 16:40:00	0	16	3	0	4
1	2009-02-25 16:41:00	20	16	3	0	4
1	2009-02-25 16:42:00	459	16	3	0	4
1	2009-02-25 16:43:00	634	16	3	0	4
1	2009-02-25 16:44:00	427	16	3	0	4
1	2009-02-25 16:45:00	156	16	3	0	4
1	2009-02-25 16:46:00	0	16	3	0	4
1	2009-02-25 16:47:00	0	16	3	0	4
1	2009-02-25 16:48:00	0	16	3	0	4
1	2009-02-25 16:49:00	0	16	3	0	4
1	2009-02-25 16:50:00	0	16	3	0	4
1	2009-02-25 16:51:00	0	16	3	0	4
1	2009-02-25 16:52:00	309	16	3	0	4
1	2009-02-25 16:53:00	20	16	3	0	4
1	2009-02-25 16:54:00	10	16	3	0	4
1	2009-02-25 16:55:00	156	16	3	0	4
1	2009-02-25 16:56:00	0	16	3	0	4
1	2009-02-25 16:57:00	0	16	3	0	4
1	2009-02-25 16:58:00	205	16	3	0	4
1	2009-02-25 16:59:00	112	16	3	0	4
1	2009-02-25 17:00:00	309	16	3	0	4
1	2009-02-25 17:01:00	169	17	3	0	4
1	2009-02-25 17:02:00	81	17	3	0	4
1	2009-02-25 17:03:00	0	17	3	0	4
1	2009-02-25 17:04:00	0	17	3	0	4
1	2009-02-25 17:05:00	616	17	3	0	4
1	2009-02-25 17:06:00	112	17	3	0	4
1	2009-02-25 17:07:00	10	17	3	0	4
1	2009-02-25 17:08:00	217	17	3	0	4
1	2009-02-25 17:09:00	181	17	3	0	4
1	2009-02-25 17:10:00	10	17	3	0	4
1	2009-02-25 17:11:00	254	17	3	0	4
1	2009-02-25 17:12:00	1156	17	3	0	4
1	2009-02-25 17:13:00	295	17	3	0	4
1	2009-02-25 17:14:00	10	17	3	0	4
1	2009-02-25 17:15:00	492	17	3	0	4
1	2009-02-25 17:16:00	30	17	3	0	4
1	2009-02-25 17:17:00	132	17	3	0	4
1	2009-02-25 17:18:00	132	17	3	0	4
1	2009-02-25 17:19:00	323	17	3	0	4
1	2009-02-25 17:20:00	61	17	3	0	4
1	2009-02-25 17:21:00	122	17	3	0	4
1	2009-02-25 17:22:00	0	17	3	0	4
1	2009-02-25 17:23:00	0	17	3	0	4
1	2009-02-25 17:24:00	51	17	3	0	4
1	2009-02-25 17:25:00	217	17	3	0	4
1	2009-02-25 17:26:00	443	17	3	0	4
1	2009-02-25 17:27:00	977	17	3	0	4
1	2009-02-25 17:28:00	193	17	3	0	4
1	2009-02-25 17:29:00	144	17	3	0	4
1	2009-02-25 17:30:00	427	17	3	0	4
1	2009-02-25 17:31:00	366	17	3	0	4
1	2009-02-25 17:32:00	0	17	3	0	4
1	2009-02-25 17:33:00	91	17	3	0	4
1	2009-02-25 17:34:00	280	17	3	0	4
1	2009-02-25 17:35:00	10	17	3	0	4
1	2009-02-25 17:36:00	41	17	3	0	4
1	2009-02-25 17:37:00	0	17	3	0	4
1	2009-02-25 17:38:00	0	17	3	0	4
1	2009-02-25 17:39:00	20	17	3	0	4
1	2009-02-25 17:40:00	0	17	3	0	4
1	2009-02-25 17:41:00	0	17	3	0	4
1	2009-02-25 17:42:00	144	17	3	0	4
1	2009-02-25 17:43:00	0	17	3	0	4
1	2009-02-25 17:44:00	71	17	3	0	4
1	2009-02-25 17:45:00	10	17	3	0	4
1	2009-02-25 17:46:00	112	17	3	0	4
1	2009-02-25 17:47:00	20	17	3	0	4
1	2009-02-25 17:48:00	0	17	3	0	4
1	2009-02-25 17:49:00	0	17	3	0	4
1	2009-02-25 17:50:00	0	17	3	0	4
1	2009-02-25 17:51:00	0	17	3	0	4
1	2009-02-25 17:52:00	0	17	3	0	4
1	2009-02-25 17:53:00	0	17	3	0	4
1	2009-02-25 17:54:00	71	17	3	0	4
1	2009-02-25 17:55:00	102	17	3	0	4
1	2009-02-25 17:56:00	242	17	3	0	4
1	2009-02-25 17:57:00	181	17	3	0	4
1	2009-02-25 17:58:00	91	17	3	0	4
1	2009-02-25 17:59:00	0	17	3	0	4
1	2009-02-25 18:00:00	91	17	3	0	4
1	2009-02-25 18:01:00	10	18	4	0	4
1	2009-02-25 18:02:00	0	18	4	0	4
1	2009-02-25 18:03:00	0	18	4	0	4
1	2009-02-25 18:04:00	71	18	4	0	4
1	2009-02-25 18:05:00	0	18	4	0	4
1	2009-02-25 18:06:00	693	18	4	0	4
1	2009-02-25 18:07:00	230	18	4	0	4
1	2009-02-25 18:08:00	156	18	4	0	4
1	2009-02-25 18:09:00	144	18	4	0	4
1	2009-02-25 18:10:00	2702	18	4	0	4
1	2009-02-25 18:11:00	1751	18	4	0	4
1	2009-02-25 18:12:00	1825	18	4	0	4
1	2009-02-25 18:13:00	156	18	4	0	4
1	2009-02-25 18:14:00	205	18	4	0	4
1	2009-02-25 18:15:00	1386	18	4	0	4
1	2009-02-25 18:16:00	1611	18	4	0	4
1	2009-02-25 18:17:00	410	18	4	0	4
1	2009-02-25 18:18:00	1479	18	4	0	4
1	2009-02-25 18:19:00	132	18	4	0	4
1	2009-02-25 18:20:00	1788	18	4	0	4
1	2009-02-25 18:21:00	4409	18	4	0	4
1	2009-02-25 18:22:00	839	18	4	0	4
1	2009-02-25 18:23:00	1544	18	4	0	4
1	2009-02-25 18:24:00	597	18	4	0	4
1	2009-02-25 18:25:00	1447	18	4	0	4
1	2009-02-25 18:26:00	20	18	4	0	4
1	2009-02-25 18:27:00	0	18	4	0	4
1	2009-02-25 18:28:00	91	18	4	0	4
1	2009-02-25 18:29:00	0	18	4	0	4
1	2009-02-25 18:30:00	1026	18	4	0	4
1	2009-02-25 18:31:00	0	18	4	0	4
1	2009-02-25 18:32:00	10	18	4	0	4
1	2009-02-25 18:33:00	10	18	4	0	4
1	2009-02-25 18:34:00	309	18	4	0	4
1	2009-02-25 18:35:00	839	18	4	0	4
1	2009-02-25 18:36:00	634	18	4	0	4
1	2009-02-25 18:37:00	2503	18	4	0	4
1	2009-02-25 18:38:00	51	18	4	0	4
1	2009-02-25 18:39:00	754	18	4	0	4
1	2009-02-25 18:40:00	230	18	4	0	4
1	2009-02-25 18:41:00	20	18	4	0	4
1	2009-02-25 18:42:00	10	18	4	0	4
1	2009-02-25 18:43:00	144	18	4	0	4
1	2009-02-25 18:44:00	30	18	4	0	4
1	2009-02-25 18:45:00	0	18	4	0	4
1	2009-02-25 18:46:00	0	18	4	0	4
1	2009-02-25 18:47:00	0	18	4	0	4
1	2009-02-25 18:48:00	0	18	4	0	4
1	2009-02-25 18:49:00	0	18	4	0	4
1	2009-02-25 18:50:00	0	18	4	0	4
1	2009-02-25 18:51:00	51	18	4	0	4
1	2009-02-25 18:52:00	30	18	4	0	4
1	2009-02-25 18:53:00	156	18	4	0	4
1	2009-02-25 18:54:00	10	18	4	0	4
1	2009-02-25 18:55:00	0	18	4	0	4
1	2009-02-25 18:56:00	20	18	4	0	4
1	2009-02-25 18:57:00	0	18	4	0	4
1	2009-02-25 18:58:00	0	18	4	0	4
1	2009-02-25 18:59:00	10	18	4	0	4
1	2009-02-25 19:00:00	0	18	4	0	4
1	2009-02-25 19:01:00	0	19	4	0	4
1	2009-02-25 19:02:00	0	19	4	0	4
1	2009-02-25 19:03:00	0	19	4	0	4
1	2009-02-25 19:04:00	0	19	4	0	4
1	2009-02-25 19:05:00	0	19	4	0	4
1	2009-02-25 19:06:00	0	19	4	0	4
1	2009-02-25 19:07:00	0	19	4	0	4
1	2009-02-25 19:08:00	0	19	4	0	4
1	2009-02-25 19:09:00	0	19	4	0	4
1	2009-02-25 19:10:00	0	19	4	0	4
1	2009-02-25 19:11:00	0	19	4	0	4
1	2009-02-25 19:12:00	0	19	4	0	4
1	2009-02-25 19:13:00	0	19	4	0	4
1	2009-02-25 19:14:00	0	19	4	0	4
1	2009-02-25 19:15:00	30	19	4	0	4
1	2009-02-25 19:16:00	337	19	4	0	4
1	2009-02-25 19:17:00	20	19	4	0	4
1	2009-02-25 19:18:00	156	19	4	0	4
1	2009-02-25 19:19:00	0	19	4	0	4
1	2009-02-25 19:20:00	0	19	4	0	4
1	2009-02-25 19:21:00	0	19	4	0	4
1	2009-02-25 19:22:00	0	19	4	0	4
1	2009-02-25 19:23:00	0	19	4	0	4
1	2009-02-25 19:24:00	0	19	4	0	4
1	2009-02-25 19:25:00	0	19	4	0	4
1	2009-02-25 19:26:00	0	19	4	0	4
1	2009-02-25 19:27:00	0	19	4	0	4
1	2009-02-25 19:28:00	0	19	4	0	4
1	2009-02-25 19:29:00	0	19	4	0	4
1	2009-02-25 19:30:00	0	19	4	0	4
1	2009-02-25 19:31:00	0	19	4	0	4
1	2009-02-25 19:32:00	0	19	4	0	4
1	2009-02-25 19:33:00	0	19	4	0	4
1	2009-02-25 19:34:00	0	19	4	0	4
1	2009-02-25 19:35:00	0	19	4	0	4
1	2009-02-25 19:36:00	0	19	4	0	4
1	2009-02-25 19:37:00	0	19	4	0	4
1	2009-02-25 19:38:00	41	19	4	0	4
1	2009-02-25 19:39:00	30	19	4	0	4
1	2009-02-25 19:40:00	0	19	4	0	4
1	2009-02-25 19:41:00	0	19	4	0	4
1	2009-02-25 19:42:00	41	19	4	0	4
1	2009-02-25 19:43:00	41	19	4	0	4
1	2009-02-25 19:44:00	30	19	4	0	4
1	2009-02-25 19:45:00	0	19	4	0	4
1	2009-02-25 19:46:00	0	19	4	0	4
1	2009-02-25 19:47:00	0	19	4	0	4
1	2009-02-25 19:48:00	0	19	4	0	4
1	2009-02-25 19:49:00	0	19	4	0	4
1	2009-02-25 19:50:00	0	19	4	0	4
1	2009-02-25 19:51:00	0	19	4	0	4
1	2009-02-25 19:52:00	0	19	4	0	4
1	2009-02-25 19:53:00	0	19	4	0	4
1	2009-02-25 19:54:00	0	19	4	0	4
1	2009-02-25 19:55:00	0	19	4	0	4
1	2009-02-25 19:56:00	0	19	4	0	4
1	2009-02-25 19:57:00	0	19	4	0	4
1	2009-02-25 19:58:00	0	19	4	0	4
1	2009-02-25 19:59:00	0	19	4	0	4
1	2009-02-25 20:00:00	0	19	4	0	4
1	2009-02-25 20:01:00	0	20	4	0	4
1	2009-02-25 20:02:00	10	20	4	0	4
1	2009-02-25 20:03:00	41	20	4	0	4
1	2009-02-25 20:04:00	0	20	4	0	4
1	2009-02-25 20:05:00	0	20	4	0	4
1	2009-02-25 20:06:00	0	20	4	0	4
1	2009-02-25 20:07:00	0	20	4	0	4
1	2009-02-25 20:08:00	0	20	4	0	4
1	2009-02-25 20:09:00	0	20	4	0	4
1	2009-02-25 20:10:00	0	20	4	0	4
1	2009-02-25 20:11:00	0	20	4	0	4
1	2009-02-25 20:12:00	0	20	4	0	4
1	2009-02-25 20:13:00	0	20	4	0	4
1	2009-02-25 20:14:00	0	20	4	0	4
1	2009-02-25 20:15:00	41	20	4	0	4
1	2009-02-25 20:16:00	0	20	4	0	4
1	2009-02-25 20:17:00	0	20	4	0	4
1	2009-02-25 20:18:00	0	20	4	0	4
1	2009-02-25 20:19:00	0	20	4	0	4
1	2009-02-25 20:20:00	61	20	4	0	4
1	2009-02-25 20:21:00	0	20	4	0	4
1	2009-02-25 20:22:00	0	20	4	0	4
1	2009-02-25 20:23:00	30	20	4	0	4
1	2009-02-25 20:24:00	0	20	4	0	4
1	2009-02-25 20:25:00	30	20	4	0	4
1	2009-02-25 20:26:00	0	20	4	0	4
1	2009-02-25 20:27:00	20	20	4	0	4
1	2009-02-25 20:28:00	0	20	4	0	4
1	2009-02-25 20:29:00	0	20	4	0	4
1	2009-02-25 20:30:00	0	20	4	0	4
1	2009-02-25 20:31:00	0	20	4	0	4
1	2009-02-25 20:32:00	0	20	4	0	4
1	2009-02-25 20:33:00	0	20	4	0	4
1	2009-02-25 20:34:00	0	20	4	0	4
1	2009-02-25 20:35:00	693	20	4	0	4
1	2009-02-25 20:36:00	51	20	4	0	4
1	2009-02-25 20:37:00	169	20	4	0	4
1	2009-02-25 20:38:00	0	20	4	0	4
1	2009-02-25 20:39:00	266	20	4	0	4
1	2009-02-25 20:40:00	10	20	4	0	4
1	2009-02-25 20:41:00	132	20	4	0	4
1	2009-02-25 20:42:00	156	20	4	0	4
1	2009-02-25 20:43:00	0	20	4	0	4
1	2009-02-25 20:44:00	0	20	4	0	4
1	2009-02-25 20:45:00	0	20	4	0	4
1	2009-02-25 20:46:00	144	20	4	0	4
1	2009-02-25 20:47:00	122	20	4	0	4
1	2009-02-25 20:48:00	30	20	4	0	4
1	2009-02-25 20:49:00	20	20	4	0	4
1	2009-02-25 20:50:00	2363	20	4	0	4
1	2009-02-25 20:51:00	2410	20	4	0	4
1	2009-02-25 20:52:00	3436	20	4	0	4
1	2009-02-25 20:53:00	1479	20	4	0	4
1	2009-02-25 20:54:00	492	20	4	0	4
1	2009-02-25 20:55:00	266	20	4	0	4
1	2009-02-25 20:56:00	443	20	4	0	4
1	2009-02-25 20:57:00	323	20	4	0	4
1	2009-02-25 20:58:00	309	20	4	0	4
1	2009-02-25 20:59:00	193	20	4	0	4
1	2009-02-25 21:00:00	0	20	4	0	4
1	2009-02-25 21:01:00	337	21	4	0	4
1	2009-02-25 21:02:00	0	21	4	0	4
1	2009-02-25 21:03:00	0	21	4	0	4
1	2009-02-25 21:04:00	394	21	4	0	4
1	2009-02-25 21:05:00	380	21	4	0	4
1	2009-02-25 21:06:00	0	21	4	0	4
1	2009-02-25 21:07:00	0	21	4	0	4
1	2009-02-25 21:08:00	0	21	4	0	4
1	2009-02-25 21:09:00	0	21	4	0	4
1	2009-02-25 21:10:00	0	21	4	0	4
1	2009-02-25 21:11:00	0	21	4	0	4
1	2009-02-25 21:12:00	0	21	4	0	4
1	2009-02-25 21:13:00	0	21	4	0	4
1	2009-02-25 21:14:00	0	21	4	0	4
1	2009-02-25 21:15:00	0	21	4	0	4
1	2009-02-25 21:16:00	0	21	4	0	4
1	2009-02-25 21:17:00	0	21	4	0	4
1	2009-02-25 21:18:00	0	21	4	0	4
1	2009-02-25 21:19:00	0	21	4	0	4
1	2009-02-25 21:20:00	0	21	4	0	4
1	2009-02-25 21:21:00	0	21	4	0	4
1	2009-02-25 21:22:00	0	21	4	0	4
1	2009-02-25 21:23:00	0	21	4	0	4
1	2009-02-25 21:24:00	0	21	4	0	4
1	2009-02-25 21:25:00	0	21	4	0	4
1	2009-02-25 21:26:00	0	21	4	0	4
1	2009-02-25 21:27:00	0	21	4	0	4
1	2009-02-25 21:28:00	0	21	4	0	4
1	2009-02-25 21:29:00	0	21	4	0	4
1	2009-02-25 21:30:00	0	21	4	0	4
1	2009-02-25 21:31:00	0	21	4	0	4
1	2009-02-25 21:32:00	0	21	4	0	4
1	2009-02-25 21:33:00	0	21	4	0	4
1	2009-02-25 21:34:00	0	21	4	0	4
1	2009-02-25 21:35:00	0	21	4	0	4
1	2009-02-25 21:36:00	0	21	4	0	4
1	2009-02-25 21:37:00	0	21	4	0	4
1	2009-02-25 21:38:00	0	21	4	0	4
1	2009-02-25 21:39:00	0	21	4	0	4
1	2009-02-25 21:40:00	0	21	4	0	4
1	2009-02-25 21:41:00	0	21	4	0	4
1	2009-02-25 21:42:00	41	21	4	0	4
1	2009-02-25 21:43:00	30	21	4	0	4
1	2009-02-25 21:44:00	20	21	4	0	4
1	2009-02-25 21:45:00	30	21	4	0	4
1	2009-02-25 21:46:00	0	21	4	0	4
1	2009-02-25 21:47:00	10	21	4	0	4
1	2009-02-25 21:48:00	0	21	4	0	4
1	2009-02-25 21:49:00	0	21	4	0	4
1	2009-02-25 21:50:00	0	21	4	0	4
1	2009-02-25 21:51:00	0	21	4	0	4
1	2009-02-25 21:52:00	0	21	4	0	4
1	2009-02-25 21:53:00	0	21	4	0	4
1	2009-02-25 21:54:00	0	21	4	0	4
1	2009-02-25 21:55:00	0	21	4	0	4
1	2009-02-25 21:56:00	0	21	4	0	4
1	2009-02-25 21:57:00	0	21	4	0	4
1	2009-02-25 21:58:00	0	21	4	0	4
1	2009-02-25 21:59:00	0	21	4	0	4
1	2009-02-25 22:00:00	0	21	4	0	4
1	2009-02-25 22:01:00	0	22	4	0	4
1	2009-02-25 22:02:00	10	22	4	0	4
1	2009-02-25 22:03:00	0	22	4	0	4
1	2009-02-25 22:04:00	0	22	4	0	4
1	2009-02-25 22:05:00	0	22	4	0	4
1	2009-02-25 22:06:00	0	22	4	0	4
1	2009-02-25 22:07:00	0	22	4	0	4
1	2009-02-25 22:08:00	0	22	4	0	4
1	2009-02-25 22:09:00	0	22	4	0	4
1	2009-02-25 22:10:00	0	22	4	0	4
1	2009-02-25 22:11:00	0	22	4	0	4
1	2009-02-25 22:12:00	0	22	4	0	4
1	2009-02-25 22:13:00	0	22	4	0	4
1	2009-02-25 22:14:00	0	22	4	0	4
1	2009-02-25 22:15:00	0	22	4	0	4
1	2009-02-25 22:16:00	0	22	4	0	4
1	2009-02-25 22:17:00	0	22	4	0	4
1	2009-02-25 22:18:00	0	22	4	0	4
1	2009-02-25 22:19:00	0	22	4	0	4
1	2009-02-25 22:20:00	0	22	4	0	4
1	2009-02-25 22:21:00	0	22	4	0	4
1	2009-02-25 22:22:00	0	22	4	0	4
1	2009-02-25 22:23:00	0	22	4	0	4
1	2009-02-25 22:24:00	0	22	4	0	4
1	2009-02-25 22:25:00	0	22	4	0	4
1	2009-02-25 22:26:00	0	22	4	0	4
1	2009-02-25 22:27:00	0	22	4	0	4
1	2009-02-25 22:28:00	0	22	4	0	4
1	2009-02-25 22:29:00	0	22	4	0	4
1	2009-02-25 22:30:00	0	22	4	0	4
1	2009-02-25 22:31:00	0	22	4	0	4
1	2009-02-25 22:32:00	41	22	4	0	4
1	2009-02-25 22:33:00	20	22	4	0	4
1	2009-02-25 22:34:00	0	22	4	0	4
1	2009-02-25 22:35:00	0	22	4	0	4
1	2009-02-25 22:36:00	0	22	4	0	4
1	2009-02-25 22:37:00	0	22	4	0	4
1	2009-02-25 22:38:00	0	22	4	0	4
1	2009-02-25 22:39:00	0	22	4	0	4
1	2009-02-25 22:40:00	0	22	4	0	4
1	2009-02-25 22:41:00	0	22	4	0	4
1	2009-02-25 22:42:00	0	22	4	0	4
1	2009-02-25 22:43:00	0	22	4	0	4
1	2009-02-25 22:44:00	0	22	4	0	4
1	2009-02-25 22:45:00	0	22	4	0	4
1	2009-02-25 22:46:00	0	22	4	0	4
1	2009-02-25 22:47:00	0	22	4	0	4
1	2009-02-25 22:48:00	0	22	4	0	4
1	2009-02-25 22:49:00	0	22	4	0	4
1	2009-02-25 22:50:00	0	22	4	0	4
1	2009-02-25 22:51:00	0	22	4	0	4
1	2009-02-25 22:52:00	0	22	4	0	4
1	2009-02-25 22:53:00	0	22	4	0	4
1	2009-02-25 22:54:00	0	22	4	0	4
1	2009-02-25 22:55:00	0	22	4	0	4
1	2009-02-25 22:56:00	0	22	4	0	4
1	2009-02-25 22:57:00	0	22	4	0	4
1	2009-02-25 22:58:00	0	22	4	0	4
1	2009-02-25 22:59:00	0	22	4	0	4
1	2009-02-25 23:00:00	0	22	4	0	4
1	2009-02-25 23:01:00	0	23	4	0	4
1	2009-02-25 23:02:00	0	23	4	0	4
1	2009-02-25 23:03:00	0	23	4	0	4
1	2009-02-25 23:04:00	0	23	4	0	4
1	2009-02-25 23:05:00	0	23	4	0	4
1	2009-02-25 23:06:00	0	23	4	0	4
1	2009-02-25 23:07:00	0	23	4	0	4
1	2009-02-25 23:08:00	0	23	4	0	4
1	2009-02-25 23:09:00	0	23	4	0	4
1	2009-02-25 23:10:00	0	23	4	0	4
1	2009-02-25 23:11:00	0	23	4	0	4
1	2009-02-25 23:12:00	0	23	4	0	4
1	2009-02-25 23:13:00	0	23	4	0	4
1	2009-02-25 23:14:00	0	23	4	0	4
1	2009-02-25 23:15:00	0	23	4	0	4
1	2009-02-25 23:16:00	0	23	4	0	4
1	2009-02-25 23:17:00	0	23	4	0	4
1	2009-02-25 23:18:00	0	23	4	0	4
1	2009-02-25 23:19:00	0	23	4	0	4
1	2009-02-25 23:20:00	0	23	4	0	4
1	2009-02-25 23:21:00	0	23	4	0	4
1	2009-02-25 23:22:00	0	23	4	0	4
1	2009-02-25 23:23:00	0	23	4	0	4
1	2009-02-25 23:24:00	0	23	4	0	4
1	2009-02-25 23:25:00	0	23	4	0	4
1	2009-02-25 23:26:00	0	23	4	0	4
1	2009-02-25 23:27:00	51	23	4	0	4
1	2009-02-25 23:28:00	41	23	4	0	4
1	2009-02-25 23:29:00	10	23	4	0	4
1	2009-02-25 23:30:00	51	23	4	0	4
1	2009-02-25 23:31:00	0	23	4	0	4
1	2009-02-25 23:32:00	0	23	4	0	4
1	2009-02-25 23:33:00	0	23	4	0	4
1	2009-02-25 23:34:00	0	23	4	0	4
1	2009-02-25 23:35:00	0	23	4	0	4
1	2009-02-25 23:36:00	0	23	4	0	4
1	2009-02-25 23:37:00	0	23	4	0	4
1	2009-02-25 23:38:00	0	23	4	0	4
1	2009-02-25 23:39:00	0	23	4	0	4
1	2009-02-25 23:40:00	0	23	4	0	4
1	2009-02-25 23:41:00	0	23	4	0	4
1	2009-02-25 23:42:00	0	23	4	0	4
1	2009-02-25 23:43:00	0	23	4	0	4
1	2009-02-25 23:44:00	0	23	4	0	4
1	2009-02-25 23:45:00	0	23	4	0	4
1	2009-02-25 23:46:00	0	23	4	0	4
1	2009-02-25 23:47:00	0	23	4	0	4
1	2009-02-25 23:48:00	0	23	4	0	4
1	2009-02-25 23:49:00	30	23	4	0	4
1	2009-02-25 23:50:00	0	23	4	0	4
1	2009-02-25 23:51:00	0	23	4	0	4
1	2009-02-25 23:52:00	0	23	4	0	4
1	2009-02-25 23:53:00	0	23	4	0	4
1	2009-02-25 23:54:00	0	23	4	0	4
1	2009-02-25 23:55:00	0	23	4	0	4
1	2009-02-25 23:56:00	0	23	4	0	4
1	2009-02-25 23:57:00	0	23	4	0	4
1	2009-02-25 23:58:00	0	23	4	0	4
1	2009-02-25 23:59:00	0	23	4	0	4
1	2009-02-26	0	23	4	0	4
1	2009-02-26 00:01:00	0	0	1	1	5
1	2009-02-26 00:02:00	0	0	1	1	5
1	2009-02-26 00:03:00	0	0	1	1	5
1	2009-02-26 00:04:00	0	0	1	1	5
1	2009-02-26 00:05:00	0	0	1	1	5
1	2009-02-26 00:06:00	0	0	1	1	5
1	2009-02-26 00:07:00	0	0	1	1	5
1	2009-02-26 00:08:00	0	0	1	1	5
1	2009-02-26 00:09:00	0	0	1	1	5
1	2009-02-26 00:10:00	0	0	1	1	5
1	2009-02-26 00:11:00	0	0	1	1	5
1	2009-02-26 00:12:00	0	0	1	1	5
1	2009-02-26 00:13:00	0	0	1	1	5
1	2009-02-26 00:14:00	0	0	1	1	5
1	2009-02-26 00:15:00	0	0	1	1	5
1	2009-02-26 00:16:00	0	0	1	1	5
1	2009-02-26 00:17:00	0	0	1	1	5
1	2009-02-26 00:18:00	20	0	1	1	5
1	2009-02-26 00:19:00	20	0	1	1	5
1	2009-02-26 00:20:00	0	0	1	1	5
1	2009-02-26 00:21:00	0	0	1	1	5
1	2009-02-26 00:22:00	0	0	1	1	5
1	2009-02-26 00:23:00	0	0	1	1	5
1	2009-02-26 00:24:00	0	0	1	1	5
1	2009-02-26 00:25:00	0	0	1	1	5
1	2009-02-26 00:26:00	0	0	1	1	5
1	2009-02-26 00:27:00	0	0	1	1	5
1	2009-02-26 00:28:00	10	0	1	1	5
1	2009-02-26 00:29:00	0	0	1	1	5
1	2009-02-26 00:30:00	0	0	1	1	5
1	2009-02-26 00:31:00	0	0	1	1	5
1	2009-02-26 00:32:00	0	0	1	1	5
1	2009-02-26 00:33:00	0	0	1	1	5
1	2009-02-26 00:34:00	0	0	1	1	5
1	2009-02-26 00:35:00	0	0	1	1	5
1	2009-02-26 00:36:00	0	0	1	1	5
1	2009-02-26 00:37:00	0	0	1	1	5
1	2009-02-26 00:38:00	0	0	1	1	5
1	2009-02-26 00:39:00	0	0	1	1	5
1	2009-02-26 00:40:00	0	0	1	1	5
1	2009-02-26 00:41:00	0	0	1	1	5
1	2009-02-26 00:42:00	0	0	1	1	5
1	2009-02-26 00:43:00	0	0	1	1	5
1	2009-02-26 00:44:00	0	0	1	1	5
1	2009-02-26 00:45:00	0	0	1	1	5
1	2009-02-26 00:46:00	0	0	1	1	5
1	2009-02-26 00:47:00	0	0	1	1	5
1	2009-02-26 00:48:00	0	0	1	1	5
1	2009-02-26 00:49:00	0	0	1	1	5
1	2009-02-26 00:50:00	20	0	1	1	5
1	2009-02-26 00:51:00	0	0	1	1	5
1	2009-02-26 00:52:00	61	0	1	1	5
1	2009-02-26 00:53:00	0	0	1	1	5
1	2009-02-26 00:54:00	10	0	1	1	5
1	2009-02-26 00:55:00	10	0	1	1	5
1	2009-02-26 00:56:00	10	0	1	1	5
1	2009-02-26 00:57:00	30	0	1	1	5
1	2009-02-26 00:58:00	10	0	1	1	5
1	2009-02-26 00:59:00	30	0	1	1	5
1	2009-02-26 01:00:00	0	0	1	1	5
1	2009-02-26 01:01:00	0	1	1	1	5
1	2009-02-26 01:02:00	0	1	1	1	5
1	2009-02-26 01:03:00	91	1	1	1	5
1	2009-02-26 01:04:00	0	1	1	1	5
1	2009-02-26 01:05:00	0	1	1	1	5
1	2009-02-26 01:06:00	0	1	1	1	5
1	2009-02-26 01:07:00	0	1	1	1	5
1	2009-02-26 01:08:00	0	1	1	1	5
1	2009-02-26 01:09:00	0	1	1	1	5
1	2009-02-26 01:10:00	0	1	1	1	5
1	2009-02-26 01:11:00	0	1	1	1	5
1	2009-02-26 01:12:00	0	1	1	1	5
1	2009-02-26 01:13:00	0	1	1	1	5
1	2009-02-26 01:14:00	0	1	1	1	5
1	2009-02-26 01:15:00	0	1	1	1	5
1	2009-02-26 01:16:00	0	1	1	1	5
1	2009-02-26 01:17:00	0	1	1	1	5
1	2009-02-26 01:18:00	0	1	1	1	5
1	2009-02-26 01:19:00	0	1	1	1	5
1	2009-02-26 01:20:00	0	1	1	1	5
1	2009-02-26 01:21:00	0	1	1	1	5
1	2009-02-26 01:22:00	0	1	1	1	5
1	2009-02-26 01:23:00	0	1	1	1	5
1	2009-02-26 01:24:00	0	1	1	1	5
1	2009-02-26 01:25:00	0	1	1	1	5
1	2009-02-26 01:26:00	0	1	1	1	5
1	2009-02-26 01:27:00	10	1	1	1	5
1	2009-02-26 01:28:00	0	1	1	1	5
1	2009-02-26 01:29:00	0	1	1	1	5
1	2009-02-26 01:30:00	0	1	1	1	5
1	2009-02-26 01:31:00	0	1	1	1	5
1	2009-02-26 01:32:00	0	1	1	1	5
1	2009-02-26 01:33:00	0	1	1	1	5
1	2009-02-26 01:34:00	0	1	1	1	5
1	2009-02-26 01:35:00	0	1	1	1	5
1	2009-02-26 01:36:00	0	1	1	1	5
1	2009-02-26 01:37:00	0	1	1	1	5
1	2009-02-26 01:38:00	0	1	1	1	5
1	2009-02-26 01:39:00	0	1	1	1	5
1	2009-02-26 01:40:00	0	1	1	1	5
1	2009-02-26 01:41:00	0	1	1	1	5
1	2009-02-26 01:42:00	0	1	1	1	5
1	2009-02-26 01:43:00	0	1	1	1	5
1	2009-02-26 01:44:00	0	1	1	1	5
1	2009-02-26 01:45:00	0	1	1	1	5
1	2009-02-26 01:46:00	0	1	1	1	5
1	2009-02-26 01:47:00	0	1	1	1	5
1	2009-02-26 01:48:00	0	1	1	1	5
1	2009-02-26 01:49:00	0	1	1	1	5
1	2009-02-26 01:50:00	0	1	1	1	5
1	2009-02-26 01:51:00	0	1	1	1	5
1	2009-02-26 01:52:00	0	1	1	1	5
1	2009-02-26 01:53:00	0	1	1	1	5
1	2009-02-26 01:54:00	0	1	1	1	5
1	2009-02-26 01:55:00	0	1	1	1	5
1	2009-02-26 01:56:00	0	1	1	1	5
1	2009-02-26 01:57:00	0	1	1	1	5
1	2009-02-26 01:58:00	0	1	1	1	5
1	2009-02-26 01:59:00	0	1	1	1	5
1	2009-02-26 02:00:00	0	1	1	1	5
1	2009-02-26 02:01:00	0	2	1	1	5
1	2009-02-26 02:02:00	0	2	1	1	5
1	2009-02-26 02:03:00	0	2	1	1	5
1	2009-02-26 02:04:00	0	2	1	1	5
1	2009-02-26 02:05:00	0	2	1	1	5
1	2009-02-26 02:06:00	0	2	1	1	5
1	2009-02-26 02:07:00	0	2	1	1	5
1	2009-02-26 02:08:00	0	2	1	1	5
1	2009-02-26 02:09:00	0	2	1	1	5
1	2009-02-26 02:10:00	0	2	1	1	5
1	2009-02-26 02:11:00	0	2	1	1	5
1	2009-02-26 02:12:00	0	2	1	1	5
1	2009-02-26 02:13:00	0	2	1	1	5
1	2009-02-26 02:14:00	0	2	1	1	5
1	2009-02-26 02:15:00	0	2	1	1	5
1	2009-02-26 02:16:00	0	2	1	1	5
1	2009-02-26 02:17:00	0	2	1	1	5
1	2009-02-26 02:18:00	0	2	1	1	5
1	2009-02-26 02:19:00	0	2	1	1	5
1	2009-02-26 02:20:00	10	2	1	1	5
1	2009-02-26 02:21:00	0	2	1	1	5
1	2009-02-26 02:22:00	0	2	1	1	5
1	2009-02-26 02:23:00	0	2	1	1	5
1	2009-02-26 02:24:00	0	2	1	1	5
1	2009-02-26 02:25:00	0	2	1	1	5
1	2009-02-26 02:26:00	0	2	1	1	5
1	2009-02-26 02:27:00	0	2	1	1	5
1	2009-02-26 02:28:00	0	2	1	1	5
1	2009-02-26 02:29:00	0	2	1	1	5
1	2009-02-26 02:30:00	0	2	1	1	5
1	2009-02-26 02:31:00	0	2	1	1	5
1	2009-02-26 02:32:00	0	2	1	1	5
1	2009-02-26 02:33:00	0	2	1	1	5
1	2009-02-26 02:34:00	0	2	1	1	5
1	2009-02-26 02:35:00	20	2	1	1	5
1	2009-02-26 02:36:00	0	2	1	1	5
1	2009-02-26 02:37:00	0	2	1	1	5
1	2009-02-26 02:38:00	0	2	1	1	5
1	2009-02-26 02:39:00	0	2	1	1	5
1	2009-02-26 02:40:00	0	2	1	1	5
1	2009-02-26 02:41:00	0	2	1	1	5
1	2009-02-26 02:42:00	0	2	1	1	5
1	2009-02-26 02:43:00	0	2	1	1	5
1	2009-02-26 02:44:00	0	2	1	1	5
1	2009-02-26 02:45:00	0	2	1	1	5
1	2009-02-26 02:46:00	0	2	1	1	5
1	2009-02-26 02:47:00	0	2	1	1	5
1	2009-02-26 02:48:00	0	2	1	1	5
1	2009-02-26 02:49:00	0	2	1	1	5
1	2009-02-26 02:50:00	0	2	1	1	5
1	2009-02-26 02:51:00	0	2	1	1	5
1	2009-02-26 02:52:00	0	2	1	1	5
1	2009-02-26 02:53:00	0	2	1	1	5
1	2009-02-26 02:54:00	0	2	1	1	5
1	2009-02-26 02:55:00	0	2	1	1	5
1	2009-02-26 02:56:00	0	2	1	1	5
1	2009-02-26 02:57:00	0	2	1	1	5
1	2009-02-26 02:58:00	0	2	1	1	5
1	2009-02-26 02:59:00	0	2	1	1	5
1	2009-02-26 03:00:00	0	2	1	1	5
1	2009-02-26 03:01:00	0	3	1	1	5
1	2009-02-26 03:02:00	0	3	1	1	5
1	2009-02-26 03:03:00	20	3	1	1	5
1	2009-02-26 03:04:00	0	3	1	1	5
1	2009-02-26 03:05:00	0	3	1	1	5
1	2009-02-26 03:06:00	0	3	1	1	5
1	2009-02-26 03:07:00	0	3	1	1	5
1	2009-02-26 03:08:00	0	3	1	1	5
1	2009-02-26 03:09:00	0	3	1	1	5
1	2009-02-26 03:10:00	0	3	1	1	5
1	2009-02-26 03:11:00	0	3	1	1	5
1	2009-02-26 03:12:00	0	3	1	1	5
1	2009-02-26 03:13:00	0	3	1	1	5
1	2009-02-26 03:14:00	0	3	1	1	5
1	2009-02-26 03:15:00	0	3	1	1	5
1	2009-02-26 03:16:00	0	3	1	1	5
1	2009-02-26 03:17:00	0	3	1	1	5
1	2009-02-26 03:18:00	0	3	1	1	5
1	2009-02-26 03:19:00	0	3	1	1	5
1	2009-02-26 03:20:00	0	3	1	1	5
1	2009-02-26 03:21:00	0	3	1	1	5
1	2009-02-26 03:22:00	0	3	1	1	5
1	2009-02-26 03:23:00	0	3	1	1	5
1	2009-02-26 03:24:00	0	3	1	1	5
1	2009-02-26 03:25:00	0	3	1	1	5
1	2009-02-26 03:26:00	0	3	1	1	5
1	2009-02-26 03:27:00	0	3	1	1	5
1	2009-02-26 03:28:00	0	3	1	1	5
1	2009-02-26 03:29:00	61	3	1	1	5
1	2009-02-26 03:30:00	0	3	1	1	5
1	2009-02-26 03:31:00	20	3	1	1	5
1	2009-02-26 03:32:00	91	3	1	1	5
1	2009-02-26 03:33:00	0	3	1	1	5
1	2009-02-26 03:34:00	0	3	1	1	5
1	2009-02-26 03:35:00	51	3	1	1	5
1	2009-02-26 03:36:00	0	3	1	1	5
1	2009-02-26 03:37:00	0	3	1	1	5
1	2009-02-26 03:38:00	41	3	1	1	5
1	2009-02-26 03:39:00	0	3	1	1	5
1	2009-02-26 03:40:00	0	3	1	1	5
1	2009-02-26 03:41:00	0	3	1	1	5
1	2009-02-26 03:42:00	0	3	1	1	5
1	2009-02-26 03:43:00	0	3	1	1	5
1	2009-02-26 03:44:00	0	3	1	1	5
1	2009-02-26 03:45:00	0	3	1	1	5
1	2009-02-26 03:46:00	0	3	1	1	5
1	2009-02-26 03:47:00	0	3	1	1	5
1	2009-02-26 03:48:00	0	3	1	1	5
1	2009-02-26 03:49:00	0	3	1	1	5
1	2009-02-26 03:50:00	0	3	1	1	5
1	2009-02-26 03:51:00	0	3	1	1	5
1	2009-02-26 03:52:00	0	3	1	1	5
1	2009-02-26 03:53:00	0	3	1	1	5
1	2009-02-26 03:54:00	0	3	1	1	5
1	2009-02-26 03:55:00	0	3	1	1	5
1	2009-02-26 03:56:00	0	3	1	1	5
1	2009-02-26 03:57:00	0	3	1	1	5
1	2009-02-26 03:58:00	0	3	1	1	5
1	2009-02-26 03:59:00	0	3	1	1	5
1	2009-02-26 04:00:00	0	3	1	1	5
1	2009-02-26 04:01:00	30	4	1	1	5
1	2009-02-26 04:02:00	51	4	1	1	5
1	2009-02-26 04:03:00	0	4	1	1	5
1	2009-02-26 04:04:00	0	4	1	1	5
1	2009-02-26 04:05:00	30	4	1	1	5
1	2009-02-26 04:06:00	0	4	1	1	5
1	2009-02-26 04:07:00	0	4	1	1	5
1	2009-02-26 04:08:00	0	4	1	1	5
1	2009-02-26 04:09:00	0	4	1	1	5
1	2009-02-26 04:10:00	0	4	1	1	5
1	2009-02-26 04:11:00	0	4	1	1	5
1	2009-02-26 04:12:00	0	4	1	1	5
1	2009-02-26 04:13:00	0	4	1	1	5
1	2009-02-26 04:14:00	0	4	1	1	5
1	2009-02-26 04:15:00	0	4	1	1	5
1	2009-02-26 04:16:00	0	4	1	1	5
1	2009-02-26 04:17:00	0	4	1	1	5
1	2009-02-26 04:18:00	0	4	1	1	5
1	2009-02-26 04:19:00	0	4	1	1	5
1	2009-02-26 04:20:00	0	4	1	1	5
1	2009-02-26 04:21:00	0	4	1	1	5
1	2009-02-26 04:22:00	0	4	1	1	5
1	2009-02-26 04:23:00	0	4	1	1	5
1	2009-02-26 04:24:00	0	4	1	1	5
1	2009-02-26 04:25:00	20	4	1	1	5
1	2009-02-26 04:26:00	0	4	1	1	5
1	2009-02-26 04:27:00	0	4	1	1	5
1	2009-02-26 04:28:00	0	4	1	1	5
1	2009-02-26 04:29:00	0	4	1	1	5
1	2009-02-26 04:30:00	0	4	1	1	5
1	2009-02-26 04:31:00	0	4	1	1	5
1	2009-02-26 04:32:00	0	4	1	1	5
1	2009-02-26 04:33:00	0	4	1	1	5
1	2009-02-26 04:34:00	0	4	1	1	5
1	2009-02-26 04:35:00	0	4	1	1	5
1	2009-02-26 04:36:00	0	4	1	1	5
1	2009-02-26 04:37:00	0	4	1	1	5
1	2009-02-26 04:38:00	0	4	1	1	5
1	2009-02-26 04:39:00	20	4	1	1	5
1	2009-02-26 04:40:00	0	4	1	1	5
1	2009-02-26 04:41:00	0	4	1	1	5
1	2009-02-26 04:42:00	0	4	1	1	5
1	2009-02-26 04:43:00	0	4	1	1	5
1	2009-02-26 04:44:00	0	4	1	1	5
1	2009-02-26 04:45:00	0	4	1	1	5
1	2009-02-26 04:46:00	0	4	1	1	5
1	2009-02-26 04:47:00	0	4	1	1	5
1	2009-02-26 04:48:00	0	4	1	1	5
1	2009-02-26 04:49:00	0	4	1	1	5
1	2009-02-26 04:50:00	20	4	1	1	5
1	2009-02-26 04:51:00	0	4	1	1	5
1	2009-02-26 04:52:00	41	4	1	1	5
1	2009-02-26 04:53:00	0	4	1	1	5
1	2009-02-26 04:54:00	10	4	1	1	5
1	2009-02-26 04:55:00	0	4	1	1	5
1	2009-02-26 04:56:00	0	4	1	1	5
1	2009-02-26 04:57:00	0	4	1	1	5
1	2009-02-26 04:58:00	0	4	1	1	5
1	2009-02-26 04:59:00	0	4	1	1	5
1	2009-02-26 05:00:00	0	4	1	1	5
1	2009-02-26 05:01:00	0	5	1	1	5
1	2009-02-26 05:02:00	0	5	1	1	5
1	2009-02-26 05:03:00	0	5	1	1	5
1	2009-02-26 05:04:00	0	5	1	1	5
1	2009-02-26 05:05:00	0	5	1	1	5
1	2009-02-26 05:06:00	0	5	1	1	5
1	2009-02-26 05:07:00	0	5	1	1	5
1	2009-02-26 05:08:00	0	5	1	1	5
1	2009-02-26 05:09:00	0	5	1	1	5
1	2009-02-26 05:10:00	0	5	1	1	5
1	2009-02-26 05:11:00	0	5	1	1	5
1	2009-02-26 05:12:00	71	5	1	1	5
1	2009-02-26 05:13:00	0	5	1	1	5
1	2009-02-26 05:14:00	0	5	1	1	5
1	2009-02-26 05:15:00	0	5	1	1	5
1	2009-02-26 05:16:00	0	5	1	1	5
1	2009-02-26 05:17:00	112	5	1	1	5
1	2009-02-26 05:18:00	0	5	1	1	5
1	2009-02-26 05:19:00	0	5	1	1	5
1	2009-02-26 05:20:00	0	5	1	1	5
1	2009-02-26 05:21:00	0	5	1	1	5
1	2009-02-26 05:22:00	0	5	1	1	5
1	2009-02-26 05:23:00	0	5	1	1	5
1	2009-02-26 05:24:00	0	5	1	1	5
1	2009-02-26 05:25:00	0	5	1	1	5
1	2009-02-26 05:26:00	0	5	1	1	5
1	2009-02-26 05:27:00	0	5	1	1	5
1	2009-02-26 05:28:00	0	5	1	1	5
1	2009-02-26 05:29:00	0	5	1	1	5
1	2009-02-26 05:30:00	0	5	1	1	5
1	2009-02-26 05:31:00	0	5	1	1	5
1	2009-02-26 05:32:00	0	5	1	1	5
1	2009-02-26 05:33:00	0	5	1	1	5
1	2009-02-26 05:34:00	0	5	1	1	5
1	2009-02-26 05:35:00	0	5	1	1	5
1	2009-02-26 05:36:00	0	5	1	1	5
1	2009-02-26 05:37:00	0	5	1	1	5
1	2009-02-26 05:38:00	0	5	1	1	5
1	2009-02-26 05:39:00	0	5	1	1	5
1	2009-02-26 05:40:00	0	5	1	1	5
1	2009-02-26 05:41:00	0	5	1	1	5
1	2009-02-26 05:42:00	132	5	1	1	5
1	2009-02-26 05:43:00	10	5	1	1	5
1	2009-02-26 05:44:00	0	5	1	1	5
1	2009-02-26 05:45:00	0	5	1	1	5
1	2009-02-26 05:46:00	51	5	1	1	5
1	2009-02-26 05:47:00	51	5	1	1	5
1	2009-02-26 05:48:00	0	5	1	1	5
1	2009-02-26 05:49:00	0	5	1	1	5
1	2009-02-26 05:50:00	0	5	1	1	5
1	2009-02-26 05:51:00	0	5	1	1	5
1	2009-02-26 05:52:00	0	5	1	1	5
1	2009-02-26 05:53:00	0	5	1	1	5
1	2009-02-26 05:54:00	0	5	1	1	5
1	2009-02-26 05:55:00	0	5	1	1	5
1	2009-02-26 05:56:00	0	5	1	1	5
1	2009-02-26 05:57:00	0	5	1	1	5
1	2009-02-26 05:58:00	0	5	1	1	5
1	2009-02-26 05:59:00	0	5	1	1	5
1	2009-02-26 06:00:00	0	5	1	1	5
1	2009-02-26 06:01:00	0	6	2	1	5
1	2009-02-26 06:02:00	0	6	2	1	5
1	2009-02-26 06:03:00	0	6	2	1	5
1	2009-02-26 06:04:00	0	6	2	1	5
1	2009-02-26 06:05:00	0	6	2	1	5
1	2009-02-26 06:06:00	0	6	2	1	5
1	2009-02-26 06:07:00	0	6	2	1	5
1	2009-02-26 06:08:00	0	6	2	1	5
1	2009-02-26 06:09:00	0	6	2	1	5
1	2009-02-26 06:10:00	71	6	2	1	5
1	2009-02-26 06:11:00	0	6	2	1	5
1	2009-02-26 06:12:00	0	6	2	1	5
1	2009-02-26 06:13:00	0	6	2	1	5
1	2009-02-26 06:14:00	30	6	2	1	5
1	2009-02-26 06:15:00	10	6	2	1	5
1	2009-02-26 06:16:00	0	6	2	1	5
1	2009-02-26 06:17:00	0	6	2	1	5
1	2009-02-26 06:18:00	91	6	2	1	5
1	2009-02-26 06:19:00	91	6	2	1	5
1	2009-02-26 06:20:00	366	6	2	1	5
1	2009-02-26 06:21:00	366	6	2	1	5
1	2009-02-26 06:22:00	71	6	2	1	5
1	2009-02-26 06:23:00	0	6	2	1	5
1	2009-02-26 06:24:00	0	6	2	1	5
1	2009-02-26 06:25:00	0	6	2	1	5
1	2009-02-26 06:26:00	0	6	2	1	5
1	2009-02-26 06:27:00	0	6	2	1	5
1	2009-02-26 06:28:00	0	6	2	1	5
1	2009-02-26 06:29:00	0	6	2	1	5
1	2009-02-26 06:30:00	0	6	2	1	5
1	2009-02-26 06:31:00	0	6	2	1	5
1	2009-02-26 06:32:00	0	6	2	1	5
1	2009-02-26 06:33:00	0	6	2	1	5
1	2009-02-26 06:34:00	0	6	2	1	5
1	2009-02-26 06:35:00	0	6	2	1	5
1	2009-02-26 06:36:00	0	6	2	1	5
1	2009-02-26 06:37:00	0	6	2	1	5
1	2009-02-26 06:38:00	0	6	2	1	5
1	2009-02-26 06:39:00	0	6	2	1	5
1	2009-02-26 06:40:00	0	6	2	1	5
1	2009-02-26 06:41:00	0	6	2	1	5
1	2009-02-26 06:42:00	0	6	2	1	5
1	2009-02-26 06:43:00	0	6	2	1	5
1	2009-02-26 06:44:00	0	6	2	1	5
1	2009-02-26 06:45:00	616	6	2	1	5
1	2009-02-26 06:46:00	10	6	2	1	5
1	2009-02-26 06:47:00	20	6	2	1	5
1	2009-02-26 06:48:00	0	6	2	1	5
1	2009-02-26 06:49:00	10	6	2	1	5
1	2009-02-26 06:50:00	0	6	2	1	5
1	2009-02-26 06:51:00	0	6	2	1	5
1	2009-02-26 06:52:00	0	6	2	1	5
1	2009-02-26 06:53:00	0	6	2	1	5
1	2009-02-26 06:54:00	0	6	2	1	5
1	2009-02-26 06:55:00	10	6	2	1	5
1	2009-02-26 06:56:00	144	6	2	1	5
1	2009-02-26 06:57:00	2806	6	2	1	5
1	2009-02-26 06:58:00	861	6	2	1	5
1	2009-02-26 06:59:00	410	6	2	1	5
1	2009-02-26 07:00:00	597	6	2	1	5
1	2009-02-26 07:01:00	61	7	2	1	5
1	2009-02-26 07:02:00	230	7	2	1	5
1	2009-02-26 07:03:00	122	7	2	1	5
1	2009-02-26 07:04:00	10	7	2	1	5
1	2009-02-26 07:05:00	0	7	2	1	5
1	2009-02-26 07:06:00	0	7	2	1	5
1	2009-02-26 07:07:00	102	7	2	1	5
1	2009-02-26 07:08:00	0	7	2	1	5
1	2009-02-26 07:09:00	0	7	2	1	5
1	2009-02-26 07:10:00	0	7	2	1	5
1	2009-02-26 07:11:00	0	7	2	1	5
1	2009-02-26 07:12:00	156	7	2	1	5
1	2009-02-26 07:13:00	774	7	2	1	5
1	2009-02-26 07:14:00	181	7	2	1	5
1	2009-02-26 07:15:00	205	7	2	1	5
1	2009-02-26 07:16:00	266	7	2	1	5
1	2009-02-26 07:17:00	673	7	2	1	5
1	2009-02-26 07:18:00	733	7	2	1	5
1	2009-02-26 07:19:00	634	7	2	1	5
1	2009-02-26 07:20:00	205	7	2	1	5
1	2009-02-26 07:21:00	0	7	2	1	5
1	2009-02-26 07:22:00	0	7	2	1	5
1	2009-02-26 07:23:00	10	7	2	1	5
1	2009-02-26 07:24:00	0	7	2	1	5
1	2009-02-26 07:25:00	0	7	2	1	5
1	2009-02-26 07:26:00	0	7	2	1	5
1	2009-02-26 07:27:00	0	7	2	1	5
1	2009-02-26 07:28:00	0	7	2	1	5
1	2009-02-26 07:29:00	0	7	2	1	5
1	2009-02-26 07:30:00	112	7	2	1	5
1	2009-02-26 07:31:00	295	7	2	1	5
1	2009-02-26 07:32:00	230	7	2	1	5
1	2009-02-26 07:33:00	323	7	2	1	5
1	2009-02-26 07:34:00	443	7	2	1	5
1	2009-02-26 07:35:00	634	7	2	1	5
1	2009-02-26 07:36:00	20	7	2	1	5
1	2009-02-26 07:37:00	20	7	2	1	5
1	2009-02-26 07:38:00	61	7	2	1	5
1	2009-02-26 07:39:00	71	7	2	1	5
1	2009-02-26 07:40:00	394	7	2	1	5
1	2009-02-26 07:41:00	181	7	2	1	5
1	2009-02-26 07:42:00	0	7	2	1	5
1	2009-02-26 07:43:00	0	7	2	1	5
1	2009-02-26 07:44:00	10	7	2	1	5
1	2009-02-26 07:45:00	0	7	2	1	5
1	2009-02-26 07:46:00	0	7	2	1	5
1	2009-02-26 07:47:00	0	7	2	1	5
1	2009-02-26 07:48:00	0	7	2	1	5
1	2009-02-26 07:49:00	0	7	2	1	5
1	2009-02-26 07:50:00	0	7	2	1	5
1	2009-02-26 07:51:00	10	7	2	1	5
1	2009-02-26 07:52:00	0	7	2	1	5
1	2009-02-26 07:53:00	0	7	2	1	5
1	2009-02-26 07:54:00	0	7	2	1	5
1	2009-02-26 07:55:00	10	7	2	1	5
1	2009-02-26 07:56:00	112	7	2	1	5
1	2009-02-26 07:57:00	0	7	2	1	5
1	2009-02-26 07:58:00	0	7	2	1	5
1	2009-02-26 07:59:00	475	7	2	1	5
1	2009-02-26 08:00:00	351	7	2	1	5
1	2009-02-26 08:01:00	0	8	2	1	5
1	2009-02-26 08:02:00	61	8	2	1	5
1	2009-02-26 08:03:00	323	8	2	1	5
1	2009-02-26 08:04:00	10	8	2	1	5
1	2009-02-26 08:05:00	10	8	2	1	5
1	2009-02-26 08:06:00	122	8	2	1	5
1	2009-02-26 08:07:00	884	8	2	1	5
1	2009-02-26 08:08:00	61	8	2	1	5
1	2009-02-26 08:09:00	459	8	2	1	5
1	2009-02-26 08:10:00	673	8	2	1	5
1	2009-02-26 08:11:00	693	8	2	1	5
1	2009-02-26 08:12:00	1268	8	2	1	5
1	2009-02-26 08:13:00	693	8	2	1	5
1	2009-02-26 08:14:00	459	8	2	1	5
1	2009-02-26 08:15:00	41	8	2	1	5
1	2009-02-26 08:16:00	102	8	2	1	5
1	2009-02-26 08:17:00	0	8	2	1	5
1	2009-02-26 08:18:00	0	8	2	1	5
1	2009-02-26 08:19:00	0	8	2	1	5
1	2009-02-26 08:20:00	10	8	2	1	5
1	2009-02-26 08:21:00	0	8	2	1	5
1	2009-02-26 08:22:00	41	8	2	1	5
1	2009-02-26 08:23:00	0	8	2	1	5
1	2009-02-26 08:24:00	61	8	2	1	5
1	2009-02-26 08:25:00	953	8	2	1	5
1	2009-02-26 08:26:00	561	8	2	1	5
1	2009-02-26 08:27:00	713	8	2	1	5
1	2009-02-26 08:28:00	774	8	2	1	5
1	2009-02-26 08:29:00	475	8	2	1	5
1	2009-02-26 08:30:00	193	8	2	1	5
1	2009-02-26 08:31:00	41	8	2	1	5
1	2009-02-26 08:32:00	0	8	2	1	5
1	2009-02-26 08:33:00	10	8	2	1	5
1	2009-02-26 08:34:00	0	8	2	1	5
1	2009-02-26 08:35:00	0	8	2	1	5
1	2009-02-26 08:36:00	0	8	2	1	5
1	2009-02-26 08:37:00	0	8	2	1	5
1	2009-02-26 08:38:00	0	8	2	1	5
1	2009-02-26 08:39:00	169	8	2	1	5
1	2009-02-26 08:40:00	1026	8	2	1	5
1	2009-02-26 08:41:00	337	8	2	1	5
1	2009-02-26 08:42:00	122	8	2	1	5
1	2009-02-26 08:43:00	193	8	2	1	5
1	2009-02-26 08:44:00	144	8	2	1	5
1	2009-02-26 08:45:00	132	8	2	1	5
1	2009-02-26 08:46:00	242	8	2	1	5
1	2009-02-26 08:47:00	524	8	2	1	5
1	2009-02-26 08:48:00	492	8	2	1	5
1	2009-02-26 08:49:00	309	8	2	1	5
1	2009-02-26 08:50:00	713	8	2	1	5
1	2009-02-26 08:51:00	337	8	2	1	5
1	2009-02-26 08:52:00	524	8	2	1	5
1	2009-02-26 08:53:00	861	8	2	1	5
1	2009-02-26 08:54:00	266	8	2	1	5
1	2009-02-26 08:55:00	144	8	2	1	5
1	2009-02-26 08:56:00	20	8	2	1	5
1	2009-02-26 08:57:00	20	8	2	1	5
1	2009-02-26 08:58:00	0	8	2	1	5
1	2009-02-26 08:59:00	0	8	2	1	5
1	2009-02-26 09:00:00	0	8	2	1	5
1	2009-02-26 09:01:00	0	9	2	1	5
1	2009-02-26 09:02:00	0	9	2	1	5
1	2009-02-26 09:03:00	0	9	2	1	5
1	2009-02-26 09:04:00	0	9	2	1	5
1	2009-02-26 09:05:00	10	9	2	1	5
1	2009-02-26 09:06:00	0	9	2	1	5
1	2009-02-26 09:07:00	20	9	2	1	5
1	2009-02-26 09:08:00	0	9	2	1	5
1	2009-02-26 09:09:00	0	9	2	1	5
1	2009-02-26 09:10:00	0	9	2	1	5
1	2009-02-26 09:11:00	0	9	2	1	5
1	2009-02-26 09:12:00	0	9	2	1	5
1	2009-02-26 09:13:00	0	9	2	1	5
1	2009-02-26 09:14:00	0	9	2	1	5
1	2009-02-26 09:15:00	0	9	2	1	5
1	2009-02-26 09:16:00	0	9	2	1	5
1	2009-02-26 09:17:00	0	9	2	1	5
1	2009-02-26 09:18:00	0	9	2	1	5
1	2009-02-26 09:19:00	0	9	2	1	5
1	2009-02-26 09:20:00	20	9	2	1	5
1	2009-02-26 09:21:00	0	9	2	1	5
1	2009-02-26 09:22:00	61	9	2	1	5
1	2009-02-26 09:23:00	475	9	2	1	5
1	2009-02-26 09:24:00	794	9	2	1	5
1	2009-02-26 09:25:00	524	9	2	1	5
1	2009-02-26 09:26:00	169	9	2	1	5
1	2009-02-26 09:27:00	144	9	2	1	5
1	2009-02-26 09:28:00	112	9	2	1	5
1	2009-02-26 09:29:00	634	9	2	1	5
1	2009-02-26 09:30:00	733	9	2	1	5
1	2009-02-26 09:31:00	81	9	2	1	5
1	2009-02-26 09:32:00	0	9	2	1	5
1	2009-02-26 09:33:00	427	9	2	1	5
1	2009-02-26 09:34:00	91	9	2	1	5
1	2009-02-26 09:35:00	10	9	2	1	5
1	2009-02-26 09:36:00	132	9	2	1	5
1	2009-02-26 09:37:00	112	9	2	1	5
1	2009-02-26 09:38:00	102	9	2	1	5
1	2009-02-26 09:39:00	156	9	2	1	5
1	2009-02-26 09:40:00	122	9	2	1	5
1	2009-02-26 09:41:00	337	9	2	1	5
1	2009-02-26 09:42:00	10	9	2	1	5
1	2009-02-26 09:43:00	71	9	2	1	5
1	2009-02-26 09:44:00	266	9	2	1	5
1	2009-02-26 09:45:00	30	9	2	1	5
1	2009-02-26 09:46:00	20	9	2	1	5
1	2009-02-26 09:47:00	0	9	2	1	5
1	2009-02-26 09:48:00	309	9	2	1	5
1	2009-02-26 09:49:00	230	9	2	1	5
1	2009-02-26 09:50:00	443	9	2	1	5
1	2009-02-26 09:51:00	156	9	2	1	5
1	2009-02-26 09:52:00	10	9	2	1	5
1	2009-02-26 09:53:00	20	9	2	1	5
1	2009-02-26 09:54:00	542	9	2	1	5
1	2009-02-26 09:55:00	230	9	2	1	5
1	2009-02-26 09:56:00	10	9	2	1	5
1	2009-02-26 09:57:00	0	9	2	1	5
1	2009-02-26 09:58:00	542	9	2	1	5
1	2009-02-26 09:59:00	524	9	2	1	5
1	2009-02-26 10:00:00	861	9	2	1	5
1	2009-02-26 10:01:00	1825	10	2	1	5
1	2009-02-26 10:02:00	1512	10	2	1	5
1	2009-02-26 10:03:00	884	10	2	1	5
1	2009-02-26 10:04:00	323	10	2	1	5
1	2009-02-26 10:05:00	280	10	2	1	5
1	2009-02-26 10:06:00	0	10	2	1	5
1	2009-02-26 10:07:00	61	10	2	1	5
1	2009-02-26 10:08:00	508	10	2	1	5
1	2009-02-26 10:09:00	1512	10	2	1	5
1	2009-02-26 10:10:00	524	10	2	1	5
1	2009-02-26 10:11:00	156	10	2	1	5
1	2009-02-26 10:12:00	71	10	2	1	5
1	2009-02-26 10:13:00	0	10	2	1	5
1	2009-02-26 10:14:00	0	10	2	1	5
1	2009-02-26 10:15:00	144	10	2	1	5
1	2009-02-26 10:16:00	30	10	2	1	5
1	2009-02-26 10:17:00	0	10	2	1	5
1	2009-02-26 10:18:00	102	10	2	1	5
1	2009-02-26 10:19:00	61	10	2	1	5
1	2009-02-26 10:20:00	0	10	2	1	5
1	2009-02-26 10:21:00	10	10	2	1	5
1	2009-02-26 10:22:00	10	10	2	1	5
1	2009-02-26 10:23:00	0	10	2	1	5
1	2009-02-26 10:24:00	0	10	2	1	5
1	2009-02-26 10:25:00	0	10	2	1	5
1	2009-02-26 10:26:00	0	10	2	1	5
1	2009-02-26 10:27:00	30	10	2	1	5
1	2009-02-26 10:28:00	0	10	2	1	5
1	2009-02-26 10:29:00	0	10	2	1	5
1	2009-02-26 10:30:00	0	10	2	1	5
1	2009-02-26 10:31:00	0	10	2	1	5
1	2009-02-26 10:32:00	41	10	2	1	5
1	2009-02-26 10:33:00	0	10	2	1	5
1	2009-02-26 10:34:00	0	10	2	1	5
1	2009-02-26 10:35:00	0	10	2	1	5
1	2009-02-26 10:36:00	0	10	2	1	5
1	2009-02-26 10:37:00	112	10	2	1	5
1	2009-02-26 10:38:00	10	10	2	1	5
1	2009-02-26 10:39:00	0	10	2	1	5
1	2009-02-26 10:40:00	193	10	2	1	5
1	2009-02-26 10:41:00	71	10	2	1	5
1	2009-02-26 10:42:00	0	10	2	1	5
1	2009-02-26 10:43:00	0	10	2	1	5
1	2009-02-26 10:44:00	0	10	2	1	5
1	2009-02-26 10:45:00	254	10	2	1	5
1	2009-02-26 10:46:00	10	10	2	1	5
1	2009-02-26 10:47:00	0	10	2	1	5
1	2009-02-26 10:48:00	0	10	2	1	5
1	2009-02-26 10:49:00	0	10	2	1	5
1	2009-02-26 10:50:00	0	10	2	1	5
1	2009-02-26 10:51:00	0	10	2	1	5
1	2009-02-26 10:52:00	266	10	2	1	5
1	2009-02-26 10:53:00	0	10	2	1	5
1	2009-02-26 10:54:00	81	10	2	1	5
1	2009-02-26 10:55:00	122	10	2	1	5
1	2009-02-26 10:56:00	10	10	2	1	5
1	2009-02-26 10:57:00	0	10	2	1	5
1	2009-02-26 10:58:00	0	10	2	1	5
1	2009-02-26 10:59:00	0	10	2	1	5
1	2009-02-26 11:00:00	0	10	2	1	5
1	2009-02-26 11:01:00	0	11	2	1	5
1	2009-02-26 11:02:00	0	11	2	1	5
1	2009-02-26 11:03:00	0	11	2	1	5
1	2009-02-26 11:04:00	0	11	2	1	5
1	2009-02-26 11:05:00	0	11	2	1	5
1	2009-02-26 11:06:00	0	11	2	1	5
1	2009-02-26 11:07:00	0	11	2	1	5
1	2009-02-26 11:08:00	0	11	2	1	5
1	2009-02-26 11:09:00	0	11	2	1	5
1	2009-02-26 11:10:00	0	11	2	1	5
1	2009-02-26 11:11:00	0	11	2	1	5
1	2009-02-26 11:12:00	0	11	2	1	5
1	2009-02-26 11:13:00	0	11	2	1	5
1	2009-02-26 11:14:00	0	11	2	1	5
1	2009-02-26 11:15:00	0	11	2	1	5
1	2009-02-26 11:16:00	0	11	2	1	5
1	2009-02-26 11:17:00	0	11	2	1	5
1	2009-02-26 11:18:00	10	11	2	1	5
1	2009-02-26 11:19:00	0	11	2	1	5
1	2009-02-26 11:20:00	10	11	2	1	5
1	2009-02-26 11:21:00	0	11	2	1	5
1	2009-02-26 11:22:00	0	11	2	1	5
1	2009-02-26 11:23:00	0	11	2	1	5
1	2009-02-26 11:24:00	0	11	2	1	5
1	2009-02-26 11:25:00	0	11	2	1	5
1	2009-02-26 11:26:00	337	11	2	1	5
1	2009-02-26 11:27:00	181	11	2	1	5
1	2009-02-26 11:28:00	0	11	2	1	5
1	2009-02-26 11:29:00	0	11	2	1	5
1	2009-02-26 11:30:00	0	11	2	1	5
1	2009-02-26 11:31:00	30	11	2	1	5
1	2009-02-26 11:32:00	0	11	2	1	5
1	2009-02-26 11:33:00	0	11	2	1	5
1	2009-02-26 11:34:00	0	11	2	1	5
1	2009-02-26 11:35:00	0	11	2	1	5
1	2009-02-26 11:36:00	0	11	2	1	5
1	2009-02-26 11:37:00	0	11	2	1	5
1	2009-02-26 11:38:00	0	11	2	1	5
1	2009-02-26 11:39:00	41	11	2	1	5
1	2009-02-26 11:40:00	0	11	2	1	5
1	2009-02-26 11:41:00	0	11	2	1	5
1	2009-02-26 11:42:00	10	11	2	1	5
1	2009-02-26 11:43:00	10	11	2	1	5
1	2009-02-26 11:44:00	20	11	2	1	5
1	2009-02-26 11:45:00	0	11	2	1	5
1	2009-02-26 11:46:00	0	11	2	1	5
1	2009-02-26 11:47:00	0	11	2	1	5
1	2009-02-26 11:48:00	0	11	2	1	5
1	2009-02-26 11:49:00	0	11	2	1	5
1	2009-02-26 11:50:00	0	11	2	1	5
1	2009-02-26 11:51:00	0	11	2	1	5
1	2009-02-26 11:52:00	0	11	2	1	5
1	2009-02-26 11:53:00	132	11	2	1	5
1	2009-02-26 11:54:00	20	11	2	1	5
1	2009-02-26 11:55:00	0	11	2	1	5
1	2009-02-26 11:56:00	10	11	2	1	5
1	2009-02-26 11:57:00	10	11	2	1	5
1	2009-02-26 11:58:00	242	11	2	1	5
1	2009-02-26 11:59:00	0	11	2	1	5
1	2009-02-26 12:00:00	0	11	2	1	5
1	2009-02-26 12:01:00	0	12	3	1	5
1	2009-02-26 12:02:00	230	12	3	1	5
1	2009-02-26 12:03:00	0	12	3	1	5
1	2009-02-26 12:04:00	0	12	3	1	5
1	2009-02-26 12:05:00	0	12	3	1	5
1	2009-02-26 12:06:00	0	12	3	1	5
1	2009-02-26 12:07:00	0	12	3	1	5
1	2009-02-26 12:08:00	0	12	3	1	5
1	2009-02-26 12:09:00	0	12	3	1	5
1	2009-02-26 12:10:00	0	12	3	1	5
1	2009-02-26 12:11:00	0	12	3	1	5
1	2009-02-26 12:12:00	0	12	3	1	5
1	2009-02-26 12:13:00	337	12	3	1	5
1	2009-02-26 12:14:00	1211	12	3	1	5
1	2009-02-26 12:15:00	475	12	3	1	5
1	2009-02-26 12:16:00	366	12	3	1	5
1	2009-02-26 12:17:00	295	12	3	1	5
1	2009-02-26 12:18:00	205	12	3	1	5
1	2009-02-26 12:19:00	181	12	3	1	5
1	2009-02-26 12:20:00	309	12	3	1	5
1	2009-02-26 12:21:00	337	12	3	1	5
1	2009-02-26 12:22:00	561	12	3	1	5
1	2009-02-26 12:23:00	561	12	3	1	5
1	2009-02-26 12:24:00	652	12	3	1	5
1	2009-02-26 12:25:00	459	12	3	1	5
1	2009-02-26 12:26:00	0	12	3	1	5
1	2009-02-26 12:27:00	0	12	3	1	5
1	2009-02-26 12:28:00	0	12	3	1	5
1	2009-02-26 12:29:00	0	12	3	1	5
1	2009-02-26 12:30:00	0	12	3	1	5
1	2009-02-26 12:31:00	0	12	3	1	5
1	2009-02-26 12:32:00	0	12	3	1	5
1	2009-02-26 12:33:00	0	12	3	1	5
1	2009-02-26 12:34:00	0	12	3	1	5
1	2009-02-26 12:35:00	0	12	3	1	5
1	2009-02-26 12:36:00	0	12	3	1	5
1	2009-02-26 12:37:00	0	12	3	1	5
1	2009-02-26 12:38:00	0	12	3	1	5
1	2009-02-26 12:39:00	0	12	3	1	5
1	2009-02-26 12:40:00	0	12	3	1	5
1	2009-02-26 12:41:00	0	12	3	1	5
1	2009-02-26 12:42:00	0	12	3	1	5
1	2009-02-26 12:43:00	10	12	3	1	5
1	2009-02-26 12:44:00	0	12	3	1	5
1	2009-02-26 12:45:00	0	12	3	1	5
1	2009-02-26 12:46:00	1611	12	3	1	5
1	2009-02-26 12:47:00	443	12	3	1	5
1	2009-02-26 12:48:00	673	12	3	1	5
1	2009-02-26 12:49:00	542	12	3	1	5
1	2009-02-26 12:50:00	1130	12	3	1	5
1	2009-02-26 12:51:00	3895	12	3	1	5
1	2009-02-26 12:52:00	2101	12	3	1	5
1	2009-02-26 12:53:00	561	12	3	1	5
1	2009-02-26 12:54:00	524	12	3	1	5
1	2009-02-26 12:55:00	1940	12	3	1	5
1	2009-02-26 12:56:00	459	12	3	1	5
1	2009-02-26 12:57:00	475	12	3	1	5
1	2009-02-26 12:58:00	41	12	3	1	5
1	2009-02-26 12:59:00	193	12	3	1	5
1	2009-02-26 13:00:00	10	12	3	1	5
1	2009-02-26 13:01:00	0	13	3	1	5
1	2009-02-26 13:02:00	0	13	3	1	5
1	2009-02-26 13:03:00	112	13	3	1	5
1	2009-02-26 13:04:00	394	13	3	1	5
1	2009-02-26 13:05:00	122	13	3	1	5
1	2009-02-26 13:06:00	0	13	3	1	5
1	2009-02-26 13:07:00	91	13	3	1	5
1	2009-02-26 13:08:00	30	13	3	1	5
1	2009-02-26 13:09:00	217	13	3	1	5
1	2009-02-26 13:10:00	0	13	3	1	5
1	2009-02-26 13:11:00	10	13	3	1	5
1	2009-02-26 13:12:00	0	13	3	1	5
1	2009-02-26 13:13:00	0	13	3	1	5
1	2009-02-26 13:14:00	0	13	3	1	5
1	2009-02-26 13:15:00	0	13	3	1	5
1	2009-02-26 13:16:00	0	13	3	1	5
1	2009-02-26 13:17:00	0	13	3	1	5
1	2009-02-26 13:18:00	0	13	3	1	5
1	2009-02-26 13:19:00	0	13	3	1	5
1	2009-02-26 13:20:00	0	13	3	1	5
1	2009-02-26 13:21:00	0	13	3	1	5
1	2009-02-26 13:22:00	0	13	3	1	5
1	2009-02-26 13:23:00	0	13	3	1	5
1	2009-02-26 13:24:00	0	13	3	1	5
1	2009-02-26 13:25:00	0	13	3	1	5
1	2009-02-26 13:26:00	0	13	3	1	5
1	2009-02-26 13:27:00	0	13	3	1	5
1	2009-02-26 13:28:00	0	13	3	1	5
1	2009-02-26 13:29:00	0	13	3	1	5
1	2009-02-26 13:30:00	0	13	3	1	5
1	2009-02-26 13:31:00	0	13	3	1	5
1	2009-02-26 13:32:00	0	13	3	1	5
1	2009-02-26 13:33:00	0	13	3	1	5
1	2009-02-26 13:34:00	0	13	3	1	5
1	2009-02-26 13:35:00	0	13	3	1	5
1	2009-02-26 13:36:00	0	13	3	1	5
1	2009-02-26 13:37:00	0	13	3	1	5
1	2009-02-26 13:38:00	0	13	3	1	5
1	2009-02-26 13:39:00	0	13	3	1	5
1	2009-02-26 13:40:00	0	13	3	1	5
1	2009-02-26 13:41:00	0	13	3	1	5
1	2009-02-26 13:42:00	0	13	3	1	5
1	2009-02-26 13:43:00	0	13	3	1	5
1	2009-02-26 13:44:00	0	13	3	1	5
1	2009-02-26 13:45:00	0	13	3	1	5
1	2009-02-26 13:46:00	0	13	3	1	5
1	2009-02-26 13:47:00	0	13	3	1	5
1	2009-02-26 13:48:00	0	13	3	1	5
1	2009-02-26 13:49:00	0	13	3	1	5
1	2009-02-26 13:50:00	0	13	3	1	5
1	2009-02-26 13:51:00	0	13	3	1	5
1	2009-02-26 13:52:00	0	13	3	1	5
1	2009-02-26 13:53:00	0	13	3	1	5
1	2009-02-26 13:54:00	0	13	3	1	5
1	2009-02-26 13:55:00	0	13	3	1	5
1	2009-02-26 13:56:00	0	13	3	1	5
1	2009-02-26 13:57:00	0	13	3	1	5
1	2009-02-26 13:58:00	0	13	3	1	5
1	2009-02-26 13:59:00	0	13	3	1	5
1	2009-02-26 14:00:00	0	13	3	1	5
1	2009-02-26 14:01:00	0	14	3	1	5
1	2009-02-26 14:02:00	0	14	3	1	5
1	2009-02-26 14:03:00	0	14	3	1	5
1	2009-02-26 14:04:00	0	14	3	1	5
1	2009-02-26 14:05:00	0	14	3	1	5
1	2009-02-26 14:06:00	0	14	3	1	5
1	2009-02-26 14:07:00	0	14	3	1	5
1	2009-02-26 14:08:00	0	14	3	1	5
1	2009-02-26 14:09:00	0	14	3	1	5
1	2009-02-26 14:10:00	0	14	3	1	5
1	2009-02-26 14:11:00	20	14	3	1	5
1	2009-02-26 14:12:00	0	14	3	1	5
1	2009-02-26 14:13:00	0	14	3	1	5
1	2009-02-26 14:14:00	0	14	3	1	5
1	2009-02-26 14:15:00	0	14	3	1	5
1	2009-02-26 14:16:00	0	14	3	1	5
1	2009-02-26 14:17:00	0	14	3	1	5
1	2009-02-26 14:18:00	0	14	3	1	5
1	2009-02-26 14:19:00	0	14	3	1	5
1	2009-02-26 14:20:00	0	14	3	1	5
1	2009-02-26 14:21:00	0	14	3	1	5
1	2009-02-26 14:22:00	0	14	3	1	5
1	2009-02-26 14:23:00	0	14	3	1	5
1	2009-02-26 14:24:00	0	14	3	1	5
1	2009-02-26 14:25:00	0	14	3	1	5
1	2009-02-26 14:26:00	0	14	3	1	5
1	2009-02-26 14:27:00	0	14	3	1	5
1	2009-02-26 14:28:00	0	14	3	1	5
1	2009-02-26 14:29:00	0	14	3	1	5
1	2009-02-26 14:30:00	0	14	3	1	5
1	2009-02-26 14:31:00	0	14	3	1	5
1	2009-02-26 14:32:00	0	14	3	1	5
1	2009-02-26 14:33:00	0	14	3	1	5
1	2009-02-26 14:34:00	0	14	3	1	5
1	2009-02-26 14:35:00	0	14	3	1	5
1	2009-02-26 14:36:00	0	14	3	1	5
1	2009-02-26 14:37:00	0	14	3	1	5
1	2009-02-26 14:38:00	0	14	3	1	5
1	2009-02-26 14:39:00	0	14	3	1	5
1	2009-02-26 14:40:00	10	14	3	1	5
1	2009-02-26 14:41:00	30	14	3	1	5
1	2009-02-26 14:42:00	0	14	3	1	5
1	2009-02-26 14:43:00	0	14	3	1	5
1	2009-02-26 14:44:00	0	14	3	1	5
1	2009-02-26 14:45:00	0	14	3	1	5
1	2009-02-26 14:46:00	0	14	3	1	5
1	2009-02-26 14:47:00	0	14	3	1	5
1	2009-02-26 14:48:00	0	14	3	1	5
1	2009-02-26 14:49:00	0	14	3	1	5
1	2009-02-26 14:50:00	0	14	3	1	5
1	2009-02-26 14:51:00	0	14	3	1	5
1	2009-02-26 14:52:00	0	14	3	1	5
1	2009-02-26 14:53:00	0	14	3	1	5
1	2009-02-26 14:54:00	0	14	3	1	5
1	2009-02-26 14:55:00	0	14	3	1	5
1	2009-02-26 14:56:00	30	14	3	1	5
1	2009-02-26 14:57:00	0	14	3	1	5
1	2009-02-26 14:58:00	0	14	3	1	5
1	2009-02-26 14:59:00	0	14	3	1	5
1	2009-02-26 15:00:00	71	14	3	1	5
1	2009-02-26 15:01:00	217	15	3	1	5
1	2009-02-26 15:02:00	0	15	3	1	5
1	2009-02-26 15:03:00	0	15	3	1	5
1	2009-02-26 15:04:00	0	15	3	1	5
1	2009-02-26 15:05:00	380	15	3	1	5
1	2009-02-26 15:06:00	112	15	3	1	5
1	2009-02-26 15:07:00	181	15	3	1	5
1	2009-02-26 15:08:00	0	15	3	1	5
1	2009-02-26 15:09:00	0	15	3	1	5
1	2009-02-26 15:10:00	0	15	3	1	5
1	2009-02-26 15:11:00	0	15	3	1	5
1	2009-02-26 15:12:00	0	15	3	1	5
1	2009-02-26 15:13:00	0	15	3	1	5
1	2009-02-26 15:14:00	0	15	3	1	5
1	2009-02-26 15:15:00	0	15	3	1	5
1	2009-02-26 15:16:00	0	15	3	1	5
1	2009-02-26 15:17:00	0	15	3	1	5
1	2009-02-26 15:18:00	0	15	3	1	5
1	2009-02-26 15:19:00	0	15	3	1	5
[truncated: 88,721 more rows]

## Sheet: Pivot Segment
Multiplier	2
x (Low Intensity)	648.936
y (High Intensity)	679.542
	Column Labels
Values	1	2	3	4	5	6	7	8	9	Grand Total
Average of Activity	79.7054	94.1748	87.6157	89.6802	84.9439	78.1672	72.3642	79.3404	63.5008	81.0547
StdDev of Activity	284.616	292.684	269.967	320.53	270.226	277.264	255.084	284.9	262.175	280.436
Count of Activity	10080	10080	10080	10080	10080	10080	10080	10080	10080	90720
Count Above x	299	451	396	391	366	360	307	406	280
% Above x	0.0296627	0.0447421	0.0392857	0.0387897	0.0363095	0.0357143	0.0304563	0.0402778	0.0277778
Count Above y		420	366	363	340	332	289	361	266
% Above y		0.0416667	0.0363095	0.0360119	0.0337302	0.0329365	0.0286706	0.0358135	0.0263889

## Sheet: Pivot Weekday
Sum of Activity	Column Labels
Row Labels	1	2	3	4	5	6	7	8	9	Grand Total
1	116901	158365	117136	140516	121733	82688	89066	60210	102267	988882
2	96570	108490	88107	90061	72793	100184	100635	156961	84408	898209
3	101805	143725	121125	92651	112204	119104	137610	118687	93716	1040627
4	129683	26808	127565	90451	91177	118379	103880	148480	116510	952933
5	104769	142400	133213	133004	129127	100905	119551	108778	98249	1069996
6	129971	187748	138647	135545	130261	81595	91797	111208	91939	1098711
7	123731	181746	157373	221748	198940	185070	86892	95427	52999	1303926
Grand Total	803430	949282	883166	903976	856235	787925	729431	799751	640088	7353284
Count of Activity	Column Labels
Row Labels	1	2	3	4	5	6	7	8	9	Grand Total
1	1440	1440	1440	1440	1440	1440	1440	1440	1440	12960
2	1440	1440	1440	1440	1440	1440	1440	1440	1440	12960
3	1440	1440	1440	1440	1440	1440	1440	1440	1440	12960
4	1440	1440	1440	1440	1440	1440	1440	1440	1440	12960
5	1440	1440	1440	1440	1440	1440	1440	1440	1440	12960
6	1440	1440	1440	1440	1440	1440	1440	1440	1440	12960
7	1440	1440	1440	1440	1440	1440	1440	1440	1440	12960
Grand Total	10080	10080	10080	10080	10080	10080	10080	10080	10080	90720

## Sheet: Pivot Quadrant
Sum of Activity	Column Labels
Row Labels	1	2	3	4	5	6	7	8	9	Grand Total
1	12035	12532	9348	23014	31814	22444	18511	52550	38747	220995
2	340563	375231	337818	410574	481563	441323	337891	424533	305832	3455328
3	267862	392108	291459	280353	131696	142490	184277	81301	133713	1905259
4	182970	169411	244541	190035	211162	181668	188752	241367	161796	1771702
Grand Total	803430	949282	883166	903976	856235	787925	729431	799751	640088	7353284
Average	200858	237320	220792	225994	214059	196981	182358	199938	160022
Count of Activity	Column Labels
Row Labels	1	2	3	4	5	6	7	8	9	Grand Total
1	2520	2520	2520	2520	2520	2520	2520	2520	2520	22680
2	2520	2520	2520	2520	2520	2520	2520	2520	2520	22680
3	2520	2520	2520	2520	2520	2520	2520	2520	2520	22680
4	2520	2520	2520	2520	2520	2520	2520	2520	2520	22680
Grand Total	10080	10080	10080	10080	10080	10080	10080	10080	10080	90720

## Sheet: 2.18.09
Actogram, Copy Raw Data, All Days
Identity:	Shon
Filename:	E:\Active Research Files\meloxicam titre canine\cases\shon\Shon 2.18.09.AWC
Gender:	M
Age:	9
Height:	30.5 cm	12.0 in
Weight:	16.0 kg	35.3 lbs
Start Date:	18-Feb-2009 (Wed)
Start Time:	18:00:00
Interval:	1.00 mins
Date Stamp:	Time Stamp:	Activity Data:	Marker Press:
2009-02-25	00:01:00	0
2009-02-25	00:02:00	0
2009-02-25	00:03:00	0
2009-02-25	00:04:00	0
2009-02-25	00:05:00	0
2009-02-25	00:06:00	0
2009-02-25	00:07:00	0
2009-02-25	00:08:00	0
2009-02-25	00:09:00	0
2009-02-25	00:10:00	0
2009-02-25	00:11:00	0
2009-02-25	00:12:00	0
2009-02-25	00:13:00	10
2009-02-25	00:14:00	0
2009-02-25	00:15:00	0
2009-02-25	00:16:00	0
2009-02-25	00:17:00	0
2009-02-25	00:18:00	0
2009-02-25	00:19:00	0
2009-02-25	00:20:00	0
2009-02-25	00:21:00	0
2009-02-25	00:22:00	0
2009-02-25	00:23:00	0
2009-02-25	00:24:00	0
2009-02-25	00:25:00	0
2009-02-25	00:26:00	0
2009-02-25	00:27:00	0
2009-02-25	00:28:00	0
2009-02-25	00:29:00	0
2009-02-25	00:30:00	0
2009-02-25	00:31:00	0
2009-02-25	00:32:00	0
2009-02-25	00:33:00	0
2009-02-25	00:34:00	0
2009-02-25	00:35:00	0
2009-02-25	00:36:00	0
2009-02-25	00:37:00	0
2009-02-25	00:38:00	0
2009-02-25	00:39:00	0
2009-02-25	00:40:00	0
2009-02-25	00:41:00	0
2009-02-25	00:42:00	0
2009-02-25	00:43:00	0
2009-02-25	00:44:00	0
2009-02-25	00:45:00	0
2009-02-25	00:46:00	20
2009-02-25	00:47:00	10
2009-02-25	00:48:00	0
2009-02-25	00:49:00	0
2009-02-25	00:50:00	0
2009-02-25	00:51:00	0
2009-02-25	00:52:00	0
2009-02-25	00:53:00	0
2009-02-25	00:54:00	0
2009-02-25	00:55:00	0
2009-02-25	00:56:00	20
2009-02-25	00:57:00	0
2009-02-25	00:58:00	0
2009-02-25	00:59:00	0
2009-02-25	01:00:00	0
2009-02-25	01:01:00	0
2009-02-25	01:02:00	0
2009-02-25	01:03:00	0
2009-02-25	01:04:00	0
2009-02-25	01:05:00	0
2009-02-25	01:06:00	0
2009-02-25	01:07:00	0
2009-02-25	01:08:00	0
2009-02-25	01:09:00	0
2009-02-25	01:10:00	0
2009-02-25	01:11:00	0
2009-02-25	01:12:00	0
2009-02-25	01:13:00	0
2009-02-25	01:14:00	0
2009-02-25	01:15:00	0
2009-02-25	01:16:00	0
2009-02-25	01:17:00	0
2009-02-25	01:18:00	0
2009-02-25	01:19:00	0
2009-02-25	01:20:00	0
2009-02-25	01:21:00	0
2009-02-25	01:22:00	0
2009-02-25	01:23:00	0
2009-02-25	01:24:00	0
2009-02-25	01:25:00	0
2009-02-25	01:26:00	0
2009-02-25	01:27:00	0
2009-02-25	01:28:00	0
2009-02-25	01:29:00	0
2009-02-25	01:30:00	0
2009-02-25	01:31:00	0
2009-02-25	01:32:00	0
2009-02-25	01:33:00	0
2009-02-25	01:34:00	0
2009-02-25	01:35:00	0
2009-02-25	01:36:00	0
2009-02-25	01:37:00	0
2009-02-25	01:38:00	0
2009-02-25	01:39:00	0
2009-02-25	01:40:00	0
2009-02-25	01:41:00	0
2009-02-25	01:42:00	0
2009-02-25	01:43:00	0
2009-02-25	01:44:00	0
2009-02-25	01:45:00	0
2009-02-25	01:46:00	0
2009-02-25	01:47:00	0
2009-02-25	01:48:00	0
2009-02-25	01:49:00	0
2009-02-25	01:50:00	0
2009-02-25	01:51:00	0
2009-02-25	01:52:00	0
2009-02-25	01:53:00	0
2009-02-25	01:54:00	0
2009-02-25	01:55:00	0
2009-02-25	01:56:00	10
2009-02-25	01:57:00	0
2009-02-25	01:58:00	0
2009-02-25	01:59:00	0
2009-02-25	02:00:00	0
2009-02-25	02:01:00	0
2009-02-25	02:02:00	0
2009-02-25	02:03:00	0
2009-02-25	02:04:00	0
2009-02-25	02:05:00	0
2009-02-25	02:06:00	0
2009-02-25	02:07:00	0
2009-02-25	02:08:00	0
2009-02-25	02:09:00	0
2009-02-25	02:10:00	0
2009-02-25	02:11:00	0
2009-02-25	02:12:00	0
2009-02-25	02:13:00	0
2009-02-25	02:14:00	30
2009-02-25	02:15:00	0
2009-02-25	02:16:00	20
2009-02-25	02:17:00	10
2009-02-25	02:18:00	0
2009-02-25	02:19:00	0
2009-02-25	02:20:00	0
2009-02-25	02:21:00	0
2009-02-25	02:22:00	0
2009-02-25	02:23:00	0
2009-02-25	02:24:00	0
2009-02-25	02:25:00	0
2009-02-25	02:26:00	0
2009-02-25	02:27:00	0
2009-02-25	02:28:00	0
2009-02-25	02:29:00	0
2009-02-25	02:30:00	0
2009-02-25	02:31:00	0
2009-02-25	02:32:00	0
2009-02-25	02:33:00	0
2009-02-25	02:34:00	0
2009-02-25	02:35:00	0
2009-02-25	02:36:00	0
2009-02-25	02:37:00	0
2009-02-25	02:38:00	0
2009-02-25	02:39:00	0
2009-02-25	02:40:00	0
2009-02-25	02:41:00	0
2009-02-25	02:42:00	0
2009-02-25	02:43:00	0
2009-02-25	02:44:00	0
2009-02-25	02:45:00	0
2009-02-25	02:46:00	10
2009-02-25	02:47:00	0
2009-02-25	02:48:00	0
2009-02-25	02:49:00	0
2009-02-25	02:50:00	0
2009-02-25	02:51:00	0
2009-02-25	02:52:00	0
2009-02-25	02:53:00	0
2009-02-25	02:54:00	0
2009-02-25	02:55:00	0
2009-02-25	02:56:00	10
2009-02-25	02:57:00	0
2009-02-25	02:58:00	0
2009-02-25	02:59:00	0
2009-02-25	03:00:00	0
2009-02-25	03:01:00	0
2009-02-25	03:02:00	0
2009-02-25	03:03:00	0
2009-02-25	03:04:00	0
2009-02-25	03:05:00	0
2009-02-25	03:06:00	0
2009-02-25	03:07:00	0
2009-02-25	03:08:00	0
2009-02-25	03:09:00	0
2009-02-25	03:10:00	0
2009-02-25	03:11:00	0
2009-02-25	03:12:00	0
2009-02-25	03:13:00	0
2009-02-25	03:14:00	0
2009-02-25	03:15:00	0
2009-02-25	03:16:00	0
2009-02-25	03:17:00	0
2009-02-25	03:18:00	0
2009-02-25	03:19:00	0
2009-02-25	03:20:00	0
2009-02-25	03:21:00	0
2009-02-25	03:22:00	0
2009-02-25	03:23:00	0
2009-02-25	03:24:00	0
2009-02-25	03:25:00	10
2009-02-25	03:26:00	71
2009-02-25	03:27:00	0
2009-02-25	03:28:00	0
2009-02-25	03:29:00	0
2009-02-25	03:30:00	91
2009-02-25	03:31:00	20
2009-02-25	03:32:00	0
2009-02-25	03:33:00	0
2009-02-25	03:34:00	0
2009-02-25	03:35:00	0
2009-02-25	03:36:00	0
2009-02-25	03:37:00	10
2009-02-25	03:38:00	0
2009-02-25	03:39:00	0
2009-02-25	03:40:00	0
2009-02-25	03:41:00	0
2009-02-25	03:42:00	0
2009-02-25	03:43:00	0
2009-02-25	03:44:00	0
2009-02-25	03:45:00	0
2009-02-25	03:46:00	0
2009-02-25	03:47:00	0
2009-02-25	03:48:00	0
2009-02-25	03:49:00	0
2009-02-25	03:50:00	0
2009-02-25	03:51:00	0
2009-02-25	03:52:00	0
2009-02-25	03:53:00	0
2009-02-25	03:54:00	0
2009-02-25	03:55:00	0
2009-02-25	03:56:00	0
2009-02-25	03:57:00	0
2009-02-25	03:58:00	0
2009-02-25	03:59:00	0
2009-02-25	04:00:00	0
2009-02-25	04:01:00	0
2009-02-25	04:02:00	0
2009-02-25	04:03:00	10
2009-02-25	04:04:00	0
2009-02-25	04:05:00	0
2009-02-25	04:06:00	0
2009-02-25	04:07:00	61
2009-02-25	04:08:00	10
2009-02-25	04:09:00	0
2009-02-25	04:10:00	0
2009-02-25	04:11:00	0
2009-02-25	04:12:00	0
2009-02-25	04:13:00	0
2009-02-25	04:14:00	0
2009-02-25	04:15:00	0
2009-02-25	04:16:00	0
2009-02-25	04:17:00	0
2009-02-25	04:18:00	0
2009-02-25	04:19:00	0
2009-02-25	04:20:00	0
2009-02-25	04:21:00	0
2009-02-25	04:22:00	0
2009-02-25	04:23:00	0
2009-02-25	04:24:00	0
2009-02-25	04:25:00	0
2009-02-25	04:26:00	0
2009-02-25	04:27:00	0
2009-02-25	04:28:00	0
2009-02-25	04:29:00	0
2009-02-25	04:30:00	0
2009-02-25	04:31:00	0
2009-02-25	04:32:00	0
2009-02-25	04:33:00	0
2009-02-25	04:34:00	0
2009-02-25	04:35:00	0
2009-02-25	04:36:00	0
2009-02-25	04:37:00	0
2009-02-25	04:38:00	0
2009-02-25	04:39:00	0
2009-02-25	04:40:00	0
2009-02-25	04:41:00	0
2009-02-25	04:42:00	0
2009-02-25	04:43:00	30
2009-02-25	04:44:00	30
2009-02-25	04:45:00	10
2009-02-25	04:46:00	0
2009-02-25	04:47:00	41
2009-02-25	04:48:00	323
2009-02-25	04:49:00	0
2009-02-25	04:50:00	91
2009-02-25	04:51:00	0
2009-02-25	04:52:00	0
2009-02-25	04:53:00	254
2009-02-25	04:54:00	51
2009-02-25	04:55:00	10
2009-02-25	04:56:00	561
2009-02-25	04:57:00	102
2009-02-25	04:58:00	0
2009-02-25	04:59:00	0
2009-02-25	05:00:00	0
2009-02-25	05:01:00	0
2009-02-25	05:02:00	0
2009-02-25	05:03:00	0
2009-02-25	05:04:00	0
2009-02-25	05:05:00	0
2009-02-25	05:06:00	0
2009-02-25	05:07:00	0
2009-02-25	05:08:00	0
2009-02-25	05:09:00	0
2009-02-25	05:10:00	0
2009-02-25	05:11:00	0
2009-02-25	05:12:00	0
2009-02-25	05:13:00	0
2009-02-25	05:14:00	0
2009-02-25	05:15:00	0
2009-02-25	05:16:00	0
2009-02-25	05:17:00	0
2009-02-25	05:18:00	0
2009-02-25	05:19:00	0
2009-02-25	05:20:00	0
2009-02-25	05:21:00	0
2009-02-25	05:22:00	0
2009-02-25	05:23:00	0
2009-02-25	05:24:00	0
2009-02-25	05:25:00	0
2009-02-25	05:26:00	0
2009-02-25	05:27:00	0
2009-02-25	05:28:00	0
2009-02-25	05:29:00	0
2009-02-25	05:30:00	0
2009-02-25	05:31:00	0
2009-02-25	05:32:00	0
2009-02-25	05:33:00	0
2009-02-25	05:34:00	61
2009-02-25	05:35:00	0
2009-02-25	05:36:00	0
2009-02-25	05:37:00	0
2009-02-25	05:38:00	0
2009-02-25	05:39:00	0
2009-02-25	05:40:00	0
2009-02-25	05:41:00	0
2009-02-25	05:42:00	0
2009-02-25	05:43:00	0
2009-02-25	05:44:00	0
2009-02-25	05:45:00	0
2009-02-25	05:46:00	0
2009-02-25	05:47:00	0
2009-02-25	05:48:00	0
2009-02-25	05:49:00	0
2009-02-25	05:50:00	0
2009-02-25	05:51:00	0
2009-02-25	05:52:00	0
2009-02-25	05:53:00	0
2009-02-25	05:54:00	0
2009-02-25	05:55:00	0
2009-02-25	05:56:00	0
2009-02-25	05:57:00	0
2009-02-25	05:58:00	0
2009-02-25	05:59:00	0
2009-02-25	06:00:00	0
2009-02-25	06:01:00	0
2009-02-25	06:02:00	0
2009-02-25	06:03:00	0
2009-02-25	06:04:00	0
2009-02-25	06:05:00	0
2009-02-25	06:06:00	0
2009-02-25	06:07:00	0
2009-02-25	06:08:00	0
2009-02-25	06:09:00	0
2009-02-25	06:10:00	0
2009-02-25	06:11:00	0
2009-02-25	06:12:00	0
2009-02-25	06:13:00	0
2009-02-25	06:14:00	0
2009-02-25	06:15:00	0
2009-02-25	06:16:00	0
2009-02-25	06:17:00	0
2009-02-25	06:18:00	0
2009-02-25	06:19:00	0
2009-02-25	06:20:00	0
2009-02-25	06:21:00	0
2009-02-25	06:22:00	0
2009-02-25	06:23:00	0
2009-02-25	06:24:00	0
2009-02-25	06:25:00	0
2009-02-25	06:26:00	0
2009-02-25	06:27:00	0
2009-02-25	06:28:00	0
2009-02-25	06:29:00	0
2009-02-25	06:30:00	0
2009-02-25	06:31:00	0
2009-02-25	06:32:00	0
2009-02-25	06:33:00	144
2009-02-25	06:34:00	10
2009-02-25	06:35:00	0
2009-02-25	06:36:00	0
2009-02-25	06:37:00	0
2009-02-25	06:38:00	0
2009-02-25	06:39:00	20
2009-02-25	06:40:00	0
2009-02-25	06:41:00	0
2009-02-25	06:42:00	0
2009-02-25	06:43:00	0
2009-02-25	06:44:00	0
2009-02-25	06:45:00	0
2009-02-25	06:46:00	0
2009-02-25	06:47:00	0
2009-02-25	06:48:00	0
2009-02-25	06:49:00	0
2009-02-25	06:50:00	10
2009-02-25	06:51:00	0
2009-02-25	06:52:00	144
2009-02-25	06:53:00	20
2009-02-25	06:54:00	30
2009-02-25	06:55:00	0
2009-02-25	06:56:00	122
2009-02-25	06:57:00	0
2009-02-25	06:58:00	0
2009-02-25	06:59:00	0
2009-02-25	07:00:00	0
2009-02-25	07:01:00	0
2009-02-25	07:02:00	0
2009-02-25	07:03:00	0
2009-02-25	07:04:00	0
2009-02-25	07:05:00	0
2009-02-25	07:06:00	0
2009-02-25	07:07:00	0
2009-02-25	07:08:00	0
2009-02-25	07:09:00	427
2009-02-25	07:10:00	0
2009-02-25	07:11:00	0
2009-02-25	07:12:00	0
2009-02-25	07:13:00	0
2009-02-25	07:14:00	0
2009-02-25	07:15:00	0
2009-02-25	07:16:00	0
2009-02-25	07:17:00	0
2009-02-25	07:18:00	0
2009-02-25	07:19:00	0
2009-02-25	07:20:00	0
2009-02-25	07:21:00	0
2009-02-25	07:22:00	0
2009-02-25	07:23:00	0
2009-02-25	07:24:00	0
2009-02-25	07:25:00	0
2009-02-25	07:26:00	0
2009-02-25	07:27:00	0
2009-02-25	07:28:00	0
2009-02-25	07:29:00	0
2009-02-25	07:30:00	0
2009-02-25	07:31:00	0
2009-02-25	07:32:00	0
2009-02-25	07:33:00	0
2009-02-25	07:34:00	20
2009-02-25	07:35:00	0
2009-02-25	07:36:00	0
2009-02-25	07:37:00	0
2009-02-25	07:38:00	0
2009-02-25	07:39:00	10
2009-02-25	07:40:00	0
2009-02-25	07:41:00	0
2009-02-25	07:42:00	0
2009-02-25	07:43:00	0
2009-02-25	07:44:00	0
2009-02-25	07:45:00	0
2009-02-25	07:46:00	0
2009-02-25	07:47:00	794
2009-02-25	07:48:00	0
2009-02-25	07:49:00	0
2009-02-25	07:50:00	10
2009-02-25	07:51:00	10
2009-02-25	07:52:00	61
2009-02-25	07:53:00	3692
2009-02-25	07:54:00	2274
2009-02-25	07:55:00	929
2009-02-25	07:56:00	929
2009-02-25	07:57:00	673
2009-02-25	07:58:00	1130
2009-02-25	07:59:00	713
2009-02-25	08:00:00	597
2009-02-25	08:01:00	1103
2009-02-25	08:02:00	410
2009-02-25	08:03:00	427
2009-02-25	08:04:00	351
2009-02-25	08:05:00	754
2009-02-25	08:06:00	30
2009-02-25	08:07:00	132
2009-02-25	08:08:00	0
2009-02-25	08:09:00	0
2009-02-25	08:10:00	0
2009-02-25	08:11:00	0
2009-02-25	08:12:00	0
2009-02-25	08:13:00	0
2009-02-25	08:14:00	0
2009-02-25	08:15:00	0
2009-02-25	08:16:00	0
2009-02-25	08:17:00	20
2009-02-25	08:18:00	0
2009-02-25	08:19:00	0
2009-02-25	08:20:00	0
2009-02-25	08:21:00	0
2009-02-25	08:22:00	0
2009-02-25	08:23:00	0
2009-02-25	08:24:00	0
2009-02-25	08:25:00	0
2009-02-25	08:26:00	0
2009-02-25	08:27:00	0
2009-02-25	08:28:00	0
2009-02-25	08:29:00	0
2009-02-25	08:30:00	0
2009-02-25	08:31:00	0
2009-02-25	08:32:00	0
2009-02-25	08:33:00	10
2009-02-25	08:34:00	0
2009-02-25	08:35:00	0
2009-02-25	08:36:00	0
2009-02-25	08:37:00	20
2009-02-25	08:38:00	0
2009-02-25	08:39:00	0
2009-02-25	08:40:00	0
2009-02-25	08:41:00	0
2009-02-25	08:42:00	0
2009-02-25	08:43:00	0
2009-02-25	08:44:00	0
2009-02-25	08:45:00	0
2009-02-25	08:46:00	41
2009-02-25	08:47:00	0
2009-02-25	08:48:00	30
2009-02-25	08:49:00	10
2009-02-25	08:50:00	0
2009-02-25	08:51:00	10
2009-02-25	08:52:00	0
2009-02-25	08:53:00	217
2009-02-25	08:54:00	230
2009-02-25	08:55:00	0
2009-02-25	08:56:00	10
2009-02-25	08:57:00	579
2009-02-25	08:58:00	754
2009-02-25	08:59:00	132
2009-02-25	09:00:00	81
2009-02-25	09:01:00	10
2009-02-25	09:02:00	144
2009-02-25	09:03:00	51
2009-02-25	09:04:00	30
2009-02-25	09:05:00	112
2009-02-25	09:06:00	634
2009-02-25	09:07:00	459
2009-02-25	09:08:00	884
2009-02-25	09:09:00	380
2009-02-25	09:10:00	30
2009-02-25	09:11:00	0
2009-02-25	09:12:00	0
2009-02-25	09:13:00	0
2009-02-25	09:14:00	0
2009-02-25	09:15:00	0
2009-02-25	09:16:00	0
2009-02-25	09:17:00	132
2009-02-25	09:18:00	266
2009-02-25	09:19:00	0
2009-02-25	09:20:00	71
2009-02-25	09:21:00	91
2009-02-25	09:22:00	10
2009-02-25	09:23:00	0
2009-02-25	09:24:00	0
2009-02-25	09:25:00	0
2009-02-25	09:26:00	0
2009-02-25	09:27:00	0
2009-02-25	09:28:00	0
2009-02-25	09:29:00	144
2009-02-25	09:30:00	839
2009-02-25	09:31:00	193
2009-02-25	09:32:00	0
2009-02-25	09:33:00	459
2009-02-25	09:34:00	579
2009-02-25	09:35:00	1447
2009-02-25	09:36:00	542
2009-02-25	09:37:00	337
2009-02-25	09:38:00	1863
2009-02-25	09:39:00	1479
2009-02-25	09:40:00	929
2009-02-25	09:41:00	616
2009-02-25	09:42:00	1680
2009-02-25	09:43:00	156
2009-02-25	09:44:00	20
2009-02-25	09:45:00	0
2009-02-25	09:46:00	0
2009-02-25	09:47:00	0
2009-02-25	09:48:00	0
2009-02-25	09:49:00	10
2009-02-25	09:50:00	217
2009-02-25	09:51:00	351
2009-02-25	09:52:00	41
2009-02-25	09:53:00	0
2009-02-25	09:54:00	0
2009-02-25	09:55:00	0
2009-02-25	09:56:00	81
2009-02-25	09:57:00	0
2009-02-25	09:58:00	0
2009-02-25	09:59:00	0
2009-02-25	10:00:00	10
2009-02-25	10:01:00	0
2009-02-25	10:02:00	217
2009-02-25	10:03:00	0
2009-02-25	10:04:00	169
2009-02-25	10:05:00	10
2009-02-25	10:06:00	0
2009-02-25	10:07:00	112
2009-02-25	10:08:00	0
2009-02-25	10:09:00	0
2009-02-25	10:10:00	0
2009-02-25	10:11:00	0
2009-02-25	10:12:00	0
2009-02-25	10:13:00	10
2009-02-25	10:14:00	0
2009-02-25	10:15:00	0
2009-02-25	10:16:00	0
2009-02-25	10:17:00	0
2009-02-25	10:18:00	10
2009-02-25	10:19:00	51
2009-02-25	10:20:00	193
2009-02-25	10:21:00	102
2009-02-25	10:22:00	0
2009-02-25	10:23:00	20
2009-02-25	10:24:00	0
2009-02-25	10:25:00	0
2009-02-25	10:26:00	0
2009-02-25	10:27:00	0
2009-02-25	10:28:00	0
2009-02-25	10:29:00	0
2009-02-25	10:30:00	0
2009-02-25	10:31:00	0
2009-02-25	10:32:00	51
2009-02-25	10:33:00	0
2009-02-25	10:34:00	0
2009-02-25	10:35:00	0
2009-02-25	10:36:00	41
2009-02-25	10:37:00	0
2009-02-25	10:38:00	0
2009-02-25	10:39:00	0
2009-02-25	10:40:00	91
2009-02-25	10:41:00	51
2009-02-25	10:42:00	0
2009-02-25	10:43:00	0
2009-02-25	10:44:00	10
2009-02-25	10:45:00	0
2009-02-25	10:46:00	0
2009-02-25	10:47:00	0
2009-02-25	10:48:00	41
2009-02-25	10:49:00	10
2009-02-25	10:50:00	20
2009-02-25	10:51:00	0
2009-02-25	10:52:00	0
2009-02-25	10:53:00	10
2009-02-25	10:54:00	0
2009-02-25	10:55:00	0
2009-02-25	10:56:00	0
2009-02-25	10:57:00	0
2009-02-25	10:58:00	0
2009-02-25	10:59:00	0
2009-02-25	11:00:00	0
2009-02-25	11:01:00	0
2009-02-25	11:02:00	0
2009-02-25	11:03:00	0
2009-02-25	11:04:00	0
2009-02-25	11:05:00	0
2009-02-25	11:06:00	0
2009-02-25	11:07:00	0
2009-02-25	11:08:00	0
2009-02-25	11:09:00	0
2009-02-25	11:10:00	0
2009-02-25	11:11:00	0
2009-02-25	11:12:00	0
2009-02-25	11:13:00	0
2009-02-25	11:14:00	0
2009-02-25	11:15:00	0
2009-02-25	11:16:00	0
2009-02-25	11:17:00	0
2009-02-25	11:18:00	0
2009-02-25	11:19:00	10
2009-02-25	11:20:00	0
2009-02-25	11:21:00	0
2009-02-25	11:22:00	0
2009-02-25	11:23:00	10
2009-02-25	11:24:00	0
2009-02-25	11:25:00	102
2009-02-25	11:26:00	280
2009-02-25	11:27:00	10
2009-02-25	11:28:00	0
2009-02-25	11:29:00	0
2009-02-25	11:30:00	0
2009-02-25	11:31:00	0
2009-02-25	11:32:00	0
2009-02-25	11:33:00	0
2009-02-25	11:34:00	0
2009-02-25	11:35:00	0
2009-02-25	11:36:00	0
2009-02-25	11:37:00	0
2009-02-25	11:38:00	0
2009-02-25	11:39:00	0
2009-02-25	11:40:00	10
2009-02-25	11:41:00	0
2009-02-25	11:42:00	91
2009-02-25	11:43:00	20
2009-02-25	11:44:00	10
2009-02-25	11:45:00	10
2009-02-25	11:46:00	10
2009-02-25	11:47:00	0
2009-02-25	11:48:00	10
2009-02-25	11:49:00	51
2009-02-25	11:50:00	10
2009-02-25	11:51:00	10
2009-02-25	11:52:00	0
2009-02-25	11:53:00	0
2009-02-25	11:54:00	10
2009-02-25	11:55:00	0
2009-02-25	11:56:00	0
2009-02-25	11:57:00	0
2009-02-25	11:58:00	0
2009-02-25	11:59:00	0
2009-02-25	12:00:00	295
2009-02-25	12:01:00	309
2009-02-25	12:02:00	181
2009-02-25	12:03:00	205
2009-02-25	12:04:00	51
2009-02-25	12:05:00	132
2009-02-25	12:06:00	410
2009-02-25	12:07:00	156
2009-02-25	12:08:00	81
2009-02-25	12:09:00	144
2009-02-25	12:10:00	459
2009-02-25	12:11:00	132
2009-02-25	12:12:00	205
2009-02-25	12:13:00	266
2009-02-25	12:14:00	71
2009-02-25	12:15:00	0
2009-02-25	12:16:00	0
2009-02-25	12:17:00	112
2009-02-25	12:18:00	0
2009-02-25	12:19:00	144
2009-02-25	12:20:00	0
2009-02-25	12:21:00	0
2009-02-25	12:22:00	0
2009-02-25	12:23:00	0
2009-02-25	12:24:00	0
2009-02-25	12:25:00	0
2009-02-25	12:26:00	0
2009-02-25	12:27:00	156
2009-02-25	12:28:00	71
2009-02-25	12:29:00	0
2009-02-25	12:30:00	0
2009-02-25	12:31:00	0
2009-02-25	12:32:00	0
2009-02-25	12:33:00	0
2009-02-25	12:34:00	0
2009-02-25	12:35:00	41
2009-02-25	12:36:00	61
2009-02-25	12:37:00	132
2009-02-25	12:38:00	217
2009-02-25	12:39:00	81
2009-02-25	12:40:00	61
2009-02-25	12:41:00	122
2009-02-25	12:42:00	295
2009-02-25	12:43:00	181
2009-02-25	12:44:00	0
2009-02-25	12:45:00	0
2009-02-25	12:46:00	0
2009-02-25	12:47:00	0
2009-02-25	12:48:00	41
2009-02-25	12:49:00	156
2009-02-25	12:50:00	266
2009-02-25	12:51:00	410
2009-02-25	12:52:00	380
2009-02-25	12:53:00	20
2009-02-25	12:54:00	71
2009-02-25	12:55:00	41
2009-02-25	12:56:00	169
2009-02-25	12:57:00	0
2009-02-25	12:58:00	230
2009-02-25	12:59:00	380
2009-02-25	13:00:00	10
2009-02-25	13:01:00	61
2009-02-25	13:02:00	774
2009-02-25	13:03:00	713
2009-02-25	13:04:00	774
2009-02-25	13:05:00	351
2009-02-25	13:06:00	0
2009-02-25	13:07:00	0
2009-02-25	13:08:00	295
2009-02-25	13:09:00	169
2009-02-25	13:10:00	230
2009-02-25	13:11:00	0
2009-02-25	13:12:00	0
2009-02-25	13:13:00	295
2009-02-25	13:14:00	81
2009-02-25	13:15:00	0
2009-02-25	13:16:00	0
2009-02-25	13:17:00	0
2009-02-25	13:18:00	0
2009-02-25	13:19:00	10
2009-02-25	13:20:00	156
2009-02-25	13:21:00	0
2009-02-25	13:22:00	230
2009-02-25	13:23:00	492
2009-02-25	13:24:00	30
2009-02-25	13:25:00	169
2009-02-25	13:26:00	0
2009-02-25	13:27:00	144
2009-02-25	13:28:00	102
2009-02-25	13:29:00	0
2009-02-25	13:30:00	0
2009-02-25	13:31:00	0
2009-02-25	13:32:00	0
2009-02-25	13:33:00	0
2009-02-25	13:34:00	0
2009-02-25	13:35:00	41
2009-02-25	13:36:00	102
2009-02-25	13:37:00	0
2009-02-25	13:38:00	112
2009-02-25	13:39:00	41
2009-02-25	13:40:00	71
2009-02-25	13:41:00	71
2009-02-25	13:42:00	0
2009-02-25	13:43:00	0
2009-02-25	13:44:00	102
2009-02-25	13:45:00	427
2009-02-25	13:46:00	309
2009-02-25	13:47:00	10
2009-02-25	13:48:00	0
2009-02-25	13:49:00	366
2009-02-25	13:50:00	51
2009-02-25	13:51:00	323
2009-02-25	13:52:00	0
2009-02-25	13:53:00	0
2009-02-25	13:54:00	0
2009-02-25	13:55:00	0
2009-02-25	13:56:00	0
2009-02-25	13:57:00	0
2009-02-25	13:58:00	156
2009-02-25	13:59:00	132
2009-02-25	14:00:00	156
2009-02-25	14:01:00	0
2009-02-25	14:02:00	41
2009-02-25	14:03:00	132
2009-02-25	14:04:00	71
2009-02-25	14:05:00	20
2009-02-25	14:06:00	0
2009-02-25	14:07:00	0
2009-02-25	14:08:00	0
2009-02-25	14:09:00	0
2009-02-25	14:10:00	81
2009-02-25	14:11:00	10
2009-02-25	14:12:00	217
2009-02-25	14:13:00	0
2009-02-25	14:14:00	102
2009-02-25	14:15:00	102
2009-02-25	14:16:00	156
2009-02-25	14:17:00	0
2009-02-25	14:18:00	0
2009-02-25	14:19:00	0
2009-02-25	14:20:00	0
2009-02-25	14:21:00	0
2009-02-25	14:22:00	0
2009-02-25	14:23:00	10
2009-02-25	14:24:00	0
2009-02-25	14:25:00	0
2009-02-25	14:26:00	0
2009-02-25	14:27:00	0
2009-02-25	14:28:00	0
2009-02-25	14:29:00	10
2009-02-25	14:30:00	242
2009-02-25	14:31:00	91
2009-02-25	14:32:00	20
2009-02-25	14:33:00	30
2009-02-25	14:34:00	10
2009-02-25	14:35:00	0
2009-02-25	14:36:00	10
2009-02-25	14:37:00	0
2009-02-25	14:38:00	0
2009-02-25	14:39:00	112
2009-02-25	14:40:00	181
2009-02-25	14:41:00	102
2009-02-25	14:42:00	0
2009-02-25	14:43:00	20
2009-02-25	14:44:00	122
2009-02-25	14:45:00	122
2009-02-25	14:46:00	0
2009-02-25	14:47:00	0
2009-02-25	14:48:00	0
2009-02-25	14:49:00	0
2009-02-25	14:50:00	0
2009-02-25	14:51:00	10
2009-02-25	14:52:00	10
2009-02-25	14:53:00	254
2009-02-25	14:54:00	132
2009-02-25	14:55:00	230
2009-02-25	14:56:00	20
2009-02-25	14:57:00	242
2009-02-25	14:58:00	205
2009-02-25	14:59:00	91
2009-02-25	15:00:00	351
2009-02-25	15:01:00	0
2009-02-25	15:02:00	0
2009-02-25	15:03:00	0
2009-02-25	15:04:00	0
2009-02-25	15:05:00	0
2009-02-25	15:06:00	0
2009-02-25	15:07:00	0
2009-02-25	15:08:00	20
2009-02-25	15:09:00	91
2009-02-25	15:10:00	112
2009-02-25	15:11:00	91
2009-02-25	15:12:00	459
2009-02-25	15:13:00	1103
2009-02-25	15:14:00	242
2009-02-25	15:15:00	71
2009-02-25	15:16:00	41
2009-02-25	15:17:00	193
2009-02-25	15:18:00	309
2009-02-25	15:19:00	1103
2009-02-25	15:20:00	1156
2009-02-25	15:21:00	634
2009-02-25	15:22:00	295
2009-02-25	15:23:00	20
2009-02-25	15:24:00	0
2009-02-25	15:25:00	0
2009-02-25	15:26:00	0
2009-02-25	15:27:00	0
2009-02-25	15:28:00	1788
2009-02-25	15:29:00	242
2009-02-25	15:30:00	280
2009-02-25	15:31:00	41
2009-02-25	15:32:00	51
2009-02-25	15:33:00	20
2009-02-25	15:34:00	597
2009-02-25	15:35:00	524
2009-02-25	15:36:00	0
2009-02-25	15:37:00	492
2009-02-25	15:38:00	217
2009-02-25	15:39:00	10
2009-02-25	15:40:00	266
2009-02-25	15:41:00	394
2009-02-25	15:42:00	410
2009-02-25	15:43:00	337
2009-02-25	15:44:00	427
2009-02-25	15:45:00	0
2009-02-25	15:46:00	10
2009-02-25	15:47:00	0
2009-02-25	15:48:00	81
2009-02-25	15:49:00	61
2009-02-25	15:50:00	205
2009-02-25	15:51:00	61
2009-02-25	15:52:00	102
2009-02-25	15:53:00	0
2009-02-25	15:54:00	102
2009-02-25	15:55:00	10
2009-02-25	15:56:00	156
2009-02-25	15:57:00	91
2009-02-25	15:58:00	41
2009-02-25	15:59:00	0
2009-02-25	16:00:00	51
2009-02-25	16:01:00	112
2009-02-25	16:02:00	10
2009-02-25	16:03:00	0
2009-02-25	16:04:00	0
2009-02-25	16:05:00	10
2009-02-25	16:06:00	0
2009-02-25	16:07:00	0
2009-02-25	16:08:00	122
2009-02-25	16:09:00	380
2009-02-25	16:10:00	459
2009-02-25	16:11:00	10
2009-02-25	16:12:00	10
2009-02-25	16:13:00	0
2009-02-25	16:14:00	0
2009-02-25	16:15:00	0
2009-02-25	16:16:00	0
2009-02-25	16:17:00	112
2009-02-25	16:18:00	10
2009-02-25	16:19:00	0
2009-02-25	16:20:00	0
2009-02-25	16:21:00	0
2009-02-25	16:22:00	217
2009-02-25	16:23:00	443
2009-02-25	16:24:00	394
2009-02-25	16:25:00	20
2009-02-25	16:26:00	41
2009-02-25	16:27:00	0
2009-02-25	16:28:00	410
2009-02-25	16:29:00	0
2009-02-25	16:30:00	254
2009-02-25	16:31:00	0
2009-02-25	16:32:00	0
2009-02-25	16:33:00	0
2009-02-25	16:34:00	0
2009-02-25	16:35:00	0
2009-02-25	16:36:00	561
2009-02-25	16:37:00	459
2009-02-25	16:38:00	20
2009-02-25	16:39:00	156
2009-02-25	16:40:00	0
2009-02-25	16:41:00	20
2009-02-25	16:42:00	459
2009-02-25	16:43:00	634
2009-02-25	16:44:00	427
2009-02-25	16:45:00	156
2009-02-25	16:46:00	0
2009-02-25	16:47:00	0
2009-02-25	16:48:00	0
2009-02-25	16:49:00	0
2009-02-25	16:50:00	0
2009-02-25	16:51:00	0
2009-02-25	16:52:00	309
2009-02-25	16:53:00	20
2009-02-25	16:54:00	10
2009-02-25	16:55:00	156
2009-02-25	16:56:00	0
2009-02-25	16:57:00	0
2009-02-25	16:58:00	205
2009-02-25	16:59:00	112
2009-02-25	17:00:00	309
2009-02-25	17:01:00	169
2009-02-25	17:02:00	81
2009-02-25	17:03:00	0
2009-02-25	17:04:00	0
2009-02-25	17:05:00	616
2009-02-25	17:06:00	112
2009-02-25	17:07:00	10
2009-02-25	17:08:00	217
2009-02-25	17:09:00	181
2009-02-25	17:10:00	10
2009-02-25	17:11:00	254
2009-02-25	17:12:00	1156
2009-02-25	17:13:00	295
2009-02-25	17:14:00	10
2009-02-25	17:15:00	492
2009-02-25	17:16:00	30
2009-02-25	17:17:00	132
2009-02-25	17:18:00	132
2009-02-25	17:19:00	323
2009-02-25	17:20:00	61
2009-02-25	17:21:00	122
2009-02-25	17:22:00	0
2009-02-25	17:23:00	0
2009-02-25	17:24:00	51
2009-02-25	17:25:00	217
2009-02-25	17:26:00	443
2009-02-25	17:27:00	977
2009-02-25	17:28:00	193
2009-02-25	17:29:00	144
2009-02-25	17:30:00	427
2009-02-25	17:31:00	366
2009-02-25	17:32:00	0
2009-02-25	17:33:00	91
2009-02-25	17:34:00	280
2009-02-25	17:35:00	10
2009-02-25	17:36:00	41
2009-02-25	17:37:00	0
2009-02-25	17:38:00	0
2009-02-25	17:39:00	20
2009-02-25	17:40:00	0
2009-02-25	17:41:00	0
2009-02-25	17:42:00	144
2009-02-25	17:43:00	0
2009-02-25	17:44:00	71
2009-02-25	17:45:00	10
2009-02-25	17:46:00	112
2009-02-25	17:47:00	20
2009-02-25	17:48:00	0
2009-02-25	17:49:00	0
2009-02-25	17:50:00	0
2009-02-25	17:51:00	0
2009-02-25	17:52:00	0
2009-02-25	17:53:00	0
2009-02-25	17:54:00	71
2009-02-25	17:55:00	102
2009-02-25	17:56:00	242
2009-02-25	17:57:00	181
2009-02-25	17:58:00	91
2009-02-25	17:59:00	0
2009-02-25	18:00:00	91
2009-02-25	18:01:00	10
2009-02-25	18:02:00	0
2009-02-25	18:03:00	0
2009-02-25	18:04:00	71
2009-02-25	18:05:00	0
2009-02-25	18:06:00	693
2009-02-25	18:07:00	230
2009-02-25	18:08:00	156
2009-02-25	18:09:00	144
2009-02-25	18:10:00	2702
2009-02-25	18:11:00	1751
2009-02-25	18:12:00	1825
2009-02-25	18:13:00	156
2009-02-25	18:14:00	205
2009-02-25	18:15:00	1386
2009-02-25	18:16:00	1611
2009-02-25	18:17:00	410
2009-02-25	18:18:00	1479
2009-02-25	18:19:00	132
2009-02-25	18:20:00	1788
2009-02-25	18:21:00	4409
2009-02-25	18:22:00	839
2009-02-25	18:23:00	1544
2009-02-25	18:24:00	597
2009-02-25	18:25:00	1447
2009-02-25	18:26:00	20
2009-02-25	18:27:00	0
2009-02-25	18:28:00	91
2009-02-25	18:29:00	0
2009-02-25	18:30:00	1026
2009-02-25	18:31:00	0
2009-02-25	18:32:00	10
2009-02-25	18:33:00	10
2009-02-25	18:34:00	309
2009-02-25	18:35:00	839
2009-02-25	18:36:00	634
2009-02-25	18:37:00	2503
2009-02-25	18:38:00	51
2009-02-25	18:39:00	754
2009-02-25	18:40:00	230
2009-02-25	18:41:00	20
2009-02-25	18:42:00	10
2009-02-25	18:43:00	144
2009-02-25	18:44:00	30
2009-02-25	18:45:00	0
2009-02-25	18:46:00	0
2009-02-25	18:47:00	0
2009-02-25	18:48:00	0
2009-02-25	18:49:00	0
2009-02-25	18:50:00	0
2009-02-25	18:51:00	51
2009-02-25	18:52:00	30
2009-02-25	18:53:00	156
2009-02-25	18:54:00	10
2009-02-25	18:55:00	0
2009-02-25	18:56:00	20
2009-02-25	18:57:00	0
2009-02-25	18:58:00	0
2009-02-25	18:59:00	10
2009-02-25	19:00:00	0
2009-02-25	19:01:00	0
2009-02-25	19:02:00	0
2009-02-25	19:03:00	0
2009-02-25	19:04:00	0
2009-02-25	19:05:00	0
2009-02-25	19:06:00	0
2009-02-25	19:07:00	0
2009-02-25	19:08:00	0
2009-02-25	19:09:00	0
2009-02-25	19:10:00	0
2009-02-25	19:11:00	0
2009-02-25	19:12:00	0
2009-02-25	19:13:00	0
2009-02-25	19:14:00	0
2009-02-25	19:15:00	30
2009-02-25	19:16:00	337
2009-02-25	19:17:00	20
2009-02-25	19:18:00	156
2009-02-25	19:19:00	0
2009-02-25	19:20:00	0
2009-02-25	19:21:00	0
2009-02-25	19:22:00	0
2009-02-25	19:23:00	0
2009-02-25	19:24:00	0
2009-02-25	19:25:00	0
2009-02-25	19:26:00	0
2009-02-25	19:27:00	0
2009-02-25	19:28:00	0
2009-02-25	19:29:00	0
2009-02-25	19:30:00	0
2009-02-25	19:31:00	0
2009-02-25	19:32:00	0
2009-02-25	19:33:00	0
2009-02-25	19:34:00	0
2009-02-25	19:35:00	0
2009-02-25	19:36:00	0
2009-02-25	19:37:00	0
2009-02-25	19:38:00	41
2009-02-25	19:39:00	30
2009-02-25	19:40:00	0
2009-02-25	19:41:00	0
2009-02-25	19:42:00	41
2009-02-25	19:43:00	41
2009-02-25	19:44:00	30
2009-02-25	19:45:00	0
2009-02-25	19:46:00	0
2009-02-25	19:47:00	0
2009-02-25	19:48:00	0
2009-02-25	19:49:00	0
2009-02-25	19:50:00	0
2009-02-25	19:51:00	0
2009-02-25	19:52:00	0
2009-02-25	19:53:00	0
2009-02-25	19:54:00	0
2009-02-25	19:55:00	0
2009-02-25	19:56:00	0
2009-02-25	19:57:00	0
2009-02-25	19:58:00	0
2009-02-25	19:59:00	0
2009-02-25	20:00:00	0
2009-02-25	20:01:00	0
2009-02-25	20:02:00	10
2009-02-25	20:03:00	41
2009-02-25	20:04:00	0
2009-02-25	20:05:00	0
2009-02-25	20:06:00	0
2009-02-25	20:07:00	0
2009-02-25	20:08:00	0
2009-02-25	20:09:00	0
2009-02-25	20:10:00	0
2009-02-25	20:11:00	0
2009-02-25	20:12:00	0
2009-02-25	20:13:00	0
2009-02-25	20:14:00	0
2009-02-25	20:15:00	41
2009-02-25	20:16:00	0
2009-02-25	20:17:00	0
2009-02-25	20:18:00	0
2009-02-25	20:19:00	0
2009-02-25	20:20:00	61
2009-02-25	20:21:00	0
2009-02-25	20:22:00	0
2009-02-25	20:23:00	30
2009-02-25	20:24:00	0
2009-02-25	20:25:00	30
2009-02-25	20:26:00	0
2009-02-25	20:27:00	20
2009-02-25	20:28:00	0
2009-02-25	20:29:00	0
2009-02-25	20:30:00	0
2009-02-25	20:31:00	0
2009-02-25	20:32:00	0
2009-02-25	20:33:00	0
2009-02-25	20:34:00	0
2009-02-25	20:35:00	693
2009-02-25	20:36:00	51
2009-02-25	20:37:00	169
2009-02-25	20:38:00	0
2009-02-25	20:39:00	266
2009-02-25	20:40:00	10
2009-02-25	20:41:00	132
2009-02-25	20:42:00	156
2009-02-25	20:43:00	0
2009-02-25	20:44:00	0
2009-02-25	20:45:00	0
2009-02-25	20:46:00	144
2009-02-25	20:47:00	122
2009-02-25	20:48:00	30
2009-02-25	20:49:00	20
2009-02-25	20:50:00	2363
2009-02-25	20:51:00	2410
2009-02-25	20:52:00	3436
2009-02-25	20:53:00	1479
2009-02-25	20:54:00	492
2009-02-25	20:55:00	266
2009-02-25	20:56:00	443
2009-02-25	20:57:00	323
2009-02-25	20:58:00	309
2009-02-25	20:59:00	193
2009-02-25	21:00:00	0
2009-02-25	21:01:00	337
2009-02-25	21:02:00	0
2009-02-25	21:03:00	0
2009-02-25	21:04:00	394
2009-02-25	21:05:00	380
2009-02-25	21:06:00	0
2009-02-25	21:07:00	0
2009-02-25	21:08:00	0
2009-02-25	21:09:00	0
2009-02-25	21:10:00	0
2009-02-25	21:11:00	0
2009-02-25	21:12:00	0
2009-02-25	21:13:00	0
2009-02-25	21:14:00	0
2009-02-25	21:15:00	0
2009-02-25	21:16:00	0
2009-02-25	21:17:00	0
2009-02-25	21:18:00	0
2009-02-25	21:19:00	0
2009-02-25	21:20:00	0
2009-02-25	21:21:00	0
2009-02-25	21:22:00	0
2009-02-25	21:23:00	0
2009-02-25	21:24:00	0
2009-02-25	21:25:00	0
2009-02-25	21:26:00	0
2009-02-25	21:27:00	0
2009-02-25	21:28:00	0
2009-02-25	21:29:00	0
2009-02-25	21:30:00	0
2009-02-25	21:31:00	0
2009-02-25	21:32:00	0
2009-02-25	21:33:00	0
2009-02-25	21:34:00	0
2009-02-25	21:35:00	0
2009-02-25	21:36:00	0
2009-02-25	21:37:00	0
2009-02-25	21:38:00	0
2009-02-25	21:39:00	0
2009-02-25	21:40:00	0
2009-02-25	21:41:00	0
2009-02-25	21:42:00	41
2009-02-25	21:43:00	30
2009-02-25	21:44:00	20
2009-02-25	21:45:00	30
2009-02-25	21:46:00	0
2009-02-25	21:47:00	10
2009-02-25	21:48:00	0
2009-02-25	21:49:00	0
2009-02-25	21:50:00	0
2009-02-25	21:51:00	0
2009-02-25	21:52:00	0
2009-02-25	21:53:00	0
2009-02-25	21:54:00	0
2009-02-25	21:55:00	0
2009-02-25	21:56:00	0
2009-02-25	21:57:00	0
2009-02-25	21:58:00	0
2009-02-25	21:59:00	0
2009-02-25	22:00:00	0
2009-02-25	22:01:00	0
2009-02-25	22:02:00	10
2009-02-25	22:03:00	0
2009-02-25	22:04:00	0
2009-02-25	22:05:00	0
2009-02-25	22:06:00	0
2009-02-25	22:07:00	0
2009-02-25	22:08:00	0
2009-02-25	22:09:00	0
2009-02-25	22:10:00	0
2009-02-25	22:11:00	0
2009-02-25	22:12:00	0
2009-02-25	22:13:00	0
2009-02-25	22:14:00	0
2009-02-25	22:15:00	0
2009-02-25	22:16:00	0
2009-02-25	22:17:00	0
2009-02-25	22:18:00	0
2009-02-25	22:19:00	0
2009-02-25	22:20:00	0
2009-02-25	22:21:00	0
2009-02-25	22:22:00	0
2009-02-25	22:23:00	0
2009-02-25	22:24:00	0
2009-02-25	22:25:00	0
2009-02-25	22:26:00	0
2009-02-25	22:27:00	0
2009-02-25	22:28:00	0
2009-02-25	22:29:00	0
2009-02-25	22:30:00	0
2009-02-25	22:31:00	0
2009-02-25	22:32:00	41
2009-02-25	22:33:00	20
2009-02-25	22:34:00	0
2009-02-25	22:35:00	0
2009-02-25	22:36:00	0
2009-02-25	22:37:00	0
2009-02-25	22:38:00	0
2009-02-25	22:39:00	0
2009-02-25	22:40:00	0
2009-02-25	22:41:00	0
2009-02-25	22:42:00	0
2009-02-25	22:43:00	0
2009-02-25	22:44:00	0
2009-02-25	22:45:00	0
2009-02-25	22:46:00	0
2009-02-25	22:47:00	0
2009-02-25	22:48:00	0
2009-02-25	22:49:00	0
2009-02-25	22:50:00	0
2009-02-25	22:51:00	0
2009-02-25	22:52:00	0
2009-02-25	22:53:00	0
2009-02-25	22:54:00	0
2009-02-25	22:55:00	0
2009-02-25	22:56:00	0
2009-02-25	22:57:00	0
2009-02-25	22:58:00	0
2009-02-25	22:59:00	0
2009-02-25	23:00:00	0
2009-02-25	23:01:00	0
2009-02-25	23:02:00	0
2009-02-25	23:03:00	0
2009-02-25	23:04:00	0
2009-02-25	23:05:00	0
2009-02-25	23:06:00	0
2009-02-25	23:07:00	0
2009-02-25	23:08:00	0
2009-02-25	23:09:00	0
2009-02-25	23:10:00	0
2009-02-25	23:11:00	0
2009-02-25	23:12:00	0
2009-02-25	23:13:00	0
2009-02-25	23:14:00	0
2009-02-25	23:15:00	0
2009-02-25	23:16:00	0
2009-02-25	23:17:00	0
2009-02-25	23:18:00	0
2009-02-25	23:19:00	0
2009-02-25	23:20:00	0
2009-02-25	23:21:00	0
2009-02-25	23:22:00	0
2009-02-25	23:23:00	0
2009-02-25	23:24:00	0
2009-02-25	23:25:00	0
2009-02-25	23:26:00	0
2009-02-25	23:27:00	51
2009-02-25	23:28:00	41
2009-02-25	23:29:00	10
2009-02-25	23:30:00	51
2009-02-25	23:31:00	0
2009-02-25	23:32:00	0
2009-02-25	23:33:00	0
2009-02-25	23:34:00	0
2009-02-25	23:35:00	0
2009-02-25	23:36:00	0
2009-02-25	23:37:00	0
2009-02-25	23:38:00	0
2009-02-25	23:39:00	0
2009-02-25	23:40:00	0
2009-02-25	23:41:00	0
2009-02-25	23:42:00	0
2009-02-25	23:43:00	0
2009-02-25	23:44:00	0
2009-02-25	23:45:00	0
2009-02-25	23:46:00	0
2009-02-25	23:47:00	0
2009-02-25	23:48:00	0
2009-02-25	23:49:00	30
2009-02-25	23:50:00	0
2009-02-25	23:51:00	0
2009-02-25	23:52:00	0
2009-02-25	23:53:00	0
2009-02-25	23:54:00	0
2009-02-25	23:55:00	0
2009-02-25	23:56:00	0
2009-02-25	23:57:00	0
2009-02-25	23:58:00	0
2009-02-25	23:59:00	0
2009-02-26	00:00:00	0
2009-02-26	00:01:00	0
2009-02-26	00:02:00	0
2009-02-26	00:03:00	0
2009-02-26	00:04:00	0
2009-02-26	00:05:00	0
2009-02-26	00:06:00	0
2009-02-26	00:07:00	0
2009-02-26	00:08:00	0
2009-02-26	00:09:00	0
2009-02-26	00:10:00	0
2009-02-26	00:11:00	0
2009-02-26	00:12:00	0
2009-02-26	00:13:00	0
2009-02-26	00:14:00	0
2009-02-26	00:15:00	0
2009-02-26	00:16:00	0
2009-02-26	00:17:00	0
2009-02-26	00:18:00	20
2009-02-26	00:19:00	20
2009-02-26	00:20:00	0
2009-02-26	00:21:00	0
2009-02-26	00:22:00	0
2009-02-26	00:23:00	0
2009-02-26	00:24:00	0
2009-02-26	00:25:00	0
2009-02-26	00:26:00	0
2009-02-26	00:27:00	0
2009-02-26	00:28:00	10
2009-02-26	00:29:00	0
2009-02-26	00:30:00	0
2009-02-26	00:31:00	0
2009-02-26	00:32:00	0
2009-02-26	00:33:00	0
2009-02-26	00:34:00	0
2009-02-26	00:35:00	0
2009-02-26	00:36:00	0
2009-02-26	00:37:00	0
2009-02-26	00:38:00	0
2009-02-26	00:39:00	0
2009-02-26	00:40:00	0
2009-02-26	00:41:00	0
2009-02-26	00:42:00	0
2009-02-26	00:43:00	0
2009-02-26	00:44:00	0
2009-02-26	00:45:00	0
2009-02-26	00:46:00	0
2009-02-26	00:47:00	0
2009-02-26	00:48:00	0
2009-02-26	00:49:00	0
2009-02-26	00:50:00	20
2009-02-26	00:51:00	0
2009-02-26	00:52:00	61
2009-02-26	00:53:00	0
2009-02-26	00:54:00	10
2009-02-26	00:55:00	10
2009-02-26	00:56:00	10
2009-02-26	00:57:00	30
2009-02-26	00:58:00	10
2009-02-26	00:59:00	30
2009-02-26	01:00:00	0
2009-02-26	01:01:00	0
2009-02-26	01:02:00	0
2009-02-26	01:03:00	91
2009-02-26	01:04:00	0
2009-02-26	01:05:00	0
2009-02-26	01:06:00	0
2009-02-26	01:07:00	0
2009-02-26	01:08:00	0
2009-02-26	01:09:00	0
2009-02-26	01:10:00	0
2009-02-26	01:11:00	0
2009-02-26	01:12:00	0
2009-02-26	01:13:00	0
2009-02-26	01:14:00	0
2009-02-26	01:15:00	0
2009-02-26	01:16:00	0
2009-02-26	01:17:00	0
2009-02-26	01:18:00	0
2009-02-26	01:19:00	0
2009-02-26	01:20:00	0
2009-02-26	01:21:00	0
2009-02-26	01:22:00	0
2009-02-26	01:23:00	0
2009-02-26	01:24:00	0
2009-02-26	01:25:00	0
2009-02-26	01:26:00	0
2009-02-26	01:27:00	10
2009-02-26	01:28:00	0
2009-02-26	01:29:00	0
2009-02-26	01:30:00	0
2009-02-26	01:31:00	0
2009-02-26	01:32:00	0
2009-02-26	01:33:00	0
2009-02-26	01:34:00	0
2009-02-26	01:35:00	0
2009-02-26	01:36:00	0
2009-02-26	01:37:00	0
2009-02-26	01:38:00	0
2009-02-26	01:39:00	0
2009-02-26	01:40:00	0
2009-02-26	01:41:00	0
2009-02-26	01:42:00	0
2009-02-26	01:43:00	0
2009-02-26	01:44:00	0
2009-02-26	01:45:00	0
2009-02-26	01:46:00	0
2009-02-26	01:47:00	0
2009-02-26	01:48:00	0
2009-02-26	01:49:00	0
2009-02-26	01:50:00	0
2009-02-26	01:51:00	0
2009-02-26	01:52:00	0
2009-02-26	01:53:00	0
2009-02-26	01:54:00	0
2009-02-26	01:55:00	0
2009-02-26	01:56:00	0
2009-02-26	01:57:00	0
2009-02-26	01:58:00	0
2009-02-26	01:59:00	0
2009-02-26	02:00:00	0
2009-02-26	02:01:00	0
2009-02-26	02:02:00	0
2009-02-26	02:03:00	0
2009-02-26	02:04:00	0
2009-02-26	02:05:00	0
2009-02-26	02:06:00	0
2009-02-26	02:07:00	0
2009-02-26	02:08:00	0
2009-02-26	02:09:00	0
2009-02-26	02:10:00	0
2009-02-26	02:11:00	0
2009-02-26	02:12:00	0
2009-02-26	02:13:00	0
2009-02-26	02:14:00	0
2009-02-26	02:15:00	0
2009-02-26	02:16:00	0
2009-02-26	02:17:00	0
2009-02-26	02:18:00	0
2009-02-26	02:19:00	0
2009-02-26	02:20:00	10
2009-02-26	02:21:00	0
2009-02-26	02:22:00	0
2009-02-26	02:23:00	0
2009-02-26	02:24:00	0
2009-02-26	02:25:00	0
2009-02-26	02:26:00	0
2009-02-26	02:27:00	0
2009-02-26	02:28:00	0
2009-02-26	02:29:00	0
2009-02-26	02:30:00	0
2009-02-26	02:31:00	0
2009-02-26	02:32:00	0
2009-02-26	02:33:00	0
2009-02-26	02:34:00	0
2009-02-26	02:35:00	20
2009-02-26	02:36:00	0
2009-02-26	02:37:00	0
2009-02-26	02:38:00	0
2009-02-26	02:39:00	0
2009-02-26	02:40:00	0
2009-02-26	02:41:00	0
2009-02-26	02:42:00	0
2009-02-26	02:43:00	0
2009-02-26	02:44:00	0
2009-02-26	02:45:00	0
2009-02-26	02:46:00	0
2009-02-26	02:47:00	0
2009-02-26	02:48:00	0
2009-02-26	02:49:00	0
2009-02-26	02:50:00	0
2009-02-26	02:51:00	0
2009-02-26	02:52:00	0
2009-02-26	02:53:00	0
2009-02-26	02:54:00	0
2009-02-26	02:55:00	0
2009-02-26	02:56:00	0
2009-02-26	02:57:00	0
2009-02-26	02:58:00	0
2009-02-26	02:59:00	0
2009-02-26	03:00:00	0
2009-02-26	03:01:00	0
2009-02-26	03:02:00	0
2009-02-26	03:03:00	20
2009-02-26	03:04:00	0
2009-02-26	03:05:00	0
2009-02-26	03:06:00	0
2009-02-26	03:07:00	0
2009-02-26	03:08:00	0
2009-02-26	03:09:00	0
2009-02-26	03:10:00	0
2009-02-26	03:11:00	0
2009-02-26	03:12:00	0
2009-02-26	03:13:00	0
2009-02-26	03:14:00	0
2009-02-26	03:15:00	0
2009-02-26	03:16:00	0
2009-02-26	03:17:00	0
2009-02-26	03:18:00	0
2009-02-26	03:19:00	0
2009-02-26	03:20:00	0
2009-02-26	03:21:00	0
2009-02-26	03:22:00	0
2009-02-26	03:23:00	0
2009-02-26	03:24:00	0
2009-02-26	03:25:00	0
2009-02-26	03:26:00	0
2009-02-26	03:27:00	0
2009-02-26	03:28:00	0
2009-02-26	03:29:00	61
2009-02-26	03:30:00	0
2009-02-26	03:31:00	20
2009-02-26	03:32:00	91
2009-02-26	03:33:00	0
2009-02-26	03:34:00	0
2009-02-26	03:35:00	51
2009-02-26	03:36:00	0
2009-02-26	03:37:00	0
2009-02-26	03:38:00	41
2009-02-26	03:39:00	0
2009-02-26	03:40:00	0
2009-02-26	03:41:00	0
2009-02-26	03:42:00	0
2009-02-26	03:43:00	0
2009-02-26	03:44:00	0
2009-02-26	03:45:00	0
2009-02-26	03:46:00	0
2009-02-26	03:47:00	0
2009-02-26	03:48:00	0
2009-02-26	03:49:00	0
2009-02-26	03:50:00	0
2009-02-26	03:51:00	0
2009-02-26	03:52:00	0
2009-02-26	03:53:00	0
2009-02-26	03:54:00	0
2009-02-26	03:55:00	0
2009-02-26	03:56:00	0
2009-02-26	03:57:00	0
2009-02-26	03:58:00	0
2009-02-26	03:59:00	0
2009-02-26	04:00:00	0
2009-02-26	04:01:00	30
2009-02-26	04:02:00	51
2009-02-26	04:03:00	0
2009-02-26	04:04:00	0
2009-02-26	04:05:00	30
2009-02-26	04:06:00	0
2009-02-26	04:07:00	0
2009-02-26	04:08:00	0
2009-02-26	04:09:00	0
2009-02-26	04:10:00	0
2009-02-26	04:11:00	0
2009-02-26	04:12:00	0
2009-02-26	04:13:00	0
2009-02-26	04:14:00	0
2009-02-26	04:15:00	0
2009-02-26	04:16:00	0
2009-02-26	04:17:00	0
2009-02-26	04:18:00	0
2009-02-26	04:19:00	0
2009-02-26	04:20:00	0
2009-02-26	04:21:00	0
2009-02-26	04:22:00	0
2009-02-26	04:23:00	0
2009-02-26	04:24:00	0
2009-02-26	04:25:00	20
2009-02-26	04:26:00	0
2009-02-26	04:27:00	0
2009-02-26	04:28:00	0
2009-02-26	04:29:00	0
2009-02-26	04:30:00	0
2009-02-26	04:31:00	0
2009-02-26	04:32:00	0
2009-02-26	04:33:00	0
2009-02-26	04:34:00	0
2009-02-26	04:35:00	0
2009-02-26	04:36:00	0
2009-02-26	04:37:00	0
2009-02-26	04:38:00	0
2009-02-26	04:39:00	20
2009-02-26	04:40:00	0
2009-02-26	04:41:00	0
2009-02-26	04:42:00	0
2009-02-26	04:43:00	0
2009-02-26	04:44:00	0
2009-02-26	04:45:00	0
2009-02-26	04:46:00	0
2009-02-26	04:47:00	0
2009-02-26	04:48:00	0
2009-02-26	04:49:00	0
2009-02-26	04:50:00	20
2009-02-26	04:51:00	0
2009-02-26	04:52:00	41
2009-02-26	04:53:00	0
2009-02-26	04:54:00	10
2009-02-26	04:55:00	0
2009-02-26	04:56:00	0
2009-02-26	04:57:00	0
2009-02-26	04:58:00	0
2009-02-26	04:59:00	0
2009-02-26	05:00:00	0
2009-02-26	05:01:00	0
2009-02-26	05:02:00	0
2009-02-26	05:03:00	0
2009-02-26	05:04:00	0
2009-02-26	05:05:00	0
2009-02-26	05:06:00	0
2009-02-26	05:07:00	0
2009-02-26	05:08:00	0
2009-02-26	05:09:00	0
2009-02-26	05:10:00	0
2009-02-26	05:11:00	0
2009-02-26	05:12:00	71
2009-02-26	05:13:00	0
2009-02-26	05:14:00	0
2009-02-26	05:15:00	0
2009-02-26	05:16:00	0
2009-02-26	05:17:00	112
2009-02-26	05:18:00	0
2009-02-26	05:19:00	0
2009-02-26	05:20:00	0
2009-02-26	05:21:00	0
2009-02-26	05:22:00	0
2009-02-26	05:23:00	0
2009-02-26	05:24:00	0
2009-02-26	05:25:00	0
2009-02-26	05:26:00	0
2009-02-26	05:27:00	0
2009-02-26	05:28:00	0
2009-02-26	05:29:00	0
2009-02-26	05:30:00	0
2009-02-26	05:31:00	0
2009-02-26	05:32:00	0
2009-02-26	05:33:00	0
2009-02-26	05:34:00	0
2009-02-26	05:35:00	0
2009-02-26	05:36:00	0
2009-02-26	05:37:00	0
2009-02-26	05:38:00	0
2009-02-26	05:39:00	0
2009-02-26	05:40:00	0
2009-02-26	05:41:00	0
2009-02-26	05:42:00	132
2009-02-26	05:43:00	10
2009-02-26	05:44:00	0
2009-02-26	05:45:00	0
2009-02-26	05:46:00	51
2009-02-26	05:47:00	51
2009-02-26	05:48:00	0
2009-02-26	05:49:00	0
2009-02-26	05:50:00	0
2009-02-26	05:51:00	0
2009-02-26	05:52:00	0
2009-02-26	05:53:00	0
2009-02-26	05:54:00	0
2009-02-26	05:55:00	0
2009-02-26	05:56:00	0
2009-02-26	05:57:00	0
2009-02-26	05:58:00	0
2009-02-26	05:59:00	0
2009-02-26	06:00:00	0
2009-02-26	06:01:00	0
2009-02-26	06:02:00	0
2009-02-26	06:03:00	0
2009-02-26	06:04:00	0
2009-02-26	06:05:00	0
2009-02-26	06:06:00	0
2009-02-26	06:07:00	0
2009-02-26	06:08:00	0
2009-02-26	06:09:00	0
2009-02-26	06:10:00	71
2009-02-26	06:11:00	0
2009-02-26	06:12:00	0
2009-02-26	06:13:00	0
2009-02-26	06:14:00	30
2009-02-26	06:15:00	10
2009-02-26	06:16:00	0
2009-02-26	06:17:00	0
2009-02-26	06:18:00	91
2009-02-26	06:19:00	91
2009-02-26	06:20:00	366
2009-02-26	06:21:00	366
2009-02-26	06:22:00	71
2009-02-26	06:23:00	0
2009-02-26	06:24:00	0
2009-02-26	06:25:00	0
2009-02-26	06:26:00	0
2009-02-26	06:27:00	0
2009-02-26	06:28:00	0
2009-02-26	06:29:00	0
2009-02-26	06:30:00	0
2009-02-26	06:31:00	0
2009-02-26	06:32:00	0
2009-02-26	06:33:00	0
2009-02-26	06:34:00	0
2009-02-26	06:35:00	0
2009-02-26	06:36:00	0
2009-02-26	06:37:00	0
2009-02-26	06:38:00	0
2009-02-26	06:39:00	0
2009-02-26	06:40:00	0
2009-02-26	06:41:00	0
2009-02-26	06:42:00	0
2009-02-26	06:43:00	0
2009-02-26	06:44:00	0
2009-02-26	06:45:00	616
2009-02-26	06:46:00	10
2009-02-26	06:47:00	20
2009-02-26	06:48:00	0
2009-02-26	06:49:00	10
2009-02-26	06:50:00	0
2009-02-26	06:51:00	0
2009-02-26	06:52:00	0
2009-02-26	06:53:00	0
2009-02-26	06:54:00	0
2009-02-26	06:55:00	10
2009-02-26	06:56:00	144
2009-02-26	06:57:00	2806
2009-02-26	06:58:00	861
2009-02-26	06:59:00	410
2009-02-26	07:00:00	597
2009-02-26	07:01:00	61
2009-02-26	07:02:00	230
2009-02-26	07:03:00	122
2009-02-26	07:04:00	10
2009-02-26	07:05:00	0
2009-02-26	07:06:00	0
2009-02-26	07:07:00	102
2009-02-26	07:08:00	0
2009-02-26	07:09:00	0
2009-02-26	07:10:00	0
2009-02-26	07:11:00	0
2009-02-26	07:12:00	156
2009-02-26	07:13:00	774
2009-02-26	07:14:00	181
2009-02-26	07:15:00	205
2009-02-26	07:16:00	266
2009-02-26	07:17:00	673
2009-02-26	07:18:00	733
2009-02-26	07:19:00	634
2009-02-26	07:20:00	205
2009-02-26	07:21:00	0
2009-02-26	07:22:00	0
2009-02-26	07:23:00	10
2009-02-26	07:24:00	0
2009-02-26	07:25:00	0
2009-02-26	07:26:00	0
2009-02-26	07:27:00	0
2009-02-26	07:28:00	0
2009-02-26	07:29:00	0
2009-02-26	07:30:00	112
2009-02-26	07:31:00	295
2009-02-26	07:32:00	230
2009-02-26	07:33:00	323
2009-02-26	07:34:00	443
2009-02-26	07:35:00	634
2009-02-26	07:36:00	20
2009-02-26	07:37:00	20
2009-02-26	07:38:00	61
2009-02-26	07:39:00	71
2009-02-26	07:40:00	394
2009-02-26	07:41:00	181
2009-02-26	07:42:00	0
2009-02-26	07:43:00	0
2009-02-26	07:44:00	10
2009-02-26	07:45:00	0
2009-02-26	07:46:00	0
2009-02-26	07:47:00	0
2009-02-26	07:48:00	0
2009-02-26	07:49:00	0
2009-02-26	07:50:00	0
2009-02-26	07:51:00	10
2009-02-26	07:52:00	0
2009-02-26	07:53:00	0
2009-02-26	07:54:00	0
2009-02-26	07:55:00	10
2009-02-26	07:56:00	112
2009-02-26	07:57:00	0
2009-02-26	07:58:00	0
2009-02-26	07:59:00	475
2009-02-26	08:00:00	351
2009-02-26	08:01:00	0
2009-02-26	08:02:00	61
2009-02-26	08:03:00	323
2009-02-26	08:04:00	10
2009-02-26	08:05:00	10
2009-02-26	08:06:00	122
2009-02-26	08:07:00	884
2009-02-26	08:08:00	61
2009-02-26	08:09:00	459
2009-02-26	08:10:00	673
2009-02-26	08:11:00	693
2009-02-26	08:12:00	1268
2009-02-26	08:13:00	693
2009-02-26	08:14:00	459
2009-02-26	08:15:00	41
2009-02-26	08:16:00	102
2009-02-26	08:17:00	0
2009-02-26	08:18:00	0
2009-02-26	08:19:00	0
2009-02-26	08:20:00	10
2009-02-26	08:21:00	0
2009-02-26	08:22:00	41
2009-02-26	08:23:00	0
2009-02-26	08:24:00	61
2009-02-26	08:25:00	953
2009-02-26	08:26:00	561
2009-02-26	08:27:00	713
2009-02-26	08:28:00	774
2009-02-26	08:29:00	475
2009-02-26	08:30:00	193
2009-02-26	08:31:00	41
2009-02-26	08:32:00	0
2009-02-26	08:33:00	10
2009-02-26	08:34:00	0
2009-02-26	08:35:00	0
2009-02-26	08:36:00	0
2009-02-26	08:37:00	0
2009-02-26	08:38:00	0
2009-02-26	08:39:00	169
2009-02-26	08:40:00	1026
2009-02-26	08:41:00	337
2009-02-26	08:42:00	122
2009-02-26	08:43:00	193
2009-02-26	08:44:00	144
2009-02-26	08:45:00	132
2009-02-26	08:46:00	242
2009-02-26	08:47:00	524
2009-02-26	08:48:00	492
2009-02-26	08:49:00	309
2009-02-26	08:50:00	713
2009-02-26	08:51:00	337
2009-02-26	08:52:00	524
2009-02-26	08:53:00	861
2009-02-26	08:54:00	266
2009-02-26	08:55:00	144
2009-02-26	08:56:00	20
2009-02-26	08:57:00	20
2009-02-26	08:58:00	0
2009-02-26	08:59:00	0
2009-02-26	09:00:00	0
2009-02-26	09:01:00	0
2009-02-26	09:02:00	0
2009-02-26	09:03:00	0
2009-02-26	09:04:00	0
2009-02-26	09:05:00	10
2009-02-26	09:06:00	0
2009-02-26	09:07:00	20
2009-02-26	09:08:00	0
2009-02-26	09:09:00	0
[truncated: 9,530 more rows]

## Sheet: 3.4.09 (asprin)
Actogram, Copy Raw Data, All Days
Identity:	Shon
Filename:	E:\Active Research Files\meloxicam titre canine\cases\shon\Shon 3.4.09 aspirin.AWC
Gender:	M
Age:	9
Height:	30.5 cm	12.0 in
Weight:	16.0 kg	35.3 lbs
Start Date:	04-Mar-2009 (Wed)
Start Time:	18:00:00
Interval:	1.00 mins
Date Stamp:	Time Stamp:	Activity Data:	Marker Press:
2009-03-04	00:00:00	0
2009-03-04	00:01:00	0
2009-03-04	00:02:00	0
2009-03-04	00:03:00	0
2009-03-04	00:04:00	0
2009-03-04	00:05:00	0
2009-03-04	00:06:00	0
2009-03-04	00:07:00	0
2009-03-04	00:08:00	0
2009-03-04	00:09:00	0
2009-03-04	00:10:00	0
2009-03-04	00:11:00	0
2009-03-04	00:12:00	0
2009-03-04	00:13:00	0
2009-03-04	00:14:00	0
2009-03-04	00:15:00	0
2009-03-04	00:16:00	0
2009-03-04	00:17:00	0
2009-03-04	00:18:00	0
2009-03-04	00:19:00	0
2009-03-04	00:20:00	0
2009-03-04	00:21:00	0
2009-03-04	00:22:00	0
2009-03-04	00:23:00	0
2009-03-04	00:24:00	0
2009-03-04	00:25:00	0
2009-03-04	00:26:00	0
2009-03-04	00:27:00	0
2009-03-04	00:28:00	0
2009-03-04	00:29:00	0
2009-03-04	00:30:00	0
2009-03-04	00:31:00	0
2009-03-04	00:32:00	0
2009-03-04	00:33:00	0
2009-03-04	00:34:00	0
2009-03-04	00:35:00	0
2009-03-04	00:36:00	0
2009-03-04	00:37:00	0
2009-03-04	00:38:00	0
2009-03-04	00:39:00	0
2009-03-04	00:40:00	0
2009-03-04	00:41:00	0
2009-03-04	00:42:00	0
2009-03-04	00:43:00	0
2009-03-04	00:44:00	0
2009-03-04	00:45:00	0
2009-03-04	00:46:00	0
2009-03-04	00:47:00	0
2009-03-04	00:48:00	0
2009-03-04	00:49:00	0
2009-03-04	00:50:00	0
2009-03-04	00:51:00	0
2009-03-04	00:52:00	0
2009-03-04	00:53:00	0
2009-03-04	00:54:00	0
2009-03-04	00:55:00	0
2009-03-04	00:56:00	0
2009-03-04	00:57:00	0
2009-03-04	00:58:00	0
2009-03-04	00:59:00	0
2009-03-04	01:00:00	0
2009-03-04	01:01:00	0
2009-03-04	01:02:00	0
2009-03-04	01:03:00	0
2009-03-04	01:04:00	0
2009-03-04	01:05:00	0
2009-03-04	01:06:00	0
2009-03-04	01:07:00	0
2009-03-04	01:08:00	0
2009-03-04	01:09:00	0
2009-03-04	01:10:00	0
2009-03-04	01:11:00	0
2009-03-04	01:12:00	0
2009-03-04	01:13:00	0
2009-03-04	01:14:00	0
2009-03-04	01:15:00	0
2009-03-04	01:16:00	0
2009-03-04	01:17:00	0
2009-03-04	01:18:00	0
2009-03-04	01:19:00	0
2009-03-04	01:20:00	0
2009-03-04	01:21:00	0
2009-03-04	01:22:00	0
2009-03-04	01:23:00	0
2009-03-04	01:24:00	0
2009-03-04	01:25:00	0
2009-03-04	01:26:00	0
2009-03-04	01:27:00	0
2009-03-04	01:28:00	0
2009-03-04	01:29:00	0
2009-03-04	01:30:00	0
2009-03-04	01:31:00	0
2009-03-04	01:32:00	0
2009-03-04	01:33:00	0
2009-03-04	01:34:00	0
2009-03-04	01:35:00	0
2009-03-04	01:36:00	0
2009-03-04	01:37:00	0
2009-03-04	01:38:00	0
2009-03-04	01:39:00	0
2009-03-04	01:40:00	0
2009-03-04	01:41:00	0
2009-03-04	01:42:00	0
2009-03-04	01:43:00	0
2009-03-04	01:44:00	0
2009-03-04	01:45:00	0
2009-03-04	01:46:00	0
2009-03-04	01:47:00	0
2009-03-04	01:48:00	0
2009-03-04	01:49:00	0
2009-03-04	01:50:00	0
2009-03-04	01:51:00	0
2009-03-04	01:52:00	0
2009-03-04	01:53:00	0
2009-03-04	01:54:00	0
2009-03-04	01:55:00	0
2009-03-04	01:56:00	0
2009-03-04	01:57:00	0
2009-03-04	01:58:00	0
2009-03-04	01:59:00	0
2009-03-04	02:00:00	0
2009-03-04	02:01:00	0
2009-03-04	02:02:00	0
2009-03-04	02:03:00	0
2009-03-04	02:04:00	0
2009-03-04	02:05:00	0
2009-03-04	02:06:00	0
2009-03-04	02:07:00	0
2009-03-04	02:08:00	0
2009-03-04	02:09:00	0
2009-03-04	02:10:00	0
2009-03-04	02:11:00	0
2009-03-04	02:12:00	0
2009-03-04	02:13:00	0
2009-03-04	02:14:00	0
2009-03-04	02:15:00	0
2009-03-04	02:16:00	0
2009-03-04	02:17:00	0
2009-03-04	02:18:00	0
2009-03-04	02:19:00	0
2009-03-04	02:20:00	0
2009-03-04	02:21:00	0
2009-03-04	02:22:00	0
2009-03-04	02:23:00	0
2009-03-04	02:24:00	0
2009-03-04	02:25:00	0
2009-03-04	02:26:00	0
2009-03-04	02:27:00	0
2009-03-04	02:28:00	0
2009-03-04	02:29:00	0
2009-03-04	02:30:00	0
2009-03-04	02:31:00	0
2009-03-04	02:32:00	0
2009-03-04	02:33:00	0
2009-03-04	02:34:00	0
2009-03-04	02:35:00	0
2009-03-04	02:36:00	0
2009-03-04	02:37:00	0
2009-03-04	02:38:00	0
2009-03-04	02:39:00	0
2009-03-04	02:40:00	0
2009-03-04	02:41:00	0
2009-03-04	02:42:00	0
2009-03-04	02:43:00	0
2009-03-04	02:44:00	0
2009-03-04	02:45:00	0
2009-03-04	02:46:00	0
2009-03-04	02:47:00	0
2009-03-04	02:48:00	0
2009-03-04	02:49:00	0
2009-03-04	02:50:00	0
2009-03-04	02:51:00	0
2009-03-04	02:52:00	0
2009-03-04	02:53:00	0
2009-03-04	02:54:00	0
2009-03-04	02:55:00	0
2009-03-04	02:56:00	0
2009-03-04	02:57:00	0
2009-03-04	02:58:00	0
2009-03-04	02:59:00	0
2009-03-04	03:00:00	0
2009-03-04	03:01:00	0
2009-03-04	03:02:00	0
2009-03-04	03:03:00	0
2009-03-04	03:04:00	0
2009-03-04	03:05:00	0
2009-03-04	03:06:00	0
2009-03-04	03:07:00	0
2009-03-04	03:08:00	0
2009-03-04	03:09:00	0
2009-03-04	03:10:00	0
2009-03-04	03:11:00	0
2009-03-04	03:12:00	0
2009-03-04	03:13:00	0
2009-03-04	03:14:00	0
2009-03-04	03:15:00	0
2009-03-04	03:16:00	0
2009-03-04	03:17:00	0
2009-03-04	03:18:00	0
2009-03-04	03:19:00	0
2009-03-04	03:20:00	0
2009-03-04	03:21:00	0
2009-03-04	03:22:00	0
2009-03-04	03:23:00	0
2009-03-04	03:24:00	0
2009-03-04	03:25:00	0
2009-03-04	03:26:00	0
2009-03-04	03:27:00	0
2009-03-04	03:28:00	0
2009-03-04	03:29:00	0
2009-03-04	03:30:00	0
2009-03-04	03:31:00	0
2009-03-04	03:32:00	0
2009-03-04	03:33:00	0
2009-03-04	03:34:00	0
2009-03-04	03:35:00	0
2009-03-04	03:36:00	0
2009-03-04	03:37:00	0
2009-03-04	03:38:00	0
2009-03-04	03:39:00	0
2009-03-04	03:40:00	0
2009-03-04	03:41:00	0
2009-03-04	03:42:00	0
2009-03-04	03:43:00	0
2009-03-04	03:44:00	0
2009-03-04	03:45:00	0
2009-03-04	03:46:00	0
2009-03-04	03:47:00	0
2009-03-04	03:48:00	0
2009-03-04	03:49:00	0
2009-03-04	03:50:00	0
2009-03-04	03:51:00	0
2009-03-04	03:52:00	0
2009-03-04	03:53:00	0
2009-03-04	03:54:00	0
2009-03-04	03:55:00	0
2009-03-04	03:56:00	0
2009-03-04	03:57:00	0
2009-03-04	03:58:00	0
2009-03-04	03:59:00	0
2009-03-04	04:00:00	0
2009-03-04	04:01:00	0
2009-03-04	04:02:00	0
2009-03-04	04:03:00	0
2009-03-04	04:04:00	0
2009-03-04	04:05:00	0
2009-03-04	04:06:00	0
2009-03-04	04:07:00	0
2009-03-04	04:08:00	0
2009-03-04	04:09:00	0
2009-03-04	04:10:00	0
2009-03-04	04:11:00	0
2009-03-04	04:12:00	0
2009-03-04	04:13:00	0
2009-03-04	04:14:00	0
2009-03-04	04:15:00	0
2009-03-04	04:16:00	0
2009-03-04	04:17:00	0
2009-03-04	04:18:00	0
2009-03-04	04:19:00	0
2009-03-04	04:20:00	0
2009-03-04	04:21:00	0
2009-03-04	04:22:00	0
2009-03-04	04:23:00	0
2009-03-04	04:24:00	0
2009-03-04	04:25:00	0
2009-03-04	04:26:00	0
2009-03-04	04:27:00	0
2009-03-04	04:28:00	0
2009-03-04	04:29:00	0
2009-03-04	04:30:00	0
2009-03-04	04:31:00	0
2009-03-04	04:32:00	0
2009-03-04	04:33:00	0
2009-03-04	04:34:00	0
2009-03-04	04:35:00	0
2009-03-04	04:36:00	0
2009-03-04	04:37:00	0
2009-03-04	04:38:00	0
2009-03-04	04:39:00	0
2009-03-04	04:40:00	0
2009-03-04	04:41:00	0
2009-03-04	04:42:00	0
2009-03-04	04:43:00	0
2009-03-04	04:44:00	0
2009-03-04	04:45:00	0
2009-03-04	04:46:00	0
2009-03-04	04:47:00	0
2009-03-04	04:48:00	0
2009-03-04	04:49:00	0
2009-03-04	04:50:00	0
2009-03-04	04:51:00	0
2009-03-04	04:52:00	0
2009-03-04	04:53:00	0
2009-03-04	04:54:00	0
2009-03-04	04:55:00	0
2009-03-04	04:56:00	0
2009-03-04	04:57:00	0
2009-03-04	04:58:00	0
2009-03-04	04:59:00	0
2009-03-04	05:00:00	0
2009-03-04	05:01:00	0
2009-03-04	05:02:00	0
2009-03-04	05:03:00	0
2009-03-04	05:04:00	0
2009-03-04	05:05:00	0
2009-03-04	05:06:00	0
2009-03-04	05:07:00	0
2009-03-04	05:08:00	0
2009-03-04	05:09:00	0
2009-03-04	05:10:00	0
2009-03-04	05:11:00	0
2009-03-04	05:12:00	0
2009-03-04	05:13:00	0
2009-03-04	05:14:00	0
2009-03-04	05:15:00	0
2009-03-04	05:16:00	0
2009-03-04	05:17:00	0
2009-03-04	05:18:00	0
2009-03-04	05:19:00	0
2009-03-04	05:20:00	0
2009-03-04	05:21:00	0
2009-03-04	05:22:00	0
2009-03-04	05:23:00	0
2009-03-04	05:24:00	0
2009-03-04	05:25:00	0
2009-03-04	05:26:00	0
2009-03-04	05:27:00	0
2009-03-04	05:28:00	0
2009-03-04	05:29:00	0
2009-03-04	05:30:00	0
2009-03-04	05:31:00	0
2009-03-04	05:32:00	0
2009-03-04	05:33:00	0
2009-03-04	05:34:00	0
2009-03-04	05:35:00	0
2009-03-04	05:36:00	0
2009-03-04	05:37:00	0
2009-03-04	05:38:00	0
2009-03-04	05:39:00	0
2009-03-04	05:40:00	0
2009-03-04	05:41:00	0
2009-03-04	05:42:00	0
2009-03-04	05:43:00	0
2009-03-04	05:44:00	0
2009-03-04	05:45:00	0
2009-03-04	05:46:00	0
2009-03-04	05:47:00	0
2009-03-04	05:48:00	0
2009-03-04	05:49:00	0
2009-03-04	05:50:00	0
2009-03-04	05:51:00	0
2009-03-04	05:52:00	0
2009-03-04	05:53:00	0
2009-03-04	05:54:00	0
2009-03-04	05:55:00	0
2009-03-04	05:56:00	0
2009-03-04	05:57:00	0
2009-03-04	05:58:00	0
2009-03-04	05:59:00	0
2009-03-04	06:00:00	0
2009-03-04	06:01:00	0
2009-03-04	06:02:00	0
2009-03-04	06:03:00	0
2009-03-04	06:04:00	0
2009-03-04	06:05:00	0
2009-03-04	06:06:00	0
2009-03-04	06:07:00	0
2009-03-04	06:08:00	0
2009-03-04	06:09:00	0
2009-03-04	06:10:00	0
2009-03-04	06:11:00	0
2009-03-04	06:12:00	0
2009-03-04	06:13:00	0
2009-03-04	06:14:00	0
2009-03-04	06:15:00	0
2009-03-04	06:16:00	0
2009-03-04	06:17:00	0
2009-03-04	06:18:00	0
2009-03-04	06:19:00	0
2009-03-04	06:20:00	0
2009-03-04	06:21:00	0
2009-03-04	06:22:00	0
2009-03-04	06:23:00	0
2009-03-04	06:24:00	0
2009-03-04	06:25:00	0
2009-03-04	06:26:00	0
2009-03-04	06:27:00	0
2009-03-04	06:28:00	0
2009-03-04	06:29:00	0
2009-03-04	06:30:00	0
2009-03-04	06:31:00	0
2009-03-04	06:32:00	0
2009-03-04	06:33:00	0
2009-03-04	06:34:00	0
2009-03-04	06:35:00	0
2009-03-04	06:36:00	0
2009-03-04	06:37:00	0
2009-03-04	06:38:00	0
2009-03-04	06:39:00	0
2009-03-04	06:40:00	0
2009-03-04	06:41:00	0
2009-03-04	06:42:00	0
2009-03-04	06:43:00	0
2009-03-04	06:44:00	0
2009-03-04	06:45:00	0
2009-03-04	06:46:00	0
2009-03-04	06:47:00	0
2009-03-04	06:48:00	0
2009-03-04	06:49:00	0
2009-03-04	06:50:00	0
2009-03-04	06:51:00	0
2009-03-04	06:52:00	0
2009-03-04	06:53:00	0
2009-03-04	06:54:00	0
2009-03-04	06:55:00	0
2009-03-04	06:56:00	0
2009-03-04	06:57:00	0
2009-03-04	06:58:00	0
2009-03-04	06:59:00	0
2009-03-04	07:00:00	0
2009-03-04	07:01:00	0
2009-03-04	07:02:00	0
2009-03-04	07:03:00	0
2009-03-04	07:04:00	0
2009-03-04	07:05:00	0
2009-03-04	07:06:00	0
2009-03-04	07:07:00	0
2009-03-04	07:08:00	0
2009-03-04	07:09:00	0
2009-03-04	07:10:00	0
2009-03-04	07:11:00	0
2009-03-04	07:12:00	0
2009-03-04	07:13:00	0
2009-03-04	07:14:00	0
2009-03-04	07:15:00	0
2009-03-04	07:16:00	0
2009-03-04	07:17:00	0
2009-03-04	07:18:00	0
2009-03-04	07:19:00	0
2009-03-04	07:20:00	0
2009-03-04	07:21:00	0
2009-03-04	07:22:00	0
2009-03-04	07:23:00	0
2009-03-04	07:24:00	0
2009-03-04	07:25:00	0
2009-03-04	07:26:00	0
2009-03-04	07:27:00	0
2009-03-04	07:28:00	0
2009-03-04	07:29:00	0
2009-03-04	07:30:00	0
2009-03-04	07:31:00	0
2009-03-04	07:32:00	0
2009-03-04	07:33:00	0
2009-03-04	07:34:00	0
2009-03-04	07:35:00	0
2009-03-04	07:36:00	0
2009-03-04	07:37:00	0
2009-03-04	07:38:00	0
2009-03-04	07:39:00	0
2009-03-04	07:40:00	0
2009-03-04	07:41:00	0
2009-03-04	07:42:00	0
2009-03-04	07:43:00	0
2009-03-04	07:44:00	0
2009-03-04	07:45:00	0
2009-03-04	07:46:00	0
2009-03-04	07:47:00	0
2009-03-04	07:48:00	0
2009-03-04	07:49:00	0
2009-03-04	07:50:00	0
2009-03-04	07:51:00	0
2009-03-04	07:52:00	0
2009-03-04	07:53:00	0
2009-03-04	07:54:00	0
2009-03-04	07:55:00	0
2009-03-04	07:56:00	0
2009-03-04	07:57:00	0
2009-03-04	07:58:00	0
2009-03-04	07:59:00	0
2009-03-04	08:00:00	0
2009-03-04	08:01:00	0
2009-03-04	08:02:00	0
2009-03-04	08:03:00	0
2009-03-04	08:04:00	0
2009-03-04	08:05:00	0
2009-03-04	08:06:00	0
2009-03-04	08:07:00	0
2009-03-04	08:08:00	0
2009-03-04	08:09:00	0
2009-03-04	08:10:00	0
2009-03-04	08:11:00	0
2009-03-04	08:12:00	0
2009-03-04	08:13:00	0
2009-03-04	08:14:00	0
2009-03-04	08:15:00	0
2009-03-04	08:16:00	0
2009-03-04	08:17:00	0
2009-03-04	08:18:00	0
2009-03-04	08:19:00	0
2009-03-04	08:20:00	0
2009-03-04	08:21:00	0
2009-03-04	08:22:00	0
2009-03-04	08:23:00	0
2009-03-04	08:24:00	0
2009-03-04	08:25:00	0
2009-03-04	08:26:00	0
2009-03-04	08:27:00	0
2009-03-04	08:28:00	0
2009-03-04	08:29:00	0
2009-03-04	08:30:00	0
2009-03-04	08:31:00	0
2009-03-04	08:32:00	0
2009-03-04	08:33:00	0
2009-03-04	08:34:00	0
2009-03-04	08:35:00	0
2009-03-04	08:36:00	0
2009-03-04	08:37:00	0
2009-03-04	08:38:00	0
2009-03-04	08:39:00	0
2009-03-04	08:40:00	0
2009-03-04	08:41:00	0
2009-03-04	08:42:00	0
2009-03-04	08:43:00	0
2009-03-04	08:44:00	0
2009-03-04	08:45:00	0
2009-03-04	08:46:00	0
2009-03-04	08:47:00	0
2009-03-04	08:48:00	0
2009-03-04	08:49:00	0
2009-03-04	08:50:00	0
2009-03-04	08:51:00	0
2009-03-04	08:52:00	0
2009-03-04	08:53:00	0
2009-03-04	08:54:00	0
2009-03-04	08:55:00	0
2009-03-04	08:56:00	0
2009-03-04	08:57:00	0
2009-03-04	08:58:00	0
2009-03-04	08:59:00	0
2009-03-04	09:00:00	0
2009-03-04	09:01:00	0
2009-03-04	09:02:00	0
2009-03-04	09:03:00	0
2009-03-04	09:04:00	0
2009-03-04	09:05:00	0
2009-03-04	09:06:00	0
2009-03-04	09:07:00	0
2009-03-04	09:08:00	0
2009-03-04	09:09:00	0
2009-03-04	09:10:00	0
2009-03-04	09:11:00	0
2009-03-04	09:12:00	0
2009-03-04	09:13:00	0
2009-03-04	09:14:00	0
2009-03-04	09:15:00	0
2009-03-04	09:16:00	0
2009-03-04	09:17:00	0
2009-03-04	09:18:00	0
2009-03-04	09:19:00	0
2009-03-04	09:20:00	0
2009-03-04	09:21:00	0
2009-03-04	09:22:00	0
2009-03-04	09:23:00	0
2009-03-04	09:24:00	0
2009-03-04	09:25:00	0
2009-03-04	09:26:00	0
2009-03-04	09:27:00	0
2009-03-04	09:28:00	0
2009-03-04	09:29:00	0
2009-03-04	09:30:00	0
2009-03-04	09:31:00	0
2009-03-04	09:32:00	0
2009-03-04	09:33:00	0
2009-03-04	09:34:00	0
2009-03-04	09:35:00	0
2009-03-04	09:36:00	0
2009-03-04	09:37:00	0
2009-03-04	09:38:00	0
2009-03-04	09:39:00	0
2009-03-04	09:40:00	0
2009-03-04	09:41:00	0
2009-03-04	09:42:00	0
2009-03-04	09:43:00	0
2009-03-04	09:44:00	0
2009-03-04	09:45:00	0
2009-03-04	09:46:00	0
2009-03-04	09:47:00	0
2009-03-04	09:48:00	0
2009-03-04	09:49:00	0
2009-03-04	09:50:00	0
2009-03-04	09:51:00	0
2009-03-04	09:52:00	0
2009-03-04	09:53:00	0
2009-03-04	09:54:00	0
2009-03-04	09:55:00	0
2009-03-04	09:56:00	0
2009-03-04	09:57:00	0
2009-03-04	09:58:00	0
2009-03-04	09:59:00	0
2009-03-04	10:00:00	0
2009-03-04	10:01:00	0
2009-03-04	10:02:00	0
2009-03-04	10:03:00	0
2009-03-04	10:04:00	0
2009-03-04	10:05:00	0
2009-03-04	10:06:00	0
2009-03-04	10:07:00	0
2009-03-04	10:08:00	0
2009-03-04	10:09:00	0
2009-03-04	10:10:00	0
2009-03-04	10:11:00	0
2009-03-04	10:12:00	0
2009-03-04	10:13:00	0
2009-03-04	10:14:00	0
2009-03-04	10:15:00	0
2009-03-04	10:16:00	0
2009-03-04	10:17:00	0
2009-03-04	10:18:00	0
2009-03-04	10:19:00	0
2009-03-04	10:20:00	0
2009-03-04	10:21:00	0
2009-03-04	10:22:00	0
2009-03-04	10:23:00	0
2009-03-04	10:24:00	0
2009-03-04	10:25:00	0
2009-03-04	10:26:00	0
2009-03-04	10:27:00	0
2009-03-04	10:28:00	0
2009-03-04	10:29:00	0
2009-03-04	10:30:00	0
2009-03-04	10:31:00	0
2009-03-04	10:32:00	0
2009-03-04	10:33:00	0
2009-03-04	10:34:00	0
2009-03-04	10:35:00	0
2009-03-04	10:36:00	0
2009-03-04	10:37:00	0
2009-03-04	10:38:00	0
2009-03-04	10:39:00	0
2009-03-04	10:40:00	0
2009-03-04	10:41:00	0
2009-03-04	10:42:00	0
2009-03-04	10:43:00	0
2009-03-04	10:44:00	0
2009-03-04	10:45:00	0
2009-03-04	10:46:00	0
2009-03-04	10:47:00	0
2009-03-04	10:48:00	0
2009-03-04	10:49:00	0
2009-03-04	10:50:00	0
2009-03-04	10:51:00	0
2009-03-04	10:52:00	0
2009-03-04	10:53:00	0
2009-03-04	10:54:00	0
2009-03-04	10:55:00	0
2009-03-04	10:56:00	0
2009-03-04	10:57:00	0
2009-03-04	10:58:00	0
2009-03-04	10:59:00	0
2009-03-04	11:00:00	0
2009-03-04	11:01:00	0
2009-03-04	11:02:00	0
2009-03-04	11:03:00	0
2009-03-04	11:04:00	0
2009-03-04	11:05:00	0
2009-03-04	11:06:00	0
2009-03-04	11:07:00	0
2009-03-04	11:08:00	0
2009-03-04	11:09:00	0
2009-03-04	11:10:00	0
2009-03-04	11:11:00	0
2009-03-04	11:12:00	0
2009-03-04	11:13:00	0
2009-03-04	11:14:00	0
2009-03-04	11:15:00	0
2009-03-04	11:16:00	0
2009-03-04	11:17:00	0
2009-03-04	11:18:00	0
2009-03-04	11:19:00	0
2009-03-04	11:20:00	0
2009-03-04	11:21:00	0
2009-03-04	11:22:00	0
2009-03-04	11:23:00	0
2009-03-04	11:24:00	0
2009-03-04	11:25:00	0
2009-03-04	11:26:00	0
2009-03-04	11:27:00	0
2009-03-04	11:28:00	0
2009-03-04	11:29:00	0
2009-03-04	11:30:00	0
2009-03-04	11:31:00	0
2009-03-04	11:32:00	0
2009-03-04	11:33:00	0
2009-03-04	11:34:00	0
2009-03-04	11:35:00	0
2009-03-04	11:36:00	0
2009-03-04	11:37:00	0
2009-03-04	11:38:00	0
2009-03-04	11:39:00	0
2009-03-04	11:40:00	0
2009-03-04	11:41:00	0
2009-03-04	11:42:00	0
2009-03-04	11:43:00	0
2009-03-04	11:44:00	0
2009-03-04	11:45:00	0
2009-03-04	11:46:00	0
2009-03-04	11:47:00	0
2009-03-04	11:48:00	0
2009-03-04	11:49:00	0
2009-03-04	11:50:00	0
2009-03-04	11:51:00	0
2009-03-04	11:52:00	0
2009-03-04	11:53:00	0
2009-03-04	11:54:00	0
2009-03-04	11:55:00	0
2009-03-04	11:56:00	0
2009-03-04	11:57:00	0
2009-03-04	11:58:00	0
2009-03-04	11:59:00	0
2009-03-04	12:00:00	0
2009-03-04	12:01:00	0
2009-03-04	12:02:00	0
2009-03-04	12:03:00	0
2009-03-04	12:04:00	0
2009-03-04	12:05:00	0
2009-03-04	12:06:00	0
2009-03-04	12:07:00	0
2009-03-04	12:08:00	0
2009-03-04	12:09:00	0
2009-03-04	12:10:00	0
2009-03-04	12:11:00	0
2009-03-04	12:12:00	0
2009-03-04	12:13:00	0
2009-03-04	12:14:00	0
2009-03-04	12:15:00	0
2009-03-04	12:16:00	0
2009-03-04	12:17:00	0
2009-03-04	12:18:00	0
2009-03-04	12:19:00	0
2009-03-04	12:20:00	0
2009-03-04	12:21:00	0
2009-03-04	12:22:00	0
2009-03-04	12:23:00	0
2009-03-04	12:24:00	0
2009-03-04	12:25:00	0
2009-03-04	12:26:00	0
2009-03-04	12:27:00	0
2009-03-04	12:28:00	0
2009-03-04	12:29:00	0
2009-03-04	12:30:00	0
2009-03-04	12:31:00	0
2009-03-04	12:32:00	0
2009-03-04	12:33:00	0
2009-03-04	12:34:00	0
2009-03-04	12:35:00	0
2009-03-04	12:36:00	0
2009-03-04	12:37:00	0
2009-03-04	12:38:00	0
2009-03-04	12:39:00	0
2009-03-04	12:40:00	0
2009-03-04	12:41:00	0
2009-03-04	12:42:00	0
2009-03-04	12:43:00	0
2009-03-04	12:44:00	0
2009-03-04	12:45:00	0
2009-03-04	12:46:00	0
2009-03-04	12:47:00	0
2009-03-04	12:48:00	0
2009-03-04	12:49:00	0
2009-03-04	12:50:00	0
2009-03-04	12:51:00	0
2009-03-04	12:52:00	0
2009-03-04	12:53:00	0
2009-03-04	12:54:00	0
2009-03-04	12:55:00	0
2009-03-04	12:56:00	0
2009-03-04	12:57:00	0
2009-03-04	12:58:00	0
2009-03-04	12:59:00	0
2009-03-04	13:00:00	0
2009-03-04	13:01:00	0
2009-03-04	13:02:00	0
2009-03-04	13:03:00	0
2009-03-04	13:04:00	0
2009-03-04	13:05:00	0
2009-03-04	13:06:00	0
2009-03-04	13:07:00	0
2009-03-04	13:08:00	0
2009-03-04	13:09:00	0
2009-03-04	13:10:00	0
2009-03-04	13:11:00	0
2009-03-04	13:12:00	0
2009-03-04	13:13:00	0
2009-03-04	13:14:00	0
2009-03-04	13:15:00	0
2009-03-04	13:16:00	0
2009-03-04	13:17:00	0
2009-03-04	13:18:00	0
2009-03-04	13:19:00	0
2009-03-04	13:20:00	0
2009-03-04	13:21:00	0
2009-03-04	13:22:00	0
2009-03-04	13:23:00	0
2009-03-04	13:24:00	0
2009-03-04	13:25:00	0
2009-03-04	13:26:00	0
2009-03-04	13:27:00	0
2009-03-04	13:28:00	0
2009-03-04	13:29:00	0
2009-03-04	13:30:00	0
2009-03-04	13:31:00	0
2009-03-04	13:32:00	0
2009-03-04	13:33:00	0
2009-03-04	13:34:00	0
2009-03-04	13:35:00	0
2009-03-04	13:36:00	0
2009-03-04	13:37:00	0
2009-03-04	13:38:00	0
2009-03-04	13:39:00	0
2009-03-04	13:40:00	0
2009-03-04	13:41:00	0
2009-03-04	13:42:00	0
2009-03-04	13:43:00	0
2009-03-04	13:44:00	0
2009-03-04	13:45:00	0
2009-03-04	13:46:00	0
2009-03-04	13:47:00	0
2009-03-04	13:48:00	0
2009-03-04	13:49:00	0
2009-03-04	13:50:00	0
2009-03-04	13:51:00	0
2009-03-04	13:52:00	0
2009-03-04	13:53:00	0
2009-03-04	13:54:00	0
2009-03-04	13:55:00	0
2009-03-04	13:56:00	0
2009-03-04	13:57:00	0
2009-03-04	13:58:00	0
2009-03-04	13:59:00	0
2009-03-04	14:00:00	0
2009-03-04	14:01:00	0
2009-03-04	14:02:00	0
2009-03-04	14:03:00	0
2009-03-04	14:04:00	0
2009-03-04	14:05:00	0
2009-03-04	14:06:00	0
2009-03-04	14:07:00	0
2009-03-04	14:08:00	0
2009-03-04	14:09:00	0
2009-03-04	14:10:00	0
2009-03-04	14:11:00	0
2009-03-04	14:12:00	0
2009-03-04	14:13:00	0
2009-03-04	14:14:00	0
2009-03-04	14:15:00	0
2009-03-04	14:16:00	0
2009-03-04	14:17:00	0
2009-03-04	14:18:00	0
2009-03-04	14:19:00	0
2009-03-04	14:20:00	0
2009-03-04	14:21:00	0
2009-03-04	14:22:00	0
2009-03-04	14:23:00	0
2009-03-04	14:24:00	0
2009-03-04	14:25:00	0
2009-03-04	14:26:00	0
2009-03-04	14:27:00	0
2009-03-04	14:28:00	0
2009-03-04	14:29:00	0
2009-03-04	14:30:00	0
2009-03-04	14:31:00	0
2009-03-04	14:32:00	0
2009-03-04	14:33:00	0
2009-03-04	14:34:00	0
2009-03-04	14:35:00	0
2009-03-04	14:36:00	0
2009-03-04	14:37:00	0
2009-03-04	14:38:00	0
2009-03-04	14:39:00	0
2009-03-04	14:40:00	0
2009-03-04	14:41:00	0
2009-03-04	14:42:00	0
2009-03-04	14:43:00	0
2009-03-04	14:44:00	0
2009-03-04	14:45:00	0
2009-03-04	14:46:00	0
2009-03-04	14:47:00	0
2009-03-04	14:48:00	0
2009-03-04	14:49:00	0
2009-03-04	14:50:00	0
2009-03-04	14:51:00	0
2009-03-04	14:52:00	0
2009-03-04	14:53:00	0
2009-03-04	14:54:00	0
2009-03-04	14:55:00	0
2009-03-04	14:56:00	0
2009-03-04	14:57:00	0
2009-03-04	14:58:00	0
2009-03-04	14:59:00	0
2009-03-04	15:00:00	0
2009-03-04	15:01:00	0
2009-03-04	15:02:00	0
2009-03-04	15:03:00	0
2009-03-04	15:04:00	0
2009-03-04	15:05:00	0
2009-03-04	15:06:00	0
2009-03-04	15:07:00	0
2009-03-04	15:08:00	0
2009-03-04	15:09:00	0
2009-03-04	15:10:00	0
2009-03-04	15:11:00	0
2009-03-04	15:12:00	0
2009-03-04	15:13:00	0
2009-03-04	15:14:00	0
2009-03-04	15:15:00	0
2009-03-04	15:16:00	0
2009-03-04	15:17:00	0
2009-03-04	15:18:00	0
2009-03-04	15:19:00	0
2009-03-04	15:20:00	0
2009-03-04	15:21:00	0
2009-03-04	15:22:00	0
2009-03-04	15:23:00	0
2009-03-04	15:24:00	0
2009-03-04	15:25:00	0
2009-03-04	15:26:00	0
2009-03-04	15:27:00	0
2009-03-04	15:28:00	0
2009-03-04	15:29:00	0
2009-03-04	15:30:00	0
2009-03-04	15:31:00	0
2009-03-04	15:32:00	0
2009-03-04	15:33:00	0
2009-03-04	15:34:00	0
2009-03-04	15:35:00	0
2009-03-04	15:36:00	0
2009-03-04	15:37:00	0
2009-03-04	15:38:00	0
2009-03-04	15:39:00	0
2009-03-04	15:40:00	0
2009-03-04	15:41:00	0
2009-03-04	15:42:00	0
2009-03-04	15:43:00	0
2009-03-04	15:44:00	0
2009-03-04	15:45:00	0
2009-03-04	15:46:00	0
2009-03-04	15:47:00	0
2009-03-04	15:48:00	0
2009-03-04	15:49:00	0
2009-03-04	15:50:00	0
2009-03-04	15:51:00	0
2009-03-04	15:52:00	0
2009-03-04	15:53:00	0
2009-03-04	15:54:00	0
2009-03-04	15:55:00	0
2009-03-04	15:56:00	0
2009-03-04	15:57:00	0
2009-03-04	15:58:00	0
2009-03-04	15:59:00	0
2009-03-04	16:00:00	0
2009-03-04	16:01:00	0
2009-03-04	16:02:00	0
2009-03-04	16:03:00	0
2009-03-04	16:04:00	0
2009-03-04	16:05:00	0
2009-03-04	16:06:00	0
2009-03-04	16:07:00	0
2009-03-04	16:08:00	0
2009-03-04	16:09:00	0
2009-03-04	16:10:00	0
2009-03-04	16:11:00	0
2009-03-04	16:12:00	0
2009-03-04	16:13:00	0
2009-03-04	16:14:00	0
2009-03-04	16:15:00	0
2009-03-04	16:16:00	0
2009-03-04	16:17:00	0
2009-03-04	16:18:00	0
2009-03-04	16:19:00	0
2009-03-04	16:20:00	0
2009-03-04	16:21:00	0
2009-03-04	16:22:00	0
2009-03-04	16:23:00	0
2009-03-04	16:24:00	0
2009-03-04	16:25:00	0
2009-03-04	16:26:00	0
2009-03-04	16:27:00	0
2009-03-04	16:28:00	0
2009-03-04	16:29:00	0
2009-03-04	16:30:00	0
2009-03-04	16:31:00	0
2009-03-04	16:32:00	0
2009-03-04	16:33:00	0
2009-03-04	16:34:00	0
2009-03-04	16:35:00	0
2009-03-04	16:36:00	0
2009-03-04	16:37:00	0
2009-03-04	16:38:00	0
2009-03-04	16:39:00	0
2009-03-04	16:40:00	0
2009-03-04	16:41:00	0
2009-03-04	16:42:00	0
2009-03-04	16:43:00	0
2009-03-04	16:44:00	0
2009-03-04	16:45:00	0
2009-03-04	16:46:00	0
2009-03-04	16:47:00	0
2009-03-04	16:48:00	0
2009-03-04	16:49:00	0
2009-03-04	16:50:00	0
2009-03-04	16:51:00	0
2009-03-04	16:52:00	0
2009-03-04	16:53:00	0
2009-03-04	16:54:00	0
2009-03-04	16:55:00	0
2009-03-04	16:56:00	0
2009-03-04	16:57:00	0
2009-03-04	16:58:00	0
2009-03-04	16:59:00	0
2009-03-04	17:00:00	0
2009-03-04	17:01:00	0
2009-03-04	17:02:00	0
2009-03-04	17:03:00	0
2009-03-04	17:04:00	0
2009-03-04	17:05:00	0
2009-03-04	17:06:00	0
2009-03-04	17:07:00	0
2009-03-04	17:08:00	0
2009-03-04	17:09:00	0
2009-03-04	17:10:00	0
2009-03-04	17:11:00	0
2009-03-04	17:12:00	0
2009-03-04	17:13:00	0
2009-03-04	17:14:00	0
2009-03-04	17:15:00	0
2009-03-04	17:16:00	0
2009-03-04	17:17:00	0
2009-03-04	17:18:00	0
2009-03-04	17:19:00	0
2009-03-04	17:20:00	0
2009-03-04	17:21:00	0
2009-03-04	17:22:00	0
2009-03-04	17:23:00	0
2009-03-04	17:24:00	0
2009-03-04	17:25:00	0
2009-03-04	17:26:00	0
2009-03-04	17:27:00	0
2009-03-04	17:28:00	0
2009-03-04	17:29:00	0
2009-03-04	17:30:00	0
2009-03-04	17:31:00	0
2009-03-04	17:32:00	0
2009-03-04	17:33:00	0
2009-03-04	17:34:00	0
2009-03-04	17:35:00	0
2009-03-04	17:36:00	0
2009-03-04	17:37:00	0
2009-03-04	17:38:00	0
2009-03-04	17:39:00	0
2009-03-04	17:40:00	0
2009-03-04	17:41:00	0
2009-03-04	17:42:00	0
2009-03-04	17:43:00	0
2009-03-04	17:44:00	0
2009-03-04	17:45:00	0
2009-03-04	17:46:00	0
2009-03-04	17:47:00	0
2009-03-04	17:48:00	0
2009-03-04	17:49:00	0
2009-03-04	17:50:00	0
2009-03-04	17:51:00	0
2009-03-04	17:52:00	0
2009-03-04	17:53:00	0
2009-03-04	17:54:00	0
2009-03-04	17:55:00	0
2009-03-04	17:56:00	0
2009-03-04	17:57:00	0
2009-03-04	17:58:00	0
2009-03-04	17:59:00	0
2009-03-04	18:00:00	295
2009-03-04	18:01:00	508
2009-03-04	18:02:00	906
2009-03-04	18:03:00	817
2009-03-04	18:04:00	906
2009-03-04	18:05:00	839
2009-03-04	18:06:00	459
2009-03-04	18:07:00	230
2009-03-04	18:08:00	91
2009-03-04	18:09:00	0
2009-03-04	18:10:00	0
2009-03-04	18:11:00	0
2009-03-04	18:12:00	0
2009-03-04	18:13:00	0
2009-03-04	18:14:00	280
2009-03-04	18:15:00	295
2009-03-04	18:16:00	2060
2009-03-04	18:17:00	169
2009-03-04	18:18:00	10
2009-03-04	18:19:00	144
2009-03-04	18:20:00	0
2009-03-04	18:21:00	0
2009-03-04	18:22:00	0
2009-03-04	18:23:00	0
2009-03-04	18:24:00	0
2009-03-04	18:25:00	0
2009-03-04	18:26:00	0
2009-03-04	18:27:00	0
2009-03-04	18:28:00	0
2009-03-04	18:29:00	0
2009-03-04	18:30:00	0
2009-03-04	18:31:00	0
2009-03-04	18:32:00	0
2009-03-04	18:33:00	0
2009-03-04	18:34:00	0
2009-03-04	18:35:00	0
2009-03-04	18:36:00	0
2009-03-04	18:37:00	0
2009-03-04	18:38:00	0
2009-03-04	18:39:00	0
2009-03-04	18:40:00	0
2009-03-04	18:41:00	0
2009-03-04	18:42:00	0
2009-03-04	18:43:00	0
2009-03-04	18:44:00	0
2009-03-04	18:45:00	0
2009-03-04	18:46:00	0
2009-03-04	18:47:00	0
2009-03-04	18:48:00	0
2009-03-04	18:49:00	0
2009-03-04	18:50:00	0
2009-03-04	18:51:00	0
2009-03-04	18:52:00	0
2009-03-04	18:53:00	0
2009-03-04	18:54:00	0
2009-03-04	18:55:00	0
2009-03-04	18:56:00	0
2009-03-04	18:57:00	0
2009-03-04	18:58:00	0
2009-03-04	18:59:00	71
2009-03-04	19:00:00	0
2009-03-04	19:01:00	0
2009-03-04	19:02:00	0
2009-03-04	19:03:00	0
2009-03-04	19:04:00	0
2009-03-04	19:05:00	0
2009-03-04	19:06:00	0
2009-03-04	19:07:00	0
2009-03-04	19:08:00	0
2009-03-04	19:09:00	0
2009-03-04	19:10:00	0
2009-03-04	19:11:00	0
2009-03-04	19:12:00	0
2009-03-04	19:13:00	0
2009-03-04	19:14:00	0
2009-03-04	19:15:00	0
2009-03-04	19:16:00	0
2009-03-04	19:17:00	0
2009-03-04	19:18:00	0
2009-03-04	19:19:00	0
2009-03-04	19:20:00	0
2009-03-04	19:21:00	0
2009-03-04	19:22:00	0
2009-03-04	19:23:00	0
2009-03-04	19:24:00	0
2009-03-04	19:25:00	0
2009-03-04	19:26:00	0
2009-03-04	19:27:00	41
2009-03-04	19:28:00	0
2009-03-04	19:29:00	0
2009-03-04	19:30:00	0
2009-03-04	19:31:00	0
2009-03-04	19:32:00	0
2009-03-04	19:33:00	0
2009-03-04	19:34:00	0
2009-03-04	19:35:00	0
2009-03-04	19:36:00	0
2009-03-04	19:37:00	0
2009-03-04	19:38:00	0
2009-03-04	19:39:00	0
2009-03-04	19:40:00	0
2009-03-04	19:41:00	0
2009-03-04	19:42:00	0
2009-03-04	19:43:00	0
2009-03-04	19:44:00	0
2009-03-04	19:45:00	0
2009-03-04	19:46:00	0
2009-03-04	19:47:00	0
2009-03-04	19:48:00	0
2009-03-04	19:49:00	0
2009-03-04	19:50:00	0
2009-03-04	19:51:00	0
2009-03-04	19:52:00	0
2009-03-04	19:53:00	0
2009-03-04	19:54:00	0
2009-03-04	19:55:00	0
2009-03-04	19:56:00	0
2009-03-04	19:57:00	0
2009-03-04	19:58:00	0
2009-03-04	19:59:00	0
2009-03-04	20:00:00	0
2009-03-04	20:01:00	0
2009-03-04	20:02:00	0
2009-03-04	20:03:00	0
2009-03-04	20:04:00	0
2009-03-04	20:05:00	30
2009-03-04	20:06:00	0
2009-03-04	20:07:00	10
2009-03-04	20:08:00	91
2009-03-04	20:09:00	0
2009-03-04	20:10:00	30
2009-03-04	20:11:00	122
2009-03-04	20:12:00	0
2009-03-04	20:13:00	0
2009-03-04	20:14:00	295
2009-03-04	20:15:00	156
2009-03-04	20:16:00	132
2009-03-04	20:17:00	0
2009-03-04	20:18:00	0
2009-03-04	20:19:00	0
2009-03-04	20:20:00	30
2009-03-04	20:21:00	0
2009-03-04	20:22:00	0
2009-03-04	20:23:00	0
2009-03-04	20:24:00	0
2009-03-04	20:25:00	0
2009-03-04	20:26:00	0
2009-03-04	20:27:00	0
2009-03-04	20:28:00	380
2009-03-04	20:29:00	1715
2009-03-04	20:30:00	2552
2009-03-04	20:31:00	266
2009-03-04	20:32:00	0
2009-03-04	20:33:00	0
2009-03-04	20:34:00	0
2009-03-04	20:35:00	0
2009-03-04	20:36:00	10
2009-03-04	20:37:00	0
2009-03-04	20:38:00	0
2009-03-04	20:39:00	0
2009-03-04	20:40:00	20
2009-03-04	20:41:00	0
2009-03-04	20:42:00	0
2009-03-04	20:43:00	0
2009-03-04	20:44:00	0
2009-03-04	20:45:00	0
2009-03-04	20:46:00	20
2009-03-04	20:47:00	579
2009-03-04	20:48:00	0
2009-03-04	20:49:00	10
2009-03-04	20:50:00	0
2009-03-04	20:51:00	10
2009-03-04	20:52:00	0
2009-03-04	20:53:00	0
2009-03-04	20:54:00	0
2009-03-04	20:55:00	0
2009-03-04	20:56:00	0
2009-03-04	20:57:00	0
2009-03-04	20:58:00	0
2009-03-04	20:59:00	10
2009-03-04	21:00:00	0
2009-03-04	21:01:00	0
2009-03-04	21:02:00	0
2009-03-04	21:03:00	0
2009-03-04	21:04:00	0
2009-03-04	21:05:00	0
2009-03-04	21:06:00	51
2009-03-04	21:07:00	443
2009-03-04	21:08:00	1182
2009-03-04	21:09:00	1715
2009-03-04	21:10:00	561
2009-03-04	21:11:00	1002
2009-03-04	21:12:00	524
2009-03-04	21:13:00	394
2009-03-04	21:14:00	280
2009-03-04	21:15:00	366
2009-03-04	21:16:00	30
2009-03-04	21:17:00	337
2009-03-04	21:18:00	193
2009-03-04	21:19:00	122
2009-03-04	21:20:00	71
2009-03-04	21:21:00	71
2009-03-04	21:22:00	122
2009-03-04	21:23:00	81
2009-03-04	21:24:00	0
2009-03-04	21:25:00	0
2009-03-04	21:26:00	81
2009-03-04	21:27:00	181
2009-03-04	21:28:00	0
2009-03-04	21:29:00	0
2009-03-04	21:30:00	0
2009-03-04	21:31:00	906
2009-03-04	21:32:00	394
2009-03-04	21:33:00	0
2009-03-04	21:34:00	0
2009-03-04	21:35:00	0
2009-03-04	21:36:00	0
2009-03-04	21:37:00	0
2009-03-04	21:38:00	0
2009-03-04	21:39:00	0
2009-03-04	21:40:00	0
2009-03-04	21:41:00	0
2009-03-04	21:42:00	0
2009-03-04	21:43:00	0
2009-03-04	21:44:00	0
2009-03-04	21:45:00	0
2009-03-04	21:46:00	10
2009-03-04	21:47:00	0
2009-03-04	21:48:00	0
2009-03-04	21:49:00	0
2009-03-04	21:50:00	0
2009-03-04	21:51:00	0
2009-03-04	21:52:00	0
2009-03-04	21:53:00	181
2009-03-04	21:54:00	0
2009-03-04	21:55:00	10
2009-03-04	21:56:00	0
2009-03-04	21:57:00	0
2009-03-04	21:58:00	0
2009-03-04	21:59:00	0
2009-03-04	22:00:00	0
2009-03-04	22:01:00	0
2009-03-04	22:02:00	0
2009-03-04	22:03:00	0
2009-03-04	22:04:00	0
2009-03-04	22:05:00	0
2009-03-04	22:06:00	0
2009-03-04	22:07:00	0
2009-03-04	22:08:00	0
2009-03-04	22:09:00	10
2009-03-04	22:10:00	0
2009-03-04	22:11:00	0
2009-03-04	22:12:00	71
2009-03-04	22:13:00	0
2009-03-04	22:14:00	81
2009-03-04	22:15:00	20
2009-03-04	22:16:00	410
2009-03-04	22:17:00	169
2009-03-04	22:18:00	0
2009-03-04	22:19:00	0
2009-03-04	22:20:00	0
2009-03-04	22:21:00	0
2009-03-04	22:22:00	0
2009-03-04	22:23:00	0
2009-03-04	22:24:00	0
2009-03-04	22:25:00	0
2009-03-04	22:26:00	0
2009-03-04	22:27:00	0
2009-03-04	22:28:00	0
2009-03-04	22:29:00	0
2009-03-04	22:30:00	0
2009-03-04	22:31:00	0
2009-03-04	22:32:00	0
2009-03-04	22:33:00	0
2009-03-04	22:34:00	0
2009-03-04	22:35:00	0
2009-03-04	22:36:00	0
2009-03-04	22:37:00	0
2009-03-04	22:38:00	0
2009-03-04	22:39:00	0
2009-03-04	22:40:00	0
2009-03-04	22:41:00	0
2009-03-04	22:42:00	0
2009-03-04	22:43:00	0
2009-03-04	22:44:00	0
2009-03-04	22:45:00	0
2009-03-04	22:46:00	0
2009-03-04	22:47:00	0
2009-03-04	22:48:00	0
2009-03-04	22:49:00	0
2009-03-04	22:50:00	0
2009-03-04	22:51:00	0
2009-03-04	22:52:00	0
2009-03-04	22:53:00	0
2009-03-04	22:54:00	0
2009-03-04	22:55:00	0
2009-03-04	22:56:00	0
2009-03-04	22:57:00	0
2009-03-04	22:58:00	0
2009-03-04	22:59:00	0
2009-03-04	23:00:00	0
2009-03-04	23:01:00	0
2009-03-04	23:02:00	0
2009-03-04	23:03:00	0
2009-03-04	23:04:00	0
2009-03-04	23:05:00	0
2009-03-04	23:06:00	0
2009-03-04	23:07:00	0
2009-03-04	23:08:00	0
2009-03-04	23:09:00	0
2009-03-04	23:10:00	0
2009-03-04	23:11:00	0
2009-03-04	23:12:00	0
2009-03-04	23:13:00	0
2009-03-04	23:14:00	0
2009-03-04	23:15:00	0
2009-03-04	23:16:00	0
2009-03-04	23:17:00	0
2009-03-04	23:18:00	0
2009-03-04	23:19:00	0
2009-03-04	23:20:00	0
2009-03-04	23:21:00	0
2009-03-04	23:22:00	0
2009-03-04	23:23:00	0
2009-03-04	23:24:00	0
2009-03-04	23:25:00	0
2009-03-04	23:26:00	0
2009-03-04	23:27:00	0
2009-03-04	23:28:00	0
2009-03-04	23:29:00	0
2009-03-04	23:30:00	0
2009-03-04	23:31:00	0
2009-03-04	23:32:00	0
2009-03-04	23:33:00	0
2009-03-04	23:34:00	0
2009-03-04	23:35:00	0
2009-03-04	23:36:00	0
2009-03-04	23:37:00	0
2009-03-04	23:38:00	0
2009-03-04	23:39:00	0
2009-03-04	23:40:00	0
2009-03-04	23:41:00	0
2009-03-04	23:42:00	0
2009-03-04	23:43:00	0
2009-03-04	23:44:00	0
2009-03-04	23:45:00	0
2009-03-04	23:46:00	0
2009-03-04	23:47:00	0
2009-03-04	23:48:00	0
2009-03-04	23:49:00	0
2009-03-04	23:50:00	0
2009-03-04	23:51:00	0
2009-03-04	23:52:00	0
2009-03-04	23:53:00	0
2009-03-04	23:54:00	0
2009-03-04	23:55:00	0
2009-03-04	23:56:00	0
2009-03-04	23:57:00	0
2009-03-04	23:58:00	0
2009-03-04	23:59:00	0
2009-03-05	00:00:00	0
2009-03-05	00:01:00	0
2009-03-05	00:02:00	0
2009-03-05	00:03:00	0
2009-03-05	00:04:00	0
2009-03-05	00:05:00	0
2009-03-05	00:06:00	0
2009-03-05	00:07:00	0
2009-03-05	00:08:00	0
2009-03-05	00:09:00	0
2009-03-05	00:10:00	0
2009-03-05	00:11:00	0
2009-03-05	00:12:00	0
2009-03-05	00:13:00	20
2009-03-05	00:14:00	51
2009-03-05	00:15:00	132
2009-03-05	00:16:00	0
2009-03-05	00:17:00	0
2009-03-05	00:18:00	0
2009-03-05	00:19:00	0
2009-03-05	00:20:00	0
2009-03-05	00:21:00	0
2009-03-05	00:22:00	0
2009-03-05	00:23:00	0
2009-03-05	00:24:00	0
2009-03-05	00:25:00	0
2009-03-05	00:26:00	0
2009-03-05	00:27:00	0
2009-03-05	00:28:00	0
2009-03-05	00:29:00	0
2009-03-05	00:30:00	0
2009-03-05	00:31:00	0
2009-03-05	00:32:00	0
2009-03-05	00:33:00	0
2009-03-05	00:34:00	0
2009-03-05	00:35:00	0
2009-03-05	00:36:00	0
2009-03-05	00:37:00	0
2009-03-05	00:38:00	0
2009-03-05	00:39:00	0
2009-03-05	00:40:00	0
2009-03-05	00:41:00	0
2009-03-05	00:42:00	0
2009-03-05	00:43:00	0
2009-03-05	00:44:00	0
2009-03-05	00:45:00	0
2009-03-05	00:46:00	0
2009-03-05	00:47:00	0
2009-03-05	00:48:00	0
2009-03-05	00:49:00	0
2009-03-05	00:50:00	0
2009-03-05	00:51:00	0
2009-03-05	00:52:00	0
2009-03-05	00:53:00	0
2009-03-05	00:54:00	0
2009-03-05	00:55:00	0
2009-03-05	00:56:00	0
2009-03-05	00:57:00	0
2009-03-05	00:58:00	0
2009-03-05	00:59:00	0
2009-03-05	01:00:00	0
2009-03-05	01:01:00	0
2009-03-05	01:02:00	0
2009-03-05	01:03:00	0
2009-03-05	01:04:00	0
2009-03-05	01:05:00	0
2009-03-05	01:06:00	0
2009-03-05	01:07:00	0
2009-03-05	01:08:00	0
2009-03-05	01:09:00	0
2009-03-05	01:10:00	0
2009-03-05	01:11:00	0
2009-03-05	01:12:00	0
2009-03-05	01:13:00	0
2009-03-05	01:14:00	0
2009-03-05	01:15:00	0
2009-03-05	01:16:00	0
2009-03-05	01:17:00	0
2009-03-05	01:18:00	0
2009-03-05	01:19:00	0
2009-03-05	01:20:00	0
2009-03-05	01:21:00	0
2009-03-05	01:22:00	0
2009-03-05	01:23:00	0
2009-03-05	01:24:00	0
2009-03-05	01:25:00	0
2009-03-05	01:26:00	10
2009-03-05	01:27:00	0
2009-03-05	01:28:00	0
2009-03-05	01:29:00	0
2009-03-05	01:30:00	0
2009-03-05	01:31:00	0
2009-03-05	01:32:00	0
2009-03-05	01:33:00	0
2009-03-05	01:34:00	0
2009-03-05	01:35:00	0
2009-03-05	01:36:00	0
2009-03-05	01:37:00	0
2009-03-05	01:38:00	0
2009-03-05	01:39:00	30
2009-03-05	01:40:00	0
2009-03-05	01:41:00	0
2009-03-05	01:42:00	0
2009-03-05	01:43:00	0
2009-03-05	01:44:00	0
2009-03-05	01:45:00	0
2009-03-05	01:46:00	0
2009-03-05	01:47:00	41
2009-03-05	01:48:00	0
2009-03-05	01:49:00	10
2009-03-05	01:50:00	0
2009-03-05	01:51:00	0
2009-03-05	01:52:00	0
2009-03-05	01:53:00	0
2009-03-05	01:54:00	0
2009-03-05	01:55:00	0
2009-03-05	01:56:00	0
2009-03-05	01:57:00	0
2009-03-05	01:58:00	0
2009-03-05	01:59:00	0
2009-03-05	02:00:00	0
2009-03-05	02:01:00	0
2009-03-05	02:02:00	0
2009-03-05	02:03:00	0
2009-03-05	02:04:00	0
2009-03-05	02:05:00	0
2009-03-05	02:06:00	0
2009-03-05	02:07:00	0
2009-03-05	02:08:00	10
2009-03-05	02:09:00	20
2009-03-05	02:10:00	61
2009-03-05	02:11:00	102
2009-03-05	02:12:00	10
2009-03-05	02:13:00	0
2009-03-05	02:14:00	0
2009-03-05	02:15:00	0
2009-03-05	02:16:00	0
2009-03-05	02:17:00	0
2009-03-05	02:18:00	0
2009-03-05	02:19:00	0
2009-03-05	02:20:00	0
2009-03-05	02:21:00	0
2009-03-05	02:22:00	0
2009-03-05	02:23:00	0
2009-03-05	02:24:00	0
2009-03-05	02:25:00	0
2009-03-05	02:26:00	0
2009-03-05	02:27:00	0
2009-03-05	02:28:00	0
2009-03-05	02:29:00	0
2009-03-05	02:30:00	0
2009-03-05	02:31:00	0
2009-03-05	02:32:00	0
2009-03-05	02:33:00	0
2009-03-05	02:34:00	0
2009-03-05	02:35:00	0
2009-03-05	02:36:00	0
2009-03-05	02:37:00	0
2009-03-05	02:38:00	0
2009-03-05	02:39:00	0
2009-03-05	02:40:00	0
2009-03-05	02:41:00	0
2009-03-05	02:42:00	0
2009-03-05	02:43:00	0
2009-03-05	02:44:00	0
2009-03-05	02:45:00	0
2009-03-05	02:46:00	0
2009-03-05	02:47:00	0
2009-03-05	02:48:00	0
2009-03-05	02:49:00	0
2009-03-05	02:50:00	0
2009-03-05	02:51:00	0
2009-03-05	02:52:00	0
2009-03-05	02:53:00	0
2009-03-05	02:54:00	0
2009-03-05	02:55:00	0
2009-03-05	02:56:00	0
2009-03-05	02:57:00	51
2009-03-05	02:58:00	0
2009-03-05	02:59:00	0
2009-03-05	03:00:00	0
2009-03-05	03:01:00	0
2009-03-05	03:02:00	0
2009-03-05	03:03:00	0
2009-03-05	03:04:00	0
2009-03-05	03:05:00	0
2009-03-05	03:06:00	0
2009-03-05	03:07:00	0
2009-03-05	03:08:00	0
2009-03-05	03:09:00	0
2009-03-05	03:10:00	0
2009-03-05	03:11:00	0
2009-03-05	03:12:00	0
2009-03-05	03:13:00	0
2009-03-05	03:14:00	0
2009-03-05	03:15:00	0
2009-03-05	03:16:00	0
2009-03-05	03:17:00	0
2009-03-05	03:18:00	0
2009-03-05	03:19:00	0
2009-03-05	03:20:00	0
2009-03-05	03:21:00	0
2009-03-05	03:22:00	0
2009-03-05	03:23:00	0
2009-03-05	03:24:00	0
2009-03-05	03:25:00	0
2009-03-05	03:26:00	0
2009-03-05	03:27:00	0
2009-03-05	03:28:00	0
2009-03-05	03:29:00	0
2009-03-05	03:30:00	0
2009-03-05	03:31:00	0
2009-03-05	03:32:00	0
2009-03-05	03:33:00	0
2009-03-05	03:34:00	0
2009-03-05	03:35:00	20
2009-03-05	03:36:00	0
2009-03-05	03:37:00	0
2009-03-05	03:38:00	0
2009-03-05	03:39:00	0
2009-03-05	03:40:00	0
2009-03-05	03:41:00	0
2009-03-05	03:42:00	0
2009-03-05	03:43:00	0
2009-03-05	03:44:00	20
2009-03-05	03:45:00	30
2009-03-05	03:46:00	0
2009-03-05	03:47:00	0
2009-03-05	03:48:00	0
2009-03-05	03:49:00	193
2009-03-05	03:50:00	61
2009-03-05	03:51:00	0
2009-03-05	03:52:00	0
2009-03-05	03:53:00	0
2009-03-05	03:54:00	0
2009-03-05	03:55:00	10
2009-03-05	03:56:00	0
2009-03-05	03:57:00	0
2009-03-05	03:58:00	0
2009-03-05	03:59:00	0
2009-03-05	04:00:00	0
2009-03-05	04:01:00	0
2009-03-05	04:02:00	0
2009-03-05	04:03:00	0
2009-03-05	04:04:00	0
2009-03-05	04:05:00	0
2009-03-05	04:06:00	0
2009-03-05	04:07:00	0
2009-03-05	04:08:00	0
2009-03-05	04:09:00	0
2009-03-05	04:10:00	0
2009-03-05	04:11:00	0
2009-03-05	04:12:00	0
2009-03-05	04:13:00	0
2009-03-05	04:14:00	0
2009-03-05	04:15:00	0
2009-03-05	04:16:00	0
2009-03-05	04:17:00	0
2009-03-05	04:18:00	0
2009-03-05	04:19:00	0
2009-03-05	04:20:00	0
2009-03-05	04:21:00	0
2009-03-05	04:22:00	0
2009-03-05	04:23:00	0
2009-03-05	04:24:00	0
2009-03-05	04:25:00	0
2009-03-05	04:26:00	0
2009-03-05	04:27:00	0
2009-03-05	04:28:00	0
2009-03-05	04:29:00	0
2009-03-05	04:30:00	0
2009-03-05	04:31:00	0
2009-03-05	04:32:00	0
2009-03-05	04:33:00	0
2009-03-05	04:34:00	20
2009-03-05	04:35:00	0
2009-03-05	04:36:00	0
2009-03-05	04:37:00	0
2009-03-05	04:38:00	0
2009-03-05	04:39:00	0
2009-03-05	04:40:00	0
2009-03-05	04:41:00	0
2009-03-05	04:42:00	0
2009-03-05	04:43:00	0
2009-03-05	04:44:00	0
2009-03-05	04:45:00	0
2009-03-05	04:46:00	0
2009-03-05	04:47:00	0
2009-03-05	04:48:00	0
2009-03-05	04:49:00	0
2009-03-05	04:50:00	0
2009-03-05	04:51:00	0
2009-03-05	04:52:00	0
2009-03-05	04:53:00	0
2009-03-05	04:54:00	0
2009-03-05	04:55:00	41
2009-03-05	04:56:00	20
2009-03-05	04:57:00	20
2009-03-05	04:58:00	30
2009-03-05	04:59:00	0
2009-03-05	05:00:00	0
2009-03-05	05:01:00	0
2009-03-05	05:02:00	0
2009-03-05	05:03:00	0
2009-03-05	05:04:00	0
2009-03-05	05:05:00	0
2009-03-05	05:06:00	0
2009-03-05	05:07:00	0
2009-03-05	05:08:00	0
2009-03-05	05:09:00	0
2009-03-05	05:10:00	0
2009-03-05	05:11:00	0
2009-03-05	05:12:00	0
2009-03-05	05:13:00	0
2009-03-05	05:14:00	0
2009-03-05	05:15:00	0
2009-03-05	05:16:00	0
2009-03-05	05:17:00	0
2009-03-05	05:18:00	0
2009-03-05	05:19:00	0
2009-03-05	05:20:00	0
2009-03-05	05:21:00	0
2009-03-05	05:22:00	0
2009-03-05	05:23:00	0
2009-03-05	05:24:00	0
2009-03-05	05:25:00	0
2009-03-05	05:26:00	0
2009-03-05	05:27:00	0
2009-03-05	05:28:00	0
2009-03-05	05:29:00	0
2009-03-05	05:30:00	0
2009-03-05	05:31:00	0
2009-03-05	05:32:00	0
2009-03-05	05:33:00	0
2009-03-05	05:34:00	0
2009-03-05	05:35:00	0
2009-03-05	05:36:00	0
2009-03-05	05:37:00	0
2009-03-05	05:38:00	0
2009-03-05	05:39:00	0
2009-03-05	05:40:00	0
2009-03-05	05:41:00	0
2009-03-05	05:42:00	0
2009-03-05	05:43:00	0
2009-03-05	05:44:00	0
2009-03-05	05:45:00	0
2009-03-05	05:46:00	10
2009-03-05	05:47:00	10
2009-03-05	05:48:00	102
2009-03-05	05:49:00	0
2009-03-05	05:50:00	51
2009-03-05	05:51:00	0
2009-03-05	05:52:00	0
2009-03-05	05:53:00	0
2009-03-05	05:54:00	0
2009-03-05	05:55:00	0
2009-03-05	05:56:00	0
2009-03-05	05:57:00	10
2009-03-05	05:58:00	0
2009-03-05	05:59:00	0
2009-03-05	06:00:00	0
2009-03-05	06:01:00	0
2009-03-05	06:02:00	0
2009-03-05	06:03:00	0
2009-03-05	06:04:00	0
2009-03-05	06:05:00	0
2009-03-05	06:06:00	0
2009-03-05	06:07:00	20
2009-03-05	06:08:00	102
2009-03-05	06:09:00	30
2009-03-05	06:10:00	0
2009-03-05	06:11:00	0
2009-03-05	06:12:00	0
2009-03-05	06:13:00	0
2009-03-05	06:14:00	0
2009-03-05	06:15:00	0
2009-03-05	06:16:00	0
2009-03-05	06:17:00	0
2009-03-05	06:18:00	0
2009-03-05	06:19:00	0
2009-03-05	06:20:00	0
2009-03-05	06:21:00	0
2009-03-05	06:22:00	0
2009-03-05	06:23:00	0
2009-03-05	06:24:00	0
2009-03-05	06:25:00	0
2009-03-05	06:26:00	0
2009-03-05	06:27:00	0
2009-03-05	06:28:00	0
2009-03-05	06:29:00	0
2009-03-05	06:30:00	0
2009-03-05	06:31:00	0
2009-03-05	06:32:00	20
2009-03-05	06:33:00	0
2009-03-05	06:34:00	0
2009-03-05	06:35:00	0
2009-03-05	06:36:00	0
2009-03-05	06:37:00	0
2009-03-05	06:38:00	132
2009-03-05	06:39:00	673
2009-03-05	06:40:00	337
2009-03-05	06:41:00	91
2009-03-05	06:42:00	366
2009-03-05	06:43:00	0
2009-03-05	06:44:00	0
2009-03-05	06:45:00	0
2009-03-05	06:46:00	10
2009-03-05	06:47:00	0
2009-03-05	06:48:00	0
2009-03-05	06:49:00	0
2009-03-05	06:50:00	0
2009-03-05	06:51:00	0
2009-03-05	06:52:00	0
2009-03-05	06:53:00	0
2009-03-05	06:54:00	0
2009-03-05	06:55:00	0
2009-03-05	06:56:00	0
2009-03-05	06:57:00	0
2009-03-05	06:58:00	0
2009-03-05	06:59:00	0
2009-03-05	07:00:00	0
2009-03-05	07:01:00	366
2009-03-05	07:02:00	132
2009-03-05	07:03:00	0
2009-03-05	07:04:00	266
2009-03-05	07:05:00	230
2009-03-05	07:06:00	0
2009-03-05	07:07:00	0
2009-03-05	07:08:00	0
2009-03-05	07:09:00	0
2009-03-05	07:10:00	0
2009-03-05	07:11:00	0
2009-03-05	07:12:00	0
2009-03-05	07:13:00	0
2009-03-05	07:14:00	0
2009-03-05	07:15:00	0
2009-03-05	07:16:00	0
2009-03-05	07:17:00	0
2009-03-05	07:18:00	0
2009-03-05	07:19:00	0
2009-03-05	07:20:00	0
2009-03-05	07:21:00	0
2009-03-05	07:22:00	0
2009-03-05	07:23:00	0
2009-03-05	07:24:00	0
2009-03-05	07:25:00	0
2009-03-05	07:26:00	634
2009-03-05	07:27:00	634
2009-03-05	07:28:00	2702
2009-03-05	07:29:00	774
2009-03-05	07:30:00	380
2009-03-05	07:31:00	81
2009-03-05	07:32:00	817
2009-03-05	07:33:00	394
2009-03-05	07:34:00	295
2009-03-05	07:35:00	81
2009-03-05	07:36:00	169
2009-03-05	07:37:00	280
2009-03-05	07:38:00	132
2009-03-05	07:39:00	132
2009-03-05	07:40:00	81
2009-03-05	07:41:00	112
2009-03-05	07:42:00	102
2009-03-05	07:43:00	217
2009-03-05	07:44:00	81
2009-03-05	07:45:00	71
2009-03-05	07:46:00	713
2009-03-05	07:47:00	230
2009-03-05	07:48:00	122
2009-03-05	07:49:00	0
2009-03-05	07:50:00	0
2009-03-05	07:51:00	0
2009-03-05	07:52:00	0
2009-03-05	07:53:00	0
2009-03-05	07:54:00	0
2009-03-05	07:55:00	169
2009-03-05	07:56:00	459
2009-03-05	07:57:00	205
2009-03-05	07:58:00	112
2009-03-05	07:59:00	351
2009-03-05	08:00:00	280
2009-03-05	08:01:00	0
2009-03-05	08:02:00	0
2009-03-05	08:03:00	673
2009-03-05	08:04:00	754
2009-03-05	08:05:00	61
2009-03-05	08:06:00	0
2009-03-05	08:07:00	156
2009-03-05	08:08:00	337
2009-03-05	08:09:00	81
2009-03-05	08:10:00	0
2009-03-05	08:11:00	20
2009-03-05	08:12:00	10
2009-03-05	08:13:00	0
2009-03-05	08:14:00	0
2009-03-05	08:15:00	0
2009-03-05	08:16:00	0
2009-03-05	08:17:00	0
2009-03-05	08:18:00	0
2009-03-05	08:19:00	0
2009-03-05	08:20:00	0
2009-03-05	08:21:00	0
2009-03-05	08:22:00	102
2009-03-05	08:23:00	156
2009-03-05	08:24:00	30
2009-03-05	08:25:00	30
2009-03-05	08:26:00	1751
2009-03-05	08:27:00	524
2009-03-05	08:28:00	71
2009-03-05	08:29:00	132
2009-03-05	08:30:00	71
2009-03-05	08:31:00	713
2009-03-05	08:32:00	693
2009-03-05	08:33:00	861
2009-03-05	08:34:00	122
2009-03-05	08:35:00	839
2009-03-05	08:36:00	181
2009-03-05	08:37:00	10
2009-03-05	08:38:00	0
2009-03-05	08:39:00	242
2009-03-05	08:40:00	230
2009-03-05	08:41:00	205
2009-03-05	08:42:00	0
2009-03-05	08:43:00	205
2009-03-05	08:44:00	427
2009-03-05	08:45:00	351
2009-03-05	08:46:00	41
2009-03-05	08:47:00	0
2009-03-05	08:48:00	0
2009-03-05	08:49:00	71
2009-03-05	08:50:00	0
2009-03-05	08:51:00	0
2009-03-05	08:52:00	0
2009-03-05	08:53:00	0
2009-03-05	08:54:00	295
2009-03-05	08:55:00	0
2009-03-05	08:56:00	0
2009-03-05	08:57:00	337
2009-03-05	08:58:00	410
2009-03-05	08:59:00	0
2009-03-05	09:00:00	30
2009-03-05	09:01:00	0
2009-03-05	09:02:00	0
2009-03-05	09:03:00	0
2009-03-05	09:04:00	0
2009-03-05	09:05:00	10
2009-03-05	09:06:00	0
2009-03-05	09:07:00	0
2009-03-05	09:08:00	0
[truncated: 9,531 more rows]

## Sheet: 3.11.09
Actogram, Copy Raw Data, All Days
Identity:	Shon
Filename:	E:\Active Research Files\meloxicam titre canine\cases\shon\Shon 3.11.09.AWC
Gender:	M
Age:	9
Height:	30.5 cm	12.0 in
Weight:	16.0 kg	35.3 lbs
Start Date:	11-Mar-2009 (Wed)
Start Time:	18:00:00
Interval:	1.00 mins
Date Stamp:	Time Stamp:	Activity Data:	Marker Press:
2009-03-11	00:00:00	0
2009-03-11	00:01:00	0
2009-03-11	00:02:00	0
2009-03-11	00:03:00	0
2009-03-11	00:04:00	0
2009-03-11	00:05:00	0
2009-03-11	00:06:00	0
2009-03-11	00:07:00	0
2009-03-11	00:08:00	0
2009-03-11	00:09:00	0
2009-03-11	00:10:00	0
2009-03-11	00:11:00	0
2009-03-11	00:12:00	0
2009-03-11	00:13:00	0
2009-03-11	00:14:00	0
2009-03-11	00:15:00	0
2009-03-11	00:16:00	0
2009-03-11	00:17:00	0
2009-03-11	00:18:00	0
2009-03-11	00:19:00	0
2009-03-11	00:20:00	0
2009-03-11	00:21:00	0
2009-03-11	00:22:00	0
2009-03-11	00:23:00	0
2009-03-11	00:24:00	0
2009-03-11	00:25:00	0
2009-03-11	00:26:00	0
2009-03-11	00:27:00	0
2009-03-11	00:28:00	0
2009-03-11	00:29:00	0
2009-03-11	00:30:00	0
2009-03-11	00:31:00	0
2009-03-11	00:32:00	0
2009-03-11	00:33:00	0
2009-03-11	00:34:00	0
2009-03-11	00:35:00	0
2009-03-11	00:36:00	0
2009-03-11	00:37:00	0
2009-03-11	00:38:00	0
2009-03-11	00:39:00	0
2009-03-11	00:40:00	0
2009-03-11	00:41:00	0
2009-03-11	00:42:00	0
2009-03-11	00:43:00	0
2009-03-11	00:44:00	0
2009-03-11	00:45:00	0
2009-03-11	00:46:00	0
2009-03-11	00:47:00	0
2009-03-11	00:48:00	0
2009-03-11	00:49:00	0
2009-03-11	00:50:00	0
2009-03-11	00:51:00	0
2009-03-11	00:52:00	0
2009-03-11	00:53:00	0
2009-03-11	00:54:00	0
2009-03-11	00:55:00	0
2009-03-11	00:56:00	0
2009-03-11	00:57:00	0
2009-03-11	00:58:00	0
2009-03-11	00:59:00	0
2009-03-11	01:00:00	0
2009-03-11	01:01:00	0
2009-03-11	01:02:00	0
2009-03-11	01:03:00	0
2009-03-11	01:04:00	0
2009-03-11	01:05:00	0
2009-03-11	01:06:00	0
2009-03-11	01:07:00	0
2009-03-11	01:08:00	0
2009-03-11	01:09:00	0
2009-03-11	01:10:00	0
2009-03-11	01:11:00	0
2009-03-11	01:12:00	0
2009-03-11	01:13:00	0
2009-03-11	01:14:00	0
2009-03-11	01:15:00	0
2009-03-11	01:16:00	0
2009-03-11	01:17:00	0
2009-03-11	01:18:00	0
2009-03-11	01:19:00	0
2009-03-11	01:20:00	0
2009-03-11	01:21:00	0
2009-03-11	01:22:00	0
2009-03-11	01:23:00	0
2009-03-11	01:24:00	0
2009-03-11	01:25:00	0
2009-03-11	01:26:00	0
2009-03-11	01:27:00	0
2009-03-11	01:28:00	0
2009-03-11	01:29:00	0
2009-03-11	01:30:00	0
2009-03-11	01:31:00	0
2009-03-11	01:32:00	0
2009-03-11	01:33:00	0
2009-03-11	01:34:00	0
2009-03-11	01:35:00	0
2009-03-11	01:36:00	0
2009-03-11	01:37:00	0
2009-03-11	01:38:00	0
2009-03-11	01:39:00	0
2009-03-11	01:40:00	0
2009-03-11	01:41:00	0
2009-03-11	01:42:00	0
2009-03-11	01:43:00	0
2009-03-11	01:44:00	0
2009-03-11	01:45:00	0
2009-03-11	01:46:00	0
2009-03-11	01:47:00	0
2009-03-11	01:48:00	0
2009-03-11	01:49:00	0
2009-03-11	01:50:00	0
2009-03-11	01:51:00	0
2009-03-11	01:52:00	0
2009-03-11	01:53:00	0
2009-03-11	01:54:00	0
2009-03-11	01:55:00	0
2009-03-11	01:56:00	0
2009-03-11	01:57:00	0
2009-03-11	01:58:00	0
2009-03-11	01:59:00	0
2009-03-11	02:00:00	0
2009-03-11	02:01:00	0
2009-03-11	02:02:00	0
2009-03-11	02:03:00	0
2009-03-11	02:04:00	0
2009-03-11	02:05:00	0
2009-03-11	02:06:00	0
2009-03-11	02:07:00	0
2009-03-11	02:08:00	0
2009-03-11	02:09:00	0
2009-03-11	02:10:00	0
2009-03-11	02:11:00	0
2009-03-11	02:12:00	0
2009-03-11	02:13:00	0
2009-03-11	02:14:00	0
2009-03-11	02:15:00	0
2009-03-11	02:16:00	0
2009-03-11	02:17:00	0
2009-03-11	02:18:00	0
2009-03-11	02:19:00	0
2009-03-11	02:20:00	0
2009-03-11	02:21:00	0
2009-03-11	02:22:00	0
2009-03-11	02:23:00	0
2009-03-11	02:24:00	0
2009-03-11	02:25:00	0
2009-03-11	02:26:00	0
2009-03-11	02:27:00	0
2009-03-11	02:28:00	0
2009-03-11	02:29:00	0
2009-03-11	02:30:00	0
2009-03-11	02:31:00	0
2009-03-11	02:32:00	0
2009-03-11	02:33:00	0
2009-03-11	02:34:00	0
2009-03-11	02:35:00	0
2009-03-11	02:36:00	0
2009-03-11	02:37:00	0
2009-03-11	02:38:00	0
2009-03-11	02:39:00	0
2009-03-11	02:40:00	0
2009-03-11	02:41:00	0
2009-03-11	02:42:00	0
2009-03-11	02:43:00	0
2009-03-11	02:44:00	0
2009-03-11	02:45:00	0
2009-03-11	02:46:00	0
2009-03-11	02:47:00	0
2009-03-11	02:48:00	0
2009-03-11	02:49:00	0
2009-03-11	02:50:00	0
2009-03-11	02:51:00	0
2009-03-11	02:52:00	0
2009-03-11	02:53:00	0
2009-03-11	02:54:00	0
2009-03-11	02:55:00	0
2009-03-11	02:56:00	0
2009-03-11	02:57:00	0
2009-03-11	02:58:00	0
2009-03-11	02:59:00	0
2009-03-11	03:00:00	0
2009-03-11	03:01:00	0
2009-03-11	03:02:00	0
2009-03-11	03:03:00	0
2009-03-11	03:04:00	0
2009-03-11	03:05:00	0
2009-03-11	03:06:00	0
2009-03-11	03:07:00	0
2009-03-11	03:08:00	0
2009-03-11	03:09:00	0
2009-03-11	03:10:00	0
2009-03-11	03:11:00	0
2009-03-11	03:12:00	0
2009-03-11	03:13:00	0
2009-03-11	03:14:00	0
2009-03-11	03:15:00	0
2009-03-11	03:16:00	0
2009-03-11	03:17:00	0
2009-03-11	03:18:00	0
2009-03-11	03:19:00	0
2009-03-11	03:20:00	0
2009-03-11	03:21:00	0
2009-03-11	03:22:00	0
2009-03-11	03:23:00	0
2009-03-11	03:24:00	0
2009-03-11	03:25:00	0
2009-03-11	03:26:00	0
2009-03-11	03:27:00	0
2009-03-11	03:28:00	0
2009-03-11	03:29:00	0
2009-03-11	03:30:00	0
2009-03-11	03:31:00	0
2009-03-11	03:32:00	0
2009-03-11	03:33:00	0
2009-03-11	03:34:00	0
2009-03-11	03:35:00	0
2009-03-11	03:36:00	0
2009-03-11	03:37:00	0
2009-03-11	03:38:00	0
2009-03-11	03:39:00	0
2009-03-11	03:40:00	0
2009-03-11	03:41:00	0
2009-03-11	03:42:00	0
2009-03-11	03:43:00	0
2009-03-11	03:44:00	0
2009-03-11	03:45:00	0
2009-03-11	03:46:00	0
2009-03-11	03:47:00	0
2009-03-11	03:48:00	0
2009-03-11	03:49:00	0
2009-03-11	03:50:00	0
2009-03-11	03:51:00	0
2009-03-11	03:52:00	0
2009-03-11	03:53:00	0
2009-03-11	03:54:00	0
2009-03-11	03:55:00	0
2009-03-11	03:56:00	0
2009-03-11	03:57:00	0
2009-03-11	03:58:00	0
2009-03-11	03:59:00	0
2009-03-11	04:00:00	0
2009-03-11	04:01:00	0
2009-03-11	04:02:00	0
2009-03-11	04:03:00	0
2009-03-11	04:04:00	0
2009-03-11	04:05:00	0
2009-03-11	04:06:00	0
2009-03-11	04:07:00	0
2009-03-11	04:08:00	0
2009-03-11	04:09:00	0
2009-03-11	04:10:00	0
2009-03-11	04:11:00	0
2009-03-11	04:12:00	0
2009-03-11	04:13:00	0
2009-03-11	04:14:00	0
2009-03-11	04:15:00	0
2009-03-11	04:16:00	0
2009-03-11	04:17:00	0
2009-03-11	04:18:00	0
2009-03-11	04:19:00	0
2009-03-11	04:20:00	0
2009-03-11	04:21:00	0
2009-03-11	04:22:00	0
2009-03-11	04:23:00	0
2009-03-11	04:24:00	0
2009-03-11	04:25:00	0
2009-03-11	04:26:00	0
2009-03-11	04:27:00	0
2009-03-11	04:28:00	0
2009-03-11	04:29:00	0
2009-03-11	04:30:00	0
2009-03-11	04:31:00	0
2009-03-11	04:32:00	0
2009-03-11	04:33:00	0
2009-03-11	04:34:00	0
2009-03-11	04:35:00	0
2009-03-11	04:36:00	0
2009-03-11	04:37:00	0
2009-03-11	04:38:00	0
2009-03-11	04:39:00	0
2009-03-11	04:40:00	0
2009-03-11	04:41:00	0
2009-03-11	04:42:00	0
2009-03-11	04:43:00	0
2009-03-11	04:44:00	0
2009-03-11	04:45:00	0
2009-03-11	04:46:00	0
2009-03-11	04:47:00	0
2009-03-11	04:48:00	0
2009-03-11	04:49:00	0
2009-03-11	04:50:00	0
2009-03-11	04:51:00	0
2009-03-11	04:52:00	0
2009-03-11	04:53:00	0
2009-03-11	04:54:00	0
2009-03-11	04:55:00	0
2009-03-11	04:56:00	0
2009-03-11	04:57:00	0
2009-03-11	04:58:00	0
2009-03-11	04:59:00	0
2009-03-11	05:00:00	0
2009-03-11	05:01:00	0
2009-03-11	05:02:00	0
2009-03-11	05:03:00	0
2009-03-11	05:04:00	0
2009-03-11	05:05:00	0
2009-03-11	05:06:00	0
2009-03-11	05:07:00	0
2009-03-11	05:08:00	0
2009-03-11	05:09:00	0
2009-03-11	05:10:00	0
2009-03-11	05:11:00	0
2009-03-11	05:12:00	0
2009-03-11	05:13:00	0
2009-03-11	05:14:00	0
2009-03-11	05:15:00	0
2009-03-11	05:16:00	0
2009-03-11	05:17:00	0
2009-03-11	05:18:00	0
2009-03-11	05:19:00	0
2009-03-11	05:20:00	0
2009-03-11	05:21:00	0
2009-03-11	05:22:00	0
2009-03-11	05:23:00	0
2009-03-11	05:24:00	0
2009-03-11	05:25:00	0
2009-03-11	05:26:00	0
2009-03-11	05:27:00	0
2009-03-11	05:28:00	0
2009-03-11	05:29:00	0
2009-03-11	05:30:00	0
2009-03-11	05:31:00	0
2009-03-11	05:32:00	0
2009-03-11	05:33:00	0
2009-03-11	05:34:00	0
2009-03-11	05:35:00	0
2009-03-11	05:36:00	0
2009-03-11	05:37:00	0
2009-03-11	05:38:00	0
2009-03-11	05:39:00	0
2009-03-11	05:40:00	0
2009-03-11	05:41:00	0
2009-03-11	05:42:00	0
2009-03-11	05:43:00	0
2009-03-11	05:44:00	0
2009-03-11	05:45:00	0
2009-03-11	05:46:00	0
2009-03-11	05:47:00	0
2009-03-11	05:48:00	0
2009-03-11	05:49:00	0
2009-03-11	05:50:00	0
2009-03-11	05:51:00	0
2009-03-11	05:52:00	0
2009-03-11	05:53:00	0
2009-03-11	05:54:00	0
2009-03-11	05:55:00	0
2009-03-11	05:56:00	0
2009-03-11	05:57:00	0
2009-03-11	05:58:00	0
2009-03-11	05:59:00	0
2009-03-11	06:00:00	0
2009-03-11	06:01:00	0
2009-03-11	06:02:00	0
2009-03-11	06:03:00	0
2009-03-11	06:04:00	0
2009-03-11	06:05:00	0
2009-03-11	06:06:00	0
2009-03-11	06:07:00	0
2009-03-11	06:08:00	0
2009-03-11	06:09:00	0
2009-03-11	06:10:00	0
2009-03-11	06:11:00	0
2009-03-11	06:12:00	0
2009-03-11	06:13:00	0
2009-03-11	06:14:00	0
2009-03-11	06:15:00	0
2009-03-11	06:16:00	0
2009-03-11	06:17:00	0
2009-03-11	06:18:00	0
2009-03-11	06:19:00	0
2009-03-11	06:20:00	0
2009-03-11	06:21:00	0
2009-03-11	06:22:00	0
2009-03-11	06:23:00	0
2009-03-11	06:24:00	0
2009-03-11	06:25:00	0
2009-03-11	06:26:00	0
2009-03-11	06:27:00	0
2009-03-11	06:28:00	0
2009-03-11	06:29:00	0
2009-03-11	06:30:00	0
2009-03-11	06:31:00	0
2009-03-11	06:32:00	0
2009-03-11	06:33:00	0
2009-03-11	06:34:00	0
2009-03-11	06:35:00	0
2009-03-11	06:36:00	0
2009-03-11	06:37:00	0
2009-03-11	06:38:00	0
2009-03-11	06:39:00	0
2009-03-11	06:40:00	0
2009-03-11	06:41:00	0
2009-03-11	06:42:00	0
2009-03-11	06:43:00	0
2009-03-11	06:44:00	0
2009-03-11	06:45:00	0
2009-03-11	06:46:00	0
2009-03-11	06:47:00	0
2009-03-11	06:48:00	0
2009-03-11	06:49:00	0
2009-03-11	06:50:00	0
2009-03-11	06:51:00	0
2009-03-11	06:52:00	0
2009-03-11	06:53:00	0
2009-03-11	06:54:00	0
2009-03-11	06:55:00	0
2009-03-11	06:56:00	0
2009-03-11	06:57:00	0
2009-03-11	06:58:00	0
2009-03-11	06:59:00	0
2009-03-11	07:00:00	0
2009-03-11	07:01:00	0
2009-03-11	07:02:00	0
2009-03-11	07:03:00	0
2009-03-11	07:04:00	0
2009-03-11	07:05:00	0
2009-03-11	07:06:00	0
2009-03-11	07:07:00	0
2009-03-11	07:08:00	0
2009-03-11	07:09:00	0
2009-03-11	07:10:00	0
2009-03-11	07:11:00	0
2009-03-11	07:12:00	0
2009-03-11	07:13:00	0
2009-03-11	07:14:00	0
2009-03-11	07:15:00	0
2009-03-11	07:16:00	0
2009-03-11	07:17:00	0
2009-03-11	07:18:00	0
2009-03-11	07:19:00	0
2009-03-11	07:20:00	0
2009-03-11	07:21:00	0
2009-03-11	07:22:00	0
2009-03-11	07:23:00	0
2009-03-11	07:24:00	0
2009-03-11	07:25:00	0
2009-03-11	07:26:00	0
2009-03-11	07:27:00	0
2009-03-11	07:28:00	0
2009-03-11	07:29:00	0
2009-03-11	07:30:00	0
2009-03-11	07:31:00	0
2009-03-11	07:32:00	0
2009-03-11	07:33:00	0
2009-03-11	07:34:00	0
2009-03-11	07:35:00	0
2009-03-11	07:36:00	0
2009-03-11	07:37:00	0
2009-03-11	07:38:00	0
2009-03-11	07:39:00	0
2009-03-11	07:40:00	0
2009-03-11	07:41:00	0
2009-03-11	07:42:00	0
2009-03-11	07:43:00	0
2009-03-11	07:44:00	0
2009-03-11	07:45:00	0
2009-03-11	07:46:00	0
2009-03-11	07:47:00	0
2009-03-11	07:48:00	0
2009-03-11	07:49:00	0
2009-03-11	07:50:00	0
2009-03-11	07:51:00	0
2009-03-11	07:52:00	0
2009-03-11	07:53:00	0
2009-03-11	07:54:00	0
2009-03-11	07:55:00	0
2009-03-11	07:56:00	0
2009-03-11	07:57:00	0
2009-03-11	07:58:00	0
2009-03-11	07:59:00	0
2009-03-11	08:00:00	0
2009-03-11	08:01:00	0
2009-03-11	08:02:00	0
2009-03-11	08:03:00	0
2009-03-11	08:04:00	0
2009-03-11	08:05:00	0
2009-03-11	08:06:00	0
2009-03-11	08:07:00	0
2009-03-11	08:08:00	0
2009-03-11	08:09:00	0
2009-03-11	08:10:00	0
2009-03-11	08:11:00	0
2009-03-11	08:12:00	0
2009-03-11	08:13:00	0
2009-03-11	08:14:00	0
2009-03-11	08:15:00	0
2009-03-11	08:16:00	0
2009-03-11	08:17:00	0
2009-03-11	08:18:00	0
2009-03-11	08:19:00	0
2009-03-11	08:20:00	0
2009-03-11	08:21:00	0
2009-03-11	08:22:00	0
2009-03-11	08:23:00	0
2009-03-11	08:24:00	0
2009-03-11	08:25:00	0
2009-03-11	08:26:00	0
2009-03-11	08:27:00	0
2009-03-11	08:28:00	0
2009-03-11	08:29:00	0
2009-03-11	08:30:00	0
2009-03-11	08:31:00	0
2009-03-11	08:32:00	0
2009-03-11	08:33:00	0
2009-03-11	08:34:00	0
2009-03-11	08:35:00	0
2009-03-11	08:36:00	0
2009-03-11	08:37:00	0
2009-03-11	08:38:00	0
2009-03-11	08:39:00	0
2009-03-11	08:40:00	0
2009-03-11	08:41:00	0
2009-03-11	08:42:00	0
2009-03-11	08:43:00	0
2009-03-11	08:44:00	0
2009-03-11	08:45:00	0
2009-03-11	08:46:00	0
2009-03-11	08:47:00	0
2009-03-11	08:48:00	0
2009-03-11	08:49:00	0
2009-03-11	08:50:00	0
2009-03-11	08:51:00	0
2009-03-11	08:52:00	0
2009-03-11	08:53:00	0
2009-03-11	08:54:00	0
2009-03-11	08:55:00	0
2009-03-11	08:56:00	0
2009-03-11	08:57:00	0
2009-03-11	08:58:00	0
2009-03-11	08:59:00	0
2009-03-11	09:00:00	0
2009-03-11	09:01:00	0
2009-03-11	09:02:00	0
2009-03-11	09:03:00	0
2009-03-11	09:04:00	0
2009-03-11	09:05:00	0
2009-03-11	09:06:00	0
2009-03-11	09:07:00	0
2009-03-11	09:08:00	0
2009-03-11	09:09:00	0
2009-03-11	09:10:00	0
2009-03-11	09:11:00	0
2009-03-11	09:12:00	0
2009-03-11	09:13:00	0
2009-03-11	09:14:00	0
2009-03-11	09:15:00	0
2009-03-11	09:16:00	0
2009-03-11	09:17:00	0
2009-03-11	09:18:00	0
2009-03-11	09:19:00	0
2009-03-11	09:20:00	0
2009-03-11	09:21:00	0
2009-03-11	09:22:00	0
2009-03-11	09:23:00	0
2009-03-11	09:24:00	0
2009-03-11	09:25:00	0
2009-03-11	09:26:00	0
2009-03-11	09:27:00	0
2009-03-11	09:28:00	0
2009-03-11	09:29:00	0
2009-03-11	09:30:00	0
2009-03-11	09:31:00	0
2009-03-11	09:32:00	0
2009-03-11	09:33:00	0
2009-03-11	09:34:00	0
2009-03-11	09:35:00	0
2009-03-11	09:36:00	0
2009-03-11	09:37:00	0
2009-03-11	09:38:00	0
2009-03-11	09:39:00	0
2009-03-11	09:40:00	0
2009-03-11	09:41:00	0
2009-03-11	09:42:00	0
2009-03-11	09:43:00	0
2009-03-11	09:44:00	0
2009-03-11	09:45:00	0
2009-03-11	09:46:00	0
2009-03-11	09:47:00	0
2009-03-11	09:48:00	0
2009-03-11	09:49:00	0
2009-03-11	09:50:00	0
2009-03-11	09:51:00	0
2009-03-11	09:52:00	0
2009-03-11	09:53:00	0
2009-03-11	09:54:00	0
2009-03-11	09:55:00	0
2009-03-11	09:56:00	0
2009-03-11	09:57:00	0
2009-03-11	09:58:00	0
2009-03-11	09:59:00	0
2009-03-11	10:00:00	0
2009-03-11	10:01:00	0
2009-03-11	10:02:00	0
2009-03-11	10:03:00	0
2009-03-11	10:04:00	0
2009-03-11	10:05:00	0
2009-03-11	10:06:00	0
2009-03-11	10:07:00	0
2009-03-11	10:08:00	0
2009-03-11	10:09:00	0
2009-03-11	10:10:00	0
2009-03-11	10:11:00	0
2009-03-11	10:12:00	0
2009-03-11	10:13:00	0
2009-03-11	10:14:00	0
2009-03-11	10:15:00	0
2009-03-11	10:16:00	0
2009-03-11	10:17:00	0
2009-03-11	10:18:00	0
2009-03-11	10:19:00	0
2009-03-11	10:20:00	0
2009-03-11	10:21:00	0
2009-03-11	10:22:00	0
2009-03-11	10:23:00	0
2009-03-11	10:24:00	0
2009-03-11	10:25:00	0
2009-03-11	10:26:00	0
2009-03-11	10:27:00	0
2009-03-11	10:28:00	0
2009-03-11	10:29:00	0
2009-03-11	10:30:00	0
2009-03-11	10:31:00	0
2009-03-11	10:32:00	0
2009-03-11	10:33:00	0
2009-03-11	10:34:00	0
2009-03-11	10:35:00	0
2009-03-11	10:36:00	0
2009-03-11	10:37:00	0
2009-03-11	10:38:00	0
2009-03-11	10:39:00	0
2009-03-11	10:40:00	0
2009-03-11	10:41:00	0
2009-03-11	10:42:00	0
2009-03-11	10:43:00	0
2009-03-11	10:44:00	0
2009-03-11	10:45:00	0
2009-03-11	10:46:00	0
2009-03-11	10:47:00	0
2009-03-11	10:48:00	0
2009-03-11	10:49:00	0
2009-03-11	10:50:00	0
2009-03-11	10:51:00	0
2009-03-11	10:52:00	0
2009-03-11	10:53:00	0
2009-03-11	10:54:00	0
2009-03-11	10:55:00	0
2009-03-11	10:56:00	0
2009-03-11	10:57:00	0
2009-03-11	10:58:00	0
2009-03-11	10:59:00	0
2009-03-11	11:00:00	0
2009-03-11	11:01:00	0
2009-03-11	11:02:00	0
2009-03-11	11:03:00	0
2009-03-11	11:04:00	0
2009-03-11	11:05:00	0
2009-03-11	11:06:00	0
2009-03-11	11:07:00	0
2009-03-11	11:08:00	0
2009-03-11	11:09:00	0
2009-03-11	11:10:00	0
2009-03-11	11:11:00	0
2009-03-11	11:12:00	0
2009-03-11	11:13:00	0
2009-03-11	11:14:00	0
2009-03-11	11:15:00	0
2009-03-11	11:16:00	0
2009-03-11	11:17:00	0
2009-03-11	11:18:00	0
2009-03-11	11:19:00	0
2009-03-11	11:20:00	0
2009-03-11	11:21:00	0
2009-03-11	11:22:00	0
2009-03-11	11:23:00	0
2009-03-11	11:24:00	0
2009-03-11	11:25:00	0
2009-03-11	11:26:00	0
2009-03-11	11:27:00	0
2009-03-11	11:28:00	0
2009-03-11	11:29:00	0
2009-03-11	11:30:00	0
2009-03-11	11:31:00	0
2009-03-11	11:32:00	0
2009-03-11	11:33:00	0
2009-03-11	11:34:00	0
2009-03-11	11:35:00	0
2009-03-11	11:36:00	0
2009-03-11	11:37:00	0
2009-03-11	11:38:00	0
2009-03-11	11:39:00	0
2009-03-11	11:40:00	0
2009-03-11	11:41:00	0
2009-03-11	11:42:00	0
2009-03-11	11:43:00	0
2009-03-11	11:44:00	0
2009-03-11	11:45:00	0
2009-03-11	11:46:00	0
2009-03-11	11:47:00	0
2009-03-11	11:48:00	0
2009-03-11	11:49:00	0
2009-03-11	11:50:00	0
2009-03-11	11:51:00	0
2009-03-11	11:52:00	0
2009-03-11	11:53:00	0
2009-03-11	11:54:00	0
2009-03-11	11:55:00	0
2009-03-11	11:56:00	0
2009-03-11	11:57:00	0
2009-03-11	11:58:00	0
2009-03-11	11:59:00	0
2009-03-11	12:00:00	0
2009-03-11	12:01:00	0
2009-03-11	12:02:00	0
2009-03-11	12:03:00	0
2009-03-11	12:04:00	0
2009-03-11	12:05:00	0
2009-03-11	12:06:00	0
2009-03-11	12:07:00	0
2009-03-11	12:08:00	0
2009-03-11	12:09:00	0
2009-03-11	12:10:00	0
2009-03-11	12:11:00	0
2009-03-11	12:12:00	0
2009-03-11	12:13:00	0
2009-03-11	12:14:00	0
2009-03-11	12:15:00	0
2009-03-11	12:16:00	0
2009-03-11	12:17:00	0
2009-03-11	12:18:00	0
2009-03-11	12:19:00	0
2009-03-11	12:20:00	0
2009-03-11	12:21:00	0
2009-03-11	12:22:00	0
2009-03-11	12:23:00	0
2009-03-11	12:24:00	0
2009-03-11	12:25:00	0
2009-03-11	12:26:00	0
2009-03-11	12:27:00	0
2009-03-11	12:28:00	0
2009-03-11	12:29:00	0
2009-03-11	12:30:00	0
2009-03-11	12:31:00	0
2009-03-11	12:32:00	0
2009-03-11	12:33:00	0
2009-03-11	12:34:00	0
2009-03-11	12:35:00	0
2009-03-11	12:36:00	0
2009-03-11	12:37:00	0
2009-03-11	12:38:00	0
2009-03-11	12:39:00	0
2009-03-11	12:40:00	0
2009-03-11	12:41:00	0
2009-03-11	12:42:00	0
2009-03-11	12:43:00	0
2009-03-11	12:44:00	0
2009-03-11	12:45:00	0
2009-03-11	12:46:00	0
2009-03-11	12:47:00	0
2009-03-11	12:48:00	0
2009-03-11	12:49:00	0
2009-03-11	12:50:00	0
2009-03-11	12:51:00	0
2009-03-11	12:52:00	0
2009-03-11	12:53:00	0
2009-03-11	12:54:00	0
2009-03-11	12:55:00	0
2009-03-11	12:56:00	0
2009-03-11	12:57:00	0
2009-03-11	12:58:00	0
2009-03-11	12:59:00	0
2009-03-11	13:00:00	0
2009-03-11	13:01:00	0
2009-03-11	13:02:00	0
2009-03-11	13:03:00	0
2009-03-11	13:04:00	0
2009-03-11	13:05:00	0
2009-03-11	13:06:00	0
2009-03-11	13:07:00	0
2009-03-11	13:08:00	0
2009-03-11	13:09:00	0
2009-03-11	13:10:00	0
2009-03-11	13:11:00	0
2009-03-11	13:12:00	0
2009-03-11	13:13:00	0
2009-03-11	13:14:00	0
2009-03-11	13:15:00	0
2009-03-11	13:16:00	0
2009-03-11	13:17:00	0
2009-03-11	13:18:00	0
2009-03-11	13:19:00	0
2009-03-11	13:20:00	0
2009-03-11	13:21:00	0
2009-03-11	13:22:00	0
2009-03-11	13:23:00	0
2009-03-11	13:24:00	0
2009-03-11	13:25:00	0
2009-03-11	13:26:00	0
2009-03-11	13:27:00	0
2009-03-11	13:28:00	0
2009-03-11	13:29:00	0
2009-03-11	13:30:00	0
2009-03-11	13:31:00	0
2009-03-11	13:32:00	0
2009-03-11	13:33:00	0
2009-03-11	13:34:00	0
2009-03-11	13:35:00	0
2009-03-11	13:36:00	0
2009-03-11	13:37:00	0
2009-03-11	13:38:00	0
2009-03-11	13:39:00	0
2009-03-11	13:40:00	0
2009-03-11	13:41:00	0
2009-03-11	13:42:00	0
2009-03-11	13:43:00	0
2009-03-11	13:44:00	0
2009-03-11	13:45:00	0
2009-03-11	13:46:00	0
2009-03-11	13:47:00	0
2009-03-11	13:48:00	0
2009-03-11	13:49:00	0
2009-03-11	13:50:00	0
2009-03-11	13:51:00	0
2009-03-11	13:52:00	0
2009-03-11	13:53:00	0
2009-03-11	13:54:00	0
2009-03-11	13:55:00	0
2009-03-11	13:56:00	0
2009-03-11	13:57:00	0
2009-03-11	13:58:00	0
2009-03-11	13:59:00	0
2009-03-11	14:00:00	0
2009-03-11	14:01:00	0
2009-03-11	14:02:00	0
2009-03-11	14:03:00	0
2009-03-11	14:04:00	0
2009-03-11	14:05:00	0
2009-03-11	14:06:00	0
2009-03-11	14:07:00	0
2009-03-11	14:08:00	0
2009-03-11	14:09:00	0
2009-03-11	14:10:00	0
2009-03-11	14:11:00	0
2009-03-11	14:12:00	0
2009-03-11	14:13:00	0
2009-03-11	14:14:00	0
2009-03-11	14:15:00	0
2009-03-11	14:16:00	0
2009-03-11	14:17:00	0
2009-03-11	14:18:00	0
2009-03-11	14:19:00	0
2009-03-11	14:20:00	0
2009-03-11	14:21:00	0
2009-03-11	14:22:00	0
2009-03-11	14:23:00	0
2009-03-11	14:24:00	0
2009-03-11	14:25:00	0
2009-03-11	14:26:00	0
2009-03-11	14:27:00	0
2009-03-11	14:28:00	0
2009-03-11	14:29:00	0
2009-03-11	14:30:00	0
2009-03-11	14:31:00	0
2009-03-11	14:32:00	0
2009-03-11	14:33:00	0
2009-03-11	14:34:00	0
2009-03-11	14:35:00	0
2009-03-11	14:36:00	0
2009-03-11	14:37:00	0
2009-03-11	14:38:00	0
2009-03-11	14:39:00	0
2009-03-11	14:40:00	0
2009-03-11	14:41:00	0
2009-03-11	14:42:00	0
2009-03-11	14:43:00	0
2009-03-11	14:44:00	0
2009-03-11	14:45:00	0
2009-03-11	14:46:00	0
2009-03-11	14:47:00	0
2009-03-11	14:48:00	0
2009-03-11	14:49:00	0
2009-03-11	14:50:00	0
2009-03-11	14:51:00	0
2009-03-11	14:52:00	0
2009-03-11	14:53:00	0
2009-03-11	14:54:00	0
2009-03-11	14:55:00	0
2009-03-11	14:56:00	0
2009-03-11	14:57:00	0
2009-03-11	14:58:00	0
2009-03-11	14:59:00	0
2009-03-11	15:00:00	0
2009-03-11	15:01:00	0
2009-03-11	15:02:00	0
2009-03-11	15:03:00	0
2009-03-11	15:04:00	0
2009-03-11	15:05:00	0
2009-03-11	15:06:00	0
2009-03-11	15:07:00	0
2009-03-11	15:08:00	0
2009-03-11	15:09:00	0
2009-03-11	15:10:00	0
2009-03-11	15:11:00	0
2009-03-11	15:12:00	0
2009-03-11	15:13:00	0
2009-03-11	15:14:00	0
2009-03-11	15:15:00	0
2009-03-11	15:16:00	0
2009-03-11	15:17:00	0
2009-03-11	15:18:00	0
2009-03-11	15:19:00	0
2009-03-11	15:20:00	0
2009-03-11	15:21:00	0
2009-03-11	15:22:00	0
2009-03-11	15:23:00	0
2009-03-11	15:24:00	0
2009-03-11	15:25:00	0
2009-03-11	15:26:00	0
2009-03-11	15:27:00	0
2009-03-11	15:28:00	0
2009-03-11	15:29:00	0
2009-03-11	15:30:00	0
2009-03-11	15:31:00	0
2009-03-11	15:32:00	0
2009-03-11	15:33:00	0
2009-03-11	15:34:00	0
2009-03-11	15:35:00	0
2009-03-11	15:36:00	0
2009-03-11	15:37:00	0
2009-03-11	15:38:00	0
2009-03-11	15:39:00	0
2009-03-11	15:40:00	0
2009-03-11	15:41:00	0
2009-03-11	15:42:00	0
2009-03-11	15:43:00	0
2009-03-11	15:44:00	0
2009-03-11	15:45:00	0
2009-03-11	15:46:00	0
2009-03-11	15:47:00	0
2009-03-11	15:48:00	0
2009-03-11	15:49:00	0
2009-03-11	15:50:00	0
2009-03-11	15:51:00	0
2009-03-11	15:52:00	0
2009-03-11	15:53:00	0
2009-03-11	15:54:00	0
2009-03-11	15:55:00	0
2009-03-11	15:56:00	0
2009-03-11	15:57:00	0
2009-03-11	15:58:00	0
2009-03-11	15:59:00	0
2009-03-11	16:00:00	0
2009-03-11	16:01:00	0
2009-03-11	16:02:00	0
2009-03-11	16:03:00	0
2009-03-11	16:04:00	0
2009-03-11	16:05:00	0
2009-03-11	16:06:00	0
2009-03-11	16:07:00	0
2009-03-11	16:08:00	0
2009-03-11	16:09:00	0
2009-03-11	16:10:00	0
2009-03-11	16:11:00	0
2009-03-11	16:12:00	0
2009-03-11	16:13:00	0
2009-03-11	16:14:00	0
2009-03-11	16:15:00	0
2009-03-11	16:16:00	0
2009-03-11	16:17:00	0
2009-03-11	16:18:00	0
2009-03-11	16:19:00	0
2009-03-11	16:20:00	0
2009-03-11	16:21:00	0
2009-03-11	16:22:00	0
2009-03-11	16:23:00	0
2009-03-11	16:24:00	0
2009-03-11	16:25:00	0
2009-03-11	16:26:00	0
2009-03-11	16:27:00	0
2009-03-11	16:28:00	0
2009-03-11	16:29:00	0
2009-03-11	16:30:00	0
2009-03-11	16:31:00	0
2009-03-11	16:32:00	0
2009-03-11	16:33:00	0
2009-03-11	16:34:00	0
2009-03-11	16:35:00	0
2009-03-11	16:36:00	0
2009-03-11	16:37:00	0
2009-03-11	16:38:00	0
2009-03-11	16:39:00	0
2009-03-11	16:40:00	0
2009-03-11	16:41:00	0
2009-03-11	16:42:00	0
2009-03-11	16:43:00	0
2009-03-11	16:44:00	0
2009-03-11	16:45:00	0
2009-03-11	16:46:00	0
2009-03-11	16:47:00	0
2009-03-11	16:48:00	0
2009-03-11	16:49:00	0
2009-03-11	16:50:00	0
2009-03-11	16:51:00	0
2009-03-11	16:52:00	0
2009-03-11	16:53:00	0
2009-03-11	16:54:00	0
2009-03-11	16:55:00	0
2009-03-11	16:56:00	0
2009-03-11	16:57:00	0
2009-03-11	16:58:00	0
2009-03-11	16:59:00	0
2009-03-11	17:00:00	0
2009-03-11	17:01:00	0
2009-03-11	17:02:00	0
2009-03-11	17:03:00	0
2009-03-11	17:04:00	0
2009-03-11	17:05:00	0
2009-03-11	17:06:00	0
2009-03-11	17:07:00	0
2009-03-11	17:08:00	0
2009-03-11	17:09:00	0
2009-03-11	17:10:00	0
2009-03-11	17:11:00	0
2009-03-11	17:12:00	0
2009-03-11	17:13:00	0
2009-03-11	17:14:00	0
2009-03-11	17:15:00	0
2009-03-11	17:16:00	0
2009-03-11	17:17:00	0
2009-03-11	17:18:00	0
2009-03-11	17:19:00	0
2009-03-11	17:20:00	0
2009-03-11	17:21:00	0
2009-03-11	17:22:00	0
2009-03-11	17:23:00	0
2009-03-11	17:24:00	0
2009-03-11	17:25:00	0
2009-03-11	17:26:00	0
2009-03-11	17:27:00	0
2009-03-11	17:28:00	0
2009-03-11	17:29:00	0
2009-03-11	17:30:00	0
2009-03-11	17:31:00	0
2009-03-11	17:32:00	0
2009-03-11	17:33:00	0
2009-03-11	17:34:00	0
2009-03-11	17:35:00	0
2009-03-11	17:36:00	0
2009-03-11	17:37:00	0
2009-03-11	17:38:00	0
2009-03-11	17:39:00	0
2009-03-11	17:40:00	0
2009-03-11	17:41:00	0
2009-03-11	17:42:00	0
2009-03-11	17:43:00	0
2009-03-11	17:44:00	0
2009-03-11	17:45:00	0
2009-03-11	17:46:00	0
2009-03-11	17:47:00	0
2009-03-11	17:48:00	0
2009-03-11	17:49:00	0
2009-03-11	17:50:00	0
2009-03-11	17:51:00	0
2009-03-11	17:52:00	0
2009-03-11	17:53:00	0
2009-03-11	17:54:00	0
2009-03-11	17:55:00	0
2009-03-11	17:56:00	0
2009-03-11	17:57:00	0
2009-03-11	17:58:00	0
2009-03-11	17:59:00	0
2009-03-11	18:00:00	0	M
2009-03-11	18:01:00	1386
2009-03-11	18:02:00	205
2009-03-11	18:03:00	337
2009-03-11	18:04:00	337
2009-03-11	18:05:00	443
2009-03-11	18:06:00	337
2009-03-11	18:07:00	1512
2009-03-11	18:08:00	309
2009-03-11	18:09:00	91
2009-03-11	18:10:00	0
2009-03-11	18:11:00	0
2009-03-11	18:12:00	169
2009-03-11	18:13:00	309
2009-03-11	18:14:00	366
2009-03-11	18:15:00	41
2009-03-11	18:16:00	427
2009-03-11	18:17:00	10
2009-03-11	18:18:00	0
2009-03-11	18:19:00	10
2009-03-11	18:20:00	10
2009-03-11	18:21:00	91
2009-03-11	18:22:00	20
2009-03-11	18:23:00	0
2009-03-11	18:24:00	20
2009-03-11	18:25:00	0
2009-03-11	18:26:00	0
2009-03-11	18:27:00	30
2009-03-11	18:28:00	337
2009-03-11	18:29:00	205
2009-03-11	18:30:00	0
2009-03-11	18:31:00	51
2009-03-11	18:32:00	0
2009-03-11	18:33:00	0
2009-03-11	18:34:00	144
2009-03-11	18:35:00	0
2009-03-11	18:36:00	20
2009-03-11	18:37:00	0
2009-03-11	18:38:00	0
2009-03-11	18:39:00	10
2009-03-11	18:40:00	102
2009-03-11	18:41:00	0
2009-03-11	18:42:00	10
2009-03-11	18:43:00	169
2009-03-11	18:44:00	20
2009-03-11	18:45:00	0
2009-03-11	18:46:00	156
2009-03-11	18:47:00	0
2009-03-11	18:48:00	0
2009-03-11	18:49:00	10
2009-03-11	18:50:00	10
2009-03-11	18:51:00	41
2009-03-11	18:52:00	280
2009-03-11	18:53:00	112
2009-03-11	18:54:00	71
2009-03-11	18:55:00	0
2009-03-11	18:56:00	0
2009-03-11	18:57:00	0
2009-03-11	18:58:00	0
2009-03-11	18:59:00	634
2009-03-11	19:00:00	733
2009-03-11	19:01:00	366
2009-03-11	19:02:00	0
2009-03-11	19:03:00	81
2009-03-11	19:04:00	122
2009-03-11	19:05:00	266
2009-03-11	19:06:00	427
2009-03-11	19:07:00	309
2009-03-11	19:08:00	91
2009-03-11	19:09:00	266
2009-03-11	19:10:00	309
2009-03-11	19:11:00	41
2009-03-11	19:12:00	144
2009-03-11	19:13:00	30
2009-03-11	19:14:00	102
2009-03-11	19:15:00	81
2009-03-11	19:16:00	323
2009-03-11	19:17:00	0
2009-03-11	19:18:00	122
2009-03-11	19:19:00	0
2009-03-11	19:20:00	475
2009-03-11	19:21:00	579
2009-03-11	19:22:00	673
2009-03-11	19:23:00	492
2009-03-11	19:24:00	673
2009-03-11	19:25:00	81
2009-03-11	19:26:00	10
2009-03-11	19:27:00	0
2009-03-11	19:28:00	0
2009-03-11	19:29:00	0
2009-03-11	19:30:00	0
2009-03-11	19:31:00	0
2009-03-11	19:32:00	81
2009-03-11	19:33:00	0
2009-03-11	19:34:00	0
2009-03-11	19:35:00	10
2009-03-11	19:36:00	132
2009-03-11	19:37:00	323
2009-03-11	19:38:00	0
2009-03-11	19:39:00	0
2009-03-11	19:40:00	10
2009-03-11	19:41:00	0
2009-03-11	19:42:00	10
2009-03-11	19:43:00	10
2009-03-11	19:44:00	20
2009-03-11	19:45:00	0
2009-03-11	19:46:00	0
2009-03-11	19:47:00	1077
2009-03-11	19:48:00	81
2009-03-11	19:49:00	61
2009-03-11	19:50:00	181
2009-03-11	19:51:00	0
2009-03-11	19:52:00	10
2009-03-11	19:53:00	81
2009-03-11	19:54:00	20
2009-03-11	19:55:00	0
2009-03-11	19:56:00	0
2009-03-11	19:57:00	0
2009-03-11	19:58:00	0
2009-03-11	19:59:00	0
2009-03-11	20:00:00	61
2009-03-11	20:01:00	112
2009-03-11	20:02:00	0
2009-03-11	20:03:00	0
2009-03-11	20:04:00	0
2009-03-11	20:05:00	0
2009-03-11	20:06:00	0
2009-03-11	20:07:00	673
2009-03-11	20:08:00	394
2009-03-11	20:09:00	673
2009-03-11	20:10:00	156
2009-03-11	20:11:00	1902
2009-03-11	20:12:00	733
2009-03-11	20:13:00	71
2009-03-11	20:14:00	366
2009-03-11	20:15:00	102
2009-03-11	20:16:00	475
2009-03-11	20:17:00	217
2009-03-11	20:18:00	169
2009-03-11	20:19:00	81
2009-03-11	20:20:00	156
2009-03-11	20:21:00	475
2009-03-11	20:22:00	71
2009-03-11	20:23:00	673
2009-03-11	20:24:00	561
2009-03-11	20:25:00	427
2009-03-11	20:26:00	561
2009-03-11	20:27:00	673
2009-03-11	20:28:00	351
2009-03-11	20:29:00	351
2009-03-11	20:30:00	733
2009-03-11	20:31:00	280
2009-03-11	20:32:00	193
2009-03-11	20:33:00	81
2009-03-11	20:34:00	0
2009-03-11	20:35:00	112
2009-03-11	20:36:00	0
2009-03-11	20:37:00	0
2009-03-11	20:38:00	0
2009-03-11	20:39:00	0
2009-03-11	20:40:00	169
2009-03-11	20:41:00	91
2009-03-11	20:42:00	0
2009-03-11	20:43:00	51
2009-03-11	20:44:00	579
2009-03-11	20:45:00	10
2009-03-11	20:46:00	144
2009-03-11	20:47:00	0
2009-03-11	20:48:00	0
2009-03-11	20:49:00	0
2009-03-11	20:50:00	0
2009-03-11	20:51:00	0
2009-03-11	20:52:00	0
2009-03-11	20:53:00	0
2009-03-11	20:54:00	0
2009-03-11	20:55:00	0
2009-03-11	20:56:00	0
2009-03-11	20:57:00	0
2009-03-11	20:58:00	0
2009-03-11	20:59:00	0
2009-03-11	21:00:00	0
2009-03-11	21:01:00	0
2009-03-11	21:02:00	0
2009-03-11	21:03:00	0
2009-03-11	21:04:00	0
2009-03-11	21:05:00	0
2009-03-11	21:06:00	0
2009-03-11	21:07:00	0
2009-03-11	21:08:00	0
2009-03-11	21:09:00	0
2009-03-11	21:10:00	0
2009-03-11	21:11:00	0
2009-03-11	21:12:00	0
2009-03-11	21:13:00	51
2009-03-11	21:14:00	0
2009-03-11	21:15:00	0
2009-03-11	21:16:00	0
2009-03-11	21:17:00	0
2009-03-11	21:18:00	0
2009-03-11	21:19:00	0
2009-03-11	21:20:00	71
2009-03-11	21:21:00	30
2009-03-11	21:22:00	41
2009-03-11	21:23:00	242
2009-03-11	21:24:00	0
2009-03-11	21:25:00	0
2009-03-11	21:26:00	0
2009-03-11	21:27:00	0
2009-03-11	21:28:00	0
2009-03-11	21:29:00	0
2009-03-11	21:30:00	0
2009-03-11	21:31:00	0
2009-03-11	21:32:00	0
2009-03-11	21:33:00	0
2009-03-11	21:34:00	0
2009-03-11	21:35:00	0
2009-03-11	21:36:00	0
2009-03-11	21:37:00	0
2009-03-11	21:38:00	0
2009-03-11	21:39:00	0
2009-03-11	21:40:00	0
2009-03-11	21:41:00	0
2009-03-11	21:42:00	0
2009-03-11	21:43:00	0
2009-03-11	21:44:00	0
2009-03-11	21:45:00	0
2009-03-11	21:46:00	0
2009-03-11	21:47:00	0
2009-03-11	21:48:00	0
2009-03-11	21:49:00	0
2009-03-11	21:50:00	20
2009-03-11	21:51:00	0
2009-03-11	21:52:00	0
2009-03-11	21:53:00	0
2009-03-11	21:54:00	10
2009-03-11	21:55:00	0
2009-03-11	21:56:00	0
2009-03-11	21:57:00	0
2009-03-11	21:58:00	0
2009-03-11	21:59:00	0
2009-03-11	22:00:00	0
2009-03-11	22:01:00	0
2009-03-11	22:02:00	10
2009-03-11	22:03:00	0
2009-03-11	22:04:00	0
2009-03-11	22:05:00	0
2009-03-11	22:06:00	0
2009-03-11	22:07:00	0
2009-03-11	22:08:00	337
2009-03-11	22:09:00	181
2009-03-11	22:10:00	266
2009-03-11	22:11:00	102
2009-03-11	22:12:00	0
2009-03-11	22:13:00	181
2009-03-11	22:14:00	144
2009-03-11	22:15:00	295
2009-03-11	22:16:00	205
2009-03-11	22:17:00	10
2009-03-11	22:18:00	0
2009-03-11	22:19:00	0
2009-03-11	22:20:00	0
2009-03-11	22:21:00	0
2009-03-11	22:22:00	0
2009-03-11	22:23:00	0
2009-03-11	22:24:00	0
2009-03-11	22:25:00	0
2009-03-11	22:26:00	0
2009-03-11	22:27:00	0
2009-03-11	22:28:00	112
2009-03-11	22:29:00	579
2009-03-11	22:30:00	242
2009-03-11	22:31:00	169
2009-03-11	22:32:00	20
2009-03-11	22:33:00	323
2009-03-11	22:34:00	280
2009-03-11	22:35:00	475
2009-03-11	22:36:00	0
2009-03-11	22:37:00	0
2009-03-11	22:38:00	0
2009-03-11	22:39:00	0
2009-03-11	22:40:00	0
2009-03-11	22:41:00	0
2009-03-11	22:42:00	91
2009-03-11	22:43:00	0
2009-03-11	22:44:00	0
2009-03-11	22:45:00	0
2009-03-11	22:46:00	0
2009-03-11	22:47:00	0
2009-03-11	22:48:00	0
2009-03-11	22:49:00	81
2009-03-11	22:50:00	10
2009-03-11	22:51:00	30
2009-03-11	22:52:00	181
2009-03-11	22:53:00	0
2009-03-11	22:54:00	10
2009-03-11	22:55:00	579
2009-03-11	22:56:00	0
2009-03-11	22:57:00	0
2009-03-11	22:58:00	0
2009-03-11	22:59:00	0
2009-03-11	23:00:00	0
2009-03-11	23:01:00	0
2009-03-11	23:02:00	0
2009-03-11	23:03:00	0
2009-03-11	23:04:00	0
2009-03-11	23:05:00	0
2009-03-11	23:06:00	0
2009-03-11	23:07:00	0
2009-03-11	23:08:00	0
2009-03-11	23:09:00	0
2009-03-11	23:10:00	0
2009-03-11	23:11:00	0
2009-03-11	23:12:00	0
2009-03-11	23:13:00	0
2009-03-11	23:14:00	0
2009-03-11	23:15:00	0
2009-03-11	23:16:00	0
2009-03-11	23:17:00	0
2009-03-11	23:18:00	0
2009-03-11	23:19:00	0
2009-03-11	23:20:00	0
2009-03-11	23:21:00	0
2009-03-11	23:22:00	0
2009-03-11	23:23:00	0
2009-03-11	23:24:00	0
2009-03-11	23:25:00	0
2009-03-11	23:26:00	0
2009-03-11	23:27:00	0
2009-03-11	23:28:00	71
2009-03-11	23:29:00	0
2009-03-11	23:30:00	0
2009-03-11	23:31:00	0
2009-03-11	23:32:00	0
2009-03-11	23:33:00	0
2009-03-11	23:34:00	0
2009-03-11	23:35:00	0
2009-03-11	23:36:00	0
2009-03-11	23:37:00	0
2009-03-11	23:38:00	0
2009-03-11	23:39:00	0
2009-03-11	23:40:00	0
2009-03-11	23:41:00	0
2009-03-11	23:42:00	0
2009-03-11	23:43:00	0
2009-03-11	23:44:00	0
2009-03-11	23:45:00	0
2009-03-11	23:46:00	0
2009-03-11	23:47:00	0
2009-03-11	23:48:00	0
2009-03-11	23:49:00	0
2009-03-11	23:50:00	0
2009-03-11	23:51:00	0
2009-03-11	23:52:00	0
2009-03-11	23:53:00	0
2009-03-11	23:54:00	0
2009-03-11	23:55:00	0
2009-03-11	23:56:00	0
2009-03-11	23:57:00	0
2009-03-11	23:58:00	0
2009-03-11	23:59:00	0
2009-03-12	00:00:00	0
2009-03-12	00:01:00	0
2009-03-12	00:02:00	0
2009-03-12	00:03:00	0
2009-03-12	00:04:00	0
2009-03-12	00:05:00	0
2009-03-12	00:06:00	0
2009-03-12	00:07:00	0
2009-03-12	00:08:00	0
2009-03-12	00:09:00	0
2009-03-12	00:10:00	0
2009-03-12	00:11:00	0
2009-03-12	00:12:00	0
2009-03-12	00:13:00	0
2009-03-12	00:14:00	0
2009-03-12	00:15:00	0
2009-03-12	00:16:00	0
2009-03-12	00:17:00	0
2009-03-12	00:18:00	0
2009-03-12	00:19:00	0
2009-03-12	00:20:00	0
2009-03-12	00:21:00	0
2009-03-12	00:22:00	0
2009-03-12	00:23:00	0
2009-03-12	00:24:00	0
2009-03-12	00:25:00	0
2009-03-12	00:26:00	0
2009-03-12	00:27:00	0
2009-03-12	00:28:00	0
2009-03-12	00:29:00	0
2009-03-12	00:30:00	0
2009-03-12	00:31:00	0
2009-03-12	00:32:00	0
2009-03-12	00:33:00	0
2009-03-12	00:34:00	0
2009-03-12	00:35:00	0
2009-03-12	00:36:00	0
2009-03-12	00:37:00	0
2009-03-12	00:38:00	0
2009-03-12	00:39:00	0
2009-03-12	00:40:00	0
2009-03-12	00:41:00	0
2009-03-12	00:42:00	0
2009-03-12	00:43:00	0
2009-03-12	00:44:00	0
2009-03-12	00:45:00	0
2009-03-12	00:46:00	0
2009-03-12	00:47:00	0
2009-03-12	00:48:00	0
2009-03-12	00:49:00	0
2009-03-12	00:50:00	0
2009-03-12	00:51:00	0
2009-03-12	00:52:00	0
2009-03-12	00:53:00	0
2009-03-12	00:54:00	0
2009-03-12	00:55:00	0
2009-03-12	00:56:00	0
2009-03-12	00:57:00	0
2009-03-12	00:58:00	0
2009-03-12	00:59:00	0
2009-03-12	01:00:00	0
2009-03-12	01:01:00	0
2009-03-12	01:02:00	0
2009-03-12	01:03:00	0
2009-03-12	01:04:00	0
2009-03-12	01:05:00	0
2009-03-12	01:06:00	0
2009-03-12	01:07:00	0
2009-03-12	01:08:00	0
2009-03-12	01:09:00	0
2009-03-12	01:10:00	0
2009-03-12	01:11:00	0
2009-03-12	01:12:00	10
2009-03-12	01:13:00	0
2009-03-12	01:14:00	0
2009-03-12	01:15:00	0
2009-03-12	01:16:00	0
2009-03-12	01:17:00	0
2009-03-12	01:18:00	0
2009-03-12	01:19:00	0
2009-03-12	01:20:00	0
2009-03-12	01:21:00	0
2009-03-12	01:22:00	0
2009-03-12	01:23:00	0
2009-03-12	01:24:00	0
2009-03-12	01:25:00	0
2009-03-12	01:26:00	0
2009-03-12	01:27:00	0
2009-03-12	01:28:00	0
2009-03-12	01:29:00	0
2009-03-12	01:30:00	0
2009-03-12	01:31:00	0
2009-03-12	01:32:00	0
2009-03-12	01:33:00	0
2009-03-12	01:34:00	0
2009-03-12	01:35:00	0
2009-03-12	01:36:00	0
2009-03-12	01:37:00	0
2009-03-12	01:38:00	20
2009-03-12	01:39:00	0
2009-03-12	01:40:00	0
2009-03-12	01:41:00	0
2009-03-12	01:42:00	0
2009-03-12	01:43:00	0
2009-03-12	01:44:00	0
2009-03-12	01:45:00	0
2009-03-12	01:46:00	0
2009-03-12	01:47:00	0
2009-03-12	01:48:00	0
2009-03-12	01:49:00	0
2009-03-12	01:50:00	0
2009-03-12	01:51:00	0
2009-03-12	01:52:00	0
2009-03-12	01:53:00	0
2009-03-12	01:54:00	0
2009-03-12	01:55:00	0
2009-03-12	01:56:00	0
2009-03-12	01:57:00	0
2009-03-12	01:58:00	0
2009-03-12	01:59:00	0
2009-03-12	02:00:00	0
2009-03-12	02:01:00	0
2009-03-12	02:02:00	0
2009-03-12	02:03:00	0
2009-03-12	02:04:00	0
2009-03-12	02:05:00	0
2009-03-12	02:06:00	0
2009-03-12	02:07:00	0
2009-03-12	02:08:00	0
2009-03-12	02:09:00	0
2009-03-12	02:10:00	0
2009-03-12	02:11:00	0
2009-03-12	02:12:00	0
2009-03-12	02:13:00	0
2009-03-12	02:14:00	0
2009-03-12	02:15:00	0
2009-03-12	02:16:00	0
2009-03-12	02:17:00	0
2009-03-12	02:18:00	0
2009-03-12	02:19:00	0
2009-03-12	02:20:00	0
2009-03-12	02:21:00	0
2009-03-12	02:22:00	0
2009-03-12	02:23:00	0
2009-03-12	02:24:00	0
2009-03-12	02:25:00	0
2009-03-12	02:26:00	0
2009-03-12	02:27:00	0
2009-03-12	02:28:00	0
2009-03-12	02:29:00	0
2009-03-12	02:30:00	0
2009-03-12	02:31:00	10
2009-03-12	02:32:00	0
2009-03-12	02:33:00	0
2009-03-12	02:34:00	122
2009-03-12	02:35:00	366
2009-03-12	02:36:00	102
2009-03-12	02:37:00	10
2009-03-12	02:38:00	0
2009-03-12	02:39:00	0
2009-03-12	02:40:00	0
2009-03-12	02:41:00	0
2009-03-12	02:42:00	0
2009-03-12	02:43:00	0
2009-03-12	02:44:00	0
2009-03-12	02:45:00	0
2009-03-12	02:46:00	0
2009-03-12	02:47:00	0
2009-03-12	02:48:00	0
2009-03-12	02:49:00	0
2009-03-12	02:50:00	0
2009-03-12	02:51:00	0
2009-03-12	02:52:00	0
2009-03-12	02:53:00	0
2009-03-12	02:54:00	0
2009-03-12	02:55:00	0
2009-03-12	02:56:00	0
2009-03-12	02:57:00	0
2009-03-12	02:58:00	0
2009-03-12	02:59:00	0
2009-03-12	03:00:00	0
2009-03-12	03:01:00	0
2009-03-12	03:02:00	0
2009-03-12	03:03:00	0
2009-03-12	03:04:00	0
2009-03-12	03:05:00	0
2009-03-12	03:06:00	0
2009-03-12	03:07:00	0
2009-03-12	03:08:00	0
2009-03-12	03:09:00	0
2009-03-12	03:10:00	0
2009-03-12	03:11:00	0
2009-03-12	03:12:00	0
2009-03-12	03:13:00	0
2009-03-12	03:14:00	0
2009-03-12	03:15:00	0
2009-03-12	03:16:00	0
2009-03-12	03:17:00	0
2009-03-12	03:18:00	0
2009-03-12	03:19:00	0
2009-03-12	03:20:00	0
2009-03-12	03:21:00	0
2009-03-12	03:22:00	0
2009-03-12	03:23:00	0
2009-03-12	03:24:00	0
2009-03-12	03:25:00	0
2009-03-12	03:26:00	0
2009-03-12	03:27:00	0
2009-03-12	03:28:00	30
2009-03-12	03:29:00	20
2009-03-12	03:30:00	20
2009-03-12	03:31:00	41
2009-03-12	03:32:00	0
2009-03-12	03:33:00	0
2009-03-12	03:34:00	0
2009-03-12	03:35:00	0
2009-03-12	03:36:00	0
2009-03-12	03:37:00	0
2009-03-12	03:38:00	0
2009-03-12	03:39:00	0
2009-03-12	03:40:00	0
2009-03-12	03:41:00	0
2009-03-12	03:42:00	0
2009-03-12	03:43:00	0
2009-03-12	03:44:00	0
2009-03-12	03:45:00	0
2009-03-12	03:46:00	0
2009-03-12	03:47:00	0
2009-03-12	03:48:00	0
2009-03-12	03:49:00	0
2009-03-12	03:50:00	0
2009-03-12	03:51:00	0
2009-03-12	03:52:00	0
2009-03-12	03:53:00	20
2009-03-12	03:54:00	0
2009-03-12	03:55:00	0
2009-03-12	03:56:00	0
2009-03-12	03:57:00	20
2009-03-12	03:58:00	0
2009-03-12	03:59:00	0
2009-03-12	04:00:00	0
2009-03-12	04:01:00	0
2009-03-12	04:02:00	0
2009-03-12	04:03:00	0
2009-03-12	04:04:00	0
2009-03-12	04:05:00	0
2009-03-12	04:06:00	0
2009-03-12	04:07:00	0
2009-03-12	04:08:00	0
2009-03-12	04:09:00	0
2009-03-12	04:10:00	0
2009-03-12	04:11:00	0
2009-03-12	04:12:00	0
2009-03-12	04:13:00	0
2009-03-12	04:14:00	0
2009-03-12	04:15:00	0
2009-03-12	04:16:00	0
2009-03-12	04:17:00	0
2009-03-12	04:18:00	0
2009-03-12	04:19:00	0
2009-03-12	04:20:00	0
2009-03-12	04:21:00	0
2009-03-12	04:22:00	0
2009-03-12	04:23:00	0
2009-03-12	04:24:00	0
2009-03-12	04:25:00	0
2009-03-12	04:26:00	0
2009-03-12	04:27:00	0
2009-03-12	04:28:00	10
2009-03-12	04:29:00	30
2009-03-12	04:30:00	0
2009-03-12	04:31:00	0
2009-03-12	04:32:00	0
2009-03-12	04:33:00	10
2009-03-12	04:34:00	0
2009-03-12	04:35:00	0
2009-03-12	04:36:00	0
2009-03-12	04:37:00	0
2009-03-12	04:38:00	0
2009-03-12	04:39:00	0
2009-03-12	04:40:00	41
2009-03-12	04:41:00	0
2009-03-12	04:42:00	0
2009-03-12	04:43:00	0
2009-03-12	04:44:00	0
2009-03-12	04:45:00	0
2009-03-12	04:46:00	0
2009-03-12	04:47:00	0
2009-03-12	04:48:00	0
2009-03-12	04:49:00	0
2009-03-12	04:50:00	0
2009-03-12	04:51:00	0
2009-03-12	04:52:00	0
2009-03-12	04:53:00	0
2009-03-12	04:54:00	0
2009-03-12	04:55:00	0
2009-03-12	04:56:00	0
2009-03-12	04:57:00	0
2009-03-12	04:58:00	0
2009-03-12	04:59:00	0
2009-03-12	05:00:00	0
2009-03-12	05:01:00	0
2009-03-12	05:02:00	0
2009-03-12	05:03:00	0
2009-03-12	05:04:00	0
2009-03-12	05:05:00	0
2009-03-12	05:06:00	0
2009-03-12	05:07:00	0
2009-03-12	05:08:00	0
2009-03-12	05:09:00	0
2009-03-12	05:10:00	0
2009-03-12	05:11:00	0
2009-03-12	05:12:00	0
2009-03-12	05:13:00	0
2009-03-12	05:14:00	0
2009-03-12	05:15:00	0
2009-03-12	05:16:00	0
2009-03-12	05:17:00	0
2009-03-12	05:18:00	0
2009-03-12	05:19:00	0
2009-03-12	05:20:00	0
2009-03-12	05:21:00	0
2009-03-12	05:22:00	0
2009-03-12	05:23:00	0
2009-03-12	05:24:00	0
2009-03-12	05:25:00	0
2009-03-12	05:26:00	0
2009-03-12	05:27:00	30
2009-03-12	05:28:00	0
2009-03-12	05:29:00	0
2009-03-12	05:30:00	0
2009-03-12	05:31:00	0
2009-03-12	05:32:00	0
2009-03-12	05:33:00	0
2009-03-12	05:34:00	0
2009-03-12	05:35:00	0
2009-03-12	05:36:00	0
2009-03-12	05:37:00	0
2009-03-12	05:38:00	0
2009-03-12	05:39:00	0
2009-03-12	05:40:00	0
2009-03-12	05:41:00	0
2009-03-12	05:42:00	10
2009-03-12	05:43:00	0
2009-03-12	05:44:00	0
2009-03-12	05:45:00	0
2009-03-12	05:46:00	0
2009-03-12	05:47:00	10
2009-03-12	05:48:00	0
2009-03-12	05:49:00	0
2009-03-12	05:50:00	0
2009-03-12	05:51:00	144
2009-03-12	05:52:00	0
2009-03-12	05:53:00	0
2009-03-12	05:54:00	0
2009-03-12	05:55:00	0
2009-03-12	05:56:00	0
2009-03-12	05:57:00	0
2009-03-12	05:58:00	0
2009-03-12	05:59:00	0
2009-03-12	06:00:00	0
2009-03-12	06:01:00	0
2009-03-12	06:02:00	0
2009-03-12	06:03:00	0
2009-03-12	06:04:00	0
2009-03-12	06:05:00	0
2009-03-12	06:06:00	0
2009-03-12	06:07:00	0
2009-03-12	06:08:00	0
2009-03-12	06:09:00	0
2009-03-12	06:10:00	20
2009-03-12	06:11:00	0
2009-03-12	06:12:00	0
2009-03-12	06:13:00	0
2009-03-12	06:14:00	0
2009-03-12	06:15:00	0
2009-03-12	06:16:00	0
2009-03-12	06:17:00	0
2009-03-12	06:18:00	0
2009-03-12	06:19:00	0
2009-03-12	06:20:00	0
2009-03-12	06:21:00	0
2009-03-12	06:22:00	0
2009-03-12	06:23:00	0
2009-03-12	06:24:00	10
2009-03-12	06:25:00	0
2009-03-12	06:26:00	0
2009-03-12	06:27:00	0
2009-03-12	06:28:00	0
2009-03-12	06:29:00	0
2009-03-12	06:30:00	0
2009-03-12	06:31:00	0
2009-03-12	06:32:00	0
2009-03-12	06:33:00	0
2009-03-12	06:34:00	0
2009-03-12	06:35:00	0
2009-03-12	06:36:00	0
2009-03-12	06:37:00	0
2009-03-12	06:38:00	30
2009-03-12	06:39:00	41
2009-03-12	06:40:00	10
2009-03-12	06:41:00	0
2009-03-12	06:42:00	0
2009-03-12	06:43:00	81
2009-03-12	06:44:00	30
2009-03-12	06:45:00	0
2009-03-12	06:46:00	0
2009-03-12	06:47:00	0
2009-03-12	06:48:00	0
2009-03-12	06:49:00	0
2009-03-12	06:50:00	0
2009-03-12	06:51:00	0
2009-03-12	06:52:00	0
2009-03-12	06:53:00	0
2009-03-12	06:54:00	0
2009-03-12	06:55:00	0
2009-03-12	06:56:00	0
2009-03-12	06:57:00	30
2009-03-12	06:58:00	0
2009-03-12	06:59:00	0
2009-03-12	07:00:00	0
2009-03-12	07:01:00	0
2009-03-12	07:02:00	112
2009-03-12	07:03:00	0
2009-03-12	07:04:00	0
2009-03-12	07:05:00	0
2009-03-12	07:06:00	0
2009-03-12	07:07:00	0
2009-03-12	07:08:00	0
2009-03-12	07:09:00	0
2009-03-12	07:10:00	0
2009-03-12	07:11:00	0
2009-03-12	07:12:00	0
2009-03-12	07:13:00	0
2009-03-12	07:14:00	0
2009-03-12	07:15:00	0
2009-03-12	07:16:00	0
2009-03-12	07:17:00	0
2009-03-12	07:18:00	0
2009-03-12	07:19:00	10
2009-03-12	07:20:00	0
2009-03-12	07:21:00	0
2009-03-12	07:22:00	0
2009-03-12	07:23:00	351
2009-03-12	07:24:00	410
2009-03-12	07:25:00	20
2009-03-12	07:26:00	10
2009-03-12	07:27:00	0
2009-03-12	07:28:00	0
2009-03-12	07:29:00	30
2009-03-12	07:30:00	443
2009-03-12	07:31:00	579
2009-03-12	07:32:00	81
2009-03-12	07:33:00	0
2009-03-12	07:34:00	0
2009-03-12	07:35:00	2274
2009-03-12	07:36:00	2806
2009-03-12	07:37:00	2318
2009-03-12	07:38:00	652
2009-03-12	07:39:00	1416
2009-03-12	07:40:00	1156
2009-03-12	07:41:00	713
2009-03-12	07:42:00	794
2009-03-12	07:43:00	427
2009-03-12	07:44:00	102
2009-03-12	07:45:00	0
2009-03-12	07:46:00	0
2009-03-12	07:47:00	0
2009-03-12	07:48:00	0
2009-03-12	07:49:00	0
2009-03-12	07:50:00	0
2009-03-12	07:51:00	0
2009-03-12	07:52:00	41
2009-03-12	07:53:00	295
2009-03-12	07:54:00	0
2009-03-12	07:55:00	0
2009-03-12	07:56:00	0
2009-03-12	07:57:00	0
2009-03-12	07:58:00	0
2009-03-12	07:59:00	0
2009-03-12	08:00:00	0
2009-03-12	08:01:00	0
2009-03-12	08:02:00	0
2009-03-12	08:03:00	0
2009-03-12	08:04:00	0
2009-03-12	08:05:00	0
2009-03-12	08:06:00	0
2009-03-12	08:07:00	0
2009-03-12	08:08:00	0
2009-03-12	08:09:00	122
2009-03-12	08:10:00	693
2009-03-12	08:11:00	10
2009-03-12	08:12:00	0
2009-03-12	08:13:00	0
2009-03-12	08:14:00	30
2009-03-12	08:15:00	0
2009-03-12	08:16:00	254
2009-03-12	08:17:00	0
2009-03-12	08:18:00	0
2009-03-12	08:19:00	30
2009-03-12	08:20:00	0
2009-03-12	08:21:00	0
2009-03-12	08:22:00	0
2009-03-12	08:23:00	0
2009-03-12	08:24:00	0
2009-03-12	08:25:00	0
2009-03-12	08:26:00	0
2009-03-12	08:27:00	0
2009-03-12	08:28:00	0
2009-03-12	08:29:00	1182
2009-03-12	08:30:00	144
2009-03-12	08:31:00	181
2009-03-12	08:32:00	205
2009-03-12	08:33:00	713
2009-03-12	08:34:00	230
2009-03-12	08:35:00	0
2009-03-12	08:36:00	61
2009-03-12	08:37:00	309
2009-03-12	08:38:00	0
2009-03-12	08:39:00	0
2009-03-12	08:40:00	0
2009-03-12	08:41:00	0
2009-03-12	08:42:00	0
2009-03-12	08:43:00	41
2009-03-12	08:44:00	0
2009-03-12	08:45:00	0
2009-03-12	08:46:00	20
2009-03-12	08:47:00	0
2009-03-12	08:48:00	1050
2009-03-12	08:49:00	181
2009-03-12	08:50:00	102
2009-03-12	08:51:00	242
2009-03-12	08:52:00	102
2009-03-12	08:53:00	1002
2009-03-12	08:54:00	144
2009-03-12	08:55:00	410
2009-03-12	08:56:00	323
2009-03-12	08:57:00	280
2009-03-12	08:58:00	524
2009-03-12	08:59:00	156
2009-03-12	09:00:00	884
2009-03-12	09:01:00	132
2009-03-12	09:02:00	156
2009-03-12	09:03:00	579
2009-03-12	09:04:00	81
2009-03-12	09:05:00	0
2009-03-12	09:06:00	0
2009-03-12	09:07:00	0
2009-03-12	09:08:00	0
[truncated: 19,611 more rows]

## Sheet: 3.25.09
Actogram, Copy Raw Data, All Days
Identity:	Shon
Filename:	E:\Active Research Files\meloxicam titre canine\cases\shon\Shon 3.25.09.AWC
Gender:	M
Age:	9
Height:	30.5 cm	12.0 in
Weight:	16.0 kg	35.3 lbs
Start Date:	25-Mar-2009 (Wed)
Start Time:	18:00:00
Interval:	1.00 mins
Date Stamp:	Time Stamp:	Activity Data:	Marker Press:
2009-03-25	00:00:00	0
2009-03-25	00:01:00	0
2009-03-25	00:02:00	0
2009-03-25	00:03:00	0
2009-03-25	00:04:00	0
2009-03-25	00:05:00	0
2009-03-25	00:06:00	0
2009-03-25	00:07:00	0
2009-03-25	00:08:00	0
2009-03-25	00:09:00	0
2009-03-25	00:10:00	0
2009-03-25	00:11:00	0
2009-03-25	00:12:00	0
2009-03-25	00:13:00	0
2009-03-25	00:14:00	0
2009-03-25	00:15:00	0
2009-03-25	00:16:00	0
2009-03-25	00:17:00	0
2009-03-25	00:18:00	0
2009-03-25	00:19:00	0
2009-03-25	00:20:00	0
2009-03-25	00:21:00	0
2009-03-25	00:22:00	0
2009-03-25	00:23:00	0
2009-03-25	00:24:00	0
2009-03-25	00:25:00	0
2009-03-25	00:26:00	0
2009-03-25	00:27:00	0
2009-03-25	00:28:00	0
2009-03-25	00:29:00	0
2009-03-25	00:30:00	0
2009-03-25	00:31:00	0
2009-03-25	00:32:00	0
2009-03-25	00:33:00	0
2009-03-25	00:34:00	0
2009-03-25	00:35:00	0
2009-03-25	00:36:00	0
2009-03-25	00:37:00	0
2009-03-25	00:38:00	0
2009-03-25	00:39:00	0
2009-03-25	00:40:00	0
2009-03-25	00:41:00	0
2009-03-25	00:42:00	0
2009-03-25	00:43:00	0
2009-03-25	00:44:00	0
2009-03-25	00:45:00	0
2009-03-25	00:46:00	0
2009-03-25	00:47:00	0
2009-03-25	00:48:00	0
2009-03-25	00:49:00	0
2009-03-25	00:50:00	0
2009-03-25	00:51:00	0
2009-03-25	00:52:00	0
2009-03-25	00:53:00	0
2009-03-25	00:54:00	0
2009-03-25	00:55:00	0
2009-03-25	00:56:00	0
2009-03-25	00:57:00	0
2009-03-25	00:58:00	0
2009-03-25	00:59:00	0
2009-03-25	01:00:00	0
2009-03-25	01:01:00	0
2009-03-25	01:02:00	0
2009-03-25	01:03:00	0
2009-03-25	01:04:00	0
2009-03-25	01:05:00	0
2009-03-25	01:06:00	0
2009-03-25	01:07:00	0
2009-03-25	01:08:00	0
2009-03-25	01:09:00	0
2009-03-25	01:10:00	0
2009-03-25	01:11:00	0
2009-03-25	01:12:00	0
2009-03-25	01:13:00	0
2009-03-25	01:14:00	0
2009-03-25	01:15:00	0
2009-03-25	01:16:00	0
2009-03-25	01:17:00	0
2009-03-25	01:18:00	0
2009-03-25	01:19:00	0
2009-03-25	01:20:00	0
2009-03-25	01:21:00	0
2009-03-25	01:22:00	0
2009-03-25	01:23:00	0
2009-03-25	01:24:00	0
2009-03-25	01:25:00	0
2009-03-25	01:26:00	0
2009-03-25	01:27:00	0
2009-03-25	01:28:00	0
2009-03-25	01:29:00	0
2009-03-25	01:30:00	0
2009-03-25	01:31:00	0
2009-03-25	01:32:00	0
2009-03-25	01:33:00	0
2009-03-25	01:34:00	0
2009-03-25	01:35:00	0
2009-03-25	01:36:00	0
2009-03-25	01:37:00	0
2009-03-25	01:38:00	0
2009-03-25	01:39:00	0
2009-03-25	01:40:00	0
2009-03-25	01:41:00	0
2009-03-25	01:42:00	0
2009-03-25	01:43:00	0
2009-03-25	01:44:00	0
2009-03-25	01:45:00	0
2009-03-25	01:46:00	0
2009-03-25	01:47:00	0
2009-03-25	01:48:00	0
2009-03-25	01:49:00	0
2009-03-25	01:50:00	0
2009-03-25	01:51:00	0
2009-03-25	01:52:00	0
2009-03-25	01:53:00	0
2009-03-25	01:54:00	0
2009-03-25	01:55:00	0
2009-03-25	01:56:00	0
2009-03-25	01:57:00	0
2009-03-25	01:58:00	0
2009-03-25	01:59:00	0
2009-03-25	02:00:00	0
2009-03-25	02:01:00	0
2009-03-25	02:02:00	0
2009-03-25	02:03:00	0
2009-03-25	02:04:00	0
2009-03-25	02:05:00	0
2009-03-25	02:06:00	0
2009-03-25	02:07:00	0
2009-03-25	02:08:00	0
2009-03-25	02:09:00	0
2009-03-25	02:10:00	0
2009-03-25	02:11:00	0
2009-03-25	02:12:00	0
2009-03-25	02:13:00	0
2009-03-25	02:14:00	0
2009-03-25	02:15:00	0
2009-03-25	02:16:00	0
2009-03-25	02:17:00	0
2009-03-25	02:18:00	0
2009-03-25	02:19:00	0
2009-03-25	02:20:00	0
2009-03-25	02:21:00	0
2009-03-25	02:22:00	0
2009-03-25	02:23:00	0
2009-03-25	02:24:00	0
2009-03-25	02:25:00	0
2009-03-25	02:26:00	0
2009-03-25	02:27:00	0
2009-03-25	02:28:00	0
2009-03-25	02:29:00	0
2009-03-25	02:30:00	0
2009-03-25	02:31:00	0
2009-03-25	02:32:00	0
2009-03-25	02:33:00	0
2009-03-25	02:34:00	0
2009-03-25	02:35:00	0
2009-03-25	02:36:00	0
2009-03-25	02:37:00	0
2009-03-25	02:38:00	0
2009-03-25	02:39:00	0
2009-03-25	02:40:00	0
2009-03-25	02:41:00	0
2009-03-25	02:42:00	0
2009-03-25	02:43:00	0
2009-03-25	02:44:00	0
2009-03-25	02:45:00	0
2009-03-25	02:46:00	0
2009-03-25	02:47:00	0
2009-03-25	02:48:00	0
2009-03-25	02:49:00	0
2009-03-25	02:50:00	0
2009-03-25	02:51:00	0
2009-03-25	02:52:00	0
2009-03-25	02:53:00	0
2009-03-25	02:54:00	0
2009-03-25	02:55:00	0
2009-03-25	02:56:00	0
2009-03-25	02:57:00	0
2009-03-25	02:58:00	0
2009-03-25	02:59:00	0
2009-03-25	03:00:00	0
2009-03-25	03:01:00	0
2009-03-25	03:02:00	0
2009-03-25	03:03:00	0
2009-03-25	03:04:00	0
2009-03-25	03:05:00	0
2009-03-25	03:06:00	0
2009-03-25	03:07:00	0
2009-03-25	03:08:00	0
2009-03-25	03:09:00	0
2009-03-25	03:10:00	0
2009-03-25	03:11:00	0
2009-03-25	03:12:00	0
2009-03-25	03:13:00	0
2009-03-25	03:14:00	0
2009-03-25	03:15:00	0
2009-03-25	03:16:00	0
2009-03-25	03:17:00	0
2009-03-25	03:18:00	0
2009-03-25	03:19:00	0
2009-03-25	03:20:00	0
2009-03-25	03:21:00	0
2009-03-25	03:22:00	0
2009-03-25	03:23:00	0
2009-03-25	03:24:00	0
2009-03-25	03:25:00	0
2009-03-25	03:26:00	0
2009-03-25	03:27:00	0
2009-03-25	03:28:00	0
2009-03-25	03:29:00	0
2009-03-25	03:30:00	0
2009-03-25	03:31:00	0
2009-03-25	03:32:00	0
2009-03-25	03:33:00	0
2009-03-25	03:34:00	0
2009-03-25	03:35:00	0
2009-03-25	03:36:00	0
2009-03-25	03:37:00	0
2009-03-25	03:38:00	0
2009-03-25	03:39:00	0
2009-03-25	03:40:00	0
2009-03-25	03:41:00	0
2009-03-25	03:42:00	0
2009-03-25	03:43:00	0
2009-03-25	03:44:00	0
2009-03-25	03:45:00	0
2009-03-25	03:46:00	0
2009-03-25	03:47:00	0
2009-03-25	03:48:00	0
2009-03-25	03:49:00	0
2009-03-25	03:50:00	0
2009-03-25	03:51:00	0
2009-03-25	03:52:00	0
2009-03-25	03:53:00	0
2009-03-25	03:54:00	0
2009-03-25	03:55:00	0
2009-03-25	03:56:00	0
2009-03-25	03:57:00	0
2009-03-25	03:58:00	0
2009-03-25	03:59:00	0
2009-03-25	04:00:00	0
2009-03-25	04:01:00	0
2009-03-25	04:02:00	0
2009-03-25	04:03:00	0
2009-03-25	04:04:00	0
2009-03-25	04:05:00	0
2009-03-25	04:06:00	0
2009-03-25	04:07:00	0
2009-03-25	04:08:00	0
2009-03-25	04:09:00	0
2009-03-25	04:10:00	0
2009-03-25	04:11:00	0
2009-03-25	04:12:00	0
2009-03-25	04:13:00	0
2009-03-25	04:14:00	0
2009-03-25	04:15:00	0
2009-03-25	04:16:00	0
2009-03-25	04:17:00	0
2009-03-25	04:18:00	0
2009-03-25	04:19:00	0
2009-03-25	04:20:00	0
2009-03-25	04:21:00	0
2009-03-25	04:22:00	0
2009-03-25	04:23:00	0
2009-03-25	04:24:00	0
2009-03-25	04:25:00	0
2009-03-25	04:26:00	0
2009-03-25	04:27:00	0
2009-03-25	04:28:00	0
2009-03-25	04:29:00	0
2009-03-25	04:30:00	0
2009-03-25	04:31:00	0
2009-03-25	04:32:00	0
2009-03-25	04:33:00	0
2009-03-25	04:34:00	0
2009-03-25	04:35:00	0
2009-03-25	04:36:00	0
2009-03-25	04:37:00	0
2009-03-25	04:38:00	0
2009-03-25	04:39:00	0
2009-03-25	04:40:00	0
2009-03-25	04:41:00	0
2009-03-25	04:42:00	0
2009-03-25	04:43:00	0
2009-03-25	04:44:00	0
2009-03-25	04:45:00	0
2009-03-25	04:46:00	0
2009-03-25	04:47:00	0
2009-03-25	04:48:00	0
2009-03-25	04:49:00	0
2009-03-25	04:50:00	0
2009-03-25	04:51:00	0
2009-03-25	04:52:00	0
2009-03-25	04:53:00	0
2009-03-25	04:54:00	0
2009-03-25	04:55:00	0
2009-03-25	04:56:00	0
2009-03-25	04:57:00	0
2009-03-25	04:58:00	0
2009-03-25	04:59:00	0
2009-03-25	05:00:00	0
2009-03-25	05:01:00	0
2009-03-25	05:02:00	0
2009-03-25	05:03:00	0
2009-03-25	05:04:00	0
2009-03-25	05:05:00	0
2009-03-25	05:06:00	0
2009-03-25	05:07:00	0
2009-03-25	05:08:00	0
2009-03-25	05:09:00	0
2009-03-25	05:10:00	0
2009-03-25	05:11:00	0
2009-03-25	05:12:00	0
2009-03-25	05:13:00	0
2009-03-25	05:14:00	0
2009-03-25	05:15:00	0
2009-03-25	05:16:00	0
2009-03-25	05:17:00	0
2009-03-25	05:18:00	0
2009-03-25	05:19:00	0
2009-03-25	05:20:00	0
2009-03-25	05:21:00	0
2009-03-25	05:22:00	0
2009-03-25	05:23:00	0
2009-03-25	05:24:00	0
2009-03-25	05:25:00	0
2009-03-25	05:26:00	0
2009-03-25	05:27:00	0
2009-03-25	05:28:00	0
2009-03-25	05:29:00	0
2009-03-25	05:30:00	0
2009-03-25	05:31:00	0
2009-03-25	05:32:00	0
2009-03-25	05:33:00	0
2009-03-25	05:34:00	0
2009-03-25	05:35:00	0
2009-03-25	05:36:00	0
2009-03-25	05:37:00	0
2009-03-25	05:38:00	0
2009-03-25	05:39:00	0
2009-03-25	05:40:00	0
2009-03-25	05:41:00	0
2009-03-25	05:42:00	0
2009-03-25	05:43:00	0
2009-03-25	05:44:00	0
2009-03-25	05:45:00	0
2009-03-25	05:46:00	0
2009-03-25	05:47:00	0
2009-03-25	05:48:00	0
2009-03-25	05:49:00	0
2009-03-25	05:50:00	0
2009-03-25	05:51:00	0
2009-03-25	05:52:00	0
2009-03-25	05:53:00	0
2009-03-25	05:54:00	0
2009-03-25	05:55:00	0
2009-03-25	05:56:00	0
2009-03-25	05:57:00	0
2009-03-25	05:58:00	0
2009-03-25	05:59:00	0
2009-03-25	06:00:00	0
2009-03-25	06:01:00	0
2009-03-25	06:02:00	0
2009-03-25	06:03:00	0
2009-03-25	06:04:00	0
2009-03-25	06:05:00	0
2009-03-25	06:06:00	0
2009-03-25	06:07:00	0
2009-03-25	06:08:00	0
2009-03-25	06:09:00	0
2009-03-25	06:10:00	0
2009-03-25	06:11:00	0
2009-03-25	06:12:00	0
2009-03-25	06:13:00	0
2009-03-25	06:14:00	0
2009-03-25	06:15:00	0
2009-03-25	06:16:00	0
2009-03-25	06:17:00	0
2009-03-25	06:18:00	0
2009-03-25	06:19:00	0
2009-03-25	06:20:00	0
2009-03-25	06:21:00	0
2009-03-25	06:22:00	0
2009-03-25	06:23:00	0
2009-03-25	06:24:00	0
2009-03-25	06:25:00	0
2009-03-25	06:26:00	0
2009-03-25	06:27:00	0
2009-03-25	06:28:00	0
2009-03-25	06:29:00	0
2009-03-25	06:30:00	0
2009-03-25	06:31:00	0
2009-03-25	06:32:00	0
2009-03-25	06:33:00	0
2009-03-25	06:34:00	0
2009-03-25	06:35:00	0
2009-03-25	06:36:00	0
2009-03-25	06:37:00	0
2009-03-25	06:38:00	0
2009-03-25	06:39:00	0
2009-03-25	06:40:00	0
2009-03-25	06:41:00	0
2009-03-25	06:42:00	0
2009-03-25	06:43:00	0
2009-03-25	06:44:00	0
2009-03-25	06:45:00	0
2009-03-25	06:46:00	0
2009-03-25	06:47:00	0
2009-03-25	06:48:00	0
2009-03-25	06:49:00	0
2009-03-25	06:50:00	0
2009-03-25	06:51:00	0
2009-03-25	06:52:00	0
2009-03-25	06:53:00	0
2009-03-25	06:54:00	0
2009-03-25	06:55:00	0
2009-03-25	06:56:00	0
2009-03-25	06:57:00	0
2009-03-25	06:58:00	0
2009-03-25	06:59:00	0
2009-03-25	07:00:00	0
2009-03-25	07:01:00	0
2009-03-25	07:02:00	0
2009-03-25	07:03:00	0
2009-03-25	07:04:00	0
2009-03-25	07:05:00	0
2009-03-25	07:06:00	0
2009-03-25	07:07:00	0
2009-03-25	07:08:00	0
2009-03-25	07:09:00	0
2009-03-25	07:10:00	0
2009-03-25	07:11:00	0
2009-03-25	07:12:00	0
2009-03-25	07:13:00	0
2009-03-25	07:14:00	0
2009-03-25	07:15:00	0
2009-03-25	07:16:00	0
2009-03-25	07:17:00	0
2009-03-25	07:18:00	0
2009-03-25	07:19:00	0
2009-03-25	07:20:00	0
2009-03-25	07:21:00	0
2009-03-25	07:22:00	0
2009-03-25	07:23:00	0
2009-03-25	07:24:00	0
2009-03-25	07:25:00	0
2009-03-25	07:26:00	0
2009-03-25	07:27:00	0
2009-03-25	07:28:00	0
2009-03-25	07:29:00	0
2009-03-25	07:30:00	0
2009-03-25	07:31:00	0
2009-03-25	07:32:00	0
2009-03-25	07:33:00	0
2009-03-25	07:34:00	0
2009-03-25	07:35:00	0
2009-03-25	07:36:00	0
2009-03-25	07:37:00	0
2009-03-25	07:38:00	0
2009-03-25	07:39:00	0
2009-03-25	07:40:00	0
2009-03-25	07:41:00	0
2009-03-25	07:42:00	0
2009-03-25	07:43:00	0
2009-03-25	07:44:00	0
2009-03-25	07:45:00	0
2009-03-25	07:46:00	0
2009-03-25	07:47:00	0
2009-03-25	07:48:00	0
2009-03-25	07:49:00	0
2009-03-25	07:50:00	0
2009-03-25	07:51:00	0
2009-03-25	07:52:00	0
2009-03-25	07:53:00	0
2009-03-25	07:54:00	0
2009-03-25	07:55:00	0
2009-03-25	07:56:00	0
2009-03-25	07:57:00	0
2009-03-25	07:58:00	0
2009-03-25	07:59:00	0
2009-03-25	08:00:00	0
2009-03-25	08:01:00	0
2009-03-25	08:02:00	0
2009-03-25	08:03:00	0
2009-03-25	08:04:00	0
2009-03-25	08:05:00	0
2009-03-25	08:06:00	0
2009-03-25	08:07:00	0
2009-03-25	08:08:00	0
2009-03-25	08:09:00	0
2009-03-25	08:10:00	0
2009-03-25	08:11:00	0
2009-03-25	08:12:00	0
2009-03-25	08:13:00	0
2009-03-25	08:14:00	0
2009-03-25	08:15:00	0
2009-03-25	08:16:00	0
2009-03-25	08:17:00	0
2009-03-25	08:18:00	0
2009-03-25	08:19:00	0
2009-03-25	08:20:00	0
2009-03-25	08:21:00	0
2009-03-25	08:22:00	0
2009-03-25	08:23:00	0
2009-03-25	08:24:00	0
2009-03-25	08:25:00	0
2009-03-25	08:26:00	0
2009-03-25	08:27:00	0
2009-03-25	08:28:00	0
2009-03-25	08:29:00	0
2009-03-25	08:30:00	0
2009-03-25	08:31:00	0
2009-03-25	08:32:00	0
2009-03-25	08:33:00	0
2009-03-25	08:34:00	0
2009-03-25	08:35:00	0
2009-03-25	08:36:00	0
2009-03-25	08:37:00	0
2009-03-25	08:38:00	0
2009-03-25	08:39:00	0
2009-03-25	08:40:00	0
2009-03-25	08:41:00	0
2009-03-25	08:42:00	0
2009-03-25	08:43:00	0
2009-03-25	08:44:00	0
2009-03-25	08:45:00	0
2009-03-25	08:46:00	0
2009-03-25	08:47:00	0
2009-03-25	08:48:00	0
2009-03-25	08:49:00	0
2009-03-25	08:50:00	0
2009-03-25	08:51:00	0
2009-03-25	08:52:00	0
2009-03-25	08:53:00	0
2009-03-25	08:54:00	0
2009-03-25	08:55:00	0
2009-03-25	08:56:00	0
2009-03-25	08:57:00	0
2009-03-25	08:58:00	0
2009-03-25	08:59:00	0
2009-03-25	09:00:00	0
2009-03-25	09:01:00	0
2009-03-25	09:02:00	0
2009-03-25	09:03:00	0
2009-03-25	09:04:00	0
2009-03-25	09:05:00	0
2009-03-25	09:06:00	0
2009-03-25	09:07:00	0
2009-03-25	09:08:00	0
2009-03-25	09:09:00	0
2009-03-25	09:10:00	0
2009-03-25	09:11:00	0
2009-03-25	09:12:00	0
2009-03-25	09:13:00	0
2009-03-25	09:14:00	0
2009-03-25	09:15:00	0
2009-03-25	09:16:00	0
2009-03-25	09:17:00	0
2009-03-25	09:18:00	0
2009-03-25	09:19:00	0
2009-03-25	09:20:00	0
2009-03-25	09:21:00	0
2009-03-25	09:22:00	0
2009-03-25	09:23:00	0
2009-03-25	09:24:00	0
2009-03-25	09:25:00	0
2009-03-25	09:26:00	0
2009-03-25	09:27:00	0
2009-03-25	09:28:00	0
2009-03-25	09:29:00	0
2009-03-25	09:30:00	0
2009-03-25	09:31:00	0
2009-03-25	09:32:00	0
2009-03-25	09:33:00	0
2009-03-25	09:34:00	0
2009-03-25	09:35:00	0
2009-03-25	09:36:00	0
2009-03-25	09:37:00	0
2009-03-25	09:38:00	0
2009-03-25	09:39:00	0
2009-03-25	09:40:00	0
2009-03-25	09:41:00	0
2009-03-25	09:42:00	0
2009-03-25	09:43:00	0
2009-03-25	09:44:00	0
2009-03-25	09:45:00	0
2009-03-25	09:46:00	0
2009-03-25	09:47:00	0
2009-03-25	09:48:00	0
2009-03-25	09:49:00	0
2009-03-25	09:50:00	0
2009-03-25	09:51:00	0
2009-03-25	09:52:00	0
2009-03-25	09:53:00	0
2009-03-25	09:54:00	0
2009-03-25	09:55:00	0
2009-03-25	09:56:00	0
2009-03-25	09:57:00	0
2009-03-25	09:58:00	0
2009-03-25	09:59:00	0
2009-03-25	10:00:00	0
2009-03-25	10:01:00	0
2009-03-25	10:02:00	0
2009-03-25	10:03:00	0
2009-03-25	10:04:00	0
2009-03-25	10:05:00	0
2009-03-25	10:06:00	0
2009-03-25	10:07:00	0
2009-03-25	10:08:00	0
2009-03-25	10:09:00	0
2009-03-25	10:10:00	0
2009-03-25	10:11:00	0
2009-03-25	10:12:00	0
2009-03-25	10:13:00	0
2009-03-25	10:14:00	0
2009-03-25	10:15:00	0
2009-03-25	10:16:00	0
2009-03-25	10:17:00	0
2009-03-25	10:18:00	0
2009-03-25	10:19:00	0
2009-03-25	10:20:00	0
2009-03-25	10:21:00	0
2009-03-25	10:22:00	0
2009-03-25	10:23:00	0
2009-03-25	10:24:00	0
2009-03-25	10:25:00	0
2009-03-25	10:26:00	0
2009-03-25	10:27:00	0
2009-03-25	10:28:00	0
2009-03-25	10:29:00	0
2009-03-25	10:30:00	0
2009-03-25	10:31:00	0
2009-03-25	10:32:00	0
2009-03-25	10:33:00	0
2009-03-25	10:34:00	0
2009-03-25	10:35:00	0
2009-03-25	10:36:00	0
2009-03-25	10:37:00	0
2009-03-25	10:38:00	0
2009-03-25	10:39:00	0
2009-03-25	10:40:00	0
2009-03-25	10:41:00	0
2009-03-25	10:42:00	0
2009-03-25	10:43:00	0
2009-03-25	10:44:00	0
2009-03-25	10:45:00	0
2009-03-25	10:46:00	0
2009-03-25	10:47:00	0
2009-03-25	10:48:00	0
2009-03-25	10:49:00	0
2009-03-25	10:50:00	0
2009-03-25	10:51:00	0
2009-03-25	10:52:00	0
2009-03-25	10:53:00	0
2009-03-25	10:54:00	0
2009-03-25	10:55:00	0
2009-03-25	10:56:00	0
2009-03-25	10:57:00	0
2009-03-25	10:58:00	0
2009-03-25	10:59:00	0
2009-03-25	11:00:00	0
2009-03-25	11:01:00	0
2009-03-25	11:02:00	0
2009-03-25	11:03:00	0
2009-03-25	11:04:00	0
2009-03-25	11:05:00	0
2009-03-25	11:06:00	0
2009-03-25	11:07:00	0
2009-03-25	11:08:00	0
2009-03-25	11:09:00	0
2009-03-25	11:10:00	0
2009-03-25	11:11:00	0
2009-03-25	11:12:00	0
2009-03-25	11:13:00	0
2009-03-25	11:14:00	0
2009-03-25	11:15:00	0
2009-03-25	11:16:00	0
2009-03-25	11:17:00	0
2009-03-25	11:18:00	0
2009-03-25	11:19:00	0
2009-03-25	11:20:00	0
2009-03-25	11:21:00	0
2009-03-25	11:22:00	0
2009-03-25	11:23:00	0
2009-03-25	11:24:00	0
2009-03-25	11:25:00	0
2009-03-25	11:26:00	0
2009-03-25	11:27:00	0
2009-03-25	11:28:00	0
2009-03-25	11:29:00	0
2009-03-25	11:30:00	0
2009-03-25	11:31:00	0
2009-03-25	11:32:00	0
2009-03-25	11:33:00	0
2009-03-25	11:34:00	0
2009-03-25	11:35:00	0
2009-03-25	11:36:00	0
2009-03-25	11:37:00	0
2009-03-25	11:38:00	0
2009-03-25	11:39:00	0
2009-03-25	11:40:00	0
2009-03-25	11:41:00	0
2009-03-25	11:42:00	0
2009-03-25	11:43:00	0
2009-03-25	11:44:00	0
2009-03-25	11:45:00	0
2009-03-25	11:46:00	0
2009-03-25	11:47:00	0
2009-03-25	11:48:00	0
2009-03-25	11:49:00	0
2009-03-25	11:50:00	0
2009-03-25	11:51:00	0
2009-03-25	11:52:00	0
2009-03-25	11:53:00	0
2009-03-25	11:54:00	0
2009-03-25	11:55:00	0
2009-03-25	11:56:00	0
2009-03-25	11:57:00	0
2009-03-25	11:58:00	0
2009-03-25	11:59:00	0
2009-03-25	12:00:00	0
2009-03-25	12:01:00	0
2009-03-25	12:02:00	0
2009-03-25	12:03:00	0
2009-03-25	12:04:00	0
2009-03-25	12:05:00	0
2009-03-25	12:06:00	0
2009-03-25	12:07:00	0
2009-03-25	12:08:00	0
2009-03-25	12:09:00	0
2009-03-25	12:10:00	0
2009-03-25	12:11:00	0
2009-03-25	12:12:00	0
2009-03-25	12:13:00	0
2009-03-25	12:14:00	0
2009-03-25	12:15:00	0
2009-03-25	12:16:00	0
2009-03-25	12:17:00	0
2009-03-25	12:18:00	0
2009-03-25	12:19:00	0
2009-03-25	12:20:00	0
2009-03-25	12:21:00	0
2009-03-25	12:22:00	0
2009-03-25	12:23:00	0
2009-03-25	12:24:00	0
2009-03-25	12:25:00	0
2009-03-25	12:26:00	0
2009-03-25	12:27:00	0
2009-03-25	12:28:00	0
2009-03-25	12:29:00	0
2009-03-25	12:30:00	0
2009-03-25	12:31:00	0
2009-03-25	12:32:00	0
2009-03-25	12:33:00	0
2009-03-25	12:34:00	0
2009-03-25	12:35:00	0
2009-03-25	12:36:00	0
2009-03-25	12:37:00	0
2009-03-25	12:38:00	0
2009-03-25	12:39:00	0
2009-03-25	12:40:00	0
2009-03-25	12:41:00	0
2009-03-25	12:42:00	0
2009-03-25	12:43:00	0
2009-03-25	12:44:00	0
2009-03-25	12:45:00	0
2009-03-25	12:46:00	0
2009-03-25	12:47:00	0
2009-03-25	12:48:00	0
2009-03-25	12:49:00	0
2009-03-25	12:50:00	0
2009-03-25	12:51:00	0
2009-03-25	12:52:00	0
2009-03-25	12:53:00	0
2009-03-25	12:54:00	0
2009-03-25	12:55:00	0
2009-03-25	12:56:00	0
2009-03-25	12:57:00	0
2009-03-25	12:58:00	0
2009-03-25	12:59:00	0
2009-03-25	13:00:00	0
2009-03-25	13:01:00	0
2009-03-25	13:02:00	0
2009-03-25	13:03:00	0
2009-03-25	13:04:00	0
2009-03-25	13:05:00	0
2009-03-25	13:06:00	0
2009-03-25	13:07:00	0
2009-03-25	13:08:00	0
2009-03-25	13:09:00	0
2009-03-25	13:10:00	0
2009-03-25	13:11:00	0
2009-03-25	13:12:00	0
2009-03-25	13:13:00	0
2009-03-25	13:14:00	0
2009-03-25	13:15:00	0
2009-03-25	13:16:00	0
2009-03-25	13:17:00	0
2009-03-25	13:18:00	0
2009-03-25	13:19:00	0
2009-03-25	13:20:00	0
2009-03-25	13:21:00	0
2009-03-25	13:22:00	0
2009-03-25	13:23:00	0
2009-03-25	13:24:00	0
2009-03-25	13:25:00	0
2009-03-25	13:26:00	0
2009-03-25	13:27:00	0
2009-03-25	13:28:00	0
2009-03-25	13:29:00	0
2009-03-25	13:30:00	0
2009-03-25	13:31:00	0
2009-03-25	13:32:00	0
2009-03-25	13:33:00	0
2009-03-25	13:34:00	0
2009-03-25	13:35:00	0
2009-03-25	13:36:00	0
2009-03-25	13:37:00	0
2009-03-25	13:38:00	0
2009-03-25	13:39:00	0
2009-03-25	13:40:00	0
2009-03-25	13:41:00	0
2009-03-25	13:42:00	0
2009-03-25	13:43:00	0
2009-03-25	13:44:00	0
2009-03-25	13:45:00	0
2009-03-25	13:46:00	0
2009-03-25	13:47:00	0
2009-03-25	13:48:00	0
2009-03-25	13:49:00	0
2009-03-25	13:50:00	0
2009-03-25	13:51:00	0
2009-03-25	13:52:00	0
2009-03-25	13:53:00	0
2009-03-25	13:54:00	0
2009-03-25	13:55:00	0
2009-03-25	13:56:00	0
2009-03-25	13:57:00	0
2009-03-25	13:58:00	0
2009-03-25	13:59:00	0
2009-03-25	14:00:00	0
2009-03-25	14:01:00	0
2009-03-25	14:02:00	0
2009-03-25	14:03:00	0
2009-03-25	14:04:00	0
2009-03-25	14:05:00	0
2009-03-25	14:06:00	0
2009-03-25	14:07:00	0
2009-03-25	14:08:00	0
2009-03-25	14:09:00	0
2009-03-25	14:10:00	0
2009-03-25	14:11:00	0
2009-03-25	14:12:00	0
2009-03-25	14:13:00	0
2009-03-25	14:14:00	0
2009-03-25	14:15:00	0
2009-03-25	14:16:00	0
2009-03-25	14:17:00	0
2009-03-25	14:18:00	0
2009-03-25	14:19:00	0
2009-03-25	14:20:00	0
2009-03-25	14:21:00	0
2009-03-25	14:22:00	0
2009-03-25	14:23:00	0
2009-03-25	14:24:00	0
2009-03-25	14:25:00	0
2009-03-25	14:26:00	0
2009-03-25	14:27:00	0
2009-03-25	14:28:00	0
2009-03-25	14:29:00	0
2009-03-25	14:30:00	0
2009-03-25	14:31:00	0
2009-03-25	14:32:00	0
2009-03-25	14:33:00	0
2009-03-25	14:34:00	0
2009-03-25	14:35:00	0
2009-03-25	14:36:00	0
2009-03-25	14:37:00	0
2009-03-25	14:38:00	0
2009-03-25	14:39:00	0
2009-03-25	14:40:00	0
2009-03-25	14:41:00	0
2009-03-25	14:42:00	0
2009-03-25	14:43:00	0
2009-03-25	14:44:00	0
2009-03-25	14:45:00	0
2009-03-25	14:46:00	0
2009-03-25	14:47:00	0
2009-03-25	14:48:00	0
2009-03-25	14:49:00	0
2009-03-25	14:50:00	0
2009-03-25	14:51:00	0
2009-03-25	14:52:00	0
2009-03-25	14:53:00	0
2009-03-25	14:54:00	0
2009-03-25	14:55:00	0
2009-03-25	14:56:00	0
2009-03-25	14:57:00	0
2009-03-25	14:58:00	0
2009-03-25	14:59:00	0
2009-03-25	15:00:00	0
2009-03-25	15:01:00	0
2009-03-25	15:02:00	0
2009-03-25	15:03:00	0
2009-03-25	15:04:00	0
2009-03-25	15:05:00	0
2009-03-25	15:06:00	0
2009-03-25	15:07:00	0
2009-03-25	15:08:00	0
2009-03-25	15:09:00	0
2009-03-25	15:10:00	0
2009-03-25	15:11:00	0
2009-03-25	15:12:00	0
2009-03-25	15:13:00	0
2009-03-25	15:14:00	0
2009-03-25	15:15:00	0
2009-03-25	15:16:00	0
2009-03-25	15:17:00	0
2009-03-25	15:18:00	0
2009-03-25	15:19:00	0
2009-03-25	15:20:00	0
2009-03-25	15:21:00	0
2009-03-25	15:22:00	0
2009-03-25	15:23:00	0
2009-03-25	15:24:00	0
2009-03-25	15:25:00	0
2009-03-25	15:26:00	0
2009-03-25	15:27:00	0
2009-03-25	15:28:00	0
2009-03-25	15:29:00	0
2009-03-25	15:30:00	0
2009-03-25	15:31:00	0
2009-03-25	15:32:00	0
2009-03-25	15:33:00	0
2009-03-25	15:34:00	0
2009-03-25	15:35:00	0
2009-03-25	15:36:00	0
2009-03-25	15:37:00	0
2009-03-25	15:38:00	0
2009-03-25	15:39:00	0
2009-03-25	15:40:00	0
2009-03-25	15:41:00	0
2009-03-25	15:42:00	0
2009-03-25	15:43:00	0
2009-03-25	15:44:00	0
2009-03-25	15:45:00	0
2009-03-25	15:46:00	0
2009-03-25	15:47:00	0
2009-03-25	15:48:00	0
2009-03-25	15:49:00	0
2009-03-25	15:50:00	0
2009-03-25	15:51:00	0
2009-03-25	15:52:00	0
2009-03-25	15:53:00	0
2009-03-25	15:54:00	0
2009-03-25	15:55:00	0
2009-03-25	15:56:00	0
2009-03-25	15:57:00	0
2009-03-25	15:58:00	0
2009-03-25	15:59:00	0
2009-03-25	16:00:00	0
2009-03-25	16:01:00	0
2009-03-25	16:02:00	0
2009-03-25	16:03:00	0
2009-03-25	16:04:00	0
2009-03-25	16:05:00	0
2009-03-25	16:06:00	0
2009-03-25	16:07:00	0
2009-03-25	16:08:00	0
2009-03-25	16:09:00	0
2009-03-25	16:10:00	0
2009-03-25	16:11:00	0
2009-03-25	16:12:00	0
2009-03-25	16:13:00	0
2009-03-25	16:14:00	0
2009-03-25	16:15:00	0
2009-03-25	16:16:00	0
2009-03-25	16:17:00	0
2009-03-25	16:18:00	0
2009-03-25	16:19:00	0
2009-03-25	16:20:00	0
2009-03-25	16:21:00	0
2009-03-25	16:22:00	0
2009-03-25	16:23:00	0
2009-03-25	16:24:00	0
2009-03-25	16:25:00	0
2009-03-25	16:26:00	0
2009-03-25	16:27:00	0
2009-03-25	16:28:00	0
2009-03-25	16:29:00	0
2009-03-25	16:30:00	0
2009-03-25	16:31:00	0
2009-03-25	16:32:00	0
2009-03-25	16:33:00	0
2009-03-25	16:34:00	0
2009-03-25	16:35:00	0
2009-03-25	16:36:00	0
2009-03-25	16:37:00	0
2009-03-25	16:38:00	0
2009-03-25	16:39:00	0
2009-03-25	16:40:00	0
2009-03-25	16:41:00	0
2009-03-25	16:42:00	0
2009-03-25	16:43:00	0
2009-03-25	16:44:00	0
2009-03-25	16:45:00	0
2009-03-25	16:46:00	0
2009-03-25	16:47:00	0
2009-03-25	16:48:00	0
2009-03-25	16:49:00	0
2009-03-25	16:50:00	0
2009-03-25	16:51:00	0
2009-03-25	16:52:00	0
2009-03-25	16:53:00	0
2009-03-25	16:54:00	0
2009-03-25	16:55:00	0
2009-03-25	16:56:00	0
2009-03-25	16:57:00	0
2009-03-25	16:58:00	0
2009-03-25	16:59:00	0
2009-03-25	17:00:00	0
2009-03-25	17:01:00	0
2009-03-25	17:02:00	0
2009-03-25	17:03:00	0
2009-03-25	17:04:00	0
2009-03-25	17:05:00	0
2009-03-25	17:06:00	0
2009-03-25	17:07:00	0
2009-03-25	17:08:00	0
2009-03-25	17:09:00	0
2009-03-25	17:10:00	0
2009-03-25	17:11:00	0
2009-03-25	17:12:00	0
2009-03-25	17:13:00	0
2009-03-25	17:14:00	0
2009-03-25	17:15:00	0
2009-03-25	17:16:00	0
2009-03-25	17:17:00	0
2009-03-25	17:18:00	0
2009-03-25	17:19:00	0
2009-03-25	17:20:00	0
2009-03-25	17:21:00	0
2009-03-25	17:22:00	0
2009-03-25	17:23:00	0
2009-03-25	17:24:00	0
2009-03-25	17:25:00	0
2009-03-25	17:26:00	0
2009-03-25	17:27:00	0
2009-03-25	17:28:00	0
2009-03-25	17:29:00	0
2009-03-25	17:30:00	0
2009-03-25	17:31:00	0
2009-03-25	17:32:00	0
2009-03-25	17:33:00	0
2009-03-25	17:34:00	0
2009-03-25	17:35:00	0
2009-03-25	17:36:00	0
2009-03-25	17:37:00	0
2009-03-25	17:38:00	0
2009-03-25	17:39:00	0
2009-03-25	17:40:00	0
2009-03-25	17:41:00	0
2009-03-25	17:42:00	0
2009-03-25	17:43:00	0
2009-03-25	17:44:00	0
2009-03-25	17:45:00	0
2009-03-25	17:46:00	0
2009-03-25	17:47:00	0
2009-03-25	17:48:00	0
2009-03-25	17:49:00	0
2009-03-25	17:50:00	0
2009-03-25	17:51:00	0
2009-03-25	17:52:00	0
2009-03-25	17:53:00	0
2009-03-25	17:54:00	0
2009-03-25	17:55:00	0
2009-03-25	17:56:00	0
2009-03-25	17:57:00	0
2009-03-25	17:58:00	0
2009-03-25	17:59:00	0
2009-03-25	18:00:00	0
2009-03-25	18:01:00	0
2009-03-25	18:02:00	0
2009-03-25	18:03:00	0
2009-03-25	18:04:00	0
2009-03-25	18:05:00	0
2009-03-25	18:06:00	0
2009-03-25	18:07:00	0
2009-03-25	18:08:00	10
2009-03-25	18:09:00	0
2009-03-25	18:10:00	144
2009-03-25	18:11:00	112
2009-03-25	18:12:00	51
2009-03-25	18:13:00	0
2009-03-25	18:14:00	0
2009-03-25	18:15:00	0
2009-03-25	18:16:00	0
2009-03-25	18:17:00	0
2009-03-25	18:18:00	0
2009-03-25	18:19:00	0
2009-03-25	18:20:00	0
2009-03-25	18:21:00	0
2009-03-25	18:22:00	10
2009-03-25	18:23:00	0
2009-03-25	18:24:00	0
2009-03-25	18:25:00	351
2009-03-25	18:26:00	508
2009-03-25	18:27:00	309
2009-03-25	18:28:00	20
2009-03-25	18:29:00	0
2009-03-25	18:30:00	0
2009-03-25	18:31:00	112
2009-03-25	18:32:00	20
2009-03-25	18:33:00	10
2009-03-25	18:34:00	0
2009-03-25	18:35:00	0
2009-03-25	18:36:00	1447
2009-03-25	18:37:00	3135
2009-03-25	18:38:00	977
2009-03-25	18:39:00	817
2009-03-25	18:40:00	861
2009-03-25	18:41:00	1156
2009-03-25	18:42:00	673
2009-03-25	18:43:00	673
2009-03-25	18:44:00	30
2009-03-25	18:45:00	0
2009-03-25	18:46:00	10
2009-03-25	18:47:00	351
2009-03-25	18:48:00	0
2009-03-25	18:49:00	0
2009-03-25	18:50:00	0
2009-03-25	18:51:00	0
2009-03-25	18:52:00	0
2009-03-25	18:53:00	10
2009-03-25	18:54:00	0
2009-03-25	18:55:00	0
2009-03-25	18:56:00	20
2009-03-25	18:57:00	10
2009-03-25	18:58:00	0
2009-03-25	18:59:00	0
2009-03-25	19:00:00	0
2009-03-25	19:01:00	0
2009-03-25	19:02:00	0
2009-03-25	19:03:00	0
2009-03-25	19:04:00	0
2009-03-25	19:05:00	0
2009-03-25	19:06:00	0
2009-03-25	19:07:00	51
2009-03-25	19:08:00	10
2009-03-25	19:09:00	20
2009-03-25	19:10:00	10
2009-03-25	19:11:00	10
2009-03-25	19:12:00	0
2009-03-25	19:13:00	0
2009-03-25	19:14:00	0
2009-03-25	19:15:00	0
2009-03-25	19:16:00	0
2009-03-25	19:17:00	0
2009-03-25	19:18:00	10
2009-03-25	19:19:00	0
2009-03-25	19:20:00	10
2009-03-25	19:21:00	0
2009-03-25	19:22:00	0
2009-03-25	19:23:00	20
2009-03-25	19:24:00	181
2009-03-25	19:25:00	427
2009-03-25	19:26:00	366
2009-03-25	19:27:00	0
2009-03-25	19:28:00	10
2009-03-25	19:29:00	20
2009-03-25	19:30:00	10
2009-03-25	19:31:00	0
2009-03-25	19:32:00	10
2009-03-25	19:33:00	10
2009-03-25	19:34:00	323
2009-03-25	19:35:00	524
2009-03-25	19:36:00	906
2009-03-25	19:37:00	122
2009-03-25	19:38:00	41
2009-03-25	19:39:00	0
2009-03-25	19:40:00	156
2009-03-25	19:41:00	144
2009-03-25	19:42:00	91
2009-03-25	19:43:00	323
2009-03-25	19:44:00	10
2009-03-25	19:45:00	280
2009-03-25	19:46:00	1577
2009-03-25	19:47:00	673
2009-03-25	19:48:00	561
2009-03-25	19:49:00	839
2009-03-25	19:50:00	579
2009-03-25	19:51:00	230
2009-03-25	19:52:00	193
2009-03-25	19:53:00	10
2009-03-25	19:54:00	144
2009-03-25	19:55:00	51
2009-03-25	19:56:00	71
2009-03-25	19:57:00	0
2009-03-25	19:58:00	0
2009-03-25	19:59:00	0
2009-03-25	20:00:00	0
2009-03-25	20:01:00	0
2009-03-25	20:02:00	0
2009-03-25	20:03:00	0
2009-03-25	20:04:00	0
2009-03-25	20:05:00	0
2009-03-25	20:06:00	0
2009-03-25	20:07:00	0
2009-03-25	20:08:00	0
2009-03-25	20:09:00	0
2009-03-25	20:10:00	0
2009-03-25	20:11:00	0
2009-03-25	20:12:00	10
2009-03-25	20:13:00	0
2009-03-25	20:14:00	0
2009-03-25	20:15:00	0
2009-03-25	20:16:00	0
2009-03-25	20:17:00	0
2009-03-25	20:18:00	0
2009-03-25	20:19:00	0
2009-03-25	20:20:00	0
2009-03-25	20:21:00	0
2009-03-25	20:22:00	0
2009-03-25	20:23:00	51
2009-03-25	20:24:00	0
2009-03-25	20:25:00	0
2009-03-25	20:26:00	0
2009-03-25	20:27:00	0
2009-03-25	20:28:00	0
2009-03-25	20:29:00	0
2009-03-25	20:30:00	0
2009-03-25	20:31:00	0
2009-03-25	20:32:00	0
2009-03-25	20:33:00	0
2009-03-25	20:34:00	0
2009-03-25	20:35:00	10
2009-03-25	20:36:00	0
2009-03-25	20:37:00	10
2009-03-25	20:38:00	0
2009-03-25	20:39:00	0
2009-03-25	20:40:00	0
2009-03-25	20:41:00	0
2009-03-25	20:42:00	0
2009-03-25	20:43:00	0
2009-03-25	20:44:00	0
2009-03-25	20:45:00	0
2009-03-25	20:46:00	0
2009-03-25	20:47:00	0
2009-03-25	20:48:00	0
2009-03-25	20:49:00	0
2009-03-25	20:50:00	0
2009-03-25	20:51:00	0
2009-03-25	20:52:00	10
2009-03-25	20:53:00	20
2009-03-25	20:54:00	10
2009-03-25	20:55:00	0
2009-03-25	20:56:00	0
2009-03-25	20:57:00	0
2009-03-25	20:58:00	0
2009-03-25	20:59:00	0
2009-03-25	21:00:00	0
2009-03-25	21:01:00	0
2009-03-25	21:02:00	0
2009-03-25	21:03:00	0
2009-03-25	21:04:00	0
2009-03-25	21:05:00	0
2009-03-25	21:06:00	0
2009-03-25	21:07:00	0
2009-03-25	21:08:00	0
2009-03-25	21:09:00	0
2009-03-25	21:10:00	0
2009-03-25	21:11:00	0
2009-03-25	21:12:00	0
2009-03-25	21:13:00	0
2009-03-25	21:14:00	0
2009-03-25	21:15:00	0
2009-03-25	21:16:00	0
2009-03-25	21:17:00	0
2009-03-25	21:18:00	0
2009-03-25	21:19:00	0
2009-03-25	21:20:00	0
2009-03-25	21:21:00	30
2009-03-25	21:22:00	0
2009-03-25	21:23:00	0
2009-03-25	21:24:00	0
2009-03-25	21:25:00	0
2009-03-25	21:26:00	10
2009-03-25	21:27:00	0
2009-03-25	21:28:00	0
2009-03-25	21:29:00	156
2009-03-25	21:30:00	132
2009-03-25	21:31:00	91
2009-03-25	21:32:00	30
2009-03-25	21:33:00	475
2009-03-25	21:34:00	181
2009-03-25	21:35:00	71
2009-03-25	21:36:00	0
2009-03-25	21:37:00	0
2009-03-25	21:38:00	30
2009-03-25	21:39:00	41
2009-03-25	21:40:00	524
2009-03-25	21:41:00	0
2009-03-25	21:42:00	266
2009-03-25	21:43:00	20
2009-03-25	21:44:00	205
2009-03-25	21:45:00	242
2009-03-25	21:46:00	20
2009-03-25	21:47:00	10
2009-03-25	21:48:00	0
2009-03-25	21:49:00	0
2009-03-25	21:50:00	0
2009-03-25	21:51:00	0
2009-03-25	21:52:00	0
2009-03-25	21:53:00	10
2009-03-25	21:54:00	10
2009-03-25	21:55:00	51
2009-03-25	21:56:00	20
2009-03-25	21:57:00	61
2009-03-25	21:58:00	20
2009-03-25	21:59:00	977
2009-03-25	22:00:00	2060
2009-03-25	22:01:00	1863
2009-03-25	22:02:00	673
2009-03-25	22:03:00	1296
2009-03-25	22:04:00	144
2009-03-25	22:05:00	427
2009-03-25	22:06:00	508
2009-03-25	22:07:00	524
2009-03-25	22:08:00	254
2009-03-25	22:09:00	0
2009-03-25	22:10:00	181
2009-03-25	22:11:00	0
2009-03-25	22:12:00	0
2009-03-25	22:13:00	0
2009-03-25	22:14:00	0
2009-03-25	22:15:00	597
2009-03-25	22:16:00	0
2009-03-25	22:17:00	0
2009-03-25	22:18:00	0
2009-03-25	22:19:00	0
2009-03-25	22:20:00	0
2009-03-25	22:21:00	0
2009-03-25	22:22:00	0
2009-03-25	22:23:00	0
2009-03-25	22:24:00	0
2009-03-25	22:25:00	0
2009-03-25	22:26:00	0
2009-03-25	22:27:00	0
2009-03-25	22:28:00	0
2009-03-25	22:29:00	0
2009-03-25	22:30:00	0
2009-03-25	22:31:00	0
2009-03-25	22:32:00	0
2009-03-25	22:33:00	0
2009-03-25	22:34:00	0
2009-03-25	22:35:00	0
2009-03-25	22:36:00	0
2009-03-25	22:37:00	0
2009-03-25	22:38:00	0
2009-03-25	22:39:00	0
2009-03-25	22:40:00	0
2009-03-25	22:41:00	0
2009-03-25	22:42:00	0
2009-03-25	22:43:00	0
2009-03-25	22:44:00	0
2009-03-25	22:45:00	0
2009-03-25	22:46:00	0
2009-03-25	22:47:00	0
2009-03-25	22:48:00	0
2009-03-25	22:49:00	0
2009-03-25	22:50:00	0
2009-03-25	22:51:00	0
2009-03-25	22:52:00	0
2009-03-25	22:53:00	0
2009-03-25	22:54:00	20
2009-03-25	22:55:00	0
2009-03-25	22:56:00	0
2009-03-25	22:57:00	10
2009-03-25	22:58:00	0
2009-03-25	22:59:00	0
2009-03-25	23:00:00	0
2009-03-25	23:01:00	0
2009-03-25	23:02:00	0
2009-03-25	23:03:00	0
2009-03-25	23:04:00	0
2009-03-25	23:05:00	0
2009-03-25	23:06:00	0
2009-03-25	23:07:00	0
2009-03-25	23:08:00	0
2009-03-25	23:09:00	0
2009-03-25	23:10:00	0
2009-03-25	23:11:00	0
2009-03-25	23:12:00	0
2009-03-25	23:13:00	0
2009-03-25	23:14:00	0
2009-03-25	23:15:00	0
2009-03-25	23:16:00	0
2009-03-25	23:17:00	0
2009-03-25	23:18:00	0
2009-03-25	23:19:00	0
2009-03-25	23:20:00	0
2009-03-25	23:21:00	0
2009-03-25	23:22:00	0
2009-03-25	23:23:00	0
2009-03-25	23:24:00	0
2009-03-25	23:25:00	0
2009-03-25	23:26:00	0
2009-03-25	23:27:00	0
2009-03-25	23:28:00	30
2009-03-25	23:29:00	0
2009-03-25	23:30:00	10
2009-03-25	23:31:00	0
2009-03-25	23:32:00	51
2009-03-25	23:33:00	20
2009-03-25	23:34:00	0
2009-03-25	23:35:00	0
2009-03-25	23:36:00	0
2009-03-25	23:37:00	0
2009-03-25	23:38:00	0
2009-03-25	23:39:00	0
2009-03-25	23:40:00	0
2009-03-25	23:41:00	0
2009-03-25	23:42:00	0
2009-03-25	23:43:00	0
2009-03-25	23:44:00	0
2009-03-25	23:45:00	0
2009-03-25	23:46:00	0
2009-03-25	23:47:00	0
2009-03-25	23:48:00	0
2009-03-25	23:49:00	0
2009-03-25	23:50:00	0
2009-03-25	23:51:00	0
2009-03-25	23:52:00	0
2009-03-25	23:53:00	0
2009-03-25	23:54:00	0
2009-03-25	23:55:00	0
2009-03-25	23:56:00	0
2009-03-25	23:57:00	0
2009-03-25	23:58:00	0
2009-03-25	23:59:00	0
2009-03-26	00:00:00	10
2009-03-26	00:01:00	0
2009-03-26	00:02:00	0
2009-03-26	00:03:00	0
2009-03-26	00:04:00	0
2009-03-26	00:05:00	0
2009-03-26	00:06:00	0
2009-03-26	00:07:00	0
2009-03-26	00:08:00	0
2009-03-26	00:09:00	0
2009-03-26	00:10:00	0
2009-03-26	00:11:00	0
2009-03-26	00:12:00	0
2009-03-26	00:13:00	0
2009-03-26	00:14:00	0
2009-03-26	00:15:00	0
2009-03-26	00:16:00	0
2009-03-26	00:17:00	0
2009-03-26	00:18:00	0
2009-03-26	00:19:00	0
2009-03-26	00:20:00	0
2009-03-26	00:21:00	0
2009-03-26	00:22:00	0
2009-03-26	00:23:00	0
2009-03-26	00:24:00	0
2009-03-26	00:25:00	0
2009-03-26	00:26:00	0
2009-03-26	00:27:00	0
2009-03-26	00:28:00	0
2009-03-26	00:29:00	0
2009-03-26	00:30:00	0
2009-03-26	00:31:00	0
2009-03-26	00:32:00	0
2009-03-26	00:33:00	0
2009-03-26	00:34:00	0
2009-03-26	00:35:00	0
2009-03-26	00:36:00	0
2009-03-26	00:37:00	0
2009-03-26	00:38:00	0
2009-03-26	00:39:00	0
2009-03-26	00:40:00	0
2009-03-26	00:41:00	0
2009-03-26	00:42:00	0
2009-03-26	00:43:00	0
2009-03-26	00:44:00	10
2009-03-26	00:45:00	0
2009-03-26	00:46:00	0
2009-03-26	00:47:00	0
2009-03-26	00:48:00	0
2009-03-26	00:49:00	0
2009-03-26	00:50:00	0
2009-03-26	00:51:00	0
2009-03-26	00:52:00	0
2009-03-26	00:53:00	0
2009-03-26	00:54:00	0
2009-03-26	00:55:00	0
2009-03-26	00:56:00	0
2009-03-26	00:57:00	0
2009-03-26	00:58:00	0
2009-03-26	00:59:00	0
2009-03-26	01:00:00	0
2009-03-26	01:01:00	0
2009-03-26	01:02:00	0
2009-03-26	01:03:00	0
2009-03-26	01:04:00	0
2009-03-26	01:05:00	0
2009-03-26	01:06:00	10
2009-03-26	01:07:00	0
2009-03-26	01:08:00	0
2009-03-26	01:09:00	0
2009-03-26	01:10:00	10
2009-03-26	01:11:00	0
2009-03-26	01:12:00	0
2009-03-26	01:13:00	0
2009-03-26	01:14:00	0
2009-03-26	01:15:00	0
2009-03-26	01:16:00	0
2009-03-26	01:17:00	0
2009-03-26	01:18:00	0
2009-03-26	01:19:00	0
2009-03-26	01:20:00	0
2009-03-26	01:21:00	0
2009-03-26	01:22:00	0
2009-03-26	01:23:00	0
2009-03-26	01:24:00	0
2009-03-26	01:25:00	0
2009-03-26	01:26:00	0
2009-03-26	01:27:00	0
2009-03-26	01:28:00	0
2009-03-26	01:29:00	0
2009-03-26	01:30:00	0
2009-03-26	01:31:00	0
2009-03-26	01:32:00	0
2009-03-26	01:33:00	0
2009-03-26	01:34:00	0
2009-03-26	01:35:00	0
2009-03-26	01:36:00	0
2009-03-26	01:37:00	0
2009-03-26	01:38:00	0
2009-03-26	01:39:00	0
2009-03-26	01:40:00	0
2009-03-26	01:41:00	0
2009-03-26	01:42:00	0
2009-03-26	01:43:00	0
2009-03-26	01:44:00	0
2009-03-26	01:45:00	10
2009-03-26	01:46:00	0
2009-03-26	01:47:00	0
2009-03-26	01:48:00	51
2009-03-26	01:49:00	0
2009-03-26	01:50:00	0
2009-03-26	01:51:00	0
2009-03-26	01:52:00	0
2009-03-26	01:53:00	0
2009-03-26	01:54:00	0
2009-03-26	01:55:00	0
2009-03-26	01:56:00	0
2009-03-26	01:57:00	0
2009-03-26	01:58:00	0
2009-03-26	01:59:00	0
2009-03-26	02:00:00	0
2009-03-26	02:01:00	0
2009-03-26	02:02:00	0
2009-03-26	02:03:00	0
2009-03-26	02:04:00	0
2009-03-26	02:05:00	0
2009-03-26	02:06:00	0
2009-03-26	02:07:00	0
2009-03-26	02:08:00	0
2009-03-26	02:09:00	0
2009-03-26	02:10:00	0
2009-03-26	02:11:00	0
2009-03-26	02:12:00	0
2009-03-26	02:13:00	0
2009-03-26	02:14:00	0
2009-03-26	02:15:00	0
2009-03-26	02:16:00	0
2009-03-26	02:17:00	0
2009-03-26	02:18:00	0
2009-03-26	02:19:00	0
2009-03-26	02:20:00	0
2009-03-26	02:21:00	0
2009-03-26	02:22:00	0
2009-03-26	02:23:00	0
2009-03-26	02:24:00	0
2009-03-26	02:25:00	0
2009-03-26	02:26:00	0
2009-03-26	02:27:00	0
2009-03-26	02:28:00	51
2009-03-26	02:29:00	0
2009-03-26	02:30:00	0
2009-03-26	02:31:00	0
2009-03-26	02:32:00	0
2009-03-26	02:33:00	0
2009-03-26	02:34:00	0
2009-03-26	02:35:00	10
2009-03-26	02:36:00	0
2009-03-26	02:37:00	10
2009-03-26	02:38:00	10
2009-03-26	02:39:00	0
2009-03-26	02:40:00	0
2009-03-26	02:41:00	0
2009-03-26	02:42:00	0
2009-03-26	02:43:00	0
2009-03-26	02:44:00	0
2009-03-26	02:45:00	0
2009-03-26	02:46:00	0
2009-03-26	02:47:00	0
2009-03-26	02:48:00	0
2009-03-26	02:49:00	0
2009-03-26	02:50:00	0
2009-03-26	02:51:00	0
2009-03-26	02:52:00	10
2009-03-26	02:53:00	10
2009-03-26	02:54:00	10
2009-03-26	02:55:00	20
2009-03-26	02:56:00	0
2009-03-26	02:57:00	0
2009-03-26	02:58:00	0
2009-03-26	02:59:00	0
2009-03-26	03:00:00	0
2009-03-26	03:01:00	0
2009-03-26	03:02:00	0
2009-03-26	03:03:00	0
2009-03-26	03:04:00	0
2009-03-26	03:05:00	0
2009-03-26	03:06:00	0
2009-03-26	03:07:00	0
2009-03-26	03:08:00	0
2009-03-26	03:09:00	0
2009-03-26	03:10:00	0
2009-03-26	03:11:00	0
2009-03-26	03:12:00	0
2009-03-26	03:13:00	0
2009-03-26	03:14:00	0
2009-03-26	03:15:00	0
2009-03-26	03:16:00	0
2009-03-26	03:17:00	0
2009-03-26	03:18:00	0
2009-03-26	03:19:00	0
2009-03-26	03:20:00	0
2009-03-26	03:21:00	0
2009-03-26	03:22:00	0
2009-03-26	03:23:00	0
2009-03-26	03:24:00	0
2009-03-26	03:25:00	0
2009-03-26	03:26:00	0
2009-03-26	03:27:00	0
2009-03-26	03:28:00	0
2009-03-26	03:29:00	0
2009-03-26	03:30:00	0
2009-03-26	03:31:00	0
2009-03-26	03:32:00	0
2009-03-26	03:33:00	0
2009-03-26	03:34:00	0
2009-03-26	03:35:00	0
2009-03-26	03:36:00	0
2009-03-26	03:37:00	0
2009-03-26	03:38:00	0
2009-03-26	03:39:00	0
2009-03-26	03:40:00	0
2009-03-26	03:41:00	169
2009-03-26	03:42:00	0
2009-03-26	03:43:00	0
2009-03-26	03:44:00	0
2009-03-26	03:45:00	0
2009-03-26	03:46:00	0
2009-03-26	03:47:00	0
2009-03-26	03:48:00	0
2009-03-26	03:49:00	0
2009-03-26	03:50:00	0
2009-03-26	03:51:00	0
2009-03-26	03:52:00	0
2009-03-26	03:53:00	0
2009-03-26	03:54:00	0
2009-03-26	03:55:00	0
2009-03-26	03:56:00	0
2009-03-26	03:57:00	0
2009-03-26	03:58:00	0
2009-03-26	03:59:00	0
2009-03-26	04:00:00	0
2009-03-26	04:01:00	0
2009-03-26	04:02:00	0
2009-03-26	04:03:00	0
2009-03-26	04:04:00	10
2009-03-26	04:05:00	0
2009-03-26	04:06:00	0
2009-03-26	04:07:00	0
2009-03-26	04:08:00	0
2009-03-26	04:09:00	0
2009-03-26	04:10:00	0
2009-03-26	04:11:00	0
2009-03-26	04:12:00	0
2009-03-26	04:13:00	0
2009-03-26	04:14:00	0
2009-03-26	04:15:00	0
2009-03-26	04:16:00	0
2009-03-26	04:17:00	0
2009-03-26	04:18:00	0
2009-03-26	04:19:00	0
2009-03-26	04:20:00	0
2009-03-26	04:21:00	0
2009-03-26	04:22:00	0
2009-03-26	04:23:00	0
2009-03-26	04:24:00	0
2009-03-26	04:25:00	0
2009-03-26	04:26:00	0
2009-03-26	04:27:00	0
2009-03-26	04:28:00	0
2009-03-26	04:29:00	10
2009-03-26	04:30:00	0
2009-03-26	04:31:00	0
2009-03-26	04:32:00	0
2009-03-26	04:33:00	0
2009-03-26	04:34:00	0
2009-03-26	04:35:00	0
2009-03-26	04:36:00	0
2009-03-26	04:37:00	0
2009-03-26	04:38:00	0
2009-03-26	04:39:00	10
2009-03-26	04:40:00	0
2009-03-26	04:41:00	0
2009-03-26	04:42:00	0
2009-03-26	04:43:00	0
2009-03-26	04:44:00	30
2009-03-26	04:45:00	0
2009-03-26	04:46:00	0
2009-03-26	04:47:00	0
2009-03-26	04:48:00	0
2009-03-26	04:49:00	0
2009-03-26	04:50:00	0
2009-03-26	04:51:00	0
2009-03-26	04:52:00	0
2009-03-26	04:53:00	0
2009-03-26	04:54:00	0
2009-03-26	04:55:00	41
2009-03-26	04:56:00	10
2009-03-26	04:57:00	10
2009-03-26	04:58:00	0
2009-03-26	04:59:00	10
2009-03-26	05:00:00	0
2009-03-26	05:01:00	0
2009-03-26	05:02:00	0
2009-03-26	05:03:00	0
2009-03-26	05:04:00	0
2009-03-26	05:05:00	0
2009-03-26	05:06:00	0
2009-03-26	05:07:00	0
2009-03-26	05:08:00	0
2009-03-26	05:09:00	0
2009-03-26	05:10:00	0
2009-03-26	05:11:00	0
2009-03-26	05:12:00	10
2009-03-26	05:13:00	0
2009-03-26	05:14:00	0
2009-03-26	05:15:00	0
2009-03-26	05:16:00	0
2009-03-26	05:17:00	0
2009-03-26	05:18:00	0
2009-03-26	05:19:00	0
2009-03-26	05:20:00	0
2009-03-26	05:21:00	0
2009-03-26	05:22:00	0
2009-03-26	05:23:00	0
2009-03-26	05:24:00	0
2009-03-26	05:25:00	0
2009-03-26	05:26:00	0
2009-03-26	05:27:00	0
2009-03-26	05:28:00	0
2009-03-26	05:29:00	0
2009-03-26	05:30:00	0
2009-03-26	05:31:00	0
2009-03-26	05:32:00	0
2009-03-26	05:33:00	0
2009-03-26	05:34:00	0
2009-03-26	05:35:00	0
2009-03-26	05:36:00	0
2009-03-26	05:37:00	0
2009-03-26	05:38:00	10
2009-03-26	05:39:00	0
2009-03-26	05:40:00	0
2009-03-26	05:41:00	0
2009-03-26	05:42:00	0
2009-03-26	05:43:00	0
2009-03-26	05:44:00	0
2009-03-26	05:45:00	0
2009-03-26	05:46:00	0
2009-03-26	05:47:00	0
2009-03-26	05:48:00	0
2009-03-26	05:49:00	0
2009-03-26	05:50:00	0
2009-03-26	05:51:00	410
2009-03-26	05:52:00	144
2009-03-26	05:53:00	0
2009-03-26	05:54:00	0
2009-03-26	05:55:00	0
2009-03-26	05:56:00	144
2009-03-26	05:57:00	81
2009-03-26	05:58:00	0
2009-03-26	05:59:00	0
2009-03-26	06:00:00	0
2009-03-26	06:01:00	0
2009-03-26	06:02:00	0
2009-03-26	06:03:00	0
2009-03-26	06:04:00	0
2009-03-26	06:05:00	0
2009-03-26	06:06:00	0
2009-03-26	06:07:00	0
2009-03-26	06:08:00	0
2009-03-26	06:09:00	0
2009-03-26	06:10:00	0
2009-03-26	06:11:00	10
2009-03-26	06:12:00	156
2009-03-26	06:13:00	794
2009-03-26	06:14:00	10
2009-03-26	06:15:00	193
2009-03-26	06:16:00	102
2009-03-26	06:17:00	443
2009-03-26	06:18:00	0
2009-03-26	06:19:00	0
2009-03-26	06:20:00	542
2009-03-26	06:21:00	51
2009-03-26	06:22:00	0
2009-03-26	06:23:00	41
2009-03-26	06:24:00	0
2009-03-26	06:25:00	0
2009-03-26	06:26:00	0
2009-03-26	06:27:00	0
2009-03-26	06:28:00	0
2009-03-26	06:29:00	0
2009-03-26	06:30:00	0
2009-03-26	06:31:00	0
2009-03-26	06:32:00	0
2009-03-26	06:33:00	20
2009-03-26	06:34:00	0
2009-03-26	06:35:00	0
2009-03-26	06:36:00	0
2009-03-26	06:37:00	0
2009-03-26	06:38:00	0
2009-03-26	06:39:00	0
2009-03-26	06:40:00	0
2009-03-26	06:41:00	0
2009-03-26	06:42:00	0
2009-03-26	06:43:00	0
2009-03-26	06:44:00	0
2009-03-26	06:45:00	0
2009-03-26	06:46:00	0
2009-03-26	06:47:00	0
2009-03-26	06:48:00	0
2009-03-26	06:49:00	0
2009-03-26	06:50:00	0
2009-03-26	06:51:00	0
2009-03-26	06:52:00	0
2009-03-26	06:53:00	0
2009-03-26	06:54:00	0
2009-03-26	06:55:00	132
2009-03-26	06:56:00	20
2009-03-26	06:57:00	0
2009-03-26	06:58:00	0
2009-03-26	06:59:00	0
2009-03-26	07:00:00	0
2009-03-26	07:01:00	20
2009-03-26	07:02:00	10
2009-03-26	07:03:00	0
2009-03-26	07:04:00	0
2009-03-26	07:05:00	0
2009-03-26	07:06:00	542
2009-03-26	07:07:00	41
2009-03-26	07:08:00	0
2009-03-26	07:09:00	169
2009-03-26	07:10:00	542
2009-03-26	07:11:00	0
2009-03-26	07:12:00	0
2009-03-26	07:13:00	10
2009-03-26	07:14:00	10
2009-03-26	07:15:00	2143
2009-03-26	07:16:00	1296
2009-03-26	07:17:00	3759
2009-03-26	07:18:00	1211
2009-03-26	07:19:00	1211
2009-03-26	07:20:00	861
2009-03-26	07:21:00	634
2009-03-26	07:22:00	1026
2009-03-26	07:23:00	2229
2009-03-26	07:24:00	839
2009-03-26	07:25:00	112
2009-03-26	07:26:00	280
2009-03-26	07:27:00	102
2009-03-26	07:28:00	230
2009-03-26	07:29:00	542
2009-03-26	07:30:00	266
2009-03-26	07:31:00	156
2009-03-26	07:32:00	1026
2009-03-26	07:33:00	394
2009-03-26	07:34:00	71
2009-03-26	07:35:00	122
2009-03-26	07:36:00	351
2009-03-26	07:37:00	112
2009-03-26	07:38:00	122
2009-03-26	07:39:00	323
2009-03-26	07:40:00	30
2009-03-26	07:41:00	0
2009-03-26	07:42:00	10
2009-03-26	07:43:00	0
2009-03-26	07:44:00	0
2009-03-26	07:45:00	0
2009-03-26	07:46:00	0
2009-03-26	07:47:00	0
2009-03-26	07:48:00	0
2009-03-26	07:49:00	0
2009-03-26	07:50:00	0
2009-03-26	07:51:00	0
2009-03-26	07:52:00	0
2009-03-26	07:53:00	0
2009-03-26	07:54:00	0
2009-03-26	07:55:00	0
2009-03-26	07:56:00	0
2009-03-26	07:57:00	0
2009-03-26	07:58:00	0
2009-03-26	07:59:00	0
2009-03-26	08:00:00	0
2009-03-26	08:01:00	0
2009-03-26	08:02:00	10
2009-03-26	08:03:00	181
2009-03-26	08:04:00	427
2009-03-26	08:05:00	0
2009-03-26	08:06:00	0
2009-03-26	08:07:00	10
2009-03-26	08:08:00	0
2009-03-26	08:09:00	0
2009-03-26	08:10:00	20
2009-03-26	08:11:00	0
2009-03-26	08:12:00	0
2009-03-26	08:13:00	0
2009-03-26	08:14:00	0
2009-03-26	08:15:00	0
2009-03-26	08:16:00	0
2009-03-26	08:17:00	0
2009-03-26	08:18:00	20
2009-03-26	08:19:00	0
2009-03-26	08:20:00	0
2009-03-26	08:21:00	0
2009-03-26	08:22:00	0
2009-03-26	08:23:00	0
2009-03-26	08:24:00	0
2009-03-26	08:25:00	0
2009-03-26	08:26:00	10
2009-03-26	08:27:00	10
2009-03-26	08:28:00	542
2009-03-26	08:29:00	169
2009-03-26	08:30:00	61
2009-03-26	08:31:00	205
2009-03-26	08:32:00	443
2009-03-26	08:33:00	0
2009-03-26	08:34:00	0
2009-03-26	08:35:00	10
2009-03-26	08:36:00	0
2009-03-26	08:37:00	30
2009-03-26	08:38:00	10
2009-03-26	08:39:00	230
2009-03-26	08:40:00	132
2009-03-26	08:41:00	102
2009-03-26	08:42:00	0
2009-03-26	08:43:00	0
2009-03-26	08:44:00	0
2009-03-26	08:45:00	0
2009-03-26	08:46:00	20
2009-03-26	08:47:00	427
2009-03-26	08:48:00	205
2009-03-26	08:49:00	112
2009-03-26	08:50:00	181
2009-03-26	08:51:00	323
2009-03-26	08:52:00	0
2009-03-26	08:53:00	0
2009-03-26	08:54:00	0
2009-03-26	08:55:00	230
2009-03-26	08:56:00	0
2009-03-26	08:57:00	2274
2009-03-26	08:58:00	953
2009-03-26	08:59:00	2101
2009-03-26	09:00:00	230
2009-03-26	09:01:00	132
2009-03-26	09:02:00	181
2009-03-26	09:03:00	524
2009-03-26	09:04:00	254
2009-03-26	09:05:00	794
2009-03-26	09:06:00	20
2009-03-26	09:07:00	0
2009-03-26	09:08:00	0
[truncated: 19,611 more rows]

## Sheet: 4.8.09
Actogram, Copy Raw Data, All Days
Identity:	Shon
Filename:	E:\Active Research Files\meloxicam titre canine\cases\shon\Shon 4.8.09.AWC
Gender:	M
Age:	9
Height:	30.5 cm	12.0 in
Weight:	16.0 kg	35.3 lbs
Start Date:	08-Apr-2009 (Wed)
Start Time:	18:00:00
Interval:	1.00 mins
Date Stamp:	Time Stamp:	Activity Data:	Marker Press:
2009-04-08	00:00:00	0
2009-04-08	00:01:00	0
2009-04-08	00:02:00	0
2009-04-08	00:03:00	0
2009-04-08	00:04:00	0
2009-04-08	00:05:00	0
2009-04-08	00:06:00	0
2009-04-08	00:07:00	0
2009-04-08	00:08:00	0
2009-04-08	00:09:00	0
2009-04-08	00:10:00	0
2009-04-08	00:11:00	0
2009-04-08	00:12:00	0
2009-04-08	00:13:00	0
2009-04-08	00:14:00	0
2009-04-08	00:15:00	0
2009-04-08	00:16:00	0
2009-04-08	00:17:00	0
2009-04-08	00:18:00	0
2009-04-08	00:19:00	0
2009-04-08	00:20:00	0
2009-04-08	00:21:00	0
2009-04-08	00:22:00	0
2009-04-08	00:23:00	0
2009-04-08	00:24:00	0
2009-04-08	00:25:00	0
2009-04-08	00:26:00	0
2009-04-08	00:27:00	0
2009-04-08	00:28:00	0
2009-04-08	00:29:00	0
2009-04-08	00:30:00	0
2009-04-08	00:31:00	0
2009-04-08	00:32:00	0
2009-04-08	00:33:00	0
2009-04-08	00:34:00	0
2009-04-08	00:35:00	0
2009-04-08	00:36:00	0
2009-04-08	00:37:00	0
2009-04-08	00:38:00	0
2009-04-08	00:39:00	0
2009-04-08	00:40:00	0
2009-04-08	00:41:00	0
2009-04-08	00:42:00	0
2009-04-08	00:43:00	0
2009-04-08	00:44:00	0
2009-04-08	00:45:00	0
2009-04-08	00:46:00	0
2009-04-08	00:47:00	0
2009-04-08	00:48:00	0
2009-04-08	00:49:00	0
2009-04-08	00:50:00	0
2009-04-08	00:51:00	0
2009-04-08	00:52:00	0
2009-04-08	00:53:00	0
2009-04-08	00:54:00	0
2009-04-08	00:55:00	0
2009-04-08	00:56:00	0
2009-04-08	00:57:00	0
2009-04-08	00:58:00	0
2009-04-08	00:59:00	0
2009-04-08	01:00:00	0
2009-04-08	01:01:00	0
2009-04-08	01:02:00	0
2009-04-08	01:03:00	0
2009-04-08	01:04:00	0
2009-04-08	01:05:00	0
2009-04-08	01:06:00	0
2009-04-08	01:07:00	0
2009-04-08	01:08:00	0
2009-04-08	01:09:00	0
2009-04-08	01:10:00	0
2009-04-08	01:11:00	0
2009-04-08	01:12:00	0
2009-04-08	01:13:00	0
2009-04-08	01:14:00	0
2009-04-08	01:15:00	0
2009-04-08	01:16:00	0
2009-04-08	01:17:00	0
2009-04-08	01:18:00	0
2009-04-08	01:19:00	0
2009-04-08	01:20:00	0
2009-04-08	01:21:00	0
2009-04-08	01:22:00	0
2009-04-08	01:23:00	0
2009-04-08	01:24:00	0
2009-04-08	01:25:00	0
2009-04-08	01:26:00	0
2009-04-08	01:27:00	0
2009-04-08	01:28:00	0
2009-04-08	01:29:00	0
2009-04-08	01:30:00	0
2009-04-08	01:31:00	0
2009-04-08	01:32:00	0
2009-04-08	01:33:00	0
2009-04-08	01:34:00	0
2009-04-08	01:35:00	0
2009-04-08	01:36:00	0
2009-04-08	01:37:00	0
2009-04-08	01:38:00	0
2009-04-08	01:39:00	0
2009-04-08	01:40:00	0
2009-04-08	01:41:00	0
2009-04-08	01:42:00	0
2009-04-08	01:43:00	0
2009-04-08	01:44:00	0
2009-04-08	01:45:00	0
2009-04-08	01:46:00	0
2009-04-08	01:47:00	0
2009-04-08	01:48:00	0
2009-04-08	01:49:00	0
2009-04-08	01:50:00	0
2009-04-08	01:51:00	0
2009-04-08	01:52:00	0
2009-04-08	01:53:00	0
2009-04-08	01:54:00	0
2009-04-08	01:55:00	0
2009-04-08	01:56:00	0
2009-04-08	01:57:00	0
2009-04-08	01:58:00	0
2009-04-08	01:59:00	0
2009-04-08	02:00:00	0
2009-04-08	02:01:00	0
2009-04-08	02:02:00	0
2009-04-08	02:03:00	0
2009-04-08	02:04:00	0
2009-04-08	02:05:00	0
2009-04-08	02:06:00	0
2009-04-08	02:07:00	0
2009-04-08	02:08:00	0
2009-04-08	02:09:00	0
2009-04-08	02:10:00	0
2009-04-08	02:11:00	0
2009-04-08	02:12:00	0
2009-04-08	02:13:00	0
2009-04-08	02:14:00	0
2009-04-08	02:15:00	0
2009-04-08	02:16:00	0
2009-04-08	02:17:00	0
2009-04-08	02:18:00	0
2009-04-08	02:19:00	0
2009-04-08	02:20:00	0
2009-04-08	02:21:00	0
2009-04-08	02:22:00	0
2009-04-08	02:23:00	0
2009-04-08	02:24:00	0
2009-04-08	02:25:00	0
2009-04-08	02:26:00	0
2009-04-08	02:27:00	0
2009-04-08	02:28:00	0
2009-04-08	02:29:00	0
2009-04-08	02:30:00	0
2009-04-08	02:31:00	0
2009-04-08	02:32:00	0
2009-04-08	02:33:00	0
2009-04-08	02:34:00	0
2009-04-08	02:35:00	0
2009-04-08	02:36:00	0
2009-04-08	02:37:00	0
2009-04-08	02:38:00	0
2009-04-08	02:39:00	0
2009-04-08	02:40:00	0
2009-04-08	02:41:00	0
2009-04-08	02:42:00	0
2009-04-08	02:43:00	0
2009-04-08	02:44:00	0
2009-04-08	02:45:00	0
2009-04-08	02:46:00	0
2009-04-08	02:47:00	0
2009-04-08	02:48:00	0
2009-04-08	02:49:00	0
2009-04-08	02:50:00	0
2009-04-08	02:51:00	0
2009-04-08	02:52:00	0
2009-04-08	02:53:00	0
2009-04-08	02:54:00	0
2009-04-08	02:55:00	0
2009-04-08	02:56:00	0
2009-04-08	02:57:00	0
2009-04-08	02:58:00	0
2009-04-08	02:59:00	0
2009-04-08	03:00:00	0
2009-04-08	03:01:00	0
2009-04-08	03:02:00	0
2009-04-08	03:03:00	0
2009-04-08	03:04:00	0
2009-04-08	03:05:00	0
2009-04-08	03:06:00	0
2009-04-08	03:07:00	0
2009-04-08	03:08:00	0
2009-04-08	03:09:00	0
2009-04-08	03:10:00	0
2009-04-08	03:11:00	0
2009-04-08	03:12:00	0
2009-04-08	03:13:00	0
2009-04-08	03:14:00	0
2009-04-08	03:15:00	0
2009-04-08	03:16:00	0
2009-04-08	03:17:00	0
2009-04-08	03:18:00	0
2009-04-08	03:19:00	0
2009-04-08	03:20:00	0
2009-04-08	03:21:00	0
2009-04-08	03:22:00	0
2009-04-08	03:23:00	0
2009-04-08	03:24:00	0
2009-04-08	03:25:00	0
2009-04-08	03:26:00	0
2009-04-08	03:27:00	0
2009-04-08	03:28:00	0
2009-04-08	03:29:00	0
2009-04-08	03:30:00	0
2009-04-08	03:31:00	0
2009-04-08	03:32:00	0
2009-04-08	03:33:00	0
2009-04-08	03:34:00	0
2009-04-08	03:35:00	0
2009-04-08	03:36:00	0
2009-04-08	03:37:00	0
2009-04-08	03:38:00	0
2009-04-08	03:39:00	0
2009-04-08	03:40:00	0
2009-04-08	03:41:00	0
2009-04-08	03:42:00	0
2009-04-08	03:43:00	0
2009-04-08	03:44:00	0
2009-04-08	03:45:00	0
2009-04-08	03:46:00	0
2009-04-08	03:47:00	0
2009-04-08	03:48:00	0
2009-04-08	03:49:00	0
2009-04-08	03:50:00	0
2009-04-08	03:51:00	0
2009-04-08	03:52:00	0
2009-04-08	03:53:00	0
2009-04-08	03:54:00	0
2009-04-08	03:55:00	0
2009-04-08	03:56:00	0
2009-04-08	03:57:00	0
2009-04-08	03:58:00	0
2009-04-08	03:59:00	0
2009-04-08	04:00:00	0
2009-04-08	04:01:00	0
2009-04-08	04:02:00	0
2009-04-08	04:03:00	0
2009-04-08	04:04:00	0
2009-04-08	04:05:00	0
2009-04-08	04:06:00	0
2009-04-08	04:07:00	0
2009-04-08	04:08:00	0
2009-04-08	04:09:00	0
2009-04-08	04:10:00	0
2009-04-08	04:11:00	0
2009-04-08	04:12:00	0
2009-04-08	04:13:00	0
2009-04-08	04:14:00	0
2009-04-08	04:15:00	0
2009-04-08	04:16:00	0
2009-04-08	04:17:00	0
2009-04-08	04:18:00	0
2009-04-08	04:19:00	0
2009-04-08	04:20:00	0
2009-04-08	04:21:00	0
2009-04-08	04:22:00	0
2009-04-08	04:23:00	0
2009-04-08	04:24:00	0
2009-04-08	04:25:00	0
2009-04-08	04:26:00	0
2009-04-08	04:27:00	0
2009-04-08	04:28:00	0
2009-04-08	04:29:00	0
2009-04-08	04:30:00	0
2009-04-08	04:31:00	0
2009-04-08	04:32:00	0
2009-04-08	04:33:00	0
2009-04-08	04:34:00	0
2009-04-08	04:35:00	0
2009-04-08	04:36:00	0
2009-04-08	04:37:00	0
2009-04-08	04:38:00	0
2009-04-08	04:39:00	0
2009-04-08	04:40:00	0
2009-04-08	04:41:00	0
2009-04-08	04:42:00	0
2009-04-08	04:43:00	0
2009-04-08	04:44:00	0
2009-04-08	04:45:00	0
2009-04-08	04:46:00	0
2009-04-08	04:47:00	0
2009-04-08	04:48:00	0
2009-04-08	04:49:00	0
2009-04-08	04:50:00	0
2009-04-08	04:51:00	0
2009-04-08	04:52:00	0
2009-04-08	04:53:00	0
2009-04-08	04:54:00	0
2009-04-08	04:55:00	0
2009-04-08	04:56:00	0
2009-04-08	04:57:00	0
2009-04-08	04:58:00	0
2009-04-08	04:59:00	0
2009-04-08	05:00:00	0
2009-04-08	05:01:00	0
2009-04-08	05:02:00	0
2009-04-08	05:03:00	0
2009-04-08	05:04:00	0
2009-04-08	05:05:00	0
2009-04-08	05:06:00	0
2009-04-08	05:07:00	0
2009-04-08	05:08:00	0
2009-04-08	05:09:00	0
2009-04-08	05:10:00	0
2009-04-08	05:11:00	0
2009-04-08	05:12:00	0
2009-04-08	05:13:00	0
2009-04-08	05:14:00	0
2009-04-08	05:15:00	0
2009-04-08	05:16:00	0
2009-04-08	05:17:00	0
2009-04-08	05:18:00	0
2009-04-08	05:19:00	0
2009-04-08	05:20:00	0
2009-04-08	05:21:00	0
2009-04-08	05:22:00	0
2009-04-08	05:23:00	0
2009-04-08	05:24:00	0
2009-04-08	05:25:00	0
2009-04-08	05:26:00	0
2009-04-08	05:27:00	0
2009-04-08	05:28:00	0
2009-04-08	05:29:00	0
2009-04-08	05:30:00	0
2009-04-08	05:31:00	0
2009-04-08	05:32:00	0
2009-04-08	05:33:00	0
2009-04-08	05:34:00	0
2009-04-08	05:35:00	0
2009-04-08	05:36:00	0
2009-04-08	05:37:00	0
2009-04-08	05:38:00	0
2009-04-08	05:39:00	0
2009-04-08	05:40:00	0
2009-04-08	05:41:00	0
2009-04-08	05:42:00	0
2009-04-08	05:43:00	0
2009-04-08	05:44:00	0
2009-04-08	05:45:00	0
2009-04-08	05:46:00	0
2009-04-08	05:47:00	0
2009-04-08	05:48:00	0
2009-04-08	05:49:00	0
2009-04-08	05:50:00	0
2009-04-08	05:51:00	0
2009-04-08	05:52:00	0
2009-04-08	05:53:00	0
2009-04-08	05:54:00	0
2009-04-08	05:55:00	0
2009-04-08	05:56:00	0
2009-04-08	05:57:00	0
2009-04-08	05:58:00	0
2009-04-08	05:59:00	0
2009-04-08	06:00:00	0
2009-04-08	06:01:00	0
2009-04-08	06:02:00	0
2009-04-08	06:03:00	0
2009-04-08	06:04:00	0
2009-04-08	06:05:00	0
2009-04-08	06:06:00	0
2009-04-08	06:07:00	0
2009-04-08	06:08:00	0
2009-04-08	06:09:00	0
2009-04-08	06:10:00	0
2009-04-08	06:11:00	0
2009-04-08	06:12:00	0
2009-04-08	06:13:00	0
2009-04-08	06:14:00	0
2009-04-08	06:15:00	0
2009-04-08	06:16:00	0
2009-04-08	06:17:00	0
2009-04-08	06:18:00	0
2009-04-08	06:19:00	0
2009-04-08	06:20:00	0
2009-04-08	06:21:00	0
2009-04-08	06:22:00	0
2009-04-08	06:23:00	0
2009-04-08	06:24:00	0
2009-04-08	06:25:00	0
2009-04-08	06:26:00	0
2009-04-08	06:27:00	0
2009-04-08	06:28:00	0
2009-04-08	06:29:00	0
2009-04-08	06:30:00	0
2009-04-08	06:31:00	0
2009-04-08	06:32:00	0
2009-04-08	06:33:00	0
2009-04-08	06:34:00	0
2009-04-08	06:35:00	0
2009-04-08	06:36:00	0
2009-04-08	06:37:00	0
2009-04-08	06:38:00	0
2009-04-08	06:39:00	0
2009-04-08	06:40:00	0
2009-04-08	06:41:00	0
2009-04-08	06:42:00	0
2009-04-08	06:43:00	0
2009-04-08	06:44:00	0
2009-04-08	06:45:00	0
2009-04-08	06:46:00	0
2009-04-08	06:47:00	0
2009-04-08	06:48:00	0
2009-04-08	06:49:00	0
2009-04-08	06:50:00	0
2009-04-08	06:51:00	0
2009-04-08	06:52:00	0
2009-04-08	06:53:00	0
2009-04-08	06:54:00	0
2009-04-08	06:55:00	0
2009-04-08	06:56:00	0
2009-04-08	06:57:00	0
2009-04-08	06:58:00	0
2009-04-08	06:59:00	0
2009-04-08	07:00:00	0
2009-04-08	07:01:00	0
2009-04-08	07:02:00	0
2009-04-08	07:03:00	0
2009-04-08	07:04:00	0
2009-04-08	07:05:00	0
2009-04-08	07:06:00	0
2009-04-08	07:07:00	0
2009-04-08	07:08:00	0
2009-04-08	07:09:00	0
2009-04-08	07:10:00	0
2009-04-08	07:11:00	0
2009-04-08	07:12:00	0
2009-04-08	07:13:00	0
2009-04-08	07:14:00	0
2009-04-08	07:15:00	0
2009-04-08	07:16:00	0
2009-04-08	07:17:00	0
2009-04-08	07:18:00	0
2009-04-08	07:19:00	0
2009-04-08	07:20:00	0
2009-04-08	07:21:00	0
2009-04-08	07:22:00	0
2009-04-08	07:23:00	0
2009-04-08	07:24:00	0
2009-04-08	07:25:00	0
2009-04-08	07:26:00	0
2009-04-08	07:27:00	0
2009-04-08	07:28:00	0
2009-04-08	07:29:00	0
2009-04-08	07:30:00	0
2009-04-08	07:31:00	0
2009-04-08	07:32:00	0
2009-04-08	07:33:00	0
2009-04-08	07:34:00	0
2009-04-08	07:35:00	0
2009-04-08	07:36:00	0
2009-04-08	07:37:00	0
2009-04-08	07:38:00	0
2009-04-08	07:39:00	0
2009-04-08	07:40:00	0
2009-04-08	07:41:00	0
2009-04-08	07:42:00	0
2009-04-08	07:43:00	0
2009-04-08	07:44:00	0
2009-04-08	07:45:00	0
2009-04-08	07:46:00	0
2009-04-08	07:47:00	0
2009-04-08	07:48:00	0
2009-04-08	07:49:00	0
2009-04-08	07:50:00	0
2009-04-08	07:51:00	0
2009-04-08	07:52:00	0
2009-04-08	07:53:00	0
2009-04-08	07:54:00	0
2009-04-08	07:55:00	0
2009-04-08	07:56:00	0
2009-04-08	07:57:00	0
2009-04-08	07:58:00	0
2009-04-08	07:59:00	0
2009-04-08	08:00:00	0
2009-04-08	08:01:00	0
2009-04-08	08:02:00	0
2009-04-08	08:03:00	0
2009-04-08	08:04:00	0
2009-04-08	08:05:00	0
2009-04-08	08:06:00	0
2009-04-08	08:07:00	0
2009-04-08	08:08:00	0
2009-04-08	08:09:00	0
2009-04-08	08:10:00	0
2009-04-08	08:11:00	0
2009-04-08	08:12:00	0
2009-04-08	08:13:00	0
2009-04-08	08:14:00	0
2009-04-08	08:15:00	0
2009-04-08	08:16:00	0
2009-04-08	08:17:00	0
2009-04-08	08:18:00	0
2009-04-08	08:19:00	0
2009-04-08	08:20:00	0
2009-04-08	08:21:00	0
2009-04-08	08:22:00	0
2009-04-08	08:23:00	0
2009-04-08	08:24:00	0
2009-04-08	08:25:00	0
2009-04-08	08:26:00	0
2009-04-08	08:27:00	0
2009-04-08	08:28:00	0
2009-04-08	08:29:00	0
2009-04-08	08:30:00	0
2009-04-08	08:31:00	0
2009-04-08	08:32:00	0
2009-04-08	08:33:00	0
2009-04-08	08:34:00	0
2009-04-08	08:35:00	0
2009-04-08	08:36:00	0
2009-04-08	08:37:00	0
2009-04-08	08:38:00	0
2009-04-08	08:39:00	0
2009-04-08	08:40:00	0
2009-04-08	08:41:00	0
2009-04-08	08:42:00	0
2009-04-08	08:43:00	0
2009-04-08	08:44:00	0
2009-04-08	08:45:00	0
2009-04-08	08:46:00	0
2009-04-08	08:47:00	0
2009-04-08	08:48:00	0
2009-04-08	08:49:00	0
2009-04-08	08:50:00	0
2009-04-08	08:51:00	0
2009-04-08	08:52:00	0
2009-04-08	08:53:00	0
2009-04-08	08:54:00	0
2009-04-08	08:55:00	0
2009-04-08	08:56:00	0
2009-04-08	08:57:00	0
2009-04-08	08:58:00	0
2009-04-08	08:59:00	0
2009-04-08	09:00:00	0
2009-04-08	09:01:00	0
2009-04-08	09:02:00	0
2009-04-08	09:03:00	0
2009-04-08	09:04:00	0
2009-04-08	09:05:00	0
2009-04-08	09:06:00	0
2009-04-08	09:07:00	0
2009-04-08	09:08:00	0
2009-04-08	09:09:00	0
2009-04-08	09:10:00	0
2009-04-08	09:11:00	0
2009-04-08	09:12:00	0
2009-04-08	09:13:00	0
2009-04-08	09:14:00	0
2009-04-08	09:15:00	0
2009-04-08	09:16:00	0
2009-04-08	09:17:00	0
2009-04-08	09:18:00	0
2009-04-08	09:19:00	0
2009-04-08	09:20:00	0
2009-04-08	09:21:00	0
2009-04-08	09:22:00	0
2009-04-08	09:23:00	0
2009-04-08	09:24:00	0
2009-04-08	09:25:00	0
2009-04-08	09:26:00	0
2009-04-08	09:27:00	0
2009-04-08	09:28:00	0
2009-04-08	09:29:00	0
2009-04-08	09:30:00	0
2009-04-08	09:31:00	0
2009-04-08	09:32:00	0
2009-04-08	09:33:00	0
2009-04-08	09:34:00	0
2009-04-08	09:35:00	0
2009-04-08	09:36:00	0
2009-04-08	09:37:00	0
2009-04-08	09:38:00	0
2009-04-08	09:39:00	0
2009-04-08	09:40:00	0
2009-04-08	09:41:00	0
2009-04-08	09:42:00	0
2009-04-08	09:43:00	0
2009-04-08	09:44:00	0
2009-04-08	09:45:00	0
2009-04-08	09:46:00	0
2009-04-08	09:47:00	0
2009-04-08	09:48:00	0
2009-04-08	09:49:00	0
2009-04-08	09:50:00	0
2009-04-08	09:51:00	0
2009-04-08	09:52:00	0
2009-04-08	09:53:00	0
2009-04-08	09:54:00	0
2009-04-08	09:55:00	0
2009-04-08	09:56:00	0
2009-04-08	09:57:00	0
2009-04-08	09:58:00	0
2009-04-08	09:59:00	0
2009-04-08	10:00:00	0
2009-04-08	10:01:00	0
2009-04-08	10:02:00	0
2009-04-08	10:03:00	0
2009-04-08	10:04:00	0
2009-04-08	10:05:00	0
2009-04-08	10:06:00	0
2009-04-08	10:07:00	0
2009-04-08	10:08:00	0
2009-04-08	10:09:00	0
2009-04-08	10:10:00	0
2009-04-08	10:11:00	0
2009-04-08	10:12:00	0
2009-04-08	10:13:00	0
2009-04-08	10:14:00	0
2009-04-08	10:15:00	0
2009-04-08	10:16:00	0
2009-04-08	10:17:00	0
2009-04-08	10:18:00	0
2009-04-08	10:19:00	0
2009-04-08	10:20:00	0
2009-04-08	10:21:00	0
2009-04-08	10:22:00	0
2009-04-08	10:23:00	0
2009-04-08	10:24:00	0
2009-04-08	10:25:00	0
2009-04-08	10:26:00	0
2009-04-08	10:27:00	0
2009-04-08	10:28:00	0
2009-04-08	10:29:00	0
2009-04-08	10:30:00	0
2009-04-08	10:31:00	0
2009-04-08	10:32:00	0
2009-04-08	10:33:00	0
2009-04-08	10:34:00	0
2009-04-08	10:35:00	0
2009-04-08	10:36:00	0
2009-04-08	10:37:00	0
2009-04-08	10:38:00	0
2009-04-08	10:39:00	0
2009-04-08	10:40:00	0
2009-04-08	10:41:00	0
2009-04-08	10:42:00	0
2009-04-08	10:43:00	0
2009-04-08	10:44:00	0
2009-04-08	10:45:00	0
2009-04-08	10:46:00	0
2009-04-08	10:47:00	0
2009-04-08	10:48:00	0
2009-04-08	10:49:00	0
2009-04-08	10:50:00	0
2009-04-08	10:51:00	0
2009-04-08	10:52:00	0
2009-04-08	10:53:00	0
2009-04-08	10:54:00	0
2009-04-08	10:55:00	0
2009-04-08	10:56:00	0
2009-04-08	10:57:00	0
2009-04-08	10:58:00	0
2009-04-08	10:59:00	0
2009-04-08	11:00:00	0
2009-04-08	11:01:00	0
2009-04-08	11:02:00	0
2009-04-08	11:03:00	0
2009-04-08	11:04:00	0
2009-04-08	11:05:00	0
2009-04-08	11:06:00	0
2009-04-08	11:07:00	0
2009-04-08	11:08:00	0
2009-04-08	11:09:00	0
2009-04-08	11:10:00	0
2009-04-08	11:11:00	0
2009-04-08	11:12:00	0
2009-04-08	11:13:00	0
2009-04-08	11:14:00	0
2009-04-08	11:15:00	0
2009-04-08	11:16:00	0
2009-04-08	11:17:00	0
2009-04-08	11:18:00	0
2009-04-08	11:19:00	0
2009-04-08	11:20:00	0
2009-04-08	11:21:00	0
2009-04-08	11:22:00	0
2009-04-08	11:23:00	0
2009-04-08	11:24:00	0
2009-04-08	11:25:00	0
2009-04-08	11:26:00	0
2009-04-08	11:27:00	0
2009-04-08	11:28:00	0
2009-04-08	11:29:00	0
2009-04-08	11:30:00	0
2009-04-08	11:31:00	0
2009-04-08	11:32:00	0
2009-04-08	11:33:00	0
2009-04-08	11:34:00	0
2009-04-08	11:35:00	0
2009-04-08	11:36:00	0
2009-04-08	11:37:00	0
2009-04-08	11:38:00	0
2009-04-08	11:39:00	0
2009-04-08	11:40:00	0
2009-04-08	11:41:00	0
2009-04-08	11:42:00	0
2009-04-08	11:43:00	0
2009-04-08	11:44:00	0
2009-04-08	11:45:00	0
2009-04-08	11:46:00	0
2009-04-08	11:47:00	0
2009-04-08	11:48:00	0
2009-04-08	11:49:00	0
2009-04-08	11:50:00	0
2009-04-08	11:51:00	0
2009-04-08	11:52:00	0
2009-04-08	11:53:00	0
2009-04-08	11:54:00	0
2009-04-08	11:55:00	0
2009-04-08	11:56:00	0
2009-04-08	11:57:00	0
2009-04-08	11:58:00	0
2009-04-08	11:59:00	0
2009-04-08	12:00:00	0
2009-04-08	12:01:00	0
2009-04-08	12:02:00	0
2009-04-08	12:03:00	0
2009-04-08	12:04:00	0
2009-04-08	12:05:00	0
2009-04-08	12:06:00	0
2009-04-08	12:07:00	0
2009-04-08	12:08:00	0
2009-04-08	12:09:00	0
2009-04-08	12:10:00	0
2009-04-08	12:11:00	0
2009-04-08	12:12:00	0
2009-04-08	12:13:00	0
2009-04-08	12:14:00	0
2009-04-08	12:15:00	0
2009-04-08	12:16:00	0
2009-04-08	12:17:00	0
2009-04-08	12:18:00	0
2009-04-08	12:19:00	0
2009-04-08	12:20:00	0
2009-04-08	12:21:00	0
2009-04-08	12:22:00	0
2009-04-08	12:23:00	0
2009-04-08	12:24:00	0
2009-04-08	12:25:00	0
2009-04-08	12:26:00	0
2009-04-08	12:27:00	0
2009-04-08	12:28:00	0
2009-04-08	12:29:00	0
2009-04-08	12:30:00	0
2009-04-08	12:31:00	0
2009-04-08	12:32:00	0
2009-04-08	12:33:00	0
2009-04-08	12:34:00	0
2009-04-08	12:35:00	0
2009-04-08	12:36:00	0
2009-04-08	12:37:00	0
2009-04-08	12:38:00	0
2009-04-08	12:39:00	0
2009-04-08	12:40:00	0
2009-04-08	12:41:00	0
2009-04-08	12:42:00	0
2009-04-08	12:43:00	0
2009-04-08	12:44:00	0
2009-04-08	12:45:00	0
2009-04-08	12:46:00	0
2009-04-08	12:47:00	0
2009-04-08	12:48:00	0
2009-04-08	12:49:00	0
2009-04-08	12:50:00	0
2009-04-08	12:51:00	0
2009-04-08	12:52:00	0
2009-04-08	12:53:00	0
2009-04-08	12:54:00	0
2009-04-08	12:55:00	0
2009-04-08	12:56:00	0
2009-04-08	12:57:00	0
2009-04-08	12:58:00	0
2009-04-08	12:59:00	0
2009-04-08	13:00:00	0
2009-04-08	13:01:00	0
2009-04-08	13:02:00	0
2009-04-08	13:03:00	0
2009-04-08	13:04:00	0
2009-04-08	13:05:00	0
2009-04-08	13:06:00	0
2009-04-08	13:07:00	0
2009-04-08	13:08:00	0
2009-04-08	13:09:00	0
2009-04-08	13:10:00	0
2009-04-08	13:11:00	0
2009-04-08	13:12:00	0
2009-04-08	13:13:00	0
2009-04-08	13:14:00	0
2009-04-08	13:15:00	0
2009-04-08	13:16:00	0
2009-04-08	13:17:00	0
2009-04-08	13:18:00	0
2009-04-08	13:19:00	0
2009-04-08	13:20:00	0
2009-04-08	13:21:00	0
2009-04-08	13:22:00	0
2009-04-08	13:23:00	0
2009-04-08	13:24:00	0
2009-04-08	13:25:00	0
2009-04-08	13:26:00	0
2009-04-08	13:27:00	0
2009-04-08	13:28:00	0
2009-04-08	13:29:00	0
2009-04-08	13:30:00	0
2009-04-08	13:31:00	0
2009-04-08	13:32:00	0
2009-04-08	13:33:00	0
2009-04-08	13:34:00	0
2009-04-08	13:35:00	0
2009-04-08	13:36:00	0
2009-04-08	13:37:00	0
2009-04-08	13:38:00	0
2009-04-08	13:39:00	0
2009-04-08	13:40:00	0
2009-04-08	13:41:00	0
2009-04-08	13:42:00	0
2009-04-08	13:43:00	0
2009-04-08	13:44:00	0
2009-04-08	13:45:00	0
2009-04-08	13:46:00	0
2009-04-08	13:47:00	0
2009-04-08	13:48:00	0
2009-04-08	13:49:00	0
2009-04-08	13:50:00	0
2009-04-08	13:51:00	0
2009-04-08	13:52:00	0
2009-04-08	13:53:00	0
2009-04-08	13:54:00	0
2009-04-08	13:55:00	0
2009-04-08	13:56:00	0
2009-04-08	13:57:00	0
2009-04-08	13:58:00	0
2009-04-08	13:59:00	0
2009-04-08	14:00:00	0
2009-04-08	14:01:00	0
2009-04-08	14:02:00	0
2009-04-08	14:03:00	0
2009-04-08	14:04:00	0
2009-04-08	14:05:00	0
2009-04-08	14:06:00	0
2009-04-08	14:07:00	0
2009-04-08	14:08:00	0
2009-04-08	14:09:00	0
2009-04-08	14:10:00	0
2009-04-08	14:11:00	0
2009-04-08	14:12:00	0
2009-04-08	14:13:00	0
2009-04-08	14:14:00	0
2009-04-08	14:15:00	0
2009-04-08	14:16:00	0
2009-04-08	14:17:00	0
2009-04-08	14:18:00	0
2009-04-08	14:19:00	0
2009-04-08	14:20:00	0
2009-04-08	14:21:00	0
2009-04-08	14:22:00	0
2009-04-08	14:23:00	0
2009-04-08	14:24:00	0
2009-04-08	14:25:00	0
2009-04-08	14:26:00	0
2009-04-08	14:27:00	0
2009-04-08	14:28:00	0
2009-04-08	14:29:00	0
2009-04-08	14:30:00	0
2009-04-08	14:31:00	0
2009-04-08	14:32:00	0
2009-04-08	14:33:00	0
2009-04-08	14:34:00	0
2009-04-08	14:35:00	0
2009-04-08	14:36:00	0
2009-04-08	14:37:00	0
2009-04-08	14:38:00	0
2009-04-08	14:39:00	0
2009-04-08	14:40:00	0
2009-04-08	14:41:00	0
2009-04-08	14:42:00	0
2009-04-08	14:43:00	0
2009-04-08	14:44:00	0
2009-04-08	14:45:00	0
2009-04-08	14:46:00	0
2009-04-08	14:47:00	0
2009-04-08	14:48:00	0
2009-04-08	14:49:00	0
2009-04-08	14:50:00	0
2009-04-08	14:51:00	0
2009-04-08	14:52:00	0
2009-04-08	14:53:00	0
2009-04-08	14:54:00	0
2009-04-08	14:55:00	0
2009-04-08	14:56:00	0
2009-04-08	14:57:00	0
2009-04-08	14:58:00	0
2009-04-08	14:59:00	0
2009-04-08	15:00:00	0
2009-04-08	15:01:00	0
2009-04-08	15:02:00	0
2009-04-08	15:03:00	0
2009-04-08	15:04:00	0
2009-04-08	15:05:00	0
2009-04-08	15:06:00	0
2009-04-08	15:07:00	0
2009-04-08	15:08:00	0
2009-04-08	15:09:00	0
2009-04-08	15:10:00	0
2009-04-08	15:11:00	0
2009-04-08	15:12:00	0
2009-04-08	15:13:00	0
2009-04-08	15:14:00	0
2009-04-08	15:15:00	0
2009-04-08	15:16:00	0
2009-04-08	15:17:00	0
2009-04-08	15:18:00	0
2009-04-08	15:19:00	0
2009-04-08	15:20:00	0
2009-04-08	15:21:00	0
2009-04-08	15:22:00	0
2009-04-08	15:23:00	0
2009-04-08	15:24:00	0
2009-04-08	15:25:00	0
2009-04-08	15:26:00	0
2009-04-08	15:27:00	0
2009-04-08	15:28:00	0
2009-04-08	15:29:00	0
2009-04-08	15:30:00	0
2009-04-08	15:31:00	0
2009-04-08	15:32:00	0
2009-04-08	15:33:00	0
2009-04-08	15:34:00	0
2009-04-08	15:35:00	0
2009-04-08	15:36:00	0
2009-04-08	15:37:00	0
2009-04-08	15:38:00	0
2009-04-08	15:39:00	0
2009-04-08	15:40:00	0
2009-04-08	15:41:00	0
2009-04-08	15:42:00	0
2009-04-08	15:43:00	0
2009-04-08	15:44:00	0
2009-04-08	15:45:00	0
2009-04-08	15:46:00	0
2009-04-08	15:47:00	0
2009-04-08	15:48:00	0
2009-04-08	15:49:00	0
2009-04-08	15:50:00	0
2009-04-08	15:51:00	0
2009-04-08	15:52:00	0
2009-04-08	15:53:00	0
2009-04-08	15:54:00	0
2009-04-08	15:55:00	0
2009-04-08	15:56:00	0
2009-04-08	15:57:00	0
2009-04-08	15:58:00	0
2009-04-08	15:59:00	0
2009-04-08	16:00:00	0
2009-04-08	16:01:00	0
2009-04-08	16:02:00	0
2009-04-08	16:03:00	0
2009-04-08	16:04:00	0
2009-04-08	16:05:00	0
2009-04-08	16:06:00	0
2009-04-08	16:07:00	0
2009-04-08	16:08:00	0
2009-04-08	16:09:00	0
2009-04-08	16:10:00	0
2009-04-08	16:11:00	0
2009-04-08	16:12:00	0
2009-04-08	16:13:00	0
2009-04-08	16:14:00	0
2009-04-08	16:15:00	0
2009-04-08	16:16:00	0
2009-04-08	16:17:00	0
2009-04-08	16:18:00	0
2009-04-08	16:19:00	0
2009-04-08	16:20:00	0
2009-04-08	16:21:00	0
2009-04-08	16:22:00	0
2009-04-08	16:23:00	0
2009-04-08	16:24:00	0
2009-04-08	16:25:00	0
2009-04-08	16:26:00	0
2009-04-08	16:27:00	0
2009-04-08	16:28:00	0
2009-04-08	16:29:00	0
2009-04-08	16:30:00	0
2009-04-08	16:31:00	0
2009-04-08	16:32:00	0
2009-04-08	16:33:00	0
2009-04-08	16:34:00	0
2009-04-08	16:35:00	0
2009-04-08	16:36:00	0
2009-04-08	16:37:00	0
2009-04-08	16:38:00	0
2009-04-08	16:39:00	0
2009-04-08	16:40:00	0
2009-04-08	16:41:00	0
2009-04-08	16:42:00	0
2009-04-08	16:43:00	0
2009-04-08	16:44:00	0
2009-04-08	16:45:00	0
2009-04-08	16:46:00	0
2009-04-08	16:47:00	0
2009-04-08	16:48:00	0
2009-04-08	16:49:00	0
2009-04-08	16:50:00	0
2009-04-08	16:51:00	0
2009-04-08	16:52:00	0
2009-04-08	16:53:00	0
2009-04-08	16:54:00	0
2009-04-08	16:55:00	0
2009-04-08	16:56:00	0
2009-04-08	16:57:00	0
2009-04-08	16:58:00	0
2009-04-08	16:59:00	0
2009-04-08	17:00:00	0
2009-04-08	17:01:00	0
2009-04-08	17:02:00	0
2009-04-08	17:03:00	0
2009-04-08	17:04:00	0
2009-04-08	17:05:00	0
2009-04-08	17:06:00	0
2009-04-08	17:07:00	0
2009-04-08	17:08:00	0
2009-04-08	17:09:00	0
2009-04-08	17:10:00	0
2009-04-08	17:11:00	0
2009-04-08	17:12:00	0
2009-04-08	17:13:00	0
2009-04-08	17:14:00	0
2009-04-08	17:15:00	0
2009-04-08	17:16:00	0
2009-04-08	17:17:00	0
2009-04-08	17:18:00	0
2009-04-08	17:19:00	0
2009-04-08	17:20:00	0
2009-04-08	17:21:00	0
2009-04-08	17:22:00	0
2009-04-08	17:23:00	0
2009-04-08	17:24:00	0
2009-04-08	17:25:00	0
2009-04-08	17:26:00	0
2009-04-08	17:27:00	0
2009-04-08	17:28:00	0
2009-04-08	17:29:00	0
2009-04-08	17:30:00	0
2009-04-08	17:31:00	0
2009-04-08	17:32:00	0
2009-04-08	17:33:00	0
2009-04-08	17:34:00	0
2009-04-08	17:35:00	0
2009-04-08	17:36:00	0
2009-04-08	17:37:00	0
2009-04-08	17:38:00	0
2009-04-08	17:39:00	0
2009-04-08	17:40:00	0
2009-04-08	17:41:00	0
2009-04-08	17:42:00	0
2009-04-08	17:43:00	0
2009-04-08	17:44:00	0
2009-04-08	17:45:00	0
2009-04-08	17:46:00	0
2009-04-08	17:47:00	0
2009-04-08	17:48:00	0
2009-04-08	17:49:00	0
2009-04-08	17:50:00	0
2009-04-08	17:51:00	0
2009-04-08	17:52:00	0
2009-04-08	17:53:00	0
2009-04-08	17:54:00	0
2009-04-08	17:55:00	0
2009-04-08	17:56:00	0
2009-04-08	17:57:00	0
2009-04-08	17:58:00	0
2009-04-08	17:59:00	0
2009-04-08	18:00:00	112
2009-04-08	18:01:00	242
2009-04-08	18:02:00	91
2009-04-08	18:03:00	10
2009-04-08	18:04:00	0
2009-04-08	18:05:00	0
2009-04-08	18:06:00	380
2009-04-08	18:07:00	156
2009-04-08	18:08:00	1611
2009-04-08	18:09:00	81
2009-04-08	18:10:00	91
2009-04-08	18:11:00	351
2009-04-08	18:12:00	102
2009-04-08	18:13:00	20
2009-04-08	18:14:00	0
2009-04-08	18:15:00	0
2009-04-08	18:16:00	0
2009-04-08	18:17:00	0
2009-04-08	18:18:00	542
2009-04-08	18:19:00	132
2009-04-08	18:20:00	91
2009-04-08	18:21:00	217
2009-04-08	18:22:00	20
2009-04-08	18:23:00	181
2009-04-08	18:24:00	169
2009-04-08	18:25:00	0
2009-04-08	18:26:00	0
2009-04-08	18:27:00	0
2009-04-08	18:28:00	0
2009-04-08	18:29:00	0
2009-04-08	18:30:00	0
2009-04-08	18:31:00	0
2009-04-08	18:32:00	459
2009-04-08	18:33:00	144
2009-04-08	18:34:00	10
2009-04-08	18:35:00	156
2009-04-08	18:36:00	144
2009-04-08	18:37:00	0
2009-04-08	18:38:00	0
2009-04-08	18:39:00	0
2009-04-08	18:40:00	1715
2009-04-08	18:41:00	427
2009-04-08	18:42:00	1268
2009-04-08	18:43:00	427
2009-04-08	18:44:00	616
2009-04-08	18:45:00	337
2009-04-08	18:46:00	20
2009-04-08	18:47:00	0
2009-04-08	18:48:00	0
2009-04-08	18:49:00	20
2009-04-08	18:50:00	0
2009-04-08	18:51:00	0
2009-04-08	18:52:00	217
2009-04-08	18:53:00	20
2009-04-08	18:54:00	217
2009-04-08	18:55:00	10
2009-04-08	18:56:00	0
2009-04-08	18:57:00	0
2009-04-08	18:58:00	0
2009-04-08	18:59:00	0
2009-04-08	19:00:00	0
2009-04-08	19:01:00	0
2009-04-08	19:02:00	0
2009-04-08	19:03:00	0
2009-04-08	19:04:00	0
2009-04-08	19:05:00	0
2009-04-08	19:06:00	0
2009-04-08	19:07:00	0
2009-04-08	19:08:00	0
2009-04-08	19:09:00	0
2009-04-08	19:10:00	0
2009-04-08	19:11:00	0
2009-04-08	19:12:00	0
2009-04-08	19:13:00	0
2009-04-08	19:14:00	0
2009-04-08	19:15:00	0
2009-04-08	19:16:00	0
2009-04-08	19:17:00	10
2009-04-08	19:18:00	61
2009-04-08	19:19:00	0
2009-04-08	19:20:00	0
2009-04-08	19:21:00	0
2009-04-08	19:22:00	0
2009-04-08	19:23:00	0
2009-04-08	19:24:00	0
2009-04-08	19:25:00	0
2009-04-08	19:26:00	0
2009-04-08	19:27:00	0
2009-04-08	19:28:00	0
2009-04-08	19:29:00	0
2009-04-08	19:30:00	0
2009-04-08	19:31:00	0
2009-04-08	19:32:00	0
2009-04-08	19:33:00	61
2009-04-08	19:34:00	0
2009-04-08	19:35:00	0
2009-04-08	19:36:00	0
2009-04-08	19:37:00	0
2009-04-08	19:38:00	0
2009-04-08	19:39:00	0
2009-04-08	19:40:00	0
2009-04-08	19:41:00	0
2009-04-08	19:42:00	0
2009-04-08	19:43:00	0
2009-04-08	19:44:00	0
2009-04-08	19:45:00	0
2009-04-08	19:46:00	0
2009-04-08	19:47:00	0
2009-04-08	19:48:00	0
2009-04-08	19:49:00	0
2009-04-08	19:50:00	61
2009-04-08	19:51:00	0
2009-04-08	19:52:00	41
2009-04-08	19:53:00	10
2009-04-08	19:54:00	10
2009-04-08	19:55:00	0
2009-04-08	19:56:00	0
2009-04-08	19:57:00	0
2009-04-08	19:58:00	0
2009-04-08	19:59:00	0
2009-04-08	20:00:00	181
2009-04-08	20:01:00	0
2009-04-08	20:02:00	427
2009-04-08	20:03:00	61
2009-04-08	20:04:00	953
2009-04-08	20:05:00	2503
2009-04-08	20:06:00	794
2009-04-08	20:07:00	337
2009-04-08	20:08:00	309
2009-04-08	20:09:00	492
2009-04-08	20:10:00	337
2009-04-08	20:11:00	20
2009-04-08	20:12:00	30
2009-04-08	20:13:00	30
2009-04-08	20:14:00	10
2009-04-08	20:15:00	0
2009-04-08	20:16:00	0
2009-04-08	20:17:00	0
2009-04-08	20:18:00	0
2009-04-08	20:19:00	181
2009-04-08	20:20:00	30
2009-04-08	20:21:00	81
2009-04-08	20:22:00	10
2009-04-08	20:23:00	0
2009-04-08	20:24:00	0
2009-04-08	20:25:00	20
2009-04-08	20:26:00	1296
2009-04-08	20:27:00	1479
2009-04-08	20:28:00	616
2009-04-08	20:29:00	561
2009-04-08	20:30:00	20
2009-04-08	20:31:00	542
2009-04-08	20:32:00	193
2009-04-08	20:33:00	508
2009-04-08	20:34:00	169
2009-04-08	20:35:00	112
2009-04-08	20:36:00	132
2009-04-08	20:37:00	122
2009-04-08	20:38:00	91
2009-04-08	20:39:00	0
2009-04-08	20:40:00	0
2009-04-08	20:41:00	156
2009-04-08	20:42:00	91
2009-04-08	20:43:00	122
2009-04-08	20:44:00	337
2009-04-08	20:45:00	0
2009-04-08	20:46:00	0
2009-04-08	20:47:00	91
2009-04-08	20:48:00	0
2009-04-08	20:49:00	132
2009-04-08	20:50:00	169
2009-04-08	20:51:00	181
2009-04-08	20:52:00	0
2009-04-08	20:53:00	0
2009-04-08	20:54:00	0
2009-04-08	20:55:00	0
2009-04-08	20:56:00	0
2009-04-08	20:57:00	0
2009-04-08	20:58:00	0
2009-04-08	20:59:00	0
2009-04-08	21:00:00	0
2009-04-08	21:01:00	0
2009-04-08	21:02:00	0
2009-04-08	21:03:00	0
2009-04-08	21:04:00	0
2009-04-08	21:05:00	0
2009-04-08	21:06:00	0
2009-04-08	21:07:00	0
2009-04-08	21:08:00	0
2009-04-08	21:09:00	0
2009-04-08	21:10:00	0
2009-04-08	21:11:00	0
2009-04-08	21:12:00	0
2009-04-08	21:13:00	0
2009-04-08	21:14:00	0
2009-04-08	21:15:00	0
2009-04-08	21:16:00	0
2009-04-08	21:17:00	0
2009-04-08	21:18:00	0
2009-04-08	21:19:00	0
2009-04-08	21:20:00	0
2009-04-08	21:21:00	0
2009-04-08	21:22:00	0
2009-04-08	21:23:00	0
2009-04-08	21:24:00	10
2009-04-08	21:25:00	0
2009-04-08	21:26:00	0
2009-04-08	21:27:00	51
2009-04-08	21:28:00	0
2009-04-08	21:29:00	0
2009-04-08	21:30:00	0
2009-04-08	21:31:00	0
2009-04-08	21:32:00	0
2009-04-08	21:33:00	0
2009-04-08	21:34:00	0
2009-04-08	21:35:00	0
2009-04-08	21:36:00	0
2009-04-08	21:37:00	0
2009-04-08	21:38:00	0
2009-04-08	21:39:00	0
2009-04-08	21:40:00	0
2009-04-08	21:41:00	0
2009-04-08	21:42:00	0
2009-04-08	21:43:00	0
2009-04-08	21:44:00	0
2009-04-08	21:45:00	0
2009-04-08	21:46:00	0
2009-04-08	21:47:00	0
2009-04-08	21:48:00	0
2009-04-08	21:49:00	0
2009-04-08	21:50:00	0
2009-04-08	21:51:00	0
2009-04-08	21:52:00	0
2009-04-08	21:53:00	0
2009-04-08	21:54:00	0
2009-04-08	21:55:00	0
2009-04-08	21:56:00	0
2009-04-08	21:57:00	0
2009-04-08	21:58:00	0
2009-04-08	21:59:00	0
2009-04-08	22:00:00	0
2009-04-08	22:01:00	0
2009-04-08	22:02:00	0
2009-04-08	22:03:00	0
2009-04-08	22:04:00	0
2009-04-08	22:05:00	0
2009-04-08	22:06:00	0
2009-04-08	22:07:00	0
2009-04-08	22:08:00	0
2009-04-08	22:09:00	0
2009-04-08	22:10:00	0
2009-04-08	22:11:00	0
2009-04-08	22:12:00	0
2009-04-08	22:13:00	0
2009-04-08	22:14:00	0
2009-04-08	22:15:00	0
2009-04-08	22:16:00	41
2009-04-08	22:17:00	817
2009-04-08	22:18:00	10
2009-04-08	22:19:00	10
2009-04-08	22:20:00	508
2009-04-08	22:21:00	0
2009-04-08	22:22:00	0
2009-04-08	22:23:00	0
2009-04-08	22:24:00	0
2009-04-08	22:25:00	10
2009-04-08	22:26:00	0
2009-04-08	22:27:00	0
2009-04-08	22:28:00	0
2009-04-08	22:29:00	0
2009-04-08	22:30:00	0
2009-04-08	22:31:00	0
2009-04-08	22:32:00	0
2009-04-08	22:33:00	0
2009-04-08	22:34:00	0
2009-04-08	22:35:00	0
2009-04-08	22:36:00	0
2009-04-08	22:37:00	0
2009-04-08	22:38:00	0
2009-04-08	22:39:00	0
2009-04-08	22:40:00	0
2009-04-08	22:41:00	0
2009-04-08	22:42:00	0
2009-04-08	22:43:00	0
2009-04-08	22:44:00	0
2009-04-08	22:45:00	0
2009-04-08	22:46:00	0
2009-04-08	22:47:00	0
2009-04-08	22:48:00	0
2009-04-08	22:49:00	0
2009-04-08	22:50:00	0
2009-04-08	22:51:00	0
2009-04-08	22:52:00	0
2009-04-08	22:53:00	0
2009-04-08	22:54:00	0
2009-04-08	22:55:00	0
2009-04-08	22:56:00	0
2009-04-08	22:57:00	0
2009-04-08	22:58:00	0
2009-04-08	22:59:00	0
2009-04-08	23:00:00	0
2009-04-08	23:01:00	0
2009-04-08	23:02:00	0
2009-04-08	23:03:00	10
2009-04-08	23:04:00	10
2009-04-08	23:05:00	10
2009-04-08	23:06:00	10
2009-04-08	23:07:00	0
2009-04-08	23:08:00	0
2009-04-08	23:09:00	0
2009-04-08	23:10:00	0
2009-04-08	23:11:00	0
2009-04-08	23:12:00	0
2009-04-08	23:13:00	10
2009-04-08	23:14:00	0
2009-04-08	23:15:00	0
2009-04-08	23:16:00	0
2009-04-08	23:17:00	0
2009-04-08	23:18:00	0
2009-04-08	23:19:00	0
2009-04-08	23:20:00	0
2009-04-08	23:21:00	0
2009-04-08	23:22:00	0
2009-04-08	23:23:00	0
2009-04-08	23:24:00	0
2009-04-08	23:25:00	0
2009-04-08	23:26:00	0
2009-04-08	23:27:00	0
2009-04-08	23:28:00	0
2009-04-08	23:29:00	0
2009-04-08	23:30:00	0
2009-04-08	23:31:00	0
2009-04-08	23:32:00	0
2009-04-08	23:33:00	0
2009-04-08	23:34:00	0
2009-04-08	23:35:00	0
2009-04-08	23:36:00	0
2009-04-08	23:37:00	0
2009-04-08	23:38:00	0
2009-04-08	23:39:00	0
2009-04-08	23:40:00	0
2009-04-08	23:41:00	0
2009-04-08	23:42:00	0
2009-04-08	23:43:00	0
2009-04-08	23:44:00	0
2009-04-08	23:45:00	0
2009-04-08	23:46:00	0
2009-04-08	23:47:00	0
2009-04-08	23:48:00	0
2009-04-08	23:49:00	0
2009-04-08	23:50:00	0
2009-04-08	23:51:00	0
2009-04-08	23:52:00	0
2009-04-08	23:53:00	0
2009-04-08	23:54:00	0
2009-04-08	23:55:00	0
2009-04-08	23:56:00	0
2009-04-08	23:57:00	0
2009-04-08	23:58:00	0
2009-04-08	23:59:00	0
2009-04-09	00:00:00	0
2009-04-09	00:01:00	0
2009-04-09	00:02:00	0
2009-04-09	00:03:00	0
2009-04-09	00:04:00	0
2009-04-09	00:05:00	0
2009-04-09	00:06:00	0
2009-04-09	00:07:00	0
2009-04-09	00:08:00	0
2009-04-09	00:09:00	20
2009-04-09	00:10:00	0
2009-04-09	00:11:00	0
2009-04-09	00:12:00	0
2009-04-09	00:13:00	30
2009-04-09	00:14:00	10
2009-04-09	00:15:00	81
2009-04-09	00:16:00	205
2009-04-09	00:17:00	0
2009-04-09	00:18:00	0
2009-04-09	00:19:00	0
2009-04-09	00:20:00	0
2009-04-09	00:21:00	0
2009-04-09	00:22:00	0
2009-04-09	00:23:00	0
2009-04-09	00:24:00	0
2009-04-09	00:25:00	0
2009-04-09	00:26:00	0
2009-04-09	00:27:00	0
2009-04-09	00:28:00	0
2009-04-09	00:29:00	0
2009-04-09	00:30:00	0
2009-04-09	00:31:00	0
2009-04-09	00:32:00	0
2009-04-09	00:33:00	0
2009-04-09	00:34:00	0
2009-04-09	00:35:00	0
2009-04-09	00:36:00	0
2009-04-09	00:37:00	0
2009-04-09	00:38:00	10
2009-04-09	00:39:00	0
2009-04-09	00:40:00	0
2009-04-09	00:41:00	0
2009-04-09	00:42:00	0
2009-04-09	00:43:00	0
2009-04-09	00:44:00	0
2009-04-09	00:45:00	0
2009-04-09	00:46:00	0
2009-04-09	00:47:00	0
2009-04-09	00:48:00	0
2009-04-09	00:49:00	0
2009-04-09	00:50:00	0
2009-04-09	00:51:00	0
2009-04-09	00:52:00	0
2009-04-09	00:53:00	0
2009-04-09	00:54:00	0
2009-04-09	00:55:00	0
2009-04-09	00:56:00	0
2009-04-09	00:57:00	0
2009-04-09	00:58:00	0
2009-04-09	00:59:00	0
2009-04-09	01:00:00	0
2009-04-09	01:01:00	0
2009-04-09	01:02:00	0
2009-04-09	01:03:00	0
2009-04-09	01:04:00	0
2009-04-09	01:05:00	0
2009-04-09	01:06:00	0
2009-04-09	01:07:00	0
2009-04-09	01:08:00	0
2009-04-09	01:09:00	0
2009-04-09	01:10:00	0
2009-04-09	01:11:00	0
2009-04-09	01:12:00	0
2009-04-09	01:13:00	0
2009-04-09	01:14:00	0
2009-04-09	01:15:00	0
2009-04-09	01:16:00	0
2009-04-09	01:17:00	0
2009-04-09	01:18:00	0
2009-04-09	01:19:00	0
2009-04-09	01:20:00	0
2009-04-09	01:21:00	0
2009-04-09	01:22:00	0
2009-04-09	01:23:00	0
2009-04-09	01:24:00	0
2009-04-09	01:25:00	0
2009-04-09	01:26:00	0
2009-04-09	01:27:00	0
2009-04-09	01:28:00	0
2009-04-09	01:29:00	0
2009-04-09	01:30:00	0
2009-04-09	01:31:00	0
2009-04-09	01:32:00	0
2009-04-09	01:33:00	0
2009-04-09	01:34:00	0
2009-04-09	01:35:00	0
2009-04-09	01:36:00	0
2009-04-09	01:37:00	0
2009-04-09	01:38:00	0
2009-04-09	01:39:00	0
2009-04-09	01:40:00	0
2009-04-09	01:41:00	0
2009-04-09	01:42:00	0
2009-04-09	01:43:00	0
2009-04-09	01:44:00	0
2009-04-09	01:45:00	0
2009-04-09	01:46:00	0
2009-04-09	01:47:00	0
2009-04-09	01:48:00	0
2009-04-09	01:49:00	0
2009-04-09	01:50:00	0
2009-04-09	01:51:00	0
2009-04-09	01:52:00	0
2009-04-09	01:53:00	0
2009-04-09	01:54:00	0
2009-04-09	01:55:00	0
2009-04-09	01:56:00	0
2009-04-09	01:57:00	0
2009-04-09	01:58:00	0
2009-04-09	01:59:00	0
2009-04-09	02:00:00	0
2009-04-09	02:01:00	0
2009-04-09	02:02:00	20
2009-04-09	02:03:00	0
2009-04-09	02:04:00	0
2009-04-09	02:05:00	0
2009-04-09	02:06:00	0
2009-04-09	02:07:00	0
2009-04-09	02:08:00	0
2009-04-09	02:09:00	0
2009-04-09	02:10:00	0
2009-04-09	02:11:00	0
2009-04-09	02:12:00	0
2009-04-09	02:13:00	0
2009-04-09	02:14:00	0
2009-04-09	02:15:00	0
2009-04-09	02:16:00	0
2009-04-09	02:17:00	0
2009-04-09	02:18:00	0
2009-04-09	02:19:00	0
2009-04-09	02:20:00	0
2009-04-09	02:21:00	0
2009-04-09	02:22:00	0
2009-04-09	02:23:00	0
2009-04-09	02:24:00	0
2009-04-09	02:25:00	0
2009-04-09	02:26:00	0
2009-04-09	02:27:00	0
2009-04-09	02:28:00	0
2009-04-09	02:29:00	0
2009-04-09	02:30:00	0
2009-04-09	02:31:00	0
2009-04-09	02:32:00	0
2009-04-09	02:33:00	0
2009-04-09	02:34:00	0
2009-04-09	02:35:00	0
2009-04-09	02:36:00	0
2009-04-09	02:37:00	0
2009-04-09	02:38:00	0
2009-04-09	02:39:00	0
2009-04-09	02:40:00	51
2009-04-09	02:41:00	20
2009-04-09	02:42:00	41
2009-04-09	02:43:00	10
2009-04-09	02:44:00	0
2009-04-09	02:45:00	0
2009-04-09	02:46:00	0
2009-04-09	02:47:00	0
2009-04-09	02:48:00	0
2009-04-09	02:49:00	0
2009-04-09	02:50:00	0
2009-04-09	02:51:00	0
2009-04-09	02:52:00	0
2009-04-09	02:53:00	0
2009-04-09	02:54:00	0
2009-04-09	02:55:00	0
2009-04-09	02:56:00	0
2009-04-09	02:57:00	0
2009-04-09	02:58:00	0
2009-04-09	02:59:00	0
2009-04-09	03:00:00	0
2009-04-09	03:01:00	0
2009-04-09	03:02:00	0
2009-04-09	03:03:00	0
2009-04-09	03:04:00	0
2009-04-09	03:05:00	0
2009-04-09	03:06:00	0
2009-04-09	03:07:00	0
2009-04-09	03:08:00	0
2009-04-09	03:09:00	0
2009-04-09	03:10:00	0
2009-04-09	03:11:00	0
2009-04-09	03:12:00	0
2009-04-09	03:13:00	0
2009-04-09	03:14:00	0
2009-04-09	03:15:00	0
2009-04-09	03:16:00	0
2009-04-09	03:17:00	0
2009-04-09	03:18:00	0
2009-04-09	03:19:00	0
2009-04-09	03:20:00	0
2009-04-09	03:21:00	0
2009-04-09	03:22:00	0
2009-04-09	03:23:00	0
2009-04-09	03:24:00	0
2009-04-09	03:25:00	0
2009-04-09	03:26:00	0
2009-04-09	03:27:00	0
2009-04-09	03:28:00	0
2009-04-09	03:29:00	0
2009-04-09	03:30:00	0
2009-04-09	03:31:00	0
2009-04-09	03:32:00	0
2009-04-09	03:33:00	0
2009-04-09	03:34:00	0
2009-04-09	03:35:00	0
2009-04-09	03:36:00	0
2009-04-09	03:37:00	0
2009-04-09	03:38:00	0
2009-04-09	03:39:00	0
2009-04-09	03:40:00	0
2009-04-09	03:41:00	0
2009-04-09	03:42:00	0
2009-04-09	03:43:00	0
2009-04-09	03:44:00	10
2009-04-09	03:45:00	0
2009-04-09	03:46:00	0
2009-04-09	03:47:00	0
2009-04-09	03:48:00	0
2009-04-09	03:49:00	0
2009-04-09	03:50:00	0
2009-04-09	03:51:00	0
2009-04-09	03:52:00	30
2009-04-09	03:53:00	20
2009-04-09	03:54:00	0
2009-04-09	03:55:00	0
2009-04-09	03:56:00	0
2009-04-09	03:57:00	0
2009-04-09	03:58:00	0
2009-04-09	03:59:00	0
2009-04-09	04:00:00	0
2009-04-09	04:01:00	0
2009-04-09	04:02:00	0
2009-04-09	04:03:00	0
2009-04-09	04:04:00	0
2009-04-09	04:05:00	0
2009-04-09	04:06:00	0
2009-04-09	04:07:00	0
2009-04-09	04:08:00	0
2009-04-09	04:09:00	10
2009-04-09	04:10:00	366
2009-04-09	04:11:00	20
2009-04-09	04:12:00	0
2009-04-09	04:13:00	0
2009-04-09	04:14:00	0
2009-04-09	04:15:00	0
2009-04-09	04:16:00	0
2009-04-09	04:17:00	0
2009-04-09	04:18:00	0
2009-04-09	04:19:00	0
2009-04-09	04:20:00	0
2009-04-09	04:21:00	0
2009-04-09	04:22:00	0
2009-04-09	04:23:00	0
2009-04-09	04:24:00	0
2009-04-09	04:25:00	0
2009-04-09	04:26:00	0
2009-04-09	04:27:00	0
2009-04-09	04:28:00	0
2009-04-09	04:29:00	0
2009-04-09	04:30:00	0
2009-04-09	04:31:00	0
2009-04-09	04:32:00	0
2009-04-09	04:33:00	0
2009-04-09	04:34:00	0
2009-04-09	04:35:00	0
2009-04-09	04:36:00	0
2009-04-09	04:37:00	0
2009-04-09	04:38:00	0
2009-04-09	04:39:00	0
2009-04-09	04:40:00	0
2009-04-09	04:41:00	0
2009-04-09	04:42:00	0
2009-04-09	04:43:00	0
2009-04-09	04:44:00	0
2009-04-09	04:45:00	0
2009-04-09	04:46:00	0
2009-04-09	04:47:00	0
2009-04-09	04:48:00	0
2009-04-09	04:49:00	0
2009-04-09	04:50:00	0
2009-04-09	04:51:00	0
2009-04-09	04:52:00	0
2009-04-09	04:53:00	0
2009-04-09	04:54:00	0
2009-04-09	04:55:00	0
2009-04-09	04:56:00	0
2009-04-09	04:57:00	0
2009-04-09	04:58:00	0
2009-04-09	04:59:00	0
2009-04-09	05:00:00	0
2009-04-09	05:01:00	0
2009-04-09	05:02:00	0
2009-04-09	05:03:00	0
2009-04-09	05:04:00	0
2009-04-09	05:05:00	0
2009-04-09	05:06:00	0
2009-04-09	05:07:00	0
2009-04-09	05:08:00	0
2009-04-09	05:09:00	0
2009-04-09	05:10:00	0
2009-04-09	05:11:00	0
2009-04-09	05:12:00	0
2009-04-09	05:13:00	0
2009-04-09	05:14:00	0
2009-04-09	05:15:00	0
2009-04-09	05:16:00	0
2009-04-09	05:17:00	0
2009-04-09	05:18:00	0
2009-04-09	05:19:00	0
2009-04-09	05:20:00	0
2009-04-09	05:21:00	0
2009-04-09	05:22:00	0
2009-04-09	05:23:00	0
2009-04-09	05:24:00	0
2009-04-09	05:25:00	0
2009-04-09	05:26:00	0
2009-04-09	05:27:00	0
2009-04-09	05:28:00	0
2009-04-09	05:29:00	10
2009-04-09	05:30:00	71
2009-04-09	05:31:00	0
2009-04-09	05:32:00	0
2009-04-09	05:33:00	0
2009-04-09	05:34:00	0
2009-04-09	05:35:00	0
2009-04-09	05:36:00	41
2009-04-09	05:37:00	20
2009-04-09	05:38:00	0
2009-04-09	05:39:00	0
2009-04-09	05:40:00	0
2009-04-09	05:41:00	0
2009-04-09	05:42:00	0
2009-04-09	05:43:00	0
2009-04-09	05:44:00	0
2009-04-09	05:45:00	0
2009-04-09	05:46:00	0
2009-04-09	05:47:00	0
2009-04-09	05:48:00	0
2009-04-09	05:49:00	0
2009-04-09	05:50:00	0
2009-04-09	05:51:00	0
2009-04-09	05:52:00	0
2009-04-09	05:53:00	0
2009-04-09	05:54:00	0
2009-04-09	05:55:00	0
2009-04-09	05:56:00	0
2009-04-09	05:57:00	0
2009-04-09	05:58:00	0
2009-04-09	05:59:00	0
2009-04-09	06:00:00	0
2009-04-09	06:01:00	0
2009-04-09	06:02:00	0
2009-04-09	06:03:00	20
2009-04-09	06:04:00	71
2009-04-09	06:05:00	169
2009-04-09	06:06:00	0
2009-04-09	06:07:00	0
2009-04-09	06:08:00	0
2009-04-09	06:09:00	181
2009-04-09	06:10:00	0
2009-04-09	06:11:00	0
2009-04-09	06:12:00	0
2009-04-09	06:13:00	0
2009-04-09	06:14:00	0
2009-04-09	06:15:00	0
2009-04-09	06:16:00	0
2009-04-09	06:17:00	0
2009-04-09	06:18:00	20
2009-04-09	06:19:00	0
2009-04-09	06:20:00	0
2009-04-09	06:21:00	0
2009-04-09	06:22:00	0
2009-04-09	06:23:00	10
2009-04-09	06:24:00	713
2009-04-09	06:25:00	205
2009-04-09	06:26:00	337
2009-04-09	06:27:00	394
2009-04-09	06:28:00	0
2009-04-09	06:29:00	0
2009-04-09	06:30:00	30
2009-04-09	06:31:00	20
2009-04-09	06:32:00	0
2009-04-09	06:33:00	30
2009-04-09	06:34:00	0
2009-04-09	06:35:00	0
2009-04-09	06:36:00	0
2009-04-09	06:37:00	0
2009-04-09	06:38:00	0
2009-04-09	06:39:00	0
2009-04-09	06:40:00	0
2009-04-09	06:41:00	0
2009-04-09	06:42:00	0
2009-04-09	06:43:00	0
2009-04-09	06:44:00	0
2009-04-09	06:45:00	0
2009-04-09	06:46:00	0
2009-04-09	06:47:00	0
2009-04-09	06:48:00	0
2009-04-09	06:49:00	0
2009-04-09	06:50:00	0
2009-04-09	06:51:00	0
2009-04-09	06:52:00	30
2009-04-09	06:53:00	0
2009-04-09	06:54:00	0
2009-04-09	06:55:00	0
2009-04-09	06:56:00	0
2009-04-09	06:57:00	0
2009-04-09	06:58:00	20
2009-04-09	06:59:00	0
2009-04-09	07:00:00	0
2009-04-09	07:01:00	0
2009-04-09	07:02:00	0
2009-04-09	07:03:00	0
2009-04-09	07:04:00	0
2009-04-09	07:05:00	20
2009-04-09	07:06:00	0
2009-04-09	07:07:00	0
2009-04-09	07:08:00	0
2009-04-09	07:09:00	0
2009-04-09	07:10:00	0
2009-04-09	07:11:00	0
2009-04-09	07:12:00	0
2009-04-09	07:13:00	0
2009-04-09	07:14:00	0
2009-04-09	07:15:00	0
2009-04-09	07:16:00	0
2009-04-09	07:17:00	0
2009-04-09	07:18:00	0
2009-04-09	07:19:00	0
2009-04-09	07:20:00	10
2009-04-09	07:21:00	30
2009-04-09	07:22:00	20
2009-04-09	07:23:00	323
2009-04-09	07:24:00	410
2009-04-09	07:25:00	0
2009-04-09	07:26:00	41
2009-04-09	07:27:00	0
2009-04-09	07:28:00	0
2009-04-09	07:29:00	112
2009-04-09	07:30:00	0
2009-04-09	07:31:00	0
2009-04-09	07:32:00	0
2009-04-09	07:33:00	0
2009-04-09	07:34:00	20
2009-04-09	07:35:00	0
2009-04-09	07:36:00	0
2009-04-09	07:37:00	0
2009-04-09	07:38:00	0
2009-04-09	07:39:00	0
2009-04-09	07:40:00	0
2009-04-09	07:41:00	0
2009-04-09	07:42:00	0
2009-04-09	07:43:00	10
2009-04-09	07:44:00	0
2009-04-09	07:45:00	0
2009-04-09	07:46:00	0
2009-04-09	07:47:00	0
2009-04-09	07:48:00	0
2009-04-09	07:49:00	0
2009-04-09	07:50:00	0
2009-04-09	07:51:00	0
2009-04-09	07:52:00	0
2009-04-09	07:53:00	0
2009-04-09	07:54:00	0
2009-04-09	07:55:00	10
2009-04-09	07:56:00	0
2009-04-09	07:57:00	1788
2009-04-09	07:58:00	1715
2009-04-09	07:59:00	1416
2009-04-09	08:00:00	977
2009-04-09	08:01:00	1863
2009-04-09	08:02:00	754
2009-04-09	08:03:00	1611
2009-04-09	08:04:00	673
2009-04-09	08:05:00	1050
2009-04-09	08:06:00	132
2009-04-09	08:07:00	366
2009-04-09	08:08:00	91
2009-04-09	08:09:00	280
2009-04-09	08:10:00	1611
2009-04-09	08:11:00	366
2009-04-09	08:12:00	1050
2009-04-09	08:13:00	1611
2009-04-09	08:14:00	295
2009-04-09	08:15:00	1355
2009-04-09	08:16:00	1447
2009-04-09	08:17:00	616
2009-04-09	08:18:00	733
2009-04-09	08:19:00	884
2009-04-09	08:20:00	181
2009-04-09	08:21:00	254
2009-04-09	08:22:00	144
2009-04-09	08:23:00	91
2009-04-09	08:24:00	0
2009-04-09	08:25:00	0
2009-04-09	08:26:00	0
2009-04-09	08:27:00	0
2009-04-09	08:28:00	366
2009-04-09	08:29:00	754
2009-04-09	08:30:00	144
2009-04-09	08:31:00	20
2009-04-09	08:32:00	144
2009-04-09	08:33:00	492
2009-04-09	08:34:00	861
2009-04-09	08:35:00	41
2009-04-09	08:36:00	0
2009-04-09	08:37:00	0
2009-04-09	08:38:00	0
2009-04-09	08:39:00	0
2009-04-09	08:40:00	0
2009-04-09	08:41:00	0
2009-04-09	08:42:00	0
2009-04-09	08:43:00	193
2009-04-09	08:44:00	217
2009-04-09	08:45:00	0
2009-04-09	08:46:00	0
2009-04-09	08:47:00	0
2009-04-09	08:48:00	0
2009-04-09	08:49:00	0
2009-04-09	08:50:00	61
2009-04-09	08:51:00	10
2009-04-09	08:52:00	112
2009-04-09	08:53:00	0
2009-04-09	08:54:00	0
2009-04-09	08:55:00	0
2009-04-09	08:56:00	0
2009-04-09	08:57:00	0
2009-04-09	08:58:00	0
2009-04-09	08:59:00	0
2009-04-09	09:00:00	0
2009-04-09	09:01:00	0
2009-04-09	09:02:00	0
2009-04-09	09:03:00	0
2009-04-09	09:04:00	102
2009-04-09	09:05:00	0
2009-04-09	09:06:00	0
2009-04-09	09:07:00	0
2009-04-09	09:08:00	0
[truncated: 19,611 more rows]

[truncated: 4 more sheets: 4.22.09, 5.6.09, 5.20.09, 6.4.09]
