# Supplementary material for: Initial evaluation of nighttime restlessness in a naturally occurring canine model of osteoarthritis pain
Source: PeerJ. 2015 Feb 17;3:e772. doi: 10.7717/peerj.772 (PMC4340376; doi:10.7717/peerj.772)
Supplement: Supplemental Information 28 [file peerj-03-772-s028.xlsx]

## Sheet: Office Visits
Visit Date	Visit Number
2009-02-19 06:00:00	1
2009-03-05 06:00:00	2
2009-03-19 06:00:00	3
2009-04-02 06:00:00	4
2009-04-16 06:00:00	5
2009-04-30 06:00:00	6
2009-05-14 06:00:00	7
2009-05-28 06:00:00	8
2009-06-11 06:00:00	9

## Sheet: 28_Data
Segment	DateTime	Activity	Hour	Quadrant	Study Day	Weekday
1	2009-02-26 06:01:00	0	6	2	7	5
1	2009-02-26 06:02:00	0	6	2	7	5
1	2009-02-26 06:03:00	0	6	2	7	5
1	2009-02-26 06:04:00	0	6	2	7	5
1	2009-02-26 06:05:00	0	6	2	7	5
1	2009-02-26 06:06:00	0	6	2	7	5
1	2009-02-26 06:07:00	0	6	2	7	5
1	2009-02-26 06:08:00	0	6	2	7	5
1	2009-02-26 06:09:00	0	6	2	7	5
1	2009-02-26 06:10:00	0	6	2	7	5
1	2009-02-26 06:11:00	0	6	2	7	5
1	2009-02-26 06:12:00	0	6	2	7	5
1	2009-02-26 06:13:00	0	6	2	7	5
1	2009-02-26 06:14:00	0	6	2	7	5
1	2009-02-26 06:15:00	0	6	2	7	5
1	2009-02-26 06:16:00	0	6	2	7	5
1	2009-02-26 06:17:00	0	6	2	7	5
1	2009-02-26 06:18:00	0	6	2	7	5
1	2009-02-26 06:19:00	0	6	2	7	5
1	2009-02-26 06:20:00	0	6	2	7	5
1	2009-02-26 06:21:00	0	6	2	7	5
1	2009-02-26 06:22:00	0	6	2	7	5
1	2009-02-26 06:23:00	26	6	2	7	5
1	2009-02-26 06:24:00	320	6	2	7	5
1	2009-02-26 06:25:00	13	6	2	7	5
1	2009-02-26 06:26:00	115	6	2	7	5
1	2009-02-26 06:27:00	599	6	2	7	5
1	2009-02-26 06:28:00	228	6	2	7	5
1	2009-02-26 06:29:00	13	6	2	7	5
1	2009-02-26 06:30:00	13	6	2	7	5
1	2009-02-26 06:31:00	0	6	2	7	5
1	2009-02-26 06:32:00	154	6	2	7	5
1	2009-02-26 06:33:00	353	6	2	7	5
1	2009-02-26 06:34:00	1085	6	2	7	5
1	2009-02-26 06:35:00	1029	6	2	7	5
1	2009-02-26 06:36:00	259	6	2	7	5
1	2009-02-26 06:37:00	166	6	2	7	5
1	2009-02-26 06:38:00	0	6	2	7	5
1	2009-02-26 06:39:00	90	6	2	7	5
1	2009-02-26 06:40:00	407	6	2	7	5
1	2009-02-26 06:41:00	182	6	2	7	5
1	2009-02-26 06:42:00	115	6	2	7	5
1	2009-02-26 06:43:00	154	6	2	7	5
1	2009-02-26 06:44:00	182	6	2	7	5
1	2009-02-26 06:45:00	389	6	2	7	5
1	2009-02-26 06:46:00	389	6	2	7	5
1	2009-02-26 06:47:00	90	6	2	7	5
1	2009-02-26 06:48:00	599	6	2	7	5
1	2009-02-26 06:49:00	26	6	2	7	5
1	2009-02-26 06:50:00	166	6	2	7	5
1	2009-02-26 06:51:00	517	6	2	7	5
1	2009-02-26 06:52:00	128	6	2	7	5
1	2009-02-26 06:53:00	479	6	2	7	5
1	2009-02-26 06:54:00	407	6	2	7	5
1	2009-02-26 06:55:00	335	6	2	7	5
1	2009-02-26 06:56:00	425	6	2	7	5
1	2009-02-26 06:57:00	371	6	2	7	5
1	2009-02-26 06:58:00	497	6	2	7	5
1	2009-02-26 06:59:00	730	6	2	7	5
1	2009-02-26 07:00:00	660	6	2	7	5
1	2009-02-26 07:01:00	443	7	2	7	5
1	2009-02-26 07:02:00	497	7	2	7	5
1	2009-02-26 07:03:00	684	7	2	7	5
1	2009-02-26 07:04:00	479	7	2	7	5
1	2009-02-26 07:05:00	197	7	2	7	5
1	2009-02-26 07:06:00	0	7	2	7	5
1	2009-02-26 07:07:00	166	7	2	7	5
1	2009-02-26 07:08:00	259	7	2	7	5
1	2009-02-26 07:09:00	407	7	2	7	5
1	2009-02-26 07:10:00	497	7	2	7	5
1	2009-02-26 07:11:00	517	7	2	7	5
1	2009-02-26 07:12:00	461	7	2	7	5
1	2009-02-26 07:13:00	579	7	2	7	5
1	2009-02-26 07:14:00	538	7	2	7	5
1	2009-02-26 07:15:00	684	7	2	7	5
1	2009-02-26 07:16:00	461	7	2	7	5
1	2009-02-26 07:17:00	320	7	2	7	5
1	2009-02-26 07:18:00	389	7	2	7	5
1	2009-02-26 07:19:00	38	7	2	7	5
1	2009-02-26 07:20:00	0	7	2	7	5
1	2009-02-26 07:21:00	0	7	2	7	5
1	2009-02-26 07:22:00	0	7	2	7	5
1	2009-02-26 07:23:00	0	7	2	7	5
1	2009-02-26 07:24:00	0	7	2	7	5
1	2009-02-26 07:25:00	0	7	2	7	5
1	2009-02-26 07:26:00	0	7	2	7	5
1	2009-02-26 07:27:00	141	7	2	7	5
1	2009-02-26 07:28:00	90	7	2	7	5
1	2009-02-26 07:29:00	51	7	2	7	5
1	2009-02-26 07:30:00	289	7	2	7	5
1	2009-02-26 07:31:00	0	7	2	7	5
1	2009-02-26 07:32:00	0	7	2	7	5
1	2009-02-26 07:33:00	166	7	2	7	5
1	2009-02-26 07:34:00	0	7	2	7	5
1	2009-02-26 07:35:00	182	7	2	7	5
1	2009-02-26 07:36:00	0	7	2	7	5
1	2009-02-26 07:37:00	0	7	2	7	5
1	2009-02-26 07:38:00	0	7	2	7	5
1	2009-02-26 07:39:00	212	7	2	7	5
1	2009-02-26 07:40:00	102	7	2	7	5
1	2009-02-26 07:41:00	141	7	2	7	5
1	2009-02-26 07:42:00	154	7	2	7	5
1	2009-02-26 07:43:00	182	7	2	7	5
1	2009-02-26 07:44:00	289	7	2	7	5
1	2009-02-26 07:45:00	102	7	2	7	5
1	2009-02-26 07:46:00	128	7	2	7	5
1	2009-02-26 07:47:00	0	7	2	7	5
1	2009-02-26 07:48:00	128	7	2	7	5
1	2009-02-26 07:49:00	90	7	2	7	5
1	2009-02-26 07:50:00	64	7	2	7	5
1	2009-02-26 07:51:00	0	7	2	7	5
1	2009-02-26 07:52:00	38	7	2	7	5
1	2009-02-26 07:53:00	0	7	2	7	5
1	2009-02-26 07:54:00	0	7	2	7	5
1	2009-02-26 07:55:00	0	7	2	7	5
1	2009-02-26 07:56:00	38	7	2	7	5
1	2009-02-26 07:57:00	38	7	2	7	5
1	2009-02-26 07:58:00	0	7	2	7	5
1	2009-02-26 07:59:00	26	7	2	7	5
1	2009-02-26 08:00:00	0	7	2	7	5
1	2009-02-26 08:01:00	0	8	2	7	5
1	2009-02-26 08:02:00	0	8	2	7	5
1	2009-02-26 08:03:00	0	8	2	7	5
1	2009-02-26 08:04:00	0	8	2	7	5
1	2009-02-26 08:05:00	0	8	2	7	5
1	2009-02-26 08:06:00	0	8	2	7	5
1	2009-02-26 08:07:00	0	8	2	7	5
1	2009-02-26 08:08:00	0	8	2	7	5
1	2009-02-26 08:09:00	0	8	2	7	5
1	2009-02-26 08:10:00	0	8	2	7	5
1	2009-02-26 08:11:00	0	8	2	7	5
1	2009-02-26 08:12:00	0	8	2	7	5
1	2009-02-26 08:13:00	0	8	2	7	5
1	2009-02-26 08:14:00	0	8	2	7	5
1	2009-02-26 08:15:00	0	8	2	7	5
1	2009-02-26 08:16:00	0	8	2	7	5
1	2009-02-26 08:17:00	0	8	2	7	5
1	2009-02-26 08:18:00	0	8	2	7	5
1	2009-02-26 08:19:00	0	8	2	7	5
1	2009-02-26 08:20:00	0	8	2	7	5
1	2009-02-26 08:21:00	0	8	2	7	5
1	2009-02-26 08:22:00	0	8	2	7	5
1	2009-02-26 08:23:00	0	8	2	7	5
1	2009-02-26 08:24:00	64	8	2	7	5
1	2009-02-26 08:25:00	0	8	2	7	5
1	2009-02-26 08:26:00	0	8	2	7	5
1	2009-02-26 08:27:00	0	8	2	7	5
1	2009-02-26 08:28:00	0	8	2	7	5
1	2009-02-26 08:29:00	0	8	2	7	5
1	2009-02-26 08:30:00	0	8	2	7	5
1	2009-02-26 08:31:00	0	8	2	7	5
1	2009-02-26 08:32:00	0	8	2	7	5
1	2009-02-26 08:33:00	0	8	2	7	5
1	2009-02-26 08:34:00	0	8	2	7	5
1	2009-02-26 08:35:00	0	8	2	7	5
1	2009-02-26 08:36:00	0	8	2	7	5
1	2009-02-26 08:37:00	128	8	2	7	5
1	2009-02-26 08:38:00	353	8	2	7	5
1	2009-02-26 08:39:00	182	8	2	7	5
1	2009-02-26 08:40:00	38	8	2	7	5
1	2009-02-26 08:41:00	0	8	2	7	5
1	2009-02-26 08:42:00	0	8	2	7	5
1	2009-02-26 08:43:00	0	8	2	7	5
1	2009-02-26 08:44:00	0	8	2	7	5
1	2009-02-26 08:45:00	0	8	2	7	5
1	2009-02-26 08:46:00	64	8	2	7	5
1	2009-02-26 08:47:00	0	8	2	7	5
1	2009-02-26 08:48:00	0	8	2	7	5
1	2009-02-26 08:49:00	0	8	2	7	5
1	2009-02-26 08:50:00	0	8	2	7	5
1	2009-02-26 08:51:00	0	8	2	7	5
1	2009-02-26 08:52:00	0	8	2	7	5
1	2009-02-26 08:53:00	0	8	2	7	5
1	2009-02-26 08:54:00	0	8	2	7	5
1	2009-02-26 08:55:00	0	8	2	7	5
1	2009-02-26 08:56:00	0	8	2	7	5
1	2009-02-26 08:57:00	0	8	2	7	5
1	2009-02-26 08:58:00	0	8	2	7	5
1	2009-02-26 08:59:00	0	8	2	7	5
1	2009-02-26 09:00:00	0	8	2	7	5
1	2009-02-26 09:01:00	0	9	2	7	5
1	2009-02-26 09:02:00	0	9	2	7	5
1	2009-02-26 09:03:00	0	9	2	7	5
1	2009-02-26 09:04:00	0	9	2	7	5
1	2009-02-26 09:05:00	0	9	2	7	5
1	2009-02-26 09:06:00	0	9	2	7	5
1	2009-02-26 09:07:00	0	9	2	7	5
1	2009-02-26 09:08:00	0	9	2	7	5
1	2009-02-26 09:09:00	0	9	2	7	5
1	2009-02-26 09:10:00	0	9	2	7	5
1	2009-02-26 09:11:00	0	9	2	7	5
1	2009-02-26 09:12:00	0	9	2	7	5
1	2009-02-26 09:13:00	0	9	2	7	5
1	2009-02-26 09:14:00	0	9	2	7	5
1	2009-02-26 09:15:00	0	9	2	7	5
1	2009-02-26 09:16:00	0	9	2	7	5
1	2009-02-26 09:17:00	0	9	2	7	5
1	2009-02-26 09:18:00	0	9	2	7	5
1	2009-02-26 09:19:00	0	9	2	7	5
1	2009-02-26 09:20:00	0	9	2	7	5
1	2009-02-26 09:21:00	0	9	2	7	5
1	2009-02-26 09:22:00	0	9	2	7	5
1	2009-02-26 09:23:00	0	9	2	7	5
1	2009-02-26 09:24:00	0	9	2	7	5
1	2009-02-26 09:25:00	13	9	2	7	5
1	2009-02-26 09:26:00	0	9	2	7	5
1	2009-02-26 09:27:00	0	9	2	7	5
1	2009-02-26 09:28:00	0	9	2	7	5
1	2009-02-26 09:29:00	0	9	2	7	5
1	2009-02-26 09:30:00	0	9	2	7	5
1	2009-02-26 09:31:00	0	9	2	7	5
1	2009-02-26 09:32:00	0	9	2	7	5
1	2009-02-26 09:33:00	0	9	2	7	5
1	2009-02-26 09:34:00	0	9	2	7	5
1	2009-02-26 09:35:00	0	9	2	7	5
1	2009-02-26 09:36:00	0	9	2	7	5
1	2009-02-26 09:37:00	0	9	2	7	5
1	2009-02-26 09:38:00	0	9	2	7	5
1	2009-02-26 09:39:00	0	9	2	7	5
1	2009-02-26 09:40:00	0	9	2	7	5
1	2009-02-26 09:41:00	0	9	2	7	5
1	2009-02-26 09:42:00	0	9	2	7	5
1	2009-02-26 09:43:00	0	9	2	7	5
1	2009-02-26 09:44:00	0	9	2	7	5
1	2009-02-26 09:45:00	0	9	2	7	5
1	2009-02-26 09:46:00	0	9	2	7	5
1	2009-02-26 09:47:00	0	9	2	7	5
1	2009-02-26 09:48:00	0	9	2	7	5
1	2009-02-26 09:49:00	0	9	2	7	5
1	2009-02-26 09:50:00	0	9	2	7	5
1	2009-02-26 09:51:00	0	9	2	7	5
1	2009-02-26 09:52:00	0	9	2	7	5
1	2009-02-26 09:53:00	0	9	2	7	5
1	2009-02-26 09:54:00	0	9	2	7	5
1	2009-02-26 09:55:00	0	9	2	7	5
1	2009-02-26 09:56:00	0	9	2	7	5
1	2009-02-26 09:57:00	51	9	2	7	5
1	2009-02-26 09:58:00	0	9	2	7	5
1	2009-02-26 09:59:00	0	9	2	7	5
1	2009-02-26 10:00:00	0	9	2	7	5
1	2009-02-26 10:01:00	0	10	2	7	5
1	2009-02-26 10:02:00	0	10	2	7	5
1	2009-02-26 10:03:00	0	10	2	7	5
1	2009-02-26 10:04:00	0	10	2	7	5
1	2009-02-26 10:05:00	0	10	2	7	5
1	2009-02-26 10:06:00	0	10	2	7	5
1	2009-02-26 10:07:00	0	10	2	7	5
1	2009-02-26 10:08:00	0	10	2	7	5
1	2009-02-26 10:09:00	0	10	2	7	5
1	2009-02-26 10:10:00	0	10	2	7	5
1	2009-02-26 10:11:00	0	10	2	7	5
1	2009-02-26 10:12:00	0	10	2	7	5
1	2009-02-26 10:13:00	0	10	2	7	5
1	2009-02-26 10:14:00	0	10	2	7	5
1	2009-02-26 10:15:00	0	10	2	7	5
1	2009-02-26 10:16:00	0	10	2	7	5
1	2009-02-26 10:17:00	0	10	2	7	5
1	2009-02-26 10:18:00	0	10	2	7	5
1	2009-02-26 10:19:00	0	10	2	7	5
1	2009-02-26 10:20:00	0	10	2	7	5
1	2009-02-26 10:21:00	0	10	2	7	5
1	2009-02-26 10:22:00	0	10	2	7	5
1	2009-02-26 10:23:00	0	10	2	7	5
1	2009-02-26 10:24:00	0	10	2	7	5
1	2009-02-26 10:25:00	51	10	2	7	5
1	2009-02-26 10:26:00	0	10	2	7	5
1	2009-02-26 10:27:00	0	10	2	7	5
1	2009-02-26 10:28:00	0	10	2	7	5
1	2009-02-26 10:29:00	0	10	2	7	5
1	2009-02-26 10:30:00	0	10	2	7	5
1	2009-02-26 10:31:00	0	10	2	7	5
1	2009-02-26 10:32:00	0	10	2	7	5
1	2009-02-26 10:33:00	0	10	2	7	5
1	2009-02-26 10:34:00	13	10	2	7	5
1	2009-02-26 10:35:00	0	10	2	7	5
1	2009-02-26 10:36:00	0	10	2	7	5
1	2009-02-26 10:37:00	0	10	2	7	5
1	2009-02-26 10:38:00	0	10	2	7	5
1	2009-02-26 10:39:00	0	10	2	7	5
1	2009-02-26 10:40:00	0	10	2	7	5
1	2009-02-26 10:41:00	0	10	2	7	5
1	2009-02-26 10:42:00	0	10	2	7	5
1	2009-02-26 10:43:00	0	10	2	7	5
1	2009-02-26 10:44:00	0	10	2	7	5
1	2009-02-26 10:45:00	0	10	2	7	5
1	2009-02-26 10:46:00	0	10	2	7	5
1	2009-02-26 10:47:00	0	10	2	7	5
1	2009-02-26 10:48:00	0	10	2	7	5
1	2009-02-26 10:49:00	0	10	2	7	5
1	2009-02-26 10:50:00	0	10	2	7	5
1	2009-02-26 10:51:00	0	10	2	7	5
1	2009-02-26 10:52:00	0	10	2	7	5
1	2009-02-26 10:53:00	0	10	2	7	5
1	2009-02-26 10:54:00	0	10	2	7	5
1	2009-02-26 10:55:00	0	10	2	7	5
1	2009-02-26 10:56:00	0	10	2	7	5
1	2009-02-26 10:57:00	0	10	2	7	5
1	2009-02-26 10:58:00	0	10	2	7	5
1	2009-02-26 10:59:00	0	10	2	7	5
1	2009-02-26 11:00:00	0	10	2	7	5
1	2009-02-26 11:01:00	0	11	2	7	5
1	2009-02-26 11:02:00	0	11	2	7	5
1	2009-02-26 11:03:00	0	11	2	7	5
1	2009-02-26 11:04:00	0	11	2	7	5
1	2009-02-26 11:05:00	0	11	2	7	5
1	2009-02-26 11:06:00	0	11	2	7	5
1	2009-02-26 11:07:00	0	11	2	7	5
1	2009-02-26 11:08:00	0	11	2	7	5
1	2009-02-26 11:09:00	0	11	2	7	5
1	2009-02-26 11:10:00	0	11	2	7	5
1	2009-02-26 11:11:00	0	11	2	7	5
1	2009-02-26 11:12:00	0	11	2	7	5
1	2009-02-26 11:13:00	0	11	2	7	5
1	2009-02-26 11:14:00	0	11	2	7	5
1	2009-02-26 11:15:00	0	11	2	7	5
1	2009-02-26 11:16:00	0	11	2	7	5
1	2009-02-26 11:17:00	0	11	2	7	5
1	2009-02-26 11:18:00	0	11	2	7	5
1	2009-02-26 11:19:00	0	11	2	7	5
1	2009-02-26 11:20:00	0	11	2	7	5
1	2009-02-26 11:21:00	0	11	2	7	5
1	2009-02-26 11:22:00	0	11	2	7	5
1	2009-02-26 11:23:00	0	11	2	7	5
1	2009-02-26 11:24:00	0	11	2	7	5
1	2009-02-26 11:25:00	0	11	2	7	5
1	2009-02-26 11:26:00	0	11	2	7	5
1	2009-02-26 11:27:00	0	11	2	7	5
1	2009-02-26 11:28:00	0	11	2	7	5
1	2009-02-26 11:29:00	0	11	2	7	5
1	2009-02-26 11:30:00	0	11	2	7	5
1	2009-02-26 11:31:00	0	11	2	7	5
1	2009-02-26 11:32:00	0	11	2	7	5
1	2009-02-26 11:33:00	0	11	2	7	5
1	2009-02-26 11:34:00	0	11	2	7	5
1	2009-02-26 11:35:00	0	11	2	7	5
1	2009-02-26 11:36:00	0	11	2	7	5
1	2009-02-26 11:37:00	26	11	2	7	5
1	2009-02-26 11:38:00	353	11	2	7	5
1	2009-02-26 11:39:00	51	11	2	7	5
1	2009-02-26 11:40:00	259	11	2	7	5
1	2009-02-26 11:41:00	26	11	2	7	5
1	2009-02-26 11:42:00	0	11	2	7	5
1	2009-02-26 11:43:00	115	11	2	7	5
1	2009-02-26 11:44:00	320	11	2	7	5
1	2009-02-26 11:45:00	212	11	2	7	5
1	2009-02-26 11:46:00	0	11	2	7	5
1	2009-02-26 11:47:00	141	11	2	7	5
1	2009-02-26 11:48:00	51	11	2	7	5
1	2009-02-26 11:49:00	0	11	2	7	5
1	2009-02-26 11:50:00	0	11	2	7	5
1	2009-02-26 11:51:00	0	11	2	7	5
1	2009-02-26 11:52:00	0	11	2	7	5
1	2009-02-26 11:53:00	0	11	2	7	5
1	2009-02-26 11:54:00	0	11	2	7	5
1	2009-02-26 11:55:00	0	11	2	7	5
1	2009-02-26 11:56:00	0	11	2	7	5
1	2009-02-26 11:57:00	0	11	2	7	5
1	2009-02-26 11:58:00	0	11	2	7	5
1	2009-02-26 11:59:00	0	11	2	7	5
1	2009-02-26 12:00:00	0	11	2	7	5
1	2009-02-26 12:01:00	0	12	3	7	5
1	2009-02-26 12:02:00	0	12	3	7	5
1	2009-02-26 12:03:00	0	12	3	7	5
1	2009-02-26 12:04:00	0	12	3	7	5
1	2009-02-26 12:05:00	0	12	3	7	5
1	2009-02-26 12:06:00	0	12	3	7	5
1	2009-02-26 12:07:00	0	12	3	7	5
1	2009-02-26 12:08:00	0	12	3	7	5
1	2009-02-26 12:09:00	0	12	3	7	5
1	2009-02-26 12:10:00	0	12	3	7	5
1	2009-02-26 12:11:00	0	12	3	7	5
1	2009-02-26 12:12:00	0	12	3	7	5
1	2009-02-26 12:13:00	0	12	3	7	5
1	2009-02-26 12:14:00	0	12	3	7	5
1	2009-02-26 12:15:00	0	12	3	7	5
1	2009-02-26 12:16:00	0	12	3	7	5
1	2009-02-26 12:17:00	0	12	3	7	5
1	2009-02-26 12:18:00	0	12	3	7	5
1	2009-02-26 12:19:00	0	12	3	7	5
1	2009-02-26 12:20:00	0	12	3	7	5
1	2009-02-26 12:21:00	0	12	3	7	5
1	2009-02-26 12:22:00	0	12	3	7	5
1	2009-02-26 12:23:00	0	12	3	7	5
1	2009-02-26 12:24:00	0	12	3	7	5
1	2009-02-26 12:25:00	0	12	3	7	5
1	2009-02-26 12:26:00	0	12	3	7	5
1	2009-02-26 12:27:00	0	12	3	7	5
1	2009-02-26 12:28:00	0	12	3	7	5
1	2009-02-26 12:29:00	0	12	3	7	5
1	2009-02-26 12:30:00	0	12	3	7	5
1	2009-02-26 12:31:00	0	12	3	7	5
1	2009-02-26 12:32:00	0	12	3	7	5
1	2009-02-26 12:33:00	0	12	3	7	5
1	2009-02-26 12:34:00	0	12	3	7	5
1	2009-02-26 12:35:00	0	12	3	7	5
1	2009-02-26 12:36:00	0	12	3	7	5
1	2009-02-26 12:37:00	0	12	3	7	5
1	2009-02-26 12:38:00	0	12	3	7	5
1	2009-02-26 12:39:00	0	12	3	7	5
1	2009-02-26 12:40:00	0	12	3	7	5
1	2009-02-26 12:41:00	0	12	3	7	5
1	2009-02-26 12:42:00	0	12	3	7	5
1	2009-02-26 12:43:00	0	12	3	7	5
1	2009-02-26 12:44:00	0	12	3	7	5
1	2009-02-26 12:45:00	0	12	3	7	5
1	2009-02-26 12:46:00	0	12	3	7	5
1	2009-02-26 12:47:00	0	12	3	7	5
1	2009-02-26 12:48:00	0	12	3	7	5
1	2009-02-26 12:49:00	0	12	3	7	5
1	2009-02-26 12:50:00	197	12	3	7	5
1	2009-02-26 12:51:00	305	12	3	7	5
1	2009-02-26 12:52:00	1390	12	3	7	5
1	2009-02-26 12:53:00	684	12	3	7	5
1	2009-02-26 12:54:00	517	12	3	7	5
1	2009-02-26 12:55:00	730	12	3	7	5
1	2009-02-26 12:56:00	64	12	3	7	5
1	2009-02-26 12:57:00	407	12	3	7	5
1	2009-02-26 12:58:00	26	12	3	7	5
1	2009-02-26 12:59:00	51	12	3	7	5
1	2009-02-26 13:00:00	90	12	3	7	5
1	2009-02-26 13:01:00	335	13	3	7	5
1	2009-02-26 13:02:00	128	13	3	7	5
1	2009-02-26 13:03:00	243	13	3	7	5
1	2009-02-26 13:04:00	51	13	3	7	5
1	2009-02-26 13:05:00	141	13	3	7	5
1	2009-02-26 13:06:00	197	13	3	7	5
1	2009-02-26 13:07:00	0	13	3	7	5
1	2009-02-26 13:08:00	13	13	3	7	5
1	2009-02-26 13:09:00	259	13	3	7	5
1	2009-02-26 13:10:00	51	13	3	7	5
1	2009-02-26 13:11:00	51	13	3	7	5
1	2009-02-26 13:12:00	141	13	3	7	5
1	2009-02-26 13:13:00	305	13	3	7	5
1	2009-02-26 13:14:00	128	13	3	7	5
1	2009-02-26 13:15:00	0	13	3	7	5
1	2009-02-26 13:16:00	128	13	3	7	5
1	2009-02-26 13:17:00	13	13	3	7	5
1	2009-02-26 13:18:00	0	13	3	7	5
1	2009-02-26 13:19:00	0	13	3	7	5
1	2009-02-26 13:20:00	0	13	3	7	5
1	2009-02-26 13:21:00	0	13	3	7	5
1	2009-02-26 13:22:00	0	13	3	7	5
1	2009-02-26 13:23:00	13	13	3	7	5
1	2009-02-26 13:24:00	212	13	3	7	5
1	2009-02-26 13:25:00	182	13	3	7	5
1	2009-02-26 13:26:00	26	13	3	7	5
1	2009-02-26 13:27:00	166	13	3	7	5
1	2009-02-26 13:28:00	0	13	3	7	5
1	2009-02-26 13:29:00	0	13	3	7	5
1	2009-02-26 13:30:00	0	13	3	7	5
1	2009-02-26 13:31:00	0	13	3	7	5
1	2009-02-26 13:32:00	0	13	3	7	5
1	2009-02-26 13:33:00	0	13	3	7	5
1	2009-02-26 13:34:00	0	13	3	7	5
1	2009-02-26 13:35:00	0	13	3	7	5
1	2009-02-26 13:36:00	0	13	3	7	5
1	2009-02-26 13:37:00	0	13	3	7	5
1	2009-02-26 13:38:00	0	13	3	7	5
1	2009-02-26 13:39:00	128	13	3	7	5
1	2009-02-26 13:40:00	320	13	3	7	5
1	2009-02-26 13:41:00	822	13	3	7	5
1	2009-02-26 13:42:00	102	13	3	7	5
1	2009-02-26 13:43:00	305	13	3	7	5
1	2009-02-26 13:44:00	26	13	3	7	5
1	2009-02-26 13:45:00	0	13	3	7	5
1	2009-02-26 13:46:00	0	13	3	7	5
1	2009-02-26 13:47:00	0	13	3	7	5
1	2009-02-26 13:48:00	26	13	3	7	5
1	2009-02-26 13:49:00	0	13	3	7	5
1	2009-02-26 13:50:00	0	13	3	7	5
1	2009-02-26 13:51:00	0	13	3	7	5
1	2009-02-26 13:52:00	26	13	3	7	5
1	2009-02-26 13:53:00	0	13	3	7	5
1	2009-02-26 13:54:00	0	13	3	7	5
1	2009-02-26 13:55:00	0	13	3	7	5
1	2009-02-26 13:56:00	0	13	3	7	5
1	2009-02-26 13:57:00	0	13	3	7	5
1	2009-02-26 13:58:00	13	13	3	7	5
1	2009-02-26 13:59:00	0	13	3	7	5
1	2009-02-26 14:00:00	0	13	3	7	5
1	2009-02-26 14:01:00	0	14	3	7	5
1	2009-02-26 14:02:00	0	14	3	7	5
1	2009-02-26 14:03:00	0	14	3	7	5
1	2009-02-26 14:04:00	0	14	3	7	5
1	2009-02-26 14:05:00	0	14	3	7	5
1	2009-02-26 14:06:00	0	14	3	7	5
1	2009-02-26 14:07:00	0	14	3	7	5
1	2009-02-26 14:08:00	0	14	3	7	5
1	2009-02-26 14:09:00	0	14	3	7	5
1	2009-02-26 14:10:00	0	14	3	7	5
1	2009-02-26 14:11:00	0	14	3	7	5
1	2009-02-26 14:12:00	0	14	3	7	5
1	2009-02-26 14:13:00	0	14	3	7	5
1	2009-02-26 14:14:00	0	14	3	7	5
1	2009-02-26 14:15:00	0	14	3	7	5
1	2009-02-26 14:16:00	0	14	3	7	5
1	2009-02-26 14:17:00	0	14	3	7	5
1	2009-02-26 14:18:00	0	14	3	7	5
1	2009-02-26 14:19:00	0	14	3	7	5
1	2009-02-26 14:20:00	799	14	3	7	5
1	2009-02-26 14:21:00	274	14	3	7	5
1	2009-02-26 14:22:00	479	14	3	7	5
1	2009-02-26 14:23:00	259	14	3	7	5
1	2009-02-26 14:24:00	51	14	3	7	5
1	2009-02-26 14:25:00	479	14	3	7	5
1	2009-02-26 14:26:00	243	14	3	7	5
1	2009-02-26 14:27:00	182	14	3	7	5
1	2009-02-26 14:28:00	335	14	3	7	5
1	2009-02-26 14:29:00	243	14	3	7	5
1	2009-02-26 14:30:00	154	14	3	7	5
1	2009-02-26 14:31:00	128	14	3	7	5
1	2009-02-26 14:32:00	0	14	3	7	5
1	2009-02-26 14:33:00	407	14	3	7	5
1	2009-02-26 14:34:00	274	14	3	7	5
1	2009-02-26 14:35:00	305	14	3	7	5
1	2009-02-26 14:36:00	335	14	3	7	5
1	2009-02-26 14:37:00	0	14	3	7	5
1	2009-02-26 14:38:00	243	14	3	7	5
1	2009-02-26 14:39:00	166	14	3	7	5
1	2009-02-26 14:40:00	102	14	3	7	5
1	2009-02-26 14:41:00	115	14	3	7	5
1	2009-02-26 14:42:00	182	14	3	7	5
1	2009-02-26 14:43:00	0	14	3	7	5
1	2009-02-26 14:44:00	0	14	3	7	5
1	2009-02-26 14:45:00	0	14	3	7	5
1	2009-02-26 14:46:00	0	14	3	7	5
1	2009-02-26 14:47:00	13	14	3	7	5
1	2009-02-26 14:48:00	0	14	3	7	5
1	2009-02-26 14:49:00	274	14	3	7	5
1	2009-02-26 14:50:00	141	14	3	7	5
1	2009-02-26 14:51:00	243	14	3	7	5
1	2009-02-26 14:52:00	0	14	3	7	5
1	2009-02-26 14:53:00	0	14	3	7	5
1	2009-02-26 14:54:00	228	14	3	7	5
1	2009-02-26 14:55:00	77	14	3	7	5
1	2009-02-26 14:56:00	102	14	3	7	5
1	2009-02-26 14:57:00	228	14	3	7	5
1	2009-02-26 14:58:00	0	14	3	7	5
1	2009-02-26 14:59:00	0	14	3	7	5
1	2009-02-26 15:00:00	0	14	3	7	5
1	2009-02-26 15:01:00	13	15	3	7	5
1	2009-02-26 15:02:00	0	15	3	7	5
1	2009-02-26 15:03:00	0	15	3	7	5
1	2009-02-26 15:04:00	26	15	3	7	5
1	2009-02-26 15:05:00	13	15	3	7	5
1	2009-02-26 15:06:00	0	15	3	7	5
1	2009-02-26 15:07:00	0	15	3	7	5
1	2009-02-26 15:08:00	38	15	3	7	5
1	2009-02-26 15:09:00	538	15	3	7	5
1	2009-02-26 15:10:00	259	15	3	7	5
1	2009-02-26 15:11:00	0	15	3	7	5
1	2009-02-26 15:12:00	0	15	3	7	5
1	2009-02-26 15:13:00	0	15	3	7	5
1	2009-02-26 15:14:00	128	15	3	7	5
1	2009-02-26 15:15:00	371	15	3	7	5
1	2009-02-26 15:16:00	77	15	3	7	5
1	2009-02-26 15:17:00	128	15	3	7	5
1	2009-02-26 15:18:00	64	15	3	7	5
1	2009-02-26 15:19:00	128	15	3	7	5
1	2009-02-26 15:20:00	13	15	3	7	5
1	2009-02-26 15:21:00	51	15	3	7	5
1	2009-02-26 15:22:00	259	15	3	7	5
1	2009-02-26 15:23:00	115	15	3	7	5
1	2009-02-26 15:24:00	320	15	3	7	5
1	2009-02-26 15:25:00	599	15	3	7	5
1	2009-02-26 15:26:00	443	15	3	7	5
1	2009-02-26 15:27:00	320	15	3	7	5
1	2009-02-26 15:28:00	77	15	3	7	5
1	2009-02-26 15:29:00	1746	15	3	7	5
1	2009-02-26 15:30:00	1170	15	3	7	5
1	2009-02-26 15:31:00	166	15	3	7	5
1	2009-02-26 15:32:00	38	15	3	7	5
1	2009-02-26 15:33:00	197	15	3	7	5
1	2009-02-26 15:34:00	0	15	3	7	5
1	2009-02-26 15:35:00	115	15	3	7	5
1	2009-02-26 15:36:00	274	15	3	7	5
1	2009-02-26 15:37:00	289	15	3	7	5
1	2009-02-26 15:38:00	599	15	3	7	5
1	2009-02-26 15:39:00	26	15	3	7	5
1	2009-02-26 15:40:00	640	15	3	7	5
1	2009-02-26 15:41:00	389	15	3	7	5
1	2009-02-26 15:42:00	166	15	3	7	5
1	2009-02-26 15:43:00	166	15	3	7	5
1	2009-02-26 15:44:00	182	15	3	7	5
1	2009-02-26 15:45:00	26	15	3	7	5
1	2009-02-26 15:46:00	0	15	3	7	5
1	2009-02-26 15:47:00	0	15	3	7	5
1	2009-02-26 15:48:00	0	15	3	7	5
1	2009-02-26 15:49:00	197	15	3	7	5
1	2009-02-26 15:50:00	0	15	3	7	5
1	2009-02-26 15:51:00	0	15	3	7	5
1	2009-02-26 15:52:00	13	15	3	7	5
1	2009-02-26 15:53:00	0	15	3	7	5
1	2009-02-26 15:54:00	13	15	3	7	5
1	2009-02-26 15:55:00	0	15	3	7	5
1	2009-02-26 15:56:00	102	15	3	7	5
1	2009-02-26 15:57:00	243	15	3	7	5
1	2009-02-26 15:58:00	128	15	3	7	5
1	2009-02-26 15:59:00	0	15	3	7	5
1	2009-02-26 16:00:00	154	15	3	7	5
1	2009-02-26 16:01:00	197	16	3	7	5
1	2009-02-26 16:02:00	141	16	3	7	5
1	2009-02-26 16:03:00	38	16	3	7	5
1	2009-02-26 16:04:00	0	16	3	7	5
1	2009-02-26 16:05:00	289	16	3	7	5
1	2009-02-26 16:06:00	335	16	3	7	5
1	2009-02-26 16:07:00	154	16	3	7	5
1	2009-02-26 16:08:00	90	16	3	7	5
1	2009-02-26 16:09:00	182	16	3	7	5
1	2009-02-26 16:10:00	0	16	3	7	5
1	2009-02-26 16:11:00	0	16	3	7	5
1	2009-02-26 16:12:00	182	16	3	7	5
1	2009-02-26 16:13:00	197	16	3	7	5
1	2009-02-26 16:14:00	64	16	3	7	5
1	2009-02-26 16:15:00	0	16	3	7	5
1	2009-02-26 16:16:00	13	16	3	7	5
1	2009-02-26 16:17:00	64	16	3	7	5
1	2009-02-26 16:18:00	730	16	3	7	5
1	2009-02-26 16:19:00	620	16	3	7	5
1	2009-02-26 16:20:00	1262	16	3	7	5
1	2009-02-26 16:21:00	873	16	3	7	5
1	2009-02-26 16:22:00	538	16	3	7	5
1	2009-02-26 16:23:00	822	16	3	7	5
1	2009-02-26 16:24:00	1390	16	3	7	5
1	2009-02-26 16:25:00	950	16	3	7	5
1	2009-02-26 16:26:00	707	16	3	7	5
1	2009-02-26 16:27:00	26	16	3	7	5
1	2009-02-26 16:28:00	0	16	3	7	5
1	2009-02-26 16:29:00	0	16	3	7	5
1	2009-02-26 16:30:00	1114	16	3	7	5
1	2009-02-26 16:31:00	497	16	3	7	5
1	2009-02-26 16:32:00	154	16	3	7	5
1	2009-02-26 16:33:00	305	16	3	7	5
1	2009-02-26 16:34:00	128	16	3	7	5
1	2009-02-26 16:35:00	305	16	3	7	5
1	2009-02-26 16:36:00	77	16	3	7	5
1	2009-02-26 16:37:00	212	16	3	7	5
1	2009-02-26 16:38:00	166	16	3	7	5
1	2009-02-26 16:39:00	579	16	3	7	5
1	2009-02-26 16:40:00	243	16	3	7	5
1	2009-02-26 16:41:00	353	16	3	7	5
1	2009-02-26 16:42:00	141	16	3	7	5
1	2009-02-26 16:43:00	166	16	3	7	5
1	2009-02-26 16:44:00	730	16	3	7	5
1	2009-02-26 16:45:00	1231	16	3	7	5
1	2009-02-26 16:46:00	1001	16	3	7	5
1	2009-02-26 16:47:00	141	16	3	7	5
1	2009-02-26 16:48:00	38	16	3	7	5
1	2009-02-26 16:49:00	90	16	3	7	5
1	2009-02-26 16:50:00	259	16	3	7	5
1	2009-02-26 16:51:00	228	16	3	7	5
1	2009-02-26 16:52:00	38	16	3	7	5
1	2009-02-26 16:53:00	0	16	3	7	5
1	2009-02-26 16:54:00	0	16	3	7	5
1	2009-02-26 16:55:00	0	16	3	7	5
1	2009-02-26 16:56:00	0	16	3	7	5
1	2009-02-26 16:57:00	13	16	3	7	5
1	2009-02-26 16:58:00	0	16	3	7	5
1	2009-02-26 16:59:00	26	16	3	7	5
1	2009-02-26 17:00:00	0	16	3	7	5
1	2009-02-26 17:01:00	0	17	3	7	5
1	2009-02-26 17:02:00	0	17	3	7	5
1	2009-02-26 17:03:00	228	17	3	7	5
1	2009-02-26 17:04:00	0	17	3	7	5
1	2009-02-26 17:05:00	38	17	3	7	5
1	2009-02-26 17:06:00	38	17	3	7	5
1	2009-02-26 17:07:00	166	17	3	7	5
1	2009-02-26 17:08:00	115	17	3	7	5
1	2009-02-26 17:09:00	182	17	3	7	5
1	2009-02-26 17:10:00	0	17	3	7	5
1	2009-02-26 17:11:00	102	17	3	7	5
1	2009-02-26 17:12:00	0	17	3	7	5
1	2009-02-26 17:13:00	0	17	3	7	5
1	2009-02-26 17:14:00	0	17	3	7	5
1	2009-02-26 17:15:00	0	17	3	7	5
1	2009-02-26 17:16:00	0	17	3	7	5
1	2009-02-26 17:17:00	26	17	3	7	5
1	2009-02-26 17:18:00	0	17	3	7	5
1	2009-02-26 17:19:00	0	17	3	7	5
1	2009-02-26 17:20:00	0	17	3	7	5
1	2009-02-26 17:21:00	0	17	3	7	5
1	2009-02-26 17:22:00	0	17	3	7	5
1	2009-02-26 17:23:00	0	17	3	7	5
1	2009-02-26 17:24:00	0	17	3	7	5
1	2009-02-26 17:25:00	0	17	3	7	5
1	2009-02-26 17:26:00	0	17	3	7	5
1	2009-02-26 17:27:00	0	17	3	7	5
1	2009-02-26 17:28:00	0	17	3	7	5
1	2009-02-26 17:29:00	0	17	3	7	5
1	2009-02-26 17:30:00	0	17	3	7	5
1	2009-02-26 17:31:00	0	17	3	7	5
1	2009-02-26 17:32:00	0	17	3	7	5
1	2009-02-26 17:33:00	0	17	3	7	5
1	2009-02-26 17:34:00	0	17	3	7	5
1	2009-02-26 17:35:00	0	17	3	7	5
1	2009-02-26 17:36:00	13	17	3	7	5
1	2009-02-26 17:37:00	0	17	3	7	5
1	2009-02-26 17:38:00	0	17	3	7	5
1	2009-02-26 17:39:00	0	17	3	7	5
1	2009-02-26 17:40:00	0	17	3	7	5
1	2009-02-26 17:41:00	13	17	3	7	5
1	2009-02-26 17:42:00	0	17	3	7	5
1	2009-02-26 17:43:00	38	17	3	7	5
1	2009-02-26 17:44:00	0	17	3	7	5
1	2009-02-26 17:45:00	0	17	3	7	5
1	2009-02-26 17:46:00	0	17	3	7	5
1	2009-02-26 17:47:00	0	17	3	7	5
1	2009-02-26 17:48:00	0	17	3	7	5
1	2009-02-26 17:49:00	0	17	3	7	5
1	2009-02-26 17:50:00	0	17	3	7	5
1	2009-02-26 17:51:00	0	17	3	7	5
1	2009-02-26 17:52:00	0	17	3	7	5
1	2009-02-26 17:53:00	0	17	3	7	5
1	2009-02-26 17:54:00	26	17	3	7	5
1	2009-02-26 17:55:00	141	17	3	7	5
1	2009-02-26 17:56:00	64	17	3	7	5
1	2009-02-26 17:57:00	166	17	3	7	5
1	2009-02-26 17:58:00	13	17	3	7	5
1	2009-02-26 17:59:00	0	17	3	7	5
1	2009-02-26 18:00:00	0	17	3	7	5
1	2009-02-26 18:01:00	0	18	4	7	5
1	2009-02-26 18:02:00	0	18	4	7	5
1	2009-02-26 18:03:00	0	18	4	7	5
1	2009-02-26 18:04:00	0	18	4	7	5
1	2009-02-26 18:05:00	0	18	4	7	5
1	2009-02-26 18:06:00	0	18	4	7	5
1	2009-02-26 18:07:00	0	18	4	7	5
1	2009-02-26 18:08:00	0	18	4	7	5
1	2009-02-26 18:09:00	0	18	4	7	5
1	2009-02-26 18:10:00	0	18	4	7	5
1	2009-02-26 18:11:00	0	18	4	7	5
1	2009-02-26 18:12:00	0	18	4	7	5
1	2009-02-26 18:13:00	13	18	4	7	5
1	2009-02-26 18:14:00	0	18	4	7	5
1	2009-02-26 18:15:00	0	18	4	7	5
1	2009-02-26 18:16:00	0	18	4	7	5
1	2009-02-26 18:17:00	0	18	4	7	5
1	2009-02-26 18:18:00	0	18	4	7	5
1	2009-02-26 18:19:00	0	18	4	7	5
1	2009-02-26 18:20:00	425	18	4	7	5
1	2009-02-26 18:21:00	0	18	4	7	5
1	2009-02-26 18:22:00	0	18	4	7	5
1	2009-02-26 18:23:00	0	18	4	7	5
1	2009-02-26 18:24:00	0	18	4	7	5
1	2009-02-26 18:25:00	0	18	4	7	5
1	2009-02-26 18:26:00	0	18	4	7	5
1	2009-02-26 18:27:00	0	18	4	7	5
1	2009-02-26 18:28:00	0	18	4	7	5
1	2009-02-26 18:29:00	0	18	4	7	5
1	2009-02-26 18:30:00	0	18	4	7	5
1	2009-02-26 18:31:00	0	18	4	7	5
1	2009-02-26 18:32:00	0	18	4	7	5
1	2009-02-26 18:33:00	0	18	4	7	5
1	2009-02-26 18:34:00	0	18	4	7	5
1	2009-02-26 18:35:00	0	18	4	7	5
1	2009-02-26 18:36:00	0	18	4	7	5
1	2009-02-26 18:37:00	0	18	4	7	5
1	2009-02-26 18:38:00	0	18	4	7	5
1	2009-02-26 18:39:00	0	18	4	7	5
1	2009-02-26 18:40:00	0	18	4	7	5
1	2009-02-26 18:41:00	0	18	4	7	5
1	2009-02-26 18:42:00	0	18	4	7	5
1	2009-02-26 18:43:00	0	18	4	7	5
1	2009-02-26 18:44:00	0	18	4	7	5
1	2009-02-26 18:45:00	0	18	4	7	5
1	2009-02-26 18:46:00	0	18	4	7	5
1	2009-02-26 18:47:00	0	18	4	7	5
1	2009-02-26 18:48:00	0	18	4	7	5
1	2009-02-26 18:49:00	0	18	4	7	5
1	2009-02-26 18:50:00	0	18	4	7	5
1	2009-02-26 18:51:00	0	18	4	7	5
1	2009-02-26 18:52:00	0	18	4	7	5
1	2009-02-26 18:53:00	38	18	4	7	5
1	2009-02-26 18:54:00	38	18	4	7	5
1	2009-02-26 18:55:00	0	18	4	7	5
1	2009-02-26 18:56:00	13	18	4	7	5
1	2009-02-26 18:57:00	0	18	4	7	5
1	2009-02-26 18:58:00	0	18	4	7	5
1	2009-02-26 18:59:00	0	18	4	7	5
1	2009-02-26 19:00:00	26	18	4	7	5
1	2009-02-26 19:01:00	26	19	4	7	5
1	2009-02-26 19:02:00	0	19	4	7	5
1	2009-02-26 19:03:00	0	19	4	7	5
1	2009-02-26 19:04:00	0	19	4	7	5
1	2009-02-26 19:05:00	13	19	4	7	5
1	2009-02-26 19:06:00	0	19	4	7	5
1	2009-02-26 19:07:00	0	19	4	7	5
1	2009-02-26 19:08:00	0	19	4	7	5
1	2009-02-26 19:09:00	0	19	4	7	5
1	2009-02-26 19:10:00	0	19	4	7	5
1	2009-02-26 19:11:00	0	19	4	7	5
1	2009-02-26 19:12:00	0	19	4	7	5
1	2009-02-26 19:13:00	0	19	4	7	5
1	2009-02-26 19:14:00	0	19	4	7	5
1	2009-02-26 19:15:00	0	19	4	7	5
1	2009-02-26 19:16:00	0	19	4	7	5
1	2009-02-26 19:17:00	0	19	4	7	5
1	2009-02-26 19:18:00	0	19	4	7	5
1	2009-02-26 19:19:00	0	19	4	7	5
1	2009-02-26 19:20:00	0	19	4	7	5
1	2009-02-26 19:21:00	0	19	4	7	5
1	2009-02-26 19:22:00	0	19	4	7	5
1	2009-02-26 19:23:00	0	19	4	7	5
1	2009-02-26 19:24:00	0	19	4	7	5
1	2009-02-26 19:25:00	0	19	4	7	5
1	2009-02-26 19:26:00	0	19	4	7	5
1	2009-02-26 19:27:00	0	19	4	7	5
1	2009-02-26 19:28:00	0	19	4	7	5
1	2009-02-26 19:29:00	0	19	4	7	5
1	2009-02-26 19:30:00	0	19	4	7	5
1	2009-02-26 19:31:00	0	19	4	7	5
1	2009-02-26 19:32:00	0	19	4	7	5
1	2009-02-26 19:33:00	0	19	4	7	5
1	2009-02-26 19:34:00	0	19	4	7	5
1	2009-02-26 19:35:00	0	19	4	7	5
1	2009-02-26 19:36:00	0	19	4	7	5
1	2009-02-26 19:37:00	0	19	4	7	5
1	2009-02-26 19:38:00	0	19	4	7	5
1	2009-02-26 19:39:00	0	19	4	7	5
1	2009-02-26 19:40:00	0	19	4	7	5
1	2009-02-26 19:41:00	0	19	4	7	5
1	2009-02-26 19:42:00	0	19	4	7	5
1	2009-02-26 19:43:00	0	19	4	7	5
1	2009-02-26 19:44:00	0	19	4	7	5
1	2009-02-26 19:45:00	0	19	4	7	5
1	2009-02-26 19:46:00	0	19	4	7	5
1	2009-02-26 19:47:00	0	19	4	7	5
1	2009-02-26 19:48:00	0	19	4	7	5
1	2009-02-26 19:49:00	0	19	4	7	5
1	2009-02-26 19:50:00	0	19	4	7	5
1	2009-02-26 19:51:00	0	19	4	7	5
1	2009-02-26 19:52:00	0	19	4	7	5
1	2009-02-26 19:53:00	0	19	4	7	5
1	2009-02-26 19:54:00	558	19	4	7	5
1	2009-02-26 19:55:00	0	19	4	7	5
1	2009-02-26 19:56:00	51	19	4	7	5
1	2009-02-26 19:57:00	0	19	4	7	5
1	2009-02-26 19:58:00	0	19	4	7	5
1	2009-02-26 19:59:00	0	19	4	7	5
1	2009-02-26 20:00:00	0	19	4	7	5
1	2009-02-26 20:01:00	0	20	4	7	5
1	2009-02-26 20:02:00	0	20	4	7	5
1	2009-02-26 20:03:00	0	20	4	7	5
1	2009-02-26 20:04:00	0	20	4	7	5
1	2009-02-26 20:05:00	128	20	4	7	5
1	2009-02-26 20:06:00	102	20	4	7	5
1	2009-02-26 20:07:00	0	20	4	7	5
1	2009-02-26 20:08:00	212	20	4	7	5
1	2009-02-26 20:09:00	13	20	4	7	5
1	2009-02-26 20:10:00	0	20	4	7	5
1	2009-02-26 20:11:00	13	20	4	7	5
1	2009-02-26 20:12:00	0	20	4	7	5
1	2009-02-26 20:13:00	0	20	4	7	5
1	2009-02-26 20:14:00	0	20	4	7	5
1	2009-02-26 20:15:00	0	20	4	7	5
1	2009-02-26 20:16:00	0	20	4	7	5
1	2009-02-26 20:17:00	0	20	4	7	5
1	2009-02-26 20:18:00	26	20	4	7	5
1	2009-02-26 20:19:00	13	20	4	7	5
1	2009-02-26 20:20:00	0	20	4	7	5
1	2009-02-26 20:21:00	0	20	4	7	5
1	2009-02-26 20:22:00	0	20	4	7	5
1	2009-02-26 20:23:00	0	20	4	7	5
1	2009-02-26 20:24:00	13	20	4	7	5
1	2009-02-26 20:25:00	1201	20	4	7	5
1	2009-02-26 20:26:00	1905	20	4	7	5
1	2009-02-26 20:27:00	1633	20	4	7	5
1	2009-02-26 20:28:00	684	20	4	7	5
1	2009-02-26 20:29:00	517	20	4	7	5
1	2009-02-26 20:30:00	243	20	4	7	5
1	2009-02-26 20:31:00	305	20	4	7	5
1	2009-02-26 20:32:00	538	20	4	7	5
1	2009-02-26 20:33:00	0	20	4	7	5
1	2009-02-26 20:34:00	128	20	4	7	5
1	2009-02-26 20:35:00	517	20	4	7	5
1	2009-02-26 20:36:00	579	20	4	7	5
1	2009-02-26 20:37:00	479	20	4	7	5
1	2009-02-26 20:38:00	289	20	4	7	5
1	2009-02-26 20:39:00	558	20	4	7	5
1	2009-02-26 20:40:00	517	20	4	7	5
1	2009-02-26 20:41:00	684	20	4	7	5
1	2009-02-26 20:42:00	497	20	4	7	5
1	2009-02-26 20:43:00	389	20	4	7	5
1	2009-02-26 20:44:00	0	20	4	7	5
1	2009-02-26 20:45:00	335	20	4	7	5
1	2009-02-26 20:46:00	128	20	4	7	5
1	2009-02-26 20:47:00	0	20	4	7	5
1	2009-02-26 20:48:00	0	20	4	7	5
1	2009-02-26 20:49:00	26	20	4	7	5
1	2009-02-26 20:50:00	497	20	4	7	5
1	2009-02-26 20:51:00	371	20	4	7	5
1	2009-02-26 20:52:00	371	20	4	7	5
1	2009-02-26 20:53:00	289	20	4	7	5
1	2009-02-26 20:54:00	13	20	4	7	5
1	2009-02-26 20:55:00	0	20	4	7	5
1	2009-02-26 20:56:00	0	20	4	7	5
1	2009-02-26 20:57:00	13	20	4	7	5
1	2009-02-26 20:58:00	0	20	4	7	5
1	2009-02-26 20:59:00	13	20	4	7	5
1	2009-02-26 21:00:00	64	20	4	7	5
1	2009-02-26 21:01:00	141	21	4	7	5
1	2009-02-26 21:02:00	0	21	4	7	5
1	2009-02-26 21:03:00	0	21	4	7	5
1	2009-02-26 21:04:00	0	21	4	7	5
1	2009-02-26 21:05:00	13	21	4	7	5
1	2009-02-26 21:06:00	0	21	4	7	5
1	2009-02-26 21:07:00	0	21	4	7	5
1	2009-02-26 21:08:00	26	21	4	7	5
1	2009-02-26 21:09:00	371	21	4	7	5
1	2009-02-26 21:10:00	102	21	4	7	5
1	2009-02-26 21:11:00	0	21	4	7	5
1	2009-02-26 21:12:00	0	21	4	7	5
1	2009-02-26 21:13:00	26	21	4	7	5
1	2009-02-26 21:14:00	0	21	4	7	5
1	2009-02-26 21:15:00	13	21	4	7	5
1	2009-02-26 21:16:00	259	21	4	7	5
1	2009-02-26 21:17:00	13	21	4	7	5
1	2009-02-26 21:18:00	0	21	4	7	5
1	2009-02-26 21:19:00	0	21	4	7	5
1	2009-02-26 21:20:00	0	21	4	7	5
1	2009-02-26 21:21:00	0	21	4	7	5
1	2009-02-26 21:22:00	0	21	4	7	5
1	2009-02-26 21:23:00	0	21	4	7	5
1	2009-02-26 21:24:00	0	21	4	7	5
1	2009-02-26 21:25:00	0	21	4	7	5
1	2009-02-26 21:26:00	0	21	4	7	5
1	2009-02-26 21:27:00	0	21	4	7	5
1	2009-02-26 21:28:00	0	21	4	7	5
1	2009-02-26 21:29:00	0	21	4	7	5
1	2009-02-26 21:30:00	0	21	4	7	5
1	2009-02-26 21:31:00	0	21	4	7	5
1	2009-02-26 21:32:00	0	21	4	7	5
1	2009-02-26 21:33:00	0	21	4	7	5
1	2009-02-26 21:34:00	0	21	4	7	5
1	2009-02-26 21:35:00	154	21	4	7	5
1	2009-02-26 21:36:00	38	21	4	7	5
1	2009-02-26 21:37:00	0	21	4	7	5
1	2009-02-26 21:38:00	0	21	4	7	5
1	2009-02-26 21:39:00	0	21	4	7	5
1	2009-02-26 21:40:00	0	21	4	7	5
1	2009-02-26 21:41:00	0	21	4	7	5
1	2009-02-26 21:42:00	0	21	4	7	5
1	2009-02-26 21:43:00	0	21	4	7	5
1	2009-02-26 21:44:00	0	21	4	7	5
1	2009-02-26 21:45:00	0	21	4	7	5
1	2009-02-26 21:46:00	26	21	4	7	5
1	2009-02-26 21:47:00	305	21	4	7	5
1	2009-02-26 21:48:00	0	21	4	7	5
1	2009-02-26 21:49:00	0	21	4	7	5
1	2009-02-26 21:50:00	228	21	4	7	5
1	2009-02-26 21:51:00	26	21	4	7	5
1	2009-02-26 21:52:00	0	21	4	7	5
1	2009-02-26 21:53:00	0	21	4	7	5
1	2009-02-26 21:54:00	13	21	4	7	5
1	2009-02-26 21:55:00	38	21	4	7	5
1	2009-02-26 21:56:00	0	21	4	7	5
1	2009-02-26 21:57:00	0	21	4	7	5
1	2009-02-26 21:58:00	0	21	4	7	5
1	2009-02-26 21:59:00	0	21	4	7	5
1	2009-02-26 22:00:00	0	21	4	7	5
1	2009-02-26 22:01:00	0	22	4	7	5
1	2009-02-26 22:02:00	0	22	4	7	5
1	2009-02-26 22:03:00	0	22	4	7	5
1	2009-02-26 22:04:00	0	22	4	7	5
1	2009-02-26 22:05:00	0	22	4	7	5
1	2009-02-26 22:06:00	0	22	4	7	5
1	2009-02-26 22:07:00	0	22	4	7	5
1	2009-02-26 22:08:00	0	22	4	7	5
1	2009-02-26 22:09:00	0	22	4	7	5
1	2009-02-26 22:10:00	13	22	4	7	5
1	2009-02-26 22:11:00	0	22	4	7	5
1	2009-02-26 22:12:00	0	22	4	7	5
1	2009-02-26 22:13:00	13	22	4	7	5
1	2009-02-26 22:14:00	0	22	4	7	5
1	2009-02-26 22:15:00	0	22	4	7	5
1	2009-02-26 22:16:00	0	22	4	7	5
1	2009-02-26 22:17:00	0	22	4	7	5
1	2009-02-26 22:18:00	0	22	4	7	5
1	2009-02-26 22:19:00	0	22	4	7	5
1	2009-02-26 22:20:00	0	22	4	7	5
1	2009-02-26 22:21:00	0	22	4	7	5
1	2009-02-26 22:22:00	0	22	4	7	5
1	2009-02-26 22:23:00	0	22	4	7	5
1	2009-02-26 22:24:00	0	22	4	7	5
1	2009-02-26 22:25:00	0	22	4	7	5
1	2009-02-26 22:26:00	0	22	4	7	5
1	2009-02-26 22:27:00	0	22	4	7	5
1	2009-02-26 22:28:00	0	22	4	7	5
1	2009-02-26 22:29:00	0	22	4	7	5
1	2009-02-26 22:30:00	0	22	4	7	5
1	2009-02-26 22:31:00	13	22	4	7	5
1	2009-02-26 22:32:00	0	22	4	7	5
1	2009-02-26 22:33:00	0	22	4	7	5
1	2009-02-26 22:34:00	274	22	4	7	5
1	2009-02-26 22:35:00	26	22	4	7	5
1	2009-02-26 22:36:00	0	22	4	7	5
1	2009-02-26 22:37:00	0	22	4	7	5
1	2009-02-26 22:38:00	0	22	4	7	5
1	2009-02-26 22:39:00	0	22	4	7	5
1	2009-02-26 22:40:00	0	22	4	7	5
1	2009-02-26 22:41:00	0	22	4	7	5
1	2009-02-26 22:42:00	0	22	4	7	5
1	2009-02-26 22:43:00	0	22	4	7	5
1	2009-02-26 22:44:00	0	22	4	7	5
1	2009-02-26 22:45:00	0	22	4	7	5
1	2009-02-26 22:46:00	0	22	4	7	5
1	2009-02-26 22:47:00	0	22	4	7	5
1	2009-02-26 22:48:00	0	22	4	7	5
1	2009-02-26 22:49:00	0	22	4	7	5
1	2009-02-26 22:50:00	0	22	4	7	5
1	2009-02-26 22:51:00	0	22	4	7	5
1	2009-02-26 22:52:00	0	22	4	7	5
1	2009-02-26 22:53:00	0	22	4	7	5
1	2009-02-26 22:54:00	0	22	4	7	5
1	2009-02-26 22:55:00	0	22	4	7	5
1	2009-02-26 22:56:00	0	22	4	7	5
1	2009-02-26 22:57:00	0	22	4	7	5
1	2009-02-26 22:58:00	0	22	4	7	5
1	2009-02-26 22:59:00	0	22	4	7	5
1	2009-02-26 23:00:00	0	22	4	7	5
1	2009-02-26 23:01:00	0	23	4	7	5
1	2009-02-26 23:02:00	0	23	4	7	5
1	2009-02-26 23:03:00	0	23	4	7	5
1	2009-02-26 23:04:00	0	23	4	7	5
1	2009-02-26 23:05:00	0	23	4	7	5
1	2009-02-26 23:06:00	0	23	4	7	5
1	2009-02-26 23:07:00	0	23	4	7	5
1	2009-02-26 23:08:00	0	23	4	7	5
1	2009-02-26 23:09:00	0	23	4	7	5
1	2009-02-26 23:10:00	0	23	4	7	5
1	2009-02-26 23:11:00	0	23	4	7	5
1	2009-02-26 23:12:00	0	23	4	7	5
1	2009-02-26 23:13:00	0	23	4	7	5
1	2009-02-26 23:14:00	0	23	4	7	5
1	2009-02-26 23:15:00	0	23	4	7	5
1	2009-02-26 23:16:00	0	23	4	7	5
1	2009-02-26 23:17:00	0	23	4	7	5
1	2009-02-26 23:18:00	0	23	4	7	5
1	2009-02-26 23:19:00	0	23	4	7	5
1	2009-02-26 23:20:00	0	23	4	7	5
1	2009-02-26 23:21:00	0	23	4	7	5
1	2009-02-26 23:22:00	0	23	4	7	5
1	2009-02-26 23:23:00	0	23	4	7	5
1	2009-02-26 23:24:00	0	23	4	7	5
1	2009-02-26 23:25:00	0	23	4	7	5
1	2009-02-26 23:26:00	0	23	4	7	5
1	2009-02-26 23:27:00	0	23	4	7	5
1	2009-02-26 23:28:00	0	23	4	7	5
1	2009-02-26 23:29:00	0	23	4	7	5
1	2009-02-26 23:30:00	0	23	4	7	5
1	2009-02-26 23:31:00	0	23	4	7	5
1	2009-02-26 23:32:00	0	23	4	7	5
1	2009-02-26 23:33:00	0	23	4	7	5
1	2009-02-26 23:34:00	0	23	4	7	5
1	2009-02-26 23:35:00	0	23	4	7	5
1	2009-02-26 23:36:00	0	23	4	7	5
1	2009-02-26 23:37:00	0	23	4	7	5
1	2009-02-26 23:38:00	0	23	4	7	5
1	2009-02-26 23:39:00	0	23	4	7	5
1	2009-02-26 23:40:00	0	23	4	7	5
1	2009-02-26 23:41:00	0	23	4	7	5
1	2009-02-26 23:42:00	0	23	4	7	5
1	2009-02-26 23:43:00	0	23	4	7	5
1	2009-02-26 23:44:00	0	23	4	7	5
1	2009-02-26 23:45:00	0	23	4	7	5
1	2009-02-26 23:46:00	0	23	4	7	5
1	2009-02-26 23:47:00	0	23	4	7	5
1	2009-02-26 23:48:00	0	23	4	7	5
1	2009-02-26 23:49:00	0	23	4	7	5
1	2009-02-26 23:50:00	0	23	4	7	5
1	2009-02-26 23:51:00	0	23	4	7	5
1	2009-02-26 23:52:00	0	23	4	7	5
1	2009-02-26 23:53:00	0	23	4	7	5
1	2009-02-26 23:54:00	0	23	4	7	5
1	2009-02-26 23:55:00	0	23	4	7	5
1	2009-02-26 23:56:00	0	23	4	7	5
1	2009-02-26 23:57:00	0	23	4	7	5
1	2009-02-26 23:58:00	0	23	4	7	5
1	2009-02-26 23:59:00	0	23	4	7	5
1	2009-02-27	0	23	4	7	5
1	2009-02-27 00:01:00	0	0	1	8	6
1	2009-02-27 00:02:00	0	0	1	8	6
1	2009-02-27 00:03:00	0	0	1	8	6
1	2009-02-27 00:04:00	0	0	1	8	6
1	2009-02-27 00:05:00	0	0	1	8	6
1	2009-02-27 00:06:00	0	0	1	8	6
1	2009-02-27 00:07:00	0	0	1	8	6
1	2009-02-27 00:08:00	0	0	1	8	6
1	2009-02-27 00:09:00	0	0	1	8	6
1	2009-02-27 00:10:00	0	0	1	8	6
1	2009-02-27 00:11:00	0	0	1	8	6
1	2009-02-27 00:12:00	0	0	1	8	6
1	2009-02-27 00:13:00	0	0	1	8	6
1	2009-02-27 00:14:00	0	0	1	8	6
1	2009-02-27 00:15:00	0	0	1	8	6
1	2009-02-27 00:16:00	0	0	1	8	6
1	2009-02-27 00:17:00	0	0	1	8	6
1	2009-02-27 00:18:00	13	0	1	8	6
1	2009-02-27 00:19:00	154	0	1	8	6
1	2009-02-27 00:20:00	0	0	1	8	6
1	2009-02-27 00:21:00	0	0	1	8	6
1	2009-02-27 00:22:00	0	0	1	8	6
1	2009-02-27 00:23:00	0	0	1	8	6
1	2009-02-27 00:24:00	0	0	1	8	6
1	2009-02-27 00:25:00	0	0	1	8	6
1	2009-02-27 00:26:00	0	0	1	8	6
1	2009-02-27 00:27:00	0	0	1	8	6
1	2009-02-27 00:28:00	0	0	1	8	6
1	2009-02-27 00:29:00	0	0	1	8	6
1	2009-02-27 00:30:00	0	0	1	8	6
1	2009-02-27 00:31:00	0	0	1	8	6
1	2009-02-27 00:32:00	0	0	1	8	6
1	2009-02-27 00:33:00	0	0	1	8	6
1	2009-02-27 00:34:00	0	0	1	8	6
1	2009-02-27 00:35:00	0	0	1	8	6
1	2009-02-27 00:36:00	0	0	1	8	6
1	2009-02-27 00:37:00	0	0	1	8	6
1	2009-02-27 00:38:00	0	0	1	8	6
1	2009-02-27 00:39:00	0	0	1	8	6
1	2009-02-27 00:40:00	0	0	1	8	6
1	2009-02-27 00:41:00	0	0	1	8	6
1	2009-02-27 00:42:00	0	0	1	8	6
1	2009-02-27 00:43:00	0	0	1	8	6
1	2009-02-27 00:44:00	0	0	1	8	6
1	2009-02-27 00:45:00	0	0	1	8	6
1	2009-02-27 00:46:00	0	0	1	8	6
1	2009-02-27 00:47:00	0	0	1	8	6
1	2009-02-27 00:48:00	0	0	1	8	6
1	2009-02-27 00:49:00	0	0	1	8	6
1	2009-02-27 00:50:00	0	0	1	8	6
1	2009-02-27 00:51:00	0	0	1	8	6
1	2009-02-27 00:52:00	13	0	1	8	6
1	2009-02-27 00:53:00	0	0	1	8	6
1	2009-02-27 00:54:00	0	0	1	8	6
1	2009-02-27 00:55:00	0	0	1	8	6
1	2009-02-27 00:56:00	0	0	1	8	6
1	2009-02-27 00:57:00	0	0	1	8	6
1	2009-02-27 00:58:00	0	0	1	8	6
1	2009-02-27 00:59:00	0	0	1	8	6
1	2009-02-27 01:00:00	0	0	1	8	6
1	2009-02-27 01:01:00	0	1	1	8	6
1	2009-02-27 01:02:00	0	1	1	8	6
1	2009-02-27 01:03:00	0	1	1	8	6
1	2009-02-27 01:04:00	0	1	1	8	6
1	2009-02-27 01:05:00	0	1	1	8	6
1	2009-02-27 01:06:00	0	1	1	8	6
1	2009-02-27 01:07:00	0	1	1	8	6
1	2009-02-27 01:08:00	0	1	1	8	6
1	2009-02-27 01:09:00	0	1	1	8	6
1	2009-02-27 01:10:00	0	1	1	8	6
1	2009-02-27 01:11:00	38	1	1	8	6
1	2009-02-27 01:12:00	0	1	1	8	6
1	2009-02-27 01:13:00	0	1	1	8	6
1	2009-02-27 01:14:00	13	1	1	8	6
1	2009-02-27 01:15:00	0	1	1	8	6
1	2009-02-27 01:16:00	0	1	1	8	6
1	2009-02-27 01:17:00	0	1	1	8	6
1	2009-02-27 01:18:00	0	1	1	8	6
1	2009-02-27 01:19:00	0	1	1	8	6
1	2009-02-27 01:20:00	0	1	1	8	6
1	2009-02-27 01:21:00	0	1	1	8	6
1	2009-02-27 01:22:00	0	1	1	8	6
1	2009-02-27 01:23:00	0	1	1	8	6
1	2009-02-27 01:24:00	0	1	1	8	6
1	2009-02-27 01:25:00	0	1	1	8	6
1	2009-02-27 01:26:00	0	1	1	8	6
1	2009-02-27 01:27:00	0	1	1	8	6
1	2009-02-27 01:28:00	0	1	1	8	6
1	2009-02-27 01:29:00	0	1	1	8	6
1	2009-02-27 01:30:00	0	1	1	8	6
1	2009-02-27 01:31:00	0	1	1	8	6
1	2009-02-27 01:32:00	0	1	1	8	6
1	2009-02-27 01:33:00	0	1	1	8	6
1	2009-02-27 01:34:00	0	1	1	8	6
1	2009-02-27 01:35:00	0	1	1	8	6
1	2009-02-27 01:36:00	0	1	1	8	6
1	2009-02-27 01:37:00	0	1	1	8	6
1	2009-02-27 01:38:00	13	1	1	8	6
1	2009-02-27 01:39:00	0	1	1	8	6
1	2009-02-27 01:40:00	0	1	1	8	6
1	2009-02-27 01:41:00	38	1	1	8	6
1	2009-02-27 01:42:00	0	1	1	8	6
1	2009-02-27 01:43:00	0	1	1	8	6
1	2009-02-27 01:44:00	0	1	1	8	6
1	2009-02-27 01:45:00	0	1	1	8	6
1	2009-02-27 01:46:00	0	1	1	8	6
1	2009-02-27 01:47:00	0	1	1	8	6
1	2009-02-27 01:48:00	0	1	1	8	6
1	2009-02-27 01:49:00	0	1	1	8	6
1	2009-02-27 01:50:00	0	1	1	8	6
1	2009-02-27 01:51:00	0	1	1	8	6
1	2009-02-27 01:52:00	0	1	1	8	6
1	2009-02-27 01:53:00	0	1	1	8	6
1	2009-02-27 01:54:00	13	1	1	8	6
1	2009-02-27 01:55:00	0	1	1	8	6
1	2009-02-27 01:56:00	0	1	1	8	6
1	2009-02-27 01:57:00	0	1	1	8	6
1	2009-02-27 01:58:00	0	1	1	8	6
1	2009-02-27 01:59:00	0	1	1	8	6
1	2009-02-27 02:00:00	0	1	1	8	6
1	2009-02-27 02:01:00	0	2	1	8	6
1	2009-02-27 02:02:00	0	2	1	8	6
1	2009-02-27 02:03:00	0	2	1	8	6
1	2009-02-27 02:04:00	0	2	1	8	6
1	2009-02-27 02:05:00	0	2	1	8	6
1	2009-02-27 02:06:00	0	2	1	8	6
1	2009-02-27 02:07:00	13	2	1	8	6
1	2009-02-27 02:08:00	0	2	1	8	6
1	2009-02-27 02:09:00	0	2	1	8	6
1	2009-02-27 02:10:00	0	2	1	8	6
1	2009-02-27 02:11:00	0	2	1	8	6
1	2009-02-27 02:12:00	0	2	1	8	6
1	2009-02-27 02:13:00	0	2	1	8	6
1	2009-02-27 02:14:00	0	2	1	8	6
1	2009-02-27 02:15:00	0	2	1	8	6
1	2009-02-27 02:16:00	0	2	1	8	6
1	2009-02-27 02:17:00	0	2	1	8	6
1	2009-02-27 02:18:00	0	2	1	8	6
1	2009-02-27 02:19:00	0	2	1	8	6
1	2009-02-27 02:20:00	0	2	1	8	6
1	2009-02-27 02:21:00	0	2	1	8	6
1	2009-02-27 02:22:00	0	2	1	8	6
1	2009-02-27 02:23:00	0	2	1	8	6
1	2009-02-27 02:24:00	51	2	1	8	6
1	2009-02-27 02:25:00	38	2	1	8	6
1	2009-02-27 02:26:00	0	2	1	8	6
1	2009-02-27 02:27:00	0	2	1	8	6
1	2009-02-27 02:28:00	0	2	1	8	6
1	2009-02-27 02:29:00	0	2	1	8	6
1	2009-02-27 02:30:00	0	2	1	8	6
1	2009-02-27 02:31:00	0	2	1	8	6
1	2009-02-27 02:32:00	0	2	1	8	6
1	2009-02-27 02:33:00	0	2	1	8	6
1	2009-02-27 02:34:00	0	2	1	8	6
1	2009-02-27 02:35:00	0	2	1	8	6
1	2009-02-27 02:36:00	0	2	1	8	6
1	2009-02-27 02:37:00	0	2	1	8	6
1	2009-02-27 02:38:00	0	2	1	8	6
1	2009-02-27 02:39:00	0	2	1	8	6
1	2009-02-27 02:40:00	0	2	1	8	6
1	2009-02-27 02:41:00	0	2	1	8	6
1	2009-02-27 02:42:00	0	2	1	8	6
1	2009-02-27 02:43:00	0	2	1	8	6
1	2009-02-27 02:44:00	0	2	1	8	6
1	2009-02-27 02:45:00	13	2	1	8	6
1	2009-02-27 02:46:00	0	2	1	8	6
1	2009-02-27 02:47:00	0	2	1	8	6
1	2009-02-27 02:48:00	0	2	1	8	6
1	2009-02-27 02:49:00	0	2	1	8	6
1	2009-02-27 02:50:00	0	2	1	8	6
1	2009-02-27 02:51:00	0	2	1	8	6
1	2009-02-27 02:52:00	0	2	1	8	6
1	2009-02-27 02:53:00	0	2	1	8	6
1	2009-02-27 02:54:00	0	2	1	8	6
1	2009-02-27 02:55:00	0	2	1	8	6
1	2009-02-27 02:56:00	0	2	1	8	6
1	2009-02-27 02:57:00	0	2	1	8	6
1	2009-02-27 02:58:00	0	2	1	8	6
1	2009-02-27 02:59:00	0	2	1	8	6
1	2009-02-27 03:00:00	0	2	1	8	6
1	2009-02-27 03:01:00	0	3	1	8	6
1	2009-02-27 03:02:00	13	3	1	8	6
1	2009-02-27 03:03:00	0	3	1	8	6
1	2009-02-27 03:04:00	0	3	1	8	6
1	2009-02-27 03:05:00	0	3	1	8	6
1	2009-02-27 03:06:00	0	3	1	8	6
1	2009-02-27 03:07:00	0	3	1	8	6
1	2009-02-27 03:08:00	0	3	1	8	6
1	2009-02-27 03:09:00	0	3	1	8	6
1	2009-02-27 03:10:00	0	3	1	8	6
1	2009-02-27 03:11:00	0	3	1	8	6
1	2009-02-27 03:12:00	0	3	1	8	6
1	2009-02-27 03:13:00	0	3	1	8	6
1	2009-02-27 03:14:00	0	3	1	8	6
1	2009-02-27 03:15:00	0	3	1	8	6
1	2009-02-27 03:16:00	0	3	1	8	6
1	2009-02-27 03:17:00	0	3	1	8	6
1	2009-02-27 03:18:00	0	3	1	8	6
1	2009-02-27 03:19:00	0	3	1	8	6
1	2009-02-27 03:20:00	0	3	1	8	6
1	2009-02-27 03:21:00	0	3	1	8	6
1	2009-02-27 03:22:00	0	3	1	8	6
1	2009-02-27 03:23:00	0	3	1	8	6
1	2009-02-27 03:24:00	0	3	1	8	6
1	2009-02-27 03:25:00	0	3	1	8	6
1	2009-02-27 03:26:00	0	3	1	8	6
1	2009-02-27 03:27:00	0	3	1	8	6
1	2009-02-27 03:28:00	0	3	1	8	6
1	2009-02-27 03:29:00	0	3	1	8	6
1	2009-02-27 03:30:00	0	3	1	8	6
1	2009-02-27 03:31:00	0	3	1	8	6
1	2009-02-27 03:32:00	0	3	1	8	6
1	2009-02-27 03:33:00	0	3	1	8	6
1	2009-02-27 03:34:00	0	3	1	8	6
1	2009-02-27 03:35:00	0	3	1	8	6
1	2009-02-27 03:36:00	0	3	1	8	6
1	2009-02-27 03:37:00	0	3	1	8	6
1	2009-02-27 03:38:00	0	3	1	8	6
1	2009-02-27 03:39:00	0	3	1	8	6
1	2009-02-27 03:40:00	0	3	1	8	6
1	2009-02-27 03:41:00	0	3	1	8	6
1	2009-02-27 03:42:00	0	3	1	8	6
1	2009-02-27 03:43:00	0	3	1	8	6
1	2009-02-27 03:44:00	0	3	1	8	6
1	2009-02-27 03:45:00	0	3	1	8	6
1	2009-02-27 03:46:00	0	3	1	8	6
1	2009-02-27 03:47:00	0	3	1	8	6
1	2009-02-27 03:48:00	0	3	1	8	6
1	2009-02-27 03:49:00	0	3	1	8	6
1	2009-02-27 03:50:00	0	3	1	8	6
1	2009-02-27 03:51:00	0	3	1	8	6
1	2009-02-27 03:52:00	0	3	1	8	6
1	2009-02-27 03:53:00	0	3	1	8	6
1	2009-02-27 03:54:00	0	3	1	8	6
1	2009-02-27 03:55:00	0	3	1	8	6
1	2009-02-27 03:56:00	0	3	1	8	6
1	2009-02-27 03:57:00	0	3	1	8	6
1	2009-02-27 03:58:00	0	3	1	8	6
1	2009-02-27 03:59:00	0	3	1	8	6
1	2009-02-27 04:00:00	0	3	1	8	6
1	2009-02-27 04:01:00	0	4	1	8	6
1	2009-02-27 04:02:00	0	4	1	8	6
1	2009-02-27 04:03:00	0	4	1	8	6
1	2009-02-27 04:04:00	0	4	1	8	6
1	2009-02-27 04:05:00	0	4	1	8	6
1	2009-02-27 04:06:00	0	4	1	8	6
1	2009-02-27 04:07:00	0	4	1	8	6
1	2009-02-27 04:08:00	0	4	1	8	6
1	2009-02-27 04:09:00	13	4	1	8	6
1	2009-02-27 04:10:00	38	4	1	8	6
1	2009-02-27 04:11:00	0	4	1	8	6
1	2009-02-27 04:12:00	0	4	1	8	6
1	2009-02-27 04:13:00	0	4	1	8	6
1	2009-02-27 04:14:00	0	4	1	8	6
1	2009-02-27 04:15:00	0	4	1	8	6
1	2009-02-27 04:16:00	0	4	1	8	6
1	2009-02-27 04:17:00	0	4	1	8	6
1	2009-02-27 04:18:00	0	4	1	8	6
1	2009-02-27 04:19:00	0	4	1	8	6
1	2009-02-27 04:20:00	0	4	1	8	6
1	2009-02-27 04:21:00	0	4	1	8	6
1	2009-02-27 04:22:00	0	4	1	8	6
1	2009-02-27 04:23:00	0	4	1	8	6
1	2009-02-27 04:24:00	0	4	1	8	6
1	2009-02-27 04:25:00	0	4	1	8	6
1	2009-02-27 04:26:00	0	4	1	8	6
1	2009-02-27 04:27:00	0	4	1	8	6
1	2009-02-27 04:28:00	0	4	1	8	6
1	2009-02-27 04:29:00	0	4	1	8	6
1	2009-02-27 04:30:00	13	4	1	8	6
1	2009-02-27 04:31:00	0	4	1	8	6
1	2009-02-27 04:32:00	0	4	1	8	6
1	2009-02-27 04:33:00	0	4	1	8	6
1	2009-02-27 04:34:00	0	4	1	8	6
1	2009-02-27 04:35:00	0	4	1	8	6
1	2009-02-27 04:36:00	0	4	1	8	6
1	2009-02-27 04:37:00	0	4	1	8	6
1	2009-02-27 04:38:00	0	4	1	8	6
1	2009-02-27 04:39:00	0	4	1	8	6
1	2009-02-27 04:40:00	0	4	1	8	6
1	2009-02-27 04:41:00	0	4	1	8	6
1	2009-02-27 04:42:00	0	4	1	8	6
1	2009-02-27 04:43:00	0	4	1	8	6
1	2009-02-27 04:44:00	0	4	1	8	6
1	2009-02-27 04:45:00	0	4	1	8	6
1	2009-02-27 04:46:00	0	4	1	8	6
1	2009-02-27 04:47:00	0	4	1	8	6
1	2009-02-27 04:48:00	0	4	1	8	6
1	2009-02-27 04:49:00	0	4	1	8	6
1	2009-02-27 04:50:00	0	4	1	8	6
1	2009-02-27 04:51:00	0	4	1	8	6
1	2009-02-27 04:52:00	0	4	1	8	6
1	2009-02-27 04:53:00	0	4	1	8	6
1	2009-02-27 04:54:00	0	4	1	8	6
1	2009-02-27 04:55:00	0	4	1	8	6
1	2009-02-27 04:56:00	0	4	1	8	6
1	2009-02-27 04:57:00	0	4	1	8	6
1	2009-02-27 04:58:00	0	4	1	8	6
1	2009-02-27 04:59:00	0	4	1	8	6
1	2009-02-27 05:00:00	0	4	1	8	6
1	2009-02-27 05:01:00	0	5	1	8	6
1	2009-02-27 05:02:00	0	5	1	8	6
1	2009-02-27 05:03:00	0	5	1	8	6
1	2009-02-27 05:04:00	0	5	1	8	6
1	2009-02-27 05:05:00	0	5	1	8	6
1	2009-02-27 05:06:00	0	5	1	8	6
1	2009-02-27 05:07:00	0	5	1	8	6
1	2009-02-27 05:08:00	0	5	1	8	6
1	2009-02-27 05:09:00	0	5	1	8	6
1	2009-02-27 05:10:00	0	5	1	8	6
1	2009-02-27 05:11:00	0	5	1	8	6
1	2009-02-27 05:12:00	0	5	1	8	6
1	2009-02-27 05:13:00	0	5	1	8	6
1	2009-02-27 05:14:00	0	5	1	8	6
1	2009-02-27 05:15:00	0	5	1	8	6
1	2009-02-27 05:16:00	0	5	1	8	6
1	2009-02-27 05:17:00	0	5	1	8	6
1	2009-02-27 05:18:00	0	5	1	8	6
1	2009-02-27 05:19:00	0	5	1	8	6
1	2009-02-27 05:20:00	0	5	1	8	6
1	2009-02-27 05:21:00	0	5	1	8	6
1	2009-02-27 05:22:00	0	5	1	8	6
1	2009-02-27 05:23:00	0	5	1	8	6
1	2009-02-27 05:24:00	0	5	1	8	6
1	2009-02-27 05:25:00	0	5	1	8	6
1	2009-02-27 05:26:00	0	5	1	8	6
1	2009-02-27 05:27:00	0	5	1	8	6
1	2009-02-27 05:28:00	0	5	1	8	6
1	2009-02-27 05:29:00	0	5	1	8	6
1	2009-02-27 05:30:00	0	5	1	8	6
1	2009-02-27 05:31:00	0	5	1	8	6
1	2009-02-27 05:32:00	0	5	1	8	6
1	2009-02-27 05:33:00	0	5	1	8	6
1	2009-02-27 05:34:00	0	5	1	8	6
1	2009-02-27 05:35:00	0	5	1	8	6
1	2009-02-27 05:36:00	0	5	1	8	6
1	2009-02-27 05:37:00	0	5	1	8	6
1	2009-02-27 05:38:00	0	5	1	8	6
1	2009-02-27 05:39:00	0	5	1	8	6
1	2009-02-27 05:40:00	0	5	1	8	6
1	2009-02-27 05:41:00	0	5	1	8	6
1	2009-02-27 05:42:00	0	5	1	8	6
1	2009-02-27 05:43:00	0	5	1	8	6
1	2009-02-27 05:44:00	0	5	1	8	6
1	2009-02-27 05:45:00	0	5	1	8	6
1	2009-02-27 05:46:00	0	5	1	8	6
1	2009-02-27 05:47:00	0	5	1	8	6
1	2009-02-27 05:48:00	0	5	1	8	6
1	2009-02-27 05:49:00	0	5	1	8	6
1	2009-02-27 05:50:00	0	5	1	8	6
1	2009-02-27 05:51:00	0	5	1	8	6
1	2009-02-27 05:52:00	0	5	1	8	6
1	2009-02-27 05:53:00	0	5	1	8	6
1	2009-02-27 05:54:00	0	5	1	8	6
1	2009-02-27 05:55:00	13	5	1	8	6
1	2009-02-27 05:56:00	0	5	1	8	6
1	2009-02-27 05:57:00	77	5	1	8	6
1	2009-02-27 05:58:00	13	5	1	8	6
1	2009-02-27 05:59:00	0	5	1	8	6
1	2009-02-27 06:00:00	0	5	1	8	6
1	2009-02-27 06:01:00	0	6	2	8	6
1	2009-02-27 06:02:00	0	6	2	8	6
1	2009-02-27 06:03:00	0	6	2	8	6
1	2009-02-27 06:04:00	0	6	2	8	6
1	2009-02-27 06:05:00	0	6	2	8	6
1	2009-02-27 06:06:00	0	6	2	8	6
1	2009-02-27 06:07:00	0	6	2	8	6
1	2009-02-27 06:08:00	0	6	2	8	6
1	2009-02-27 06:09:00	0	6	2	8	6
1	2009-02-27 06:10:00	0	6	2	8	6
1	2009-02-27 06:11:00	0	6	2	8	6
1	2009-02-27 06:12:00	0	6	2	8	6
1	2009-02-27 06:13:00	0	6	2	8	6
1	2009-02-27 06:14:00	0	6	2	8	6
1	2009-02-27 06:15:00	0	6	2	8	6
1	2009-02-27 06:16:00	0	6	2	8	6
1	2009-02-27 06:17:00	0	6	2	8	6
1	2009-02-27 06:18:00	0	6	2	8	6
1	2009-02-27 06:19:00	0	6	2	8	6
1	2009-02-27 06:20:00	0	6	2	8	6
1	2009-02-27 06:21:00	0	6	2	8	6
1	2009-02-27 06:22:00	77	6	2	8	6
1	2009-02-27 06:23:00	212	6	2	8	6
1	2009-02-27 06:24:00	517	6	2	8	6
1	2009-02-27 06:25:00	166	6	2	8	6
1	2009-02-27 06:26:00	13	6	2	8	6
1	2009-02-27 06:27:00	90	6	2	8	6
1	2009-02-27 06:28:00	13	6	2	8	6
1	2009-02-27 06:29:00	0	6	2	8	6
1	2009-02-27 06:30:00	166	6	2	8	6
1	2009-02-27 06:31:00	128	6	2	8	6
1	2009-02-27 06:32:00	950	6	2	8	6
1	2009-02-27 06:33:00	730	6	2	8	6
1	2009-02-27 06:34:00	950	6	2	8	6
1	2009-02-27 06:35:00	730	6	2	8	6
1	2009-02-27 06:36:00	753	6	2	8	6
1	2009-02-27 06:37:00	305	6	2	8	6
1	2009-02-27 06:38:00	115	6	2	8	6
1	2009-02-27 06:39:00	154	6	2	8	6
1	2009-02-27 06:40:00	353	6	2	8	6
1	2009-02-27 06:41:00	707	6	2	8	6
1	2009-02-27 06:42:00	407	6	2	8	6
1	2009-02-27 06:43:00	371	6	2	8	6
1	2009-02-27 06:44:00	479	6	2	8	6
1	2009-02-27 06:45:00	620	6	2	8	6
1	2009-02-27 06:46:00	660	6	2	8	6
1	2009-02-27 06:47:00	425	6	2	8	6
1	2009-02-27 06:48:00	335	6	2	8	6
1	2009-02-27 06:49:00	1001	6	2	8	6
1	2009-02-27 06:50:00	479	6	2	8	6
1	2009-02-27 06:51:00	38	6	2	8	6
1	2009-02-27 06:52:00	90	6	2	8	6
1	2009-02-27 06:53:00	197	6	2	8	6
1	2009-02-27 06:54:00	228	6	2	8	6
1	2009-02-27 06:55:00	0	6	2	8	6
1	2009-02-27 06:56:00	0	6	2	8	6
1	2009-02-27 06:57:00	0	6	2	8	6
1	2009-02-27 06:58:00	0	6	2	8	6
1	2009-02-27 06:59:00	0	6	2	8	6
1	2009-02-27 07:00:00	0	6	2	8	6
1	2009-02-27 07:01:00	13	7	2	8	6
1	2009-02-27 07:02:00	0	7	2	8	6
1	2009-02-27 07:03:00	0	7	2	8	6
1	2009-02-27 07:04:00	0	7	2	8	6
1	2009-02-27 07:05:00	0	7	2	8	6
1	2009-02-27 07:06:00	0	7	2	8	6
1	2009-02-27 07:07:00	0	7	2	8	6
1	2009-02-27 07:08:00	51	7	2	8	6
1	2009-02-27 07:09:00	0	7	2	8	6
1	2009-02-27 07:10:00	0	7	2	8	6
1	2009-02-27 07:11:00	0	7	2	8	6
1	2009-02-27 07:12:00	0	7	2	8	6
1	2009-02-27 07:13:00	0	7	2	8	6
1	2009-02-27 07:14:00	0	7	2	8	6
1	2009-02-27 07:15:00	0	7	2	8	6
1	2009-02-27 07:16:00	0	7	2	8	6
1	2009-02-27 07:17:00	0	7	2	8	6
1	2009-02-27 07:18:00	0	7	2	8	6
1	2009-02-27 07:19:00	0	7	2	8	6
1	2009-02-27 07:20:00	154	7	2	8	6
1	2009-02-27 07:21:00	479	7	2	8	6
1	2009-02-27 07:22:00	259	7	2	8	6
1	2009-02-27 07:23:00	182	7	2	8	6
1	2009-02-27 07:24:00	13	7	2	8	6
1	2009-02-27 07:25:00	0	7	2	8	6
1	2009-02-27 07:26:00	182	7	2	8	6
1	2009-02-27 07:27:00	0	7	2	8	6
1	2009-02-27 07:28:00	0	7	2	8	6
1	2009-02-27 07:29:00	0	7	2	8	6
1	2009-02-27 07:30:00	0	7	2	8	6
1	2009-02-27 07:31:00	0	7	2	8	6
1	2009-02-27 07:32:00	0	7	2	8	6
1	2009-02-27 07:33:00	38	7	2	8	6
1	2009-02-27 07:34:00	115	7	2	8	6
1	2009-02-27 07:35:00	197	7	2	8	6
1	2009-02-27 07:36:00	538	7	2	8	6
1	2009-02-27 07:37:00	558	7	2	8	6
1	2009-02-27 07:38:00	0	7	2	8	6
1	2009-02-27 07:39:00	38	7	2	8	6
1	2009-02-27 07:40:00	730	7	2	8	6
1	2009-02-27 07:41:00	371	7	2	8	6
1	2009-02-27 07:42:00	77	7	2	8	6
1	2009-02-27 07:43:00	0	7	2	8	6
1	2009-02-27 07:44:00	0	7	2	8	6
1	2009-02-27 07:45:00	0	7	2	8	6
1	2009-02-27 07:46:00	0	7	2	8	6
1	2009-02-27 07:47:00	128	7	2	8	6
1	2009-02-27 07:48:00	51	7	2	8	6
1	2009-02-27 07:49:00	335	7	2	8	6
1	2009-02-27 07:50:00	497	7	2	8	6
1	2009-02-27 07:51:00	0	7	2	8	6
1	2009-02-27 07:52:00	0	7	2	8	6
1	2009-02-27 07:53:00	0	7	2	8	6
1	2009-02-27 07:54:00	0	7	2	8	6
1	2009-02-27 07:55:00	0	7	2	8	6
1	2009-02-27 07:56:00	0	7	2	8	6
1	2009-02-27 07:57:00	0	7	2	8	6
1	2009-02-27 07:58:00	51	7	2	8	6
1	2009-02-27 07:59:00	228	7	2	8	6
1	2009-02-27 08:00:00	13	7	2	8	6
1	2009-02-27 08:01:00	0	8	2	8	6
1	2009-02-27 08:02:00	0	8	2	8	6
1	2009-02-27 08:03:00	0	8	2	8	6
1	2009-02-27 08:04:00	0	8	2	8	6
1	2009-02-27 08:05:00	0	8	2	8	6
1	2009-02-27 08:06:00	0	8	2	8	6
1	2009-02-27 08:07:00	13	8	2	8	6
1	2009-02-27 08:08:00	0	8	2	8	6
1	2009-02-27 08:09:00	13	8	2	8	6
1	2009-02-27 08:10:00	0	8	2	8	6
1	2009-02-27 08:11:00	0	8	2	8	6
1	2009-02-27 08:12:00	13	8	2	8	6
1	2009-02-27 08:13:00	13	8	2	8	6
1	2009-02-27 08:14:00	0	8	2	8	6
1	2009-02-27 08:15:00	0	8	2	8	6
1	2009-02-27 08:16:00	353	8	2	8	6
1	2009-02-27 08:17:00	320	8	2	8	6
1	2009-02-27 08:18:00	64	8	2	8	6
1	2009-02-27 08:19:00	353	8	2	8	6
1	2009-02-27 08:20:00	212	8	2	8	6
1	2009-02-27 08:21:00	289	8	2	8	6
1	2009-02-27 08:22:00	243	8	2	8	6
1	2009-02-27 08:23:00	274	8	2	8	6
1	2009-02-27 08:24:00	479	8	2	8	6
1	2009-02-27 08:25:00	640	8	2	8	6
1	2009-02-27 08:26:00	558	8	2	8	6
1	2009-02-27 08:27:00	335	8	2	8	6
1	2009-02-27 08:28:00	305	8	2	8	6
1	2009-02-27 08:29:00	90	8	2	8	6
1	2009-02-27 08:30:00	335	8	2	8	6
1	2009-02-27 08:31:00	141	8	2	8	6
1	2009-02-27 08:32:00	0	8	2	8	6
1	2009-02-27 08:33:00	0	8	2	8	6
1	2009-02-27 08:34:00	0	8	2	8	6
1	2009-02-27 08:35:00	0	8	2	8	6
1	2009-02-27 08:36:00	0	8	2	8	6
1	2009-02-27 08:37:00	0	8	2	8	6
1	2009-02-27 08:38:00	0	8	2	8	6
1	2009-02-27 08:39:00	0	8	2	8	6
1	2009-02-27 08:40:00	0	8	2	8	6
1	2009-02-27 08:41:00	0	8	2	8	6
1	2009-02-27 08:42:00	13	8	2	8	6
1	2009-02-27 08:43:00	0	8	2	8	6
1	2009-02-27 08:44:00	0	8	2	8	6
1	2009-02-27 08:45:00	0	8	2	8	6
1	2009-02-27 08:46:00	0	8	2	8	6
1	2009-02-27 08:47:00	0	8	2	8	6
1	2009-02-27 08:48:00	0	8	2	8	6
1	2009-02-27 08:49:00	0	8	2	8	6
1	2009-02-27 08:50:00	0	8	2	8	6
1	2009-02-27 08:51:00	0	8	2	8	6
1	2009-02-27 08:52:00	0	8	2	8	6
1	2009-02-27 08:53:00	0	8	2	8	6
1	2009-02-27 08:54:00	0	8	2	8	6
1	2009-02-27 08:55:00	0	8	2	8	6
1	2009-02-27 08:56:00	0	8	2	8	6
1	2009-02-27 08:57:00	0	8	2	8	6
1	2009-02-27 08:58:00	0	8	2	8	6
1	2009-02-27 08:59:00	0	8	2	8	6
1	2009-02-27 09:00:00	0	8	2	8	6
1	2009-02-27 09:01:00	0	9	2	8	6
1	2009-02-27 09:02:00	0	9	2	8	6
1	2009-02-27 09:03:00	0	9	2	8	6
1	2009-02-27 09:04:00	0	9	2	8	6
1	2009-02-27 09:05:00	0	9	2	8	6
1	2009-02-27 09:06:00	0	9	2	8	6
1	2009-02-27 09:07:00	0	9	2	8	6
1	2009-02-27 09:08:00	0	9	2	8	6
1	2009-02-27 09:09:00	0	9	2	8	6
1	2009-02-27 09:10:00	0	9	2	8	6
1	2009-02-27 09:11:00	0	9	2	8	6
1	2009-02-27 09:12:00	13	9	2	8	6
1	2009-02-27 09:13:00	0	9	2	8	6
1	2009-02-27 09:14:00	0	9	2	8	6
1	2009-02-27 09:15:00	0	9	2	8	6
1	2009-02-27 09:16:00	0	9	2	8	6
1	2009-02-27 09:17:00	13	9	2	8	6
1	2009-02-27 09:18:00	0	9	2	8	6
1	2009-02-27 09:19:00	0	9	2	8	6
1	2009-02-27 09:20:00	13	9	2	8	6
1	2009-02-27 09:21:00	0	9	2	8	6
1	2009-02-27 09:22:00	0	9	2	8	6
1	2009-02-27 09:23:00	0	9	2	8	6
1	2009-02-27 09:24:00	0	9	2	8	6
1	2009-02-27 09:25:00	0	9	2	8	6
1	2009-02-27 09:26:00	0	9	2	8	6
1	2009-02-27 09:27:00	0	9	2	8	6
1	2009-02-27 09:28:00	0	9	2	8	6
1	2009-02-27 09:29:00	0	9	2	8	6
1	2009-02-27 09:30:00	0	9	2	8	6
1	2009-02-27 09:31:00	0	9	2	8	6
1	2009-02-27 09:32:00	0	9	2	8	6
1	2009-02-27 09:33:00	0	9	2	8	6
1	2009-02-27 09:34:00	0	9	2	8	6
1	2009-02-27 09:35:00	0	9	2	8	6
1	2009-02-27 09:36:00	0	9	2	8	6
1	2009-02-27 09:37:00	0	9	2	8	6
1	2009-02-27 09:38:00	0	9	2	8	6
1	2009-02-27 09:39:00	0	9	2	8	6
1	2009-02-27 09:40:00	0	9	2	8	6
1	2009-02-27 09:41:00	0	9	2	8	6
1	2009-02-27 09:42:00	0	9	2	8	6
1	2009-02-27 09:43:00	0	9	2	8	6
1	2009-02-27 09:44:00	0	9	2	8	6
1	2009-02-27 09:45:00	0	9	2	8	6
1	2009-02-27 09:46:00	0	9	2	8	6
1	2009-02-27 09:47:00	13	9	2	8	6
1	2009-02-27 09:48:00	0	9	2	8	6
1	2009-02-27 09:49:00	0	9	2	8	6
1	2009-02-27 09:50:00	0	9	2	8	6
1	2009-02-27 09:51:00	0	9	2	8	6
1	2009-02-27 09:52:00	0	9	2	8	6
1	2009-02-27 09:53:00	0	9	2	8	6
1	2009-02-27 09:54:00	0	9	2	8	6
1	2009-02-27 09:55:00	0	9	2	8	6
1	2009-02-27 09:56:00	0	9	2	8	6
1	2009-02-27 09:57:00	0	9	2	8	6
1	2009-02-27 09:58:00	0	9	2	8	6
1	2009-02-27 09:59:00	0	9	2	8	6
1	2009-02-27 10:00:00	0	9	2	8	6
1	2009-02-27 10:01:00	0	10	2	8	6
1	2009-02-27 10:02:00	0	10	2	8	6
1	2009-02-27 10:03:00	0	10	2	8	6
1	2009-02-27 10:04:00	0	10	2	8	6
1	2009-02-27 10:05:00	0	10	2	8	6
1	2009-02-27 10:06:00	0	10	2	8	6
1	2009-02-27 10:07:00	0	10	2	8	6
1	2009-02-27 10:08:00	0	10	2	8	6
1	2009-02-27 10:09:00	0	10	2	8	6
1	2009-02-27 10:10:00	0	10	2	8	6
1	2009-02-27 10:11:00	0	10	2	8	6
1	2009-02-27 10:12:00	0	10	2	8	6
1	2009-02-27 10:13:00	0	10	2	8	6
1	2009-02-27 10:14:00	0	10	2	8	6
1	2009-02-27 10:15:00	0	10	2	8	6
1	2009-02-27 10:16:00	0	10	2	8	6
1	2009-02-27 10:17:00	0	10	2	8	6
1	2009-02-27 10:18:00	0	10	2	8	6
1	2009-02-27 10:19:00	0	10	2	8	6
1	2009-02-27 10:20:00	0	10	2	8	6
1	2009-02-27 10:21:00	0	10	2	8	6
1	2009-02-27 10:22:00	0	10	2	8	6
1	2009-02-27 10:23:00	13	10	2	8	6
1	2009-02-27 10:24:00	0	10	2	8	6
1	2009-02-27 10:25:00	0	10	2	8	6
1	2009-02-27 10:26:00	0	10	2	8	6
1	2009-02-27 10:27:00	0	10	2	8	6
1	2009-02-27 10:28:00	0	10	2	8	6
1	2009-02-27 10:29:00	0	10	2	8	6
1	2009-02-27 10:30:00	0	10	2	8	6
1	2009-02-27 10:31:00	0	10	2	8	6
1	2009-02-27 10:32:00	0	10	2	8	6
1	2009-02-27 10:33:00	0	10	2	8	6
1	2009-02-27 10:34:00	0	10	2	8	6
1	2009-02-27 10:35:00	13	10	2	8	6
1	2009-02-27 10:36:00	0	10	2	8	6
1	2009-02-27 10:37:00	497	10	2	8	6
1	2009-02-27 10:38:00	0	10	2	8	6
1	2009-02-27 10:39:00	0	10	2	8	6
1	2009-02-27 10:40:00	0	10	2	8	6
1	2009-02-27 10:41:00	0	10	2	8	6
1	2009-02-27 10:42:00	0	10	2	8	6
1	2009-02-27 10:43:00	0	10	2	8	6
1	2009-02-27 10:44:00	0	10	2	8	6
1	2009-02-27 10:45:00	0	10	2	8	6
1	2009-02-27 10:46:00	0	10	2	8	6
1	2009-02-27 10:47:00	0	10	2	8	6
1	2009-02-27 10:48:00	0	10	2	8	6
1	2009-02-27 10:49:00	0	10	2	8	6
1	2009-02-27 10:50:00	0	10	2	8	6
1	2009-02-27 10:51:00	0	10	2	8	6
1	2009-02-27 10:52:00	0	10	2	8	6
1	2009-02-27 10:53:00	0	10	2	8	6
1	2009-02-27 10:54:00	0	10	2	8	6
1	2009-02-27 10:55:00	0	10	2	8	6
1	2009-02-27 10:56:00	0	10	2	8	6
1	2009-02-27 10:57:00	0	10	2	8	6
1	2009-02-27 10:58:00	0	10	2	8	6
1	2009-02-27 10:59:00	0	10	2	8	6
1	2009-02-27 11:00:00	0	10	2	8	6
1	2009-02-27 11:01:00	0	11	2	8	6
1	2009-02-27 11:02:00	0	11	2	8	6
1	2009-02-27 11:03:00	0	11	2	8	6
1	2009-02-27 11:04:00	0	11	2	8	6
1	2009-02-27 11:05:00	0	11	2	8	6
1	2009-02-27 11:06:00	0	11	2	8	6
1	2009-02-27 11:07:00	0	11	2	8	6
1	2009-02-27 11:08:00	0	11	2	8	6
1	2009-02-27 11:09:00	0	11	2	8	6
1	2009-02-27 11:10:00	0	11	2	8	6
1	2009-02-27 11:11:00	0	11	2	8	6
1	2009-02-27 11:12:00	0	11	2	8	6
1	2009-02-27 11:13:00	0	11	2	8	6
1	2009-02-27 11:14:00	0	11	2	8	6
1	2009-02-27 11:15:00	0	11	2	8	6
1	2009-02-27 11:16:00	0	11	2	8	6
1	2009-02-27 11:17:00	0	11	2	8	6
1	2009-02-27 11:18:00	0	11	2	8	6
1	2009-02-27 11:19:00	0	11	2	8	6
1	2009-02-27 11:20:00	0	11	2	8	6
1	2009-02-27 11:21:00	0	11	2	8	6
1	2009-02-27 11:22:00	0	11	2	8	6
1	2009-02-27 11:23:00	0	11	2	8	6
1	2009-02-27 11:24:00	0	11	2	8	6
1	2009-02-27 11:25:00	0	11	2	8	6
1	2009-02-27 11:26:00	0	11	2	8	6
1	2009-02-27 11:27:00	0	11	2	8	6
1	2009-02-27 11:28:00	0	11	2	8	6
1	2009-02-27 11:29:00	0	11	2	8	6
1	2009-02-27 11:30:00	0	11	2	8	6
1	2009-02-27 11:31:00	0	11	2	8	6
1	2009-02-27 11:32:00	0	11	2	8	6
1	2009-02-27 11:33:00	0	11	2	8	6
1	2009-02-27 11:34:00	0	11	2	8	6
1	2009-02-27 11:35:00	0	11	2	8	6
1	2009-02-27 11:36:00	0	11	2	8	6
1	2009-02-27 11:37:00	0	11	2	8	6
1	2009-02-27 11:38:00	0	11	2	8	6
1	2009-02-27 11:39:00	64	11	2	8	6
1	2009-02-27 11:40:00	26	11	2	8	6
1	2009-02-27 11:41:00	26	11	2	8	6
1	2009-02-27 11:42:00	0	11	2	8	6
1	2009-02-27 11:43:00	0	11	2	8	6
1	2009-02-27 11:44:00	0	11	2	8	6
1	2009-02-27 11:45:00	0	11	2	8	6
1	2009-02-27 11:46:00	0	11	2	8	6
1	2009-02-27 11:47:00	0	11	2	8	6
1	2009-02-27 11:48:00	0	11	2	8	6
1	2009-02-27 11:49:00	0	11	2	8	6
1	2009-02-27 11:50:00	0	11	2	8	6
1	2009-02-27 11:51:00	0	11	2	8	6
1	2009-02-27 11:52:00	0	11	2	8	6
1	2009-02-27 11:53:00	0	11	2	8	6
1	2009-02-27 11:54:00	0	11	2	8	6
1	2009-02-27 11:55:00	0	11	2	8	6
1	2009-02-27 11:56:00	0	11	2	8	6
1	2009-02-27 11:57:00	0	11	2	8	6
1	2009-02-27 11:58:00	0	11	2	8	6
1	2009-02-27 11:59:00	0	11	2	8	6
1	2009-02-27 12:00:00	0	11	2	8	6
1	2009-02-27 12:01:00	0	12	3	8	6
1	2009-02-27 12:02:00	0	12	3	8	6
1	2009-02-27 12:03:00	26	12	3	8	6
1	2009-02-27 12:04:00	38	12	3	8	6
1	2009-02-27 12:05:00	0	12	3	8	6
1	2009-02-27 12:06:00	0	12	3	8	6
1	2009-02-27 12:07:00	0	12	3	8	6
1	2009-02-27 12:08:00	0	12	3	8	6
1	2009-02-27 12:09:00	0	12	3	8	6
1	2009-02-27 12:10:00	0	12	3	8	6
1	2009-02-27 12:11:00	0	12	3	8	6
1	2009-02-27 12:12:00	0	12	3	8	6
1	2009-02-27 12:13:00	0	12	3	8	6
1	2009-02-27 12:14:00	0	12	3	8	6
1	2009-02-27 12:15:00	0	12	3	8	6
1	2009-02-27 12:16:00	0	12	3	8	6
1	2009-02-27 12:17:00	0	12	3	8	6
1	2009-02-27 12:18:00	0	12	3	8	6
1	2009-02-27 12:19:00	0	12	3	8	6
1	2009-02-27 12:20:00	0	12	3	8	6
1	2009-02-27 12:21:00	0	12	3	8	6
1	2009-02-27 12:22:00	0	12	3	8	6
1	2009-02-27 12:23:00	0	12	3	8	6
1	2009-02-27 12:24:00	13	12	3	8	6
1	2009-02-27 12:25:00	0	12	3	8	6
1	2009-02-27 12:26:00	0	12	3	8	6
1	2009-02-27 12:27:00	0	12	3	8	6
1	2009-02-27 12:28:00	0	12	3	8	6
1	2009-02-27 12:29:00	0	12	3	8	6
1	2009-02-27 12:30:00	13	12	3	8	6
1	2009-02-27 12:31:00	13	12	3	8	6
1	2009-02-27 12:32:00	141	12	3	8	6
1	2009-02-27 12:33:00	0	12	3	8	6
1	2009-02-27 12:34:00	0	12	3	8	6
1	2009-02-27 12:35:00	0	12	3	8	6
1	2009-02-27 12:36:00	0	12	3	8	6
1	2009-02-27 12:37:00	0	12	3	8	6
1	2009-02-27 12:38:00	1114	12	3	8	6
1	2009-02-27 12:39:00	1490	12	3	8	6
1	2009-02-27 12:40:00	479	12	3	8	6
1	2009-02-27 12:41:00	2396	12	3	8	6
1	2009-02-27 12:42:00	799	12	3	8	6
1	2009-02-27 12:43:00	1597	12	3	8	6
1	2009-02-27 12:44:00	335	12	3	8	6
1	2009-02-27 12:45:00	335	12	3	8	6
1	2009-02-27 12:46:00	38	12	3	8	6
1	2009-02-27 12:47:00	0	12	3	8	6
1	2009-02-27 12:48:00	0	12	3	8	6
1	2009-02-27 12:49:00	0	12	3	8	6
1	2009-02-27 12:50:00	0	12	3	8	6
1	2009-02-27 12:51:00	0	12	3	8	6
1	2009-02-27 12:52:00	197	12	3	8	6
1	2009-02-27 12:53:00	0	12	3	8	6
1	2009-02-27 12:54:00	0	12	3	8	6
1	2009-02-27 12:55:00	0	12	3	8	6
1	2009-02-27 12:56:00	0	12	3	8	6
1	2009-02-27 12:57:00	0	12	3	8	6
1	2009-02-27 12:58:00	0	12	3	8	6
1	2009-02-27 12:59:00	0	12	3	8	6
1	2009-02-27 13:00:00	26	12	3	8	6
1	2009-02-27 13:01:00	0	13	3	8	6
1	2009-02-27 13:02:00	0	13	3	8	6
1	2009-02-27 13:03:00	0	13	3	8	6
1	2009-02-27 13:04:00	0	13	3	8	6
1	2009-02-27 13:05:00	0	13	3	8	6
1	2009-02-27 13:06:00	0	13	3	8	6
1	2009-02-27 13:07:00	0	13	3	8	6
1	2009-02-27 13:08:00	90	13	3	8	6
1	2009-02-27 13:09:00	13	13	3	8	6
1	2009-02-27 13:10:00	389	13	3	8	6
1	2009-02-27 13:11:00	305	13	3	8	6
1	2009-02-27 13:12:00	0	13	3	8	6
1	2009-02-27 13:13:00	13	13	3	8	6
1	2009-02-27 13:14:00	0	13	3	8	6
1	2009-02-27 13:15:00	0	13	3	8	6
1	2009-02-27 13:16:00	0	13	3	8	6
1	2009-02-27 13:17:00	0	13	3	8	6
1	2009-02-27 13:18:00	51	13	3	8	6
1	2009-02-27 13:19:00	166	13	3	8	6
1	2009-02-27 13:20:00	0	13	3	8	6
1	2009-02-27 13:21:00	0	13	3	8	6
1	2009-02-27 13:22:00	0	13	3	8	6
1	2009-02-27 13:23:00	0	13	3	8	6
1	2009-02-27 13:24:00	0	13	3	8	6
1	2009-02-27 13:25:00	479	13	3	8	6
1	2009-02-27 13:26:00	425	13	3	8	6
1	2009-02-27 13:27:00	64	13	3	8	6
1	2009-02-27 13:28:00	0	13	3	8	6
1	2009-02-27 13:29:00	0	13	3	8	6
1	2009-02-27 13:30:00	0	13	3	8	6
1	2009-02-27 13:31:00	0	13	3	8	6
1	2009-02-27 13:32:00	0	13	3	8	6
1	2009-02-27 13:33:00	0	13	3	8	6
1	2009-02-27 13:34:00	0	13	3	8	6
1	2009-02-27 13:35:00	0	13	3	8	6
1	2009-02-27 13:36:00	0	13	3	8	6
1	2009-02-27 13:37:00	0	13	3	8	6
1	2009-02-27 13:38:00	0	13	3	8	6
1	2009-02-27 13:39:00	0	13	3	8	6
1	2009-02-27 13:40:00	0	13	3	8	6
1	2009-02-27 13:41:00	0	13	3	8	6
1	2009-02-27 13:42:00	0	13	3	8	6
1	2009-02-27 13:43:00	0	13	3	8	6
1	2009-02-27 13:44:00	0	13	3	8	6
1	2009-02-27 13:45:00	0	13	3	8	6
1	2009-02-27 13:46:00	13	13	3	8	6
1	2009-02-27 13:47:00	0	13	3	8	6
1	2009-02-27 13:48:00	0	13	3	8	6
1	2009-02-27 13:49:00	0	13	3	8	6
1	2009-02-27 13:50:00	0	13	3	8	6
1	2009-02-27 13:51:00	0	13	3	8	6
1	2009-02-27 13:52:00	0	13	3	8	6
1	2009-02-27 13:53:00	13	13	3	8	6
1	2009-02-27 13:54:00	0	13	3	8	6
1	2009-02-27 13:55:00	0	13	3	8	6
1	2009-02-27 13:56:00	0	13	3	8	6
1	2009-02-27 13:57:00	0	13	3	8	6
1	2009-02-27 13:58:00	26	13	3	8	6
1	2009-02-27 13:59:00	51	13	3	8	6
1	2009-02-27 14:00:00	0	13	3	8	6
1	2009-02-27 14:01:00	0	14	3	8	6
1	2009-02-27 14:02:00	0	14	3	8	6
1	2009-02-27 14:03:00	0	14	3	8	6
1	2009-02-27 14:04:00	0	14	3	8	6
1	2009-02-27 14:05:00	0	14	3	8	6
1	2009-02-27 14:06:00	0	14	3	8	6
1	2009-02-27 14:07:00	0	14	3	8	6
1	2009-02-27 14:08:00	0	14	3	8	6
1	2009-02-27 14:09:00	0	14	3	8	6
1	2009-02-27 14:10:00	0	14	3	8	6
1	2009-02-27 14:11:00	0	14	3	8	6
1	2009-02-27 14:12:00	0	14	3	8	6
1	2009-02-27 14:13:00	0	14	3	8	6
1	2009-02-27 14:14:00	0	14	3	8	6
1	2009-02-27 14:15:00	13	14	3	8	6
1	2009-02-27 14:16:00	389	14	3	8	6
1	2009-02-27 14:17:00	154	14	3	8	6
1	2009-02-27 14:18:00	0	14	3	8	6
1	2009-02-27 14:19:00	0	14	3	8	6
1	2009-02-27 14:20:00	0	14	3	8	6
1	2009-02-27 14:21:00	0	14	3	8	6
1	2009-02-27 14:22:00	0	14	3	8	6
1	2009-02-27 14:23:00	0	14	3	8	6
1	2009-02-27 14:24:00	0	14	3	8	6
1	2009-02-27 14:25:00	0	14	3	8	6
1	2009-02-27 14:26:00	0	14	3	8	6
1	2009-02-27 14:27:00	0	14	3	8	6
1	2009-02-27 14:28:00	0	14	3	8	6
1	2009-02-27 14:29:00	0	14	3	8	6
1	2009-02-27 14:30:00	0	14	3	8	6
1	2009-02-27 14:31:00	0	14	3	8	6
1	2009-02-27 14:32:00	0	14	3	8	6
1	2009-02-27 14:33:00	0	14	3	8	6
1	2009-02-27 14:34:00	0	14	3	8	6
1	2009-02-27 14:35:00	0	14	3	8	6
1	2009-02-27 14:36:00	0	14	3	8	6
1	2009-02-27 14:37:00	0	14	3	8	6
1	2009-02-27 14:38:00	0	14	3	8	6
1	2009-02-27 14:39:00	0	14	3	8	6
1	2009-02-27 14:40:00	0	14	3	8	6
1	2009-02-27 14:41:00	0	14	3	8	6
1	2009-02-27 14:42:00	0	14	3	8	6
1	2009-02-27 14:43:00	38	14	3	8	6
1	2009-02-27 14:44:00	0	14	3	8	6
1	2009-02-27 14:45:00	0	14	3	8	6
1	2009-02-27 14:46:00	0	14	3	8	6
1	2009-02-27 14:47:00	0	14	3	8	6
1	2009-02-27 14:48:00	0	14	3	8	6
1	2009-02-27 14:49:00	0	14	3	8	6
1	2009-02-27 14:50:00	0	14	3	8	6
1	2009-02-27 14:51:00	0	14	3	8	6
1	2009-02-27 14:52:00	0	14	3	8	6
1	2009-02-27 14:53:00	0	14	3	8	6
1	2009-02-27 14:54:00	0	14	3	8	6
1	2009-02-27 14:55:00	0	14	3	8	6
1	2009-02-27 14:56:00	0	14	3	8	6
1	2009-02-27 14:57:00	0	14	3	8	6
1	2009-02-27 14:58:00	0	14	3	8	6
1	2009-02-27 14:59:00	0	14	3	8	6
1	2009-02-27 15:00:00	0	14	3	8	6
1	2009-02-27 15:01:00	0	15	3	8	6
1	2009-02-27 15:02:00	0	15	3	8	6
1	2009-02-27 15:03:00	0	15	3	8	6
1	2009-02-27 15:04:00	0	15	3	8	6
1	2009-02-27 15:05:00	0	15	3	8	6
1	2009-02-27 15:06:00	13	15	3	8	6
1	2009-02-27 15:07:00	0	15	3	8	6
1	2009-02-27 15:08:00	0	15	3	8	6
1	2009-02-27 15:09:00	128	15	3	8	6
1	2009-02-27 15:10:00	0	15	3	8	6
1	2009-02-27 15:11:00	0	15	3	8	6
1	2009-02-27 15:12:00	0	15	3	8	6
1	2009-02-27 15:13:00	0	15	3	8	6
1	2009-02-27 15:14:00	259	15	3	8	6
1	2009-02-27 15:15:00	538	15	3	8	6
1	2009-02-27 15:16:00	13	15	3	8	6
1	2009-02-27 15:17:00	13	15	3	8	6
1	2009-02-27 15:18:00	407	15	3	8	6
1	2009-02-27 15:19:00	197	15	3	8	6
[truncated: 78,641 more rows]

## Sheet: Pivot Segment
Multiplier	2
x (Low Intensity)	508.295
y (High Intensity)	838.089
	Column Labels
Values	1	2	3	4	5	6	7	8	Grand Total
Average of Activity	65.892	91.2338	84.4276	125.189	79.8977	74.4667	98.6934	53.1772	84.1222
StdDev of Activity	221.202	373.427	284.62	380.05	293.57	248.924	379.111	259.08	311.469
Count of Activity	10080	10080	10080	10080	10080	10080	10080	10080	80640
Count Above x	362	448	441	755	433	405	478	206
% Above x	0.0359127	0.0444444	0.04375	0.0749008	0.0429563	0.0401786	0.0474206	0.0204365
Count Above y		243	182	397	205	156	298	102
% Above y		0.0241071	0.0180556	0.0393849	0.0203373	0.0154762	0.0295635	0.010119

## Sheet: Pivot Weekday
Sum of Activity	Column Labels
Row Labels	1	2	3	4	5	6	7	8	Grand Total
1	92571	116520	168959	175921	89853	126534	186163	61936	1018457
2	117362	109168	125173	192410	63783	97928	92574	56017	854415
3	84863	290986	127717	225374	89863	65811	99303	58443	1042360
4	93129	73639	92197	67106	107246	156029	216489	51601	857436
5	89470	113864	96015	169847	129802	109036	177605	50962	936601
6	109238	112380	147200	221197	117345	103036	153797	187661	1151854
7	77558	103080	93769	210055	207477	92250	68898	69406	922493
Grand Total	664191	919637	851030	1261910	805369	750624	994829	536026	6783616
Count of Activity	Column Labels
Row Labels	1	2	3	4	5	6	7	8	Grand Total
1	1440	1440	1440	1440	1440	1440	1440	1440	11520
2	1440	1440	1440	1440	1440	1440	1440	1440	11520
3	1440	1440	1440	1440	1440	1440	1440	1440	11520
4	1440	1440	1440	1440	1440	1440	1440	1440	11520
5	1440	1440	1440	1440	1440	1440	1440	1440	11520
6	1440	1440	1440	1440	1440	1440	1440	1440	11520
7	1440	1440	1440	1440	1440	1440	1440	1440	11520
Grand Total	10080	10080	10080	10080	10080	10080	10080	10080	80640

## Sheet: Pivot Quadrant
Sum of Activity	Column Labels
Row Labels	1	2	3	4	5	6	7	8	Grand Total
1	19109	75816	15002	25540	8695	19835	20939	7638	192574
2	235823	112596	316629	362518	232467	191915	145878	126706	1724532
3	279875	417471	320749	437938	267180	345804	250328	169939	2489284
4	129384	313754	198650	435914	297027	193070	577684	231743	2377226
Grand Total	664191	919637	851030	1261910	805369	750624	994829	536026	6783616
Average	166048	229909	212758	315478	201342	187656	248707	134006
Count of Activity	Column Labels
Row Labels	1	2	3	4	5	6	7	8	Grand Total
1	2520	2520	2520	2520	2520	2520	2520	2520	20160
2	2520	2520	2520	2520	2520	2520	2520	2520	20160
3	2520	2520	2520	2520	2520	2520	2520	2520	20160
4	2520	2520	2520	2520	2520	2520	2520	2520	20160
Grand Total	10080	10080	10080	10080	10080	10080	10080	10080	80640

## Sheet: 2.19.09
Actogram, Copy Raw Data, All Days
Identity:	Kitty Reiser
Filename:	E:\Active Research Files\meloxicam titre canine\cases\kitty\Kitty Reiser 2.19.09.AWC
Gender:	F
Age:	7
Height:	61.0 cm	24.0 in
Weight:	20.4 kg	45.0 lbs
Start Date:	19-Feb-2009 (Thu)
Start Time:	18:00:00
Interval:	1.00 mins
Date Stamp:	Time Stamp:	Activity Data:	Marker Press:
2009-02-19	00:00:00	0
2009-02-19	00:01:00	0
2009-02-19	00:02:00	0
2009-02-19	00:03:00	0
2009-02-19	00:04:00	0
2009-02-19	00:05:00	0
2009-02-19	00:06:00	0
2009-02-19	00:07:00	0
2009-02-19	00:08:00	0
2009-02-19	00:09:00	0
2009-02-19	00:10:00	0
2009-02-19	00:11:00	0
2009-02-19	00:12:00	0
2009-02-19	00:13:00	0
2009-02-19	00:14:00	0
2009-02-19	00:15:00	0
2009-02-19	00:16:00	0
2009-02-19	00:17:00	0
2009-02-19	00:18:00	0
2009-02-19	00:19:00	0
2009-02-19	00:20:00	0
2009-02-19	00:21:00	0
2009-02-19	00:22:00	0
2009-02-19	00:23:00	0
2009-02-19	00:24:00	0
2009-02-19	00:25:00	0
2009-02-19	00:26:00	0
2009-02-19	00:27:00	0
2009-02-19	00:28:00	0
2009-02-19	00:29:00	0
2009-02-19	00:30:00	0
2009-02-19	00:31:00	0
2009-02-19	00:32:00	0
2009-02-19	00:33:00	0
2009-02-19	00:34:00	0
2009-02-19	00:35:00	0
2009-02-19	00:36:00	0
2009-02-19	00:37:00	0
2009-02-19	00:38:00	0
2009-02-19	00:39:00	0
2009-02-19	00:40:00	0
2009-02-19	00:41:00	0
2009-02-19	00:42:00	0
2009-02-19	00:43:00	0
2009-02-19	00:44:00	0
2009-02-19	00:45:00	0
2009-02-19	00:46:00	0
2009-02-19	00:47:00	0
2009-02-19	00:48:00	0
2009-02-19	00:49:00	0
2009-02-19	00:50:00	0
2009-02-19	00:51:00	0
2009-02-19	00:52:00	0
2009-02-19	00:53:00	0
2009-02-19	00:54:00	0
2009-02-19	00:55:00	0
2009-02-19	00:56:00	0
2009-02-19	00:57:00	0
2009-02-19	00:58:00	0
2009-02-19	00:59:00	0
2009-02-19	01:00:00	0
2009-02-19	01:01:00	0
2009-02-19	01:02:00	0
2009-02-19	01:03:00	0
2009-02-19	01:04:00	0
2009-02-19	01:05:00	0
2009-02-19	01:06:00	0
2009-02-19	01:07:00	0
2009-02-19	01:08:00	0
2009-02-19	01:09:00	0
2009-02-19	01:10:00	0
2009-02-19	01:11:00	0
2009-02-19	01:12:00	0
2009-02-19	01:13:00	0
2009-02-19	01:14:00	0
2009-02-19	01:15:00	0
2009-02-19	01:16:00	0
2009-02-19	01:17:00	0
2009-02-19	01:18:00	0
2009-02-19	01:19:00	0
2009-02-19	01:20:00	0
2009-02-19	01:21:00	0
2009-02-19	01:22:00	0
2009-02-19	01:23:00	0
2009-02-19	01:24:00	0
2009-02-19	01:25:00	0
2009-02-19	01:26:00	0
2009-02-19	01:27:00	0
2009-02-19	01:28:00	0
2009-02-19	01:29:00	0
2009-02-19	01:30:00	0
2009-02-19	01:31:00	0
2009-02-19	01:32:00	0
2009-02-19	01:33:00	0
2009-02-19	01:34:00	0
2009-02-19	01:35:00	0
2009-02-19	01:36:00	0
2009-02-19	01:37:00	0
2009-02-19	01:38:00	0
2009-02-19	01:39:00	0
2009-02-19	01:40:00	0
2009-02-19	01:41:00	0
2009-02-19	01:42:00	0
2009-02-19	01:43:00	0
2009-02-19	01:44:00	0
2009-02-19	01:45:00	0
2009-02-19	01:46:00	0
2009-02-19	01:47:00	0
2009-02-19	01:48:00	0
2009-02-19	01:49:00	0
2009-02-19	01:50:00	0
2009-02-19	01:51:00	0
2009-02-19	01:52:00	0
2009-02-19	01:53:00	0
2009-02-19	01:54:00	0
2009-02-19	01:55:00	0
2009-02-19	01:56:00	0
2009-02-19	01:57:00	0
2009-02-19	01:58:00	0
2009-02-19	01:59:00	0
2009-02-19	02:00:00	0
2009-02-19	02:01:00	0
2009-02-19	02:02:00	0
2009-02-19	02:03:00	0
2009-02-19	02:04:00	0
2009-02-19	02:05:00	0
2009-02-19	02:06:00	0
2009-02-19	02:07:00	0
2009-02-19	02:08:00	0
2009-02-19	02:09:00	0
2009-02-19	02:10:00	0
2009-02-19	02:11:00	0
2009-02-19	02:12:00	0
2009-02-19	02:13:00	0
2009-02-19	02:14:00	0
2009-02-19	02:15:00	0
2009-02-19	02:16:00	0
2009-02-19	02:17:00	0
2009-02-19	02:18:00	0
2009-02-19	02:19:00	0
2009-02-19	02:20:00	0
2009-02-19	02:21:00	0
2009-02-19	02:22:00	0
2009-02-19	02:23:00	0
2009-02-19	02:24:00	0
2009-02-19	02:25:00	0
2009-02-19	02:26:00	0
2009-02-19	02:27:00	0
2009-02-19	02:28:00	0
2009-02-19	02:29:00	0
2009-02-19	02:30:00	0
2009-02-19	02:31:00	0
2009-02-19	02:32:00	0
2009-02-19	02:33:00	0
2009-02-19	02:34:00	0
2009-02-19	02:35:00	0
2009-02-19	02:36:00	0
2009-02-19	02:37:00	0
2009-02-19	02:38:00	0
2009-02-19	02:39:00	0
2009-02-19	02:40:00	0
2009-02-19	02:41:00	0
2009-02-19	02:42:00	0
2009-02-19	02:43:00	0
2009-02-19	02:44:00	0
2009-02-19	02:45:00	0
2009-02-19	02:46:00	0
2009-02-19	02:47:00	0
2009-02-19	02:48:00	0
2009-02-19	02:49:00	0
2009-02-19	02:50:00	0
2009-02-19	02:51:00	0
2009-02-19	02:52:00	0
2009-02-19	02:53:00	0
2009-02-19	02:54:00	0
2009-02-19	02:55:00	0
2009-02-19	02:56:00	0
2009-02-19	02:57:00	0
2009-02-19	02:58:00	0
2009-02-19	02:59:00	0
2009-02-19	03:00:00	0
2009-02-19	03:01:00	0
2009-02-19	03:02:00	0
2009-02-19	03:03:00	0
2009-02-19	03:04:00	0
2009-02-19	03:05:00	0
2009-02-19	03:06:00	0
2009-02-19	03:07:00	0
2009-02-19	03:08:00	0
2009-02-19	03:09:00	0
2009-02-19	03:10:00	0
2009-02-19	03:11:00	0
2009-02-19	03:12:00	0
2009-02-19	03:13:00	0
2009-02-19	03:14:00	0
2009-02-19	03:15:00	0
2009-02-19	03:16:00	0
2009-02-19	03:17:00	0
2009-02-19	03:18:00	0
2009-02-19	03:19:00	0
2009-02-19	03:20:00	0
2009-02-19	03:21:00	0
2009-02-19	03:22:00	0
2009-02-19	03:23:00	0
2009-02-19	03:24:00	0
2009-02-19	03:25:00	0
2009-02-19	03:26:00	0
2009-02-19	03:27:00	0
2009-02-19	03:28:00	0
2009-02-19	03:29:00	0
2009-02-19	03:30:00	0
2009-02-19	03:31:00	0
2009-02-19	03:32:00	0
2009-02-19	03:33:00	0
2009-02-19	03:34:00	0
2009-02-19	03:35:00	0
2009-02-19	03:36:00	0
2009-02-19	03:37:00	0
2009-02-19	03:38:00	0
2009-02-19	03:39:00	0
2009-02-19	03:40:00	0
2009-02-19	03:41:00	0
2009-02-19	03:42:00	0
2009-02-19	03:43:00	0
2009-02-19	03:44:00	0
2009-02-19	03:45:00	0
2009-02-19	03:46:00	0
2009-02-19	03:47:00	0
2009-02-19	03:48:00	0
2009-02-19	03:49:00	0
2009-02-19	03:50:00	0
2009-02-19	03:51:00	0
2009-02-19	03:52:00	0
2009-02-19	03:53:00	0
2009-02-19	03:54:00	0
2009-02-19	03:55:00	0
2009-02-19	03:56:00	0
2009-02-19	03:57:00	0
2009-02-19	03:58:00	0
2009-02-19	03:59:00	0
2009-02-19	04:00:00	0
2009-02-19	04:01:00	0
2009-02-19	04:02:00	0
2009-02-19	04:03:00	0
2009-02-19	04:04:00	0
2009-02-19	04:05:00	0
2009-02-19	04:06:00	0
2009-02-19	04:07:00	0
2009-02-19	04:08:00	0
2009-02-19	04:09:00	0
2009-02-19	04:10:00	0
2009-02-19	04:11:00	0
2009-02-19	04:12:00	0
2009-02-19	04:13:00	0
2009-02-19	04:14:00	0
2009-02-19	04:15:00	0
2009-02-19	04:16:00	0
2009-02-19	04:17:00	0
2009-02-19	04:18:00	0
2009-02-19	04:19:00	0
2009-02-19	04:20:00	0
2009-02-19	04:21:00	0
2009-02-19	04:22:00	0
2009-02-19	04:23:00	0
2009-02-19	04:24:00	0
2009-02-19	04:25:00	0
2009-02-19	04:26:00	0
2009-02-19	04:27:00	0
2009-02-19	04:28:00	0
2009-02-19	04:29:00	0
2009-02-19	04:30:00	0
2009-02-19	04:31:00	0
2009-02-19	04:32:00	0
2009-02-19	04:33:00	0
2009-02-19	04:34:00	0
2009-02-19	04:35:00	0
2009-02-19	04:36:00	0
2009-02-19	04:37:00	0
2009-02-19	04:38:00	0
2009-02-19	04:39:00	0
2009-02-19	04:40:00	0
2009-02-19	04:41:00	0
2009-02-19	04:42:00	0
2009-02-19	04:43:00	0
2009-02-19	04:44:00	0
2009-02-19	04:45:00	0
2009-02-19	04:46:00	0
2009-02-19	04:47:00	0
2009-02-19	04:48:00	0
2009-02-19	04:49:00	0
2009-02-19	04:50:00	0
2009-02-19	04:51:00	0
2009-02-19	04:52:00	0
2009-02-19	04:53:00	0
2009-02-19	04:54:00	0
2009-02-19	04:55:00	0
2009-02-19	04:56:00	0
2009-02-19	04:57:00	0
2009-02-19	04:58:00	0
2009-02-19	04:59:00	0
2009-02-19	05:00:00	0
2009-02-19	05:01:00	0
2009-02-19	05:02:00	0
2009-02-19	05:03:00	0
2009-02-19	05:04:00	0
2009-02-19	05:05:00	0
2009-02-19	05:06:00	0
2009-02-19	05:07:00	0
2009-02-19	05:08:00	0
2009-02-19	05:09:00	0
2009-02-19	05:10:00	0
2009-02-19	05:11:00	0
2009-02-19	05:12:00	0
2009-02-19	05:13:00	0
2009-02-19	05:14:00	0
2009-02-19	05:15:00	0
2009-02-19	05:16:00	0
2009-02-19	05:17:00	0
2009-02-19	05:18:00	0
2009-02-19	05:19:00	0
2009-02-19	05:20:00	0
2009-02-19	05:21:00	0
2009-02-19	05:22:00	0
2009-02-19	05:23:00	0
2009-02-19	05:24:00	0
2009-02-19	05:25:00	0
2009-02-19	05:26:00	0
2009-02-19	05:27:00	0
2009-02-19	05:28:00	0
2009-02-19	05:29:00	0
2009-02-19	05:30:00	0
2009-02-19	05:31:00	0
2009-02-19	05:32:00	0
2009-02-19	05:33:00	0
2009-02-19	05:34:00	0
2009-02-19	05:35:00	0
2009-02-19	05:36:00	0
2009-02-19	05:37:00	0
2009-02-19	05:38:00	0
2009-02-19	05:39:00	0
2009-02-19	05:40:00	0
2009-02-19	05:41:00	0
2009-02-19	05:42:00	0
2009-02-19	05:43:00	0
2009-02-19	05:44:00	0
2009-02-19	05:45:00	0
2009-02-19	05:46:00	0
2009-02-19	05:47:00	0
2009-02-19	05:48:00	0
2009-02-19	05:49:00	0
2009-02-19	05:50:00	0
2009-02-19	05:51:00	0
2009-02-19	05:52:00	0
2009-02-19	05:53:00	0
2009-02-19	05:54:00	0
2009-02-19	05:55:00	0
2009-02-19	05:56:00	0
2009-02-19	05:57:00	0
2009-02-19	05:58:00	0
2009-02-19	05:59:00	0
2009-02-19	06:00:00	0
2009-02-19	06:01:00	0
2009-02-19	06:02:00	0
2009-02-19	06:03:00	0
2009-02-19	06:04:00	0
2009-02-19	06:05:00	0
2009-02-19	06:06:00	0
2009-02-19	06:07:00	0
2009-02-19	06:08:00	0
2009-02-19	06:09:00	0
2009-02-19	06:10:00	0
2009-02-19	06:11:00	0
2009-02-19	06:12:00	0
2009-02-19	06:13:00	0
2009-02-19	06:14:00	0
2009-02-19	06:15:00	0
2009-02-19	06:16:00	0
2009-02-19	06:17:00	0
2009-02-19	06:18:00	0
2009-02-19	06:19:00	0
2009-02-19	06:20:00	0
2009-02-19	06:21:00	0
2009-02-19	06:22:00	0
2009-02-19	06:23:00	0
2009-02-19	06:24:00	0
2009-02-19	06:25:00	0
2009-02-19	06:26:00	0
2009-02-19	06:27:00	0
2009-02-19	06:28:00	0
2009-02-19	06:29:00	0
2009-02-19	06:30:00	0
2009-02-19	06:31:00	0
2009-02-19	06:32:00	0
2009-02-19	06:33:00	0
2009-02-19	06:34:00	0
2009-02-19	06:35:00	0
2009-02-19	06:36:00	0
2009-02-19	06:37:00	0
2009-02-19	06:38:00	0
2009-02-19	06:39:00	0
2009-02-19	06:40:00	0
2009-02-19	06:41:00	0
2009-02-19	06:42:00	0
2009-02-19	06:43:00	0
2009-02-19	06:44:00	0
2009-02-19	06:45:00	0
2009-02-19	06:46:00	0
2009-02-19	06:47:00	0
2009-02-19	06:48:00	0
2009-02-19	06:49:00	0
2009-02-19	06:50:00	0
2009-02-19	06:51:00	0
2009-02-19	06:52:00	0
2009-02-19	06:53:00	0
2009-02-19	06:54:00	0
2009-02-19	06:55:00	0
2009-02-19	06:56:00	0
2009-02-19	06:57:00	0
2009-02-19	06:58:00	0
2009-02-19	06:59:00	0
2009-02-19	07:00:00	0
2009-02-19	07:01:00	0
2009-02-19	07:02:00	0
2009-02-19	07:03:00	0
2009-02-19	07:04:00	0
2009-02-19	07:05:00	0
2009-02-19	07:06:00	0
2009-02-19	07:07:00	0
2009-02-19	07:08:00	0
2009-02-19	07:09:00	0
2009-02-19	07:10:00	0
2009-02-19	07:11:00	0
2009-02-19	07:12:00	0
2009-02-19	07:13:00	0
2009-02-19	07:14:00	0
2009-02-19	07:15:00	0
2009-02-19	07:16:00	0
2009-02-19	07:17:00	0
2009-02-19	07:18:00	0
2009-02-19	07:19:00	0
2009-02-19	07:20:00	0
2009-02-19	07:21:00	0
2009-02-19	07:22:00	0
2009-02-19	07:23:00	0
2009-02-19	07:24:00	0
2009-02-19	07:25:00	0
2009-02-19	07:26:00	0
2009-02-19	07:27:00	0
2009-02-19	07:28:00	0
2009-02-19	07:29:00	0
2009-02-19	07:30:00	0
2009-02-19	07:31:00	0
2009-02-19	07:32:00	0
2009-02-19	07:33:00	0
2009-02-19	07:34:00	0
2009-02-19	07:35:00	0
2009-02-19	07:36:00	0
2009-02-19	07:37:00	0
2009-02-19	07:38:00	0
2009-02-19	07:39:00	0
2009-02-19	07:40:00	0
2009-02-19	07:41:00	0
2009-02-19	07:42:00	0
2009-02-19	07:43:00	0
2009-02-19	07:44:00	0
2009-02-19	07:45:00	0
2009-02-19	07:46:00	0
2009-02-19	07:47:00	0
2009-02-19	07:48:00	0
2009-02-19	07:49:00	0
2009-02-19	07:50:00	0
2009-02-19	07:51:00	0
2009-02-19	07:52:00	0
2009-02-19	07:53:00	0
2009-02-19	07:54:00	0
2009-02-19	07:55:00	0
2009-02-19	07:56:00	0
2009-02-19	07:57:00	0
2009-02-19	07:58:00	0
2009-02-19	07:59:00	0
2009-02-19	08:00:00	0
2009-02-19	08:01:00	0
2009-02-19	08:02:00	0
2009-02-19	08:03:00	0
2009-02-19	08:04:00	0
2009-02-19	08:05:00	0
2009-02-19	08:06:00	0
2009-02-19	08:07:00	0
2009-02-19	08:08:00	0
2009-02-19	08:09:00	0
2009-02-19	08:10:00	0
2009-02-19	08:11:00	0
2009-02-19	08:12:00	0
2009-02-19	08:13:00	0
2009-02-19	08:14:00	0
2009-02-19	08:15:00	0
2009-02-19	08:16:00	0
2009-02-19	08:17:00	0
2009-02-19	08:18:00	0
2009-02-19	08:19:00	0
2009-02-19	08:20:00	0
2009-02-19	08:21:00	0
2009-02-19	08:22:00	0
2009-02-19	08:23:00	0
2009-02-19	08:24:00	0
2009-02-19	08:25:00	0
2009-02-19	08:26:00	0
2009-02-19	08:27:00	0
2009-02-19	08:28:00	0
2009-02-19	08:29:00	0
2009-02-19	08:30:00	0
2009-02-19	08:31:00	0
2009-02-19	08:32:00	0
2009-02-19	08:33:00	0
2009-02-19	08:34:00	0
2009-02-19	08:35:00	0
2009-02-19	08:36:00	0
2009-02-19	08:37:00	0
2009-02-19	08:38:00	0
2009-02-19	08:39:00	0
2009-02-19	08:40:00	0
2009-02-19	08:41:00	0
2009-02-19	08:42:00	0
2009-02-19	08:43:00	0
2009-02-19	08:44:00	0
2009-02-19	08:45:00	0
2009-02-19	08:46:00	0
2009-02-19	08:47:00	0
2009-02-19	08:48:00	0
2009-02-19	08:49:00	0
2009-02-19	08:50:00	0
2009-02-19	08:51:00	0
2009-02-19	08:52:00	0
2009-02-19	08:53:00	0
2009-02-19	08:54:00	0
2009-02-19	08:55:00	0
2009-02-19	08:56:00	0
2009-02-19	08:57:00	0
2009-02-19	08:58:00	0
2009-02-19	08:59:00	0
2009-02-19	09:00:00	0
2009-02-19	09:01:00	0
2009-02-19	09:02:00	0
2009-02-19	09:03:00	0
2009-02-19	09:04:00	0
2009-02-19	09:05:00	0
2009-02-19	09:06:00	0
2009-02-19	09:07:00	0
2009-02-19	09:08:00	0
2009-02-19	09:09:00	0
2009-02-19	09:10:00	0
2009-02-19	09:11:00	0
2009-02-19	09:12:00	0
2009-02-19	09:13:00	0
2009-02-19	09:14:00	0
2009-02-19	09:15:00	0
2009-02-19	09:16:00	0
2009-02-19	09:17:00	0
2009-02-19	09:18:00	0
2009-02-19	09:19:00	0
2009-02-19	09:20:00	0
2009-02-19	09:21:00	0
2009-02-19	09:22:00	0
2009-02-19	09:23:00	0
2009-02-19	09:24:00	0
2009-02-19	09:25:00	0
2009-02-19	09:26:00	0
2009-02-19	09:27:00	0
2009-02-19	09:28:00	0
2009-02-19	09:29:00	0
2009-02-19	09:30:00	0
2009-02-19	09:31:00	0
2009-02-19	09:32:00	0
2009-02-19	09:33:00	0
2009-02-19	09:34:00	0
2009-02-19	09:35:00	0
2009-02-19	09:36:00	0
2009-02-19	09:37:00	0
2009-02-19	09:38:00	0
2009-02-19	09:39:00	0
2009-02-19	09:40:00	0
2009-02-19	09:41:00	0
2009-02-19	09:42:00	0
2009-02-19	09:43:00	0
2009-02-19	09:44:00	0
2009-02-19	09:45:00	0
2009-02-19	09:46:00	0
2009-02-19	09:47:00	0
2009-02-19	09:48:00	0
2009-02-19	09:49:00	0
2009-02-19	09:50:00	0
2009-02-19	09:51:00	0
2009-02-19	09:52:00	0
2009-02-19	09:53:00	0
2009-02-19	09:54:00	0
2009-02-19	09:55:00	0
2009-02-19	09:56:00	0
2009-02-19	09:57:00	0
2009-02-19	09:58:00	0
2009-02-19	09:59:00	0
2009-02-19	10:00:00	0
2009-02-19	10:01:00	0
2009-02-19	10:02:00	0
2009-02-19	10:03:00	0
2009-02-19	10:04:00	0
2009-02-19	10:05:00	0
2009-02-19	10:06:00	0
2009-02-19	10:07:00	0
2009-02-19	10:08:00	0
2009-02-19	10:09:00	0
2009-02-19	10:10:00	0
2009-02-19	10:11:00	0
2009-02-19	10:12:00	0
2009-02-19	10:13:00	0
2009-02-19	10:14:00	0
2009-02-19	10:15:00	0
2009-02-19	10:16:00	0
2009-02-19	10:17:00	0
2009-02-19	10:18:00	0
2009-02-19	10:19:00	0
2009-02-19	10:20:00	0
2009-02-19	10:21:00	0
2009-02-19	10:22:00	0
2009-02-19	10:23:00	0
2009-02-19	10:24:00	0
2009-02-19	10:25:00	0
2009-02-19	10:26:00	0
2009-02-19	10:27:00	0
2009-02-19	10:28:00	0
2009-02-19	10:29:00	0
2009-02-19	10:30:00	0
2009-02-19	10:31:00	0
2009-02-19	10:32:00	0
2009-02-19	10:33:00	0
2009-02-19	10:34:00	0
2009-02-19	10:35:00	0
2009-02-19	10:36:00	0
2009-02-19	10:37:00	0
2009-02-19	10:38:00	0
2009-02-19	10:39:00	0
2009-02-19	10:40:00	0
2009-02-19	10:41:00	0
2009-02-19	10:42:00	0
2009-02-19	10:43:00	0
2009-02-19	10:44:00	0
2009-02-19	10:45:00	0
2009-02-19	10:46:00	0
2009-02-19	10:47:00	0
2009-02-19	10:48:00	0
2009-02-19	10:49:00	0
2009-02-19	10:50:00	0
2009-02-19	10:51:00	0
2009-02-19	10:52:00	0
2009-02-19	10:53:00	0
2009-02-19	10:54:00	0
2009-02-19	10:55:00	0
2009-02-19	10:56:00	0
2009-02-19	10:57:00	0
2009-02-19	10:58:00	0
2009-02-19	10:59:00	0
2009-02-19	11:00:00	0
2009-02-19	11:01:00	0
2009-02-19	11:02:00	0
2009-02-19	11:03:00	0
2009-02-19	11:04:00	0
2009-02-19	11:05:00	0
2009-02-19	11:06:00	0
2009-02-19	11:07:00	0
2009-02-19	11:08:00	0
2009-02-19	11:09:00	0
2009-02-19	11:10:00	0
2009-02-19	11:11:00	0
2009-02-19	11:12:00	0
2009-02-19	11:13:00	0
2009-02-19	11:14:00	0
2009-02-19	11:15:00	0
2009-02-19	11:16:00	0
2009-02-19	11:17:00	0
2009-02-19	11:18:00	0
2009-02-19	11:19:00	0
2009-02-19	11:20:00	0
2009-02-19	11:21:00	0
2009-02-19	11:22:00	0
2009-02-19	11:23:00	0
2009-02-19	11:24:00	0
2009-02-19	11:25:00	0
2009-02-19	11:26:00	0
2009-02-19	11:27:00	0
2009-02-19	11:28:00	0
2009-02-19	11:29:00	0
2009-02-19	11:30:00	0
2009-02-19	11:31:00	0
2009-02-19	11:32:00	0
2009-02-19	11:33:00	0
2009-02-19	11:34:00	0
2009-02-19	11:35:00	0
2009-02-19	11:36:00	0
2009-02-19	11:37:00	0
2009-02-19	11:38:00	0
2009-02-19	11:39:00	0
2009-02-19	11:40:00	0
2009-02-19	11:41:00	0
2009-02-19	11:42:00	0
2009-02-19	11:43:00	0
2009-02-19	11:44:00	0
2009-02-19	11:45:00	0
2009-02-19	11:46:00	0
2009-02-19	11:47:00	0
2009-02-19	11:48:00	0
2009-02-19	11:49:00	0
2009-02-19	11:50:00	0
2009-02-19	11:51:00	0
2009-02-19	11:52:00	0
2009-02-19	11:53:00	0
2009-02-19	11:54:00	0
2009-02-19	11:55:00	0
2009-02-19	11:56:00	0
2009-02-19	11:57:00	0
2009-02-19	11:58:00	0
2009-02-19	11:59:00	0
2009-02-19	12:00:00	0
2009-02-19	12:01:00	0
2009-02-19	12:02:00	0
2009-02-19	12:03:00	0
2009-02-19	12:04:00	0
2009-02-19	12:05:00	0
2009-02-19	12:06:00	0
2009-02-19	12:07:00	0
2009-02-19	12:08:00	0
2009-02-19	12:09:00	0
2009-02-19	12:10:00	0
2009-02-19	12:11:00	0
2009-02-19	12:12:00	0
2009-02-19	12:13:00	0
2009-02-19	12:14:00	0
2009-02-19	12:15:00	0
2009-02-19	12:16:00	0
2009-02-19	12:17:00	0
2009-02-19	12:18:00	0
2009-02-19	12:19:00	0
2009-02-19	12:20:00	0
2009-02-19	12:21:00	0
2009-02-19	12:22:00	0
2009-02-19	12:23:00	0
2009-02-19	12:24:00	0
2009-02-19	12:25:00	0
2009-02-19	12:26:00	0
2009-02-19	12:27:00	0
2009-02-19	12:28:00	0
2009-02-19	12:29:00	0
2009-02-19	12:30:00	0
2009-02-19	12:31:00	0
2009-02-19	12:32:00	0
2009-02-19	12:33:00	0
2009-02-19	12:34:00	0
2009-02-19	12:35:00	0
2009-02-19	12:36:00	0
2009-02-19	12:37:00	0
2009-02-19	12:38:00	0
2009-02-19	12:39:00	0
2009-02-19	12:40:00	0
2009-02-19	12:41:00	0
2009-02-19	12:42:00	0
2009-02-19	12:43:00	0
2009-02-19	12:44:00	0
2009-02-19	12:45:00	0
2009-02-19	12:46:00	0
2009-02-19	12:47:00	0
2009-02-19	12:48:00	0
2009-02-19	12:49:00	0
2009-02-19	12:50:00	0
2009-02-19	12:51:00	0
2009-02-19	12:52:00	0
2009-02-19	12:53:00	0
2009-02-19	12:54:00	0
2009-02-19	12:55:00	0
2009-02-19	12:56:00	0
2009-02-19	12:57:00	0
2009-02-19	12:58:00	0
2009-02-19	12:59:00	0
2009-02-19	13:00:00	0
2009-02-19	13:01:00	0
2009-02-19	13:02:00	0
2009-02-19	13:03:00	0
2009-02-19	13:04:00	0
2009-02-19	13:05:00	0
2009-02-19	13:06:00	0
2009-02-19	13:07:00	0
2009-02-19	13:08:00	0
2009-02-19	13:09:00	0
2009-02-19	13:10:00	0
2009-02-19	13:11:00	0
2009-02-19	13:12:00	0
2009-02-19	13:13:00	0
2009-02-19	13:14:00	0
2009-02-19	13:15:00	0
2009-02-19	13:16:00	0
2009-02-19	13:17:00	0
2009-02-19	13:18:00	0
2009-02-19	13:19:00	0
2009-02-19	13:20:00	0
2009-02-19	13:21:00	0
2009-02-19	13:22:00	0
2009-02-19	13:23:00	0
2009-02-19	13:24:00	0
2009-02-19	13:25:00	0
2009-02-19	13:26:00	0
2009-02-19	13:27:00	0
2009-02-19	13:28:00	0
2009-02-19	13:29:00	0
2009-02-19	13:30:00	0
2009-02-19	13:31:00	0
2009-02-19	13:32:00	0
2009-02-19	13:33:00	0
2009-02-19	13:34:00	0
2009-02-19	13:35:00	0
2009-02-19	13:36:00	0
2009-02-19	13:37:00	0
2009-02-19	13:38:00	0
2009-02-19	13:39:00	0
2009-02-19	13:40:00	0
2009-02-19	13:41:00	0
2009-02-19	13:42:00	0
2009-02-19	13:43:00	0
2009-02-19	13:44:00	0
2009-02-19	13:45:00	0
2009-02-19	13:46:00	0
2009-02-19	13:47:00	0
2009-02-19	13:48:00	0
2009-02-19	13:49:00	0
2009-02-19	13:50:00	0
2009-02-19	13:51:00	0
2009-02-19	13:52:00	0
2009-02-19	13:53:00	0
2009-02-19	13:54:00	0
2009-02-19	13:55:00	0
2009-02-19	13:56:00	0
2009-02-19	13:57:00	0
2009-02-19	13:58:00	0
2009-02-19	13:59:00	0
2009-02-19	14:00:00	0
2009-02-19	14:01:00	0
2009-02-19	14:02:00	0
2009-02-19	14:03:00	0
2009-02-19	14:04:00	0
2009-02-19	14:05:00	0
2009-02-19	14:06:00	0
2009-02-19	14:07:00	0
2009-02-19	14:08:00	0
2009-02-19	14:09:00	0
2009-02-19	14:10:00	0
2009-02-19	14:11:00	0
2009-02-19	14:12:00	0
2009-02-19	14:13:00	0
2009-02-19	14:14:00	0
2009-02-19	14:15:00	0
2009-02-19	14:16:00	0
2009-02-19	14:17:00	0
2009-02-19	14:18:00	0
2009-02-19	14:19:00	0
2009-02-19	14:20:00	0
2009-02-19	14:21:00	0
2009-02-19	14:22:00	0
2009-02-19	14:23:00	0
2009-02-19	14:24:00	0
2009-02-19	14:25:00	0
2009-02-19	14:26:00	0
2009-02-19	14:27:00	0
2009-02-19	14:28:00	0
2009-02-19	14:29:00	0
2009-02-19	14:30:00	0
2009-02-19	14:31:00	0
2009-02-19	14:32:00	0
2009-02-19	14:33:00	0
2009-02-19	14:34:00	0
2009-02-19	14:35:00	0
2009-02-19	14:36:00	0
2009-02-19	14:37:00	0
2009-02-19	14:38:00	0
2009-02-19	14:39:00	0
2009-02-19	14:40:00	0
2009-02-19	14:41:00	0
2009-02-19	14:42:00	0
2009-02-19	14:43:00	0
2009-02-19	14:44:00	0
2009-02-19	14:45:00	0
2009-02-19	14:46:00	0
2009-02-19	14:47:00	0
2009-02-19	14:48:00	0
2009-02-19	14:49:00	0
2009-02-19	14:50:00	0
2009-02-19	14:51:00	0
2009-02-19	14:52:00	0
2009-02-19	14:53:00	0
2009-02-19	14:54:00	0
2009-02-19	14:55:00	0
2009-02-19	14:56:00	0
2009-02-19	14:57:00	0
2009-02-19	14:58:00	0
2009-02-19	14:59:00	0
2009-02-19	15:00:00	0
2009-02-19	15:01:00	0
2009-02-19	15:02:00	0
2009-02-19	15:03:00	0
2009-02-19	15:04:00	0
2009-02-19	15:05:00	0
2009-02-19	15:06:00	0
2009-02-19	15:07:00	0
2009-02-19	15:08:00	0
2009-02-19	15:09:00	0
2009-02-19	15:10:00	0
2009-02-19	15:11:00	0
2009-02-19	15:12:00	0
2009-02-19	15:13:00	0
2009-02-19	15:14:00	0
2009-02-19	15:15:00	0
2009-02-19	15:16:00	0
2009-02-19	15:17:00	0
2009-02-19	15:18:00	0
2009-02-19	15:19:00	0
2009-02-19	15:20:00	0
2009-02-19	15:21:00	0
2009-02-19	15:22:00	0
2009-02-19	15:23:00	0
2009-02-19	15:24:00	0
2009-02-19	15:25:00	0
2009-02-19	15:26:00	0
2009-02-19	15:27:00	0
2009-02-19	15:28:00	0
2009-02-19	15:29:00	0
2009-02-19	15:30:00	0
2009-02-19	15:31:00	0
2009-02-19	15:32:00	0
2009-02-19	15:33:00	0
2009-02-19	15:34:00	0
2009-02-19	15:35:00	0
2009-02-19	15:36:00	0
2009-02-19	15:37:00	0
2009-02-19	15:38:00	0
2009-02-19	15:39:00	0
2009-02-19	15:40:00	0
2009-02-19	15:41:00	0
2009-02-19	15:42:00	0
2009-02-19	15:43:00	0
2009-02-19	15:44:00	0
2009-02-19	15:45:00	0
2009-02-19	15:46:00	0
2009-02-19	15:47:00	0
2009-02-19	15:48:00	0
2009-02-19	15:49:00	0
2009-02-19	15:50:00	0
2009-02-19	15:51:00	0
2009-02-19	15:52:00	0
2009-02-19	15:53:00	0
2009-02-19	15:54:00	0
2009-02-19	15:55:00	0
2009-02-19	15:56:00	0
2009-02-19	15:57:00	0
2009-02-19	15:58:00	0
2009-02-19	15:59:00	0
2009-02-19	16:00:00	0
2009-02-19	16:01:00	0
2009-02-19	16:02:00	0
2009-02-19	16:03:00	0
2009-02-19	16:04:00	0
2009-02-19	16:05:00	0
2009-02-19	16:06:00	0
2009-02-19	16:07:00	0
2009-02-19	16:08:00	0
2009-02-19	16:09:00	0
2009-02-19	16:10:00	0
2009-02-19	16:11:00	0
2009-02-19	16:12:00	0
2009-02-19	16:13:00	0
2009-02-19	16:14:00	0
2009-02-19	16:15:00	0
2009-02-19	16:16:00	0
2009-02-19	16:17:00	0
2009-02-19	16:18:00	0
2009-02-19	16:19:00	0
2009-02-19	16:20:00	0
2009-02-19	16:21:00	0
2009-02-19	16:22:00	0
2009-02-19	16:23:00	0
2009-02-19	16:24:00	0
2009-02-19	16:25:00	0
2009-02-19	16:26:00	0
2009-02-19	16:27:00	0
2009-02-19	16:28:00	0
2009-02-19	16:29:00	0
2009-02-19	16:30:00	0
2009-02-19	16:31:00	0
2009-02-19	16:32:00	0
2009-02-19	16:33:00	0
2009-02-19	16:34:00	0
2009-02-19	16:35:00	0
2009-02-19	16:36:00	0
2009-02-19	16:37:00	0
2009-02-19	16:38:00	0
2009-02-19	16:39:00	0
2009-02-19	16:40:00	0
2009-02-19	16:41:00	0
2009-02-19	16:42:00	0
2009-02-19	16:43:00	0
2009-02-19	16:44:00	0
2009-02-19	16:45:00	0
2009-02-19	16:46:00	0
2009-02-19	16:47:00	0
2009-02-19	16:48:00	0
2009-02-19	16:49:00	0
2009-02-19	16:50:00	0
2009-02-19	16:51:00	0
2009-02-19	16:52:00	0
2009-02-19	16:53:00	0
2009-02-19	16:54:00	0
2009-02-19	16:55:00	0
2009-02-19	16:56:00	0
2009-02-19	16:57:00	0
2009-02-19	16:58:00	0
2009-02-19	16:59:00	0
2009-02-19	17:00:00	0
2009-02-19	17:01:00	0
2009-02-19	17:02:00	0
2009-02-19	17:03:00	0
2009-02-19	17:04:00	0
2009-02-19	17:05:00	0
2009-02-19	17:06:00	0
2009-02-19	17:07:00	0
2009-02-19	17:08:00	0
2009-02-19	17:09:00	0
2009-02-19	17:10:00	0
2009-02-19	17:11:00	0
2009-02-19	17:12:00	0
2009-02-19	17:13:00	0
2009-02-19	17:14:00	0
2009-02-19	17:15:00	0
2009-02-19	17:16:00	0
2009-02-19	17:17:00	0
2009-02-19	17:18:00	0
2009-02-19	17:19:00	0
2009-02-19	17:20:00	0
2009-02-19	17:21:00	0
2009-02-19	17:22:00	0
2009-02-19	17:23:00	0
2009-02-19	17:24:00	0
2009-02-19	17:25:00	0
2009-02-19	17:26:00	0
2009-02-19	17:27:00	0
2009-02-19	17:28:00	0
2009-02-19	17:29:00	0
2009-02-19	17:30:00	0
2009-02-19	17:31:00	0
2009-02-19	17:32:00	0
2009-02-19	17:33:00	0
2009-02-19	17:34:00	0
2009-02-19	17:35:00	0
2009-02-19	17:36:00	0
2009-02-19	17:37:00	0
2009-02-19	17:38:00	0
2009-02-19	17:39:00	0
2009-02-19	17:40:00	0
2009-02-19	17:41:00	0
2009-02-19	17:42:00	0
2009-02-19	17:43:00	0
2009-02-19	17:44:00	0
2009-02-19	17:45:00	0
2009-02-19	17:46:00	0
2009-02-19	17:47:00	0
2009-02-19	17:48:00	0
2009-02-19	17:49:00	0
2009-02-19	17:50:00	0
2009-02-19	17:51:00	0
2009-02-19	17:52:00	0
2009-02-19	17:53:00	0
2009-02-19	17:54:00	0
2009-02-19	17:55:00	0
2009-02-19	17:56:00	0
2009-02-19	17:57:00	0
2009-02-19	17:58:00	0
2009-02-19	17:59:00	0
2009-02-19	18:00:00	0
2009-02-19	18:01:00	0
2009-02-19	18:02:00	0
2009-02-19	18:03:00	0
2009-02-19	18:04:00	371
2009-02-19	18:05:00	259
2009-02-19	18:06:00	274
2009-02-19	18:07:00	77
2009-02-19	18:08:00	0
2009-02-19	18:09:00	0
2009-02-19	18:10:00	0
2009-02-19	18:11:00	13
2009-02-19	18:12:00	0
2009-02-19	18:13:00	0
2009-02-19	18:14:00	0
2009-02-19	18:15:00	0
2009-02-19	18:16:00	0
2009-02-19	18:17:00	0
2009-02-19	18:18:00	64
2009-02-19	18:19:00	166
2009-02-19	18:20:00	141
2009-02-19	18:21:00	77
2009-02-19	18:22:00	0
2009-02-19	18:23:00	0
2009-02-19	18:24:00	0
2009-02-19	18:25:00	154
2009-02-19	18:26:00	166
2009-02-19	18:27:00	90
2009-02-19	18:28:00	0
2009-02-19	18:29:00	166
2009-02-19	18:30:00	38
2009-02-19	18:31:00	13
2009-02-19	18:32:00	128
2009-02-19	18:33:00	26
2009-02-19	18:34:00	51
2009-02-19	18:35:00	0
2009-02-19	18:36:00	353
2009-02-19	18:37:00	259
2009-02-19	18:38:00	274
2009-02-19	18:39:00	353
2009-02-19	18:40:00	128
2009-02-19	18:41:00	51
2009-02-19	18:42:00	38
2009-02-19	18:43:00	0
2009-02-19	18:44:00	0
2009-02-19	18:45:00	497
2009-02-19	18:46:00	274
2009-02-19	18:47:00	64
2009-02-19	18:48:00	212
2009-02-19	18:49:00	353
2009-02-19	18:50:00	182
2009-02-19	18:51:00	259
2009-02-19	18:52:00	166
2009-02-19	18:53:00	197
2009-02-19	18:54:00	243
2009-02-19	18:55:00	26
2009-02-19	18:56:00	51
2009-02-19	18:57:00	0
2009-02-19	18:58:00	0
2009-02-19	18:59:00	0
2009-02-19	19:00:00	0
2009-02-19	19:01:00	0
2009-02-19	19:02:00	0
2009-02-19	19:03:00	0
2009-02-19	19:04:00	0
2009-02-19	19:05:00	0
2009-02-19	19:06:00	0
2009-02-19	19:07:00	182
2009-02-19	19:08:00	0
2009-02-19	19:09:00	0
2009-02-19	19:10:00	0
2009-02-19	19:11:00	0
2009-02-19	19:12:00	0
2009-02-19	19:13:00	0
2009-02-19	19:14:00	0
2009-02-19	19:15:00	0
2009-02-19	19:16:00	0
2009-02-19	19:17:00	0
2009-02-19	19:18:00	0
2009-02-19	19:19:00	0
2009-02-19	19:20:00	0
2009-02-19	19:21:00	0
2009-02-19	19:22:00	0
2009-02-19	19:23:00	0
2009-02-19	19:24:00	13
2009-02-19	19:25:00	0
2009-02-19	19:26:00	0
2009-02-19	19:27:00	0
2009-02-19	19:28:00	0
2009-02-19	19:29:00	0
2009-02-19	19:30:00	0
2009-02-19	19:31:00	77
2009-02-19	19:32:00	0
2009-02-19	19:33:00	13
2009-02-19	19:34:00	274
2009-02-19	19:35:00	259
2009-02-19	19:36:00	77
2009-02-19	19:37:00	243
2009-02-19	19:38:00	102
2009-02-19	19:39:00	166
2009-02-19	19:40:00	0
2009-02-19	19:41:00	0
2009-02-19	19:42:00	51
2009-02-19	19:43:00	371
2009-02-19	19:44:00	353
2009-02-19	19:45:00	182
2009-02-19	19:46:00	26
2009-02-19	19:47:00	0
2009-02-19	19:48:00	0
2009-02-19	19:49:00	353
2009-02-19	19:50:00	228
2009-02-19	19:51:00	0
2009-02-19	19:52:00	0
2009-02-19	19:53:00	0
2009-02-19	19:54:00	0
2009-02-19	19:55:00	0
2009-02-19	19:56:00	0
2009-02-19	19:57:00	371
2009-02-19	19:58:00	776
2009-02-19	19:59:00	141
2009-02-19	20:00:00	197
2009-02-19	20:01:00	51
2009-02-19	20:02:00	305
2009-02-19	20:03:00	197
2009-02-19	20:04:00	228
2009-02-19	20:05:00	443
2009-02-19	20:06:00	305
2009-02-19	20:07:00	353
2009-02-19	20:08:00	305
2009-02-19	20:09:00	128
2009-02-19	20:10:00	274
2009-02-19	20:11:00	274
2009-02-19	20:12:00	730
2009-02-19	20:13:00	620
2009-02-19	20:14:00	389
2009-02-19	20:15:00	320
2009-02-19	20:16:00	0
2009-02-19	20:17:00	0
2009-02-19	20:18:00	0
2009-02-19	20:19:00	0
2009-02-19	20:20:00	0
2009-02-19	20:21:00	0
2009-02-19	20:22:00	0
2009-02-19	20:23:00	0
2009-02-19	20:24:00	0
2009-02-19	20:25:00	0
2009-02-19	20:26:00	0
2009-02-19	20:27:00	0
2009-02-19	20:28:00	0
2009-02-19	20:29:00	0
2009-02-19	20:30:00	0
2009-02-19	20:31:00	0
2009-02-19	20:32:00	0
2009-02-19	20:33:00	0
2009-02-19	20:34:00	0
2009-02-19	20:35:00	0
2009-02-19	20:36:00	0
2009-02-19	20:37:00	0
2009-02-19	20:38:00	0
2009-02-19	20:39:00	0
2009-02-19	20:40:00	0
2009-02-19	20:41:00	0
2009-02-19	20:42:00	0
2009-02-19	20:43:00	0
2009-02-19	20:44:00	0
2009-02-19	20:45:00	0
2009-02-19	20:46:00	0
2009-02-19	20:47:00	0
2009-02-19	20:48:00	0
2009-02-19	20:49:00	0
2009-02-19	20:50:00	0
2009-02-19	20:51:00	0
2009-02-19	20:52:00	0
2009-02-19	20:53:00	0
2009-02-19	20:54:00	0
2009-02-19	20:55:00	13
2009-02-19	20:56:00	0
2009-02-19	20:57:00	0
2009-02-19	20:58:00	0
2009-02-19	20:59:00	0
2009-02-19	21:00:00	0
2009-02-19	21:01:00	0
2009-02-19	21:02:00	0
2009-02-19	21:03:00	0
2009-02-19	21:04:00	0
2009-02-19	21:05:00	0
2009-02-19	21:06:00	0
2009-02-19	21:07:00	0
2009-02-19	21:08:00	0
2009-02-19	21:09:00	0
2009-02-19	21:10:00	0
2009-02-19	21:11:00	0
2009-02-19	21:12:00	0
2009-02-19	21:13:00	0
2009-02-19	21:14:00	0
2009-02-19	21:15:00	0
2009-02-19	21:16:00	0
2009-02-19	21:17:00	13
2009-02-19	21:18:00	0
2009-02-19	21:19:00	26
2009-02-19	21:20:00	0
2009-02-19	21:21:00	13
2009-02-19	21:22:00	0
2009-02-19	21:23:00	38
2009-02-19	21:24:00	0
2009-02-19	21:25:00	38
2009-02-19	21:26:00	0
2009-02-19	21:27:00	0
2009-02-19	21:28:00	0
2009-02-19	21:29:00	0
2009-02-19	21:30:00	0
2009-02-19	21:31:00	26
2009-02-19	21:32:00	26
2009-02-19	21:33:00	26
2009-02-19	21:34:00	0
2009-02-19	21:35:00	0
2009-02-19	21:36:00	0
2009-02-19	21:37:00	0
2009-02-19	21:38:00	154
2009-02-19	21:39:00	128
2009-02-19	21:40:00	102
2009-02-19	21:41:00	154
2009-02-19	21:42:00	90
2009-02-19	21:43:00	38
2009-02-19	21:44:00	0
2009-02-19	21:45:00	0
2009-02-19	21:46:00	0
2009-02-19	21:47:00	0
2009-02-19	21:48:00	0
2009-02-19	21:49:00	0
2009-02-19	21:50:00	0
2009-02-19	21:51:00	0
2009-02-19	21:52:00	0
2009-02-19	21:53:00	0
2009-02-19	21:54:00	0
2009-02-19	21:55:00	0
2009-02-19	21:56:00	141
2009-02-19	21:57:00	479
2009-02-19	21:58:00	1001
2009-02-19	21:59:00	274
2009-02-19	22:00:00	212
2009-02-19	22:01:00	26
2009-02-19	22:02:00	13
2009-02-19	22:03:00	26
2009-02-19	22:04:00	259
2009-02-19	22:05:00	274
2009-02-19	22:06:00	753
2009-02-19	22:07:00	579
2009-02-19	22:08:00	640
2009-02-19	22:09:00	497
2009-02-19	22:10:00	90
2009-02-19	22:11:00	461
2009-02-19	22:12:00	166
2009-02-19	22:13:00	289
2009-02-19	22:14:00	707
2009-02-19	22:15:00	90
2009-02-19	22:16:00	197
2009-02-19	22:17:00	0
2009-02-19	22:18:00	0
2009-02-19	22:19:00	0
2009-02-19	22:20:00	0
2009-02-19	22:21:00	259
2009-02-19	22:22:00	0
2009-02-19	22:23:00	0
2009-02-19	22:24:00	461
2009-02-19	22:25:00	64
2009-02-19	22:26:00	0
2009-02-19	22:27:00	0
2009-02-19	22:28:00	0
2009-02-19	22:29:00	0
2009-02-19	22:30:00	0
2009-02-19	22:31:00	0
2009-02-19	22:32:00	0
2009-02-19	22:33:00	13
2009-02-19	22:34:00	13
2009-02-19	22:35:00	0
2009-02-19	22:36:00	0
2009-02-19	22:37:00	0
2009-02-19	22:38:00	0
2009-02-19	22:39:00	0
2009-02-19	22:40:00	0
2009-02-19	22:41:00	0
2009-02-19	22:42:00	0
2009-02-19	22:43:00	0
2009-02-19	22:44:00	0
2009-02-19	22:45:00	0
2009-02-19	22:46:00	26
2009-02-19	22:47:00	0
2009-02-19	22:48:00	0
2009-02-19	22:49:00	0
2009-02-19	22:50:00	0
2009-02-19	22:51:00	0
2009-02-19	22:52:00	0
2009-02-19	22:53:00	0
2009-02-19	22:54:00	0
2009-02-19	22:55:00	0
2009-02-19	22:56:00	0
2009-02-19	22:57:00	51
2009-02-19	22:58:00	212
2009-02-19	22:59:00	0
2009-02-19	23:00:00	0
2009-02-19	23:01:00	0
2009-02-19	23:02:00	0
2009-02-19	23:03:00	0
2009-02-19	23:04:00	0
2009-02-19	23:05:00	0
2009-02-19	23:06:00	0
2009-02-19	23:07:00	0
2009-02-19	23:08:00	0
2009-02-19	23:09:00	0
2009-02-19	23:10:00	0
2009-02-19	23:11:00	0
2009-02-19	23:12:00	0
2009-02-19	23:13:00	0
2009-02-19	23:14:00	0
2009-02-19	23:15:00	0
2009-02-19	23:16:00	0
2009-02-19	23:17:00	0
2009-02-19	23:18:00	0
2009-02-19	23:19:00	0
2009-02-19	23:20:00	0
2009-02-19	23:21:00	0
2009-02-19	23:22:00	0
2009-02-19	23:23:00	0
2009-02-19	23:24:00	0
2009-02-19	23:25:00	0
2009-02-19	23:26:00	0
2009-02-19	23:27:00	0
2009-02-19	23:28:00	0
2009-02-19	23:29:00	0
2009-02-19	23:30:00	0
2009-02-19	23:31:00	0
2009-02-19	23:32:00	0
2009-02-19	23:33:00	0
2009-02-19	23:34:00	0
2009-02-19	23:35:00	0
2009-02-19	23:36:00	0
2009-02-19	23:37:00	0
2009-02-19	23:38:00	0
2009-02-19	23:39:00	0
2009-02-19	23:40:00	0
2009-02-19	23:41:00	0
2009-02-19	23:42:00	0
2009-02-19	23:43:00	0
2009-02-19	23:44:00	0
2009-02-19	23:45:00	0
2009-02-19	23:46:00	0
2009-02-19	23:47:00	0
2009-02-19	23:48:00	0
2009-02-19	23:49:00	0
2009-02-19	23:50:00	0
2009-02-19	23:51:00	0
2009-02-19	23:52:00	0
2009-02-19	23:53:00	0
2009-02-19	23:54:00	0
2009-02-19	23:55:00	0
2009-02-19	23:56:00	0
2009-02-19	23:57:00	0
2009-02-19	23:58:00	0
2009-02-19	23:59:00	0
2009-02-20	00:00:00	0
2009-02-20	00:01:00	0
2009-02-20	00:02:00	0
2009-02-20	00:03:00	0
2009-02-20	00:04:00	0
2009-02-20	00:05:00	0
2009-02-20	00:06:00	0
2009-02-20	00:07:00	0
2009-02-20	00:08:00	0
2009-02-20	00:09:00	0
2009-02-20	00:10:00	0
2009-02-20	00:11:00	0
2009-02-20	00:12:00	0
2009-02-20	00:13:00	0
2009-02-20	00:14:00	0
2009-02-20	00:15:00	0
2009-02-20	00:16:00	0
2009-02-20	00:17:00	0
2009-02-20	00:18:00	0
2009-02-20	00:19:00	0
2009-02-20	00:20:00	0
2009-02-20	00:21:00	0
2009-02-20	00:22:00	0
2009-02-20	00:23:00	0
2009-02-20	00:24:00	0
2009-02-20	00:25:00	0
2009-02-20	00:26:00	0
2009-02-20	00:27:00	0
2009-02-20	00:28:00	0
2009-02-20	00:29:00	0
2009-02-20	00:30:00	0
2009-02-20	00:31:00	0
2009-02-20	00:32:00	0
2009-02-20	00:33:00	0
2009-02-20	00:34:00	0
2009-02-20	00:35:00	0
2009-02-20	00:36:00	0
2009-02-20	00:37:00	0
2009-02-20	00:38:00	0
2009-02-20	00:39:00	0
2009-02-20	00:40:00	0
2009-02-20	00:41:00	0
2009-02-20	00:42:00	0
2009-02-20	00:43:00	0
2009-02-20	00:44:00	0
2009-02-20	00:45:00	0
2009-02-20	00:46:00	0
2009-02-20	00:47:00	0
2009-02-20	00:48:00	0
2009-02-20	00:49:00	0
2009-02-20	00:50:00	0
2009-02-20	00:51:00	0
2009-02-20	00:52:00	0
2009-02-20	00:53:00	0
2009-02-20	00:54:00	0
2009-02-20	00:55:00	0
2009-02-20	00:56:00	0
2009-02-20	00:57:00	0
2009-02-20	00:58:00	0
2009-02-20	00:59:00	0
2009-02-20	01:00:00	0
2009-02-20	01:01:00	0
2009-02-20	01:02:00	0
2009-02-20	01:03:00	0
2009-02-20	01:04:00	0
2009-02-20	01:05:00	0
2009-02-20	01:06:00	0
2009-02-20	01:07:00	0
2009-02-20	01:08:00	0
2009-02-20	01:09:00	0
2009-02-20	01:10:00	0
2009-02-20	01:11:00	0
2009-02-20	01:12:00	0
2009-02-20	01:13:00	0
2009-02-20	01:14:00	0
2009-02-20	01:15:00	0
2009-02-20	01:16:00	0
2009-02-20	01:17:00	0
2009-02-20	01:18:00	0
2009-02-20	01:19:00	0
2009-02-20	01:20:00	0
2009-02-20	01:21:00	0
2009-02-20	01:22:00	0
2009-02-20	01:23:00	0
2009-02-20	01:24:00	0
2009-02-20	01:25:00	0
2009-02-20	01:26:00	0
2009-02-20	01:27:00	0
2009-02-20	01:28:00	0
2009-02-20	01:29:00	0
2009-02-20	01:30:00	0
2009-02-20	01:31:00	0
2009-02-20	01:32:00	0
2009-02-20	01:33:00	0
2009-02-20	01:34:00	0
2009-02-20	01:35:00	0
2009-02-20	01:36:00	0
2009-02-20	01:37:00	0
2009-02-20	01:38:00	0
2009-02-20	01:39:00	0
2009-02-20	01:40:00	0
2009-02-20	01:41:00	0
2009-02-20	01:42:00	0
2009-02-20	01:43:00	0
2009-02-20	01:44:00	0
2009-02-20	01:45:00	0
2009-02-20	01:46:00	0
2009-02-20	01:47:00	13
2009-02-20	01:48:00	0
2009-02-20	01:49:00	0
2009-02-20	01:50:00	26
2009-02-20	01:51:00	26
2009-02-20	01:52:00	77
2009-02-20	01:53:00	26
2009-02-20	01:54:00	0
2009-02-20	01:55:00	0
2009-02-20	01:56:00	0
2009-02-20	01:57:00	0
2009-02-20	01:58:00	51
2009-02-20	01:59:00	0
2009-02-20	02:00:00	0
2009-02-20	02:01:00	0
2009-02-20	02:02:00	0
2009-02-20	02:03:00	0
2009-02-20	02:04:00	0
2009-02-20	02:05:00	0
2009-02-20	02:06:00	0
2009-02-20	02:07:00	0
2009-02-20	02:08:00	0
2009-02-20	02:09:00	0
2009-02-20	02:10:00	0
2009-02-20	02:11:00	0
2009-02-20	02:12:00	0
2009-02-20	02:13:00	0
2009-02-20	02:14:00	0
2009-02-20	02:15:00	0
2009-02-20	02:16:00	0
2009-02-20	02:17:00	0
2009-02-20	02:18:00	0
2009-02-20	02:19:00	0
2009-02-20	02:20:00	0
2009-02-20	02:21:00	0
2009-02-20	02:22:00	0
2009-02-20	02:23:00	0
2009-02-20	02:24:00	0
2009-02-20	02:25:00	0
2009-02-20	02:26:00	0
2009-02-20	02:27:00	0
2009-02-20	02:28:00	0
2009-02-20	02:29:00	0
2009-02-20	02:30:00	0
2009-02-20	02:31:00	0
2009-02-20	02:32:00	0
2009-02-20	02:33:00	0
2009-02-20	02:34:00	0
2009-02-20	02:35:00	0
2009-02-20	02:36:00	0
2009-02-20	02:37:00	0
2009-02-20	02:38:00	0
2009-02-20	02:39:00	0
2009-02-20	02:40:00	0
2009-02-20	02:41:00	0
2009-02-20	02:42:00	0
2009-02-20	02:43:00	0
2009-02-20	02:44:00	0
2009-02-20	02:45:00	0
2009-02-20	02:46:00	0
2009-02-20	02:47:00	0
2009-02-20	02:48:00	0
2009-02-20	02:49:00	0
2009-02-20	02:50:00	0
2009-02-20	02:51:00	13
2009-02-20	02:52:00	0
2009-02-20	02:53:00	0
2009-02-20	02:54:00	0
2009-02-20	02:55:00	13
2009-02-20	02:56:00	0
2009-02-20	02:57:00	0
2009-02-20	02:58:00	0
2009-02-20	02:59:00	0
2009-02-20	03:00:00	0
2009-02-20	03:01:00	0
2009-02-20	03:02:00	0
2009-02-20	03:03:00	0
2009-02-20	03:04:00	0
2009-02-20	03:05:00	0
2009-02-20	03:06:00	0
2009-02-20	03:07:00	0
2009-02-20	03:08:00	0
2009-02-20	03:09:00	0
2009-02-20	03:10:00	0
2009-02-20	03:11:00	0
2009-02-20	03:12:00	0
2009-02-20	03:13:00	0
2009-02-20	03:14:00	0
2009-02-20	03:15:00	0
2009-02-20	03:16:00	0
2009-02-20	03:17:00	0
2009-02-20	03:18:00	0
2009-02-20	03:19:00	0
2009-02-20	03:20:00	0
2009-02-20	03:21:00	0
2009-02-20	03:22:00	0
2009-02-20	03:23:00	0
2009-02-20	03:24:00	0
2009-02-20	03:25:00	0
2009-02-20	03:26:00	0
2009-02-20	03:27:00	0
2009-02-20	03:28:00	0
2009-02-20	03:29:00	0
2009-02-20	03:30:00	0
2009-02-20	03:31:00	0
2009-02-20	03:32:00	0
2009-02-20	03:33:00	0
2009-02-20	03:34:00	0
2009-02-20	03:35:00	0
2009-02-20	03:36:00	0
2009-02-20	03:37:00	0
2009-02-20	03:38:00	0
2009-02-20	03:39:00	0
2009-02-20	03:40:00	0
2009-02-20	03:41:00	0
2009-02-20	03:42:00	0
2009-02-20	03:43:00	0
2009-02-20	03:44:00	0
2009-02-20	03:45:00	0
2009-02-20	03:46:00	0
2009-02-20	03:47:00	0
2009-02-20	03:48:00	0
2009-02-20	03:49:00	0
2009-02-20	03:50:00	0
2009-02-20	03:51:00	0
2009-02-20	03:52:00	13
2009-02-20	03:53:00	0
2009-02-20	03:54:00	0
2009-02-20	03:55:00	0
2009-02-20	03:56:00	0
2009-02-20	03:57:00	0
2009-02-20	03:58:00	0
2009-02-20	03:59:00	0
2009-02-20	04:00:00	0
2009-02-20	04:01:00	0
2009-02-20	04:02:00	0
2009-02-20	04:03:00	0
2009-02-20	04:04:00	0
2009-02-20	04:05:00	0
2009-02-20	04:06:00	0
2009-02-20	04:07:00	0
2009-02-20	04:08:00	0
2009-02-20	04:09:00	0
2009-02-20	04:10:00	0
2009-02-20	04:11:00	0
2009-02-20	04:12:00	0
2009-02-20	04:13:00	0
2009-02-20	04:14:00	0
2009-02-20	04:15:00	13
2009-02-20	04:16:00	0
2009-02-20	04:17:00	13
2009-02-20	04:18:00	0
2009-02-20	04:19:00	0
2009-02-20	04:20:00	0
2009-02-20	04:21:00	0
2009-02-20	04:22:00	0
2009-02-20	04:23:00	0
2009-02-20	04:24:00	0
2009-02-20	04:25:00	0
2009-02-20	04:26:00	0
2009-02-20	04:27:00	0
2009-02-20	04:28:00	0
2009-02-20	04:29:00	0
2009-02-20	04:30:00	0
2009-02-20	04:31:00	0
2009-02-20	04:32:00	0
2009-02-20	04:33:00	0
2009-02-20	04:34:00	0
2009-02-20	04:35:00	0
2009-02-20	04:36:00	0
2009-02-20	04:37:00	0
2009-02-20	04:38:00	0
2009-02-20	04:39:00	0
2009-02-20	04:40:00	166
2009-02-20	04:41:00	0
2009-02-20	04:42:00	38
2009-02-20	04:43:00	0
2009-02-20	04:44:00	0
2009-02-20	04:45:00	0
2009-02-20	04:46:00	0
2009-02-20	04:47:00	0
2009-02-20	04:48:00	0
2009-02-20	04:49:00	0
2009-02-20	04:50:00	0
2009-02-20	04:51:00	0
2009-02-20	04:52:00	0
2009-02-20	04:53:00	0
2009-02-20	04:54:00	0
2009-02-20	04:55:00	13
2009-02-20	04:56:00	38
2009-02-20	04:57:00	26
2009-02-20	04:58:00	64
2009-02-20	04:59:00	0
2009-02-20	05:00:00	115
2009-02-20	05:01:00	128
2009-02-20	05:02:00	0
2009-02-20	05:03:00	0
2009-02-20	05:04:00	0
2009-02-20	05:05:00	0
2009-02-20	05:06:00	0
2009-02-20	05:07:00	0
2009-02-20	05:08:00	0
2009-02-20	05:09:00	0
2009-02-20	05:10:00	0
2009-02-20	05:11:00	0
2009-02-20	05:12:00	0
2009-02-20	05:13:00	0
2009-02-20	05:14:00	0
2009-02-20	05:15:00	0
2009-02-20	05:16:00	0
2009-02-20	05:17:00	0
2009-02-20	05:18:00	0
2009-02-20	05:19:00	0
2009-02-20	05:20:00	0
2009-02-20	05:21:00	0
2009-02-20	05:22:00	0
2009-02-20	05:23:00	0
2009-02-20	05:24:00	0
2009-02-20	05:25:00	0
2009-02-20	05:26:00	0
2009-02-20	05:27:00	0
2009-02-20	05:28:00	0
2009-02-20	05:29:00	0
2009-02-20	05:30:00	0
2009-02-20	05:31:00	0
2009-02-20	05:32:00	0
2009-02-20	05:33:00	0
2009-02-20	05:34:00	0
2009-02-20	05:35:00	0
2009-02-20	05:36:00	0
2009-02-20	05:37:00	0
2009-02-20	05:38:00	0
2009-02-20	05:39:00	0
2009-02-20	05:40:00	0
2009-02-20	05:41:00	0
2009-02-20	05:42:00	0
2009-02-20	05:43:00	0
2009-02-20	05:44:00	0
2009-02-20	05:45:00	0
2009-02-20	05:46:00	0
2009-02-20	05:47:00	0
2009-02-20	05:48:00	0
2009-02-20	05:49:00	0
2009-02-20	05:50:00	0
2009-02-20	05:51:00	0
2009-02-20	05:52:00	0
2009-02-20	05:53:00	0
2009-02-20	05:54:00	0
2009-02-20	05:55:00	0
2009-02-20	05:56:00	0
2009-02-20	05:57:00	0
2009-02-20	05:58:00	0
2009-02-20	05:59:00	0
2009-02-20	06:00:00	0
2009-02-20	06:01:00	154
2009-02-20	06:02:00	0
2009-02-20	06:03:00	0
2009-02-20	06:04:00	0
2009-02-20	06:05:00	0
2009-02-20	06:06:00	0
2009-02-20	06:07:00	0
2009-02-20	06:08:00	0
2009-02-20	06:09:00	26
2009-02-20	06:10:00	0
2009-02-20	06:11:00	0
2009-02-20	06:12:00	0
2009-02-20	06:13:00	0
2009-02-20	06:14:00	0
2009-02-20	06:15:00	0
2009-02-20	06:16:00	0
2009-02-20	06:17:00	0
2009-02-20	06:18:00	0
2009-02-20	06:19:00	0
2009-02-20	06:20:00	0
2009-02-20	06:21:00	0
2009-02-20	06:22:00	0
2009-02-20	06:23:00	0
2009-02-20	06:24:00	0
2009-02-20	06:25:00	0
2009-02-20	06:26:00	0
2009-02-20	06:27:00	0
2009-02-20	06:28:00	0
2009-02-20	06:29:00	0
2009-02-20	06:30:00	0
2009-02-20	06:31:00	0
2009-02-20	06:32:00	0
2009-02-20	06:33:00	0
2009-02-20	06:34:00	51
2009-02-20	06:35:00	13
2009-02-20	06:36:00	13
2009-02-20	06:37:00	13
2009-02-20	06:38:00	51
2009-02-20	06:39:00	684
2009-02-20	06:40:00	684
2009-02-20	06:41:00	599
2009-02-20	06:42:00	353
2009-02-20	06:43:00	243
2009-02-20	06:44:00	197
2009-02-20	06:45:00	274
2009-02-20	06:46:00	558
2009-02-20	06:47:00	320
2009-02-20	06:48:00	517
2009-02-20	06:49:00	479
2009-02-20	06:50:00	461
2009-02-20	06:51:00	259
2009-02-20	06:52:00	141
2009-02-20	06:53:00	822
2009-02-20	06:54:00	38
2009-02-20	06:55:00	497
2009-02-20	06:56:00	353
2009-02-20	06:57:00	407
2009-02-20	06:58:00	353
2009-02-20	06:59:00	90
2009-02-20	07:00:00	115
2009-02-20	07:01:00	228
2009-02-20	07:02:00	320
2009-02-20	07:03:00	154
2009-02-20	07:04:00	0
2009-02-20	07:05:00	0
2009-02-20	07:06:00	0
2009-02-20	07:07:00	0
2009-02-20	07:08:00	0
2009-02-20	07:09:00	0
2009-02-20	07:10:00	0
2009-02-20	07:11:00	0
2009-02-20	07:12:00	0
2009-02-20	07:13:00	0
2009-02-20	07:14:00	0
2009-02-20	07:15:00	13
2009-02-20	07:16:00	0
2009-02-20	07:17:00	0
2009-02-20	07:18:00	0
2009-02-20	07:19:00	0
2009-02-20	07:20:00	0
2009-02-20	07:21:00	0
2009-02-20	07:22:00	0
2009-02-20	07:23:00	0
2009-02-20	07:24:00	0
2009-02-20	07:25:00	0
2009-02-20	07:26:00	0
2009-02-20	07:27:00	13
2009-02-20	07:28:00	0
2009-02-20	07:29:00	0
2009-02-20	07:30:00	0
2009-02-20	07:31:00	0
2009-02-20	07:32:00	0
2009-02-20	07:33:00	0
2009-02-20	07:34:00	0
2009-02-20	07:35:00	0
2009-02-20	07:36:00	0
2009-02-20	07:37:00	0
2009-02-20	07:38:00	0
2009-02-20	07:39:00	0
2009-02-20	07:40:00	38
2009-02-20	07:41:00	154
2009-02-20	07:42:00	1324
2009-02-20	07:43:00	776
2009-02-20	07:44:00	0
2009-02-20	07:45:00	38
2009-02-20	07:46:00	26
2009-02-20	07:47:00	0
2009-02-20	07:48:00	0
2009-02-20	07:49:00	0
2009-02-20	07:50:00	13
2009-02-20	07:51:00	0
2009-02-20	07:52:00	0
2009-02-20	07:53:00	0
2009-02-20	07:54:00	13
2009-02-20	07:55:00	13
2009-02-20	07:56:00	166
2009-02-20	07:57:00	115
2009-02-20	07:58:00	371
2009-02-20	07:59:00	0
2009-02-20	08:00:00	0
2009-02-20	08:01:00	0
2009-02-20	08:02:00	26
2009-02-20	08:03:00	0
2009-02-20	08:04:00	0
2009-02-20	08:05:00	0
2009-02-20	08:06:00	0
2009-02-20	08:07:00	0
2009-02-20	08:08:00	0
2009-02-20	08:09:00	0
2009-02-20	08:10:00	0
2009-02-20	08:11:00	0
2009-02-20	08:12:00	0
2009-02-20	08:13:00	0
2009-02-20	08:14:00	0
2009-02-20	08:15:00	0
2009-02-20	08:16:00	0
2009-02-20	08:17:00	0
2009-02-20	08:18:00	0
2009-02-20	08:19:00	0
2009-02-20	08:20:00	0
2009-02-20	08:21:00	0
2009-02-20	08:22:00	0
2009-02-20	08:23:00	0
2009-02-20	08:24:00	0
2009-02-20	08:25:00	0
2009-02-20	08:26:00	0
2009-02-20	08:27:00	0
2009-02-20	08:28:00	13
2009-02-20	08:29:00	13
2009-02-20	08:30:00	0
2009-02-20	08:31:00	13
2009-02-20	08:32:00	0
2009-02-20	08:33:00	0
2009-02-20	08:34:00	0
2009-02-20	08:35:00	51
2009-02-20	08:36:00	0
2009-02-20	08:37:00	0
2009-02-20	08:38:00	0
2009-02-20	08:39:00	0
2009-02-20	08:40:00	0
2009-02-20	08:41:00	13
2009-02-20	08:42:00	38
2009-02-20	08:43:00	0
2009-02-20	08:44:00	0
2009-02-20	08:45:00	0
2009-02-20	08:46:00	0
2009-02-20	08:47:00	0
2009-02-20	08:48:00	0
2009-02-20	08:49:00	51
2009-02-20	08:50:00	154
2009-02-20	08:51:00	128
2009-02-20	08:52:00	0
2009-02-20	08:53:00	0
2009-02-20	08:54:00	0
2009-02-20	08:55:00	0
2009-02-20	08:56:00	0
2009-02-20	08:57:00	0
2009-02-20	08:58:00	0
2009-02-20	08:59:00	0
2009-02-20	09:00:00	0
2009-02-20	09:01:00	0
2009-02-20	09:02:00	0
2009-02-20	09:03:00	0
2009-02-20	09:04:00	0
2009-02-20	09:05:00	13
2009-02-20	09:06:00	0
2009-02-20	09:07:00	0
2009-02-20	09:08:00	0
[truncated: 19,611 more rows]

## Sheet: 3.5.09
Actogram, Copy Raw Data, All Days
Identity:	Kitty Reiser
Filename:	E:\Active Research Files\meloxicam titre canine\cases\kitty\Kitty Reiser 3.5.09.AWC
Gender:	F
Age:	7
Height:	61.0 cm	24.0 in
Weight:	20.4 kg	45.0 lbs
Start Date:	05-Mar-2009 (Thu)
Start Time:	18:00:00
Interval:	1.00 mins
Date Stamp:	Time Stamp:	Activity Data:	Marker Press:
2009-03-05	00:00:00	0
2009-03-05	00:01:00	0
2009-03-05	00:02:00	0
2009-03-05	00:03:00	0
2009-03-05	00:04:00	0
2009-03-05	00:05:00	0
2009-03-05	00:06:00	0
2009-03-05	00:07:00	0
2009-03-05	00:08:00	0
2009-03-05	00:09:00	0
2009-03-05	00:10:00	0
2009-03-05	00:11:00	0
2009-03-05	00:12:00	0
2009-03-05	00:13:00	0
2009-03-05	00:14:00	0
2009-03-05	00:15:00	0
2009-03-05	00:16:00	0
2009-03-05	00:17:00	0
2009-03-05	00:18:00	0
2009-03-05	00:19:00	0
2009-03-05	00:20:00	0
2009-03-05	00:21:00	0
2009-03-05	00:22:00	0
2009-03-05	00:23:00	0
2009-03-05	00:24:00	0
2009-03-05	00:25:00	0
2009-03-05	00:26:00	0
2009-03-05	00:27:00	0
2009-03-05	00:28:00	0
2009-03-05	00:29:00	0
2009-03-05	00:30:00	0
2009-03-05	00:31:00	0
2009-03-05	00:32:00	0
2009-03-05	00:33:00	0
2009-03-05	00:34:00	0
2009-03-05	00:35:00	0
2009-03-05	00:36:00	0
2009-03-05	00:37:00	0
2009-03-05	00:38:00	0
2009-03-05	00:39:00	0
2009-03-05	00:40:00	0
2009-03-05	00:41:00	0
2009-03-05	00:42:00	0
2009-03-05	00:43:00	0
2009-03-05	00:44:00	0
2009-03-05	00:45:00	0
2009-03-05	00:46:00	0
2009-03-05	00:47:00	0
2009-03-05	00:48:00	0
2009-03-05	00:49:00	0
2009-03-05	00:50:00	0
2009-03-05	00:51:00	0
2009-03-05	00:52:00	0
2009-03-05	00:53:00	0
2009-03-05	00:54:00	0
2009-03-05	00:55:00	0
2009-03-05	00:56:00	0
2009-03-05	00:57:00	0
2009-03-05	00:58:00	0
2009-03-05	00:59:00	0
2009-03-05	01:00:00	0
2009-03-05	01:01:00	0
2009-03-05	01:02:00	0
2009-03-05	01:03:00	0
2009-03-05	01:04:00	0
2009-03-05	01:05:00	0
2009-03-05	01:06:00	0
2009-03-05	01:07:00	0
2009-03-05	01:08:00	0
2009-03-05	01:09:00	0
2009-03-05	01:10:00	0
2009-03-05	01:11:00	0
2009-03-05	01:12:00	0
2009-03-05	01:13:00	0
2009-03-05	01:14:00	0
2009-03-05	01:15:00	0
2009-03-05	01:16:00	0
2009-03-05	01:17:00	0
2009-03-05	01:18:00	0
2009-03-05	01:19:00	0
2009-03-05	01:20:00	0
2009-03-05	01:21:00	0
2009-03-05	01:22:00	0
2009-03-05	01:23:00	0
2009-03-05	01:24:00	0
2009-03-05	01:25:00	0
2009-03-05	01:26:00	0
2009-03-05	01:27:00	0
2009-03-05	01:28:00	0
2009-03-05	01:29:00	0
2009-03-05	01:30:00	0
2009-03-05	01:31:00	0
2009-03-05	01:32:00	0
2009-03-05	01:33:00	0
2009-03-05	01:34:00	0
2009-03-05	01:35:00	0
2009-03-05	01:36:00	0
2009-03-05	01:37:00	0
2009-03-05	01:38:00	0
2009-03-05	01:39:00	0
2009-03-05	01:40:00	0
2009-03-05	01:41:00	0
2009-03-05	01:42:00	0
2009-03-05	01:43:00	0
2009-03-05	01:44:00	0
2009-03-05	01:45:00	0
2009-03-05	01:46:00	0
2009-03-05	01:47:00	0
2009-03-05	01:48:00	0
2009-03-05	01:49:00	0
2009-03-05	01:50:00	0
2009-03-05	01:51:00	0
2009-03-05	01:52:00	0
2009-03-05	01:53:00	0
2009-03-05	01:54:00	0
2009-03-05	01:55:00	0
2009-03-05	01:56:00	0
2009-03-05	01:57:00	0
2009-03-05	01:58:00	0
2009-03-05	01:59:00	0
2009-03-05	02:00:00	0
2009-03-05	02:01:00	0
2009-03-05	02:02:00	0
2009-03-05	02:03:00	0
2009-03-05	02:04:00	0
2009-03-05	02:05:00	0
2009-03-05	02:06:00	0
2009-03-05	02:07:00	0
2009-03-05	02:08:00	0
2009-03-05	02:09:00	0
2009-03-05	02:10:00	0
2009-03-05	02:11:00	0
2009-03-05	02:12:00	0
2009-03-05	02:13:00	0
2009-03-05	02:14:00	0
2009-03-05	02:15:00	0
2009-03-05	02:16:00	0
2009-03-05	02:17:00	0
2009-03-05	02:18:00	0
2009-03-05	02:19:00	0
2009-03-05	02:20:00	0
2009-03-05	02:21:00	0
2009-03-05	02:22:00	0
2009-03-05	02:23:00	0
2009-03-05	02:24:00	0
2009-03-05	02:25:00	0
2009-03-05	02:26:00	0
2009-03-05	02:27:00	0
2009-03-05	02:28:00	0
2009-03-05	02:29:00	0
2009-03-05	02:30:00	0
2009-03-05	02:31:00	0
2009-03-05	02:32:00	0
2009-03-05	02:33:00	0
2009-03-05	02:34:00	0
2009-03-05	02:35:00	0
2009-03-05	02:36:00	0
2009-03-05	02:37:00	0
2009-03-05	02:38:00	0
2009-03-05	02:39:00	0
2009-03-05	02:40:00	0
2009-03-05	02:41:00	0
2009-03-05	02:42:00	0
2009-03-05	02:43:00	0
2009-03-05	02:44:00	0
2009-03-05	02:45:00	0
2009-03-05	02:46:00	0
2009-03-05	02:47:00	0
2009-03-05	02:48:00	0
2009-03-05	02:49:00	0
2009-03-05	02:50:00	0
2009-03-05	02:51:00	0
2009-03-05	02:52:00	0
2009-03-05	02:53:00	0
2009-03-05	02:54:00	0
2009-03-05	02:55:00	0
2009-03-05	02:56:00	0
2009-03-05	02:57:00	0
2009-03-05	02:58:00	0
2009-03-05	02:59:00	0
2009-03-05	03:00:00	0
2009-03-05	03:01:00	0
2009-03-05	03:02:00	0
2009-03-05	03:03:00	0
2009-03-05	03:04:00	0
2009-03-05	03:05:00	0
2009-03-05	03:06:00	0
2009-03-05	03:07:00	0
2009-03-05	03:08:00	0
2009-03-05	03:09:00	0
2009-03-05	03:10:00	0
2009-03-05	03:11:00	0
2009-03-05	03:12:00	0
2009-03-05	03:13:00	0
2009-03-05	03:14:00	0
2009-03-05	03:15:00	0
2009-03-05	03:16:00	0
2009-03-05	03:17:00	0
2009-03-05	03:18:00	0
2009-03-05	03:19:00	0
2009-03-05	03:20:00	0
2009-03-05	03:21:00	0
2009-03-05	03:22:00	0
2009-03-05	03:23:00	0
2009-03-05	03:24:00	0
2009-03-05	03:25:00	0
2009-03-05	03:26:00	0
2009-03-05	03:27:00	0
2009-03-05	03:28:00	0
2009-03-05	03:29:00	0
2009-03-05	03:30:00	0
2009-03-05	03:31:00	0
2009-03-05	03:32:00	0
2009-03-05	03:33:00	0
2009-03-05	03:34:00	0
2009-03-05	03:35:00	0
2009-03-05	03:36:00	0
2009-03-05	03:37:00	0
2009-03-05	03:38:00	0
2009-03-05	03:39:00	0
2009-03-05	03:40:00	0
2009-03-05	03:41:00	0
2009-03-05	03:42:00	0
2009-03-05	03:43:00	0
2009-03-05	03:44:00	0
2009-03-05	03:45:00	0
2009-03-05	03:46:00	0
2009-03-05	03:47:00	0
2009-03-05	03:48:00	0
2009-03-05	03:49:00	0
2009-03-05	03:50:00	0
2009-03-05	03:51:00	0
2009-03-05	03:52:00	0
2009-03-05	03:53:00	0
2009-03-05	03:54:00	0
2009-03-05	03:55:00	0
2009-03-05	03:56:00	0
2009-03-05	03:57:00	0
2009-03-05	03:58:00	0
2009-03-05	03:59:00	0
2009-03-05	04:00:00	0
2009-03-05	04:01:00	0
2009-03-05	04:02:00	0
2009-03-05	04:03:00	0
2009-03-05	04:04:00	0
2009-03-05	04:05:00	0
2009-03-05	04:06:00	0
2009-03-05	04:07:00	0
2009-03-05	04:08:00	0
2009-03-05	04:09:00	0
2009-03-05	04:10:00	0
2009-03-05	04:11:00	0
2009-03-05	04:12:00	0
2009-03-05	04:13:00	0
2009-03-05	04:14:00	0
2009-03-05	04:15:00	0
2009-03-05	04:16:00	0
2009-03-05	04:17:00	0
2009-03-05	04:18:00	0
2009-03-05	04:19:00	0
2009-03-05	04:20:00	0
2009-03-05	04:21:00	0
2009-03-05	04:22:00	0
2009-03-05	04:23:00	0
2009-03-05	04:24:00	0
2009-03-05	04:25:00	0
2009-03-05	04:26:00	0
2009-03-05	04:27:00	0
2009-03-05	04:28:00	0
2009-03-05	04:29:00	0
2009-03-05	04:30:00	0
2009-03-05	04:31:00	0
2009-03-05	04:32:00	0
2009-03-05	04:33:00	0
2009-03-05	04:34:00	0
2009-03-05	04:35:00	0
2009-03-05	04:36:00	0
2009-03-05	04:37:00	0
2009-03-05	04:38:00	0
2009-03-05	04:39:00	0
2009-03-05	04:40:00	0
2009-03-05	04:41:00	0
2009-03-05	04:42:00	0
2009-03-05	04:43:00	0
2009-03-05	04:44:00	0
2009-03-05	04:45:00	0
2009-03-05	04:46:00	0
2009-03-05	04:47:00	0
2009-03-05	04:48:00	0
2009-03-05	04:49:00	0
2009-03-05	04:50:00	0
2009-03-05	04:51:00	0
2009-03-05	04:52:00	0
2009-03-05	04:53:00	0
2009-03-05	04:54:00	0
2009-03-05	04:55:00	0
2009-03-05	04:56:00	0
2009-03-05	04:57:00	0
2009-03-05	04:58:00	0
2009-03-05	04:59:00	0
2009-03-05	05:00:00	0
2009-03-05	05:01:00	0
2009-03-05	05:02:00	0
2009-03-05	05:03:00	0
2009-03-05	05:04:00	0
2009-03-05	05:05:00	0
2009-03-05	05:06:00	0
2009-03-05	05:07:00	0
2009-03-05	05:08:00	0
2009-03-05	05:09:00	0
2009-03-05	05:10:00	0
2009-03-05	05:11:00	0
2009-03-05	05:12:00	0
2009-03-05	05:13:00	0
2009-03-05	05:14:00	0
2009-03-05	05:15:00	0
2009-03-05	05:16:00	0
2009-03-05	05:17:00	0
2009-03-05	05:18:00	0
2009-03-05	05:19:00	0
2009-03-05	05:20:00	0
2009-03-05	05:21:00	0
2009-03-05	05:22:00	0
2009-03-05	05:23:00	0
2009-03-05	05:24:00	0
2009-03-05	05:25:00	0
2009-03-05	05:26:00	0
2009-03-05	05:27:00	0
2009-03-05	05:28:00	0
2009-03-05	05:29:00	0
2009-03-05	05:30:00	0
2009-03-05	05:31:00	0
2009-03-05	05:32:00	0
2009-03-05	05:33:00	0
2009-03-05	05:34:00	0
2009-03-05	05:35:00	0
2009-03-05	05:36:00	0
2009-03-05	05:37:00	0
2009-03-05	05:38:00	0
2009-03-05	05:39:00	0
2009-03-05	05:40:00	0
2009-03-05	05:41:00	0
2009-03-05	05:42:00	0
2009-03-05	05:43:00	0
2009-03-05	05:44:00	0
2009-03-05	05:45:00	0
2009-03-05	05:46:00	0
2009-03-05	05:47:00	0
2009-03-05	05:48:00	0
2009-03-05	05:49:00	0
2009-03-05	05:50:00	0
2009-03-05	05:51:00	0
2009-03-05	05:52:00	0
2009-03-05	05:53:00	0
2009-03-05	05:54:00	0
2009-03-05	05:55:00	0
2009-03-05	05:56:00	0
2009-03-05	05:57:00	0
2009-03-05	05:58:00	0
2009-03-05	05:59:00	0
2009-03-05	06:00:00	0
2009-03-05	06:01:00	0
2009-03-05	06:02:00	0
2009-03-05	06:03:00	0
2009-03-05	06:04:00	0
2009-03-05	06:05:00	0
2009-03-05	06:06:00	0
2009-03-05	06:07:00	0
2009-03-05	06:08:00	0
2009-03-05	06:09:00	0
2009-03-05	06:10:00	0
2009-03-05	06:11:00	0
2009-03-05	06:12:00	0
2009-03-05	06:13:00	0
2009-03-05	06:14:00	0
2009-03-05	06:15:00	0
2009-03-05	06:16:00	0
2009-03-05	06:17:00	0
2009-03-05	06:18:00	0
2009-03-05	06:19:00	0
2009-03-05	06:20:00	0
2009-03-05	06:21:00	0
2009-03-05	06:22:00	0
2009-03-05	06:23:00	0
2009-03-05	06:24:00	0
2009-03-05	06:25:00	0
2009-03-05	06:26:00	0
2009-03-05	06:27:00	0
2009-03-05	06:28:00	0
2009-03-05	06:29:00	0
2009-03-05	06:30:00	0
2009-03-05	06:31:00	0
2009-03-05	06:32:00	0
2009-03-05	06:33:00	0
2009-03-05	06:34:00	0
2009-03-05	06:35:00	0
2009-03-05	06:36:00	0
2009-03-05	06:37:00	0
2009-03-05	06:38:00	0
2009-03-05	06:39:00	0
2009-03-05	06:40:00	0
2009-03-05	06:41:00	0
2009-03-05	06:42:00	0
2009-03-05	06:43:00	0
2009-03-05	06:44:00	0
2009-03-05	06:45:00	0
2009-03-05	06:46:00	0
2009-03-05	06:47:00	0
2009-03-05	06:48:00	0
2009-03-05	06:49:00	0
2009-03-05	06:50:00	0
2009-03-05	06:51:00	0
2009-03-05	06:52:00	0
2009-03-05	06:53:00	0
2009-03-05	06:54:00	0
2009-03-05	06:55:00	0
2009-03-05	06:56:00	0
2009-03-05	06:57:00	0
2009-03-05	06:58:00	0
2009-03-05	06:59:00	0
2009-03-05	07:00:00	0
2009-03-05	07:01:00	0
2009-03-05	07:02:00	0
2009-03-05	07:03:00	0
2009-03-05	07:04:00	0
2009-03-05	07:05:00	0
2009-03-05	07:06:00	0
2009-03-05	07:07:00	0
2009-03-05	07:08:00	0
2009-03-05	07:09:00	0
2009-03-05	07:10:00	0
2009-03-05	07:11:00	0
2009-03-05	07:12:00	0
2009-03-05	07:13:00	0
2009-03-05	07:14:00	0
2009-03-05	07:15:00	0
2009-03-05	07:16:00	0
2009-03-05	07:17:00	0
2009-03-05	07:18:00	0
2009-03-05	07:19:00	0
2009-03-05	07:20:00	0
2009-03-05	07:21:00	0
2009-03-05	07:22:00	0
2009-03-05	07:23:00	0
2009-03-05	07:24:00	0
2009-03-05	07:25:00	0
2009-03-05	07:26:00	0
2009-03-05	07:27:00	0
2009-03-05	07:28:00	0
2009-03-05	07:29:00	0
2009-03-05	07:30:00	0
2009-03-05	07:31:00	0
2009-03-05	07:32:00	0
2009-03-05	07:33:00	0
2009-03-05	07:34:00	0
2009-03-05	07:35:00	0
2009-03-05	07:36:00	0
2009-03-05	07:37:00	0
2009-03-05	07:38:00	0
2009-03-05	07:39:00	0
2009-03-05	07:40:00	0
2009-03-05	07:41:00	0
2009-03-05	07:42:00	0
2009-03-05	07:43:00	0
2009-03-05	07:44:00	0
2009-03-05	07:45:00	0
2009-03-05	07:46:00	0
2009-03-05	07:47:00	0
2009-03-05	07:48:00	0
2009-03-05	07:49:00	0
2009-03-05	07:50:00	0
2009-03-05	07:51:00	0
2009-03-05	07:52:00	0
2009-03-05	07:53:00	0
2009-03-05	07:54:00	0
2009-03-05	07:55:00	0
2009-03-05	07:56:00	0
2009-03-05	07:57:00	0
2009-03-05	07:58:00	0
2009-03-05	07:59:00	0
2009-03-05	08:00:00	0
2009-03-05	08:01:00	0
2009-03-05	08:02:00	0
2009-03-05	08:03:00	0
2009-03-05	08:04:00	0
2009-03-05	08:05:00	0
2009-03-05	08:06:00	0
2009-03-05	08:07:00	0
2009-03-05	08:08:00	0
2009-03-05	08:09:00	0
2009-03-05	08:10:00	0
2009-03-05	08:11:00	0
2009-03-05	08:12:00	0
2009-03-05	08:13:00	0
2009-03-05	08:14:00	0
2009-03-05	08:15:00	0
2009-03-05	08:16:00	0
2009-03-05	08:17:00	0
2009-03-05	08:18:00	0
2009-03-05	08:19:00	0
2009-03-05	08:20:00	0
2009-03-05	08:21:00	0
2009-03-05	08:22:00	0
2009-03-05	08:23:00	0
2009-03-05	08:24:00	0
2009-03-05	08:25:00	0
2009-03-05	08:26:00	0
2009-03-05	08:27:00	0
2009-03-05	08:28:00	0
2009-03-05	08:29:00	0
2009-03-05	08:30:00	0
2009-03-05	08:31:00	0
2009-03-05	08:32:00	0
2009-03-05	08:33:00	0
2009-03-05	08:34:00	0
2009-03-05	08:35:00	0
2009-03-05	08:36:00	0
2009-03-05	08:37:00	0
2009-03-05	08:38:00	0
2009-03-05	08:39:00	0
2009-03-05	08:40:00	0
2009-03-05	08:41:00	0
2009-03-05	08:42:00	0
2009-03-05	08:43:00	0
2009-03-05	08:44:00	0
2009-03-05	08:45:00	0
2009-03-05	08:46:00	0
2009-03-05	08:47:00	0
2009-03-05	08:48:00	0
2009-03-05	08:49:00	0
2009-03-05	08:50:00	0
2009-03-05	08:51:00	0
2009-03-05	08:52:00	0
2009-03-05	08:53:00	0
2009-03-05	08:54:00	0
2009-03-05	08:55:00	0
2009-03-05	08:56:00	0
2009-03-05	08:57:00	0
2009-03-05	08:58:00	0
2009-03-05	08:59:00	0
2009-03-05	09:00:00	0
2009-03-05	09:01:00	0
2009-03-05	09:02:00	0
2009-03-05	09:03:00	0
2009-03-05	09:04:00	0
2009-03-05	09:05:00	0
2009-03-05	09:06:00	0
2009-03-05	09:07:00	0
2009-03-05	09:08:00	0
2009-03-05	09:09:00	0
2009-03-05	09:10:00	0
2009-03-05	09:11:00	0
2009-03-05	09:12:00	0
2009-03-05	09:13:00	0
2009-03-05	09:14:00	0
2009-03-05	09:15:00	0
2009-03-05	09:16:00	0
2009-03-05	09:17:00	0
2009-03-05	09:18:00	0
2009-03-05	09:19:00	0
2009-03-05	09:20:00	0
2009-03-05	09:21:00	0
2009-03-05	09:22:00	0
2009-03-05	09:23:00	0
2009-03-05	09:24:00	0
2009-03-05	09:25:00	0
2009-03-05	09:26:00	0
2009-03-05	09:27:00	0
2009-03-05	09:28:00	0
2009-03-05	09:29:00	0
2009-03-05	09:30:00	0
2009-03-05	09:31:00	0
2009-03-05	09:32:00	0
2009-03-05	09:33:00	0
2009-03-05	09:34:00	0
2009-03-05	09:35:00	0
2009-03-05	09:36:00	0
2009-03-05	09:37:00	0
2009-03-05	09:38:00	0
2009-03-05	09:39:00	0
2009-03-05	09:40:00	0
2009-03-05	09:41:00	0
2009-03-05	09:42:00	0
2009-03-05	09:43:00	0
2009-03-05	09:44:00	0
2009-03-05	09:45:00	0
2009-03-05	09:46:00	0
2009-03-05	09:47:00	0
2009-03-05	09:48:00	0
2009-03-05	09:49:00	0
2009-03-05	09:50:00	0
2009-03-05	09:51:00	0
2009-03-05	09:52:00	0
2009-03-05	09:53:00	0
2009-03-05	09:54:00	0
2009-03-05	09:55:00	0
2009-03-05	09:56:00	0
2009-03-05	09:57:00	0
2009-03-05	09:58:00	0
2009-03-05	09:59:00	0
2009-03-05	10:00:00	0
2009-03-05	10:01:00	0
2009-03-05	10:02:00	0
2009-03-05	10:03:00	0
2009-03-05	10:04:00	0
2009-03-05	10:05:00	0
2009-03-05	10:06:00	0
2009-03-05	10:07:00	0
2009-03-05	10:08:00	0
2009-03-05	10:09:00	0
2009-03-05	10:10:00	0
2009-03-05	10:11:00	0
2009-03-05	10:12:00	0
2009-03-05	10:13:00	0
2009-03-05	10:14:00	0
2009-03-05	10:15:00	0
2009-03-05	10:16:00	0
2009-03-05	10:17:00	0
2009-03-05	10:18:00	0
2009-03-05	10:19:00	0
2009-03-05	10:20:00	0
2009-03-05	10:21:00	0
2009-03-05	10:22:00	0
2009-03-05	10:23:00	0
2009-03-05	10:24:00	0
2009-03-05	10:25:00	0
2009-03-05	10:26:00	0
2009-03-05	10:27:00	0
2009-03-05	10:28:00	0
2009-03-05	10:29:00	0
2009-03-05	10:30:00	0
2009-03-05	10:31:00	0
2009-03-05	10:32:00	0
2009-03-05	10:33:00	0
2009-03-05	10:34:00	0
2009-03-05	10:35:00	0
2009-03-05	10:36:00	0
2009-03-05	10:37:00	0
2009-03-05	10:38:00	0
2009-03-05	10:39:00	0
2009-03-05	10:40:00	0
2009-03-05	10:41:00	0
2009-03-05	10:42:00	0
2009-03-05	10:43:00	0
2009-03-05	10:44:00	0
2009-03-05	10:45:00	0
2009-03-05	10:46:00	0
2009-03-05	10:47:00	0
2009-03-05	10:48:00	0
2009-03-05	10:49:00	0
2009-03-05	10:50:00	0
2009-03-05	10:51:00	0
2009-03-05	10:52:00	0
2009-03-05	10:53:00	0
2009-03-05	10:54:00	0
2009-03-05	10:55:00	0
2009-03-05	10:56:00	0
2009-03-05	10:57:00	0
2009-03-05	10:58:00	0
2009-03-05	10:59:00	0
2009-03-05	11:00:00	0
2009-03-05	11:01:00	0
2009-03-05	11:02:00	0
2009-03-05	11:03:00	0
2009-03-05	11:04:00	0
2009-03-05	11:05:00	0
2009-03-05	11:06:00	0
2009-03-05	11:07:00	0
2009-03-05	11:08:00	0
2009-03-05	11:09:00	0
2009-03-05	11:10:00	0
2009-03-05	11:11:00	0
2009-03-05	11:12:00	0
2009-03-05	11:13:00	0
2009-03-05	11:14:00	0
2009-03-05	11:15:00	0
2009-03-05	11:16:00	0
2009-03-05	11:17:00	0
2009-03-05	11:18:00	0
2009-03-05	11:19:00	0
2009-03-05	11:20:00	0
2009-03-05	11:21:00	0
2009-03-05	11:22:00	0
2009-03-05	11:23:00	0
2009-03-05	11:24:00	0
2009-03-05	11:25:00	0
2009-03-05	11:26:00	0
2009-03-05	11:27:00	0
2009-03-05	11:28:00	0
2009-03-05	11:29:00	0
2009-03-05	11:30:00	0
2009-03-05	11:31:00	0
2009-03-05	11:32:00	0
2009-03-05	11:33:00	0
2009-03-05	11:34:00	0
2009-03-05	11:35:00	0
2009-03-05	11:36:00	0
2009-03-05	11:37:00	0
2009-03-05	11:38:00	0
2009-03-05	11:39:00	0
2009-03-05	11:40:00	0
2009-03-05	11:41:00	0
2009-03-05	11:42:00	0
2009-03-05	11:43:00	0
2009-03-05	11:44:00	0
2009-03-05	11:45:00	0
2009-03-05	11:46:00	0
2009-03-05	11:47:00	0
2009-03-05	11:48:00	0
2009-03-05	11:49:00	0
2009-03-05	11:50:00	0
2009-03-05	11:51:00	0
2009-03-05	11:52:00	0
2009-03-05	11:53:00	0
2009-03-05	11:54:00	0
2009-03-05	11:55:00	0
2009-03-05	11:56:00	0
2009-03-05	11:57:00	0
2009-03-05	11:58:00	0
2009-03-05	11:59:00	0
2009-03-05	12:00:00	0
2009-03-05	12:01:00	0
2009-03-05	12:02:00	0
2009-03-05	12:03:00	0
2009-03-05	12:04:00	0
2009-03-05	12:05:00	0
2009-03-05	12:06:00	0
2009-03-05	12:07:00	0
2009-03-05	12:08:00	0
2009-03-05	12:09:00	0
2009-03-05	12:10:00	0
2009-03-05	12:11:00	0
2009-03-05	12:12:00	0
2009-03-05	12:13:00	0
2009-03-05	12:14:00	0
2009-03-05	12:15:00	0
2009-03-05	12:16:00	0
2009-03-05	12:17:00	0
2009-03-05	12:18:00	0
2009-03-05	12:19:00	0
2009-03-05	12:20:00	0
2009-03-05	12:21:00	0
2009-03-05	12:22:00	0
2009-03-05	12:23:00	0
2009-03-05	12:24:00	0
2009-03-05	12:25:00	0
2009-03-05	12:26:00	0
2009-03-05	12:27:00	0
2009-03-05	12:28:00	0
2009-03-05	12:29:00	0
2009-03-05	12:30:00	0
2009-03-05	12:31:00	0
2009-03-05	12:32:00	0
2009-03-05	12:33:00	0
2009-03-05	12:34:00	0
2009-03-05	12:35:00	0
2009-03-05	12:36:00	0
2009-03-05	12:37:00	0
2009-03-05	12:38:00	0
2009-03-05	12:39:00	0
2009-03-05	12:40:00	0
2009-03-05	12:41:00	0
2009-03-05	12:42:00	0
2009-03-05	12:43:00	0
2009-03-05	12:44:00	0
2009-03-05	12:45:00	0
2009-03-05	12:46:00	0
2009-03-05	12:47:00	0
2009-03-05	12:48:00	0
2009-03-05	12:49:00	0
2009-03-05	12:50:00	0
2009-03-05	12:51:00	0
2009-03-05	12:52:00	0
2009-03-05	12:53:00	0
2009-03-05	12:54:00	0
2009-03-05	12:55:00	0
2009-03-05	12:56:00	0
2009-03-05	12:57:00	0
2009-03-05	12:58:00	0
2009-03-05	12:59:00	0
2009-03-05	13:00:00	0
2009-03-05	13:01:00	0
2009-03-05	13:02:00	0
2009-03-05	13:03:00	0
2009-03-05	13:04:00	0
2009-03-05	13:05:00	0
2009-03-05	13:06:00	0
2009-03-05	13:07:00	0
2009-03-05	13:08:00	0
2009-03-05	13:09:00	0
2009-03-05	13:10:00	0
2009-03-05	13:11:00	0
2009-03-05	13:12:00	0
2009-03-05	13:13:00	0
2009-03-05	13:14:00	0
2009-03-05	13:15:00	0
2009-03-05	13:16:00	0
2009-03-05	13:17:00	0
2009-03-05	13:18:00	0
2009-03-05	13:19:00	0
2009-03-05	13:20:00	0
2009-03-05	13:21:00	0
2009-03-05	13:22:00	0
2009-03-05	13:23:00	0
2009-03-05	13:24:00	0
2009-03-05	13:25:00	0
2009-03-05	13:26:00	0
2009-03-05	13:27:00	0
2009-03-05	13:28:00	0
2009-03-05	13:29:00	0
2009-03-05	13:30:00	0
2009-03-05	13:31:00	0
2009-03-05	13:32:00	0
2009-03-05	13:33:00	0
2009-03-05	13:34:00	0
2009-03-05	13:35:00	0
2009-03-05	13:36:00	0
2009-03-05	13:37:00	0
2009-03-05	13:38:00	0
2009-03-05	13:39:00	0
2009-03-05	13:40:00	0
2009-03-05	13:41:00	0
2009-03-05	13:42:00	0
2009-03-05	13:43:00	0
2009-03-05	13:44:00	0
2009-03-05	13:45:00	0
2009-03-05	13:46:00	0
2009-03-05	13:47:00	0
2009-03-05	13:48:00	0
2009-03-05	13:49:00	0
2009-03-05	13:50:00	0
2009-03-05	13:51:00	0
2009-03-05	13:52:00	0
2009-03-05	13:53:00	0
2009-03-05	13:54:00	0
2009-03-05	13:55:00	0
2009-03-05	13:56:00	0
2009-03-05	13:57:00	0
2009-03-05	13:58:00	0
2009-03-05	13:59:00	0
2009-03-05	14:00:00	0
2009-03-05	14:01:00	0
2009-03-05	14:02:00	0
2009-03-05	14:03:00	0
2009-03-05	14:04:00	0
2009-03-05	14:05:00	0
2009-03-05	14:06:00	0
2009-03-05	14:07:00	0
2009-03-05	14:08:00	0
2009-03-05	14:09:00	0
2009-03-05	14:10:00	0
2009-03-05	14:11:00	0
2009-03-05	14:12:00	0
2009-03-05	14:13:00	0
2009-03-05	14:14:00	0
2009-03-05	14:15:00	0
2009-03-05	14:16:00	0
2009-03-05	14:17:00	0
2009-03-05	14:18:00	0
2009-03-05	14:19:00	0
2009-03-05	14:20:00	0
2009-03-05	14:21:00	0
2009-03-05	14:22:00	0
2009-03-05	14:23:00	0
2009-03-05	14:24:00	0
2009-03-05	14:25:00	0
2009-03-05	14:26:00	0
2009-03-05	14:27:00	0
2009-03-05	14:28:00	0
2009-03-05	14:29:00	0
2009-03-05	14:30:00	0
2009-03-05	14:31:00	0
2009-03-05	14:32:00	0
2009-03-05	14:33:00	0
2009-03-05	14:34:00	0
2009-03-05	14:35:00	0
2009-03-05	14:36:00	0
2009-03-05	14:37:00	0
2009-03-05	14:38:00	0
2009-03-05	14:39:00	0
2009-03-05	14:40:00	0
2009-03-05	14:41:00	0
2009-03-05	14:42:00	0
2009-03-05	14:43:00	0
2009-03-05	14:44:00	0
2009-03-05	14:45:00	0
2009-03-05	14:46:00	0
2009-03-05	14:47:00	0
2009-03-05	14:48:00	0
2009-03-05	14:49:00	0
2009-03-05	14:50:00	0
2009-03-05	14:51:00	0
2009-03-05	14:52:00	0
2009-03-05	14:53:00	0
2009-03-05	14:54:00	0
2009-03-05	14:55:00	0
2009-03-05	14:56:00	0
2009-03-05	14:57:00	0
2009-03-05	14:58:00	0
2009-03-05	14:59:00	0
2009-03-05	15:00:00	0
2009-03-05	15:01:00	0
2009-03-05	15:02:00	0
2009-03-05	15:03:00	0
2009-03-05	15:04:00	0
2009-03-05	15:05:00	0
2009-03-05	15:06:00	0
2009-03-05	15:07:00	0
2009-03-05	15:08:00	0
2009-03-05	15:09:00	0
2009-03-05	15:10:00	0
2009-03-05	15:11:00	0
2009-03-05	15:12:00	0
2009-03-05	15:13:00	0
2009-03-05	15:14:00	0
2009-03-05	15:15:00	0
2009-03-05	15:16:00	0
2009-03-05	15:17:00	0
2009-03-05	15:18:00	0
2009-03-05	15:19:00	0
2009-03-05	15:20:00	0
2009-03-05	15:21:00	0
2009-03-05	15:22:00	0
2009-03-05	15:23:00	0
2009-03-05	15:24:00	0
2009-03-05	15:25:00	0
2009-03-05	15:26:00	0
2009-03-05	15:27:00	0
2009-03-05	15:28:00	0
2009-03-05	15:29:00	0
2009-03-05	15:30:00	0
2009-03-05	15:31:00	0
2009-03-05	15:32:00	0
2009-03-05	15:33:00	0
2009-03-05	15:34:00	0
2009-03-05	15:35:00	0
2009-03-05	15:36:00	0
2009-03-05	15:37:00	0
2009-03-05	15:38:00	0
2009-03-05	15:39:00	0
2009-03-05	15:40:00	0
2009-03-05	15:41:00	0
2009-03-05	15:42:00	0
2009-03-05	15:43:00	0
2009-03-05	15:44:00	0
2009-03-05	15:45:00	0
2009-03-05	15:46:00	0
2009-03-05	15:47:00	0
2009-03-05	15:48:00	0
2009-03-05	15:49:00	0
2009-03-05	15:50:00	0
2009-03-05	15:51:00	0
2009-03-05	15:52:00	0
2009-03-05	15:53:00	0
2009-03-05	15:54:00	0
2009-03-05	15:55:00	0
2009-03-05	15:56:00	0
2009-03-05	15:57:00	0
2009-03-05	15:58:00	0
2009-03-05	15:59:00	0
2009-03-05	16:00:00	0
2009-03-05	16:01:00	0
2009-03-05	16:02:00	0
2009-03-05	16:03:00	0
2009-03-05	16:04:00	0
2009-03-05	16:05:00	0
2009-03-05	16:06:00	0
2009-03-05	16:07:00	0
2009-03-05	16:08:00	0
2009-03-05	16:09:00	0
2009-03-05	16:10:00	0
2009-03-05	16:11:00	0
2009-03-05	16:12:00	0
2009-03-05	16:13:00	0
2009-03-05	16:14:00	0
2009-03-05	16:15:00	0
2009-03-05	16:16:00	0
2009-03-05	16:17:00	0
2009-03-05	16:18:00	0
2009-03-05	16:19:00	0
2009-03-05	16:20:00	0
2009-03-05	16:21:00	0
2009-03-05	16:22:00	0
2009-03-05	16:23:00	0
2009-03-05	16:24:00	0
2009-03-05	16:25:00	0
2009-03-05	16:26:00	0
2009-03-05	16:27:00	0
2009-03-05	16:28:00	0
2009-03-05	16:29:00	0
2009-03-05	16:30:00	0
2009-03-05	16:31:00	0
2009-03-05	16:32:00	0
2009-03-05	16:33:00	0
2009-03-05	16:34:00	0
2009-03-05	16:35:00	0
2009-03-05	16:36:00	0
2009-03-05	16:37:00	0
2009-03-05	16:38:00	0
2009-03-05	16:39:00	0
2009-03-05	16:40:00	0
2009-03-05	16:41:00	0
2009-03-05	16:42:00	0
2009-03-05	16:43:00	0
2009-03-05	16:44:00	0
2009-03-05	16:45:00	0
2009-03-05	16:46:00	0
2009-03-05	16:47:00	0
2009-03-05	16:48:00	0
2009-03-05	16:49:00	0
2009-03-05	16:50:00	0
2009-03-05	16:51:00	0
2009-03-05	16:52:00	0
2009-03-05	16:53:00	0
2009-03-05	16:54:00	0
2009-03-05	16:55:00	0
2009-03-05	16:56:00	0
2009-03-05	16:57:00	0
2009-03-05	16:58:00	0
2009-03-05	16:59:00	0
2009-03-05	17:00:00	0
2009-03-05	17:01:00	0
2009-03-05	17:02:00	0
2009-03-05	17:03:00	0
2009-03-05	17:04:00	0
2009-03-05	17:05:00	0
2009-03-05	17:06:00	0
2009-03-05	17:07:00	0
2009-03-05	17:08:00	0
2009-03-05	17:09:00	0
2009-03-05	17:10:00	0
2009-03-05	17:11:00	0
2009-03-05	17:12:00	0
2009-03-05	17:13:00	0
2009-03-05	17:14:00	0
2009-03-05	17:15:00	0
2009-03-05	17:16:00	0
2009-03-05	17:17:00	0
2009-03-05	17:18:00	0
2009-03-05	17:19:00	0
2009-03-05	17:20:00	0
2009-03-05	17:21:00	0
2009-03-05	17:22:00	0
2009-03-05	17:23:00	0
2009-03-05	17:24:00	0
2009-03-05	17:25:00	0
2009-03-05	17:26:00	0
2009-03-05	17:27:00	0
2009-03-05	17:28:00	0
2009-03-05	17:29:00	0
2009-03-05	17:30:00	0
2009-03-05	17:31:00	0
2009-03-05	17:32:00	0
2009-03-05	17:33:00	0
2009-03-05	17:34:00	0
2009-03-05	17:35:00	0
2009-03-05	17:36:00	0
2009-03-05	17:37:00	0
2009-03-05	17:38:00	0
2009-03-05	17:39:00	0
2009-03-05	17:40:00	0
2009-03-05	17:41:00	0
2009-03-05	17:42:00	0
2009-03-05	17:43:00	0
2009-03-05	17:44:00	0
2009-03-05	17:45:00	0
2009-03-05	17:46:00	0
2009-03-05	17:47:00	0
2009-03-05	17:48:00	0
2009-03-05	17:49:00	0
2009-03-05	17:50:00	0
2009-03-05	17:51:00	0
2009-03-05	17:52:00	0
2009-03-05	17:53:00	0
2009-03-05	17:54:00	0
2009-03-05	17:55:00	0
2009-03-05	17:56:00	0
2009-03-05	17:57:00	0
2009-03-05	17:58:00	0
2009-03-05	17:59:00	0
2009-03-05	18:00:00	0
2009-03-05	18:01:00	0
2009-03-05	18:02:00	0
2009-03-05	18:03:00	0
2009-03-05	18:04:00	0
2009-03-05	18:05:00	0
2009-03-05	18:06:00	0
2009-03-05	18:07:00	0
2009-03-05	18:08:00	0
2009-03-05	18:09:00	102
2009-03-05	18:10:00	389
2009-03-05	18:11:00	0
2009-03-05	18:12:00	141
2009-03-05	18:13:00	0
2009-03-05	18:14:00	320
2009-03-05	18:15:00	335
2009-03-05	18:16:00	353
2009-03-05	18:17:00	305
2009-03-05	18:18:00	558
2009-03-05	18:19:00	26
2009-03-05	18:20:00	0
2009-03-05	18:21:00	197
2009-03-05	18:22:00	0
2009-03-05	18:23:00	0
2009-03-05	18:24:00	102
2009-03-05	18:25:00	259
2009-03-05	18:26:00	0
2009-03-05	18:27:00	0
2009-03-05	18:28:00	899
2009-03-05	18:29:00	26
2009-03-05	18:30:00	0
2009-03-05	18:31:00	0
2009-03-05	18:32:00	0
2009-03-05	18:33:00	0
2009-03-05	18:34:00	0
2009-03-05	18:35:00	0
2009-03-05	18:36:00	0
2009-03-05	18:37:00	0
2009-03-05	18:38:00	0
2009-03-05	18:39:00	0
2009-03-05	18:40:00	0
2009-03-05	18:41:00	0
2009-03-05	18:42:00	0
2009-03-05	18:43:00	0
2009-03-05	18:44:00	0
2009-03-05	18:45:00	0
2009-03-05	18:46:00	0
2009-03-05	18:47:00	305
2009-03-05	18:48:00	166
2009-03-05	18:49:00	0
2009-03-05	18:50:00	0
2009-03-05	18:51:00	0
2009-03-05	18:52:00	13
2009-03-05	18:53:00	0
2009-03-05	18:54:00	0
2009-03-05	18:55:00	0
2009-03-05	18:56:00	0
2009-03-05	18:57:00	0
2009-03-05	18:58:00	0
2009-03-05	18:59:00	0
2009-03-05	19:00:00	0
2009-03-05	19:01:00	0
2009-03-05	19:02:00	0
2009-03-05	19:03:00	0
2009-03-05	19:04:00	0
2009-03-05	19:05:00	0
2009-03-05	19:06:00	0
2009-03-05	19:07:00	0
2009-03-05	19:08:00	0
2009-03-05	19:09:00	0
2009-03-05	19:10:00	0
2009-03-05	19:11:00	0
2009-03-05	19:12:00	0
2009-03-05	19:13:00	0
2009-03-05	19:14:00	0
2009-03-05	19:15:00	0
2009-03-05	19:16:00	0
2009-03-05	19:17:00	243
2009-03-05	19:18:00	51
2009-03-05	19:19:00	0
2009-03-05	19:20:00	0
2009-03-05	19:21:00	0
2009-03-05	19:22:00	0
2009-03-05	19:23:00	0
2009-03-05	19:24:00	13
2009-03-05	19:25:00	0
2009-03-05	19:26:00	0
2009-03-05	19:27:00	13
2009-03-05	19:28:00	0
2009-03-05	19:29:00	13
2009-03-05	19:30:00	0
2009-03-05	19:31:00	305
2009-03-05	19:32:00	115
2009-03-05	19:33:00	517
2009-03-05	19:34:00	141
2009-03-05	19:35:00	0
2009-03-05	19:36:00	0
2009-03-05	19:37:00	26
2009-03-05	19:38:00	51
2009-03-05	19:39:00	38
2009-03-05	19:40:00	26
2009-03-05	19:41:00	0
2009-03-05	19:42:00	13
2009-03-05	19:43:00	13
2009-03-05	19:44:00	0
2009-03-05	19:45:00	0
2009-03-05	19:46:00	0
2009-03-05	19:47:00	51
2009-03-05	19:48:00	26
2009-03-05	19:49:00	38
2009-03-05	19:50:00	51
2009-03-05	19:51:00	13
2009-03-05	19:52:00	13
2009-03-05	19:53:00	0
2009-03-05	19:54:00	0
2009-03-05	19:55:00	38
2009-03-05	19:56:00	0
2009-03-05	19:57:00	0
2009-03-05	19:58:00	26
2009-03-05	19:59:00	0
2009-03-05	20:00:00	0
2009-03-05	20:01:00	0
2009-03-05	20:02:00	0
2009-03-05	20:03:00	0
2009-03-05	20:04:00	0
2009-03-05	20:05:00	0
2009-03-05	20:06:00	0
2009-03-05	20:07:00	0
2009-03-05	20:08:00	0
2009-03-05	20:09:00	0
2009-03-05	20:10:00	13
2009-03-05	20:11:00	13
2009-03-05	20:12:00	0
2009-03-05	20:13:00	0
2009-03-05	20:14:00	64
2009-03-05	20:15:00	0
2009-03-05	20:16:00	13
2009-03-05	20:17:00	0
2009-03-05	20:18:00	51
2009-03-05	20:19:00	0
2009-03-05	20:20:00	0
2009-03-05	20:21:00	51
2009-03-05	20:22:00	0
2009-03-05	20:23:00	0
2009-03-05	20:24:00	38
2009-03-05	20:25:00	13
2009-03-05	20:26:00	0
2009-03-05	20:27:00	0
2009-03-05	20:28:00	51
2009-03-05	20:29:00	64
2009-03-05	20:30:00	0
2009-03-05	20:31:00	64
2009-03-05	20:32:00	13
2009-03-05	20:33:00	38
2009-03-05	20:34:00	1262
2009-03-05	20:35:00	497
2009-03-05	20:36:00	558
2009-03-05	20:37:00	538
2009-03-05	20:38:00	228
2009-03-05	20:39:00	90
2009-03-05	20:40:00	51
2009-03-05	20:41:00	38
2009-03-05	20:42:00	128
2009-03-05	20:43:00	479
2009-03-05	20:44:00	335
2009-03-05	20:45:00	335
2009-03-05	20:46:00	13
2009-03-05	20:47:00	64
2009-03-05	20:48:00	753
2009-03-05	20:49:00	776
2009-03-05	20:50:00	102
2009-03-05	20:51:00	0
2009-03-05	20:52:00	0
2009-03-05	20:53:00	13
2009-03-05	20:54:00	38
2009-03-05	20:55:00	0
2009-03-05	20:56:00	0
2009-03-05	20:57:00	0
2009-03-05	20:58:00	0
2009-03-05	20:59:00	0
2009-03-05	21:00:00	0
2009-03-05	21:01:00	0
2009-03-05	21:02:00	0
2009-03-05	21:03:00	13
2009-03-05	21:04:00	0
2009-03-05	21:05:00	0
2009-03-05	21:06:00	0
2009-03-05	21:07:00	0
2009-03-05	21:08:00	13
2009-03-05	21:09:00	0
2009-03-05	21:10:00	51
2009-03-05	21:11:00	154
2009-03-05	21:12:00	259
2009-03-05	21:13:00	51
2009-03-05	21:14:00	0
2009-03-05	21:15:00	77
2009-03-05	21:16:00	0
2009-03-05	21:17:00	13
2009-03-05	21:18:00	0
2009-03-05	21:19:00	0
2009-03-05	21:20:00	0
2009-03-05	21:21:00	26
2009-03-05	21:22:00	259
2009-03-05	21:23:00	13
2009-03-05	21:24:00	0
2009-03-05	21:25:00	0
2009-03-05	21:26:00	26
2009-03-05	21:27:00	26
2009-03-05	21:28:00	38
2009-03-05	21:29:00	0
2009-03-05	21:30:00	0
2009-03-05	21:31:00	0
2009-03-05	21:32:00	0
2009-03-05	21:33:00	0
2009-03-05	21:34:00	0
2009-03-05	21:35:00	38
2009-03-05	21:36:00	640
2009-03-05	21:37:00	64
2009-03-05	21:38:00	0
2009-03-05	21:39:00	51
2009-03-05	21:40:00	320
2009-03-05	21:41:00	425
2009-03-05	21:42:00	128
2009-03-05	21:43:00	0
2009-03-05	21:44:00	0
2009-03-05	21:45:00	0
2009-03-05	21:46:00	0
2009-03-05	21:47:00	115
2009-03-05	21:48:00	707
2009-03-05	21:49:00	228
2009-03-05	21:50:00	0
2009-03-05	21:51:00	0
2009-03-05	21:52:00	0
2009-03-05	21:53:00	0
2009-03-05	21:54:00	0
2009-03-05	21:55:00	26
2009-03-05	21:56:00	38
2009-03-05	21:57:00	26
2009-03-05	21:58:00	0
2009-03-05	21:59:00	0
2009-03-05	22:00:00	0
2009-03-05	22:01:00	13
2009-03-05	22:02:00	13
2009-03-05	22:03:00	0
2009-03-05	22:04:00	51
2009-03-05	22:05:00	0
2009-03-05	22:06:00	13
2009-03-05	22:07:00	0
2009-03-05	22:08:00	259
2009-03-05	22:09:00	0
2009-03-05	22:10:00	0
2009-03-05	22:11:00	0
2009-03-05	22:12:00	0
2009-03-05	22:13:00	0
2009-03-05	22:14:00	0
2009-03-05	22:15:00	0
2009-03-05	22:16:00	0
2009-03-05	22:17:00	0
2009-03-05	22:18:00	0
2009-03-05	22:19:00	0
2009-03-05	22:20:00	0
2009-03-05	22:21:00	0
2009-03-05	22:22:00	0
2009-03-05	22:23:00	0
2009-03-05	22:24:00	0
2009-03-05	22:25:00	0
2009-03-05	22:26:00	0
2009-03-05	22:27:00	0
2009-03-05	22:28:00	0
2009-03-05	22:29:00	0
2009-03-05	22:30:00	0
2009-03-05	22:31:00	0
2009-03-05	22:32:00	0
2009-03-05	22:33:00	0
2009-03-05	22:34:00	0
2009-03-05	22:35:00	0
2009-03-05	22:36:00	0
2009-03-05	22:37:00	0
2009-03-05	22:38:00	0
2009-03-05	22:39:00	0
2009-03-05	22:40:00	0
2009-03-05	22:41:00	0
2009-03-05	22:42:00	0
2009-03-05	22:43:00	0
2009-03-05	22:44:00	0
2009-03-05	22:45:00	0
2009-03-05	22:46:00	0
2009-03-05	22:47:00	0
2009-03-05	22:48:00	0
2009-03-05	22:49:00	0
2009-03-05	22:50:00	0
2009-03-05	22:51:00	0
2009-03-05	22:52:00	0
2009-03-05	22:53:00	0
2009-03-05	22:54:00	0
2009-03-05	22:55:00	0
2009-03-05	22:56:00	0
2009-03-05	22:57:00	0
2009-03-05	22:58:00	0
2009-03-05	22:59:00	0
2009-03-05	23:00:00	0
2009-03-05	23:01:00	0
2009-03-05	23:02:00	0
2009-03-05	23:03:00	0
2009-03-05	23:04:00	0
2009-03-05	23:05:00	0
2009-03-05	23:06:00	0
2009-03-05	23:07:00	0
2009-03-05	23:08:00	0
2009-03-05	23:09:00	0
2009-03-05	23:10:00	0
2009-03-05	23:11:00	38
2009-03-05	23:12:00	0
2009-03-05	23:13:00	0
2009-03-05	23:14:00	0
2009-03-05	23:15:00	0
2009-03-05	23:16:00	0
2009-03-05	23:17:00	0
2009-03-05	23:18:00	0
2009-03-05	23:19:00	0
2009-03-05	23:20:00	0
2009-03-05	23:21:00	0
2009-03-05	23:22:00	0
2009-03-05	23:23:00	0
2009-03-05	23:24:00	0
2009-03-05	23:25:00	0
2009-03-05	23:26:00	0
2009-03-05	23:27:00	0
2009-03-05	23:28:00	0
2009-03-05	23:29:00	0
2009-03-05	23:30:00	0
2009-03-05	23:31:00	0
2009-03-05	23:32:00	0
2009-03-05	23:33:00	0
2009-03-05	23:34:00	0
2009-03-05	23:35:00	0
2009-03-05	23:36:00	0
2009-03-05	23:37:00	0
2009-03-05	23:38:00	0
2009-03-05	23:39:00	0
2009-03-05	23:40:00	0
2009-03-05	23:41:00	0
2009-03-05	23:42:00	0
2009-03-05	23:43:00	0
2009-03-05	23:44:00	0
2009-03-05	23:45:00	0
2009-03-05	23:46:00	0
2009-03-05	23:47:00	0
2009-03-05	23:48:00	0
2009-03-05	23:49:00	0
2009-03-05	23:50:00	0
2009-03-05	23:51:00	0
2009-03-05	23:52:00	26
2009-03-05	23:53:00	0
2009-03-05	23:54:00	0
2009-03-05	23:55:00	0
2009-03-05	23:56:00	0
2009-03-05	23:57:00	0
2009-03-05	23:58:00	0
2009-03-05	23:59:00	0
2009-03-06	00:00:00	0
2009-03-06	00:01:00	0
2009-03-06	00:02:00	0
2009-03-06	00:03:00	0
2009-03-06	00:04:00	0
2009-03-06	00:05:00	0
2009-03-06	00:06:00	0
2009-03-06	00:07:00	0
2009-03-06	00:08:00	0
2009-03-06	00:09:00	0
2009-03-06	00:10:00	0
2009-03-06	00:11:00	0
2009-03-06	00:12:00	0
2009-03-06	00:13:00	0
2009-03-06	00:14:00	0
2009-03-06	00:15:00	0
2009-03-06	00:16:00	0
2009-03-06	00:17:00	0
2009-03-06	00:18:00	0
2009-03-06	00:19:00	0
2009-03-06	00:20:00	0
2009-03-06	00:21:00	0
2009-03-06	00:22:00	0
2009-03-06	00:23:00	0
2009-03-06	00:24:00	0
2009-03-06	00:25:00	13
2009-03-06	00:26:00	0
2009-03-06	00:27:00	0
2009-03-06	00:28:00	0
2009-03-06	00:29:00	0
2009-03-06	00:30:00	0
2009-03-06	00:31:00	0
2009-03-06	00:32:00	0
2009-03-06	00:33:00	0
2009-03-06	00:34:00	0
2009-03-06	00:35:00	0
2009-03-06	00:36:00	0
2009-03-06	00:37:00	0
2009-03-06	00:38:00	0
2009-03-06	00:39:00	0
2009-03-06	00:40:00	0
2009-03-06	00:41:00	0
2009-03-06	00:42:00	0
2009-03-06	00:43:00	38
2009-03-06	00:44:00	102
2009-03-06	00:45:00	0
2009-03-06	00:46:00	0
2009-03-06	00:47:00	0
2009-03-06	00:48:00	0
2009-03-06	00:49:00	0
2009-03-06	00:50:00	0
2009-03-06	00:51:00	0
2009-03-06	00:52:00	0
2009-03-06	00:53:00	0
2009-03-06	00:54:00	0
2009-03-06	00:55:00	0
2009-03-06	00:56:00	0
2009-03-06	00:57:00	0
2009-03-06	00:58:00	0
2009-03-06	00:59:00	38
2009-03-06	01:00:00	0
2009-03-06	01:01:00	0
2009-03-06	01:02:00	0
2009-03-06	01:03:00	0
2009-03-06	01:04:00	13
2009-03-06	01:05:00	0
2009-03-06	01:06:00	0
2009-03-06	01:07:00	0
2009-03-06	01:08:00	0
2009-03-06	01:09:00	0
2009-03-06	01:10:00	0
2009-03-06	01:11:00	0
2009-03-06	01:12:00	0
2009-03-06	01:13:00	0
2009-03-06	01:14:00	13
2009-03-06	01:15:00	0
2009-03-06	01:16:00	0
2009-03-06	01:17:00	0
2009-03-06	01:18:00	0
2009-03-06	01:19:00	0
2009-03-06	01:20:00	0
2009-03-06	01:21:00	0
2009-03-06	01:22:00	0
2009-03-06	01:23:00	0
2009-03-06	01:24:00	0
2009-03-06	01:25:00	0
2009-03-06	01:26:00	0
2009-03-06	01:27:00	0
2009-03-06	01:28:00	0
2009-03-06	01:29:00	0
2009-03-06	01:30:00	0
2009-03-06	01:31:00	0
2009-03-06	01:32:00	0
2009-03-06	01:33:00	0
2009-03-06	01:34:00	0
2009-03-06	01:35:00	0
2009-03-06	01:36:00	0
2009-03-06	01:37:00	0
2009-03-06	01:38:00	0
2009-03-06	01:39:00	0
2009-03-06	01:40:00	0
2009-03-06	01:41:00	0
2009-03-06	01:42:00	0
2009-03-06	01:43:00	0
2009-03-06	01:44:00	0
2009-03-06	01:45:00	0
2009-03-06	01:46:00	0
2009-03-06	01:47:00	0
2009-03-06	01:48:00	0
2009-03-06	01:49:00	0
2009-03-06	01:50:00	0
2009-03-06	01:51:00	0
2009-03-06	01:52:00	0
2009-03-06	01:53:00	0
2009-03-06	01:54:00	0
2009-03-06	01:55:00	13
2009-03-06	01:56:00	0
2009-03-06	01:57:00	0
2009-03-06	01:58:00	0
2009-03-06	01:59:00	0
2009-03-06	02:00:00	0
2009-03-06	02:01:00	0
2009-03-06	02:02:00	0
2009-03-06	02:03:00	0
2009-03-06	02:04:00	0
2009-03-06	02:05:00	0
2009-03-06	02:06:00	0
2009-03-06	02:07:00	0
2009-03-06	02:08:00	0
2009-03-06	02:09:00	0
2009-03-06	02:10:00	0
2009-03-06	02:11:00	0
2009-03-06	02:12:00	0
2009-03-06	02:13:00	0
2009-03-06	02:14:00	0
2009-03-06	02:15:00	0
2009-03-06	02:16:00	0
2009-03-06	02:17:00	0
2009-03-06	02:18:00	0
2009-03-06	02:19:00	0
2009-03-06	02:20:00	0
2009-03-06	02:21:00	0
2009-03-06	02:22:00	0
2009-03-06	02:23:00	0
2009-03-06	02:24:00	0
2009-03-06	02:25:00	0
2009-03-06	02:26:00	0
2009-03-06	02:27:00	0
2009-03-06	02:28:00	0
2009-03-06	02:29:00	0
2009-03-06	02:30:00	0
2009-03-06	02:31:00	0
2009-03-06	02:32:00	0
2009-03-06	02:33:00	0
2009-03-06	02:34:00	0
2009-03-06	02:35:00	0
2009-03-06	02:36:00	0
2009-03-06	02:37:00	0
2009-03-06	02:38:00	0
2009-03-06	02:39:00	0
2009-03-06	02:40:00	0
2009-03-06	02:41:00	64
2009-03-06	02:42:00	0
2009-03-06	02:43:00	0
2009-03-06	02:44:00	0
2009-03-06	02:45:00	0
2009-03-06	02:46:00	0
2009-03-06	02:47:00	0
2009-03-06	02:48:00	0
2009-03-06	02:49:00	0
2009-03-06	02:50:00	0
2009-03-06	02:51:00	26
2009-03-06	02:52:00	0
2009-03-06	02:53:00	0
2009-03-06	02:54:00	0
2009-03-06	02:55:00	0
2009-03-06	02:56:00	0
2009-03-06	02:57:00	0
2009-03-06	02:58:00	0
2009-03-06	02:59:00	0
2009-03-06	03:00:00	0
2009-03-06	03:01:00	0
2009-03-06	03:02:00	0
2009-03-06	03:03:00	0
2009-03-06	03:04:00	0
2009-03-06	03:05:00	0
2009-03-06	03:06:00	0
2009-03-06	03:07:00	0
2009-03-06	03:08:00	0
2009-03-06	03:09:00	0
2009-03-06	03:10:00	0
2009-03-06	03:11:00	0
2009-03-06	03:12:00	0
2009-03-06	03:13:00	0
2009-03-06	03:14:00	0
2009-03-06	03:15:00	0
2009-03-06	03:16:00	0
2009-03-06	03:17:00	0
2009-03-06	03:18:00	0
2009-03-06	03:19:00	0
2009-03-06	03:20:00	0
2009-03-06	03:21:00	0
2009-03-06	03:22:00	0
2009-03-06	03:23:00	26
2009-03-06	03:24:00	0
2009-03-06	03:25:00	26
2009-03-06	03:26:00	13
2009-03-06	03:27:00	0
2009-03-06	03:28:00	38
2009-03-06	03:29:00	64
2009-03-06	03:30:00	77
2009-03-06	03:31:00	0
2009-03-06	03:32:00	0
2009-03-06	03:33:00	0
2009-03-06	03:34:00	0
2009-03-06	03:35:00	0
2009-03-06	03:36:00	0
2009-03-06	03:37:00	0
2009-03-06	03:38:00	0
2009-03-06	03:39:00	0
2009-03-06	03:40:00	0
2009-03-06	03:41:00	0
2009-03-06	03:42:00	0
2009-03-06	03:43:00	0
2009-03-06	03:44:00	0
2009-03-06	03:45:00	0
2009-03-06	03:46:00	0
2009-03-06	03:47:00	0
2009-03-06	03:48:00	0
2009-03-06	03:49:00	0
2009-03-06	03:50:00	0
2009-03-06	03:51:00	0
2009-03-06	03:52:00	0
2009-03-06	03:53:00	0
2009-03-06	03:54:00	0
2009-03-06	03:55:00	0
2009-03-06	03:56:00	0
2009-03-06	03:57:00	0
2009-03-06	03:58:00	0
2009-03-06	03:59:00	0
2009-03-06	04:00:00	0
2009-03-06	04:01:00	0
2009-03-06	04:02:00	0
2009-03-06	04:03:00	0
2009-03-06	04:04:00	0
2009-03-06	04:05:00	0
2009-03-06	04:06:00	0
2009-03-06	04:07:00	0
2009-03-06	04:08:00	0
2009-03-06	04:09:00	0
2009-03-06	04:10:00	0
2009-03-06	04:11:00	0
2009-03-06	04:12:00	0
2009-03-06	04:13:00	0
2009-03-06	04:14:00	0
2009-03-06	04:15:00	0
2009-03-06	04:16:00	0
2009-03-06	04:17:00	0
2009-03-06	04:18:00	13
2009-03-06	04:19:00	0
2009-03-06	04:20:00	0
2009-03-06	04:21:00	0
2009-03-06	04:22:00	26
2009-03-06	04:23:00	0
2009-03-06	04:24:00	0
2009-03-06	04:25:00	26
2009-03-06	04:26:00	0
2009-03-06	04:27:00	0
2009-03-06	04:28:00	0
2009-03-06	04:29:00	0
2009-03-06	04:30:00	0
2009-03-06	04:31:00	0
2009-03-06	04:32:00	0
2009-03-06	04:33:00	0
2009-03-06	04:34:00	0
2009-03-06	04:35:00	0
2009-03-06	04:36:00	0
2009-03-06	04:37:00	0
2009-03-06	04:38:00	0
2009-03-06	04:39:00	0
2009-03-06	04:40:00	0
2009-03-06	04:41:00	0
2009-03-06	04:42:00	0
2009-03-06	04:43:00	0
2009-03-06	04:44:00	0
2009-03-06	04:45:00	0
2009-03-06	04:46:00	38
2009-03-06	04:47:00	0
2009-03-06	04:48:00	0
2009-03-06	04:49:00	0
2009-03-06	04:50:00	0
2009-03-06	04:51:00	0
2009-03-06	04:52:00	0
2009-03-06	04:53:00	0
2009-03-06	04:54:00	38
2009-03-06	04:55:00	0
2009-03-06	04:56:00	0
2009-03-06	04:57:00	0
2009-03-06	04:58:00	0
2009-03-06	04:59:00	0
2009-03-06	05:00:00	0
2009-03-06	05:01:00	0
2009-03-06	05:02:00	0
2009-03-06	05:03:00	0
2009-03-06	05:04:00	0
2009-03-06	05:05:00	38
2009-03-06	05:06:00	0
2009-03-06	05:07:00	0
2009-03-06	05:08:00	0
2009-03-06	05:09:00	13
2009-03-06	05:10:00	0
2009-03-06	05:11:00	0
2009-03-06	05:12:00	0
2009-03-06	05:13:00	0
2009-03-06	05:14:00	0
2009-03-06	05:15:00	0
2009-03-06	05:16:00	0
2009-03-06	05:17:00	0
2009-03-06	05:18:00	0
2009-03-06	05:19:00	13
2009-03-06	05:20:00	13
2009-03-06	05:21:00	0
2009-03-06	05:22:00	26
2009-03-06	05:23:00	64
2009-03-06	05:24:00	13
2009-03-06	05:25:00	0
2009-03-06	05:26:00	0
2009-03-06	05:27:00	0
2009-03-06	05:28:00	0
2009-03-06	05:29:00	0
2009-03-06	05:30:00	0
2009-03-06	05:31:00	0
2009-03-06	05:32:00	0
2009-03-06	05:33:00	0
2009-03-06	05:34:00	0
2009-03-06	05:35:00	0
2009-03-06	05:36:00	0
2009-03-06	05:37:00	0
2009-03-06	05:38:00	0
2009-03-06	05:39:00	0
2009-03-06	05:40:00	0
2009-03-06	05:41:00	0
2009-03-06	05:42:00	0
2009-03-06	05:43:00	0
2009-03-06	05:44:00	0
2009-03-06	05:45:00	0
2009-03-06	05:46:00	0
2009-03-06	05:47:00	0
2009-03-06	05:48:00	0
2009-03-06	05:49:00	0
2009-03-06	05:50:00	0
2009-03-06	05:51:00	0
2009-03-06	05:52:00	0
2009-03-06	05:53:00	0
2009-03-06	05:54:00	13
2009-03-06	05:55:00	0
2009-03-06	05:56:00	0
2009-03-06	05:57:00	0
2009-03-06	05:58:00	0
2009-03-06	05:59:00	0
2009-03-06	06:00:00	0
2009-03-06	06:01:00	0
2009-03-06	06:02:00	0
2009-03-06	06:03:00	0
2009-03-06	06:04:00	13
2009-03-06	06:05:00	0
2009-03-06	06:06:00	0
2009-03-06	06:07:00	26
2009-03-06	06:08:00	154
2009-03-06	06:09:00	13
2009-03-06	06:10:00	0
2009-03-06	06:11:00	0
2009-03-06	06:12:00	0
2009-03-06	06:13:00	0
2009-03-06	06:14:00	0
2009-03-06	06:15:00	0
2009-03-06	06:16:00	0
2009-03-06	06:17:00	0
2009-03-06	06:18:00	0
2009-03-06	06:19:00	0
2009-03-06	06:20:00	0
2009-03-06	06:21:00	0
2009-03-06	06:22:00	707
2009-03-06	06:23:00	425
2009-03-06	06:24:00	77
2009-03-06	06:25:00	0
2009-03-06	06:26:00	102
2009-03-06	06:27:00	579
2009-03-06	06:28:00	924
2009-03-06	06:29:00	461
2009-03-06	06:30:00	684
2009-03-06	06:31:00	538
2009-03-06	06:32:00	243
2009-03-06	06:33:00	102
2009-03-06	06:34:00	128
2009-03-06	06:35:00	259
2009-03-06	06:36:00	407
2009-03-06	06:37:00	353
2009-03-06	06:38:00	389
2009-03-06	06:39:00	154
2009-03-06	06:40:00	497
2009-03-06	06:41:00	640
2009-03-06	06:42:00	212
2009-03-06	06:43:00	0
2009-03-06	06:44:00	13
2009-03-06	06:45:00	0
2009-03-06	06:46:00	320
2009-03-06	06:47:00	115
2009-03-06	06:48:00	13
2009-03-06	06:49:00	0
2009-03-06	06:50:00	0
2009-03-06	06:51:00	141
2009-03-06	06:52:00	0
2009-03-06	06:53:00	0
2009-03-06	06:54:00	26
2009-03-06	06:55:00	26
2009-03-06	06:56:00	0
2009-03-06	06:57:00	26
2009-03-06	06:58:00	0
2009-03-06	06:59:00	0
2009-03-06	07:00:00	51
2009-03-06	07:01:00	0
2009-03-06	07:02:00	64
2009-03-06	07:03:00	0
2009-03-06	07:04:00	0
2009-03-06	07:05:00	0
2009-03-06	07:06:00	0
2009-03-06	07:07:00	51
2009-03-06	07:08:00	26
2009-03-06	07:09:00	0
2009-03-06	07:10:00	0
2009-03-06	07:11:00	0
2009-03-06	07:12:00	0
2009-03-06	07:13:00	0
2009-03-06	07:14:00	0
2009-03-06	07:15:00	13
2009-03-06	07:16:00	0
2009-03-06	07:17:00	0
2009-03-06	07:18:00	0
2009-03-06	07:19:00	0
2009-03-06	07:20:00	0
2009-03-06	07:21:00	0
2009-03-06	07:22:00	0
2009-03-06	07:23:00	0
2009-03-06	07:24:00	0
2009-03-06	07:25:00	0
2009-03-06	07:26:00	26
2009-03-06	07:27:00	182
2009-03-06	07:28:00	0
2009-03-06	07:29:00	0
2009-03-06	07:30:00	0
2009-03-06	07:31:00	0
2009-03-06	07:32:00	0
2009-03-06	07:33:00	0
2009-03-06	07:34:00	0
2009-03-06	07:35:00	0
2009-03-06	07:36:00	0
2009-03-06	07:37:00	228
2009-03-06	07:38:00	115
2009-03-06	07:39:00	0
2009-03-06	07:40:00	407
2009-03-06	07:41:00	620
2009-03-06	07:42:00	660
2009-03-06	07:43:00	51
2009-03-06	07:44:00	0
2009-03-06	07:45:00	497
2009-03-06	07:46:00	847
2009-03-06	07:47:00	259
2009-03-06	07:48:00	461
2009-03-06	07:49:00	660
2009-03-06	07:50:00	182
2009-03-06	07:51:00	243
2009-03-06	07:52:00	0
2009-03-06	07:53:00	0
2009-03-06	07:54:00	0
2009-03-06	07:55:00	228
2009-03-06	07:56:00	0
2009-03-06	07:57:00	77
2009-03-06	07:58:00	228
2009-03-06	07:59:00	0
2009-03-06	08:00:00	0
2009-03-06	08:01:00	0
2009-03-06	08:02:00	13
2009-03-06	08:03:00	13
2009-03-06	08:04:00	51
2009-03-06	08:05:00	0
2009-03-06	08:06:00	0
2009-03-06	08:07:00	0
2009-03-06	08:08:00	13
2009-03-06	08:09:00	0
2009-03-06	08:10:00	13
2009-03-06	08:11:00	0
2009-03-06	08:12:00	0
2009-03-06	08:13:00	0
2009-03-06	08:14:00	0
2009-03-06	08:15:00	0
2009-03-06	08:16:00	13
2009-03-06	08:17:00	13
2009-03-06	08:18:00	0
2009-03-06	08:19:00	0
2009-03-06	08:20:00	0
2009-03-06	08:21:00	0
2009-03-06	08:22:00	0
2009-03-06	08:23:00	0
2009-03-06	08:24:00	0
2009-03-06	08:25:00	660
2009-03-06	08:26:00	212
2009-03-06	08:27:00	0
2009-03-06	08:28:00	64
2009-03-06	08:29:00	0
2009-03-06	08:30:00	0
2009-03-06	08:31:00	26
2009-03-06	08:32:00	0
2009-03-06	08:33:00	166
2009-03-06	08:34:00	0
2009-03-06	08:35:00	13
2009-03-06	08:36:00	0
2009-03-06	08:37:00	0
2009-03-06	08:38:00	0
2009-03-06	08:39:00	0
2009-03-06	08:40:00	0
2009-03-06	08:41:00	0
2009-03-06	08:42:00	0
2009-03-06	08:43:00	0
2009-03-06	08:44:00	0
2009-03-06	08:45:00	0
2009-03-06	08:46:00	0
2009-03-06	08:47:00	0
2009-03-06	08:48:00	0
2009-03-06	08:49:00	0
2009-03-06	08:50:00	0
2009-03-06	08:51:00	0
2009-03-06	08:52:00	0
2009-03-06	08:53:00	0
2009-03-06	08:54:00	0
2009-03-06	08:55:00	0
2009-03-06	08:56:00	0
2009-03-06	08:57:00	0
2009-03-06	08:58:00	707
2009-03-06	08:59:00	0
2009-03-06	09:00:00	0
2009-03-06	09:01:00	13
2009-03-06	09:02:00	0
2009-03-06	09:03:00	0
2009-03-06	09:04:00	0
2009-03-06	09:05:00	0
2009-03-06	09:06:00	0
2009-03-06	09:07:00	0
2009-03-06	09:08:00	0
[truncated: 19,611 more rows]

## Sheet: 3.19.09
Actogram, Copy Raw Data, All Days
Identity:	Kitty Reiser
Filename:	E:\Active Research Files\meloxicam titre canine\cases\kitty\Kitty Reiser 3.19.09.AWC
Gender:	F
Age:	7
Height:	61.0 cm	24.0 in
Weight:	20.4 kg	45.0 lbs
Start Date:	19-Mar-2009 (Thu)
Start Time:	18:00:00
Interval:	1.00 mins
Date Stamp:	Time Stamp:	Activity Data:	Marker Press:
2009-03-19	00:00:00	0
2009-03-19	00:01:00	0
2009-03-19	00:02:00	0
2009-03-19	00:03:00	0
2009-03-19	00:04:00	0
2009-03-19	00:05:00	0
2009-03-19	00:06:00	0
2009-03-19	00:07:00	0
2009-03-19	00:08:00	0
2009-03-19	00:09:00	0
2009-03-19	00:10:00	0
2009-03-19	00:11:00	0
2009-03-19	00:12:00	0
2009-03-19	00:13:00	0
2009-03-19	00:14:00	0
2009-03-19	00:15:00	0
2009-03-19	00:16:00	0
2009-03-19	00:17:00	0
2009-03-19	00:18:00	0
2009-03-19	00:19:00	0
2009-03-19	00:20:00	0
2009-03-19	00:21:00	0
2009-03-19	00:22:00	0
2009-03-19	00:23:00	0
2009-03-19	00:24:00	0
2009-03-19	00:25:00	0
2009-03-19	00:26:00	0
2009-03-19	00:27:00	0
2009-03-19	00:28:00	0
2009-03-19	00:29:00	0
2009-03-19	00:30:00	0
2009-03-19	00:31:00	0
2009-03-19	00:32:00	0
2009-03-19	00:33:00	0
2009-03-19	00:34:00	0
2009-03-19	00:35:00	0
2009-03-19	00:36:00	0
2009-03-19	00:37:00	0
2009-03-19	00:38:00	0
2009-03-19	00:39:00	0
2009-03-19	00:40:00	0
2009-03-19	00:41:00	0
2009-03-19	00:42:00	0
2009-03-19	00:43:00	0
2009-03-19	00:44:00	0
2009-03-19	00:45:00	0
2009-03-19	00:46:00	0
2009-03-19	00:47:00	0
2009-03-19	00:48:00	0
2009-03-19	00:49:00	0
2009-03-19	00:50:00	0
2009-03-19	00:51:00	0
2009-03-19	00:52:00	0
2009-03-19	00:53:00	0
2009-03-19	00:54:00	0
2009-03-19	00:55:00	0
2009-03-19	00:56:00	0
2009-03-19	00:57:00	0
2009-03-19	00:58:00	0
2009-03-19	00:59:00	0
2009-03-19	01:00:00	0
2009-03-19	01:01:00	0
2009-03-19	01:02:00	0
2009-03-19	01:03:00	0
2009-03-19	01:04:00	0
2009-03-19	01:05:00	0
2009-03-19	01:06:00	0
2009-03-19	01:07:00	0
2009-03-19	01:08:00	0
2009-03-19	01:09:00	0
2009-03-19	01:10:00	0
2009-03-19	01:11:00	0
2009-03-19	01:12:00	0
2009-03-19	01:13:00	0
2009-03-19	01:14:00	0
2009-03-19	01:15:00	0
2009-03-19	01:16:00	0
2009-03-19	01:17:00	0
2009-03-19	01:18:00	0
2009-03-19	01:19:00	0
2009-03-19	01:20:00	0
2009-03-19	01:21:00	0
2009-03-19	01:22:00	0
2009-03-19	01:23:00	0
2009-03-19	01:24:00	0
2009-03-19	01:25:00	0
2009-03-19	01:26:00	0
2009-03-19	01:27:00	0
2009-03-19	01:28:00	0
2009-03-19	01:29:00	0
2009-03-19	01:30:00	0
2009-03-19	01:31:00	0
2009-03-19	01:32:00	0
2009-03-19	01:33:00	0
2009-03-19	01:34:00	0
2009-03-19	01:35:00	0
2009-03-19	01:36:00	0
2009-03-19	01:37:00	0
2009-03-19	01:38:00	0
2009-03-19	01:39:00	0
2009-03-19	01:40:00	0
2009-03-19	01:41:00	0
2009-03-19	01:42:00	0
2009-03-19	01:43:00	0
2009-03-19	01:44:00	0
2009-03-19	01:45:00	0
2009-03-19	01:46:00	0
2009-03-19	01:47:00	0
2009-03-19	01:48:00	0
2009-03-19	01:49:00	0
2009-03-19	01:50:00	0
2009-03-19	01:51:00	0
2009-03-19	01:52:00	0
2009-03-19	01:53:00	0
2009-03-19	01:54:00	0
2009-03-19	01:55:00	0
2009-03-19	01:56:00	0
2009-03-19	01:57:00	0
2009-03-19	01:58:00	0
2009-03-19	01:59:00	0
2009-03-19	02:00:00	0
2009-03-19	02:01:00	0
2009-03-19	02:02:00	0
2009-03-19	02:03:00	0
2009-03-19	02:04:00	0
2009-03-19	02:05:00	0
2009-03-19	02:06:00	0
2009-03-19	02:07:00	0
2009-03-19	02:08:00	0
2009-03-19	02:09:00	0
2009-03-19	02:10:00	0
2009-03-19	02:11:00	0
2009-03-19	02:12:00	0
2009-03-19	02:13:00	0
2009-03-19	02:14:00	0
2009-03-19	02:15:00	0
2009-03-19	02:16:00	0
2009-03-19	02:17:00	0
2009-03-19	02:18:00	0
2009-03-19	02:19:00	0
2009-03-19	02:20:00	0
2009-03-19	02:21:00	0
2009-03-19	02:22:00	0
2009-03-19	02:23:00	0
2009-03-19	02:24:00	0
2009-03-19	02:25:00	0
2009-03-19	02:26:00	0
2009-03-19	02:27:00	0
2009-03-19	02:28:00	0
2009-03-19	02:29:00	0
2009-03-19	02:30:00	0
2009-03-19	02:31:00	0
2009-03-19	02:32:00	0
2009-03-19	02:33:00	0
2009-03-19	02:34:00	0
2009-03-19	02:35:00	0
2009-03-19	02:36:00	0
2009-03-19	02:37:00	0
2009-03-19	02:38:00	0
2009-03-19	02:39:00	0
2009-03-19	02:40:00	0
2009-03-19	02:41:00	0
2009-03-19	02:42:00	0
2009-03-19	02:43:00	0
2009-03-19	02:44:00	0
2009-03-19	02:45:00	0
2009-03-19	02:46:00	0
2009-03-19	02:47:00	0
2009-03-19	02:48:00	0
2009-03-19	02:49:00	0
2009-03-19	02:50:00	0
2009-03-19	02:51:00	0
2009-03-19	02:52:00	0
2009-03-19	02:53:00	0
2009-03-19	02:54:00	0
2009-03-19	02:55:00	0
2009-03-19	02:56:00	0
2009-03-19	02:57:00	0
2009-03-19	02:58:00	0
2009-03-19	02:59:00	0
2009-03-19	03:00:00	0
2009-03-19	03:01:00	0
2009-03-19	03:02:00	0
2009-03-19	03:03:00	0
2009-03-19	03:04:00	0
2009-03-19	03:05:00	0
2009-03-19	03:06:00	0
2009-03-19	03:07:00	0
2009-03-19	03:08:00	0
2009-03-19	03:09:00	0
2009-03-19	03:10:00	0
2009-03-19	03:11:00	0
2009-03-19	03:12:00	0
2009-03-19	03:13:00	0
2009-03-19	03:14:00	0
2009-03-19	03:15:00	0
2009-03-19	03:16:00	0
2009-03-19	03:17:00	0
2009-03-19	03:18:00	0
2009-03-19	03:19:00	0
2009-03-19	03:20:00	0
2009-03-19	03:21:00	0
2009-03-19	03:22:00	0
2009-03-19	03:23:00	0
2009-03-19	03:24:00	0
2009-03-19	03:25:00	0
2009-03-19	03:26:00	0
2009-03-19	03:27:00	0
2009-03-19	03:28:00	0
2009-03-19	03:29:00	0
2009-03-19	03:30:00	0
2009-03-19	03:31:00	0
2009-03-19	03:32:00	0
2009-03-19	03:33:00	0
2009-03-19	03:34:00	0
2009-03-19	03:35:00	0
2009-03-19	03:36:00	0
2009-03-19	03:37:00	0
2009-03-19	03:38:00	0
2009-03-19	03:39:00	0
2009-03-19	03:40:00	0
2009-03-19	03:41:00	0
2009-03-19	03:42:00	0
2009-03-19	03:43:00	0
2009-03-19	03:44:00	0
2009-03-19	03:45:00	0
2009-03-19	03:46:00	0
2009-03-19	03:47:00	0
2009-03-19	03:48:00	0
2009-03-19	03:49:00	0
2009-03-19	03:50:00	0
2009-03-19	03:51:00	0
2009-03-19	03:52:00	0
2009-03-19	03:53:00	0
2009-03-19	03:54:00	0
2009-03-19	03:55:00	0
2009-03-19	03:56:00	0
2009-03-19	03:57:00	0
2009-03-19	03:58:00	0
2009-03-19	03:59:00	0
2009-03-19	04:00:00	0
2009-03-19	04:01:00	0
2009-03-19	04:02:00	0
2009-03-19	04:03:00	0
2009-03-19	04:04:00	0
2009-03-19	04:05:00	0
2009-03-19	04:06:00	0
2009-03-19	04:07:00	0
2009-03-19	04:08:00	0
2009-03-19	04:09:00	0
2009-03-19	04:10:00	0
2009-03-19	04:11:00	0
2009-03-19	04:12:00	0
2009-03-19	04:13:00	0
2009-03-19	04:14:00	0
2009-03-19	04:15:00	0
2009-03-19	04:16:00	0
2009-03-19	04:17:00	0
2009-03-19	04:18:00	0
2009-03-19	04:19:00	0
2009-03-19	04:20:00	0
2009-03-19	04:21:00	0
2009-03-19	04:22:00	0
2009-03-19	04:23:00	0
2009-03-19	04:24:00	0
2009-03-19	04:25:00	0
2009-03-19	04:26:00	0
2009-03-19	04:27:00	0
2009-03-19	04:28:00	0
2009-03-19	04:29:00	0
2009-03-19	04:30:00	0
2009-03-19	04:31:00	0
2009-03-19	04:32:00	0
2009-03-19	04:33:00	0
2009-03-19	04:34:00	0
2009-03-19	04:35:00	0
2009-03-19	04:36:00	0
2009-03-19	04:37:00	0
2009-03-19	04:38:00	0
2009-03-19	04:39:00	0
2009-03-19	04:40:00	0
2009-03-19	04:41:00	0
2009-03-19	04:42:00	0
2009-03-19	04:43:00	0
2009-03-19	04:44:00	0
2009-03-19	04:45:00	0
2009-03-19	04:46:00	0
2009-03-19	04:47:00	0
2009-03-19	04:48:00	0
2009-03-19	04:49:00	0
2009-03-19	04:50:00	0
2009-03-19	04:51:00	0
2009-03-19	04:52:00	0
2009-03-19	04:53:00	0
2009-03-19	04:54:00	0
2009-03-19	04:55:00	0
2009-03-19	04:56:00	0
2009-03-19	04:57:00	0
2009-03-19	04:58:00	0
2009-03-19	04:59:00	0
2009-03-19	05:00:00	0
2009-03-19	05:01:00	0
2009-03-19	05:02:00	0
2009-03-19	05:03:00	0
2009-03-19	05:04:00	0
2009-03-19	05:05:00	0
2009-03-19	05:06:00	0
2009-03-19	05:07:00	0
2009-03-19	05:08:00	0
2009-03-19	05:09:00	0
2009-03-19	05:10:00	0
2009-03-19	05:11:00	0
2009-03-19	05:12:00	0
2009-03-19	05:13:00	0
2009-03-19	05:14:00	0
2009-03-19	05:15:00	0
2009-03-19	05:16:00	0
2009-03-19	05:17:00	0
2009-03-19	05:18:00	0
2009-03-19	05:19:00	0
2009-03-19	05:20:00	0
2009-03-19	05:21:00	0
2009-03-19	05:22:00	0
2009-03-19	05:23:00	0
2009-03-19	05:24:00	0
2009-03-19	05:25:00	0
2009-03-19	05:26:00	0
2009-03-19	05:27:00	0
2009-03-19	05:28:00	0
2009-03-19	05:29:00	0
2009-03-19	05:30:00	0
2009-03-19	05:31:00	0
2009-03-19	05:32:00	0
2009-03-19	05:33:00	0
2009-03-19	05:34:00	0
2009-03-19	05:35:00	0
2009-03-19	05:36:00	0
2009-03-19	05:37:00	0
2009-03-19	05:38:00	0
2009-03-19	05:39:00	0
2009-03-19	05:40:00	0
2009-03-19	05:41:00	0
2009-03-19	05:42:00	0
2009-03-19	05:43:00	0
2009-03-19	05:44:00	0
2009-03-19	05:45:00	0
2009-03-19	05:46:00	0
2009-03-19	05:47:00	0
2009-03-19	05:48:00	0
2009-03-19	05:49:00	0
2009-03-19	05:50:00	0
2009-03-19	05:51:00	0
2009-03-19	05:52:00	0
2009-03-19	05:53:00	0
2009-03-19	05:54:00	0
2009-03-19	05:55:00	0
2009-03-19	05:56:00	0
2009-03-19	05:57:00	0
2009-03-19	05:58:00	0
2009-03-19	05:59:00	0
2009-03-19	06:00:00	0
2009-03-19	06:01:00	0
2009-03-19	06:02:00	0
2009-03-19	06:03:00	0
2009-03-19	06:04:00	0
2009-03-19	06:05:00	0
2009-03-19	06:06:00	0
2009-03-19	06:07:00	0
2009-03-19	06:08:00	0
2009-03-19	06:09:00	0
2009-03-19	06:10:00	0
2009-03-19	06:11:00	0
2009-03-19	06:12:00	0
2009-03-19	06:13:00	0
2009-03-19	06:14:00	0
2009-03-19	06:15:00	0
2009-03-19	06:16:00	0
2009-03-19	06:17:00	0
2009-03-19	06:18:00	0
2009-03-19	06:19:00	0
2009-03-19	06:20:00	0
2009-03-19	06:21:00	0
2009-03-19	06:22:00	0
2009-03-19	06:23:00	0
2009-03-19	06:24:00	0
2009-03-19	06:25:00	0
2009-03-19	06:26:00	0
2009-03-19	06:27:00	0
2009-03-19	06:28:00	0
2009-03-19	06:29:00	0
2009-03-19	06:30:00	0
2009-03-19	06:31:00	0
2009-03-19	06:32:00	0
2009-03-19	06:33:00	0
2009-03-19	06:34:00	0
2009-03-19	06:35:00	0
2009-03-19	06:36:00	0
2009-03-19	06:37:00	0
2009-03-19	06:38:00	0
2009-03-19	06:39:00	0
2009-03-19	06:40:00	0
2009-03-19	06:41:00	0
2009-03-19	06:42:00	0
2009-03-19	06:43:00	0
2009-03-19	06:44:00	0
2009-03-19	06:45:00	0
2009-03-19	06:46:00	0
2009-03-19	06:47:00	0
2009-03-19	06:48:00	0
2009-03-19	06:49:00	0
2009-03-19	06:50:00	0
2009-03-19	06:51:00	0
2009-03-19	06:52:00	0
2009-03-19	06:53:00	0
2009-03-19	06:54:00	0
2009-03-19	06:55:00	0
2009-03-19	06:56:00	0
2009-03-19	06:57:00	0
2009-03-19	06:58:00	0
2009-03-19	06:59:00	0
2009-03-19	07:00:00	0
2009-03-19	07:01:00	0
2009-03-19	07:02:00	0
2009-03-19	07:03:00	0
2009-03-19	07:04:00	0
2009-03-19	07:05:00	0
2009-03-19	07:06:00	0
2009-03-19	07:07:00	0
2009-03-19	07:08:00	0
2009-03-19	07:09:00	0
2009-03-19	07:10:00	0
2009-03-19	07:11:00	0
2009-03-19	07:12:00	0
2009-03-19	07:13:00	0
2009-03-19	07:14:00	0
2009-03-19	07:15:00	0
2009-03-19	07:16:00	0
2009-03-19	07:17:00	0
2009-03-19	07:18:00	0
2009-03-19	07:19:00	0
2009-03-19	07:20:00	0
2009-03-19	07:21:00	0
2009-03-19	07:22:00	0
2009-03-19	07:23:00	0
2009-03-19	07:24:00	0
2009-03-19	07:25:00	0
2009-03-19	07:26:00	0
2009-03-19	07:27:00	0
2009-03-19	07:28:00	0
2009-03-19	07:29:00	0
2009-03-19	07:30:00	0
2009-03-19	07:31:00	0
2009-03-19	07:32:00	0
2009-03-19	07:33:00	0
2009-03-19	07:34:00	0
2009-03-19	07:35:00	0
2009-03-19	07:36:00	0
2009-03-19	07:37:00	0
2009-03-19	07:38:00	0
2009-03-19	07:39:00	0
2009-03-19	07:40:00	0
2009-03-19	07:41:00	0
2009-03-19	07:42:00	0
2009-03-19	07:43:00	0
2009-03-19	07:44:00	0
2009-03-19	07:45:00	0
2009-03-19	07:46:00	0
2009-03-19	07:47:00	0
2009-03-19	07:48:00	0
2009-03-19	07:49:00	0
2009-03-19	07:50:00	0
2009-03-19	07:51:00	0
2009-03-19	07:52:00	0
2009-03-19	07:53:00	0
2009-03-19	07:54:00	0
2009-03-19	07:55:00	0
2009-03-19	07:56:00	0
2009-03-19	07:57:00	0
2009-03-19	07:58:00	0
2009-03-19	07:59:00	0
2009-03-19	08:00:00	0
2009-03-19	08:01:00	0
2009-03-19	08:02:00	0
2009-03-19	08:03:00	0
2009-03-19	08:04:00	0
2009-03-19	08:05:00	0
2009-03-19	08:06:00	0
2009-03-19	08:07:00	0
2009-03-19	08:08:00	0
2009-03-19	08:09:00	0
2009-03-19	08:10:00	0
2009-03-19	08:11:00	0
2009-03-19	08:12:00	0
2009-03-19	08:13:00	0
2009-03-19	08:14:00	0
2009-03-19	08:15:00	0
2009-03-19	08:16:00	0
2009-03-19	08:17:00	0
2009-03-19	08:18:00	0
2009-03-19	08:19:00	0
2009-03-19	08:20:00	0
2009-03-19	08:21:00	0
2009-03-19	08:22:00	0
2009-03-19	08:23:00	0
2009-03-19	08:24:00	0
2009-03-19	08:25:00	0
2009-03-19	08:26:00	0
2009-03-19	08:27:00	0
2009-03-19	08:28:00	0
2009-03-19	08:29:00	0
2009-03-19	08:30:00	0
2009-03-19	08:31:00	0
2009-03-19	08:32:00	0
2009-03-19	08:33:00	0
2009-03-19	08:34:00	0
2009-03-19	08:35:00	0
2009-03-19	08:36:00	0
2009-03-19	08:37:00	0
2009-03-19	08:38:00	0
2009-03-19	08:39:00	0
2009-03-19	08:40:00	0
2009-03-19	08:41:00	0
2009-03-19	08:42:00	0
2009-03-19	08:43:00	0
2009-03-19	08:44:00	0
2009-03-19	08:45:00	0
2009-03-19	08:46:00	0
2009-03-19	08:47:00	0
2009-03-19	08:48:00	0
2009-03-19	08:49:00	0
2009-03-19	08:50:00	0
2009-03-19	08:51:00	0
2009-03-19	08:52:00	0
2009-03-19	08:53:00	0
2009-03-19	08:54:00	0
2009-03-19	08:55:00	0
2009-03-19	08:56:00	0
2009-03-19	08:57:00	0
2009-03-19	08:58:00	0
2009-03-19	08:59:00	0
2009-03-19	09:00:00	0
2009-03-19	09:01:00	0
2009-03-19	09:02:00	0
2009-03-19	09:03:00	0
2009-03-19	09:04:00	0
2009-03-19	09:05:00	0
2009-03-19	09:06:00	0
2009-03-19	09:07:00	0
2009-03-19	09:08:00	0
2009-03-19	09:09:00	0
2009-03-19	09:10:00	0
2009-03-19	09:11:00	0
2009-03-19	09:12:00	0
2009-03-19	09:13:00	0
2009-03-19	09:14:00	0
2009-03-19	09:15:00	0
2009-03-19	09:16:00	0
2009-03-19	09:17:00	0
2009-03-19	09:18:00	0
2009-03-19	09:19:00	0
2009-03-19	09:20:00	0
2009-03-19	09:21:00	0
2009-03-19	09:22:00	0
2009-03-19	09:23:00	0
2009-03-19	09:24:00	0
2009-03-19	09:25:00	0
2009-03-19	09:26:00	0
2009-03-19	09:27:00	0
2009-03-19	09:28:00	0
2009-03-19	09:29:00	0
2009-03-19	09:30:00	0
2009-03-19	09:31:00	0
2009-03-19	09:32:00	0
2009-03-19	09:33:00	0
2009-03-19	09:34:00	0
2009-03-19	09:35:00	0
2009-03-19	09:36:00	0
2009-03-19	09:37:00	0
2009-03-19	09:38:00	0
2009-03-19	09:39:00	0
2009-03-19	09:40:00	0
2009-03-19	09:41:00	0
2009-03-19	09:42:00	0
2009-03-19	09:43:00	0
2009-03-19	09:44:00	0
2009-03-19	09:45:00	0
2009-03-19	09:46:00	0
2009-03-19	09:47:00	0
2009-03-19	09:48:00	0
2009-03-19	09:49:00	0
2009-03-19	09:50:00	0
2009-03-19	09:51:00	0
2009-03-19	09:52:00	0
2009-03-19	09:53:00	0
2009-03-19	09:54:00	0
2009-03-19	09:55:00	0
2009-03-19	09:56:00	0
2009-03-19	09:57:00	0
2009-03-19	09:58:00	0
2009-03-19	09:59:00	0
2009-03-19	10:00:00	0
2009-03-19	10:01:00	0
2009-03-19	10:02:00	0
2009-03-19	10:03:00	0
2009-03-19	10:04:00	0
2009-03-19	10:05:00	0
2009-03-19	10:06:00	0
2009-03-19	10:07:00	0
2009-03-19	10:08:00	0
2009-03-19	10:09:00	0
2009-03-19	10:10:00	0
2009-03-19	10:11:00	0
2009-03-19	10:12:00	0
2009-03-19	10:13:00	0
2009-03-19	10:14:00	0
2009-03-19	10:15:00	0
2009-03-19	10:16:00	0
2009-03-19	10:17:00	0
2009-03-19	10:18:00	0
2009-03-19	10:19:00	0
2009-03-19	10:20:00	0
2009-03-19	10:21:00	0
2009-03-19	10:22:00	0
2009-03-19	10:23:00	0
2009-03-19	10:24:00	0
2009-03-19	10:25:00	0
2009-03-19	10:26:00	0
2009-03-19	10:27:00	0
2009-03-19	10:28:00	0
2009-03-19	10:29:00	0
2009-03-19	10:30:00	0
2009-03-19	10:31:00	0
2009-03-19	10:32:00	0
2009-03-19	10:33:00	0
2009-03-19	10:34:00	0
2009-03-19	10:35:00	0
2009-03-19	10:36:00	0
2009-03-19	10:37:00	0
2009-03-19	10:38:00	0
2009-03-19	10:39:00	0
2009-03-19	10:40:00	0
2009-03-19	10:41:00	0
2009-03-19	10:42:00	0
2009-03-19	10:43:00	0
2009-03-19	10:44:00	0
2009-03-19	10:45:00	0
2009-03-19	10:46:00	0
2009-03-19	10:47:00	0
2009-03-19	10:48:00	0
2009-03-19	10:49:00	0
2009-03-19	10:50:00	0
2009-03-19	10:51:00	0
2009-03-19	10:52:00	0
2009-03-19	10:53:00	0
2009-03-19	10:54:00	0
2009-03-19	10:55:00	0
2009-03-19	10:56:00	0
2009-03-19	10:57:00	0
2009-03-19	10:58:00	0
2009-03-19	10:59:00	0
2009-03-19	11:00:00	0
2009-03-19	11:01:00	0
2009-03-19	11:02:00	0
2009-03-19	11:03:00	0
2009-03-19	11:04:00	0
2009-03-19	11:05:00	0
2009-03-19	11:06:00	0
2009-03-19	11:07:00	0
2009-03-19	11:08:00	0
2009-03-19	11:09:00	0
2009-03-19	11:10:00	0
2009-03-19	11:11:00	0
2009-03-19	11:12:00	0
2009-03-19	11:13:00	0
2009-03-19	11:14:00	0
2009-03-19	11:15:00	0
2009-03-19	11:16:00	0
2009-03-19	11:17:00	0
2009-03-19	11:18:00	0
2009-03-19	11:19:00	0
2009-03-19	11:20:00	0
2009-03-19	11:21:00	0
2009-03-19	11:22:00	0
2009-03-19	11:23:00	0
2009-03-19	11:24:00	0
2009-03-19	11:25:00	0
2009-03-19	11:26:00	0
2009-03-19	11:27:00	0
2009-03-19	11:28:00	0
2009-03-19	11:29:00	0
2009-03-19	11:30:00	0
2009-03-19	11:31:00	0
2009-03-19	11:32:00	0
2009-03-19	11:33:00	0
2009-03-19	11:34:00	0
2009-03-19	11:35:00	0
2009-03-19	11:36:00	0
2009-03-19	11:37:00	0
2009-03-19	11:38:00	0
2009-03-19	11:39:00	0
2009-03-19	11:40:00	0
2009-03-19	11:41:00	0
2009-03-19	11:42:00	0
2009-03-19	11:43:00	0
2009-03-19	11:44:00	0
2009-03-19	11:45:00	0
2009-03-19	11:46:00	0
2009-03-19	11:47:00	0
2009-03-19	11:48:00	0
2009-03-19	11:49:00	0
2009-03-19	11:50:00	0
2009-03-19	11:51:00	0
2009-03-19	11:52:00	0
2009-03-19	11:53:00	0
2009-03-19	11:54:00	0
2009-03-19	11:55:00	0
2009-03-19	11:56:00	0
2009-03-19	11:57:00	0
2009-03-19	11:58:00	0
2009-03-19	11:59:00	0
2009-03-19	12:00:00	0
2009-03-19	12:01:00	0
2009-03-19	12:02:00	0
2009-03-19	12:03:00	0
2009-03-19	12:04:00	0
2009-03-19	12:05:00	0
2009-03-19	12:06:00	0
2009-03-19	12:07:00	0
2009-03-19	12:08:00	0
2009-03-19	12:09:00	0
2009-03-19	12:10:00	0
2009-03-19	12:11:00	0
2009-03-19	12:12:00	0
2009-03-19	12:13:00	0
2009-03-19	12:14:00	0
2009-03-19	12:15:00	0
2009-03-19	12:16:00	0
2009-03-19	12:17:00	0
2009-03-19	12:18:00	0
2009-03-19	12:19:00	0
2009-03-19	12:20:00	0
2009-03-19	12:21:00	0
2009-03-19	12:22:00	0
2009-03-19	12:23:00	0
2009-03-19	12:24:00	0
2009-03-19	12:25:00	0
2009-03-19	12:26:00	0
2009-03-19	12:27:00	0
2009-03-19	12:28:00	0
2009-03-19	12:29:00	0
2009-03-19	12:30:00	0
2009-03-19	12:31:00	0
2009-03-19	12:32:00	0
2009-03-19	12:33:00	0
2009-03-19	12:34:00	0
2009-03-19	12:35:00	0
2009-03-19	12:36:00	0
2009-03-19	12:37:00	0
2009-03-19	12:38:00	0
2009-03-19	12:39:00	0
2009-03-19	12:40:00	0
2009-03-19	12:41:00	0
2009-03-19	12:42:00	0
2009-03-19	12:43:00	0
2009-03-19	12:44:00	0
2009-03-19	12:45:00	0
2009-03-19	12:46:00	0
2009-03-19	12:47:00	0
2009-03-19	12:48:00	0
2009-03-19	12:49:00	0
2009-03-19	12:50:00	0
2009-03-19	12:51:00	0
2009-03-19	12:52:00	0
2009-03-19	12:53:00	0
2009-03-19	12:54:00	0
2009-03-19	12:55:00	0
2009-03-19	12:56:00	0
2009-03-19	12:57:00	0
2009-03-19	12:58:00	0
2009-03-19	12:59:00	0
2009-03-19	13:00:00	0
2009-03-19	13:01:00	0
2009-03-19	13:02:00	0
2009-03-19	13:03:00	0
2009-03-19	13:04:00	0
2009-03-19	13:05:00	0
2009-03-19	13:06:00	0
2009-03-19	13:07:00	0
2009-03-19	13:08:00	0
2009-03-19	13:09:00	0
2009-03-19	13:10:00	0
2009-03-19	13:11:00	0
2009-03-19	13:12:00	0
2009-03-19	13:13:00	0
2009-03-19	13:14:00	0
2009-03-19	13:15:00	0
2009-03-19	13:16:00	0
2009-03-19	13:17:00	0
2009-03-19	13:18:00	0
2009-03-19	13:19:00	0
2009-03-19	13:20:00	0
2009-03-19	13:21:00	0
2009-03-19	13:22:00	0
2009-03-19	13:23:00	0
2009-03-19	13:24:00	0
2009-03-19	13:25:00	0
2009-03-19	13:26:00	0
2009-03-19	13:27:00	0
2009-03-19	13:28:00	0
2009-03-19	13:29:00	0
2009-03-19	13:30:00	0
2009-03-19	13:31:00	0
2009-03-19	13:32:00	0
2009-03-19	13:33:00	0
2009-03-19	13:34:00	0
2009-03-19	13:35:00	0
2009-03-19	13:36:00	0
2009-03-19	13:37:00	0
2009-03-19	13:38:00	0
2009-03-19	13:39:00	0
2009-03-19	13:40:00	0
2009-03-19	13:41:00	0
2009-03-19	13:42:00	0
2009-03-19	13:43:00	0
2009-03-19	13:44:00	0
2009-03-19	13:45:00	0
2009-03-19	13:46:00	0
2009-03-19	13:47:00	0
2009-03-19	13:48:00	0
2009-03-19	13:49:00	0
2009-03-19	13:50:00	0
2009-03-19	13:51:00	0
2009-03-19	13:52:00	0
2009-03-19	13:53:00	0
2009-03-19	13:54:00	0
2009-03-19	13:55:00	0
2009-03-19	13:56:00	0
2009-03-19	13:57:00	0
2009-03-19	13:58:00	0
2009-03-19	13:59:00	0
2009-03-19	14:00:00	0
2009-03-19	14:01:00	0
2009-03-19	14:02:00	0
2009-03-19	14:03:00	0
2009-03-19	14:04:00	0
2009-03-19	14:05:00	0
2009-03-19	14:06:00	0
2009-03-19	14:07:00	0
2009-03-19	14:08:00	0
2009-03-19	14:09:00	0
2009-03-19	14:10:00	0
2009-03-19	14:11:00	0
2009-03-19	14:12:00	0
2009-03-19	14:13:00	0
2009-03-19	14:14:00	0
2009-03-19	14:15:00	0
2009-03-19	14:16:00	0
2009-03-19	14:17:00	0
2009-03-19	14:18:00	0
2009-03-19	14:19:00	0
2009-03-19	14:20:00	0
2009-03-19	14:21:00	0
2009-03-19	14:22:00	0
2009-03-19	14:23:00	0
2009-03-19	14:24:00	0
2009-03-19	14:25:00	0
2009-03-19	14:26:00	0
2009-03-19	14:27:00	0
2009-03-19	14:28:00	0
2009-03-19	14:29:00	0
2009-03-19	14:30:00	0
2009-03-19	14:31:00	0
2009-03-19	14:32:00	0
2009-03-19	14:33:00	0
2009-03-19	14:34:00	0
2009-03-19	14:35:00	0
2009-03-19	14:36:00	0
2009-03-19	14:37:00	0
2009-03-19	14:38:00	0
2009-03-19	14:39:00	0
2009-03-19	14:40:00	0
2009-03-19	14:41:00	0
2009-03-19	14:42:00	0
2009-03-19	14:43:00	0
2009-03-19	14:44:00	0
2009-03-19	14:45:00	0
2009-03-19	14:46:00	0
2009-03-19	14:47:00	0
2009-03-19	14:48:00	0
2009-03-19	14:49:00	0
2009-03-19	14:50:00	0
2009-03-19	14:51:00	0
2009-03-19	14:52:00	0
2009-03-19	14:53:00	0
2009-03-19	14:54:00	0
2009-03-19	14:55:00	0
2009-03-19	14:56:00	0
2009-03-19	14:57:00	0
2009-03-19	14:58:00	0
2009-03-19	14:59:00	0
2009-03-19	15:00:00	0
2009-03-19	15:01:00	0
2009-03-19	15:02:00	0
2009-03-19	15:03:00	0
2009-03-19	15:04:00	0
2009-03-19	15:05:00	0
2009-03-19	15:06:00	0
2009-03-19	15:07:00	0
2009-03-19	15:08:00	0
2009-03-19	15:09:00	0
2009-03-19	15:10:00	0
2009-03-19	15:11:00	0
2009-03-19	15:12:00	0
2009-03-19	15:13:00	0
2009-03-19	15:14:00	0
2009-03-19	15:15:00	0
2009-03-19	15:16:00	0
2009-03-19	15:17:00	0
2009-03-19	15:18:00	0
2009-03-19	15:19:00	0
2009-03-19	15:20:00	0
2009-03-19	15:21:00	0
2009-03-19	15:22:00	0
2009-03-19	15:23:00	0
2009-03-19	15:24:00	0
2009-03-19	15:25:00	0
2009-03-19	15:26:00	0
2009-03-19	15:27:00	0
2009-03-19	15:28:00	0
2009-03-19	15:29:00	0
2009-03-19	15:30:00	0
2009-03-19	15:31:00	0
2009-03-19	15:32:00	0
2009-03-19	15:33:00	0
2009-03-19	15:34:00	0
2009-03-19	15:35:00	0
2009-03-19	15:36:00	0
2009-03-19	15:37:00	0
2009-03-19	15:38:00	0
2009-03-19	15:39:00	0
2009-03-19	15:40:00	0
2009-03-19	15:41:00	0
2009-03-19	15:42:00	0
2009-03-19	15:43:00	0
2009-03-19	15:44:00	0
2009-03-19	15:45:00	0
2009-03-19	15:46:00	0
2009-03-19	15:47:00	0
2009-03-19	15:48:00	0
2009-03-19	15:49:00	0
2009-03-19	15:50:00	0
2009-03-19	15:51:00	0
2009-03-19	15:52:00	0
2009-03-19	15:53:00	0
2009-03-19	15:54:00	0
2009-03-19	15:55:00	0
2009-03-19	15:56:00	0
2009-03-19	15:57:00	0
2009-03-19	15:58:00	0
2009-03-19	15:59:00	0
2009-03-19	16:00:00	0
2009-03-19	16:01:00	0
2009-03-19	16:02:00	0
2009-03-19	16:03:00	0
2009-03-19	16:04:00	0
2009-03-19	16:05:00	0
2009-03-19	16:06:00	0
2009-03-19	16:07:00	0
2009-03-19	16:08:00	0
2009-03-19	16:09:00	0
2009-03-19	16:10:00	0
2009-03-19	16:11:00	0
2009-03-19	16:12:00	0
2009-03-19	16:13:00	0
2009-03-19	16:14:00	0
2009-03-19	16:15:00	0
2009-03-19	16:16:00	0
2009-03-19	16:17:00	0
2009-03-19	16:18:00	0
2009-03-19	16:19:00	0
2009-03-19	16:20:00	0
2009-03-19	16:21:00	0
2009-03-19	16:22:00	0
2009-03-19	16:23:00	0
2009-03-19	16:24:00	0
2009-03-19	16:25:00	0
2009-03-19	16:26:00	0
2009-03-19	16:27:00	0
2009-03-19	16:28:00	0
2009-03-19	16:29:00	0
2009-03-19	16:30:00	0
2009-03-19	16:31:00	0
2009-03-19	16:32:00	0
2009-03-19	16:33:00	0
2009-03-19	16:34:00	0
2009-03-19	16:35:00	0
2009-03-19	16:36:00	0
2009-03-19	16:37:00	0
2009-03-19	16:38:00	0
2009-03-19	16:39:00	0
2009-03-19	16:40:00	0
2009-03-19	16:41:00	0
2009-03-19	16:42:00	0
2009-03-19	16:43:00	0
2009-03-19	16:44:00	0
2009-03-19	16:45:00	0
2009-03-19	16:46:00	0
2009-03-19	16:47:00	0
2009-03-19	16:48:00	0
2009-03-19	16:49:00	0
2009-03-19	16:50:00	0
2009-03-19	16:51:00	0
2009-03-19	16:52:00	0
2009-03-19	16:53:00	0
2009-03-19	16:54:00	0
2009-03-19	16:55:00	0
2009-03-19	16:56:00	0
2009-03-19	16:57:00	0
2009-03-19	16:58:00	0
2009-03-19	16:59:00	0
2009-03-19	17:00:00	0
2009-03-19	17:01:00	0
2009-03-19	17:02:00	0
2009-03-19	17:03:00	0
2009-03-19	17:04:00	0
2009-03-19	17:05:00	0
2009-03-19	17:06:00	0
2009-03-19	17:07:00	0
2009-03-19	17:08:00	0
2009-03-19	17:09:00	0
2009-03-19	17:10:00	0
2009-03-19	17:11:00	0
2009-03-19	17:12:00	0
2009-03-19	17:13:00	0
2009-03-19	17:14:00	0
2009-03-19	17:15:00	0
2009-03-19	17:16:00	0
2009-03-19	17:17:00	0
2009-03-19	17:18:00	0
2009-03-19	17:19:00	0
2009-03-19	17:20:00	0
2009-03-19	17:21:00	0
2009-03-19	17:22:00	0
2009-03-19	17:23:00	0
2009-03-19	17:24:00	0
2009-03-19	17:25:00	0
2009-03-19	17:26:00	0
2009-03-19	17:27:00	0
2009-03-19	17:28:00	0
2009-03-19	17:29:00	0
2009-03-19	17:30:00	0
2009-03-19	17:31:00	0
2009-03-19	17:32:00	0
2009-03-19	17:33:00	0
2009-03-19	17:34:00	0
2009-03-19	17:35:00	0
2009-03-19	17:36:00	0
2009-03-19	17:37:00	0
2009-03-19	17:38:00	0
2009-03-19	17:39:00	0
2009-03-19	17:40:00	0
2009-03-19	17:41:00	0
2009-03-19	17:42:00	0
2009-03-19	17:43:00	0
2009-03-19	17:44:00	0
2009-03-19	17:45:00	0
2009-03-19	17:46:00	0
2009-03-19	17:47:00	0
2009-03-19	17:48:00	0
2009-03-19	17:49:00	0
2009-03-19	17:50:00	0
2009-03-19	17:51:00	0
2009-03-19	17:52:00	0
2009-03-19	17:53:00	0
2009-03-19	17:54:00	0
2009-03-19	17:55:00	0
2009-03-19	17:56:00	0
2009-03-19	17:57:00	0
2009-03-19	17:58:00	0
2009-03-19	17:59:00	0
2009-03-19	18:00:00	212
2009-03-19	18:01:00	335
2009-03-19	18:02:00	102
2009-03-19	18:03:00	38
2009-03-19	18:04:00	38
2009-03-19	18:05:00	212
2009-03-19	18:06:00	538
2009-03-19	18:07:00	197
2009-03-19	18:08:00	115
2009-03-19	18:09:00	461
2009-03-19	18:10:00	243
2009-03-19	18:11:00	102
2009-03-19	18:12:00	684
2009-03-19	18:13:00	707
2009-03-19	18:14:00	2030
2009-03-19	18:15:00	2299
2009-03-19	18:16:00	2808
2009-03-19	18:17:00	2865
2009-03-19	18:18:00	3738
2009-03-19	18:19:00	4175
2009-03-19	18:20:00	3341
2009-03-19	18:21:00	3738
2009-03-19	18:22:00	3807
2009-03-19	18:23:00	1823
2009-03-19	18:24:00	1142
2009-03-19	18:25:00	1784
2009-03-19	18:26:00	2396
2009-03-19	18:27:00	975
2009-03-19	18:28:00	1946
2009-03-19	18:29:00	2396
2009-03-19	18:30:00	2647
2009-03-19	18:31:00	2348
2009-03-19	18:32:00	2253
2009-03-19	18:33:00	1597
2009-03-19	18:34:00	425
2009-03-19	18:35:00	259
2009-03-19	18:36:00	182
2009-03-19	18:37:00	0
2009-03-19	18:38:00	320
2009-03-19	18:39:00	115
2009-03-19	18:40:00	154
2009-03-19	18:41:00	0
2009-03-19	18:42:00	0
2009-03-19	18:43:00	0
2009-03-19	18:44:00	115
2009-03-19	18:45:00	154
2009-03-19	18:46:00	0
2009-03-19	18:47:00	0
2009-03-19	18:48:00	0
2009-03-19	18:49:00	0
2009-03-19	18:50:00	128
2009-03-19	18:51:00	371
2009-03-19	18:52:00	407
2009-03-19	18:53:00	182
2009-03-19	18:54:00	243
2009-03-19	18:55:00	64
2009-03-19	18:56:00	0
2009-03-19	18:57:00	0
2009-03-19	18:58:00	0
2009-03-19	18:59:00	0
2009-03-19	19:00:00	0
2009-03-19	19:01:00	0
2009-03-19	19:02:00	0
2009-03-19	19:03:00	0
2009-03-19	19:04:00	0
2009-03-19	19:05:00	0
2009-03-19	19:06:00	0
2009-03-19	19:07:00	0
2009-03-19	19:08:00	0
2009-03-19	19:09:00	26
2009-03-19	19:10:00	128
2009-03-19	19:11:00	13
2009-03-19	19:12:00	0
2009-03-19	19:13:00	0
2009-03-19	19:14:00	13
2009-03-19	19:15:00	166
2009-03-19	19:16:00	51
2009-03-19	19:17:00	259
2009-03-19	19:18:00	128
2009-03-19	19:19:00	77
2009-03-19	19:20:00	154
2009-03-19	19:21:00	0
2009-03-19	19:22:00	0
2009-03-19	19:23:00	0
2009-03-19	19:24:00	0
2009-03-19	19:25:00	0
2009-03-19	19:26:00	0
2009-03-19	19:27:00	0
2009-03-19	19:28:00	51
2009-03-19	19:29:00	115
2009-03-19	19:30:00	13
2009-03-19	19:31:00	0
2009-03-19	19:32:00	305
2009-03-19	19:33:00	389
2009-03-19	19:34:00	197
2009-03-19	19:35:00	289
2009-03-19	19:36:00	51
2009-03-19	19:37:00	128
2009-03-19	19:38:00	77
2009-03-19	19:39:00	26
2009-03-19	19:40:00	102
2009-03-19	19:41:00	141
2009-03-19	19:42:00	0
2009-03-19	19:43:00	0
2009-03-19	19:44:00	0
2009-03-19	19:45:00	13
2009-03-19	19:46:00	128
2009-03-19	19:47:00	197
2009-03-19	19:48:00	90
2009-03-19	19:49:00	102
2009-03-19	19:50:00	26
2009-03-19	19:51:00	64
2009-03-19	19:52:00	0
2009-03-19	19:53:00	0
2009-03-19	19:54:00	0
2009-03-19	19:55:00	0
2009-03-19	19:56:00	0
2009-03-19	19:57:00	0
2009-03-19	19:58:00	0
2009-03-19	19:59:00	0
2009-03-19	20:00:00	0
2009-03-19	20:01:00	0
2009-03-19	20:02:00	13
2009-03-19	20:03:00	13
2009-03-19	20:04:00	13
2009-03-19	20:05:00	0
2009-03-19	20:06:00	0
2009-03-19	20:07:00	13
2009-03-19	20:08:00	0
2009-03-19	20:09:00	0
2009-03-19	20:10:00	0
2009-03-19	20:11:00	13
2009-03-19	20:12:00	154
2009-03-19	20:13:00	13
2009-03-19	20:14:00	26
2009-03-19	20:15:00	0
2009-03-19	20:16:00	0
2009-03-19	20:17:00	0
2009-03-19	20:18:00	0
2009-03-19	20:19:00	0
2009-03-19	20:20:00	0
2009-03-19	20:21:00	0
2009-03-19	20:22:00	0
2009-03-19	20:23:00	0
2009-03-19	20:24:00	26
2009-03-19	20:25:00	0
2009-03-19	20:26:00	13
2009-03-19	20:27:00	0
2009-03-19	20:28:00	0
2009-03-19	20:29:00	0
2009-03-19	20:30:00	0
2009-03-19	20:31:00	0
2009-03-19	20:32:00	51
2009-03-19	20:33:00	38
2009-03-19	20:34:00	0
2009-03-19	20:35:00	0
2009-03-19	20:36:00	0
2009-03-19	20:37:00	0
2009-03-19	20:38:00	0
2009-03-19	20:39:00	0
2009-03-19	20:40:00	0
2009-03-19	20:41:00	0
2009-03-19	20:42:00	0
2009-03-19	20:43:00	0
2009-03-19	20:44:00	0
2009-03-19	20:45:00	0
2009-03-19	20:46:00	0
2009-03-19	20:47:00	0
2009-03-19	20:48:00	0
2009-03-19	20:49:00	0
2009-03-19	20:50:00	0
2009-03-19	20:51:00	0
2009-03-19	20:52:00	0
2009-03-19	20:53:00	0
2009-03-19	20:54:00	0
2009-03-19	20:55:00	0
2009-03-19	20:56:00	0
2009-03-19	20:57:00	0
2009-03-19	20:58:00	0
2009-03-19	20:59:00	0
2009-03-19	21:00:00	0
2009-03-19	21:01:00	51
2009-03-19	21:02:00	77
2009-03-19	21:03:00	182
2009-03-19	21:04:00	353
2009-03-19	21:05:00	0
2009-03-19	21:06:00	0
2009-03-19	21:07:00	0
2009-03-19	21:08:00	0
2009-03-19	21:09:00	0
2009-03-19	21:10:00	0
2009-03-19	21:11:00	0
2009-03-19	21:12:00	0
2009-03-19	21:13:00	0
2009-03-19	21:14:00	0
2009-03-19	21:15:00	0
2009-03-19	21:16:00	0
2009-03-19	21:17:00	0
2009-03-19	21:18:00	0
2009-03-19	21:19:00	0
2009-03-19	21:20:00	0
2009-03-19	21:21:00	51
2009-03-19	21:22:00	0
2009-03-19	21:23:00	0
2009-03-19	21:24:00	0
2009-03-19	21:25:00	0
2009-03-19	21:26:00	0
2009-03-19	21:27:00	0
2009-03-19	21:28:00	0
2009-03-19	21:29:00	0
2009-03-19	21:30:00	0
2009-03-19	21:31:00	0
2009-03-19	21:32:00	0
2009-03-19	21:33:00	0
2009-03-19	21:34:00	0
2009-03-19	21:35:00	0
2009-03-19	21:36:00	0
2009-03-19	21:37:00	0
2009-03-19	21:38:00	0
2009-03-19	21:39:00	0
2009-03-19	21:40:00	13
2009-03-19	21:41:00	13
2009-03-19	21:42:00	13
2009-03-19	21:43:00	0
2009-03-19	21:44:00	0
2009-03-19	21:45:00	0
2009-03-19	21:46:00	0
2009-03-19	21:47:00	0
2009-03-19	21:48:00	0
2009-03-19	21:49:00	0
2009-03-19	21:50:00	0
2009-03-19	21:51:00	13
2009-03-19	21:52:00	141
2009-03-19	21:53:00	0
2009-03-19	21:54:00	0
2009-03-19	21:55:00	26
2009-03-19	21:56:00	13
2009-03-19	21:57:00	26
2009-03-19	21:58:00	13
2009-03-19	21:59:00	0
2009-03-19	22:00:00	0
2009-03-19	22:01:00	0
2009-03-19	22:02:00	305
2009-03-19	22:03:00	13
2009-03-19	22:04:00	0
2009-03-19	22:05:00	0
2009-03-19	22:06:00	64
2009-03-19	22:07:00	0
2009-03-19	22:08:00	0
2009-03-19	22:09:00	26
2009-03-19	22:10:00	154
2009-03-19	22:11:00	0
2009-03-19	22:12:00	0
2009-03-19	22:13:00	0
2009-03-19	22:14:00	0
2009-03-19	22:15:00	0
2009-03-19	22:16:00	0
2009-03-19	22:17:00	0
2009-03-19	22:18:00	0
2009-03-19	22:19:00	0
2009-03-19	22:20:00	0
2009-03-19	22:21:00	0
2009-03-19	22:22:00	0
2009-03-19	22:23:00	0
2009-03-19	22:24:00	0
2009-03-19	22:25:00	0
2009-03-19	22:26:00	0
2009-03-19	22:27:00	0
2009-03-19	22:28:00	0
2009-03-19	22:29:00	0
2009-03-19	22:30:00	0
2009-03-19	22:31:00	0
2009-03-19	22:32:00	0
2009-03-19	22:33:00	0
2009-03-19	22:34:00	0
2009-03-19	22:35:00	0
2009-03-19	22:36:00	0
2009-03-19	22:37:00	0
2009-03-19	22:38:00	0
2009-03-19	22:39:00	0
2009-03-19	22:40:00	0
2009-03-19	22:41:00	0
2009-03-19	22:42:00	0
2009-03-19	22:43:00	0
2009-03-19	22:44:00	0
2009-03-19	22:45:00	0
2009-03-19	22:46:00	0
2009-03-19	22:47:00	0
2009-03-19	22:48:00	0
2009-03-19	22:49:00	0
2009-03-19	22:50:00	0
2009-03-19	22:51:00	0
2009-03-19	22:52:00	0
2009-03-19	22:53:00	0
2009-03-19	22:54:00	0
2009-03-19	22:55:00	0
2009-03-19	22:56:00	0
2009-03-19	22:57:00	0
2009-03-19	22:58:00	0
2009-03-19	22:59:00	0
2009-03-19	23:00:00	0
2009-03-19	23:01:00	0
2009-03-19	23:02:00	0
2009-03-19	23:03:00	0
2009-03-19	23:04:00	0
2009-03-19	23:05:00	0
2009-03-19	23:06:00	0
2009-03-19	23:07:00	0
2009-03-19	23:08:00	0
2009-03-19	23:09:00	0
2009-03-19	23:10:00	0
2009-03-19	23:11:00	0
2009-03-19	23:12:00	0
2009-03-19	23:13:00	0
2009-03-19	23:14:00	26
2009-03-19	23:15:00	38
2009-03-19	23:16:00	13
2009-03-19	23:17:00	0
2009-03-19	23:18:00	0
2009-03-19	23:19:00	0
2009-03-19	23:20:00	51
2009-03-19	23:21:00	197
2009-03-19	23:22:00	0
2009-03-19	23:23:00	0
2009-03-19	23:24:00	0
2009-03-19	23:25:00	0
2009-03-19	23:26:00	0
2009-03-19	23:27:00	0
2009-03-19	23:28:00	0
2009-03-19	23:29:00	0
2009-03-19	23:30:00	0
2009-03-19	23:31:00	0
2009-03-19	23:32:00	0
2009-03-19	23:33:00	0
2009-03-19	23:34:00	0
2009-03-19	23:35:00	0
2009-03-19	23:36:00	0
2009-03-19	23:37:00	0
2009-03-19	23:38:00	0
2009-03-19	23:39:00	0
2009-03-19	23:40:00	0
2009-03-19	23:41:00	0
2009-03-19	23:42:00	0
2009-03-19	23:43:00	0
2009-03-19	23:44:00	0
2009-03-19	23:45:00	0
2009-03-19	23:46:00	0
2009-03-19	23:47:00	0
2009-03-19	23:48:00	0
2009-03-19	23:49:00	0
2009-03-19	23:50:00	0
2009-03-19	23:51:00	0
2009-03-19	23:52:00	0
2009-03-19	23:53:00	0
2009-03-19	23:54:00	0
2009-03-19	23:55:00	0
2009-03-19	23:56:00	0
2009-03-19	23:57:00	0
2009-03-19	23:58:00	0
2009-03-19	23:59:00	0
2009-03-20	00:00:00	0
2009-03-20	00:01:00	0
2009-03-20	00:02:00	0
2009-03-20	00:03:00	0
2009-03-20	00:04:00	0
2009-03-20	00:05:00	0
2009-03-20	00:06:00	0
2009-03-20	00:07:00	0
2009-03-20	00:08:00	0
2009-03-20	00:09:00	0
2009-03-20	00:10:00	0
2009-03-20	00:11:00	0
2009-03-20	00:12:00	0
2009-03-20	00:13:00	0
2009-03-20	00:14:00	0
2009-03-20	00:15:00	0
2009-03-20	00:16:00	0
2009-03-20	00:17:00	0
2009-03-20	00:18:00	0
2009-03-20	00:19:00	0
2009-03-20	00:20:00	0
2009-03-20	00:21:00	0
2009-03-20	00:22:00	0
2009-03-20	00:23:00	0
2009-03-20	00:24:00	0
2009-03-20	00:25:00	0
2009-03-20	00:26:00	0
2009-03-20	00:27:00	0
2009-03-20	00:28:00	0
2009-03-20	00:29:00	0
2009-03-20	00:30:00	0
2009-03-20	00:31:00	0
2009-03-20	00:32:00	0
2009-03-20	00:33:00	0
2009-03-20	00:34:00	0
2009-03-20	00:35:00	0
2009-03-20	00:36:00	0
2009-03-20	00:37:00	0
2009-03-20	00:38:00	0
2009-03-20	00:39:00	0
2009-03-20	00:40:00	0
2009-03-20	00:41:00	0
2009-03-20	00:42:00	0
2009-03-20	00:43:00	0
2009-03-20	00:44:00	0
2009-03-20	00:45:00	0
2009-03-20	00:46:00	0
2009-03-20	00:47:00	0
2009-03-20	00:48:00	0
2009-03-20	00:49:00	0
2009-03-20	00:50:00	0
2009-03-20	00:51:00	0
2009-03-20	00:52:00	0
2009-03-20	00:53:00	0
2009-03-20	00:54:00	0
2009-03-20	00:55:00	0
2009-03-20	00:56:00	0
2009-03-20	00:57:00	0
2009-03-20	00:58:00	0
2009-03-20	00:59:00	0
2009-03-20	01:00:00	0
2009-03-20	01:01:00	0
2009-03-20	01:02:00	0
2009-03-20	01:03:00	0
2009-03-20	01:04:00	0
2009-03-20	01:05:00	0
2009-03-20	01:06:00	0
2009-03-20	01:07:00	0
2009-03-20	01:08:00	26
2009-03-20	01:09:00	0
2009-03-20	01:10:00	13
2009-03-20	01:11:00	13
2009-03-20	01:12:00	26
2009-03-20	01:13:00	51
2009-03-20	01:14:00	0
2009-03-20	01:15:00	13
2009-03-20	01:16:00	0
2009-03-20	01:17:00	0
2009-03-20	01:18:00	0
2009-03-20	01:19:00	0
2009-03-20	01:20:00	0
2009-03-20	01:21:00	0
2009-03-20	01:22:00	0
2009-03-20	01:23:00	0
2009-03-20	01:24:00	0
2009-03-20	01:25:00	0
2009-03-20	01:26:00	0
2009-03-20	01:27:00	0
2009-03-20	01:28:00	0
2009-03-20	01:29:00	0
2009-03-20	01:30:00	13
2009-03-20	01:31:00	0
2009-03-20	01:32:00	0
2009-03-20	01:33:00	0
2009-03-20	01:34:00	0
2009-03-20	01:35:00	0
2009-03-20	01:36:00	0
2009-03-20	01:37:00	0
2009-03-20	01:38:00	51
2009-03-20	01:39:00	13
2009-03-20	01:40:00	0
2009-03-20	01:41:00	0
2009-03-20	01:42:00	0
2009-03-20	01:43:00	0
2009-03-20	01:44:00	0
2009-03-20	01:45:00	0
2009-03-20	01:46:00	0
2009-03-20	01:47:00	0
2009-03-20	01:48:00	0
2009-03-20	01:49:00	0
2009-03-20	01:50:00	0
2009-03-20	01:51:00	0
2009-03-20	01:52:00	0
2009-03-20	01:53:00	0
2009-03-20	01:54:00	0
2009-03-20	01:55:00	0
2009-03-20	01:56:00	0
2009-03-20	01:57:00	0
2009-03-20	01:58:00	0
2009-03-20	01:59:00	77
2009-03-20	02:00:00	0
2009-03-20	02:01:00	0
2009-03-20	02:02:00	0
2009-03-20	02:03:00	0
2009-03-20	02:04:00	0
2009-03-20	02:05:00	0
2009-03-20	02:06:00	0
2009-03-20	02:07:00	0
2009-03-20	02:08:00	0
2009-03-20	02:09:00	0
2009-03-20	02:10:00	0
2009-03-20	02:11:00	0
2009-03-20	02:12:00	0
2009-03-20	02:13:00	0
2009-03-20	02:14:00	0
2009-03-20	02:15:00	0
2009-03-20	02:16:00	0
2009-03-20	02:17:00	0
2009-03-20	02:18:00	0
2009-03-20	02:19:00	0
2009-03-20	02:20:00	0
2009-03-20	02:21:00	0
2009-03-20	02:22:00	0
2009-03-20	02:23:00	0
2009-03-20	02:24:00	0
2009-03-20	02:25:00	0
2009-03-20	02:26:00	0
2009-03-20	02:27:00	0
2009-03-20	02:28:00	0
2009-03-20	02:29:00	0
2009-03-20	02:30:00	51
2009-03-20	02:31:00	0
2009-03-20	02:32:00	0
2009-03-20	02:33:00	0
2009-03-20	02:34:00	0
2009-03-20	02:35:00	0
2009-03-20	02:36:00	0
2009-03-20	02:37:00	0
2009-03-20	02:38:00	0
2009-03-20	02:39:00	0
2009-03-20	02:40:00	0
2009-03-20	02:41:00	0
2009-03-20	02:42:00	0
2009-03-20	02:43:00	0
2009-03-20	02:44:00	0
2009-03-20	02:45:00	0
2009-03-20	02:46:00	0
2009-03-20	02:47:00	0
2009-03-20	02:48:00	0
2009-03-20	02:49:00	0
2009-03-20	02:50:00	0
2009-03-20	02:51:00	0
2009-03-20	02:52:00	0
2009-03-20	02:53:00	0
2009-03-20	02:54:00	0
2009-03-20	02:55:00	26
2009-03-20	02:56:00	0
2009-03-20	02:57:00	0
2009-03-20	02:58:00	0
2009-03-20	02:59:00	0
2009-03-20	03:00:00	0
2009-03-20	03:01:00	0
2009-03-20	03:02:00	0
2009-03-20	03:03:00	0
2009-03-20	03:04:00	0
2009-03-20	03:05:00	0
2009-03-20	03:06:00	0
2009-03-20	03:07:00	0
2009-03-20	03:08:00	0
2009-03-20	03:09:00	0
2009-03-20	03:10:00	0
2009-03-20	03:11:00	0
2009-03-20	03:12:00	0
2009-03-20	03:13:00	0
2009-03-20	03:14:00	0
2009-03-20	03:15:00	0
2009-03-20	03:16:00	0
2009-03-20	03:17:00	0
2009-03-20	03:18:00	0
2009-03-20	03:19:00	0
2009-03-20	03:20:00	0
2009-03-20	03:21:00	0
2009-03-20	03:22:00	0
2009-03-20	03:23:00	0
2009-03-20	03:24:00	0
2009-03-20	03:25:00	0
2009-03-20	03:26:00	0
2009-03-20	03:27:00	0
2009-03-20	03:28:00	0
2009-03-20	03:29:00	0
2009-03-20	03:30:00	0
2009-03-20	03:31:00	0
2009-03-20	03:32:00	0
2009-03-20	03:33:00	0
2009-03-20	03:34:00	0
2009-03-20	03:35:00	0
2009-03-20	03:36:00	0
2009-03-20	03:37:00	0
2009-03-20	03:38:00	0
2009-03-20	03:39:00	0
2009-03-20	03:40:00	0
2009-03-20	03:41:00	0
2009-03-20	03:42:00	0
2009-03-20	03:43:00	0
2009-03-20	03:44:00	0
2009-03-20	03:45:00	0
2009-03-20	03:46:00	0
2009-03-20	03:47:00	0
2009-03-20	03:48:00	0
2009-03-20	03:49:00	0
2009-03-20	03:50:00	0
2009-03-20	03:51:00	0
2009-03-20	03:52:00	0
2009-03-20	03:53:00	0
2009-03-20	03:54:00	0
2009-03-20	03:55:00	0
2009-03-20	03:56:00	0
2009-03-20	03:57:00	0
2009-03-20	03:58:00	0
2009-03-20	03:59:00	0
2009-03-20	04:00:00	0
2009-03-20	04:01:00	0
2009-03-20	04:02:00	0
2009-03-20	04:03:00	0
2009-03-20	04:04:00	0
2009-03-20	04:05:00	0
2009-03-20	04:06:00	0
2009-03-20	04:07:00	0
2009-03-20	04:08:00	0
2009-03-20	04:09:00	0
2009-03-20	04:10:00	0
2009-03-20	04:11:00	0
2009-03-20	04:12:00	0
2009-03-20	04:13:00	13
2009-03-20	04:14:00	0
2009-03-20	04:15:00	0
2009-03-20	04:16:00	0
2009-03-20	04:17:00	0
2009-03-20	04:18:00	0
2009-03-20	04:19:00	0
2009-03-20	04:20:00	0
2009-03-20	04:21:00	0
2009-03-20	04:22:00	0
2009-03-20	04:23:00	0
2009-03-20	04:24:00	0
2009-03-20	04:25:00	13
2009-03-20	04:26:00	0
2009-03-20	04:27:00	0
2009-03-20	04:28:00	0
2009-03-20	04:29:00	0
2009-03-20	04:30:00	0
2009-03-20	04:31:00	0
2009-03-20	04:32:00	0
2009-03-20	04:33:00	0
2009-03-20	04:34:00	0
2009-03-20	04:35:00	0
2009-03-20	04:36:00	0
2009-03-20	04:37:00	0
2009-03-20	04:38:00	0
2009-03-20	04:39:00	0
2009-03-20	04:40:00	0
2009-03-20	04:41:00	0
2009-03-20	04:42:00	26
2009-03-20	04:43:00	0
2009-03-20	04:44:00	0
2009-03-20	04:45:00	0
2009-03-20	04:46:00	0
2009-03-20	04:47:00	13
2009-03-20	04:48:00	0
2009-03-20	04:49:00	115
2009-03-20	04:50:00	243
2009-03-20	04:51:00	90
2009-03-20	04:52:00	38
2009-03-20	04:53:00	0
2009-03-20	04:54:00	0
2009-03-20	04:55:00	13
2009-03-20	04:56:00	0
2009-03-20	04:57:00	0
2009-03-20	04:58:00	0
2009-03-20	04:59:00	13
2009-03-20	05:00:00	0
2009-03-20	05:01:00	0
2009-03-20	05:02:00	0
2009-03-20	05:03:00	0
2009-03-20	05:04:00	13
2009-03-20	05:05:00	0
2009-03-20	05:06:00	0
2009-03-20	05:07:00	0
2009-03-20	05:08:00	0
2009-03-20	05:09:00	0
2009-03-20	05:10:00	0
2009-03-20	05:11:00	0
2009-03-20	05:12:00	13
2009-03-20	05:13:00	13
2009-03-20	05:14:00	0
2009-03-20	05:15:00	0
2009-03-20	05:16:00	0
2009-03-20	05:17:00	0
2009-03-20	05:18:00	0
2009-03-20	05:19:00	0
2009-03-20	05:20:00	0
2009-03-20	05:21:00	0
2009-03-20	05:22:00	0
2009-03-20	05:23:00	0
2009-03-20	05:24:00	0
2009-03-20	05:25:00	13
2009-03-20	05:26:00	0
2009-03-20	05:27:00	0
2009-03-20	05:28:00	0
2009-03-20	05:29:00	0
2009-03-20	05:30:00	0
2009-03-20	05:31:00	0
2009-03-20	05:32:00	0
2009-03-20	05:33:00	0
2009-03-20	05:34:00	0
2009-03-20	05:35:00	0
2009-03-20	05:36:00	0
2009-03-20	05:37:00	0
2009-03-20	05:38:00	0
2009-03-20	05:39:00	0
2009-03-20	05:40:00	0
2009-03-20	05:41:00	0
2009-03-20	05:42:00	26
2009-03-20	05:43:00	0
2009-03-20	05:44:00	0
2009-03-20	05:45:00	13
2009-03-20	05:46:00	0
2009-03-20	05:47:00	0
2009-03-20	05:48:00	0
2009-03-20	05:49:00	13
2009-03-20	05:50:00	141
2009-03-20	05:51:00	0
2009-03-20	05:52:00	0
2009-03-20	05:53:00	0
2009-03-20	05:54:00	0
2009-03-20	05:55:00	0
2009-03-20	05:56:00	0
2009-03-20	05:57:00	0
2009-03-20	05:58:00	0
2009-03-20	05:59:00	0
2009-03-20	06:00:00	0
2009-03-20	06:01:00	0
2009-03-20	06:02:00	0
2009-03-20	06:03:00	0
2009-03-20	06:04:00	0
2009-03-20	06:05:00	0
2009-03-20	06:06:00	0
2009-03-20	06:07:00	0
2009-03-20	06:08:00	0
2009-03-20	06:09:00	0
2009-03-20	06:10:00	0
2009-03-20	06:11:00	13
2009-03-20	06:12:00	0
2009-03-20	06:13:00	0
2009-03-20	06:14:00	0
2009-03-20	06:15:00	0
2009-03-20	06:16:00	0
2009-03-20	06:17:00	0
2009-03-20	06:18:00	0
2009-03-20	06:19:00	0
2009-03-20	06:20:00	0
2009-03-20	06:21:00	0
2009-03-20	06:22:00	26
2009-03-20	06:23:00	51
2009-03-20	06:24:00	26
2009-03-20	06:25:00	259
2009-03-20	06:26:00	182
2009-03-20	06:27:00	212
2009-03-20	06:28:00	26
2009-03-20	06:29:00	182
2009-03-20	06:30:00	154
2009-03-20	06:31:00	407
2009-03-20	06:32:00	425
2009-03-20	06:33:00	538
2009-03-20	06:34:00	579
2009-03-20	06:35:00	212
2009-03-20	06:36:00	166
2009-03-20	06:37:00	228
2009-03-20	06:38:00	154
2009-03-20	06:39:00	128
2009-03-20	06:40:00	182
2009-03-20	06:41:00	26
2009-03-20	06:42:00	115
2009-03-20	06:43:00	538
2009-03-20	06:44:00	425
2009-03-20	06:45:00	166
2009-03-20	06:46:00	228
2009-03-20	06:47:00	335
2009-03-20	06:48:00	51
2009-03-20	06:49:00	13
2009-03-20	06:50:00	538
2009-03-20	06:51:00	64
2009-03-20	06:52:00	371
2009-03-20	06:53:00	128
2009-03-20	06:54:00	197
2009-03-20	06:55:00	0
2009-03-20	06:56:00	0
2009-03-20	06:57:00	0
2009-03-20	06:58:00	0
2009-03-20	06:59:00	0
2009-03-20	07:00:00	0
2009-03-20	07:01:00	90
2009-03-20	07:02:00	77
2009-03-20	07:03:00	0
2009-03-20	07:04:00	13
2009-03-20	07:05:00	0
2009-03-20	07:06:00	0
2009-03-20	07:07:00	0
2009-03-20	07:08:00	0
2009-03-20	07:09:00	13
2009-03-20	07:10:00	0
2009-03-20	07:11:00	0
2009-03-20	07:12:00	0
2009-03-20	07:13:00	102
2009-03-20	07:14:00	461
2009-03-20	07:15:00	0
2009-03-20	07:16:00	51
2009-03-20	07:17:00	154
2009-03-20	07:18:00	141
2009-03-20	07:19:00	0
2009-03-20	07:20:00	0
2009-03-20	07:21:00	0
2009-03-20	07:22:00	0
2009-03-20	07:23:00	182
2009-03-20	07:24:00	212
2009-03-20	07:25:00	289
2009-03-20	07:26:00	0
2009-03-20	07:27:00	13
2009-03-20	07:28:00	13
2009-03-20	07:29:00	166
2009-03-20	07:30:00	212
2009-03-20	07:31:00	115
2009-03-20	07:32:00	13
2009-03-20	07:33:00	154
2009-03-20	07:34:00	389
2009-03-20	07:35:00	182
2009-03-20	07:36:00	182
2009-03-20	07:37:00	154
2009-03-20	07:38:00	243
2009-03-20	07:39:00	166
2009-03-20	07:40:00	64
2009-03-20	07:41:00	0
2009-03-20	07:42:00	0
2009-03-20	07:43:00	0
2009-03-20	07:44:00	0
2009-03-20	07:45:00	243
2009-03-20	07:46:00	115
2009-03-20	07:47:00	38
2009-03-20	07:48:00	141
2009-03-20	07:49:00	0
2009-03-20	07:50:00	0
2009-03-20	07:51:00	0
2009-03-20	07:52:00	0
2009-03-20	07:53:00	0
2009-03-20	07:54:00	0
2009-03-20	07:55:00	0
2009-03-20	07:56:00	0
2009-03-20	07:57:00	0
2009-03-20	07:58:00	0
2009-03-20	07:59:00	0
2009-03-20	08:00:00	0
2009-03-20	08:01:00	0
2009-03-20	08:02:00	0
2009-03-20	08:03:00	0
2009-03-20	08:04:00	0
2009-03-20	08:05:00	0
2009-03-20	08:06:00	0
2009-03-20	08:07:00	0
2009-03-20	08:08:00	0
2009-03-20	08:09:00	0
2009-03-20	08:10:00	0
2009-03-20	08:11:00	0
2009-03-20	08:12:00	0
2009-03-20	08:13:00	0
2009-03-20	08:14:00	0
2009-03-20	08:15:00	0
2009-03-20	08:16:00	0
2009-03-20	08:17:00	0
2009-03-20	08:18:00	0
2009-03-20	08:19:00	0
2009-03-20	08:20:00	0
2009-03-20	08:21:00	0
2009-03-20	08:22:00	0
2009-03-20	08:23:00	0
2009-03-20	08:24:00	0
2009-03-20	08:25:00	0
2009-03-20	08:26:00	0
2009-03-20	08:27:00	0
2009-03-20	08:28:00	0
2009-03-20	08:29:00	0
2009-03-20	08:30:00	0
2009-03-20	08:31:00	0
2009-03-20	08:32:00	0
2009-03-20	08:33:00	0
2009-03-20	08:34:00	0
2009-03-20	08:35:00	0
2009-03-20	08:36:00	0
2009-03-20	08:37:00	0
2009-03-20	08:38:00	102
2009-03-20	08:39:00	115
2009-03-20	08:40:00	0
2009-03-20	08:41:00	0
2009-03-20	08:42:00	0
2009-03-20	08:43:00	0
2009-03-20	08:44:00	0
2009-03-20	08:45:00	0
2009-03-20	08:46:00	0
2009-03-20	08:47:00	64
2009-03-20	08:48:00	0
2009-03-20	08:49:00	26
2009-03-20	08:50:00	13
2009-03-20	08:51:00	0
2009-03-20	08:52:00	0
2009-03-20	08:53:00	0
2009-03-20	08:54:00	0
2009-03-20	08:55:00	0
2009-03-20	08:56:00	212
2009-03-20	08:57:00	461
2009-03-20	08:58:00	684
2009-03-20	08:59:00	274
2009-03-20	09:00:00	64
2009-03-20	09:01:00	684
2009-03-20	09:02:00	579
2009-03-20	09:03:00	243
2009-03-20	09:04:00	305
2009-03-20	09:05:00	141
2009-03-20	09:06:00	128
2009-03-20	09:07:00	0
2009-03-20	09:08:00	0
[truncated: 19,611 more rows]

## Sheet: 4.2.09
Actogram, Copy Raw Data, All Days
Identity:	Kitty Reiser
Filename:	E:\Active Research Files\meloxicam titre canine\cases\kitty\Kitty Reiser 4.2.09.AWC
Gender:	F
Age:	7
Height:	61.0 cm	24.0 in
Weight:	20.4 kg	45.0 lbs
Start Date:	02-Apr-2009 (Thu)
Start Time:	18:00:00
Interval:	1.00 mins
Date Stamp:	Time Stamp:	Activity Data:	Marker Press:
2009-04-02	00:00:00	0
2009-04-02	00:01:00	0
2009-04-02	00:02:00	0
2009-04-02	00:03:00	0
2009-04-02	00:04:00	0
2009-04-02	00:05:00	0
2009-04-02	00:06:00	0
2009-04-02	00:07:00	0
2009-04-02	00:08:00	0
2009-04-02	00:09:00	0
2009-04-02	00:10:00	0
2009-04-02	00:11:00	0
2009-04-02	00:12:00	0
2009-04-02	00:13:00	0
2009-04-02	00:14:00	0
2009-04-02	00:15:00	0
2009-04-02	00:16:00	0
2009-04-02	00:17:00	0
2009-04-02	00:18:00	0
2009-04-02	00:19:00	0
2009-04-02	00:20:00	0
2009-04-02	00:21:00	0
2009-04-02	00:22:00	0
2009-04-02	00:23:00	0
2009-04-02	00:24:00	0
2009-04-02	00:25:00	0
2009-04-02	00:26:00	0
2009-04-02	00:27:00	0
2009-04-02	00:28:00	0
2009-04-02	00:29:00	0
2009-04-02	00:30:00	0
2009-04-02	00:31:00	0
2009-04-02	00:32:00	0
2009-04-02	00:33:00	0
2009-04-02	00:34:00	0
2009-04-02	00:35:00	0
2009-04-02	00:36:00	0
2009-04-02	00:37:00	0
2009-04-02	00:38:00	0
2009-04-02	00:39:00	0
2009-04-02	00:40:00	0
2009-04-02	00:41:00	0
2009-04-02	00:42:00	0
2009-04-02	00:43:00	0
2009-04-02	00:44:00	0
2009-04-02	00:45:00	0
2009-04-02	00:46:00	0
2009-04-02	00:47:00	0
2009-04-02	00:48:00	0
2009-04-02	00:49:00	0
2009-04-02	00:50:00	0
2009-04-02	00:51:00	0
2009-04-02	00:52:00	0
2009-04-02	00:53:00	0
2009-04-02	00:54:00	0
2009-04-02	00:55:00	0
2009-04-02	00:56:00	0
2009-04-02	00:57:00	0
2009-04-02	00:58:00	0
2009-04-02	00:59:00	0
2009-04-02	01:00:00	0
2009-04-02	01:01:00	0
2009-04-02	01:02:00	0
2009-04-02	01:03:00	0
2009-04-02	01:04:00	0
2009-04-02	01:05:00	0
2009-04-02	01:06:00	0
2009-04-02	01:07:00	0
2009-04-02	01:08:00	0
2009-04-02	01:09:00	0
2009-04-02	01:10:00	0
2009-04-02	01:11:00	0
2009-04-02	01:12:00	0
2009-04-02	01:13:00	0
2009-04-02	01:14:00	0
2009-04-02	01:15:00	0
2009-04-02	01:16:00	0
2009-04-02	01:17:00	0
2009-04-02	01:18:00	0
2009-04-02	01:19:00	0
2009-04-02	01:20:00	0
2009-04-02	01:21:00	0
2009-04-02	01:22:00	0
2009-04-02	01:23:00	0
2009-04-02	01:24:00	0
2009-04-02	01:25:00	0
2009-04-02	01:26:00	0
2009-04-02	01:27:00	0
2009-04-02	01:28:00	0
2009-04-02	01:29:00	0
2009-04-02	01:30:00	0
2009-04-02	01:31:00	0
2009-04-02	01:32:00	0
2009-04-02	01:33:00	0
2009-04-02	01:34:00	0
2009-04-02	01:35:00	0
2009-04-02	01:36:00	0
2009-04-02	01:37:00	0
2009-04-02	01:38:00	0
2009-04-02	01:39:00	0
2009-04-02	01:40:00	0
2009-04-02	01:41:00	0
2009-04-02	01:42:00	0
2009-04-02	01:43:00	0
2009-04-02	01:44:00	0
2009-04-02	01:45:00	0
2009-04-02	01:46:00	0
2009-04-02	01:47:00	0
2009-04-02	01:48:00	0
2009-04-02	01:49:00	0
2009-04-02	01:50:00	0
2009-04-02	01:51:00	0
2009-04-02	01:52:00	0
2009-04-02	01:53:00	0
2009-04-02	01:54:00	0
2009-04-02	01:55:00	0
2009-04-02	01:56:00	0
2009-04-02	01:57:00	0
2009-04-02	01:58:00	0
2009-04-02	01:59:00	0
2009-04-02	02:00:00	0
2009-04-02	02:01:00	0
2009-04-02	02:02:00	0
2009-04-02	02:03:00	0
2009-04-02	02:04:00	0
2009-04-02	02:05:00	0
2009-04-02	02:06:00	0
2009-04-02	02:07:00	0
2009-04-02	02:08:00	0
2009-04-02	02:09:00	0
2009-04-02	02:10:00	0
2009-04-02	02:11:00	0
2009-04-02	02:12:00	0
2009-04-02	02:13:00	0
2009-04-02	02:14:00	0
2009-04-02	02:15:00	0
2009-04-02	02:16:00	0
2009-04-02	02:17:00	0
2009-04-02	02:18:00	0
2009-04-02	02:19:00	0
2009-04-02	02:20:00	0
2009-04-02	02:21:00	0
2009-04-02	02:22:00	0
2009-04-02	02:23:00	0
2009-04-02	02:24:00	0
2009-04-02	02:25:00	0
2009-04-02	02:26:00	0
2009-04-02	02:27:00	0
2009-04-02	02:28:00	0
2009-04-02	02:29:00	0
2009-04-02	02:30:00	0
2009-04-02	02:31:00	0
2009-04-02	02:32:00	0
2009-04-02	02:33:00	0
2009-04-02	02:34:00	0
2009-04-02	02:35:00	0
2009-04-02	02:36:00	0
2009-04-02	02:37:00	0
2009-04-02	02:38:00	0
2009-04-02	02:39:00	0
2009-04-02	02:40:00	0
2009-04-02	02:41:00	0
2009-04-02	02:42:00	0
2009-04-02	02:43:00	0
2009-04-02	02:44:00	0
2009-04-02	02:45:00	0
2009-04-02	02:46:00	0
2009-04-02	02:47:00	0
2009-04-02	02:48:00	0
2009-04-02	02:49:00	0
2009-04-02	02:50:00	0
2009-04-02	02:51:00	0
2009-04-02	02:52:00	0
2009-04-02	02:53:00	0
2009-04-02	02:54:00	0
2009-04-02	02:55:00	0
2009-04-02	02:56:00	0
2009-04-02	02:57:00	0
2009-04-02	02:58:00	0
2009-04-02	02:59:00	0
2009-04-02	03:00:00	0
2009-04-02	03:01:00	0
2009-04-02	03:02:00	0
2009-04-02	03:03:00	0
2009-04-02	03:04:00	0
2009-04-02	03:05:00	0
2009-04-02	03:06:00	0
2009-04-02	03:07:00	0
2009-04-02	03:08:00	0
2009-04-02	03:09:00	0
2009-04-02	03:10:00	0
2009-04-02	03:11:00	0
2009-04-02	03:12:00	0
2009-04-02	03:13:00	0
2009-04-02	03:14:00	0
2009-04-02	03:15:00	0
2009-04-02	03:16:00	0
2009-04-02	03:17:00	0
2009-04-02	03:18:00	0
2009-04-02	03:19:00	0
2009-04-02	03:20:00	0
2009-04-02	03:21:00	0
2009-04-02	03:22:00	0
2009-04-02	03:23:00	0
2009-04-02	03:24:00	0
2009-04-02	03:25:00	0
2009-04-02	03:26:00	0
2009-04-02	03:27:00	0
2009-04-02	03:28:00	0
2009-04-02	03:29:00	0
2009-04-02	03:30:00	0
2009-04-02	03:31:00	0
2009-04-02	03:32:00	0
2009-04-02	03:33:00	0
2009-04-02	03:34:00	0
2009-04-02	03:35:00	0
2009-04-02	03:36:00	0
2009-04-02	03:37:00	0
2009-04-02	03:38:00	0
2009-04-02	03:39:00	0
2009-04-02	03:40:00	0
2009-04-02	03:41:00	0
2009-04-02	03:42:00	0
2009-04-02	03:43:00	0
2009-04-02	03:44:00	0
2009-04-02	03:45:00	0
2009-04-02	03:46:00	0
2009-04-02	03:47:00	0
2009-04-02	03:48:00	0
2009-04-02	03:49:00	0
2009-04-02	03:50:00	0
2009-04-02	03:51:00	0
2009-04-02	03:52:00	0
2009-04-02	03:53:00	0
2009-04-02	03:54:00	0
2009-04-02	03:55:00	0
2009-04-02	03:56:00	0
2009-04-02	03:57:00	0
2009-04-02	03:58:00	0
2009-04-02	03:59:00	0
2009-04-02	04:00:00	0
2009-04-02	04:01:00	0
2009-04-02	04:02:00	0
2009-04-02	04:03:00	0
2009-04-02	04:04:00	0
2009-04-02	04:05:00	0
2009-04-02	04:06:00	0
2009-04-02	04:07:00	0
2009-04-02	04:08:00	0
2009-04-02	04:09:00	0
2009-04-02	04:10:00	0
2009-04-02	04:11:00	0
2009-04-02	04:12:00	0
2009-04-02	04:13:00	0
2009-04-02	04:14:00	0
2009-04-02	04:15:00	0
2009-04-02	04:16:00	0
2009-04-02	04:17:00	0
2009-04-02	04:18:00	0
2009-04-02	04:19:00	0
2009-04-02	04:20:00	0
2009-04-02	04:21:00	0
2009-04-02	04:22:00	0
2009-04-02	04:23:00	0
2009-04-02	04:24:00	0
2009-04-02	04:25:00	0
2009-04-02	04:26:00	0
2009-04-02	04:27:00	0
2009-04-02	04:28:00	0
2009-04-02	04:29:00	0
2009-04-02	04:30:00	0
2009-04-02	04:31:00	0
2009-04-02	04:32:00	0
2009-04-02	04:33:00	0
2009-04-02	04:34:00	0
2009-04-02	04:35:00	0
2009-04-02	04:36:00	0
2009-04-02	04:37:00	0
2009-04-02	04:38:00	0
2009-04-02	04:39:00	0
2009-04-02	04:40:00	0
2009-04-02	04:41:00	0
2009-04-02	04:42:00	0
2009-04-02	04:43:00	0
2009-04-02	04:44:00	0
2009-04-02	04:45:00	0
2009-04-02	04:46:00	0
2009-04-02	04:47:00	0
2009-04-02	04:48:00	0
2009-04-02	04:49:00	0
2009-04-02	04:50:00	0
2009-04-02	04:51:00	0
2009-04-02	04:52:00	0
2009-04-02	04:53:00	0
2009-04-02	04:54:00	0
2009-04-02	04:55:00	0
2009-04-02	04:56:00	0
2009-04-02	04:57:00	0
2009-04-02	04:58:00	0
2009-04-02	04:59:00	0
2009-04-02	05:00:00	0
2009-04-02	05:01:00	0
2009-04-02	05:02:00	0
2009-04-02	05:03:00	0
2009-04-02	05:04:00	0
2009-04-02	05:05:00	0
2009-04-02	05:06:00	0
2009-04-02	05:07:00	0
2009-04-02	05:08:00	0
2009-04-02	05:09:00	0
2009-04-02	05:10:00	0
2009-04-02	05:11:00	0
2009-04-02	05:12:00	0
2009-04-02	05:13:00	0
2009-04-02	05:14:00	0
2009-04-02	05:15:00	0
2009-04-02	05:16:00	0
2009-04-02	05:17:00	0
2009-04-02	05:18:00	0
2009-04-02	05:19:00	0
2009-04-02	05:20:00	0
2009-04-02	05:21:00	0
2009-04-02	05:22:00	0
2009-04-02	05:23:00	0
2009-04-02	05:24:00	0
2009-04-02	05:25:00	0
2009-04-02	05:26:00	0
2009-04-02	05:27:00	0
2009-04-02	05:28:00	0
2009-04-02	05:29:00	0
2009-04-02	05:30:00	0
2009-04-02	05:31:00	0
2009-04-02	05:32:00	0
2009-04-02	05:33:00	0
2009-04-02	05:34:00	0
2009-04-02	05:35:00	0
2009-04-02	05:36:00	0
2009-04-02	05:37:00	0
2009-04-02	05:38:00	0
2009-04-02	05:39:00	0
2009-04-02	05:40:00	0
2009-04-02	05:41:00	0
2009-04-02	05:42:00	0
2009-04-02	05:43:00	0
2009-04-02	05:44:00	0
2009-04-02	05:45:00	0
2009-04-02	05:46:00	0
2009-04-02	05:47:00	0
2009-04-02	05:48:00	0
2009-04-02	05:49:00	0
2009-04-02	05:50:00	0
2009-04-02	05:51:00	0
2009-04-02	05:52:00	0
2009-04-02	05:53:00	0
2009-04-02	05:54:00	0
2009-04-02	05:55:00	0
2009-04-02	05:56:00	0
2009-04-02	05:57:00	0
2009-04-02	05:58:00	0
2009-04-02	05:59:00	0
2009-04-02	06:00:00	0
2009-04-02	06:01:00	0
2009-04-02	06:02:00	0
2009-04-02	06:03:00	0
2009-04-02	06:04:00	0
2009-04-02	06:05:00	0
2009-04-02	06:06:00	0
2009-04-02	06:07:00	0
2009-04-02	06:08:00	0
2009-04-02	06:09:00	0
2009-04-02	06:10:00	0
2009-04-02	06:11:00	0
2009-04-02	06:12:00	0
2009-04-02	06:13:00	0
2009-04-02	06:14:00	0
2009-04-02	06:15:00	0
2009-04-02	06:16:00	0
2009-04-02	06:17:00	0
2009-04-02	06:18:00	0
2009-04-02	06:19:00	0
2009-04-02	06:20:00	0
2009-04-02	06:21:00	0
2009-04-02	06:22:00	0
2009-04-02	06:23:00	0
2009-04-02	06:24:00	0
2009-04-02	06:25:00	0
2009-04-02	06:26:00	0
2009-04-02	06:27:00	0
2009-04-02	06:28:00	0
2009-04-02	06:29:00	0
2009-04-02	06:30:00	0
2009-04-02	06:31:00	0
2009-04-02	06:32:00	0
2009-04-02	06:33:00	0
2009-04-02	06:34:00	0
2009-04-02	06:35:00	0
2009-04-02	06:36:00	0
2009-04-02	06:37:00	0
2009-04-02	06:38:00	0
2009-04-02	06:39:00	0
2009-04-02	06:40:00	0
2009-04-02	06:41:00	0
2009-04-02	06:42:00	0
2009-04-02	06:43:00	0
2009-04-02	06:44:00	0
2009-04-02	06:45:00	0
2009-04-02	06:46:00	0
2009-04-02	06:47:00	0
2009-04-02	06:48:00	0
2009-04-02	06:49:00	0
2009-04-02	06:50:00	0
2009-04-02	06:51:00	0
2009-04-02	06:52:00	0
2009-04-02	06:53:00	0
2009-04-02	06:54:00	0
2009-04-02	06:55:00	0
2009-04-02	06:56:00	0
2009-04-02	06:57:00	0
2009-04-02	06:58:00	0
2009-04-02	06:59:00	0
2009-04-02	07:00:00	0
2009-04-02	07:01:00	0
2009-04-02	07:02:00	0
2009-04-02	07:03:00	0
2009-04-02	07:04:00	0
2009-04-02	07:05:00	0
2009-04-02	07:06:00	0
2009-04-02	07:07:00	0
2009-04-02	07:08:00	0
2009-04-02	07:09:00	0
2009-04-02	07:10:00	0
2009-04-02	07:11:00	0
2009-04-02	07:12:00	0
2009-04-02	07:13:00	0
2009-04-02	07:14:00	0
2009-04-02	07:15:00	0
2009-04-02	07:16:00	0
2009-04-02	07:17:00	0
2009-04-02	07:18:00	0
2009-04-02	07:19:00	0
2009-04-02	07:20:00	0
2009-04-02	07:21:00	0
2009-04-02	07:22:00	0
2009-04-02	07:23:00	0
2009-04-02	07:24:00	0
2009-04-02	07:25:00	0
2009-04-02	07:26:00	0
2009-04-02	07:27:00	0
2009-04-02	07:28:00	0
2009-04-02	07:29:00	0
2009-04-02	07:30:00	0
2009-04-02	07:31:00	0
2009-04-02	07:32:00	0
2009-04-02	07:33:00	0
2009-04-02	07:34:00	0
2009-04-02	07:35:00	0
2009-04-02	07:36:00	0
2009-04-02	07:37:00	0
2009-04-02	07:38:00	0
2009-04-02	07:39:00	0
2009-04-02	07:40:00	0
2009-04-02	07:41:00	0
2009-04-02	07:42:00	0
2009-04-02	07:43:00	0
2009-04-02	07:44:00	0
2009-04-02	07:45:00	0
2009-04-02	07:46:00	0
2009-04-02	07:47:00	0
2009-04-02	07:48:00	0
2009-04-02	07:49:00	0
2009-04-02	07:50:00	0
2009-04-02	07:51:00	0
2009-04-02	07:52:00	0
2009-04-02	07:53:00	0
2009-04-02	07:54:00	0
2009-04-02	07:55:00	0
2009-04-02	07:56:00	0
2009-04-02	07:57:00	0
2009-04-02	07:58:00	0
2009-04-02	07:59:00	0
2009-04-02	08:00:00	0
2009-04-02	08:01:00	0
2009-04-02	08:02:00	0
2009-04-02	08:03:00	0
2009-04-02	08:04:00	0
2009-04-02	08:05:00	0
2009-04-02	08:06:00	0
2009-04-02	08:07:00	0
2009-04-02	08:08:00	0
2009-04-02	08:09:00	0
2009-04-02	08:10:00	0
2009-04-02	08:11:00	0
2009-04-02	08:12:00	0
2009-04-02	08:13:00	0
2009-04-02	08:14:00	0
2009-04-02	08:15:00	0
2009-04-02	08:16:00	0
2009-04-02	08:17:00	0
2009-04-02	08:18:00	0
2009-04-02	08:19:00	0
2009-04-02	08:20:00	0
2009-04-02	08:21:00	0
2009-04-02	08:22:00	0
2009-04-02	08:23:00	0
2009-04-02	08:24:00	0
2009-04-02	08:25:00	0
2009-04-02	08:26:00	0
2009-04-02	08:27:00	0
2009-04-02	08:28:00	0
2009-04-02	08:29:00	0
2009-04-02	08:30:00	0
2009-04-02	08:31:00	0
2009-04-02	08:32:00	0
2009-04-02	08:33:00	0
2009-04-02	08:34:00	0
2009-04-02	08:35:00	0
2009-04-02	08:36:00	0
2009-04-02	08:37:00	0
2009-04-02	08:38:00	0
2009-04-02	08:39:00	0
2009-04-02	08:40:00	0
2009-04-02	08:41:00	0
2009-04-02	08:42:00	0
2009-04-02	08:43:00	0
2009-04-02	08:44:00	0
2009-04-02	08:45:00	0
2009-04-02	08:46:00	0
2009-04-02	08:47:00	0
2009-04-02	08:48:00	0
2009-04-02	08:49:00	0
2009-04-02	08:50:00	0
2009-04-02	08:51:00	0
2009-04-02	08:52:00	0
2009-04-02	08:53:00	0
2009-04-02	08:54:00	0
2009-04-02	08:55:00	0
2009-04-02	08:56:00	0
2009-04-02	08:57:00	0
2009-04-02	08:58:00	0
2009-04-02	08:59:00	0
2009-04-02	09:00:00	0
2009-04-02	09:01:00	0
2009-04-02	09:02:00	0
2009-04-02	09:03:00	0
2009-04-02	09:04:00	0
2009-04-02	09:05:00	0
2009-04-02	09:06:00	0
2009-04-02	09:07:00	0
2009-04-02	09:08:00	0
2009-04-02	09:09:00	0
2009-04-02	09:10:00	0
2009-04-02	09:11:00	0
2009-04-02	09:12:00	0
2009-04-02	09:13:00	0
2009-04-02	09:14:00	0
2009-04-02	09:15:00	0
2009-04-02	09:16:00	0
2009-04-02	09:17:00	0
2009-04-02	09:18:00	0
2009-04-02	09:19:00	0
2009-04-02	09:20:00	0
2009-04-02	09:21:00	0
2009-04-02	09:22:00	0
2009-04-02	09:23:00	0
2009-04-02	09:24:00	0
2009-04-02	09:25:00	0
2009-04-02	09:26:00	0
2009-04-02	09:27:00	0
2009-04-02	09:28:00	0
2009-04-02	09:29:00	0
2009-04-02	09:30:00	0
2009-04-02	09:31:00	0
2009-04-02	09:32:00	0
2009-04-02	09:33:00	0
2009-04-02	09:34:00	0
2009-04-02	09:35:00	0
2009-04-02	09:36:00	0
2009-04-02	09:37:00	0
2009-04-02	09:38:00	0
2009-04-02	09:39:00	0
2009-04-02	09:40:00	0
2009-04-02	09:41:00	0
2009-04-02	09:42:00	0
2009-04-02	09:43:00	0
2009-04-02	09:44:00	0
2009-04-02	09:45:00	0
2009-04-02	09:46:00	0
2009-04-02	09:47:00	0
2009-04-02	09:48:00	0
2009-04-02	09:49:00	0
2009-04-02	09:50:00	0
2009-04-02	09:51:00	0
2009-04-02	09:52:00	0
2009-04-02	09:53:00	0
2009-04-02	09:54:00	0
2009-04-02	09:55:00	0
2009-04-02	09:56:00	0
2009-04-02	09:57:00	0
2009-04-02	09:58:00	0
2009-04-02	09:59:00	0
2009-04-02	10:00:00	0
2009-04-02	10:01:00	0
2009-04-02	10:02:00	0
2009-04-02	10:03:00	0
2009-04-02	10:04:00	0
2009-04-02	10:05:00	0
2009-04-02	10:06:00	0
2009-04-02	10:07:00	0
2009-04-02	10:08:00	0
2009-04-02	10:09:00	0
2009-04-02	10:10:00	0
2009-04-02	10:11:00	0
2009-04-02	10:12:00	0
2009-04-02	10:13:00	0
2009-04-02	10:14:00	0
2009-04-02	10:15:00	0
2009-04-02	10:16:00	0
2009-04-02	10:17:00	0
2009-04-02	10:18:00	0
2009-04-02	10:19:00	0
2009-04-02	10:20:00	0
2009-04-02	10:21:00	0
2009-04-02	10:22:00	0
2009-04-02	10:23:00	0
2009-04-02	10:24:00	0
2009-04-02	10:25:00	0
2009-04-02	10:26:00	0
2009-04-02	10:27:00	0
2009-04-02	10:28:00	0
2009-04-02	10:29:00	0
2009-04-02	10:30:00	0
2009-04-02	10:31:00	0
2009-04-02	10:32:00	0
2009-04-02	10:33:00	0
2009-04-02	10:34:00	0
2009-04-02	10:35:00	0
2009-04-02	10:36:00	0
2009-04-02	10:37:00	0
2009-04-02	10:38:00	0
2009-04-02	10:39:00	0
2009-04-02	10:40:00	0
2009-04-02	10:41:00	0
2009-04-02	10:42:00	0
2009-04-02	10:43:00	0
2009-04-02	10:44:00	0
2009-04-02	10:45:00	0
2009-04-02	10:46:00	0
2009-04-02	10:47:00	0
2009-04-02	10:48:00	0
2009-04-02	10:49:00	0
2009-04-02	10:50:00	0
2009-04-02	10:51:00	0
2009-04-02	10:52:00	0
2009-04-02	10:53:00	0
2009-04-02	10:54:00	0
2009-04-02	10:55:00	0
2009-04-02	10:56:00	0
2009-04-02	10:57:00	0
2009-04-02	10:58:00	0
2009-04-02	10:59:00	0
2009-04-02	11:00:00	0
2009-04-02	11:01:00	0
2009-04-02	11:02:00	0
2009-04-02	11:03:00	0
2009-04-02	11:04:00	0
2009-04-02	11:05:00	0
2009-04-02	11:06:00	0
2009-04-02	11:07:00	0
2009-04-02	11:08:00	0
2009-04-02	11:09:00	0
2009-04-02	11:10:00	0
2009-04-02	11:11:00	0
2009-04-02	11:12:00	0
2009-04-02	11:13:00	0
2009-04-02	11:14:00	0
2009-04-02	11:15:00	0
2009-04-02	11:16:00	0
2009-04-02	11:17:00	0
2009-04-02	11:18:00	0
2009-04-02	11:19:00	0
2009-04-02	11:20:00	0
2009-04-02	11:21:00	0
2009-04-02	11:22:00	0
2009-04-02	11:23:00	0
2009-04-02	11:24:00	0
2009-04-02	11:25:00	0
2009-04-02	11:26:00	0
2009-04-02	11:27:00	0
2009-04-02	11:28:00	0
2009-04-02	11:29:00	0
2009-04-02	11:30:00	0
2009-04-02	11:31:00	0
2009-04-02	11:32:00	0
2009-04-02	11:33:00	0
2009-04-02	11:34:00	0
2009-04-02	11:35:00	0
2009-04-02	11:36:00	0
2009-04-02	11:37:00	0
2009-04-02	11:38:00	0
2009-04-02	11:39:00	0
2009-04-02	11:40:00	0
2009-04-02	11:41:00	0
2009-04-02	11:42:00	0
2009-04-02	11:43:00	0
2009-04-02	11:44:00	0
2009-04-02	11:45:00	0
2009-04-02	11:46:00	0
2009-04-02	11:47:00	0
2009-04-02	11:48:00	0
2009-04-02	11:49:00	0
2009-04-02	11:50:00	0
2009-04-02	11:51:00	0
2009-04-02	11:52:00	0
2009-04-02	11:53:00	0
2009-04-02	11:54:00	0
2009-04-02	11:55:00	0
2009-04-02	11:56:00	0
2009-04-02	11:57:00	0
2009-04-02	11:58:00	0
2009-04-02	11:59:00	0
2009-04-02	12:00:00	0
2009-04-02	12:01:00	0
2009-04-02	12:02:00	0
2009-04-02	12:03:00	0
2009-04-02	12:04:00	0
2009-04-02	12:05:00	0
2009-04-02	12:06:00	0
2009-04-02	12:07:00	0
2009-04-02	12:08:00	0
2009-04-02	12:09:00	0
2009-04-02	12:10:00	0
2009-04-02	12:11:00	0
2009-04-02	12:12:00	0
2009-04-02	12:13:00	0
2009-04-02	12:14:00	0
2009-04-02	12:15:00	0
2009-04-02	12:16:00	0
2009-04-02	12:17:00	0
2009-04-02	12:18:00	0
2009-04-02	12:19:00	0
2009-04-02	12:20:00	0
2009-04-02	12:21:00	0
2009-04-02	12:22:00	0
2009-04-02	12:23:00	0
2009-04-02	12:24:00	0
2009-04-02	12:25:00	0
2009-04-02	12:26:00	0
2009-04-02	12:27:00	0
2009-04-02	12:28:00	0
2009-04-02	12:29:00	0
2009-04-02	12:30:00	0
2009-04-02	12:31:00	0
2009-04-02	12:32:00	0
2009-04-02	12:33:00	0
2009-04-02	12:34:00	0
2009-04-02	12:35:00	0
2009-04-02	12:36:00	0
2009-04-02	12:37:00	0
2009-04-02	12:38:00	0
2009-04-02	12:39:00	0
2009-04-02	12:40:00	0
2009-04-02	12:41:00	0
2009-04-02	12:42:00	0
2009-04-02	12:43:00	0
2009-04-02	12:44:00	0
2009-04-02	12:45:00	0
2009-04-02	12:46:00	0
2009-04-02	12:47:00	0
2009-04-02	12:48:00	0
2009-04-02	12:49:00	0
2009-04-02	12:50:00	0
2009-04-02	12:51:00	0
2009-04-02	12:52:00	0
2009-04-02	12:53:00	0
2009-04-02	12:54:00	0
2009-04-02	12:55:00	0
2009-04-02	12:56:00	0
2009-04-02	12:57:00	0
2009-04-02	12:58:00	0
2009-04-02	12:59:00	0
2009-04-02	13:00:00	0
2009-04-02	13:01:00	0
2009-04-02	13:02:00	0
2009-04-02	13:03:00	0
2009-04-02	13:04:00	0
2009-04-02	13:05:00	0
2009-04-02	13:06:00	0
2009-04-02	13:07:00	0
2009-04-02	13:08:00	0
2009-04-02	13:09:00	0
2009-04-02	13:10:00	0
2009-04-02	13:11:00	0
2009-04-02	13:12:00	0
2009-04-02	13:13:00	0
2009-04-02	13:14:00	0
2009-04-02	13:15:00	0
2009-04-02	13:16:00	0
2009-04-02	13:17:00	0
2009-04-02	13:18:00	0
2009-04-02	13:19:00	0
2009-04-02	13:20:00	0
2009-04-02	13:21:00	0
2009-04-02	13:22:00	0
2009-04-02	13:23:00	0
2009-04-02	13:24:00	0
2009-04-02	13:25:00	0
2009-04-02	13:26:00	0
2009-04-02	13:27:00	0
2009-04-02	13:28:00	0
2009-04-02	13:29:00	0
2009-04-02	13:30:00	0
2009-04-02	13:31:00	0
2009-04-02	13:32:00	0
2009-04-02	13:33:00	0
2009-04-02	13:34:00	0
2009-04-02	13:35:00	0
2009-04-02	13:36:00	0
2009-04-02	13:37:00	0
2009-04-02	13:38:00	0
2009-04-02	13:39:00	0
2009-04-02	13:40:00	0
2009-04-02	13:41:00	0
2009-04-02	13:42:00	0
2009-04-02	13:43:00	0
2009-04-02	13:44:00	0
2009-04-02	13:45:00	0
2009-04-02	13:46:00	0
2009-04-02	13:47:00	0
2009-04-02	13:48:00	0
2009-04-02	13:49:00	0
2009-04-02	13:50:00	0
2009-04-02	13:51:00	0
2009-04-02	13:52:00	0
2009-04-02	13:53:00	0
2009-04-02	13:54:00	0
2009-04-02	13:55:00	0
2009-04-02	13:56:00	0
2009-04-02	13:57:00	0
2009-04-02	13:58:00	0
2009-04-02	13:59:00	0
2009-04-02	14:00:00	0
2009-04-02	14:01:00	0
2009-04-02	14:02:00	0
2009-04-02	14:03:00	0
2009-04-02	14:04:00	0
2009-04-02	14:05:00	0
2009-04-02	14:06:00	0
2009-04-02	14:07:00	0
2009-04-02	14:08:00	0
2009-04-02	14:09:00	0
2009-04-02	14:10:00	0
2009-04-02	14:11:00	0
2009-04-02	14:12:00	0
2009-04-02	14:13:00	0
2009-04-02	14:14:00	0
2009-04-02	14:15:00	0
2009-04-02	14:16:00	0
2009-04-02	14:17:00	0
2009-04-02	14:18:00	0
2009-04-02	14:19:00	0
2009-04-02	14:20:00	0
2009-04-02	14:21:00	0
2009-04-02	14:22:00	0
2009-04-02	14:23:00	0
2009-04-02	14:24:00	0
2009-04-02	14:25:00	0
2009-04-02	14:26:00	0
2009-04-02	14:27:00	0
2009-04-02	14:28:00	0
2009-04-02	14:29:00	0
2009-04-02	14:30:00	0
2009-04-02	14:31:00	0
2009-04-02	14:32:00	0
2009-04-02	14:33:00	0
2009-04-02	14:34:00	0
2009-04-02	14:35:00	0
2009-04-02	14:36:00	0
2009-04-02	14:37:00	0
2009-04-02	14:38:00	0
2009-04-02	14:39:00	0
2009-04-02	14:40:00	0
2009-04-02	14:41:00	0
2009-04-02	14:42:00	0
2009-04-02	14:43:00	0
2009-04-02	14:44:00	0
2009-04-02	14:45:00	0
2009-04-02	14:46:00	0
2009-04-02	14:47:00	0
2009-04-02	14:48:00	0
2009-04-02	14:49:00	0
2009-04-02	14:50:00	0
2009-04-02	14:51:00	0
2009-04-02	14:52:00	0
2009-04-02	14:53:00	0
2009-04-02	14:54:00	0
2009-04-02	14:55:00	0
2009-04-02	14:56:00	0
2009-04-02	14:57:00	0
2009-04-02	14:58:00	0
2009-04-02	14:59:00	0
2009-04-02	15:00:00	0
2009-04-02	15:01:00	0
2009-04-02	15:02:00	0
2009-04-02	15:03:00	0
2009-04-02	15:04:00	0
2009-04-02	15:05:00	0
2009-04-02	15:06:00	0
2009-04-02	15:07:00	0
2009-04-02	15:08:00	0
2009-04-02	15:09:00	0
2009-04-02	15:10:00	0
2009-04-02	15:11:00	0
2009-04-02	15:12:00	0
2009-04-02	15:13:00	0
2009-04-02	15:14:00	0
2009-04-02	15:15:00	0
2009-04-02	15:16:00	0
2009-04-02	15:17:00	0
2009-04-02	15:18:00	0
2009-04-02	15:19:00	0
2009-04-02	15:20:00	0
2009-04-02	15:21:00	0
2009-04-02	15:22:00	0
2009-04-02	15:23:00	0
2009-04-02	15:24:00	0
2009-04-02	15:25:00	0
2009-04-02	15:26:00	0
2009-04-02	15:27:00	0
2009-04-02	15:28:00	0
2009-04-02	15:29:00	0
2009-04-02	15:30:00	0
2009-04-02	15:31:00	0
2009-04-02	15:32:00	0
2009-04-02	15:33:00	0
2009-04-02	15:34:00	0
2009-04-02	15:35:00	0
2009-04-02	15:36:00	0
2009-04-02	15:37:00	0
2009-04-02	15:38:00	0
2009-04-02	15:39:00	0
2009-04-02	15:40:00	0
2009-04-02	15:41:00	0
2009-04-02	15:42:00	0
2009-04-02	15:43:00	0
2009-04-02	15:44:00	0
2009-04-02	15:45:00	0
2009-04-02	15:46:00	0
2009-04-02	15:47:00	0
2009-04-02	15:48:00	0
2009-04-02	15:49:00	0
2009-04-02	15:50:00	0
2009-04-02	15:51:00	0
2009-04-02	15:52:00	0
2009-04-02	15:53:00	0
2009-04-02	15:54:00	0
2009-04-02	15:55:00	0
2009-04-02	15:56:00	0
2009-04-02	15:57:00	0
2009-04-02	15:58:00	0
2009-04-02	15:59:00	0
2009-04-02	16:00:00	0
2009-04-02	16:01:00	0
2009-04-02	16:02:00	0
2009-04-02	16:03:00	0
2009-04-02	16:04:00	0
2009-04-02	16:05:00	0
2009-04-02	16:06:00	0
2009-04-02	16:07:00	0
2009-04-02	16:08:00	0
2009-04-02	16:09:00	0
2009-04-02	16:10:00	0
2009-04-02	16:11:00	0
2009-04-02	16:12:00	0
2009-04-02	16:13:00	0
2009-04-02	16:14:00	0
2009-04-02	16:15:00	0
2009-04-02	16:16:00	0
2009-04-02	16:17:00	0
2009-04-02	16:18:00	0
2009-04-02	16:19:00	0
2009-04-02	16:20:00	0
2009-04-02	16:21:00	0
2009-04-02	16:22:00	0
2009-04-02	16:23:00	0
2009-04-02	16:24:00	0
2009-04-02	16:25:00	0
2009-04-02	16:26:00	0
2009-04-02	16:27:00	0
2009-04-02	16:28:00	0
2009-04-02	16:29:00	0
2009-04-02	16:30:00	0
2009-04-02	16:31:00	0
2009-04-02	16:32:00	0
2009-04-02	16:33:00	0
2009-04-02	16:34:00	0
2009-04-02	16:35:00	0
2009-04-02	16:36:00	0
2009-04-02	16:37:00	0
2009-04-02	16:38:00	0
2009-04-02	16:39:00	0
2009-04-02	16:40:00	0
2009-04-02	16:41:00	0
2009-04-02	16:42:00	0
2009-04-02	16:43:00	0
2009-04-02	16:44:00	0
2009-04-02	16:45:00	0
2009-04-02	16:46:00	0
2009-04-02	16:47:00	0
2009-04-02	16:48:00	0
2009-04-02	16:49:00	0
2009-04-02	16:50:00	0
2009-04-02	16:51:00	0
2009-04-02	16:52:00	0
2009-04-02	16:53:00	0
2009-04-02	16:54:00	0
2009-04-02	16:55:00	0
2009-04-02	16:56:00	0
2009-04-02	16:57:00	0
2009-04-02	16:58:00	0
2009-04-02	16:59:00	0
2009-04-02	17:00:00	0
2009-04-02	17:01:00	0
2009-04-02	17:02:00	0
2009-04-02	17:03:00	0
2009-04-02	17:04:00	0
2009-04-02	17:05:00	0
2009-04-02	17:06:00	0
2009-04-02	17:07:00	0
2009-04-02	17:08:00	0
2009-04-02	17:09:00	0
2009-04-02	17:10:00	0
2009-04-02	17:11:00	0
2009-04-02	17:12:00	0
2009-04-02	17:13:00	0
2009-04-02	17:14:00	0
2009-04-02	17:15:00	0
2009-04-02	17:16:00	0
2009-04-02	17:17:00	0
2009-04-02	17:18:00	0
2009-04-02	17:19:00	0
2009-04-02	17:20:00	0
2009-04-02	17:21:00	0
2009-04-02	17:22:00	0
2009-04-02	17:23:00	0
2009-04-02	17:24:00	0
2009-04-02	17:25:00	0
2009-04-02	17:26:00	0
2009-04-02	17:27:00	0
2009-04-02	17:28:00	0
2009-04-02	17:29:00	0
2009-04-02	17:30:00	0
2009-04-02	17:31:00	0
2009-04-02	17:32:00	0
2009-04-02	17:33:00	0
2009-04-02	17:34:00	0
2009-04-02	17:35:00	0
2009-04-02	17:36:00	0
2009-04-02	17:37:00	0
2009-04-02	17:38:00	0
2009-04-02	17:39:00	0
2009-04-02	17:40:00	0
2009-04-02	17:41:00	0
2009-04-02	17:42:00	0
2009-04-02	17:43:00	0
2009-04-02	17:44:00	0
2009-04-02	17:45:00	0
2009-04-02	17:46:00	0
2009-04-02	17:47:00	0
2009-04-02	17:48:00	0
2009-04-02	17:49:00	0
2009-04-02	17:50:00	0
2009-04-02	17:51:00	0
2009-04-02	17:52:00	0
2009-04-02	17:53:00	0
2009-04-02	17:54:00	0
2009-04-02	17:55:00	0
2009-04-02	17:56:00	0
2009-04-02	17:57:00	0
2009-04-02	17:58:00	0
2009-04-02	17:59:00	0
2009-04-02	18:00:00	0	M
2009-04-02	18:01:00	0
2009-04-02	18:02:00	0
2009-04-02	18:03:00	0
2009-04-02	18:04:00	13
2009-04-02	18:05:00	0
2009-04-02	18:06:00	0
2009-04-02	18:07:00	0
2009-04-02	18:08:00	166
2009-04-02	18:09:00	51
2009-04-02	18:10:00	0
2009-04-02	18:11:00	579
2009-04-02	18:12:00	371
2009-04-02	18:13:00	407
2009-04-02	18:14:00	335
2009-04-02	18:15:00	1293
2009-04-02	18:16:00	243
2009-04-02	18:17:00	0
2009-04-02	18:18:00	0
2009-04-02	18:19:00	0
2009-04-02	18:20:00	538
2009-04-02	18:21:00	141
2009-04-02	18:22:00	26
2009-04-02	18:23:00	13
2009-04-02	18:24:00	0
2009-04-02	18:25:00	0
2009-04-02	18:26:00	13
2009-04-02	18:27:00	538
2009-04-02	18:28:00	51
2009-04-02	18:29:00	182
2009-04-02	18:30:00	64
2009-04-02	18:31:00	0
2009-04-02	18:32:00	0
2009-04-02	18:33:00	599
2009-04-02	18:34:00	0
2009-04-02	18:35:00	0
2009-04-02	18:36:00	212
2009-04-02	18:37:00	0
2009-04-02	18:38:00	0
2009-04-02	18:39:00	0
2009-04-02	18:40:00	0
2009-04-02	18:41:00	13
2009-04-02	18:42:00	0
2009-04-02	18:43:00	0
2009-04-02	18:44:00	0
2009-04-02	18:45:00	0
2009-04-02	18:46:00	0
2009-04-02	18:47:00	0
2009-04-02	18:48:00	0
2009-04-02	18:49:00	274
2009-04-02	18:50:00	0
2009-04-02	18:51:00	13
2009-04-02	18:52:00	0
2009-04-02	18:53:00	0
2009-04-02	18:54:00	0
2009-04-02	18:55:00	335
2009-04-02	18:56:00	0
2009-04-02	18:57:00	0
2009-04-02	18:58:00	0
2009-04-02	18:59:00	228
2009-04-02	19:00:00	0
2009-04-02	19:01:00	0
2009-04-02	19:02:00	0
2009-04-02	19:03:00	0
2009-04-02	19:04:00	0
2009-04-02	19:05:00	0
2009-04-02	19:06:00	0
2009-04-02	19:07:00	0
2009-04-02	19:08:00	0
2009-04-02	19:09:00	26
2009-04-02	19:10:00	0
2009-04-02	19:11:00	0
2009-04-02	19:12:00	0
2009-04-02	19:13:00	0
2009-04-02	19:14:00	0
2009-04-02	19:15:00	0
2009-04-02	19:16:00	13
2009-04-02	19:17:00	154
2009-04-02	19:18:00	0
2009-04-02	19:19:00	77
2009-04-02	19:20:00	0
2009-04-02	19:21:00	0
2009-04-02	19:22:00	0
2009-04-02	19:23:00	0
2009-04-02	19:24:00	0
2009-04-02	19:25:00	0
2009-04-02	19:26:00	0
2009-04-02	19:27:00	0
2009-04-02	19:28:00	0
2009-04-02	19:29:00	0
2009-04-02	19:30:00	0
2009-04-02	19:31:00	0
2009-04-02	19:32:00	0
2009-04-02	19:33:00	90
2009-04-02	19:34:00	77
2009-04-02	19:35:00	51
2009-04-02	19:36:00	182
2009-04-02	19:37:00	0
2009-04-02	19:38:00	38
2009-04-02	19:39:00	38
2009-04-02	19:40:00	0
2009-04-02	19:41:00	0
2009-04-02	19:42:00	0
2009-04-02	19:43:00	0
2009-04-02	19:44:00	0
2009-04-02	19:45:00	0
2009-04-02	19:46:00	0
2009-04-02	19:47:00	0
2009-04-02	19:48:00	0
2009-04-02	19:49:00	259
2009-04-02	19:50:00	0
2009-04-02	19:51:00	0
2009-04-02	19:52:00	0
2009-04-02	19:53:00	0
2009-04-02	19:54:00	0
2009-04-02	19:55:00	0
2009-04-02	19:56:00	0
2009-04-02	19:57:00	0
2009-04-02	19:58:00	0
2009-04-02	19:59:00	0
2009-04-02	20:00:00	0
2009-04-02	20:01:00	0
2009-04-02	20:02:00	0
2009-04-02	20:03:00	13
2009-04-02	20:04:00	0
2009-04-02	20:05:00	0
2009-04-02	20:06:00	0
2009-04-02	20:07:00	0
2009-04-02	20:08:00	0
2009-04-02	20:09:00	0
2009-04-02	20:10:00	0
2009-04-02	20:11:00	0
2009-04-02	20:12:00	0
2009-04-02	20:13:00	115
2009-04-02	20:14:00	26
2009-04-02	20:15:00	0
2009-04-02	20:16:00	0
2009-04-02	20:17:00	0
2009-04-02	20:18:00	0
2009-04-02	20:19:00	0
2009-04-02	20:20:00	0
2009-04-02	20:21:00	0
2009-04-02	20:22:00	0
2009-04-02	20:23:00	0
2009-04-02	20:24:00	0
2009-04-02	20:25:00	0
2009-04-02	20:26:00	0
2009-04-02	20:27:00	0
2009-04-02	20:28:00	0
2009-04-02	20:29:00	0
2009-04-02	20:30:00	0
2009-04-02	20:31:00	0
2009-04-02	20:32:00	0
2009-04-02	20:33:00	0
2009-04-02	20:34:00	0
2009-04-02	20:35:00	0
2009-04-02	20:36:00	0
2009-04-02	20:37:00	0
2009-04-02	20:38:00	0
2009-04-02	20:39:00	182
2009-04-02	20:40:00	0
2009-04-02	20:41:00	0
2009-04-02	20:42:00	0
2009-04-02	20:43:00	0
2009-04-02	20:44:00	0
2009-04-02	20:45:00	0
2009-04-02	20:46:00	26
2009-04-02	20:47:00	0
2009-04-02	20:48:00	0
2009-04-02	20:49:00	0
2009-04-02	20:50:00	0
2009-04-02	20:51:00	0
2009-04-02	20:52:00	0
2009-04-02	20:53:00	0
2009-04-02	20:54:00	0
2009-04-02	20:55:00	0
2009-04-02	20:56:00	0
2009-04-02	20:57:00	0
2009-04-02	20:58:00	0
2009-04-02	20:59:00	26
2009-04-02	21:00:00	0
2009-04-02	21:01:00	0
2009-04-02	21:02:00	0
2009-04-02	21:03:00	0
2009-04-02	21:04:00	0
2009-04-02	21:05:00	13
2009-04-02	21:06:00	0
2009-04-02	21:07:00	0
2009-04-02	21:08:00	0
2009-04-02	21:09:00	0
2009-04-02	21:10:00	0
2009-04-02	21:11:00	0
2009-04-02	21:12:00	0
2009-04-02	21:13:00	13
2009-04-02	21:14:00	0
2009-04-02	21:15:00	13
2009-04-02	21:16:00	0
2009-04-02	21:17:00	0
2009-04-02	21:18:00	0
2009-04-02	21:19:00	0
2009-04-02	21:20:00	0
2009-04-02	21:21:00	0
2009-04-02	21:22:00	13
2009-04-02	21:23:00	0
2009-04-02	21:24:00	0
2009-04-02	21:25:00	0
2009-04-02	21:26:00	0
2009-04-02	21:27:00	0
2009-04-02	21:28:00	0
2009-04-02	21:29:00	0
2009-04-02	21:30:00	0
2009-04-02	21:31:00	0
2009-04-02	21:32:00	0
2009-04-02	21:33:00	0
2009-04-02	21:34:00	0
2009-04-02	21:35:00	0
2009-04-02	21:36:00	0
2009-04-02	21:37:00	0
2009-04-02	21:38:00	0
2009-04-02	21:39:00	0
2009-04-02	21:40:00	0
2009-04-02	21:41:00	0
2009-04-02	21:42:00	0
2009-04-02	21:43:00	0
2009-04-02	21:44:00	26
2009-04-02	21:45:00	0
2009-04-02	21:46:00	13
2009-04-02	21:47:00	0
2009-04-02	21:48:00	0
2009-04-02	21:49:00	0
2009-04-02	21:50:00	0
2009-04-02	21:51:00	0
2009-04-02	21:52:00	0
2009-04-02	21:53:00	0
2009-04-02	21:54:00	0
2009-04-02	21:55:00	0
2009-04-02	21:56:00	0
2009-04-02	21:57:00	0
2009-04-02	21:58:00	0
2009-04-02	21:59:00	0
2009-04-02	22:00:00	0
2009-04-02	22:01:00	0
2009-04-02	22:02:00	0
2009-04-02	22:03:00	0
2009-04-02	22:04:00	0
2009-04-02	22:05:00	0
2009-04-02	22:06:00	0
2009-04-02	22:07:00	0
2009-04-02	22:08:00	353
2009-04-02	22:09:00	0
2009-04-02	22:10:00	0
2009-04-02	22:11:00	128
2009-04-02	22:12:00	0
2009-04-02	22:13:00	0
2009-04-02	22:14:00	0
2009-04-02	22:15:00	0
2009-04-02	22:16:00	0
2009-04-02	22:17:00	0
2009-04-02	22:18:00	0
2009-04-02	22:19:00	0
2009-04-02	22:20:00	0
2009-04-02	22:21:00	0
2009-04-02	22:22:00	0
2009-04-02	22:23:00	0
2009-04-02	22:24:00	0
2009-04-02	22:25:00	0
2009-04-02	22:26:00	0
2009-04-02	22:27:00	0
2009-04-02	22:28:00	0
2009-04-02	22:29:00	0
2009-04-02	22:30:00	0
2009-04-02	22:31:00	0
2009-04-02	22:32:00	0
2009-04-02	22:33:00	0
2009-04-02	22:34:00	0
2009-04-02	22:35:00	0
2009-04-02	22:36:00	0
2009-04-02	22:37:00	0
2009-04-02	22:38:00	0
2009-04-02	22:39:00	0
2009-04-02	22:40:00	212
2009-04-02	22:41:00	0
2009-04-02	22:42:00	517
2009-04-02	22:43:00	660
2009-04-02	22:44:00	730
2009-04-02	22:45:00	0
2009-04-02	22:46:00	799
2009-04-02	22:47:00	115
2009-04-02	22:48:00	0
2009-04-02	22:49:00	0
2009-04-02	22:50:00	0
2009-04-02	22:51:00	0
2009-04-02	22:52:00	0
2009-04-02	22:53:00	13
2009-04-02	22:54:00	0
2009-04-02	22:55:00	0
2009-04-02	22:56:00	0
2009-04-02	22:57:00	0
2009-04-02	22:58:00	0
2009-04-02	22:59:00	0
2009-04-02	23:00:00	0
2009-04-02	23:01:00	13
2009-04-02	23:02:00	154
2009-04-02	23:03:00	77
2009-04-02	23:04:00	0
2009-04-02	23:05:00	0
2009-04-02	23:06:00	0
2009-04-02	23:07:00	0
2009-04-02	23:08:00	0
2009-04-02	23:09:00	0
2009-04-02	23:10:00	0
2009-04-02	23:11:00	0
2009-04-02	23:12:00	0
2009-04-02	23:13:00	0
2009-04-02	23:14:00	0
2009-04-02	23:15:00	0
2009-04-02	23:16:00	0
2009-04-02	23:17:00	0
2009-04-02	23:18:00	0
2009-04-02	23:19:00	0
2009-04-02	23:20:00	0
2009-04-02	23:21:00	0
2009-04-02	23:22:00	0
2009-04-02	23:23:00	0
2009-04-02	23:24:00	0
2009-04-02	23:25:00	0
2009-04-02	23:26:00	0
2009-04-02	23:27:00	0
2009-04-02	23:28:00	0
2009-04-02	23:29:00	0
2009-04-02	23:30:00	0
2009-04-02	23:31:00	0
2009-04-02	23:32:00	0
2009-04-02	23:33:00	0
2009-04-02	23:34:00	0
2009-04-02	23:35:00	0
2009-04-02	23:36:00	0
2009-04-02	23:37:00	0
2009-04-02	23:38:00	0
2009-04-02	23:39:00	0
2009-04-02	23:40:00	0
2009-04-02	23:41:00	0
2009-04-02	23:42:00	0
2009-04-02	23:43:00	0
2009-04-02	23:44:00	0
2009-04-02	23:45:00	0
2009-04-02	23:46:00	0
2009-04-02	23:47:00	0
2009-04-02	23:48:00	0
2009-04-02	23:49:00	0
2009-04-02	23:50:00	0
2009-04-02	23:51:00	0
2009-04-02	23:52:00	0
2009-04-02	23:53:00	640
2009-04-02	23:54:00	371
2009-04-02	23:55:00	371
2009-04-02	23:56:00	13
2009-04-02	23:57:00	353
2009-04-02	23:58:00	579
2009-04-02	23:59:00	274
2009-04-03	00:00:00	102
2009-04-03	00:01:00	0
2009-04-03	00:02:00	0
2009-04-03	00:03:00	0
2009-04-03	00:04:00	0
2009-04-03	00:05:00	0
2009-04-03	00:06:00	128
2009-04-03	00:07:00	115
2009-04-03	00:08:00	274
2009-04-03	00:09:00	0
2009-04-03	00:10:00	0
2009-04-03	00:11:00	0
2009-04-03	00:12:00	0
2009-04-03	00:13:00	0
2009-04-03	00:14:00	0
2009-04-03	00:15:00	0
2009-04-03	00:16:00	0
2009-04-03	00:17:00	0
2009-04-03	00:18:00	0
2009-04-03	00:19:00	0
2009-04-03	00:20:00	0
2009-04-03	00:21:00	0
2009-04-03	00:22:00	684
2009-04-03	00:23:00	26
2009-04-03	00:24:00	0
2009-04-03	00:25:00	0
2009-04-03	00:26:00	0
2009-04-03	00:27:00	0
2009-04-03	00:28:00	0
2009-04-03	00:29:00	0
2009-04-03	00:30:00	0
2009-04-03	00:31:00	0
2009-04-03	00:32:00	0
2009-04-03	00:33:00	0
2009-04-03	00:34:00	0
2009-04-03	00:35:00	0
2009-04-03	00:36:00	0
2009-04-03	00:37:00	0
2009-04-03	00:38:00	0
2009-04-03	00:39:00	0
2009-04-03	00:40:00	0
2009-04-03	00:41:00	0
2009-04-03	00:42:00	0
2009-04-03	00:43:00	0
2009-04-03	00:44:00	0
2009-04-03	00:45:00	13
2009-04-03	00:46:00	0
2009-04-03	00:47:00	0
2009-04-03	00:48:00	26
2009-04-03	00:49:00	13
2009-04-03	00:50:00	38
2009-04-03	00:51:00	13
2009-04-03	00:52:00	26
2009-04-03	00:53:00	0
2009-04-03	00:54:00	0
2009-04-03	00:55:00	13
2009-04-03	00:56:00	26
2009-04-03	00:57:00	13
2009-04-03	00:58:00	13
2009-04-03	00:59:00	0
2009-04-03	01:00:00	0
2009-04-03	01:01:00	0
2009-04-03	01:02:00	13
2009-04-03	01:03:00	13
2009-04-03	01:04:00	26
2009-04-03	01:05:00	13
2009-04-03	01:06:00	26
2009-04-03	01:07:00	13
2009-04-03	01:08:00	13
2009-04-03	01:09:00	26
2009-04-03	01:10:00	0
2009-04-03	01:11:00	13
2009-04-03	01:12:00	0
2009-04-03	01:13:00	0
2009-04-03	01:14:00	0
2009-04-03	01:15:00	0
2009-04-03	01:16:00	0
2009-04-03	01:17:00	0
2009-04-03	01:18:00	0
2009-04-03	01:19:00	13
2009-04-03	01:20:00	0
2009-04-03	01:21:00	13
2009-04-03	01:22:00	0
2009-04-03	01:23:00	13
2009-04-03	01:24:00	38
2009-04-03	01:25:00	13
2009-04-03	01:26:00	0
2009-04-03	01:27:00	0
2009-04-03	01:28:00	0
2009-04-03	01:29:00	0
2009-04-03	01:30:00	0
2009-04-03	01:31:00	0
2009-04-03	01:32:00	0
2009-04-03	01:33:00	0
2009-04-03	01:34:00	13
2009-04-03	01:35:00	26
2009-04-03	01:36:00	0
2009-04-03	01:37:00	0
2009-04-03	01:38:00	13
2009-04-03	01:39:00	128
2009-04-03	01:40:00	212
2009-04-03	01:41:00	228
2009-04-03	01:42:00	90
2009-04-03	01:43:00	0
2009-04-03	01:44:00	0
2009-04-03	01:45:00	0
2009-04-03	01:46:00	0
2009-04-03	01:47:00	0
2009-04-03	01:48:00	0
2009-04-03	01:49:00	0
2009-04-03	01:50:00	0
2009-04-03	01:51:00	0
2009-04-03	01:52:00	0
2009-04-03	01:53:00	0
2009-04-03	01:54:00	0
2009-04-03	01:55:00	0
2009-04-03	01:56:00	0
2009-04-03	01:57:00	0
2009-04-03	01:58:00	0
2009-04-03	01:59:00	0
2009-04-03	02:00:00	0
2009-04-03	02:01:00	0
2009-04-03	02:02:00	0
2009-04-03	02:03:00	0
2009-04-03	02:04:00	13
2009-04-03	02:05:00	0
2009-04-03	02:06:00	0
2009-04-03	02:07:00	0
2009-04-03	02:08:00	0
2009-04-03	02:09:00	0
2009-04-03	02:10:00	0
2009-04-03	02:11:00	0
2009-04-03	02:12:00	0
2009-04-03	02:13:00	0
2009-04-03	02:14:00	0
2009-04-03	02:15:00	0
2009-04-03	02:16:00	64
2009-04-03	02:17:00	0
2009-04-03	02:18:00	0
2009-04-03	02:19:00	0
2009-04-03	02:20:00	0
2009-04-03	02:21:00	0
2009-04-03	02:22:00	0
2009-04-03	02:23:00	0
2009-04-03	02:24:00	0
2009-04-03	02:25:00	0
2009-04-03	02:26:00	0
2009-04-03	02:27:00	0
2009-04-03	02:28:00	0
2009-04-03	02:29:00	0
2009-04-03	02:30:00	0
2009-04-03	02:31:00	0
2009-04-03	02:32:00	0
2009-04-03	02:33:00	0
2009-04-03	02:34:00	0
2009-04-03	02:35:00	13
2009-04-03	02:36:00	0
2009-04-03	02:37:00	0
2009-04-03	02:38:00	0
2009-04-03	02:39:00	0
2009-04-03	02:40:00	320
2009-04-03	02:41:00	77
2009-04-03	02:42:00	0
2009-04-03	02:43:00	0
2009-04-03	02:44:00	0
2009-04-03	02:45:00	0
2009-04-03	02:46:00	0
2009-04-03	02:47:00	0
2009-04-03	02:48:00	0
2009-04-03	02:49:00	0
2009-04-03	02:50:00	0
2009-04-03	02:51:00	0
2009-04-03	02:52:00	0
2009-04-03	02:53:00	0
2009-04-03	02:54:00	0
2009-04-03	02:55:00	0
2009-04-03	02:56:00	0
2009-04-03	02:57:00	0
2009-04-03	02:58:00	0
2009-04-03	02:59:00	0
2009-04-03	03:00:00	0
2009-04-03	03:01:00	0
2009-04-03	03:02:00	0
2009-04-03	03:03:00	0
2009-04-03	03:04:00	0
2009-04-03	03:05:00	0
2009-04-03	03:06:00	0
2009-04-03	03:07:00	0
2009-04-03	03:08:00	0
2009-04-03	03:09:00	0
2009-04-03	03:10:00	0
2009-04-03	03:11:00	0
2009-04-03	03:12:00	0
2009-04-03	03:13:00	0
2009-04-03	03:14:00	0
2009-04-03	03:15:00	0
2009-04-03	03:16:00	0
2009-04-03	03:17:00	0
2009-04-03	03:18:00	0
2009-04-03	03:19:00	13
2009-04-03	03:20:00	0
2009-04-03	03:21:00	0
2009-04-03	03:22:00	0
2009-04-03	03:23:00	0
2009-04-03	03:24:00	0
2009-04-03	03:25:00	0
2009-04-03	03:26:00	0
2009-04-03	03:27:00	0
2009-04-03	03:28:00	0
2009-04-03	03:29:00	0
2009-04-03	03:30:00	0
2009-04-03	03:31:00	0
2009-04-03	03:32:00	0
2009-04-03	03:33:00	0
2009-04-03	03:34:00	0
2009-04-03	03:35:00	26
2009-04-03	03:36:00	0
2009-04-03	03:37:00	0
2009-04-03	03:38:00	0
2009-04-03	03:39:00	0
2009-04-03	03:40:00	0
2009-04-03	03:41:00	0
2009-04-03	03:42:00	0
2009-04-03	03:43:00	0
2009-04-03	03:44:00	0
2009-04-03	03:45:00	0
2009-04-03	03:46:00	0
2009-04-03	03:47:00	0
2009-04-03	03:48:00	0
2009-04-03	03:49:00	0
2009-04-03	03:50:00	0
2009-04-03	03:51:00	0
2009-04-03	03:52:00	0
2009-04-03	03:53:00	0
2009-04-03	03:54:00	0
2009-04-03	03:55:00	0
2009-04-03	03:56:00	0
2009-04-03	03:57:00	0
2009-04-03	03:58:00	0
2009-04-03	03:59:00	0
2009-04-03	04:00:00	0
2009-04-03	04:01:00	0
2009-04-03	04:02:00	13
2009-04-03	04:03:00	0
2009-04-03	04:04:00	13
2009-04-03	04:05:00	0
2009-04-03	04:06:00	0
2009-04-03	04:07:00	0
2009-04-03	04:08:00	0
2009-04-03	04:09:00	0
2009-04-03	04:10:00	0
2009-04-03	04:11:00	0
2009-04-03	04:12:00	0
2009-04-03	04:13:00	0
2009-04-03	04:14:00	0
2009-04-03	04:15:00	0
2009-04-03	04:16:00	0
2009-04-03	04:17:00	0
2009-04-03	04:18:00	0
2009-04-03	04:19:00	0
2009-04-03	04:20:00	0
2009-04-03	04:21:00	0
2009-04-03	04:22:00	0
2009-04-03	04:23:00	0
2009-04-03	04:24:00	0
2009-04-03	04:25:00	0
2009-04-03	04:26:00	0
2009-04-03	04:27:00	0
2009-04-03	04:28:00	0
2009-04-03	04:29:00	0
2009-04-03	04:30:00	0
2009-04-03	04:31:00	0
2009-04-03	04:32:00	13
2009-04-03	04:33:00	13
2009-04-03	04:34:00	0
2009-04-03	04:35:00	13
2009-04-03	04:36:00	0
2009-04-03	04:37:00	0
2009-04-03	04:38:00	0
2009-04-03	04:39:00	0
2009-04-03	04:40:00	0
2009-04-03	04:41:00	0
2009-04-03	04:42:00	0
2009-04-03	04:43:00	0
2009-04-03	04:44:00	0
2009-04-03	04:45:00	0
2009-04-03	04:46:00	0
2009-04-03	04:47:00	0
2009-04-03	04:48:00	0
2009-04-03	04:49:00	0
2009-04-03	04:50:00	0
2009-04-03	04:51:00	0
2009-04-03	04:52:00	0
2009-04-03	04:53:00	0
2009-04-03	04:54:00	0
2009-04-03	04:55:00	0
2009-04-03	04:56:00	0
2009-04-03	04:57:00	0
2009-04-03	04:58:00	0
2009-04-03	04:59:00	0
2009-04-03	05:00:00	0
2009-04-03	05:01:00	26
2009-04-03	05:02:00	0
2009-04-03	05:03:00	13
2009-04-03	05:04:00	0
2009-04-03	05:05:00	0
2009-04-03	05:06:00	0
2009-04-03	05:07:00	0
2009-04-03	05:08:00	0
2009-04-03	05:09:00	0
2009-04-03	05:10:00	0
2009-04-03	05:11:00	0
2009-04-03	05:12:00	0
2009-04-03	05:13:00	0
2009-04-03	05:14:00	0
2009-04-03	05:15:00	0
2009-04-03	05:16:00	0
2009-04-03	05:17:00	0
2009-04-03	05:18:00	0
2009-04-03	05:19:00	0
2009-04-03	05:20:00	0
2009-04-03	05:21:00	0
2009-04-03	05:22:00	13
2009-04-03	05:23:00	0
2009-04-03	05:24:00	0
2009-04-03	05:25:00	0
2009-04-03	05:26:00	0
2009-04-03	05:27:00	0
2009-04-03	05:28:00	0
2009-04-03	05:29:00	0
2009-04-03	05:30:00	0
2009-04-03	05:31:00	0
2009-04-03	05:32:00	0
2009-04-03	05:33:00	0
2009-04-03	05:34:00	0
2009-04-03	05:35:00	0
2009-04-03	05:36:00	0
2009-04-03	05:37:00	0
2009-04-03	05:38:00	0
2009-04-03	05:39:00	0
2009-04-03	05:40:00	0
2009-04-03	05:41:00	0
2009-04-03	05:42:00	0
2009-04-03	05:43:00	0
2009-04-03	05:44:00	0
2009-04-03	05:45:00	0
2009-04-03	05:46:00	0
2009-04-03	05:47:00	0
2009-04-03	05:48:00	0
2009-04-03	05:49:00	0
2009-04-03	05:50:00	0
2009-04-03	05:51:00	0
2009-04-03	05:52:00	0
2009-04-03	05:53:00	0
2009-04-03	05:54:00	13
2009-04-03	05:55:00	335
2009-04-03	05:56:00	0
2009-04-03	05:57:00	0
2009-04-03	05:58:00	0
2009-04-03	05:59:00	0
2009-04-03	06:00:00	0
2009-04-03	06:01:00	0
2009-04-03	06:02:00	0
2009-04-03	06:03:00	0
2009-04-03	06:04:00	0
2009-04-03	06:05:00	0
2009-04-03	06:06:00	0
2009-04-03	06:07:00	0
2009-04-03	06:08:00	154
2009-04-03	06:09:00	154
2009-04-03	06:10:00	154
2009-04-03	06:11:00	243
2009-04-03	06:12:00	128
2009-04-03	06:13:00	0
2009-04-03	06:14:00	0
2009-04-03	06:15:00	0
2009-04-03	06:16:00	0
2009-04-03	06:17:00	0
2009-04-03	06:18:00	0
2009-04-03	06:19:00	0
2009-04-03	06:20:00	0
2009-04-03	06:21:00	0
2009-04-03	06:22:00	0
2009-04-03	06:23:00	0
2009-04-03	06:24:00	0
2009-04-03	06:25:00	0
2009-04-03	06:26:00	335
2009-04-03	06:27:00	26
2009-04-03	06:28:00	26
2009-04-03	06:29:00	26
2009-04-03	06:30:00	182
2009-04-03	06:31:00	13
2009-04-03	06:32:00	90
2009-04-03	06:33:00	497
2009-04-03	06:34:00	389
2009-04-03	06:35:00	26
2009-04-03	06:36:00	0
2009-04-03	06:37:00	128
2009-04-03	06:38:00	0
2009-04-03	06:39:00	0
2009-04-03	06:40:00	0
2009-04-03	06:41:00	0
2009-04-03	06:42:00	0
2009-04-03	06:43:00	0
2009-04-03	06:44:00	212
2009-04-03	06:45:00	517
2009-04-03	06:46:00	228
2009-04-03	06:47:00	154
2009-04-03	06:48:00	353
2009-04-03	06:49:00	305
2009-04-03	06:50:00	212
2009-04-03	06:51:00	182
2009-04-03	06:52:00	90
2009-04-03	06:53:00	371
2009-04-03	06:54:00	166
2009-04-03	06:55:00	115
2009-04-03	06:56:00	335
2009-04-03	06:57:00	182
2009-04-03	06:58:00	51
2009-04-03	06:59:00	166
2009-04-03	07:00:00	141
2009-04-03	07:01:00	0
2009-04-03	07:02:00	166
2009-04-03	07:03:00	212
2009-04-03	07:04:00	77
2009-04-03	07:05:00	753
2009-04-03	07:06:00	182
2009-04-03	07:07:00	558
2009-04-03	07:08:00	26
2009-04-03	07:09:00	26
2009-04-03	07:10:00	407
2009-04-03	07:11:00	13
2009-04-03	07:12:00	182
2009-04-03	07:13:00	497
2009-04-03	07:14:00	274
2009-04-03	07:15:00	335
2009-04-03	07:16:00	538
2009-04-03	07:17:00	335
2009-04-03	07:18:00	353
2009-04-03	07:19:00	197
2009-04-03	07:20:00	371
2009-04-03	07:21:00	305
2009-04-03	07:22:00	182
2009-04-03	07:23:00	51
2009-04-03	07:24:00	0
2009-04-03	07:25:00	26
2009-04-03	07:26:00	13
2009-04-03	07:27:00	13
2009-04-03	07:28:00	128
2009-04-03	07:29:00	0
2009-04-03	07:30:00	0
2009-04-03	07:31:00	0
2009-04-03	07:32:00	0
2009-04-03	07:33:00	0
2009-04-03	07:34:00	0
2009-04-03	07:35:00	259
2009-04-03	07:36:00	102
2009-04-03	07:37:00	0
2009-04-03	07:38:00	0
2009-04-03	07:39:00	353
2009-04-03	07:40:00	90
2009-04-03	07:41:00	228
2009-04-03	07:42:00	274
2009-04-03	07:43:00	0
2009-04-03	07:44:00	497
2009-04-03	07:45:00	847
2009-04-03	07:46:00	1457
2009-04-03	07:47:00	479
2009-04-03	07:48:00	274
2009-04-03	07:49:00	305
2009-04-03	07:50:00	389
2009-04-03	07:51:00	443
2009-04-03	07:52:00	115
2009-04-03	07:53:00	154
2009-04-03	07:54:00	102
2009-04-03	07:55:00	243
2009-04-03	07:56:00	38
2009-04-03	07:57:00	0
2009-04-03	07:58:00	26
2009-04-03	07:59:00	0
2009-04-03	08:00:00	0
2009-04-03	08:01:00	0
2009-04-03	08:02:00	0
2009-04-03	08:03:00	13
2009-04-03	08:04:00	26
2009-04-03	08:05:00	0
2009-04-03	08:06:00	0
2009-04-03	08:07:00	0
2009-04-03	08:08:00	0
2009-04-03	08:09:00	51
2009-04-03	08:10:00	51
2009-04-03	08:11:00	243
2009-04-03	08:12:00	51
2009-04-03	08:13:00	0
2009-04-03	08:14:00	0
2009-04-03	08:15:00	13
2009-04-03	08:16:00	0
2009-04-03	08:17:00	0
2009-04-03	08:18:00	0
2009-04-03	08:19:00	0
2009-04-03	08:20:00	0
2009-04-03	08:21:00	0
2009-04-03	08:22:00	0
2009-04-03	08:23:00	0
2009-04-03	08:24:00	0
2009-04-03	08:25:00	0
2009-04-03	08:26:00	0
2009-04-03	08:27:00	0
2009-04-03	08:28:00	0
2009-04-03	08:29:00	0
2009-04-03	08:30:00	0
2009-04-03	08:31:00	0
2009-04-03	08:32:00	13
2009-04-03	08:33:00	0
2009-04-03	08:34:00	0
2009-04-03	08:35:00	0
2009-04-03	08:36:00	0
2009-04-03	08:37:00	182
2009-04-03	08:38:00	64
2009-04-03	08:39:00	0
2009-04-03	08:40:00	0
2009-04-03	08:41:00	0
2009-04-03	08:42:00	0
2009-04-03	08:43:00	0
2009-04-03	08:44:00	0
2009-04-03	08:45:00	0
2009-04-03	08:46:00	0
2009-04-03	08:47:00	0
2009-04-03	08:48:00	0
2009-04-03	08:49:00	0
2009-04-03	08:50:00	141
2009-04-03	08:51:00	0
2009-04-03	08:52:00	141
2009-04-03	08:53:00	13
2009-04-03	08:54:00	0
2009-04-03	08:55:00	0
2009-04-03	08:56:00	0
2009-04-03	08:57:00	0
2009-04-03	08:58:00	0
2009-04-03	08:59:00	0
2009-04-03	09:00:00	0
2009-04-03	09:01:00	0
2009-04-03	09:02:00	0
2009-04-03	09:03:00	0
2009-04-03	09:04:00	0
2009-04-03	09:05:00	0
2009-04-03	09:06:00	0
2009-04-03	09:07:00	847
2009-04-03	09:08:00	305
[truncated: 19,611 more rows]

## Sheet: 4.16.09
Actogram, Copy Raw Data, All Days
Identity:	Kitty Reiser
Filename:	E:\Active Research Files\meloxicam titre canine\cases\kitty\Kitty Reiser 4.16.09.AWC
Gender:	F
Age:	7
Height:	61.0 cm	24.0 in
Weight:	20.4 kg	45.0 lbs
Start Date:	16-Apr-2009 (Thu)
Start Time:	18:00:00
Interval:	1.00 mins
Date Stamp:	Time Stamp:	Activity Data:	Marker Press:
2009-04-16	00:00:00	0
2009-04-16	00:01:00	0
2009-04-16	00:02:00	0
2009-04-16	00:03:00	0
2009-04-16	00:04:00	0
2009-04-16	00:05:00	0
2009-04-16	00:06:00	0
2009-04-16	00:07:00	0
2009-04-16	00:08:00	0
2009-04-16	00:09:00	0
2009-04-16	00:10:00	0
2009-04-16	00:11:00	0
2009-04-16	00:12:00	0
2009-04-16	00:13:00	0
2009-04-16	00:14:00	0
2009-04-16	00:15:00	0
2009-04-16	00:16:00	0
2009-04-16	00:17:00	0
2009-04-16	00:18:00	0
2009-04-16	00:19:00	0
2009-04-16	00:20:00	0
2009-04-16	00:21:00	0
2009-04-16	00:22:00	0
2009-04-16	00:23:00	0
2009-04-16	00:24:00	0
2009-04-16	00:25:00	0
2009-04-16	00:26:00	0
2009-04-16	00:27:00	0
2009-04-16	00:28:00	0
2009-04-16	00:29:00	0
2009-04-16	00:30:00	0
2009-04-16	00:31:00	0
2009-04-16	00:32:00	0
2009-04-16	00:33:00	0
2009-04-16	00:34:00	0
2009-04-16	00:35:00	0
2009-04-16	00:36:00	0
2009-04-16	00:37:00	0
2009-04-16	00:38:00	0
2009-04-16	00:39:00	0
2009-04-16	00:40:00	0
2009-04-16	00:41:00	0
2009-04-16	00:42:00	0
2009-04-16	00:43:00	0
2009-04-16	00:44:00	0
2009-04-16	00:45:00	0
2009-04-16	00:46:00	0
2009-04-16	00:47:00	0
2009-04-16	00:48:00	0
2009-04-16	00:49:00	0
2009-04-16	00:50:00	0
2009-04-16	00:51:00	0
2009-04-16	00:52:00	0
2009-04-16	00:53:00	0
2009-04-16	00:54:00	0
2009-04-16	00:55:00	0
2009-04-16	00:56:00	0
2009-04-16	00:57:00	0
2009-04-16	00:58:00	0
2009-04-16	00:59:00	0
2009-04-16	01:00:00	0
2009-04-16	01:01:00	0
2009-04-16	01:02:00	0
2009-04-16	01:03:00	0
2009-04-16	01:04:00	0
2009-04-16	01:05:00	0
2009-04-16	01:06:00	0
2009-04-16	01:07:00	0
2009-04-16	01:08:00	0
2009-04-16	01:09:00	0
2009-04-16	01:10:00	0
2009-04-16	01:11:00	0
2009-04-16	01:12:00	0
2009-04-16	01:13:00	0
2009-04-16	01:14:00	0
2009-04-16	01:15:00	0
2009-04-16	01:16:00	0
2009-04-16	01:17:00	0
2009-04-16	01:18:00	0
2009-04-16	01:19:00	0
2009-04-16	01:20:00	0
2009-04-16	01:21:00	0
2009-04-16	01:22:00	0
2009-04-16	01:23:00	0
2009-04-16	01:24:00	0
2009-04-16	01:25:00	0
2009-04-16	01:26:00	0
2009-04-16	01:27:00	0
2009-04-16	01:28:00	0
2009-04-16	01:29:00	0
2009-04-16	01:30:00	0
2009-04-16	01:31:00	0
2009-04-16	01:32:00	0
2009-04-16	01:33:00	0
2009-04-16	01:34:00	0
2009-04-16	01:35:00	0
2009-04-16	01:36:00	0
2009-04-16	01:37:00	0
2009-04-16	01:38:00	0
2009-04-16	01:39:00	0
2009-04-16	01:40:00	0
2009-04-16	01:41:00	0
2009-04-16	01:42:00	0
2009-04-16	01:43:00	0
2009-04-16	01:44:00	0
2009-04-16	01:45:00	0
2009-04-16	01:46:00	0
2009-04-16	01:47:00	0
2009-04-16	01:48:00	0
2009-04-16	01:49:00	0
2009-04-16	01:50:00	0
2009-04-16	01:51:00	0
2009-04-16	01:52:00	0
2009-04-16	01:53:00	0
2009-04-16	01:54:00	0
2009-04-16	01:55:00	0
2009-04-16	01:56:00	0
2009-04-16	01:57:00	0
2009-04-16	01:58:00	0
2009-04-16	01:59:00	0
2009-04-16	02:00:00	0
2009-04-16	02:01:00	0
2009-04-16	02:02:00	0
2009-04-16	02:03:00	0
2009-04-16	02:04:00	0
2009-04-16	02:05:00	0
2009-04-16	02:06:00	0
2009-04-16	02:07:00	0
2009-04-16	02:08:00	0
2009-04-16	02:09:00	0
2009-04-16	02:10:00	0
2009-04-16	02:11:00	0
2009-04-16	02:12:00	0
2009-04-16	02:13:00	0
2009-04-16	02:14:00	0
2009-04-16	02:15:00	0
2009-04-16	02:16:00	0
2009-04-16	02:17:00	0
2009-04-16	02:18:00	0
2009-04-16	02:19:00	0
2009-04-16	02:20:00	0
2009-04-16	02:21:00	0
2009-04-16	02:22:00	0
2009-04-16	02:23:00	0
2009-04-16	02:24:00	0
2009-04-16	02:25:00	0
2009-04-16	02:26:00	0
2009-04-16	02:27:00	0
2009-04-16	02:28:00	0
2009-04-16	02:29:00	0
2009-04-16	02:30:00	0
2009-04-16	02:31:00	0
2009-04-16	02:32:00	0
2009-04-16	02:33:00	0
2009-04-16	02:34:00	0
2009-04-16	02:35:00	0
2009-04-16	02:36:00	0
2009-04-16	02:37:00	0
2009-04-16	02:38:00	0
2009-04-16	02:39:00	0
2009-04-16	02:40:00	0
2009-04-16	02:41:00	0
2009-04-16	02:42:00	0
2009-04-16	02:43:00	0
2009-04-16	02:44:00	0
2009-04-16	02:45:00	0
2009-04-16	02:46:00	0
2009-04-16	02:47:00	0
2009-04-16	02:48:00	0
2009-04-16	02:49:00	0
2009-04-16	02:50:00	0
2009-04-16	02:51:00	0
2009-04-16	02:52:00	0
2009-04-16	02:53:00	0
2009-04-16	02:54:00	0
2009-04-16	02:55:00	0
2009-04-16	02:56:00	0
2009-04-16	02:57:00	0
2009-04-16	02:58:00	0
2009-04-16	02:59:00	0
2009-04-16	03:00:00	0
2009-04-16	03:01:00	0
2009-04-16	03:02:00	0
2009-04-16	03:03:00	0
2009-04-16	03:04:00	0
2009-04-16	03:05:00	0
2009-04-16	03:06:00	0
2009-04-16	03:07:00	0
2009-04-16	03:08:00	0
2009-04-16	03:09:00	0
2009-04-16	03:10:00	0
2009-04-16	03:11:00	0
2009-04-16	03:12:00	0
2009-04-16	03:13:00	0
2009-04-16	03:14:00	0
2009-04-16	03:15:00	0
2009-04-16	03:16:00	0
2009-04-16	03:17:00	0
2009-04-16	03:18:00	0
2009-04-16	03:19:00	0
2009-04-16	03:20:00	0
2009-04-16	03:21:00	0
2009-04-16	03:22:00	0
2009-04-16	03:23:00	0
2009-04-16	03:24:00	0
2009-04-16	03:25:00	0
2009-04-16	03:26:00	0
2009-04-16	03:27:00	0
2009-04-16	03:28:00	0
2009-04-16	03:29:00	0
2009-04-16	03:30:00	0
2009-04-16	03:31:00	0
2009-04-16	03:32:00	0
2009-04-16	03:33:00	0
2009-04-16	03:34:00	0
2009-04-16	03:35:00	0
2009-04-16	03:36:00	0
2009-04-16	03:37:00	0
2009-04-16	03:38:00	0
2009-04-16	03:39:00	0
2009-04-16	03:40:00	0
2009-04-16	03:41:00	0
2009-04-16	03:42:00	0
2009-04-16	03:43:00	0
2009-04-16	03:44:00	0
2009-04-16	03:45:00	0
2009-04-16	03:46:00	0
2009-04-16	03:47:00	0
2009-04-16	03:48:00	0
2009-04-16	03:49:00	0
2009-04-16	03:50:00	0
2009-04-16	03:51:00	0
2009-04-16	03:52:00	0
2009-04-16	03:53:00	0
2009-04-16	03:54:00	0
2009-04-16	03:55:00	0
2009-04-16	03:56:00	0
2009-04-16	03:57:00	0
2009-04-16	03:58:00	0
2009-04-16	03:59:00	0
2009-04-16	04:00:00	0
2009-04-16	04:01:00	0
2009-04-16	04:02:00	0
2009-04-16	04:03:00	0
2009-04-16	04:04:00	0
2009-04-16	04:05:00	0
2009-04-16	04:06:00	0
2009-04-16	04:07:00	0
2009-04-16	04:08:00	0
2009-04-16	04:09:00	0
2009-04-16	04:10:00	0
2009-04-16	04:11:00	0
2009-04-16	04:12:00	0
2009-04-16	04:13:00	0
2009-04-16	04:14:00	0
2009-04-16	04:15:00	0
2009-04-16	04:16:00	0
2009-04-16	04:17:00	0
2009-04-16	04:18:00	0
2009-04-16	04:19:00	0
2009-04-16	04:20:00	0
2009-04-16	04:21:00	0
2009-04-16	04:22:00	0
2009-04-16	04:23:00	0
2009-04-16	04:24:00	0
2009-04-16	04:25:00	0
2009-04-16	04:26:00	0
2009-04-16	04:27:00	0
2009-04-16	04:28:00	0
2009-04-16	04:29:00	0
2009-04-16	04:30:00	0
2009-04-16	04:31:00	0
2009-04-16	04:32:00	0
2009-04-16	04:33:00	0
2009-04-16	04:34:00	0
2009-04-16	04:35:00	0
2009-04-16	04:36:00	0
2009-04-16	04:37:00	0
2009-04-16	04:38:00	0
2009-04-16	04:39:00	0
2009-04-16	04:40:00	0
2009-04-16	04:41:00	0
2009-04-16	04:42:00	0
2009-04-16	04:43:00	0
2009-04-16	04:44:00	0
2009-04-16	04:45:00	0
2009-04-16	04:46:00	0
2009-04-16	04:47:00	0
2009-04-16	04:48:00	0
2009-04-16	04:49:00	0
2009-04-16	04:50:00	0
2009-04-16	04:51:00	0
2009-04-16	04:52:00	0
2009-04-16	04:53:00	0
2009-04-16	04:54:00	0
2009-04-16	04:55:00	0
2009-04-16	04:56:00	0
2009-04-16	04:57:00	0
2009-04-16	04:58:00	0
2009-04-16	04:59:00	0
2009-04-16	05:00:00	0
2009-04-16	05:01:00	0
2009-04-16	05:02:00	0
2009-04-16	05:03:00	0
2009-04-16	05:04:00	0
2009-04-16	05:05:00	0
2009-04-16	05:06:00	0
2009-04-16	05:07:00	0
2009-04-16	05:08:00	0
2009-04-16	05:09:00	0
2009-04-16	05:10:00	0
2009-04-16	05:11:00	0
2009-04-16	05:12:00	0
2009-04-16	05:13:00	0
2009-04-16	05:14:00	0
2009-04-16	05:15:00	0
2009-04-16	05:16:00	0
2009-04-16	05:17:00	0
2009-04-16	05:18:00	0
2009-04-16	05:19:00	0
2009-04-16	05:20:00	0
2009-04-16	05:21:00	0
2009-04-16	05:22:00	0
2009-04-16	05:23:00	0
2009-04-16	05:24:00	0
2009-04-16	05:25:00	0
2009-04-16	05:26:00	0
2009-04-16	05:27:00	0
2009-04-16	05:28:00	0
2009-04-16	05:29:00	0
2009-04-16	05:30:00	0
2009-04-16	05:31:00	0
2009-04-16	05:32:00	0
2009-04-16	05:33:00	0
2009-04-16	05:34:00	0
2009-04-16	05:35:00	0
2009-04-16	05:36:00	0
2009-04-16	05:37:00	0
2009-04-16	05:38:00	0
2009-04-16	05:39:00	0
2009-04-16	05:40:00	0
2009-04-16	05:41:00	0
2009-04-16	05:42:00	0
2009-04-16	05:43:00	0
2009-04-16	05:44:00	0
2009-04-16	05:45:00	0
2009-04-16	05:46:00	0
2009-04-16	05:47:00	0
2009-04-16	05:48:00	0
2009-04-16	05:49:00	0
2009-04-16	05:50:00	0
2009-04-16	05:51:00	0
2009-04-16	05:52:00	0
2009-04-16	05:53:00	0
2009-04-16	05:54:00	0
2009-04-16	05:55:00	0
2009-04-16	05:56:00	0
2009-04-16	05:57:00	0
2009-04-16	05:58:00	0
2009-04-16	05:59:00	0
2009-04-16	06:00:00	0
2009-04-16	06:01:00	0
2009-04-16	06:02:00	0
2009-04-16	06:03:00	0
2009-04-16	06:04:00	0
2009-04-16	06:05:00	0
2009-04-16	06:06:00	0
2009-04-16	06:07:00	0
2009-04-16	06:08:00	0
2009-04-16	06:09:00	0
2009-04-16	06:10:00	0
2009-04-16	06:11:00	0
2009-04-16	06:12:00	0
2009-04-16	06:13:00	0
2009-04-16	06:14:00	0
2009-04-16	06:15:00	0
2009-04-16	06:16:00	0
2009-04-16	06:17:00	0
2009-04-16	06:18:00	0
2009-04-16	06:19:00	0
2009-04-16	06:20:00	0
2009-04-16	06:21:00	0
2009-04-16	06:22:00	0
2009-04-16	06:23:00	0
2009-04-16	06:24:00	0
2009-04-16	06:25:00	0
2009-04-16	06:26:00	0
2009-04-16	06:27:00	0
2009-04-16	06:28:00	0
2009-04-16	06:29:00	0
2009-04-16	06:30:00	0
2009-04-16	06:31:00	0
2009-04-16	06:32:00	0
2009-04-16	06:33:00	0
2009-04-16	06:34:00	0
2009-04-16	06:35:00	0
2009-04-16	06:36:00	0
2009-04-16	06:37:00	0
2009-04-16	06:38:00	0
2009-04-16	06:39:00	0
2009-04-16	06:40:00	0
2009-04-16	06:41:00	0
2009-04-16	06:42:00	0
2009-04-16	06:43:00	0
2009-04-16	06:44:00	0
2009-04-16	06:45:00	0
2009-04-16	06:46:00	0
2009-04-16	06:47:00	0
2009-04-16	06:48:00	0
2009-04-16	06:49:00	0
2009-04-16	06:50:00	0
2009-04-16	06:51:00	0
2009-04-16	06:52:00	0
2009-04-16	06:53:00	0
2009-04-16	06:54:00	0
2009-04-16	06:55:00	0
2009-04-16	06:56:00	0
2009-04-16	06:57:00	0
2009-04-16	06:58:00	0
2009-04-16	06:59:00	0
2009-04-16	07:00:00	0
2009-04-16	07:01:00	0
2009-04-16	07:02:00	0
2009-04-16	07:03:00	0
2009-04-16	07:04:00	0
2009-04-16	07:05:00	0
2009-04-16	07:06:00	0
2009-04-16	07:07:00	0
2009-04-16	07:08:00	0
2009-04-16	07:09:00	0
2009-04-16	07:10:00	0
2009-04-16	07:11:00	0
2009-04-16	07:12:00	0
2009-04-16	07:13:00	0
2009-04-16	07:14:00	0
2009-04-16	07:15:00	0
2009-04-16	07:16:00	0
2009-04-16	07:17:00	0
2009-04-16	07:18:00	0
2009-04-16	07:19:00	0
2009-04-16	07:20:00	0
2009-04-16	07:21:00	0
2009-04-16	07:22:00	0
2009-04-16	07:23:00	0
2009-04-16	07:24:00	0
2009-04-16	07:25:00	0
2009-04-16	07:26:00	0
2009-04-16	07:27:00	0
2009-04-16	07:28:00	0
2009-04-16	07:29:00	0
2009-04-16	07:30:00	0
2009-04-16	07:31:00	0
2009-04-16	07:32:00	0
2009-04-16	07:33:00	0
2009-04-16	07:34:00	0
2009-04-16	07:35:00	0
2009-04-16	07:36:00	0
2009-04-16	07:37:00	0
2009-04-16	07:38:00	0
2009-04-16	07:39:00	0
2009-04-16	07:40:00	0
2009-04-16	07:41:00	0
2009-04-16	07:42:00	0
2009-04-16	07:43:00	0
2009-04-16	07:44:00	0
2009-04-16	07:45:00	0
2009-04-16	07:46:00	0
2009-04-16	07:47:00	0
2009-04-16	07:48:00	0
2009-04-16	07:49:00	0
2009-04-16	07:50:00	0
2009-04-16	07:51:00	0
2009-04-16	07:52:00	0
2009-04-16	07:53:00	0
2009-04-16	07:54:00	0
2009-04-16	07:55:00	0
2009-04-16	07:56:00	0
2009-04-16	07:57:00	0
2009-04-16	07:58:00	0
2009-04-16	07:59:00	0
2009-04-16	08:00:00	0
2009-04-16	08:01:00	0
2009-04-16	08:02:00	0
2009-04-16	08:03:00	0
2009-04-16	08:04:00	0
2009-04-16	08:05:00	0
2009-04-16	08:06:00	0
2009-04-16	08:07:00	0
2009-04-16	08:08:00	0
2009-04-16	08:09:00	0
2009-04-16	08:10:00	0
2009-04-16	08:11:00	0
2009-04-16	08:12:00	0
2009-04-16	08:13:00	0
2009-04-16	08:14:00	0
2009-04-16	08:15:00	0
2009-04-16	08:16:00	0
2009-04-16	08:17:00	0
2009-04-16	08:18:00	0
2009-04-16	08:19:00	0
2009-04-16	08:20:00	0
2009-04-16	08:21:00	0
2009-04-16	08:22:00	0
2009-04-16	08:23:00	0
2009-04-16	08:24:00	0
2009-04-16	08:25:00	0
2009-04-16	08:26:00	0
2009-04-16	08:27:00	0
2009-04-16	08:28:00	0
2009-04-16	08:29:00	0
2009-04-16	08:30:00	0
2009-04-16	08:31:00	0
2009-04-16	08:32:00	0
2009-04-16	08:33:00	0
2009-04-16	08:34:00	0
2009-04-16	08:35:00	0
2009-04-16	08:36:00	0
2009-04-16	08:37:00	0
2009-04-16	08:38:00	0
2009-04-16	08:39:00	0
2009-04-16	08:40:00	0
2009-04-16	08:41:00	0
2009-04-16	08:42:00	0
2009-04-16	08:43:00	0
2009-04-16	08:44:00	0
2009-04-16	08:45:00	0
2009-04-16	08:46:00	0
2009-04-16	08:47:00	0
2009-04-16	08:48:00	0
2009-04-16	08:49:00	0
2009-04-16	08:50:00	0
2009-04-16	08:51:00	0
2009-04-16	08:52:00	0
2009-04-16	08:53:00	0
2009-04-16	08:54:00	0
2009-04-16	08:55:00	0
2009-04-16	08:56:00	0
2009-04-16	08:57:00	0
2009-04-16	08:58:00	0
2009-04-16	08:59:00	0
2009-04-16	09:00:00	0
2009-04-16	09:01:00	0
2009-04-16	09:02:00	0
2009-04-16	09:03:00	0
2009-04-16	09:04:00	0
2009-04-16	09:05:00	0
2009-04-16	09:06:00	0
2009-04-16	09:07:00	0
2009-04-16	09:08:00	0
2009-04-16	09:09:00	0
2009-04-16	09:10:00	0
2009-04-16	09:11:00	0
2009-04-16	09:12:00	0
2009-04-16	09:13:00	0
2009-04-16	09:14:00	0
2009-04-16	09:15:00	0
2009-04-16	09:16:00	0
2009-04-16	09:17:00	0
2009-04-16	09:18:00	0
2009-04-16	09:19:00	0
2009-04-16	09:20:00	0
2009-04-16	09:21:00	0
2009-04-16	09:22:00	0
2009-04-16	09:23:00	0
2009-04-16	09:24:00	0
2009-04-16	09:25:00	0
2009-04-16	09:26:00	0
2009-04-16	09:27:00	0
2009-04-16	09:28:00	0
2009-04-16	09:29:00	0
2009-04-16	09:30:00	0
2009-04-16	09:31:00	0
2009-04-16	09:32:00	0
2009-04-16	09:33:00	0
2009-04-16	09:34:00	0
2009-04-16	09:35:00	0
2009-04-16	09:36:00	0
2009-04-16	09:37:00	0
2009-04-16	09:38:00	0
2009-04-16	09:39:00	0
2009-04-16	09:40:00	0
2009-04-16	09:41:00	0
2009-04-16	09:42:00	0
2009-04-16	09:43:00	0
2009-04-16	09:44:00	0
2009-04-16	09:45:00	0
2009-04-16	09:46:00	0
2009-04-16	09:47:00	0
2009-04-16	09:48:00	0
2009-04-16	09:49:00	0
2009-04-16	09:50:00	0
2009-04-16	09:51:00	0
2009-04-16	09:52:00	0
2009-04-16	09:53:00	0
2009-04-16	09:54:00	0
2009-04-16	09:55:00	0
2009-04-16	09:56:00	0
2009-04-16	09:57:00	0
2009-04-16	09:58:00	0
2009-04-16	09:59:00	0
2009-04-16	10:00:00	0
2009-04-16	10:01:00	0
2009-04-16	10:02:00	0
2009-04-16	10:03:00	0
2009-04-16	10:04:00	0
2009-04-16	10:05:00	0
2009-04-16	10:06:00	0
2009-04-16	10:07:00	0
2009-04-16	10:08:00	0
2009-04-16	10:09:00	0
2009-04-16	10:10:00	0
2009-04-16	10:11:00	0
2009-04-16	10:12:00	0
2009-04-16	10:13:00	0
2009-04-16	10:14:00	0
2009-04-16	10:15:00	0
2009-04-16	10:16:00	0
2009-04-16	10:17:00	0
2009-04-16	10:18:00	0
2009-04-16	10:19:00	0
2009-04-16	10:20:00	0
2009-04-16	10:21:00	0
2009-04-16	10:22:00	0
2009-04-16	10:23:00	0
2009-04-16	10:24:00	0
2009-04-16	10:25:00	0
2009-04-16	10:26:00	0
2009-04-16	10:27:00	0
2009-04-16	10:28:00	0
2009-04-16	10:29:00	0
2009-04-16	10:30:00	0
2009-04-16	10:31:00	0
2009-04-16	10:32:00	0
2009-04-16	10:33:00	0
2009-04-16	10:34:00	0
2009-04-16	10:35:00	0
2009-04-16	10:36:00	0
2009-04-16	10:37:00	0
2009-04-16	10:38:00	0
2009-04-16	10:39:00	0
2009-04-16	10:40:00	0
2009-04-16	10:41:00	0
2009-04-16	10:42:00	0
2009-04-16	10:43:00	0
2009-04-16	10:44:00	0
2009-04-16	10:45:00	0
2009-04-16	10:46:00	0
2009-04-16	10:47:00	0
2009-04-16	10:48:00	0
2009-04-16	10:49:00	0
2009-04-16	10:50:00	0
2009-04-16	10:51:00	0
2009-04-16	10:52:00	0
2009-04-16	10:53:00	0
2009-04-16	10:54:00	0
2009-04-16	10:55:00	0
2009-04-16	10:56:00	0
2009-04-16	10:57:00	0
2009-04-16	10:58:00	0
2009-04-16	10:59:00	0
2009-04-16	11:00:00	0
2009-04-16	11:01:00	0
2009-04-16	11:02:00	0
2009-04-16	11:03:00	0
2009-04-16	11:04:00	0
2009-04-16	11:05:00	0
2009-04-16	11:06:00	0
2009-04-16	11:07:00	0
2009-04-16	11:08:00	0
2009-04-16	11:09:00	0
2009-04-16	11:10:00	0
2009-04-16	11:11:00	0
2009-04-16	11:12:00	0
2009-04-16	11:13:00	0
2009-04-16	11:14:00	0
2009-04-16	11:15:00	0
2009-04-16	11:16:00	0
2009-04-16	11:17:00	0
2009-04-16	11:18:00	0
2009-04-16	11:19:00	0
2009-04-16	11:20:00	0
2009-04-16	11:21:00	0
2009-04-16	11:22:00	0
2009-04-16	11:23:00	0
2009-04-16	11:24:00	0
2009-04-16	11:25:00	0
2009-04-16	11:26:00	0
2009-04-16	11:27:00	0
2009-04-16	11:28:00	0
2009-04-16	11:29:00	0
2009-04-16	11:30:00	0
2009-04-16	11:31:00	0
2009-04-16	11:32:00	0
2009-04-16	11:33:00	0
2009-04-16	11:34:00	0
2009-04-16	11:35:00	0
2009-04-16	11:36:00	0
2009-04-16	11:37:00	0
2009-04-16	11:38:00	0
2009-04-16	11:39:00	0
2009-04-16	11:40:00	0
2009-04-16	11:41:00	0
2009-04-16	11:42:00	0
2009-04-16	11:43:00	0
2009-04-16	11:44:00	0
2009-04-16	11:45:00	0
2009-04-16	11:46:00	0
2009-04-16	11:47:00	0
2009-04-16	11:48:00	0
2009-04-16	11:49:00	0
2009-04-16	11:50:00	0
2009-04-16	11:51:00	0
2009-04-16	11:52:00	0
2009-04-16	11:53:00	0
2009-04-16	11:54:00	0
2009-04-16	11:55:00	0
2009-04-16	11:56:00	0
2009-04-16	11:57:00	0
2009-04-16	11:58:00	0
2009-04-16	11:59:00	0
2009-04-16	12:00:00	0
2009-04-16	12:01:00	0
2009-04-16	12:02:00	0
2009-04-16	12:03:00	0
2009-04-16	12:04:00	0
2009-04-16	12:05:00	0
2009-04-16	12:06:00	0
2009-04-16	12:07:00	0
2009-04-16	12:08:00	0
2009-04-16	12:09:00	0
2009-04-16	12:10:00	0
2009-04-16	12:11:00	0
2009-04-16	12:12:00	0
2009-04-16	12:13:00	0
2009-04-16	12:14:00	0
2009-04-16	12:15:00	0
2009-04-16	12:16:00	0
2009-04-16	12:17:00	0
2009-04-16	12:18:00	0
2009-04-16	12:19:00	0
2009-04-16	12:20:00	0
2009-04-16	12:21:00	0
2009-04-16	12:22:00	0
2009-04-16	12:23:00	0
2009-04-16	12:24:00	0
2009-04-16	12:25:00	0
2009-04-16	12:26:00	0
2009-04-16	12:27:00	0
2009-04-16	12:28:00	0
2009-04-16	12:29:00	0
2009-04-16	12:30:00	0
2009-04-16	12:31:00	0
2009-04-16	12:32:00	0
2009-04-16	12:33:00	0
2009-04-16	12:34:00	0
2009-04-16	12:35:00	0
2009-04-16	12:36:00	0
2009-04-16	12:37:00	0
2009-04-16	12:38:00	0
2009-04-16	12:39:00	0
2009-04-16	12:40:00	0
2009-04-16	12:41:00	0
2009-04-16	12:42:00	0
2009-04-16	12:43:00	0
2009-04-16	12:44:00	0
2009-04-16	12:45:00	0
2009-04-16	12:46:00	0
2009-04-16	12:47:00	0
2009-04-16	12:48:00	0
2009-04-16	12:49:00	0
2009-04-16	12:50:00	0
2009-04-16	12:51:00	0
2009-04-16	12:52:00	0
2009-04-16	12:53:00	0
2009-04-16	12:54:00	0
2009-04-16	12:55:00	0
2009-04-16	12:56:00	0
2009-04-16	12:57:00	0
2009-04-16	12:58:00	0
2009-04-16	12:59:00	0
2009-04-16	13:00:00	0
2009-04-16	13:01:00	0
2009-04-16	13:02:00	0
2009-04-16	13:03:00	0
2009-04-16	13:04:00	0
2009-04-16	13:05:00	0
2009-04-16	13:06:00	0
2009-04-16	13:07:00	0
2009-04-16	13:08:00	0
2009-04-16	13:09:00	0
2009-04-16	13:10:00	0
2009-04-16	13:11:00	0
2009-04-16	13:12:00	0
2009-04-16	13:13:00	0
2009-04-16	13:14:00	0
2009-04-16	13:15:00	0
2009-04-16	13:16:00	0
2009-04-16	13:17:00	0
2009-04-16	13:18:00	0
2009-04-16	13:19:00	0
2009-04-16	13:20:00	0
2009-04-16	13:21:00	0
2009-04-16	13:22:00	0
2009-04-16	13:23:00	0
2009-04-16	13:24:00	0
2009-04-16	13:25:00	0
2009-04-16	13:26:00	0
2009-04-16	13:27:00	0
2009-04-16	13:28:00	0
2009-04-16	13:29:00	0
2009-04-16	13:30:00	0
2009-04-16	13:31:00	0
2009-04-16	13:32:00	0
2009-04-16	13:33:00	0
2009-04-16	13:34:00	0
2009-04-16	13:35:00	0
2009-04-16	13:36:00	0
2009-04-16	13:37:00	0
2009-04-16	13:38:00	0
2009-04-16	13:39:00	0
2009-04-16	13:40:00	0
2009-04-16	13:41:00	0
2009-04-16	13:42:00	0
2009-04-16	13:43:00	0
2009-04-16	13:44:00	0
2009-04-16	13:45:00	0
2009-04-16	13:46:00	0
2009-04-16	13:47:00	0
2009-04-16	13:48:00	0
2009-04-16	13:49:00	0
2009-04-16	13:50:00	0
2009-04-16	13:51:00	0
2009-04-16	13:52:00	0
2009-04-16	13:53:00	0
2009-04-16	13:54:00	0
2009-04-16	13:55:00	0
2009-04-16	13:56:00	0
2009-04-16	13:57:00	0
2009-04-16	13:58:00	0
2009-04-16	13:59:00	0
2009-04-16	14:00:00	0
2009-04-16	14:01:00	0
2009-04-16	14:02:00	0
2009-04-16	14:03:00	0
2009-04-16	14:04:00	0
2009-04-16	14:05:00	0
2009-04-16	14:06:00	0
2009-04-16	14:07:00	0
2009-04-16	14:08:00	0
2009-04-16	14:09:00	0
2009-04-16	14:10:00	0
2009-04-16	14:11:00	0
2009-04-16	14:12:00	0
2009-04-16	14:13:00	0
2009-04-16	14:14:00	0
2009-04-16	14:15:00	0
2009-04-16	14:16:00	0
2009-04-16	14:17:00	0
2009-04-16	14:18:00	0
2009-04-16	14:19:00	0
2009-04-16	14:20:00	0
2009-04-16	14:21:00	0
2009-04-16	14:22:00	0
2009-04-16	14:23:00	0
2009-04-16	14:24:00	0
2009-04-16	14:25:00	0
2009-04-16	14:26:00	0
2009-04-16	14:27:00	0
2009-04-16	14:28:00	0
2009-04-16	14:29:00	0
2009-04-16	14:30:00	0
2009-04-16	14:31:00	0
2009-04-16	14:32:00	0
2009-04-16	14:33:00	0
2009-04-16	14:34:00	0
2009-04-16	14:35:00	0
2009-04-16	14:36:00	0
2009-04-16	14:37:00	0
2009-04-16	14:38:00	0
2009-04-16	14:39:00	0
2009-04-16	14:40:00	0
2009-04-16	14:41:00	0
2009-04-16	14:42:00	0
2009-04-16	14:43:00	0
2009-04-16	14:44:00	0
2009-04-16	14:45:00	0
2009-04-16	14:46:00	0
2009-04-16	14:47:00	0
2009-04-16	14:48:00	0
2009-04-16	14:49:00	0
2009-04-16	14:50:00	0
2009-04-16	14:51:00	0
2009-04-16	14:52:00	0
2009-04-16	14:53:00	0
2009-04-16	14:54:00	0
2009-04-16	14:55:00	0
2009-04-16	14:56:00	0
2009-04-16	14:57:00	0
2009-04-16	14:58:00	0
2009-04-16	14:59:00	0
2009-04-16	15:00:00	0
2009-04-16	15:01:00	0
2009-04-16	15:02:00	0
2009-04-16	15:03:00	0
2009-04-16	15:04:00	0
2009-04-16	15:05:00	0
2009-04-16	15:06:00	0
2009-04-16	15:07:00	0
2009-04-16	15:08:00	0
2009-04-16	15:09:00	0
2009-04-16	15:10:00	0
2009-04-16	15:11:00	0
2009-04-16	15:12:00	0
2009-04-16	15:13:00	0
2009-04-16	15:14:00	0
2009-04-16	15:15:00	0
2009-04-16	15:16:00	0
2009-04-16	15:17:00	0
2009-04-16	15:18:00	0
2009-04-16	15:19:00	0
2009-04-16	15:20:00	0
2009-04-16	15:21:00	0
2009-04-16	15:22:00	0
2009-04-16	15:23:00	0
2009-04-16	15:24:00	0
2009-04-16	15:25:00	0
2009-04-16	15:26:00	0
2009-04-16	15:27:00	0
2009-04-16	15:28:00	0
2009-04-16	15:29:00	0
2009-04-16	15:30:00	0
2009-04-16	15:31:00	0
2009-04-16	15:32:00	0
2009-04-16	15:33:00	0
2009-04-16	15:34:00	0
2009-04-16	15:35:00	0
2009-04-16	15:36:00	0
2009-04-16	15:37:00	0
2009-04-16	15:38:00	0
2009-04-16	15:39:00	0
2009-04-16	15:40:00	0
2009-04-16	15:41:00	0
2009-04-16	15:42:00	0
2009-04-16	15:43:00	0
2009-04-16	15:44:00	0
2009-04-16	15:45:00	0
2009-04-16	15:46:00	0
2009-04-16	15:47:00	0
2009-04-16	15:48:00	0
2009-04-16	15:49:00	0
2009-04-16	15:50:00	0
2009-04-16	15:51:00	0
2009-04-16	15:52:00	0
2009-04-16	15:53:00	0
2009-04-16	15:54:00	0
2009-04-16	15:55:00	0
2009-04-16	15:56:00	0
2009-04-16	15:57:00	0
2009-04-16	15:58:00	0
2009-04-16	15:59:00	0
2009-04-16	16:00:00	0
2009-04-16	16:01:00	0
2009-04-16	16:02:00	0
2009-04-16	16:03:00	0
2009-04-16	16:04:00	0
2009-04-16	16:05:00	0
2009-04-16	16:06:00	0
2009-04-16	16:07:00	0
2009-04-16	16:08:00	0
2009-04-16	16:09:00	0
2009-04-16	16:10:00	0
2009-04-16	16:11:00	0
2009-04-16	16:12:00	0
2009-04-16	16:13:00	0
2009-04-16	16:14:00	0
2009-04-16	16:15:00	0
2009-04-16	16:16:00	0
2009-04-16	16:17:00	0
2009-04-16	16:18:00	0
2009-04-16	16:19:00	0
2009-04-16	16:20:00	0
2009-04-16	16:21:00	0
2009-04-16	16:22:00	0
2009-04-16	16:23:00	0
2009-04-16	16:24:00	0
2009-04-16	16:25:00	0
2009-04-16	16:26:00	0
2009-04-16	16:27:00	0
2009-04-16	16:28:00	0
2009-04-16	16:29:00	0
2009-04-16	16:30:00	0
2009-04-16	16:31:00	0
2009-04-16	16:32:00	0
2009-04-16	16:33:00	0
2009-04-16	16:34:00	0
2009-04-16	16:35:00	0
2009-04-16	16:36:00	0
2009-04-16	16:37:00	0
2009-04-16	16:38:00	0
2009-04-16	16:39:00	0
2009-04-16	16:40:00	0
2009-04-16	16:41:00	0
2009-04-16	16:42:00	0
2009-04-16	16:43:00	0
2009-04-16	16:44:00	0
2009-04-16	16:45:00	0
2009-04-16	16:46:00	0
2009-04-16	16:47:00	0
2009-04-16	16:48:00	0
2009-04-16	16:49:00	0
2009-04-16	16:50:00	0
2009-04-16	16:51:00	0
2009-04-16	16:52:00	0
2009-04-16	16:53:00	0
2009-04-16	16:54:00	0
2009-04-16	16:55:00	0
2009-04-16	16:56:00	0
2009-04-16	16:57:00	0
2009-04-16	16:58:00	0
2009-04-16	16:59:00	0
2009-04-16	17:00:00	0
2009-04-16	17:01:00	0
2009-04-16	17:02:00	0
2009-04-16	17:03:00	0
2009-04-16	17:04:00	0
2009-04-16	17:05:00	0
2009-04-16	17:06:00	0
2009-04-16	17:07:00	0
2009-04-16	17:08:00	0
2009-04-16	17:09:00	0
2009-04-16	17:10:00	0
2009-04-16	17:11:00	0
2009-04-16	17:12:00	0
2009-04-16	17:13:00	0
2009-04-16	17:14:00	0
2009-04-16	17:15:00	0
2009-04-16	17:16:00	0
2009-04-16	17:17:00	0
2009-04-16	17:18:00	0
2009-04-16	17:19:00	0
2009-04-16	17:20:00	0
2009-04-16	17:21:00	0
2009-04-16	17:22:00	0
2009-04-16	17:23:00	0
2009-04-16	17:24:00	0
2009-04-16	17:25:00	0
2009-04-16	17:26:00	0
2009-04-16	17:27:00	0
2009-04-16	17:28:00	0
2009-04-16	17:29:00	0
2009-04-16	17:30:00	0
2009-04-16	17:31:00	0
2009-04-16	17:32:00	0
2009-04-16	17:33:00	0
2009-04-16	17:34:00	0
2009-04-16	17:35:00	0
2009-04-16	17:36:00	0
2009-04-16	17:37:00	0
2009-04-16	17:38:00	0
2009-04-16	17:39:00	0
2009-04-16	17:40:00	0
2009-04-16	17:41:00	0
2009-04-16	17:42:00	0
2009-04-16	17:43:00	0
2009-04-16	17:44:00	0
2009-04-16	17:45:00	0
2009-04-16	17:46:00	0
2009-04-16	17:47:00	0
2009-04-16	17:48:00	0
2009-04-16	17:49:00	0
2009-04-16	17:50:00	0
2009-04-16	17:51:00	0
2009-04-16	17:52:00	0
2009-04-16	17:53:00	0
2009-04-16	17:54:00	0
2009-04-16	17:55:00	0
2009-04-16	17:56:00	0
2009-04-16	17:57:00	0
2009-04-16	17:58:00	0
2009-04-16	17:59:00	0
2009-04-16	18:00:00	0	M
2009-04-16	18:01:00	0
2009-04-16	18:02:00	0
2009-04-16	18:03:00	0
2009-04-16	18:04:00	0
2009-04-16	18:05:00	0
2009-04-16	18:06:00	0
2009-04-16	18:07:00	0
2009-04-16	18:08:00	128
2009-04-16	18:09:00	228
2009-04-16	18:10:00	0
2009-04-16	18:11:00	0
2009-04-16	18:12:00	0
2009-04-16	18:13:00	0
2009-04-16	18:14:00	0
2009-04-16	18:15:00	0
2009-04-16	18:16:00	0
2009-04-16	18:17:00	0
2009-04-16	18:18:00	0
2009-04-16	18:19:00	0
2009-04-16	18:20:00	0
2009-04-16	18:21:00	0
2009-04-16	18:22:00	51
2009-04-16	18:23:00	102
2009-04-16	18:24:00	102
2009-04-16	18:25:00	141
2009-04-16	18:26:00	13
2009-04-16	18:27:00	0
2009-04-16	18:28:00	0
2009-04-16	18:29:00	0
2009-04-16	18:30:00	873
2009-04-16	18:31:00	243
2009-04-16	18:32:00	13
2009-04-16	18:33:00	0
2009-04-16	18:34:00	0
2009-04-16	18:35:00	51
2009-04-16	18:36:00	0
2009-04-16	18:37:00	0
2009-04-16	18:38:00	0
2009-04-16	18:39:00	0
2009-04-16	18:40:00	51
2009-04-16	18:41:00	0
2009-04-16	18:42:00	0
2009-04-16	18:43:00	0
2009-04-16	18:44:00	0
2009-04-16	18:45:00	0
2009-04-16	18:46:00	13
2009-04-16	18:47:00	0
2009-04-16	18:48:00	873
2009-04-16	18:49:00	1633
2009-04-16	18:50:00	1562
2009-04-16	18:51:00	212
2009-04-16	18:52:00	640
2009-04-16	18:53:00	443
2009-04-16	18:54:00	517
2009-04-16	18:55:00	660
2009-04-16	18:56:00	228
2009-04-16	18:57:00	166
2009-04-16	18:58:00	620
2009-04-16	18:59:00	353
2009-04-16	19:00:00	182
2009-04-16	19:01:00	847
2009-04-16	19:02:00	115
2009-04-16	19:03:00	0
2009-04-16	19:04:00	128
2009-04-16	19:05:00	90
2009-04-16	19:06:00	102
2009-04-16	19:07:00	154
2009-04-16	19:08:00	0
2009-04-16	19:09:00	0
2009-04-16	19:10:00	0
2009-04-16	19:11:00	0
2009-04-16	19:12:00	0
2009-04-16	19:13:00	0
2009-04-16	19:14:00	289
2009-04-16	19:15:00	166
2009-04-16	19:16:00	274
2009-04-16	19:17:00	335
2009-04-16	19:18:00	479
2009-04-16	19:19:00	425
2009-04-16	19:20:00	115
2009-04-16	19:21:00	26
2009-04-16	19:22:00	353
2009-04-16	19:23:00	38
2009-04-16	19:24:00	13
2009-04-16	19:25:00	0
2009-04-16	19:26:00	13
2009-04-16	19:27:00	0
2009-04-16	19:28:00	13
2009-04-16	19:29:00	0
2009-04-16	19:30:00	0
2009-04-16	19:31:00	0
2009-04-16	19:32:00	0
2009-04-16	19:33:00	0
2009-04-16	19:34:00	0
2009-04-16	19:35:00	0
2009-04-16	19:36:00	13
2009-04-16	19:37:00	0
2009-04-16	19:38:00	0
2009-04-16	19:39:00	0
2009-04-16	19:40:00	13
2009-04-16	19:41:00	26
2009-04-16	19:42:00	13
2009-04-16	19:43:00	0
2009-04-16	19:44:00	0
2009-04-16	19:45:00	0
2009-04-16	19:46:00	13
2009-04-16	19:47:00	0
2009-04-16	19:48:00	13
2009-04-16	19:49:00	243
2009-04-16	19:50:00	0
2009-04-16	19:51:00	0
2009-04-16	19:52:00	182
2009-04-16	19:53:00	38
2009-04-16	19:54:00	0
2009-04-16	19:55:00	0
2009-04-16	19:56:00	0
2009-04-16	19:57:00	0
2009-04-16	19:58:00	0
2009-04-16	19:59:00	289
2009-04-16	20:00:00	0
2009-04-16	20:01:00	0
2009-04-16	20:02:00	0
2009-04-16	20:03:00	0
2009-04-16	20:04:00	0
2009-04-16	20:05:00	0
2009-04-16	20:06:00	0
2009-04-16	20:07:00	0
2009-04-16	20:08:00	0
2009-04-16	20:09:00	0
2009-04-16	20:10:00	0
2009-04-16	20:11:00	0
2009-04-16	20:12:00	0
2009-04-16	20:13:00	0
2009-04-16	20:14:00	0
2009-04-16	20:15:00	0
2009-04-16	20:16:00	0
2009-04-16	20:17:00	0
2009-04-16	20:18:00	0
2009-04-16	20:19:00	141
2009-04-16	20:20:00	13
2009-04-16	20:21:00	0
2009-04-16	20:22:00	38
2009-04-16	20:23:00	0
2009-04-16	20:24:00	243
2009-04-16	20:25:00	335
2009-04-16	20:26:00	38
2009-04-16	20:27:00	0
2009-04-16	20:28:00	0
2009-04-16	20:29:00	0
2009-04-16	20:30:00	0
2009-04-16	20:31:00	0
2009-04-16	20:32:00	182
2009-04-16	20:33:00	141
2009-04-16	20:34:00	90
2009-04-16	20:35:00	0
2009-04-16	20:36:00	0
2009-04-16	20:37:00	0
2009-04-16	20:38:00	0
2009-04-16	20:39:00	0
2009-04-16	20:40:00	0
2009-04-16	20:41:00	0
2009-04-16	20:42:00	0
2009-04-16	20:43:00	353
2009-04-16	20:44:00	259
2009-04-16	20:45:00	0
2009-04-16	20:46:00	0
2009-04-16	20:47:00	0
2009-04-16	20:48:00	0
2009-04-16	20:49:00	0
2009-04-16	20:50:00	0
2009-04-16	20:51:00	0
2009-04-16	20:52:00	0
2009-04-16	20:53:00	0
2009-04-16	20:54:00	0
2009-04-16	20:55:00	0
2009-04-16	20:56:00	0
2009-04-16	20:57:00	0
2009-04-16	20:58:00	13
2009-04-16	20:59:00	0
2009-04-16	21:00:00	0
2009-04-16	21:01:00	0
2009-04-16	21:02:00	0
2009-04-16	21:03:00	0
2009-04-16	21:04:00	0
2009-04-16	21:05:00	0
2009-04-16	21:06:00	0
2009-04-16	21:07:00	0
2009-04-16	21:08:00	0
2009-04-16	21:09:00	0
2009-04-16	21:10:00	289
2009-04-16	21:11:00	950
2009-04-16	21:12:00	425
2009-04-16	21:13:00	599
2009-04-16	21:14:00	517
2009-04-16	21:15:00	228
2009-04-16	21:16:00	558
2009-04-16	21:17:00	305
2009-04-16	21:18:00	243
2009-04-16	21:19:00	274
2009-04-16	21:20:00	228
2009-04-16	21:21:00	38
2009-04-16	21:22:00	38
2009-04-16	21:23:00	0
2009-04-16	21:24:00	0
2009-04-16	21:25:00	0
2009-04-16	21:26:00	0
2009-04-16	21:27:00	0
2009-04-16	21:28:00	0
2009-04-16	21:29:00	0
2009-04-16	21:30:00	13
2009-04-16	21:31:00	13
2009-04-16	21:32:00	90
2009-04-16	21:33:00	461
2009-04-16	21:34:00	353
2009-04-16	21:35:00	0
2009-04-16	21:36:00	13
2009-04-16	21:37:00	0
2009-04-16	21:38:00	13
2009-04-16	21:39:00	0
2009-04-16	21:40:00	0
2009-04-16	21:41:00	0
2009-04-16	21:42:00	0
2009-04-16	21:43:00	0
2009-04-16	21:44:00	0
2009-04-16	21:45:00	0
2009-04-16	21:46:00	0
2009-04-16	21:47:00	0
2009-04-16	21:48:00	0
2009-04-16	21:49:00	0
2009-04-16	21:50:00	13
2009-04-16	21:51:00	0
2009-04-16	21:52:00	0
2009-04-16	21:53:00	0
2009-04-16	21:54:00	0
2009-04-16	21:55:00	0
2009-04-16	21:56:00	0
2009-04-16	21:57:00	0
2009-04-16	21:58:00	51
2009-04-16	21:59:00	0
2009-04-16	22:00:00	0
2009-04-16	22:01:00	0
2009-04-16	22:02:00	0
2009-04-16	22:03:00	0
2009-04-16	22:04:00	0
2009-04-16	22:05:00	0
2009-04-16	22:06:00	0
2009-04-16	22:07:00	0
2009-04-16	22:08:00	77
2009-04-16	22:09:00	38
2009-04-16	22:10:00	0
2009-04-16	22:11:00	0
2009-04-16	22:12:00	0
2009-04-16	22:13:00	0
2009-04-16	22:14:00	0
2009-04-16	22:15:00	0
2009-04-16	22:16:00	0
2009-04-16	22:17:00	0
2009-04-16	22:18:00	0
2009-04-16	22:19:00	0
2009-04-16	22:20:00	0
2009-04-16	22:21:00	0
2009-04-16	22:22:00	0
2009-04-16	22:23:00	0
2009-04-16	22:24:00	38
2009-04-16	22:25:00	0
2009-04-16	22:26:00	0
2009-04-16	22:27:00	0
2009-04-16	22:28:00	0
2009-04-16	22:29:00	0
2009-04-16	22:30:00	243
2009-04-16	22:31:00	38
2009-04-16	22:32:00	13
2009-04-16	22:33:00	0
2009-04-16	22:34:00	0
2009-04-16	22:35:00	26
2009-04-16	22:36:00	13
2009-04-16	22:37:00	13
2009-04-16	22:38:00	26
2009-04-16	22:39:00	51
2009-04-16	22:40:00	0
2009-04-16	22:41:00	0
2009-04-16	22:42:00	0
2009-04-16	22:43:00	0
2009-04-16	22:44:00	0
2009-04-16	22:45:00	0
2009-04-16	22:46:00	0
2009-04-16	22:47:00	0
2009-04-16	22:48:00	0
2009-04-16	22:49:00	13
2009-04-16	22:50:00	0
2009-04-16	22:51:00	0
2009-04-16	22:52:00	0
2009-04-16	22:53:00	0
2009-04-16	22:54:00	0
2009-04-16	22:55:00	0
2009-04-16	22:56:00	0
2009-04-16	22:57:00	0
2009-04-16	22:58:00	0
2009-04-16	22:59:00	0
2009-04-16	23:00:00	0
2009-04-16	23:01:00	0
2009-04-16	23:02:00	0
2009-04-16	23:03:00	0
2009-04-16	23:04:00	0
2009-04-16	23:05:00	0
2009-04-16	23:06:00	0
2009-04-16	23:07:00	0
2009-04-16	23:08:00	0
2009-04-16	23:09:00	0
2009-04-16	23:10:00	0
2009-04-16	23:11:00	0
2009-04-16	23:12:00	0
2009-04-16	23:13:00	0
2009-04-16	23:14:00	0
2009-04-16	23:15:00	0
2009-04-16	23:16:00	0
2009-04-16	23:17:00	0
2009-04-16	23:18:00	0
2009-04-16	23:19:00	0
2009-04-16	23:20:00	0
2009-04-16	23:21:00	0
2009-04-16	23:22:00	0
2009-04-16	23:23:00	0
2009-04-16	23:24:00	0
2009-04-16	23:25:00	0
2009-04-16	23:26:00	0
2009-04-16	23:27:00	0
2009-04-16	23:28:00	0
2009-04-16	23:29:00	0
2009-04-16	23:30:00	0
2009-04-16	23:31:00	0
2009-04-16	23:32:00	0
2009-04-16	23:33:00	0
2009-04-16	23:34:00	0
2009-04-16	23:35:00	0
2009-04-16	23:36:00	0
2009-04-16	23:37:00	0
2009-04-16	23:38:00	0
2009-04-16	23:39:00	0
2009-04-16	23:40:00	0
2009-04-16	23:41:00	0
2009-04-16	23:42:00	0
2009-04-16	23:43:00	0
2009-04-16	23:44:00	0
2009-04-16	23:45:00	0
2009-04-16	23:46:00	0
2009-04-16	23:47:00	0
2009-04-16	23:48:00	0
2009-04-16	23:49:00	0
2009-04-16	23:50:00	0
2009-04-16	23:51:00	0
2009-04-16	23:52:00	0
2009-04-16	23:53:00	0
2009-04-16	23:54:00	0
2009-04-16	23:55:00	0
2009-04-16	23:56:00	0
2009-04-16	23:57:00	0
2009-04-16	23:58:00	0
2009-04-16	23:59:00	0
2009-04-17	00:00:00	0
2009-04-17	00:01:00	0
2009-04-17	00:02:00	0
2009-04-17	00:03:00	0
2009-04-17	00:04:00	0
2009-04-17	00:05:00	0
2009-04-17	00:06:00	0
2009-04-17	00:07:00	0
2009-04-17	00:08:00	0
2009-04-17	00:09:00	0
2009-04-17	00:10:00	0
2009-04-17	00:11:00	0
2009-04-17	00:12:00	0
2009-04-17	00:13:00	0
2009-04-17	00:14:00	0
2009-04-17	00:15:00	0
2009-04-17	00:16:00	0
2009-04-17	00:17:00	0
2009-04-17	00:18:00	0
2009-04-17	00:19:00	0
2009-04-17	00:20:00	0
2009-04-17	00:21:00	0
2009-04-17	00:22:00	0
2009-04-17	00:23:00	0
2009-04-17	00:24:00	0
2009-04-17	00:25:00	0
2009-04-17	00:26:00	0
2009-04-17	00:27:00	0
2009-04-17	00:28:00	0
2009-04-17	00:29:00	0
2009-04-17	00:30:00	0
2009-04-17	00:31:00	0
2009-04-17	00:32:00	0
2009-04-17	00:33:00	0
2009-04-17	00:34:00	0
2009-04-17	00:35:00	0
2009-04-17	00:36:00	0
2009-04-17	00:37:00	0
2009-04-17	00:38:00	0
2009-04-17	00:39:00	0
2009-04-17	00:40:00	0
2009-04-17	00:41:00	0
2009-04-17	00:42:00	0
2009-04-17	00:43:00	0
2009-04-17	00:44:00	0
2009-04-17	00:45:00	0
2009-04-17	00:46:00	0
2009-04-17	00:47:00	0
2009-04-17	00:48:00	0
2009-04-17	00:49:00	0
2009-04-17	00:50:00	0
2009-04-17	00:51:00	0
2009-04-17	00:52:00	0
2009-04-17	00:53:00	0
2009-04-17	00:54:00	0
2009-04-17	00:55:00	0
2009-04-17	00:56:00	0
2009-04-17	00:57:00	0
2009-04-17	00:58:00	0
2009-04-17	00:59:00	0
2009-04-17	01:00:00	0
2009-04-17	01:01:00	0
2009-04-17	01:02:00	0
2009-04-17	01:03:00	0
2009-04-17	01:04:00	0
2009-04-17	01:05:00	0
2009-04-17	01:06:00	0
2009-04-17	01:07:00	0
2009-04-17	01:08:00	0
2009-04-17	01:09:00	0
2009-04-17	01:10:00	13
2009-04-17	01:11:00	0
2009-04-17	01:12:00	0
2009-04-17	01:13:00	102
2009-04-17	01:14:00	38
2009-04-17	01:15:00	0
2009-04-17	01:16:00	0
2009-04-17	01:17:00	0
2009-04-17	01:18:00	0
2009-04-17	01:19:00	0
2009-04-17	01:20:00	0
2009-04-17	01:21:00	0
2009-04-17	01:22:00	0
2009-04-17	01:23:00	0
2009-04-17	01:24:00	0
2009-04-17	01:25:00	0
2009-04-17	01:26:00	0
2009-04-17	01:27:00	0
2009-04-17	01:28:00	0
2009-04-17	01:29:00	0
2009-04-17	01:30:00	0
2009-04-17	01:31:00	0
2009-04-17	01:32:00	13
2009-04-17	01:33:00	38
2009-04-17	01:34:00	0
2009-04-17	01:35:00	0
2009-04-17	01:36:00	0
2009-04-17	01:37:00	0
2009-04-17	01:38:00	0
2009-04-17	01:39:00	0
2009-04-17	01:40:00	0
2009-04-17	01:41:00	0
2009-04-17	01:42:00	0
2009-04-17	01:43:00	0
2009-04-17	01:44:00	0
2009-04-17	01:45:00	0
2009-04-17	01:46:00	0
2009-04-17	01:47:00	0
2009-04-17	01:48:00	0
2009-04-17	01:49:00	0
2009-04-17	01:50:00	0
2009-04-17	01:51:00	0
2009-04-17	01:52:00	0
2009-04-17	01:53:00	0
2009-04-17	01:54:00	0
2009-04-17	01:55:00	0
2009-04-17	01:56:00	0
2009-04-17	01:57:00	0
2009-04-17	01:58:00	0
2009-04-17	01:59:00	0
2009-04-17	02:00:00	0
2009-04-17	02:01:00	0
2009-04-17	02:02:00	0
2009-04-17	02:03:00	0
2009-04-17	02:04:00	0
2009-04-17	02:05:00	0
2009-04-17	02:06:00	0
2009-04-17	02:07:00	0
2009-04-17	02:08:00	0
2009-04-17	02:09:00	0
2009-04-17	02:10:00	0
2009-04-17	02:11:00	0
2009-04-17	02:12:00	0
2009-04-17	02:13:00	0
2009-04-17	02:14:00	0
2009-04-17	02:15:00	0
2009-04-17	02:16:00	0
2009-04-17	02:17:00	0
2009-04-17	02:18:00	0
2009-04-17	02:19:00	0
2009-04-17	02:20:00	0
2009-04-17	02:21:00	0
2009-04-17	02:22:00	0
2009-04-17	02:23:00	0
2009-04-17	02:24:00	0
2009-04-17	02:25:00	0
2009-04-17	02:26:00	0
2009-04-17	02:27:00	13
2009-04-17	02:28:00	13
2009-04-17	02:29:00	26
2009-04-17	02:30:00	0
2009-04-17	02:31:00	0
2009-04-17	02:32:00	0
2009-04-17	02:33:00	0
2009-04-17	02:34:00	0
2009-04-17	02:35:00	0
2009-04-17	02:36:00	0
2009-04-17	02:37:00	0
2009-04-17	02:38:00	0
2009-04-17	02:39:00	0
2009-04-17	02:40:00	0
2009-04-17	02:41:00	0
2009-04-17	02:42:00	0
2009-04-17	02:43:00	0
2009-04-17	02:44:00	0
2009-04-17	02:45:00	0
2009-04-17	02:46:00	0
2009-04-17	02:47:00	0
2009-04-17	02:48:00	0
2009-04-17	02:49:00	0
2009-04-17	02:50:00	26
2009-04-17	02:51:00	13
2009-04-17	02:52:00	0
2009-04-17	02:53:00	0
2009-04-17	02:54:00	0
2009-04-17	02:55:00	0
2009-04-17	02:56:00	0
2009-04-17	02:57:00	0
2009-04-17	02:58:00	0
2009-04-17	02:59:00	0
2009-04-17	03:00:00	0
2009-04-17	03:01:00	0
2009-04-17	03:02:00	0
2009-04-17	03:03:00	0
2009-04-17	03:04:00	0
2009-04-17	03:05:00	0
2009-04-17	03:06:00	0
2009-04-17	03:07:00	0
2009-04-17	03:08:00	0
2009-04-17	03:09:00	0
2009-04-17	03:10:00	0
2009-04-17	03:11:00	0
2009-04-17	03:12:00	0
2009-04-17	03:13:00	0
2009-04-17	03:14:00	0
2009-04-17	03:15:00	13
2009-04-17	03:16:00	0
2009-04-17	03:17:00	26
2009-04-17	03:18:00	13
2009-04-17	03:19:00	51
2009-04-17	03:20:00	0
2009-04-17	03:21:00	0
2009-04-17	03:22:00	0
2009-04-17	03:23:00	0
2009-04-17	03:24:00	0
2009-04-17	03:25:00	0
2009-04-17	03:26:00	0
2009-04-17	03:27:00	0
2009-04-17	03:28:00	0
2009-04-17	03:29:00	0
2009-04-17	03:30:00	0
2009-04-17	03:31:00	0
2009-04-17	03:32:00	0
2009-04-17	03:33:00	0
2009-04-17	03:34:00	0
2009-04-17	03:35:00	0
2009-04-17	03:36:00	0
2009-04-17	03:37:00	0
2009-04-17	03:38:00	0
2009-04-17	03:39:00	0
2009-04-17	03:40:00	0
2009-04-17	03:41:00	0
2009-04-17	03:42:00	0
2009-04-17	03:43:00	0
2009-04-17	03:44:00	0
2009-04-17	03:45:00	0
2009-04-17	03:46:00	0
2009-04-17	03:47:00	0
2009-04-17	03:48:00	0
2009-04-17	03:49:00	0
2009-04-17	03:50:00	0
2009-04-17	03:51:00	0
2009-04-17	03:52:00	0
2009-04-17	03:53:00	0
2009-04-17	03:54:00	0
2009-04-17	03:55:00	0
2009-04-17	03:56:00	0
2009-04-17	03:57:00	0
2009-04-17	03:58:00	0
2009-04-17	03:59:00	0
2009-04-17	04:00:00	0
2009-04-17	04:01:00	0
2009-04-17	04:02:00	0
2009-04-17	04:03:00	0
2009-04-17	04:04:00	0
2009-04-17	04:05:00	0
2009-04-17	04:06:00	0
2009-04-17	04:07:00	0
2009-04-17	04:08:00	0
2009-04-17	04:09:00	0
2009-04-17	04:10:00	0
2009-04-17	04:11:00	0
2009-04-17	04:12:00	0
2009-04-17	04:13:00	0
2009-04-17	04:14:00	0
2009-04-17	04:15:00	0
2009-04-17	04:16:00	0
2009-04-17	04:17:00	0
2009-04-17	04:18:00	0
2009-04-17	04:19:00	0
2009-04-17	04:20:00	0
2009-04-17	04:21:00	0
2009-04-17	04:22:00	0
2009-04-17	04:23:00	0
2009-04-17	04:24:00	0
2009-04-17	04:25:00	0
2009-04-17	04:26:00	0
2009-04-17	04:27:00	0
2009-04-17	04:28:00	0
2009-04-17	04:29:00	0
2009-04-17	04:30:00	0
2009-04-17	04:31:00	0
2009-04-17	04:32:00	0
2009-04-17	04:33:00	0
2009-04-17	04:34:00	0
2009-04-17	04:35:00	0
2009-04-17	04:36:00	0
2009-04-17	04:37:00	0
2009-04-17	04:38:00	0
2009-04-17	04:39:00	0
2009-04-17	04:40:00	0
2009-04-17	04:41:00	0
2009-04-17	04:42:00	0
2009-04-17	04:43:00	0
2009-04-17	04:44:00	0
2009-04-17	04:45:00	0
2009-04-17	04:46:00	0
2009-04-17	04:47:00	0
2009-04-17	04:48:00	0
2009-04-17	04:49:00	0
2009-04-17	04:50:00	0
2009-04-17	04:51:00	0
2009-04-17	04:52:00	0
2009-04-17	04:53:00	0
2009-04-17	04:54:00	0
2009-04-17	04:55:00	0
2009-04-17	04:56:00	0
2009-04-17	04:57:00	0
2009-04-17	04:58:00	0
2009-04-17	04:59:00	0
2009-04-17	05:00:00	0
2009-04-17	05:01:00	0
2009-04-17	05:02:00	0
2009-04-17	05:03:00	0
2009-04-17	05:04:00	0
2009-04-17	05:05:00	0
2009-04-17	05:06:00	0
2009-04-17	05:07:00	0
2009-04-17	05:08:00	0
2009-04-17	05:09:00	0
2009-04-17	05:10:00	0
2009-04-17	05:11:00	0
2009-04-17	05:12:00	0
2009-04-17	05:13:00	0
2009-04-17	05:14:00	13
2009-04-17	05:15:00	0
2009-04-17	05:16:00	0
2009-04-17	05:17:00	0
2009-04-17	05:18:00	0
2009-04-17	05:19:00	0
2009-04-17	05:20:00	0
2009-04-17	05:21:00	38
2009-04-17	05:22:00	0
2009-04-17	05:23:00	0
2009-04-17	05:24:00	0
2009-04-17	05:25:00	13
2009-04-17	05:26:00	0
2009-04-17	05:27:00	0
2009-04-17	05:28:00	0
2009-04-17	05:29:00	0
2009-04-17	05:30:00	0
2009-04-17	05:31:00	0
2009-04-17	05:32:00	0
2009-04-17	05:33:00	13
2009-04-17	05:34:00	90
2009-04-17	05:35:00	26
2009-04-17	05:36:00	0
2009-04-17	05:37:00	0
2009-04-17	05:38:00	26
2009-04-17	05:39:00	0
2009-04-17	05:40:00	0
2009-04-17	05:41:00	0
2009-04-17	05:42:00	0
2009-04-17	05:43:00	0
2009-04-17	05:44:00	0
2009-04-17	05:45:00	0
2009-04-17	05:46:00	0
2009-04-17	05:47:00	0
2009-04-17	05:48:00	0
2009-04-17	05:49:00	0
2009-04-17	05:50:00	0
2009-04-17	05:51:00	0
2009-04-17	05:52:00	0
2009-04-17	05:53:00	0
2009-04-17	05:54:00	0
2009-04-17	05:55:00	26
2009-04-17	05:56:00	0
2009-04-17	05:57:00	0
2009-04-17	05:58:00	0
2009-04-17	05:59:00	0
2009-04-17	06:00:00	0
2009-04-17	06:01:00	0
2009-04-17	06:02:00	0
2009-04-17	06:03:00	0
2009-04-17	06:04:00	0
2009-04-17	06:05:00	0
2009-04-17	06:06:00	0
2009-04-17	06:07:00	0
2009-04-17	06:08:00	0
2009-04-17	06:09:00	0
2009-04-17	06:10:00	0
2009-04-17	06:11:00	0
2009-04-17	06:12:00	0
2009-04-17	06:13:00	0
2009-04-17	06:14:00	0
2009-04-17	06:15:00	0
2009-04-17	06:16:00	0
2009-04-17	06:17:00	0
2009-04-17	06:18:00	0
2009-04-17	06:19:00	77
2009-04-17	06:20:00	13
2009-04-17	06:21:00	320
2009-04-17	06:22:00	51
2009-04-17	06:23:00	335
2009-04-17	06:24:00	274
2009-04-17	06:25:00	64
2009-04-17	06:26:00	13
2009-04-17	06:27:00	13
2009-04-17	06:28:00	182
2009-04-17	06:29:00	0
2009-04-17	06:30:00	0
2009-04-17	06:31:00	1457
2009-04-17	06:32:00	950
2009-04-17	06:33:00	1262
2009-04-17	06:34:00	320
2009-04-17	06:35:00	389
2009-04-17	06:36:00	407
2009-04-17	06:37:00	197
2009-04-17	06:38:00	443
2009-04-17	06:39:00	497
2009-04-17	06:40:00	579
2009-04-17	06:41:00	77
2009-04-17	06:42:00	335
2009-04-17	06:43:00	0
2009-04-17	06:44:00	305
2009-04-17	06:45:00	115
2009-04-17	06:46:00	102
2009-04-17	06:47:00	0
2009-04-17	06:48:00	305
2009-04-17	06:49:00	274
2009-04-17	06:50:00	0
2009-04-17	06:51:00	0
2009-04-17	06:52:00	0
2009-04-17	06:53:00	0
2009-04-17	06:54:00	128
2009-04-17	06:55:00	26
2009-04-17	06:56:00	38
2009-04-17	06:57:00	13
2009-04-17	06:58:00	320
2009-04-17	06:59:00	26
2009-04-17	07:00:00	305
2009-04-17	07:01:00	0
2009-04-17	07:02:00	182
2009-04-17	07:03:00	90
2009-04-17	07:04:00	13
2009-04-17	07:05:00	0
2009-04-17	07:06:00	0
2009-04-17	07:07:00	371
2009-04-17	07:08:00	0
2009-04-17	07:09:00	0
2009-04-17	07:10:00	0
2009-04-17	07:11:00	0
2009-04-17	07:12:00	38
2009-04-17	07:13:00	0
2009-04-17	07:14:00	0
2009-04-17	07:15:00	0
2009-04-17	07:16:00	0
2009-04-17	07:17:00	0
2009-04-17	07:18:00	26
2009-04-17	07:19:00	13
2009-04-17	07:20:00	0
2009-04-17	07:21:00	0
2009-04-17	07:22:00	0
2009-04-17	07:23:00	0
2009-04-17	07:24:00	13
2009-04-17	07:25:00	0
2009-04-17	07:26:00	0
2009-04-17	07:27:00	0
2009-04-17	07:28:00	0
2009-04-17	07:29:00	353
2009-04-17	07:30:00	517
2009-04-17	07:31:00	90
2009-04-17	07:32:00	479
2009-04-17	07:33:00	461
2009-04-17	07:34:00	38
2009-04-17	07:35:00	0
2009-04-17	07:36:00	77
2009-04-17	07:37:00	0
2009-04-17	07:38:00	115
2009-04-17	07:39:00	51
2009-04-17	07:40:00	13
2009-04-17	07:41:00	0
2009-04-17	07:42:00	141
2009-04-17	07:43:00	0
2009-04-17	07:44:00	0
2009-04-17	07:45:00	0
2009-04-17	07:46:00	0
2009-04-17	07:47:00	0
2009-04-17	07:48:00	0
2009-04-17	07:49:00	0
2009-04-17	07:50:00	0
2009-04-17	07:51:00	0
2009-04-17	07:52:00	102
2009-04-17	07:53:00	13
2009-04-17	07:54:00	0
2009-04-17	07:55:00	0
2009-04-17	07:56:00	0
2009-04-17	07:57:00	0
2009-04-17	07:58:00	0
2009-04-17	07:59:00	0
2009-04-17	08:00:00	0
2009-04-17	08:01:00	0
2009-04-17	08:02:00	0
2009-04-17	08:03:00	0
2009-04-17	08:04:00	0
2009-04-17	08:05:00	0
2009-04-17	08:06:00	0
2009-04-17	08:07:00	0
2009-04-17	08:08:00	0
2009-04-17	08:09:00	0
2009-04-17	08:10:00	0
2009-04-17	08:11:00	0
2009-04-17	08:12:00	0
2009-04-17	08:13:00	0
2009-04-17	08:14:00	0
2009-04-17	08:15:00	0
2009-04-17	08:16:00	0
2009-04-17	08:17:00	0
2009-04-17	08:18:00	0
2009-04-17	08:19:00	0
2009-04-17	08:20:00	0
2009-04-17	08:21:00	0
2009-04-17	08:22:00	0
2009-04-17	08:23:00	38
2009-04-17	08:24:00	0
2009-04-17	08:25:00	0
2009-04-17	08:26:00	335
2009-04-17	08:27:00	90
2009-04-17	08:28:00	0
2009-04-17	08:29:00	0
2009-04-17	08:30:00	0
2009-04-17	08:31:00	0
2009-04-17	08:32:00	0
2009-04-17	08:33:00	90
2009-04-17	08:34:00	0
2009-04-17	08:35:00	0
2009-04-17	08:36:00	0
2009-04-17	08:37:00	0
2009-04-17	08:38:00	0
2009-04-17	08:39:00	0
2009-04-17	08:40:00	13
2009-04-17	08:41:00	0
2009-04-17	08:42:00	0
2009-04-17	08:43:00	0
2009-04-17	08:44:00	0
2009-04-17	08:45:00	0
2009-04-17	08:46:00	0
2009-04-17	08:47:00	0
2009-04-17	08:48:00	0
2009-04-17	08:49:00	0
2009-04-17	08:50:00	0
2009-04-17	08:51:00	0
2009-04-17	08:52:00	51
2009-04-17	08:53:00	0
2009-04-17	08:54:00	0
2009-04-17	08:55:00	0
2009-04-17	08:56:00	0
2009-04-17	08:57:00	0
2009-04-17	08:58:00	0
2009-04-17	08:59:00	0
2009-04-17	09:00:00	0
2009-04-17	09:01:00	0
2009-04-17	09:02:00	0
2009-04-17	09:03:00	0
2009-04-17	09:04:00	0
2009-04-17	09:05:00	0
2009-04-17	09:06:00	0
2009-04-17	09:07:00	0
2009-04-17	09:08:00	0
[truncated: 19,611 more rows]

[truncated: 3 more sheets: 4.30.09, 5.14.09, 5.28.09]
