# Supplementary material for: Initial evaluation of nighttime restlessness in a naturally occurring canine model of osteoarthritis pain
Source: PeerJ. 2015 Feb 17;3:e772. doi: 10.7717/peerj.772 (PMC4340376; doi:10.7717/peerj.772)
Supplement: Supplemental Information 29 [file peerj-03-772-s029.xlsx]

## Sheet: Office Visits
Visit Date	Visit Number
2009-02-20 06:00:00	1
2009-03-06 06:00:00	2
2009-03-20 06:00:00	3
2009-03-30 06:00:00	4
2009-04-20 06:00:00	5
2009-05-04 06:00:00	6
2009-05-18 06:00:00	7
2009-06-01 06:00:00	8
2009-06-15 06:00:00	9

## Sheet: 29_Data
Segment	DateTime	Activity	Hour	Quadrant	Study Day	Weekday
1	2009-02-27 06:01:00	0	6	2	7	6
1	2009-02-27 06:02:00	0	6	2	7	6
1	2009-02-27 06:03:00	12	6	2	7	6
1	2009-02-27 06:04:00	0	6	2	7	6
1	2009-02-27 06:05:00	0	6	2	7	6
1	2009-02-27 06:06:00	0	6	2	7	6
1	2009-02-27 06:07:00	0	6	2	7	6
1	2009-02-27 06:08:00	70	6	2	7	6
1	2009-02-27 06:09:00	0	6	2	7	6
1	2009-02-27 06:10:00	0	6	2	7	6
1	2009-02-27 06:11:00	0	6	2	7	6
1	2009-02-27 06:12:00	0	6	2	7	6
1	2009-02-27 06:13:00	0	6	2	7	6
1	2009-02-27 06:14:00	0	6	2	7	6
1	2009-02-27 06:15:00	0	6	2	7	6
1	2009-02-27 06:16:00	0	6	2	7	6
1	2009-02-27 06:17:00	0	6	2	7	6
1	2009-02-27 06:18:00	0	6	2	7	6
1	2009-02-27 06:19:00	0	6	2	7	6
1	2009-02-27 06:20:00	0	6	2	7	6
1	2009-02-27 06:21:00	0	6	2	7	6
1	2009-02-27 06:22:00	0	6	2	7	6
1	2009-02-27 06:23:00	0	6	2	7	6
1	2009-02-27 06:24:00	0	6	2	7	6
1	2009-02-27 06:25:00	0	6	2	7	6
1	2009-02-27 06:26:00	0	6	2	7	6
1	2009-02-27 06:27:00	0	6	2	7	6
1	2009-02-27 06:28:00	0	6	2	7	6
1	2009-02-27 06:29:00	0	6	2	7	6
1	2009-02-27 06:30:00	0	6	2	7	6
1	2009-02-27 06:31:00	47	6	2	7	6
1	2009-02-27 06:32:00	0	6	2	7	6
1	2009-02-27 06:33:00	0	6	2	7	6
1	2009-02-27 06:34:00	0	6	2	7	6
1	2009-02-27 06:35:00	0	6	2	7	6
1	2009-02-27 06:36:00	0	6	2	7	6
1	2009-02-27 06:37:00	0	6	2	7	6
1	2009-02-27 06:38:00	58	6	2	7	6
1	2009-02-27 06:39:00	0	6	2	7	6
1	2009-02-27 06:40:00	0	6	2	7	6
1	2009-02-27 06:41:00	0	6	2	7	6
1	2009-02-27 06:42:00	0	6	2	7	6
1	2009-02-27 06:43:00	0	6	2	7	6
1	2009-02-27 06:44:00	863	6	2	7	6
1	2009-02-27 06:45:00	0	6	2	7	6
1	2009-02-27 06:46:00	0	6	2	7	6
1	2009-02-27 06:47:00	0	6	2	7	6
1	2009-02-27 06:48:00	0	6	2	7	6
1	2009-02-27 06:49:00	0	6	2	7	6
1	2009-02-27 06:50:00	23	6	2	7	6
1	2009-02-27 06:51:00	0	6	2	7	6
1	2009-02-27 06:52:00	0	6	2	7	6
1	2009-02-27 06:53:00	0	6	2	7	6
1	2009-02-27 06:54:00	116	6	2	7	6
1	2009-02-27 06:55:00	305	6	2	7	6
1	2009-02-27 06:56:00	817	6	2	7	6
1	2009-02-27 06:57:00	249	6	2	7	6
1	2009-02-27 06:58:00	2979	6	2	7	6
1	2009-02-27 06:59:00	93	6	2	7	6
1	2009-02-27 07:00:00	116	6	2	7	6
1	2009-02-27 07:01:00	193	7	2	7	6
1	2009-02-27 07:02:00	12	7	2	7	6
1	2009-02-27 07:03:00	93	7	2	7	6
1	2009-02-27 07:04:00	961	7	2	7	6
1	2009-02-27 07:05:00	705	7	2	7	6
1	2009-02-27 07:06:00	451	7	2	7	6
1	2009-02-27 07:07:00	1091	7	2	7	6
1	2009-02-27 07:08:00	435	7	2	7	6
1	2009-02-27 07:09:00	354	7	2	7	6
1	2009-02-27 07:10:00	305	7	2	7	6
1	2009-02-27 07:11:00	81	7	2	7	6
1	2009-02-27 07:12:00	81	7	2	7	6
1	2009-02-27 07:13:00	179	7	2	7	6
1	2009-02-27 07:14:00	419	7	2	7	6
1	2009-02-27 07:15:00	794	7	2	7	6
1	2009-02-27 07:16:00	337	7	2	7	6
1	2009-02-27 07:17:00	70	7	2	7	6
1	2009-02-27 07:18:00	582	7	2	7	6
1	2009-02-27 07:19:00	263	7	2	7	6
1	2009-02-27 07:20:00	0	7	2	7	6
1	2009-02-27 07:21:00	0	7	2	7	6
1	2009-02-27 07:22:00	0	7	2	7	6
1	2009-02-27 07:23:00	0	7	2	7	6
1	2009-02-27 07:24:00	0	7	2	7	6
1	2009-02-27 07:25:00	58	7	2	7	6
1	2009-02-27 07:26:00	235	7	2	7	6
1	2009-02-27 07:27:00	12	7	2	7	6
1	2009-02-27 07:28:00	0	7	2	7	6
1	2009-02-27 07:29:00	0	7	2	7	6
1	2009-02-27 07:30:00	0	7	2	7	6
1	2009-02-27 07:31:00	0	7	2	7	6
1	2009-02-27 07:32:00	128	7	2	7	6
1	2009-02-27 07:33:00	0	7	2	7	6
1	2009-02-27 07:34:00	105	7	2	7	6
1	2009-02-27 07:35:00	35	7	2	7	6
1	2009-02-27 07:36:00	140	7	2	7	6
1	2009-02-27 07:37:00	0	7	2	7	6
1	2009-02-27 07:38:00	116	7	2	7	6
1	2009-02-27 07:39:00	105	7	2	7	6
1	2009-02-27 07:40:00	0	7	2	7	6
1	2009-02-27 07:41:00	23	7	2	7	6
1	2009-02-27 07:42:00	0	7	2	7	6
1	2009-02-27 07:43:00	0	7	2	7	6
1	2009-02-27 07:44:00	0	7	2	7	6
1	2009-02-27 07:45:00	0	7	2	7	6
1	2009-02-27 07:46:00	0	7	2	7	6
1	2009-02-27 07:47:00	0	7	2	7	6
1	2009-02-27 07:48:00	23	7	2	7	6
1	2009-02-27 07:49:00	12	7	2	7	6
1	2009-02-27 07:50:00	0	7	2	7	6
1	2009-02-27 07:51:00	0	7	2	7	6
1	2009-02-27 07:52:00	0	7	2	7	6
1	2009-02-27 07:53:00	0	7	2	7	6
1	2009-02-27 07:54:00	0	7	2	7	6
1	2009-02-27 07:55:00	403	7	2	7	6
1	2009-02-27 07:56:00	370	7	2	7	6
1	2009-02-27 07:57:00	0	7	2	7	6
1	2009-02-27 07:58:00	263	7	2	7	6
1	2009-02-27 07:59:00	386	7	2	7	6
1	2009-02-27 08:00:00	0	7	2	7	6
1	2009-02-27 08:01:00	0	8	2	7	6
1	2009-02-27 08:02:00	0	8	2	7	6
1	2009-02-27 08:03:00	0	8	2	7	6
1	2009-02-27 08:04:00	0	8	2	7	6
1	2009-02-27 08:05:00	0	8	2	7	6
1	2009-02-27 08:06:00	23	8	2	7	6
1	2009-02-27 08:07:00	128	8	2	7	6
1	2009-02-27 08:08:00	0	8	2	7	6
1	2009-02-27 08:09:00	0	8	2	7	6
1	2009-02-27 08:10:00	0	8	2	7	6
1	2009-02-27 08:11:00	0	8	2	7	6
1	2009-02-27 08:12:00	35	8	2	7	6
1	2009-02-27 08:13:00	12	8	2	7	6
1	2009-02-27 08:14:00	0	8	2	7	6
1	2009-02-27 08:15:00	0	8	2	7	6
1	2009-02-27 08:16:00	105	8	2	7	6
1	2009-02-27 08:17:00	0	8	2	7	6
1	2009-02-27 08:18:00	642	8	2	7	6
1	2009-02-27 08:19:00	151	8	2	7	6
1	2009-02-27 08:20:00	0	8	2	7	6
1	2009-02-27 08:21:00	47	8	2	7	6
1	2009-02-27 08:22:00	545	8	2	7	6
1	2009-02-27 08:23:00	12	8	2	7	6
1	2009-02-27 08:24:00	0	8	2	7	6
1	2009-02-27 08:25:00	0	8	2	7	6
1	2009-02-27 08:26:00	221	8	2	7	6
1	2009-02-27 08:27:00	0	8	2	7	6
1	2009-02-27 08:28:00	179	8	2	7	6
1	2009-02-27 08:29:00	0	8	2	7	6
1	2009-02-27 08:30:00	370	8	2	7	6
1	2009-02-27 08:31:00	0	8	2	7	6
1	2009-02-27 08:32:00	0	8	2	7	6
1	2009-02-27 08:33:00	0	8	2	7	6
1	2009-02-27 08:34:00	151	8	2	7	6
1	2009-02-27 08:35:00	0	8	2	7	6
1	2009-02-27 08:36:00	0	8	2	7	6
1	2009-02-27 08:37:00	0	8	2	7	6
1	2009-02-27 08:38:00	0	8	2	7	6
1	2009-02-27 08:39:00	0	8	2	7	6
1	2009-02-27 08:40:00	0	8	2	7	6
1	2009-02-27 08:41:00	0	8	2	7	6
1	2009-02-27 08:42:00	0	8	2	7	6
1	2009-02-27 08:43:00	0	8	2	7	6
1	2009-02-27 08:44:00	0	8	2	7	6
1	2009-02-27 08:45:00	0	8	2	7	6
1	2009-02-27 08:46:00	0	8	2	7	6
1	2009-02-27 08:47:00	0	8	2	7	6
1	2009-02-27 08:48:00	0	8	2	7	6
1	2009-02-27 08:49:00	0	8	2	7	6
1	2009-02-27 08:50:00	0	8	2	7	6
1	2009-02-27 08:51:00	0	8	2	7	6
1	2009-02-27 08:52:00	0	8	2	7	6
1	2009-02-27 08:53:00	0	8	2	7	6
1	2009-02-27 08:54:00	0	8	2	7	6
1	2009-02-27 08:55:00	0	8	2	7	6
1	2009-02-27 08:56:00	0	8	2	7	6
1	2009-02-27 08:57:00	0	8	2	7	6
1	2009-02-27 08:58:00	0	8	2	7	6
1	2009-02-27 08:59:00	0	8	2	7	6
1	2009-02-27 09:00:00	0	8	2	7	6
1	2009-02-27 09:01:00	35	9	2	7	6
1	2009-02-27 09:02:00	0	9	2	7	6
1	2009-02-27 09:03:00	563	9	2	7	6
1	2009-02-27 09:04:00	305	9	2	7	6
1	2009-02-27 09:05:00	489	9	2	7	6
1	2009-02-27 09:06:00	386	9	2	7	6
1	2009-02-27 09:07:00	93	9	2	7	6
1	2009-02-27 09:08:00	165	9	2	7	6
1	2009-02-27 09:09:00	0	9	2	7	6
1	2009-02-27 09:10:00	0	9	2	7	6
1	2009-02-27 09:11:00	0	9	2	7	6
1	2009-02-27 09:12:00	0	9	2	7	6
1	2009-02-27 09:13:00	0	9	2	7	6
1	2009-02-27 09:14:00	0	9	2	7	6
1	2009-02-27 09:15:00	81	9	2	7	6
1	2009-02-27 09:16:00	0	9	2	7	6
1	2009-02-27 09:17:00	0	9	2	7	6
1	2009-02-27 09:18:00	0	9	2	7	6
1	2009-02-27 09:19:00	0	9	2	7	6
1	2009-02-27 09:20:00	0	9	2	7	6
1	2009-02-27 09:21:00	0	9	2	7	6
1	2009-02-27 09:22:00	12	9	2	7	6
1	2009-02-27 09:23:00	12	9	2	7	6
1	2009-02-27 09:24:00	0	9	2	7	6
1	2009-02-27 09:25:00	35	9	2	7	6
1	2009-02-27 09:26:00	0	9	2	7	6
1	2009-02-27 09:27:00	0	9	2	7	6
1	2009-02-27 09:28:00	0	9	2	7	6
1	2009-02-27 09:29:00	23	9	2	7	6
1	2009-02-27 09:30:00	0	9	2	7	6
1	2009-02-27 09:31:00	0	9	2	7	6
1	2009-02-27 09:32:00	207	9	2	7	6
1	2009-02-27 09:33:00	0	9	2	7	6
1	2009-02-27 09:34:00	0	9	2	7	6
1	2009-02-27 09:35:00	0	9	2	7	6
1	2009-02-27 09:36:00	0	9	2	7	6
1	2009-02-27 09:37:00	0	9	2	7	6
1	2009-02-27 09:38:00	0	9	2	7	6
1	2009-02-27 09:39:00	0	9	2	7	6
1	2009-02-27 09:40:00	23	9	2	7	6
1	2009-02-27 09:41:00	0	9	2	7	6
1	2009-02-27 09:42:00	93	9	2	7	6
1	2009-02-27 09:43:00	321	9	2	7	6
1	2009-02-27 09:44:00	0	9	2	7	6
1	2009-02-27 09:45:00	12	9	2	7	6
1	2009-02-27 09:46:00	0	9	2	7	6
1	2009-02-27 09:47:00	0	9	2	7	6
1	2009-02-27 09:48:00	0	9	2	7	6
1	2009-02-27 09:49:00	0	9	2	7	6
1	2009-02-27 09:50:00	0	9	2	7	6
1	2009-02-27 09:51:00	0	9	2	7	6
1	2009-02-27 09:52:00	0	9	2	7	6
1	2009-02-27 09:53:00	23	9	2	7	6
1	2009-02-27 09:54:00	0	9	2	7	6
1	2009-02-27 09:55:00	23	9	2	7	6
1	2009-02-27 09:56:00	0	9	2	7	6
1	2009-02-27 09:57:00	0	9	2	7	6
1	2009-02-27 09:58:00	12	9	2	7	6
1	2009-02-27 09:59:00	0	9	2	7	6
1	2009-02-27 10:00:00	249	9	2	7	6
1	2009-02-27 10:01:00	207	10	2	7	6
1	2009-02-27 10:02:00	0	10	2	7	6
1	2009-02-27 10:03:00	489	10	2	7	6
1	2009-02-27 10:04:00	207	10	2	7	6
1	2009-02-27 10:05:00	0	10	2	7	6
1	2009-02-27 10:06:00	0	10	2	7	6
1	2009-02-27 10:07:00	58	10	2	7	6
1	2009-02-27 10:08:00	193	10	2	7	6
1	2009-02-27 10:09:00	0	10	2	7	6
1	2009-02-27 10:10:00	0	10	2	7	6
1	2009-02-27 10:11:00	705	10	2	7	6
1	2009-02-27 10:12:00	35	10	2	7	6
1	2009-02-27 10:13:00	0	10	2	7	6
1	2009-02-27 10:14:00	12	10	2	7	6
1	2009-02-27 10:15:00	0	10	2	7	6
1	2009-02-27 10:16:00	0	10	2	7	6
1	2009-02-27 10:17:00	0	10	2	7	6
1	2009-02-27 10:18:00	12	10	2	7	6
1	2009-02-27 10:19:00	0	10	2	7	6
1	2009-02-27 10:20:00	0	10	2	7	6
1	2009-02-27 10:21:00	165	10	2	7	6
1	2009-02-27 10:22:00	35	10	2	7	6
1	2009-02-27 10:23:00	23	10	2	7	6
1	2009-02-27 10:24:00	81	10	2	7	6
1	2009-02-27 10:25:00	0	10	2	7	6
1	2009-02-27 10:26:00	23	10	2	7	6
1	2009-02-27 10:27:00	140	10	2	7	6
1	2009-02-27 10:28:00	0	10	2	7	6
1	2009-02-27 10:29:00	12	10	2	7	6
1	2009-02-27 10:30:00	0	10	2	7	6
1	2009-02-27 10:31:00	23	10	2	7	6
1	2009-02-27 10:32:00	0	10	2	7	6
1	2009-02-27 10:33:00	0	10	2	7	6
1	2009-02-27 10:34:00	23	10	2	7	6
1	2009-02-27 10:35:00	23	10	2	7	6
1	2009-02-27 10:36:00	0	10	2	7	6
1	2009-02-27 10:37:00	0	10	2	7	6
1	2009-02-27 10:38:00	12	10	2	7	6
1	2009-02-27 10:39:00	23	10	2	7	6
1	2009-02-27 10:40:00	0	10	2	7	6
1	2009-02-27 10:41:00	0	10	2	7	6
1	2009-02-27 10:42:00	0	10	2	7	6
1	2009-02-27 10:43:00	0	10	2	7	6
1	2009-02-27 10:44:00	249	10	2	7	6
1	2009-02-27 10:45:00	58	10	2	7	6
1	2009-02-27 10:46:00	35	10	2	7	6
1	2009-02-27 10:47:00	0	10	2	7	6
1	2009-02-27 10:48:00	0	10	2	7	6
1	2009-02-27 10:49:00	0	10	2	7	6
1	2009-02-27 10:50:00	1324	10	2	7	6
1	2009-02-27 10:51:00	0	10	2	7	6
1	2009-02-27 10:52:00	0	10	2	7	6
1	2009-02-27 10:53:00	0	10	2	7	6
1	2009-02-27 10:54:00	0	10	2	7	6
1	2009-02-27 10:55:00	0	10	2	7	6
1	2009-02-27 10:56:00	47	10	2	7	6
1	2009-02-27 10:57:00	0	10	2	7	6
1	2009-02-27 10:58:00	263	10	2	7	6
1	2009-02-27 10:59:00	0	10	2	7	6
1	2009-02-27 11:00:00	0	10	2	7	6
1	2009-02-27 11:01:00	0	11	2	7	6
1	2009-02-27 11:02:00	0	11	2	7	6
1	2009-02-27 11:03:00	23	11	2	7	6
1	2009-02-27 11:04:00	0	11	2	7	6
1	2009-02-27 11:05:00	0	11	2	7	6
1	2009-02-27 11:06:00	470	11	2	7	6
1	2009-02-27 11:07:00	116	11	2	7	6
1	2009-02-27 11:08:00	0	11	2	7	6
1	2009-02-27 11:09:00	0	11	2	7	6
1	2009-02-27 11:10:00	0	11	2	7	6
1	2009-02-27 11:11:00	0	11	2	7	6
1	2009-02-27 11:12:00	0	11	2	7	6
1	2009-02-27 11:13:00	12	11	2	7	6
1	2009-02-27 11:14:00	0	11	2	7	6
1	2009-02-27 11:15:00	0	11	2	7	6
1	2009-02-27 11:16:00	0	11	2	7	6
1	2009-02-27 11:17:00	0	11	2	7	6
1	2009-02-27 11:18:00	0	11	2	7	6
1	2009-02-27 11:19:00	0	11	2	7	6
1	2009-02-27 11:20:00	0	11	2	7	6
1	2009-02-27 11:21:00	0	11	2	7	6
1	2009-02-27 11:22:00	0	11	2	7	6
1	2009-02-27 11:23:00	23	11	2	7	6
1	2009-02-27 11:24:00	0	11	2	7	6
1	2009-02-27 11:25:00	0	11	2	7	6
1	2009-02-27 11:26:00	0	11	2	7	6
1	2009-02-27 11:27:00	0	11	2	7	6
1	2009-02-27 11:28:00	0	11	2	7	6
1	2009-02-27 11:29:00	0	11	2	7	6
1	2009-02-27 11:30:00	140	11	2	7	6
1	2009-02-27 11:31:00	0	11	2	7	6
1	2009-02-27 11:32:00	0	11	2	7	6
1	2009-02-27 11:33:00	0	11	2	7	6
1	2009-02-27 11:34:00	70	11	2	7	6
1	2009-02-27 11:35:00	0	11	2	7	6
1	2009-02-27 11:36:00	0	11	2	7	6
1	2009-02-27 11:37:00	0	11	2	7	6
1	2009-02-27 11:38:00	0	11	2	7	6
1	2009-02-27 11:39:00	0	11	2	7	6
1	2009-02-27 11:40:00	0	11	2	7	6
1	2009-02-27 11:41:00	47	11	2	7	6
1	2009-02-27 11:42:00	0	11	2	7	6
1	2009-02-27 11:43:00	0	11	2	7	6
1	2009-02-27 11:44:00	0	11	2	7	6
1	2009-02-27 11:45:00	0	11	2	7	6
1	2009-02-27 11:46:00	305	11	2	7	6
1	2009-02-27 11:47:00	0	11	2	7	6
1	2009-02-27 11:48:00	0	11	2	7	6
1	2009-02-27 11:49:00	151	11	2	7	6
1	2009-02-27 11:50:00	0	11	2	7	6
1	2009-02-27 11:51:00	0	11	2	7	6
1	2009-02-27 11:52:00	0	11	2	7	6
1	2009-02-27 11:53:00	70	11	2	7	6
1	2009-02-27 11:54:00	58	11	2	7	6
1	2009-02-27 11:55:00	235	11	2	7	6
1	2009-02-27 11:56:00	35	11	2	7	6
1	2009-02-27 11:57:00	12	11	2	7	6
1	2009-02-27 11:58:00	12	11	2	7	6
1	2009-02-27 11:59:00	0	11	2	7	6
1	2009-02-27 12:00:00	0	11	2	7	6
1	2009-02-27 12:01:00	0	12	3	7	6
1	2009-02-27 12:02:00	747	12	3	7	6
1	2009-02-27 12:03:00	23	12	3	7	6
1	2009-02-27 12:04:00	0	12	3	7	6
1	2009-02-27 12:05:00	0	12	3	7	6
1	2009-02-27 12:06:00	235	12	3	7	6
1	2009-02-27 12:07:00	0	12	3	7	6
1	2009-02-27 12:08:00	35	12	3	7	6
1	2009-02-27 12:09:00	58	12	3	7	6
1	2009-02-27 12:10:00	0	12	3	7	6
1	2009-02-27 12:11:00	0	12	3	7	6
1	2009-02-27 12:12:00	0	12	3	7	6
1	2009-02-27 12:13:00	0	12	3	7	6
1	2009-02-27 12:14:00	105	12	3	7	6
1	2009-02-27 12:15:00	0	12	3	7	6
1	2009-02-27 12:16:00	0	12	3	7	6
1	2009-02-27 12:17:00	0	12	3	7	6
1	2009-02-27 12:18:00	0	12	3	7	6
1	2009-02-27 12:19:00	0	12	3	7	6
1	2009-02-27 12:20:00	0	12	3	7	6
1	2009-02-27 12:21:00	0	12	3	7	6
1	2009-02-27 12:22:00	0	12	3	7	6
1	2009-02-27 12:23:00	0	12	3	7	6
1	2009-02-27 12:24:00	0	12	3	7	6
1	2009-02-27 12:25:00	0	12	3	7	6
1	2009-02-27 12:26:00	0	12	3	7	6
1	2009-02-27 12:27:00	0	12	3	7	6
1	2009-02-27 12:28:00	0	12	3	7	6
1	2009-02-27 12:29:00	0	12	3	7	6
1	2009-02-27 12:30:00	0	12	3	7	6
1	2009-02-27 12:31:00	0	12	3	7	6
1	2009-02-27 12:32:00	235	12	3	7	6
1	2009-02-27 12:33:00	0	12	3	7	6
1	2009-02-27 12:34:00	0	12	3	7	6
1	2009-02-27 12:35:00	0	12	3	7	6
1	2009-02-27 12:36:00	0	12	3	7	6
1	2009-02-27 12:37:00	35	12	3	7	6
1	2009-02-27 12:38:00	0	12	3	7	6
1	2009-02-27 12:39:00	0	12	3	7	6
1	2009-02-27 12:40:00	12	12	3	7	6
1	2009-02-27 12:41:00	116	12	3	7	6
1	2009-02-27 12:42:00	70	12	3	7	6
1	2009-02-27 12:43:00	470	12	3	7	6
1	2009-02-27 12:44:00	12	12	3	7	6
1	2009-02-27 12:45:00	0	12	3	7	6
1	2009-02-27 12:46:00	0	12	3	7	6
1	2009-02-27 12:47:00	23	12	3	7	6
1	2009-02-27 12:48:00	0	12	3	7	6
1	2009-02-27 12:49:00	0	12	3	7	6
1	2009-02-27 12:50:00	35	12	3	7	6
1	2009-02-27 12:51:00	93	12	3	7	6
1	2009-02-27 12:52:00	0	12	3	7	6
1	2009-02-27 12:53:00	0	12	3	7	6
1	2009-02-27 12:54:00	0	12	3	7	6
1	2009-02-27 12:55:00	249	12	3	7	6
1	2009-02-27 12:56:00	0	12	3	7	6
1	2009-02-27 12:57:00	0	12	3	7	6
1	2009-02-27 12:58:00	0	12	3	7	6
1	2009-02-27 12:59:00	0	12	3	7	6
1	2009-02-27 13:00:00	0	12	3	7	6
1	2009-02-27 13:01:00	0	13	3	7	6
1	2009-02-27 13:02:00	0	13	3	7	6
1	2009-02-27 13:03:00	0	13	3	7	6
1	2009-02-27 13:04:00	0	13	3	7	6
1	2009-02-27 13:05:00	0	13	3	7	6
1	2009-02-27 13:06:00	0	13	3	7	6
1	2009-02-27 13:07:00	0	13	3	7	6
1	2009-02-27 13:08:00	0	13	3	7	6
1	2009-02-27 13:09:00	0	13	3	7	6
1	2009-02-27 13:10:00	0	13	3	7	6
1	2009-02-27 13:11:00	0	13	3	7	6
1	2009-02-27 13:12:00	0	13	3	7	6
1	2009-02-27 13:13:00	81	13	3	7	6
1	2009-02-27 13:14:00	0	13	3	7	6
1	2009-02-27 13:15:00	0	13	3	7	6
1	2009-02-27 13:16:00	0	13	3	7	6
1	2009-02-27 13:17:00	93	13	3	7	6
1	2009-02-27 13:18:00	0	13	3	7	6
1	2009-02-27 13:19:00	0	13	3	7	6
1	2009-02-27 13:20:00	0	13	3	7	6
1	2009-02-27 13:21:00	0	13	3	7	6
1	2009-02-27 13:22:00	35	13	3	7	6
1	2009-02-27 13:23:00	0	13	3	7	6
1	2009-02-27 13:24:00	0	13	3	7	6
1	2009-02-27 13:25:00	0	13	3	7	6
1	2009-02-27 13:26:00	0	13	3	7	6
1	2009-02-27 13:27:00	0	13	3	7	6
1	2009-02-27 13:28:00	0	13	3	7	6
1	2009-02-27 13:29:00	0	13	3	7	6
1	2009-02-27 13:30:00	12	13	3	7	6
1	2009-02-27 13:31:00	0	13	3	7	6
1	2009-02-27 13:32:00	0	13	3	7	6
1	2009-02-27 13:33:00	0	13	3	7	6
1	2009-02-27 13:34:00	0	13	3	7	6
1	2009-02-27 13:35:00	0	13	3	7	6
1	2009-02-27 13:36:00	0	13	3	7	6
1	2009-02-27 13:37:00	0	13	3	7	6
1	2009-02-27 13:38:00	0	13	3	7	6
1	2009-02-27 13:39:00	0	13	3	7	6
1	2009-02-27 13:40:00	0	13	3	7	6
1	2009-02-27 13:41:00	0	13	3	7	6
1	2009-02-27 13:42:00	0	13	3	7	6
1	2009-02-27 13:43:00	0	13	3	7	6
1	2009-02-27 13:44:00	0	13	3	7	6
1	2009-02-27 13:45:00	0	13	3	7	6
1	2009-02-27 13:46:00	0	13	3	7	6
1	2009-02-27 13:47:00	0	13	3	7	6
1	2009-02-27 13:48:00	0	13	3	7	6
1	2009-02-27 13:49:00	0	13	3	7	6
1	2009-02-27 13:50:00	0	13	3	7	6
1	2009-02-27 13:51:00	0	13	3	7	6
1	2009-02-27 13:52:00	47	13	3	7	6
1	2009-02-27 13:53:00	0	13	3	7	6
1	2009-02-27 13:54:00	0	13	3	7	6
1	2009-02-27 13:55:00	0	13	3	7	6
1	2009-02-27 13:56:00	0	13	3	7	6
1	2009-02-27 13:57:00	0	13	3	7	6
1	2009-02-27 13:58:00	0	13	3	7	6
1	2009-02-27 13:59:00	0	13	3	7	6
1	2009-02-27 14:00:00	0	13	3	7	6
1	2009-02-27 14:01:00	0	14	3	7	6
1	2009-02-27 14:02:00	0	14	3	7	6
1	2009-02-27 14:03:00	0	14	3	7	6
1	2009-02-27 14:04:00	0	14	3	7	6
1	2009-02-27 14:05:00	0	14	3	7	6
1	2009-02-27 14:06:00	0	14	3	7	6
1	2009-02-27 14:07:00	0	14	3	7	6
1	2009-02-27 14:08:00	0	14	3	7	6
1	2009-02-27 14:09:00	0	14	3	7	6
1	2009-02-27 14:10:00	0	14	3	7	6
1	2009-02-27 14:11:00	0	14	3	7	6
1	2009-02-27 14:12:00	0	14	3	7	6
1	2009-02-27 14:13:00	0	14	3	7	6
1	2009-02-27 14:14:00	0	14	3	7	6
1	2009-02-27 14:15:00	23	14	3	7	6
1	2009-02-27 14:16:00	770	14	3	7	6
1	2009-02-27 14:17:00	23	14	3	7	6
1	2009-02-27 14:18:00	0	14	3	7	6
1	2009-02-27 14:19:00	0	14	3	7	6
1	2009-02-27 14:20:00	23	14	3	7	6
1	2009-02-27 14:21:00	1091	14	3	7	6
1	2009-02-27 14:22:00	0	14	3	7	6
1	2009-02-27 14:23:00	23	14	3	7	6
1	2009-02-27 14:24:00	0	14	3	7	6
1	2009-02-27 14:25:00	58	14	3	7	6
1	2009-02-27 14:26:00	0	14	3	7	6
1	2009-02-27 14:27:00	0	14	3	7	6
1	2009-02-27 14:28:00	0	14	3	7	6
1	2009-02-27 14:29:00	47	14	3	7	6
1	2009-02-27 14:30:00	545	14	3	7	6
1	2009-02-27 14:31:00	0	14	3	7	6
1	2009-02-27 14:32:00	151	14	3	7	6
1	2009-02-27 14:33:00	0	14	3	7	6
1	2009-02-27 14:34:00	0	14	3	7	6
1	2009-02-27 14:35:00	35	14	3	7	6
1	2009-02-27 14:36:00	0	14	3	7	6
1	2009-02-27 14:37:00	0	14	3	7	6
1	2009-02-27 14:38:00	0	14	3	7	6
1	2009-02-27 14:39:00	0	14	3	7	6
1	2009-02-27 14:40:00	0	14	3	7	6
1	2009-02-27 14:41:00	35	14	3	7	6
1	2009-02-27 14:42:00	0	14	3	7	6
1	2009-02-27 14:43:00	0	14	3	7	6
1	2009-02-27 14:44:00	23	14	3	7	6
1	2009-02-27 14:45:00	0	14	3	7	6
1	2009-02-27 14:46:00	0	14	3	7	6
1	2009-02-27 14:47:00	0	14	3	7	6
1	2009-02-27 14:48:00	0	14	3	7	6
1	2009-02-27 14:49:00	0	14	3	7	6
1	2009-02-27 14:50:00	12	14	3	7	6
1	2009-02-27 14:51:00	0	14	3	7	6
1	2009-02-27 14:52:00	0	14	3	7	6
1	2009-02-27 14:53:00	0	14	3	7	6
1	2009-02-27 14:54:00	0	14	3	7	6
1	2009-02-27 14:55:00	0	14	3	7	6
1	2009-02-27 14:56:00	0	14	3	7	6
1	2009-02-27 14:57:00	0	14	3	7	6
1	2009-02-27 14:58:00	0	14	3	7	6
1	2009-02-27 14:59:00	0	14	3	7	6
1	2009-02-27 15:00:00	0	14	3	7	6
1	2009-02-27 15:01:00	0	15	3	7	6
1	2009-02-27 15:02:00	23	15	3	7	6
1	2009-02-27 15:03:00	0	15	3	7	6
1	2009-02-27 15:04:00	0	15	3	7	6
1	2009-02-27 15:05:00	0	15	3	7	6
1	2009-02-27 15:06:00	0	15	3	7	6
1	2009-02-27 15:07:00	0	15	3	7	6
1	2009-02-27 15:08:00	0	15	3	7	6
1	2009-02-27 15:09:00	0	15	3	7	6
1	2009-02-27 15:10:00	0	15	3	7	6
1	2009-02-27 15:11:00	0	15	3	7	6
1	2009-02-27 15:12:00	0	15	3	7	6
1	2009-02-27 15:13:00	207	15	3	7	6
1	2009-02-27 15:14:00	910	15	3	7	6
1	2009-02-27 15:15:00	794	15	3	7	6
1	2009-02-27 15:16:00	179	15	3	7	6
1	2009-02-27 15:17:00	277	15	3	7	6
1	2009-02-27 15:18:00	116	15	3	7	6
1	2009-02-27 15:19:00	12	15	3	7	6
1	2009-02-27 15:20:00	642	15	3	7	6
1	2009-02-27 15:21:00	249	15	3	7	6
1	2009-02-27 15:22:00	23	15	3	7	6
1	2009-02-27 15:23:00	451	15	3	7	6
1	2009-02-27 15:24:00	70	15	3	7	6
1	2009-02-27 15:25:00	47	15	3	7	6
1	2009-02-27 15:26:00	0	15	3	7	6
1	2009-02-27 15:27:00	23	15	3	7	6
1	2009-02-27 15:28:00	0	15	3	7	6
1	2009-02-27 15:29:00	0	15	3	7	6
1	2009-02-27 15:30:00	0	15	3	7	6
1	2009-02-27 15:31:00	0	15	3	7	6
1	2009-02-27 15:32:00	0	15	3	7	6
1	2009-02-27 15:33:00	12	15	3	7	6
1	2009-02-27 15:34:00	0	15	3	7	6
1	2009-02-27 15:35:00	0	15	3	7	6
1	2009-02-27 15:36:00	0	15	3	7	6
1	2009-02-27 15:37:00	235	15	3	7	6
1	2009-02-27 15:38:00	291	15	3	7	6
1	2009-02-27 15:39:00	0	15	3	7	6
1	2009-02-27 15:40:00	0	15	3	7	6
1	2009-02-27 15:41:00	0	15	3	7	6
1	2009-02-27 15:42:00	0	15	3	7	6
1	2009-02-27 15:43:00	0	15	3	7	6
1	2009-02-27 15:44:00	0	15	3	7	6
1	2009-02-27 15:45:00	0	15	3	7	6
1	2009-02-27 15:46:00	0	15	3	7	6
1	2009-02-27 15:47:00	165	15	3	7	6
1	2009-02-27 15:48:00	0	15	3	7	6
1	2009-02-27 15:49:00	0	15	3	7	6
1	2009-02-27 15:50:00	0	15	3	7	6
1	2009-02-27 15:51:00	12	15	3	7	6
1	2009-02-27 15:52:00	0	15	3	7	6
1	2009-02-27 15:53:00	0	15	3	7	6
1	2009-02-27 15:54:00	23	15	3	7	6
1	2009-02-27 15:55:00	684	15	3	7	6
1	2009-02-27 15:56:00	1038	15	3	7	6
1	2009-02-27 15:57:00	435	15	3	7	6
1	2009-02-27 15:58:00	93	15	3	7	6
1	2009-02-27 15:59:00	70	15	3	7	6
1	2009-02-27 16:00:00	193	15	3	7	6
1	2009-02-27 16:01:00	0	16	3	7	6
1	2009-02-27 16:02:00	0	16	3	7	6
1	2009-02-27 16:03:00	0	16	3	7	6
1	2009-02-27 16:04:00	0	16	3	7	6
1	2009-02-27 16:05:00	23	16	3	7	6
1	2009-02-27 16:06:00	0	16	3	7	6
1	2009-02-27 16:07:00	0	16	3	7	6
1	2009-02-27 16:08:00	0	16	3	7	6
1	2009-02-27 16:09:00	0	16	3	7	6
1	2009-02-27 16:10:00	0	16	3	7	6
1	2009-02-27 16:11:00	0	16	3	7	6
1	2009-02-27 16:12:00	0	16	3	7	6
1	2009-02-27 16:13:00	23	16	3	7	6
1	2009-02-27 16:14:00	0	16	3	7	6
1	2009-02-27 16:15:00	0	16	3	7	6
1	2009-02-27 16:16:00	0	16	3	7	6
1	2009-02-27 16:17:00	0	16	3	7	6
1	2009-02-27 16:18:00	0	16	3	7	6
1	2009-02-27 16:19:00	0	16	3	7	6
1	2009-02-27 16:20:00	116	16	3	7	6
1	2009-02-27 16:21:00	419	16	3	7	6
1	2009-02-27 16:22:00	0	16	3	7	6
1	2009-02-27 16:23:00	0	16	3	7	6
1	2009-02-27 16:24:00	0	16	3	7	6
1	2009-02-27 16:25:00	47	16	3	7	6
1	2009-02-27 16:26:00	0	16	3	7	6
1	2009-02-27 16:27:00	12	16	3	7	6
1	2009-02-27 16:28:00	0	16	3	7	6
1	2009-02-27 16:29:00	12	16	3	7	6
1	2009-02-27 16:30:00	0	16	3	7	6
1	2009-02-27 16:31:00	0	16	3	7	6
1	2009-02-27 16:32:00	12	16	3	7	6
1	2009-02-27 16:33:00	0	16	3	7	6
1	2009-02-27 16:34:00	0	16	3	7	6
1	2009-02-27 16:35:00	0	16	3	7	6
1	2009-02-27 16:36:00	0	16	3	7	6
1	2009-02-27 16:37:00	0	16	3	7	6
1	2009-02-27 16:38:00	0	16	3	7	6
1	2009-02-27 16:39:00	0	16	3	7	6
1	2009-02-27 16:40:00	0	16	3	7	6
1	2009-02-27 16:41:00	0	16	3	7	6
1	2009-02-27 16:42:00	221	16	3	7	6
1	2009-02-27 16:43:00	0	16	3	7	6
1	2009-02-27 16:44:00	0	16	3	7	6
1	2009-02-27 16:45:00	0	16	3	7	6
1	2009-02-27 16:46:00	0	16	3	7	6
1	2009-02-27 16:47:00	0	16	3	7	6
1	2009-02-27 16:48:00	23	16	3	7	6
1	2009-02-27 16:49:00	0	16	3	7	6
1	2009-02-27 16:50:00	726	16	3	7	6
1	2009-02-27 16:51:00	0	16	3	7	6
1	2009-02-27 16:52:00	0	16	3	7	6
1	2009-02-27 16:53:00	0	16	3	7	6
1	2009-02-27 16:54:00	0	16	3	7	6
1	2009-02-27 16:55:00	0	16	3	7	6
1	2009-02-27 16:56:00	116	16	3	7	6
1	2009-02-27 16:57:00	0	16	3	7	6
1	2009-02-27 16:58:00	0	16	3	7	6
1	2009-02-27 16:59:00	0	16	3	7	6
1	2009-02-27 17:00:00	0	16	3	7	6
1	2009-02-27 17:01:00	0	17	3	7	6
1	2009-02-27 17:02:00	0	17	3	7	6
1	2009-02-27 17:03:00	0	17	3	7	6
1	2009-02-27 17:04:00	0	17	3	7	6
1	2009-02-27 17:05:00	0	17	3	7	6
1	2009-02-27 17:06:00	128	17	3	7	6
1	2009-02-27 17:07:00	0	17	3	7	6
1	2009-02-27 17:08:00	0	17	3	7	6
1	2009-02-27 17:09:00	0	17	3	7	6
1	2009-02-27 17:10:00	0	17	3	7	6
1	2009-02-27 17:11:00	354	17	3	7	6
1	2009-02-27 17:12:00	936	17	3	7	6
1	2009-02-27 17:13:00	93	17	3	7	6
1	2009-02-27 17:14:00	0	17	3	7	6
1	2009-02-27 17:15:00	23	17	3	7	6
1	2009-02-27 17:16:00	23	17	3	7	6
1	2009-02-27 17:17:00	0	17	3	7	6
1	2009-02-27 17:18:00	0	17	3	7	6
1	2009-02-27 17:19:00	0	17	3	7	6
1	2009-02-27 17:20:00	0	17	3	7	6
1	2009-02-27 17:21:00	0	17	3	7	6
1	2009-02-27 17:22:00	12	17	3	7	6
1	2009-02-27 17:23:00	0	17	3	7	6
1	2009-02-27 17:24:00	93	17	3	7	6
1	2009-02-27 17:25:00	0	17	3	7	6
1	2009-02-27 17:26:00	35	17	3	7	6
1	2009-02-27 17:27:00	0	17	3	7	6
1	2009-02-27 17:28:00	0	17	3	7	6
1	2009-02-27 17:29:00	747	17	3	7	6
1	2009-02-27 17:30:00	165	17	3	7	6
1	2009-02-27 17:31:00	0	17	3	7	6
1	2009-02-27 17:32:00	0	17	3	7	6
1	2009-02-27 17:33:00	0	17	3	7	6
1	2009-02-27 17:34:00	0	17	3	7	6
1	2009-02-27 17:35:00	23	17	3	7	6
1	2009-02-27 17:36:00	0	17	3	7	6
1	2009-02-27 17:37:00	23	17	3	7	6
1	2009-02-27 17:38:00	23	17	3	7	6
1	2009-02-27 17:39:00	0	17	3	7	6
1	2009-02-27 17:40:00	0	17	3	7	6
1	2009-02-27 17:41:00	0	17	3	7	6
1	2009-02-27 17:42:00	23	17	3	7	6
1	2009-02-27 17:43:00	35	17	3	7	6
1	2009-02-27 17:44:00	0	17	3	7	6
1	2009-02-27 17:45:00	23	17	3	7	6
1	2009-02-27 17:46:00	0	17	3	7	6
1	2009-02-27 17:47:00	47	17	3	7	6
1	2009-02-27 17:48:00	12	17	3	7	6
1	2009-02-27 17:49:00	0	17	3	7	6
1	2009-02-27 17:50:00	128	17	3	7	6
1	2009-02-27 17:51:00	526	17	3	7	6
1	2009-02-27 17:52:00	207	17	3	7	6
1	2009-02-27 17:53:00	403	17	3	7	6
1	2009-02-27 17:54:00	0	17	3	7	6
1	2009-02-27 17:55:00	0	17	3	7	6
1	2009-02-27 17:56:00	0	17	3	7	6
1	2009-02-27 17:57:00	0	17	3	7	6
1	2009-02-27 17:58:00	179	17	3	7	6
1	2009-02-27 17:59:00	35	17	3	7	6
1	2009-02-27 18:00:00	0	17	3	7	6
1	2009-02-27 18:01:00	23	18	4	7	6
1	2009-02-27 18:02:00	0	18	4	7	6
1	2009-02-27 18:03:00	12	18	4	7	6
1	2009-02-27 18:04:00	23	18	4	7	6
1	2009-02-27 18:05:00	545	18	4	7	6
1	2009-02-27 18:06:00	489	18	4	7	6
1	2009-02-27 18:07:00	305	18	4	7	6
1	2009-02-27 18:08:00	642	18	4	7	6
1	2009-02-27 18:09:00	140	18	4	7	6
1	2009-02-27 18:10:00	12	18	4	7	6
1	2009-02-27 18:11:00	0	18	4	7	6
1	2009-02-27 18:12:00	179	18	4	7	6
1	2009-02-27 18:13:00	451	18	4	7	6
1	2009-02-27 18:14:00	116	18	4	7	6
1	2009-02-27 18:15:00	0	18	4	7	6
1	2009-02-27 18:16:00	23	18	4	7	6
1	2009-02-27 18:17:00	235	18	4	7	6
1	2009-02-27 18:18:00	545	18	4	7	6
1	2009-02-27 18:19:00	582	18	4	7	6
1	2009-02-27 18:20:00	642	18	4	7	6
1	2009-02-27 18:21:00	794	18	4	7	6
1	2009-02-27 18:22:00	705	18	4	7	6
1	2009-02-27 18:23:00	507	18	4	7	6
1	2009-02-27 18:24:00	451	18	4	7	6
1	2009-02-27 18:25:00	489	18	4	7	6
1	2009-02-27 18:26:00	23	18	4	7	6
1	2009-02-27 18:27:00	12	18	4	7	6
1	2009-02-27 18:28:00	0	18	4	7	6
1	2009-02-27 18:29:00	12	18	4	7	6
1	2009-02-27 18:30:00	470	18	4	7	6
1	2009-02-27 18:31:00	419	18	4	7	6
1	2009-02-27 18:32:00	545	18	4	7	6
1	2009-02-27 18:33:00	305	18	4	7	6
1	2009-02-27 18:34:00	140	18	4	7	6
1	2009-02-27 18:35:00	12	18	4	7	6
1	2009-02-27 18:36:00	0	18	4	7	6
1	2009-02-27 18:37:00	0	18	4	7	6
1	2009-02-27 18:38:00	0	18	4	7	6
1	2009-02-27 18:39:00	23	18	4	7	6
1	2009-02-27 18:40:00	249	18	4	7	6
1	2009-02-27 18:41:00	489	18	4	7	6
1	2009-02-27 18:42:00	403	18	4	7	6
1	2009-02-27 18:43:00	277	18	4	7	6
1	2009-02-27 18:44:00	403	18	4	7	6
1	2009-02-27 18:45:00	354	18	4	7	6
1	2009-02-27 18:46:00	354	18	4	7	6
1	2009-02-27 18:47:00	235	18	4	7	6
1	2009-02-27 18:48:00	23	18	4	7	6
1	2009-02-27 18:49:00	642	18	4	7	6
1	2009-02-27 18:50:00	705	18	4	7	6
1	2009-02-27 18:51:00	582	18	4	7	6
1	2009-02-27 18:52:00	817	18	4	7	6
1	2009-02-27 18:53:00	582	18	4	7	6
1	2009-02-27 18:54:00	563	18	4	7	6
1	2009-02-27 18:55:00	563	18	4	7	6
1	2009-02-27 18:56:00	817	18	4	7	6
1	2009-02-27 18:57:00	600	18	4	7	6
1	2009-02-27 18:58:00	545	18	4	7	6
1	2009-02-27 18:59:00	470	18	4	7	6
1	2009-02-27 19:00:00	794	18	4	7	6
1	2009-02-27 19:01:00	840	19	4	7	6
1	2009-02-27 19:02:00	642	19	4	7	6
1	2009-02-27 19:03:00	526	19	4	7	6
1	2009-02-27 19:04:00	987	19	4	7	6
1	2009-02-27 19:05:00	1064	19	4	7	6
1	2009-02-27 19:06:00	1622	19	4	7	6
1	2009-02-27 19:07:00	600	19	4	7	6
1	2009-02-27 19:08:00	726	19	4	7	6
1	2009-02-27 19:09:00	354	19	4	7	6
1	2009-02-27 19:10:00	1012	19	4	7	6
1	2009-02-27 19:11:00	910	19	4	7	6
1	2009-02-27 19:12:00	563	19	4	7	6
1	2009-02-27 19:13:00	563	19	4	7	6
1	2009-02-27 19:14:00	151	19	4	7	6
1	2009-02-27 19:15:00	23	19	4	7	6
1	2009-02-27 19:16:00	35	19	4	7	6
1	2009-02-27 19:17:00	23	19	4	7	6
1	2009-02-27 19:18:00	12	19	4	7	6
1	2009-02-27 19:19:00	207	19	4	7	6
1	2009-02-27 19:20:00	621	19	4	7	6
1	2009-02-27 19:21:00	526	19	4	7	6
1	2009-02-27 19:22:00	23	19	4	7	6
1	2009-02-27 19:23:00	0	19	4	7	6
1	2009-02-27 19:24:00	47	19	4	7	6
1	2009-02-27 19:25:00	0	19	4	7	6
1	2009-02-27 19:26:00	12	19	4	7	6
1	2009-02-27 19:27:00	0	19	4	7	6
1	2009-02-27 19:28:00	0	19	4	7	6
1	2009-02-27 19:29:00	0	19	4	7	6
1	2009-02-27 19:30:00	0	19	4	7	6
1	2009-02-27 19:31:00	0	19	4	7	6
1	2009-02-27 19:32:00	0	19	4	7	6
1	2009-02-27 19:33:00	0	19	4	7	6
1	2009-02-27 19:34:00	12	19	4	7	6
1	2009-02-27 19:35:00	403	19	4	7	6
1	2009-02-27 19:36:00	600	19	4	7	6
1	2009-02-27 19:37:00	451	19	4	7	6
1	2009-02-27 19:38:00	0	19	4	7	6
1	2009-02-27 19:39:00	0	19	4	7	6
1	2009-02-27 19:40:00	0	19	4	7	6
1	2009-02-27 19:41:00	0	19	4	7	6
1	2009-02-27 19:42:00	0	19	4	7	6
1	2009-02-27 19:43:00	0	19	4	7	6
1	2009-02-27 19:44:00	0	19	4	7	6
1	2009-02-27 19:45:00	12	19	4	7	6
1	2009-02-27 19:46:00	93	19	4	7	6
1	2009-02-27 19:47:00	0	19	4	7	6
1	2009-02-27 19:48:00	0	19	4	7	6
1	2009-02-27 19:49:00	0	19	4	7	6
1	2009-02-27 19:50:00	12	19	4	7	6
1	2009-02-27 19:51:00	23	19	4	7	6
1	2009-02-27 19:52:00	0	19	4	7	6
1	2009-02-27 19:53:00	140	19	4	7	6
1	2009-02-27 19:54:00	621	19	4	7	6
1	2009-02-27 19:55:00	642	19	4	7	6
1	2009-02-27 19:56:00	403	19	4	7	6
1	2009-02-27 19:57:00	35	19	4	7	6
1	2009-02-27 19:58:00	0	19	4	7	6
1	2009-02-27 19:59:00	0	19	4	7	6
1	2009-02-27 20:00:00	12	19	4	7	6
1	2009-02-27 20:01:00	684	20	4	7	6
1	2009-02-27 20:02:00	545	20	4	7	6
1	2009-02-27 20:03:00	489	20	4	7	6
1	2009-02-27 20:04:00	403	20	4	7	6
1	2009-02-27 20:05:00	0	20	4	7	6
1	2009-02-27 20:06:00	12	20	4	7	6
1	2009-02-27 20:07:00	0	20	4	7	6
1	2009-02-27 20:08:00	23	20	4	7	6
1	2009-02-27 20:09:00	0	20	4	7	6
1	2009-02-27 20:10:00	0	20	4	7	6
1	2009-02-27 20:11:00	12	20	4	7	6
1	2009-02-27 20:12:00	12	20	4	7	6
1	2009-02-27 20:13:00	621	20	4	7	6
1	2009-02-27 20:14:00	435	20	4	7	6
1	2009-02-27 20:15:00	451	20	4	7	6
1	2009-02-27 20:16:00	47	20	4	7	6
1	2009-02-27 20:17:00	81	20	4	7	6
1	2009-02-27 20:18:00	47	20	4	7	6
1	2009-02-27 20:19:00	0	20	4	7	6
1	2009-02-27 20:20:00	23	20	4	7	6
1	2009-02-27 20:21:00	0	20	4	7	6
1	2009-02-27 20:22:00	0	20	4	7	6
1	2009-02-27 20:23:00	0	20	4	7	6
1	2009-02-27 20:24:00	0	20	4	7	6
1	2009-02-27 20:25:00	12	20	4	7	6
1	2009-02-27 20:26:00	545	20	4	7	6
1	2009-02-27 20:27:00	507	20	4	7	6
1	2009-02-27 20:28:00	1064	20	4	7	6
1	2009-02-27 20:29:00	1485	20	4	7	6
1	2009-02-27 20:30:00	321	20	4	7	6
1	2009-02-27 20:31:00	0	20	4	7	6
1	2009-02-27 20:32:00	165	20	4	7	6
1	2009-02-27 20:33:00	0	20	4	7	6
1	2009-02-27 20:34:00	221	20	4	7	6
1	2009-02-27 20:35:00	128	20	4	7	6
1	2009-02-27 20:36:00	0	20	4	7	6
1	2009-02-27 20:37:00	47	20	4	7	6
1	2009-02-27 20:38:00	337	20	4	7	6
1	2009-02-27 20:39:00	23	20	4	7	6
1	2009-02-27 20:40:00	526	20	4	7	6
1	2009-02-27 20:41:00	93	20	4	7	6
1	2009-02-27 20:42:00	128	20	4	7	6
1	2009-02-27 20:43:00	81	20	4	7	6
1	2009-02-27 20:44:00	165	20	4	7	6
1	2009-02-27 20:45:00	0	20	4	7	6
1	2009-02-27 20:46:00	0	20	4	7	6
1	2009-02-27 20:47:00	0	20	4	7	6
1	2009-02-27 20:48:00	0	20	4	7	6
1	2009-02-27 20:49:00	0	20	4	7	6
1	2009-02-27 20:50:00	0	20	4	7	6
1	2009-02-27 20:51:00	305	20	4	7	6
1	2009-02-27 20:52:00	0	20	4	7	6
1	2009-02-27 20:53:00	0	20	4	7	6
1	2009-02-27 20:54:00	0	20	4	7	6
1	2009-02-27 20:55:00	35	20	4	7	6
1	2009-02-27 20:56:00	93	20	4	7	6
1	2009-02-27 20:57:00	0	20	4	7	6
1	2009-02-27 20:58:00	0	20	4	7	6
1	2009-02-27 20:59:00	0	20	4	7	6
1	2009-02-27 21:00:00	0	20	4	7	6
1	2009-02-27 21:01:00	0	21	4	7	6
1	2009-02-27 21:02:00	0	21	4	7	6
1	2009-02-27 21:03:00	370	21	4	7	6
1	2009-02-27 21:04:00	545	21	4	7	6
1	2009-02-27 21:05:00	0	21	4	7	6
1	2009-02-27 21:06:00	0	21	4	7	6
1	2009-02-27 21:07:00	23	21	4	7	6
1	2009-02-27 21:08:00	0	21	4	7	6
1	2009-02-27 21:09:00	0	21	4	7	6
1	2009-02-27 21:10:00	70	21	4	7	6
1	2009-02-27 21:11:00	47	21	4	7	6
1	2009-02-27 21:12:00	747	21	4	7	6
1	2009-02-27 21:13:00	179	21	4	7	6
1	2009-02-27 21:14:00	235	21	4	7	6
1	2009-02-27 21:15:00	0	21	4	7	6
1	2009-02-27 21:16:00	193	21	4	7	6
1	2009-02-27 21:17:00	0	21	4	7	6
1	2009-02-27 21:18:00	0	21	4	7	6
1	2009-02-27 21:19:00	291	21	4	7	6
1	2009-02-27 21:20:00	0	21	4	7	6
1	2009-02-27 21:21:00	0	21	4	7	6
1	2009-02-27 21:22:00	0	21	4	7	6
1	2009-02-27 21:23:00	0	21	4	7	6
1	2009-02-27 21:24:00	116	21	4	7	6
1	2009-02-27 21:25:00	70	21	4	7	6
1	2009-02-27 21:26:00	0	21	4	7	6
1	2009-02-27 21:27:00	0	21	4	7	6
1	2009-02-27 21:28:00	526	21	4	7	6
1	2009-02-27 21:29:00	2814	21	4	7	6
1	2009-02-27 21:30:00	3726	21	4	7	6
1	2009-02-27 21:31:00	3153	21	4	7	6
1	2009-02-27 21:32:00	354	21	4	7	6
1	2009-02-27 21:33:00	35	21	4	7	6
1	2009-02-27 21:34:00	47	21	4	7	6
1	2009-02-27 21:35:00	12	21	4	7	6
1	2009-02-27 21:36:00	0	21	4	7	6
1	2009-02-27 21:37:00	747	21	4	7	6
1	2009-02-27 21:38:00	2814	21	4	7	6
1	2009-02-27 21:39:00	70	21	4	7	6
1	2009-02-27 21:40:00	0	21	4	7	6
1	2009-02-27 21:41:00	12	21	4	7	6
1	2009-02-27 21:42:00	193	21	4	7	6
1	2009-02-27 21:43:00	0	21	4	7	6
1	2009-02-27 21:44:00	221	21	4	7	6
1	2009-02-27 21:45:00	747	21	4	7	6
1	2009-02-27 21:46:00	165	21	4	7	6
1	2009-02-27 21:47:00	305	21	4	7	6
1	2009-02-27 21:48:00	470	21	4	7	6
1	2009-02-27 21:49:00	0	21	4	7	6
1	2009-02-27 21:50:00	419	21	4	7	6
1	2009-02-27 21:51:00	545	21	4	7	6
1	2009-02-27 21:52:00	12	21	4	7	6
1	2009-02-27 21:53:00	12	21	4	7	6
1	2009-02-27 21:54:00	12	21	4	7	6
1	2009-02-27 21:55:00	263	21	4	7	6
1	2009-02-27 21:56:00	621	21	4	7	6
1	2009-02-27 21:57:00	663	21	4	7	6
1	2009-02-27 21:58:00	277	21	4	7	6
1	2009-02-27 21:59:00	0	21	4	7	6
1	2009-02-27 22:00:00	600	21	4	7	6
1	2009-02-27 22:01:00	305	22	4	7	6
1	2009-02-27 22:02:00	235	22	4	7	6
1	2009-02-27 22:03:00	621	22	4	7	6
1	2009-02-27 22:04:00	563	22	4	7	6
1	2009-02-27 22:05:00	747	22	4	7	6
1	2009-02-27 22:06:00	684	22	4	7	6
1	2009-02-27 22:07:00	489	22	4	7	6
1	2009-02-27 22:08:00	600	22	4	7	6
1	2009-02-27 22:09:00	2178	22	4	7	6
1	2009-02-27 22:10:00	1354	22	4	7	6
1	2009-02-27 22:11:00	1387	22	4	7	6
1	2009-02-27 22:12:00	526	22	4	7	6
1	2009-02-27 22:13:00	1387	22	4	7	6
1	2009-02-27 22:14:00	221	22	4	7	6
1	2009-02-27 22:15:00	0	22	4	7	6
1	2009-02-27 22:16:00	1119	22	4	7	6
1	2009-02-27 22:17:00	221	22	4	7	6
1	2009-02-27 22:18:00	0	22	4	7	6
1	2009-02-27 22:19:00	0	22	4	7	6
1	2009-02-27 22:20:00	12	22	4	7	6
1	2009-02-27 22:21:00	12	22	4	7	6
1	2009-02-27 22:22:00	12	22	4	7	6
1	2009-02-27 22:23:00	23	22	4	7	6
1	2009-02-27 22:24:00	0	22	4	7	6
1	2009-02-27 22:25:00	23	22	4	7	6
1	2009-02-27 22:26:00	0	22	4	7	6
1	2009-02-27 22:27:00	0	22	4	7	6
1	2009-02-27 22:28:00	23	22	4	7	6
1	2009-02-27 22:29:00	0	22	4	7	6
1	2009-02-27 22:30:00	0	22	4	7	6
1	2009-02-27 22:31:00	0	22	4	7	6
1	2009-02-27 22:32:00	0	22	4	7	6
1	2009-02-27 22:33:00	70	22	4	7	6
1	2009-02-27 22:34:00	0	22	4	7	6
1	2009-02-27 22:35:00	35	22	4	7	6
1	2009-02-27 22:36:00	0	22	4	7	6
1	2009-02-27 22:37:00	0	22	4	7	6
1	2009-02-27 22:38:00	0	22	4	7	6
1	2009-02-27 22:39:00	47	22	4	7	6
1	2009-02-27 22:40:00	0	22	4	7	6
1	2009-02-27 22:41:00	0	22	4	7	6
1	2009-02-27 22:42:00	0	22	4	7	6
1	2009-02-27 22:43:00	0	22	4	7	6
1	2009-02-27 22:44:00	386	22	4	7	6
1	2009-02-27 22:45:00	221	22	4	7	6
1	2009-02-27 22:46:00	1233	22	4	7	6
1	2009-02-27 22:47:00	1119	22	4	7	6
1	2009-02-27 22:48:00	582	22	4	7	6
1	2009-02-27 22:49:00	35	22	4	7	6
1	2009-02-27 22:50:00	165	22	4	7	6
1	2009-02-27 22:51:00	165	22	4	7	6
1	2009-02-27 22:52:00	370	22	4	7	6
1	2009-02-27 22:53:00	470	22	4	7	6
1	2009-02-27 22:54:00	93	22	4	7	6
1	2009-02-27 22:55:00	221	22	4	7	6
1	2009-02-27 22:56:00	35	22	4	7	6
1	2009-02-27 22:57:00	435	22	4	7	6
1	2009-02-27 22:58:00	435	22	4	7	6
1	2009-02-27 22:59:00	23	22	4	7	6
1	2009-02-27 23:00:00	0	22	4	7	6
1	2009-02-27 23:01:00	0	23	4	7	6
1	2009-02-27 23:02:00	0	23	4	7	6
1	2009-02-27 23:03:00	58	23	4	7	6
1	2009-02-27 23:04:00	207	23	4	7	6
1	2009-02-27 23:05:00	0	23	4	7	6
1	2009-02-27 23:06:00	0	23	4	7	6
1	2009-02-27 23:07:00	70	23	4	7	6
1	2009-02-27 23:08:00	0	23	4	7	6
1	2009-02-27 23:09:00	0	23	4	7	6
1	2009-02-27 23:10:00	0	23	4	7	6
1	2009-02-27 23:11:00	93	23	4	7	6
1	2009-02-27 23:12:00	0	23	4	7	6
1	2009-02-27 23:13:00	0	23	4	7	6
1	2009-02-27 23:14:00	0	23	4	7	6
1	2009-02-27 23:15:00	0	23	4	7	6
1	2009-02-27 23:16:00	0	23	4	7	6
1	2009-02-27 23:17:00	0	23	4	7	6
1	2009-02-27 23:18:00	0	23	4	7	6
1	2009-02-27 23:19:00	0	23	4	7	6
1	2009-02-27 23:20:00	0	23	4	7	6
1	2009-02-27 23:21:00	0	23	4	7	6
1	2009-02-27 23:22:00	0	23	4	7	6
1	2009-02-27 23:23:00	0	23	4	7	6
1	2009-02-27 23:24:00	0	23	4	7	6
1	2009-02-27 23:25:00	0	23	4	7	6
1	2009-02-27 23:26:00	0	23	4	7	6
1	2009-02-27 23:27:00	0	23	4	7	6
1	2009-02-27 23:28:00	0	23	4	7	6
1	2009-02-27 23:29:00	0	23	4	7	6
1	2009-02-27 23:30:00	0	23	4	7	6
1	2009-02-27 23:31:00	0	23	4	7	6
1	2009-02-27 23:32:00	0	23	4	7	6
1	2009-02-27 23:33:00	0	23	4	7	6
1	2009-02-27 23:34:00	0	23	4	7	6
1	2009-02-27 23:35:00	0	23	4	7	6
1	2009-02-27 23:36:00	0	23	4	7	6
1	2009-02-27 23:37:00	23	23	4	7	6
1	2009-02-27 23:38:00	0	23	4	7	6
1	2009-02-27 23:39:00	0	23	4	7	6
1	2009-02-27 23:40:00	0	23	4	7	6
1	2009-02-27 23:41:00	0	23	4	7	6
1	2009-02-27 23:42:00	0	23	4	7	6
1	2009-02-27 23:43:00	0	23	4	7	6
1	2009-02-27 23:44:00	0	23	4	7	6
1	2009-02-27 23:45:00	0	23	4	7	6
1	2009-02-27 23:46:00	0	23	4	7	6
1	2009-02-27 23:47:00	0	23	4	7	6
1	2009-02-27 23:48:00	58	23	4	7	6
1	2009-02-27 23:49:00	0	23	4	7	6
1	2009-02-27 23:50:00	12	23	4	7	6
1	2009-02-27 23:51:00	0	23	4	7	6
1	2009-02-27 23:52:00	0	23	4	7	6
1	2009-02-27 23:53:00	0	23	4	7	6
1	2009-02-27 23:54:00	0	23	4	7	6
1	2009-02-27 23:55:00	0	23	4	7	6
1	2009-02-27 23:56:00	0	23	4	7	6
1	2009-02-27 23:57:00	0	23	4	7	6
1	2009-02-27 23:58:00	0	23	4	7	6
1	2009-02-27 23:59:00	0	23	4	7	6
1	2009-02-28	0	23	4	7	6
1	2009-02-28 00:01:00	0	0	1	8	7
1	2009-02-28 00:02:00	0	0	1	8	7
1	2009-02-28 00:03:00	0	0	1	8	7
1	2009-02-28 00:04:00	0	0	1	8	7
1	2009-02-28 00:05:00	0	0	1	8	7
1	2009-02-28 00:06:00	116	0	1	8	7
1	2009-02-28 00:07:00	0	0	1	8	7
1	2009-02-28 00:08:00	0	0	1	8	7
1	2009-02-28 00:09:00	0	0	1	8	7
1	2009-02-28 00:10:00	0	0	1	8	7
1	2009-02-28 00:11:00	0	0	1	8	7
1	2009-02-28 00:12:00	0	0	1	8	7
1	2009-02-28 00:13:00	23	0	1	8	7
1	2009-02-28 00:14:00	0	0	1	8	7
1	2009-02-28 00:15:00	0	0	1	8	7
1	2009-02-28 00:16:00	0	0	1	8	7
1	2009-02-28 00:17:00	0	0	1	8	7
1	2009-02-28 00:18:00	0	0	1	8	7
1	2009-02-28 00:19:00	0	0	1	8	7
1	2009-02-28 00:20:00	0	0	1	8	7
1	2009-02-28 00:21:00	0	0	1	8	7
1	2009-02-28 00:22:00	0	0	1	8	7
1	2009-02-28 00:23:00	0	0	1	8	7
1	2009-02-28 00:24:00	0	0	1	8	7
1	2009-02-28 00:25:00	0	0	1	8	7
1	2009-02-28 00:26:00	0	0	1	8	7
1	2009-02-28 00:27:00	0	0	1	8	7
1	2009-02-28 00:28:00	0	0	1	8	7
1	2009-02-28 00:29:00	0	0	1	8	7
1	2009-02-28 00:30:00	0	0	1	8	7
1	2009-02-28 00:31:00	0	0	1	8	7
1	2009-02-28 00:32:00	0	0	1	8	7
1	2009-02-28 00:33:00	0	0	1	8	7
1	2009-02-28 00:34:00	0	0	1	8	7
1	2009-02-28 00:35:00	0	0	1	8	7
1	2009-02-28 00:36:00	0	0	1	8	7
1	2009-02-28 00:37:00	0	0	1	8	7
1	2009-02-28 00:38:00	0	0	1	8	7
1	2009-02-28 00:39:00	0	0	1	8	7
1	2009-02-28 00:40:00	0	0	1	8	7
1	2009-02-28 00:41:00	0	0	1	8	7
1	2009-02-28 00:42:00	0	0	1	8	7
1	2009-02-28 00:43:00	0	0	1	8	7
1	2009-02-28 00:44:00	0	0	1	8	7
1	2009-02-28 00:45:00	0	0	1	8	7
1	2009-02-28 00:46:00	0	0	1	8	7
1	2009-02-28 00:47:00	0	0	1	8	7
1	2009-02-28 00:48:00	12	0	1	8	7
1	2009-02-28 00:49:00	0	0	1	8	7
1	2009-02-28 00:50:00	0	0	1	8	7
1	2009-02-28 00:51:00	0	0	1	8	7
1	2009-02-28 00:52:00	0	0	1	8	7
1	2009-02-28 00:53:00	0	0	1	8	7
1	2009-02-28 00:54:00	12	0	1	8	7
1	2009-02-28 00:55:00	0	0	1	8	7
1	2009-02-28 00:56:00	0	0	1	8	7
1	2009-02-28 00:57:00	0	0	1	8	7
1	2009-02-28 00:58:00	0	0	1	8	7
1	2009-02-28 00:59:00	0	0	1	8	7
1	2009-02-28 01:00:00	35	0	1	8	7
1	2009-02-28 01:01:00	12	1	1	8	7
1	2009-02-28 01:02:00	0	1	1	8	7
1	2009-02-28 01:03:00	0	1	1	8	7
1	2009-02-28 01:04:00	0	1	1	8	7
1	2009-02-28 01:05:00	81	1	1	8	7
1	2009-02-28 01:06:00	0	1	1	8	7
1	2009-02-28 01:07:00	0	1	1	8	7
1	2009-02-28 01:08:00	0	1	1	8	7
1	2009-02-28 01:09:00	0	1	1	8	7
1	2009-02-28 01:10:00	0	1	1	8	7
1	2009-02-28 01:11:00	0	1	1	8	7
1	2009-02-28 01:12:00	0	1	1	8	7
1	2009-02-28 01:13:00	0	1	1	8	7
1	2009-02-28 01:14:00	0	1	1	8	7
1	2009-02-28 01:15:00	0	1	1	8	7
1	2009-02-28 01:16:00	0	1	1	8	7
1	2009-02-28 01:17:00	58	1	1	8	7
1	2009-02-28 01:18:00	35	1	1	8	7
1	2009-02-28 01:19:00	0	1	1	8	7
1	2009-02-28 01:20:00	0	1	1	8	7
1	2009-02-28 01:21:00	0	1	1	8	7
1	2009-02-28 01:22:00	0	1	1	8	7
1	2009-02-28 01:23:00	0	1	1	8	7
1	2009-02-28 01:24:00	0	1	1	8	7
1	2009-02-28 01:25:00	0	1	1	8	7
1	2009-02-28 01:26:00	0	1	1	8	7
1	2009-02-28 01:27:00	0	1	1	8	7
1	2009-02-28 01:28:00	0	1	1	8	7
1	2009-02-28 01:29:00	0	1	1	8	7
1	2009-02-28 01:30:00	0	1	1	8	7
1	2009-02-28 01:31:00	0	1	1	8	7
1	2009-02-28 01:32:00	58	1	1	8	7
1	2009-02-28 01:33:00	0	1	1	8	7
1	2009-02-28 01:34:00	193	1	1	8	7
1	2009-02-28 01:35:00	0	1	1	8	7
1	2009-02-28 01:36:00	12	1	1	8	7
1	2009-02-28 01:37:00	0	1	1	8	7
1	2009-02-28 01:38:00	0	1	1	8	7
1	2009-02-28 01:39:00	0	1	1	8	7
1	2009-02-28 01:40:00	0	1	1	8	7
1	2009-02-28 01:41:00	0	1	1	8	7
1	2009-02-28 01:42:00	0	1	1	8	7
1	2009-02-28 01:43:00	0	1	1	8	7
1	2009-02-28 01:44:00	0	1	1	8	7
1	2009-02-28 01:45:00	0	1	1	8	7
1	2009-02-28 01:46:00	0	1	1	8	7
1	2009-02-28 01:47:00	0	1	1	8	7
1	2009-02-28 01:48:00	0	1	1	8	7
1	2009-02-28 01:49:00	0	1	1	8	7
1	2009-02-28 01:50:00	0	1	1	8	7
1	2009-02-28 01:51:00	0	1	1	8	7
1	2009-02-28 01:52:00	0	1	1	8	7
1	2009-02-28 01:53:00	0	1	1	8	7
1	2009-02-28 01:54:00	0	1	1	8	7
1	2009-02-28 01:55:00	0	1	1	8	7
1	2009-02-28 01:56:00	0	1	1	8	7
1	2009-02-28 01:57:00	0	1	1	8	7
1	2009-02-28 01:58:00	12	1	1	8	7
1	2009-02-28 01:59:00	0	1	1	8	7
1	2009-02-28 02:00:00	0	1	1	8	7
1	2009-02-28 02:01:00	0	2	1	8	7
1	2009-02-28 02:02:00	0	2	1	8	7
1	2009-02-28 02:03:00	0	2	1	8	7
1	2009-02-28 02:04:00	0	2	1	8	7
1	2009-02-28 02:05:00	0	2	1	8	7
1	2009-02-28 02:06:00	0	2	1	8	7
1	2009-02-28 02:07:00	0	2	1	8	7
1	2009-02-28 02:08:00	0	2	1	8	7
1	2009-02-28 02:09:00	0	2	1	8	7
1	2009-02-28 02:10:00	12	2	1	8	7
1	2009-02-28 02:11:00	0	2	1	8	7
1	2009-02-28 02:12:00	0	2	1	8	7
1	2009-02-28 02:13:00	0	2	1	8	7
1	2009-02-28 02:14:00	0	2	1	8	7
1	2009-02-28 02:15:00	0	2	1	8	7
1	2009-02-28 02:16:00	0	2	1	8	7
1	2009-02-28 02:17:00	0	2	1	8	7
1	2009-02-28 02:18:00	0	2	1	8	7
1	2009-02-28 02:19:00	105	2	1	8	7
1	2009-02-28 02:20:00	0	2	1	8	7
1	2009-02-28 02:21:00	0	2	1	8	7
1	2009-02-28 02:22:00	0	2	1	8	7
1	2009-02-28 02:23:00	0	2	1	8	7
1	2009-02-28 02:24:00	0	2	1	8	7
1	2009-02-28 02:25:00	0	2	1	8	7
1	2009-02-28 02:26:00	0	2	1	8	7
1	2009-02-28 02:27:00	0	2	1	8	7
1	2009-02-28 02:28:00	140	2	1	8	7
1	2009-02-28 02:29:00	193	2	1	8	7
1	2009-02-28 02:30:00	35	2	1	8	7
1	2009-02-28 02:31:00	93	2	1	8	7
1	2009-02-28 02:32:00	116	2	1	8	7
1	2009-02-28 02:33:00	23	2	1	8	7
1	2009-02-28 02:34:00	0	2	1	8	7
1	2009-02-28 02:35:00	35	2	1	8	7
1	2009-02-28 02:36:00	0	2	1	8	7
1	2009-02-28 02:37:00	0	2	1	8	7
1	2009-02-28 02:38:00	0	2	1	8	7
1	2009-02-28 02:39:00	0	2	1	8	7
1	2009-02-28 02:40:00	0	2	1	8	7
1	2009-02-28 02:41:00	0	2	1	8	7
1	2009-02-28 02:42:00	0	2	1	8	7
1	2009-02-28 02:43:00	0	2	1	8	7
1	2009-02-28 02:44:00	0	2	1	8	7
1	2009-02-28 02:45:00	0	2	1	8	7
1	2009-02-28 02:46:00	0	2	1	8	7
1	2009-02-28 02:47:00	0	2	1	8	7
1	2009-02-28 02:48:00	0	2	1	8	7
1	2009-02-28 02:49:00	0	2	1	8	7
1	2009-02-28 02:50:00	12	2	1	8	7
1	2009-02-28 02:51:00	0	2	1	8	7
1	2009-02-28 02:52:00	0	2	1	8	7
1	2009-02-28 02:53:00	0	2	1	8	7
1	2009-02-28 02:54:00	0	2	1	8	7
1	2009-02-28 02:55:00	0	2	1	8	7
1	2009-02-28 02:56:00	58	2	1	8	7
1	2009-02-28 02:57:00	47	2	1	8	7
1	2009-02-28 02:58:00	0	2	1	8	7
1	2009-02-28 02:59:00	116	2	1	8	7
1	2009-02-28 03:00:00	0	2	1	8	7
1	2009-02-28 03:01:00	0	3	1	8	7
1	2009-02-28 03:02:00	0	3	1	8	7
1	2009-02-28 03:03:00	0	3	1	8	7
1	2009-02-28 03:04:00	0	3	1	8	7
1	2009-02-28 03:05:00	0	3	1	8	7
1	2009-02-28 03:06:00	0	3	1	8	7
1	2009-02-28 03:07:00	0	3	1	8	7
1	2009-02-28 03:08:00	0	3	1	8	7
1	2009-02-28 03:09:00	0	3	1	8	7
1	2009-02-28 03:10:00	0	3	1	8	7
1	2009-02-28 03:11:00	0	3	1	8	7
1	2009-02-28 03:12:00	0	3	1	8	7
1	2009-02-28 03:13:00	0	3	1	8	7
1	2009-02-28 03:14:00	0	3	1	8	7
1	2009-02-28 03:15:00	0	3	1	8	7
1	2009-02-28 03:16:00	0	3	1	8	7
1	2009-02-28 03:17:00	0	3	1	8	7
1	2009-02-28 03:18:00	0	3	1	8	7
1	2009-02-28 03:19:00	0	3	1	8	7
1	2009-02-28 03:20:00	0	3	1	8	7
1	2009-02-28 03:21:00	0	3	1	8	7
1	2009-02-28 03:22:00	0	3	1	8	7
1	2009-02-28 03:23:00	0	3	1	8	7
1	2009-02-28 03:24:00	0	3	1	8	7
1	2009-02-28 03:25:00	0	3	1	8	7
1	2009-02-28 03:26:00	0	3	1	8	7
1	2009-02-28 03:27:00	0	3	1	8	7
1	2009-02-28 03:28:00	0	3	1	8	7
1	2009-02-28 03:29:00	0	3	1	8	7
1	2009-02-28 03:30:00	0	3	1	8	7
1	2009-02-28 03:31:00	0	3	1	8	7
1	2009-02-28 03:32:00	0	3	1	8	7
1	2009-02-28 03:33:00	47	3	1	8	7
1	2009-02-28 03:34:00	0	3	1	8	7
1	2009-02-28 03:35:00	23	3	1	8	7
1	2009-02-28 03:36:00	35	3	1	8	7
1	2009-02-28 03:37:00	0	3	1	8	7
1	2009-02-28 03:38:00	0	3	1	8	7
1	2009-02-28 03:39:00	403	3	1	8	7
1	2009-02-28 03:40:00	0	3	1	8	7
1	2009-02-28 03:41:00	0	3	1	8	7
1	2009-02-28 03:42:00	0	3	1	8	7
1	2009-02-28 03:43:00	0	3	1	8	7
1	2009-02-28 03:44:00	0	3	1	8	7
1	2009-02-28 03:45:00	0	3	1	8	7
1	2009-02-28 03:46:00	0	3	1	8	7
1	2009-02-28 03:47:00	0	3	1	8	7
1	2009-02-28 03:48:00	0	3	1	8	7
1	2009-02-28 03:49:00	12	3	1	8	7
1	2009-02-28 03:50:00	0	3	1	8	7
1	2009-02-28 03:51:00	0	3	1	8	7
1	2009-02-28 03:52:00	0	3	1	8	7
1	2009-02-28 03:53:00	0	3	1	8	7
1	2009-02-28 03:54:00	0	3	1	8	7
1	2009-02-28 03:55:00	0	3	1	8	7
1	2009-02-28 03:56:00	0	3	1	8	7
1	2009-02-28 03:57:00	0	3	1	8	7
1	2009-02-28 03:58:00	0	3	1	8	7
1	2009-02-28 03:59:00	0	3	1	8	7
1	2009-02-28 04:00:00	0	3	1	8	7
1	2009-02-28 04:01:00	12	4	1	8	7
1	2009-02-28 04:02:00	0	4	1	8	7
1	2009-02-28 04:03:00	0	4	1	8	7
1	2009-02-28 04:04:00	0	4	1	8	7
1	2009-02-28 04:05:00	0	4	1	8	7
1	2009-02-28 04:06:00	0	4	1	8	7
1	2009-02-28 04:07:00	0	4	1	8	7
1	2009-02-28 04:08:00	0	4	1	8	7
1	2009-02-28 04:09:00	0	4	1	8	7
1	2009-02-28 04:10:00	0	4	1	8	7
1	2009-02-28 04:11:00	0	4	1	8	7
1	2009-02-28 04:12:00	0	4	1	8	7
1	2009-02-28 04:13:00	0	4	1	8	7
1	2009-02-28 04:14:00	0	4	1	8	7
1	2009-02-28 04:15:00	0	4	1	8	7
1	2009-02-28 04:16:00	0	4	1	8	7
1	2009-02-28 04:17:00	0	4	1	8	7
1	2009-02-28 04:18:00	0	4	1	8	7
1	2009-02-28 04:19:00	0	4	1	8	7
1	2009-02-28 04:20:00	0	4	1	8	7
1	2009-02-28 04:21:00	0	4	1	8	7
1	2009-02-28 04:22:00	12	4	1	8	7
1	2009-02-28 04:23:00	0	4	1	8	7
1	2009-02-28 04:24:00	0	4	1	8	7
1	2009-02-28 04:25:00	0	4	1	8	7
1	2009-02-28 04:26:00	12	4	1	8	7
1	2009-02-28 04:27:00	0	4	1	8	7
1	2009-02-28 04:28:00	0	4	1	8	7
1	2009-02-28 04:29:00	0	4	1	8	7
1	2009-02-28 04:30:00	0	4	1	8	7
1	2009-02-28 04:31:00	0	4	1	8	7
1	2009-02-28 04:32:00	0	4	1	8	7
1	2009-02-28 04:33:00	0	4	1	8	7
1	2009-02-28 04:34:00	0	4	1	8	7
1	2009-02-28 04:35:00	0	4	1	8	7
1	2009-02-28 04:36:00	0	4	1	8	7
1	2009-02-28 04:37:00	0	4	1	8	7
1	2009-02-28 04:38:00	0	4	1	8	7
1	2009-02-28 04:39:00	0	4	1	8	7
1	2009-02-28 04:40:00	0	4	1	8	7
1	2009-02-28 04:41:00	0	4	1	8	7
1	2009-02-28 04:42:00	0	4	1	8	7
1	2009-02-28 04:43:00	0	4	1	8	7
1	2009-02-28 04:44:00	0	4	1	8	7
1	2009-02-28 04:45:00	0	4	1	8	7
1	2009-02-28 04:46:00	0	4	1	8	7
1	2009-02-28 04:47:00	0	4	1	8	7
1	2009-02-28 04:48:00	0	4	1	8	7
1	2009-02-28 04:49:00	0	4	1	8	7
1	2009-02-28 04:50:00	0	4	1	8	7
1	2009-02-28 04:51:00	0	4	1	8	7
1	2009-02-28 04:52:00	0	4	1	8	7
1	2009-02-28 04:53:00	0	4	1	8	7
1	2009-02-28 04:54:00	0	4	1	8	7
1	2009-02-28 04:55:00	0	4	1	8	7
1	2009-02-28 04:56:00	0	4	1	8	7
1	2009-02-28 04:57:00	0	4	1	8	7
1	2009-02-28 04:58:00	0	4	1	8	7
1	2009-02-28 04:59:00	0	4	1	8	7
1	2009-02-28 05:00:00	0	4	1	8	7
1	2009-02-28 05:01:00	0	5	1	8	7
1	2009-02-28 05:02:00	0	5	1	8	7
1	2009-02-28 05:03:00	0	5	1	8	7
1	2009-02-28 05:04:00	0	5	1	8	7
1	2009-02-28 05:05:00	0	5	1	8	7
1	2009-02-28 05:06:00	0	5	1	8	7
1	2009-02-28 05:07:00	0	5	1	8	7
1	2009-02-28 05:08:00	0	5	1	8	7
1	2009-02-28 05:09:00	0	5	1	8	7
1	2009-02-28 05:10:00	0	5	1	8	7
1	2009-02-28 05:11:00	0	5	1	8	7
1	2009-02-28 05:12:00	0	5	1	8	7
1	2009-02-28 05:13:00	0	5	1	8	7
1	2009-02-28 05:14:00	0	5	1	8	7
1	2009-02-28 05:15:00	0	5	1	8	7
1	2009-02-28 05:16:00	0	5	1	8	7
1	2009-02-28 05:17:00	0	5	1	8	7
1	2009-02-28 05:18:00	0	5	1	8	7
1	2009-02-28 05:19:00	0	5	1	8	7
1	2009-02-28 05:20:00	12	5	1	8	7
1	2009-02-28 05:21:00	0	5	1	8	7
1	2009-02-28 05:22:00	0	5	1	8	7
1	2009-02-28 05:23:00	0	5	1	8	7
1	2009-02-28 05:24:00	0	5	1	8	7
1	2009-02-28 05:25:00	0	5	1	8	7
1	2009-02-28 05:26:00	0	5	1	8	7
1	2009-02-28 05:27:00	0	5	1	8	7
1	2009-02-28 05:28:00	0	5	1	8	7
1	2009-02-28 05:29:00	0	5	1	8	7
1	2009-02-28 05:30:00	0	5	1	8	7
1	2009-02-28 05:31:00	0	5	1	8	7
1	2009-02-28 05:32:00	0	5	1	8	7
1	2009-02-28 05:33:00	0	5	1	8	7
1	2009-02-28 05:34:00	0	5	1	8	7
1	2009-02-28 05:35:00	0	5	1	8	7
1	2009-02-28 05:36:00	0	5	1	8	7
1	2009-02-28 05:37:00	0	5	1	8	7
1	2009-02-28 05:38:00	0	5	1	8	7
1	2009-02-28 05:39:00	0	5	1	8	7
1	2009-02-28 05:40:00	0	5	1	8	7
1	2009-02-28 05:41:00	0	5	1	8	7
1	2009-02-28 05:42:00	12	5	1	8	7
1	2009-02-28 05:43:00	0	5	1	8	7
1	2009-02-28 05:44:00	0	5	1	8	7
1	2009-02-28 05:45:00	0	5	1	8	7
1	2009-02-28 05:46:00	0	5	1	8	7
1	2009-02-28 05:47:00	0	5	1	8	7
1	2009-02-28 05:48:00	207	5	1	8	7
1	2009-02-28 05:49:00	0	5	1	8	7
1	2009-02-28 05:50:00	0	5	1	8	7
1	2009-02-28 05:51:00	47	5	1	8	7
1	2009-02-28 05:52:00	0	5	1	8	7
1	2009-02-28 05:53:00	0	5	1	8	7
1	2009-02-28 05:54:00	0	5	1	8	7
1	2009-02-28 05:55:00	0	5	1	8	7
1	2009-02-28 05:56:00	0	5	1	8	7
1	2009-02-28 05:57:00	0	5	1	8	7
1	2009-02-28 05:58:00	0	5	1	8	7
1	2009-02-28 05:59:00	0	5	1	8	7
1	2009-02-28 06:00:00	0	5	1	8	7
1	2009-02-28 06:01:00	0	6	2	8	7
1	2009-02-28 06:02:00	0	6	2	8	7
1	2009-02-28 06:03:00	0	6	2	8	7
1	2009-02-28 06:04:00	0	6	2	8	7
1	2009-02-28 06:05:00	0	6	2	8	7
1	2009-02-28 06:06:00	0	6	2	8	7
1	2009-02-28 06:07:00	0	6	2	8	7
1	2009-02-28 06:08:00	0	6	2	8	7
1	2009-02-28 06:09:00	0	6	2	8	7
1	2009-02-28 06:10:00	0	6	2	8	7
1	2009-02-28 06:11:00	0	6	2	8	7
1	2009-02-28 06:12:00	0	6	2	8	7
1	2009-02-28 06:13:00	0	6	2	8	7
1	2009-02-28 06:14:00	0	6	2	8	7
1	2009-02-28 06:15:00	0	6	2	8	7
1	2009-02-28 06:16:00	0	6	2	8	7
1	2009-02-28 06:17:00	0	6	2	8	7
1	2009-02-28 06:18:00	0	6	2	8	7
1	2009-02-28 06:19:00	0	6	2	8	7
1	2009-02-28 06:20:00	0	6	2	8	7
1	2009-02-28 06:21:00	0	6	2	8	7
1	2009-02-28 06:22:00	0	6	2	8	7
1	2009-02-28 06:23:00	12	6	2	8	7
1	2009-02-28 06:24:00	35	6	2	8	7
1	2009-02-28 06:25:00	0	6	2	8	7
1	2009-02-28 06:26:00	0	6	2	8	7
1	2009-02-28 06:27:00	0	6	2	8	7
1	2009-02-28 06:28:00	0	6	2	8	7
1	2009-02-28 06:29:00	0	6	2	8	7
1	2009-02-28 06:30:00	0	6	2	8	7
1	2009-02-28 06:31:00	0	6	2	8	7
1	2009-02-28 06:32:00	0	6	2	8	7
1	2009-02-28 06:33:00	0	6	2	8	7
1	2009-02-28 06:34:00	0	6	2	8	7
1	2009-02-28 06:35:00	0	6	2	8	7
1	2009-02-28 06:36:00	0	6	2	8	7
1	2009-02-28 06:37:00	70	6	2	8	7
1	2009-02-28 06:38:00	0	6	2	8	7
1	2009-02-28 06:39:00	0	6	2	8	7
1	2009-02-28 06:40:00	0	6	2	8	7
1	2009-02-28 06:41:00	0	6	2	8	7
1	2009-02-28 06:42:00	0	6	2	8	7
1	2009-02-28 06:43:00	0	6	2	8	7
1	2009-02-28 06:44:00	0	6	2	8	7
1	2009-02-28 06:45:00	0	6	2	8	7
1	2009-02-28 06:46:00	0	6	2	8	7
1	2009-02-28 06:47:00	0	6	2	8	7
1	2009-02-28 06:48:00	0	6	2	8	7
1	2009-02-28 06:49:00	0	6	2	8	7
1	2009-02-28 06:50:00	0	6	2	8	7
1	2009-02-28 06:51:00	12	6	2	8	7
1	2009-02-28 06:52:00	0	6	2	8	7
1	2009-02-28 06:53:00	23	6	2	8	7
1	2009-02-28 06:54:00	0	6	2	8	7
1	2009-02-28 06:55:00	35	6	2	8	7
1	2009-02-28 06:56:00	0	6	2	8	7
1	2009-02-28 06:57:00	47	6	2	8	7
1	2009-02-28 06:58:00	47	6	2	8	7
1	2009-02-28 06:59:00	0	6	2	8	7
1	2009-02-28 07:00:00	70	6	2	8	7
1	2009-02-28 07:01:00	12	7	2	8	7
1	2009-02-28 07:02:00	47	7	2	8	7
1	2009-02-28 07:03:00	961	7	2	8	7
1	2009-02-28 07:04:00	12	7	2	8	7
1	2009-02-28 07:05:00	58	7	2	8	7
1	2009-02-28 07:06:00	35	7	2	8	7
1	2009-02-28 07:07:00	1038	7	2	8	7
1	2009-02-28 07:08:00	105	7	2	8	7
1	2009-02-28 07:09:00	277	7	2	8	7
1	2009-02-28 07:10:00	0	7	2	8	7
1	2009-02-28 07:11:00	23	7	2	8	7
1	2009-02-28 07:12:00	179	7	2	8	7
1	2009-02-28 07:13:00	747	7	2	8	7
1	2009-02-28 07:14:00	0	7	2	8	7
1	2009-02-28 07:15:00	0	7	2	8	7
1	2009-02-28 07:16:00	0	7	2	8	7
1	2009-02-28 07:17:00	0	7	2	8	7
1	2009-02-28 07:18:00	23	7	2	8	7
1	2009-02-28 07:19:00	0	7	2	8	7
1	2009-02-28 07:20:00	0	7	2	8	7
1	2009-02-28 07:21:00	0	7	2	8	7
1	2009-02-28 07:22:00	0	7	2	8	7
1	2009-02-28 07:23:00	0	7	2	8	7
1	2009-02-28 07:24:00	0	7	2	8	7
1	2009-02-28 07:25:00	0	7	2	8	7
1	2009-02-28 07:26:00	0	7	2	8	7
1	2009-02-28 07:27:00	0	7	2	8	7
1	2009-02-28 07:28:00	0	7	2	8	7
1	2009-02-28 07:29:00	0	7	2	8	7
1	2009-02-28 07:30:00	0	7	2	8	7
1	2009-02-28 07:31:00	0	7	2	8	7
1	2009-02-28 07:32:00	0	7	2	8	7
1	2009-02-28 07:33:00	0	7	2	8	7
1	2009-02-28 07:34:00	0	7	2	8	7
1	2009-02-28 07:35:00	0	7	2	8	7
1	2009-02-28 07:36:00	0	7	2	8	7
1	2009-02-28 07:37:00	0	7	2	8	7
1	2009-02-28 07:38:00	0	7	2	8	7
1	2009-02-28 07:39:00	0	7	2	8	7
1	2009-02-28 07:40:00	0	7	2	8	7
1	2009-02-28 07:41:00	0	7	2	8	7
1	2009-02-28 07:42:00	0	7	2	8	7
1	2009-02-28 07:43:00	321	7	2	8	7
1	2009-02-28 07:44:00	0	7	2	8	7
1	2009-02-28 07:45:00	0	7	2	8	7
1	2009-02-28 07:46:00	0	7	2	8	7
1	2009-02-28 07:47:00	0	7	2	8	7
1	2009-02-28 07:48:00	12	7	2	8	7
1	2009-02-28 07:49:00	0	7	2	8	7
1	2009-02-28 07:50:00	12	7	2	8	7
1	2009-02-28 07:51:00	23	7	2	8	7
1	2009-02-28 07:52:00	0	7	2	8	7
1	2009-02-28 07:53:00	0	7	2	8	7
1	2009-02-28 07:54:00	0	7	2	8	7
1	2009-02-28 07:55:00	12	7	2	8	7
1	2009-02-28 07:56:00	23	7	2	8	7
1	2009-02-28 07:57:00	23	7	2	8	7
1	2009-02-28 07:58:00	0	7	2	8	7
1	2009-02-28 07:59:00	12	7	2	8	7
1	2009-02-28 08:00:00	12	7	2	8	7
1	2009-02-28 08:01:00	12	8	2	8	7
1	2009-02-28 08:02:00	12	8	2	8	7
1	2009-02-28 08:03:00	0	8	2	8	7
1	2009-02-28 08:04:00	1012	8	2	8	7
1	2009-02-28 08:05:00	386	8	2	8	7
1	2009-02-28 08:06:00	23	8	2	8	7
1	2009-02-28 08:07:00	116	8	2	8	7
1	2009-02-28 08:08:00	0	8	2	8	7
1	2009-02-28 08:09:00	663	8	2	8	7
1	2009-02-28 08:10:00	1294	8	2	8	7
1	2009-02-28 08:11:00	0	8	2	8	7
1	2009-02-28 08:12:00	140	8	2	8	7
1	2009-02-28 08:13:00	0	8	2	8	7
1	2009-02-28 08:14:00	0	8	2	8	7
1	2009-02-28 08:15:00	0	8	2	8	7
1	2009-02-28 08:16:00	0	8	2	8	7
1	2009-02-28 08:17:00	70	8	2	8	7
1	2009-02-28 08:18:00	0	8	2	8	7
1	2009-02-28 08:19:00	207	8	2	8	7
1	2009-02-28 08:20:00	193	8	2	8	7
1	2009-02-28 08:21:00	0	8	2	8	7
1	2009-02-28 08:22:00	0	8	2	8	7
1	2009-02-28 08:23:00	0	8	2	8	7
1	2009-02-28 08:24:00	0	8	2	8	7
1	2009-02-28 08:25:00	12	8	2	8	7
1	2009-02-28 08:26:00	12	8	2	8	7
1	2009-02-28 08:27:00	987	8	2	8	7
1	2009-02-28 08:28:00	193	8	2	8	7
1	2009-02-28 08:29:00	221	8	2	8	7
1	2009-02-28 08:30:00	0	8	2	8	7
1	2009-02-28 08:31:00	0	8	2	8	7
1	2009-02-28 08:32:00	0	8	2	8	7
1	2009-02-28 08:33:00	0	8	2	8	7
1	2009-02-28 08:34:00	12	8	2	8	7
1	2009-02-28 08:35:00	0	8	2	8	7
1	2009-02-28 08:36:00	0	8	2	8	7
1	2009-02-28 08:37:00	35	8	2	8	7
1	2009-02-28 08:38:00	0	8	2	8	7
1	2009-02-28 08:39:00	0	8	2	8	7
1	2009-02-28 08:40:00	0	8	2	8	7
1	2009-02-28 08:41:00	337	8	2	8	7
1	2009-02-28 08:42:00	12	8	2	8	7
1	2009-02-28 08:43:00	0	8	2	8	7
1	2009-02-28 08:44:00	545	8	2	8	7
1	2009-02-28 08:45:00	419	8	2	8	7
1	2009-02-28 08:46:00	0	8	2	8	7
1	2009-02-28 08:47:00	0	8	2	8	7
1	2009-02-28 08:48:00	291	8	2	8	7
1	2009-02-28 08:49:00	961	8	2	8	7
1	2009-02-28 08:50:00	470	8	2	8	7
1	2009-02-28 08:51:00	277	8	2	8	7
1	2009-02-28 08:52:00	354	8	2	8	7
1	2009-02-28 08:53:00	0	8	2	8	7
1	2009-02-28 08:54:00	0	8	2	8	7
1	2009-02-28 08:55:00	193	8	2	8	7
1	2009-02-28 08:56:00	0	8	2	8	7
1	2009-02-28 08:57:00	0	8	2	8	7
1	2009-02-28 08:58:00	0	8	2	8	7
1	2009-02-28 08:59:00	0	8	2	8	7
1	2009-02-28 09:00:00	140	8	2	8	7
1	2009-02-28 09:01:00	0	9	2	8	7
1	2009-02-28 09:02:00	663	9	2	8	7
1	2009-02-28 09:03:00	277	9	2	8	7
1	2009-02-28 09:04:00	93	9	2	8	7
1	2009-02-28 09:05:00	193	9	2	8	7
1	2009-02-28 09:06:00	35	9	2	8	7
1	2009-02-28 09:07:00	23	9	2	8	7
1	2009-02-28 09:08:00	0	9	2	8	7
1	2009-02-28 09:09:00	0	9	2	8	7
1	2009-02-28 09:10:00	0	9	2	8	7
1	2009-02-28 09:11:00	81	9	2	8	7
1	2009-02-28 09:12:00	140	9	2	8	7
1	2009-02-28 09:13:00	47	9	2	8	7
1	2009-02-28 09:14:00	0	9	2	8	7
1	2009-02-28 09:15:00	0	9	2	8	7
1	2009-02-28 09:16:00	12	9	2	8	7
1	2009-02-28 09:17:00	0	9	2	8	7
1	2009-02-28 09:18:00	0	9	2	8	7
1	2009-02-28 09:19:00	235	9	2	8	7
1	2009-02-28 09:20:00	0	9	2	8	7
1	2009-02-28 09:21:00	451	9	2	8	7
1	2009-02-28 09:22:00	116	9	2	8	7
1	2009-02-28 09:23:00	179	9	2	8	7
1	2009-02-28 09:24:00	70	9	2	8	7
1	2009-02-28 09:25:00	0	9	2	8	7
1	2009-02-28 09:26:00	0	9	2	8	7
1	2009-02-28 09:27:00	0	9	2	8	7
1	2009-02-28 09:28:00	0	9	2	8	7
1	2009-02-28 09:29:00	0	9	2	8	7
1	2009-02-28 09:30:00	249	9	2	8	7
1	2009-02-28 09:31:00	526	9	2	8	7
1	2009-02-28 09:32:00	0	9	2	8	7
1	2009-02-28 09:33:00	0	9	2	8	7
1	2009-02-28 09:34:00	151	9	2	8	7
1	2009-02-28 09:35:00	35	9	2	8	7
1	2009-02-28 09:36:00	221	9	2	8	7
1	2009-02-28 09:37:00	621	9	2	8	7
1	2009-02-28 09:38:00	0	9	2	8	7
1	2009-02-28 09:39:00	0	9	2	8	7
1	2009-02-28 09:40:00	23	9	2	8	7
1	2009-02-28 09:41:00	0	9	2	8	7
1	2009-02-28 09:42:00	23	9	2	8	7
1	2009-02-28 09:43:00	0	9	2	8	7
1	2009-02-28 09:44:00	12	9	2	8	7
1	2009-02-28 09:45:00	0	9	2	8	7
1	2009-02-28 09:46:00	0	9	2	8	7
1	2009-02-28 09:47:00	0	9	2	8	7
1	2009-02-28 09:48:00	0	9	2	8	7
1	2009-02-28 09:49:00	207	9	2	8	7
1	2009-02-28 09:50:00	235	9	2	8	7
1	2009-02-28 09:51:00	0	9	2	8	7
1	2009-02-28 09:52:00	0	9	2	8	7
1	2009-02-28 09:53:00	47	9	2	8	7
1	2009-02-28 09:54:00	23	9	2	8	7
1	2009-02-28 09:55:00	23	9	2	8	7
1	2009-02-28 09:56:00	0	9	2	8	7
1	2009-02-28 09:57:00	0	9	2	8	7
1	2009-02-28 09:58:00	140	9	2	8	7
1	2009-02-28 09:59:00	12	9	2	8	7
1	2009-02-28 10:00:00	58	9	2	8	7
1	2009-02-28 10:01:00	70	10	2	8	7
1	2009-02-28 10:02:00	0	10	2	8	7
1	2009-02-28 10:03:00	0	10	2	8	7
1	2009-02-28 10:04:00	35	10	2	8	7
1	2009-02-28 10:05:00	249	10	2	8	7
1	2009-02-28 10:06:00	526	10	2	8	7
1	2009-02-28 10:07:00	12	10	2	8	7
1	2009-02-28 10:08:00	337	10	2	8	7
1	2009-02-28 10:09:00	263	10	2	8	7
1	2009-02-28 10:10:00	0	10	2	8	7
1	2009-02-28 10:11:00	35	10	2	8	7
1	2009-02-28 10:12:00	0	10	2	8	7
1	2009-02-28 10:13:00	0	10	2	8	7
1	2009-02-28 10:14:00	47	10	2	8	7
1	2009-02-28 10:15:00	12	10	2	8	7
1	2009-02-28 10:16:00	0	10	2	8	7
1	2009-02-28 10:17:00	0	10	2	8	7
1	2009-02-28 10:18:00	0	10	2	8	7
1	2009-02-28 10:19:00	321	10	2	8	7
1	2009-02-28 10:20:00	277	10	2	8	7
1	2009-02-28 10:21:00	221	10	2	8	7
1	2009-02-28 10:22:00	0	10	2	8	7
1	2009-02-28 10:23:00	0	10	2	8	7
1	2009-02-28 10:24:00	0	10	2	8	7
1	2009-02-28 10:25:00	140	10	2	8	7
1	2009-02-28 10:26:00	910	10	2	8	7
1	2009-02-28 10:27:00	12	10	2	8	7
1	2009-02-28 10:28:00	0	10	2	8	7
1	2009-02-28 10:29:00	0	10	2	8	7
1	2009-02-28 10:30:00	0	10	2	8	7
1	2009-02-28 10:31:00	0	10	2	8	7
1	2009-02-28 10:32:00	0	10	2	8	7
1	2009-02-28 10:33:00	0	10	2	8	7
1	2009-02-28 10:34:00	0	10	2	8	7
1	2009-02-28 10:35:00	0	10	2	8	7
1	2009-02-28 10:36:00	0	10	2	8	7
1	2009-02-28 10:37:00	0	10	2	8	7
1	2009-02-28 10:38:00	0	10	2	8	7
1	2009-02-28 10:39:00	0	10	2	8	7
1	2009-02-28 10:40:00	0	10	2	8	7
1	2009-02-28 10:41:00	0	10	2	8	7
1	2009-02-28 10:42:00	0	10	2	8	7
1	2009-02-28 10:43:00	0	10	2	8	7
1	2009-02-28 10:44:00	0	10	2	8	7
1	2009-02-28 10:45:00	0	10	2	8	7
1	2009-02-28 10:46:00	0	10	2	8	7
1	2009-02-28 10:47:00	23	10	2	8	7
1	2009-02-28 10:48:00	12	10	2	8	7
1	2009-02-28 10:49:00	12	10	2	8	7
1	2009-02-28 10:50:00	0	10	2	8	7
1	2009-02-28 10:51:00	526	10	2	8	7
1	2009-02-28 10:52:00	470	10	2	8	7
1	2009-02-28 10:53:00	0	10	2	8	7
1	2009-02-28 10:54:00	0	10	2	8	7
1	2009-02-28 10:55:00	0	10	2	8	7
1	2009-02-28 10:56:00	0	10	2	8	7
1	2009-02-28 10:57:00	235	10	2	8	7
1	2009-02-28 10:58:00	12	10	2	8	7
1	2009-02-28 10:59:00	179	10	2	8	7
1	2009-02-28 11:00:00	794	10	2	8	7
1	2009-02-28 11:01:00	663	11	2	8	7
1	2009-02-28 11:02:00	221	11	2	8	7
1	2009-02-28 11:03:00	910	11	2	8	7
1	2009-02-28 11:04:00	794	11	2	8	7
1	2009-02-28 11:05:00	0	11	2	8	7
1	2009-02-28 11:06:00	23	11	2	8	7
1	2009-02-28 11:07:00	0	11	2	8	7
1	2009-02-28 11:08:00	0	11	2	8	7
1	2009-02-28 11:09:00	1806	11	2	8	7
1	2009-02-28 11:10:00	1091	11	2	8	7
1	2009-02-28 11:11:00	1324	11	2	8	7
1	2009-02-28 11:12:00	116	11	2	8	7
1	2009-02-28 11:13:00	0	11	2	8	7
1	2009-02-28 11:14:00	0	11	2	8	7
1	2009-02-28 11:15:00	0	11	2	8	7
1	2009-02-28 11:16:00	0	11	2	8	7
1	2009-02-28 11:17:00	337	11	2	8	7
1	2009-02-28 11:18:00	116	11	2	8	7
1	2009-02-28 11:19:00	0	11	2	8	7
1	2009-02-28 11:20:00	0	11	2	8	7
1	2009-02-28 11:21:00	12	11	2	8	7
1	2009-02-28 11:22:00	0	11	2	8	7
1	2009-02-28 11:23:00	370	11	2	8	7
1	2009-02-28 11:24:00	910	11	2	8	7
1	2009-02-28 11:25:00	2048	11	2	8	7
1	2009-02-28 11:26:00	770	11	2	8	7
1	2009-02-28 11:27:00	726	11	2	8	7
1	2009-02-28 11:28:00	12	11	2	8	7
1	2009-02-28 11:29:00	12	11	2	8	7
1	2009-02-28 11:30:00	165	11	2	8	7
1	2009-02-28 11:31:00	0	11	2	8	7
1	2009-02-28 11:32:00	0	11	2	8	7
1	2009-02-28 11:33:00	47	11	2	8	7
1	2009-02-28 11:34:00	23	11	2	8	7
1	2009-02-28 11:35:00	221	11	2	8	7
1	2009-02-28 11:36:00	0	11	2	8	7
1	2009-02-28 11:37:00	0	11	2	8	7
1	2009-02-28 11:38:00	0	11	2	8	7
1	2009-02-28 11:39:00	0	11	2	8	7
1	2009-02-28 11:40:00	35	11	2	8	7
1	2009-02-28 11:41:00	0	11	2	8	7
1	2009-02-28 11:42:00	0	11	2	8	7
1	2009-02-28 11:43:00	0	11	2	8	7
1	2009-02-28 11:44:00	0	11	2	8	7
1	2009-02-28 11:45:00	0	11	2	8	7
1	2009-02-28 11:46:00	0	11	2	8	7
1	2009-02-28 11:47:00	0	11	2	8	7
1	2009-02-28 11:48:00	0	11	2	8	7
1	2009-02-28 11:49:00	0	11	2	8	7
1	2009-02-28 11:50:00	0	11	2	8	7
1	2009-02-28 11:51:00	0	11	2	8	7
1	2009-02-28 11:52:00	0	11	2	8	7
1	2009-02-28 11:53:00	0	11	2	8	7
1	2009-02-28 11:54:00	0	11	2	8	7
1	2009-02-28 11:55:00	12	11	2	8	7
1	2009-02-28 11:56:00	0	11	2	8	7
1	2009-02-28 11:57:00	93	11	2	8	7
1	2009-02-28 11:58:00	684	11	2	8	7
1	2009-02-28 11:59:00	0	11	2	8	7
1	2009-02-28 12:00:00	0	11	2	8	7
1	2009-02-28 12:01:00	0	12	3	8	7
1	2009-02-28 12:02:00	35	12	3	8	7
1	2009-02-28 12:03:00	0	12	3	8	7
1	2009-02-28 12:04:00	0	12	3	8	7
1	2009-02-28 12:05:00	0	12	3	8	7
1	2009-02-28 12:06:00	0	12	3	8	7
1	2009-02-28 12:07:00	47	12	3	8	7
1	2009-02-28 12:08:00	0	12	3	8	7
1	2009-02-28 12:09:00	0	12	3	8	7
1	2009-02-28 12:10:00	47	12	3	8	7
1	2009-02-28 12:11:00	0	12	3	8	7
1	2009-02-28 12:12:00	0	12	3	8	7
1	2009-02-28 12:13:00	0	12	3	8	7
1	2009-02-28 12:14:00	0	12	3	8	7
1	2009-02-28 12:15:00	0	12	3	8	7
1	2009-02-28 12:16:00	0	12	3	8	7
1	2009-02-28 12:17:00	0	12	3	8	7
1	2009-02-28 12:18:00	12	12	3	8	7
1	2009-02-28 12:19:00	0	12	3	8	7
1	2009-02-28 12:20:00	0	12	3	8	7
1	2009-02-28 12:21:00	0	12	3	8	7
1	2009-02-28 12:22:00	0	12	3	8	7
1	2009-02-28 12:23:00	0	12	3	8	7
1	2009-02-28 12:24:00	0	12	3	8	7
1	2009-02-28 12:25:00	23	12	3	8	7
1	2009-02-28 12:26:00	35	12	3	8	7
1	2009-02-28 12:27:00	0	12	3	8	7
1	2009-02-28 12:28:00	0	12	3	8	7
1	2009-02-28 12:29:00	105	12	3	8	7
1	2009-02-28 12:30:00	70	12	3	8	7
1	2009-02-28 12:31:00	0	12	3	8	7
1	2009-02-28 12:32:00	0	12	3	8	7
1	2009-02-28 12:33:00	0	12	3	8	7
1	2009-02-28 12:34:00	12	12	3	8	7
1	2009-02-28 12:35:00	0	12	3	8	7
1	2009-02-28 12:36:00	0	12	3	8	7
1	2009-02-28 12:37:00	0	12	3	8	7
1	2009-02-28 12:38:00	0	12	3	8	7
1	2009-02-28 12:39:00	0	12	3	8	7
1	2009-02-28 12:40:00	0	12	3	8	7
1	2009-02-28 12:41:00	0	12	3	8	7
1	2009-02-28 12:42:00	0	12	3	8	7
1	2009-02-28 12:43:00	0	12	3	8	7
1	2009-02-28 12:44:00	0	12	3	8	7
1	2009-02-28 12:45:00	0	12	3	8	7
1	2009-02-28 12:46:00	0	12	3	8	7
1	2009-02-28 12:47:00	0	12	3	8	7
1	2009-02-28 12:48:00	0	12	3	8	7
1	2009-02-28 12:49:00	0	12	3	8	7
1	2009-02-28 12:50:00	0	12	3	8	7
1	2009-02-28 12:51:00	0	12	3	8	7
1	2009-02-28 12:52:00	0	12	3	8	7
1	2009-02-28 12:53:00	0	12	3	8	7
1	2009-02-28 12:54:00	0	12	3	8	7
1	2009-02-28 12:55:00	0	12	3	8	7
1	2009-02-28 12:56:00	0	12	3	8	7
1	2009-02-28 12:57:00	93	12	3	8	7
1	2009-02-28 12:58:00	0	12	3	8	7
1	2009-02-28 12:59:00	0	12	3	8	7
1	2009-02-28 13:00:00	0	12	3	8	7
1	2009-02-28 13:01:00	0	13	3	8	7
1	2009-02-28 13:02:00	0	13	3	8	7
1	2009-02-28 13:03:00	0	13	3	8	7
1	2009-02-28 13:04:00	0	13	3	8	7
1	2009-02-28 13:05:00	0	13	3	8	7
1	2009-02-28 13:06:00	0	13	3	8	7
1	2009-02-28 13:07:00	70	13	3	8	7
1	2009-02-28 13:08:00	0	13	3	8	7
1	2009-02-28 13:09:00	0	13	3	8	7
1	2009-02-28 13:10:00	0	13	3	8	7
1	2009-02-28 13:11:00	0	13	3	8	7
1	2009-02-28 13:12:00	0	13	3	8	7
1	2009-02-28 13:13:00	179	13	3	8	7
1	2009-02-28 13:14:00	0	13	3	8	7
1	2009-02-28 13:15:00	0	13	3	8	7
1	2009-02-28 13:16:00	0	13	3	8	7
1	2009-02-28 13:17:00	0	13	3	8	7
1	2009-02-28 13:18:00	23	13	3	8	7
1	2009-02-28 13:19:00	0	13	3	8	7
1	2009-02-28 13:20:00	0	13	3	8	7
1	2009-02-28 13:21:00	0	13	3	8	7
1	2009-02-28 13:22:00	0	13	3	8	7
1	2009-02-28 13:23:00	0	13	3	8	7
1	2009-02-28 13:24:00	0	13	3	8	7
1	2009-02-28 13:25:00	0	13	3	8	7
1	2009-02-28 13:26:00	0	13	3	8	7
1	2009-02-28 13:27:00	0	13	3	8	7
1	2009-02-28 13:28:00	0	13	3	8	7
1	2009-02-28 13:29:00	93	13	3	8	7
1	2009-02-28 13:30:00	23	13	3	8	7
1	2009-02-28 13:31:00	0	13	3	8	7
1	2009-02-28 13:32:00	0	13	3	8	7
1	2009-02-28 13:33:00	193	13	3	8	7
1	2009-02-28 13:34:00	0	13	3	8	7
1	2009-02-28 13:35:00	0	13	3	8	7
1	2009-02-28 13:36:00	0	13	3	8	7
1	2009-02-28 13:37:00	0	13	3	8	7
1	2009-02-28 13:38:00	58	13	3	8	7
1	2009-02-28 13:39:00	0	13	3	8	7
1	2009-02-28 13:40:00	23	13	3	8	7
1	2009-02-28 13:41:00	1657	13	3	8	7
1	2009-02-28 13:42:00	526	13	3	8	7
1	2009-02-28 13:43:00	23	13	3	8	7
1	2009-02-28 13:44:00	12	13	3	8	7
1	2009-02-28 13:45:00	337	13	3	8	7
1	2009-02-28 13:46:00	0	13	3	8	7
1	2009-02-28 13:47:00	0	13	3	8	7
1	2009-02-28 13:48:00	12	13	3	8	7
1	2009-02-28 13:49:00	0	13	3	8	7
1	2009-02-28 13:50:00	23	13	3	8	7
1	2009-02-28 13:51:00	58	13	3	8	7
1	2009-02-28 13:52:00	684	13	3	8	7
1	2009-02-28 13:53:00	354	13	3	8	7
1	2009-02-28 13:54:00	0	13	3	8	7
1	2009-02-28 13:55:00	23	13	3	8	7
1	2009-02-28 13:56:00	0	13	3	8	7
1	2009-02-28 13:57:00	840	13	3	8	7
1	2009-02-28 13:58:00	291	13	3	8	7
1	2009-02-28 13:59:00	0	13	3	8	7
1	2009-02-28 14:00:00	0	13	3	8	7
1	2009-02-28 14:01:00	23	14	3	8	7
1	2009-02-28 14:02:00	0	14	3	8	7
1	2009-02-28 14:03:00	563	14	3	8	7
1	2009-02-28 14:04:00	2455	14	3	8	7
1	2009-02-28 14:05:00	140	14	3	8	7
1	2009-02-28 14:06:00	0	14	3	8	7
1	2009-02-28 14:07:00	0	14	3	8	7
1	2009-02-28 14:08:00	0	14	3	8	7
1	2009-02-28 14:09:00	0	14	3	8	7
1	2009-02-28 14:10:00	0	14	3	8	7
1	2009-02-28 14:11:00	0	14	3	8	7
1	2009-02-28 14:12:00	0	14	3	8	7
1	2009-02-28 14:13:00	0	14	3	8	7
1	2009-02-28 14:14:00	0	14	3	8	7
1	2009-02-28 14:15:00	582	14	3	8	7
1	2009-02-28 14:16:00	0	14	3	8	7
1	2009-02-28 14:17:00	0	14	3	8	7
1	2009-02-28 14:18:00	35	14	3	8	7
1	2009-02-28 14:19:00	0	14	3	8	7
1	2009-02-28 14:20:00	321	14	3	8	7
1	2009-02-28 14:21:00	0	14	3	8	7
1	2009-02-28 14:22:00	0	14	3	8	7
1	2009-02-28 14:23:00	12	14	3	8	7
1	2009-02-28 14:24:00	0	14	3	8	7
1	2009-02-28 14:25:00	0	14	3	8	7
1	2009-02-28 14:26:00	0	14	3	8	7
1	2009-02-28 14:27:00	0	14	3	8	7
1	2009-02-28 14:28:00	12	14	3	8	7
1	2009-02-28 14:29:00	0	14	3	8	7
1	2009-02-28 14:30:00	0	14	3	8	7
1	2009-02-28 14:31:00	81	14	3	8	7
1	2009-02-28 14:32:00	0	14	3	8	7
1	2009-02-28 14:33:00	0	14	3	8	7
1	2009-02-28 14:34:00	12	14	3	8	7
1	2009-02-28 14:35:00	0	14	3	8	7
1	2009-02-28 14:36:00	0	14	3	8	7
1	2009-02-28 14:37:00	179	14	3	8	7
1	2009-02-28 14:38:00	0	14	3	8	7
1	2009-02-28 14:39:00	0	14	3	8	7
1	2009-02-28 14:40:00	0	14	3	8	7
1	2009-02-28 14:41:00	0	14	3	8	7
1	2009-02-28 14:42:00	0	14	3	8	7
1	2009-02-28 14:43:00	0	14	3	8	7
1	2009-02-28 14:44:00	0	14	3	8	7
1	2009-02-28 14:45:00	0	14	3	8	7
1	2009-02-28 14:46:00	0	14	3	8	7
1	2009-02-28 14:47:00	93	14	3	8	7
1	2009-02-28 14:48:00	0	14	3	8	7
1	2009-02-28 14:49:00	0	14	3	8	7
1	2009-02-28 14:50:00	507	14	3	8	7
1	2009-02-28 14:51:00	207	14	3	8	7
1	2009-02-28 14:52:00	0	14	3	8	7
1	2009-02-28 14:53:00	0	14	3	8	7
1	2009-02-28 14:54:00	0	14	3	8	7
1	2009-02-28 14:55:00	0	14	3	8	7
1	2009-02-28 14:56:00	0	14	3	8	7
1	2009-02-28 14:57:00	0	14	3	8	7
1	2009-02-28 14:58:00	0	14	3	8	7
1	2009-02-28 14:59:00	23	14	3	8	7
1	2009-02-28 15:00:00	0	14	3	8	7
1	2009-02-28 15:01:00	0	15	3	8	7
1	2009-02-28 15:02:00	0	15	3	8	7
1	2009-02-28 15:03:00	0	15	3	8	7
1	2009-02-28 15:04:00	0	15	3	8	7
1	2009-02-28 15:05:00	0	15	3	8	7
1	2009-02-28 15:06:00	0	15	3	8	7
1	2009-02-28 15:07:00	0	15	3	8	7
1	2009-02-28 15:08:00	0	15	3	8	7
1	2009-02-28 15:09:00	0	15	3	8	7
1	2009-02-28 15:10:00	0	15	3	8	7
1	2009-02-28 15:11:00	0	15	3	8	7
1	2009-02-28 15:12:00	58	15	3	8	7
1	2009-02-28 15:13:00	47	15	3	8	7
1	2009-02-28 15:14:00	0	15	3	8	7
1	2009-02-28 15:15:00	0	15	3	8	7
1	2009-02-28 15:16:00	0	15	3	8	7
1	2009-02-28 15:17:00	0	15	3	8	7
1	2009-02-28 15:18:00	0	15	3	8	7
1	2009-02-28 15:19:00	0	15	3	8	7
[truncated: 78,641 more rows]

## Sheet: Pivot Segment
Multiplier	2
x (Low Intensity)	578.65
y (High Intensity)	463.122
	Column Labels
Values	1	2	3	4	5	6	7	8	Grand Total
Average of Activity	86.5272	61.7302	77.883	133.04	136.693	106.126	122.523	108.856	104.452
StdDev of Activity	246.061	200.696	409.394	385.4	483.45	353.021	399.113	396.131	371.846
Count of Activity	8820	10080	10080	10080	10080	10080	10080	10080	79380
Count Above x	439	279	389	609	630	527	611	463
% Above x	0.0497732	0.0276786	0.0385913	0.0604167	0.0625	0.0522817	0.0606151	0.0459325
Count Above y		392	514	793	794	674	761	643
% Above y		0.0388889	0.0509921	0.0786706	0.0787698	0.0668651	0.075496	0.0637897

## Sheet: Pivot Weekday
Sum of Activity	Column Labels
Row Labels	1	2	3	4	5	6	7	8	Grand Total
1	137203	102339	175601	211474	322295	102312	216823	151907	1419954
2	136904	91278	88852	150462	115767	98148	157140	281299	1119850
3	138202	116439	117193	144955	163387	137996	106481	92563	1017216
4	42408	86311	100984	205835	261324	149248	197096	122027	1165233
5	75022	81957	79299	285645	225586	153748	99363	157911	1158531
6	136820	90508	72912	214233	134525	170546	185734	132287	1137565
7	96611	53408	150220	128444	154977	257753	272398	159273	1273084
Grand Total	763170	622240	785061	1341048	1377861	1069751	1235035	1097267	8291433
Count of Activity	Column Labels
Row Labels	1	2	3	4	5	6	7	8	Grand Total
1	1440	1440	1440	1440	1440	1440	1440	1440	11520
2	1440	1440	1440	1440	1440	1440	1440	1440	11520
3	1320	1440	1440	1440	1440	1440	1440	1440	11400
4	300	1440	1440	1440	1440	1440	1440	1440	10380
5	1440	1440	1440	1440	1440	1440	1440	1440	11520
6	1440	1440	1440	1440	1440	1440	1440	1440	11520
7	1440	1440	1440	1440	1440	1440	1440	1440	11520
Grand Total	8820	10080	10080	10080	10080	10080	10080	10080	79380

## Sheet: Pivot Quadrant
Sum of Activity	Column Labels
Row Labels	1	2	3	4	5	6	7	8	Grand Total
1	14548	28168	57295	60421	48222	44454	23304	37085	313497
2	193437	187908	194124	405096	248408	231057	312158	408752	2180940
3	211496	165949	262773	320094	224382	254713	419498	175789	2034694
4	343689	240215	270869	555437	856849	539527	480075	475641	3762302
Grand Total	763170	622240	785061	1341048	1377861	1069751	1235035	1097267	8291433
Average	190792	155560	196265	335262	344465	267438	308759	274317
Count of Activity	Column Labels
Row Labels	1	2	3	4	5	6	7	8	Grand Total
1	2160	2520	2520	2520	2520	2520	2520	2520	19800
2	2160	2520	2520	2520	2520	2520	2520	2520	19800
3	2160	2520	2520	2520	2520	2520	2520	2520	19800
4	2340	2520	2520	2520	2520	2520	2520	2520	19980
Grand Total	8820	10080	10080	10080	10080	10080	10080	10080	79380

## Sheet: 2.20.09
Actogram, Copy Raw Data, All Days
Identity:	Jade
Filename:	E:\Active Research Files\meloxicam titre canine\cases\jade\Jade.02.20.09.AWC
Gender:	F
Age:	8
Height:	61.0 cm	24.0 in
Weight:	40.0 kg	88.2 lbs
Start Date:	20-Feb-2009 (Fri)
Start Time:	18:00:00
Interval:	1.00 mins
Date Stamp:	Time Stamp:	Activity Data:	Marker Press:
2009-02-20	00:00:00	0
2009-02-20	00:01:00	0
2009-02-20	00:02:00	0
2009-02-20	00:03:00	0
2009-02-20	00:04:00	0
2009-02-20	00:05:00	0
2009-02-20	00:06:00	0
2009-02-20	00:07:00	0
2009-02-20	00:08:00	0
2009-02-20	00:09:00	0
2009-02-20	00:10:00	0
2009-02-20	00:11:00	0
2009-02-20	00:12:00	0
2009-02-20	00:13:00	0
2009-02-20	00:14:00	0
2009-02-20	00:15:00	0
2009-02-20	00:16:00	0
2009-02-20	00:17:00	0
2009-02-20	00:18:00	0
2009-02-20	00:19:00	0
2009-02-20	00:20:00	0
2009-02-20	00:21:00	0
2009-02-20	00:22:00	0
2009-02-20	00:23:00	0
2009-02-20	00:24:00	0
2009-02-20	00:25:00	0
2009-02-20	00:26:00	0
2009-02-20	00:27:00	0
2009-02-20	00:28:00	0
2009-02-20	00:29:00	0
2009-02-20	00:30:00	0
2009-02-20	00:31:00	0
2009-02-20	00:32:00	0
2009-02-20	00:33:00	0
2009-02-20	00:34:00	0
2009-02-20	00:35:00	0
2009-02-20	00:36:00	0
2009-02-20	00:37:00	0
2009-02-20	00:38:00	0
2009-02-20	00:39:00	0
2009-02-20	00:40:00	0
2009-02-20	00:41:00	0
2009-02-20	00:42:00	0
2009-02-20	00:43:00	0
2009-02-20	00:44:00	0
2009-02-20	00:45:00	0
2009-02-20	00:46:00	0
2009-02-20	00:47:00	0
2009-02-20	00:48:00	0
2009-02-20	00:49:00	0
2009-02-20	00:50:00	0
2009-02-20	00:51:00	0
2009-02-20	00:52:00	0
2009-02-20	00:53:00	0
2009-02-20	00:54:00	0
2009-02-20	00:55:00	0
2009-02-20	00:56:00	0
2009-02-20	00:57:00	0
2009-02-20	00:58:00	0
2009-02-20	00:59:00	0
2009-02-20	01:00:00	0
2009-02-20	01:01:00	0
2009-02-20	01:02:00	0
2009-02-20	01:03:00	0
2009-02-20	01:04:00	0
2009-02-20	01:05:00	0
2009-02-20	01:06:00	0
2009-02-20	01:07:00	0
2009-02-20	01:08:00	0
2009-02-20	01:09:00	0
2009-02-20	01:10:00	0
2009-02-20	01:11:00	0
2009-02-20	01:12:00	0
2009-02-20	01:13:00	0
2009-02-20	01:14:00	0
2009-02-20	01:15:00	0
2009-02-20	01:16:00	0
2009-02-20	01:17:00	0
2009-02-20	01:18:00	0
2009-02-20	01:19:00	0
2009-02-20	01:20:00	0
2009-02-20	01:21:00	0
2009-02-20	01:22:00	0
2009-02-20	01:23:00	0
2009-02-20	01:24:00	0
2009-02-20	01:25:00	0
2009-02-20	01:26:00	0
2009-02-20	01:27:00	0
2009-02-20	01:28:00	0
2009-02-20	01:29:00	0
2009-02-20	01:30:00	0
2009-02-20	01:31:00	0
2009-02-20	01:32:00	0
2009-02-20	01:33:00	0
2009-02-20	01:34:00	0
2009-02-20	01:35:00	0
2009-02-20	01:36:00	0
2009-02-20	01:37:00	0
2009-02-20	01:38:00	0
2009-02-20	01:39:00	0
2009-02-20	01:40:00	0
2009-02-20	01:41:00	0
2009-02-20	01:42:00	0
2009-02-20	01:43:00	0
2009-02-20	01:44:00	0
2009-02-20	01:45:00	0
2009-02-20	01:46:00	0
2009-02-20	01:47:00	0
2009-02-20	01:48:00	0
2009-02-20	01:49:00	0
2009-02-20	01:50:00	0
2009-02-20	01:51:00	0
2009-02-20	01:52:00	0
2009-02-20	01:53:00	0
2009-02-20	01:54:00	0
2009-02-20	01:55:00	0
2009-02-20	01:56:00	0
2009-02-20	01:57:00	0
2009-02-20	01:58:00	0
2009-02-20	01:59:00	0
2009-02-20	02:00:00	0
2009-02-20	02:01:00	0
2009-02-20	02:02:00	0
2009-02-20	02:03:00	0
2009-02-20	02:04:00	0
2009-02-20	02:05:00	0
2009-02-20	02:06:00	0
2009-02-20	02:07:00	0
2009-02-20	02:08:00	0
2009-02-20	02:09:00	0
2009-02-20	02:10:00	0
2009-02-20	02:11:00	0
2009-02-20	02:12:00	0
2009-02-20	02:13:00	0
2009-02-20	02:14:00	0
2009-02-20	02:15:00	0
2009-02-20	02:16:00	0
2009-02-20	02:17:00	0
2009-02-20	02:18:00	0
2009-02-20	02:19:00	0
2009-02-20	02:20:00	0
2009-02-20	02:21:00	0
2009-02-20	02:22:00	0
2009-02-20	02:23:00	0
2009-02-20	02:24:00	0
2009-02-20	02:25:00	0
2009-02-20	02:26:00	0
2009-02-20	02:27:00	0
2009-02-20	02:28:00	0
2009-02-20	02:29:00	0
2009-02-20	02:30:00	0
2009-02-20	02:31:00	0
2009-02-20	02:32:00	0
2009-02-20	02:33:00	0
2009-02-20	02:34:00	0
2009-02-20	02:35:00	0
2009-02-20	02:36:00	0
2009-02-20	02:37:00	0
2009-02-20	02:38:00	0
2009-02-20	02:39:00	0
2009-02-20	02:40:00	0
2009-02-20	02:41:00	0
2009-02-20	02:42:00	0
2009-02-20	02:43:00	0
2009-02-20	02:44:00	0
2009-02-20	02:45:00	0
2009-02-20	02:46:00	0
2009-02-20	02:47:00	0
2009-02-20	02:48:00	0
2009-02-20	02:49:00	0
2009-02-20	02:50:00	0
2009-02-20	02:51:00	0
2009-02-20	02:52:00	0
2009-02-20	02:53:00	0
2009-02-20	02:54:00	0
2009-02-20	02:55:00	0
2009-02-20	02:56:00	0
2009-02-20	02:57:00	0
2009-02-20	02:58:00	0
2009-02-20	02:59:00	0
2009-02-20	03:00:00	0
2009-02-20	03:01:00	0
2009-02-20	03:02:00	0
2009-02-20	03:03:00	0
2009-02-20	03:04:00	0
2009-02-20	03:05:00	0
2009-02-20	03:06:00	0
2009-02-20	03:07:00	0
2009-02-20	03:08:00	0
2009-02-20	03:09:00	0
2009-02-20	03:10:00	0
2009-02-20	03:11:00	0
2009-02-20	03:12:00	0
2009-02-20	03:13:00	0
2009-02-20	03:14:00	0
2009-02-20	03:15:00	0
2009-02-20	03:16:00	0
2009-02-20	03:17:00	0
2009-02-20	03:18:00	0
2009-02-20	03:19:00	0
2009-02-20	03:20:00	0
2009-02-20	03:21:00	0
2009-02-20	03:22:00	0
2009-02-20	03:23:00	0
2009-02-20	03:24:00	0
2009-02-20	03:25:00	0
2009-02-20	03:26:00	0
2009-02-20	03:27:00	0
2009-02-20	03:28:00	0
2009-02-20	03:29:00	0
2009-02-20	03:30:00	0
2009-02-20	03:31:00	0
2009-02-20	03:32:00	0
2009-02-20	03:33:00	0
2009-02-20	03:34:00	0
2009-02-20	03:35:00	0
2009-02-20	03:36:00	0
2009-02-20	03:37:00	0
2009-02-20	03:38:00	0
2009-02-20	03:39:00	0
2009-02-20	03:40:00	0
2009-02-20	03:41:00	0
2009-02-20	03:42:00	0
2009-02-20	03:43:00	0
2009-02-20	03:44:00	0
2009-02-20	03:45:00	0
2009-02-20	03:46:00	0
2009-02-20	03:47:00	0
2009-02-20	03:48:00	0
2009-02-20	03:49:00	0
2009-02-20	03:50:00	0
2009-02-20	03:51:00	0
2009-02-20	03:52:00	0
2009-02-20	03:53:00	0
2009-02-20	03:54:00	0
2009-02-20	03:55:00	0
2009-02-20	03:56:00	0
2009-02-20	03:57:00	0
2009-02-20	03:58:00	0
2009-02-20	03:59:00	0
2009-02-20	04:00:00	0
2009-02-20	04:01:00	0
2009-02-20	04:02:00	0
2009-02-20	04:03:00	0
2009-02-20	04:04:00	0
2009-02-20	04:05:00	0
2009-02-20	04:06:00	0
2009-02-20	04:07:00	0
2009-02-20	04:08:00	0
2009-02-20	04:09:00	0
2009-02-20	04:10:00	0
2009-02-20	04:11:00	0
2009-02-20	04:12:00	0
2009-02-20	04:13:00	0
2009-02-20	04:14:00	0
2009-02-20	04:15:00	0
2009-02-20	04:16:00	0
2009-02-20	04:17:00	0
2009-02-20	04:18:00	0
2009-02-20	04:19:00	0
2009-02-20	04:20:00	0
2009-02-20	04:21:00	0
2009-02-20	04:22:00	0
2009-02-20	04:23:00	0
2009-02-20	04:24:00	0
2009-02-20	04:25:00	0
2009-02-20	04:26:00	0
2009-02-20	04:27:00	0
2009-02-20	04:28:00	0
2009-02-20	04:29:00	0
2009-02-20	04:30:00	0
2009-02-20	04:31:00	0
2009-02-20	04:32:00	0
2009-02-20	04:33:00	0
2009-02-20	04:34:00	0
2009-02-20	04:35:00	0
2009-02-20	04:36:00	0
2009-02-20	04:37:00	0
2009-02-20	04:38:00	0
2009-02-20	04:39:00	0
2009-02-20	04:40:00	0
2009-02-20	04:41:00	0
2009-02-20	04:42:00	0
2009-02-20	04:43:00	0
2009-02-20	04:44:00	0
2009-02-20	04:45:00	0
2009-02-20	04:46:00	0
2009-02-20	04:47:00	0
2009-02-20	04:48:00	0
2009-02-20	04:49:00	0
2009-02-20	04:50:00	0
2009-02-20	04:51:00	0
2009-02-20	04:52:00	0
2009-02-20	04:53:00	0
2009-02-20	04:54:00	0
2009-02-20	04:55:00	0
2009-02-20	04:56:00	0
2009-02-20	04:57:00	0
2009-02-20	04:58:00	0
2009-02-20	04:59:00	0
2009-02-20	05:00:00	0
2009-02-20	05:01:00	0
2009-02-20	05:02:00	0
2009-02-20	05:03:00	0
2009-02-20	05:04:00	0
2009-02-20	05:05:00	0
2009-02-20	05:06:00	0
2009-02-20	05:07:00	0
2009-02-20	05:08:00	0
2009-02-20	05:09:00	0
2009-02-20	05:10:00	0
2009-02-20	05:11:00	0
2009-02-20	05:12:00	0
2009-02-20	05:13:00	0
2009-02-20	05:14:00	0
2009-02-20	05:15:00	0
2009-02-20	05:16:00	0
2009-02-20	05:17:00	0
2009-02-20	05:18:00	0
2009-02-20	05:19:00	0
2009-02-20	05:20:00	0
2009-02-20	05:21:00	0
2009-02-20	05:22:00	0
2009-02-20	05:23:00	0
2009-02-20	05:24:00	0
2009-02-20	05:25:00	0
2009-02-20	05:26:00	0
2009-02-20	05:27:00	0
2009-02-20	05:28:00	0
2009-02-20	05:29:00	0
2009-02-20	05:30:00	0
2009-02-20	05:31:00	0
2009-02-20	05:32:00	0
2009-02-20	05:33:00	0
2009-02-20	05:34:00	0
2009-02-20	05:35:00	0
2009-02-20	05:36:00	0
2009-02-20	05:37:00	0
2009-02-20	05:38:00	0
2009-02-20	05:39:00	0
2009-02-20	05:40:00	0
2009-02-20	05:41:00	0
2009-02-20	05:42:00	0
2009-02-20	05:43:00	0
2009-02-20	05:44:00	0
2009-02-20	05:45:00	0
2009-02-20	05:46:00	0
2009-02-20	05:47:00	0
2009-02-20	05:48:00	0
2009-02-20	05:49:00	0
2009-02-20	05:50:00	0
2009-02-20	05:51:00	0
2009-02-20	05:52:00	0
2009-02-20	05:53:00	0
2009-02-20	05:54:00	0
2009-02-20	05:55:00	0
2009-02-20	05:56:00	0
2009-02-20	05:57:00	0
2009-02-20	05:58:00	0
2009-02-20	05:59:00	0
2009-02-20	06:00:00	0
2009-02-20	06:01:00	0
2009-02-20	06:02:00	0
2009-02-20	06:03:00	0
2009-02-20	06:04:00	0
2009-02-20	06:05:00	0
2009-02-20	06:06:00	0
2009-02-20	06:07:00	0
2009-02-20	06:08:00	0
2009-02-20	06:09:00	0
2009-02-20	06:10:00	0
2009-02-20	06:11:00	0
2009-02-20	06:12:00	0
2009-02-20	06:13:00	0
2009-02-20	06:14:00	0
2009-02-20	06:15:00	0
2009-02-20	06:16:00	0
2009-02-20	06:17:00	0
2009-02-20	06:18:00	0
2009-02-20	06:19:00	0
2009-02-20	06:20:00	0
2009-02-20	06:21:00	0
2009-02-20	06:22:00	0
2009-02-20	06:23:00	0
2009-02-20	06:24:00	0
2009-02-20	06:25:00	0
2009-02-20	06:26:00	0
2009-02-20	06:27:00	0
2009-02-20	06:28:00	0
2009-02-20	06:29:00	0
2009-02-20	06:30:00	0
2009-02-20	06:31:00	0
2009-02-20	06:32:00	0
2009-02-20	06:33:00	0
2009-02-20	06:34:00	0
2009-02-20	06:35:00	0
2009-02-20	06:36:00	0
2009-02-20	06:37:00	0
2009-02-20	06:38:00	0
2009-02-20	06:39:00	0
2009-02-20	06:40:00	0
2009-02-20	06:41:00	0
2009-02-20	06:42:00	0
2009-02-20	06:43:00	0
2009-02-20	06:44:00	0
2009-02-20	06:45:00	0
2009-02-20	06:46:00	0
2009-02-20	06:47:00	0
2009-02-20	06:48:00	0
2009-02-20	06:49:00	0
2009-02-20	06:50:00	0
2009-02-20	06:51:00	0
2009-02-20	06:52:00	0
2009-02-20	06:53:00	0
2009-02-20	06:54:00	0
2009-02-20	06:55:00	0
2009-02-20	06:56:00	0
2009-02-20	06:57:00	0
2009-02-20	06:58:00	0
2009-02-20	06:59:00	0
2009-02-20	07:00:00	0
2009-02-20	07:01:00	0
2009-02-20	07:02:00	0
2009-02-20	07:03:00	0
2009-02-20	07:04:00	0
2009-02-20	07:05:00	0
2009-02-20	07:06:00	0
2009-02-20	07:07:00	0
2009-02-20	07:08:00	0
2009-02-20	07:09:00	0
2009-02-20	07:10:00	0
2009-02-20	07:11:00	0
2009-02-20	07:12:00	0
2009-02-20	07:13:00	0
2009-02-20	07:14:00	0
2009-02-20	07:15:00	0
2009-02-20	07:16:00	0
2009-02-20	07:17:00	0
2009-02-20	07:18:00	0
2009-02-20	07:19:00	0
2009-02-20	07:20:00	0
2009-02-20	07:21:00	0
2009-02-20	07:22:00	0
2009-02-20	07:23:00	0
2009-02-20	07:24:00	0
2009-02-20	07:25:00	0
2009-02-20	07:26:00	0
2009-02-20	07:27:00	0
2009-02-20	07:28:00	0
2009-02-20	07:29:00	0
2009-02-20	07:30:00	0
2009-02-20	07:31:00	0
2009-02-20	07:32:00	0
2009-02-20	07:33:00	0
2009-02-20	07:34:00	0
2009-02-20	07:35:00	0
2009-02-20	07:36:00	0
2009-02-20	07:37:00	0
2009-02-20	07:38:00	0
2009-02-20	07:39:00	0
2009-02-20	07:40:00	0
2009-02-20	07:41:00	0
2009-02-20	07:42:00	0
2009-02-20	07:43:00	0
2009-02-20	07:44:00	0
2009-02-20	07:45:00	0
2009-02-20	07:46:00	0
2009-02-20	07:47:00	0
2009-02-20	07:48:00	0
2009-02-20	07:49:00	0
2009-02-20	07:50:00	0
2009-02-20	07:51:00	0
2009-02-20	07:52:00	0
2009-02-20	07:53:00	0
2009-02-20	07:54:00	0
2009-02-20	07:55:00	0
2009-02-20	07:56:00	0
2009-02-20	07:57:00	0
2009-02-20	07:58:00	0
2009-02-20	07:59:00	0
2009-02-20	08:00:00	0
2009-02-20	08:01:00	0
2009-02-20	08:02:00	0
2009-02-20	08:03:00	0
2009-02-20	08:04:00	0
2009-02-20	08:05:00	0
2009-02-20	08:06:00	0
2009-02-20	08:07:00	0
2009-02-20	08:08:00	0
2009-02-20	08:09:00	0
2009-02-20	08:10:00	0
2009-02-20	08:11:00	0
2009-02-20	08:12:00	0
2009-02-20	08:13:00	0
2009-02-20	08:14:00	0
2009-02-20	08:15:00	0
2009-02-20	08:16:00	0
2009-02-20	08:17:00	0
2009-02-20	08:18:00	0
2009-02-20	08:19:00	0
2009-02-20	08:20:00	0
2009-02-20	08:21:00	0
2009-02-20	08:22:00	0
2009-02-20	08:23:00	0
2009-02-20	08:24:00	0
2009-02-20	08:25:00	0
2009-02-20	08:26:00	0
2009-02-20	08:27:00	0
2009-02-20	08:28:00	0
2009-02-20	08:29:00	0
2009-02-20	08:30:00	0
2009-02-20	08:31:00	0
2009-02-20	08:32:00	0
2009-02-20	08:33:00	0
2009-02-20	08:34:00	0
2009-02-20	08:35:00	0
2009-02-20	08:36:00	0
2009-02-20	08:37:00	0
2009-02-20	08:38:00	0
2009-02-20	08:39:00	0
2009-02-20	08:40:00	0
2009-02-20	08:41:00	0
2009-02-20	08:42:00	0
2009-02-20	08:43:00	0
2009-02-20	08:44:00	0
2009-02-20	08:45:00	0
2009-02-20	08:46:00	0
2009-02-20	08:47:00	0
2009-02-20	08:48:00	0
2009-02-20	08:49:00	0
2009-02-20	08:50:00	0
2009-02-20	08:51:00	0
2009-02-20	08:52:00	0
2009-02-20	08:53:00	0
2009-02-20	08:54:00	0
2009-02-20	08:55:00	0
2009-02-20	08:56:00	0
2009-02-20	08:57:00	0
2009-02-20	08:58:00	0
2009-02-20	08:59:00	0
2009-02-20	09:00:00	0
2009-02-20	09:01:00	0
2009-02-20	09:02:00	0
2009-02-20	09:03:00	0
2009-02-20	09:04:00	0
2009-02-20	09:05:00	0
2009-02-20	09:06:00	0
2009-02-20	09:07:00	0
2009-02-20	09:08:00	0
2009-02-20	09:09:00	0
2009-02-20	09:10:00	0
2009-02-20	09:11:00	0
2009-02-20	09:12:00	0
2009-02-20	09:13:00	0
2009-02-20	09:14:00	0
2009-02-20	09:15:00	0
2009-02-20	09:16:00	0
2009-02-20	09:17:00	0
2009-02-20	09:18:00	0
2009-02-20	09:19:00	0
2009-02-20	09:20:00	0
2009-02-20	09:21:00	0
2009-02-20	09:22:00	0
2009-02-20	09:23:00	0
2009-02-20	09:24:00	0
2009-02-20	09:25:00	0
2009-02-20	09:26:00	0
2009-02-20	09:27:00	0
2009-02-20	09:28:00	0
2009-02-20	09:29:00	0
2009-02-20	09:30:00	0
2009-02-20	09:31:00	0
2009-02-20	09:32:00	0
2009-02-20	09:33:00	0
2009-02-20	09:34:00	0
2009-02-20	09:35:00	0
2009-02-20	09:36:00	0
2009-02-20	09:37:00	0
2009-02-20	09:38:00	0
2009-02-20	09:39:00	0
2009-02-20	09:40:00	0
2009-02-20	09:41:00	0
2009-02-20	09:42:00	0
2009-02-20	09:43:00	0
2009-02-20	09:44:00	0
2009-02-20	09:45:00	0
2009-02-20	09:46:00	0
2009-02-20	09:47:00	0
2009-02-20	09:48:00	0
2009-02-20	09:49:00	0
2009-02-20	09:50:00	0
2009-02-20	09:51:00	0
2009-02-20	09:52:00	0
2009-02-20	09:53:00	0
2009-02-20	09:54:00	0
2009-02-20	09:55:00	0
2009-02-20	09:56:00	0
2009-02-20	09:57:00	0
2009-02-20	09:58:00	0
2009-02-20	09:59:00	0
2009-02-20	10:00:00	0
2009-02-20	10:01:00	0
2009-02-20	10:02:00	0
2009-02-20	10:03:00	0
2009-02-20	10:04:00	0
2009-02-20	10:05:00	0
2009-02-20	10:06:00	0
2009-02-20	10:07:00	0
2009-02-20	10:08:00	0
2009-02-20	10:09:00	0
2009-02-20	10:10:00	0
2009-02-20	10:11:00	0
2009-02-20	10:12:00	0
2009-02-20	10:13:00	0
2009-02-20	10:14:00	0
2009-02-20	10:15:00	0
2009-02-20	10:16:00	0
2009-02-20	10:17:00	0
2009-02-20	10:18:00	0
2009-02-20	10:19:00	0
2009-02-20	10:20:00	0
2009-02-20	10:21:00	0
2009-02-20	10:22:00	0
2009-02-20	10:23:00	0
2009-02-20	10:24:00	0
2009-02-20	10:25:00	0
2009-02-20	10:26:00	0
2009-02-20	10:27:00	0
2009-02-20	10:28:00	0
2009-02-20	10:29:00	0
2009-02-20	10:30:00	0
2009-02-20	10:31:00	0
2009-02-20	10:32:00	0
2009-02-20	10:33:00	0
2009-02-20	10:34:00	0
2009-02-20	10:35:00	0
2009-02-20	10:36:00	0
2009-02-20	10:37:00	0
2009-02-20	10:38:00	0
2009-02-20	10:39:00	0
2009-02-20	10:40:00	0
2009-02-20	10:41:00	0
2009-02-20	10:42:00	0
2009-02-20	10:43:00	0
2009-02-20	10:44:00	0
2009-02-20	10:45:00	0
2009-02-20	10:46:00	0
2009-02-20	10:47:00	0
2009-02-20	10:48:00	0
2009-02-20	10:49:00	0
2009-02-20	10:50:00	0
2009-02-20	10:51:00	0
2009-02-20	10:52:00	0
2009-02-20	10:53:00	0
2009-02-20	10:54:00	0
2009-02-20	10:55:00	0
2009-02-20	10:56:00	0
2009-02-20	10:57:00	0
2009-02-20	10:58:00	0
2009-02-20	10:59:00	0
2009-02-20	11:00:00	0
2009-02-20	11:01:00	0
2009-02-20	11:02:00	0
2009-02-20	11:03:00	0
2009-02-20	11:04:00	0
2009-02-20	11:05:00	0
2009-02-20	11:06:00	0
2009-02-20	11:07:00	0
2009-02-20	11:08:00	0
2009-02-20	11:09:00	0
2009-02-20	11:10:00	0
2009-02-20	11:11:00	0
2009-02-20	11:12:00	0
2009-02-20	11:13:00	0
2009-02-20	11:14:00	0
2009-02-20	11:15:00	0
2009-02-20	11:16:00	0
2009-02-20	11:17:00	0
2009-02-20	11:18:00	0
2009-02-20	11:19:00	0
2009-02-20	11:20:00	0
2009-02-20	11:21:00	0
2009-02-20	11:22:00	0
2009-02-20	11:23:00	0
2009-02-20	11:24:00	0
2009-02-20	11:25:00	0
2009-02-20	11:26:00	0
2009-02-20	11:27:00	0
2009-02-20	11:28:00	0
2009-02-20	11:29:00	0
2009-02-20	11:30:00	0
2009-02-20	11:31:00	0
2009-02-20	11:32:00	0
2009-02-20	11:33:00	0
2009-02-20	11:34:00	0
2009-02-20	11:35:00	0
2009-02-20	11:36:00	0
2009-02-20	11:37:00	0
2009-02-20	11:38:00	0
2009-02-20	11:39:00	0
2009-02-20	11:40:00	0
2009-02-20	11:41:00	0
2009-02-20	11:42:00	0
2009-02-20	11:43:00	0
2009-02-20	11:44:00	0
2009-02-20	11:45:00	0
2009-02-20	11:46:00	0
2009-02-20	11:47:00	0
2009-02-20	11:48:00	0
2009-02-20	11:49:00	0
2009-02-20	11:50:00	0
2009-02-20	11:51:00	0
2009-02-20	11:52:00	0
2009-02-20	11:53:00	0
2009-02-20	11:54:00	0
2009-02-20	11:55:00	0
2009-02-20	11:56:00	0
2009-02-20	11:57:00	0
2009-02-20	11:58:00	0
2009-02-20	11:59:00	0
2009-02-20	12:00:00	0
2009-02-20	12:01:00	0
2009-02-20	12:02:00	0
2009-02-20	12:03:00	0
2009-02-20	12:04:00	0
2009-02-20	12:05:00	0
2009-02-20	12:06:00	0
2009-02-20	12:07:00	0
2009-02-20	12:08:00	0
2009-02-20	12:09:00	0
2009-02-20	12:10:00	0
2009-02-20	12:11:00	0
2009-02-20	12:12:00	0
2009-02-20	12:13:00	0
2009-02-20	12:14:00	0
2009-02-20	12:15:00	0
2009-02-20	12:16:00	0
2009-02-20	12:17:00	0
2009-02-20	12:18:00	0
2009-02-20	12:19:00	0
2009-02-20	12:20:00	0
2009-02-20	12:21:00	0
2009-02-20	12:22:00	0
2009-02-20	12:23:00	0
2009-02-20	12:24:00	0
2009-02-20	12:25:00	0
2009-02-20	12:26:00	0
2009-02-20	12:27:00	0
2009-02-20	12:28:00	0
2009-02-20	12:29:00	0
2009-02-20	12:30:00	0
2009-02-20	12:31:00	0
2009-02-20	12:32:00	0
2009-02-20	12:33:00	0
2009-02-20	12:34:00	0
2009-02-20	12:35:00	0
2009-02-20	12:36:00	0
2009-02-20	12:37:00	0
2009-02-20	12:38:00	0
2009-02-20	12:39:00	0
2009-02-20	12:40:00	0
2009-02-20	12:41:00	0
2009-02-20	12:42:00	0
2009-02-20	12:43:00	0
2009-02-20	12:44:00	0
2009-02-20	12:45:00	0
2009-02-20	12:46:00	0
2009-02-20	12:47:00	0
2009-02-20	12:48:00	0
2009-02-20	12:49:00	0
2009-02-20	12:50:00	0
2009-02-20	12:51:00	0
2009-02-20	12:52:00	0
2009-02-20	12:53:00	0
2009-02-20	12:54:00	0
2009-02-20	12:55:00	0
2009-02-20	12:56:00	0
2009-02-20	12:57:00	0
2009-02-20	12:58:00	0
2009-02-20	12:59:00	0
2009-02-20	13:00:00	0
2009-02-20	13:01:00	0
2009-02-20	13:02:00	0
2009-02-20	13:03:00	0
2009-02-20	13:04:00	0
2009-02-20	13:05:00	0
2009-02-20	13:06:00	0
2009-02-20	13:07:00	0
2009-02-20	13:08:00	0
2009-02-20	13:09:00	0
2009-02-20	13:10:00	0
2009-02-20	13:11:00	0
2009-02-20	13:12:00	0
2009-02-20	13:13:00	0
2009-02-20	13:14:00	0
2009-02-20	13:15:00	0
2009-02-20	13:16:00	0
2009-02-20	13:17:00	0
2009-02-20	13:18:00	0
2009-02-20	13:19:00	0
2009-02-20	13:20:00	0
2009-02-20	13:21:00	0
2009-02-20	13:22:00	0
2009-02-20	13:23:00	0
2009-02-20	13:24:00	0
2009-02-20	13:25:00	0
2009-02-20	13:26:00	0
2009-02-20	13:27:00	0
2009-02-20	13:28:00	0
2009-02-20	13:29:00	0
2009-02-20	13:30:00	0
2009-02-20	13:31:00	0
2009-02-20	13:32:00	0
2009-02-20	13:33:00	0
2009-02-20	13:34:00	0
2009-02-20	13:35:00	0
2009-02-20	13:36:00	0
2009-02-20	13:37:00	0
2009-02-20	13:38:00	0
2009-02-20	13:39:00	0
2009-02-20	13:40:00	0
2009-02-20	13:41:00	0
2009-02-20	13:42:00	0
2009-02-20	13:43:00	0
2009-02-20	13:44:00	0
2009-02-20	13:45:00	0
2009-02-20	13:46:00	0
2009-02-20	13:47:00	0
2009-02-20	13:48:00	0
2009-02-20	13:49:00	0
2009-02-20	13:50:00	0
2009-02-20	13:51:00	0
2009-02-20	13:52:00	0
2009-02-20	13:53:00	0
2009-02-20	13:54:00	0
2009-02-20	13:55:00	0
2009-02-20	13:56:00	0
2009-02-20	13:57:00	0
2009-02-20	13:58:00	0
2009-02-20	13:59:00	0
2009-02-20	14:00:00	0
2009-02-20	14:01:00	0
2009-02-20	14:02:00	0
2009-02-20	14:03:00	0
2009-02-20	14:04:00	0
2009-02-20	14:05:00	0
2009-02-20	14:06:00	0
2009-02-20	14:07:00	0
2009-02-20	14:08:00	0
2009-02-20	14:09:00	0
2009-02-20	14:10:00	0
2009-02-20	14:11:00	0
2009-02-20	14:12:00	0
2009-02-20	14:13:00	0
2009-02-20	14:14:00	0
2009-02-20	14:15:00	0
2009-02-20	14:16:00	0
2009-02-20	14:17:00	0
2009-02-20	14:18:00	0
2009-02-20	14:19:00	0
2009-02-20	14:20:00	0
2009-02-20	14:21:00	0
2009-02-20	14:22:00	0
2009-02-20	14:23:00	0
2009-02-20	14:24:00	0
2009-02-20	14:25:00	0
2009-02-20	14:26:00	0
2009-02-20	14:27:00	0
2009-02-20	14:28:00	0
2009-02-20	14:29:00	0
2009-02-20	14:30:00	0
2009-02-20	14:31:00	0
2009-02-20	14:32:00	0
2009-02-20	14:33:00	0
2009-02-20	14:34:00	0
2009-02-20	14:35:00	0
2009-02-20	14:36:00	0
2009-02-20	14:37:00	0
2009-02-20	14:38:00	0
2009-02-20	14:39:00	0
2009-02-20	14:40:00	0
2009-02-20	14:41:00	0
2009-02-20	14:42:00	0
2009-02-20	14:43:00	0
2009-02-20	14:44:00	0
2009-02-20	14:45:00	0
2009-02-20	14:46:00	0
2009-02-20	14:47:00	0
2009-02-20	14:48:00	0
2009-02-20	14:49:00	0
2009-02-20	14:50:00	0
2009-02-20	14:51:00	0
2009-02-20	14:52:00	0
2009-02-20	14:53:00	0
2009-02-20	14:54:00	0
2009-02-20	14:55:00	0
2009-02-20	14:56:00	0
2009-02-20	14:57:00	0
2009-02-20	14:58:00	0
2009-02-20	14:59:00	0
2009-02-20	15:00:00	0
2009-02-20	15:01:00	0
2009-02-20	15:02:00	0
2009-02-20	15:03:00	0
2009-02-20	15:04:00	0
2009-02-20	15:05:00	0
2009-02-20	15:06:00	0
2009-02-20	15:07:00	0
2009-02-20	15:08:00	0
2009-02-20	15:09:00	0
2009-02-20	15:10:00	0
2009-02-20	15:11:00	0
2009-02-20	15:12:00	0
2009-02-20	15:13:00	0
2009-02-20	15:14:00	0
2009-02-20	15:15:00	0
2009-02-20	15:16:00	0
2009-02-20	15:17:00	0
2009-02-20	15:18:00	0
2009-02-20	15:19:00	0
2009-02-20	15:20:00	0
2009-02-20	15:21:00	0
2009-02-20	15:22:00	0
2009-02-20	15:23:00	0
2009-02-20	15:24:00	0
2009-02-20	15:25:00	0
2009-02-20	15:26:00	0
2009-02-20	15:27:00	0
2009-02-20	15:28:00	0
2009-02-20	15:29:00	0
2009-02-20	15:30:00	0
2009-02-20	15:31:00	0
2009-02-20	15:32:00	0
2009-02-20	15:33:00	0
2009-02-20	15:34:00	0
2009-02-20	15:35:00	0
2009-02-20	15:36:00	0
2009-02-20	15:37:00	0
2009-02-20	15:38:00	0
2009-02-20	15:39:00	0
2009-02-20	15:40:00	0
2009-02-20	15:41:00	0
2009-02-20	15:42:00	0
2009-02-20	15:43:00	0
2009-02-20	15:44:00	0
2009-02-20	15:45:00	0
2009-02-20	15:46:00	0
2009-02-20	15:47:00	0
2009-02-20	15:48:00	0
2009-02-20	15:49:00	0
2009-02-20	15:50:00	0
2009-02-20	15:51:00	0
2009-02-20	15:52:00	0
2009-02-20	15:53:00	0
2009-02-20	15:54:00	0
2009-02-20	15:55:00	0
2009-02-20	15:56:00	0
2009-02-20	15:57:00	0
2009-02-20	15:58:00	0
2009-02-20	15:59:00	0
2009-02-20	16:00:00	0
2009-02-20	16:01:00	0
2009-02-20	16:02:00	0
2009-02-20	16:03:00	0
2009-02-20	16:04:00	0
2009-02-20	16:05:00	0
2009-02-20	16:06:00	0
2009-02-20	16:07:00	0
2009-02-20	16:08:00	0
2009-02-20	16:09:00	0
2009-02-20	16:10:00	0
2009-02-20	16:11:00	0
2009-02-20	16:12:00	0
2009-02-20	16:13:00	0
2009-02-20	16:14:00	0
2009-02-20	16:15:00	0
2009-02-20	16:16:00	0
2009-02-20	16:17:00	0
2009-02-20	16:18:00	0
2009-02-20	16:19:00	0
2009-02-20	16:20:00	0
2009-02-20	16:21:00	0
2009-02-20	16:22:00	0
2009-02-20	16:23:00	0
2009-02-20	16:24:00	0
2009-02-20	16:25:00	0
2009-02-20	16:26:00	0
2009-02-20	16:27:00	0
2009-02-20	16:28:00	0
2009-02-20	16:29:00	0
2009-02-20	16:30:00	0
2009-02-20	16:31:00	0
2009-02-20	16:32:00	0
2009-02-20	16:33:00	0
2009-02-20	16:34:00	0
2009-02-20	16:35:00	0
2009-02-20	16:36:00	0
2009-02-20	16:37:00	0
2009-02-20	16:38:00	0
2009-02-20	16:39:00	0
2009-02-20	16:40:00	0
2009-02-20	16:41:00	0
2009-02-20	16:42:00	0
2009-02-20	16:43:00	0
2009-02-20	16:44:00	0
2009-02-20	16:45:00	0
2009-02-20	16:46:00	0
2009-02-20	16:47:00	0
2009-02-20	16:48:00	0
2009-02-20	16:49:00	0
2009-02-20	16:50:00	0
2009-02-20	16:51:00	0
2009-02-20	16:52:00	0
2009-02-20	16:53:00	0
2009-02-20	16:54:00	0
2009-02-20	16:55:00	0
2009-02-20	16:56:00	0
2009-02-20	16:57:00	0
2009-02-20	16:58:00	0
2009-02-20	16:59:00	0
2009-02-20	17:00:00	0
2009-02-20	17:01:00	0
2009-02-20	17:02:00	0
2009-02-20	17:03:00	0
2009-02-20	17:04:00	0
2009-02-20	17:05:00	0
2009-02-20	17:06:00	0
2009-02-20	17:07:00	0
2009-02-20	17:08:00	0
2009-02-20	17:09:00	0
2009-02-20	17:10:00	0
2009-02-20	17:11:00	0
2009-02-20	17:12:00	0
2009-02-20	17:13:00	0
2009-02-20	17:14:00	0
2009-02-20	17:15:00	0
2009-02-20	17:16:00	0
2009-02-20	17:17:00	0
2009-02-20	17:18:00	0
2009-02-20	17:19:00	0
2009-02-20	17:20:00	0
2009-02-20	17:21:00	0
2009-02-20	17:22:00	0
2009-02-20	17:23:00	0
2009-02-20	17:24:00	0
2009-02-20	17:25:00	0
2009-02-20	17:26:00	0
2009-02-20	17:27:00	0
2009-02-20	17:28:00	0
2009-02-20	17:29:00	0
2009-02-20	17:30:00	0
2009-02-20	17:31:00	0
2009-02-20	17:32:00	0
2009-02-20	17:33:00	0
2009-02-20	17:34:00	0
2009-02-20	17:35:00	0
2009-02-20	17:36:00	0
2009-02-20	17:37:00	0
2009-02-20	17:38:00	0
2009-02-20	17:39:00	0
2009-02-20	17:40:00	0
2009-02-20	17:41:00	0
2009-02-20	17:42:00	0
2009-02-20	17:43:00	0
2009-02-20	17:44:00	0
2009-02-20	17:45:00	0
2009-02-20	17:46:00	0
2009-02-20	17:47:00	0
2009-02-20	17:48:00	0
2009-02-20	17:49:00	0
2009-02-20	17:50:00	0
2009-02-20	17:51:00	0
2009-02-20	17:52:00	0
2009-02-20	17:53:00	0
2009-02-20	17:54:00	0
2009-02-20	17:55:00	0
2009-02-20	17:56:00	0
2009-02-20	17:57:00	0
2009-02-20	17:58:00	0
2009-02-20	17:59:00	0
2009-02-20	18:00:00	151
2009-02-20	18:01:00	93
2009-02-20	18:02:00	23
2009-02-20	18:03:00	105
2009-02-20	18:04:00	207
2009-02-20	18:05:00	165
2009-02-20	18:06:00	321
2009-02-20	18:07:00	545
2009-02-20	18:08:00	684
2009-02-20	18:09:00	600
2009-02-20	18:10:00	507
2009-02-20	18:11:00	105
2009-02-20	18:12:00	0
2009-02-20	18:13:00	0
2009-02-20	18:14:00	128
2009-02-20	18:15:00	165
2009-02-20	18:16:00	116
2009-02-20	18:17:00	0
2009-02-20	18:18:00	165
2009-02-20	18:19:00	0
2009-02-20	18:20:00	0
2009-02-20	18:21:00	0
2009-02-20	18:22:00	0
2009-02-20	18:23:00	0
2009-02-20	18:24:00	0
2009-02-20	18:25:00	0
2009-02-20	18:26:00	0
2009-02-20	18:27:00	0
2009-02-20	18:28:00	0
2009-02-20	18:29:00	0
2009-02-20	18:30:00	0
2009-02-20	18:31:00	0
2009-02-20	18:32:00	0
2009-02-20	18:33:00	12
2009-02-20	18:34:00	0
2009-02-20	18:35:00	0
2009-02-20	18:36:00	0
2009-02-20	18:37:00	0
2009-02-20	18:38:00	0
2009-02-20	18:39:00	0
2009-02-20	18:40:00	58
2009-02-20	18:41:00	0
2009-02-20	18:42:00	0
2009-02-20	18:43:00	0
2009-02-20	18:44:00	0
2009-02-20	18:45:00	12
2009-02-20	18:46:00	0
2009-02-20	18:47:00	0
2009-02-20	18:48:00	0
2009-02-20	18:49:00	0
2009-02-20	18:50:00	0
2009-02-20	18:51:00	0
2009-02-20	18:52:00	0
2009-02-20	18:53:00	0
2009-02-20	18:54:00	0
2009-02-20	18:55:00	193
2009-02-20	18:56:00	0
2009-02-20	18:57:00	0
2009-02-20	18:58:00	0
2009-02-20	18:59:00	0
2009-02-20	19:00:00	23
2009-02-20	19:01:00	58
2009-02-20	19:02:00	23
2009-02-20	19:03:00	0
2009-02-20	19:04:00	0
2009-02-20	19:05:00	70
2009-02-20	19:06:00	140
2009-02-20	19:07:00	58
2009-02-20	19:08:00	12
2009-02-20	19:09:00	0
2009-02-20	19:10:00	70
2009-02-20	19:11:00	70
2009-02-20	19:12:00	0
2009-02-20	19:13:00	35
2009-02-20	19:14:00	81
2009-02-20	19:15:00	0
2009-02-20	19:16:00	12
2009-02-20	19:17:00	0
2009-02-20	19:18:00	0
2009-02-20	19:19:00	47
2009-02-20	19:20:00	0
2009-02-20	19:21:00	0
2009-02-20	19:22:00	0
2009-02-20	19:23:00	0
2009-02-20	19:24:00	0
2009-02-20	19:25:00	0
2009-02-20	19:26:00	0
2009-02-20	19:27:00	0
2009-02-20	19:28:00	0
2009-02-20	19:29:00	12
2009-02-20	19:30:00	0
2009-02-20	19:31:00	0
2009-02-20	19:32:00	0
2009-02-20	19:33:00	0
2009-02-20	19:34:00	0
2009-02-20	19:35:00	0
2009-02-20	19:36:00	0
2009-02-20	19:37:00	0
2009-02-20	19:38:00	105
2009-02-20	19:39:00	93
2009-02-20	19:40:00	0
2009-02-20	19:41:00	0
2009-02-20	19:42:00	0
2009-02-20	19:43:00	0
2009-02-20	19:44:00	0
2009-02-20	19:45:00	0
2009-02-20	19:46:00	0
2009-02-20	19:47:00	0
2009-02-20	19:48:00	0
2009-02-20	19:49:00	0
2009-02-20	19:50:00	0
2009-02-20	19:51:00	0
2009-02-20	19:52:00	0
2009-02-20	19:53:00	0
2009-02-20	19:54:00	0
2009-02-20	19:55:00	128
2009-02-20	19:56:00	291
2009-02-20	19:57:00	93
2009-02-20	19:58:00	116
2009-02-20	19:59:00	0
2009-02-20	20:00:00	0
2009-02-20	20:01:00	0
2009-02-20	20:02:00	0
2009-02-20	20:03:00	105
2009-02-20	20:04:00	35
2009-02-20	20:05:00	235
2009-02-20	20:06:00	58
2009-02-20	20:07:00	354
2009-02-20	20:08:00	277
2009-02-20	20:09:00	105
2009-02-20	20:10:00	235
2009-02-20	20:11:00	0
2009-02-20	20:12:00	105
2009-02-20	20:13:00	0
2009-02-20	20:14:00	35
2009-02-20	20:15:00	58
2009-02-20	20:16:00	0
2009-02-20	20:17:00	419
2009-02-20	20:18:00	386
2009-02-20	20:19:00	370
2009-02-20	20:20:00	116
2009-02-20	20:21:00	235
2009-02-20	20:22:00	563
2009-02-20	20:23:00	179
2009-02-20	20:24:00	291
2009-02-20	20:25:00	23
2009-02-20	20:26:00	128
2009-02-20	20:27:00	0
2009-02-20	20:28:00	0
2009-02-20	20:29:00	0
2009-02-20	20:30:00	0
2009-02-20	20:31:00	0
2009-02-20	20:32:00	0
2009-02-20	20:33:00	0
2009-02-20	20:34:00	0
2009-02-20	20:35:00	0
2009-02-20	20:36:00	0
2009-02-20	20:37:00	0
2009-02-20	20:38:00	0
2009-02-20	20:39:00	23
2009-02-20	20:40:00	0
2009-02-20	20:41:00	58
2009-02-20	20:42:00	0
2009-02-20	20:43:00	0
2009-02-20	20:44:00	0
2009-02-20	20:45:00	0
2009-02-20	20:46:00	0
2009-02-20	20:47:00	0
2009-02-20	20:48:00	0
2009-02-20	20:49:00	0
2009-02-20	20:50:00	0
2009-02-20	20:51:00	0
2009-02-20	20:52:00	23
2009-02-20	20:53:00	35
2009-02-20	20:54:00	0
2009-02-20	20:55:00	0
2009-02-20	20:56:00	0
2009-02-20	20:57:00	0
2009-02-20	20:58:00	0
2009-02-20	20:59:00	23
2009-02-20	21:00:00	0
2009-02-20	21:01:00	47
2009-02-20	21:02:00	0
2009-02-20	21:03:00	12
2009-02-20	21:04:00	81
2009-02-20	21:05:00	235
2009-02-20	21:06:00	0
2009-02-20	21:07:00	12
2009-02-20	21:08:00	12
2009-02-20	21:09:00	563
2009-02-20	21:10:00	1119
2009-02-20	21:11:00	684
2009-02-20	21:12:00	105
2009-02-20	21:13:00	0
2009-02-20	21:14:00	0
2009-02-20	21:15:00	0
2009-02-20	21:16:00	0
2009-02-20	21:17:00	105
2009-02-20	21:18:00	0
2009-02-20	21:19:00	0
2009-02-20	21:20:00	0
2009-02-20	21:21:00	0
2009-02-20	21:22:00	0
2009-02-20	21:23:00	0
2009-02-20	21:24:00	0
2009-02-20	21:25:00	0
2009-02-20	21:26:00	0
2009-02-20	21:27:00	0
2009-02-20	21:28:00	0
2009-02-20	21:29:00	0
2009-02-20	21:30:00	0
2009-02-20	21:31:00	0
2009-02-20	21:32:00	207
2009-02-20	21:33:00	1233
2009-02-20	21:34:00	0
2009-02-20	21:35:00	140
2009-02-20	21:36:00	263
2009-02-20	21:37:00	0
2009-02-20	21:38:00	140
2009-02-20	21:39:00	47
2009-02-20	21:40:00	0
2009-02-20	21:41:00	0
2009-02-20	21:42:00	263
2009-02-20	21:43:00	354
2009-02-20	21:44:00	0
2009-02-20	21:45:00	0
2009-02-20	21:46:00	0
2009-02-20	21:47:00	0
2009-02-20	21:48:00	0
2009-02-20	21:49:00	0
2009-02-20	21:50:00	0
2009-02-20	21:51:00	0
2009-02-20	21:52:00	0
2009-02-20	21:53:00	0
2009-02-20	21:54:00	0
2009-02-20	21:55:00	0
2009-02-20	21:56:00	0
2009-02-20	21:57:00	0
2009-02-20	21:58:00	12
2009-02-20	21:59:00	0
2009-02-20	22:00:00	93
2009-02-20	22:01:00	0
2009-02-20	22:02:00	0
2009-02-20	22:03:00	0
2009-02-20	22:04:00	0
2009-02-20	22:05:00	0
2009-02-20	22:06:00	0
2009-02-20	22:07:00	0
2009-02-20	22:08:00	70
2009-02-20	22:09:00	0
2009-02-20	22:10:00	128
2009-02-20	22:11:00	128
2009-02-20	22:12:00	0
2009-02-20	22:13:00	291
2009-02-20	22:14:00	179
2009-02-20	22:15:00	370
2009-02-20	22:16:00	0
2009-02-20	22:17:00	70
2009-02-20	22:18:00	321
2009-02-20	22:19:00	726
2009-02-20	22:20:00	263
2009-02-20	22:21:00	0
2009-02-20	22:22:00	12
2009-02-20	22:23:00	0
2009-02-20	22:24:00	0
2009-02-20	22:25:00	0
2009-02-20	22:26:00	12
2009-02-20	22:27:00	0
2009-02-20	22:28:00	0
2009-02-20	22:29:00	0
2009-02-20	22:30:00	12
2009-02-20	22:31:00	489
2009-02-20	22:32:00	0
2009-02-20	22:33:00	0
2009-02-20	22:34:00	23
2009-02-20	22:35:00	0
2009-02-20	22:36:00	105
2009-02-20	22:37:00	0
2009-02-20	22:38:00	105
2009-02-20	22:39:00	0
2009-02-20	22:40:00	0
2009-02-20	22:41:00	0
2009-02-20	22:42:00	0
2009-02-20	22:43:00	0
2009-02-20	22:44:00	0
2009-02-20	22:45:00	0
2009-02-20	22:46:00	0
2009-02-20	22:47:00	0
2009-02-20	22:48:00	0
2009-02-20	22:49:00	0
2009-02-20	22:50:00	0
2009-02-20	22:51:00	0
2009-02-20	22:52:00	0
2009-02-20	22:53:00	0
2009-02-20	22:54:00	0
2009-02-20	22:55:00	0
2009-02-20	22:56:00	0
2009-02-20	22:57:00	0
2009-02-20	22:58:00	0
2009-02-20	22:59:00	0
2009-02-20	23:00:00	0
2009-02-20	23:01:00	0
2009-02-20	23:02:00	0
2009-02-20	23:03:00	0
2009-02-20	23:04:00	0
2009-02-20	23:05:00	0
2009-02-20	23:06:00	12
2009-02-20	23:07:00	0
2009-02-20	23:08:00	0
2009-02-20	23:09:00	0
2009-02-20	23:10:00	0
2009-02-20	23:11:00	0
2009-02-20	23:12:00	0
2009-02-20	23:13:00	0
2009-02-20	23:14:00	0
2009-02-20	23:15:00	0
2009-02-20	23:16:00	0
2009-02-20	23:17:00	0
2009-02-20	23:18:00	0
2009-02-20	23:19:00	0
2009-02-20	23:20:00	0
2009-02-20	23:21:00	0
2009-02-20	23:22:00	0
2009-02-20	23:23:00	0
2009-02-20	23:24:00	0
2009-02-20	23:25:00	0
2009-02-20	23:26:00	0
2009-02-20	23:27:00	0
2009-02-20	23:28:00	0
2009-02-20	23:29:00	0
2009-02-20	23:30:00	0
2009-02-20	23:31:00	0
2009-02-20	23:32:00	0
2009-02-20	23:33:00	0
2009-02-20	23:34:00	0
2009-02-20	23:35:00	0
2009-02-20	23:36:00	0
2009-02-20	23:37:00	0
2009-02-20	23:38:00	0
2009-02-20	23:39:00	0
2009-02-20	23:40:00	0
2009-02-20	23:41:00	0
2009-02-20	23:42:00	0
2009-02-20	23:43:00	0
2009-02-20	23:44:00	0
2009-02-20	23:45:00	0
2009-02-20	23:46:00	0
2009-02-20	23:47:00	0
2009-02-20	23:48:00	0
2009-02-20	23:49:00	0
2009-02-20	23:50:00	0
2009-02-20	23:51:00	0
2009-02-20	23:52:00	0
2009-02-20	23:53:00	0
2009-02-20	23:54:00	0
2009-02-20	23:55:00	0
2009-02-20	23:56:00	0
2009-02-20	23:57:00	0
2009-02-20	23:58:00	0
2009-02-20	23:59:00	0
2009-02-21	00:00:00	0
2009-02-21	00:01:00	0
2009-02-21	00:02:00	0
2009-02-21	00:03:00	0
2009-02-21	00:04:00	0
2009-02-21	00:05:00	0
2009-02-21	00:06:00	0
2009-02-21	00:07:00	0
2009-02-21	00:08:00	0
2009-02-21	00:09:00	0
2009-02-21	00:10:00	0
2009-02-21	00:11:00	0
2009-02-21	00:12:00	0
2009-02-21	00:13:00	0
2009-02-21	00:14:00	0
2009-02-21	00:15:00	0
2009-02-21	00:16:00	0
2009-02-21	00:17:00	23
2009-02-21	00:18:00	0
2009-02-21	00:19:00	0
2009-02-21	00:20:00	0
2009-02-21	00:21:00	0
2009-02-21	00:22:00	0
2009-02-21	00:23:00	0
2009-02-21	00:24:00	0
2009-02-21	00:25:00	0
2009-02-21	00:26:00	0
2009-02-21	00:27:00	0
2009-02-21	00:28:00	0
2009-02-21	00:29:00	0
2009-02-21	00:30:00	0
2009-02-21	00:31:00	0
2009-02-21	00:32:00	0
2009-02-21	00:33:00	0
2009-02-21	00:34:00	0
2009-02-21	00:35:00	0
2009-02-21	00:36:00	0
2009-02-21	00:37:00	0
2009-02-21	00:38:00	0
2009-02-21	00:39:00	81
2009-02-21	00:40:00	0
2009-02-21	00:41:00	0
2009-02-21	00:42:00	0
2009-02-21	00:43:00	0
2009-02-21	00:44:00	0
2009-02-21	00:45:00	0
2009-02-21	00:46:00	0
2009-02-21	00:47:00	0
2009-02-21	00:48:00	0
2009-02-21	00:49:00	0
2009-02-21	00:50:00	0
2009-02-21	00:51:00	0
2009-02-21	00:52:00	0
2009-02-21	00:53:00	0
2009-02-21	00:54:00	0
2009-02-21	00:55:00	0
2009-02-21	00:56:00	0
2009-02-21	00:57:00	0
2009-02-21	00:58:00	0
2009-02-21	00:59:00	0
2009-02-21	01:00:00	0
2009-02-21	01:01:00	0
2009-02-21	01:02:00	0
2009-02-21	01:03:00	0
2009-02-21	01:04:00	0
2009-02-21	01:05:00	0
2009-02-21	01:06:00	0
2009-02-21	01:07:00	0
2009-02-21	01:08:00	0
2009-02-21	01:09:00	0
2009-02-21	01:10:00	0
2009-02-21	01:11:00	0
2009-02-21	01:12:00	0
2009-02-21	01:13:00	0
2009-02-21	01:14:00	0
2009-02-21	01:15:00	0
2009-02-21	01:16:00	0
2009-02-21	01:17:00	0
2009-02-21	01:18:00	0
2009-02-21	01:19:00	0
2009-02-21	01:20:00	0
2009-02-21	01:21:00	0
2009-02-21	01:22:00	0
2009-02-21	01:23:00	0
2009-02-21	01:24:00	0
2009-02-21	01:25:00	12
2009-02-21	01:26:00	0
2009-02-21	01:27:00	0
2009-02-21	01:28:00	545
2009-02-21	01:29:00	235
2009-02-21	01:30:00	23
2009-02-21	01:31:00	12
2009-02-21	01:32:00	0
2009-02-21	01:33:00	0
2009-02-21	01:34:00	0
2009-02-21	01:35:00	0
2009-02-21	01:36:00	0
2009-02-21	01:37:00	0
2009-02-21	01:38:00	0
2009-02-21	01:39:00	0
2009-02-21	01:40:00	0
2009-02-21	01:41:00	0
2009-02-21	01:42:00	0
2009-02-21	01:43:00	23
2009-02-21	01:44:00	0
2009-02-21	01:45:00	0
2009-02-21	01:46:00	0
2009-02-21	01:47:00	0
2009-02-21	01:48:00	0
2009-02-21	01:49:00	0
2009-02-21	01:50:00	0
2009-02-21	01:51:00	0
2009-02-21	01:52:00	0
2009-02-21	01:53:00	0
2009-02-21	01:54:00	0
2009-02-21	01:55:00	0
2009-02-21	01:56:00	0
2009-02-21	01:57:00	0
2009-02-21	01:58:00	0
2009-02-21	01:59:00	0
2009-02-21	02:00:00	0
2009-02-21	02:01:00	23
2009-02-21	02:02:00	0
2009-02-21	02:03:00	0
2009-02-21	02:04:00	0
2009-02-21	02:05:00	0
2009-02-21	02:06:00	0
2009-02-21	02:07:00	0
2009-02-21	02:08:00	0
2009-02-21	02:09:00	0
2009-02-21	02:10:00	0
2009-02-21	02:11:00	0
2009-02-21	02:12:00	0
2009-02-21	02:13:00	0
2009-02-21	02:14:00	0
2009-02-21	02:15:00	0
2009-02-21	02:16:00	0
2009-02-21	02:17:00	0
2009-02-21	02:18:00	0
2009-02-21	02:19:00	0
2009-02-21	02:20:00	0
2009-02-21	02:21:00	0
2009-02-21	02:22:00	0
2009-02-21	02:23:00	0
2009-02-21	02:24:00	0
2009-02-21	02:25:00	0
2009-02-21	02:26:00	0
2009-02-21	02:27:00	0
2009-02-21	02:28:00	0
2009-02-21	02:29:00	0
2009-02-21	02:30:00	0
2009-02-21	02:31:00	0
2009-02-21	02:32:00	0
2009-02-21	02:33:00	0
2009-02-21	02:34:00	0
2009-02-21	02:35:00	0
2009-02-21	02:36:00	0
2009-02-21	02:37:00	0
2009-02-21	02:38:00	0
2009-02-21	02:39:00	0
2009-02-21	02:40:00	0
2009-02-21	02:41:00	0
2009-02-21	02:42:00	0
2009-02-21	02:43:00	0
2009-02-21	02:44:00	0
2009-02-21	02:45:00	0
2009-02-21	02:46:00	0
2009-02-21	02:47:00	12
2009-02-21	02:48:00	0
2009-02-21	02:49:00	0
2009-02-21	02:50:00	0
2009-02-21	02:51:00	0
2009-02-21	02:52:00	0
2009-02-21	02:53:00	0
2009-02-21	02:54:00	0
2009-02-21	02:55:00	0
2009-02-21	02:56:00	0
2009-02-21	02:57:00	0
2009-02-21	02:58:00	0
2009-02-21	02:59:00	0
2009-02-21	03:00:00	0
2009-02-21	03:01:00	0
2009-02-21	03:02:00	0
2009-02-21	03:03:00	0
2009-02-21	03:04:00	0
2009-02-21	03:05:00	0
2009-02-21	03:06:00	0
2009-02-21	03:07:00	0
2009-02-21	03:08:00	0
2009-02-21	03:09:00	0
2009-02-21	03:10:00	0
2009-02-21	03:11:00	0
2009-02-21	03:12:00	0
2009-02-21	03:13:00	23
2009-02-21	03:14:00	0
2009-02-21	03:15:00	0
2009-02-21	03:16:00	0
2009-02-21	03:17:00	0
2009-02-21	03:18:00	0
2009-02-21	03:19:00	0
2009-02-21	03:20:00	0
2009-02-21	03:21:00	0
2009-02-21	03:22:00	0
2009-02-21	03:23:00	151
2009-02-21	03:24:00	0
2009-02-21	03:25:00	0
2009-02-21	03:26:00	0
2009-02-21	03:27:00	0
2009-02-21	03:28:00	0
2009-02-21	03:29:00	0
2009-02-21	03:30:00	0
2009-02-21	03:31:00	0
2009-02-21	03:32:00	0
2009-02-21	03:33:00	0
2009-02-21	03:34:00	0
2009-02-21	03:35:00	0
2009-02-21	03:36:00	12
2009-02-21	03:37:00	0
2009-02-21	03:38:00	0
2009-02-21	03:39:00	0
2009-02-21	03:40:00	0
2009-02-21	03:41:00	0
2009-02-21	03:42:00	0
2009-02-21	03:43:00	0
2009-02-21	03:44:00	0
2009-02-21	03:45:00	0
2009-02-21	03:46:00	0
2009-02-21	03:47:00	58
2009-02-21	03:48:00	0
2009-02-21	03:49:00	0
2009-02-21	03:50:00	0
2009-02-21	03:51:00	0
2009-02-21	03:52:00	0
2009-02-21	03:53:00	0
2009-02-21	03:54:00	0
2009-02-21	03:55:00	93
2009-02-21	03:56:00	0
2009-02-21	03:57:00	0
2009-02-21	03:58:00	0
2009-02-21	03:59:00	0
2009-02-21	04:00:00	0
2009-02-21	04:01:00	0
2009-02-21	04:02:00	0
2009-02-21	04:03:00	0
2009-02-21	04:04:00	0
2009-02-21	04:05:00	0
2009-02-21	04:06:00	0
2009-02-21	04:07:00	0
2009-02-21	04:08:00	0
2009-02-21	04:09:00	0
2009-02-21	04:10:00	0
2009-02-21	04:11:00	0
2009-02-21	04:12:00	0
2009-02-21	04:13:00	0
2009-02-21	04:14:00	0
2009-02-21	04:15:00	12
2009-02-21	04:16:00	0
2009-02-21	04:17:00	0
2009-02-21	04:18:00	0
2009-02-21	04:19:00	0
2009-02-21	04:20:00	0
2009-02-21	04:21:00	0
2009-02-21	04:22:00	0
2009-02-21	04:23:00	0
2009-02-21	04:24:00	0
2009-02-21	04:25:00	0
2009-02-21	04:26:00	0
2009-02-21	04:27:00	0
2009-02-21	04:28:00	23
2009-02-21	04:29:00	0
2009-02-21	04:30:00	0
2009-02-21	04:31:00	0
2009-02-21	04:32:00	0
2009-02-21	04:33:00	0
2009-02-21	04:34:00	0
2009-02-21	04:35:00	0
2009-02-21	04:36:00	0
2009-02-21	04:37:00	0
2009-02-21	04:38:00	0
2009-02-21	04:39:00	58
2009-02-21	04:40:00	0
2009-02-21	04:41:00	0
2009-02-21	04:42:00	0
2009-02-21	04:43:00	0
2009-02-21	04:44:00	0
2009-02-21	04:45:00	0
2009-02-21	04:46:00	0
2009-02-21	04:47:00	0
2009-02-21	04:48:00	0
2009-02-21	04:49:00	0
2009-02-21	04:50:00	0
2009-02-21	04:51:00	0
2009-02-21	04:52:00	35
2009-02-21	04:53:00	0
2009-02-21	04:54:00	0
2009-02-21	04:55:00	0
2009-02-21	04:56:00	0
2009-02-21	04:57:00	0
2009-02-21	04:58:00	0
2009-02-21	04:59:00	0
2009-02-21	05:00:00	0
2009-02-21	05:01:00	0
2009-02-21	05:02:00	0
2009-02-21	05:03:00	0
2009-02-21	05:04:00	0
2009-02-21	05:05:00	0
2009-02-21	05:06:00	0
2009-02-21	05:07:00	93
2009-02-21	05:08:00	0
2009-02-21	05:09:00	0
2009-02-21	05:10:00	0
2009-02-21	05:11:00	0
2009-02-21	05:12:00	0
2009-02-21	05:13:00	47
2009-02-21	05:14:00	0
2009-02-21	05:15:00	0
2009-02-21	05:16:00	0
2009-02-21	05:17:00	0
2009-02-21	05:18:00	179
2009-02-21	05:19:00	0
2009-02-21	05:20:00	0
2009-02-21	05:21:00	0
2009-02-21	05:22:00	0
2009-02-21	05:23:00	0
2009-02-21	05:24:00	0
2009-02-21	05:25:00	0
2009-02-21	05:26:00	0
2009-02-21	05:27:00	0
2009-02-21	05:28:00	0
2009-02-21	05:29:00	0
2009-02-21	05:30:00	0
2009-02-21	05:31:00	0
2009-02-21	05:32:00	35
2009-02-21	05:33:00	0
2009-02-21	05:34:00	0
2009-02-21	05:35:00	0
2009-02-21	05:36:00	0
2009-02-21	05:37:00	0
2009-02-21	05:38:00	0
2009-02-21	05:39:00	0
2009-02-21	05:40:00	0
2009-02-21	05:41:00	0
2009-02-21	05:42:00	0
2009-02-21	05:43:00	0
2009-02-21	05:44:00	0
2009-02-21	05:45:00	0
2009-02-21	05:46:00	0
2009-02-21	05:47:00	0
2009-02-21	05:48:00	0
2009-02-21	05:49:00	0
2009-02-21	05:50:00	0
2009-02-21	05:51:00	0
2009-02-21	05:52:00	0
2009-02-21	05:53:00	0
2009-02-21	05:54:00	23
2009-02-21	05:55:00	0
2009-02-21	05:56:00	0
2009-02-21	05:57:00	0
2009-02-21	05:58:00	0
2009-02-21	05:59:00	0
2009-02-21	06:00:00	0
2009-02-21	06:01:00	0
2009-02-21	06:02:00	0
2009-02-21	06:03:00	0
2009-02-21	06:04:00	0
2009-02-21	06:05:00	0
2009-02-21	06:06:00	0
2009-02-21	06:07:00	0
2009-02-21	06:08:00	0
2009-02-21	06:09:00	0
2009-02-21	06:10:00	0
2009-02-21	06:11:00	0
2009-02-21	06:12:00	0
2009-02-21	06:13:00	0
2009-02-21	06:14:00	0
2009-02-21	06:15:00	0
2009-02-21	06:16:00	0
2009-02-21	06:17:00	0
2009-02-21	06:18:00	0
2009-02-21	06:19:00	70
2009-02-21	06:20:00	12
2009-02-21	06:21:00	0
2009-02-21	06:22:00	0
2009-02-21	06:23:00	249
2009-02-21	06:24:00	0
2009-02-21	06:25:00	0
2009-02-21	06:26:00	165
2009-02-21	06:27:00	0
2009-02-21	06:28:00	0
2009-02-21	06:29:00	0
2009-02-21	06:30:00	12
2009-02-21	06:31:00	0
2009-02-21	06:32:00	0
2009-02-21	06:33:00	0
2009-02-21	06:34:00	0
2009-02-21	06:35:00	0
2009-02-21	06:36:00	0
2009-02-21	06:37:00	0
2009-02-21	06:38:00	0
2009-02-21	06:39:00	0
2009-02-21	06:40:00	0
2009-02-21	06:41:00	0
2009-02-21	06:42:00	23
2009-02-21	06:43:00	0
2009-02-21	06:44:00	0
2009-02-21	06:45:00	0
2009-02-21	06:46:00	0
2009-02-21	06:47:00	12
2009-02-21	06:48:00	0
2009-02-21	06:49:00	0
2009-02-21	06:50:00	0
2009-02-21	06:51:00	0
2009-02-21	06:52:00	0
2009-02-21	06:53:00	0
2009-02-21	06:54:00	0
2009-02-21	06:55:00	0
2009-02-21	06:56:00	0
2009-02-21	06:57:00	0
2009-02-21	06:58:00	0
2009-02-21	06:59:00	0
2009-02-21	07:00:00	0
2009-02-21	07:01:00	0
2009-02-21	07:02:00	0
2009-02-21	07:03:00	0
2009-02-21	07:04:00	0
2009-02-21	07:05:00	0
2009-02-21	07:06:00	0
2009-02-21	07:07:00	0
2009-02-21	07:08:00	0
2009-02-21	07:09:00	0
2009-02-21	07:10:00	0
2009-02-21	07:11:00	0
2009-02-21	07:12:00	0
2009-02-21	07:13:00	0
2009-02-21	07:14:00	0
2009-02-21	07:15:00	0
2009-02-21	07:16:00	0
2009-02-21	07:17:00	81
2009-02-21	07:18:00	582
2009-02-21	07:19:00	105
2009-02-21	07:20:00	12
2009-02-21	07:21:00	0
2009-02-21	07:22:00	0
2009-02-21	07:23:00	0
2009-02-21	07:24:00	0
2009-02-21	07:25:00	0
2009-02-21	07:26:00	0
2009-02-21	07:27:00	0
2009-02-21	07:28:00	0
2009-02-21	07:29:00	0
2009-02-21	07:30:00	0
2009-02-21	07:31:00	0
2009-02-21	07:32:00	0
2009-02-21	07:33:00	0
2009-02-21	07:34:00	0
2009-02-21	07:35:00	0
2009-02-21	07:36:00	0
2009-02-21	07:37:00	0
2009-02-21	07:38:00	0
2009-02-21	07:39:00	0
2009-02-21	07:40:00	0
2009-02-21	07:41:00	0
2009-02-21	07:42:00	47
2009-02-21	07:43:00	58
2009-02-21	07:44:00	0
2009-02-21	07:45:00	70
2009-02-21	07:46:00	235
2009-02-21	07:47:00	35
2009-02-21	07:48:00	0
2009-02-21	07:49:00	0
2009-02-21	07:50:00	35
2009-02-21	07:51:00	0
2009-02-21	07:52:00	0
2009-02-21	07:53:00	47
2009-02-21	07:54:00	0
2009-02-21	07:55:00	0
2009-02-21	07:56:00	0
2009-02-21	07:57:00	840
2009-02-21	07:58:00	81
2009-02-21	07:59:00	23
2009-02-21	08:00:00	0
2009-02-21	08:01:00	70
2009-02-21	08:02:00	12
2009-02-21	08:03:00	0
2009-02-21	08:04:00	0
2009-02-21	08:05:00	47
2009-02-21	08:06:00	12
2009-02-21	08:07:00	47
2009-02-21	08:08:00	105
2009-02-21	08:09:00	0
2009-02-21	08:10:00	23
2009-02-21	08:11:00	0
2009-02-21	08:12:00	0
2009-02-21	08:13:00	0
2009-02-21	08:14:00	12
2009-02-21	08:15:00	0
2009-02-21	08:16:00	47
2009-02-21	08:17:00	705
2009-02-21	08:18:00	23
2009-02-21	08:19:00	0
2009-02-21	08:20:00	403
2009-02-21	08:21:00	0
2009-02-21	08:22:00	0
2009-02-21	08:23:00	0
2009-02-21	08:24:00	81
2009-02-21	08:25:00	770
2009-02-21	08:26:00	277
2009-02-21	08:27:00	263
2009-02-21	08:28:00	0
2009-02-21	08:29:00	0
2009-02-21	08:30:00	0
2009-02-21	08:31:00	0
2009-02-21	08:32:00	0
2009-02-21	08:33:00	0
2009-02-21	08:34:00	0
2009-02-21	08:35:00	0
2009-02-21	08:36:00	0
2009-02-21	08:37:00	0
2009-02-21	08:38:00	0
2009-02-21	08:39:00	12
2009-02-21	08:40:00	12
2009-02-21	08:41:00	0
2009-02-21	08:42:00	0
2009-02-21	08:43:00	12
2009-02-21	08:44:00	0
2009-02-21	08:45:00	12
2009-02-21	08:46:00	0
2009-02-21	08:47:00	0
2009-02-21	08:48:00	0
2009-02-21	08:49:00	0
2009-02-21	08:50:00	0
2009-02-21	08:51:00	0
2009-02-21	08:52:00	451
2009-02-21	08:53:00	0
2009-02-21	08:54:00	0
2009-02-21	08:55:00	0
2009-02-21	08:56:00	0
2009-02-21	08:57:00	0
2009-02-21	08:58:00	23
2009-02-21	08:59:00	0
2009-02-21	09:00:00	0
2009-02-21	09:01:00	489
2009-02-21	09:02:00	12
2009-02-21	09:03:00	0
2009-02-21	09:04:00	0
2009-02-21	09:05:00	0
2009-02-21	09:06:00	0
2009-02-21	09:07:00	12
2009-02-21	09:08:00	0
[truncated: 19,611 more rows]

## Sheet: 3.6.09
Actogram, Copy Raw Data, All Days
Identity:	Jade
Filename:	E:\Active Research Files\meloxicam titre canine\cases\jade\Jade 3.6.09.AWC
Gender:	F
Age:	8
Height:	61.0 cm	24.0 in
Weight:	40.0 kg	88.2 lbs
Start Date:	06-Mar-2009 (Fri)
Start Time:	17:00:00
Interval:	1.00 mins
Date Stamp:	Time Stamp:	Activity Data:	Marker Press:
2009-03-06	00:00:00	0
2009-03-06	00:01:00	0
2009-03-06	00:02:00	0
2009-03-06	00:03:00	0
2009-03-06	00:04:00	0
2009-03-06	00:05:00	0
2009-03-06	00:06:00	0
2009-03-06	00:07:00	0
2009-03-06	00:08:00	0
2009-03-06	00:09:00	0
2009-03-06	00:10:00	0
2009-03-06	00:11:00	0
2009-03-06	00:12:00	0
2009-03-06	00:13:00	0
2009-03-06	00:14:00	0
2009-03-06	00:15:00	0
2009-03-06	00:16:00	0
2009-03-06	00:17:00	0
2009-03-06	00:18:00	0
2009-03-06	00:19:00	0
2009-03-06	00:20:00	0
2009-03-06	00:21:00	0
2009-03-06	00:22:00	0
2009-03-06	00:23:00	0
2009-03-06	00:24:00	0
2009-03-06	00:25:00	0
2009-03-06	00:26:00	0
2009-03-06	00:27:00	0
2009-03-06	00:28:00	0
2009-03-06	00:29:00	0
2009-03-06	00:30:00	0
2009-03-06	00:31:00	0
2009-03-06	00:32:00	0
2009-03-06	00:33:00	0
2009-03-06	00:34:00	0
2009-03-06	00:35:00	0
2009-03-06	00:36:00	0
2009-03-06	00:37:00	0
2009-03-06	00:38:00	0
2009-03-06	00:39:00	0
2009-03-06	00:40:00	0
2009-03-06	00:41:00	0
2009-03-06	00:42:00	0
2009-03-06	00:43:00	0
2009-03-06	00:44:00	0
2009-03-06	00:45:00	0
2009-03-06	00:46:00	0
2009-03-06	00:47:00	0
2009-03-06	00:48:00	0
2009-03-06	00:49:00	0
2009-03-06	00:50:00	0
2009-03-06	00:51:00	0
2009-03-06	00:52:00	0
2009-03-06	00:53:00	0
2009-03-06	00:54:00	0
2009-03-06	00:55:00	0
2009-03-06	00:56:00	0
2009-03-06	00:57:00	0
2009-03-06	00:58:00	0
2009-03-06	00:59:00	0
2009-03-06	01:00:00	0
2009-03-06	01:01:00	0
2009-03-06	01:02:00	0
2009-03-06	01:03:00	0
2009-03-06	01:04:00	0
2009-03-06	01:05:00	0
2009-03-06	01:06:00	0
2009-03-06	01:07:00	0
2009-03-06	01:08:00	0
2009-03-06	01:09:00	0
2009-03-06	01:10:00	0
2009-03-06	01:11:00	0
2009-03-06	01:12:00	0
2009-03-06	01:13:00	0
2009-03-06	01:14:00	0
2009-03-06	01:15:00	0
2009-03-06	01:16:00	0
2009-03-06	01:17:00	0
2009-03-06	01:18:00	0
2009-03-06	01:19:00	0
2009-03-06	01:20:00	0
2009-03-06	01:21:00	0
2009-03-06	01:22:00	0
2009-03-06	01:23:00	0
2009-03-06	01:24:00	0
2009-03-06	01:25:00	0
2009-03-06	01:26:00	0
2009-03-06	01:27:00	0
2009-03-06	01:28:00	0
2009-03-06	01:29:00	0
2009-03-06	01:30:00	0
2009-03-06	01:31:00	0
2009-03-06	01:32:00	0
2009-03-06	01:33:00	0
2009-03-06	01:34:00	0
2009-03-06	01:35:00	0
2009-03-06	01:36:00	0
2009-03-06	01:37:00	0
2009-03-06	01:38:00	0
2009-03-06	01:39:00	0
2009-03-06	01:40:00	0
2009-03-06	01:41:00	0
2009-03-06	01:42:00	0
2009-03-06	01:43:00	0
2009-03-06	01:44:00	0
2009-03-06	01:45:00	0
2009-03-06	01:46:00	0
2009-03-06	01:47:00	0
2009-03-06	01:48:00	0
2009-03-06	01:49:00	0
2009-03-06	01:50:00	0
2009-03-06	01:51:00	0
2009-03-06	01:52:00	0
2009-03-06	01:53:00	0
2009-03-06	01:54:00	0
2009-03-06	01:55:00	0
2009-03-06	01:56:00	0
2009-03-06	01:57:00	0
2009-03-06	01:58:00	0
2009-03-06	01:59:00	0
2009-03-06	02:00:00	0
2009-03-06	02:01:00	0
2009-03-06	02:02:00	0
2009-03-06	02:03:00	0
2009-03-06	02:04:00	0
2009-03-06	02:05:00	0
2009-03-06	02:06:00	0
2009-03-06	02:07:00	0
2009-03-06	02:08:00	0
2009-03-06	02:09:00	0
2009-03-06	02:10:00	0
2009-03-06	02:11:00	0
2009-03-06	02:12:00	0
2009-03-06	02:13:00	0
2009-03-06	02:14:00	0
2009-03-06	02:15:00	0
2009-03-06	02:16:00	0
2009-03-06	02:17:00	0
2009-03-06	02:18:00	0
2009-03-06	02:19:00	0
2009-03-06	02:20:00	0
2009-03-06	02:21:00	0
2009-03-06	02:22:00	0
2009-03-06	02:23:00	0
2009-03-06	02:24:00	0
2009-03-06	02:25:00	0
2009-03-06	02:26:00	0
2009-03-06	02:27:00	0
2009-03-06	02:28:00	0
2009-03-06	02:29:00	0
2009-03-06	02:30:00	0
2009-03-06	02:31:00	0
2009-03-06	02:32:00	0
2009-03-06	02:33:00	0
2009-03-06	02:34:00	0
2009-03-06	02:35:00	0
2009-03-06	02:36:00	0
2009-03-06	02:37:00	0
2009-03-06	02:38:00	0
2009-03-06	02:39:00	0
2009-03-06	02:40:00	0
2009-03-06	02:41:00	0
2009-03-06	02:42:00	0
2009-03-06	02:43:00	0
2009-03-06	02:44:00	0
2009-03-06	02:45:00	0
2009-03-06	02:46:00	0
2009-03-06	02:47:00	0
2009-03-06	02:48:00	0
2009-03-06	02:49:00	0
2009-03-06	02:50:00	0
2009-03-06	02:51:00	0
2009-03-06	02:52:00	0
2009-03-06	02:53:00	0
2009-03-06	02:54:00	0
2009-03-06	02:55:00	0
2009-03-06	02:56:00	0
2009-03-06	02:57:00	0
2009-03-06	02:58:00	0
2009-03-06	02:59:00	0
2009-03-06	03:00:00	0
2009-03-06	03:01:00	0
2009-03-06	03:02:00	0
2009-03-06	03:03:00	0
2009-03-06	03:04:00	0
2009-03-06	03:05:00	0
2009-03-06	03:06:00	0
2009-03-06	03:07:00	0
2009-03-06	03:08:00	0
2009-03-06	03:09:00	0
2009-03-06	03:10:00	0
2009-03-06	03:11:00	0
2009-03-06	03:12:00	0
2009-03-06	03:13:00	0
2009-03-06	03:14:00	0
2009-03-06	03:15:00	0
2009-03-06	03:16:00	0
2009-03-06	03:17:00	0
2009-03-06	03:18:00	0
2009-03-06	03:19:00	0
2009-03-06	03:20:00	0
2009-03-06	03:21:00	0
2009-03-06	03:22:00	0
2009-03-06	03:23:00	0
2009-03-06	03:24:00	0
2009-03-06	03:25:00	0
2009-03-06	03:26:00	0
2009-03-06	03:27:00	0
2009-03-06	03:28:00	0
2009-03-06	03:29:00	0
2009-03-06	03:30:00	0
2009-03-06	03:31:00	0
2009-03-06	03:32:00	0
2009-03-06	03:33:00	0
2009-03-06	03:34:00	0
2009-03-06	03:35:00	0
2009-03-06	03:36:00	0
2009-03-06	03:37:00	0
2009-03-06	03:38:00	0
2009-03-06	03:39:00	0
2009-03-06	03:40:00	0
2009-03-06	03:41:00	0
2009-03-06	03:42:00	0
2009-03-06	03:43:00	0
2009-03-06	03:44:00	0
2009-03-06	03:45:00	0
2009-03-06	03:46:00	0
2009-03-06	03:47:00	0
2009-03-06	03:48:00	0
2009-03-06	03:49:00	0
2009-03-06	03:50:00	0
2009-03-06	03:51:00	0
2009-03-06	03:52:00	0
2009-03-06	03:53:00	0
2009-03-06	03:54:00	0
2009-03-06	03:55:00	0
2009-03-06	03:56:00	0
2009-03-06	03:57:00	0
2009-03-06	03:58:00	0
2009-03-06	03:59:00	0
2009-03-06	04:00:00	0
2009-03-06	04:01:00	0
2009-03-06	04:02:00	0
2009-03-06	04:03:00	0
2009-03-06	04:04:00	0
2009-03-06	04:05:00	0
2009-03-06	04:06:00	0
2009-03-06	04:07:00	0
2009-03-06	04:08:00	0
2009-03-06	04:09:00	0
2009-03-06	04:10:00	0
2009-03-06	04:11:00	0
2009-03-06	04:12:00	0
2009-03-06	04:13:00	0
2009-03-06	04:14:00	0
2009-03-06	04:15:00	0
2009-03-06	04:16:00	0
2009-03-06	04:17:00	0
2009-03-06	04:18:00	0
2009-03-06	04:19:00	0
2009-03-06	04:20:00	0
2009-03-06	04:21:00	0
2009-03-06	04:22:00	0
2009-03-06	04:23:00	0
2009-03-06	04:24:00	0
2009-03-06	04:25:00	0
2009-03-06	04:26:00	0
2009-03-06	04:27:00	0
2009-03-06	04:28:00	0
2009-03-06	04:29:00	0
2009-03-06	04:30:00	0
2009-03-06	04:31:00	0
2009-03-06	04:32:00	0
2009-03-06	04:33:00	0
2009-03-06	04:34:00	0
2009-03-06	04:35:00	0
2009-03-06	04:36:00	0
2009-03-06	04:37:00	0
2009-03-06	04:38:00	0
2009-03-06	04:39:00	0
2009-03-06	04:40:00	0
2009-03-06	04:41:00	0
2009-03-06	04:42:00	0
2009-03-06	04:43:00	0
2009-03-06	04:44:00	0
2009-03-06	04:45:00	0
2009-03-06	04:46:00	0
2009-03-06	04:47:00	0
2009-03-06	04:48:00	0
2009-03-06	04:49:00	0
2009-03-06	04:50:00	0
2009-03-06	04:51:00	0
2009-03-06	04:52:00	0
2009-03-06	04:53:00	0
2009-03-06	04:54:00	0
2009-03-06	04:55:00	0
2009-03-06	04:56:00	0
2009-03-06	04:57:00	0
2009-03-06	04:58:00	0
2009-03-06	04:59:00	0
2009-03-06	05:00:00	0
2009-03-06	05:01:00	0
2009-03-06	05:02:00	0
2009-03-06	05:03:00	0
2009-03-06	05:04:00	0
2009-03-06	05:05:00	0
2009-03-06	05:06:00	0
2009-03-06	05:07:00	0
2009-03-06	05:08:00	0
2009-03-06	05:09:00	0
2009-03-06	05:10:00	0
2009-03-06	05:11:00	0
2009-03-06	05:12:00	0
2009-03-06	05:13:00	0
2009-03-06	05:14:00	0
2009-03-06	05:15:00	0
2009-03-06	05:16:00	0
2009-03-06	05:17:00	0
2009-03-06	05:18:00	0
2009-03-06	05:19:00	0
2009-03-06	05:20:00	0
2009-03-06	05:21:00	0
2009-03-06	05:22:00	0
2009-03-06	05:23:00	0
2009-03-06	05:24:00	0
2009-03-06	05:25:00	0
2009-03-06	05:26:00	0
2009-03-06	05:27:00	0
2009-03-06	05:28:00	0
2009-03-06	05:29:00	0
2009-03-06	05:30:00	0
2009-03-06	05:31:00	0
2009-03-06	05:32:00	0
2009-03-06	05:33:00	0
2009-03-06	05:34:00	0
2009-03-06	05:35:00	0
2009-03-06	05:36:00	0
2009-03-06	05:37:00	0
2009-03-06	05:38:00	0
2009-03-06	05:39:00	0
2009-03-06	05:40:00	0
2009-03-06	05:41:00	0
2009-03-06	05:42:00	0
2009-03-06	05:43:00	0
2009-03-06	05:44:00	0
2009-03-06	05:45:00	0
2009-03-06	05:46:00	0
2009-03-06	05:47:00	0
2009-03-06	05:48:00	0
2009-03-06	05:49:00	0
2009-03-06	05:50:00	0
2009-03-06	05:51:00	0
2009-03-06	05:52:00	0
2009-03-06	05:53:00	0
2009-03-06	05:54:00	0
2009-03-06	05:55:00	0
2009-03-06	05:56:00	0
2009-03-06	05:57:00	0
2009-03-06	05:58:00	0
2009-03-06	05:59:00	0
2009-03-06	06:00:00	0
2009-03-06	06:01:00	0
2009-03-06	06:02:00	0
2009-03-06	06:03:00	0
2009-03-06	06:04:00	0
2009-03-06	06:05:00	0
2009-03-06	06:06:00	0
2009-03-06	06:07:00	0
2009-03-06	06:08:00	0
2009-03-06	06:09:00	0
2009-03-06	06:10:00	0
2009-03-06	06:11:00	0
2009-03-06	06:12:00	0
2009-03-06	06:13:00	0
2009-03-06	06:14:00	0
2009-03-06	06:15:00	0
2009-03-06	06:16:00	0
2009-03-06	06:17:00	0
2009-03-06	06:18:00	0
2009-03-06	06:19:00	0
2009-03-06	06:20:00	0
2009-03-06	06:21:00	0
2009-03-06	06:22:00	0
2009-03-06	06:23:00	0
2009-03-06	06:24:00	0
2009-03-06	06:25:00	0
2009-03-06	06:26:00	0
2009-03-06	06:27:00	0
2009-03-06	06:28:00	0
2009-03-06	06:29:00	0
2009-03-06	06:30:00	0
2009-03-06	06:31:00	0
2009-03-06	06:32:00	0
2009-03-06	06:33:00	0
2009-03-06	06:34:00	0
2009-03-06	06:35:00	0
2009-03-06	06:36:00	0
2009-03-06	06:37:00	0
2009-03-06	06:38:00	0
2009-03-06	06:39:00	0
2009-03-06	06:40:00	0
2009-03-06	06:41:00	0
2009-03-06	06:42:00	0
2009-03-06	06:43:00	0
2009-03-06	06:44:00	0
2009-03-06	06:45:00	0
2009-03-06	06:46:00	0
2009-03-06	06:47:00	0
2009-03-06	06:48:00	0
2009-03-06	06:49:00	0
2009-03-06	06:50:00	0
2009-03-06	06:51:00	0
2009-03-06	06:52:00	0
2009-03-06	06:53:00	0
2009-03-06	06:54:00	0
2009-03-06	06:55:00	0
2009-03-06	06:56:00	0
2009-03-06	06:57:00	0
2009-03-06	06:58:00	0
2009-03-06	06:59:00	0
2009-03-06	07:00:00	0
2009-03-06	07:01:00	0
2009-03-06	07:02:00	0
2009-03-06	07:03:00	0
2009-03-06	07:04:00	0
2009-03-06	07:05:00	0
2009-03-06	07:06:00	0
2009-03-06	07:07:00	0
2009-03-06	07:08:00	0
2009-03-06	07:09:00	0
2009-03-06	07:10:00	0
2009-03-06	07:11:00	0
2009-03-06	07:12:00	0
2009-03-06	07:13:00	0
2009-03-06	07:14:00	0
2009-03-06	07:15:00	0
2009-03-06	07:16:00	0
2009-03-06	07:17:00	0
2009-03-06	07:18:00	0
2009-03-06	07:19:00	0
2009-03-06	07:20:00	0
2009-03-06	07:21:00	0
2009-03-06	07:22:00	0
2009-03-06	07:23:00	0
2009-03-06	07:24:00	0
2009-03-06	07:25:00	0
2009-03-06	07:26:00	0
2009-03-06	07:27:00	0
2009-03-06	07:28:00	0
2009-03-06	07:29:00	0
2009-03-06	07:30:00	0
2009-03-06	07:31:00	0
2009-03-06	07:32:00	0
2009-03-06	07:33:00	0
2009-03-06	07:34:00	0
2009-03-06	07:35:00	0
2009-03-06	07:36:00	0
2009-03-06	07:37:00	0
2009-03-06	07:38:00	0
2009-03-06	07:39:00	0
2009-03-06	07:40:00	0
2009-03-06	07:41:00	0
2009-03-06	07:42:00	0
2009-03-06	07:43:00	0
2009-03-06	07:44:00	0
2009-03-06	07:45:00	0
2009-03-06	07:46:00	0
2009-03-06	07:47:00	0
2009-03-06	07:48:00	0
2009-03-06	07:49:00	0
2009-03-06	07:50:00	0
2009-03-06	07:51:00	0
2009-03-06	07:52:00	0
2009-03-06	07:53:00	0
2009-03-06	07:54:00	0
2009-03-06	07:55:00	0
2009-03-06	07:56:00	0
2009-03-06	07:57:00	0
2009-03-06	07:58:00	0
2009-03-06	07:59:00	0
2009-03-06	08:00:00	0
2009-03-06	08:01:00	0
2009-03-06	08:02:00	0
2009-03-06	08:03:00	0
2009-03-06	08:04:00	0
2009-03-06	08:05:00	0
2009-03-06	08:06:00	0
2009-03-06	08:07:00	0
2009-03-06	08:08:00	0
2009-03-06	08:09:00	0
2009-03-06	08:10:00	0
2009-03-06	08:11:00	0
2009-03-06	08:12:00	0
2009-03-06	08:13:00	0
2009-03-06	08:14:00	0
2009-03-06	08:15:00	0
2009-03-06	08:16:00	0
2009-03-06	08:17:00	0
2009-03-06	08:18:00	0
2009-03-06	08:19:00	0
2009-03-06	08:20:00	0
2009-03-06	08:21:00	0
2009-03-06	08:22:00	0
2009-03-06	08:23:00	0
2009-03-06	08:24:00	0
2009-03-06	08:25:00	0
2009-03-06	08:26:00	0
2009-03-06	08:27:00	0
2009-03-06	08:28:00	0
2009-03-06	08:29:00	0
2009-03-06	08:30:00	0
2009-03-06	08:31:00	0
2009-03-06	08:32:00	0
2009-03-06	08:33:00	0
2009-03-06	08:34:00	0
2009-03-06	08:35:00	0
2009-03-06	08:36:00	0
2009-03-06	08:37:00	0
2009-03-06	08:38:00	0
2009-03-06	08:39:00	0
2009-03-06	08:40:00	0
2009-03-06	08:41:00	0
2009-03-06	08:42:00	0
2009-03-06	08:43:00	0
2009-03-06	08:44:00	0
2009-03-06	08:45:00	0
2009-03-06	08:46:00	0
2009-03-06	08:47:00	0
2009-03-06	08:48:00	0
2009-03-06	08:49:00	0
2009-03-06	08:50:00	0
2009-03-06	08:51:00	0
2009-03-06	08:52:00	0
2009-03-06	08:53:00	0
2009-03-06	08:54:00	0
2009-03-06	08:55:00	0
2009-03-06	08:56:00	0
2009-03-06	08:57:00	0
2009-03-06	08:58:00	0
2009-03-06	08:59:00	0
2009-03-06	09:00:00	0
2009-03-06	09:01:00	0
2009-03-06	09:02:00	0
2009-03-06	09:03:00	0
2009-03-06	09:04:00	0
2009-03-06	09:05:00	0
2009-03-06	09:06:00	0
2009-03-06	09:07:00	0
2009-03-06	09:08:00	0
2009-03-06	09:09:00	0
2009-03-06	09:10:00	0
2009-03-06	09:11:00	0
2009-03-06	09:12:00	0
2009-03-06	09:13:00	0
2009-03-06	09:14:00	0
2009-03-06	09:15:00	0
2009-03-06	09:16:00	0
2009-03-06	09:17:00	0
2009-03-06	09:18:00	0
2009-03-06	09:19:00	0
2009-03-06	09:20:00	0
2009-03-06	09:21:00	0
2009-03-06	09:22:00	0
2009-03-06	09:23:00	0
2009-03-06	09:24:00	0
2009-03-06	09:25:00	0
2009-03-06	09:26:00	0
2009-03-06	09:27:00	0
2009-03-06	09:28:00	0
2009-03-06	09:29:00	0
2009-03-06	09:30:00	0
2009-03-06	09:31:00	0
2009-03-06	09:32:00	0
2009-03-06	09:33:00	0
2009-03-06	09:34:00	0
2009-03-06	09:35:00	0
2009-03-06	09:36:00	0
2009-03-06	09:37:00	0
2009-03-06	09:38:00	0
2009-03-06	09:39:00	0
2009-03-06	09:40:00	0
2009-03-06	09:41:00	0
2009-03-06	09:42:00	0
2009-03-06	09:43:00	0
2009-03-06	09:44:00	0
2009-03-06	09:45:00	0
2009-03-06	09:46:00	0
2009-03-06	09:47:00	0
2009-03-06	09:48:00	0
2009-03-06	09:49:00	0
2009-03-06	09:50:00	0
2009-03-06	09:51:00	0
2009-03-06	09:52:00	0
2009-03-06	09:53:00	0
2009-03-06	09:54:00	0
2009-03-06	09:55:00	0
2009-03-06	09:56:00	0
2009-03-06	09:57:00	0
2009-03-06	09:58:00	0
2009-03-06	09:59:00	0
2009-03-06	10:00:00	0
2009-03-06	10:01:00	0
2009-03-06	10:02:00	0
2009-03-06	10:03:00	0
2009-03-06	10:04:00	0
2009-03-06	10:05:00	0
2009-03-06	10:06:00	0
2009-03-06	10:07:00	0
2009-03-06	10:08:00	0
2009-03-06	10:09:00	0
2009-03-06	10:10:00	0
2009-03-06	10:11:00	0
2009-03-06	10:12:00	0
2009-03-06	10:13:00	0
2009-03-06	10:14:00	0
2009-03-06	10:15:00	0
2009-03-06	10:16:00	0
2009-03-06	10:17:00	0
2009-03-06	10:18:00	0
2009-03-06	10:19:00	0
2009-03-06	10:20:00	0
2009-03-06	10:21:00	0
2009-03-06	10:22:00	0
2009-03-06	10:23:00	0
2009-03-06	10:24:00	0
2009-03-06	10:25:00	0
2009-03-06	10:26:00	0
2009-03-06	10:27:00	0
2009-03-06	10:28:00	0
2009-03-06	10:29:00	0
2009-03-06	10:30:00	0
2009-03-06	10:31:00	0
2009-03-06	10:32:00	0
2009-03-06	10:33:00	0
2009-03-06	10:34:00	0
2009-03-06	10:35:00	0
2009-03-06	10:36:00	0
2009-03-06	10:37:00	0
2009-03-06	10:38:00	0
2009-03-06	10:39:00	0
2009-03-06	10:40:00	0
2009-03-06	10:41:00	0
2009-03-06	10:42:00	0
2009-03-06	10:43:00	0
2009-03-06	10:44:00	0
2009-03-06	10:45:00	0
2009-03-06	10:46:00	0
2009-03-06	10:47:00	0
2009-03-06	10:48:00	0
2009-03-06	10:49:00	0
2009-03-06	10:50:00	0
2009-03-06	10:51:00	0
2009-03-06	10:52:00	0
2009-03-06	10:53:00	0
2009-03-06	10:54:00	0
2009-03-06	10:55:00	0
2009-03-06	10:56:00	0
2009-03-06	10:57:00	0
2009-03-06	10:58:00	0
2009-03-06	10:59:00	0
2009-03-06	11:00:00	0
2009-03-06	11:01:00	0
2009-03-06	11:02:00	0
2009-03-06	11:03:00	0
2009-03-06	11:04:00	0
2009-03-06	11:05:00	0
2009-03-06	11:06:00	0
2009-03-06	11:07:00	0
2009-03-06	11:08:00	0
2009-03-06	11:09:00	0
2009-03-06	11:10:00	0
2009-03-06	11:11:00	0
2009-03-06	11:12:00	0
2009-03-06	11:13:00	0
2009-03-06	11:14:00	0
2009-03-06	11:15:00	0
2009-03-06	11:16:00	0
2009-03-06	11:17:00	0
2009-03-06	11:18:00	0
2009-03-06	11:19:00	0
2009-03-06	11:20:00	0
2009-03-06	11:21:00	0
2009-03-06	11:22:00	0
2009-03-06	11:23:00	0
2009-03-06	11:24:00	0
2009-03-06	11:25:00	0
2009-03-06	11:26:00	0
2009-03-06	11:27:00	0
2009-03-06	11:28:00	0
2009-03-06	11:29:00	0
2009-03-06	11:30:00	0
2009-03-06	11:31:00	0
2009-03-06	11:32:00	0
2009-03-06	11:33:00	0
2009-03-06	11:34:00	0
2009-03-06	11:35:00	0
2009-03-06	11:36:00	0
2009-03-06	11:37:00	0
2009-03-06	11:38:00	0
2009-03-06	11:39:00	0
2009-03-06	11:40:00	0
2009-03-06	11:41:00	0
2009-03-06	11:42:00	0
2009-03-06	11:43:00	0
2009-03-06	11:44:00	0
2009-03-06	11:45:00	0
2009-03-06	11:46:00	0
2009-03-06	11:47:00	0
2009-03-06	11:48:00	0
2009-03-06	11:49:00	0
2009-03-06	11:50:00	0
2009-03-06	11:51:00	0
2009-03-06	11:52:00	0
2009-03-06	11:53:00	0
2009-03-06	11:54:00	0
2009-03-06	11:55:00	0
2009-03-06	11:56:00	0
2009-03-06	11:57:00	0
2009-03-06	11:58:00	0
2009-03-06	11:59:00	0
2009-03-06	12:00:00	0
2009-03-06	12:01:00	0
2009-03-06	12:02:00	0
2009-03-06	12:03:00	0
2009-03-06	12:04:00	0
2009-03-06	12:05:00	0
2009-03-06	12:06:00	0
2009-03-06	12:07:00	0
2009-03-06	12:08:00	0
2009-03-06	12:09:00	0
2009-03-06	12:10:00	0
2009-03-06	12:11:00	0
2009-03-06	12:12:00	0
2009-03-06	12:13:00	0
2009-03-06	12:14:00	0
2009-03-06	12:15:00	0
2009-03-06	12:16:00	0
2009-03-06	12:17:00	0
2009-03-06	12:18:00	0
2009-03-06	12:19:00	0
2009-03-06	12:20:00	0
2009-03-06	12:21:00	0
2009-03-06	12:22:00	0
2009-03-06	12:23:00	0
2009-03-06	12:24:00	0
2009-03-06	12:25:00	0
2009-03-06	12:26:00	0
2009-03-06	12:27:00	0
2009-03-06	12:28:00	0
2009-03-06	12:29:00	0
2009-03-06	12:30:00	0
2009-03-06	12:31:00	0
2009-03-06	12:32:00	0
2009-03-06	12:33:00	0
2009-03-06	12:34:00	0
2009-03-06	12:35:00	0
2009-03-06	12:36:00	0
2009-03-06	12:37:00	0
2009-03-06	12:38:00	0
2009-03-06	12:39:00	0
2009-03-06	12:40:00	0
2009-03-06	12:41:00	0
2009-03-06	12:42:00	0
2009-03-06	12:43:00	0
2009-03-06	12:44:00	0
2009-03-06	12:45:00	0
2009-03-06	12:46:00	0
2009-03-06	12:47:00	0
2009-03-06	12:48:00	0
2009-03-06	12:49:00	0
2009-03-06	12:50:00	0
2009-03-06	12:51:00	0
2009-03-06	12:52:00	0
2009-03-06	12:53:00	0
2009-03-06	12:54:00	0
2009-03-06	12:55:00	0
2009-03-06	12:56:00	0
2009-03-06	12:57:00	0
2009-03-06	12:58:00	0
2009-03-06	12:59:00	0
2009-03-06	13:00:00	0
2009-03-06	13:01:00	0
2009-03-06	13:02:00	0
2009-03-06	13:03:00	0
2009-03-06	13:04:00	0
2009-03-06	13:05:00	0
2009-03-06	13:06:00	0
2009-03-06	13:07:00	0
2009-03-06	13:08:00	0
2009-03-06	13:09:00	0
2009-03-06	13:10:00	0
2009-03-06	13:11:00	0
2009-03-06	13:12:00	0
2009-03-06	13:13:00	0
2009-03-06	13:14:00	0
2009-03-06	13:15:00	0
2009-03-06	13:16:00	0
2009-03-06	13:17:00	0
2009-03-06	13:18:00	0
2009-03-06	13:19:00	0
2009-03-06	13:20:00	0
2009-03-06	13:21:00	0
2009-03-06	13:22:00	0
2009-03-06	13:23:00	0
2009-03-06	13:24:00	0
2009-03-06	13:25:00	0
2009-03-06	13:26:00	0
2009-03-06	13:27:00	0
2009-03-06	13:28:00	0
2009-03-06	13:29:00	0
2009-03-06	13:30:00	0
2009-03-06	13:31:00	0
2009-03-06	13:32:00	0
2009-03-06	13:33:00	0
2009-03-06	13:34:00	0
2009-03-06	13:35:00	0
2009-03-06	13:36:00	0
2009-03-06	13:37:00	0
2009-03-06	13:38:00	0
2009-03-06	13:39:00	0
2009-03-06	13:40:00	0
2009-03-06	13:41:00	0
2009-03-06	13:42:00	0
2009-03-06	13:43:00	0
2009-03-06	13:44:00	0
2009-03-06	13:45:00	0
2009-03-06	13:46:00	0
2009-03-06	13:47:00	0
2009-03-06	13:48:00	0
2009-03-06	13:49:00	0
2009-03-06	13:50:00	0
2009-03-06	13:51:00	0
2009-03-06	13:52:00	0
2009-03-06	13:53:00	0
2009-03-06	13:54:00	0
2009-03-06	13:55:00	0
2009-03-06	13:56:00	0
2009-03-06	13:57:00	0
2009-03-06	13:58:00	0
2009-03-06	13:59:00	0
2009-03-06	14:00:00	0
2009-03-06	14:01:00	0
2009-03-06	14:02:00	0
2009-03-06	14:03:00	0
2009-03-06	14:04:00	0
2009-03-06	14:05:00	0
2009-03-06	14:06:00	0
2009-03-06	14:07:00	0
2009-03-06	14:08:00	0
2009-03-06	14:09:00	0
2009-03-06	14:10:00	0
2009-03-06	14:11:00	0
2009-03-06	14:12:00	0
2009-03-06	14:13:00	0
2009-03-06	14:14:00	0
2009-03-06	14:15:00	0
2009-03-06	14:16:00	0
2009-03-06	14:17:00	0
2009-03-06	14:18:00	0
2009-03-06	14:19:00	0
2009-03-06	14:20:00	0
2009-03-06	14:21:00	0
2009-03-06	14:22:00	0
2009-03-06	14:23:00	0
2009-03-06	14:24:00	0
2009-03-06	14:25:00	0
2009-03-06	14:26:00	0
2009-03-06	14:27:00	0
2009-03-06	14:28:00	0
2009-03-06	14:29:00	0
2009-03-06	14:30:00	0
2009-03-06	14:31:00	0
2009-03-06	14:32:00	0
2009-03-06	14:33:00	0
2009-03-06	14:34:00	0
2009-03-06	14:35:00	0
2009-03-06	14:36:00	0
2009-03-06	14:37:00	0
2009-03-06	14:38:00	0
2009-03-06	14:39:00	0
2009-03-06	14:40:00	0
2009-03-06	14:41:00	0
2009-03-06	14:42:00	0
2009-03-06	14:43:00	0
2009-03-06	14:44:00	0
2009-03-06	14:45:00	0
2009-03-06	14:46:00	0
2009-03-06	14:47:00	0
2009-03-06	14:48:00	0
2009-03-06	14:49:00	0
2009-03-06	14:50:00	0
2009-03-06	14:51:00	0
2009-03-06	14:52:00	0
2009-03-06	14:53:00	0
2009-03-06	14:54:00	0
2009-03-06	14:55:00	0
2009-03-06	14:56:00	0
2009-03-06	14:57:00	0
2009-03-06	14:58:00	0
2009-03-06	14:59:00	0
2009-03-06	15:00:00	0
2009-03-06	15:01:00	0
2009-03-06	15:02:00	0
2009-03-06	15:03:00	0
2009-03-06	15:04:00	0
2009-03-06	15:05:00	0
2009-03-06	15:06:00	0
2009-03-06	15:07:00	0
2009-03-06	15:08:00	0
2009-03-06	15:09:00	0
2009-03-06	15:10:00	0
2009-03-06	15:11:00	0
2009-03-06	15:12:00	0
2009-03-06	15:13:00	0
2009-03-06	15:14:00	0
2009-03-06	15:15:00	0
2009-03-06	15:16:00	0
2009-03-06	15:17:00	0
2009-03-06	15:18:00	0
2009-03-06	15:19:00	0
2009-03-06	15:20:00	0
2009-03-06	15:21:00	0
2009-03-06	15:22:00	0
2009-03-06	15:23:00	0
2009-03-06	15:24:00	0
2009-03-06	15:25:00	0
2009-03-06	15:26:00	0
2009-03-06	15:27:00	0
2009-03-06	15:28:00	0
2009-03-06	15:29:00	0
2009-03-06	15:30:00	0
2009-03-06	15:31:00	0
2009-03-06	15:32:00	0
2009-03-06	15:33:00	0
2009-03-06	15:34:00	0
2009-03-06	15:35:00	0
2009-03-06	15:36:00	0
2009-03-06	15:37:00	0
2009-03-06	15:38:00	0
2009-03-06	15:39:00	0
2009-03-06	15:40:00	0
2009-03-06	15:41:00	0
2009-03-06	15:42:00	0
2009-03-06	15:43:00	0
2009-03-06	15:44:00	0
2009-03-06	15:45:00	0
2009-03-06	15:46:00	0
2009-03-06	15:47:00	0
2009-03-06	15:48:00	0
2009-03-06	15:49:00	0
2009-03-06	15:50:00	0
2009-03-06	15:51:00	0
2009-03-06	15:52:00	0
2009-03-06	15:53:00	0
2009-03-06	15:54:00	0
2009-03-06	15:55:00	0
2009-03-06	15:56:00	0
2009-03-06	15:57:00	0
2009-03-06	15:58:00	0
2009-03-06	15:59:00	0
2009-03-06	16:00:00	0
2009-03-06	16:01:00	0
2009-03-06	16:02:00	0
2009-03-06	16:03:00	0
2009-03-06	16:04:00	0
2009-03-06	16:05:00	0
2009-03-06	16:06:00	0
2009-03-06	16:07:00	0
2009-03-06	16:08:00	0
2009-03-06	16:09:00	0
2009-03-06	16:10:00	0
2009-03-06	16:11:00	0
2009-03-06	16:12:00	0
2009-03-06	16:13:00	0
2009-03-06	16:14:00	0
2009-03-06	16:15:00	0
2009-03-06	16:16:00	0
2009-03-06	16:17:00	0
2009-03-06	16:18:00	0
2009-03-06	16:19:00	0
2009-03-06	16:20:00	0
2009-03-06	16:21:00	0
2009-03-06	16:22:00	0
2009-03-06	16:23:00	0
2009-03-06	16:24:00	0
2009-03-06	16:25:00	0
2009-03-06	16:26:00	0
2009-03-06	16:27:00	0
2009-03-06	16:28:00	0
2009-03-06	16:29:00	0
2009-03-06	16:30:00	0
2009-03-06	16:31:00	0
2009-03-06	16:32:00	0
2009-03-06	16:33:00	0
2009-03-06	16:34:00	0
2009-03-06	16:35:00	0
2009-03-06	16:36:00	0
2009-03-06	16:37:00	0
2009-03-06	16:38:00	0
2009-03-06	16:39:00	0
2009-03-06	16:40:00	0
2009-03-06	16:41:00	0
2009-03-06	16:42:00	0
2009-03-06	16:43:00	0
2009-03-06	16:44:00	0
2009-03-06	16:45:00	0
2009-03-06	16:46:00	0
2009-03-06	16:47:00	0
2009-03-06	16:48:00	0
2009-03-06	16:49:00	0
2009-03-06	16:50:00	0
2009-03-06	16:51:00	0
2009-03-06	16:52:00	0
2009-03-06	16:53:00	0
2009-03-06	16:54:00	0
2009-03-06	16:55:00	0
2009-03-06	16:56:00	0
2009-03-06	16:57:00	0
2009-03-06	16:58:00	0
2009-03-06	16:59:00	0
2009-03-06	17:00:00	0	M
2009-03-06	17:01:00	23
2009-03-06	17:02:00	0
2009-03-06	17:03:00	116
2009-03-06	17:04:00	12
2009-03-06	17:05:00	12
2009-03-06	17:06:00	81
2009-03-06	17:07:00	0
2009-03-06	17:08:00	0
2009-03-06	17:09:00	0
2009-03-06	17:10:00	0
2009-03-06	17:11:00	0
2009-03-06	17:12:00	35
2009-03-06	17:13:00	70
2009-03-06	17:14:00	23
2009-03-06	17:15:00	23
2009-03-06	17:16:00	0
2009-03-06	17:17:00	35
2009-03-06	17:18:00	35
2009-03-06	17:19:00	0
2009-03-06	17:20:00	12
2009-03-06	17:21:00	47
2009-03-06	17:22:00	0
2009-03-06	17:23:00	35
2009-03-06	17:24:00	0
2009-03-06	17:25:00	0
2009-03-06	17:26:00	116
2009-03-06	17:27:00	12
2009-03-06	17:28:00	35
2009-03-06	17:29:00	489
2009-03-06	17:30:00	470
2009-03-06	17:31:00	23
2009-03-06	17:32:00	0
2009-03-06	17:33:00	12
2009-03-06	17:34:00	0
2009-03-06	17:35:00	179
2009-03-06	17:36:00	291
2009-03-06	17:37:00	58
2009-03-06	17:38:00	12
2009-03-06	17:39:00	0
2009-03-06	17:40:00	12
2009-03-06	17:41:00	23
2009-03-06	17:42:00	165
2009-03-06	17:43:00	1452
2009-03-06	17:44:00	2134
2009-03-06	17:45:00	1731
2009-03-06	17:46:00	489
2009-03-06	17:47:00	936
2009-03-06	17:48:00	526
2009-03-06	17:49:00	321
2009-03-06	17:50:00	337
2009-03-06	17:51:00	489
2009-03-06	17:52:00	435
2009-03-06	17:53:00	507
2009-03-06	17:54:00	545
2009-03-06	17:55:00	545
2009-03-06	17:56:00	936
2009-03-06	17:57:00	1038
2009-03-06	17:58:00	936
2009-03-06	17:59:00	451
2009-03-06	18:00:00	489
2009-03-06	18:01:00	507
2009-03-06	18:02:00	507
2009-03-06	18:03:00	419
2009-03-06	18:04:00	419
2009-03-06	18:05:00	600
2009-03-06	18:06:00	370
2009-03-06	18:07:00	386
2009-03-06	18:08:00	563
2009-03-06	18:09:00	582
2009-03-06	18:10:00	305
2009-03-06	18:11:00	354
2009-03-06	18:12:00	961
2009-03-06	18:13:00	563
2009-03-06	18:14:00	642
2009-03-06	18:15:00	1064
2009-03-06	18:16:00	770
2009-03-06	18:17:00	770
2009-03-06	18:18:00	600
2009-03-06	18:19:00	81
2009-03-06	18:20:00	151
2009-03-06	18:21:00	0
2009-03-06	18:22:00	0
2009-03-06	18:23:00	0
2009-03-06	18:24:00	23
2009-03-06	18:25:00	12
2009-03-06	18:26:00	0
2009-03-06	18:27:00	165
2009-03-06	18:28:00	403
2009-03-06	18:29:00	354
2009-03-06	18:30:00	663
2009-03-06	18:31:00	263
2009-03-06	18:32:00	165
2009-03-06	18:33:00	47
2009-03-06	18:34:00	35
2009-03-06	18:35:00	0
2009-03-06	18:36:00	0
2009-03-06	18:37:00	12
2009-03-06	18:38:00	23
2009-03-06	18:39:00	0
2009-03-06	18:40:00	23
2009-03-06	18:41:00	70
2009-03-06	18:42:00	0
2009-03-06	18:43:00	0
2009-03-06	18:44:00	0
2009-03-06	18:45:00	0
2009-03-06	18:46:00	0
2009-03-06	18:47:00	12
2009-03-06	18:48:00	12
2009-03-06	18:49:00	35
2009-03-06	18:50:00	0
2009-03-06	18:51:00	0
2009-03-06	18:52:00	0
2009-03-06	18:53:00	0
2009-03-06	18:54:00	0
2009-03-06	18:55:00	0
2009-03-06	18:56:00	0
2009-03-06	18:57:00	249
2009-03-06	18:58:00	470
2009-03-06	18:59:00	0
2009-03-06	19:00:00	321
2009-03-06	19:01:00	0
2009-03-06	19:02:00	321
2009-03-06	19:03:00	403
2009-03-06	19:04:00	1012
2009-03-06	19:05:00	354
2009-03-06	19:06:00	582
2009-03-06	19:07:00	58
2009-03-06	19:08:00	23
2009-03-06	19:09:00	321
2009-03-06	19:10:00	140
2009-03-06	19:11:00	179
2009-03-06	19:12:00	105
2009-03-06	19:13:00	165
2009-03-06	19:14:00	235
2009-03-06	19:15:00	128
2009-03-06	19:16:00	35
2009-03-06	19:17:00	35
2009-03-06	19:18:00	93
2009-03-06	19:19:00	128
2009-03-06	19:20:00	151
2009-03-06	19:21:00	23
2009-03-06	19:22:00	47
2009-03-06	19:23:00	151
2009-03-06	19:24:00	116
2009-03-06	19:25:00	235
2009-03-06	19:26:00	105
2009-03-06	19:27:00	207
2009-03-06	19:28:00	291
2009-03-06	19:29:00	0
2009-03-06	19:30:00	193
2009-03-06	19:31:00	277
2009-03-06	19:32:00	305
2009-03-06	19:33:00	563
2009-03-06	19:34:00	81
2009-03-06	19:35:00	435
2009-03-06	19:36:00	70
2009-03-06	19:37:00	370
2009-03-06	19:38:00	151
2009-03-06	19:39:00	770
2009-03-06	19:40:00	321
2009-03-06	19:41:00	151
2009-03-06	19:42:00	0
2009-03-06	19:43:00	151
2009-03-06	19:44:00	0
2009-03-06	19:45:00	0
2009-03-06	19:46:00	128
2009-03-06	19:47:00	12
2009-03-06	19:48:00	0
2009-03-06	19:49:00	0
2009-03-06	19:50:00	0
2009-03-06	19:51:00	0
2009-03-06	19:52:00	165
2009-03-06	19:53:00	277
2009-03-06	19:54:00	81
2009-03-06	19:55:00	0
2009-03-06	19:56:00	151
2009-03-06	19:57:00	0
2009-03-06	19:58:00	70
2009-03-06	19:59:00	12
2009-03-06	20:00:00	23
2009-03-06	20:01:00	0
2009-03-06	20:02:00	12
2009-03-06	20:03:00	81
2009-03-06	20:04:00	354
2009-03-06	20:05:00	12
2009-03-06	20:06:00	0
2009-03-06	20:07:00	0
2009-03-06	20:08:00	0
2009-03-06	20:09:00	0
2009-03-06	20:10:00	0
2009-03-06	20:11:00	23
2009-03-06	20:12:00	23
2009-03-06	20:13:00	23
2009-03-06	20:14:00	179
2009-03-06	20:15:00	81
2009-03-06	20:16:00	526
2009-03-06	20:17:00	2090
2009-03-06	20:18:00	705
2009-03-06	20:19:00	179
2009-03-06	20:20:00	47
2009-03-06	20:21:00	12
2009-03-06	20:22:00	12
2009-03-06	20:23:00	81
2009-03-06	20:24:00	116
2009-03-06	20:25:00	0
2009-03-06	20:26:00	12
2009-03-06	20:27:00	70
2009-03-06	20:28:00	81
2009-03-06	20:29:00	58
2009-03-06	20:30:00	263
2009-03-06	20:31:00	263
2009-03-06	20:32:00	337
2009-03-06	20:33:00	23
2009-03-06	20:34:00	221
2009-03-06	20:35:00	354
2009-03-06	20:36:00	128
2009-03-06	20:37:00	0
2009-03-06	20:38:00	0
2009-03-06	20:39:00	70
2009-03-06	20:40:00	23
2009-03-06	20:41:00	105
2009-03-06	20:42:00	0
2009-03-06	20:43:00	58
2009-03-06	20:44:00	1387
2009-03-06	20:45:00	58
2009-03-06	20:46:00	321
2009-03-06	20:47:00	987
2009-03-06	20:48:00	207
2009-03-06	20:49:00	0
2009-03-06	20:50:00	1147
2009-03-06	20:51:00	12
2009-03-06	20:52:00	403
2009-03-06	20:53:00	105
2009-03-06	20:54:00	93
2009-03-06	20:55:00	81
2009-03-06	20:56:00	0
2009-03-06	20:57:00	249
2009-03-06	20:58:00	305
2009-03-06	20:59:00	58
2009-03-06	21:00:00	70
2009-03-06	21:01:00	0
2009-03-06	21:02:00	12
2009-03-06	21:03:00	140
2009-03-06	21:04:00	165
2009-03-06	21:05:00	305
2009-03-06	21:06:00	305
2009-03-06	21:07:00	435
2009-03-06	21:08:00	128
2009-03-06	21:09:00	354
2009-03-06	21:10:00	116
2009-03-06	21:11:00	291
2009-03-06	21:12:00	179
2009-03-06	21:13:00	151
2009-03-06	21:14:00	151
2009-03-06	21:15:00	58
2009-03-06	21:16:00	263
2009-03-06	21:17:00	794
2009-03-06	21:18:00	794
2009-03-06	21:19:00	435
2009-03-06	21:20:00	435
2009-03-06	21:21:00	58
2009-03-06	21:22:00	128
2009-03-06	21:23:00	207
2009-03-06	21:24:00	93
2009-03-06	21:25:00	403
2009-03-06	21:26:00	451
2009-03-06	21:27:00	221
2009-03-06	21:28:00	93
2009-03-06	21:29:00	235
2009-03-06	21:30:00	321
2009-03-06	21:31:00	291
2009-03-06	21:32:00	249
2009-03-06	21:33:00	451
2009-03-06	21:34:00	621
2009-03-06	21:35:00	403
2009-03-06	21:36:00	193
2009-03-06	21:37:00	305
2009-03-06	21:38:00	451
2009-03-06	21:39:00	370
2009-03-06	21:40:00	545
2009-03-06	21:41:00	1387
2009-03-06	21:42:00	337
2009-03-06	21:43:00	403
2009-03-06	21:44:00	370
2009-03-06	21:45:00	370
2009-03-06	21:46:00	987
2009-03-06	21:47:00	354
2009-03-06	21:48:00	321
2009-03-06	21:49:00	105
2009-03-06	21:50:00	70
2009-03-06	21:51:00	128
2009-03-06	21:52:00	263
2009-03-06	21:53:00	165
2009-03-06	21:54:00	403
2009-03-06	21:55:00	747
2009-03-06	21:56:00	207
2009-03-06	21:57:00	277
2009-03-06	21:58:00	0
2009-03-06	21:59:00	0
2009-03-06	22:00:00	0
2009-03-06	22:01:00	93
2009-03-06	22:02:00	0
2009-03-06	22:03:00	0
2009-03-06	22:04:00	0
2009-03-06	22:05:00	0
2009-03-06	22:06:00	0
2009-03-06	22:07:00	0
2009-03-06	22:08:00	0
2009-03-06	22:09:00	0
2009-03-06	22:10:00	0
2009-03-06	22:11:00	0
2009-03-06	22:12:00	0
2009-03-06	22:13:00	0
2009-03-06	22:14:00	0
2009-03-06	22:15:00	0
2009-03-06	22:16:00	0
2009-03-06	22:17:00	0
2009-03-06	22:18:00	0
2009-03-06	22:19:00	0
2009-03-06	22:20:00	0
2009-03-06	22:21:00	0
2009-03-06	22:22:00	0
2009-03-06	22:23:00	0
2009-03-06	22:24:00	563
2009-03-06	22:25:00	321
2009-03-06	22:26:00	507
2009-03-06	22:27:00	489
2009-03-06	22:28:00	305
2009-03-06	22:29:00	526
2009-03-06	22:30:00	249
2009-03-06	22:31:00	47
2009-03-06	22:32:00	0
2009-03-06	22:33:00	0
2009-03-06	22:34:00	321
2009-03-06	22:35:00	263
2009-03-06	22:36:00	128
2009-03-06	22:37:00	0
2009-03-06	22:38:00	0
2009-03-06	22:39:00	0
2009-03-06	22:40:00	0
2009-03-06	22:41:00	47
2009-03-06	22:42:00	0
2009-03-06	22:43:00	0
2009-03-06	22:44:00	0
2009-03-06	22:45:00	0
2009-03-06	22:46:00	0
2009-03-06	22:47:00	0
2009-03-06	22:48:00	47
2009-03-06	22:49:00	47
2009-03-06	22:50:00	0
2009-03-06	22:51:00	0
2009-03-06	22:52:00	0
2009-03-06	22:53:00	0
2009-03-06	22:54:00	0
2009-03-06	22:55:00	0
2009-03-06	22:56:00	0
2009-03-06	22:57:00	0
2009-03-06	22:58:00	0
2009-03-06	22:59:00	0
2009-03-06	23:00:00	0
2009-03-06	23:01:00	0
2009-03-06	23:02:00	0
2009-03-06	23:03:00	0
2009-03-06	23:04:00	0
2009-03-06	23:05:00	0
2009-03-06	23:06:00	0
2009-03-06	23:07:00	0
2009-03-06	23:08:00	0
2009-03-06	23:09:00	0
2009-03-06	23:10:00	0
2009-03-06	23:11:00	0
2009-03-06	23:12:00	0
2009-03-06	23:13:00	0
2009-03-06	23:14:00	0
2009-03-06	23:15:00	0
2009-03-06	23:16:00	0
2009-03-06	23:17:00	0
2009-03-06	23:18:00	0
2009-03-06	23:19:00	0
2009-03-06	23:20:00	0
2009-03-06	23:21:00	12
2009-03-06	23:22:00	0
2009-03-06	23:23:00	0
2009-03-06	23:24:00	0
2009-03-06	23:25:00	0
2009-03-06	23:26:00	0
2009-03-06	23:27:00	0
2009-03-06	23:28:00	0
2009-03-06	23:29:00	0
2009-03-06	23:30:00	0
2009-03-06	23:31:00	12
2009-03-06	23:32:00	0
2009-03-06	23:33:00	0
2009-03-06	23:34:00	0
2009-03-06	23:35:00	0
2009-03-06	23:36:00	0
2009-03-06	23:37:00	0
2009-03-06	23:38:00	0
2009-03-06	23:39:00	0
2009-03-06	23:40:00	0
2009-03-06	23:41:00	0
2009-03-06	23:42:00	0
2009-03-06	23:43:00	0
2009-03-06	23:44:00	0
2009-03-06	23:45:00	58
2009-03-06	23:46:00	0
2009-03-06	23:47:00	0
2009-03-06	23:48:00	0
2009-03-06	23:49:00	23
2009-03-06	23:50:00	12
2009-03-06	23:51:00	0
2009-03-06	23:52:00	0
2009-03-06	23:53:00	0
2009-03-06	23:54:00	0
2009-03-06	23:55:00	0
2009-03-06	23:56:00	0
2009-03-06	23:57:00	0
2009-03-06	23:58:00	0
2009-03-06	23:59:00	0
2009-03-07	00:00:00	0
2009-03-07	00:01:00	0
2009-03-07	00:02:00	0
2009-03-07	00:03:00	0
2009-03-07	00:04:00	0
2009-03-07	00:05:00	0
2009-03-07	00:06:00	0
2009-03-07	00:07:00	0
2009-03-07	00:08:00	0
2009-03-07	00:09:00	0
2009-03-07	00:10:00	0
2009-03-07	00:11:00	35
2009-03-07	00:12:00	23
2009-03-07	00:13:00	0
2009-03-07	00:14:00	0
2009-03-07	00:15:00	0
2009-03-07	00:16:00	0
2009-03-07	00:17:00	0
2009-03-07	00:18:00	0
2009-03-07	00:19:00	0
2009-03-07	00:20:00	70
2009-03-07	00:21:00	12
2009-03-07	00:22:00	0
2009-03-07	00:23:00	93
2009-03-07	00:24:00	165
2009-03-07	00:25:00	58
2009-03-07	00:26:00	0
2009-03-07	00:27:00	0
2009-03-07	00:28:00	0
2009-03-07	00:29:00	0
2009-03-07	00:30:00	0
2009-03-07	00:31:00	0
2009-03-07	00:32:00	0
2009-03-07	00:33:00	0
2009-03-07	00:34:00	0
2009-03-07	00:35:00	0
2009-03-07	00:36:00	0
2009-03-07	00:37:00	12
2009-03-07	00:38:00	0
2009-03-07	00:39:00	0
2009-03-07	00:40:00	0
2009-03-07	00:41:00	0
2009-03-07	00:42:00	0
2009-03-07	00:43:00	0
2009-03-07	00:44:00	0
2009-03-07	00:45:00	0
2009-03-07	00:46:00	0
2009-03-07	00:47:00	0
2009-03-07	00:48:00	0
2009-03-07	00:49:00	0
2009-03-07	00:50:00	0
2009-03-07	00:51:00	0
2009-03-07	00:52:00	0
2009-03-07	00:53:00	23
2009-03-07	00:54:00	23
2009-03-07	00:55:00	0
2009-03-07	00:56:00	0
2009-03-07	00:57:00	0
2009-03-07	00:58:00	0
2009-03-07	00:59:00	70
2009-03-07	01:00:00	0
2009-03-07	01:01:00	0
2009-03-07	01:02:00	0
2009-03-07	01:03:00	47
2009-03-07	01:04:00	0
2009-03-07	01:05:00	0
2009-03-07	01:06:00	0
2009-03-07	01:07:00	0
2009-03-07	01:08:00	0
2009-03-07	01:09:00	0
2009-03-07	01:10:00	0
2009-03-07	01:11:00	0
2009-03-07	01:12:00	0
2009-03-07	01:13:00	0
2009-03-07	01:14:00	0
2009-03-07	01:15:00	0
2009-03-07	01:16:00	12
2009-03-07	01:17:00	70
2009-03-07	01:18:00	0
2009-03-07	01:19:00	0
2009-03-07	01:20:00	0
2009-03-07	01:21:00	0
2009-03-07	01:22:00	0
2009-03-07	01:23:00	0
2009-03-07	01:24:00	0
2009-03-07	01:25:00	0
2009-03-07	01:26:00	0
2009-03-07	01:27:00	235
2009-03-07	01:28:00	370
2009-03-07	01:29:00	321
2009-03-07	01:30:00	35
2009-03-07	01:31:00	12
2009-03-07	01:32:00	0
2009-03-07	01:33:00	0
2009-03-07	01:34:00	0
2009-03-07	01:35:00	0
2009-03-07	01:36:00	0
2009-03-07	01:37:00	0
2009-03-07	01:38:00	0
2009-03-07	01:39:00	0
2009-03-07	01:40:00	0
2009-03-07	01:41:00	0
2009-03-07	01:42:00	0
2009-03-07	01:43:00	0
2009-03-07	01:44:00	0
2009-03-07	01:45:00	0
2009-03-07	01:46:00	0
2009-03-07	01:47:00	0
2009-03-07	01:48:00	0
2009-03-07	01:49:00	0
2009-03-07	01:50:00	0
2009-03-07	01:51:00	0
2009-03-07	01:52:00	0
2009-03-07	01:53:00	0
2009-03-07	01:54:00	0
2009-03-07	01:55:00	0
2009-03-07	01:56:00	0
2009-03-07	01:57:00	0
2009-03-07	01:58:00	0
2009-03-07	01:59:00	0
2009-03-07	02:00:00	0
2009-03-07	02:01:00	0
2009-03-07	02:02:00	0
2009-03-07	02:03:00	0
2009-03-07	02:04:00	0
2009-03-07	02:05:00	0
2009-03-07	02:06:00	0
2009-03-07	02:07:00	0
2009-03-07	02:08:00	47
2009-03-07	02:09:00	0
2009-03-07	02:10:00	0
2009-03-07	02:11:00	0
2009-03-07	02:12:00	0
2009-03-07	02:13:00	70
2009-03-07	02:14:00	58
2009-03-07	02:15:00	0
2009-03-07	02:16:00	0
2009-03-07	02:17:00	0
2009-03-07	02:18:00	70
2009-03-07	02:19:00	0
2009-03-07	02:20:00	0
2009-03-07	02:21:00	0
2009-03-07	02:22:00	0
2009-03-07	02:23:00	0
2009-03-07	02:24:00	0
2009-03-07	02:25:00	0
2009-03-07	02:26:00	0
2009-03-07	02:27:00	0
2009-03-07	02:28:00	0
2009-03-07	02:29:00	0
2009-03-07	02:30:00	0
2009-03-07	02:31:00	0
2009-03-07	02:32:00	0
2009-03-07	02:33:00	0
2009-03-07	02:34:00	0
2009-03-07	02:35:00	0
2009-03-07	02:36:00	0
2009-03-07	02:37:00	0
2009-03-07	02:38:00	0
2009-03-07	02:39:00	0
2009-03-07	02:40:00	0
2009-03-07	02:41:00	0
2009-03-07	02:42:00	0
2009-03-07	02:43:00	0
2009-03-07	02:44:00	0
2009-03-07	02:45:00	0
2009-03-07	02:46:00	0
2009-03-07	02:47:00	0
2009-03-07	02:48:00	0
2009-03-07	02:49:00	0
2009-03-07	02:50:00	0
2009-03-07	02:51:00	0
2009-03-07	02:52:00	0
2009-03-07	02:53:00	0
2009-03-07	02:54:00	0
2009-03-07	02:55:00	0
2009-03-07	02:56:00	0
2009-03-07	02:57:00	0
2009-03-07	02:58:00	0
2009-03-07	02:59:00	0
2009-03-07	03:00:00	81
2009-03-07	03:01:00	70
2009-03-07	03:02:00	0
2009-03-07	03:03:00	0
2009-03-07	03:04:00	0
2009-03-07	03:05:00	0
2009-03-07	03:06:00	0
2009-03-07	03:07:00	0
2009-03-07	03:08:00	0
2009-03-07	03:09:00	0
2009-03-07	03:10:00	0
2009-03-07	03:11:00	70
2009-03-07	03:12:00	0
2009-03-07	03:13:00	0
2009-03-07	03:14:00	0
2009-03-07	03:15:00	0
2009-03-07	03:16:00	0
2009-03-07	03:17:00	0
2009-03-07	03:18:00	0
2009-03-07	03:19:00	0
2009-03-07	03:20:00	0
2009-03-07	03:21:00	0
2009-03-07	03:22:00	0
2009-03-07	03:23:00	0
2009-03-07	03:24:00	0
2009-03-07	03:25:00	0
2009-03-07	03:26:00	0
2009-03-07	03:27:00	0
2009-03-07	03:28:00	23
2009-03-07	03:29:00	0
2009-03-07	03:30:00	0
2009-03-07	03:31:00	0
2009-03-07	03:32:00	35
2009-03-07	03:33:00	0
2009-03-07	03:34:00	0
2009-03-07	03:35:00	0
2009-03-07	03:36:00	0
2009-03-07	03:37:00	0
2009-03-07	03:38:00	0
2009-03-07	03:39:00	0
2009-03-07	03:40:00	0
2009-03-07	03:41:00	0
2009-03-07	03:42:00	0
2009-03-07	03:43:00	0
2009-03-07	03:44:00	0
2009-03-07	03:45:00	12
2009-03-07	03:46:00	0
2009-03-07	03:47:00	35
2009-03-07	03:48:00	0
2009-03-07	03:49:00	0
2009-03-07	03:50:00	0
2009-03-07	03:51:00	0
2009-03-07	03:52:00	0
2009-03-07	03:53:00	0
2009-03-07	03:54:00	0
2009-03-07	03:55:00	0
2009-03-07	03:56:00	0
2009-03-07	03:57:00	0
2009-03-07	03:58:00	0
2009-03-07	03:59:00	0
2009-03-07	04:00:00	0
2009-03-07	04:01:00	0
2009-03-07	04:02:00	0
2009-03-07	04:03:00	0
2009-03-07	04:04:00	0
2009-03-07	04:05:00	0
2009-03-07	04:06:00	0
2009-03-07	04:07:00	0
2009-03-07	04:08:00	0
2009-03-07	04:09:00	0
2009-03-07	04:10:00	0
2009-03-07	04:11:00	0
2009-03-07	04:12:00	0
2009-03-07	04:13:00	0
2009-03-07	04:14:00	0
2009-03-07	04:15:00	0
2009-03-07	04:16:00	0
2009-03-07	04:17:00	0
2009-03-07	04:18:00	0
2009-03-07	04:19:00	0
2009-03-07	04:20:00	0
2009-03-07	04:21:00	0
2009-03-07	04:22:00	0
2009-03-07	04:23:00	0
2009-03-07	04:24:00	0
2009-03-07	04:25:00	0
2009-03-07	04:26:00	0
2009-03-07	04:27:00	0
2009-03-07	04:28:00	0
2009-03-07	04:29:00	0
2009-03-07	04:30:00	0
2009-03-07	04:31:00	0
2009-03-07	04:32:00	0
2009-03-07	04:33:00	70
2009-03-07	04:34:00	35
2009-03-07	04:35:00	0
2009-03-07	04:36:00	0
2009-03-07	04:37:00	0
2009-03-07	04:38:00	0
2009-03-07	04:39:00	0
2009-03-07	04:40:00	0
2009-03-07	04:41:00	0
2009-03-07	04:42:00	0
2009-03-07	04:43:00	0
2009-03-07	04:44:00	0
2009-03-07	04:45:00	0
2009-03-07	04:46:00	0
2009-03-07	04:47:00	0
2009-03-07	04:48:00	0
2009-03-07	04:49:00	0
2009-03-07	04:50:00	0
2009-03-07	04:51:00	0
2009-03-07	04:52:00	0
2009-03-07	04:53:00	0
2009-03-07	04:54:00	0
2009-03-07	04:55:00	0
2009-03-07	04:56:00	0
2009-03-07	04:57:00	0
2009-03-07	04:58:00	0
2009-03-07	04:59:00	0
2009-03-07	05:00:00	0
2009-03-07	05:01:00	0
2009-03-07	05:02:00	0
2009-03-07	05:03:00	0
2009-03-07	05:04:00	0
2009-03-07	05:05:00	0
2009-03-07	05:06:00	0
2009-03-07	05:07:00	0
2009-03-07	05:08:00	12
2009-03-07	05:09:00	0
2009-03-07	05:10:00	0
2009-03-07	05:11:00	0
2009-03-07	05:12:00	0
2009-03-07	05:13:00	0
2009-03-07	05:14:00	0
2009-03-07	05:15:00	0
2009-03-07	05:16:00	0
2009-03-07	05:17:00	0
2009-03-07	05:18:00	0
2009-03-07	05:19:00	0
2009-03-07	05:20:00	0
2009-03-07	05:21:00	0
2009-03-07	05:22:00	70
2009-03-07	05:23:00	58
2009-03-07	05:24:00	0
2009-03-07	05:25:00	0
2009-03-07	05:26:00	35
2009-03-07	05:27:00	0
2009-03-07	05:28:00	0
2009-03-07	05:29:00	0
2009-03-07	05:30:00	0
2009-03-07	05:31:00	0
2009-03-07	05:32:00	0
2009-03-07	05:33:00	0
2009-03-07	05:34:00	0
2009-03-07	05:35:00	0
2009-03-07	05:36:00	0
2009-03-07	05:37:00	0
2009-03-07	05:38:00	0
2009-03-07	05:39:00	0
2009-03-07	05:40:00	23
2009-03-07	05:41:00	0
2009-03-07	05:42:00	0
2009-03-07	05:43:00	0
2009-03-07	05:44:00	0
2009-03-07	05:45:00	0
2009-03-07	05:46:00	0
2009-03-07	05:47:00	0
2009-03-07	05:48:00	0
2009-03-07	05:49:00	0
2009-03-07	05:50:00	0
2009-03-07	05:51:00	0
2009-03-07	05:52:00	0
2009-03-07	05:53:00	0
2009-03-07	05:54:00	0
2009-03-07	05:55:00	0
2009-03-07	05:56:00	0
2009-03-07	05:57:00	0
2009-03-07	05:58:00	0
2009-03-07	05:59:00	0
2009-03-07	06:00:00	0
2009-03-07	06:01:00	0
2009-03-07	06:02:00	0
2009-03-07	06:03:00	58
2009-03-07	06:04:00	221
2009-03-07	06:05:00	0
2009-03-07	06:06:00	0
2009-03-07	06:07:00	0
2009-03-07	06:08:00	0
2009-03-07	06:09:00	0
2009-03-07	06:10:00	0
2009-03-07	06:11:00	0
2009-03-07	06:12:00	0
2009-03-07	06:13:00	0
2009-03-07	06:14:00	12
2009-03-07	06:15:00	23
2009-03-07	06:16:00	12
2009-03-07	06:17:00	0
2009-03-07	06:18:00	0
2009-03-07	06:19:00	0
2009-03-07	06:20:00	35
2009-03-07	06:21:00	12
2009-03-07	06:22:00	0
2009-03-07	06:23:00	0
2009-03-07	06:24:00	0
2009-03-07	06:25:00	0
2009-03-07	06:26:00	0
2009-03-07	06:27:00	0
2009-03-07	06:28:00	0
2009-03-07	06:29:00	0
2009-03-07	06:30:00	0
2009-03-07	06:31:00	0
2009-03-07	06:32:00	0
2009-03-07	06:33:00	0
2009-03-07	06:34:00	0
2009-03-07	06:35:00	0
2009-03-07	06:36:00	0
2009-03-07	06:37:00	0
2009-03-07	06:38:00	12
2009-03-07	06:39:00	0
2009-03-07	06:40:00	0
2009-03-07	06:41:00	35
2009-03-07	06:42:00	0
2009-03-07	06:43:00	0
2009-03-07	06:44:00	0
2009-03-07	06:45:00	0
2009-03-07	06:46:00	0
2009-03-07	06:47:00	0
2009-03-07	06:48:00	0
2009-03-07	06:49:00	0
2009-03-07	06:50:00	0
2009-03-07	06:51:00	0
2009-03-07	06:52:00	0
2009-03-07	06:53:00	0
2009-03-07	06:54:00	0
2009-03-07	06:55:00	0
2009-03-07	06:56:00	0
2009-03-07	06:57:00	0
2009-03-07	06:58:00	0
2009-03-07	06:59:00	0
2009-03-07	07:00:00	0
2009-03-07	07:01:00	0
2009-03-07	07:02:00	0
2009-03-07	07:03:00	0
2009-03-07	07:04:00	0
2009-03-07	07:05:00	0
2009-03-07	07:06:00	0
2009-03-07	07:07:00	0
2009-03-07	07:08:00	0
2009-03-07	07:09:00	47
2009-03-07	07:10:00	0
2009-03-07	07:11:00	0
2009-03-07	07:12:00	0
2009-03-07	07:13:00	0
2009-03-07	07:14:00	0
2009-03-07	07:15:00	0
2009-03-07	07:16:00	0
2009-03-07	07:17:00	0
2009-03-07	07:18:00	0
2009-03-07	07:19:00	0
2009-03-07	07:20:00	0
2009-03-07	07:21:00	0
2009-03-07	07:22:00	0
2009-03-07	07:23:00	12
2009-03-07	07:24:00	23
2009-03-07	07:25:00	0
2009-03-07	07:26:00	0
2009-03-07	07:27:00	0
2009-03-07	07:28:00	0
2009-03-07	07:29:00	0
2009-03-07	07:30:00	0
2009-03-07	07:31:00	0
2009-03-07	07:32:00	0
2009-03-07	07:33:00	0
2009-03-07	07:34:00	0
2009-03-07	07:35:00	0
2009-03-07	07:36:00	507
2009-03-07	07:37:00	151
2009-03-07	07:38:00	35
2009-03-07	07:39:00	0
2009-03-07	07:40:00	0
2009-03-07	07:41:00	0
2009-03-07	07:42:00	0
2009-03-07	07:43:00	0
2009-03-07	07:44:00	0
2009-03-07	07:45:00	0
2009-03-07	07:46:00	12
2009-03-07	07:47:00	0
2009-03-07	07:48:00	0
2009-03-07	07:49:00	0
2009-03-07	07:50:00	0
2009-03-07	07:51:00	0
2009-03-07	07:52:00	81
2009-03-07	07:53:00	0
2009-03-07	07:54:00	0
2009-03-07	07:55:00	0
2009-03-07	07:56:00	0
2009-03-07	07:57:00	0
2009-03-07	07:58:00	0
2009-03-07	07:59:00	0
2009-03-07	08:00:00	0
2009-03-07	08:01:00	0
2009-03-07	08:02:00	0
2009-03-07	08:03:00	0
2009-03-07	08:04:00	0
2009-03-07	08:05:00	0
2009-03-07	08:06:00	0
2009-03-07	08:07:00	0
2009-03-07	08:08:00	0
2009-03-07	08:09:00	0
2009-03-07	08:10:00	0
2009-03-07	08:11:00	81
2009-03-07	08:12:00	0
2009-03-07	08:13:00	0
2009-03-07	08:14:00	0
2009-03-07	08:15:00	0
2009-03-07	08:16:00	0
2009-03-07	08:17:00	0
2009-03-07	08:18:00	0
2009-03-07	08:19:00	0
2009-03-07	08:20:00	0
2009-03-07	08:21:00	0
2009-03-07	08:22:00	0
2009-03-07	08:23:00	0
2009-03-07	08:24:00	0
2009-03-07	08:25:00	0
2009-03-07	08:26:00	0
2009-03-07	08:27:00	0
2009-03-07	08:28:00	0
2009-03-07	08:29:00	81
2009-03-07	08:30:00	0
2009-03-07	08:31:00	0
2009-03-07	08:32:00	0
2009-03-07	08:33:00	0
2009-03-07	08:34:00	0
2009-03-07	08:35:00	0
2009-03-07	08:36:00	0
2009-03-07	08:37:00	0
2009-03-07	08:38:00	0
2009-03-07	08:39:00	0
2009-03-07	08:40:00	0
2009-03-07	08:41:00	0
2009-03-07	08:42:00	0
2009-03-07	08:43:00	0
2009-03-07	08:44:00	0
2009-03-07	08:45:00	0
2009-03-07	08:46:00	47
2009-03-07	08:47:00	0
2009-03-07	08:48:00	93
2009-03-07	08:49:00	0
2009-03-07	08:50:00	0
2009-03-07	08:51:00	105
2009-03-07	08:52:00	12
2009-03-07	08:53:00	277
2009-03-07	08:54:00	235
2009-03-07	08:55:00	0
2009-03-07	08:56:00	0
2009-03-07	08:57:00	0
2009-03-07	08:58:00	0
2009-03-07	08:59:00	0
2009-03-07	09:00:00	0
2009-03-07	09:01:00	987
2009-03-07	09:02:00	263
2009-03-07	09:03:00	47
2009-03-07	09:04:00	0
2009-03-07	09:05:00	0
2009-03-07	09:06:00	0
2009-03-07	09:07:00	0
2009-03-07	09:08:00	35
[truncated: 19,611 more rows]

## Sheet: 3.20.09
Actogram, Copy Raw Data, All Days
Identity:	Jade
Filename:	E:\Active Research Files\meloxicam titre canine\cases\jade\302123845_C843599.AWC
Gender:	F
Age:	8
Height:	61.0 cm	24.0 in
Weight:	40.0 kg	88.2 lbs
Start Date:	20-Mar-2009 (Fri)
Start Time:	17:00:00
Interval:	1.00 mins
Date Stamp:	Time Stamp:	Activity Data:	Marker Press:
2009-03-20	00:00:00	0
2009-03-20	00:01:00	0
2009-03-20	00:02:00	0
2009-03-20	00:03:00	0
2009-03-20	00:04:00	0
2009-03-20	00:05:00	0
2009-03-20	00:06:00	0
2009-03-20	00:07:00	0
2009-03-20	00:08:00	0
2009-03-20	00:09:00	0
2009-03-20	00:10:00	0
2009-03-20	00:11:00	0
2009-03-20	00:12:00	0
2009-03-20	00:13:00	0
2009-03-20	00:14:00	0
2009-03-20	00:15:00	0
2009-03-20	00:16:00	0
2009-03-20	00:17:00	0
2009-03-20	00:18:00	0
2009-03-20	00:19:00	0
2009-03-20	00:20:00	0
2009-03-20	00:21:00	0
2009-03-20	00:22:00	0
2009-03-20	00:23:00	0
2009-03-20	00:24:00	0
2009-03-20	00:25:00	0
2009-03-20	00:26:00	0
2009-03-20	00:27:00	0
2009-03-20	00:28:00	0
2009-03-20	00:29:00	0
2009-03-20	00:30:00	0
2009-03-20	00:31:00	0
2009-03-20	00:32:00	0
2009-03-20	00:33:00	0
2009-03-20	00:34:00	0
2009-03-20	00:35:00	0
2009-03-20	00:36:00	0
2009-03-20	00:37:00	0
2009-03-20	00:38:00	0
2009-03-20	00:39:00	0
2009-03-20	00:40:00	0
2009-03-20	00:41:00	0
2009-03-20	00:42:00	0
2009-03-20	00:43:00	0
2009-03-20	00:44:00	0
2009-03-20	00:45:00	0
2009-03-20	00:46:00	0
2009-03-20	00:47:00	0
2009-03-20	00:48:00	0
2009-03-20	00:49:00	0
2009-03-20	00:50:00	0
2009-03-20	00:51:00	0
2009-03-20	00:52:00	0
2009-03-20	00:53:00	0
2009-03-20	00:54:00	0
2009-03-20	00:55:00	0
2009-03-20	00:56:00	0
2009-03-20	00:57:00	0
2009-03-20	00:58:00	0
2009-03-20	00:59:00	0
2009-03-20	01:00:00	0
2009-03-20	01:01:00	0
2009-03-20	01:02:00	0
2009-03-20	01:03:00	0
2009-03-20	01:04:00	0
2009-03-20	01:05:00	0
2009-03-20	01:06:00	0
2009-03-20	01:07:00	0
2009-03-20	01:08:00	0
2009-03-20	01:09:00	0
2009-03-20	01:10:00	0
2009-03-20	01:11:00	0
2009-03-20	01:12:00	0
2009-03-20	01:13:00	0
2009-03-20	01:14:00	0
2009-03-20	01:15:00	0
2009-03-20	01:16:00	0
2009-03-20	01:17:00	0
2009-03-20	01:18:00	0
2009-03-20	01:19:00	0
2009-03-20	01:20:00	0
2009-03-20	01:21:00	0
2009-03-20	01:22:00	0
2009-03-20	01:23:00	0
2009-03-20	01:24:00	0
2009-03-20	01:25:00	0
2009-03-20	01:26:00	0
2009-03-20	01:27:00	0
2009-03-20	01:28:00	0
2009-03-20	01:29:00	0
2009-03-20	01:30:00	0
2009-03-20	01:31:00	0
2009-03-20	01:32:00	0
2009-03-20	01:33:00	0
2009-03-20	01:34:00	0
2009-03-20	01:35:00	0
2009-03-20	01:36:00	0
2009-03-20	01:37:00	0
2009-03-20	01:38:00	0
2009-03-20	01:39:00	0
2009-03-20	01:40:00	0
2009-03-20	01:41:00	0
2009-03-20	01:42:00	0
2009-03-20	01:43:00	0
2009-03-20	01:44:00	0
2009-03-20	01:45:00	0
2009-03-20	01:46:00	0
2009-03-20	01:47:00	0
2009-03-20	01:48:00	0
2009-03-20	01:49:00	0
2009-03-20	01:50:00	0
2009-03-20	01:51:00	0
2009-03-20	01:52:00	0
2009-03-20	01:53:00	0
2009-03-20	01:54:00	0
2009-03-20	01:55:00	0
2009-03-20	01:56:00	0
2009-03-20	01:57:00	0
2009-03-20	01:58:00	0
2009-03-20	01:59:00	0
2009-03-20	02:00:00	0
2009-03-20	02:01:00	0
2009-03-20	02:02:00	0
2009-03-20	02:03:00	0
2009-03-20	02:04:00	0
2009-03-20	02:05:00	0
2009-03-20	02:06:00	0
2009-03-20	02:07:00	0
2009-03-20	02:08:00	0
2009-03-20	02:09:00	0
2009-03-20	02:10:00	0
2009-03-20	02:11:00	0
2009-03-20	02:12:00	0
2009-03-20	02:13:00	0
2009-03-20	02:14:00	0
2009-03-20	02:15:00	0
2009-03-20	02:16:00	0
2009-03-20	02:17:00	0
2009-03-20	02:18:00	0
2009-03-20	02:19:00	0
2009-03-20	02:20:00	0
2009-03-20	02:21:00	0
2009-03-20	02:22:00	0
2009-03-20	02:23:00	0
2009-03-20	02:24:00	0
2009-03-20	02:25:00	0
2009-03-20	02:26:00	0
2009-03-20	02:27:00	0
2009-03-20	02:28:00	0
2009-03-20	02:29:00	0
2009-03-20	02:30:00	0
2009-03-20	02:31:00	0
2009-03-20	02:32:00	0
2009-03-20	02:33:00	0
2009-03-20	02:34:00	0
2009-03-20	02:35:00	0
2009-03-20	02:36:00	0
2009-03-20	02:37:00	0
2009-03-20	02:38:00	0
2009-03-20	02:39:00	0
2009-03-20	02:40:00	0
2009-03-20	02:41:00	0
2009-03-20	02:42:00	0
2009-03-20	02:43:00	0
2009-03-20	02:44:00	0
2009-03-20	02:45:00	0
2009-03-20	02:46:00	0
2009-03-20	02:47:00	0
2009-03-20	02:48:00	0
2009-03-20	02:49:00	0
2009-03-20	02:50:00	0
2009-03-20	02:51:00	0
2009-03-20	02:52:00	0
2009-03-20	02:53:00	0
2009-03-20	02:54:00	0
2009-03-20	02:55:00	0
2009-03-20	02:56:00	0
2009-03-20	02:57:00	0
2009-03-20	02:58:00	0
2009-03-20	02:59:00	0
2009-03-20	03:00:00	0
2009-03-20	03:01:00	0
2009-03-20	03:02:00	0
2009-03-20	03:03:00	0
2009-03-20	03:04:00	0
2009-03-20	03:05:00	0
2009-03-20	03:06:00	0
2009-03-20	03:07:00	0
2009-03-20	03:08:00	0
2009-03-20	03:09:00	0
2009-03-20	03:10:00	0
2009-03-20	03:11:00	0
2009-03-20	03:12:00	0
2009-03-20	03:13:00	0
2009-03-20	03:14:00	0
2009-03-20	03:15:00	0
2009-03-20	03:16:00	0
2009-03-20	03:17:00	0
2009-03-20	03:18:00	0
2009-03-20	03:19:00	0
2009-03-20	03:20:00	0
2009-03-20	03:21:00	0
2009-03-20	03:22:00	0
2009-03-20	03:23:00	0
2009-03-20	03:24:00	0
2009-03-20	03:25:00	0
2009-03-20	03:26:00	0
2009-03-20	03:27:00	0
2009-03-20	03:28:00	0
2009-03-20	03:29:00	0
2009-03-20	03:30:00	0
2009-03-20	03:31:00	0
2009-03-20	03:32:00	0
2009-03-20	03:33:00	0
2009-03-20	03:34:00	0
2009-03-20	03:35:00	0
2009-03-20	03:36:00	0
2009-03-20	03:37:00	0
2009-03-20	03:38:00	0
2009-03-20	03:39:00	0
2009-03-20	03:40:00	0
2009-03-20	03:41:00	0
2009-03-20	03:42:00	0
2009-03-20	03:43:00	0
2009-03-20	03:44:00	0
2009-03-20	03:45:00	0
2009-03-20	03:46:00	0
2009-03-20	03:47:00	0
2009-03-20	03:48:00	0
2009-03-20	03:49:00	0
2009-03-20	03:50:00	0
2009-03-20	03:51:00	0
2009-03-20	03:52:00	0
2009-03-20	03:53:00	0
2009-03-20	03:54:00	0
2009-03-20	03:55:00	0
2009-03-20	03:56:00	0
2009-03-20	03:57:00	0
2009-03-20	03:58:00	0
2009-03-20	03:59:00	0
2009-03-20	04:00:00	0
2009-03-20	04:01:00	0
2009-03-20	04:02:00	0
2009-03-20	04:03:00	0
2009-03-20	04:04:00	0
2009-03-20	04:05:00	0
2009-03-20	04:06:00	0
2009-03-20	04:07:00	0
2009-03-20	04:08:00	0
2009-03-20	04:09:00	0
2009-03-20	04:10:00	0
2009-03-20	04:11:00	0
2009-03-20	04:12:00	0
2009-03-20	04:13:00	0
2009-03-20	04:14:00	0
2009-03-20	04:15:00	0
2009-03-20	04:16:00	0
2009-03-20	04:17:00	0
2009-03-20	04:18:00	0
2009-03-20	04:19:00	0
2009-03-20	04:20:00	0
2009-03-20	04:21:00	0
2009-03-20	04:22:00	0
2009-03-20	04:23:00	0
2009-03-20	04:24:00	0
2009-03-20	04:25:00	0
2009-03-20	04:26:00	0
2009-03-20	04:27:00	0
2009-03-20	04:28:00	0
2009-03-20	04:29:00	0
2009-03-20	04:30:00	0
2009-03-20	04:31:00	0
2009-03-20	04:32:00	0
2009-03-20	04:33:00	0
2009-03-20	04:34:00	0
2009-03-20	04:35:00	0
2009-03-20	04:36:00	0
2009-03-20	04:37:00	0
2009-03-20	04:38:00	0
2009-03-20	04:39:00	0
2009-03-20	04:40:00	0
2009-03-20	04:41:00	0
2009-03-20	04:42:00	0
2009-03-20	04:43:00	0
2009-03-20	04:44:00	0
2009-03-20	04:45:00	0
2009-03-20	04:46:00	0
2009-03-20	04:47:00	0
2009-03-20	04:48:00	0
2009-03-20	04:49:00	0
2009-03-20	04:50:00	0
2009-03-20	04:51:00	0
2009-03-20	04:52:00	0
2009-03-20	04:53:00	0
2009-03-20	04:54:00	0
2009-03-20	04:55:00	0
2009-03-20	04:56:00	0
2009-03-20	04:57:00	0
2009-03-20	04:58:00	0
2009-03-20	04:59:00	0
2009-03-20	05:00:00	0
2009-03-20	05:01:00	0
2009-03-20	05:02:00	0
2009-03-20	05:03:00	0
2009-03-20	05:04:00	0
2009-03-20	05:05:00	0
2009-03-20	05:06:00	0
2009-03-20	05:07:00	0
2009-03-20	05:08:00	0
2009-03-20	05:09:00	0
2009-03-20	05:10:00	0
2009-03-20	05:11:00	0
2009-03-20	05:12:00	0
2009-03-20	05:13:00	0
2009-03-20	05:14:00	0
2009-03-20	05:15:00	0
2009-03-20	05:16:00	0
2009-03-20	05:17:00	0
2009-03-20	05:18:00	0
2009-03-20	05:19:00	0
2009-03-20	05:20:00	0
2009-03-20	05:21:00	0
2009-03-20	05:22:00	0
2009-03-20	05:23:00	0
2009-03-20	05:24:00	0
2009-03-20	05:25:00	0
2009-03-20	05:26:00	0
2009-03-20	05:27:00	0
2009-03-20	05:28:00	0
2009-03-20	05:29:00	0
2009-03-20	05:30:00	0
2009-03-20	05:31:00	0
2009-03-20	05:32:00	0
2009-03-20	05:33:00	0
2009-03-20	05:34:00	0
2009-03-20	05:35:00	0
2009-03-20	05:36:00	0
2009-03-20	05:37:00	0
2009-03-20	05:38:00	0
2009-03-20	05:39:00	0
2009-03-20	05:40:00	0
2009-03-20	05:41:00	0
2009-03-20	05:42:00	0
2009-03-20	05:43:00	0
2009-03-20	05:44:00	0
2009-03-20	05:45:00	0
2009-03-20	05:46:00	0
2009-03-20	05:47:00	0
2009-03-20	05:48:00	0
2009-03-20	05:49:00	0
2009-03-20	05:50:00	0
2009-03-20	05:51:00	0
2009-03-20	05:52:00	0
2009-03-20	05:53:00	0
2009-03-20	05:54:00	0
2009-03-20	05:55:00	0
2009-03-20	05:56:00	0
2009-03-20	05:57:00	0
2009-03-20	05:58:00	0
2009-03-20	05:59:00	0
2009-03-20	06:00:00	0
2009-03-20	06:01:00	0
2009-03-20	06:02:00	0
2009-03-20	06:03:00	0
2009-03-20	06:04:00	0
2009-03-20	06:05:00	0
2009-03-20	06:06:00	0
2009-03-20	06:07:00	0
2009-03-20	06:08:00	0
2009-03-20	06:09:00	0
2009-03-20	06:10:00	0
2009-03-20	06:11:00	0
2009-03-20	06:12:00	0
2009-03-20	06:13:00	0
2009-03-20	06:14:00	0
2009-03-20	06:15:00	0
2009-03-20	06:16:00	0
2009-03-20	06:17:00	0
2009-03-20	06:18:00	0
2009-03-20	06:19:00	0
2009-03-20	06:20:00	0
2009-03-20	06:21:00	0
2009-03-20	06:22:00	0
2009-03-20	06:23:00	0
2009-03-20	06:24:00	0
2009-03-20	06:25:00	0
2009-03-20	06:26:00	0
2009-03-20	06:27:00	0
2009-03-20	06:28:00	0
2009-03-20	06:29:00	0
2009-03-20	06:30:00	0
2009-03-20	06:31:00	0
2009-03-20	06:32:00	0
2009-03-20	06:33:00	0
2009-03-20	06:34:00	0
2009-03-20	06:35:00	0
2009-03-20	06:36:00	0
2009-03-20	06:37:00	0
2009-03-20	06:38:00	0
2009-03-20	06:39:00	0
2009-03-20	06:40:00	0
2009-03-20	06:41:00	0
2009-03-20	06:42:00	0
2009-03-20	06:43:00	0
2009-03-20	06:44:00	0
2009-03-20	06:45:00	0
2009-03-20	06:46:00	0
2009-03-20	06:47:00	0
2009-03-20	06:48:00	0
2009-03-20	06:49:00	0
2009-03-20	06:50:00	0
2009-03-20	06:51:00	0
2009-03-20	06:52:00	0
2009-03-20	06:53:00	0
2009-03-20	06:54:00	0
2009-03-20	06:55:00	0
2009-03-20	06:56:00	0
2009-03-20	06:57:00	0
2009-03-20	06:58:00	0
2009-03-20	06:59:00	0
2009-03-20	07:00:00	0
2009-03-20	07:01:00	0
2009-03-20	07:02:00	0
2009-03-20	07:03:00	0
2009-03-20	07:04:00	0
2009-03-20	07:05:00	0
2009-03-20	07:06:00	0
2009-03-20	07:07:00	0
2009-03-20	07:08:00	0
2009-03-20	07:09:00	0
2009-03-20	07:10:00	0
2009-03-20	07:11:00	0
2009-03-20	07:12:00	0
2009-03-20	07:13:00	0
2009-03-20	07:14:00	0
2009-03-20	07:15:00	0
2009-03-20	07:16:00	0
2009-03-20	07:17:00	0
2009-03-20	07:18:00	0
2009-03-20	07:19:00	0
2009-03-20	07:20:00	0
2009-03-20	07:21:00	0
2009-03-20	07:22:00	0
2009-03-20	07:23:00	0
2009-03-20	07:24:00	0
2009-03-20	07:25:00	0
2009-03-20	07:26:00	0
2009-03-20	07:27:00	0
2009-03-20	07:28:00	0
2009-03-20	07:29:00	0
2009-03-20	07:30:00	0
2009-03-20	07:31:00	0
2009-03-20	07:32:00	0
2009-03-20	07:33:00	0
2009-03-20	07:34:00	0
2009-03-20	07:35:00	0
2009-03-20	07:36:00	0
2009-03-20	07:37:00	0
2009-03-20	07:38:00	0
2009-03-20	07:39:00	0
2009-03-20	07:40:00	0
2009-03-20	07:41:00	0
2009-03-20	07:42:00	0
2009-03-20	07:43:00	0
2009-03-20	07:44:00	0
2009-03-20	07:45:00	0
2009-03-20	07:46:00	0
2009-03-20	07:47:00	0
2009-03-20	07:48:00	0
2009-03-20	07:49:00	0
2009-03-20	07:50:00	0
2009-03-20	07:51:00	0
2009-03-20	07:52:00	0
2009-03-20	07:53:00	0
2009-03-20	07:54:00	0
2009-03-20	07:55:00	0
2009-03-20	07:56:00	0
2009-03-20	07:57:00	0
2009-03-20	07:58:00	0
2009-03-20	07:59:00	0
2009-03-20	08:00:00	0
2009-03-20	08:01:00	0
2009-03-20	08:02:00	0
2009-03-20	08:03:00	0
2009-03-20	08:04:00	0
2009-03-20	08:05:00	0
2009-03-20	08:06:00	0
2009-03-20	08:07:00	0
2009-03-20	08:08:00	0
2009-03-20	08:09:00	0
2009-03-20	08:10:00	0
2009-03-20	08:11:00	0
2009-03-20	08:12:00	0
2009-03-20	08:13:00	0
2009-03-20	08:14:00	0
2009-03-20	08:15:00	0
2009-03-20	08:16:00	0
2009-03-20	08:17:00	0
2009-03-20	08:18:00	0
2009-03-20	08:19:00	0
2009-03-20	08:20:00	0
2009-03-20	08:21:00	0
2009-03-20	08:22:00	0
2009-03-20	08:23:00	0
2009-03-20	08:24:00	0
2009-03-20	08:25:00	0
2009-03-20	08:26:00	0
2009-03-20	08:27:00	0
2009-03-20	08:28:00	0
2009-03-20	08:29:00	0
2009-03-20	08:30:00	0
2009-03-20	08:31:00	0
2009-03-20	08:32:00	0
2009-03-20	08:33:00	0
2009-03-20	08:34:00	0
2009-03-20	08:35:00	0
2009-03-20	08:36:00	0
2009-03-20	08:37:00	0
2009-03-20	08:38:00	0
2009-03-20	08:39:00	0
2009-03-20	08:40:00	0
2009-03-20	08:41:00	0
2009-03-20	08:42:00	0
2009-03-20	08:43:00	0
2009-03-20	08:44:00	0
2009-03-20	08:45:00	0
2009-03-20	08:46:00	0
2009-03-20	08:47:00	0
2009-03-20	08:48:00	0
2009-03-20	08:49:00	0
2009-03-20	08:50:00	0
2009-03-20	08:51:00	0
2009-03-20	08:52:00	0
2009-03-20	08:53:00	0
2009-03-20	08:54:00	0
2009-03-20	08:55:00	0
2009-03-20	08:56:00	0
2009-03-20	08:57:00	0
2009-03-20	08:58:00	0
2009-03-20	08:59:00	0
2009-03-20	09:00:00	0
2009-03-20	09:01:00	0
2009-03-20	09:02:00	0
2009-03-20	09:03:00	0
2009-03-20	09:04:00	0
2009-03-20	09:05:00	0
2009-03-20	09:06:00	0
2009-03-20	09:07:00	0
2009-03-20	09:08:00	0
2009-03-20	09:09:00	0
2009-03-20	09:10:00	0
2009-03-20	09:11:00	0
2009-03-20	09:12:00	0
2009-03-20	09:13:00	0
2009-03-20	09:14:00	0
2009-03-20	09:15:00	0
2009-03-20	09:16:00	0
2009-03-20	09:17:00	0
2009-03-20	09:18:00	0
2009-03-20	09:19:00	0
2009-03-20	09:20:00	0
2009-03-20	09:21:00	0
2009-03-20	09:22:00	0
2009-03-20	09:23:00	0
2009-03-20	09:24:00	0
2009-03-20	09:25:00	0
2009-03-20	09:26:00	0
2009-03-20	09:27:00	0
2009-03-20	09:28:00	0
2009-03-20	09:29:00	0
2009-03-20	09:30:00	0
2009-03-20	09:31:00	0
2009-03-20	09:32:00	0
2009-03-20	09:33:00	0
2009-03-20	09:34:00	0
2009-03-20	09:35:00	0
2009-03-20	09:36:00	0
2009-03-20	09:37:00	0
2009-03-20	09:38:00	0
2009-03-20	09:39:00	0
2009-03-20	09:40:00	0
2009-03-20	09:41:00	0
2009-03-20	09:42:00	0
2009-03-20	09:43:00	0
2009-03-20	09:44:00	0
2009-03-20	09:45:00	0
2009-03-20	09:46:00	0
2009-03-20	09:47:00	0
2009-03-20	09:48:00	0
2009-03-20	09:49:00	0
2009-03-20	09:50:00	0
2009-03-20	09:51:00	0
2009-03-20	09:52:00	0
2009-03-20	09:53:00	0
2009-03-20	09:54:00	0
2009-03-20	09:55:00	0
2009-03-20	09:56:00	0
2009-03-20	09:57:00	0
2009-03-20	09:58:00	0
2009-03-20	09:59:00	0
2009-03-20	10:00:00	0
2009-03-20	10:01:00	0
2009-03-20	10:02:00	0
2009-03-20	10:03:00	0
2009-03-20	10:04:00	0
2009-03-20	10:05:00	0
2009-03-20	10:06:00	0
2009-03-20	10:07:00	0
2009-03-20	10:08:00	0
2009-03-20	10:09:00	0
2009-03-20	10:10:00	0
2009-03-20	10:11:00	0
2009-03-20	10:12:00	0
2009-03-20	10:13:00	0
2009-03-20	10:14:00	0
2009-03-20	10:15:00	0
2009-03-20	10:16:00	0
2009-03-20	10:17:00	0
2009-03-20	10:18:00	0
2009-03-20	10:19:00	0
2009-03-20	10:20:00	0
2009-03-20	10:21:00	0
2009-03-20	10:22:00	0
2009-03-20	10:23:00	0
2009-03-20	10:24:00	0
2009-03-20	10:25:00	0
2009-03-20	10:26:00	0
2009-03-20	10:27:00	0
2009-03-20	10:28:00	0
2009-03-20	10:29:00	0
2009-03-20	10:30:00	0
2009-03-20	10:31:00	0
2009-03-20	10:32:00	0
2009-03-20	10:33:00	0
2009-03-20	10:34:00	0
2009-03-20	10:35:00	0
2009-03-20	10:36:00	0
2009-03-20	10:37:00	0
2009-03-20	10:38:00	0
2009-03-20	10:39:00	0
2009-03-20	10:40:00	0
2009-03-20	10:41:00	0
2009-03-20	10:42:00	0
2009-03-20	10:43:00	0
2009-03-20	10:44:00	0
2009-03-20	10:45:00	0
2009-03-20	10:46:00	0
2009-03-20	10:47:00	0
2009-03-20	10:48:00	0
2009-03-20	10:49:00	0
2009-03-20	10:50:00	0
2009-03-20	10:51:00	0
2009-03-20	10:52:00	0
2009-03-20	10:53:00	0
2009-03-20	10:54:00	0
2009-03-20	10:55:00	0
2009-03-20	10:56:00	0
2009-03-20	10:57:00	0
2009-03-20	10:58:00	0
2009-03-20	10:59:00	0
2009-03-20	11:00:00	0
2009-03-20	11:01:00	0
2009-03-20	11:02:00	0
2009-03-20	11:03:00	0
2009-03-20	11:04:00	0
2009-03-20	11:05:00	0
2009-03-20	11:06:00	0
2009-03-20	11:07:00	0
2009-03-20	11:08:00	0
2009-03-20	11:09:00	0
2009-03-20	11:10:00	0
2009-03-20	11:11:00	0
2009-03-20	11:12:00	0
2009-03-20	11:13:00	0
2009-03-20	11:14:00	0
2009-03-20	11:15:00	0
2009-03-20	11:16:00	0
2009-03-20	11:17:00	0
2009-03-20	11:18:00	0
2009-03-20	11:19:00	0
2009-03-20	11:20:00	0
2009-03-20	11:21:00	0
2009-03-20	11:22:00	0
2009-03-20	11:23:00	0
2009-03-20	11:24:00	0
2009-03-20	11:25:00	0
2009-03-20	11:26:00	0
2009-03-20	11:27:00	0
2009-03-20	11:28:00	0
2009-03-20	11:29:00	0
2009-03-20	11:30:00	0
2009-03-20	11:31:00	0
2009-03-20	11:32:00	0
2009-03-20	11:33:00	0
2009-03-20	11:34:00	0
2009-03-20	11:35:00	0
2009-03-20	11:36:00	0
2009-03-20	11:37:00	0
2009-03-20	11:38:00	0
2009-03-20	11:39:00	0
2009-03-20	11:40:00	0
2009-03-20	11:41:00	0
2009-03-20	11:42:00	0
2009-03-20	11:43:00	0
2009-03-20	11:44:00	0
2009-03-20	11:45:00	0
2009-03-20	11:46:00	0
2009-03-20	11:47:00	0
2009-03-20	11:48:00	0
2009-03-20	11:49:00	0
2009-03-20	11:50:00	0
2009-03-20	11:51:00	0
2009-03-20	11:52:00	0
2009-03-20	11:53:00	0
2009-03-20	11:54:00	0
2009-03-20	11:55:00	0
2009-03-20	11:56:00	0
2009-03-20	11:57:00	0
2009-03-20	11:58:00	0
2009-03-20	11:59:00	0
2009-03-20	12:00:00	0
2009-03-20	12:01:00	0
2009-03-20	12:02:00	0
2009-03-20	12:03:00	0
2009-03-20	12:04:00	0
2009-03-20	12:05:00	0
2009-03-20	12:06:00	0
2009-03-20	12:07:00	0
2009-03-20	12:08:00	0
2009-03-20	12:09:00	0
2009-03-20	12:10:00	0
2009-03-20	12:11:00	0
2009-03-20	12:12:00	0
2009-03-20	12:13:00	0
2009-03-20	12:14:00	0
2009-03-20	12:15:00	0
2009-03-20	12:16:00	0
2009-03-20	12:17:00	0
2009-03-20	12:18:00	0
2009-03-20	12:19:00	0
2009-03-20	12:20:00	0
2009-03-20	12:21:00	0
2009-03-20	12:22:00	0
2009-03-20	12:23:00	0
2009-03-20	12:24:00	0
2009-03-20	12:25:00	0
2009-03-20	12:26:00	0
2009-03-20	12:27:00	0
2009-03-20	12:28:00	0
2009-03-20	12:29:00	0
2009-03-20	12:30:00	0
2009-03-20	12:31:00	0
2009-03-20	12:32:00	0
2009-03-20	12:33:00	0
2009-03-20	12:34:00	0
2009-03-20	12:35:00	0
2009-03-20	12:36:00	0
2009-03-20	12:37:00	0
2009-03-20	12:38:00	0
2009-03-20	12:39:00	0
2009-03-20	12:40:00	0
2009-03-20	12:41:00	0
2009-03-20	12:42:00	0
2009-03-20	12:43:00	0
2009-03-20	12:44:00	0
2009-03-20	12:45:00	0
2009-03-20	12:46:00	0
2009-03-20	12:47:00	0
2009-03-20	12:48:00	0
2009-03-20	12:49:00	0
2009-03-20	12:50:00	0
2009-03-20	12:51:00	0
2009-03-20	12:52:00	0
2009-03-20	12:53:00	0
2009-03-20	12:54:00	0
2009-03-20	12:55:00	0
2009-03-20	12:56:00	0
2009-03-20	12:57:00	0
2009-03-20	12:58:00	0
2009-03-20	12:59:00	0
2009-03-20	13:00:00	0
2009-03-20	13:01:00	0
2009-03-20	13:02:00	0
2009-03-20	13:03:00	0
2009-03-20	13:04:00	0
2009-03-20	13:05:00	0
2009-03-20	13:06:00	0
2009-03-20	13:07:00	0
2009-03-20	13:08:00	0
2009-03-20	13:09:00	0
2009-03-20	13:10:00	0
2009-03-20	13:11:00	0
2009-03-20	13:12:00	0
2009-03-20	13:13:00	0
2009-03-20	13:14:00	0
2009-03-20	13:15:00	0
2009-03-20	13:16:00	0
2009-03-20	13:17:00	0
2009-03-20	13:18:00	0
2009-03-20	13:19:00	0
2009-03-20	13:20:00	0
2009-03-20	13:21:00	0
2009-03-20	13:22:00	0
2009-03-20	13:23:00	0
2009-03-20	13:24:00	0
2009-03-20	13:25:00	0
2009-03-20	13:26:00	0
2009-03-20	13:27:00	0
2009-03-20	13:28:00	0
2009-03-20	13:29:00	0
2009-03-20	13:30:00	0
2009-03-20	13:31:00	0
2009-03-20	13:32:00	0
2009-03-20	13:33:00	0
2009-03-20	13:34:00	0
2009-03-20	13:35:00	0
2009-03-20	13:36:00	0
2009-03-20	13:37:00	0
2009-03-20	13:38:00	0
2009-03-20	13:39:00	0
2009-03-20	13:40:00	0
2009-03-20	13:41:00	0
2009-03-20	13:42:00	0
2009-03-20	13:43:00	0
2009-03-20	13:44:00	0
2009-03-20	13:45:00	0
2009-03-20	13:46:00	0
2009-03-20	13:47:00	0
2009-03-20	13:48:00	0
2009-03-20	13:49:00	0
2009-03-20	13:50:00	0
2009-03-20	13:51:00	0
2009-03-20	13:52:00	0
2009-03-20	13:53:00	0
2009-03-20	13:54:00	0
2009-03-20	13:55:00	0
2009-03-20	13:56:00	0
2009-03-20	13:57:00	0
2009-03-20	13:58:00	0
2009-03-20	13:59:00	0
2009-03-20	14:00:00	0
2009-03-20	14:01:00	0
2009-03-20	14:02:00	0
2009-03-20	14:03:00	0
2009-03-20	14:04:00	0
2009-03-20	14:05:00	0
2009-03-20	14:06:00	0
2009-03-20	14:07:00	0
2009-03-20	14:08:00	0
2009-03-20	14:09:00	0
2009-03-20	14:10:00	0
2009-03-20	14:11:00	0
2009-03-20	14:12:00	0
2009-03-20	14:13:00	0
2009-03-20	14:14:00	0
2009-03-20	14:15:00	0
2009-03-20	14:16:00	0
2009-03-20	14:17:00	0
2009-03-20	14:18:00	0
2009-03-20	14:19:00	0
2009-03-20	14:20:00	0
2009-03-20	14:21:00	0
2009-03-20	14:22:00	0
2009-03-20	14:23:00	0
2009-03-20	14:24:00	0
2009-03-20	14:25:00	0
2009-03-20	14:26:00	0
2009-03-20	14:27:00	0
2009-03-20	14:28:00	0
2009-03-20	14:29:00	0
2009-03-20	14:30:00	0
2009-03-20	14:31:00	0
2009-03-20	14:32:00	0
2009-03-20	14:33:00	0
2009-03-20	14:34:00	0
2009-03-20	14:35:00	0
2009-03-20	14:36:00	0
2009-03-20	14:37:00	0
2009-03-20	14:38:00	0
2009-03-20	14:39:00	0
2009-03-20	14:40:00	0
2009-03-20	14:41:00	0
2009-03-20	14:42:00	0
2009-03-20	14:43:00	0
2009-03-20	14:44:00	0
2009-03-20	14:45:00	0
2009-03-20	14:46:00	0
2009-03-20	14:47:00	0
2009-03-20	14:48:00	0
2009-03-20	14:49:00	0
2009-03-20	14:50:00	0
2009-03-20	14:51:00	0
2009-03-20	14:52:00	0
2009-03-20	14:53:00	0
2009-03-20	14:54:00	0
2009-03-20	14:55:00	0
2009-03-20	14:56:00	0
2009-03-20	14:57:00	0
2009-03-20	14:58:00	0
2009-03-20	14:59:00	0
2009-03-20	15:00:00	0
2009-03-20	15:01:00	0
2009-03-20	15:02:00	0
2009-03-20	15:03:00	0
2009-03-20	15:04:00	0
2009-03-20	15:05:00	0
2009-03-20	15:06:00	0
2009-03-20	15:07:00	0
2009-03-20	15:08:00	0
2009-03-20	15:09:00	0
2009-03-20	15:10:00	0
2009-03-20	15:11:00	0
2009-03-20	15:12:00	0
2009-03-20	15:13:00	0
2009-03-20	15:14:00	0
2009-03-20	15:15:00	0
2009-03-20	15:16:00	0
2009-03-20	15:17:00	0
2009-03-20	15:18:00	0
2009-03-20	15:19:00	0
2009-03-20	15:20:00	0
2009-03-20	15:21:00	0
2009-03-20	15:22:00	0
2009-03-20	15:23:00	0
2009-03-20	15:24:00	0
2009-03-20	15:25:00	0
2009-03-20	15:26:00	0
2009-03-20	15:27:00	0
2009-03-20	15:28:00	0
2009-03-20	15:29:00	0
2009-03-20	15:30:00	0
2009-03-20	15:31:00	0
2009-03-20	15:32:00	0
2009-03-20	15:33:00	0
2009-03-20	15:34:00	0
2009-03-20	15:35:00	0
2009-03-20	15:36:00	0
2009-03-20	15:37:00	0
2009-03-20	15:38:00	0
2009-03-20	15:39:00	0
2009-03-20	15:40:00	0
2009-03-20	15:41:00	0
2009-03-20	15:42:00	0
2009-03-20	15:43:00	0
2009-03-20	15:44:00	0
2009-03-20	15:45:00	0
2009-03-20	15:46:00	0
2009-03-20	15:47:00	0
2009-03-20	15:48:00	0
2009-03-20	15:49:00	0
2009-03-20	15:50:00	0
2009-03-20	15:51:00	0
2009-03-20	15:52:00	0
2009-03-20	15:53:00	0
2009-03-20	15:54:00	0
2009-03-20	15:55:00	0
2009-03-20	15:56:00	0
2009-03-20	15:57:00	0
2009-03-20	15:58:00	0
2009-03-20	15:59:00	0
2009-03-20	16:00:00	0
2009-03-20	16:01:00	0
2009-03-20	16:02:00	0
2009-03-20	16:03:00	0
2009-03-20	16:04:00	0
2009-03-20	16:05:00	0
2009-03-20	16:06:00	0
2009-03-20	16:07:00	0
2009-03-20	16:08:00	0
2009-03-20	16:09:00	0
2009-03-20	16:10:00	0
2009-03-20	16:11:00	0
2009-03-20	16:12:00	0
2009-03-20	16:13:00	0
2009-03-20	16:14:00	0
2009-03-20	16:15:00	0
2009-03-20	16:16:00	0
2009-03-20	16:17:00	0
2009-03-20	16:18:00	0
2009-03-20	16:19:00	0
2009-03-20	16:20:00	0
2009-03-20	16:21:00	0
2009-03-20	16:22:00	0
2009-03-20	16:23:00	0
2009-03-20	16:24:00	0
2009-03-20	16:25:00	0
2009-03-20	16:26:00	0
2009-03-20	16:27:00	0
2009-03-20	16:28:00	0
2009-03-20	16:29:00	0
2009-03-20	16:30:00	0
2009-03-20	16:31:00	0
2009-03-20	16:32:00	0
2009-03-20	16:33:00	0
2009-03-20	16:34:00	0
2009-03-20	16:35:00	0
2009-03-20	16:36:00	0
2009-03-20	16:37:00	0
2009-03-20	16:38:00	0
2009-03-20	16:39:00	0
2009-03-20	16:40:00	0
2009-03-20	16:41:00	0
2009-03-20	16:42:00	0
2009-03-20	16:43:00	0
2009-03-20	16:44:00	0
2009-03-20	16:45:00	0
2009-03-20	16:46:00	0
2009-03-20	16:47:00	0
2009-03-20	16:48:00	0
2009-03-20	16:49:00	0
2009-03-20	16:50:00	0
2009-03-20	16:51:00	0
2009-03-20	16:52:00	0
2009-03-20	16:53:00	0
2009-03-20	16:54:00	0
2009-03-20	16:55:00	0
2009-03-20	16:56:00	0
2009-03-20	16:57:00	0
2009-03-20	16:58:00	0
2009-03-20	16:59:00	0
2009-03-20	17:00:00	0
2009-03-20	17:01:00	0
2009-03-20	17:02:00	0
2009-03-20	17:03:00	0
2009-03-20	17:04:00	0
2009-03-20	17:05:00	70
2009-03-20	17:06:00	151
2009-03-20	17:07:00	0
2009-03-20	17:08:00	0
2009-03-20	17:09:00	0
2009-03-20	17:10:00	0
2009-03-20	17:11:00	0
2009-03-20	17:12:00	23
2009-03-20	17:13:00	0
2009-03-20	17:14:00	0
2009-03-20	17:15:00	0
2009-03-20	17:16:00	0
2009-03-20	17:17:00	193
2009-03-20	17:18:00	0
2009-03-20	17:19:00	0
2009-03-20	17:20:00	0
2009-03-20	17:21:00	0
2009-03-20	17:22:00	0
2009-03-20	17:23:00	0
2009-03-20	17:24:00	81
2009-03-20	17:25:00	0
2009-03-20	17:26:00	0
2009-03-20	17:27:00	0
2009-03-20	17:28:00	0
2009-03-20	17:29:00	0
2009-03-20	17:30:00	70
2009-03-20	17:31:00	70
2009-03-20	17:32:00	140
2009-03-20	17:33:00	23
2009-03-20	17:34:00	0
2009-03-20	17:35:00	0
2009-03-20	17:36:00	0
2009-03-20	17:37:00	58
2009-03-20	17:38:00	0
2009-03-20	17:39:00	0
2009-03-20	17:40:00	35
2009-03-20	17:41:00	0
2009-03-20	17:42:00	0
2009-03-20	17:43:00	0
2009-03-20	17:44:00	0
2009-03-20	17:45:00	0
2009-03-20	17:46:00	151
2009-03-20	17:47:00	81
2009-03-20	17:48:00	23
2009-03-20	17:49:00	0
2009-03-20	17:50:00	0
2009-03-20	17:51:00	12
2009-03-20	17:52:00	0
2009-03-20	17:53:00	0
2009-03-20	17:54:00	0
2009-03-20	17:55:00	621
2009-03-20	17:56:00	545
2009-03-20	17:57:00	545
2009-03-20	17:58:00	0
2009-03-20	17:59:00	12
2009-03-20	18:00:00	23
2009-03-20	18:01:00	12
2009-03-20	18:02:00	12
2009-03-20	18:03:00	435
2009-03-20	18:04:00	221
2009-03-20	18:05:00	0
2009-03-20	18:06:00	0
2009-03-20	18:07:00	0
2009-03-20	18:08:00	0
2009-03-20	18:09:00	0
2009-03-20	18:10:00	0
2009-03-20	18:11:00	0
2009-03-20	18:12:00	0
2009-03-20	18:13:00	47
2009-03-20	18:14:00	263
2009-03-20	18:15:00	277
2009-03-20	18:16:00	0
2009-03-20	18:17:00	0
2009-03-20	18:18:00	12
2009-03-20	18:19:00	0
2009-03-20	18:20:00	0
2009-03-20	18:21:00	23
2009-03-20	18:22:00	23
2009-03-20	18:23:00	0
2009-03-20	18:24:00	0
2009-03-20	18:25:00	0
2009-03-20	18:26:00	0
2009-03-20	18:27:00	0
2009-03-20	18:28:00	0
2009-03-20	18:29:00	12
2009-03-20	18:30:00	0
2009-03-20	18:31:00	116
2009-03-20	18:32:00	23
2009-03-20	18:33:00	263
2009-03-20	18:34:00	35
2009-03-20	18:35:00	0
2009-03-20	18:36:00	0
2009-03-20	18:37:00	0
2009-03-20	18:38:00	23
2009-03-20	18:39:00	0
2009-03-20	18:40:00	0
2009-03-20	18:41:00	0
2009-03-20	18:42:00	0
2009-03-20	18:43:00	70
2009-03-20	18:44:00	451
2009-03-20	18:45:00	70
2009-03-20	18:46:00	0
2009-03-20	18:47:00	0
2009-03-20	18:48:00	0
2009-03-20	18:49:00	12
2009-03-20	18:50:00	0
2009-03-20	18:51:00	0
2009-03-20	18:52:00	0
2009-03-20	18:53:00	0
2009-03-20	18:54:00	0
2009-03-20	18:55:00	0
2009-03-20	18:56:00	0
2009-03-20	18:57:00	0
2009-03-20	18:58:00	0
2009-03-20	18:59:00	0
2009-03-20	19:00:00	193
2009-03-20	19:01:00	0
2009-03-20	19:02:00	0
2009-03-20	19:03:00	0
2009-03-20	19:04:00	0
2009-03-20	19:05:00	0
2009-03-20	19:06:00	140
2009-03-20	19:07:00	12
2009-03-20	19:08:00	235
2009-03-20	19:09:00	0
2009-03-20	19:10:00	23
2009-03-20	19:11:00	0
2009-03-20	19:12:00	0
2009-03-20	19:13:00	140
2009-03-20	19:14:00	0
2009-03-20	19:15:00	0
2009-03-20	19:16:00	0
2009-03-20	19:17:00	23
2009-03-20	19:18:00	0
2009-03-20	19:19:00	0
2009-03-20	19:20:00	23
2009-03-20	19:21:00	35
2009-03-20	19:22:00	12
2009-03-20	19:23:00	23
2009-03-20	19:24:00	0
2009-03-20	19:25:00	0
2009-03-20	19:26:00	0
2009-03-20	19:27:00	0
2009-03-20	19:28:00	0
2009-03-20	19:29:00	0
2009-03-20	19:30:00	193
2009-03-20	19:31:00	12
2009-03-20	19:32:00	0
2009-03-20	19:33:00	12
2009-03-20	19:34:00	0
2009-03-20	19:35:00	0
2009-03-20	19:36:00	0
2009-03-20	19:37:00	0
2009-03-20	19:38:00	70
2009-03-20	19:39:00	12
2009-03-20	19:40:00	0
2009-03-20	19:41:00	0
2009-03-20	19:42:00	0
2009-03-20	19:43:00	0
2009-03-20	19:44:00	12
2009-03-20	19:45:00	0
2009-03-20	19:46:00	0
2009-03-20	19:47:00	0
2009-03-20	19:48:00	35
2009-03-20	19:49:00	0
2009-03-20	19:50:00	12
2009-03-20	19:51:00	0
2009-03-20	19:52:00	12
2009-03-20	19:53:00	165
2009-03-20	19:54:00	0
2009-03-20	19:55:00	23
2009-03-20	19:56:00	35
2009-03-20	19:57:00	12
2009-03-20	19:58:00	58
2009-03-20	19:59:00	684
2009-03-20	20:00:00	507
2009-03-20	20:01:00	545
2009-03-20	20:02:00	507
2009-03-20	20:03:00	451
2009-03-20	20:04:00	419
2009-03-20	20:05:00	470
2009-03-20	20:06:00	12
2009-03-20	20:07:00	0
2009-03-20	20:08:00	0
2009-03-20	20:09:00	0
2009-03-20	20:10:00	0
2009-03-20	20:11:00	12
2009-03-20	20:12:00	12
2009-03-20	20:13:00	0
2009-03-20	20:14:00	0
2009-03-20	20:15:00	12
2009-03-20	20:16:00	0
2009-03-20	20:17:00	0
2009-03-20	20:18:00	0
2009-03-20	20:19:00	23
2009-03-20	20:20:00	12
2009-03-20	20:21:00	151
2009-03-20	20:22:00	621
2009-03-20	20:23:00	2655
2009-03-20	20:24:00	3214
2009-03-20	20:25:00	451
2009-03-20	20:26:00	0
2009-03-20	20:27:00	70
2009-03-20	20:28:00	0
2009-03-20	20:29:00	582
2009-03-20	20:30:00	1091
2009-03-20	20:31:00	305
2009-03-20	20:32:00	451
2009-03-20	20:33:00	642
2009-03-20	20:34:00	128
2009-03-20	20:35:00	507
2009-03-20	20:36:00	936
2009-03-20	20:37:00	910
2009-03-20	20:38:00	58
2009-03-20	20:39:00	165
2009-03-20	20:40:00	47
2009-03-20	20:41:00	291
2009-03-20	20:42:00	235
2009-03-20	20:43:00	263
2009-03-20	20:44:00	23
2009-03-20	20:45:00	1264
2009-03-20	20:46:00	961
2009-03-20	20:47:00	291
2009-03-20	20:48:00	58
2009-03-20	20:49:00	165
2009-03-20	20:50:00	12
2009-03-20	20:51:00	93
2009-03-20	20:52:00	2979
2009-03-20	20:53:00	4080
2009-03-20	20:54:00	2867
2009-03-20	20:55:00	2360
2009-03-20	20:56:00	3658
2009-03-20	20:57:00	4382
2009-03-20	20:58:00	3335
2009-03-20	20:59:00	2707
2009-03-20	21:00:00	2604
2009-03-20	21:01:00	1846
2009-03-20	21:02:00	2178
2009-03-20	21:03:00	1657
2009-03-20	21:04:00	1587
2009-03-20	21:05:00	2655
2009-03-20	21:06:00	4080
2009-03-20	21:07:00	2313
2009-03-20	21:08:00	3037
2009-03-20	21:09:00	840
2009-03-20	21:10:00	4461
2009-03-20	21:11:00	3796
2009-03-20	21:12:00	2760
2009-03-20	21:13:00	2504
2009-03-20	21:14:00	2090
2009-03-20	21:15:00	936
2009-03-20	21:16:00	35
2009-03-20	21:17:00	0
2009-03-20	21:18:00	12
2009-03-20	21:19:00	0
2009-03-20	21:20:00	489
2009-03-20	21:21:00	47
2009-03-20	21:22:00	12
2009-03-20	21:23:00	221
2009-03-20	21:24:00	277
2009-03-20	21:25:00	0
2009-03-20	21:26:00	0
2009-03-20	21:27:00	207
2009-03-20	21:28:00	747
2009-03-20	21:29:00	403
2009-03-20	21:30:00	12
2009-03-20	21:31:00	35
2009-03-20	21:32:00	151
2009-03-20	21:33:00	263
2009-03-20	21:34:00	0
2009-03-20	21:35:00	58
2009-03-20	21:36:00	0
2009-03-20	21:37:00	0
2009-03-20	21:38:00	12
2009-03-20	21:39:00	23
2009-03-20	21:40:00	0
2009-03-20	21:41:00	0
2009-03-20	21:42:00	47
2009-03-20	21:43:00	451
2009-03-20	21:44:00	770
2009-03-20	21:45:00	370
2009-03-20	21:46:00	642
2009-03-20	21:47:00	263
2009-03-20	21:48:00	337
2009-03-20	21:49:00	263
2009-03-20	21:50:00	116
2009-03-20	21:51:00	0
2009-03-20	21:52:00	0
2009-03-20	21:53:00	165
2009-03-20	21:54:00	116
2009-03-20	21:55:00	165
2009-03-20	21:56:00	221
2009-03-20	21:57:00	451
2009-03-20	21:58:00	621
2009-03-20	21:59:00	23
2009-03-20	22:00:00	507
2009-03-20	22:01:00	193
2009-03-20	22:02:00	526
2009-03-20	22:03:00	2455
2009-03-20	22:04:00	1091
2009-03-20	22:05:00	321
2009-03-20	22:06:00	0
2009-03-20	22:07:00	0
2009-03-20	22:08:00	0
2009-03-20	22:09:00	0
2009-03-20	22:10:00	12
2009-03-20	22:11:00	987
2009-03-20	22:12:00	419
2009-03-20	22:13:00	179
2009-03-20	22:14:00	0
2009-03-20	22:15:00	105
2009-03-20	22:16:00	116
2009-03-20	22:17:00	58
2009-03-20	22:18:00	165
2009-03-20	22:19:00	207
2009-03-20	22:20:00	0
2009-03-20	22:21:00	0
2009-03-20	22:22:00	0
2009-03-20	22:23:00	435
2009-03-20	22:24:00	526
2009-03-20	22:25:00	47
2009-03-20	22:26:00	58
2009-03-20	22:27:00	12
2009-03-20	22:28:00	58
2009-03-20	22:29:00	526
2009-03-20	22:30:00	12
2009-03-20	22:31:00	35
2009-03-20	22:32:00	0
2009-03-20	22:33:00	0
2009-03-20	22:34:00	47
2009-03-20	22:35:00	0
2009-03-20	22:36:00	0
2009-03-20	22:37:00	0
2009-03-20	22:38:00	0
2009-03-20	22:39:00	0
2009-03-20	22:40:00	0
2009-03-20	22:41:00	0
2009-03-20	22:42:00	0
2009-03-20	22:43:00	0
2009-03-20	22:44:00	0
2009-03-20	22:45:00	0
2009-03-20	22:46:00	0
2009-03-20	22:47:00	0
2009-03-20	22:48:00	58
2009-03-20	22:49:00	0
2009-03-20	22:50:00	58
2009-03-20	22:51:00	0
2009-03-20	22:52:00	0
2009-03-20	22:53:00	0
2009-03-20	22:54:00	0
2009-03-20	22:55:00	0
2009-03-20	22:56:00	0
2009-03-20	22:57:00	0
2009-03-20	22:58:00	0
2009-03-20	22:59:00	0
2009-03-20	23:00:00	0
2009-03-20	23:01:00	0
2009-03-20	23:02:00	0
2009-03-20	23:03:00	0
2009-03-20	23:04:00	0
2009-03-20	23:05:00	0
2009-03-20	23:06:00	0
2009-03-20	23:07:00	0
2009-03-20	23:08:00	0
2009-03-20	23:09:00	12
2009-03-20	23:10:00	0
2009-03-20	23:11:00	0
2009-03-20	23:12:00	0
2009-03-20	23:13:00	0
2009-03-20	23:14:00	0
2009-03-20	23:15:00	0
2009-03-20	23:16:00	0
2009-03-20	23:17:00	0
2009-03-20	23:18:00	0
2009-03-20	23:19:00	0
2009-03-20	23:20:00	0
2009-03-20	23:21:00	0
2009-03-20	23:22:00	0
2009-03-20	23:23:00	0
2009-03-20	23:24:00	47
2009-03-20	23:25:00	0
2009-03-20	23:26:00	58
2009-03-20	23:27:00	151
2009-03-20	23:28:00	0
2009-03-20	23:29:00	0
2009-03-20	23:30:00	0
2009-03-20	23:31:00	0
2009-03-20	23:32:00	0
2009-03-20	23:33:00	0
2009-03-20	23:34:00	0
2009-03-20	23:35:00	0
2009-03-20	23:36:00	0
2009-03-20	23:37:00	58
2009-03-20	23:38:00	0
2009-03-20	23:39:00	0
2009-03-20	23:40:00	0
2009-03-20	23:41:00	0
2009-03-20	23:42:00	0
2009-03-20	23:43:00	0
2009-03-20	23:44:00	0
2009-03-20	23:45:00	0
2009-03-20	23:46:00	0
2009-03-20	23:47:00	0
2009-03-20	23:48:00	0
2009-03-20	23:49:00	0
2009-03-20	23:50:00	0
2009-03-20	23:51:00	0
2009-03-20	23:52:00	0
2009-03-20	23:53:00	70
2009-03-20	23:54:00	0
2009-03-20	23:55:00	0
2009-03-20	23:56:00	0
2009-03-20	23:57:00	0
2009-03-20	23:58:00	0
2009-03-20	23:59:00	0
2009-03-21	00:00:00	0
2009-03-21	00:01:00	0
2009-03-21	00:02:00	0
2009-03-21	00:03:00	0
2009-03-21	00:04:00	0
2009-03-21	00:05:00	105
2009-03-21	00:06:00	0
2009-03-21	00:07:00	0
2009-03-21	00:08:00	0
2009-03-21	00:09:00	0
2009-03-21	00:10:00	0
2009-03-21	00:11:00	0
2009-03-21	00:12:00	0
2009-03-21	00:13:00	0
2009-03-21	00:14:00	0
2009-03-21	00:15:00	235
2009-03-21	00:16:00	70
2009-03-21	00:17:00	0
2009-03-21	00:18:00	0
2009-03-21	00:19:00	0
2009-03-21	00:20:00	0
2009-03-21	00:21:00	0
2009-03-21	00:22:00	0
2009-03-21	00:23:00	0
2009-03-21	00:24:00	0
2009-03-21	00:25:00	0
2009-03-21	00:26:00	0
2009-03-21	00:27:00	0
2009-03-21	00:28:00	0
2009-03-21	00:29:00	0
2009-03-21	00:30:00	0
2009-03-21	00:31:00	0
2009-03-21	00:32:00	0
2009-03-21	00:33:00	0
2009-03-21	00:34:00	0
2009-03-21	00:35:00	35
2009-03-21	00:36:00	0
2009-03-21	00:37:00	0
2009-03-21	00:38:00	0
2009-03-21	00:39:00	0
2009-03-21	00:40:00	0
2009-03-21	00:41:00	0
2009-03-21	00:42:00	0
2009-03-21	00:43:00	0
2009-03-21	00:44:00	0
2009-03-21	00:45:00	0
2009-03-21	00:46:00	0
2009-03-21	00:47:00	12
2009-03-21	00:48:00	0
2009-03-21	00:49:00	0
2009-03-21	00:50:00	0
2009-03-21	00:51:00	0
2009-03-21	00:52:00	0
2009-03-21	00:53:00	0
2009-03-21	00:54:00	0
2009-03-21	00:55:00	0
2009-03-21	00:56:00	0
2009-03-21	00:57:00	0
2009-03-21	00:58:00	0
2009-03-21	00:59:00	0
2009-03-21	01:00:00	47
2009-03-21	01:01:00	0
2009-03-21	01:02:00	116
2009-03-21	01:03:00	0
2009-03-21	01:04:00	0
2009-03-21	01:05:00	0
2009-03-21	01:06:00	0
2009-03-21	01:07:00	0
2009-03-21	01:08:00	0
2009-03-21	01:09:00	0
2009-03-21	01:10:00	0
2009-03-21	01:11:00	0
2009-03-21	01:12:00	0
2009-03-21	01:13:00	0
2009-03-21	01:14:00	0
2009-03-21	01:15:00	0
2009-03-21	01:16:00	0
2009-03-21	01:17:00	0
2009-03-21	01:18:00	0
2009-03-21	01:19:00	0
2009-03-21	01:20:00	0
2009-03-21	01:21:00	0
2009-03-21	01:22:00	0
2009-03-21	01:23:00	0
2009-03-21	01:24:00	0
2009-03-21	01:25:00	93
2009-03-21	01:26:00	0
2009-03-21	01:27:00	0
2009-03-21	01:28:00	0
2009-03-21	01:29:00	140
2009-03-21	01:30:00	151
2009-03-21	01:31:00	47
2009-03-21	01:32:00	0
2009-03-21	01:33:00	0
2009-03-21	01:34:00	0
2009-03-21	01:35:00	0
2009-03-21	01:36:00	0
2009-03-21	01:37:00	0
2009-03-21	01:38:00	0
2009-03-21	01:39:00	0
2009-03-21	01:40:00	0
2009-03-21	01:41:00	0
2009-03-21	01:42:00	0
2009-03-21	01:43:00	0
2009-03-21	01:44:00	0
2009-03-21	01:45:00	0
2009-03-21	01:46:00	0
2009-03-21	01:47:00	35
2009-03-21	01:48:00	23
2009-03-21	01:49:00	0
2009-03-21	01:50:00	0
2009-03-21	01:51:00	0
2009-03-21	01:52:00	0
2009-03-21	01:53:00	0
2009-03-21	01:54:00	0
2009-03-21	01:55:00	0
2009-03-21	01:56:00	0
2009-03-21	01:57:00	58
2009-03-21	01:58:00	70
2009-03-21	01:59:00	165
2009-03-21	02:00:00	81
2009-03-21	02:01:00	0
2009-03-21	02:02:00	0
2009-03-21	02:03:00	0
2009-03-21	02:04:00	0
2009-03-21	02:05:00	0
2009-03-21	02:06:00	0
2009-03-21	02:07:00	0
2009-03-21	02:08:00	70
2009-03-21	02:09:00	0
2009-03-21	02:10:00	0
2009-03-21	02:11:00	0
2009-03-21	02:12:00	0
2009-03-21	02:13:00	0
2009-03-21	02:14:00	0
2009-03-21	02:15:00	0
2009-03-21	02:16:00	0
2009-03-21	02:17:00	0
2009-03-21	02:18:00	0
2009-03-21	02:19:00	0
2009-03-21	02:20:00	0
2009-03-21	02:21:00	0
2009-03-21	02:22:00	0
2009-03-21	02:23:00	0
2009-03-21	02:24:00	0
2009-03-21	02:25:00	0
2009-03-21	02:26:00	0
2009-03-21	02:27:00	0
2009-03-21	02:28:00	0
2009-03-21	02:29:00	0
2009-03-21	02:30:00	0
2009-03-21	02:31:00	0
2009-03-21	02:32:00	0
2009-03-21	02:33:00	0
2009-03-21	02:34:00	0
2009-03-21	02:35:00	0
2009-03-21	02:36:00	0
2009-03-21	02:37:00	0
2009-03-21	02:38:00	0
2009-03-21	02:39:00	0
2009-03-21	02:40:00	0
2009-03-21	02:41:00	0
2009-03-21	02:42:00	0
2009-03-21	02:43:00	0
2009-03-21	02:44:00	0
2009-03-21	02:45:00	0
2009-03-21	02:46:00	0
2009-03-21	02:47:00	0
2009-03-21	02:48:00	0
2009-03-21	02:49:00	0
2009-03-21	02:50:00	0
2009-03-21	02:51:00	235
2009-03-21	02:52:00	0
2009-03-21	02:53:00	0
2009-03-21	02:54:00	0
2009-03-21	02:55:00	0
2009-03-21	02:56:00	0
2009-03-21	02:57:00	0
2009-03-21	02:58:00	0
2009-03-21	02:59:00	0
2009-03-21	03:00:00	0
2009-03-21	03:01:00	0
2009-03-21	03:02:00	0
2009-03-21	03:03:00	0
2009-03-21	03:04:00	0
2009-03-21	03:05:00	0
2009-03-21	03:06:00	0
2009-03-21	03:07:00	0
2009-03-21	03:08:00	12
2009-03-21	03:09:00	0
2009-03-21	03:10:00	0
2009-03-21	03:11:00	0
2009-03-21	03:12:00	0
2009-03-21	03:13:00	0
2009-03-21	03:14:00	0
2009-03-21	03:15:00	0
2009-03-21	03:16:00	0
2009-03-21	03:17:00	0
2009-03-21	03:18:00	0
2009-03-21	03:19:00	0
2009-03-21	03:20:00	0
2009-03-21	03:21:00	0
2009-03-21	03:22:00	0
2009-03-21	03:23:00	0
2009-03-21	03:24:00	0
2009-03-21	03:25:00	0
2009-03-21	03:26:00	0
2009-03-21	03:27:00	0
2009-03-21	03:28:00	0
2009-03-21	03:29:00	0
2009-03-21	03:30:00	0
2009-03-21	03:31:00	0
2009-03-21	03:32:00	0
2009-03-21	03:33:00	116
2009-03-21	03:34:00	0
2009-03-21	03:35:00	0
2009-03-21	03:36:00	0
2009-03-21	03:37:00	0
2009-03-21	03:38:00	0
2009-03-21	03:39:00	0
2009-03-21	03:40:00	0
2009-03-21	03:41:00	0
2009-03-21	03:42:00	0
2009-03-21	03:43:00	0
2009-03-21	03:44:00	0
2009-03-21	03:45:00	0
2009-03-21	03:46:00	0
2009-03-21	03:47:00	0
2009-03-21	03:48:00	0
2009-03-21	03:49:00	0
2009-03-21	03:50:00	0
2009-03-21	03:51:00	0
2009-03-21	03:52:00	0
2009-03-21	03:53:00	0
2009-03-21	03:54:00	0
2009-03-21	03:55:00	0
2009-03-21	03:56:00	23
2009-03-21	03:57:00	0
2009-03-21	03:58:00	0
2009-03-21	03:59:00	0
2009-03-21	04:00:00	0
2009-03-21	04:01:00	0
2009-03-21	04:02:00	0
2009-03-21	04:03:00	0
2009-03-21	04:04:00	0
2009-03-21	04:05:00	0
2009-03-21	04:06:00	0
2009-03-21	04:07:00	0
2009-03-21	04:08:00	0
2009-03-21	04:09:00	0
2009-03-21	04:10:00	0
2009-03-21	04:11:00	0
2009-03-21	04:12:00	0
2009-03-21	04:13:00	0
2009-03-21	04:14:00	0
2009-03-21	04:15:00	12
2009-03-21	04:16:00	58
2009-03-21	04:17:00	128
2009-03-21	04:18:00	0
2009-03-21	04:19:00	0
2009-03-21	04:20:00	0
2009-03-21	04:21:00	81
2009-03-21	04:22:00	0
2009-03-21	04:23:00	0
2009-03-21	04:24:00	0
2009-03-21	04:25:00	0
2009-03-21	04:26:00	0
2009-03-21	04:27:00	0
2009-03-21	04:28:00	0
2009-03-21	04:29:00	0
2009-03-21	04:30:00	0
2009-03-21	04:31:00	0
2009-03-21	04:32:00	0
2009-03-21	04:33:00	0
2009-03-21	04:34:00	0
2009-03-21	04:35:00	0
2009-03-21	04:36:00	0
2009-03-21	04:37:00	0
2009-03-21	04:38:00	0
2009-03-21	04:39:00	0
2009-03-21	04:40:00	0
2009-03-21	04:41:00	0
2009-03-21	04:42:00	0
2009-03-21	04:43:00	0
2009-03-21	04:44:00	0
2009-03-21	04:45:00	0
2009-03-21	04:46:00	58
2009-03-21	04:47:00	93
2009-03-21	04:48:00	0
2009-03-21	04:49:00	0
2009-03-21	04:50:00	0
2009-03-21	04:51:00	0
2009-03-21	04:52:00	0
2009-03-21	04:53:00	0
2009-03-21	04:54:00	0
2009-03-21	04:55:00	0
2009-03-21	04:56:00	0
2009-03-21	04:57:00	0
2009-03-21	04:58:00	0
2009-03-21	04:59:00	12
2009-03-21	05:00:00	0
2009-03-21	05:01:00	0
2009-03-21	05:02:00	0
2009-03-21	05:03:00	0
2009-03-21	05:04:00	0
2009-03-21	05:05:00	0
2009-03-21	05:06:00	0
2009-03-21	05:07:00	0
2009-03-21	05:08:00	0
2009-03-21	05:09:00	0
2009-03-21	05:10:00	0
2009-03-21	05:11:00	0
2009-03-21	05:12:00	0
2009-03-21	05:13:00	58
2009-03-21	05:14:00	0
2009-03-21	05:15:00	0
2009-03-21	05:16:00	0
2009-03-21	05:17:00	0
2009-03-21	05:18:00	0
2009-03-21	05:19:00	0
2009-03-21	05:20:00	0
2009-03-21	05:21:00	0
2009-03-21	05:22:00	0
2009-03-21	05:23:00	0
2009-03-21	05:24:00	0
2009-03-21	05:25:00	0
2009-03-21	05:26:00	0
2009-03-21	05:27:00	0
2009-03-21	05:28:00	0
2009-03-21	05:29:00	0
2009-03-21	05:30:00	0
2009-03-21	05:31:00	0
2009-03-21	05:32:00	0
2009-03-21	05:33:00	0
2009-03-21	05:34:00	0
2009-03-21	05:35:00	0
2009-03-21	05:36:00	0
2009-03-21	05:37:00	0
2009-03-21	05:38:00	23
2009-03-21	05:39:00	0
2009-03-21	05:40:00	0
2009-03-21	05:41:00	0
2009-03-21	05:42:00	0
2009-03-21	05:43:00	0
2009-03-21	05:44:00	0
2009-03-21	05:45:00	0
2009-03-21	05:46:00	0
2009-03-21	05:47:00	0
2009-03-21	05:48:00	0
2009-03-21	05:49:00	0
2009-03-21	05:50:00	0
2009-03-21	05:51:00	0
2009-03-21	05:52:00	0
2009-03-21	05:53:00	12
2009-03-21	05:54:00	0
2009-03-21	05:55:00	93
2009-03-21	05:56:00	0
2009-03-21	05:57:00	0
2009-03-21	05:58:00	0
2009-03-21	05:59:00	93
2009-03-21	06:00:00	93
2009-03-21	06:01:00	0
2009-03-21	06:02:00	58
2009-03-21	06:03:00	0
2009-03-21	06:04:00	0
2009-03-21	06:05:00	0
2009-03-21	06:06:00	0
2009-03-21	06:07:00	0
2009-03-21	06:08:00	0
2009-03-21	06:09:00	0
2009-03-21	06:10:00	0
2009-03-21	06:11:00	0
2009-03-21	06:12:00	0
2009-03-21	06:13:00	12
2009-03-21	06:14:00	0
2009-03-21	06:15:00	0
2009-03-21	06:16:00	0
2009-03-21	06:17:00	0
2009-03-21	06:18:00	0
2009-03-21	06:19:00	0
2009-03-21	06:20:00	0
2009-03-21	06:21:00	0
2009-03-21	06:22:00	0
2009-03-21	06:23:00	0
2009-03-21	06:24:00	0
2009-03-21	06:25:00	0
2009-03-21	06:26:00	0
2009-03-21	06:27:00	0
2009-03-21	06:28:00	0
2009-03-21	06:29:00	47
2009-03-21	06:30:00	81
2009-03-21	06:31:00	0
2009-03-21	06:32:00	0
2009-03-21	06:33:00	0
2009-03-21	06:34:00	0
2009-03-21	06:35:00	12
2009-03-21	06:36:00	0
2009-03-21	06:37:00	0
2009-03-21	06:38:00	0
2009-03-21	06:39:00	0
2009-03-21	06:40:00	0
2009-03-21	06:41:00	0
2009-03-21	06:42:00	0
2009-03-21	06:43:00	0
2009-03-21	06:44:00	0
2009-03-21	06:45:00	0
2009-03-21	06:46:00	0
2009-03-21	06:47:00	0
2009-03-21	06:48:00	0
2009-03-21	06:49:00	35
2009-03-21	06:50:00	0
2009-03-21	06:51:00	0
2009-03-21	06:52:00	0
2009-03-21	06:53:00	0
2009-03-21	06:54:00	0
2009-03-21	06:55:00	0
2009-03-21	06:56:00	0
2009-03-21	06:57:00	0
2009-03-21	06:58:00	0
2009-03-21	06:59:00	0
2009-03-21	07:00:00	0
2009-03-21	07:01:00	0
2009-03-21	07:02:00	0
2009-03-21	07:03:00	0
2009-03-21	07:04:00	0
2009-03-21	07:05:00	0
2009-03-21	07:06:00	0
2009-03-21	07:07:00	0
2009-03-21	07:08:00	0
2009-03-21	07:09:00	0
2009-03-21	07:10:00	0
2009-03-21	07:11:00	0
2009-03-21	07:12:00	0
2009-03-21	07:13:00	0
2009-03-21	07:14:00	0
2009-03-21	07:15:00	0
2009-03-21	07:16:00	0
2009-03-21	07:17:00	0
2009-03-21	07:18:00	0
2009-03-21	07:19:00	0
2009-03-21	07:20:00	0
2009-03-21	07:21:00	0
2009-03-21	07:22:00	0
2009-03-21	07:23:00	0
2009-03-21	07:24:00	0
2009-03-21	07:25:00	58
2009-03-21	07:26:00	0
2009-03-21	07:27:00	81
2009-03-21	07:28:00	0
2009-03-21	07:29:00	0
2009-03-21	07:30:00	0
2009-03-21	07:31:00	0
2009-03-21	07:32:00	0
2009-03-21	07:33:00	0
2009-03-21	07:34:00	0
2009-03-21	07:35:00	0
2009-03-21	07:36:00	0
2009-03-21	07:37:00	12
2009-03-21	07:38:00	0
2009-03-21	07:39:00	0
2009-03-21	07:40:00	0
2009-03-21	07:41:00	0
2009-03-21	07:42:00	0
2009-03-21	07:43:00	0
2009-03-21	07:44:00	70
2009-03-21	07:45:00	0
2009-03-21	07:46:00	0
2009-03-21	07:47:00	0
2009-03-21	07:48:00	0
2009-03-21	07:49:00	0
2009-03-21	07:50:00	0
2009-03-21	07:51:00	0
2009-03-21	07:52:00	58
2009-03-21	07:53:00	35
2009-03-21	07:54:00	0
2009-03-21	07:55:00	0
2009-03-21	07:56:00	0
2009-03-21	07:57:00	0
2009-03-21	07:58:00	0
2009-03-21	07:59:00	0
2009-03-21	08:00:00	0
2009-03-21	08:01:00	0
2009-03-21	08:02:00	0
2009-03-21	08:03:00	0
2009-03-21	08:04:00	0
2009-03-21	08:05:00	0
2009-03-21	08:06:00	0
2009-03-21	08:07:00	0
2009-03-21	08:08:00	0
2009-03-21	08:09:00	12
2009-03-21	08:10:00	165
2009-03-21	08:11:00	58
2009-03-21	08:12:00	0
2009-03-21	08:13:00	12
2009-03-21	08:14:00	0
2009-03-21	08:15:00	0
2009-03-21	08:16:00	0
2009-03-21	08:17:00	0
2009-03-21	08:18:00	12
2009-03-21	08:19:00	419
2009-03-21	08:20:00	526
2009-03-21	08:21:00	193
2009-03-21	08:22:00	705
2009-03-21	08:23:00	12
2009-03-21	08:24:00	0
2009-03-21	08:25:00	12
2009-03-21	08:26:00	0
2009-03-21	08:27:00	0
2009-03-21	08:28:00	0
2009-03-21	08:29:00	0
2009-03-21	08:30:00	0
2009-03-21	08:31:00	47
2009-03-21	08:32:00	35
2009-03-21	08:33:00	193
2009-03-21	08:34:00	81
2009-03-21	08:35:00	0
2009-03-21	08:36:00	0
2009-03-21	08:37:00	0
2009-03-21	08:38:00	0
2009-03-21	08:39:00	0
2009-03-21	08:40:00	12
2009-03-21	08:41:00	0
2009-03-21	08:42:00	354
2009-03-21	08:43:00	93
2009-03-21	08:44:00	451
2009-03-21	08:45:00	1387
2009-03-21	08:46:00	747
2009-03-21	08:47:00	193
2009-03-21	08:48:00	403
2009-03-21	08:49:00	470
2009-03-21	08:50:00	70
2009-03-21	08:51:00	0
2009-03-21	08:52:00	563
2009-03-21	08:53:00	726
2009-03-21	08:54:00	35
2009-03-21	08:55:00	179
2009-03-21	08:56:00	58
2009-03-21	08:57:00	0
2009-03-21	08:58:00	0
2009-03-21	08:59:00	12
2009-03-21	09:00:00	140
2009-03-21	09:01:00	105
2009-03-21	09:02:00	0
2009-03-21	09:03:00	0
2009-03-21	09:04:00	116
2009-03-21	09:05:00	81
2009-03-21	09:06:00	81
2009-03-21	09:07:00	451
2009-03-21	09:08:00	489
[truncated: 13,851 more rows]

## Sheet: 4.3.09
Actogram, Copy Raw Data, All Days
Identity:	Jade
Filename:	E:\Active Research Files\meloxicam titre canine\cases\jade\Jade 4.3.09.AWC
Gender:	F
Age:	8
Height:	91.4 cm	36.0 in
Weight:	70.0 kg	154.3 lbs
Start Date:	03-Apr-2009 (Fri)
Start Time:	12:11:00
Interval:	1.00 mins
Date Stamp:	Time Stamp:	Activity Data:	Marker Press:
2009-04-03	00:00:00	0
2009-04-03	00:01:00	0
2009-04-03	00:02:00	0
2009-04-03	00:03:00	0
2009-04-03	00:04:00	0
2009-04-03	00:05:00	0
2009-04-03	00:06:00	0
2009-04-03	00:07:00	0
2009-04-03	00:08:00	0
2009-04-03	00:09:00	0
2009-04-03	00:10:00	0
2009-04-03	00:11:00	0
2009-04-03	00:12:00	0
2009-04-03	00:13:00	0
2009-04-03	00:14:00	0
2009-04-03	00:15:00	0
2009-04-03	00:16:00	0
2009-04-03	00:17:00	0
2009-04-03	00:18:00	0
2009-04-03	00:19:00	0
2009-04-03	00:20:00	0
2009-04-03	00:21:00	0
2009-04-03	00:22:00	0
2009-04-03	00:23:00	0
2009-04-03	00:24:00	0
2009-04-03	00:25:00	0
2009-04-03	00:26:00	0
2009-04-03	00:27:00	0
2009-04-03	00:28:00	0
2009-04-03	00:29:00	0
2009-04-03	00:30:00	0
2009-04-03	00:31:00	0
2009-04-03	00:32:00	0
2009-04-03	00:33:00	0
2009-04-03	00:34:00	0
2009-04-03	00:35:00	0
2009-04-03	00:36:00	0
2009-04-03	00:37:00	0
2009-04-03	00:38:00	0
2009-04-03	00:39:00	0
2009-04-03	00:40:00	0
2009-04-03	00:41:00	0
2009-04-03	00:42:00	0
2009-04-03	00:43:00	0
2009-04-03	00:44:00	0
2009-04-03	00:45:00	0
2009-04-03	00:46:00	0
2009-04-03	00:47:00	0
2009-04-03	00:48:00	0
2009-04-03	00:49:00	0
2009-04-03	00:50:00	0
2009-04-03	00:51:00	0
2009-04-03	00:52:00	0
2009-04-03	00:53:00	0
2009-04-03	00:54:00	0
2009-04-03	00:55:00	0
2009-04-03	00:56:00	0
2009-04-03	00:57:00	0
2009-04-03	00:58:00	0
2009-04-03	00:59:00	0
2009-04-03	01:00:00	0
2009-04-03	01:01:00	0
2009-04-03	01:02:00	0
2009-04-03	01:03:00	0
2009-04-03	01:04:00	0
2009-04-03	01:05:00	0
2009-04-03	01:06:00	0
2009-04-03	01:07:00	0
2009-04-03	01:08:00	0
2009-04-03	01:09:00	0
2009-04-03	01:10:00	0
2009-04-03	01:11:00	0
2009-04-03	01:12:00	0
2009-04-03	01:13:00	0
2009-04-03	01:14:00	0
2009-04-03	01:15:00	0
2009-04-03	01:16:00	0
2009-04-03	01:17:00	0
2009-04-03	01:18:00	0
2009-04-03	01:19:00	0
2009-04-03	01:20:00	0
2009-04-03	01:21:00	0
2009-04-03	01:22:00	0
2009-04-03	01:23:00	0
2009-04-03	01:24:00	0
2009-04-03	01:25:00	0
2009-04-03	01:26:00	0
2009-04-03	01:27:00	0
2009-04-03	01:28:00	0
2009-04-03	01:29:00	0
2009-04-03	01:30:00	0
2009-04-03	01:31:00	0
2009-04-03	01:32:00	0
2009-04-03	01:33:00	0
2009-04-03	01:34:00	0
2009-04-03	01:35:00	0
2009-04-03	01:36:00	0
2009-04-03	01:37:00	0
2009-04-03	01:38:00	0
2009-04-03	01:39:00	0
2009-04-03	01:40:00	0
2009-04-03	01:41:00	0
2009-04-03	01:42:00	0
2009-04-03	01:43:00	0
2009-04-03	01:44:00	0
2009-04-03	01:45:00	0
2009-04-03	01:46:00	0
2009-04-03	01:47:00	0
2009-04-03	01:48:00	0
2009-04-03	01:49:00	0
2009-04-03	01:50:00	0
2009-04-03	01:51:00	0
2009-04-03	01:52:00	0
2009-04-03	01:53:00	0
2009-04-03	01:54:00	0
2009-04-03	01:55:00	0
2009-04-03	01:56:00	0
2009-04-03	01:57:00	0
2009-04-03	01:58:00	0
2009-04-03	01:59:00	0
2009-04-03	02:00:00	0
2009-04-03	02:01:00	0
2009-04-03	02:02:00	0
2009-04-03	02:03:00	0
2009-04-03	02:04:00	0
2009-04-03	02:05:00	0
2009-04-03	02:06:00	0
2009-04-03	02:07:00	0
2009-04-03	02:08:00	0
2009-04-03	02:09:00	0
2009-04-03	02:10:00	0
2009-04-03	02:11:00	0
2009-04-03	02:12:00	0
2009-04-03	02:13:00	0
2009-04-03	02:14:00	0
2009-04-03	02:15:00	0
2009-04-03	02:16:00	0
2009-04-03	02:17:00	0
2009-04-03	02:18:00	0
2009-04-03	02:19:00	0
2009-04-03	02:20:00	0
2009-04-03	02:21:00	0
2009-04-03	02:22:00	0
2009-04-03	02:23:00	0
2009-04-03	02:24:00	0
2009-04-03	02:25:00	0
2009-04-03	02:26:00	0
2009-04-03	02:27:00	0
2009-04-03	02:28:00	0
2009-04-03	02:29:00	0
2009-04-03	02:30:00	0
2009-04-03	02:31:00	0
2009-04-03	02:32:00	0
2009-04-03	02:33:00	0
2009-04-03	02:34:00	0
2009-04-03	02:35:00	0
2009-04-03	02:36:00	0
2009-04-03	02:37:00	0
2009-04-03	02:38:00	0
2009-04-03	02:39:00	0
2009-04-03	02:40:00	0
2009-04-03	02:41:00	0
2009-04-03	02:42:00	0
2009-04-03	02:43:00	0
2009-04-03	02:44:00	0
2009-04-03	02:45:00	0
2009-04-03	02:46:00	0
2009-04-03	02:47:00	0
2009-04-03	02:48:00	0
2009-04-03	02:49:00	0
2009-04-03	02:50:00	0
2009-04-03	02:51:00	0
2009-04-03	02:52:00	0
2009-04-03	02:53:00	0
2009-04-03	02:54:00	0
2009-04-03	02:55:00	0
2009-04-03	02:56:00	0
2009-04-03	02:57:00	0
2009-04-03	02:58:00	0
2009-04-03	02:59:00	0
2009-04-03	03:00:00	0
2009-04-03	03:01:00	0
2009-04-03	03:02:00	0
2009-04-03	03:03:00	0
2009-04-03	03:04:00	0
2009-04-03	03:05:00	0
2009-04-03	03:06:00	0
2009-04-03	03:07:00	0
2009-04-03	03:08:00	0
2009-04-03	03:09:00	0
2009-04-03	03:10:00	0
2009-04-03	03:11:00	0
2009-04-03	03:12:00	0
2009-04-03	03:13:00	0
2009-04-03	03:14:00	0
2009-04-03	03:15:00	0
2009-04-03	03:16:00	0
2009-04-03	03:17:00	0
2009-04-03	03:18:00	0
2009-04-03	03:19:00	0
2009-04-03	03:20:00	0
2009-04-03	03:21:00	0
2009-04-03	03:22:00	0
2009-04-03	03:23:00	0
2009-04-03	03:24:00	0
2009-04-03	03:25:00	0
2009-04-03	03:26:00	0
2009-04-03	03:27:00	0
2009-04-03	03:28:00	0
2009-04-03	03:29:00	0
2009-04-03	03:30:00	0
2009-04-03	03:31:00	0
2009-04-03	03:32:00	0
2009-04-03	03:33:00	0
2009-04-03	03:34:00	0
2009-04-03	03:35:00	0
2009-04-03	03:36:00	0
2009-04-03	03:37:00	0
2009-04-03	03:38:00	0
2009-04-03	03:39:00	0
2009-04-03	03:40:00	0
2009-04-03	03:41:00	0
2009-04-03	03:42:00	0
2009-04-03	03:43:00	0
2009-04-03	03:44:00	0
2009-04-03	03:45:00	0
2009-04-03	03:46:00	0
2009-04-03	03:47:00	0
2009-04-03	03:48:00	0
2009-04-03	03:49:00	0
2009-04-03	03:50:00	0
2009-04-03	03:51:00	0
2009-04-03	03:52:00	0
2009-04-03	03:53:00	0
2009-04-03	03:54:00	0
2009-04-03	03:55:00	0
2009-04-03	03:56:00	0
2009-04-03	03:57:00	0
2009-04-03	03:58:00	0
2009-04-03	03:59:00	0
2009-04-03	04:00:00	0
2009-04-03	04:01:00	0
2009-04-03	04:02:00	0
2009-04-03	04:03:00	0
2009-04-03	04:04:00	0
2009-04-03	04:05:00	0
2009-04-03	04:06:00	0
2009-04-03	04:07:00	0
2009-04-03	04:08:00	0
2009-04-03	04:09:00	0
2009-04-03	04:10:00	0
2009-04-03	04:11:00	0
2009-04-03	04:12:00	0
2009-04-03	04:13:00	0
2009-04-03	04:14:00	0
2009-04-03	04:15:00	0
2009-04-03	04:16:00	0
2009-04-03	04:17:00	0
2009-04-03	04:18:00	0
2009-04-03	04:19:00	0
2009-04-03	04:20:00	0
2009-04-03	04:21:00	0
2009-04-03	04:22:00	0
2009-04-03	04:23:00	0
2009-04-03	04:24:00	0
2009-04-03	04:25:00	0
2009-04-03	04:26:00	0
2009-04-03	04:27:00	0
2009-04-03	04:28:00	0
2009-04-03	04:29:00	0
2009-04-03	04:30:00	0
2009-04-03	04:31:00	0
2009-04-03	04:32:00	0
2009-04-03	04:33:00	0
2009-04-03	04:34:00	0
2009-04-03	04:35:00	0
2009-04-03	04:36:00	0
2009-04-03	04:37:00	0
2009-04-03	04:38:00	0
2009-04-03	04:39:00	0
2009-04-03	04:40:00	0
2009-04-03	04:41:00	0
2009-04-03	04:42:00	0
2009-04-03	04:43:00	0
2009-04-03	04:44:00	0
2009-04-03	04:45:00	0
2009-04-03	04:46:00	0
2009-04-03	04:47:00	0
2009-04-03	04:48:00	0
2009-04-03	04:49:00	0
2009-04-03	04:50:00	0
2009-04-03	04:51:00	0
2009-04-03	04:52:00	0
2009-04-03	04:53:00	0
2009-04-03	04:54:00	0
2009-04-03	04:55:00	0
2009-04-03	04:56:00	0
2009-04-03	04:57:00	0
2009-04-03	04:58:00	0
2009-04-03	04:59:00	0
2009-04-03	05:00:00	0
2009-04-03	05:01:00	0
2009-04-03	05:02:00	0
2009-04-03	05:03:00	0
2009-04-03	05:04:00	0
2009-04-03	05:05:00	0
2009-04-03	05:06:00	0
2009-04-03	05:07:00	0
2009-04-03	05:08:00	0
2009-04-03	05:09:00	0
2009-04-03	05:10:00	0
2009-04-03	05:11:00	0
2009-04-03	05:12:00	0
2009-04-03	05:13:00	0
2009-04-03	05:14:00	0
2009-04-03	05:15:00	0
2009-04-03	05:16:00	0
2009-04-03	05:17:00	0
2009-04-03	05:18:00	0
2009-04-03	05:19:00	0
2009-04-03	05:20:00	0
2009-04-03	05:21:00	0
2009-04-03	05:22:00	0
2009-04-03	05:23:00	0
2009-04-03	05:24:00	0
2009-04-03	05:25:00	0
2009-04-03	05:26:00	0
2009-04-03	05:27:00	0
2009-04-03	05:28:00	0
2009-04-03	05:29:00	0
2009-04-03	05:30:00	0
2009-04-03	05:31:00	0
2009-04-03	05:32:00	0
2009-04-03	05:33:00	0
2009-04-03	05:34:00	0
2009-04-03	05:35:00	0
2009-04-03	05:36:00	0
2009-04-03	05:37:00	0
2009-04-03	05:38:00	0
2009-04-03	05:39:00	0
2009-04-03	05:40:00	0
2009-04-03	05:41:00	0
2009-04-03	05:42:00	0
2009-04-03	05:43:00	0
2009-04-03	05:44:00	0
2009-04-03	05:45:00	0
2009-04-03	05:46:00	0
2009-04-03	05:47:00	0
2009-04-03	05:48:00	0
2009-04-03	05:49:00	0
2009-04-03	05:50:00	0
2009-04-03	05:51:00	0
2009-04-03	05:52:00	0
2009-04-03	05:53:00	0
2009-04-03	05:54:00	0
2009-04-03	05:55:00	0
2009-04-03	05:56:00	0
2009-04-03	05:57:00	0
2009-04-03	05:58:00	0
2009-04-03	05:59:00	0
2009-04-03	06:00:00	0
2009-04-03	06:01:00	0
2009-04-03	06:02:00	0
2009-04-03	06:03:00	0
2009-04-03	06:04:00	0
2009-04-03	06:05:00	0
2009-04-03	06:06:00	0
2009-04-03	06:07:00	0
2009-04-03	06:08:00	0
2009-04-03	06:09:00	0
2009-04-03	06:10:00	0
2009-04-03	06:11:00	0
2009-04-03	06:12:00	0
2009-04-03	06:13:00	0
2009-04-03	06:14:00	0
2009-04-03	06:15:00	0
2009-04-03	06:16:00	0
2009-04-03	06:17:00	0
2009-04-03	06:18:00	0
2009-04-03	06:19:00	0
2009-04-03	06:20:00	0
2009-04-03	06:21:00	0
2009-04-03	06:22:00	0
2009-04-03	06:23:00	0
2009-04-03	06:24:00	0
2009-04-03	06:25:00	0
2009-04-03	06:26:00	0
2009-04-03	06:27:00	0
2009-04-03	06:28:00	0
2009-04-03	06:29:00	0
2009-04-03	06:30:00	0
2009-04-03	06:31:00	0
2009-04-03	06:32:00	0
2009-04-03	06:33:00	0
2009-04-03	06:34:00	0
2009-04-03	06:35:00	0
2009-04-03	06:36:00	0
2009-04-03	06:37:00	0
2009-04-03	06:38:00	0
2009-04-03	06:39:00	0
2009-04-03	06:40:00	0
2009-04-03	06:41:00	0
2009-04-03	06:42:00	0
2009-04-03	06:43:00	0
2009-04-03	06:44:00	0
2009-04-03	06:45:00	0
2009-04-03	06:46:00	0
2009-04-03	06:47:00	0
2009-04-03	06:48:00	0
2009-04-03	06:49:00	0
2009-04-03	06:50:00	0
2009-04-03	06:51:00	0
2009-04-03	06:52:00	0
2009-04-03	06:53:00	0
2009-04-03	06:54:00	0
2009-04-03	06:55:00	0
2009-04-03	06:56:00	0
2009-04-03	06:57:00	0
2009-04-03	06:58:00	0
2009-04-03	06:59:00	0
2009-04-03	07:00:00	0
2009-04-03	07:01:00	0
2009-04-03	07:02:00	0
2009-04-03	07:03:00	0
2009-04-03	07:04:00	0
2009-04-03	07:05:00	0
2009-04-03	07:06:00	0
2009-04-03	07:07:00	0
2009-04-03	07:08:00	0
2009-04-03	07:09:00	0
2009-04-03	07:10:00	0
2009-04-03	07:11:00	0
2009-04-03	07:12:00	0
2009-04-03	07:13:00	0
2009-04-03	07:14:00	0
2009-04-03	07:15:00	0
2009-04-03	07:16:00	0
2009-04-03	07:17:00	0
2009-04-03	07:18:00	0
2009-04-03	07:19:00	0
2009-04-03	07:20:00	0
2009-04-03	07:21:00	0
2009-04-03	07:22:00	0
2009-04-03	07:23:00	0
2009-04-03	07:24:00	0
2009-04-03	07:25:00	0
2009-04-03	07:26:00	0
2009-04-03	07:27:00	0
2009-04-03	07:28:00	0
2009-04-03	07:29:00	0
2009-04-03	07:30:00	0
2009-04-03	07:31:00	0
2009-04-03	07:32:00	0
2009-04-03	07:33:00	0
2009-04-03	07:34:00	0
2009-04-03	07:35:00	0
2009-04-03	07:36:00	0
2009-04-03	07:37:00	0
2009-04-03	07:38:00	0
2009-04-03	07:39:00	0
2009-04-03	07:40:00	0
2009-04-03	07:41:00	0
2009-04-03	07:42:00	0
2009-04-03	07:43:00	0
2009-04-03	07:44:00	0
2009-04-03	07:45:00	0
2009-04-03	07:46:00	0
2009-04-03	07:47:00	0
2009-04-03	07:48:00	0
2009-04-03	07:49:00	0
2009-04-03	07:50:00	0
2009-04-03	07:51:00	0
2009-04-03	07:52:00	0
2009-04-03	07:53:00	0
2009-04-03	07:54:00	0
2009-04-03	07:55:00	0
2009-04-03	07:56:00	0
2009-04-03	07:57:00	0
2009-04-03	07:58:00	0
2009-04-03	07:59:00	0
2009-04-03	08:00:00	0
2009-04-03	08:01:00	0
2009-04-03	08:02:00	0
2009-04-03	08:03:00	0
2009-04-03	08:04:00	0
2009-04-03	08:05:00	0
2009-04-03	08:06:00	0
2009-04-03	08:07:00	0
2009-04-03	08:08:00	0
2009-04-03	08:09:00	0
2009-04-03	08:10:00	0
2009-04-03	08:11:00	0
2009-04-03	08:12:00	0
2009-04-03	08:13:00	0
2009-04-03	08:14:00	0
2009-04-03	08:15:00	0
2009-04-03	08:16:00	0
2009-04-03	08:17:00	0
2009-04-03	08:18:00	0
2009-04-03	08:19:00	0
2009-04-03	08:20:00	0
2009-04-03	08:21:00	0
2009-04-03	08:22:00	0
2009-04-03	08:23:00	0
2009-04-03	08:24:00	0
2009-04-03	08:25:00	0
2009-04-03	08:26:00	0
2009-04-03	08:27:00	0
2009-04-03	08:28:00	0
2009-04-03	08:29:00	0
2009-04-03	08:30:00	0
2009-04-03	08:31:00	0
2009-04-03	08:32:00	0
2009-04-03	08:33:00	0
2009-04-03	08:34:00	0
2009-04-03	08:35:00	0
2009-04-03	08:36:00	0
2009-04-03	08:37:00	0
2009-04-03	08:38:00	0
2009-04-03	08:39:00	0
2009-04-03	08:40:00	0
2009-04-03	08:41:00	0
2009-04-03	08:42:00	0
2009-04-03	08:43:00	0
2009-04-03	08:44:00	0
2009-04-03	08:45:00	0
2009-04-03	08:46:00	0
2009-04-03	08:47:00	0
2009-04-03	08:48:00	0
2009-04-03	08:49:00	0
2009-04-03	08:50:00	0
2009-04-03	08:51:00	0
2009-04-03	08:52:00	0
2009-04-03	08:53:00	0
2009-04-03	08:54:00	0
2009-04-03	08:55:00	0
2009-04-03	08:56:00	0
2009-04-03	08:57:00	0
2009-04-03	08:58:00	0
2009-04-03	08:59:00	0
2009-04-03	09:00:00	0
2009-04-03	09:01:00	0
2009-04-03	09:02:00	0
2009-04-03	09:03:00	0
2009-04-03	09:04:00	0
2009-04-03	09:05:00	0
2009-04-03	09:06:00	0
2009-04-03	09:07:00	0
2009-04-03	09:08:00	0
2009-04-03	09:09:00	0
2009-04-03	09:10:00	0
2009-04-03	09:11:00	0
2009-04-03	09:12:00	0
2009-04-03	09:13:00	0
2009-04-03	09:14:00	0
2009-04-03	09:15:00	0
2009-04-03	09:16:00	0
2009-04-03	09:17:00	0
2009-04-03	09:18:00	0
2009-04-03	09:19:00	0
2009-04-03	09:20:00	0
2009-04-03	09:21:00	0
2009-04-03	09:22:00	0
2009-04-03	09:23:00	0
2009-04-03	09:24:00	0
2009-04-03	09:25:00	0
2009-04-03	09:26:00	0
2009-04-03	09:27:00	0
2009-04-03	09:28:00	0
2009-04-03	09:29:00	0
2009-04-03	09:30:00	0
2009-04-03	09:31:00	0
2009-04-03	09:32:00	0
2009-04-03	09:33:00	0
2009-04-03	09:34:00	0
2009-04-03	09:35:00	0
2009-04-03	09:36:00	0
2009-04-03	09:37:00	0
2009-04-03	09:38:00	0
2009-04-03	09:39:00	0
2009-04-03	09:40:00	0
2009-04-03	09:41:00	0
2009-04-03	09:42:00	0
2009-04-03	09:43:00	0
2009-04-03	09:44:00	0
2009-04-03	09:45:00	0
2009-04-03	09:46:00	0
2009-04-03	09:47:00	0
2009-04-03	09:48:00	0
2009-04-03	09:49:00	0
2009-04-03	09:50:00	0
2009-04-03	09:51:00	0
2009-04-03	09:52:00	0
2009-04-03	09:53:00	0
2009-04-03	09:54:00	0
2009-04-03	09:55:00	0
2009-04-03	09:56:00	0
2009-04-03	09:57:00	0
2009-04-03	09:58:00	0
2009-04-03	09:59:00	0
2009-04-03	10:00:00	0
2009-04-03	10:01:00	0
2009-04-03	10:02:00	0
2009-04-03	10:03:00	0
2009-04-03	10:04:00	0
2009-04-03	10:05:00	0
2009-04-03	10:06:00	0
2009-04-03	10:07:00	0
2009-04-03	10:08:00	0
2009-04-03	10:09:00	0
2009-04-03	10:10:00	0
2009-04-03	10:11:00	0
2009-04-03	10:12:00	0
2009-04-03	10:13:00	0
2009-04-03	10:14:00	0
2009-04-03	10:15:00	0
2009-04-03	10:16:00	0
2009-04-03	10:17:00	0
2009-04-03	10:18:00	0
2009-04-03	10:19:00	0
2009-04-03	10:20:00	0
2009-04-03	10:21:00	0
2009-04-03	10:22:00	0
2009-04-03	10:23:00	0
2009-04-03	10:24:00	0
2009-04-03	10:25:00	0
2009-04-03	10:26:00	0
2009-04-03	10:27:00	0
2009-04-03	10:28:00	0
2009-04-03	10:29:00	0
2009-04-03	10:30:00	0
2009-04-03	10:31:00	0
2009-04-03	10:32:00	0
2009-04-03	10:33:00	0
2009-04-03	10:34:00	0
2009-04-03	10:35:00	0
2009-04-03	10:36:00	0
2009-04-03	10:37:00	0
2009-04-03	10:38:00	0
2009-04-03	10:39:00	0
2009-04-03	10:40:00	0
2009-04-03	10:41:00	0
2009-04-03	10:42:00	0
2009-04-03	10:43:00	0
2009-04-03	10:44:00	0
2009-04-03	10:45:00	0
2009-04-03	10:46:00	0
2009-04-03	10:47:00	0
2009-04-03	10:48:00	0
2009-04-03	10:49:00	0
2009-04-03	10:50:00	0
2009-04-03	10:51:00	0
2009-04-03	10:52:00	0
2009-04-03	10:53:00	0
2009-04-03	10:54:00	0
2009-04-03	10:55:00	0
2009-04-03	10:56:00	0
2009-04-03	10:57:00	0
2009-04-03	10:58:00	0
2009-04-03	10:59:00	0
2009-04-03	11:00:00	0
2009-04-03	11:01:00	0
2009-04-03	11:02:00	0
2009-04-03	11:03:00	0
2009-04-03	11:04:00	0
2009-04-03	11:05:00	0
2009-04-03	11:06:00	0
2009-04-03	11:07:00	0
2009-04-03	11:08:00	0
2009-04-03	11:09:00	0
2009-04-03	11:10:00	0
2009-04-03	11:11:00	0
2009-04-03	11:12:00	0
2009-04-03	11:13:00	0
2009-04-03	11:14:00	0
2009-04-03	11:15:00	0
2009-04-03	11:16:00	0
2009-04-03	11:17:00	0
2009-04-03	11:18:00	0
2009-04-03	11:19:00	0
2009-04-03	11:20:00	0
2009-04-03	11:21:00	0
2009-04-03	11:22:00	0
2009-04-03	11:23:00	0
2009-04-03	11:24:00	0
2009-04-03	11:25:00	0
2009-04-03	11:26:00	0
2009-04-03	11:27:00	0
2009-04-03	11:28:00	0
2009-04-03	11:29:00	0
2009-04-03	11:30:00	0
2009-04-03	11:31:00	0
2009-04-03	11:32:00	0
2009-04-03	11:33:00	0
2009-04-03	11:34:00	0
2009-04-03	11:35:00	0
2009-04-03	11:36:00	0
2009-04-03	11:37:00	0
2009-04-03	11:38:00	0
2009-04-03	11:39:00	0
2009-04-03	11:40:00	0
2009-04-03	11:41:00	0
2009-04-03	11:42:00	0
2009-04-03	11:43:00	0
2009-04-03	11:44:00	0
2009-04-03	11:45:00	0
2009-04-03	11:46:00	0
2009-04-03	11:47:00	0
2009-04-03	11:48:00	0
2009-04-03	11:49:00	0
2009-04-03	11:50:00	0
2009-04-03	11:51:00	0
2009-04-03	11:52:00	0
2009-04-03	11:53:00	0
2009-04-03	11:54:00	0
2009-04-03	11:55:00	0
2009-04-03	11:56:00	0
2009-04-03	11:57:00	0
2009-04-03	11:58:00	0
2009-04-03	11:59:00	0
2009-04-03	12:00:00	0
2009-04-03	12:01:00	0
2009-04-03	12:02:00	0
2009-04-03	12:03:00	0
2009-04-03	12:04:00	0
2009-04-03	12:05:00	0
2009-04-03	12:06:00	0
2009-04-03	12:07:00	0
2009-04-03	12:08:00	0
2009-04-03	12:09:00	0
2009-04-03	12:10:00	0
2009-04-03	12:11:00	676
2009-04-03	12:12:00	1003
2009-04-03	12:13:00	390
2009-04-03	12:14:00	647
2009-04-03	12:15:00	785
2009-04-03	12:16:00	321
2009-04-03	12:17:00	478
2009-04-03	12:18:00	818
2009-04-03	12:19:00	1640
2009-04-03	12:20:00	1339
2009-04-03	12:21:00	926
2009-04-03	12:22:00	379
2009-04-03	12:23:00	285
2009-04-03	12:24:00	721
2009-04-03	12:25:00	564
2009-04-03	12:26:00	527
2009-04-03	12:27:00	1290
2009-04-03	12:28:00	331
2009-04-03	12:29:00	490
2009-04-03	12:30:00	752
2009-04-03	12:31:00	400
2009-04-03	12:32:00	321
2009-04-03	12:33:00	44
2009-04-03	12:34:00	86
2009-04-03	12:35:00	676
2009-04-03	12:36:00	455
2009-04-03	12:37:00	605
2009-04-03	12:38:00	690
2009-04-03	12:39:00	983
2009-04-03	12:40:00	211
2009-04-03	12:41:00	605
2009-04-03	12:42:00	455
2009-04-03	12:43:00	58
2009-04-03	12:44:00	432
2009-04-03	12:45:00	34
2009-04-03	12:46:00	227
2009-04-03	12:47:00	564
2009-04-03	12:48:00	1670
2009-04-03	12:49:00	1700
2009-04-03	12:50:00	605
2009-04-03	12:51:00	115
2009-04-03	12:52:00	115
2009-04-03	12:53:00	75
2009-04-03	12:54:00	39
2009-04-03	12:55:00	53
2009-04-03	12:56:00	276
2009-04-03	12:57:00	34
2009-04-03	12:58:00	0
2009-04-03	12:59:00	0
2009-04-03	13:00:00	69
2009-04-03	13:01:00	219
2009-04-03	13:02:00	48
2009-04-03	13:03:00	29
2009-04-03	13:04:00	19
2009-04-03	13:05:00	121
2009-04-03	13:06:00	285
2009-04-03	13:07:00	311
2009-04-03	13:08:00	141
2009-04-03	13:09:00	889
2009-04-03	13:10:00	661
2009-04-03	13:11:00	48
2009-04-03	13:12:00	340
2009-04-03	13:13:00	706
2009-04-03	13:14:00	44
2009-04-03	13:15:00	10
2009-04-03	13:16:00	15
2009-04-03	13:17:00	44
2009-04-03	13:18:00	10
2009-04-03	13:19:00	0
2009-04-03	13:20:00	5
2009-04-03	13:21:00	10
2009-04-03	13:22:00	0
2009-04-03	13:23:00	19
2009-04-03	13:24:00	15
2009-04-03	13:25:00	5
2009-04-03	13:26:00	0
2009-04-03	13:27:00	0
2009-04-03	13:28:00	10
2009-04-03	13:29:00	48
2009-04-03	13:30:00	48
2009-04-03	13:31:00	0
2009-04-03	13:32:00	5
2009-04-03	13:33:00	0
2009-04-03	13:34:00	5
2009-04-03	13:35:00	127
2009-04-03	13:36:00	69
2009-04-03	13:37:00	5
2009-04-03	13:38:00	69
2009-04-03	13:39:00	44
2009-04-03	13:40:00	5
2009-04-03	13:41:00	0
2009-04-03	13:42:00	0
2009-04-03	13:43:00	0
2009-04-03	13:44:00	0
2009-04-03	13:45:00	44
2009-04-03	13:46:00	5
2009-04-03	13:47:00	204
2009-04-03	13:48:00	63
2009-04-03	13:49:00	10
2009-04-03	13:50:00	86
2009-04-03	13:51:00	34
2009-04-03	13:52:00	5
2009-04-03	13:53:00	5
2009-04-03	13:54:00	0
2009-04-03	13:55:00	115
2009-04-03	13:56:00	44
2009-04-03	13:57:00	110
2009-04-03	13:58:00	10
2009-04-03	13:59:00	121
2009-04-03	14:00:00	0
2009-04-03	14:01:00	340
2009-04-03	14:02:00	75
2009-04-03	14:03:00	34
2009-04-03	14:04:00	19
2009-04-03	14:05:00	69
2009-04-03	14:06:00	29
2009-04-03	14:07:00	10
2009-04-03	14:08:00	98
2009-04-03	14:09:00	69
2009-04-03	14:10:00	19
2009-04-03	14:11:00	92
2009-04-03	14:12:00	147
2009-04-03	14:13:00	58
2009-04-03	14:14:00	24
2009-04-03	14:15:00	86
2009-04-03	14:16:00	48
2009-04-03	14:17:00	5
2009-04-03	14:18:00	5
2009-04-03	14:19:00	5
2009-04-03	14:20:00	5
2009-04-03	14:21:00	0
2009-04-03	14:22:00	34
2009-04-03	14:23:00	44
2009-04-03	14:24:00	10
2009-04-03	14:25:00	10
2009-04-03	14:26:00	39
2009-04-03	14:27:00	58
2009-04-03	14:28:00	34
2009-04-03	14:29:00	48
2009-04-03	14:30:00	48
2009-04-03	14:31:00	19
2009-04-03	14:32:00	5
2009-04-03	14:33:00	0
2009-04-03	14:34:00	92
2009-04-03	14:35:00	141
2009-04-03	14:36:00	39
2009-04-03	14:37:00	0
2009-04-03	14:38:00	134
2009-04-03	14:39:00	10
2009-04-03	14:40:00	15
2009-04-03	14:41:00	15
2009-04-03	14:42:00	39
2009-04-03	14:43:00	0
2009-04-03	14:44:00	48
2009-04-03	14:45:00	147
2009-04-03	14:46:00	10
2009-04-03	14:47:00	98
2009-04-03	14:48:00	75
2009-04-03	14:49:00	34
2009-04-03	14:50:00	19
2009-04-03	14:51:00	34
2009-04-03	14:52:00	69
2009-04-03	14:53:00	501
2009-04-03	14:54:00	92
2009-04-03	14:55:00	34
2009-04-03	14:56:00	276
2009-04-03	14:57:00	5
2009-04-03	14:58:00	19
2009-04-03	14:59:00	5
2009-04-03	15:00:00	34
2009-04-03	15:01:00	10
2009-04-03	15:02:00	34
2009-04-03	15:03:00	24
2009-04-03	15:04:00	104
2009-04-03	15:05:00	0
2009-04-03	15:06:00	5
2009-04-03	15:07:00	86
2009-04-03	15:08:00	39
2009-04-03	15:09:00	104
2009-04-03	15:10:00	44
2009-04-03	15:11:00	0
2009-04-03	15:12:00	10
2009-04-03	15:13:00	785
2009-04-03	15:14:00	175
2009-04-03	15:15:00	10
2009-04-03	15:16:00	10
2009-04-03	15:17:00	5
2009-04-03	15:18:00	63
2009-04-03	15:19:00	115
2009-04-03	15:20:00	86
2009-04-03	15:21:00	104
2009-04-03	15:22:00	39
2009-04-03	15:23:00	0
2009-04-03	15:24:00	15
2009-04-03	15:25:00	48
2009-04-03	15:26:00	34
2009-04-03	15:27:00	44
2009-04-03	15:28:00	5
2009-04-03	15:29:00	75
2009-04-03	15:30:00	10
2009-04-03	15:31:00	34
2009-04-03	15:32:00	5
2009-04-03	15:33:00	121
2009-04-03	15:34:00	0
2009-04-03	15:35:00	86
2009-04-03	15:36:00	63
2009-04-03	15:37:00	1195
2009-04-03	15:38:00	1731
2009-04-03	15:39:00	2067
2009-04-03	15:40:00	647
2009-04-03	15:41:00	127
2009-04-03	15:42:00	514
2009-04-03	15:43:00	104
2009-04-03	15:44:00	58
2009-04-03	15:45:00	39
2009-04-03	15:46:00	86
2009-04-03	15:47:00	379
2009-04-03	15:48:00	80
2009-04-03	15:49:00	121
2009-04-03	15:50:00	98
2009-04-03	15:51:00	19
2009-04-03	15:52:00	53
2009-04-03	15:53:00	211
2009-04-03	15:54:00	259
2009-04-03	15:55:00	58
2009-04-03	15:56:00	86
2009-04-03	15:57:00	86
2009-04-03	15:58:00	53
2009-04-03	15:59:00	34
2009-04-03	16:00:00	0
2009-04-03	16:01:00	110
2009-04-03	16:02:00	115
2009-04-03	16:03:00	242
2009-04-03	16:04:00	127
2009-04-03	16:05:00	34
2009-04-03	16:06:00	5
2009-04-03	16:07:00	5
2009-04-03	16:08:00	0
2009-04-03	16:09:00	0
2009-04-03	16:10:00	127
2009-04-03	16:11:00	19
2009-04-03	16:12:00	204
2009-04-03	16:13:00	69
2009-04-03	16:14:00	0
2009-04-03	16:15:00	15
2009-04-03	16:16:00	188
2009-04-03	16:17:00	39
2009-04-03	16:18:00	0
2009-04-03	16:19:00	15
2009-04-03	16:20:00	0
2009-04-03	16:21:00	0
2009-04-03	16:22:00	0
2009-04-03	16:23:00	0
2009-04-03	16:24:00	15
2009-04-03	16:25:00	44
2009-04-03	16:26:00	44
2009-04-03	16:27:00	86
2009-04-03	16:28:00	154
2009-04-03	16:29:00	268
2009-04-03	16:30:00	400
2009-04-03	16:31:00	19
2009-04-03	16:32:00	10
2009-04-03	16:33:00	121
2009-04-03	16:34:00	0
2009-04-03	16:35:00	19
2009-04-03	16:36:00	0
2009-04-03	16:37:00	0
2009-04-03	16:38:00	104
2009-04-03	16:39:00	0
2009-04-03	16:40:00	0
2009-04-03	16:41:00	15
2009-04-03	16:42:00	0
2009-04-03	16:43:00	188
2009-04-03	16:44:00	871
2009-04-03	16:45:00	2775
2009-04-03	16:46:00	2296
2009-04-03	16:47:00	964
2009-04-03	16:48:00	619
2009-04-03	16:49:00	490
2009-04-03	16:50:00	360
2009-04-03	16:51:00	592
2009-04-03	16:52:00	259
2009-04-03	16:53:00	259
2009-04-03	16:54:00	466
2009-04-03	16:55:00	661
2009-04-03	16:56:00	676
2009-04-03	16:57:00	369
2009-04-03	16:58:00	1195
2009-04-03	16:59:00	964
2009-04-03	17:00:00	690
2009-04-03	17:01:00	661
2009-04-03	17:02:00	285
2009-04-03	17:03:00	564
2009-04-03	17:04:00	802
2009-04-03	17:05:00	632
2009-04-03	17:06:00	592
2009-04-03	17:07:00	605
2009-04-03	17:08:00	564
2009-04-03	17:09:00	592
2009-04-03	17:10:00	501
2009-04-03	17:11:00	490
2009-04-03	17:12:00	501
2009-04-03	17:13:00	721
2009-04-03	17:14:00	853
2009-04-03	17:15:00	818
2009-04-03	17:16:00	1106
2009-04-03	17:17:00	2337
2009-04-03	17:18:00	1469
2009-04-03	17:19:00	1552
2009-04-03	17:20:00	3885
2009-04-03	17:21:00	2179
2009-04-03	17:22:00	276
2009-04-03	17:23:00	721
2009-04-03	17:24:00	5
2009-04-03	17:25:00	400
2009-04-03	17:26:00	501
2009-04-03	17:27:00	605
2009-04-03	17:28:00	926
2009-04-03	17:29:00	24
2009-04-03	17:30:00	69
2009-04-03	17:31:00	44
2009-04-03	17:32:00	10
2009-04-03	17:33:00	0
2009-04-03	17:34:00	181
2009-04-03	17:35:00	196
2009-04-03	17:36:00	443
2009-04-03	17:37:00	0
2009-04-03	17:38:00	15
2009-04-03	17:39:00	422
2009-04-03	17:40:00	110
2009-04-03	17:41:00	1150
2009-04-03	17:42:00	0
2009-04-03	17:43:00	219
2009-04-03	17:44:00	303
2009-04-03	17:45:00	0
2009-04-03	17:46:00	29
2009-04-03	17:47:00	0
2009-04-03	17:48:00	15
2009-04-03	17:49:00	53
2009-04-03	17:50:00	34
2009-04-03	17:51:00	5
2009-04-03	17:52:00	0
2009-04-03	17:53:00	242
2009-04-03	17:54:00	514
2009-04-03	17:55:00	227
2009-04-03	17:56:00	379
2009-04-03	17:57:00	34
2009-04-03	17:58:00	5
2009-04-03	17:59:00	44
2009-04-03	18:00:00	769
2009-04-03	18:01:00	706
2009-04-03	18:02:00	1218
2009-04-03	18:03:00	268
2009-04-03	18:04:00	983
2009-04-03	18:05:00	5
2009-04-03	18:06:00	10
2009-04-03	18:07:00	0
2009-04-03	18:08:00	752
2009-04-03	18:09:00	24
2009-04-03	18:10:00	147
2009-04-03	18:11:00	853
2009-04-03	18:12:00	908
2009-04-03	18:13:00	24
2009-04-03	18:14:00	19
2009-04-03	18:15:00	34
2009-04-03	18:16:00	34
2009-04-03	18:17:00	19
2009-04-03	18:18:00	5
2009-04-03	18:19:00	331
2009-04-03	18:20:00	432
2009-04-03	18:21:00	204
2009-04-03	18:22:00	5
2009-04-03	18:23:00	5
2009-04-03	18:24:00	242
2009-04-03	18:25:00	0
2009-04-03	18:26:00	0
2009-04-03	18:27:00	466
2009-04-03	18:28:00	168
2009-04-03	18:29:00	15
2009-04-03	18:30:00	0
2009-04-03	18:31:00	141
2009-04-03	18:32:00	0
2009-04-03	18:33:00	10
2009-04-03	18:34:00	0
2009-04-03	18:35:00	0
2009-04-03	18:36:00	5
2009-04-03	18:37:00	188
2009-04-03	18:38:00	1390
2009-04-03	18:39:00	443
2009-04-03	18:40:00	676
2009-04-03	18:41:00	422
2009-04-03	18:42:00	181
2009-04-03	18:43:00	75
2009-04-03	18:44:00	48
2009-04-03	18:45:00	0
2009-04-03	18:46:00	63
2009-04-03	18:47:00	80
2009-04-03	18:48:00	80
2009-04-03	18:49:00	15
2009-04-03	18:50:00	127
2009-04-03	18:51:00	188
2009-04-03	18:52:00	0
2009-04-03	18:53:00	5
2009-04-03	18:54:00	19
2009-04-03	18:55:00	0
2009-04-03	18:56:00	0
2009-04-03	18:57:00	63
2009-04-03	18:58:00	0
2009-04-03	18:59:00	0
2009-04-03	19:00:00	39
2009-04-03	19:01:00	0
2009-04-03	19:02:00	0
2009-04-03	19:03:00	69
2009-04-03	19:04:00	0
2009-04-03	19:05:00	0
2009-04-03	19:06:00	0
2009-04-03	19:07:00	0
2009-04-03	19:08:00	63
2009-04-03	19:09:00	0
2009-04-03	19:10:00	0
2009-04-03	19:11:00	39
2009-04-03	19:12:00	0
2009-04-03	19:13:00	321
2009-04-03	19:14:00	0
2009-04-03	19:15:00	0
2009-04-03	19:16:00	0
2009-04-03	19:17:00	0
2009-04-03	19:18:00	0
2009-04-03	19:19:00	0
2009-04-03	19:20:00	0
2009-04-03	19:21:00	0
2009-04-03	19:22:00	0
2009-04-03	19:23:00	0
2009-04-03	19:24:00	0
2009-04-03	19:25:00	58
2009-04-03	19:26:00	80
2009-04-03	19:27:00	29
2009-04-03	19:28:00	211
2009-04-03	19:29:00	0
2009-04-03	19:30:00	0
2009-04-03	19:31:00	19
2009-04-03	19:32:00	44
2009-04-03	19:33:00	0
2009-04-03	19:34:00	0
2009-04-03	19:35:00	29
2009-04-03	19:36:00	0
2009-04-03	19:37:00	983
2009-04-03	19:38:00	889
2009-04-03	19:39:00	737
2009-04-03	19:40:00	127
2009-04-03	19:41:00	39
2009-04-03	19:42:00	0
2009-04-03	19:43:00	29
2009-04-03	19:44:00	24
2009-04-03	19:45:00	34
2009-04-03	19:46:00	10
2009-04-03	19:47:00	147
2009-04-03	19:48:00	5
2009-04-03	19:49:00	539
2009-04-03	19:50:00	303
2009-04-03	19:51:00	5
2009-04-03	19:52:00	15
2009-04-03	19:53:00	10
2009-04-03	19:54:00	0
2009-04-03	19:55:00	0
2009-04-03	19:56:00	29
2009-04-03	19:57:00	0
2009-04-03	19:58:00	29
2009-04-03	19:59:00	134
2009-04-03	20:00:00	1469
2009-04-03	20:01:00	539
2009-04-03	20:02:00	1496
2009-04-03	20:03:00	1218
2009-04-03	20:04:00	1218
2009-04-03	20:05:00	552
2009-04-03	20:06:00	379
2009-04-03	20:07:00	154
2009-04-03	20:08:00	0
2009-04-03	20:09:00	5
2009-04-03	20:10:00	15
2009-04-03	20:11:00	39
2009-04-03	20:12:00	98
2009-04-03	20:13:00	0
2009-04-03	20:14:00	340
2009-04-03	20:15:00	836
2009-04-03	20:16:00	19
2009-04-03	20:17:00	211
2009-04-03	20:18:00	175
2009-04-03	20:19:00	5
2009-04-03	20:20:00	0
2009-04-03	20:21:00	175
2009-04-03	20:22:00	175
2009-04-03	20:23:00	10
2009-04-03	20:24:00	24
2009-04-03	20:25:00	161
2009-04-03	20:26:00	15
2009-04-03	20:27:00	0
2009-04-03	20:28:00	0
2009-04-03	20:29:00	0
2009-04-03	20:30:00	0
2009-04-03	20:31:00	104
2009-04-03	20:32:00	5
2009-04-03	20:33:00	5
2009-04-03	20:34:00	0
2009-04-03	20:35:00	0
2009-04-03	20:36:00	5
2009-04-03	20:37:00	0
2009-04-03	20:38:00	0
2009-04-03	20:39:00	92
2009-04-03	20:40:00	0
2009-04-03	20:41:00	0
2009-04-03	20:42:00	0
2009-04-03	20:43:00	0
2009-04-03	20:44:00	0
2009-04-03	20:45:00	0
2009-04-03	20:46:00	0
2009-04-03	20:47:00	0
2009-04-03	20:48:00	53
2009-04-03	20:49:00	5
2009-04-03	20:50:00	15
2009-04-03	20:51:00	0
2009-04-03	20:52:00	141
2009-04-03	20:53:00	175
2009-04-03	20:54:00	5
2009-04-03	20:55:00	0
2009-04-03	20:56:00	0
2009-04-03	20:57:00	44
2009-04-03	20:58:00	154
2009-04-03	20:59:00	276
2009-04-03	21:00:00	250
2009-04-03	21:01:00	0
2009-04-03	21:02:00	10
2009-04-03	21:03:00	360
2009-04-03	21:04:00	5
2009-04-03	21:05:00	10
2009-04-03	21:06:00	19
2009-04-03	21:07:00	121
2009-04-03	21:08:00	181
2009-04-03	21:09:00	204
2009-04-03	21:10:00	632
2009-04-03	21:11:00	250
2009-04-03	21:12:00	5
2009-04-03	21:13:00	5
2009-04-03	21:14:00	181
2009-04-03	21:15:00	0
2009-04-03	21:16:00	737
2009-04-03	21:17:00	1241
2009-04-03	21:18:00	1290
2009-04-03	21:19:00	1469
2009-04-03	21:20:00	1064
2009-04-03	21:21:00	1241
2009-04-03	21:22:00	1442
2009-04-03	21:23:00	769
2009-04-03	21:24:00	1106
2009-04-03	21:25:00	294
2009-04-03	21:26:00	268
2009-04-03	21:27:00	15
2009-04-03	21:28:00	48
2009-04-03	21:29:00	75
2009-04-03	21:30:00	676
2009-04-03	21:31:00	619
2009-04-03	21:32:00	443
2009-04-03	21:33:00	235
2009-04-03	21:34:00	539
2009-04-03	21:35:00	1926
2009-04-03	21:36:00	632
2009-04-03	21:37:00	24
2009-04-03	21:38:00	48
2009-04-03	21:39:00	802
2009-04-03	21:40:00	752
2009-04-03	21:41:00	1085
2009-04-03	21:42:00	1172
2009-04-03	21:43:00	168
2009-04-03	21:44:00	1218
2009-04-03	21:45:00	4735
2009-04-03	21:46:00	4289
2009-04-03	21:47:00	3885
2009-04-03	21:48:00	3696
2009-04-03	21:49:00	5310
2009-04-03	21:50:00	2504
2009-04-03	21:51:00	98
2009-04-03	21:52:00	390
2009-04-03	21:53:00	3179
2009-04-03	21:54:00	2729
2009-04-03	21:55:00	926
2009-04-03	21:56:00	58
2009-04-03	21:57:00	2256
2009-04-03	21:58:00	311
2009-04-03	21:59:00	39
2009-04-03	22:00:00	5
2009-04-03	22:01:00	3696
2009-04-03	22:02:00	501
2009-04-03	22:03:00	3179
2009-04-03	22:04:00	2971
2009-04-03	22:05:00	2547
2009-04-03	22:06:00	29
2009-04-03	22:07:00	168
2009-04-03	22:08:00	340
2009-04-03	22:09:00	15
2009-04-03	22:10:00	44
2009-04-03	22:11:00	5
2009-04-03	22:12:00	0
2009-04-03	22:13:00	311
2009-04-03	22:14:00	53
2009-04-03	22:15:00	1640
2009-04-03	22:16:00	1314
2009-04-03	22:17:00	455
2009-04-03	22:18:00	75
2009-04-03	22:19:00	0
2009-04-03	22:20:00	2729
2009-04-03	22:21:00	4735
2009-04-03	22:22:00	4289
2009-04-03	22:23:00	3950
2009-04-03	22:24:00	2637
2009-04-03	22:25:00	578
2009-04-03	22:26:00	527
2009-04-03	22:27:00	1003
2009-04-03	22:28:00	605
2009-04-03	22:29:00	311
2009-04-03	22:30:00	0
2009-04-03	22:31:00	86
2009-04-03	22:32:00	196
2009-04-03	22:33:00	115
2009-04-03	22:34:00	175
2009-04-03	22:35:00	539
2009-04-03	22:36:00	944
2009-04-03	22:37:00	422
2009-04-03	22:38:00	10
2009-04-03	22:39:00	721
2009-04-03	22:40:00	5
2009-04-03	22:41:00	0
2009-04-03	22:42:00	24
2009-04-03	22:43:00	63
2009-04-03	22:44:00	69
2009-04-03	22:45:00	154
2009-04-03	22:46:00	154
2009-04-03	22:47:00	539
2009-04-03	22:48:00	802
2009-04-03	22:49:00	53
2009-04-03	22:50:00	48
2009-04-03	22:51:00	58
2009-04-03	22:52:00	285
2009-04-03	22:53:00	0
2009-04-03	22:54:00	411
2009-04-03	22:55:00	926
2009-04-03	22:56:00	1150
2009-04-03	22:57:00	690
2009-04-03	22:58:00	2378
2009-04-03	22:59:00	1241
2009-04-03	23:00:00	276
2009-04-03	23:01:00	422
2009-04-03	23:02:00	219
2009-04-03	23:03:00	340
2009-04-03	23:04:00	1241
2009-04-03	23:05:00	350
2009-04-03	23:06:00	661
2009-04-03	23:07:00	889
2009-04-03	23:08:00	340
2009-04-03	23:09:00	19
2009-04-03	23:10:00	311
2009-04-03	23:11:00	769
2009-04-03	23:12:00	63
2009-04-03	23:13:00	0
2009-04-03	23:14:00	19
2009-04-03	23:15:00	34
2009-04-03	23:16:00	0
2009-04-03	23:17:00	0
2009-04-03	23:18:00	15
2009-04-03	23:19:00	0
2009-04-03	23:20:00	0
2009-04-03	23:21:00	0
2009-04-03	23:22:00	0
2009-04-03	23:23:00	0
2009-04-03	23:24:00	0
2009-04-03	23:25:00	19
2009-04-03	23:26:00	1442
2009-04-03	23:27:00	75
2009-04-03	23:28:00	48
2009-04-03	23:29:00	24
2009-04-03	23:30:00	0
2009-04-03	23:31:00	19
2009-04-03	23:32:00	24
2009-04-03	23:33:00	0
2009-04-03	23:34:00	0
2009-04-03	23:35:00	58
2009-04-03	23:36:00	578
2009-04-03	23:37:00	80
2009-04-03	23:38:00	98
2009-04-03	23:39:00	10
2009-04-03	23:40:00	0
2009-04-03	23:41:00	0
2009-04-03	23:42:00	0
2009-04-03	23:43:00	0
2009-04-03	23:44:00	0
2009-04-03	23:45:00	0
2009-04-03	23:46:00	0
2009-04-03	23:47:00	303
2009-04-03	23:48:00	204
2009-04-03	23:49:00	0
2009-04-03	23:50:00	0
2009-04-03	23:51:00	0
2009-04-03	23:52:00	0
2009-04-03	23:53:00	0
2009-04-03	23:54:00	0
2009-04-03	23:55:00	0
2009-04-03	23:56:00	0
2009-04-03	23:57:00	0
2009-04-03	23:58:00	0
2009-04-03	23:59:00	0
2009-04-04	00:00:00	63
2009-04-04	00:01:00	75
2009-04-04	00:02:00	0
2009-04-04	00:03:00	0
2009-04-04	00:04:00	0
2009-04-04	00:05:00	0
2009-04-04	00:06:00	0
2009-04-04	00:07:00	0
2009-04-04	00:08:00	0
2009-04-04	00:09:00	0
2009-04-04	00:10:00	0
2009-04-04	00:11:00	0
2009-04-04	00:12:00	0
2009-04-04	00:13:00	0
2009-04-04	00:14:00	0
2009-04-04	00:15:00	0
2009-04-04	00:16:00	0
2009-04-04	00:17:00	0
2009-04-04	00:18:00	0
2009-04-04	00:19:00	0
2009-04-04	00:20:00	0
2009-04-04	00:21:00	0
2009-04-04	00:22:00	0
2009-04-04	00:23:00	58
2009-04-04	00:24:00	0
2009-04-04	00:25:00	0
2009-04-04	00:26:00	0
2009-04-04	00:27:00	0
2009-04-04	00:28:00	0
2009-04-04	00:29:00	181
2009-04-04	00:30:00	69
2009-04-04	00:31:00	0
2009-04-04	00:32:00	0
2009-04-04	00:33:00	0
2009-04-04	00:34:00	0
2009-04-04	00:35:00	0
2009-04-04	00:36:00	0
2009-04-04	00:37:00	0
2009-04-04	00:38:00	0
2009-04-04	00:39:00	0
2009-04-04	00:40:00	0
2009-04-04	00:41:00	0
2009-04-04	00:42:00	0
2009-04-04	00:43:00	0
2009-04-04	00:44:00	0
2009-04-04	00:45:00	0
2009-04-04	00:46:00	15
2009-04-04	00:47:00	75
2009-04-04	00:48:00	0
2009-04-04	00:49:00	63
2009-04-04	00:50:00	0
2009-04-04	00:51:00	0
2009-04-04	00:52:00	0
2009-04-04	00:53:00	0
2009-04-04	00:54:00	0
2009-04-04	00:55:00	0
2009-04-04	00:56:00	0
2009-04-04	00:57:00	0
2009-04-04	00:58:00	0
2009-04-04	00:59:00	58
2009-04-04	01:00:00	0
2009-04-04	01:01:00	0
2009-04-04	01:02:00	0
2009-04-04	01:03:00	0
2009-04-04	01:04:00	0
2009-04-04	01:05:00	0
2009-04-04	01:06:00	0
2009-04-04	01:07:00	0
2009-04-04	01:08:00	0
2009-04-04	01:09:00	0
2009-04-04	01:10:00	0
2009-04-04	01:11:00	0
2009-04-04	01:12:00	0
2009-04-04	01:13:00	0
2009-04-04	01:14:00	0
2009-04-04	01:15:00	0
2009-04-04	01:16:00	350
2009-04-04	01:17:00	19
2009-04-04	01:18:00	0
2009-04-04	01:19:00	0
2009-04-04	01:20:00	0
2009-04-04	01:21:00	0
2009-04-04	01:22:00	0
2009-04-04	01:23:00	0
2009-04-04	01:24:00	0
2009-04-04	01:25:00	0
2009-04-04	01:26:00	0
2009-04-04	01:27:00	0
2009-04-04	01:28:00	0
2009-04-04	01:29:00	0
2009-04-04	01:30:00	0
2009-04-04	01:31:00	0
2009-04-04	01:32:00	0
2009-04-04	01:33:00	0
2009-04-04	01:34:00	0
2009-04-04	01:35:00	34
2009-04-04	01:36:00	5
2009-04-04	01:37:00	0
2009-04-04	01:38:00	0
2009-04-04	01:39:00	0
2009-04-04	01:40:00	0
2009-04-04	01:41:00	0
2009-04-04	01:42:00	0
2009-04-04	01:43:00	0
2009-04-04	01:44:00	0
2009-04-04	01:45:00	0
2009-04-04	01:46:00	0
2009-04-04	01:47:00	0
2009-04-04	01:48:00	0
2009-04-04	01:49:00	29
2009-04-04	01:50:00	0
2009-04-04	01:51:00	0
2009-04-04	01:52:00	0
2009-04-04	01:53:00	0
2009-04-04	01:54:00	0
2009-04-04	01:55:00	0
2009-04-04	01:56:00	0
2009-04-04	01:57:00	75
2009-04-04	01:58:00	242
2009-04-04	01:59:00	0
2009-04-04	02:00:00	0
2009-04-04	02:01:00	0
2009-04-04	02:02:00	0
2009-04-04	02:03:00	0
2009-04-04	02:04:00	0
2009-04-04	02:05:00	0
2009-04-04	02:06:00	0
2009-04-04	02:07:00	0
2009-04-04	02:08:00	0
2009-04-04	02:09:00	15
2009-04-04	02:10:00	0
2009-04-04	02:11:00	0
2009-04-04	02:12:00	0
2009-04-04	02:13:00	0
2009-04-04	02:14:00	0
2009-04-04	02:15:00	0
2009-04-04	02:16:00	0
2009-04-04	02:17:00	0
2009-04-04	02:18:00	0
2009-04-04	02:19:00	0
2009-04-04	02:20:00	0
2009-04-04	02:21:00	141
2009-04-04	02:22:00	0
2009-04-04	02:23:00	0
2009-04-04	02:24:00	0
2009-04-04	02:25:00	0
2009-04-04	02:26:00	0
2009-04-04	02:27:00	0
2009-04-04	02:28:00	0
2009-04-04	02:29:00	0
2009-04-04	02:30:00	432
2009-04-04	02:31:00	69
2009-04-04	02:32:00	0
2009-04-04	02:33:00	0
2009-04-04	02:34:00	0
2009-04-04	02:35:00	0
2009-04-04	02:36:00	0
2009-04-04	02:37:00	0
2009-04-04	02:38:00	0
2009-04-04	02:39:00	63
2009-04-04	02:40:00	0
2009-04-04	02:41:00	0
2009-04-04	02:42:00	0
2009-04-04	02:43:00	0
2009-04-04	02:44:00	0
2009-04-04	02:45:00	0
2009-04-04	02:46:00	0
2009-04-04	02:47:00	0
2009-04-04	02:48:00	0
2009-04-04	02:49:00	0
2009-04-04	02:50:00	0
2009-04-04	02:51:00	0
2009-04-04	02:52:00	0
2009-04-04	02:53:00	0
2009-04-04	02:54:00	0
2009-04-04	02:55:00	0
2009-04-04	02:56:00	0
2009-04-04	02:57:00	48
2009-04-04	02:58:00	0
2009-04-04	02:59:00	0
2009-04-04	03:00:00	0
2009-04-04	03:01:00	0
2009-04-04	03:02:00	0
2009-04-04	03:03:00	0
2009-04-04	03:04:00	0
2009-04-04	03:05:00	0
2009-04-04	03:06:00	0
2009-04-04	03:07:00	0
2009-04-04	03:08:00	0
2009-04-04	03:09:00	0
2009-04-04	03:10:00	0
2009-04-04	03:11:00	0
2009-04-04	03:12:00	0
2009-04-04	03:13:00	75
2009-04-04	03:14:00	0
2009-04-04	03:15:00	0
2009-04-04	03:16:00	0
2009-04-04	03:17:00	0
2009-04-04	03:18:00	0
2009-04-04	03:19:00	0
2009-04-04	03:20:00	0
2009-04-04	03:21:00	0
2009-04-04	03:22:00	0
2009-04-04	03:23:00	5
2009-04-04	03:24:00	0
2009-04-04	03:25:00	0
2009-04-04	03:26:00	0
2009-04-04	03:27:00	15
2009-04-04	03:28:00	92
2009-04-04	03:29:00	0
2009-04-04	03:30:00	0
2009-04-04	03:31:00	0
2009-04-04	03:32:00	0
2009-04-04	03:33:00	0
2009-04-04	03:34:00	0
2009-04-04	03:35:00	0
2009-04-04	03:36:00	0
2009-04-04	03:37:00	110
2009-04-04	03:38:00	0
2009-04-04	03:39:00	0
2009-04-04	03:40:00	0
2009-04-04	03:41:00	0
2009-04-04	03:42:00	0
2009-04-04	03:43:00	0
2009-04-04	03:44:00	0
2009-04-04	03:45:00	0
2009-04-04	03:46:00	0
2009-04-04	03:47:00	0
2009-04-04	03:48:00	0
2009-04-04	03:49:00	0
2009-04-04	03:50:00	0
2009-04-04	03:51:00	0
2009-04-04	03:52:00	0
2009-04-04	03:53:00	0
2009-04-04	03:54:00	0
2009-04-04	03:55:00	10
2009-04-04	03:56:00	0
2009-04-04	03:57:00	34
2009-04-04	03:58:00	75
2009-04-04	03:59:00	0
2009-04-04	04:00:00	0
2009-04-04	04:01:00	0
2009-04-04	04:02:00	0
2009-04-04	04:03:00	0
2009-04-04	04:04:00	0
2009-04-04	04:05:00	0
2009-04-04	04:06:00	0
2009-04-04	04:07:00	0
2009-04-04	04:08:00	0
2009-04-04	04:09:00	0
2009-04-04	04:10:00	0
2009-04-04	04:11:00	0
2009-04-04	04:12:00	0
2009-04-04	04:13:00	0
2009-04-04	04:14:00	58
2009-04-04	04:15:00	0
2009-04-04	04:16:00	127
2009-04-04	04:17:00	0
2009-04-04	04:18:00	0
2009-04-04	04:19:00	0
2009-04-04	04:20:00	0
2009-04-04	04:21:00	0
2009-04-04	04:22:00	0
2009-04-04	04:23:00	0
2009-04-04	04:24:00	0
2009-04-04	04:25:00	0
2009-04-04	04:26:00	0
2009-04-04	04:27:00	0
2009-04-04	04:28:00	0
2009-04-04	04:29:00	0
2009-04-04	04:30:00	0
2009-04-04	04:31:00	311
2009-04-04	04:32:00	5
2009-04-04	04:33:00	0
2009-04-04	04:34:00	0
2009-04-04	04:35:00	0
2009-04-04	04:36:00	0
2009-04-04	04:37:00	0
2009-04-04	04:38:00	0
2009-04-04	04:39:00	0
2009-04-04	04:40:00	0
2009-04-04	04:41:00	0
2009-04-04	04:42:00	0
2009-04-04	04:43:00	0
2009-04-04	04:44:00	0
2009-04-04	04:45:00	0
2009-04-04	04:46:00	0
2009-04-04	04:47:00	0
2009-04-04	04:48:00	0
2009-04-04	04:49:00	0
2009-04-04	04:50:00	0
2009-04-04	04:51:00	0
2009-04-04	04:52:00	24
2009-04-04	04:53:00	0
2009-04-04	04:54:00	0
2009-04-04	04:55:00	0
2009-04-04	04:56:00	0
2009-04-04	04:57:00	0
2009-04-04	04:58:00	0
2009-04-04	04:59:00	0
2009-04-04	05:00:00	0
2009-04-04	05:01:00	0
2009-04-04	05:02:00	0
2009-04-04	05:03:00	0
2009-04-04	05:04:00	0
2009-04-04	05:05:00	0
2009-04-04	05:06:00	0
2009-04-04	05:07:00	0
2009-04-04	05:08:00	0
2009-04-04	05:09:00	0
2009-04-04	05:10:00	0
2009-04-04	05:11:00	0
2009-04-04	05:12:00	0
2009-04-04	05:13:00	0
2009-04-04	05:14:00	0
2009-04-04	05:15:00	0
2009-04-04	05:16:00	0
2009-04-04	05:17:00	268
2009-04-04	05:18:00	0
2009-04-04	05:19:00	24
2009-04-04	05:20:00	86
2009-04-04	05:21:00	154
2009-04-04	05:22:00	0
2009-04-04	05:23:00	0
2009-04-04	05:24:00	0
2009-04-04	05:25:00	0
2009-04-04	05:26:00	0
2009-04-04	05:27:00	0
2009-04-04	05:28:00	0
2009-04-04	05:29:00	0
2009-04-04	05:30:00	0
2009-04-04	05:31:00	0
2009-04-04	05:32:00	0
2009-04-04	05:33:00	0
2009-04-04	05:34:00	0
2009-04-04	05:35:00	0
2009-04-04	05:36:00	63
2009-04-04	05:37:00	0
2009-04-04	05:38:00	0
2009-04-04	05:39:00	0
2009-04-04	05:40:00	0
2009-04-04	05:41:00	0
2009-04-04	05:42:00	0
2009-04-04	05:43:00	0
2009-04-04	05:44:00	0
2009-04-04	05:45:00	0
2009-04-04	05:46:00	0
2009-04-04	05:47:00	0
2009-04-04	05:48:00	0
2009-04-04	05:49:00	0
2009-04-04	05:50:00	0
2009-04-04	05:51:00	0
2009-04-04	05:52:00	0
2009-04-04	05:53:00	0
2009-04-04	05:54:00	0
2009-04-04	05:55:00	0
2009-04-04	05:56:00	0
2009-04-04	05:57:00	0
2009-04-04	05:58:00	0
2009-04-04	05:59:00	0
2009-04-04	06:00:00	0
2009-04-04	06:01:00	0
2009-04-04	06:02:00	0
2009-04-04	06:03:00	0
2009-04-04	06:04:00	0
2009-04-04	06:05:00	0
2009-04-04	06:06:00	0
2009-04-04	06:07:00	0
2009-04-04	06:08:00	0
2009-04-04	06:09:00	0
2009-04-04	06:10:00	0
2009-04-04	06:11:00	0
2009-04-04	06:12:00	0
2009-04-04	06:13:00	0
2009-04-04	06:14:00	0
2009-04-04	06:15:00	63
2009-04-04	06:16:00	0
2009-04-04	06:17:00	0
2009-04-04	06:18:00	0
2009-04-04	06:19:00	0
2009-04-04	06:20:00	0
2009-04-04	06:21:00	0
2009-04-04	06:22:00	0
2009-04-04	06:23:00	0
2009-04-04	06:24:00	0
2009-04-04	06:25:00	0
2009-04-04	06:26:00	0
2009-04-04	06:27:00	0
2009-04-04	06:28:00	0
2009-04-04	06:29:00	0
2009-04-04	06:30:00	0
2009-04-04	06:31:00	0
2009-04-04	06:32:00	0
2009-04-04	06:33:00	0
2009-04-04	06:34:00	0
2009-04-04	06:35:00	5
2009-04-04	06:36:00	276
2009-04-04	06:37:00	115
2009-04-04	06:38:00	0
2009-04-04	06:39:00	0
2009-04-04	06:40:00	0
2009-04-04	06:41:00	0
2009-04-04	06:42:00	0
2009-04-04	06:43:00	0
2009-04-04	06:44:00	48
2009-04-04	06:45:00	0
2009-04-04	06:46:00	0
2009-04-04	06:47:00	0
2009-04-04	06:48:00	0
2009-04-04	06:49:00	0
2009-04-04	06:50:00	0
2009-04-04	06:51:00	0
2009-04-04	06:52:00	0
2009-04-04	06:53:00	0
2009-04-04	06:54:00	0
2009-04-04	06:55:00	0
2009-04-04	06:56:00	0
2009-04-04	06:57:00	0
2009-04-04	06:58:00	0
2009-04-04	06:59:00	0
2009-04-04	07:00:00	0
2009-04-04	07:01:00	0
2009-04-04	07:02:00	0
2009-04-04	07:03:00	0
2009-04-04	07:04:00	0
2009-04-04	07:05:00	0
2009-04-04	07:06:00	29
2009-04-04	07:07:00	0
2009-04-04	07:08:00	0
2009-04-04	07:09:00	0
2009-04-04	07:10:00	0
2009-04-04	07:11:00	0
2009-04-04	07:12:00	0
2009-04-04	07:13:00	0
2009-04-04	07:14:00	0
2009-04-04	07:15:00	0
2009-04-04	07:16:00	0
2009-04-04	07:17:00	19
2009-04-04	07:18:00	0
2009-04-04	07:19:00	0
2009-04-04	07:20:00	0
2009-04-04	07:21:00	0
2009-04-04	07:22:00	0
2009-04-04	07:23:00	0
2009-04-04	07:24:00	0
2009-04-04	07:25:00	0
2009-04-04	07:26:00	63
2009-04-04	07:27:00	0
2009-04-04	07:28:00	29
2009-04-04	07:29:00	0
2009-04-04	07:30:00	0
2009-04-04	07:31:00	0
2009-04-04	07:32:00	0
2009-04-04	07:33:00	0
2009-04-04	07:34:00	0
2009-04-04	07:35:00	0
2009-04-04	07:36:00	44
2009-04-04	07:37:00	0
2009-04-04	07:38:00	0
2009-04-04	07:39:00	86
2009-04-04	07:40:00	0
2009-04-04	07:41:00	0
2009-04-04	07:42:00	647
2009-04-04	07:43:00	19
2009-04-04	07:44:00	0
2009-04-04	07:45:00	0
2009-04-04	07:46:00	0
2009-04-04	07:47:00	0
2009-04-04	07:48:00	24
2009-04-04	07:49:00	0
2009-04-04	07:50:00	0
2009-04-04	07:51:00	0
2009-04-04	07:52:00	0
2009-04-04	07:53:00	0
2009-04-04	07:54:00	0
2009-04-04	07:55:00	5
2009-04-04	07:56:00	5
2009-04-04	07:57:00	0
2009-04-04	07:58:00	0
2009-04-04	07:59:00	0
2009-04-04	08:00:00	0
2009-04-04	08:01:00	0
2009-04-04	08:02:00	0
2009-04-04	08:03:00	0
2009-04-04	08:04:00	0
2009-04-04	08:05:00	0
2009-04-04	08:06:00	0
2009-04-04	08:07:00	0
2009-04-04	08:08:00	24
2009-04-04	08:09:00	63
2009-04-04	08:10:00	0
2009-04-04	08:11:00	276
2009-04-04	08:12:00	15
2009-04-04	08:13:00	24
2009-04-04	08:14:00	0
2009-04-04	08:15:00	75
2009-04-04	08:16:00	0
2009-04-04	08:17:00	0
2009-04-04	08:18:00	0
2009-04-04	08:19:00	5
2009-04-04	08:20:00	0
2009-04-04	08:21:00	690
2009-04-04	08:22:00	592
2009-04-04	08:23:00	24
2009-04-04	08:24:00	29
2009-04-04	08:25:00	0
2009-04-04	08:26:00	0
2009-04-04	08:27:00	24
2009-04-04	08:28:00	134
2009-04-04	08:29:00	647
2009-04-04	08:30:00	53
2009-04-04	08:31:00	0
2009-04-04	08:32:00	0
2009-04-04	08:33:00	10
2009-04-04	08:34:00	490
2009-04-04	08:35:00	5
2009-04-04	08:36:00	0
2009-04-04	08:37:00	769
2009-04-04	08:38:00	350
2009-04-04	08:39:00	127
2009-04-04	08:40:00	10
2009-04-04	08:41:00	0
2009-04-04	08:42:00	0
2009-04-04	08:43:00	63
2009-04-04	08:44:00	0
2009-04-04	08:45:00	227
2009-04-04	08:46:00	769
2009-04-04	08:47:00	578
2009-04-04	08:48:00	737
2009-04-04	08:49:00	127
2009-04-04	08:50:00	15
2009-04-04	08:51:00	432
2009-04-04	08:52:00	466
2009-04-04	08:53:00	181
2009-04-04	08:54:00	1003
2009-04-04	08:55:00	0
2009-04-04	08:56:00	48
2009-04-04	08:57:00	0
2009-04-04	08:58:00	53
2009-04-04	08:59:00	0
2009-04-04	09:00:00	0
2009-04-04	09:01:00	39
2009-04-04	09:02:00	0
2009-04-04	09:03:00	5
2009-04-04	09:04:00	75
2009-04-04	09:05:00	0
2009-04-04	09:06:00	0
2009-04-04	09:07:00	235
2009-04-04	09:08:00	0
[truncated: 23,931 more rows]

## Sheet: 4.20.09
Actogram, Copy Raw Data, All Days
Identity:	Jade
Filename:	E:\Active Research Files\meloxicam titre canine\cases\jade\Jade 4.20.09.AWC
Gender:	F
Age:	8
Height:	91.4 cm	36.0 in
Weight:	70.0 kg	154.3 lbs
Start Date:	20-Apr-2009 (Mon)
Start Time:	18:00:00
Interval:	1.00 mins
Date Stamp:	Time Stamp:	Activity Data:	Marker Press:
2009-04-20	00:00:00	0
2009-04-20	00:01:00	0
2009-04-20	00:02:00	0
2009-04-20	00:03:00	0
2009-04-20	00:04:00	0
2009-04-20	00:05:00	0
2009-04-20	00:06:00	0
2009-04-20	00:07:00	0
2009-04-20	00:08:00	0
2009-04-20	00:09:00	0
2009-04-20	00:10:00	0
2009-04-20	00:11:00	0
2009-04-20	00:12:00	0
2009-04-20	00:13:00	0
2009-04-20	00:14:00	0
2009-04-20	00:15:00	0
2009-04-20	00:16:00	0
2009-04-20	00:17:00	0
2009-04-20	00:18:00	0
2009-04-20	00:19:00	0
2009-04-20	00:20:00	0
2009-04-20	00:21:00	0
2009-04-20	00:22:00	0
2009-04-20	00:23:00	0
2009-04-20	00:24:00	0
2009-04-20	00:25:00	0
2009-04-20	00:26:00	0
2009-04-20	00:27:00	0
2009-04-20	00:28:00	0
2009-04-20	00:29:00	0
2009-04-20	00:30:00	0
2009-04-20	00:31:00	0
2009-04-20	00:32:00	0
2009-04-20	00:33:00	0
2009-04-20	00:34:00	0
2009-04-20	00:35:00	0
2009-04-20	00:36:00	0
2009-04-20	00:37:00	0
2009-04-20	00:38:00	0
2009-04-20	00:39:00	0
2009-04-20	00:40:00	0
2009-04-20	00:41:00	0
2009-04-20	00:42:00	0
2009-04-20	00:43:00	0
2009-04-20	00:44:00	0
2009-04-20	00:45:00	0
2009-04-20	00:46:00	0
2009-04-20	00:47:00	0
2009-04-20	00:48:00	0
2009-04-20	00:49:00	0
2009-04-20	00:50:00	0
2009-04-20	00:51:00	0
2009-04-20	00:52:00	0
2009-04-20	00:53:00	0
2009-04-20	00:54:00	0
2009-04-20	00:55:00	0
2009-04-20	00:56:00	0
2009-04-20	00:57:00	0
2009-04-20	00:58:00	0
2009-04-20	00:59:00	0
2009-04-20	01:00:00	0
2009-04-20	01:01:00	0
2009-04-20	01:02:00	0
2009-04-20	01:03:00	0
2009-04-20	01:04:00	0
2009-04-20	01:05:00	0
2009-04-20	01:06:00	0
2009-04-20	01:07:00	0
2009-04-20	01:08:00	0
2009-04-20	01:09:00	0
2009-04-20	01:10:00	0
2009-04-20	01:11:00	0
2009-04-20	01:12:00	0
2009-04-20	01:13:00	0
2009-04-20	01:14:00	0
2009-04-20	01:15:00	0
2009-04-20	01:16:00	0
2009-04-20	01:17:00	0
2009-04-20	01:18:00	0
2009-04-20	01:19:00	0
2009-04-20	01:20:00	0
2009-04-20	01:21:00	0
2009-04-20	01:22:00	0
2009-04-20	01:23:00	0
2009-04-20	01:24:00	0
2009-04-20	01:25:00	0
2009-04-20	01:26:00	0
2009-04-20	01:27:00	0
2009-04-20	01:28:00	0
2009-04-20	01:29:00	0
2009-04-20	01:30:00	0
2009-04-20	01:31:00	0
2009-04-20	01:32:00	0
2009-04-20	01:33:00	0
2009-04-20	01:34:00	0
2009-04-20	01:35:00	0
2009-04-20	01:36:00	0
2009-04-20	01:37:00	0
2009-04-20	01:38:00	0
2009-04-20	01:39:00	0
2009-04-20	01:40:00	0
2009-04-20	01:41:00	0
2009-04-20	01:42:00	0
2009-04-20	01:43:00	0
2009-04-20	01:44:00	0
2009-04-20	01:45:00	0
2009-04-20	01:46:00	0
2009-04-20	01:47:00	0
2009-04-20	01:48:00	0
2009-04-20	01:49:00	0
2009-04-20	01:50:00	0
2009-04-20	01:51:00	0
2009-04-20	01:52:00	0
2009-04-20	01:53:00	0
2009-04-20	01:54:00	0
2009-04-20	01:55:00	0
2009-04-20	01:56:00	0
2009-04-20	01:57:00	0
2009-04-20	01:58:00	0
2009-04-20	01:59:00	0
2009-04-20	02:00:00	0
2009-04-20	02:01:00	0
2009-04-20	02:02:00	0
2009-04-20	02:03:00	0
2009-04-20	02:04:00	0
2009-04-20	02:05:00	0
2009-04-20	02:06:00	0
2009-04-20	02:07:00	0
2009-04-20	02:08:00	0
2009-04-20	02:09:00	0
2009-04-20	02:10:00	0
2009-04-20	02:11:00	0
2009-04-20	02:12:00	0
2009-04-20	02:13:00	0
2009-04-20	02:14:00	0
2009-04-20	02:15:00	0
2009-04-20	02:16:00	0
2009-04-20	02:17:00	0
2009-04-20	02:18:00	0
2009-04-20	02:19:00	0
2009-04-20	02:20:00	0
2009-04-20	02:21:00	0
2009-04-20	02:22:00	0
2009-04-20	02:23:00	0
2009-04-20	02:24:00	0
2009-04-20	02:25:00	0
2009-04-20	02:26:00	0
2009-04-20	02:27:00	0
2009-04-20	02:28:00	0
2009-04-20	02:29:00	0
2009-04-20	02:30:00	0
2009-04-20	02:31:00	0
2009-04-20	02:32:00	0
2009-04-20	02:33:00	0
2009-04-20	02:34:00	0
2009-04-20	02:35:00	0
2009-04-20	02:36:00	0
2009-04-20	02:37:00	0
2009-04-20	02:38:00	0
2009-04-20	02:39:00	0
2009-04-20	02:40:00	0
2009-04-20	02:41:00	0
2009-04-20	02:42:00	0
2009-04-20	02:43:00	0
2009-04-20	02:44:00	0
2009-04-20	02:45:00	0
2009-04-20	02:46:00	0
2009-04-20	02:47:00	0
2009-04-20	02:48:00	0
2009-04-20	02:49:00	0
2009-04-20	02:50:00	0
2009-04-20	02:51:00	0
2009-04-20	02:52:00	0
2009-04-20	02:53:00	0
2009-04-20	02:54:00	0
2009-04-20	02:55:00	0
2009-04-20	02:56:00	0
2009-04-20	02:57:00	0
2009-04-20	02:58:00	0
2009-04-20	02:59:00	0
2009-04-20	03:00:00	0
2009-04-20	03:01:00	0
2009-04-20	03:02:00	0
2009-04-20	03:03:00	0
2009-04-20	03:04:00	0
2009-04-20	03:05:00	0
2009-04-20	03:06:00	0
2009-04-20	03:07:00	0
2009-04-20	03:08:00	0
2009-04-20	03:09:00	0
2009-04-20	03:10:00	0
2009-04-20	03:11:00	0
2009-04-20	03:12:00	0
2009-04-20	03:13:00	0
2009-04-20	03:14:00	0
2009-04-20	03:15:00	0
2009-04-20	03:16:00	0
2009-04-20	03:17:00	0
2009-04-20	03:18:00	0
2009-04-20	03:19:00	0
2009-04-20	03:20:00	0
2009-04-20	03:21:00	0
2009-04-20	03:22:00	0
2009-04-20	03:23:00	0
2009-04-20	03:24:00	0
2009-04-20	03:25:00	0
2009-04-20	03:26:00	0
2009-04-20	03:27:00	0
2009-04-20	03:28:00	0
2009-04-20	03:29:00	0
2009-04-20	03:30:00	0
2009-04-20	03:31:00	0
2009-04-20	03:32:00	0
2009-04-20	03:33:00	0
2009-04-20	03:34:00	0
2009-04-20	03:35:00	0
2009-04-20	03:36:00	0
2009-04-20	03:37:00	0
2009-04-20	03:38:00	0
2009-04-20	03:39:00	0
2009-04-20	03:40:00	0
2009-04-20	03:41:00	0
2009-04-20	03:42:00	0
2009-04-20	03:43:00	0
2009-04-20	03:44:00	0
2009-04-20	03:45:00	0
2009-04-20	03:46:00	0
2009-04-20	03:47:00	0
2009-04-20	03:48:00	0
2009-04-20	03:49:00	0
2009-04-20	03:50:00	0
2009-04-20	03:51:00	0
2009-04-20	03:52:00	0
2009-04-20	03:53:00	0
2009-04-20	03:54:00	0
2009-04-20	03:55:00	0
2009-04-20	03:56:00	0
2009-04-20	03:57:00	0
2009-04-20	03:58:00	0
2009-04-20	03:59:00	0
2009-04-20	04:00:00	0
2009-04-20	04:01:00	0
2009-04-20	04:02:00	0
2009-04-20	04:03:00	0
2009-04-20	04:04:00	0
2009-04-20	04:05:00	0
2009-04-20	04:06:00	0
2009-04-20	04:07:00	0
2009-04-20	04:08:00	0
2009-04-20	04:09:00	0
2009-04-20	04:10:00	0
2009-04-20	04:11:00	0
2009-04-20	04:12:00	0
2009-04-20	04:13:00	0
2009-04-20	04:14:00	0
2009-04-20	04:15:00	0
2009-04-20	04:16:00	0
2009-04-20	04:17:00	0
2009-04-20	04:18:00	0
2009-04-20	04:19:00	0
2009-04-20	04:20:00	0
2009-04-20	04:21:00	0
2009-04-20	04:22:00	0
2009-04-20	04:23:00	0
2009-04-20	04:24:00	0
2009-04-20	04:25:00	0
2009-04-20	04:26:00	0
2009-04-20	04:27:00	0
2009-04-20	04:28:00	0
2009-04-20	04:29:00	0
2009-04-20	04:30:00	0
2009-04-20	04:31:00	0
2009-04-20	04:32:00	0
2009-04-20	04:33:00	0
2009-04-20	04:34:00	0
2009-04-20	04:35:00	0
2009-04-20	04:36:00	0
2009-04-20	04:37:00	0
2009-04-20	04:38:00	0
2009-04-20	04:39:00	0
2009-04-20	04:40:00	0
2009-04-20	04:41:00	0
2009-04-20	04:42:00	0
2009-04-20	04:43:00	0
2009-04-20	04:44:00	0
2009-04-20	04:45:00	0
2009-04-20	04:46:00	0
2009-04-20	04:47:00	0
2009-04-20	04:48:00	0
2009-04-20	04:49:00	0
2009-04-20	04:50:00	0
2009-04-20	04:51:00	0
2009-04-20	04:52:00	0
2009-04-20	04:53:00	0
2009-04-20	04:54:00	0
2009-04-20	04:55:00	0
2009-04-20	04:56:00	0
2009-04-20	04:57:00	0
2009-04-20	04:58:00	0
2009-04-20	04:59:00	0
2009-04-20	05:00:00	0
2009-04-20	05:01:00	0
2009-04-20	05:02:00	0
2009-04-20	05:03:00	0
2009-04-20	05:04:00	0
2009-04-20	05:05:00	0
2009-04-20	05:06:00	0
2009-04-20	05:07:00	0
2009-04-20	05:08:00	0
2009-04-20	05:09:00	0
2009-04-20	05:10:00	0
2009-04-20	05:11:00	0
2009-04-20	05:12:00	0
2009-04-20	05:13:00	0
2009-04-20	05:14:00	0
2009-04-20	05:15:00	0
2009-04-20	05:16:00	0
2009-04-20	05:17:00	0
2009-04-20	05:18:00	0
2009-04-20	05:19:00	0
2009-04-20	05:20:00	0
2009-04-20	05:21:00	0
2009-04-20	05:22:00	0
2009-04-20	05:23:00	0
2009-04-20	05:24:00	0
2009-04-20	05:25:00	0
2009-04-20	05:26:00	0
2009-04-20	05:27:00	0
2009-04-20	05:28:00	0
2009-04-20	05:29:00	0
2009-04-20	05:30:00	0
2009-04-20	05:31:00	0
2009-04-20	05:32:00	0
2009-04-20	05:33:00	0
2009-04-20	05:34:00	0
2009-04-20	05:35:00	0
2009-04-20	05:36:00	0
2009-04-20	05:37:00	0
2009-04-20	05:38:00	0
2009-04-20	05:39:00	0
2009-04-20	05:40:00	0
2009-04-20	05:41:00	0
2009-04-20	05:42:00	0
2009-04-20	05:43:00	0
2009-04-20	05:44:00	0
2009-04-20	05:45:00	0
2009-04-20	05:46:00	0
2009-04-20	05:47:00	0
2009-04-20	05:48:00	0
2009-04-20	05:49:00	0
2009-04-20	05:50:00	0
2009-04-20	05:51:00	0
2009-04-20	05:52:00	0
2009-04-20	05:53:00	0
2009-04-20	05:54:00	0
2009-04-20	05:55:00	0
2009-04-20	05:56:00	0
2009-04-20	05:57:00	0
2009-04-20	05:58:00	0
2009-04-20	05:59:00	0
2009-04-20	06:00:00	0
2009-04-20	06:01:00	0
2009-04-20	06:02:00	0
2009-04-20	06:03:00	0
2009-04-20	06:04:00	0
2009-04-20	06:05:00	0
2009-04-20	06:06:00	0
2009-04-20	06:07:00	0
2009-04-20	06:08:00	0
2009-04-20	06:09:00	0
2009-04-20	06:10:00	0
2009-04-20	06:11:00	0
2009-04-20	06:12:00	0
2009-04-20	06:13:00	0
2009-04-20	06:14:00	0
2009-04-20	06:15:00	0
2009-04-20	06:16:00	0
2009-04-20	06:17:00	0
2009-04-20	06:18:00	0
2009-04-20	06:19:00	0
2009-04-20	06:20:00	0
2009-04-20	06:21:00	0
2009-04-20	06:22:00	0
2009-04-20	06:23:00	0
2009-04-20	06:24:00	0
2009-04-20	06:25:00	0
2009-04-20	06:26:00	0
2009-04-20	06:27:00	0
2009-04-20	06:28:00	0
2009-04-20	06:29:00	0
2009-04-20	06:30:00	0
2009-04-20	06:31:00	0
2009-04-20	06:32:00	0
2009-04-20	06:33:00	0
2009-04-20	06:34:00	0
2009-04-20	06:35:00	0
2009-04-20	06:36:00	0
2009-04-20	06:37:00	0
2009-04-20	06:38:00	0
2009-04-20	06:39:00	0
2009-04-20	06:40:00	0
2009-04-20	06:41:00	0
2009-04-20	06:42:00	0
2009-04-20	06:43:00	0
2009-04-20	06:44:00	0
2009-04-20	06:45:00	0
2009-04-20	06:46:00	0
2009-04-20	06:47:00	0
2009-04-20	06:48:00	0
2009-04-20	06:49:00	0
2009-04-20	06:50:00	0
2009-04-20	06:51:00	0
2009-04-20	06:52:00	0
2009-04-20	06:53:00	0
2009-04-20	06:54:00	0
2009-04-20	06:55:00	0
2009-04-20	06:56:00	0
2009-04-20	06:57:00	0
2009-04-20	06:58:00	0
2009-04-20	06:59:00	0
2009-04-20	07:00:00	0
2009-04-20	07:01:00	0
2009-04-20	07:02:00	0
2009-04-20	07:03:00	0
2009-04-20	07:04:00	0
2009-04-20	07:05:00	0
2009-04-20	07:06:00	0
2009-04-20	07:07:00	0
2009-04-20	07:08:00	0
2009-04-20	07:09:00	0
2009-04-20	07:10:00	0
2009-04-20	07:11:00	0
2009-04-20	07:12:00	0
2009-04-20	07:13:00	0
2009-04-20	07:14:00	0
2009-04-20	07:15:00	0
2009-04-20	07:16:00	0
2009-04-20	07:17:00	0
2009-04-20	07:18:00	0
2009-04-20	07:19:00	0
2009-04-20	07:20:00	0
2009-04-20	07:21:00	0
2009-04-20	07:22:00	0
2009-04-20	07:23:00	0
2009-04-20	07:24:00	0
2009-04-20	07:25:00	0
2009-04-20	07:26:00	0
2009-04-20	07:27:00	0
2009-04-20	07:28:00	0
2009-04-20	07:29:00	0
2009-04-20	07:30:00	0
2009-04-20	07:31:00	0
2009-04-20	07:32:00	0
2009-04-20	07:33:00	0
2009-04-20	07:34:00	0
2009-04-20	07:35:00	0
2009-04-20	07:36:00	0
2009-04-20	07:37:00	0
2009-04-20	07:38:00	0
2009-04-20	07:39:00	0
2009-04-20	07:40:00	0
2009-04-20	07:41:00	0
2009-04-20	07:42:00	0
2009-04-20	07:43:00	0
2009-04-20	07:44:00	0
2009-04-20	07:45:00	0
2009-04-20	07:46:00	0
2009-04-20	07:47:00	0
2009-04-20	07:48:00	0
2009-04-20	07:49:00	0
2009-04-20	07:50:00	0
2009-04-20	07:51:00	0
2009-04-20	07:52:00	0
2009-04-20	07:53:00	0
2009-04-20	07:54:00	0
2009-04-20	07:55:00	0
2009-04-20	07:56:00	0
2009-04-20	07:57:00	0
2009-04-20	07:58:00	0
2009-04-20	07:59:00	0
2009-04-20	08:00:00	0
2009-04-20	08:01:00	0
2009-04-20	08:02:00	0
2009-04-20	08:03:00	0
2009-04-20	08:04:00	0
2009-04-20	08:05:00	0
2009-04-20	08:06:00	0
2009-04-20	08:07:00	0
2009-04-20	08:08:00	0
2009-04-20	08:09:00	0
2009-04-20	08:10:00	0
2009-04-20	08:11:00	0
2009-04-20	08:12:00	0
2009-04-20	08:13:00	0
2009-04-20	08:14:00	0
2009-04-20	08:15:00	0
2009-04-20	08:16:00	0
2009-04-20	08:17:00	0
2009-04-20	08:18:00	0
2009-04-20	08:19:00	0
2009-04-20	08:20:00	0
2009-04-20	08:21:00	0
2009-04-20	08:22:00	0
2009-04-20	08:23:00	0
2009-04-20	08:24:00	0
2009-04-20	08:25:00	0
2009-04-20	08:26:00	0
2009-04-20	08:27:00	0
2009-04-20	08:28:00	0
2009-04-20	08:29:00	0
2009-04-20	08:30:00	0
2009-04-20	08:31:00	0
2009-04-20	08:32:00	0
2009-04-20	08:33:00	0
2009-04-20	08:34:00	0
2009-04-20	08:35:00	0
2009-04-20	08:36:00	0
2009-04-20	08:37:00	0
2009-04-20	08:38:00	0
2009-04-20	08:39:00	0
2009-04-20	08:40:00	0
2009-04-20	08:41:00	0
2009-04-20	08:42:00	0
2009-04-20	08:43:00	0
2009-04-20	08:44:00	0
2009-04-20	08:45:00	0
2009-04-20	08:46:00	0
2009-04-20	08:47:00	0
2009-04-20	08:48:00	0
2009-04-20	08:49:00	0
2009-04-20	08:50:00	0
2009-04-20	08:51:00	0
2009-04-20	08:52:00	0
2009-04-20	08:53:00	0
2009-04-20	08:54:00	0
2009-04-20	08:55:00	0
2009-04-20	08:56:00	0
2009-04-20	08:57:00	0
2009-04-20	08:58:00	0
2009-04-20	08:59:00	0
2009-04-20	09:00:00	0
2009-04-20	09:01:00	0
2009-04-20	09:02:00	0
2009-04-20	09:03:00	0
2009-04-20	09:04:00	0
2009-04-20	09:05:00	0
2009-04-20	09:06:00	0
2009-04-20	09:07:00	0
2009-04-20	09:08:00	0
2009-04-20	09:09:00	0
2009-04-20	09:10:00	0
2009-04-20	09:11:00	0
2009-04-20	09:12:00	0
2009-04-20	09:13:00	0
2009-04-20	09:14:00	0
2009-04-20	09:15:00	0
2009-04-20	09:16:00	0
2009-04-20	09:17:00	0
2009-04-20	09:18:00	0
2009-04-20	09:19:00	0
2009-04-20	09:20:00	0
2009-04-20	09:21:00	0
2009-04-20	09:22:00	0
2009-04-20	09:23:00	0
2009-04-20	09:24:00	0
2009-04-20	09:25:00	0
2009-04-20	09:26:00	0
2009-04-20	09:27:00	0
2009-04-20	09:28:00	0
2009-04-20	09:29:00	0
2009-04-20	09:30:00	0
2009-04-20	09:31:00	0
2009-04-20	09:32:00	0
2009-04-20	09:33:00	0
2009-04-20	09:34:00	0
2009-04-20	09:35:00	0
2009-04-20	09:36:00	0
2009-04-20	09:37:00	0
2009-04-20	09:38:00	0
2009-04-20	09:39:00	0
2009-04-20	09:40:00	0
2009-04-20	09:41:00	0
2009-04-20	09:42:00	0
2009-04-20	09:43:00	0
2009-04-20	09:44:00	0
2009-04-20	09:45:00	0
2009-04-20	09:46:00	0
2009-04-20	09:47:00	0
2009-04-20	09:48:00	0
2009-04-20	09:49:00	0
2009-04-20	09:50:00	0
2009-04-20	09:51:00	0
2009-04-20	09:52:00	0
2009-04-20	09:53:00	0
2009-04-20	09:54:00	0
2009-04-20	09:55:00	0
2009-04-20	09:56:00	0
2009-04-20	09:57:00	0
2009-04-20	09:58:00	0
2009-04-20	09:59:00	0
2009-04-20	10:00:00	0
2009-04-20	10:01:00	0
2009-04-20	10:02:00	0
2009-04-20	10:03:00	0
2009-04-20	10:04:00	0
2009-04-20	10:05:00	0
2009-04-20	10:06:00	0
2009-04-20	10:07:00	0
2009-04-20	10:08:00	0
2009-04-20	10:09:00	0
2009-04-20	10:10:00	0
2009-04-20	10:11:00	0
2009-04-20	10:12:00	0
2009-04-20	10:13:00	0
2009-04-20	10:14:00	0
2009-04-20	10:15:00	0
2009-04-20	10:16:00	0
2009-04-20	10:17:00	0
2009-04-20	10:18:00	0
2009-04-20	10:19:00	0
2009-04-20	10:20:00	0
2009-04-20	10:21:00	0
2009-04-20	10:22:00	0
2009-04-20	10:23:00	0
2009-04-20	10:24:00	0
2009-04-20	10:25:00	0
2009-04-20	10:26:00	0
2009-04-20	10:27:00	0
2009-04-20	10:28:00	0
2009-04-20	10:29:00	0
2009-04-20	10:30:00	0
2009-04-20	10:31:00	0
2009-04-20	10:32:00	0
2009-04-20	10:33:00	0
2009-04-20	10:34:00	0
2009-04-20	10:35:00	0
2009-04-20	10:36:00	0
2009-04-20	10:37:00	0
2009-04-20	10:38:00	0
2009-04-20	10:39:00	0
2009-04-20	10:40:00	0
2009-04-20	10:41:00	0
2009-04-20	10:42:00	0
2009-04-20	10:43:00	0
2009-04-20	10:44:00	0
2009-04-20	10:45:00	0
2009-04-20	10:46:00	0
2009-04-20	10:47:00	0
2009-04-20	10:48:00	0
2009-04-20	10:49:00	0
2009-04-20	10:50:00	0
2009-04-20	10:51:00	0
2009-04-20	10:52:00	0
2009-04-20	10:53:00	0
2009-04-20	10:54:00	0
2009-04-20	10:55:00	0
2009-04-20	10:56:00	0
2009-04-20	10:57:00	0
2009-04-20	10:58:00	0
2009-04-20	10:59:00	0
2009-04-20	11:00:00	0
2009-04-20	11:01:00	0
2009-04-20	11:02:00	0
2009-04-20	11:03:00	0
2009-04-20	11:04:00	0
2009-04-20	11:05:00	0
2009-04-20	11:06:00	0
2009-04-20	11:07:00	0
2009-04-20	11:08:00	0
2009-04-20	11:09:00	0
2009-04-20	11:10:00	0
2009-04-20	11:11:00	0
2009-04-20	11:12:00	0
2009-04-20	11:13:00	0
2009-04-20	11:14:00	0
2009-04-20	11:15:00	0
2009-04-20	11:16:00	0
2009-04-20	11:17:00	0
2009-04-20	11:18:00	0
2009-04-20	11:19:00	0
2009-04-20	11:20:00	0
2009-04-20	11:21:00	0
2009-04-20	11:22:00	0
2009-04-20	11:23:00	0
2009-04-20	11:24:00	0
2009-04-20	11:25:00	0
2009-04-20	11:26:00	0
2009-04-20	11:27:00	0
2009-04-20	11:28:00	0
2009-04-20	11:29:00	0
2009-04-20	11:30:00	0
2009-04-20	11:31:00	0
2009-04-20	11:32:00	0
2009-04-20	11:33:00	0
2009-04-20	11:34:00	0
2009-04-20	11:35:00	0
2009-04-20	11:36:00	0
2009-04-20	11:37:00	0
2009-04-20	11:38:00	0
2009-04-20	11:39:00	0
2009-04-20	11:40:00	0
2009-04-20	11:41:00	0
2009-04-20	11:42:00	0
2009-04-20	11:43:00	0
2009-04-20	11:44:00	0
2009-04-20	11:45:00	0
2009-04-20	11:46:00	0
2009-04-20	11:47:00	0
2009-04-20	11:48:00	0
2009-04-20	11:49:00	0
2009-04-20	11:50:00	0
2009-04-20	11:51:00	0
2009-04-20	11:52:00	0
2009-04-20	11:53:00	0
2009-04-20	11:54:00	0
2009-04-20	11:55:00	0
2009-04-20	11:56:00	0
2009-04-20	11:57:00	0
2009-04-20	11:58:00	0
2009-04-20	11:59:00	0
2009-04-20	12:00:00	0
2009-04-20	12:01:00	0
2009-04-20	12:02:00	0
2009-04-20	12:03:00	0
2009-04-20	12:04:00	0
2009-04-20	12:05:00	0
2009-04-20	12:06:00	0
2009-04-20	12:07:00	0
2009-04-20	12:08:00	0
2009-04-20	12:09:00	0
2009-04-20	12:10:00	0
2009-04-20	12:11:00	0
2009-04-20	12:12:00	0
2009-04-20	12:13:00	0
2009-04-20	12:14:00	0
2009-04-20	12:15:00	0
2009-04-20	12:16:00	0
2009-04-20	12:17:00	0
2009-04-20	12:18:00	0
2009-04-20	12:19:00	0
2009-04-20	12:20:00	0
2009-04-20	12:21:00	0
2009-04-20	12:22:00	0
2009-04-20	12:23:00	0
2009-04-20	12:24:00	0
2009-04-20	12:25:00	0
2009-04-20	12:26:00	0
2009-04-20	12:27:00	0
2009-04-20	12:28:00	0
2009-04-20	12:29:00	0
2009-04-20	12:30:00	0
2009-04-20	12:31:00	0
2009-04-20	12:32:00	0
2009-04-20	12:33:00	0
2009-04-20	12:34:00	0
2009-04-20	12:35:00	0
2009-04-20	12:36:00	0
2009-04-20	12:37:00	0
2009-04-20	12:38:00	0
2009-04-20	12:39:00	0
2009-04-20	12:40:00	0
2009-04-20	12:41:00	0
2009-04-20	12:42:00	0
2009-04-20	12:43:00	0
2009-04-20	12:44:00	0
2009-04-20	12:45:00	0
2009-04-20	12:46:00	0
2009-04-20	12:47:00	0
2009-04-20	12:48:00	0
2009-04-20	12:49:00	0
2009-04-20	12:50:00	0
2009-04-20	12:51:00	0
2009-04-20	12:52:00	0
2009-04-20	12:53:00	0
2009-04-20	12:54:00	0
2009-04-20	12:55:00	0
2009-04-20	12:56:00	0
2009-04-20	12:57:00	0
2009-04-20	12:58:00	0
2009-04-20	12:59:00	0
2009-04-20	13:00:00	0
2009-04-20	13:01:00	0
2009-04-20	13:02:00	0
2009-04-20	13:03:00	0
2009-04-20	13:04:00	0
2009-04-20	13:05:00	0
2009-04-20	13:06:00	0
2009-04-20	13:07:00	0
2009-04-20	13:08:00	0
2009-04-20	13:09:00	0
2009-04-20	13:10:00	0
2009-04-20	13:11:00	0
2009-04-20	13:12:00	0
2009-04-20	13:13:00	0
2009-04-20	13:14:00	0
2009-04-20	13:15:00	0
2009-04-20	13:16:00	0
2009-04-20	13:17:00	0
2009-04-20	13:18:00	0
2009-04-20	13:19:00	0
2009-04-20	13:20:00	0
2009-04-20	13:21:00	0
2009-04-20	13:22:00	0
2009-04-20	13:23:00	0
2009-04-20	13:24:00	0
2009-04-20	13:25:00	0
2009-04-20	13:26:00	0
2009-04-20	13:27:00	0
2009-04-20	13:28:00	0
2009-04-20	13:29:00	0
2009-04-20	13:30:00	0
2009-04-20	13:31:00	0
2009-04-20	13:32:00	0
2009-04-20	13:33:00	0
2009-04-20	13:34:00	0
2009-04-20	13:35:00	0
2009-04-20	13:36:00	0
2009-04-20	13:37:00	0
2009-04-20	13:38:00	0
2009-04-20	13:39:00	0
2009-04-20	13:40:00	0
2009-04-20	13:41:00	0
2009-04-20	13:42:00	0
2009-04-20	13:43:00	0
2009-04-20	13:44:00	0
2009-04-20	13:45:00	0
2009-04-20	13:46:00	0
2009-04-20	13:47:00	0
2009-04-20	13:48:00	0
2009-04-20	13:49:00	0
2009-04-20	13:50:00	0
2009-04-20	13:51:00	0
2009-04-20	13:52:00	0
2009-04-20	13:53:00	0
2009-04-20	13:54:00	0
2009-04-20	13:55:00	0
2009-04-20	13:56:00	0
2009-04-20	13:57:00	0
2009-04-20	13:58:00	0
2009-04-20	13:59:00	0
2009-04-20	14:00:00	0
2009-04-20	14:01:00	0
2009-04-20	14:02:00	0
2009-04-20	14:03:00	0
2009-04-20	14:04:00	0
2009-04-20	14:05:00	0
2009-04-20	14:06:00	0
2009-04-20	14:07:00	0
2009-04-20	14:08:00	0
2009-04-20	14:09:00	0
2009-04-20	14:10:00	0
2009-04-20	14:11:00	0
2009-04-20	14:12:00	0
2009-04-20	14:13:00	0
2009-04-20	14:14:00	0
2009-04-20	14:15:00	0
2009-04-20	14:16:00	0
2009-04-20	14:17:00	0
2009-04-20	14:18:00	0
2009-04-20	14:19:00	0
2009-04-20	14:20:00	0
2009-04-20	14:21:00	0
2009-04-20	14:22:00	0
2009-04-20	14:23:00	0
2009-04-20	14:24:00	0
2009-04-20	14:25:00	0
2009-04-20	14:26:00	0
2009-04-20	14:27:00	0
2009-04-20	14:28:00	0
2009-04-20	14:29:00	0
2009-04-20	14:30:00	0
2009-04-20	14:31:00	0
2009-04-20	14:32:00	0
2009-04-20	14:33:00	0
2009-04-20	14:34:00	0
2009-04-20	14:35:00	0
2009-04-20	14:36:00	0
2009-04-20	14:37:00	0
2009-04-20	14:38:00	0
2009-04-20	14:39:00	0
2009-04-20	14:40:00	0
2009-04-20	14:41:00	0
2009-04-20	14:42:00	0
2009-04-20	14:43:00	0
2009-04-20	14:44:00	0
2009-04-20	14:45:00	0
2009-04-20	14:46:00	0
2009-04-20	14:47:00	0
2009-04-20	14:48:00	0
2009-04-20	14:49:00	0
2009-04-20	14:50:00	0
2009-04-20	14:51:00	0
2009-04-20	14:52:00	0
2009-04-20	14:53:00	0
2009-04-20	14:54:00	0
2009-04-20	14:55:00	0
2009-04-20	14:56:00	0
2009-04-20	14:57:00	0
2009-04-20	14:58:00	0
2009-04-20	14:59:00	0
2009-04-20	15:00:00	0
2009-04-20	15:01:00	0
2009-04-20	15:02:00	0
2009-04-20	15:03:00	0
2009-04-20	15:04:00	0
2009-04-20	15:05:00	0
2009-04-20	15:06:00	0
2009-04-20	15:07:00	0
2009-04-20	15:08:00	0
2009-04-20	15:09:00	0
2009-04-20	15:10:00	0
2009-04-20	15:11:00	0
2009-04-20	15:12:00	0
2009-04-20	15:13:00	0
2009-04-20	15:14:00	0
2009-04-20	15:15:00	0
2009-04-20	15:16:00	0
2009-04-20	15:17:00	0
2009-04-20	15:18:00	0
2009-04-20	15:19:00	0
2009-04-20	15:20:00	0
2009-04-20	15:21:00	0
2009-04-20	15:22:00	0
2009-04-20	15:23:00	0
2009-04-20	15:24:00	0
2009-04-20	15:25:00	0
2009-04-20	15:26:00	0
2009-04-20	15:27:00	0
2009-04-20	15:28:00	0
2009-04-20	15:29:00	0
2009-04-20	15:30:00	0
2009-04-20	15:31:00	0
2009-04-20	15:32:00	0
2009-04-20	15:33:00	0
2009-04-20	15:34:00	0
2009-04-20	15:35:00	0
2009-04-20	15:36:00	0
2009-04-20	15:37:00	0
2009-04-20	15:38:00	0
2009-04-20	15:39:00	0
2009-04-20	15:40:00	0
2009-04-20	15:41:00	0
2009-04-20	15:42:00	0
2009-04-20	15:43:00	0
2009-04-20	15:44:00	0
2009-04-20	15:45:00	0
2009-04-20	15:46:00	0
2009-04-20	15:47:00	0
2009-04-20	15:48:00	0
2009-04-20	15:49:00	0
2009-04-20	15:50:00	0
2009-04-20	15:51:00	0
2009-04-20	15:52:00	0
2009-04-20	15:53:00	0
2009-04-20	15:54:00	0
2009-04-20	15:55:00	0
2009-04-20	15:56:00	0
2009-04-20	15:57:00	0
2009-04-20	15:58:00	0
2009-04-20	15:59:00	0
2009-04-20	16:00:00	0
2009-04-20	16:01:00	0
2009-04-20	16:02:00	0
2009-04-20	16:03:00	0
2009-04-20	16:04:00	0
2009-04-20	16:05:00	0
2009-04-20	16:06:00	0
2009-04-20	16:07:00	0
2009-04-20	16:08:00	0
2009-04-20	16:09:00	0
2009-04-20	16:10:00	0
2009-04-20	16:11:00	0
2009-04-20	16:12:00	0
2009-04-20	16:13:00	0
2009-04-20	16:14:00	0
2009-04-20	16:15:00	0
2009-04-20	16:16:00	0
2009-04-20	16:17:00	0
2009-04-20	16:18:00	0
2009-04-20	16:19:00	0
2009-04-20	16:20:00	0
2009-04-20	16:21:00	0
2009-04-20	16:22:00	0
2009-04-20	16:23:00	0
2009-04-20	16:24:00	0
2009-04-20	16:25:00	0
2009-04-20	16:26:00	0
2009-04-20	16:27:00	0
2009-04-20	16:28:00	0
2009-04-20	16:29:00	0
2009-04-20	16:30:00	0
2009-04-20	16:31:00	0
2009-04-20	16:32:00	0
2009-04-20	16:33:00	0
2009-04-20	16:34:00	0
2009-04-20	16:35:00	0
2009-04-20	16:36:00	0
2009-04-20	16:37:00	0
2009-04-20	16:38:00	0
2009-04-20	16:39:00	0
2009-04-20	16:40:00	0
2009-04-20	16:41:00	0
2009-04-20	16:42:00	0
2009-04-20	16:43:00	0
2009-04-20	16:44:00	0
2009-04-20	16:45:00	0
2009-04-20	16:46:00	0
2009-04-20	16:47:00	0
2009-04-20	16:48:00	0
2009-04-20	16:49:00	0
2009-04-20	16:50:00	0
2009-04-20	16:51:00	0
2009-04-20	16:52:00	0
2009-04-20	16:53:00	0
2009-04-20	16:54:00	0
2009-04-20	16:55:00	0
2009-04-20	16:56:00	0
2009-04-20	16:57:00	0
2009-04-20	16:58:00	0
2009-04-20	16:59:00	0
2009-04-20	17:00:00	0
2009-04-20	17:01:00	0
2009-04-20	17:02:00	0
2009-04-20	17:03:00	0
2009-04-20	17:04:00	0
2009-04-20	17:05:00	0
2009-04-20	17:06:00	0
2009-04-20	17:07:00	0
2009-04-20	17:08:00	0
2009-04-20	17:09:00	0
2009-04-20	17:10:00	0
2009-04-20	17:11:00	0
2009-04-20	17:12:00	0
2009-04-20	17:13:00	0
2009-04-20	17:14:00	0
2009-04-20	17:15:00	0
2009-04-20	17:16:00	0
2009-04-20	17:17:00	0
2009-04-20	17:18:00	0
2009-04-20	17:19:00	0
2009-04-20	17:20:00	0
2009-04-20	17:21:00	0
2009-04-20	17:22:00	0
2009-04-20	17:23:00	0
2009-04-20	17:24:00	0
2009-04-20	17:25:00	0
2009-04-20	17:26:00	0
2009-04-20	17:27:00	0
2009-04-20	17:28:00	0
2009-04-20	17:29:00	0
2009-04-20	17:30:00	0
2009-04-20	17:31:00	0
2009-04-20	17:32:00	0
2009-04-20	17:33:00	0
2009-04-20	17:34:00	0
2009-04-20	17:35:00	0
2009-04-20	17:36:00	0
2009-04-20	17:37:00	0
2009-04-20	17:38:00	0
2009-04-20	17:39:00	0
2009-04-20	17:40:00	0
2009-04-20	17:41:00	0
2009-04-20	17:42:00	0
2009-04-20	17:43:00	0
2009-04-20	17:44:00	0
2009-04-20	17:45:00	0
2009-04-20	17:46:00	0
2009-04-20	17:47:00	0
2009-04-20	17:48:00	0
2009-04-20	17:49:00	0
2009-04-20	17:50:00	0
2009-04-20	17:51:00	0
2009-04-20	17:52:00	0
2009-04-20	17:53:00	0
2009-04-20	17:54:00	0
2009-04-20	17:55:00	0
2009-04-20	17:56:00	0
2009-04-20	17:57:00	0
2009-04-20	17:58:00	0
2009-04-20	17:59:00	0
2009-04-20	18:00:00	0
2009-04-20	18:01:00	0
2009-04-20	18:02:00	0
2009-04-20	18:03:00	0
2009-04-20	18:04:00	0
2009-04-20	18:05:00	0
2009-04-20	18:06:00	0
2009-04-20	18:07:00	10
2009-04-20	18:08:00	0
2009-04-20	18:09:00	285
2009-04-20	18:10:00	121
2009-04-20	18:11:00	721
2009-04-20	18:12:00	490
2009-04-20	18:13:00	721
2009-04-20	18:14:00	0
2009-04-20	18:15:00	0
2009-04-20	18:16:00	0
2009-04-20	18:17:00	0
2009-04-20	18:18:00	110
2009-04-20	18:19:00	168
2009-04-20	18:20:00	0
2009-04-20	18:21:00	0
2009-04-20	18:22:00	0
2009-04-20	18:23:00	0
2009-04-20	18:24:00	422
2009-04-20	18:25:00	390
2009-04-20	18:26:00	0
2009-04-20	18:27:00	5
2009-04-20	18:28:00	0
2009-04-20	18:29:00	0
2009-04-20	18:30:00	161
2009-04-20	18:31:00	0
2009-04-20	18:32:00	219
2009-04-20	18:33:00	0
2009-04-20	18:34:00	0
2009-04-20	18:35:00	0
2009-04-20	18:36:00	0
2009-04-20	18:37:00	0
2009-04-20	18:38:00	0
2009-04-20	18:39:00	0
2009-04-20	18:40:00	75
2009-04-20	18:41:00	0
2009-04-20	18:42:00	0
2009-04-20	18:43:00	86
2009-04-20	18:44:00	0
2009-04-20	18:45:00	44
2009-04-20	18:46:00	154
2009-04-20	18:47:00	321
2009-04-20	18:48:00	39
2009-04-20	18:49:00	204
2009-04-20	18:50:00	10
2009-04-20	18:51:00	19
2009-04-20	18:52:00	10
2009-04-20	18:53:00	0
2009-04-20	18:54:00	0
2009-04-20	18:55:00	0
2009-04-20	18:56:00	63
2009-04-20	18:57:00	0
2009-04-20	18:58:00	0
2009-04-20	18:59:00	0
2009-04-20	19:00:00	0
2009-04-20	19:01:00	0
2009-04-20	19:02:00	63
2009-04-20	19:03:00	0
2009-04-20	19:04:00	0
2009-04-20	19:05:00	0
2009-04-20	19:06:00	0
2009-04-20	19:07:00	39
2009-04-20	19:08:00	321
2009-04-20	19:09:00	926
2009-04-20	19:10:00	908
2009-04-20	19:11:00	592
2009-04-20	19:12:00	379
2009-04-20	19:13:00	44
2009-04-20	19:14:00	0
2009-04-20	19:15:00	39
2009-04-20	19:16:00	0
2009-04-20	19:17:00	0
2009-04-20	19:18:00	29
2009-04-20	19:19:00	80
2009-04-20	19:20:00	44
2009-04-20	19:21:00	0
2009-04-20	19:22:00	0
2009-04-20	19:23:00	0
2009-04-20	19:24:00	501
2009-04-20	19:25:00	478
2009-04-20	19:26:00	104
2009-04-20	19:27:00	0
2009-04-20	19:28:00	0
2009-04-20	19:29:00	303
2009-04-20	19:30:00	48
2009-04-20	19:31:00	0
2009-04-20	19:32:00	48
2009-04-20	19:33:00	34
2009-04-20	19:34:00	34
2009-04-20	19:35:00	0
2009-04-20	19:36:00	80
2009-04-20	19:37:00	0
2009-04-20	19:38:00	53
2009-04-20	19:39:00	0
2009-04-20	19:40:00	69
2009-04-20	19:41:00	24
2009-04-20	19:42:00	647
2009-04-20	19:43:00	785
2009-04-20	19:44:00	676
2009-04-20	19:45:00	104
2009-04-20	19:46:00	527
2009-04-20	19:47:00	422
2009-04-20	19:48:00	478
2009-04-20	19:49:00	48
2009-04-20	19:50:00	321
2009-04-20	19:51:00	196
2009-04-20	19:52:00	605
2009-04-20	19:53:00	1826
2009-04-20	19:54:00	1241
2009-04-20	19:55:00	2218
2009-04-20	19:56:00	1524
2009-04-20	19:57:00	1611
2009-04-20	19:58:00	3400
2009-04-20	19:59:00	4219
2009-04-20	20:00:00	6247
2009-04-20	20:01:00	5397
2009-04-20	20:02:00	5760
2009-04-20	20:03:00	5310
2009-04-20	20:04:00	4974
2009-04-20	20:05:00	3022
2009-04-20	20:06:00	2547
2009-04-20	20:07:00	4893
2009-04-20	20:08:00	4657
2009-04-20	20:09:00	5310
2009-04-20	20:10:00	3457
2009-04-20	20:11:00	5056
2009-04-20	20:12:00	3125
2009-04-20	20:13:00	3022
2009-04-20	20:14:00	769
2009-04-20	20:15:00	242
2009-04-20	20:16:00	1150
2009-04-20	20:17:00	802
2009-04-20	20:18:00	889
2009-04-20	20:19:00	80
2009-04-20	20:20:00	647
2009-04-20	20:21:00	661
2009-04-20	20:22:00	75
2009-04-20	20:23:00	432
2009-04-20	20:24:00	1106
2009-04-20	20:25:00	311
2009-04-20	20:26:00	785
2009-04-20	20:27:00	853
2009-04-20	20:28:00	908
2009-04-20	20:29:00	871
2009-04-20	20:30:00	632
2009-04-20	20:31:00	1218
2009-04-20	20:32:00	455
2009-04-20	20:33:00	889
2009-04-20	20:34:00	926
2009-04-20	20:35:00	632
2009-04-20	20:36:00	539
2009-04-20	20:37:00	690
2009-04-20	20:38:00	836
2009-04-20	20:39:00	1085
2009-04-20	20:40:00	235
2009-04-20	20:41:00	3821
2009-04-20	20:42:00	2067
2009-04-20	20:43:00	3758
2009-04-20	20:44:00	5310
2009-04-20	20:45:00	3821
2009-04-20	20:46:00	3696
2009-04-20	20:47:00	1314
2009-04-20	20:48:00	1469
2009-04-20	20:49:00	2871
2009-04-20	20:50:00	4582
2009-04-20	20:51:00	3344
2009-04-20	20:52:00	3233
2009-04-20	20:53:00	490
2009-04-20	20:54:00	676
2009-04-20	20:55:00	466
2009-04-20	20:56:00	5667
2009-04-20	20:57:00	3574
2009-04-20	20:58:00	2141
2009-04-20	20:59:00	1859
2009-04-20	21:00:00	871
2009-04-20	21:01:00	752
2009-04-20	21:02:00	1172
2009-04-20	21:03:00	1043
2009-04-20	21:04:00	188
2009-04-20	21:05:00	268
2009-04-20	21:06:00	564
2009-04-20	21:07:00	331
2009-04-20	21:08:00	390
2009-04-20	21:09:00	340
2009-04-20	21:10:00	34
2009-04-20	21:11:00	369
2009-04-20	21:12:00	0
2009-04-20	21:13:00	98
2009-04-20	21:14:00	196
2009-04-20	21:15:00	115
2009-04-20	21:16:00	285
2009-04-20	21:17:00	48
2009-04-20	21:18:00	48
2009-04-20	21:19:00	63
2009-04-20	21:20:00	211
2009-04-20	21:21:00	785
2009-04-20	21:22:00	321
2009-04-20	21:23:00	110
2009-04-20	21:24:00	871
2009-04-20	21:25:00	390
2009-04-20	21:26:00	219
2009-04-20	21:27:00	44
2009-04-20	21:28:00	204
2009-04-20	21:29:00	539
2009-04-20	21:30:00	24
2009-04-20	21:31:00	24
2009-04-20	21:32:00	34
2009-04-20	21:33:00	58
2009-04-20	21:34:00	24
2009-04-20	21:35:00	29
2009-04-20	21:36:00	15
2009-04-20	21:37:00	44
2009-04-20	21:38:00	127
2009-04-20	21:39:00	276
2009-04-20	21:40:00	285
2009-04-20	21:41:00	211
2009-04-20	21:42:00	0
2009-04-20	21:43:00	0
2009-04-20	21:44:00	0
2009-04-20	21:45:00	422
2009-04-20	21:46:00	411
2009-04-20	21:47:00	455
2009-04-20	21:48:00	455
2009-04-20	21:49:00	818
2009-04-20	21:50:00	48
2009-04-20	21:51:00	53
2009-04-20	21:52:00	58
2009-04-20	21:53:00	0
2009-04-20	21:54:00	0
2009-04-20	21:55:00	0
2009-04-20	21:56:00	0
2009-04-20	21:57:00	605
2009-04-20	21:58:00	1265
2009-04-20	21:59:00	871
2009-04-20	22:00:00	853
2009-04-20	22:01:00	514
2009-04-20	22:02:00	69
2009-04-20	22:03:00	34
2009-04-20	22:04:00	29
2009-04-20	22:05:00	369
2009-04-20	22:06:00	443
2009-04-20	22:07:00	34
2009-04-20	22:08:00	34
2009-04-20	22:09:00	80
2009-04-20	22:10:00	501
2009-04-20	22:11:00	48
2009-04-20	22:12:00	0
2009-04-20	22:13:00	0
2009-04-20	22:14:00	0
2009-04-20	22:15:00	0
2009-04-20	22:16:00	53
2009-04-20	22:17:00	0
2009-04-20	22:18:00	0
2009-04-20	22:19:00	0
2009-04-20	22:20:00	0
2009-04-20	22:21:00	321
2009-04-20	22:22:00	98
2009-04-20	22:23:00	632
2009-04-20	22:24:00	63
2009-04-20	22:25:00	259
2009-04-20	22:26:00	0
2009-04-20	22:27:00	0
2009-04-20	22:28:00	400
2009-04-20	22:29:00	196
2009-04-20	22:30:00	0
2009-04-20	22:31:00	0
2009-04-20	22:32:00	0
2009-04-20	22:33:00	0
2009-04-20	22:34:00	0
2009-04-20	22:35:00	0
2009-04-20	22:36:00	0
2009-04-20	22:37:00	0
2009-04-20	22:38:00	0
2009-04-20	22:39:00	0
2009-04-20	22:40:00	34
2009-04-20	22:41:00	58
2009-04-20	22:42:00	0
2009-04-20	22:43:00	0
2009-04-20	22:44:00	0
2009-04-20	22:45:00	0
2009-04-20	22:46:00	0
2009-04-20	22:47:00	0
2009-04-20	22:48:00	0
2009-04-20	22:49:00	0
2009-04-20	22:50:00	0
2009-04-20	22:51:00	5
2009-04-20	22:52:00	0
2009-04-20	22:53:00	0
2009-04-20	22:54:00	0
2009-04-20	22:55:00	0
2009-04-20	22:56:00	5
2009-04-20	22:57:00	0
2009-04-20	22:58:00	0
2009-04-20	22:59:00	0
2009-04-20	23:00:00	0
2009-04-20	23:01:00	0
2009-04-20	23:02:00	0
2009-04-20	23:03:00	5
2009-04-20	23:04:00	24
2009-04-20	23:05:00	0
2009-04-20	23:06:00	0
2009-04-20	23:07:00	0
2009-04-20	23:08:00	0
2009-04-20	23:09:00	0
2009-04-20	23:10:00	0
2009-04-20	23:11:00	0
2009-04-20	23:12:00	0
2009-04-20	23:13:00	0
2009-04-20	23:14:00	0
2009-04-20	23:15:00	5
2009-04-20	23:16:00	24
2009-04-20	23:17:00	69
2009-04-20	23:18:00	0
2009-04-20	23:19:00	0
2009-04-20	23:20:00	0
2009-04-20	23:21:00	0
2009-04-20	23:22:00	0
2009-04-20	23:23:00	0
2009-04-20	23:24:00	0
2009-04-20	23:25:00	0
2009-04-20	23:26:00	0
2009-04-20	23:27:00	0
2009-04-20	23:28:00	0
2009-04-20	23:29:00	0
2009-04-20	23:30:00	0
2009-04-20	23:31:00	0
2009-04-20	23:32:00	0
2009-04-20	23:33:00	0
2009-04-20	23:34:00	0
2009-04-20	23:35:00	0
2009-04-20	23:36:00	0
2009-04-20	23:37:00	0
2009-04-20	23:38:00	0
2009-04-20	23:39:00	53
2009-04-20	23:40:00	0
2009-04-20	23:41:00	0
2009-04-20	23:42:00	0
2009-04-20	23:43:00	0
2009-04-20	23:44:00	0
2009-04-20	23:45:00	0
2009-04-20	23:46:00	0
2009-04-20	23:47:00	0
2009-04-20	23:48:00	0
2009-04-20	23:49:00	5
2009-04-20	23:50:00	0
2009-04-20	23:51:00	0
2009-04-20	23:52:00	0
2009-04-20	23:53:00	0
2009-04-20	23:54:00	0
2009-04-20	23:55:00	0
2009-04-20	23:56:00	0
2009-04-20	23:57:00	411
2009-04-20	23:58:00	0
2009-04-20	23:59:00	0
2009-04-21	00:00:00	0
2009-04-21	00:01:00	0
2009-04-21	00:02:00	0
2009-04-21	00:03:00	0
2009-04-21	00:04:00	0
2009-04-21	00:05:00	0
2009-04-21	00:06:00	0
2009-04-21	00:07:00	0
2009-04-21	00:08:00	0
2009-04-21	00:09:00	0
2009-04-21	00:10:00	0
2009-04-21	00:11:00	0
2009-04-21	00:12:00	0
2009-04-21	00:13:00	0
2009-04-21	00:14:00	0
2009-04-21	00:15:00	0
2009-04-21	00:16:00	0
2009-04-21	00:17:00	0
2009-04-21	00:18:00	0
2009-04-21	00:19:00	0
2009-04-21	00:20:00	0
2009-04-21	00:21:00	0
2009-04-21	00:22:00	34
2009-04-21	00:23:00	0
2009-04-21	00:24:00	0
2009-04-21	00:25:00	0
2009-04-21	00:26:00	0
2009-04-21	00:27:00	0
2009-04-21	00:28:00	0
2009-04-21	00:29:00	0
2009-04-21	00:30:00	0
2009-04-21	00:31:00	0
2009-04-21	00:32:00	0
2009-04-21	00:33:00	0
2009-04-21	00:34:00	0
2009-04-21	00:35:00	0
2009-04-21	00:36:00	0
2009-04-21	00:37:00	0
2009-04-21	00:38:00	0
2009-04-21	00:39:00	0
2009-04-21	00:40:00	34
2009-04-21	00:41:00	0
2009-04-21	00:42:00	0
2009-04-21	00:43:00	0
2009-04-21	00:44:00	0
2009-04-21	00:45:00	0
2009-04-21	00:46:00	0
2009-04-21	00:47:00	0
2009-04-21	00:48:00	80
2009-04-21	00:49:00	0
2009-04-21	00:50:00	0
2009-04-21	00:51:00	0
2009-04-21	00:52:00	0
2009-04-21	00:53:00	0
2009-04-21	00:54:00	0
2009-04-21	00:55:00	0
2009-04-21	00:56:00	0
2009-04-21	00:57:00	0
2009-04-21	00:58:00	227
2009-04-21	00:59:00	321
2009-04-21	01:00:00	115
2009-04-21	01:01:00	39
2009-04-21	01:02:00	0
2009-04-21	01:03:00	0
2009-04-21	01:04:00	0
2009-04-21	01:05:00	0
2009-04-21	01:06:00	0
2009-04-21	01:07:00	0
2009-04-21	01:08:00	0
2009-04-21	01:09:00	0
2009-04-21	01:10:00	0
2009-04-21	01:11:00	44
2009-04-21	01:12:00	0
2009-04-21	01:13:00	0
2009-04-21	01:14:00	0
2009-04-21	01:15:00	0
2009-04-21	01:16:00	0
2009-04-21	01:17:00	0
2009-04-21	01:18:00	0
2009-04-21	01:19:00	0
2009-04-21	01:20:00	0
2009-04-21	01:21:00	15
2009-04-21	01:22:00	168
2009-04-21	01:23:00	259
2009-04-21	01:24:00	19
2009-04-21	01:25:00	0
2009-04-21	01:26:00	0
2009-04-21	01:27:00	0
2009-04-21	01:28:00	0
2009-04-21	01:29:00	0
2009-04-21	01:30:00	0
2009-04-21	01:31:00	0
2009-04-21	01:32:00	0
2009-04-21	01:33:00	0
2009-04-21	01:34:00	0
2009-04-21	01:35:00	0
2009-04-21	01:36:00	92
2009-04-21	01:37:00	0
2009-04-21	01:38:00	0
2009-04-21	01:39:00	0
2009-04-21	01:40:00	0
2009-04-21	01:41:00	0
2009-04-21	01:42:00	0
2009-04-21	01:43:00	98
2009-04-21	01:44:00	0
2009-04-21	01:45:00	39
2009-04-21	01:46:00	0
2009-04-21	01:47:00	0
2009-04-21	01:48:00	0
2009-04-21	01:49:00	0
2009-04-21	01:50:00	44
2009-04-21	01:51:00	0
2009-04-21	01:52:00	0
2009-04-21	01:53:00	0
2009-04-21	01:54:00	0
2009-04-21	01:55:00	0
2009-04-21	01:56:00	0
2009-04-21	01:57:00	0
2009-04-21	01:58:00	0
2009-04-21	01:59:00	0
2009-04-21	02:00:00	5
2009-04-21	02:01:00	15
2009-04-21	02:02:00	0
2009-04-21	02:03:00	0
2009-04-21	02:04:00	0
2009-04-21	02:05:00	0
2009-04-21	02:06:00	0
2009-04-21	02:07:00	0
2009-04-21	02:08:00	0
2009-04-21	02:09:00	0
2009-04-21	02:10:00	0
2009-04-21	02:11:00	0
2009-04-21	02:12:00	0
2009-04-21	02:13:00	0
2009-04-21	02:14:00	0
2009-04-21	02:15:00	0
2009-04-21	02:16:00	0
2009-04-21	02:17:00	0
2009-04-21	02:18:00	0
2009-04-21	02:19:00	5
2009-04-21	02:20:00	0
2009-04-21	02:21:00	0
2009-04-21	02:22:00	0
2009-04-21	02:23:00	0
2009-04-21	02:24:00	0
2009-04-21	02:25:00	0
2009-04-21	02:26:00	24
2009-04-21	02:27:00	0
2009-04-21	02:28:00	0
2009-04-21	02:29:00	0
2009-04-21	02:30:00	0
2009-04-21	02:31:00	0
2009-04-21	02:32:00	0
2009-04-21	02:33:00	0
2009-04-21	02:34:00	0
2009-04-21	02:35:00	0
2009-04-21	02:36:00	0
2009-04-21	02:37:00	0
2009-04-21	02:38:00	44
2009-04-21	02:39:00	0
2009-04-21	02:40:00	0
2009-04-21	02:41:00	0
2009-04-21	02:42:00	0
2009-04-21	02:43:00	0
2009-04-21	02:44:00	0
2009-04-21	02:45:00	0
2009-04-21	02:46:00	0
2009-04-21	02:47:00	0
2009-04-21	02:48:00	0
2009-04-21	02:49:00	0
2009-04-21	02:50:00	0
2009-04-21	02:51:00	0
2009-04-21	02:52:00	29
2009-04-21	02:53:00	98
2009-04-21	02:54:00	0
2009-04-21	02:55:00	350
2009-04-21	02:56:00	34
2009-04-21	02:57:00	0
2009-04-21	02:58:00	0
2009-04-21	02:59:00	0
2009-04-21	03:00:00	0
2009-04-21	03:01:00	86
2009-04-21	03:02:00	0
2009-04-21	03:03:00	0
2009-04-21	03:04:00	0
2009-04-21	03:05:00	0
2009-04-21	03:06:00	0
2009-04-21	03:07:00	0
2009-04-21	03:08:00	0
2009-04-21	03:09:00	0
2009-04-21	03:10:00	0
2009-04-21	03:11:00	5
2009-04-21	03:12:00	0
2009-04-21	03:13:00	0
2009-04-21	03:14:00	0
2009-04-21	03:15:00	134
2009-04-21	03:16:00	39
2009-04-21	03:17:00	0
2009-04-21	03:18:00	0
2009-04-21	03:19:00	0
2009-04-21	03:20:00	0
2009-04-21	03:21:00	0
2009-04-21	03:22:00	0
2009-04-21	03:23:00	0
2009-04-21	03:24:00	0
2009-04-21	03:25:00	0
2009-04-21	03:26:00	0
2009-04-21	03:27:00	0
2009-04-21	03:28:00	0
2009-04-21	03:29:00	0
2009-04-21	03:30:00	0
2009-04-21	03:31:00	0
2009-04-21	03:32:00	0
2009-04-21	03:33:00	39
2009-04-21	03:34:00	0
2009-04-21	03:35:00	0
2009-04-21	03:36:00	0
2009-04-21	03:37:00	0
2009-04-21	03:38:00	0
2009-04-21	03:39:00	0
2009-04-21	03:40:00	0
2009-04-21	03:41:00	0
2009-04-21	03:42:00	0
2009-04-21	03:43:00	0
2009-04-21	03:44:00	19
2009-04-21	03:45:00	80
2009-04-21	03:46:00	98
2009-04-21	03:47:00	92
2009-04-21	03:48:00	0
2009-04-21	03:49:00	0
2009-04-21	03:50:00	0
2009-04-21	03:51:00	0
2009-04-21	03:52:00	0
2009-04-21	03:53:00	0
2009-04-21	03:54:00	0
2009-04-21	03:55:00	0
2009-04-21	03:56:00	0
2009-04-21	03:57:00	0
2009-04-21	03:58:00	0
2009-04-21	03:59:00	0
2009-04-21	04:00:00	5
2009-04-21	04:01:00	0
2009-04-21	04:02:00	0
2009-04-21	04:03:00	0
2009-04-21	04:04:00	0
2009-04-21	04:05:00	340
2009-04-21	04:06:00	69
2009-04-21	04:07:00	0
2009-04-21	04:08:00	0
2009-04-21	04:09:00	0
2009-04-21	04:10:00	0
2009-04-21	04:11:00	0
2009-04-21	04:12:00	0
2009-04-21	04:13:00	0
2009-04-21	04:14:00	0
2009-04-21	04:15:00	69
2009-04-21	04:16:00	0
2009-04-21	04:17:00	58
2009-04-21	04:18:00	0
2009-04-21	04:19:00	0
2009-04-21	04:20:00	0
2009-04-21	04:21:00	0
2009-04-21	04:22:00	0
2009-04-21	04:23:00	0
2009-04-21	04:24:00	0
2009-04-21	04:25:00	0
2009-04-21	04:26:00	0
2009-04-21	04:27:00	0
2009-04-21	04:28:00	0
2009-04-21	04:29:00	0
2009-04-21	04:30:00	0
2009-04-21	04:31:00	0
2009-04-21	04:32:00	0
2009-04-21	04:33:00	0
2009-04-21	04:34:00	0
2009-04-21	04:35:00	0
2009-04-21	04:36:00	0
2009-04-21	04:37:00	19
2009-04-21	04:38:00	19
2009-04-21	04:39:00	303
2009-04-21	04:40:00	98
2009-04-21	04:41:00	0
2009-04-21	04:42:00	0
2009-04-21	04:43:00	0
2009-04-21	04:44:00	0
2009-04-21	04:45:00	0
2009-04-21	04:46:00	0
2009-04-21	04:47:00	0
2009-04-21	04:48:00	0
2009-04-21	04:49:00	0
2009-04-21	04:50:00	0
2009-04-21	04:51:00	0
2009-04-21	04:52:00	0
2009-04-21	04:53:00	0
2009-04-21	04:54:00	0
2009-04-21	04:55:00	0
2009-04-21	04:56:00	0
2009-04-21	04:57:00	48
2009-04-21	04:58:00	0
2009-04-21	04:59:00	0
2009-04-21	05:00:00	0
2009-04-21	05:01:00	0
2009-04-21	05:02:00	0
2009-04-21	05:03:00	0
2009-04-21	05:04:00	0
2009-04-21	05:05:00	0
2009-04-21	05:06:00	0
2009-04-21	05:07:00	5
2009-04-21	05:08:00	5
2009-04-21	05:09:00	0
2009-04-21	05:10:00	5
2009-04-21	05:11:00	0
2009-04-21	05:12:00	0
2009-04-21	05:13:00	0
2009-04-21	05:14:00	0
2009-04-21	05:15:00	127
2009-04-21	05:16:00	0
2009-04-21	05:17:00	0
2009-04-21	05:18:00	0
2009-04-21	05:19:00	0
2009-04-21	05:20:00	0
2009-04-21	05:21:00	0
2009-04-21	05:22:00	181
2009-04-21	05:23:00	63
2009-04-21	05:24:00	0
2009-04-21	05:25:00	0
2009-04-21	05:26:00	0
2009-04-21	05:27:00	0
2009-04-21	05:28:00	0
2009-04-21	05:29:00	0
2009-04-21	05:30:00	0
2009-04-21	05:31:00	0
2009-04-21	05:32:00	0
2009-04-21	05:33:00	58
2009-04-21	05:34:00	98
2009-04-21	05:35:00	0
2009-04-21	05:36:00	0
2009-04-21	05:37:00	0
2009-04-21	05:38:00	0
2009-04-21	05:39:00	0
2009-04-21	05:40:00	0
2009-04-21	05:41:00	0
2009-04-21	05:42:00	0
2009-04-21	05:43:00	0
2009-04-21	05:44:00	0
2009-04-21	05:45:00	0
2009-04-21	05:46:00	0
2009-04-21	05:47:00	0
2009-04-21	05:48:00	0
2009-04-21	05:49:00	0
2009-04-21	05:50:00	0
2009-04-21	05:51:00	0
2009-04-21	05:52:00	294
2009-04-21	05:53:00	80
2009-04-21	05:54:00	115
2009-04-21	05:55:00	0
2009-04-21	05:56:00	0
2009-04-21	05:57:00	0
2009-04-21	05:58:00	75
2009-04-21	05:59:00	0
2009-04-21	06:00:00	0
2009-04-21	06:01:00	0
2009-04-21	06:02:00	0
2009-04-21	06:03:00	0
2009-04-21	06:04:00	0
2009-04-21	06:05:00	0
2009-04-21	06:06:00	0
2009-04-21	06:07:00	0
2009-04-21	06:08:00	0
2009-04-21	06:09:00	0
2009-04-21	06:10:00	0
2009-04-21	06:11:00	0
2009-04-21	06:12:00	0
2009-04-21	06:13:00	29
2009-04-21	06:14:00	259
2009-04-21	06:15:00	10
2009-04-21	06:16:00	0
2009-04-21	06:17:00	0
2009-04-21	06:18:00	0
2009-04-21	06:19:00	0
2009-04-21	06:20:00	0
2009-04-21	06:21:00	0
2009-04-21	06:22:00	0
2009-04-21	06:23:00	0
2009-04-21	06:24:00	0
2009-04-21	06:25:00	0
2009-04-21	06:26:00	0
2009-04-21	06:27:00	53
2009-04-21	06:28:00	0
2009-04-21	06:29:00	0
2009-04-21	06:30:00	39
2009-04-21	06:31:00	0
2009-04-21	06:32:00	0
2009-04-21	06:33:00	0
2009-04-21	06:34:00	0
2009-04-21	06:35:00	0
2009-04-21	06:36:00	0
2009-04-21	06:37:00	0
2009-04-21	06:38:00	0
2009-04-21	06:39:00	0
2009-04-21	06:40:00	0
2009-04-21	06:41:00	24
2009-04-21	06:42:00	0
2009-04-21	06:43:00	69
2009-04-21	06:44:00	276
2009-04-21	06:45:00	24
2009-04-21	06:46:00	0
2009-04-21	06:47:00	34
2009-04-21	06:48:00	0
2009-04-21	06:49:00	0
2009-04-21	06:50:00	115
2009-04-21	06:51:00	0
2009-04-21	06:52:00	0
2009-04-21	06:53:00	34
2009-04-21	06:54:00	908
2009-04-21	06:55:00	578
2009-04-21	06:56:00	802
2009-04-21	06:57:00	0
2009-04-21	06:58:00	0
2009-04-21	06:59:00	0
2009-04-21	07:00:00	80
2009-04-21	07:01:00	0
2009-04-21	07:02:00	0
2009-04-21	07:03:00	0
2009-04-21	07:04:00	0
2009-04-21	07:05:00	0
2009-04-21	07:06:00	0
2009-04-21	07:07:00	15
2009-04-21	07:08:00	0
2009-04-21	07:09:00	0
2009-04-21	07:10:00	0
2009-04-21	07:11:00	0
2009-04-21	07:12:00	0
2009-04-21	07:13:00	0
2009-04-21	07:14:00	0
2009-04-21	07:15:00	0
2009-04-21	07:16:00	0
2009-04-21	07:17:00	0
2009-04-21	07:18:00	0
2009-04-21	07:19:00	0
2009-04-21	07:20:00	0
2009-04-21	07:21:00	0
2009-04-21	07:22:00	0
2009-04-21	07:23:00	10
2009-04-21	07:24:00	86
2009-04-21	07:25:00	63
2009-04-21	07:26:00	390
2009-04-21	07:27:00	964
2009-04-21	07:28:00	478
2009-04-21	07:29:00	0
2009-04-21	07:30:00	0
2009-04-21	07:31:00	0
2009-04-21	07:32:00	0
2009-04-21	07:33:00	5
2009-04-21	07:34:00	369
2009-04-21	07:35:00	161
2009-04-21	07:36:00	552
2009-04-21	07:37:00	2971
2009-04-21	07:38:00	63
2009-04-21	07:39:00	0
2009-04-21	07:40:00	10
2009-04-21	07:41:00	379
2009-04-21	07:42:00	1290
2009-04-21	07:43:00	5
2009-04-21	07:44:00	0
2009-04-21	07:45:00	0
2009-04-21	07:46:00	0
2009-04-21	07:47:00	0
2009-04-21	07:48:00	0
2009-04-21	07:49:00	10
2009-04-21	07:50:00	0
2009-04-21	07:51:00	115
2009-04-21	07:52:00	69
2009-04-21	07:53:00	39
2009-04-21	07:54:00	331
2009-04-21	07:55:00	647
2009-04-21	07:56:00	466
2009-04-21	07:57:00	1150
2009-04-21	07:58:00	5
2009-04-21	07:59:00	259
2009-04-21	08:00:00	110
2009-04-21	08:01:00	34
2009-04-21	08:02:00	5
2009-04-21	08:03:00	10
2009-04-21	08:04:00	432
2009-04-21	08:05:00	115
2009-04-21	08:06:00	141
2009-04-21	08:07:00	188
2009-04-21	08:08:00	0
2009-04-21	08:09:00	188
2009-04-21	08:10:00	75
2009-04-21	08:11:00	29
2009-04-21	08:12:00	276
2009-04-21	08:13:00	552
2009-04-21	08:14:00	432
2009-04-21	08:15:00	369
2009-04-21	08:16:00	564
2009-04-21	08:17:00	219
2009-04-21	08:18:00	29
2009-04-21	08:19:00	15
2009-04-21	08:20:00	80
2009-04-21	08:21:00	141
2009-04-21	08:22:00	400
2009-04-21	08:23:00	29
2009-04-21	08:24:00	161
2009-04-21	08:25:00	400
2009-04-21	08:26:00	34
2009-04-21	08:27:00	592
2009-04-21	08:28:00	889
2009-04-21	08:29:00	721
2009-04-21	08:30:00	619
2009-04-21	08:31:00	24
2009-04-21	08:32:00	5
2009-04-21	08:33:00	250
2009-04-21	08:34:00	647
2009-04-21	08:35:00	578
2009-04-21	08:36:00	578
2009-04-21	08:37:00	242
2009-04-21	08:38:00	0
2009-04-21	08:39:00	188
2009-04-21	08:40:00	514
2009-04-21	08:41:00	24
2009-04-21	08:42:00	490
2009-04-21	08:43:00	321
2009-04-21	08:44:00	188
2009-04-21	08:45:00	250
2009-04-21	08:46:00	1611
2009-04-21	08:47:00	1524
2009-04-21	08:48:00	1364
2009-04-21	08:49:00	1043
2009-04-21	08:50:00	1611
2009-04-21	08:51:00	411
2009-04-21	08:52:00	19
2009-04-21	08:53:00	181
2009-04-21	08:54:00	147
2009-04-21	08:55:00	227
2009-04-21	08:56:00	592
2009-04-21	08:57:00	871
2009-04-21	08:58:00	690
2009-04-21	08:59:00	19
2009-04-21	09:00:00	2971
2009-04-21	09:01:00	4219
2009-04-21	09:02:00	4735
2009-04-21	09:03:00	1640
2009-04-21	09:04:00	29
2009-04-21	09:05:00	34
2009-04-21	09:06:00	4974
2009-04-21	09:07:00	4814
2009-04-21	09:08:00	4893
[truncated: 19,611 more rows]

[truncated: 3 more sheets: 5.4.09, 5.18.09, 6.1.09]
