# Supplementary material for: Initial evaluation of nighttime restlessness in a naturally occurring canine model of osteoarthritis pain
Source: PeerJ. 2015 Feb 17;3:e772. doi: 10.7717/peerj.772 (PMC4340376; doi:10.7717/peerj.772)
Supplement: Supplemental Information 31 [file peerj-03-772-s031.xlsx]

## Sheet: Office Visits
Visit Date	Visit Number
2009-02-27 06:00:00	1
2009-03-13 06:00:00	2
2009-03-27 06:00:00	3
2009-04-13 06:00:00	4
2009-04-29 06:00:00	5
2009-05-13 06:00:00	6
2009-05-27 06:00:00	7
2009-06-10 06:00:00	8
2009-06-24 06:00:00	9

## Sheet: 31_Data
Segment	DateTime	Activity	Hour	Quadrant	Study Day	Weekday
1	2009-03-06 06:01:00	0	6	2	7	6
1	2009-03-06 06:02:00	0	6	2	7	6
1	2009-03-06 06:03:00	0	6	2	7	6
1	2009-03-06 06:04:00	0	6	2	7	6
1	2009-03-06 06:05:00	0	6	2	7	6
1	2009-03-06 06:06:00	0	6	2	7	6
1	2009-03-06 06:07:00	0	6	2	7	6
1	2009-03-06 06:08:00	0	6	2	7	6
1	2009-03-06 06:09:00	0	6	2	7	6
1	2009-03-06 06:10:00	0	6	2	7	6
1	2009-03-06 06:11:00	0	6	2	7	6
1	2009-03-06 06:12:00	0	6	2	7	6
1	2009-03-06 06:13:00	0	6	2	7	6
1	2009-03-06 06:14:00	0	6	2	7	6
1	2009-03-06 06:15:00	10	6	2	7	6
1	2009-03-06 06:16:00	0	6	2	7	6
1	2009-03-06 06:17:00	0	6	2	7	6
1	2009-03-06 06:18:00	63	6	2	7	6
1	2009-03-06 06:19:00	0	6	2	7	6
1	2009-03-06 06:20:00	0	6	2	7	6
1	2009-03-06 06:21:00	0	6	2	7	6
1	2009-03-06 06:22:00	0	6	2	7	6
1	2009-03-06 06:23:00	0	6	2	7	6
1	2009-03-06 06:24:00	0	6	2	7	6
1	2009-03-06 06:25:00	10	6	2	7	6
1	2009-03-06 06:26:00	441	6	2	7	6
1	2009-03-06 06:27:00	63	6	2	7	6
1	2009-03-06 06:28:00	617	6	2	7	6
1	2009-03-06 06:29:00	844	6	2	7	6
1	2009-03-06 06:30:00	290	6	2	7	6
1	2009-03-06 06:31:00	319	6	2	7	6
1	2009-03-06 06:32:00	63	6	2	7	6
1	2009-03-06 06:33:00	844	6	2	7	6
1	2009-03-06 06:34:00	0	6	2	7	6
1	2009-03-06 06:35:00	10	6	2	7	6
1	2009-03-06 06:36:00	0	6	2	7	6
1	2009-03-06 06:37:00	42	6	2	7	6
1	2009-03-06 06:38:00	0	6	2	7	6
1	2009-03-06 06:39:00	0	6	2	7	6
1	2009-03-06 06:40:00	212	6	2	7	6
1	2009-03-06 06:41:00	0	6	2	7	6
1	2009-03-06 06:42:00	0	6	2	7	6
1	2009-03-06 06:43:00	0	6	2	7	6
1	2009-03-06 06:44:00	0	6	2	7	6
1	2009-03-06 06:45:00	0	6	2	7	6
1	2009-03-06 06:46:00	0	6	2	7	6
1	2009-03-06 06:47:00	0	6	2	7	6
1	2009-03-06 06:48:00	0	6	2	7	6
1	2009-03-06 06:49:00	0	6	2	7	6
1	2009-03-06 06:50:00	0	6	2	7	6
1	2009-03-06 06:51:00	0	6	2	7	6
1	2009-03-06 06:52:00	0	6	2	7	6
1	2009-03-06 06:53:00	0	6	2	7	6
1	2009-03-06 06:54:00	0	6	2	7	6
1	2009-03-06 06:55:00	0	6	2	7	6
1	2009-03-06 06:56:00	0	6	2	7	6
1	2009-03-06 06:57:00	0	6	2	7	6
1	2009-03-06 06:58:00	10	6	2	7	6
1	2009-03-06 06:59:00	0	6	2	7	6
1	2009-03-06 07:00:00	0	6	2	7	6
1	2009-03-06 07:01:00	0	7	2	7	6
1	2009-03-06 07:02:00	21	7	2	7	6
1	2009-03-06 07:03:00	0	7	2	7	6
1	2009-03-06 07:04:00	0	7	2	7	6
1	2009-03-06 07:05:00	0	7	2	7	6
1	2009-03-06 07:06:00	0	7	2	7	6
1	2009-03-06 07:07:00	0	7	2	7	6
1	2009-03-06 07:08:00	0	7	2	7	6
1	2009-03-06 07:09:00	0	7	2	7	6
1	2009-03-06 07:10:00	0	7	2	7	6
1	2009-03-06 07:11:00	0	7	2	7	6
1	2009-03-06 07:12:00	0	7	2	7	6
1	2009-03-06 07:13:00	0	7	2	7	6
1	2009-03-06 07:14:00	0	7	2	7	6
1	2009-03-06 07:15:00	0	7	2	7	6
1	2009-03-06 07:16:00	0	7	2	7	6
1	2009-03-06 07:17:00	0	7	2	7	6
1	2009-03-06 07:18:00	0	7	2	7	6
1	2009-03-06 07:19:00	0	7	2	7	6
1	2009-03-06 07:20:00	0	7	2	7	6
1	2009-03-06 07:21:00	0	7	2	7	6
1	2009-03-06 07:22:00	0	7	2	7	6
1	2009-03-06 07:23:00	0	7	2	7	6
1	2009-03-06 07:24:00	0	7	2	7	6
1	2009-03-06 07:25:00	0	7	2	7	6
1	2009-03-06 07:26:00	0	7	2	7	6
1	2009-03-06 07:27:00	0	7	2	7	6
1	2009-03-06 07:28:00	0	7	2	7	6
1	2009-03-06 07:29:00	0	7	2	7	6
1	2009-03-06 07:30:00	0	7	2	7	6
1	2009-03-06 07:31:00	0	7	2	7	6
1	2009-03-06 07:32:00	10	7	2	7	6
1	2009-03-06 07:33:00	0	7	2	7	6
1	2009-03-06 07:34:00	0	7	2	7	6
1	2009-03-06 07:35:00	0	7	2	7	6
1	2009-03-06 07:36:00	0	7	2	7	6
1	2009-03-06 07:37:00	0	7	2	7	6
1	2009-03-06 07:38:00	0	7	2	7	6
1	2009-03-06 07:39:00	0	7	2	7	6
1	2009-03-06 07:40:00	0	7	2	7	6
1	2009-03-06 07:41:00	0	7	2	7	6
1	2009-03-06 07:42:00	0	7	2	7	6
1	2009-03-06 07:43:00	0	7	2	7	6
1	2009-03-06 07:44:00	0	7	2	7	6
1	2009-03-06 07:45:00	0	7	2	7	6
1	2009-03-06 07:46:00	0	7	2	7	6
1	2009-03-06 07:47:00	0	7	2	7	6
1	2009-03-06 07:48:00	0	7	2	7	6
1	2009-03-06 07:49:00	0	7	2	7	6
1	2009-03-06 07:50:00	0	7	2	7	6
1	2009-03-06 07:51:00	0	7	2	7	6
1	2009-03-06 07:52:00	0	7	2	7	6
1	2009-03-06 07:53:00	0	7	2	7	6
1	2009-03-06 07:54:00	0	7	2	7	6
1	2009-03-06 07:55:00	0	7	2	7	6
1	2009-03-06 07:56:00	0	7	2	7	6
1	2009-03-06 07:57:00	0	7	2	7	6
1	2009-03-06 07:58:00	0	7	2	7	6
1	2009-03-06 07:59:00	0	7	2	7	6
1	2009-03-06 08:00:00	0	7	2	7	6
1	2009-03-06 08:01:00	0	8	2	7	6
1	2009-03-06 08:02:00	0	8	2	7	6
1	2009-03-06 08:03:00	0	8	2	7	6
1	2009-03-06 08:04:00	0	8	2	7	6
1	2009-03-06 08:05:00	0	8	2	7	6
1	2009-03-06 08:06:00	0	8	2	7	6
1	2009-03-06 08:07:00	31	8	2	7	6
1	2009-03-06 08:08:00	0	8	2	7	6
1	2009-03-06 08:09:00	0	8	2	7	6
1	2009-03-06 08:10:00	0	8	2	7	6
1	2009-03-06 08:11:00	0	8	2	7	6
1	2009-03-06 08:12:00	0	8	2	7	6
1	2009-03-06 08:13:00	10	8	2	7	6
1	2009-03-06 08:14:00	0	8	2	7	6
1	2009-03-06 08:15:00	0	8	2	7	6
1	2009-03-06 08:16:00	0	8	2	7	6
1	2009-03-06 08:17:00	0	8	2	7	6
1	2009-03-06 08:18:00	0	8	2	7	6
1	2009-03-06 08:19:00	0	8	2	7	6
1	2009-03-06 08:20:00	0	8	2	7	6
1	2009-03-06 08:21:00	0	8	2	7	6
1	2009-03-06 08:22:00	0	8	2	7	6
1	2009-03-06 08:23:00	0	8	2	7	6
1	2009-03-06 08:24:00	0	8	2	7	6
1	2009-03-06 08:25:00	0	8	2	7	6
1	2009-03-06 08:26:00	0	8	2	7	6
1	2009-03-06 08:27:00	0	8	2	7	6
1	2009-03-06 08:28:00	0	8	2	7	6
1	2009-03-06 08:29:00	0	8	2	7	6
1	2009-03-06 08:30:00	0	8	2	7	6
1	2009-03-06 08:31:00	0	8	2	7	6
1	2009-03-06 08:32:00	0	8	2	7	6
1	2009-03-06 08:33:00	0	8	2	7	6
1	2009-03-06 08:34:00	0	8	2	7	6
1	2009-03-06 08:35:00	363	8	2	7	6
1	2009-03-06 08:36:00	0	8	2	7	6
1	2009-03-06 08:37:00	820	8	2	7	6
1	2009-03-06 08:38:00	275	8	2	7	6
1	2009-03-06 08:39:00	94	8	2	7	6
1	2009-03-06 08:40:00	63	8	2	7	6
1	2009-03-06 08:41:00	348	8	2	7	6
1	2009-03-06 08:42:00	0	8	2	7	6
1	2009-03-06 08:43:00	0	8	2	7	6
1	2009-03-06 08:44:00	778	8	2	7	6
1	2009-03-06 08:45:00	31	8	2	7	6
1	2009-03-06 08:46:00	250	8	2	7	6
1	2009-03-06 08:47:00	42	8	2	7	6
1	2009-03-06 08:48:00	225	8	2	7	6
1	2009-03-06 08:49:00	392	8	2	7	6
1	2009-03-06 08:50:00	0	8	2	7	6
1	2009-03-06 08:51:00	0	8	2	7	6
1	2009-03-06 08:52:00	0	8	2	7	6
1	2009-03-06 08:53:00	31	8	2	7	6
1	2009-03-06 08:54:00	0	8	2	7	6
1	2009-03-06 08:55:00	0	8	2	7	6
1	2009-03-06 08:56:00	0	8	2	7	6
1	2009-03-06 08:57:00	10	8	2	7	6
1	2009-03-06 08:58:00	0	8	2	7	6
1	2009-03-06 08:59:00	0	8	2	7	6
1	2009-03-06 09:00:00	0	8	2	7	6
1	2009-03-06 09:01:00	0	9	2	7	6
1	2009-03-06 09:02:00	0	9	2	7	6
1	2009-03-06 09:03:00	0	9	2	7	6
1	2009-03-06 09:04:00	407	9	2	7	6
1	2009-03-06 09:05:00	250	9	2	7	6
1	2009-03-06 09:06:00	598	9	2	7	6
1	2009-03-06 09:07:00	52	9	2	7	6
1	2009-03-06 09:08:00	10	9	2	7	6
1	2009-03-06 09:09:00	10	9	2	7	6
1	2009-03-06 09:10:00	0	9	2	7	6
1	2009-03-06 09:11:00	10	9	2	7	6
1	2009-03-06 09:12:00	10	9	2	7	6
1	2009-03-06 09:13:00	21	9	2	7	6
1	2009-03-06 09:14:00	174	9	2	7	6
1	2009-03-06 09:15:00	63	9	2	7	6
1	2009-03-06 09:16:00	0	9	2	7	6
1	2009-03-06 09:17:00	0	9	2	7	6
1	2009-03-06 09:18:00	21	9	2	7	6
1	2009-03-06 09:19:00	0	9	2	7	6
1	2009-03-06 09:20:00	0	9	2	7	6
1	2009-03-06 09:21:00	0	9	2	7	6
1	2009-03-06 09:22:00	0	9	2	7	6
1	2009-03-06 09:23:00	0	9	2	7	6
1	2009-03-06 09:24:00	0	9	2	7	6
1	2009-03-06 09:25:00	0	9	2	7	6
1	2009-03-06 09:26:00	0	9	2	7	6
1	2009-03-06 09:27:00	0	9	2	7	6
1	2009-03-06 09:28:00	0	9	2	7	6
1	2009-03-06 09:29:00	0	9	2	7	6
1	2009-03-06 09:30:00	31	9	2	7	6
1	2009-03-06 09:31:00	0	9	2	7	6
1	2009-03-06 09:32:00	0	9	2	7	6
1	2009-03-06 09:33:00	0	9	2	7	6
1	2009-03-06 09:34:00	0	9	2	7	6
1	2009-03-06 09:35:00	0	9	2	7	6
1	2009-03-06 09:36:00	0	9	2	7	6
1	2009-03-06 09:37:00	0	9	2	7	6
1	2009-03-06 09:38:00	0	9	2	7	6
1	2009-03-06 09:39:00	0	9	2	7	6
1	2009-03-06 09:40:00	0	9	2	7	6
1	2009-03-06 09:41:00	0	9	2	7	6
1	2009-03-06 09:42:00	0	9	2	7	6
1	2009-03-06 09:43:00	0	9	2	7	6
1	2009-03-06 09:44:00	0	9	2	7	6
1	2009-03-06 09:45:00	0	9	2	7	6
1	2009-03-06 09:46:00	0	9	2	7	6
1	2009-03-06 09:47:00	0	9	2	7	6
1	2009-03-06 09:48:00	0	9	2	7	6
1	2009-03-06 09:49:00	0	9	2	7	6
1	2009-03-06 09:50:00	31	9	2	7	6
1	2009-03-06 09:51:00	0	9	2	7	6
1	2009-03-06 09:52:00	0	9	2	7	6
1	2009-03-06 09:53:00	0	9	2	7	6
1	2009-03-06 09:54:00	0	9	2	7	6
1	2009-03-06 09:55:00	0	9	2	7	6
1	2009-03-06 09:56:00	0	9	2	7	6
1	2009-03-06 09:57:00	0	9	2	7	6
1	2009-03-06 09:58:00	0	9	2	7	6
1	2009-03-06 09:59:00	10	9	2	7	6
1	2009-03-06 10:00:00	0	9	2	7	6
1	2009-03-06 10:01:00	0	10	2	7	6
1	2009-03-06 10:02:00	0	10	2	7	6
1	2009-03-06 10:03:00	0	10	2	7	6
1	2009-03-06 10:04:00	0	10	2	7	6
1	2009-03-06 10:05:00	0	10	2	7	6
1	2009-03-06 10:06:00	0	10	2	7	6
1	2009-03-06 10:07:00	0	10	2	7	6
1	2009-03-06 10:08:00	0	10	2	7	6
1	2009-03-06 10:09:00	0	10	2	7	6
1	2009-03-06 10:10:00	0	10	2	7	6
1	2009-03-06 10:11:00	0	10	2	7	6
1	2009-03-06 10:12:00	0	10	2	7	6
1	2009-03-06 10:13:00	0	10	2	7	6
1	2009-03-06 10:14:00	0	10	2	7	6
1	2009-03-06 10:15:00	0	10	2	7	6
1	2009-03-06 10:16:00	0	10	2	7	6
1	2009-03-06 10:17:00	0	10	2	7	6
1	2009-03-06 10:18:00	0	10	2	7	6
1	2009-03-06 10:19:00	0	10	2	7	6
1	2009-03-06 10:20:00	0	10	2	7	6
1	2009-03-06 10:21:00	0	10	2	7	6
1	2009-03-06 10:22:00	0	10	2	7	6
1	2009-03-06 10:23:00	0	10	2	7	6
1	2009-03-06 10:24:00	407	10	2	7	6
1	2009-03-06 10:25:00	508	10	2	7	6
1	2009-03-06 10:26:00	0	10	2	7	6
1	2009-03-06 10:27:00	0	10	2	7	6
1	2009-03-06 10:28:00	0	10	2	7	6
1	2009-03-06 10:29:00	0	10	2	7	6
1	2009-03-06 10:30:00	21	10	2	7	6
1	2009-03-06 10:31:00	0	10	2	7	6
1	2009-03-06 10:32:00	0	10	2	7	6
1	2009-03-06 10:33:00	0	10	2	7	6
1	2009-03-06 10:34:00	0	10	2	7	6
1	2009-03-06 10:35:00	0	10	2	7	6
1	2009-03-06 10:36:00	0	10	2	7	6
1	2009-03-06 10:37:00	0	10	2	7	6
1	2009-03-06 10:38:00	10	10	2	7	6
1	2009-03-06 10:39:00	0	10	2	7	6
1	2009-03-06 10:40:00	21	10	2	7	6
1	2009-03-06 10:41:00	21	10	2	7	6
1	2009-03-06 10:42:00	21	10	2	7	6
1	2009-03-06 10:43:00	0	10	2	7	6
1	2009-03-06 10:44:00	0	10	2	7	6
1	2009-03-06 10:45:00	0	10	2	7	6
1	2009-03-06 10:46:00	0	10	2	7	6
1	2009-03-06 10:47:00	0	10	2	7	6
1	2009-03-06 10:48:00	0	10	2	7	6
1	2009-03-06 10:49:00	0	10	2	7	6
1	2009-03-06 10:50:00	0	10	2	7	6
1	2009-03-06 10:51:00	0	10	2	7	6
1	2009-03-06 10:52:00	0	10	2	7	6
1	2009-03-06 10:53:00	0	10	2	7	6
1	2009-03-06 10:54:00	42	10	2	7	6
1	2009-03-06 10:55:00	617	10	2	7	6
1	2009-03-06 10:56:00	334	10	2	7	6
1	2009-03-06 10:57:00	63	10	2	7	6
1	2009-03-06 10:58:00	162	10	2	7	6
1	2009-03-06 10:59:00	105	10	2	7	6
1	2009-03-06 11:00:00	105	10	2	7	6
1	2009-03-06 11:01:00	105	11	2	7	6
1	2009-03-06 11:02:00	0	11	2	7	6
1	2009-03-06 11:03:00	0	11	2	7	6
1	2009-03-06 11:04:00	0	11	2	7	6
1	2009-03-06 11:05:00	0	11	2	7	6
1	2009-03-06 11:06:00	0	11	2	7	6
1	2009-03-06 11:07:00	52	11	2	7	6
1	2009-03-06 11:08:00	94	11	2	7	6
1	2009-03-06 11:09:00	31	11	2	7	6
1	2009-03-06 11:10:00	0	11	2	7	6
1	2009-03-06 11:11:00	0	11	2	7	6
1	2009-03-06 11:12:00	0	11	2	7	6
1	2009-03-06 11:13:00	0	11	2	7	6
1	2009-03-06 11:14:00	0	11	2	7	6
1	2009-03-06 11:15:00	0	11	2	7	6
1	2009-03-06 11:16:00	0	11	2	7	6
1	2009-03-06 11:17:00	0	11	2	7	6
1	2009-03-06 11:18:00	0	11	2	7	6
1	2009-03-06 11:19:00	0	11	2	7	6
1	2009-03-06 11:20:00	0	11	2	7	6
1	2009-03-06 11:21:00	0	11	2	7	6
1	2009-03-06 11:22:00	0	11	2	7	6
1	2009-03-06 11:23:00	0	11	2	7	6
1	2009-03-06 11:24:00	0	11	2	7	6
1	2009-03-06 11:25:00	0	11	2	7	6
1	2009-03-06 11:26:00	0	11	2	7	6
1	2009-03-06 11:27:00	199	11	2	7	6
1	2009-03-06 11:28:00	737	11	2	7	6
1	2009-03-06 11:29:00	319	11	2	7	6
1	2009-03-06 11:30:00	474	11	2	7	6
1	2009-03-06 11:31:00	2170	11	2	7	6
1	2009-03-06 11:32:00	2004	11	2	7	6
1	2009-03-06 11:33:00	73	11	2	7	6
1	2009-03-06 11:34:00	378	11	2	7	6
1	2009-03-06 11:35:00	2348	11	2	7	6
1	2009-03-06 11:36:00	778	11	2	7	6
1	2009-03-06 11:37:00	407	11	2	7	6
1	2009-03-06 11:38:00	2004	11	2	7	6
1	2009-03-06 11:39:00	984	11	2	7	6
1	2009-03-06 11:40:00	378	11	2	7	6
1	2009-03-06 11:41:00	1924	11	2	7	6
1	2009-03-06 11:42:00	1924	11	2	7	6
1	2009-03-06 11:43:00	1528	11	2	7	6
1	2009-03-06 11:44:00	250	11	2	7	6
1	2009-03-06 11:45:00	778	11	2	7	6
1	2009-03-06 11:46:00	392	11	2	7	6
1	2009-03-06 11:47:00	617	11	2	7	6
1	2009-03-06 11:48:00	695	11	2	7	6
1	2009-03-06 11:49:00	1431	11	2	7	6
1	2009-03-06 11:50:00	799	11	2	7	6
1	2009-03-06 11:51:00	541	11	2	7	6
1	2009-03-06 11:52:00	126	11	2	7	6
1	2009-03-06 11:53:00	10	11	2	7	6
1	2009-03-06 11:54:00	212	11	2	7	6
1	2009-03-06 11:55:00	867	11	2	7	6
1	2009-03-06 11:56:00	457	11	2	7	6
1	2009-03-06 11:57:00	290	11	2	7	6
1	2009-03-06 11:58:00	674	11	2	7	6
1	2009-03-06 11:59:00	525	11	2	7	6
1	2009-03-06 12:00:00	10	11	2	7	6
1	2009-03-06 12:01:00	758	12	3	7	6
1	2009-03-06 12:02:00	126	12	3	7	6
1	2009-03-06 12:03:00	84	12	3	7	6
1	2009-03-06 12:04:00	0	12	3	7	6
1	2009-03-06 12:05:00	0	12	3	7	6
1	2009-03-06 12:06:00	0	12	3	7	6
1	2009-03-06 12:07:00	0	12	3	7	6
1	2009-03-06 12:08:00	10	12	3	7	6
1	2009-03-06 12:09:00	115	12	3	7	6
1	2009-03-06 12:10:00	199	12	3	7	6
1	2009-03-06 12:11:00	187	12	3	7	6
1	2009-03-06 12:12:00	457	12	3	7	6
1	2009-03-06 12:13:00	0	12	3	7	6
1	2009-03-06 12:14:00	0	12	3	7	6
1	2009-03-06 12:15:00	0	12	3	7	6
1	2009-03-06 12:16:00	10	12	3	7	6
1	2009-03-06 12:17:00	0	12	3	7	6
1	2009-03-06 12:18:00	0	12	3	7	6
1	2009-03-06 12:19:00	0	12	3	7	6
1	2009-03-06 12:20:00	0	12	3	7	6
1	2009-03-06 12:21:00	0	12	3	7	6
1	2009-03-06 12:22:00	0	12	3	7	6
1	2009-03-06 12:23:00	0	12	3	7	6
1	2009-03-06 12:24:00	0	12	3	7	6
1	2009-03-06 12:25:00	0	12	3	7	6
1	2009-03-06 12:26:00	0	12	3	7	6
1	2009-03-06 12:27:00	0	12	3	7	6
1	2009-03-06 12:28:00	0	12	3	7	6
1	2009-03-06 12:29:00	0	12	3	7	6
1	2009-03-06 12:30:00	560	12	3	7	6
1	2009-03-06 12:31:00	0	12	3	7	6
1	2009-03-06 12:32:00	0	12	3	7	6
1	2009-03-06 12:33:00	0	12	3	7	6
1	2009-03-06 12:34:00	21	12	3	7	6
1	2009-03-06 12:35:00	0	12	3	7	6
1	2009-03-06 12:36:00	21	12	3	7	6
1	2009-03-06 12:37:00	0	12	3	7	6
1	2009-03-06 12:38:00	10	12	3	7	6
1	2009-03-06 12:39:00	0	12	3	7	6
1	2009-03-06 12:40:00	21	12	3	7	6
1	2009-03-06 12:41:00	0	12	3	7	6
1	2009-03-06 12:42:00	0	12	3	7	6
1	2009-03-06 12:43:00	21	12	3	7	6
1	2009-03-06 12:44:00	441	12	3	7	6
1	2009-03-06 12:45:00	212	12	3	7	6
1	2009-03-06 12:46:00	0	12	3	7	6
1	2009-03-06 12:47:00	31	12	3	7	6
1	2009-03-06 12:48:00	225	12	3	7	6
1	2009-03-06 12:49:00	149	12	3	7	6
1	2009-03-06 12:50:00	0	12	3	7	6
1	2009-03-06 12:51:00	0	12	3	7	6
1	2009-03-06 12:52:00	0	12	3	7	6
1	2009-03-06 12:53:00	10	12	3	7	6
1	2009-03-06 12:54:00	0	12	3	7	6
1	2009-03-06 12:55:00	0	12	3	7	6
1	2009-03-06 12:56:00	0	12	3	7	6
1	2009-03-06 12:57:00	0	12	3	7	6
1	2009-03-06 12:58:00	0	12	3	7	6
1	2009-03-06 12:59:00	0	12	3	7	6
1	2009-03-06 13:00:00	0	12	3	7	6
1	2009-03-06 13:01:00	0	13	3	7	6
1	2009-03-06 13:02:00	0	13	3	7	6
1	2009-03-06 13:03:00	0	13	3	7	6
1	2009-03-06 13:04:00	0	13	3	7	6
1	2009-03-06 13:05:00	0	13	3	7	6
1	2009-03-06 13:06:00	0	13	3	7	6
1	2009-03-06 13:07:00	0	13	3	7	6
1	2009-03-06 13:08:00	73	13	3	7	6
1	2009-03-06 13:09:00	0	13	3	7	6
1	2009-03-06 13:10:00	0	13	3	7	6
1	2009-03-06 13:11:00	0	13	3	7	6
1	2009-03-06 13:12:00	0	13	3	7	6
1	2009-03-06 13:13:00	52	13	3	7	6
1	2009-03-06 13:14:00	0	13	3	7	6
1	2009-03-06 13:15:00	0	13	3	7	6
1	2009-03-06 13:16:00	0	13	3	7	6
1	2009-03-06 13:17:00	0	13	3	7	6
1	2009-03-06 13:18:00	0	13	3	7	6
1	2009-03-06 13:19:00	0	13	3	7	6
1	2009-03-06 13:20:00	0	13	3	7	6
1	2009-03-06 13:21:00	0	13	3	7	6
1	2009-03-06 13:22:00	0	13	3	7	6
1	2009-03-06 13:23:00	0	13	3	7	6
1	2009-03-06 13:24:00	0	13	3	7	6
1	2009-03-06 13:25:00	0	13	3	7	6
1	2009-03-06 13:26:00	0	13	3	7	6
1	2009-03-06 13:27:00	0	13	3	7	6
1	2009-03-06 13:28:00	0	13	3	7	6
1	2009-03-06 13:29:00	0	13	3	7	6
1	2009-03-06 13:30:00	0	13	3	7	6
1	2009-03-06 13:31:00	10	13	3	7	6
1	2009-03-06 13:32:00	0	13	3	7	6
1	2009-03-06 13:33:00	0	13	3	7	6
1	2009-03-06 13:34:00	0	13	3	7	6
1	2009-03-06 13:35:00	0	13	3	7	6
1	2009-03-06 13:36:00	0	13	3	7	6
1	2009-03-06 13:37:00	0	13	3	7	6
1	2009-03-06 13:38:00	0	13	3	7	6
1	2009-03-06 13:39:00	0	13	3	7	6
1	2009-03-06 13:40:00	0	13	3	7	6
1	2009-03-06 13:41:00	0	13	3	7	6
1	2009-03-06 13:42:00	0	13	3	7	6
1	2009-03-06 13:43:00	0	13	3	7	6
1	2009-03-06 13:44:00	0	13	3	7	6
1	2009-03-06 13:45:00	0	13	3	7	6
1	2009-03-06 13:46:00	0	13	3	7	6
1	2009-03-06 13:47:00	0	13	3	7	6
1	2009-03-06 13:48:00	0	13	3	7	6
1	2009-03-06 13:49:00	0	13	3	7	6
1	2009-03-06 13:50:00	0	13	3	7	6
1	2009-03-06 13:51:00	0	13	3	7	6
1	2009-03-06 13:52:00	0	13	3	7	6
1	2009-03-06 13:53:00	0	13	3	7	6
1	2009-03-06 13:54:00	0	13	3	7	6
1	2009-03-06 13:55:00	0	13	3	7	6
1	2009-03-06 13:56:00	0	13	3	7	6
1	2009-03-06 13:57:00	0	13	3	7	6
1	2009-03-06 13:58:00	174	13	3	7	6
1	2009-03-06 13:59:00	0	13	3	7	6
1	2009-03-06 14:00:00	0	13	3	7	6
1	2009-03-06 14:01:00	0	14	3	7	6
1	2009-03-06 14:02:00	0	14	3	7	6
1	2009-03-06 14:03:00	52	14	3	7	6
1	2009-03-06 14:04:00	136	14	3	7	6
1	2009-03-06 14:05:00	579	14	3	7	6
1	2009-03-06 14:06:00	0	14	3	7	6
1	2009-03-06 14:07:00	149	14	3	7	6
1	2009-03-06 14:08:00	0	14	3	7	6
1	2009-03-06 14:09:00	0	14	3	7	6
1	2009-03-06 14:10:00	0	14	3	7	6
1	2009-03-06 14:11:00	0	14	3	7	6
1	2009-03-06 14:12:00	0	14	3	7	6
1	2009-03-06 14:13:00	0	14	3	7	6
1	2009-03-06 14:14:00	0	14	3	7	6
1	2009-03-06 14:15:00	0	14	3	7	6
1	2009-03-06 14:16:00	0	14	3	7	6
1	2009-03-06 14:17:00	0	14	3	7	6
1	2009-03-06 14:18:00	0	14	3	7	6
1	2009-03-06 14:19:00	0	14	3	7	6
1	2009-03-06 14:20:00	0	14	3	7	6
1	2009-03-06 14:21:00	0	14	3	7	6
1	2009-03-06 14:22:00	0	14	3	7	6
1	2009-03-06 14:23:00	0	14	3	7	6
1	2009-03-06 14:24:00	0	14	3	7	6
1	2009-03-06 14:25:00	0	14	3	7	6
1	2009-03-06 14:26:00	0	14	3	7	6
1	2009-03-06 14:27:00	174	14	3	7	6
1	2009-03-06 14:28:00	348	14	3	7	6
1	2009-03-06 14:29:00	2004	14	3	7	6
1	2009-03-06 14:30:00	799	14	3	7	6
1	2009-03-06 14:31:00	936	14	3	7	6
1	2009-03-06 14:32:00	3064	14	3	7	6
1	2009-03-06 14:33:00	1112	14	3	7	6
1	2009-03-06 14:34:00	52	14	3	7	6
1	2009-03-06 14:35:00	42	14	3	7	6
1	2009-03-06 14:36:00	262	14	3	7	6
1	2009-03-06 14:37:00	84	14	3	7	6
1	2009-03-06 14:38:00	94	14	3	7	6
1	2009-03-06 14:39:00	237	14	3	7	6
1	2009-03-06 14:40:00	94	14	3	7	6
1	2009-03-06 14:41:00	0	14	3	7	6
1	2009-03-06 14:42:00	441	14	3	7	6
1	2009-03-06 14:43:00	936	14	3	7	6
1	2009-03-06 14:44:00	319	14	3	7	6
1	2009-03-06 14:45:00	136	14	3	7	6
1	2009-03-06 14:46:00	560	14	3	7	6
1	2009-03-06 14:47:00	541	14	3	7	6
1	2009-03-06 14:48:00	1034	14	3	7	6
1	2009-03-06 14:49:00	844	14	3	7	6
1	2009-03-06 14:50:00	598	14	3	7	6
1	2009-03-06 14:51:00	716	14	3	7	6
1	2009-03-06 14:52:00	2302	14	3	7	6
1	2009-03-06 14:53:00	820	14	3	7	6
1	2009-03-06 14:54:00	392	14	3	7	6
1	2009-03-06 14:55:00	237	14	3	7	6
1	2009-03-06 14:56:00	636	14	3	7	6
1	2009-03-06 14:57:00	262	14	3	7	6
1	2009-03-06 14:58:00	1085	14	3	7	6
1	2009-03-06 14:59:00	42	14	3	7	6
1	2009-03-06 15:00:00	1112	14	3	7	6
1	2009-03-06 15:01:00	1309	15	3	7	6
1	2009-03-06 15:02:00	695	15	3	7	6
1	2009-03-06 15:03:00	1339	15	3	7	6
1	2009-03-06 15:04:00	1112	15	3	7	6
1	2009-03-06 15:05:00	474	15	3	7	6
1	2009-03-06 15:06:00	1009	15	3	7	6
1	2009-03-06 15:07:00	984	15	3	7	6
1	2009-03-06 15:08:00	149	15	3	7	6
1	2009-03-06 15:09:00	1628	15	3	7	6
1	2009-03-06 15:10:00	199	15	3	7	6
1	2009-03-06 15:11:00	250	15	3	7	6
1	2009-03-06 15:12:00	348	15	3	7	6
1	2009-03-06 15:13:00	319	15	3	7	6
1	2009-03-06 15:14:00	237	15	3	7	6
1	2009-03-06 15:15:00	126	15	3	7	6
1	2009-03-06 15:16:00	225	15	3	7	6
1	2009-03-06 15:17:00	174	15	3	7	6
1	2009-03-06 15:18:00	199	15	3	7	6
1	2009-03-06 15:19:00	126	15	3	7	6
1	2009-03-06 15:20:00	275	15	3	7	6
1	2009-03-06 15:21:00	126	15	3	7	6
1	2009-03-06 15:22:00	187	15	3	7	6
1	2009-03-06 15:23:00	275	15	3	7	6
1	2009-03-06 15:24:00	334	15	3	7	6
1	2009-03-06 15:25:00	348	15	3	7	6
1	2009-03-06 15:26:00	187	15	3	7	6
1	2009-03-06 15:27:00	149	15	3	7	6
1	2009-03-06 15:28:00	348	15	3	7	6
1	2009-03-06 15:29:00	392	15	3	7	6
1	2009-03-06 15:30:00	363	15	3	7	6
1	2009-03-06 15:31:00	334	15	3	7	6
1	2009-03-06 15:32:00	237	15	3	7	6
1	2009-03-06 15:33:00	199	15	3	7	6
1	2009-03-06 15:34:00	63	15	3	7	6
1	2009-03-06 15:35:00	105	15	3	7	6
1	2009-03-06 15:36:00	63	15	3	7	6
1	2009-03-06 15:37:00	149	15	3	7	6
1	2009-03-06 15:38:00	187	15	3	7	6
1	2009-03-06 15:39:00	149	15	3	7	6
1	2009-03-06 15:40:00	115	15	3	7	6
1	2009-03-06 15:41:00	42	15	3	7	6
1	2009-03-06 15:42:00	94	15	3	7	6
1	2009-03-06 15:43:00	63	15	3	7	6
1	2009-03-06 15:44:00	31	15	3	7	6
1	2009-03-06 15:45:00	31	15	3	7	6
1	2009-03-06 15:46:00	84	15	3	7	6
1	2009-03-06 15:47:00	84	15	3	7	6
1	2009-03-06 15:48:00	52	15	3	7	6
1	2009-03-06 15:49:00	42	15	3	7	6
1	2009-03-06 15:50:00	21	15	3	7	6
1	2009-03-06 15:51:00	136	15	3	7	6
1	2009-03-06 15:52:00	31	15	3	7	6
1	2009-03-06 15:53:00	21	15	3	7	6
1	2009-03-06 15:54:00	63	15	3	7	6
1	2009-03-06 15:55:00	21	15	3	7	6
1	2009-03-06 15:56:00	10	15	3	7	6
1	2009-03-06 15:57:00	31	15	3	7	6
1	2009-03-06 15:58:00	42	15	3	7	6
1	2009-03-06 15:59:00	10	15	3	7	6
1	2009-03-06 16:00:00	21	15	3	7	6
1	2009-03-06 16:01:00	0	16	3	7	6
1	2009-03-06 16:02:00	21	16	3	7	6
1	2009-03-06 16:03:00	10	16	3	7	6
1	2009-03-06 16:04:00	10	16	3	7	6
1	2009-03-06 16:05:00	31	16	3	7	6
1	2009-03-06 16:06:00	10	16	3	7	6
1	2009-03-06 16:07:00	0	16	3	7	6
1	2009-03-06 16:08:00	10	16	3	7	6
1	2009-03-06 16:09:00	52	16	3	7	6
1	2009-03-06 16:10:00	0	16	3	7	6
1	2009-03-06 16:11:00	10	16	3	7	6
1	2009-03-06 16:12:00	0	16	3	7	6
1	2009-03-06 16:13:00	10	16	3	7	6
1	2009-03-06 16:14:00	0	16	3	7	6
1	2009-03-06 16:15:00	10	16	3	7	6
1	2009-03-06 16:16:00	10	16	3	7	6
1	2009-03-06 16:17:00	10	16	3	7	6
1	2009-03-06 16:18:00	10	16	3	7	6
1	2009-03-06 16:19:00	21	16	3	7	6
1	2009-03-06 16:20:00	10	16	3	7	6
1	2009-03-06 16:21:00	21	16	3	7	6
1	2009-03-06 16:22:00	10	16	3	7	6
1	2009-03-06 16:23:00	10	16	3	7	6
1	2009-03-06 16:24:00	10	16	3	7	6
1	2009-03-06 16:25:00	10	16	3	7	6
1	2009-03-06 16:26:00	10	16	3	7	6
1	2009-03-06 16:27:00	174	16	3	7	6
1	2009-03-06 16:28:00	105	16	3	7	6
1	2009-03-06 16:29:00	199	16	3	7	6
1	2009-03-06 16:30:00	31	16	3	7	6
1	2009-03-06 16:31:00	84	16	3	7	6
1	2009-03-06 16:32:00	42	16	3	7	6
1	2009-03-06 16:33:00	94	16	3	7	6
1	2009-03-06 16:34:00	31	16	3	7	6
1	2009-03-06 16:35:00	52	16	3	7	6
1	2009-03-06 16:36:00	21	16	3	7	6
1	2009-03-06 16:37:00	10	16	3	7	6
1	2009-03-06 16:38:00	10	16	3	7	6
1	2009-03-06 16:39:00	21	16	3	7	6
1	2009-03-06 16:40:00	0	16	3	7	6
1	2009-03-06 16:41:00	10	16	3	7	6
1	2009-03-06 16:42:00	21	16	3	7	6
1	2009-03-06 16:43:00	10	16	3	7	6
1	2009-03-06 16:44:00	21	16	3	7	6
1	2009-03-06 16:45:00	21	16	3	7	6
1	2009-03-06 16:46:00	63	16	3	7	6
1	2009-03-06 16:47:00	31	16	3	7	6
1	2009-03-06 16:48:00	10	16	3	7	6
1	2009-03-06 16:49:00	21	16	3	7	6
1	2009-03-06 16:50:00	10	16	3	7	6
1	2009-03-06 16:51:00	10	16	3	7	6
1	2009-03-06 16:52:00	0	16	3	7	6
1	2009-03-06 16:53:00	21	16	3	7	6
1	2009-03-06 16:54:00	10	16	3	7	6
1	2009-03-06 16:55:00	10	16	3	7	6
1	2009-03-06 16:56:00	10	16	3	7	6
1	2009-03-06 16:57:00	10	16	3	7	6
1	2009-03-06 16:58:00	31	16	3	7	6
1	2009-03-06 16:59:00	10	16	3	7	6
1	2009-03-06 17:00:00	84	16	3	7	6
1	2009-03-06 17:01:00	94	17	3	7	6
1	2009-03-06 17:02:00	42	17	3	7	6
1	2009-03-06 17:03:00	63	17	3	7	6
1	2009-03-06 17:04:00	52	17	3	7	6
1	2009-03-06 17:05:00	94	17	3	7	6
1	2009-03-06 17:06:00	52	17	3	7	6
1	2009-03-06 17:07:00	73	17	3	7	6
1	2009-03-06 17:08:00	52	17	3	7	6
1	2009-03-06 17:09:00	290	17	3	7	6
1	2009-03-06 17:10:00	199	17	3	7	6
1	2009-03-06 17:11:00	262	17	3	7	6
1	2009-03-06 17:12:00	63	17	3	7	6
1	2009-03-06 17:13:00	162	17	3	7	6
1	2009-03-06 17:14:00	225	17	3	7	6
1	2009-03-06 17:15:00	304	17	3	7	6
1	2009-03-06 17:16:00	304	17	3	7	6
1	2009-03-06 17:17:00	174	17	3	7	6
1	2009-03-06 17:18:00	262	17	3	7	6
1	2009-03-06 17:19:00	304	17	3	7	6
1	2009-03-06 17:20:00	73	17	3	7	6
1	2009-03-06 17:21:00	31	17	3	7	6
1	2009-03-06 17:22:00	63	17	3	7	6
1	2009-03-06 17:23:00	21	17	3	7	6
1	2009-03-06 17:24:00	52	17	3	7	6
1	2009-03-06 17:25:00	10	17	3	7	6
1	2009-03-06 17:26:00	10	17	3	7	6
1	2009-03-06 17:27:00	115	17	3	7	6
1	2009-03-06 17:28:00	31	17	3	7	6
1	2009-03-06 17:29:00	21	17	3	7	6
1	2009-03-06 17:30:00	10	17	3	7	6
1	2009-03-06 17:31:00	84	17	3	7	6
1	2009-03-06 17:32:00	52	17	3	7	6
1	2009-03-06 17:33:00	42	17	3	7	6
1	2009-03-06 17:34:00	10	17	3	7	6
1	2009-03-06 17:35:00	21	17	3	7	6
1	2009-03-06 17:36:00	31	17	3	7	6
1	2009-03-06 17:37:00	42	17	3	7	6
1	2009-03-06 17:38:00	187	17	3	7	6
1	2009-03-06 17:39:00	126	17	3	7	6
1	2009-03-06 17:40:00	84	17	3	7	6
1	2009-03-06 17:41:00	63	17	3	7	6
1	2009-03-06 17:42:00	31	17	3	7	6
1	2009-03-06 17:43:00	10	17	3	7	6
1	2009-03-06 17:44:00	10	17	3	7	6
1	2009-03-06 17:45:00	115	17	3	7	6
1	2009-03-06 17:46:00	42	17	3	7	6
1	2009-03-06 17:47:00	52	17	3	7	6
1	2009-03-06 17:48:00	52	17	3	7	6
1	2009-03-06 17:49:00	348	17	3	7	6
1	2009-03-06 17:50:00	126	17	3	7	6
1	2009-03-06 17:51:00	21	17	3	7	6
1	2009-03-06 17:52:00	10	17	3	7	6
1	2009-03-06 17:53:00	10	17	3	7	6
1	2009-03-06 17:54:00	10	17	3	7	6
1	2009-03-06 17:55:00	10	17	3	7	6
1	2009-03-06 17:56:00	31	17	3	7	6
1	2009-03-06 17:57:00	10	17	3	7	6
1	2009-03-06 17:58:00	10	17	3	7	6
1	2009-03-06 17:59:00	10	17	3	7	6
1	2009-03-06 18:00:00	0	17	3	7	6
1	2009-03-06 18:01:00	0	18	4	7	6
1	2009-03-06 18:02:00	42	18	4	7	6
1	2009-03-06 18:03:00	0	18	4	7	6
1	2009-03-06 18:04:00	0	18	4	7	6
1	2009-03-06 18:05:00	149	18	4	7	6
1	2009-03-06 18:06:00	275	18	4	7	6
1	2009-03-06 18:07:00	126	18	4	7	6
1	2009-03-06 18:08:00	334	18	4	7	6
1	2009-03-06 18:09:00	174	18	4	7	6
1	2009-03-06 18:10:00	319	18	4	7	6
1	2009-03-06 18:11:00	348	18	4	7	6
1	2009-03-06 18:12:00	508	18	4	7	6
1	2009-03-06 18:13:00	407	18	4	7	6
1	2009-03-06 18:14:00	212	18	4	7	6
1	2009-03-06 18:15:00	237	18	4	7	6
1	2009-03-06 18:16:00	392	18	4	7	6
1	2009-03-06 18:17:00	716	18	4	7	6
1	2009-03-06 18:18:00	2585	18	4	7	6
1	2009-03-06 18:19:00	1194	18	4	7	6
1	2009-03-06 18:20:00	1463	18	4	7	6
1	2009-03-06 18:21:00	1309	18	4	7	6
1	2009-03-06 18:22:00	959	18	4	7	6
1	2009-03-06 18:23:00	778	18	4	7	6
1	2009-03-06 18:24:00	541	18	4	7	6
1	2009-03-06 18:25:00	890	18	4	7	6
1	2009-03-06 18:26:00	525	18	4	7	6
1	2009-03-06 18:27:00	378	18	4	7	6
1	2009-03-06 18:28:00	275	18	4	7	6
1	2009-03-06 18:29:00	262	18	4	7	6
1	2009-03-06 18:30:00	290	18	4	7	6
1	2009-03-06 18:31:00	491	18	4	7	6
1	2009-03-06 18:32:00	225	18	4	7	6
1	2009-03-06 18:33:00	392	18	4	7	6
1	2009-03-06 18:34:00	0	18	4	7	6
1	2009-03-06 18:35:00	0	18	4	7	6
1	2009-03-06 18:36:00	363	18	4	7	6
1	2009-03-06 18:37:00	424	18	4	7	6
1	2009-03-06 18:38:00	126	18	4	7	6
1	2009-03-06 18:39:00	348	18	4	7	6
1	2009-03-06 18:40:00	560	18	4	7	6
1	2009-03-06 18:41:00	84	18	4	7	6
1	2009-03-06 18:42:00	73	18	4	7	6
1	2009-03-06 18:43:00	162	18	4	7	6
1	2009-03-06 18:44:00	378	18	4	7	6
1	2009-03-06 18:45:00	250	18	4	7	6
1	2009-03-06 18:46:00	0	18	4	7	6
1	2009-03-06 18:47:00	0	18	4	7	6
1	2009-03-06 18:48:00	0	18	4	7	6
1	2009-03-06 18:49:00	0	18	4	7	6
1	2009-03-06 18:50:00	212	18	4	7	6
1	2009-03-06 18:51:00	94	18	4	7	6
1	2009-03-06 18:52:00	2004	18	4	7	6
1	2009-03-06 18:53:00	758	18	4	7	6
1	2009-03-06 18:54:00	1112	18	4	7	6
1	2009-03-06 18:55:00	1251	18	4	7	6
1	2009-03-06 18:56:00	579	18	4	7	6
1	2009-03-06 18:57:00	778	18	4	7	6
1	2009-03-06 18:58:00	31	18	4	7	6
1	2009-03-06 18:59:00	1009	18	4	7	6
1	2009-03-06 19:00:00	457	18	4	7	6
1	2009-03-06 19:01:00	31	19	4	7	6
1	2009-03-06 19:02:00	212	19	4	7	6
1	2009-03-06 19:03:00	378	19	4	7	6
1	2009-03-06 19:04:00	491	19	4	7	6
1	2009-03-06 19:05:00	334	19	4	7	6
1	2009-03-06 19:06:00	758	19	4	7	6
1	2009-03-06 19:07:00	1494	19	4	7	6
1	2009-03-06 19:08:00	1309	19	4	7	6
1	2009-03-06 19:09:00	1528	19	4	7	6
1	2009-03-06 19:10:00	491	19	4	7	6
1	2009-03-06 19:11:00	105	19	4	7	6
1	2009-03-06 19:12:00	0	19	4	7	6
1	2009-03-06 19:13:00	10	19	4	7	6
1	2009-03-06 19:14:00	0	19	4	7	6
1	2009-03-06 19:15:00	0	19	4	7	6
1	2009-03-06 19:16:00	0	19	4	7	6
1	2009-03-06 19:17:00	21	19	4	7	6
1	2009-03-06 19:18:00	10	19	4	7	6
1	2009-03-06 19:19:00	0	19	4	7	6
1	2009-03-06 19:20:00	0	19	4	7	6
1	2009-03-06 19:21:00	10	19	4	7	6
1	2009-03-06 19:22:00	0	19	4	7	6
1	2009-03-06 19:23:00	10	19	4	7	6
1	2009-03-06 19:24:00	0	19	4	7	6
1	2009-03-06 19:25:00	304	19	4	7	6
1	2009-03-06 19:26:00	716	19	4	7	6
1	2009-03-06 19:27:00	136	19	4	7	6
1	2009-03-06 19:28:00	94	19	4	7	6
1	2009-03-06 19:29:00	136	19	4	7	6
1	2009-03-06 19:30:00	21	19	4	7	6
1	2009-03-06 19:31:00	31	19	4	7	6
1	2009-03-06 19:32:00	52	19	4	7	6
1	2009-03-06 19:33:00	0	19	4	7	6
1	2009-03-06 19:34:00	0	19	4	7	6
1	2009-03-06 19:35:00	0	19	4	7	6
1	2009-03-06 19:36:00	0	19	4	7	6
1	2009-03-06 19:37:00	31	19	4	7	6
1	2009-03-06 19:38:00	0	19	4	7	6
1	2009-03-06 19:39:00	0	19	4	7	6
1	2009-03-06 19:40:00	21	19	4	7	6
1	2009-03-06 19:41:00	334	19	4	7	6
1	2009-03-06 19:42:00	105	19	4	7	6
1	2009-03-06 19:43:00	21	19	4	7	6
1	2009-03-06 19:44:00	348	19	4	7	6
1	2009-03-06 19:45:00	126	19	4	7	6
1	2009-03-06 19:46:00	598	19	4	7	6
1	2009-03-06 19:47:00	424	19	4	7	6
1	2009-03-06 19:48:00	525	19	4	7	6
1	2009-03-06 19:49:00	560	19	4	7	6
1	2009-03-06 19:50:00	457	19	4	7	6
1	2009-03-06 19:51:00	441	19	4	7	6
1	2009-03-06 19:52:00	10	19	4	7	6
1	2009-03-06 19:53:00	10	19	4	7	6
1	2009-03-06 19:54:00	0	19	4	7	6
1	2009-03-06 19:55:00	10	19	4	7	6
1	2009-03-06 19:56:00	0	19	4	7	6
1	2009-03-06 19:57:00	52	19	4	7	6
1	2009-03-06 19:58:00	275	19	4	7	6
1	2009-03-06 19:59:00	63	19	4	7	6
1	2009-03-06 20:00:00	0	19	4	7	6
1	2009-03-06 20:01:00	0	20	4	7	6
1	2009-03-06 20:02:00	42	20	4	7	6
1	2009-03-06 20:03:00	334	20	4	7	6
1	2009-03-06 20:04:00	0	20	4	7	6
1	2009-03-06 20:05:00	10	20	4	7	6
1	2009-03-06 20:06:00	0	20	4	7	6
1	2009-03-06 20:07:00	0	20	4	7	6
1	2009-03-06 20:08:00	0	20	4	7	6
1	2009-03-06 20:09:00	52	20	4	7	6
1	2009-03-06 20:10:00	0	20	4	7	6
1	2009-03-06 20:11:00	115	20	4	7	6
1	2009-03-06 20:12:00	0	20	4	7	6
1	2009-03-06 20:13:00	0	20	4	7	6
1	2009-03-06 20:14:00	0	20	4	7	6
1	2009-03-06 20:15:00	42	20	4	7	6
1	2009-03-06 20:16:00	0	20	4	7	6
1	2009-03-06 20:17:00	0	20	4	7	6
1	2009-03-06 20:18:00	0	20	4	7	6
1	2009-03-06 20:19:00	0	20	4	7	6
1	2009-03-06 20:20:00	0	20	4	7	6
1	2009-03-06 20:21:00	73	20	4	7	6
1	2009-03-06 20:22:00	579	20	4	7	6
1	2009-03-06 20:23:00	174	20	4	7	6
1	2009-03-06 20:24:00	63	20	4	7	6
1	2009-03-06 20:25:00	84	20	4	7	6
1	2009-03-06 20:26:00	598	20	4	7	6
1	2009-03-06 20:27:00	636	20	4	7	6
1	2009-03-06 20:28:00	187	20	4	7	6
1	2009-03-06 20:29:00	31	20	4	7	6
1	2009-03-06 20:30:00	407	20	4	7	6
1	2009-03-06 20:31:00	162	20	4	7	6
1	2009-03-06 20:32:00	0	20	4	7	6
1	2009-03-06 20:33:00	10	20	4	7	6
1	2009-03-06 20:34:00	0	20	4	7	6
1	2009-03-06 20:35:00	0	20	4	7	6
1	2009-03-06 20:36:00	63	20	4	7	6
1	2009-03-06 20:37:00	63	20	4	7	6
1	2009-03-06 20:38:00	115	20	4	7	6
1	2009-03-06 20:39:00	136	20	4	7	6
1	2009-03-06 20:40:00	63	20	4	7	6
1	2009-03-06 20:41:00	31	20	4	7	6
1	2009-03-06 20:42:00	0	20	4	7	6
1	2009-03-06 20:43:00	136	20	4	7	6
1	2009-03-06 20:44:00	984	20	4	7	6
1	2009-03-06 20:45:00	491	20	4	7	6
1	2009-03-06 20:46:00	21	20	4	7	6
1	2009-03-06 20:47:00	84	20	4	7	6
1	2009-03-06 20:48:00	105	20	4	7	6
1	2009-03-06 20:49:00	136	20	4	7	6
1	2009-03-06 20:50:00	21	20	4	7	6
1	2009-03-06 20:51:00	0	20	4	7	6
1	2009-03-06 20:52:00	0	20	4	7	6
1	2009-03-06 20:53:00	0	20	4	7	6
1	2009-03-06 20:54:00	0	20	4	7	6
1	2009-03-06 20:55:00	0	20	4	7	6
1	2009-03-06 20:56:00	0	20	4	7	6
1	2009-03-06 20:57:00	0	20	4	7	6
1	2009-03-06 20:58:00	0	20	4	7	6
1	2009-03-06 20:59:00	0	20	4	7	6
1	2009-03-06 21:00:00	52	20	4	7	6
1	2009-03-06 21:01:00	0	21	4	7	6
1	2009-03-06 21:02:00	0	21	4	7	6
1	2009-03-06 21:03:00	0	21	4	7	6
1	2009-03-06 21:04:00	174	21	4	7	6
1	2009-03-06 21:05:00	21	21	4	7	6
1	2009-03-06 21:06:00	441	21	4	7	6
1	2009-03-06 21:07:00	237	21	4	7	6
1	2009-03-06 21:08:00	598	21	4	7	6
1	2009-03-06 21:09:00	275	21	4	7	6
1	2009-03-06 21:10:00	1251	21	4	7	6
1	2009-03-06 21:11:00	1664	21	4	7	6
1	2009-03-06 21:12:00	2394	21	4	7	6
1	2009-03-06 21:13:00	936	21	4	7	6
1	2009-03-06 21:14:00	2394	21	4	7	6
1	2009-03-06 21:15:00	441	21	4	7	6
1	2009-03-06 21:16:00	162	21	4	7	6
1	2009-03-06 21:17:00	73	21	4	7	6
1	2009-03-06 21:18:00	237	21	4	7	6
1	2009-03-06 21:19:00	304	21	4	7	6
1	2009-03-06 21:20:00	262	21	4	7	6
1	2009-03-06 21:21:00	348	21	4	7	6
1	2009-03-06 21:22:00	84	21	4	7	6
1	2009-03-06 21:23:00	262	21	4	7	6
1	2009-03-06 21:24:00	474	21	4	7	6
1	2009-03-06 21:25:00	716	21	4	7	6
1	2009-03-06 21:26:00	820	21	4	7	6
1	2009-03-06 21:27:00	441	21	4	7	6
1	2009-03-06 21:28:00	52	21	4	7	6
1	2009-03-06 21:29:00	105	21	4	7	6
1	2009-03-06 21:30:00	42	21	4	7	6
1	2009-03-06 21:31:00	0	21	4	7	6
1	2009-03-06 21:32:00	52	21	4	7	6
1	2009-03-06 21:33:00	0	21	4	7	6
1	2009-03-06 21:34:00	42	21	4	7	6
1	2009-03-06 21:35:00	31	21	4	7	6
1	2009-03-06 21:36:00	42	21	4	7	6
1	2009-03-06 21:37:00	0	21	4	7	6
1	2009-03-06 21:38:00	31	21	4	7	6
1	2009-03-06 21:39:00	21	21	4	7	6
1	2009-03-06 21:40:00	42	21	4	7	6
1	2009-03-06 21:41:00	0	21	4	7	6
1	2009-03-06 21:42:00	0	21	4	7	6
1	2009-03-06 21:43:00	0	21	4	7	6
1	2009-03-06 21:44:00	0	21	4	7	6
1	2009-03-06 21:45:00	0	21	4	7	6
1	2009-03-06 21:46:00	0	21	4	7	6
1	2009-03-06 21:47:00	0	21	4	7	6
1	2009-03-06 21:48:00	0	21	4	7	6
1	2009-03-06 21:49:00	0	21	4	7	6
1	2009-03-06 21:50:00	0	21	4	7	6
1	2009-03-06 21:51:00	0	21	4	7	6
1	2009-03-06 21:52:00	0	21	4	7	6
1	2009-03-06 21:53:00	21	21	4	7	6
1	2009-03-06 21:54:00	10	21	4	7	6
1	2009-03-06 21:55:00	0	21	4	7	6
1	2009-03-06 21:56:00	0	21	4	7	6
1	2009-03-06 21:57:00	10	21	4	7	6
1	2009-03-06 21:58:00	63	21	4	7	6
1	2009-03-06 21:59:00	115	21	4	7	6
1	2009-03-06 22:00:00	334	21	4	7	6
1	2009-03-06 22:01:00	21	22	4	7	6
1	2009-03-06 22:02:00	84	22	4	7	6
1	2009-03-06 22:03:00	0	22	4	7	6
1	2009-03-06 22:04:00	0	22	4	7	6
1	2009-03-06 22:05:00	0	22	4	7	6
1	2009-03-06 22:06:00	0	22	4	7	6
1	2009-03-06 22:07:00	63	22	4	7	6
1	2009-03-06 22:08:00	94	22	4	7	6
1	2009-03-06 22:09:00	105	22	4	7	6
1	2009-03-06 22:10:00	84	22	4	7	6
1	2009-03-06 22:11:00	0	22	4	7	6
1	2009-03-06 22:12:00	0	22	4	7	6
1	2009-03-06 22:13:00	0	22	4	7	6
1	2009-03-06 22:14:00	0	22	4	7	6
1	2009-03-06 22:15:00	21	22	4	7	6
1	2009-03-06 22:16:00	0	22	4	7	6
1	2009-03-06 22:17:00	0	22	4	7	6
1	2009-03-06 22:18:00	0	22	4	7	6
1	2009-03-06 22:19:00	0	22	4	7	6
1	2009-03-06 22:20:00	52	22	4	7	6
1	2009-03-06 22:21:00	319	22	4	7	6
1	2009-03-06 22:22:00	136	22	4	7	6
1	2009-03-06 22:23:00	149	22	4	7	6
1	2009-03-06 22:24:00	105	22	4	7	6
1	2009-03-06 22:25:00	262	22	4	7	6
1	2009-03-06 22:26:00	0	22	4	7	6
1	2009-03-06 22:27:00	0	22	4	7	6
1	2009-03-06 22:28:00	10	22	4	7	6
1	2009-03-06 22:29:00	0	22	4	7	6
1	2009-03-06 22:30:00	0	22	4	7	6
1	2009-03-06 22:31:00	695	22	4	7	6
1	2009-03-06 22:32:00	10	22	4	7	6
1	2009-03-06 22:33:00	778	22	4	7	6
1	2009-03-06 22:34:00	2348	22	4	7	6
1	2009-03-06 22:35:00	424	22	4	7	6
1	2009-03-06 22:36:00	21	22	4	7	6
1	2009-03-06 22:37:00	225	22	4	7	6
1	2009-03-06 22:38:00	275	22	4	7	6
1	2009-03-06 22:39:00	508	22	4	7	6
1	2009-03-06 22:40:00	42	22	4	7	6
1	2009-03-06 22:41:00	199	22	4	7	6
1	2009-03-06 22:42:00	0	22	4	7	6
1	2009-03-06 22:43:00	10	22	4	7	6
1	2009-03-06 22:44:00	10	22	4	7	6
1	2009-03-06 22:45:00	10	22	4	7	6
1	2009-03-06 22:46:00	0	22	4	7	6
1	2009-03-06 22:47:00	0	22	4	7	6
1	2009-03-06 22:48:00	84	22	4	7	6
1	2009-03-06 22:49:00	457	22	4	7	6
1	2009-03-06 22:50:00	0	22	4	7	6
1	2009-03-06 22:51:00	0	22	4	7	6
1	2009-03-06 22:52:00	0	22	4	7	6
1	2009-03-06 22:53:00	42	22	4	7	6
1	2009-03-06 22:54:00	0	22	4	7	6
1	2009-03-06 22:55:00	0	22	4	7	6
1	2009-03-06 22:56:00	0	22	4	7	6
1	2009-03-06 22:57:00	10	22	4	7	6
1	2009-03-06 22:58:00	52	22	4	7	6
1	2009-03-06 22:59:00	0	22	4	7	6
1	2009-03-06 23:00:00	0	22	4	7	6
1	2009-03-06 23:01:00	0	23	4	7	6
1	2009-03-06 23:02:00	0	23	4	7	6
1	2009-03-06 23:03:00	0	23	4	7	6
1	2009-03-06 23:04:00	0	23	4	7	6
1	2009-03-06 23:05:00	0	23	4	7	6
1	2009-03-06 23:06:00	63	23	4	7	6
1	2009-03-06 23:07:00	52	23	4	7	6
1	2009-03-06 23:08:00	0	23	4	7	6
1	2009-03-06 23:09:00	0	23	4	7	6
1	2009-03-06 23:10:00	0	23	4	7	6
1	2009-03-06 23:11:00	0	23	4	7	6
1	2009-03-06 23:12:00	0	23	4	7	6
1	2009-03-06 23:13:00	0	23	4	7	6
1	2009-03-06 23:14:00	0	23	4	7	6
1	2009-03-06 23:15:00	0	23	4	7	6
1	2009-03-06 23:16:00	0	23	4	7	6
1	2009-03-06 23:17:00	0	23	4	7	6
1	2009-03-06 23:18:00	0	23	4	7	6
1	2009-03-06 23:19:00	0	23	4	7	6
1	2009-03-06 23:20:00	0	23	4	7	6
1	2009-03-06 23:21:00	0	23	4	7	6
1	2009-03-06 23:22:00	0	23	4	7	6
1	2009-03-06 23:23:00	0	23	4	7	6
1	2009-03-06 23:24:00	0	23	4	7	6
1	2009-03-06 23:25:00	0	23	4	7	6
1	2009-03-06 23:26:00	0	23	4	7	6
1	2009-03-06 23:27:00	0	23	4	7	6
1	2009-03-06 23:28:00	115	23	4	7	6
1	2009-03-06 23:29:00	674	23	4	7	6
1	2009-03-06 23:30:00	1700	23	4	7	6
1	2009-03-06 23:31:00	758	23	4	7	6
1	2009-03-06 23:32:00	491	23	4	7	6
1	2009-03-06 23:33:00	84	23	4	7	6
1	2009-03-06 23:34:00	250	23	4	7	6
1	2009-03-06 23:35:00	115	23	4	7	6
1	2009-03-06 23:36:00	0	23	4	7	6
1	2009-03-06 23:37:00	0	23	4	7	6
1	2009-03-06 23:38:00	0	23	4	7	6
1	2009-03-06 23:39:00	31	23	4	7	6
1	2009-03-06 23:40:00	0	23	4	7	6
1	2009-03-06 23:41:00	42	23	4	7	6
1	2009-03-06 23:42:00	73	23	4	7	6
1	2009-03-06 23:43:00	0	23	4	7	6
1	2009-03-06 23:44:00	0	23	4	7	6
1	2009-03-06 23:45:00	10	23	4	7	6
1	2009-03-06 23:46:00	31	23	4	7	6
1	2009-03-06 23:47:00	0	23	4	7	6
1	2009-03-06 23:48:00	10	23	4	7	6
1	2009-03-06 23:49:00	0	23	4	7	6
1	2009-03-06 23:50:00	0	23	4	7	6
1	2009-03-06 23:51:00	0	23	4	7	6
1	2009-03-06 23:52:00	21	23	4	7	6
1	2009-03-06 23:53:00	0	23	4	7	6
1	2009-03-06 23:54:00	0	23	4	7	6
1	2009-03-06 23:55:00	0	23	4	7	6
1	2009-03-06 23:56:00	0	23	4	7	6
1	2009-03-06 23:57:00	0	23	4	7	6
1	2009-03-06 23:58:00	0	23	4	7	6
1	2009-03-06 23:59:00	0	23	4	7	6
1	2009-03-07	0	23	4	7	6
1	2009-03-07 00:01:00	10	0	1	8	7
1	2009-03-07 00:02:00	0	0	1	8	7
1	2009-03-07 00:03:00	0	0	1	8	7
1	2009-03-07 00:04:00	0	0	1	8	7
1	2009-03-07 00:05:00	0	0	1	8	7
1	2009-03-07 00:06:00	0	0	1	8	7
1	2009-03-07 00:07:00	0	0	1	8	7
1	2009-03-07 00:08:00	10	0	1	8	7
1	2009-03-07 00:09:00	0	0	1	8	7
1	2009-03-07 00:10:00	0	0	1	8	7
1	2009-03-07 00:11:00	0	0	1	8	7
1	2009-03-07 00:12:00	0	0	1	8	7
1	2009-03-07 00:13:00	0	0	1	8	7
1	2009-03-07 00:14:00	0	0	1	8	7
1	2009-03-07 00:15:00	0	0	1	8	7
1	2009-03-07 00:16:00	0	0	1	8	7
1	2009-03-07 00:17:00	0	0	1	8	7
1	2009-03-07 00:18:00	0	0	1	8	7
1	2009-03-07 00:19:00	0	0	1	8	7
1	2009-03-07 00:20:00	0	0	1	8	7
1	2009-03-07 00:21:00	0	0	1	8	7
1	2009-03-07 00:22:00	0	0	1	8	7
1	2009-03-07 00:23:00	508	0	1	8	7
1	2009-03-07 00:24:00	0	0	1	8	7
1	2009-03-07 00:25:00	0	0	1	8	7
1	2009-03-07 00:26:00	10	0	1	8	7
1	2009-03-07 00:27:00	0	0	1	8	7
1	2009-03-07 00:28:00	0	0	1	8	7
1	2009-03-07 00:29:00	0	0	1	8	7
1	2009-03-07 00:30:00	0	0	1	8	7
1	2009-03-07 00:31:00	695	0	1	8	7
1	2009-03-07 00:32:00	378	0	1	8	7
1	2009-03-07 00:33:00	407	0	1	8	7
1	2009-03-07 00:34:00	304	0	1	8	7
1	2009-03-07 00:35:00	63	0	1	8	7
1	2009-03-07 00:36:00	31	0	1	8	7
1	2009-03-07 00:37:00	0	0	1	8	7
1	2009-03-07 00:38:00	0	0	1	8	7
1	2009-03-07 00:39:00	10	0	1	8	7
1	2009-03-07 00:40:00	31	0	1	8	7
1	2009-03-07 00:41:00	0	0	1	8	7
1	2009-03-07 00:42:00	0	0	1	8	7
1	2009-03-07 00:43:00	407	0	1	8	7
1	2009-03-07 00:44:00	348	0	1	8	7
1	2009-03-07 00:45:00	31	0	1	8	7
1	2009-03-07 00:46:00	149	0	1	8	7
1	2009-03-07 00:47:00	31	0	1	8	7
1	2009-03-07 00:48:00	0	0	1	8	7
1	2009-03-07 00:49:00	0	0	1	8	7
1	2009-03-07 00:50:00	10	0	1	8	7
1	2009-03-07 00:51:00	0	0	1	8	7
1	2009-03-07 00:52:00	0	0	1	8	7
1	2009-03-07 00:53:00	52	0	1	8	7
1	2009-03-07 00:54:00	0	0	1	8	7
1	2009-03-07 00:55:00	0	0	1	8	7
1	2009-03-07 00:56:00	0	0	1	8	7
1	2009-03-07 00:57:00	31	0	1	8	7
1	2009-03-07 00:58:00	21	0	1	8	7
1	2009-03-07 00:59:00	0	0	1	8	7
1	2009-03-07 01:00:00	0	0	1	8	7
1	2009-03-07 01:01:00	0	1	1	8	7
1	2009-03-07 01:02:00	0	1	1	8	7
1	2009-03-07 01:03:00	0	1	1	8	7
1	2009-03-07 01:04:00	0	1	1	8	7
1	2009-03-07 01:05:00	162	1	1	8	7
1	2009-03-07 01:06:00	21	1	1	8	7
1	2009-03-07 01:07:00	0	1	1	8	7
1	2009-03-07 01:08:00	0	1	1	8	7
1	2009-03-07 01:09:00	0	1	1	8	7
1	2009-03-07 01:10:00	31	1	1	8	7
1	2009-03-07 01:11:00	31	1	1	8	7
1	2009-03-07 01:12:00	0	1	1	8	7
1	2009-03-07 01:13:00	21	1	1	8	7
1	2009-03-07 01:14:00	21	1	1	8	7
1	2009-03-07 01:15:00	0	1	1	8	7
1	2009-03-07 01:16:00	319	1	1	8	7
1	2009-03-07 01:17:00	334	1	1	8	7
1	2009-03-07 01:18:00	136	1	1	8	7
1	2009-03-07 01:19:00	10	1	1	8	7
1	2009-03-07 01:20:00	21	1	1	8	7
1	2009-03-07 01:21:00	10	1	1	8	7
1	2009-03-07 01:22:00	84	1	1	8	7
1	2009-03-07 01:23:00	136	1	1	8	7
1	2009-03-07 01:24:00	73	1	1	8	7
1	2009-03-07 01:25:00	10	1	1	8	7
1	2009-03-07 01:26:00	0	1	1	8	7
1	2009-03-07 01:27:00	0	1	1	8	7
1	2009-03-07 01:28:00	0	1	1	8	7
1	2009-03-07 01:29:00	52	1	1	8	7
1	2009-03-07 01:30:00	0	1	1	8	7
1	2009-03-07 01:31:00	0	1	1	8	7
1	2009-03-07 01:32:00	52	1	1	8	7
1	2009-03-07 01:33:00	21	1	1	8	7
1	2009-03-07 01:34:00	0	1	1	8	7
1	2009-03-07 01:35:00	0	1	1	8	7
1	2009-03-07 01:36:00	250	1	1	8	7
1	2009-03-07 01:37:00	187	1	1	8	7
1	2009-03-07 01:38:00	250	1	1	8	7
1	2009-03-07 01:39:00	52	1	1	8	7
1	2009-03-07 01:40:00	21	1	1	8	7
1	2009-03-07 01:41:00	115	1	1	8	7
1	2009-03-07 01:42:00	115	1	1	8	7
1	2009-03-07 01:43:00	126	1	1	8	7
1	2009-03-07 01:44:00	913	1	1	8	7
1	2009-03-07 01:45:00	1809	1	1	8	7
1	2009-03-07 01:46:00	1628	1	1	8	7
1	2009-03-07 01:47:00	2170	1	1	8	7
1	2009-03-07 01:48:00	844	1	1	8	7
1	2009-03-07 01:49:00	1964	1	1	8	7
1	2009-03-07 01:50:00	225	1	1	8	7
1	2009-03-07 01:51:00	136	1	1	8	7
1	2009-03-07 01:52:00	319	1	1	8	7
1	2009-03-07 01:53:00	10	1	1	8	7
1	2009-03-07 01:54:00	0	1	1	8	7
1	2009-03-07 01:55:00	304	1	1	8	7
1	2009-03-07 01:56:00	0	1	1	8	7
1	2009-03-07 01:57:00	0	1	1	8	7
1	2009-03-07 01:58:00	0	1	1	8	7
1	2009-03-07 01:59:00	0	1	1	8	7
1	2009-03-07 02:00:00	0	1	1	8	7
1	2009-03-07 02:01:00	0	2	1	8	7
1	2009-03-07 02:02:00	0	2	1	8	7
1	2009-03-07 02:03:00	0	2	1	8	7
1	2009-03-07 02:04:00	0	2	1	8	7
1	2009-03-07 02:05:00	0	2	1	8	7
1	2009-03-07 02:06:00	0	2	1	8	7
1	2009-03-07 02:07:00	0	2	1	8	7
1	2009-03-07 02:08:00	0	2	1	8	7
1	2009-03-07 02:09:00	0	2	1	8	7
1	2009-03-07 02:10:00	0	2	1	8	7
1	2009-03-07 02:11:00	10	2	1	8	7
1	2009-03-07 02:12:00	0	2	1	8	7
1	2009-03-07 02:13:00	0	2	1	8	7
1	2009-03-07 02:14:00	0	2	1	8	7
1	2009-03-07 02:15:00	10	2	1	8	7
1	2009-03-07 02:16:00	0	2	1	8	7
1	2009-03-07 02:17:00	275	2	1	8	7
1	2009-03-07 02:18:00	115	2	1	8	7
1	2009-03-07 02:19:00	10	2	1	8	7
1	2009-03-07 02:20:00	0	2	1	8	7
1	2009-03-07 02:21:00	0	2	1	8	7
1	2009-03-07 02:22:00	63	2	1	8	7
1	2009-03-07 02:23:00	0	2	1	8	7
1	2009-03-07 02:24:00	0	2	1	8	7
1	2009-03-07 02:25:00	0	2	1	8	7
1	2009-03-07 02:26:00	0	2	1	8	7
1	2009-03-07 02:27:00	0	2	1	8	7
1	2009-03-07 02:28:00	0	2	1	8	7
1	2009-03-07 02:29:00	0	2	1	8	7
1	2009-03-07 02:30:00	0	2	1	8	7
1	2009-03-07 02:31:00	0	2	1	8	7
1	2009-03-07 02:32:00	0	2	1	8	7
1	2009-03-07 02:33:00	0	2	1	8	7
1	2009-03-07 02:34:00	0	2	1	8	7
1	2009-03-07 02:35:00	0	2	1	8	7
1	2009-03-07 02:36:00	0	2	1	8	7
1	2009-03-07 02:37:00	0	2	1	8	7
1	2009-03-07 02:38:00	0	2	1	8	7
1	2009-03-07 02:39:00	0	2	1	8	7
1	2009-03-07 02:40:00	21	2	1	8	7
1	2009-03-07 02:41:00	10	2	1	8	7
1	2009-03-07 02:42:00	0	2	1	8	7
1	2009-03-07 02:43:00	0	2	1	8	7
1	2009-03-07 02:44:00	0	2	1	8	7
1	2009-03-07 02:45:00	0	2	1	8	7
1	2009-03-07 02:46:00	0	2	1	8	7
1	2009-03-07 02:47:00	10	2	1	8	7
1	2009-03-07 02:48:00	0	2	1	8	7
1	2009-03-07 02:49:00	0	2	1	8	7
1	2009-03-07 02:50:00	0	2	1	8	7
1	2009-03-07 02:51:00	0	2	1	8	7
1	2009-03-07 02:52:00	0	2	1	8	7
1	2009-03-07 02:53:00	0	2	1	8	7
1	2009-03-07 02:54:00	0	2	1	8	7
1	2009-03-07 02:55:00	0	2	1	8	7
1	2009-03-07 02:56:00	0	2	1	8	7
1	2009-03-07 02:57:00	0	2	1	8	7
1	2009-03-07 02:58:00	0	2	1	8	7
1	2009-03-07 02:59:00	0	2	1	8	7
1	2009-03-07 03:00:00	0	2	1	8	7
1	2009-03-07 03:01:00	0	3	1	8	7
1	2009-03-07 03:02:00	0	3	1	8	7
1	2009-03-07 03:03:00	0	3	1	8	7
1	2009-03-07 03:04:00	0	3	1	8	7
1	2009-03-07 03:05:00	0	3	1	8	7
1	2009-03-07 03:06:00	0	3	1	8	7
1	2009-03-07 03:07:00	0	3	1	8	7
1	2009-03-07 03:08:00	0	3	1	8	7
1	2009-03-07 03:09:00	10	3	1	8	7
1	2009-03-07 03:10:00	0	3	1	8	7
1	2009-03-07 03:11:00	0	3	1	8	7
1	2009-03-07 03:12:00	0	3	1	8	7
1	2009-03-07 03:13:00	0	3	1	8	7
1	2009-03-07 03:14:00	63	3	1	8	7
1	2009-03-07 03:15:00	31	3	1	8	7
1	2009-03-07 03:16:00	0	3	1	8	7
1	2009-03-07 03:17:00	0	3	1	8	7
1	2009-03-07 03:18:00	0	3	1	8	7
1	2009-03-07 03:19:00	0	3	1	8	7
1	2009-03-07 03:20:00	0	3	1	8	7
1	2009-03-07 03:21:00	0	3	1	8	7
1	2009-03-07 03:22:00	0	3	1	8	7
1	2009-03-07 03:23:00	0	3	1	8	7
1	2009-03-07 03:24:00	0	3	1	8	7
1	2009-03-07 03:25:00	0	3	1	8	7
1	2009-03-07 03:26:00	0	3	1	8	7
1	2009-03-07 03:27:00	0	3	1	8	7
1	2009-03-07 03:28:00	0	3	1	8	7
1	2009-03-07 03:29:00	0	3	1	8	7
1	2009-03-07 03:30:00	0	3	1	8	7
1	2009-03-07 03:31:00	0	3	1	8	7
1	2009-03-07 03:32:00	0	3	1	8	7
1	2009-03-07 03:33:00	0	3	1	8	7
1	2009-03-07 03:34:00	0	3	1	8	7
1	2009-03-07 03:35:00	0	3	1	8	7
1	2009-03-07 03:36:00	0	3	1	8	7
1	2009-03-07 03:37:00	0	3	1	8	7
1	2009-03-07 03:38:00	0	3	1	8	7
1	2009-03-07 03:39:00	0	3	1	8	7
1	2009-03-07 03:40:00	0	3	1	8	7
1	2009-03-07 03:41:00	0	3	1	8	7
1	2009-03-07 03:42:00	0	3	1	8	7
1	2009-03-07 03:43:00	0	3	1	8	7
1	2009-03-07 03:44:00	0	3	1	8	7
1	2009-03-07 03:45:00	0	3	1	8	7
1	2009-03-07 03:46:00	0	3	1	8	7
1	2009-03-07 03:47:00	0	3	1	8	7
1	2009-03-07 03:48:00	0	3	1	8	7
1	2009-03-07 03:49:00	0	3	1	8	7
1	2009-03-07 03:50:00	0	3	1	8	7
1	2009-03-07 03:51:00	0	3	1	8	7
1	2009-03-07 03:52:00	0	3	1	8	7
1	2009-03-07 03:53:00	0	3	1	8	7
1	2009-03-07 03:54:00	0	3	1	8	7
1	2009-03-07 03:55:00	0	3	1	8	7
1	2009-03-07 03:56:00	0	3	1	8	7
1	2009-03-07 03:57:00	0	3	1	8	7
1	2009-03-07 03:58:00	0	3	1	8	7
1	2009-03-07 03:59:00	0	3	1	8	7
1	2009-03-07 04:00:00	0	3	1	8	7
1	2009-03-07 04:01:00	0	4	1	8	7
1	2009-03-07 04:02:00	0	4	1	8	7
1	2009-03-07 04:03:00	0	4	1	8	7
1	2009-03-07 04:04:00	0	4	1	8	7
1	2009-03-07 04:05:00	0	4	1	8	7
1	2009-03-07 04:06:00	0	4	1	8	7
1	2009-03-07 04:07:00	0	4	1	8	7
1	2009-03-07 04:08:00	0	4	1	8	7
1	2009-03-07 04:09:00	0	4	1	8	7
1	2009-03-07 04:10:00	0	4	1	8	7
1	2009-03-07 04:11:00	0	4	1	8	7
1	2009-03-07 04:12:00	0	4	1	8	7
1	2009-03-07 04:13:00	0	4	1	8	7
1	2009-03-07 04:14:00	0	4	1	8	7
1	2009-03-07 04:15:00	0	4	1	8	7
1	2009-03-07 04:16:00	0	4	1	8	7
1	2009-03-07 04:17:00	0	4	1	8	7
1	2009-03-07 04:18:00	0	4	1	8	7
1	2009-03-07 04:19:00	0	4	1	8	7
1	2009-03-07 04:20:00	0	4	1	8	7
1	2009-03-07 04:21:00	0	4	1	8	7
1	2009-03-07 04:22:00	0	4	1	8	7
1	2009-03-07 04:23:00	0	4	1	8	7
1	2009-03-07 04:24:00	0	4	1	8	7
1	2009-03-07 04:25:00	0	4	1	8	7
1	2009-03-07 04:26:00	0	4	1	8	7
1	2009-03-07 04:27:00	0	4	1	8	7
1	2009-03-07 04:28:00	0	4	1	8	7
1	2009-03-07 04:29:00	0	4	1	8	7
1	2009-03-07 04:30:00	0	4	1	8	7
1	2009-03-07 04:31:00	0	4	1	8	7
1	2009-03-07 04:32:00	0	4	1	8	7
1	2009-03-07 04:33:00	0	4	1	8	7
1	2009-03-07 04:34:00	0	4	1	8	7
1	2009-03-07 04:35:00	0	4	1	8	7
1	2009-03-07 04:36:00	0	4	1	8	7
1	2009-03-07 04:37:00	0	4	1	8	7
1	2009-03-07 04:38:00	0	4	1	8	7
1	2009-03-07 04:39:00	0	4	1	8	7
1	2009-03-07 04:40:00	0	4	1	8	7
1	2009-03-07 04:41:00	0	4	1	8	7
1	2009-03-07 04:42:00	0	4	1	8	7
1	2009-03-07 04:43:00	0	4	1	8	7
1	2009-03-07 04:44:00	0	4	1	8	7
1	2009-03-07 04:45:00	0	4	1	8	7
1	2009-03-07 04:46:00	0	4	1	8	7
1	2009-03-07 04:47:00	0	4	1	8	7
1	2009-03-07 04:48:00	0	4	1	8	7
1	2009-03-07 04:49:00	0	4	1	8	7
1	2009-03-07 04:50:00	0	4	1	8	7
1	2009-03-07 04:51:00	0	4	1	8	7
1	2009-03-07 04:52:00	0	4	1	8	7
1	2009-03-07 04:53:00	0	4	1	8	7
1	2009-03-07 04:54:00	0	4	1	8	7
1	2009-03-07 04:55:00	0	4	1	8	7
1	2009-03-07 04:56:00	0	4	1	8	7
1	2009-03-07 04:57:00	0	4	1	8	7
1	2009-03-07 04:58:00	0	4	1	8	7
1	2009-03-07 04:59:00	0	4	1	8	7
1	2009-03-07 05:00:00	0	4	1	8	7
1	2009-03-07 05:01:00	0	5	1	8	7
1	2009-03-07 05:02:00	0	5	1	8	7
1	2009-03-07 05:03:00	0	5	1	8	7
1	2009-03-07 05:04:00	0	5	1	8	7
1	2009-03-07 05:05:00	0	5	1	8	7
1	2009-03-07 05:06:00	0	5	1	8	7
1	2009-03-07 05:07:00	0	5	1	8	7
1	2009-03-07 05:08:00	0	5	1	8	7
1	2009-03-07 05:09:00	0	5	1	8	7
1	2009-03-07 05:10:00	0	5	1	8	7
1	2009-03-07 05:11:00	0	5	1	8	7
1	2009-03-07 05:12:00	0	5	1	8	7
1	2009-03-07 05:13:00	0	5	1	8	7
1	2009-03-07 05:14:00	0	5	1	8	7
1	2009-03-07 05:15:00	0	5	1	8	7
1	2009-03-07 05:16:00	0	5	1	8	7
1	2009-03-07 05:17:00	0	5	1	8	7
1	2009-03-07 05:18:00	105	5	1	8	7
1	2009-03-07 05:19:00	0	5	1	8	7
1	2009-03-07 05:20:00	0	5	1	8	7
1	2009-03-07 05:21:00	0	5	1	8	7
1	2009-03-07 05:22:00	0	5	1	8	7
1	2009-03-07 05:23:00	0	5	1	8	7
1	2009-03-07 05:24:00	0	5	1	8	7
1	2009-03-07 05:25:00	0	5	1	8	7
1	2009-03-07 05:26:00	0	5	1	8	7
1	2009-03-07 05:27:00	0	5	1	8	7
1	2009-03-07 05:28:00	0	5	1	8	7
1	2009-03-07 05:29:00	0	5	1	8	7
1	2009-03-07 05:30:00	0	5	1	8	7
1	2009-03-07 05:31:00	0	5	1	8	7
1	2009-03-07 05:32:00	0	5	1	8	7
1	2009-03-07 05:33:00	0	5	1	8	7
1	2009-03-07 05:34:00	0	5	1	8	7
1	2009-03-07 05:35:00	0	5	1	8	7
1	2009-03-07 05:36:00	0	5	1	8	7
1	2009-03-07 05:37:00	0	5	1	8	7
1	2009-03-07 05:38:00	21	5	1	8	7
1	2009-03-07 05:39:00	0	5	1	8	7
1	2009-03-07 05:40:00	0	5	1	8	7
1	2009-03-07 05:41:00	0	5	1	8	7
1	2009-03-07 05:42:00	0	5	1	8	7
1	2009-03-07 05:43:00	0	5	1	8	7
1	2009-03-07 05:44:00	0	5	1	8	7
1	2009-03-07 05:45:00	0	5	1	8	7
1	2009-03-07 05:46:00	0	5	1	8	7
1	2009-03-07 05:47:00	0	5	1	8	7
1	2009-03-07 05:48:00	0	5	1	8	7
1	2009-03-07 05:49:00	0	5	1	8	7
1	2009-03-07 05:50:00	0	5	1	8	7
1	2009-03-07 05:51:00	0	5	1	8	7
1	2009-03-07 05:52:00	0	5	1	8	7
1	2009-03-07 05:53:00	0	5	1	8	7
1	2009-03-07 05:54:00	0	5	1	8	7
1	2009-03-07 05:55:00	0	5	1	8	7
1	2009-03-07 05:56:00	0	5	1	8	7
1	2009-03-07 05:57:00	0	5	1	8	7
1	2009-03-07 05:58:00	0	5	1	8	7
1	2009-03-07 05:59:00	0	5	1	8	7
1	2009-03-07 06:00:00	0	5	1	8	7
1	2009-03-07 06:01:00	0	6	2	8	7
1	2009-03-07 06:02:00	0	6	2	8	7
1	2009-03-07 06:03:00	0	6	2	8	7
1	2009-03-07 06:04:00	0	6	2	8	7
1	2009-03-07 06:05:00	0	6	2	8	7
1	2009-03-07 06:06:00	0	6	2	8	7
1	2009-03-07 06:07:00	0	6	2	8	7
1	2009-03-07 06:08:00	0	6	2	8	7
1	2009-03-07 06:09:00	0	6	2	8	7
1	2009-03-07 06:10:00	0	6	2	8	7
1	2009-03-07 06:11:00	0	6	2	8	7
1	2009-03-07 06:12:00	0	6	2	8	7
1	2009-03-07 06:13:00	0	6	2	8	7
1	2009-03-07 06:14:00	0	6	2	8	7
1	2009-03-07 06:15:00	0	6	2	8	7
1	2009-03-07 06:16:00	0	6	2	8	7
1	2009-03-07 06:17:00	0	6	2	8	7
1	2009-03-07 06:18:00	0	6	2	8	7
1	2009-03-07 06:19:00	0	6	2	8	7
1	2009-03-07 06:20:00	0	6	2	8	7
1	2009-03-07 06:21:00	0	6	2	8	7
1	2009-03-07 06:22:00	0	6	2	8	7
1	2009-03-07 06:23:00	0	6	2	8	7
1	2009-03-07 06:24:00	0	6	2	8	7
1	2009-03-07 06:25:00	0	6	2	8	7
1	2009-03-07 06:26:00	0	6	2	8	7
1	2009-03-07 06:27:00	0	6	2	8	7
1	2009-03-07 06:28:00	0	6	2	8	7
1	2009-03-07 06:29:00	0	6	2	8	7
1	2009-03-07 06:30:00	0	6	2	8	7
1	2009-03-07 06:31:00	0	6	2	8	7
1	2009-03-07 06:32:00	0	6	2	8	7
1	2009-03-07 06:33:00	21	6	2	8	7
1	2009-03-07 06:34:00	31	6	2	8	7
1	2009-03-07 06:35:00	52	6	2	8	7
1	2009-03-07 06:36:00	0	6	2	8	7
1	2009-03-07 06:37:00	0	6	2	8	7
1	2009-03-07 06:38:00	0	6	2	8	7
1	2009-03-07 06:39:00	52	6	2	8	7
1	2009-03-07 06:40:00	105	6	2	8	7
1	2009-03-07 06:41:00	105	6	2	8	7
1	2009-03-07 06:42:00	0	6	2	8	7
1	2009-03-07 06:43:00	0	6	2	8	7
1	2009-03-07 06:44:00	0	6	2	8	7
1	2009-03-07 06:45:00	10	6	2	8	7
1	2009-03-07 06:46:00	0	6	2	8	7
1	2009-03-07 06:47:00	0	6	2	8	7
1	2009-03-07 06:48:00	0	6	2	8	7
1	2009-03-07 06:49:00	0	6	2	8	7
1	2009-03-07 06:50:00	0	6	2	8	7
1	2009-03-07 06:51:00	0	6	2	8	7
1	2009-03-07 06:52:00	73	6	2	8	7
1	2009-03-07 06:53:00	73	6	2	8	7
1	2009-03-07 06:54:00	0	6	2	8	7
1	2009-03-07 06:55:00	0	6	2	8	7
1	2009-03-07 06:56:00	0	6	2	8	7
1	2009-03-07 06:57:00	0	6	2	8	7
1	2009-03-07 06:58:00	0	6	2	8	7
1	2009-03-07 06:59:00	0	6	2	8	7
1	2009-03-07 07:00:00	0	6	2	8	7
1	2009-03-07 07:01:00	0	7	2	8	7
1	2009-03-07 07:02:00	0	7	2	8	7
1	2009-03-07 07:03:00	0	7	2	8	7
1	2009-03-07 07:04:00	0	7	2	8	7
1	2009-03-07 07:05:00	0	7	2	8	7
1	2009-03-07 07:06:00	0	7	2	8	7
1	2009-03-07 07:07:00	0	7	2	8	7
1	2009-03-07 07:08:00	10	7	2	8	7
1	2009-03-07 07:09:00	0	7	2	8	7
1	2009-03-07 07:10:00	73	7	2	8	7
1	2009-03-07 07:11:00	0	7	2	8	7
1	2009-03-07 07:12:00	42	7	2	8	7
1	2009-03-07 07:13:00	31	7	2	8	7
1	2009-03-07 07:14:00	0	7	2	8	7
1	2009-03-07 07:15:00	0	7	2	8	7
1	2009-03-07 07:16:00	0	7	2	8	7
1	2009-03-07 07:17:00	0	7	2	8	7
1	2009-03-07 07:18:00	0	7	2	8	7
1	2009-03-07 07:19:00	0	7	2	8	7
1	2009-03-07 07:20:00	0	7	2	8	7
1	2009-03-07 07:21:00	0	7	2	8	7
1	2009-03-07 07:22:00	63	7	2	8	7
1	2009-03-07 07:23:00	21	7	2	8	7
1	2009-03-07 07:24:00	10	7	2	8	7
1	2009-03-07 07:25:00	105	7	2	8	7
1	2009-03-07 07:26:00	655	7	2	8	7
1	2009-03-07 07:27:00	936	7	2	8	7
1	2009-03-07 07:28:00	212	7	2	8	7
1	2009-03-07 07:29:00	250	7	2	8	7
1	2009-03-07 07:30:00	0	7	2	8	7
1	2009-03-07 07:31:00	0	7	2	8	7
1	2009-03-07 07:32:00	491	7	2	8	7
1	2009-03-07 07:33:00	42	7	2	8	7
1	2009-03-07 07:34:00	541	7	2	8	7
1	2009-03-07 07:35:00	31	7	2	8	7
1	2009-03-07 07:36:00	0	7	2	8	7
1	2009-03-07 07:37:00	0	7	2	8	7
1	2009-03-07 07:38:00	0	7	2	8	7
1	2009-03-07 07:39:00	0	7	2	8	7
1	2009-03-07 07:40:00	0	7	2	8	7
1	2009-03-07 07:41:00	0	7	2	8	7
1	2009-03-07 07:42:00	0	7	2	8	7
1	2009-03-07 07:43:00	63	7	2	8	7
1	2009-03-07 07:44:00	0	7	2	8	7
1	2009-03-07 07:45:00	0	7	2	8	7
1	2009-03-07 07:46:00	0	7	2	8	7
1	2009-03-07 07:47:00	0	7	2	8	7
1	2009-03-07 07:48:00	0	7	2	8	7
1	2009-03-07 07:49:00	0	7	2	8	7
1	2009-03-07 07:50:00	0	7	2	8	7
1	2009-03-07 07:51:00	0	7	2	8	7
1	2009-03-07 07:52:00	0	7	2	8	7
1	2009-03-07 07:53:00	0	7	2	8	7
1	2009-03-07 07:54:00	0	7	2	8	7
1	2009-03-07 07:55:00	0	7	2	8	7
1	2009-03-07 07:56:00	0	7	2	8	7
1	2009-03-07 07:57:00	0	7	2	8	7
1	2009-03-07 07:58:00	63	7	2	8	7
1	2009-03-07 07:59:00	10	7	2	8	7
1	2009-03-07 08:00:00	579	7	2	8	7
1	2009-03-07 08:01:00	441	8	2	8	7
1	2009-03-07 08:02:00	407	8	2	8	7
1	2009-03-07 08:03:00	304	8	2	8	7
1	2009-03-07 08:04:00	0	8	2	8	7
1	2009-03-07 08:05:00	0	8	2	8	7
1	2009-03-07 08:06:00	304	8	2	8	7
1	2009-03-07 08:07:00	0	8	2	8	7
1	2009-03-07 08:08:00	149	8	2	8	7
1	2009-03-07 08:09:00	913	8	2	8	7
1	2009-03-07 08:10:00	913	8	2	8	7
1	2009-03-07 08:11:00	959	8	2	8	7
1	2009-03-07 08:12:00	1884	8	2	8	7
1	2009-03-07 08:13:00	1309	8	2	8	7
1	2009-03-07 08:14:00	1112	8	2	8	7
1	2009-03-07 08:15:00	1561	8	2	8	7
1	2009-03-07 08:16:00	1112	8	2	8	7
1	2009-03-07 08:17:00	913	8	2	8	7
1	2009-03-07 08:18:00	348	8	2	8	7
1	2009-03-07 08:19:00	737	8	2	8	7
1	2009-03-07 08:20:00	695	8	2	8	7
1	2009-03-07 08:21:00	136	8	2	8	7
1	2009-03-07 08:22:00	250	8	2	8	7
1	2009-03-07 08:23:00	212	8	2	8	7
1	2009-03-07 08:24:00	363	8	2	8	7
1	2009-03-07 08:25:00	105	8	2	8	7
1	2009-03-07 08:26:00	225	8	2	8	7
1	2009-03-07 08:27:00	0	8	2	8	7
1	2009-03-07 08:28:00	0	8	2	8	7
1	2009-03-07 08:29:00	0	8	2	8	7
1	2009-03-07 08:30:00	10	8	2	8	7
1	2009-03-07 08:31:00	0	8	2	8	7
1	2009-03-07 08:32:00	0	8	2	8	7
1	2009-03-07 08:33:00	0	8	2	8	7
1	2009-03-07 08:34:00	52	8	2	8	7
1	2009-03-07 08:35:00	0	8	2	8	7
1	2009-03-07 08:36:00	0	8	2	8	7
1	2009-03-07 08:37:00	0	8	2	8	7
1	2009-03-07 08:38:00	0	8	2	8	7
1	2009-03-07 08:39:00	0	8	2	8	7
1	2009-03-07 08:40:00	0	8	2	8	7
1	2009-03-07 08:41:00	0	8	2	8	7
1	2009-03-07 08:42:00	0	8	2	8	7
1	2009-03-07 08:43:00	0	8	2	8	7
1	2009-03-07 08:44:00	0	8	2	8	7
1	2009-03-07 08:45:00	0	8	2	8	7
1	2009-03-07 08:46:00	0	8	2	8	7
1	2009-03-07 08:47:00	0	8	2	8	7
1	2009-03-07 08:48:00	0	8	2	8	7
1	2009-03-07 08:49:00	0	8	2	8	7
1	2009-03-07 08:50:00	0	8	2	8	7
1	2009-03-07 08:51:00	0	8	2	8	7
1	2009-03-07 08:52:00	0	8	2	8	7
1	2009-03-07 08:53:00	0	8	2	8	7
1	2009-03-07 08:54:00	0	8	2	8	7
1	2009-03-07 08:55:00	0	8	2	8	7
1	2009-03-07 08:56:00	0	8	2	8	7
1	2009-03-07 08:57:00	0	8	2	8	7
1	2009-03-07 08:58:00	0	8	2	8	7
1	2009-03-07 08:59:00	0	8	2	8	7
1	2009-03-07 09:00:00	0	8	2	8	7
1	2009-03-07 09:01:00	0	9	2	8	7
1	2009-03-07 09:02:00	0	9	2	8	7
1	2009-03-07 09:03:00	0	9	2	8	7
1	2009-03-07 09:04:00	0	9	2	8	7
1	2009-03-07 09:05:00	0	9	2	8	7
1	2009-03-07 09:06:00	0	9	2	8	7
1	2009-03-07 09:07:00	0	9	2	8	7
1	2009-03-07 09:08:00	0	9	2	8	7
1	2009-03-07 09:09:00	0	9	2	8	7
1	2009-03-07 09:10:00	0	9	2	8	7
1	2009-03-07 09:11:00	0	9	2	8	7
1	2009-03-07 09:12:00	10	9	2	8	7
1	2009-03-07 09:13:00	0	9	2	8	7
1	2009-03-07 09:14:00	31	9	2	8	7
1	2009-03-07 09:15:00	31	9	2	8	7
1	2009-03-07 09:16:00	115	9	2	8	7
1	2009-03-07 09:17:00	695	9	2	8	7
1	2009-03-07 09:18:00	1309	9	2	8	7
1	2009-03-07 09:19:00	2738	9	2	8	7
1	2009-03-07 09:20:00	1034	9	2	8	7
1	2009-03-07 09:21:00	474	9	2	8	7
1	2009-03-07 09:22:00	1060	9	2	8	7
1	2009-03-07 09:23:00	304	9	2	8	7
1	2009-03-07 09:24:00	262	9	2	8	7
1	2009-03-07 09:25:00	334	9	2	8	7
1	2009-03-07 09:26:00	0	9	2	8	7
1	2009-03-07 09:27:00	0	9	2	8	7
1	2009-03-07 09:28:00	174	9	2	8	7
1	2009-03-07 09:29:00	105	9	2	8	7
1	2009-03-07 09:30:00	0	9	2	8	7
1	2009-03-07 09:31:00	407	9	2	8	7
1	2009-03-07 09:32:00	212	9	2	8	7
1	2009-03-07 09:33:00	21	9	2	8	7
1	2009-03-07 09:34:00	0	9	2	8	7
1	2009-03-07 09:35:00	63	9	2	8	7
1	2009-03-07 09:36:00	94	9	2	8	7
1	2009-03-07 09:37:00	10	9	2	8	7
1	2009-03-07 09:38:00	0	9	2	8	7
1	2009-03-07 09:39:00	0	9	2	8	7
1	2009-03-07 09:40:00	0	9	2	8	7
1	2009-03-07 09:41:00	0	9	2	8	7
1	2009-03-07 09:42:00	0	9	2	8	7
1	2009-03-07 09:43:00	0	9	2	8	7
1	2009-03-07 09:44:00	0	9	2	8	7
1	2009-03-07 09:45:00	0	9	2	8	7
1	2009-03-07 09:46:00	21	9	2	8	7
1	2009-03-07 09:47:00	0	9	2	8	7
1	2009-03-07 09:48:00	0	9	2	8	7
1	2009-03-07 09:49:00	0	9	2	8	7
1	2009-03-07 09:50:00	0	9	2	8	7
1	2009-03-07 09:51:00	0	9	2	8	7
1	2009-03-07 09:52:00	0	9	2	8	7
1	2009-03-07 09:53:00	0	9	2	8	7
1	2009-03-07 09:54:00	0	9	2	8	7
1	2009-03-07 09:55:00	348	9	2	8	7
1	2009-03-07 09:56:00	334	9	2	8	7
1	2009-03-07 09:57:00	149	9	2	8	7
1	2009-03-07 09:58:00	474	9	2	8	7
1	2009-03-07 09:59:00	598	9	2	8	7
1	2009-03-07 10:00:00	560	9	2	8	7
1	2009-03-07 10:01:00	541	10	2	8	7
1	2009-03-07 10:02:00	560	10	2	8	7
1	2009-03-07 10:03:00	275	10	2	8	7
1	2009-03-07 10:04:00	541	10	2	8	7
1	2009-03-07 10:05:00	262	10	2	8	7
1	2009-03-07 10:06:00	598	10	2	8	7
1	2009-03-07 10:07:00	913	10	2	8	7
1	2009-03-07 10:08:00	262	10	2	8	7
1	2009-03-07 10:09:00	21	10	2	8	7
1	2009-03-07 10:10:00	304	10	2	8	7
1	2009-03-07 10:11:00	275	10	2	8	7
1	2009-03-07 10:12:00	187	10	2	8	7
1	2009-03-07 10:13:00	52	10	2	8	7
1	2009-03-07 10:14:00	0	10	2	8	7
1	2009-03-07 10:15:00	42	10	2	8	7
1	2009-03-07 10:16:00	212	10	2	8	7
1	2009-03-07 10:17:00	0	10	2	8	7
1	2009-03-07 10:18:00	0	10	2	8	7
1	2009-03-07 10:19:00	21	10	2	8	7
1	2009-03-07 10:20:00	52	10	2	8	7
1	2009-03-07 10:21:00	31	10	2	8	7
1	2009-03-07 10:22:00	31	10	2	8	7
1	2009-03-07 10:23:00	262	10	2	8	7
1	2009-03-07 10:24:00	0	10	2	8	7
1	2009-03-07 10:25:00	115	10	2	8	7
1	2009-03-07 10:26:00	21	10	2	8	7
1	2009-03-07 10:27:00	0	10	2	8	7
1	2009-03-07 10:28:00	10	10	2	8	7
1	2009-03-07 10:29:00	10	10	2	8	7
1	2009-03-07 10:30:00	10	10	2	8	7
1	2009-03-07 10:31:00	0	10	2	8	7
1	2009-03-07 10:32:00	115	10	2	8	7
1	2009-03-07 10:33:00	541	10	2	8	7
1	2009-03-07 10:34:00	136	10	2	8	7
1	2009-03-07 10:35:00	334	10	2	8	7
1	2009-03-07 10:36:00	0	10	2	8	7
1	2009-03-07 10:37:00	319	10	2	8	7
1	2009-03-07 10:38:00	290	10	2	8	7
1	2009-03-07 10:39:00	84	10	2	8	7
1	2009-03-07 10:40:00	42	10	2	8	7
1	2009-03-07 10:41:00	149	10	2	8	7
1	2009-03-07 10:42:00	0	10	2	8	7
1	2009-03-07 10:43:00	0	10	2	8	7
1	2009-03-07 10:44:00	0	10	2	8	7
1	2009-03-07 10:45:00	10	10	2	8	7
1	2009-03-07 10:46:00	31	10	2	8	7
1	2009-03-07 10:47:00	31	10	2	8	7
1	2009-03-07 10:48:00	149	10	2	8	7
1	2009-03-07 10:49:00	10	10	2	8	7
1	2009-03-07 10:50:00	42	10	2	8	7
1	2009-03-07 10:51:00	174	10	2	8	7
1	2009-03-07 10:52:00	617	10	2	8	7
1	2009-03-07 10:53:00	0	10	2	8	7
1	2009-03-07 10:54:00	0	10	2	8	7
1	2009-03-07 10:55:00	424	10	2	8	7
1	2009-03-07 10:56:00	136	10	2	8	7
1	2009-03-07 10:57:00	0	10	2	8	7
1	2009-03-07 10:58:00	21	10	2	8	7
1	2009-03-07 10:59:00	0	10	2	8	7
1	2009-03-07 11:00:00	10	10	2	8	7
1	2009-03-07 11:01:00	0	11	2	8	7
1	2009-03-07 11:02:00	0	11	2	8	7
1	2009-03-07 11:03:00	10	11	2	8	7
1	2009-03-07 11:04:00	0	11	2	8	7
1	2009-03-07 11:05:00	31	11	2	8	7
1	2009-03-07 11:06:00	31	11	2	8	7
1	2009-03-07 11:07:00	0	11	2	8	7
1	2009-03-07 11:08:00	10	11	2	8	7
1	2009-03-07 11:09:00	10	11	2	8	7
1	2009-03-07 11:10:00	0	11	2	8	7
1	2009-03-07 11:11:00	52	11	2	8	7
1	2009-03-07 11:12:00	10	11	2	8	7
1	2009-03-07 11:13:00	0	11	2	8	7
1	2009-03-07 11:14:00	31	11	2	8	7
1	2009-03-07 11:15:00	31	11	2	8	7
1	2009-03-07 11:16:00	0	11	2	8	7
1	2009-03-07 11:17:00	84	11	2	8	7
1	2009-03-07 11:18:00	560	11	2	8	7
1	2009-03-07 11:19:00	212	11	2	8	7
1	2009-03-07 11:20:00	10	11	2	8	7
1	2009-03-07 11:21:00	42	11	2	8	7
1	2009-03-07 11:22:00	31	11	2	8	7
1	2009-03-07 11:23:00	508	11	2	8	7
1	2009-03-07 11:24:00	0	11	2	8	7
1	2009-03-07 11:25:00	0	11	2	8	7
1	2009-03-07 11:26:00	0	11	2	8	7
1	2009-03-07 11:27:00	42	11	2	8	7
1	2009-03-07 11:28:00	0	11	2	8	7
1	2009-03-07 11:29:00	598	11	2	8	7
1	2009-03-07 11:30:00	491	11	2	8	7
1	2009-03-07 11:31:00	10	11	2	8	7
1	2009-03-07 11:32:00	31	11	2	8	7
1	2009-03-07 11:33:00	10	11	2	8	7
1	2009-03-07 11:34:00	304	11	2	8	7
1	2009-03-07 11:35:00	0	11	2	8	7
1	2009-03-07 11:36:00	10	11	2	8	7
1	2009-03-07 11:37:00	0	11	2	8	7
1	2009-03-07 11:38:00	21	11	2	8	7
1	2009-03-07 11:39:00	0	11	2	8	7
1	2009-03-07 11:40:00	10	11	2	8	7
1	2009-03-07 11:41:00	0	11	2	8	7
1	2009-03-07 11:42:00	0	11	2	8	7
1	2009-03-07 11:43:00	525	11	2	8	7
1	2009-03-07 11:44:00	0	11	2	8	7
1	2009-03-07 11:45:00	0	11	2	8	7
1	2009-03-07 11:46:00	0	11	2	8	7
1	2009-03-07 11:47:00	0	11	2	8	7
1	2009-03-07 11:48:00	187	11	2	8	7
1	2009-03-07 11:49:00	212	11	2	8	7
1	2009-03-07 11:50:00	1167	11	2	8	7
1	2009-03-07 11:51:00	959	11	2	8	7
1	2009-03-07 11:52:00	1561	11	2	8	7
1	2009-03-07 11:53:00	1167	11	2	8	7
1	2009-03-07 11:54:00	1112	11	2	8	7
1	2009-03-07 11:55:00	126	11	2	8	7
1	2009-03-07 11:56:00	21	11	2	8	7
1	2009-03-07 11:57:00	212	11	2	8	7
1	2009-03-07 11:58:00	225	11	2	8	7
1	2009-03-07 11:59:00	250	11	2	8	7
1	2009-03-07 12:00:00	262	11	2	8	7
1	2009-03-07 12:01:00	10	12	3	8	7
1	2009-03-07 12:02:00	0	12	3	8	7
1	2009-03-07 12:03:00	334	12	3	8	7
1	2009-03-07 12:04:00	0	12	3	8	7
1	2009-03-07 12:05:00	0	12	3	8	7
1	2009-03-07 12:06:00	31	12	3	8	7
1	2009-03-07 12:07:00	0	12	3	8	7
1	2009-03-07 12:08:00	94	12	3	8	7
1	2009-03-07 12:09:00	212	12	3	8	7
1	2009-03-07 12:10:00	0	12	3	8	7
1	2009-03-07 12:11:00	0	12	3	8	7
1	2009-03-07 12:12:00	0	12	3	8	7
1	2009-03-07 12:13:00	0	12	3	8	7
1	2009-03-07 12:14:00	1009	12	3	8	7
1	2009-03-07 12:15:00	10	12	3	8	7
1	2009-03-07 12:16:00	290	12	3	8	7
1	2009-03-07 12:17:00	0	12	3	8	7
1	2009-03-07 12:18:00	0	12	3	8	7
1	2009-03-07 12:19:00	21	12	3	8	7
1	2009-03-07 12:20:00	0	12	3	8	7
1	2009-03-07 12:21:00	42	12	3	8	7
1	2009-03-07 12:22:00	0	12	3	8	7
1	2009-03-07 12:23:00	0	12	3	8	7
1	2009-03-07 12:24:00	0	12	3	8	7
1	2009-03-07 12:25:00	0	12	3	8	7
1	2009-03-07 12:26:00	0	12	3	8	7
1	2009-03-07 12:27:00	0	12	3	8	7
1	2009-03-07 12:28:00	0	12	3	8	7
1	2009-03-07 12:29:00	0	12	3	8	7
1	2009-03-07 12:30:00	0	12	3	8	7
1	2009-03-07 12:31:00	0	12	3	8	7
1	2009-03-07 12:32:00	0	12	3	8	7
1	2009-03-07 12:33:00	0	12	3	8	7
1	2009-03-07 12:34:00	0	12	3	8	7
1	2009-03-07 12:35:00	0	12	3	8	7
1	2009-03-07 12:36:00	0	12	3	8	7
1	2009-03-07 12:37:00	21	12	3	8	7
1	2009-03-07 12:38:00	0	12	3	8	7
1	2009-03-07 12:39:00	0	12	3	8	7
1	2009-03-07 12:40:00	0	12	3	8	7
1	2009-03-07 12:41:00	0	12	3	8	7
1	2009-03-07 12:42:00	0	12	3	8	7
1	2009-03-07 12:43:00	0	12	3	8	7
1	2009-03-07 12:44:00	0	12	3	8	7
1	2009-03-07 12:45:00	0	12	3	8	7
1	2009-03-07 12:46:00	0	12	3	8	7
1	2009-03-07 12:47:00	0	12	3	8	7
1	2009-03-07 12:48:00	42	12	3	8	7
1	2009-03-07 12:49:00	491	12	3	8	7
1	2009-03-07 12:50:00	424	12	3	8	7
1	2009-03-07 12:51:00	84	12	3	8	7
1	2009-03-07 12:52:00	716	12	3	8	7
1	2009-03-07 12:53:00	441	12	3	8	7
1	2009-03-07 12:54:00	10	12	3	8	7
1	2009-03-07 12:55:00	0	12	3	8	7
1	2009-03-07 12:56:00	0	12	3	8	7
1	2009-03-07 12:57:00	0	12	3	8	7
1	2009-03-07 12:58:00	0	12	3	8	7
1	2009-03-07 12:59:00	0	12	3	8	7
1	2009-03-07 13:00:00	0	12	3	8	7
1	2009-03-07 13:01:00	0	13	3	8	7
1	2009-03-07 13:02:00	0	13	3	8	7
1	2009-03-07 13:03:00	0	13	3	8	7
1	2009-03-07 13:04:00	1167	13	3	8	7
1	2009-03-07 13:05:00	392	13	3	8	7
1	2009-03-07 13:06:00	199	13	3	8	7
1	2009-03-07 13:07:00	0	13	3	8	7
1	2009-03-07 13:08:00	0	13	3	8	7
1	2009-03-07 13:09:00	0	13	3	8	7
1	2009-03-07 13:10:00	115	13	3	8	7
1	2009-03-07 13:11:00	262	13	3	8	7
1	2009-03-07 13:12:00	126	13	3	8	7
1	2009-03-07 13:13:00	199	13	3	8	7
1	2009-03-07 13:14:00	0	13	3	8	7
1	2009-03-07 13:15:00	31	13	3	8	7
1	2009-03-07 13:16:00	149	13	3	8	7
1	2009-03-07 13:17:00	21	13	3	8	7
1	2009-03-07 13:18:00	392	13	3	8	7
1	2009-03-07 13:19:00	10	13	3	8	7
1	2009-03-07 13:20:00	0	13	3	8	7
1	2009-03-07 13:21:00	0	13	3	8	7
1	2009-03-07 13:22:00	0	13	3	8	7
1	2009-03-07 13:23:00	0	13	3	8	7
1	2009-03-07 13:24:00	695	13	3	8	7
1	2009-03-07 13:25:00	1251	13	3	8	7
1	2009-03-07 13:26:00	1009	13	3	8	7
1	2009-03-07 13:27:00	936	13	3	8	7
1	2009-03-07 13:28:00	525	13	3	8	7
1	2009-03-07 13:29:00	598	13	3	8	7
1	2009-03-07 13:30:00	225	13	3	8	7
1	2009-03-07 13:31:00	304	13	3	8	7
1	2009-03-07 13:32:00	407	13	3	8	7
1	2009-03-07 13:33:00	225	13	3	8	7
1	2009-03-07 13:34:00	73	13	3	8	7
1	2009-03-07 13:35:00	424	13	3	8	7
1	2009-03-07 13:36:00	63	13	3	8	7
1	2009-03-07 13:37:00	319	13	3	8	7
1	2009-03-07 13:38:00	441	13	3	8	7
1	2009-03-07 13:39:00	63	13	3	8	7
1	2009-03-07 13:40:00	0	13	3	8	7
1	2009-03-07 13:41:00	474	13	3	8	7
1	2009-03-07 13:42:00	508	13	3	8	7
1	2009-03-07 13:43:00	275	13	3	8	7
1	2009-03-07 13:44:00	0	13	3	8	7
1	2009-03-07 13:45:00	0	13	3	8	7
1	2009-03-07 13:46:00	0	13	3	8	7
1	2009-03-07 13:47:00	31	13	3	8	7
1	2009-03-07 13:48:00	0	13	3	8	7
1	2009-03-07 13:49:00	0	13	3	8	7
1	2009-03-07 13:50:00	0	13	3	8	7
1	2009-03-07 13:51:00	0	13	3	8	7
1	2009-03-07 13:52:00	0	13	3	8	7
1	2009-03-07 13:53:00	10	13	3	8	7
1	2009-03-07 13:54:00	73	13	3	8	7
1	2009-03-07 13:55:00	0	13	3	8	7
1	2009-03-07 13:56:00	0	13	3	8	7
1	2009-03-07 13:57:00	0	13	3	8	7
1	2009-03-07 13:58:00	0	13	3	8	7
1	2009-03-07 13:59:00	0	13	3	8	7
1	2009-03-07 14:00:00	0	13	3	8	7
1	2009-03-07 14:01:00	31	14	3	8	7
1	2009-03-07 14:02:00	0	14	3	8	7
1	2009-03-07 14:03:00	0	14	3	8	7
1	2009-03-07 14:04:00	187	14	3	8	7
1	2009-03-07 14:05:00	187	14	3	8	7
1	2009-03-07 14:06:00	407	14	3	8	7
1	2009-03-07 14:07:00	199	14	3	8	7
1	2009-03-07 14:08:00	0	14	3	8	7
1	2009-03-07 14:09:00	0	14	3	8	7
1	2009-03-07 14:10:00	0	14	3	8	7
1	2009-03-07 14:11:00	0	14	3	8	7
1	2009-03-07 14:12:00	0	14	3	8	7
1	2009-03-07 14:13:00	0	14	3	8	7
1	2009-03-07 14:14:00	31	14	3	8	7
1	2009-03-07 14:15:00	0	14	3	8	7
1	2009-03-07 14:16:00	0	14	3	8	7
1	2009-03-07 14:17:00	10	14	3	8	7
1	2009-03-07 14:18:00	0	14	3	8	7
1	2009-03-07 14:19:00	0	14	3	8	7
1	2009-03-07 14:20:00	0	14	3	8	7
1	2009-03-07 14:21:00	0	14	3	8	7
1	2009-03-07 14:22:00	0	14	3	8	7
1	2009-03-07 14:23:00	0	14	3	8	7
1	2009-03-07 14:24:00	149	14	3	8	7
1	2009-03-07 14:25:00	0	14	3	8	7
1	2009-03-07 14:26:00	10	14	3	8	7
1	2009-03-07 14:27:00	94	14	3	8	7
1	2009-03-07 14:28:00	0	14	3	8	7
1	2009-03-07 14:29:00	0	14	3	8	7
1	2009-03-07 14:30:00	0	14	3	8	7
1	2009-03-07 14:31:00	0	14	3	8	7
1	2009-03-07 14:32:00	0	14	3	8	7
1	2009-03-07 14:33:00	0	14	3	8	7
1	2009-03-07 14:34:00	0	14	3	8	7
1	2009-03-07 14:35:00	21	14	3	8	7
1	2009-03-07 14:36:00	0	14	3	8	7
1	2009-03-07 14:37:00	84	14	3	8	7
1	2009-03-07 14:38:00	0	14	3	8	7
1	2009-03-07 14:39:00	0	14	3	8	7
1	2009-03-07 14:40:00	10	14	3	8	7
1	2009-03-07 14:41:00	0	14	3	8	7
1	2009-03-07 14:42:00	0	14	3	8	7
1	2009-03-07 14:43:00	0	14	3	8	7
1	2009-03-07 14:44:00	0	14	3	8	7
1	2009-03-07 14:45:00	0	14	3	8	7
1	2009-03-07 14:46:00	0	14	3	8	7
1	2009-03-07 14:47:00	0	14	3	8	7
1	2009-03-07 14:48:00	0	14	3	8	7
1	2009-03-07 14:49:00	0	14	3	8	7
1	2009-03-07 14:50:00	304	14	3	8	7
1	2009-03-07 14:51:00	0	14	3	8	7
1	2009-03-07 14:52:00	0	14	3	8	7
1	2009-03-07 14:53:00	0	14	3	8	7
1	2009-03-07 14:54:00	0	14	3	8	7
1	2009-03-07 14:55:00	0	14	3	8	7
1	2009-03-07 14:56:00	0	14	3	8	7
1	2009-03-07 14:57:00	0	14	3	8	7
1	2009-03-07 14:58:00	0	14	3	8	7
1	2009-03-07 14:59:00	0	14	3	8	7
1	2009-03-07 15:00:00	348	14	3	8	7
1	2009-03-07 15:01:00	525	15	3	8	7
1	2009-03-07 15:02:00	162	15	3	8	7
1	2009-03-07 15:03:00	304	15	3	8	7
1	2009-03-07 15:04:00	0	15	3	8	7
1	2009-03-07 15:05:00	0	15	3	8	7
1	2009-03-07 15:06:00	0	15	3	8	7
1	2009-03-07 15:07:00	0	15	3	8	7
1	2009-03-07 15:08:00	0	15	3	8	7
1	2009-03-07 15:09:00	10	15	3	8	7
1	2009-03-07 15:10:00	0	15	3	8	7
1	2009-03-07 15:11:00	0	15	3	8	7
1	2009-03-07 15:12:00	0	15	3	8	7
1	2009-03-07 15:13:00	0	15	3	8	7
1	2009-03-07 15:14:00	42	15	3	8	7
1	2009-03-07 15:15:00	0	15	3	8	7
1	2009-03-07 15:16:00	0	15	3	8	7
1	2009-03-07 15:17:00	42	15	3	8	7
1	2009-03-07 15:18:00	0	15	3	8	7
1	2009-03-07 15:19:00	799	15	3	8	7
[truncated: 78,641 more rows]

## Sheet: Pivot Segment
Multiplier	2
x (Low Intensity)	650.045
y (High Intensity)	629.361
	Column Labels
Values	1	2	3	4	5	6	7	8	Grand Total
Average of Activity	92.2985	81.2308	128.387	112.978	100.603	133.821	144.83	181.818	121.996
StdDev of Activity	278.873	274.065	335.858	297.447	265.081	305.541	327.386	362.828	309.011
Count of Activity	10080	10080	10080	10080	10080	10080	10080	10080	80640
Count Above x	396	316	627	565	481	714	727	1108
% Above x	0.0392857	0.0313492	0.0622024	0.0560516	0.0477183	0.0708333	0.072123	0.109921
Count Above y		335	666	598	508	761	769	1158
% Above y		0.0332341	0.0660714	0.0593254	0.0503968	0.075496	0.0762897	0.114881

## Sheet: Pivot Weekday
Sum of Activity	Column Labels
Row Labels	1	2	3	4	5	6	7	8	Grand Total
1	117437	134197	247975	145831	196300	253823	276702	272441	1644706
2	94716	113612	140709	198447	106738	235904	166209	219846	1276181
3	142663	96430	170429	143954	112629	139415	221382	233344	1260246
4	100257	122781	144792	233722	178876	165567	202739	219427	1368161
5	117875	87342	204315	143906	155388	224047	195068	231060	1359001
6	173016	83400	159826	110441	115118	150814	204151	292070	1288836
7	184405	181044	226091	162518	149032	179349	193634	364538	1640611
Grand Total	930369	818806	1294137	1138819	1014081	1348919	1459885	1832726	9837742
Count of Activity	Column Labels
Row Labels	1	2	3	4	5	6	7	8	Grand Total
1	1440	1440	1440	1440	1440	1440	1440	1440	11520
2	1440	1440	1440	1440	1440	1440	1440	1440	11520
3	1440	1440	1440	1440	1440	1440	1440	1440	11520
4	1440	1440	1440	1440	1440	1440	1440	1440	11520
5	1440	1440	1440	1440	1440	1440	1440	1440	11520
6	1440	1440	1440	1440	1440	1440	1440	1440	11520
7	1440	1440	1440	1440	1440	1440	1440	1440	11520
Grand Total	10080	10080	10080	10080	10080	10080	10080	10080	80640

## Sheet: Pivot Quadrant
Sum of Activity	Column Labels
Row Labels	1	2	3	4	5	6	7	8	Grand Total
1	88701	53582	91908	82008	66262	141241	88432	154292	766426
2	172244	144273	262814	179490	200772	427493	374404	457527	2219017
3	408607	394818	395656	332377	292135	466666	451176	613812	3355247
4	260817	226133	543759	544944	454912	313519	545873	607095	3497052
Grand Total	930369	818806	1294137	1138819	1014081	1348919	1459885	1832726	9837742
Average	232592	204702	323534	284705	253520	337230	364971	458182
Count of Activity	Column Labels
Row Labels	1	2	3	4	5	6	7	8	Grand Total
1	2520	2520	2520	2520	2520	2520	2520	2520	20160
2	2520	2520	2520	2520	2520	2520	2520	2520	20160
3	2520	2520	2520	2520	2520	2520	2520	2520	20160
4	2520	2520	2520	2520	2520	2520	2520	2520	20160
Grand Total	10080	10080	10080	10080	10080	10080	10080	10080	80640

## Sheet: 2.27.09
Actogram, Copy Raw Data, All Days
Identity:	Shug
Filename:	E:\Active Research Files\meloxicam titre canine\cases\shug\Shug 2.27.09.AWC
Gender:	F
Age:	10
Height:	50.8 cm	20.0 in
Weight:	18.1 kg	39.9 lbs
Start Date:	27-Feb-2009 (Fri)
Start Time:	18:00:00
Interval:	1.00 mins
Date Stamp:	Time Stamp:	Activity Data:	Marker Press:
2009-02-27	00:00:00	0
2009-02-27	00:01:00	0
2009-02-27	00:02:00	0
2009-02-27	00:03:00	0
2009-02-27	00:04:00	0
2009-02-27	00:05:00	0
2009-02-27	00:06:00	0
2009-02-27	00:07:00	0
2009-02-27	00:08:00	0
2009-02-27	00:09:00	0
2009-02-27	00:10:00	0
2009-02-27	00:11:00	0
2009-02-27	00:12:00	0
2009-02-27	00:13:00	0
2009-02-27	00:14:00	0
2009-02-27	00:15:00	0
2009-02-27	00:16:00	0
2009-02-27	00:17:00	0
2009-02-27	00:18:00	0
2009-02-27	00:19:00	0
2009-02-27	00:20:00	0
2009-02-27	00:21:00	0
2009-02-27	00:22:00	0
2009-02-27	00:23:00	0
2009-02-27	00:24:00	0
2009-02-27	00:25:00	0
2009-02-27	00:26:00	0
2009-02-27	00:27:00	0
2009-02-27	00:28:00	0
2009-02-27	00:29:00	0
2009-02-27	00:30:00	0
2009-02-27	00:31:00	0
2009-02-27	00:32:00	0
2009-02-27	00:33:00	0
2009-02-27	00:34:00	0
2009-02-27	00:35:00	0
2009-02-27	00:36:00	0
2009-02-27	00:37:00	0
2009-02-27	00:38:00	0
2009-02-27	00:39:00	0
2009-02-27	00:40:00	0
2009-02-27	00:41:00	0
2009-02-27	00:42:00	0
2009-02-27	00:43:00	0
2009-02-27	00:44:00	0
2009-02-27	00:45:00	0
2009-02-27	00:46:00	0
2009-02-27	00:47:00	0
2009-02-27	00:48:00	0
2009-02-27	00:49:00	0
2009-02-27	00:50:00	0
2009-02-27	00:51:00	0
2009-02-27	00:52:00	0
2009-02-27	00:53:00	0
2009-02-27	00:54:00	0
2009-02-27	00:55:00	0
2009-02-27	00:56:00	0
2009-02-27	00:57:00	0
2009-02-27	00:58:00	0
2009-02-27	00:59:00	0
2009-02-27	01:00:00	0
2009-02-27	01:01:00	0
2009-02-27	01:02:00	0
2009-02-27	01:03:00	0
2009-02-27	01:04:00	0
2009-02-27	01:05:00	0
2009-02-27	01:06:00	0
2009-02-27	01:07:00	0
2009-02-27	01:08:00	0
2009-02-27	01:09:00	0
2009-02-27	01:10:00	0
2009-02-27	01:11:00	0
2009-02-27	01:12:00	0
2009-02-27	01:13:00	0
2009-02-27	01:14:00	0
2009-02-27	01:15:00	0
2009-02-27	01:16:00	0
2009-02-27	01:17:00	0
2009-02-27	01:18:00	0
2009-02-27	01:19:00	0
2009-02-27	01:20:00	0
2009-02-27	01:21:00	0
2009-02-27	01:22:00	0
2009-02-27	01:23:00	0
2009-02-27	01:24:00	0
2009-02-27	01:25:00	0
2009-02-27	01:26:00	0
2009-02-27	01:27:00	0
2009-02-27	01:28:00	0
2009-02-27	01:29:00	0
2009-02-27	01:30:00	0
2009-02-27	01:31:00	0
2009-02-27	01:32:00	0
2009-02-27	01:33:00	0
2009-02-27	01:34:00	0
2009-02-27	01:35:00	0
2009-02-27	01:36:00	0
2009-02-27	01:37:00	0
2009-02-27	01:38:00	0
2009-02-27	01:39:00	0
2009-02-27	01:40:00	0
2009-02-27	01:41:00	0
2009-02-27	01:42:00	0
2009-02-27	01:43:00	0
2009-02-27	01:44:00	0
2009-02-27	01:45:00	0
2009-02-27	01:46:00	0
2009-02-27	01:47:00	0
2009-02-27	01:48:00	0
2009-02-27	01:49:00	0
2009-02-27	01:50:00	0
2009-02-27	01:51:00	0
2009-02-27	01:52:00	0
2009-02-27	01:53:00	0
2009-02-27	01:54:00	0
2009-02-27	01:55:00	0
2009-02-27	01:56:00	0
2009-02-27	01:57:00	0
2009-02-27	01:58:00	0
2009-02-27	01:59:00	0
2009-02-27	02:00:00	0
2009-02-27	02:01:00	0
2009-02-27	02:02:00	0
2009-02-27	02:03:00	0
2009-02-27	02:04:00	0
2009-02-27	02:05:00	0
2009-02-27	02:06:00	0
2009-02-27	02:07:00	0
2009-02-27	02:08:00	0
2009-02-27	02:09:00	0
2009-02-27	02:10:00	0
2009-02-27	02:11:00	0
2009-02-27	02:12:00	0
2009-02-27	02:13:00	0
2009-02-27	02:14:00	0
2009-02-27	02:15:00	0
2009-02-27	02:16:00	0
2009-02-27	02:17:00	0
2009-02-27	02:18:00	0
2009-02-27	02:19:00	0
2009-02-27	02:20:00	0
2009-02-27	02:21:00	0
2009-02-27	02:22:00	0
2009-02-27	02:23:00	0
2009-02-27	02:24:00	0
2009-02-27	02:25:00	0
2009-02-27	02:26:00	0
2009-02-27	02:27:00	0
2009-02-27	02:28:00	0
2009-02-27	02:29:00	0
2009-02-27	02:30:00	0
2009-02-27	02:31:00	0
2009-02-27	02:32:00	0
2009-02-27	02:33:00	0
2009-02-27	02:34:00	0
2009-02-27	02:35:00	0
2009-02-27	02:36:00	0
2009-02-27	02:37:00	0
2009-02-27	02:38:00	0
2009-02-27	02:39:00	0
2009-02-27	02:40:00	0
2009-02-27	02:41:00	0
2009-02-27	02:42:00	0
2009-02-27	02:43:00	0
2009-02-27	02:44:00	0
2009-02-27	02:45:00	0
2009-02-27	02:46:00	0
2009-02-27	02:47:00	0
2009-02-27	02:48:00	0
2009-02-27	02:49:00	0
2009-02-27	02:50:00	0
2009-02-27	02:51:00	0
2009-02-27	02:52:00	0
2009-02-27	02:53:00	0
2009-02-27	02:54:00	0
2009-02-27	02:55:00	0
2009-02-27	02:56:00	0
2009-02-27	02:57:00	0
2009-02-27	02:58:00	0
2009-02-27	02:59:00	0
2009-02-27	03:00:00	0
2009-02-27	03:01:00	0
2009-02-27	03:02:00	0
2009-02-27	03:03:00	0
2009-02-27	03:04:00	0
2009-02-27	03:05:00	0
2009-02-27	03:06:00	0
2009-02-27	03:07:00	0
2009-02-27	03:08:00	0
2009-02-27	03:09:00	0
2009-02-27	03:10:00	0
2009-02-27	03:11:00	0
2009-02-27	03:12:00	0
2009-02-27	03:13:00	0
2009-02-27	03:14:00	0
2009-02-27	03:15:00	0
2009-02-27	03:16:00	0
2009-02-27	03:17:00	0
2009-02-27	03:18:00	0
2009-02-27	03:19:00	0
2009-02-27	03:20:00	0
2009-02-27	03:21:00	0
2009-02-27	03:22:00	0
2009-02-27	03:23:00	0
2009-02-27	03:24:00	0
2009-02-27	03:25:00	0
2009-02-27	03:26:00	0
2009-02-27	03:27:00	0
2009-02-27	03:28:00	0
2009-02-27	03:29:00	0
2009-02-27	03:30:00	0
2009-02-27	03:31:00	0
2009-02-27	03:32:00	0
2009-02-27	03:33:00	0
2009-02-27	03:34:00	0
2009-02-27	03:35:00	0
2009-02-27	03:36:00	0
2009-02-27	03:37:00	0
2009-02-27	03:38:00	0
2009-02-27	03:39:00	0
2009-02-27	03:40:00	0
2009-02-27	03:41:00	0
2009-02-27	03:42:00	0
2009-02-27	03:43:00	0
2009-02-27	03:44:00	0
2009-02-27	03:45:00	0
2009-02-27	03:46:00	0
2009-02-27	03:47:00	0
2009-02-27	03:48:00	0
2009-02-27	03:49:00	0
2009-02-27	03:50:00	0
2009-02-27	03:51:00	0
2009-02-27	03:52:00	0
2009-02-27	03:53:00	0
2009-02-27	03:54:00	0
2009-02-27	03:55:00	0
2009-02-27	03:56:00	0
2009-02-27	03:57:00	0
2009-02-27	03:58:00	0
2009-02-27	03:59:00	0
2009-02-27	04:00:00	0
2009-02-27	04:01:00	0
2009-02-27	04:02:00	0
2009-02-27	04:03:00	0
2009-02-27	04:04:00	0
2009-02-27	04:05:00	0
2009-02-27	04:06:00	0
2009-02-27	04:07:00	0
2009-02-27	04:08:00	0
2009-02-27	04:09:00	0
2009-02-27	04:10:00	0
2009-02-27	04:11:00	0
2009-02-27	04:12:00	0
2009-02-27	04:13:00	0
2009-02-27	04:14:00	0
2009-02-27	04:15:00	0
2009-02-27	04:16:00	0
2009-02-27	04:17:00	0
2009-02-27	04:18:00	0
2009-02-27	04:19:00	0
2009-02-27	04:20:00	0
2009-02-27	04:21:00	0
2009-02-27	04:22:00	0
2009-02-27	04:23:00	0
2009-02-27	04:24:00	0
2009-02-27	04:25:00	0
2009-02-27	04:26:00	0
2009-02-27	04:27:00	0
2009-02-27	04:28:00	0
2009-02-27	04:29:00	0
2009-02-27	04:30:00	0
2009-02-27	04:31:00	0
2009-02-27	04:32:00	0
2009-02-27	04:33:00	0
2009-02-27	04:34:00	0
2009-02-27	04:35:00	0
2009-02-27	04:36:00	0
2009-02-27	04:37:00	0
2009-02-27	04:38:00	0
2009-02-27	04:39:00	0
2009-02-27	04:40:00	0
2009-02-27	04:41:00	0
2009-02-27	04:42:00	0
2009-02-27	04:43:00	0
2009-02-27	04:44:00	0
2009-02-27	04:45:00	0
2009-02-27	04:46:00	0
2009-02-27	04:47:00	0
2009-02-27	04:48:00	0
2009-02-27	04:49:00	0
2009-02-27	04:50:00	0
2009-02-27	04:51:00	0
2009-02-27	04:52:00	0
2009-02-27	04:53:00	0
2009-02-27	04:54:00	0
2009-02-27	04:55:00	0
2009-02-27	04:56:00	0
2009-02-27	04:57:00	0
2009-02-27	04:58:00	0
2009-02-27	04:59:00	0
2009-02-27	05:00:00	0
2009-02-27	05:01:00	0
2009-02-27	05:02:00	0
2009-02-27	05:03:00	0
2009-02-27	05:04:00	0
2009-02-27	05:05:00	0
2009-02-27	05:06:00	0
2009-02-27	05:07:00	0
2009-02-27	05:08:00	0
2009-02-27	05:09:00	0
2009-02-27	05:10:00	0
2009-02-27	05:11:00	0
2009-02-27	05:12:00	0
2009-02-27	05:13:00	0
2009-02-27	05:14:00	0
2009-02-27	05:15:00	0
2009-02-27	05:16:00	0
2009-02-27	05:17:00	0
2009-02-27	05:18:00	0
2009-02-27	05:19:00	0
2009-02-27	05:20:00	0
2009-02-27	05:21:00	0
2009-02-27	05:22:00	0
2009-02-27	05:23:00	0
2009-02-27	05:24:00	0
2009-02-27	05:25:00	0
2009-02-27	05:26:00	0
2009-02-27	05:27:00	0
2009-02-27	05:28:00	0
2009-02-27	05:29:00	0
2009-02-27	05:30:00	0
2009-02-27	05:31:00	0
2009-02-27	05:32:00	0
2009-02-27	05:33:00	0
2009-02-27	05:34:00	0
2009-02-27	05:35:00	0
2009-02-27	05:36:00	0
2009-02-27	05:37:00	0
2009-02-27	05:38:00	0
2009-02-27	05:39:00	0
2009-02-27	05:40:00	0
2009-02-27	05:41:00	0
2009-02-27	05:42:00	0
2009-02-27	05:43:00	0
2009-02-27	05:44:00	0
2009-02-27	05:45:00	0
2009-02-27	05:46:00	0
2009-02-27	05:47:00	0
2009-02-27	05:48:00	0
2009-02-27	05:49:00	0
2009-02-27	05:50:00	0
2009-02-27	05:51:00	0
2009-02-27	05:52:00	0
2009-02-27	05:53:00	0
2009-02-27	05:54:00	0
2009-02-27	05:55:00	0
2009-02-27	05:56:00	0
2009-02-27	05:57:00	0
2009-02-27	05:58:00	0
2009-02-27	05:59:00	0
2009-02-27	06:00:00	0
2009-02-27	06:01:00	0
2009-02-27	06:02:00	0
2009-02-27	06:03:00	0
2009-02-27	06:04:00	0
2009-02-27	06:05:00	0
2009-02-27	06:06:00	0
2009-02-27	06:07:00	0
2009-02-27	06:08:00	0
2009-02-27	06:09:00	0
2009-02-27	06:10:00	0
2009-02-27	06:11:00	0
2009-02-27	06:12:00	0
2009-02-27	06:13:00	0
2009-02-27	06:14:00	0
2009-02-27	06:15:00	0
2009-02-27	06:16:00	0
2009-02-27	06:17:00	0
2009-02-27	06:18:00	0
2009-02-27	06:19:00	0
2009-02-27	06:20:00	0
2009-02-27	06:21:00	0
2009-02-27	06:22:00	0
2009-02-27	06:23:00	0
2009-02-27	06:24:00	0
2009-02-27	06:25:00	0
2009-02-27	06:26:00	0
2009-02-27	06:27:00	0
2009-02-27	06:28:00	0
2009-02-27	06:29:00	0
2009-02-27	06:30:00	0
2009-02-27	06:31:00	0
2009-02-27	06:32:00	0
2009-02-27	06:33:00	0
2009-02-27	06:34:00	0
2009-02-27	06:35:00	0
2009-02-27	06:36:00	0
2009-02-27	06:37:00	0
2009-02-27	06:38:00	0
2009-02-27	06:39:00	0
2009-02-27	06:40:00	0
2009-02-27	06:41:00	0
2009-02-27	06:42:00	0
2009-02-27	06:43:00	0
2009-02-27	06:44:00	0
2009-02-27	06:45:00	0
2009-02-27	06:46:00	0
2009-02-27	06:47:00	0
2009-02-27	06:48:00	0
2009-02-27	06:49:00	0
2009-02-27	06:50:00	0
2009-02-27	06:51:00	0
2009-02-27	06:52:00	0
2009-02-27	06:53:00	0
2009-02-27	06:54:00	0
2009-02-27	06:55:00	0
2009-02-27	06:56:00	0
2009-02-27	06:57:00	0
2009-02-27	06:58:00	0
2009-02-27	06:59:00	0
2009-02-27	07:00:00	0
2009-02-27	07:01:00	0
2009-02-27	07:02:00	0
2009-02-27	07:03:00	0
2009-02-27	07:04:00	0
2009-02-27	07:05:00	0
2009-02-27	07:06:00	0
2009-02-27	07:07:00	0
2009-02-27	07:08:00	0
2009-02-27	07:09:00	0
2009-02-27	07:10:00	0
2009-02-27	07:11:00	0
2009-02-27	07:12:00	0
2009-02-27	07:13:00	0
2009-02-27	07:14:00	0
2009-02-27	07:15:00	0
2009-02-27	07:16:00	0
2009-02-27	07:17:00	0
2009-02-27	07:18:00	0
2009-02-27	07:19:00	0
2009-02-27	07:20:00	0
2009-02-27	07:21:00	0
2009-02-27	07:22:00	0
2009-02-27	07:23:00	0
2009-02-27	07:24:00	0
2009-02-27	07:25:00	0
2009-02-27	07:26:00	0
2009-02-27	07:27:00	0
2009-02-27	07:28:00	0
2009-02-27	07:29:00	0
2009-02-27	07:30:00	0
2009-02-27	07:31:00	0
2009-02-27	07:32:00	0
2009-02-27	07:33:00	0
2009-02-27	07:34:00	0
2009-02-27	07:35:00	0
2009-02-27	07:36:00	0
2009-02-27	07:37:00	0
2009-02-27	07:38:00	0
2009-02-27	07:39:00	0
2009-02-27	07:40:00	0
2009-02-27	07:41:00	0
2009-02-27	07:42:00	0
2009-02-27	07:43:00	0
2009-02-27	07:44:00	0
2009-02-27	07:45:00	0
2009-02-27	07:46:00	0
2009-02-27	07:47:00	0
2009-02-27	07:48:00	0
2009-02-27	07:49:00	0
2009-02-27	07:50:00	0
2009-02-27	07:51:00	0
2009-02-27	07:52:00	0
2009-02-27	07:53:00	0
2009-02-27	07:54:00	0
2009-02-27	07:55:00	0
2009-02-27	07:56:00	0
2009-02-27	07:57:00	0
2009-02-27	07:58:00	0
2009-02-27	07:59:00	0
2009-02-27	08:00:00	0
2009-02-27	08:01:00	0
2009-02-27	08:02:00	0
2009-02-27	08:03:00	0
2009-02-27	08:04:00	0
2009-02-27	08:05:00	0
2009-02-27	08:06:00	0
2009-02-27	08:07:00	0
2009-02-27	08:08:00	0
2009-02-27	08:09:00	0
2009-02-27	08:10:00	0
2009-02-27	08:11:00	0
2009-02-27	08:12:00	0
2009-02-27	08:13:00	0
2009-02-27	08:14:00	0
2009-02-27	08:15:00	0
2009-02-27	08:16:00	0
2009-02-27	08:17:00	0
2009-02-27	08:18:00	0
2009-02-27	08:19:00	0
2009-02-27	08:20:00	0
2009-02-27	08:21:00	0
2009-02-27	08:22:00	0
2009-02-27	08:23:00	0
2009-02-27	08:24:00	0
2009-02-27	08:25:00	0
2009-02-27	08:26:00	0
2009-02-27	08:27:00	0
2009-02-27	08:28:00	0
2009-02-27	08:29:00	0
2009-02-27	08:30:00	0
2009-02-27	08:31:00	0
2009-02-27	08:32:00	0
2009-02-27	08:33:00	0
2009-02-27	08:34:00	0
2009-02-27	08:35:00	0
2009-02-27	08:36:00	0
2009-02-27	08:37:00	0
2009-02-27	08:38:00	0
2009-02-27	08:39:00	0
2009-02-27	08:40:00	0
2009-02-27	08:41:00	0
2009-02-27	08:42:00	0
2009-02-27	08:43:00	0
2009-02-27	08:44:00	0
2009-02-27	08:45:00	0
2009-02-27	08:46:00	0
2009-02-27	08:47:00	0
2009-02-27	08:48:00	0
2009-02-27	08:49:00	0
2009-02-27	08:50:00	0
2009-02-27	08:51:00	0
2009-02-27	08:52:00	0
2009-02-27	08:53:00	0
2009-02-27	08:54:00	0
2009-02-27	08:55:00	0
2009-02-27	08:56:00	0
2009-02-27	08:57:00	0
2009-02-27	08:58:00	0
2009-02-27	08:59:00	0
2009-02-27	09:00:00	0
2009-02-27	09:01:00	0
2009-02-27	09:02:00	0
2009-02-27	09:03:00	0
2009-02-27	09:04:00	0
2009-02-27	09:05:00	0
2009-02-27	09:06:00	0
2009-02-27	09:07:00	0
2009-02-27	09:08:00	0
2009-02-27	09:09:00	0
2009-02-27	09:10:00	0
2009-02-27	09:11:00	0
2009-02-27	09:12:00	0
2009-02-27	09:13:00	0
2009-02-27	09:14:00	0
2009-02-27	09:15:00	0
2009-02-27	09:16:00	0
2009-02-27	09:17:00	0
2009-02-27	09:18:00	0
2009-02-27	09:19:00	0
2009-02-27	09:20:00	0
2009-02-27	09:21:00	0
2009-02-27	09:22:00	0
2009-02-27	09:23:00	0
2009-02-27	09:24:00	0
2009-02-27	09:25:00	0
2009-02-27	09:26:00	0
2009-02-27	09:27:00	0
2009-02-27	09:28:00	0
2009-02-27	09:29:00	0
2009-02-27	09:30:00	0
2009-02-27	09:31:00	0
2009-02-27	09:32:00	0
2009-02-27	09:33:00	0
2009-02-27	09:34:00	0
2009-02-27	09:35:00	0
2009-02-27	09:36:00	0
2009-02-27	09:37:00	0
2009-02-27	09:38:00	0
2009-02-27	09:39:00	0
2009-02-27	09:40:00	0
2009-02-27	09:41:00	0
2009-02-27	09:42:00	0
2009-02-27	09:43:00	0
2009-02-27	09:44:00	0
2009-02-27	09:45:00	0
2009-02-27	09:46:00	0
2009-02-27	09:47:00	0
2009-02-27	09:48:00	0
2009-02-27	09:49:00	0
2009-02-27	09:50:00	0
2009-02-27	09:51:00	0
2009-02-27	09:52:00	0
2009-02-27	09:53:00	0
2009-02-27	09:54:00	0
2009-02-27	09:55:00	0
2009-02-27	09:56:00	0
2009-02-27	09:57:00	0
2009-02-27	09:58:00	0
2009-02-27	09:59:00	0
2009-02-27	10:00:00	0
2009-02-27	10:01:00	0
2009-02-27	10:02:00	0
2009-02-27	10:03:00	0
2009-02-27	10:04:00	0
2009-02-27	10:05:00	0
2009-02-27	10:06:00	0
2009-02-27	10:07:00	0
2009-02-27	10:08:00	0
2009-02-27	10:09:00	0
2009-02-27	10:10:00	0
2009-02-27	10:11:00	0
2009-02-27	10:12:00	0
2009-02-27	10:13:00	0
2009-02-27	10:14:00	0
2009-02-27	10:15:00	0
2009-02-27	10:16:00	0
2009-02-27	10:17:00	0
2009-02-27	10:18:00	0
2009-02-27	10:19:00	0
2009-02-27	10:20:00	0
2009-02-27	10:21:00	0
2009-02-27	10:22:00	0
2009-02-27	10:23:00	0
2009-02-27	10:24:00	0
2009-02-27	10:25:00	0
2009-02-27	10:26:00	0
2009-02-27	10:27:00	0
2009-02-27	10:28:00	0
2009-02-27	10:29:00	0
2009-02-27	10:30:00	0
2009-02-27	10:31:00	0
2009-02-27	10:32:00	0
2009-02-27	10:33:00	0
2009-02-27	10:34:00	0
2009-02-27	10:35:00	0
2009-02-27	10:36:00	0
2009-02-27	10:37:00	0
2009-02-27	10:38:00	0
2009-02-27	10:39:00	0
2009-02-27	10:40:00	0
2009-02-27	10:41:00	0
2009-02-27	10:42:00	0
2009-02-27	10:43:00	0
2009-02-27	10:44:00	0
2009-02-27	10:45:00	0
2009-02-27	10:46:00	0
2009-02-27	10:47:00	0
2009-02-27	10:48:00	0
2009-02-27	10:49:00	0
2009-02-27	10:50:00	0
2009-02-27	10:51:00	0
2009-02-27	10:52:00	0
2009-02-27	10:53:00	0
2009-02-27	10:54:00	0
2009-02-27	10:55:00	0
2009-02-27	10:56:00	0
2009-02-27	10:57:00	0
2009-02-27	10:58:00	0
2009-02-27	10:59:00	0
2009-02-27	11:00:00	0
2009-02-27	11:01:00	0
2009-02-27	11:02:00	0
2009-02-27	11:03:00	0
2009-02-27	11:04:00	0
2009-02-27	11:05:00	0
2009-02-27	11:06:00	0
2009-02-27	11:07:00	0
2009-02-27	11:08:00	0
2009-02-27	11:09:00	0
2009-02-27	11:10:00	0
2009-02-27	11:11:00	0
2009-02-27	11:12:00	0
2009-02-27	11:13:00	0
2009-02-27	11:14:00	0
2009-02-27	11:15:00	0
2009-02-27	11:16:00	0
2009-02-27	11:17:00	0
2009-02-27	11:18:00	0
2009-02-27	11:19:00	0
2009-02-27	11:20:00	0
2009-02-27	11:21:00	0
2009-02-27	11:22:00	0
2009-02-27	11:23:00	0
2009-02-27	11:24:00	0
2009-02-27	11:25:00	0
2009-02-27	11:26:00	0
2009-02-27	11:27:00	0
2009-02-27	11:28:00	0
2009-02-27	11:29:00	0
2009-02-27	11:30:00	0
2009-02-27	11:31:00	0
2009-02-27	11:32:00	0
2009-02-27	11:33:00	0
2009-02-27	11:34:00	0
2009-02-27	11:35:00	0
2009-02-27	11:36:00	0
2009-02-27	11:37:00	0
2009-02-27	11:38:00	0
2009-02-27	11:39:00	0
2009-02-27	11:40:00	0
2009-02-27	11:41:00	0
2009-02-27	11:42:00	0
2009-02-27	11:43:00	0
2009-02-27	11:44:00	0
2009-02-27	11:45:00	0
2009-02-27	11:46:00	0
2009-02-27	11:47:00	0
2009-02-27	11:48:00	0
2009-02-27	11:49:00	0
2009-02-27	11:50:00	0
2009-02-27	11:51:00	0
2009-02-27	11:52:00	0
2009-02-27	11:53:00	0
2009-02-27	11:54:00	0
2009-02-27	11:55:00	0
2009-02-27	11:56:00	0
2009-02-27	11:57:00	0
2009-02-27	11:58:00	0
2009-02-27	11:59:00	0
2009-02-27	12:00:00	0
2009-02-27	12:01:00	0
2009-02-27	12:02:00	0
2009-02-27	12:03:00	0
2009-02-27	12:04:00	0
2009-02-27	12:05:00	0
2009-02-27	12:06:00	0
2009-02-27	12:07:00	0
2009-02-27	12:08:00	0
2009-02-27	12:09:00	0
2009-02-27	12:10:00	0
2009-02-27	12:11:00	0
2009-02-27	12:12:00	0
2009-02-27	12:13:00	0
2009-02-27	12:14:00	0
2009-02-27	12:15:00	0
2009-02-27	12:16:00	0
2009-02-27	12:17:00	0
2009-02-27	12:18:00	0
2009-02-27	12:19:00	0
2009-02-27	12:20:00	0
2009-02-27	12:21:00	0
2009-02-27	12:22:00	0
2009-02-27	12:23:00	0
2009-02-27	12:24:00	0
2009-02-27	12:25:00	0
2009-02-27	12:26:00	0
2009-02-27	12:27:00	0
2009-02-27	12:28:00	0
2009-02-27	12:29:00	0
2009-02-27	12:30:00	0
2009-02-27	12:31:00	0
2009-02-27	12:32:00	0
2009-02-27	12:33:00	0
2009-02-27	12:34:00	0
2009-02-27	12:35:00	0
2009-02-27	12:36:00	0
2009-02-27	12:37:00	0
2009-02-27	12:38:00	0
2009-02-27	12:39:00	0
2009-02-27	12:40:00	0
2009-02-27	12:41:00	0
2009-02-27	12:42:00	0
2009-02-27	12:43:00	0
2009-02-27	12:44:00	0
2009-02-27	12:45:00	0
2009-02-27	12:46:00	0
2009-02-27	12:47:00	0
2009-02-27	12:48:00	0
2009-02-27	12:49:00	0
2009-02-27	12:50:00	0
2009-02-27	12:51:00	0
2009-02-27	12:52:00	0
2009-02-27	12:53:00	0
2009-02-27	12:54:00	0
2009-02-27	12:55:00	0
2009-02-27	12:56:00	0
2009-02-27	12:57:00	0
2009-02-27	12:58:00	0
2009-02-27	12:59:00	0
2009-02-27	13:00:00	0
2009-02-27	13:01:00	0
2009-02-27	13:02:00	0
2009-02-27	13:03:00	0
2009-02-27	13:04:00	0
2009-02-27	13:05:00	0
2009-02-27	13:06:00	0
2009-02-27	13:07:00	0
2009-02-27	13:08:00	0
2009-02-27	13:09:00	0
2009-02-27	13:10:00	0
2009-02-27	13:11:00	0
2009-02-27	13:12:00	0
2009-02-27	13:13:00	0
2009-02-27	13:14:00	0
2009-02-27	13:15:00	0
2009-02-27	13:16:00	0
2009-02-27	13:17:00	0
2009-02-27	13:18:00	0
2009-02-27	13:19:00	0
2009-02-27	13:20:00	0
2009-02-27	13:21:00	0
2009-02-27	13:22:00	0
2009-02-27	13:23:00	0
2009-02-27	13:24:00	0
2009-02-27	13:25:00	0
2009-02-27	13:26:00	0
2009-02-27	13:27:00	0
2009-02-27	13:28:00	0
2009-02-27	13:29:00	0
2009-02-27	13:30:00	0
2009-02-27	13:31:00	0
2009-02-27	13:32:00	0
2009-02-27	13:33:00	0
2009-02-27	13:34:00	0
2009-02-27	13:35:00	0
2009-02-27	13:36:00	0
2009-02-27	13:37:00	0
2009-02-27	13:38:00	0
2009-02-27	13:39:00	0
2009-02-27	13:40:00	0
2009-02-27	13:41:00	0
2009-02-27	13:42:00	0
2009-02-27	13:43:00	0
2009-02-27	13:44:00	0
2009-02-27	13:45:00	0
2009-02-27	13:46:00	0
2009-02-27	13:47:00	0
2009-02-27	13:48:00	0
2009-02-27	13:49:00	0
2009-02-27	13:50:00	0
2009-02-27	13:51:00	0
2009-02-27	13:52:00	0
2009-02-27	13:53:00	0
2009-02-27	13:54:00	0
2009-02-27	13:55:00	0
2009-02-27	13:56:00	0
2009-02-27	13:57:00	0
2009-02-27	13:58:00	0
2009-02-27	13:59:00	0
2009-02-27	14:00:00	0
2009-02-27	14:01:00	0
2009-02-27	14:02:00	0
2009-02-27	14:03:00	0
2009-02-27	14:04:00	0
2009-02-27	14:05:00	0
2009-02-27	14:06:00	0
2009-02-27	14:07:00	0
2009-02-27	14:08:00	0
2009-02-27	14:09:00	0
2009-02-27	14:10:00	0
2009-02-27	14:11:00	0
2009-02-27	14:12:00	0
2009-02-27	14:13:00	0
2009-02-27	14:14:00	0
2009-02-27	14:15:00	0
2009-02-27	14:16:00	0
2009-02-27	14:17:00	0
2009-02-27	14:18:00	0
2009-02-27	14:19:00	0
2009-02-27	14:20:00	0
2009-02-27	14:21:00	0
2009-02-27	14:22:00	0
2009-02-27	14:23:00	0
2009-02-27	14:24:00	0
2009-02-27	14:25:00	0
2009-02-27	14:26:00	0
2009-02-27	14:27:00	0
2009-02-27	14:28:00	0
2009-02-27	14:29:00	0
2009-02-27	14:30:00	0
2009-02-27	14:31:00	0
2009-02-27	14:32:00	0
2009-02-27	14:33:00	0
2009-02-27	14:34:00	0
2009-02-27	14:35:00	0
2009-02-27	14:36:00	0
2009-02-27	14:37:00	0
2009-02-27	14:38:00	0
2009-02-27	14:39:00	0
2009-02-27	14:40:00	0
2009-02-27	14:41:00	0
2009-02-27	14:42:00	0
2009-02-27	14:43:00	0
2009-02-27	14:44:00	0
2009-02-27	14:45:00	0
2009-02-27	14:46:00	0
2009-02-27	14:47:00	0
2009-02-27	14:48:00	0
2009-02-27	14:49:00	0
2009-02-27	14:50:00	0
2009-02-27	14:51:00	0
2009-02-27	14:52:00	0
2009-02-27	14:53:00	0
2009-02-27	14:54:00	0
2009-02-27	14:55:00	0
2009-02-27	14:56:00	0
2009-02-27	14:57:00	0
2009-02-27	14:58:00	0
2009-02-27	14:59:00	0
2009-02-27	15:00:00	0
2009-02-27	15:01:00	0
2009-02-27	15:02:00	0
2009-02-27	15:03:00	0
2009-02-27	15:04:00	0
2009-02-27	15:05:00	0
2009-02-27	15:06:00	0
2009-02-27	15:07:00	0
2009-02-27	15:08:00	0
2009-02-27	15:09:00	0
2009-02-27	15:10:00	0
2009-02-27	15:11:00	0
2009-02-27	15:12:00	0
2009-02-27	15:13:00	0
2009-02-27	15:14:00	0
2009-02-27	15:15:00	0
2009-02-27	15:16:00	0
2009-02-27	15:17:00	0
2009-02-27	15:18:00	0
2009-02-27	15:19:00	0
2009-02-27	15:20:00	0
2009-02-27	15:21:00	0
2009-02-27	15:22:00	0
2009-02-27	15:23:00	0
2009-02-27	15:24:00	0
2009-02-27	15:25:00	0
2009-02-27	15:26:00	0
2009-02-27	15:27:00	0
2009-02-27	15:28:00	0
2009-02-27	15:29:00	0
2009-02-27	15:30:00	0
2009-02-27	15:31:00	0
2009-02-27	15:32:00	0
2009-02-27	15:33:00	0
2009-02-27	15:34:00	0
2009-02-27	15:35:00	0
2009-02-27	15:36:00	0
2009-02-27	15:37:00	0
2009-02-27	15:38:00	0
2009-02-27	15:39:00	0
2009-02-27	15:40:00	0
2009-02-27	15:41:00	0
2009-02-27	15:42:00	0
2009-02-27	15:43:00	0
2009-02-27	15:44:00	0
2009-02-27	15:45:00	0
2009-02-27	15:46:00	0
2009-02-27	15:47:00	0
2009-02-27	15:48:00	0
2009-02-27	15:49:00	0
2009-02-27	15:50:00	0
2009-02-27	15:51:00	0
2009-02-27	15:52:00	0
2009-02-27	15:53:00	0
2009-02-27	15:54:00	0
2009-02-27	15:55:00	0
2009-02-27	15:56:00	0
2009-02-27	15:57:00	0
2009-02-27	15:58:00	0
2009-02-27	15:59:00	0
2009-02-27	16:00:00	0
2009-02-27	16:01:00	0
2009-02-27	16:02:00	0
2009-02-27	16:03:00	0
2009-02-27	16:04:00	0
2009-02-27	16:05:00	0
2009-02-27	16:06:00	0
2009-02-27	16:07:00	0
2009-02-27	16:08:00	0
2009-02-27	16:09:00	0
2009-02-27	16:10:00	0
2009-02-27	16:11:00	0
2009-02-27	16:12:00	0
2009-02-27	16:13:00	0
2009-02-27	16:14:00	0
2009-02-27	16:15:00	0
2009-02-27	16:16:00	0
2009-02-27	16:17:00	0
2009-02-27	16:18:00	0
2009-02-27	16:19:00	0
2009-02-27	16:20:00	0
2009-02-27	16:21:00	0
2009-02-27	16:22:00	0
2009-02-27	16:23:00	0
2009-02-27	16:24:00	0
2009-02-27	16:25:00	0
2009-02-27	16:26:00	0
2009-02-27	16:27:00	0
2009-02-27	16:28:00	0
2009-02-27	16:29:00	0
2009-02-27	16:30:00	0
2009-02-27	16:31:00	0
2009-02-27	16:32:00	0
2009-02-27	16:33:00	0
2009-02-27	16:34:00	0
2009-02-27	16:35:00	0
2009-02-27	16:36:00	0
2009-02-27	16:37:00	0
2009-02-27	16:38:00	0
2009-02-27	16:39:00	0
2009-02-27	16:40:00	0
2009-02-27	16:41:00	0
2009-02-27	16:42:00	0
2009-02-27	16:43:00	0
2009-02-27	16:44:00	0
2009-02-27	16:45:00	0
2009-02-27	16:46:00	0
2009-02-27	16:47:00	0
2009-02-27	16:48:00	0
2009-02-27	16:49:00	0
2009-02-27	16:50:00	0
2009-02-27	16:51:00	0
2009-02-27	16:52:00	0
2009-02-27	16:53:00	0
2009-02-27	16:54:00	0
2009-02-27	16:55:00	0
2009-02-27	16:56:00	0
2009-02-27	16:57:00	0
2009-02-27	16:58:00	0
2009-02-27	16:59:00	0
2009-02-27	17:00:00	0
2009-02-27	17:01:00	0
2009-02-27	17:02:00	0
2009-02-27	17:03:00	0
2009-02-27	17:04:00	0
2009-02-27	17:05:00	0
2009-02-27	17:06:00	0
2009-02-27	17:07:00	0
2009-02-27	17:08:00	0
2009-02-27	17:09:00	0
2009-02-27	17:10:00	0
2009-02-27	17:11:00	0
2009-02-27	17:12:00	0
2009-02-27	17:13:00	0
2009-02-27	17:14:00	0
2009-02-27	17:15:00	0
2009-02-27	17:16:00	0
2009-02-27	17:17:00	0
2009-02-27	17:18:00	0
2009-02-27	17:19:00	0
2009-02-27	17:20:00	0
2009-02-27	17:21:00	0
2009-02-27	17:22:00	0
2009-02-27	17:23:00	0
2009-02-27	17:24:00	0
2009-02-27	17:25:00	0
2009-02-27	17:26:00	0
2009-02-27	17:27:00	0
2009-02-27	17:28:00	0
2009-02-27	17:29:00	0
2009-02-27	17:30:00	0
2009-02-27	17:31:00	0
2009-02-27	17:32:00	0
2009-02-27	17:33:00	0
2009-02-27	17:34:00	0
2009-02-27	17:35:00	0
2009-02-27	17:36:00	0
2009-02-27	17:37:00	0
2009-02-27	17:38:00	0
2009-02-27	17:39:00	0
2009-02-27	17:40:00	0
2009-02-27	17:41:00	0
2009-02-27	17:42:00	0
2009-02-27	17:43:00	0
2009-02-27	17:44:00	0
2009-02-27	17:45:00	0
2009-02-27	17:46:00	0
2009-02-27	17:47:00	0
2009-02-27	17:48:00	0
2009-02-27	17:49:00	0
2009-02-27	17:50:00	0
2009-02-27	17:51:00	0
2009-02-27	17:52:00	0
2009-02-27	17:53:00	0
2009-02-27	17:54:00	0
2009-02-27	17:55:00	0
2009-02-27	17:56:00	0
2009-02-27	17:57:00	0
2009-02-27	17:58:00	0
2009-02-27	17:59:00	0
2009-02-27	18:00:00	0	M
2009-02-27	18:01:00	0
2009-02-27	18:02:00	0
2009-02-27	18:03:00	0
2009-02-27	18:04:00	0
2009-02-27	18:05:00	0
2009-02-27	18:06:00	0
2009-02-27	18:07:00	0
2009-02-27	18:08:00	0
2009-02-27	18:09:00	0
2009-02-27	18:10:00	0
2009-02-27	18:11:00	225
2009-02-27	18:12:00	126
2009-02-27	18:13:00	0
2009-02-27	18:14:00	0
2009-02-27	18:15:00	73
2009-02-27	18:16:00	363
2009-02-27	18:17:00	115
2009-02-27	18:18:00	0
2009-02-27	18:19:00	0
2009-02-27	18:20:00	0
2009-02-27	18:21:00	0
2009-02-27	18:22:00	0
2009-02-27	18:23:00	0
2009-02-27	18:24:00	0
2009-02-27	18:25:00	0
2009-02-27	18:26:00	0
2009-02-27	18:27:00	0
2009-02-27	18:28:00	0
2009-02-27	18:29:00	0
2009-02-27	18:30:00	0
2009-02-27	18:31:00	0
2009-02-27	18:32:00	0
2009-02-27	18:33:00	304
2009-02-27	18:34:00	10
2009-02-27	18:35:00	94
2009-02-27	18:36:00	0
2009-02-27	18:37:00	21
2009-02-27	18:38:00	52
2009-02-27	18:39:00	0
2009-02-27	18:40:00	63
2009-02-27	18:41:00	94
2009-02-27	18:42:00	0
2009-02-27	18:43:00	10
2009-02-27	18:44:00	0
2009-02-27	18:45:00	0
2009-02-27	18:46:00	73
2009-02-27	18:47:00	52
2009-02-27	18:48:00	0
2009-02-27	18:49:00	94
2009-02-27	18:50:00	149
2009-02-27	18:51:00	0
2009-02-27	18:52:00	0
2009-02-27	18:53:00	0
2009-02-27	18:54:00	0
2009-02-27	18:55:00	0
2009-02-27	18:56:00	0
2009-02-27	18:57:00	0
2009-02-27	18:58:00	0
2009-02-27	18:59:00	0
2009-02-27	19:00:00	0
2009-02-27	19:01:00	0
2009-02-27	19:02:00	0
2009-02-27	19:03:00	136
2009-02-27	19:04:00	10
2009-02-27	19:05:00	105
2009-02-27	19:06:00	0
2009-02-27	19:07:00	0
2009-02-27	19:08:00	0
2009-02-27	19:09:00	0
2009-02-27	19:10:00	0
2009-02-27	19:11:00	0
2009-02-27	19:12:00	0
2009-02-27	19:13:00	0
2009-02-27	19:14:00	0
2009-02-27	19:15:00	0
2009-02-27	19:16:00	0
2009-02-27	19:17:00	275
2009-02-27	19:18:00	63
2009-02-27	19:19:00	275
2009-02-27	19:20:00	10
2009-02-27	19:21:00	73
2009-02-27	19:22:00	21
2009-02-27	19:23:00	0
2009-02-27	19:24:00	10
2009-02-27	19:25:00	31
2009-02-27	19:26:00	10
2009-02-27	19:27:00	115
2009-02-27	19:28:00	94
2009-02-27	19:29:00	52
2009-02-27	19:30:00	0
2009-02-27	19:31:00	0
2009-02-27	19:32:00	52
2009-02-27	19:33:00	10
2009-02-27	19:34:00	0
2009-02-27	19:35:00	84
2009-02-27	19:36:00	94
2009-02-27	19:37:00	73
2009-02-27	19:38:00	63
2009-02-27	19:39:00	94
2009-02-27	19:40:00	21
2009-02-27	19:41:00	52
2009-02-27	19:42:00	0
2009-02-27	19:43:00	0
2009-02-27	19:44:00	0
2009-02-27	19:45:00	0
2009-02-27	19:46:00	84
2009-02-27	19:47:00	94
2009-02-27	19:48:00	10
2009-02-27	19:49:00	94
2009-02-27	19:50:00	42
2009-02-27	19:51:00	63
2009-02-27	19:52:00	174
2009-02-27	19:53:00	126
2009-02-27	19:54:00	63
2009-02-27	19:55:00	31
2009-02-27	19:56:00	42
2009-02-27	19:57:00	42
2009-02-27	19:58:00	0
2009-02-27	19:59:00	63
2009-02-27	20:00:00	52
2009-02-27	20:01:00	0
2009-02-27	20:02:00	0
2009-02-27	20:03:00	136
2009-02-27	20:04:00	73
2009-02-27	20:05:00	0
2009-02-27	20:06:00	162
2009-02-27	20:07:00	63
2009-02-27	20:08:00	0
2009-02-27	20:09:00	0
2009-02-27	20:10:00	0
2009-02-27	20:11:00	0
2009-02-27	20:12:00	0
2009-02-27	20:13:00	0
2009-02-27	20:14:00	0
2009-02-27	20:15:00	0
2009-02-27	20:16:00	0
2009-02-27	20:17:00	0
2009-02-27	20:18:00	0
2009-02-27	20:19:00	0
2009-02-27	20:20:00	0
2009-02-27	20:21:00	0
2009-02-27	20:22:00	0
2009-02-27	20:23:00	0
2009-02-27	20:24:00	0
2009-02-27	20:25:00	0
2009-02-27	20:26:00	0
2009-02-27	20:27:00	84
2009-02-27	20:28:00	126
2009-02-27	20:29:00	0
2009-02-27	20:30:00	0
2009-02-27	20:31:00	10
2009-02-27	20:32:00	0
2009-02-27	20:33:00	0
2009-02-27	20:34:00	10
2009-02-27	20:35:00	21
2009-02-27	20:36:00	0
2009-02-27	20:37:00	0
2009-02-27	20:38:00	0
2009-02-27	20:39:00	0
2009-02-27	20:40:00	0
2009-02-27	20:41:00	0
2009-02-27	20:42:00	0
2009-02-27	20:43:00	31
2009-02-27	20:44:00	94
2009-02-27	20:45:00	0
2009-02-27	20:46:00	187
2009-02-27	20:47:00	187
2009-02-27	20:48:00	21
2009-02-27	20:49:00	0
2009-02-27	20:50:00	0
2009-02-27	20:51:00	0
2009-02-27	20:52:00	136
2009-02-27	20:53:00	187
2009-02-27	20:54:00	275
2009-02-27	20:55:00	84
2009-02-27	20:56:00	0
2009-02-27	20:57:00	149
2009-02-27	20:58:00	136
2009-02-27	20:59:00	126
2009-02-27	21:00:00	21
2009-02-27	21:01:00	0
2009-02-27	21:02:00	21
2009-02-27	21:03:00	52
2009-02-27	21:04:00	262
2009-02-27	21:05:00	212
2009-02-27	21:06:00	0
2009-02-27	21:07:00	162
2009-02-27	21:08:00	304
2009-02-27	21:09:00	126
2009-02-27	21:10:00	105
2009-02-27	21:11:00	225
2009-02-27	21:12:00	0
2009-02-27	21:13:00	0
2009-02-27	21:14:00	84
2009-02-27	21:15:00	21
2009-02-27	21:16:00	10
2009-02-27	21:17:00	162
2009-02-27	21:18:00	0
2009-02-27	21:19:00	0
2009-02-27	21:20:00	0
2009-02-27	21:21:00	0
2009-02-27	21:22:00	0
2009-02-27	21:23:00	0
2009-02-27	21:24:00	0
2009-02-27	21:25:00	0
2009-02-27	21:26:00	0
2009-02-27	21:27:00	0
2009-02-27	21:28:00	0
2009-02-27	21:29:00	0
2009-02-27	21:30:00	0
2009-02-27	21:31:00	0
2009-02-27	21:32:00	149
2009-02-27	21:33:00	0
2009-02-27	21:34:00	0
2009-02-27	21:35:00	126
2009-02-27	21:36:00	0
2009-02-27	21:37:00	0
2009-02-27	21:38:00	0
2009-02-27	21:39:00	0
2009-02-27	21:40:00	0
2009-02-27	21:41:00	0
2009-02-27	21:42:00	73
2009-02-27	21:43:00	0
2009-02-27	21:44:00	424
2009-02-27	21:45:00	1964
2009-02-27	21:46:00	1167
2009-02-27	21:47:00	716
2009-02-27	21:48:00	598
2009-02-27	21:49:00	674
2009-02-27	21:50:00	84
2009-02-27	21:51:00	21
2009-02-27	21:52:00	42
2009-02-27	21:53:00	0
2009-02-27	21:54:00	0
2009-02-27	21:55:00	162
2009-02-27	21:56:00	0
2009-02-27	21:57:00	136
2009-02-27	21:58:00	0
2009-02-27	21:59:00	0
2009-02-27	22:00:00	0
2009-02-27	22:01:00	0
2009-02-27	22:02:00	0
2009-02-27	22:03:00	0
2009-02-27	22:04:00	0
2009-02-27	22:05:00	0
2009-02-27	22:06:00	42
2009-02-27	22:07:00	31
2009-02-27	22:08:00	136
2009-02-27	22:09:00	187
2009-02-27	22:10:00	10
2009-02-27	22:11:00	0
2009-02-27	22:12:00	21
2009-02-27	22:13:00	0
2009-02-27	22:14:00	0
2009-02-27	22:15:00	0
2009-02-27	22:16:00	0
2009-02-27	22:17:00	0
2009-02-27	22:18:00	0
2009-02-27	22:19:00	0
2009-02-27	22:20:00	0
2009-02-27	22:21:00	0
2009-02-27	22:22:00	0
2009-02-27	22:23:00	0
2009-02-27	22:24:00	0
2009-02-27	22:25:00	0
2009-02-27	22:26:00	0
2009-02-27	22:27:00	0
2009-02-27	22:28:00	0
2009-02-27	22:29:00	0
2009-02-27	22:30:00	0
2009-02-27	22:31:00	31
2009-02-27	22:32:00	0
2009-02-27	22:33:00	0
2009-02-27	22:34:00	136
2009-02-27	22:35:00	126
2009-02-27	22:36:00	52
2009-02-27	22:37:00	31
2009-02-27	22:38:00	21
2009-02-27	22:39:00	0
2009-02-27	22:40:00	0
2009-02-27	22:41:00	0
2009-02-27	22:42:00	0
2009-02-27	22:43:00	0
2009-02-27	22:44:00	0
2009-02-27	22:45:00	0
2009-02-27	22:46:00	0
2009-02-27	22:47:00	0
2009-02-27	22:48:00	0
2009-02-27	22:49:00	0
2009-02-27	22:50:00	0
2009-02-27	22:51:00	0
2009-02-27	22:52:00	0
2009-02-27	22:53:00	0
2009-02-27	22:54:00	0
2009-02-27	22:55:00	0
2009-02-27	22:56:00	0
2009-02-27	22:57:00	0
2009-02-27	22:58:00	0
2009-02-27	22:59:00	0
2009-02-27	23:00:00	0
2009-02-27	23:01:00	0
2009-02-27	23:02:00	0
2009-02-27	23:03:00	0
2009-02-27	23:04:00	0
2009-02-27	23:05:00	0
2009-02-27	23:06:00	0
2009-02-27	23:07:00	0
2009-02-27	23:08:00	187
2009-02-27	23:09:00	21
2009-02-27	23:10:00	10
2009-02-27	23:11:00	0
2009-02-27	23:12:00	0
2009-02-27	23:13:00	0
2009-02-27	23:14:00	21
2009-02-27	23:15:00	0
2009-02-27	23:16:00	0
2009-02-27	23:17:00	0
2009-02-27	23:18:00	0
2009-02-27	23:19:00	0
2009-02-27	23:20:00	0
2009-02-27	23:21:00	10
2009-02-27	23:22:00	105
2009-02-27	23:23:00	126
2009-02-27	23:24:00	63
2009-02-27	23:25:00	0
2009-02-27	23:26:00	10
2009-02-27	23:27:00	10
2009-02-27	23:28:00	304
2009-02-27	23:29:00	225
2009-02-27	23:30:00	10
2009-02-27	23:31:00	0
2009-02-27	23:32:00	0
2009-02-27	23:33:00	0
2009-02-27	23:34:00	0
2009-02-27	23:35:00	0
2009-02-27	23:36:00	21
2009-02-27	23:37:00	10
2009-02-27	23:38:00	52
2009-02-27	23:39:00	250
2009-02-27	23:40:00	84
2009-02-27	23:41:00	237
2009-02-27	23:42:00	237
2009-02-27	23:43:00	424
2009-02-27	23:44:00	378
2009-02-27	23:45:00	378
2009-02-27	23:46:00	0
2009-02-27	23:47:00	0
2009-02-27	23:48:00	0
2009-02-27	23:49:00	0
2009-02-27	23:50:00	0
2009-02-27	23:51:00	126
2009-02-27	23:52:00	491
2009-02-27	23:53:00	1339
2009-02-27	23:54:00	695
2009-02-27	23:55:00	174
2009-02-27	23:56:00	149
2009-02-27	23:57:00	579
2009-02-27	23:58:00	304
2009-02-27	23:59:00	42
2009-02-28	00:00:00	491
2009-02-28	00:01:00	31
2009-02-28	00:02:00	115
2009-02-28	00:03:00	0
2009-02-28	00:04:00	0
2009-02-28	00:05:00	0
2009-02-28	00:06:00	0
2009-02-28	00:07:00	0
2009-02-28	00:08:00	0
2009-02-28	00:09:00	21
2009-02-28	00:10:00	0
2009-02-28	00:11:00	0
2009-02-28	00:12:00	0
2009-02-28	00:13:00	0
2009-02-28	00:14:00	0
2009-02-28	00:15:00	0
2009-02-28	00:16:00	0
2009-02-28	00:17:00	0
2009-02-28	00:18:00	0
2009-02-28	00:19:00	0
2009-02-28	00:20:00	0
2009-02-28	00:21:00	52
2009-02-28	00:22:00	0
2009-02-28	00:23:00	0
2009-02-28	00:24:00	0
2009-02-28	00:25:00	0
2009-02-28	00:26:00	0
2009-02-28	00:27:00	0
2009-02-28	00:28:00	0
2009-02-28	00:29:00	0
2009-02-28	00:30:00	0
2009-02-28	00:31:00	0
2009-02-28	00:32:00	0
2009-02-28	00:33:00	0
2009-02-28	00:34:00	0
2009-02-28	00:35:00	0
2009-02-28	00:36:00	0
2009-02-28	00:37:00	0
2009-02-28	00:38:00	0
2009-02-28	00:39:00	0
2009-02-28	00:40:00	0
2009-02-28	00:41:00	0
2009-02-28	00:42:00	0
2009-02-28	00:43:00	0
2009-02-28	00:44:00	0
2009-02-28	00:45:00	0
2009-02-28	00:46:00	0
2009-02-28	00:47:00	0
2009-02-28	00:48:00	0
2009-02-28	00:49:00	0
2009-02-28	00:50:00	0
2009-02-28	00:51:00	0
2009-02-28	00:52:00	0
2009-02-28	00:53:00	0
2009-02-28	00:54:00	0
2009-02-28	00:55:00	0
2009-02-28	00:56:00	0
2009-02-28	00:57:00	0
2009-02-28	00:58:00	0
2009-02-28	00:59:00	0
2009-02-28	01:00:00	0
2009-02-28	01:01:00	0
2009-02-28	01:02:00	0
2009-02-28	01:03:00	0
2009-02-28	01:04:00	0
2009-02-28	01:05:00	0
2009-02-28	01:06:00	0
2009-02-28	01:07:00	0
2009-02-28	01:08:00	0
2009-02-28	01:09:00	0
2009-02-28	01:10:00	0
2009-02-28	01:11:00	0
2009-02-28	01:12:00	0
2009-02-28	01:13:00	10
2009-02-28	01:14:00	0
2009-02-28	01:15:00	0
2009-02-28	01:16:00	0
2009-02-28	01:17:00	0
2009-02-28	01:18:00	0
2009-02-28	01:19:00	0
2009-02-28	01:20:00	0
2009-02-28	01:21:00	0
2009-02-28	01:22:00	0
2009-02-28	01:23:00	0
2009-02-28	01:24:00	0
2009-02-28	01:25:00	0
2009-02-28	01:26:00	0
2009-02-28	01:27:00	0
2009-02-28	01:28:00	0
2009-02-28	01:29:00	0
2009-02-28	01:30:00	0
2009-02-28	01:31:00	0
2009-02-28	01:32:00	0
2009-02-28	01:33:00	0
2009-02-28	01:34:00	0
2009-02-28	01:35:00	0
2009-02-28	01:36:00	0
2009-02-28	01:37:00	0
2009-02-28	01:38:00	0
2009-02-28	01:39:00	0
2009-02-28	01:40:00	0
2009-02-28	01:41:00	0
2009-02-28	01:42:00	0
2009-02-28	01:43:00	0
2009-02-28	01:44:00	0
2009-02-28	01:45:00	0
2009-02-28	01:46:00	0
2009-02-28	01:47:00	0
2009-02-28	01:48:00	0
2009-02-28	01:49:00	0
2009-02-28	01:50:00	0
2009-02-28	01:51:00	0
2009-02-28	01:52:00	0
2009-02-28	01:53:00	0
2009-02-28	01:54:00	0
2009-02-28	01:55:00	0
2009-02-28	01:56:00	0
2009-02-28	01:57:00	0
2009-02-28	01:58:00	0
2009-02-28	01:59:00	0
2009-02-28	02:00:00	0
2009-02-28	02:01:00	0
2009-02-28	02:02:00	0
2009-02-28	02:03:00	0
2009-02-28	02:04:00	0
2009-02-28	02:05:00	0
2009-02-28	02:06:00	0
2009-02-28	02:07:00	0
2009-02-28	02:08:00	0
2009-02-28	02:09:00	0
2009-02-28	02:10:00	0
2009-02-28	02:11:00	0
2009-02-28	02:12:00	0
2009-02-28	02:13:00	0
2009-02-28	02:14:00	0
2009-02-28	02:15:00	0
2009-02-28	02:16:00	0
2009-02-28	02:17:00	0
2009-02-28	02:18:00	0
2009-02-28	02:19:00	0
2009-02-28	02:20:00	0
2009-02-28	02:21:00	0
2009-02-28	02:22:00	0
2009-02-28	02:23:00	0
2009-02-28	02:24:00	0
2009-02-28	02:25:00	0
2009-02-28	02:26:00	0
2009-02-28	02:27:00	0
2009-02-28	02:28:00	0
2009-02-28	02:29:00	0
2009-02-28	02:30:00	0
2009-02-28	02:31:00	0
2009-02-28	02:32:00	0
2009-02-28	02:33:00	0
2009-02-28	02:34:00	0
2009-02-28	02:35:00	0
2009-02-28	02:36:00	0
2009-02-28	02:37:00	0
2009-02-28	02:38:00	0
2009-02-28	02:39:00	0
2009-02-28	02:40:00	0
2009-02-28	02:41:00	0
2009-02-28	02:42:00	0
2009-02-28	02:43:00	0
2009-02-28	02:44:00	0
2009-02-28	02:45:00	0
2009-02-28	02:46:00	0
2009-02-28	02:47:00	0
2009-02-28	02:48:00	0
2009-02-28	02:49:00	0
2009-02-28	02:50:00	0
2009-02-28	02:51:00	0
2009-02-28	02:52:00	0
2009-02-28	02:53:00	0
2009-02-28	02:54:00	0
2009-02-28	02:55:00	0
2009-02-28	02:56:00	0
2009-02-28	02:57:00	0
2009-02-28	02:58:00	0
2009-02-28	02:59:00	0
2009-02-28	03:00:00	0
2009-02-28	03:01:00	0
2009-02-28	03:02:00	0
2009-02-28	03:03:00	0
2009-02-28	03:04:00	0
2009-02-28	03:05:00	0
2009-02-28	03:06:00	0
2009-02-28	03:07:00	0
2009-02-28	03:08:00	31
2009-02-28	03:09:00	0
2009-02-28	03:10:00	0
2009-02-28	03:11:00	0
2009-02-28	03:12:00	0
2009-02-28	03:13:00	0
2009-02-28	03:14:00	0
2009-02-28	03:15:00	0
2009-02-28	03:16:00	0
2009-02-28	03:17:00	0
2009-02-28	03:18:00	0
2009-02-28	03:19:00	0
2009-02-28	03:20:00	0
2009-02-28	03:21:00	0
2009-02-28	03:22:00	31
2009-02-28	03:23:00	0
2009-02-28	03:24:00	0
2009-02-28	03:25:00	0
2009-02-28	03:26:00	0
2009-02-28	03:27:00	0
2009-02-28	03:28:00	0
2009-02-28	03:29:00	94
2009-02-28	03:30:00	0
2009-02-28	03:31:00	0
2009-02-28	03:32:00	0
2009-02-28	03:33:00	0
2009-02-28	03:34:00	0
2009-02-28	03:35:00	0
2009-02-28	03:36:00	0
2009-02-28	03:37:00	0
2009-02-28	03:38:00	0
2009-02-28	03:39:00	0
2009-02-28	03:40:00	0
2009-02-28	03:41:00	0
2009-02-28	03:42:00	0
2009-02-28	03:43:00	0
2009-02-28	03:44:00	0
2009-02-28	03:45:00	0
2009-02-28	03:46:00	0
2009-02-28	03:47:00	0
2009-02-28	03:48:00	0
2009-02-28	03:49:00	0
2009-02-28	03:50:00	0
2009-02-28	03:51:00	0
2009-02-28	03:52:00	0
2009-02-28	03:53:00	0
2009-02-28	03:54:00	0
2009-02-28	03:55:00	0
2009-02-28	03:56:00	0
2009-02-28	03:57:00	0
2009-02-28	03:58:00	0
2009-02-28	03:59:00	0
2009-02-28	04:00:00	0
2009-02-28	04:01:00	0
2009-02-28	04:02:00	0
2009-02-28	04:03:00	0
2009-02-28	04:04:00	0
2009-02-28	04:05:00	0
2009-02-28	04:06:00	0
2009-02-28	04:07:00	0
2009-02-28	04:08:00	0
2009-02-28	04:09:00	0
2009-02-28	04:10:00	0
2009-02-28	04:11:00	0
2009-02-28	04:12:00	0
2009-02-28	04:13:00	0
2009-02-28	04:14:00	0
2009-02-28	04:15:00	0
2009-02-28	04:16:00	0
2009-02-28	04:17:00	0
2009-02-28	04:18:00	0
2009-02-28	04:19:00	0
2009-02-28	04:20:00	0
2009-02-28	04:21:00	0
2009-02-28	04:22:00	0
2009-02-28	04:23:00	0
2009-02-28	04:24:00	0
2009-02-28	04:25:00	0
2009-02-28	04:26:00	0
2009-02-28	04:27:00	0
2009-02-28	04:28:00	0
2009-02-28	04:29:00	0
2009-02-28	04:30:00	0
2009-02-28	04:31:00	0
2009-02-28	04:32:00	0
2009-02-28	04:33:00	0
2009-02-28	04:34:00	0
2009-02-28	04:35:00	0
2009-02-28	04:36:00	0
2009-02-28	04:37:00	0
2009-02-28	04:38:00	0
2009-02-28	04:39:00	10
2009-02-28	04:40:00	0
2009-02-28	04:41:00	0
2009-02-28	04:42:00	0
2009-02-28	04:43:00	0
2009-02-28	04:44:00	0
2009-02-28	04:45:00	0
2009-02-28	04:46:00	0
2009-02-28	04:47:00	0
2009-02-28	04:48:00	0
2009-02-28	04:49:00	0
2009-02-28	04:50:00	0
2009-02-28	04:51:00	0
2009-02-28	04:52:00	0
2009-02-28	04:53:00	0
2009-02-28	04:54:00	0
2009-02-28	04:55:00	0
2009-02-28	04:56:00	0
2009-02-28	04:57:00	0
2009-02-28	04:58:00	0
2009-02-28	04:59:00	0
2009-02-28	05:00:00	0
2009-02-28	05:01:00	0
2009-02-28	05:02:00	0
2009-02-28	05:03:00	0
2009-02-28	05:04:00	0
2009-02-28	05:05:00	0
2009-02-28	05:06:00	0
2009-02-28	05:07:00	0
2009-02-28	05:08:00	0
2009-02-28	05:09:00	0
2009-02-28	05:10:00	0
2009-02-28	05:11:00	0
2009-02-28	05:12:00	0
2009-02-28	05:13:00	0
2009-02-28	05:14:00	0
2009-02-28	05:15:00	0
2009-02-28	05:16:00	0
2009-02-28	05:17:00	0
2009-02-28	05:18:00	0
2009-02-28	05:19:00	0
2009-02-28	05:20:00	0
2009-02-28	05:21:00	0
2009-02-28	05:22:00	0
2009-02-28	05:23:00	0
2009-02-28	05:24:00	0
2009-02-28	05:25:00	0
2009-02-28	05:26:00	52
2009-02-28	05:27:00	0
2009-02-28	05:28:00	0
2009-02-28	05:29:00	0
2009-02-28	05:30:00	0
2009-02-28	05:31:00	0
2009-02-28	05:32:00	0
2009-02-28	05:33:00	0
2009-02-28	05:34:00	0
2009-02-28	05:35:00	0
2009-02-28	05:36:00	21
2009-02-28	05:37:00	0
2009-02-28	05:38:00	0
2009-02-28	05:39:00	10
2009-02-28	05:40:00	0
2009-02-28	05:41:00	0
2009-02-28	05:42:00	0
2009-02-28	05:43:00	0
2009-02-28	05:44:00	0
2009-02-28	05:45:00	0
2009-02-28	05:46:00	0
2009-02-28	05:47:00	0
2009-02-28	05:48:00	0
2009-02-28	05:49:00	0
2009-02-28	05:50:00	0
2009-02-28	05:51:00	0
2009-02-28	05:52:00	0
2009-02-28	05:53:00	0
2009-02-28	05:54:00	0
2009-02-28	05:55:00	0
2009-02-28	05:56:00	0
2009-02-28	05:57:00	0
2009-02-28	05:58:00	0
2009-02-28	05:59:00	0
2009-02-28	06:00:00	0
2009-02-28	06:01:00	0
2009-02-28	06:02:00	0
2009-02-28	06:03:00	0
2009-02-28	06:04:00	0
2009-02-28	06:05:00	0
2009-02-28	06:06:00	0
2009-02-28	06:07:00	0
2009-02-28	06:08:00	0
2009-02-28	06:09:00	0
2009-02-28	06:10:00	0
2009-02-28	06:11:00	0
2009-02-28	06:12:00	0
2009-02-28	06:13:00	0
2009-02-28	06:14:00	0
2009-02-28	06:15:00	0
2009-02-28	06:16:00	0
2009-02-28	06:17:00	0
2009-02-28	06:18:00	0
2009-02-28	06:19:00	0
2009-02-28	06:20:00	0
2009-02-28	06:21:00	0
2009-02-28	06:22:00	0
2009-02-28	06:23:00	0
2009-02-28	06:24:00	0
2009-02-28	06:25:00	0
2009-02-28	06:26:00	0
2009-02-28	06:27:00	0
2009-02-28	06:28:00	10
2009-02-28	06:29:00	10
2009-02-28	06:30:00	0
2009-02-28	06:31:00	42
2009-02-28	06:32:00	0
2009-02-28	06:33:00	0
2009-02-28	06:34:00	0
2009-02-28	06:35:00	0
2009-02-28	06:36:00	0
2009-02-28	06:37:00	0
2009-02-28	06:38:00	0
2009-02-28	06:39:00	0
2009-02-28	06:40:00	0
2009-02-28	06:41:00	0
2009-02-28	06:42:00	0
2009-02-28	06:43:00	0
2009-02-28	06:44:00	0
2009-02-28	06:45:00	31
2009-02-28	06:46:00	10
2009-02-28	06:47:00	0
2009-02-28	06:48:00	0
2009-02-28	06:49:00	10
2009-02-28	06:50:00	0
2009-02-28	06:51:00	0
2009-02-28	06:52:00	10
2009-02-28	06:53:00	0
2009-02-28	06:54:00	0
2009-02-28	06:55:00	0
2009-02-28	06:56:00	0
2009-02-28	06:57:00	0
2009-02-28	06:58:00	0
2009-02-28	06:59:00	0
2009-02-28	07:00:00	0
2009-02-28	07:01:00	0
2009-02-28	07:02:00	0
2009-02-28	07:03:00	0
2009-02-28	07:04:00	0
2009-02-28	07:05:00	0
2009-02-28	07:06:00	0
2009-02-28	07:07:00	0
2009-02-28	07:08:00	0
2009-02-28	07:09:00	0
2009-02-28	07:10:00	0
2009-02-28	07:11:00	0
2009-02-28	07:12:00	0
2009-02-28	07:13:00	0
2009-02-28	07:14:00	0
2009-02-28	07:15:00	0
2009-02-28	07:16:00	0
2009-02-28	07:17:00	0
2009-02-28	07:18:00	0
2009-02-28	07:19:00	0
2009-02-28	07:20:00	31
2009-02-28	07:21:00	0
2009-02-28	07:22:00	0
2009-02-28	07:23:00	0
2009-02-28	07:24:00	0
2009-02-28	07:25:00	0
2009-02-28	07:26:00	0
2009-02-28	07:27:00	0
2009-02-28	07:28:00	0
2009-02-28	07:29:00	0
2009-02-28	07:30:00	52
2009-02-28	07:31:00	10
2009-02-28	07:32:00	63
2009-02-28	07:33:00	126
2009-02-28	07:34:00	0
2009-02-28	07:35:00	0
2009-02-28	07:36:00	0
2009-02-28	07:37:00	0
2009-02-28	07:38:00	0
2009-02-28	07:39:00	0
2009-02-28	07:40:00	0
2009-02-28	07:41:00	0
2009-02-28	07:42:00	0
2009-02-28	07:43:00	0
2009-02-28	07:44:00	0
2009-02-28	07:45:00	0
2009-02-28	07:46:00	0
2009-02-28	07:47:00	0
2009-02-28	07:48:00	0
2009-02-28	07:49:00	0
2009-02-28	07:50:00	0
2009-02-28	07:51:00	0
2009-02-28	07:52:00	0
2009-02-28	07:53:00	0
2009-02-28	07:54:00	0
2009-02-28	07:55:00	0
2009-02-28	07:56:00	0
2009-02-28	07:57:00	0
2009-02-28	07:58:00	0
2009-02-28	07:59:00	0
2009-02-28	08:00:00	0
2009-02-28	08:01:00	0
2009-02-28	08:02:00	0
2009-02-28	08:03:00	0
2009-02-28	08:04:00	0
2009-02-28	08:05:00	0
2009-02-28	08:06:00	0
2009-02-28	08:07:00	0
2009-02-28	08:08:00	0
2009-02-28	08:09:00	0
2009-02-28	08:10:00	0
2009-02-28	08:11:00	0
2009-02-28	08:12:00	0
2009-02-28	08:13:00	0
2009-02-28	08:14:00	0
2009-02-28	08:15:00	0
2009-02-28	08:16:00	21
2009-02-28	08:17:00	0
2009-02-28	08:18:00	0
2009-02-28	08:19:00	0
2009-02-28	08:20:00	0
2009-02-28	08:21:00	0
2009-02-28	08:22:00	0
2009-02-28	08:23:00	0
2009-02-28	08:24:00	0
2009-02-28	08:25:00	0
2009-02-28	08:26:00	0
2009-02-28	08:27:00	0
2009-02-28	08:28:00	0
2009-02-28	08:29:00	0
2009-02-28	08:30:00	0
2009-02-28	08:31:00	0
2009-02-28	08:32:00	0
2009-02-28	08:33:00	0
2009-02-28	08:34:00	0
2009-02-28	08:35:00	0
2009-02-28	08:36:00	0
2009-02-28	08:37:00	0
2009-02-28	08:38:00	0
2009-02-28	08:39:00	0
2009-02-28	08:40:00	0
2009-02-28	08:41:00	0
2009-02-28	08:42:00	0
2009-02-28	08:43:00	0
2009-02-28	08:44:00	0
2009-02-28	08:45:00	0
2009-02-28	08:46:00	0
2009-02-28	08:47:00	0
2009-02-28	08:48:00	0
2009-02-28	08:49:00	0
2009-02-28	08:50:00	0
2009-02-28	08:51:00	0
2009-02-28	08:52:00	0
2009-02-28	08:53:00	0
2009-02-28	08:54:00	10
2009-02-28	08:55:00	212
2009-02-28	08:56:00	0
2009-02-28	08:57:00	0
2009-02-28	08:58:00	0
2009-02-28	08:59:00	0
2009-02-28	09:00:00	0
2009-02-28	09:01:00	334
2009-02-28	09:02:00	84
2009-02-28	09:03:00	63
2009-02-28	09:04:00	63
2009-02-28	09:05:00	0
2009-02-28	09:06:00	187
2009-02-28	09:07:00	1112
2009-02-28	09:08:00	21
[truncated: 19,611 more rows]

## Sheet: 3.13.09
Actogram, Copy Raw Data, All Days
Identity:	Shug
Filename:	E:\Active Research Files\meloxicam titre canine\cases\shug\Shug 3.13.09.AWC
Gender:	F
Age:	10
Height:	50.8 cm	20.0 in
Weight:	18.1 kg	39.9 lbs
Start Date:	13-Mar-2009 (Fri)
Start Time:	18:00:00
Interval:	1.00 mins
Date Stamp:	Time Stamp:	Activity Data:	Marker Press:
2009-03-13	00:00:00	0
2009-03-13	00:01:00	0
2009-03-13	00:02:00	0
2009-03-13	00:03:00	0
2009-03-13	00:04:00	0
2009-03-13	00:05:00	0
2009-03-13	00:06:00	0
2009-03-13	00:07:00	0
2009-03-13	00:08:00	0
2009-03-13	00:09:00	0
2009-03-13	00:10:00	0
2009-03-13	00:11:00	0
2009-03-13	00:12:00	0
2009-03-13	00:13:00	0
2009-03-13	00:14:00	0
2009-03-13	00:15:00	0
2009-03-13	00:16:00	0
2009-03-13	00:17:00	0
2009-03-13	00:18:00	0
2009-03-13	00:19:00	0
2009-03-13	00:20:00	0
2009-03-13	00:21:00	0
2009-03-13	00:22:00	0
2009-03-13	00:23:00	0
2009-03-13	00:24:00	0
2009-03-13	00:25:00	0
2009-03-13	00:26:00	0
2009-03-13	00:27:00	0
2009-03-13	00:28:00	0
2009-03-13	00:29:00	0
2009-03-13	00:30:00	0
2009-03-13	00:31:00	0
2009-03-13	00:32:00	0
2009-03-13	00:33:00	0
2009-03-13	00:34:00	0
2009-03-13	00:35:00	0
2009-03-13	00:36:00	0
2009-03-13	00:37:00	0
2009-03-13	00:38:00	0
2009-03-13	00:39:00	0
2009-03-13	00:40:00	0
2009-03-13	00:41:00	0
2009-03-13	00:42:00	0
2009-03-13	00:43:00	0
2009-03-13	00:44:00	0
2009-03-13	00:45:00	0
2009-03-13	00:46:00	0
2009-03-13	00:47:00	0
2009-03-13	00:48:00	0
2009-03-13	00:49:00	0
2009-03-13	00:50:00	0
2009-03-13	00:51:00	0
2009-03-13	00:52:00	0
2009-03-13	00:53:00	0
2009-03-13	00:54:00	0
2009-03-13	00:55:00	0
2009-03-13	00:56:00	0
2009-03-13	00:57:00	0
2009-03-13	00:58:00	0
2009-03-13	00:59:00	0
2009-03-13	01:00:00	0
2009-03-13	01:01:00	0
2009-03-13	01:02:00	0
2009-03-13	01:03:00	0
2009-03-13	01:04:00	0
2009-03-13	01:05:00	0
2009-03-13	01:06:00	0
2009-03-13	01:07:00	0
2009-03-13	01:08:00	0
2009-03-13	01:09:00	0
2009-03-13	01:10:00	0
2009-03-13	01:11:00	0
2009-03-13	01:12:00	0
2009-03-13	01:13:00	0
2009-03-13	01:14:00	0
2009-03-13	01:15:00	0
2009-03-13	01:16:00	0
2009-03-13	01:17:00	0
2009-03-13	01:18:00	0
2009-03-13	01:19:00	0
2009-03-13	01:20:00	0
2009-03-13	01:21:00	0
2009-03-13	01:22:00	0
2009-03-13	01:23:00	0
2009-03-13	01:24:00	0
2009-03-13	01:25:00	0
2009-03-13	01:26:00	0
2009-03-13	01:27:00	0
2009-03-13	01:28:00	0
2009-03-13	01:29:00	0
2009-03-13	01:30:00	0
2009-03-13	01:31:00	0
2009-03-13	01:32:00	0
2009-03-13	01:33:00	0
2009-03-13	01:34:00	0
2009-03-13	01:35:00	0
2009-03-13	01:36:00	0
2009-03-13	01:37:00	0
2009-03-13	01:38:00	0
2009-03-13	01:39:00	0
2009-03-13	01:40:00	0
2009-03-13	01:41:00	0
2009-03-13	01:42:00	0
2009-03-13	01:43:00	0
2009-03-13	01:44:00	0
2009-03-13	01:45:00	0
2009-03-13	01:46:00	0
2009-03-13	01:47:00	0
2009-03-13	01:48:00	0
2009-03-13	01:49:00	0
2009-03-13	01:50:00	0
2009-03-13	01:51:00	0
2009-03-13	01:52:00	0
2009-03-13	01:53:00	0
2009-03-13	01:54:00	0
2009-03-13	01:55:00	0
2009-03-13	01:56:00	0
2009-03-13	01:57:00	0
2009-03-13	01:58:00	0
2009-03-13	01:59:00	0
2009-03-13	02:00:00	0
2009-03-13	02:01:00	0
2009-03-13	02:02:00	0
2009-03-13	02:03:00	0
2009-03-13	02:04:00	0
2009-03-13	02:05:00	0
2009-03-13	02:06:00	0
2009-03-13	02:07:00	0
2009-03-13	02:08:00	0
2009-03-13	02:09:00	0
2009-03-13	02:10:00	0
2009-03-13	02:11:00	0
2009-03-13	02:12:00	0
2009-03-13	02:13:00	0
2009-03-13	02:14:00	0
2009-03-13	02:15:00	0
2009-03-13	02:16:00	0
2009-03-13	02:17:00	0
2009-03-13	02:18:00	0
2009-03-13	02:19:00	0
2009-03-13	02:20:00	0
2009-03-13	02:21:00	0
2009-03-13	02:22:00	0
2009-03-13	02:23:00	0
2009-03-13	02:24:00	0
2009-03-13	02:25:00	0
2009-03-13	02:26:00	0
2009-03-13	02:27:00	0
2009-03-13	02:28:00	0
2009-03-13	02:29:00	0
2009-03-13	02:30:00	0
2009-03-13	02:31:00	0
2009-03-13	02:32:00	0
2009-03-13	02:33:00	0
2009-03-13	02:34:00	0
2009-03-13	02:35:00	0
2009-03-13	02:36:00	0
2009-03-13	02:37:00	0
2009-03-13	02:38:00	0
2009-03-13	02:39:00	0
2009-03-13	02:40:00	0
2009-03-13	02:41:00	0
2009-03-13	02:42:00	0
2009-03-13	02:43:00	0
2009-03-13	02:44:00	0
2009-03-13	02:45:00	0
2009-03-13	02:46:00	0
2009-03-13	02:47:00	0
2009-03-13	02:48:00	0
2009-03-13	02:49:00	0
2009-03-13	02:50:00	0
2009-03-13	02:51:00	0
2009-03-13	02:52:00	0
2009-03-13	02:53:00	0
2009-03-13	02:54:00	0
2009-03-13	02:55:00	0
2009-03-13	02:56:00	0
2009-03-13	02:57:00	0
2009-03-13	02:58:00	0
2009-03-13	02:59:00	0
2009-03-13	03:00:00	0
2009-03-13	03:01:00	0
2009-03-13	03:02:00	0
2009-03-13	03:03:00	0
2009-03-13	03:04:00	0
2009-03-13	03:05:00	0
2009-03-13	03:06:00	0
2009-03-13	03:07:00	0
2009-03-13	03:08:00	0
2009-03-13	03:09:00	0
2009-03-13	03:10:00	0
2009-03-13	03:11:00	0
2009-03-13	03:12:00	0
2009-03-13	03:13:00	0
2009-03-13	03:14:00	0
2009-03-13	03:15:00	0
2009-03-13	03:16:00	0
2009-03-13	03:17:00	0
2009-03-13	03:18:00	0
2009-03-13	03:19:00	0
2009-03-13	03:20:00	0
2009-03-13	03:21:00	0
2009-03-13	03:22:00	0
2009-03-13	03:23:00	0
2009-03-13	03:24:00	0
2009-03-13	03:25:00	0
2009-03-13	03:26:00	0
2009-03-13	03:27:00	0
2009-03-13	03:28:00	0
2009-03-13	03:29:00	0
2009-03-13	03:30:00	0
2009-03-13	03:31:00	0
2009-03-13	03:32:00	0
2009-03-13	03:33:00	0
2009-03-13	03:34:00	0
2009-03-13	03:35:00	0
2009-03-13	03:36:00	0
2009-03-13	03:37:00	0
2009-03-13	03:38:00	0
2009-03-13	03:39:00	0
2009-03-13	03:40:00	0
2009-03-13	03:41:00	0
2009-03-13	03:42:00	0
2009-03-13	03:43:00	0
2009-03-13	03:44:00	0
2009-03-13	03:45:00	0
2009-03-13	03:46:00	0
2009-03-13	03:47:00	0
2009-03-13	03:48:00	0
2009-03-13	03:49:00	0
2009-03-13	03:50:00	0
2009-03-13	03:51:00	0
2009-03-13	03:52:00	0
2009-03-13	03:53:00	0
2009-03-13	03:54:00	0
2009-03-13	03:55:00	0
2009-03-13	03:56:00	0
2009-03-13	03:57:00	0
2009-03-13	03:58:00	0
2009-03-13	03:59:00	0
2009-03-13	04:00:00	0
2009-03-13	04:01:00	0
2009-03-13	04:02:00	0
2009-03-13	04:03:00	0
2009-03-13	04:04:00	0
2009-03-13	04:05:00	0
2009-03-13	04:06:00	0
2009-03-13	04:07:00	0
2009-03-13	04:08:00	0
2009-03-13	04:09:00	0
2009-03-13	04:10:00	0
2009-03-13	04:11:00	0
2009-03-13	04:12:00	0
2009-03-13	04:13:00	0
2009-03-13	04:14:00	0
2009-03-13	04:15:00	0
2009-03-13	04:16:00	0
2009-03-13	04:17:00	0
2009-03-13	04:18:00	0
2009-03-13	04:19:00	0
2009-03-13	04:20:00	0
2009-03-13	04:21:00	0
2009-03-13	04:22:00	0
2009-03-13	04:23:00	0
2009-03-13	04:24:00	0
2009-03-13	04:25:00	0
2009-03-13	04:26:00	0
2009-03-13	04:27:00	0
2009-03-13	04:28:00	0
2009-03-13	04:29:00	0
2009-03-13	04:30:00	0
2009-03-13	04:31:00	0
2009-03-13	04:32:00	0
2009-03-13	04:33:00	0
2009-03-13	04:34:00	0
2009-03-13	04:35:00	0
2009-03-13	04:36:00	0
2009-03-13	04:37:00	0
2009-03-13	04:38:00	0
2009-03-13	04:39:00	0
2009-03-13	04:40:00	0
2009-03-13	04:41:00	0
2009-03-13	04:42:00	0
2009-03-13	04:43:00	0
2009-03-13	04:44:00	0
2009-03-13	04:45:00	0
2009-03-13	04:46:00	0
2009-03-13	04:47:00	0
2009-03-13	04:48:00	0
2009-03-13	04:49:00	0
2009-03-13	04:50:00	0
2009-03-13	04:51:00	0
2009-03-13	04:52:00	0
2009-03-13	04:53:00	0
2009-03-13	04:54:00	0
2009-03-13	04:55:00	0
2009-03-13	04:56:00	0
2009-03-13	04:57:00	0
2009-03-13	04:58:00	0
2009-03-13	04:59:00	0
2009-03-13	05:00:00	0
2009-03-13	05:01:00	0
2009-03-13	05:02:00	0
2009-03-13	05:03:00	0
2009-03-13	05:04:00	0
2009-03-13	05:05:00	0
2009-03-13	05:06:00	0
2009-03-13	05:07:00	0
2009-03-13	05:08:00	0
2009-03-13	05:09:00	0
2009-03-13	05:10:00	0
2009-03-13	05:11:00	0
2009-03-13	05:12:00	0
2009-03-13	05:13:00	0
2009-03-13	05:14:00	0
2009-03-13	05:15:00	0
2009-03-13	05:16:00	0
2009-03-13	05:17:00	0
2009-03-13	05:18:00	0
2009-03-13	05:19:00	0
2009-03-13	05:20:00	0
2009-03-13	05:21:00	0
2009-03-13	05:22:00	0
2009-03-13	05:23:00	0
2009-03-13	05:24:00	0
2009-03-13	05:25:00	0
2009-03-13	05:26:00	0
2009-03-13	05:27:00	0
2009-03-13	05:28:00	0
2009-03-13	05:29:00	0
2009-03-13	05:30:00	0
2009-03-13	05:31:00	0
2009-03-13	05:32:00	0
2009-03-13	05:33:00	0
2009-03-13	05:34:00	0
2009-03-13	05:35:00	0
2009-03-13	05:36:00	0
2009-03-13	05:37:00	0
2009-03-13	05:38:00	0
2009-03-13	05:39:00	0
2009-03-13	05:40:00	0
2009-03-13	05:41:00	0
2009-03-13	05:42:00	0
2009-03-13	05:43:00	0
2009-03-13	05:44:00	0
2009-03-13	05:45:00	0
2009-03-13	05:46:00	0
2009-03-13	05:47:00	0
2009-03-13	05:48:00	0
2009-03-13	05:49:00	0
2009-03-13	05:50:00	0
2009-03-13	05:51:00	0
2009-03-13	05:52:00	0
2009-03-13	05:53:00	0
2009-03-13	05:54:00	0
2009-03-13	05:55:00	0
2009-03-13	05:56:00	0
2009-03-13	05:57:00	0
2009-03-13	05:58:00	0
2009-03-13	05:59:00	0
2009-03-13	06:00:00	0
2009-03-13	06:01:00	0
2009-03-13	06:02:00	0
2009-03-13	06:03:00	0
2009-03-13	06:04:00	0
2009-03-13	06:05:00	0
2009-03-13	06:06:00	0
2009-03-13	06:07:00	0
2009-03-13	06:08:00	0
2009-03-13	06:09:00	0
2009-03-13	06:10:00	0
2009-03-13	06:11:00	0
2009-03-13	06:12:00	0
2009-03-13	06:13:00	0
2009-03-13	06:14:00	0
2009-03-13	06:15:00	0
2009-03-13	06:16:00	0
2009-03-13	06:17:00	0
2009-03-13	06:18:00	0
2009-03-13	06:19:00	0
2009-03-13	06:20:00	0
2009-03-13	06:21:00	0
2009-03-13	06:22:00	0
2009-03-13	06:23:00	0
2009-03-13	06:24:00	0
2009-03-13	06:25:00	0
2009-03-13	06:26:00	0
2009-03-13	06:27:00	0
2009-03-13	06:28:00	0
2009-03-13	06:29:00	0
2009-03-13	06:30:00	0
2009-03-13	06:31:00	0
2009-03-13	06:32:00	0
2009-03-13	06:33:00	0
2009-03-13	06:34:00	0
2009-03-13	06:35:00	0
2009-03-13	06:36:00	0
2009-03-13	06:37:00	0
2009-03-13	06:38:00	0
2009-03-13	06:39:00	0
2009-03-13	06:40:00	0
2009-03-13	06:41:00	0
2009-03-13	06:42:00	0
2009-03-13	06:43:00	0
2009-03-13	06:44:00	0
2009-03-13	06:45:00	0
2009-03-13	06:46:00	0
2009-03-13	06:47:00	0
2009-03-13	06:48:00	0
2009-03-13	06:49:00	0
2009-03-13	06:50:00	0
2009-03-13	06:51:00	0
2009-03-13	06:52:00	0
2009-03-13	06:53:00	0
2009-03-13	06:54:00	0
2009-03-13	06:55:00	0
2009-03-13	06:56:00	0
2009-03-13	06:57:00	0
2009-03-13	06:58:00	0
2009-03-13	06:59:00	0
2009-03-13	07:00:00	0
2009-03-13	07:01:00	0
2009-03-13	07:02:00	0
2009-03-13	07:03:00	0
2009-03-13	07:04:00	0
2009-03-13	07:05:00	0
2009-03-13	07:06:00	0
2009-03-13	07:07:00	0
2009-03-13	07:08:00	0
2009-03-13	07:09:00	0
2009-03-13	07:10:00	0
2009-03-13	07:11:00	0
2009-03-13	07:12:00	0
2009-03-13	07:13:00	0
2009-03-13	07:14:00	0
2009-03-13	07:15:00	0
2009-03-13	07:16:00	0
2009-03-13	07:17:00	0
2009-03-13	07:18:00	0
2009-03-13	07:19:00	0
2009-03-13	07:20:00	0
2009-03-13	07:21:00	0
2009-03-13	07:22:00	0
2009-03-13	07:23:00	0
2009-03-13	07:24:00	0
2009-03-13	07:25:00	0
2009-03-13	07:26:00	0
2009-03-13	07:27:00	0
2009-03-13	07:28:00	0
2009-03-13	07:29:00	0
2009-03-13	07:30:00	0
2009-03-13	07:31:00	0
2009-03-13	07:32:00	0
2009-03-13	07:33:00	0
2009-03-13	07:34:00	0
2009-03-13	07:35:00	0
2009-03-13	07:36:00	0
2009-03-13	07:37:00	0
2009-03-13	07:38:00	0
2009-03-13	07:39:00	0
2009-03-13	07:40:00	0
2009-03-13	07:41:00	0
2009-03-13	07:42:00	0
2009-03-13	07:43:00	0
2009-03-13	07:44:00	0
2009-03-13	07:45:00	0
2009-03-13	07:46:00	0
2009-03-13	07:47:00	0
2009-03-13	07:48:00	0
2009-03-13	07:49:00	0
2009-03-13	07:50:00	0
2009-03-13	07:51:00	0
2009-03-13	07:52:00	0
2009-03-13	07:53:00	0
2009-03-13	07:54:00	0
2009-03-13	07:55:00	0
2009-03-13	07:56:00	0
2009-03-13	07:57:00	0
2009-03-13	07:58:00	0
2009-03-13	07:59:00	0
2009-03-13	08:00:00	0
2009-03-13	08:01:00	0
2009-03-13	08:02:00	0
2009-03-13	08:03:00	0
2009-03-13	08:04:00	0
2009-03-13	08:05:00	0
2009-03-13	08:06:00	0
2009-03-13	08:07:00	0
2009-03-13	08:08:00	0
2009-03-13	08:09:00	0
2009-03-13	08:10:00	0
2009-03-13	08:11:00	0
2009-03-13	08:12:00	0
2009-03-13	08:13:00	0
2009-03-13	08:14:00	0
2009-03-13	08:15:00	0
2009-03-13	08:16:00	0
2009-03-13	08:17:00	0
2009-03-13	08:18:00	0
2009-03-13	08:19:00	0
2009-03-13	08:20:00	0
2009-03-13	08:21:00	0
2009-03-13	08:22:00	0
2009-03-13	08:23:00	0
2009-03-13	08:24:00	0
2009-03-13	08:25:00	0
2009-03-13	08:26:00	0
2009-03-13	08:27:00	0
2009-03-13	08:28:00	0
2009-03-13	08:29:00	0
2009-03-13	08:30:00	0
2009-03-13	08:31:00	0
2009-03-13	08:32:00	0
2009-03-13	08:33:00	0
2009-03-13	08:34:00	0
2009-03-13	08:35:00	0
2009-03-13	08:36:00	0
2009-03-13	08:37:00	0
2009-03-13	08:38:00	0
2009-03-13	08:39:00	0
2009-03-13	08:40:00	0
2009-03-13	08:41:00	0
2009-03-13	08:42:00	0
2009-03-13	08:43:00	0
2009-03-13	08:44:00	0
2009-03-13	08:45:00	0
2009-03-13	08:46:00	0
2009-03-13	08:47:00	0
2009-03-13	08:48:00	0
2009-03-13	08:49:00	0
2009-03-13	08:50:00	0
2009-03-13	08:51:00	0
2009-03-13	08:52:00	0
2009-03-13	08:53:00	0
2009-03-13	08:54:00	0
2009-03-13	08:55:00	0
2009-03-13	08:56:00	0
2009-03-13	08:57:00	0
2009-03-13	08:58:00	0
2009-03-13	08:59:00	0
2009-03-13	09:00:00	0
2009-03-13	09:01:00	0
2009-03-13	09:02:00	0
2009-03-13	09:03:00	0
2009-03-13	09:04:00	0
2009-03-13	09:05:00	0
2009-03-13	09:06:00	0
2009-03-13	09:07:00	0
2009-03-13	09:08:00	0
2009-03-13	09:09:00	0
2009-03-13	09:10:00	0
2009-03-13	09:11:00	0
2009-03-13	09:12:00	0
2009-03-13	09:13:00	0
2009-03-13	09:14:00	0
2009-03-13	09:15:00	0
2009-03-13	09:16:00	0
2009-03-13	09:17:00	0
2009-03-13	09:18:00	0
2009-03-13	09:19:00	0
2009-03-13	09:20:00	0
2009-03-13	09:21:00	0
2009-03-13	09:22:00	0
2009-03-13	09:23:00	0
2009-03-13	09:24:00	0
2009-03-13	09:25:00	0
2009-03-13	09:26:00	0
2009-03-13	09:27:00	0
2009-03-13	09:28:00	0
2009-03-13	09:29:00	0
2009-03-13	09:30:00	0
2009-03-13	09:31:00	0
2009-03-13	09:32:00	0
2009-03-13	09:33:00	0
2009-03-13	09:34:00	0
2009-03-13	09:35:00	0
2009-03-13	09:36:00	0
2009-03-13	09:37:00	0
2009-03-13	09:38:00	0
2009-03-13	09:39:00	0
2009-03-13	09:40:00	0
2009-03-13	09:41:00	0
2009-03-13	09:42:00	0
2009-03-13	09:43:00	0
2009-03-13	09:44:00	0
2009-03-13	09:45:00	0
2009-03-13	09:46:00	0
2009-03-13	09:47:00	0
2009-03-13	09:48:00	0
2009-03-13	09:49:00	0
2009-03-13	09:50:00	0
2009-03-13	09:51:00	0
2009-03-13	09:52:00	0
2009-03-13	09:53:00	0
2009-03-13	09:54:00	0
2009-03-13	09:55:00	0
2009-03-13	09:56:00	0
2009-03-13	09:57:00	0
2009-03-13	09:58:00	0
2009-03-13	09:59:00	0
2009-03-13	10:00:00	0
2009-03-13	10:01:00	0
2009-03-13	10:02:00	0
2009-03-13	10:03:00	0
2009-03-13	10:04:00	0
2009-03-13	10:05:00	0
2009-03-13	10:06:00	0
2009-03-13	10:07:00	0
2009-03-13	10:08:00	0
2009-03-13	10:09:00	0
2009-03-13	10:10:00	0
2009-03-13	10:11:00	0
2009-03-13	10:12:00	0
2009-03-13	10:13:00	0
2009-03-13	10:14:00	0
2009-03-13	10:15:00	0
2009-03-13	10:16:00	0
2009-03-13	10:17:00	0
2009-03-13	10:18:00	0
2009-03-13	10:19:00	0
2009-03-13	10:20:00	0
2009-03-13	10:21:00	0
2009-03-13	10:22:00	0
2009-03-13	10:23:00	0
2009-03-13	10:24:00	0
2009-03-13	10:25:00	0
2009-03-13	10:26:00	0
2009-03-13	10:27:00	0
2009-03-13	10:28:00	0
2009-03-13	10:29:00	0
2009-03-13	10:30:00	0
2009-03-13	10:31:00	0
2009-03-13	10:32:00	0
2009-03-13	10:33:00	0
2009-03-13	10:34:00	0
2009-03-13	10:35:00	0
2009-03-13	10:36:00	0
2009-03-13	10:37:00	0
2009-03-13	10:38:00	0
2009-03-13	10:39:00	0
2009-03-13	10:40:00	0
2009-03-13	10:41:00	0
2009-03-13	10:42:00	0
2009-03-13	10:43:00	0
2009-03-13	10:44:00	0
2009-03-13	10:45:00	0
2009-03-13	10:46:00	0
2009-03-13	10:47:00	0
2009-03-13	10:48:00	0
2009-03-13	10:49:00	0
2009-03-13	10:50:00	0
2009-03-13	10:51:00	0
2009-03-13	10:52:00	0
2009-03-13	10:53:00	0
2009-03-13	10:54:00	0
2009-03-13	10:55:00	0
2009-03-13	10:56:00	0
2009-03-13	10:57:00	0
2009-03-13	10:58:00	0
2009-03-13	10:59:00	0
2009-03-13	11:00:00	0
2009-03-13	11:01:00	0
2009-03-13	11:02:00	0
2009-03-13	11:03:00	0
2009-03-13	11:04:00	0
2009-03-13	11:05:00	0
2009-03-13	11:06:00	0
2009-03-13	11:07:00	0
2009-03-13	11:08:00	0
2009-03-13	11:09:00	0
2009-03-13	11:10:00	0
2009-03-13	11:11:00	0
2009-03-13	11:12:00	0
2009-03-13	11:13:00	0
2009-03-13	11:14:00	0
2009-03-13	11:15:00	0
2009-03-13	11:16:00	0
2009-03-13	11:17:00	0
2009-03-13	11:18:00	0
2009-03-13	11:19:00	0
2009-03-13	11:20:00	0
2009-03-13	11:21:00	0
2009-03-13	11:22:00	0
2009-03-13	11:23:00	0
2009-03-13	11:24:00	0
2009-03-13	11:25:00	0
2009-03-13	11:26:00	0
2009-03-13	11:27:00	0
2009-03-13	11:28:00	0
2009-03-13	11:29:00	0
2009-03-13	11:30:00	0
2009-03-13	11:31:00	0
2009-03-13	11:32:00	0
2009-03-13	11:33:00	0
2009-03-13	11:34:00	0
2009-03-13	11:35:00	0
2009-03-13	11:36:00	0
2009-03-13	11:37:00	0
2009-03-13	11:38:00	0
2009-03-13	11:39:00	0
2009-03-13	11:40:00	0
2009-03-13	11:41:00	0
2009-03-13	11:42:00	0
2009-03-13	11:43:00	0
2009-03-13	11:44:00	0
2009-03-13	11:45:00	0
2009-03-13	11:46:00	0
2009-03-13	11:47:00	0
2009-03-13	11:48:00	0
2009-03-13	11:49:00	0
2009-03-13	11:50:00	0
2009-03-13	11:51:00	0
2009-03-13	11:52:00	0
2009-03-13	11:53:00	0
2009-03-13	11:54:00	0
2009-03-13	11:55:00	0
2009-03-13	11:56:00	0
2009-03-13	11:57:00	0
2009-03-13	11:58:00	0
2009-03-13	11:59:00	0
2009-03-13	12:00:00	0
2009-03-13	12:01:00	0
2009-03-13	12:02:00	0
2009-03-13	12:03:00	0
2009-03-13	12:04:00	0
2009-03-13	12:05:00	0
2009-03-13	12:06:00	0
2009-03-13	12:07:00	0
2009-03-13	12:08:00	0
2009-03-13	12:09:00	0
2009-03-13	12:10:00	0
2009-03-13	12:11:00	0
2009-03-13	12:12:00	0
2009-03-13	12:13:00	0
2009-03-13	12:14:00	0
2009-03-13	12:15:00	0
2009-03-13	12:16:00	0
2009-03-13	12:17:00	0
2009-03-13	12:18:00	0
2009-03-13	12:19:00	0
2009-03-13	12:20:00	0
2009-03-13	12:21:00	0
2009-03-13	12:22:00	0
2009-03-13	12:23:00	0
2009-03-13	12:24:00	0
2009-03-13	12:25:00	0
2009-03-13	12:26:00	0
2009-03-13	12:27:00	0
2009-03-13	12:28:00	0
2009-03-13	12:29:00	0
2009-03-13	12:30:00	0
2009-03-13	12:31:00	0
2009-03-13	12:32:00	0
2009-03-13	12:33:00	0
2009-03-13	12:34:00	0
2009-03-13	12:35:00	0
2009-03-13	12:36:00	0
2009-03-13	12:37:00	0
2009-03-13	12:38:00	0
2009-03-13	12:39:00	0
2009-03-13	12:40:00	0
2009-03-13	12:41:00	0
2009-03-13	12:42:00	0
2009-03-13	12:43:00	0
2009-03-13	12:44:00	0
2009-03-13	12:45:00	0
2009-03-13	12:46:00	0
2009-03-13	12:47:00	0
2009-03-13	12:48:00	0
2009-03-13	12:49:00	0
2009-03-13	12:50:00	0
2009-03-13	12:51:00	0
2009-03-13	12:52:00	0
2009-03-13	12:53:00	0
2009-03-13	12:54:00	0
2009-03-13	12:55:00	0
2009-03-13	12:56:00	0
2009-03-13	12:57:00	0
2009-03-13	12:58:00	0
2009-03-13	12:59:00	0
2009-03-13	13:00:00	0
2009-03-13	13:01:00	0
2009-03-13	13:02:00	0
2009-03-13	13:03:00	0
2009-03-13	13:04:00	0
2009-03-13	13:05:00	0
2009-03-13	13:06:00	0
2009-03-13	13:07:00	0
2009-03-13	13:08:00	0
2009-03-13	13:09:00	0
2009-03-13	13:10:00	0
2009-03-13	13:11:00	0
2009-03-13	13:12:00	0
2009-03-13	13:13:00	0
2009-03-13	13:14:00	0
2009-03-13	13:15:00	0
2009-03-13	13:16:00	0
2009-03-13	13:17:00	0
2009-03-13	13:18:00	0
2009-03-13	13:19:00	0
2009-03-13	13:20:00	0
2009-03-13	13:21:00	0
2009-03-13	13:22:00	0
2009-03-13	13:23:00	0
2009-03-13	13:24:00	0
2009-03-13	13:25:00	0
2009-03-13	13:26:00	0
2009-03-13	13:27:00	0
2009-03-13	13:28:00	0
2009-03-13	13:29:00	0
2009-03-13	13:30:00	0
2009-03-13	13:31:00	0
2009-03-13	13:32:00	0
2009-03-13	13:33:00	0
2009-03-13	13:34:00	0
2009-03-13	13:35:00	0
2009-03-13	13:36:00	0
2009-03-13	13:37:00	0
2009-03-13	13:38:00	0
2009-03-13	13:39:00	0
2009-03-13	13:40:00	0
2009-03-13	13:41:00	0
2009-03-13	13:42:00	0
2009-03-13	13:43:00	0
2009-03-13	13:44:00	0
2009-03-13	13:45:00	0
2009-03-13	13:46:00	0
2009-03-13	13:47:00	0
2009-03-13	13:48:00	0
2009-03-13	13:49:00	0
2009-03-13	13:50:00	0
2009-03-13	13:51:00	0
2009-03-13	13:52:00	0
2009-03-13	13:53:00	0
2009-03-13	13:54:00	0
2009-03-13	13:55:00	0
2009-03-13	13:56:00	0
2009-03-13	13:57:00	0
2009-03-13	13:58:00	0
2009-03-13	13:59:00	0
2009-03-13	14:00:00	0
2009-03-13	14:01:00	0
2009-03-13	14:02:00	0
2009-03-13	14:03:00	0
2009-03-13	14:04:00	0
2009-03-13	14:05:00	0
2009-03-13	14:06:00	0
2009-03-13	14:07:00	0
2009-03-13	14:08:00	0
2009-03-13	14:09:00	0
2009-03-13	14:10:00	0
2009-03-13	14:11:00	0
2009-03-13	14:12:00	0
2009-03-13	14:13:00	0
2009-03-13	14:14:00	0
2009-03-13	14:15:00	0
2009-03-13	14:16:00	0
2009-03-13	14:17:00	0
2009-03-13	14:18:00	0
2009-03-13	14:19:00	0
2009-03-13	14:20:00	0
2009-03-13	14:21:00	0
2009-03-13	14:22:00	0
2009-03-13	14:23:00	0
2009-03-13	14:24:00	0
2009-03-13	14:25:00	0
2009-03-13	14:26:00	0
2009-03-13	14:27:00	0
2009-03-13	14:28:00	0
2009-03-13	14:29:00	0
2009-03-13	14:30:00	0
2009-03-13	14:31:00	0
2009-03-13	14:32:00	0
2009-03-13	14:33:00	0
2009-03-13	14:34:00	0
2009-03-13	14:35:00	0
2009-03-13	14:36:00	0
2009-03-13	14:37:00	0
2009-03-13	14:38:00	0
2009-03-13	14:39:00	0
2009-03-13	14:40:00	0
2009-03-13	14:41:00	0
2009-03-13	14:42:00	0
2009-03-13	14:43:00	0
2009-03-13	14:44:00	0
2009-03-13	14:45:00	0
2009-03-13	14:46:00	0
2009-03-13	14:47:00	0
2009-03-13	14:48:00	0
2009-03-13	14:49:00	0
2009-03-13	14:50:00	0
2009-03-13	14:51:00	0
2009-03-13	14:52:00	0
2009-03-13	14:53:00	0
2009-03-13	14:54:00	0
2009-03-13	14:55:00	0
2009-03-13	14:56:00	0
2009-03-13	14:57:00	0
2009-03-13	14:58:00	0
2009-03-13	14:59:00	0
2009-03-13	15:00:00	0
2009-03-13	15:01:00	0
2009-03-13	15:02:00	0
2009-03-13	15:03:00	0
2009-03-13	15:04:00	0
2009-03-13	15:05:00	0
2009-03-13	15:06:00	0
2009-03-13	15:07:00	0
2009-03-13	15:08:00	0
2009-03-13	15:09:00	0
2009-03-13	15:10:00	0
2009-03-13	15:11:00	0
2009-03-13	15:12:00	0
2009-03-13	15:13:00	0
2009-03-13	15:14:00	0
2009-03-13	15:15:00	0
2009-03-13	15:16:00	0
2009-03-13	15:17:00	0
2009-03-13	15:18:00	0
2009-03-13	15:19:00	0
2009-03-13	15:20:00	0
2009-03-13	15:21:00	0
2009-03-13	15:22:00	0
2009-03-13	15:23:00	0
2009-03-13	15:24:00	0
2009-03-13	15:25:00	0
2009-03-13	15:26:00	0
2009-03-13	15:27:00	0
2009-03-13	15:28:00	0
2009-03-13	15:29:00	0
2009-03-13	15:30:00	0
2009-03-13	15:31:00	0
2009-03-13	15:32:00	0
2009-03-13	15:33:00	0
2009-03-13	15:34:00	0
2009-03-13	15:35:00	0
2009-03-13	15:36:00	0
2009-03-13	15:37:00	0
2009-03-13	15:38:00	0
2009-03-13	15:39:00	0
2009-03-13	15:40:00	0
2009-03-13	15:41:00	0
2009-03-13	15:42:00	0
2009-03-13	15:43:00	0
2009-03-13	15:44:00	0
2009-03-13	15:45:00	0
2009-03-13	15:46:00	0
2009-03-13	15:47:00	0
2009-03-13	15:48:00	0
2009-03-13	15:49:00	0
2009-03-13	15:50:00	0
2009-03-13	15:51:00	0
2009-03-13	15:52:00	0
2009-03-13	15:53:00	0
2009-03-13	15:54:00	0
2009-03-13	15:55:00	0
2009-03-13	15:56:00	0
2009-03-13	15:57:00	0
2009-03-13	15:58:00	0
2009-03-13	15:59:00	0
2009-03-13	16:00:00	0
2009-03-13	16:01:00	0
2009-03-13	16:02:00	0
2009-03-13	16:03:00	0
2009-03-13	16:04:00	0
2009-03-13	16:05:00	0
2009-03-13	16:06:00	0
2009-03-13	16:07:00	0
2009-03-13	16:08:00	0
2009-03-13	16:09:00	0
2009-03-13	16:10:00	0
2009-03-13	16:11:00	0
2009-03-13	16:12:00	0
2009-03-13	16:13:00	0
2009-03-13	16:14:00	0
2009-03-13	16:15:00	0
2009-03-13	16:16:00	0
2009-03-13	16:17:00	0
2009-03-13	16:18:00	0
2009-03-13	16:19:00	0
2009-03-13	16:20:00	0
2009-03-13	16:21:00	0
2009-03-13	16:22:00	0
2009-03-13	16:23:00	0
2009-03-13	16:24:00	0
2009-03-13	16:25:00	0
2009-03-13	16:26:00	0
2009-03-13	16:27:00	0
2009-03-13	16:28:00	0
2009-03-13	16:29:00	0
2009-03-13	16:30:00	0
2009-03-13	16:31:00	0
2009-03-13	16:32:00	0
2009-03-13	16:33:00	0
2009-03-13	16:34:00	0
2009-03-13	16:35:00	0
2009-03-13	16:36:00	0
2009-03-13	16:37:00	0
2009-03-13	16:38:00	0
2009-03-13	16:39:00	0
2009-03-13	16:40:00	0
2009-03-13	16:41:00	0
2009-03-13	16:42:00	0
2009-03-13	16:43:00	0
2009-03-13	16:44:00	0
2009-03-13	16:45:00	0
2009-03-13	16:46:00	0
2009-03-13	16:47:00	0
2009-03-13	16:48:00	0
2009-03-13	16:49:00	0
2009-03-13	16:50:00	0
2009-03-13	16:51:00	0
2009-03-13	16:52:00	0
2009-03-13	16:53:00	0
2009-03-13	16:54:00	0
2009-03-13	16:55:00	0
2009-03-13	16:56:00	0
2009-03-13	16:57:00	0
2009-03-13	16:58:00	0
2009-03-13	16:59:00	0
2009-03-13	17:00:00	0
2009-03-13	17:01:00	0
2009-03-13	17:02:00	0
2009-03-13	17:03:00	0
2009-03-13	17:04:00	0
2009-03-13	17:05:00	0
2009-03-13	17:06:00	0
2009-03-13	17:07:00	0
2009-03-13	17:08:00	0
2009-03-13	17:09:00	0
2009-03-13	17:10:00	0
2009-03-13	17:11:00	0
2009-03-13	17:12:00	0
2009-03-13	17:13:00	0
2009-03-13	17:14:00	0
2009-03-13	17:15:00	0
2009-03-13	17:16:00	0
2009-03-13	17:17:00	0
2009-03-13	17:18:00	0
2009-03-13	17:19:00	0
2009-03-13	17:20:00	0
2009-03-13	17:21:00	0
2009-03-13	17:22:00	0
2009-03-13	17:23:00	0
2009-03-13	17:24:00	0
2009-03-13	17:25:00	0
2009-03-13	17:26:00	0
2009-03-13	17:27:00	0
2009-03-13	17:28:00	0
2009-03-13	17:29:00	0
2009-03-13	17:30:00	0
2009-03-13	17:31:00	0
2009-03-13	17:32:00	0
2009-03-13	17:33:00	0
2009-03-13	17:34:00	0
2009-03-13	17:35:00	0
2009-03-13	17:36:00	0
2009-03-13	17:37:00	0
2009-03-13	17:38:00	0
2009-03-13	17:39:00	0
2009-03-13	17:40:00	0
2009-03-13	17:41:00	0
2009-03-13	17:42:00	0
2009-03-13	17:43:00	0
2009-03-13	17:44:00	0
2009-03-13	17:45:00	0
2009-03-13	17:46:00	0
2009-03-13	17:47:00	0
2009-03-13	17:48:00	0
2009-03-13	17:49:00	0
2009-03-13	17:50:00	0
2009-03-13	17:51:00	0
2009-03-13	17:52:00	0
2009-03-13	17:53:00	0
2009-03-13	17:54:00	0
2009-03-13	17:55:00	0
2009-03-13	17:56:00	0
2009-03-13	17:57:00	0
2009-03-13	17:58:00	0
2009-03-13	17:59:00	0
2009-03-13	18:00:00	21
2009-03-13	18:01:00	10
2009-03-13	18:02:00	0
2009-03-13	18:03:00	0
2009-03-13	18:04:00	0
2009-03-13	18:05:00	237
2009-03-13	18:06:00	63
2009-03-13	18:07:00	10
2009-03-13	18:08:00	0
2009-03-13	18:09:00	0
2009-03-13	18:10:00	0
2009-03-13	18:11:00	0
2009-03-13	18:12:00	52
2009-03-13	18:13:00	42
2009-03-13	18:14:00	0
2009-03-13	18:15:00	0
2009-03-13	18:16:00	0
2009-03-13	18:17:00	0
2009-03-13	18:18:00	0
2009-03-13	18:19:00	10
2009-03-13	18:20:00	0
2009-03-13	18:21:00	0
2009-03-13	18:22:00	1251
2009-03-13	18:23:00	1847
2009-03-13	18:24:00	1309
2009-03-13	18:25:00	1167
2009-03-13	18:26:00	1339
2009-03-13	18:27:00	1431
2009-03-13	18:28:00	31
2009-03-13	18:29:00	21
2009-03-13	18:30:00	716
2009-03-13	18:31:00	31
2009-03-13	18:32:00	0
2009-03-13	18:33:00	0
2009-03-13	18:34:00	10
2009-03-13	18:35:00	541
2009-03-13	18:36:00	63
2009-03-13	18:37:00	187
2009-03-13	18:38:00	212
2009-03-13	18:39:00	541
2009-03-13	18:40:00	290
2009-03-13	18:41:00	42
2009-03-13	18:42:00	0
2009-03-13	18:43:00	0
2009-03-13	18:44:00	0
2009-03-13	18:45:00	126
2009-03-13	18:46:00	174
2009-03-13	18:47:00	0
2009-03-13	18:48:00	0
2009-03-13	18:49:00	0
2009-03-13	18:50:00	0
2009-03-13	18:51:00	0
2009-03-13	18:52:00	0
2009-03-13	18:53:00	42
2009-03-13	18:54:00	0
2009-03-13	18:55:00	0
2009-03-13	18:56:00	52
2009-03-13	18:57:00	63
2009-03-13	18:58:00	0
2009-03-13	18:59:00	10
2009-03-13	19:00:00	0
2009-03-13	19:01:00	334
2009-03-13	19:02:00	913
2009-03-13	19:03:00	334
2009-03-13	19:04:00	1060
2009-03-13	19:05:00	508
2009-03-13	19:06:00	716
2009-03-13	19:07:00	617
2009-03-13	19:08:00	758
2009-03-13	19:09:00	636
2009-03-13	19:10:00	0
2009-03-13	19:11:00	212
2009-03-13	19:12:00	94
2009-03-13	19:13:00	392
2009-03-13	19:14:00	407
2009-03-13	19:15:00	334
2009-03-13	19:16:00	275
2009-03-13	19:17:00	392
2009-03-13	19:18:00	579
2009-03-13	19:19:00	655
2009-03-13	19:20:00	363
2009-03-13	19:21:00	21
2009-03-13	19:22:00	0
2009-03-13	19:23:00	0
2009-03-13	19:24:00	525
2009-03-13	19:25:00	237
2009-03-13	19:26:00	250
2009-03-13	19:27:00	716
2009-03-13	19:28:00	363
2009-03-13	19:29:00	21
2009-03-13	19:30:00	0
2009-03-13	19:31:00	0
2009-03-13	19:32:00	304
2009-03-13	19:33:00	31
2009-03-13	19:34:00	149
2009-03-13	19:35:00	304
2009-03-13	19:36:00	94
2009-03-13	19:37:00	275
2009-03-13	19:38:00	225
2009-03-13	19:39:00	225
2009-03-13	19:40:00	0
2009-03-13	19:41:00	0
2009-03-13	19:42:00	0
2009-03-13	19:43:00	0
2009-03-13	19:44:00	0
2009-03-13	19:45:00	0
2009-03-13	19:46:00	0
2009-03-13	19:47:00	0
2009-03-13	19:48:00	0
2009-03-13	19:49:00	0
2009-03-13	19:50:00	10
2009-03-13	19:51:00	799
2009-03-13	19:52:00	334
2009-03-13	19:53:00	0
2009-03-13	19:54:00	0
2009-03-13	19:55:00	0
2009-03-13	19:56:00	0
2009-03-13	19:57:00	0
2009-03-13	19:58:00	0
2009-03-13	19:59:00	0
2009-03-13	20:00:00	0
2009-03-13	20:01:00	0
2009-03-13	20:02:00	0
2009-03-13	20:03:00	0
2009-03-13	20:04:00	0
2009-03-13	20:05:00	0
2009-03-13	20:06:00	474
2009-03-13	20:07:00	162
2009-03-13	20:08:00	0
2009-03-13	20:09:00	0
2009-03-13	20:10:00	0
2009-03-13	20:11:00	0
2009-03-13	20:12:00	0
2009-03-13	20:13:00	0
2009-03-13	20:14:00	0
2009-03-13	20:15:00	0
2009-03-13	20:16:00	0
2009-03-13	20:17:00	0
2009-03-13	20:18:00	0
2009-03-13	20:19:00	0
2009-03-13	20:20:00	10
2009-03-13	20:21:00	0
2009-03-13	20:22:00	0
2009-03-13	20:23:00	0
2009-03-13	20:24:00	0
2009-03-13	20:25:00	0
2009-03-13	20:26:00	0
2009-03-13	20:27:00	10
2009-03-13	20:28:00	0
2009-03-13	20:29:00	0
2009-03-13	20:30:00	0
2009-03-13	20:31:00	0
2009-03-13	20:32:00	0
2009-03-13	20:33:00	0
2009-03-13	20:34:00	0
2009-03-13	20:35:00	0
2009-03-13	20:36:00	0
2009-03-13	20:37:00	0
2009-03-13	20:38:00	0
2009-03-13	20:39:00	0
2009-03-13	20:40:00	0
2009-03-13	20:41:00	0
2009-03-13	20:42:00	0
2009-03-13	20:43:00	0
2009-03-13	20:44:00	0
2009-03-13	20:45:00	0
2009-03-13	20:46:00	0
2009-03-13	20:47:00	0
2009-03-13	20:48:00	0
2009-03-13	20:49:00	0
2009-03-13	20:50:00	0
2009-03-13	20:51:00	0
2009-03-13	20:52:00	0
2009-03-13	20:53:00	0
2009-03-13	20:54:00	0
2009-03-13	20:55:00	0
2009-03-13	20:56:00	0
2009-03-13	20:57:00	0
2009-03-13	20:58:00	0
2009-03-13	20:59:00	0
2009-03-13	21:00:00	0
2009-03-13	21:01:00	0
2009-03-13	21:02:00	0
2009-03-13	21:03:00	0
2009-03-13	21:04:00	0
2009-03-13	21:05:00	0
2009-03-13	21:06:00	0
2009-03-13	21:07:00	0
2009-03-13	21:08:00	0
2009-03-13	21:09:00	0
2009-03-13	21:10:00	0
2009-03-13	21:11:00	0
2009-03-13	21:12:00	0
2009-03-13	21:13:00	0
2009-03-13	21:14:00	0
2009-03-13	21:15:00	0
2009-03-13	21:16:00	0
2009-03-13	21:17:00	0
2009-03-13	21:18:00	0
2009-03-13	21:19:00	0
2009-03-13	21:20:00	0
2009-03-13	21:21:00	0
2009-03-13	21:22:00	0
2009-03-13	21:23:00	0
2009-03-13	21:24:00	0
2009-03-13	21:25:00	0
2009-03-13	21:26:00	0
2009-03-13	21:27:00	0
2009-03-13	21:28:00	0
2009-03-13	21:29:00	0
2009-03-13	21:30:00	0
2009-03-13	21:31:00	0
2009-03-13	21:32:00	0
2009-03-13	21:33:00	0
2009-03-13	21:34:00	0
2009-03-13	21:35:00	0
2009-03-13	21:36:00	0
2009-03-13	21:37:00	0
2009-03-13	21:38:00	0
2009-03-13	21:39:00	0
2009-03-13	21:40:00	0
2009-03-13	21:41:00	0
2009-03-13	21:42:00	0
2009-03-13	21:43:00	0
2009-03-13	21:44:00	0
2009-03-13	21:45:00	0
2009-03-13	21:46:00	0
2009-03-13	21:47:00	0
2009-03-13	21:48:00	0
2009-03-13	21:49:00	0
2009-03-13	21:50:00	0
2009-03-13	21:51:00	0
2009-03-13	21:52:00	0
2009-03-13	21:53:00	0
2009-03-13	21:54:00	0
2009-03-13	21:55:00	0
2009-03-13	21:56:00	0
2009-03-13	21:57:00	0
2009-03-13	21:58:00	0
2009-03-13	21:59:00	0
2009-03-13	22:00:00	0
2009-03-13	22:01:00	0
2009-03-13	22:02:00	0
2009-03-13	22:03:00	0
2009-03-13	22:04:00	0
2009-03-13	22:05:00	0
2009-03-13	22:06:00	0
2009-03-13	22:07:00	0
2009-03-13	22:08:00	0
2009-03-13	22:09:00	0
2009-03-13	22:10:00	0
2009-03-13	22:11:00	0
2009-03-13	22:12:00	0
2009-03-13	22:13:00	0
2009-03-13	22:14:00	0
2009-03-13	22:15:00	0
2009-03-13	22:16:00	0
2009-03-13	22:17:00	0
2009-03-13	22:18:00	0
2009-03-13	22:19:00	0
2009-03-13	22:20:00	0
2009-03-13	22:21:00	0
2009-03-13	22:22:00	0
2009-03-13	22:23:00	0
2009-03-13	22:24:00	0
2009-03-13	22:25:00	0
2009-03-13	22:26:00	0
2009-03-13	22:27:00	0
2009-03-13	22:28:00	0
2009-03-13	22:29:00	0
2009-03-13	22:30:00	0
2009-03-13	22:31:00	0
2009-03-13	22:32:00	0
2009-03-13	22:33:00	0
2009-03-13	22:34:00	10
2009-03-13	22:35:00	0
2009-03-13	22:36:00	0
2009-03-13	22:37:00	0
2009-03-13	22:38:00	0
2009-03-13	22:39:00	0
2009-03-13	22:40:00	0
2009-03-13	22:41:00	0
2009-03-13	22:42:00	0
2009-03-13	22:43:00	0
2009-03-13	22:44:00	162
2009-03-13	22:45:00	162
2009-03-13	22:46:00	10
2009-03-13	22:47:00	225
2009-03-13	22:48:00	304
2009-03-13	22:49:00	0
2009-03-13	22:50:00	10
2009-03-13	22:51:00	0
2009-03-13	22:52:00	0
2009-03-13	22:53:00	0
2009-03-13	22:54:00	0
2009-03-13	22:55:00	52
2009-03-13	22:56:00	0
2009-03-13	22:57:00	290
2009-03-13	22:58:00	10
2009-03-13	22:59:00	0
2009-03-13	23:00:00	0
2009-03-13	23:01:00	0
2009-03-13	23:02:00	0
2009-03-13	23:03:00	0
2009-03-13	23:04:00	0
2009-03-13	23:05:00	10
2009-03-13	23:06:00	0
2009-03-13	23:07:00	0
2009-03-13	23:08:00	0
2009-03-13	23:09:00	0
2009-03-13	23:10:00	0
2009-03-13	23:11:00	0
2009-03-13	23:12:00	0
2009-03-13	23:13:00	0
2009-03-13	23:14:00	0
2009-03-13	23:15:00	0
2009-03-13	23:16:00	42
2009-03-13	23:17:00	0
2009-03-13	23:18:00	0
2009-03-13	23:19:00	0
2009-03-13	23:20:00	21
2009-03-13	23:21:00	42
2009-03-13	23:22:00	0
2009-03-13	23:23:00	0
2009-03-13	23:24:00	0
2009-03-13	23:25:00	0
2009-03-13	23:26:00	0
2009-03-13	23:27:00	0
2009-03-13	23:28:00	0
2009-03-13	23:29:00	0
2009-03-13	23:30:00	0
2009-03-13	23:31:00	0
2009-03-13	23:32:00	0
2009-03-13	23:33:00	0
2009-03-13	23:34:00	10
2009-03-13	23:35:00	0
2009-03-13	23:36:00	0
2009-03-13	23:37:00	0
2009-03-13	23:38:00	0
2009-03-13	23:39:00	0
2009-03-13	23:40:00	0
2009-03-13	23:41:00	0
2009-03-13	23:42:00	52
2009-03-13	23:43:00	149
2009-03-13	23:44:00	73
2009-03-13	23:45:00	0
2009-03-13	23:46:00	21
2009-03-13	23:47:00	0
2009-03-13	23:48:00	0
2009-03-13	23:49:00	0
2009-03-13	23:50:00	0
2009-03-13	23:51:00	0
2009-03-13	23:52:00	0
2009-03-13	23:53:00	0
2009-03-13	23:54:00	0
2009-03-13	23:55:00	0
2009-03-13	23:56:00	0
2009-03-13	23:57:00	0
2009-03-13	23:58:00	0
2009-03-13	23:59:00	0
2009-03-14	00:00:00	0
2009-03-14	00:01:00	0
2009-03-14	00:02:00	0
2009-03-14	00:03:00	0
2009-03-14	00:04:00	0
2009-03-14	00:05:00	0
2009-03-14	00:06:00	0
2009-03-14	00:07:00	0
2009-03-14	00:08:00	0
2009-03-14	00:09:00	424
2009-03-14	00:10:00	1060
2009-03-14	00:11:00	304
2009-03-14	00:12:00	636
2009-03-14	00:13:00	378
2009-03-14	00:14:00	525
2009-03-14	00:15:00	525
2009-03-14	00:16:00	187
2009-03-14	00:17:00	250
2009-03-14	00:18:00	1431
2009-03-14	00:19:00	474
2009-03-14	00:20:00	149
2009-03-14	00:21:00	250
2009-03-14	00:22:00	737
2009-03-14	00:23:00	491
2009-03-14	00:24:00	0
2009-03-14	00:25:00	0
2009-03-14	00:26:00	10
2009-03-14	00:27:00	0
2009-03-14	00:28:00	0
2009-03-14	00:29:00	0
2009-03-14	00:30:00	10
2009-03-14	00:31:00	115
2009-03-14	00:32:00	0
2009-03-14	00:33:00	0
2009-03-14	00:34:00	0
2009-03-14	00:35:00	0
2009-03-14	00:36:00	0
2009-03-14	00:37:00	0
2009-03-14	00:38:00	10
2009-03-14	00:39:00	0
2009-03-14	00:40:00	0
2009-03-14	00:41:00	0
2009-03-14	00:42:00	0
2009-03-14	00:43:00	0
2009-03-14	00:44:00	0
2009-03-14	00:45:00	0
2009-03-14	00:46:00	0
2009-03-14	00:47:00	31
2009-03-14	00:48:00	0
2009-03-14	00:49:00	0
2009-03-14	00:50:00	0
2009-03-14	00:51:00	52
2009-03-14	00:52:00	42
2009-03-14	00:53:00	126
2009-03-14	00:54:00	52
2009-03-14	00:55:00	0
2009-03-14	00:56:00	10
2009-03-14	00:57:00	10
2009-03-14	00:58:00	10
2009-03-14	00:59:00	21
2009-03-14	01:00:00	0
2009-03-14	01:01:00	31
2009-03-14	01:02:00	0
2009-03-14	01:03:00	0
2009-03-14	01:04:00	42
2009-03-14	01:05:00	31
2009-03-14	01:06:00	31
2009-03-14	01:07:00	0
2009-03-14	01:08:00	0
2009-03-14	01:09:00	31
2009-03-14	01:10:00	0
2009-03-14	01:11:00	0
2009-03-14	01:12:00	21
2009-03-14	01:13:00	0
2009-03-14	01:14:00	10
2009-03-14	01:15:00	348
2009-03-14	01:16:00	617
2009-03-14	01:17:00	598
2009-03-14	01:18:00	820
2009-03-14	01:19:00	304
2009-03-14	01:20:00	10
2009-03-14	01:21:00	0
2009-03-14	01:22:00	199
2009-03-14	01:23:00	225
2009-03-14	01:24:00	716
2009-03-14	01:25:00	84
2009-03-14	01:26:00	0
2009-03-14	01:27:00	275
2009-03-14	01:28:00	0
2009-03-14	01:29:00	0
2009-03-14	01:30:00	0
2009-03-14	01:31:00	0
2009-03-14	01:32:00	0
2009-03-14	01:33:00	0
2009-03-14	01:34:00	0
2009-03-14	01:35:00	0
2009-03-14	01:36:00	0
2009-03-14	01:37:00	0
2009-03-14	01:38:00	0
2009-03-14	01:39:00	0
2009-03-14	01:40:00	0
2009-03-14	01:41:00	0
2009-03-14	01:42:00	0
2009-03-14	01:43:00	0
2009-03-14	01:44:00	0
2009-03-14	01:45:00	42
2009-03-14	01:46:00	0
2009-03-14	01:47:00	0
2009-03-14	01:48:00	0
2009-03-14	01:49:00	0
2009-03-14	01:50:00	0
2009-03-14	01:51:00	0
2009-03-14	01:52:00	0
2009-03-14	01:53:00	0
2009-03-14	01:54:00	0
2009-03-14	01:55:00	0
2009-03-14	01:56:00	0
2009-03-14	01:57:00	0
2009-03-14	01:58:00	0
2009-03-14	01:59:00	0
2009-03-14	02:00:00	0
2009-03-14	02:01:00	0
2009-03-14	02:02:00	0
2009-03-14	02:03:00	21
2009-03-14	02:04:00	0
2009-03-14	02:05:00	0
2009-03-14	02:06:00	63
2009-03-14	02:07:00	0
2009-03-14	02:08:00	0
2009-03-14	02:09:00	52
2009-03-14	02:10:00	0
2009-03-14	02:11:00	0
2009-03-14	02:12:00	0
2009-03-14	02:13:00	0
2009-03-14	02:14:00	0
2009-03-14	02:15:00	0
2009-03-14	02:16:00	10
2009-03-14	02:17:00	0
2009-03-14	02:18:00	0
2009-03-14	02:19:00	0
2009-03-14	02:20:00	0
2009-03-14	02:21:00	0
2009-03-14	02:22:00	0
2009-03-14	02:23:00	0
2009-03-14	02:24:00	0
2009-03-14	02:25:00	0
2009-03-14	02:26:00	10
2009-03-14	02:27:00	0
2009-03-14	02:28:00	0
2009-03-14	02:29:00	21
2009-03-14	02:30:00	0
2009-03-14	02:31:00	0
2009-03-14	02:32:00	0
2009-03-14	02:33:00	0
2009-03-14	02:34:00	0
2009-03-14	02:35:00	0
2009-03-14	02:36:00	0
2009-03-14	02:37:00	0
2009-03-14	02:38:00	0
2009-03-14	02:39:00	0
2009-03-14	02:40:00	0
2009-03-14	02:41:00	0
2009-03-14	02:42:00	0
2009-03-14	02:43:00	0
2009-03-14	02:44:00	52
2009-03-14	02:45:00	0
2009-03-14	02:46:00	0
2009-03-14	02:47:00	0
2009-03-14	02:48:00	0
2009-03-14	02:49:00	0
2009-03-14	02:50:00	0
2009-03-14	02:51:00	0
2009-03-14	02:52:00	0
2009-03-14	02:53:00	0
2009-03-14	02:54:00	0
2009-03-14	02:55:00	0
2009-03-14	02:56:00	0
2009-03-14	02:57:00	0
2009-03-14	02:58:00	0
2009-03-14	02:59:00	0
2009-03-14	03:00:00	0
2009-03-14	03:01:00	0
2009-03-14	03:02:00	0
2009-03-14	03:03:00	0
2009-03-14	03:04:00	0
2009-03-14	03:05:00	0
2009-03-14	03:06:00	0
2009-03-14	03:07:00	0
2009-03-14	03:08:00	0
2009-03-14	03:09:00	84
2009-03-14	03:10:00	0
2009-03-14	03:11:00	0
2009-03-14	03:12:00	0
2009-03-14	03:13:00	0
2009-03-14	03:14:00	0
2009-03-14	03:15:00	0
2009-03-14	03:16:00	0
2009-03-14	03:17:00	0
2009-03-14	03:18:00	0
2009-03-14	03:19:00	0
2009-03-14	03:20:00	0
2009-03-14	03:21:00	0
2009-03-14	03:22:00	0
2009-03-14	03:23:00	0
2009-03-14	03:24:00	0
2009-03-14	03:25:00	0
2009-03-14	03:26:00	0
2009-03-14	03:27:00	0
2009-03-14	03:28:00	0
2009-03-14	03:29:00	10
2009-03-14	03:30:00	0
2009-03-14	03:31:00	0
2009-03-14	03:32:00	73
2009-03-14	03:33:00	0
2009-03-14	03:34:00	0
2009-03-14	03:35:00	0
2009-03-14	03:36:00	0
2009-03-14	03:37:00	0
2009-03-14	03:38:00	0
2009-03-14	03:39:00	0
2009-03-14	03:40:00	0
2009-03-14	03:41:00	0
2009-03-14	03:42:00	0
2009-03-14	03:43:00	0
2009-03-14	03:44:00	0
2009-03-14	03:45:00	0
2009-03-14	03:46:00	0
2009-03-14	03:47:00	0
2009-03-14	03:48:00	0
2009-03-14	03:49:00	0
2009-03-14	03:50:00	0
2009-03-14	03:51:00	0
2009-03-14	03:52:00	0
2009-03-14	03:53:00	0
2009-03-14	03:54:00	0
2009-03-14	03:55:00	0
2009-03-14	03:56:00	0
2009-03-14	03:57:00	0
2009-03-14	03:58:00	0
2009-03-14	03:59:00	0
2009-03-14	04:00:00	52
2009-03-14	04:01:00	0
2009-03-14	04:02:00	0
2009-03-14	04:03:00	0
2009-03-14	04:04:00	0
2009-03-14	04:05:00	0
2009-03-14	04:06:00	0
2009-03-14	04:07:00	0
2009-03-14	04:08:00	0
2009-03-14	04:09:00	0
2009-03-14	04:10:00	0
2009-03-14	04:11:00	0
2009-03-14	04:12:00	0
2009-03-14	04:13:00	0
2009-03-14	04:14:00	0
2009-03-14	04:15:00	0
2009-03-14	04:16:00	0
2009-03-14	04:17:00	0
2009-03-14	04:18:00	0
2009-03-14	04:19:00	0
2009-03-14	04:20:00	0
2009-03-14	04:21:00	0
2009-03-14	04:22:00	0
2009-03-14	04:23:00	0
2009-03-14	04:24:00	0
2009-03-14	04:25:00	0
2009-03-14	04:26:00	0
2009-03-14	04:27:00	0
2009-03-14	04:28:00	0
2009-03-14	04:29:00	73
2009-03-14	04:30:00	0
2009-03-14	04:31:00	0
2009-03-14	04:32:00	0
2009-03-14	04:33:00	0
2009-03-14	04:34:00	0
2009-03-14	04:35:00	0
2009-03-14	04:36:00	0
2009-03-14	04:37:00	0
2009-03-14	04:38:00	0
2009-03-14	04:39:00	0
2009-03-14	04:40:00	0
2009-03-14	04:41:00	0
2009-03-14	04:42:00	0
2009-03-14	04:43:00	0
2009-03-14	04:44:00	0
2009-03-14	04:45:00	0
2009-03-14	04:46:00	0
2009-03-14	04:47:00	0
2009-03-14	04:48:00	0
2009-03-14	04:49:00	0
2009-03-14	04:50:00	0
2009-03-14	04:51:00	0
2009-03-14	04:52:00	0
2009-03-14	04:53:00	0
2009-03-14	04:54:00	0
2009-03-14	04:55:00	42
2009-03-14	04:56:00	0
2009-03-14	04:57:00	0
2009-03-14	04:58:00	0
2009-03-14	04:59:00	0
2009-03-14	05:00:00	0
2009-03-14	05:01:00	0
2009-03-14	05:02:00	0
2009-03-14	05:03:00	0
2009-03-14	05:04:00	42
2009-03-14	05:05:00	0
2009-03-14	05:06:00	0
2009-03-14	05:07:00	0
2009-03-14	05:08:00	42
2009-03-14	05:09:00	0
2009-03-14	05:10:00	0
2009-03-14	05:11:00	0
2009-03-14	05:12:00	0
2009-03-14	05:13:00	0
2009-03-14	05:14:00	0
2009-03-14	05:15:00	0
2009-03-14	05:16:00	0
2009-03-14	05:17:00	0
2009-03-14	05:18:00	0
2009-03-14	05:19:00	0
2009-03-14	05:20:00	0
2009-03-14	05:21:00	0
2009-03-14	05:22:00	0
2009-03-14	05:23:00	0
2009-03-14	05:24:00	0
2009-03-14	05:25:00	0
2009-03-14	05:26:00	21
2009-03-14	05:27:00	0
2009-03-14	05:28:00	0
2009-03-14	05:29:00	0
2009-03-14	05:30:00	0
2009-03-14	05:31:00	31
2009-03-14	05:32:00	0
2009-03-14	05:33:00	0
2009-03-14	05:34:00	0
2009-03-14	05:35:00	0
2009-03-14	05:36:00	0
2009-03-14	05:37:00	0
2009-03-14	05:38:00	0
2009-03-14	05:39:00	0
2009-03-14	05:40:00	0
2009-03-14	05:41:00	0
2009-03-14	05:42:00	0
2009-03-14	05:43:00	0
2009-03-14	05:44:00	0
2009-03-14	05:45:00	0
2009-03-14	05:46:00	0
2009-03-14	05:47:00	0
2009-03-14	05:48:00	0
2009-03-14	05:49:00	0
2009-03-14	05:50:00	0
2009-03-14	05:51:00	21
2009-03-14	05:52:00	0
2009-03-14	05:53:00	0
2009-03-14	05:54:00	0
2009-03-14	05:55:00	0
2009-03-14	05:56:00	0
2009-03-14	05:57:00	0
2009-03-14	05:58:00	0
2009-03-14	05:59:00	0
2009-03-14	06:00:00	0
2009-03-14	06:01:00	0
2009-03-14	06:02:00	0
2009-03-14	06:03:00	0
2009-03-14	06:04:00	0
2009-03-14	06:05:00	0
2009-03-14	06:06:00	0
2009-03-14	06:07:00	0
2009-03-14	06:08:00	0
2009-03-14	06:09:00	0
2009-03-14	06:10:00	0
2009-03-14	06:11:00	0
2009-03-14	06:12:00	10
2009-03-14	06:13:00	0
2009-03-14	06:14:00	0
2009-03-14	06:15:00	0
2009-03-14	06:16:00	0
2009-03-14	06:17:00	0
2009-03-14	06:18:00	0
2009-03-14	06:19:00	0
2009-03-14	06:20:00	0
2009-03-14	06:21:00	0
2009-03-14	06:22:00	0
2009-03-14	06:23:00	0
2009-03-14	06:24:00	10
2009-03-14	06:25:00	0
2009-03-14	06:26:00	0
2009-03-14	06:27:00	0
2009-03-14	06:28:00	0
2009-03-14	06:29:00	0
2009-03-14	06:30:00	0
2009-03-14	06:31:00	0
2009-03-14	06:32:00	0
2009-03-14	06:33:00	0
2009-03-14	06:34:00	0
2009-03-14	06:35:00	0
2009-03-14	06:36:00	0
2009-03-14	06:37:00	0
2009-03-14	06:38:00	0
2009-03-14	06:39:00	0
2009-03-14	06:40:00	0
2009-03-14	06:41:00	0
2009-03-14	06:42:00	0
2009-03-14	06:43:00	0
2009-03-14	06:44:00	0
2009-03-14	06:45:00	0
2009-03-14	06:46:00	10
2009-03-14	06:47:00	0
2009-03-14	06:48:00	31
2009-03-14	06:49:00	0
2009-03-14	06:50:00	0
2009-03-14	06:51:00	149
2009-03-14	06:52:00	0
2009-03-14	06:53:00	0
2009-03-14	06:54:00	0
2009-03-14	06:55:00	0
2009-03-14	06:56:00	0
2009-03-14	06:57:00	0
2009-03-14	06:58:00	0
2009-03-14	06:59:00	0
2009-03-14	07:00:00	0
2009-03-14	07:01:00	0
2009-03-14	07:02:00	0
2009-03-14	07:03:00	0
2009-03-14	07:04:00	0
2009-03-14	07:05:00	0
2009-03-14	07:06:00	0
2009-03-14	07:07:00	0
2009-03-14	07:08:00	0
2009-03-14	07:09:00	0
2009-03-14	07:10:00	0
2009-03-14	07:11:00	0
2009-03-14	07:12:00	0
2009-03-14	07:13:00	0
2009-03-14	07:14:00	0
2009-03-14	07:15:00	0
2009-03-14	07:16:00	10
2009-03-14	07:17:00	0
2009-03-14	07:18:00	0
2009-03-14	07:19:00	0
2009-03-14	07:20:00	0
2009-03-14	07:21:00	0
2009-03-14	07:22:00	0
2009-03-14	07:23:00	0
2009-03-14	07:24:00	0
2009-03-14	07:25:00	0
2009-03-14	07:26:00	0
2009-03-14	07:27:00	0
2009-03-14	07:28:00	0
2009-03-14	07:29:00	0
2009-03-14	07:30:00	0
2009-03-14	07:31:00	0
2009-03-14	07:32:00	0
2009-03-14	07:33:00	0
2009-03-14	07:34:00	21
2009-03-14	07:35:00	0
2009-03-14	07:36:00	0
2009-03-14	07:37:00	0
2009-03-14	07:38:00	0
2009-03-14	07:39:00	0
2009-03-14	07:40:00	0
2009-03-14	07:41:00	0
2009-03-14	07:42:00	0
2009-03-14	07:43:00	0
2009-03-14	07:44:00	0
2009-03-14	07:45:00	0
2009-03-14	07:46:00	0
2009-03-14	07:47:00	0
2009-03-14	07:48:00	0
2009-03-14	07:49:00	0
2009-03-14	07:50:00	0
2009-03-14	07:51:00	0
2009-03-14	07:52:00	0
2009-03-14	07:53:00	0
2009-03-14	07:54:00	21
2009-03-14	07:55:00	0
2009-03-14	07:56:00	0
2009-03-14	07:57:00	0
2009-03-14	07:58:00	84
2009-03-14	07:59:00	0
2009-03-14	08:00:00	0
2009-03-14	08:01:00	0
2009-03-14	08:02:00	0
2009-03-14	08:03:00	0
2009-03-14	08:04:00	0
2009-03-14	08:05:00	0
2009-03-14	08:06:00	0
2009-03-14	08:07:00	0
2009-03-14	08:08:00	0
2009-03-14	08:09:00	0
2009-03-14	08:10:00	0
2009-03-14	08:11:00	21
2009-03-14	08:12:00	0
2009-03-14	08:13:00	0
2009-03-14	08:14:00	0
2009-03-14	08:15:00	0
2009-03-14	08:16:00	0
2009-03-14	08:17:00	0
2009-03-14	08:18:00	0
2009-03-14	08:19:00	0
2009-03-14	08:20:00	0
2009-03-14	08:21:00	0
2009-03-14	08:22:00	0
2009-03-14	08:23:00	0
2009-03-14	08:24:00	0
2009-03-14	08:25:00	0
2009-03-14	08:26:00	0
2009-03-14	08:27:00	0
2009-03-14	08:28:00	0
2009-03-14	08:29:00	0
2009-03-14	08:30:00	0
2009-03-14	08:31:00	0
2009-03-14	08:32:00	0
2009-03-14	08:33:00	0
2009-03-14	08:34:00	0
2009-03-14	08:35:00	0
2009-03-14	08:36:00	0
2009-03-14	08:37:00	0
2009-03-14	08:38:00	0
2009-03-14	08:39:00	0
2009-03-14	08:40:00	0
2009-03-14	08:41:00	0
2009-03-14	08:42:00	0
2009-03-14	08:43:00	0
2009-03-14	08:44:00	275
2009-03-14	08:45:00	21
2009-03-14	08:46:00	73
2009-03-14	08:47:00	674
2009-03-14	08:48:00	250
2009-03-14	08:49:00	115
2009-03-14	08:50:00	262
2009-03-14	08:51:00	820
2009-03-14	08:52:00	424
2009-03-14	08:53:00	212
2009-03-14	08:54:00	136
2009-03-14	08:55:00	187
2009-03-14	08:56:00	136
2009-03-14	08:57:00	348
2009-03-14	08:58:00	225
2009-03-14	08:59:00	275
2009-03-14	09:00:00	63
2009-03-14	09:01:00	304
2009-03-14	09:02:00	84
2009-03-14	09:03:00	617
2009-03-14	09:04:00	304
2009-03-14	09:05:00	149
2009-03-14	09:06:00	94
2009-03-14	09:07:00	84
2009-03-14	09:08:00	126
[truncated: 19,611 more rows]

## Sheet: 4.3.09
Actogram, Copy Raw Data, All Days
Identity:	Shug second monitor
Filename:	E:\Active Research Files\meloxicam titre canine\cases\shug\Shug second monitor 4.3.09.AWC
Gender:	F
Age:	10
Height:	76.2 cm	30.0 in
Weight:	44.0 kg	97.0 lbs
Start Date:	03-Apr-2009 (Fri)
Start Time:	18:00:00
Interval:	1.00 mins
Date Stamp:	Time Stamp:	Activity Data:	Marker Press:
2009-04-03	00:00:00	0
2009-04-03	00:01:00	0
2009-04-03	00:02:00	0
2009-04-03	00:03:00	0
2009-04-03	00:04:00	0
2009-04-03	00:05:00	0
2009-04-03	00:06:00	0
2009-04-03	00:07:00	0
2009-04-03	00:08:00	0
2009-04-03	00:09:00	0
2009-04-03	00:10:00	0
2009-04-03	00:11:00	0
2009-04-03	00:12:00	0
2009-04-03	00:13:00	0
2009-04-03	00:14:00	0
2009-04-03	00:15:00	0
2009-04-03	00:16:00	0
2009-04-03	00:17:00	0
2009-04-03	00:18:00	0
2009-04-03	00:19:00	0
2009-04-03	00:20:00	0
2009-04-03	00:21:00	0
2009-04-03	00:22:00	0
2009-04-03	00:23:00	0
2009-04-03	00:24:00	0
2009-04-03	00:25:00	0
2009-04-03	00:26:00	0
2009-04-03	00:27:00	0
2009-04-03	00:28:00	0
2009-04-03	00:29:00	0
2009-04-03	00:30:00	0
2009-04-03	00:31:00	0
2009-04-03	00:32:00	0
2009-04-03	00:33:00	0
2009-04-03	00:34:00	0
2009-04-03	00:35:00	0
2009-04-03	00:36:00	0
2009-04-03	00:37:00	0
2009-04-03	00:38:00	0
2009-04-03	00:39:00	0
2009-04-03	00:40:00	0
2009-04-03	00:41:00	0
2009-04-03	00:42:00	0
2009-04-03	00:43:00	0
2009-04-03	00:44:00	0
2009-04-03	00:45:00	0
2009-04-03	00:46:00	0
2009-04-03	00:47:00	0
2009-04-03	00:48:00	0
2009-04-03	00:49:00	0
2009-04-03	00:50:00	0
2009-04-03	00:51:00	0
2009-04-03	00:52:00	0
2009-04-03	00:53:00	0
2009-04-03	00:54:00	0
2009-04-03	00:55:00	0
2009-04-03	00:56:00	0
2009-04-03	00:57:00	0
2009-04-03	00:58:00	0
2009-04-03	00:59:00	0
2009-04-03	01:00:00	0
2009-04-03	01:01:00	0
2009-04-03	01:02:00	0
2009-04-03	01:03:00	0
2009-04-03	01:04:00	0
2009-04-03	01:05:00	0
2009-04-03	01:06:00	0
2009-04-03	01:07:00	0
2009-04-03	01:08:00	0
2009-04-03	01:09:00	0
2009-04-03	01:10:00	0
2009-04-03	01:11:00	0
2009-04-03	01:12:00	0
2009-04-03	01:13:00	0
2009-04-03	01:14:00	0
2009-04-03	01:15:00	0
2009-04-03	01:16:00	0
2009-04-03	01:17:00	0
2009-04-03	01:18:00	0
2009-04-03	01:19:00	0
2009-04-03	01:20:00	0
2009-04-03	01:21:00	0
2009-04-03	01:22:00	0
2009-04-03	01:23:00	0
2009-04-03	01:24:00	0
2009-04-03	01:25:00	0
2009-04-03	01:26:00	0
2009-04-03	01:27:00	0
2009-04-03	01:28:00	0
2009-04-03	01:29:00	0
2009-04-03	01:30:00	0
2009-04-03	01:31:00	0
2009-04-03	01:32:00	0
2009-04-03	01:33:00	0
2009-04-03	01:34:00	0
2009-04-03	01:35:00	0
2009-04-03	01:36:00	0
2009-04-03	01:37:00	0
2009-04-03	01:38:00	0
2009-04-03	01:39:00	0
2009-04-03	01:40:00	0
2009-04-03	01:41:00	0
2009-04-03	01:42:00	0
2009-04-03	01:43:00	0
2009-04-03	01:44:00	0
2009-04-03	01:45:00	0
2009-04-03	01:46:00	0
2009-04-03	01:47:00	0
2009-04-03	01:48:00	0
2009-04-03	01:49:00	0
2009-04-03	01:50:00	0
2009-04-03	01:51:00	0
2009-04-03	01:52:00	0
2009-04-03	01:53:00	0
2009-04-03	01:54:00	0
2009-04-03	01:55:00	0
2009-04-03	01:56:00	0
2009-04-03	01:57:00	0
2009-04-03	01:58:00	0
2009-04-03	01:59:00	0
2009-04-03	02:00:00	0
2009-04-03	02:01:00	0
2009-04-03	02:02:00	0
2009-04-03	02:03:00	0
2009-04-03	02:04:00	0
2009-04-03	02:05:00	0
2009-04-03	02:06:00	0
2009-04-03	02:07:00	0
2009-04-03	02:08:00	0
2009-04-03	02:09:00	0
2009-04-03	02:10:00	0
2009-04-03	02:11:00	0
2009-04-03	02:12:00	0
2009-04-03	02:13:00	0
2009-04-03	02:14:00	0
2009-04-03	02:15:00	0
2009-04-03	02:16:00	0
2009-04-03	02:17:00	0
2009-04-03	02:18:00	0
2009-04-03	02:19:00	0
2009-04-03	02:20:00	0
2009-04-03	02:21:00	0
2009-04-03	02:22:00	0
2009-04-03	02:23:00	0
2009-04-03	02:24:00	0
2009-04-03	02:25:00	0
2009-04-03	02:26:00	0
2009-04-03	02:27:00	0
2009-04-03	02:28:00	0
2009-04-03	02:29:00	0
2009-04-03	02:30:00	0
2009-04-03	02:31:00	0
2009-04-03	02:32:00	0
2009-04-03	02:33:00	0
2009-04-03	02:34:00	0
2009-04-03	02:35:00	0
2009-04-03	02:36:00	0
2009-04-03	02:37:00	0
2009-04-03	02:38:00	0
2009-04-03	02:39:00	0
2009-04-03	02:40:00	0
2009-04-03	02:41:00	0
2009-04-03	02:42:00	0
2009-04-03	02:43:00	0
2009-04-03	02:44:00	0
2009-04-03	02:45:00	0
2009-04-03	02:46:00	0
2009-04-03	02:47:00	0
2009-04-03	02:48:00	0
2009-04-03	02:49:00	0
2009-04-03	02:50:00	0
2009-04-03	02:51:00	0
2009-04-03	02:52:00	0
2009-04-03	02:53:00	0
2009-04-03	02:54:00	0
2009-04-03	02:55:00	0
2009-04-03	02:56:00	0
2009-04-03	02:57:00	0
2009-04-03	02:58:00	0
2009-04-03	02:59:00	0
2009-04-03	03:00:00	0
2009-04-03	03:01:00	0
2009-04-03	03:02:00	0
2009-04-03	03:03:00	0
2009-04-03	03:04:00	0
2009-04-03	03:05:00	0
2009-04-03	03:06:00	0
2009-04-03	03:07:00	0
2009-04-03	03:08:00	0
2009-04-03	03:09:00	0
2009-04-03	03:10:00	0
2009-04-03	03:11:00	0
2009-04-03	03:12:00	0
2009-04-03	03:13:00	0
2009-04-03	03:14:00	0
2009-04-03	03:15:00	0
2009-04-03	03:16:00	0
2009-04-03	03:17:00	0
2009-04-03	03:18:00	0
2009-04-03	03:19:00	0
2009-04-03	03:20:00	0
2009-04-03	03:21:00	0
2009-04-03	03:22:00	0
2009-04-03	03:23:00	0
2009-04-03	03:24:00	0
2009-04-03	03:25:00	0
2009-04-03	03:26:00	0
2009-04-03	03:27:00	0
2009-04-03	03:28:00	0
2009-04-03	03:29:00	0
2009-04-03	03:30:00	0
2009-04-03	03:31:00	0
2009-04-03	03:32:00	0
2009-04-03	03:33:00	0
2009-04-03	03:34:00	0
2009-04-03	03:35:00	0
2009-04-03	03:36:00	0
2009-04-03	03:37:00	0
2009-04-03	03:38:00	0
2009-04-03	03:39:00	0
2009-04-03	03:40:00	0
2009-04-03	03:41:00	0
2009-04-03	03:42:00	0
2009-04-03	03:43:00	0
2009-04-03	03:44:00	0
2009-04-03	03:45:00	0
2009-04-03	03:46:00	0
2009-04-03	03:47:00	0
2009-04-03	03:48:00	0
2009-04-03	03:49:00	0
2009-04-03	03:50:00	0
2009-04-03	03:51:00	0
2009-04-03	03:52:00	0
2009-04-03	03:53:00	0
2009-04-03	03:54:00	0
2009-04-03	03:55:00	0
2009-04-03	03:56:00	0
2009-04-03	03:57:00	0
2009-04-03	03:58:00	0
2009-04-03	03:59:00	0
2009-04-03	04:00:00	0
2009-04-03	04:01:00	0
2009-04-03	04:02:00	0
2009-04-03	04:03:00	0
2009-04-03	04:04:00	0
2009-04-03	04:05:00	0
2009-04-03	04:06:00	0
2009-04-03	04:07:00	0
2009-04-03	04:08:00	0
2009-04-03	04:09:00	0
2009-04-03	04:10:00	0
2009-04-03	04:11:00	0
2009-04-03	04:12:00	0
2009-04-03	04:13:00	0
2009-04-03	04:14:00	0
2009-04-03	04:15:00	0
2009-04-03	04:16:00	0
2009-04-03	04:17:00	0
2009-04-03	04:18:00	0
2009-04-03	04:19:00	0
2009-04-03	04:20:00	0
2009-04-03	04:21:00	0
2009-04-03	04:22:00	0
2009-04-03	04:23:00	0
2009-04-03	04:24:00	0
2009-04-03	04:25:00	0
2009-04-03	04:26:00	0
2009-04-03	04:27:00	0
2009-04-03	04:28:00	0
2009-04-03	04:29:00	0
2009-04-03	04:30:00	0
2009-04-03	04:31:00	0
2009-04-03	04:32:00	0
2009-04-03	04:33:00	0
2009-04-03	04:34:00	0
2009-04-03	04:35:00	0
2009-04-03	04:36:00	0
2009-04-03	04:37:00	0
2009-04-03	04:38:00	0
2009-04-03	04:39:00	0
2009-04-03	04:40:00	0
2009-04-03	04:41:00	0
2009-04-03	04:42:00	0
2009-04-03	04:43:00	0
2009-04-03	04:44:00	0
2009-04-03	04:45:00	0
2009-04-03	04:46:00	0
2009-04-03	04:47:00	0
2009-04-03	04:48:00	0
2009-04-03	04:49:00	0
2009-04-03	04:50:00	0
2009-04-03	04:51:00	0
2009-04-03	04:52:00	0
2009-04-03	04:53:00	0
2009-04-03	04:54:00	0
2009-04-03	04:55:00	0
2009-04-03	04:56:00	0
2009-04-03	04:57:00	0
2009-04-03	04:58:00	0
2009-04-03	04:59:00	0
2009-04-03	05:00:00	0
2009-04-03	05:01:00	0
2009-04-03	05:02:00	0
2009-04-03	05:03:00	0
2009-04-03	05:04:00	0
2009-04-03	05:05:00	0
2009-04-03	05:06:00	0
2009-04-03	05:07:00	0
2009-04-03	05:08:00	0
2009-04-03	05:09:00	0
2009-04-03	05:10:00	0
2009-04-03	05:11:00	0
2009-04-03	05:12:00	0
2009-04-03	05:13:00	0
2009-04-03	05:14:00	0
2009-04-03	05:15:00	0
2009-04-03	05:16:00	0
2009-04-03	05:17:00	0
2009-04-03	05:18:00	0
2009-04-03	05:19:00	0
2009-04-03	05:20:00	0
2009-04-03	05:21:00	0
2009-04-03	05:22:00	0
2009-04-03	05:23:00	0
2009-04-03	05:24:00	0
2009-04-03	05:25:00	0
2009-04-03	05:26:00	0
2009-04-03	05:27:00	0
2009-04-03	05:28:00	0
2009-04-03	05:29:00	0
2009-04-03	05:30:00	0
2009-04-03	05:31:00	0
2009-04-03	05:32:00	0
2009-04-03	05:33:00	0
2009-04-03	05:34:00	0
2009-04-03	05:35:00	0
2009-04-03	05:36:00	0
2009-04-03	05:37:00	0
2009-04-03	05:38:00	0
2009-04-03	05:39:00	0
2009-04-03	05:40:00	0
2009-04-03	05:41:00	0
2009-04-03	05:42:00	0
2009-04-03	05:43:00	0
2009-04-03	05:44:00	0
2009-04-03	05:45:00	0
2009-04-03	05:46:00	0
2009-04-03	05:47:00	0
2009-04-03	05:48:00	0
2009-04-03	05:49:00	0
2009-04-03	05:50:00	0
2009-04-03	05:51:00	0
2009-04-03	05:52:00	0
2009-04-03	05:53:00	0
2009-04-03	05:54:00	0
2009-04-03	05:55:00	0
2009-04-03	05:56:00	0
2009-04-03	05:57:00	0
2009-04-03	05:58:00	0
2009-04-03	05:59:00	0
2009-04-03	06:00:00	0
2009-04-03	06:01:00	0
2009-04-03	06:02:00	0
2009-04-03	06:03:00	0
2009-04-03	06:04:00	0
2009-04-03	06:05:00	0
2009-04-03	06:06:00	0
2009-04-03	06:07:00	0
2009-04-03	06:08:00	0
2009-04-03	06:09:00	0
2009-04-03	06:10:00	0
2009-04-03	06:11:00	0
2009-04-03	06:12:00	0
2009-04-03	06:13:00	0
2009-04-03	06:14:00	0
2009-04-03	06:15:00	0
2009-04-03	06:16:00	0
2009-04-03	06:17:00	0
2009-04-03	06:18:00	0
2009-04-03	06:19:00	0
2009-04-03	06:20:00	0
2009-04-03	06:21:00	0
2009-04-03	06:22:00	0
2009-04-03	06:23:00	0
2009-04-03	06:24:00	0
2009-04-03	06:25:00	0
2009-04-03	06:26:00	0
2009-04-03	06:27:00	0
2009-04-03	06:28:00	0
2009-04-03	06:29:00	0
2009-04-03	06:30:00	0
2009-04-03	06:31:00	0
2009-04-03	06:32:00	0
2009-04-03	06:33:00	0
2009-04-03	06:34:00	0
2009-04-03	06:35:00	0
2009-04-03	06:36:00	0
2009-04-03	06:37:00	0
2009-04-03	06:38:00	0
2009-04-03	06:39:00	0
2009-04-03	06:40:00	0
2009-04-03	06:41:00	0
2009-04-03	06:42:00	0
2009-04-03	06:43:00	0
2009-04-03	06:44:00	0
2009-04-03	06:45:00	0
2009-04-03	06:46:00	0
2009-04-03	06:47:00	0
2009-04-03	06:48:00	0
2009-04-03	06:49:00	0
2009-04-03	06:50:00	0
2009-04-03	06:51:00	0
2009-04-03	06:52:00	0
2009-04-03	06:53:00	0
2009-04-03	06:54:00	0
2009-04-03	06:55:00	0
2009-04-03	06:56:00	0
2009-04-03	06:57:00	0
2009-04-03	06:58:00	0
2009-04-03	06:59:00	0
2009-04-03	07:00:00	0
2009-04-03	07:01:00	0
2009-04-03	07:02:00	0
2009-04-03	07:03:00	0
2009-04-03	07:04:00	0
2009-04-03	07:05:00	0
2009-04-03	07:06:00	0
2009-04-03	07:07:00	0
2009-04-03	07:08:00	0
2009-04-03	07:09:00	0
2009-04-03	07:10:00	0
2009-04-03	07:11:00	0
2009-04-03	07:12:00	0
2009-04-03	07:13:00	0
2009-04-03	07:14:00	0
2009-04-03	07:15:00	0
2009-04-03	07:16:00	0
2009-04-03	07:17:00	0
2009-04-03	07:18:00	0
2009-04-03	07:19:00	0
2009-04-03	07:20:00	0
2009-04-03	07:21:00	0
2009-04-03	07:22:00	0
2009-04-03	07:23:00	0
2009-04-03	07:24:00	0
2009-04-03	07:25:00	0
2009-04-03	07:26:00	0
2009-04-03	07:27:00	0
2009-04-03	07:28:00	0
2009-04-03	07:29:00	0
2009-04-03	07:30:00	0
2009-04-03	07:31:00	0
2009-04-03	07:32:00	0
2009-04-03	07:33:00	0
2009-04-03	07:34:00	0
2009-04-03	07:35:00	0
2009-04-03	07:36:00	0
2009-04-03	07:37:00	0
2009-04-03	07:38:00	0
2009-04-03	07:39:00	0
2009-04-03	07:40:00	0
2009-04-03	07:41:00	0
2009-04-03	07:42:00	0
2009-04-03	07:43:00	0
2009-04-03	07:44:00	0
2009-04-03	07:45:00	0
2009-04-03	07:46:00	0
2009-04-03	07:47:00	0
2009-04-03	07:48:00	0
2009-04-03	07:49:00	0
2009-04-03	07:50:00	0
2009-04-03	07:51:00	0
2009-04-03	07:52:00	0
2009-04-03	07:53:00	0
2009-04-03	07:54:00	0
2009-04-03	07:55:00	0
2009-04-03	07:56:00	0
2009-04-03	07:57:00	0
2009-04-03	07:58:00	0
2009-04-03	07:59:00	0
2009-04-03	08:00:00	0
2009-04-03	08:01:00	0
2009-04-03	08:02:00	0
2009-04-03	08:03:00	0
2009-04-03	08:04:00	0
2009-04-03	08:05:00	0
2009-04-03	08:06:00	0
2009-04-03	08:07:00	0
2009-04-03	08:08:00	0
2009-04-03	08:09:00	0
2009-04-03	08:10:00	0
2009-04-03	08:11:00	0
2009-04-03	08:12:00	0
2009-04-03	08:13:00	0
2009-04-03	08:14:00	0
2009-04-03	08:15:00	0
2009-04-03	08:16:00	0
2009-04-03	08:17:00	0
2009-04-03	08:18:00	0
2009-04-03	08:19:00	0
2009-04-03	08:20:00	0
2009-04-03	08:21:00	0
2009-04-03	08:22:00	0
2009-04-03	08:23:00	0
2009-04-03	08:24:00	0
2009-04-03	08:25:00	0
2009-04-03	08:26:00	0
2009-04-03	08:27:00	0
2009-04-03	08:28:00	0
2009-04-03	08:29:00	0
2009-04-03	08:30:00	0
2009-04-03	08:31:00	0
2009-04-03	08:32:00	0
2009-04-03	08:33:00	0
2009-04-03	08:34:00	0
2009-04-03	08:35:00	0
2009-04-03	08:36:00	0
2009-04-03	08:37:00	0
2009-04-03	08:38:00	0
2009-04-03	08:39:00	0
2009-04-03	08:40:00	0
2009-04-03	08:41:00	0
2009-04-03	08:42:00	0
2009-04-03	08:43:00	0
2009-04-03	08:44:00	0
2009-04-03	08:45:00	0
2009-04-03	08:46:00	0
2009-04-03	08:47:00	0
2009-04-03	08:48:00	0
2009-04-03	08:49:00	0
2009-04-03	08:50:00	0
2009-04-03	08:51:00	0
2009-04-03	08:52:00	0
2009-04-03	08:53:00	0
2009-04-03	08:54:00	0
2009-04-03	08:55:00	0
2009-04-03	08:56:00	0
2009-04-03	08:57:00	0
2009-04-03	08:58:00	0
2009-04-03	08:59:00	0
2009-04-03	09:00:00	0
2009-04-03	09:01:00	0
2009-04-03	09:02:00	0
2009-04-03	09:03:00	0
2009-04-03	09:04:00	0
2009-04-03	09:05:00	0
2009-04-03	09:06:00	0
2009-04-03	09:07:00	0
2009-04-03	09:08:00	0
2009-04-03	09:09:00	0
2009-04-03	09:10:00	0
2009-04-03	09:11:00	0
2009-04-03	09:12:00	0
2009-04-03	09:13:00	0
2009-04-03	09:14:00	0
2009-04-03	09:15:00	0
2009-04-03	09:16:00	0
2009-04-03	09:17:00	0
2009-04-03	09:18:00	0
2009-04-03	09:19:00	0
2009-04-03	09:20:00	0
2009-04-03	09:21:00	0
2009-04-03	09:22:00	0
2009-04-03	09:23:00	0
2009-04-03	09:24:00	0
2009-04-03	09:25:00	0
2009-04-03	09:26:00	0
2009-04-03	09:27:00	0
2009-04-03	09:28:00	0
2009-04-03	09:29:00	0
2009-04-03	09:30:00	0
2009-04-03	09:31:00	0
2009-04-03	09:32:00	0
2009-04-03	09:33:00	0
2009-04-03	09:34:00	0
2009-04-03	09:35:00	0
2009-04-03	09:36:00	0
2009-04-03	09:37:00	0
2009-04-03	09:38:00	0
2009-04-03	09:39:00	0
2009-04-03	09:40:00	0
2009-04-03	09:41:00	0
2009-04-03	09:42:00	0
2009-04-03	09:43:00	0
2009-04-03	09:44:00	0
2009-04-03	09:45:00	0
2009-04-03	09:46:00	0
2009-04-03	09:47:00	0
2009-04-03	09:48:00	0
2009-04-03	09:49:00	0
2009-04-03	09:50:00	0
2009-04-03	09:51:00	0
2009-04-03	09:52:00	0
2009-04-03	09:53:00	0
2009-04-03	09:54:00	0
2009-04-03	09:55:00	0
2009-04-03	09:56:00	0
2009-04-03	09:57:00	0
2009-04-03	09:58:00	0
2009-04-03	09:59:00	0
2009-04-03	10:00:00	0
2009-04-03	10:01:00	0
2009-04-03	10:02:00	0
2009-04-03	10:03:00	0
2009-04-03	10:04:00	0
2009-04-03	10:05:00	0
2009-04-03	10:06:00	0
2009-04-03	10:07:00	0
2009-04-03	10:08:00	0
2009-04-03	10:09:00	0
2009-04-03	10:10:00	0
2009-04-03	10:11:00	0
2009-04-03	10:12:00	0
2009-04-03	10:13:00	0
2009-04-03	10:14:00	0
2009-04-03	10:15:00	0
2009-04-03	10:16:00	0
2009-04-03	10:17:00	0
2009-04-03	10:18:00	0
2009-04-03	10:19:00	0
2009-04-03	10:20:00	0
2009-04-03	10:21:00	0
2009-04-03	10:22:00	0
2009-04-03	10:23:00	0
2009-04-03	10:24:00	0
2009-04-03	10:25:00	0
2009-04-03	10:26:00	0
2009-04-03	10:27:00	0
2009-04-03	10:28:00	0
2009-04-03	10:29:00	0
2009-04-03	10:30:00	0
2009-04-03	10:31:00	0
2009-04-03	10:32:00	0
2009-04-03	10:33:00	0
2009-04-03	10:34:00	0
2009-04-03	10:35:00	0
2009-04-03	10:36:00	0
2009-04-03	10:37:00	0
2009-04-03	10:38:00	0
2009-04-03	10:39:00	0
2009-04-03	10:40:00	0
2009-04-03	10:41:00	0
2009-04-03	10:42:00	0
2009-04-03	10:43:00	0
2009-04-03	10:44:00	0
2009-04-03	10:45:00	0
2009-04-03	10:46:00	0
2009-04-03	10:47:00	0
2009-04-03	10:48:00	0
2009-04-03	10:49:00	0
2009-04-03	10:50:00	0
2009-04-03	10:51:00	0
2009-04-03	10:52:00	0
2009-04-03	10:53:00	0
2009-04-03	10:54:00	0
2009-04-03	10:55:00	0
2009-04-03	10:56:00	0
2009-04-03	10:57:00	0
2009-04-03	10:58:00	0
2009-04-03	10:59:00	0
2009-04-03	11:00:00	0
2009-04-03	11:01:00	0
2009-04-03	11:02:00	0
2009-04-03	11:03:00	0
2009-04-03	11:04:00	0
2009-04-03	11:05:00	0
2009-04-03	11:06:00	0
2009-04-03	11:07:00	0
2009-04-03	11:08:00	0
2009-04-03	11:09:00	0
2009-04-03	11:10:00	0
2009-04-03	11:11:00	0
2009-04-03	11:12:00	0
2009-04-03	11:13:00	0
2009-04-03	11:14:00	0
2009-04-03	11:15:00	0
2009-04-03	11:16:00	0
2009-04-03	11:17:00	0
2009-04-03	11:18:00	0
2009-04-03	11:19:00	0
2009-04-03	11:20:00	0
2009-04-03	11:21:00	0
2009-04-03	11:22:00	0
2009-04-03	11:23:00	0
2009-04-03	11:24:00	0
2009-04-03	11:25:00	0
2009-04-03	11:26:00	0
2009-04-03	11:27:00	0
2009-04-03	11:28:00	0
2009-04-03	11:29:00	0
2009-04-03	11:30:00	0
2009-04-03	11:31:00	0
2009-04-03	11:32:00	0
2009-04-03	11:33:00	0
2009-04-03	11:34:00	0
2009-04-03	11:35:00	0
2009-04-03	11:36:00	0
2009-04-03	11:37:00	0
2009-04-03	11:38:00	0
2009-04-03	11:39:00	0
2009-04-03	11:40:00	0
2009-04-03	11:41:00	0
2009-04-03	11:42:00	0
2009-04-03	11:43:00	0
2009-04-03	11:44:00	0
2009-04-03	11:45:00	0
2009-04-03	11:46:00	0
2009-04-03	11:47:00	0
2009-04-03	11:48:00	0
2009-04-03	11:49:00	0
2009-04-03	11:50:00	0
2009-04-03	11:51:00	0
2009-04-03	11:52:00	0
2009-04-03	11:53:00	0
2009-04-03	11:54:00	0
2009-04-03	11:55:00	0
2009-04-03	11:56:00	0
2009-04-03	11:57:00	0
2009-04-03	11:58:00	0
2009-04-03	11:59:00	0
2009-04-03	12:00:00	0
2009-04-03	12:01:00	0
2009-04-03	12:02:00	0
2009-04-03	12:03:00	0
2009-04-03	12:04:00	0
2009-04-03	12:05:00	0
2009-04-03	12:06:00	0
2009-04-03	12:07:00	0
2009-04-03	12:08:00	0
2009-04-03	12:09:00	0
2009-04-03	12:10:00	0
2009-04-03	12:11:00	0
2009-04-03	12:12:00	0
2009-04-03	12:13:00	0
2009-04-03	12:14:00	0
2009-04-03	12:15:00	0
2009-04-03	12:16:00	0
2009-04-03	12:17:00	0
2009-04-03	12:18:00	0
2009-04-03	12:19:00	0
2009-04-03	12:20:00	0
2009-04-03	12:21:00	0
2009-04-03	12:22:00	0
2009-04-03	12:23:00	0
2009-04-03	12:24:00	0
2009-04-03	12:25:00	0
2009-04-03	12:26:00	0
2009-04-03	12:27:00	0
2009-04-03	12:28:00	0
2009-04-03	12:29:00	0
2009-04-03	12:30:00	0
2009-04-03	12:31:00	0
2009-04-03	12:32:00	0
2009-04-03	12:33:00	0
2009-04-03	12:34:00	0
2009-04-03	12:35:00	0
2009-04-03	12:36:00	0
2009-04-03	12:37:00	0
2009-04-03	12:38:00	0
2009-04-03	12:39:00	0
2009-04-03	12:40:00	0
2009-04-03	12:41:00	0
2009-04-03	12:42:00	0
2009-04-03	12:43:00	0
2009-04-03	12:44:00	0
2009-04-03	12:45:00	0
2009-04-03	12:46:00	0
2009-04-03	12:47:00	0
2009-04-03	12:48:00	0
2009-04-03	12:49:00	0
2009-04-03	12:50:00	0
2009-04-03	12:51:00	0
2009-04-03	12:52:00	0
2009-04-03	12:53:00	0
2009-04-03	12:54:00	0
2009-04-03	12:55:00	0
2009-04-03	12:56:00	0
2009-04-03	12:57:00	0
2009-04-03	12:58:00	0
2009-04-03	12:59:00	0
2009-04-03	13:00:00	0
2009-04-03	13:01:00	0
2009-04-03	13:02:00	0
2009-04-03	13:03:00	0
2009-04-03	13:04:00	0
2009-04-03	13:05:00	0
2009-04-03	13:06:00	0
2009-04-03	13:07:00	0
2009-04-03	13:08:00	0
2009-04-03	13:09:00	0
2009-04-03	13:10:00	0
2009-04-03	13:11:00	0
2009-04-03	13:12:00	0
2009-04-03	13:13:00	0
2009-04-03	13:14:00	0
2009-04-03	13:15:00	0
2009-04-03	13:16:00	0
2009-04-03	13:17:00	0
2009-04-03	13:18:00	0
2009-04-03	13:19:00	0
2009-04-03	13:20:00	0
2009-04-03	13:21:00	0
2009-04-03	13:22:00	0
2009-04-03	13:23:00	0
2009-04-03	13:24:00	0
2009-04-03	13:25:00	0
2009-04-03	13:26:00	0
2009-04-03	13:27:00	0
2009-04-03	13:28:00	0
2009-04-03	13:29:00	0
2009-04-03	13:30:00	0
2009-04-03	13:31:00	0
2009-04-03	13:32:00	0
2009-04-03	13:33:00	0
2009-04-03	13:34:00	0
2009-04-03	13:35:00	0
2009-04-03	13:36:00	0
2009-04-03	13:37:00	0
2009-04-03	13:38:00	0
2009-04-03	13:39:00	0
2009-04-03	13:40:00	0
2009-04-03	13:41:00	0
2009-04-03	13:42:00	0
2009-04-03	13:43:00	0
2009-04-03	13:44:00	0
2009-04-03	13:45:00	0
2009-04-03	13:46:00	0
2009-04-03	13:47:00	0
2009-04-03	13:48:00	0
2009-04-03	13:49:00	0
2009-04-03	13:50:00	0
2009-04-03	13:51:00	0
2009-04-03	13:52:00	0
2009-04-03	13:53:00	0
2009-04-03	13:54:00	0
2009-04-03	13:55:00	0
2009-04-03	13:56:00	0
2009-04-03	13:57:00	0
2009-04-03	13:58:00	0
2009-04-03	13:59:00	0
2009-04-03	14:00:00	0
2009-04-03	14:01:00	0
2009-04-03	14:02:00	0
2009-04-03	14:03:00	0
2009-04-03	14:04:00	0
2009-04-03	14:05:00	0
2009-04-03	14:06:00	0
2009-04-03	14:07:00	0
2009-04-03	14:08:00	0
2009-04-03	14:09:00	0
2009-04-03	14:10:00	0
2009-04-03	14:11:00	0
2009-04-03	14:12:00	0
2009-04-03	14:13:00	0
2009-04-03	14:14:00	0
2009-04-03	14:15:00	0
2009-04-03	14:16:00	0
2009-04-03	14:17:00	0
2009-04-03	14:18:00	0
2009-04-03	14:19:00	0
2009-04-03	14:20:00	0
2009-04-03	14:21:00	0
2009-04-03	14:22:00	0
2009-04-03	14:23:00	0
2009-04-03	14:24:00	0
2009-04-03	14:25:00	0
2009-04-03	14:26:00	0
2009-04-03	14:27:00	0
2009-04-03	14:28:00	0
2009-04-03	14:29:00	0
2009-04-03	14:30:00	0
2009-04-03	14:31:00	0
2009-04-03	14:32:00	0
2009-04-03	14:33:00	0
2009-04-03	14:34:00	0
2009-04-03	14:35:00	0
2009-04-03	14:36:00	0
2009-04-03	14:37:00	0
2009-04-03	14:38:00	0
2009-04-03	14:39:00	0
2009-04-03	14:40:00	0
2009-04-03	14:41:00	0
2009-04-03	14:42:00	0
2009-04-03	14:43:00	0
2009-04-03	14:44:00	0
2009-04-03	14:45:00	0
2009-04-03	14:46:00	0
2009-04-03	14:47:00	0
2009-04-03	14:48:00	0
2009-04-03	14:49:00	0
2009-04-03	14:50:00	0
2009-04-03	14:51:00	0
2009-04-03	14:52:00	0
2009-04-03	14:53:00	0
2009-04-03	14:54:00	0
2009-04-03	14:55:00	0
2009-04-03	14:56:00	0
2009-04-03	14:57:00	0
2009-04-03	14:58:00	0
2009-04-03	14:59:00	0
2009-04-03	15:00:00	0
2009-04-03	15:01:00	0
2009-04-03	15:02:00	0
2009-04-03	15:03:00	0
2009-04-03	15:04:00	0
2009-04-03	15:05:00	0
2009-04-03	15:06:00	0
2009-04-03	15:07:00	0
2009-04-03	15:08:00	0
2009-04-03	15:09:00	0
2009-04-03	15:10:00	0
2009-04-03	15:11:00	0
2009-04-03	15:12:00	0
2009-04-03	15:13:00	0
2009-04-03	15:14:00	0
2009-04-03	15:15:00	0
2009-04-03	15:16:00	0
2009-04-03	15:17:00	0
2009-04-03	15:18:00	0
2009-04-03	15:19:00	0
2009-04-03	15:20:00	0
2009-04-03	15:21:00	0
2009-04-03	15:22:00	0
2009-04-03	15:23:00	0
2009-04-03	15:24:00	0
2009-04-03	15:25:00	0
2009-04-03	15:26:00	0
2009-04-03	15:27:00	0
2009-04-03	15:28:00	0
2009-04-03	15:29:00	0
2009-04-03	15:30:00	0
2009-04-03	15:31:00	0
2009-04-03	15:32:00	0
2009-04-03	15:33:00	0
2009-04-03	15:34:00	0
2009-04-03	15:35:00	0
2009-04-03	15:36:00	0
2009-04-03	15:37:00	0
2009-04-03	15:38:00	0
2009-04-03	15:39:00	0
2009-04-03	15:40:00	0
2009-04-03	15:41:00	0
2009-04-03	15:42:00	0
2009-04-03	15:43:00	0
2009-04-03	15:44:00	0
2009-04-03	15:45:00	0
2009-04-03	15:46:00	0
2009-04-03	15:47:00	0
2009-04-03	15:48:00	0
2009-04-03	15:49:00	0
2009-04-03	15:50:00	0
2009-04-03	15:51:00	0
2009-04-03	15:52:00	0
2009-04-03	15:53:00	0
2009-04-03	15:54:00	0
2009-04-03	15:55:00	0
2009-04-03	15:56:00	0
2009-04-03	15:57:00	0
2009-04-03	15:58:00	0
2009-04-03	15:59:00	0
2009-04-03	16:00:00	0
2009-04-03	16:01:00	0
2009-04-03	16:02:00	0
2009-04-03	16:03:00	0
2009-04-03	16:04:00	0
2009-04-03	16:05:00	0
2009-04-03	16:06:00	0
2009-04-03	16:07:00	0
2009-04-03	16:08:00	0
2009-04-03	16:09:00	0
2009-04-03	16:10:00	0
2009-04-03	16:11:00	0
2009-04-03	16:12:00	0
2009-04-03	16:13:00	0
2009-04-03	16:14:00	0
2009-04-03	16:15:00	0
2009-04-03	16:16:00	0
2009-04-03	16:17:00	0
2009-04-03	16:18:00	0
2009-04-03	16:19:00	0
2009-04-03	16:20:00	0
2009-04-03	16:21:00	0
2009-04-03	16:22:00	0
2009-04-03	16:23:00	0
2009-04-03	16:24:00	0
2009-04-03	16:25:00	0
2009-04-03	16:26:00	0
2009-04-03	16:27:00	0
2009-04-03	16:28:00	0
2009-04-03	16:29:00	0
2009-04-03	16:30:00	0
2009-04-03	16:31:00	0
2009-04-03	16:32:00	0
2009-04-03	16:33:00	0
2009-04-03	16:34:00	0
2009-04-03	16:35:00	0
2009-04-03	16:36:00	0
2009-04-03	16:37:00	0
2009-04-03	16:38:00	0
2009-04-03	16:39:00	0
2009-04-03	16:40:00	0
2009-04-03	16:41:00	0
2009-04-03	16:42:00	0
2009-04-03	16:43:00	0
2009-04-03	16:44:00	0
2009-04-03	16:45:00	0
2009-04-03	16:46:00	0
2009-04-03	16:47:00	0
2009-04-03	16:48:00	0
2009-04-03	16:49:00	0
2009-04-03	16:50:00	0
2009-04-03	16:51:00	0
2009-04-03	16:52:00	0
2009-04-03	16:53:00	0
2009-04-03	16:54:00	0
2009-04-03	16:55:00	0
2009-04-03	16:56:00	0
2009-04-03	16:57:00	0
2009-04-03	16:58:00	0
2009-04-03	16:59:00	0
2009-04-03	17:00:00	0
2009-04-03	17:01:00	0
2009-04-03	17:02:00	0
2009-04-03	17:03:00	0
2009-04-03	17:04:00	0
2009-04-03	17:05:00	0
2009-04-03	17:06:00	0
2009-04-03	17:07:00	0
2009-04-03	17:08:00	0
2009-04-03	17:09:00	0
2009-04-03	17:10:00	0
2009-04-03	17:11:00	0
2009-04-03	17:12:00	0
2009-04-03	17:13:00	0
2009-04-03	17:14:00	0
2009-04-03	17:15:00	0
2009-04-03	17:16:00	0
2009-04-03	17:17:00	0
2009-04-03	17:18:00	0
2009-04-03	17:19:00	0
2009-04-03	17:20:00	0
2009-04-03	17:21:00	0
2009-04-03	17:22:00	0
2009-04-03	17:23:00	0
2009-04-03	17:24:00	0
2009-04-03	17:25:00	0
2009-04-03	17:26:00	0
2009-04-03	17:27:00	0
2009-04-03	17:28:00	0
2009-04-03	17:29:00	0
2009-04-03	17:30:00	0
2009-04-03	17:31:00	0
2009-04-03	17:32:00	0
2009-04-03	17:33:00	0
2009-04-03	17:34:00	0
2009-04-03	17:35:00	0
2009-04-03	17:36:00	0
2009-04-03	17:37:00	0
2009-04-03	17:38:00	0
2009-04-03	17:39:00	0
2009-04-03	17:40:00	0
2009-04-03	17:41:00	0
2009-04-03	17:42:00	0
2009-04-03	17:43:00	0
2009-04-03	17:44:00	0
2009-04-03	17:45:00	0
2009-04-03	17:46:00	0
2009-04-03	17:47:00	0
2009-04-03	17:48:00	0
2009-04-03	17:49:00	0
2009-04-03	17:50:00	0
2009-04-03	17:51:00	0
2009-04-03	17:52:00	0
2009-04-03	17:53:00	0
2009-04-03	17:54:00	0
2009-04-03	17:55:00	0
2009-04-03	17:56:00	0
2009-04-03	17:57:00	0
2009-04-03	17:58:00	0
2009-04-03	17:59:00	0
2009-04-03	18:00:00	0	M
2009-04-03	18:01:00	752
2009-04-03	18:02:00	527
2009-04-03	18:03:00	350
2009-04-03	18:04:00	1172
2009-04-03	18:05:00	908
2009-04-03	18:06:00	889
2009-04-03	18:07:00	527
2009-04-03	18:08:00	390
2009-04-03	18:09:00	853
2009-04-03	18:10:00	1552
2009-04-03	18:11:00	1195
2009-04-03	18:12:00	605
2009-04-03	18:13:00	121
2009-04-03	18:14:00	303
2009-04-03	18:15:00	134
2009-04-03	18:16:00	0
2009-04-03	18:17:00	134
2009-04-03	18:18:00	303
2009-04-03	18:19:00	5
2009-04-03	18:20:00	211
2009-04-03	18:21:00	0
2009-04-03	18:22:00	752
2009-04-03	18:23:00	539
2009-04-03	18:24:00	908
2009-04-03	18:25:00	539
2009-04-03	18:26:00	422
2009-04-03	18:27:00	276
2009-04-03	18:28:00	196
2009-04-03	18:29:00	350
2009-04-03	18:30:00	204
2009-04-03	18:31:00	432
2009-04-03	18:32:00	39
2009-04-03	18:33:00	0
2009-04-03	18:34:00	0
2009-04-03	18:35:00	0
2009-04-03	18:36:00	331
2009-04-03	18:37:00	39
2009-04-03	18:38:00	0
2009-04-03	18:39:00	181
2009-04-03	18:40:00	39
2009-04-03	18:41:00	147
2009-04-03	18:42:00	466
2009-04-03	18:43:00	0
2009-04-03	18:44:00	578
2009-04-03	18:45:00	836
2009-04-03	18:46:00	53
2009-04-03	18:47:00	0
2009-04-03	18:48:00	10
2009-04-03	18:49:00	0
2009-04-03	18:50:00	0
2009-04-03	18:51:00	5
2009-04-03	18:52:00	19
2009-04-03	18:53:00	53
2009-04-03	18:54:00	5
2009-04-03	18:55:00	34
2009-04-03	18:56:00	0
2009-04-03	18:57:00	0
2009-04-03	18:58:00	0
2009-04-03	18:59:00	592
2009-04-03	19:00:00	147
2009-04-03	19:01:00	175
2009-04-03	19:02:00	188
2009-04-03	19:03:00	369
2009-04-03	19:04:00	0
2009-04-03	19:05:00	514
2009-04-03	19:06:00	10
2009-04-03	19:07:00	34
2009-04-03	19:08:00	0
2009-04-03	19:09:00	147
2009-04-03	19:10:00	19
2009-04-03	19:11:00	15
2009-04-03	19:12:00	141
2009-04-03	19:13:00	350
2009-04-03	19:14:00	514
2009-04-03	19:15:00	619
2009-04-03	19:16:00	161
2009-04-03	19:17:00	219
2009-04-03	19:18:00	0
2009-04-03	19:19:00	1085
2009-04-03	19:20:00	1003
2009-04-03	19:21:00	983
2009-04-03	19:22:00	1892
2009-04-03	19:23:00	752
2009-04-03	19:24:00	514
2009-04-03	19:25:00	539
2009-04-03	19:26:00	1085
2009-04-03	19:27:00	1552
2009-04-03	19:28:00	769
2009-04-03	19:29:00	818
2009-04-03	19:30:00	1023
2009-04-03	19:31:00	350
2009-04-03	19:32:00	69
2009-04-03	19:33:00	908
2009-04-03	19:34:00	1085
2009-04-03	19:35:00	1043
2009-04-03	19:36:00	926
2009-04-03	19:37:00	321
2009-04-03	19:38:00	737
2009-04-03	19:39:00	501
2009-04-03	19:40:00	466
2009-04-03	19:41:00	1496
2009-04-03	19:42:00	647
2009-04-03	19:43:00	0
2009-04-03	19:44:00	196
2009-04-03	19:45:00	478
2009-04-03	19:46:00	400
2009-04-03	19:47:00	294
2009-04-03	19:48:00	53
2009-04-03	19:49:00	0
2009-04-03	19:50:00	0
2009-04-03	19:51:00	0
2009-04-03	19:52:00	0
2009-04-03	19:53:00	0
2009-04-03	19:54:00	0
2009-04-03	19:55:00	0
2009-04-03	19:56:00	0
2009-04-03	19:57:00	0
2009-04-03	19:58:00	0
2009-04-03	19:59:00	44
2009-04-03	20:00:00	478
2009-04-03	20:01:00	92
2009-04-03	20:02:00	44
2009-04-03	20:03:00	0
2009-04-03	20:04:00	0
2009-04-03	20:05:00	0
2009-04-03	20:06:00	104
2009-04-03	20:07:00	29
2009-04-03	20:08:00	818
2009-04-03	20:09:00	1700
2009-04-03	20:10:00	1524
2009-04-03	20:11:00	1700
2009-04-03	20:12:00	1290
2009-04-03	20:13:00	1339
2009-04-03	20:14:00	769
2009-04-03	20:15:00	250
2009-04-03	20:16:00	80
2009-04-03	20:17:00	285
2009-04-03	20:18:00	605
2009-04-03	20:19:00	501
2009-04-03	20:20:00	706
2009-04-03	20:21:00	400
2009-04-03	20:22:00	944
2009-04-03	20:23:00	564
2009-04-03	20:24:00	411
2009-04-03	20:25:00	250
2009-04-03	20:26:00	908
2009-04-03	20:27:00	661
2009-04-03	20:28:00	619
2009-04-03	20:29:00	802
2009-04-03	20:30:00	592
2009-04-03	20:31:00	514
2009-04-03	20:32:00	161
2009-04-03	20:33:00	196
2009-04-03	20:34:00	211
2009-04-03	20:35:00	303
2009-04-03	20:36:00	121
2009-04-03	20:37:00	188
2009-04-03	20:38:00	0
2009-04-03	20:39:00	0
2009-04-03	20:40:00	175
2009-04-03	20:41:00	227
2009-04-03	20:42:00	411
2009-04-03	20:43:00	227
2009-04-03	20:44:00	204
2009-04-03	20:45:00	303
2009-04-03	20:46:00	110
2009-04-03	20:47:00	110
2009-04-03	20:48:00	0
2009-04-03	20:49:00	0
2009-04-03	20:50:00	0
2009-04-03	20:51:00	211
2009-04-03	20:52:00	53
2009-04-03	20:53:00	58
2009-04-03	20:54:00	0
2009-04-03	20:55:00	0
2009-04-03	20:56:00	53
2009-04-03	20:57:00	0
2009-04-03	20:58:00	0
2009-04-03	20:59:00	0
2009-04-03	21:00:00	0
2009-04-03	21:01:00	0
2009-04-03	21:02:00	53
2009-04-03	21:03:00	134
2009-04-03	21:04:00	490
2009-04-03	21:05:00	115
2009-04-03	21:06:00	92
2009-04-03	21:07:00	53
2009-04-03	21:08:00	10
2009-04-03	21:09:00	29
2009-04-03	21:10:00	10
2009-04-03	21:11:00	39
2009-04-03	21:12:00	48
2009-04-03	21:13:00	34
2009-04-03	21:14:00	10
2009-04-03	21:15:00	39
2009-04-03	21:16:00	34
2009-04-03	21:17:00	34
2009-04-03	21:18:00	0
2009-04-03	21:19:00	0
2009-04-03	21:20:00	0
2009-04-03	21:21:00	75
2009-04-03	21:22:00	0
2009-04-03	21:23:00	0
2009-04-03	21:24:00	0
2009-04-03	21:25:00	0
2009-04-03	21:26:00	0
2009-04-03	21:27:00	0
2009-04-03	21:28:00	58
2009-04-03	21:29:00	0
2009-04-03	21:30:00	0
2009-04-03	21:31:00	0
2009-04-03	21:32:00	0
2009-04-03	21:33:00	0
2009-04-03	21:34:00	0
2009-04-03	21:35:00	69
2009-04-03	21:36:00	400
2009-04-03	21:37:00	10
2009-04-03	21:38:00	196
2009-04-03	21:39:00	10
2009-04-03	21:40:00	44
2009-04-03	21:41:00	0
2009-04-03	21:42:00	0
2009-04-03	21:43:00	0
2009-04-03	21:44:00	0
2009-04-03	21:45:00	0
2009-04-03	21:46:00	0
2009-04-03	21:47:00	0
2009-04-03	21:48:00	44
2009-04-03	21:49:00	0
2009-04-03	21:50:00	63
2009-04-03	21:51:00	276
2009-04-03	21:52:00	455
2009-04-03	21:53:00	58
2009-04-03	21:54:00	19
2009-04-03	21:55:00	48
2009-04-03	21:56:00	0
2009-04-03	21:57:00	134
2009-04-03	21:58:00	115
2009-04-03	21:59:00	10
2009-04-03	22:00:00	0
2009-04-03	22:01:00	0
2009-04-03	22:02:00	0
2009-04-03	22:03:00	0
2009-04-03	22:04:00	0
2009-04-03	22:05:00	0
2009-04-03	22:06:00	0
2009-04-03	22:07:00	268
2009-04-03	22:08:00	5
2009-04-03	22:09:00	0
2009-04-03	22:10:00	0
2009-04-03	22:11:00	0
2009-04-03	22:12:00	0
2009-04-03	22:13:00	0
2009-04-03	22:14:00	0
2009-04-03	22:15:00	0
2009-04-03	22:16:00	0
2009-04-03	22:17:00	0
2009-04-03	22:18:00	0
2009-04-03	22:19:00	1043
2009-04-03	22:20:00	2971
2009-04-03	22:21:00	836
2009-04-03	22:22:00	1106
2009-04-03	22:23:00	1064
2009-04-03	22:24:00	350
2009-04-03	22:25:00	29
2009-04-03	22:26:00	29
2009-04-03	22:27:00	19
2009-04-03	22:28:00	539
2009-04-03	22:29:00	294
2009-04-03	22:30:00	5
2009-04-03	22:31:00	5
2009-04-03	22:32:00	0
2009-04-03	22:33:00	161
2009-04-03	22:34:00	1265
2009-04-03	22:35:00	676
2009-04-03	22:36:00	321
2009-04-03	22:37:00	527
2009-04-03	22:38:00	422
2009-04-03	22:39:00	29
2009-04-03	22:40:00	175
2009-04-03	22:41:00	0
2009-04-03	22:42:00	121
2009-04-03	22:43:00	127
2009-04-03	22:44:00	48
2009-04-03	22:45:00	34
2009-04-03	22:46:00	80
2009-04-03	22:47:00	58
2009-04-03	22:48:00	227
2009-04-03	22:49:00	871
2009-04-03	22:50:00	211
2009-04-03	22:51:00	350
2009-04-03	22:52:00	0
2009-04-03	22:53:00	69
2009-04-03	22:54:00	63
2009-04-03	22:55:00	0
2009-04-03	22:56:00	211
2009-04-03	22:57:00	294
2009-04-03	22:58:00	1128
2009-04-03	22:59:00	706
2009-04-03	23:00:00	752
2009-04-03	23:01:00	661
2009-04-03	23:02:00	0
2009-04-03	23:03:00	0
2009-04-03	23:04:00	0
2009-04-03	23:05:00	647
2009-04-03	23:06:00	818
2009-04-03	23:07:00	303
2009-04-03	23:08:00	369
2009-04-03	23:09:00	154
2009-04-03	23:10:00	39
2009-04-03	23:11:00	379
2009-04-03	23:12:00	134
2009-04-03	23:13:00	175
2009-04-03	23:14:00	0
2009-04-03	23:15:00	0
2009-04-03	23:16:00	0
2009-04-03	23:17:00	75
2009-04-03	23:18:00	80
2009-04-03	23:19:00	134
2009-04-03	23:20:00	340
2009-04-03	23:21:00	98
2009-04-03	23:22:00	908
2009-04-03	23:23:00	721
2009-04-03	23:24:00	926
2009-04-03	23:25:00	647
2009-04-03	23:26:00	127
2009-04-03	23:27:00	141
2009-04-03	23:28:00	44
2009-04-03	23:29:00	34
2009-04-03	23:30:00	0
2009-04-03	23:31:00	168
2009-04-03	23:32:00	1023
2009-04-03	23:33:00	455
2009-04-03	23:34:00	983
2009-04-03	23:35:00	647
2009-04-03	23:36:00	889
2009-04-03	23:37:00	219
2009-04-03	23:38:00	175
2009-04-03	23:39:00	0
2009-04-03	23:40:00	80
2009-04-03	23:41:00	0
2009-04-03	23:42:00	0
2009-04-03	23:43:00	0
2009-04-03	23:44:00	15
2009-04-03	23:45:00	5
2009-04-03	23:46:00	75
2009-04-03	23:47:00	432
2009-04-03	23:48:00	268
2009-04-03	23:49:00	0
2009-04-03	23:50:00	0
2009-04-03	23:51:00	0
2009-04-03	23:52:00	0
2009-04-03	23:53:00	0
2009-04-03	23:54:00	0
2009-04-03	23:55:00	0
2009-04-03	23:56:00	15
2009-04-03	23:57:00	0
2009-04-03	23:58:00	0
2009-04-03	23:59:00	0
2009-04-04	00:00:00	0
2009-04-04	00:01:00	0
2009-04-04	00:02:00	0
2009-04-04	00:03:00	0
2009-04-04	00:04:00	0
2009-04-04	00:05:00	29
2009-04-04	00:06:00	0
2009-04-04	00:07:00	0
2009-04-04	00:08:00	0
2009-04-04	00:09:00	0
2009-04-04	00:10:00	0
2009-04-04	00:11:00	63
2009-04-04	00:12:00	250
2009-04-04	00:13:00	134
2009-04-04	00:14:00	39
2009-04-04	00:15:00	115
2009-04-04	00:16:00	98
2009-04-04	00:17:00	141
2009-04-04	00:18:00	115
2009-04-04	00:19:00	15
2009-04-04	00:20:00	147
2009-04-04	00:21:00	268
2009-04-04	00:22:00	219
2009-04-04	00:23:00	242
2009-04-04	00:24:00	737
2009-04-04	00:25:00	390
2009-04-04	00:26:00	964
2009-04-04	00:27:00	836
2009-04-04	00:28:00	311
2009-04-04	00:29:00	578
2009-04-04	00:30:00	514
2009-04-04	00:31:00	19
2009-04-04	00:32:00	0
2009-04-04	00:33:00	0
2009-04-04	00:34:00	0
2009-04-04	00:35:00	5
2009-04-04	00:36:00	0
2009-04-04	00:37:00	29
2009-04-04	00:38:00	390
2009-04-04	00:39:00	619
2009-04-04	00:40:00	737
2009-04-04	00:41:00	1314
2009-04-04	00:42:00	1794
2009-04-04	00:43:00	1670
2009-04-04	00:44:00	1390
2009-04-04	00:45:00	1003
2009-04-04	00:46:00	1339
2009-04-04	00:47:00	1731
2009-04-04	00:48:00	514
2009-04-04	00:49:00	141
2009-04-04	00:50:00	250
2009-04-04	00:51:00	605
2009-04-04	00:52:00	676
2009-04-04	00:53:00	15
2009-04-04	00:54:00	5
2009-04-04	00:55:00	0
2009-04-04	00:56:00	29
2009-04-04	00:57:00	10
2009-04-04	00:58:00	0
2009-04-04	00:59:00	10
2009-04-04	01:00:00	0
2009-04-04	01:01:00	0
2009-04-04	01:02:00	0
2009-04-04	01:03:00	0
2009-04-04	01:04:00	0
2009-04-04	01:05:00	0
2009-04-04	01:06:00	0
2009-04-04	01:07:00	0
2009-04-04	01:08:00	578
2009-04-04	01:09:00	944
2009-04-04	01:10:00	1064
2009-04-04	01:11:00	1172
2009-04-04	01:12:00	242
2009-04-04	01:13:00	0
2009-04-04	01:14:00	29
2009-04-04	01:15:00	0
2009-04-04	01:16:00	5
2009-04-04	01:17:00	0
2009-04-04	01:18:00	0
2009-04-04	01:19:00	0
2009-04-04	01:20:00	0
2009-04-04	01:21:00	0
2009-04-04	01:22:00	0
2009-04-04	01:23:00	0
2009-04-04	01:24:00	0
2009-04-04	01:25:00	0
2009-04-04	01:26:00	0
2009-04-04	01:27:00	0
2009-04-04	01:28:00	0
2009-04-04	01:29:00	0
2009-04-04	01:30:00	0
2009-04-04	01:31:00	10
2009-04-04	01:32:00	0
2009-04-04	01:33:00	0
2009-04-04	01:34:00	0
2009-04-04	01:35:00	0
2009-04-04	01:36:00	0
2009-04-04	01:37:00	0
2009-04-04	01:38:00	0
2009-04-04	01:39:00	0
2009-04-04	01:40:00	0
2009-04-04	01:41:00	0
2009-04-04	01:42:00	0
2009-04-04	01:43:00	0
2009-04-04	01:44:00	0
2009-04-04	01:45:00	0
2009-04-04	01:46:00	10
2009-04-04	01:47:00	0
2009-04-04	01:48:00	0
2009-04-04	01:49:00	0
2009-04-04	01:50:00	0
2009-04-04	01:51:00	0
2009-04-04	01:52:00	0
2009-04-04	01:53:00	0
2009-04-04	01:54:00	0
2009-04-04	01:55:00	19
2009-04-04	01:56:00	24
2009-04-04	01:57:00	0
2009-04-04	01:58:00	0
2009-04-04	01:59:00	0
2009-04-04	02:00:00	0
2009-04-04	02:01:00	0
2009-04-04	02:02:00	0
2009-04-04	02:03:00	0
2009-04-04	02:04:00	0
2009-04-04	02:05:00	0
2009-04-04	02:06:00	0
2009-04-04	02:07:00	0
2009-04-04	02:08:00	0
2009-04-04	02:09:00	0
2009-04-04	02:10:00	0
2009-04-04	02:11:00	0
2009-04-04	02:12:00	0
2009-04-04	02:13:00	0
2009-04-04	02:14:00	0
2009-04-04	02:15:00	0
2009-04-04	02:16:00	0
2009-04-04	02:17:00	0
2009-04-04	02:18:00	0
2009-04-04	02:19:00	0
2009-04-04	02:20:00	0
2009-04-04	02:21:00	0
2009-04-04	02:22:00	0
2009-04-04	02:23:00	0
2009-04-04	02:24:00	0
2009-04-04	02:25:00	0
2009-04-04	02:26:00	0
2009-04-04	02:27:00	0
2009-04-04	02:28:00	0
2009-04-04	02:29:00	5
2009-04-04	02:30:00	0
2009-04-04	02:31:00	0
2009-04-04	02:32:00	0
2009-04-04	02:33:00	0
2009-04-04	02:34:00	0
2009-04-04	02:35:00	0
2009-04-04	02:36:00	0
2009-04-04	02:37:00	0
2009-04-04	02:38:00	0
2009-04-04	02:39:00	0
2009-04-04	02:40:00	0
2009-04-04	02:41:00	0
2009-04-04	02:42:00	0
2009-04-04	02:43:00	0
2009-04-04	02:44:00	0
2009-04-04	02:45:00	0
2009-04-04	02:46:00	0
2009-04-04	02:47:00	63
2009-04-04	02:48:00	0
2009-04-04	02:49:00	0
2009-04-04	02:50:00	0
2009-04-04	02:51:00	53
2009-04-04	02:52:00	690
2009-04-04	02:53:00	134
2009-04-04	02:54:00	737
2009-04-04	02:55:00	294
2009-04-04	02:56:00	15
2009-04-04	02:57:00	0
2009-04-04	02:58:00	0
2009-04-04	02:59:00	0
2009-04-04	03:00:00	0
2009-04-04	03:01:00	0
2009-04-04	03:02:00	0
2009-04-04	03:03:00	0
2009-04-04	03:04:00	0
2009-04-04	03:05:00	0
2009-04-04	03:06:00	0
2009-04-04	03:07:00	0
2009-04-04	03:08:00	0
2009-04-04	03:09:00	0
2009-04-04	03:10:00	0
2009-04-04	03:11:00	0
2009-04-04	03:12:00	0
2009-04-04	03:13:00	0
2009-04-04	03:14:00	0
2009-04-04	03:15:00	0
2009-04-04	03:16:00	0
2009-04-04	03:17:00	0
2009-04-04	03:18:00	0
2009-04-04	03:19:00	455
2009-04-04	03:20:00	227
2009-04-04	03:21:00	10
2009-04-04	03:22:00	0
2009-04-04	03:23:00	0
2009-04-04	03:24:00	0
2009-04-04	03:25:00	0
2009-04-04	03:26:00	0
2009-04-04	03:27:00	0
2009-04-04	03:28:00	0
2009-04-04	03:29:00	0
2009-04-04	03:30:00	0
2009-04-04	03:31:00	0
2009-04-04	03:32:00	0
2009-04-04	03:33:00	0
2009-04-04	03:34:00	0
2009-04-04	03:35:00	0
2009-04-04	03:36:00	0
2009-04-04	03:37:00	0
2009-04-04	03:38:00	0
2009-04-04	03:39:00	0
2009-04-04	03:40:00	0
2009-04-04	03:41:00	0
2009-04-04	03:42:00	0
2009-04-04	03:43:00	0
2009-04-04	03:44:00	0
2009-04-04	03:45:00	10
2009-04-04	03:46:00	0
2009-04-04	03:47:00	0
2009-04-04	03:48:00	0
2009-04-04	03:49:00	0
2009-04-04	03:50:00	0
2009-04-04	03:51:00	0
2009-04-04	03:52:00	0
2009-04-04	03:53:00	0
2009-04-04	03:54:00	0
2009-04-04	03:55:00	0
2009-04-04	03:56:00	15
2009-04-04	03:57:00	0
2009-04-04	03:58:00	0
2009-04-04	03:59:00	0
2009-04-04	04:00:00	0
2009-04-04	04:01:00	0
2009-04-04	04:02:00	0
2009-04-04	04:03:00	0
2009-04-04	04:04:00	0
2009-04-04	04:05:00	0
2009-04-04	04:06:00	0
2009-04-04	04:07:00	0
2009-04-04	04:08:00	0
2009-04-04	04:09:00	0
2009-04-04	04:10:00	0
2009-04-04	04:11:00	0
2009-04-04	04:12:00	0
2009-04-04	04:13:00	0
2009-04-04	04:14:00	0
2009-04-04	04:15:00	0
2009-04-04	04:16:00	0
2009-04-04	04:17:00	0
2009-04-04	04:18:00	0
2009-04-04	04:19:00	0
2009-04-04	04:20:00	0
2009-04-04	04:21:00	0
2009-04-04	04:22:00	0
2009-04-04	04:23:00	0
2009-04-04	04:24:00	0
2009-04-04	04:25:00	10
2009-04-04	04:26:00	0
2009-04-04	04:27:00	0
2009-04-04	04:28:00	0
2009-04-04	04:29:00	10
2009-04-04	04:30:00	0
2009-04-04	04:31:00	0
2009-04-04	04:32:00	0
2009-04-04	04:33:00	0
2009-04-04	04:34:00	0
2009-04-04	04:35:00	0
2009-04-04	04:36:00	0
2009-04-04	04:37:00	0
2009-04-04	04:38:00	0
2009-04-04	04:39:00	0
2009-04-04	04:40:00	0
2009-04-04	04:41:00	0
2009-04-04	04:42:00	0
2009-04-04	04:43:00	0
2009-04-04	04:44:00	0
2009-04-04	04:45:00	0
2009-04-04	04:46:00	0
2009-04-04	04:47:00	0
2009-04-04	04:48:00	0
2009-04-04	04:49:00	0
2009-04-04	04:50:00	0
2009-04-04	04:51:00	0
2009-04-04	04:52:00	5
2009-04-04	04:53:00	0
2009-04-04	04:54:00	0
2009-04-04	04:55:00	0
2009-04-04	04:56:00	0
2009-04-04	04:57:00	0
2009-04-04	04:58:00	19
2009-04-04	04:59:00	0
2009-04-04	05:00:00	0
2009-04-04	05:01:00	0
2009-04-04	05:02:00	0
2009-04-04	05:03:00	0
2009-04-04	05:04:00	5
2009-04-04	05:05:00	5
2009-04-04	05:06:00	0
2009-04-04	05:07:00	0
2009-04-04	05:08:00	0
2009-04-04	05:09:00	0
2009-04-04	05:10:00	0
2009-04-04	05:11:00	0
2009-04-04	05:12:00	0
2009-04-04	05:13:00	0
2009-04-04	05:14:00	0
2009-04-04	05:15:00	5
2009-04-04	05:16:00	0
2009-04-04	05:17:00	0
2009-04-04	05:18:00	5
2009-04-04	05:19:00	0
2009-04-04	05:20:00	0
2009-04-04	05:21:00	0
2009-04-04	05:22:00	0
2009-04-04	05:23:00	0
2009-04-04	05:24:00	0
2009-04-04	05:25:00	0
2009-04-04	05:26:00	0
2009-04-04	05:27:00	0
2009-04-04	05:28:00	0
2009-04-04	05:29:00	5
2009-04-04	05:30:00	0
2009-04-04	05:31:00	0
2009-04-04	05:32:00	0
2009-04-04	05:33:00	0
2009-04-04	05:34:00	0
2009-04-04	05:35:00	0
2009-04-04	05:36:00	0
2009-04-04	05:37:00	0
2009-04-04	05:38:00	0
2009-04-04	05:39:00	0
2009-04-04	05:40:00	0
2009-04-04	05:41:00	0
2009-04-04	05:42:00	0
2009-04-04	05:43:00	0
2009-04-04	05:44:00	0
2009-04-04	05:45:00	0
2009-04-04	05:46:00	0
2009-04-04	05:47:00	0
2009-04-04	05:48:00	0
2009-04-04	05:49:00	0
2009-04-04	05:50:00	0
2009-04-04	05:51:00	0
2009-04-04	05:52:00	0
2009-04-04	05:53:00	0
2009-04-04	05:54:00	0
2009-04-04	05:55:00	0
2009-04-04	05:56:00	0
2009-04-04	05:57:00	34
2009-04-04	05:58:00	0
2009-04-04	05:59:00	0
2009-04-04	06:00:00	161
2009-04-04	06:01:00	168
2009-04-04	06:02:00	0
2009-04-04	06:03:00	0
2009-04-04	06:04:00	0
2009-04-04	06:05:00	0
2009-04-04	06:06:00	0
2009-04-04	06:07:00	0
2009-04-04	06:08:00	0
2009-04-04	06:09:00	0
2009-04-04	06:10:00	0
2009-04-04	06:11:00	0
2009-04-04	06:12:00	0
2009-04-04	06:13:00	34
2009-04-04	06:14:00	53
2009-04-04	06:15:00	0
2009-04-04	06:16:00	104
2009-04-04	06:17:00	0
2009-04-04	06:18:00	0
2009-04-04	06:19:00	0
2009-04-04	06:20:00	0
2009-04-04	06:21:00	0
2009-04-04	06:22:00	0
2009-04-04	06:23:00	0
2009-04-04	06:24:00	0
2009-04-04	06:25:00	0
2009-04-04	06:26:00	0
2009-04-04	06:27:00	0
2009-04-04	06:28:00	0
2009-04-04	06:29:00	0
2009-04-04	06:30:00	0
2009-04-04	06:31:00	0
2009-04-04	06:32:00	0
2009-04-04	06:33:00	0
2009-04-04	06:34:00	121
2009-04-04	06:35:00	0
2009-04-04	06:36:00	0
2009-04-04	06:37:00	0
2009-04-04	06:38:00	0
2009-04-04	06:39:00	0
2009-04-04	06:40:00	0
2009-04-04	06:41:00	0
2009-04-04	06:42:00	0
2009-04-04	06:43:00	0
2009-04-04	06:44:00	0
2009-04-04	06:45:00	0
2009-04-04	06:46:00	161
2009-04-04	06:47:00	0
2009-04-04	06:48:00	676
2009-04-04	06:49:00	250
2009-04-04	06:50:00	369
2009-04-04	06:51:00	0
2009-04-04	06:52:00	0
2009-04-04	06:53:00	19
2009-04-04	06:54:00	0
2009-04-04	06:55:00	0
2009-04-04	06:56:00	0
2009-04-04	06:57:00	0
2009-04-04	06:58:00	0
2009-04-04	06:59:00	0
2009-04-04	07:00:00	0
2009-04-04	07:01:00	0
2009-04-04	07:02:00	0
2009-04-04	07:03:00	0
2009-04-04	07:04:00	0
2009-04-04	07:05:00	0
2009-04-04	07:06:00	0
2009-04-04	07:07:00	0
2009-04-04	07:08:00	0
2009-04-04	07:09:00	0
2009-04-04	07:10:00	0
2009-04-04	07:11:00	0
2009-04-04	07:12:00	0
2009-04-04	07:13:00	0
2009-04-04	07:14:00	0
2009-04-04	07:15:00	0
2009-04-04	07:16:00	552
2009-04-04	07:17:00	0
2009-04-04	07:18:00	0
2009-04-04	07:19:00	0
2009-04-04	07:20:00	647
2009-04-04	07:21:00	196
2009-04-04	07:22:00	889
2009-04-04	07:23:00	1064
2009-04-04	07:24:00	455
2009-04-04	07:25:00	350
2009-04-04	07:26:00	134
2009-04-04	07:27:00	110
2009-04-04	07:28:00	478
2009-04-04	07:29:00	802
2009-04-04	07:30:00	1043
2009-04-04	07:31:00	944
2009-04-04	07:32:00	1023
2009-04-04	07:33:00	964
2009-04-04	07:34:00	2067
2009-04-04	07:35:00	2104
2009-04-04	07:36:00	2032
2009-04-04	07:37:00	1859
2009-04-04	07:38:00	2378
2009-04-04	07:39:00	2296
2009-04-04	07:40:00	2104
2009-04-04	07:41:00	1552
2009-04-04	07:42:00	1826
2009-04-04	07:43:00	1552
2009-04-04	07:44:00	1826
2009-04-04	07:45:00	1670
2009-04-04	07:46:00	1442
2009-04-04	07:47:00	527
2009-04-04	07:48:00	390
2009-04-04	07:49:00	661
2009-04-04	07:50:00	706
2009-04-04	07:51:00	235
2009-04-04	07:52:00	619
2009-04-04	07:53:00	466
2009-04-04	07:54:00	455
2009-04-04	07:55:00	592
2009-04-04	07:56:00	647
2009-04-04	07:57:00	181
2009-04-04	07:58:00	632
2009-04-04	07:59:00	514
2009-04-04	08:00:00	321
2009-04-04	08:01:00	24
2009-04-04	08:02:00	75
2009-04-04	08:03:00	48
2009-04-04	08:04:00	276
2009-04-04	08:05:00	168
2009-04-04	08:06:00	44
2009-04-04	08:07:00	0
2009-04-04	08:08:00	661
2009-04-04	08:09:00	1085
2009-04-04	08:10:00	422
2009-04-04	08:11:00	944
2009-04-04	08:12:00	871
2009-04-04	08:13:00	331
2009-04-04	08:14:00	75
2009-04-04	08:15:00	321
2009-04-04	08:16:00	785
2009-04-04	08:17:00	400
2009-04-04	08:18:00	294
2009-04-04	08:19:00	15
2009-04-04	08:20:00	29
2009-04-04	08:21:00	0
2009-04-04	08:22:00	10
2009-04-04	08:23:00	276
2009-04-04	08:24:00	411
2009-04-04	08:25:00	10
2009-04-04	08:26:00	219
2009-04-04	08:27:00	39
2009-04-04	08:28:00	86
2009-04-04	08:29:00	369
2009-04-04	08:30:00	527
2009-04-04	08:31:00	168
2009-04-04	08:32:00	34
2009-04-04	08:33:00	15
2009-04-04	08:34:00	0
2009-04-04	08:35:00	0
2009-04-04	08:36:00	0
2009-04-04	08:37:00	0
2009-04-04	08:38:00	0
2009-04-04	08:39:00	29
2009-04-04	08:40:00	0
2009-04-04	08:41:00	0
2009-04-04	08:42:00	0
2009-04-04	08:43:00	0
2009-04-04	08:44:00	63
2009-04-04	08:45:00	0
2009-04-04	08:46:00	0
2009-04-04	08:47:00	0
2009-04-04	08:48:00	321
2009-04-04	08:49:00	321
2009-04-04	08:50:00	98
2009-04-04	08:51:00	321
2009-04-04	08:52:00	10
2009-04-04	08:53:00	1339
2009-04-04	08:54:00	721
2009-04-04	08:55:00	818
2009-04-04	08:56:00	501
2009-04-04	08:57:00	514
2009-04-04	08:58:00	369
2009-04-04	08:59:00	121
2009-04-04	09:00:00	0
2009-04-04	09:01:00	15
2009-04-04	09:02:00	0
2009-04-04	09:03:00	0
2009-04-04	09:04:00	422
2009-04-04	09:05:00	115
2009-04-04	09:06:00	5
2009-04-04	09:07:00	422
2009-04-04	09:08:00	39
[truncated: 13,851 more rows]

## Sheet: 4.13.09
Actogram, Copy Raw Data, All Days
Identity:	Shug second monitor
Filename:	E:\Active Research Files\meloxicam titre canine\cases\shug\Shug second monitor 4.13.09.AWC
Gender:	F
Age:	10
Height:	76.2 cm	30.0 in
Weight:	44.0 kg	97.0 lbs
Start Date:	13-Apr-2009 (Mon)
Start Time:	18:00:00
Interval:	1.00 mins
Date Stamp:	Time Stamp:	Activity Data:	Marker Press:
2009-04-13	00:00:00	0
2009-04-13	00:01:00	0
2009-04-13	00:02:00	0
2009-04-13	00:03:00	0
2009-04-13	00:04:00	0
2009-04-13	00:05:00	0
2009-04-13	00:06:00	0
2009-04-13	00:07:00	0
2009-04-13	00:08:00	0
2009-04-13	00:09:00	0
2009-04-13	00:10:00	0
2009-04-13	00:11:00	0
2009-04-13	00:12:00	0
2009-04-13	00:13:00	0
2009-04-13	00:14:00	0
2009-04-13	00:15:00	0
2009-04-13	00:16:00	0
2009-04-13	00:17:00	0
2009-04-13	00:18:00	0
2009-04-13	00:19:00	0
2009-04-13	00:20:00	0
2009-04-13	00:21:00	0
2009-04-13	00:22:00	0
2009-04-13	00:23:00	0
2009-04-13	00:24:00	0
2009-04-13	00:25:00	0
2009-04-13	00:26:00	0
2009-04-13	00:27:00	0
2009-04-13	00:28:00	0
2009-04-13	00:29:00	0
2009-04-13	00:30:00	0
2009-04-13	00:31:00	0
2009-04-13	00:32:00	0
2009-04-13	00:33:00	0
2009-04-13	00:34:00	0
2009-04-13	00:35:00	0
2009-04-13	00:36:00	0
2009-04-13	00:37:00	0
2009-04-13	00:38:00	0
2009-04-13	00:39:00	0
2009-04-13	00:40:00	0
2009-04-13	00:41:00	0
2009-04-13	00:42:00	0
2009-04-13	00:43:00	0
2009-04-13	00:44:00	0
2009-04-13	00:45:00	0
2009-04-13	00:46:00	0
2009-04-13	00:47:00	0
2009-04-13	00:48:00	0
2009-04-13	00:49:00	0
2009-04-13	00:50:00	0
2009-04-13	00:51:00	0
2009-04-13	00:52:00	0
2009-04-13	00:53:00	0
2009-04-13	00:54:00	0
2009-04-13	00:55:00	0
2009-04-13	00:56:00	0
2009-04-13	00:57:00	0
2009-04-13	00:58:00	0
2009-04-13	00:59:00	0
2009-04-13	01:00:00	0
2009-04-13	01:01:00	0
2009-04-13	01:02:00	0
2009-04-13	01:03:00	0
2009-04-13	01:04:00	0
2009-04-13	01:05:00	0
2009-04-13	01:06:00	0
2009-04-13	01:07:00	0
2009-04-13	01:08:00	0
2009-04-13	01:09:00	0
2009-04-13	01:10:00	0
2009-04-13	01:11:00	0
2009-04-13	01:12:00	0
2009-04-13	01:13:00	0
2009-04-13	01:14:00	0
2009-04-13	01:15:00	0
2009-04-13	01:16:00	0
2009-04-13	01:17:00	0
2009-04-13	01:18:00	0
2009-04-13	01:19:00	0
2009-04-13	01:20:00	0
2009-04-13	01:21:00	0
2009-04-13	01:22:00	0
2009-04-13	01:23:00	0
2009-04-13	01:24:00	0
2009-04-13	01:25:00	0
2009-04-13	01:26:00	0
2009-04-13	01:27:00	0
2009-04-13	01:28:00	0
2009-04-13	01:29:00	0
2009-04-13	01:30:00	0
2009-04-13	01:31:00	0
2009-04-13	01:32:00	0
2009-04-13	01:33:00	0
2009-04-13	01:34:00	0
2009-04-13	01:35:00	0
2009-04-13	01:36:00	0
2009-04-13	01:37:00	0
2009-04-13	01:38:00	0
2009-04-13	01:39:00	0
2009-04-13	01:40:00	0
2009-04-13	01:41:00	0
2009-04-13	01:42:00	0
2009-04-13	01:43:00	0
2009-04-13	01:44:00	0
2009-04-13	01:45:00	0
2009-04-13	01:46:00	0
2009-04-13	01:47:00	0
2009-04-13	01:48:00	0
2009-04-13	01:49:00	0
2009-04-13	01:50:00	0
2009-04-13	01:51:00	0
2009-04-13	01:52:00	0
2009-04-13	01:53:00	0
2009-04-13	01:54:00	0
2009-04-13	01:55:00	0
2009-04-13	01:56:00	0
2009-04-13	01:57:00	0
2009-04-13	01:58:00	0
2009-04-13	01:59:00	0
2009-04-13	02:00:00	0
2009-04-13	02:01:00	0
2009-04-13	02:02:00	0
2009-04-13	02:03:00	0
2009-04-13	02:04:00	0
2009-04-13	02:05:00	0
2009-04-13	02:06:00	0
2009-04-13	02:07:00	0
2009-04-13	02:08:00	0
2009-04-13	02:09:00	0
2009-04-13	02:10:00	0
2009-04-13	02:11:00	0
2009-04-13	02:12:00	0
2009-04-13	02:13:00	0
2009-04-13	02:14:00	0
2009-04-13	02:15:00	0
2009-04-13	02:16:00	0
2009-04-13	02:17:00	0
2009-04-13	02:18:00	0
2009-04-13	02:19:00	0
2009-04-13	02:20:00	0
2009-04-13	02:21:00	0
2009-04-13	02:22:00	0
2009-04-13	02:23:00	0
2009-04-13	02:24:00	0
2009-04-13	02:25:00	0
2009-04-13	02:26:00	0
2009-04-13	02:27:00	0
2009-04-13	02:28:00	0
2009-04-13	02:29:00	0
2009-04-13	02:30:00	0
2009-04-13	02:31:00	0
2009-04-13	02:32:00	0
2009-04-13	02:33:00	0
2009-04-13	02:34:00	0
2009-04-13	02:35:00	0
2009-04-13	02:36:00	0
2009-04-13	02:37:00	0
2009-04-13	02:38:00	0
2009-04-13	02:39:00	0
2009-04-13	02:40:00	0
2009-04-13	02:41:00	0
2009-04-13	02:42:00	0
2009-04-13	02:43:00	0
2009-04-13	02:44:00	0
2009-04-13	02:45:00	0
2009-04-13	02:46:00	0
2009-04-13	02:47:00	0
2009-04-13	02:48:00	0
2009-04-13	02:49:00	0
2009-04-13	02:50:00	0
2009-04-13	02:51:00	0
2009-04-13	02:52:00	0
2009-04-13	02:53:00	0
2009-04-13	02:54:00	0
2009-04-13	02:55:00	0
2009-04-13	02:56:00	0
2009-04-13	02:57:00	0
2009-04-13	02:58:00	0
2009-04-13	02:59:00	0
2009-04-13	03:00:00	0
2009-04-13	03:01:00	0
2009-04-13	03:02:00	0
2009-04-13	03:03:00	0
2009-04-13	03:04:00	0
2009-04-13	03:05:00	0
2009-04-13	03:06:00	0
2009-04-13	03:07:00	0
2009-04-13	03:08:00	0
2009-04-13	03:09:00	0
2009-04-13	03:10:00	0
2009-04-13	03:11:00	0
2009-04-13	03:12:00	0
2009-04-13	03:13:00	0
2009-04-13	03:14:00	0
2009-04-13	03:15:00	0
2009-04-13	03:16:00	0
2009-04-13	03:17:00	0
2009-04-13	03:18:00	0
2009-04-13	03:19:00	0
2009-04-13	03:20:00	0
2009-04-13	03:21:00	0
2009-04-13	03:22:00	0
2009-04-13	03:23:00	0
2009-04-13	03:24:00	0
2009-04-13	03:25:00	0
2009-04-13	03:26:00	0
2009-04-13	03:27:00	0
2009-04-13	03:28:00	0
2009-04-13	03:29:00	0
2009-04-13	03:30:00	0
2009-04-13	03:31:00	0
2009-04-13	03:32:00	0
2009-04-13	03:33:00	0
2009-04-13	03:34:00	0
2009-04-13	03:35:00	0
2009-04-13	03:36:00	0
2009-04-13	03:37:00	0
2009-04-13	03:38:00	0
2009-04-13	03:39:00	0
2009-04-13	03:40:00	0
2009-04-13	03:41:00	0
2009-04-13	03:42:00	0
2009-04-13	03:43:00	0
2009-04-13	03:44:00	0
2009-04-13	03:45:00	0
2009-04-13	03:46:00	0
2009-04-13	03:47:00	0
2009-04-13	03:48:00	0
2009-04-13	03:49:00	0
2009-04-13	03:50:00	0
2009-04-13	03:51:00	0
2009-04-13	03:52:00	0
2009-04-13	03:53:00	0
2009-04-13	03:54:00	0
2009-04-13	03:55:00	0
2009-04-13	03:56:00	0
2009-04-13	03:57:00	0
2009-04-13	03:58:00	0
2009-04-13	03:59:00	0
2009-04-13	04:00:00	0
2009-04-13	04:01:00	0
2009-04-13	04:02:00	0
2009-04-13	04:03:00	0
2009-04-13	04:04:00	0
2009-04-13	04:05:00	0
2009-04-13	04:06:00	0
2009-04-13	04:07:00	0
2009-04-13	04:08:00	0
2009-04-13	04:09:00	0
2009-04-13	04:10:00	0
2009-04-13	04:11:00	0
2009-04-13	04:12:00	0
2009-04-13	04:13:00	0
2009-04-13	04:14:00	0
2009-04-13	04:15:00	0
2009-04-13	04:16:00	0
2009-04-13	04:17:00	0
2009-04-13	04:18:00	0
2009-04-13	04:19:00	0
2009-04-13	04:20:00	0
2009-04-13	04:21:00	0
2009-04-13	04:22:00	0
2009-04-13	04:23:00	0
2009-04-13	04:24:00	0
2009-04-13	04:25:00	0
2009-04-13	04:26:00	0
2009-04-13	04:27:00	0
2009-04-13	04:28:00	0
2009-04-13	04:29:00	0
2009-04-13	04:30:00	0
2009-04-13	04:31:00	0
2009-04-13	04:32:00	0
2009-04-13	04:33:00	0
2009-04-13	04:34:00	0
2009-04-13	04:35:00	0
2009-04-13	04:36:00	0
2009-04-13	04:37:00	0
2009-04-13	04:38:00	0
2009-04-13	04:39:00	0
2009-04-13	04:40:00	0
2009-04-13	04:41:00	0
2009-04-13	04:42:00	0
2009-04-13	04:43:00	0
2009-04-13	04:44:00	0
2009-04-13	04:45:00	0
2009-04-13	04:46:00	0
2009-04-13	04:47:00	0
2009-04-13	04:48:00	0
2009-04-13	04:49:00	0
2009-04-13	04:50:00	0
2009-04-13	04:51:00	0
2009-04-13	04:52:00	0
2009-04-13	04:53:00	0
2009-04-13	04:54:00	0
2009-04-13	04:55:00	0
2009-04-13	04:56:00	0
2009-04-13	04:57:00	0
2009-04-13	04:58:00	0
2009-04-13	04:59:00	0
2009-04-13	05:00:00	0
2009-04-13	05:01:00	0
2009-04-13	05:02:00	0
2009-04-13	05:03:00	0
2009-04-13	05:04:00	0
2009-04-13	05:05:00	0
2009-04-13	05:06:00	0
2009-04-13	05:07:00	0
2009-04-13	05:08:00	0
2009-04-13	05:09:00	0
2009-04-13	05:10:00	0
2009-04-13	05:11:00	0
2009-04-13	05:12:00	0
2009-04-13	05:13:00	0
2009-04-13	05:14:00	0
2009-04-13	05:15:00	0
2009-04-13	05:16:00	0
2009-04-13	05:17:00	0
2009-04-13	05:18:00	0
2009-04-13	05:19:00	0
2009-04-13	05:20:00	0
2009-04-13	05:21:00	0
2009-04-13	05:22:00	0
2009-04-13	05:23:00	0
2009-04-13	05:24:00	0
2009-04-13	05:25:00	0
2009-04-13	05:26:00	0
2009-04-13	05:27:00	0
2009-04-13	05:28:00	0
2009-04-13	05:29:00	0
2009-04-13	05:30:00	0
2009-04-13	05:31:00	0
2009-04-13	05:32:00	0
2009-04-13	05:33:00	0
2009-04-13	05:34:00	0
2009-04-13	05:35:00	0
2009-04-13	05:36:00	0
2009-04-13	05:37:00	0
2009-04-13	05:38:00	0
2009-04-13	05:39:00	0
2009-04-13	05:40:00	0
2009-04-13	05:41:00	0
2009-04-13	05:42:00	0
2009-04-13	05:43:00	0
2009-04-13	05:44:00	0
2009-04-13	05:45:00	0
2009-04-13	05:46:00	0
2009-04-13	05:47:00	0
2009-04-13	05:48:00	0
2009-04-13	05:49:00	0
2009-04-13	05:50:00	0
2009-04-13	05:51:00	0
2009-04-13	05:52:00	0
2009-04-13	05:53:00	0
2009-04-13	05:54:00	0
2009-04-13	05:55:00	0
2009-04-13	05:56:00	0
2009-04-13	05:57:00	0
2009-04-13	05:58:00	0
2009-04-13	05:59:00	0
2009-04-13	06:00:00	0
2009-04-13	06:01:00	0
2009-04-13	06:02:00	0
2009-04-13	06:03:00	0
2009-04-13	06:04:00	0
2009-04-13	06:05:00	0
2009-04-13	06:06:00	0
2009-04-13	06:07:00	0
2009-04-13	06:08:00	0
2009-04-13	06:09:00	0
2009-04-13	06:10:00	0
2009-04-13	06:11:00	0
2009-04-13	06:12:00	0
2009-04-13	06:13:00	0
2009-04-13	06:14:00	0
2009-04-13	06:15:00	0
2009-04-13	06:16:00	0
2009-04-13	06:17:00	0
2009-04-13	06:18:00	0
2009-04-13	06:19:00	0
2009-04-13	06:20:00	0
2009-04-13	06:21:00	0
2009-04-13	06:22:00	0
2009-04-13	06:23:00	0
2009-04-13	06:24:00	0
2009-04-13	06:25:00	0
2009-04-13	06:26:00	0
2009-04-13	06:27:00	0
2009-04-13	06:28:00	0
2009-04-13	06:29:00	0
2009-04-13	06:30:00	0
2009-04-13	06:31:00	0
2009-04-13	06:32:00	0
2009-04-13	06:33:00	0
2009-04-13	06:34:00	0
2009-04-13	06:35:00	0
2009-04-13	06:36:00	0
2009-04-13	06:37:00	0
2009-04-13	06:38:00	0
2009-04-13	06:39:00	0
2009-04-13	06:40:00	0
2009-04-13	06:41:00	0
2009-04-13	06:42:00	0
2009-04-13	06:43:00	0
2009-04-13	06:44:00	0
2009-04-13	06:45:00	0
2009-04-13	06:46:00	0
2009-04-13	06:47:00	0
2009-04-13	06:48:00	0
2009-04-13	06:49:00	0
2009-04-13	06:50:00	0
2009-04-13	06:51:00	0
2009-04-13	06:52:00	0
2009-04-13	06:53:00	0
2009-04-13	06:54:00	0
2009-04-13	06:55:00	0
2009-04-13	06:56:00	0
2009-04-13	06:57:00	0
2009-04-13	06:58:00	0
2009-04-13	06:59:00	0
2009-04-13	07:00:00	0
2009-04-13	07:01:00	0
2009-04-13	07:02:00	0
2009-04-13	07:03:00	0
2009-04-13	07:04:00	0
2009-04-13	07:05:00	0
2009-04-13	07:06:00	0
2009-04-13	07:07:00	0
2009-04-13	07:08:00	0
2009-04-13	07:09:00	0
2009-04-13	07:10:00	0
2009-04-13	07:11:00	0
2009-04-13	07:12:00	0
2009-04-13	07:13:00	0
2009-04-13	07:14:00	0
2009-04-13	07:15:00	0
2009-04-13	07:16:00	0
2009-04-13	07:17:00	0
2009-04-13	07:18:00	0
2009-04-13	07:19:00	0
2009-04-13	07:20:00	0
2009-04-13	07:21:00	0
2009-04-13	07:22:00	0
2009-04-13	07:23:00	0
2009-04-13	07:24:00	0
2009-04-13	07:25:00	0
2009-04-13	07:26:00	0
2009-04-13	07:27:00	0
2009-04-13	07:28:00	0
2009-04-13	07:29:00	0
2009-04-13	07:30:00	0
2009-04-13	07:31:00	0
2009-04-13	07:32:00	0
2009-04-13	07:33:00	0
2009-04-13	07:34:00	0
2009-04-13	07:35:00	0
2009-04-13	07:36:00	0
2009-04-13	07:37:00	0
2009-04-13	07:38:00	0
2009-04-13	07:39:00	0
2009-04-13	07:40:00	0
2009-04-13	07:41:00	0
2009-04-13	07:42:00	0
2009-04-13	07:43:00	0
2009-04-13	07:44:00	0
2009-04-13	07:45:00	0
2009-04-13	07:46:00	0
2009-04-13	07:47:00	0
2009-04-13	07:48:00	0
2009-04-13	07:49:00	0
2009-04-13	07:50:00	0
2009-04-13	07:51:00	0
2009-04-13	07:52:00	0
2009-04-13	07:53:00	0
2009-04-13	07:54:00	0
2009-04-13	07:55:00	0
2009-04-13	07:56:00	0
2009-04-13	07:57:00	0
2009-04-13	07:58:00	0
2009-04-13	07:59:00	0
2009-04-13	08:00:00	0
2009-04-13	08:01:00	0
2009-04-13	08:02:00	0
2009-04-13	08:03:00	0
2009-04-13	08:04:00	0
2009-04-13	08:05:00	0
2009-04-13	08:06:00	0
2009-04-13	08:07:00	0
2009-04-13	08:08:00	0
2009-04-13	08:09:00	0
2009-04-13	08:10:00	0
2009-04-13	08:11:00	0
2009-04-13	08:12:00	0
2009-04-13	08:13:00	0
2009-04-13	08:14:00	0
2009-04-13	08:15:00	0
2009-04-13	08:16:00	0
2009-04-13	08:17:00	0
2009-04-13	08:18:00	0
2009-04-13	08:19:00	0
2009-04-13	08:20:00	0
2009-04-13	08:21:00	0
2009-04-13	08:22:00	0
2009-04-13	08:23:00	0
2009-04-13	08:24:00	0
2009-04-13	08:25:00	0
2009-04-13	08:26:00	0
2009-04-13	08:27:00	0
2009-04-13	08:28:00	0
2009-04-13	08:29:00	0
2009-04-13	08:30:00	0
2009-04-13	08:31:00	0
2009-04-13	08:32:00	0
2009-04-13	08:33:00	0
2009-04-13	08:34:00	0
2009-04-13	08:35:00	0
2009-04-13	08:36:00	0
2009-04-13	08:37:00	0
2009-04-13	08:38:00	0
2009-04-13	08:39:00	0
2009-04-13	08:40:00	0
2009-04-13	08:41:00	0
2009-04-13	08:42:00	0
2009-04-13	08:43:00	0
2009-04-13	08:44:00	0
2009-04-13	08:45:00	0
2009-04-13	08:46:00	0
2009-04-13	08:47:00	0
2009-04-13	08:48:00	0
2009-04-13	08:49:00	0
2009-04-13	08:50:00	0
2009-04-13	08:51:00	0
2009-04-13	08:52:00	0
2009-04-13	08:53:00	0
2009-04-13	08:54:00	0
2009-04-13	08:55:00	0
2009-04-13	08:56:00	0
2009-04-13	08:57:00	0
2009-04-13	08:58:00	0
2009-04-13	08:59:00	0
2009-04-13	09:00:00	0
2009-04-13	09:01:00	0
2009-04-13	09:02:00	0
2009-04-13	09:03:00	0
2009-04-13	09:04:00	0
2009-04-13	09:05:00	0
2009-04-13	09:06:00	0
2009-04-13	09:07:00	0
2009-04-13	09:08:00	0
2009-04-13	09:09:00	0
2009-04-13	09:10:00	0
2009-04-13	09:11:00	0
2009-04-13	09:12:00	0
2009-04-13	09:13:00	0
2009-04-13	09:14:00	0
2009-04-13	09:15:00	0
2009-04-13	09:16:00	0
2009-04-13	09:17:00	0
2009-04-13	09:18:00	0
2009-04-13	09:19:00	0
2009-04-13	09:20:00	0
2009-04-13	09:21:00	0
2009-04-13	09:22:00	0
2009-04-13	09:23:00	0
2009-04-13	09:24:00	0
2009-04-13	09:25:00	0
2009-04-13	09:26:00	0
2009-04-13	09:27:00	0
2009-04-13	09:28:00	0
2009-04-13	09:29:00	0
2009-04-13	09:30:00	0
2009-04-13	09:31:00	0
2009-04-13	09:32:00	0
2009-04-13	09:33:00	0
2009-04-13	09:34:00	0
2009-04-13	09:35:00	0
2009-04-13	09:36:00	0
2009-04-13	09:37:00	0
2009-04-13	09:38:00	0
2009-04-13	09:39:00	0
2009-04-13	09:40:00	0
2009-04-13	09:41:00	0
2009-04-13	09:42:00	0
2009-04-13	09:43:00	0
2009-04-13	09:44:00	0
2009-04-13	09:45:00	0
2009-04-13	09:46:00	0
2009-04-13	09:47:00	0
2009-04-13	09:48:00	0
2009-04-13	09:49:00	0
2009-04-13	09:50:00	0
2009-04-13	09:51:00	0
2009-04-13	09:52:00	0
2009-04-13	09:53:00	0
2009-04-13	09:54:00	0
2009-04-13	09:55:00	0
2009-04-13	09:56:00	0
2009-04-13	09:57:00	0
2009-04-13	09:58:00	0
2009-04-13	09:59:00	0
2009-04-13	10:00:00	0
2009-04-13	10:01:00	0
2009-04-13	10:02:00	0
2009-04-13	10:03:00	0
2009-04-13	10:04:00	0
2009-04-13	10:05:00	0
2009-04-13	10:06:00	0
2009-04-13	10:07:00	0
2009-04-13	10:08:00	0
2009-04-13	10:09:00	0
2009-04-13	10:10:00	0
2009-04-13	10:11:00	0
2009-04-13	10:12:00	0
2009-04-13	10:13:00	0
2009-04-13	10:14:00	0
2009-04-13	10:15:00	0
2009-04-13	10:16:00	0
2009-04-13	10:17:00	0
2009-04-13	10:18:00	0
2009-04-13	10:19:00	0
2009-04-13	10:20:00	0
2009-04-13	10:21:00	0
2009-04-13	10:22:00	0
2009-04-13	10:23:00	0
2009-04-13	10:24:00	0
2009-04-13	10:25:00	0
2009-04-13	10:26:00	0
2009-04-13	10:27:00	0
2009-04-13	10:28:00	0
2009-04-13	10:29:00	0
2009-04-13	10:30:00	0
2009-04-13	10:31:00	0
2009-04-13	10:32:00	0
2009-04-13	10:33:00	0
2009-04-13	10:34:00	0
2009-04-13	10:35:00	0
2009-04-13	10:36:00	0
2009-04-13	10:37:00	0
2009-04-13	10:38:00	0
2009-04-13	10:39:00	0
2009-04-13	10:40:00	0
2009-04-13	10:41:00	0
2009-04-13	10:42:00	0
2009-04-13	10:43:00	0
2009-04-13	10:44:00	0
2009-04-13	10:45:00	0
2009-04-13	10:46:00	0
2009-04-13	10:47:00	0
2009-04-13	10:48:00	0
2009-04-13	10:49:00	0
2009-04-13	10:50:00	0
2009-04-13	10:51:00	0
2009-04-13	10:52:00	0
2009-04-13	10:53:00	0
2009-04-13	10:54:00	0
2009-04-13	10:55:00	0
2009-04-13	10:56:00	0
2009-04-13	10:57:00	0
2009-04-13	10:58:00	0
2009-04-13	10:59:00	0
2009-04-13	11:00:00	0
2009-04-13	11:01:00	0
2009-04-13	11:02:00	0
2009-04-13	11:03:00	0
2009-04-13	11:04:00	0
2009-04-13	11:05:00	0
2009-04-13	11:06:00	0
2009-04-13	11:07:00	0
2009-04-13	11:08:00	0
2009-04-13	11:09:00	0
2009-04-13	11:10:00	0
2009-04-13	11:11:00	0
2009-04-13	11:12:00	0
2009-04-13	11:13:00	0
2009-04-13	11:14:00	0
2009-04-13	11:15:00	0
2009-04-13	11:16:00	0
2009-04-13	11:17:00	0
2009-04-13	11:18:00	0
2009-04-13	11:19:00	0
2009-04-13	11:20:00	0
2009-04-13	11:21:00	0
2009-04-13	11:22:00	0
2009-04-13	11:23:00	0
2009-04-13	11:24:00	0
2009-04-13	11:25:00	0
2009-04-13	11:26:00	0
2009-04-13	11:27:00	0
2009-04-13	11:28:00	0
2009-04-13	11:29:00	0
2009-04-13	11:30:00	0
2009-04-13	11:31:00	0
2009-04-13	11:32:00	0
2009-04-13	11:33:00	0
2009-04-13	11:34:00	0
2009-04-13	11:35:00	0
2009-04-13	11:36:00	0
2009-04-13	11:37:00	0
2009-04-13	11:38:00	0
2009-04-13	11:39:00	0
2009-04-13	11:40:00	0
2009-04-13	11:41:00	0
2009-04-13	11:42:00	0
2009-04-13	11:43:00	0
2009-04-13	11:44:00	0
2009-04-13	11:45:00	0
2009-04-13	11:46:00	0
2009-04-13	11:47:00	0
2009-04-13	11:48:00	0
2009-04-13	11:49:00	0
2009-04-13	11:50:00	0
2009-04-13	11:51:00	0
2009-04-13	11:52:00	0
2009-04-13	11:53:00	0
2009-04-13	11:54:00	0
2009-04-13	11:55:00	0
2009-04-13	11:56:00	0
2009-04-13	11:57:00	0
2009-04-13	11:58:00	0
2009-04-13	11:59:00	0
2009-04-13	12:00:00	0
2009-04-13	12:01:00	0
2009-04-13	12:02:00	0
2009-04-13	12:03:00	0
2009-04-13	12:04:00	0
2009-04-13	12:05:00	0
2009-04-13	12:06:00	0
2009-04-13	12:07:00	0
2009-04-13	12:08:00	0
2009-04-13	12:09:00	0
2009-04-13	12:10:00	0
2009-04-13	12:11:00	0
2009-04-13	12:12:00	0
2009-04-13	12:13:00	0
2009-04-13	12:14:00	0
2009-04-13	12:15:00	0
2009-04-13	12:16:00	0
2009-04-13	12:17:00	0
2009-04-13	12:18:00	0
2009-04-13	12:19:00	0
2009-04-13	12:20:00	0
2009-04-13	12:21:00	0
2009-04-13	12:22:00	0
2009-04-13	12:23:00	0
2009-04-13	12:24:00	0
2009-04-13	12:25:00	0
2009-04-13	12:26:00	0
2009-04-13	12:27:00	0
2009-04-13	12:28:00	0
2009-04-13	12:29:00	0
2009-04-13	12:30:00	0
2009-04-13	12:31:00	0
2009-04-13	12:32:00	0
2009-04-13	12:33:00	0
2009-04-13	12:34:00	0
2009-04-13	12:35:00	0
2009-04-13	12:36:00	0
2009-04-13	12:37:00	0
2009-04-13	12:38:00	0
2009-04-13	12:39:00	0
2009-04-13	12:40:00	0
2009-04-13	12:41:00	0
2009-04-13	12:42:00	0
2009-04-13	12:43:00	0
2009-04-13	12:44:00	0
2009-04-13	12:45:00	0
2009-04-13	12:46:00	0
2009-04-13	12:47:00	0
2009-04-13	12:48:00	0
2009-04-13	12:49:00	0
2009-04-13	12:50:00	0
2009-04-13	12:51:00	0
2009-04-13	12:52:00	0
2009-04-13	12:53:00	0
2009-04-13	12:54:00	0
2009-04-13	12:55:00	0
2009-04-13	12:56:00	0
2009-04-13	12:57:00	0
2009-04-13	12:58:00	0
2009-04-13	12:59:00	0
2009-04-13	13:00:00	0
2009-04-13	13:01:00	0
2009-04-13	13:02:00	0
2009-04-13	13:03:00	0
2009-04-13	13:04:00	0
2009-04-13	13:05:00	0
2009-04-13	13:06:00	0
2009-04-13	13:07:00	0
2009-04-13	13:08:00	0
2009-04-13	13:09:00	0
2009-04-13	13:10:00	0
2009-04-13	13:11:00	0
2009-04-13	13:12:00	0
2009-04-13	13:13:00	0
2009-04-13	13:14:00	0
2009-04-13	13:15:00	0
2009-04-13	13:16:00	0
2009-04-13	13:17:00	0
2009-04-13	13:18:00	0
2009-04-13	13:19:00	0
2009-04-13	13:20:00	0
2009-04-13	13:21:00	0
2009-04-13	13:22:00	0
2009-04-13	13:23:00	0
2009-04-13	13:24:00	0
2009-04-13	13:25:00	0
2009-04-13	13:26:00	0
2009-04-13	13:27:00	0
2009-04-13	13:28:00	0
2009-04-13	13:29:00	0
2009-04-13	13:30:00	0
2009-04-13	13:31:00	0
2009-04-13	13:32:00	0
2009-04-13	13:33:00	0
2009-04-13	13:34:00	0
2009-04-13	13:35:00	0
2009-04-13	13:36:00	0
2009-04-13	13:37:00	0
2009-04-13	13:38:00	0
2009-04-13	13:39:00	0
2009-04-13	13:40:00	0
2009-04-13	13:41:00	0
2009-04-13	13:42:00	0
2009-04-13	13:43:00	0
2009-04-13	13:44:00	0
2009-04-13	13:45:00	0
2009-04-13	13:46:00	0
2009-04-13	13:47:00	0
2009-04-13	13:48:00	0
2009-04-13	13:49:00	0
2009-04-13	13:50:00	0
2009-04-13	13:51:00	0
2009-04-13	13:52:00	0
2009-04-13	13:53:00	0
2009-04-13	13:54:00	0
2009-04-13	13:55:00	0
2009-04-13	13:56:00	0
2009-04-13	13:57:00	0
2009-04-13	13:58:00	0
2009-04-13	13:59:00	0
2009-04-13	14:00:00	0
2009-04-13	14:01:00	0
2009-04-13	14:02:00	0
2009-04-13	14:03:00	0
2009-04-13	14:04:00	0
2009-04-13	14:05:00	0
2009-04-13	14:06:00	0
2009-04-13	14:07:00	0
2009-04-13	14:08:00	0
2009-04-13	14:09:00	0
2009-04-13	14:10:00	0
2009-04-13	14:11:00	0
2009-04-13	14:12:00	0
2009-04-13	14:13:00	0
2009-04-13	14:14:00	0
2009-04-13	14:15:00	0
2009-04-13	14:16:00	0
2009-04-13	14:17:00	0
2009-04-13	14:18:00	0
2009-04-13	14:19:00	0
2009-04-13	14:20:00	0
2009-04-13	14:21:00	0
2009-04-13	14:22:00	0
2009-04-13	14:23:00	0
2009-04-13	14:24:00	0
2009-04-13	14:25:00	0
2009-04-13	14:26:00	0
2009-04-13	14:27:00	0
2009-04-13	14:28:00	0
2009-04-13	14:29:00	0
2009-04-13	14:30:00	0
2009-04-13	14:31:00	0
2009-04-13	14:32:00	0
2009-04-13	14:33:00	0
2009-04-13	14:34:00	0
2009-04-13	14:35:00	0
2009-04-13	14:36:00	0
2009-04-13	14:37:00	0
2009-04-13	14:38:00	0
2009-04-13	14:39:00	0
2009-04-13	14:40:00	0
2009-04-13	14:41:00	0
2009-04-13	14:42:00	0
2009-04-13	14:43:00	0
2009-04-13	14:44:00	0
2009-04-13	14:45:00	0
2009-04-13	14:46:00	0
2009-04-13	14:47:00	0
2009-04-13	14:48:00	0
2009-04-13	14:49:00	0
2009-04-13	14:50:00	0
2009-04-13	14:51:00	0
2009-04-13	14:52:00	0
2009-04-13	14:53:00	0
2009-04-13	14:54:00	0
2009-04-13	14:55:00	0
2009-04-13	14:56:00	0
2009-04-13	14:57:00	0
2009-04-13	14:58:00	0
2009-04-13	14:59:00	0
2009-04-13	15:00:00	0
2009-04-13	15:01:00	0
2009-04-13	15:02:00	0
2009-04-13	15:03:00	0
2009-04-13	15:04:00	0
2009-04-13	15:05:00	0
2009-04-13	15:06:00	0
2009-04-13	15:07:00	0
2009-04-13	15:08:00	0
2009-04-13	15:09:00	0
2009-04-13	15:10:00	0
2009-04-13	15:11:00	0
2009-04-13	15:12:00	0
2009-04-13	15:13:00	0
2009-04-13	15:14:00	0
2009-04-13	15:15:00	0
2009-04-13	15:16:00	0
2009-04-13	15:17:00	0
2009-04-13	15:18:00	0
2009-04-13	15:19:00	0
2009-04-13	15:20:00	0
2009-04-13	15:21:00	0
2009-04-13	15:22:00	0
2009-04-13	15:23:00	0
2009-04-13	15:24:00	0
2009-04-13	15:25:00	0
2009-04-13	15:26:00	0
2009-04-13	15:27:00	0
2009-04-13	15:28:00	0
2009-04-13	15:29:00	0
2009-04-13	15:30:00	0
2009-04-13	15:31:00	0
2009-04-13	15:32:00	0
2009-04-13	15:33:00	0
2009-04-13	15:34:00	0
2009-04-13	15:35:00	0
2009-04-13	15:36:00	0
2009-04-13	15:37:00	0
2009-04-13	15:38:00	0
2009-04-13	15:39:00	0
2009-04-13	15:40:00	0
2009-04-13	15:41:00	0
2009-04-13	15:42:00	0
2009-04-13	15:43:00	0
2009-04-13	15:44:00	0
2009-04-13	15:45:00	0
2009-04-13	15:46:00	0
2009-04-13	15:47:00	0
2009-04-13	15:48:00	0
2009-04-13	15:49:00	0
2009-04-13	15:50:00	0
2009-04-13	15:51:00	0
2009-04-13	15:52:00	0
2009-04-13	15:53:00	0
2009-04-13	15:54:00	0
2009-04-13	15:55:00	0
2009-04-13	15:56:00	0
2009-04-13	15:57:00	0
2009-04-13	15:58:00	0
2009-04-13	15:59:00	0
2009-04-13	16:00:00	0
2009-04-13	16:01:00	0
2009-04-13	16:02:00	0
2009-04-13	16:03:00	0
2009-04-13	16:04:00	0
2009-04-13	16:05:00	0
2009-04-13	16:06:00	0
2009-04-13	16:07:00	0
2009-04-13	16:08:00	0
2009-04-13	16:09:00	0
2009-04-13	16:10:00	0
2009-04-13	16:11:00	0
2009-04-13	16:12:00	0
2009-04-13	16:13:00	0
2009-04-13	16:14:00	0
2009-04-13	16:15:00	0
2009-04-13	16:16:00	0
2009-04-13	16:17:00	0
2009-04-13	16:18:00	0
2009-04-13	16:19:00	0
2009-04-13	16:20:00	0
2009-04-13	16:21:00	0
2009-04-13	16:22:00	0
2009-04-13	16:23:00	0
2009-04-13	16:24:00	0
2009-04-13	16:25:00	0
2009-04-13	16:26:00	0
2009-04-13	16:27:00	0
2009-04-13	16:28:00	0
2009-04-13	16:29:00	0
2009-04-13	16:30:00	0
2009-04-13	16:31:00	0
2009-04-13	16:32:00	0
2009-04-13	16:33:00	0
2009-04-13	16:34:00	0
2009-04-13	16:35:00	0
2009-04-13	16:36:00	0
2009-04-13	16:37:00	0
2009-04-13	16:38:00	0
2009-04-13	16:39:00	0
2009-04-13	16:40:00	0
2009-04-13	16:41:00	0
2009-04-13	16:42:00	0
2009-04-13	16:43:00	0
2009-04-13	16:44:00	0
2009-04-13	16:45:00	0
2009-04-13	16:46:00	0
2009-04-13	16:47:00	0
2009-04-13	16:48:00	0
2009-04-13	16:49:00	0
2009-04-13	16:50:00	0
2009-04-13	16:51:00	0
2009-04-13	16:52:00	0
2009-04-13	16:53:00	0
2009-04-13	16:54:00	0
2009-04-13	16:55:00	0
2009-04-13	16:56:00	0
2009-04-13	16:57:00	0
2009-04-13	16:58:00	0
2009-04-13	16:59:00	0
2009-04-13	17:00:00	0
2009-04-13	17:01:00	0
2009-04-13	17:02:00	0
2009-04-13	17:03:00	0
2009-04-13	17:04:00	0
2009-04-13	17:05:00	0
2009-04-13	17:06:00	0
2009-04-13	17:07:00	0
2009-04-13	17:08:00	0
2009-04-13	17:09:00	0
2009-04-13	17:10:00	0
2009-04-13	17:11:00	0
2009-04-13	17:12:00	0
2009-04-13	17:13:00	0
2009-04-13	17:14:00	0
2009-04-13	17:15:00	0
2009-04-13	17:16:00	0
2009-04-13	17:17:00	0
2009-04-13	17:18:00	0
2009-04-13	17:19:00	0
2009-04-13	17:20:00	0
2009-04-13	17:21:00	0
2009-04-13	17:22:00	0
2009-04-13	17:23:00	0
2009-04-13	17:24:00	0
2009-04-13	17:25:00	0
2009-04-13	17:26:00	0
2009-04-13	17:27:00	0
2009-04-13	17:28:00	0
2009-04-13	17:29:00	0
2009-04-13	17:30:00	0
2009-04-13	17:31:00	0
2009-04-13	17:32:00	0
2009-04-13	17:33:00	0
2009-04-13	17:34:00	0
2009-04-13	17:35:00	0
2009-04-13	17:36:00	0
2009-04-13	17:37:00	0
2009-04-13	17:38:00	0
2009-04-13	17:39:00	0
2009-04-13	17:40:00	0
2009-04-13	17:41:00	0
2009-04-13	17:42:00	0
2009-04-13	17:43:00	0
2009-04-13	17:44:00	0
2009-04-13	17:45:00	0
2009-04-13	17:46:00	0
2009-04-13	17:47:00	0
2009-04-13	17:48:00	0
2009-04-13	17:49:00	0
2009-04-13	17:50:00	0
2009-04-13	17:51:00	0
2009-04-13	17:52:00	0
2009-04-13	17:53:00	0
2009-04-13	17:54:00	0
2009-04-13	17:55:00	0
2009-04-13	17:56:00	0
2009-04-13	17:57:00	0
2009-04-13	17:58:00	0
2009-04-13	17:59:00	0
2009-04-13	18:00:00	86
2009-04-13	18:01:00	321
2009-04-13	18:02:00	501
2009-04-13	18:03:00	242
2009-04-13	18:04:00	39
2009-04-13	18:05:00	10
2009-04-13	18:06:00	0
2009-04-13	18:07:00	455
2009-04-13	18:08:00	1085
2009-04-13	18:09:00	539
2009-04-13	18:10:00	0
2009-04-13	18:11:00	34
2009-04-13	18:12:00	0
2009-04-13	18:13:00	0
2009-04-13	18:14:00	0
2009-04-13	18:15:00	0
2009-04-13	18:16:00	10
2009-04-13	18:17:00	0
2009-04-13	18:18:00	0
2009-04-13	18:19:00	0
2009-04-13	18:20:00	0
2009-04-13	18:21:00	0
2009-04-13	18:22:00	0
2009-04-13	18:23:00	0
2009-04-13	18:24:00	0
2009-04-13	18:25:00	0
2009-04-13	18:26:00	19
2009-04-13	18:27:00	0
2009-04-13	18:28:00	0
2009-04-13	18:29:00	5
2009-04-13	18:30:00	110
2009-04-13	18:31:00	1731
2009-04-13	18:32:00	1892
2009-04-13	18:33:00	2256
2009-04-13	18:34:00	802
2009-04-13	18:35:00	619
2009-04-13	18:36:00	0
2009-04-13	18:37:00	0
2009-04-13	18:38:00	44
2009-04-13	18:39:00	514
2009-04-13	18:40:00	676
2009-04-13	18:41:00	785
2009-04-13	18:42:00	340
2009-04-13	18:43:00	10
2009-04-13	18:44:00	478
2009-04-13	18:45:00	350
2009-04-13	18:46:00	411
2009-04-13	18:47:00	268
2009-04-13	18:48:00	721
2009-04-13	18:49:00	802
2009-04-13	18:50:00	944
2009-04-13	18:51:00	1043
2009-04-13	18:52:00	619
2009-04-13	18:53:00	422
2009-04-13	18:54:00	104
2009-04-13	18:55:00	379
2009-04-13	18:56:00	110
2009-04-13	18:57:00	44
2009-04-13	18:58:00	0
2009-04-13	18:59:00	19
2009-04-13	19:00:00	10
2009-04-13	19:01:00	514
2009-04-13	19:02:00	104
2009-04-13	19:03:00	115
2009-04-13	19:04:00	0
2009-04-13	19:05:00	390
2009-04-13	19:06:00	578
2009-04-13	19:07:00	1023
2009-04-13	19:08:00	908
2009-04-13	19:09:00	311
2009-04-13	19:10:00	400
2009-04-13	19:11:00	527
2009-04-13	19:12:00	390
2009-04-13	19:13:00	311
2009-04-13	19:14:00	539
2009-04-13	19:15:00	443
2009-04-13	19:16:00	321
2009-04-13	19:17:00	98
2009-04-13	19:18:00	578
2009-04-13	19:19:00	390
2009-04-13	19:20:00	211
2009-04-13	19:21:00	175
2009-04-13	19:22:00	0
2009-04-13	19:23:00	10
2009-04-13	19:24:00	34
2009-04-13	19:25:00	154
2009-04-13	19:26:00	147
2009-04-13	19:27:00	321
2009-04-13	19:28:00	168
2009-04-13	19:29:00	10
2009-04-13	19:30:00	19
2009-04-13	19:31:00	0
2009-04-13	19:32:00	0
2009-04-13	19:33:00	69
2009-04-13	19:34:00	0
2009-04-13	19:35:00	0
2009-04-13	19:36:00	53
2009-04-13	19:37:00	0
2009-04-13	19:38:00	276
2009-04-13	19:39:00	211
2009-04-13	19:40:00	340
2009-04-13	19:41:00	147
2009-04-13	19:42:00	0
2009-04-13	19:43:00	0
2009-04-13	19:44:00	0
2009-04-13	19:45:00	0
2009-04-13	19:46:00	63
2009-04-13	19:47:00	0
2009-04-13	19:48:00	0
2009-04-13	19:49:00	0
2009-04-13	19:50:00	0
2009-04-13	19:51:00	0
2009-04-13	19:52:00	0
2009-04-13	19:53:00	0
2009-04-13	19:54:00	0
2009-04-13	19:55:00	0
2009-04-13	19:56:00	0
2009-04-13	19:57:00	0
2009-04-13	19:58:00	0
2009-04-13	19:59:00	0
2009-04-13	20:00:00	0
2009-04-13	20:01:00	0
2009-04-13	20:02:00	514
2009-04-13	20:03:00	871
2009-04-13	20:04:00	1023
2009-04-13	20:05:00	1762
2009-04-13	20:06:00	211
2009-04-13	20:07:00	34
2009-04-13	20:08:00	92
2009-04-13	20:09:00	0
2009-04-13	20:10:00	0
2009-04-13	20:11:00	276
2009-04-13	20:12:00	147
2009-04-13	20:13:00	39
2009-04-13	20:14:00	29
2009-04-13	20:15:00	0
2009-04-13	20:16:00	24
2009-04-13	20:17:00	0
2009-04-13	20:18:00	0
2009-04-13	20:19:00	0
2009-04-13	20:20:00	0
2009-04-13	20:21:00	0
2009-04-13	20:22:00	0
2009-04-13	20:23:00	0
2009-04-13	20:24:00	0
2009-04-13	20:25:00	0
2009-04-13	20:26:00	0
2009-04-13	20:27:00	0
2009-04-13	20:28:00	0
2009-04-13	20:29:00	0
2009-04-13	20:30:00	0
2009-04-13	20:31:00	0
2009-04-13	20:32:00	0
2009-04-13	20:33:00	0
2009-04-13	20:34:00	24
2009-04-13	20:35:00	0
2009-04-13	20:36:00	0
2009-04-13	20:37:00	0
2009-04-13	20:38:00	0
2009-04-13	20:39:00	0
2009-04-13	20:40:00	0
2009-04-13	20:41:00	147
2009-04-13	20:42:00	58
2009-04-13	20:43:00	10
2009-04-13	20:44:00	0
2009-04-13	20:45:00	0
2009-04-13	20:46:00	360
2009-04-13	20:47:00	0
2009-04-13	20:48:00	0
2009-04-13	20:49:00	0
2009-04-13	20:50:00	0
2009-04-13	20:51:00	63
2009-04-13	20:52:00	34
2009-04-13	20:53:00	0
2009-04-13	20:54:00	0
2009-04-13	20:55:00	0
2009-04-13	20:56:00	0
2009-04-13	20:57:00	0
2009-04-13	20:58:00	0
2009-04-13	20:59:00	0
2009-04-13	21:00:00	0
2009-04-13	21:01:00	0
2009-04-13	21:02:00	0
2009-04-13	21:03:00	0
2009-04-13	21:04:00	0
2009-04-13	21:05:00	0
2009-04-13	21:06:00	0
2009-04-13	21:07:00	0
2009-04-13	21:08:00	0
2009-04-13	21:09:00	0
2009-04-13	21:10:00	0
2009-04-13	21:11:00	5
2009-04-13	21:12:00	0
2009-04-13	21:13:00	0
2009-04-13	21:14:00	0
2009-04-13	21:15:00	0
2009-04-13	21:16:00	0
2009-04-13	21:17:00	0
2009-04-13	21:18:00	15
2009-04-13	21:19:00	0
2009-04-13	21:20:00	0
2009-04-13	21:21:00	0
2009-04-13	21:22:00	0
2009-04-13	21:23:00	0
2009-04-13	21:24:00	0
2009-04-13	21:25:00	0
2009-04-13	21:26:00	0
2009-04-13	21:27:00	0
2009-04-13	21:28:00	24
2009-04-13	21:29:00	0
2009-04-13	21:30:00	0
2009-04-13	21:31:00	0
2009-04-13	21:32:00	0
2009-04-13	21:33:00	53
2009-04-13	21:34:00	0
2009-04-13	21:35:00	0
2009-04-13	21:36:00	0
2009-04-13	21:37:00	0
2009-04-13	21:38:00	0
2009-04-13	21:39:00	0
2009-04-13	21:40:00	0
2009-04-13	21:41:00	0
2009-04-13	21:42:00	0
2009-04-13	21:43:00	0
2009-04-13	21:44:00	0
2009-04-13	21:45:00	0
2009-04-13	21:46:00	0
2009-04-13	21:47:00	0
2009-04-13	21:48:00	0
2009-04-13	21:49:00	0
2009-04-13	21:50:00	0
2009-04-13	21:51:00	0
2009-04-13	21:52:00	0
2009-04-13	21:53:00	0
2009-04-13	21:54:00	0
2009-04-13	21:55:00	0
2009-04-13	21:56:00	0
2009-04-13	21:57:00	5
2009-04-13	21:58:00	0
2009-04-13	21:59:00	19
2009-04-13	22:00:00	0
2009-04-13	22:01:00	0
2009-04-13	22:02:00	0
2009-04-13	22:03:00	0
2009-04-13	22:04:00	0
2009-04-13	22:05:00	0
2009-04-13	22:06:00	0
2009-04-13	22:07:00	0
2009-04-13	22:08:00	0
2009-04-13	22:09:00	0
2009-04-13	22:10:00	0
2009-04-13	22:11:00	0
2009-04-13	22:12:00	0
2009-04-13	22:13:00	0
2009-04-13	22:14:00	141
2009-04-13	22:15:00	1195
2009-04-13	22:16:00	676
2009-04-13	22:17:00	15
2009-04-13	22:18:00	204
2009-04-13	22:19:00	161
2009-04-13	22:20:00	127
2009-04-13	22:21:00	1023
2009-04-13	22:22:00	605
2009-04-13	22:23:00	242
2009-04-13	22:24:00	92
2009-04-13	22:25:00	0
2009-04-13	22:26:00	0
2009-04-13	22:27:00	58
2009-04-13	22:28:00	0
2009-04-13	22:29:00	0
2009-04-13	22:30:00	0
2009-04-13	22:31:00	0
2009-04-13	22:32:00	0
2009-04-13	22:33:00	0
2009-04-13	22:34:00	0
2009-04-13	22:35:00	0
2009-04-13	22:36:00	227
2009-04-13	22:37:00	29
2009-04-13	22:38:00	0
2009-04-13	22:39:00	0
2009-04-13	22:40:00	0
2009-04-13	22:41:00	0
2009-04-13	22:42:00	0
2009-04-13	22:43:00	0
2009-04-13	22:44:00	0
2009-04-13	22:45:00	0
2009-04-13	22:46:00	0
2009-04-13	22:47:00	0
2009-04-13	22:48:00	0
2009-04-13	22:49:00	0
2009-04-13	22:50:00	0
2009-04-13	22:51:00	0
2009-04-13	22:52:00	0
2009-04-13	22:53:00	0
2009-04-13	22:54:00	0
2009-04-13	22:55:00	0
2009-04-13	22:56:00	0
2009-04-13	22:57:00	0
2009-04-13	22:58:00	115
2009-04-13	22:59:00	0
2009-04-13	23:00:00	0
2009-04-13	23:01:00	0
2009-04-13	23:02:00	0
2009-04-13	23:03:00	0
2009-04-13	23:04:00	0
2009-04-13	23:05:00	0
2009-04-13	23:06:00	0
2009-04-13	23:07:00	0
2009-04-13	23:08:00	0
2009-04-13	23:09:00	0
2009-04-13	23:10:00	0
2009-04-13	23:11:00	0
2009-04-13	23:12:00	5
2009-04-13	23:13:00	0
2009-04-13	23:14:00	0
2009-04-13	23:15:00	0
2009-04-13	23:16:00	0
2009-04-13	23:17:00	0
2009-04-13	23:18:00	0
2009-04-13	23:19:00	0
2009-04-13	23:20:00	0
2009-04-13	23:21:00	0
2009-04-13	23:22:00	0
2009-04-13	23:23:00	0
2009-04-13	23:24:00	0
2009-04-13	23:25:00	0
2009-04-13	23:26:00	0
2009-04-13	23:27:00	0
2009-04-13	23:28:00	0
2009-04-13	23:29:00	0
2009-04-13	23:30:00	0
2009-04-13	23:31:00	0
2009-04-13	23:32:00	0
2009-04-13	23:33:00	0
2009-04-13	23:34:00	0
2009-04-13	23:35:00	0
2009-04-13	23:36:00	5
2009-04-13	23:37:00	0
2009-04-13	23:38:00	0
2009-04-13	23:39:00	0
2009-04-13	23:40:00	0
2009-04-13	23:41:00	0
2009-04-13	23:42:00	0
2009-04-13	23:43:00	0
2009-04-13	23:44:00	0
2009-04-13	23:45:00	0
2009-04-13	23:46:00	98
2009-04-13	23:47:00	0
2009-04-13	23:48:00	0
2009-04-13	23:49:00	0
2009-04-13	23:50:00	0
2009-04-13	23:51:00	0
2009-04-13	23:52:00	0
2009-04-13	23:53:00	0
2009-04-13	23:54:00	0
2009-04-13	23:55:00	0
2009-04-13	23:56:00	0
2009-04-13	23:57:00	0
2009-04-13	23:58:00	0
2009-04-13	23:59:00	0
2009-04-14	00:00:00	0
2009-04-14	00:01:00	0
2009-04-14	00:02:00	0
2009-04-14	00:03:00	0
2009-04-14	00:04:00	0
2009-04-14	00:05:00	0
2009-04-14	00:06:00	0
2009-04-14	00:07:00	0
2009-04-14	00:08:00	0
2009-04-14	00:09:00	0
2009-04-14	00:10:00	0
2009-04-14	00:11:00	0
2009-04-14	00:12:00	19
2009-04-14	00:13:00	0
2009-04-14	00:14:00	0
2009-04-14	00:15:00	0
2009-04-14	00:16:00	0
2009-04-14	00:17:00	0
2009-04-14	00:18:00	0
2009-04-14	00:19:00	0
2009-04-14	00:20:00	0
2009-04-14	00:21:00	0
2009-04-14	00:22:00	0
2009-04-14	00:23:00	0
2009-04-14	00:24:00	0
2009-04-14	00:25:00	0
2009-04-14	00:26:00	0
2009-04-14	00:27:00	0
2009-04-14	00:28:00	0
2009-04-14	00:29:00	0
2009-04-14	00:30:00	10
2009-04-14	00:31:00	0
2009-04-14	00:32:00	0
2009-04-14	00:33:00	0
2009-04-14	00:34:00	0
2009-04-14	00:35:00	0
2009-04-14	00:36:00	0
2009-04-14	00:37:00	0
2009-04-14	00:38:00	0
2009-04-14	00:39:00	0
2009-04-14	00:40:00	0
2009-04-14	00:41:00	0
2009-04-14	00:42:00	10
2009-04-14	00:43:00	0
2009-04-14	00:44:00	0
2009-04-14	00:45:00	0
2009-04-14	00:46:00	0
2009-04-14	00:47:00	0
2009-04-14	00:48:00	0
2009-04-14	00:49:00	0
2009-04-14	00:50:00	0
2009-04-14	00:51:00	0
2009-04-14	00:52:00	0
2009-04-14	00:53:00	104
2009-04-14	00:54:00	10
2009-04-14	00:55:00	0
2009-04-14	00:56:00	0
2009-04-14	00:57:00	0
2009-04-14	00:58:00	0
2009-04-14	00:59:00	0
2009-04-14	01:00:00	0
2009-04-14	01:01:00	0
2009-04-14	01:02:00	0
2009-04-14	01:03:00	0
2009-04-14	01:04:00	0
2009-04-14	01:05:00	0
2009-04-14	01:06:00	0
2009-04-14	01:07:00	0
2009-04-14	01:08:00	0
2009-04-14	01:09:00	0
2009-04-14	01:10:00	0
2009-04-14	01:11:00	0
2009-04-14	01:12:00	0
2009-04-14	01:13:00	0
2009-04-14	01:14:00	5
2009-04-14	01:15:00	121
2009-04-14	01:16:00	0
2009-04-14	01:17:00	0
2009-04-14	01:18:00	0
2009-04-14	01:19:00	0
2009-04-14	01:20:00	0
2009-04-14	01:21:00	0
2009-04-14	01:22:00	0
2009-04-14	01:23:00	0
2009-04-14	01:24:00	0
2009-04-14	01:25:00	0
2009-04-14	01:26:00	0
2009-04-14	01:27:00	0
2009-04-14	01:28:00	0
2009-04-14	01:29:00	0
2009-04-14	01:30:00	92
2009-04-14	01:31:00	24
2009-04-14	01:32:00	0
2009-04-14	01:33:00	0
2009-04-14	01:34:00	0
2009-04-14	01:35:00	0
2009-04-14	01:36:00	0
2009-04-14	01:37:00	0
2009-04-14	01:38:00	0
2009-04-14	01:39:00	0
2009-04-14	01:40:00	0
2009-04-14	01:41:00	0
2009-04-14	01:42:00	0
2009-04-14	01:43:00	0
2009-04-14	01:44:00	0
2009-04-14	01:45:00	75
2009-04-14	01:46:00	19
2009-04-14	01:47:00	0
2009-04-14	01:48:00	0
2009-04-14	01:49:00	0
2009-04-14	01:50:00	0
2009-04-14	01:51:00	0
2009-04-14	01:52:00	0
2009-04-14	01:53:00	0
2009-04-14	01:54:00	0
2009-04-14	01:55:00	0
2009-04-14	01:56:00	0
2009-04-14	01:57:00	0
2009-04-14	01:58:00	0
2009-04-14	01:59:00	0
2009-04-14	02:00:00	0
2009-04-14	02:01:00	0
2009-04-14	02:02:00	0
2009-04-14	02:03:00	0
2009-04-14	02:04:00	0
2009-04-14	02:05:00	0
2009-04-14	02:06:00	0
2009-04-14	02:07:00	0
2009-04-14	02:08:00	0
2009-04-14	02:09:00	0
2009-04-14	02:10:00	0
2009-04-14	02:11:00	0
2009-04-14	02:12:00	0
2009-04-14	02:13:00	0
2009-04-14	02:14:00	0
2009-04-14	02:15:00	0
2009-04-14	02:16:00	0
2009-04-14	02:17:00	0
2009-04-14	02:18:00	0
2009-04-14	02:19:00	0
2009-04-14	02:20:00	0
2009-04-14	02:21:00	0
2009-04-14	02:22:00	0
2009-04-14	02:23:00	0
2009-04-14	02:24:00	0
2009-04-14	02:25:00	0
2009-04-14	02:26:00	0
2009-04-14	02:27:00	0
2009-04-14	02:28:00	0
2009-04-14	02:29:00	0
2009-04-14	02:30:00	0
2009-04-14	02:31:00	0
2009-04-14	02:32:00	0
2009-04-14	02:33:00	0
2009-04-14	02:34:00	48
2009-04-14	02:35:00	0
2009-04-14	02:36:00	0
2009-04-14	02:37:00	0
2009-04-14	02:38:00	0
2009-04-14	02:39:00	0
2009-04-14	02:40:00	0
2009-04-14	02:41:00	0
2009-04-14	02:42:00	0
2009-04-14	02:43:00	0
2009-04-14	02:44:00	0
2009-04-14	02:45:00	0
2009-04-14	02:46:00	0
2009-04-14	02:47:00	0
2009-04-14	02:48:00	0
2009-04-14	02:49:00	0
2009-04-14	02:50:00	0
2009-04-14	02:51:00	0
2009-04-14	02:52:00	0
2009-04-14	02:53:00	0
2009-04-14	02:54:00	0
2009-04-14	02:55:00	0
2009-04-14	02:56:00	0
2009-04-14	02:57:00	0
2009-04-14	02:58:00	0
2009-04-14	02:59:00	0
2009-04-14	03:00:00	15
2009-04-14	03:01:00	0
2009-04-14	03:02:00	0
2009-04-14	03:03:00	0
2009-04-14	03:04:00	0
2009-04-14	03:05:00	0
2009-04-14	03:06:00	24
2009-04-14	03:07:00	0
2009-04-14	03:08:00	0
2009-04-14	03:09:00	0
2009-04-14	03:10:00	0
2009-04-14	03:11:00	0
2009-04-14	03:12:00	121
2009-04-14	03:13:00	0
2009-04-14	03:14:00	0
2009-04-14	03:15:00	0
2009-04-14	03:16:00	0
2009-04-14	03:17:00	0
2009-04-14	03:18:00	0
2009-04-14	03:19:00	0
2009-04-14	03:20:00	0
2009-04-14	03:21:00	0
2009-04-14	03:22:00	0
2009-04-14	03:23:00	0
2009-04-14	03:24:00	0
2009-04-14	03:25:00	0
2009-04-14	03:26:00	0
2009-04-14	03:27:00	0
2009-04-14	03:28:00	0
2009-04-14	03:29:00	0
2009-04-14	03:30:00	0
2009-04-14	03:31:00	0
2009-04-14	03:32:00	0
2009-04-14	03:33:00	0
2009-04-14	03:34:00	0
2009-04-14	03:35:00	15
2009-04-14	03:36:00	0
2009-04-14	03:37:00	0
2009-04-14	03:38:00	0
2009-04-14	03:39:00	0
2009-04-14	03:40:00	69
2009-04-14	03:41:00	0
2009-04-14	03:42:00	0
2009-04-14	03:43:00	0
2009-04-14	03:44:00	0
2009-04-14	03:45:00	0
2009-04-14	03:46:00	0
2009-04-14	03:47:00	0
2009-04-14	03:48:00	0
2009-04-14	03:49:00	0
2009-04-14	03:50:00	0
2009-04-14	03:51:00	39
2009-04-14	03:52:00	0
2009-04-14	03:53:00	69
2009-04-14	03:54:00	0
2009-04-14	03:55:00	0
2009-04-14	03:56:00	0
2009-04-14	03:57:00	0
2009-04-14	03:58:00	0
2009-04-14	03:59:00	0
2009-04-14	04:00:00	0
2009-04-14	04:01:00	0
2009-04-14	04:02:00	0
2009-04-14	04:03:00	0
2009-04-14	04:04:00	0
2009-04-14	04:05:00	0
2009-04-14	04:06:00	0
2009-04-14	04:07:00	0
2009-04-14	04:08:00	0
2009-04-14	04:09:00	0
2009-04-14	04:10:00	0
2009-04-14	04:11:00	0
2009-04-14	04:12:00	0
2009-04-14	04:13:00	0
2009-04-14	04:14:00	0
2009-04-14	04:15:00	0
2009-04-14	04:16:00	0
2009-04-14	04:17:00	0
2009-04-14	04:18:00	0
2009-04-14	04:19:00	0
2009-04-14	04:20:00	0
2009-04-14	04:21:00	0
2009-04-14	04:22:00	0
2009-04-14	04:23:00	0
2009-04-14	04:24:00	0
2009-04-14	04:25:00	0
2009-04-14	04:26:00	5
2009-04-14	04:27:00	0
2009-04-14	04:28:00	0
2009-04-14	04:29:00	0
2009-04-14	04:30:00	0
2009-04-14	04:31:00	0
2009-04-14	04:32:00	0
2009-04-14	04:33:00	0
2009-04-14	04:34:00	219
2009-04-14	04:35:00	80
2009-04-14	04:36:00	5
2009-04-14	04:37:00	400
2009-04-14	04:38:00	219
2009-04-14	04:39:00	0
2009-04-14	04:40:00	0
2009-04-14	04:41:00	24
2009-04-14	04:42:00	0
2009-04-14	04:43:00	0
2009-04-14	04:44:00	0
2009-04-14	04:45:00	0
2009-04-14	04:46:00	0
2009-04-14	04:47:00	0
2009-04-14	04:48:00	0
2009-04-14	04:49:00	5
2009-04-14	04:50:00	0
2009-04-14	04:51:00	10
2009-04-14	04:52:00	19
2009-04-14	04:53:00	15
2009-04-14	04:54:00	0
2009-04-14	04:55:00	0
2009-04-14	04:56:00	0
2009-04-14	04:57:00	0
2009-04-14	04:58:00	0
2009-04-14	04:59:00	0
2009-04-14	05:00:00	0
2009-04-14	05:01:00	0
2009-04-14	05:02:00	0
2009-04-14	05:03:00	0
2009-04-14	05:04:00	5
2009-04-14	05:05:00	0
2009-04-14	05:06:00	5
2009-04-14	05:07:00	0
2009-04-14	05:08:00	0
2009-04-14	05:09:00	0
2009-04-14	05:10:00	48
2009-04-14	05:11:00	0
2009-04-14	05:12:00	0
2009-04-14	05:13:00	0
2009-04-14	05:14:00	0
2009-04-14	05:15:00	0
2009-04-14	05:16:00	0
2009-04-14	05:17:00	0
2009-04-14	05:18:00	0
2009-04-14	05:19:00	0
2009-04-14	05:20:00	0
2009-04-14	05:21:00	0
2009-04-14	05:22:00	0
2009-04-14	05:23:00	5
2009-04-14	05:24:00	0
2009-04-14	05:25:00	0
2009-04-14	05:26:00	0
2009-04-14	05:27:00	0
2009-04-14	05:28:00	0
2009-04-14	05:29:00	0
2009-04-14	05:30:00	10
2009-04-14	05:31:00	5
2009-04-14	05:32:00	0
2009-04-14	05:33:00	19
2009-04-14	05:34:00	0
2009-04-14	05:35:00	92
2009-04-14	05:36:00	0
2009-04-14	05:37:00	0
2009-04-14	05:38:00	0
2009-04-14	05:39:00	0
2009-04-14	05:40:00	24
2009-04-14	05:41:00	24
2009-04-14	05:42:00	58
2009-04-14	05:43:00	29
2009-04-14	05:44:00	1043
2009-04-14	05:45:00	1064
2009-04-14	05:46:00	853
2009-04-14	05:47:00	539
2009-04-14	05:48:00	134
2009-04-14	05:49:00	98
2009-04-14	05:50:00	369
2009-04-14	05:51:00	0
2009-04-14	05:52:00	0
2009-04-14	05:53:00	0
2009-04-14	05:54:00	19
2009-04-14	05:55:00	0
2009-04-14	05:56:00	5
2009-04-14	05:57:00	15
2009-04-14	05:58:00	235
2009-04-14	05:59:00	5
2009-04-14	06:00:00	0
2009-04-14	06:01:00	0
2009-04-14	06:02:00	24
2009-04-14	06:03:00	0
2009-04-14	06:04:00	0
2009-04-14	06:05:00	0
2009-04-14	06:06:00	0
2009-04-14	06:07:00	0
2009-04-14	06:08:00	0
2009-04-14	06:09:00	0
2009-04-14	06:10:00	0
2009-04-14	06:11:00	0
2009-04-14	06:12:00	0
2009-04-14	06:13:00	0
2009-04-14	06:14:00	24
2009-04-14	06:15:00	15
2009-04-14	06:16:00	0
2009-04-14	06:17:00	0
2009-04-14	06:18:00	0
2009-04-14	06:19:00	0
2009-04-14	06:20:00	0
2009-04-14	06:21:00	0
2009-04-14	06:22:00	0
2009-04-14	06:23:00	0
2009-04-14	06:24:00	0
2009-04-14	06:25:00	0
2009-04-14	06:26:00	0
2009-04-14	06:27:00	0
2009-04-14	06:28:00	0
2009-04-14	06:29:00	0
2009-04-14	06:30:00	0
2009-04-14	06:31:00	0
2009-04-14	06:32:00	24
2009-04-14	06:33:00	39
2009-04-14	06:34:00	63
2009-04-14	06:35:00	48
2009-04-14	06:36:00	432
2009-04-14	06:37:00	619
2009-04-14	06:38:00	690
2009-04-14	06:39:00	0
2009-04-14	06:40:00	0
2009-04-14	06:41:00	0
2009-04-14	06:42:00	0
2009-04-14	06:43:00	0
2009-04-14	06:44:00	0
2009-04-14	06:45:00	0
2009-04-14	06:46:00	0
2009-04-14	06:47:00	0
2009-04-14	06:48:00	0
2009-04-14	06:49:00	0
2009-04-14	06:50:00	0
2009-04-14	06:51:00	0
2009-04-14	06:52:00	0
2009-04-14	06:53:00	0
2009-04-14	06:54:00	0
2009-04-14	06:55:00	0
2009-04-14	06:56:00	0
2009-04-14	06:57:00	0
2009-04-14	06:58:00	0
2009-04-14	06:59:00	0
2009-04-14	07:00:00	15
2009-04-14	07:01:00	0
2009-04-14	07:02:00	0
2009-04-14	07:03:00	0
2009-04-14	07:04:00	0
2009-04-14	07:05:00	0
2009-04-14	07:06:00	0
2009-04-14	07:07:00	0
2009-04-14	07:08:00	0
2009-04-14	07:09:00	0
2009-04-14	07:10:00	0
2009-04-14	07:11:00	0
2009-04-14	07:12:00	10
2009-04-14	07:13:00	0
2009-04-14	07:14:00	0
2009-04-14	07:15:00	0
2009-04-14	07:16:00	0
2009-04-14	07:17:00	0
2009-04-14	07:18:00	0
2009-04-14	07:19:00	0
2009-04-14	07:20:00	0
2009-04-14	07:21:00	0
2009-04-14	07:22:00	0
2009-04-14	07:23:00	0
2009-04-14	07:24:00	0
2009-04-14	07:25:00	0
2009-04-14	07:26:00	0
2009-04-14	07:27:00	0
2009-04-14	07:28:00	0
2009-04-14	07:29:00	0
2009-04-14	07:30:00	0
2009-04-14	07:31:00	0
2009-04-14	07:32:00	0
2009-04-14	07:33:00	0
2009-04-14	07:34:00	0
2009-04-14	07:35:00	0
2009-04-14	07:36:00	0
2009-04-14	07:37:00	0
2009-04-14	07:38:00	0
2009-04-14	07:39:00	0
2009-04-14	07:40:00	0
2009-04-14	07:41:00	0
2009-04-14	07:42:00	0
2009-04-14	07:43:00	0
2009-04-14	07:44:00	0
2009-04-14	07:45:00	0
2009-04-14	07:46:00	0
2009-04-14	07:47:00	0
2009-04-14	07:48:00	0
2009-04-14	07:49:00	0
2009-04-14	07:50:00	0
2009-04-14	07:51:00	0
2009-04-14	07:52:00	0
2009-04-14	07:53:00	0
2009-04-14	07:54:00	0
2009-04-14	07:55:00	0
2009-04-14	07:56:00	0
2009-04-14	07:57:00	0
2009-04-14	07:58:00	0
2009-04-14	07:59:00	0
2009-04-14	08:00:00	5
2009-04-14	08:01:00	5
2009-04-14	08:02:00	0
2009-04-14	08:03:00	0
2009-04-14	08:04:00	0
2009-04-14	08:05:00	0
2009-04-14	08:06:00	0
2009-04-14	08:07:00	0
2009-04-14	08:08:00	48
2009-04-14	08:09:00	0
2009-04-14	08:10:00	0
2009-04-14	08:11:00	0
2009-04-14	08:12:00	0
2009-04-14	08:13:00	0
2009-04-14	08:14:00	63
2009-04-14	08:15:00	0
2009-04-14	08:16:00	0
2009-04-14	08:17:00	0
2009-04-14	08:18:00	0
2009-04-14	08:19:00	75
2009-04-14	08:20:00	0
2009-04-14	08:21:00	0
2009-04-14	08:22:00	0
2009-04-14	08:23:00	75
2009-04-14	08:24:00	58
2009-04-14	08:25:00	400
2009-04-14	08:26:00	235
2009-04-14	08:27:00	331
2009-04-14	08:28:00	0
2009-04-14	08:29:00	737
2009-04-14	08:30:00	605
2009-04-14	08:31:00	514
2009-04-14	08:32:00	188
2009-04-14	08:33:00	127
2009-04-14	08:34:00	250
2009-04-14	08:35:00	0
2009-04-14	08:36:00	340
2009-04-14	08:37:00	39
2009-04-14	08:38:00	44
2009-04-14	08:39:00	141
2009-04-14	08:40:00	802
2009-04-14	08:41:00	632
2009-04-14	08:42:00	5
2009-04-14	08:43:00	24
2009-04-14	08:44:00	69
2009-04-14	08:45:00	53
2009-04-14	08:46:00	134
2009-04-14	08:47:00	80
2009-04-14	08:48:00	69
2009-04-14	08:49:00	15
2009-04-14	08:50:00	0
2009-04-14	08:51:00	0
2009-04-14	08:52:00	0
2009-04-14	08:53:00	0
2009-04-14	08:54:00	331
2009-04-14	08:55:00	2637
2009-04-14	08:56:00	134
2009-04-14	08:57:00	53
2009-04-14	08:58:00	86
2009-04-14	08:59:00	204
2009-04-14	09:00:00	1195
2009-04-14	09:01:00	69
2009-04-14	09:02:00	10
2009-04-14	09:03:00	311
2009-04-14	09:04:00	0
2009-04-14	09:05:00	0
2009-04-14	09:06:00	0
2009-04-14	09:07:00	0
2009-04-14	09:08:00	0
[truncated: 22,491 more rows]

## Sheet: 4.29.09
Actogram, Copy Raw Data, All Days
Identity:	Shug second monitor
Filename:	E:\Active Research Files\meloxicam titre canine\cases\shug\Shug second monitor 4.29.09.AWC
Gender:	F
Age:	10
Height:	76.2 cm	30.0 in
Weight:	44.0 kg	97.0 lbs
Start Date:	29-Apr-2009 (Wed)
Start Time:	18:00:00
Interval:	1.00 mins
Date Stamp:	Time Stamp:	Activity Data:	Marker Press:
2009-04-29	00:00:00	0
2009-04-29	00:01:00	0
2009-04-29	00:02:00	0
2009-04-29	00:03:00	0
2009-04-29	00:04:00	0
2009-04-29	00:05:00	0
2009-04-29	00:06:00	0
2009-04-29	00:07:00	0
2009-04-29	00:08:00	0
2009-04-29	00:09:00	0
2009-04-29	00:10:00	0
2009-04-29	00:11:00	0
2009-04-29	00:12:00	0
2009-04-29	00:13:00	0
2009-04-29	00:14:00	0
2009-04-29	00:15:00	0
2009-04-29	00:16:00	0
2009-04-29	00:17:00	0
2009-04-29	00:18:00	0
2009-04-29	00:19:00	0
2009-04-29	00:20:00	0
2009-04-29	00:21:00	0
2009-04-29	00:22:00	0
2009-04-29	00:23:00	0
2009-04-29	00:24:00	0
2009-04-29	00:25:00	0
2009-04-29	00:26:00	0
2009-04-29	00:27:00	0
2009-04-29	00:28:00	0
2009-04-29	00:29:00	0
2009-04-29	00:30:00	0
2009-04-29	00:31:00	0
2009-04-29	00:32:00	0
2009-04-29	00:33:00	0
2009-04-29	00:34:00	0
2009-04-29	00:35:00	0
2009-04-29	00:36:00	0
2009-04-29	00:37:00	0
2009-04-29	00:38:00	0
2009-04-29	00:39:00	0
2009-04-29	00:40:00	0
2009-04-29	00:41:00	0
2009-04-29	00:42:00	0
2009-04-29	00:43:00	0
2009-04-29	00:44:00	0
2009-04-29	00:45:00	0
2009-04-29	00:46:00	0
2009-04-29	00:47:00	0
2009-04-29	00:48:00	0
2009-04-29	00:49:00	0
2009-04-29	00:50:00	0
2009-04-29	00:51:00	0
2009-04-29	00:52:00	0
2009-04-29	00:53:00	0
2009-04-29	00:54:00	0
2009-04-29	00:55:00	0
2009-04-29	00:56:00	0
2009-04-29	00:57:00	0
2009-04-29	00:58:00	0
2009-04-29	00:59:00	0
2009-04-29	01:00:00	0
2009-04-29	01:01:00	0
2009-04-29	01:02:00	0
2009-04-29	01:03:00	0
2009-04-29	01:04:00	0
2009-04-29	01:05:00	0
2009-04-29	01:06:00	0
2009-04-29	01:07:00	0
2009-04-29	01:08:00	0
2009-04-29	01:09:00	0
2009-04-29	01:10:00	0
2009-04-29	01:11:00	0
2009-04-29	01:12:00	0
2009-04-29	01:13:00	0
2009-04-29	01:14:00	0
2009-04-29	01:15:00	0
2009-04-29	01:16:00	0
2009-04-29	01:17:00	0
2009-04-29	01:18:00	0
2009-04-29	01:19:00	0
2009-04-29	01:20:00	0
2009-04-29	01:21:00	0
2009-04-29	01:22:00	0
2009-04-29	01:23:00	0
2009-04-29	01:24:00	0
2009-04-29	01:25:00	0
2009-04-29	01:26:00	0
2009-04-29	01:27:00	0
2009-04-29	01:28:00	0
2009-04-29	01:29:00	0
2009-04-29	01:30:00	0
2009-04-29	01:31:00	0
2009-04-29	01:32:00	0
2009-04-29	01:33:00	0
2009-04-29	01:34:00	0
2009-04-29	01:35:00	0
2009-04-29	01:36:00	0
2009-04-29	01:37:00	0
2009-04-29	01:38:00	0
2009-04-29	01:39:00	0
2009-04-29	01:40:00	0
2009-04-29	01:41:00	0
2009-04-29	01:42:00	0
2009-04-29	01:43:00	0
2009-04-29	01:44:00	0
2009-04-29	01:45:00	0
2009-04-29	01:46:00	0
2009-04-29	01:47:00	0
2009-04-29	01:48:00	0
2009-04-29	01:49:00	0
2009-04-29	01:50:00	0
2009-04-29	01:51:00	0
2009-04-29	01:52:00	0
2009-04-29	01:53:00	0
2009-04-29	01:54:00	0
2009-04-29	01:55:00	0
2009-04-29	01:56:00	0
2009-04-29	01:57:00	0
2009-04-29	01:58:00	0
2009-04-29	01:59:00	0
2009-04-29	02:00:00	0
2009-04-29	02:01:00	0
2009-04-29	02:02:00	0
2009-04-29	02:03:00	0
2009-04-29	02:04:00	0
2009-04-29	02:05:00	0
2009-04-29	02:06:00	0
2009-04-29	02:07:00	0
2009-04-29	02:08:00	0
2009-04-29	02:09:00	0
2009-04-29	02:10:00	0
2009-04-29	02:11:00	0
2009-04-29	02:12:00	0
2009-04-29	02:13:00	0
2009-04-29	02:14:00	0
2009-04-29	02:15:00	0
2009-04-29	02:16:00	0
2009-04-29	02:17:00	0
2009-04-29	02:18:00	0
2009-04-29	02:19:00	0
2009-04-29	02:20:00	0
2009-04-29	02:21:00	0
2009-04-29	02:22:00	0
2009-04-29	02:23:00	0
2009-04-29	02:24:00	0
2009-04-29	02:25:00	0
2009-04-29	02:26:00	0
2009-04-29	02:27:00	0
2009-04-29	02:28:00	0
2009-04-29	02:29:00	0
2009-04-29	02:30:00	0
2009-04-29	02:31:00	0
2009-04-29	02:32:00	0
2009-04-29	02:33:00	0
2009-04-29	02:34:00	0
2009-04-29	02:35:00	0
2009-04-29	02:36:00	0
2009-04-29	02:37:00	0
2009-04-29	02:38:00	0
2009-04-29	02:39:00	0
2009-04-29	02:40:00	0
2009-04-29	02:41:00	0
2009-04-29	02:42:00	0
2009-04-29	02:43:00	0
2009-04-29	02:44:00	0
2009-04-29	02:45:00	0
2009-04-29	02:46:00	0
2009-04-29	02:47:00	0
2009-04-29	02:48:00	0
2009-04-29	02:49:00	0
2009-04-29	02:50:00	0
2009-04-29	02:51:00	0
2009-04-29	02:52:00	0
2009-04-29	02:53:00	0
2009-04-29	02:54:00	0
2009-04-29	02:55:00	0
2009-04-29	02:56:00	0
2009-04-29	02:57:00	0
2009-04-29	02:58:00	0
2009-04-29	02:59:00	0
2009-04-29	03:00:00	0
2009-04-29	03:01:00	0
2009-04-29	03:02:00	0
2009-04-29	03:03:00	0
2009-04-29	03:04:00	0
2009-04-29	03:05:00	0
2009-04-29	03:06:00	0
2009-04-29	03:07:00	0
2009-04-29	03:08:00	0
2009-04-29	03:09:00	0
2009-04-29	03:10:00	0
2009-04-29	03:11:00	0
2009-04-29	03:12:00	0
2009-04-29	03:13:00	0
2009-04-29	03:14:00	0
2009-04-29	03:15:00	0
2009-04-29	03:16:00	0
2009-04-29	03:17:00	0
2009-04-29	03:18:00	0
2009-04-29	03:19:00	0
2009-04-29	03:20:00	0
2009-04-29	03:21:00	0
2009-04-29	03:22:00	0
2009-04-29	03:23:00	0
2009-04-29	03:24:00	0
2009-04-29	03:25:00	0
2009-04-29	03:26:00	0
2009-04-29	03:27:00	0
2009-04-29	03:28:00	0
2009-04-29	03:29:00	0
2009-04-29	03:30:00	0
2009-04-29	03:31:00	0
2009-04-29	03:32:00	0
2009-04-29	03:33:00	0
2009-04-29	03:34:00	0
2009-04-29	03:35:00	0
2009-04-29	03:36:00	0
2009-04-29	03:37:00	0
2009-04-29	03:38:00	0
2009-04-29	03:39:00	0
2009-04-29	03:40:00	0
2009-04-29	03:41:00	0
2009-04-29	03:42:00	0
2009-04-29	03:43:00	0
2009-04-29	03:44:00	0
2009-04-29	03:45:00	0
2009-04-29	03:46:00	0
2009-04-29	03:47:00	0
2009-04-29	03:48:00	0
2009-04-29	03:49:00	0
2009-04-29	03:50:00	0
2009-04-29	03:51:00	0
2009-04-29	03:52:00	0
2009-04-29	03:53:00	0
2009-04-29	03:54:00	0
2009-04-29	03:55:00	0
2009-04-29	03:56:00	0
2009-04-29	03:57:00	0
2009-04-29	03:58:00	0
2009-04-29	03:59:00	0
2009-04-29	04:00:00	0
2009-04-29	04:01:00	0
2009-04-29	04:02:00	0
2009-04-29	04:03:00	0
2009-04-29	04:04:00	0
2009-04-29	04:05:00	0
2009-04-29	04:06:00	0
2009-04-29	04:07:00	0
2009-04-29	04:08:00	0
2009-04-29	04:09:00	0
2009-04-29	04:10:00	0
2009-04-29	04:11:00	0
2009-04-29	04:12:00	0
2009-04-29	04:13:00	0
2009-04-29	04:14:00	0
2009-04-29	04:15:00	0
2009-04-29	04:16:00	0
2009-04-29	04:17:00	0
2009-04-29	04:18:00	0
2009-04-29	04:19:00	0
2009-04-29	04:20:00	0
2009-04-29	04:21:00	0
2009-04-29	04:22:00	0
2009-04-29	04:23:00	0
2009-04-29	04:24:00	0
2009-04-29	04:25:00	0
2009-04-29	04:26:00	0
2009-04-29	04:27:00	0
2009-04-29	04:28:00	0
2009-04-29	04:29:00	0
2009-04-29	04:30:00	0
2009-04-29	04:31:00	0
2009-04-29	04:32:00	0
2009-04-29	04:33:00	0
2009-04-29	04:34:00	0
2009-04-29	04:35:00	0
2009-04-29	04:36:00	0
2009-04-29	04:37:00	0
2009-04-29	04:38:00	0
2009-04-29	04:39:00	0
2009-04-29	04:40:00	0
2009-04-29	04:41:00	0
2009-04-29	04:42:00	0
2009-04-29	04:43:00	0
2009-04-29	04:44:00	0
2009-04-29	04:45:00	0
2009-04-29	04:46:00	0
2009-04-29	04:47:00	0
2009-04-29	04:48:00	0
2009-04-29	04:49:00	0
2009-04-29	04:50:00	0
2009-04-29	04:51:00	0
2009-04-29	04:52:00	0
2009-04-29	04:53:00	0
2009-04-29	04:54:00	0
2009-04-29	04:55:00	0
2009-04-29	04:56:00	0
2009-04-29	04:57:00	0
2009-04-29	04:58:00	0
2009-04-29	04:59:00	0
2009-04-29	05:00:00	0
2009-04-29	05:01:00	0
2009-04-29	05:02:00	0
2009-04-29	05:03:00	0
2009-04-29	05:04:00	0
2009-04-29	05:05:00	0
2009-04-29	05:06:00	0
2009-04-29	05:07:00	0
2009-04-29	05:08:00	0
2009-04-29	05:09:00	0
2009-04-29	05:10:00	0
2009-04-29	05:11:00	0
2009-04-29	05:12:00	0
2009-04-29	05:13:00	0
2009-04-29	05:14:00	0
2009-04-29	05:15:00	0
2009-04-29	05:16:00	0
2009-04-29	05:17:00	0
2009-04-29	05:18:00	0
2009-04-29	05:19:00	0
2009-04-29	05:20:00	0
2009-04-29	05:21:00	0
2009-04-29	05:22:00	0
2009-04-29	05:23:00	0
2009-04-29	05:24:00	0
2009-04-29	05:25:00	0
2009-04-29	05:26:00	0
2009-04-29	05:27:00	0
2009-04-29	05:28:00	0
2009-04-29	05:29:00	0
2009-04-29	05:30:00	0
2009-04-29	05:31:00	0
2009-04-29	05:32:00	0
2009-04-29	05:33:00	0
2009-04-29	05:34:00	0
2009-04-29	05:35:00	0
2009-04-29	05:36:00	0
2009-04-29	05:37:00	0
2009-04-29	05:38:00	0
2009-04-29	05:39:00	0
2009-04-29	05:40:00	0
2009-04-29	05:41:00	0
2009-04-29	05:42:00	0
2009-04-29	05:43:00	0
2009-04-29	05:44:00	0
2009-04-29	05:45:00	0
2009-04-29	05:46:00	0
2009-04-29	05:47:00	0
2009-04-29	05:48:00	0
2009-04-29	05:49:00	0
2009-04-29	05:50:00	0
2009-04-29	05:51:00	0
2009-04-29	05:52:00	0
2009-04-29	05:53:00	0
2009-04-29	05:54:00	0
2009-04-29	05:55:00	0
2009-04-29	05:56:00	0
2009-04-29	05:57:00	0
2009-04-29	05:58:00	0
2009-04-29	05:59:00	0
2009-04-29	06:00:00	0
2009-04-29	06:01:00	0
2009-04-29	06:02:00	0
2009-04-29	06:03:00	0
2009-04-29	06:04:00	0
2009-04-29	06:05:00	0
2009-04-29	06:06:00	0
2009-04-29	06:07:00	0
2009-04-29	06:08:00	0
2009-04-29	06:09:00	0
2009-04-29	06:10:00	0
2009-04-29	06:11:00	0
2009-04-29	06:12:00	0
2009-04-29	06:13:00	0
2009-04-29	06:14:00	0
2009-04-29	06:15:00	0
2009-04-29	06:16:00	0
2009-04-29	06:17:00	0
2009-04-29	06:18:00	0
2009-04-29	06:19:00	0
2009-04-29	06:20:00	0
2009-04-29	06:21:00	0
2009-04-29	06:22:00	0
2009-04-29	06:23:00	0
2009-04-29	06:24:00	0
2009-04-29	06:25:00	0
2009-04-29	06:26:00	0
2009-04-29	06:27:00	0
2009-04-29	06:28:00	0
2009-04-29	06:29:00	0
2009-04-29	06:30:00	0
2009-04-29	06:31:00	0
2009-04-29	06:32:00	0
2009-04-29	06:33:00	0
2009-04-29	06:34:00	0
2009-04-29	06:35:00	0
2009-04-29	06:36:00	0
2009-04-29	06:37:00	0
2009-04-29	06:38:00	0
2009-04-29	06:39:00	0
2009-04-29	06:40:00	0
2009-04-29	06:41:00	0
2009-04-29	06:42:00	0
2009-04-29	06:43:00	0
2009-04-29	06:44:00	0
2009-04-29	06:45:00	0
2009-04-29	06:46:00	0
2009-04-29	06:47:00	0
2009-04-29	06:48:00	0
2009-04-29	06:49:00	0
2009-04-29	06:50:00	0
2009-04-29	06:51:00	0
2009-04-29	06:52:00	0
2009-04-29	06:53:00	0
2009-04-29	06:54:00	0
2009-04-29	06:55:00	0
2009-04-29	06:56:00	0
2009-04-29	06:57:00	0
2009-04-29	06:58:00	0
2009-04-29	06:59:00	0
2009-04-29	07:00:00	0
2009-04-29	07:01:00	0
2009-04-29	07:02:00	0
2009-04-29	07:03:00	0
2009-04-29	07:04:00	0
2009-04-29	07:05:00	0
2009-04-29	07:06:00	0
2009-04-29	07:07:00	0
2009-04-29	07:08:00	0
2009-04-29	07:09:00	0
2009-04-29	07:10:00	0
2009-04-29	07:11:00	0
2009-04-29	07:12:00	0
2009-04-29	07:13:00	0
2009-04-29	07:14:00	0
2009-04-29	07:15:00	0
2009-04-29	07:16:00	0
2009-04-29	07:17:00	0
2009-04-29	07:18:00	0
2009-04-29	07:19:00	0
2009-04-29	07:20:00	0
2009-04-29	07:21:00	0
2009-04-29	07:22:00	0
2009-04-29	07:23:00	0
2009-04-29	07:24:00	0
2009-04-29	07:25:00	0
2009-04-29	07:26:00	0
2009-04-29	07:27:00	0
2009-04-29	07:28:00	0
2009-04-29	07:29:00	0
2009-04-29	07:30:00	0
2009-04-29	07:31:00	0
2009-04-29	07:32:00	0
2009-04-29	07:33:00	0
2009-04-29	07:34:00	0
2009-04-29	07:35:00	0
2009-04-29	07:36:00	0
2009-04-29	07:37:00	0
2009-04-29	07:38:00	0
2009-04-29	07:39:00	0
2009-04-29	07:40:00	0
2009-04-29	07:41:00	0
2009-04-29	07:42:00	0
2009-04-29	07:43:00	0
2009-04-29	07:44:00	0
2009-04-29	07:45:00	0
2009-04-29	07:46:00	0
2009-04-29	07:47:00	0
2009-04-29	07:48:00	0
2009-04-29	07:49:00	0
2009-04-29	07:50:00	0
2009-04-29	07:51:00	0
2009-04-29	07:52:00	0
2009-04-29	07:53:00	0
2009-04-29	07:54:00	0
2009-04-29	07:55:00	0
2009-04-29	07:56:00	0
2009-04-29	07:57:00	0
2009-04-29	07:58:00	0
2009-04-29	07:59:00	0
2009-04-29	08:00:00	0
2009-04-29	08:01:00	0
2009-04-29	08:02:00	0
2009-04-29	08:03:00	0
2009-04-29	08:04:00	0
2009-04-29	08:05:00	0
2009-04-29	08:06:00	0
2009-04-29	08:07:00	0
2009-04-29	08:08:00	0
2009-04-29	08:09:00	0
2009-04-29	08:10:00	0
2009-04-29	08:11:00	0
2009-04-29	08:12:00	0
2009-04-29	08:13:00	0
2009-04-29	08:14:00	0
2009-04-29	08:15:00	0
2009-04-29	08:16:00	0
2009-04-29	08:17:00	0
2009-04-29	08:18:00	0
2009-04-29	08:19:00	0
2009-04-29	08:20:00	0
2009-04-29	08:21:00	0
2009-04-29	08:22:00	0
2009-04-29	08:23:00	0
2009-04-29	08:24:00	0
2009-04-29	08:25:00	0
2009-04-29	08:26:00	0
2009-04-29	08:27:00	0
2009-04-29	08:28:00	0
2009-04-29	08:29:00	0
2009-04-29	08:30:00	0
2009-04-29	08:31:00	0
2009-04-29	08:32:00	0
2009-04-29	08:33:00	0
2009-04-29	08:34:00	0
2009-04-29	08:35:00	0
2009-04-29	08:36:00	0
2009-04-29	08:37:00	0
2009-04-29	08:38:00	0
2009-04-29	08:39:00	0
2009-04-29	08:40:00	0
2009-04-29	08:41:00	0
2009-04-29	08:42:00	0
2009-04-29	08:43:00	0
2009-04-29	08:44:00	0
2009-04-29	08:45:00	0
2009-04-29	08:46:00	0
2009-04-29	08:47:00	0
2009-04-29	08:48:00	0
2009-04-29	08:49:00	0
2009-04-29	08:50:00	0
2009-04-29	08:51:00	0
2009-04-29	08:52:00	0
2009-04-29	08:53:00	0
2009-04-29	08:54:00	0
2009-04-29	08:55:00	0
2009-04-29	08:56:00	0
2009-04-29	08:57:00	0
2009-04-29	08:58:00	0
2009-04-29	08:59:00	0
2009-04-29	09:00:00	0
2009-04-29	09:01:00	0
2009-04-29	09:02:00	0
2009-04-29	09:03:00	0
2009-04-29	09:04:00	0
2009-04-29	09:05:00	0
2009-04-29	09:06:00	0
2009-04-29	09:07:00	0
2009-04-29	09:08:00	0
2009-04-29	09:09:00	0
2009-04-29	09:10:00	0
2009-04-29	09:11:00	0
2009-04-29	09:12:00	0
2009-04-29	09:13:00	0
2009-04-29	09:14:00	0
2009-04-29	09:15:00	0
2009-04-29	09:16:00	0
2009-04-29	09:17:00	0
2009-04-29	09:18:00	0
2009-04-29	09:19:00	0
2009-04-29	09:20:00	0
2009-04-29	09:21:00	0
2009-04-29	09:22:00	0
2009-04-29	09:23:00	0
2009-04-29	09:24:00	0
2009-04-29	09:25:00	0
2009-04-29	09:26:00	0
2009-04-29	09:27:00	0
2009-04-29	09:28:00	0
2009-04-29	09:29:00	0
2009-04-29	09:30:00	0
2009-04-29	09:31:00	0
2009-04-29	09:32:00	0
2009-04-29	09:33:00	0
2009-04-29	09:34:00	0
2009-04-29	09:35:00	0
2009-04-29	09:36:00	0
2009-04-29	09:37:00	0
2009-04-29	09:38:00	0
2009-04-29	09:39:00	0
2009-04-29	09:40:00	0
2009-04-29	09:41:00	0
2009-04-29	09:42:00	0
2009-04-29	09:43:00	0
2009-04-29	09:44:00	0
2009-04-29	09:45:00	0
2009-04-29	09:46:00	0
2009-04-29	09:47:00	0
2009-04-29	09:48:00	0
2009-04-29	09:49:00	0
2009-04-29	09:50:00	0
2009-04-29	09:51:00	0
2009-04-29	09:52:00	0
2009-04-29	09:53:00	0
2009-04-29	09:54:00	0
2009-04-29	09:55:00	0
2009-04-29	09:56:00	0
2009-04-29	09:57:00	0
2009-04-29	09:58:00	0
2009-04-29	09:59:00	0
2009-04-29	10:00:00	0
2009-04-29	10:01:00	0
2009-04-29	10:02:00	0
2009-04-29	10:03:00	0
2009-04-29	10:04:00	0
2009-04-29	10:05:00	0
2009-04-29	10:06:00	0
2009-04-29	10:07:00	0
2009-04-29	10:08:00	0
2009-04-29	10:09:00	0
2009-04-29	10:10:00	0
2009-04-29	10:11:00	0
2009-04-29	10:12:00	0
2009-04-29	10:13:00	0
2009-04-29	10:14:00	0
2009-04-29	10:15:00	0
2009-04-29	10:16:00	0
2009-04-29	10:17:00	0
2009-04-29	10:18:00	0
2009-04-29	10:19:00	0
2009-04-29	10:20:00	0
2009-04-29	10:21:00	0
2009-04-29	10:22:00	0
2009-04-29	10:23:00	0
2009-04-29	10:24:00	0
2009-04-29	10:25:00	0
2009-04-29	10:26:00	0
2009-04-29	10:27:00	0
2009-04-29	10:28:00	0
2009-04-29	10:29:00	0
2009-04-29	10:30:00	0
2009-04-29	10:31:00	0
2009-04-29	10:32:00	0
2009-04-29	10:33:00	0
2009-04-29	10:34:00	0
2009-04-29	10:35:00	0
2009-04-29	10:36:00	0
2009-04-29	10:37:00	0
2009-04-29	10:38:00	0
2009-04-29	10:39:00	0
2009-04-29	10:40:00	0
2009-04-29	10:41:00	0
2009-04-29	10:42:00	0
2009-04-29	10:43:00	0
2009-04-29	10:44:00	0
2009-04-29	10:45:00	0
2009-04-29	10:46:00	0
2009-04-29	10:47:00	0
2009-04-29	10:48:00	0
2009-04-29	10:49:00	0
2009-04-29	10:50:00	0
2009-04-29	10:51:00	0
2009-04-29	10:52:00	0
2009-04-29	10:53:00	0
2009-04-29	10:54:00	0
2009-04-29	10:55:00	0
2009-04-29	10:56:00	0
2009-04-29	10:57:00	0
2009-04-29	10:58:00	0
2009-04-29	10:59:00	0
2009-04-29	11:00:00	0
2009-04-29	11:01:00	0
2009-04-29	11:02:00	0
2009-04-29	11:03:00	0
2009-04-29	11:04:00	0
2009-04-29	11:05:00	0
2009-04-29	11:06:00	0
2009-04-29	11:07:00	0
2009-04-29	11:08:00	0
2009-04-29	11:09:00	0
2009-04-29	11:10:00	0
2009-04-29	11:11:00	0
2009-04-29	11:12:00	0
2009-04-29	11:13:00	0
2009-04-29	11:14:00	0
2009-04-29	11:15:00	0
2009-04-29	11:16:00	0
2009-04-29	11:17:00	0
2009-04-29	11:18:00	0
2009-04-29	11:19:00	0
2009-04-29	11:20:00	0
2009-04-29	11:21:00	0
2009-04-29	11:22:00	0
2009-04-29	11:23:00	0
2009-04-29	11:24:00	0
2009-04-29	11:25:00	0
2009-04-29	11:26:00	0
2009-04-29	11:27:00	0
2009-04-29	11:28:00	0
2009-04-29	11:29:00	0
2009-04-29	11:30:00	0
2009-04-29	11:31:00	0
2009-04-29	11:32:00	0
2009-04-29	11:33:00	0
2009-04-29	11:34:00	0
2009-04-29	11:35:00	0
2009-04-29	11:36:00	0
2009-04-29	11:37:00	0
2009-04-29	11:38:00	0
2009-04-29	11:39:00	0
2009-04-29	11:40:00	0
2009-04-29	11:41:00	0
2009-04-29	11:42:00	0
2009-04-29	11:43:00	0
2009-04-29	11:44:00	0
2009-04-29	11:45:00	0
2009-04-29	11:46:00	0
2009-04-29	11:47:00	0
2009-04-29	11:48:00	0
2009-04-29	11:49:00	0
2009-04-29	11:50:00	0
2009-04-29	11:51:00	0
2009-04-29	11:52:00	0
2009-04-29	11:53:00	0
2009-04-29	11:54:00	0
2009-04-29	11:55:00	0
2009-04-29	11:56:00	0
2009-04-29	11:57:00	0
2009-04-29	11:58:00	0
2009-04-29	11:59:00	0
2009-04-29	12:00:00	0
2009-04-29	12:01:00	0
2009-04-29	12:02:00	0
2009-04-29	12:03:00	0
2009-04-29	12:04:00	0
2009-04-29	12:05:00	0
2009-04-29	12:06:00	0
2009-04-29	12:07:00	0
2009-04-29	12:08:00	0
2009-04-29	12:09:00	0
2009-04-29	12:10:00	0
2009-04-29	12:11:00	0
2009-04-29	12:12:00	0
2009-04-29	12:13:00	0
2009-04-29	12:14:00	0
2009-04-29	12:15:00	0
2009-04-29	12:16:00	0
2009-04-29	12:17:00	0
2009-04-29	12:18:00	0
2009-04-29	12:19:00	0
2009-04-29	12:20:00	0
2009-04-29	12:21:00	0
2009-04-29	12:22:00	0
2009-04-29	12:23:00	0
2009-04-29	12:24:00	0
2009-04-29	12:25:00	0
2009-04-29	12:26:00	0
2009-04-29	12:27:00	0
2009-04-29	12:28:00	0
2009-04-29	12:29:00	0
2009-04-29	12:30:00	0
2009-04-29	12:31:00	0
2009-04-29	12:32:00	0
2009-04-29	12:33:00	0
2009-04-29	12:34:00	0
2009-04-29	12:35:00	0
2009-04-29	12:36:00	0
2009-04-29	12:37:00	0
2009-04-29	12:38:00	0
2009-04-29	12:39:00	0
2009-04-29	12:40:00	0
2009-04-29	12:41:00	0
2009-04-29	12:42:00	0
2009-04-29	12:43:00	0
2009-04-29	12:44:00	0
2009-04-29	12:45:00	0
2009-04-29	12:46:00	0
2009-04-29	12:47:00	0
2009-04-29	12:48:00	0
2009-04-29	12:49:00	0
2009-04-29	12:50:00	0
2009-04-29	12:51:00	0
2009-04-29	12:52:00	0
2009-04-29	12:53:00	0
2009-04-29	12:54:00	0
2009-04-29	12:55:00	0
2009-04-29	12:56:00	0
2009-04-29	12:57:00	0
2009-04-29	12:58:00	0
2009-04-29	12:59:00	0
2009-04-29	13:00:00	0
2009-04-29	13:01:00	0
2009-04-29	13:02:00	0
2009-04-29	13:03:00	0
2009-04-29	13:04:00	0
2009-04-29	13:05:00	0
2009-04-29	13:06:00	0
2009-04-29	13:07:00	0
2009-04-29	13:08:00	0
2009-04-29	13:09:00	0
2009-04-29	13:10:00	0
2009-04-29	13:11:00	0
2009-04-29	13:12:00	0
2009-04-29	13:13:00	0
2009-04-29	13:14:00	0
2009-04-29	13:15:00	0
2009-04-29	13:16:00	0
2009-04-29	13:17:00	0
2009-04-29	13:18:00	0
2009-04-29	13:19:00	0
2009-04-29	13:20:00	0
2009-04-29	13:21:00	0
2009-04-29	13:22:00	0
2009-04-29	13:23:00	0
2009-04-29	13:24:00	0
2009-04-29	13:25:00	0
2009-04-29	13:26:00	0
2009-04-29	13:27:00	0
2009-04-29	13:28:00	0
2009-04-29	13:29:00	0
2009-04-29	13:30:00	0
2009-04-29	13:31:00	0
2009-04-29	13:32:00	0
2009-04-29	13:33:00	0
2009-04-29	13:34:00	0
2009-04-29	13:35:00	0
2009-04-29	13:36:00	0
2009-04-29	13:37:00	0
2009-04-29	13:38:00	0
2009-04-29	13:39:00	0
2009-04-29	13:40:00	0
2009-04-29	13:41:00	0
2009-04-29	13:42:00	0
2009-04-29	13:43:00	0
2009-04-29	13:44:00	0
2009-04-29	13:45:00	0
2009-04-29	13:46:00	0
2009-04-29	13:47:00	0
2009-04-29	13:48:00	0
2009-04-29	13:49:00	0
2009-04-29	13:50:00	0
2009-04-29	13:51:00	0
2009-04-29	13:52:00	0
2009-04-29	13:53:00	0
2009-04-29	13:54:00	0
2009-04-29	13:55:00	0
2009-04-29	13:56:00	0
2009-04-29	13:57:00	0
2009-04-29	13:58:00	0
2009-04-29	13:59:00	0
2009-04-29	14:00:00	0
2009-04-29	14:01:00	0
2009-04-29	14:02:00	0
2009-04-29	14:03:00	0
2009-04-29	14:04:00	0
2009-04-29	14:05:00	0
2009-04-29	14:06:00	0
2009-04-29	14:07:00	0
2009-04-29	14:08:00	0
2009-04-29	14:09:00	0
2009-04-29	14:10:00	0
2009-04-29	14:11:00	0
2009-04-29	14:12:00	0
2009-04-29	14:13:00	0
2009-04-29	14:14:00	0
2009-04-29	14:15:00	0
2009-04-29	14:16:00	0
2009-04-29	14:17:00	0
2009-04-29	14:18:00	0
2009-04-29	14:19:00	0
2009-04-29	14:20:00	0
2009-04-29	14:21:00	0
2009-04-29	14:22:00	0
2009-04-29	14:23:00	0
2009-04-29	14:24:00	0
2009-04-29	14:25:00	0
2009-04-29	14:26:00	0
2009-04-29	14:27:00	0
2009-04-29	14:28:00	0
2009-04-29	14:29:00	0
2009-04-29	14:30:00	0
2009-04-29	14:31:00	0
2009-04-29	14:32:00	0
2009-04-29	14:33:00	0
2009-04-29	14:34:00	0
2009-04-29	14:35:00	0
2009-04-29	14:36:00	0
2009-04-29	14:37:00	0
2009-04-29	14:38:00	0
2009-04-29	14:39:00	0
2009-04-29	14:40:00	0
2009-04-29	14:41:00	0
2009-04-29	14:42:00	0
2009-04-29	14:43:00	0
2009-04-29	14:44:00	0
2009-04-29	14:45:00	0
2009-04-29	14:46:00	0
2009-04-29	14:47:00	0
2009-04-29	14:48:00	0
2009-04-29	14:49:00	0
2009-04-29	14:50:00	0
2009-04-29	14:51:00	0
2009-04-29	14:52:00	0
2009-04-29	14:53:00	0
2009-04-29	14:54:00	0
2009-04-29	14:55:00	0
2009-04-29	14:56:00	0
2009-04-29	14:57:00	0
2009-04-29	14:58:00	0
2009-04-29	14:59:00	0
2009-04-29	15:00:00	0
2009-04-29	15:01:00	0
2009-04-29	15:02:00	0
2009-04-29	15:03:00	0
2009-04-29	15:04:00	0
2009-04-29	15:05:00	0
2009-04-29	15:06:00	0
2009-04-29	15:07:00	0
2009-04-29	15:08:00	0
2009-04-29	15:09:00	0
2009-04-29	15:10:00	0
2009-04-29	15:11:00	0
2009-04-29	15:12:00	0
2009-04-29	15:13:00	0
2009-04-29	15:14:00	0
2009-04-29	15:15:00	0
2009-04-29	15:16:00	0
2009-04-29	15:17:00	0
2009-04-29	15:18:00	0
2009-04-29	15:19:00	0
2009-04-29	15:20:00	0
2009-04-29	15:21:00	0
2009-04-29	15:22:00	0
2009-04-29	15:23:00	0
2009-04-29	15:24:00	0
2009-04-29	15:25:00	0
2009-04-29	15:26:00	0
2009-04-29	15:27:00	0
2009-04-29	15:28:00	0
2009-04-29	15:29:00	0
2009-04-29	15:30:00	0
2009-04-29	15:31:00	0
2009-04-29	15:32:00	0
2009-04-29	15:33:00	0
2009-04-29	15:34:00	0
2009-04-29	15:35:00	0
2009-04-29	15:36:00	0
2009-04-29	15:37:00	0
2009-04-29	15:38:00	0
2009-04-29	15:39:00	0
2009-04-29	15:40:00	0
2009-04-29	15:41:00	0
2009-04-29	15:42:00	0
2009-04-29	15:43:00	0
2009-04-29	15:44:00	0
2009-04-29	15:45:00	0
2009-04-29	15:46:00	0
2009-04-29	15:47:00	0
2009-04-29	15:48:00	0
2009-04-29	15:49:00	0
2009-04-29	15:50:00	0
2009-04-29	15:51:00	0
2009-04-29	15:52:00	0
2009-04-29	15:53:00	0
2009-04-29	15:54:00	0
2009-04-29	15:55:00	0
2009-04-29	15:56:00	0
2009-04-29	15:57:00	0
2009-04-29	15:58:00	0
2009-04-29	15:59:00	0
2009-04-29	16:00:00	0
2009-04-29	16:01:00	0
2009-04-29	16:02:00	0
2009-04-29	16:03:00	0
2009-04-29	16:04:00	0
2009-04-29	16:05:00	0
2009-04-29	16:06:00	0
2009-04-29	16:07:00	0
2009-04-29	16:08:00	0
2009-04-29	16:09:00	0
2009-04-29	16:10:00	0
2009-04-29	16:11:00	0
2009-04-29	16:12:00	0
2009-04-29	16:13:00	0
2009-04-29	16:14:00	0
2009-04-29	16:15:00	0
2009-04-29	16:16:00	0
2009-04-29	16:17:00	0
2009-04-29	16:18:00	0
2009-04-29	16:19:00	0
2009-04-29	16:20:00	0
2009-04-29	16:21:00	0
2009-04-29	16:22:00	0
2009-04-29	16:23:00	0
2009-04-29	16:24:00	0
2009-04-29	16:25:00	0
2009-04-29	16:26:00	0
2009-04-29	16:27:00	0
2009-04-29	16:28:00	0
2009-04-29	16:29:00	0
2009-04-29	16:30:00	0
2009-04-29	16:31:00	0
2009-04-29	16:32:00	0
2009-04-29	16:33:00	0
2009-04-29	16:34:00	0
2009-04-29	16:35:00	0
2009-04-29	16:36:00	0
2009-04-29	16:37:00	0
2009-04-29	16:38:00	0
2009-04-29	16:39:00	0
2009-04-29	16:40:00	0
2009-04-29	16:41:00	0
2009-04-29	16:42:00	0
2009-04-29	16:43:00	0
2009-04-29	16:44:00	0
2009-04-29	16:45:00	0
2009-04-29	16:46:00	0
2009-04-29	16:47:00	0
2009-04-29	16:48:00	0
2009-04-29	16:49:00	0
2009-04-29	16:50:00	0
2009-04-29	16:51:00	0
2009-04-29	16:52:00	0
2009-04-29	16:53:00	0
2009-04-29	16:54:00	0
2009-04-29	16:55:00	0
2009-04-29	16:56:00	0
2009-04-29	16:57:00	0
2009-04-29	16:58:00	0
2009-04-29	16:59:00	0
2009-04-29	17:00:00	0
2009-04-29	17:01:00	0
2009-04-29	17:02:00	0
2009-04-29	17:03:00	0
2009-04-29	17:04:00	0
2009-04-29	17:05:00	0
2009-04-29	17:06:00	0
2009-04-29	17:07:00	0
2009-04-29	17:08:00	0
2009-04-29	17:09:00	0
2009-04-29	17:10:00	0
2009-04-29	17:11:00	0
2009-04-29	17:12:00	0
2009-04-29	17:13:00	0
2009-04-29	17:14:00	0
2009-04-29	17:15:00	0
2009-04-29	17:16:00	0
2009-04-29	17:17:00	0
2009-04-29	17:18:00	0
2009-04-29	17:19:00	0
2009-04-29	17:20:00	0
2009-04-29	17:21:00	0
2009-04-29	17:22:00	0
2009-04-29	17:23:00	0
2009-04-29	17:24:00	0
2009-04-29	17:25:00	0
2009-04-29	17:26:00	0
2009-04-29	17:27:00	0
2009-04-29	17:28:00	0
2009-04-29	17:29:00	0
2009-04-29	17:30:00	0
2009-04-29	17:31:00	0
2009-04-29	17:32:00	0
2009-04-29	17:33:00	0
2009-04-29	17:34:00	0
2009-04-29	17:35:00	0
2009-04-29	17:36:00	0
2009-04-29	17:37:00	0
2009-04-29	17:38:00	0
2009-04-29	17:39:00	0
2009-04-29	17:40:00	0
2009-04-29	17:41:00	0
2009-04-29	17:42:00	0
2009-04-29	17:43:00	0
2009-04-29	17:44:00	0
2009-04-29	17:45:00	0
2009-04-29	17:46:00	0
2009-04-29	17:47:00	0
2009-04-29	17:48:00	0
2009-04-29	17:49:00	0
2009-04-29	17:50:00	0
2009-04-29	17:51:00	0
2009-04-29	17:52:00	0
2009-04-29	17:53:00	0
2009-04-29	17:54:00	0
2009-04-29	17:55:00	0
2009-04-29	17:56:00	0
2009-04-29	17:57:00	0
2009-04-29	17:58:00	0
2009-04-29	17:59:00	0
2009-04-29	18:00:00	0
2009-04-29	18:01:00	0
2009-04-29	18:02:00	58
2009-04-29	18:03:00	311
2009-04-29	18:04:00	80
2009-04-29	18:05:00	0
2009-04-29	18:06:00	44
2009-04-29	18:07:00	181
2009-04-29	18:08:00	196
2009-04-29	18:09:00	400
2009-04-29	18:10:00	24
2009-04-29	18:11:00	0
2009-04-29	18:12:00	0
2009-04-29	18:13:00	0
2009-04-29	18:14:00	58
2009-04-29	18:15:00	0
2009-04-29	18:16:00	0
2009-04-29	18:17:00	0
2009-04-29	18:18:00	0
2009-04-29	18:19:00	466
2009-04-29	18:20:00	818
2009-04-29	18:21:00	632
2009-04-29	18:22:00	161
2009-04-29	18:23:00	58
2009-04-29	18:24:00	259
2009-04-29	18:25:00	422
2009-04-29	18:26:00	268
2009-04-29	18:27:00	0
2009-04-29	18:28:00	24
2009-04-29	18:29:00	0
2009-04-29	18:30:00	19
2009-04-29	18:31:00	0
2009-04-29	18:32:00	204
2009-04-29	18:33:00	369
2009-04-29	18:34:00	350
2009-04-29	18:35:00	5
2009-04-29	18:36:00	168
2009-04-29	18:37:00	227
2009-04-29	18:38:00	250
2009-04-29	18:39:00	168
2009-04-29	18:40:00	455
2009-04-29	18:41:00	104
2009-04-29	18:42:00	1290
2009-04-29	18:43:00	1043
2009-04-29	18:44:00	422
2009-04-29	18:45:00	311
2009-04-29	18:46:00	2067
2009-04-29	18:47:00	908
2009-04-29	18:48:00	478
2009-04-29	18:49:00	908
2009-04-29	18:50:00	235
2009-04-29	18:51:00	285
2009-04-29	18:52:00	1290
2009-04-29	18:53:00	908
2009-04-29	18:54:00	1496
2009-04-29	18:55:00	737
2009-04-29	18:56:00	53
2009-04-29	18:57:00	259
2009-04-29	18:58:00	24
2009-04-29	18:59:00	15
2009-04-29	19:00:00	196
2009-04-29	19:01:00	926
2009-04-29	19:02:00	1731
2009-04-29	19:03:00	836
2009-04-29	19:04:00	63
2009-04-29	19:05:00	0
2009-04-29	19:06:00	539
2009-04-29	19:07:00	721
2009-04-29	19:08:00	1064
2009-04-29	19:09:00	390
2009-04-29	19:10:00	411
2009-04-29	19:11:00	411
2009-04-29	19:12:00	227
2009-04-29	19:13:00	219
2009-04-29	19:14:00	0
2009-04-29	19:15:00	5
2009-04-29	19:16:00	311
2009-04-29	19:17:00	24
2009-04-29	19:18:00	294
2009-04-29	19:19:00	390
2009-04-29	19:20:00	785
2009-04-29	19:21:00	944
2009-04-29	19:22:00	964
2009-04-29	19:23:00	802
2009-04-29	19:24:00	350
2009-04-29	19:25:00	411
2009-04-29	19:26:00	466
2009-04-29	19:27:00	5
2009-04-29	19:28:00	647
2009-04-29	19:29:00	785
2009-04-29	19:30:00	411
2009-04-29	19:31:00	285
2009-04-29	19:32:00	147
2009-04-29	19:33:00	443
2009-04-29	19:34:00	1043
2009-04-29	19:35:00	983
2009-04-29	19:36:00	1043
2009-04-29	19:37:00	1826
2009-04-29	19:38:00	908
2009-04-29	19:39:00	360
2009-04-29	19:40:00	303
2009-04-29	19:41:00	227
2009-04-29	19:42:00	422
2009-04-29	19:43:00	490
2009-04-29	19:44:00	592
2009-04-29	19:45:00	369
2009-04-29	19:46:00	5
2009-04-29	19:47:00	80
2009-04-29	19:48:00	5
2009-04-29	19:49:00	242
2009-04-29	19:50:00	432
2009-04-29	19:51:00	422
2009-04-29	19:52:00	340
2009-04-29	19:53:00	19
2009-04-29	19:54:00	10
2009-04-29	19:55:00	0
2009-04-29	19:56:00	110
2009-04-29	19:57:00	1023
2009-04-29	19:58:00	1172
2009-04-29	19:59:00	466
2009-04-29	20:00:00	411
2009-04-29	20:01:00	564
2009-04-29	20:02:00	340
2009-04-29	20:03:00	10
2009-04-29	20:04:00	10
2009-04-29	20:05:00	303
2009-04-29	20:06:00	752
2009-04-29	20:07:00	769
2009-04-29	20:08:00	908
2009-04-29	20:09:00	227
2009-04-29	20:10:00	10
2009-04-29	20:11:00	53
2009-04-29	20:12:00	69
2009-04-29	20:13:00	721
2009-04-29	20:14:00	539
2009-04-29	20:15:00	983
2009-04-29	20:16:00	836
2009-04-29	20:17:00	235
2009-04-29	20:18:00	196
2009-04-29	20:19:00	227
2009-04-29	20:20:00	0
2009-04-29	20:21:00	24
2009-04-29	20:22:00	0
2009-04-29	20:23:00	0
2009-04-29	20:24:00	63
2009-04-29	20:25:00	0
2009-04-29	20:26:00	0
2009-04-29	20:27:00	802
2009-04-29	20:28:00	676
2009-04-29	20:29:00	908
2009-04-29	20:30:00	147
2009-04-29	20:31:00	39
2009-04-29	20:32:00	268
2009-04-29	20:33:00	0
2009-04-29	20:34:00	15
2009-04-29	20:35:00	10
2009-04-29	20:36:00	478
2009-04-29	20:37:00	1339
2009-04-29	20:38:00	1003
2009-04-29	20:39:00	400
2009-04-29	20:40:00	0
2009-04-29	20:41:00	0
2009-04-29	20:42:00	5
2009-04-29	20:43:00	141
2009-04-29	20:44:00	0
2009-04-29	20:45:00	0
2009-04-29	20:46:00	80
2009-04-29	20:47:00	44
2009-04-29	20:48:00	0
2009-04-29	20:49:00	24
2009-04-29	20:50:00	10
2009-04-29	20:51:00	10
2009-04-29	20:52:00	15
2009-04-29	20:53:00	5
2009-04-29	20:54:00	227
2009-04-29	20:55:00	853
2009-04-29	20:56:00	1442
2009-04-29	20:57:00	802
2009-04-29	20:58:00	161
2009-04-29	20:59:00	134
2009-04-29	21:00:00	110
2009-04-29	21:01:00	0
2009-04-29	21:02:00	86
2009-04-29	21:03:00	0
2009-04-29	21:04:00	44
2009-04-29	21:05:00	0
2009-04-29	21:06:00	390
2009-04-29	21:07:00	818
2009-04-29	21:08:00	10
2009-04-29	21:09:00	0
2009-04-29	21:10:00	10
2009-04-29	21:11:00	0
2009-04-29	21:12:00	0
2009-04-29	21:13:00	0
2009-04-29	21:14:00	0
2009-04-29	21:15:00	0
2009-04-29	21:16:00	39
2009-04-29	21:17:00	0
2009-04-29	21:18:00	0
2009-04-29	21:19:00	24
2009-04-29	21:20:00	44
2009-04-29	21:21:00	0
2009-04-29	21:22:00	0
2009-04-29	21:23:00	0
2009-04-29	21:24:00	0
2009-04-29	21:25:00	0
2009-04-29	21:26:00	75
2009-04-29	21:27:00	0
2009-04-29	21:28:00	0
2009-04-29	21:29:00	0
2009-04-29	21:30:00	0
2009-04-29	21:31:00	0
2009-04-29	21:32:00	0
2009-04-29	21:33:00	69
2009-04-29	21:34:00	10
2009-04-29	21:35:00	0
2009-04-29	21:36:00	0
2009-04-29	21:37:00	0
2009-04-29	21:38:00	0
2009-04-29	21:39:00	0
2009-04-29	21:40:00	0
2009-04-29	21:41:00	0
2009-04-29	21:42:00	0
2009-04-29	21:43:00	0
2009-04-29	21:44:00	0
2009-04-29	21:45:00	0
2009-04-29	21:46:00	0
2009-04-29	21:47:00	19
2009-04-29	21:48:00	0
2009-04-29	21:49:00	0
2009-04-29	21:50:00	0
2009-04-29	21:51:00	0
2009-04-29	21:52:00	0
2009-04-29	21:53:00	0
2009-04-29	21:54:00	0
2009-04-29	21:55:00	0
2009-04-29	21:56:00	0
2009-04-29	21:57:00	0
2009-04-29	21:58:00	0
2009-04-29	21:59:00	19
2009-04-29	22:00:00	5
2009-04-29	22:01:00	0
2009-04-29	22:02:00	0
2009-04-29	22:03:00	0
2009-04-29	22:04:00	15
2009-04-29	22:05:00	15
2009-04-29	22:06:00	0
2009-04-29	22:07:00	0
2009-04-29	22:08:00	0
2009-04-29	22:09:00	34
2009-04-29	22:10:00	134
2009-04-29	22:11:00	490
2009-04-29	22:12:00	147
2009-04-29	22:13:00	154
2009-04-29	22:14:00	0
2009-04-29	22:15:00	15
2009-04-29	22:16:00	0
2009-04-29	22:17:00	0
2009-04-29	22:18:00	0
2009-04-29	22:19:00	0
2009-04-29	22:20:00	0
2009-04-29	22:21:00	0
2009-04-29	22:22:00	0
2009-04-29	22:23:00	0
2009-04-29	22:24:00	0
2009-04-29	22:25:00	175
2009-04-29	22:26:00	0
2009-04-29	22:27:00	0
2009-04-29	22:28:00	0
2009-04-29	22:29:00	29
2009-04-29	22:30:00	0
2009-04-29	22:31:00	0
2009-04-29	22:32:00	141
2009-04-29	22:33:00	44
2009-04-29	22:34:00	0
2009-04-29	22:35:00	0
2009-04-29	22:36:00	0
2009-04-29	22:37:00	175
2009-04-29	22:38:00	0
2009-04-29	22:39:00	39
2009-04-29	22:40:00	0
2009-04-29	22:41:00	110
2009-04-29	22:42:00	0
2009-04-29	22:43:00	0
2009-04-29	22:44:00	0
2009-04-29	22:45:00	0
2009-04-29	22:46:00	0
2009-04-29	22:47:00	0
2009-04-29	22:48:00	0
2009-04-29	22:49:00	0
2009-04-29	22:50:00	0
2009-04-29	22:51:00	0
2009-04-29	22:52:00	0
2009-04-29	22:53:00	0
2009-04-29	22:54:00	10
2009-04-29	22:55:00	0
2009-04-29	22:56:00	0
2009-04-29	22:57:00	0
2009-04-29	22:58:00	0
2009-04-29	22:59:00	0
2009-04-29	23:00:00	0
2009-04-29	23:01:00	0
2009-04-29	23:02:00	276
2009-04-29	23:03:00	400
2009-04-29	23:04:00	34
2009-04-29	23:05:00	466
2009-04-29	23:06:00	268
2009-04-29	23:07:00	181
2009-04-29	23:08:00	926
2009-04-29	23:09:00	647
2009-04-29	23:10:00	92
2009-04-29	23:11:00	390
2009-04-29	23:12:00	321
2009-04-29	23:13:00	175
2009-04-29	23:14:00	58
2009-04-29	23:15:00	0
2009-04-29	23:16:00	0
2009-04-29	23:17:00	24
2009-04-29	23:18:00	0
2009-04-29	23:19:00	0
2009-04-29	23:20:00	0
2009-04-29	23:21:00	0
2009-04-29	23:22:00	0
2009-04-29	23:23:00	0
2009-04-29	23:24:00	0
2009-04-29	23:25:00	0
2009-04-29	23:26:00	0
2009-04-29	23:27:00	0
2009-04-29	23:28:00	0
2009-04-29	23:29:00	0
2009-04-29	23:30:00	0
2009-04-29	23:31:00	0
2009-04-29	23:32:00	0
2009-04-29	23:33:00	0
2009-04-29	23:34:00	0
2009-04-29	23:35:00	0
2009-04-29	23:36:00	0
2009-04-29	23:37:00	0
2009-04-29	23:38:00	0
2009-04-29	23:39:00	0
2009-04-29	23:40:00	0
2009-04-29	23:41:00	0
2009-04-29	23:42:00	0
2009-04-29	23:43:00	0
2009-04-29	23:44:00	24
2009-04-29	23:45:00	0
2009-04-29	23:46:00	0
2009-04-29	23:47:00	0
2009-04-29	23:48:00	0
2009-04-29	23:49:00	0
2009-04-29	23:50:00	0
2009-04-29	23:51:00	0
2009-04-29	23:52:00	0
2009-04-29	23:53:00	0
2009-04-29	23:54:00	0
2009-04-29	23:55:00	0
2009-04-29	23:56:00	0
2009-04-29	23:57:00	0
2009-04-29	23:58:00	0
2009-04-29	23:59:00	0
2009-04-30	00:00:00	0
2009-04-30	00:01:00	0
2009-04-30	00:02:00	0
2009-04-30	00:03:00	0
2009-04-30	00:04:00	0
2009-04-30	00:05:00	0
2009-04-30	00:06:00	0
2009-04-30	00:07:00	75
2009-04-30	00:08:00	19
2009-04-30	00:09:00	53
2009-04-30	00:10:00	44
2009-04-30	00:11:00	490
2009-04-30	00:12:00	490
2009-04-30	00:13:00	331
2009-04-30	00:14:00	19
2009-04-30	00:15:00	15
2009-04-30	00:16:00	0
2009-04-30	00:17:00	5
2009-04-30	00:18:00	0
2009-04-30	00:19:00	0
2009-04-30	00:20:00	0
2009-04-30	00:21:00	0
2009-04-30	00:22:00	0
2009-04-30	00:23:00	0
2009-04-30	00:24:00	181
2009-04-30	00:25:00	115
2009-04-30	00:26:00	219
2009-04-30	00:27:00	15
2009-04-30	00:28:00	0
2009-04-30	00:29:00	0
2009-04-30	00:30:00	0
2009-04-30	00:31:00	0
2009-04-30	00:32:00	0
2009-04-30	00:33:00	80
2009-04-30	00:34:00	0
2009-04-30	00:35:00	0
2009-04-30	00:36:00	0
2009-04-30	00:37:00	0
2009-04-30	00:38:00	0
2009-04-30	00:39:00	0
2009-04-30	00:40:00	0
2009-04-30	00:41:00	0
2009-04-30	00:42:00	0
2009-04-30	00:43:00	0
2009-04-30	00:44:00	0
2009-04-30	00:45:00	0
2009-04-30	00:46:00	29
2009-04-30	00:47:00	0
2009-04-30	00:48:00	0
2009-04-30	00:49:00	0
2009-04-30	00:50:00	0
2009-04-30	00:51:00	0
2009-04-30	00:52:00	0
2009-04-30	00:53:00	0
2009-04-30	00:54:00	0
2009-04-30	00:55:00	0
2009-04-30	00:56:00	0
2009-04-30	00:57:00	0
2009-04-30	00:58:00	29
2009-04-30	00:59:00	58
2009-04-30	01:00:00	10
2009-04-30	01:01:00	527
2009-04-30	01:02:00	285
2009-04-30	01:03:00	39
2009-04-30	01:04:00	39
2009-04-30	01:05:00	0
2009-04-30	01:06:00	10
2009-04-30	01:07:00	0
2009-04-30	01:08:00	0
2009-04-30	01:09:00	0
2009-04-30	01:10:00	0
2009-04-30	01:11:00	0
2009-04-30	01:12:00	0
2009-04-30	01:13:00	0
2009-04-30	01:14:00	0
2009-04-30	01:15:00	0
2009-04-30	01:16:00	0
2009-04-30	01:17:00	15
2009-04-30	01:18:00	0
2009-04-30	01:19:00	0
2009-04-30	01:20:00	0
2009-04-30	01:21:00	0
2009-04-30	01:22:00	0
2009-04-30	01:23:00	0
2009-04-30	01:24:00	0
2009-04-30	01:25:00	0
2009-04-30	01:26:00	0
2009-04-30	01:27:00	0
2009-04-30	01:28:00	0
2009-04-30	01:29:00	0
2009-04-30	01:30:00	0
2009-04-30	01:31:00	0
2009-04-30	01:32:00	0
2009-04-30	01:33:00	0
2009-04-30	01:34:00	0
2009-04-30	01:35:00	0
2009-04-30	01:36:00	0
2009-04-30	01:37:00	0
2009-04-30	01:38:00	0
2009-04-30	01:39:00	0
2009-04-30	01:40:00	0
2009-04-30	01:41:00	0
2009-04-30	01:42:00	5
2009-04-30	01:43:00	0
2009-04-30	01:44:00	0
2009-04-30	01:45:00	0
2009-04-30	01:46:00	0
2009-04-30	01:47:00	0
2009-04-30	01:48:00	0
2009-04-30	01:49:00	0
2009-04-30	01:50:00	29
2009-04-30	01:51:00	63
2009-04-30	01:52:00	44
2009-04-30	01:53:00	181
2009-04-30	01:54:00	0
2009-04-30	01:55:00	0
2009-04-30	01:56:00	0
2009-04-30	01:57:00	0
2009-04-30	01:58:00	0
2009-04-30	01:59:00	0
2009-04-30	02:00:00	0
2009-04-30	02:01:00	0
2009-04-30	02:02:00	0
2009-04-30	02:03:00	0
2009-04-30	02:04:00	0
2009-04-30	02:05:00	0
2009-04-30	02:06:00	0
2009-04-30	02:07:00	0
2009-04-30	02:08:00	0
2009-04-30	02:09:00	0
2009-04-30	02:10:00	0
2009-04-30	02:11:00	0
2009-04-30	02:12:00	0
2009-04-30	02:13:00	0
2009-04-30	02:14:00	0
2009-04-30	02:15:00	0
2009-04-30	02:16:00	0
2009-04-30	02:17:00	0
2009-04-30	02:18:00	0
2009-04-30	02:19:00	0
2009-04-30	02:20:00	15
2009-04-30	02:21:00	0
2009-04-30	02:22:00	0
2009-04-30	02:23:00	0
2009-04-30	02:24:00	0
2009-04-30	02:25:00	0
2009-04-30	02:26:00	0
2009-04-30	02:27:00	29
2009-04-30	02:28:00	0
2009-04-30	02:29:00	0
2009-04-30	02:30:00	0
2009-04-30	02:31:00	0
2009-04-30	02:32:00	0
2009-04-30	02:33:00	0
2009-04-30	02:34:00	0
2009-04-30	02:35:00	0
2009-04-30	02:36:00	0
2009-04-30	02:37:00	0
2009-04-30	02:38:00	0
2009-04-30	02:39:00	0
2009-04-30	02:40:00	0
2009-04-30	02:41:00	0
2009-04-30	02:42:00	0
2009-04-30	02:43:00	0
2009-04-30	02:44:00	0
2009-04-30	02:45:00	0
2009-04-30	02:46:00	0
2009-04-30	02:47:00	0
2009-04-30	02:48:00	0
2009-04-30	02:49:00	5
2009-04-30	02:50:00	0
2009-04-30	02:51:00	29
2009-04-30	02:52:00	0
2009-04-30	02:53:00	0
2009-04-30	02:54:00	0
2009-04-30	02:55:00	0
2009-04-30	02:56:00	0
2009-04-30	02:57:00	0
2009-04-30	02:58:00	0
2009-04-30	02:59:00	0
2009-04-30	03:00:00	0
2009-04-30	03:01:00	0
2009-04-30	03:02:00	0
2009-04-30	03:03:00	0
2009-04-30	03:04:00	0
2009-04-30	03:05:00	0
2009-04-30	03:06:00	0
2009-04-30	03:07:00	0
2009-04-30	03:08:00	0
2009-04-30	03:09:00	0
2009-04-30	03:10:00	0
2009-04-30	03:11:00	0
2009-04-30	03:12:00	0
2009-04-30	03:13:00	0
2009-04-30	03:14:00	0
2009-04-30	03:15:00	0
2009-04-30	03:16:00	0
2009-04-30	03:17:00	0
2009-04-30	03:18:00	0
2009-04-30	03:19:00	0
2009-04-30	03:20:00	0
2009-04-30	03:21:00	0
2009-04-30	03:22:00	0
2009-04-30	03:23:00	0
2009-04-30	03:24:00	0
2009-04-30	03:25:00	0
2009-04-30	03:26:00	0
2009-04-30	03:27:00	0
2009-04-30	03:28:00	0
2009-04-30	03:29:00	0
2009-04-30	03:30:00	48
2009-04-30	03:31:00	110
2009-04-30	03:32:00	75
2009-04-30	03:33:00	0
2009-04-30	03:34:00	80
2009-04-30	03:35:00	19
2009-04-30	03:36:00	0
2009-04-30	03:37:00	0
2009-04-30	03:38:00	0
2009-04-30	03:39:00	340
2009-04-30	03:40:00	0
2009-04-30	03:41:00	0
2009-04-30	03:42:00	0
2009-04-30	03:43:00	0
2009-04-30	03:44:00	0
2009-04-30	03:45:00	0
2009-04-30	03:46:00	0
2009-04-30	03:47:00	10
2009-04-30	03:48:00	39
2009-04-30	03:49:00	0
2009-04-30	03:50:00	0
2009-04-30	03:51:00	0
2009-04-30	03:52:00	0
2009-04-30	03:53:00	0
2009-04-30	03:54:00	0
2009-04-30	03:55:00	0
2009-04-30	03:56:00	0
2009-04-30	03:57:00	0
2009-04-30	03:58:00	0
2009-04-30	03:59:00	0
2009-04-30	04:00:00	0
2009-04-30	04:01:00	0
2009-04-30	04:02:00	0
2009-04-30	04:03:00	0
2009-04-30	04:04:00	0
2009-04-30	04:05:00	5
2009-04-30	04:06:00	0
2009-04-30	04:07:00	0
2009-04-30	04:08:00	0
2009-04-30	04:09:00	0
2009-04-30	04:10:00	5
2009-04-30	04:11:00	0
2009-04-30	04:12:00	0
2009-04-30	04:13:00	0
2009-04-30	04:14:00	98
2009-04-30	04:15:00	0
2009-04-30	04:16:00	0
2009-04-30	04:17:00	0
2009-04-30	04:18:00	0
2009-04-30	04:19:00	0
2009-04-30	04:20:00	0
2009-04-30	04:21:00	0
2009-04-30	04:22:00	0
2009-04-30	04:23:00	0
2009-04-30	04:24:00	0
2009-04-30	04:25:00	0
2009-04-30	04:26:00	0
2009-04-30	04:27:00	0
2009-04-30	04:28:00	0
2009-04-30	04:29:00	0
2009-04-30	04:30:00	5
2009-04-30	04:31:00	0
2009-04-30	04:32:00	0
2009-04-30	04:33:00	0
2009-04-30	04:34:00	0
2009-04-30	04:35:00	0
2009-04-30	04:36:00	0
2009-04-30	04:37:00	0
2009-04-30	04:38:00	0
2009-04-30	04:39:00	0
2009-04-30	04:40:00	0
2009-04-30	04:41:00	0
2009-04-30	04:42:00	0
2009-04-30	04:43:00	0
2009-04-30	04:44:00	0
2009-04-30	04:45:00	0
2009-04-30	04:46:00	0
2009-04-30	04:47:00	0
2009-04-30	04:48:00	5
2009-04-30	04:49:00	0
2009-04-30	04:50:00	5
2009-04-30	04:51:00	5
2009-04-30	04:52:00	0
2009-04-30	04:53:00	0
2009-04-30	04:54:00	0
2009-04-30	04:55:00	0
2009-04-30	04:56:00	0
2009-04-30	04:57:00	5
2009-04-30	04:58:00	0
2009-04-30	04:59:00	0
2009-04-30	05:00:00	0
2009-04-30	05:01:00	0
2009-04-30	05:02:00	0
2009-04-30	05:03:00	0
2009-04-30	05:04:00	0
2009-04-30	05:05:00	10
2009-04-30	05:06:00	29
2009-04-30	05:07:00	0
2009-04-30	05:08:00	15
2009-04-30	05:09:00	92
2009-04-30	05:10:00	0
2009-04-30	05:11:00	0
2009-04-30	05:12:00	0
2009-04-30	05:13:00	0
2009-04-30	05:14:00	0
2009-04-30	05:15:00	196
2009-04-30	05:16:00	75
2009-04-30	05:17:00	39
2009-04-30	05:18:00	0
2009-04-30	05:19:00	0
2009-04-30	05:20:00	0
2009-04-30	05:21:00	0
2009-04-30	05:22:00	0
2009-04-30	05:23:00	0
2009-04-30	05:24:00	0
2009-04-30	05:25:00	0
2009-04-30	05:26:00	0
2009-04-30	05:27:00	0
2009-04-30	05:28:00	0
2009-04-30	05:29:00	0
2009-04-30	05:30:00	0
2009-04-30	05:31:00	0
2009-04-30	05:32:00	0
2009-04-30	05:33:00	0
2009-04-30	05:34:00	0
2009-04-30	05:35:00	24
2009-04-30	05:36:00	5
2009-04-30	05:37:00	0
2009-04-30	05:38:00	10
2009-04-30	05:39:00	0
2009-04-30	05:40:00	0
2009-04-30	05:41:00	5
2009-04-30	05:42:00	0
2009-04-30	05:43:00	632
2009-04-30	05:44:00	908
2009-04-30	05:45:00	1640
2009-04-30	05:46:00	1524
2009-04-30	05:47:00	632
2009-04-30	05:48:00	147
2009-04-30	05:49:00	147
2009-04-30	05:50:00	121
2009-04-30	05:51:00	134
2009-04-30	05:52:00	127
2009-04-30	05:53:00	53
2009-04-30	05:54:00	48
2009-04-30	05:55:00	0
2009-04-30	05:56:00	0
2009-04-30	05:57:00	0
2009-04-30	05:58:00	39
2009-04-30	05:59:00	0
2009-04-30	06:00:00	0
2009-04-30	06:01:00	0
2009-04-30	06:02:00	0
2009-04-30	06:03:00	0
2009-04-30	06:04:00	0
2009-04-30	06:05:00	0
2009-04-30	06:06:00	0
2009-04-30	06:07:00	0
2009-04-30	06:08:00	0
2009-04-30	06:09:00	0
2009-04-30	06:10:00	29
2009-04-30	06:11:00	0
2009-04-30	06:12:00	69
2009-04-30	06:13:00	0
2009-04-30	06:14:00	0
2009-04-30	06:15:00	0
2009-04-30	06:16:00	39
2009-04-30	06:17:00	0
2009-04-30	06:18:00	0
2009-04-30	06:19:00	0
2009-04-30	06:20:00	121
2009-04-30	06:21:00	889
2009-04-30	06:22:00	321
2009-04-30	06:23:00	0
2009-04-30	06:24:00	0
2009-04-30	06:25:00	0
2009-04-30	06:26:00	0
2009-04-30	06:27:00	15
2009-04-30	06:28:00	44
2009-04-30	06:29:00	63
2009-04-30	06:30:00	39
2009-04-30	06:31:00	219
2009-04-30	06:32:00	926
2009-04-30	06:33:00	1640
2009-04-30	06:34:00	908
2009-04-30	06:35:00	1218
2009-04-30	06:36:00	737
2009-04-30	06:37:00	443
2009-04-30	06:38:00	411
2009-04-30	06:39:00	411
2009-04-30	06:40:00	5
2009-04-30	06:41:00	0
2009-04-30	06:42:00	0
2009-04-30	06:43:00	0
2009-04-30	06:44:00	0
2009-04-30	06:45:00	0
2009-04-30	06:46:00	19
2009-04-30	06:47:00	0
2009-04-30	06:48:00	0
2009-04-30	06:49:00	0
2009-04-30	06:50:00	0
2009-04-30	06:51:00	0
2009-04-30	06:52:00	15
2009-04-30	06:53:00	0
2009-04-30	06:54:00	0
2009-04-30	06:55:00	0
2009-04-30	06:56:00	0
2009-04-30	06:57:00	0
2009-04-30	06:58:00	0
2009-04-30	06:59:00	0
2009-04-30	07:00:00	0
2009-04-30	07:01:00	0
2009-04-30	07:02:00	0
2009-04-30	07:03:00	196
2009-04-30	07:04:00	0
2009-04-30	07:05:00	69
2009-04-30	07:06:00	0
2009-04-30	07:07:00	0
2009-04-30	07:08:00	0
2009-04-30	07:09:00	0
2009-04-30	07:10:00	24
2009-04-30	07:11:00	0
2009-04-30	07:12:00	0
2009-04-30	07:13:00	0
2009-04-30	07:14:00	0
2009-04-30	07:15:00	0
2009-04-30	07:16:00	0
2009-04-30	07:17:00	86
2009-04-30	07:18:00	0
2009-04-30	07:19:00	0
2009-04-30	07:20:00	0
2009-04-30	07:21:00	0
2009-04-30	07:22:00	285
2009-04-30	07:23:00	647
2009-04-30	07:24:00	737
2009-04-30	07:25:00	0
2009-04-30	07:26:00	58
2009-04-30	07:27:00	10
2009-04-30	07:28:00	0
2009-04-30	07:29:00	0
2009-04-30	07:30:00	0
2009-04-30	07:31:00	0
2009-04-30	07:32:00	0
2009-04-30	07:33:00	0
2009-04-30	07:34:00	0
2009-04-30	07:35:00	0
2009-04-30	07:36:00	0
2009-04-30	07:37:00	0
2009-04-30	07:38:00	0
2009-04-30	07:39:00	0
2009-04-30	07:40:00	0
2009-04-30	07:41:00	369
2009-04-30	07:42:00	0
2009-04-30	07:43:00	0
2009-04-30	07:44:00	0
2009-04-30	07:45:00	0
2009-04-30	07:46:00	0
2009-04-30	07:47:00	0
2009-04-30	07:48:00	0
2009-04-30	07:49:00	0
2009-04-30	07:50:00	0
2009-04-30	07:51:00	69
2009-04-30	07:52:00	0
2009-04-30	07:53:00	0
2009-04-30	07:54:00	0
2009-04-30	07:55:00	0
2009-04-30	07:56:00	0
2009-04-30	07:57:00	0
2009-04-30	07:58:00	24
2009-04-30	07:59:00	0
2009-04-30	08:00:00	0
2009-04-30	08:01:00	0
2009-04-30	08:02:00	0
2009-04-30	08:03:00	0
2009-04-30	08:04:00	0
2009-04-30	08:05:00	0
2009-04-30	08:06:00	0
2009-04-30	08:07:00	0
2009-04-30	08:08:00	0
2009-04-30	08:09:00	0
2009-04-30	08:10:00	0
2009-04-30	08:11:00	10
2009-04-30	08:12:00	0
2009-04-30	08:13:00	0
2009-04-30	08:14:00	0
2009-04-30	08:15:00	0
2009-04-30	08:16:00	0
2009-04-30	08:17:00	48
2009-04-30	08:18:00	24
2009-04-30	08:19:00	0
2009-04-30	08:20:00	0
2009-04-30	08:21:00	0
2009-04-30	08:22:00	5
2009-04-30	08:23:00	0
2009-04-30	08:24:00	63
2009-04-30	08:25:00	58
2009-04-30	08:26:00	0
2009-04-30	08:27:00	0
2009-04-30	08:28:00	0
2009-04-30	08:29:00	0
2009-04-30	08:30:00	0
2009-04-30	08:31:00	0
2009-04-30	08:32:00	0
2009-04-30	08:33:00	0
2009-04-30	08:34:00	0
2009-04-30	08:35:00	0
2009-04-30	08:36:00	5
2009-04-30	08:37:00	0
2009-04-30	08:38:00	0
2009-04-30	08:39:00	0
2009-04-30	08:40:00	0
2009-04-30	08:41:00	0
2009-04-30	08:42:00	0
2009-04-30	08:43:00	0
2009-04-30	08:44:00	0
2009-04-30	08:45:00	0
2009-04-30	08:46:00	0
2009-04-30	08:47:00	0
2009-04-30	08:48:00	0
2009-04-30	08:49:00	0
2009-04-30	08:50:00	0
2009-04-30	08:51:00	0
2009-04-30	08:52:00	0
2009-04-30	08:53:00	0
2009-04-30	08:54:00	0
2009-04-30	08:55:00	10
2009-04-30	08:56:00	19
2009-04-30	08:57:00	0
2009-04-30	08:58:00	0
2009-04-30	08:59:00	0
2009-04-30	09:00:00	0
2009-04-30	09:01:00	0
2009-04-30	09:02:00	0
2009-04-30	09:03:00	80
2009-04-30	09:04:00	0
2009-04-30	09:05:00	0
2009-04-30	09:06:00	0
2009-04-30	09:07:00	0
2009-04-30	09:08:00	0
[truncated: 19,611 more rows]

[truncated: 3 more sheets: 5.13.09, 5.27.09, 6.10.09]
