# Supplementary material for: Initial evaluation of nighttime restlessness in a naturally occurring canine model of osteoarthritis pain
Source: PeerJ. 2015 Feb 17;3:e772. doi: 10.7717/peerj.772 (PMC4340376; doi:10.7717/peerj.772)
Supplement: Supplemental Information 33 [file peerj-03-772-s033.xlsx]

## Sheet: Office Visits
Visit Date	Visit Number
2009-03-04 06:00:00	1
2009-03-23 06:00:00	2
2009-04-06 06:00:00	3
2009-04-20 06:00:00	4
2009-05-04 06:00:00	5
2009-05-18 06:00:00	6
2009-06-01 06:00:00	7
2009-06-15 06:00:00	8
2009-06-29 06:00:00	9

## Sheet: 33_Data
Segment	DateTime	Activity	Hour	Quadrant	Study Day	Weekday
1	2009-03-16 06:01:00	0	6	2	12	2
1	2009-03-16 06:02:00	0	6	2	12	2
1	2009-03-16 06:03:00	0	6	2	12	2
1	2009-03-16 06:04:00	0	6	2	12	2
1	2009-03-16 06:05:00	0	6	2	12	2
1	2009-03-16 06:06:00	0	6	2	12	2
1	2009-03-16 06:07:00	0	6	2	12	2
1	2009-03-16 06:08:00	0	6	2	12	2
1	2009-03-16 06:09:00	0	6	2	12	2
1	2009-03-16 06:10:00	0	6	2	12	2
1	2009-03-16 06:11:00	0	6	2	12	2
1	2009-03-16 06:12:00	0	6	2	12	2
1	2009-03-16 06:13:00	0	6	2	12	2
1	2009-03-16 06:14:00	0	6	2	12	2
1	2009-03-16 06:15:00	0	6	2	12	2
1	2009-03-16 06:16:00	0	6	2	12	2
1	2009-03-16 06:17:00	0	6	2	12	2
1	2009-03-16 06:18:00	12	6	2	12	2
1	2009-03-16 06:19:00	35	6	2	12	2
1	2009-03-16 06:20:00	0	6	2	12	2
1	2009-03-16 06:21:00	58	6	2	12	2
1	2009-03-16 06:22:00	12	6	2	12	2
1	2009-03-16 06:23:00	0	6	2	12	2
1	2009-03-16 06:24:00	0	6	2	12	2
1	2009-03-16 06:25:00	0	6	2	12	2
1	2009-03-16 06:26:00	0	6	2	12	2
1	2009-03-16 06:27:00	0	6	2	12	2
1	2009-03-16 06:28:00	0	6	2	12	2
1	2009-03-16 06:29:00	0	6	2	12	2
1	2009-03-16 06:30:00	12	6	2	12	2
1	2009-03-16 06:31:00	0	6	2	12	2
1	2009-03-16 06:32:00	0	6	2	12	2
1	2009-03-16 06:33:00	0	6	2	12	2
1	2009-03-16 06:34:00	0	6	2	12	2
1	2009-03-16 06:35:00	0	6	2	12	2
1	2009-03-16 06:36:00	0	6	2	12	2
1	2009-03-16 06:37:00	0	6	2	12	2
1	2009-03-16 06:38:00	0	6	2	12	2
1	2009-03-16 06:39:00	0	6	2	12	2
1	2009-03-16 06:40:00	0	6	2	12	2
1	2009-03-16 06:41:00	0	6	2	12	2
1	2009-03-16 06:42:00	0	6	2	12	2
1	2009-03-16 06:43:00	0	6	2	12	2
1	2009-03-16 06:44:00	105	6	2	12	2
1	2009-03-16 06:45:00	0	6	2	12	2
1	2009-03-16 06:46:00	0	6	2	12	2
1	2009-03-16 06:47:00	0	6	2	12	2
1	2009-03-16 06:48:00	0	6	2	12	2
1	2009-03-16 06:49:00	0	6	2	12	2
1	2009-03-16 06:50:00	58	6	2	12	2
1	2009-03-16 06:51:00	193	6	2	12	2
1	2009-03-16 06:52:00	0	6	2	12	2
1	2009-03-16 06:53:00	0	6	2	12	2
1	2009-03-16 06:54:00	0	6	2	12	2
1	2009-03-16 06:55:00	0	6	2	12	2
1	2009-03-16 06:56:00	207	6	2	12	2
1	2009-03-16 06:57:00	370	6	2	12	2
1	2009-03-16 06:58:00	386	6	2	12	2
1	2009-03-16 06:59:00	354	6	2	12	2
1	2009-03-16 07:00:00	337	6	2	12	2
1	2009-03-16 07:01:00	840	7	2	12	2
1	2009-03-16 07:02:00	1485	7	2	12	2
1	2009-03-16 07:03:00	910	7	2	12	2
1	2009-03-16 07:04:00	151	7	2	12	2
1	2009-03-16 07:05:00	863	7	2	12	2
1	2009-03-16 07:06:00	470	7	2	12	2
1	2009-03-16 07:07:00	582	7	2	12	2
1	2009-03-16 07:08:00	684	7	2	12	2
1	2009-03-16 07:09:00	165	7	2	12	2
1	2009-03-16 07:10:00	70	7	2	12	2
1	2009-03-16 07:11:00	23	7	2	12	2
1	2009-03-16 07:12:00	47	7	2	12	2
1	2009-03-16 07:13:00	12	7	2	12	2
1	2009-03-16 07:14:00	12	7	2	12	2
1	2009-03-16 07:15:00	0	7	2	12	2
1	2009-03-16 07:16:00	0	7	2	12	2
1	2009-03-16 07:17:00	0	7	2	12	2
1	2009-03-16 07:18:00	0	7	2	12	2
1	2009-03-16 07:19:00	47	7	2	12	2
1	2009-03-16 07:20:00	12	7	2	12	2
1	2009-03-16 07:21:00	0	7	2	12	2
1	2009-03-16 07:22:00	0	7	2	12	2
1	2009-03-16 07:23:00	0	7	2	12	2
1	2009-03-16 07:24:00	0	7	2	12	2
1	2009-03-16 07:25:00	0	7	2	12	2
1	2009-03-16 07:26:00	0	7	2	12	2
1	2009-03-16 07:27:00	0	7	2	12	2
1	2009-03-16 07:28:00	0	7	2	12	2
1	2009-03-16 07:29:00	0	7	2	12	2
1	2009-03-16 07:30:00	23	7	2	12	2
1	2009-03-16 07:31:00	58	7	2	12	2
1	2009-03-16 07:32:00	0	7	2	12	2
1	2009-03-16 07:33:00	0	7	2	12	2
1	2009-03-16 07:34:00	0	7	2	12	2
1	2009-03-16 07:35:00	0	7	2	12	2
1	2009-03-16 07:36:00	0	7	2	12	2
1	2009-03-16 07:37:00	0	7	2	12	2
1	2009-03-16 07:38:00	0	7	2	12	2
1	2009-03-16 07:39:00	0	7	2	12	2
1	2009-03-16 07:40:00	0	7	2	12	2
1	2009-03-16 07:41:00	0	7	2	12	2
1	2009-03-16 07:42:00	81	7	2	12	2
1	2009-03-16 07:43:00	105	7	2	12	2
1	2009-03-16 07:44:00	0	7	2	12	2
1	2009-03-16 07:45:00	545	7	2	12	2
1	2009-03-16 07:46:00	81	7	2	12	2
1	2009-03-16 07:47:00	0	7	2	12	2
1	2009-03-16 07:48:00	0	7	2	12	2
1	2009-03-16 07:49:00	0	7	2	12	2
1	2009-03-16 07:50:00	0	7	2	12	2
1	2009-03-16 07:51:00	0	7	2	12	2
1	2009-03-16 07:52:00	47	7	2	12	2
1	2009-03-16 07:53:00	81	7	2	12	2
1	2009-03-16 07:54:00	81	7	2	12	2
1	2009-03-16 07:55:00	0	7	2	12	2
1	2009-03-16 07:56:00	0	7	2	12	2
1	2009-03-16 07:57:00	105	7	2	12	2
1	2009-03-16 07:58:00	0	7	2	12	2
1	2009-03-16 07:59:00	0	7	2	12	2
1	2009-03-16 08:00:00	0	7	2	12	2
1	2009-03-16 08:01:00	0	8	2	12	2
1	2009-03-16 08:02:00	0	8	2	12	2
1	2009-03-16 08:03:00	0	8	2	12	2
1	2009-03-16 08:04:00	0	8	2	12	2
1	2009-03-16 08:05:00	0	8	2	12	2
1	2009-03-16 08:06:00	0	8	2	12	2
1	2009-03-16 08:07:00	165	8	2	12	2
1	2009-03-16 08:08:00	105	8	2	12	2
1	2009-03-16 08:09:00	47	8	2	12	2
1	2009-03-16 08:10:00	321	8	2	12	2
1	2009-03-16 08:11:00	151	8	2	12	2
1	2009-03-16 08:12:00	35	8	2	12	2
1	2009-03-16 08:13:00	58	8	2	12	2
1	2009-03-16 08:14:00	35	8	2	12	2
1	2009-03-16 08:15:00	0	8	2	12	2
1	2009-03-16 08:16:00	58	8	2	12	2
1	2009-03-16 08:17:00	128	8	2	12	2
1	2009-03-16 08:18:00	12	8	2	12	2
1	2009-03-16 08:19:00	0	8	2	12	2
1	2009-03-16 08:20:00	0	8	2	12	2
1	2009-03-16 08:21:00	0	8	2	12	2
1	2009-03-16 08:22:00	23	8	2	12	2
1	2009-03-16 08:23:00	0	8	2	12	2
1	2009-03-16 08:24:00	0	8	2	12	2
1	2009-03-16 08:25:00	12	8	2	12	2
1	2009-03-16 08:26:00	0	8	2	12	2
1	2009-03-16 08:27:00	0	8	2	12	2
1	2009-03-16 08:28:00	0	8	2	12	2
1	2009-03-16 08:29:00	0	8	2	12	2
1	2009-03-16 08:30:00	0	8	2	12	2
1	2009-03-16 08:31:00	12	8	2	12	2
1	2009-03-16 08:32:00	35	8	2	12	2
1	2009-03-16 08:33:00	23	8	2	12	2
1	2009-03-16 08:34:00	12	8	2	12	2
1	2009-03-16 08:35:00	0	8	2	12	2
1	2009-03-16 08:36:00	0	8	2	12	2
1	2009-03-16 08:37:00	23	8	2	12	2
1	2009-03-16 08:38:00	0	8	2	12	2
1	2009-03-16 08:39:00	12	8	2	12	2
1	2009-03-16 08:40:00	0	8	2	12	2
1	2009-03-16 08:41:00	0	8	2	12	2
1	2009-03-16 08:42:00	0	8	2	12	2
1	2009-03-16 08:43:00	0	8	2	12	2
1	2009-03-16 08:44:00	0	8	2	12	2
1	2009-03-16 08:45:00	0	8	2	12	2
1	2009-03-16 08:46:00	12	8	2	12	2
1	2009-03-16 08:47:00	0	8	2	12	2
1	2009-03-16 08:48:00	0	8	2	12	2
1	2009-03-16 08:49:00	0	8	2	12	2
1	2009-03-16 08:50:00	0	8	2	12	2
1	2009-03-16 08:51:00	0	8	2	12	2
1	2009-03-16 08:52:00	0	8	2	12	2
1	2009-03-16 08:53:00	0	8	2	12	2
1	2009-03-16 08:54:00	0	8	2	12	2
1	2009-03-16 08:55:00	0	8	2	12	2
1	2009-03-16 08:56:00	47	8	2	12	2
1	2009-03-16 08:57:00	35	8	2	12	2
1	2009-03-16 08:58:00	93	8	2	12	2
1	2009-03-16 08:59:00	0	8	2	12	2
1	2009-03-16 09:00:00	0	8	2	12	2
1	2009-03-16 09:01:00	0	9	2	12	2
1	2009-03-16 09:02:00	0	9	2	12	2
1	2009-03-16 09:03:00	0	9	2	12	2
1	2009-03-16 09:04:00	23	9	2	12	2
1	2009-03-16 09:05:00	70	9	2	12	2
1	2009-03-16 09:06:00	23	9	2	12	2
1	2009-03-16 09:07:00	726	9	2	12	2
1	2009-03-16 09:08:00	435	9	2	12	2
1	2009-03-16 09:09:00	0	9	2	12	2
1	2009-03-16 09:10:00	0	9	2	12	2
1	2009-03-16 09:11:00	0	9	2	12	2
1	2009-03-16 09:12:00	0	9	2	12	2
1	2009-03-16 09:13:00	23	9	2	12	2
1	2009-03-16 09:14:00	0	9	2	12	2
1	2009-03-16 09:15:00	0	9	2	12	2
1	2009-03-16 09:16:00	0	9	2	12	2
1	2009-03-16 09:17:00	0	9	2	12	2
1	2009-03-16 09:18:00	0	9	2	12	2
1	2009-03-16 09:19:00	0	9	2	12	2
1	2009-03-16 09:20:00	0	9	2	12	2
1	2009-03-16 09:21:00	0	9	2	12	2
1	2009-03-16 09:22:00	12	9	2	12	2
1	2009-03-16 09:23:00	47	9	2	12	2
1	2009-03-16 09:24:00	81	9	2	12	2
1	2009-03-16 09:25:00	0	9	2	12	2
1	2009-03-16 09:26:00	35	9	2	12	2
1	2009-03-16 09:27:00	93	9	2	12	2
1	2009-03-16 09:28:00	35	9	2	12	2
1	2009-03-16 09:29:00	35	9	2	12	2
1	2009-03-16 09:30:00	58	9	2	12	2
1	2009-03-16 09:31:00	0	9	2	12	2
1	2009-03-16 09:32:00	23	9	2	12	2
1	2009-03-16 09:33:00	0	9	2	12	2
1	2009-03-16 09:34:00	0	9	2	12	2
1	2009-03-16 09:35:00	0	9	2	12	2
1	2009-03-16 09:36:00	0	9	2	12	2
1	2009-03-16 09:37:00	12	9	2	12	2
1	2009-03-16 09:38:00	23	9	2	12	2
1	2009-03-16 09:39:00	93	9	2	12	2
1	2009-03-16 09:40:00	47	9	2	12	2
1	2009-03-16 09:41:00	0	9	2	12	2
1	2009-03-16 09:42:00	47	9	2	12	2
1	2009-03-16 09:43:00	81	9	2	12	2
1	2009-03-16 09:44:00	0	9	2	12	2
1	2009-03-16 09:45:00	0	9	2	12	2
1	2009-03-16 09:46:00	0	9	2	12	2
1	2009-03-16 09:47:00	0	9	2	12	2
1	2009-03-16 09:48:00	0	9	2	12	2
1	2009-03-16 09:49:00	0	9	2	12	2
1	2009-03-16 09:50:00	0	9	2	12	2
1	2009-03-16 09:51:00	249	9	2	12	2
1	2009-03-16 09:52:00	770	9	2	12	2
1	2009-03-16 09:53:00	621	9	2	12	2
1	2009-03-16 09:54:00	1203	9	2	12	2
1	2009-03-16 09:55:00	1387	9	2	12	2
1	2009-03-16 09:56:00	1324	9	2	12	2
1	2009-03-16 09:57:00	726	9	2	12	2
1	2009-03-16 09:58:00	128	9	2	12	2
1	2009-03-16 09:59:00	70	9	2	12	2
1	2009-03-16 10:00:00	128	9	2	12	2
1	2009-03-16 10:01:00	81	10	2	12	2
1	2009-03-16 10:02:00	0	10	2	12	2
1	2009-03-16 10:03:00	0	10	2	12	2
1	2009-03-16 10:04:00	0	10	2	12	2
1	2009-03-16 10:05:00	0	10	2	12	2
1	2009-03-16 10:06:00	0	10	2	12	2
1	2009-03-16 10:07:00	0	10	2	12	2
1	2009-03-16 10:08:00	0	10	2	12	2
1	2009-03-16 10:09:00	0	10	2	12	2
1	2009-03-16 10:10:00	0	10	2	12	2
1	2009-03-16 10:11:00	0	10	2	12	2
1	2009-03-16 10:12:00	0	10	2	12	2
1	2009-03-16 10:13:00	0	10	2	12	2
1	2009-03-16 10:14:00	0	10	2	12	2
1	2009-03-16 10:15:00	0	10	2	12	2
1	2009-03-16 10:16:00	0	10	2	12	2
1	2009-03-16 10:17:00	0	10	2	12	2
1	2009-03-16 10:18:00	12	10	2	12	2
1	2009-03-16 10:19:00	58	10	2	12	2
1	2009-03-16 10:20:00	0	10	2	12	2
1	2009-03-16 10:21:00	0	10	2	12	2
1	2009-03-16 10:22:00	0	10	2	12	2
1	2009-03-16 10:23:00	0	10	2	12	2
1	2009-03-16 10:24:00	12	10	2	12	2
1	2009-03-16 10:25:00	0	10	2	12	2
1	2009-03-16 10:26:00	0	10	2	12	2
1	2009-03-16 10:27:00	0	10	2	12	2
1	2009-03-16 10:28:00	0	10	2	12	2
1	2009-03-16 10:29:00	0	10	2	12	2
1	2009-03-16 10:30:00	0	10	2	12	2
1	2009-03-16 10:31:00	0	10	2	12	2
1	2009-03-16 10:32:00	0	10	2	12	2
1	2009-03-16 10:33:00	0	10	2	12	2
1	2009-03-16 10:34:00	0	10	2	12	2
1	2009-03-16 10:35:00	0	10	2	12	2
1	2009-03-16 10:36:00	0	10	2	12	2
1	2009-03-16 10:37:00	0	10	2	12	2
1	2009-03-16 10:38:00	0	10	2	12	2
1	2009-03-16 10:39:00	0	10	2	12	2
1	2009-03-16 10:40:00	0	10	2	12	2
1	2009-03-16 10:41:00	0	10	2	12	2
1	2009-03-16 10:42:00	0	10	2	12	2
1	2009-03-16 10:43:00	0	10	2	12	2
1	2009-03-16 10:44:00	0	10	2	12	2
1	2009-03-16 10:45:00	0	10	2	12	2
1	2009-03-16 10:46:00	0	10	2	12	2
1	2009-03-16 10:47:00	0	10	2	12	2
1	2009-03-16 10:48:00	0	10	2	12	2
1	2009-03-16 10:49:00	0	10	2	12	2
1	2009-03-16 10:50:00	0	10	2	12	2
1	2009-03-16 10:51:00	0	10	2	12	2
1	2009-03-16 10:52:00	0	10	2	12	2
1	2009-03-16 10:53:00	0	10	2	12	2
1	2009-03-16 10:54:00	0	10	2	12	2
1	2009-03-16 10:55:00	47	10	2	12	2
1	2009-03-16 10:56:00	0	10	2	12	2
1	2009-03-16 10:57:00	0	10	2	12	2
1	2009-03-16 10:58:00	0	10	2	12	2
1	2009-03-16 10:59:00	0	10	2	12	2
1	2009-03-16 11:00:00	0	10	2	12	2
1	2009-03-16 11:01:00	0	11	2	12	2
1	2009-03-16 11:02:00	0	11	2	12	2
1	2009-03-16 11:03:00	0	11	2	12	2
1	2009-03-16 11:04:00	0	11	2	12	2
1	2009-03-16 11:05:00	0	11	2	12	2
1	2009-03-16 11:06:00	0	11	2	12	2
1	2009-03-16 11:07:00	12	11	2	12	2
1	2009-03-16 11:08:00	0	11	2	12	2
1	2009-03-16 11:09:00	0	11	2	12	2
1	2009-03-16 11:10:00	0	11	2	12	2
1	2009-03-16 11:11:00	35	11	2	12	2
1	2009-03-16 11:12:00	0	11	2	12	2
1	2009-03-16 11:13:00	0	11	2	12	2
1	2009-03-16 11:14:00	12	11	2	12	2
1	2009-03-16 11:15:00	0	11	2	12	2
1	2009-03-16 11:16:00	0	11	2	12	2
1	2009-03-16 11:17:00	0	11	2	12	2
1	2009-03-16 11:18:00	0	11	2	12	2
1	2009-03-16 11:19:00	0	11	2	12	2
1	2009-03-16 11:20:00	23	11	2	12	2
1	2009-03-16 11:21:00	0	11	2	12	2
1	2009-03-16 11:22:00	0	11	2	12	2
1	2009-03-16 11:23:00	0	11	2	12	2
1	2009-03-16 11:24:00	0	11	2	12	2
1	2009-03-16 11:25:00	0	11	2	12	2
1	2009-03-16 11:26:00	0	11	2	12	2
1	2009-03-16 11:27:00	0	11	2	12	2
1	2009-03-16 11:28:00	0	11	2	12	2
1	2009-03-16 11:29:00	0	11	2	12	2
1	2009-03-16 11:30:00	0	11	2	12	2
1	2009-03-16 11:31:00	0	11	2	12	2
1	2009-03-16 11:32:00	0	11	2	12	2
1	2009-03-16 11:33:00	0	11	2	12	2
1	2009-03-16 11:34:00	0	11	2	12	2
1	2009-03-16 11:35:00	0	11	2	12	2
1	2009-03-16 11:36:00	0	11	2	12	2
1	2009-03-16 11:37:00	0	11	2	12	2
1	2009-03-16 11:38:00	0	11	2	12	2
1	2009-03-16 11:39:00	0	11	2	12	2
1	2009-03-16 11:40:00	0	11	2	12	2
1	2009-03-16 11:41:00	0	11	2	12	2
1	2009-03-16 11:42:00	0	11	2	12	2
1	2009-03-16 11:43:00	0	11	2	12	2
1	2009-03-16 11:44:00	0	11	2	12	2
1	2009-03-16 11:45:00	0	11	2	12	2
1	2009-03-16 11:46:00	0	11	2	12	2
1	2009-03-16 11:47:00	0	11	2	12	2
1	2009-03-16 11:48:00	0	11	2	12	2
1	2009-03-16 11:49:00	0	11	2	12	2
1	2009-03-16 11:50:00	0	11	2	12	2
1	2009-03-16 11:51:00	0	11	2	12	2
1	2009-03-16 11:52:00	0	11	2	12	2
1	2009-03-16 11:53:00	0	11	2	12	2
1	2009-03-16 11:54:00	0	11	2	12	2
1	2009-03-16 11:55:00	0	11	2	12	2
1	2009-03-16 11:56:00	0	11	2	12	2
1	2009-03-16 11:57:00	0	11	2	12	2
1	2009-03-16 11:58:00	0	11	2	12	2
1	2009-03-16 11:59:00	0	11	2	12	2
1	2009-03-16 12:00:00	0	11	2	12	2
1	2009-03-16 12:01:00	0	12	3	12	2
1	2009-03-16 12:02:00	0	12	3	12	2
1	2009-03-16 12:03:00	0	12	3	12	2
1	2009-03-16 12:04:00	0	12	3	12	2
1	2009-03-16 12:05:00	0	12	3	12	2
1	2009-03-16 12:06:00	0	12	3	12	2
1	2009-03-16 12:07:00	12	12	3	12	2
1	2009-03-16 12:08:00	23	12	3	12	2
1	2009-03-16 12:09:00	23	12	3	12	2
1	2009-03-16 12:10:00	0	12	3	12	2
1	2009-03-16 12:11:00	0	12	3	12	2
1	2009-03-16 12:12:00	0	12	3	12	2
1	2009-03-16 12:13:00	0	12	3	12	2
1	2009-03-16 12:14:00	0	12	3	12	2
1	2009-03-16 12:15:00	0	12	3	12	2
1	2009-03-16 12:16:00	0	12	3	12	2
1	2009-03-16 12:17:00	0	12	3	12	2
1	2009-03-16 12:18:00	0	12	3	12	2
1	2009-03-16 12:19:00	23	12	3	12	2
1	2009-03-16 12:20:00	0	12	3	12	2
1	2009-03-16 12:21:00	0	12	3	12	2
1	2009-03-16 12:22:00	0	12	3	12	2
1	2009-03-16 12:23:00	0	12	3	12	2
1	2009-03-16 12:24:00	0	12	3	12	2
1	2009-03-16 12:25:00	0	12	3	12	2
1	2009-03-16 12:26:00	0	12	3	12	2
1	2009-03-16 12:27:00	0	12	3	12	2
1	2009-03-16 12:28:00	0	12	3	12	2
1	2009-03-16 12:29:00	0	12	3	12	2
1	2009-03-16 12:30:00	0	12	3	12	2
1	2009-03-16 12:31:00	0	12	3	12	2
1	2009-03-16 12:32:00	0	12	3	12	2
1	2009-03-16 12:33:00	0	12	3	12	2
1	2009-03-16 12:34:00	0	12	3	12	2
1	2009-03-16 12:35:00	0	12	3	12	2
1	2009-03-16 12:36:00	0	12	3	12	2
1	2009-03-16 12:37:00	0	12	3	12	2
1	2009-03-16 12:38:00	0	12	3	12	2
1	2009-03-16 12:39:00	0	12	3	12	2
1	2009-03-16 12:40:00	0	12	3	12	2
1	2009-03-16 12:41:00	0	12	3	12	2
1	2009-03-16 12:42:00	0	12	3	12	2
1	2009-03-16 12:43:00	0	12	3	12	2
1	2009-03-16 12:44:00	0	12	3	12	2
1	2009-03-16 12:45:00	0	12	3	12	2
1	2009-03-16 12:46:00	0	12	3	12	2
1	2009-03-16 12:47:00	0	12	3	12	2
1	2009-03-16 12:48:00	0	12	3	12	2
1	2009-03-16 12:49:00	0	12	3	12	2
1	2009-03-16 12:50:00	0	12	3	12	2
1	2009-03-16 12:51:00	0	12	3	12	2
1	2009-03-16 12:52:00	0	12	3	12	2
1	2009-03-16 12:53:00	0	12	3	12	2
1	2009-03-16 12:54:00	0	12	3	12	2
1	2009-03-16 12:55:00	0	12	3	12	2
1	2009-03-16 12:56:00	0	12	3	12	2
1	2009-03-16 12:57:00	0	12	3	12	2
1	2009-03-16 12:58:00	0	12	3	12	2
1	2009-03-16 12:59:00	0	12	3	12	2
1	2009-03-16 13:00:00	0	12	3	12	2
1	2009-03-16 13:01:00	0	13	3	12	2
1	2009-03-16 13:02:00	0	13	3	12	2
1	2009-03-16 13:03:00	0	13	3	12	2
1	2009-03-16 13:04:00	0	13	3	12	2
1	2009-03-16 13:05:00	35	13	3	12	2
1	2009-03-16 13:06:00	0	13	3	12	2
1	2009-03-16 13:07:00	23	13	3	12	2
1	2009-03-16 13:08:00	35	13	3	12	2
1	2009-03-16 13:09:00	0	13	3	12	2
1	2009-03-16 13:10:00	0	13	3	12	2
1	2009-03-16 13:11:00	0	13	3	12	2
1	2009-03-16 13:12:00	0	13	3	12	2
1	2009-03-16 13:13:00	0	13	3	12	2
1	2009-03-16 13:14:00	0	13	3	12	2
1	2009-03-16 13:15:00	0	13	3	12	2
1	2009-03-16 13:16:00	0	13	3	12	2
1	2009-03-16 13:17:00	0	13	3	12	2
1	2009-03-16 13:18:00	0	13	3	12	2
1	2009-03-16 13:19:00	0	13	3	12	2
1	2009-03-16 13:20:00	0	13	3	12	2
1	2009-03-16 13:21:00	0	13	3	12	2
1	2009-03-16 13:22:00	0	13	3	12	2
1	2009-03-16 13:23:00	0	13	3	12	2
1	2009-03-16 13:24:00	0	13	3	12	2
1	2009-03-16 13:25:00	0	13	3	12	2
1	2009-03-16 13:26:00	0	13	3	12	2
1	2009-03-16 13:27:00	0	13	3	12	2
1	2009-03-16 13:28:00	58	13	3	12	2
1	2009-03-16 13:29:00	0	13	3	12	2
1	2009-03-16 13:30:00	0	13	3	12	2
1	2009-03-16 13:31:00	0	13	3	12	2
1	2009-03-16 13:32:00	0	13	3	12	2
1	2009-03-16 13:33:00	0	13	3	12	2
1	2009-03-16 13:34:00	0	13	3	12	2
1	2009-03-16 13:35:00	0	13	3	12	2
1	2009-03-16 13:36:00	0	13	3	12	2
1	2009-03-16 13:37:00	0	13	3	12	2
1	2009-03-16 13:38:00	0	13	3	12	2
1	2009-03-16 13:39:00	0	13	3	12	2
1	2009-03-16 13:40:00	0	13	3	12	2
1	2009-03-16 13:41:00	0	13	3	12	2
1	2009-03-16 13:42:00	0	13	3	12	2
1	2009-03-16 13:43:00	0	13	3	12	2
1	2009-03-16 13:44:00	0	13	3	12	2
1	2009-03-16 13:45:00	12	13	3	12	2
1	2009-03-16 13:46:00	0	13	3	12	2
1	2009-03-16 13:47:00	0	13	3	12	2
1	2009-03-16 13:48:00	0	13	3	12	2
1	2009-03-16 13:49:00	0	13	3	12	2
1	2009-03-16 13:50:00	0	13	3	12	2
1	2009-03-16 13:51:00	0	13	3	12	2
1	2009-03-16 13:52:00	151	13	3	12	2
1	2009-03-16 13:53:00	70	13	3	12	2
1	2009-03-16 13:54:00	151	13	3	12	2
1	2009-03-16 13:55:00	0	13	3	12	2
1	2009-03-16 13:56:00	0	13	3	12	2
1	2009-03-16 13:57:00	0	13	3	12	2
1	2009-03-16 13:58:00	0	13	3	12	2
1	2009-03-16 13:59:00	0	13	3	12	2
1	2009-03-16 14:00:00	35	13	3	12	2
1	2009-03-16 14:01:00	0	14	3	12	2
1	2009-03-16 14:02:00	58	14	3	12	2
1	2009-03-16 14:03:00	58	14	3	12	2
1	2009-03-16 14:04:00	0	14	3	12	2
1	2009-03-16 14:05:00	0	14	3	12	2
1	2009-03-16 14:06:00	0	14	3	12	2
1	2009-03-16 14:07:00	0	14	3	12	2
1	2009-03-16 14:08:00	0	14	3	12	2
1	2009-03-16 14:09:00	0	14	3	12	2
1	2009-03-16 14:10:00	0	14	3	12	2
1	2009-03-16 14:11:00	0	14	3	12	2
1	2009-03-16 14:12:00	0	14	3	12	2
1	2009-03-16 14:13:00	0	14	3	12	2
1	2009-03-16 14:14:00	0	14	3	12	2
1	2009-03-16 14:15:00	0	14	3	12	2
1	2009-03-16 14:16:00	0	14	3	12	2
1	2009-03-16 14:17:00	0	14	3	12	2
1	2009-03-16 14:18:00	0	14	3	12	2
1	2009-03-16 14:19:00	0	14	3	12	2
1	2009-03-16 14:20:00	0	14	3	12	2
1	2009-03-16 14:21:00	0	14	3	12	2
1	2009-03-16 14:22:00	0	14	3	12	2
1	2009-03-16 14:23:00	0	14	3	12	2
1	2009-03-16 14:24:00	0	14	3	12	2
1	2009-03-16 14:25:00	0	14	3	12	2
1	2009-03-16 14:26:00	0	14	3	12	2
1	2009-03-16 14:27:00	0	14	3	12	2
1	2009-03-16 14:28:00	35	14	3	12	2
1	2009-03-16 14:29:00	47	14	3	12	2
1	2009-03-16 14:30:00	47	14	3	12	2
1	2009-03-16 14:31:00	179	14	3	12	2
1	2009-03-16 14:32:00	12	14	3	12	2
1	2009-03-16 14:33:00	0	14	3	12	2
1	2009-03-16 14:34:00	0	14	3	12	2
1	2009-03-16 14:35:00	0	14	3	12	2
1	2009-03-16 14:36:00	0	14	3	12	2
1	2009-03-16 14:37:00	0	14	3	12	2
1	2009-03-16 14:38:00	0	14	3	12	2
1	2009-03-16 14:39:00	23	14	3	12	2
1	2009-03-16 14:40:00	58	14	3	12	2
1	2009-03-16 14:41:00	0	14	3	12	2
1	2009-03-16 14:42:00	0	14	3	12	2
1	2009-03-16 14:43:00	0	14	3	12	2
1	2009-03-16 14:44:00	0	14	3	12	2
1	2009-03-16 14:45:00	0	14	3	12	2
1	2009-03-16 14:46:00	0	14	3	12	2
1	2009-03-16 14:47:00	0	14	3	12	2
1	2009-03-16 14:48:00	0	14	3	12	2
1	2009-03-16 14:49:00	0	14	3	12	2
1	2009-03-16 14:50:00	0	14	3	12	2
1	2009-03-16 14:51:00	0	14	3	12	2
1	2009-03-16 14:52:00	0	14	3	12	2
1	2009-03-16 14:53:00	0	14	3	12	2
1	2009-03-16 14:54:00	0	14	3	12	2
1	2009-03-16 14:55:00	0	14	3	12	2
1	2009-03-16 14:56:00	35	14	3	12	2
1	2009-03-16 14:57:00	23	14	3	12	2
1	2009-03-16 14:58:00	105	14	3	12	2
1	2009-03-16 14:59:00	0	14	3	12	2
1	2009-03-16 15:00:00	128	14	3	12	2
1	2009-03-16 15:01:00	0	15	3	12	2
1	2009-03-16 15:02:00	81	15	3	12	2
1	2009-03-16 15:03:00	0	15	3	12	2
1	2009-03-16 15:04:00	0	15	3	12	2
1	2009-03-16 15:05:00	0	15	3	12	2
1	2009-03-16 15:06:00	0	15	3	12	2
1	2009-03-16 15:07:00	0	15	3	12	2
1	2009-03-16 15:08:00	0	15	3	12	2
1	2009-03-16 15:09:00	0	15	3	12	2
1	2009-03-16 15:10:00	0	15	3	12	2
1	2009-03-16 15:11:00	0	15	3	12	2
1	2009-03-16 15:12:00	0	15	3	12	2
1	2009-03-16 15:13:00	0	15	3	12	2
1	2009-03-16 15:14:00	0	15	3	12	2
1	2009-03-16 15:15:00	0	15	3	12	2
1	2009-03-16 15:16:00	0	15	3	12	2
1	2009-03-16 15:17:00	23	15	3	12	2
1	2009-03-16 15:18:00	0	15	3	12	2
1	2009-03-16 15:19:00	0	15	3	12	2
1	2009-03-16 15:20:00	70	15	3	12	2
1	2009-03-16 15:21:00	0	15	3	12	2
1	2009-03-16 15:22:00	0	15	3	12	2
1	2009-03-16 15:23:00	263	15	3	12	2
1	2009-03-16 15:24:00	1091	15	3	12	2
1	2009-03-16 15:25:00	1657	15	3	12	2
1	2009-03-16 15:26:00	1694	15	3	12	2
1	2009-03-16 15:27:00	1354	15	3	12	2
1	2009-03-16 15:28:00	81	15	3	12	2
1	2009-03-16 15:29:00	93	15	3	12	2
1	2009-03-16 15:30:00	70	15	3	12	2
1	2009-03-16 15:31:00	0	15	3	12	2
1	2009-03-16 15:32:00	0	15	3	12	2
1	2009-03-16 15:33:00	0	15	3	12	2
1	2009-03-16 15:34:00	0	15	3	12	2
1	2009-03-16 15:35:00	0	15	3	12	2
1	2009-03-16 15:36:00	0	15	3	12	2
1	2009-03-16 15:37:00	0	15	3	12	2
1	2009-03-16 15:38:00	0	15	3	12	2
1	2009-03-16 15:39:00	0	15	3	12	2
1	2009-03-16 15:40:00	0	15	3	12	2
1	2009-03-16 15:41:00	0	15	3	12	2
1	2009-03-16 15:42:00	12	15	3	12	2
1	2009-03-16 15:43:00	0	15	3	12	2
1	2009-03-16 15:44:00	0	15	3	12	2
1	2009-03-16 15:45:00	0	15	3	12	2
1	2009-03-16 15:46:00	0	15	3	12	2
1	2009-03-16 15:47:00	0	15	3	12	2
1	2009-03-16 15:48:00	0	15	3	12	2
1	2009-03-16 15:49:00	0	15	3	12	2
1	2009-03-16 15:50:00	0	15	3	12	2
1	2009-03-16 15:51:00	0	15	3	12	2
1	2009-03-16 15:52:00	0	15	3	12	2
1	2009-03-16 15:53:00	0	15	3	12	2
1	2009-03-16 15:54:00	0	15	3	12	2
1	2009-03-16 15:55:00	0	15	3	12	2
1	2009-03-16 15:56:00	0	15	3	12	2
1	2009-03-16 15:57:00	12	15	3	12	2
1	2009-03-16 15:58:00	0	15	3	12	2
1	2009-03-16 15:59:00	0	15	3	12	2
1	2009-03-16 16:00:00	35	15	3	12	2
1	2009-03-16 16:01:00	23	16	3	12	2
1	2009-03-16 16:02:00	23	16	3	12	2
1	2009-03-16 16:03:00	0	16	3	12	2
1	2009-03-16 16:04:00	0	16	3	12	2
1	2009-03-16 16:05:00	70	16	3	12	2
1	2009-03-16 16:06:00	35	16	3	12	2
1	2009-03-16 16:07:00	0	16	3	12	2
1	2009-03-16 16:08:00	12	16	3	12	2
1	2009-03-16 16:09:00	12	16	3	12	2
1	2009-03-16 16:10:00	12	16	3	12	2
1	2009-03-16 16:11:00	12	16	3	12	2
1	2009-03-16 16:12:00	0	16	3	12	2
1	2009-03-16 16:13:00	0	16	3	12	2
1	2009-03-16 16:14:00	0	16	3	12	2
1	2009-03-16 16:15:00	0	16	3	12	2
1	2009-03-16 16:16:00	23	16	3	12	2
1	2009-03-16 16:17:00	23	16	3	12	2
1	2009-03-16 16:18:00	0	16	3	12	2
1	2009-03-16 16:19:00	0	16	3	12	2
1	2009-03-16 16:20:00	12	16	3	12	2
1	2009-03-16 16:21:00	0	16	3	12	2
1	2009-03-16 16:22:00	0	16	3	12	2
1	2009-03-16 16:23:00	0	16	3	12	2
1	2009-03-16 16:24:00	0	16	3	12	2
1	2009-03-16 16:25:00	12	16	3	12	2
1	2009-03-16 16:26:00	0	16	3	12	2
1	2009-03-16 16:27:00	0	16	3	12	2
1	2009-03-16 16:28:00	0	16	3	12	2
1	2009-03-16 16:29:00	0	16	3	12	2
1	2009-03-16 16:30:00	235	16	3	12	2
1	2009-03-16 16:31:00	93	16	3	12	2
1	2009-03-16 16:32:00	207	16	3	12	2
1	2009-03-16 16:33:00	193	16	3	12	2
1	2009-03-16 16:34:00	0	16	3	12	2
1	2009-03-16 16:35:00	0	16	3	12	2
1	2009-03-16 16:36:00	23	16	3	12	2
1	2009-03-16 16:37:00	0	16	3	12	2
1	2009-03-16 16:38:00	0	16	3	12	2
1	2009-03-16 16:39:00	0	16	3	12	2
1	2009-03-16 16:40:00	0	16	3	12	2
1	2009-03-16 16:41:00	0	16	3	12	2
1	2009-03-16 16:42:00	0	16	3	12	2
1	2009-03-16 16:43:00	0	16	3	12	2
1	2009-03-16 16:44:00	0	16	3	12	2
1	2009-03-16 16:45:00	0	16	3	12	2
1	2009-03-16 16:46:00	0	16	3	12	2
1	2009-03-16 16:47:00	0	16	3	12	2
1	2009-03-16 16:48:00	0	16	3	12	2
1	2009-03-16 16:49:00	0	16	3	12	2
1	2009-03-16 16:50:00	12	16	3	12	2
1	2009-03-16 16:51:00	0	16	3	12	2
1	2009-03-16 16:52:00	0	16	3	12	2
1	2009-03-16 16:53:00	0	16	3	12	2
1	2009-03-16 16:54:00	0	16	3	12	2
1	2009-03-16 16:55:00	12	16	3	12	2
1	2009-03-16 16:56:00	93	16	3	12	2
1	2009-03-16 16:57:00	58	16	3	12	2
1	2009-03-16 16:58:00	105	16	3	12	2
1	2009-03-16 16:59:00	81	16	3	12	2
1	2009-03-16 17:00:00	0	16	3	12	2
1	2009-03-16 17:01:00	0	17	3	12	2
1	2009-03-16 17:02:00	0	17	3	12	2
1	2009-03-16 17:03:00	0	17	3	12	2
1	2009-03-16 17:04:00	0	17	3	12	2
1	2009-03-16 17:05:00	12	17	3	12	2
1	2009-03-16 17:06:00	0	17	3	12	2
1	2009-03-16 17:07:00	207	17	3	12	2
1	2009-03-16 17:08:00	0	17	3	12	2
1	2009-03-16 17:09:00	0	17	3	12	2
1	2009-03-16 17:10:00	0	17	3	12	2
1	2009-03-16 17:11:00	0	17	3	12	2
1	2009-03-16 17:12:00	35	17	3	12	2
1	2009-03-16 17:13:00	1091	17	3	12	2
1	2009-03-16 17:14:00	545	17	3	12	2
1	2009-03-16 17:15:00	354	17	3	12	2
1	2009-03-16 17:16:00	489	17	3	12	2
1	2009-03-16 17:17:00	770	17	3	12	2
1	2009-03-16 17:18:00	1147	17	3	12	2
1	2009-03-16 17:19:00	151	17	3	12	2
1	2009-03-16 17:20:00	165	17	3	12	2
1	2009-03-16 17:21:00	179	17	3	12	2
1	2009-03-16 17:22:00	128	17	3	12	2
1	2009-03-16 17:23:00	81	17	3	12	2
1	2009-03-16 17:24:00	116	17	3	12	2
1	2009-03-16 17:25:00	12	17	3	12	2
1	2009-03-16 17:26:00	70	17	3	12	2
1	2009-03-16 17:27:00	0	17	3	12	2
1	2009-03-16 17:28:00	23	17	3	12	2
1	2009-03-16 17:29:00	435	17	3	12	2
1	2009-03-16 17:30:00	863	17	3	12	2
1	2009-03-16 17:31:00	207	17	3	12	2
1	2009-03-16 17:32:00	93	17	3	12	2
1	2009-03-16 17:33:00	221	17	3	12	2
1	2009-03-16 17:34:00	47	17	3	12	2
1	2009-03-16 17:35:00	81	17	3	12	2
1	2009-03-16 17:36:00	193	17	3	12	2
1	2009-03-16 17:37:00	207	17	3	12	2
1	2009-03-16 17:38:00	93	17	3	12	2
1	2009-03-16 17:39:00	47	17	3	12	2
1	2009-03-16 17:40:00	12	17	3	12	2
1	2009-03-16 17:41:00	0	17	3	12	2
1	2009-03-16 17:42:00	165	17	3	12	2
1	2009-03-16 17:43:00	35	17	3	12	2
1	2009-03-16 17:44:00	0	17	3	12	2
1	2009-03-16 17:45:00	35	17	3	12	2
1	2009-03-16 17:46:00	70	17	3	12	2
1	2009-03-16 17:47:00	140	17	3	12	2
1	2009-03-16 17:48:00	58	17	3	12	2
1	2009-03-16 17:49:00	0	17	3	12	2
1	2009-03-16 17:50:00	0	17	3	12	2
1	2009-03-16 17:51:00	23	17	3	12	2
1	2009-03-16 17:52:00	70	17	3	12	2
1	2009-03-16 17:53:00	23	17	3	12	2
1	2009-03-16 17:54:00	0	17	3	12	2
1	2009-03-16 17:55:00	0	17	3	12	2
1	2009-03-16 17:56:00	0	17	3	12	2
1	2009-03-16 17:57:00	151	17	3	12	2
1	2009-03-16 17:58:00	0	17	3	12	2
1	2009-03-16 17:59:00	0	17	3	12	2
1	2009-03-16 18:00:00	0	17	3	12	2
1	2009-03-16 18:01:00	0	18	4	12	2
1	2009-03-16 18:02:00	0	18	4	12	2
1	2009-03-16 18:03:00	0	18	4	12	2
1	2009-03-16 18:04:00	0	18	4	12	2
1	2009-03-16 18:05:00	0	18	4	12	2
1	2009-03-16 18:06:00	249	18	4	12	2
1	2009-03-16 18:07:00	0	18	4	12	2
1	2009-03-16 18:08:00	0	18	4	12	2
1	2009-03-16 18:09:00	0	18	4	12	2
1	2009-03-16 18:10:00	0	18	4	12	2
1	2009-03-16 18:11:00	0	18	4	12	2
1	2009-03-16 18:12:00	0	18	4	12	2
1	2009-03-16 18:13:00	12	18	4	12	2
1	2009-03-16 18:14:00	35	18	4	12	2
1	2009-03-16 18:15:00	277	18	4	12	2
1	2009-03-16 18:16:00	386	18	4	12	2
1	2009-03-16 18:17:00	726	18	4	12	2
1	2009-03-16 18:18:00	105	18	4	12	2
1	2009-03-16 18:19:00	435	18	4	12	2
1	2009-03-16 18:20:00	128	18	4	12	2
1	2009-03-16 18:21:00	140	18	4	12	2
1	2009-03-16 18:22:00	116	18	4	12	2
1	2009-03-16 18:23:00	128	18	4	12	2
1	2009-03-16 18:24:00	140	18	4	12	2
1	2009-03-16 18:25:00	81	18	4	12	2
1	2009-03-16 18:26:00	116	18	4	12	2
1	2009-03-16 18:27:00	47	18	4	12	2
1	2009-03-16 18:28:00	93	18	4	12	2
1	2009-03-16 18:29:00	70	18	4	12	2
1	2009-03-16 18:30:00	58	18	4	12	2
1	2009-03-16 18:31:00	70	18	4	12	2
1	2009-03-16 18:32:00	193	18	4	12	2
1	2009-03-16 18:33:00	179	18	4	12	2
1	2009-03-16 18:34:00	23	18	4	12	2
1	2009-03-16 18:35:00	0	18	4	12	2
1	2009-03-16 18:36:00	0	18	4	12	2
1	2009-03-16 18:37:00	207	18	4	12	2
1	2009-03-16 18:38:00	0	18	4	12	2
1	2009-03-16 18:39:00	0	18	4	12	2
1	2009-03-16 18:40:00	0	18	4	12	2
1	2009-03-16 18:41:00	58	18	4	12	2
1	2009-03-16 18:42:00	23	18	4	12	2
1	2009-03-16 18:43:00	58	18	4	12	2
1	2009-03-16 18:44:00	70	18	4	12	2
1	2009-03-16 18:45:00	35	18	4	12	2
1	2009-03-16 18:46:00	0	18	4	12	2
1	2009-03-16 18:47:00	105	18	4	12	2
1	2009-03-16 18:48:00	93	18	4	12	2
1	2009-03-16 18:49:00	12	18	4	12	2
1	2009-03-16 18:50:00	12	18	4	12	2
1	2009-03-16 18:51:00	116	18	4	12	2
1	2009-03-16 18:52:00	140	18	4	12	2
1	2009-03-16 18:53:00	23	18	4	12	2
1	2009-03-16 18:54:00	140	18	4	12	2
1	2009-03-16 18:55:00	81	18	4	12	2
1	2009-03-16 18:56:00	23	18	4	12	2
1	2009-03-16 18:57:00	35	18	4	12	2
1	2009-03-16 18:58:00	23	18	4	12	2
1	2009-03-16 18:59:00	35	18	4	12	2
1	2009-03-16 19:00:00	12	18	4	12	2
1	2009-03-16 19:01:00	23	19	4	12	2
1	2009-03-16 19:02:00	0	19	4	12	2
1	2009-03-16 19:03:00	12	19	4	12	2
1	2009-03-16 19:04:00	23	19	4	12	2
1	2009-03-16 19:05:00	12	19	4	12	2
1	2009-03-16 19:06:00	35	19	4	12	2
1	2009-03-16 19:07:00	47	19	4	12	2
1	2009-03-16 19:08:00	35	19	4	12	2
1	2009-03-16 19:09:00	47	19	4	12	2
1	2009-03-16 19:10:00	0	19	4	12	2
1	2009-03-16 19:11:00	0	19	4	12	2
1	2009-03-16 19:12:00	0	19	4	12	2
1	2009-03-16 19:13:00	0	19	4	12	2
1	2009-03-16 19:14:00	0	19	4	12	2
1	2009-03-16 19:15:00	0	19	4	12	2
1	2009-03-16 19:16:00	116	19	4	12	2
1	2009-03-16 19:17:00	249	19	4	12	2
1	2009-03-16 19:18:00	0	19	4	12	2
1	2009-03-16 19:19:00	93	19	4	12	2
1	2009-03-16 19:20:00	93	19	4	12	2
1	2009-03-16 19:21:00	93	19	4	12	2
1	2009-03-16 19:22:00	0	19	4	12	2
1	2009-03-16 19:23:00	0	19	4	12	2
1	2009-03-16 19:24:00	0	19	4	12	2
1	2009-03-16 19:25:00	370	19	4	12	2
1	2009-03-16 19:26:00	165	19	4	12	2
1	2009-03-16 19:27:00	179	19	4	12	2
1	2009-03-16 19:28:00	70	19	4	12	2
1	2009-03-16 19:29:00	151	19	4	12	2
1	2009-03-16 19:30:00	81	19	4	12	2
1	2009-03-16 19:31:00	70	19	4	12	2
1	2009-03-16 19:32:00	116	19	4	12	2
1	2009-03-16 19:33:00	249	19	4	12	2
1	2009-03-16 19:34:00	193	19	4	12	2
1	2009-03-16 19:35:00	507	19	4	12	2
1	2009-03-16 19:36:00	1147	19	4	12	2
1	2009-03-16 19:37:00	1552	19	4	12	2
1	2009-03-16 19:38:00	2553	19	4	12	2
1	2009-03-16 19:39:00	1387	19	4	12	2
1	2009-03-16 19:40:00	1264	19	4	12	2
1	2009-03-16 19:41:00	1622	19	4	12	2
1	2009-03-16 19:42:00	1119	19	4	12	2
1	2009-03-16 19:43:00	1147	19	4	12	2
1	2009-03-16 19:44:00	1387	19	4	12	2
1	2009-03-16 19:45:00	1964	19	4	12	2
1	2009-03-16 19:46:00	370	19	4	12	2
1	2009-03-16 19:47:00	1420	19	4	12	2
1	2009-03-16 19:48:00	47	19	4	12	2
1	2009-03-16 19:49:00	81	19	4	12	2
1	2009-03-16 19:50:00	1038	19	4	12	2
1	2009-03-16 19:51:00	105	19	4	12	2
1	2009-03-16 19:52:00	747	19	4	12	2
1	2009-03-16 19:53:00	936	19	4	12	2
1	2009-03-16 19:54:00	451	19	4	12	2
1	2009-03-16 19:55:00	35	19	4	12	2
1	2009-03-16 19:56:00	140	19	4	12	2
1	2009-03-16 19:57:00	70	19	4	12	2
1	2009-03-16 19:58:00	35	19	4	12	2
1	2009-03-16 19:59:00	47	19	4	12	2
1	2009-03-16 20:00:00	35	19	4	12	2
1	2009-03-16 20:01:00	58	20	4	12	2
1	2009-03-16 20:02:00	0	20	4	12	2
1	2009-03-16 20:03:00	0	20	4	12	2
1	2009-03-16 20:04:00	81	20	4	12	2
1	2009-03-16 20:05:00	81	20	4	12	2
1	2009-03-16 20:06:00	0	20	4	12	2
1	2009-03-16 20:07:00	0	20	4	12	2
1	2009-03-16 20:08:00	12	20	4	12	2
1	2009-03-16 20:09:00	0	20	4	12	2
1	2009-03-16 20:10:00	0	20	4	12	2
1	2009-03-16 20:11:00	0	20	4	12	2
1	2009-03-16 20:12:00	235	20	4	12	2
1	2009-03-16 20:13:00	128	20	4	12	2
1	2009-03-16 20:14:00	105	20	4	12	2
1	2009-03-16 20:15:00	105	20	4	12	2
1	2009-03-16 20:16:00	0	20	4	12	2
1	2009-03-16 20:17:00	0	20	4	12	2
1	2009-03-16 20:18:00	0	20	4	12	2
1	2009-03-16 20:19:00	47	20	4	12	2
1	2009-03-16 20:20:00	116	20	4	12	2
1	2009-03-16 20:21:00	35	20	4	12	2
1	2009-03-16 20:22:00	0	20	4	12	2
1	2009-03-16 20:23:00	0	20	4	12	2
1	2009-03-16 20:24:00	0	20	4	12	2
1	2009-03-16 20:25:00	0	20	4	12	2
1	2009-03-16 20:26:00	0	20	4	12	2
1	2009-03-16 20:27:00	0	20	4	12	2
1	2009-03-16 20:28:00	0	20	4	12	2
1	2009-03-16 20:29:00	23	20	4	12	2
1	2009-03-16 20:30:00	0	20	4	12	2
1	2009-03-16 20:31:00	0	20	4	12	2
1	2009-03-16 20:32:00	0	20	4	12	2
1	2009-03-16 20:33:00	0	20	4	12	2
1	2009-03-16 20:34:00	0	20	4	12	2
1	2009-03-16 20:35:00	0	20	4	12	2
1	2009-03-16 20:36:00	0	20	4	12	2
1	2009-03-16 20:37:00	0	20	4	12	2
1	2009-03-16 20:38:00	0	20	4	12	2
1	2009-03-16 20:39:00	0	20	4	12	2
1	2009-03-16 20:40:00	0	20	4	12	2
1	2009-03-16 20:41:00	0	20	4	12	2
1	2009-03-16 20:42:00	0	20	4	12	2
1	2009-03-16 20:43:00	0	20	4	12	2
1	2009-03-16 20:44:00	23	20	4	12	2
1	2009-03-16 20:45:00	23	20	4	12	2
1	2009-03-16 20:46:00	0	20	4	12	2
1	2009-03-16 20:47:00	0	20	4	12	2
1	2009-03-16 20:48:00	0	20	4	12	2
1	2009-03-16 20:49:00	0	20	4	12	2
1	2009-03-16 20:50:00	0	20	4	12	2
1	2009-03-16 20:51:00	0	20	4	12	2
1	2009-03-16 20:52:00	0	20	4	12	2
1	2009-03-16 20:53:00	0	20	4	12	2
1	2009-03-16 20:54:00	0	20	4	12	2
1	2009-03-16 20:55:00	0	20	4	12	2
1	2009-03-16 20:56:00	0	20	4	12	2
1	2009-03-16 20:57:00	0	20	4	12	2
1	2009-03-16 20:58:00	0	20	4	12	2
1	2009-03-16 20:59:00	0	20	4	12	2
1	2009-03-16 21:00:00	0	20	4	12	2
1	2009-03-16 21:01:00	0	21	4	12	2
1	2009-03-16 21:02:00	0	21	4	12	2
1	2009-03-16 21:03:00	0	21	4	12	2
1	2009-03-16 21:04:00	0	21	4	12	2
1	2009-03-16 21:05:00	0	21	4	12	2
1	2009-03-16 21:06:00	0	21	4	12	2
1	2009-03-16 21:07:00	0	21	4	12	2
1	2009-03-16 21:08:00	0	21	4	12	2
1	2009-03-16 21:09:00	0	21	4	12	2
1	2009-03-16 21:10:00	0	21	4	12	2
1	2009-03-16 21:11:00	0	21	4	12	2
1	2009-03-16 21:12:00	0	21	4	12	2
1	2009-03-16 21:13:00	0	21	4	12	2
1	2009-03-16 21:14:00	0	21	4	12	2
1	2009-03-16 21:15:00	0	21	4	12	2
1	2009-03-16 21:16:00	23	21	4	12	2
1	2009-03-16 21:17:00	0	21	4	12	2
1	2009-03-16 21:18:00	47	21	4	12	2
1	2009-03-16 21:19:00	0	21	4	12	2
1	2009-03-16 21:20:00	0	21	4	12	2
1	2009-03-16 21:21:00	0	21	4	12	2
1	2009-03-16 21:22:00	0	21	4	12	2
1	2009-03-16 21:23:00	0	21	4	12	2
1	2009-03-16 21:24:00	0	21	4	12	2
1	2009-03-16 21:25:00	0	21	4	12	2
1	2009-03-16 21:26:00	0	21	4	12	2
1	2009-03-16 21:27:00	0	21	4	12	2
1	2009-03-16 21:28:00	0	21	4	12	2
1	2009-03-16 21:29:00	0	21	4	12	2
1	2009-03-16 21:30:00	0	21	4	12	2
1	2009-03-16 21:31:00	0	21	4	12	2
1	2009-03-16 21:32:00	0	21	4	12	2
1	2009-03-16 21:33:00	0	21	4	12	2
1	2009-03-16 21:34:00	0	21	4	12	2
1	2009-03-16 21:35:00	0	21	4	12	2
1	2009-03-16 21:36:00	0	21	4	12	2
1	2009-03-16 21:37:00	0	21	4	12	2
1	2009-03-16 21:38:00	0	21	4	12	2
1	2009-03-16 21:39:00	0	21	4	12	2
1	2009-03-16 21:40:00	0	21	4	12	2
1	2009-03-16 21:41:00	0	21	4	12	2
1	2009-03-16 21:42:00	0	21	4	12	2
1	2009-03-16 21:43:00	0	21	4	12	2
1	2009-03-16 21:44:00	0	21	4	12	2
1	2009-03-16 21:45:00	0	21	4	12	2
1	2009-03-16 21:46:00	0	21	4	12	2
1	2009-03-16 21:47:00	12	21	4	12	2
1	2009-03-16 21:48:00	0	21	4	12	2
1	2009-03-16 21:49:00	0	21	4	12	2
1	2009-03-16 21:50:00	0	21	4	12	2
1	2009-03-16 21:51:00	0	21	4	12	2
1	2009-03-16 21:52:00	0	21	4	12	2
1	2009-03-16 21:53:00	0	21	4	12	2
1	2009-03-16 21:54:00	0	21	4	12	2
1	2009-03-16 21:55:00	0	21	4	12	2
1	2009-03-16 21:56:00	0	21	4	12	2
1	2009-03-16 21:57:00	0	21	4	12	2
1	2009-03-16 21:58:00	0	21	4	12	2
1	2009-03-16 21:59:00	0	21	4	12	2
1	2009-03-16 22:00:00	0	21	4	12	2
1	2009-03-16 22:01:00	0	22	4	12	2
1	2009-03-16 22:02:00	12	22	4	12	2
1	2009-03-16 22:03:00	116	22	4	12	2
1	2009-03-16 22:04:00	70	22	4	12	2
1	2009-03-16 22:05:00	291	22	4	12	2
1	2009-03-16 22:06:00	817	22	4	12	2
1	2009-03-16 22:07:00	936	22	4	12	2
1	2009-03-16 22:08:00	1657	22	4	12	2
1	2009-03-16 22:09:00	249	22	4	12	2
1	2009-03-16 22:10:00	105	22	4	12	2
1	2009-03-16 22:11:00	582	22	4	12	2
1	2009-03-16 22:12:00	151	22	4	12	2
1	2009-03-16 22:13:00	47	22	4	12	2
1	2009-03-16 22:14:00	81	22	4	12	2
1	2009-03-16 22:15:00	370	22	4	12	2
1	2009-03-16 22:16:00	179	22	4	12	2
1	2009-03-16 22:17:00	93	22	4	12	2
1	2009-03-16 22:18:00	70	22	4	12	2
1	2009-03-16 22:19:00	0	22	4	12	2
1	2009-03-16 22:20:00	0	22	4	12	2
1	2009-03-16 22:21:00	0	22	4	12	2
1	2009-03-16 22:22:00	0	22	4	12	2
1	2009-03-16 22:23:00	12	22	4	12	2
1	2009-03-16 22:24:00	0	22	4	12	2
1	2009-03-16 22:25:00	0	22	4	12	2
1	2009-03-16 22:26:00	12	22	4	12	2
1	2009-03-16 22:27:00	0	22	4	12	2
1	2009-03-16 22:28:00	0	22	4	12	2
1	2009-03-16 22:29:00	0	22	4	12	2
1	2009-03-16 22:30:00	0	22	4	12	2
1	2009-03-16 22:31:00	0	22	4	12	2
1	2009-03-16 22:32:00	35	22	4	12	2
1	2009-03-16 22:33:00	0	22	4	12	2
1	2009-03-16 22:34:00	0	22	4	12	2
1	2009-03-16 22:35:00	0	22	4	12	2
1	2009-03-16 22:36:00	0	22	4	12	2
1	2009-03-16 22:37:00	0	22	4	12	2
1	2009-03-16 22:38:00	0	22	4	12	2
1	2009-03-16 22:39:00	0	22	4	12	2
1	2009-03-16 22:40:00	0	22	4	12	2
1	2009-03-16 22:41:00	0	22	4	12	2
1	2009-03-16 22:42:00	0	22	4	12	2
1	2009-03-16 22:43:00	0	22	4	12	2
1	2009-03-16 22:44:00	0	22	4	12	2
1	2009-03-16 22:45:00	0	22	4	12	2
1	2009-03-16 22:46:00	0	22	4	12	2
1	2009-03-16 22:47:00	0	22	4	12	2
1	2009-03-16 22:48:00	0	22	4	12	2
1	2009-03-16 22:49:00	0	22	4	12	2
1	2009-03-16 22:50:00	0	22	4	12	2
1	2009-03-16 22:51:00	0	22	4	12	2
1	2009-03-16 22:52:00	0	22	4	12	2
1	2009-03-16 22:53:00	0	22	4	12	2
1	2009-03-16 22:54:00	0	22	4	12	2
1	2009-03-16 22:55:00	0	22	4	12	2
1	2009-03-16 22:56:00	0	22	4	12	2
1	2009-03-16 22:57:00	0	22	4	12	2
1	2009-03-16 22:58:00	0	22	4	12	2
1	2009-03-16 22:59:00	12	22	4	12	2
1	2009-03-16 23:00:00	0	22	4	12	2
1	2009-03-16 23:01:00	0	23	4	12	2
1	2009-03-16 23:02:00	0	23	4	12	2
1	2009-03-16 23:03:00	0	23	4	12	2
1	2009-03-16 23:04:00	0	23	4	12	2
1	2009-03-16 23:05:00	0	23	4	12	2
1	2009-03-16 23:06:00	0	23	4	12	2
1	2009-03-16 23:07:00	0	23	4	12	2
1	2009-03-16 23:08:00	0	23	4	12	2
1	2009-03-16 23:09:00	0	23	4	12	2
1	2009-03-16 23:10:00	0	23	4	12	2
1	2009-03-16 23:11:00	0	23	4	12	2
1	2009-03-16 23:12:00	0	23	4	12	2
1	2009-03-16 23:13:00	0	23	4	12	2
1	2009-03-16 23:14:00	0	23	4	12	2
1	2009-03-16 23:15:00	0	23	4	12	2
1	2009-03-16 23:16:00	0	23	4	12	2
1	2009-03-16 23:17:00	0	23	4	12	2
1	2009-03-16 23:18:00	0	23	4	12	2
1	2009-03-16 23:19:00	0	23	4	12	2
1	2009-03-16 23:20:00	0	23	4	12	2
1	2009-03-16 23:21:00	0	23	4	12	2
1	2009-03-16 23:22:00	0	23	4	12	2
1	2009-03-16 23:23:00	0	23	4	12	2
1	2009-03-16 23:24:00	0	23	4	12	2
1	2009-03-16 23:25:00	0	23	4	12	2
1	2009-03-16 23:26:00	0	23	4	12	2
1	2009-03-16 23:27:00	0	23	4	12	2
1	2009-03-16 23:28:00	0	23	4	12	2
1	2009-03-16 23:29:00	0	23	4	12	2
1	2009-03-16 23:30:00	0	23	4	12	2
1	2009-03-16 23:31:00	0	23	4	12	2
1	2009-03-16 23:32:00	0	23	4	12	2
1	2009-03-16 23:33:00	0	23	4	12	2
1	2009-03-16 23:34:00	0	23	4	12	2
1	2009-03-16 23:35:00	0	23	4	12	2
1	2009-03-16 23:36:00	0	23	4	12	2
1	2009-03-16 23:37:00	0	23	4	12	2
1	2009-03-16 23:38:00	0	23	4	12	2
1	2009-03-16 23:39:00	0	23	4	12	2
1	2009-03-16 23:40:00	0	23	4	12	2
1	2009-03-16 23:41:00	0	23	4	12	2
1	2009-03-16 23:42:00	0	23	4	12	2
1	2009-03-16 23:43:00	0	23	4	12	2
1	2009-03-16 23:44:00	0	23	4	12	2
1	2009-03-16 23:45:00	0	23	4	12	2
1	2009-03-16 23:46:00	0	23	4	12	2
1	2009-03-16 23:47:00	0	23	4	12	2
1	2009-03-16 23:48:00	0	23	4	12	2
1	2009-03-16 23:49:00	0	23	4	12	2
1	2009-03-16 23:50:00	0	23	4	12	2
1	2009-03-16 23:51:00	0	23	4	12	2
1	2009-03-16 23:52:00	0	23	4	12	2
1	2009-03-16 23:53:00	0	23	4	12	2
1	2009-03-16 23:54:00	0	23	4	12	2
1	2009-03-16 23:55:00	0	23	4	12	2
1	2009-03-16 23:56:00	0	23	4	12	2
1	2009-03-16 23:57:00	0	23	4	12	2
1	2009-03-16 23:58:00	0	23	4	12	2
1	2009-03-16 23:59:00	35	23	4	12	2
1	2009-03-17	0	23	4	12	2
1	2009-03-17 00:01:00	81	0	1	13	3
1	2009-03-17 00:02:00	0	0	1	13	3
1	2009-03-17 00:03:00	0	0	1	13	3
1	2009-03-17 00:04:00	0	0	1	13	3
1	2009-03-17 00:05:00	0	0	1	13	3
1	2009-03-17 00:06:00	0	0	1	13	3
1	2009-03-17 00:07:00	0	0	1	13	3
1	2009-03-17 00:08:00	0	0	1	13	3
1	2009-03-17 00:09:00	0	0	1	13	3
1	2009-03-17 00:10:00	0	0	1	13	3
1	2009-03-17 00:11:00	0	0	1	13	3
1	2009-03-17 00:12:00	0	0	1	13	3
1	2009-03-17 00:13:00	0	0	1	13	3
1	2009-03-17 00:14:00	0	0	1	13	3
1	2009-03-17 00:15:00	0	0	1	13	3
1	2009-03-17 00:16:00	0	0	1	13	3
1	2009-03-17 00:17:00	0	0	1	13	3
1	2009-03-17 00:18:00	0	0	1	13	3
1	2009-03-17 00:19:00	0	0	1	13	3
1	2009-03-17 00:20:00	0	0	1	13	3
1	2009-03-17 00:21:00	0	0	1	13	3
1	2009-03-17 00:22:00	0	0	1	13	3
1	2009-03-17 00:23:00	0	0	1	13	3
1	2009-03-17 00:24:00	0	0	1	13	3
1	2009-03-17 00:25:00	0	0	1	13	3
1	2009-03-17 00:26:00	0	0	1	13	3
1	2009-03-17 00:27:00	0	0	1	13	3
1	2009-03-17 00:28:00	0	0	1	13	3
1	2009-03-17 00:29:00	0	0	1	13	3
1	2009-03-17 00:30:00	0	0	1	13	3
1	2009-03-17 00:31:00	0	0	1	13	3
1	2009-03-17 00:32:00	0	0	1	13	3
1	2009-03-17 00:33:00	35	0	1	13	3
1	2009-03-17 00:34:00	0	0	1	13	3
1	2009-03-17 00:35:00	0	0	1	13	3
1	2009-03-17 00:36:00	0	0	1	13	3
1	2009-03-17 00:37:00	0	0	1	13	3
1	2009-03-17 00:38:00	0	0	1	13	3
1	2009-03-17 00:39:00	0	0	1	13	3
1	2009-03-17 00:40:00	0	0	1	13	3
1	2009-03-17 00:41:00	0	0	1	13	3
1	2009-03-17 00:42:00	0	0	1	13	3
1	2009-03-17 00:43:00	0	0	1	13	3
1	2009-03-17 00:44:00	0	0	1	13	3
1	2009-03-17 00:45:00	0	0	1	13	3
1	2009-03-17 00:46:00	0	0	1	13	3
1	2009-03-17 00:47:00	0	0	1	13	3
1	2009-03-17 00:48:00	0	0	1	13	3
1	2009-03-17 00:49:00	0	0	1	13	3
1	2009-03-17 00:50:00	0	0	1	13	3
1	2009-03-17 00:51:00	0	0	1	13	3
1	2009-03-17 00:52:00	0	0	1	13	3
1	2009-03-17 00:53:00	0	0	1	13	3
1	2009-03-17 00:54:00	0	0	1	13	3
1	2009-03-17 00:55:00	0	0	1	13	3
1	2009-03-17 00:56:00	0	0	1	13	3
1	2009-03-17 00:57:00	93	0	1	13	3
1	2009-03-17 00:58:00	47	0	1	13	3
1	2009-03-17 00:59:00	0	0	1	13	3
1	2009-03-17 01:00:00	0	0	1	13	3
1	2009-03-17 01:01:00	0	1	1	13	3
1	2009-03-17 01:02:00	0	1	1	13	3
1	2009-03-17 01:03:00	0	1	1	13	3
1	2009-03-17 01:04:00	0	1	1	13	3
1	2009-03-17 01:05:00	0	1	1	13	3
1	2009-03-17 01:06:00	0	1	1	13	3
1	2009-03-17 01:07:00	0	1	1	13	3
1	2009-03-17 01:08:00	0	1	1	13	3
1	2009-03-17 01:09:00	0	1	1	13	3
1	2009-03-17 01:10:00	0	1	1	13	3
1	2009-03-17 01:11:00	0	1	1	13	3
1	2009-03-17 01:12:00	0	1	1	13	3
1	2009-03-17 01:13:00	0	1	1	13	3
1	2009-03-17 01:14:00	0	1	1	13	3
1	2009-03-17 01:15:00	0	1	1	13	3
1	2009-03-17 01:16:00	0	1	1	13	3
1	2009-03-17 01:17:00	0	1	1	13	3
1	2009-03-17 01:18:00	0	1	1	13	3
1	2009-03-17 01:19:00	0	1	1	13	3
1	2009-03-17 01:20:00	0	1	1	13	3
1	2009-03-17 01:21:00	0	1	1	13	3
1	2009-03-17 01:22:00	0	1	1	13	3
1	2009-03-17 01:23:00	0	1	1	13	3
1	2009-03-17 01:24:00	0	1	1	13	3
1	2009-03-17 01:25:00	0	1	1	13	3
1	2009-03-17 01:26:00	12	1	1	13	3
1	2009-03-17 01:27:00	0	1	1	13	3
1	2009-03-17 01:28:00	0	1	1	13	3
1	2009-03-17 01:29:00	0	1	1	13	3
1	2009-03-17 01:30:00	0	1	1	13	3
1	2009-03-17 01:31:00	0	1	1	13	3
1	2009-03-17 01:32:00	0	1	1	13	3
1	2009-03-17 01:33:00	0	1	1	13	3
1	2009-03-17 01:34:00	0	1	1	13	3
1	2009-03-17 01:35:00	0	1	1	13	3
1	2009-03-17 01:36:00	0	1	1	13	3
1	2009-03-17 01:37:00	0	1	1	13	3
1	2009-03-17 01:38:00	0	1	1	13	3
1	2009-03-17 01:39:00	0	1	1	13	3
1	2009-03-17 01:40:00	0	1	1	13	3
1	2009-03-17 01:41:00	0	1	1	13	3
1	2009-03-17 01:42:00	0	1	1	13	3
1	2009-03-17 01:43:00	0	1	1	13	3
1	2009-03-17 01:44:00	0	1	1	13	3
1	2009-03-17 01:45:00	0	1	1	13	3
1	2009-03-17 01:46:00	0	1	1	13	3
1	2009-03-17 01:47:00	0	1	1	13	3
1	2009-03-17 01:48:00	0	1	1	13	3
1	2009-03-17 01:49:00	0	1	1	13	3
1	2009-03-17 01:50:00	0	1	1	13	3
1	2009-03-17 01:51:00	0	1	1	13	3
1	2009-03-17 01:52:00	0	1	1	13	3
1	2009-03-17 01:53:00	0	1	1	13	3
1	2009-03-17 01:54:00	0	1	1	13	3
1	2009-03-17 01:55:00	0	1	1	13	3
1	2009-03-17 01:56:00	0	1	1	13	3
1	2009-03-17 01:57:00	0	1	1	13	3
1	2009-03-17 01:58:00	35	1	1	13	3
1	2009-03-17 01:59:00	0	1	1	13	3
1	2009-03-17 02:00:00	0	1	1	13	3
1	2009-03-17 02:01:00	0	2	1	13	3
1	2009-03-17 02:02:00	0	2	1	13	3
1	2009-03-17 02:03:00	23	2	1	13	3
1	2009-03-17 02:04:00	0	2	1	13	3
1	2009-03-17 02:05:00	70	2	1	13	3
1	2009-03-17 02:06:00	0	2	1	13	3
1	2009-03-17 02:07:00	0	2	1	13	3
1	2009-03-17 02:08:00	0	2	1	13	3
1	2009-03-17 02:09:00	0	2	1	13	3
1	2009-03-17 02:10:00	0	2	1	13	3
1	2009-03-17 02:11:00	0	2	1	13	3
1	2009-03-17 02:12:00	0	2	1	13	3
1	2009-03-17 02:13:00	0	2	1	13	3
1	2009-03-17 02:14:00	0	2	1	13	3
1	2009-03-17 02:15:00	0	2	1	13	3
1	2009-03-17 02:16:00	0	2	1	13	3
1	2009-03-17 02:17:00	0	2	1	13	3
1	2009-03-17 02:18:00	0	2	1	13	3
1	2009-03-17 02:19:00	0	2	1	13	3
1	2009-03-17 02:20:00	0	2	1	13	3
1	2009-03-17 02:21:00	0	2	1	13	3
1	2009-03-17 02:22:00	0	2	1	13	3
1	2009-03-17 02:23:00	0	2	1	13	3
1	2009-03-17 02:24:00	0	2	1	13	3
1	2009-03-17 02:25:00	0	2	1	13	3
1	2009-03-17 02:26:00	0	2	1	13	3
1	2009-03-17 02:27:00	0	2	1	13	3
1	2009-03-17 02:28:00	0	2	1	13	3
1	2009-03-17 02:29:00	0	2	1	13	3
1	2009-03-17 02:30:00	0	2	1	13	3
1	2009-03-17 02:31:00	0	2	1	13	3
1	2009-03-17 02:32:00	0	2	1	13	3
1	2009-03-17 02:33:00	0	2	1	13	3
1	2009-03-17 02:34:00	0	2	1	13	3
1	2009-03-17 02:35:00	0	2	1	13	3
1	2009-03-17 02:36:00	0	2	1	13	3
1	2009-03-17 02:37:00	0	2	1	13	3
1	2009-03-17 02:38:00	0	2	1	13	3
1	2009-03-17 02:39:00	0	2	1	13	3
1	2009-03-17 02:40:00	0	2	1	13	3
1	2009-03-17 02:41:00	0	2	1	13	3
1	2009-03-17 02:42:00	0	2	1	13	3
1	2009-03-17 02:43:00	0	2	1	13	3
1	2009-03-17 02:44:00	0	2	1	13	3
1	2009-03-17 02:45:00	0	2	1	13	3
1	2009-03-17 02:46:00	0	2	1	13	3
1	2009-03-17 02:47:00	0	2	1	13	3
1	2009-03-17 02:48:00	0	2	1	13	3
1	2009-03-17 02:49:00	0	2	1	13	3
1	2009-03-17 02:50:00	0	2	1	13	3
1	2009-03-17 02:51:00	0	2	1	13	3
1	2009-03-17 02:52:00	0	2	1	13	3
1	2009-03-17 02:53:00	0	2	1	13	3
1	2009-03-17 02:54:00	0	2	1	13	3
1	2009-03-17 02:55:00	0	2	1	13	3
1	2009-03-17 02:56:00	0	2	1	13	3
1	2009-03-17 02:57:00	0	2	1	13	3
1	2009-03-17 02:58:00	0	2	1	13	3
1	2009-03-17 02:59:00	0	2	1	13	3
1	2009-03-17 03:00:00	0	2	1	13	3
1	2009-03-17 03:01:00	0	3	1	13	3
1	2009-03-17 03:02:00	0	3	1	13	3
1	2009-03-17 03:03:00	0	3	1	13	3
1	2009-03-17 03:04:00	0	3	1	13	3
1	2009-03-17 03:05:00	0	3	1	13	3
1	2009-03-17 03:06:00	0	3	1	13	3
1	2009-03-17 03:07:00	0	3	1	13	3
1	2009-03-17 03:08:00	23	3	1	13	3
1	2009-03-17 03:09:00	0	3	1	13	3
1	2009-03-17 03:10:00	0	3	1	13	3
1	2009-03-17 03:11:00	0	3	1	13	3
1	2009-03-17 03:12:00	0	3	1	13	3
1	2009-03-17 03:13:00	0	3	1	13	3
1	2009-03-17 03:14:00	0	3	1	13	3
1	2009-03-17 03:15:00	0	3	1	13	3
1	2009-03-17 03:16:00	93	3	1	13	3
1	2009-03-17 03:17:00	12	3	1	13	3
1	2009-03-17 03:18:00	0	3	1	13	3
1	2009-03-17 03:19:00	0	3	1	13	3
1	2009-03-17 03:20:00	0	3	1	13	3
1	2009-03-17 03:21:00	0	3	1	13	3
1	2009-03-17 03:22:00	0	3	1	13	3
1	2009-03-17 03:23:00	0	3	1	13	3
1	2009-03-17 03:24:00	0	3	1	13	3
1	2009-03-17 03:25:00	0	3	1	13	3
1	2009-03-17 03:26:00	0	3	1	13	3
1	2009-03-17 03:27:00	0	3	1	13	3
1	2009-03-17 03:28:00	0	3	1	13	3
1	2009-03-17 03:29:00	0	3	1	13	3
1	2009-03-17 03:30:00	0	3	1	13	3
1	2009-03-17 03:31:00	0	3	1	13	3
1	2009-03-17 03:32:00	0	3	1	13	3
1	2009-03-17 03:33:00	0	3	1	13	3
1	2009-03-17 03:34:00	0	3	1	13	3
1	2009-03-17 03:35:00	0	3	1	13	3
1	2009-03-17 03:36:00	0	3	1	13	3
1	2009-03-17 03:37:00	0	3	1	13	3
1	2009-03-17 03:38:00	35	3	1	13	3
1	2009-03-17 03:39:00	0	3	1	13	3
1	2009-03-17 03:40:00	0	3	1	13	3
1	2009-03-17 03:41:00	0	3	1	13	3
1	2009-03-17 03:42:00	0	3	1	13	3
1	2009-03-17 03:43:00	0	3	1	13	3
1	2009-03-17 03:44:00	0	3	1	13	3
1	2009-03-17 03:45:00	0	3	1	13	3
1	2009-03-17 03:46:00	0	3	1	13	3
1	2009-03-17 03:47:00	0	3	1	13	3
1	2009-03-17 03:48:00	0	3	1	13	3
1	2009-03-17 03:49:00	0	3	1	13	3
1	2009-03-17 03:50:00	0	3	1	13	3
1	2009-03-17 03:51:00	0	3	1	13	3
1	2009-03-17 03:52:00	0	3	1	13	3
1	2009-03-17 03:53:00	12	3	1	13	3
1	2009-03-17 03:54:00	0	3	1	13	3
1	2009-03-17 03:55:00	0	3	1	13	3
1	2009-03-17 03:56:00	0	3	1	13	3
1	2009-03-17 03:57:00	0	3	1	13	3
1	2009-03-17 03:58:00	0	3	1	13	3
1	2009-03-17 03:59:00	0	3	1	13	3
1	2009-03-17 04:00:00	0	3	1	13	3
1	2009-03-17 04:01:00	0	4	1	13	3
1	2009-03-17 04:02:00	0	4	1	13	3
1	2009-03-17 04:03:00	0	4	1	13	3
1	2009-03-17 04:04:00	0	4	1	13	3
1	2009-03-17 04:05:00	0	4	1	13	3
1	2009-03-17 04:06:00	0	4	1	13	3
1	2009-03-17 04:07:00	0	4	1	13	3
1	2009-03-17 04:08:00	0	4	1	13	3
1	2009-03-17 04:09:00	0	4	1	13	3
1	2009-03-17 04:10:00	0	4	1	13	3
1	2009-03-17 04:11:00	0	4	1	13	3
1	2009-03-17 04:12:00	0	4	1	13	3
1	2009-03-17 04:13:00	0	4	1	13	3
1	2009-03-17 04:14:00	0	4	1	13	3
1	2009-03-17 04:15:00	0	4	1	13	3
1	2009-03-17 04:16:00	0	4	1	13	3
1	2009-03-17 04:17:00	0	4	1	13	3
1	2009-03-17 04:18:00	0	4	1	13	3
1	2009-03-17 04:19:00	0	4	1	13	3
1	2009-03-17 04:20:00	0	4	1	13	3
1	2009-03-17 04:21:00	0	4	1	13	3
1	2009-03-17 04:22:00	0	4	1	13	3
1	2009-03-17 04:23:00	0	4	1	13	3
1	2009-03-17 04:24:00	0	4	1	13	3
1	2009-03-17 04:25:00	0	4	1	13	3
1	2009-03-17 04:26:00	0	4	1	13	3
1	2009-03-17 04:27:00	23	4	1	13	3
1	2009-03-17 04:28:00	0	4	1	13	3
1	2009-03-17 04:29:00	0	4	1	13	3
1	2009-03-17 04:30:00	0	4	1	13	3
1	2009-03-17 04:31:00	0	4	1	13	3
1	2009-03-17 04:32:00	0	4	1	13	3
1	2009-03-17 04:33:00	0	4	1	13	3
1	2009-03-17 04:34:00	0	4	1	13	3
1	2009-03-17 04:35:00	0	4	1	13	3
1	2009-03-17 04:36:00	0	4	1	13	3
1	2009-03-17 04:37:00	0	4	1	13	3
1	2009-03-17 04:38:00	0	4	1	13	3
1	2009-03-17 04:39:00	0	4	1	13	3
1	2009-03-17 04:40:00	0	4	1	13	3
1	2009-03-17 04:41:00	70	4	1	13	3
1	2009-03-17 04:42:00	0	4	1	13	3
1	2009-03-17 04:43:00	0	4	1	13	3
1	2009-03-17 04:44:00	0	4	1	13	3
1	2009-03-17 04:45:00	0	4	1	13	3
1	2009-03-17 04:46:00	0	4	1	13	3
1	2009-03-17 04:47:00	0	4	1	13	3
1	2009-03-17 04:48:00	0	4	1	13	3
1	2009-03-17 04:49:00	0	4	1	13	3
1	2009-03-17 04:50:00	0	4	1	13	3
1	2009-03-17 04:51:00	0	4	1	13	3
1	2009-03-17 04:52:00	0	4	1	13	3
1	2009-03-17 04:53:00	0	4	1	13	3
1	2009-03-17 04:54:00	0	4	1	13	3
1	2009-03-17 04:55:00	0	4	1	13	3
1	2009-03-17 04:56:00	0	4	1	13	3
1	2009-03-17 04:57:00	0	4	1	13	3
1	2009-03-17 04:58:00	0	4	1	13	3
1	2009-03-17 04:59:00	0	4	1	13	3
1	2009-03-17 05:00:00	0	4	1	13	3
1	2009-03-17 05:01:00	0	5	1	13	3
1	2009-03-17 05:02:00	0	5	1	13	3
1	2009-03-17 05:03:00	0	5	1	13	3
1	2009-03-17 05:04:00	0	5	1	13	3
1	2009-03-17 05:05:00	0	5	1	13	3
1	2009-03-17 05:06:00	0	5	1	13	3
1	2009-03-17 05:07:00	0	5	1	13	3
1	2009-03-17 05:08:00	0	5	1	13	3
1	2009-03-17 05:09:00	0	5	1	13	3
1	2009-03-17 05:10:00	0	5	1	13	3
1	2009-03-17 05:11:00	0	5	1	13	3
1	2009-03-17 05:12:00	0	5	1	13	3
1	2009-03-17 05:13:00	0	5	1	13	3
1	2009-03-17 05:14:00	0	5	1	13	3
1	2009-03-17 05:15:00	0	5	1	13	3
1	2009-03-17 05:16:00	0	5	1	13	3
1	2009-03-17 05:17:00	0	5	1	13	3
1	2009-03-17 05:18:00	0	5	1	13	3
1	2009-03-17 05:19:00	0	5	1	13	3
1	2009-03-17 05:20:00	0	5	1	13	3
1	2009-03-17 05:21:00	0	5	1	13	3
1	2009-03-17 05:22:00	0	5	1	13	3
1	2009-03-17 05:23:00	0	5	1	13	3
1	2009-03-17 05:24:00	0	5	1	13	3
1	2009-03-17 05:25:00	0	5	1	13	3
1	2009-03-17 05:26:00	0	5	1	13	3
1	2009-03-17 05:27:00	0	5	1	13	3
1	2009-03-17 05:28:00	0	5	1	13	3
1	2009-03-17 05:29:00	0	5	1	13	3
1	2009-03-17 05:30:00	0	5	1	13	3
1	2009-03-17 05:31:00	0	5	1	13	3
1	2009-03-17 05:32:00	0	5	1	13	3
1	2009-03-17 05:33:00	0	5	1	13	3
1	2009-03-17 05:34:00	0	5	1	13	3
1	2009-03-17 05:35:00	0	5	1	13	3
1	2009-03-17 05:36:00	35	5	1	13	3
1	2009-03-17 05:37:00	0	5	1	13	3
1	2009-03-17 05:38:00	0	5	1	13	3
1	2009-03-17 05:39:00	0	5	1	13	3
1	2009-03-17 05:40:00	0	5	1	13	3
1	2009-03-17 05:41:00	0	5	1	13	3
1	2009-03-17 05:42:00	0	5	1	13	3
1	2009-03-17 05:43:00	0	5	1	13	3
1	2009-03-17 05:44:00	12	5	1	13	3
1	2009-03-17 05:45:00	105	5	1	13	3
1	2009-03-17 05:46:00	35	5	1	13	3
1	2009-03-17 05:47:00	0	5	1	13	3
1	2009-03-17 05:48:00	0	5	1	13	3
1	2009-03-17 05:49:00	0	5	1	13	3
1	2009-03-17 05:50:00	0	5	1	13	3
1	2009-03-17 05:51:00	0	5	1	13	3
1	2009-03-17 05:52:00	0	5	1	13	3
1	2009-03-17 05:53:00	0	5	1	13	3
1	2009-03-17 05:54:00	0	5	1	13	3
1	2009-03-17 05:55:00	0	5	1	13	3
1	2009-03-17 05:56:00	0	5	1	13	3
1	2009-03-17 05:57:00	12	5	1	13	3
1	2009-03-17 05:58:00	0	5	1	13	3
1	2009-03-17 05:59:00	0	5	1	13	3
1	2009-03-17 06:00:00	0	5	1	13	3
1	2009-03-17 06:01:00	0	6	2	13	3
1	2009-03-17 06:02:00	0	6	2	13	3
1	2009-03-17 06:03:00	0	6	2	13	3
1	2009-03-17 06:04:00	0	6	2	13	3
1	2009-03-17 06:05:00	12	6	2	13	3
1	2009-03-17 06:06:00	70	6	2	13	3
1	2009-03-17 06:07:00	0	6	2	13	3
1	2009-03-17 06:08:00	0	6	2	13	3
1	2009-03-17 06:09:00	0	6	2	13	3
1	2009-03-17 06:10:00	12	6	2	13	3
1	2009-03-17 06:11:00	0	6	2	13	3
1	2009-03-17 06:12:00	0	6	2	13	3
1	2009-03-17 06:13:00	0	6	2	13	3
1	2009-03-17 06:14:00	0	6	2	13	3
1	2009-03-17 06:15:00	0	6	2	13	3
1	2009-03-17 06:16:00	0	6	2	13	3
1	2009-03-17 06:17:00	70	6	2	13	3
1	2009-03-17 06:18:00	0	6	2	13	3
1	2009-03-17 06:19:00	0	6	2	13	3
1	2009-03-17 06:20:00	0	6	2	13	3
1	2009-03-17 06:21:00	0	6	2	13	3
1	2009-03-17 06:22:00	165	6	2	13	3
1	2009-03-17 06:23:00	35	6	2	13	3
1	2009-03-17 06:24:00	0	6	2	13	3
1	2009-03-17 06:25:00	0	6	2	13	3
1	2009-03-17 06:26:00	0	6	2	13	3
1	2009-03-17 06:27:00	0	6	2	13	3
1	2009-03-17 06:28:00	0	6	2	13	3
1	2009-03-17 06:29:00	0	6	2	13	3
1	2009-03-17 06:30:00	0	6	2	13	3
1	2009-03-17 06:31:00	0	6	2	13	3
1	2009-03-17 06:32:00	0	6	2	13	3
1	2009-03-17 06:33:00	0	6	2	13	3
1	2009-03-17 06:34:00	0	6	2	13	3
1	2009-03-17 06:35:00	0	6	2	13	3
1	2009-03-17 06:36:00	23	6	2	13	3
1	2009-03-17 06:37:00	0	6	2	13	3
1	2009-03-17 06:38:00	0	6	2	13	3
1	2009-03-17 06:39:00	0	6	2	13	3
1	2009-03-17 06:40:00	0	6	2	13	3
1	2009-03-17 06:41:00	0	6	2	13	3
1	2009-03-17 06:42:00	0	6	2	13	3
1	2009-03-17 06:43:00	526	6	2	13	3
1	2009-03-17 06:44:00	470	6	2	13	3
1	2009-03-17 06:45:00	277	6	2	13	3
1	2009-03-17 06:46:00	12	6	2	13	3
1	2009-03-17 06:47:00	207	6	2	13	3
1	2009-03-17 06:48:00	887	6	2	13	3
1	2009-03-17 06:49:00	1452	6	2	13	3
1	2009-03-17 06:50:00	563	6	2	13	3
1	2009-03-17 06:51:00	1731	6	2	13	3
1	2009-03-17 06:52:00	1587	6	2	13	3
1	2009-03-17 06:53:00	2006	6	2	13	3
1	2009-03-17 06:54:00	1324	6	2	13	3
1	2009-03-17 06:55:00	2455	6	2	13	3
1	2009-03-17 06:56:00	1294	6	2	13	3
1	2009-03-17 06:57:00	1587	6	2	13	3
1	2009-03-17 06:58:00	770	6	2	13	3
1	2009-03-17 06:59:00	165	6	2	13	3
1	2009-03-17 07:00:00	81	6	2	13	3
1	2009-03-17 07:01:00	128	7	2	13	3
1	2009-03-17 07:02:00	58	7	2	13	3
1	2009-03-17 07:03:00	140	7	2	13	3
1	2009-03-17 07:04:00	70	7	2	13	3
1	2009-03-17 07:05:00	23	7	2	13	3
1	2009-03-17 07:06:00	207	7	2	13	3
1	2009-03-17 07:07:00	0	7	2	13	3
1	2009-03-17 07:08:00	0	7	2	13	3
1	2009-03-17 07:09:00	0	7	2	13	3
1	2009-03-17 07:10:00	151	7	2	13	3
1	2009-03-17 07:11:00	35	7	2	13	3
1	2009-03-17 07:12:00	0	7	2	13	3
1	2009-03-17 07:13:00	12	7	2	13	3
1	2009-03-17 07:14:00	0	7	2	13	3
1	2009-03-17 07:15:00	23	7	2	13	3
1	2009-03-17 07:16:00	165	7	2	13	3
1	2009-03-17 07:17:00	35	7	2	13	3
1	2009-03-17 07:18:00	0	7	2	13	3
1	2009-03-17 07:19:00	221	7	2	13	3
1	2009-03-17 07:20:00	93	7	2	13	3
1	2009-03-17 07:21:00	235	7	2	13	3
1	2009-03-17 07:22:00	470	7	2	13	3
1	2009-03-17 07:23:00	0	7	2	13	3
1	2009-03-17 07:24:00	0	7	2	13	3
1	2009-03-17 07:25:00	0	7	2	13	3
1	2009-03-17 07:26:00	105	7	2	13	3
1	2009-03-17 07:27:00	207	7	2	13	3
1	2009-03-17 07:28:00	221	7	2	13	3
1	2009-03-17 07:29:00	0	7	2	13	3
1	2009-03-17 07:30:00	0	7	2	13	3
1	2009-03-17 07:31:00	0	7	2	13	3
1	2009-03-17 07:32:00	0	7	2	13	3
1	2009-03-17 07:33:00	0	7	2	13	3
1	2009-03-17 07:34:00	0	7	2	13	3
1	2009-03-17 07:35:00	0	7	2	13	3
1	2009-03-17 07:36:00	0	7	2	13	3
1	2009-03-17 07:37:00	93	7	2	13	3
1	2009-03-17 07:38:00	105	7	2	13	3
1	2009-03-17 07:39:00	0	7	2	13	3
1	2009-03-17 07:40:00	0	7	2	13	3
1	2009-03-17 07:41:00	0	7	2	13	3
1	2009-03-17 07:42:00	128	7	2	13	3
1	2009-03-17 07:43:00	0	7	2	13	3
1	2009-03-17 07:44:00	0	7	2	13	3
1	2009-03-17 07:45:00	0	7	2	13	3
1	2009-03-17 07:46:00	0	7	2	13	3
1	2009-03-17 07:47:00	0	7	2	13	3
1	2009-03-17 07:48:00	0	7	2	13	3
1	2009-03-17 07:49:00	58	7	2	13	3
1	2009-03-17 07:50:00	305	7	2	13	3
1	2009-03-17 07:51:00	23	7	2	13	3
1	2009-03-17 07:52:00	58	7	2	13	3
1	2009-03-17 07:53:00	81	7	2	13	3
1	2009-03-17 07:54:00	35	7	2	13	3
1	2009-03-17 07:55:00	305	7	2	13	3
1	2009-03-17 07:56:00	58	7	2	13	3
1	2009-03-17 07:57:00	70	7	2	13	3
1	2009-03-17 07:58:00	116	7	2	13	3
1	2009-03-17 07:59:00	221	7	2	13	3
1	2009-03-17 08:00:00	0	7	2	13	3
1	2009-03-17 08:01:00	12	8	2	13	3
1	2009-03-17 08:02:00	23	8	2	13	3
1	2009-03-17 08:03:00	0	8	2	13	3
1	2009-03-17 08:04:00	0	8	2	13	3
1	2009-03-17 08:05:00	0	8	2	13	3
1	2009-03-17 08:06:00	0	8	2	13	3
1	2009-03-17 08:07:00	23	8	2	13	3
1	2009-03-17 08:08:00	0	8	2	13	3
1	2009-03-17 08:09:00	0	8	2	13	3
1	2009-03-17 08:10:00	0	8	2	13	3
1	2009-03-17 08:11:00	0	8	2	13	3
1	2009-03-17 08:12:00	0	8	2	13	3
1	2009-03-17 08:13:00	23	8	2	13	3
1	2009-03-17 08:14:00	0	8	2	13	3
1	2009-03-17 08:15:00	0	8	2	13	3
1	2009-03-17 08:16:00	0	8	2	13	3
1	2009-03-17 08:17:00	0	8	2	13	3
1	2009-03-17 08:18:00	0	8	2	13	3
1	2009-03-17 08:19:00	12	8	2	13	3
1	2009-03-17 08:20:00	0	8	2	13	3
1	2009-03-17 08:21:00	58	8	2	13	3
1	2009-03-17 08:22:00	249	8	2	13	3
1	2009-03-17 08:23:00	23	8	2	13	3
1	2009-03-17 08:24:00	0	8	2	13	3
1	2009-03-17 08:25:00	0	8	2	13	3
1	2009-03-17 08:26:00	0	8	2	13	3
1	2009-03-17 08:27:00	0	8	2	13	3
1	2009-03-17 08:28:00	0	8	2	13	3
1	2009-03-17 08:29:00	0	8	2	13	3
1	2009-03-17 08:30:00	0	8	2	13	3
1	2009-03-17 08:31:00	403	8	2	13	3
1	2009-03-17 08:32:00	235	8	2	13	3
1	2009-03-17 08:33:00	0	8	2	13	3
1	2009-03-17 08:34:00	0	8	2	13	3
1	2009-03-17 08:35:00	0	8	2	13	3
1	2009-03-17 08:36:00	0	8	2	13	3
1	2009-03-17 08:37:00	0	8	2	13	3
1	2009-03-17 08:38:00	0	8	2	13	3
1	2009-03-17 08:39:00	0	8	2	13	3
1	2009-03-17 08:40:00	0	8	2	13	3
1	2009-03-17 08:41:00	0	8	2	13	3
1	2009-03-17 08:42:00	0	8	2	13	3
1	2009-03-17 08:43:00	0	8	2	13	3
1	2009-03-17 08:44:00	0	8	2	13	3
1	2009-03-17 08:45:00	0	8	2	13	3
1	2009-03-17 08:46:00	0	8	2	13	3
1	2009-03-17 08:47:00	0	8	2	13	3
1	2009-03-17 08:48:00	0	8	2	13	3
1	2009-03-17 08:49:00	0	8	2	13	3
1	2009-03-17 08:50:00	0	8	2	13	3
1	2009-03-17 08:51:00	0	8	2	13	3
1	2009-03-17 08:52:00	0	8	2	13	3
1	2009-03-17 08:53:00	0	8	2	13	3
1	2009-03-17 08:54:00	0	8	2	13	3
1	2009-03-17 08:55:00	0	8	2	13	3
1	2009-03-17 08:56:00	0	8	2	13	3
1	2009-03-17 08:57:00	0	8	2	13	3
1	2009-03-17 08:58:00	0	8	2	13	3
1	2009-03-17 08:59:00	0	8	2	13	3
1	2009-03-17 09:00:00	0	8	2	13	3
1	2009-03-17 09:01:00	0	9	2	13	3
1	2009-03-17 09:02:00	0	9	2	13	3
1	2009-03-17 09:03:00	0	9	2	13	3
1	2009-03-17 09:04:00	0	9	2	13	3
1	2009-03-17 09:05:00	0	9	2	13	3
1	2009-03-17 09:06:00	23	9	2	13	3
1	2009-03-17 09:07:00	0	9	2	13	3
1	2009-03-17 09:08:00	0	9	2	13	3
1	2009-03-17 09:09:00	0	9	2	13	3
1	2009-03-17 09:10:00	0	9	2	13	3
1	2009-03-17 09:11:00	0	9	2	13	3
1	2009-03-17 09:12:00	0	9	2	13	3
1	2009-03-17 09:13:00	0	9	2	13	3
1	2009-03-17 09:14:00	0	9	2	13	3
1	2009-03-17 09:15:00	0	9	2	13	3
1	2009-03-17 09:16:00	0	9	2	13	3
1	2009-03-17 09:17:00	0	9	2	13	3
1	2009-03-17 09:18:00	0	9	2	13	3
1	2009-03-17 09:19:00	0	9	2	13	3
1	2009-03-17 09:20:00	0	9	2	13	3
1	2009-03-17 09:21:00	0	9	2	13	3
1	2009-03-17 09:22:00	0	9	2	13	3
1	2009-03-17 09:23:00	0	9	2	13	3
1	2009-03-17 09:24:00	0	9	2	13	3
1	2009-03-17 09:25:00	0	9	2	13	3
1	2009-03-17 09:26:00	0	9	2	13	3
1	2009-03-17 09:27:00	0	9	2	13	3
1	2009-03-17 09:28:00	0	9	2	13	3
1	2009-03-17 09:29:00	0	9	2	13	3
1	2009-03-17 09:30:00	0	9	2	13	3
1	2009-03-17 09:31:00	0	9	2	13	3
1	2009-03-17 09:32:00	0	9	2	13	3
1	2009-03-17 09:33:00	0	9	2	13	3
1	2009-03-17 09:34:00	0	9	2	13	3
1	2009-03-17 09:35:00	12	9	2	13	3
1	2009-03-17 09:36:00	0	9	2	13	3
1	2009-03-17 09:37:00	0	9	2	13	3
1	2009-03-17 09:38:00	0	9	2	13	3
1	2009-03-17 09:39:00	0	9	2	13	3
1	2009-03-17 09:40:00	0	9	2	13	3
1	2009-03-17 09:41:00	0	9	2	13	3
1	2009-03-17 09:42:00	0	9	2	13	3
1	2009-03-17 09:43:00	0	9	2	13	3
1	2009-03-17 09:44:00	705	9	2	13	3
1	2009-03-17 09:45:00	165	9	2	13	3
1	2009-03-17 09:46:00	0	9	2	13	3
1	2009-03-17 09:47:00	0	9	2	13	3
1	2009-03-17 09:48:00	0	9	2	13	3
1	2009-03-17 09:49:00	0	9	2	13	3
1	2009-03-17 09:50:00	0	9	2	13	3
1	2009-03-17 09:51:00	0	9	2	13	3
1	2009-03-17 09:52:00	0	9	2	13	3
1	2009-03-17 09:53:00	0	9	2	13	3
1	2009-03-17 09:54:00	0	9	2	13	3
1	2009-03-17 09:55:00	0	9	2	13	3
1	2009-03-17 09:56:00	0	9	2	13	3
1	2009-03-17 09:57:00	0	9	2	13	3
1	2009-03-17 09:58:00	0	9	2	13	3
1	2009-03-17 09:59:00	0	9	2	13	3
1	2009-03-17 10:00:00	526	9	2	13	3
1	2009-03-17 10:01:00	23	10	2	13	3
1	2009-03-17 10:02:00	207	10	2	13	3
1	2009-03-17 10:03:00	0	10	2	13	3
1	2009-03-17 10:04:00	0	10	2	13	3
1	2009-03-17 10:05:00	0	10	2	13	3
1	2009-03-17 10:06:00	0	10	2	13	3
1	2009-03-17 10:07:00	0	10	2	13	3
1	2009-03-17 10:08:00	0	10	2	13	3
1	2009-03-17 10:09:00	0	10	2	13	3
1	2009-03-17 10:10:00	0	10	2	13	3
1	2009-03-17 10:11:00	0	10	2	13	3
1	2009-03-17 10:12:00	0	10	2	13	3
1	2009-03-17 10:13:00	0	10	2	13	3
1	2009-03-17 10:14:00	0	10	2	13	3
1	2009-03-17 10:15:00	221	10	2	13	3
1	2009-03-17 10:16:00	0	10	2	13	3
1	2009-03-17 10:17:00	0	10	2	13	3
1	2009-03-17 10:18:00	0	10	2	13	3
1	2009-03-17 10:19:00	0	10	2	13	3
1	2009-03-17 10:20:00	0	10	2	13	3
1	2009-03-17 10:21:00	0	10	2	13	3
1	2009-03-17 10:22:00	0	10	2	13	3
1	2009-03-17 10:23:00	0	10	2	13	3
1	2009-03-17 10:24:00	0	10	2	13	3
1	2009-03-17 10:25:00	0	10	2	13	3
1	2009-03-17 10:26:00	0	10	2	13	3
1	2009-03-17 10:27:00	0	10	2	13	3
1	2009-03-17 10:28:00	0	10	2	13	3
1	2009-03-17 10:29:00	0	10	2	13	3
1	2009-03-17 10:30:00	0	10	2	13	3
1	2009-03-17 10:31:00	0	10	2	13	3
1	2009-03-17 10:32:00	0	10	2	13	3
1	2009-03-17 10:33:00	0	10	2	13	3
1	2009-03-17 10:34:00	0	10	2	13	3
1	2009-03-17 10:35:00	0	10	2	13	3
1	2009-03-17 10:36:00	0	10	2	13	3
1	2009-03-17 10:37:00	0	10	2	13	3
1	2009-03-17 10:38:00	0	10	2	13	3
1	2009-03-17 10:39:00	0	10	2	13	3
1	2009-03-17 10:40:00	0	10	2	13	3
1	2009-03-17 10:41:00	0	10	2	13	3
1	2009-03-17 10:42:00	0	10	2	13	3
1	2009-03-17 10:43:00	0	10	2	13	3
1	2009-03-17 10:44:00	0	10	2	13	3
1	2009-03-17 10:45:00	0	10	2	13	3
1	2009-03-17 10:46:00	0	10	2	13	3
1	2009-03-17 10:47:00	0	10	2	13	3
1	2009-03-17 10:48:00	0	10	2	13	3
1	2009-03-17 10:49:00	0	10	2	13	3
1	2009-03-17 10:50:00	12	10	2	13	3
1	2009-03-17 10:51:00	0	10	2	13	3
1	2009-03-17 10:52:00	0	10	2	13	3
1	2009-03-17 10:53:00	0	10	2	13	3
1	2009-03-17 10:54:00	70	10	2	13	3
1	2009-03-17 10:55:00	0	10	2	13	3
1	2009-03-17 10:56:00	12	10	2	13	3
1	2009-03-17 10:57:00	0	10	2	13	3
1	2009-03-17 10:58:00	0	10	2	13	3
1	2009-03-17 10:59:00	0	10	2	13	3
1	2009-03-17 11:00:00	193	10	2	13	3
1	2009-03-17 11:01:00	435	11	2	13	3
1	2009-03-17 11:02:00	81	11	2	13	3
1	2009-03-17 11:03:00	47	11	2	13	3
1	2009-03-17 11:04:00	105	11	2	13	3
1	2009-03-17 11:05:00	105	11	2	13	3
1	2009-03-17 11:06:00	507	11	2	13	3
1	2009-03-17 11:07:00	817	11	2	13	3
1	2009-03-17 11:08:00	936	11	2	13	3
1	2009-03-17 11:09:00	1147	11	2	13	3
1	2009-03-17 11:10:00	0	11	2	13	3
1	2009-03-17 11:11:00	105	11	2	13	3
1	2009-03-17 11:12:00	70	11	2	13	3
1	2009-03-17 11:13:00	58	11	2	13	3
1	2009-03-17 11:14:00	58	11	2	13	3
1	2009-03-17 11:15:00	0	11	2	13	3
1	2009-03-17 11:16:00	0	11	2	13	3
1	2009-03-17 11:17:00	0	11	2	13	3
1	2009-03-17 11:18:00	0	11	2	13	3
1	2009-03-17 11:19:00	0	11	2	13	3
1	2009-03-17 11:20:00	0	11	2	13	3
1	2009-03-17 11:21:00	0	11	2	13	3
1	2009-03-17 11:22:00	0	11	2	13	3
1	2009-03-17 11:23:00	0	11	2	13	3
1	2009-03-17 11:24:00	0	11	2	13	3
1	2009-03-17 11:25:00	0	11	2	13	3
1	2009-03-17 11:26:00	0	11	2	13	3
1	2009-03-17 11:27:00	0	11	2	13	3
1	2009-03-17 11:28:00	0	11	2	13	3
1	2009-03-17 11:29:00	0	11	2	13	3
1	2009-03-17 11:30:00	0	11	2	13	3
1	2009-03-17 11:31:00	0	11	2	13	3
1	2009-03-17 11:32:00	23	11	2	13	3
1	2009-03-17 11:33:00	93	11	2	13	3
1	2009-03-17 11:34:00	0	11	2	13	3
1	2009-03-17 11:35:00	12	11	2	13	3
1	2009-03-17 11:36:00	0	11	2	13	3
1	2009-03-17 11:37:00	0	11	2	13	3
1	2009-03-17 11:38:00	0	11	2	13	3
1	2009-03-17 11:39:00	0	11	2	13	3
1	2009-03-17 11:40:00	0	11	2	13	3
1	2009-03-17 11:41:00	0	11	2	13	3
1	2009-03-17 11:42:00	0	11	2	13	3
1	2009-03-17 11:43:00	0	11	2	13	3
1	2009-03-17 11:44:00	0	11	2	13	3
1	2009-03-17 11:45:00	0	11	2	13	3
1	2009-03-17 11:46:00	0	11	2	13	3
1	2009-03-17 11:47:00	0	11	2	13	3
1	2009-03-17 11:48:00	0	11	2	13	3
1	2009-03-17 11:49:00	0	11	2	13	3
1	2009-03-17 11:50:00	0	11	2	13	3
1	2009-03-17 11:51:00	0	11	2	13	3
1	2009-03-17 11:52:00	0	11	2	13	3
1	2009-03-17 11:53:00	0	11	2	13	3
1	2009-03-17 11:54:00	0	11	2	13	3
1	2009-03-17 11:55:00	0	11	2	13	3
1	2009-03-17 11:56:00	0	11	2	13	3
1	2009-03-17 11:57:00	0	11	2	13	3
1	2009-03-17 11:58:00	0	11	2	13	3
1	2009-03-17 11:59:00	0	11	2	13	3
1	2009-03-17 12:00:00	0	11	2	13	3
1	2009-03-17 12:01:00	0	12	3	13	3
1	2009-03-17 12:02:00	0	12	3	13	3
1	2009-03-17 12:03:00	0	12	3	13	3
1	2009-03-17 12:04:00	0	12	3	13	3
1	2009-03-17 12:05:00	0	12	3	13	3
1	2009-03-17 12:06:00	0	12	3	13	3
1	2009-03-17 12:07:00	0	12	3	13	3
1	2009-03-17 12:08:00	0	12	3	13	3
1	2009-03-17 12:09:00	0	12	3	13	3
1	2009-03-17 12:10:00	0	12	3	13	3
1	2009-03-17 12:11:00	0	12	3	13	3
1	2009-03-17 12:12:00	0	12	3	13	3
1	2009-03-17 12:13:00	93	12	3	13	3
1	2009-03-17 12:14:00	12	12	3	13	3
1	2009-03-17 12:15:00	0	12	3	13	3
1	2009-03-17 12:16:00	0	12	3	13	3
1	2009-03-17 12:17:00	0	12	3	13	3
1	2009-03-17 12:18:00	0	12	3	13	3
1	2009-03-17 12:19:00	0	12	3	13	3
1	2009-03-17 12:20:00	0	12	3	13	3
1	2009-03-17 12:21:00	0	12	3	13	3
1	2009-03-17 12:22:00	0	12	3	13	3
1	2009-03-17 12:23:00	0	12	3	13	3
1	2009-03-17 12:24:00	12	12	3	13	3
1	2009-03-17 12:25:00	0	12	3	13	3
1	2009-03-17 12:26:00	23	12	3	13	3
1	2009-03-17 12:27:00	0	12	3	13	3
1	2009-03-17 12:28:00	0	12	3	13	3
1	2009-03-17 12:29:00	0	12	3	13	3
1	2009-03-17 12:30:00	0	12	3	13	3
1	2009-03-17 12:31:00	0	12	3	13	3
1	2009-03-17 12:32:00	0	12	3	13	3
1	2009-03-17 12:33:00	0	12	3	13	3
1	2009-03-17 12:34:00	0	12	3	13	3
1	2009-03-17 12:35:00	0	12	3	13	3
1	2009-03-17 12:36:00	0	12	3	13	3
1	2009-03-17 12:37:00	0	12	3	13	3
1	2009-03-17 12:38:00	0	12	3	13	3
1	2009-03-17 12:39:00	0	12	3	13	3
1	2009-03-17 12:40:00	0	12	3	13	3
1	2009-03-17 12:41:00	0	12	3	13	3
1	2009-03-17 12:42:00	0	12	3	13	3
1	2009-03-17 12:43:00	0	12	3	13	3
1	2009-03-17 12:44:00	0	12	3	13	3
1	2009-03-17 12:45:00	0	12	3	13	3
1	2009-03-17 12:46:00	0	12	3	13	3
1	2009-03-17 12:47:00	0	12	3	13	3
1	2009-03-17 12:48:00	0	12	3	13	3
1	2009-03-17 12:49:00	0	12	3	13	3
1	2009-03-17 12:50:00	0	12	3	13	3
1	2009-03-17 12:51:00	0	12	3	13	3
1	2009-03-17 12:52:00	0	12	3	13	3
1	2009-03-17 12:53:00	0	12	3	13	3
1	2009-03-17 12:54:00	0	12	3	13	3
1	2009-03-17 12:55:00	0	12	3	13	3
1	2009-03-17 12:56:00	0	12	3	13	3
1	2009-03-17 12:57:00	0	12	3	13	3
1	2009-03-17 12:58:00	0	12	3	13	3
1	2009-03-17 12:59:00	12	12	3	13	3
1	2009-03-17 13:00:00	0	12	3	13	3
1	2009-03-17 13:01:00	0	13	3	13	3
1	2009-03-17 13:02:00	0	13	3	13	3
1	2009-03-17 13:03:00	0	13	3	13	3
1	2009-03-17 13:04:00	0	13	3	13	3
1	2009-03-17 13:05:00	0	13	3	13	3
1	2009-03-17 13:06:00	12	13	3	13	3
1	2009-03-17 13:07:00	0	13	3	13	3
1	2009-03-17 13:08:00	23	13	3	13	3
1	2009-03-17 13:09:00	58	13	3	13	3
1	2009-03-17 13:10:00	0	13	3	13	3
1	2009-03-17 13:11:00	0	13	3	13	3
1	2009-03-17 13:12:00	0	13	3	13	3
1	2009-03-17 13:13:00	0	13	3	13	3
1	2009-03-17 13:14:00	0	13	3	13	3
1	2009-03-17 13:15:00	0	13	3	13	3
1	2009-03-17 13:16:00	0	13	3	13	3
1	2009-03-17 13:17:00	0	13	3	13	3
1	2009-03-17 13:18:00	0	13	3	13	3
1	2009-03-17 13:19:00	0	13	3	13	3
1	2009-03-17 13:20:00	0	13	3	13	3
1	2009-03-17 13:21:00	0	13	3	13	3
1	2009-03-17 13:22:00	0	13	3	13	3
1	2009-03-17 13:23:00	0	13	3	13	3
1	2009-03-17 13:24:00	0	13	3	13	3
1	2009-03-17 13:25:00	0	13	3	13	3
1	2009-03-17 13:26:00	0	13	3	13	3
1	2009-03-17 13:27:00	0	13	3	13	3
1	2009-03-17 13:28:00	0	13	3	13	3
1	2009-03-17 13:29:00	0	13	3	13	3
1	2009-03-17 13:30:00	0	13	3	13	3
1	2009-03-17 13:31:00	0	13	3	13	3
1	2009-03-17 13:32:00	0	13	3	13	3
1	2009-03-17 13:33:00	0	13	3	13	3
1	2009-03-17 13:34:00	0	13	3	13	3
1	2009-03-17 13:35:00	0	13	3	13	3
1	2009-03-17 13:36:00	0	13	3	13	3
1	2009-03-17 13:37:00	0	13	3	13	3
1	2009-03-17 13:38:00	0	13	3	13	3
1	2009-03-17 13:39:00	0	13	3	13	3
1	2009-03-17 13:40:00	0	13	3	13	3
1	2009-03-17 13:41:00	0	13	3	13	3
1	2009-03-17 13:42:00	0	13	3	13	3
1	2009-03-17 13:43:00	0	13	3	13	3
1	2009-03-17 13:44:00	0	13	3	13	3
1	2009-03-17 13:45:00	0	13	3	13	3
1	2009-03-17 13:46:00	0	13	3	13	3
1	2009-03-17 13:47:00	0	13	3	13	3
1	2009-03-17 13:48:00	0	13	3	13	3
1	2009-03-17 13:49:00	0	13	3	13	3
1	2009-03-17 13:50:00	0	13	3	13	3
1	2009-03-17 13:51:00	0	13	3	13	3
1	2009-03-17 13:52:00	0	13	3	13	3
1	2009-03-17 13:53:00	0	13	3	13	3
1	2009-03-17 13:54:00	0	13	3	13	3
1	2009-03-17 13:55:00	0	13	3	13	3
1	2009-03-17 13:56:00	0	13	3	13	3
1	2009-03-17 13:57:00	0	13	3	13	3
1	2009-03-17 13:58:00	0	13	3	13	3
1	2009-03-17 13:59:00	0	13	3	13	3
1	2009-03-17 14:00:00	0	13	3	13	3
1	2009-03-17 14:01:00	0	14	3	13	3
1	2009-03-17 14:02:00	0	14	3	13	3
1	2009-03-17 14:03:00	0	14	3	13	3
1	2009-03-17 14:04:00	0	14	3	13	3
1	2009-03-17 14:05:00	0	14	3	13	3
1	2009-03-17 14:06:00	35	14	3	13	3
1	2009-03-17 14:07:00	47	14	3	13	3
1	2009-03-17 14:08:00	0	14	3	13	3
1	2009-03-17 14:09:00	0	14	3	13	3
1	2009-03-17 14:10:00	0	14	3	13	3
1	2009-03-17 14:11:00	0	14	3	13	3
1	2009-03-17 14:12:00	0	14	3	13	3
1	2009-03-17 14:13:00	0	14	3	13	3
1	2009-03-17 14:14:00	0	14	3	13	3
1	2009-03-17 14:15:00	0	14	3	13	3
1	2009-03-17 14:16:00	0	14	3	13	3
1	2009-03-17 14:17:00	0	14	3	13	3
1	2009-03-17 14:18:00	0	14	3	13	3
1	2009-03-17 14:19:00	0	14	3	13	3
1	2009-03-17 14:20:00	0	14	3	13	3
1	2009-03-17 14:21:00	0	14	3	13	3
1	2009-03-17 14:22:00	0	14	3	13	3
1	2009-03-17 14:23:00	0	14	3	13	3
1	2009-03-17 14:24:00	0	14	3	13	3
1	2009-03-17 14:25:00	0	14	3	13	3
1	2009-03-17 14:26:00	0	14	3	13	3
1	2009-03-17 14:27:00	0	14	3	13	3
1	2009-03-17 14:28:00	0	14	3	13	3
1	2009-03-17 14:29:00	23	14	3	13	3
1	2009-03-17 14:30:00	12	14	3	13	3
1	2009-03-17 14:31:00	0	14	3	13	3
1	2009-03-17 14:32:00	0	14	3	13	3
1	2009-03-17 14:33:00	0	14	3	13	3
1	2009-03-17 14:34:00	0	14	3	13	3
1	2009-03-17 14:35:00	0	14	3	13	3
1	2009-03-17 14:36:00	0	14	3	13	3
1	2009-03-17 14:37:00	0	14	3	13	3
1	2009-03-17 14:38:00	0	14	3	13	3
1	2009-03-17 14:39:00	0	14	3	13	3
1	2009-03-17 14:40:00	0	14	3	13	3
1	2009-03-17 14:41:00	0	14	3	13	3
1	2009-03-17 14:42:00	12	14	3	13	3
1	2009-03-17 14:43:00	35	14	3	13	3
1	2009-03-17 14:44:00	0	14	3	13	3
1	2009-03-17 14:45:00	0	14	3	13	3
1	2009-03-17 14:46:00	0	14	3	13	3
1	2009-03-17 14:47:00	0	14	3	13	3
1	2009-03-17 14:48:00	0	14	3	13	3
1	2009-03-17 14:49:00	0	14	3	13	3
1	2009-03-17 14:50:00	0	14	3	13	3
1	2009-03-17 14:51:00	0	14	3	13	3
1	2009-03-17 14:52:00	0	14	3	13	3
1	2009-03-17 14:53:00	0	14	3	13	3
1	2009-03-17 14:54:00	0	14	3	13	3
1	2009-03-17 14:55:00	0	14	3	13	3
1	2009-03-17 14:56:00	0	14	3	13	3
1	2009-03-17 14:57:00	0	14	3	13	3
1	2009-03-17 14:58:00	0	14	3	13	3
1	2009-03-17 14:59:00	0	14	3	13	3
1	2009-03-17 15:00:00	0	14	3	13	3
1	2009-03-17 15:01:00	0	15	3	13	3
1	2009-03-17 15:02:00	0	15	3	13	3
1	2009-03-17 15:03:00	0	15	3	13	3
1	2009-03-17 15:04:00	0	15	3	13	3
1	2009-03-17 15:05:00	0	15	3	13	3
1	2009-03-17 15:06:00	0	15	3	13	3
1	2009-03-17 15:07:00	0	15	3	13	3
1	2009-03-17 15:08:00	0	15	3	13	3
1	2009-03-17 15:09:00	0	15	3	13	3
1	2009-03-17 15:10:00	0	15	3	13	3
1	2009-03-17 15:11:00	0	15	3	13	3
1	2009-03-17 15:12:00	0	15	3	13	3
1	2009-03-17 15:13:00	0	15	3	13	3
1	2009-03-17 15:14:00	0	15	3	13	3
1	2009-03-17 15:15:00	0	15	3	13	3
1	2009-03-17 15:16:00	0	15	3	13	3
1	2009-03-17 15:17:00	0	15	3	13	3
1	2009-03-17 15:18:00	0	15	3	13	3
1	2009-03-17 15:19:00	0	15	3	13	3
[truncated: 78,641 more rows]

## Sheet: Pivot Segment
Multiplier	2
x (Low Intensity)	549.525
y (High Intensity)	546.761
	Column Labels
Values	1	2	3	4	5	6	7	8	Grand Total
Average of Activity	61.1533	64.7237	44.7981	53.3713	69.261	57.0517	54.6479	63.3939	60.2547
StdDev of Activity	244.186	241.018	193.657	238.092	293.496	218.493	231.512	255.176	246.1
Count of Activity	10080	10080	2580	10080	10080	10080	6240	10080	69300
Count Above x	311	330	48	245	331	311	165	344
% Above x	0.0308532	0.0327381	0.0186047	0.0243056	0.0328373	0.0308532	0.0264423	0.034127
Count Above y		330	48	245	331	311	165	344
% Above y		0.0327381	0.0186047	0.0243056	0.0328373	0.0308532	0.0264423	0.034127

## Sheet: Pivot Weekday
Sum of Activity	Column Labels
Row Labels	1	2	3	4	5	6	7	8	Grand Total
1	96615	102886	37721	63033	70367	107573		93961	572156
2	74994	124486	6035	49287	95195	66214	100972	89075	606258
3	88797	108721		59735	135329	65966	70719	84635	613902
4	97895	75309		30608	93329	105418	89616	105622	597797
5	53694	71334		118498	93598	91424	73399	90737	592684
6	66009	81953		79516	94907	69076	6297	76857	474615
7	138421	87726	71823	137306	115426	69410		98124	718236
Grand Total	616425	652415	115579	537983	698151	575081	341003	639011	4175648
Count of Activity	Column Labels
Row Labels	1	2	3	4	5	6	7	8	Grand Total
1	1440	1440	1440	1440	1440	1440		1440	10080
2	1440	1440	360	1440	1440	1440	1440	1440	10440
3	1440	1440		1440	1440	1440	1440	1440	10080
4	1440	1440		1440	1440	1440	1440	1440	10080
5	1440	1440		1440	1440	1440	1440	1440	10080
6	1440	1440		1440	1440	1440	480	1440	9120
7	1440	1440	780	1440	1440	1440		1440	9420
Grand Total	10080	10080	2580	10080	10080	10080	6240	10080	69300

## Sheet: Pivot Quadrant
Sum of Activity	Column Labels
Row Labels	1	2	3	4	5	6	7	8	Grand Total
1	5626	8612	6955	9998	6412	16216	12581	11393	77793
2	158488	142246	10221	172690	167368	93384	67104	176286	987787
3	191262	112304	62105	69225	168037	147870	65809	103810	920422
4	261049	389253	36298	286070	356334	317611	195509	347522	2189646
Grand Total	616425	652415	115579	537983	698151	575081	341003	639011	4175648
Average	154106	163104	28894.8	134496	174538	143770	85250.8	159753
Count of Activity	Column Labels
Row Labels	1	2	3	4	5	6	7	8	Grand Total
1	2520	2520	720	2520	2520	2520	1800	2520	17640
2	2520	2520	420	2520	2520	2520	1560	2520	17100
3	2520	2520	720	2520	2520	2520	1440	2520	17280
4	2520	2520	720	2520	2520	2520	1440	2520	17280
Grand Total	10080	10080	2580	10080	10080	10080	6240	10080	69300

## Sheet: 3.4.09
Actogram, Copy Raw Data, All Days
Identity:	Baxter
Filename:	E:\Active Research Files\meloxicam titre canine\cases\baxter\Baxter 3.4.09.AWC
Gender:	M
Age:	3
Height:	76.2 cm	30.0 in
Weight:	29.5 kg	65.0 lbs
Start Date:	04-Mar-2009 (Wed)
Start Time:	18:00:00
Interval:	1.00 mins
Date Stamp:	Time Stamp:	Activity Data:	Marker Press:
2009-03-04	00:00:00	0
2009-03-04	00:01:00	0
2009-03-04	00:02:00	0
2009-03-04	00:03:00	0
2009-03-04	00:04:00	0
2009-03-04	00:05:00	0
2009-03-04	00:06:00	0
2009-03-04	00:07:00	0
2009-03-04	00:08:00	0
2009-03-04	00:09:00	0
2009-03-04	00:10:00	0
2009-03-04	00:11:00	0
2009-03-04	00:12:00	0
2009-03-04	00:13:00	0
2009-03-04	00:14:00	0
2009-03-04	00:15:00	0
2009-03-04	00:16:00	0
2009-03-04	00:17:00	0
2009-03-04	00:18:00	0
2009-03-04	00:19:00	0
2009-03-04	00:20:00	0
2009-03-04	00:21:00	0
2009-03-04	00:22:00	0
2009-03-04	00:23:00	0
2009-03-04	00:24:00	0
2009-03-04	00:25:00	0
2009-03-04	00:26:00	0
2009-03-04	00:27:00	0
2009-03-04	00:28:00	0
2009-03-04	00:29:00	0
2009-03-04	00:30:00	0
2009-03-04	00:31:00	0
2009-03-04	00:32:00	0
2009-03-04	00:33:00	0
2009-03-04	00:34:00	0
2009-03-04	00:35:00	0
2009-03-04	00:36:00	0
2009-03-04	00:37:00	0
2009-03-04	00:38:00	0
2009-03-04	00:39:00	0
2009-03-04	00:40:00	0
2009-03-04	00:41:00	0
2009-03-04	00:42:00	0
2009-03-04	00:43:00	0
2009-03-04	00:44:00	0
2009-03-04	00:45:00	0
2009-03-04	00:46:00	0
2009-03-04	00:47:00	0
2009-03-04	00:48:00	0
2009-03-04	00:49:00	0
2009-03-04	00:50:00	0
2009-03-04	00:51:00	0
2009-03-04	00:52:00	0
2009-03-04	00:53:00	0
2009-03-04	00:54:00	0
2009-03-04	00:55:00	0
2009-03-04	00:56:00	0
2009-03-04	00:57:00	0
2009-03-04	00:58:00	0
2009-03-04	00:59:00	0
2009-03-04	01:00:00	0
2009-03-04	01:01:00	0
2009-03-04	01:02:00	0
2009-03-04	01:03:00	0
2009-03-04	01:04:00	0
2009-03-04	01:05:00	0
2009-03-04	01:06:00	0
2009-03-04	01:07:00	0
2009-03-04	01:08:00	0
2009-03-04	01:09:00	0
2009-03-04	01:10:00	0
2009-03-04	01:11:00	0
2009-03-04	01:12:00	0
2009-03-04	01:13:00	0
2009-03-04	01:14:00	0
2009-03-04	01:15:00	0
2009-03-04	01:16:00	0
2009-03-04	01:17:00	0
2009-03-04	01:18:00	0
2009-03-04	01:19:00	0
2009-03-04	01:20:00	0
2009-03-04	01:21:00	0
2009-03-04	01:22:00	0
2009-03-04	01:23:00	0
2009-03-04	01:24:00	0
2009-03-04	01:25:00	0
2009-03-04	01:26:00	0
2009-03-04	01:27:00	0
2009-03-04	01:28:00	0
2009-03-04	01:29:00	0
2009-03-04	01:30:00	0
2009-03-04	01:31:00	0
2009-03-04	01:32:00	0
2009-03-04	01:33:00	0
2009-03-04	01:34:00	0
2009-03-04	01:35:00	0
2009-03-04	01:36:00	0
2009-03-04	01:37:00	0
2009-03-04	01:38:00	0
2009-03-04	01:39:00	0
2009-03-04	01:40:00	0
2009-03-04	01:41:00	0
2009-03-04	01:42:00	0
2009-03-04	01:43:00	0
2009-03-04	01:44:00	0
2009-03-04	01:45:00	0
2009-03-04	01:46:00	0
2009-03-04	01:47:00	0
2009-03-04	01:48:00	0
2009-03-04	01:49:00	0
2009-03-04	01:50:00	0
2009-03-04	01:51:00	0
2009-03-04	01:52:00	0
2009-03-04	01:53:00	0
2009-03-04	01:54:00	0
2009-03-04	01:55:00	0
2009-03-04	01:56:00	0
2009-03-04	01:57:00	0
2009-03-04	01:58:00	0
2009-03-04	01:59:00	0
2009-03-04	02:00:00	0
2009-03-04	02:01:00	0
2009-03-04	02:02:00	0
2009-03-04	02:03:00	0
2009-03-04	02:04:00	0
2009-03-04	02:05:00	0
2009-03-04	02:06:00	0
2009-03-04	02:07:00	0
2009-03-04	02:08:00	0
2009-03-04	02:09:00	0
2009-03-04	02:10:00	0
2009-03-04	02:11:00	0
2009-03-04	02:12:00	0
2009-03-04	02:13:00	0
2009-03-04	02:14:00	0
2009-03-04	02:15:00	0
2009-03-04	02:16:00	0
2009-03-04	02:17:00	0
2009-03-04	02:18:00	0
2009-03-04	02:19:00	0
2009-03-04	02:20:00	0
2009-03-04	02:21:00	0
2009-03-04	02:22:00	0
2009-03-04	02:23:00	0
2009-03-04	02:24:00	0
2009-03-04	02:25:00	0
2009-03-04	02:26:00	0
2009-03-04	02:27:00	0
2009-03-04	02:28:00	0
2009-03-04	02:29:00	0
2009-03-04	02:30:00	0
2009-03-04	02:31:00	0
2009-03-04	02:32:00	0
2009-03-04	02:33:00	0
2009-03-04	02:34:00	0
2009-03-04	02:35:00	0
2009-03-04	02:36:00	0
2009-03-04	02:37:00	0
2009-03-04	02:38:00	0
2009-03-04	02:39:00	0
2009-03-04	02:40:00	0
2009-03-04	02:41:00	0
2009-03-04	02:42:00	0
2009-03-04	02:43:00	0
2009-03-04	02:44:00	0
2009-03-04	02:45:00	0
2009-03-04	02:46:00	0
2009-03-04	02:47:00	0
2009-03-04	02:48:00	0
2009-03-04	02:49:00	0
2009-03-04	02:50:00	0
2009-03-04	02:51:00	0
2009-03-04	02:52:00	0
2009-03-04	02:53:00	0
2009-03-04	02:54:00	0
2009-03-04	02:55:00	0
2009-03-04	02:56:00	0
2009-03-04	02:57:00	0
2009-03-04	02:58:00	0
2009-03-04	02:59:00	0
2009-03-04	03:00:00	0
2009-03-04	03:01:00	0
2009-03-04	03:02:00	0
2009-03-04	03:03:00	0
2009-03-04	03:04:00	0
2009-03-04	03:05:00	0
2009-03-04	03:06:00	0
2009-03-04	03:07:00	0
2009-03-04	03:08:00	0
2009-03-04	03:09:00	0
2009-03-04	03:10:00	0
2009-03-04	03:11:00	0
2009-03-04	03:12:00	0
2009-03-04	03:13:00	0
2009-03-04	03:14:00	0
2009-03-04	03:15:00	0
2009-03-04	03:16:00	0
2009-03-04	03:17:00	0
2009-03-04	03:18:00	0
2009-03-04	03:19:00	0
2009-03-04	03:20:00	0
2009-03-04	03:21:00	0
2009-03-04	03:22:00	0
2009-03-04	03:23:00	0
2009-03-04	03:24:00	0
2009-03-04	03:25:00	0
2009-03-04	03:26:00	0
2009-03-04	03:27:00	0
2009-03-04	03:28:00	0
2009-03-04	03:29:00	0
2009-03-04	03:30:00	0
2009-03-04	03:31:00	0
2009-03-04	03:32:00	0
2009-03-04	03:33:00	0
2009-03-04	03:34:00	0
2009-03-04	03:35:00	0
2009-03-04	03:36:00	0
2009-03-04	03:37:00	0
2009-03-04	03:38:00	0
2009-03-04	03:39:00	0
2009-03-04	03:40:00	0
2009-03-04	03:41:00	0
2009-03-04	03:42:00	0
2009-03-04	03:43:00	0
2009-03-04	03:44:00	0
2009-03-04	03:45:00	0
2009-03-04	03:46:00	0
2009-03-04	03:47:00	0
2009-03-04	03:48:00	0
2009-03-04	03:49:00	0
2009-03-04	03:50:00	0
2009-03-04	03:51:00	0
2009-03-04	03:52:00	0
2009-03-04	03:53:00	0
2009-03-04	03:54:00	0
2009-03-04	03:55:00	0
2009-03-04	03:56:00	0
2009-03-04	03:57:00	0
2009-03-04	03:58:00	0
2009-03-04	03:59:00	0
2009-03-04	04:00:00	0
2009-03-04	04:01:00	0
2009-03-04	04:02:00	0
2009-03-04	04:03:00	0
2009-03-04	04:04:00	0
2009-03-04	04:05:00	0
2009-03-04	04:06:00	0
2009-03-04	04:07:00	0
2009-03-04	04:08:00	0
2009-03-04	04:09:00	0
2009-03-04	04:10:00	0
2009-03-04	04:11:00	0
2009-03-04	04:12:00	0
2009-03-04	04:13:00	0
2009-03-04	04:14:00	0
2009-03-04	04:15:00	0
2009-03-04	04:16:00	0
2009-03-04	04:17:00	0
2009-03-04	04:18:00	0
2009-03-04	04:19:00	0
2009-03-04	04:20:00	0
2009-03-04	04:21:00	0
2009-03-04	04:22:00	0
2009-03-04	04:23:00	0
2009-03-04	04:24:00	0
2009-03-04	04:25:00	0
2009-03-04	04:26:00	0
2009-03-04	04:27:00	0
2009-03-04	04:28:00	0
2009-03-04	04:29:00	0
2009-03-04	04:30:00	0
2009-03-04	04:31:00	0
2009-03-04	04:32:00	0
2009-03-04	04:33:00	0
2009-03-04	04:34:00	0
2009-03-04	04:35:00	0
2009-03-04	04:36:00	0
2009-03-04	04:37:00	0
2009-03-04	04:38:00	0
2009-03-04	04:39:00	0
2009-03-04	04:40:00	0
2009-03-04	04:41:00	0
2009-03-04	04:42:00	0
2009-03-04	04:43:00	0
2009-03-04	04:44:00	0
2009-03-04	04:45:00	0
2009-03-04	04:46:00	0
2009-03-04	04:47:00	0
2009-03-04	04:48:00	0
2009-03-04	04:49:00	0
2009-03-04	04:50:00	0
2009-03-04	04:51:00	0
2009-03-04	04:52:00	0
2009-03-04	04:53:00	0
2009-03-04	04:54:00	0
2009-03-04	04:55:00	0
2009-03-04	04:56:00	0
2009-03-04	04:57:00	0
2009-03-04	04:58:00	0
2009-03-04	04:59:00	0
2009-03-04	05:00:00	0
2009-03-04	05:01:00	0
2009-03-04	05:02:00	0
2009-03-04	05:03:00	0
2009-03-04	05:04:00	0
2009-03-04	05:05:00	0
2009-03-04	05:06:00	0
2009-03-04	05:07:00	0
2009-03-04	05:08:00	0
2009-03-04	05:09:00	0
2009-03-04	05:10:00	0
2009-03-04	05:11:00	0
2009-03-04	05:12:00	0
2009-03-04	05:13:00	0
2009-03-04	05:14:00	0
2009-03-04	05:15:00	0
2009-03-04	05:16:00	0
2009-03-04	05:17:00	0
2009-03-04	05:18:00	0
2009-03-04	05:19:00	0
2009-03-04	05:20:00	0
2009-03-04	05:21:00	0
2009-03-04	05:22:00	0
2009-03-04	05:23:00	0
2009-03-04	05:24:00	0
2009-03-04	05:25:00	0
2009-03-04	05:26:00	0
2009-03-04	05:27:00	0
2009-03-04	05:28:00	0
2009-03-04	05:29:00	0
2009-03-04	05:30:00	0
2009-03-04	05:31:00	0
2009-03-04	05:32:00	0
2009-03-04	05:33:00	0
2009-03-04	05:34:00	0
2009-03-04	05:35:00	0
2009-03-04	05:36:00	0
2009-03-04	05:37:00	0
2009-03-04	05:38:00	0
2009-03-04	05:39:00	0
2009-03-04	05:40:00	0
2009-03-04	05:41:00	0
2009-03-04	05:42:00	0
2009-03-04	05:43:00	0
2009-03-04	05:44:00	0
2009-03-04	05:45:00	0
2009-03-04	05:46:00	0
2009-03-04	05:47:00	0
2009-03-04	05:48:00	0
2009-03-04	05:49:00	0
2009-03-04	05:50:00	0
2009-03-04	05:51:00	0
2009-03-04	05:52:00	0
2009-03-04	05:53:00	0
2009-03-04	05:54:00	0
2009-03-04	05:55:00	0
2009-03-04	05:56:00	0
2009-03-04	05:57:00	0
2009-03-04	05:58:00	0
2009-03-04	05:59:00	0
2009-03-04	06:00:00	0
2009-03-04	06:01:00	0
2009-03-04	06:02:00	0
2009-03-04	06:03:00	0
2009-03-04	06:04:00	0
2009-03-04	06:05:00	0
2009-03-04	06:06:00	0
2009-03-04	06:07:00	0
2009-03-04	06:08:00	0
2009-03-04	06:09:00	0
2009-03-04	06:10:00	0
2009-03-04	06:11:00	0
2009-03-04	06:12:00	0
2009-03-04	06:13:00	0
2009-03-04	06:14:00	0
2009-03-04	06:15:00	0
2009-03-04	06:16:00	0
2009-03-04	06:17:00	0
2009-03-04	06:18:00	0
2009-03-04	06:19:00	0
2009-03-04	06:20:00	0
2009-03-04	06:21:00	0
2009-03-04	06:22:00	0
2009-03-04	06:23:00	0
2009-03-04	06:24:00	0
2009-03-04	06:25:00	0
2009-03-04	06:26:00	0
2009-03-04	06:27:00	0
2009-03-04	06:28:00	0
2009-03-04	06:29:00	0
2009-03-04	06:30:00	0
2009-03-04	06:31:00	0
2009-03-04	06:32:00	0
2009-03-04	06:33:00	0
2009-03-04	06:34:00	0
2009-03-04	06:35:00	0
2009-03-04	06:36:00	0
2009-03-04	06:37:00	0
2009-03-04	06:38:00	0
2009-03-04	06:39:00	0
2009-03-04	06:40:00	0
2009-03-04	06:41:00	0
2009-03-04	06:42:00	0
2009-03-04	06:43:00	0
2009-03-04	06:44:00	0
2009-03-04	06:45:00	0
2009-03-04	06:46:00	0
2009-03-04	06:47:00	0
2009-03-04	06:48:00	0
2009-03-04	06:49:00	0
2009-03-04	06:50:00	0
2009-03-04	06:51:00	0
2009-03-04	06:52:00	0
2009-03-04	06:53:00	0
2009-03-04	06:54:00	0
2009-03-04	06:55:00	0
2009-03-04	06:56:00	0
2009-03-04	06:57:00	0
2009-03-04	06:58:00	0
2009-03-04	06:59:00	0
2009-03-04	07:00:00	0
2009-03-04	07:01:00	0
2009-03-04	07:02:00	0
2009-03-04	07:03:00	0
2009-03-04	07:04:00	0
2009-03-04	07:05:00	0
2009-03-04	07:06:00	0
2009-03-04	07:07:00	0
2009-03-04	07:08:00	0
2009-03-04	07:09:00	0
2009-03-04	07:10:00	0
2009-03-04	07:11:00	0
2009-03-04	07:12:00	0
2009-03-04	07:13:00	0
2009-03-04	07:14:00	0
2009-03-04	07:15:00	0
2009-03-04	07:16:00	0
2009-03-04	07:17:00	0
2009-03-04	07:18:00	0
2009-03-04	07:19:00	0
2009-03-04	07:20:00	0
2009-03-04	07:21:00	0
2009-03-04	07:22:00	0
2009-03-04	07:23:00	0
2009-03-04	07:24:00	0
2009-03-04	07:25:00	0
2009-03-04	07:26:00	0
2009-03-04	07:27:00	0
2009-03-04	07:28:00	0
2009-03-04	07:29:00	0
2009-03-04	07:30:00	0
2009-03-04	07:31:00	0
2009-03-04	07:32:00	0
2009-03-04	07:33:00	0
2009-03-04	07:34:00	0
2009-03-04	07:35:00	0
2009-03-04	07:36:00	0
2009-03-04	07:37:00	0
2009-03-04	07:38:00	0
2009-03-04	07:39:00	0
2009-03-04	07:40:00	0
2009-03-04	07:41:00	0
2009-03-04	07:42:00	0
2009-03-04	07:43:00	0
2009-03-04	07:44:00	0
2009-03-04	07:45:00	0
2009-03-04	07:46:00	0
2009-03-04	07:47:00	0
2009-03-04	07:48:00	0
2009-03-04	07:49:00	0
2009-03-04	07:50:00	0
2009-03-04	07:51:00	0
2009-03-04	07:52:00	0
2009-03-04	07:53:00	0
2009-03-04	07:54:00	0
2009-03-04	07:55:00	0
2009-03-04	07:56:00	0
2009-03-04	07:57:00	0
2009-03-04	07:58:00	0
2009-03-04	07:59:00	0
2009-03-04	08:00:00	0
2009-03-04	08:01:00	0
2009-03-04	08:02:00	0
2009-03-04	08:03:00	0
2009-03-04	08:04:00	0
2009-03-04	08:05:00	0
2009-03-04	08:06:00	0
2009-03-04	08:07:00	0
2009-03-04	08:08:00	0
2009-03-04	08:09:00	0
2009-03-04	08:10:00	0
2009-03-04	08:11:00	0
2009-03-04	08:12:00	0
2009-03-04	08:13:00	0
2009-03-04	08:14:00	0
2009-03-04	08:15:00	0
2009-03-04	08:16:00	0
2009-03-04	08:17:00	0
2009-03-04	08:18:00	0
2009-03-04	08:19:00	0
2009-03-04	08:20:00	0
2009-03-04	08:21:00	0
2009-03-04	08:22:00	0
2009-03-04	08:23:00	0
2009-03-04	08:24:00	0
2009-03-04	08:25:00	0
2009-03-04	08:26:00	0
2009-03-04	08:27:00	0
2009-03-04	08:28:00	0
2009-03-04	08:29:00	0
2009-03-04	08:30:00	0
2009-03-04	08:31:00	0
2009-03-04	08:32:00	0
2009-03-04	08:33:00	0
2009-03-04	08:34:00	0
2009-03-04	08:35:00	0
2009-03-04	08:36:00	0
2009-03-04	08:37:00	0
2009-03-04	08:38:00	0
2009-03-04	08:39:00	0
2009-03-04	08:40:00	0
2009-03-04	08:41:00	0
2009-03-04	08:42:00	0
2009-03-04	08:43:00	0
2009-03-04	08:44:00	0
2009-03-04	08:45:00	0
2009-03-04	08:46:00	0
2009-03-04	08:47:00	0
2009-03-04	08:48:00	0
2009-03-04	08:49:00	0
2009-03-04	08:50:00	0
2009-03-04	08:51:00	0
2009-03-04	08:52:00	0
2009-03-04	08:53:00	0
2009-03-04	08:54:00	0
2009-03-04	08:55:00	0
2009-03-04	08:56:00	0
2009-03-04	08:57:00	0
2009-03-04	08:58:00	0
2009-03-04	08:59:00	0
2009-03-04	09:00:00	0
2009-03-04	09:01:00	0
2009-03-04	09:02:00	0
2009-03-04	09:03:00	0
2009-03-04	09:04:00	0
2009-03-04	09:05:00	0
2009-03-04	09:06:00	0
2009-03-04	09:07:00	0
2009-03-04	09:08:00	0
2009-03-04	09:09:00	0
2009-03-04	09:10:00	0
2009-03-04	09:11:00	0
2009-03-04	09:12:00	0
2009-03-04	09:13:00	0
2009-03-04	09:14:00	0
2009-03-04	09:15:00	0
2009-03-04	09:16:00	0
2009-03-04	09:17:00	0
2009-03-04	09:18:00	0
2009-03-04	09:19:00	0
2009-03-04	09:20:00	0
2009-03-04	09:21:00	0
2009-03-04	09:22:00	0
2009-03-04	09:23:00	0
2009-03-04	09:24:00	0
2009-03-04	09:25:00	0
2009-03-04	09:26:00	0
2009-03-04	09:27:00	0
2009-03-04	09:28:00	0
2009-03-04	09:29:00	0
2009-03-04	09:30:00	0
2009-03-04	09:31:00	0
2009-03-04	09:32:00	0
2009-03-04	09:33:00	0
2009-03-04	09:34:00	0
2009-03-04	09:35:00	0
2009-03-04	09:36:00	0
2009-03-04	09:37:00	0
2009-03-04	09:38:00	0
2009-03-04	09:39:00	0
2009-03-04	09:40:00	0
2009-03-04	09:41:00	0
2009-03-04	09:42:00	0
2009-03-04	09:43:00	0
2009-03-04	09:44:00	0
2009-03-04	09:45:00	0
2009-03-04	09:46:00	0
2009-03-04	09:47:00	0
2009-03-04	09:48:00	0
2009-03-04	09:49:00	0
2009-03-04	09:50:00	0
2009-03-04	09:51:00	0
2009-03-04	09:52:00	0
2009-03-04	09:53:00	0
2009-03-04	09:54:00	0
2009-03-04	09:55:00	0
2009-03-04	09:56:00	0
2009-03-04	09:57:00	0
2009-03-04	09:58:00	0
2009-03-04	09:59:00	0
2009-03-04	10:00:00	0
2009-03-04	10:01:00	0
2009-03-04	10:02:00	0
2009-03-04	10:03:00	0
2009-03-04	10:04:00	0
2009-03-04	10:05:00	0
2009-03-04	10:06:00	0
2009-03-04	10:07:00	0
2009-03-04	10:08:00	0
2009-03-04	10:09:00	0
2009-03-04	10:10:00	0
2009-03-04	10:11:00	0
2009-03-04	10:12:00	0
2009-03-04	10:13:00	0
2009-03-04	10:14:00	0
2009-03-04	10:15:00	0
2009-03-04	10:16:00	0
2009-03-04	10:17:00	0
2009-03-04	10:18:00	0
2009-03-04	10:19:00	0
2009-03-04	10:20:00	0
2009-03-04	10:21:00	0
2009-03-04	10:22:00	0
2009-03-04	10:23:00	0
2009-03-04	10:24:00	0
2009-03-04	10:25:00	0
2009-03-04	10:26:00	0
2009-03-04	10:27:00	0
2009-03-04	10:28:00	0
2009-03-04	10:29:00	0
2009-03-04	10:30:00	0
2009-03-04	10:31:00	0
2009-03-04	10:32:00	0
2009-03-04	10:33:00	0
2009-03-04	10:34:00	0
2009-03-04	10:35:00	0
2009-03-04	10:36:00	0
2009-03-04	10:37:00	0
2009-03-04	10:38:00	0
2009-03-04	10:39:00	0
2009-03-04	10:40:00	0
2009-03-04	10:41:00	0
2009-03-04	10:42:00	0
2009-03-04	10:43:00	0
2009-03-04	10:44:00	0
2009-03-04	10:45:00	0
2009-03-04	10:46:00	0
2009-03-04	10:47:00	0
2009-03-04	10:48:00	0
2009-03-04	10:49:00	0
2009-03-04	10:50:00	0
2009-03-04	10:51:00	0
2009-03-04	10:52:00	0
2009-03-04	10:53:00	0
2009-03-04	10:54:00	0
2009-03-04	10:55:00	0
2009-03-04	10:56:00	0
2009-03-04	10:57:00	0
2009-03-04	10:58:00	0
2009-03-04	10:59:00	0
2009-03-04	11:00:00	0
2009-03-04	11:01:00	0
2009-03-04	11:02:00	0
2009-03-04	11:03:00	0
2009-03-04	11:04:00	0
2009-03-04	11:05:00	0
2009-03-04	11:06:00	0
2009-03-04	11:07:00	0
2009-03-04	11:08:00	0
2009-03-04	11:09:00	0
2009-03-04	11:10:00	0
2009-03-04	11:11:00	0
2009-03-04	11:12:00	0
2009-03-04	11:13:00	0
2009-03-04	11:14:00	0
2009-03-04	11:15:00	0
2009-03-04	11:16:00	0
2009-03-04	11:17:00	0
2009-03-04	11:18:00	0
2009-03-04	11:19:00	0
2009-03-04	11:20:00	0
2009-03-04	11:21:00	0
2009-03-04	11:22:00	0
2009-03-04	11:23:00	0
2009-03-04	11:24:00	0
2009-03-04	11:25:00	0
2009-03-04	11:26:00	0
2009-03-04	11:27:00	0
2009-03-04	11:28:00	0
2009-03-04	11:29:00	0
2009-03-04	11:30:00	0
2009-03-04	11:31:00	0
2009-03-04	11:32:00	0
2009-03-04	11:33:00	0
2009-03-04	11:34:00	0
2009-03-04	11:35:00	0
2009-03-04	11:36:00	0
2009-03-04	11:37:00	0
2009-03-04	11:38:00	0
2009-03-04	11:39:00	0
2009-03-04	11:40:00	0
2009-03-04	11:41:00	0
2009-03-04	11:42:00	0
2009-03-04	11:43:00	0
2009-03-04	11:44:00	0
2009-03-04	11:45:00	0
2009-03-04	11:46:00	0
2009-03-04	11:47:00	0
2009-03-04	11:48:00	0
2009-03-04	11:49:00	0
2009-03-04	11:50:00	0
2009-03-04	11:51:00	0
2009-03-04	11:52:00	0
2009-03-04	11:53:00	0
2009-03-04	11:54:00	0
2009-03-04	11:55:00	0
2009-03-04	11:56:00	0
2009-03-04	11:57:00	0
2009-03-04	11:58:00	0
2009-03-04	11:59:00	0
2009-03-04	12:00:00	0
2009-03-04	12:01:00	0
2009-03-04	12:02:00	0
2009-03-04	12:03:00	0
2009-03-04	12:04:00	0
2009-03-04	12:05:00	0
2009-03-04	12:06:00	0
2009-03-04	12:07:00	0
2009-03-04	12:08:00	0
2009-03-04	12:09:00	0
2009-03-04	12:10:00	0
2009-03-04	12:11:00	0
2009-03-04	12:12:00	0
2009-03-04	12:13:00	0
2009-03-04	12:14:00	0
2009-03-04	12:15:00	0
2009-03-04	12:16:00	0
2009-03-04	12:17:00	0
2009-03-04	12:18:00	0
2009-03-04	12:19:00	0
2009-03-04	12:20:00	0
2009-03-04	12:21:00	0
2009-03-04	12:22:00	0
2009-03-04	12:23:00	0
2009-03-04	12:24:00	0
2009-03-04	12:25:00	0
2009-03-04	12:26:00	0
2009-03-04	12:27:00	0
2009-03-04	12:28:00	0
2009-03-04	12:29:00	0
2009-03-04	12:30:00	0
2009-03-04	12:31:00	0
2009-03-04	12:32:00	0
2009-03-04	12:33:00	0
2009-03-04	12:34:00	0
2009-03-04	12:35:00	0
2009-03-04	12:36:00	0
2009-03-04	12:37:00	0
2009-03-04	12:38:00	0
2009-03-04	12:39:00	0
2009-03-04	12:40:00	0
2009-03-04	12:41:00	0
2009-03-04	12:42:00	0
2009-03-04	12:43:00	0
2009-03-04	12:44:00	0
2009-03-04	12:45:00	0
2009-03-04	12:46:00	0
2009-03-04	12:47:00	0
2009-03-04	12:48:00	0
2009-03-04	12:49:00	0
2009-03-04	12:50:00	0
2009-03-04	12:51:00	0
2009-03-04	12:52:00	0
2009-03-04	12:53:00	0
2009-03-04	12:54:00	0
2009-03-04	12:55:00	0
2009-03-04	12:56:00	0
2009-03-04	12:57:00	0
2009-03-04	12:58:00	0
2009-03-04	12:59:00	0
2009-03-04	13:00:00	0
2009-03-04	13:01:00	0
2009-03-04	13:02:00	0
2009-03-04	13:03:00	0
2009-03-04	13:04:00	0
2009-03-04	13:05:00	0
2009-03-04	13:06:00	0
2009-03-04	13:07:00	0
2009-03-04	13:08:00	0
2009-03-04	13:09:00	0
2009-03-04	13:10:00	0
2009-03-04	13:11:00	0
2009-03-04	13:12:00	0
2009-03-04	13:13:00	0
2009-03-04	13:14:00	0
2009-03-04	13:15:00	0
2009-03-04	13:16:00	0
2009-03-04	13:17:00	0
2009-03-04	13:18:00	0
2009-03-04	13:19:00	0
2009-03-04	13:20:00	0
2009-03-04	13:21:00	0
2009-03-04	13:22:00	0
2009-03-04	13:23:00	0
2009-03-04	13:24:00	0
2009-03-04	13:25:00	0
2009-03-04	13:26:00	0
2009-03-04	13:27:00	0
2009-03-04	13:28:00	0
2009-03-04	13:29:00	0
2009-03-04	13:30:00	0
2009-03-04	13:31:00	0
2009-03-04	13:32:00	0
2009-03-04	13:33:00	0
2009-03-04	13:34:00	0
2009-03-04	13:35:00	0
2009-03-04	13:36:00	0
2009-03-04	13:37:00	0
2009-03-04	13:38:00	0
2009-03-04	13:39:00	0
2009-03-04	13:40:00	0
2009-03-04	13:41:00	0
2009-03-04	13:42:00	0
2009-03-04	13:43:00	0
2009-03-04	13:44:00	0
2009-03-04	13:45:00	0
2009-03-04	13:46:00	0
2009-03-04	13:47:00	0
2009-03-04	13:48:00	0
2009-03-04	13:49:00	0
2009-03-04	13:50:00	0
2009-03-04	13:51:00	0
2009-03-04	13:52:00	0
2009-03-04	13:53:00	0
2009-03-04	13:54:00	0
2009-03-04	13:55:00	0
2009-03-04	13:56:00	0
2009-03-04	13:57:00	0
2009-03-04	13:58:00	0
2009-03-04	13:59:00	0
2009-03-04	14:00:00	0
2009-03-04	14:01:00	0
2009-03-04	14:02:00	0
2009-03-04	14:03:00	0
2009-03-04	14:04:00	0
2009-03-04	14:05:00	0
2009-03-04	14:06:00	0
2009-03-04	14:07:00	0
2009-03-04	14:08:00	0
2009-03-04	14:09:00	0
2009-03-04	14:10:00	0
2009-03-04	14:11:00	0
2009-03-04	14:12:00	0
2009-03-04	14:13:00	0
2009-03-04	14:14:00	0
2009-03-04	14:15:00	0
2009-03-04	14:16:00	0
2009-03-04	14:17:00	0
2009-03-04	14:18:00	0
2009-03-04	14:19:00	0
2009-03-04	14:20:00	0
2009-03-04	14:21:00	0
2009-03-04	14:22:00	0
2009-03-04	14:23:00	0
2009-03-04	14:24:00	0
2009-03-04	14:25:00	0
2009-03-04	14:26:00	0
2009-03-04	14:27:00	0
2009-03-04	14:28:00	0
2009-03-04	14:29:00	0
2009-03-04	14:30:00	0
2009-03-04	14:31:00	0
2009-03-04	14:32:00	0
2009-03-04	14:33:00	0
2009-03-04	14:34:00	0
2009-03-04	14:35:00	0
2009-03-04	14:36:00	0
2009-03-04	14:37:00	0
2009-03-04	14:38:00	0
2009-03-04	14:39:00	0
2009-03-04	14:40:00	0
2009-03-04	14:41:00	0
2009-03-04	14:42:00	0
2009-03-04	14:43:00	0
2009-03-04	14:44:00	0
2009-03-04	14:45:00	0
2009-03-04	14:46:00	0
2009-03-04	14:47:00	0
2009-03-04	14:48:00	0
2009-03-04	14:49:00	0
2009-03-04	14:50:00	0
2009-03-04	14:51:00	0
2009-03-04	14:52:00	0
2009-03-04	14:53:00	0
2009-03-04	14:54:00	0
2009-03-04	14:55:00	0
2009-03-04	14:56:00	0
2009-03-04	14:57:00	0
2009-03-04	14:58:00	0
2009-03-04	14:59:00	0
2009-03-04	15:00:00	0
2009-03-04	15:01:00	0
2009-03-04	15:02:00	0
2009-03-04	15:03:00	0
2009-03-04	15:04:00	0
2009-03-04	15:05:00	0
2009-03-04	15:06:00	0
2009-03-04	15:07:00	0
2009-03-04	15:08:00	0
2009-03-04	15:09:00	0
2009-03-04	15:10:00	0
2009-03-04	15:11:00	0
2009-03-04	15:12:00	0
2009-03-04	15:13:00	0
2009-03-04	15:14:00	0
2009-03-04	15:15:00	0
2009-03-04	15:16:00	0
2009-03-04	15:17:00	0
2009-03-04	15:18:00	0
2009-03-04	15:19:00	0
2009-03-04	15:20:00	0
2009-03-04	15:21:00	0
2009-03-04	15:22:00	0
2009-03-04	15:23:00	0
2009-03-04	15:24:00	0
2009-03-04	15:25:00	0
2009-03-04	15:26:00	0
2009-03-04	15:27:00	0
2009-03-04	15:28:00	0
2009-03-04	15:29:00	0
2009-03-04	15:30:00	0
2009-03-04	15:31:00	0
2009-03-04	15:32:00	0
2009-03-04	15:33:00	0
2009-03-04	15:34:00	0
2009-03-04	15:35:00	0
2009-03-04	15:36:00	0
2009-03-04	15:37:00	0
2009-03-04	15:38:00	0
2009-03-04	15:39:00	0
2009-03-04	15:40:00	0
2009-03-04	15:41:00	0
2009-03-04	15:42:00	0
2009-03-04	15:43:00	0
2009-03-04	15:44:00	0
2009-03-04	15:45:00	0
2009-03-04	15:46:00	0
2009-03-04	15:47:00	0
2009-03-04	15:48:00	0
2009-03-04	15:49:00	0
2009-03-04	15:50:00	0
2009-03-04	15:51:00	0
2009-03-04	15:52:00	0
2009-03-04	15:53:00	0
2009-03-04	15:54:00	0
2009-03-04	15:55:00	0
2009-03-04	15:56:00	0
2009-03-04	15:57:00	0
2009-03-04	15:58:00	0
2009-03-04	15:59:00	0
2009-03-04	16:00:00	0
2009-03-04	16:01:00	0
2009-03-04	16:02:00	0
2009-03-04	16:03:00	0
2009-03-04	16:04:00	0
2009-03-04	16:05:00	0
2009-03-04	16:06:00	0
2009-03-04	16:07:00	0
2009-03-04	16:08:00	0
2009-03-04	16:09:00	0
2009-03-04	16:10:00	0
2009-03-04	16:11:00	0
2009-03-04	16:12:00	0
2009-03-04	16:13:00	0
2009-03-04	16:14:00	0
2009-03-04	16:15:00	0
2009-03-04	16:16:00	0
2009-03-04	16:17:00	0
2009-03-04	16:18:00	0
2009-03-04	16:19:00	0
2009-03-04	16:20:00	0
2009-03-04	16:21:00	0
2009-03-04	16:22:00	0
2009-03-04	16:23:00	0
2009-03-04	16:24:00	0
2009-03-04	16:25:00	0
2009-03-04	16:26:00	0
2009-03-04	16:27:00	0
2009-03-04	16:28:00	0
2009-03-04	16:29:00	0
2009-03-04	16:30:00	0
2009-03-04	16:31:00	0
2009-03-04	16:32:00	0
2009-03-04	16:33:00	0
2009-03-04	16:34:00	0
2009-03-04	16:35:00	0
2009-03-04	16:36:00	0
2009-03-04	16:37:00	0
2009-03-04	16:38:00	0
2009-03-04	16:39:00	0
2009-03-04	16:40:00	0
2009-03-04	16:41:00	0
2009-03-04	16:42:00	0
2009-03-04	16:43:00	0
2009-03-04	16:44:00	0
2009-03-04	16:45:00	0
2009-03-04	16:46:00	0
2009-03-04	16:47:00	0
2009-03-04	16:48:00	0
2009-03-04	16:49:00	0
2009-03-04	16:50:00	0
2009-03-04	16:51:00	0
2009-03-04	16:52:00	0
2009-03-04	16:53:00	0
2009-03-04	16:54:00	0
2009-03-04	16:55:00	0
2009-03-04	16:56:00	0
2009-03-04	16:57:00	0
2009-03-04	16:58:00	0
2009-03-04	16:59:00	0
2009-03-04	17:00:00	0
2009-03-04	17:01:00	0
2009-03-04	17:02:00	0
2009-03-04	17:03:00	0
2009-03-04	17:04:00	0
2009-03-04	17:05:00	0
2009-03-04	17:06:00	0
2009-03-04	17:07:00	0
2009-03-04	17:08:00	0
2009-03-04	17:09:00	0
2009-03-04	17:10:00	0
2009-03-04	17:11:00	0
2009-03-04	17:12:00	0
2009-03-04	17:13:00	0
2009-03-04	17:14:00	0
2009-03-04	17:15:00	0
2009-03-04	17:16:00	0
2009-03-04	17:17:00	0
2009-03-04	17:18:00	0
2009-03-04	17:19:00	0
2009-03-04	17:20:00	0
2009-03-04	17:21:00	0
2009-03-04	17:22:00	0
2009-03-04	17:23:00	0
2009-03-04	17:24:00	0
2009-03-04	17:25:00	0
2009-03-04	17:26:00	0
2009-03-04	17:27:00	0
2009-03-04	17:28:00	0
2009-03-04	17:29:00	0
2009-03-04	17:30:00	0
2009-03-04	17:31:00	0
2009-03-04	17:32:00	0
2009-03-04	17:33:00	0
2009-03-04	17:34:00	0
2009-03-04	17:35:00	0
2009-03-04	17:36:00	0
2009-03-04	17:37:00	0
2009-03-04	17:38:00	0
2009-03-04	17:39:00	0
2009-03-04	17:40:00	0
2009-03-04	17:41:00	0
2009-03-04	17:42:00	0
2009-03-04	17:43:00	0
2009-03-04	17:44:00	0
2009-03-04	17:45:00	0
2009-03-04	17:46:00	0
2009-03-04	17:47:00	0
2009-03-04	17:48:00	0
2009-03-04	17:49:00	0
2009-03-04	17:50:00	0
2009-03-04	17:51:00	0
2009-03-04	17:52:00	0
2009-03-04	17:53:00	0
2009-03-04	17:54:00	0
2009-03-04	17:55:00	0
2009-03-04	17:56:00	0
2009-03-04	17:57:00	0
2009-03-04	17:58:00	0
2009-03-04	17:59:00	0
2009-03-04	18:00:00	0	M
2009-03-04	18:01:00	0
2009-03-04	18:02:00	12
2009-03-04	18:03:00	0
2009-03-04	18:04:00	105
2009-03-04	18:05:00	93
2009-03-04	18:06:00	47
2009-03-04	18:07:00	58
2009-03-04	18:08:00	47
2009-03-04	18:09:00	0
2009-03-04	18:10:00	0
2009-03-04	18:11:00	0
2009-03-04	18:12:00	81
2009-03-04	18:13:00	0
2009-03-04	18:14:00	0
2009-03-04	18:15:00	0
2009-03-04	18:16:00	0
2009-03-04	18:17:00	0
2009-03-04	18:18:00	0
2009-03-04	18:19:00	0
2009-03-04	18:20:00	93
2009-03-04	18:21:00	93
2009-03-04	18:22:00	0
2009-03-04	18:23:00	0
2009-03-04	18:24:00	0
2009-03-04	18:25:00	0
2009-03-04	18:26:00	0
2009-03-04	18:27:00	0
2009-03-04	18:28:00	0
2009-03-04	18:29:00	0
2009-03-04	18:30:00	0
2009-03-04	18:31:00	0
2009-03-04	18:32:00	0
2009-03-04	18:33:00	70
2009-03-04	18:34:00	35
2009-03-04	18:35:00	35
2009-03-04	18:36:00	0
2009-03-04	18:37:00	23
2009-03-04	18:38:00	179
2009-03-04	18:39:00	179
2009-03-04	18:40:00	321
2009-03-04	18:41:00	165
2009-03-04	18:42:00	58
2009-03-04	18:43:00	70
2009-03-04	18:44:00	116
2009-03-04	18:45:00	70
2009-03-04	18:46:00	81
2009-03-04	18:47:00	81
2009-03-04	18:48:00	58
2009-03-04	18:49:00	35
2009-03-04	18:50:00	0
2009-03-04	18:51:00	128
2009-03-04	18:52:00	105
2009-03-04	18:53:00	128
2009-03-04	18:54:00	193
2009-03-04	18:55:00	81
2009-03-04	18:56:00	0
2009-03-04	18:57:00	0
2009-03-04	18:58:00	0
2009-03-04	18:59:00	128
2009-03-04	19:00:00	70
2009-03-04	19:01:00	105
2009-03-04	19:02:00	0
2009-03-04	19:03:00	0
2009-03-04	19:04:00	23
2009-03-04	19:05:00	0
2009-03-04	19:06:00	58
2009-03-04	19:07:00	0
2009-03-04	19:08:00	70
2009-03-04	19:09:00	81
2009-03-04	19:10:00	58
2009-03-04	19:11:00	47
2009-03-04	19:12:00	35
2009-03-04	19:13:00	35
2009-03-04	19:14:00	35
2009-03-04	19:15:00	0
2009-03-04	19:16:00	0
2009-03-04	19:17:00	165
2009-03-04	19:18:00	70
2009-03-04	19:19:00	35
2009-03-04	19:20:00	58
2009-03-04	19:21:00	70
2009-03-04	19:22:00	35
2009-03-04	19:23:00	35
2009-03-04	19:24:00	70
2009-03-04	19:25:00	23
2009-03-04	19:26:00	81
2009-03-04	19:27:00	12
2009-03-04	19:28:00	47
2009-03-04	19:29:00	58
2009-03-04	19:30:00	12
2009-03-04	19:31:00	93
2009-03-04	19:32:00	0
2009-03-04	19:33:00	0
2009-03-04	19:34:00	0
2009-03-04	19:35:00	0
2009-03-04	19:36:00	0
2009-03-04	19:37:00	0
2009-03-04	19:38:00	0
2009-03-04	19:39:00	0
2009-03-04	19:40:00	0
2009-03-04	19:41:00	0
2009-03-04	19:42:00	0
2009-03-04	19:43:00	0
2009-03-04	19:44:00	0
2009-03-04	19:45:00	116
2009-03-04	19:46:00	47
2009-03-04	19:47:00	58
2009-03-04	19:48:00	47
2009-03-04	19:49:00	35
2009-03-04	19:50:00	0
2009-03-04	19:51:00	12
2009-03-04	19:52:00	47
2009-03-04	19:53:00	0
2009-03-04	19:54:00	0
2009-03-04	19:55:00	0
2009-03-04	19:56:00	0
2009-03-04	19:57:00	0
2009-03-04	19:58:00	0
2009-03-04	19:59:00	0
2009-03-04	20:00:00	0
2009-03-04	20:01:00	0
2009-03-04	20:02:00	0
2009-03-04	20:03:00	116
2009-03-04	20:04:00	81
2009-03-04	20:05:00	58
2009-03-04	20:06:00	35
2009-03-04	20:07:00	81
2009-03-04	20:08:00	47
2009-03-04	20:09:00	35
2009-03-04	20:10:00	207
2009-03-04	20:11:00	47
2009-03-04	20:12:00	35
2009-03-04	20:13:00	58
2009-03-04	20:14:00	0
2009-03-04	20:15:00	47
2009-03-04	20:16:00	23
2009-03-04	20:17:00	370
2009-03-04	20:18:00	817
2009-03-04	20:19:00	1622
2009-03-04	20:20:00	621
2009-03-04	20:21:00	140
2009-03-04	20:22:00	47
2009-03-04	20:23:00	23
2009-03-04	20:24:00	0
2009-03-04	20:25:00	221
2009-03-04	20:26:00	419
2009-03-04	20:27:00	207
2009-03-04	20:28:00	12
2009-03-04	20:29:00	23
2009-03-04	20:30:00	0
2009-03-04	20:31:00	0
2009-03-04	20:32:00	0
2009-03-04	20:33:00	0
2009-03-04	20:34:00	105
2009-03-04	20:35:00	35
2009-03-04	20:36:00	70
2009-03-04	20:37:00	0
2009-03-04	20:38:00	0
2009-03-04	20:39:00	0
2009-03-04	20:40:00	0
2009-03-04	20:41:00	35
2009-03-04	20:42:00	0
2009-03-04	20:43:00	0
2009-03-04	20:44:00	0
2009-03-04	20:45:00	0
2009-03-04	20:46:00	0
2009-03-04	20:47:00	0
2009-03-04	20:48:00	35
2009-03-04	20:49:00	47
2009-03-04	20:50:00	193
2009-03-04	20:51:00	0
2009-03-04	20:52:00	0
2009-03-04	20:53:00	0
2009-03-04	20:54:00	0
2009-03-04	20:55:00	0
2009-03-04	20:56:00	0
2009-03-04	20:57:00	0
2009-03-04	20:58:00	0
2009-03-04	20:59:00	0
2009-03-04	21:00:00	179
2009-03-04	21:01:00	151
2009-03-04	21:02:00	179
2009-03-04	21:03:00	165
2009-03-04	21:04:00	249
2009-03-04	21:05:00	105
2009-03-04	21:06:00	12
2009-03-04	21:07:00	0
2009-03-04	21:08:00	12
2009-03-04	21:09:00	35
2009-03-04	21:10:00	0
2009-03-04	21:11:00	403
2009-03-04	21:12:00	249
2009-03-04	21:13:00	179
2009-03-04	21:14:00	93
2009-03-04	21:15:00	370
2009-03-04	21:16:00	1694
2009-03-04	21:17:00	1354
2009-03-04	21:18:00	1885
2009-03-04	21:19:00	1622
2009-03-04	21:20:00	2267
2009-03-04	21:21:00	1354
2009-03-04	21:22:00	1203
2009-03-04	21:23:00	1452
2009-03-04	21:24:00	1657
2009-03-04	21:25:00	987
2009-03-04	21:26:00	489
2009-03-04	21:27:00	70
2009-03-04	21:28:00	35
2009-03-04	21:29:00	23
2009-03-04	21:30:00	47
2009-03-04	21:31:00	12
2009-03-04	21:32:00	23
2009-03-04	21:33:00	35
2009-03-04	21:34:00	0
2009-03-04	21:35:00	0
2009-03-04	21:36:00	0
2009-03-04	21:37:00	0
2009-03-04	21:38:00	0
2009-03-04	21:39:00	23
2009-03-04	21:40:00	23
2009-03-04	21:41:00	12
2009-03-04	21:42:00	0
2009-03-04	21:43:00	0
2009-03-04	21:44:00	0
2009-03-04	21:45:00	0
2009-03-04	21:46:00	0
2009-03-04	21:47:00	0
2009-03-04	21:48:00	35
2009-03-04	21:49:00	337
2009-03-04	21:50:00	179
2009-03-04	21:51:00	0
2009-03-04	21:52:00	0
2009-03-04	21:53:00	0
2009-03-04	21:54:00	0
2009-03-04	21:55:00	0
2009-03-04	21:56:00	0
2009-03-04	21:57:00	0
2009-03-04	21:58:00	0
2009-03-04	21:59:00	0
2009-03-04	22:00:00	0
2009-03-04	22:01:00	0
2009-03-04	22:02:00	0
2009-03-04	22:03:00	0
2009-03-04	22:04:00	0
2009-03-04	22:05:00	0
2009-03-04	22:06:00	0
2009-03-04	22:07:00	0
2009-03-04	22:08:00	0
2009-03-04	22:09:00	0
2009-03-04	22:10:00	0
2009-03-04	22:11:00	0
2009-03-04	22:12:00	0
2009-03-04	22:13:00	0
2009-03-04	22:14:00	0
2009-03-04	22:15:00	0
2009-03-04	22:16:00	0
2009-03-04	22:17:00	0
2009-03-04	22:18:00	0
2009-03-04	22:19:00	0
2009-03-04	22:20:00	0
2009-03-04	22:21:00	0
2009-03-04	22:22:00	0
2009-03-04	22:23:00	0
2009-03-04	22:24:00	23
2009-03-04	22:25:00	0
2009-03-04	22:26:00	0
2009-03-04	22:27:00	0
2009-03-04	22:28:00	0
2009-03-04	22:29:00	0
2009-03-04	22:30:00	0
2009-03-04	22:31:00	0
2009-03-04	22:32:00	0
2009-03-04	22:33:00	0
2009-03-04	22:34:00	0
2009-03-04	22:35:00	12
2009-03-04	22:36:00	0
2009-03-04	22:37:00	0
2009-03-04	22:38:00	0
2009-03-04	22:39:00	0
2009-03-04	22:40:00	0
2009-03-04	22:41:00	0
2009-03-04	22:42:00	0
2009-03-04	22:43:00	0
2009-03-04	22:44:00	0
2009-03-04	22:45:00	0
2009-03-04	22:46:00	0
2009-03-04	22:47:00	0
2009-03-04	22:48:00	0
2009-03-04	22:49:00	0
2009-03-04	22:50:00	0
2009-03-04	22:51:00	0
2009-03-04	22:52:00	0
2009-03-04	22:53:00	0
2009-03-04	22:54:00	0
2009-03-04	22:55:00	0
2009-03-04	22:56:00	0
2009-03-04	22:57:00	0
2009-03-04	22:58:00	0
2009-03-04	22:59:00	0
2009-03-04	23:00:00	0
2009-03-04	23:01:00	0
2009-03-04	23:02:00	0
2009-03-04	23:03:00	0
2009-03-04	23:04:00	0
2009-03-04	23:05:00	0
2009-03-04	23:06:00	0
2009-03-04	23:07:00	0
2009-03-04	23:08:00	0
2009-03-04	23:09:00	0
2009-03-04	23:10:00	0
2009-03-04	23:11:00	0
2009-03-04	23:12:00	0
2009-03-04	23:13:00	0
2009-03-04	23:14:00	0
2009-03-04	23:15:00	0
2009-03-04	23:16:00	0
2009-03-04	23:17:00	0
2009-03-04	23:18:00	0
2009-03-04	23:19:00	0
2009-03-04	23:20:00	0
2009-03-04	23:21:00	0
2009-03-04	23:22:00	0
2009-03-04	23:23:00	0
2009-03-04	23:24:00	0
2009-03-04	23:25:00	0
2009-03-04	23:26:00	0
2009-03-04	23:27:00	0
2009-03-04	23:28:00	0
2009-03-04	23:29:00	0
2009-03-04	23:30:00	0
2009-03-04	23:31:00	0
2009-03-04	23:32:00	0
2009-03-04	23:33:00	0
2009-03-04	23:34:00	0
2009-03-04	23:35:00	0
2009-03-04	23:36:00	0
2009-03-04	23:37:00	0
2009-03-04	23:38:00	0
2009-03-04	23:39:00	0
2009-03-04	23:40:00	0
2009-03-04	23:41:00	0
2009-03-04	23:42:00	0
2009-03-04	23:43:00	0
2009-03-04	23:44:00	0
2009-03-04	23:45:00	0
2009-03-04	23:46:00	0
2009-03-04	23:47:00	0
2009-03-04	23:48:00	0
2009-03-04	23:49:00	0
2009-03-04	23:50:00	0
2009-03-04	23:51:00	0
2009-03-04	23:52:00	0
2009-03-04	23:53:00	0
2009-03-04	23:54:00	0
2009-03-04	23:55:00	0
2009-03-04	23:56:00	0
2009-03-04	23:57:00	105
2009-03-04	23:58:00	23
2009-03-04	23:59:00	0
2009-03-05	00:00:00	0
2009-03-05	00:01:00	0
2009-03-05	00:02:00	0
2009-03-05	00:03:00	0
2009-03-05	00:04:00	0
2009-03-05	00:05:00	0
2009-03-05	00:06:00	0
2009-03-05	00:07:00	0
2009-03-05	00:08:00	0
2009-03-05	00:09:00	0
2009-03-05	00:10:00	0
2009-03-05	00:11:00	0
2009-03-05	00:12:00	12
2009-03-05	00:13:00	193
2009-03-05	00:14:00	863
2009-03-05	00:15:00	770
2009-03-05	00:16:00	1203
2009-03-05	00:17:00	291
2009-03-05	00:18:00	663
2009-03-05	00:19:00	140
2009-03-05	00:20:00	0
2009-03-05	00:21:00	0
2009-03-05	00:22:00	0
2009-03-05	00:23:00	0
2009-03-05	00:24:00	0
2009-03-05	00:25:00	0
2009-03-05	00:26:00	0
2009-03-05	00:27:00	0
2009-03-05	00:28:00	0
2009-03-05	00:29:00	0
2009-03-05	00:30:00	0
2009-03-05	00:31:00	0
2009-03-05	00:32:00	0
2009-03-05	00:33:00	0
2009-03-05	00:34:00	0
2009-03-05	00:35:00	0
2009-03-05	00:36:00	0
2009-03-05	00:37:00	0
2009-03-05	00:38:00	0
2009-03-05	00:39:00	0
2009-03-05	00:40:00	0
2009-03-05	00:41:00	0
2009-03-05	00:42:00	0
2009-03-05	00:43:00	277
2009-03-05	00:44:00	0
2009-03-05	00:45:00	0
2009-03-05	00:46:00	0
2009-03-05	00:47:00	0
2009-03-05	00:48:00	0
2009-03-05	00:49:00	0
2009-03-05	00:50:00	0
2009-03-05	00:51:00	0
2009-03-05	00:52:00	0
2009-03-05	00:53:00	0
2009-03-05	00:54:00	0
2009-03-05	00:55:00	0
2009-03-05	00:56:00	0
2009-03-05	00:57:00	0
2009-03-05	00:58:00	0
2009-03-05	00:59:00	0
2009-03-05	01:00:00	0
2009-03-05	01:01:00	0
2009-03-05	01:02:00	0
2009-03-05	01:03:00	0
2009-03-05	01:04:00	0
2009-03-05	01:05:00	0
2009-03-05	01:06:00	0
2009-03-05	01:07:00	0
2009-03-05	01:08:00	0
2009-03-05	01:09:00	0
2009-03-05	01:10:00	0
2009-03-05	01:11:00	0
2009-03-05	01:12:00	0
2009-03-05	01:13:00	0
2009-03-05	01:14:00	0
2009-03-05	01:15:00	0
2009-03-05	01:16:00	0
2009-03-05	01:17:00	0
2009-03-05	01:18:00	0
2009-03-05	01:19:00	0
2009-03-05	01:20:00	0
2009-03-05	01:21:00	0
2009-03-05	01:22:00	0
2009-03-05	01:23:00	0
2009-03-05	01:24:00	0
2009-03-05	01:25:00	0
2009-03-05	01:26:00	0
2009-03-05	01:27:00	0
2009-03-05	01:28:00	0
2009-03-05	01:29:00	0
2009-03-05	01:30:00	0
2009-03-05	01:31:00	0
2009-03-05	01:32:00	0
2009-03-05	01:33:00	0
2009-03-05	01:34:00	0
2009-03-05	01:35:00	0
2009-03-05	01:36:00	0
2009-03-05	01:37:00	0
2009-03-05	01:38:00	0
2009-03-05	01:39:00	0
2009-03-05	01:40:00	0
2009-03-05	01:41:00	0
2009-03-05	01:42:00	0
2009-03-05	01:43:00	0
2009-03-05	01:44:00	0
2009-03-05	01:45:00	0
2009-03-05	01:46:00	0
2009-03-05	01:47:00	0
2009-03-05	01:48:00	0
2009-03-05	01:49:00	0
2009-03-05	01:50:00	0
2009-03-05	01:51:00	0
2009-03-05	01:52:00	0
2009-03-05	01:53:00	0
2009-03-05	01:54:00	0
2009-03-05	01:55:00	0
2009-03-05	01:56:00	0
2009-03-05	01:57:00	0
2009-03-05	01:58:00	0
2009-03-05	01:59:00	0
2009-03-05	02:00:00	0
2009-03-05	02:01:00	0
2009-03-05	02:02:00	0
2009-03-05	02:03:00	0
2009-03-05	02:04:00	0
2009-03-05	02:05:00	0
2009-03-05	02:06:00	0
2009-03-05	02:07:00	0
2009-03-05	02:08:00	0
2009-03-05	02:09:00	0
2009-03-05	02:10:00	0
2009-03-05	02:11:00	0
2009-03-05	02:12:00	0
2009-03-05	02:13:00	0
2009-03-05	02:14:00	0
2009-03-05	02:15:00	0
2009-03-05	02:16:00	0
2009-03-05	02:17:00	0
2009-03-05	02:18:00	0
2009-03-05	02:19:00	0
2009-03-05	02:20:00	0
2009-03-05	02:21:00	0
2009-03-05	02:22:00	0
2009-03-05	02:23:00	0
2009-03-05	02:24:00	0
2009-03-05	02:25:00	0
2009-03-05	02:26:00	0
2009-03-05	02:27:00	12
2009-03-05	02:28:00	70
2009-03-05	02:29:00	0
2009-03-05	02:30:00	0
2009-03-05	02:31:00	0
2009-03-05	02:32:00	0
2009-03-05	02:33:00	0
2009-03-05	02:34:00	0
2009-03-05	02:35:00	0
2009-03-05	02:36:00	0
2009-03-05	02:37:00	0
2009-03-05	02:38:00	0
2009-03-05	02:39:00	0
2009-03-05	02:40:00	0
2009-03-05	02:41:00	0
2009-03-05	02:42:00	0
2009-03-05	02:43:00	0
2009-03-05	02:44:00	0
2009-03-05	02:45:00	0
2009-03-05	02:46:00	0
2009-03-05	02:47:00	0
2009-03-05	02:48:00	0
2009-03-05	02:49:00	0
2009-03-05	02:50:00	0
2009-03-05	02:51:00	0
2009-03-05	02:52:00	0
2009-03-05	02:53:00	0
2009-03-05	02:54:00	0
2009-03-05	02:55:00	0
2009-03-05	02:56:00	0
2009-03-05	02:57:00	0
2009-03-05	02:58:00	0
2009-03-05	02:59:00	0
2009-03-05	03:00:00	0
2009-03-05	03:01:00	0
2009-03-05	03:02:00	0
2009-03-05	03:03:00	0
2009-03-05	03:04:00	0
2009-03-05	03:05:00	0
2009-03-05	03:06:00	0
2009-03-05	03:07:00	0
2009-03-05	03:08:00	0
2009-03-05	03:09:00	0
2009-03-05	03:10:00	0
2009-03-05	03:11:00	0
2009-03-05	03:12:00	0
2009-03-05	03:13:00	0
2009-03-05	03:14:00	0
2009-03-05	03:15:00	0
2009-03-05	03:16:00	47
2009-03-05	03:17:00	0
2009-03-05	03:18:00	0
2009-03-05	03:19:00	0
2009-03-05	03:20:00	0
2009-03-05	03:21:00	0
2009-03-05	03:22:00	0
2009-03-05	03:23:00	0
2009-03-05	03:24:00	0
2009-03-05	03:25:00	0
2009-03-05	03:26:00	0
2009-03-05	03:27:00	0
2009-03-05	03:28:00	0
2009-03-05	03:29:00	0
2009-03-05	03:30:00	12
2009-03-05	03:31:00	0
2009-03-05	03:32:00	0
2009-03-05	03:33:00	0
2009-03-05	03:34:00	0
2009-03-05	03:35:00	0
2009-03-05	03:36:00	0
2009-03-05	03:37:00	0
2009-03-05	03:38:00	0
2009-03-05	03:39:00	0
2009-03-05	03:40:00	0
2009-03-05	03:41:00	0
2009-03-05	03:42:00	0
2009-03-05	03:43:00	0
2009-03-05	03:44:00	0
2009-03-05	03:45:00	0
2009-03-05	03:46:00	0
2009-03-05	03:47:00	0
2009-03-05	03:48:00	0
2009-03-05	03:49:00	0
2009-03-05	03:50:00	0
2009-03-05	03:51:00	0
2009-03-05	03:52:00	0
2009-03-05	03:53:00	0
2009-03-05	03:54:00	0
2009-03-05	03:55:00	0
2009-03-05	03:56:00	0
2009-03-05	03:57:00	0
2009-03-05	03:58:00	0
2009-03-05	03:59:00	0
2009-03-05	04:00:00	0
2009-03-05	04:01:00	0
2009-03-05	04:02:00	0
2009-03-05	04:03:00	0
2009-03-05	04:04:00	0
2009-03-05	04:05:00	0
2009-03-05	04:06:00	0
2009-03-05	04:07:00	0
2009-03-05	04:08:00	0
2009-03-05	04:09:00	0
2009-03-05	04:10:00	0
2009-03-05	04:11:00	0
2009-03-05	04:12:00	0
2009-03-05	04:13:00	0
2009-03-05	04:14:00	0
2009-03-05	04:15:00	0
2009-03-05	04:16:00	0
2009-03-05	04:17:00	0
2009-03-05	04:18:00	0
2009-03-05	04:19:00	0
2009-03-05	04:20:00	0
2009-03-05	04:21:00	0
2009-03-05	04:22:00	0
2009-03-05	04:23:00	0
2009-03-05	04:24:00	0
2009-03-05	04:25:00	12
2009-03-05	04:26:00	0
2009-03-05	04:27:00	0
2009-03-05	04:28:00	0
2009-03-05	04:29:00	0
2009-03-05	04:30:00	0
2009-03-05	04:31:00	0
2009-03-05	04:32:00	0
2009-03-05	04:33:00	0
2009-03-05	04:34:00	0
2009-03-05	04:35:00	0
2009-03-05	04:36:00	0
2009-03-05	04:37:00	0
2009-03-05	04:38:00	0
2009-03-05	04:39:00	0
2009-03-05	04:40:00	0
2009-03-05	04:41:00	0
2009-03-05	04:42:00	0
2009-03-05	04:43:00	0
2009-03-05	04:44:00	0
2009-03-05	04:45:00	0
2009-03-05	04:46:00	0
2009-03-05	04:47:00	0
2009-03-05	04:48:00	0
2009-03-05	04:49:00	140
2009-03-05	04:50:00	0
2009-03-05	04:51:00	0
2009-03-05	04:52:00	0
2009-03-05	04:53:00	0
2009-03-05	04:54:00	0
2009-03-05	04:55:00	0
2009-03-05	04:56:00	0
2009-03-05	04:57:00	0
2009-03-05	04:58:00	0
2009-03-05	04:59:00	0
2009-03-05	05:00:00	0
2009-03-05	05:01:00	0
2009-03-05	05:02:00	0
2009-03-05	05:03:00	0
2009-03-05	05:04:00	0
2009-03-05	05:05:00	12
2009-03-05	05:06:00	0
2009-03-05	05:07:00	0
2009-03-05	05:08:00	0
2009-03-05	05:09:00	0
2009-03-05	05:10:00	0
2009-03-05	05:11:00	0
2009-03-05	05:12:00	0
2009-03-05	05:13:00	0
2009-03-05	05:14:00	0
2009-03-05	05:15:00	0
2009-03-05	05:16:00	0
2009-03-05	05:17:00	0
2009-03-05	05:18:00	0
2009-03-05	05:19:00	0
2009-03-05	05:20:00	0
2009-03-05	05:21:00	0
2009-03-05	05:22:00	0
2009-03-05	05:23:00	0
2009-03-05	05:24:00	12
2009-03-05	05:25:00	0
2009-03-05	05:26:00	0
2009-03-05	05:27:00	0
2009-03-05	05:28:00	0
2009-03-05	05:29:00	0
2009-03-05	05:30:00	0
2009-03-05	05:31:00	0
2009-03-05	05:32:00	0
2009-03-05	05:33:00	0
2009-03-05	05:34:00	0
2009-03-05	05:35:00	0
2009-03-05	05:36:00	0
2009-03-05	05:37:00	0
2009-03-05	05:38:00	0
2009-03-05	05:39:00	0
2009-03-05	05:40:00	0
2009-03-05	05:41:00	0
2009-03-05	05:42:00	0
2009-03-05	05:43:00	0
2009-03-05	05:44:00	0
2009-03-05	05:45:00	0
2009-03-05	05:46:00	0
2009-03-05	05:47:00	47
2009-03-05	05:48:00	23
2009-03-05	05:49:00	0
2009-03-05	05:50:00	0
2009-03-05	05:51:00	0
2009-03-05	05:52:00	0
2009-03-05	05:53:00	0
2009-03-05	05:54:00	0
2009-03-05	05:55:00	0
2009-03-05	05:56:00	0
2009-03-05	05:57:00	0
2009-03-05	05:58:00	0
2009-03-05	05:59:00	0
2009-03-05	06:00:00	0
2009-03-05	06:01:00	0
2009-03-05	06:02:00	0
2009-03-05	06:03:00	0
2009-03-05	06:04:00	0
2009-03-05	06:05:00	35
2009-03-05	06:06:00	0
2009-03-05	06:07:00	0
2009-03-05	06:08:00	0
2009-03-05	06:09:00	0
2009-03-05	06:10:00	0
2009-03-05	06:11:00	47
2009-03-05	06:12:00	23
2009-03-05	06:13:00	0
2009-03-05	06:14:00	0
2009-03-05	06:15:00	0
2009-03-05	06:16:00	0
2009-03-05	06:17:00	0
2009-03-05	06:18:00	0
2009-03-05	06:19:00	0
2009-03-05	06:20:00	0
2009-03-05	06:21:00	0
2009-03-05	06:22:00	0
2009-03-05	06:23:00	0
2009-03-05	06:24:00	0
2009-03-05	06:25:00	0
2009-03-05	06:26:00	35
2009-03-05	06:27:00	0
2009-03-05	06:28:00	0
2009-03-05	06:29:00	0
2009-03-05	06:30:00	0
2009-03-05	06:31:00	0
2009-03-05	06:32:00	0
2009-03-05	06:33:00	0
2009-03-05	06:34:00	0
2009-03-05	06:35:00	0
2009-03-05	06:36:00	0
2009-03-05	06:37:00	0
2009-03-05	06:38:00	0
2009-03-05	06:39:00	0
2009-03-05	06:40:00	0
2009-03-05	06:41:00	0
2009-03-05	06:42:00	0
2009-03-05	06:43:00	0
2009-03-05	06:44:00	0
2009-03-05	06:45:00	0
2009-03-05	06:46:00	0
2009-03-05	06:47:00	0
2009-03-05	06:48:00	0
2009-03-05	06:49:00	0
2009-03-05	06:50:00	0
2009-03-05	06:51:00	0
2009-03-05	06:52:00	0
2009-03-05	06:53:00	0
2009-03-05	06:54:00	0
2009-03-05	06:55:00	0
2009-03-05	06:56:00	0
2009-03-05	06:57:00	0
2009-03-05	06:58:00	0
2009-03-05	06:59:00	0
2009-03-05	07:00:00	0
2009-03-05	07:01:00	0
2009-03-05	07:02:00	0
2009-03-05	07:03:00	0
2009-03-05	07:04:00	0
2009-03-05	07:05:00	0
2009-03-05	07:06:00	0
2009-03-05	07:07:00	0
2009-03-05	07:08:00	0
2009-03-05	07:09:00	0
2009-03-05	07:10:00	0
2009-03-05	07:11:00	0
2009-03-05	07:12:00	0
2009-03-05	07:13:00	0
2009-03-05	07:14:00	0
2009-03-05	07:15:00	0
2009-03-05	07:16:00	0
2009-03-05	07:17:00	0
2009-03-05	07:18:00	0
2009-03-05	07:19:00	0
2009-03-05	07:20:00	0
2009-03-05	07:21:00	0
2009-03-05	07:22:00	12
2009-03-05	07:23:00	0
2009-03-05	07:24:00	0
2009-03-05	07:25:00	0
2009-03-05	07:26:00	0
2009-03-05	07:27:00	0
2009-03-05	07:28:00	0
2009-03-05	07:29:00	93
2009-03-05	07:30:00	305
2009-03-05	07:31:00	0
2009-03-05	07:32:00	0
2009-03-05	07:33:00	0
2009-03-05	07:34:00	0
2009-03-05	07:35:00	0
2009-03-05	07:36:00	0
2009-03-05	07:37:00	0
2009-03-05	07:38:00	0
2009-03-05	07:39:00	0
2009-03-05	07:40:00	0
2009-03-05	07:41:00	0
2009-03-05	07:42:00	0
2009-03-05	07:43:00	0
2009-03-05	07:44:00	0
2009-03-05	07:45:00	0
2009-03-05	07:46:00	0
2009-03-05	07:47:00	0
2009-03-05	07:48:00	0
2009-03-05	07:49:00	0
2009-03-05	07:50:00	0
2009-03-05	07:51:00	0
2009-03-05	07:52:00	0
2009-03-05	07:53:00	0
2009-03-05	07:54:00	0
2009-03-05	07:55:00	105
2009-03-05	07:56:00	0
2009-03-05	07:57:00	0
2009-03-05	07:58:00	0
2009-03-05	07:59:00	0
2009-03-05	08:00:00	0
2009-03-05	08:01:00	105
2009-03-05	08:02:00	179
2009-03-05	08:03:00	140
2009-03-05	08:04:00	105
2009-03-05	08:05:00	81
2009-03-05	08:06:00	354
2009-03-05	08:07:00	47
2009-03-05	08:08:00	47
2009-03-05	08:09:00	0
2009-03-05	08:10:00	0
2009-03-05	08:11:00	0
2009-03-05	08:12:00	0
2009-03-05	08:13:00	305
2009-03-05	08:14:00	93
2009-03-05	08:15:00	2223
2009-03-05	08:16:00	1925
2009-03-05	08:17:00	1925
2009-03-05	08:18:00	1012
2009-03-05	08:19:00	1064
2009-03-05	08:20:00	1806
2009-03-05	08:21:00	684
2009-03-05	08:22:00	961
2009-03-05	08:23:00	1387
2009-03-05	08:24:00	221
2009-03-05	08:25:00	128
2009-03-05	08:26:00	58
2009-03-05	08:27:00	105
2009-03-05	08:28:00	23
2009-03-05	08:29:00	0
2009-03-05	08:30:00	0
2009-03-05	08:31:00	0
2009-03-05	08:32:00	0
2009-03-05	08:33:00	0
2009-03-05	08:34:00	12
2009-03-05	08:35:00	0
2009-03-05	08:36:00	0
2009-03-05	08:37:00	0
2009-03-05	08:38:00	0
2009-03-05	08:39:00	451
2009-03-05	08:40:00	193
2009-03-05	08:41:00	221
2009-03-05	08:42:00	370
2009-03-05	08:43:00	0
2009-03-05	08:44:00	0
2009-03-05	08:45:00	12
2009-03-05	08:46:00	0
2009-03-05	08:47:00	0
2009-03-05	08:48:00	0
2009-03-05	08:49:00	0
2009-03-05	08:50:00	0
2009-03-05	08:51:00	0
2009-03-05	08:52:00	0
2009-03-05	08:53:00	0
2009-03-05	08:54:00	128
2009-03-05	08:55:00	0
2009-03-05	08:56:00	0
2009-03-05	08:57:00	0
2009-03-05	08:58:00	0
2009-03-05	08:59:00	0
2009-03-05	09:00:00	0
2009-03-05	09:01:00	0
2009-03-05	09:02:00	0
2009-03-05	09:03:00	0
2009-03-05	09:04:00	0
2009-03-05	09:05:00	47
2009-03-05	09:06:00	47
2009-03-05	09:07:00	0
2009-03-05	09:08:00	0
[truncated: 26,811 more rows]

## Sheet: 3.23.09
Actogram, Copy Raw Data, All Days
Identity:	Baxter
Filename:	E:\Active Research Files\meloxicam titre canine\cases\baxter\Baxter 3.23.09.AWC
Gender:	M
Age:	3
Height:	76.2 cm	30.0 in
Weight:	29.5 kg	65.0 lbs
Start Date:	23-Mar-2009 (Mon)
Start Time:	18:00:00
Interval:	1.00 mins
Date Stamp:	Time Stamp:	Activity Data:	Marker Press:
2009-03-23	00:00:00	0
2009-03-23	00:01:00	0
2009-03-23	00:02:00	0
2009-03-23	00:03:00	0
2009-03-23	00:04:00	0
2009-03-23	00:05:00	0
2009-03-23	00:06:00	0
2009-03-23	00:07:00	0
2009-03-23	00:08:00	0
2009-03-23	00:09:00	0
2009-03-23	00:10:00	0
2009-03-23	00:11:00	0
2009-03-23	00:12:00	0
2009-03-23	00:13:00	0
2009-03-23	00:14:00	0
2009-03-23	00:15:00	0
2009-03-23	00:16:00	0
2009-03-23	00:17:00	0
2009-03-23	00:18:00	0
2009-03-23	00:19:00	0
2009-03-23	00:20:00	0
2009-03-23	00:21:00	0
2009-03-23	00:22:00	0
2009-03-23	00:23:00	0
2009-03-23	00:24:00	0
2009-03-23	00:25:00	0
2009-03-23	00:26:00	0
2009-03-23	00:27:00	0
2009-03-23	00:28:00	0
2009-03-23	00:29:00	0
2009-03-23	00:30:00	0
2009-03-23	00:31:00	0
2009-03-23	00:32:00	0
2009-03-23	00:33:00	0
2009-03-23	00:34:00	0
2009-03-23	00:35:00	0
2009-03-23	00:36:00	0
2009-03-23	00:37:00	0
2009-03-23	00:38:00	0
2009-03-23	00:39:00	0
2009-03-23	00:40:00	0
2009-03-23	00:41:00	0
2009-03-23	00:42:00	0
2009-03-23	00:43:00	0
2009-03-23	00:44:00	0
2009-03-23	00:45:00	0
2009-03-23	00:46:00	0
2009-03-23	00:47:00	0
2009-03-23	00:48:00	0
2009-03-23	00:49:00	0
2009-03-23	00:50:00	0
2009-03-23	00:51:00	0
2009-03-23	00:52:00	0
2009-03-23	00:53:00	0
2009-03-23	00:54:00	0
2009-03-23	00:55:00	0
2009-03-23	00:56:00	0
2009-03-23	00:57:00	0
2009-03-23	00:58:00	0
2009-03-23	00:59:00	0
2009-03-23	01:00:00	0
2009-03-23	01:01:00	0
2009-03-23	01:02:00	0
2009-03-23	01:03:00	0
2009-03-23	01:04:00	0
2009-03-23	01:05:00	0
2009-03-23	01:06:00	0
2009-03-23	01:07:00	0
2009-03-23	01:08:00	0
2009-03-23	01:09:00	0
2009-03-23	01:10:00	0
2009-03-23	01:11:00	0
2009-03-23	01:12:00	0
2009-03-23	01:13:00	0
2009-03-23	01:14:00	0
2009-03-23	01:15:00	0
2009-03-23	01:16:00	0
2009-03-23	01:17:00	0
2009-03-23	01:18:00	0
2009-03-23	01:19:00	0
2009-03-23	01:20:00	0
2009-03-23	01:21:00	0
2009-03-23	01:22:00	0
2009-03-23	01:23:00	0
2009-03-23	01:24:00	0
2009-03-23	01:25:00	0
2009-03-23	01:26:00	0
2009-03-23	01:27:00	0
2009-03-23	01:28:00	0
2009-03-23	01:29:00	0
2009-03-23	01:30:00	0
2009-03-23	01:31:00	0
2009-03-23	01:32:00	0
2009-03-23	01:33:00	0
2009-03-23	01:34:00	0
2009-03-23	01:35:00	0
2009-03-23	01:36:00	0
2009-03-23	01:37:00	0
2009-03-23	01:38:00	0
2009-03-23	01:39:00	0
2009-03-23	01:40:00	0
2009-03-23	01:41:00	0
2009-03-23	01:42:00	0
2009-03-23	01:43:00	0
2009-03-23	01:44:00	0
2009-03-23	01:45:00	0
2009-03-23	01:46:00	0
2009-03-23	01:47:00	0
2009-03-23	01:48:00	0
2009-03-23	01:49:00	0
2009-03-23	01:50:00	0
2009-03-23	01:51:00	0
2009-03-23	01:52:00	0
2009-03-23	01:53:00	0
2009-03-23	01:54:00	0
2009-03-23	01:55:00	0
2009-03-23	01:56:00	0
2009-03-23	01:57:00	0
2009-03-23	01:58:00	0
2009-03-23	01:59:00	0
2009-03-23	02:00:00	0
2009-03-23	02:01:00	0
2009-03-23	02:02:00	0
2009-03-23	02:03:00	0
2009-03-23	02:04:00	0
2009-03-23	02:05:00	0
2009-03-23	02:06:00	0
2009-03-23	02:07:00	0
2009-03-23	02:08:00	0
2009-03-23	02:09:00	0
2009-03-23	02:10:00	0
2009-03-23	02:11:00	0
2009-03-23	02:12:00	0
2009-03-23	02:13:00	0
2009-03-23	02:14:00	0
2009-03-23	02:15:00	0
2009-03-23	02:16:00	0
2009-03-23	02:17:00	0
2009-03-23	02:18:00	0
2009-03-23	02:19:00	0
2009-03-23	02:20:00	0
2009-03-23	02:21:00	0
2009-03-23	02:22:00	0
2009-03-23	02:23:00	0
2009-03-23	02:24:00	0
2009-03-23	02:25:00	0
2009-03-23	02:26:00	0
2009-03-23	02:27:00	0
2009-03-23	02:28:00	0
2009-03-23	02:29:00	0
2009-03-23	02:30:00	0
2009-03-23	02:31:00	0
2009-03-23	02:32:00	0
2009-03-23	02:33:00	0
2009-03-23	02:34:00	0
2009-03-23	02:35:00	0
2009-03-23	02:36:00	0
2009-03-23	02:37:00	0
2009-03-23	02:38:00	0
2009-03-23	02:39:00	0
2009-03-23	02:40:00	0
2009-03-23	02:41:00	0
2009-03-23	02:42:00	0
2009-03-23	02:43:00	0
2009-03-23	02:44:00	0
2009-03-23	02:45:00	0
2009-03-23	02:46:00	0
2009-03-23	02:47:00	0
2009-03-23	02:48:00	0
2009-03-23	02:49:00	0
2009-03-23	02:50:00	0
2009-03-23	02:51:00	0
2009-03-23	02:52:00	0
2009-03-23	02:53:00	0
2009-03-23	02:54:00	0
2009-03-23	02:55:00	0
2009-03-23	02:56:00	0
2009-03-23	02:57:00	0
2009-03-23	02:58:00	0
2009-03-23	02:59:00	0
2009-03-23	03:00:00	0
2009-03-23	03:01:00	0
2009-03-23	03:02:00	0
2009-03-23	03:03:00	0
2009-03-23	03:04:00	0
2009-03-23	03:05:00	0
2009-03-23	03:06:00	0
2009-03-23	03:07:00	0
2009-03-23	03:08:00	0
2009-03-23	03:09:00	0
2009-03-23	03:10:00	0
2009-03-23	03:11:00	0
2009-03-23	03:12:00	0
2009-03-23	03:13:00	0
2009-03-23	03:14:00	0
2009-03-23	03:15:00	0
2009-03-23	03:16:00	0
2009-03-23	03:17:00	0
2009-03-23	03:18:00	0
2009-03-23	03:19:00	0
2009-03-23	03:20:00	0
2009-03-23	03:21:00	0
2009-03-23	03:22:00	0
2009-03-23	03:23:00	0
2009-03-23	03:24:00	0
2009-03-23	03:25:00	0
2009-03-23	03:26:00	0
2009-03-23	03:27:00	0
2009-03-23	03:28:00	0
2009-03-23	03:29:00	0
2009-03-23	03:30:00	0
2009-03-23	03:31:00	0
2009-03-23	03:32:00	0
2009-03-23	03:33:00	0
2009-03-23	03:34:00	0
2009-03-23	03:35:00	0
2009-03-23	03:36:00	0
2009-03-23	03:37:00	0
2009-03-23	03:38:00	0
2009-03-23	03:39:00	0
2009-03-23	03:40:00	0
2009-03-23	03:41:00	0
2009-03-23	03:42:00	0
2009-03-23	03:43:00	0
2009-03-23	03:44:00	0
2009-03-23	03:45:00	0
2009-03-23	03:46:00	0
2009-03-23	03:47:00	0
2009-03-23	03:48:00	0
2009-03-23	03:49:00	0
2009-03-23	03:50:00	0
2009-03-23	03:51:00	0
2009-03-23	03:52:00	0
2009-03-23	03:53:00	0
2009-03-23	03:54:00	0
2009-03-23	03:55:00	0
2009-03-23	03:56:00	0
2009-03-23	03:57:00	0
2009-03-23	03:58:00	0
2009-03-23	03:59:00	0
2009-03-23	04:00:00	0
2009-03-23	04:01:00	0
2009-03-23	04:02:00	0
2009-03-23	04:03:00	0
2009-03-23	04:04:00	0
2009-03-23	04:05:00	0
2009-03-23	04:06:00	0
2009-03-23	04:07:00	0
2009-03-23	04:08:00	0
2009-03-23	04:09:00	0
2009-03-23	04:10:00	0
2009-03-23	04:11:00	0
2009-03-23	04:12:00	0
2009-03-23	04:13:00	0
2009-03-23	04:14:00	0
2009-03-23	04:15:00	0
2009-03-23	04:16:00	0
2009-03-23	04:17:00	0
2009-03-23	04:18:00	0
2009-03-23	04:19:00	0
2009-03-23	04:20:00	0
2009-03-23	04:21:00	0
2009-03-23	04:22:00	0
2009-03-23	04:23:00	0
2009-03-23	04:24:00	0
2009-03-23	04:25:00	0
2009-03-23	04:26:00	0
2009-03-23	04:27:00	0
2009-03-23	04:28:00	0
2009-03-23	04:29:00	0
2009-03-23	04:30:00	0
2009-03-23	04:31:00	0
2009-03-23	04:32:00	0
2009-03-23	04:33:00	0
2009-03-23	04:34:00	0
2009-03-23	04:35:00	0
2009-03-23	04:36:00	0
2009-03-23	04:37:00	0
2009-03-23	04:38:00	0
2009-03-23	04:39:00	0
2009-03-23	04:40:00	0
2009-03-23	04:41:00	0
2009-03-23	04:42:00	0
2009-03-23	04:43:00	0
2009-03-23	04:44:00	0
2009-03-23	04:45:00	0
2009-03-23	04:46:00	0
2009-03-23	04:47:00	0
2009-03-23	04:48:00	0
2009-03-23	04:49:00	0
2009-03-23	04:50:00	0
2009-03-23	04:51:00	0
2009-03-23	04:52:00	0
2009-03-23	04:53:00	0
2009-03-23	04:54:00	0
2009-03-23	04:55:00	0
2009-03-23	04:56:00	0
2009-03-23	04:57:00	0
2009-03-23	04:58:00	0
2009-03-23	04:59:00	0
2009-03-23	05:00:00	0
2009-03-23	05:01:00	0
2009-03-23	05:02:00	0
2009-03-23	05:03:00	0
2009-03-23	05:04:00	0
2009-03-23	05:05:00	0
2009-03-23	05:06:00	0
2009-03-23	05:07:00	0
2009-03-23	05:08:00	0
2009-03-23	05:09:00	0
2009-03-23	05:10:00	0
2009-03-23	05:11:00	0
2009-03-23	05:12:00	0
2009-03-23	05:13:00	0
2009-03-23	05:14:00	0
2009-03-23	05:15:00	0
2009-03-23	05:16:00	0
2009-03-23	05:17:00	0
2009-03-23	05:18:00	0
2009-03-23	05:19:00	0
2009-03-23	05:20:00	0
2009-03-23	05:21:00	0
2009-03-23	05:22:00	0
2009-03-23	05:23:00	0
2009-03-23	05:24:00	0
2009-03-23	05:25:00	0
2009-03-23	05:26:00	0
2009-03-23	05:27:00	0
2009-03-23	05:28:00	0
2009-03-23	05:29:00	0
2009-03-23	05:30:00	0
2009-03-23	05:31:00	0
2009-03-23	05:32:00	0
2009-03-23	05:33:00	0
2009-03-23	05:34:00	0
2009-03-23	05:35:00	0
2009-03-23	05:36:00	0
2009-03-23	05:37:00	0
2009-03-23	05:38:00	0
2009-03-23	05:39:00	0
2009-03-23	05:40:00	0
2009-03-23	05:41:00	0
2009-03-23	05:42:00	0
2009-03-23	05:43:00	0
2009-03-23	05:44:00	0
2009-03-23	05:45:00	0
2009-03-23	05:46:00	0
2009-03-23	05:47:00	0
2009-03-23	05:48:00	0
2009-03-23	05:49:00	0
2009-03-23	05:50:00	0
2009-03-23	05:51:00	0
2009-03-23	05:52:00	0
2009-03-23	05:53:00	0
2009-03-23	05:54:00	0
2009-03-23	05:55:00	0
2009-03-23	05:56:00	0
2009-03-23	05:57:00	0
2009-03-23	05:58:00	0
2009-03-23	05:59:00	0
2009-03-23	06:00:00	0
2009-03-23	06:01:00	0
2009-03-23	06:02:00	0
2009-03-23	06:03:00	0
2009-03-23	06:04:00	0
2009-03-23	06:05:00	0
2009-03-23	06:06:00	0
2009-03-23	06:07:00	0
2009-03-23	06:08:00	0
2009-03-23	06:09:00	0
2009-03-23	06:10:00	0
2009-03-23	06:11:00	0
2009-03-23	06:12:00	0
2009-03-23	06:13:00	0
2009-03-23	06:14:00	0
2009-03-23	06:15:00	0
2009-03-23	06:16:00	0
2009-03-23	06:17:00	0
2009-03-23	06:18:00	0
2009-03-23	06:19:00	0
2009-03-23	06:20:00	0
2009-03-23	06:21:00	0
2009-03-23	06:22:00	0
2009-03-23	06:23:00	0
2009-03-23	06:24:00	0
2009-03-23	06:25:00	0
2009-03-23	06:26:00	0
2009-03-23	06:27:00	0
2009-03-23	06:28:00	0
2009-03-23	06:29:00	0
2009-03-23	06:30:00	0
2009-03-23	06:31:00	0
2009-03-23	06:32:00	0
2009-03-23	06:33:00	0
2009-03-23	06:34:00	0
2009-03-23	06:35:00	0
2009-03-23	06:36:00	0
2009-03-23	06:37:00	0
2009-03-23	06:38:00	0
2009-03-23	06:39:00	0
2009-03-23	06:40:00	0
2009-03-23	06:41:00	0
2009-03-23	06:42:00	0
2009-03-23	06:43:00	0
2009-03-23	06:44:00	0
2009-03-23	06:45:00	0
2009-03-23	06:46:00	0
2009-03-23	06:47:00	0
2009-03-23	06:48:00	0
2009-03-23	06:49:00	0
2009-03-23	06:50:00	0
2009-03-23	06:51:00	0
2009-03-23	06:52:00	0
2009-03-23	06:53:00	0
2009-03-23	06:54:00	0
2009-03-23	06:55:00	0
2009-03-23	06:56:00	0
2009-03-23	06:57:00	0
2009-03-23	06:58:00	0
2009-03-23	06:59:00	0
2009-03-23	07:00:00	0
2009-03-23	07:01:00	0
2009-03-23	07:02:00	0
2009-03-23	07:03:00	0
2009-03-23	07:04:00	0
2009-03-23	07:05:00	0
2009-03-23	07:06:00	0
2009-03-23	07:07:00	0
2009-03-23	07:08:00	0
2009-03-23	07:09:00	0
2009-03-23	07:10:00	0
2009-03-23	07:11:00	0
2009-03-23	07:12:00	0
2009-03-23	07:13:00	0
2009-03-23	07:14:00	0
2009-03-23	07:15:00	0
2009-03-23	07:16:00	0
2009-03-23	07:17:00	0
2009-03-23	07:18:00	0
2009-03-23	07:19:00	0
2009-03-23	07:20:00	0
2009-03-23	07:21:00	0
2009-03-23	07:22:00	0
2009-03-23	07:23:00	0
2009-03-23	07:24:00	0
2009-03-23	07:25:00	0
2009-03-23	07:26:00	0
2009-03-23	07:27:00	0
2009-03-23	07:28:00	0
2009-03-23	07:29:00	0
2009-03-23	07:30:00	0
2009-03-23	07:31:00	0
2009-03-23	07:32:00	0
2009-03-23	07:33:00	0
2009-03-23	07:34:00	0
2009-03-23	07:35:00	0
2009-03-23	07:36:00	0
2009-03-23	07:37:00	0
2009-03-23	07:38:00	0
2009-03-23	07:39:00	0
2009-03-23	07:40:00	0
2009-03-23	07:41:00	0
2009-03-23	07:42:00	0
2009-03-23	07:43:00	0
2009-03-23	07:44:00	0
2009-03-23	07:45:00	0
2009-03-23	07:46:00	0
2009-03-23	07:47:00	0
2009-03-23	07:48:00	0
2009-03-23	07:49:00	0
2009-03-23	07:50:00	0
2009-03-23	07:51:00	0
2009-03-23	07:52:00	0
2009-03-23	07:53:00	0
2009-03-23	07:54:00	0
2009-03-23	07:55:00	0
2009-03-23	07:56:00	0
2009-03-23	07:57:00	0
2009-03-23	07:58:00	0
2009-03-23	07:59:00	0
2009-03-23	08:00:00	0
2009-03-23	08:01:00	0
2009-03-23	08:02:00	0
2009-03-23	08:03:00	0
2009-03-23	08:04:00	0
2009-03-23	08:05:00	0
2009-03-23	08:06:00	0
2009-03-23	08:07:00	0
2009-03-23	08:08:00	0
2009-03-23	08:09:00	0
2009-03-23	08:10:00	0
2009-03-23	08:11:00	0
2009-03-23	08:12:00	0
2009-03-23	08:13:00	0
2009-03-23	08:14:00	0
2009-03-23	08:15:00	0
2009-03-23	08:16:00	0
2009-03-23	08:17:00	0
2009-03-23	08:18:00	0
2009-03-23	08:19:00	0
2009-03-23	08:20:00	0
2009-03-23	08:21:00	0
2009-03-23	08:22:00	0
2009-03-23	08:23:00	0
2009-03-23	08:24:00	0
2009-03-23	08:25:00	0
2009-03-23	08:26:00	0
2009-03-23	08:27:00	0
2009-03-23	08:28:00	0
2009-03-23	08:29:00	0
2009-03-23	08:30:00	0
2009-03-23	08:31:00	0
2009-03-23	08:32:00	0
2009-03-23	08:33:00	0
2009-03-23	08:34:00	0
2009-03-23	08:35:00	0
2009-03-23	08:36:00	0
2009-03-23	08:37:00	0
2009-03-23	08:38:00	0
2009-03-23	08:39:00	0
2009-03-23	08:40:00	0
2009-03-23	08:41:00	0
2009-03-23	08:42:00	0
2009-03-23	08:43:00	0
2009-03-23	08:44:00	0
2009-03-23	08:45:00	0
2009-03-23	08:46:00	0
2009-03-23	08:47:00	0
2009-03-23	08:48:00	0
2009-03-23	08:49:00	0
2009-03-23	08:50:00	0
2009-03-23	08:51:00	0
2009-03-23	08:52:00	0
2009-03-23	08:53:00	0
2009-03-23	08:54:00	0
2009-03-23	08:55:00	0
2009-03-23	08:56:00	0
2009-03-23	08:57:00	0
2009-03-23	08:58:00	0
2009-03-23	08:59:00	0
2009-03-23	09:00:00	0
2009-03-23	09:01:00	0
2009-03-23	09:02:00	0
2009-03-23	09:03:00	0
2009-03-23	09:04:00	0
2009-03-23	09:05:00	0
2009-03-23	09:06:00	0
2009-03-23	09:07:00	0
2009-03-23	09:08:00	0
2009-03-23	09:09:00	0
2009-03-23	09:10:00	0
2009-03-23	09:11:00	0
2009-03-23	09:12:00	0
2009-03-23	09:13:00	0
2009-03-23	09:14:00	0
2009-03-23	09:15:00	0
2009-03-23	09:16:00	0
2009-03-23	09:17:00	0
2009-03-23	09:18:00	0
2009-03-23	09:19:00	0
2009-03-23	09:20:00	0
2009-03-23	09:21:00	0
2009-03-23	09:22:00	0
2009-03-23	09:23:00	0
2009-03-23	09:24:00	0
2009-03-23	09:25:00	0
2009-03-23	09:26:00	0
2009-03-23	09:27:00	0
2009-03-23	09:28:00	0
2009-03-23	09:29:00	0
2009-03-23	09:30:00	0
2009-03-23	09:31:00	0
2009-03-23	09:32:00	0
2009-03-23	09:33:00	0
2009-03-23	09:34:00	0
2009-03-23	09:35:00	0
2009-03-23	09:36:00	0
2009-03-23	09:37:00	0
2009-03-23	09:38:00	0
2009-03-23	09:39:00	0
2009-03-23	09:40:00	0
2009-03-23	09:41:00	0
2009-03-23	09:42:00	0
2009-03-23	09:43:00	0
2009-03-23	09:44:00	0
2009-03-23	09:45:00	0
2009-03-23	09:46:00	0
2009-03-23	09:47:00	0
2009-03-23	09:48:00	0
2009-03-23	09:49:00	0
2009-03-23	09:50:00	0
2009-03-23	09:51:00	0
2009-03-23	09:52:00	0
2009-03-23	09:53:00	0
2009-03-23	09:54:00	0
2009-03-23	09:55:00	0
2009-03-23	09:56:00	0
2009-03-23	09:57:00	0
2009-03-23	09:58:00	0
2009-03-23	09:59:00	0
2009-03-23	10:00:00	0
2009-03-23	10:01:00	0
2009-03-23	10:02:00	0
2009-03-23	10:03:00	0
2009-03-23	10:04:00	0
2009-03-23	10:05:00	0
2009-03-23	10:06:00	0
2009-03-23	10:07:00	0
2009-03-23	10:08:00	0
2009-03-23	10:09:00	0
2009-03-23	10:10:00	0
2009-03-23	10:11:00	0
2009-03-23	10:12:00	0
2009-03-23	10:13:00	0
2009-03-23	10:14:00	0
2009-03-23	10:15:00	0
2009-03-23	10:16:00	0
2009-03-23	10:17:00	0
2009-03-23	10:18:00	0
2009-03-23	10:19:00	0
2009-03-23	10:20:00	0
2009-03-23	10:21:00	0
2009-03-23	10:22:00	0
2009-03-23	10:23:00	0
2009-03-23	10:24:00	0
2009-03-23	10:25:00	0
2009-03-23	10:26:00	0
2009-03-23	10:27:00	0
2009-03-23	10:28:00	0
2009-03-23	10:29:00	0
2009-03-23	10:30:00	0
2009-03-23	10:31:00	0
2009-03-23	10:32:00	0
2009-03-23	10:33:00	0
2009-03-23	10:34:00	0
2009-03-23	10:35:00	0
2009-03-23	10:36:00	0
2009-03-23	10:37:00	0
2009-03-23	10:38:00	0
2009-03-23	10:39:00	0
2009-03-23	10:40:00	0
2009-03-23	10:41:00	0
2009-03-23	10:42:00	0
2009-03-23	10:43:00	0
2009-03-23	10:44:00	0
2009-03-23	10:45:00	0
2009-03-23	10:46:00	0
2009-03-23	10:47:00	0
2009-03-23	10:48:00	0
2009-03-23	10:49:00	0
2009-03-23	10:50:00	0
2009-03-23	10:51:00	0
2009-03-23	10:52:00	0
2009-03-23	10:53:00	0
2009-03-23	10:54:00	0
2009-03-23	10:55:00	0
2009-03-23	10:56:00	0
2009-03-23	10:57:00	0
2009-03-23	10:58:00	0
2009-03-23	10:59:00	0
2009-03-23	11:00:00	0
2009-03-23	11:01:00	0
2009-03-23	11:02:00	0
2009-03-23	11:03:00	0
2009-03-23	11:04:00	0
2009-03-23	11:05:00	0
2009-03-23	11:06:00	0
2009-03-23	11:07:00	0
2009-03-23	11:08:00	0
2009-03-23	11:09:00	0
2009-03-23	11:10:00	0
2009-03-23	11:11:00	0
2009-03-23	11:12:00	0
2009-03-23	11:13:00	0
2009-03-23	11:14:00	0
2009-03-23	11:15:00	0
2009-03-23	11:16:00	0
2009-03-23	11:17:00	0
2009-03-23	11:18:00	0
2009-03-23	11:19:00	0
2009-03-23	11:20:00	0
2009-03-23	11:21:00	0
2009-03-23	11:22:00	0
2009-03-23	11:23:00	0
2009-03-23	11:24:00	0
2009-03-23	11:25:00	0
2009-03-23	11:26:00	0
2009-03-23	11:27:00	0
2009-03-23	11:28:00	0
2009-03-23	11:29:00	0
2009-03-23	11:30:00	0
2009-03-23	11:31:00	0
2009-03-23	11:32:00	0
2009-03-23	11:33:00	0
2009-03-23	11:34:00	0
2009-03-23	11:35:00	0
2009-03-23	11:36:00	0
2009-03-23	11:37:00	0
2009-03-23	11:38:00	0
2009-03-23	11:39:00	0
2009-03-23	11:40:00	0
2009-03-23	11:41:00	0
2009-03-23	11:42:00	0
2009-03-23	11:43:00	0
2009-03-23	11:44:00	0
2009-03-23	11:45:00	0
2009-03-23	11:46:00	0
2009-03-23	11:47:00	0
2009-03-23	11:48:00	0
2009-03-23	11:49:00	0
2009-03-23	11:50:00	0
2009-03-23	11:51:00	0
2009-03-23	11:52:00	0
2009-03-23	11:53:00	0
2009-03-23	11:54:00	0
2009-03-23	11:55:00	0
2009-03-23	11:56:00	0
2009-03-23	11:57:00	0
2009-03-23	11:58:00	0
2009-03-23	11:59:00	0
2009-03-23	12:00:00	0
2009-03-23	12:01:00	0
2009-03-23	12:02:00	0
2009-03-23	12:03:00	0
2009-03-23	12:04:00	0
2009-03-23	12:05:00	0
2009-03-23	12:06:00	0
2009-03-23	12:07:00	0
2009-03-23	12:08:00	0
2009-03-23	12:09:00	0
2009-03-23	12:10:00	0
2009-03-23	12:11:00	0
2009-03-23	12:12:00	0
2009-03-23	12:13:00	0
2009-03-23	12:14:00	0
2009-03-23	12:15:00	0
2009-03-23	12:16:00	0
2009-03-23	12:17:00	0
2009-03-23	12:18:00	0
2009-03-23	12:19:00	0
2009-03-23	12:20:00	0
2009-03-23	12:21:00	0
2009-03-23	12:22:00	0
2009-03-23	12:23:00	0
2009-03-23	12:24:00	0
2009-03-23	12:25:00	0
2009-03-23	12:26:00	0
2009-03-23	12:27:00	0
2009-03-23	12:28:00	0
2009-03-23	12:29:00	0
2009-03-23	12:30:00	0
2009-03-23	12:31:00	0
2009-03-23	12:32:00	0
2009-03-23	12:33:00	0
2009-03-23	12:34:00	0
2009-03-23	12:35:00	0
2009-03-23	12:36:00	0
2009-03-23	12:37:00	0
2009-03-23	12:38:00	0
2009-03-23	12:39:00	0
2009-03-23	12:40:00	0
2009-03-23	12:41:00	0
2009-03-23	12:42:00	0
2009-03-23	12:43:00	0
2009-03-23	12:44:00	0
2009-03-23	12:45:00	0
2009-03-23	12:46:00	0
2009-03-23	12:47:00	0
2009-03-23	12:48:00	0
2009-03-23	12:49:00	0
2009-03-23	12:50:00	0
2009-03-23	12:51:00	0
2009-03-23	12:52:00	0
2009-03-23	12:53:00	0
2009-03-23	12:54:00	0
2009-03-23	12:55:00	0
2009-03-23	12:56:00	0
2009-03-23	12:57:00	0
2009-03-23	12:58:00	0
2009-03-23	12:59:00	0
2009-03-23	13:00:00	0
2009-03-23	13:01:00	0
2009-03-23	13:02:00	0
2009-03-23	13:03:00	0
2009-03-23	13:04:00	0
2009-03-23	13:05:00	0
2009-03-23	13:06:00	0
2009-03-23	13:07:00	0
2009-03-23	13:08:00	0
2009-03-23	13:09:00	0
2009-03-23	13:10:00	0
2009-03-23	13:11:00	0
2009-03-23	13:12:00	0
2009-03-23	13:13:00	0
2009-03-23	13:14:00	0
2009-03-23	13:15:00	0
2009-03-23	13:16:00	0
2009-03-23	13:17:00	0
2009-03-23	13:18:00	0
2009-03-23	13:19:00	0
2009-03-23	13:20:00	0
2009-03-23	13:21:00	0
2009-03-23	13:22:00	0
2009-03-23	13:23:00	0
2009-03-23	13:24:00	0
2009-03-23	13:25:00	0
2009-03-23	13:26:00	0
2009-03-23	13:27:00	0
2009-03-23	13:28:00	0
2009-03-23	13:29:00	0
2009-03-23	13:30:00	0
2009-03-23	13:31:00	0
2009-03-23	13:32:00	0
2009-03-23	13:33:00	0
2009-03-23	13:34:00	0
2009-03-23	13:35:00	0
2009-03-23	13:36:00	0
2009-03-23	13:37:00	0
2009-03-23	13:38:00	0
2009-03-23	13:39:00	0
2009-03-23	13:40:00	0
2009-03-23	13:41:00	0
2009-03-23	13:42:00	0
2009-03-23	13:43:00	0
2009-03-23	13:44:00	0
2009-03-23	13:45:00	0
2009-03-23	13:46:00	0
2009-03-23	13:47:00	0
2009-03-23	13:48:00	0
2009-03-23	13:49:00	0
2009-03-23	13:50:00	0
2009-03-23	13:51:00	0
2009-03-23	13:52:00	0
2009-03-23	13:53:00	0
2009-03-23	13:54:00	0
2009-03-23	13:55:00	0
2009-03-23	13:56:00	0
2009-03-23	13:57:00	0
2009-03-23	13:58:00	0
2009-03-23	13:59:00	0
2009-03-23	14:00:00	0
2009-03-23	14:01:00	0
2009-03-23	14:02:00	0
2009-03-23	14:03:00	0
2009-03-23	14:04:00	0
2009-03-23	14:05:00	0
2009-03-23	14:06:00	0
2009-03-23	14:07:00	0
2009-03-23	14:08:00	0
2009-03-23	14:09:00	0
2009-03-23	14:10:00	0
2009-03-23	14:11:00	0
2009-03-23	14:12:00	0
2009-03-23	14:13:00	0
2009-03-23	14:14:00	0
2009-03-23	14:15:00	0
2009-03-23	14:16:00	0
2009-03-23	14:17:00	0
2009-03-23	14:18:00	0
2009-03-23	14:19:00	0
2009-03-23	14:20:00	0
2009-03-23	14:21:00	0
2009-03-23	14:22:00	0
2009-03-23	14:23:00	0
2009-03-23	14:24:00	0
2009-03-23	14:25:00	0
2009-03-23	14:26:00	0
2009-03-23	14:27:00	0
2009-03-23	14:28:00	0
2009-03-23	14:29:00	0
2009-03-23	14:30:00	0
2009-03-23	14:31:00	0
2009-03-23	14:32:00	0
2009-03-23	14:33:00	0
2009-03-23	14:34:00	0
2009-03-23	14:35:00	0
2009-03-23	14:36:00	0
2009-03-23	14:37:00	0
2009-03-23	14:38:00	0
2009-03-23	14:39:00	0
2009-03-23	14:40:00	0
2009-03-23	14:41:00	0
2009-03-23	14:42:00	0
2009-03-23	14:43:00	0
2009-03-23	14:44:00	0
2009-03-23	14:45:00	0
2009-03-23	14:46:00	0
2009-03-23	14:47:00	0
2009-03-23	14:48:00	0
2009-03-23	14:49:00	0
2009-03-23	14:50:00	0
2009-03-23	14:51:00	0
2009-03-23	14:52:00	0
2009-03-23	14:53:00	0
2009-03-23	14:54:00	0
2009-03-23	14:55:00	0
2009-03-23	14:56:00	0
2009-03-23	14:57:00	0
2009-03-23	14:58:00	0
2009-03-23	14:59:00	0
2009-03-23	15:00:00	0
2009-03-23	15:01:00	0
2009-03-23	15:02:00	0
2009-03-23	15:03:00	0
2009-03-23	15:04:00	0
2009-03-23	15:05:00	0
2009-03-23	15:06:00	0
2009-03-23	15:07:00	0
2009-03-23	15:08:00	0
2009-03-23	15:09:00	0
2009-03-23	15:10:00	0
2009-03-23	15:11:00	0
2009-03-23	15:12:00	0
2009-03-23	15:13:00	0
2009-03-23	15:14:00	0
2009-03-23	15:15:00	0
2009-03-23	15:16:00	0
2009-03-23	15:17:00	0
2009-03-23	15:18:00	0
2009-03-23	15:19:00	0
2009-03-23	15:20:00	0
2009-03-23	15:21:00	0
2009-03-23	15:22:00	0
2009-03-23	15:23:00	0
2009-03-23	15:24:00	0
2009-03-23	15:25:00	0
2009-03-23	15:26:00	0
2009-03-23	15:27:00	0
2009-03-23	15:28:00	0
2009-03-23	15:29:00	0
2009-03-23	15:30:00	0
2009-03-23	15:31:00	0
2009-03-23	15:32:00	0
2009-03-23	15:33:00	0
2009-03-23	15:34:00	0
2009-03-23	15:35:00	0
2009-03-23	15:36:00	0
2009-03-23	15:37:00	0
2009-03-23	15:38:00	0
2009-03-23	15:39:00	0
2009-03-23	15:40:00	0
2009-03-23	15:41:00	0
2009-03-23	15:42:00	0
2009-03-23	15:43:00	0
2009-03-23	15:44:00	0
2009-03-23	15:45:00	0
2009-03-23	15:46:00	0
2009-03-23	15:47:00	0
2009-03-23	15:48:00	0
2009-03-23	15:49:00	0
2009-03-23	15:50:00	0
2009-03-23	15:51:00	0
2009-03-23	15:52:00	0
2009-03-23	15:53:00	0
2009-03-23	15:54:00	0
2009-03-23	15:55:00	0
2009-03-23	15:56:00	0
2009-03-23	15:57:00	0
2009-03-23	15:58:00	0
2009-03-23	15:59:00	0
2009-03-23	16:00:00	0
2009-03-23	16:01:00	0
2009-03-23	16:02:00	0
2009-03-23	16:03:00	0
2009-03-23	16:04:00	0
2009-03-23	16:05:00	0
2009-03-23	16:06:00	0
2009-03-23	16:07:00	0
2009-03-23	16:08:00	0
2009-03-23	16:09:00	0
2009-03-23	16:10:00	0
2009-03-23	16:11:00	0
2009-03-23	16:12:00	0
2009-03-23	16:13:00	0
2009-03-23	16:14:00	0
2009-03-23	16:15:00	0
2009-03-23	16:16:00	0
2009-03-23	16:17:00	0
2009-03-23	16:18:00	0
2009-03-23	16:19:00	0
2009-03-23	16:20:00	0
2009-03-23	16:21:00	0
2009-03-23	16:22:00	0
2009-03-23	16:23:00	0
2009-03-23	16:24:00	0
2009-03-23	16:25:00	0
2009-03-23	16:26:00	0
2009-03-23	16:27:00	0
2009-03-23	16:28:00	0
2009-03-23	16:29:00	0
2009-03-23	16:30:00	0
2009-03-23	16:31:00	0
2009-03-23	16:32:00	0
2009-03-23	16:33:00	0
2009-03-23	16:34:00	0
2009-03-23	16:35:00	0
2009-03-23	16:36:00	0
2009-03-23	16:37:00	0
2009-03-23	16:38:00	0
2009-03-23	16:39:00	0
2009-03-23	16:40:00	0
2009-03-23	16:41:00	0
2009-03-23	16:42:00	0
2009-03-23	16:43:00	0
2009-03-23	16:44:00	0
2009-03-23	16:45:00	0
2009-03-23	16:46:00	0
2009-03-23	16:47:00	0
2009-03-23	16:48:00	0
2009-03-23	16:49:00	0
2009-03-23	16:50:00	0
2009-03-23	16:51:00	0
2009-03-23	16:52:00	0
2009-03-23	16:53:00	0
2009-03-23	16:54:00	0
2009-03-23	16:55:00	0
2009-03-23	16:56:00	0
2009-03-23	16:57:00	0
2009-03-23	16:58:00	0
2009-03-23	16:59:00	0
2009-03-23	17:00:00	0
2009-03-23	17:01:00	0
2009-03-23	17:02:00	0
2009-03-23	17:03:00	0
2009-03-23	17:04:00	0
2009-03-23	17:05:00	0
2009-03-23	17:06:00	0
2009-03-23	17:07:00	0
2009-03-23	17:08:00	0
2009-03-23	17:09:00	0
2009-03-23	17:10:00	0
2009-03-23	17:11:00	0
2009-03-23	17:12:00	0
2009-03-23	17:13:00	0
2009-03-23	17:14:00	0
2009-03-23	17:15:00	0
2009-03-23	17:16:00	0
2009-03-23	17:17:00	0
2009-03-23	17:18:00	0
2009-03-23	17:19:00	0
2009-03-23	17:20:00	0
2009-03-23	17:21:00	0
2009-03-23	17:22:00	0
2009-03-23	17:23:00	0
2009-03-23	17:24:00	0
2009-03-23	17:25:00	0
2009-03-23	17:26:00	0
2009-03-23	17:27:00	0
2009-03-23	17:28:00	0
2009-03-23	17:29:00	0
2009-03-23	17:30:00	0
2009-03-23	17:31:00	0
2009-03-23	17:32:00	0
2009-03-23	17:33:00	0
2009-03-23	17:34:00	0
2009-03-23	17:35:00	0
2009-03-23	17:36:00	0
2009-03-23	17:37:00	0
2009-03-23	17:38:00	0
2009-03-23	17:39:00	0
2009-03-23	17:40:00	0
2009-03-23	17:41:00	0
2009-03-23	17:42:00	0
2009-03-23	17:43:00	0
2009-03-23	17:44:00	0
2009-03-23	17:45:00	0
2009-03-23	17:46:00	0
2009-03-23	17:47:00	0
2009-03-23	17:48:00	0
2009-03-23	17:49:00	0
2009-03-23	17:50:00	0
2009-03-23	17:51:00	0
2009-03-23	17:52:00	0
2009-03-23	17:53:00	0
2009-03-23	17:54:00	0
2009-03-23	17:55:00	0
2009-03-23	17:56:00	0
2009-03-23	17:57:00	0
2009-03-23	17:58:00	0
2009-03-23	17:59:00	0
2009-03-23	18:00:00	0	M
2009-03-23	18:01:00	23
2009-03-23	18:02:00	58
2009-03-23	18:03:00	47
2009-03-23	18:04:00	47
2009-03-23	18:05:00	0
2009-03-23	18:06:00	0
2009-03-23	18:07:00	291
2009-03-23	18:08:00	128
2009-03-23	18:09:00	58
2009-03-23	18:10:00	47
2009-03-23	18:11:00	151
2009-03-23	18:12:00	235
2009-03-23	18:13:00	35
2009-03-23	18:14:00	128
2009-03-23	18:15:00	0
2009-03-23	18:16:00	0
2009-03-23	18:17:00	0
2009-03-23	18:18:00	0
2009-03-23	18:19:00	0
2009-03-23	18:20:00	0
2009-03-23	18:21:00	0
2009-03-23	18:22:00	0
2009-03-23	18:23:00	0
2009-03-23	18:24:00	0
2009-03-23	18:25:00	0
2009-03-23	18:26:00	0
2009-03-23	18:27:00	0
2009-03-23	18:28:00	0
2009-03-23	18:29:00	0
2009-03-23	18:30:00	0
2009-03-23	18:31:00	0
2009-03-23	18:32:00	0
2009-03-23	18:33:00	0
2009-03-23	18:34:00	0
2009-03-23	18:35:00	0
2009-03-23	18:36:00	0
2009-03-23	18:37:00	0
2009-03-23	18:38:00	0
2009-03-23	18:39:00	0
2009-03-23	18:40:00	0
2009-03-23	18:41:00	0
2009-03-23	18:42:00	0
2009-03-23	18:43:00	0
2009-03-23	18:44:00	0
2009-03-23	18:45:00	0
2009-03-23	18:46:00	0
2009-03-23	18:47:00	0
2009-03-23	18:48:00	0
2009-03-23	18:49:00	0
2009-03-23	18:50:00	0
2009-03-23	18:51:00	0
2009-03-23	18:52:00	0
2009-03-23	18:53:00	0
2009-03-23	18:54:00	0
2009-03-23	18:55:00	0
2009-03-23	18:56:00	0
2009-03-23	18:57:00	0
2009-03-23	18:58:00	0
2009-03-23	18:59:00	12
2009-03-23	19:00:00	489
2009-03-23	19:01:00	116
2009-03-23	19:02:00	165
2009-03-23	19:03:00	81
2009-03-23	19:04:00	1038
2009-03-23	19:05:00	1846
2009-03-23	19:06:00	1694
2009-03-23	19:07:00	1552
2009-03-23	19:08:00	1324
2009-03-23	19:09:00	1452
2009-03-23	19:10:00	1452
2009-03-23	19:11:00	1264
2009-03-23	19:12:00	1324
2009-03-23	19:13:00	1324
2009-03-23	19:14:00	1694
2009-03-23	19:15:00	1233
2009-03-23	19:16:00	1387
2009-03-23	19:17:00	1517
2009-03-23	19:18:00	1119
2009-03-23	19:19:00	1294
2009-03-23	19:20:00	1233
2009-03-23	19:21:00	1354
2009-03-23	19:22:00	1175
2009-03-23	19:23:00	305
2009-03-23	19:24:00	105
2009-03-23	19:25:00	0
2009-03-23	19:26:00	0
2009-03-23	19:27:00	0
2009-03-23	19:28:00	0
2009-03-23	19:29:00	58
2009-03-23	19:30:00	58
2009-03-23	19:31:00	70
2009-03-23	19:32:00	70
2009-03-23	19:33:00	58
2009-03-23	19:34:00	386
2009-03-23	19:35:00	128
2009-03-23	19:36:00	0
2009-03-23	19:37:00	93
2009-03-23	19:38:00	47
2009-03-23	19:39:00	0
2009-03-23	19:40:00	0
2009-03-23	19:41:00	0
2009-03-23	19:42:00	0
2009-03-23	19:43:00	526
2009-03-23	19:44:00	987
2009-03-23	19:45:00	1119
2009-03-23	19:46:00	263
2009-03-23	19:47:00	140
2009-03-23	19:48:00	0
2009-03-23	19:49:00	0
2009-03-23	19:50:00	0
2009-03-23	19:51:00	0
2009-03-23	19:52:00	0
2009-03-23	19:53:00	0
2009-03-23	19:54:00	0
2009-03-23	19:55:00	0
2009-03-23	19:56:00	0
2009-03-23	19:57:00	0
2009-03-23	19:58:00	0
2009-03-23	19:59:00	0
2009-03-23	20:00:00	0
2009-03-23	20:01:00	0
2009-03-23	20:02:00	0
2009-03-23	20:03:00	0
2009-03-23	20:04:00	0
2009-03-23	20:05:00	0
2009-03-23	20:06:00	0
2009-03-23	20:07:00	0
2009-03-23	20:08:00	0
2009-03-23	20:09:00	0
2009-03-23	20:10:00	0
2009-03-23	20:11:00	0
2009-03-23	20:12:00	0
2009-03-23	20:13:00	0
2009-03-23	20:14:00	0
2009-03-23	20:15:00	0
2009-03-23	20:16:00	0
2009-03-23	20:17:00	0
2009-03-23	20:18:00	0
2009-03-23	20:19:00	0
2009-03-23	20:20:00	0
2009-03-23	20:21:00	0
2009-03-23	20:22:00	0
2009-03-23	20:23:00	0
2009-03-23	20:24:00	0
2009-03-23	20:25:00	0
2009-03-23	20:26:00	0
2009-03-23	20:27:00	0
2009-03-23	20:28:00	0
2009-03-23	20:29:00	0
2009-03-23	20:30:00	0
2009-03-23	20:31:00	0
2009-03-23	20:32:00	0
2009-03-23	20:33:00	0
2009-03-23	20:34:00	0
2009-03-23	20:35:00	0
2009-03-23	20:36:00	0
2009-03-23	20:37:00	12
2009-03-23	20:38:00	0
2009-03-23	20:39:00	0
2009-03-23	20:40:00	0
2009-03-23	20:41:00	12
2009-03-23	20:42:00	47
2009-03-23	20:43:00	0
2009-03-23	20:44:00	0
2009-03-23	20:45:00	0
2009-03-23	20:46:00	0
2009-03-23	20:47:00	0
2009-03-23	20:48:00	0
2009-03-23	20:49:00	0
2009-03-23	20:50:00	0
2009-03-23	20:51:00	0
2009-03-23	20:52:00	0
2009-03-23	20:53:00	0
2009-03-23	20:54:00	0
2009-03-23	20:55:00	0
2009-03-23	20:56:00	0
2009-03-23	20:57:00	0
2009-03-23	20:58:00	0
2009-03-23	20:59:00	0
2009-03-23	21:00:00	0
2009-03-23	21:01:00	0
2009-03-23	21:02:00	12
2009-03-23	21:03:00	0
2009-03-23	21:04:00	0
2009-03-23	21:05:00	0
2009-03-23	21:06:00	58
2009-03-23	21:07:00	0
2009-03-23	21:08:00	0
2009-03-23	21:09:00	0
2009-03-23	21:10:00	12
2009-03-23	21:11:00	0
2009-03-23	21:12:00	58
2009-03-23	21:13:00	0
2009-03-23	21:14:00	0
2009-03-23	21:15:00	0
2009-03-23	21:16:00	0
2009-03-23	21:17:00	0
2009-03-23	21:18:00	0
2009-03-23	21:19:00	0
2009-03-23	21:20:00	0
2009-03-23	21:21:00	0
2009-03-23	21:22:00	0
2009-03-23	21:23:00	0
2009-03-23	21:24:00	0
2009-03-23	21:25:00	0
2009-03-23	21:26:00	0
2009-03-23	21:27:00	0
2009-03-23	21:28:00	0
2009-03-23	21:29:00	0
2009-03-23	21:30:00	0
2009-03-23	21:31:00	0
2009-03-23	21:32:00	0
2009-03-23	21:33:00	0
2009-03-23	21:34:00	0
2009-03-23	21:35:00	0
2009-03-23	21:36:00	0
2009-03-23	21:37:00	0
2009-03-23	21:38:00	0
2009-03-23	21:39:00	0
2009-03-23	21:40:00	0
2009-03-23	21:41:00	0
2009-03-23	21:42:00	0
2009-03-23	21:43:00	0
2009-03-23	21:44:00	0
2009-03-23	21:45:00	0
2009-03-23	21:46:00	0
2009-03-23	21:47:00	0
2009-03-23	21:48:00	0
2009-03-23	21:49:00	0
2009-03-23	21:50:00	0
2009-03-23	21:51:00	0
2009-03-23	21:52:00	0
2009-03-23	21:53:00	0
2009-03-23	21:54:00	0
2009-03-23	21:55:00	0
2009-03-23	21:56:00	0
2009-03-23	21:57:00	0
2009-03-23	21:58:00	0
2009-03-23	21:59:00	0
2009-03-23	22:00:00	0
2009-03-23	22:01:00	0
2009-03-23	22:02:00	12
2009-03-23	22:03:00	249
2009-03-23	22:04:00	370
2009-03-23	22:05:00	12
2009-03-23	22:06:00	93
2009-03-23	22:07:00	0
2009-03-23	22:08:00	0
2009-03-23	22:09:00	70
2009-03-23	22:10:00	105
2009-03-23	22:11:00	58
2009-03-23	22:12:00	23
2009-03-23	22:13:00	58
2009-03-23	22:14:00	263
2009-03-23	22:15:00	151
2009-03-23	22:16:00	0
2009-03-23	22:17:00	0
2009-03-23	22:18:00	0
2009-03-23	22:19:00	0
2009-03-23	22:20:00	0
2009-03-23	22:21:00	0
2009-03-23	22:22:00	0
2009-03-23	22:23:00	0
2009-03-23	22:24:00	0
2009-03-23	22:25:00	0
2009-03-23	22:26:00	0
2009-03-23	22:27:00	0
2009-03-23	22:28:00	0
2009-03-23	22:29:00	0
2009-03-23	22:30:00	0
2009-03-23	22:31:00	0
2009-03-23	22:32:00	0
2009-03-23	22:33:00	0
2009-03-23	22:34:00	0
2009-03-23	22:35:00	0
2009-03-23	22:36:00	0
2009-03-23	22:37:00	0
2009-03-23	22:38:00	0
2009-03-23	22:39:00	0
2009-03-23	22:40:00	0
2009-03-23	22:41:00	0
2009-03-23	22:42:00	12
2009-03-23	22:43:00	0
2009-03-23	22:44:00	12
2009-03-23	22:45:00	193
2009-03-23	22:46:00	249
2009-03-23	22:47:00	642
2009-03-23	22:48:00	263
2009-03-23	22:49:00	221
2009-03-23	22:50:00	1324
2009-03-23	22:51:00	419
2009-03-23	22:52:00	386
2009-03-23	22:53:00	93
2009-03-23	22:54:00	0
2009-03-23	22:55:00	179
2009-03-23	22:56:00	435
2009-03-23	22:57:00	0
2009-03-23	22:58:00	0
2009-03-23	22:59:00	0
2009-03-23	23:00:00	0
2009-03-23	23:01:00	0
2009-03-23	23:02:00	0
2009-03-23	23:03:00	0
2009-03-23	23:04:00	0
2009-03-23	23:05:00	305
2009-03-23	23:06:00	0
2009-03-23	23:07:00	0
2009-03-23	23:08:00	105
2009-03-23	23:09:00	0
2009-03-23	23:10:00	105
2009-03-23	23:11:00	0
2009-03-23	23:12:00	0
2009-03-23	23:13:00	0
2009-03-23	23:14:00	0
2009-03-23	23:15:00	0
2009-03-23	23:16:00	0
2009-03-23	23:17:00	0
2009-03-23	23:18:00	0
2009-03-23	23:19:00	0
2009-03-23	23:20:00	0
2009-03-23	23:21:00	0
2009-03-23	23:22:00	0
2009-03-23	23:23:00	0
2009-03-23	23:24:00	0
2009-03-23	23:25:00	0
2009-03-23	23:26:00	0
2009-03-23	23:27:00	0
2009-03-23	23:28:00	0
2009-03-23	23:29:00	0
2009-03-23	23:30:00	0
2009-03-23	23:31:00	0
2009-03-23	23:32:00	0
2009-03-23	23:33:00	0
2009-03-23	23:34:00	0
2009-03-23	23:35:00	0
2009-03-23	23:36:00	0
2009-03-23	23:37:00	0
2009-03-23	23:38:00	0
2009-03-23	23:39:00	0
2009-03-23	23:40:00	0
2009-03-23	23:41:00	0
2009-03-23	23:42:00	0
2009-03-23	23:43:00	0
2009-03-23	23:44:00	0
2009-03-23	23:45:00	0
2009-03-23	23:46:00	0
2009-03-23	23:47:00	0
2009-03-23	23:48:00	0
2009-03-23	23:49:00	0
2009-03-23	23:50:00	0
2009-03-23	23:51:00	0
2009-03-23	23:52:00	0
2009-03-23	23:53:00	0
2009-03-23	23:54:00	0
2009-03-23	23:55:00	0
2009-03-23	23:56:00	0
2009-03-23	23:57:00	0
2009-03-23	23:58:00	0
2009-03-23	23:59:00	0
2009-03-24	00:00:00	0
2009-03-24	00:01:00	0
2009-03-24	00:02:00	0
2009-03-24	00:03:00	0
2009-03-24	00:04:00	70
2009-03-24	00:05:00	70
2009-03-24	00:06:00	0
2009-03-24	00:07:00	0
2009-03-24	00:08:00	0
2009-03-24	00:09:00	0
2009-03-24	00:10:00	0
2009-03-24	00:11:00	0
2009-03-24	00:12:00	0
2009-03-24	00:13:00	0
2009-03-24	00:14:00	0
2009-03-24	00:15:00	0
2009-03-24	00:16:00	0
2009-03-24	00:17:00	0
2009-03-24	00:18:00	0
2009-03-24	00:19:00	0
2009-03-24	00:20:00	0
2009-03-24	00:21:00	0
2009-03-24	00:22:00	0
2009-03-24	00:23:00	0
2009-03-24	00:24:00	0
2009-03-24	00:25:00	0
2009-03-24	00:26:00	0
2009-03-24	00:27:00	0
2009-03-24	00:28:00	0
2009-03-24	00:29:00	0
2009-03-24	00:30:00	0
2009-03-24	00:31:00	0
2009-03-24	00:32:00	47
2009-03-24	00:33:00	0
2009-03-24	00:34:00	0
2009-03-24	00:35:00	0
2009-03-24	00:36:00	0
2009-03-24	00:37:00	0
2009-03-24	00:38:00	93
2009-03-24	00:39:00	12
2009-03-24	00:40:00	0
2009-03-24	00:41:00	0
2009-03-24	00:42:00	0
2009-03-24	00:43:00	0
2009-03-24	00:44:00	0
2009-03-24	00:45:00	0
2009-03-24	00:46:00	0
2009-03-24	00:47:00	0
2009-03-24	00:48:00	0
2009-03-24	00:49:00	0
2009-03-24	00:50:00	0
2009-03-24	00:51:00	0
2009-03-24	00:52:00	0
2009-03-24	00:53:00	0
2009-03-24	00:54:00	0
2009-03-24	00:55:00	0
2009-03-24	00:56:00	0
2009-03-24	00:57:00	0
2009-03-24	00:58:00	0
2009-03-24	00:59:00	0
2009-03-24	01:00:00	0
2009-03-24	01:01:00	0
2009-03-24	01:02:00	0
2009-03-24	01:03:00	0
2009-03-24	01:04:00	0
2009-03-24	01:05:00	35
2009-03-24	01:06:00	0
2009-03-24	01:07:00	0
2009-03-24	01:08:00	0
2009-03-24	01:09:00	0
2009-03-24	01:10:00	0
2009-03-24	01:11:00	0
2009-03-24	01:12:00	0
2009-03-24	01:13:00	0
2009-03-24	01:14:00	0
2009-03-24	01:15:00	0
2009-03-24	01:16:00	0
2009-03-24	01:17:00	0
2009-03-24	01:18:00	0
2009-03-24	01:19:00	0
2009-03-24	01:20:00	0
2009-03-24	01:21:00	0
2009-03-24	01:22:00	0
2009-03-24	01:23:00	0
2009-03-24	01:24:00	0
2009-03-24	01:25:00	0
2009-03-24	01:26:00	0
2009-03-24	01:27:00	0
2009-03-24	01:28:00	0
2009-03-24	01:29:00	0
2009-03-24	01:30:00	0
2009-03-24	01:31:00	0
2009-03-24	01:32:00	0
2009-03-24	01:33:00	0
2009-03-24	01:34:00	0
2009-03-24	01:35:00	0
2009-03-24	01:36:00	0
2009-03-24	01:37:00	0
2009-03-24	01:38:00	0
2009-03-24	01:39:00	0
2009-03-24	01:40:00	0
2009-03-24	01:41:00	0
2009-03-24	01:42:00	0
2009-03-24	01:43:00	0
2009-03-24	01:44:00	0
2009-03-24	01:45:00	0
2009-03-24	01:46:00	0
2009-03-24	01:47:00	0
2009-03-24	01:48:00	0
2009-03-24	01:49:00	0
2009-03-24	01:50:00	0
2009-03-24	01:51:00	0
2009-03-24	01:52:00	0
2009-03-24	01:53:00	0
2009-03-24	01:54:00	0
2009-03-24	01:55:00	0
2009-03-24	01:56:00	0
2009-03-24	01:57:00	0
2009-03-24	01:58:00	0
2009-03-24	01:59:00	47
2009-03-24	02:00:00	0
2009-03-24	02:01:00	0
2009-03-24	02:02:00	0
2009-03-24	02:03:00	0
2009-03-24	02:04:00	0
2009-03-24	02:05:00	0
2009-03-24	02:06:00	0
2009-03-24	02:07:00	0
2009-03-24	02:08:00	0
2009-03-24	02:09:00	0
2009-03-24	02:10:00	0
2009-03-24	02:11:00	12
2009-03-24	02:12:00	70
2009-03-24	02:13:00	0
2009-03-24	02:14:00	0
2009-03-24	02:15:00	0
2009-03-24	02:16:00	0
2009-03-24	02:17:00	0
2009-03-24	02:18:00	0
2009-03-24	02:19:00	0
2009-03-24	02:20:00	0
2009-03-24	02:21:00	0
2009-03-24	02:22:00	0
2009-03-24	02:23:00	12
2009-03-24	02:24:00	0
2009-03-24	02:25:00	0
2009-03-24	02:26:00	0
2009-03-24	02:27:00	0
2009-03-24	02:28:00	0
2009-03-24	02:29:00	0
2009-03-24	02:30:00	0
2009-03-24	02:31:00	0
2009-03-24	02:32:00	0
2009-03-24	02:33:00	0
2009-03-24	02:34:00	0
2009-03-24	02:35:00	0
2009-03-24	02:36:00	0
2009-03-24	02:37:00	0
2009-03-24	02:38:00	0
2009-03-24	02:39:00	0
2009-03-24	02:40:00	0
2009-03-24	02:41:00	0
2009-03-24	02:42:00	0
2009-03-24	02:43:00	0
2009-03-24	02:44:00	0
2009-03-24	02:45:00	0
2009-03-24	02:46:00	0
2009-03-24	02:47:00	0
2009-03-24	02:48:00	0
2009-03-24	02:49:00	23
2009-03-24	02:50:00	116
2009-03-24	02:51:00	12
2009-03-24	02:52:00	0
2009-03-24	02:53:00	0
2009-03-24	02:54:00	0
2009-03-24	02:55:00	0
2009-03-24	02:56:00	0
2009-03-24	02:57:00	0
2009-03-24	02:58:00	0
2009-03-24	02:59:00	0
2009-03-24	03:00:00	0
2009-03-24	03:01:00	12
2009-03-24	03:02:00	0
2009-03-24	03:03:00	0
2009-03-24	03:04:00	0
2009-03-24	03:05:00	0
2009-03-24	03:06:00	0
2009-03-24	03:07:00	0
2009-03-24	03:08:00	0
2009-03-24	03:09:00	0
2009-03-24	03:10:00	0
2009-03-24	03:11:00	0
2009-03-24	03:12:00	0
2009-03-24	03:13:00	0
2009-03-24	03:14:00	0
2009-03-24	03:15:00	12
2009-03-24	03:16:00	0
2009-03-24	03:17:00	0
2009-03-24	03:18:00	0
2009-03-24	03:19:00	0
2009-03-24	03:20:00	0
2009-03-24	03:21:00	0
2009-03-24	03:22:00	0
2009-03-24	03:23:00	0
2009-03-24	03:24:00	0
2009-03-24	03:25:00	0
2009-03-24	03:26:00	0
2009-03-24	03:27:00	0
2009-03-24	03:28:00	0
2009-03-24	03:29:00	0
2009-03-24	03:30:00	0
2009-03-24	03:31:00	0
2009-03-24	03:32:00	0
2009-03-24	03:33:00	0
2009-03-24	03:34:00	0
2009-03-24	03:35:00	0
2009-03-24	03:36:00	0
2009-03-24	03:37:00	0
2009-03-24	03:38:00	0
2009-03-24	03:39:00	0
2009-03-24	03:40:00	165
2009-03-24	03:41:00	12
2009-03-24	03:42:00	70
2009-03-24	03:43:00	12
2009-03-24	03:44:00	0
2009-03-24	03:45:00	0
2009-03-24	03:46:00	0
2009-03-24	03:47:00	0
2009-03-24	03:48:00	0
2009-03-24	03:49:00	0
2009-03-24	03:50:00	0
2009-03-24	03:51:00	0
2009-03-24	03:52:00	0
2009-03-24	03:53:00	12
2009-03-24	03:54:00	0
2009-03-24	03:55:00	0
2009-03-24	03:56:00	0
2009-03-24	03:57:00	0
2009-03-24	03:58:00	0
2009-03-24	03:59:00	0
2009-03-24	04:00:00	0
2009-03-24	04:01:00	0
2009-03-24	04:02:00	0
2009-03-24	04:03:00	0
2009-03-24	04:04:00	105
2009-03-24	04:05:00	0
2009-03-24	04:06:00	0
2009-03-24	04:07:00	0
2009-03-24	04:08:00	0
2009-03-24	04:09:00	0
2009-03-24	04:10:00	0
2009-03-24	04:11:00	0
2009-03-24	04:12:00	0
2009-03-24	04:13:00	0
2009-03-24	04:14:00	0
2009-03-24	04:15:00	0
2009-03-24	04:16:00	0
2009-03-24	04:17:00	0
2009-03-24	04:18:00	0
2009-03-24	04:19:00	0
2009-03-24	04:20:00	0
2009-03-24	04:21:00	0
2009-03-24	04:22:00	0
2009-03-24	04:23:00	0
2009-03-24	04:24:00	0
2009-03-24	04:25:00	0
2009-03-24	04:26:00	0
2009-03-24	04:27:00	0
2009-03-24	04:28:00	0
2009-03-24	04:29:00	0
2009-03-24	04:30:00	0
2009-03-24	04:31:00	0
2009-03-24	04:32:00	0
2009-03-24	04:33:00	0
2009-03-24	04:34:00	0
2009-03-24	04:35:00	0
2009-03-24	04:36:00	0
2009-03-24	04:37:00	0
2009-03-24	04:38:00	0
2009-03-24	04:39:00	0
2009-03-24	04:40:00	0
2009-03-24	04:41:00	0
2009-03-24	04:42:00	0
2009-03-24	04:43:00	0
2009-03-24	04:44:00	0
2009-03-24	04:45:00	0
2009-03-24	04:46:00	0
2009-03-24	04:47:00	23
2009-03-24	04:48:00	0
2009-03-24	04:49:00	0
2009-03-24	04:50:00	0
2009-03-24	04:51:00	0
2009-03-24	04:52:00	0
2009-03-24	04:53:00	0
2009-03-24	04:54:00	0
2009-03-24	04:55:00	0
2009-03-24	04:56:00	0
2009-03-24	04:57:00	0
2009-03-24	04:58:00	0
2009-03-24	04:59:00	0
2009-03-24	05:00:00	0
2009-03-24	05:01:00	0
2009-03-24	05:02:00	0
2009-03-24	05:03:00	0
2009-03-24	05:04:00	0
2009-03-24	05:05:00	0
2009-03-24	05:06:00	0
2009-03-24	05:07:00	0
2009-03-24	05:08:00	0
2009-03-24	05:09:00	0
2009-03-24	05:10:00	0
2009-03-24	05:11:00	0
2009-03-24	05:12:00	12
2009-03-24	05:13:00	93
2009-03-24	05:14:00	0
2009-03-24	05:15:00	0
2009-03-24	05:16:00	0
2009-03-24	05:17:00	0
2009-03-24	05:18:00	0
2009-03-24	05:19:00	0
2009-03-24	05:20:00	0
2009-03-24	05:21:00	0
2009-03-24	05:22:00	0
2009-03-24	05:23:00	0
2009-03-24	05:24:00	0
2009-03-24	05:25:00	0
2009-03-24	05:26:00	0
2009-03-24	05:27:00	0
2009-03-24	05:28:00	0
2009-03-24	05:29:00	0
2009-03-24	05:30:00	0
2009-03-24	05:31:00	0
2009-03-24	05:32:00	0
2009-03-24	05:33:00	0
2009-03-24	05:34:00	0
2009-03-24	05:35:00	0
2009-03-24	05:36:00	0
2009-03-24	05:37:00	0
2009-03-24	05:38:00	0
2009-03-24	05:39:00	0
2009-03-24	05:40:00	0
2009-03-24	05:41:00	0
2009-03-24	05:42:00	0
2009-03-24	05:43:00	0
2009-03-24	05:44:00	0
2009-03-24	05:45:00	0
2009-03-24	05:46:00	12
2009-03-24	05:47:00	0
2009-03-24	05:48:00	0
2009-03-24	05:49:00	0
2009-03-24	05:50:00	0
2009-03-24	05:51:00	0
2009-03-24	05:52:00	0
2009-03-24	05:53:00	0
2009-03-24	05:54:00	0
2009-03-24	05:55:00	0
2009-03-24	05:56:00	0
2009-03-24	05:57:00	0
2009-03-24	05:58:00	0
2009-03-24	05:59:00	0
2009-03-24	06:00:00	0
2009-03-24	06:01:00	23
2009-03-24	06:02:00	0
2009-03-24	06:03:00	0
2009-03-24	06:04:00	0
2009-03-24	06:05:00	0
2009-03-24	06:06:00	0
2009-03-24	06:07:00	0
2009-03-24	06:08:00	0
2009-03-24	06:09:00	0
2009-03-24	06:10:00	0
2009-03-24	06:11:00	0
2009-03-24	06:12:00	0
2009-03-24	06:13:00	0
2009-03-24	06:14:00	0
2009-03-24	06:15:00	0
2009-03-24	06:16:00	0
2009-03-24	06:17:00	0
2009-03-24	06:18:00	0
2009-03-24	06:19:00	0
2009-03-24	06:20:00	0
2009-03-24	06:21:00	0
2009-03-24	06:22:00	0
2009-03-24	06:23:00	0
2009-03-24	06:24:00	0
2009-03-24	06:25:00	0
2009-03-24	06:26:00	105
2009-03-24	06:27:00	12
2009-03-24	06:28:00	0
2009-03-24	06:29:00	0
2009-03-24	06:30:00	0
2009-03-24	06:31:00	0
2009-03-24	06:32:00	0
2009-03-24	06:33:00	0
2009-03-24	06:34:00	0
2009-03-24	06:35:00	0
2009-03-24	06:36:00	0
2009-03-24	06:37:00	0
2009-03-24	06:38:00	23
2009-03-24	06:39:00	0
2009-03-24	06:40:00	0
2009-03-24	06:41:00	0
2009-03-24	06:42:00	0
2009-03-24	06:43:00	0
2009-03-24	06:44:00	0
2009-03-24	06:45:00	0
2009-03-24	06:46:00	0
2009-03-24	06:47:00	0
2009-03-24	06:48:00	0
2009-03-24	06:49:00	0
2009-03-24	06:50:00	0
2009-03-24	06:51:00	0
2009-03-24	06:52:00	0
2009-03-24	06:53:00	0
2009-03-24	06:54:00	0
2009-03-24	06:55:00	0
2009-03-24	06:56:00	0
2009-03-24	06:57:00	0
2009-03-24	06:58:00	0
2009-03-24	06:59:00	0
2009-03-24	07:00:00	0
2009-03-24	07:01:00	0
2009-03-24	07:02:00	12
2009-03-24	07:03:00	0
2009-03-24	07:04:00	0
2009-03-24	07:05:00	0
2009-03-24	07:06:00	0
2009-03-24	07:07:00	0
2009-03-24	07:08:00	0
2009-03-24	07:09:00	0
2009-03-24	07:10:00	0
2009-03-24	07:11:00	0
2009-03-24	07:12:00	0
2009-03-24	07:13:00	0
2009-03-24	07:14:00	0
2009-03-24	07:15:00	23
2009-03-24	07:16:00	58
2009-03-24	07:17:00	0
2009-03-24	07:18:00	0
2009-03-24	07:19:00	0
2009-03-24	07:20:00	81
2009-03-24	07:21:00	0
2009-03-24	07:22:00	0
2009-03-24	07:23:00	58
2009-03-24	07:24:00	277
2009-03-24	07:25:00	193
2009-03-24	07:26:00	0
2009-03-24	07:27:00	0
2009-03-24	07:28:00	0
2009-03-24	07:29:00	105
2009-03-24	07:30:00	0
2009-03-24	07:31:00	0
2009-03-24	07:32:00	0
2009-03-24	07:33:00	0
2009-03-24	07:34:00	0
2009-03-24	07:35:00	386
2009-03-24	07:36:00	435
2009-03-24	07:37:00	179
2009-03-24	07:38:00	621
2009-03-24	07:39:00	263
2009-03-24	07:40:00	58
2009-03-24	07:41:00	1354
2009-03-24	07:42:00	489
2009-03-24	07:43:00	291
2009-03-24	07:44:00	35
2009-03-24	07:45:00	337
2009-03-24	07:46:00	705
2009-03-24	07:47:00	58
2009-03-24	07:48:00	70
2009-03-24	07:49:00	47
2009-03-24	07:50:00	0
2009-03-24	07:51:00	0
2009-03-24	07:52:00	0
2009-03-24	07:53:00	0
2009-03-24	07:54:00	0
2009-03-24	07:55:00	0
2009-03-24	07:56:00	0
2009-03-24	07:57:00	0
2009-03-24	07:58:00	0
2009-03-24	07:59:00	0
2009-03-24	08:00:00	0
2009-03-24	08:01:00	0
2009-03-24	08:02:00	403
2009-03-24	08:03:00	81
2009-03-24	08:04:00	105
2009-03-24	08:05:00	179
2009-03-24	08:06:00	193
2009-03-24	08:07:00	12
2009-03-24	08:08:00	70
2009-03-24	08:09:00	128
2009-03-24	08:10:00	23
2009-03-24	08:11:00	207
2009-03-24	08:12:00	116
2009-03-24	08:13:00	93
2009-03-24	08:14:00	507
2009-03-24	08:15:00	305
2009-03-24	08:16:00	105
2009-03-24	08:17:00	0
2009-03-24	08:18:00	12
2009-03-24	08:19:00	0
2009-03-24	08:20:00	0
2009-03-24	08:21:00	0
2009-03-24	08:22:00	58
2009-03-24	08:23:00	0
2009-03-24	08:24:00	0
2009-03-24	08:25:00	0
2009-03-24	08:26:00	0
2009-03-24	08:27:00	0
2009-03-24	08:28:00	0
2009-03-24	08:29:00	0
2009-03-24	08:30:00	0
2009-03-24	08:31:00	0
2009-03-24	08:32:00	0
2009-03-24	08:33:00	12
2009-03-24	08:34:00	0
2009-03-24	08:35:00	0
2009-03-24	08:36:00	0
2009-03-24	08:37:00	0
2009-03-24	08:38:00	116
2009-03-24	08:39:00	0
2009-03-24	08:40:00	0
2009-03-24	08:41:00	0
2009-03-24	08:42:00	0
2009-03-24	08:43:00	179
2009-03-24	08:44:00	165
2009-03-24	08:45:00	128
2009-03-24	08:46:00	0
2009-03-24	08:47:00	105
2009-03-24	08:48:00	58
2009-03-24	08:49:00	70
2009-03-24	08:50:00	263
2009-03-24	08:51:00	35
2009-03-24	08:52:00	35
2009-03-24	08:53:00	0
2009-03-24	08:54:00	81
2009-03-24	08:55:00	0
2009-03-24	08:56:00	0
2009-03-24	08:57:00	370
2009-03-24	08:58:00	354
2009-03-24	08:59:00	936
2009-03-24	09:00:00	817
2009-03-24	09:01:00	1731
2009-03-24	09:02:00	1175
2009-03-24	09:03:00	961
2009-03-24	09:04:00	863
2009-03-24	09:05:00	207
2009-03-24	09:06:00	249
2009-03-24	09:07:00	93
2009-03-24	09:08:00	58
[truncated: 19,611 more rows]

## Sheet: 4.6.09
Actogram, Copy Raw Data, All Days
Identity:	Baxter
Filename:	E:\Active Research Files\meloxicam titre canine\cases\baxter\Baxter 4.6.09.AWC
Gender:	M
Age:	3
Height:	76.2 cm	30.0 in
Weight:	29.5 kg	65.0 lbs
Start Date:	06-Apr-2009 (Mon)
Start Time:	18:00:00
Interval:	1.00 mins
Date Stamp:	Time Stamp:	Activity Data:	Marker Press:
2009-04-06	00:00:00	0
2009-04-06	00:01:00	0
2009-04-06	00:02:00	0
2009-04-06	00:03:00	0
2009-04-06	00:04:00	0
2009-04-06	00:05:00	0
2009-04-06	00:06:00	0
2009-04-06	00:07:00	0
2009-04-06	00:08:00	0
2009-04-06	00:09:00	0
2009-04-06	00:10:00	0
2009-04-06	00:11:00	0
2009-04-06	00:12:00	0
2009-04-06	00:13:00	0
2009-04-06	00:14:00	0
2009-04-06	00:15:00	0
2009-04-06	00:16:00	0
2009-04-06	00:17:00	0
2009-04-06	00:18:00	0
2009-04-06	00:19:00	0
2009-04-06	00:20:00	0
2009-04-06	00:21:00	0
2009-04-06	00:22:00	0
2009-04-06	00:23:00	0
2009-04-06	00:24:00	0
2009-04-06	00:25:00	0
2009-04-06	00:26:00	0
2009-04-06	00:27:00	0
2009-04-06	00:28:00	0
2009-04-06	00:29:00	0
2009-04-06	00:30:00	0
2009-04-06	00:31:00	0
2009-04-06	00:32:00	0
2009-04-06	00:33:00	0
2009-04-06	00:34:00	0
2009-04-06	00:35:00	0
2009-04-06	00:36:00	0
2009-04-06	00:37:00	0
2009-04-06	00:38:00	0
2009-04-06	00:39:00	0
2009-04-06	00:40:00	0
2009-04-06	00:41:00	0
2009-04-06	00:42:00	0
2009-04-06	00:43:00	0
2009-04-06	00:44:00	0
2009-04-06	00:45:00	0
2009-04-06	00:46:00	0
2009-04-06	00:47:00	0
2009-04-06	00:48:00	0
2009-04-06	00:49:00	0
2009-04-06	00:50:00	0
2009-04-06	00:51:00	0
2009-04-06	00:52:00	0
2009-04-06	00:53:00	0
2009-04-06	00:54:00	0
2009-04-06	00:55:00	0
2009-04-06	00:56:00	0
2009-04-06	00:57:00	0
2009-04-06	00:58:00	0
2009-04-06	00:59:00	0
2009-04-06	01:00:00	0
2009-04-06	01:01:00	0
2009-04-06	01:02:00	0
2009-04-06	01:03:00	0
2009-04-06	01:04:00	0
2009-04-06	01:05:00	0
2009-04-06	01:06:00	0
2009-04-06	01:07:00	0
2009-04-06	01:08:00	0
2009-04-06	01:09:00	0
2009-04-06	01:10:00	0
2009-04-06	01:11:00	0
2009-04-06	01:12:00	0
2009-04-06	01:13:00	0
2009-04-06	01:14:00	0
2009-04-06	01:15:00	0
2009-04-06	01:16:00	0
2009-04-06	01:17:00	0
2009-04-06	01:18:00	0
2009-04-06	01:19:00	0
2009-04-06	01:20:00	0
2009-04-06	01:21:00	0
2009-04-06	01:22:00	0
2009-04-06	01:23:00	0
2009-04-06	01:24:00	0
2009-04-06	01:25:00	0
2009-04-06	01:26:00	0
2009-04-06	01:27:00	0
2009-04-06	01:28:00	0
2009-04-06	01:29:00	0
2009-04-06	01:30:00	0
2009-04-06	01:31:00	0
2009-04-06	01:32:00	0
2009-04-06	01:33:00	0
2009-04-06	01:34:00	0
2009-04-06	01:35:00	0
2009-04-06	01:36:00	0
2009-04-06	01:37:00	0
2009-04-06	01:38:00	0
2009-04-06	01:39:00	0
2009-04-06	01:40:00	0
2009-04-06	01:41:00	0
2009-04-06	01:42:00	0
2009-04-06	01:43:00	0
2009-04-06	01:44:00	0
2009-04-06	01:45:00	0
2009-04-06	01:46:00	0
2009-04-06	01:47:00	0
2009-04-06	01:48:00	0
2009-04-06	01:49:00	0
2009-04-06	01:50:00	0
2009-04-06	01:51:00	0
2009-04-06	01:52:00	0
2009-04-06	01:53:00	0
2009-04-06	01:54:00	0
2009-04-06	01:55:00	0
2009-04-06	01:56:00	0
2009-04-06	01:57:00	0
2009-04-06	01:58:00	0
2009-04-06	01:59:00	0
2009-04-06	02:00:00	0
2009-04-06	02:01:00	0
2009-04-06	02:02:00	0
2009-04-06	02:03:00	0
2009-04-06	02:04:00	0
2009-04-06	02:05:00	0
2009-04-06	02:06:00	0
2009-04-06	02:07:00	0
2009-04-06	02:08:00	0
2009-04-06	02:09:00	0
2009-04-06	02:10:00	0
2009-04-06	02:11:00	0
2009-04-06	02:12:00	0
2009-04-06	02:13:00	0
2009-04-06	02:14:00	0
2009-04-06	02:15:00	0
2009-04-06	02:16:00	0
2009-04-06	02:17:00	0
2009-04-06	02:18:00	0
2009-04-06	02:19:00	0
2009-04-06	02:20:00	0
2009-04-06	02:21:00	0
2009-04-06	02:22:00	0
2009-04-06	02:23:00	0
2009-04-06	02:24:00	0
2009-04-06	02:25:00	0
2009-04-06	02:26:00	0
2009-04-06	02:27:00	0
2009-04-06	02:28:00	0
2009-04-06	02:29:00	0
2009-04-06	02:30:00	0
2009-04-06	02:31:00	0
2009-04-06	02:32:00	0
2009-04-06	02:33:00	0
2009-04-06	02:34:00	0
2009-04-06	02:35:00	0
2009-04-06	02:36:00	0
2009-04-06	02:37:00	0
2009-04-06	02:38:00	0
2009-04-06	02:39:00	0
2009-04-06	02:40:00	0
2009-04-06	02:41:00	0
2009-04-06	02:42:00	0
2009-04-06	02:43:00	0
2009-04-06	02:44:00	0
2009-04-06	02:45:00	0
2009-04-06	02:46:00	0
2009-04-06	02:47:00	0
2009-04-06	02:48:00	0
2009-04-06	02:49:00	0
2009-04-06	02:50:00	0
2009-04-06	02:51:00	0
2009-04-06	02:52:00	0
2009-04-06	02:53:00	0
2009-04-06	02:54:00	0
2009-04-06	02:55:00	0
2009-04-06	02:56:00	0
2009-04-06	02:57:00	0
2009-04-06	02:58:00	0
2009-04-06	02:59:00	0
2009-04-06	03:00:00	0
2009-04-06	03:01:00	0
2009-04-06	03:02:00	0
2009-04-06	03:03:00	0
2009-04-06	03:04:00	0
2009-04-06	03:05:00	0
2009-04-06	03:06:00	0
2009-04-06	03:07:00	0
2009-04-06	03:08:00	0
2009-04-06	03:09:00	0
2009-04-06	03:10:00	0
2009-04-06	03:11:00	0
2009-04-06	03:12:00	0
2009-04-06	03:13:00	0
2009-04-06	03:14:00	0
2009-04-06	03:15:00	0
2009-04-06	03:16:00	0
2009-04-06	03:17:00	0
2009-04-06	03:18:00	0
2009-04-06	03:19:00	0
2009-04-06	03:20:00	0
2009-04-06	03:21:00	0
2009-04-06	03:22:00	0
2009-04-06	03:23:00	0
2009-04-06	03:24:00	0
2009-04-06	03:25:00	0
2009-04-06	03:26:00	0
2009-04-06	03:27:00	0
2009-04-06	03:28:00	0
2009-04-06	03:29:00	0
2009-04-06	03:30:00	0
2009-04-06	03:31:00	0
2009-04-06	03:32:00	0
2009-04-06	03:33:00	0
2009-04-06	03:34:00	0
2009-04-06	03:35:00	0
2009-04-06	03:36:00	0
2009-04-06	03:37:00	0
2009-04-06	03:38:00	0
2009-04-06	03:39:00	0
2009-04-06	03:40:00	0
2009-04-06	03:41:00	0
2009-04-06	03:42:00	0
2009-04-06	03:43:00	0
2009-04-06	03:44:00	0
2009-04-06	03:45:00	0
2009-04-06	03:46:00	0
2009-04-06	03:47:00	0
2009-04-06	03:48:00	0
2009-04-06	03:49:00	0
2009-04-06	03:50:00	0
2009-04-06	03:51:00	0
2009-04-06	03:52:00	0
2009-04-06	03:53:00	0
2009-04-06	03:54:00	0
2009-04-06	03:55:00	0
2009-04-06	03:56:00	0
2009-04-06	03:57:00	0
2009-04-06	03:58:00	0
2009-04-06	03:59:00	0
2009-04-06	04:00:00	0
2009-04-06	04:01:00	0
2009-04-06	04:02:00	0
2009-04-06	04:03:00	0
2009-04-06	04:04:00	0
2009-04-06	04:05:00	0
2009-04-06	04:06:00	0
2009-04-06	04:07:00	0
2009-04-06	04:08:00	0
2009-04-06	04:09:00	0
2009-04-06	04:10:00	0
2009-04-06	04:11:00	0
2009-04-06	04:12:00	0
2009-04-06	04:13:00	0
2009-04-06	04:14:00	0
2009-04-06	04:15:00	0
2009-04-06	04:16:00	0
2009-04-06	04:17:00	0
2009-04-06	04:18:00	0
2009-04-06	04:19:00	0
2009-04-06	04:20:00	0
2009-04-06	04:21:00	0
2009-04-06	04:22:00	0
2009-04-06	04:23:00	0
2009-04-06	04:24:00	0
2009-04-06	04:25:00	0
2009-04-06	04:26:00	0
2009-04-06	04:27:00	0
2009-04-06	04:28:00	0
2009-04-06	04:29:00	0
2009-04-06	04:30:00	0
2009-04-06	04:31:00	0
2009-04-06	04:32:00	0
2009-04-06	04:33:00	0
2009-04-06	04:34:00	0
2009-04-06	04:35:00	0
2009-04-06	04:36:00	0
2009-04-06	04:37:00	0
2009-04-06	04:38:00	0
2009-04-06	04:39:00	0
2009-04-06	04:40:00	0
2009-04-06	04:41:00	0
2009-04-06	04:42:00	0
2009-04-06	04:43:00	0
2009-04-06	04:44:00	0
2009-04-06	04:45:00	0
2009-04-06	04:46:00	0
2009-04-06	04:47:00	0
2009-04-06	04:48:00	0
2009-04-06	04:49:00	0
2009-04-06	04:50:00	0
2009-04-06	04:51:00	0
2009-04-06	04:52:00	0
2009-04-06	04:53:00	0
2009-04-06	04:54:00	0
2009-04-06	04:55:00	0
2009-04-06	04:56:00	0
2009-04-06	04:57:00	0
2009-04-06	04:58:00	0
2009-04-06	04:59:00	0
2009-04-06	05:00:00	0
2009-04-06	05:01:00	0
2009-04-06	05:02:00	0
2009-04-06	05:03:00	0
2009-04-06	05:04:00	0
2009-04-06	05:05:00	0
2009-04-06	05:06:00	0
2009-04-06	05:07:00	0
2009-04-06	05:08:00	0
2009-04-06	05:09:00	0
2009-04-06	05:10:00	0
2009-04-06	05:11:00	0
2009-04-06	05:12:00	0
2009-04-06	05:13:00	0
2009-04-06	05:14:00	0
2009-04-06	05:15:00	0
2009-04-06	05:16:00	0
2009-04-06	05:17:00	0
2009-04-06	05:18:00	0
2009-04-06	05:19:00	0
2009-04-06	05:20:00	0
2009-04-06	05:21:00	0
2009-04-06	05:22:00	0
2009-04-06	05:23:00	0
2009-04-06	05:24:00	0
2009-04-06	05:25:00	0
2009-04-06	05:26:00	0
2009-04-06	05:27:00	0
2009-04-06	05:28:00	0
2009-04-06	05:29:00	0
2009-04-06	05:30:00	0
2009-04-06	05:31:00	0
2009-04-06	05:32:00	0
2009-04-06	05:33:00	0
2009-04-06	05:34:00	0
2009-04-06	05:35:00	0
2009-04-06	05:36:00	0
2009-04-06	05:37:00	0
2009-04-06	05:38:00	0
2009-04-06	05:39:00	0
2009-04-06	05:40:00	0
2009-04-06	05:41:00	0
2009-04-06	05:42:00	0
2009-04-06	05:43:00	0
2009-04-06	05:44:00	0
2009-04-06	05:45:00	0
2009-04-06	05:46:00	0
2009-04-06	05:47:00	0
2009-04-06	05:48:00	0
2009-04-06	05:49:00	0
2009-04-06	05:50:00	0
2009-04-06	05:51:00	0
2009-04-06	05:52:00	0
2009-04-06	05:53:00	0
2009-04-06	05:54:00	0
2009-04-06	05:55:00	0
2009-04-06	05:56:00	0
2009-04-06	05:57:00	0
2009-04-06	05:58:00	0
2009-04-06	05:59:00	0
2009-04-06	06:00:00	0
2009-04-06	06:01:00	0
2009-04-06	06:02:00	0
2009-04-06	06:03:00	0
2009-04-06	06:04:00	0
2009-04-06	06:05:00	0
2009-04-06	06:06:00	0
2009-04-06	06:07:00	0
2009-04-06	06:08:00	0
2009-04-06	06:09:00	0
2009-04-06	06:10:00	0
2009-04-06	06:11:00	0
2009-04-06	06:12:00	0
2009-04-06	06:13:00	0
2009-04-06	06:14:00	0
2009-04-06	06:15:00	0
2009-04-06	06:16:00	0
2009-04-06	06:17:00	0
2009-04-06	06:18:00	0
2009-04-06	06:19:00	0
2009-04-06	06:20:00	0
2009-04-06	06:21:00	0
2009-04-06	06:22:00	0
2009-04-06	06:23:00	0
2009-04-06	06:24:00	0
2009-04-06	06:25:00	0
2009-04-06	06:26:00	0
2009-04-06	06:27:00	0
2009-04-06	06:28:00	0
2009-04-06	06:29:00	0
2009-04-06	06:30:00	0
2009-04-06	06:31:00	0
2009-04-06	06:32:00	0
2009-04-06	06:33:00	0
2009-04-06	06:34:00	0
2009-04-06	06:35:00	0
2009-04-06	06:36:00	0
2009-04-06	06:37:00	0
2009-04-06	06:38:00	0
2009-04-06	06:39:00	0
2009-04-06	06:40:00	0
2009-04-06	06:41:00	0
2009-04-06	06:42:00	0
2009-04-06	06:43:00	0
2009-04-06	06:44:00	0
2009-04-06	06:45:00	0
2009-04-06	06:46:00	0
2009-04-06	06:47:00	0
2009-04-06	06:48:00	0
2009-04-06	06:49:00	0
2009-04-06	06:50:00	0
2009-04-06	06:51:00	0
2009-04-06	06:52:00	0
2009-04-06	06:53:00	0
2009-04-06	06:54:00	0
2009-04-06	06:55:00	0
2009-04-06	06:56:00	0
2009-04-06	06:57:00	0
2009-04-06	06:58:00	0
2009-04-06	06:59:00	0
2009-04-06	07:00:00	0
2009-04-06	07:01:00	0
2009-04-06	07:02:00	0
2009-04-06	07:03:00	0
2009-04-06	07:04:00	0
2009-04-06	07:05:00	0
2009-04-06	07:06:00	0
2009-04-06	07:07:00	0
2009-04-06	07:08:00	0
2009-04-06	07:09:00	0
2009-04-06	07:10:00	0
2009-04-06	07:11:00	0
2009-04-06	07:12:00	0
2009-04-06	07:13:00	0
2009-04-06	07:14:00	0
2009-04-06	07:15:00	0
2009-04-06	07:16:00	0
2009-04-06	07:17:00	0
2009-04-06	07:18:00	0
2009-04-06	07:19:00	0
2009-04-06	07:20:00	0
2009-04-06	07:21:00	0
2009-04-06	07:22:00	0
2009-04-06	07:23:00	0
2009-04-06	07:24:00	0
2009-04-06	07:25:00	0
2009-04-06	07:26:00	0
2009-04-06	07:27:00	0
2009-04-06	07:28:00	0
2009-04-06	07:29:00	0
2009-04-06	07:30:00	0
2009-04-06	07:31:00	0
2009-04-06	07:32:00	0
2009-04-06	07:33:00	0
2009-04-06	07:34:00	0
2009-04-06	07:35:00	0
2009-04-06	07:36:00	0
2009-04-06	07:37:00	0
2009-04-06	07:38:00	0
2009-04-06	07:39:00	0
2009-04-06	07:40:00	0
2009-04-06	07:41:00	0
2009-04-06	07:42:00	0
2009-04-06	07:43:00	0
2009-04-06	07:44:00	0
2009-04-06	07:45:00	0
2009-04-06	07:46:00	0
2009-04-06	07:47:00	0
2009-04-06	07:48:00	0
2009-04-06	07:49:00	0
2009-04-06	07:50:00	0
2009-04-06	07:51:00	0
2009-04-06	07:52:00	0
2009-04-06	07:53:00	0
2009-04-06	07:54:00	0
2009-04-06	07:55:00	0
2009-04-06	07:56:00	0
2009-04-06	07:57:00	0
2009-04-06	07:58:00	0
2009-04-06	07:59:00	0
2009-04-06	08:00:00	0
2009-04-06	08:01:00	0
2009-04-06	08:02:00	0
2009-04-06	08:03:00	0
2009-04-06	08:04:00	0
2009-04-06	08:05:00	0
2009-04-06	08:06:00	0
2009-04-06	08:07:00	0
2009-04-06	08:08:00	0
2009-04-06	08:09:00	0
2009-04-06	08:10:00	0
2009-04-06	08:11:00	0
2009-04-06	08:12:00	0
2009-04-06	08:13:00	0
2009-04-06	08:14:00	0
2009-04-06	08:15:00	0
2009-04-06	08:16:00	0
2009-04-06	08:17:00	0
2009-04-06	08:18:00	0
2009-04-06	08:19:00	0
2009-04-06	08:20:00	0
2009-04-06	08:21:00	0
2009-04-06	08:22:00	0
2009-04-06	08:23:00	0
2009-04-06	08:24:00	0
2009-04-06	08:25:00	0
2009-04-06	08:26:00	0
2009-04-06	08:27:00	0
2009-04-06	08:28:00	0
2009-04-06	08:29:00	0
2009-04-06	08:30:00	0
2009-04-06	08:31:00	0
2009-04-06	08:32:00	0
2009-04-06	08:33:00	0
2009-04-06	08:34:00	0
2009-04-06	08:35:00	0
2009-04-06	08:36:00	0
2009-04-06	08:37:00	0
2009-04-06	08:38:00	0
2009-04-06	08:39:00	0
2009-04-06	08:40:00	0
2009-04-06	08:41:00	0
2009-04-06	08:42:00	0
2009-04-06	08:43:00	0
2009-04-06	08:44:00	0
2009-04-06	08:45:00	0
2009-04-06	08:46:00	0
2009-04-06	08:47:00	0
2009-04-06	08:48:00	0
2009-04-06	08:49:00	0
2009-04-06	08:50:00	0
2009-04-06	08:51:00	0
2009-04-06	08:52:00	0
2009-04-06	08:53:00	0
2009-04-06	08:54:00	0
2009-04-06	08:55:00	0
2009-04-06	08:56:00	0
2009-04-06	08:57:00	0
2009-04-06	08:58:00	0
2009-04-06	08:59:00	0
2009-04-06	09:00:00	0
2009-04-06	09:01:00	0
2009-04-06	09:02:00	0
2009-04-06	09:03:00	0
2009-04-06	09:04:00	0
2009-04-06	09:05:00	0
2009-04-06	09:06:00	0
2009-04-06	09:07:00	0
2009-04-06	09:08:00	0
2009-04-06	09:09:00	0
2009-04-06	09:10:00	0
2009-04-06	09:11:00	0
2009-04-06	09:12:00	0
2009-04-06	09:13:00	0
2009-04-06	09:14:00	0
2009-04-06	09:15:00	0
2009-04-06	09:16:00	0
2009-04-06	09:17:00	0
2009-04-06	09:18:00	0
2009-04-06	09:19:00	0
2009-04-06	09:20:00	0
2009-04-06	09:21:00	0
2009-04-06	09:22:00	0
2009-04-06	09:23:00	0
2009-04-06	09:24:00	0
2009-04-06	09:25:00	0
2009-04-06	09:26:00	0
2009-04-06	09:27:00	0
2009-04-06	09:28:00	0
2009-04-06	09:29:00	0
2009-04-06	09:30:00	0
2009-04-06	09:31:00	0
2009-04-06	09:32:00	0
2009-04-06	09:33:00	0
2009-04-06	09:34:00	0
2009-04-06	09:35:00	0
2009-04-06	09:36:00	0
2009-04-06	09:37:00	0
2009-04-06	09:38:00	0
2009-04-06	09:39:00	0
2009-04-06	09:40:00	0
2009-04-06	09:41:00	0
2009-04-06	09:42:00	0
2009-04-06	09:43:00	0
2009-04-06	09:44:00	0
2009-04-06	09:45:00	0
2009-04-06	09:46:00	0
2009-04-06	09:47:00	0
2009-04-06	09:48:00	0
2009-04-06	09:49:00	0
2009-04-06	09:50:00	0
2009-04-06	09:51:00	0
2009-04-06	09:52:00	0
2009-04-06	09:53:00	0
2009-04-06	09:54:00	0
2009-04-06	09:55:00	0
2009-04-06	09:56:00	0
2009-04-06	09:57:00	0
2009-04-06	09:58:00	0
2009-04-06	09:59:00	0
2009-04-06	10:00:00	0
2009-04-06	10:01:00	0
2009-04-06	10:02:00	0
2009-04-06	10:03:00	0
2009-04-06	10:04:00	0
2009-04-06	10:05:00	0
2009-04-06	10:06:00	0
2009-04-06	10:07:00	0
2009-04-06	10:08:00	0
2009-04-06	10:09:00	0
2009-04-06	10:10:00	0
2009-04-06	10:11:00	0
2009-04-06	10:12:00	0
2009-04-06	10:13:00	0
2009-04-06	10:14:00	0
2009-04-06	10:15:00	0
2009-04-06	10:16:00	0
2009-04-06	10:17:00	0
2009-04-06	10:18:00	0
2009-04-06	10:19:00	0
2009-04-06	10:20:00	0
2009-04-06	10:21:00	0
2009-04-06	10:22:00	0
2009-04-06	10:23:00	0
2009-04-06	10:24:00	0
2009-04-06	10:25:00	0
2009-04-06	10:26:00	0
2009-04-06	10:27:00	0
2009-04-06	10:28:00	0
2009-04-06	10:29:00	0
2009-04-06	10:30:00	0
2009-04-06	10:31:00	0
2009-04-06	10:32:00	0
2009-04-06	10:33:00	0
2009-04-06	10:34:00	0
2009-04-06	10:35:00	0
2009-04-06	10:36:00	0
2009-04-06	10:37:00	0
2009-04-06	10:38:00	0
2009-04-06	10:39:00	0
2009-04-06	10:40:00	0
2009-04-06	10:41:00	0
2009-04-06	10:42:00	0
2009-04-06	10:43:00	0
2009-04-06	10:44:00	0
2009-04-06	10:45:00	0
2009-04-06	10:46:00	0
2009-04-06	10:47:00	0
2009-04-06	10:48:00	0
2009-04-06	10:49:00	0
2009-04-06	10:50:00	0
2009-04-06	10:51:00	0
2009-04-06	10:52:00	0
2009-04-06	10:53:00	0
2009-04-06	10:54:00	0
2009-04-06	10:55:00	0
2009-04-06	10:56:00	0
2009-04-06	10:57:00	0
2009-04-06	10:58:00	0
2009-04-06	10:59:00	0
2009-04-06	11:00:00	0
2009-04-06	11:01:00	0
2009-04-06	11:02:00	0
2009-04-06	11:03:00	0
2009-04-06	11:04:00	0
2009-04-06	11:05:00	0
2009-04-06	11:06:00	0
2009-04-06	11:07:00	0
2009-04-06	11:08:00	0
2009-04-06	11:09:00	0
2009-04-06	11:10:00	0
2009-04-06	11:11:00	0
2009-04-06	11:12:00	0
2009-04-06	11:13:00	0
2009-04-06	11:14:00	0
2009-04-06	11:15:00	0
2009-04-06	11:16:00	0
2009-04-06	11:17:00	0
2009-04-06	11:18:00	0
2009-04-06	11:19:00	0
2009-04-06	11:20:00	0
2009-04-06	11:21:00	0
2009-04-06	11:22:00	0
2009-04-06	11:23:00	0
2009-04-06	11:24:00	0
2009-04-06	11:25:00	0
2009-04-06	11:26:00	0
2009-04-06	11:27:00	0
2009-04-06	11:28:00	0
2009-04-06	11:29:00	0
2009-04-06	11:30:00	0
2009-04-06	11:31:00	0
2009-04-06	11:32:00	0
2009-04-06	11:33:00	0
2009-04-06	11:34:00	0
2009-04-06	11:35:00	0
2009-04-06	11:36:00	0
2009-04-06	11:37:00	0
2009-04-06	11:38:00	0
2009-04-06	11:39:00	0
2009-04-06	11:40:00	0
2009-04-06	11:41:00	0
2009-04-06	11:42:00	0
2009-04-06	11:43:00	0
2009-04-06	11:44:00	0
2009-04-06	11:45:00	0
2009-04-06	11:46:00	0
2009-04-06	11:47:00	0
2009-04-06	11:48:00	0
2009-04-06	11:49:00	0
2009-04-06	11:50:00	0
2009-04-06	11:51:00	0
2009-04-06	11:52:00	0
2009-04-06	11:53:00	0
2009-04-06	11:54:00	0
2009-04-06	11:55:00	0
2009-04-06	11:56:00	0
2009-04-06	11:57:00	0
2009-04-06	11:58:00	0
2009-04-06	11:59:00	0
2009-04-06	12:00:00	0
2009-04-06	12:01:00	0
2009-04-06	12:02:00	0
2009-04-06	12:03:00	0
2009-04-06	12:04:00	0
2009-04-06	12:05:00	0
2009-04-06	12:06:00	0
2009-04-06	12:07:00	0
2009-04-06	12:08:00	0
2009-04-06	12:09:00	0
2009-04-06	12:10:00	0
2009-04-06	12:11:00	0
2009-04-06	12:12:00	0
2009-04-06	12:13:00	0
2009-04-06	12:14:00	0
2009-04-06	12:15:00	0
2009-04-06	12:16:00	0
2009-04-06	12:17:00	0
2009-04-06	12:18:00	0
2009-04-06	12:19:00	0
2009-04-06	12:20:00	0
2009-04-06	12:21:00	0
2009-04-06	12:22:00	0
2009-04-06	12:23:00	0
2009-04-06	12:24:00	0
2009-04-06	12:25:00	0
2009-04-06	12:26:00	0
2009-04-06	12:27:00	0
2009-04-06	12:28:00	0
2009-04-06	12:29:00	0
2009-04-06	12:30:00	0
2009-04-06	12:31:00	0
2009-04-06	12:32:00	0
2009-04-06	12:33:00	0
2009-04-06	12:34:00	0
2009-04-06	12:35:00	0
2009-04-06	12:36:00	0
2009-04-06	12:37:00	0
2009-04-06	12:38:00	0
2009-04-06	12:39:00	0
2009-04-06	12:40:00	0
2009-04-06	12:41:00	0
2009-04-06	12:42:00	0
2009-04-06	12:43:00	0
2009-04-06	12:44:00	0
2009-04-06	12:45:00	0
2009-04-06	12:46:00	0
2009-04-06	12:47:00	0
2009-04-06	12:48:00	0
2009-04-06	12:49:00	0
2009-04-06	12:50:00	0
2009-04-06	12:51:00	0
2009-04-06	12:52:00	0
2009-04-06	12:53:00	0
2009-04-06	12:54:00	0
2009-04-06	12:55:00	0
2009-04-06	12:56:00	0
2009-04-06	12:57:00	0
2009-04-06	12:58:00	0
2009-04-06	12:59:00	0
2009-04-06	13:00:00	0
2009-04-06	13:01:00	0
2009-04-06	13:02:00	0
2009-04-06	13:03:00	0
2009-04-06	13:04:00	0
2009-04-06	13:05:00	0
2009-04-06	13:06:00	0
2009-04-06	13:07:00	0
2009-04-06	13:08:00	0
2009-04-06	13:09:00	0
2009-04-06	13:10:00	0
2009-04-06	13:11:00	0
2009-04-06	13:12:00	0
2009-04-06	13:13:00	0
2009-04-06	13:14:00	0
2009-04-06	13:15:00	0
2009-04-06	13:16:00	0
2009-04-06	13:17:00	0
2009-04-06	13:18:00	0
2009-04-06	13:19:00	0
2009-04-06	13:20:00	0
2009-04-06	13:21:00	0
2009-04-06	13:22:00	0
2009-04-06	13:23:00	0
2009-04-06	13:24:00	0
2009-04-06	13:25:00	0
2009-04-06	13:26:00	0
2009-04-06	13:27:00	0
2009-04-06	13:28:00	0
2009-04-06	13:29:00	0
2009-04-06	13:30:00	0
2009-04-06	13:31:00	0
2009-04-06	13:32:00	0
2009-04-06	13:33:00	0
2009-04-06	13:34:00	0
2009-04-06	13:35:00	0
2009-04-06	13:36:00	0
2009-04-06	13:37:00	0
2009-04-06	13:38:00	0
2009-04-06	13:39:00	0
2009-04-06	13:40:00	0
2009-04-06	13:41:00	0
2009-04-06	13:42:00	0
2009-04-06	13:43:00	0
2009-04-06	13:44:00	0
2009-04-06	13:45:00	0
2009-04-06	13:46:00	0
2009-04-06	13:47:00	0
2009-04-06	13:48:00	0
2009-04-06	13:49:00	0
2009-04-06	13:50:00	0
2009-04-06	13:51:00	0
2009-04-06	13:52:00	0
2009-04-06	13:53:00	0
2009-04-06	13:54:00	0
2009-04-06	13:55:00	0
2009-04-06	13:56:00	0
2009-04-06	13:57:00	0
2009-04-06	13:58:00	0
2009-04-06	13:59:00	0
2009-04-06	14:00:00	0
2009-04-06	14:01:00	0
2009-04-06	14:02:00	0
2009-04-06	14:03:00	0
2009-04-06	14:04:00	0
2009-04-06	14:05:00	0
2009-04-06	14:06:00	0
2009-04-06	14:07:00	0
2009-04-06	14:08:00	0
2009-04-06	14:09:00	0
2009-04-06	14:10:00	0
2009-04-06	14:11:00	0
2009-04-06	14:12:00	0
2009-04-06	14:13:00	0
2009-04-06	14:14:00	0
2009-04-06	14:15:00	0
2009-04-06	14:16:00	0
2009-04-06	14:17:00	0
2009-04-06	14:18:00	0
2009-04-06	14:19:00	0
2009-04-06	14:20:00	0
2009-04-06	14:21:00	0
2009-04-06	14:22:00	0
2009-04-06	14:23:00	0
2009-04-06	14:24:00	0
2009-04-06	14:25:00	0
2009-04-06	14:26:00	0
2009-04-06	14:27:00	0
2009-04-06	14:28:00	0
2009-04-06	14:29:00	0
2009-04-06	14:30:00	0
2009-04-06	14:31:00	0
2009-04-06	14:32:00	0
2009-04-06	14:33:00	0
2009-04-06	14:34:00	0
2009-04-06	14:35:00	0
2009-04-06	14:36:00	0
2009-04-06	14:37:00	0
2009-04-06	14:38:00	0
2009-04-06	14:39:00	0
2009-04-06	14:40:00	0
2009-04-06	14:41:00	0
2009-04-06	14:42:00	0
2009-04-06	14:43:00	0
2009-04-06	14:44:00	0
2009-04-06	14:45:00	0
2009-04-06	14:46:00	0
2009-04-06	14:47:00	0
2009-04-06	14:48:00	0
2009-04-06	14:49:00	0
2009-04-06	14:50:00	0
2009-04-06	14:51:00	0
2009-04-06	14:52:00	0
2009-04-06	14:53:00	0
2009-04-06	14:54:00	0
2009-04-06	14:55:00	0
2009-04-06	14:56:00	0
2009-04-06	14:57:00	0
2009-04-06	14:58:00	0
2009-04-06	14:59:00	0
2009-04-06	15:00:00	0
2009-04-06	15:01:00	0
2009-04-06	15:02:00	0
2009-04-06	15:03:00	0
2009-04-06	15:04:00	0
2009-04-06	15:05:00	0
2009-04-06	15:06:00	0
2009-04-06	15:07:00	0
2009-04-06	15:08:00	0
2009-04-06	15:09:00	0
2009-04-06	15:10:00	0
2009-04-06	15:11:00	0
2009-04-06	15:12:00	0
2009-04-06	15:13:00	0
2009-04-06	15:14:00	0
2009-04-06	15:15:00	0
2009-04-06	15:16:00	0
2009-04-06	15:17:00	0
2009-04-06	15:18:00	0
2009-04-06	15:19:00	0
2009-04-06	15:20:00	0
2009-04-06	15:21:00	0
2009-04-06	15:22:00	0
2009-04-06	15:23:00	0
2009-04-06	15:24:00	0
2009-04-06	15:25:00	0
2009-04-06	15:26:00	0
2009-04-06	15:27:00	0
2009-04-06	15:28:00	0
2009-04-06	15:29:00	0
2009-04-06	15:30:00	0
2009-04-06	15:31:00	0
2009-04-06	15:32:00	0
2009-04-06	15:33:00	0
2009-04-06	15:34:00	0
2009-04-06	15:35:00	0
2009-04-06	15:36:00	0
2009-04-06	15:37:00	0
2009-04-06	15:38:00	0
2009-04-06	15:39:00	0
2009-04-06	15:40:00	0
2009-04-06	15:41:00	0
2009-04-06	15:42:00	0
2009-04-06	15:43:00	0
2009-04-06	15:44:00	0
2009-04-06	15:45:00	0
2009-04-06	15:46:00	0
2009-04-06	15:47:00	0
2009-04-06	15:48:00	0
2009-04-06	15:49:00	0
2009-04-06	15:50:00	0
2009-04-06	15:51:00	0
2009-04-06	15:52:00	0
2009-04-06	15:53:00	0
2009-04-06	15:54:00	0
2009-04-06	15:55:00	0
2009-04-06	15:56:00	0
2009-04-06	15:57:00	0
2009-04-06	15:58:00	0
2009-04-06	15:59:00	0
2009-04-06	16:00:00	0
2009-04-06	16:01:00	0
2009-04-06	16:02:00	0
2009-04-06	16:03:00	0
2009-04-06	16:04:00	0
2009-04-06	16:05:00	0
2009-04-06	16:06:00	0
2009-04-06	16:07:00	0
2009-04-06	16:08:00	0
2009-04-06	16:09:00	0
2009-04-06	16:10:00	0
2009-04-06	16:11:00	0
2009-04-06	16:12:00	0
2009-04-06	16:13:00	0
2009-04-06	16:14:00	0
2009-04-06	16:15:00	0
2009-04-06	16:16:00	0
2009-04-06	16:17:00	0
2009-04-06	16:18:00	0
2009-04-06	16:19:00	0
2009-04-06	16:20:00	0
2009-04-06	16:21:00	0
2009-04-06	16:22:00	0
2009-04-06	16:23:00	0
2009-04-06	16:24:00	0
2009-04-06	16:25:00	0
2009-04-06	16:26:00	0
2009-04-06	16:27:00	0
2009-04-06	16:28:00	0
2009-04-06	16:29:00	0
2009-04-06	16:30:00	0
2009-04-06	16:31:00	0
2009-04-06	16:32:00	0
2009-04-06	16:33:00	0
2009-04-06	16:34:00	0
2009-04-06	16:35:00	0
2009-04-06	16:36:00	0
2009-04-06	16:37:00	0
2009-04-06	16:38:00	0
2009-04-06	16:39:00	0
2009-04-06	16:40:00	0
2009-04-06	16:41:00	0
2009-04-06	16:42:00	0
2009-04-06	16:43:00	0
2009-04-06	16:44:00	0
2009-04-06	16:45:00	0
2009-04-06	16:46:00	0
2009-04-06	16:47:00	0
2009-04-06	16:48:00	0
2009-04-06	16:49:00	0
2009-04-06	16:50:00	0
2009-04-06	16:51:00	0
2009-04-06	16:52:00	0
2009-04-06	16:53:00	0
2009-04-06	16:54:00	0
2009-04-06	16:55:00	0
2009-04-06	16:56:00	0
2009-04-06	16:57:00	0
2009-04-06	16:58:00	0
2009-04-06	16:59:00	0
2009-04-06	17:00:00	0
2009-04-06	17:01:00	0
2009-04-06	17:02:00	0
2009-04-06	17:03:00	0
2009-04-06	17:04:00	0
2009-04-06	17:05:00	0
2009-04-06	17:06:00	0
2009-04-06	17:07:00	0
2009-04-06	17:08:00	0
2009-04-06	17:09:00	0
2009-04-06	17:10:00	0
2009-04-06	17:11:00	0
2009-04-06	17:12:00	0
2009-04-06	17:13:00	0
2009-04-06	17:14:00	0
2009-04-06	17:15:00	0
2009-04-06	17:16:00	0
2009-04-06	17:17:00	0
2009-04-06	17:18:00	0
2009-04-06	17:19:00	0
2009-04-06	17:20:00	0
2009-04-06	17:21:00	0
2009-04-06	17:22:00	0
2009-04-06	17:23:00	0
2009-04-06	17:24:00	0
2009-04-06	17:25:00	0
2009-04-06	17:26:00	0
2009-04-06	17:27:00	0
2009-04-06	17:28:00	0
2009-04-06	17:29:00	0
2009-04-06	17:30:00	0
2009-04-06	17:31:00	0
2009-04-06	17:32:00	0
2009-04-06	17:33:00	0
2009-04-06	17:34:00	0
2009-04-06	17:35:00	0
2009-04-06	17:36:00	0
2009-04-06	17:37:00	0
2009-04-06	17:38:00	0
2009-04-06	17:39:00	0
2009-04-06	17:40:00	0
2009-04-06	17:41:00	0
2009-04-06	17:42:00	0
2009-04-06	17:43:00	0
2009-04-06	17:44:00	0
2009-04-06	17:45:00	0
2009-04-06	17:46:00	0
2009-04-06	17:47:00	0
2009-04-06	17:48:00	0
2009-04-06	17:49:00	0
2009-04-06	17:50:00	0
2009-04-06	17:51:00	0
2009-04-06	17:52:00	0
2009-04-06	17:53:00	0
2009-04-06	17:54:00	0
2009-04-06	17:55:00	0
2009-04-06	17:56:00	0
2009-04-06	17:57:00	0
2009-04-06	17:58:00	0
2009-04-06	17:59:00	0
2009-04-06	18:00:00	0
2009-04-06	18:01:00	12
2009-04-06	18:02:00	165
2009-04-06	18:03:00	193
2009-04-06	18:04:00	23
2009-04-06	18:05:00	47
2009-04-06	18:06:00	0
2009-04-06	18:07:00	0
2009-04-06	18:08:00	0
2009-04-06	18:09:00	0
2009-04-06	18:10:00	0
2009-04-06	18:11:00	12
2009-04-06	18:12:00	0
2009-04-06	18:13:00	321
2009-04-06	18:14:00	179
2009-04-06	18:15:00	81
2009-04-06	18:16:00	0
2009-04-06	18:17:00	0
2009-04-06	18:18:00	0
2009-04-06	18:19:00	0
2009-04-06	18:20:00	0
2009-04-06	18:21:00	0
2009-04-06	18:22:00	0
2009-04-06	18:23:00	0
2009-04-06	18:24:00	0
2009-04-06	18:25:00	0
2009-04-06	18:26:00	0
2009-04-06	18:27:00	0
2009-04-06	18:28:00	0
2009-04-06	18:29:00	0
2009-04-06	18:30:00	0
2009-04-06	18:31:00	35
2009-04-06	18:32:00	128
2009-04-06	18:33:00	105
2009-04-06	18:34:00	70
2009-04-06	18:35:00	0
2009-04-06	18:36:00	0
2009-04-06	18:37:00	0
2009-04-06	18:38:00	70
2009-04-06	18:39:00	207
2009-04-06	18:40:00	140
2009-04-06	18:41:00	81
2009-04-06	18:42:00	165
2009-04-06	18:43:00	12
2009-04-06	18:44:00	0
2009-04-06	18:45:00	35
2009-04-06	18:46:00	419
2009-04-06	18:47:00	81
2009-04-06	18:48:00	81
2009-04-06	18:49:00	0
2009-04-06	18:50:00	0
2009-04-06	18:51:00	0
2009-04-06	18:52:00	0
2009-04-06	18:53:00	0
2009-04-06	18:54:00	0
2009-04-06	18:55:00	0
2009-04-06	18:56:00	0
2009-04-06	18:57:00	0
2009-04-06	18:58:00	0
2009-04-06	18:59:00	0
2009-04-06	19:00:00	0
2009-04-06	19:01:00	0
2009-04-06	19:02:00	0
2009-04-06	19:03:00	0
2009-04-06	19:04:00	35
2009-04-06	19:05:00	70
2009-04-06	19:06:00	151
2009-04-06	19:07:00	35
2009-04-06	19:08:00	0
2009-04-06	19:09:00	12
2009-04-06	19:10:00	0
2009-04-06	19:11:00	0
2009-04-06	19:12:00	0
2009-04-06	19:13:00	0
2009-04-06	19:14:00	93
2009-04-06	19:15:00	81
2009-04-06	19:16:00	47
2009-04-06	19:17:00	0
2009-04-06	19:18:00	70
2009-04-06	19:19:00	235
2009-04-06	19:20:00	582
2009-04-06	19:21:00	1038
2009-04-06	19:22:00	794
2009-04-06	19:23:00	305
2009-04-06	19:24:00	140
2009-04-06	19:25:00	0
2009-04-06	19:26:00	0
2009-04-06	19:27:00	0
2009-04-06	19:28:00	70
2009-04-06	19:29:00	0
2009-04-06	19:30:00	0
2009-04-06	19:31:00	435
2009-04-06	19:32:00	23
2009-04-06	19:33:00	47
2009-04-06	19:34:00	0
2009-04-06	19:35:00	0
2009-04-06	19:36:00	0
2009-04-06	19:37:00	0
2009-04-06	19:38:00	0
2009-04-06	19:39:00	0
2009-04-06	19:40:00	0
2009-04-06	19:41:00	0
2009-04-06	19:42:00	0
2009-04-06	19:43:00	0
2009-04-06	19:44:00	0
2009-04-06	19:45:00	81
2009-04-06	19:46:00	263
2009-04-06	19:47:00	0
2009-04-06	19:48:00	47
2009-04-06	19:49:00	179
2009-04-06	19:50:00	23
2009-04-06	19:51:00	58
2009-04-06	19:52:00	470
2009-04-06	19:53:00	12
2009-04-06	19:54:00	23
2009-04-06	19:55:00	12
2009-04-06	19:56:00	0
2009-04-06	19:57:00	0
2009-04-06	19:58:00	0
2009-04-06	19:59:00	0
2009-04-06	20:00:00	0
2009-04-06	20:01:00	582
2009-04-06	20:02:00	1038
2009-04-06	20:03:00	1064
2009-04-06	20:04:00	840
2009-04-06	20:05:00	910
2009-04-06	20:06:00	1420
2009-04-06	20:07:00	1175
2009-04-06	20:08:00	1064
2009-04-06	20:09:00	1147
2009-04-06	20:10:00	747
2009-04-06	20:11:00	840
2009-04-06	20:12:00	563
2009-04-06	20:13:00	910
2009-04-06	20:14:00	221
2009-04-06	20:15:00	23
2009-04-06	20:16:00	116
2009-04-06	20:17:00	12
2009-04-06	20:18:00	47
2009-04-06	20:19:00	70
2009-04-06	20:20:00	35
2009-04-06	20:21:00	70
2009-04-06	20:22:00	58
2009-04-06	20:23:00	47
2009-04-06	20:24:00	93
2009-04-06	20:25:00	105
2009-04-06	20:26:00	35
2009-04-06	20:27:00	140
2009-04-06	20:28:00	140
2009-04-06	20:29:00	58
2009-04-06	20:30:00	105
2009-04-06	20:31:00	93
2009-04-06	20:32:00	70
2009-04-06	20:33:00	151
2009-04-06	20:34:00	0
2009-04-06	20:35:00	0
2009-04-06	20:36:00	0
2009-04-06	20:37:00	1485
2009-04-06	20:38:00	70
2009-04-06	20:39:00	419
2009-04-06	20:40:00	81
2009-04-06	20:41:00	58
2009-04-06	20:42:00	116
2009-04-06	20:43:00	140
2009-04-06	20:44:00	47
2009-04-06	20:45:00	47
2009-04-06	20:46:00	12
2009-04-06	20:47:00	12
2009-04-06	20:48:00	910
2009-04-06	20:49:00	370
2009-04-06	20:50:00	151
2009-04-06	20:51:00	817
2009-04-06	20:52:00	35
2009-04-06	20:53:00	0
2009-04-06	20:54:00	0
2009-04-06	20:55:00	0
2009-04-06	20:56:00	0
2009-04-06	20:57:00	0
2009-04-06	20:58:00	0
2009-04-06	20:59:00	0
2009-04-06	21:00:00	0
2009-04-06	21:01:00	0
2009-04-06	21:02:00	0
2009-04-06	21:03:00	451
2009-04-06	21:04:00	207
2009-04-06	21:05:00	105
2009-04-06	21:06:00	116
2009-04-06	21:07:00	370
2009-04-06	21:08:00	47
2009-04-06	21:09:00	116
2009-04-06	21:10:00	35
2009-04-06	21:11:00	47
2009-04-06	21:12:00	0
2009-04-06	21:13:00	0
2009-04-06	21:14:00	0
2009-04-06	21:15:00	0
2009-04-06	21:16:00	35
2009-04-06	21:17:00	207
2009-04-06	21:18:00	23
2009-04-06	21:19:00	249
2009-04-06	21:20:00	93
2009-04-06	21:21:00	47
2009-04-06	21:22:00	0
2009-04-06	21:23:00	58
2009-04-06	21:24:00	93
2009-04-06	21:25:00	70
2009-04-06	21:26:00	0
2009-04-06	21:27:00	105
2009-04-06	21:28:00	47
2009-04-06	21:29:00	0
2009-04-06	21:30:00	0
2009-04-06	21:31:00	0
2009-04-06	21:32:00	0
2009-04-06	21:33:00	0
2009-04-06	21:34:00	0
2009-04-06	21:35:00	0
2009-04-06	21:36:00	0
2009-04-06	21:37:00	0
2009-04-06	21:38:00	0
2009-04-06	21:39:00	0
2009-04-06	21:40:00	0
2009-04-06	21:41:00	0
2009-04-06	21:42:00	0
2009-04-06	21:43:00	0
2009-04-06	21:44:00	0
2009-04-06	21:45:00	0
2009-04-06	21:46:00	0
2009-04-06	21:47:00	0
2009-04-06	21:48:00	0
2009-04-06	21:49:00	0
2009-04-06	21:50:00	0
2009-04-06	21:51:00	0
2009-04-06	21:52:00	0
2009-04-06	21:53:00	0
2009-04-06	21:54:00	0
2009-04-06	21:55:00	0
2009-04-06	21:56:00	0
2009-04-06	21:57:00	12
2009-04-06	21:58:00	0
2009-04-06	21:59:00	0
2009-04-06	22:00:00	0
2009-04-06	22:01:00	0
2009-04-06	22:02:00	0
2009-04-06	22:03:00	0
2009-04-06	22:04:00	0
2009-04-06	22:05:00	0
2009-04-06	22:06:00	0
2009-04-06	22:07:00	0
2009-04-06	22:08:00	0
2009-04-06	22:09:00	0
2009-04-06	22:10:00	0
2009-04-06	22:11:00	0
2009-04-06	22:12:00	0
2009-04-06	22:13:00	0
2009-04-06	22:14:00	0
2009-04-06	22:15:00	0
2009-04-06	22:16:00	0
2009-04-06	22:17:00	0
2009-04-06	22:18:00	0
2009-04-06	22:19:00	0
2009-04-06	22:20:00	0
2009-04-06	22:21:00	0
2009-04-06	22:22:00	0
2009-04-06	22:23:00	0
2009-04-06	22:24:00	0
2009-04-06	22:25:00	0
2009-04-06	22:26:00	0
2009-04-06	22:27:00	0
2009-04-06	22:28:00	0
2009-04-06	22:29:00	0
2009-04-06	22:30:00	0
2009-04-06	22:31:00	0
2009-04-06	22:32:00	0
2009-04-06	22:33:00	0
2009-04-06	22:34:00	0
2009-04-06	22:35:00	0
2009-04-06	22:36:00	23
2009-04-06	22:37:00	0
2009-04-06	22:38:00	0
2009-04-06	22:39:00	0
2009-04-06	22:40:00	0
2009-04-06	22:41:00	0
2009-04-06	22:42:00	0
2009-04-06	22:43:00	0
2009-04-06	22:44:00	0
2009-04-06	22:45:00	12
2009-04-06	22:46:00	35
2009-04-06	22:47:00	0
2009-04-06	22:48:00	0
2009-04-06	22:49:00	0
2009-04-06	22:50:00	0
2009-04-06	22:51:00	0
2009-04-06	22:52:00	0
2009-04-06	22:53:00	0
2009-04-06	22:54:00	0
2009-04-06	22:55:00	0
2009-04-06	22:56:00	0
2009-04-06	22:57:00	0
2009-04-06	22:58:00	0
2009-04-06	22:59:00	0
2009-04-06	23:00:00	0
2009-04-06	23:01:00	0
2009-04-06	23:02:00	0
2009-04-06	23:03:00	0
2009-04-06	23:04:00	0
2009-04-06	23:05:00	0
2009-04-06	23:06:00	0
2009-04-06	23:07:00	0
2009-04-06	23:08:00	0
2009-04-06	23:09:00	0
2009-04-06	23:10:00	0
2009-04-06	23:11:00	0
2009-04-06	23:12:00	0
2009-04-06	23:13:00	0
2009-04-06	23:14:00	0
2009-04-06	23:15:00	0
2009-04-06	23:16:00	0
2009-04-06	23:17:00	0
2009-04-06	23:18:00	0
2009-04-06	23:19:00	70
2009-04-06	23:20:00	207
2009-04-06	23:21:00	582
2009-04-06	23:22:00	263
2009-04-06	23:23:00	1064
2009-04-06	23:24:00	817
2009-04-06	23:25:00	370
2009-04-06	23:26:00	794
2009-04-06	23:27:00	263
2009-04-06	23:28:00	470
2009-04-06	23:29:00	0
2009-04-06	23:30:00	0
2009-04-06	23:31:00	0
2009-04-06	23:32:00	12
2009-04-06	23:33:00	0
2009-04-06	23:34:00	0
2009-04-06	23:35:00	0
2009-04-06	23:36:00	0
2009-04-06	23:37:00	0
2009-04-06	23:38:00	0
2009-04-06	23:39:00	0
2009-04-06	23:40:00	0
2009-04-06	23:41:00	23
2009-04-06	23:42:00	0
2009-04-06	23:43:00	0
2009-04-06	23:44:00	0
2009-04-06	23:45:00	0
2009-04-06	23:46:00	0
2009-04-06	23:47:00	0
2009-04-06	23:48:00	0
2009-04-06	23:49:00	0
2009-04-06	23:50:00	0
2009-04-06	23:51:00	0
2009-04-06	23:52:00	0
2009-04-06	23:53:00	0
2009-04-06	23:54:00	0
2009-04-06	23:55:00	0
2009-04-06	23:56:00	0
2009-04-06	23:57:00	0
2009-04-06	23:58:00	0
2009-04-06	23:59:00	0
2009-04-07	00:00:00	0
2009-04-07	00:01:00	0
2009-04-07	00:02:00	0
2009-04-07	00:03:00	0
2009-04-07	00:04:00	0
2009-04-07	00:05:00	0
2009-04-07	00:06:00	0
2009-04-07	00:07:00	0
2009-04-07	00:08:00	0
2009-04-07	00:09:00	0
2009-04-07	00:10:00	0
2009-04-07	00:11:00	0
2009-04-07	00:12:00	0
2009-04-07	00:13:00	0
2009-04-07	00:14:00	0
2009-04-07	00:15:00	0
2009-04-07	00:16:00	0
2009-04-07	00:17:00	0
2009-04-07	00:18:00	0
2009-04-07	00:19:00	0
2009-04-07	00:20:00	0
2009-04-07	00:21:00	35
2009-04-07	00:22:00	0
2009-04-07	00:23:00	0
2009-04-07	00:24:00	0
2009-04-07	00:25:00	0
2009-04-07	00:26:00	0
2009-04-07	00:27:00	0
2009-04-07	00:28:00	0
2009-04-07	00:29:00	0
2009-04-07	00:30:00	0
2009-04-07	00:31:00	0
2009-04-07	00:32:00	0
2009-04-07	00:33:00	0
2009-04-07	00:34:00	0
2009-04-07	00:35:00	0
2009-04-07	00:36:00	0
2009-04-07	00:37:00	47
2009-04-07	00:38:00	128
2009-04-07	00:39:00	0
2009-04-07	00:40:00	0
2009-04-07	00:41:00	0
2009-04-07	00:42:00	0
2009-04-07	00:43:00	0
2009-04-07	00:44:00	0
2009-04-07	00:45:00	0
2009-04-07	00:46:00	0
2009-04-07	00:47:00	0
2009-04-07	00:48:00	0
2009-04-07	00:49:00	0
2009-04-07	00:50:00	0
2009-04-07	00:51:00	0
2009-04-07	00:52:00	23
2009-04-07	00:53:00	23
2009-04-07	00:54:00	0
2009-04-07	00:55:00	0
2009-04-07	00:56:00	0
2009-04-07	00:57:00	0
2009-04-07	00:58:00	0
2009-04-07	00:59:00	12
2009-04-07	01:00:00	0
2009-04-07	01:01:00	0
2009-04-07	01:02:00	0
2009-04-07	01:03:00	0
2009-04-07	01:04:00	0
2009-04-07	01:05:00	0
2009-04-07	01:06:00	0
2009-04-07	01:07:00	0
2009-04-07	01:08:00	0
2009-04-07	01:09:00	0
2009-04-07	01:10:00	0
2009-04-07	01:11:00	0
2009-04-07	01:12:00	0
2009-04-07	01:13:00	0
2009-04-07	01:14:00	0
2009-04-07	01:15:00	0
2009-04-07	01:16:00	0
2009-04-07	01:17:00	0
2009-04-07	01:18:00	0
2009-04-07	01:19:00	0
2009-04-07	01:20:00	0
2009-04-07	01:21:00	0
2009-04-07	01:22:00	12
2009-04-07	01:23:00	0
2009-04-07	01:24:00	0
2009-04-07	01:25:00	0
2009-04-07	01:26:00	0
2009-04-07	01:27:00	0
2009-04-07	01:28:00	0
2009-04-07	01:29:00	0
2009-04-07	01:30:00	0
2009-04-07	01:31:00	0
2009-04-07	01:32:00	0
2009-04-07	01:33:00	0
2009-04-07	01:34:00	0
2009-04-07	01:35:00	0
2009-04-07	01:36:00	0
2009-04-07	01:37:00	0
2009-04-07	01:38:00	0
2009-04-07	01:39:00	0
2009-04-07	01:40:00	0
2009-04-07	01:41:00	0
2009-04-07	01:42:00	0
2009-04-07	01:43:00	0
2009-04-07	01:44:00	0
2009-04-07	01:45:00	0
2009-04-07	01:46:00	0
2009-04-07	01:47:00	0
2009-04-07	01:48:00	0
2009-04-07	01:49:00	0
2009-04-07	01:50:00	0
2009-04-07	01:51:00	0
2009-04-07	01:52:00	0
2009-04-07	01:53:00	0
2009-04-07	01:54:00	0
2009-04-07	01:55:00	0
2009-04-07	01:56:00	0
2009-04-07	01:57:00	0
2009-04-07	01:58:00	0
2009-04-07	01:59:00	0
2009-04-07	02:00:00	0
2009-04-07	02:01:00	12
2009-04-07	02:02:00	0
2009-04-07	02:03:00	23
2009-04-07	02:04:00	0
2009-04-07	02:05:00	0
2009-04-07	02:06:00	0
2009-04-07	02:07:00	0
2009-04-07	02:08:00	0
2009-04-07	02:09:00	0
2009-04-07	02:10:00	0
2009-04-07	02:11:00	0
2009-04-07	02:12:00	0
2009-04-07	02:13:00	0
2009-04-07	02:14:00	0
2009-04-07	02:15:00	0
2009-04-07	02:16:00	0
2009-04-07	02:17:00	0
2009-04-07	02:18:00	0
2009-04-07	02:19:00	0
2009-04-07	02:20:00	0
2009-04-07	02:21:00	0
2009-04-07	02:22:00	0
2009-04-07	02:23:00	0
2009-04-07	02:24:00	0
2009-04-07	02:25:00	0
2009-04-07	02:26:00	0
2009-04-07	02:27:00	0
2009-04-07	02:28:00	0
2009-04-07	02:29:00	0
2009-04-07	02:30:00	0
2009-04-07	02:31:00	0
2009-04-07	02:32:00	0
2009-04-07	02:33:00	0
2009-04-07	02:34:00	0
2009-04-07	02:35:00	93
2009-04-07	02:36:00	0
2009-04-07	02:37:00	0
2009-04-07	02:38:00	0
2009-04-07	02:39:00	0
2009-04-07	02:40:00	0
2009-04-07	02:41:00	0
2009-04-07	02:42:00	0
2009-04-07	02:43:00	0
2009-04-07	02:44:00	0
2009-04-07	02:45:00	0
2009-04-07	02:46:00	0
2009-04-07	02:47:00	0
2009-04-07	02:48:00	0
2009-04-07	02:49:00	0
2009-04-07	02:50:00	0
2009-04-07	02:51:00	23
2009-04-07	02:52:00	0
2009-04-07	02:53:00	0
2009-04-07	02:54:00	0
2009-04-07	02:55:00	0
2009-04-07	02:56:00	0
2009-04-07	02:57:00	0
2009-04-07	02:58:00	0
2009-04-07	02:59:00	0
2009-04-07	03:00:00	0
2009-04-07	03:01:00	0
2009-04-07	03:02:00	0
2009-04-07	03:03:00	0
2009-04-07	03:04:00	0
2009-04-07	03:05:00	0
2009-04-07	03:06:00	0
2009-04-07	03:07:00	0
2009-04-07	03:08:00	0
2009-04-07	03:09:00	0
2009-04-07	03:10:00	0
2009-04-07	03:11:00	0
2009-04-07	03:12:00	0
2009-04-07	03:13:00	0
2009-04-07	03:14:00	81
2009-04-07	03:15:00	0
2009-04-07	03:16:00	0
2009-04-07	03:17:00	0
2009-04-07	03:18:00	0
2009-04-07	03:19:00	0
2009-04-07	03:20:00	0
2009-04-07	03:21:00	0
2009-04-07	03:22:00	0
2009-04-07	03:23:00	0
2009-04-07	03:24:00	0
2009-04-07	03:25:00	0
2009-04-07	03:26:00	0
2009-04-07	03:27:00	0
2009-04-07	03:28:00	0
2009-04-07	03:29:00	0
2009-04-07	03:30:00	0
2009-04-07	03:31:00	0
2009-04-07	03:32:00	0
2009-04-07	03:33:00	0
2009-04-07	03:34:00	0
2009-04-07	03:35:00	0
2009-04-07	03:36:00	0
2009-04-07	03:37:00	0
2009-04-07	03:38:00	0
2009-04-07	03:39:00	0
2009-04-07	03:40:00	0
2009-04-07	03:41:00	0
2009-04-07	03:42:00	0
2009-04-07	03:43:00	0
2009-04-07	03:44:00	0
2009-04-07	03:45:00	0
2009-04-07	03:46:00	0
2009-04-07	03:47:00	0
2009-04-07	03:48:00	0
2009-04-07	03:49:00	0
2009-04-07	03:50:00	0
2009-04-07	03:51:00	0
2009-04-07	03:52:00	0
2009-04-07	03:53:00	0
2009-04-07	03:54:00	0
2009-04-07	03:55:00	0
2009-04-07	03:56:00	0
2009-04-07	03:57:00	0
2009-04-07	03:58:00	0
2009-04-07	03:59:00	0
2009-04-07	04:00:00	0
2009-04-07	04:01:00	0
2009-04-07	04:02:00	0
2009-04-07	04:03:00	0
2009-04-07	04:04:00	0
2009-04-07	04:05:00	0
2009-04-07	04:06:00	0
2009-04-07	04:07:00	0
2009-04-07	04:08:00	0
2009-04-07	04:09:00	0
2009-04-07	04:10:00	0
2009-04-07	04:11:00	0
2009-04-07	04:12:00	0
2009-04-07	04:13:00	0
2009-04-07	04:14:00	0
2009-04-07	04:15:00	0
2009-04-07	04:16:00	0
2009-04-07	04:17:00	0
2009-04-07	04:18:00	0
2009-04-07	04:19:00	0
2009-04-07	04:20:00	0
2009-04-07	04:21:00	0
2009-04-07	04:22:00	0
2009-04-07	04:23:00	0
2009-04-07	04:24:00	0
2009-04-07	04:25:00	0
2009-04-07	04:26:00	0
2009-04-07	04:27:00	0
2009-04-07	04:28:00	0
2009-04-07	04:29:00	12
2009-04-07	04:30:00	0
2009-04-07	04:31:00	0
2009-04-07	04:32:00	81
2009-04-07	04:33:00	0
2009-04-07	04:34:00	0
2009-04-07	04:35:00	0
2009-04-07	04:36:00	0
2009-04-07	04:37:00	0
2009-04-07	04:38:00	0
2009-04-07	04:39:00	0
2009-04-07	04:40:00	0
2009-04-07	04:41:00	0
2009-04-07	04:42:00	0
2009-04-07	04:43:00	0
2009-04-07	04:44:00	0
2009-04-07	04:45:00	0
2009-04-07	04:46:00	0
2009-04-07	04:47:00	0
2009-04-07	04:48:00	0
2009-04-07	04:49:00	0
2009-04-07	04:50:00	0
2009-04-07	04:51:00	0
2009-04-07	04:52:00	0
2009-04-07	04:53:00	0
2009-04-07	04:54:00	0
2009-04-07	04:55:00	0
2009-04-07	04:56:00	12
2009-04-07	04:57:00	0
2009-04-07	04:58:00	12
2009-04-07	04:59:00	0
2009-04-07	05:00:00	0
2009-04-07	05:01:00	0
2009-04-07	05:02:00	0
2009-04-07	05:03:00	0
2009-04-07	05:04:00	0
2009-04-07	05:05:00	0
2009-04-07	05:06:00	0
2009-04-07	05:07:00	0
2009-04-07	05:08:00	0
2009-04-07	05:09:00	0
2009-04-07	05:10:00	0
2009-04-07	05:11:00	0
2009-04-07	05:12:00	0
2009-04-07	05:13:00	0
2009-04-07	05:14:00	0
2009-04-07	05:15:00	0
2009-04-07	05:16:00	0
2009-04-07	05:17:00	0
2009-04-07	05:18:00	0
2009-04-07	05:19:00	0
2009-04-07	05:20:00	0
2009-04-07	05:21:00	0
2009-04-07	05:22:00	0
2009-04-07	05:23:00	0
2009-04-07	05:24:00	0
2009-04-07	05:25:00	0
2009-04-07	05:26:00	0
2009-04-07	05:27:00	0
2009-04-07	05:28:00	0
2009-04-07	05:29:00	0
2009-04-07	05:30:00	0
2009-04-07	05:31:00	0
2009-04-07	05:32:00	0
2009-04-07	05:33:00	0
2009-04-07	05:34:00	0
2009-04-07	05:35:00	0
2009-04-07	05:36:00	0
2009-04-07	05:37:00	0
2009-04-07	05:38:00	0
2009-04-07	05:39:00	0
2009-04-07	05:40:00	0
2009-04-07	05:41:00	0
2009-04-07	05:42:00	0
2009-04-07	05:43:00	0
2009-04-07	05:44:00	0
2009-04-07	05:45:00	0
2009-04-07	05:46:00	0
2009-04-07	05:47:00	0
2009-04-07	05:48:00	0
2009-04-07	05:49:00	0
2009-04-07	05:50:00	0
2009-04-07	05:51:00	0
2009-04-07	05:52:00	0
2009-04-07	05:53:00	58
2009-04-07	05:54:00	0
2009-04-07	05:55:00	0
2009-04-07	05:56:00	0
2009-04-07	05:57:00	0
2009-04-07	05:58:00	0
2009-04-07	05:59:00	0
2009-04-07	06:00:00	0
2009-04-07	06:01:00	0
2009-04-07	06:02:00	0
2009-04-07	06:03:00	0
2009-04-07	06:04:00	0
2009-04-07	06:05:00	0
2009-04-07	06:06:00	0
2009-04-07	06:07:00	0
2009-04-07	06:08:00	0
2009-04-07	06:09:00	0
2009-04-07	06:10:00	0
2009-04-07	06:11:00	0
2009-04-07	06:12:00	0
2009-04-07	06:13:00	0
2009-04-07	06:14:00	0
2009-04-07	06:15:00	0
2009-04-07	06:16:00	0
2009-04-07	06:17:00	0
2009-04-07	06:18:00	0
2009-04-07	06:19:00	0
2009-04-07	06:20:00	0
2009-04-07	06:21:00	0
2009-04-07	06:22:00	0
2009-04-07	06:23:00	0
2009-04-07	06:24:00	0
2009-04-07	06:25:00	0
2009-04-07	06:26:00	0
2009-04-07	06:27:00	0
2009-04-07	06:28:00	0
2009-04-07	06:29:00	0
2009-04-07	06:30:00	0
2009-04-07	06:31:00	0
2009-04-07	06:32:00	0
2009-04-07	06:33:00	0
2009-04-07	06:34:00	0
2009-04-07	06:35:00	0
2009-04-07	06:36:00	0
2009-04-07	06:37:00	0
2009-04-07	06:38:00	0
2009-04-07	06:39:00	0
2009-04-07	06:40:00	0
2009-04-07	06:41:00	0
2009-04-07	06:42:00	0
2009-04-07	06:43:00	0
2009-04-07	06:44:00	0
2009-04-07	06:45:00	12
2009-04-07	06:46:00	0
2009-04-07	06:47:00	0
2009-04-07	06:48:00	0
2009-04-07	06:49:00	0
2009-04-07	06:50:00	0
2009-04-07	06:51:00	0
2009-04-07	06:52:00	0
2009-04-07	06:53:00	0
2009-04-07	06:54:00	0
2009-04-07	06:55:00	0
2009-04-07	06:56:00	0
2009-04-07	06:57:00	0
2009-04-07	06:58:00	70
2009-04-07	06:59:00	435
2009-04-07	07:00:00	47
2009-04-07	07:01:00	12
2009-04-07	07:02:00	249
2009-04-07	07:03:00	277
2009-04-07	07:04:00	291
2009-04-07	07:05:00	128
2009-04-07	07:06:00	794
2009-04-07	07:07:00	582
2009-04-07	07:08:00	600
2009-04-07	07:09:00	642
2009-04-07	07:10:00	863
2009-04-07	07:11:00	1846
2009-04-07	07:12:00	1452
2009-04-07	07:13:00	1387
2009-04-07	07:14:00	370
2009-04-07	07:15:00	193
2009-04-07	07:16:00	354
2009-04-07	07:17:00	526
2009-04-07	07:18:00	93
2009-04-07	07:19:00	165
2009-04-07	07:20:00	47
2009-04-07	07:21:00	23
2009-04-07	07:22:00	0
2009-04-07	07:23:00	35
2009-04-07	07:24:00	0
2009-04-07	07:25:00	0
2009-04-07	07:26:00	0
2009-04-07	07:27:00	0
2009-04-07	07:28:00	0
2009-04-07	07:29:00	0
2009-04-07	07:30:00	0
2009-04-07	07:31:00	621
2009-04-07	07:32:00	684
2009-04-07	07:33:00	23
2009-04-07	07:34:00	70
2009-04-07	07:35:00	321
2009-04-07	07:36:00	81
2009-04-07	07:37:00	0
2009-04-07	07:38:00	0
2009-04-07	07:39:00	0
2009-04-07	07:40:00	0
2009-04-07	07:41:00	0
2009-04-07	07:42:00	12
2009-04-07	07:43:00	0
2009-04-07	07:44:00	0
2009-04-07	07:45:00	0
2009-04-07	07:46:00	12
2009-04-07	07:47:00	0
2009-04-07	07:48:00	0
2009-04-07	07:49:00	0
2009-04-07	07:50:00	151
2009-04-07	07:51:00	0
2009-04-07	07:52:00	0
2009-04-07	07:53:00	0
2009-04-07	07:54:00	0
2009-04-07	07:55:00	0
2009-04-07	07:56:00	0
2009-04-07	07:57:00	0
2009-04-07	07:58:00	23
2009-04-07	07:59:00	0
2009-04-07	08:00:00	0
2009-04-07	08:01:00	0
2009-04-07	08:02:00	81
2009-04-07	08:03:00	0
2009-04-07	08:04:00	0
2009-04-07	08:05:00	0
2009-04-07	08:06:00	58
2009-04-07	08:07:00	128
2009-04-07	08:08:00	140
2009-04-07	08:09:00	354
2009-04-07	08:10:00	47
2009-04-07	08:11:00	35
2009-04-07	08:12:00	47
2009-04-07	08:13:00	70
2009-04-07	08:14:00	23
2009-04-07	08:15:00	12
2009-04-07	08:16:00	193
2009-04-07	08:17:00	23
2009-04-07	08:18:00	23
2009-04-07	08:19:00	23
2009-04-07	08:20:00	370
2009-04-07	08:21:00	35
2009-04-07	08:22:00	35
2009-04-07	08:23:00	235
2009-04-07	08:24:00	93
2009-04-07	08:25:00	58
2009-04-07	08:26:00	249
2009-04-07	08:27:00	0
2009-04-07	08:28:00	12
2009-04-07	08:29:00	0
2009-04-07	08:30:00	0
2009-04-07	08:31:00	0
2009-04-07	08:32:00	0
2009-04-07	08:33:00	0
2009-04-07	08:34:00	0
2009-04-07	08:35:00	0
2009-04-07	08:36:00	47
2009-04-07	08:37:00	0
2009-04-07	08:38:00	35
2009-04-07	08:39:00	0
2009-04-07	08:40:00	0
2009-04-07	08:41:00	0
2009-04-07	08:42:00	0
2009-04-07	08:43:00	0
2009-04-07	08:44:00	0
2009-04-07	08:45:00	0
2009-04-07	08:46:00	0
2009-04-07	08:47:00	0
2009-04-07	08:48:00	0
2009-04-07	08:49:00	0
2009-04-07	08:50:00	0
2009-04-07	08:51:00	0
2009-04-07	08:52:00	0
2009-04-07	08:53:00	0
2009-04-07	08:54:00	0
2009-04-07	08:55:00	0
2009-04-07	08:56:00	0
2009-04-07	08:57:00	0
2009-04-07	08:58:00	0
2009-04-07	08:59:00	0
2009-04-07	09:00:00	58
2009-04-07	09:01:00	207
2009-04-07	09:02:00	70
2009-04-07	09:03:00	35
2009-04-07	09:04:00	35
2009-04-07	09:05:00	23
2009-04-07	09:06:00	0
2009-04-07	09:07:00	0
2009-04-07	09:08:00	12
[truncated: 19,611 more rows]

## Sheet: 4.20.09
Actogram, Copy Raw Data, All Days
Identity:	Baxter
Filename:	E:\Active Research Files\meloxicam titre canine\cases\baxter\Baxter 4.20.09.AWC
Gender:	M
Age:	3
Height:	76.2 cm	30.0 in
Weight:	29.5 kg	65.0 lbs
Start Date:	20-Apr-2009 (Mon)
Start Time:	18:00:00
Interval:	1.00 mins
Date Stamp:	Time Stamp:	Activity Data:	Marker Press:
2009-04-20	00:00:00	0
2009-04-20	00:01:00	0
2009-04-20	00:02:00	0
2009-04-20	00:03:00	0
2009-04-20	00:04:00	0
2009-04-20	00:05:00	0
2009-04-20	00:06:00	0
2009-04-20	00:07:00	0
2009-04-20	00:08:00	0
2009-04-20	00:09:00	0
2009-04-20	00:10:00	0
2009-04-20	00:11:00	0
2009-04-20	00:12:00	0
2009-04-20	00:13:00	0
2009-04-20	00:14:00	0
2009-04-20	00:15:00	0
2009-04-20	00:16:00	0
2009-04-20	00:17:00	0
2009-04-20	00:18:00	0
2009-04-20	00:19:00	0
2009-04-20	00:20:00	0
2009-04-20	00:21:00	0
2009-04-20	00:22:00	0
2009-04-20	00:23:00	0
2009-04-20	00:24:00	0
2009-04-20	00:25:00	0
2009-04-20	00:26:00	0
2009-04-20	00:27:00	0
2009-04-20	00:28:00	0
2009-04-20	00:29:00	0
2009-04-20	00:30:00	0
2009-04-20	00:31:00	0
2009-04-20	00:32:00	0
2009-04-20	00:33:00	0
2009-04-20	00:34:00	0
2009-04-20	00:35:00	0
2009-04-20	00:36:00	0
2009-04-20	00:37:00	0
2009-04-20	00:38:00	0
2009-04-20	00:39:00	0
2009-04-20	00:40:00	0
2009-04-20	00:41:00	0
2009-04-20	00:42:00	0
2009-04-20	00:43:00	0
2009-04-20	00:44:00	0
2009-04-20	00:45:00	0
2009-04-20	00:46:00	0
2009-04-20	00:47:00	0
2009-04-20	00:48:00	0
2009-04-20	00:49:00	0
2009-04-20	00:50:00	0
2009-04-20	00:51:00	0
2009-04-20	00:52:00	0
2009-04-20	00:53:00	0
2009-04-20	00:54:00	0
2009-04-20	00:55:00	0
2009-04-20	00:56:00	0
2009-04-20	00:57:00	0
2009-04-20	00:58:00	0
2009-04-20	00:59:00	0
2009-04-20	01:00:00	0
2009-04-20	01:01:00	0
2009-04-20	01:02:00	0
2009-04-20	01:03:00	0
2009-04-20	01:04:00	0
2009-04-20	01:05:00	0
2009-04-20	01:06:00	0
2009-04-20	01:07:00	0
2009-04-20	01:08:00	0
2009-04-20	01:09:00	0
2009-04-20	01:10:00	0
2009-04-20	01:11:00	0
2009-04-20	01:12:00	0
2009-04-20	01:13:00	0
2009-04-20	01:14:00	0
2009-04-20	01:15:00	0
2009-04-20	01:16:00	0
2009-04-20	01:17:00	0
2009-04-20	01:18:00	0
2009-04-20	01:19:00	0
2009-04-20	01:20:00	0
2009-04-20	01:21:00	0
2009-04-20	01:22:00	0
2009-04-20	01:23:00	0
2009-04-20	01:24:00	0
2009-04-20	01:25:00	0
2009-04-20	01:26:00	0
2009-04-20	01:27:00	0
2009-04-20	01:28:00	0
2009-04-20	01:29:00	0
2009-04-20	01:30:00	0
2009-04-20	01:31:00	0
2009-04-20	01:32:00	0
2009-04-20	01:33:00	0
2009-04-20	01:34:00	0
2009-04-20	01:35:00	0
2009-04-20	01:36:00	0
2009-04-20	01:37:00	0
2009-04-20	01:38:00	0
2009-04-20	01:39:00	0
2009-04-20	01:40:00	0
2009-04-20	01:41:00	0
2009-04-20	01:42:00	0
2009-04-20	01:43:00	0
2009-04-20	01:44:00	0
2009-04-20	01:45:00	0
2009-04-20	01:46:00	0
2009-04-20	01:47:00	0
2009-04-20	01:48:00	0
2009-04-20	01:49:00	0
2009-04-20	01:50:00	0
2009-04-20	01:51:00	0
2009-04-20	01:52:00	0
2009-04-20	01:53:00	0
2009-04-20	01:54:00	0
2009-04-20	01:55:00	0
2009-04-20	01:56:00	0
2009-04-20	01:57:00	0
2009-04-20	01:58:00	0
2009-04-20	01:59:00	0
2009-04-20	02:00:00	0
2009-04-20	02:01:00	0
2009-04-20	02:02:00	0
2009-04-20	02:03:00	0
2009-04-20	02:04:00	0
2009-04-20	02:05:00	0
2009-04-20	02:06:00	0
2009-04-20	02:07:00	0
2009-04-20	02:08:00	0
2009-04-20	02:09:00	0
2009-04-20	02:10:00	0
2009-04-20	02:11:00	0
2009-04-20	02:12:00	0
2009-04-20	02:13:00	0
2009-04-20	02:14:00	0
2009-04-20	02:15:00	0
2009-04-20	02:16:00	0
2009-04-20	02:17:00	0
2009-04-20	02:18:00	0
2009-04-20	02:19:00	0
2009-04-20	02:20:00	0
2009-04-20	02:21:00	0
2009-04-20	02:22:00	0
2009-04-20	02:23:00	0
2009-04-20	02:24:00	0
2009-04-20	02:25:00	0
2009-04-20	02:26:00	0
2009-04-20	02:27:00	0
2009-04-20	02:28:00	0
2009-04-20	02:29:00	0
2009-04-20	02:30:00	0
2009-04-20	02:31:00	0
2009-04-20	02:32:00	0
2009-04-20	02:33:00	0
2009-04-20	02:34:00	0
2009-04-20	02:35:00	0
2009-04-20	02:36:00	0
2009-04-20	02:37:00	0
2009-04-20	02:38:00	0
2009-04-20	02:39:00	0
2009-04-20	02:40:00	0
2009-04-20	02:41:00	0
2009-04-20	02:42:00	0
2009-04-20	02:43:00	0
2009-04-20	02:44:00	0
2009-04-20	02:45:00	0
2009-04-20	02:46:00	0
2009-04-20	02:47:00	0
2009-04-20	02:48:00	0
2009-04-20	02:49:00	0
2009-04-20	02:50:00	0
2009-04-20	02:51:00	0
2009-04-20	02:52:00	0
2009-04-20	02:53:00	0
2009-04-20	02:54:00	0
2009-04-20	02:55:00	0
2009-04-20	02:56:00	0
2009-04-20	02:57:00	0
2009-04-20	02:58:00	0
2009-04-20	02:59:00	0
2009-04-20	03:00:00	0
2009-04-20	03:01:00	0
2009-04-20	03:02:00	0
2009-04-20	03:03:00	0
2009-04-20	03:04:00	0
2009-04-20	03:05:00	0
2009-04-20	03:06:00	0
2009-04-20	03:07:00	0
2009-04-20	03:08:00	0
2009-04-20	03:09:00	0
2009-04-20	03:10:00	0
2009-04-20	03:11:00	0
2009-04-20	03:12:00	0
2009-04-20	03:13:00	0
2009-04-20	03:14:00	0
2009-04-20	03:15:00	0
2009-04-20	03:16:00	0
2009-04-20	03:17:00	0
2009-04-20	03:18:00	0
2009-04-20	03:19:00	0
2009-04-20	03:20:00	0
2009-04-20	03:21:00	0
2009-04-20	03:22:00	0
2009-04-20	03:23:00	0
2009-04-20	03:24:00	0
2009-04-20	03:25:00	0
2009-04-20	03:26:00	0
2009-04-20	03:27:00	0
2009-04-20	03:28:00	0
2009-04-20	03:29:00	0
2009-04-20	03:30:00	0
2009-04-20	03:31:00	0
2009-04-20	03:32:00	0
2009-04-20	03:33:00	0
2009-04-20	03:34:00	0
2009-04-20	03:35:00	0
2009-04-20	03:36:00	0
2009-04-20	03:37:00	0
2009-04-20	03:38:00	0
2009-04-20	03:39:00	0
2009-04-20	03:40:00	0
2009-04-20	03:41:00	0
2009-04-20	03:42:00	0
2009-04-20	03:43:00	0
2009-04-20	03:44:00	0
2009-04-20	03:45:00	0
2009-04-20	03:46:00	0
2009-04-20	03:47:00	0
2009-04-20	03:48:00	0
2009-04-20	03:49:00	0
2009-04-20	03:50:00	0
2009-04-20	03:51:00	0
2009-04-20	03:52:00	0
2009-04-20	03:53:00	0
2009-04-20	03:54:00	0
2009-04-20	03:55:00	0
2009-04-20	03:56:00	0
2009-04-20	03:57:00	0
2009-04-20	03:58:00	0
2009-04-20	03:59:00	0
2009-04-20	04:00:00	0
2009-04-20	04:01:00	0
2009-04-20	04:02:00	0
2009-04-20	04:03:00	0
2009-04-20	04:04:00	0
2009-04-20	04:05:00	0
2009-04-20	04:06:00	0
2009-04-20	04:07:00	0
2009-04-20	04:08:00	0
2009-04-20	04:09:00	0
2009-04-20	04:10:00	0
2009-04-20	04:11:00	0
2009-04-20	04:12:00	0
2009-04-20	04:13:00	0
2009-04-20	04:14:00	0
2009-04-20	04:15:00	0
2009-04-20	04:16:00	0
2009-04-20	04:17:00	0
2009-04-20	04:18:00	0
2009-04-20	04:19:00	0
2009-04-20	04:20:00	0
2009-04-20	04:21:00	0
2009-04-20	04:22:00	0
2009-04-20	04:23:00	0
2009-04-20	04:24:00	0
2009-04-20	04:25:00	0
2009-04-20	04:26:00	0
2009-04-20	04:27:00	0
2009-04-20	04:28:00	0
2009-04-20	04:29:00	0
2009-04-20	04:30:00	0
2009-04-20	04:31:00	0
2009-04-20	04:32:00	0
2009-04-20	04:33:00	0
2009-04-20	04:34:00	0
2009-04-20	04:35:00	0
2009-04-20	04:36:00	0
2009-04-20	04:37:00	0
2009-04-20	04:38:00	0
2009-04-20	04:39:00	0
2009-04-20	04:40:00	0
2009-04-20	04:41:00	0
2009-04-20	04:42:00	0
2009-04-20	04:43:00	0
2009-04-20	04:44:00	0
2009-04-20	04:45:00	0
2009-04-20	04:46:00	0
2009-04-20	04:47:00	0
2009-04-20	04:48:00	0
2009-04-20	04:49:00	0
2009-04-20	04:50:00	0
2009-04-20	04:51:00	0
2009-04-20	04:52:00	0
2009-04-20	04:53:00	0
2009-04-20	04:54:00	0
2009-04-20	04:55:00	0
2009-04-20	04:56:00	0
2009-04-20	04:57:00	0
2009-04-20	04:58:00	0
2009-04-20	04:59:00	0
2009-04-20	05:00:00	0
2009-04-20	05:01:00	0
2009-04-20	05:02:00	0
2009-04-20	05:03:00	0
2009-04-20	05:04:00	0
2009-04-20	05:05:00	0
2009-04-20	05:06:00	0
2009-04-20	05:07:00	0
2009-04-20	05:08:00	0
2009-04-20	05:09:00	0
2009-04-20	05:10:00	0
2009-04-20	05:11:00	0
2009-04-20	05:12:00	0
2009-04-20	05:13:00	0
2009-04-20	05:14:00	0
2009-04-20	05:15:00	0
2009-04-20	05:16:00	0
2009-04-20	05:17:00	0
2009-04-20	05:18:00	0
2009-04-20	05:19:00	0
2009-04-20	05:20:00	0
2009-04-20	05:21:00	0
2009-04-20	05:22:00	0
2009-04-20	05:23:00	0
2009-04-20	05:24:00	0
2009-04-20	05:25:00	0
2009-04-20	05:26:00	0
2009-04-20	05:27:00	0
2009-04-20	05:28:00	0
2009-04-20	05:29:00	0
2009-04-20	05:30:00	0
2009-04-20	05:31:00	0
2009-04-20	05:32:00	0
2009-04-20	05:33:00	0
2009-04-20	05:34:00	0
2009-04-20	05:35:00	0
2009-04-20	05:36:00	0
2009-04-20	05:37:00	0
2009-04-20	05:38:00	0
2009-04-20	05:39:00	0
2009-04-20	05:40:00	0
2009-04-20	05:41:00	0
2009-04-20	05:42:00	0
2009-04-20	05:43:00	0
2009-04-20	05:44:00	0
2009-04-20	05:45:00	0
2009-04-20	05:46:00	0
2009-04-20	05:47:00	0
2009-04-20	05:48:00	0
2009-04-20	05:49:00	0
2009-04-20	05:50:00	0
2009-04-20	05:51:00	0
2009-04-20	05:52:00	0
2009-04-20	05:53:00	0
2009-04-20	05:54:00	0
2009-04-20	05:55:00	0
2009-04-20	05:56:00	0
2009-04-20	05:57:00	0
2009-04-20	05:58:00	0
2009-04-20	05:59:00	0
2009-04-20	06:00:00	0
2009-04-20	06:01:00	0
2009-04-20	06:02:00	0
2009-04-20	06:03:00	0
2009-04-20	06:04:00	0
2009-04-20	06:05:00	0
2009-04-20	06:06:00	0
2009-04-20	06:07:00	0
2009-04-20	06:08:00	0
2009-04-20	06:09:00	0
2009-04-20	06:10:00	0
2009-04-20	06:11:00	0
2009-04-20	06:12:00	0
2009-04-20	06:13:00	0
2009-04-20	06:14:00	0
2009-04-20	06:15:00	0
2009-04-20	06:16:00	0
2009-04-20	06:17:00	0
2009-04-20	06:18:00	0
2009-04-20	06:19:00	0
2009-04-20	06:20:00	0
2009-04-20	06:21:00	0
2009-04-20	06:22:00	0
2009-04-20	06:23:00	0
2009-04-20	06:24:00	0
2009-04-20	06:25:00	0
2009-04-20	06:26:00	0
2009-04-20	06:27:00	0
2009-04-20	06:28:00	0
2009-04-20	06:29:00	0
2009-04-20	06:30:00	0
2009-04-20	06:31:00	0
2009-04-20	06:32:00	0
2009-04-20	06:33:00	0
2009-04-20	06:34:00	0
2009-04-20	06:35:00	0
2009-04-20	06:36:00	0
2009-04-20	06:37:00	0
2009-04-20	06:38:00	0
2009-04-20	06:39:00	0
2009-04-20	06:40:00	0
2009-04-20	06:41:00	0
2009-04-20	06:42:00	0
2009-04-20	06:43:00	0
2009-04-20	06:44:00	0
2009-04-20	06:45:00	0
2009-04-20	06:46:00	0
2009-04-20	06:47:00	0
2009-04-20	06:48:00	0
2009-04-20	06:49:00	0
2009-04-20	06:50:00	0
2009-04-20	06:51:00	0
2009-04-20	06:52:00	0
2009-04-20	06:53:00	0
2009-04-20	06:54:00	0
2009-04-20	06:55:00	0
2009-04-20	06:56:00	0
2009-04-20	06:57:00	0
2009-04-20	06:58:00	0
2009-04-20	06:59:00	0
2009-04-20	07:00:00	0
2009-04-20	07:01:00	0
2009-04-20	07:02:00	0
2009-04-20	07:03:00	0
2009-04-20	07:04:00	0
2009-04-20	07:05:00	0
2009-04-20	07:06:00	0
2009-04-20	07:07:00	0
2009-04-20	07:08:00	0
2009-04-20	07:09:00	0
2009-04-20	07:10:00	0
2009-04-20	07:11:00	0
2009-04-20	07:12:00	0
2009-04-20	07:13:00	0
2009-04-20	07:14:00	0
2009-04-20	07:15:00	0
2009-04-20	07:16:00	0
2009-04-20	07:17:00	0
2009-04-20	07:18:00	0
2009-04-20	07:19:00	0
2009-04-20	07:20:00	0
2009-04-20	07:21:00	0
2009-04-20	07:22:00	0
2009-04-20	07:23:00	0
2009-04-20	07:24:00	0
2009-04-20	07:25:00	0
2009-04-20	07:26:00	0
2009-04-20	07:27:00	0
2009-04-20	07:28:00	0
2009-04-20	07:29:00	0
2009-04-20	07:30:00	0
2009-04-20	07:31:00	0
2009-04-20	07:32:00	0
2009-04-20	07:33:00	0
2009-04-20	07:34:00	0
2009-04-20	07:35:00	0
2009-04-20	07:36:00	0
2009-04-20	07:37:00	0
2009-04-20	07:38:00	0
2009-04-20	07:39:00	0
2009-04-20	07:40:00	0
2009-04-20	07:41:00	0
2009-04-20	07:42:00	0
2009-04-20	07:43:00	0
2009-04-20	07:44:00	0
2009-04-20	07:45:00	0
2009-04-20	07:46:00	0
2009-04-20	07:47:00	0
2009-04-20	07:48:00	0
2009-04-20	07:49:00	0
2009-04-20	07:50:00	0
2009-04-20	07:51:00	0
2009-04-20	07:52:00	0
2009-04-20	07:53:00	0
2009-04-20	07:54:00	0
2009-04-20	07:55:00	0
2009-04-20	07:56:00	0
2009-04-20	07:57:00	0
2009-04-20	07:58:00	0
2009-04-20	07:59:00	0
2009-04-20	08:00:00	0
2009-04-20	08:01:00	0
2009-04-20	08:02:00	0
2009-04-20	08:03:00	0
2009-04-20	08:04:00	0
2009-04-20	08:05:00	0
2009-04-20	08:06:00	0
2009-04-20	08:07:00	0
2009-04-20	08:08:00	0
2009-04-20	08:09:00	0
2009-04-20	08:10:00	0
2009-04-20	08:11:00	0
2009-04-20	08:12:00	0
2009-04-20	08:13:00	0
2009-04-20	08:14:00	0
2009-04-20	08:15:00	0
2009-04-20	08:16:00	0
2009-04-20	08:17:00	0
2009-04-20	08:18:00	0
2009-04-20	08:19:00	0
2009-04-20	08:20:00	0
2009-04-20	08:21:00	0
2009-04-20	08:22:00	0
2009-04-20	08:23:00	0
2009-04-20	08:24:00	0
2009-04-20	08:25:00	0
2009-04-20	08:26:00	0
2009-04-20	08:27:00	0
2009-04-20	08:28:00	0
2009-04-20	08:29:00	0
2009-04-20	08:30:00	0
2009-04-20	08:31:00	0
2009-04-20	08:32:00	0
2009-04-20	08:33:00	0
2009-04-20	08:34:00	0
2009-04-20	08:35:00	0
2009-04-20	08:36:00	0
2009-04-20	08:37:00	0
2009-04-20	08:38:00	0
2009-04-20	08:39:00	0
2009-04-20	08:40:00	0
2009-04-20	08:41:00	0
2009-04-20	08:42:00	0
2009-04-20	08:43:00	0
2009-04-20	08:44:00	0
2009-04-20	08:45:00	0
2009-04-20	08:46:00	0
2009-04-20	08:47:00	0
2009-04-20	08:48:00	0
2009-04-20	08:49:00	0
2009-04-20	08:50:00	0
2009-04-20	08:51:00	0
2009-04-20	08:52:00	0
2009-04-20	08:53:00	0
2009-04-20	08:54:00	0
2009-04-20	08:55:00	0
2009-04-20	08:56:00	0
2009-04-20	08:57:00	0
2009-04-20	08:58:00	0
2009-04-20	08:59:00	0
2009-04-20	09:00:00	0
2009-04-20	09:01:00	0
2009-04-20	09:02:00	0
2009-04-20	09:03:00	0
2009-04-20	09:04:00	0
2009-04-20	09:05:00	0
2009-04-20	09:06:00	0
2009-04-20	09:07:00	0
2009-04-20	09:08:00	0
2009-04-20	09:09:00	0
2009-04-20	09:10:00	0
2009-04-20	09:11:00	0
2009-04-20	09:12:00	0
2009-04-20	09:13:00	0
2009-04-20	09:14:00	0
2009-04-20	09:15:00	0
2009-04-20	09:16:00	0
2009-04-20	09:17:00	0
2009-04-20	09:18:00	0
2009-04-20	09:19:00	0
2009-04-20	09:20:00	0
2009-04-20	09:21:00	0
2009-04-20	09:22:00	0
2009-04-20	09:23:00	0
2009-04-20	09:24:00	0
2009-04-20	09:25:00	0
2009-04-20	09:26:00	0
2009-04-20	09:27:00	0
2009-04-20	09:28:00	0
2009-04-20	09:29:00	0
2009-04-20	09:30:00	0
2009-04-20	09:31:00	0
2009-04-20	09:32:00	0
2009-04-20	09:33:00	0
2009-04-20	09:34:00	0
2009-04-20	09:35:00	0
2009-04-20	09:36:00	0
2009-04-20	09:37:00	0
2009-04-20	09:38:00	0
2009-04-20	09:39:00	0
2009-04-20	09:40:00	0
2009-04-20	09:41:00	0
2009-04-20	09:42:00	0
2009-04-20	09:43:00	0
2009-04-20	09:44:00	0
2009-04-20	09:45:00	0
2009-04-20	09:46:00	0
2009-04-20	09:47:00	0
2009-04-20	09:48:00	0
2009-04-20	09:49:00	0
2009-04-20	09:50:00	0
2009-04-20	09:51:00	0
2009-04-20	09:52:00	0
2009-04-20	09:53:00	0
2009-04-20	09:54:00	0
2009-04-20	09:55:00	0
2009-04-20	09:56:00	0
2009-04-20	09:57:00	0
2009-04-20	09:58:00	0
2009-04-20	09:59:00	0
2009-04-20	10:00:00	0
2009-04-20	10:01:00	0
2009-04-20	10:02:00	0
2009-04-20	10:03:00	0
2009-04-20	10:04:00	0
2009-04-20	10:05:00	0
2009-04-20	10:06:00	0
2009-04-20	10:07:00	0
2009-04-20	10:08:00	0
2009-04-20	10:09:00	0
2009-04-20	10:10:00	0
2009-04-20	10:11:00	0
2009-04-20	10:12:00	0
2009-04-20	10:13:00	0
2009-04-20	10:14:00	0
2009-04-20	10:15:00	0
2009-04-20	10:16:00	0
2009-04-20	10:17:00	0
2009-04-20	10:18:00	0
2009-04-20	10:19:00	0
2009-04-20	10:20:00	0
2009-04-20	10:21:00	0
2009-04-20	10:22:00	0
2009-04-20	10:23:00	0
2009-04-20	10:24:00	0
2009-04-20	10:25:00	0
2009-04-20	10:26:00	0
2009-04-20	10:27:00	0
2009-04-20	10:28:00	0
2009-04-20	10:29:00	0
2009-04-20	10:30:00	0
2009-04-20	10:31:00	0
2009-04-20	10:32:00	0
2009-04-20	10:33:00	0
2009-04-20	10:34:00	0
2009-04-20	10:35:00	0
2009-04-20	10:36:00	0
2009-04-20	10:37:00	0
2009-04-20	10:38:00	0
2009-04-20	10:39:00	0
2009-04-20	10:40:00	0
2009-04-20	10:41:00	0
2009-04-20	10:42:00	0
2009-04-20	10:43:00	0
2009-04-20	10:44:00	0
2009-04-20	10:45:00	0
2009-04-20	10:46:00	0
2009-04-20	10:47:00	0
2009-04-20	10:48:00	0
2009-04-20	10:49:00	0
2009-04-20	10:50:00	0
2009-04-20	10:51:00	0
2009-04-20	10:52:00	0
2009-04-20	10:53:00	0
2009-04-20	10:54:00	0
2009-04-20	10:55:00	0
2009-04-20	10:56:00	0
2009-04-20	10:57:00	0
2009-04-20	10:58:00	0
2009-04-20	10:59:00	0
2009-04-20	11:00:00	0
2009-04-20	11:01:00	0
2009-04-20	11:02:00	0
2009-04-20	11:03:00	0
2009-04-20	11:04:00	0
2009-04-20	11:05:00	0
2009-04-20	11:06:00	0
2009-04-20	11:07:00	0
2009-04-20	11:08:00	0
2009-04-20	11:09:00	0
2009-04-20	11:10:00	0
2009-04-20	11:11:00	0
2009-04-20	11:12:00	0
2009-04-20	11:13:00	0
2009-04-20	11:14:00	0
2009-04-20	11:15:00	0
2009-04-20	11:16:00	0
2009-04-20	11:17:00	0
2009-04-20	11:18:00	0
2009-04-20	11:19:00	0
2009-04-20	11:20:00	0
2009-04-20	11:21:00	0
2009-04-20	11:22:00	0
2009-04-20	11:23:00	0
2009-04-20	11:24:00	0
2009-04-20	11:25:00	0
2009-04-20	11:26:00	0
2009-04-20	11:27:00	0
2009-04-20	11:28:00	0
2009-04-20	11:29:00	0
2009-04-20	11:30:00	0
2009-04-20	11:31:00	0
2009-04-20	11:32:00	0
2009-04-20	11:33:00	0
2009-04-20	11:34:00	0
2009-04-20	11:35:00	0
2009-04-20	11:36:00	0
2009-04-20	11:37:00	0
2009-04-20	11:38:00	0
2009-04-20	11:39:00	0
2009-04-20	11:40:00	0
2009-04-20	11:41:00	0
2009-04-20	11:42:00	0
2009-04-20	11:43:00	0
2009-04-20	11:44:00	0
2009-04-20	11:45:00	0
2009-04-20	11:46:00	0
2009-04-20	11:47:00	0
2009-04-20	11:48:00	0
2009-04-20	11:49:00	0
2009-04-20	11:50:00	0
2009-04-20	11:51:00	0
2009-04-20	11:52:00	0
2009-04-20	11:53:00	0
2009-04-20	11:54:00	0
2009-04-20	11:55:00	0
2009-04-20	11:56:00	0
2009-04-20	11:57:00	0
2009-04-20	11:58:00	0
2009-04-20	11:59:00	0
2009-04-20	12:00:00	0
2009-04-20	12:01:00	0
2009-04-20	12:02:00	0
2009-04-20	12:03:00	0
2009-04-20	12:04:00	0
2009-04-20	12:05:00	0
2009-04-20	12:06:00	0
2009-04-20	12:07:00	0
2009-04-20	12:08:00	0
2009-04-20	12:09:00	0
2009-04-20	12:10:00	0
2009-04-20	12:11:00	0
2009-04-20	12:12:00	0
2009-04-20	12:13:00	0
2009-04-20	12:14:00	0
2009-04-20	12:15:00	0
2009-04-20	12:16:00	0
2009-04-20	12:17:00	0
2009-04-20	12:18:00	0
2009-04-20	12:19:00	0
2009-04-20	12:20:00	0
2009-04-20	12:21:00	0
2009-04-20	12:22:00	0
2009-04-20	12:23:00	0
2009-04-20	12:24:00	0
2009-04-20	12:25:00	0
2009-04-20	12:26:00	0
2009-04-20	12:27:00	0
2009-04-20	12:28:00	0
2009-04-20	12:29:00	0
2009-04-20	12:30:00	0
2009-04-20	12:31:00	0
2009-04-20	12:32:00	0
2009-04-20	12:33:00	0
2009-04-20	12:34:00	0
2009-04-20	12:35:00	0
2009-04-20	12:36:00	0
2009-04-20	12:37:00	0
2009-04-20	12:38:00	0
2009-04-20	12:39:00	0
2009-04-20	12:40:00	0
2009-04-20	12:41:00	0
2009-04-20	12:42:00	0
2009-04-20	12:43:00	0
2009-04-20	12:44:00	0
2009-04-20	12:45:00	0
2009-04-20	12:46:00	0
2009-04-20	12:47:00	0
2009-04-20	12:48:00	0
2009-04-20	12:49:00	0
2009-04-20	12:50:00	0
2009-04-20	12:51:00	0
2009-04-20	12:52:00	0
2009-04-20	12:53:00	0
2009-04-20	12:54:00	0
2009-04-20	12:55:00	0
2009-04-20	12:56:00	0
2009-04-20	12:57:00	0
2009-04-20	12:58:00	0
2009-04-20	12:59:00	0
2009-04-20	13:00:00	0
2009-04-20	13:01:00	0
2009-04-20	13:02:00	0
2009-04-20	13:03:00	0
2009-04-20	13:04:00	0
2009-04-20	13:05:00	0
2009-04-20	13:06:00	0
2009-04-20	13:07:00	0
2009-04-20	13:08:00	0
2009-04-20	13:09:00	0
2009-04-20	13:10:00	0
2009-04-20	13:11:00	0
2009-04-20	13:12:00	0
2009-04-20	13:13:00	0
2009-04-20	13:14:00	0
2009-04-20	13:15:00	0
2009-04-20	13:16:00	0
2009-04-20	13:17:00	0
2009-04-20	13:18:00	0
2009-04-20	13:19:00	0
2009-04-20	13:20:00	0
2009-04-20	13:21:00	0
2009-04-20	13:22:00	0
2009-04-20	13:23:00	0
2009-04-20	13:24:00	0
2009-04-20	13:25:00	0
2009-04-20	13:26:00	0
2009-04-20	13:27:00	0
2009-04-20	13:28:00	0
2009-04-20	13:29:00	0
2009-04-20	13:30:00	0
2009-04-20	13:31:00	0
2009-04-20	13:32:00	0
2009-04-20	13:33:00	0
2009-04-20	13:34:00	0
2009-04-20	13:35:00	0
2009-04-20	13:36:00	0
2009-04-20	13:37:00	0
2009-04-20	13:38:00	0
2009-04-20	13:39:00	0
2009-04-20	13:40:00	0
2009-04-20	13:41:00	0
2009-04-20	13:42:00	0
2009-04-20	13:43:00	0
2009-04-20	13:44:00	0
2009-04-20	13:45:00	0
2009-04-20	13:46:00	0
2009-04-20	13:47:00	0
2009-04-20	13:48:00	0
2009-04-20	13:49:00	0
2009-04-20	13:50:00	0
2009-04-20	13:51:00	0
2009-04-20	13:52:00	0
2009-04-20	13:53:00	0
2009-04-20	13:54:00	0
2009-04-20	13:55:00	0
2009-04-20	13:56:00	0
2009-04-20	13:57:00	0
2009-04-20	13:58:00	0
2009-04-20	13:59:00	0
2009-04-20	14:00:00	0
2009-04-20	14:01:00	0
2009-04-20	14:02:00	0
2009-04-20	14:03:00	0
2009-04-20	14:04:00	0
2009-04-20	14:05:00	0
2009-04-20	14:06:00	0
2009-04-20	14:07:00	0
2009-04-20	14:08:00	0
2009-04-20	14:09:00	0
2009-04-20	14:10:00	0
2009-04-20	14:11:00	0
2009-04-20	14:12:00	0
2009-04-20	14:13:00	0
2009-04-20	14:14:00	0
2009-04-20	14:15:00	0
2009-04-20	14:16:00	0
2009-04-20	14:17:00	0
2009-04-20	14:18:00	0
2009-04-20	14:19:00	0
2009-04-20	14:20:00	0
2009-04-20	14:21:00	0
2009-04-20	14:22:00	0
2009-04-20	14:23:00	0
2009-04-20	14:24:00	0
2009-04-20	14:25:00	0
2009-04-20	14:26:00	0
2009-04-20	14:27:00	0
2009-04-20	14:28:00	0
2009-04-20	14:29:00	0
2009-04-20	14:30:00	0
2009-04-20	14:31:00	0
2009-04-20	14:32:00	0
2009-04-20	14:33:00	0
2009-04-20	14:34:00	0
2009-04-20	14:35:00	0
2009-04-20	14:36:00	0
2009-04-20	14:37:00	0
2009-04-20	14:38:00	0
2009-04-20	14:39:00	0
2009-04-20	14:40:00	0
2009-04-20	14:41:00	0
2009-04-20	14:42:00	0
2009-04-20	14:43:00	0
2009-04-20	14:44:00	0
2009-04-20	14:45:00	0
2009-04-20	14:46:00	0
2009-04-20	14:47:00	0
2009-04-20	14:48:00	0
2009-04-20	14:49:00	0
2009-04-20	14:50:00	0
2009-04-20	14:51:00	0
2009-04-20	14:52:00	0
2009-04-20	14:53:00	0
2009-04-20	14:54:00	0
2009-04-20	14:55:00	0
2009-04-20	14:56:00	0
2009-04-20	14:57:00	0
2009-04-20	14:58:00	0
2009-04-20	14:59:00	0
2009-04-20	15:00:00	0
2009-04-20	15:01:00	0
2009-04-20	15:02:00	0
2009-04-20	15:03:00	0
2009-04-20	15:04:00	0
2009-04-20	15:05:00	0
2009-04-20	15:06:00	0
2009-04-20	15:07:00	0
2009-04-20	15:08:00	0
2009-04-20	15:09:00	0
2009-04-20	15:10:00	0
2009-04-20	15:11:00	0
2009-04-20	15:12:00	0
2009-04-20	15:13:00	0
2009-04-20	15:14:00	0
2009-04-20	15:15:00	0
2009-04-20	15:16:00	0
2009-04-20	15:17:00	0
2009-04-20	15:18:00	0
2009-04-20	15:19:00	0
2009-04-20	15:20:00	0
2009-04-20	15:21:00	0
2009-04-20	15:22:00	0
2009-04-20	15:23:00	0
2009-04-20	15:24:00	0
2009-04-20	15:25:00	0
2009-04-20	15:26:00	0
2009-04-20	15:27:00	0
2009-04-20	15:28:00	0
2009-04-20	15:29:00	0
2009-04-20	15:30:00	0
2009-04-20	15:31:00	0
2009-04-20	15:32:00	0
2009-04-20	15:33:00	0
2009-04-20	15:34:00	0
2009-04-20	15:35:00	0
2009-04-20	15:36:00	0
2009-04-20	15:37:00	0
2009-04-20	15:38:00	0
2009-04-20	15:39:00	0
2009-04-20	15:40:00	0
2009-04-20	15:41:00	0
2009-04-20	15:42:00	0
2009-04-20	15:43:00	0
2009-04-20	15:44:00	0
2009-04-20	15:45:00	0
2009-04-20	15:46:00	0
2009-04-20	15:47:00	0
2009-04-20	15:48:00	0
2009-04-20	15:49:00	0
2009-04-20	15:50:00	0
2009-04-20	15:51:00	0
2009-04-20	15:52:00	0
2009-04-20	15:53:00	0
2009-04-20	15:54:00	0
2009-04-20	15:55:00	0
2009-04-20	15:56:00	0
2009-04-20	15:57:00	0
2009-04-20	15:58:00	0
2009-04-20	15:59:00	0
2009-04-20	16:00:00	0
2009-04-20	16:01:00	0
2009-04-20	16:02:00	0
2009-04-20	16:03:00	0
2009-04-20	16:04:00	0
2009-04-20	16:05:00	0
2009-04-20	16:06:00	0
2009-04-20	16:07:00	0
2009-04-20	16:08:00	0
2009-04-20	16:09:00	0
2009-04-20	16:10:00	0
2009-04-20	16:11:00	0
2009-04-20	16:12:00	0
2009-04-20	16:13:00	0
2009-04-20	16:14:00	0
2009-04-20	16:15:00	0
2009-04-20	16:16:00	0
2009-04-20	16:17:00	0
2009-04-20	16:18:00	0
2009-04-20	16:19:00	0
2009-04-20	16:20:00	0
2009-04-20	16:21:00	0
2009-04-20	16:22:00	0
2009-04-20	16:23:00	0
2009-04-20	16:24:00	0
2009-04-20	16:25:00	0
2009-04-20	16:26:00	0
2009-04-20	16:27:00	0
2009-04-20	16:28:00	0
2009-04-20	16:29:00	0
2009-04-20	16:30:00	0
2009-04-20	16:31:00	0
2009-04-20	16:32:00	0
2009-04-20	16:33:00	0
2009-04-20	16:34:00	0
2009-04-20	16:35:00	0
2009-04-20	16:36:00	0
2009-04-20	16:37:00	0
2009-04-20	16:38:00	0
2009-04-20	16:39:00	0
2009-04-20	16:40:00	0
2009-04-20	16:41:00	0
2009-04-20	16:42:00	0
2009-04-20	16:43:00	0
2009-04-20	16:44:00	0
2009-04-20	16:45:00	0
2009-04-20	16:46:00	0
2009-04-20	16:47:00	0
2009-04-20	16:48:00	0
2009-04-20	16:49:00	0
2009-04-20	16:50:00	0
2009-04-20	16:51:00	0
2009-04-20	16:52:00	0
2009-04-20	16:53:00	0
2009-04-20	16:54:00	0
2009-04-20	16:55:00	0
2009-04-20	16:56:00	0
2009-04-20	16:57:00	0
2009-04-20	16:58:00	0
2009-04-20	16:59:00	0
2009-04-20	17:00:00	0
2009-04-20	17:01:00	0
2009-04-20	17:02:00	0
2009-04-20	17:03:00	0
2009-04-20	17:04:00	0
2009-04-20	17:05:00	0
2009-04-20	17:06:00	0
2009-04-20	17:07:00	0
2009-04-20	17:08:00	0
2009-04-20	17:09:00	0
2009-04-20	17:10:00	0
2009-04-20	17:11:00	0
2009-04-20	17:12:00	0
2009-04-20	17:13:00	0
2009-04-20	17:14:00	0
2009-04-20	17:15:00	0
2009-04-20	17:16:00	0
2009-04-20	17:17:00	0
2009-04-20	17:18:00	0
2009-04-20	17:19:00	0
2009-04-20	17:20:00	0
2009-04-20	17:21:00	0
2009-04-20	17:22:00	0
2009-04-20	17:23:00	0
2009-04-20	17:24:00	0
2009-04-20	17:25:00	0
2009-04-20	17:26:00	0
2009-04-20	17:27:00	0
2009-04-20	17:28:00	0
2009-04-20	17:29:00	0
2009-04-20	17:30:00	0
2009-04-20	17:31:00	0
2009-04-20	17:32:00	0
2009-04-20	17:33:00	0
2009-04-20	17:34:00	0
2009-04-20	17:35:00	0
2009-04-20	17:36:00	0
2009-04-20	17:37:00	0
2009-04-20	17:38:00	0
2009-04-20	17:39:00	0
2009-04-20	17:40:00	0
2009-04-20	17:41:00	0
2009-04-20	17:42:00	0
2009-04-20	17:43:00	0
2009-04-20	17:44:00	0
2009-04-20	17:45:00	0
2009-04-20	17:46:00	0
2009-04-20	17:47:00	0
2009-04-20	17:48:00	0
2009-04-20	17:49:00	0
2009-04-20	17:50:00	0
2009-04-20	17:51:00	0
2009-04-20	17:52:00	0
2009-04-20	17:53:00	0
2009-04-20	17:54:00	0
2009-04-20	17:55:00	0
2009-04-20	17:56:00	0
2009-04-20	17:57:00	0
2009-04-20	17:58:00	0
2009-04-20	17:59:00	0
2009-04-20	18:00:00	0	M
2009-04-20	18:01:00	0
2009-04-20	18:02:00	0
2009-04-20	18:03:00	105
2009-04-20	18:04:00	0
2009-04-20	18:05:00	0
2009-04-20	18:06:00	0
2009-04-20	18:07:00	140
2009-04-20	18:08:00	0
2009-04-20	18:09:00	165
2009-04-20	18:10:00	321
2009-04-20	18:11:00	116
2009-04-20	18:12:00	23
2009-04-20	18:13:00	128
2009-04-20	18:14:00	0
2009-04-20	18:15:00	70
2009-04-20	18:16:00	47
2009-04-20	18:17:00	0
2009-04-20	18:18:00	0
2009-04-20	18:19:00	0
2009-04-20	18:20:00	0
2009-04-20	18:21:00	0
2009-04-20	18:22:00	0
2009-04-20	18:23:00	0
2009-04-20	18:24:00	0
2009-04-20	18:25:00	0
2009-04-20	18:26:00	12
2009-04-20	18:27:00	35
2009-04-20	18:28:00	0
2009-04-20	18:29:00	0
2009-04-20	18:30:00	0
2009-04-20	18:31:00	0
2009-04-20	18:32:00	0
2009-04-20	18:33:00	0
2009-04-20	18:34:00	0
2009-04-20	18:35:00	0
2009-04-20	18:36:00	0
2009-04-20	18:37:00	0
2009-04-20	18:38:00	0
2009-04-20	18:39:00	0
2009-04-20	18:40:00	0
2009-04-20	18:41:00	0
2009-04-20	18:42:00	0
2009-04-20	18:43:00	0
2009-04-20	18:44:00	0
2009-04-20	18:45:00	0
2009-04-20	18:46:00	0
2009-04-20	18:47:00	0
2009-04-20	18:48:00	0
2009-04-20	18:49:00	0
2009-04-20	18:50:00	0
2009-04-20	18:51:00	0
2009-04-20	18:52:00	12
2009-04-20	18:53:00	0
2009-04-20	18:54:00	0
2009-04-20	18:55:00	0
2009-04-20	18:56:00	0
2009-04-20	18:57:00	0
2009-04-20	18:58:00	0
2009-04-20	18:59:00	0
2009-04-20	19:00:00	0
2009-04-20	19:01:00	0
2009-04-20	19:02:00	0
2009-04-20	19:03:00	0
2009-04-20	19:04:00	35
2009-04-20	19:05:00	81
2009-04-20	19:06:00	0
2009-04-20	19:07:00	0
2009-04-20	19:08:00	0
2009-04-20	19:09:00	0
2009-04-20	19:10:00	0
2009-04-20	19:11:00	0
2009-04-20	19:12:00	0
2009-04-20	19:13:00	0
2009-04-20	19:14:00	0
2009-04-20	19:15:00	0
2009-04-20	19:16:00	0
2009-04-20	19:17:00	0
2009-04-20	19:18:00	0
2009-04-20	19:19:00	0
2009-04-20	19:20:00	0
2009-04-20	19:21:00	0
2009-04-20	19:22:00	235
2009-04-20	19:23:00	337
2009-04-20	19:24:00	817
2009-04-20	19:25:00	370
2009-04-20	19:26:00	545
2009-04-20	19:27:00	747
2009-04-20	19:28:00	58
2009-04-20	19:29:00	151
2009-04-20	19:30:00	207
2009-04-20	19:31:00	207
2009-04-20	19:32:00	70
2009-04-20	19:33:00	193
2009-04-20	19:34:00	1064
2009-04-20	19:35:00	1324
2009-04-20	19:36:00	12
2009-04-20	19:37:00	642
2009-04-20	19:38:00	2006
2009-04-20	19:39:00	2048
2009-04-20	19:40:00	545
2009-04-20	19:41:00	1147
2009-04-20	19:42:00	1806
2009-04-20	19:43:00	705
2009-04-20	19:44:00	507
2009-04-20	19:45:00	1552
2009-04-20	19:46:00	1769
2009-04-20	19:47:00	1694
2009-04-20	19:48:00	1694
2009-04-20	19:49:00	1517
2009-04-20	19:50:00	726
2009-04-20	19:51:00	1294
2009-04-20	19:52:00	1324
2009-04-20	19:53:00	1264
2009-04-20	19:54:00	910
2009-04-20	19:55:00	337
2009-04-20	19:56:00	58
2009-04-20	19:57:00	0
2009-04-20	19:58:00	0
2009-04-20	19:59:00	0
2009-04-20	20:00:00	0
2009-04-20	20:01:00	0
2009-04-20	20:02:00	0
2009-04-20	20:03:00	0
2009-04-20	20:04:00	193
2009-04-20	20:05:00	128
2009-04-20	20:06:00	47
2009-04-20	20:07:00	0
2009-04-20	20:08:00	0
2009-04-20	20:09:00	116
2009-04-20	20:10:00	12
2009-04-20	20:11:00	0
2009-04-20	20:12:00	116
2009-04-20	20:13:00	23
2009-04-20	20:14:00	47
2009-04-20	20:15:00	81
2009-04-20	20:16:00	93
2009-04-20	20:17:00	0
2009-04-20	20:18:00	0
2009-04-20	20:19:00	0
2009-04-20	20:20:00	0
2009-04-20	20:21:00	0
2009-04-20	20:22:00	0
2009-04-20	20:23:00	12
2009-04-20	20:24:00	12
2009-04-20	20:25:00	0
2009-04-20	20:26:00	12
2009-04-20	20:27:00	0
2009-04-20	20:28:00	0
2009-04-20	20:29:00	0
2009-04-20	20:30:00	0
2009-04-20	20:31:00	0
2009-04-20	20:32:00	0
2009-04-20	20:33:00	0
2009-04-20	20:34:00	0
2009-04-20	20:35:00	0
2009-04-20	20:36:00	0
2009-04-20	20:37:00	0
2009-04-20	20:38:00	0
2009-04-20	20:39:00	0
2009-04-20	20:40:00	0
2009-04-20	20:41:00	0
2009-04-20	20:42:00	0
2009-04-20	20:43:00	0
2009-04-20	20:44:00	0
2009-04-20	20:45:00	0
2009-04-20	20:46:00	0
2009-04-20	20:47:00	0
2009-04-20	20:48:00	0
2009-04-20	20:49:00	0
2009-04-20	20:50:00	0
2009-04-20	20:51:00	0
2009-04-20	20:52:00	0
2009-04-20	20:53:00	0
2009-04-20	20:54:00	0
2009-04-20	20:55:00	0
2009-04-20	20:56:00	0
2009-04-20	20:57:00	0
2009-04-20	20:58:00	0
2009-04-20	20:59:00	0
2009-04-20	21:00:00	0
2009-04-20	21:01:00	47
2009-04-20	21:02:00	140
2009-04-20	21:03:00	193
2009-04-20	21:04:00	35
2009-04-20	21:05:00	0
2009-04-20	21:06:00	0
2009-04-20	21:07:00	0
2009-04-20	21:08:00	140
2009-04-20	21:09:00	12
2009-04-20	21:10:00	12
2009-04-20	21:11:00	0
2009-04-20	21:12:00	0
2009-04-20	21:13:00	0
2009-04-20	21:14:00	0
2009-04-20	21:15:00	0
2009-04-20	21:16:00	0
2009-04-20	21:17:00	0
2009-04-20	21:18:00	0
2009-04-20	21:19:00	0
2009-04-20	21:20:00	0
2009-04-20	21:21:00	0
2009-04-20	21:22:00	0
2009-04-20	21:23:00	0
2009-04-20	21:24:00	0
2009-04-20	21:25:00	0
2009-04-20	21:26:00	0
2009-04-20	21:27:00	0
2009-04-20	21:28:00	0
2009-04-20	21:29:00	0
2009-04-20	21:30:00	0
2009-04-20	21:31:00	0
2009-04-20	21:32:00	0
2009-04-20	21:33:00	0
2009-04-20	21:34:00	0
2009-04-20	21:35:00	0
2009-04-20	21:36:00	0
2009-04-20	21:37:00	0
2009-04-20	21:38:00	0
2009-04-20	21:39:00	0
2009-04-20	21:40:00	0
2009-04-20	21:41:00	0
2009-04-20	21:42:00	0
2009-04-20	21:43:00	93
2009-04-20	21:44:00	0
2009-04-20	21:45:00	0
2009-04-20	21:46:00	0
2009-04-20	21:47:00	0
2009-04-20	21:48:00	0
2009-04-20	21:49:00	0
2009-04-20	21:50:00	0
2009-04-20	21:51:00	0
2009-04-20	21:52:00	0
2009-04-20	21:53:00	0
2009-04-20	21:54:00	23
2009-04-20	21:55:00	0
2009-04-20	21:56:00	193
2009-04-20	21:57:00	0
2009-04-20	21:58:00	0
2009-04-20	21:59:00	0
2009-04-20	22:00:00	0
2009-04-20	22:01:00	0
2009-04-20	22:02:00	0
2009-04-20	22:03:00	0
2009-04-20	22:04:00	0
2009-04-20	22:05:00	0
2009-04-20	22:06:00	0
2009-04-20	22:07:00	0
2009-04-20	22:08:00	0
2009-04-20	22:09:00	0
2009-04-20	22:10:00	0
2009-04-20	22:11:00	0
2009-04-20	22:12:00	0
2009-04-20	22:13:00	105
2009-04-20	22:14:00	0
2009-04-20	22:15:00	0
2009-04-20	22:16:00	0
2009-04-20	22:17:00	0
2009-04-20	22:18:00	0
2009-04-20	22:19:00	0
2009-04-20	22:20:00	0
2009-04-20	22:21:00	0
2009-04-20	22:22:00	0
2009-04-20	22:23:00	0
2009-04-20	22:24:00	0
2009-04-20	22:25:00	0
2009-04-20	22:26:00	0
2009-04-20	22:27:00	0
2009-04-20	22:28:00	0
2009-04-20	22:29:00	0
2009-04-20	22:30:00	0
2009-04-20	22:31:00	0
2009-04-20	22:32:00	0
2009-04-20	22:33:00	0
2009-04-20	22:34:00	12
2009-04-20	22:35:00	70
2009-04-20	22:36:00	23
2009-04-20	22:37:00	770
2009-04-20	22:38:00	370
2009-04-20	22:39:00	151
2009-04-20	22:40:00	47
2009-04-20	22:41:00	235
2009-04-20	22:42:00	489
2009-04-20	22:43:00	1264
2009-04-20	22:44:00	621
2009-04-20	22:45:00	370
2009-04-20	22:46:00	2178
2009-04-20	22:47:00	1925
2009-04-20	22:48:00	47
2009-04-20	22:49:00	1552
2009-04-20	22:50:00	321
2009-04-20	22:51:00	23
2009-04-20	22:52:00	747
2009-04-20	22:53:00	663
2009-04-20	22:54:00	621
2009-04-20	22:55:00	489
2009-04-20	22:56:00	1175
2009-04-20	22:57:00	0
2009-04-20	22:58:00	0
2009-04-20	22:59:00	0
2009-04-20	23:00:00	0
2009-04-20	23:01:00	0
2009-04-20	23:02:00	0
2009-04-20	23:03:00	0
2009-04-20	23:04:00	0
2009-04-20	23:05:00	0
2009-04-20	23:06:00	12
2009-04-20	23:07:00	0
2009-04-20	23:08:00	0
2009-04-20	23:09:00	0
2009-04-20	23:10:00	0
2009-04-20	23:11:00	0
2009-04-20	23:12:00	0
2009-04-20	23:13:00	23
2009-04-20	23:14:00	0
2009-04-20	23:15:00	0
2009-04-20	23:16:00	0
2009-04-20	23:17:00	0
2009-04-20	23:18:00	0
2009-04-20	23:19:00	0
2009-04-20	23:20:00	0
2009-04-20	23:21:00	0
2009-04-20	23:22:00	0
2009-04-20	23:23:00	0
2009-04-20	23:24:00	0
2009-04-20	23:25:00	0
2009-04-20	23:26:00	0
2009-04-20	23:27:00	0
2009-04-20	23:28:00	0
2009-04-20	23:29:00	0
2009-04-20	23:30:00	0
2009-04-20	23:31:00	0
2009-04-20	23:32:00	0
2009-04-20	23:33:00	0
2009-04-20	23:34:00	0
2009-04-20	23:35:00	0
2009-04-20	23:36:00	0
2009-04-20	23:37:00	0
2009-04-20	23:38:00	0
2009-04-20	23:39:00	0
2009-04-20	23:40:00	0
2009-04-20	23:41:00	0
2009-04-20	23:42:00	0
2009-04-20	23:43:00	0
2009-04-20	23:44:00	0
2009-04-20	23:45:00	0
2009-04-20	23:46:00	0
2009-04-20	23:47:00	0
2009-04-20	23:48:00	0
2009-04-20	23:49:00	0
2009-04-20	23:50:00	0
2009-04-20	23:51:00	0
2009-04-20	23:52:00	0
2009-04-20	23:53:00	0
2009-04-20	23:54:00	0
2009-04-20	23:55:00	0
2009-04-20	23:56:00	0
2009-04-20	23:57:00	0
2009-04-20	23:58:00	0
2009-04-20	23:59:00	0
2009-04-21	00:00:00	0
2009-04-21	00:01:00	35
2009-04-21	00:02:00	0
2009-04-21	00:03:00	0
2009-04-21	00:04:00	35
2009-04-21	00:05:00	0
2009-04-21	00:06:00	0
2009-04-21	00:07:00	0
2009-04-21	00:08:00	0
2009-04-21	00:09:00	0
2009-04-21	00:10:00	0
2009-04-21	00:11:00	0
2009-04-21	00:12:00	0
2009-04-21	00:13:00	0
2009-04-21	00:14:00	0
2009-04-21	00:15:00	0
2009-04-21	00:16:00	0
2009-04-21	00:17:00	0
2009-04-21	00:18:00	0
2009-04-21	00:19:00	0
2009-04-21	00:20:00	0
2009-04-21	00:21:00	0
2009-04-21	00:22:00	0
2009-04-21	00:23:00	0
2009-04-21	00:24:00	12
2009-04-21	00:25:00	0
2009-04-21	00:26:00	0
2009-04-21	00:27:00	0
2009-04-21	00:28:00	140
2009-04-21	00:29:00	0
2009-04-21	00:30:00	0
2009-04-21	00:31:00	0
2009-04-21	00:32:00	0
2009-04-21	00:33:00	0
2009-04-21	00:34:00	0
2009-04-21	00:35:00	0
2009-04-21	00:36:00	0
2009-04-21	00:37:00	0
2009-04-21	00:38:00	0
2009-04-21	00:39:00	0
2009-04-21	00:40:00	0
2009-04-21	00:41:00	0
2009-04-21	00:42:00	0
2009-04-21	00:43:00	0
2009-04-21	00:44:00	0
2009-04-21	00:45:00	0
2009-04-21	00:46:00	0
2009-04-21	00:47:00	0
2009-04-21	00:48:00	0
2009-04-21	00:49:00	0
2009-04-21	00:50:00	0
2009-04-21	00:51:00	0
2009-04-21	00:52:00	0
2009-04-21	00:53:00	0
2009-04-21	00:54:00	0
2009-04-21	00:55:00	0
2009-04-21	00:56:00	0
2009-04-21	00:57:00	35
2009-04-21	00:58:00	0
2009-04-21	00:59:00	0
2009-04-21	01:00:00	0
2009-04-21	01:01:00	0
2009-04-21	01:02:00	0
2009-04-21	01:03:00	0
2009-04-21	01:04:00	0
2009-04-21	01:05:00	0
2009-04-21	01:06:00	0
2009-04-21	01:07:00	0
2009-04-21	01:08:00	12
2009-04-21	01:09:00	0
2009-04-21	01:10:00	0
2009-04-21	01:11:00	0
2009-04-21	01:12:00	0
2009-04-21	01:13:00	0
2009-04-21	01:14:00	0
2009-04-21	01:15:00	0
2009-04-21	01:16:00	0
2009-04-21	01:17:00	0
2009-04-21	01:18:00	0
2009-04-21	01:19:00	0
2009-04-21	01:20:00	0
2009-04-21	01:21:00	0
2009-04-21	01:22:00	0
2009-04-21	01:23:00	0
2009-04-21	01:24:00	0
2009-04-21	01:25:00	0
2009-04-21	01:26:00	0
2009-04-21	01:27:00	0
2009-04-21	01:28:00	0
2009-04-21	01:29:00	0
2009-04-21	01:30:00	0
2009-04-21	01:31:00	0
2009-04-21	01:32:00	140
2009-04-21	01:33:00	0
2009-04-21	01:34:00	0
2009-04-21	01:35:00	0
2009-04-21	01:36:00	0
2009-04-21	01:37:00	0
2009-04-21	01:38:00	0
2009-04-21	01:39:00	12
2009-04-21	01:40:00	0
2009-04-21	01:41:00	0
2009-04-21	01:42:00	0
2009-04-21	01:43:00	0
2009-04-21	01:44:00	0
2009-04-21	01:45:00	0
2009-04-21	01:46:00	0
2009-04-21	01:47:00	0
2009-04-21	01:48:00	0
2009-04-21	01:49:00	12
2009-04-21	01:50:00	386
2009-04-21	01:51:00	116
2009-04-21	01:52:00	0
2009-04-21	01:53:00	0
2009-04-21	01:54:00	0
2009-04-21	01:55:00	0
2009-04-21	01:56:00	0
2009-04-21	01:57:00	0
2009-04-21	01:58:00	0
2009-04-21	01:59:00	0
2009-04-21	02:00:00	0
2009-04-21	02:01:00	0
2009-04-21	02:02:00	0
2009-04-21	02:03:00	0
2009-04-21	02:04:00	0
2009-04-21	02:05:00	0
2009-04-21	02:06:00	0
2009-04-21	02:07:00	12
2009-04-21	02:08:00	0
2009-04-21	02:09:00	0
2009-04-21	02:10:00	0
2009-04-21	02:11:00	0
2009-04-21	02:12:00	0
2009-04-21	02:13:00	0
2009-04-21	02:14:00	0
2009-04-21	02:15:00	47
2009-04-21	02:16:00	0
2009-04-21	02:17:00	0
2009-04-21	02:18:00	0
2009-04-21	02:19:00	0
2009-04-21	02:20:00	0
2009-04-21	02:21:00	0
2009-04-21	02:22:00	0
2009-04-21	02:23:00	0
2009-04-21	02:24:00	0
2009-04-21	02:25:00	0
2009-04-21	02:26:00	0
2009-04-21	02:27:00	0
2009-04-21	02:28:00	0
2009-04-21	02:29:00	0
2009-04-21	02:30:00	0
2009-04-21	02:31:00	0
2009-04-21	02:32:00	0
2009-04-21	02:33:00	0
2009-04-21	02:34:00	0
2009-04-21	02:35:00	0
2009-04-21	02:36:00	0
2009-04-21	02:37:00	0
2009-04-21	02:38:00	0
2009-04-21	02:39:00	0
2009-04-21	02:40:00	0
2009-04-21	02:41:00	0
2009-04-21	02:42:00	0
2009-04-21	02:43:00	0
2009-04-21	02:44:00	0
2009-04-21	02:45:00	0
2009-04-21	02:46:00	0
2009-04-21	02:47:00	0
2009-04-21	02:48:00	0
2009-04-21	02:49:00	0
2009-04-21	02:50:00	0
2009-04-21	02:51:00	0
2009-04-21	02:52:00	0
2009-04-21	02:53:00	0
2009-04-21	02:54:00	0
2009-04-21	02:55:00	0
2009-04-21	02:56:00	0
2009-04-21	02:57:00	0
2009-04-21	02:58:00	0
2009-04-21	02:59:00	0
2009-04-21	03:00:00	0
2009-04-21	03:01:00	0
2009-04-21	03:02:00	0
2009-04-21	03:03:00	0
2009-04-21	03:04:00	0
2009-04-21	03:05:00	0
2009-04-21	03:06:00	0
2009-04-21	03:07:00	0
2009-04-21	03:08:00	0
2009-04-21	03:09:00	0
2009-04-21	03:10:00	0
2009-04-21	03:11:00	0
2009-04-21	03:12:00	0
2009-04-21	03:13:00	0
2009-04-21	03:14:00	0
2009-04-21	03:15:00	0
2009-04-21	03:16:00	0
2009-04-21	03:17:00	0
2009-04-21	03:18:00	0
2009-04-21	03:19:00	93
2009-04-21	03:20:00	12
2009-04-21	03:21:00	0
2009-04-21	03:22:00	0
2009-04-21	03:23:00	0
2009-04-21	03:24:00	0
2009-04-21	03:25:00	0
2009-04-21	03:26:00	0
2009-04-21	03:27:00	0
2009-04-21	03:28:00	0
2009-04-21	03:29:00	0
2009-04-21	03:30:00	0
2009-04-21	03:31:00	0
2009-04-21	03:32:00	0
2009-04-21	03:33:00	0
2009-04-21	03:34:00	0
2009-04-21	03:35:00	0
2009-04-21	03:36:00	0
2009-04-21	03:37:00	0
2009-04-21	03:38:00	0
2009-04-21	03:39:00	0
2009-04-21	03:40:00	0
2009-04-21	03:41:00	0
2009-04-21	03:42:00	0
2009-04-21	03:43:00	0
2009-04-21	03:44:00	0
2009-04-21	03:45:00	0
2009-04-21	03:46:00	0
2009-04-21	03:47:00	0
2009-04-21	03:48:00	0
2009-04-21	03:49:00	0
2009-04-21	03:50:00	0
2009-04-21	03:51:00	0
2009-04-21	03:52:00	0
2009-04-21	03:53:00	0
2009-04-21	03:54:00	0
2009-04-21	03:55:00	0
2009-04-21	03:56:00	0
2009-04-21	03:57:00	0
2009-04-21	03:58:00	0
2009-04-21	03:59:00	0
2009-04-21	04:00:00	0
2009-04-21	04:01:00	0
2009-04-21	04:02:00	0
2009-04-21	04:03:00	0
2009-04-21	04:04:00	0
2009-04-21	04:05:00	12
2009-04-21	04:06:00	70
2009-04-21	04:07:00	0
2009-04-21	04:08:00	0
2009-04-21	04:09:00	0
2009-04-21	04:10:00	0
2009-04-21	04:11:00	0
2009-04-21	04:12:00	0
2009-04-21	04:13:00	0
2009-04-21	04:14:00	0
2009-04-21	04:15:00	12
2009-04-21	04:16:00	0
2009-04-21	04:17:00	0
2009-04-21	04:18:00	0
2009-04-21	04:19:00	0
2009-04-21	04:20:00	0
2009-04-21	04:21:00	0
2009-04-21	04:22:00	0
2009-04-21	04:23:00	0
2009-04-21	04:24:00	0
2009-04-21	04:25:00	0
2009-04-21	04:26:00	0
2009-04-21	04:27:00	0
2009-04-21	04:28:00	0
2009-04-21	04:29:00	0
2009-04-21	04:30:00	0
2009-04-21	04:31:00	0
2009-04-21	04:32:00	0
2009-04-21	04:33:00	12
2009-04-21	04:34:00	0
2009-04-21	04:35:00	93
2009-04-21	04:36:00	0
2009-04-21	04:37:00	0
2009-04-21	04:38:00	0
2009-04-21	04:39:00	0
2009-04-21	04:40:00	0
2009-04-21	04:41:00	0
2009-04-21	04:42:00	0
2009-04-21	04:43:00	0
2009-04-21	04:44:00	0
2009-04-21	04:45:00	0
2009-04-21	04:46:00	12
2009-04-21	04:47:00	0
2009-04-21	04:48:00	0
2009-04-21	04:49:00	0
2009-04-21	04:50:00	0
2009-04-21	04:51:00	0
2009-04-21	04:52:00	0
2009-04-21	04:53:00	0
2009-04-21	04:54:00	12
2009-04-21	04:55:00	58
2009-04-21	04:56:00	0
2009-04-21	04:57:00	0
2009-04-21	04:58:00	0
2009-04-21	04:59:00	0
2009-04-21	05:00:00	0
2009-04-21	05:01:00	0
2009-04-21	05:02:00	0
2009-04-21	05:03:00	0
2009-04-21	05:04:00	0
2009-04-21	05:05:00	0
2009-04-21	05:06:00	0
2009-04-21	05:07:00	0
2009-04-21	05:08:00	0
2009-04-21	05:09:00	0
2009-04-21	05:10:00	0
2009-04-21	05:11:00	0
2009-04-21	05:12:00	0
2009-04-21	05:13:00	93
2009-04-21	05:14:00	0
2009-04-21	05:15:00	0
2009-04-21	05:16:00	0
2009-04-21	05:17:00	0
2009-04-21	05:18:00	0
2009-04-21	05:19:00	0
2009-04-21	05:20:00	0
2009-04-21	05:21:00	0
2009-04-21	05:22:00	0
2009-04-21	05:23:00	0
2009-04-21	05:24:00	0
2009-04-21	05:25:00	0
2009-04-21	05:26:00	0
2009-04-21	05:27:00	0
2009-04-21	05:28:00	0
2009-04-21	05:29:00	0
2009-04-21	05:30:00	0
2009-04-21	05:31:00	0
2009-04-21	05:32:00	0
2009-04-21	05:33:00	0
2009-04-21	05:34:00	0
2009-04-21	05:35:00	0
2009-04-21	05:36:00	0
2009-04-21	05:37:00	0
2009-04-21	05:38:00	0
2009-04-21	05:39:00	0
2009-04-21	05:40:00	0
2009-04-21	05:41:00	0
2009-04-21	05:42:00	0
2009-04-21	05:43:00	0
2009-04-21	05:44:00	0
2009-04-21	05:45:00	0
2009-04-21	05:46:00	0
2009-04-21	05:47:00	0
2009-04-21	05:48:00	0
2009-04-21	05:49:00	0
2009-04-21	05:50:00	0
2009-04-21	05:51:00	0
2009-04-21	05:52:00	0
2009-04-21	05:53:00	0
2009-04-21	05:54:00	0
2009-04-21	05:55:00	0
2009-04-21	05:56:00	0
2009-04-21	05:57:00	0
2009-04-21	05:58:00	0
2009-04-21	05:59:00	0
2009-04-21	06:00:00	12
2009-04-21	06:01:00	0
2009-04-21	06:02:00	0
2009-04-21	06:03:00	0
2009-04-21	06:04:00	0
2009-04-21	06:05:00	0
2009-04-21	06:06:00	0
2009-04-21	06:07:00	0
2009-04-21	06:08:00	0
2009-04-21	06:09:00	0
2009-04-21	06:10:00	0
2009-04-21	06:11:00	0
2009-04-21	06:12:00	0
2009-04-21	06:13:00	0
2009-04-21	06:14:00	0
2009-04-21	06:15:00	0
2009-04-21	06:16:00	0
2009-04-21	06:17:00	0
2009-04-21	06:18:00	0
2009-04-21	06:19:00	0
2009-04-21	06:20:00	0
2009-04-21	06:21:00	0
2009-04-21	06:22:00	0
2009-04-21	06:23:00	0
2009-04-21	06:24:00	0
2009-04-21	06:25:00	0
2009-04-21	06:26:00	0
2009-04-21	06:27:00	0
2009-04-21	06:28:00	0
2009-04-21	06:29:00	0
2009-04-21	06:30:00	0
2009-04-21	06:31:00	0
2009-04-21	06:32:00	0
2009-04-21	06:33:00	0
2009-04-21	06:34:00	0
2009-04-21	06:35:00	58
2009-04-21	06:36:00	0
2009-04-21	06:37:00	0
2009-04-21	06:38:00	0
2009-04-21	06:39:00	0
2009-04-21	06:40:00	58
2009-04-21	06:41:00	0
2009-04-21	06:42:00	0
2009-04-21	06:43:00	0
2009-04-21	06:44:00	0
2009-04-21	06:45:00	105
2009-04-21	06:46:00	0
2009-04-21	06:47:00	0
2009-04-21	06:48:00	12
2009-04-21	06:49:00	0
2009-04-21	06:50:00	0
2009-04-21	06:51:00	0
2009-04-21	06:52:00	58
2009-04-21	06:53:00	12
2009-04-21	06:54:00	0
2009-04-21	06:55:00	0
2009-04-21	06:56:00	0
2009-04-21	06:57:00	12
2009-04-21	06:58:00	12
2009-04-21	06:59:00	0
2009-04-21	07:00:00	0
2009-04-21	07:01:00	0
2009-04-21	07:02:00	0
2009-04-21	07:03:00	0
2009-04-21	07:04:00	0
2009-04-21	07:05:00	0
2009-04-21	07:06:00	0
2009-04-21	07:07:00	0
2009-04-21	07:08:00	0
2009-04-21	07:09:00	0
2009-04-21	07:10:00	0
2009-04-21	07:11:00	0
2009-04-21	07:12:00	0
2009-04-21	07:13:00	0
2009-04-21	07:14:00	0
2009-04-21	07:15:00	0
2009-04-21	07:16:00	0
2009-04-21	07:17:00	70
2009-04-21	07:18:00	0
2009-04-21	07:19:00	0
2009-04-21	07:20:00	0
2009-04-21	07:21:00	0
2009-04-21	07:22:00	0
2009-04-21	07:23:00	0
2009-04-21	07:24:00	0
2009-04-21	07:25:00	0
2009-04-21	07:26:00	0
2009-04-21	07:27:00	0
2009-04-21	07:28:00	0
2009-04-21	07:29:00	0
2009-04-21	07:30:00	0
2009-04-21	07:31:00	0
2009-04-21	07:32:00	0
2009-04-21	07:33:00	0
2009-04-21	07:34:00	0
2009-04-21	07:35:00	0
2009-04-21	07:36:00	0
2009-04-21	07:37:00	0
2009-04-21	07:38:00	0
2009-04-21	07:39:00	0
2009-04-21	07:40:00	0
2009-04-21	07:41:00	0
2009-04-21	07:42:00	0
2009-04-21	07:43:00	0
2009-04-21	07:44:00	0
2009-04-21	07:45:00	0
2009-04-21	07:46:00	0
2009-04-21	07:47:00	0
2009-04-21	07:48:00	0
2009-04-21	07:49:00	12
2009-04-21	07:50:00	0
2009-04-21	07:51:00	0
2009-04-21	07:52:00	0
2009-04-21	07:53:00	0
2009-04-21	07:54:00	23
2009-04-21	07:55:00	0
2009-04-21	07:56:00	0
2009-04-21	07:57:00	0
2009-04-21	07:58:00	0
2009-04-21	07:59:00	0
2009-04-21	08:00:00	93
2009-04-21	08:01:00	0
2009-04-21	08:02:00	0
2009-04-21	08:03:00	35
2009-04-21	08:04:00	0
2009-04-21	08:05:00	0
2009-04-21	08:06:00	0
2009-04-21	08:07:00	0
2009-04-21	08:08:00	0
2009-04-21	08:09:00	0
2009-04-21	08:10:00	545
2009-04-21	08:11:00	140
2009-04-21	08:12:00	179
2009-04-21	08:13:00	70
2009-04-21	08:14:00	140
2009-04-21	08:15:00	403
2009-04-21	08:16:00	207
2009-04-21	08:17:00	70
2009-04-21	08:18:00	93
2009-04-21	08:19:00	70
2009-04-21	08:20:00	863
2009-04-21	08:21:00	582
2009-04-21	08:22:00	151
2009-04-21	08:23:00	910
2009-04-21	08:24:00	249
2009-04-21	08:25:00	128
2009-04-21	08:26:00	12
2009-04-21	08:27:00	128
2009-04-21	08:28:00	0
2009-04-21	08:29:00	0
2009-04-21	08:30:00	116
2009-04-21	08:31:00	47
2009-04-21	08:32:00	0
2009-04-21	08:33:00	0
2009-04-21	08:34:00	0
2009-04-21	08:35:00	0
2009-04-21	08:36:00	0
2009-04-21	08:37:00	0
2009-04-21	08:38:00	0
2009-04-21	08:39:00	0
2009-04-21	08:40:00	0
2009-04-21	08:41:00	0
2009-04-21	08:42:00	0
2009-04-21	08:43:00	0
2009-04-21	08:44:00	0
2009-04-21	08:45:00	0
2009-04-21	08:46:00	128
2009-04-21	08:47:00	47
2009-04-21	08:48:00	151
2009-04-21	08:49:00	470
2009-04-21	08:50:00	12
2009-04-21	08:51:00	249
2009-04-21	08:52:00	0
2009-04-21	08:53:00	0
2009-04-21	08:54:00	0
2009-04-21	08:55:00	0
2009-04-21	08:56:00	0
2009-04-21	08:57:00	0
2009-04-21	08:58:00	140
2009-04-21	08:59:00	179
2009-04-21	09:00:00	12
2009-04-21	09:01:00	0
2009-04-21	09:02:00	0
2009-04-21	09:03:00	0
2009-04-21	09:04:00	23
2009-04-21	09:05:00	35
2009-04-21	09:06:00	0
2009-04-21	09:07:00	116
2009-04-21	09:08:00	116
[truncated: 19,611 more rows]

## Sheet: 5.4.09
Actogram, Copy Raw Data, All Days
Identity:	Baxter
Filename:	E:\Active Research Files\meloxicam titre canine\cases\baxter\Baxter 5.4.09.AWC
Gender:	M
Age:	3
Height:	76.2 cm	30.0 in
Weight:	29.5 kg	65.0 lbs
Start Date:	04-May-2009 (Mon)
Start Time:	18:00:00
Interval:	1.00 mins
Date Stamp:	Time Stamp:	Activity Data:	Marker Press:
2009-05-04	00:00:00	0
2009-05-04	00:01:00	0
2009-05-04	00:02:00	0
2009-05-04	00:03:00	0
2009-05-04	00:04:00	0
2009-05-04	00:05:00	0
2009-05-04	00:06:00	0
2009-05-04	00:07:00	0
2009-05-04	00:08:00	0
2009-05-04	00:09:00	0
2009-05-04	00:10:00	0
2009-05-04	00:11:00	0
2009-05-04	00:12:00	0
2009-05-04	00:13:00	0
2009-05-04	00:14:00	0
2009-05-04	00:15:00	0
2009-05-04	00:16:00	0
2009-05-04	00:17:00	0
2009-05-04	00:18:00	0
2009-05-04	00:19:00	0
2009-05-04	00:20:00	0
2009-05-04	00:21:00	0
2009-05-04	00:22:00	0
2009-05-04	00:23:00	0
2009-05-04	00:24:00	0
2009-05-04	00:25:00	0
2009-05-04	00:26:00	0
2009-05-04	00:27:00	0
2009-05-04	00:28:00	0
2009-05-04	00:29:00	0
2009-05-04	00:30:00	0
2009-05-04	00:31:00	0
2009-05-04	00:32:00	0
2009-05-04	00:33:00	0
2009-05-04	00:34:00	0
2009-05-04	00:35:00	0
2009-05-04	00:36:00	0
2009-05-04	00:37:00	0
2009-05-04	00:38:00	0
2009-05-04	00:39:00	0
2009-05-04	00:40:00	0
2009-05-04	00:41:00	0
2009-05-04	00:42:00	0
2009-05-04	00:43:00	0
2009-05-04	00:44:00	0
2009-05-04	00:45:00	0
2009-05-04	00:46:00	0
2009-05-04	00:47:00	0
2009-05-04	00:48:00	0
2009-05-04	00:49:00	0
2009-05-04	00:50:00	0
2009-05-04	00:51:00	0
2009-05-04	00:52:00	0
2009-05-04	00:53:00	0
2009-05-04	00:54:00	0
2009-05-04	00:55:00	0
2009-05-04	00:56:00	0
2009-05-04	00:57:00	0
2009-05-04	00:58:00	0
2009-05-04	00:59:00	0
2009-05-04	01:00:00	0
2009-05-04	01:01:00	0
2009-05-04	01:02:00	0
2009-05-04	01:03:00	0
2009-05-04	01:04:00	0
2009-05-04	01:05:00	0
2009-05-04	01:06:00	0
2009-05-04	01:07:00	0
2009-05-04	01:08:00	0
2009-05-04	01:09:00	0
2009-05-04	01:10:00	0
2009-05-04	01:11:00	0
2009-05-04	01:12:00	0
2009-05-04	01:13:00	0
2009-05-04	01:14:00	0
2009-05-04	01:15:00	0
2009-05-04	01:16:00	0
2009-05-04	01:17:00	0
2009-05-04	01:18:00	0
2009-05-04	01:19:00	0
2009-05-04	01:20:00	0
2009-05-04	01:21:00	0
2009-05-04	01:22:00	0
2009-05-04	01:23:00	0
2009-05-04	01:24:00	0
2009-05-04	01:25:00	0
2009-05-04	01:26:00	0
2009-05-04	01:27:00	0
2009-05-04	01:28:00	0
2009-05-04	01:29:00	0
2009-05-04	01:30:00	0
2009-05-04	01:31:00	0
2009-05-04	01:32:00	0
2009-05-04	01:33:00	0
2009-05-04	01:34:00	0
2009-05-04	01:35:00	0
2009-05-04	01:36:00	0
2009-05-04	01:37:00	0
2009-05-04	01:38:00	0
2009-05-04	01:39:00	0
2009-05-04	01:40:00	0
2009-05-04	01:41:00	0
2009-05-04	01:42:00	0
2009-05-04	01:43:00	0
2009-05-04	01:44:00	0
2009-05-04	01:45:00	0
2009-05-04	01:46:00	0
2009-05-04	01:47:00	0
2009-05-04	01:48:00	0
2009-05-04	01:49:00	0
2009-05-04	01:50:00	0
2009-05-04	01:51:00	0
2009-05-04	01:52:00	0
2009-05-04	01:53:00	0
2009-05-04	01:54:00	0
2009-05-04	01:55:00	0
2009-05-04	01:56:00	0
2009-05-04	01:57:00	0
2009-05-04	01:58:00	0
2009-05-04	01:59:00	0
2009-05-04	02:00:00	0
2009-05-04	02:01:00	0
2009-05-04	02:02:00	0
2009-05-04	02:03:00	0
2009-05-04	02:04:00	0
2009-05-04	02:05:00	0
2009-05-04	02:06:00	0
2009-05-04	02:07:00	0
2009-05-04	02:08:00	0
2009-05-04	02:09:00	0
2009-05-04	02:10:00	0
2009-05-04	02:11:00	0
2009-05-04	02:12:00	0
2009-05-04	02:13:00	0
2009-05-04	02:14:00	0
2009-05-04	02:15:00	0
2009-05-04	02:16:00	0
2009-05-04	02:17:00	0
2009-05-04	02:18:00	0
2009-05-04	02:19:00	0
2009-05-04	02:20:00	0
2009-05-04	02:21:00	0
2009-05-04	02:22:00	0
2009-05-04	02:23:00	0
2009-05-04	02:24:00	0
2009-05-04	02:25:00	0
2009-05-04	02:26:00	0
2009-05-04	02:27:00	0
2009-05-04	02:28:00	0
2009-05-04	02:29:00	0
2009-05-04	02:30:00	0
2009-05-04	02:31:00	0
2009-05-04	02:32:00	0
2009-05-04	02:33:00	0
2009-05-04	02:34:00	0
2009-05-04	02:35:00	0
2009-05-04	02:36:00	0
2009-05-04	02:37:00	0
2009-05-04	02:38:00	0
2009-05-04	02:39:00	0
2009-05-04	02:40:00	0
2009-05-04	02:41:00	0
2009-05-04	02:42:00	0
2009-05-04	02:43:00	0
2009-05-04	02:44:00	0
2009-05-04	02:45:00	0
2009-05-04	02:46:00	0
2009-05-04	02:47:00	0
2009-05-04	02:48:00	0
2009-05-04	02:49:00	0
2009-05-04	02:50:00	0
2009-05-04	02:51:00	0
2009-05-04	02:52:00	0
2009-05-04	02:53:00	0
2009-05-04	02:54:00	0
2009-05-04	02:55:00	0
2009-05-04	02:56:00	0
2009-05-04	02:57:00	0
2009-05-04	02:58:00	0
2009-05-04	02:59:00	0
2009-05-04	03:00:00	0
2009-05-04	03:01:00	0
2009-05-04	03:02:00	0
2009-05-04	03:03:00	0
2009-05-04	03:04:00	0
2009-05-04	03:05:00	0
2009-05-04	03:06:00	0
2009-05-04	03:07:00	0
2009-05-04	03:08:00	0
2009-05-04	03:09:00	0
2009-05-04	03:10:00	0
2009-05-04	03:11:00	0
2009-05-04	03:12:00	0
2009-05-04	03:13:00	0
2009-05-04	03:14:00	0
2009-05-04	03:15:00	0
2009-05-04	03:16:00	0
2009-05-04	03:17:00	0
2009-05-04	03:18:00	0
2009-05-04	03:19:00	0
2009-05-04	03:20:00	0
2009-05-04	03:21:00	0
2009-05-04	03:22:00	0
2009-05-04	03:23:00	0
2009-05-04	03:24:00	0
2009-05-04	03:25:00	0
2009-05-04	03:26:00	0
2009-05-04	03:27:00	0
2009-05-04	03:28:00	0
2009-05-04	03:29:00	0
2009-05-04	03:30:00	0
2009-05-04	03:31:00	0
2009-05-04	03:32:00	0
2009-05-04	03:33:00	0
2009-05-04	03:34:00	0
2009-05-04	03:35:00	0
2009-05-04	03:36:00	0
2009-05-04	03:37:00	0
2009-05-04	03:38:00	0
2009-05-04	03:39:00	0
2009-05-04	03:40:00	0
2009-05-04	03:41:00	0
2009-05-04	03:42:00	0
2009-05-04	03:43:00	0
2009-05-04	03:44:00	0
2009-05-04	03:45:00	0
2009-05-04	03:46:00	0
2009-05-04	03:47:00	0
2009-05-04	03:48:00	0
2009-05-04	03:49:00	0
2009-05-04	03:50:00	0
2009-05-04	03:51:00	0
2009-05-04	03:52:00	0
2009-05-04	03:53:00	0
2009-05-04	03:54:00	0
2009-05-04	03:55:00	0
2009-05-04	03:56:00	0
2009-05-04	03:57:00	0
2009-05-04	03:58:00	0
2009-05-04	03:59:00	0
2009-05-04	04:00:00	0
2009-05-04	04:01:00	0
2009-05-04	04:02:00	0
2009-05-04	04:03:00	0
2009-05-04	04:04:00	0
2009-05-04	04:05:00	0
2009-05-04	04:06:00	0
2009-05-04	04:07:00	0
2009-05-04	04:08:00	0
2009-05-04	04:09:00	0
2009-05-04	04:10:00	0
2009-05-04	04:11:00	0
2009-05-04	04:12:00	0
2009-05-04	04:13:00	0
2009-05-04	04:14:00	0
2009-05-04	04:15:00	0
2009-05-04	04:16:00	0
2009-05-04	04:17:00	0
2009-05-04	04:18:00	0
2009-05-04	04:19:00	0
2009-05-04	04:20:00	0
2009-05-04	04:21:00	0
2009-05-04	04:22:00	0
2009-05-04	04:23:00	0
2009-05-04	04:24:00	0
2009-05-04	04:25:00	0
2009-05-04	04:26:00	0
2009-05-04	04:27:00	0
2009-05-04	04:28:00	0
2009-05-04	04:29:00	0
2009-05-04	04:30:00	0
2009-05-04	04:31:00	0
2009-05-04	04:32:00	0
2009-05-04	04:33:00	0
2009-05-04	04:34:00	0
2009-05-04	04:35:00	0
2009-05-04	04:36:00	0
2009-05-04	04:37:00	0
2009-05-04	04:38:00	0
2009-05-04	04:39:00	0
2009-05-04	04:40:00	0
2009-05-04	04:41:00	0
2009-05-04	04:42:00	0
2009-05-04	04:43:00	0
2009-05-04	04:44:00	0
2009-05-04	04:45:00	0
2009-05-04	04:46:00	0
2009-05-04	04:47:00	0
2009-05-04	04:48:00	0
2009-05-04	04:49:00	0
2009-05-04	04:50:00	0
2009-05-04	04:51:00	0
2009-05-04	04:52:00	0
2009-05-04	04:53:00	0
2009-05-04	04:54:00	0
2009-05-04	04:55:00	0
2009-05-04	04:56:00	0
2009-05-04	04:57:00	0
2009-05-04	04:58:00	0
2009-05-04	04:59:00	0
2009-05-04	05:00:00	0
2009-05-04	05:01:00	0
2009-05-04	05:02:00	0
2009-05-04	05:03:00	0
2009-05-04	05:04:00	0
2009-05-04	05:05:00	0
2009-05-04	05:06:00	0
2009-05-04	05:07:00	0
2009-05-04	05:08:00	0
2009-05-04	05:09:00	0
2009-05-04	05:10:00	0
2009-05-04	05:11:00	0
2009-05-04	05:12:00	0
2009-05-04	05:13:00	0
2009-05-04	05:14:00	0
2009-05-04	05:15:00	0
2009-05-04	05:16:00	0
2009-05-04	05:17:00	0
2009-05-04	05:18:00	0
2009-05-04	05:19:00	0
2009-05-04	05:20:00	0
2009-05-04	05:21:00	0
2009-05-04	05:22:00	0
2009-05-04	05:23:00	0
2009-05-04	05:24:00	0
2009-05-04	05:25:00	0
2009-05-04	05:26:00	0
2009-05-04	05:27:00	0
2009-05-04	05:28:00	0
2009-05-04	05:29:00	0
2009-05-04	05:30:00	0
2009-05-04	05:31:00	0
2009-05-04	05:32:00	0
2009-05-04	05:33:00	0
2009-05-04	05:34:00	0
2009-05-04	05:35:00	0
2009-05-04	05:36:00	0
2009-05-04	05:37:00	0
2009-05-04	05:38:00	0
2009-05-04	05:39:00	0
2009-05-04	05:40:00	0
2009-05-04	05:41:00	0
2009-05-04	05:42:00	0
2009-05-04	05:43:00	0
2009-05-04	05:44:00	0
2009-05-04	05:45:00	0
2009-05-04	05:46:00	0
2009-05-04	05:47:00	0
2009-05-04	05:48:00	0
2009-05-04	05:49:00	0
2009-05-04	05:50:00	0
2009-05-04	05:51:00	0
2009-05-04	05:52:00	0
2009-05-04	05:53:00	0
2009-05-04	05:54:00	0
2009-05-04	05:55:00	0
2009-05-04	05:56:00	0
2009-05-04	05:57:00	0
2009-05-04	05:58:00	0
2009-05-04	05:59:00	0
2009-05-04	06:00:00	0
2009-05-04	06:01:00	0
2009-05-04	06:02:00	0
2009-05-04	06:03:00	0
2009-05-04	06:04:00	0
2009-05-04	06:05:00	0
2009-05-04	06:06:00	0
2009-05-04	06:07:00	0
2009-05-04	06:08:00	0
2009-05-04	06:09:00	0
2009-05-04	06:10:00	0
2009-05-04	06:11:00	0
2009-05-04	06:12:00	0
2009-05-04	06:13:00	0
2009-05-04	06:14:00	0
2009-05-04	06:15:00	0
2009-05-04	06:16:00	0
2009-05-04	06:17:00	0
2009-05-04	06:18:00	0
2009-05-04	06:19:00	0
2009-05-04	06:20:00	0
2009-05-04	06:21:00	0
2009-05-04	06:22:00	0
2009-05-04	06:23:00	0
2009-05-04	06:24:00	0
2009-05-04	06:25:00	0
2009-05-04	06:26:00	0
2009-05-04	06:27:00	0
2009-05-04	06:28:00	0
2009-05-04	06:29:00	0
2009-05-04	06:30:00	0
2009-05-04	06:31:00	0
2009-05-04	06:32:00	0
2009-05-04	06:33:00	0
2009-05-04	06:34:00	0
2009-05-04	06:35:00	0
2009-05-04	06:36:00	0
2009-05-04	06:37:00	0
2009-05-04	06:38:00	0
2009-05-04	06:39:00	0
2009-05-04	06:40:00	0
2009-05-04	06:41:00	0
2009-05-04	06:42:00	0
2009-05-04	06:43:00	0
2009-05-04	06:44:00	0
2009-05-04	06:45:00	0
2009-05-04	06:46:00	0
2009-05-04	06:47:00	0
2009-05-04	06:48:00	0
2009-05-04	06:49:00	0
2009-05-04	06:50:00	0
2009-05-04	06:51:00	0
2009-05-04	06:52:00	0
2009-05-04	06:53:00	0
2009-05-04	06:54:00	0
2009-05-04	06:55:00	0
2009-05-04	06:56:00	0
2009-05-04	06:57:00	0
2009-05-04	06:58:00	0
2009-05-04	06:59:00	0
2009-05-04	07:00:00	0
2009-05-04	07:01:00	0
2009-05-04	07:02:00	0
2009-05-04	07:03:00	0
2009-05-04	07:04:00	0
2009-05-04	07:05:00	0
2009-05-04	07:06:00	0
2009-05-04	07:07:00	0
2009-05-04	07:08:00	0
2009-05-04	07:09:00	0
2009-05-04	07:10:00	0
2009-05-04	07:11:00	0
2009-05-04	07:12:00	0
2009-05-04	07:13:00	0
2009-05-04	07:14:00	0
2009-05-04	07:15:00	0
2009-05-04	07:16:00	0
2009-05-04	07:17:00	0
2009-05-04	07:18:00	0
2009-05-04	07:19:00	0
2009-05-04	07:20:00	0
2009-05-04	07:21:00	0
2009-05-04	07:22:00	0
2009-05-04	07:23:00	0
2009-05-04	07:24:00	0
2009-05-04	07:25:00	0
2009-05-04	07:26:00	0
2009-05-04	07:27:00	0
2009-05-04	07:28:00	0
2009-05-04	07:29:00	0
2009-05-04	07:30:00	0
2009-05-04	07:31:00	0
2009-05-04	07:32:00	0
2009-05-04	07:33:00	0
2009-05-04	07:34:00	0
2009-05-04	07:35:00	0
2009-05-04	07:36:00	0
2009-05-04	07:37:00	0
2009-05-04	07:38:00	0
2009-05-04	07:39:00	0
2009-05-04	07:40:00	0
2009-05-04	07:41:00	0
2009-05-04	07:42:00	0
2009-05-04	07:43:00	0
2009-05-04	07:44:00	0
2009-05-04	07:45:00	0
2009-05-04	07:46:00	0
2009-05-04	07:47:00	0
2009-05-04	07:48:00	0
2009-05-04	07:49:00	0
2009-05-04	07:50:00	0
2009-05-04	07:51:00	0
2009-05-04	07:52:00	0
2009-05-04	07:53:00	0
2009-05-04	07:54:00	0
2009-05-04	07:55:00	0
2009-05-04	07:56:00	0
2009-05-04	07:57:00	0
2009-05-04	07:58:00	0
2009-05-04	07:59:00	0
2009-05-04	08:00:00	0
2009-05-04	08:01:00	0
2009-05-04	08:02:00	0
2009-05-04	08:03:00	0
2009-05-04	08:04:00	0
2009-05-04	08:05:00	0
2009-05-04	08:06:00	0
2009-05-04	08:07:00	0
2009-05-04	08:08:00	0
2009-05-04	08:09:00	0
2009-05-04	08:10:00	0
2009-05-04	08:11:00	0
2009-05-04	08:12:00	0
2009-05-04	08:13:00	0
2009-05-04	08:14:00	0
2009-05-04	08:15:00	0
2009-05-04	08:16:00	0
2009-05-04	08:17:00	0
2009-05-04	08:18:00	0
2009-05-04	08:19:00	0
2009-05-04	08:20:00	0
2009-05-04	08:21:00	0
2009-05-04	08:22:00	0
2009-05-04	08:23:00	0
2009-05-04	08:24:00	0
2009-05-04	08:25:00	0
2009-05-04	08:26:00	0
2009-05-04	08:27:00	0
2009-05-04	08:28:00	0
2009-05-04	08:29:00	0
2009-05-04	08:30:00	0
2009-05-04	08:31:00	0
2009-05-04	08:32:00	0
2009-05-04	08:33:00	0
2009-05-04	08:34:00	0
2009-05-04	08:35:00	0
2009-05-04	08:36:00	0
2009-05-04	08:37:00	0
2009-05-04	08:38:00	0
2009-05-04	08:39:00	0
2009-05-04	08:40:00	0
2009-05-04	08:41:00	0
2009-05-04	08:42:00	0
2009-05-04	08:43:00	0
2009-05-04	08:44:00	0
2009-05-04	08:45:00	0
2009-05-04	08:46:00	0
2009-05-04	08:47:00	0
2009-05-04	08:48:00	0
2009-05-04	08:49:00	0
2009-05-04	08:50:00	0
2009-05-04	08:51:00	0
2009-05-04	08:52:00	0
2009-05-04	08:53:00	0
2009-05-04	08:54:00	0
2009-05-04	08:55:00	0
2009-05-04	08:56:00	0
2009-05-04	08:57:00	0
2009-05-04	08:58:00	0
2009-05-04	08:59:00	0
2009-05-04	09:00:00	0
2009-05-04	09:01:00	0
2009-05-04	09:02:00	0
2009-05-04	09:03:00	0
2009-05-04	09:04:00	0
2009-05-04	09:05:00	0
2009-05-04	09:06:00	0
2009-05-04	09:07:00	0
2009-05-04	09:08:00	0
2009-05-04	09:09:00	0
2009-05-04	09:10:00	0
2009-05-04	09:11:00	0
2009-05-04	09:12:00	0
2009-05-04	09:13:00	0
2009-05-04	09:14:00	0
2009-05-04	09:15:00	0
2009-05-04	09:16:00	0
2009-05-04	09:17:00	0
2009-05-04	09:18:00	0
2009-05-04	09:19:00	0
2009-05-04	09:20:00	0
2009-05-04	09:21:00	0
2009-05-04	09:22:00	0
2009-05-04	09:23:00	0
2009-05-04	09:24:00	0
2009-05-04	09:25:00	0
2009-05-04	09:26:00	0
2009-05-04	09:27:00	0
2009-05-04	09:28:00	0
2009-05-04	09:29:00	0
2009-05-04	09:30:00	0
2009-05-04	09:31:00	0
2009-05-04	09:32:00	0
2009-05-04	09:33:00	0
2009-05-04	09:34:00	0
2009-05-04	09:35:00	0
2009-05-04	09:36:00	0
2009-05-04	09:37:00	0
2009-05-04	09:38:00	0
2009-05-04	09:39:00	0
2009-05-04	09:40:00	0
2009-05-04	09:41:00	0
2009-05-04	09:42:00	0
2009-05-04	09:43:00	0
2009-05-04	09:44:00	0
2009-05-04	09:45:00	0
2009-05-04	09:46:00	0
2009-05-04	09:47:00	0
2009-05-04	09:48:00	0
2009-05-04	09:49:00	0
2009-05-04	09:50:00	0
2009-05-04	09:51:00	0
2009-05-04	09:52:00	0
2009-05-04	09:53:00	0
2009-05-04	09:54:00	0
2009-05-04	09:55:00	0
2009-05-04	09:56:00	0
2009-05-04	09:57:00	0
2009-05-04	09:58:00	0
2009-05-04	09:59:00	0
2009-05-04	10:00:00	0
2009-05-04	10:01:00	0
2009-05-04	10:02:00	0
2009-05-04	10:03:00	0
2009-05-04	10:04:00	0
2009-05-04	10:05:00	0
2009-05-04	10:06:00	0
2009-05-04	10:07:00	0
2009-05-04	10:08:00	0
2009-05-04	10:09:00	0
2009-05-04	10:10:00	0
2009-05-04	10:11:00	0
2009-05-04	10:12:00	0
2009-05-04	10:13:00	0
2009-05-04	10:14:00	0
2009-05-04	10:15:00	0
2009-05-04	10:16:00	0
2009-05-04	10:17:00	0
2009-05-04	10:18:00	0
2009-05-04	10:19:00	0
2009-05-04	10:20:00	0
2009-05-04	10:21:00	0
2009-05-04	10:22:00	0
2009-05-04	10:23:00	0
2009-05-04	10:24:00	0
2009-05-04	10:25:00	0
2009-05-04	10:26:00	0
2009-05-04	10:27:00	0
2009-05-04	10:28:00	0
2009-05-04	10:29:00	0
2009-05-04	10:30:00	0
2009-05-04	10:31:00	0
2009-05-04	10:32:00	0
2009-05-04	10:33:00	0
2009-05-04	10:34:00	0
2009-05-04	10:35:00	0
2009-05-04	10:36:00	0
2009-05-04	10:37:00	0
2009-05-04	10:38:00	0
2009-05-04	10:39:00	0
2009-05-04	10:40:00	0
2009-05-04	10:41:00	0
2009-05-04	10:42:00	0
2009-05-04	10:43:00	0
2009-05-04	10:44:00	0
2009-05-04	10:45:00	0
2009-05-04	10:46:00	0
2009-05-04	10:47:00	0
2009-05-04	10:48:00	0
2009-05-04	10:49:00	0
2009-05-04	10:50:00	0
2009-05-04	10:51:00	0
2009-05-04	10:52:00	0
2009-05-04	10:53:00	0
2009-05-04	10:54:00	0
2009-05-04	10:55:00	0
2009-05-04	10:56:00	0
2009-05-04	10:57:00	0
2009-05-04	10:58:00	0
2009-05-04	10:59:00	0
2009-05-04	11:00:00	0
2009-05-04	11:01:00	0
2009-05-04	11:02:00	0
2009-05-04	11:03:00	0
2009-05-04	11:04:00	0
2009-05-04	11:05:00	0
2009-05-04	11:06:00	0
2009-05-04	11:07:00	0
2009-05-04	11:08:00	0
2009-05-04	11:09:00	0
2009-05-04	11:10:00	0
2009-05-04	11:11:00	0
2009-05-04	11:12:00	0
2009-05-04	11:13:00	0
2009-05-04	11:14:00	0
2009-05-04	11:15:00	0
2009-05-04	11:16:00	0
2009-05-04	11:17:00	0
2009-05-04	11:18:00	0
2009-05-04	11:19:00	0
2009-05-04	11:20:00	0
2009-05-04	11:21:00	0
2009-05-04	11:22:00	0
2009-05-04	11:23:00	0
2009-05-04	11:24:00	0
2009-05-04	11:25:00	0
2009-05-04	11:26:00	0
2009-05-04	11:27:00	0
2009-05-04	11:28:00	0
2009-05-04	11:29:00	0
2009-05-04	11:30:00	0
2009-05-04	11:31:00	0
2009-05-04	11:32:00	0
2009-05-04	11:33:00	0
2009-05-04	11:34:00	0
2009-05-04	11:35:00	0
2009-05-04	11:36:00	0
2009-05-04	11:37:00	0
2009-05-04	11:38:00	0
2009-05-04	11:39:00	0
2009-05-04	11:40:00	0
2009-05-04	11:41:00	0
2009-05-04	11:42:00	0
2009-05-04	11:43:00	0
2009-05-04	11:44:00	0
2009-05-04	11:45:00	0
2009-05-04	11:46:00	0
2009-05-04	11:47:00	0
2009-05-04	11:48:00	0
2009-05-04	11:49:00	0
2009-05-04	11:50:00	0
2009-05-04	11:51:00	0
2009-05-04	11:52:00	0
2009-05-04	11:53:00	0
2009-05-04	11:54:00	0
2009-05-04	11:55:00	0
2009-05-04	11:56:00	0
2009-05-04	11:57:00	0
2009-05-04	11:58:00	0
2009-05-04	11:59:00	0
2009-05-04	12:00:00	0
2009-05-04	12:01:00	0
2009-05-04	12:02:00	0
2009-05-04	12:03:00	0
2009-05-04	12:04:00	0
2009-05-04	12:05:00	0
2009-05-04	12:06:00	0
2009-05-04	12:07:00	0
2009-05-04	12:08:00	0
2009-05-04	12:09:00	0
2009-05-04	12:10:00	0
2009-05-04	12:11:00	0
2009-05-04	12:12:00	0
2009-05-04	12:13:00	0
2009-05-04	12:14:00	0
2009-05-04	12:15:00	0
2009-05-04	12:16:00	0
2009-05-04	12:17:00	0
2009-05-04	12:18:00	0
2009-05-04	12:19:00	0
2009-05-04	12:20:00	0
2009-05-04	12:21:00	0
2009-05-04	12:22:00	0
2009-05-04	12:23:00	0
2009-05-04	12:24:00	0
2009-05-04	12:25:00	0
2009-05-04	12:26:00	0
2009-05-04	12:27:00	0
2009-05-04	12:28:00	0
2009-05-04	12:29:00	0
2009-05-04	12:30:00	0
2009-05-04	12:31:00	0
2009-05-04	12:32:00	0
2009-05-04	12:33:00	0
2009-05-04	12:34:00	0
2009-05-04	12:35:00	0
2009-05-04	12:36:00	0
2009-05-04	12:37:00	0
2009-05-04	12:38:00	0
2009-05-04	12:39:00	0
2009-05-04	12:40:00	0
2009-05-04	12:41:00	0
2009-05-04	12:42:00	0
2009-05-04	12:43:00	0
2009-05-04	12:44:00	0
2009-05-04	12:45:00	0
2009-05-04	12:46:00	0
2009-05-04	12:47:00	0
2009-05-04	12:48:00	0
2009-05-04	12:49:00	0
2009-05-04	12:50:00	0
2009-05-04	12:51:00	0
2009-05-04	12:52:00	0
2009-05-04	12:53:00	0
2009-05-04	12:54:00	0
2009-05-04	12:55:00	0
2009-05-04	12:56:00	0
2009-05-04	12:57:00	0
2009-05-04	12:58:00	0
2009-05-04	12:59:00	0
2009-05-04	13:00:00	0
2009-05-04	13:01:00	0
2009-05-04	13:02:00	0
2009-05-04	13:03:00	0
2009-05-04	13:04:00	0
2009-05-04	13:05:00	0
2009-05-04	13:06:00	0
2009-05-04	13:07:00	0
2009-05-04	13:08:00	0
2009-05-04	13:09:00	0
2009-05-04	13:10:00	0
2009-05-04	13:11:00	0
2009-05-04	13:12:00	0
2009-05-04	13:13:00	0
2009-05-04	13:14:00	0
2009-05-04	13:15:00	0
2009-05-04	13:16:00	0
2009-05-04	13:17:00	0
2009-05-04	13:18:00	0
2009-05-04	13:19:00	0
2009-05-04	13:20:00	0
2009-05-04	13:21:00	0
2009-05-04	13:22:00	0
2009-05-04	13:23:00	0
2009-05-04	13:24:00	0
2009-05-04	13:25:00	0
2009-05-04	13:26:00	0
2009-05-04	13:27:00	0
2009-05-04	13:28:00	0
2009-05-04	13:29:00	0
2009-05-04	13:30:00	0
2009-05-04	13:31:00	0
2009-05-04	13:32:00	0
2009-05-04	13:33:00	0
2009-05-04	13:34:00	0
2009-05-04	13:35:00	0
2009-05-04	13:36:00	0
2009-05-04	13:37:00	0
2009-05-04	13:38:00	0
2009-05-04	13:39:00	0
2009-05-04	13:40:00	0
2009-05-04	13:41:00	0
2009-05-04	13:42:00	0
2009-05-04	13:43:00	0
2009-05-04	13:44:00	0
2009-05-04	13:45:00	0
2009-05-04	13:46:00	0
2009-05-04	13:47:00	0
2009-05-04	13:48:00	0
2009-05-04	13:49:00	0
2009-05-04	13:50:00	0
2009-05-04	13:51:00	0
2009-05-04	13:52:00	0
2009-05-04	13:53:00	0
2009-05-04	13:54:00	0
2009-05-04	13:55:00	0
2009-05-04	13:56:00	0
2009-05-04	13:57:00	0
2009-05-04	13:58:00	0
2009-05-04	13:59:00	0
2009-05-04	14:00:00	0
2009-05-04	14:01:00	0
2009-05-04	14:02:00	0
2009-05-04	14:03:00	0
2009-05-04	14:04:00	0
2009-05-04	14:05:00	0
2009-05-04	14:06:00	0
2009-05-04	14:07:00	0
2009-05-04	14:08:00	0
2009-05-04	14:09:00	0
2009-05-04	14:10:00	0
2009-05-04	14:11:00	0
2009-05-04	14:12:00	0
2009-05-04	14:13:00	0
2009-05-04	14:14:00	0
2009-05-04	14:15:00	0
2009-05-04	14:16:00	0
2009-05-04	14:17:00	0
2009-05-04	14:18:00	0
2009-05-04	14:19:00	0
2009-05-04	14:20:00	0
2009-05-04	14:21:00	0
2009-05-04	14:22:00	0
2009-05-04	14:23:00	0
2009-05-04	14:24:00	0
2009-05-04	14:25:00	0
2009-05-04	14:26:00	0
2009-05-04	14:27:00	0
2009-05-04	14:28:00	0
2009-05-04	14:29:00	0
2009-05-04	14:30:00	0
2009-05-04	14:31:00	0
2009-05-04	14:32:00	0
2009-05-04	14:33:00	0
2009-05-04	14:34:00	0
2009-05-04	14:35:00	0
2009-05-04	14:36:00	0
2009-05-04	14:37:00	0
2009-05-04	14:38:00	0
2009-05-04	14:39:00	0
2009-05-04	14:40:00	0
2009-05-04	14:41:00	0
2009-05-04	14:42:00	0
2009-05-04	14:43:00	0
2009-05-04	14:44:00	0
2009-05-04	14:45:00	0
2009-05-04	14:46:00	0
2009-05-04	14:47:00	0
2009-05-04	14:48:00	0
2009-05-04	14:49:00	0
2009-05-04	14:50:00	0
2009-05-04	14:51:00	0
2009-05-04	14:52:00	0
2009-05-04	14:53:00	0
2009-05-04	14:54:00	0
2009-05-04	14:55:00	0
2009-05-04	14:56:00	0
2009-05-04	14:57:00	0
2009-05-04	14:58:00	0
2009-05-04	14:59:00	0
2009-05-04	15:00:00	0
2009-05-04	15:01:00	0
2009-05-04	15:02:00	0
2009-05-04	15:03:00	0
2009-05-04	15:04:00	0
2009-05-04	15:05:00	0
2009-05-04	15:06:00	0
2009-05-04	15:07:00	0
2009-05-04	15:08:00	0
2009-05-04	15:09:00	0
2009-05-04	15:10:00	0
2009-05-04	15:11:00	0
2009-05-04	15:12:00	0
2009-05-04	15:13:00	0
2009-05-04	15:14:00	0
2009-05-04	15:15:00	0
2009-05-04	15:16:00	0
2009-05-04	15:17:00	0
2009-05-04	15:18:00	0
2009-05-04	15:19:00	0
2009-05-04	15:20:00	0
2009-05-04	15:21:00	0
2009-05-04	15:22:00	0
2009-05-04	15:23:00	0
2009-05-04	15:24:00	0
2009-05-04	15:25:00	0
2009-05-04	15:26:00	0
2009-05-04	15:27:00	0
2009-05-04	15:28:00	0
2009-05-04	15:29:00	0
2009-05-04	15:30:00	0
2009-05-04	15:31:00	0
2009-05-04	15:32:00	0
2009-05-04	15:33:00	0
2009-05-04	15:34:00	0
2009-05-04	15:35:00	0
2009-05-04	15:36:00	0
2009-05-04	15:37:00	0
2009-05-04	15:38:00	0
2009-05-04	15:39:00	0
2009-05-04	15:40:00	0
2009-05-04	15:41:00	0
2009-05-04	15:42:00	0
2009-05-04	15:43:00	0
2009-05-04	15:44:00	0
2009-05-04	15:45:00	0
2009-05-04	15:46:00	0
2009-05-04	15:47:00	0
2009-05-04	15:48:00	0
2009-05-04	15:49:00	0
2009-05-04	15:50:00	0
2009-05-04	15:51:00	0
2009-05-04	15:52:00	0
2009-05-04	15:53:00	0
2009-05-04	15:54:00	0
2009-05-04	15:55:00	0
2009-05-04	15:56:00	0
2009-05-04	15:57:00	0
2009-05-04	15:58:00	0
2009-05-04	15:59:00	0
2009-05-04	16:00:00	0
2009-05-04	16:01:00	0
2009-05-04	16:02:00	0
2009-05-04	16:03:00	0
2009-05-04	16:04:00	0
2009-05-04	16:05:00	0
2009-05-04	16:06:00	0
2009-05-04	16:07:00	0
2009-05-04	16:08:00	0
2009-05-04	16:09:00	0
2009-05-04	16:10:00	0
2009-05-04	16:11:00	0
2009-05-04	16:12:00	0
2009-05-04	16:13:00	0
2009-05-04	16:14:00	0
2009-05-04	16:15:00	0
2009-05-04	16:16:00	0
2009-05-04	16:17:00	0
2009-05-04	16:18:00	0
2009-05-04	16:19:00	0
2009-05-04	16:20:00	0
2009-05-04	16:21:00	0
2009-05-04	16:22:00	0
2009-05-04	16:23:00	0
2009-05-04	16:24:00	0
2009-05-04	16:25:00	0
2009-05-04	16:26:00	0
2009-05-04	16:27:00	0
2009-05-04	16:28:00	0
2009-05-04	16:29:00	0
2009-05-04	16:30:00	0
2009-05-04	16:31:00	0
2009-05-04	16:32:00	0
2009-05-04	16:33:00	0
2009-05-04	16:34:00	0
2009-05-04	16:35:00	0
2009-05-04	16:36:00	0
2009-05-04	16:37:00	0
2009-05-04	16:38:00	0
2009-05-04	16:39:00	0
2009-05-04	16:40:00	0
2009-05-04	16:41:00	0
2009-05-04	16:42:00	0
2009-05-04	16:43:00	0
2009-05-04	16:44:00	0
2009-05-04	16:45:00	0
2009-05-04	16:46:00	0
2009-05-04	16:47:00	0
2009-05-04	16:48:00	0
2009-05-04	16:49:00	0
2009-05-04	16:50:00	0
2009-05-04	16:51:00	0
2009-05-04	16:52:00	0
2009-05-04	16:53:00	0
2009-05-04	16:54:00	0
2009-05-04	16:55:00	0
2009-05-04	16:56:00	0
2009-05-04	16:57:00	0
2009-05-04	16:58:00	0
2009-05-04	16:59:00	0
2009-05-04	17:00:00	0
2009-05-04	17:01:00	0
2009-05-04	17:02:00	0
2009-05-04	17:03:00	0
2009-05-04	17:04:00	0
2009-05-04	17:05:00	0
2009-05-04	17:06:00	0
2009-05-04	17:07:00	0
2009-05-04	17:08:00	0
2009-05-04	17:09:00	0
2009-05-04	17:10:00	0
2009-05-04	17:11:00	0
2009-05-04	17:12:00	0
2009-05-04	17:13:00	0
2009-05-04	17:14:00	0
2009-05-04	17:15:00	0
2009-05-04	17:16:00	0
2009-05-04	17:17:00	0
2009-05-04	17:18:00	0
2009-05-04	17:19:00	0
2009-05-04	17:20:00	0
2009-05-04	17:21:00	0
2009-05-04	17:22:00	0
2009-05-04	17:23:00	0
2009-05-04	17:24:00	0
2009-05-04	17:25:00	0
2009-05-04	17:26:00	0
2009-05-04	17:27:00	0
2009-05-04	17:28:00	0
2009-05-04	17:29:00	0
2009-05-04	17:30:00	0
2009-05-04	17:31:00	0
2009-05-04	17:32:00	0
2009-05-04	17:33:00	0
2009-05-04	17:34:00	0
2009-05-04	17:35:00	0
2009-05-04	17:36:00	0
2009-05-04	17:37:00	0
2009-05-04	17:38:00	0
2009-05-04	17:39:00	0
2009-05-04	17:40:00	0
2009-05-04	17:41:00	0
2009-05-04	17:42:00	0
2009-05-04	17:43:00	0
2009-05-04	17:44:00	0
2009-05-04	17:45:00	0
2009-05-04	17:46:00	0
2009-05-04	17:47:00	0
2009-05-04	17:48:00	0
2009-05-04	17:49:00	0
2009-05-04	17:50:00	0
2009-05-04	17:51:00	0
2009-05-04	17:52:00	0
2009-05-04	17:53:00	0
2009-05-04	17:54:00	0
2009-05-04	17:55:00	0
2009-05-04	17:56:00	0
2009-05-04	17:57:00	0
2009-05-04	17:58:00	0
2009-05-04	17:59:00	0
2009-05-04	18:00:00	1038
2009-05-04	18:01:00	70
2009-05-04	18:02:00	128
2009-05-04	18:03:00	0
2009-05-04	18:04:00	451
2009-05-04	18:05:00	0
2009-05-04	18:06:00	81
2009-05-04	18:07:00	105
2009-05-04	18:08:00	0
2009-05-04	18:09:00	0
2009-05-04	18:10:00	0
2009-05-04	18:11:00	0
2009-05-04	18:12:00	0
2009-05-04	18:13:00	0
2009-05-04	18:14:00	0
2009-05-04	18:15:00	0
2009-05-04	18:16:00	0
2009-05-04	18:17:00	0
2009-05-04	18:18:00	0
2009-05-04	18:19:00	0
2009-05-04	18:20:00	0
2009-05-04	18:21:00	12
2009-05-04	18:22:00	0
2009-05-04	18:23:00	0
2009-05-04	18:24:00	0
2009-05-04	18:25:00	0
2009-05-04	18:26:00	0
2009-05-04	18:27:00	0
2009-05-04	18:28:00	0
2009-05-04	18:29:00	0
2009-05-04	18:30:00	0
2009-05-04	18:31:00	0
2009-05-04	18:32:00	0
2009-05-04	18:33:00	0
2009-05-04	18:34:00	0
2009-05-04	18:35:00	0
2009-05-04	18:36:00	0
2009-05-04	18:37:00	0
2009-05-04	18:38:00	0
2009-05-04	18:39:00	0
2009-05-04	18:40:00	0
2009-05-04	18:41:00	0
2009-05-04	18:42:00	0
2009-05-04	18:43:00	0
2009-05-04	18:44:00	0
2009-05-04	18:45:00	0
2009-05-04	18:46:00	0
2009-05-04	18:47:00	12
2009-05-04	18:48:00	0
2009-05-04	18:49:00	0
2009-05-04	18:50:00	0
2009-05-04	18:51:00	12
2009-05-04	18:52:00	35
2009-05-04	18:53:00	235
2009-05-04	18:54:00	81
2009-05-04	18:55:00	0
2009-05-04	18:56:00	179
2009-05-04	18:57:00	0
2009-05-04	18:58:00	0
2009-05-04	18:59:00	0
2009-05-04	19:00:00	140
2009-05-04	19:01:00	151
2009-05-04	19:02:00	151
2009-05-04	19:03:00	207
2009-05-04	19:04:00	116
2009-05-04	19:05:00	221
2009-05-04	19:06:00	403
2009-05-04	19:07:00	337
2009-05-04	19:08:00	291
2009-05-04	19:09:00	526
2009-05-04	19:10:00	70
2009-05-04	19:11:00	47
2009-05-04	19:12:00	116
2009-05-04	19:13:00	70
2009-05-04	19:14:00	179
2009-05-04	19:15:00	207
2009-05-04	19:16:00	12
2009-05-04	19:17:00	0
2009-05-04	19:18:00	58
2009-05-04	19:19:00	249
2009-05-04	19:20:00	221
2009-05-04	19:21:00	207
2009-05-04	19:22:00	235
2009-05-04	19:23:00	249
2009-05-04	19:24:00	277
2009-05-04	19:25:00	451
2009-05-04	19:26:00	291
2009-05-04	19:27:00	165
2009-05-04	19:28:00	58
2009-05-04	19:29:00	12
2009-05-04	19:30:00	0
2009-05-04	19:31:00	0
2009-05-04	19:32:00	0
2009-05-04	19:33:00	0
2009-05-04	19:34:00	0
2009-05-04	19:35:00	0
2009-05-04	19:36:00	0
2009-05-04	19:37:00	0
2009-05-04	19:38:00	0
2009-05-04	19:39:00	0
2009-05-04	19:40:00	0
2009-05-04	19:41:00	0
2009-05-04	19:42:00	0
2009-05-04	19:43:00	0
2009-05-04	19:44:00	0
2009-05-04	19:45:00	0
2009-05-04	19:46:00	0
2009-05-04	19:47:00	0
2009-05-04	19:48:00	0
2009-05-04	19:49:00	0
2009-05-04	19:50:00	0
2009-05-04	19:51:00	0
2009-05-04	19:52:00	0
2009-05-04	19:53:00	0
2009-05-04	19:54:00	0
2009-05-04	19:55:00	0
2009-05-04	19:56:00	0
2009-05-04	19:57:00	0
2009-05-04	19:58:00	0
2009-05-04	19:59:00	0
2009-05-04	20:00:00	0
2009-05-04	20:01:00	0
2009-05-04	20:02:00	0
2009-05-04	20:03:00	165
2009-05-04	20:04:00	354
2009-05-04	20:05:00	1203
2009-05-04	20:06:00	1769
2009-05-04	20:07:00	2006
2009-05-04	20:08:00	1964
2009-05-04	20:09:00	1806
2009-05-04	20:10:00	1175
2009-05-04	20:11:00	910
2009-05-04	20:12:00	1552
2009-05-04	20:13:00	1324
2009-05-04	20:14:00	1769
2009-05-04	20:15:00	1038
2009-05-04	20:16:00	1203
2009-05-04	20:17:00	1147
2009-05-04	20:18:00	747
2009-05-04	20:19:00	1294
2009-05-04	20:20:00	1038
2009-05-04	20:21:00	235
2009-05-04	20:22:00	277
2009-05-04	20:23:00	179
2009-05-04	20:24:00	105
2009-05-04	20:25:00	70
2009-05-04	20:26:00	35
2009-05-04	20:27:00	58
2009-05-04	20:28:00	35
2009-05-04	20:29:00	58
2009-05-04	20:30:00	70
2009-05-04	20:31:00	0
2009-05-04	20:32:00	0
2009-05-04	20:33:00	0
2009-05-04	20:34:00	0
2009-05-04	20:35:00	0
2009-05-04	20:36:00	0
2009-05-04	20:37:00	0
2009-05-04	20:38:00	0
2009-05-04	20:39:00	0
2009-05-04	20:40:00	0
2009-05-04	20:41:00	0
2009-05-04	20:42:00	0
2009-05-04	20:43:00	0
2009-05-04	20:44:00	0
2009-05-04	20:45:00	0
2009-05-04	20:46:00	0
2009-05-04	20:47:00	0
2009-05-04	20:48:00	0
2009-05-04	20:49:00	0
2009-05-04	20:50:00	0
2009-05-04	20:51:00	0
2009-05-04	20:52:00	0
2009-05-04	20:53:00	0
2009-05-04	20:54:00	0
2009-05-04	20:55:00	0
2009-05-04	20:56:00	0
2009-05-04	20:57:00	0
2009-05-04	20:58:00	0
2009-05-04	20:59:00	0
2009-05-04	21:00:00	0
2009-05-04	21:01:00	0
2009-05-04	21:02:00	0
2009-05-04	21:03:00	0
2009-05-04	21:04:00	0
2009-05-04	21:05:00	0
2009-05-04	21:06:00	0
2009-05-04	21:07:00	0
2009-05-04	21:08:00	0
2009-05-04	21:09:00	0
2009-05-04	21:10:00	0
2009-05-04	21:11:00	0
2009-05-04	21:12:00	0
2009-05-04	21:13:00	0
2009-05-04	21:14:00	0
2009-05-04	21:15:00	0
2009-05-04	21:16:00	0
2009-05-04	21:17:00	0
2009-05-04	21:18:00	0
2009-05-04	21:19:00	0
2009-05-04	21:20:00	0
2009-05-04	21:21:00	0
2009-05-04	21:22:00	0
2009-05-04	21:23:00	0
2009-05-04	21:24:00	0
2009-05-04	21:25:00	0
2009-05-04	21:26:00	0
2009-05-04	21:27:00	0
2009-05-04	21:28:00	0
2009-05-04	21:29:00	0
2009-05-04	21:30:00	0
2009-05-04	21:31:00	0
2009-05-04	21:32:00	0
2009-05-04	21:33:00	0
2009-05-04	21:34:00	0
2009-05-04	21:35:00	0
2009-05-04	21:36:00	0
2009-05-04	21:37:00	0
2009-05-04	21:38:00	0
2009-05-04	21:39:00	0
2009-05-04	21:40:00	0
2009-05-04	21:41:00	0
2009-05-04	21:42:00	0
2009-05-04	21:43:00	0
2009-05-04	21:44:00	0
2009-05-04	21:45:00	0
2009-05-04	21:46:00	0
2009-05-04	21:47:00	0
2009-05-04	21:48:00	0
2009-05-04	21:49:00	0
2009-05-04	21:50:00	0
2009-05-04	21:51:00	0
2009-05-04	21:52:00	0
2009-05-04	21:53:00	0
2009-05-04	21:54:00	0
2009-05-04	21:55:00	0
2009-05-04	21:56:00	0
2009-05-04	21:57:00	0
2009-05-04	21:58:00	0
2009-05-04	21:59:00	0
2009-05-04	22:00:00	0
2009-05-04	22:01:00	0
2009-05-04	22:02:00	0
2009-05-04	22:03:00	47
2009-05-04	22:04:00	0
2009-05-04	22:05:00	0
2009-05-04	22:06:00	0
2009-05-04	22:07:00	0
2009-05-04	22:08:00	0
2009-05-04	22:09:00	0
2009-05-04	22:10:00	0
2009-05-04	22:11:00	0
2009-05-04	22:12:00	0
2009-05-04	22:13:00	0
2009-05-04	22:14:00	0
2009-05-04	22:15:00	0
2009-05-04	22:16:00	0
2009-05-04	22:17:00	0
2009-05-04	22:18:00	0
2009-05-04	22:19:00	0
2009-05-04	22:20:00	0
2009-05-04	22:21:00	0
2009-05-04	22:22:00	0
2009-05-04	22:23:00	0
2009-05-04	22:24:00	58
2009-05-04	22:25:00	105
2009-05-04	22:26:00	291
2009-05-04	22:27:00	470
2009-05-04	22:28:00	1175
2009-05-04	22:29:00	470
2009-05-04	22:30:00	58
2009-05-04	22:31:00	0
2009-05-04	22:32:00	419
2009-05-04	22:33:00	321
2009-05-04	22:34:00	47
2009-05-04	22:35:00	0
2009-05-04	22:36:00	0
2009-05-04	22:37:00	0
2009-05-04	22:38:00	0
2009-05-04	22:39:00	0
2009-05-04	22:40:00	0
2009-05-04	22:41:00	0
2009-05-04	22:42:00	0
2009-05-04	22:43:00	0
2009-05-04	22:44:00	0
2009-05-04	22:45:00	0
2009-05-04	22:46:00	0
2009-05-04	22:47:00	0
2009-05-04	22:48:00	0
2009-05-04	22:49:00	0
2009-05-04	22:50:00	0
2009-05-04	22:51:00	0
2009-05-04	22:52:00	0
2009-05-04	22:53:00	0
2009-05-04	22:54:00	0
2009-05-04	22:55:00	0
2009-05-04	22:56:00	0
2009-05-04	22:57:00	0
2009-05-04	22:58:00	0
2009-05-04	22:59:00	0
2009-05-04	23:00:00	0
2009-05-04	23:01:00	0
2009-05-04	23:02:00	0
2009-05-04	23:03:00	0
2009-05-04	23:04:00	0
2009-05-04	23:05:00	0
2009-05-04	23:06:00	0
2009-05-04	23:07:00	0
2009-05-04	23:08:00	0
2009-05-04	23:09:00	0
2009-05-04	23:10:00	0
2009-05-04	23:11:00	0
2009-05-04	23:12:00	0
2009-05-04	23:13:00	0
2009-05-04	23:14:00	0
2009-05-04	23:15:00	0
2009-05-04	23:16:00	0
2009-05-04	23:17:00	0
2009-05-04	23:18:00	0
2009-05-04	23:19:00	0
2009-05-04	23:20:00	0
2009-05-04	23:21:00	0
2009-05-04	23:22:00	0
2009-05-04	23:23:00	0
2009-05-04	23:24:00	0
2009-05-04	23:25:00	0
2009-05-04	23:26:00	0
2009-05-04	23:27:00	0
2009-05-04	23:28:00	0
2009-05-04	23:29:00	0
2009-05-04	23:30:00	0
2009-05-04	23:31:00	0
2009-05-04	23:32:00	0
2009-05-04	23:33:00	0
2009-05-04	23:34:00	0
2009-05-04	23:35:00	0
2009-05-04	23:36:00	0
2009-05-04	23:37:00	0
2009-05-04	23:38:00	0
2009-05-04	23:39:00	0
2009-05-04	23:40:00	0
2009-05-04	23:41:00	0
2009-05-04	23:42:00	0
2009-05-04	23:43:00	0
2009-05-04	23:44:00	0
2009-05-04	23:45:00	0
2009-05-04	23:46:00	0
2009-05-04	23:47:00	0
2009-05-04	23:48:00	0
2009-05-04	23:49:00	0
2009-05-04	23:50:00	0
2009-05-04	23:51:00	0
2009-05-04	23:52:00	0
2009-05-04	23:53:00	0
2009-05-04	23:54:00	0
2009-05-04	23:55:00	0
2009-05-04	23:56:00	0
2009-05-04	23:57:00	0
2009-05-04	23:58:00	0
2009-05-04	23:59:00	0
2009-05-05	00:00:00	0
2009-05-05	00:01:00	0
2009-05-05	00:02:00	0
2009-05-05	00:03:00	0
2009-05-05	00:04:00	23
2009-05-05	00:05:00	70
2009-05-05	00:06:00	0
2009-05-05	00:07:00	0
2009-05-05	00:08:00	0
2009-05-05	00:09:00	0
2009-05-05	00:10:00	0
2009-05-05	00:11:00	0
2009-05-05	00:12:00	0
2009-05-05	00:13:00	0
2009-05-05	00:14:00	0
2009-05-05	00:15:00	0
2009-05-05	00:16:00	0
2009-05-05	00:17:00	0
2009-05-05	00:18:00	0
2009-05-05	00:19:00	0
2009-05-05	00:20:00	0
2009-05-05	00:21:00	0
2009-05-05	00:22:00	0
2009-05-05	00:23:00	0
2009-05-05	00:24:00	0
2009-05-05	00:25:00	0
2009-05-05	00:26:00	0
2009-05-05	00:27:00	0
2009-05-05	00:28:00	0
2009-05-05	00:29:00	0
2009-05-05	00:30:00	0
2009-05-05	00:31:00	0
2009-05-05	00:32:00	0
2009-05-05	00:33:00	0
2009-05-05	00:34:00	0
2009-05-05	00:35:00	0
2009-05-05	00:36:00	0
2009-05-05	00:37:00	0
2009-05-05	00:38:00	0
2009-05-05	00:39:00	0
2009-05-05	00:40:00	0
2009-05-05	00:41:00	0
2009-05-05	00:42:00	0
2009-05-05	00:43:00	0
2009-05-05	00:44:00	0
2009-05-05	00:45:00	0
2009-05-05	00:46:00	0
2009-05-05	00:47:00	0
2009-05-05	00:48:00	0
2009-05-05	00:49:00	0
2009-05-05	00:50:00	0
2009-05-05	00:51:00	0
2009-05-05	00:52:00	0
2009-05-05	00:53:00	23
2009-05-05	00:54:00	58
2009-05-05	00:55:00	0
2009-05-05	00:56:00	0
2009-05-05	00:57:00	0
2009-05-05	00:58:00	0
2009-05-05	00:59:00	0
2009-05-05	01:00:00	0
2009-05-05	01:01:00	0
2009-05-05	01:02:00	0
2009-05-05	01:03:00	0
2009-05-05	01:04:00	0
2009-05-05	01:05:00	0
2009-05-05	01:06:00	0
2009-05-05	01:07:00	0
2009-05-05	01:08:00	0
2009-05-05	01:09:00	0
2009-05-05	01:10:00	0
2009-05-05	01:11:00	0
2009-05-05	01:12:00	0
2009-05-05	01:13:00	0
2009-05-05	01:14:00	0
2009-05-05	01:15:00	0
2009-05-05	01:16:00	0
2009-05-05	01:17:00	0
2009-05-05	01:18:00	0
2009-05-05	01:19:00	12
2009-05-05	01:20:00	0
2009-05-05	01:21:00	0
2009-05-05	01:22:00	0
2009-05-05	01:23:00	0
2009-05-05	01:24:00	0
2009-05-05	01:25:00	0
2009-05-05	01:26:00	0
2009-05-05	01:27:00	0
2009-05-05	01:28:00	0
2009-05-05	01:29:00	0
2009-05-05	01:30:00	0
2009-05-05	01:31:00	0
2009-05-05	01:32:00	0
2009-05-05	01:33:00	0
2009-05-05	01:34:00	0
2009-05-05	01:35:00	0
2009-05-05	01:36:00	0
2009-05-05	01:37:00	0
2009-05-05	01:38:00	0
2009-05-05	01:39:00	0
2009-05-05	01:40:00	0
2009-05-05	01:41:00	0
2009-05-05	01:42:00	0
2009-05-05	01:43:00	0
2009-05-05	01:44:00	47
2009-05-05	01:45:00	0
2009-05-05	01:46:00	0
2009-05-05	01:47:00	0
2009-05-05	01:48:00	0
2009-05-05	01:49:00	0
2009-05-05	01:50:00	0
2009-05-05	01:51:00	0
2009-05-05	01:52:00	0
2009-05-05	01:53:00	0
2009-05-05	01:54:00	0
2009-05-05	01:55:00	0
2009-05-05	01:56:00	0
2009-05-05	01:57:00	0
2009-05-05	01:58:00	0
2009-05-05	01:59:00	0
2009-05-05	02:00:00	0
2009-05-05	02:01:00	0
2009-05-05	02:02:00	0
2009-05-05	02:03:00	0
2009-05-05	02:04:00	0
2009-05-05	02:05:00	0
2009-05-05	02:06:00	0
2009-05-05	02:07:00	0
2009-05-05	02:08:00	0
2009-05-05	02:09:00	0
2009-05-05	02:10:00	0
2009-05-05	02:11:00	0
2009-05-05	02:12:00	0
2009-05-05	02:13:00	0
2009-05-05	02:14:00	0
2009-05-05	02:15:00	0
2009-05-05	02:16:00	12
2009-05-05	02:17:00	0
2009-05-05	02:18:00	0
2009-05-05	02:19:00	0
2009-05-05	02:20:00	0
2009-05-05	02:21:00	0
2009-05-05	02:22:00	0
2009-05-05	02:23:00	0
2009-05-05	02:24:00	0
2009-05-05	02:25:00	0
2009-05-05	02:26:00	0
2009-05-05	02:27:00	0
2009-05-05	02:28:00	0
2009-05-05	02:29:00	0
2009-05-05	02:30:00	0
2009-05-05	02:31:00	0
2009-05-05	02:32:00	0
2009-05-05	02:33:00	0
2009-05-05	02:34:00	0
2009-05-05	02:35:00	0
2009-05-05	02:36:00	0
2009-05-05	02:37:00	0
2009-05-05	02:38:00	0
2009-05-05	02:39:00	0
2009-05-05	02:40:00	0
2009-05-05	02:41:00	0
2009-05-05	02:42:00	0
2009-05-05	02:43:00	58
2009-05-05	02:44:00	0
2009-05-05	02:45:00	0
2009-05-05	02:46:00	0
2009-05-05	02:47:00	0
2009-05-05	02:48:00	0
2009-05-05	02:49:00	0
2009-05-05	02:50:00	0
2009-05-05	02:51:00	0
2009-05-05	02:52:00	0
2009-05-05	02:53:00	12
2009-05-05	02:54:00	0
2009-05-05	02:55:00	0
2009-05-05	02:56:00	0
2009-05-05	02:57:00	0
2009-05-05	02:58:00	0
2009-05-05	02:59:00	0
2009-05-05	03:00:00	0
2009-05-05	03:01:00	0
2009-05-05	03:02:00	0
2009-05-05	03:03:00	0
2009-05-05	03:04:00	0
2009-05-05	03:05:00	0
2009-05-05	03:06:00	0
2009-05-05	03:07:00	0
2009-05-05	03:08:00	0
2009-05-05	03:09:00	0
2009-05-05	03:10:00	0
2009-05-05	03:11:00	0
2009-05-05	03:12:00	0
2009-05-05	03:13:00	0
2009-05-05	03:14:00	0
2009-05-05	03:15:00	0
2009-05-05	03:16:00	0
2009-05-05	03:17:00	0
2009-05-05	03:18:00	0
2009-05-05	03:19:00	0
2009-05-05	03:20:00	0
2009-05-05	03:21:00	0
2009-05-05	03:22:00	35
2009-05-05	03:23:00	0
2009-05-05	03:24:00	0
2009-05-05	03:25:00	0
2009-05-05	03:26:00	0
2009-05-05	03:27:00	0
2009-05-05	03:28:00	0
2009-05-05	03:29:00	0
2009-05-05	03:30:00	0
2009-05-05	03:31:00	0
2009-05-05	03:32:00	0
2009-05-05	03:33:00	0
2009-05-05	03:34:00	0
2009-05-05	03:35:00	0
2009-05-05	03:36:00	47
2009-05-05	03:37:00	0
2009-05-05	03:38:00	0
2009-05-05	03:39:00	0
2009-05-05	03:40:00	0
2009-05-05	03:41:00	0
2009-05-05	03:42:00	0
2009-05-05	03:43:00	0
2009-05-05	03:44:00	0
2009-05-05	03:45:00	0
2009-05-05	03:46:00	0
2009-05-05	03:47:00	0
2009-05-05	03:48:00	0
2009-05-05	03:49:00	12
2009-05-05	03:50:00	0
2009-05-05	03:51:00	0
2009-05-05	03:52:00	0
2009-05-05	03:53:00	0
2009-05-05	03:54:00	0
2009-05-05	03:55:00	0
2009-05-05	03:56:00	0
2009-05-05	03:57:00	0
2009-05-05	03:58:00	0
2009-05-05	03:59:00	0
2009-05-05	04:00:00	0
2009-05-05	04:01:00	0
2009-05-05	04:02:00	0
2009-05-05	04:03:00	0
2009-05-05	04:04:00	0
2009-05-05	04:05:00	0
2009-05-05	04:06:00	0
2009-05-05	04:07:00	0
2009-05-05	04:08:00	0
2009-05-05	04:09:00	0
2009-05-05	04:10:00	0
2009-05-05	04:11:00	0
2009-05-05	04:12:00	0
2009-05-05	04:13:00	0
2009-05-05	04:14:00	0
2009-05-05	04:15:00	0
2009-05-05	04:16:00	0
2009-05-05	04:17:00	0
2009-05-05	04:18:00	0
2009-05-05	04:19:00	0
2009-05-05	04:20:00	0
2009-05-05	04:21:00	0
2009-05-05	04:22:00	0
2009-05-05	04:23:00	0
2009-05-05	04:24:00	0
2009-05-05	04:25:00	0
2009-05-05	04:26:00	0
2009-05-05	04:27:00	0
2009-05-05	04:28:00	0
2009-05-05	04:29:00	0
2009-05-05	04:30:00	0
2009-05-05	04:31:00	0
2009-05-05	04:32:00	0
2009-05-05	04:33:00	0
2009-05-05	04:34:00	0
2009-05-05	04:35:00	0
2009-05-05	04:36:00	0
2009-05-05	04:37:00	0
2009-05-05	04:38:00	0
2009-05-05	04:39:00	0
2009-05-05	04:40:00	0
2009-05-05	04:41:00	0
2009-05-05	04:42:00	0
2009-05-05	04:43:00	0
2009-05-05	04:44:00	0
2009-05-05	04:45:00	58
2009-05-05	04:46:00	0
2009-05-05	04:47:00	0
2009-05-05	04:48:00	0
2009-05-05	04:49:00	0
2009-05-05	04:50:00	0
2009-05-05	04:51:00	0
2009-05-05	04:52:00	0
2009-05-05	04:53:00	0
2009-05-05	04:54:00	0
2009-05-05	04:55:00	0
2009-05-05	04:56:00	0
2009-05-05	04:57:00	0
2009-05-05	04:58:00	0
2009-05-05	04:59:00	0
2009-05-05	05:00:00	0
2009-05-05	05:01:00	0
2009-05-05	05:02:00	0
2009-05-05	05:03:00	0
2009-05-05	05:04:00	0
2009-05-05	05:05:00	0
2009-05-05	05:06:00	0
2009-05-05	05:07:00	0
2009-05-05	05:08:00	0
2009-05-05	05:09:00	0
2009-05-05	05:10:00	0
2009-05-05	05:11:00	0
2009-05-05	05:12:00	0
2009-05-05	05:13:00	0
2009-05-05	05:14:00	0
2009-05-05	05:15:00	0
2009-05-05	05:16:00	0
2009-05-05	05:17:00	0
2009-05-05	05:18:00	0
2009-05-05	05:19:00	0
2009-05-05	05:20:00	12
2009-05-05	05:21:00	0
2009-05-05	05:22:00	0
2009-05-05	05:23:00	0
2009-05-05	05:24:00	0
2009-05-05	05:25:00	0
2009-05-05	05:26:00	0
2009-05-05	05:27:00	0
2009-05-05	05:28:00	0
2009-05-05	05:29:00	0
2009-05-05	05:30:00	0
2009-05-05	05:31:00	0
2009-05-05	05:32:00	0
2009-05-05	05:33:00	0
2009-05-05	05:34:00	0
2009-05-05	05:35:00	0
2009-05-05	05:36:00	0
2009-05-05	05:37:00	0
2009-05-05	05:38:00	0
2009-05-05	05:39:00	0
2009-05-05	05:40:00	70
2009-05-05	05:41:00	0
2009-05-05	05:42:00	0
2009-05-05	05:43:00	0
2009-05-05	05:44:00	0
2009-05-05	05:45:00	0
2009-05-05	05:46:00	0
2009-05-05	05:47:00	0
2009-05-05	05:48:00	0
2009-05-05	05:49:00	0
2009-05-05	05:50:00	0
2009-05-05	05:51:00	0
2009-05-05	05:52:00	0
2009-05-05	05:53:00	0
2009-05-05	05:54:00	0
2009-05-05	05:55:00	0
2009-05-05	05:56:00	0
2009-05-05	05:57:00	0
2009-05-05	05:58:00	0
2009-05-05	05:59:00	0
2009-05-05	06:00:00	0
2009-05-05	06:01:00	0
2009-05-05	06:02:00	0
2009-05-05	06:03:00	0
2009-05-05	06:04:00	0
2009-05-05	06:05:00	0
2009-05-05	06:06:00	0
2009-05-05	06:07:00	0
2009-05-05	06:08:00	0
2009-05-05	06:09:00	0
2009-05-05	06:10:00	0
2009-05-05	06:11:00	0
2009-05-05	06:12:00	0
2009-05-05	06:13:00	0
2009-05-05	06:14:00	0
2009-05-05	06:15:00	0
2009-05-05	06:16:00	0
2009-05-05	06:17:00	0
2009-05-05	06:18:00	0
2009-05-05	06:19:00	0
2009-05-05	06:20:00	0
2009-05-05	06:21:00	0
2009-05-05	06:22:00	0
2009-05-05	06:23:00	0
2009-05-05	06:24:00	0
2009-05-05	06:25:00	0
2009-05-05	06:26:00	0
2009-05-05	06:27:00	0
2009-05-05	06:28:00	0
2009-05-05	06:29:00	0
2009-05-05	06:30:00	0
2009-05-05	06:31:00	0
2009-05-05	06:32:00	0
2009-05-05	06:33:00	0
2009-05-05	06:34:00	0
2009-05-05	06:35:00	0
2009-05-05	06:36:00	0
2009-05-05	06:37:00	0
2009-05-05	06:38:00	12
2009-05-05	06:39:00	0
2009-05-05	06:40:00	12
2009-05-05	06:41:00	0
2009-05-05	06:42:00	35
2009-05-05	06:43:00	207
2009-05-05	06:44:00	12
2009-05-05	06:45:00	93
2009-05-05	06:46:00	0
2009-05-05	06:47:00	0
2009-05-05	06:48:00	47
2009-05-05	06:49:00	23
2009-05-05	06:50:00	0
2009-05-05	06:51:00	0
2009-05-05	06:52:00	0
2009-05-05	06:53:00	0
2009-05-05	06:54:00	0
2009-05-05	06:55:00	0
2009-05-05	06:56:00	0
2009-05-05	06:57:00	0
2009-05-05	06:58:00	0
2009-05-05	06:59:00	0
2009-05-05	07:00:00	0
2009-05-05	07:01:00	0
2009-05-05	07:02:00	0
2009-05-05	07:03:00	0
2009-05-05	07:04:00	0
2009-05-05	07:05:00	0
2009-05-05	07:06:00	0
2009-05-05	07:07:00	0
2009-05-05	07:08:00	0
2009-05-05	07:09:00	0
2009-05-05	07:10:00	0
2009-05-05	07:11:00	0
2009-05-05	07:12:00	0
2009-05-05	07:13:00	0
2009-05-05	07:14:00	0
2009-05-05	07:15:00	0
2009-05-05	07:16:00	0
2009-05-05	07:17:00	0
2009-05-05	07:18:00	0
2009-05-05	07:19:00	0
2009-05-05	07:20:00	0
2009-05-05	07:21:00	0
2009-05-05	07:22:00	0
2009-05-05	07:23:00	0
2009-05-05	07:24:00	0
2009-05-05	07:25:00	0
2009-05-05	07:26:00	0
2009-05-05	07:27:00	0
2009-05-05	07:28:00	0
2009-05-05	07:29:00	0
2009-05-05	07:30:00	0
2009-05-05	07:31:00	0
2009-05-05	07:32:00	0
2009-05-05	07:33:00	0
2009-05-05	07:34:00	0
2009-05-05	07:35:00	0
2009-05-05	07:36:00	0
2009-05-05	07:37:00	151
2009-05-05	07:38:00	193
2009-05-05	07:39:00	0
2009-05-05	07:40:00	70
2009-05-05	07:41:00	0
2009-05-05	07:42:00	105
2009-05-05	07:43:00	93
2009-05-05	07:44:00	35
2009-05-05	07:45:00	0
2009-05-05	07:46:00	0
2009-05-05	07:47:00	0
2009-05-05	07:48:00	0
2009-05-05	07:49:00	105
2009-05-05	07:50:00	0
2009-05-05	07:51:00	0
2009-05-05	07:52:00	0
2009-05-05	07:53:00	0
2009-05-05	07:54:00	0
2009-05-05	07:55:00	12
2009-05-05	07:56:00	35
2009-05-05	07:57:00	0
2009-05-05	07:58:00	0
2009-05-05	07:59:00	140
2009-05-05	08:00:00	221
2009-05-05	08:01:00	58
2009-05-05	08:02:00	0
2009-05-05	08:03:00	23
2009-05-05	08:04:00	151
2009-05-05	08:05:00	277
2009-05-05	08:06:00	23
2009-05-05	08:07:00	140
2009-05-05	08:08:00	305
2009-05-05	08:09:00	642
2009-05-05	08:10:00	887
2009-05-05	08:11:00	987
2009-05-05	08:12:00	179
2009-05-05	08:13:00	2923
2009-05-05	08:14:00	705
2009-05-05	08:15:00	1294
2009-05-05	08:16:00	1657
2009-05-05	08:17:00	1203
2009-05-05	08:18:00	370
2009-05-05	08:19:00	70
2009-05-05	08:20:00	0
2009-05-05	08:21:00	354
2009-05-05	08:22:00	403
2009-05-05	08:23:00	817
2009-05-05	08:24:00	291
2009-05-05	08:25:00	2223
2009-05-05	08:26:00	1203
2009-05-05	08:27:00	887
2009-05-05	08:28:00	35
2009-05-05	08:29:00	193
2009-05-05	08:30:00	105
2009-05-05	08:31:00	179
2009-05-05	08:32:00	0
2009-05-05	08:33:00	0
2009-05-05	08:34:00	12
2009-05-05	08:35:00	0
2009-05-05	08:36:00	0
2009-05-05	08:37:00	0
2009-05-05	08:38:00	35
2009-05-05	08:39:00	140
2009-05-05	08:40:00	93
2009-05-05	08:41:00	0
2009-05-05	08:42:00	12
2009-05-05	08:43:00	0
2009-05-05	08:44:00	0
2009-05-05	08:45:00	0
2009-05-05	08:46:00	105
2009-05-05	08:47:00	35
2009-05-05	08:48:00	105
2009-05-05	08:49:00	12
2009-05-05	08:50:00	35
2009-05-05	08:51:00	93
2009-05-05	08:52:00	0
2009-05-05	08:53:00	0
2009-05-05	08:54:00	0
2009-05-05	08:55:00	0
2009-05-05	08:56:00	58
2009-05-05	08:57:00	321
2009-05-05	08:58:00	0
2009-05-05	08:59:00	0
2009-05-05	09:00:00	0
2009-05-05	09:01:00	23
2009-05-05	09:02:00	0
2009-05-05	09:03:00	12
2009-05-05	09:04:00	70
2009-05-05	09:05:00	47
2009-05-05	09:06:00	58
2009-05-05	09:07:00	0
2009-05-05	09:08:00	0
[truncated: 19,611 more rows]

[truncated: 3 more sheets: 5.18.09, 6.1.09, 6.15.09]
