# Supplementary material for: Initial evaluation of nighttime restlessness in a naturally occurring canine model of osteoarthritis pain
Source: PeerJ. 2015 Feb 17;3:e772. doi: 10.7717/peerj.772 (PMC4340376; doi:10.7717/peerj.772)
Supplement: Supplemental Information 34 [file peerj-03-772-s034.xlsx]

## Sheet: Office Visits
Visit Date	Visit Number
2009-03-04 06:00:00	1
2009-03-18 06:00:00	2
2009-04-01 06:00:00	3
2009-04-15 06:00:00	4
2009-04-29 06:00:00	5
2009-05-13 06:00:00	6
2009-05-27 06:00:00	7
2009-06-10 06:00:00	8
2009-06-24 06:00:00	9

## Sheet: 34_Data
Segment	DateTime	Activity	Hour	Quadrant	Study Day	Weekday
1	2009-03-11 06:01:00	0	6	2	7	4
1	2009-03-11 06:02:00	0	6	2	7	4
1	2009-03-11 06:03:00	0	6	2	7	4
1	2009-03-11 06:04:00	0	6	2	7	4
1	2009-03-11 06:05:00	0	6	2	7	4
1	2009-03-11 06:06:00	0	6	2	7	4
1	2009-03-11 06:07:00	25	6	2	7	4
1	2009-03-11 06:08:00	0	6	2	7	4
1	2009-03-11 06:09:00	0	6	2	7	4
1	2009-03-11 06:10:00	0	6	2	7	4
1	2009-03-11 06:11:00	0	6	2	7	4
1	2009-03-11 06:12:00	0	6	2	7	4
1	2009-03-11 06:13:00	0	6	2	7	4
1	2009-03-11 06:14:00	0	6	2	7	4
1	2009-03-11 06:15:00	0	6	2	7	4
1	2009-03-11 06:16:00	0	6	2	7	4
1	2009-03-11 06:17:00	0	6	2	7	4
1	2009-03-11 06:18:00	0	6	2	7	4
1	2009-03-11 06:19:00	0	6	2	7	4
1	2009-03-11 06:20:00	0	6	2	7	4
1	2009-03-11 06:21:00	0	6	2	7	4
1	2009-03-11 06:22:00	0	6	2	7	4
1	2009-03-11 06:23:00	0	6	2	7	4
1	2009-03-11 06:24:00	0	6	2	7	4
1	2009-03-11 06:25:00	0	6	2	7	4
1	2009-03-11 06:26:00	0	6	2	7	4
1	2009-03-11 06:27:00	0	6	2	7	4
1	2009-03-11 06:28:00	0	6	2	7	4
1	2009-03-11 06:29:00	0	6	2	7	4
1	2009-03-11 06:30:00	0	6	2	7	4
1	2009-03-11 06:31:00	0	6	2	7	4
1	2009-03-11 06:32:00	0	6	2	7	4
1	2009-03-11 06:33:00	0	6	2	7	4
1	2009-03-11 06:34:00	0	6	2	7	4
1	2009-03-11 06:35:00	0	6	2	7	4
1	2009-03-11 06:36:00	0	6	2	7	4
1	2009-03-11 06:37:00	0	6	2	7	4
1	2009-03-11 06:38:00	0	6	2	7	4
1	2009-03-11 06:39:00	0	6	2	7	4
1	2009-03-11 06:40:00	74	6	2	7	4
1	2009-03-11 06:41:00	49	6	2	7	4
1	2009-03-11 06:42:00	25	6	2	7	4
1	2009-03-11 06:43:00	0	6	2	7	4
1	2009-03-11 06:44:00	0	6	2	7	4
1	2009-03-11 06:45:00	0	6	2	7	4
1	2009-03-11 06:46:00	0	6	2	7	4
1	2009-03-11 06:47:00	0	6	2	7	4
1	2009-03-11 06:48:00	0	6	2	7	4
1	2009-03-11 06:49:00	0	6	2	7	4
1	2009-03-11 06:50:00	0	6	2	7	4
1	2009-03-11 06:51:00	0	6	2	7	4
1	2009-03-11 06:52:00	0	6	2	7	4
1	2009-03-11 06:53:00	0	6	2	7	4
1	2009-03-11 06:54:00	0	6	2	7	4
1	2009-03-11 06:55:00	0	6	2	7	4
1	2009-03-11 06:56:00	0	6	2	7	4
1	2009-03-11 06:57:00	0	6	2	7	4
1	2009-03-11 06:58:00	0	6	2	7	4
1	2009-03-11 06:59:00	0	6	2	7	4
1	2009-03-11 07:00:00	0	6	2	7	4
1	2009-03-11 07:01:00	0	7	2	7	4
1	2009-03-11 07:02:00	0	7	2	7	4
1	2009-03-11 07:03:00	0	7	2	7	4
1	2009-03-11 07:04:00	0	7	2	7	4
1	2009-03-11 07:05:00	86	7	2	7	4
1	2009-03-11 07:06:00	62	7	2	7	4
1	2009-03-11 07:07:00	0	7	2	7	4
1	2009-03-11 07:08:00	0	7	2	7	4
1	2009-03-11 07:09:00	0	7	2	7	4
1	2009-03-11 07:10:00	0	7	2	7	4
1	2009-03-11 07:11:00	0	7	2	7	4
1	2009-03-11 07:12:00	0	7	2	7	4
1	2009-03-11 07:13:00	0	7	2	7	4
1	2009-03-11 07:14:00	0	7	2	7	4
1	2009-03-11 07:15:00	0	7	2	7	4
1	2009-03-11 07:16:00	0	7	2	7	4
1	2009-03-11 07:17:00	0	7	2	7	4
1	2009-03-11 07:18:00	556	7	2	7	4
1	2009-03-11 07:19:00	322	7	2	7	4
1	2009-03-11 07:20:00	460	7	2	7	4
1	2009-03-11 07:21:00	308	7	2	7	4
1	2009-03-11 07:22:00	1125	7	2	7	4
1	2009-03-11 07:23:00	148	7	2	7	4
1	2009-03-11 07:24:00	234	7	2	7	4
1	2009-03-11 07:25:00	293	7	2	7	4
1	2009-03-11 07:26:00	263	7	2	7	4
1	2009-03-11 07:27:00	0	7	2	7	4
1	2009-03-11 07:28:00	746	7	2	7	4
1	2009-03-11 07:29:00	962	7	2	7	4
1	2009-03-11 07:30:00	1369	7	2	7	4
1	2009-03-11 07:31:00	1994	7	2	7	4
1	2009-03-11 07:32:00	635	7	2	7	4
1	2009-03-11 07:33:00	12	7	2	7	4
1	2009-03-11 07:34:00	0	7	2	7	4
1	2009-03-11 07:35:00	12	7	2	7	4
1	2009-03-11 07:36:00	0	7	2	7	4
1	2009-03-11 07:37:00	0	7	2	7	4
1	2009-03-11 07:38:00	1098	7	2	7	4
1	2009-03-11 07:39:00	1214	7	2	7	4
1	2009-03-11 07:40:00	249	7	2	7	4
1	2009-03-11 07:41:00	357	7	2	7	4
1	2009-03-11 07:42:00	990	7	2	7	4
1	2009-03-11 07:43:00	1753	7	2	7	4
1	2009-03-11 07:44:00	839	7	2	7	4
1	2009-03-11 07:45:00	724	7	2	7	4
1	2009-03-11 07:46:00	1433	7	2	7	4
1	2009-03-11 07:47:00	1071	7	2	7	4
1	2009-03-11 07:48:00	1642	7	2	7	4
1	2009-03-11 07:49:00	2257	7	2	7	4
1	2009-03-11 07:50:00	1536	7	2	7	4
1	2009-03-11 07:51:00	1679	7	2	7	4
1	2009-03-11 07:52:00	1716	7	2	7	4
1	2009-03-11 07:53:00	1570	7	2	7	4
1	2009-03-11 07:54:00	1910	7	2	7	4
1	2009-03-11 07:55:00	1098	7	2	7	4
1	2009-03-11 07:56:00	1125	7	2	7	4
1	2009-03-11 07:57:00	263	7	2	7	4
1	2009-03-11 07:58:00	204	7	2	7	4
1	2009-03-11 07:59:00	234	7	2	7	4
1	2009-03-11 08:00:00	234	7	2	7	4
1	2009-03-11 08:01:00	98	8	2	7	4
1	2009-03-11 08:02:00	190	8	2	7	4
1	2009-03-11 08:03:00	190	8	2	7	4
1	2009-03-11 08:04:00	62	8	2	7	4
1	2009-03-11 08:05:00	234	8	2	7	4
1	2009-03-11 08:06:00	160	8	2	7	4
1	2009-03-11 08:07:00	86	8	2	7	4
1	2009-03-11 08:08:00	374	8	2	7	4
1	2009-03-11 08:09:00	357	8	2	7	4
1	2009-03-11 08:10:00	111	8	2	7	4
1	2009-03-11 08:11:00	0	8	2	7	4
1	2009-03-11 08:12:00	0	8	2	7	4
1	2009-03-11 08:13:00	497	8	2	7	4
1	2009-03-11 08:14:00	0	8	2	7	4
1	2009-03-11 08:15:00	12	8	2	7	4
1	2009-03-11 08:16:00	0	8	2	7	4
1	2009-03-11 08:17:00	0	8	2	7	4
1	2009-03-11 08:18:00	0	8	2	7	4
1	2009-03-11 08:19:00	62	8	2	7	4
1	2009-03-11 08:20:00	0	8	2	7	4
1	2009-03-11 08:21:00	0	8	2	7	4
1	2009-03-11 08:22:00	0	8	2	7	4
1	2009-03-11 08:23:00	25	8	2	7	4
1	2009-03-11 08:24:00	0	8	2	7	4
1	2009-03-11 08:25:00	49	8	2	7	4
1	2009-03-11 08:26:00	0	8	2	7	4
1	2009-03-11 08:27:00	0	8	2	7	4
1	2009-03-11 08:28:00	0	8	2	7	4
1	2009-03-11 08:29:00	0	8	2	7	4
1	2009-03-11 08:30:00	25	8	2	7	4
1	2009-03-11 08:31:00	25	8	2	7	4
1	2009-03-11 08:32:00	12	8	2	7	4
1	2009-03-11 08:33:00	0	8	2	7	4
1	2009-03-11 08:34:00	25	8	2	7	4
1	2009-03-11 08:35:00	12	8	2	7	4
1	2009-03-11 08:36:00	0	8	2	7	4
1	2009-03-11 08:37:00	12	8	2	7	4
1	2009-03-11 08:38:00	0	8	2	7	4
1	2009-03-11 08:39:00	0	8	2	7	4
1	2009-03-11 08:40:00	0	8	2	7	4
1	2009-03-11 08:41:00	0	8	2	7	4
1	2009-03-11 08:42:00	12	8	2	7	4
1	2009-03-11 08:43:00	25	8	2	7	4
1	2009-03-11 08:44:00	25	8	2	7	4
1	2009-03-11 08:45:00	0	8	2	7	4
1	2009-03-11 08:46:00	0	8	2	7	4
1	2009-03-11 08:47:00	0	8	2	7	4
1	2009-03-11 08:48:00	0	8	2	7	4
1	2009-03-11 08:49:00	0	8	2	7	4
1	2009-03-11 08:50:00	0	8	2	7	4
1	2009-03-11 08:51:00	0	8	2	7	4
1	2009-03-11 08:52:00	556	8	2	7	4
1	2009-03-11 08:53:00	0	8	2	7	4
1	2009-03-11 08:54:00	0	8	2	7	4
1	2009-03-11 08:55:00	0	8	2	7	4
1	2009-03-11 08:56:00	0	8	2	7	4
1	2009-03-11 08:57:00	0	8	2	7	4
1	2009-03-11 08:58:00	0	8	2	7	4
1	2009-03-11 08:59:00	0	8	2	7	4
1	2009-03-11 09:00:00	12	8	2	7	4
1	2009-03-11 09:01:00	12	9	2	7	4
1	2009-03-11 09:02:00	49	9	2	7	4
1	2009-03-11 09:03:00	12	9	2	7	4
1	2009-03-11 09:04:00	12	9	2	7	4
1	2009-03-11 09:05:00	308	9	2	7	4
1	2009-03-11 09:06:00	25	9	2	7	4
1	2009-03-11 09:07:00	0	9	2	7	4
1	2009-03-11 09:08:00	0	9	2	7	4
1	2009-03-11 09:09:00	0	9	2	7	4
1	2009-03-11 09:10:00	0	9	2	7	4
1	2009-03-11 09:11:00	0	9	2	7	4
1	2009-03-11 09:12:00	190	9	2	7	4
1	2009-03-11 09:13:00	37	9	2	7	4
1	2009-03-11 09:14:00	0	9	2	7	4
1	2009-03-11 09:15:00	0	9	2	7	4
1	2009-03-11 09:16:00	0	9	2	7	4
1	2009-03-11 09:17:00	0	9	2	7	4
1	2009-03-11 09:18:00	0	9	2	7	4
1	2009-03-11 09:19:00	0	9	2	7	4
1	2009-03-11 09:20:00	0	9	2	7	4
1	2009-03-11 09:21:00	0	9	2	7	4
1	2009-03-11 09:22:00	0	9	2	7	4
1	2009-03-11 09:23:00	0	9	2	7	4
1	2009-03-11 09:24:00	37	9	2	7	4
1	2009-03-11 09:25:00	0	9	2	7	4
1	2009-03-11 09:26:00	0	9	2	7	4
1	2009-03-11 09:27:00	0	9	2	7	4
1	2009-03-11 09:28:00	0	9	2	7	4
1	2009-03-11 09:29:00	0	9	2	7	4
1	2009-03-11 09:30:00	0	9	2	7	4
1	2009-03-11 09:31:00	0	9	2	7	4
1	2009-03-11 09:32:00	0	9	2	7	4
1	2009-03-11 09:33:00	0	9	2	7	4
1	2009-03-11 09:34:00	12	9	2	7	4
1	2009-03-11 09:35:00	0	9	2	7	4
1	2009-03-11 09:36:00	0	9	2	7	4
1	2009-03-11 09:37:00	0	9	2	7	4
1	2009-03-11 09:38:00	0	9	2	7	4
1	2009-03-11 09:39:00	0	9	2	7	4
1	2009-03-11 09:40:00	0	9	2	7	4
1	2009-03-11 09:41:00	0	9	2	7	4
1	2009-03-11 09:42:00	0	9	2	7	4
1	2009-03-11 09:43:00	0	9	2	7	4
1	2009-03-11 09:44:00	12	9	2	7	4
1	2009-03-11 09:45:00	0	9	2	7	4
1	2009-03-11 09:46:00	0	9	2	7	4
1	2009-03-11 09:47:00	0	9	2	7	4
1	2009-03-11 09:48:00	12	9	2	7	4
1	2009-03-11 09:49:00	0	9	2	7	4
1	2009-03-11 09:50:00	12	9	2	7	4
1	2009-03-11 09:51:00	0	9	2	7	4
1	2009-03-11 09:52:00	0	9	2	7	4
1	2009-03-11 09:53:00	0	9	2	7	4
1	2009-03-11 09:54:00	0	9	2	7	4
1	2009-03-11 09:55:00	0	9	2	7	4
1	2009-03-11 09:56:00	0	9	2	7	4
1	2009-03-11 09:57:00	0	9	2	7	4
1	2009-03-11 09:58:00	0	9	2	7	4
1	2009-03-11 09:59:00	0	9	2	7	4
1	2009-03-11 10:00:00	0	9	2	7	4
1	2009-03-11 10:01:00	0	10	2	7	4
1	2009-03-11 10:02:00	0	10	2	7	4
1	2009-03-11 10:03:00	0	10	2	7	4
1	2009-03-11 10:04:00	0	10	2	7	4
1	2009-03-11 10:05:00	0	10	2	7	4
1	2009-03-11 10:06:00	0	10	2	7	4
1	2009-03-11 10:07:00	219	10	2	7	4
1	2009-03-11 10:08:00	497	10	2	7	4
1	2009-03-11 10:09:00	990	10	2	7	4
1	2009-03-11 10:10:00	98	10	2	7	4
1	2009-03-11 10:11:00	790	10	2	7	4
1	2009-03-11 10:12:00	98	10	2	7	4
1	2009-03-11 10:13:00	12	10	2	7	4
1	2009-03-11 10:14:00	25	10	2	7	4
1	2009-03-11 10:15:00	0	10	2	7	4
1	2009-03-11 10:16:00	0	10	2	7	4
1	2009-03-11 10:17:00	0	10	2	7	4
1	2009-03-11 10:18:00	12	10	2	7	4
1	2009-03-11 10:19:00	391	10	2	7	4
1	2009-03-11 10:20:00	49	10	2	7	4
1	2009-03-11 10:21:00	0	10	2	7	4
1	2009-03-11 10:22:00	0	10	2	7	4
1	2009-03-11 10:23:00	308	10	2	7	4
1	2009-03-11 10:24:00	135	10	2	7	4
1	2009-03-11 10:25:00	0	10	2	7	4
1	2009-03-11 10:26:00	0	10	2	7	4
1	2009-03-11 10:27:00	0	10	2	7	4
1	2009-03-11 10:28:00	12	10	2	7	4
1	2009-03-11 10:29:00	0	10	2	7	4
1	2009-03-11 10:30:00	12	10	2	7	4
1	2009-03-11 10:31:00	0	10	2	7	4
1	2009-03-11 10:32:00	219	10	2	7	4
1	2009-03-11 10:33:00	62	10	2	7	4
1	2009-03-11 10:34:00	12	10	2	7	4
1	2009-03-11 10:35:00	391	10	2	7	4
1	2009-03-11 10:36:00	0	10	2	7	4
1	2009-03-11 10:37:00	0	10	2	7	4
1	2009-03-11 10:38:00	0	10	2	7	4
1	2009-03-11 10:39:00	0	10	2	7	4
1	2009-03-11 10:40:00	0	10	2	7	4
1	2009-03-11 10:41:00	0	10	2	7	4
1	2009-03-11 10:42:00	0	10	2	7	4
1	2009-03-11 10:43:00	12	10	2	7	4
1	2009-03-11 10:44:00	0	10	2	7	4
1	2009-03-11 10:45:00	12	10	2	7	4
1	2009-03-11 10:46:00	12	10	2	7	4
1	2009-03-11 10:47:00	0	10	2	7	4
1	2009-03-11 10:48:00	0	10	2	7	4
1	2009-03-11 10:49:00	308	10	2	7	4
1	2009-03-11 10:50:00	0	10	2	7	4
1	2009-03-11 10:51:00	0	10	2	7	4
1	2009-03-11 10:52:00	204	10	2	7	4
1	2009-03-11 10:53:00	293	10	2	7	4
1	2009-03-11 10:54:00	12	10	2	7	4
1	2009-03-11 10:55:00	62	10	2	7	4
1	2009-03-11 10:56:00	74	10	2	7	4
1	2009-03-11 10:57:00	0	10	2	7	4
1	2009-03-11 10:58:00	0	10	2	7	4
1	2009-03-11 10:59:00	74	10	2	7	4
1	2009-03-11 11:00:00	86	10	2	7	4
1	2009-03-11 11:01:00	86	11	2	7	4
1	2009-03-11 11:02:00	12	11	2	7	4
1	2009-03-11 11:03:00	0	11	2	7	4
1	2009-03-11 11:04:00	0	11	2	7	4
1	2009-03-11 11:05:00	12	11	2	7	4
1	2009-03-11 11:06:00	0	11	2	7	4
1	2009-03-11 11:07:00	37	11	2	7	4
1	2009-03-11 11:08:00	12	11	2	7	4
1	2009-03-11 11:09:00	0	11	2	7	4
1	2009-03-11 11:10:00	37	11	2	7	4
1	2009-03-11 11:11:00	12	11	2	7	4
1	2009-03-11 11:12:00	0	11	2	7	4
1	2009-03-11 11:13:00	12	11	2	7	4
1	2009-03-11 11:14:00	0	11	2	7	4
1	2009-03-11 11:15:00	25	11	2	7	4
1	2009-03-11 11:16:00	0	11	2	7	4
1	2009-03-11 11:17:00	12	11	2	7	4
1	2009-03-11 11:18:00	0	11	2	7	4
1	2009-03-11 11:19:00	0	11	2	7	4
1	2009-03-11 11:20:00	0	11	2	7	4
1	2009-03-11 11:21:00	0	11	2	7	4
1	2009-03-11 11:22:00	12	11	2	7	4
1	2009-03-11 11:23:00	0	11	2	7	4
1	2009-03-11 11:24:00	0	11	2	7	4
1	2009-03-11 11:25:00	0	11	2	7	4
1	2009-03-11 11:26:00	0	11	2	7	4
1	2009-03-11 11:27:00	0	11	2	7	4
1	2009-03-11 11:28:00	0	11	2	7	4
1	2009-03-11 11:29:00	0	11	2	7	4
1	2009-03-11 11:30:00	0	11	2	7	4
1	2009-03-11 11:31:00	0	11	2	7	4
1	2009-03-11 11:32:00	0	11	2	7	4
1	2009-03-11 11:33:00	0	11	2	7	4
1	2009-03-11 11:34:00	0	11	2	7	4
1	2009-03-11 11:35:00	0	11	2	7	4
1	2009-03-11 11:36:00	0	11	2	7	4
1	2009-03-11 11:37:00	0	11	2	7	4
1	2009-03-11 11:38:00	0	11	2	7	4
1	2009-03-11 11:39:00	0	11	2	7	4
1	2009-03-11 11:40:00	0	11	2	7	4
1	2009-03-11 11:41:00	0	11	2	7	4
1	2009-03-11 11:42:00	0	11	2	7	4
1	2009-03-11 11:43:00	0	11	2	7	4
1	2009-03-11 11:44:00	0	11	2	7	4
1	2009-03-11 11:45:00	615	11	2	7	4
1	2009-03-11 11:46:00	1536	11	2	7	4
1	2009-03-11 11:47:00	1369	11	2	7	4
1	2009-03-11 11:48:00	37	11	2	7	4
1	2009-03-11 11:49:00	12	11	2	7	4
1	2009-03-11 11:50:00	25	11	2	7	4
1	2009-03-11 11:51:00	12	11	2	7	4
1	2009-03-11 11:52:00	0	11	2	7	4
1	2009-03-11 11:53:00	0	11	2	7	4
1	2009-03-11 11:54:00	74	11	2	7	4
1	2009-03-11 11:55:00	12	11	2	7	4
1	2009-03-11 11:56:00	0	11	2	7	4
1	2009-03-11 11:57:00	0	11	2	7	4
1	2009-03-11 11:58:00	0	11	2	7	4
1	2009-03-11 11:59:00	0	11	2	7	4
1	2009-03-11 12:00:00	0	11	2	7	4
1	2009-03-11 12:01:00	0	12	3	7	4
1	2009-03-11 12:02:00	12	12	3	7	4
1	2009-03-11 12:03:00	25	12	3	7	4
1	2009-03-11 12:04:00	204	12	3	7	4
1	2009-03-11 12:05:00	322	12	3	7	4
1	2009-03-11 12:06:00	0	12	3	7	4
1	2009-03-11 12:07:00	204	12	3	7	4
1	2009-03-11 12:08:00	1605	12	3	7	4
1	2009-03-11 12:09:00	864	12	3	7	4
1	2009-03-11 12:10:00	308	12	3	7	4
1	2009-03-11 12:11:00	839	12	3	7	4
1	2009-03-11 12:12:00	1792	12	3	7	4
1	2009-03-11 12:13:00	1098	12	3	7	4
1	2009-03-11 12:14:00	938	12	3	7	4
1	2009-03-11 12:15:00	1273	12	3	7	4
1	2009-03-11 12:16:00	576	12	3	7	4
1	2009-03-11 12:17:00	657	12	3	7	4
1	2009-03-11 12:18:00	293	12	3	7	4
1	2009-03-11 12:19:00	426	12	3	7	4
1	2009-03-11 12:20:00	0	12	3	7	4
1	2009-03-11 12:21:00	0	12	3	7	4
1	2009-03-11 12:22:00	322	12	3	7	4
1	2009-03-11 12:23:00	0	12	3	7	4
1	2009-03-11 12:24:00	0	12	3	7	4
1	2009-03-11 12:25:00	0	12	3	7	4
1	2009-03-11 12:26:00	0	12	3	7	4
1	2009-03-11 12:27:00	0	12	3	7	4
1	2009-03-11 12:28:00	0	12	3	7	4
1	2009-03-11 12:29:00	0	12	3	7	4
1	2009-03-11 12:30:00	0	12	3	7	4
1	2009-03-11 12:31:00	148	12	3	7	4
1	2009-03-11 12:32:00	443	12	3	7	4
1	2009-03-11 12:33:00	74	12	3	7	4
1	2009-03-11 12:34:00	160	12	3	7	4
1	2009-03-11 12:35:00	702	12	3	7	4
1	2009-03-11 12:36:00	990	12	3	7	4
1	2009-03-11 12:37:00	1184	12	3	7	4
1	2009-03-11 12:38:00	123	12	3	7	4
1	2009-03-11 12:39:00	0	12	3	7	4
1	2009-03-11 12:40:00	0	12	3	7	4
1	2009-03-11 12:41:00	234	12	3	7	4
1	2009-03-11 12:42:00	0	12	3	7	4
1	2009-03-11 12:43:00	0	12	3	7	4
1	2009-03-11 12:44:00	0	12	3	7	4
1	2009-03-11 12:45:00	0	12	3	7	4
1	2009-03-11 12:46:00	0	12	3	7	4
1	2009-03-11 12:47:00	0	12	3	7	4
1	2009-03-11 12:48:00	0	12	3	7	4
1	2009-03-11 12:49:00	0	12	3	7	4
1	2009-03-11 12:50:00	12	12	3	7	4
1	2009-03-11 12:51:00	0	12	3	7	4
1	2009-03-11 12:52:00	0	12	3	7	4
1	2009-03-11 12:53:00	0	12	3	7	4
1	2009-03-11 12:54:00	0	12	3	7	4
1	2009-03-11 12:55:00	0	12	3	7	4
1	2009-03-11 12:56:00	0	12	3	7	4
1	2009-03-11 12:57:00	0	12	3	7	4
1	2009-03-11 12:58:00	0	12	3	7	4
1	2009-03-11 12:59:00	0	12	3	7	4
1	2009-03-11 13:00:00	0	12	3	7	4
1	2009-03-11 13:01:00	0	13	3	7	4
1	2009-03-11 13:02:00	37	13	3	7	4
1	2009-03-11 13:03:00	49	13	3	7	4
1	2009-03-11 13:04:00	74	13	3	7	4
1	2009-03-11 13:05:00	0	13	3	7	4
1	2009-03-11 13:06:00	37	13	3	7	4
1	2009-03-11 13:07:00	0	13	3	7	4
1	2009-03-11 13:08:00	0	13	3	7	4
1	2009-03-11 13:09:00	37	13	3	7	4
1	2009-03-11 13:10:00	746	13	3	7	4
1	2009-03-11 13:11:00	263	13	3	7	4
1	2009-03-11 13:12:00	0	13	3	7	4
1	2009-03-11 13:13:00	0	13	3	7	4
1	2009-03-11 13:14:00	86	13	3	7	4
1	2009-03-11 13:15:00	148	13	3	7	4
1	2009-03-11 13:16:00	0	13	3	7	4
1	2009-03-11 13:17:00	0	13	3	7	4
1	2009-03-11 13:18:00	135	13	3	7	4
1	2009-03-11 13:19:00	0	13	3	7	4
1	2009-03-11 13:20:00	0	13	3	7	4
1	2009-03-11 13:21:00	0	13	3	7	4
1	2009-03-11 13:22:00	12	13	3	7	4
1	2009-03-11 13:23:00	12	13	3	7	4
1	2009-03-11 13:24:00	0	13	3	7	4
1	2009-03-11 13:25:00	0	13	3	7	4
1	2009-03-11 13:26:00	0	13	3	7	4
1	2009-03-11 13:27:00	12	13	3	7	4
1	2009-03-11 13:28:00	0	13	3	7	4
1	2009-03-11 13:29:00	62	13	3	7	4
1	2009-03-11 13:30:00	409	13	3	7	4
1	2009-03-11 13:31:00	62	13	3	7	4
1	2009-03-11 13:32:00	0	13	3	7	4
1	2009-03-11 13:33:00	0	13	3	7	4
1	2009-03-11 13:34:00	0	13	3	7	4
1	2009-03-11 13:35:00	0	13	3	7	4
1	2009-03-11 13:36:00	0	13	3	7	4
1	2009-03-11 13:37:00	175	13	3	7	4
1	2009-03-11 13:38:00	12	13	3	7	4
1	2009-03-11 13:39:00	25	13	3	7	4
1	2009-03-11 13:40:00	12	13	3	7	4
1	2009-03-11 13:41:00	98	13	3	7	4
1	2009-03-11 13:42:00	49	13	3	7	4
1	2009-03-11 13:43:00	62	13	3	7	4
1	2009-03-11 13:44:00	460	13	3	7	4
1	2009-03-11 13:45:00	86	13	3	7	4
1	2009-03-11 13:46:00	0	13	3	7	4
1	2009-03-11 13:47:00	0	13	3	7	4
1	2009-03-11 13:48:00	0	13	3	7	4
1	2009-03-11 13:49:00	0	13	3	7	4
1	2009-03-11 13:50:00	160	13	3	7	4
1	2009-03-11 13:51:00	0	13	3	7	4
1	2009-03-11 13:52:00	0	13	3	7	4
1	2009-03-11 13:53:00	98	13	3	7	4
1	2009-03-11 13:54:00	293	13	3	7	4
1	2009-03-11 13:55:00	0	13	3	7	4
1	2009-03-11 13:56:00	0	13	3	7	4
1	2009-03-11 13:57:00	0	13	3	7	4
1	2009-03-11 13:58:00	0	13	3	7	4
1	2009-03-11 13:59:00	0	13	3	7	4
1	2009-03-11 14:00:00	0	13	3	7	4
1	2009-03-11 14:01:00	37	14	3	7	4
1	2009-03-11 14:02:00	12	14	3	7	4
1	2009-03-11 14:03:00	86	14	3	7	4
1	2009-03-11 14:04:00	37	14	3	7	4
1	2009-03-11 14:05:00	37	14	3	7	4
1	2009-03-11 14:06:00	37	14	3	7	4
1	2009-03-11 14:07:00	37	14	3	7	4
1	2009-03-11 14:08:00	49	14	3	7	4
1	2009-03-11 14:09:00	160	14	3	7	4
1	2009-03-11 14:10:00	12	14	3	7	4
1	2009-03-11 14:11:00	0	14	3	7	4
1	2009-03-11 14:12:00	0	14	3	7	4
1	2009-03-11 14:13:00	0	14	3	7	4
1	2009-03-11 14:14:00	0	14	3	7	4
1	2009-03-11 14:15:00	0	14	3	7	4
1	2009-03-11 14:16:00	25	14	3	7	4
1	2009-03-11 14:17:00	278	14	3	7	4
1	2009-03-11 14:18:00	460	14	3	7	4
1	2009-03-11 14:19:00	0	14	3	7	4
1	2009-03-11 14:20:00	0	14	3	7	4
1	2009-03-11 14:21:00	0	14	3	7	4
1	2009-03-11 14:22:00	0	14	3	7	4
1	2009-03-11 14:23:00	0	14	3	7	4
1	2009-03-11 14:24:00	0	14	3	7	4
1	2009-03-11 14:25:00	234	14	3	7	4
1	2009-03-11 14:26:00	263	14	3	7	4
1	2009-03-11 14:27:00	12	14	3	7	4
1	2009-03-11 14:28:00	12	14	3	7	4
1	2009-03-11 14:29:00	0	14	3	7	4
1	2009-03-11 14:30:00	25	14	3	7	4
1	2009-03-11 14:31:00	0	14	3	7	4
1	2009-03-11 14:32:00	12	14	3	7	4
1	2009-03-11 14:33:00	0	14	3	7	4
1	2009-03-11 14:34:00	62	14	3	7	4
1	2009-03-11 14:35:00	98	14	3	7	4
1	2009-03-11 14:36:00	135	14	3	7	4
1	2009-03-11 14:37:00	0	14	3	7	4
1	2009-03-11 14:38:00	0	14	3	7	4
1	2009-03-11 14:39:00	0	14	3	7	4
1	2009-03-11 14:40:00	37	14	3	7	4
1	2009-03-11 14:41:00	0	14	3	7	4
1	2009-03-11 14:42:00	0	14	3	7	4
1	2009-03-11 14:43:00	234	14	3	7	4
1	2009-03-11 14:44:00	98	14	3	7	4
1	2009-03-11 14:45:00	517	14	3	7	4
1	2009-03-11 14:46:00	175	14	3	7	4
1	2009-03-11 14:47:00	0	14	3	7	4
1	2009-03-11 14:48:00	0	14	3	7	4
1	2009-03-11 14:49:00	12	14	3	7	4
1	2009-03-11 14:50:00	135	14	3	7	4
1	2009-03-11 14:51:00	12	14	3	7	4
1	2009-03-11 14:52:00	0	14	3	7	4
1	2009-03-11 14:53:00	12	14	3	7	4
1	2009-03-11 14:54:00	0	14	3	7	4
1	2009-03-11 14:55:00	0	14	3	7	4
1	2009-03-11 14:56:00	0	14	3	7	4
1	2009-03-11 14:57:00	12	14	3	7	4
1	2009-03-11 14:58:00	0	14	3	7	4
1	2009-03-11 14:59:00	0	14	3	7	4
1	2009-03-11 15:00:00	12	14	3	7	4
1	2009-03-11 15:01:00	25	15	3	7	4
1	2009-03-11 15:02:00	0	15	3	7	4
1	2009-03-11 15:03:00	0	15	3	7	4
1	2009-03-11 15:04:00	0	15	3	7	4
1	2009-03-11 15:05:00	0	15	3	7	4
1	2009-03-11 15:06:00	0	15	3	7	4
1	2009-03-11 15:07:00	12	15	3	7	4
1	2009-03-11 15:08:00	12	15	3	7	4
1	2009-03-11 15:09:00	219	15	3	7	4
1	2009-03-11 15:10:00	0	15	3	7	4
1	2009-03-11 15:11:00	0	15	3	7	4
1	2009-03-11 15:12:00	0	15	3	7	4
1	2009-03-11 15:13:00	12	15	3	7	4
1	2009-03-11 15:14:00	0	15	3	7	4
1	2009-03-11 15:15:00	0	15	3	7	4
1	2009-03-11 15:16:00	0	15	3	7	4
1	2009-03-11 15:17:00	0	15	3	7	4
1	2009-03-11 15:18:00	0	15	3	7	4
1	2009-03-11 15:19:00	0	15	3	7	4
1	2009-03-11 15:20:00	0	15	3	7	4
1	2009-03-11 15:21:00	0	15	3	7	4
1	2009-03-11 15:22:00	0	15	3	7	4
1	2009-03-11 15:23:00	0	15	3	7	4
1	2009-03-11 15:24:00	0	15	3	7	4
1	2009-03-11 15:25:00	497	15	3	7	4
1	2009-03-11 15:26:00	517	15	3	7	4
1	2009-03-11 15:27:00	74	15	3	7	4
1	2009-03-11 15:28:00	0	15	3	7	4
1	2009-03-11 15:29:00	0	15	3	7	4
1	2009-03-11 15:30:00	517	15	3	7	4
1	2009-03-11 15:31:00	219	15	3	7	4
1	2009-03-11 15:32:00	0	15	3	7	4
1	2009-03-11 15:33:00	0	15	3	7	4
1	2009-03-11 15:34:00	0	15	3	7	4
1	2009-03-11 15:35:00	0	15	3	7	4
1	2009-03-11 15:36:00	0	15	3	7	4
1	2009-03-11 15:37:00	12	15	3	7	4
1	2009-03-11 15:38:00	0	15	3	7	4
1	2009-03-11 15:39:00	0	15	3	7	4
1	2009-03-11 15:40:00	0	15	3	7	4
1	2009-03-11 15:41:00	0	15	3	7	4
1	2009-03-11 15:42:00	12	15	3	7	4
1	2009-03-11 15:43:00	0	15	3	7	4
1	2009-03-11 15:44:00	37	15	3	7	4
1	2009-03-11 15:45:00	0	15	3	7	4
1	2009-03-11 15:46:00	12	15	3	7	4
1	2009-03-11 15:47:00	25	15	3	7	4
1	2009-03-11 15:48:00	12	15	3	7	4
1	2009-03-11 15:49:00	0	15	3	7	4
1	2009-03-11 15:50:00	0	15	3	7	4
1	2009-03-11 15:51:00	0	15	3	7	4
1	2009-03-11 15:52:00	0	15	3	7	4
1	2009-03-11 15:53:00	0	15	3	7	4
1	2009-03-11 15:54:00	0	15	3	7	4
1	2009-03-11 15:55:00	0	15	3	7	4
1	2009-03-11 15:56:00	0	15	3	7	4
1	2009-03-11 15:57:00	0	15	3	7	4
1	2009-03-11 15:58:00	0	15	3	7	4
1	2009-03-11 15:59:00	0	15	3	7	4
1	2009-03-11 16:00:00	0	15	3	7	4
1	2009-03-11 16:01:00	12	16	3	7	4
1	2009-03-11 16:02:00	0	16	3	7	4
1	2009-03-11 16:03:00	37	16	3	7	4
1	2009-03-11 16:04:00	0	16	3	7	4
1	2009-03-11 16:05:00	49	16	3	7	4
1	2009-03-11 16:06:00	0	16	3	7	4
1	2009-03-11 16:07:00	49	16	3	7	4
1	2009-03-11 16:08:00	12	16	3	7	4
1	2009-03-11 16:09:00	0	16	3	7	4
1	2009-03-11 16:10:00	0	16	3	7	4
1	2009-03-11 16:11:00	0	16	3	7	4
1	2009-03-11 16:12:00	25	16	3	7	4
1	2009-03-11 16:13:00	0	16	3	7	4
1	2009-03-11 16:14:00	0	16	3	7	4
1	2009-03-11 16:15:00	308	16	3	7	4
1	2009-03-11 16:16:00	12	16	3	7	4
1	2009-03-11 16:17:00	0	16	3	7	4
1	2009-03-11 16:18:00	0	16	3	7	4
1	2009-03-11 16:19:00	25	16	3	7	4
1	2009-03-11 16:20:00	0	16	3	7	4
1	2009-03-11 16:21:00	12	16	3	7	4
1	2009-03-11 16:22:00	12	16	3	7	4
1	2009-03-11 16:23:00	25	16	3	7	4
1	2009-03-11 16:24:00	0	16	3	7	4
1	2009-03-11 16:25:00	160	16	3	7	4
1	2009-03-11 16:26:00	25	16	3	7	4
1	2009-03-11 16:27:00	12	16	3	7	4
1	2009-03-11 16:28:00	0	16	3	7	4
1	2009-03-11 16:29:00	0	16	3	7	4
1	2009-03-11 16:30:00	0	16	3	7	4
1	2009-03-11 16:31:00	0	16	3	7	4
1	2009-03-11 16:32:00	25	16	3	7	4
1	2009-03-11 16:33:00	12	16	3	7	4
1	2009-03-11 16:34:00	190	16	3	7	4
1	2009-03-11 16:35:00	25	16	3	7	4
1	2009-03-11 16:36:00	12	16	3	7	4
1	2009-03-11 16:37:00	340	16	3	7	4
1	2009-03-11 16:38:00	190	16	3	7	4
1	2009-03-11 16:39:00	0	16	3	7	4
1	2009-03-11 16:40:00	0	16	3	7	4
1	2009-03-11 16:41:00	0	16	3	7	4
1	2009-03-11 16:42:00	12	16	3	7	4
1	2009-03-11 16:43:00	293	16	3	7	4
1	2009-03-11 16:44:00	0	16	3	7	4
1	2009-03-11 16:45:00	0	16	3	7	4
1	2009-03-11 16:46:00	0	16	3	7	4
1	2009-03-11 16:47:00	12	16	3	7	4
1	2009-03-11 16:48:00	98	16	3	7	4
1	2009-03-11 16:49:00	0	16	3	7	4
1	2009-03-11 16:50:00	25	16	3	7	4
1	2009-03-11 16:51:00	0	16	3	7	4
1	2009-03-11 16:52:00	0	16	3	7	4
1	2009-03-11 16:53:00	12	16	3	7	4
1	2009-03-11 16:54:00	0	16	3	7	4
1	2009-03-11 16:55:00	12	16	3	7	4
1	2009-03-11 16:56:00	25	16	3	7	4
1	2009-03-11 16:57:00	12	16	3	7	4
1	2009-03-11 16:58:00	0	16	3	7	4
1	2009-03-11 16:59:00	37	16	3	7	4
1	2009-03-11 17:00:00	0	16	3	7	4
1	2009-03-11 17:01:00	0	17	3	7	4
1	2009-03-11 17:02:00	0	17	3	7	4
1	2009-03-11 17:03:00	0	17	3	7	4
1	2009-03-11 17:04:00	74	17	3	7	4
1	2009-03-11 17:05:00	12	17	3	7	4
1	2009-03-11 17:06:00	0	17	3	7	4
1	2009-03-11 17:07:00	12	17	3	7	4
1	2009-03-11 17:08:00	0	17	3	7	4
1	2009-03-11 17:09:00	49	17	3	7	4
1	2009-03-11 17:10:00	12	17	3	7	4
1	2009-03-11 17:11:00	0	17	3	7	4
1	2009-03-11 17:12:00	12	17	3	7	4
1	2009-03-11 17:13:00	219	17	3	7	4
1	2009-03-11 17:14:00	278	17	3	7	4
1	2009-03-11 17:15:00	123	17	3	7	4
1	2009-03-11 17:16:00	175	17	3	7	4
1	2009-03-11 17:17:00	37	17	3	7	4
1	2009-03-11 17:18:00	175	17	3	7	4
1	2009-03-11 17:19:00	374	17	3	7	4
1	2009-03-11 17:20:00	0	17	3	7	4
1	2009-03-11 17:21:00	0	17	3	7	4
1	2009-03-11 17:22:00	0	17	3	7	4
1	2009-03-11 17:23:00	0	17	3	7	4
1	2009-03-11 17:24:00	0	17	3	7	4
1	2009-03-11 17:25:00	12	17	3	7	4
1	2009-03-11 17:26:00	0	17	3	7	4
1	2009-03-11 17:27:00	0	17	3	7	4
1	2009-03-11 17:28:00	0	17	3	7	4
1	2009-03-11 17:29:00	0	17	3	7	4
1	2009-03-11 17:30:00	12	17	3	7	4
1	2009-03-11 17:31:00	123	17	3	7	4
1	2009-03-11 17:32:00	62	17	3	7	4
1	2009-03-11 17:33:00	0	17	3	7	4
1	2009-03-11 17:34:00	0	17	3	7	4
1	2009-03-11 17:35:00	0	17	3	7	4
1	2009-03-11 17:36:00	0	17	3	7	4
1	2009-03-11 17:37:00	37	17	3	7	4
1	2009-03-11 17:38:00	135	17	3	7	4
1	2009-03-11 17:39:00	0	17	3	7	4
1	2009-03-11 17:40:00	12	17	3	7	4
1	2009-03-11 17:41:00	0	17	3	7	4
1	2009-03-11 17:42:00	0	17	3	7	4
1	2009-03-11 17:43:00	0	17	3	7	4
1	2009-03-11 17:44:00	0	17	3	7	4
1	2009-03-11 17:45:00	12	17	3	7	4
1	2009-03-11 17:46:00	0	17	3	7	4
1	2009-03-11 17:47:00	0	17	3	7	4
1	2009-03-11 17:48:00	12	17	3	7	4
1	2009-03-11 17:49:00	0	17	3	7	4
1	2009-03-11 17:50:00	0	17	3	7	4
1	2009-03-11 17:51:00	37	17	3	7	4
1	2009-03-11 17:52:00	12	17	3	7	4
1	2009-03-11 17:53:00	219	17	3	7	4
1	2009-03-11 17:54:00	37	17	3	7	4
1	2009-03-11 17:55:00	12	17	3	7	4
1	2009-03-11 17:56:00	0	17	3	7	4
1	2009-03-11 17:57:00	12	17	3	7	4
1	2009-03-11 17:58:00	25	17	3	7	4
1	2009-03-11 17:59:00	204	17	3	7	4
1	2009-03-11 18:00:00	12	17	3	7	4
1	2009-03-11 18:01:00	25	18	4	7	4
1	2009-03-11 18:02:00	0	18	4	7	4
1	2009-03-11 18:03:00	204	18	4	7	4
1	2009-03-11 18:04:00	204	18	4	7	4
1	2009-03-11 18:05:00	62	18	4	7	4
1	2009-03-11 18:06:00	12	18	4	7	4
1	2009-03-11 18:07:00	12	18	4	7	4
1	2009-03-11 18:08:00	0	18	4	7	4
1	2009-03-11 18:09:00	0	18	4	7	4
1	2009-03-11 18:10:00	0	18	4	7	4
1	2009-03-11 18:11:00	0	18	4	7	4
1	2009-03-11 18:12:00	25	18	4	7	4
1	2009-03-11 18:13:00	49	18	4	7	4
1	2009-03-11 18:14:00	0	18	4	7	4
1	2009-03-11 18:15:00	0	18	4	7	4
1	2009-03-11 18:16:00	12	18	4	7	4
1	2009-03-11 18:17:00	25	18	4	7	4
1	2009-03-11 18:18:00	0	18	4	7	4
1	2009-03-11 18:19:00	0	18	4	7	4
1	2009-03-11 18:20:00	0	18	4	7	4
1	2009-03-11 18:21:00	0	18	4	7	4
1	2009-03-11 18:22:00	25	18	4	7	4
1	2009-03-11 18:23:00	0	18	4	7	4
1	2009-03-11 18:24:00	12	18	4	7	4
1	2009-03-11 18:25:00	0	18	4	7	4
1	2009-03-11 18:26:00	0	18	4	7	4
1	2009-03-11 18:27:00	12	18	4	7	4
1	2009-03-11 18:28:00	0	18	4	7	4
1	2009-03-11 18:29:00	0	18	4	7	4
1	2009-03-11 18:30:00	12	18	4	7	4
1	2009-03-11 18:31:00	0	18	4	7	4
1	2009-03-11 18:32:00	0	18	4	7	4
1	2009-03-11 18:33:00	0	18	4	7	4
1	2009-03-11 18:34:00	409	18	4	7	4
1	2009-03-11 18:35:00	391	18	4	7	4
1	2009-03-11 18:36:00	0	18	4	7	4
1	2009-03-11 18:37:00	0	18	4	7	4
1	2009-03-11 18:38:00	0	18	4	7	4
1	2009-03-11 18:39:00	0	18	4	7	4
1	2009-03-11 18:40:00	12	18	4	7	4
1	2009-03-11 18:41:00	0	18	4	7	4
1	2009-03-11 18:42:00	478	18	4	7	4
1	2009-03-11 18:43:00	62	18	4	7	4
1	2009-03-11 18:44:00	0	18	4	7	4
1	2009-03-11 18:45:00	37	18	4	7	4
1	2009-03-11 18:46:00	37	18	4	7	4
1	2009-03-11 18:47:00	12	18	4	7	4
1	2009-03-11 18:48:00	0	18	4	7	4
1	2009-03-11 18:49:00	12	18	4	7	4
1	2009-03-11 18:50:00	0	18	4	7	4
1	2009-03-11 18:51:00	12	18	4	7	4
1	2009-03-11 18:52:00	0	18	4	7	4
1	2009-03-11 18:53:00	37	18	4	7	4
1	2009-03-11 18:54:00	0	18	4	7	4
1	2009-03-11 18:55:00	0	18	4	7	4
1	2009-03-11 18:56:00	0	18	4	7	4
1	2009-03-11 18:57:00	0	18	4	7	4
1	2009-03-11 18:58:00	0	18	4	7	4
1	2009-03-11 18:59:00	0	18	4	7	4
1	2009-03-11 19:00:00	12	18	4	7	4
1	2009-03-11 19:01:00	0	19	4	7	4
1	2009-03-11 19:02:00	0	19	4	7	4
1	2009-03-11 19:03:00	12	19	4	7	4
1	2009-03-11 19:04:00	12	19	4	7	4
1	2009-03-11 19:05:00	0	19	4	7	4
1	2009-03-11 19:06:00	0	19	4	7	4
1	2009-03-11 19:07:00	123	19	4	7	4
1	2009-03-11 19:08:00	12	19	4	7	4
1	2009-03-11 19:09:00	1184	19	4	7	4
1	2009-03-11 19:10:00	1154	19	4	7	4
1	2009-03-11 19:11:00	37	19	4	7	4
1	2009-03-11 19:12:00	596	19	4	7	4
1	2009-03-11 19:13:00	615	19	4	7	4
1	2009-03-11 19:14:00	746	19	4	7	4
1	2009-03-11 19:15:00	635	19	4	7	4
1	2009-03-11 19:16:00	1273	19	4	7	4
1	2009-03-11 19:17:00	1369	19	4	7	4
1	2009-03-11 19:18:00	135	19	4	7	4
1	2009-03-11 19:19:00	234	19	4	7	4
1	2009-03-11 19:20:00	1467	19	4	7	4
1	2009-03-11 19:21:00	308	19	4	7	4
1	2009-03-11 19:22:00	0	19	4	7	4
1	2009-03-11 19:23:00	0	19	4	7	4
1	2009-03-11 19:24:00	49	19	4	7	4
1	2009-03-11 19:25:00	12	19	4	7	4
1	2009-03-11 19:26:00	596	19	4	7	4
1	2009-03-11 19:27:00	0	19	4	7	4
1	2009-03-11 19:28:00	839	19	4	7	4
1	2009-03-11 19:29:00	25	19	4	7	4
1	2009-03-11 19:30:00	0	19	4	7	4
1	2009-03-11 19:31:00	135	19	4	7	4
1	2009-03-11 19:32:00	768	19	4	7	4
1	2009-03-11 19:33:00	864	19	4	7	4
1	2009-03-11 19:34:00	1098	19	4	7	4
1	2009-03-11 19:35:00	962	19	4	7	4
1	2009-03-11 19:36:00	1273	19	4	7	4
1	2009-03-11 19:37:00	724	19	4	7	4
1	2009-03-11 19:38:00	25	19	4	7	4
1	2009-03-11 19:39:00	0	19	4	7	4
1	2009-03-11 19:40:00	12	19	4	7	4
1	2009-03-11 19:41:00	98	19	4	7	4
1	2009-03-11 19:42:00	98	19	4	7	4
1	2009-03-11 19:43:00	86	19	4	7	4
1	2009-03-11 19:44:00	190	19	4	7	4
1	2009-03-11 19:45:00	1273	19	4	7	4
1	2009-03-11 19:46:00	962	19	4	7	4
1	2009-03-11 19:47:00	815	19	4	7	4
1	2009-03-11 19:48:00	1401	19	4	7	4
1	2009-03-11 19:49:00	1369	19	4	7	4
1	2009-03-11 19:50:00	1401	19	4	7	4
1	2009-03-11 19:51:00	1679	19	4	7	4
1	2009-03-11 19:52:00	1369	19	4	7	4
1	2009-03-11 19:53:00	1642	19	4	7	4
1	2009-03-11 19:54:00	1502	19	4	7	4
1	2009-03-11 19:55:00	1952	19	4	7	4
1	2009-03-11 19:56:00	2545	19	4	7	4
1	2009-03-11 19:57:00	1098	19	4	7	4
1	2009-03-11 19:58:00	679	19	4	7	4
1	2009-03-11 19:59:00	1017	19	4	7	4
1	2009-03-11 20:00:00	657	19	4	7	4
1	2009-03-11 20:01:00	12	20	4	7	4
1	2009-03-11 20:02:00	25	20	4	7	4
1	2009-03-11 20:03:00	12	20	4	7	4
1	2009-03-11 20:04:00	0	20	4	7	4
1	2009-03-11 20:05:00	0	20	4	7	4
1	2009-03-11 20:06:00	0	20	4	7	4
1	2009-03-11 20:07:00	0	20	4	7	4
1	2009-03-11 20:08:00	25	20	4	7	4
1	2009-03-11 20:09:00	175	20	4	7	4
1	2009-03-11 20:10:00	0	20	4	7	4
1	2009-03-11 20:11:00	0	20	4	7	4
1	2009-03-11 20:12:00	0	20	4	7	4
1	2009-03-11 20:13:00	135	20	4	7	4
1	2009-03-11 20:14:00	0	20	4	7	4
1	2009-03-11 20:15:00	0	20	4	7	4
1	2009-03-11 20:16:00	0	20	4	7	4
1	2009-03-11 20:17:00	0	20	4	7	4
1	2009-03-11 20:18:00	0	20	4	7	4
1	2009-03-11 20:19:00	25	20	4	7	4
1	2009-03-11 20:20:00	25	20	4	7	4
1	2009-03-11 20:21:00	25	20	4	7	4
1	2009-03-11 20:22:00	0	20	4	7	4
1	2009-03-11 20:23:00	0	20	4	7	4
1	2009-03-11 20:24:00	0	20	4	7	4
1	2009-03-11 20:25:00	0	20	4	7	4
1	2009-03-11 20:26:00	0	20	4	7	4
1	2009-03-11 20:27:00	25	20	4	7	4
1	2009-03-11 20:28:00	0	20	4	7	4
1	2009-03-11 20:29:00	0	20	4	7	4
1	2009-03-11 20:30:00	0	20	4	7	4
1	2009-03-11 20:31:00	0	20	4	7	4
1	2009-03-11 20:32:00	0	20	4	7	4
1	2009-03-11 20:33:00	12	20	4	7	4
1	2009-03-11 20:34:00	0	20	4	7	4
1	2009-03-11 20:35:00	308	20	4	7	4
1	2009-03-11 20:36:00	234	20	4	7	4
1	2009-03-11 20:37:00	234	20	4	7	4
1	2009-03-11 20:38:00	0	20	4	7	4
1	2009-03-11 20:39:00	0	20	4	7	4
1	2009-03-11 20:40:00	0	20	4	7	4
1	2009-03-11 20:41:00	0	20	4	7	4
1	2009-03-11 20:42:00	0	20	4	7	4
1	2009-03-11 20:43:00	0	20	4	7	4
1	2009-03-11 20:44:00	0	20	4	7	4
1	2009-03-11 20:45:00	0	20	4	7	4
1	2009-03-11 20:46:00	0	20	4	7	4
1	2009-03-11 20:47:00	37	20	4	7	4
1	2009-03-11 20:48:00	0	20	4	7	4
1	2009-03-11 20:49:00	0	20	4	7	4
1	2009-03-11 20:50:00	0	20	4	7	4
1	2009-03-11 20:51:00	0	20	4	7	4
1	2009-03-11 20:52:00	0	20	4	7	4
1	2009-03-11 20:53:00	0	20	4	7	4
1	2009-03-11 20:54:00	0	20	4	7	4
1	2009-03-11 20:55:00	37	20	4	7	4
1	2009-03-11 20:56:00	204	20	4	7	4
1	2009-03-11 20:57:00	12	20	4	7	4
1	2009-03-11 20:58:00	0	20	4	7	4
1	2009-03-11 20:59:00	25	20	4	7	4
1	2009-03-11 21:00:00	0	20	4	7	4
1	2009-03-11 21:01:00	0	21	4	7	4
1	2009-03-11 21:02:00	86	21	4	7	4
1	2009-03-11 21:03:00	278	21	4	7	4
1	2009-03-11 21:04:00	160	21	4	7	4
1	2009-03-11 21:05:00	37	21	4	7	4
1	2009-03-11 21:06:00	25	21	4	7	4
1	2009-03-11 21:07:00	0	21	4	7	4
1	2009-03-11 21:08:00	0	21	4	7	4
1	2009-03-11 21:09:00	0	21	4	7	4
1	2009-03-11 21:10:00	0	21	4	7	4
1	2009-03-11 21:11:00	0	21	4	7	4
1	2009-03-11 21:12:00	0	21	4	7	4
1	2009-03-11 21:13:00	0	21	4	7	4
1	2009-03-11 21:14:00	0	21	4	7	4
1	2009-03-11 21:15:00	0	21	4	7	4
1	2009-03-11 21:16:00	0	21	4	7	4
1	2009-03-11 21:17:00	0	21	4	7	4
1	2009-03-11 21:18:00	0	21	4	7	4
1	2009-03-11 21:19:00	0	21	4	7	4
1	2009-03-11 21:20:00	0	21	4	7	4
1	2009-03-11 21:21:00	0	21	4	7	4
1	2009-03-11 21:22:00	0	21	4	7	4
1	2009-03-11 21:23:00	0	21	4	7	4
1	2009-03-11 21:24:00	0	21	4	7	4
1	2009-03-11 21:25:00	37	21	4	7	4
1	2009-03-11 21:26:00	0	21	4	7	4
1	2009-03-11 21:27:00	0	21	4	7	4
1	2009-03-11 21:28:00	0	21	4	7	4
1	2009-03-11 21:29:00	0	21	4	7	4
1	2009-03-11 21:30:00	0	21	4	7	4
1	2009-03-11 21:31:00	0	21	4	7	4
1	2009-03-11 21:32:00	0	21	4	7	4
1	2009-03-11 21:33:00	0	21	4	7	4
1	2009-03-11 21:34:00	0	21	4	7	4
1	2009-03-11 21:35:00	0	21	4	7	4
1	2009-03-11 21:36:00	0	21	4	7	4
1	2009-03-11 21:37:00	0	21	4	7	4
1	2009-03-11 21:38:00	74	21	4	7	4
1	2009-03-11 21:39:00	0	21	4	7	4
1	2009-03-11 21:40:00	0	21	4	7	4
1	2009-03-11 21:41:00	0	21	4	7	4
1	2009-03-11 21:42:00	0	21	4	7	4
1	2009-03-11 21:43:00	0	21	4	7	4
1	2009-03-11 21:44:00	0	21	4	7	4
1	2009-03-11 21:45:00	0	21	4	7	4
1	2009-03-11 21:46:00	190	21	4	7	4
1	2009-03-11 21:47:00	12	21	4	7	4
1	2009-03-11 21:48:00	12	21	4	7	4
1	2009-03-11 21:49:00	0	21	4	7	4
1	2009-03-11 21:50:00	12	21	4	7	4
1	2009-03-11 21:51:00	0	21	4	7	4
1	2009-03-11 21:52:00	0	21	4	7	4
1	2009-03-11 21:53:00	0	21	4	7	4
1	2009-03-11 21:54:00	0	21	4	7	4
1	2009-03-11 21:55:00	0	21	4	7	4
1	2009-03-11 21:56:00	0	21	4	7	4
1	2009-03-11 21:57:00	0	21	4	7	4
1	2009-03-11 21:58:00	0	21	4	7	4
1	2009-03-11 21:59:00	0	21	4	7	4
1	2009-03-11 22:00:00	12	21	4	7	4
1	2009-03-11 22:01:00	190	22	4	7	4
1	2009-03-11 22:02:00	0	22	4	7	4
1	2009-03-11 22:03:00	12	22	4	7	4
1	2009-03-11 22:04:00	478	22	4	7	4
1	2009-03-11 22:05:00	1753	22	4	7	4
1	2009-03-11 22:06:00	1154	22	4	7	4
1	2009-03-11 22:07:00	1642	22	4	7	4
1	2009-03-11 22:08:00	1570	22	4	7	4
1	2009-03-11 22:09:00	962	22	4	7	4
1	2009-03-11 22:10:00	1401	22	4	7	4
1	2009-03-11 22:11:00	478	22	4	7	4
1	2009-03-11 22:12:00	160	22	4	7	4
1	2009-03-11 22:13:00	293	22	4	7	4
1	2009-03-11 22:14:00	0	22	4	7	4
1	2009-03-11 22:15:00	1305	22	4	7	4
1	2009-03-11 22:16:00	1994	22	4	7	4
1	2009-03-11 22:17:00	556	22	4	7	4
1	2009-03-11 22:18:00	576	22	4	7	4
1	2009-03-11 22:19:00	962	22	4	7	4
1	2009-03-11 22:20:00	576	22	4	7	4
1	2009-03-11 22:21:00	37	22	4	7	4
1	2009-03-11 22:22:00	0	22	4	7	4
1	2009-03-11 22:23:00	0	22	4	7	4
1	2009-03-11 22:24:00	25	22	4	7	4
1	2009-03-11 22:25:00	49	22	4	7	4
1	2009-03-11 22:26:00	148	22	4	7	4
1	2009-03-11 22:27:00	74	22	4	7	4
1	2009-03-11 22:28:00	0	22	4	7	4
1	2009-03-11 22:29:00	12	22	4	7	4
1	2009-03-11 22:30:00	175	22	4	7	4
1	2009-03-11 22:31:00	49	22	4	7	4
1	2009-03-11 22:32:00	0	22	4	7	4
1	2009-03-11 22:33:00	25	22	4	7	4
1	2009-03-11 22:34:00	0	22	4	7	4
1	2009-03-11 22:35:00	0	22	4	7	4
1	2009-03-11 22:36:00	0	22	4	7	4
1	2009-03-11 22:37:00	0	22	4	7	4
1	2009-03-11 22:38:00	0	22	4	7	4
1	2009-03-11 22:39:00	0	22	4	7	4
1	2009-03-11 22:40:00	0	22	4	7	4
1	2009-03-11 22:41:00	0	22	4	7	4
1	2009-03-11 22:42:00	0	22	4	7	4
1	2009-03-11 22:43:00	0	22	4	7	4
1	2009-03-11 22:44:00	0	22	4	7	4
1	2009-03-11 22:45:00	0	22	4	7	4
1	2009-03-11 22:46:00	0	22	4	7	4
1	2009-03-11 22:47:00	0	22	4	7	4
1	2009-03-11 22:48:00	0	22	4	7	4
1	2009-03-11 22:49:00	0	22	4	7	4
1	2009-03-11 22:50:00	0	22	4	7	4
1	2009-03-11 22:51:00	0	22	4	7	4
1	2009-03-11 22:52:00	0	22	4	7	4
1	2009-03-11 22:53:00	37	22	4	7	4
1	2009-03-11 22:54:00	0	22	4	7	4
1	2009-03-11 22:55:00	0	22	4	7	4
1	2009-03-11 22:56:00	0	22	4	7	4
1	2009-03-11 22:57:00	0	22	4	7	4
1	2009-03-11 22:58:00	0	22	4	7	4
1	2009-03-11 22:59:00	49	22	4	7	4
1	2009-03-11 23:00:00	12	22	4	7	4
1	2009-03-11 23:01:00	37	23	4	7	4
1	2009-03-11 23:02:00	25	23	4	7	4
1	2009-03-11 23:03:00	478	23	4	7	4
1	2009-03-11 23:04:00	12	23	4	7	4
1	2009-03-11 23:05:00	148	23	4	7	4
1	2009-03-11 23:06:00	0	23	4	7	4
1	2009-03-11 23:07:00	0	23	4	7	4
1	2009-03-11 23:08:00	0	23	4	7	4
1	2009-03-11 23:09:00	0	23	4	7	4
1	2009-03-11 23:10:00	0	23	4	7	4
1	2009-03-11 23:11:00	0	23	4	7	4
1	2009-03-11 23:12:00	0	23	4	7	4
1	2009-03-11 23:13:00	0	23	4	7	4
1	2009-03-11 23:14:00	0	23	4	7	4
1	2009-03-11 23:15:00	0	23	4	7	4
1	2009-03-11 23:16:00	0	23	4	7	4
1	2009-03-11 23:17:00	0	23	4	7	4
1	2009-03-11 23:18:00	0	23	4	7	4
1	2009-03-11 23:19:00	0	23	4	7	4
1	2009-03-11 23:20:00	0	23	4	7	4
1	2009-03-11 23:21:00	0	23	4	7	4
1	2009-03-11 23:22:00	0	23	4	7	4
1	2009-03-11 23:23:00	0	23	4	7	4
1	2009-03-11 23:24:00	0	23	4	7	4
1	2009-03-11 23:25:00	0	23	4	7	4
1	2009-03-11 23:26:00	0	23	4	7	4
1	2009-03-11 23:27:00	0	23	4	7	4
1	2009-03-11 23:28:00	0	23	4	7	4
1	2009-03-11 23:29:00	0	23	4	7	4
1	2009-03-11 23:30:00	0	23	4	7	4
1	2009-03-11 23:31:00	0	23	4	7	4
1	2009-03-11 23:32:00	0	23	4	7	4
1	2009-03-11 23:33:00	0	23	4	7	4
1	2009-03-11 23:34:00	0	23	4	7	4
1	2009-03-11 23:35:00	0	23	4	7	4
1	2009-03-11 23:36:00	0	23	4	7	4
1	2009-03-11 23:37:00	0	23	4	7	4
1	2009-03-11 23:38:00	0	23	4	7	4
1	2009-03-11 23:39:00	0	23	4	7	4
1	2009-03-11 23:40:00	0	23	4	7	4
1	2009-03-11 23:41:00	0	23	4	7	4
1	2009-03-11 23:42:00	0	23	4	7	4
1	2009-03-11 23:43:00	0	23	4	7	4
1	2009-03-11 23:44:00	0	23	4	7	4
1	2009-03-11 23:45:00	0	23	4	7	4
1	2009-03-11 23:46:00	0	23	4	7	4
1	2009-03-11 23:47:00	0	23	4	7	4
1	2009-03-11 23:48:00	0	23	4	7	4
1	2009-03-11 23:49:00	0	23	4	7	4
1	2009-03-11 23:50:00	0	23	4	7	4
1	2009-03-11 23:51:00	0	23	4	7	4
1	2009-03-11 23:52:00	0	23	4	7	4
1	2009-03-11 23:53:00	0	23	4	7	4
1	2009-03-11 23:54:00	0	23	4	7	4
1	2009-03-11 23:55:00	0	23	4	7	4
1	2009-03-11 23:56:00	0	23	4	7	4
1	2009-03-11 23:57:00	0	23	4	7	4
1	2009-03-11 23:58:00	0	23	4	7	4
1	2009-03-11 23:59:00	0	23	4	7	4
1	2009-03-12	0	23	4	7	4
1	2009-03-12 00:01:00	0	0	1	8	5
1	2009-03-12 00:02:00	0	0	1	8	5
1	2009-03-12 00:03:00	0	0	1	8	5
1	2009-03-12 00:04:00	0	0	1	8	5
1	2009-03-12 00:05:00	0	0	1	8	5
1	2009-03-12 00:06:00	0	0	1	8	5
1	2009-03-12 00:07:00	0	0	1	8	5
1	2009-03-12 00:08:00	0	0	1	8	5
1	2009-03-12 00:09:00	0	0	1	8	5
1	2009-03-12 00:10:00	0	0	1	8	5
1	2009-03-12 00:11:00	0	0	1	8	5
1	2009-03-12 00:12:00	0	0	1	8	5
1	2009-03-12 00:13:00	0	0	1	8	5
1	2009-03-12 00:14:00	0	0	1	8	5
1	2009-03-12 00:15:00	0	0	1	8	5
1	2009-03-12 00:16:00	0	0	1	8	5
1	2009-03-12 00:17:00	0	0	1	8	5
1	2009-03-12 00:18:00	0	0	1	8	5
1	2009-03-12 00:19:00	0	0	1	8	5
1	2009-03-12 00:20:00	98	0	1	8	5
1	2009-03-12 00:21:00	49	0	1	8	5
1	2009-03-12 00:22:00	0	0	1	8	5
1	2009-03-12 00:23:00	0	0	1	8	5
1	2009-03-12 00:24:00	0	0	1	8	5
1	2009-03-12 00:25:00	12	0	1	8	5
1	2009-03-12 00:26:00	25	0	1	8	5
1	2009-03-12 00:27:00	322	0	1	8	5
1	2009-03-12 00:28:00	37	0	1	8	5
1	2009-03-12 00:29:00	0	0	1	8	5
1	2009-03-12 00:30:00	0	0	1	8	5
1	2009-03-12 00:31:00	0	0	1	8	5
1	2009-03-12 00:32:00	0	0	1	8	5
1	2009-03-12 00:33:00	0	0	1	8	5
1	2009-03-12 00:34:00	0	0	1	8	5
1	2009-03-12 00:35:00	0	0	1	8	5
1	2009-03-12 00:36:00	12	0	1	8	5
1	2009-03-12 00:37:00	25	0	1	8	5
1	2009-03-12 00:38:00	98	0	1	8	5
1	2009-03-12 00:39:00	293	0	1	8	5
1	2009-03-12 00:40:00	62	0	1	8	5
1	2009-03-12 00:41:00	0	0	1	8	5
1	2009-03-12 00:42:00	0	0	1	8	5
1	2009-03-12 00:43:00	0	0	1	8	5
1	2009-03-12 00:44:00	0	0	1	8	5
1	2009-03-12 00:45:00	0	0	1	8	5
1	2009-03-12 00:46:00	0	0	1	8	5
1	2009-03-12 00:47:00	0	0	1	8	5
1	2009-03-12 00:48:00	0	0	1	8	5
1	2009-03-12 00:49:00	0	0	1	8	5
1	2009-03-12 00:50:00	0	0	1	8	5
1	2009-03-12 00:51:00	0	0	1	8	5
1	2009-03-12 00:52:00	0	0	1	8	5
1	2009-03-12 00:53:00	0	0	1	8	5
1	2009-03-12 00:54:00	12	0	1	8	5
1	2009-03-12 00:55:00	0	0	1	8	5
1	2009-03-12 00:56:00	0	0	1	8	5
1	2009-03-12 00:57:00	0	0	1	8	5
1	2009-03-12 00:58:00	0	0	1	8	5
1	2009-03-12 00:59:00	0	0	1	8	5
1	2009-03-12 01:00:00	0	0	1	8	5
1	2009-03-12 01:01:00	0	1	1	8	5
1	2009-03-12 01:02:00	0	1	1	8	5
1	2009-03-12 01:03:00	0	1	1	8	5
1	2009-03-12 01:04:00	0	1	1	8	5
1	2009-03-12 01:05:00	0	1	1	8	5
1	2009-03-12 01:06:00	0	1	1	8	5
1	2009-03-12 01:07:00	0	1	1	8	5
1	2009-03-12 01:08:00	0	1	1	8	5
1	2009-03-12 01:09:00	0	1	1	8	5
1	2009-03-12 01:10:00	0	1	1	8	5
1	2009-03-12 01:11:00	0	1	1	8	5
1	2009-03-12 01:12:00	0	1	1	8	5
1	2009-03-12 01:13:00	160	1	1	8	5
1	2009-03-12 01:14:00	123	1	1	8	5
1	2009-03-12 01:15:00	0	1	1	8	5
1	2009-03-12 01:16:00	0	1	1	8	5
1	2009-03-12 01:17:00	0	1	1	8	5
1	2009-03-12 01:18:00	0	1	1	8	5
1	2009-03-12 01:19:00	25	1	1	8	5
1	2009-03-12 01:20:00	0	1	1	8	5
1	2009-03-12 01:21:00	0	1	1	8	5
1	2009-03-12 01:22:00	0	1	1	8	5
1	2009-03-12 01:23:00	0	1	1	8	5
1	2009-03-12 01:24:00	111	1	1	8	5
1	2009-03-12 01:25:00	123	1	1	8	5
1	2009-03-12 01:26:00	62	1	1	8	5
1	2009-03-12 01:27:00	12	1	1	8	5
1	2009-03-12 01:28:00	37	1	1	8	5
1	2009-03-12 01:29:00	37	1	1	8	5
1	2009-03-12 01:30:00	517	1	1	8	5
1	2009-03-12 01:31:00	913	1	1	8	5
1	2009-03-12 01:32:00	1154	1	1	8	5
1	2009-03-12 01:33:00	1154	1	1	8	5
1	2009-03-12 01:34:00	234	1	1	8	5
1	2009-03-12 01:35:00	25	1	1	8	5
1	2009-03-12 01:36:00	0	1	1	8	5
1	2009-03-12 01:37:00	0	1	1	8	5
1	2009-03-12 01:38:00	0	1	1	8	5
1	2009-03-12 01:39:00	0	1	1	8	5
1	2009-03-12 01:40:00	49	1	1	8	5
1	2009-03-12 01:41:00	234	1	1	8	5
1	2009-03-12 01:42:00	0	1	1	8	5
1	2009-03-12 01:43:00	537	1	1	8	5
1	2009-03-12 01:44:00	962	1	1	8	5
1	2009-03-12 01:45:00	497	1	1	8	5
1	2009-03-12 01:46:00	148	1	1	8	5
1	2009-03-12 01:47:00	98	1	1	8	5
1	2009-03-12 01:48:00	409	1	1	8	5
1	2009-03-12 01:49:00	25	1	1	8	5
1	2009-03-12 01:50:00	12	1	1	8	5
1	2009-03-12 01:51:00	0	1	1	8	5
1	2009-03-12 01:52:00	0	1	1	8	5
1	2009-03-12 01:53:00	0	1	1	8	5
1	2009-03-12 01:54:00	0	1	1	8	5
1	2009-03-12 01:55:00	0	1	1	8	5
1	2009-03-12 01:56:00	0	1	1	8	5
1	2009-03-12 01:57:00	0	1	1	8	5
1	2009-03-12 01:58:00	0	1	1	8	5
1	2009-03-12 01:59:00	0	1	1	8	5
1	2009-03-12 02:00:00	0	1	1	8	5
1	2009-03-12 02:01:00	0	2	1	8	5
1	2009-03-12 02:02:00	0	2	1	8	5
1	2009-03-12 02:03:00	0	2	1	8	5
1	2009-03-12 02:04:00	0	2	1	8	5
1	2009-03-12 02:05:00	0	2	1	8	5
1	2009-03-12 02:06:00	0	2	1	8	5
1	2009-03-12 02:07:00	0	2	1	8	5
1	2009-03-12 02:08:00	0	2	1	8	5
1	2009-03-12 02:09:00	12	2	1	8	5
1	2009-03-12 02:10:00	0	2	1	8	5
1	2009-03-12 02:11:00	0	2	1	8	5
1	2009-03-12 02:12:00	0	2	1	8	5
1	2009-03-12 02:13:00	0	2	1	8	5
1	2009-03-12 02:14:00	0	2	1	8	5
1	2009-03-12 02:15:00	0	2	1	8	5
1	2009-03-12 02:16:00	0	2	1	8	5
1	2009-03-12 02:17:00	0	2	1	8	5
1	2009-03-12 02:18:00	0	2	1	8	5
1	2009-03-12 02:19:00	0	2	1	8	5
1	2009-03-12 02:20:00	0	2	1	8	5
1	2009-03-12 02:21:00	0	2	1	8	5
1	2009-03-12 02:22:00	0	2	1	8	5
1	2009-03-12 02:23:00	0	2	1	8	5
1	2009-03-12 02:24:00	12	2	1	8	5
1	2009-03-12 02:25:00	278	2	1	8	5
1	2009-03-12 02:26:00	0	2	1	8	5
1	2009-03-12 02:27:00	25	2	1	8	5
1	2009-03-12 02:28:00	0	2	1	8	5
1	2009-03-12 02:29:00	0	2	1	8	5
1	2009-03-12 02:30:00	0	2	1	8	5
1	2009-03-12 02:31:00	0	2	1	8	5
1	2009-03-12 02:32:00	0	2	1	8	5
1	2009-03-12 02:33:00	0	2	1	8	5
1	2009-03-12 02:34:00	0	2	1	8	5
1	2009-03-12 02:35:00	0	2	1	8	5
1	2009-03-12 02:36:00	0	2	1	8	5
1	2009-03-12 02:37:00	0	2	1	8	5
1	2009-03-12 02:38:00	0	2	1	8	5
1	2009-03-12 02:39:00	0	2	1	8	5
1	2009-03-12 02:40:00	0	2	1	8	5
1	2009-03-12 02:41:00	0	2	1	8	5
1	2009-03-12 02:42:00	0	2	1	8	5
1	2009-03-12 02:43:00	12	2	1	8	5
1	2009-03-12 02:44:00	0	2	1	8	5
1	2009-03-12 02:45:00	0	2	1	8	5
1	2009-03-12 02:46:00	0	2	1	8	5
1	2009-03-12 02:47:00	0	2	1	8	5
1	2009-03-12 02:48:00	0	2	1	8	5
1	2009-03-12 02:49:00	0	2	1	8	5
1	2009-03-12 02:50:00	0	2	1	8	5
1	2009-03-12 02:51:00	0	2	1	8	5
1	2009-03-12 02:52:00	0	2	1	8	5
1	2009-03-12 02:53:00	0	2	1	8	5
1	2009-03-12 02:54:00	0	2	1	8	5
1	2009-03-12 02:55:00	0	2	1	8	5
1	2009-03-12 02:56:00	0	2	1	8	5
1	2009-03-12 02:57:00	0	2	1	8	5
1	2009-03-12 02:58:00	0	2	1	8	5
1	2009-03-12 02:59:00	0	2	1	8	5
1	2009-03-12 03:00:00	0	2	1	8	5
1	2009-03-12 03:01:00	0	3	1	8	5
1	2009-03-12 03:02:00	0	3	1	8	5
1	2009-03-12 03:03:00	0	3	1	8	5
1	2009-03-12 03:04:00	0	3	1	8	5
1	2009-03-12 03:05:00	0	3	1	8	5
1	2009-03-12 03:06:00	0	3	1	8	5
1	2009-03-12 03:07:00	0	3	1	8	5
1	2009-03-12 03:08:00	0	3	1	8	5
1	2009-03-12 03:09:00	0	3	1	8	5
1	2009-03-12 03:10:00	0	3	1	8	5
1	2009-03-12 03:11:00	62	3	1	8	5
1	2009-03-12 03:12:00	0	3	1	8	5
1	2009-03-12 03:13:00	0	3	1	8	5
1	2009-03-12 03:14:00	0	3	1	8	5
1	2009-03-12 03:15:00	0	3	1	8	5
1	2009-03-12 03:16:00	0	3	1	8	5
1	2009-03-12 03:17:00	0	3	1	8	5
1	2009-03-12 03:18:00	0	3	1	8	5
1	2009-03-12 03:19:00	0	3	1	8	5
1	2009-03-12 03:20:00	0	3	1	8	5
1	2009-03-12 03:21:00	0	3	1	8	5
1	2009-03-12 03:22:00	0	3	1	8	5
1	2009-03-12 03:23:00	0	3	1	8	5
1	2009-03-12 03:24:00	0	3	1	8	5
1	2009-03-12 03:25:00	0	3	1	8	5
1	2009-03-12 03:26:00	0	3	1	8	5
1	2009-03-12 03:27:00	0	3	1	8	5
1	2009-03-12 03:28:00	0	3	1	8	5
1	2009-03-12 03:29:00	37	3	1	8	5
1	2009-03-12 03:30:00	0	3	1	8	5
1	2009-03-12 03:31:00	0	3	1	8	5
1	2009-03-12 03:32:00	0	3	1	8	5
1	2009-03-12 03:33:00	0	3	1	8	5
1	2009-03-12 03:34:00	0	3	1	8	5
1	2009-03-12 03:35:00	0	3	1	8	5
1	2009-03-12 03:36:00	12	3	1	8	5
1	2009-03-12 03:37:00	0	3	1	8	5
1	2009-03-12 03:38:00	0	3	1	8	5
1	2009-03-12 03:39:00	0	3	1	8	5
1	2009-03-12 03:40:00	0	3	1	8	5
1	2009-03-12 03:41:00	0	3	1	8	5
1	2009-03-12 03:42:00	0	3	1	8	5
1	2009-03-12 03:43:00	0	3	1	8	5
1	2009-03-12 03:44:00	0	3	1	8	5
1	2009-03-12 03:45:00	0	3	1	8	5
1	2009-03-12 03:46:00	0	3	1	8	5
1	2009-03-12 03:47:00	0	3	1	8	5
1	2009-03-12 03:48:00	111	3	1	8	5
1	2009-03-12 03:49:00	0	3	1	8	5
1	2009-03-12 03:50:00	0	3	1	8	5
1	2009-03-12 03:51:00	0	3	1	8	5
1	2009-03-12 03:52:00	0	3	1	8	5
1	2009-03-12 03:53:00	0	3	1	8	5
1	2009-03-12 03:54:00	0	3	1	8	5
1	2009-03-12 03:55:00	0	3	1	8	5
1	2009-03-12 03:56:00	0	3	1	8	5
1	2009-03-12 03:57:00	0	3	1	8	5
1	2009-03-12 03:58:00	0	3	1	8	5
1	2009-03-12 03:59:00	0	3	1	8	5
1	2009-03-12 04:00:00	0	3	1	8	5
1	2009-03-12 04:01:00	0	4	1	8	5
1	2009-03-12 04:02:00	0	4	1	8	5
1	2009-03-12 04:03:00	0	4	1	8	5
1	2009-03-12 04:04:00	0	4	1	8	5
1	2009-03-12 04:05:00	0	4	1	8	5
1	2009-03-12 04:06:00	0	4	1	8	5
1	2009-03-12 04:07:00	0	4	1	8	5
1	2009-03-12 04:08:00	0	4	1	8	5
1	2009-03-12 04:09:00	0	4	1	8	5
1	2009-03-12 04:10:00	37	4	1	8	5
1	2009-03-12 04:11:00	0	4	1	8	5
1	2009-03-12 04:12:00	0	4	1	8	5
1	2009-03-12 04:13:00	0	4	1	8	5
1	2009-03-12 04:14:00	0	4	1	8	5
1	2009-03-12 04:15:00	0	4	1	8	5
1	2009-03-12 04:16:00	0	4	1	8	5
1	2009-03-12 04:17:00	0	4	1	8	5
1	2009-03-12 04:18:00	0	4	1	8	5
1	2009-03-12 04:19:00	0	4	1	8	5
1	2009-03-12 04:20:00	0	4	1	8	5
1	2009-03-12 04:21:00	0	4	1	8	5
1	2009-03-12 04:22:00	0	4	1	8	5
1	2009-03-12 04:23:00	0	4	1	8	5
1	2009-03-12 04:24:00	0	4	1	8	5
1	2009-03-12 04:25:00	0	4	1	8	5
1	2009-03-12 04:26:00	0	4	1	8	5
1	2009-03-12 04:27:00	0	4	1	8	5
1	2009-03-12 04:28:00	0	4	1	8	5
1	2009-03-12 04:29:00	0	4	1	8	5
1	2009-03-12 04:30:00	123	4	1	8	5
1	2009-03-12 04:31:00	175	4	1	8	5
1	2009-03-12 04:32:00	0	4	1	8	5
1	2009-03-12 04:33:00	0	4	1	8	5
1	2009-03-12 04:34:00	0	4	1	8	5
1	2009-03-12 04:35:00	0	4	1	8	5
1	2009-03-12 04:36:00	0	4	1	8	5
1	2009-03-12 04:37:00	0	4	1	8	5
1	2009-03-12 04:38:00	0	4	1	8	5
1	2009-03-12 04:39:00	25	4	1	8	5
1	2009-03-12 04:40:00	0	4	1	8	5
1	2009-03-12 04:41:00	0	4	1	8	5
1	2009-03-12 04:42:00	0	4	1	8	5
1	2009-03-12 04:43:00	0	4	1	8	5
1	2009-03-12 04:44:00	0	4	1	8	5
1	2009-03-12 04:45:00	0	4	1	8	5
1	2009-03-12 04:46:00	0	4	1	8	5
1	2009-03-12 04:47:00	0	4	1	8	5
1	2009-03-12 04:48:00	0	4	1	8	5
1	2009-03-12 04:49:00	0	4	1	8	5
1	2009-03-12 04:50:00	0	4	1	8	5
1	2009-03-12 04:51:00	0	4	1	8	5
1	2009-03-12 04:52:00	204	4	1	8	5
1	2009-03-12 04:53:00	175	4	1	8	5
1	2009-03-12 04:54:00	0	4	1	8	5
1	2009-03-12 04:55:00	37	4	1	8	5
1	2009-03-12 04:56:00	12	4	1	8	5
1	2009-03-12 04:57:00	12	4	1	8	5
1	2009-03-12 04:58:00	37	4	1	8	5
1	2009-03-12 04:59:00	0	4	1	8	5
1	2009-03-12 05:00:00	0	4	1	8	5
1	2009-03-12 05:01:00	0	5	1	8	5
1	2009-03-12 05:02:00	0	5	1	8	5
1	2009-03-12 05:03:00	0	5	1	8	5
1	2009-03-12 05:04:00	0	5	1	8	5
1	2009-03-12 05:05:00	0	5	1	8	5
1	2009-03-12 05:06:00	0	5	1	8	5
1	2009-03-12 05:07:00	0	5	1	8	5
1	2009-03-12 05:08:00	0	5	1	8	5
1	2009-03-12 05:09:00	0	5	1	8	5
1	2009-03-12 05:10:00	0	5	1	8	5
1	2009-03-12 05:11:00	0	5	1	8	5
1	2009-03-12 05:12:00	0	5	1	8	5
1	2009-03-12 05:13:00	0	5	1	8	5
1	2009-03-12 05:14:00	0	5	1	8	5
1	2009-03-12 05:15:00	0	5	1	8	5
1	2009-03-12 05:16:00	0	5	1	8	5
1	2009-03-12 05:17:00	0	5	1	8	5
1	2009-03-12 05:18:00	0	5	1	8	5
1	2009-03-12 05:19:00	0	5	1	8	5
1	2009-03-12 05:20:00	0	5	1	8	5
1	2009-03-12 05:21:00	0	5	1	8	5
1	2009-03-12 05:22:00	0	5	1	8	5
1	2009-03-12 05:23:00	517	5	1	8	5
1	2009-03-12 05:24:00	1071	5	1	8	5
1	2009-03-12 05:25:00	1605	5	1	8	5
1	2009-03-12 05:26:00	889	5	1	8	5
1	2009-03-12 05:27:00	1071	5	1	8	5
1	2009-03-12 05:28:00	340	5	1	8	5
1	2009-03-12 05:29:00	25	5	1	8	5
1	2009-03-12 05:30:00	37	5	1	8	5
1	2009-03-12 05:31:00	37	5	1	8	5
1	2009-03-12 05:32:00	49	5	1	8	5
1	2009-03-12 05:33:00	0	5	1	8	5
1	2009-03-12 05:34:00	0	5	1	8	5
1	2009-03-12 05:35:00	0	5	1	8	5
1	2009-03-12 05:36:00	0	5	1	8	5
1	2009-03-12 05:37:00	0	5	1	8	5
1	2009-03-12 05:38:00	0	5	1	8	5
1	2009-03-12 05:39:00	0	5	1	8	5
1	2009-03-12 05:40:00	0	5	1	8	5
1	2009-03-12 05:41:00	0	5	1	8	5
1	2009-03-12 05:42:00	0	5	1	8	5
1	2009-03-12 05:43:00	190	5	1	8	5
1	2009-03-12 05:44:00	0	5	1	8	5
1	2009-03-12 05:45:00	0	5	1	8	5
1	2009-03-12 05:46:00	0	5	1	8	5
1	2009-03-12 05:47:00	0	5	1	8	5
1	2009-03-12 05:48:00	0	5	1	8	5
1	2009-03-12 05:49:00	0	5	1	8	5
1	2009-03-12 05:50:00	0	5	1	8	5
1	2009-03-12 05:51:00	0	5	1	8	5
1	2009-03-12 05:52:00	0	5	1	8	5
1	2009-03-12 05:53:00	0	5	1	8	5
1	2009-03-12 05:54:00	0	5	1	8	5
1	2009-03-12 05:55:00	0	5	1	8	5
1	2009-03-12 05:56:00	0	5	1	8	5
1	2009-03-12 05:57:00	0	5	1	8	5
1	2009-03-12 05:58:00	0	5	1	8	5
1	2009-03-12 05:59:00	0	5	1	8	5
1	2009-03-12 06:00:00	0	5	1	8	5
1	2009-03-12 06:01:00	0	6	2	8	5
1	2009-03-12 06:02:00	25	6	2	8	5
1	2009-03-12 06:03:00	0	6	2	8	5
1	2009-03-12 06:04:00	0	6	2	8	5
1	2009-03-12 06:05:00	0	6	2	8	5
1	2009-03-12 06:06:00	0	6	2	8	5
1	2009-03-12 06:07:00	0	6	2	8	5
1	2009-03-12 06:08:00	0	6	2	8	5
1	2009-03-12 06:09:00	0	6	2	8	5
1	2009-03-12 06:10:00	0	6	2	8	5
1	2009-03-12 06:11:00	0	6	2	8	5
1	2009-03-12 06:12:00	0	6	2	8	5
1	2009-03-12 06:13:00	0	6	2	8	5
1	2009-03-12 06:14:00	0	6	2	8	5
1	2009-03-12 06:15:00	0	6	2	8	5
1	2009-03-12 06:16:00	0	6	2	8	5
1	2009-03-12 06:17:00	0	6	2	8	5
1	2009-03-12 06:18:00	0	6	2	8	5
1	2009-03-12 06:19:00	0	6	2	8	5
1	2009-03-12 06:20:00	0	6	2	8	5
1	2009-03-12 06:21:00	0	6	2	8	5
1	2009-03-12 06:22:00	0	6	2	8	5
1	2009-03-12 06:23:00	12	6	2	8	5
1	2009-03-12 06:24:00	135	6	2	8	5
1	2009-03-12 06:25:00	0	6	2	8	5
1	2009-03-12 06:26:00	0	6	2	8	5
1	2009-03-12 06:27:00	0	6	2	8	5
1	2009-03-12 06:28:00	190	6	2	8	5
1	2009-03-12 06:29:00	374	6	2	8	5
1	2009-03-12 06:30:00	190	6	2	8	5
1	2009-03-12 06:31:00	0	6	2	8	5
1	2009-03-12 06:32:00	0	6	2	8	5
1	2009-03-12 06:33:00	0	6	2	8	5
1	2009-03-12 06:34:00	0	6	2	8	5
1	2009-03-12 06:35:00	0	6	2	8	5
1	2009-03-12 06:36:00	0	6	2	8	5
1	2009-03-12 06:37:00	0	6	2	8	5
1	2009-03-12 06:38:00	0	6	2	8	5
1	2009-03-12 06:39:00	0	6	2	8	5
1	2009-03-12 06:40:00	0	6	2	8	5
1	2009-03-12 06:41:00	0	6	2	8	5
1	2009-03-12 06:42:00	0	6	2	8	5
1	2009-03-12 06:43:00	374	6	2	8	5
1	2009-03-12 06:44:00	219	6	2	8	5
1	2009-03-12 06:45:00	374	6	2	8	5
1	2009-03-12 06:46:00	25	6	2	8	5
1	2009-03-12 06:47:00	12	6	2	8	5
1	2009-03-12 06:48:00	12	6	2	8	5
1	2009-03-12 06:49:00	0	6	2	8	5
1	2009-03-12 06:50:00	0	6	2	8	5
1	2009-03-12 06:51:00	0	6	2	8	5
1	2009-03-12 06:52:00	0	6	2	8	5
1	2009-03-12 06:53:00	0	6	2	8	5
1	2009-03-12 06:54:00	25	6	2	8	5
1	2009-03-12 06:55:00	12	6	2	8	5
1	2009-03-12 06:56:00	49	6	2	8	5
1	2009-03-12 06:57:00	12	6	2	8	5
1	2009-03-12 06:58:00	0	6	2	8	5
1	2009-03-12 06:59:00	204	6	2	8	5
1	2009-03-12 07:00:00	135	6	2	8	5
1	2009-03-12 07:01:00	0	7	2	8	5
1	2009-03-12 07:02:00	219	7	2	8	5
1	2009-03-12 07:03:00	148	7	2	8	5
1	2009-03-12 07:04:00	37	7	2	8	5
1	2009-03-12 07:05:00	0	7	2	8	5
1	2009-03-12 07:06:00	0	7	2	8	5
1	2009-03-12 07:07:00	0	7	2	8	5
1	2009-03-12 07:08:00	0	7	2	8	5
1	2009-03-12 07:09:00	0	7	2	8	5
1	2009-03-12 07:10:00	0	7	2	8	5
1	2009-03-12 07:11:00	0	7	2	8	5
1	2009-03-12 07:12:00	0	7	2	8	5
1	2009-03-12 07:13:00	0	7	2	8	5
1	2009-03-12 07:14:00	0	7	2	8	5
1	2009-03-12 07:15:00	0	7	2	8	5
1	2009-03-12 07:16:00	0	7	2	8	5
1	2009-03-12 07:17:00	0	7	2	8	5
1	2009-03-12 07:18:00	0	7	2	8	5
1	2009-03-12 07:19:00	0	7	2	8	5
1	2009-03-12 07:20:00	0	7	2	8	5
1	2009-03-12 07:21:00	0	7	2	8	5
1	2009-03-12 07:22:00	0	7	2	8	5
1	2009-03-12 07:23:00	0	7	2	8	5
1	2009-03-12 07:24:00	839	7	2	8	5
1	2009-03-12 07:25:00	1305	7	2	8	5
1	2009-03-12 07:26:00	1305	7	2	8	5
1	2009-03-12 07:27:00	1502	7	2	8	5
1	2009-03-12 07:28:00	1753	7	2	8	5
1	2009-03-12 07:29:00	913	7	2	8	5
1	2009-03-12 07:30:00	1337	7	2	8	5
1	2009-03-12 07:31:00	2257	7	2	8	5
1	2009-03-12 07:32:00	1753	7	2	8	5
1	2009-03-12 07:33:00	1401	7	2	8	5
1	2009-03-12 07:34:00	1716	7	2	8	5
1	2009-03-12 07:35:00	1792	7	2	8	5
1	2009-03-12 07:36:00	2700	7	2	8	5
1	2009-03-12 07:37:00	1433	7	2	8	5
1	2009-03-12 07:38:00	517	7	2	8	5
1	2009-03-12 07:39:00	190	7	2	8	5
1	2009-03-12 07:40:00	340	7	2	8	5
1	2009-03-12 07:41:00	460	7	2	8	5
1	2009-03-12 07:42:00	657	7	2	8	5
1	2009-03-12 07:43:00	635	7	2	8	5
1	2009-03-12 07:44:00	111	7	2	8	5
1	2009-03-12 07:45:00	0	7	2	8	5
1	2009-03-12 07:46:00	0	7	2	8	5
1	2009-03-12 07:47:00	0	7	2	8	5
1	2009-03-12 07:48:00	0	7	2	8	5
1	2009-03-12 07:49:00	0	7	2	8	5
1	2009-03-12 07:50:00	12	7	2	8	5
1	2009-03-12 07:51:00	12	7	2	8	5
1	2009-03-12 07:52:00	0	7	2	8	5
1	2009-03-12 07:53:00	322	7	2	8	5
1	2009-03-12 07:54:00	497	7	2	8	5
1	2009-03-12 07:55:00	443	7	2	8	5
1	2009-03-12 07:56:00	25	7	2	8	5
1	2009-03-12 07:57:00	0	7	2	8	5
1	2009-03-12 07:58:00	0	7	2	8	5
1	2009-03-12 07:59:00	12	7	2	8	5
1	2009-03-12 08:00:00	25	7	2	8	5
1	2009-03-12 08:01:00	0	8	2	8	5
1	2009-03-12 08:02:00	0	8	2	8	5
1	2009-03-12 08:03:00	0	8	2	8	5
1	2009-03-12 08:04:00	0	8	2	8	5
1	2009-03-12 08:05:00	0	8	2	8	5
1	2009-03-12 08:06:00	135	8	2	8	5
1	2009-03-12 08:07:00	0	8	2	8	5
1	2009-03-12 08:08:00	12	8	2	8	5
1	2009-03-12 08:09:00	0	8	2	8	5
1	2009-03-12 08:10:00	37	8	2	8	5
1	2009-03-12 08:11:00	0	8	2	8	5
1	2009-03-12 08:12:00	0	8	2	8	5
1	2009-03-12 08:13:00	86	8	2	8	5
1	2009-03-12 08:14:00	0	8	2	8	5
1	2009-03-12 08:15:00	0	8	2	8	5
1	2009-03-12 08:16:00	0	8	2	8	5
1	2009-03-12 08:17:00	0	8	2	8	5
1	2009-03-12 08:18:00	0	8	2	8	5
1	2009-03-12 08:19:00	0	8	2	8	5
1	2009-03-12 08:20:00	0	8	2	8	5
1	2009-03-12 08:21:00	0	8	2	8	5
1	2009-03-12 08:22:00	635	8	2	8	5
1	2009-03-12 08:23:00	0	8	2	8	5
1	2009-03-12 08:24:00	0	8	2	8	5
1	2009-03-12 08:25:00	0	8	2	8	5
1	2009-03-12 08:26:00	204	8	2	8	5
1	2009-03-12 08:27:00	0	8	2	8	5
1	2009-03-12 08:28:00	12	8	2	8	5
1	2009-03-12 08:29:00	12	8	2	8	5
1	2009-03-12 08:30:00	25	8	2	8	5
1	2009-03-12 08:31:00	190	8	2	8	5
1	2009-03-12 08:32:00	135	8	2	8	5
1	2009-03-12 08:33:00	0	8	2	8	5
1	2009-03-12 08:34:00	0	8	2	8	5
1	2009-03-12 08:35:00	0	8	2	8	5
1	2009-03-12 08:36:00	0	8	2	8	5
1	2009-03-12 08:37:00	0	8	2	8	5
1	2009-03-12 08:38:00	0	8	2	8	5
1	2009-03-12 08:39:00	0	8	2	8	5
1	2009-03-12 08:40:00	0	8	2	8	5
1	2009-03-12 08:41:00	0	8	2	8	5
1	2009-03-12 08:42:00	12	8	2	8	5
1	2009-03-12 08:43:00	0	8	2	8	5
1	2009-03-12 08:44:00	0	8	2	8	5
1	2009-03-12 08:45:00	0	8	2	8	5
1	2009-03-12 08:46:00	12	8	2	8	5
1	2009-03-12 08:47:00	49	8	2	8	5
1	2009-03-12 08:48:00	37	8	2	8	5
1	2009-03-12 08:49:00	12	8	2	8	5
1	2009-03-12 08:50:00	12	8	2	8	5
1	2009-03-12 08:51:00	0	8	2	8	5
1	2009-03-12 08:52:00	12	8	2	8	5
1	2009-03-12 08:53:00	0	8	2	8	5
1	2009-03-12 08:54:00	0	8	2	8	5
1	2009-03-12 08:55:00	0	8	2	8	5
1	2009-03-12 08:56:00	0	8	2	8	5
1	2009-03-12 08:57:00	0	8	2	8	5
1	2009-03-12 08:58:00	0	8	2	8	5
1	2009-03-12 08:59:00	62	8	2	8	5
1	2009-03-12 09:00:00	556	8	2	8	5
1	2009-03-12 09:01:00	0	9	2	8	5
1	2009-03-12 09:02:00	0	9	2	8	5
1	2009-03-12 09:03:00	0	9	2	8	5
1	2009-03-12 09:04:00	0	9	2	8	5
1	2009-03-12 09:05:00	12	9	2	8	5
1	2009-03-12 09:06:00	0	9	2	8	5
1	2009-03-12 09:07:00	0	9	2	8	5
1	2009-03-12 09:08:00	0	9	2	8	5
1	2009-03-12 09:09:00	0	9	2	8	5
1	2009-03-12 09:10:00	0	9	2	8	5
1	2009-03-12 09:11:00	0	9	2	8	5
1	2009-03-12 09:12:00	0	9	2	8	5
1	2009-03-12 09:13:00	0	9	2	8	5
1	2009-03-12 09:14:00	12	9	2	8	5
1	2009-03-12 09:15:00	12	9	2	8	5
1	2009-03-12 09:16:00	0	9	2	8	5
1	2009-03-12 09:17:00	0	9	2	8	5
1	2009-03-12 09:18:00	0	9	2	8	5
1	2009-03-12 09:19:00	12	9	2	8	5
1	2009-03-12 09:20:00	0	9	2	8	5
1	2009-03-12 09:21:00	0	9	2	8	5
1	2009-03-12 09:22:00	0	9	2	8	5
1	2009-03-12 09:23:00	460	9	2	8	5
1	2009-03-12 09:24:00	0	9	2	8	5
1	2009-03-12 09:25:00	25	9	2	8	5
1	2009-03-12 09:26:00	0	9	2	8	5
1	2009-03-12 09:27:00	25	9	2	8	5
1	2009-03-12 09:28:00	25	9	2	8	5
1	2009-03-12 09:29:00	0	9	2	8	5
1	2009-03-12 09:30:00	25	9	2	8	5
1	2009-03-12 09:31:00	0	9	2	8	5
1	2009-03-12 09:32:00	0	9	2	8	5
1	2009-03-12 09:33:00	0	9	2	8	5
1	2009-03-12 09:34:00	0	9	2	8	5
1	2009-03-12 09:35:00	12	9	2	8	5
1	2009-03-12 09:36:00	25	9	2	8	5
1	2009-03-12 09:37:00	12	9	2	8	5
1	2009-03-12 09:38:00	111	9	2	8	5
1	2009-03-12 09:39:00	12	9	2	8	5
1	2009-03-12 09:40:00	0	9	2	8	5
1	2009-03-12 09:41:00	0	9	2	8	5
1	2009-03-12 09:42:00	12	9	2	8	5
1	2009-03-12 09:43:00	0	9	2	8	5
1	2009-03-12 09:44:00	25	9	2	8	5
1	2009-03-12 09:45:00	0	9	2	8	5
1	2009-03-12 09:46:00	0	9	2	8	5
1	2009-03-12 09:47:00	0	9	2	8	5
1	2009-03-12 09:48:00	12	9	2	8	5
1	2009-03-12 09:49:00	0	9	2	8	5
1	2009-03-12 09:50:00	0	9	2	8	5
1	2009-03-12 09:51:00	0	9	2	8	5
1	2009-03-12 09:52:00	0	9	2	8	5
1	2009-03-12 09:53:00	0	9	2	8	5
1	2009-03-12 09:54:00	0	9	2	8	5
1	2009-03-12 09:55:00	537	9	2	8	5
1	2009-03-12 09:56:00	49	9	2	8	5
1	2009-03-12 09:57:00	0	9	2	8	5
1	2009-03-12 09:58:00	0	9	2	8	5
1	2009-03-12 09:59:00	0	9	2	8	5
1	2009-03-12 10:00:00	111	9	2	8	5
1	2009-03-12 10:01:00	86	10	2	8	5
1	2009-03-12 10:02:00	0	10	2	8	5
1	2009-03-12 10:03:00	0	10	2	8	5
1	2009-03-12 10:04:00	0	10	2	8	5
1	2009-03-12 10:05:00	0	10	2	8	5
1	2009-03-12 10:06:00	0	10	2	8	5
1	2009-03-12 10:07:00	25	10	2	8	5
1	2009-03-12 10:08:00	49	10	2	8	5
1	2009-03-12 10:09:00	12	10	2	8	5
1	2009-03-12 10:10:00	0	10	2	8	5
1	2009-03-12 10:11:00	12	10	2	8	5
1	2009-03-12 10:12:00	0	10	2	8	5
1	2009-03-12 10:13:00	0	10	2	8	5
1	2009-03-12 10:14:00	37	10	2	8	5
1	2009-03-12 10:15:00	340	10	2	8	5
1	2009-03-12 10:16:00	12	10	2	8	5
1	2009-03-12 10:17:00	12	10	2	8	5
1	2009-03-12 10:18:00	0	10	2	8	5
1	2009-03-12 10:19:00	160	10	2	8	5
1	2009-03-12 10:20:00	1154	10	2	8	5
1	2009-03-12 10:21:00	1305	10	2	8	5
1	2009-03-12 10:22:00	1753	10	2	8	5
1	2009-03-12 10:23:00	374	10	2	8	5
1	2009-03-12 10:24:00	123	10	2	8	5
1	2009-03-12 10:25:00	497	10	2	8	5
1	2009-03-12 10:26:00	175	10	2	8	5
1	2009-03-12 10:27:00	790	10	2	8	5
1	2009-03-12 10:28:00	175	10	2	8	5
1	2009-03-12 10:29:00	219	10	2	8	5
1	2009-03-12 10:30:00	148	10	2	8	5
1	2009-03-12 10:31:00	123	10	2	8	5
1	2009-03-12 10:32:00	0	10	2	8	5
1	2009-03-12 10:33:00	12	10	2	8	5
1	2009-03-12 10:34:00	0	10	2	8	5
1	2009-03-12 10:35:00	37	10	2	8	5
1	2009-03-12 10:36:00	37	10	2	8	5
1	2009-03-12 10:37:00	25	10	2	8	5
1	2009-03-12 10:38:00	0	10	2	8	5
1	2009-03-12 10:39:00	0	10	2	8	5
1	2009-03-12 10:40:00	0	10	2	8	5
1	2009-03-12 10:41:00	0	10	2	8	5
1	2009-03-12 10:42:00	49	10	2	8	5
1	2009-03-12 10:43:00	49	10	2	8	5
1	2009-03-12 10:44:00	62	10	2	8	5
1	2009-03-12 10:45:00	0	10	2	8	5
1	2009-03-12 10:46:00	12	10	2	8	5
1	2009-03-12 10:47:00	12	10	2	8	5
1	2009-03-12 10:48:00	0	10	2	8	5
1	2009-03-12 10:49:00	0	10	2	8	5
1	2009-03-12 10:50:00	0	10	2	8	5
1	2009-03-12 10:51:00	0	10	2	8	5
1	2009-03-12 10:52:00	12	10	2	8	5
1	2009-03-12 10:53:00	0	10	2	8	5
1	2009-03-12 10:54:00	0	10	2	8	5
1	2009-03-12 10:55:00	679	10	2	8	5
1	2009-03-12 10:56:00	374	10	2	8	5
1	2009-03-12 10:57:00	0	10	2	8	5
1	2009-03-12 10:58:00	0	10	2	8	5
1	2009-03-12 10:59:00	0	10	2	8	5
1	2009-03-12 11:00:00	0	10	2	8	5
1	2009-03-12 11:01:00	0	11	2	8	5
1	2009-03-12 11:02:00	0	11	2	8	5
1	2009-03-12 11:03:00	460	11	2	8	5
1	2009-03-12 11:04:00	537	11	2	8	5
1	2009-03-12 11:05:00	249	11	2	8	5
1	2009-03-12 11:06:00	25	11	2	8	5
1	2009-03-12 11:07:00	25	11	2	8	5
1	2009-03-12 11:08:00	12	11	2	8	5
1	2009-03-12 11:09:00	86	11	2	8	5
1	2009-03-12 11:10:00	0	11	2	8	5
1	2009-03-12 11:11:00	123	11	2	8	5
1	2009-03-12 11:12:00	25	11	2	8	5
1	2009-03-12 11:13:00	12	11	2	8	5
1	2009-03-12 11:14:00	0	11	2	8	5
1	2009-03-12 11:15:00	0	11	2	8	5
1	2009-03-12 11:16:00	0	11	2	8	5
1	2009-03-12 11:17:00	0	11	2	8	5
1	2009-03-12 11:18:00	0	11	2	8	5
1	2009-03-12 11:19:00	0	11	2	8	5
1	2009-03-12 11:20:00	0	11	2	8	5
1	2009-03-12 11:21:00	0	11	2	8	5
1	2009-03-12 11:22:00	0	11	2	8	5
1	2009-03-12 11:23:00	0	11	2	8	5
1	2009-03-12 11:24:00	0	11	2	8	5
1	2009-03-12 11:25:00	0	11	2	8	5
1	2009-03-12 11:26:00	0	11	2	8	5
1	2009-03-12 11:27:00	0	11	2	8	5
1	2009-03-12 11:28:00	0	11	2	8	5
1	2009-03-12 11:29:00	25	11	2	8	5
1	2009-03-12 11:30:00	74	11	2	8	5
1	2009-03-12 11:31:00	0	11	2	8	5
1	2009-03-12 11:32:00	0	11	2	8	5
1	2009-03-12 11:33:00	0	11	2	8	5
1	2009-03-12 11:34:00	0	11	2	8	5
1	2009-03-12 11:35:00	1098	11	2	8	5
1	2009-03-12 11:36:00	1369	11	2	8	5
1	2009-03-12 11:37:00	204	11	2	8	5
1	2009-03-12 11:38:00	12	11	2	8	5
1	2009-03-12 11:39:00	25	11	2	8	5
1	2009-03-12 11:40:00	190	11	2	8	5
1	2009-03-12 11:41:00	0	11	2	8	5
1	2009-03-12 11:42:00	0	11	2	8	5
1	2009-03-12 11:43:00	0	11	2	8	5
1	2009-03-12 11:44:00	0	11	2	8	5
1	2009-03-12 11:45:00	0	11	2	8	5
1	2009-03-12 11:46:00	0	11	2	8	5
1	2009-03-12 11:47:00	0	11	2	8	5
1	2009-03-12 11:48:00	49	11	2	8	5
1	2009-03-12 11:49:00	340	11	2	8	5
1	2009-03-12 11:50:00	160	11	2	8	5
1	2009-03-12 11:51:00	0	11	2	8	5
1	2009-03-12 11:52:00	0	11	2	8	5
1	2009-03-12 11:53:00	0	11	2	8	5
1	2009-03-12 11:54:00	0	11	2	8	5
1	2009-03-12 11:55:00	0	11	2	8	5
1	2009-03-12 11:56:00	111	11	2	8	5
1	2009-03-12 11:57:00	293	11	2	8	5
1	2009-03-12 11:58:00	12	11	2	8	5
1	2009-03-12 11:59:00	0	11	2	8	5
1	2009-03-12 12:00:00	12	11	2	8	5
1	2009-03-12 12:01:00	12	12	3	8	5
1	2009-03-12 12:02:00	0	12	3	8	5
1	2009-03-12 12:03:00	0	12	3	8	5
1	2009-03-12 12:04:00	0	12	3	8	5
1	2009-03-12 12:05:00	49	12	3	8	5
1	2009-03-12 12:06:00	25	12	3	8	5
1	2009-03-12 12:07:00	0	12	3	8	5
1	2009-03-12 12:08:00	25	12	3	8	5
1	2009-03-12 12:09:00	0	12	3	8	5
1	2009-03-12 12:10:00	12	12	3	8	5
1	2009-03-12 12:11:00	0	12	3	8	5
1	2009-03-12 12:12:00	0	12	3	8	5
1	2009-03-12 12:13:00	0	12	3	8	5
1	2009-03-12 12:14:00	357	12	3	8	5
1	2009-03-12 12:15:00	62	12	3	8	5
1	2009-03-12 12:16:00	0	12	3	8	5
1	2009-03-12 12:17:00	135	12	3	8	5
1	2009-03-12 12:18:00	1337	12	3	8	5
1	2009-03-12 12:19:00	0	12	3	8	5
1	2009-03-12 12:20:00	37	12	3	8	5
1	2009-03-12 12:21:00	0	12	3	8	5
1	2009-03-12 12:22:00	0	12	3	8	5
1	2009-03-12 12:23:00	576	12	3	8	5
1	2009-03-12 12:24:00	25	12	3	8	5
1	2009-03-12 12:25:00	0	12	3	8	5
1	2009-03-12 12:26:00	0	12	3	8	5
1	2009-03-12 12:27:00	74	12	3	8	5
1	2009-03-12 12:28:00	12	12	3	8	5
1	2009-03-12 12:29:00	25	12	3	8	5
1	2009-03-12 12:30:00	0	12	3	8	5
1	2009-03-12 12:31:00	37	12	3	8	5
1	2009-03-12 12:32:00	0	12	3	8	5
1	2009-03-12 12:33:00	0	12	3	8	5
1	2009-03-12 12:34:00	0	12	3	8	5
1	2009-03-12 12:35:00	123	12	3	8	5
1	2009-03-12 12:36:00	293	12	3	8	5
1	2009-03-12 12:37:00	175	12	3	8	5
1	2009-03-12 12:38:00	148	12	3	8	5
1	2009-03-12 12:39:00	12	12	3	8	5
1	2009-03-12 12:40:00	12	12	3	8	5
1	2009-03-12 12:41:00	0	12	3	8	5
1	2009-03-12 12:42:00	0	12	3	8	5
1	2009-03-12 12:43:00	0	12	3	8	5
1	2009-03-12 12:44:00	12	12	3	8	5
1	2009-03-12 12:45:00	0	12	3	8	5
1	2009-03-12 12:46:00	0	12	3	8	5
1	2009-03-12 12:47:00	0	12	3	8	5
1	2009-03-12 12:48:00	0	12	3	8	5
1	2009-03-12 12:49:00	0	12	3	8	5
1	2009-03-12 12:50:00	0	12	3	8	5
1	2009-03-12 12:51:00	37	12	3	8	5
1	2009-03-12 12:52:00	0	12	3	8	5
1	2009-03-12 12:53:00	0	12	3	8	5
1	2009-03-12 12:54:00	0	12	3	8	5
1	2009-03-12 12:55:00	322	12	3	8	5
1	2009-03-12 12:56:00	0	12	3	8	5
1	2009-03-12 12:57:00	12	12	3	8	5
1	2009-03-12 12:58:00	25	12	3	8	5
1	2009-03-12 12:59:00	0	12	3	8	5
1	2009-03-12 13:00:00	0	12	3	8	5
1	2009-03-12 13:01:00	0	13	3	8	5
1	2009-03-12 13:02:00	0	13	3	8	5
1	2009-03-12 13:03:00	0	13	3	8	5
1	2009-03-12 13:04:00	0	13	3	8	5
1	2009-03-12 13:05:00	12	13	3	8	5
1	2009-03-12 13:06:00	0	13	3	8	5
1	2009-03-12 13:07:00	86	13	3	8	5
1	2009-03-12 13:08:00	0	13	3	8	5
1	2009-03-12 13:09:00	0	13	3	8	5
1	2009-03-12 13:10:00	0	13	3	8	5
1	2009-03-12 13:11:00	0	13	3	8	5
1	2009-03-12 13:12:00	0	13	3	8	5
1	2009-03-12 13:13:00	219	13	3	8	5
1	2009-03-12 13:14:00	12	13	3	8	5
1	2009-03-12 13:15:00	0	13	3	8	5
1	2009-03-12 13:16:00	37	13	3	8	5
1	2009-03-12 13:17:00	443	13	3	8	5
1	2009-03-12 13:18:00	1071	13	3	8	5
1	2009-03-12 13:19:00	1910	13	3	8	5
1	2009-03-12 13:20:00	1154	13	3	8	5
1	2009-03-12 13:21:00	1467	13	3	8	5
1	2009-03-12 13:22:00	135	13	3	8	5
1	2009-03-12 13:23:00	0	13	3	8	5
1	2009-03-12 13:24:00	0	13	3	8	5
1	2009-03-12 13:25:00	0	13	3	8	5
1	2009-03-12 13:26:00	74	13	3	8	5
1	2009-03-12 13:27:00	0	13	3	8	5
1	2009-03-12 13:28:00	0	13	3	8	5
1	2009-03-12 13:29:00	357	13	3	8	5
1	2009-03-12 13:30:00	790	13	3	8	5
1	2009-03-12 13:31:00	0	13	3	8	5
1	2009-03-12 13:32:00	0	13	3	8	5
1	2009-03-12 13:33:00	0	13	3	8	5
1	2009-03-12 13:34:00	0	13	3	8	5
1	2009-03-12 13:35:00	0	13	3	8	5
1	2009-03-12 13:36:00	460	13	3	8	5
1	2009-03-12 13:37:00	49	13	3	8	5
1	2009-03-12 13:38:00	0	13	3	8	5
1	2009-03-12 13:39:00	49	13	3	8	5
1	2009-03-12 13:40:00	263	13	3	8	5
1	2009-03-12 13:41:00	0	13	3	8	5
1	2009-03-12 13:42:00	160	13	3	8	5
1	2009-03-12 13:43:00	497	13	3	8	5
1	2009-03-12 13:44:00	962	13	3	8	5
1	2009-03-12 13:45:00	746	13	3	8	5
1	2009-03-12 13:46:00	263	13	3	8	5
1	2009-03-12 13:47:00	0	13	3	8	5
1	2009-03-12 13:48:00	12	13	3	8	5
1	2009-03-12 13:49:00	0	13	3	8	5
1	2009-03-12 13:50:00	0	13	3	8	5
1	2009-03-12 13:51:00	12	13	3	8	5
1	2009-03-12 13:52:00	0	13	3	8	5
1	2009-03-12 13:53:00	0	13	3	8	5
1	2009-03-12 13:54:00	0	13	3	8	5
1	2009-03-12 13:55:00	0	13	3	8	5
1	2009-03-12 13:56:00	0	13	3	8	5
1	2009-03-12 13:57:00	0	13	3	8	5
1	2009-03-12 13:58:00	37	13	3	8	5
1	2009-03-12 13:59:00	0	13	3	8	5
1	2009-03-12 14:00:00	0	13	3	8	5
1	2009-03-12 14:01:00	0	14	3	8	5
1	2009-03-12 14:02:00	0	14	3	8	5
1	2009-03-12 14:03:00	0	14	3	8	5
1	2009-03-12 14:04:00	0	14	3	8	5
1	2009-03-12 14:05:00	0	14	3	8	5
1	2009-03-12 14:06:00	0	14	3	8	5
1	2009-03-12 14:07:00	0	14	3	8	5
1	2009-03-12 14:08:00	0	14	3	8	5
1	2009-03-12 14:09:00	0	14	3	8	5
1	2009-03-12 14:10:00	0	14	3	8	5
1	2009-03-12 14:11:00	0	14	3	8	5
1	2009-03-12 14:12:00	0	14	3	8	5
1	2009-03-12 14:13:00	0	14	3	8	5
1	2009-03-12 14:14:00	25	14	3	8	5
1	2009-03-12 14:15:00	0	14	3	8	5
1	2009-03-12 14:16:00	0	14	3	8	5
1	2009-03-12 14:17:00	0	14	3	8	5
1	2009-03-12 14:18:00	0	14	3	8	5
1	2009-03-12 14:19:00	0	14	3	8	5
1	2009-03-12 14:20:00	0	14	3	8	5
1	2009-03-12 14:21:00	0	14	3	8	5
1	2009-03-12 14:22:00	12	14	3	8	5
1	2009-03-12 14:23:00	0	14	3	8	5
1	2009-03-12 14:24:00	0	14	3	8	5
1	2009-03-12 14:25:00	0	14	3	8	5
1	2009-03-12 14:26:00	0	14	3	8	5
1	2009-03-12 14:27:00	0	14	3	8	5
1	2009-03-12 14:28:00	0	14	3	8	5
1	2009-03-12 14:29:00	0	14	3	8	5
1	2009-03-12 14:30:00	0	14	3	8	5
1	2009-03-12 14:31:00	0	14	3	8	5
1	2009-03-12 14:32:00	37	14	3	8	5
1	2009-03-12 14:33:00	123	14	3	8	5
1	2009-03-12 14:34:00	74	14	3	8	5
1	2009-03-12 14:35:00	0	14	3	8	5
1	2009-03-12 14:36:00	0	14	3	8	5
1	2009-03-12 14:37:00	0	14	3	8	5
1	2009-03-12 14:38:00	0	14	3	8	5
1	2009-03-12 14:39:00	0	14	3	8	5
1	2009-03-12 14:40:00	0	14	3	8	5
1	2009-03-12 14:41:00	0	14	3	8	5
1	2009-03-12 14:42:00	0	14	3	8	5
1	2009-03-12 14:43:00	0	14	3	8	5
1	2009-03-12 14:44:00	0	14	3	8	5
1	2009-03-12 14:45:00	0	14	3	8	5
1	2009-03-12 14:46:00	0	14	3	8	5
1	2009-03-12 14:47:00	0	14	3	8	5
1	2009-03-12 14:48:00	0	14	3	8	5
1	2009-03-12 14:49:00	0	14	3	8	5
1	2009-03-12 14:50:00	0	14	3	8	5
1	2009-03-12 14:51:00	0	14	3	8	5
1	2009-03-12 14:52:00	0	14	3	8	5
1	2009-03-12 14:53:00	0	14	3	8	5
1	2009-03-12 14:54:00	0	14	3	8	5
1	2009-03-12 14:55:00	0	14	3	8	5
1	2009-03-12 14:56:00	0	14	3	8	5
1	2009-03-12 14:57:00	0	14	3	8	5
1	2009-03-12 14:58:00	0	14	3	8	5
1	2009-03-12 14:59:00	0	14	3	8	5
1	2009-03-12 15:00:00	0	14	3	8	5
1	2009-03-12 15:01:00	0	15	3	8	5
1	2009-03-12 15:02:00	0	15	3	8	5
1	2009-03-12 15:03:00	0	15	3	8	5
1	2009-03-12 15:04:00	0	15	3	8	5
1	2009-03-12 15:05:00	0	15	3	8	5
1	2009-03-12 15:06:00	0	15	3	8	5
1	2009-03-12 15:07:00	0	15	3	8	5
1	2009-03-12 15:08:00	0	15	3	8	5
1	2009-03-12 15:09:00	0	15	3	8	5
1	2009-03-12 15:10:00	0	15	3	8	5
1	2009-03-12 15:11:00	0	15	3	8	5
1	2009-03-12 15:12:00	0	15	3	8	5
1	2009-03-12 15:13:00	0	15	3	8	5
1	2009-03-12 15:14:00	0	15	3	8	5
1	2009-03-12 15:15:00	0	15	3	8	5
1	2009-03-12 15:16:00	0	15	3	8	5
1	2009-03-12 15:17:00	0	15	3	8	5
1	2009-03-12 15:18:00	0	15	3	8	5
1	2009-03-12 15:19:00	0	15	3	8	5
[truncated: 78,641 more rows]

## Sheet: Pivot Segment
Multiplier	2
x (Low Intensity)	779.849
y (High Intensity)	824.272
	Column Labels
Values	1	2	3	4	5	6	7	8	Grand Total
Average of Activity	111.183	113.756	104.872	117.634	126.682	97.1821	112.772	102.7	110.899
StdDev of Activity	334.333	355.258	319.462	400.044	401.05	318.543	365.922	300.61	351.482
Count of Activity	10080	9420	10080	10080	10080	9780	9780	9780	79080
Count Above x	529	475	487	463	536	391	481	466
% Above x	0.0524802	0.0504246	0.0483135	0.0459325	0.0531746	0.0399796	0.049182	0.0476483
Count Above y		448	454	443	510	367	452	428
% Above y		0.0475584	0.0450397	0.0439484	0.0505952	0.0375256	0.0462168	0.0437628

## Sheet: Pivot Weekday
Sum of Activity	Column Labels
Row Labels	1	2	3	4	5	6	7	8	Grand Total
1	160731	164736	162317	184672	182975	121091	137644	158445	1272611
2	119584	175855	138163	193677	213222	152083	154326	143895	1290805
3	167874	178078	170723	203072	177964	124708	192028	152486	1366933
4	161035	173270	127300	166730	131336	164565	129491	160515	1214242
5	177368	134652	153338	145221	198828	123002	125629	106495	1164533
6	163011	169430	139901	107406	162244	117665	154874	156875	1171406
7	171125	75565	165368	184976	210385	147327	208920	125692	1289358
Grand Total	1120728	1071586	1057110	1185754	1276954	950441	1102912	1004403	8769888
Count of Activity	Column Labels
Row Labels	1	2	3	4	5	6	7	8	Grand Total
1	1440	1440	1440	1440	1440	1440	1440	1440	11520
2	1440	1440	1440	1440	1440	1440	1440	1440	11520
3	1440	1440	1440	1440	1440	1440	1440	1440	11520
4	1440	1440	1440	1440	1440	1440	1440	1440	11520
5	1440	1440	1440	1440	1440	1440	1440	1440	11520
6	1440	1440	1440	1440	1440	1140	1440	1440	11220
7	1440	780	1440	1440	1440	1440	1140	1140	10260
Grand Total	10080	9420	10080	10080	10080	9780	9780	9780	79080

## Sheet: Pivot Quadrant
Sum of Activity	Column Labels
Row Labels	1	2	3	4	5	6	7	8	Grand Total
1	92875	56780	23815	33659	48518	59458	36307	50661	402073
2	361008	354205	425464	421691	453954	398473	428660	408735	3252190
3	285504	225734	237530	276355	338132	202305	253320	250998	2069878
4	381341	434867	370301	454049	436350	290205	384625	294009	3045747
Grand Total	1120728	1071586	1057110	1185754	1276954	950441	1102912	1004403	8769888
Average	280182	267896	264278	296438	319238	237610	275728	251101
Count of Activity	Column Labels
Row Labels	1	2	3	4	5	6	7	8	Grand Total
1	2520	2520	2520	2520	2520	2520	2520	2520	20160
2	2520	2520	2520	2520	2520	2520	2520	2520	20160
3	2520	2160	2520	2520	2520	2460	2460	2460	19620
4	2520	2220	2520	2520	2520	2280	2280	2280	19140
Grand Total	10080	9420	10080	10080	10080	9780	9780	9780	79080

## Sheet: 3.4.09
Actogram, Copy Raw Data, All Days
Identity:	Bear Stephens
Filename:	E:\Active Research Files\meloxicam titre canine\cases\bear s\Bear Stephens 3.4.2009.AWC
Gender:	M
Age:	9
Height:	76.2 cm	30.0 in
Weight:	34.0 kg	75.0 lbs
Start Date:	04-Mar-2009 (Wed)
Start Time:	18:00:00
Interval:	1.00 mins
Date Stamp:	Time Stamp:	Activity Data:	Marker Press:
2009-03-04	00:00:00	0
2009-03-04	00:01:00	0
2009-03-04	00:02:00	0
2009-03-04	00:03:00	0
2009-03-04	00:04:00	0
2009-03-04	00:05:00	0
2009-03-04	00:06:00	0
2009-03-04	00:07:00	0
2009-03-04	00:08:00	0
2009-03-04	00:09:00	0
2009-03-04	00:10:00	0
2009-03-04	00:11:00	0
2009-03-04	00:12:00	0
2009-03-04	00:13:00	0
2009-03-04	00:14:00	0
2009-03-04	00:15:00	0
2009-03-04	00:16:00	0
2009-03-04	00:17:00	0
2009-03-04	00:18:00	0
2009-03-04	00:19:00	0
2009-03-04	00:20:00	0
2009-03-04	00:21:00	0
2009-03-04	00:22:00	0
2009-03-04	00:23:00	0
2009-03-04	00:24:00	0
2009-03-04	00:25:00	0
2009-03-04	00:26:00	0
2009-03-04	00:27:00	0
2009-03-04	00:28:00	0
2009-03-04	00:29:00	0
2009-03-04	00:30:00	0
2009-03-04	00:31:00	0
2009-03-04	00:32:00	0
2009-03-04	00:33:00	0
2009-03-04	00:34:00	0
2009-03-04	00:35:00	0
2009-03-04	00:36:00	0
2009-03-04	00:37:00	0
2009-03-04	00:38:00	0
2009-03-04	00:39:00	0
2009-03-04	00:40:00	0
2009-03-04	00:41:00	0
2009-03-04	00:42:00	0
2009-03-04	00:43:00	0
2009-03-04	00:44:00	0
2009-03-04	00:45:00	0
2009-03-04	00:46:00	0
2009-03-04	00:47:00	0
2009-03-04	00:48:00	0
2009-03-04	00:49:00	0
2009-03-04	00:50:00	0
2009-03-04	00:51:00	0
2009-03-04	00:52:00	0
2009-03-04	00:53:00	0
2009-03-04	00:54:00	0
2009-03-04	00:55:00	0
2009-03-04	00:56:00	0
2009-03-04	00:57:00	0
2009-03-04	00:58:00	0
2009-03-04	00:59:00	0
2009-03-04	01:00:00	0
2009-03-04	01:01:00	0
2009-03-04	01:02:00	0
2009-03-04	01:03:00	0
2009-03-04	01:04:00	0
2009-03-04	01:05:00	0
2009-03-04	01:06:00	0
2009-03-04	01:07:00	0
2009-03-04	01:08:00	0
2009-03-04	01:09:00	0
2009-03-04	01:10:00	0
2009-03-04	01:11:00	0
2009-03-04	01:12:00	0
2009-03-04	01:13:00	0
2009-03-04	01:14:00	0
2009-03-04	01:15:00	0
2009-03-04	01:16:00	0
2009-03-04	01:17:00	0
2009-03-04	01:18:00	0
2009-03-04	01:19:00	0
2009-03-04	01:20:00	0
2009-03-04	01:21:00	0
2009-03-04	01:22:00	0
2009-03-04	01:23:00	0
2009-03-04	01:24:00	0
2009-03-04	01:25:00	0
2009-03-04	01:26:00	0
2009-03-04	01:27:00	0
2009-03-04	01:28:00	0
2009-03-04	01:29:00	0
2009-03-04	01:30:00	0
2009-03-04	01:31:00	0
2009-03-04	01:32:00	0
2009-03-04	01:33:00	0
2009-03-04	01:34:00	0
2009-03-04	01:35:00	0
2009-03-04	01:36:00	0
2009-03-04	01:37:00	0
2009-03-04	01:38:00	0
2009-03-04	01:39:00	0
2009-03-04	01:40:00	0
2009-03-04	01:41:00	0
2009-03-04	01:42:00	0
2009-03-04	01:43:00	0
2009-03-04	01:44:00	0
2009-03-04	01:45:00	0
2009-03-04	01:46:00	0
2009-03-04	01:47:00	0
2009-03-04	01:48:00	0
2009-03-04	01:49:00	0
2009-03-04	01:50:00	0
2009-03-04	01:51:00	0
2009-03-04	01:52:00	0
2009-03-04	01:53:00	0
2009-03-04	01:54:00	0
2009-03-04	01:55:00	0
2009-03-04	01:56:00	0
2009-03-04	01:57:00	0
2009-03-04	01:58:00	0
2009-03-04	01:59:00	0
2009-03-04	02:00:00	0
2009-03-04	02:01:00	0
2009-03-04	02:02:00	0
2009-03-04	02:03:00	0
2009-03-04	02:04:00	0
2009-03-04	02:05:00	0
2009-03-04	02:06:00	0
2009-03-04	02:07:00	0
2009-03-04	02:08:00	0
2009-03-04	02:09:00	0
2009-03-04	02:10:00	0
2009-03-04	02:11:00	0
2009-03-04	02:12:00	0
2009-03-04	02:13:00	0
2009-03-04	02:14:00	0
2009-03-04	02:15:00	0
2009-03-04	02:16:00	0
2009-03-04	02:17:00	0
2009-03-04	02:18:00	0
2009-03-04	02:19:00	0
2009-03-04	02:20:00	0
2009-03-04	02:21:00	0
2009-03-04	02:22:00	0
2009-03-04	02:23:00	0
2009-03-04	02:24:00	0
2009-03-04	02:25:00	0
2009-03-04	02:26:00	0
2009-03-04	02:27:00	0
2009-03-04	02:28:00	0
2009-03-04	02:29:00	0
2009-03-04	02:30:00	0
2009-03-04	02:31:00	0
2009-03-04	02:32:00	0
2009-03-04	02:33:00	0
2009-03-04	02:34:00	0
2009-03-04	02:35:00	0
2009-03-04	02:36:00	0
2009-03-04	02:37:00	0
2009-03-04	02:38:00	0
2009-03-04	02:39:00	0
2009-03-04	02:40:00	0
2009-03-04	02:41:00	0
2009-03-04	02:42:00	0
2009-03-04	02:43:00	0
2009-03-04	02:44:00	0
2009-03-04	02:45:00	0
2009-03-04	02:46:00	0
2009-03-04	02:47:00	0
2009-03-04	02:48:00	0
2009-03-04	02:49:00	0
2009-03-04	02:50:00	0
2009-03-04	02:51:00	0
2009-03-04	02:52:00	0
2009-03-04	02:53:00	0
2009-03-04	02:54:00	0
2009-03-04	02:55:00	0
2009-03-04	02:56:00	0
2009-03-04	02:57:00	0
2009-03-04	02:58:00	0
2009-03-04	02:59:00	0
2009-03-04	03:00:00	0
2009-03-04	03:01:00	0
2009-03-04	03:02:00	0
2009-03-04	03:03:00	0
2009-03-04	03:04:00	0
2009-03-04	03:05:00	0
2009-03-04	03:06:00	0
2009-03-04	03:07:00	0
2009-03-04	03:08:00	0
2009-03-04	03:09:00	0
2009-03-04	03:10:00	0
2009-03-04	03:11:00	0
2009-03-04	03:12:00	0
2009-03-04	03:13:00	0
2009-03-04	03:14:00	0
2009-03-04	03:15:00	0
2009-03-04	03:16:00	0
2009-03-04	03:17:00	0
2009-03-04	03:18:00	0
2009-03-04	03:19:00	0
2009-03-04	03:20:00	0
2009-03-04	03:21:00	0
2009-03-04	03:22:00	0
2009-03-04	03:23:00	0
2009-03-04	03:24:00	0
2009-03-04	03:25:00	0
2009-03-04	03:26:00	0
2009-03-04	03:27:00	0
2009-03-04	03:28:00	0
2009-03-04	03:29:00	0
2009-03-04	03:30:00	0
2009-03-04	03:31:00	0
2009-03-04	03:32:00	0
2009-03-04	03:33:00	0
2009-03-04	03:34:00	0
2009-03-04	03:35:00	0
2009-03-04	03:36:00	0
2009-03-04	03:37:00	0
2009-03-04	03:38:00	0
2009-03-04	03:39:00	0
2009-03-04	03:40:00	0
2009-03-04	03:41:00	0
2009-03-04	03:42:00	0
2009-03-04	03:43:00	0
2009-03-04	03:44:00	0
2009-03-04	03:45:00	0
2009-03-04	03:46:00	0
2009-03-04	03:47:00	0
2009-03-04	03:48:00	0
2009-03-04	03:49:00	0
2009-03-04	03:50:00	0
2009-03-04	03:51:00	0
2009-03-04	03:52:00	0
2009-03-04	03:53:00	0
2009-03-04	03:54:00	0
2009-03-04	03:55:00	0
2009-03-04	03:56:00	0
2009-03-04	03:57:00	0
2009-03-04	03:58:00	0
2009-03-04	03:59:00	0
2009-03-04	04:00:00	0
2009-03-04	04:01:00	0
2009-03-04	04:02:00	0
2009-03-04	04:03:00	0
2009-03-04	04:04:00	0
2009-03-04	04:05:00	0
2009-03-04	04:06:00	0
2009-03-04	04:07:00	0
2009-03-04	04:08:00	0
2009-03-04	04:09:00	0
2009-03-04	04:10:00	0
2009-03-04	04:11:00	0
2009-03-04	04:12:00	0
2009-03-04	04:13:00	0
2009-03-04	04:14:00	0
2009-03-04	04:15:00	0
2009-03-04	04:16:00	0
2009-03-04	04:17:00	0
2009-03-04	04:18:00	0
2009-03-04	04:19:00	0
2009-03-04	04:20:00	0
2009-03-04	04:21:00	0
2009-03-04	04:22:00	0
2009-03-04	04:23:00	0
2009-03-04	04:24:00	0
2009-03-04	04:25:00	0
2009-03-04	04:26:00	0
2009-03-04	04:27:00	0
2009-03-04	04:28:00	0
2009-03-04	04:29:00	0
2009-03-04	04:30:00	0
2009-03-04	04:31:00	0
2009-03-04	04:32:00	0
2009-03-04	04:33:00	0
2009-03-04	04:34:00	0
2009-03-04	04:35:00	0
2009-03-04	04:36:00	0
2009-03-04	04:37:00	0
2009-03-04	04:38:00	0
2009-03-04	04:39:00	0
2009-03-04	04:40:00	0
2009-03-04	04:41:00	0
2009-03-04	04:42:00	0
2009-03-04	04:43:00	0
2009-03-04	04:44:00	0
2009-03-04	04:45:00	0
2009-03-04	04:46:00	0
2009-03-04	04:47:00	0
2009-03-04	04:48:00	0
2009-03-04	04:49:00	0
2009-03-04	04:50:00	0
2009-03-04	04:51:00	0
2009-03-04	04:52:00	0
2009-03-04	04:53:00	0
2009-03-04	04:54:00	0
2009-03-04	04:55:00	0
2009-03-04	04:56:00	0
2009-03-04	04:57:00	0
2009-03-04	04:58:00	0
2009-03-04	04:59:00	0
2009-03-04	05:00:00	0
2009-03-04	05:01:00	0
2009-03-04	05:02:00	0
2009-03-04	05:03:00	0
2009-03-04	05:04:00	0
2009-03-04	05:05:00	0
2009-03-04	05:06:00	0
2009-03-04	05:07:00	0
2009-03-04	05:08:00	0
2009-03-04	05:09:00	0
2009-03-04	05:10:00	0
2009-03-04	05:11:00	0
2009-03-04	05:12:00	0
2009-03-04	05:13:00	0
2009-03-04	05:14:00	0
2009-03-04	05:15:00	0
2009-03-04	05:16:00	0
2009-03-04	05:17:00	0
2009-03-04	05:18:00	0
2009-03-04	05:19:00	0
2009-03-04	05:20:00	0
2009-03-04	05:21:00	0
2009-03-04	05:22:00	0
2009-03-04	05:23:00	0
2009-03-04	05:24:00	0
2009-03-04	05:25:00	0
2009-03-04	05:26:00	0
2009-03-04	05:27:00	0
2009-03-04	05:28:00	0
2009-03-04	05:29:00	0
2009-03-04	05:30:00	0
2009-03-04	05:31:00	0
2009-03-04	05:32:00	0
2009-03-04	05:33:00	0
2009-03-04	05:34:00	0
2009-03-04	05:35:00	0
2009-03-04	05:36:00	0
2009-03-04	05:37:00	0
2009-03-04	05:38:00	0
2009-03-04	05:39:00	0
2009-03-04	05:40:00	0
2009-03-04	05:41:00	0
2009-03-04	05:42:00	0
2009-03-04	05:43:00	0
2009-03-04	05:44:00	0
2009-03-04	05:45:00	0
2009-03-04	05:46:00	0
2009-03-04	05:47:00	0
2009-03-04	05:48:00	0
2009-03-04	05:49:00	0
2009-03-04	05:50:00	0
2009-03-04	05:51:00	0
2009-03-04	05:52:00	0
2009-03-04	05:53:00	0
2009-03-04	05:54:00	0
2009-03-04	05:55:00	0
2009-03-04	05:56:00	0
2009-03-04	05:57:00	0
2009-03-04	05:58:00	0
2009-03-04	05:59:00	0
2009-03-04	06:00:00	0
2009-03-04	06:01:00	0
2009-03-04	06:02:00	0
2009-03-04	06:03:00	0
2009-03-04	06:04:00	0
2009-03-04	06:05:00	0
2009-03-04	06:06:00	0
2009-03-04	06:07:00	0
2009-03-04	06:08:00	0
2009-03-04	06:09:00	0
2009-03-04	06:10:00	0
2009-03-04	06:11:00	0
2009-03-04	06:12:00	0
2009-03-04	06:13:00	0
2009-03-04	06:14:00	0
2009-03-04	06:15:00	0
2009-03-04	06:16:00	0
2009-03-04	06:17:00	0
2009-03-04	06:18:00	0
2009-03-04	06:19:00	0
2009-03-04	06:20:00	0
2009-03-04	06:21:00	0
2009-03-04	06:22:00	0
2009-03-04	06:23:00	0
2009-03-04	06:24:00	0
2009-03-04	06:25:00	0
2009-03-04	06:26:00	0
2009-03-04	06:27:00	0
2009-03-04	06:28:00	0
2009-03-04	06:29:00	0
2009-03-04	06:30:00	0
2009-03-04	06:31:00	0
2009-03-04	06:32:00	0
2009-03-04	06:33:00	0
2009-03-04	06:34:00	0
2009-03-04	06:35:00	0
2009-03-04	06:36:00	0
2009-03-04	06:37:00	0
2009-03-04	06:38:00	0
2009-03-04	06:39:00	0
2009-03-04	06:40:00	0
2009-03-04	06:41:00	0
2009-03-04	06:42:00	0
2009-03-04	06:43:00	0
2009-03-04	06:44:00	0
2009-03-04	06:45:00	0
2009-03-04	06:46:00	0
2009-03-04	06:47:00	0
2009-03-04	06:48:00	0
2009-03-04	06:49:00	0
2009-03-04	06:50:00	0
2009-03-04	06:51:00	0
2009-03-04	06:52:00	0
2009-03-04	06:53:00	0
2009-03-04	06:54:00	0
2009-03-04	06:55:00	0
2009-03-04	06:56:00	0
2009-03-04	06:57:00	0
2009-03-04	06:58:00	0
2009-03-04	06:59:00	0
2009-03-04	07:00:00	0
2009-03-04	07:01:00	0
2009-03-04	07:02:00	0
2009-03-04	07:03:00	0
2009-03-04	07:04:00	0
2009-03-04	07:05:00	0
2009-03-04	07:06:00	0
2009-03-04	07:07:00	0
2009-03-04	07:08:00	0
2009-03-04	07:09:00	0
2009-03-04	07:10:00	0
2009-03-04	07:11:00	0
2009-03-04	07:12:00	0
2009-03-04	07:13:00	0
2009-03-04	07:14:00	0
2009-03-04	07:15:00	0
2009-03-04	07:16:00	0
2009-03-04	07:17:00	0
2009-03-04	07:18:00	0
2009-03-04	07:19:00	0
2009-03-04	07:20:00	0
2009-03-04	07:21:00	0
2009-03-04	07:22:00	0
2009-03-04	07:23:00	0
2009-03-04	07:24:00	0
2009-03-04	07:25:00	0
2009-03-04	07:26:00	0
2009-03-04	07:27:00	0
2009-03-04	07:28:00	0
2009-03-04	07:29:00	0
2009-03-04	07:30:00	0
2009-03-04	07:31:00	0
2009-03-04	07:32:00	0
2009-03-04	07:33:00	0
2009-03-04	07:34:00	0
2009-03-04	07:35:00	0
2009-03-04	07:36:00	0
2009-03-04	07:37:00	0
2009-03-04	07:38:00	0
2009-03-04	07:39:00	0
2009-03-04	07:40:00	0
2009-03-04	07:41:00	0
2009-03-04	07:42:00	0
2009-03-04	07:43:00	0
2009-03-04	07:44:00	0
2009-03-04	07:45:00	0
2009-03-04	07:46:00	0
2009-03-04	07:47:00	0
2009-03-04	07:48:00	0
2009-03-04	07:49:00	0
2009-03-04	07:50:00	0
2009-03-04	07:51:00	0
2009-03-04	07:52:00	0
2009-03-04	07:53:00	0
2009-03-04	07:54:00	0
2009-03-04	07:55:00	0
2009-03-04	07:56:00	0
2009-03-04	07:57:00	0
2009-03-04	07:58:00	0
2009-03-04	07:59:00	0
2009-03-04	08:00:00	0
2009-03-04	08:01:00	0
2009-03-04	08:02:00	0
2009-03-04	08:03:00	0
2009-03-04	08:04:00	0
2009-03-04	08:05:00	0
2009-03-04	08:06:00	0
2009-03-04	08:07:00	0
2009-03-04	08:08:00	0
2009-03-04	08:09:00	0
2009-03-04	08:10:00	0
2009-03-04	08:11:00	0
2009-03-04	08:12:00	0
2009-03-04	08:13:00	0
2009-03-04	08:14:00	0
2009-03-04	08:15:00	0
2009-03-04	08:16:00	0
2009-03-04	08:17:00	0
2009-03-04	08:18:00	0
2009-03-04	08:19:00	0
2009-03-04	08:20:00	0
2009-03-04	08:21:00	0
2009-03-04	08:22:00	0
2009-03-04	08:23:00	0
2009-03-04	08:24:00	0
2009-03-04	08:25:00	0
2009-03-04	08:26:00	0
2009-03-04	08:27:00	0
2009-03-04	08:28:00	0
2009-03-04	08:29:00	0
2009-03-04	08:30:00	0
2009-03-04	08:31:00	0
2009-03-04	08:32:00	0
2009-03-04	08:33:00	0
2009-03-04	08:34:00	0
2009-03-04	08:35:00	0
2009-03-04	08:36:00	0
2009-03-04	08:37:00	0
2009-03-04	08:38:00	0
2009-03-04	08:39:00	0
2009-03-04	08:40:00	0
2009-03-04	08:41:00	0
2009-03-04	08:42:00	0
2009-03-04	08:43:00	0
2009-03-04	08:44:00	0
2009-03-04	08:45:00	0
2009-03-04	08:46:00	0
2009-03-04	08:47:00	0
2009-03-04	08:48:00	0
2009-03-04	08:49:00	0
2009-03-04	08:50:00	0
2009-03-04	08:51:00	0
2009-03-04	08:52:00	0
2009-03-04	08:53:00	0
2009-03-04	08:54:00	0
2009-03-04	08:55:00	0
2009-03-04	08:56:00	0
2009-03-04	08:57:00	0
2009-03-04	08:58:00	0
2009-03-04	08:59:00	0
2009-03-04	09:00:00	0
2009-03-04	09:01:00	0
2009-03-04	09:02:00	0
2009-03-04	09:03:00	0
2009-03-04	09:04:00	0
2009-03-04	09:05:00	0
2009-03-04	09:06:00	0
2009-03-04	09:07:00	0
2009-03-04	09:08:00	0
2009-03-04	09:09:00	0
2009-03-04	09:10:00	0
2009-03-04	09:11:00	0
2009-03-04	09:12:00	0
2009-03-04	09:13:00	0
2009-03-04	09:14:00	0
2009-03-04	09:15:00	0
2009-03-04	09:16:00	0
2009-03-04	09:17:00	0
2009-03-04	09:18:00	0
2009-03-04	09:19:00	0
2009-03-04	09:20:00	0
2009-03-04	09:21:00	0
2009-03-04	09:22:00	0
2009-03-04	09:23:00	0
2009-03-04	09:24:00	0
2009-03-04	09:25:00	0
2009-03-04	09:26:00	0
2009-03-04	09:27:00	0
2009-03-04	09:28:00	0
2009-03-04	09:29:00	0
2009-03-04	09:30:00	0
2009-03-04	09:31:00	0
2009-03-04	09:32:00	0
2009-03-04	09:33:00	0
2009-03-04	09:34:00	0
2009-03-04	09:35:00	0
2009-03-04	09:36:00	0
2009-03-04	09:37:00	0
2009-03-04	09:38:00	0
2009-03-04	09:39:00	0
2009-03-04	09:40:00	0
2009-03-04	09:41:00	0
2009-03-04	09:42:00	0
2009-03-04	09:43:00	0
2009-03-04	09:44:00	0
2009-03-04	09:45:00	0
2009-03-04	09:46:00	0
2009-03-04	09:47:00	0
2009-03-04	09:48:00	0
2009-03-04	09:49:00	0
2009-03-04	09:50:00	0
2009-03-04	09:51:00	0
2009-03-04	09:52:00	0
2009-03-04	09:53:00	0
2009-03-04	09:54:00	0
2009-03-04	09:55:00	0
2009-03-04	09:56:00	0
2009-03-04	09:57:00	0
2009-03-04	09:58:00	0
2009-03-04	09:59:00	0
2009-03-04	10:00:00	0
2009-03-04	10:01:00	0
2009-03-04	10:02:00	0
2009-03-04	10:03:00	0
2009-03-04	10:04:00	0
2009-03-04	10:05:00	0
2009-03-04	10:06:00	0
2009-03-04	10:07:00	0
2009-03-04	10:08:00	0
2009-03-04	10:09:00	0
2009-03-04	10:10:00	0
2009-03-04	10:11:00	0
2009-03-04	10:12:00	0
2009-03-04	10:13:00	0
2009-03-04	10:14:00	0
2009-03-04	10:15:00	0
2009-03-04	10:16:00	0
2009-03-04	10:17:00	0
2009-03-04	10:18:00	0
2009-03-04	10:19:00	0
2009-03-04	10:20:00	0
2009-03-04	10:21:00	0
2009-03-04	10:22:00	0
2009-03-04	10:23:00	0
2009-03-04	10:24:00	0
2009-03-04	10:25:00	0
2009-03-04	10:26:00	0
2009-03-04	10:27:00	0
2009-03-04	10:28:00	0
2009-03-04	10:29:00	0
2009-03-04	10:30:00	0
2009-03-04	10:31:00	0
2009-03-04	10:32:00	0
2009-03-04	10:33:00	0
2009-03-04	10:34:00	0
2009-03-04	10:35:00	0
2009-03-04	10:36:00	0
2009-03-04	10:37:00	0
2009-03-04	10:38:00	0
2009-03-04	10:39:00	0
2009-03-04	10:40:00	0
2009-03-04	10:41:00	0
2009-03-04	10:42:00	0
2009-03-04	10:43:00	0
2009-03-04	10:44:00	0
2009-03-04	10:45:00	0
2009-03-04	10:46:00	0
2009-03-04	10:47:00	0
2009-03-04	10:48:00	0
2009-03-04	10:49:00	0
2009-03-04	10:50:00	0
2009-03-04	10:51:00	0
2009-03-04	10:52:00	0
2009-03-04	10:53:00	0
2009-03-04	10:54:00	0
2009-03-04	10:55:00	0
2009-03-04	10:56:00	0
2009-03-04	10:57:00	0
2009-03-04	10:58:00	0
2009-03-04	10:59:00	0
2009-03-04	11:00:00	0
2009-03-04	11:01:00	0
2009-03-04	11:02:00	0
2009-03-04	11:03:00	0
2009-03-04	11:04:00	0
2009-03-04	11:05:00	0
2009-03-04	11:06:00	0
2009-03-04	11:07:00	0
2009-03-04	11:08:00	0
2009-03-04	11:09:00	0
2009-03-04	11:10:00	0
2009-03-04	11:11:00	0
2009-03-04	11:12:00	0
2009-03-04	11:13:00	0
2009-03-04	11:14:00	0
2009-03-04	11:15:00	0
2009-03-04	11:16:00	0
2009-03-04	11:17:00	0
2009-03-04	11:18:00	0
2009-03-04	11:19:00	0
2009-03-04	11:20:00	0
2009-03-04	11:21:00	0
2009-03-04	11:22:00	0
2009-03-04	11:23:00	0
2009-03-04	11:24:00	0
2009-03-04	11:25:00	0
2009-03-04	11:26:00	0
2009-03-04	11:27:00	0
2009-03-04	11:28:00	0
2009-03-04	11:29:00	0
2009-03-04	11:30:00	0
2009-03-04	11:31:00	0
2009-03-04	11:32:00	0
2009-03-04	11:33:00	0
2009-03-04	11:34:00	0
2009-03-04	11:35:00	0
2009-03-04	11:36:00	0
2009-03-04	11:37:00	0
2009-03-04	11:38:00	0
2009-03-04	11:39:00	0
2009-03-04	11:40:00	0
2009-03-04	11:41:00	0
2009-03-04	11:42:00	0
2009-03-04	11:43:00	0
2009-03-04	11:44:00	0
2009-03-04	11:45:00	0
2009-03-04	11:46:00	0
2009-03-04	11:47:00	0
2009-03-04	11:48:00	0
2009-03-04	11:49:00	0
2009-03-04	11:50:00	0
2009-03-04	11:51:00	0
2009-03-04	11:52:00	0
2009-03-04	11:53:00	0
2009-03-04	11:54:00	0
2009-03-04	11:55:00	0
2009-03-04	11:56:00	0
2009-03-04	11:57:00	0
2009-03-04	11:58:00	0
2009-03-04	11:59:00	0
2009-03-04	12:00:00	0
2009-03-04	12:01:00	0
2009-03-04	12:02:00	0
2009-03-04	12:03:00	0
2009-03-04	12:04:00	0
2009-03-04	12:05:00	0
2009-03-04	12:06:00	0
2009-03-04	12:07:00	0
2009-03-04	12:08:00	0
2009-03-04	12:09:00	0
2009-03-04	12:10:00	0
2009-03-04	12:11:00	0
2009-03-04	12:12:00	0
2009-03-04	12:13:00	0
2009-03-04	12:14:00	0
2009-03-04	12:15:00	0
2009-03-04	12:16:00	0
2009-03-04	12:17:00	0
2009-03-04	12:18:00	0
2009-03-04	12:19:00	0
2009-03-04	12:20:00	0
2009-03-04	12:21:00	0
2009-03-04	12:22:00	0
2009-03-04	12:23:00	0
2009-03-04	12:24:00	0
2009-03-04	12:25:00	0
2009-03-04	12:26:00	0
2009-03-04	12:27:00	0
2009-03-04	12:28:00	0
2009-03-04	12:29:00	0
2009-03-04	12:30:00	0
2009-03-04	12:31:00	0
2009-03-04	12:32:00	0
2009-03-04	12:33:00	0
2009-03-04	12:34:00	0
2009-03-04	12:35:00	0
2009-03-04	12:36:00	0
2009-03-04	12:37:00	0
2009-03-04	12:38:00	0
2009-03-04	12:39:00	0
2009-03-04	12:40:00	0
2009-03-04	12:41:00	0
2009-03-04	12:42:00	0
2009-03-04	12:43:00	0
2009-03-04	12:44:00	0
2009-03-04	12:45:00	0
2009-03-04	12:46:00	0
2009-03-04	12:47:00	0
2009-03-04	12:48:00	0
2009-03-04	12:49:00	0
2009-03-04	12:50:00	0
2009-03-04	12:51:00	0
2009-03-04	12:52:00	0
2009-03-04	12:53:00	0
2009-03-04	12:54:00	0
2009-03-04	12:55:00	0
2009-03-04	12:56:00	0
2009-03-04	12:57:00	0
2009-03-04	12:58:00	0
2009-03-04	12:59:00	0
2009-03-04	13:00:00	0
2009-03-04	13:01:00	0
2009-03-04	13:02:00	0
2009-03-04	13:03:00	0
2009-03-04	13:04:00	0
2009-03-04	13:05:00	0
2009-03-04	13:06:00	0
2009-03-04	13:07:00	0
2009-03-04	13:08:00	0
2009-03-04	13:09:00	0
2009-03-04	13:10:00	0
2009-03-04	13:11:00	0
2009-03-04	13:12:00	0
2009-03-04	13:13:00	0
2009-03-04	13:14:00	0
2009-03-04	13:15:00	0
2009-03-04	13:16:00	0
2009-03-04	13:17:00	0
2009-03-04	13:18:00	0
2009-03-04	13:19:00	0
2009-03-04	13:20:00	0
2009-03-04	13:21:00	0
2009-03-04	13:22:00	0
2009-03-04	13:23:00	0
2009-03-04	13:24:00	0
2009-03-04	13:25:00	0
2009-03-04	13:26:00	0
2009-03-04	13:27:00	0
2009-03-04	13:28:00	0
2009-03-04	13:29:00	0
2009-03-04	13:30:00	0
2009-03-04	13:31:00	0
2009-03-04	13:32:00	0
2009-03-04	13:33:00	0
2009-03-04	13:34:00	0
2009-03-04	13:35:00	0
2009-03-04	13:36:00	0
2009-03-04	13:37:00	0
2009-03-04	13:38:00	0
2009-03-04	13:39:00	0
2009-03-04	13:40:00	0
2009-03-04	13:41:00	0
2009-03-04	13:42:00	0
2009-03-04	13:43:00	0
2009-03-04	13:44:00	0
2009-03-04	13:45:00	0
2009-03-04	13:46:00	0
2009-03-04	13:47:00	0
2009-03-04	13:48:00	0
2009-03-04	13:49:00	0
2009-03-04	13:50:00	0
2009-03-04	13:51:00	0
2009-03-04	13:52:00	0
2009-03-04	13:53:00	0
2009-03-04	13:54:00	0
2009-03-04	13:55:00	0
2009-03-04	13:56:00	0
2009-03-04	13:57:00	0
2009-03-04	13:58:00	0
2009-03-04	13:59:00	0
2009-03-04	14:00:00	0
2009-03-04	14:01:00	0
2009-03-04	14:02:00	0
2009-03-04	14:03:00	0
2009-03-04	14:04:00	0
2009-03-04	14:05:00	0
2009-03-04	14:06:00	0
2009-03-04	14:07:00	0
2009-03-04	14:08:00	0
2009-03-04	14:09:00	0
2009-03-04	14:10:00	0
2009-03-04	14:11:00	0
2009-03-04	14:12:00	0
2009-03-04	14:13:00	0
2009-03-04	14:14:00	0
2009-03-04	14:15:00	0
2009-03-04	14:16:00	0
2009-03-04	14:17:00	0
2009-03-04	14:18:00	0
2009-03-04	14:19:00	0
2009-03-04	14:20:00	0
2009-03-04	14:21:00	0
2009-03-04	14:22:00	0
2009-03-04	14:23:00	0
2009-03-04	14:24:00	0
2009-03-04	14:25:00	0
2009-03-04	14:26:00	0
2009-03-04	14:27:00	0
2009-03-04	14:28:00	0
2009-03-04	14:29:00	0
2009-03-04	14:30:00	0
2009-03-04	14:31:00	0
2009-03-04	14:32:00	0
2009-03-04	14:33:00	0
2009-03-04	14:34:00	0
2009-03-04	14:35:00	0
2009-03-04	14:36:00	0
2009-03-04	14:37:00	0
2009-03-04	14:38:00	0
2009-03-04	14:39:00	0
2009-03-04	14:40:00	0
2009-03-04	14:41:00	0
2009-03-04	14:42:00	0
2009-03-04	14:43:00	0
2009-03-04	14:44:00	0
2009-03-04	14:45:00	0
2009-03-04	14:46:00	0
2009-03-04	14:47:00	0
2009-03-04	14:48:00	0
2009-03-04	14:49:00	0
2009-03-04	14:50:00	0
2009-03-04	14:51:00	0
2009-03-04	14:52:00	0
2009-03-04	14:53:00	0
2009-03-04	14:54:00	0
2009-03-04	14:55:00	0
2009-03-04	14:56:00	0
2009-03-04	14:57:00	0
2009-03-04	14:58:00	0
2009-03-04	14:59:00	0
2009-03-04	15:00:00	0
2009-03-04	15:01:00	0
2009-03-04	15:02:00	0
2009-03-04	15:03:00	0
2009-03-04	15:04:00	0
2009-03-04	15:05:00	0
2009-03-04	15:06:00	0
2009-03-04	15:07:00	0
2009-03-04	15:08:00	0
2009-03-04	15:09:00	0
2009-03-04	15:10:00	0
2009-03-04	15:11:00	0
2009-03-04	15:12:00	0
2009-03-04	15:13:00	0
2009-03-04	15:14:00	0
2009-03-04	15:15:00	0
2009-03-04	15:16:00	0
2009-03-04	15:17:00	0
2009-03-04	15:18:00	0
2009-03-04	15:19:00	0
2009-03-04	15:20:00	0
2009-03-04	15:21:00	0
2009-03-04	15:22:00	0
2009-03-04	15:23:00	0
2009-03-04	15:24:00	0
2009-03-04	15:25:00	0
2009-03-04	15:26:00	0
2009-03-04	15:27:00	0
2009-03-04	15:28:00	0
2009-03-04	15:29:00	0
2009-03-04	15:30:00	0
2009-03-04	15:31:00	0
2009-03-04	15:32:00	0
2009-03-04	15:33:00	0
2009-03-04	15:34:00	0
2009-03-04	15:35:00	0
2009-03-04	15:36:00	0
2009-03-04	15:37:00	0
2009-03-04	15:38:00	0
2009-03-04	15:39:00	0
2009-03-04	15:40:00	0
2009-03-04	15:41:00	0
2009-03-04	15:42:00	0
2009-03-04	15:43:00	0
2009-03-04	15:44:00	0
2009-03-04	15:45:00	0
2009-03-04	15:46:00	0
2009-03-04	15:47:00	0
2009-03-04	15:48:00	0
2009-03-04	15:49:00	0
2009-03-04	15:50:00	0
2009-03-04	15:51:00	0
2009-03-04	15:52:00	0
2009-03-04	15:53:00	0
2009-03-04	15:54:00	0
2009-03-04	15:55:00	0
2009-03-04	15:56:00	0
2009-03-04	15:57:00	0
2009-03-04	15:58:00	0
2009-03-04	15:59:00	0
2009-03-04	16:00:00	0
2009-03-04	16:01:00	0
2009-03-04	16:02:00	0
2009-03-04	16:03:00	0
2009-03-04	16:04:00	0
2009-03-04	16:05:00	0
2009-03-04	16:06:00	0
2009-03-04	16:07:00	0
2009-03-04	16:08:00	0
2009-03-04	16:09:00	0
2009-03-04	16:10:00	0
2009-03-04	16:11:00	0
2009-03-04	16:12:00	0
2009-03-04	16:13:00	0
2009-03-04	16:14:00	0
2009-03-04	16:15:00	0
2009-03-04	16:16:00	0
2009-03-04	16:17:00	0
2009-03-04	16:18:00	0
2009-03-04	16:19:00	0
2009-03-04	16:20:00	0
2009-03-04	16:21:00	0
2009-03-04	16:22:00	0
2009-03-04	16:23:00	0
2009-03-04	16:24:00	0
2009-03-04	16:25:00	0
2009-03-04	16:26:00	0
2009-03-04	16:27:00	0
2009-03-04	16:28:00	0
2009-03-04	16:29:00	0
2009-03-04	16:30:00	0
2009-03-04	16:31:00	0
2009-03-04	16:32:00	0
2009-03-04	16:33:00	0
2009-03-04	16:34:00	0
2009-03-04	16:35:00	0
2009-03-04	16:36:00	0
2009-03-04	16:37:00	0
2009-03-04	16:38:00	0
2009-03-04	16:39:00	0
2009-03-04	16:40:00	0
2009-03-04	16:41:00	0
2009-03-04	16:42:00	0
2009-03-04	16:43:00	0
2009-03-04	16:44:00	0
2009-03-04	16:45:00	0
2009-03-04	16:46:00	0
2009-03-04	16:47:00	0
2009-03-04	16:48:00	0
2009-03-04	16:49:00	0
2009-03-04	16:50:00	0
2009-03-04	16:51:00	0
2009-03-04	16:52:00	0
2009-03-04	16:53:00	0
2009-03-04	16:54:00	0
2009-03-04	16:55:00	0
2009-03-04	16:56:00	0
2009-03-04	16:57:00	0
2009-03-04	16:58:00	0
2009-03-04	16:59:00	0
2009-03-04	17:00:00	0
2009-03-04	17:01:00	0
2009-03-04	17:02:00	0
2009-03-04	17:03:00	0
2009-03-04	17:04:00	0
2009-03-04	17:05:00	0
2009-03-04	17:06:00	0
2009-03-04	17:07:00	0
2009-03-04	17:08:00	0
2009-03-04	17:09:00	0
2009-03-04	17:10:00	0
2009-03-04	17:11:00	0
2009-03-04	17:12:00	0
2009-03-04	17:13:00	0
2009-03-04	17:14:00	0
2009-03-04	17:15:00	0
2009-03-04	17:16:00	0
2009-03-04	17:17:00	0
2009-03-04	17:18:00	0
2009-03-04	17:19:00	0
2009-03-04	17:20:00	0
2009-03-04	17:21:00	0
2009-03-04	17:22:00	0
2009-03-04	17:23:00	0
2009-03-04	17:24:00	0
2009-03-04	17:25:00	0
2009-03-04	17:26:00	0
2009-03-04	17:27:00	0
2009-03-04	17:28:00	0
2009-03-04	17:29:00	0
2009-03-04	17:30:00	0
2009-03-04	17:31:00	0
2009-03-04	17:32:00	0
2009-03-04	17:33:00	0
2009-03-04	17:34:00	0
2009-03-04	17:35:00	0
2009-03-04	17:36:00	0
2009-03-04	17:37:00	0
2009-03-04	17:38:00	0
2009-03-04	17:39:00	0
2009-03-04	17:40:00	0
2009-03-04	17:41:00	0
2009-03-04	17:42:00	0
2009-03-04	17:43:00	0
2009-03-04	17:44:00	0
2009-03-04	17:45:00	0
2009-03-04	17:46:00	0
2009-03-04	17:47:00	0
2009-03-04	17:48:00	0
2009-03-04	17:49:00	0
2009-03-04	17:50:00	0
2009-03-04	17:51:00	0
2009-03-04	17:52:00	0
2009-03-04	17:53:00	0
2009-03-04	17:54:00	0
2009-03-04	17:55:00	0
2009-03-04	17:56:00	0
2009-03-04	17:57:00	0
2009-03-04	17:58:00	0
2009-03-04	17:59:00	0
2009-03-04	18:00:00	0
2009-03-04	18:01:00	25
2009-03-04	18:02:00	37
2009-03-04	18:03:00	37
2009-03-04	18:04:00	0
2009-03-04	18:05:00	0
2009-03-04	18:06:00	0
2009-03-04	18:07:00	0
2009-03-04	18:08:00	0
2009-03-04	18:09:00	0
2009-03-04	18:10:00	0
2009-03-04	18:11:00	0
2009-03-04	18:12:00	0
2009-03-04	18:13:00	12
2009-03-04	18:14:00	0
2009-03-04	18:15:00	0
2009-03-04	18:16:00	0
2009-03-04	18:17:00	1017
2009-03-04	18:18:00	278
2009-03-04	18:19:00	1044
2009-03-04	18:20:00	1305
2009-03-04	18:21:00	657
2009-03-04	18:22:00	25
2009-03-04	18:23:00	111
2009-03-04	18:24:00	135
2009-03-04	18:25:00	98
2009-03-04	18:26:00	190
2009-03-04	18:27:00	12
2009-03-04	18:28:00	0
2009-03-04	18:29:00	62
2009-03-04	18:30:00	0
2009-03-04	18:31:00	0
2009-03-04	18:32:00	0
2009-03-04	18:33:00	135
2009-03-04	18:34:00	62
2009-03-04	18:35:00	49
2009-03-04	18:36:00	12
2009-03-04	18:37:00	0
2009-03-04	18:38:00	12
2009-03-04	18:39:00	0
2009-03-04	18:40:00	111
2009-03-04	18:41:00	25
2009-03-04	18:42:00	12
2009-03-04	18:43:00	12
2009-03-04	18:44:00	0
2009-03-04	18:45:00	62
2009-03-04	18:46:00	86
2009-03-04	18:47:00	49
2009-03-04	18:48:00	49
2009-03-04	18:49:00	0
2009-03-04	18:50:00	37
2009-03-04	18:51:00	0
2009-03-04	18:52:00	0
2009-03-04	18:53:00	12
2009-03-04	18:54:00	74
2009-03-04	18:55:00	74
2009-03-04	18:56:00	0
2009-03-04	18:57:00	148
2009-03-04	18:58:00	25
2009-03-04	18:59:00	12
2009-03-04	19:00:00	49
2009-03-04	19:01:00	12
2009-03-04	19:02:00	62
2009-03-04	19:03:00	25
2009-03-04	19:04:00	37
2009-03-04	19:05:00	204
2009-03-04	19:06:00	657
2009-03-04	19:07:00	635
2009-03-04	19:08:00	724
2009-03-04	19:09:00	293
2009-03-04	19:10:00	278
2009-03-04	19:11:00	497
2009-03-04	19:12:00	374
2009-03-04	19:13:00	148
2009-03-04	19:14:00	111
2009-03-04	19:15:00	135
2009-03-04	19:16:00	0
2009-03-04	19:17:00	0
2009-03-04	19:18:00	0
2009-03-04	19:19:00	0
2009-03-04	19:20:00	0
2009-03-04	19:21:00	409
2009-03-04	19:22:00	340
2009-03-04	19:23:00	278
2009-03-04	19:24:00	49
2009-03-04	19:25:00	391
2009-03-04	19:26:00	374
2009-03-04	19:27:00	308
2009-03-04	19:28:00	249
2009-03-04	19:29:00	0
2009-03-04	19:30:00	0
2009-03-04	19:31:00	0
2009-03-04	19:32:00	0
2009-03-04	19:33:00	0
2009-03-04	19:34:00	0
2009-03-04	19:35:00	249
2009-03-04	19:36:00	0
2009-03-04	19:37:00	0
2009-03-04	19:38:00	0
2009-03-04	19:39:00	0
2009-03-04	19:40:00	0
2009-03-04	19:41:00	340
2009-03-04	19:42:00	160
2009-03-04	19:43:00	0
2009-03-04	19:44:00	0
2009-03-04	19:45:00	0
2009-03-04	19:46:00	0
2009-03-04	19:47:00	426
2009-03-04	19:48:00	0
2009-03-04	19:49:00	0
2009-03-04	19:50:00	0
2009-03-04	19:51:00	0
2009-03-04	19:52:00	0
2009-03-04	19:53:00	0
2009-03-04	19:54:00	135
2009-03-04	19:55:00	0
2009-03-04	19:56:00	340
2009-03-04	19:57:00	0
2009-03-04	19:58:00	0
2009-03-04	19:59:00	62
2009-03-04	20:00:00	0
2009-03-04	20:01:00	443
2009-03-04	20:02:00	190
2009-03-04	20:03:00	148
2009-03-04	20:04:00	175
2009-03-04	20:05:00	293
2009-03-04	20:06:00	391
2009-03-04	20:07:00	0
2009-03-04	20:08:00	0
2009-03-04	20:09:00	308
2009-03-04	20:10:00	0
2009-03-04	20:11:00	0
2009-03-04	20:12:00	160
2009-03-04	20:13:00	111
2009-03-04	20:14:00	293
2009-03-04	20:15:00	278
2009-03-04	20:16:00	175
2009-03-04	20:17:00	148
2009-03-04	20:18:00	0
2009-03-04	20:19:00	0
2009-03-04	20:20:00	0
2009-03-04	20:21:00	293
2009-03-04	20:22:00	86
2009-03-04	20:23:00	308
2009-03-04	20:24:00	234
2009-03-04	20:25:00	49
2009-03-04	20:26:00	111
2009-03-04	20:27:00	0
2009-03-04	20:28:00	0
2009-03-04	20:29:00	0
2009-03-04	20:30:00	0
2009-03-04	20:31:00	0
2009-03-04	20:32:00	204
2009-03-04	20:33:00	190
2009-03-04	20:34:00	135
2009-03-04	20:35:00	204
2009-03-04	20:36:00	204
2009-03-04	20:37:00	111
2009-03-04	20:38:00	98
2009-03-04	20:39:00	0
2009-03-04	20:40:00	0
2009-03-04	20:41:00	0
2009-03-04	20:42:00	0
2009-03-04	20:43:00	0
2009-03-04	20:44:00	49
2009-03-04	20:45:00	0
2009-03-04	20:46:00	0
2009-03-04	20:47:00	37
2009-03-04	20:48:00	0
2009-03-04	20:49:00	148
2009-03-04	20:50:00	0
2009-03-04	20:51:00	0
2009-03-04	20:52:00	0
2009-03-04	20:53:00	0
2009-03-04	20:54:00	0
2009-03-04	20:55:00	12
2009-03-04	20:56:00	0
2009-03-04	20:57:00	0
2009-03-04	20:58:00	0
2009-03-04	20:59:00	25
2009-03-04	21:00:00	0
2009-03-04	21:01:00	0
2009-03-04	21:02:00	0
2009-03-04	21:03:00	0
2009-03-04	21:04:00	25
2009-03-04	21:05:00	0
2009-03-04	21:06:00	160
2009-03-04	21:07:00	0
2009-03-04	21:08:00	0
2009-03-04	21:09:00	0
2009-03-04	21:10:00	0
2009-03-04	21:11:00	0
2009-03-04	21:12:00	0
2009-03-04	21:13:00	204
2009-03-04	21:14:00	12
2009-03-04	21:15:00	0
2009-03-04	21:16:00	0
2009-03-04	21:17:00	12
2009-03-04	21:18:00	0
2009-03-04	21:19:00	0
2009-03-04	21:20:00	0
2009-03-04	21:21:00	12
2009-03-04	21:22:00	111
2009-03-04	21:23:00	148
2009-03-04	21:24:00	0
2009-03-04	21:25:00	0
2009-03-04	21:26:00	0
2009-03-04	21:27:00	0
2009-03-04	21:28:00	0
2009-03-04	21:29:00	0
2009-03-04	21:30:00	0
2009-03-04	21:31:00	0
2009-03-04	21:32:00	0
2009-03-04	21:33:00	0
2009-03-04	21:34:00	0
2009-03-04	21:35:00	0
2009-03-04	21:36:00	0
2009-03-04	21:37:00	0
2009-03-04	21:38:00	0
2009-03-04	21:39:00	12
2009-03-04	21:40:00	0
2009-03-04	21:41:00	635
2009-03-04	21:42:00	990
2009-03-04	21:43:00	889
2009-03-04	21:44:00	889
2009-03-04	21:45:00	278
2009-03-04	21:46:00	278
2009-03-04	21:47:00	768
2009-03-04	21:48:00	12
2009-03-04	21:49:00	0
2009-03-04	21:50:00	357
2009-03-04	21:51:00	111
2009-03-04	21:52:00	0
2009-03-04	21:53:00	0
2009-03-04	21:54:00	0
2009-03-04	21:55:00	0
2009-03-04	21:56:00	0
2009-03-04	21:57:00	0
2009-03-04	21:58:00	0
2009-03-04	21:59:00	0
2009-03-04	22:00:00	0
2009-03-04	22:01:00	0
2009-03-04	22:02:00	0
2009-03-04	22:03:00	0
2009-03-04	22:04:00	49
2009-03-04	22:05:00	0
2009-03-04	22:06:00	0
2009-03-04	22:07:00	0
2009-03-04	22:08:00	0
2009-03-04	22:09:00	0
2009-03-04	22:10:00	0
2009-03-04	22:11:00	0
2009-03-04	22:12:00	0
2009-03-04	22:13:00	0
2009-03-04	22:14:00	0
2009-03-04	22:15:00	0
2009-03-04	22:16:00	0
2009-03-04	22:17:00	0
2009-03-04	22:18:00	0
2009-03-04	22:19:00	0
2009-03-04	22:20:00	0
2009-03-04	22:21:00	0
2009-03-04	22:22:00	0
2009-03-04	22:23:00	0
2009-03-04	22:24:00	12
2009-03-04	22:25:00	0
2009-03-04	22:26:00	0
2009-03-04	22:27:00	0
2009-03-04	22:28:00	0
2009-03-04	22:29:00	0
2009-03-04	22:30:00	0
2009-03-04	22:31:00	0
2009-03-04	22:32:00	0
2009-03-04	22:33:00	12
2009-03-04	22:34:00	0
2009-03-04	22:35:00	0
2009-03-04	22:36:00	0
2009-03-04	22:37:00	308
2009-03-04	22:38:00	49
2009-03-04	22:39:00	25
2009-03-04	22:40:00	790
2009-03-04	22:41:00	0
2009-03-04	22:42:00	0
2009-03-04	22:43:00	0
2009-03-04	22:44:00	0
2009-03-04	22:45:00	0
2009-03-04	22:46:00	62
2009-03-04	22:47:00	135
2009-03-04	22:48:00	175
2009-03-04	22:49:00	0
2009-03-04	22:50:00	0
2009-03-04	22:51:00	0
2009-03-04	22:52:00	0
2009-03-04	22:53:00	0
2009-03-04	22:54:00	0
2009-03-04	22:55:00	0
2009-03-04	22:56:00	0
2009-03-04	22:57:00	0
2009-03-04	22:58:00	0
2009-03-04	22:59:00	0
2009-03-04	23:00:00	0
2009-03-04	23:01:00	0
2009-03-04	23:02:00	0
2009-03-04	23:03:00	0
2009-03-04	23:04:00	0
2009-03-04	23:05:00	0
2009-03-04	23:06:00	0
2009-03-04	23:07:00	0
2009-03-04	23:08:00	0
2009-03-04	23:09:00	0
2009-03-04	23:10:00	0
2009-03-04	23:11:00	0
2009-03-04	23:12:00	0
2009-03-04	23:13:00	0
2009-03-04	23:14:00	0
2009-03-04	23:15:00	0
2009-03-04	23:16:00	0
2009-03-04	23:17:00	0
2009-03-04	23:18:00	0
2009-03-04	23:19:00	0
2009-03-04	23:20:00	0
2009-03-04	23:21:00	0
2009-03-04	23:22:00	0
2009-03-04	23:23:00	0
2009-03-04	23:24:00	0
2009-03-04	23:25:00	0
2009-03-04	23:26:00	0
2009-03-04	23:27:00	308
2009-03-04	23:28:00	308
2009-03-04	23:29:00	12
2009-03-04	23:30:00	0
2009-03-04	23:31:00	0
2009-03-04	23:32:00	0
2009-03-04	23:33:00	0
2009-03-04	23:34:00	0
2009-03-04	23:35:00	0
2009-03-04	23:36:00	0
2009-03-04	23:37:00	0
2009-03-04	23:38:00	0
2009-03-04	23:39:00	0
2009-03-04	23:40:00	0
2009-03-04	23:41:00	0
2009-03-04	23:42:00	0
2009-03-04	23:43:00	0
2009-03-04	23:44:00	0
2009-03-04	23:45:00	0
2009-03-04	23:46:00	0
2009-03-04	23:47:00	0
2009-03-04	23:48:00	0
2009-03-04	23:49:00	0
2009-03-04	23:50:00	0
2009-03-04	23:51:00	0
2009-03-04	23:52:00	0
2009-03-04	23:53:00	0
2009-03-04	23:54:00	49
2009-03-04	23:55:00	0
2009-03-04	23:56:00	0
2009-03-04	23:57:00	0
2009-03-04	23:58:00	0
2009-03-04	23:59:00	0
2009-03-05	00:00:00	0
2009-03-05	00:01:00	12
2009-03-05	00:02:00	0
2009-03-05	00:03:00	0
2009-03-05	00:04:00	0
2009-03-05	00:05:00	0
2009-03-05	00:06:00	0
2009-03-05	00:07:00	0
2009-03-05	00:08:00	0
2009-03-05	00:09:00	0
2009-03-05	00:10:00	0
2009-03-05	00:11:00	0
2009-03-05	00:12:00	0
2009-03-05	00:13:00	0
2009-03-05	00:14:00	0
2009-03-05	00:15:00	0
2009-03-05	00:16:00	0
2009-03-05	00:17:00	0
2009-03-05	00:18:00	0
2009-03-05	00:19:00	0
2009-03-05	00:20:00	0
2009-03-05	00:21:00	0
2009-03-05	00:22:00	0
2009-03-05	00:23:00	0
2009-03-05	00:24:00	0
2009-03-05	00:25:00	0
2009-03-05	00:26:00	0
2009-03-05	00:27:00	12
2009-03-05	00:28:00	0
2009-03-05	00:29:00	0
2009-03-05	00:30:00	0
2009-03-05	00:31:00	0
2009-03-05	00:32:00	0
2009-03-05	00:33:00	0
2009-03-05	00:34:00	0
2009-03-05	00:35:00	0
2009-03-05	00:36:00	0
2009-03-05	00:37:00	0
2009-03-05	00:38:00	25
2009-03-05	00:39:00	12
2009-03-05	00:40:00	0
2009-03-05	00:41:00	0
2009-03-05	00:42:00	0
2009-03-05	00:43:00	0
2009-03-05	00:44:00	0
2009-03-05	00:45:00	0
2009-03-05	00:46:00	0
2009-03-05	00:47:00	0
2009-03-05	00:48:00	0
2009-03-05	00:49:00	0
2009-03-05	00:50:00	0
2009-03-05	00:51:00	0
2009-03-05	00:52:00	0
2009-03-05	00:53:00	0
2009-03-05	00:54:00	0
2009-03-05	00:55:00	0
2009-03-05	00:56:00	0
2009-03-05	00:57:00	0
2009-03-05	00:58:00	0
2009-03-05	00:59:00	0
2009-03-05	01:00:00	0
2009-03-05	01:01:00	0
2009-03-05	01:02:00	0
2009-03-05	01:03:00	0
2009-03-05	01:04:00	0
2009-03-05	01:05:00	0
2009-03-05	01:06:00	49
2009-03-05	01:07:00	62
2009-03-05	01:08:00	12
2009-03-05	01:09:00	25
2009-03-05	01:10:00	0
2009-03-05	01:11:00	0
2009-03-05	01:12:00	0
2009-03-05	01:13:00	0
2009-03-05	01:14:00	0
2009-03-05	01:15:00	0
2009-03-05	01:16:00	0
2009-03-05	01:17:00	0
2009-03-05	01:18:00	0
2009-03-05	01:19:00	0
2009-03-05	01:20:00	0
2009-03-05	01:21:00	0
2009-03-05	01:22:00	0
2009-03-05	01:23:00	0
2009-03-05	01:24:00	0
2009-03-05	01:25:00	12
2009-03-05	01:26:00	0
2009-03-05	01:27:00	0
2009-03-05	01:28:00	0
2009-03-05	01:29:00	0
2009-03-05	01:30:00	0
2009-03-05	01:31:00	0
2009-03-05	01:32:00	0
2009-03-05	01:33:00	0
2009-03-05	01:34:00	0
2009-03-05	01:35:00	0
2009-03-05	01:36:00	0
2009-03-05	01:37:00	0
2009-03-05	01:38:00	74
2009-03-05	01:39:00	0
2009-03-05	01:40:00	0
2009-03-05	01:41:00	0
2009-03-05	01:42:00	0
2009-03-05	01:43:00	0
2009-03-05	01:44:00	0
2009-03-05	01:45:00	0
2009-03-05	01:46:00	0
2009-03-05	01:47:00	0
2009-03-05	01:48:00	0
2009-03-05	01:49:00	0
2009-03-05	01:50:00	0
2009-03-05	01:51:00	0
2009-03-05	01:52:00	0
2009-03-05	01:53:00	0
2009-03-05	01:54:00	0
2009-03-05	01:55:00	111
2009-03-05	01:56:00	635
2009-03-05	01:57:00	278
2009-03-05	01:58:00	12
2009-03-05	01:59:00	0
2009-03-05	02:00:00	0
2009-03-05	02:01:00	0
2009-03-05	02:02:00	0
2009-03-05	02:03:00	0
2009-03-05	02:04:00	0
2009-03-05	02:05:00	0
2009-03-05	02:06:00	0
2009-03-05	02:07:00	0
2009-03-05	02:08:00	0
2009-03-05	02:09:00	0
2009-03-05	02:10:00	0
2009-03-05	02:11:00	0
2009-03-05	02:12:00	0
2009-03-05	02:13:00	0
2009-03-05	02:14:00	0
2009-03-05	02:15:00	0
2009-03-05	02:16:00	0
2009-03-05	02:17:00	0
2009-03-05	02:18:00	0
2009-03-05	02:19:00	0
2009-03-05	02:20:00	0
2009-03-05	02:21:00	0
2009-03-05	02:22:00	0
2009-03-05	02:23:00	0
2009-03-05	02:24:00	0
2009-03-05	02:25:00	0
2009-03-05	02:26:00	0
2009-03-05	02:27:00	0
2009-03-05	02:28:00	0
2009-03-05	02:29:00	0
2009-03-05	02:30:00	0
2009-03-05	02:31:00	0
2009-03-05	02:32:00	0
2009-03-05	02:33:00	74
2009-03-05	02:34:00	98
2009-03-05	02:35:00	263
2009-03-05	02:36:00	0
2009-03-05	02:37:00	0
2009-03-05	02:38:00	0
2009-03-05	02:39:00	0
2009-03-05	02:40:00	0
2009-03-05	02:41:00	0
2009-03-05	02:42:00	111
2009-03-05	02:43:00	0
2009-03-05	02:44:00	0
2009-03-05	02:45:00	0
2009-03-05	02:46:00	0
2009-03-05	02:47:00	0
2009-03-05	02:48:00	0
2009-03-05	02:49:00	0
2009-03-05	02:50:00	0
2009-03-05	02:51:00	0
2009-03-05	02:52:00	0
2009-03-05	02:53:00	0
2009-03-05	02:54:00	0
2009-03-05	02:55:00	0
2009-03-05	02:56:00	0
2009-03-05	02:57:00	0
2009-03-05	02:58:00	0
2009-03-05	02:59:00	0
2009-03-05	03:00:00	0
2009-03-05	03:01:00	0
2009-03-05	03:02:00	0
2009-03-05	03:03:00	0
2009-03-05	03:04:00	0
2009-03-05	03:05:00	0
2009-03-05	03:06:00	0
2009-03-05	03:07:00	0
2009-03-05	03:08:00	0
2009-03-05	03:09:00	0
2009-03-05	03:10:00	0
2009-03-05	03:11:00	12
2009-03-05	03:12:00	0
2009-03-05	03:13:00	0
2009-03-05	03:14:00	0
2009-03-05	03:15:00	0
2009-03-05	03:16:00	0
2009-03-05	03:17:00	0
2009-03-05	03:18:00	0
2009-03-05	03:19:00	0
2009-03-05	03:20:00	0
2009-03-05	03:21:00	0
2009-03-05	03:22:00	0
2009-03-05	03:23:00	0
2009-03-05	03:24:00	0
2009-03-05	03:25:00	0
2009-03-05	03:26:00	0
2009-03-05	03:27:00	0
2009-03-05	03:28:00	0
2009-03-05	03:29:00	0
2009-03-05	03:30:00	62
2009-03-05	03:31:00	409
2009-03-05	03:32:00	497
2009-03-05	03:33:00	249
2009-03-05	03:34:00	98
2009-03-05	03:35:00	160
2009-03-05	03:36:00	25
2009-03-05	03:37:00	148
2009-03-05	03:38:00	12
2009-03-05	03:39:00	12
2009-03-05	03:40:00	12
2009-03-05	03:41:00	0
2009-03-05	03:42:00	204
2009-03-05	03:43:00	74
2009-03-05	03:44:00	37
2009-03-05	03:45:00	98
2009-03-05	03:46:00	0
2009-03-05	03:47:00	0
2009-03-05	03:48:00	0
2009-03-05	03:49:00	12
2009-03-05	03:50:00	0
2009-03-05	03:51:00	0
2009-03-05	03:52:00	0
2009-03-05	03:53:00	0
2009-03-05	03:54:00	0
2009-03-05	03:55:00	0
2009-03-05	03:56:00	0
2009-03-05	03:57:00	0
2009-03-05	03:58:00	0
2009-03-05	03:59:00	0
2009-03-05	04:00:00	0
2009-03-05	04:01:00	0
2009-03-05	04:02:00	0
2009-03-05	04:03:00	0
2009-03-05	04:04:00	0
2009-03-05	04:05:00	0
2009-03-05	04:06:00	0
2009-03-05	04:07:00	0
2009-03-05	04:08:00	0
2009-03-05	04:09:00	0
2009-03-05	04:10:00	0
2009-03-05	04:11:00	0
2009-03-05	04:12:00	0
2009-03-05	04:13:00	0
2009-03-05	04:14:00	0
2009-03-05	04:15:00	0
2009-03-05	04:16:00	0
2009-03-05	04:17:00	0
2009-03-05	04:18:00	0
2009-03-05	04:19:00	0
2009-03-05	04:20:00	0
2009-03-05	04:21:00	0
2009-03-05	04:22:00	0
2009-03-05	04:23:00	25
2009-03-05	04:24:00	0
2009-03-05	04:25:00	0
2009-03-05	04:26:00	0
2009-03-05	04:27:00	0
2009-03-05	04:28:00	0
2009-03-05	04:29:00	0
2009-03-05	04:30:00	0
2009-03-05	04:31:00	0
2009-03-05	04:32:00	0
2009-03-05	04:33:00	0
2009-03-05	04:34:00	0
2009-03-05	04:35:00	0
2009-03-05	04:36:00	0
2009-03-05	04:37:00	0
2009-03-05	04:38:00	0
2009-03-05	04:39:00	0
2009-03-05	04:40:00	0
2009-03-05	04:41:00	0
2009-03-05	04:42:00	0
2009-03-05	04:43:00	0
2009-03-05	04:44:00	0
2009-03-05	04:45:00	0
2009-03-05	04:46:00	0
2009-03-05	04:47:00	0
2009-03-05	04:48:00	0
2009-03-05	04:49:00	0
2009-03-05	04:50:00	0
2009-03-05	04:51:00	0
2009-03-05	04:52:00	0
2009-03-05	04:53:00	0
2009-03-05	04:54:00	0
2009-03-05	04:55:00	0
2009-03-05	04:56:00	98
2009-03-05	04:57:00	391
2009-03-05	04:58:00	86
2009-03-05	04:59:00	0
2009-03-05	05:00:00	0
2009-03-05	05:01:00	0
2009-03-05	05:02:00	0
2009-03-05	05:03:00	0
2009-03-05	05:04:00	0
2009-03-05	05:05:00	0
2009-03-05	05:06:00	0
2009-03-05	05:07:00	0
2009-03-05	05:08:00	0
2009-03-05	05:09:00	135
2009-03-05	05:10:00	37
2009-03-05	05:11:00	0
2009-03-05	05:12:00	0
2009-03-05	05:13:00	0
2009-03-05	05:14:00	0
2009-03-05	05:15:00	0
2009-03-05	05:16:00	0
2009-03-05	05:17:00	0
2009-03-05	05:18:00	0
2009-03-05	05:19:00	0
2009-03-05	05:20:00	0
2009-03-05	05:21:00	0
2009-03-05	05:22:00	0
2009-03-05	05:23:00	0
2009-03-05	05:24:00	0
2009-03-05	05:25:00	0
2009-03-05	05:26:00	0
2009-03-05	05:27:00	0
2009-03-05	05:28:00	0
2009-03-05	05:29:00	0
2009-03-05	05:30:00	0
2009-03-05	05:31:00	12
2009-03-05	05:32:00	0
2009-03-05	05:33:00	0
2009-03-05	05:34:00	0
2009-03-05	05:35:00	0
2009-03-05	05:36:00	0
2009-03-05	05:37:00	0
2009-03-05	05:38:00	0
2009-03-05	05:39:00	0
2009-03-05	05:40:00	0
2009-03-05	05:41:00	0
2009-03-05	05:42:00	0
2009-03-05	05:43:00	0
2009-03-05	05:44:00	0
2009-03-05	05:45:00	0
2009-03-05	05:46:00	0
2009-03-05	05:47:00	0
2009-03-05	05:48:00	0
2009-03-05	05:49:00	0
2009-03-05	05:50:00	0
2009-03-05	05:51:00	0
2009-03-05	05:52:00	0
2009-03-05	05:53:00	0
2009-03-05	05:54:00	0
2009-03-05	05:55:00	0
2009-03-05	05:56:00	0
2009-03-05	05:57:00	0
2009-03-05	05:58:00	0
2009-03-05	05:59:00	0
2009-03-05	06:00:00	74
2009-03-05	06:01:00	497
2009-03-05	06:02:00	123
2009-03-05	06:03:00	0
2009-03-05	06:04:00	0
2009-03-05	06:05:00	0
2009-03-05	06:06:00	0
2009-03-05	06:07:00	62
2009-03-05	06:08:00	657
2009-03-05	06:09:00	86
2009-03-05	06:10:00	86
2009-03-05	06:11:00	249
2009-03-05	06:12:00	0
2009-03-05	06:13:00	0
2009-03-05	06:14:00	0
2009-03-05	06:15:00	12
2009-03-05	06:16:00	0
2009-03-05	06:17:00	0
2009-03-05	06:18:00	0
2009-03-05	06:19:00	0
2009-03-05	06:20:00	0
2009-03-05	06:21:00	0
2009-03-05	06:22:00	0
2009-03-05	06:23:00	0
2009-03-05	06:24:00	0
2009-03-05	06:25:00	0
2009-03-05	06:26:00	12
2009-03-05	06:27:00	0
2009-03-05	06:28:00	0
2009-03-05	06:29:00	0
2009-03-05	06:30:00	0
2009-03-05	06:31:00	25
2009-03-05	06:32:00	0
2009-03-05	06:33:00	0
2009-03-05	06:34:00	0
2009-03-05	06:35:00	0
2009-03-05	06:36:00	0
2009-03-05	06:37:00	37
2009-03-05	06:38:00	0
2009-03-05	06:39:00	0
2009-03-05	06:40:00	0
2009-03-05	06:41:00	0
2009-03-05	06:42:00	0
2009-03-05	06:43:00	0
2009-03-05	06:44:00	0
2009-03-05	06:45:00	0
2009-03-05	06:46:00	0
2009-03-05	06:47:00	0
2009-03-05	06:48:00	0
2009-03-05	06:49:00	25
2009-03-05	06:50:00	1098
2009-03-05	06:51:00	1871
2009-03-05	06:52:00	1433
2009-03-05	06:53:00	839
2009-03-05	06:54:00	135
2009-03-05	06:55:00	0
2009-03-05	06:56:00	0
2009-03-05	06:57:00	0
2009-03-05	06:58:00	0
2009-03-05	06:59:00	308
2009-03-05	07:00:00	62
2009-03-05	07:01:00	391
2009-03-05	07:02:00	148
2009-03-05	07:03:00	0
2009-03-05	07:04:00	0
2009-03-05	07:05:00	0
2009-03-05	07:06:00	0
2009-03-05	07:07:00	204
2009-03-05	07:08:00	123
2009-03-05	07:09:00	0
2009-03-05	07:10:00	0
2009-03-05	07:11:00	0
2009-03-05	07:12:00	0
2009-03-05	07:13:00	0
2009-03-05	07:14:00	0
2009-03-05	07:15:00	0
2009-03-05	07:16:00	0
2009-03-05	07:17:00	0
2009-03-05	07:18:00	0
2009-03-05	07:19:00	0
2009-03-05	07:20:00	0
2009-03-05	07:21:00	0
2009-03-05	07:22:00	0
2009-03-05	07:23:00	0
2009-03-05	07:24:00	0
2009-03-05	07:25:00	0
2009-03-05	07:26:00	0
2009-03-05	07:27:00	25
2009-03-05	07:28:00	0
2009-03-05	07:29:00	0
2009-03-05	07:30:00	0
2009-03-05	07:31:00	0
2009-03-05	07:32:00	0
2009-03-05	07:33:00	0
2009-03-05	07:34:00	0
2009-03-05	07:35:00	0
2009-03-05	07:36:00	0
2009-03-05	07:37:00	0
2009-03-05	07:38:00	0
2009-03-05	07:39:00	0
2009-03-05	07:40:00	86
2009-03-05	07:41:00	497
2009-03-05	07:42:00	537
2009-03-05	07:43:00	374
2009-03-05	07:44:00	25
2009-03-05	07:45:00	0
2009-03-05	07:46:00	0
2009-03-05	07:47:00	0
2009-03-05	07:48:00	0
2009-03-05	07:49:00	74
2009-03-05	07:50:00	37
2009-03-05	07:51:00	0
2009-03-05	07:52:00	0
2009-03-05	07:53:00	0
2009-03-05	07:54:00	0
2009-03-05	07:55:00	768
2009-03-05	07:56:00	160
2009-03-05	07:57:00	37
2009-03-05	07:58:00	0
2009-03-05	07:59:00	0
2009-03-05	08:00:00	0
2009-03-05	08:01:00	0
2009-03-05	08:02:00	0
2009-03-05	08:03:00	0
2009-03-05	08:04:00	278
2009-03-05	08:05:00	293
2009-03-05	08:06:00	635
2009-03-05	08:07:00	1871
2009-03-05	08:08:00	657
2009-03-05	08:09:00	537
2009-03-05	08:10:00	1536
2009-03-05	08:11:00	1017
2009-03-05	08:12:00	679
2009-03-05	08:13:00	263
2009-03-05	08:14:00	0
2009-03-05	08:15:00	0
2009-03-05	08:16:00	0
2009-03-05	08:17:00	0
2009-03-05	08:18:00	0
2009-03-05	08:19:00	0
2009-03-05	08:20:00	12
2009-03-05	08:21:00	249
2009-03-05	08:22:00	913
2009-03-05	08:23:00	1071
2009-03-05	08:24:00	913
2009-03-05	08:25:00	790
2009-03-05	08:26:00	990
2009-03-05	08:27:00	1098
2009-03-05	08:28:00	1017
2009-03-05	08:29:00	1337
2009-03-05	08:30:00	537
2009-03-05	08:31:00	746
2009-03-05	08:32:00	322
2009-03-05	08:33:00	913
2009-03-05	08:34:00	679
2009-03-05	08:35:00	702
2009-03-05	08:36:00	615
2009-03-05	08:37:00	815
2009-03-05	08:38:00	374
2009-03-05	08:39:00	190
2009-03-05	08:40:00	443
2009-03-05	08:41:00	426
2009-03-05	08:42:00	409
2009-03-05	08:43:00	0
2009-03-05	08:44:00	576
2009-03-05	08:45:00	374
2009-03-05	08:46:00	340
2009-03-05	08:47:00	293
2009-03-05	08:48:00	426
2009-03-05	08:49:00	340
2009-03-05	08:50:00	204
2009-03-05	08:51:00	0
2009-03-05	08:52:00	322
2009-03-05	08:53:00	293
2009-03-05	08:54:00	1642
2009-03-05	08:55:00	839
2009-03-05	08:56:00	0
2009-03-05	08:57:00	0
2009-03-05	08:58:00	37
2009-03-05	08:59:00	1243
2009-03-05	09:00:00	409
2009-03-05	09:01:00	249
2009-03-05	09:02:00	0
2009-03-05	09:03:00	815
2009-03-05	09:04:00	478
2009-03-05	09:05:00	204
2009-03-05	09:06:00	0
2009-03-05	09:07:00	746
2009-03-05	09:08:00	839
[truncated: 19,611 more rows]

## Sheet: 3.18.09
Actogram, Copy Raw Data, All Days
Identity:	Bear Stephens
Filename:	E:\Active Research Files\meloxicam titre canine\cases\bear s\Bear Stephens 3.18.09.AWC
Gender:	M
Age:	9
Height:	76.2 cm	30.0 in
Weight:	34.0 kg	75.0 lbs
Start Date:	18-Mar-2009 (Wed)
Start Time:	18:00:00
Interval:	1.00 mins
Date Stamp:	Time Stamp:	Activity Data:	Marker Press:
2009-03-18	00:00:00	0
2009-03-18	00:01:00	0
2009-03-18	00:02:00	0
2009-03-18	00:03:00	0
2009-03-18	00:04:00	0
2009-03-18	00:05:00	0
2009-03-18	00:06:00	0
2009-03-18	00:07:00	0
2009-03-18	00:08:00	0
2009-03-18	00:09:00	0
2009-03-18	00:10:00	0
2009-03-18	00:11:00	0
2009-03-18	00:12:00	0
2009-03-18	00:13:00	0
2009-03-18	00:14:00	0
2009-03-18	00:15:00	0
2009-03-18	00:16:00	0
2009-03-18	00:17:00	0
2009-03-18	00:18:00	0
2009-03-18	00:19:00	0
2009-03-18	00:20:00	0
2009-03-18	00:21:00	0
2009-03-18	00:22:00	0
2009-03-18	00:23:00	0
2009-03-18	00:24:00	0
2009-03-18	00:25:00	0
2009-03-18	00:26:00	0
2009-03-18	00:27:00	0
2009-03-18	00:28:00	0
2009-03-18	00:29:00	0
2009-03-18	00:30:00	0
2009-03-18	00:31:00	0
2009-03-18	00:32:00	0
2009-03-18	00:33:00	0
2009-03-18	00:34:00	0
2009-03-18	00:35:00	0
2009-03-18	00:36:00	0
2009-03-18	00:37:00	0
2009-03-18	00:38:00	0
2009-03-18	00:39:00	0
2009-03-18	00:40:00	0
2009-03-18	00:41:00	0
2009-03-18	00:42:00	0
2009-03-18	00:43:00	0
2009-03-18	00:44:00	0
2009-03-18	00:45:00	0
2009-03-18	00:46:00	0
2009-03-18	00:47:00	0
2009-03-18	00:48:00	0
2009-03-18	00:49:00	0
2009-03-18	00:50:00	0
2009-03-18	00:51:00	0
2009-03-18	00:52:00	0
2009-03-18	00:53:00	0
2009-03-18	00:54:00	0
2009-03-18	00:55:00	0
2009-03-18	00:56:00	0
2009-03-18	00:57:00	0
2009-03-18	00:58:00	0
2009-03-18	00:59:00	0
2009-03-18	01:00:00	0
2009-03-18	01:01:00	0
2009-03-18	01:02:00	0
2009-03-18	01:03:00	0
2009-03-18	01:04:00	0
2009-03-18	01:05:00	0
2009-03-18	01:06:00	0
2009-03-18	01:07:00	0
2009-03-18	01:08:00	0
2009-03-18	01:09:00	0
2009-03-18	01:10:00	0
2009-03-18	01:11:00	0
2009-03-18	01:12:00	0
2009-03-18	01:13:00	0
2009-03-18	01:14:00	0
2009-03-18	01:15:00	0
2009-03-18	01:16:00	0
2009-03-18	01:17:00	0
2009-03-18	01:18:00	0
2009-03-18	01:19:00	0
2009-03-18	01:20:00	0
2009-03-18	01:21:00	0
2009-03-18	01:22:00	0
2009-03-18	01:23:00	0
2009-03-18	01:24:00	0
2009-03-18	01:25:00	0
2009-03-18	01:26:00	0
2009-03-18	01:27:00	0
2009-03-18	01:28:00	0
2009-03-18	01:29:00	0
2009-03-18	01:30:00	0
2009-03-18	01:31:00	0
2009-03-18	01:32:00	0
2009-03-18	01:33:00	0
2009-03-18	01:34:00	0
2009-03-18	01:35:00	0
2009-03-18	01:36:00	0
2009-03-18	01:37:00	0
2009-03-18	01:38:00	0
2009-03-18	01:39:00	0
2009-03-18	01:40:00	0
2009-03-18	01:41:00	0
2009-03-18	01:42:00	0
2009-03-18	01:43:00	0
2009-03-18	01:44:00	0
2009-03-18	01:45:00	0
2009-03-18	01:46:00	0
2009-03-18	01:47:00	0
2009-03-18	01:48:00	0
2009-03-18	01:49:00	0
2009-03-18	01:50:00	0
2009-03-18	01:51:00	0
2009-03-18	01:52:00	0
2009-03-18	01:53:00	0
2009-03-18	01:54:00	0
2009-03-18	01:55:00	0
2009-03-18	01:56:00	0
2009-03-18	01:57:00	0
2009-03-18	01:58:00	0
2009-03-18	01:59:00	0
2009-03-18	02:00:00	0
2009-03-18	02:01:00	0
2009-03-18	02:02:00	0
2009-03-18	02:03:00	0
2009-03-18	02:04:00	0
2009-03-18	02:05:00	0
2009-03-18	02:06:00	0
2009-03-18	02:07:00	0
2009-03-18	02:08:00	0
2009-03-18	02:09:00	0
2009-03-18	02:10:00	0
2009-03-18	02:11:00	0
2009-03-18	02:12:00	0
2009-03-18	02:13:00	0
2009-03-18	02:14:00	0
2009-03-18	02:15:00	0
2009-03-18	02:16:00	0
2009-03-18	02:17:00	0
2009-03-18	02:18:00	0
2009-03-18	02:19:00	0
2009-03-18	02:20:00	0
2009-03-18	02:21:00	0
2009-03-18	02:22:00	0
2009-03-18	02:23:00	0
2009-03-18	02:24:00	0
2009-03-18	02:25:00	0
2009-03-18	02:26:00	0
2009-03-18	02:27:00	0
2009-03-18	02:28:00	0
2009-03-18	02:29:00	0
2009-03-18	02:30:00	0
2009-03-18	02:31:00	0
2009-03-18	02:32:00	0
2009-03-18	02:33:00	0
2009-03-18	02:34:00	0
2009-03-18	02:35:00	0
2009-03-18	02:36:00	0
2009-03-18	02:37:00	0
2009-03-18	02:38:00	0
2009-03-18	02:39:00	0
2009-03-18	02:40:00	0
2009-03-18	02:41:00	0
2009-03-18	02:42:00	0
2009-03-18	02:43:00	0
2009-03-18	02:44:00	0
2009-03-18	02:45:00	0
2009-03-18	02:46:00	0
2009-03-18	02:47:00	0
2009-03-18	02:48:00	0
2009-03-18	02:49:00	0
2009-03-18	02:50:00	0
2009-03-18	02:51:00	0
2009-03-18	02:52:00	0
2009-03-18	02:53:00	0
2009-03-18	02:54:00	0
2009-03-18	02:55:00	0
2009-03-18	02:56:00	0
2009-03-18	02:57:00	0
2009-03-18	02:58:00	0
2009-03-18	02:59:00	0
2009-03-18	03:00:00	0
2009-03-18	03:01:00	0
2009-03-18	03:02:00	0
2009-03-18	03:03:00	0
2009-03-18	03:04:00	0
2009-03-18	03:05:00	0
2009-03-18	03:06:00	0
2009-03-18	03:07:00	0
2009-03-18	03:08:00	0
2009-03-18	03:09:00	0
2009-03-18	03:10:00	0
2009-03-18	03:11:00	0
2009-03-18	03:12:00	0
2009-03-18	03:13:00	0
2009-03-18	03:14:00	0
2009-03-18	03:15:00	0
2009-03-18	03:16:00	0
2009-03-18	03:17:00	0
2009-03-18	03:18:00	0
2009-03-18	03:19:00	0
2009-03-18	03:20:00	0
2009-03-18	03:21:00	0
2009-03-18	03:22:00	0
2009-03-18	03:23:00	0
2009-03-18	03:24:00	0
2009-03-18	03:25:00	0
2009-03-18	03:26:00	0
2009-03-18	03:27:00	0
2009-03-18	03:28:00	0
2009-03-18	03:29:00	0
2009-03-18	03:30:00	0
2009-03-18	03:31:00	0
2009-03-18	03:32:00	0
2009-03-18	03:33:00	0
2009-03-18	03:34:00	0
2009-03-18	03:35:00	0
2009-03-18	03:36:00	0
2009-03-18	03:37:00	0
2009-03-18	03:38:00	0
2009-03-18	03:39:00	0
2009-03-18	03:40:00	0
2009-03-18	03:41:00	0
2009-03-18	03:42:00	0
2009-03-18	03:43:00	0
2009-03-18	03:44:00	0
2009-03-18	03:45:00	0
2009-03-18	03:46:00	0
2009-03-18	03:47:00	0
2009-03-18	03:48:00	0
2009-03-18	03:49:00	0
2009-03-18	03:50:00	0
2009-03-18	03:51:00	0
2009-03-18	03:52:00	0
2009-03-18	03:53:00	0
2009-03-18	03:54:00	0
2009-03-18	03:55:00	0
2009-03-18	03:56:00	0
2009-03-18	03:57:00	0
2009-03-18	03:58:00	0
2009-03-18	03:59:00	0
2009-03-18	04:00:00	0
2009-03-18	04:01:00	0
2009-03-18	04:02:00	0
2009-03-18	04:03:00	0
2009-03-18	04:04:00	0
2009-03-18	04:05:00	0
2009-03-18	04:06:00	0
2009-03-18	04:07:00	0
2009-03-18	04:08:00	0
2009-03-18	04:09:00	0
2009-03-18	04:10:00	0
2009-03-18	04:11:00	0
2009-03-18	04:12:00	0
2009-03-18	04:13:00	0
2009-03-18	04:14:00	0
2009-03-18	04:15:00	0
2009-03-18	04:16:00	0
2009-03-18	04:17:00	0
2009-03-18	04:18:00	0
2009-03-18	04:19:00	0
2009-03-18	04:20:00	0
2009-03-18	04:21:00	0
2009-03-18	04:22:00	0
2009-03-18	04:23:00	0
2009-03-18	04:24:00	0
2009-03-18	04:25:00	0
2009-03-18	04:26:00	0
2009-03-18	04:27:00	0
2009-03-18	04:28:00	0
2009-03-18	04:29:00	0
2009-03-18	04:30:00	0
2009-03-18	04:31:00	0
2009-03-18	04:32:00	0
2009-03-18	04:33:00	0
2009-03-18	04:34:00	0
2009-03-18	04:35:00	0
2009-03-18	04:36:00	0
2009-03-18	04:37:00	0
2009-03-18	04:38:00	0
2009-03-18	04:39:00	0
2009-03-18	04:40:00	0
2009-03-18	04:41:00	0
2009-03-18	04:42:00	0
2009-03-18	04:43:00	0
2009-03-18	04:44:00	0
2009-03-18	04:45:00	0
2009-03-18	04:46:00	0
2009-03-18	04:47:00	0
2009-03-18	04:48:00	0
2009-03-18	04:49:00	0
2009-03-18	04:50:00	0
2009-03-18	04:51:00	0
2009-03-18	04:52:00	0
2009-03-18	04:53:00	0
2009-03-18	04:54:00	0
2009-03-18	04:55:00	0
2009-03-18	04:56:00	0
2009-03-18	04:57:00	0
2009-03-18	04:58:00	0
2009-03-18	04:59:00	0
2009-03-18	05:00:00	0
2009-03-18	05:01:00	0
2009-03-18	05:02:00	0
2009-03-18	05:03:00	0
2009-03-18	05:04:00	0
2009-03-18	05:05:00	0
2009-03-18	05:06:00	0
2009-03-18	05:07:00	0
2009-03-18	05:08:00	0
2009-03-18	05:09:00	0
2009-03-18	05:10:00	0
2009-03-18	05:11:00	0
2009-03-18	05:12:00	0
2009-03-18	05:13:00	0
2009-03-18	05:14:00	0
2009-03-18	05:15:00	0
2009-03-18	05:16:00	0
2009-03-18	05:17:00	0
2009-03-18	05:18:00	0
2009-03-18	05:19:00	0
2009-03-18	05:20:00	0
2009-03-18	05:21:00	0
2009-03-18	05:22:00	0
2009-03-18	05:23:00	0
2009-03-18	05:24:00	0
2009-03-18	05:25:00	0
2009-03-18	05:26:00	0
2009-03-18	05:27:00	0
2009-03-18	05:28:00	0
2009-03-18	05:29:00	0
2009-03-18	05:30:00	0
2009-03-18	05:31:00	0
2009-03-18	05:32:00	0
2009-03-18	05:33:00	0
2009-03-18	05:34:00	0
2009-03-18	05:35:00	0
2009-03-18	05:36:00	0
2009-03-18	05:37:00	0
2009-03-18	05:38:00	0
2009-03-18	05:39:00	0
2009-03-18	05:40:00	0
2009-03-18	05:41:00	0
2009-03-18	05:42:00	0
2009-03-18	05:43:00	0
2009-03-18	05:44:00	0
2009-03-18	05:45:00	0
2009-03-18	05:46:00	0
2009-03-18	05:47:00	0
2009-03-18	05:48:00	0
2009-03-18	05:49:00	0
2009-03-18	05:50:00	0
2009-03-18	05:51:00	0
2009-03-18	05:52:00	0
2009-03-18	05:53:00	0
2009-03-18	05:54:00	0
2009-03-18	05:55:00	0
2009-03-18	05:56:00	0
2009-03-18	05:57:00	0
2009-03-18	05:58:00	0
2009-03-18	05:59:00	0
2009-03-18	06:00:00	0
2009-03-18	06:01:00	0
2009-03-18	06:02:00	0
2009-03-18	06:03:00	0
2009-03-18	06:04:00	0
2009-03-18	06:05:00	0
2009-03-18	06:06:00	0
2009-03-18	06:07:00	0
2009-03-18	06:08:00	0
2009-03-18	06:09:00	0
2009-03-18	06:10:00	0
2009-03-18	06:11:00	0
2009-03-18	06:12:00	0
2009-03-18	06:13:00	0
2009-03-18	06:14:00	0
2009-03-18	06:15:00	0
2009-03-18	06:16:00	0
2009-03-18	06:17:00	0
2009-03-18	06:18:00	0
2009-03-18	06:19:00	0
2009-03-18	06:20:00	0
2009-03-18	06:21:00	0
2009-03-18	06:22:00	0
2009-03-18	06:23:00	0
2009-03-18	06:24:00	0
2009-03-18	06:25:00	0
2009-03-18	06:26:00	0
2009-03-18	06:27:00	0
2009-03-18	06:28:00	0
2009-03-18	06:29:00	0
2009-03-18	06:30:00	0
2009-03-18	06:31:00	0
2009-03-18	06:32:00	0
2009-03-18	06:33:00	0
2009-03-18	06:34:00	0
2009-03-18	06:35:00	0
2009-03-18	06:36:00	0
2009-03-18	06:37:00	0
2009-03-18	06:38:00	0
2009-03-18	06:39:00	0
2009-03-18	06:40:00	0
2009-03-18	06:41:00	0
2009-03-18	06:42:00	0
2009-03-18	06:43:00	0
2009-03-18	06:44:00	0
2009-03-18	06:45:00	0
2009-03-18	06:46:00	0
2009-03-18	06:47:00	0
2009-03-18	06:48:00	0
2009-03-18	06:49:00	0
2009-03-18	06:50:00	0
2009-03-18	06:51:00	0
2009-03-18	06:52:00	0
2009-03-18	06:53:00	0
2009-03-18	06:54:00	0
2009-03-18	06:55:00	0
2009-03-18	06:56:00	0
2009-03-18	06:57:00	0
2009-03-18	06:58:00	0
2009-03-18	06:59:00	0
2009-03-18	07:00:00	0
2009-03-18	07:01:00	0
2009-03-18	07:02:00	0
2009-03-18	07:03:00	0
2009-03-18	07:04:00	0
2009-03-18	07:05:00	0
2009-03-18	07:06:00	0
2009-03-18	07:07:00	0
2009-03-18	07:08:00	0
2009-03-18	07:09:00	0
2009-03-18	07:10:00	0
2009-03-18	07:11:00	0
2009-03-18	07:12:00	0
2009-03-18	07:13:00	0
2009-03-18	07:14:00	0
2009-03-18	07:15:00	0
2009-03-18	07:16:00	0
2009-03-18	07:17:00	0
2009-03-18	07:18:00	0
2009-03-18	07:19:00	0
2009-03-18	07:20:00	0
2009-03-18	07:21:00	0
2009-03-18	07:22:00	0
2009-03-18	07:23:00	0
2009-03-18	07:24:00	0
2009-03-18	07:25:00	0
2009-03-18	07:26:00	0
2009-03-18	07:27:00	0
2009-03-18	07:28:00	0
2009-03-18	07:29:00	0
2009-03-18	07:30:00	0
2009-03-18	07:31:00	0
2009-03-18	07:32:00	0
2009-03-18	07:33:00	0
2009-03-18	07:34:00	0
2009-03-18	07:35:00	0
2009-03-18	07:36:00	0
2009-03-18	07:37:00	0
2009-03-18	07:38:00	0
2009-03-18	07:39:00	0
2009-03-18	07:40:00	0
2009-03-18	07:41:00	0
2009-03-18	07:42:00	0
2009-03-18	07:43:00	0
2009-03-18	07:44:00	0
2009-03-18	07:45:00	0
2009-03-18	07:46:00	0
2009-03-18	07:47:00	0
2009-03-18	07:48:00	0
2009-03-18	07:49:00	0
2009-03-18	07:50:00	0
2009-03-18	07:51:00	0
2009-03-18	07:52:00	0
2009-03-18	07:53:00	0
2009-03-18	07:54:00	0
2009-03-18	07:55:00	0
2009-03-18	07:56:00	0
2009-03-18	07:57:00	0
2009-03-18	07:58:00	0
2009-03-18	07:59:00	0
2009-03-18	08:00:00	0
2009-03-18	08:01:00	0
2009-03-18	08:02:00	0
2009-03-18	08:03:00	0
2009-03-18	08:04:00	0
2009-03-18	08:05:00	0
2009-03-18	08:06:00	0
2009-03-18	08:07:00	0
2009-03-18	08:08:00	0
2009-03-18	08:09:00	0
2009-03-18	08:10:00	0
2009-03-18	08:11:00	0
2009-03-18	08:12:00	0
2009-03-18	08:13:00	0
2009-03-18	08:14:00	0
2009-03-18	08:15:00	0
2009-03-18	08:16:00	0
2009-03-18	08:17:00	0
2009-03-18	08:18:00	0
2009-03-18	08:19:00	0
2009-03-18	08:20:00	0
2009-03-18	08:21:00	0
2009-03-18	08:22:00	0
2009-03-18	08:23:00	0
2009-03-18	08:24:00	0
2009-03-18	08:25:00	0
2009-03-18	08:26:00	0
2009-03-18	08:27:00	0
2009-03-18	08:28:00	0
2009-03-18	08:29:00	0
2009-03-18	08:30:00	0
2009-03-18	08:31:00	0
2009-03-18	08:32:00	0
2009-03-18	08:33:00	0
2009-03-18	08:34:00	0
2009-03-18	08:35:00	0
2009-03-18	08:36:00	0
2009-03-18	08:37:00	0
2009-03-18	08:38:00	0
2009-03-18	08:39:00	0
2009-03-18	08:40:00	0
2009-03-18	08:41:00	0
2009-03-18	08:42:00	0
2009-03-18	08:43:00	0
2009-03-18	08:44:00	0
2009-03-18	08:45:00	0
2009-03-18	08:46:00	0
2009-03-18	08:47:00	0
2009-03-18	08:48:00	0
2009-03-18	08:49:00	0
2009-03-18	08:50:00	0
2009-03-18	08:51:00	0
2009-03-18	08:52:00	0
2009-03-18	08:53:00	0
2009-03-18	08:54:00	0
2009-03-18	08:55:00	0
2009-03-18	08:56:00	0
2009-03-18	08:57:00	0
2009-03-18	08:58:00	0
2009-03-18	08:59:00	0
2009-03-18	09:00:00	0
2009-03-18	09:01:00	0
2009-03-18	09:02:00	0
2009-03-18	09:03:00	0
2009-03-18	09:04:00	0
2009-03-18	09:05:00	0
2009-03-18	09:06:00	0
2009-03-18	09:07:00	0
2009-03-18	09:08:00	0
2009-03-18	09:09:00	0
2009-03-18	09:10:00	0
2009-03-18	09:11:00	0
2009-03-18	09:12:00	0
2009-03-18	09:13:00	0
2009-03-18	09:14:00	0
2009-03-18	09:15:00	0
2009-03-18	09:16:00	0
2009-03-18	09:17:00	0
2009-03-18	09:18:00	0
2009-03-18	09:19:00	0
2009-03-18	09:20:00	0
2009-03-18	09:21:00	0
2009-03-18	09:22:00	0
2009-03-18	09:23:00	0
2009-03-18	09:24:00	0
2009-03-18	09:25:00	0
2009-03-18	09:26:00	0
2009-03-18	09:27:00	0
2009-03-18	09:28:00	0
2009-03-18	09:29:00	0
2009-03-18	09:30:00	0
2009-03-18	09:31:00	0
2009-03-18	09:32:00	0
2009-03-18	09:33:00	0
2009-03-18	09:34:00	0
2009-03-18	09:35:00	0
2009-03-18	09:36:00	0
2009-03-18	09:37:00	0
2009-03-18	09:38:00	0
2009-03-18	09:39:00	0
2009-03-18	09:40:00	0
2009-03-18	09:41:00	0
2009-03-18	09:42:00	0
2009-03-18	09:43:00	0
2009-03-18	09:44:00	0
2009-03-18	09:45:00	0
2009-03-18	09:46:00	0
2009-03-18	09:47:00	0
2009-03-18	09:48:00	0
2009-03-18	09:49:00	0
2009-03-18	09:50:00	0
2009-03-18	09:51:00	0
2009-03-18	09:52:00	0
2009-03-18	09:53:00	0
2009-03-18	09:54:00	0
2009-03-18	09:55:00	0
2009-03-18	09:56:00	0
2009-03-18	09:57:00	0
2009-03-18	09:58:00	0
2009-03-18	09:59:00	0
2009-03-18	10:00:00	0
2009-03-18	10:01:00	0
2009-03-18	10:02:00	0
2009-03-18	10:03:00	0
2009-03-18	10:04:00	0
2009-03-18	10:05:00	0
2009-03-18	10:06:00	0
2009-03-18	10:07:00	0
2009-03-18	10:08:00	0
2009-03-18	10:09:00	0
2009-03-18	10:10:00	0
2009-03-18	10:11:00	0
2009-03-18	10:12:00	0
2009-03-18	10:13:00	0
2009-03-18	10:14:00	0
2009-03-18	10:15:00	0
2009-03-18	10:16:00	0
2009-03-18	10:17:00	0
2009-03-18	10:18:00	0
2009-03-18	10:19:00	0
2009-03-18	10:20:00	0
2009-03-18	10:21:00	0
2009-03-18	10:22:00	0
2009-03-18	10:23:00	0
2009-03-18	10:24:00	0
2009-03-18	10:25:00	0
2009-03-18	10:26:00	0
2009-03-18	10:27:00	0
2009-03-18	10:28:00	0
2009-03-18	10:29:00	0
2009-03-18	10:30:00	0
2009-03-18	10:31:00	0
2009-03-18	10:32:00	0
2009-03-18	10:33:00	0
2009-03-18	10:34:00	0
2009-03-18	10:35:00	0
2009-03-18	10:36:00	0
2009-03-18	10:37:00	0
2009-03-18	10:38:00	0
2009-03-18	10:39:00	0
2009-03-18	10:40:00	0
2009-03-18	10:41:00	0
2009-03-18	10:42:00	0
2009-03-18	10:43:00	0
2009-03-18	10:44:00	0
2009-03-18	10:45:00	0
2009-03-18	10:46:00	0
2009-03-18	10:47:00	0
2009-03-18	10:48:00	0
2009-03-18	10:49:00	0
2009-03-18	10:50:00	0
2009-03-18	10:51:00	0
2009-03-18	10:52:00	0
2009-03-18	10:53:00	0
2009-03-18	10:54:00	0
2009-03-18	10:55:00	0
2009-03-18	10:56:00	0
2009-03-18	10:57:00	0
2009-03-18	10:58:00	0
2009-03-18	10:59:00	0
2009-03-18	11:00:00	0
2009-03-18	11:01:00	0
2009-03-18	11:02:00	0
2009-03-18	11:03:00	0
2009-03-18	11:04:00	0
2009-03-18	11:05:00	0
2009-03-18	11:06:00	0
2009-03-18	11:07:00	0
2009-03-18	11:08:00	0
2009-03-18	11:09:00	0
2009-03-18	11:10:00	0
2009-03-18	11:11:00	0
2009-03-18	11:12:00	0
2009-03-18	11:13:00	0
2009-03-18	11:14:00	0
2009-03-18	11:15:00	0
2009-03-18	11:16:00	0
2009-03-18	11:17:00	0
2009-03-18	11:18:00	0
2009-03-18	11:19:00	0
2009-03-18	11:20:00	0
2009-03-18	11:21:00	0
2009-03-18	11:22:00	0
2009-03-18	11:23:00	0
2009-03-18	11:24:00	0
2009-03-18	11:25:00	0
2009-03-18	11:26:00	0
2009-03-18	11:27:00	0
2009-03-18	11:28:00	0
2009-03-18	11:29:00	0
2009-03-18	11:30:00	0
2009-03-18	11:31:00	0
2009-03-18	11:32:00	0
2009-03-18	11:33:00	0
2009-03-18	11:34:00	0
2009-03-18	11:35:00	0
2009-03-18	11:36:00	0
2009-03-18	11:37:00	0
2009-03-18	11:38:00	0
2009-03-18	11:39:00	0
2009-03-18	11:40:00	0
2009-03-18	11:41:00	0
2009-03-18	11:42:00	0
2009-03-18	11:43:00	0
2009-03-18	11:44:00	0
2009-03-18	11:45:00	0
2009-03-18	11:46:00	0
2009-03-18	11:47:00	0
2009-03-18	11:48:00	0
2009-03-18	11:49:00	0
2009-03-18	11:50:00	0
2009-03-18	11:51:00	0
2009-03-18	11:52:00	0
2009-03-18	11:53:00	0
2009-03-18	11:54:00	0
2009-03-18	11:55:00	0
2009-03-18	11:56:00	0
2009-03-18	11:57:00	0
2009-03-18	11:58:00	0
2009-03-18	11:59:00	0
2009-03-18	12:00:00	0
2009-03-18	12:01:00	0
2009-03-18	12:02:00	0
2009-03-18	12:03:00	0
2009-03-18	12:04:00	0
2009-03-18	12:05:00	0
2009-03-18	12:06:00	0
2009-03-18	12:07:00	0
2009-03-18	12:08:00	0
2009-03-18	12:09:00	0
2009-03-18	12:10:00	0
2009-03-18	12:11:00	0
2009-03-18	12:12:00	0
2009-03-18	12:13:00	0
2009-03-18	12:14:00	0
2009-03-18	12:15:00	0
2009-03-18	12:16:00	0
2009-03-18	12:17:00	0
2009-03-18	12:18:00	0
2009-03-18	12:19:00	0
2009-03-18	12:20:00	0
2009-03-18	12:21:00	0
2009-03-18	12:22:00	0
2009-03-18	12:23:00	0
2009-03-18	12:24:00	0
2009-03-18	12:25:00	0
2009-03-18	12:26:00	0
2009-03-18	12:27:00	0
2009-03-18	12:28:00	0
2009-03-18	12:29:00	0
2009-03-18	12:30:00	0
2009-03-18	12:31:00	0
2009-03-18	12:32:00	0
2009-03-18	12:33:00	0
2009-03-18	12:34:00	0
2009-03-18	12:35:00	0
2009-03-18	12:36:00	0
2009-03-18	12:37:00	0
2009-03-18	12:38:00	0
2009-03-18	12:39:00	0
2009-03-18	12:40:00	0
2009-03-18	12:41:00	0
2009-03-18	12:42:00	0
2009-03-18	12:43:00	0
2009-03-18	12:44:00	0
2009-03-18	12:45:00	0
2009-03-18	12:46:00	0
2009-03-18	12:47:00	0
2009-03-18	12:48:00	0
2009-03-18	12:49:00	0
2009-03-18	12:50:00	0
2009-03-18	12:51:00	0
2009-03-18	12:52:00	0
2009-03-18	12:53:00	0
2009-03-18	12:54:00	0
2009-03-18	12:55:00	0
2009-03-18	12:56:00	0
2009-03-18	12:57:00	0
2009-03-18	12:58:00	0
2009-03-18	12:59:00	0
2009-03-18	13:00:00	0
2009-03-18	13:01:00	0
2009-03-18	13:02:00	0
2009-03-18	13:03:00	0
2009-03-18	13:04:00	0
2009-03-18	13:05:00	0
2009-03-18	13:06:00	0
2009-03-18	13:07:00	0
2009-03-18	13:08:00	0
2009-03-18	13:09:00	0
2009-03-18	13:10:00	0
2009-03-18	13:11:00	0
2009-03-18	13:12:00	0
2009-03-18	13:13:00	0
2009-03-18	13:14:00	0
2009-03-18	13:15:00	0
2009-03-18	13:16:00	0
2009-03-18	13:17:00	0
2009-03-18	13:18:00	0
2009-03-18	13:19:00	0
2009-03-18	13:20:00	0
2009-03-18	13:21:00	0
2009-03-18	13:22:00	0
2009-03-18	13:23:00	0
2009-03-18	13:24:00	0
2009-03-18	13:25:00	0
2009-03-18	13:26:00	0
2009-03-18	13:27:00	0
2009-03-18	13:28:00	0
2009-03-18	13:29:00	0
2009-03-18	13:30:00	0
2009-03-18	13:31:00	0
2009-03-18	13:32:00	0
2009-03-18	13:33:00	0
2009-03-18	13:34:00	0
2009-03-18	13:35:00	0
2009-03-18	13:36:00	0
2009-03-18	13:37:00	0
2009-03-18	13:38:00	0
2009-03-18	13:39:00	0
2009-03-18	13:40:00	0
2009-03-18	13:41:00	0
2009-03-18	13:42:00	0
2009-03-18	13:43:00	0
2009-03-18	13:44:00	0
2009-03-18	13:45:00	0
2009-03-18	13:46:00	0
2009-03-18	13:47:00	0
2009-03-18	13:48:00	0
2009-03-18	13:49:00	0
2009-03-18	13:50:00	0
2009-03-18	13:51:00	0
2009-03-18	13:52:00	0
2009-03-18	13:53:00	0
2009-03-18	13:54:00	0
2009-03-18	13:55:00	0
2009-03-18	13:56:00	0
2009-03-18	13:57:00	0
2009-03-18	13:58:00	0
2009-03-18	13:59:00	0
2009-03-18	14:00:00	0
2009-03-18	14:01:00	0
2009-03-18	14:02:00	0
2009-03-18	14:03:00	0
2009-03-18	14:04:00	0
2009-03-18	14:05:00	0
2009-03-18	14:06:00	0
2009-03-18	14:07:00	0
2009-03-18	14:08:00	0
2009-03-18	14:09:00	0
2009-03-18	14:10:00	0
2009-03-18	14:11:00	0
2009-03-18	14:12:00	0
2009-03-18	14:13:00	0
2009-03-18	14:14:00	0
2009-03-18	14:15:00	0
2009-03-18	14:16:00	0
2009-03-18	14:17:00	0
2009-03-18	14:18:00	0
2009-03-18	14:19:00	0
2009-03-18	14:20:00	0
2009-03-18	14:21:00	0
2009-03-18	14:22:00	0
2009-03-18	14:23:00	0
2009-03-18	14:24:00	0
2009-03-18	14:25:00	0
2009-03-18	14:26:00	0
2009-03-18	14:27:00	0
2009-03-18	14:28:00	0
2009-03-18	14:29:00	0
2009-03-18	14:30:00	0
2009-03-18	14:31:00	0
2009-03-18	14:32:00	0
2009-03-18	14:33:00	0
2009-03-18	14:34:00	0
2009-03-18	14:35:00	0
2009-03-18	14:36:00	0
2009-03-18	14:37:00	0
2009-03-18	14:38:00	0
2009-03-18	14:39:00	0
2009-03-18	14:40:00	0
2009-03-18	14:41:00	0
2009-03-18	14:42:00	0
2009-03-18	14:43:00	0
2009-03-18	14:44:00	0
2009-03-18	14:45:00	0
2009-03-18	14:46:00	0
2009-03-18	14:47:00	0
2009-03-18	14:48:00	0
2009-03-18	14:49:00	0
2009-03-18	14:50:00	0
2009-03-18	14:51:00	0
2009-03-18	14:52:00	0
2009-03-18	14:53:00	0
2009-03-18	14:54:00	0
2009-03-18	14:55:00	0
2009-03-18	14:56:00	0
2009-03-18	14:57:00	0
2009-03-18	14:58:00	0
2009-03-18	14:59:00	0
2009-03-18	15:00:00	0
2009-03-18	15:01:00	0
2009-03-18	15:02:00	0
2009-03-18	15:03:00	0
2009-03-18	15:04:00	0
2009-03-18	15:05:00	0
2009-03-18	15:06:00	0
2009-03-18	15:07:00	0
2009-03-18	15:08:00	0
2009-03-18	15:09:00	0
2009-03-18	15:10:00	0
2009-03-18	15:11:00	0
2009-03-18	15:12:00	0
2009-03-18	15:13:00	0
2009-03-18	15:14:00	0
2009-03-18	15:15:00	0
2009-03-18	15:16:00	0
2009-03-18	15:17:00	0
2009-03-18	15:18:00	0
2009-03-18	15:19:00	0
2009-03-18	15:20:00	0
2009-03-18	15:21:00	0
2009-03-18	15:22:00	0
2009-03-18	15:23:00	0
2009-03-18	15:24:00	0
2009-03-18	15:25:00	0
2009-03-18	15:26:00	0
2009-03-18	15:27:00	0
2009-03-18	15:28:00	0
2009-03-18	15:29:00	0
2009-03-18	15:30:00	0
2009-03-18	15:31:00	0
2009-03-18	15:32:00	0
2009-03-18	15:33:00	0
2009-03-18	15:34:00	0
2009-03-18	15:35:00	0
2009-03-18	15:36:00	0
2009-03-18	15:37:00	0
2009-03-18	15:38:00	0
2009-03-18	15:39:00	0
2009-03-18	15:40:00	0
2009-03-18	15:41:00	0
2009-03-18	15:42:00	0
2009-03-18	15:43:00	0
2009-03-18	15:44:00	0
2009-03-18	15:45:00	0
2009-03-18	15:46:00	0
2009-03-18	15:47:00	0
2009-03-18	15:48:00	0
2009-03-18	15:49:00	0
2009-03-18	15:50:00	0
2009-03-18	15:51:00	0
2009-03-18	15:52:00	0
2009-03-18	15:53:00	0
2009-03-18	15:54:00	0
2009-03-18	15:55:00	0
2009-03-18	15:56:00	0
2009-03-18	15:57:00	0
2009-03-18	15:58:00	0
2009-03-18	15:59:00	0
2009-03-18	16:00:00	0
2009-03-18	16:01:00	0
2009-03-18	16:02:00	0
2009-03-18	16:03:00	0
2009-03-18	16:04:00	0
2009-03-18	16:05:00	0
2009-03-18	16:06:00	0
2009-03-18	16:07:00	0
2009-03-18	16:08:00	0
2009-03-18	16:09:00	0
2009-03-18	16:10:00	0
2009-03-18	16:11:00	0
2009-03-18	16:12:00	0
2009-03-18	16:13:00	0
2009-03-18	16:14:00	0
2009-03-18	16:15:00	0
2009-03-18	16:16:00	0
2009-03-18	16:17:00	0
2009-03-18	16:18:00	0
2009-03-18	16:19:00	0
2009-03-18	16:20:00	0
2009-03-18	16:21:00	0
2009-03-18	16:22:00	0
2009-03-18	16:23:00	0
2009-03-18	16:24:00	0
2009-03-18	16:25:00	0
2009-03-18	16:26:00	0
2009-03-18	16:27:00	0
2009-03-18	16:28:00	0
2009-03-18	16:29:00	0
2009-03-18	16:30:00	0
2009-03-18	16:31:00	0
2009-03-18	16:32:00	0
2009-03-18	16:33:00	0
2009-03-18	16:34:00	0
2009-03-18	16:35:00	0
2009-03-18	16:36:00	0
2009-03-18	16:37:00	0
2009-03-18	16:38:00	0
2009-03-18	16:39:00	0
2009-03-18	16:40:00	0
2009-03-18	16:41:00	0
2009-03-18	16:42:00	0
2009-03-18	16:43:00	0
2009-03-18	16:44:00	0
2009-03-18	16:45:00	0
2009-03-18	16:46:00	0
2009-03-18	16:47:00	0
2009-03-18	16:48:00	0
2009-03-18	16:49:00	0
2009-03-18	16:50:00	0
2009-03-18	16:51:00	0
2009-03-18	16:52:00	0
2009-03-18	16:53:00	0
2009-03-18	16:54:00	0
2009-03-18	16:55:00	0
2009-03-18	16:56:00	0
2009-03-18	16:57:00	0
2009-03-18	16:58:00	0
2009-03-18	16:59:00	0
2009-03-18	17:00:00	0
2009-03-18	17:01:00	0
2009-03-18	17:02:00	0
2009-03-18	17:03:00	0
2009-03-18	17:04:00	0
2009-03-18	17:05:00	0
2009-03-18	17:06:00	0
2009-03-18	17:07:00	0
2009-03-18	17:08:00	0
2009-03-18	17:09:00	0
2009-03-18	17:10:00	0
2009-03-18	17:11:00	0
2009-03-18	17:12:00	0
2009-03-18	17:13:00	0
2009-03-18	17:14:00	0
2009-03-18	17:15:00	0
2009-03-18	17:16:00	0
2009-03-18	17:17:00	0
2009-03-18	17:18:00	0
2009-03-18	17:19:00	0
2009-03-18	17:20:00	0
2009-03-18	17:21:00	0
2009-03-18	17:22:00	0
2009-03-18	17:23:00	0
2009-03-18	17:24:00	0
2009-03-18	17:25:00	0
2009-03-18	17:26:00	0
2009-03-18	17:27:00	0
2009-03-18	17:28:00	0
2009-03-18	17:29:00	0
2009-03-18	17:30:00	0
2009-03-18	17:31:00	0
2009-03-18	17:32:00	0
2009-03-18	17:33:00	0
2009-03-18	17:34:00	0
2009-03-18	17:35:00	0
2009-03-18	17:36:00	0
2009-03-18	17:37:00	0
2009-03-18	17:38:00	0
2009-03-18	17:39:00	0
2009-03-18	17:40:00	0
2009-03-18	17:41:00	0
2009-03-18	17:42:00	0
2009-03-18	17:43:00	0
2009-03-18	17:44:00	0
2009-03-18	17:45:00	0
2009-03-18	17:46:00	0
2009-03-18	17:47:00	0
2009-03-18	17:48:00	0
2009-03-18	17:49:00	0
2009-03-18	17:50:00	0
2009-03-18	17:51:00	0
2009-03-18	17:52:00	0
2009-03-18	17:53:00	0
2009-03-18	17:54:00	0
2009-03-18	17:55:00	0
2009-03-18	17:56:00	0
2009-03-18	17:57:00	0
2009-03-18	17:58:00	0
2009-03-18	17:59:00	0
2009-03-18	18:00:00	0
2009-03-18	18:01:00	0
2009-03-18	18:02:00	0
2009-03-18	18:03:00	0
2009-03-18	18:04:00	0
2009-03-18	18:05:00	0
2009-03-18	18:06:00	0
2009-03-18	18:07:00	0
2009-03-18	18:08:00	0
2009-03-18	18:09:00	25
2009-03-18	18:10:00	0
2009-03-18	18:11:00	0
2009-03-18	18:12:00	0
2009-03-18	18:13:00	0
2009-03-18	18:14:00	0
2009-03-18	18:15:00	12
2009-03-18	18:16:00	0
2009-03-18	18:17:00	0
2009-03-18	18:18:00	374
2009-03-18	18:19:00	990
2009-03-18	18:20:00	1337
2009-03-18	18:21:00	219
2009-03-18	18:22:00	0
2009-03-18	18:23:00	219
2009-03-18	18:24:00	357
2009-03-18	18:25:00	98
2009-03-18	18:26:00	409
2009-03-18	18:27:00	426
2009-03-18	18:28:00	615
2009-03-18	18:29:00	478
2009-03-18	18:30:00	293
2009-03-18	18:31:00	556
2009-03-18	18:32:00	0
2009-03-18	18:33:00	0
2009-03-18	18:34:00	0
2009-03-18	18:35:00	0
2009-03-18	18:36:00	0
2009-03-18	18:37:00	0
2009-03-18	18:38:00	0
2009-03-18	18:39:00	0
2009-03-18	18:40:00	263
2009-03-18	18:41:00	340
2009-03-18	18:42:00	497
2009-03-18	18:43:00	391
2009-03-18	18:44:00	517
2009-03-18	18:45:00	98
2009-03-18	18:46:00	0
2009-03-18	18:47:00	49
2009-03-18	18:48:00	0
2009-03-18	18:49:00	249
2009-03-18	18:50:00	443
2009-03-18	18:51:00	426
2009-03-18	18:52:00	460
2009-03-18	18:53:00	576
2009-03-18	18:54:00	98
2009-03-18	18:55:00	49
2009-03-18	18:56:00	12
2009-03-18	18:57:00	308
2009-03-18	18:58:00	340
2009-03-18	18:59:00	12
2009-03-18	19:00:00	0
2009-03-18	19:01:00	0
2009-03-18	19:02:00	37
2009-03-18	19:03:00	37
2009-03-18	19:04:00	0
2009-03-18	19:05:00	0
2009-03-18	19:06:00	49
2009-03-18	19:07:00	12
2009-03-18	19:08:00	0
2009-03-18	19:09:00	0
2009-03-18	19:10:00	49
2009-03-18	19:11:00	0
2009-03-18	19:12:00	0
2009-03-18	19:13:00	0
2009-03-18	19:14:00	0
2009-03-18	19:15:00	0
2009-03-18	19:16:00	0
2009-03-18	19:17:00	0
2009-03-18	19:18:00	0
2009-03-18	19:19:00	0
2009-03-18	19:20:00	0
2009-03-18	19:21:00	0
2009-03-18	19:22:00	12
2009-03-18	19:23:00	25
2009-03-18	19:24:00	0
2009-03-18	19:25:00	0
2009-03-18	19:26:00	0
2009-03-18	19:27:00	0
2009-03-18	19:28:00	12
2009-03-18	19:29:00	0
2009-03-18	19:30:00	0
2009-03-18	19:31:00	0
2009-03-18	19:32:00	62
2009-03-18	19:33:00	111
2009-03-18	19:34:00	0
2009-03-18	19:35:00	0
2009-03-18	19:36:00	0
2009-03-18	19:37:00	12
2009-03-18	19:38:00	12
2009-03-18	19:39:00	12
2009-03-18	19:40:00	0
2009-03-18	19:41:00	0
2009-03-18	19:42:00	0
2009-03-18	19:43:00	0
2009-03-18	19:44:00	0
2009-03-18	19:45:00	0
2009-03-18	19:46:00	0
2009-03-18	19:47:00	0
2009-03-18	19:48:00	0
2009-03-18	19:49:00	25
2009-03-18	19:50:00	0
2009-03-18	19:51:00	0
2009-03-18	19:52:00	0
2009-03-18	19:53:00	12
2009-03-18	19:54:00	0
2009-03-18	19:55:00	190
2009-03-18	19:56:00	596
2009-03-18	19:57:00	12
2009-03-18	19:58:00	12
2009-03-18	19:59:00	12
2009-03-18	20:00:00	0
2009-03-18	20:01:00	12
2009-03-18	20:02:00	460
2009-03-18	20:03:00	249
2009-03-18	20:04:00	86
2009-03-18	20:05:00	25
2009-03-18	20:06:00	0
2009-03-18	20:07:00	0
2009-03-18	20:08:00	0
2009-03-18	20:09:00	0
2009-03-18	20:10:00	0
2009-03-18	20:11:00	0
2009-03-18	20:12:00	0
2009-03-18	20:13:00	0
2009-03-18	20:14:00	0
2009-03-18	20:15:00	25
2009-03-18	20:16:00	135
2009-03-18	20:17:00	74
2009-03-18	20:18:00	0
2009-03-18	20:19:00	0
2009-03-18	20:20:00	37
2009-03-18	20:21:00	49
2009-03-18	20:22:00	0
2009-03-18	20:23:00	62
2009-03-18	20:24:00	460
2009-03-18	20:25:00	74
2009-03-18	20:26:00	0
2009-03-18	20:27:00	0
2009-03-18	20:28:00	12
2009-03-18	20:29:00	0
2009-03-18	20:30:00	25
2009-03-18	20:31:00	537
2009-03-18	20:32:00	3212
2009-03-18	20:33:00	1243
2009-03-18	20:34:00	49
2009-03-18	20:35:00	175
2009-03-18	20:36:00	175
2009-03-18	20:37:00	111
2009-03-18	20:38:00	175
2009-03-18	20:39:00	160
2009-03-18	20:40:00	864
2009-03-18	20:41:00	374
2009-03-18	20:42:00	340
2009-03-18	20:43:00	219
2009-03-18	20:44:00	12
2009-03-18	20:45:00	391
2009-03-18	20:46:00	123
2009-03-18	20:47:00	0
2009-03-18	20:48:00	1098
2009-03-18	20:49:00	1467
2009-03-18	20:50:00	0
2009-03-18	20:51:00	0
2009-03-18	20:52:00	0
2009-03-18	20:53:00	0
2009-03-18	20:54:00	0
2009-03-18	20:55:00	0
2009-03-18	20:56:00	635
2009-03-18	20:57:00	1433
2009-03-18	20:58:00	374
2009-03-18	20:59:00	2078
2009-03-18	21:00:00	537
2009-03-18	21:01:00	517
2009-03-18	21:02:00	724
2009-03-18	21:03:00	37
2009-03-18	21:04:00	357
2009-03-18	21:05:00	1369
2009-03-18	21:06:00	839
2009-03-18	21:07:00	537
2009-03-18	21:08:00	815
2009-03-18	21:09:00	938
2009-03-18	21:10:00	1044
2009-03-18	21:11:00	1214
2009-03-18	21:12:00	1337
2009-03-18	21:13:00	962
2009-03-18	21:14:00	1305
2009-03-18	21:15:00	1337
2009-03-18	21:16:00	1125
2009-03-18	21:17:00	1369
2009-03-18	21:18:00	1273
2009-03-18	21:19:00	889
2009-03-18	21:20:00	249
2009-03-18	21:21:00	409
2009-03-18	21:22:00	679
2009-03-18	21:23:00	517
2009-03-18	21:24:00	426
2009-03-18	21:25:00	62
2009-03-18	21:26:00	2122
2009-03-18	21:27:00	1125
2009-03-18	21:28:00	702
2009-03-18	21:29:00	790
2009-03-18	21:30:00	517
2009-03-18	21:31:00	596
2009-03-18	21:32:00	517
2009-03-18	21:33:00	175
2009-03-18	21:34:00	322
2009-03-18	21:35:00	49
2009-03-18	21:36:00	460
2009-03-18	21:37:00	148
2009-03-18	21:38:00	12
2009-03-18	21:39:00	478
2009-03-18	21:40:00	0
2009-03-18	21:41:00	0
2009-03-18	21:42:00	0
2009-03-18	21:43:00	0
2009-03-18	21:44:00	0
2009-03-18	21:45:00	0
2009-03-18	21:46:00	0
2009-03-18	21:47:00	0
2009-03-18	21:48:00	0
2009-03-18	21:49:00	12
2009-03-18	21:50:00	12
2009-03-18	21:51:00	0
2009-03-18	21:52:00	0
2009-03-18	21:53:00	0
2009-03-18	21:54:00	0
2009-03-18	21:55:00	0
2009-03-18	21:56:00	0
2009-03-18	21:57:00	12
2009-03-18	21:58:00	12
2009-03-18	21:59:00	12
2009-03-18	22:00:00	0
2009-03-18	22:01:00	0
2009-03-18	22:02:00	0
2009-03-18	22:03:00	12
2009-03-18	22:04:00	175
2009-03-18	22:05:00	0
2009-03-18	22:06:00	0
2009-03-18	22:07:00	0
2009-03-18	22:08:00	576
2009-03-18	22:09:00	0
2009-03-18	22:10:00	12
2009-03-18	22:11:00	0
2009-03-18	22:12:00	148
2009-03-18	22:13:00	0
2009-03-18	22:14:00	0
2009-03-18	22:15:00	249
2009-03-18	22:16:00	1125
2009-03-18	22:17:00	1154
2009-03-18	22:18:00	98
2009-03-18	22:19:00	0
2009-03-18	22:20:00	12
2009-03-18	22:21:00	0
2009-03-18	22:22:00	0
2009-03-18	22:23:00	0
2009-03-18	22:24:00	0
2009-03-18	22:25:00	0
2009-03-18	22:26:00	0
2009-03-18	22:27:00	12
2009-03-18	22:28:00	0
2009-03-18	22:29:00	0
2009-03-18	22:30:00	0
2009-03-18	22:31:00	0
2009-03-18	22:32:00	0
2009-03-18	22:33:00	12
2009-03-18	22:34:00	0
2009-03-18	22:35:00	12
2009-03-18	22:36:00	0
2009-03-18	22:37:00	0
2009-03-18	22:38:00	0
2009-03-18	22:39:00	123
2009-03-18	22:40:00	0
2009-03-18	22:41:00	0
2009-03-18	22:42:00	0
2009-03-18	22:43:00	0
2009-03-18	22:44:00	62
2009-03-18	22:45:00	0
2009-03-18	22:46:00	0
2009-03-18	22:47:00	0
2009-03-18	22:48:00	0
2009-03-18	22:49:00	0
2009-03-18	22:50:00	0
2009-03-18	22:51:00	0
2009-03-18	22:52:00	25
2009-03-18	22:53:00	0
2009-03-18	22:54:00	0
2009-03-18	22:55:00	0
2009-03-18	22:56:00	0
2009-03-18	22:57:00	0
2009-03-18	22:58:00	0
2009-03-18	22:59:00	0
2009-03-18	23:00:00	0
2009-03-18	23:01:00	0
2009-03-18	23:02:00	0
2009-03-18	23:03:00	0
2009-03-18	23:04:00	0
2009-03-18	23:05:00	0
2009-03-18	23:06:00	0
2009-03-18	23:07:00	0
2009-03-18	23:08:00	0
2009-03-18	23:09:00	0
2009-03-18	23:10:00	12
2009-03-18	23:11:00	12
2009-03-18	23:12:00	0
2009-03-18	23:13:00	0
2009-03-18	23:14:00	0
2009-03-18	23:15:00	0
2009-03-18	23:16:00	0
2009-03-18	23:17:00	0
2009-03-18	23:18:00	0
2009-03-18	23:19:00	25
2009-03-18	23:20:00	0
2009-03-18	23:21:00	322
2009-03-18	23:22:00	74
2009-03-18	23:23:00	25
2009-03-18	23:24:00	0
2009-03-18	23:25:00	0
2009-03-18	23:26:00	0
2009-03-18	23:27:00	0
2009-03-18	23:28:00	0
2009-03-18	23:29:00	0
2009-03-18	23:30:00	0
2009-03-18	23:31:00	0
2009-03-18	23:32:00	0
2009-03-18	23:33:00	0
2009-03-18	23:34:00	0
2009-03-18	23:35:00	0
2009-03-18	23:36:00	0
2009-03-18	23:37:00	0
2009-03-18	23:38:00	12
2009-03-18	23:39:00	0
2009-03-18	23:40:00	0
2009-03-18	23:41:00	0
2009-03-18	23:42:00	0
2009-03-18	23:43:00	0
2009-03-18	23:44:00	0
2009-03-18	23:45:00	0
2009-03-18	23:46:00	0
2009-03-18	23:47:00	0
2009-03-18	23:48:00	0
2009-03-18	23:49:00	0
2009-03-18	23:50:00	0
2009-03-18	23:51:00	0
2009-03-18	23:52:00	0
2009-03-18	23:53:00	0
2009-03-18	23:54:00	0
2009-03-18	23:55:00	0
2009-03-18	23:56:00	0
2009-03-18	23:57:00	0
2009-03-18	23:58:00	0
2009-03-18	23:59:00	0
2009-03-19	00:00:00	0
2009-03-19	00:01:00	0
2009-03-19	00:02:00	0
2009-03-19	00:03:00	0
2009-03-19	00:04:00	0
2009-03-19	00:05:00	0
2009-03-19	00:06:00	12
2009-03-19	00:07:00	0
2009-03-19	00:08:00	0
2009-03-19	00:09:00	0
2009-03-19	00:10:00	0
2009-03-19	00:11:00	0
2009-03-19	00:12:00	0
2009-03-19	00:13:00	0
2009-03-19	00:14:00	0
2009-03-19	00:15:00	0
2009-03-19	00:16:00	0
2009-03-19	00:17:00	0
2009-03-19	00:18:00	0
2009-03-19	00:19:00	0
2009-03-19	00:20:00	0
2009-03-19	00:21:00	0
2009-03-19	00:22:00	0
2009-03-19	00:23:00	0
2009-03-19	00:24:00	0
2009-03-19	00:25:00	0
2009-03-19	00:26:00	0
2009-03-19	00:27:00	0
2009-03-19	00:28:00	0
2009-03-19	00:29:00	0
2009-03-19	00:30:00	0
2009-03-19	00:31:00	0
2009-03-19	00:32:00	0
2009-03-19	00:33:00	0
2009-03-19	00:34:00	0
2009-03-19	00:35:00	0
2009-03-19	00:36:00	0
2009-03-19	00:37:00	0
2009-03-19	00:38:00	0
2009-03-19	00:39:00	0
2009-03-19	00:40:00	0
2009-03-19	00:41:00	0
2009-03-19	00:42:00	0
2009-03-19	00:43:00	0
2009-03-19	00:44:00	0
2009-03-19	00:45:00	0
2009-03-19	00:46:00	0
2009-03-19	00:47:00	62
2009-03-19	00:48:00	111
2009-03-19	00:49:00	12
2009-03-19	00:50:00	0
2009-03-19	00:51:00	0
2009-03-19	00:52:00	0
2009-03-19	00:53:00	0
2009-03-19	00:54:00	0
2009-03-19	00:55:00	0
2009-03-19	00:56:00	0
2009-03-19	00:57:00	0
2009-03-19	00:58:00	0
2009-03-19	00:59:00	0
2009-03-19	01:00:00	0
2009-03-19	01:01:00	0
2009-03-19	01:02:00	0
2009-03-19	01:03:00	0
2009-03-19	01:04:00	0
2009-03-19	01:05:00	0
2009-03-19	01:06:00	0
2009-03-19	01:07:00	0
2009-03-19	01:08:00	0
2009-03-19	01:09:00	0
2009-03-19	01:10:00	0
2009-03-19	01:11:00	0
2009-03-19	01:12:00	0
2009-03-19	01:13:00	0
2009-03-19	01:14:00	0
2009-03-19	01:15:00	0
2009-03-19	01:16:00	0
2009-03-19	01:17:00	0
2009-03-19	01:18:00	0
2009-03-19	01:19:00	49
2009-03-19	01:20:00	0
2009-03-19	01:21:00	0
2009-03-19	01:22:00	0
2009-03-19	01:23:00	0
2009-03-19	01:24:00	615
2009-03-19	01:25:00	0
2009-03-19	01:26:00	37
2009-03-19	01:27:00	0
2009-03-19	01:28:00	0
2009-03-19	01:29:00	0
2009-03-19	01:30:00	0
2009-03-19	01:31:00	0
2009-03-19	01:32:00	37
2009-03-19	01:33:00	234
2009-03-19	01:34:00	148
2009-03-19	01:35:00	74
2009-03-19	01:36:00	12
2009-03-19	01:37:00	0
2009-03-19	01:38:00	0
2009-03-19	01:39:00	0
2009-03-19	01:40:00	0
2009-03-19	01:41:00	0
2009-03-19	01:42:00	0
2009-03-19	01:43:00	0
2009-03-19	01:44:00	0
2009-03-19	01:45:00	0
2009-03-19	01:46:00	0
2009-03-19	01:47:00	0
2009-03-19	01:48:00	0
2009-03-19	01:49:00	0
2009-03-19	01:50:00	0
2009-03-19	01:51:00	0
2009-03-19	01:52:00	0
2009-03-19	01:53:00	0
2009-03-19	01:54:00	0
2009-03-19	01:55:00	0
2009-03-19	01:56:00	0
2009-03-19	01:57:00	0
2009-03-19	01:58:00	0
2009-03-19	01:59:00	0
2009-03-19	02:00:00	0
2009-03-19	02:01:00	0
2009-03-19	02:02:00	0
2009-03-19	02:03:00	0
2009-03-19	02:04:00	0
2009-03-19	02:05:00	0
2009-03-19	02:06:00	0
2009-03-19	02:07:00	0
2009-03-19	02:08:00	0
2009-03-19	02:09:00	0
2009-03-19	02:10:00	0
2009-03-19	02:11:00	0
2009-03-19	02:12:00	0
2009-03-19	02:13:00	0
2009-03-19	02:14:00	0
2009-03-19	02:15:00	0
2009-03-19	02:16:00	0
2009-03-19	02:17:00	0
2009-03-19	02:18:00	0
2009-03-19	02:19:00	0
2009-03-19	02:20:00	0
2009-03-19	02:21:00	0
2009-03-19	02:22:00	0
2009-03-19	02:23:00	443
2009-03-19	02:24:00	635
2009-03-19	02:25:00	0
2009-03-19	02:26:00	0
2009-03-19	02:27:00	0
2009-03-19	02:28:00	123
2009-03-19	02:29:00	12
2009-03-19	02:30:00	12
2009-03-19	02:31:00	0
2009-03-19	02:32:00	0
2009-03-19	02:33:00	0
2009-03-19	02:34:00	0
2009-03-19	02:35:00	0
2009-03-19	02:36:00	0
2009-03-19	02:37:00	0
2009-03-19	02:38:00	0
2009-03-19	02:39:00	0
2009-03-19	02:40:00	0
2009-03-19	02:41:00	0
2009-03-19	02:42:00	0
2009-03-19	02:43:00	0
2009-03-19	02:44:00	0
2009-03-19	02:45:00	0
2009-03-19	02:46:00	0
2009-03-19	02:47:00	0
2009-03-19	02:48:00	0
2009-03-19	02:49:00	0
2009-03-19	02:50:00	0
2009-03-19	02:51:00	0
2009-03-19	02:52:00	0
2009-03-19	02:53:00	0
2009-03-19	02:54:00	12
2009-03-19	02:55:00	357
2009-03-19	02:56:00	0
2009-03-19	02:57:00	0
2009-03-19	02:58:00	0
2009-03-19	02:59:00	0
2009-03-19	03:00:00	12
2009-03-19	03:01:00	160
2009-03-19	03:02:00	62
2009-03-19	03:03:00	0
2009-03-19	03:04:00	37
2009-03-19	03:05:00	0
2009-03-19	03:06:00	0
2009-03-19	03:07:00	0
2009-03-19	03:08:00	0
2009-03-19	03:09:00	0
2009-03-19	03:10:00	0
2009-03-19	03:11:00	0
2009-03-19	03:12:00	0
2009-03-19	03:13:00	0
2009-03-19	03:14:00	0
2009-03-19	03:15:00	0
2009-03-19	03:16:00	0
2009-03-19	03:17:00	0
2009-03-19	03:18:00	37
2009-03-19	03:19:00	49
2009-03-19	03:20:00	0
2009-03-19	03:21:00	0
2009-03-19	03:22:00	0
2009-03-19	03:23:00	0
2009-03-19	03:24:00	0
2009-03-19	03:25:00	0
2009-03-19	03:26:00	0
2009-03-19	03:27:00	0
2009-03-19	03:28:00	0
2009-03-19	03:29:00	0
2009-03-19	03:30:00	0
2009-03-19	03:31:00	0
2009-03-19	03:32:00	0
2009-03-19	03:33:00	0
2009-03-19	03:34:00	0
2009-03-19	03:35:00	0
2009-03-19	03:36:00	0
2009-03-19	03:37:00	0
2009-03-19	03:38:00	0
2009-03-19	03:39:00	0
2009-03-19	03:40:00	0
2009-03-19	03:41:00	0
2009-03-19	03:42:00	0
2009-03-19	03:43:00	0
2009-03-19	03:44:00	0
2009-03-19	03:45:00	0
2009-03-19	03:46:00	0
2009-03-19	03:47:00	0
2009-03-19	03:48:00	0
2009-03-19	03:49:00	25
2009-03-19	03:50:00	0
2009-03-19	03:51:00	0
2009-03-19	03:52:00	0
2009-03-19	03:53:00	0
2009-03-19	03:54:00	0
2009-03-19	03:55:00	0
2009-03-19	03:56:00	0
2009-03-19	03:57:00	148
2009-03-19	03:58:00	0
2009-03-19	03:59:00	0
2009-03-19	04:00:00	0
2009-03-19	04:01:00	0
2009-03-19	04:02:00	0
2009-03-19	04:03:00	0
2009-03-19	04:04:00	0
2009-03-19	04:05:00	0
2009-03-19	04:06:00	0
2009-03-19	04:07:00	0
2009-03-19	04:08:00	0
2009-03-19	04:09:00	0
2009-03-19	04:10:00	0
2009-03-19	04:11:00	0
2009-03-19	04:12:00	0
2009-03-19	04:13:00	0
2009-03-19	04:14:00	0
2009-03-19	04:15:00	0
2009-03-19	04:16:00	0
2009-03-19	04:17:00	0
2009-03-19	04:18:00	0
2009-03-19	04:19:00	0
2009-03-19	04:20:00	0
2009-03-19	04:21:00	12
2009-03-19	04:22:00	0
2009-03-19	04:23:00	0
2009-03-19	04:24:00	0
2009-03-19	04:25:00	0
2009-03-19	04:26:00	0
2009-03-19	04:27:00	0
2009-03-19	04:28:00	0
2009-03-19	04:29:00	0
2009-03-19	04:30:00	0
2009-03-19	04:31:00	0
2009-03-19	04:32:00	0
2009-03-19	04:33:00	0
2009-03-19	04:34:00	0
2009-03-19	04:35:00	0
2009-03-19	04:36:00	0
2009-03-19	04:37:00	0
2009-03-19	04:38:00	0
2009-03-19	04:39:00	0
2009-03-19	04:40:00	0
2009-03-19	04:41:00	0
2009-03-19	04:42:00	0
2009-03-19	04:43:00	0
2009-03-19	04:44:00	86
2009-03-19	04:45:00	0
2009-03-19	04:46:00	0
2009-03-19	04:47:00	49
2009-03-19	04:48:00	0
2009-03-19	04:49:00	0
2009-03-19	04:50:00	0
2009-03-19	04:51:00	0
2009-03-19	04:52:00	0
2009-03-19	04:53:00	0
2009-03-19	04:54:00	0
2009-03-19	04:55:00	0
2009-03-19	04:56:00	0
2009-03-19	04:57:00	0
2009-03-19	04:58:00	0
2009-03-19	04:59:00	0
2009-03-19	05:00:00	0
2009-03-19	05:01:00	0
2009-03-19	05:02:00	0
2009-03-19	05:03:00	0
2009-03-19	05:04:00	0
2009-03-19	05:05:00	0
2009-03-19	05:06:00	0
2009-03-19	05:07:00	0
2009-03-19	05:08:00	49
2009-03-19	05:09:00	1337
2009-03-19	05:10:00	135
2009-03-19	05:11:00	37
2009-03-19	05:12:00	0
2009-03-19	05:13:00	0
2009-03-19	05:14:00	0
2009-03-19	05:15:00	0
2009-03-19	05:16:00	0
2009-03-19	05:17:00	0
2009-03-19	05:18:00	0
2009-03-19	05:19:00	0
2009-03-19	05:20:00	0
2009-03-19	05:21:00	0
2009-03-19	05:22:00	0
2009-03-19	05:23:00	0
2009-03-19	05:24:00	0
2009-03-19	05:25:00	0
2009-03-19	05:26:00	0
2009-03-19	05:27:00	0
2009-03-19	05:28:00	0
2009-03-19	05:29:00	0
2009-03-19	05:30:00	0
2009-03-19	05:31:00	0
2009-03-19	05:32:00	0
2009-03-19	05:33:00	0
2009-03-19	05:34:00	0
2009-03-19	05:35:00	0
2009-03-19	05:36:00	0
2009-03-19	05:37:00	0
2009-03-19	05:38:00	0
2009-03-19	05:39:00	37
2009-03-19	05:40:00	98
2009-03-19	05:41:00	0
2009-03-19	05:42:00	0
2009-03-19	05:43:00	0
2009-03-19	05:44:00	0
2009-03-19	05:45:00	0
2009-03-19	05:46:00	0
2009-03-19	05:47:00	0
2009-03-19	05:48:00	0
2009-03-19	05:49:00	0
2009-03-19	05:50:00	0
2009-03-19	05:51:00	0
2009-03-19	05:52:00	0
2009-03-19	05:53:00	0
2009-03-19	05:54:00	0
2009-03-19	05:55:00	0
2009-03-19	05:56:00	0
2009-03-19	05:57:00	0
2009-03-19	05:58:00	0
2009-03-19	05:59:00	0
2009-03-19	06:00:00	0
2009-03-19	06:01:00	0
2009-03-19	06:02:00	0
2009-03-19	06:03:00	0
2009-03-19	06:04:00	190
2009-03-19	06:05:00	2351
2009-03-19	06:06:00	1536
2009-03-19	06:07:00	889
2009-03-19	06:08:00	1098
2009-03-19	06:09:00	889
2009-03-19	06:10:00	249
2009-03-19	06:11:00	111
2009-03-19	06:12:00	12
2009-03-19	06:13:00	98
2009-03-19	06:14:00	62
2009-03-19	06:15:00	111
2009-03-19	06:16:00	123
2009-03-19	06:17:00	0
2009-03-19	06:18:00	0
2009-03-19	06:19:00	0
2009-03-19	06:20:00	0
2009-03-19	06:21:00	0
2009-03-19	06:22:00	0
2009-03-19	06:23:00	0
2009-03-19	06:24:00	0
2009-03-19	06:25:00	0
2009-03-19	06:26:00	0
2009-03-19	06:27:00	0
2009-03-19	06:28:00	0
2009-03-19	06:29:00	0
2009-03-19	06:30:00	0
2009-03-19	06:31:00	0
2009-03-19	06:32:00	0
2009-03-19	06:33:00	0
2009-03-19	06:34:00	0
2009-03-19	06:35:00	0
2009-03-19	06:36:00	0
2009-03-19	06:37:00	0
2009-03-19	06:38:00	0
2009-03-19	06:39:00	0
2009-03-19	06:40:00	12
2009-03-19	06:41:00	0
2009-03-19	06:42:00	0
2009-03-19	06:43:00	0
2009-03-19	06:44:00	0
2009-03-19	06:45:00	0
2009-03-19	06:46:00	0
2009-03-19	06:47:00	0
2009-03-19	06:48:00	0
2009-03-19	06:49:00	0
2009-03-19	06:50:00	0
2009-03-19	06:51:00	0
2009-03-19	06:52:00	0
2009-03-19	06:53:00	0
2009-03-19	06:54:00	25
2009-03-19	06:55:00	0
2009-03-19	06:56:00	0
2009-03-19	06:57:00	0
2009-03-19	06:58:00	0
2009-03-19	06:59:00	0
2009-03-19	07:00:00	0
2009-03-19	07:01:00	0
2009-03-19	07:02:00	0
2009-03-19	07:03:00	0
2009-03-19	07:04:00	0
2009-03-19	07:05:00	25
2009-03-19	07:06:00	0
2009-03-19	07:07:00	0
2009-03-19	07:08:00	0
2009-03-19	07:09:00	0
2009-03-19	07:10:00	0
2009-03-19	07:11:00	0
2009-03-19	07:12:00	0
2009-03-19	07:13:00	0
2009-03-19	07:14:00	0
2009-03-19	07:15:00	0
2009-03-19	07:16:00	0
2009-03-19	07:17:00	0
2009-03-19	07:18:00	86
2009-03-19	07:19:00	0
2009-03-19	07:20:00	0
2009-03-19	07:21:00	0
2009-03-19	07:22:00	0
2009-03-19	07:23:00	0
2009-03-19	07:24:00	0
2009-03-19	07:25:00	0
2009-03-19	07:26:00	0
2009-03-19	07:27:00	25
2009-03-19	07:28:00	0
2009-03-19	07:29:00	74
2009-03-19	07:30:00	0
2009-03-19	07:31:00	0
2009-03-19	07:32:00	12
2009-03-19	07:33:00	12
2009-03-19	07:34:00	0
2009-03-19	07:35:00	12
2009-03-19	07:36:00	839
2009-03-19	07:37:00	249
2009-03-19	07:38:00	1337
2009-03-19	07:39:00	249
2009-03-19	07:40:00	357
2009-03-19	07:41:00	889
2009-03-19	07:42:00	357
2009-03-19	07:43:00	990
2009-03-19	07:44:00	1401
2009-03-19	07:45:00	1154
2009-03-19	07:46:00	1679
2009-03-19	07:47:00	679
2009-03-19	07:48:00	426
2009-03-19	07:49:00	1401
2009-03-19	07:50:00	2122
2009-03-19	07:51:00	1502
2009-03-19	07:52:00	1831
2009-03-19	07:53:00	1831
2009-03-19	07:54:00	1871
2009-03-19	07:55:00	1871
2009-03-19	07:56:00	2166
2009-03-19	07:57:00	2122
2009-03-19	07:58:00	2078
2009-03-19	07:59:00	2210
2009-03-19	08:00:00	1570
2009-03-19	08:01:00	2210
2009-03-19	08:02:00	1071
2009-03-19	08:03:00	190
2009-03-19	08:04:00	12
2009-03-19	08:05:00	308
2009-03-19	08:06:00	391
2009-03-19	08:07:00	234
2009-03-19	08:08:00	74
2009-03-19	08:09:00	1154
2009-03-19	08:10:00	1679
2009-03-19	08:11:00	1273
2009-03-19	08:12:00	111
2009-03-19	08:13:00	190
2009-03-19	08:14:00	340
2009-03-19	08:15:00	460
2009-03-19	08:16:00	497
2009-03-19	08:17:00	537
2009-03-19	08:18:00	123
2009-03-19	08:19:00	62
2009-03-19	08:20:00	0
2009-03-19	08:21:00	12
2009-03-19	08:22:00	25
2009-03-19	08:23:00	0
2009-03-19	08:24:00	0
2009-03-19	08:25:00	0
2009-03-19	08:26:00	0
2009-03-19	08:27:00	111
2009-03-19	08:28:00	0
2009-03-19	08:29:00	0
2009-03-19	08:30:00	0
2009-03-19	08:31:00	0
2009-03-19	08:32:00	0
2009-03-19	08:33:00	0
2009-03-19	08:34:00	0
2009-03-19	08:35:00	0
2009-03-19	08:36:00	0
2009-03-19	08:37:00	0
2009-03-19	08:38:00	0
2009-03-19	08:39:00	37
2009-03-19	08:40:00	49
2009-03-19	08:41:00	0
2009-03-19	08:42:00	0
2009-03-19	08:43:00	0
2009-03-19	08:44:00	25
2009-03-19	08:45:00	0
2009-03-19	08:46:00	25
2009-03-19	08:47:00	0
2009-03-19	08:48:00	0
2009-03-19	08:49:00	0
2009-03-19	08:50:00	0
2009-03-19	08:51:00	0
2009-03-19	08:52:00	0
2009-03-19	08:53:00	0
2009-03-19	08:54:00	0
2009-03-19	08:55:00	0
2009-03-19	08:56:00	0
2009-03-19	08:57:00	49
2009-03-19	08:58:00	175
2009-03-19	08:59:00	25
2009-03-19	09:00:00	0
2009-03-19	09:01:00	123
2009-03-19	09:02:00	37
2009-03-19	09:03:00	0
2009-03-19	09:04:00	37
2009-03-19	09:05:00	0
2009-03-19	09:06:00	0
2009-03-19	09:07:00	0
2009-03-19	09:08:00	0
[truncated: 19,611 more rows]

## Sheet: 4.1.09
Actogram, Copy Raw Data, All Days
Identity:	Bear Stephens
Filename:	E:\Active Research Files\meloxicam titre canine\cases\bear s\Bear Stephens 4.1.09.AWC
Gender:	M
Age:	9
Height:	76.2 cm	30.0 in
Weight:	34.0 kg	75.0 lbs
Start Date:	01-Apr-2009 (Wed)
Start Time:	18:00:00
Interval:	1.00 mins
Date Stamp:	Time Stamp:	Activity Data:	Marker Press:
2009-04-01	00:00:00	0
2009-04-01	00:01:00	0
2009-04-01	00:02:00	0
2009-04-01	00:03:00	0
2009-04-01	00:04:00	0
2009-04-01	00:05:00	0
2009-04-01	00:06:00	0
2009-04-01	00:07:00	0
2009-04-01	00:08:00	0
2009-04-01	00:09:00	0
2009-04-01	00:10:00	0
2009-04-01	00:11:00	0
2009-04-01	00:12:00	0
2009-04-01	00:13:00	0
2009-04-01	00:14:00	0
2009-04-01	00:15:00	0
2009-04-01	00:16:00	0
2009-04-01	00:17:00	0
2009-04-01	00:18:00	0
2009-04-01	00:19:00	0
2009-04-01	00:20:00	0
2009-04-01	00:21:00	0
2009-04-01	00:22:00	0
2009-04-01	00:23:00	0
2009-04-01	00:24:00	0
2009-04-01	00:25:00	0
2009-04-01	00:26:00	0
2009-04-01	00:27:00	0
2009-04-01	00:28:00	0
2009-04-01	00:29:00	0
2009-04-01	00:30:00	0
2009-04-01	00:31:00	0
2009-04-01	00:32:00	0
2009-04-01	00:33:00	0
2009-04-01	00:34:00	0
2009-04-01	00:35:00	0
2009-04-01	00:36:00	0
2009-04-01	00:37:00	0
2009-04-01	00:38:00	0
2009-04-01	00:39:00	0
2009-04-01	00:40:00	0
2009-04-01	00:41:00	0
2009-04-01	00:42:00	0
2009-04-01	00:43:00	0
2009-04-01	00:44:00	0
2009-04-01	00:45:00	0
2009-04-01	00:46:00	0
2009-04-01	00:47:00	0
2009-04-01	00:48:00	0
2009-04-01	00:49:00	0
2009-04-01	00:50:00	0
2009-04-01	00:51:00	0
2009-04-01	00:52:00	0
2009-04-01	00:53:00	0
2009-04-01	00:54:00	0
2009-04-01	00:55:00	0
2009-04-01	00:56:00	0
2009-04-01	00:57:00	0
2009-04-01	00:58:00	0
2009-04-01	00:59:00	0
2009-04-01	01:00:00	0
2009-04-01	01:01:00	0
2009-04-01	01:02:00	0
2009-04-01	01:03:00	0
2009-04-01	01:04:00	0
2009-04-01	01:05:00	0
2009-04-01	01:06:00	0
2009-04-01	01:07:00	0
2009-04-01	01:08:00	0
2009-04-01	01:09:00	0
2009-04-01	01:10:00	0
2009-04-01	01:11:00	0
2009-04-01	01:12:00	0
2009-04-01	01:13:00	0
2009-04-01	01:14:00	0
2009-04-01	01:15:00	0
2009-04-01	01:16:00	0
2009-04-01	01:17:00	0
2009-04-01	01:18:00	0
2009-04-01	01:19:00	0
2009-04-01	01:20:00	0
2009-04-01	01:21:00	0
2009-04-01	01:22:00	0
2009-04-01	01:23:00	0
2009-04-01	01:24:00	0
2009-04-01	01:25:00	0
2009-04-01	01:26:00	0
2009-04-01	01:27:00	0
2009-04-01	01:28:00	0
2009-04-01	01:29:00	0
2009-04-01	01:30:00	0
2009-04-01	01:31:00	0
2009-04-01	01:32:00	0
2009-04-01	01:33:00	0
2009-04-01	01:34:00	0
2009-04-01	01:35:00	0
2009-04-01	01:36:00	0
2009-04-01	01:37:00	0
2009-04-01	01:38:00	0
2009-04-01	01:39:00	0
2009-04-01	01:40:00	0
2009-04-01	01:41:00	0
2009-04-01	01:42:00	0
2009-04-01	01:43:00	0
2009-04-01	01:44:00	0
2009-04-01	01:45:00	0
2009-04-01	01:46:00	0
2009-04-01	01:47:00	0
2009-04-01	01:48:00	0
2009-04-01	01:49:00	0
2009-04-01	01:50:00	0
2009-04-01	01:51:00	0
2009-04-01	01:52:00	0
2009-04-01	01:53:00	0
2009-04-01	01:54:00	0
2009-04-01	01:55:00	0
2009-04-01	01:56:00	0
2009-04-01	01:57:00	0
2009-04-01	01:58:00	0
2009-04-01	01:59:00	0
2009-04-01	02:00:00	0
2009-04-01	02:01:00	0
2009-04-01	02:02:00	0
2009-04-01	02:03:00	0
2009-04-01	02:04:00	0
2009-04-01	02:05:00	0
2009-04-01	02:06:00	0
2009-04-01	02:07:00	0
2009-04-01	02:08:00	0
2009-04-01	02:09:00	0
2009-04-01	02:10:00	0
2009-04-01	02:11:00	0
2009-04-01	02:12:00	0
2009-04-01	02:13:00	0
2009-04-01	02:14:00	0
2009-04-01	02:15:00	0
2009-04-01	02:16:00	0
2009-04-01	02:17:00	0
2009-04-01	02:18:00	0
2009-04-01	02:19:00	0
2009-04-01	02:20:00	0
2009-04-01	02:21:00	0
2009-04-01	02:22:00	0
2009-04-01	02:23:00	0
2009-04-01	02:24:00	0
2009-04-01	02:25:00	0
2009-04-01	02:26:00	0
2009-04-01	02:27:00	0
2009-04-01	02:28:00	0
2009-04-01	02:29:00	0
2009-04-01	02:30:00	0
2009-04-01	02:31:00	0
2009-04-01	02:32:00	0
2009-04-01	02:33:00	0
2009-04-01	02:34:00	0
2009-04-01	02:35:00	0
2009-04-01	02:36:00	0
2009-04-01	02:37:00	0
2009-04-01	02:38:00	0
2009-04-01	02:39:00	0
2009-04-01	02:40:00	0
2009-04-01	02:41:00	0
2009-04-01	02:42:00	0
2009-04-01	02:43:00	0
2009-04-01	02:44:00	0
2009-04-01	02:45:00	0
2009-04-01	02:46:00	0
2009-04-01	02:47:00	0
2009-04-01	02:48:00	0
2009-04-01	02:49:00	0
2009-04-01	02:50:00	0
2009-04-01	02:51:00	0
2009-04-01	02:52:00	0
2009-04-01	02:53:00	0
2009-04-01	02:54:00	0
2009-04-01	02:55:00	0
2009-04-01	02:56:00	0
2009-04-01	02:57:00	0
2009-04-01	02:58:00	0
2009-04-01	02:59:00	0
2009-04-01	03:00:00	0
2009-04-01	03:01:00	0
2009-04-01	03:02:00	0
2009-04-01	03:03:00	0
2009-04-01	03:04:00	0
2009-04-01	03:05:00	0
2009-04-01	03:06:00	0
2009-04-01	03:07:00	0
2009-04-01	03:08:00	0
2009-04-01	03:09:00	0
2009-04-01	03:10:00	0
2009-04-01	03:11:00	0
2009-04-01	03:12:00	0
2009-04-01	03:13:00	0
2009-04-01	03:14:00	0
2009-04-01	03:15:00	0
2009-04-01	03:16:00	0
2009-04-01	03:17:00	0
2009-04-01	03:18:00	0
2009-04-01	03:19:00	0
2009-04-01	03:20:00	0
2009-04-01	03:21:00	0
2009-04-01	03:22:00	0
2009-04-01	03:23:00	0
2009-04-01	03:24:00	0
2009-04-01	03:25:00	0
2009-04-01	03:26:00	0
2009-04-01	03:27:00	0
2009-04-01	03:28:00	0
2009-04-01	03:29:00	0
2009-04-01	03:30:00	0
2009-04-01	03:31:00	0
2009-04-01	03:32:00	0
2009-04-01	03:33:00	0
2009-04-01	03:34:00	0
2009-04-01	03:35:00	0
2009-04-01	03:36:00	0
2009-04-01	03:37:00	0
2009-04-01	03:38:00	0
2009-04-01	03:39:00	0
2009-04-01	03:40:00	0
2009-04-01	03:41:00	0
2009-04-01	03:42:00	0
2009-04-01	03:43:00	0
2009-04-01	03:44:00	0
2009-04-01	03:45:00	0
2009-04-01	03:46:00	0
2009-04-01	03:47:00	0
2009-04-01	03:48:00	0
2009-04-01	03:49:00	0
2009-04-01	03:50:00	0
2009-04-01	03:51:00	0
2009-04-01	03:52:00	0
2009-04-01	03:53:00	0
2009-04-01	03:54:00	0
2009-04-01	03:55:00	0
2009-04-01	03:56:00	0
2009-04-01	03:57:00	0
2009-04-01	03:58:00	0
2009-04-01	03:59:00	0
2009-04-01	04:00:00	0
2009-04-01	04:01:00	0
2009-04-01	04:02:00	0
2009-04-01	04:03:00	0
2009-04-01	04:04:00	0
2009-04-01	04:05:00	0
2009-04-01	04:06:00	0
2009-04-01	04:07:00	0
2009-04-01	04:08:00	0
2009-04-01	04:09:00	0
2009-04-01	04:10:00	0
2009-04-01	04:11:00	0
2009-04-01	04:12:00	0
2009-04-01	04:13:00	0
2009-04-01	04:14:00	0
2009-04-01	04:15:00	0
2009-04-01	04:16:00	0
2009-04-01	04:17:00	0
2009-04-01	04:18:00	0
2009-04-01	04:19:00	0
2009-04-01	04:20:00	0
2009-04-01	04:21:00	0
2009-04-01	04:22:00	0
2009-04-01	04:23:00	0
2009-04-01	04:24:00	0
2009-04-01	04:25:00	0
2009-04-01	04:26:00	0
2009-04-01	04:27:00	0
2009-04-01	04:28:00	0
2009-04-01	04:29:00	0
2009-04-01	04:30:00	0
2009-04-01	04:31:00	0
2009-04-01	04:32:00	0
2009-04-01	04:33:00	0
2009-04-01	04:34:00	0
2009-04-01	04:35:00	0
2009-04-01	04:36:00	0
2009-04-01	04:37:00	0
2009-04-01	04:38:00	0
2009-04-01	04:39:00	0
2009-04-01	04:40:00	0
2009-04-01	04:41:00	0
2009-04-01	04:42:00	0
2009-04-01	04:43:00	0
2009-04-01	04:44:00	0
2009-04-01	04:45:00	0
2009-04-01	04:46:00	0
2009-04-01	04:47:00	0
2009-04-01	04:48:00	0
2009-04-01	04:49:00	0
2009-04-01	04:50:00	0
2009-04-01	04:51:00	0
2009-04-01	04:52:00	0
2009-04-01	04:53:00	0
2009-04-01	04:54:00	0
2009-04-01	04:55:00	0
2009-04-01	04:56:00	0
2009-04-01	04:57:00	0
2009-04-01	04:58:00	0
2009-04-01	04:59:00	0
2009-04-01	05:00:00	0
2009-04-01	05:01:00	0
2009-04-01	05:02:00	0
2009-04-01	05:03:00	0
2009-04-01	05:04:00	0
2009-04-01	05:05:00	0
2009-04-01	05:06:00	0
2009-04-01	05:07:00	0
2009-04-01	05:08:00	0
2009-04-01	05:09:00	0
2009-04-01	05:10:00	0
2009-04-01	05:11:00	0
2009-04-01	05:12:00	0
2009-04-01	05:13:00	0
2009-04-01	05:14:00	0
2009-04-01	05:15:00	0
2009-04-01	05:16:00	0
2009-04-01	05:17:00	0
2009-04-01	05:18:00	0
2009-04-01	05:19:00	0
2009-04-01	05:20:00	0
2009-04-01	05:21:00	0
2009-04-01	05:22:00	0
2009-04-01	05:23:00	0
2009-04-01	05:24:00	0
2009-04-01	05:25:00	0
2009-04-01	05:26:00	0
2009-04-01	05:27:00	0
2009-04-01	05:28:00	0
2009-04-01	05:29:00	0
2009-04-01	05:30:00	0
2009-04-01	05:31:00	0
2009-04-01	05:32:00	0
2009-04-01	05:33:00	0
2009-04-01	05:34:00	0
2009-04-01	05:35:00	0
2009-04-01	05:36:00	0
2009-04-01	05:37:00	0
2009-04-01	05:38:00	0
2009-04-01	05:39:00	0
2009-04-01	05:40:00	0
2009-04-01	05:41:00	0
2009-04-01	05:42:00	0
2009-04-01	05:43:00	0
2009-04-01	05:44:00	0
2009-04-01	05:45:00	0
2009-04-01	05:46:00	0
2009-04-01	05:47:00	0
2009-04-01	05:48:00	0
2009-04-01	05:49:00	0
2009-04-01	05:50:00	0
2009-04-01	05:51:00	0
2009-04-01	05:52:00	0
2009-04-01	05:53:00	0
2009-04-01	05:54:00	0
2009-04-01	05:55:00	0
2009-04-01	05:56:00	0
2009-04-01	05:57:00	0
2009-04-01	05:58:00	0
2009-04-01	05:59:00	0
2009-04-01	06:00:00	0
2009-04-01	06:01:00	0
2009-04-01	06:02:00	0
2009-04-01	06:03:00	0
2009-04-01	06:04:00	0
2009-04-01	06:05:00	0
2009-04-01	06:06:00	0
2009-04-01	06:07:00	0
2009-04-01	06:08:00	0
2009-04-01	06:09:00	0
2009-04-01	06:10:00	0
2009-04-01	06:11:00	0
2009-04-01	06:12:00	0
2009-04-01	06:13:00	0
2009-04-01	06:14:00	0
2009-04-01	06:15:00	0
2009-04-01	06:16:00	0
2009-04-01	06:17:00	0
2009-04-01	06:18:00	0
2009-04-01	06:19:00	0
2009-04-01	06:20:00	0
2009-04-01	06:21:00	0
2009-04-01	06:22:00	0
2009-04-01	06:23:00	0
2009-04-01	06:24:00	0
2009-04-01	06:25:00	0
2009-04-01	06:26:00	0
2009-04-01	06:27:00	0
2009-04-01	06:28:00	0
2009-04-01	06:29:00	0
2009-04-01	06:30:00	0
2009-04-01	06:31:00	0
2009-04-01	06:32:00	0
2009-04-01	06:33:00	0
2009-04-01	06:34:00	0
2009-04-01	06:35:00	0
2009-04-01	06:36:00	0
2009-04-01	06:37:00	0
2009-04-01	06:38:00	0
2009-04-01	06:39:00	0
2009-04-01	06:40:00	0
2009-04-01	06:41:00	0
2009-04-01	06:42:00	0
2009-04-01	06:43:00	0
2009-04-01	06:44:00	0
2009-04-01	06:45:00	0
2009-04-01	06:46:00	0
2009-04-01	06:47:00	0
2009-04-01	06:48:00	0
2009-04-01	06:49:00	0
2009-04-01	06:50:00	0
2009-04-01	06:51:00	0
2009-04-01	06:52:00	0
2009-04-01	06:53:00	0
2009-04-01	06:54:00	0
2009-04-01	06:55:00	0
2009-04-01	06:56:00	0
2009-04-01	06:57:00	0
2009-04-01	06:58:00	0
2009-04-01	06:59:00	0
2009-04-01	07:00:00	0
2009-04-01	07:01:00	0
2009-04-01	07:02:00	0
2009-04-01	07:03:00	0
2009-04-01	07:04:00	0
2009-04-01	07:05:00	0
2009-04-01	07:06:00	0
2009-04-01	07:07:00	0
2009-04-01	07:08:00	0
2009-04-01	07:09:00	0
2009-04-01	07:10:00	0
2009-04-01	07:11:00	0
2009-04-01	07:12:00	0
2009-04-01	07:13:00	0
2009-04-01	07:14:00	0
2009-04-01	07:15:00	0
2009-04-01	07:16:00	0
2009-04-01	07:17:00	0
2009-04-01	07:18:00	0
2009-04-01	07:19:00	0
2009-04-01	07:20:00	0
2009-04-01	07:21:00	0
2009-04-01	07:22:00	0
2009-04-01	07:23:00	0
2009-04-01	07:24:00	0
2009-04-01	07:25:00	0
2009-04-01	07:26:00	0
2009-04-01	07:27:00	0
2009-04-01	07:28:00	0
2009-04-01	07:29:00	0
2009-04-01	07:30:00	0
2009-04-01	07:31:00	0
2009-04-01	07:32:00	0
2009-04-01	07:33:00	0
2009-04-01	07:34:00	0
2009-04-01	07:35:00	0
2009-04-01	07:36:00	0
2009-04-01	07:37:00	0
2009-04-01	07:38:00	0
2009-04-01	07:39:00	0
2009-04-01	07:40:00	0
2009-04-01	07:41:00	0
2009-04-01	07:42:00	0
2009-04-01	07:43:00	0
2009-04-01	07:44:00	0
2009-04-01	07:45:00	0
2009-04-01	07:46:00	0
2009-04-01	07:47:00	0
2009-04-01	07:48:00	0
2009-04-01	07:49:00	0
2009-04-01	07:50:00	0
2009-04-01	07:51:00	0
2009-04-01	07:52:00	0
2009-04-01	07:53:00	0
2009-04-01	07:54:00	0
2009-04-01	07:55:00	0
2009-04-01	07:56:00	0
2009-04-01	07:57:00	0
2009-04-01	07:58:00	0
2009-04-01	07:59:00	0
2009-04-01	08:00:00	0
2009-04-01	08:01:00	0
2009-04-01	08:02:00	0
2009-04-01	08:03:00	0
2009-04-01	08:04:00	0
2009-04-01	08:05:00	0
2009-04-01	08:06:00	0
2009-04-01	08:07:00	0
2009-04-01	08:08:00	0
2009-04-01	08:09:00	0
2009-04-01	08:10:00	0
2009-04-01	08:11:00	0
2009-04-01	08:12:00	0
2009-04-01	08:13:00	0
2009-04-01	08:14:00	0
2009-04-01	08:15:00	0
2009-04-01	08:16:00	0
2009-04-01	08:17:00	0
2009-04-01	08:18:00	0
2009-04-01	08:19:00	0
2009-04-01	08:20:00	0
2009-04-01	08:21:00	0
2009-04-01	08:22:00	0
2009-04-01	08:23:00	0
2009-04-01	08:24:00	0
2009-04-01	08:25:00	0
2009-04-01	08:26:00	0
2009-04-01	08:27:00	0
2009-04-01	08:28:00	0
2009-04-01	08:29:00	0
2009-04-01	08:30:00	0
2009-04-01	08:31:00	0
2009-04-01	08:32:00	0
2009-04-01	08:33:00	0
2009-04-01	08:34:00	0
2009-04-01	08:35:00	0
2009-04-01	08:36:00	0
2009-04-01	08:37:00	0
2009-04-01	08:38:00	0
2009-04-01	08:39:00	0
2009-04-01	08:40:00	0
2009-04-01	08:41:00	0
2009-04-01	08:42:00	0
2009-04-01	08:43:00	0
2009-04-01	08:44:00	0
2009-04-01	08:45:00	0
2009-04-01	08:46:00	0
2009-04-01	08:47:00	0
2009-04-01	08:48:00	0
2009-04-01	08:49:00	0
2009-04-01	08:50:00	0
2009-04-01	08:51:00	0
2009-04-01	08:52:00	0
2009-04-01	08:53:00	0
2009-04-01	08:54:00	0
2009-04-01	08:55:00	0
2009-04-01	08:56:00	0
2009-04-01	08:57:00	0
2009-04-01	08:58:00	0
2009-04-01	08:59:00	0
2009-04-01	09:00:00	0
2009-04-01	09:01:00	0
2009-04-01	09:02:00	0
2009-04-01	09:03:00	0
2009-04-01	09:04:00	0
2009-04-01	09:05:00	0
2009-04-01	09:06:00	0
2009-04-01	09:07:00	0
2009-04-01	09:08:00	0
2009-04-01	09:09:00	0
2009-04-01	09:10:00	0
2009-04-01	09:11:00	0
2009-04-01	09:12:00	0
2009-04-01	09:13:00	0
2009-04-01	09:14:00	0
2009-04-01	09:15:00	0
2009-04-01	09:16:00	0
2009-04-01	09:17:00	0
2009-04-01	09:18:00	0
2009-04-01	09:19:00	0
2009-04-01	09:20:00	0
2009-04-01	09:21:00	0
2009-04-01	09:22:00	0
2009-04-01	09:23:00	0
2009-04-01	09:24:00	0
2009-04-01	09:25:00	0
2009-04-01	09:26:00	0
2009-04-01	09:27:00	0
2009-04-01	09:28:00	0
2009-04-01	09:29:00	0
2009-04-01	09:30:00	0
2009-04-01	09:31:00	0
2009-04-01	09:32:00	0
2009-04-01	09:33:00	0
2009-04-01	09:34:00	0
2009-04-01	09:35:00	0
2009-04-01	09:36:00	0
2009-04-01	09:37:00	0
2009-04-01	09:38:00	0
2009-04-01	09:39:00	0
2009-04-01	09:40:00	0
2009-04-01	09:41:00	0
2009-04-01	09:42:00	0
2009-04-01	09:43:00	0
2009-04-01	09:44:00	0
2009-04-01	09:45:00	0
2009-04-01	09:46:00	0
2009-04-01	09:47:00	0
2009-04-01	09:48:00	0
2009-04-01	09:49:00	0
2009-04-01	09:50:00	0
2009-04-01	09:51:00	0
2009-04-01	09:52:00	0
2009-04-01	09:53:00	0
2009-04-01	09:54:00	0
2009-04-01	09:55:00	0
2009-04-01	09:56:00	0
2009-04-01	09:57:00	0
2009-04-01	09:58:00	0
2009-04-01	09:59:00	0
2009-04-01	10:00:00	0
2009-04-01	10:01:00	0
2009-04-01	10:02:00	0
2009-04-01	10:03:00	0
2009-04-01	10:04:00	0
2009-04-01	10:05:00	0
2009-04-01	10:06:00	0
2009-04-01	10:07:00	0
2009-04-01	10:08:00	0
2009-04-01	10:09:00	0
2009-04-01	10:10:00	0
2009-04-01	10:11:00	0
2009-04-01	10:12:00	0
2009-04-01	10:13:00	0
2009-04-01	10:14:00	0
2009-04-01	10:15:00	0
2009-04-01	10:16:00	0
2009-04-01	10:17:00	0
2009-04-01	10:18:00	0
2009-04-01	10:19:00	0
2009-04-01	10:20:00	0
2009-04-01	10:21:00	0
2009-04-01	10:22:00	0
2009-04-01	10:23:00	0
2009-04-01	10:24:00	0
2009-04-01	10:25:00	0
2009-04-01	10:26:00	0
2009-04-01	10:27:00	0
2009-04-01	10:28:00	0
2009-04-01	10:29:00	0
2009-04-01	10:30:00	0
2009-04-01	10:31:00	0
2009-04-01	10:32:00	0
2009-04-01	10:33:00	0
2009-04-01	10:34:00	0
2009-04-01	10:35:00	0
2009-04-01	10:36:00	0
2009-04-01	10:37:00	0
2009-04-01	10:38:00	0
2009-04-01	10:39:00	0
2009-04-01	10:40:00	0
2009-04-01	10:41:00	0
2009-04-01	10:42:00	0
2009-04-01	10:43:00	0
2009-04-01	10:44:00	0
2009-04-01	10:45:00	0
2009-04-01	10:46:00	0
2009-04-01	10:47:00	0
2009-04-01	10:48:00	0
2009-04-01	10:49:00	0
2009-04-01	10:50:00	0
2009-04-01	10:51:00	0
2009-04-01	10:52:00	0
2009-04-01	10:53:00	0
2009-04-01	10:54:00	0
2009-04-01	10:55:00	0
2009-04-01	10:56:00	0
2009-04-01	10:57:00	0
2009-04-01	10:58:00	0
2009-04-01	10:59:00	0
2009-04-01	11:00:00	0
2009-04-01	11:01:00	0
2009-04-01	11:02:00	0
2009-04-01	11:03:00	0
2009-04-01	11:04:00	0
2009-04-01	11:05:00	0
2009-04-01	11:06:00	0
2009-04-01	11:07:00	0
2009-04-01	11:08:00	0
2009-04-01	11:09:00	0
2009-04-01	11:10:00	0
2009-04-01	11:11:00	0
2009-04-01	11:12:00	0
2009-04-01	11:13:00	0
2009-04-01	11:14:00	0
2009-04-01	11:15:00	0
2009-04-01	11:16:00	0
2009-04-01	11:17:00	0
2009-04-01	11:18:00	0
2009-04-01	11:19:00	0
2009-04-01	11:20:00	0
2009-04-01	11:21:00	0
2009-04-01	11:22:00	0
2009-04-01	11:23:00	0
2009-04-01	11:24:00	0
2009-04-01	11:25:00	0
2009-04-01	11:26:00	0
2009-04-01	11:27:00	0
2009-04-01	11:28:00	0
2009-04-01	11:29:00	0
2009-04-01	11:30:00	0
2009-04-01	11:31:00	0
2009-04-01	11:32:00	0
2009-04-01	11:33:00	0
2009-04-01	11:34:00	0
2009-04-01	11:35:00	0
2009-04-01	11:36:00	0
2009-04-01	11:37:00	0
2009-04-01	11:38:00	0
2009-04-01	11:39:00	0
2009-04-01	11:40:00	0
2009-04-01	11:41:00	0
2009-04-01	11:42:00	0
2009-04-01	11:43:00	0
2009-04-01	11:44:00	0
2009-04-01	11:45:00	0
2009-04-01	11:46:00	0
2009-04-01	11:47:00	0
2009-04-01	11:48:00	0
2009-04-01	11:49:00	0
2009-04-01	11:50:00	0
2009-04-01	11:51:00	0
2009-04-01	11:52:00	0
2009-04-01	11:53:00	0
2009-04-01	11:54:00	0
2009-04-01	11:55:00	0
2009-04-01	11:56:00	0
2009-04-01	11:57:00	0
2009-04-01	11:58:00	0
2009-04-01	11:59:00	0
2009-04-01	12:00:00	0
2009-04-01	12:01:00	0
2009-04-01	12:02:00	0
2009-04-01	12:03:00	0
2009-04-01	12:04:00	0
2009-04-01	12:05:00	0
2009-04-01	12:06:00	0
2009-04-01	12:07:00	0
2009-04-01	12:08:00	0
2009-04-01	12:09:00	0
2009-04-01	12:10:00	0
2009-04-01	12:11:00	0
2009-04-01	12:12:00	0
2009-04-01	12:13:00	0
2009-04-01	12:14:00	0
2009-04-01	12:15:00	0
2009-04-01	12:16:00	0
2009-04-01	12:17:00	0
2009-04-01	12:18:00	0
2009-04-01	12:19:00	0
2009-04-01	12:20:00	0
2009-04-01	12:21:00	0
2009-04-01	12:22:00	0
2009-04-01	12:23:00	0
2009-04-01	12:24:00	0
2009-04-01	12:25:00	0
2009-04-01	12:26:00	0
2009-04-01	12:27:00	0
2009-04-01	12:28:00	0
2009-04-01	12:29:00	0
2009-04-01	12:30:00	0
2009-04-01	12:31:00	0
2009-04-01	12:32:00	0
2009-04-01	12:33:00	0
2009-04-01	12:34:00	0
2009-04-01	12:35:00	0
2009-04-01	12:36:00	0
2009-04-01	12:37:00	0
2009-04-01	12:38:00	0
2009-04-01	12:39:00	0
2009-04-01	12:40:00	0
2009-04-01	12:41:00	0
2009-04-01	12:42:00	0
2009-04-01	12:43:00	0
2009-04-01	12:44:00	0
2009-04-01	12:45:00	0
2009-04-01	12:46:00	0
2009-04-01	12:47:00	0
2009-04-01	12:48:00	0
2009-04-01	12:49:00	0
2009-04-01	12:50:00	0
2009-04-01	12:51:00	0
2009-04-01	12:52:00	0
2009-04-01	12:53:00	0
2009-04-01	12:54:00	0
2009-04-01	12:55:00	0
2009-04-01	12:56:00	0
2009-04-01	12:57:00	0
2009-04-01	12:58:00	0
2009-04-01	12:59:00	0
2009-04-01	13:00:00	0
2009-04-01	13:01:00	0
2009-04-01	13:02:00	0
2009-04-01	13:03:00	0
2009-04-01	13:04:00	0
2009-04-01	13:05:00	0
2009-04-01	13:06:00	0
2009-04-01	13:07:00	0
2009-04-01	13:08:00	0
2009-04-01	13:09:00	0
2009-04-01	13:10:00	0
2009-04-01	13:11:00	0
2009-04-01	13:12:00	0
2009-04-01	13:13:00	0
2009-04-01	13:14:00	0
2009-04-01	13:15:00	0
2009-04-01	13:16:00	0
2009-04-01	13:17:00	0
2009-04-01	13:18:00	0
2009-04-01	13:19:00	0
2009-04-01	13:20:00	0
2009-04-01	13:21:00	0
2009-04-01	13:22:00	0
2009-04-01	13:23:00	0
2009-04-01	13:24:00	0
2009-04-01	13:25:00	0
2009-04-01	13:26:00	0
2009-04-01	13:27:00	0
2009-04-01	13:28:00	0
2009-04-01	13:29:00	0
2009-04-01	13:30:00	0
2009-04-01	13:31:00	0
2009-04-01	13:32:00	0
2009-04-01	13:33:00	0
2009-04-01	13:34:00	0
2009-04-01	13:35:00	0
2009-04-01	13:36:00	0
2009-04-01	13:37:00	0
2009-04-01	13:38:00	0
2009-04-01	13:39:00	0
2009-04-01	13:40:00	0
2009-04-01	13:41:00	0
2009-04-01	13:42:00	0
2009-04-01	13:43:00	0
2009-04-01	13:44:00	0
2009-04-01	13:45:00	0
2009-04-01	13:46:00	0
2009-04-01	13:47:00	0
2009-04-01	13:48:00	0
2009-04-01	13:49:00	0
2009-04-01	13:50:00	0
2009-04-01	13:51:00	0
2009-04-01	13:52:00	0
2009-04-01	13:53:00	0
2009-04-01	13:54:00	0
2009-04-01	13:55:00	0
2009-04-01	13:56:00	0
2009-04-01	13:57:00	0
2009-04-01	13:58:00	0
2009-04-01	13:59:00	0
2009-04-01	14:00:00	0
2009-04-01	14:01:00	0
2009-04-01	14:02:00	0
2009-04-01	14:03:00	0
2009-04-01	14:04:00	0
2009-04-01	14:05:00	0
2009-04-01	14:06:00	0
2009-04-01	14:07:00	0
2009-04-01	14:08:00	0
2009-04-01	14:09:00	0
2009-04-01	14:10:00	0
2009-04-01	14:11:00	0
2009-04-01	14:12:00	0
2009-04-01	14:13:00	0
2009-04-01	14:14:00	0
2009-04-01	14:15:00	0
2009-04-01	14:16:00	0
2009-04-01	14:17:00	0
2009-04-01	14:18:00	0
2009-04-01	14:19:00	0
2009-04-01	14:20:00	0
2009-04-01	14:21:00	0
2009-04-01	14:22:00	0
2009-04-01	14:23:00	0
2009-04-01	14:24:00	0
2009-04-01	14:25:00	0
2009-04-01	14:26:00	0
2009-04-01	14:27:00	0
2009-04-01	14:28:00	0
2009-04-01	14:29:00	0
2009-04-01	14:30:00	0
2009-04-01	14:31:00	0
2009-04-01	14:32:00	0
2009-04-01	14:33:00	0
2009-04-01	14:34:00	0
2009-04-01	14:35:00	0
2009-04-01	14:36:00	0
2009-04-01	14:37:00	0
2009-04-01	14:38:00	0
2009-04-01	14:39:00	0
2009-04-01	14:40:00	0
2009-04-01	14:41:00	0
2009-04-01	14:42:00	0
2009-04-01	14:43:00	0
2009-04-01	14:44:00	0
2009-04-01	14:45:00	0
2009-04-01	14:46:00	0
2009-04-01	14:47:00	0
2009-04-01	14:48:00	0
2009-04-01	14:49:00	0
2009-04-01	14:50:00	0
2009-04-01	14:51:00	0
2009-04-01	14:52:00	0
2009-04-01	14:53:00	0
2009-04-01	14:54:00	0
2009-04-01	14:55:00	0
2009-04-01	14:56:00	0
2009-04-01	14:57:00	0
2009-04-01	14:58:00	0
2009-04-01	14:59:00	0
2009-04-01	15:00:00	0
2009-04-01	15:01:00	0
2009-04-01	15:02:00	0
2009-04-01	15:03:00	0
2009-04-01	15:04:00	0
2009-04-01	15:05:00	0
2009-04-01	15:06:00	0
2009-04-01	15:07:00	0
2009-04-01	15:08:00	0
2009-04-01	15:09:00	0
2009-04-01	15:10:00	0
2009-04-01	15:11:00	0
2009-04-01	15:12:00	0
2009-04-01	15:13:00	0
2009-04-01	15:14:00	0
2009-04-01	15:15:00	0
2009-04-01	15:16:00	0
2009-04-01	15:17:00	0
2009-04-01	15:18:00	0
2009-04-01	15:19:00	0
2009-04-01	15:20:00	0
2009-04-01	15:21:00	0
2009-04-01	15:22:00	0
2009-04-01	15:23:00	0
2009-04-01	15:24:00	0
2009-04-01	15:25:00	0
2009-04-01	15:26:00	0
2009-04-01	15:27:00	0
2009-04-01	15:28:00	0
2009-04-01	15:29:00	0
2009-04-01	15:30:00	0
2009-04-01	15:31:00	0
2009-04-01	15:32:00	0
2009-04-01	15:33:00	0
2009-04-01	15:34:00	0
2009-04-01	15:35:00	0
2009-04-01	15:36:00	0
2009-04-01	15:37:00	0
2009-04-01	15:38:00	0
2009-04-01	15:39:00	0
2009-04-01	15:40:00	0
2009-04-01	15:41:00	0
2009-04-01	15:42:00	0
2009-04-01	15:43:00	0
2009-04-01	15:44:00	0
2009-04-01	15:45:00	0
2009-04-01	15:46:00	0
2009-04-01	15:47:00	0
2009-04-01	15:48:00	0
2009-04-01	15:49:00	0
2009-04-01	15:50:00	0
2009-04-01	15:51:00	0
2009-04-01	15:52:00	0
2009-04-01	15:53:00	0
2009-04-01	15:54:00	0
2009-04-01	15:55:00	0
2009-04-01	15:56:00	0
2009-04-01	15:57:00	0
2009-04-01	15:58:00	0
2009-04-01	15:59:00	0
2009-04-01	16:00:00	0
2009-04-01	16:01:00	0
2009-04-01	16:02:00	0
2009-04-01	16:03:00	0
2009-04-01	16:04:00	0
2009-04-01	16:05:00	0
2009-04-01	16:06:00	0
2009-04-01	16:07:00	0
2009-04-01	16:08:00	0
2009-04-01	16:09:00	0
2009-04-01	16:10:00	0
2009-04-01	16:11:00	0
2009-04-01	16:12:00	0
2009-04-01	16:13:00	0
2009-04-01	16:14:00	0
2009-04-01	16:15:00	0
2009-04-01	16:16:00	0
2009-04-01	16:17:00	0
2009-04-01	16:18:00	0
2009-04-01	16:19:00	0
2009-04-01	16:20:00	0
2009-04-01	16:21:00	0
2009-04-01	16:22:00	0
2009-04-01	16:23:00	0
2009-04-01	16:24:00	0
2009-04-01	16:25:00	0
2009-04-01	16:26:00	0
2009-04-01	16:27:00	0
2009-04-01	16:28:00	0
2009-04-01	16:29:00	0
2009-04-01	16:30:00	0
2009-04-01	16:31:00	0
2009-04-01	16:32:00	0
2009-04-01	16:33:00	0
2009-04-01	16:34:00	0
2009-04-01	16:35:00	0
2009-04-01	16:36:00	0
2009-04-01	16:37:00	0
2009-04-01	16:38:00	0
2009-04-01	16:39:00	0
2009-04-01	16:40:00	0
2009-04-01	16:41:00	0
2009-04-01	16:42:00	0
2009-04-01	16:43:00	0
2009-04-01	16:44:00	0
2009-04-01	16:45:00	0
2009-04-01	16:46:00	0
2009-04-01	16:47:00	0
2009-04-01	16:48:00	0
2009-04-01	16:49:00	0
2009-04-01	16:50:00	0
2009-04-01	16:51:00	0
2009-04-01	16:52:00	0
2009-04-01	16:53:00	0
2009-04-01	16:54:00	0
2009-04-01	16:55:00	0
2009-04-01	16:56:00	0
2009-04-01	16:57:00	0
2009-04-01	16:58:00	0
2009-04-01	16:59:00	0
2009-04-01	17:00:00	0
2009-04-01	17:01:00	0
2009-04-01	17:02:00	0
2009-04-01	17:03:00	0
2009-04-01	17:04:00	0
2009-04-01	17:05:00	0
2009-04-01	17:06:00	0
2009-04-01	17:07:00	0
2009-04-01	17:08:00	0
2009-04-01	17:09:00	0
2009-04-01	17:10:00	0
2009-04-01	17:11:00	0
2009-04-01	17:12:00	0
2009-04-01	17:13:00	0
2009-04-01	17:14:00	0
2009-04-01	17:15:00	0
2009-04-01	17:16:00	0
2009-04-01	17:17:00	0
2009-04-01	17:18:00	0
2009-04-01	17:19:00	0
2009-04-01	17:20:00	0
2009-04-01	17:21:00	0
2009-04-01	17:22:00	0
2009-04-01	17:23:00	0
2009-04-01	17:24:00	0
2009-04-01	17:25:00	0
2009-04-01	17:26:00	0
2009-04-01	17:27:00	0
2009-04-01	17:28:00	0
2009-04-01	17:29:00	0
2009-04-01	17:30:00	0
2009-04-01	17:31:00	0
2009-04-01	17:32:00	0
2009-04-01	17:33:00	0
2009-04-01	17:34:00	0
2009-04-01	17:35:00	0
2009-04-01	17:36:00	0
2009-04-01	17:37:00	0
2009-04-01	17:38:00	0
2009-04-01	17:39:00	0
2009-04-01	17:40:00	0
2009-04-01	17:41:00	0
2009-04-01	17:42:00	0
2009-04-01	17:43:00	0
2009-04-01	17:44:00	0
2009-04-01	17:45:00	0
2009-04-01	17:46:00	0
2009-04-01	17:47:00	0
2009-04-01	17:48:00	0
2009-04-01	17:49:00	0
2009-04-01	17:50:00	0
2009-04-01	17:51:00	0
2009-04-01	17:52:00	0
2009-04-01	17:53:00	0
2009-04-01	17:54:00	0
2009-04-01	17:55:00	0
2009-04-01	17:56:00	0
2009-04-01	17:57:00	0
2009-04-01	17:58:00	0
2009-04-01	17:59:00	0
2009-04-01	18:00:00	790
2009-04-01	18:01:00	517
2009-04-01	18:02:00	263
2009-04-01	18:03:00	556
2009-04-01	18:04:00	556
2009-04-01	18:05:00	249
2009-04-01	18:06:00	86
2009-04-01	18:07:00	37
2009-04-01	18:08:00	460
2009-04-01	18:09:00	657
2009-04-01	18:10:00	615
2009-04-01	18:11:00	746
2009-04-01	18:12:00	790
2009-04-01	18:13:00	517
2009-04-01	18:14:00	657
2009-04-01	18:15:00	702
2009-04-01	18:16:00	0
2009-04-01	18:17:00	0
2009-04-01	18:18:00	0
2009-04-01	18:19:00	0
2009-04-01	18:20:00	190
2009-04-01	18:21:00	746
2009-04-01	18:22:00	702
2009-04-01	18:23:00	815
2009-04-01	18:24:00	679
2009-04-01	18:25:00	537
2009-04-01	18:26:00	175
2009-04-01	18:27:00	0
2009-04-01	18:28:00	0
2009-04-01	18:29:00	0
2009-04-01	18:30:00	460
2009-04-01	18:31:00	679
2009-04-01	18:32:00	815
2009-04-01	18:33:00	596
2009-04-01	18:34:00	679
2009-04-01	18:35:00	37
2009-04-01	18:36:00	12
2009-04-01	18:37:00	0
2009-04-01	18:38:00	148
2009-04-01	18:39:00	0
2009-04-01	18:40:00	0
2009-04-01	18:41:00	0
2009-04-01	18:42:00	0
2009-04-01	18:43:00	123
2009-04-01	18:44:00	0
2009-04-01	18:45:00	0
2009-04-01	18:46:00	0
2009-04-01	18:47:00	12
2009-04-01	18:48:00	37
2009-04-01	18:49:00	0
2009-04-01	18:50:00	0
2009-04-01	18:51:00	12
2009-04-01	18:52:00	0
2009-04-01	18:53:00	0
2009-04-01	18:54:00	0
2009-04-01	18:55:00	86
2009-04-01	18:56:00	12
2009-04-01	18:57:00	37
2009-04-01	18:58:00	0
2009-04-01	18:59:00	12
2009-04-01	19:00:00	0
2009-04-01	19:01:00	0
2009-04-01	19:02:00	148
2009-04-01	19:03:00	0
2009-04-01	19:04:00	0
2009-04-01	19:05:00	0
2009-04-01	19:06:00	12
2009-04-01	19:07:00	0
2009-04-01	19:08:00	25
2009-04-01	19:09:00	0
2009-04-01	19:10:00	0
2009-04-01	19:11:00	0
2009-04-01	19:12:00	0
2009-04-01	19:13:00	0
2009-04-01	19:14:00	0
2009-04-01	19:15:00	0
2009-04-01	19:16:00	12
2009-04-01	19:17:00	0
2009-04-01	19:18:00	0
2009-04-01	19:19:00	0
2009-04-01	19:20:00	0
2009-04-01	19:21:00	25
2009-04-01	19:22:00	12
2009-04-01	19:23:00	123
2009-04-01	19:24:00	204
2009-04-01	19:25:00	0
2009-04-01	19:26:00	0
2009-04-01	19:27:00	12
2009-04-01	19:28:00	0
2009-04-01	19:29:00	0
2009-04-01	19:30:00	0
2009-04-01	19:31:00	0
2009-04-01	19:32:00	0
2009-04-01	19:33:00	123
2009-04-01	19:34:00	0
2009-04-01	19:35:00	0
2009-04-01	19:36:00	0
2009-04-01	19:37:00	0
2009-04-01	19:38:00	0
2009-04-01	19:39:00	25
2009-04-01	19:40:00	0
2009-04-01	19:41:00	0
2009-04-01	19:42:00	0
2009-04-01	19:43:00	37
2009-04-01	19:44:00	0
2009-04-01	19:45:00	12
2009-04-01	19:46:00	0
2009-04-01	19:47:00	37
2009-04-01	19:48:00	37
2009-04-01	19:49:00	0
2009-04-01	19:50:00	25
2009-04-01	19:51:00	12
2009-04-01	19:52:00	556
2009-04-01	19:53:00	0
2009-04-01	19:54:00	0
2009-04-01	19:55:00	0
2009-04-01	19:56:00	0
2009-04-01	19:57:00	0
2009-04-01	19:58:00	0
2009-04-01	19:59:00	0
2009-04-01	20:00:00	0
2009-04-01	20:01:00	0
2009-04-01	20:02:00	0
2009-04-01	20:03:00	0
2009-04-01	20:04:00	0
2009-04-01	20:05:00	0
2009-04-01	20:06:00	0
2009-04-01	20:07:00	0
2009-04-01	20:08:00	0
2009-04-01	20:09:00	0
2009-04-01	20:10:00	0
2009-04-01	20:11:00	0
2009-04-01	20:12:00	12
2009-04-01	20:13:00	0
2009-04-01	20:14:00	0
2009-04-01	20:15:00	0
2009-04-01	20:16:00	12
2009-04-01	20:17:00	12
2009-04-01	20:18:00	12
2009-04-01	20:19:00	0
2009-04-01	20:20:00	0
2009-04-01	20:21:00	0
2009-04-01	20:22:00	0
2009-04-01	20:23:00	0
2009-04-01	20:24:00	0
2009-04-01	20:25:00	0
2009-04-01	20:26:00	0
2009-04-01	20:27:00	0
2009-04-01	20:28:00	0
2009-04-01	20:29:00	0
2009-04-01	20:30:00	0
2009-04-01	20:31:00	0
2009-04-01	20:32:00	0
2009-04-01	20:33:00	0
2009-04-01	20:34:00	0
2009-04-01	20:35:00	0
2009-04-01	20:36:00	0
2009-04-01	20:37:00	0
2009-04-01	20:38:00	0
2009-04-01	20:39:00	0
2009-04-01	20:40:00	0
2009-04-01	20:41:00	12
2009-04-01	20:42:00	0
2009-04-01	20:43:00	357
2009-04-01	20:44:00	938
2009-04-01	20:45:00	1679
2009-04-01	20:46:00	1369
2009-04-01	20:47:00	962
2009-04-01	20:48:00	1369
2009-04-01	20:49:00	990
2009-04-01	20:50:00	37
2009-04-01	20:51:00	249
2009-04-01	20:52:00	204
2009-04-01	20:53:00	12
2009-04-01	20:54:00	37
2009-04-01	20:55:00	12
2009-04-01	20:56:00	74
2009-04-01	20:57:00	768
2009-04-01	20:58:00	12
2009-04-01	20:59:00	0
2009-04-01	21:00:00	62
2009-04-01	21:01:00	25
2009-04-01	21:02:00	148
2009-04-01	21:03:00	0
2009-04-01	21:04:00	0
2009-04-01	21:05:00	0
2009-04-01	21:06:00	0
2009-04-01	21:07:00	0
2009-04-01	21:08:00	0
2009-04-01	21:09:00	0
2009-04-01	21:10:00	0
2009-04-01	21:11:00	724
2009-04-01	21:12:00	913
2009-04-01	21:13:00	12
2009-04-01	21:14:00	0
2009-04-01	21:15:00	234
2009-04-01	21:16:00	62
2009-04-01	21:17:00	357
2009-04-01	21:18:00	1098
2009-04-01	21:19:00	190
2009-04-01	21:20:00	175
2009-04-01	21:21:00	190
2009-04-01	21:22:00	357
2009-04-01	21:23:00	219
2009-04-01	21:24:00	12
2009-04-01	21:25:00	160
2009-04-01	21:26:00	98
2009-04-01	21:27:00	374
2009-04-01	21:28:00	322
2009-04-01	21:29:00	0
2009-04-01	21:30:00	0
2009-04-01	21:31:00	86
2009-04-01	21:32:00	537
2009-04-01	21:33:00	576
2009-04-01	21:34:00	135
2009-04-01	21:35:00	37
2009-04-01	21:36:00	25
2009-04-01	21:37:00	249
2009-04-01	21:38:00	0
2009-04-01	21:39:00	0
2009-04-01	21:40:00	12
2009-04-01	21:41:00	0
2009-04-01	21:42:00	62
2009-04-01	21:43:00	889
2009-04-01	21:44:00	37
2009-04-01	21:45:00	0
2009-04-01	21:46:00	204
2009-04-01	21:47:00	123
2009-04-01	21:48:00	0
2009-04-01	21:49:00	74
2009-04-01	21:50:00	962
2009-04-01	21:51:00	1716
2009-04-01	21:52:00	768
2009-04-01	21:53:00	1071
2009-04-01	21:54:00	839
2009-04-01	21:55:00	1071
2009-04-01	21:56:00	1401
2009-04-01	21:57:00	1273
2009-04-01	21:58:00	1433
2009-04-01	21:59:00	1467
2009-04-01	22:00:00	1017
2009-04-01	22:01:00	249
2009-04-01	22:02:00	0
2009-04-01	22:03:00	25
2009-04-01	22:04:00	12
2009-04-01	22:05:00	49
2009-04-01	22:06:00	49
2009-04-01	22:07:00	135
2009-04-01	22:08:00	12
2009-04-01	22:09:00	0
2009-04-01	22:10:00	0
2009-04-01	22:11:00	0
2009-04-01	22:12:00	0
2009-04-01	22:13:00	0
2009-04-01	22:14:00	0
2009-04-01	22:15:00	0
2009-04-01	22:16:00	0
2009-04-01	22:17:00	0
2009-04-01	22:18:00	0
2009-04-01	22:19:00	0
2009-04-01	22:20:00	0
2009-04-01	22:21:00	0
2009-04-01	22:22:00	0
2009-04-01	22:23:00	0
2009-04-01	22:24:00	0
2009-04-01	22:25:00	0
2009-04-01	22:26:00	0
2009-04-01	22:27:00	0
2009-04-01	22:28:00	0
2009-04-01	22:29:00	0
2009-04-01	22:30:00	0
2009-04-01	22:31:00	0
2009-04-01	22:32:00	0
2009-04-01	22:33:00	0
2009-04-01	22:34:00	0
2009-04-01	22:35:00	0
2009-04-01	22:36:00	0
2009-04-01	22:37:00	0
2009-04-01	22:38:00	0
2009-04-01	22:39:00	0
2009-04-01	22:40:00	12
2009-04-01	22:41:00	0
2009-04-01	22:42:00	0
2009-04-01	22:43:00	0
2009-04-01	22:44:00	0
2009-04-01	22:45:00	0
2009-04-01	22:46:00	0
2009-04-01	22:47:00	0
2009-04-01	22:48:00	0
2009-04-01	22:49:00	0
2009-04-01	22:50:00	0
2009-04-01	22:51:00	12
2009-04-01	22:52:00	0
2009-04-01	22:53:00	0
2009-04-01	22:54:00	0
2009-04-01	22:55:00	0
2009-04-01	22:56:00	0
2009-04-01	22:57:00	0
2009-04-01	22:58:00	0
2009-04-01	22:59:00	0
2009-04-01	23:00:00	0
2009-04-01	23:01:00	0
2009-04-01	23:02:00	0
2009-04-01	23:03:00	123
2009-04-01	23:04:00	37
2009-04-01	23:05:00	74
2009-04-01	23:06:00	111
2009-04-01	23:07:00	98
2009-04-01	23:08:00	25
2009-04-01	23:09:00	0
2009-04-01	23:10:00	0
2009-04-01	23:11:00	0
2009-04-01	23:12:00	0
2009-04-01	23:13:00	0
2009-04-01	23:14:00	0
2009-04-01	23:15:00	0
2009-04-01	23:16:00	0
2009-04-01	23:17:00	0
2009-04-01	23:18:00	0
2009-04-01	23:19:00	0
2009-04-01	23:20:00	0
2009-04-01	23:21:00	0
2009-04-01	23:22:00	0
2009-04-01	23:23:00	0
2009-04-01	23:24:00	0
2009-04-01	23:25:00	0
2009-04-01	23:26:00	0
2009-04-01	23:27:00	0
2009-04-01	23:28:00	0
2009-04-01	23:29:00	0
2009-04-01	23:30:00	0
2009-04-01	23:31:00	0
2009-04-01	23:32:00	0
2009-04-01	23:33:00	0
2009-04-01	23:34:00	0
2009-04-01	23:35:00	0
2009-04-01	23:36:00	0
2009-04-01	23:37:00	0
2009-04-01	23:38:00	0
2009-04-01	23:39:00	0
2009-04-01	23:40:00	0
2009-04-01	23:41:00	0
2009-04-01	23:42:00	0
2009-04-01	23:43:00	0
2009-04-01	23:44:00	0
2009-04-01	23:45:00	0
2009-04-01	23:46:00	0
2009-04-01	23:47:00	0
2009-04-01	23:48:00	0
2009-04-01	23:49:00	0
2009-04-01	23:50:00	0
2009-04-01	23:51:00	135
2009-04-01	23:52:00	12
2009-04-01	23:53:00	0
2009-04-01	23:54:00	0
2009-04-01	23:55:00	37
2009-04-01	23:56:00	0
2009-04-01	23:57:00	0
2009-04-01	23:58:00	0
2009-04-01	23:59:00	0
2009-04-02	00:00:00	0
2009-04-02	00:01:00	0
2009-04-02	00:02:00	0
2009-04-02	00:03:00	0
2009-04-02	00:04:00	0
2009-04-02	00:05:00	0
2009-04-02	00:06:00	0
2009-04-02	00:07:00	0
2009-04-02	00:08:00	0
2009-04-02	00:09:00	0
2009-04-02	00:10:00	0
2009-04-02	00:11:00	12
2009-04-02	00:12:00	0
2009-04-02	00:13:00	0
2009-04-02	00:14:00	0
2009-04-02	00:15:00	0
2009-04-02	00:16:00	25
2009-04-02	00:17:00	0
2009-04-02	00:18:00	0
2009-04-02	00:19:00	0
2009-04-02	00:20:00	0
2009-04-02	00:21:00	0
2009-04-02	00:22:00	0
2009-04-02	00:23:00	0
2009-04-02	00:24:00	0
2009-04-02	00:25:00	0
2009-04-02	00:26:00	0
2009-04-02	00:27:00	0
2009-04-02	00:28:00	0
2009-04-02	00:29:00	0
2009-04-02	00:30:00	0
2009-04-02	00:31:00	0
2009-04-02	00:32:00	0
2009-04-02	00:33:00	0
2009-04-02	00:34:00	0
2009-04-02	00:35:00	12
2009-04-02	00:36:00	0
2009-04-02	00:37:00	0
2009-04-02	00:38:00	0
2009-04-02	00:39:00	0
2009-04-02	00:40:00	0
2009-04-02	00:41:00	0
2009-04-02	00:42:00	0
2009-04-02	00:43:00	0
2009-04-02	00:44:00	0
2009-04-02	00:45:00	12
2009-04-02	00:46:00	0
2009-04-02	00:47:00	0
2009-04-02	00:48:00	0
2009-04-02	00:49:00	0
2009-04-02	00:50:00	0
2009-04-02	00:51:00	0
2009-04-02	00:52:00	0
2009-04-02	00:53:00	0
2009-04-02	00:54:00	0
2009-04-02	00:55:00	0
2009-04-02	00:56:00	0
2009-04-02	00:57:00	0
2009-04-02	00:58:00	0
2009-04-02	00:59:00	0
2009-04-02	01:00:00	0
2009-04-02	01:01:00	0
2009-04-02	01:02:00	0
2009-04-02	01:03:00	25
2009-04-02	01:04:00	12
2009-04-02	01:05:00	160
2009-04-02	01:06:00	25
2009-04-02	01:07:00	0
2009-04-02	01:08:00	0
2009-04-02	01:09:00	0
2009-04-02	01:10:00	0
2009-04-02	01:11:00	0
2009-04-02	01:12:00	0
2009-04-02	01:13:00	0
2009-04-02	01:14:00	0
2009-04-02	01:15:00	0
2009-04-02	01:16:00	0
2009-04-02	01:17:00	0
2009-04-02	01:18:00	0
2009-04-02	01:19:00	0
2009-04-02	01:20:00	0
2009-04-02	01:21:00	0
2009-04-02	01:22:00	12
2009-04-02	01:23:00	0
2009-04-02	01:24:00	0
2009-04-02	01:25:00	0
2009-04-02	01:26:00	0
2009-04-02	01:27:00	0
2009-04-02	01:28:00	0
2009-04-02	01:29:00	0
2009-04-02	01:30:00	0
2009-04-02	01:31:00	0
2009-04-02	01:32:00	0
2009-04-02	01:33:00	0
2009-04-02	01:34:00	0
2009-04-02	01:35:00	12
2009-04-02	01:36:00	0
2009-04-02	01:37:00	0
2009-04-02	01:38:00	0
2009-04-02	01:39:00	0
2009-04-02	01:40:00	0
2009-04-02	01:41:00	0
2009-04-02	01:42:00	0
2009-04-02	01:43:00	0
2009-04-02	01:44:00	0
2009-04-02	01:45:00	0
2009-04-02	01:46:00	0
2009-04-02	01:47:00	0
2009-04-02	01:48:00	0
2009-04-02	01:49:00	0
2009-04-02	01:50:00	0
2009-04-02	01:51:00	219
2009-04-02	01:52:00	175
2009-04-02	01:53:00	62
2009-04-02	01:54:00	0
2009-04-02	01:55:00	111
2009-04-02	01:56:00	12
2009-04-02	01:57:00	0
2009-04-02	01:58:00	0
2009-04-02	01:59:00	0
2009-04-02	02:00:00	0
2009-04-02	02:01:00	0
2009-04-02	02:02:00	0
2009-04-02	02:03:00	0
2009-04-02	02:04:00	0
2009-04-02	02:05:00	0
2009-04-02	02:06:00	0
2009-04-02	02:07:00	0
2009-04-02	02:08:00	0
2009-04-02	02:09:00	12
2009-04-02	02:10:00	0
2009-04-02	02:11:00	0
2009-04-02	02:12:00	37
2009-04-02	02:13:00	0
2009-04-02	02:14:00	0
2009-04-02	02:15:00	0
2009-04-02	02:16:00	0
2009-04-02	02:17:00	0
2009-04-02	02:18:00	0
2009-04-02	02:19:00	0
2009-04-02	02:20:00	0
2009-04-02	02:21:00	0
2009-04-02	02:22:00	0
2009-04-02	02:23:00	0
2009-04-02	02:24:00	0
2009-04-02	02:25:00	0
2009-04-02	02:26:00	0
2009-04-02	02:27:00	0
2009-04-02	02:28:00	0
2009-04-02	02:29:00	0
2009-04-02	02:30:00	263
2009-04-02	02:31:00	135
2009-04-02	02:32:00	0
2009-04-02	02:33:00	0
2009-04-02	02:34:00	0
2009-04-02	02:35:00	0
2009-04-02	02:36:00	0
2009-04-02	02:37:00	0
2009-04-02	02:38:00	0
2009-04-02	02:39:00	0
2009-04-02	02:40:00	0
2009-04-02	02:41:00	0
2009-04-02	02:42:00	0
2009-04-02	02:43:00	0
2009-04-02	02:44:00	0
2009-04-02	02:45:00	0
2009-04-02	02:46:00	12
2009-04-02	02:47:00	0
2009-04-02	02:48:00	0
2009-04-02	02:49:00	0
2009-04-02	02:50:00	0
2009-04-02	02:51:00	0
2009-04-02	02:52:00	0
2009-04-02	02:53:00	0
2009-04-02	02:54:00	0
2009-04-02	02:55:00	0
2009-04-02	02:56:00	0
2009-04-02	02:57:00	0
2009-04-02	02:58:00	0
2009-04-02	02:59:00	0
2009-04-02	03:00:00	0
2009-04-02	03:01:00	0
2009-04-02	03:02:00	0
2009-04-02	03:03:00	0
2009-04-02	03:04:00	0
2009-04-02	03:05:00	0
2009-04-02	03:06:00	0
2009-04-02	03:07:00	0
2009-04-02	03:08:00	0
2009-04-02	03:09:00	25
2009-04-02	03:10:00	0
2009-04-02	03:11:00	0
2009-04-02	03:12:00	0
2009-04-02	03:13:00	0
2009-04-02	03:14:00	0
2009-04-02	03:15:00	0
2009-04-02	03:16:00	0
2009-04-02	03:17:00	0
2009-04-02	03:18:00	0
2009-04-02	03:19:00	0
2009-04-02	03:20:00	0
2009-04-02	03:21:00	0
2009-04-02	03:22:00	0
2009-04-02	03:23:00	0
2009-04-02	03:24:00	0
2009-04-02	03:25:00	0
2009-04-02	03:26:00	0
2009-04-02	03:27:00	0
2009-04-02	03:28:00	0
2009-04-02	03:29:00	0
2009-04-02	03:30:00	0
2009-04-02	03:31:00	12
2009-04-02	03:32:00	0
2009-04-02	03:33:00	0
2009-04-02	03:34:00	0
2009-04-02	03:35:00	0
2009-04-02	03:36:00	0
2009-04-02	03:37:00	0
2009-04-02	03:38:00	0
2009-04-02	03:39:00	0
2009-04-02	03:40:00	0
2009-04-02	03:41:00	0
2009-04-02	03:42:00	0
2009-04-02	03:43:00	0
2009-04-02	03:44:00	123
2009-04-02	03:45:00	123
2009-04-02	03:46:00	308
2009-04-02	03:47:00	62
2009-04-02	03:48:00	0
2009-04-02	03:49:00	49
2009-04-02	03:50:00	0
2009-04-02	03:51:00	0
2009-04-02	03:52:00	0
2009-04-02	03:53:00	0
2009-04-02	03:54:00	0
2009-04-02	03:55:00	0
2009-04-02	03:56:00	123
2009-04-02	03:57:00	37
2009-04-02	03:58:00	25
2009-04-02	03:59:00	0
2009-04-02	04:00:00	0
2009-04-02	04:01:00	0
2009-04-02	04:02:00	0
2009-04-02	04:03:00	0
2009-04-02	04:04:00	0
2009-04-02	04:05:00	0
2009-04-02	04:06:00	0
2009-04-02	04:07:00	0
2009-04-02	04:08:00	0
2009-04-02	04:09:00	0
2009-04-02	04:10:00	37
2009-04-02	04:11:00	0
2009-04-02	04:12:00	0
2009-04-02	04:13:00	0
2009-04-02	04:14:00	0
2009-04-02	04:15:00	0
2009-04-02	04:16:00	0
2009-04-02	04:17:00	0
2009-04-02	04:18:00	0
2009-04-02	04:19:00	25
2009-04-02	04:20:00	340
2009-04-02	04:21:00	111
2009-04-02	04:22:00	62
2009-04-02	04:23:00	0
2009-04-02	04:24:00	0
2009-04-02	04:25:00	0
2009-04-02	04:26:00	123
2009-04-02	04:27:00	0
2009-04-02	04:28:00	0
2009-04-02	04:29:00	0
2009-04-02	04:30:00	0
2009-04-02	04:31:00	0
2009-04-02	04:32:00	0
2009-04-02	04:33:00	0
2009-04-02	04:34:00	0
2009-04-02	04:35:00	0
2009-04-02	04:36:00	0
2009-04-02	04:37:00	0
2009-04-02	04:38:00	0
2009-04-02	04:39:00	0
2009-04-02	04:40:00	0
2009-04-02	04:41:00	0
2009-04-02	04:42:00	0
2009-04-02	04:43:00	0
2009-04-02	04:44:00	0
2009-04-02	04:45:00	25
2009-04-02	04:46:00	12
2009-04-02	04:47:00	0
2009-04-02	04:48:00	0
2009-04-02	04:49:00	0
2009-04-02	04:50:00	0
2009-04-02	04:51:00	0
2009-04-02	04:52:00	0
2009-04-02	04:53:00	204
2009-04-02	04:54:00	37
2009-04-02	04:55:00	37
2009-04-02	04:56:00	86
2009-04-02	04:57:00	0
2009-04-02	04:58:00	0
2009-04-02	04:59:00	0
2009-04-02	05:00:00	0
2009-04-02	05:01:00	0
2009-04-02	05:02:00	0
2009-04-02	05:03:00	0
2009-04-02	05:04:00	0
2009-04-02	05:05:00	0
2009-04-02	05:06:00	0
2009-04-02	05:07:00	0
2009-04-02	05:08:00	0
2009-04-02	05:09:00	0
2009-04-02	05:10:00	12
2009-04-02	05:11:00	0
2009-04-02	05:12:00	0
2009-04-02	05:13:00	0
2009-04-02	05:14:00	0
2009-04-02	05:15:00	0
2009-04-02	05:16:00	12
2009-04-02	05:17:00	0
2009-04-02	05:18:00	0
2009-04-02	05:19:00	0
2009-04-02	05:20:00	0
2009-04-02	05:21:00	0
2009-04-02	05:22:00	0
2009-04-02	05:23:00	0
2009-04-02	05:24:00	0
2009-04-02	05:25:00	0
2009-04-02	05:26:00	0
2009-04-02	05:27:00	12
2009-04-02	05:28:00	0
2009-04-02	05:29:00	0
2009-04-02	05:30:00	0
2009-04-02	05:31:00	0
2009-04-02	05:32:00	12
2009-04-02	05:33:00	49
2009-04-02	05:34:00	0
2009-04-02	05:35:00	0
2009-04-02	05:36:00	0
2009-04-02	05:37:00	0
2009-04-02	05:38:00	0
2009-04-02	05:39:00	0
2009-04-02	05:40:00	0
2009-04-02	05:41:00	0
2009-04-02	05:42:00	0
2009-04-02	05:43:00	0
2009-04-02	05:44:00	0
2009-04-02	05:45:00	49
2009-04-02	05:46:00	0
2009-04-02	05:47:00	12
2009-04-02	05:48:00	0
2009-04-02	05:49:00	0
2009-04-02	05:50:00	0
2009-04-02	05:51:00	0
2009-04-02	05:52:00	62
2009-04-02	05:53:00	322
2009-04-02	05:54:00	25
2009-04-02	05:55:00	0
2009-04-02	05:56:00	0
2009-04-02	05:57:00	0
2009-04-02	05:58:00	0
2009-04-02	05:59:00	0
2009-04-02	06:00:00	0
2009-04-02	06:01:00	0
2009-04-02	06:02:00	0
2009-04-02	06:03:00	25
2009-04-02	06:04:00	0
2009-04-02	06:05:00	0
2009-04-02	06:06:00	0
2009-04-02	06:07:00	0
2009-04-02	06:08:00	1605
2009-04-02	06:09:00	1952
2009-04-02	06:10:00	1214
2009-04-02	06:11:00	962
2009-04-02	06:12:00	1433
2009-04-02	06:13:00	1502
2009-04-02	06:14:00	1792
2009-04-02	06:15:00	0
2009-04-02	06:16:00	12
2009-04-02	06:17:00	0
2009-04-02	06:18:00	0
2009-04-02	06:19:00	0
2009-04-02	06:20:00	0
2009-04-02	06:21:00	0
2009-04-02	06:22:00	0
2009-04-02	06:23:00	0
2009-04-02	06:24:00	0
2009-04-02	06:25:00	0
2009-04-02	06:26:00	0
2009-04-02	06:27:00	0
2009-04-02	06:28:00	0
2009-04-02	06:29:00	25
2009-04-02	06:30:00	0
2009-04-02	06:31:00	0
2009-04-02	06:32:00	0
2009-04-02	06:33:00	0
2009-04-02	06:34:00	0
2009-04-02	06:35:00	0
2009-04-02	06:36:00	0
2009-04-02	06:37:00	0
2009-04-02	06:38:00	0
2009-04-02	06:39:00	0
2009-04-02	06:40:00	0
2009-04-02	06:41:00	0
2009-04-02	06:42:00	0
2009-04-02	06:43:00	0
2009-04-02	06:44:00	0
2009-04-02	06:45:00	0
2009-04-02	06:46:00	0
2009-04-02	06:47:00	0
2009-04-02	06:48:00	0
2009-04-02	06:49:00	0
2009-04-02	06:50:00	0
2009-04-02	06:51:00	0
2009-04-02	06:52:00	0
2009-04-02	06:53:00	0
2009-04-02	06:54:00	0
2009-04-02	06:55:00	0
2009-04-02	06:56:00	86
2009-04-02	06:57:00	0
2009-04-02	06:58:00	0
2009-04-02	06:59:00	0
2009-04-02	07:00:00	0
2009-04-02	07:01:00	0
2009-04-02	07:02:00	0
2009-04-02	07:03:00	0
2009-04-02	07:04:00	12
2009-04-02	07:05:00	0
2009-04-02	07:06:00	25
2009-04-02	07:07:00	123
2009-04-02	07:08:00	0
2009-04-02	07:09:00	0
2009-04-02	07:10:00	0
2009-04-02	07:11:00	0
2009-04-02	07:12:00	12
2009-04-02	07:13:00	0
2009-04-02	07:14:00	0
2009-04-02	07:15:00	0
2009-04-02	07:16:00	0
2009-04-02	07:17:00	0
2009-04-02	07:18:00	0
2009-04-02	07:19:00	0
2009-04-02	07:20:00	0
2009-04-02	07:21:00	0
2009-04-02	07:22:00	0
2009-04-02	07:23:00	0
2009-04-02	07:24:00	0
2009-04-02	07:25:00	0
2009-04-02	07:26:00	0
2009-04-02	07:27:00	0
2009-04-02	07:28:00	0
2009-04-02	07:29:00	37
2009-04-02	07:30:00	25
2009-04-02	07:31:00	340
2009-04-02	07:32:00	0
2009-04-02	07:33:00	148
2009-04-02	07:34:00	0
2009-04-02	07:35:00	0
2009-04-02	07:36:00	0
2009-04-02	07:37:00	12
2009-04-02	07:38:00	0
2009-04-02	07:39:00	0
2009-04-02	07:40:00	0
2009-04-02	07:41:00	0
2009-04-02	07:42:00	111
2009-04-02	07:43:00	37
2009-04-02	07:44:00	0
2009-04-02	07:45:00	0
2009-04-02	07:46:00	0
2009-04-02	07:47:00	0
2009-04-02	07:48:00	0
2009-04-02	07:49:00	249
2009-04-02	07:50:00	37
2009-04-02	07:51:00	49
2009-04-02	07:52:00	0
2009-04-02	07:53:00	263
2009-04-02	07:54:00	12
2009-04-02	07:55:00	0
2009-04-02	07:56:00	0
2009-04-02	07:57:00	0
2009-04-02	07:58:00	0
2009-04-02	07:59:00	0
2009-04-02	08:00:00	0
2009-04-02	08:01:00	0
2009-04-02	08:02:00	0
2009-04-02	08:03:00	0
2009-04-02	08:04:00	0
2009-04-02	08:05:00	0
2009-04-02	08:06:00	0
2009-04-02	08:07:00	25
2009-04-02	08:08:00	204
2009-04-02	08:09:00	409
2009-04-02	08:10:00	1305
2009-04-02	08:11:00	1467
2009-04-02	08:12:00	1753
2009-04-02	08:13:00	1570
2009-04-02	08:14:00	1952
2009-04-02	08:15:00	1433
2009-04-02	08:16:00	990
2009-04-02	08:17:00	938
2009-04-02	08:18:00	1536
2009-04-02	08:19:00	1401
2009-04-02	08:20:00	1154
2009-04-02	08:21:00	2166
2009-04-02	08:22:00	1467
2009-04-02	08:23:00	1570
2009-04-02	08:24:00	2210
2009-04-02	08:25:00	2304
2009-04-02	08:26:00	1605
2009-04-02	08:27:00	724
2009-04-02	08:28:00	1502
2009-04-02	08:29:00	1184
2009-04-02	08:30:00	962
2009-04-02	08:31:00	497
2009-04-02	08:32:00	460
2009-04-02	08:33:00	249
2009-04-02	08:34:00	596
2009-04-02	08:35:00	702
2009-04-02	08:36:00	517
2009-04-02	08:37:00	864
2009-04-02	08:38:00	913
2009-04-02	08:39:00	864
2009-04-02	08:40:00	635
2009-04-02	08:41:00	657
2009-04-02	08:42:00	0
2009-04-02	08:43:00	0
2009-04-02	08:44:00	86
2009-04-02	08:45:00	148
2009-04-02	08:46:00	0
2009-04-02	08:47:00	0
2009-04-02	08:48:00	0
2009-04-02	08:49:00	0
2009-04-02	08:50:00	0
2009-04-02	08:51:00	160
2009-04-02	08:52:00	86
2009-04-02	08:53:00	0
2009-04-02	08:54:00	0
2009-04-02	08:55:00	0
2009-04-02	08:56:00	0
2009-04-02	08:57:00	0
2009-04-02	08:58:00	340
2009-04-02	08:59:00	49
2009-04-02	09:00:00	12
2009-04-02	09:01:00	0
2009-04-02	09:02:00	0
2009-04-02	09:03:00	0
2009-04-02	09:04:00	308
2009-04-02	09:05:00	234
2009-04-02	09:06:00	0
2009-04-02	09:07:00	0
2009-04-02	09:08:00	0
[truncated: 19,611 more rows]

## Sheet: 4.15.09
Actogram, Copy Raw Data, All Days
Identity:	Bear Stephens
Filename:	E:\Active Research Files\meloxicam titre canine\cases\bear s\Bear Stephens 4.15.09.AWC
Gender:	M
Age:	9
Height:	76.2 cm	30.0 in
Weight:	34.0 kg	75.0 lbs
Start Date:	15-Apr-2009 (Wed)
Start Time:	18:00:00
Interval:	1.00 mins
Date Stamp:	Time Stamp:	Activity Data:	Marker Press:
2009-04-15	00:00:00	0
2009-04-15	00:01:00	0
2009-04-15	00:02:00	0
2009-04-15	00:03:00	0
2009-04-15	00:04:00	0
2009-04-15	00:05:00	0
2009-04-15	00:06:00	0
2009-04-15	00:07:00	0
2009-04-15	00:08:00	0
2009-04-15	00:09:00	0
2009-04-15	00:10:00	0
2009-04-15	00:11:00	0
2009-04-15	00:12:00	0
2009-04-15	00:13:00	0
2009-04-15	00:14:00	0
2009-04-15	00:15:00	0
2009-04-15	00:16:00	0
2009-04-15	00:17:00	0
2009-04-15	00:18:00	0
2009-04-15	00:19:00	0
2009-04-15	00:20:00	0
2009-04-15	00:21:00	0
2009-04-15	00:22:00	0
2009-04-15	00:23:00	0
2009-04-15	00:24:00	0
2009-04-15	00:25:00	0
2009-04-15	00:26:00	0
2009-04-15	00:27:00	0
2009-04-15	00:28:00	0
2009-04-15	00:29:00	0
2009-04-15	00:30:00	0
2009-04-15	00:31:00	0
2009-04-15	00:32:00	0
2009-04-15	00:33:00	0
2009-04-15	00:34:00	0
2009-04-15	00:35:00	0
2009-04-15	00:36:00	0
2009-04-15	00:37:00	0
2009-04-15	00:38:00	0
2009-04-15	00:39:00	0
2009-04-15	00:40:00	0
2009-04-15	00:41:00	0
2009-04-15	00:42:00	0
2009-04-15	00:43:00	0
2009-04-15	00:44:00	0
2009-04-15	00:45:00	0
2009-04-15	00:46:00	0
2009-04-15	00:47:00	0
2009-04-15	00:48:00	0
2009-04-15	00:49:00	0
2009-04-15	00:50:00	0
2009-04-15	00:51:00	0
2009-04-15	00:52:00	0
2009-04-15	00:53:00	0
2009-04-15	00:54:00	0
2009-04-15	00:55:00	0
2009-04-15	00:56:00	0
2009-04-15	00:57:00	0
2009-04-15	00:58:00	0
2009-04-15	00:59:00	0
2009-04-15	01:00:00	0
2009-04-15	01:01:00	0
2009-04-15	01:02:00	0
2009-04-15	01:03:00	0
2009-04-15	01:04:00	0
2009-04-15	01:05:00	0
2009-04-15	01:06:00	0
2009-04-15	01:07:00	0
2009-04-15	01:08:00	0
2009-04-15	01:09:00	0
2009-04-15	01:10:00	0
2009-04-15	01:11:00	0
2009-04-15	01:12:00	0
2009-04-15	01:13:00	0
2009-04-15	01:14:00	0
2009-04-15	01:15:00	0
2009-04-15	01:16:00	0
2009-04-15	01:17:00	0
2009-04-15	01:18:00	0
2009-04-15	01:19:00	0
2009-04-15	01:20:00	0
2009-04-15	01:21:00	0
2009-04-15	01:22:00	0
2009-04-15	01:23:00	0
2009-04-15	01:24:00	0
2009-04-15	01:25:00	0
2009-04-15	01:26:00	0
2009-04-15	01:27:00	0
2009-04-15	01:28:00	0
2009-04-15	01:29:00	0
2009-04-15	01:30:00	0
2009-04-15	01:31:00	0
2009-04-15	01:32:00	0
2009-04-15	01:33:00	0
2009-04-15	01:34:00	0
2009-04-15	01:35:00	0
2009-04-15	01:36:00	0
2009-04-15	01:37:00	0
2009-04-15	01:38:00	0
2009-04-15	01:39:00	0
2009-04-15	01:40:00	0
2009-04-15	01:41:00	0
2009-04-15	01:42:00	0
2009-04-15	01:43:00	0
2009-04-15	01:44:00	0
2009-04-15	01:45:00	0
2009-04-15	01:46:00	0
2009-04-15	01:47:00	0
2009-04-15	01:48:00	0
2009-04-15	01:49:00	0
2009-04-15	01:50:00	0
2009-04-15	01:51:00	0
2009-04-15	01:52:00	0
2009-04-15	01:53:00	0
2009-04-15	01:54:00	0
2009-04-15	01:55:00	0
2009-04-15	01:56:00	0
2009-04-15	01:57:00	0
2009-04-15	01:58:00	0
2009-04-15	01:59:00	0
2009-04-15	02:00:00	0
2009-04-15	02:01:00	0
2009-04-15	02:02:00	0
2009-04-15	02:03:00	0
2009-04-15	02:04:00	0
2009-04-15	02:05:00	0
2009-04-15	02:06:00	0
2009-04-15	02:07:00	0
2009-04-15	02:08:00	0
2009-04-15	02:09:00	0
2009-04-15	02:10:00	0
2009-04-15	02:11:00	0
2009-04-15	02:12:00	0
2009-04-15	02:13:00	0
2009-04-15	02:14:00	0
2009-04-15	02:15:00	0
2009-04-15	02:16:00	0
2009-04-15	02:17:00	0
2009-04-15	02:18:00	0
2009-04-15	02:19:00	0
2009-04-15	02:20:00	0
2009-04-15	02:21:00	0
2009-04-15	02:22:00	0
2009-04-15	02:23:00	0
2009-04-15	02:24:00	0
2009-04-15	02:25:00	0
2009-04-15	02:26:00	0
2009-04-15	02:27:00	0
2009-04-15	02:28:00	0
2009-04-15	02:29:00	0
2009-04-15	02:30:00	0
2009-04-15	02:31:00	0
2009-04-15	02:32:00	0
2009-04-15	02:33:00	0
2009-04-15	02:34:00	0
2009-04-15	02:35:00	0
2009-04-15	02:36:00	0
2009-04-15	02:37:00	0
2009-04-15	02:38:00	0
2009-04-15	02:39:00	0
2009-04-15	02:40:00	0
2009-04-15	02:41:00	0
2009-04-15	02:42:00	0
2009-04-15	02:43:00	0
2009-04-15	02:44:00	0
2009-04-15	02:45:00	0
2009-04-15	02:46:00	0
2009-04-15	02:47:00	0
2009-04-15	02:48:00	0
2009-04-15	02:49:00	0
2009-04-15	02:50:00	0
2009-04-15	02:51:00	0
2009-04-15	02:52:00	0
2009-04-15	02:53:00	0
2009-04-15	02:54:00	0
2009-04-15	02:55:00	0
2009-04-15	02:56:00	0
2009-04-15	02:57:00	0
2009-04-15	02:58:00	0
2009-04-15	02:59:00	0
2009-04-15	03:00:00	0
2009-04-15	03:01:00	0
2009-04-15	03:02:00	0
2009-04-15	03:03:00	0
2009-04-15	03:04:00	0
2009-04-15	03:05:00	0
2009-04-15	03:06:00	0
2009-04-15	03:07:00	0
2009-04-15	03:08:00	0
2009-04-15	03:09:00	0
2009-04-15	03:10:00	0
2009-04-15	03:11:00	0
2009-04-15	03:12:00	0
2009-04-15	03:13:00	0
2009-04-15	03:14:00	0
2009-04-15	03:15:00	0
2009-04-15	03:16:00	0
2009-04-15	03:17:00	0
2009-04-15	03:18:00	0
2009-04-15	03:19:00	0
2009-04-15	03:20:00	0
2009-04-15	03:21:00	0
2009-04-15	03:22:00	0
2009-04-15	03:23:00	0
2009-04-15	03:24:00	0
2009-04-15	03:25:00	0
2009-04-15	03:26:00	0
2009-04-15	03:27:00	0
2009-04-15	03:28:00	0
2009-04-15	03:29:00	0
2009-04-15	03:30:00	0
2009-04-15	03:31:00	0
2009-04-15	03:32:00	0
2009-04-15	03:33:00	0
2009-04-15	03:34:00	0
2009-04-15	03:35:00	0
2009-04-15	03:36:00	0
2009-04-15	03:37:00	0
2009-04-15	03:38:00	0
2009-04-15	03:39:00	0
2009-04-15	03:40:00	0
2009-04-15	03:41:00	0
2009-04-15	03:42:00	0
2009-04-15	03:43:00	0
2009-04-15	03:44:00	0
2009-04-15	03:45:00	0
2009-04-15	03:46:00	0
2009-04-15	03:47:00	0
2009-04-15	03:48:00	0
2009-04-15	03:49:00	0
2009-04-15	03:50:00	0
2009-04-15	03:51:00	0
2009-04-15	03:52:00	0
2009-04-15	03:53:00	0
2009-04-15	03:54:00	0
2009-04-15	03:55:00	0
2009-04-15	03:56:00	0
2009-04-15	03:57:00	0
2009-04-15	03:58:00	0
2009-04-15	03:59:00	0
2009-04-15	04:00:00	0
2009-04-15	04:01:00	0
2009-04-15	04:02:00	0
2009-04-15	04:03:00	0
2009-04-15	04:04:00	0
2009-04-15	04:05:00	0
2009-04-15	04:06:00	0
2009-04-15	04:07:00	0
2009-04-15	04:08:00	0
2009-04-15	04:09:00	0
2009-04-15	04:10:00	0
2009-04-15	04:11:00	0
2009-04-15	04:12:00	0
2009-04-15	04:13:00	0
2009-04-15	04:14:00	0
2009-04-15	04:15:00	0
2009-04-15	04:16:00	0
2009-04-15	04:17:00	0
2009-04-15	04:18:00	0
2009-04-15	04:19:00	0
2009-04-15	04:20:00	0
2009-04-15	04:21:00	0
2009-04-15	04:22:00	0
2009-04-15	04:23:00	0
2009-04-15	04:24:00	0
2009-04-15	04:25:00	0
2009-04-15	04:26:00	0
2009-04-15	04:27:00	0
2009-04-15	04:28:00	0
2009-04-15	04:29:00	0
2009-04-15	04:30:00	0
2009-04-15	04:31:00	0
2009-04-15	04:32:00	0
2009-04-15	04:33:00	0
2009-04-15	04:34:00	0
2009-04-15	04:35:00	0
2009-04-15	04:36:00	0
2009-04-15	04:37:00	0
2009-04-15	04:38:00	0
2009-04-15	04:39:00	0
2009-04-15	04:40:00	0
2009-04-15	04:41:00	0
2009-04-15	04:42:00	0
2009-04-15	04:43:00	0
2009-04-15	04:44:00	0
2009-04-15	04:45:00	0
2009-04-15	04:46:00	0
2009-04-15	04:47:00	0
2009-04-15	04:48:00	0
2009-04-15	04:49:00	0
2009-04-15	04:50:00	0
2009-04-15	04:51:00	0
2009-04-15	04:52:00	0
2009-04-15	04:53:00	0
2009-04-15	04:54:00	0
2009-04-15	04:55:00	0
2009-04-15	04:56:00	0
2009-04-15	04:57:00	0
2009-04-15	04:58:00	0
2009-04-15	04:59:00	0
2009-04-15	05:00:00	0
2009-04-15	05:01:00	0
2009-04-15	05:02:00	0
2009-04-15	05:03:00	0
2009-04-15	05:04:00	0
2009-04-15	05:05:00	0
2009-04-15	05:06:00	0
2009-04-15	05:07:00	0
2009-04-15	05:08:00	0
2009-04-15	05:09:00	0
2009-04-15	05:10:00	0
2009-04-15	05:11:00	0
2009-04-15	05:12:00	0
2009-04-15	05:13:00	0
2009-04-15	05:14:00	0
2009-04-15	05:15:00	0
2009-04-15	05:16:00	0
2009-04-15	05:17:00	0
2009-04-15	05:18:00	0
2009-04-15	05:19:00	0
2009-04-15	05:20:00	0
2009-04-15	05:21:00	0
2009-04-15	05:22:00	0
2009-04-15	05:23:00	0
2009-04-15	05:24:00	0
2009-04-15	05:25:00	0
2009-04-15	05:26:00	0
2009-04-15	05:27:00	0
2009-04-15	05:28:00	0
2009-04-15	05:29:00	0
2009-04-15	05:30:00	0
2009-04-15	05:31:00	0
2009-04-15	05:32:00	0
2009-04-15	05:33:00	0
2009-04-15	05:34:00	0
2009-04-15	05:35:00	0
2009-04-15	05:36:00	0
2009-04-15	05:37:00	0
2009-04-15	05:38:00	0
2009-04-15	05:39:00	0
2009-04-15	05:40:00	0
2009-04-15	05:41:00	0
2009-04-15	05:42:00	0
2009-04-15	05:43:00	0
2009-04-15	05:44:00	0
2009-04-15	05:45:00	0
2009-04-15	05:46:00	0
2009-04-15	05:47:00	0
2009-04-15	05:48:00	0
2009-04-15	05:49:00	0
2009-04-15	05:50:00	0
2009-04-15	05:51:00	0
2009-04-15	05:52:00	0
2009-04-15	05:53:00	0
2009-04-15	05:54:00	0
2009-04-15	05:55:00	0
2009-04-15	05:56:00	0
2009-04-15	05:57:00	0
2009-04-15	05:58:00	0
2009-04-15	05:59:00	0
2009-04-15	06:00:00	0
2009-04-15	06:01:00	0
2009-04-15	06:02:00	0
2009-04-15	06:03:00	0
2009-04-15	06:04:00	0
2009-04-15	06:05:00	0
2009-04-15	06:06:00	0
2009-04-15	06:07:00	0
2009-04-15	06:08:00	0
2009-04-15	06:09:00	0
2009-04-15	06:10:00	0
2009-04-15	06:11:00	0
2009-04-15	06:12:00	0
2009-04-15	06:13:00	0
2009-04-15	06:14:00	0
2009-04-15	06:15:00	0
2009-04-15	06:16:00	0
2009-04-15	06:17:00	0
2009-04-15	06:18:00	0
2009-04-15	06:19:00	0
2009-04-15	06:20:00	0
2009-04-15	06:21:00	0
2009-04-15	06:22:00	0
2009-04-15	06:23:00	0
2009-04-15	06:24:00	0
2009-04-15	06:25:00	0
2009-04-15	06:26:00	0
2009-04-15	06:27:00	0
2009-04-15	06:28:00	0
2009-04-15	06:29:00	0
2009-04-15	06:30:00	0
2009-04-15	06:31:00	0
2009-04-15	06:32:00	0
2009-04-15	06:33:00	0
2009-04-15	06:34:00	0
2009-04-15	06:35:00	0
2009-04-15	06:36:00	0
2009-04-15	06:37:00	0
2009-04-15	06:38:00	0
2009-04-15	06:39:00	0
2009-04-15	06:40:00	0
2009-04-15	06:41:00	0
2009-04-15	06:42:00	0
2009-04-15	06:43:00	0
2009-04-15	06:44:00	0
2009-04-15	06:45:00	0
2009-04-15	06:46:00	0
2009-04-15	06:47:00	0
2009-04-15	06:48:00	0
2009-04-15	06:49:00	0
2009-04-15	06:50:00	0
2009-04-15	06:51:00	0
2009-04-15	06:52:00	0
2009-04-15	06:53:00	0
2009-04-15	06:54:00	0
2009-04-15	06:55:00	0
2009-04-15	06:56:00	0
2009-04-15	06:57:00	0
2009-04-15	06:58:00	0
2009-04-15	06:59:00	0
2009-04-15	07:00:00	0
2009-04-15	07:01:00	0
2009-04-15	07:02:00	0
2009-04-15	07:03:00	0
2009-04-15	07:04:00	0
2009-04-15	07:05:00	0
2009-04-15	07:06:00	0
2009-04-15	07:07:00	0
2009-04-15	07:08:00	0
2009-04-15	07:09:00	0
2009-04-15	07:10:00	0
2009-04-15	07:11:00	0
2009-04-15	07:12:00	0
2009-04-15	07:13:00	0
2009-04-15	07:14:00	0
2009-04-15	07:15:00	0
2009-04-15	07:16:00	0
2009-04-15	07:17:00	0
2009-04-15	07:18:00	0
2009-04-15	07:19:00	0
2009-04-15	07:20:00	0
2009-04-15	07:21:00	0
2009-04-15	07:22:00	0
2009-04-15	07:23:00	0
2009-04-15	07:24:00	0
2009-04-15	07:25:00	0
2009-04-15	07:26:00	0
2009-04-15	07:27:00	0
2009-04-15	07:28:00	0
2009-04-15	07:29:00	0
2009-04-15	07:30:00	0
2009-04-15	07:31:00	0
2009-04-15	07:32:00	0
2009-04-15	07:33:00	0
2009-04-15	07:34:00	0
2009-04-15	07:35:00	0
2009-04-15	07:36:00	0
2009-04-15	07:37:00	0
2009-04-15	07:38:00	0
2009-04-15	07:39:00	0
2009-04-15	07:40:00	0
2009-04-15	07:41:00	0
2009-04-15	07:42:00	0
2009-04-15	07:43:00	0
2009-04-15	07:44:00	0
2009-04-15	07:45:00	0
2009-04-15	07:46:00	0
2009-04-15	07:47:00	0
2009-04-15	07:48:00	0
2009-04-15	07:49:00	0
2009-04-15	07:50:00	0
2009-04-15	07:51:00	0
2009-04-15	07:52:00	0
2009-04-15	07:53:00	0
2009-04-15	07:54:00	0
2009-04-15	07:55:00	0
2009-04-15	07:56:00	0
2009-04-15	07:57:00	0
2009-04-15	07:58:00	0
2009-04-15	07:59:00	0
2009-04-15	08:00:00	0
2009-04-15	08:01:00	0
2009-04-15	08:02:00	0
2009-04-15	08:03:00	0
2009-04-15	08:04:00	0
2009-04-15	08:05:00	0
2009-04-15	08:06:00	0
2009-04-15	08:07:00	0
2009-04-15	08:08:00	0
2009-04-15	08:09:00	0
2009-04-15	08:10:00	0
2009-04-15	08:11:00	0
2009-04-15	08:12:00	0
2009-04-15	08:13:00	0
2009-04-15	08:14:00	0
2009-04-15	08:15:00	0
2009-04-15	08:16:00	0
2009-04-15	08:17:00	0
2009-04-15	08:18:00	0
2009-04-15	08:19:00	0
2009-04-15	08:20:00	0
2009-04-15	08:21:00	0
2009-04-15	08:22:00	0
2009-04-15	08:23:00	0
2009-04-15	08:24:00	0
2009-04-15	08:25:00	0
2009-04-15	08:26:00	0
2009-04-15	08:27:00	0
2009-04-15	08:28:00	0
2009-04-15	08:29:00	0
2009-04-15	08:30:00	0
2009-04-15	08:31:00	0
2009-04-15	08:32:00	0
2009-04-15	08:33:00	0
2009-04-15	08:34:00	0
2009-04-15	08:35:00	0
2009-04-15	08:36:00	0
2009-04-15	08:37:00	0
2009-04-15	08:38:00	0
2009-04-15	08:39:00	0
2009-04-15	08:40:00	0
2009-04-15	08:41:00	0
2009-04-15	08:42:00	0
2009-04-15	08:43:00	0
2009-04-15	08:44:00	0
2009-04-15	08:45:00	0
2009-04-15	08:46:00	0
2009-04-15	08:47:00	0
2009-04-15	08:48:00	0
2009-04-15	08:49:00	0
2009-04-15	08:50:00	0
2009-04-15	08:51:00	0
2009-04-15	08:52:00	0
2009-04-15	08:53:00	0
2009-04-15	08:54:00	0
2009-04-15	08:55:00	0
2009-04-15	08:56:00	0
2009-04-15	08:57:00	0
2009-04-15	08:58:00	0
2009-04-15	08:59:00	0
2009-04-15	09:00:00	0
2009-04-15	09:01:00	0
2009-04-15	09:02:00	0
2009-04-15	09:03:00	0
2009-04-15	09:04:00	0
2009-04-15	09:05:00	0
2009-04-15	09:06:00	0
2009-04-15	09:07:00	0
2009-04-15	09:08:00	0
2009-04-15	09:09:00	0
2009-04-15	09:10:00	0
2009-04-15	09:11:00	0
2009-04-15	09:12:00	0
2009-04-15	09:13:00	0
2009-04-15	09:14:00	0
2009-04-15	09:15:00	0
2009-04-15	09:16:00	0
2009-04-15	09:17:00	0
2009-04-15	09:18:00	0
2009-04-15	09:19:00	0
2009-04-15	09:20:00	0
2009-04-15	09:21:00	0
2009-04-15	09:22:00	0
2009-04-15	09:23:00	0
2009-04-15	09:24:00	0
2009-04-15	09:25:00	0
2009-04-15	09:26:00	0
2009-04-15	09:27:00	0
2009-04-15	09:28:00	0
2009-04-15	09:29:00	0
2009-04-15	09:30:00	0
2009-04-15	09:31:00	0
2009-04-15	09:32:00	0
2009-04-15	09:33:00	0
2009-04-15	09:34:00	0
2009-04-15	09:35:00	0
2009-04-15	09:36:00	0
2009-04-15	09:37:00	0
2009-04-15	09:38:00	0
2009-04-15	09:39:00	0
2009-04-15	09:40:00	0
2009-04-15	09:41:00	0
2009-04-15	09:42:00	0
2009-04-15	09:43:00	0
2009-04-15	09:44:00	0
2009-04-15	09:45:00	0
2009-04-15	09:46:00	0
2009-04-15	09:47:00	0
2009-04-15	09:48:00	0
2009-04-15	09:49:00	0
2009-04-15	09:50:00	0
2009-04-15	09:51:00	0
2009-04-15	09:52:00	0
2009-04-15	09:53:00	0
2009-04-15	09:54:00	0
2009-04-15	09:55:00	0
2009-04-15	09:56:00	0
2009-04-15	09:57:00	0
2009-04-15	09:58:00	0
2009-04-15	09:59:00	0
2009-04-15	10:00:00	0
2009-04-15	10:01:00	0
2009-04-15	10:02:00	0
2009-04-15	10:03:00	0
2009-04-15	10:04:00	0
2009-04-15	10:05:00	0
2009-04-15	10:06:00	0
2009-04-15	10:07:00	0
2009-04-15	10:08:00	0
2009-04-15	10:09:00	0
2009-04-15	10:10:00	0
2009-04-15	10:11:00	0
2009-04-15	10:12:00	0
2009-04-15	10:13:00	0
2009-04-15	10:14:00	0
2009-04-15	10:15:00	0
2009-04-15	10:16:00	0
2009-04-15	10:17:00	0
2009-04-15	10:18:00	0
2009-04-15	10:19:00	0
2009-04-15	10:20:00	0
2009-04-15	10:21:00	0
2009-04-15	10:22:00	0
2009-04-15	10:23:00	0
2009-04-15	10:24:00	0
2009-04-15	10:25:00	0
2009-04-15	10:26:00	0
2009-04-15	10:27:00	0
2009-04-15	10:28:00	0
2009-04-15	10:29:00	0
2009-04-15	10:30:00	0
2009-04-15	10:31:00	0
2009-04-15	10:32:00	0
2009-04-15	10:33:00	0
2009-04-15	10:34:00	0
2009-04-15	10:35:00	0
2009-04-15	10:36:00	0
2009-04-15	10:37:00	0
2009-04-15	10:38:00	0
2009-04-15	10:39:00	0
2009-04-15	10:40:00	0
2009-04-15	10:41:00	0
2009-04-15	10:42:00	0
2009-04-15	10:43:00	0
2009-04-15	10:44:00	0
2009-04-15	10:45:00	0
2009-04-15	10:46:00	0
2009-04-15	10:47:00	0
2009-04-15	10:48:00	0
2009-04-15	10:49:00	0
2009-04-15	10:50:00	0
2009-04-15	10:51:00	0
2009-04-15	10:52:00	0
2009-04-15	10:53:00	0
2009-04-15	10:54:00	0
2009-04-15	10:55:00	0
2009-04-15	10:56:00	0
2009-04-15	10:57:00	0
2009-04-15	10:58:00	0
2009-04-15	10:59:00	0
2009-04-15	11:00:00	0
2009-04-15	11:01:00	0
2009-04-15	11:02:00	0
2009-04-15	11:03:00	0
2009-04-15	11:04:00	0
2009-04-15	11:05:00	0
2009-04-15	11:06:00	0
2009-04-15	11:07:00	0
2009-04-15	11:08:00	0
2009-04-15	11:09:00	0
2009-04-15	11:10:00	0
2009-04-15	11:11:00	0
2009-04-15	11:12:00	0
2009-04-15	11:13:00	0
2009-04-15	11:14:00	0
2009-04-15	11:15:00	0
2009-04-15	11:16:00	0
2009-04-15	11:17:00	0
2009-04-15	11:18:00	0
2009-04-15	11:19:00	0
2009-04-15	11:20:00	0
2009-04-15	11:21:00	0
2009-04-15	11:22:00	0
2009-04-15	11:23:00	0
2009-04-15	11:24:00	0
2009-04-15	11:25:00	0
2009-04-15	11:26:00	0
2009-04-15	11:27:00	0
2009-04-15	11:28:00	0
2009-04-15	11:29:00	0
2009-04-15	11:30:00	0
2009-04-15	11:31:00	0
2009-04-15	11:32:00	0
2009-04-15	11:33:00	0
2009-04-15	11:34:00	0
2009-04-15	11:35:00	0
2009-04-15	11:36:00	0
2009-04-15	11:37:00	0
2009-04-15	11:38:00	0
2009-04-15	11:39:00	0
2009-04-15	11:40:00	0
2009-04-15	11:41:00	0
2009-04-15	11:42:00	0
2009-04-15	11:43:00	0
2009-04-15	11:44:00	0
2009-04-15	11:45:00	0
2009-04-15	11:46:00	0
2009-04-15	11:47:00	0
2009-04-15	11:48:00	0
2009-04-15	11:49:00	0
2009-04-15	11:50:00	0
2009-04-15	11:51:00	0
2009-04-15	11:52:00	0
2009-04-15	11:53:00	0
2009-04-15	11:54:00	0
2009-04-15	11:55:00	0
2009-04-15	11:56:00	0
2009-04-15	11:57:00	0
2009-04-15	11:58:00	0
2009-04-15	11:59:00	0
2009-04-15	12:00:00	0
2009-04-15	12:01:00	0
2009-04-15	12:02:00	0
2009-04-15	12:03:00	0
2009-04-15	12:04:00	0
2009-04-15	12:05:00	0
2009-04-15	12:06:00	0
2009-04-15	12:07:00	0
2009-04-15	12:08:00	0
2009-04-15	12:09:00	0
2009-04-15	12:10:00	0
2009-04-15	12:11:00	0
2009-04-15	12:12:00	0
2009-04-15	12:13:00	0
2009-04-15	12:14:00	0
2009-04-15	12:15:00	0
2009-04-15	12:16:00	0
2009-04-15	12:17:00	0
2009-04-15	12:18:00	0
2009-04-15	12:19:00	0
2009-04-15	12:20:00	0
2009-04-15	12:21:00	0
2009-04-15	12:22:00	0
2009-04-15	12:23:00	0
2009-04-15	12:24:00	0
2009-04-15	12:25:00	0
2009-04-15	12:26:00	0
2009-04-15	12:27:00	0
2009-04-15	12:28:00	0
2009-04-15	12:29:00	0
2009-04-15	12:30:00	0
2009-04-15	12:31:00	0
2009-04-15	12:32:00	0
2009-04-15	12:33:00	0
2009-04-15	12:34:00	0
2009-04-15	12:35:00	0
2009-04-15	12:36:00	0
2009-04-15	12:37:00	0
2009-04-15	12:38:00	0
2009-04-15	12:39:00	0
2009-04-15	12:40:00	0
2009-04-15	12:41:00	0
2009-04-15	12:42:00	0
2009-04-15	12:43:00	0
2009-04-15	12:44:00	0
2009-04-15	12:45:00	0
2009-04-15	12:46:00	0
2009-04-15	12:47:00	0
2009-04-15	12:48:00	0
2009-04-15	12:49:00	0
2009-04-15	12:50:00	0
2009-04-15	12:51:00	0
2009-04-15	12:52:00	0
2009-04-15	12:53:00	0
2009-04-15	12:54:00	0
2009-04-15	12:55:00	0
2009-04-15	12:56:00	0
2009-04-15	12:57:00	0
2009-04-15	12:58:00	0
2009-04-15	12:59:00	0
2009-04-15	13:00:00	0
2009-04-15	13:01:00	0
2009-04-15	13:02:00	0
2009-04-15	13:03:00	0
2009-04-15	13:04:00	0
2009-04-15	13:05:00	0
2009-04-15	13:06:00	0
2009-04-15	13:07:00	0
2009-04-15	13:08:00	0
2009-04-15	13:09:00	0
2009-04-15	13:10:00	0
2009-04-15	13:11:00	0
2009-04-15	13:12:00	0
2009-04-15	13:13:00	0
2009-04-15	13:14:00	0
2009-04-15	13:15:00	0
2009-04-15	13:16:00	0
2009-04-15	13:17:00	0
2009-04-15	13:18:00	0
2009-04-15	13:19:00	0
2009-04-15	13:20:00	0
2009-04-15	13:21:00	0
2009-04-15	13:22:00	0
2009-04-15	13:23:00	0
2009-04-15	13:24:00	0
2009-04-15	13:25:00	0
2009-04-15	13:26:00	0
2009-04-15	13:27:00	0
2009-04-15	13:28:00	0
2009-04-15	13:29:00	0
2009-04-15	13:30:00	0
2009-04-15	13:31:00	0
2009-04-15	13:32:00	0
2009-04-15	13:33:00	0
2009-04-15	13:34:00	0
2009-04-15	13:35:00	0
2009-04-15	13:36:00	0
2009-04-15	13:37:00	0
2009-04-15	13:38:00	0
2009-04-15	13:39:00	0
2009-04-15	13:40:00	0
2009-04-15	13:41:00	0
2009-04-15	13:42:00	0
2009-04-15	13:43:00	0
2009-04-15	13:44:00	0
2009-04-15	13:45:00	0
2009-04-15	13:46:00	0
2009-04-15	13:47:00	0
2009-04-15	13:48:00	0
2009-04-15	13:49:00	0
2009-04-15	13:50:00	0
2009-04-15	13:51:00	0
2009-04-15	13:52:00	0
2009-04-15	13:53:00	0
2009-04-15	13:54:00	0
2009-04-15	13:55:00	0
2009-04-15	13:56:00	0
2009-04-15	13:57:00	0
2009-04-15	13:58:00	0
2009-04-15	13:59:00	0
2009-04-15	14:00:00	0
2009-04-15	14:01:00	0
2009-04-15	14:02:00	0
2009-04-15	14:03:00	0
2009-04-15	14:04:00	0
2009-04-15	14:05:00	0
2009-04-15	14:06:00	0
2009-04-15	14:07:00	0
2009-04-15	14:08:00	0
2009-04-15	14:09:00	0
2009-04-15	14:10:00	0
2009-04-15	14:11:00	0
2009-04-15	14:12:00	0
2009-04-15	14:13:00	0
2009-04-15	14:14:00	0
2009-04-15	14:15:00	0
2009-04-15	14:16:00	0
2009-04-15	14:17:00	0
2009-04-15	14:18:00	0
2009-04-15	14:19:00	0
2009-04-15	14:20:00	0
2009-04-15	14:21:00	0
2009-04-15	14:22:00	0
2009-04-15	14:23:00	0
2009-04-15	14:24:00	0
2009-04-15	14:25:00	0
2009-04-15	14:26:00	0
2009-04-15	14:27:00	0
2009-04-15	14:28:00	0
2009-04-15	14:29:00	0
2009-04-15	14:30:00	0
2009-04-15	14:31:00	0
2009-04-15	14:32:00	0
2009-04-15	14:33:00	0
2009-04-15	14:34:00	0
2009-04-15	14:35:00	0
2009-04-15	14:36:00	0
2009-04-15	14:37:00	0
2009-04-15	14:38:00	0
2009-04-15	14:39:00	0
2009-04-15	14:40:00	0
2009-04-15	14:41:00	0
2009-04-15	14:42:00	0
2009-04-15	14:43:00	0
2009-04-15	14:44:00	0
2009-04-15	14:45:00	0
2009-04-15	14:46:00	0
2009-04-15	14:47:00	0
2009-04-15	14:48:00	0
2009-04-15	14:49:00	0
2009-04-15	14:50:00	0
2009-04-15	14:51:00	0
2009-04-15	14:52:00	0
2009-04-15	14:53:00	0
2009-04-15	14:54:00	0
2009-04-15	14:55:00	0
2009-04-15	14:56:00	0
2009-04-15	14:57:00	0
2009-04-15	14:58:00	0
2009-04-15	14:59:00	0
2009-04-15	15:00:00	0
2009-04-15	15:01:00	0
2009-04-15	15:02:00	0
2009-04-15	15:03:00	0
2009-04-15	15:04:00	0
2009-04-15	15:05:00	0
2009-04-15	15:06:00	0
2009-04-15	15:07:00	0
2009-04-15	15:08:00	0
2009-04-15	15:09:00	0
2009-04-15	15:10:00	0
2009-04-15	15:11:00	0
2009-04-15	15:12:00	0
2009-04-15	15:13:00	0
2009-04-15	15:14:00	0
2009-04-15	15:15:00	0
2009-04-15	15:16:00	0
2009-04-15	15:17:00	0
2009-04-15	15:18:00	0
2009-04-15	15:19:00	0
2009-04-15	15:20:00	0
2009-04-15	15:21:00	0
2009-04-15	15:22:00	0
2009-04-15	15:23:00	0
2009-04-15	15:24:00	0
2009-04-15	15:25:00	0
2009-04-15	15:26:00	0
2009-04-15	15:27:00	0
2009-04-15	15:28:00	0
2009-04-15	15:29:00	0
2009-04-15	15:30:00	0
2009-04-15	15:31:00	0
2009-04-15	15:32:00	0
2009-04-15	15:33:00	0
2009-04-15	15:34:00	0
2009-04-15	15:35:00	0
2009-04-15	15:36:00	0
2009-04-15	15:37:00	0
2009-04-15	15:38:00	0
2009-04-15	15:39:00	0
2009-04-15	15:40:00	0
2009-04-15	15:41:00	0
2009-04-15	15:42:00	0
2009-04-15	15:43:00	0
2009-04-15	15:44:00	0
2009-04-15	15:45:00	0
2009-04-15	15:46:00	0
2009-04-15	15:47:00	0
2009-04-15	15:48:00	0
2009-04-15	15:49:00	0
2009-04-15	15:50:00	0
2009-04-15	15:51:00	0
2009-04-15	15:52:00	0
2009-04-15	15:53:00	0
2009-04-15	15:54:00	0
2009-04-15	15:55:00	0
2009-04-15	15:56:00	0
2009-04-15	15:57:00	0
2009-04-15	15:58:00	0
2009-04-15	15:59:00	0
2009-04-15	16:00:00	0
2009-04-15	16:01:00	0
2009-04-15	16:02:00	0
2009-04-15	16:03:00	0
2009-04-15	16:04:00	0
2009-04-15	16:05:00	0
2009-04-15	16:06:00	0
2009-04-15	16:07:00	0
2009-04-15	16:08:00	0
2009-04-15	16:09:00	0
2009-04-15	16:10:00	0
2009-04-15	16:11:00	0
2009-04-15	16:12:00	0
2009-04-15	16:13:00	0
2009-04-15	16:14:00	0
2009-04-15	16:15:00	0
2009-04-15	16:16:00	0
2009-04-15	16:17:00	0
2009-04-15	16:18:00	0
2009-04-15	16:19:00	0
2009-04-15	16:20:00	0
2009-04-15	16:21:00	0
2009-04-15	16:22:00	0
2009-04-15	16:23:00	0
2009-04-15	16:24:00	0
2009-04-15	16:25:00	0
2009-04-15	16:26:00	0
2009-04-15	16:27:00	0
2009-04-15	16:28:00	0
2009-04-15	16:29:00	0
2009-04-15	16:30:00	0
2009-04-15	16:31:00	0
2009-04-15	16:32:00	0
2009-04-15	16:33:00	0
2009-04-15	16:34:00	0
2009-04-15	16:35:00	0
2009-04-15	16:36:00	0
2009-04-15	16:37:00	0
2009-04-15	16:38:00	0
2009-04-15	16:39:00	0
2009-04-15	16:40:00	0
2009-04-15	16:41:00	0
2009-04-15	16:42:00	0
2009-04-15	16:43:00	0
2009-04-15	16:44:00	0
2009-04-15	16:45:00	0
2009-04-15	16:46:00	0
2009-04-15	16:47:00	0
2009-04-15	16:48:00	0
2009-04-15	16:49:00	0
2009-04-15	16:50:00	0
2009-04-15	16:51:00	0
2009-04-15	16:52:00	0
2009-04-15	16:53:00	0
2009-04-15	16:54:00	0
2009-04-15	16:55:00	0
2009-04-15	16:56:00	0
2009-04-15	16:57:00	0
2009-04-15	16:58:00	0
2009-04-15	16:59:00	0
2009-04-15	17:00:00	0
2009-04-15	17:01:00	0
2009-04-15	17:02:00	0
2009-04-15	17:03:00	0
2009-04-15	17:04:00	0
2009-04-15	17:05:00	0
2009-04-15	17:06:00	0
2009-04-15	17:07:00	0
2009-04-15	17:08:00	0
2009-04-15	17:09:00	0
2009-04-15	17:10:00	0
2009-04-15	17:11:00	0
2009-04-15	17:12:00	0
2009-04-15	17:13:00	0
2009-04-15	17:14:00	0
2009-04-15	17:15:00	0
2009-04-15	17:16:00	0
2009-04-15	17:17:00	0
2009-04-15	17:18:00	0
2009-04-15	17:19:00	0
2009-04-15	17:20:00	0
2009-04-15	17:21:00	0
2009-04-15	17:22:00	0
2009-04-15	17:23:00	0
2009-04-15	17:24:00	0
2009-04-15	17:25:00	0
2009-04-15	17:26:00	0
2009-04-15	17:27:00	0
2009-04-15	17:28:00	0
2009-04-15	17:29:00	0
2009-04-15	17:30:00	0
2009-04-15	17:31:00	0
2009-04-15	17:32:00	0
2009-04-15	17:33:00	0
2009-04-15	17:34:00	0
2009-04-15	17:35:00	0
2009-04-15	17:36:00	0
2009-04-15	17:37:00	0
2009-04-15	17:38:00	0
2009-04-15	17:39:00	0
2009-04-15	17:40:00	0
2009-04-15	17:41:00	0
2009-04-15	17:42:00	0
2009-04-15	17:43:00	0
2009-04-15	17:44:00	0
2009-04-15	17:45:00	0
2009-04-15	17:46:00	0
2009-04-15	17:47:00	0
2009-04-15	17:48:00	0
2009-04-15	17:49:00	0
2009-04-15	17:50:00	0
2009-04-15	17:51:00	0
2009-04-15	17:52:00	0
2009-04-15	17:53:00	0
2009-04-15	17:54:00	0
2009-04-15	17:55:00	0
2009-04-15	17:56:00	0
2009-04-15	17:57:00	0
2009-04-15	17:58:00	0
2009-04-15	17:59:00	0
2009-04-15	18:00:00	0
2009-04-15	18:01:00	12
2009-04-15	18:02:00	0
2009-04-15	18:03:00	0
2009-04-15	18:04:00	12
2009-04-15	18:05:00	123
2009-04-15	18:06:00	12
2009-04-15	18:07:00	12
2009-04-15	18:08:00	0
2009-04-15	18:09:00	25
2009-04-15	18:10:00	0
2009-04-15	18:11:00	12
2009-04-15	18:12:00	0
2009-04-15	18:13:00	0
2009-04-15	18:14:00	0
2009-04-15	18:15:00	0
2009-04-15	18:16:00	25
2009-04-15	18:17:00	0
2009-04-15	18:18:00	49
2009-04-15	18:19:00	0
2009-04-15	18:20:00	0
2009-04-15	18:21:00	12
2009-04-15	18:22:00	0
2009-04-15	18:23:00	25
2009-04-15	18:24:00	0
2009-04-15	18:25:00	0
2009-04-15	18:26:00	12
2009-04-15	18:27:00	0
2009-04-15	18:28:00	25
2009-04-15	18:29:00	0
2009-04-15	18:30:00	12
2009-04-15	18:31:00	0
2009-04-15	18:32:00	37
2009-04-15	18:33:00	0
2009-04-15	18:34:00	12
2009-04-15	18:35:00	37
2009-04-15	18:36:00	0
2009-04-15	18:37:00	12
2009-04-15	18:38:00	0
2009-04-15	18:39:00	0
2009-04-15	18:40:00	0
2009-04-15	18:41:00	0
2009-04-15	18:42:00	0
2009-04-15	18:43:00	0
2009-04-15	18:44:00	0
2009-04-15	18:45:00	12
2009-04-15	18:46:00	12
2009-04-15	18:47:00	49
2009-04-15	18:48:00	0
2009-04-15	18:49:00	0
2009-04-15	18:50:00	0
2009-04-15	18:51:00	0
2009-04-15	18:52:00	0
2009-04-15	18:53:00	0
2009-04-15	18:54:00	0
2009-04-15	18:55:00	0
2009-04-15	18:56:00	0
2009-04-15	18:57:00	0
2009-04-15	18:58:00	0
2009-04-15	18:59:00	12
2009-04-15	19:00:00	0
2009-04-15	19:01:00	0
2009-04-15	19:02:00	0
2009-04-15	19:03:00	12
2009-04-15	19:04:00	0
2009-04-15	19:05:00	0
2009-04-15	19:06:00	0
2009-04-15	19:07:00	12
2009-04-15	19:08:00	426
2009-04-15	19:09:00	426
2009-04-15	19:10:00	12
2009-04-15	19:11:00	49
2009-04-15	19:12:00	37
2009-04-15	19:13:00	0
2009-04-15	19:14:00	12
2009-04-15	19:15:00	293
2009-04-15	19:16:00	340
2009-04-15	19:17:00	790
2009-04-15	19:18:00	990
2009-04-15	19:19:00	219
2009-04-15	19:20:00	839
2009-04-15	19:21:00	702
2009-04-15	19:22:00	98
2009-04-15	19:23:00	111
2009-04-15	19:24:00	135
2009-04-15	19:25:00	340
2009-04-15	19:26:00	219
2009-04-15	19:27:00	37
2009-04-15	19:28:00	12
2009-04-15	19:29:00	0
2009-04-15	19:30:00	0
2009-04-15	19:31:00	249
2009-04-15	19:32:00	357
2009-04-15	19:33:00	86
2009-04-15	19:34:00	98
2009-04-15	19:35:00	62
2009-04-15	19:36:00	25
2009-04-15	19:37:00	0
2009-04-15	19:38:00	0
2009-04-15	19:39:00	0
2009-04-15	19:40:00	263
2009-04-15	19:41:00	12
2009-04-15	19:42:00	340
2009-04-15	19:43:00	293
2009-04-15	19:44:00	0
2009-04-15	19:45:00	0
2009-04-15	19:46:00	0
2009-04-15	19:47:00	0
2009-04-15	19:48:00	0
2009-04-15	19:49:00	0
2009-04-15	19:50:00	0
2009-04-15	19:51:00	12
2009-04-15	19:52:00	0
2009-04-15	19:53:00	0
2009-04-15	19:54:00	204
2009-04-15	19:55:00	37
2009-04-15	19:56:00	62
2009-04-15	19:57:00	49
2009-04-15	19:58:00	12
2009-04-15	19:59:00	0
2009-04-15	20:00:00	0
2009-04-15	20:01:00	37
2009-04-15	20:02:00	37
2009-04-15	20:03:00	1017
2009-04-15	20:04:00	1605
2009-04-15	20:05:00	478
2009-04-15	20:06:00	123
2009-04-15	20:07:00	0
2009-04-15	20:08:00	308
2009-04-15	20:09:00	357
2009-04-15	20:10:00	460
2009-04-15	20:11:00	537
2009-04-15	20:12:00	49
2009-04-15	20:13:00	0
2009-04-15	20:14:00	0
2009-04-15	20:15:00	12
2009-04-15	20:16:00	62
2009-04-15	20:17:00	913
2009-04-15	20:18:00	1536
2009-04-15	20:19:00	657
2009-04-15	20:20:00	913
2009-04-15	20:21:00	576
2009-04-15	20:22:00	460
2009-04-15	20:23:00	702
2009-04-15	20:24:00	2122
2009-04-15	20:25:00	2700
2009-04-15	20:26:00	1605
2009-04-15	20:27:00	2496
2009-04-15	20:28:00	2257
2009-04-15	20:29:00	2078
2009-04-15	20:30:00	2166
2009-04-15	20:31:00	2078
2009-04-15	20:32:00	2919
2009-04-15	20:33:00	2754
2009-04-15	20:34:00	3033
2009-04-15	20:35:00	2304
2009-04-15	20:36:00	1433
2009-04-15	20:37:00	1017
2009-04-15	20:38:00	234
2009-04-15	20:39:00	0
2009-04-15	20:40:00	12
2009-04-15	20:41:00	25
2009-04-15	20:42:00	0
2009-04-15	20:43:00	0
2009-04-15	20:44:00	0
2009-04-15	20:45:00	308
2009-04-15	20:46:00	74
2009-04-15	20:47:00	74
2009-04-15	20:48:00	0
2009-04-15	20:49:00	0
2009-04-15	20:50:00	0
2009-04-15	20:51:00	0
2009-04-15	20:52:00	0
2009-04-15	20:53:00	0
2009-04-15	20:54:00	0
2009-04-15	20:55:00	0
2009-04-15	20:56:00	0
2009-04-15	20:57:00	0
2009-04-15	20:58:00	0
2009-04-15	20:59:00	0
2009-04-15	21:00:00	234
2009-04-15	21:01:00	49
2009-04-15	21:02:00	0
2009-04-15	21:03:00	0
2009-04-15	21:04:00	0
2009-04-15	21:05:00	0
2009-04-15	21:06:00	0
2009-04-15	21:07:00	0
2009-04-15	21:08:00	0
2009-04-15	21:09:00	0
2009-04-15	21:10:00	0
2009-04-15	21:11:00	0
2009-04-15	21:12:00	0
2009-04-15	21:13:00	0
2009-04-15	21:14:00	0
2009-04-15	21:15:00	0
2009-04-15	21:16:00	0
2009-04-15	21:17:00	0
2009-04-15	21:18:00	0
2009-04-15	21:19:00	0
2009-04-15	21:20:00	0
2009-04-15	21:21:00	37
2009-04-15	21:22:00	190
2009-04-15	21:23:00	0
2009-04-15	21:24:00	0
2009-04-15	21:25:00	0
2009-04-15	21:26:00	25
2009-04-15	21:27:00	0
2009-04-15	21:28:00	25
2009-04-15	21:29:00	0
2009-04-15	21:30:00	0
2009-04-15	21:31:00	25
2009-04-15	21:32:00	0
2009-04-15	21:33:00	0
2009-04-15	21:34:00	0
2009-04-15	21:35:00	12
2009-04-15	21:36:00	0
2009-04-15	21:37:00	0
2009-04-15	21:38:00	98
2009-04-15	21:39:00	25
2009-04-15	21:40:00	409
2009-04-15	21:41:00	12
2009-04-15	21:42:00	0
2009-04-15	21:43:00	0
2009-04-15	21:44:00	0
2009-04-15	21:45:00	0
2009-04-15	21:46:00	0
2009-04-15	21:47:00	0
2009-04-15	21:48:00	0
2009-04-15	21:49:00	0
2009-04-15	21:50:00	0
2009-04-15	21:51:00	0
2009-04-15	21:52:00	0
2009-04-15	21:53:00	0
2009-04-15	21:54:00	0
2009-04-15	21:55:00	0
2009-04-15	21:56:00	0
2009-04-15	21:57:00	12
2009-04-15	21:58:00	0
2009-04-15	21:59:00	0
2009-04-15	22:00:00	0
2009-04-15	22:01:00	0
2009-04-15	22:02:00	0
2009-04-15	22:03:00	0
2009-04-15	22:04:00	0
2009-04-15	22:05:00	12
2009-04-15	22:06:00	0
2009-04-15	22:07:00	0
2009-04-15	22:08:00	0
2009-04-15	22:09:00	0
2009-04-15	22:10:00	0
2009-04-15	22:11:00	25
2009-04-15	22:12:00	86
2009-04-15	22:13:00	0
2009-04-15	22:14:00	0
2009-04-15	22:15:00	537
2009-04-15	22:16:00	990
2009-04-15	22:17:00	1337
2009-04-15	22:18:00	702
2009-04-15	22:19:00	219
2009-04-15	22:20:00	0
2009-04-15	22:21:00	0
2009-04-15	22:22:00	0
2009-04-15	22:23:00	0
2009-04-15	22:24:00	0
2009-04-15	22:25:00	12
2009-04-15	22:26:00	0
2009-04-15	22:27:00	0
2009-04-15	22:28:00	0
2009-04-15	22:29:00	0
2009-04-15	22:30:00	0
2009-04-15	22:31:00	0
2009-04-15	22:32:00	0
2009-04-15	22:33:00	0
2009-04-15	22:34:00	0
2009-04-15	22:35:00	0
2009-04-15	22:36:00	0
2009-04-15	22:37:00	0
2009-04-15	22:38:00	0
2009-04-15	22:39:00	0
2009-04-15	22:40:00	0
2009-04-15	22:41:00	0
2009-04-15	22:42:00	0
2009-04-15	22:43:00	0
2009-04-15	22:44:00	0
2009-04-15	22:45:00	0
2009-04-15	22:46:00	0
2009-04-15	22:47:00	0
2009-04-15	22:48:00	0
2009-04-15	22:49:00	0
2009-04-15	22:50:00	0
2009-04-15	22:51:00	0
2009-04-15	22:52:00	37
2009-04-15	22:53:00	0
2009-04-15	22:54:00	0
2009-04-15	22:55:00	0
2009-04-15	22:56:00	0
2009-04-15	22:57:00	0
2009-04-15	22:58:00	0
2009-04-15	22:59:00	0
2009-04-15	23:00:00	0
2009-04-15	23:01:00	0
2009-04-15	23:02:00	0
2009-04-15	23:03:00	0
2009-04-15	23:04:00	12
2009-04-15	23:05:00	0
2009-04-15	23:06:00	0
2009-04-15	23:07:00	0
2009-04-15	23:08:00	0
2009-04-15	23:09:00	0
2009-04-15	23:10:00	0
2009-04-15	23:11:00	0
2009-04-15	23:12:00	0
2009-04-15	23:13:00	0
2009-04-15	23:14:00	0
2009-04-15	23:15:00	0
2009-04-15	23:16:00	0
2009-04-15	23:17:00	0
2009-04-15	23:18:00	0
2009-04-15	23:19:00	0
2009-04-15	23:20:00	0
2009-04-15	23:21:00	0
2009-04-15	23:22:00	0
2009-04-15	23:23:00	0
2009-04-15	23:24:00	0
2009-04-15	23:25:00	25
2009-04-15	23:26:00	0
2009-04-15	23:27:00	0
2009-04-15	23:28:00	0
2009-04-15	23:29:00	0
2009-04-15	23:30:00	0
2009-04-15	23:31:00	0
2009-04-15	23:32:00	0
2009-04-15	23:33:00	0
2009-04-15	23:34:00	0
2009-04-15	23:35:00	0
2009-04-15	23:36:00	0
2009-04-15	23:37:00	0
2009-04-15	23:38:00	0
2009-04-15	23:39:00	0
2009-04-15	23:40:00	0
2009-04-15	23:41:00	0
2009-04-15	23:42:00	0
2009-04-15	23:43:00	0
2009-04-15	23:44:00	0
2009-04-15	23:45:00	0
2009-04-15	23:46:00	0
2009-04-15	23:47:00	25
2009-04-15	23:48:00	0
2009-04-15	23:49:00	0
2009-04-15	23:50:00	0
2009-04-15	23:51:00	0
2009-04-15	23:52:00	0
2009-04-15	23:53:00	0
2009-04-15	23:54:00	0
2009-04-15	23:55:00	0
2009-04-15	23:56:00	0
2009-04-15	23:57:00	0
2009-04-15	23:58:00	0
2009-04-15	23:59:00	0
2009-04-16	00:00:00	0
2009-04-16	00:01:00	0
2009-04-16	00:02:00	0
2009-04-16	00:03:00	219
2009-04-16	00:04:00	98
2009-04-16	00:05:00	0
2009-04-16	00:06:00	0
2009-04-16	00:07:00	0
2009-04-16	00:08:00	0
2009-04-16	00:09:00	62
2009-04-16	00:10:00	175
2009-04-16	00:11:00	0
2009-04-16	00:12:00	0
2009-04-16	00:13:00	0
2009-04-16	00:14:00	0
2009-04-16	00:15:00	0
2009-04-16	00:16:00	0
2009-04-16	00:17:00	0
2009-04-16	00:18:00	0
2009-04-16	00:19:00	0
2009-04-16	00:20:00	0
2009-04-16	00:21:00	0
2009-04-16	00:22:00	37
2009-04-16	00:23:00	0
2009-04-16	00:24:00	0
2009-04-16	00:25:00	0
2009-04-16	00:26:00	0
2009-04-16	00:27:00	0
2009-04-16	00:28:00	0
2009-04-16	00:29:00	0
2009-04-16	00:30:00	0
2009-04-16	00:31:00	0
2009-04-16	00:32:00	0
2009-04-16	00:33:00	0
2009-04-16	00:34:00	0
2009-04-16	00:35:00	0
2009-04-16	00:36:00	0
2009-04-16	00:37:00	0
2009-04-16	00:38:00	0
2009-04-16	00:39:00	0
2009-04-16	00:40:00	0
2009-04-16	00:41:00	0
2009-04-16	00:42:00	0
2009-04-16	00:43:00	0
2009-04-16	00:44:00	0
2009-04-16	00:45:00	0
2009-04-16	00:46:00	0
2009-04-16	00:47:00	0
2009-04-16	00:48:00	0
2009-04-16	00:49:00	0
2009-04-16	00:50:00	0
2009-04-16	00:51:00	0
2009-04-16	00:52:00	0
2009-04-16	00:53:00	0
2009-04-16	00:54:00	0
2009-04-16	00:55:00	0
2009-04-16	00:56:00	0
2009-04-16	00:57:00	0
2009-04-16	00:58:00	0
2009-04-16	00:59:00	0
2009-04-16	01:00:00	0
2009-04-16	01:01:00	0
2009-04-16	01:02:00	0
2009-04-16	01:03:00	0
2009-04-16	01:04:00	0
2009-04-16	01:05:00	12
2009-04-16	01:06:00	0
2009-04-16	01:07:00	0
2009-04-16	01:08:00	0
2009-04-16	01:09:00	0
2009-04-16	01:10:00	0
2009-04-16	01:11:00	0
2009-04-16	01:12:00	0
2009-04-16	01:13:00	0
2009-04-16	01:14:00	0
2009-04-16	01:15:00	0
2009-04-16	01:16:00	0
2009-04-16	01:17:00	0
2009-04-16	01:18:00	0
2009-04-16	01:19:00	0
2009-04-16	01:20:00	0
2009-04-16	01:21:00	0
2009-04-16	01:22:00	0
2009-04-16	01:23:00	0
2009-04-16	01:24:00	0
2009-04-16	01:25:00	0
2009-04-16	01:26:00	0
2009-04-16	01:27:00	0
2009-04-16	01:28:00	0
2009-04-16	01:29:00	0
2009-04-16	01:30:00	0
2009-04-16	01:31:00	0
2009-04-16	01:32:00	0
2009-04-16	01:33:00	12
2009-04-16	01:34:00	37
2009-04-16	01:35:00	0
2009-04-16	01:36:00	0
2009-04-16	01:37:00	0
2009-04-16	01:38:00	0
2009-04-16	01:39:00	0
2009-04-16	01:40:00	0
2009-04-16	01:41:00	0
2009-04-16	01:42:00	0
2009-04-16	01:43:00	0
2009-04-16	01:44:00	0
2009-04-16	01:45:00	0
2009-04-16	01:46:00	0
2009-04-16	01:47:00	0
2009-04-16	01:48:00	0
2009-04-16	01:49:00	0
2009-04-16	01:50:00	12
2009-04-16	01:51:00	12
2009-04-16	01:52:00	49
2009-04-16	01:53:00	74
2009-04-16	01:54:00	74
2009-04-16	01:55:00	37
2009-04-16	01:56:00	148
2009-04-16	01:57:00	25
2009-04-16	01:58:00	49
2009-04-16	01:59:00	190
2009-04-16	02:00:00	0
2009-04-16	02:01:00	0
2009-04-16	02:02:00	0
2009-04-16	02:03:00	0
2009-04-16	02:04:00	0
2009-04-16	02:05:00	0
2009-04-16	02:06:00	0
2009-04-16	02:07:00	0
2009-04-16	02:08:00	0
2009-04-16	02:09:00	0
2009-04-16	02:10:00	0
2009-04-16	02:11:00	0
2009-04-16	02:12:00	0
2009-04-16	02:13:00	0
2009-04-16	02:14:00	37
2009-04-16	02:15:00	62
2009-04-16	02:16:00	0
2009-04-16	02:17:00	0
2009-04-16	02:18:00	0
2009-04-16	02:19:00	0
2009-04-16	02:20:00	0
2009-04-16	02:21:00	0
2009-04-16	02:22:00	0
2009-04-16	02:23:00	0
2009-04-16	02:24:00	0
2009-04-16	02:25:00	0
2009-04-16	02:26:00	0
2009-04-16	02:27:00	0
2009-04-16	02:28:00	0
2009-04-16	02:29:00	0
2009-04-16	02:30:00	0
2009-04-16	02:31:00	0
2009-04-16	02:32:00	0
2009-04-16	02:33:00	0
2009-04-16	02:34:00	0
2009-04-16	02:35:00	0
2009-04-16	02:36:00	0
2009-04-16	02:37:00	12
2009-04-16	02:38:00	0
2009-04-16	02:39:00	0
2009-04-16	02:40:00	0
2009-04-16	02:41:00	0
2009-04-16	02:42:00	0
2009-04-16	02:43:00	0
2009-04-16	02:44:00	0
2009-04-16	02:45:00	0
2009-04-16	02:46:00	0
2009-04-16	02:47:00	0
2009-04-16	02:48:00	0
2009-04-16	02:49:00	0
2009-04-16	02:50:00	0
2009-04-16	02:51:00	0
2009-04-16	02:52:00	0
2009-04-16	02:53:00	0
2009-04-16	02:54:00	0
2009-04-16	02:55:00	0
2009-04-16	02:56:00	0
2009-04-16	02:57:00	0
2009-04-16	02:58:00	0
2009-04-16	02:59:00	0
2009-04-16	03:00:00	0
2009-04-16	03:01:00	0
2009-04-16	03:02:00	0
2009-04-16	03:03:00	12
2009-04-16	03:04:00	0
2009-04-16	03:05:00	0
2009-04-16	03:06:00	0
2009-04-16	03:07:00	0
2009-04-16	03:08:00	0
2009-04-16	03:09:00	0
2009-04-16	03:10:00	0
2009-04-16	03:11:00	0
2009-04-16	03:12:00	0
2009-04-16	03:13:00	0
2009-04-16	03:14:00	0
2009-04-16	03:15:00	0
2009-04-16	03:16:00	0
2009-04-16	03:17:00	12
2009-04-16	03:18:00	0
2009-04-16	03:19:00	0
2009-04-16	03:20:00	0
2009-04-16	03:21:00	0
2009-04-16	03:22:00	0
2009-04-16	03:23:00	0
2009-04-16	03:24:00	0
2009-04-16	03:25:00	37
2009-04-16	03:26:00	374
2009-04-16	03:27:00	49
2009-04-16	03:28:00	0
2009-04-16	03:29:00	37
2009-04-16	03:30:00	25
2009-04-16	03:31:00	12
2009-04-16	03:32:00	49
2009-04-16	03:33:00	0
2009-04-16	03:34:00	0
2009-04-16	03:35:00	0
2009-04-16	03:36:00	0
2009-04-16	03:37:00	0
2009-04-16	03:38:00	0
2009-04-16	03:39:00	0
2009-04-16	03:40:00	0
2009-04-16	03:41:00	12
2009-04-16	03:42:00	0
2009-04-16	03:43:00	0
2009-04-16	03:44:00	0
2009-04-16	03:45:00	0
2009-04-16	03:46:00	0
2009-04-16	03:47:00	0
2009-04-16	03:48:00	0
2009-04-16	03:49:00	98
2009-04-16	03:50:00	0
2009-04-16	03:51:00	0
2009-04-16	03:52:00	0
2009-04-16	03:53:00	0
2009-04-16	03:54:00	0
2009-04-16	03:55:00	0
2009-04-16	03:56:00	0
2009-04-16	03:57:00	0
2009-04-16	03:58:00	0
2009-04-16	03:59:00	0
2009-04-16	04:00:00	0
2009-04-16	04:01:00	0
2009-04-16	04:02:00	0
2009-04-16	04:03:00	0
2009-04-16	04:04:00	0
2009-04-16	04:05:00	0
2009-04-16	04:06:00	12
2009-04-16	04:07:00	0
2009-04-16	04:08:00	0
2009-04-16	04:09:00	0
2009-04-16	04:10:00	0
2009-04-16	04:11:00	0
2009-04-16	04:12:00	49
2009-04-16	04:13:00	0
2009-04-16	04:14:00	0
2009-04-16	04:15:00	0
2009-04-16	04:16:00	0
2009-04-16	04:17:00	0
2009-04-16	04:18:00	0
2009-04-16	04:19:00	0
2009-04-16	04:20:00	0
2009-04-16	04:21:00	0
2009-04-16	04:22:00	0
2009-04-16	04:23:00	0
2009-04-16	04:24:00	0
2009-04-16	04:25:00	0
2009-04-16	04:26:00	0
2009-04-16	04:27:00	0
2009-04-16	04:28:00	0
2009-04-16	04:29:00	0
2009-04-16	04:30:00	0
2009-04-16	04:31:00	0
2009-04-16	04:32:00	0
2009-04-16	04:33:00	0
2009-04-16	04:34:00	0
2009-04-16	04:35:00	0
2009-04-16	04:36:00	0
2009-04-16	04:37:00	25
2009-04-16	04:38:00	12
2009-04-16	04:39:00	0
2009-04-16	04:40:00	0
2009-04-16	04:41:00	0
2009-04-16	04:42:00	0
2009-04-16	04:43:00	0
2009-04-16	04:44:00	0
2009-04-16	04:45:00	0
2009-04-16	04:46:00	0
2009-04-16	04:47:00	0
2009-04-16	04:48:00	0
2009-04-16	04:49:00	0
2009-04-16	04:50:00	0
2009-04-16	04:51:00	0
2009-04-16	04:52:00	0
2009-04-16	04:53:00	0
2009-04-16	04:54:00	0
2009-04-16	04:55:00	0
2009-04-16	04:56:00	0
2009-04-16	04:57:00	0
2009-04-16	04:58:00	0
2009-04-16	04:59:00	0
2009-04-16	05:00:00	0
2009-04-16	05:01:00	0
2009-04-16	05:02:00	0
2009-04-16	05:03:00	0
2009-04-16	05:04:00	0
2009-04-16	05:05:00	0
2009-04-16	05:06:00	0
2009-04-16	05:07:00	0
2009-04-16	05:08:00	0
2009-04-16	05:09:00	0
2009-04-16	05:10:00	0
2009-04-16	05:11:00	0
2009-04-16	05:12:00	0
2009-04-16	05:13:00	0
2009-04-16	05:14:00	0
2009-04-16	05:15:00	0
2009-04-16	05:16:00	0
2009-04-16	05:17:00	0
2009-04-16	05:18:00	0
2009-04-16	05:19:00	0
2009-04-16	05:20:00	0
2009-04-16	05:21:00	0
2009-04-16	05:22:00	0
2009-04-16	05:23:00	160
2009-04-16	05:24:00	62
2009-04-16	05:25:00	37
2009-04-16	05:26:00	37
2009-04-16	05:27:00	0
2009-04-16	05:28:00	0
2009-04-16	05:29:00	0
2009-04-16	05:30:00	0
2009-04-16	05:31:00	0
2009-04-16	05:32:00	0
2009-04-16	05:33:00	0
2009-04-16	05:34:00	0
2009-04-16	05:35:00	0
2009-04-16	05:36:00	0
2009-04-16	05:37:00	0
2009-04-16	05:38:00	0
2009-04-16	05:39:00	0
2009-04-16	05:40:00	0
2009-04-16	05:41:00	0
2009-04-16	05:42:00	0
2009-04-16	05:43:00	0
2009-04-16	05:44:00	12
2009-04-16	05:45:00	0
2009-04-16	05:46:00	0
2009-04-16	05:47:00	0
2009-04-16	05:48:00	0
2009-04-16	05:49:00	0
2009-04-16	05:50:00	0
2009-04-16	05:51:00	25
2009-04-16	05:52:00	0
2009-04-16	05:53:00	0
2009-04-16	05:54:00	0
2009-04-16	05:55:00	0
2009-04-16	05:56:00	0
2009-04-16	05:57:00	0
2009-04-16	05:58:00	0
2009-04-16	05:59:00	0
2009-04-16	06:00:00	0
2009-04-16	06:01:00	0
2009-04-16	06:02:00	0
2009-04-16	06:03:00	0
2009-04-16	06:04:00	0
2009-04-16	06:05:00	0
2009-04-16	06:06:00	0
2009-04-16	06:07:00	0
2009-04-16	06:08:00	0
2009-04-16	06:09:00	219
2009-04-16	06:10:00	1910
2009-04-16	06:11:00	1994
2009-04-16	06:12:00	357
2009-04-16	06:13:00	517
2009-04-16	06:14:00	0
2009-04-16	06:15:00	25
2009-04-16	06:16:00	0
2009-04-16	06:17:00	0
2009-04-16	06:18:00	12
2009-04-16	06:19:00	0
2009-04-16	06:20:00	0
2009-04-16	06:21:00	0
2009-04-16	06:22:00	0
2009-04-16	06:23:00	0
2009-04-16	06:24:00	0
2009-04-16	06:25:00	0
2009-04-16	06:26:00	0
2009-04-16	06:27:00	0
2009-04-16	06:28:00	0
2009-04-16	06:29:00	0
2009-04-16	06:30:00	0
2009-04-16	06:31:00	0
2009-04-16	06:32:00	0
2009-04-16	06:33:00	0
2009-04-16	06:34:00	0
2009-04-16	06:35:00	12
2009-04-16	06:36:00	0
2009-04-16	06:37:00	0
2009-04-16	06:38:00	0
2009-04-16	06:39:00	0
2009-04-16	06:40:00	0
2009-04-16	06:41:00	0
2009-04-16	06:42:00	0
2009-04-16	06:43:00	0
2009-04-16	06:44:00	0
2009-04-16	06:45:00	0
2009-04-16	06:46:00	0
2009-04-16	06:47:00	0
2009-04-16	06:48:00	0
2009-04-16	06:49:00	0
2009-04-16	06:50:00	111
2009-04-16	06:51:00	25
2009-04-16	06:52:00	0
2009-04-16	06:53:00	0
2009-04-16	06:54:00	0
2009-04-16	06:55:00	0
2009-04-16	06:56:00	0
2009-04-16	06:57:00	0
2009-04-16	06:58:00	0
2009-04-16	06:59:00	0
2009-04-16	07:00:00	0
2009-04-16	07:01:00	0
2009-04-16	07:02:00	0
2009-04-16	07:03:00	0
2009-04-16	07:04:00	0
2009-04-16	07:05:00	0
2009-04-16	07:06:00	0
2009-04-16	07:07:00	0
2009-04-16	07:08:00	0
2009-04-16	07:09:00	0
2009-04-16	07:10:00	0
2009-04-16	07:11:00	12
2009-04-16	07:12:00	0
2009-04-16	07:13:00	0
2009-04-16	07:14:00	0
2009-04-16	07:15:00	0
2009-04-16	07:16:00	0
2009-04-16	07:17:00	0
2009-04-16	07:18:00	0
2009-04-16	07:19:00	0
2009-04-16	07:20:00	0
2009-04-16	07:21:00	0
2009-04-16	07:22:00	0
2009-04-16	07:23:00	0
2009-04-16	07:24:00	25
2009-04-16	07:25:00	49
2009-04-16	07:26:00	0
2009-04-16	07:27:00	12
2009-04-16	07:28:00	460
2009-04-16	07:29:00	175
2009-04-16	07:30:00	0
2009-04-16	07:31:00	0
2009-04-16	07:32:00	190
2009-04-16	07:33:00	12
2009-04-16	07:34:00	12
2009-04-16	07:35:00	0
2009-04-16	07:36:00	0
2009-04-16	07:37:00	0
2009-04-16	07:38:00	0
2009-04-16	07:39:00	0
2009-04-16	07:40:00	0
2009-04-16	07:41:00	0
2009-04-16	07:42:00	0
2009-04-16	07:43:00	0
2009-04-16	07:44:00	0
2009-04-16	07:45:00	0
2009-04-16	07:46:00	0
2009-04-16	07:47:00	0
2009-04-16	07:48:00	0
2009-04-16	07:49:00	0
2009-04-16	07:50:00	0
2009-04-16	07:51:00	0
2009-04-16	07:52:00	0
2009-04-16	07:53:00	0
2009-04-16	07:54:00	0
2009-04-16	07:55:00	0
2009-04-16	07:56:00	0
2009-04-16	07:57:00	0
2009-04-16	07:58:00	25
2009-04-16	07:59:00	0
2009-04-16	08:00:00	0
2009-04-16	08:01:00	0
2009-04-16	08:02:00	0
2009-04-16	08:03:00	0
2009-04-16	08:04:00	0
2009-04-16	08:05:00	0
2009-04-16	08:06:00	0
2009-04-16	08:07:00	0
2009-04-16	08:08:00	0
2009-04-16	08:09:00	0
2009-04-16	08:10:00	0
2009-04-16	08:11:00	0
2009-04-16	08:12:00	0
2009-04-16	08:13:00	0
2009-04-16	08:14:00	0
2009-04-16	08:15:00	0
2009-04-16	08:16:00	0
2009-04-16	08:17:00	0
2009-04-16	08:18:00	0
2009-04-16	08:19:00	0
2009-04-16	08:20:00	0
2009-04-16	08:21:00	0
2009-04-16	08:22:00	98
2009-04-16	08:23:00	724
2009-04-16	08:24:00	443
2009-04-16	08:25:00	49
2009-04-16	08:26:00	12
2009-04-16	08:27:00	12
2009-04-16	08:28:00	293
2009-04-16	08:29:00	391
2009-04-16	08:30:00	74
2009-04-16	08:31:00	12
2009-04-16	08:32:00	12
2009-04-16	08:33:00	25
2009-04-16	08:34:00	0
2009-04-16	08:35:00	322
2009-04-16	08:36:00	790
2009-04-16	08:37:00	990
2009-04-16	08:38:00	190
2009-04-16	08:39:00	517
2009-04-16	08:40:00	357
2009-04-16	08:41:00	308
2009-04-16	08:42:00	596
2009-04-16	08:43:00	635
2009-04-16	08:44:00	615
2009-04-16	08:45:00	702
2009-04-16	08:46:00	391
2009-04-16	08:47:00	460
2009-04-16	08:48:00	340
2009-04-16	08:49:00	679
2009-04-16	08:50:00	49
2009-04-16	08:51:00	0
2009-04-16	08:52:00	0
2009-04-16	08:53:00	12
2009-04-16	08:54:00	12
2009-04-16	08:55:00	25
2009-04-16	08:56:00	0
2009-04-16	08:57:00	0
2009-04-16	08:58:00	0
2009-04-16	08:59:00	25
2009-04-16	09:00:00	0
2009-04-16	09:01:00	0
2009-04-16	09:02:00	0
2009-04-16	09:03:00	0
2009-04-16	09:04:00	0
2009-04-16	09:05:00	0
2009-04-16	09:06:00	37
2009-04-16	09:07:00	426
2009-04-16	09:08:00	409
[truncated: 19,611 more rows]

## Sheet: 4.29.09
Actogram, Copy Raw Data, All Days
Identity:	Bear Stephens
Filename:	E:\Active Research Files\meloxicam titre canine\cases\bear s\Bear Stephens 4.29.09.AWC
Gender:	M
Age:	9
Height:	76.2 cm	30.0 in
Weight:	34.0 kg	75.0 lbs
Start Date:	29-Apr-2009 (Wed)
Start Time:	18:00:00
Interval:	1.00 mins
Date Stamp:	Time Stamp:	Activity Data:	Marker Press:
2009-04-29	00:00:00	0
2009-04-29	00:01:00	0
2009-04-29	00:02:00	0
2009-04-29	00:03:00	0
2009-04-29	00:04:00	0
2009-04-29	00:05:00	0
2009-04-29	00:06:00	0
2009-04-29	00:07:00	0
2009-04-29	00:08:00	0
2009-04-29	00:09:00	0
2009-04-29	00:10:00	0
2009-04-29	00:11:00	0
2009-04-29	00:12:00	0
2009-04-29	00:13:00	0
2009-04-29	00:14:00	0
2009-04-29	00:15:00	0
2009-04-29	00:16:00	0
2009-04-29	00:17:00	0
2009-04-29	00:18:00	0
2009-04-29	00:19:00	0
2009-04-29	00:20:00	0
2009-04-29	00:21:00	0
2009-04-29	00:22:00	0
2009-04-29	00:23:00	0
2009-04-29	00:24:00	0
2009-04-29	00:25:00	0
2009-04-29	00:26:00	0
2009-04-29	00:27:00	0
2009-04-29	00:28:00	0
2009-04-29	00:29:00	0
2009-04-29	00:30:00	0
2009-04-29	00:31:00	0
2009-04-29	00:32:00	0
2009-04-29	00:33:00	0
2009-04-29	00:34:00	0
2009-04-29	00:35:00	0
2009-04-29	00:36:00	0
2009-04-29	00:37:00	0
2009-04-29	00:38:00	0
2009-04-29	00:39:00	0
2009-04-29	00:40:00	0
2009-04-29	00:41:00	0
2009-04-29	00:42:00	0
2009-04-29	00:43:00	0
2009-04-29	00:44:00	0
2009-04-29	00:45:00	0
2009-04-29	00:46:00	0
2009-04-29	00:47:00	0
2009-04-29	00:48:00	0
2009-04-29	00:49:00	0
2009-04-29	00:50:00	0
2009-04-29	00:51:00	0
2009-04-29	00:52:00	0
2009-04-29	00:53:00	0
2009-04-29	00:54:00	0
2009-04-29	00:55:00	0
2009-04-29	00:56:00	0
2009-04-29	00:57:00	0
2009-04-29	00:58:00	0
2009-04-29	00:59:00	0
2009-04-29	01:00:00	0
2009-04-29	01:01:00	0
2009-04-29	01:02:00	0
2009-04-29	01:03:00	0
2009-04-29	01:04:00	0
2009-04-29	01:05:00	0
2009-04-29	01:06:00	0
2009-04-29	01:07:00	0
2009-04-29	01:08:00	0
2009-04-29	01:09:00	0
2009-04-29	01:10:00	0
2009-04-29	01:11:00	0
2009-04-29	01:12:00	0
2009-04-29	01:13:00	0
2009-04-29	01:14:00	0
2009-04-29	01:15:00	0
2009-04-29	01:16:00	0
2009-04-29	01:17:00	0
2009-04-29	01:18:00	0
2009-04-29	01:19:00	0
2009-04-29	01:20:00	0
2009-04-29	01:21:00	0
2009-04-29	01:22:00	0
2009-04-29	01:23:00	0
2009-04-29	01:24:00	0
2009-04-29	01:25:00	0
2009-04-29	01:26:00	0
2009-04-29	01:27:00	0
2009-04-29	01:28:00	0
2009-04-29	01:29:00	0
2009-04-29	01:30:00	0
2009-04-29	01:31:00	0
2009-04-29	01:32:00	0
2009-04-29	01:33:00	0
2009-04-29	01:34:00	0
2009-04-29	01:35:00	0
2009-04-29	01:36:00	0
2009-04-29	01:37:00	0
2009-04-29	01:38:00	0
2009-04-29	01:39:00	0
2009-04-29	01:40:00	0
2009-04-29	01:41:00	0
2009-04-29	01:42:00	0
2009-04-29	01:43:00	0
2009-04-29	01:44:00	0
2009-04-29	01:45:00	0
2009-04-29	01:46:00	0
2009-04-29	01:47:00	0
2009-04-29	01:48:00	0
2009-04-29	01:49:00	0
2009-04-29	01:50:00	0
2009-04-29	01:51:00	0
2009-04-29	01:52:00	0
2009-04-29	01:53:00	0
2009-04-29	01:54:00	0
2009-04-29	01:55:00	0
2009-04-29	01:56:00	0
2009-04-29	01:57:00	0
2009-04-29	01:58:00	0
2009-04-29	01:59:00	0
2009-04-29	02:00:00	0
2009-04-29	02:01:00	0
2009-04-29	02:02:00	0
2009-04-29	02:03:00	0
2009-04-29	02:04:00	0
2009-04-29	02:05:00	0
2009-04-29	02:06:00	0
2009-04-29	02:07:00	0
2009-04-29	02:08:00	0
2009-04-29	02:09:00	0
2009-04-29	02:10:00	0
2009-04-29	02:11:00	0
2009-04-29	02:12:00	0
2009-04-29	02:13:00	0
2009-04-29	02:14:00	0
2009-04-29	02:15:00	0
2009-04-29	02:16:00	0
2009-04-29	02:17:00	0
2009-04-29	02:18:00	0
2009-04-29	02:19:00	0
2009-04-29	02:20:00	0
2009-04-29	02:21:00	0
2009-04-29	02:22:00	0
2009-04-29	02:23:00	0
2009-04-29	02:24:00	0
2009-04-29	02:25:00	0
2009-04-29	02:26:00	0
2009-04-29	02:27:00	0
2009-04-29	02:28:00	0
2009-04-29	02:29:00	0
2009-04-29	02:30:00	0
2009-04-29	02:31:00	0
2009-04-29	02:32:00	0
2009-04-29	02:33:00	0
2009-04-29	02:34:00	0
2009-04-29	02:35:00	0
2009-04-29	02:36:00	0
2009-04-29	02:37:00	0
2009-04-29	02:38:00	0
2009-04-29	02:39:00	0
2009-04-29	02:40:00	0
2009-04-29	02:41:00	0
2009-04-29	02:42:00	0
2009-04-29	02:43:00	0
2009-04-29	02:44:00	0
2009-04-29	02:45:00	0
2009-04-29	02:46:00	0
2009-04-29	02:47:00	0
2009-04-29	02:48:00	0
2009-04-29	02:49:00	0
2009-04-29	02:50:00	0
2009-04-29	02:51:00	0
2009-04-29	02:52:00	0
2009-04-29	02:53:00	0
2009-04-29	02:54:00	0
2009-04-29	02:55:00	0
2009-04-29	02:56:00	0
2009-04-29	02:57:00	0
2009-04-29	02:58:00	0
2009-04-29	02:59:00	0
2009-04-29	03:00:00	0
2009-04-29	03:01:00	0
2009-04-29	03:02:00	0
2009-04-29	03:03:00	0
2009-04-29	03:04:00	0
2009-04-29	03:05:00	0
2009-04-29	03:06:00	0
2009-04-29	03:07:00	0
2009-04-29	03:08:00	0
2009-04-29	03:09:00	0
2009-04-29	03:10:00	0
2009-04-29	03:11:00	0
2009-04-29	03:12:00	0
2009-04-29	03:13:00	0
2009-04-29	03:14:00	0
2009-04-29	03:15:00	0
2009-04-29	03:16:00	0
2009-04-29	03:17:00	0
2009-04-29	03:18:00	0
2009-04-29	03:19:00	0
2009-04-29	03:20:00	0
2009-04-29	03:21:00	0
2009-04-29	03:22:00	0
2009-04-29	03:23:00	0
2009-04-29	03:24:00	0
2009-04-29	03:25:00	0
2009-04-29	03:26:00	0
2009-04-29	03:27:00	0
2009-04-29	03:28:00	0
2009-04-29	03:29:00	0
2009-04-29	03:30:00	0
2009-04-29	03:31:00	0
2009-04-29	03:32:00	0
2009-04-29	03:33:00	0
2009-04-29	03:34:00	0
2009-04-29	03:35:00	0
2009-04-29	03:36:00	0
2009-04-29	03:37:00	0
2009-04-29	03:38:00	0
2009-04-29	03:39:00	0
2009-04-29	03:40:00	0
2009-04-29	03:41:00	0
2009-04-29	03:42:00	0
2009-04-29	03:43:00	0
2009-04-29	03:44:00	0
2009-04-29	03:45:00	0
2009-04-29	03:46:00	0
2009-04-29	03:47:00	0
2009-04-29	03:48:00	0
2009-04-29	03:49:00	0
2009-04-29	03:50:00	0
2009-04-29	03:51:00	0
2009-04-29	03:52:00	0
2009-04-29	03:53:00	0
2009-04-29	03:54:00	0
2009-04-29	03:55:00	0
2009-04-29	03:56:00	0
2009-04-29	03:57:00	0
2009-04-29	03:58:00	0
2009-04-29	03:59:00	0
2009-04-29	04:00:00	0
2009-04-29	04:01:00	0
2009-04-29	04:02:00	0
2009-04-29	04:03:00	0
2009-04-29	04:04:00	0
2009-04-29	04:05:00	0
2009-04-29	04:06:00	0
2009-04-29	04:07:00	0
2009-04-29	04:08:00	0
2009-04-29	04:09:00	0
2009-04-29	04:10:00	0
2009-04-29	04:11:00	0
2009-04-29	04:12:00	0
2009-04-29	04:13:00	0
2009-04-29	04:14:00	0
2009-04-29	04:15:00	0
2009-04-29	04:16:00	0
2009-04-29	04:17:00	0
2009-04-29	04:18:00	0
2009-04-29	04:19:00	0
2009-04-29	04:20:00	0
2009-04-29	04:21:00	0
2009-04-29	04:22:00	0
2009-04-29	04:23:00	0
2009-04-29	04:24:00	0
2009-04-29	04:25:00	0
2009-04-29	04:26:00	0
2009-04-29	04:27:00	0
2009-04-29	04:28:00	0
2009-04-29	04:29:00	0
2009-04-29	04:30:00	0
2009-04-29	04:31:00	0
2009-04-29	04:32:00	0
2009-04-29	04:33:00	0
2009-04-29	04:34:00	0
2009-04-29	04:35:00	0
2009-04-29	04:36:00	0
2009-04-29	04:37:00	0
2009-04-29	04:38:00	0
2009-04-29	04:39:00	0
2009-04-29	04:40:00	0
2009-04-29	04:41:00	0
2009-04-29	04:42:00	0
2009-04-29	04:43:00	0
2009-04-29	04:44:00	0
2009-04-29	04:45:00	0
2009-04-29	04:46:00	0
2009-04-29	04:47:00	0
2009-04-29	04:48:00	0
2009-04-29	04:49:00	0
2009-04-29	04:50:00	0
2009-04-29	04:51:00	0
2009-04-29	04:52:00	0
2009-04-29	04:53:00	0
2009-04-29	04:54:00	0
2009-04-29	04:55:00	0
2009-04-29	04:56:00	0
2009-04-29	04:57:00	0
2009-04-29	04:58:00	0
2009-04-29	04:59:00	0
2009-04-29	05:00:00	0
2009-04-29	05:01:00	0
2009-04-29	05:02:00	0
2009-04-29	05:03:00	0
2009-04-29	05:04:00	0
2009-04-29	05:05:00	0
2009-04-29	05:06:00	0
2009-04-29	05:07:00	0
2009-04-29	05:08:00	0
2009-04-29	05:09:00	0
2009-04-29	05:10:00	0
2009-04-29	05:11:00	0
2009-04-29	05:12:00	0
2009-04-29	05:13:00	0
2009-04-29	05:14:00	0
2009-04-29	05:15:00	0
2009-04-29	05:16:00	0
2009-04-29	05:17:00	0
2009-04-29	05:18:00	0
2009-04-29	05:19:00	0
2009-04-29	05:20:00	0
2009-04-29	05:21:00	0
2009-04-29	05:22:00	0
2009-04-29	05:23:00	0
2009-04-29	05:24:00	0
2009-04-29	05:25:00	0
2009-04-29	05:26:00	0
2009-04-29	05:27:00	0
2009-04-29	05:28:00	0
2009-04-29	05:29:00	0
2009-04-29	05:30:00	0
2009-04-29	05:31:00	0
2009-04-29	05:32:00	0
2009-04-29	05:33:00	0
2009-04-29	05:34:00	0
2009-04-29	05:35:00	0
2009-04-29	05:36:00	0
2009-04-29	05:37:00	0
2009-04-29	05:38:00	0
2009-04-29	05:39:00	0
2009-04-29	05:40:00	0
2009-04-29	05:41:00	0
2009-04-29	05:42:00	0
2009-04-29	05:43:00	0
2009-04-29	05:44:00	0
2009-04-29	05:45:00	0
2009-04-29	05:46:00	0
2009-04-29	05:47:00	0
2009-04-29	05:48:00	0
2009-04-29	05:49:00	0
2009-04-29	05:50:00	0
2009-04-29	05:51:00	0
2009-04-29	05:52:00	0
2009-04-29	05:53:00	0
2009-04-29	05:54:00	0
2009-04-29	05:55:00	0
2009-04-29	05:56:00	0
2009-04-29	05:57:00	0
2009-04-29	05:58:00	0
2009-04-29	05:59:00	0
2009-04-29	06:00:00	0
2009-04-29	06:01:00	0
2009-04-29	06:02:00	0
2009-04-29	06:03:00	0
2009-04-29	06:04:00	0
2009-04-29	06:05:00	0
2009-04-29	06:06:00	0
2009-04-29	06:07:00	0
2009-04-29	06:08:00	0
2009-04-29	06:09:00	0
2009-04-29	06:10:00	0
2009-04-29	06:11:00	0
2009-04-29	06:12:00	0
2009-04-29	06:13:00	0
2009-04-29	06:14:00	0
2009-04-29	06:15:00	0
2009-04-29	06:16:00	0
2009-04-29	06:17:00	0
2009-04-29	06:18:00	0
2009-04-29	06:19:00	0
2009-04-29	06:20:00	0
2009-04-29	06:21:00	0
2009-04-29	06:22:00	0
2009-04-29	06:23:00	0
2009-04-29	06:24:00	0
2009-04-29	06:25:00	0
2009-04-29	06:26:00	0
2009-04-29	06:27:00	0
2009-04-29	06:28:00	0
2009-04-29	06:29:00	0
2009-04-29	06:30:00	0
2009-04-29	06:31:00	0
2009-04-29	06:32:00	0
2009-04-29	06:33:00	0
2009-04-29	06:34:00	0
2009-04-29	06:35:00	0
2009-04-29	06:36:00	0
2009-04-29	06:37:00	0
2009-04-29	06:38:00	0
2009-04-29	06:39:00	0
2009-04-29	06:40:00	0
2009-04-29	06:41:00	0
2009-04-29	06:42:00	0
2009-04-29	06:43:00	0
2009-04-29	06:44:00	0
2009-04-29	06:45:00	0
2009-04-29	06:46:00	0
2009-04-29	06:47:00	0
2009-04-29	06:48:00	0
2009-04-29	06:49:00	0
2009-04-29	06:50:00	0
2009-04-29	06:51:00	0
2009-04-29	06:52:00	0
2009-04-29	06:53:00	0
2009-04-29	06:54:00	0
2009-04-29	06:55:00	0
2009-04-29	06:56:00	0
2009-04-29	06:57:00	0
2009-04-29	06:58:00	0
2009-04-29	06:59:00	0
2009-04-29	07:00:00	0
2009-04-29	07:01:00	0
2009-04-29	07:02:00	0
2009-04-29	07:03:00	0
2009-04-29	07:04:00	0
2009-04-29	07:05:00	0
2009-04-29	07:06:00	0
2009-04-29	07:07:00	0
2009-04-29	07:08:00	0
2009-04-29	07:09:00	0
2009-04-29	07:10:00	0
2009-04-29	07:11:00	0
2009-04-29	07:12:00	0
2009-04-29	07:13:00	0
2009-04-29	07:14:00	0
2009-04-29	07:15:00	0
2009-04-29	07:16:00	0
2009-04-29	07:17:00	0
2009-04-29	07:18:00	0
2009-04-29	07:19:00	0
2009-04-29	07:20:00	0
2009-04-29	07:21:00	0
2009-04-29	07:22:00	0
2009-04-29	07:23:00	0
2009-04-29	07:24:00	0
2009-04-29	07:25:00	0
2009-04-29	07:26:00	0
2009-04-29	07:27:00	0
2009-04-29	07:28:00	0
2009-04-29	07:29:00	0
2009-04-29	07:30:00	0
2009-04-29	07:31:00	0
2009-04-29	07:32:00	0
2009-04-29	07:33:00	0
2009-04-29	07:34:00	0
2009-04-29	07:35:00	0
2009-04-29	07:36:00	0
2009-04-29	07:37:00	0
2009-04-29	07:38:00	0
2009-04-29	07:39:00	0
2009-04-29	07:40:00	0
2009-04-29	07:41:00	0
2009-04-29	07:42:00	0
2009-04-29	07:43:00	0
2009-04-29	07:44:00	0
2009-04-29	07:45:00	0
2009-04-29	07:46:00	0
2009-04-29	07:47:00	0
2009-04-29	07:48:00	0
2009-04-29	07:49:00	0
2009-04-29	07:50:00	0
2009-04-29	07:51:00	0
2009-04-29	07:52:00	0
2009-04-29	07:53:00	0
2009-04-29	07:54:00	0
2009-04-29	07:55:00	0
2009-04-29	07:56:00	0
2009-04-29	07:57:00	0
2009-04-29	07:58:00	0
2009-04-29	07:59:00	0
2009-04-29	08:00:00	0
2009-04-29	08:01:00	0
2009-04-29	08:02:00	0
2009-04-29	08:03:00	0
2009-04-29	08:04:00	0
2009-04-29	08:05:00	0
2009-04-29	08:06:00	0
2009-04-29	08:07:00	0
2009-04-29	08:08:00	0
2009-04-29	08:09:00	0
2009-04-29	08:10:00	0
2009-04-29	08:11:00	0
2009-04-29	08:12:00	0
2009-04-29	08:13:00	0
2009-04-29	08:14:00	0
2009-04-29	08:15:00	0
2009-04-29	08:16:00	0
2009-04-29	08:17:00	0
2009-04-29	08:18:00	0
2009-04-29	08:19:00	0
2009-04-29	08:20:00	0
2009-04-29	08:21:00	0
2009-04-29	08:22:00	0
2009-04-29	08:23:00	0
2009-04-29	08:24:00	0
2009-04-29	08:25:00	0
2009-04-29	08:26:00	0
2009-04-29	08:27:00	0
2009-04-29	08:28:00	0
2009-04-29	08:29:00	0
2009-04-29	08:30:00	0
2009-04-29	08:31:00	0
2009-04-29	08:32:00	0
2009-04-29	08:33:00	0
2009-04-29	08:34:00	0
2009-04-29	08:35:00	0
2009-04-29	08:36:00	0
2009-04-29	08:37:00	0
2009-04-29	08:38:00	0
2009-04-29	08:39:00	0
2009-04-29	08:40:00	0
2009-04-29	08:41:00	0
2009-04-29	08:42:00	0
2009-04-29	08:43:00	0
2009-04-29	08:44:00	0
2009-04-29	08:45:00	0
2009-04-29	08:46:00	0
2009-04-29	08:47:00	0
2009-04-29	08:48:00	0
2009-04-29	08:49:00	0
2009-04-29	08:50:00	0
2009-04-29	08:51:00	0
2009-04-29	08:52:00	0
2009-04-29	08:53:00	0
2009-04-29	08:54:00	0
2009-04-29	08:55:00	0
2009-04-29	08:56:00	0
2009-04-29	08:57:00	0
2009-04-29	08:58:00	0
2009-04-29	08:59:00	0
2009-04-29	09:00:00	0
2009-04-29	09:01:00	0
2009-04-29	09:02:00	0
2009-04-29	09:03:00	0
2009-04-29	09:04:00	0
2009-04-29	09:05:00	0
2009-04-29	09:06:00	0
2009-04-29	09:07:00	0
2009-04-29	09:08:00	0
2009-04-29	09:09:00	0
2009-04-29	09:10:00	0
2009-04-29	09:11:00	0
2009-04-29	09:12:00	0
2009-04-29	09:13:00	0
2009-04-29	09:14:00	0
2009-04-29	09:15:00	0
2009-04-29	09:16:00	0
2009-04-29	09:17:00	0
2009-04-29	09:18:00	0
2009-04-29	09:19:00	0
2009-04-29	09:20:00	0
2009-04-29	09:21:00	0
2009-04-29	09:22:00	0
2009-04-29	09:23:00	0
2009-04-29	09:24:00	0
2009-04-29	09:25:00	0
2009-04-29	09:26:00	0
2009-04-29	09:27:00	0
2009-04-29	09:28:00	0
2009-04-29	09:29:00	0
2009-04-29	09:30:00	0
2009-04-29	09:31:00	0
2009-04-29	09:32:00	0
2009-04-29	09:33:00	0
2009-04-29	09:34:00	0
2009-04-29	09:35:00	0
2009-04-29	09:36:00	0
2009-04-29	09:37:00	0
2009-04-29	09:38:00	0
2009-04-29	09:39:00	0
2009-04-29	09:40:00	0
2009-04-29	09:41:00	0
2009-04-29	09:42:00	0
2009-04-29	09:43:00	0
2009-04-29	09:44:00	0
2009-04-29	09:45:00	0
2009-04-29	09:46:00	0
2009-04-29	09:47:00	0
2009-04-29	09:48:00	0
2009-04-29	09:49:00	0
2009-04-29	09:50:00	0
2009-04-29	09:51:00	0
2009-04-29	09:52:00	0
2009-04-29	09:53:00	0
2009-04-29	09:54:00	0
2009-04-29	09:55:00	0
2009-04-29	09:56:00	0
2009-04-29	09:57:00	0
2009-04-29	09:58:00	0
2009-04-29	09:59:00	0
2009-04-29	10:00:00	0
2009-04-29	10:01:00	0
2009-04-29	10:02:00	0
2009-04-29	10:03:00	0
2009-04-29	10:04:00	0
2009-04-29	10:05:00	0
2009-04-29	10:06:00	0
2009-04-29	10:07:00	0
2009-04-29	10:08:00	0
2009-04-29	10:09:00	0
2009-04-29	10:10:00	0
2009-04-29	10:11:00	0
2009-04-29	10:12:00	0
2009-04-29	10:13:00	0
2009-04-29	10:14:00	0
2009-04-29	10:15:00	0
2009-04-29	10:16:00	0
2009-04-29	10:17:00	0
2009-04-29	10:18:00	0
2009-04-29	10:19:00	0
2009-04-29	10:20:00	0
2009-04-29	10:21:00	0
2009-04-29	10:22:00	0
2009-04-29	10:23:00	0
2009-04-29	10:24:00	0
2009-04-29	10:25:00	0
2009-04-29	10:26:00	0
2009-04-29	10:27:00	0
2009-04-29	10:28:00	0
2009-04-29	10:29:00	0
2009-04-29	10:30:00	0
2009-04-29	10:31:00	0
2009-04-29	10:32:00	0
2009-04-29	10:33:00	0
2009-04-29	10:34:00	0
2009-04-29	10:35:00	0
2009-04-29	10:36:00	0
2009-04-29	10:37:00	0
2009-04-29	10:38:00	0
2009-04-29	10:39:00	0
2009-04-29	10:40:00	0
2009-04-29	10:41:00	0
2009-04-29	10:42:00	0
2009-04-29	10:43:00	0
2009-04-29	10:44:00	0
2009-04-29	10:45:00	0
2009-04-29	10:46:00	0
2009-04-29	10:47:00	0
2009-04-29	10:48:00	0
2009-04-29	10:49:00	0
2009-04-29	10:50:00	0
2009-04-29	10:51:00	0
2009-04-29	10:52:00	0
2009-04-29	10:53:00	0
2009-04-29	10:54:00	0
2009-04-29	10:55:00	0
2009-04-29	10:56:00	0
2009-04-29	10:57:00	0
2009-04-29	10:58:00	0
2009-04-29	10:59:00	0
2009-04-29	11:00:00	0
2009-04-29	11:01:00	0
2009-04-29	11:02:00	0
2009-04-29	11:03:00	0
2009-04-29	11:04:00	0
2009-04-29	11:05:00	0
2009-04-29	11:06:00	0
2009-04-29	11:07:00	0
2009-04-29	11:08:00	0
2009-04-29	11:09:00	0
2009-04-29	11:10:00	0
2009-04-29	11:11:00	0
2009-04-29	11:12:00	0
2009-04-29	11:13:00	0
2009-04-29	11:14:00	0
2009-04-29	11:15:00	0
2009-04-29	11:16:00	0
2009-04-29	11:17:00	0
2009-04-29	11:18:00	0
2009-04-29	11:19:00	0
2009-04-29	11:20:00	0
2009-04-29	11:21:00	0
2009-04-29	11:22:00	0
2009-04-29	11:23:00	0
2009-04-29	11:24:00	0
2009-04-29	11:25:00	0
2009-04-29	11:26:00	0
2009-04-29	11:27:00	0
2009-04-29	11:28:00	0
2009-04-29	11:29:00	0
2009-04-29	11:30:00	0
2009-04-29	11:31:00	0
2009-04-29	11:32:00	0
2009-04-29	11:33:00	0
2009-04-29	11:34:00	0
2009-04-29	11:35:00	0
2009-04-29	11:36:00	0
2009-04-29	11:37:00	0
2009-04-29	11:38:00	0
2009-04-29	11:39:00	0
2009-04-29	11:40:00	0
2009-04-29	11:41:00	0
2009-04-29	11:42:00	0
2009-04-29	11:43:00	0
2009-04-29	11:44:00	0
2009-04-29	11:45:00	0
2009-04-29	11:46:00	0
2009-04-29	11:47:00	0
2009-04-29	11:48:00	0
2009-04-29	11:49:00	0
2009-04-29	11:50:00	0
2009-04-29	11:51:00	0
2009-04-29	11:52:00	0
2009-04-29	11:53:00	0
2009-04-29	11:54:00	0
2009-04-29	11:55:00	0
2009-04-29	11:56:00	0
2009-04-29	11:57:00	0
2009-04-29	11:58:00	0
2009-04-29	11:59:00	0
2009-04-29	12:00:00	0
2009-04-29	12:01:00	0
2009-04-29	12:02:00	0
2009-04-29	12:03:00	0
2009-04-29	12:04:00	0
2009-04-29	12:05:00	0
2009-04-29	12:06:00	0
2009-04-29	12:07:00	0
2009-04-29	12:08:00	0
2009-04-29	12:09:00	0
2009-04-29	12:10:00	0
2009-04-29	12:11:00	0
2009-04-29	12:12:00	0
2009-04-29	12:13:00	0
2009-04-29	12:14:00	0
2009-04-29	12:15:00	0
2009-04-29	12:16:00	0
2009-04-29	12:17:00	0
2009-04-29	12:18:00	0
2009-04-29	12:19:00	0
2009-04-29	12:20:00	0
2009-04-29	12:21:00	0
2009-04-29	12:22:00	0
2009-04-29	12:23:00	0
2009-04-29	12:24:00	0
2009-04-29	12:25:00	0
2009-04-29	12:26:00	0
2009-04-29	12:27:00	0
2009-04-29	12:28:00	0
2009-04-29	12:29:00	0
2009-04-29	12:30:00	0
2009-04-29	12:31:00	0
2009-04-29	12:32:00	0
2009-04-29	12:33:00	0
2009-04-29	12:34:00	0
2009-04-29	12:35:00	0
2009-04-29	12:36:00	0
2009-04-29	12:37:00	0
2009-04-29	12:38:00	0
2009-04-29	12:39:00	0
2009-04-29	12:40:00	0
2009-04-29	12:41:00	0
2009-04-29	12:42:00	0
2009-04-29	12:43:00	0
2009-04-29	12:44:00	0
2009-04-29	12:45:00	0
2009-04-29	12:46:00	0
2009-04-29	12:47:00	0
2009-04-29	12:48:00	0
2009-04-29	12:49:00	0
2009-04-29	12:50:00	0
2009-04-29	12:51:00	0
2009-04-29	12:52:00	0
2009-04-29	12:53:00	0
2009-04-29	12:54:00	0
2009-04-29	12:55:00	0
2009-04-29	12:56:00	0
2009-04-29	12:57:00	0
2009-04-29	12:58:00	0
2009-04-29	12:59:00	0
2009-04-29	13:00:00	0
2009-04-29	13:01:00	0
2009-04-29	13:02:00	0
2009-04-29	13:03:00	0
2009-04-29	13:04:00	0
2009-04-29	13:05:00	0
2009-04-29	13:06:00	0
2009-04-29	13:07:00	0
2009-04-29	13:08:00	0
2009-04-29	13:09:00	0
2009-04-29	13:10:00	0
2009-04-29	13:11:00	0
2009-04-29	13:12:00	0
2009-04-29	13:13:00	0
2009-04-29	13:14:00	0
2009-04-29	13:15:00	0
2009-04-29	13:16:00	0
2009-04-29	13:17:00	0
2009-04-29	13:18:00	0
2009-04-29	13:19:00	0
2009-04-29	13:20:00	0
2009-04-29	13:21:00	0
2009-04-29	13:22:00	0
2009-04-29	13:23:00	0
2009-04-29	13:24:00	0
2009-04-29	13:25:00	0
2009-04-29	13:26:00	0
2009-04-29	13:27:00	0
2009-04-29	13:28:00	0
2009-04-29	13:29:00	0
2009-04-29	13:30:00	0
2009-04-29	13:31:00	0
2009-04-29	13:32:00	0
2009-04-29	13:33:00	0
2009-04-29	13:34:00	0
2009-04-29	13:35:00	0
2009-04-29	13:36:00	0
2009-04-29	13:37:00	0
2009-04-29	13:38:00	0
2009-04-29	13:39:00	0
2009-04-29	13:40:00	0
2009-04-29	13:41:00	0
2009-04-29	13:42:00	0
2009-04-29	13:43:00	0
2009-04-29	13:44:00	0
2009-04-29	13:45:00	0
2009-04-29	13:46:00	0
2009-04-29	13:47:00	0
2009-04-29	13:48:00	0
2009-04-29	13:49:00	0
2009-04-29	13:50:00	0
2009-04-29	13:51:00	0
2009-04-29	13:52:00	0
2009-04-29	13:53:00	0
2009-04-29	13:54:00	0
2009-04-29	13:55:00	0
2009-04-29	13:56:00	0
2009-04-29	13:57:00	0
2009-04-29	13:58:00	0
2009-04-29	13:59:00	0
2009-04-29	14:00:00	0
2009-04-29	14:01:00	0
2009-04-29	14:02:00	0
2009-04-29	14:03:00	0
2009-04-29	14:04:00	0
2009-04-29	14:05:00	0
2009-04-29	14:06:00	0
2009-04-29	14:07:00	0
2009-04-29	14:08:00	0
2009-04-29	14:09:00	0
2009-04-29	14:10:00	0
2009-04-29	14:11:00	0
2009-04-29	14:12:00	0
2009-04-29	14:13:00	0
2009-04-29	14:14:00	0
2009-04-29	14:15:00	0
2009-04-29	14:16:00	0
2009-04-29	14:17:00	0
2009-04-29	14:18:00	0
2009-04-29	14:19:00	0
2009-04-29	14:20:00	0
2009-04-29	14:21:00	0
2009-04-29	14:22:00	0
2009-04-29	14:23:00	0
2009-04-29	14:24:00	0
2009-04-29	14:25:00	0
2009-04-29	14:26:00	0
2009-04-29	14:27:00	0
2009-04-29	14:28:00	0
2009-04-29	14:29:00	0
2009-04-29	14:30:00	0
2009-04-29	14:31:00	0
2009-04-29	14:32:00	0
2009-04-29	14:33:00	0
2009-04-29	14:34:00	0
2009-04-29	14:35:00	0
2009-04-29	14:36:00	0
2009-04-29	14:37:00	0
2009-04-29	14:38:00	0
2009-04-29	14:39:00	0
2009-04-29	14:40:00	0
2009-04-29	14:41:00	0
2009-04-29	14:42:00	0
2009-04-29	14:43:00	0
2009-04-29	14:44:00	0
2009-04-29	14:45:00	0
2009-04-29	14:46:00	0
2009-04-29	14:47:00	0
2009-04-29	14:48:00	0
2009-04-29	14:49:00	0
2009-04-29	14:50:00	0
2009-04-29	14:51:00	0
2009-04-29	14:52:00	0
2009-04-29	14:53:00	0
2009-04-29	14:54:00	0
2009-04-29	14:55:00	0
2009-04-29	14:56:00	0
2009-04-29	14:57:00	0
2009-04-29	14:58:00	0
2009-04-29	14:59:00	0
2009-04-29	15:00:00	0
2009-04-29	15:01:00	0
2009-04-29	15:02:00	0
2009-04-29	15:03:00	0
2009-04-29	15:04:00	0
2009-04-29	15:05:00	0
2009-04-29	15:06:00	0
2009-04-29	15:07:00	0
2009-04-29	15:08:00	0
2009-04-29	15:09:00	0
2009-04-29	15:10:00	0
2009-04-29	15:11:00	0
2009-04-29	15:12:00	0
2009-04-29	15:13:00	0
2009-04-29	15:14:00	0
2009-04-29	15:15:00	0
2009-04-29	15:16:00	0
2009-04-29	15:17:00	0
2009-04-29	15:18:00	0
2009-04-29	15:19:00	0
2009-04-29	15:20:00	0
2009-04-29	15:21:00	0
2009-04-29	15:22:00	0
2009-04-29	15:23:00	0
2009-04-29	15:24:00	0
2009-04-29	15:25:00	0
2009-04-29	15:26:00	0
2009-04-29	15:27:00	0
2009-04-29	15:28:00	0
2009-04-29	15:29:00	0
2009-04-29	15:30:00	0
2009-04-29	15:31:00	0
2009-04-29	15:32:00	0
2009-04-29	15:33:00	0
2009-04-29	15:34:00	0
2009-04-29	15:35:00	0
2009-04-29	15:36:00	0
2009-04-29	15:37:00	0
2009-04-29	15:38:00	0
2009-04-29	15:39:00	0
2009-04-29	15:40:00	0
2009-04-29	15:41:00	0
2009-04-29	15:42:00	0
2009-04-29	15:43:00	0
2009-04-29	15:44:00	0
2009-04-29	15:45:00	0
2009-04-29	15:46:00	0
2009-04-29	15:47:00	0
2009-04-29	15:48:00	0
2009-04-29	15:49:00	0
2009-04-29	15:50:00	0
2009-04-29	15:51:00	0
2009-04-29	15:52:00	0
2009-04-29	15:53:00	0
2009-04-29	15:54:00	0
2009-04-29	15:55:00	0
2009-04-29	15:56:00	0
2009-04-29	15:57:00	0
2009-04-29	15:58:00	0
2009-04-29	15:59:00	0
2009-04-29	16:00:00	0
2009-04-29	16:01:00	0
2009-04-29	16:02:00	0
2009-04-29	16:03:00	0
2009-04-29	16:04:00	0
2009-04-29	16:05:00	0
2009-04-29	16:06:00	0
2009-04-29	16:07:00	0
2009-04-29	16:08:00	0
2009-04-29	16:09:00	0
2009-04-29	16:10:00	0
2009-04-29	16:11:00	0
2009-04-29	16:12:00	0
2009-04-29	16:13:00	0
2009-04-29	16:14:00	0
2009-04-29	16:15:00	0
2009-04-29	16:16:00	0
2009-04-29	16:17:00	0
2009-04-29	16:18:00	0
2009-04-29	16:19:00	0
2009-04-29	16:20:00	0
2009-04-29	16:21:00	0
2009-04-29	16:22:00	0
2009-04-29	16:23:00	0
2009-04-29	16:24:00	0
2009-04-29	16:25:00	0
2009-04-29	16:26:00	0
2009-04-29	16:27:00	0
2009-04-29	16:28:00	0
2009-04-29	16:29:00	0
2009-04-29	16:30:00	0
2009-04-29	16:31:00	0
2009-04-29	16:32:00	0
2009-04-29	16:33:00	0
2009-04-29	16:34:00	0
2009-04-29	16:35:00	0
2009-04-29	16:36:00	0
2009-04-29	16:37:00	0
2009-04-29	16:38:00	0
2009-04-29	16:39:00	0
2009-04-29	16:40:00	0
2009-04-29	16:41:00	0
2009-04-29	16:42:00	0
2009-04-29	16:43:00	0
2009-04-29	16:44:00	0
2009-04-29	16:45:00	0
2009-04-29	16:46:00	0
2009-04-29	16:47:00	0
2009-04-29	16:48:00	0
2009-04-29	16:49:00	0
2009-04-29	16:50:00	0
2009-04-29	16:51:00	0
2009-04-29	16:52:00	0
2009-04-29	16:53:00	0
2009-04-29	16:54:00	0
2009-04-29	16:55:00	0
2009-04-29	16:56:00	0
2009-04-29	16:57:00	0
2009-04-29	16:58:00	0
2009-04-29	16:59:00	0
2009-04-29	17:00:00	0
2009-04-29	17:01:00	0
2009-04-29	17:02:00	0
2009-04-29	17:03:00	0
2009-04-29	17:04:00	0
2009-04-29	17:05:00	0
2009-04-29	17:06:00	0
2009-04-29	17:07:00	0
2009-04-29	17:08:00	0
2009-04-29	17:09:00	0
2009-04-29	17:10:00	0
2009-04-29	17:11:00	0
2009-04-29	17:12:00	0
2009-04-29	17:13:00	0
2009-04-29	17:14:00	0
2009-04-29	17:15:00	0
2009-04-29	17:16:00	0
2009-04-29	17:17:00	0
2009-04-29	17:18:00	0
2009-04-29	17:19:00	0
2009-04-29	17:20:00	0
2009-04-29	17:21:00	0
2009-04-29	17:22:00	0
2009-04-29	17:23:00	0
2009-04-29	17:24:00	0
2009-04-29	17:25:00	0
2009-04-29	17:26:00	0
2009-04-29	17:27:00	0
2009-04-29	17:28:00	0
2009-04-29	17:29:00	0
2009-04-29	17:30:00	0
2009-04-29	17:31:00	0
2009-04-29	17:32:00	0
2009-04-29	17:33:00	0
2009-04-29	17:34:00	0
2009-04-29	17:35:00	0
2009-04-29	17:36:00	0
2009-04-29	17:37:00	0
2009-04-29	17:38:00	0
2009-04-29	17:39:00	0
2009-04-29	17:40:00	0
2009-04-29	17:41:00	0
2009-04-29	17:42:00	0
2009-04-29	17:43:00	0
2009-04-29	17:44:00	0
2009-04-29	17:45:00	0
2009-04-29	17:46:00	0
2009-04-29	17:47:00	0
2009-04-29	17:48:00	0
2009-04-29	17:49:00	0
2009-04-29	17:50:00	0
2009-04-29	17:51:00	0
2009-04-29	17:52:00	0
2009-04-29	17:53:00	0
2009-04-29	17:54:00	0
2009-04-29	17:55:00	0
2009-04-29	17:56:00	0
2009-04-29	17:57:00	0
2009-04-29	17:58:00	0
2009-04-29	17:59:00	0
2009-04-29	18:00:00	0
2009-04-29	18:01:00	12
2009-04-29	18:02:00	0
2009-04-29	18:03:00	0
2009-04-29	18:04:00	25
2009-04-29	18:05:00	135
2009-04-29	18:06:00	0
2009-04-29	18:07:00	0
2009-04-29	18:08:00	409
2009-04-29	18:09:00	0
2009-04-29	18:10:00	49
2009-04-29	18:11:00	913
2009-04-29	18:12:00	357
2009-04-29	18:13:00	219
2009-04-29	18:14:00	460
2009-04-29	18:15:00	293
2009-04-29	18:16:00	322
2009-04-29	18:17:00	0
2009-04-29	18:18:00	0
2009-04-29	18:19:00	86
2009-04-29	18:20:00	12
2009-04-29	18:21:00	25
2009-04-29	18:22:00	0
2009-04-29	18:23:00	0
2009-04-29	18:24:00	86
2009-04-29	18:25:00	86
2009-04-29	18:26:00	0
2009-04-29	18:27:00	0
2009-04-29	18:28:00	263
2009-04-29	18:29:00	635
2009-04-29	18:30:00	443
2009-04-29	18:31:00	0
2009-04-29	18:32:00	0
2009-04-29	18:33:00	204
2009-04-29	18:34:00	0
2009-04-29	18:35:00	0
2009-04-29	18:36:00	0
2009-04-29	18:37:00	37
2009-04-29	18:38:00	135
2009-04-29	18:39:00	0
2009-04-29	18:40:00	0
2009-04-29	18:41:00	0
2009-04-29	18:42:00	0
2009-04-29	18:43:00	517
2009-04-29	18:44:00	278
2009-04-29	18:45:00	0
2009-04-29	18:46:00	0
2009-04-29	18:47:00	0
2009-04-29	18:48:00	74
2009-04-29	18:49:00	340
2009-04-29	18:50:00	62
2009-04-29	18:51:00	0
2009-04-29	18:52:00	0
2009-04-29	18:53:00	0
2009-04-29	18:54:00	49
2009-04-29	18:55:00	0
2009-04-29	18:56:00	0
2009-04-29	18:57:00	12
2009-04-29	18:58:00	746
2009-04-29	18:59:00	175
2009-04-29	19:00:00	0
2009-04-29	19:01:00	0
2009-04-29	19:02:00	0
2009-04-29	19:03:00	0
2009-04-29	19:04:00	0
2009-04-29	19:05:00	0
2009-04-29	19:06:00	0
2009-04-29	19:07:00	0
2009-04-29	19:08:00	0
2009-04-29	19:09:00	0
2009-04-29	19:10:00	0
2009-04-29	19:11:00	0
2009-04-29	19:12:00	0
2009-04-29	19:13:00	0
2009-04-29	19:14:00	0
2009-04-29	19:15:00	0
2009-04-29	19:16:00	0
2009-04-29	19:17:00	0
2009-04-29	19:18:00	0
2009-04-29	19:19:00	0
2009-04-29	19:20:00	0
2009-04-29	19:21:00	98
2009-04-29	19:22:00	74
2009-04-29	19:23:00	25
2009-04-29	19:24:00	37
2009-04-29	19:25:00	0
2009-04-29	19:26:00	0
2009-04-29	19:27:00	635
2009-04-29	19:28:00	0
2009-04-29	19:29:00	0
2009-04-29	19:30:00	25
2009-04-29	19:31:00	0
2009-04-29	19:32:00	0
2009-04-29	19:33:00	160
2009-04-29	19:34:00	0
2009-04-29	19:35:00	0
2009-04-29	19:36:00	0
2009-04-29	19:37:00	37
2009-04-29	19:38:00	0
2009-04-29	19:39:00	0
2009-04-29	19:40:00	0
2009-04-29	19:41:00	0
2009-04-29	19:42:00	0
2009-04-29	19:43:00	0
2009-04-29	19:44:00	0
2009-04-29	19:45:00	0
2009-04-29	19:46:00	0
2009-04-29	19:47:00	0
2009-04-29	19:48:00	0
2009-04-29	19:49:00	0
2009-04-29	19:50:00	0
2009-04-29	19:51:00	25
2009-04-29	19:52:00	0
2009-04-29	19:53:00	98
2009-04-29	19:54:00	0
2009-04-29	19:55:00	0
2009-04-29	19:56:00	0
2009-04-29	19:57:00	0
2009-04-29	19:58:00	0
2009-04-29	19:59:00	0
2009-04-29	20:00:00	0
2009-04-29	20:01:00	460
2009-04-29	20:02:00	25
2009-04-29	20:03:00	0
2009-04-29	20:04:00	12
2009-04-29	20:05:00	25
2009-04-29	20:06:00	25
2009-04-29	20:07:00	12
2009-04-29	20:08:00	0
2009-04-29	20:09:00	12
2009-04-29	20:10:00	12
2009-04-29	20:11:00	135
2009-04-29	20:12:00	111
2009-04-29	20:13:00	234
2009-04-29	20:14:00	322
2009-04-29	20:15:00	1792
2009-04-29	20:16:00	1570
2009-04-29	20:17:00	374
2009-04-29	20:18:00	111
2009-04-29	20:19:00	12
2009-04-29	20:20:00	0
2009-04-29	20:21:00	0
2009-04-29	20:22:00	148
2009-04-29	20:23:00	1184
2009-04-29	20:24:00	1467
2009-04-29	20:25:00	1502
2009-04-29	20:26:00	1467
2009-04-29	20:27:00	702
2009-04-29	20:28:00	679
2009-04-29	20:29:00	1679
2009-04-29	20:30:00	1305
2009-04-29	20:31:00	1605
2009-04-29	20:32:00	1467
2009-04-29	20:33:00	1792
2009-04-29	20:34:00	1642
2009-04-29	20:35:00	1679
2009-04-29	20:36:00	1994
2009-04-29	20:37:00	1433
2009-04-29	20:38:00	1831
2009-04-29	20:39:00	1570
2009-04-29	20:40:00	2166
2009-04-29	20:41:00	1243
2009-04-29	20:42:00	1184
2009-04-29	20:43:00	679
2009-04-29	20:44:00	190
2009-04-29	20:45:00	25
2009-04-29	20:46:00	62
2009-04-29	20:47:00	12
2009-04-29	20:48:00	12
2009-04-29	20:49:00	0
2009-04-29	20:50:00	25
2009-04-29	20:51:00	0
2009-04-29	20:52:00	0
2009-04-29	20:53:00	0
2009-04-29	20:54:00	12
2009-04-29	20:55:00	25
2009-04-29	20:56:00	0
2009-04-29	20:57:00	0
2009-04-29	20:58:00	12
2009-04-29	20:59:00	0
2009-04-29	21:00:00	0
2009-04-29	21:01:00	0
2009-04-29	21:02:00	0
2009-04-29	21:03:00	0
2009-04-29	21:04:00	0
2009-04-29	21:05:00	12
2009-04-29	21:06:00	0
2009-04-29	21:07:00	0
2009-04-29	21:08:00	0
2009-04-29	21:09:00	12
2009-04-29	21:10:00	0
2009-04-29	21:11:00	0
2009-04-29	21:12:00	0
2009-04-29	21:13:00	0
2009-04-29	21:14:00	0
2009-04-29	21:15:00	0
2009-04-29	21:16:00	12
2009-04-29	21:17:00	0
2009-04-29	21:18:00	0
2009-04-29	21:19:00	0
2009-04-29	21:20:00	0
2009-04-29	21:21:00	0
2009-04-29	21:22:00	0
2009-04-29	21:23:00	0
2009-04-29	21:24:00	25
2009-04-29	21:25:00	25
2009-04-29	21:26:00	357
2009-04-29	21:27:00	25
2009-04-29	21:28:00	25
2009-04-29	21:29:00	0
2009-04-29	21:30:00	135
2009-04-29	21:31:00	1098
2009-04-29	21:32:00	1716
2009-04-29	21:33:00	111
2009-04-29	21:34:00	357
2009-04-29	21:35:00	263
2009-04-29	21:36:00	25
2009-04-29	21:37:00	25
2009-04-29	21:38:00	37
2009-04-29	21:39:00	0
2009-04-29	21:40:00	204
2009-04-29	21:41:00	37
2009-04-29	21:42:00	12
2009-04-29	21:43:00	12
2009-04-29	21:44:00	37
2009-04-29	21:45:00	0
2009-04-29	21:46:00	0
2009-04-29	21:47:00	0
2009-04-29	21:48:00	0
2009-04-29	21:49:00	0
2009-04-29	21:50:00	0
2009-04-29	21:51:00	12
2009-04-29	21:52:00	0
2009-04-29	21:53:00	25
2009-04-29	21:54:00	0
2009-04-29	21:55:00	0
2009-04-29	21:56:00	0
2009-04-29	21:57:00	0
2009-04-29	21:58:00	0
2009-04-29	21:59:00	0
2009-04-29	22:00:00	0
2009-04-29	22:01:00	0
2009-04-29	22:02:00	0
2009-04-29	22:03:00	0
2009-04-29	22:04:00	0
2009-04-29	22:05:00	0
2009-04-29	22:06:00	0
2009-04-29	22:07:00	0
2009-04-29	22:08:00	12
2009-04-29	22:09:00	0
2009-04-29	22:10:00	357
2009-04-29	22:11:00	839
2009-04-29	22:12:00	1502
2009-04-29	22:13:00	1605
2009-04-29	22:14:00	1214
2009-04-29	22:15:00	1753
2009-04-29	22:16:00	1570
2009-04-29	22:17:00	724
2009-04-29	22:18:00	148
2009-04-29	22:19:00	37
2009-04-29	22:20:00	25
2009-04-29	22:21:00	49
2009-04-29	22:22:00	74
2009-04-29	22:23:00	98
2009-04-29	22:24:00	135
2009-04-29	22:25:00	12
2009-04-29	22:26:00	74
2009-04-29	22:27:00	12
2009-04-29	22:28:00	25
2009-04-29	22:29:00	12
2009-04-29	22:30:00	49
2009-04-29	22:31:00	0
2009-04-29	22:32:00	0
2009-04-29	22:33:00	0
2009-04-29	22:34:00	0
2009-04-29	22:35:00	0
2009-04-29	22:36:00	0
2009-04-29	22:37:00	0
2009-04-29	22:38:00	0
2009-04-29	22:39:00	0
2009-04-29	22:40:00	0
2009-04-29	22:41:00	0
2009-04-29	22:42:00	25
2009-04-29	22:43:00	0
2009-04-29	22:44:00	0
2009-04-29	22:45:00	0
2009-04-29	22:46:00	0
2009-04-29	22:47:00	0
2009-04-29	22:48:00	0
2009-04-29	22:49:00	0
2009-04-29	22:50:00	0
2009-04-29	22:51:00	0
2009-04-29	22:52:00	0
2009-04-29	22:53:00	0
2009-04-29	22:54:00	0
2009-04-29	22:55:00	0
2009-04-29	22:56:00	0
2009-04-29	22:57:00	0
2009-04-29	22:58:00	0
2009-04-29	22:59:00	0
2009-04-29	23:00:00	0
2009-04-29	23:01:00	0
2009-04-29	23:02:00	25
2009-04-29	23:03:00	0
2009-04-29	23:04:00	0
2009-04-29	23:05:00	0
2009-04-29	23:06:00	263
2009-04-29	23:07:00	49
2009-04-29	23:08:00	135
2009-04-29	23:09:00	0
2009-04-29	23:10:00	0
2009-04-29	23:11:00	0
2009-04-29	23:12:00	74
2009-04-29	23:13:00	0
2009-04-29	23:14:00	0
2009-04-29	23:15:00	0
2009-04-29	23:16:00	0
2009-04-29	23:17:00	0
2009-04-29	23:18:00	0
2009-04-29	23:19:00	0
2009-04-29	23:20:00	0
2009-04-29	23:21:00	0
2009-04-29	23:22:00	0
2009-04-29	23:23:00	0
2009-04-29	23:24:00	0
2009-04-29	23:25:00	0
2009-04-29	23:26:00	0
2009-04-29	23:27:00	0
2009-04-29	23:28:00	25
2009-04-29	23:29:00	0
2009-04-29	23:30:00	0
2009-04-29	23:31:00	0
2009-04-29	23:32:00	0
2009-04-29	23:33:00	0
2009-04-29	23:34:00	37
2009-04-29	23:35:00	0
2009-04-29	23:36:00	0
2009-04-29	23:37:00	0
2009-04-29	23:38:00	0
2009-04-29	23:39:00	0
2009-04-29	23:40:00	0
2009-04-29	23:41:00	0
2009-04-29	23:42:00	0
2009-04-29	23:43:00	0
2009-04-29	23:44:00	0
2009-04-29	23:45:00	0
2009-04-29	23:46:00	0
2009-04-29	23:47:00	0
2009-04-29	23:48:00	0
2009-04-29	23:49:00	0
2009-04-29	23:50:00	0
2009-04-29	23:51:00	0
2009-04-29	23:52:00	0
2009-04-29	23:53:00	0
2009-04-29	23:54:00	0
2009-04-29	23:55:00	0
2009-04-29	23:56:00	0
2009-04-29	23:57:00	37
2009-04-29	23:58:00	0
2009-04-29	23:59:00	0
2009-04-30	00:00:00	0
2009-04-30	00:01:00	0
2009-04-30	00:02:00	0
2009-04-30	00:03:00	0
2009-04-30	00:04:00	0
2009-04-30	00:05:00	0
2009-04-30	00:06:00	0
2009-04-30	00:07:00	0
2009-04-30	00:08:00	0
2009-04-30	00:09:00	0
2009-04-30	00:10:00	0
2009-04-30	00:11:00	0
2009-04-30	00:12:00	0
2009-04-30	00:13:00	0
2009-04-30	00:14:00	0
2009-04-30	00:15:00	0
2009-04-30	00:16:00	0
2009-04-30	00:17:00	0
2009-04-30	00:18:00	0
2009-04-30	00:19:00	0
2009-04-30	00:20:00	0
2009-04-30	00:21:00	0
2009-04-30	00:22:00	0
2009-04-30	00:23:00	49
2009-04-30	00:24:00	49
2009-04-30	00:25:00	0
2009-04-30	00:26:00	0
2009-04-30	00:27:00	0
2009-04-30	00:28:00	0
2009-04-30	00:29:00	0
2009-04-30	00:30:00	0
2009-04-30	00:31:00	0
2009-04-30	00:32:00	0
2009-04-30	00:33:00	160
2009-04-30	00:34:00	204
2009-04-30	00:35:00	443
2009-04-30	00:36:00	25
2009-04-30	00:37:00	0
2009-04-30	00:38:00	12
2009-04-30	00:39:00	0
2009-04-30	00:40:00	0
2009-04-30	00:41:00	0
2009-04-30	00:42:00	160
2009-04-30	00:43:00	25
2009-04-30	00:44:00	0
2009-04-30	00:45:00	0
2009-04-30	00:46:00	0
2009-04-30	00:47:00	0
2009-04-30	00:48:00	0
2009-04-30	00:49:00	0
2009-04-30	00:50:00	0
2009-04-30	00:51:00	0
2009-04-30	00:52:00	0
2009-04-30	00:53:00	0
2009-04-30	00:54:00	0
2009-04-30	00:55:00	0
2009-04-30	00:56:00	0
2009-04-30	00:57:00	0
2009-04-30	00:58:00	0
2009-04-30	00:59:00	0
2009-04-30	01:00:00	0
2009-04-30	01:01:00	0
2009-04-30	01:02:00	0
2009-04-30	01:03:00	0
2009-04-30	01:04:00	0
2009-04-30	01:05:00	0
2009-04-30	01:06:00	0
2009-04-30	01:07:00	0
2009-04-30	01:08:00	0
2009-04-30	01:09:00	0
2009-04-30	01:10:00	0
2009-04-30	01:11:00	0
2009-04-30	01:12:00	0
2009-04-30	01:13:00	0
2009-04-30	01:14:00	0
2009-04-30	01:15:00	0
2009-04-30	01:16:00	0
2009-04-30	01:17:00	0
2009-04-30	01:18:00	0
2009-04-30	01:19:00	0
2009-04-30	01:20:00	0
2009-04-30	01:21:00	0
2009-04-30	01:22:00	0
2009-04-30	01:23:00	0
2009-04-30	01:24:00	0
2009-04-30	01:25:00	0
2009-04-30	01:26:00	0
2009-04-30	01:27:00	0
2009-04-30	01:28:00	0
2009-04-30	01:29:00	0
2009-04-30	01:30:00	0
2009-04-30	01:31:00	0
2009-04-30	01:32:00	0
2009-04-30	01:33:00	0
2009-04-30	01:34:00	0
2009-04-30	01:35:00	0
2009-04-30	01:36:00	0
2009-04-30	01:37:00	0
2009-04-30	01:38:00	0
2009-04-30	01:39:00	0
2009-04-30	01:40:00	0
2009-04-30	01:41:00	0
2009-04-30	01:42:00	135
2009-04-30	01:43:00	204
2009-04-30	01:44:00	49
2009-04-30	01:45:00	0
2009-04-30	01:46:00	0
2009-04-30	01:47:00	0
2009-04-30	01:48:00	0
2009-04-30	01:49:00	0
2009-04-30	01:50:00	0
2009-04-30	01:51:00	0
2009-04-30	01:52:00	0
2009-04-30	01:53:00	0
2009-04-30	01:54:00	0
2009-04-30	01:55:00	0
2009-04-30	01:56:00	0
2009-04-30	01:57:00	0
2009-04-30	01:58:00	0
2009-04-30	01:59:00	0
2009-04-30	02:00:00	0
2009-04-30	02:01:00	0
2009-04-30	02:02:00	0
2009-04-30	02:03:00	0
2009-04-30	02:04:00	0
2009-04-30	02:05:00	0
2009-04-30	02:06:00	293
2009-04-30	02:07:00	340
2009-04-30	02:08:00	175
2009-04-30	02:09:00	111
2009-04-30	02:10:00	409
2009-04-30	02:11:00	0
2009-04-30	02:12:00	49
2009-04-30	02:13:00	0
2009-04-30	02:14:00	37
2009-04-30	02:15:00	0
2009-04-30	02:16:00	0
2009-04-30	02:17:00	0
2009-04-30	02:18:00	0
2009-04-30	02:19:00	0
2009-04-30	02:20:00	25
2009-04-30	02:21:00	0
2009-04-30	02:22:00	0
2009-04-30	02:23:00	0
2009-04-30	02:24:00	0
2009-04-30	02:25:00	0
2009-04-30	02:26:00	0
2009-04-30	02:27:00	0
2009-04-30	02:28:00	0
2009-04-30	02:29:00	0
2009-04-30	02:30:00	0
2009-04-30	02:31:00	0
2009-04-30	02:32:00	0
2009-04-30	02:33:00	0
2009-04-30	02:34:00	0
2009-04-30	02:35:00	0
2009-04-30	02:36:00	0
2009-04-30	02:37:00	0
2009-04-30	02:38:00	0
2009-04-30	02:39:00	0
2009-04-30	02:40:00	0
2009-04-30	02:41:00	0
2009-04-30	02:42:00	0
2009-04-30	02:43:00	0
2009-04-30	02:44:00	0
2009-04-30	02:45:00	0
2009-04-30	02:46:00	0
2009-04-30	02:47:00	0
2009-04-30	02:48:00	0
2009-04-30	02:49:00	0
2009-04-30	02:50:00	0
2009-04-30	02:51:00	0
2009-04-30	02:52:00	0
2009-04-30	02:53:00	0
2009-04-30	02:54:00	0
2009-04-30	02:55:00	0
2009-04-30	02:56:00	0
2009-04-30	02:57:00	0
2009-04-30	02:58:00	0
2009-04-30	02:59:00	0
2009-04-30	03:00:00	0
2009-04-30	03:01:00	0
2009-04-30	03:02:00	0
2009-04-30	03:03:00	0
2009-04-30	03:04:00	0
2009-04-30	03:05:00	0
2009-04-30	03:06:00	0
2009-04-30	03:07:00	0
2009-04-30	03:08:00	0
2009-04-30	03:09:00	0
2009-04-30	03:10:00	0
2009-04-30	03:11:00	0
2009-04-30	03:12:00	74
2009-04-30	03:13:00	0
2009-04-30	03:14:00	0
2009-04-30	03:15:00	0
2009-04-30	03:16:00	0
2009-04-30	03:17:00	0
2009-04-30	03:18:00	0
2009-04-30	03:19:00	0
2009-04-30	03:20:00	0
2009-04-30	03:21:00	0
2009-04-30	03:22:00	0
2009-04-30	03:23:00	0
2009-04-30	03:24:00	160
2009-04-30	03:25:00	308
2009-04-30	03:26:00	0
2009-04-30	03:27:00	0
2009-04-30	03:28:00	0
2009-04-30	03:29:00	0
2009-04-30	03:30:00	0
2009-04-30	03:31:00	0
2009-04-30	03:32:00	0
2009-04-30	03:33:00	0
2009-04-30	03:34:00	0
2009-04-30	03:35:00	0
2009-04-30	03:36:00	0
2009-04-30	03:37:00	0
2009-04-30	03:38:00	0
2009-04-30	03:39:00	0
2009-04-30	03:40:00	0
2009-04-30	03:41:00	0
2009-04-30	03:42:00	0
2009-04-30	03:43:00	0
2009-04-30	03:44:00	0
2009-04-30	03:45:00	0
2009-04-30	03:46:00	0
2009-04-30	03:47:00	0
2009-04-30	03:48:00	0
2009-04-30	03:49:00	0
2009-04-30	03:50:00	0
2009-04-30	03:51:00	0
2009-04-30	03:52:00	0
2009-04-30	03:53:00	0
2009-04-30	03:54:00	0
2009-04-30	03:55:00	0
2009-04-30	03:56:00	0
2009-04-30	03:57:00	0
2009-04-30	03:58:00	0
2009-04-30	03:59:00	0
2009-04-30	04:00:00	0
2009-04-30	04:01:00	12
2009-04-30	04:02:00	0
2009-04-30	04:03:00	0
2009-04-30	04:04:00	0
2009-04-30	04:05:00	0
2009-04-30	04:06:00	0
2009-04-30	04:07:00	0
2009-04-30	04:08:00	409
2009-04-30	04:09:00	234
2009-04-30	04:10:00	0
2009-04-30	04:11:00	0
2009-04-30	04:12:00	0
2009-04-30	04:13:00	0
2009-04-30	04:14:00	0
2009-04-30	04:15:00	0
2009-04-30	04:16:00	0
2009-04-30	04:17:00	0
2009-04-30	04:18:00	0
2009-04-30	04:19:00	0
2009-04-30	04:20:00	0
2009-04-30	04:21:00	0
2009-04-30	04:22:00	0
2009-04-30	04:23:00	0
2009-04-30	04:24:00	0
2009-04-30	04:25:00	0
2009-04-30	04:26:00	0
2009-04-30	04:27:00	0
2009-04-30	04:28:00	0
2009-04-30	04:29:00	0
2009-04-30	04:30:00	0
2009-04-30	04:31:00	0
2009-04-30	04:32:00	0
2009-04-30	04:33:00	0
2009-04-30	04:34:00	0
2009-04-30	04:35:00	0
2009-04-30	04:36:00	37
2009-04-30	04:37:00	0
2009-04-30	04:38:00	0
2009-04-30	04:39:00	0
2009-04-30	04:40:00	0
2009-04-30	04:41:00	0
2009-04-30	04:42:00	0
2009-04-30	04:43:00	0
2009-04-30	04:44:00	0
2009-04-30	04:45:00	0
2009-04-30	04:46:00	0
2009-04-30	04:47:00	0
2009-04-30	04:48:00	0
2009-04-30	04:49:00	0
2009-04-30	04:50:00	0
2009-04-30	04:51:00	0
2009-04-30	04:52:00	0
2009-04-30	04:53:00	0
2009-04-30	04:54:00	0
2009-04-30	04:55:00	0
2009-04-30	04:56:00	49
2009-04-30	04:57:00	0
2009-04-30	04:58:00	0
2009-04-30	04:59:00	0
2009-04-30	05:00:00	0
2009-04-30	05:01:00	0
2009-04-30	05:02:00	0
2009-04-30	05:03:00	0
2009-04-30	05:04:00	0
2009-04-30	05:05:00	0
2009-04-30	05:06:00	0
2009-04-30	05:07:00	0
2009-04-30	05:08:00	0
2009-04-30	05:09:00	0
2009-04-30	05:10:00	0
2009-04-30	05:11:00	0
2009-04-30	05:12:00	0
2009-04-30	05:13:00	0
2009-04-30	05:14:00	0
2009-04-30	05:15:00	0
2009-04-30	05:16:00	0
2009-04-30	05:17:00	0
2009-04-30	05:18:00	0
2009-04-30	05:19:00	0
2009-04-30	05:20:00	0
2009-04-30	05:21:00	0
2009-04-30	05:22:00	0
2009-04-30	05:23:00	0
2009-04-30	05:24:00	37
2009-04-30	05:25:00	0
2009-04-30	05:26:00	0
2009-04-30	05:27:00	0
2009-04-30	05:28:00	0
2009-04-30	05:29:00	0
2009-04-30	05:30:00	0
2009-04-30	05:31:00	0
2009-04-30	05:32:00	0
2009-04-30	05:33:00	0
2009-04-30	05:34:00	0
2009-04-30	05:35:00	478
2009-04-30	05:36:00	148
2009-04-30	05:37:00	37
2009-04-30	05:38:00	148
2009-04-30	05:39:00	49
2009-04-30	05:40:00	0
2009-04-30	05:41:00	0
2009-04-30	05:42:00	0
2009-04-30	05:43:00	0
2009-04-30	05:44:00	0
2009-04-30	05:45:00	0
2009-04-30	05:46:00	0
2009-04-30	05:47:00	0
2009-04-30	05:48:00	0
2009-04-30	05:49:00	0
2009-04-30	05:50:00	0
2009-04-30	05:51:00	0
2009-04-30	05:52:00	0
2009-04-30	05:53:00	0
2009-04-30	05:54:00	0
2009-04-30	05:55:00	0
2009-04-30	05:56:00	0
2009-04-30	05:57:00	0
2009-04-30	05:58:00	0
2009-04-30	05:59:00	0
2009-04-30	06:00:00	0
2009-04-30	06:01:00	0
2009-04-30	06:02:00	0
2009-04-30	06:03:00	0
2009-04-30	06:04:00	0
2009-04-30	06:05:00	0
2009-04-30	06:06:00	0
2009-04-30	06:07:00	0
2009-04-30	06:08:00	98
2009-04-30	06:09:00	37
2009-04-30	06:10:00	49
2009-04-30	06:11:00	0
2009-04-30	06:12:00	0
2009-04-30	06:13:00	0
2009-04-30	06:14:00	0
2009-04-30	06:15:00	0
2009-04-30	06:16:00	0
2009-04-30	06:17:00	0
2009-04-30	06:18:00	0
2009-04-30	06:19:00	0
2009-04-30	06:20:00	0
2009-04-30	06:21:00	0
2009-04-30	06:22:00	0
2009-04-30	06:23:00	0
2009-04-30	06:24:00	0
2009-04-30	06:25:00	12
2009-04-30	06:26:00	2447
2009-04-30	06:27:00	2351
2009-04-30	06:28:00	635
2009-04-30	06:29:00	37
2009-04-30	06:30:00	0
2009-04-30	06:31:00	0
2009-04-30	06:32:00	25
2009-04-30	06:33:00	86
2009-04-30	06:34:00	86
2009-04-30	06:35:00	357
2009-04-30	06:36:00	0
2009-04-30	06:37:00	0
2009-04-30	06:38:00	0
2009-04-30	06:39:00	249
2009-04-30	06:40:00	357
2009-04-30	06:41:00	0
2009-04-30	06:42:00	160
2009-04-30	06:43:00	98
2009-04-30	06:44:00	49
2009-04-30	06:45:00	49
2009-04-30	06:46:00	25
2009-04-30	06:47:00	49
2009-04-30	06:48:00	25
2009-04-30	06:49:00	12
2009-04-30	06:50:00	293
2009-04-30	06:51:00	0
2009-04-30	06:52:00	0
2009-04-30	06:53:00	0
2009-04-30	06:54:00	0
2009-04-30	06:55:00	0
2009-04-30	06:56:00	0
2009-04-30	06:57:00	0
2009-04-30	06:58:00	0
2009-04-30	06:59:00	0
2009-04-30	07:00:00	0
2009-04-30	07:01:00	0
2009-04-30	07:02:00	0
2009-04-30	07:03:00	293
2009-04-30	07:04:00	0
2009-04-30	07:05:00	0
2009-04-30	07:06:00	0
2009-04-30	07:07:00	0
2009-04-30	07:08:00	0
2009-04-30	07:09:00	0
2009-04-30	07:10:00	0
2009-04-30	07:11:00	0
2009-04-30	07:12:00	0
2009-04-30	07:13:00	0
2009-04-30	07:14:00	0
2009-04-30	07:15:00	0
2009-04-30	07:16:00	0
2009-04-30	07:17:00	0
2009-04-30	07:18:00	0
2009-04-30	07:19:00	0
2009-04-30	07:20:00	0
2009-04-30	07:21:00	0
2009-04-30	07:22:00	0
2009-04-30	07:23:00	0
2009-04-30	07:24:00	25
2009-04-30	07:25:00	0
2009-04-30	07:26:00	0
2009-04-30	07:27:00	0
2009-04-30	07:28:00	0
2009-04-30	07:29:00	0
2009-04-30	07:30:00	0
2009-04-30	07:31:00	0
2009-04-30	07:32:00	0
2009-04-30	07:33:00	0
2009-04-30	07:34:00	0
2009-04-30	07:35:00	0
2009-04-30	07:36:00	0
2009-04-30	07:37:00	0
2009-04-30	07:38:00	0
2009-04-30	07:39:00	0
2009-04-30	07:40:00	0
2009-04-30	07:41:00	25
2009-04-30	07:42:00	0
2009-04-30	07:43:00	0
2009-04-30	07:44:00	0
2009-04-30	07:45:00	0
2009-04-30	07:46:00	0
2009-04-30	07:47:00	0
2009-04-30	07:48:00	0
2009-04-30	07:49:00	0
2009-04-30	07:50:00	0
2009-04-30	07:51:00	98
2009-04-30	07:52:00	111
2009-04-30	07:53:00	0
2009-04-30	07:54:00	0
2009-04-30	07:55:00	0
2009-04-30	07:56:00	0
2009-04-30	07:57:00	0
2009-04-30	07:58:00	0
2009-04-30	07:59:00	0
2009-04-30	08:00:00	0
2009-04-30	08:01:00	0
2009-04-30	08:02:00	0
2009-04-30	08:03:00	12
2009-04-30	08:04:00	25
2009-04-30	08:05:00	0
2009-04-30	08:06:00	0
2009-04-30	08:07:00	0
2009-04-30	08:08:00	0
2009-04-30	08:09:00	0
2009-04-30	08:10:00	0
2009-04-30	08:11:00	0
2009-04-30	08:12:00	0
2009-04-30	08:13:00	0
2009-04-30	08:14:00	12
2009-04-30	08:15:00	0
2009-04-30	08:16:00	0
2009-04-30	08:17:00	0
2009-04-30	08:18:00	0
2009-04-30	08:19:00	0
2009-04-30	08:20:00	0
2009-04-30	08:21:00	0
2009-04-30	08:22:00	0
2009-04-30	08:23:00	0
2009-04-30	08:24:00	0
2009-04-30	08:25:00	0
2009-04-30	08:26:00	0
2009-04-30	08:27:00	0
2009-04-30	08:28:00	0
2009-04-30	08:29:00	0
2009-04-30	08:30:00	0
2009-04-30	08:31:00	74
2009-04-30	08:32:00	37
2009-04-30	08:33:00	37
2009-04-30	08:34:00	0
2009-04-30	08:35:00	0
2009-04-30	08:36:00	0
2009-04-30	08:37:00	0
2009-04-30	08:38:00	0
2009-04-30	08:39:00	0
2009-04-30	08:40:00	0
2009-04-30	08:41:00	0
2009-04-30	08:42:00	0
2009-04-30	08:43:00	0
2009-04-30	08:44:00	0
2009-04-30	08:45:00	0
2009-04-30	08:46:00	0
2009-04-30	08:47:00	0
2009-04-30	08:48:00	0
2009-04-30	08:49:00	0
2009-04-30	08:50:00	0
2009-04-30	08:51:00	175
2009-04-30	08:52:00	148
2009-04-30	08:53:00	0
2009-04-30	08:54:00	0
2009-04-30	08:55:00	0
2009-04-30	08:56:00	0
2009-04-30	08:57:00	0
2009-04-30	08:58:00	0
2009-04-30	08:59:00	0
2009-04-30	09:00:00	0
2009-04-30	09:01:00	0
2009-04-30	09:02:00	0
2009-04-30	09:03:00	0
2009-04-30	09:04:00	0
2009-04-30	09:05:00	0
2009-04-30	09:06:00	0
2009-04-30	09:07:00	0
2009-04-30	09:08:00	37
[truncated: 19,611 more rows]

[truncated: 3 more sheets: 5.13.09, 5.27.09, 6.10.09]
