# Supplementary material for: Initial evaluation of nighttime restlessness in a naturally occurring canine model of osteoarthritis pain
Source: PeerJ. 2015 Feb 17;3:e772. doi: 10.7717/peerj.772 (PMC4340376; doi:10.7717/peerj.772)
Supplement: Supplemental Information 35 [file peerj-03-772-s035.xlsx]

## Sheet: Office Visits
Visit Date	Visit Number
2009-03-03 06:00:00	1
2009-03-19 06:00:00	2
2009-04-02 06:00:00	3
2009-04-16 06:00:00	4
2009-04-30 06:00:00	5
2009-05-14 06:00:00	6

## Sheet: 35_Data
Segment	DateTime	Activity	Hour	Quadrant	Study Day	Weekday
1	2009-03-12 06:01:00	460	6	2	9	5
1	2009-03-12 06:02:00	175	6	2	9	5
1	2009-03-12 06:03:00	679	6	2	9	5
1	2009-03-12 06:04:00	938	6	2	9	5
1	2009-03-12 06:05:00	576	6	2	9	5
1	2009-03-12 06:06:00	635	6	2	9	5
1	2009-03-12 06:07:00	219	6	2	9	5
1	2009-03-12 06:08:00	0	6	2	9	5
1	2009-03-12 06:09:00	12	6	2	9	5
1	2009-03-12 06:10:00	0	6	2	9	5
1	2009-03-12 06:11:00	0	6	2	9	5
1	2009-03-12 06:12:00	0	6	2	9	5
1	2009-03-12 06:13:00	0	6	2	9	5
1	2009-03-12 06:14:00	0	6	2	9	5
1	2009-03-12 06:15:00	0	6	2	9	5
1	2009-03-12 06:16:00	0	6	2	9	5
1	2009-03-12 06:17:00	0	6	2	9	5
1	2009-03-12 06:18:00	0	6	2	9	5
1	2009-03-12 06:19:00	0	6	2	9	5
1	2009-03-12 06:20:00	0	6	2	9	5
1	2009-03-12 06:21:00	0	6	2	9	5
1	2009-03-12 06:22:00	0	6	2	9	5
1	2009-03-12 06:23:00	0	6	2	9	5
1	2009-03-12 06:24:00	0	6	2	9	5
1	2009-03-12 06:25:00	0	6	2	9	5
1	2009-03-12 06:26:00	0	6	2	9	5
1	2009-03-12 06:27:00	0	6	2	9	5
1	2009-03-12 06:28:00	0	6	2	9	5
1	2009-03-12 06:29:00	0	6	2	9	5
1	2009-03-12 06:30:00	0	6	2	9	5
1	2009-03-12 06:31:00	0	6	2	9	5
1	2009-03-12 06:32:00	0	6	2	9	5
1	2009-03-12 06:33:00	12	6	2	9	5
1	2009-03-12 06:34:00	12	6	2	9	5
1	2009-03-12 06:35:00	0	6	2	9	5
1	2009-03-12 06:36:00	0	6	2	9	5
1	2009-03-12 06:37:00	0	6	2	9	5
1	2009-03-12 06:38:00	0	6	2	9	5
1	2009-03-12 06:39:00	0	6	2	9	5
1	2009-03-12 06:40:00	0	6	2	9	5
1	2009-03-12 06:41:00	0	6	2	9	5
1	2009-03-12 06:42:00	0	6	2	9	5
1	2009-03-12 06:43:00	0	6	2	9	5
1	2009-03-12 06:44:00	0	6	2	9	5
1	2009-03-12 06:45:00	0	6	2	9	5
1	2009-03-12 06:46:00	0	6	2	9	5
1	2009-03-12 06:47:00	0	6	2	9	5
1	2009-03-12 06:48:00	0	6	2	9	5
1	2009-03-12 06:49:00	25	6	2	9	5
1	2009-03-12 06:50:00	0	6	2	9	5
1	2009-03-12 06:51:00	0	6	2	9	5
1	2009-03-12 06:52:00	0	6	2	9	5
1	2009-03-12 06:53:00	0	6	2	9	5
1	2009-03-12 06:54:00	0	6	2	9	5
1	2009-03-12 06:55:00	0	6	2	9	5
1	2009-03-12 06:56:00	0	6	2	9	5
1	2009-03-12 06:57:00	0	6	2	9	5
1	2009-03-12 06:58:00	0	6	2	9	5
1	2009-03-12 06:59:00	0	6	2	9	5
1	2009-03-12 07:00:00	0	6	2	9	5
1	2009-03-12 07:01:00	0	7	2	9	5
1	2009-03-12 07:02:00	12	7	2	9	5
1	2009-03-12 07:03:00	0	7	2	9	5
1	2009-03-12 07:04:00	12	7	2	9	5
1	2009-03-12 07:05:00	0	7	2	9	5
1	2009-03-12 07:06:00	0	7	2	9	5
1	2009-03-12 07:07:00	0	7	2	9	5
1	2009-03-12 07:08:00	62	7	2	9	5
1	2009-03-12 07:09:00	160	7	2	9	5
1	2009-03-12 07:10:00	25	7	2	9	5
1	2009-03-12 07:11:00	0	7	2	9	5
1	2009-03-12 07:12:00	0	7	2	9	5
1	2009-03-12 07:13:00	0	7	2	9	5
1	2009-03-12 07:14:00	12	7	2	9	5
1	2009-03-12 07:15:00	0	7	2	9	5
1	2009-03-12 07:16:00	0	7	2	9	5
1	2009-03-12 07:17:00	0	7	2	9	5
1	2009-03-12 07:18:00	0	7	2	9	5
1	2009-03-12 07:19:00	0	7	2	9	5
1	2009-03-12 07:20:00	0	7	2	9	5
1	2009-03-12 07:21:00	0	7	2	9	5
1	2009-03-12 07:22:00	0	7	2	9	5
1	2009-03-12 07:23:00	0	7	2	9	5
1	2009-03-12 07:24:00	0	7	2	9	5
1	2009-03-12 07:25:00	0	7	2	9	5
1	2009-03-12 07:26:00	0	7	2	9	5
1	2009-03-12 07:27:00	0	7	2	9	5
1	2009-03-12 07:28:00	0	7	2	9	5
1	2009-03-12 07:29:00	0	7	2	9	5
1	2009-03-12 07:30:00	0	7	2	9	5
1	2009-03-12 07:31:00	0	7	2	9	5
1	2009-03-12 07:32:00	12	7	2	9	5
1	2009-03-12 07:33:00	0	7	2	9	5
1	2009-03-12 07:34:00	0	7	2	9	5
1	2009-03-12 07:35:00	0	7	2	9	5
1	2009-03-12 07:36:00	0	7	2	9	5
1	2009-03-12 07:37:00	0	7	2	9	5
1	2009-03-12 07:38:00	0	7	2	9	5
1	2009-03-12 07:39:00	0	7	2	9	5
1	2009-03-12 07:40:00	0	7	2	9	5
1	2009-03-12 07:41:00	0	7	2	9	5
1	2009-03-12 07:42:00	0	7	2	9	5
1	2009-03-12 07:43:00	0	7	2	9	5
1	2009-03-12 07:44:00	0	7	2	9	5
1	2009-03-12 07:45:00	0	7	2	9	5
1	2009-03-12 07:46:00	0	7	2	9	5
1	2009-03-12 07:47:00	0	7	2	9	5
1	2009-03-12 07:48:00	0	7	2	9	5
1	2009-03-12 07:49:00	0	7	2	9	5
1	2009-03-12 07:50:00	0	7	2	9	5
1	2009-03-12 07:51:00	0	7	2	9	5
1	2009-03-12 07:52:00	0	7	2	9	5
1	2009-03-12 07:53:00	0	7	2	9	5
1	2009-03-12 07:54:00	0	7	2	9	5
1	2009-03-12 07:55:00	0	7	2	9	5
1	2009-03-12 07:56:00	0	7	2	9	5
1	2009-03-12 07:57:00	0	7	2	9	5
1	2009-03-12 07:58:00	0	7	2	9	5
1	2009-03-12 07:59:00	0	7	2	9	5
1	2009-03-12 08:00:00	0	7	2	9	5
1	2009-03-12 08:01:00	0	8	2	9	5
1	2009-03-12 08:02:00	0	8	2	9	5
1	2009-03-12 08:03:00	0	8	2	9	5
1	2009-03-12 08:04:00	0	8	2	9	5
1	2009-03-12 08:05:00	0	8	2	9	5
1	2009-03-12 08:06:00	0	8	2	9	5
1	2009-03-12 08:07:00	0	8	2	9	5
1	2009-03-12 08:08:00	0	8	2	9	5
1	2009-03-12 08:09:00	12	8	2	9	5
1	2009-03-12 08:10:00	0	8	2	9	5
1	2009-03-12 08:11:00	0	8	2	9	5
1	2009-03-12 08:12:00	0	8	2	9	5
1	2009-03-12 08:13:00	0	8	2	9	5
1	2009-03-12 08:14:00	0	8	2	9	5
1	2009-03-12 08:15:00	0	8	2	9	5
1	2009-03-12 08:16:00	0	8	2	9	5
1	2009-03-12 08:17:00	0	8	2	9	5
1	2009-03-12 08:18:00	0	8	2	9	5
1	2009-03-12 08:19:00	0	8	2	9	5
1	2009-03-12 08:20:00	0	8	2	9	5
1	2009-03-12 08:21:00	0	8	2	9	5
1	2009-03-12 08:22:00	0	8	2	9	5
1	2009-03-12 08:23:00	0	8	2	9	5
1	2009-03-12 08:24:00	0	8	2	9	5
1	2009-03-12 08:25:00	0	8	2	9	5
1	2009-03-12 08:26:00	0	8	2	9	5
1	2009-03-12 08:27:00	0	8	2	9	5
1	2009-03-12 08:28:00	0	8	2	9	5
1	2009-03-12 08:29:00	0	8	2	9	5
1	2009-03-12 08:30:00	0	8	2	9	5
1	2009-03-12 08:31:00	0	8	2	9	5
1	2009-03-12 08:32:00	0	8	2	9	5
1	2009-03-12 08:33:00	25	8	2	9	5
1	2009-03-12 08:34:00	0	8	2	9	5
1	2009-03-12 08:35:00	0	8	2	9	5
1	2009-03-12 08:36:00	0	8	2	9	5
1	2009-03-12 08:37:00	0	8	2	9	5
1	2009-03-12 08:38:00	0	8	2	9	5
1	2009-03-12 08:39:00	0	8	2	9	5
1	2009-03-12 08:40:00	0	8	2	9	5
1	2009-03-12 08:41:00	0	8	2	9	5
1	2009-03-12 08:42:00	0	8	2	9	5
1	2009-03-12 08:43:00	0	8	2	9	5
1	2009-03-12 08:44:00	0	8	2	9	5
1	2009-03-12 08:45:00	0	8	2	9	5
1	2009-03-12 08:46:00	0	8	2	9	5
1	2009-03-12 08:47:00	0	8	2	9	5
1	2009-03-12 08:48:00	0	8	2	9	5
1	2009-03-12 08:49:00	0	8	2	9	5
1	2009-03-12 08:50:00	0	8	2	9	5
1	2009-03-12 08:51:00	293	8	2	9	5
1	2009-03-12 08:52:00	25	8	2	9	5
1	2009-03-12 08:53:00	234	8	2	9	5
1	2009-03-12 08:54:00	0	8	2	9	5
1	2009-03-12 08:55:00	0	8	2	9	5
1	2009-03-12 08:56:00	12	8	2	9	5
1	2009-03-12 08:57:00	0	8	2	9	5
1	2009-03-12 08:58:00	0	8	2	9	5
1	2009-03-12 08:59:00	12	8	2	9	5
1	2009-03-12 09:00:00	0	8	2	9	5
1	2009-03-12 09:01:00	0	9	2	9	5
1	2009-03-12 09:02:00	0	9	2	9	5
1	2009-03-12 09:03:00	0	9	2	9	5
1	2009-03-12 09:04:00	0	9	2	9	5
1	2009-03-12 09:05:00	0	9	2	9	5
1	2009-03-12 09:06:00	0	9	2	9	5
1	2009-03-12 09:07:00	0	9	2	9	5
1	2009-03-12 09:08:00	0	9	2	9	5
1	2009-03-12 09:09:00	0	9	2	9	5
1	2009-03-12 09:10:00	0	9	2	9	5
1	2009-03-12 09:11:00	0	9	2	9	5
1	2009-03-12 09:12:00	0	9	2	9	5
1	2009-03-12 09:13:00	0	9	2	9	5
1	2009-03-12 09:14:00	0	9	2	9	5
1	2009-03-12 09:15:00	0	9	2	9	5
1	2009-03-12 09:16:00	0	9	2	9	5
1	2009-03-12 09:17:00	0	9	2	9	5
1	2009-03-12 09:18:00	0	9	2	9	5
1	2009-03-12 09:19:00	0	9	2	9	5
1	2009-03-12 09:20:00	0	9	2	9	5
1	2009-03-12 09:21:00	0	9	2	9	5
1	2009-03-12 09:22:00	0	9	2	9	5
1	2009-03-12 09:23:00	0	9	2	9	5
1	2009-03-12 09:24:00	0	9	2	9	5
1	2009-03-12 09:25:00	0	9	2	9	5
1	2009-03-12 09:26:00	0	9	2	9	5
1	2009-03-12 09:27:00	0	9	2	9	5
1	2009-03-12 09:28:00	0	9	2	9	5
1	2009-03-12 09:29:00	0	9	2	9	5
1	2009-03-12 09:30:00	0	9	2	9	5
1	2009-03-12 09:31:00	0	9	2	9	5
1	2009-03-12 09:32:00	0	9	2	9	5
1	2009-03-12 09:33:00	0	9	2	9	5
1	2009-03-12 09:34:00	0	9	2	9	5
1	2009-03-12 09:35:00	12	9	2	9	5
1	2009-03-12 09:36:00	0	9	2	9	5
1	2009-03-12 09:37:00	0	9	2	9	5
1	2009-03-12 09:38:00	12	9	2	9	5
1	2009-03-12 09:39:00	0	9	2	9	5
1	2009-03-12 09:40:00	0	9	2	9	5
1	2009-03-12 09:41:00	0	9	2	9	5
1	2009-03-12 09:42:00	12	9	2	9	5
1	2009-03-12 09:43:00	0	9	2	9	5
1	2009-03-12 09:44:00	0	9	2	9	5
1	2009-03-12 09:45:00	0	9	2	9	5
1	2009-03-12 09:46:00	0	9	2	9	5
1	2009-03-12 09:47:00	0	9	2	9	5
1	2009-03-12 09:48:00	0	9	2	9	5
1	2009-03-12 09:49:00	0	9	2	9	5
1	2009-03-12 09:50:00	0	9	2	9	5
1	2009-03-12 09:51:00	0	9	2	9	5
1	2009-03-12 09:52:00	0	9	2	9	5
1	2009-03-12 09:53:00	0	9	2	9	5
1	2009-03-12 09:54:00	0	9	2	9	5
1	2009-03-12 09:55:00	0	9	2	9	5
1	2009-03-12 09:56:00	0	9	2	9	5
1	2009-03-12 09:57:00	0	9	2	9	5
1	2009-03-12 09:58:00	0	9	2	9	5
1	2009-03-12 09:59:00	0	9	2	9	5
1	2009-03-12 10:00:00	0	9	2	9	5
1	2009-03-12 10:01:00	0	10	2	9	5
1	2009-03-12 10:02:00	0	10	2	9	5
1	2009-03-12 10:03:00	0	10	2	9	5
1	2009-03-12 10:04:00	0	10	2	9	5
1	2009-03-12 10:05:00	0	10	2	9	5
1	2009-03-12 10:06:00	0	10	2	9	5
1	2009-03-12 10:07:00	0	10	2	9	5
1	2009-03-12 10:08:00	0	10	2	9	5
1	2009-03-12 10:09:00	0	10	2	9	5
1	2009-03-12 10:10:00	0	10	2	9	5
1	2009-03-12 10:11:00	0	10	2	9	5
1	2009-03-12 10:12:00	0	10	2	9	5
1	2009-03-12 10:13:00	0	10	2	9	5
1	2009-03-12 10:14:00	0	10	2	9	5
1	2009-03-12 10:15:00	0	10	2	9	5
1	2009-03-12 10:16:00	0	10	2	9	5
1	2009-03-12 10:17:00	0	10	2	9	5
1	2009-03-12 10:18:00	0	10	2	9	5
1	2009-03-12 10:19:00	0	10	2	9	5
1	2009-03-12 10:20:00	0	10	2	9	5
1	2009-03-12 10:21:00	0	10	2	9	5
1	2009-03-12 10:22:00	0	10	2	9	5
1	2009-03-12 10:23:00	0	10	2	9	5
1	2009-03-12 10:24:00	0	10	2	9	5
1	2009-03-12 10:25:00	0	10	2	9	5
1	2009-03-12 10:26:00	0	10	2	9	5
1	2009-03-12 10:27:00	0	10	2	9	5
1	2009-03-12 10:28:00	0	10	2	9	5
1	2009-03-12 10:29:00	0	10	2	9	5
1	2009-03-12 10:30:00	0	10	2	9	5
1	2009-03-12 10:31:00	0	10	2	9	5
1	2009-03-12 10:32:00	0	10	2	9	5
1	2009-03-12 10:33:00	0	10	2	9	5
1	2009-03-12 10:34:00	12	10	2	9	5
1	2009-03-12 10:35:00	0	10	2	9	5
1	2009-03-12 10:36:00	0	10	2	9	5
1	2009-03-12 10:37:00	12	10	2	9	5
1	2009-03-12 10:38:00	25	10	2	9	5
1	2009-03-12 10:39:00	0	10	2	9	5
1	2009-03-12 10:40:00	0	10	2	9	5
1	2009-03-12 10:41:00	37	10	2	9	5
1	2009-03-12 10:42:00	0	10	2	9	5
1	2009-03-12 10:43:00	0	10	2	9	5
1	2009-03-12 10:44:00	0	10	2	9	5
1	2009-03-12 10:45:00	0	10	2	9	5
1	2009-03-12 10:46:00	175	10	2	9	5
1	2009-03-12 10:47:00	74	10	2	9	5
1	2009-03-12 10:48:00	0	10	2	9	5
1	2009-03-12 10:49:00	25	10	2	9	5
1	2009-03-12 10:50:00	0	10	2	9	5
1	2009-03-12 10:51:00	12	10	2	9	5
1	2009-03-12 10:52:00	0	10	2	9	5
1	2009-03-12 10:53:00	0	10	2	9	5
1	2009-03-12 10:54:00	0	10	2	9	5
1	2009-03-12 10:55:00	0	10	2	9	5
1	2009-03-12 10:56:00	0	10	2	9	5
1	2009-03-12 10:57:00	0	10	2	9	5
1	2009-03-12 10:58:00	0	10	2	9	5
1	2009-03-12 10:59:00	0	10	2	9	5
1	2009-03-12 11:00:00	0	10	2	9	5
1	2009-03-12 11:01:00	0	11	2	9	5
1	2009-03-12 11:02:00	0	11	2	9	5
1	2009-03-12 11:03:00	0	11	2	9	5
1	2009-03-12 11:04:00	0	11	2	9	5
1	2009-03-12 11:05:00	0	11	2	9	5
1	2009-03-12 11:06:00	0	11	2	9	5
1	2009-03-12 11:07:00	0	11	2	9	5
1	2009-03-12 11:08:00	0	11	2	9	5
1	2009-03-12 11:09:00	0	11	2	9	5
1	2009-03-12 11:10:00	0	11	2	9	5
1	2009-03-12 11:11:00	0	11	2	9	5
1	2009-03-12 11:12:00	0	11	2	9	5
1	2009-03-12 11:13:00	0	11	2	9	5
1	2009-03-12 11:14:00	0	11	2	9	5
1	2009-03-12 11:15:00	0	11	2	9	5
1	2009-03-12 11:16:00	0	11	2	9	5
1	2009-03-12 11:17:00	12	11	2	9	5
1	2009-03-12 11:18:00	0	11	2	9	5
1	2009-03-12 11:19:00	0	11	2	9	5
1	2009-03-12 11:20:00	12	11	2	9	5
1	2009-03-12 11:21:00	0	11	2	9	5
1	2009-03-12 11:22:00	0	11	2	9	5
1	2009-03-12 11:23:00	0	11	2	9	5
1	2009-03-12 11:24:00	0	11	2	9	5
1	2009-03-12 11:25:00	0	11	2	9	5
1	2009-03-12 11:26:00	12	11	2	9	5
1	2009-03-12 11:27:00	0	11	2	9	5
1	2009-03-12 11:28:00	0	11	2	9	5
1	2009-03-12 11:29:00	0	11	2	9	5
1	2009-03-12 11:30:00	0	11	2	9	5
1	2009-03-12 11:31:00	0	11	2	9	5
1	2009-03-12 11:32:00	0	11	2	9	5
1	2009-03-12 11:33:00	0	11	2	9	5
1	2009-03-12 11:34:00	0	11	2	9	5
1	2009-03-12 11:35:00	0	11	2	9	5
1	2009-03-12 11:36:00	0	11	2	9	5
1	2009-03-12 11:37:00	0	11	2	9	5
1	2009-03-12 11:38:00	0	11	2	9	5
1	2009-03-12 11:39:00	0	11	2	9	5
1	2009-03-12 11:40:00	0	11	2	9	5
1	2009-03-12 11:41:00	0	11	2	9	5
1	2009-03-12 11:42:00	0	11	2	9	5
1	2009-03-12 11:43:00	0	11	2	9	5
1	2009-03-12 11:44:00	0	11	2	9	5
1	2009-03-12 11:45:00	0	11	2	9	5
1	2009-03-12 11:46:00	0	11	2	9	5
1	2009-03-12 11:47:00	0	11	2	9	5
1	2009-03-12 11:48:00	0	11	2	9	5
1	2009-03-12 11:49:00	12	11	2	9	5
1	2009-03-12 11:50:00	0	11	2	9	5
1	2009-03-12 11:51:00	0	11	2	9	5
1	2009-03-12 11:52:00	0	11	2	9	5
1	2009-03-12 11:53:00	0	11	2	9	5
1	2009-03-12 11:54:00	0	11	2	9	5
1	2009-03-12 11:55:00	0	11	2	9	5
1	2009-03-12 11:56:00	0	11	2	9	5
1	2009-03-12 11:57:00	0	11	2	9	5
1	2009-03-12 11:58:00	0	11	2	9	5
1	2009-03-12 11:59:00	0	11	2	9	5
1	2009-03-12 12:00:00	0	11	2	9	5
1	2009-03-12 12:01:00	0	12	3	9	5
1	2009-03-12 12:02:00	0	12	3	9	5
1	2009-03-12 12:03:00	0	12	3	9	5
1	2009-03-12 12:04:00	0	12	3	9	5
1	2009-03-12 12:05:00	0	12	3	9	5
1	2009-03-12 12:06:00	0	12	3	9	5
1	2009-03-12 12:07:00	0	12	3	9	5
1	2009-03-12 12:08:00	0	12	3	9	5
1	2009-03-12 12:09:00	0	12	3	9	5
1	2009-03-12 12:10:00	0	12	3	9	5
1	2009-03-12 12:11:00	0	12	3	9	5
1	2009-03-12 12:12:00	0	12	3	9	5
1	2009-03-12 12:13:00	0	12	3	9	5
1	2009-03-12 12:14:00	0	12	3	9	5
1	2009-03-12 12:15:00	0	12	3	9	5
1	2009-03-12 12:16:00	0	12	3	9	5
1	2009-03-12 12:17:00	0	12	3	9	5
1	2009-03-12 12:18:00	0	12	3	9	5
1	2009-03-12 12:19:00	0	12	3	9	5
1	2009-03-12 12:20:00	0	12	3	9	5
1	2009-03-12 12:21:00	0	12	3	9	5
1	2009-03-12 12:22:00	0	12	3	9	5
1	2009-03-12 12:23:00	0	12	3	9	5
1	2009-03-12 12:24:00	0	12	3	9	5
1	2009-03-12 12:25:00	0	12	3	9	5
1	2009-03-12 12:26:00	0	12	3	9	5
1	2009-03-12 12:27:00	12	12	3	9	5
1	2009-03-12 12:28:00	0	12	3	9	5
1	2009-03-12 12:29:00	0	12	3	9	5
1	2009-03-12 12:30:00	0	12	3	9	5
1	2009-03-12 12:31:00	0	12	3	9	5
1	2009-03-12 12:32:00	0	12	3	9	5
1	2009-03-12 12:33:00	0	12	3	9	5
1	2009-03-12 12:34:00	0	12	3	9	5
1	2009-03-12 12:35:00	0	12	3	9	5
1	2009-03-12 12:36:00	0	12	3	9	5
1	2009-03-12 12:37:00	0	12	3	9	5
1	2009-03-12 12:38:00	0	12	3	9	5
1	2009-03-12 12:39:00	0	12	3	9	5
1	2009-03-12 12:40:00	0	12	3	9	5
1	2009-03-12 12:41:00	0	12	3	9	5
1	2009-03-12 12:42:00	0	12	3	9	5
1	2009-03-12 12:43:00	0	12	3	9	5
1	2009-03-12 12:44:00	0	12	3	9	5
1	2009-03-12 12:45:00	0	12	3	9	5
1	2009-03-12 12:46:00	0	12	3	9	5
1	2009-03-12 12:47:00	0	12	3	9	5
1	2009-03-12 12:48:00	0	12	3	9	5
1	2009-03-12 12:49:00	0	12	3	9	5
1	2009-03-12 12:50:00	0	12	3	9	5
1	2009-03-12 12:51:00	12	12	3	9	5
1	2009-03-12 12:52:00	0	12	3	9	5
1	2009-03-12 12:53:00	0	12	3	9	5
1	2009-03-12 12:54:00	25	12	3	9	5
1	2009-03-12 12:55:00	12	12	3	9	5
1	2009-03-12 12:56:00	0	12	3	9	5
1	2009-03-12 12:57:00	0	12	3	9	5
1	2009-03-12 12:58:00	0	12	3	9	5
1	2009-03-12 12:59:00	0	12	3	9	5
1	2009-03-12 13:00:00	0	12	3	9	5
1	2009-03-12 13:01:00	0	13	3	9	5
1	2009-03-12 13:02:00	0	13	3	9	5
1	2009-03-12 13:03:00	0	13	3	9	5
1	2009-03-12 13:04:00	0	13	3	9	5
1	2009-03-12 13:05:00	0	13	3	9	5
1	2009-03-12 13:06:00	0	13	3	9	5
1	2009-03-12 13:07:00	0	13	3	9	5
1	2009-03-12 13:08:00	0	13	3	9	5
1	2009-03-12 13:09:00	0	13	3	9	5
1	2009-03-12 13:10:00	0	13	3	9	5
1	2009-03-12 13:11:00	0	13	3	9	5
1	2009-03-12 13:12:00	0	13	3	9	5
1	2009-03-12 13:13:00	0	13	3	9	5
1	2009-03-12 13:14:00	0	13	3	9	5
1	2009-03-12 13:15:00	0	13	3	9	5
1	2009-03-12 13:16:00	0	13	3	9	5
1	2009-03-12 13:17:00	0	13	3	9	5
1	2009-03-12 13:18:00	0	13	3	9	5
1	2009-03-12 13:19:00	0	13	3	9	5
1	2009-03-12 13:20:00	0	13	3	9	5
1	2009-03-12 13:21:00	0	13	3	9	5
1	2009-03-12 13:22:00	0	13	3	9	5
1	2009-03-12 13:23:00	0	13	3	9	5
1	2009-03-12 13:24:00	0	13	3	9	5
1	2009-03-12 13:25:00	0	13	3	9	5
1	2009-03-12 13:26:00	0	13	3	9	5
1	2009-03-12 13:27:00	0	13	3	9	5
1	2009-03-12 13:28:00	175	13	3	9	5
1	2009-03-12 13:29:00	537	13	3	9	5
1	2009-03-12 13:30:00	0	13	3	9	5
1	2009-03-12 13:31:00	0	13	3	9	5
1	2009-03-12 13:32:00	0	13	3	9	5
1	2009-03-12 13:33:00	517	13	3	9	5
1	2009-03-12 13:34:00	517	13	3	9	5
1	2009-03-12 13:35:00	768	13	3	9	5
1	2009-03-12 13:36:00	517	13	3	9	5
1	2009-03-12 13:37:00	219	13	3	9	5
1	2009-03-12 13:38:00	517	13	3	9	5
1	2009-03-12 13:39:00	1273	13	3	9	5
1	2009-03-12 13:40:00	308	13	3	9	5
1	2009-03-12 13:41:00	391	13	3	9	5
1	2009-03-12 13:42:00	497	13	3	9	5
1	2009-03-12 13:43:00	12	13	3	9	5
1	2009-03-12 13:44:00	293	13	3	9	5
1	2009-03-12 13:45:00	497	13	3	9	5
1	2009-03-12 13:46:00	49	13	3	9	5
1	2009-03-12 13:47:00	148	13	3	9	5
1	2009-03-12 13:48:00	135	13	3	9	5
1	2009-03-12 13:49:00	123	13	3	9	5
1	2009-03-12 13:50:00	556	13	3	9	5
1	2009-03-12 13:51:00	293	13	3	9	5
1	2009-03-12 13:52:00	391	13	3	9	5
1	2009-03-12 13:53:00	0	13	3	9	5
1	2009-03-12 13:54:00	12	13	3	9	5
1	2009-03-12 13:55:00	0	13	3	9	5
1	2009-03-12 13:56:00	0	13	3	9	5
1	2009-03-12 13:57:00	0	13	3	9	5
1	2009-03-12 13:58:00	0	13	3	9	5
1	2009-03-12 13:59:00	443	13	3	9	5
1	2009-03-12 14:00:00	702	13	3	9	5
1	2009-03-12 14:01:00	0	14	3	9	5
1	2009-03-12 14:02:00	0	14	3	9	5
1	2009-03-12 14:03:00	0	14	3	9	5
1	2009-03-12 14:04:00	0	14	3	9	5
1	2009-03-12 14:05:00	0	14	3	9	5
1	2009-03-12 14:06:00	0	14	3	9	5
1	2009-03-12 14:07:00	0	14	3	9	5
1	2009-03-12 14:08:00	37	14	3	9	5
1	2009-03-12 14:09:00	0	14	3	9	5
1	2009-03-12 14:10:00	0	14	3	9	5
1	2009-03-12 14:11:00	98	14	3	9	5
1	2009-03-12 14:12:00	0	14	3	9	5
1	2009-03-12 14:13:00	0	14	3	9	5
1	2009-03-12 14:14:00	0	14	3	9	5
1	2009-03-12 14:15:00	0	14	3	9	5
1	2009-03-12 14:16:00	0	14	3	9	5
1	2009-03-12 14:17:00	0	14	3	9	5
1	2009-03-12 14:18:00	0	14	3	9	5
1	2009-03-12 14:19:00	0	14	3	9	5
1	2009-03-12 14:20:00	0	14	3	9	5
1	2009-03-12 14:21:00	0	14	3	9	5
1	2009-03-12 14:22:00	12	14	3	9	5
1	2009-03-12 14:23:00	25	14	3	9	5
1	2009-03-12 14:24:00	990	14	3	9	5
1	2009-03-12 14:25:00	391	14	3	9	5
1	2009-03-12 14:26:00	249	14	3	9	5
1	2009-03-12 14:27:00	702	14	3	9	5
1	2009-03-12 14:28:00	990	14	3	9	5
1	2009-03-12 14:29:00	679	14	3	9	5
1	2009-03-12 14:30:00	263	14	3	9	5
1	2009-03-12 14:31:00	148	14	3	9	5
1	2009-03-12 14:32:00	0	14	3	9	5
1	2009-03-12 14:33:00	0	14	3	9	5
1	2009-03-12 14:34:00	0	14	3	9	5
1	2009-03-12 14:35:00	0	14	3	9	5
1	2009-03-12 14:36:00	0	14	3	9	5
1	2009-03-12 14:37:00	0	14	3	9	5
1	2009-03-12 14:38:00	460	14	3	9	5
1	2009-03-12 14:39:00	37	14	3	9	5
1	2009-03-12 14:40:00	357	14	3	9	5
1	2009-03-12 14:41:00	204	14	3	9	5
1	2009-03-12 14:42:00	768	14	3	9	5
1	2009-03-12 14:43:00	913	14	3	9	5
1	2009-03-12 14:44:00	2919	14	3	9	5
1	2009-03-12 14:45:00	86	14	3	9	5
1	2009-03-12 14:46:00	175	14	3	9	5
1	2009-03-12 14:47:00	0	14	3	9	5
1	2009-03-12 14:48:00	0	14	3	9	5
1	2009-03-12 14:49:00	0	14	3	9	5
1	2009-03-12 14:50:00	0	14	3	9	5
1	2009-03-12 14:51:00	426	14	3	9	5
1	2009-03-12 14:52:00	443	14	3	9	5
1	2009-03-12 14:53:00	278	14	3	9	5
1	2009-03-12 14:54:00	0	14	3	9	5
1	2009-03-12 14:55:00	0	14	3	9	5
1	2009-03-12 14:56:00	0	14	3	9	5
1	2009-03-12 14:57:00	0	14	3	9	5
1	2009-03-12 14:58:00	293	14	3	9	5
1	2009-03-12 14:59:00	679	14	3	9	5
1	2009-03-12 15:00:00	1994	14	3	9	5
1	2009-03-12 15:01:00	1305	15	3	9	5
1	2009-03-12 15:02:00	724	15	3	9	5
1	2009-03-12 15:03:00	537	15	3	9	5
1	2009-03-12 15:04:00	517	15	3	9	5
1	2009-03-12 15:05:00	340	15	3	9	5
1	2009-03-12 15:06:00	49	15	3	9	5
1	2009-03-12 15:07:00	0	15	3	9	5
1	2009-03-12 15:08:00	0	15	3	9	5
1	2009-03-12 15:09:00	37	15	3	9	5
1	2009-03-12 15:10:00	25	15	3	9	5
1	2009-03-12 15:11:00	49	15	3	9	5
1	2009-03-12 15:12:00	0	15	3	9	5
1	2009-03-12 15:13:00	374	15	3	9	5
1	2009-03-12 15:14:00	357	15	3	9	5
1	2009-03-12 15:15:00	308	15	3	9	5
1	2009-03-12 15:16:00	49	15	3	9	5
1	2009-03-12 15:17:00	0	15	3	9	5
1	2009-03-12 15:18:00	12	15	3	9	5
1	2009-03-12 15:19:00	12	15	3	9	5
1	2009-03-12 15:20:00	0	15	3	9	5
1	2009-03-12 15:21:00	12	15	3	9	5
1	2009-03-12 15:22:00	263	15	3	9	5
1	2009-03-12 15:23:00	374	15	3	9	5
1	2009-03-12 15:24:00	234	15	3	9	5
1	2009-03-12 15:25:00	293	15	3	9	5
1	2009-03-12 15:26:00	135	15	3	9	5
1	2009-03-12 15:27:00	357	15	3	9	5
1	2009-03-12 15:28:00	340	15	3	9	5
1	2009-03-12 15:29:00	25	15	3	9	5
1	2009-03-12 15:30:00	0	15	3	9	5
1	2009-03-12 15:31:00	12	15	3	9	5
1	2009-03-12 15:32:00	0	15	3	9	5
1	2009-03-12 15:33:00	0	15	3	9	5
1	2009-03-12 15:34:00	0	15	3	9	5
1	2009-03-12 15:35:00	25	15	3	9	5
1	2009-03-12 15:36:00	0	15	3	9	5
1	2009-03-12 15:37:00	219	15	3	9	5
1	2009-03-12 15:38:00	204	15	3	9	5
1	2009-03-12 15:39:00	12	15	3	9	5
1	2009-03-12 15:40:00	0	15	3	9	5
1	2009-03-12 15:41:00	12	15	3	9	5
1	2009-03-12 15:42:00	0	15	3	9	5
1	2009-03-12 15:43:00	0	15	3	9	5
1	2009-03-12 15:44:00	0	15	3	9	5
1	2009-03-12 15:45:00	25	15	3	9	5
1	2009-03-12 15:46:00	0	15	3	9	5
1	2009-03-12 15:47:00	0	15	3	9	5
1	2009-03-12 15:48:00	0	15	3	9	5
1	2009-03-12 15:49:00	0	15	3	9	5
1	2009-03-12 15:50:00	0	15	3	9	5
1	2009-03-12 15:51:00	0	15	3	9	5
1	2009-03-12 15:52:00	0	15	3	9	5
1	2009-03-12 15:53:00	0	15	3	9	5
1	2009-03-12 15:54:00	0	15	3	9	5
1	2009-03-12 15:55:00	25	15	3	9	5
1	2009-03-12 15:56:00	0	15	3	9	5
1	2009-03-12 15:57:00	0	15	3	9	5
1	2009-03-12 15:58:00	0	15	3	9	5
1	2009-03-12 15:59:00	0	15	3	9	5
1	2009-03-12 16:00:00	0	15	3	9	5
1	2009-03-12 16:01:00	0	16	3	9	5
1	2009-03-12 16:02:00	0	16	3	9	5
1	2009-03-12 16:03:00	0	16	3	9	5
1	2009-03-12 16:04:00	0	16	3	9	5
1	2009-03-12 16:05:00	0	16	3	9	5
1	2009-03-12 16:06:00	0	16	3	9	5
1	2009-03-12 16:07:00	12	16	3	9	5
1	2009-03-12 16:08:00	0	16	3	9	5
1	2009-03-12 16:09:00	0	16	3	9	5
1	2009-03-12 16:10:00	0	16	3	9	5
1	2009-03-12 16:11:00	0	16	3	9	5
1	2009-03-12 16:12:00	0	16	3	9	5
1	2009-03-12 16:13:00	12	16	3	9	5
1	2009-03-12 16:14:00	478	16	3	9	5
1	2009-03-12 16:15:00	148	16	3	9	5
1	2009-03-12 16:16:00	111	16	3	9	5
1	2009-03-12 16:17:00	497	16	3	9	5
1	2009-03-12 16:18:00	391	16	3	9	5
1	2009-03-12 16:19:00	0	16	3	9	5
1	2009-03-12 16:20:00	0	16	3	9	5
1	2009-03-12 16:21:00	0	16	3	9	5
1	2009-03-12 16:22:00	0	16	3	9	5
1	2009-03-12 16:23:00	0	16	3	9	5
1	2009-03-12 16:24:00	0	16	3	9	5
1	2009-03-12 16:25:00	0	16	3	9	5
1	2009-03-12 16:26:00	0	16	3	9	5
1	2009-03-12 16:27:00	0	16	3	9	5
1	2009-03-12 16:28:00	0	16	3	9	5
1	2009-03-12 16:29:00	0	16	3	9	5
1	2009-03-12 16:30:00	517	16	3	9	5
1	2009-03-12 16:31:00	576	16	3	9	5
1	2009-03-12 16:32:00	864	16	3	9	5
1	2009-03-12 16:33:00	679	16	3	9	5
1	2009-03-12 16:34:00	815	16	3	9	5
1	2009-03-12 16:35:00	478	16	3	9	5
1	2009-03-12 16:36:00	190	16	3	9	5
1	2009-03-12 16:37:00	322	16	3	9	5
1	2009-03-12 16:38:00	37	16	3	9	5
1	2009-03-12 16:39:00	12	16	3	9	5
1	2009-03-12 16:40:00	12	16	3	9	5
1	2009-03-12 16:41:00	12	16	3	9	5
1	2009-03-12 16:42:00	0	16	3	9	5
1	2009-03-12 16:43:00	12	16	3	9	5
1	2009-03-12 16:44:00	12	16	3	9	5
1	2009-03-12 16:45:00	12	16	3	9	5
1	2009-03-12 16:46:00	0	16	3	9	5
1	2009-03-12 16:47:00	0	16	3	9	5
1	2009-03-12 16:48:00	148	16	3	9	5
1	2009-03-12 16:49:00	25	16	3	9	5
1	2009-03-12 16:50:00	12	16	3	9	5
1	2009-03-12 16:51:00	49	16	3	9	5
1	2009-03-12 16:52:00	12	16	3	9	5
1	2009-03-12 16:53:00	0	16	3	9	5
1	2009-03-12 16:54:00	0	16	3	9	5
1	2009-03-12 16:55:00	0	16	3	9	5
1	2009-03-12 16:56:00	12	16	3	9	5
1	2009-03-12 16:57:00	0	16	3	9	5
1	2009-03-12 16:58:00	724	16	3	9	5
1	2009-03-12 16:59:00	790	16	3	9	5
1	2009-03-12 17:00:00	135	16	3	9	5
1	2009-03-12 17:01:00	0	17	3	9	5
1	2009-03-12 17:02:00	0	17	3	9	5
1	2009-03-12 17:03:00	0	17	3	9	5
1	2009-03-12 17:04:00	0	17	3	9	5
1	2009-03-12 17:05:00	12	17	3	9	5
1	2009-03-12 17:06:00	12	17	3	9	5
1	2009-03-12 17:07:00	25	17	3	9	5
1	2009-03-12 17:08:00	12	17	3	9	5
1	2009-03-12 17:09:00	12	17	3	9	5
1	2009-03-12 17:10:00	0	17	3	9	5
1	2009-03-12 17:11:00	0	17	3	9	5
1	2009-03-12 17:12:00	0	17	3	9	5
1	2009-03-12 17:13:00	0	17	3	9	5
1	2009-03-12 17:14:00	37	17	3	9	5
1	2009-03-12 17:15:00	322	17	3	9	5
1	2009-03-12 17:16:00	234	17	3	9	5
1	2009-03-12 17:17:00	62	17	3	9	5
1	2009-03-12 17:18:00	0	17	3	9	5
1	2009-03-12 17:19:00	0	17	3	9	5
1	2009-03-12 17:20:00	0	17	3	9	5
1	2009-03-12 17:21:00	0	17	3	9	5
1	2009-03-12 17:22:00	0	17	3	9	5
1	2009-03-12 17:23:00	0	17	3	9	5
1	2009-03-12 17:24:00	0	17	3	9	5
1	2009-03-12 17:25:00	0	17	3	9	5
1	2009-03-12 17:26:00	0	17	3	9	5
1	2009-03-12 17:27:00	0	17	3	9	5
1	2009-03-12 17:28:00	0	17	3	9	5
1	2009-03-12 17:29:00	25	17	3	9	5
1	2009-03-12 17:30:00	0	17	3	9	5
1	2009-03-12 17:31:00	0	17	3	9	5
1	2009-03-12 17:32:00	0	17	3	9	5
1	2009-03-12 17:33:00	0	17	3	9	5
1	2009-03-12 17:34:00	0	17	3	9	5
1	2009-03-12 17:35:00	0	17	3	9	5
1	2009-03-12 17:36:00	0	17	3	9	5
1	2009-03-12 17:37:00	0	17	3	9	5
1	2009-03-12 17:38:00	0	17	3	9	5
1	2009-03-12 17:39:00	0	17	3	9	5
1	2009-03-12 17:40:00	0	17	3	9	5
1	2009-03-12 17:41:00	0	17	3	9	5
1	2009-03-12 17:42:00	0	17	3	9	5
1	2009-03-12 17:43:00	0	17	3	9	5
1	2009-03-12 17:44:00	0	17	3	9	5
1	2009-03-12 17:45:00	0	17	3	9	5
1	2009-03-12 17:46:00	0	17	3	9	5
1	2009-03-12 17:47:00	0	17	3	9	5
1	2009-03-12 17:48:00	0	17	3	9	5
1	2009-03-12 17:49:00	0	17	3	9	5
1	2009-03-12 17:50:00	0	17	3	9	5
1	2009-03-12 17:51:00	0	17	3	9	5
1	2009-03-12 17:52:00	0	17	3	9	5
1	2009-03-12 17:53:00	0	17	3	9	5
1	2009-03-12 17:54:00	0	17	3	9	5
1	2009-03-12 17:55:00	0	17	3	9	5
1	2009-03-12 17:56:00	0	17	3	9	5
1	2009-03-12 17:57:00	0	17	3	9	5
1	2009-03-12 17:58:00	0	17	3	9	5
1	2009-03-12 17:59:00	0	17	3	9	5
1	2009-03-12 18:00:00	0	17	3	9	5
1	2009-03-12 18:01:00	0	18	4	9	5
1	2009-03-12 18:02:00	0	18	4	9	5
1	2009-03-12 18:03:00	0	18	4	9	5
1	2009-03-12 18:04:00	0	18	4	9	5
1	2009-03-12 18:05:00	0	18	4	9	5
1	2009-03-12 18:06:00	0	18	4	9	5
1	2009-03-12 18:07:00	0	18	4	9	5
1	2009-03-12 18:08:00	0	18	4	9	5
1	2009-03-12 18:09:00	25	18	4	9	5
1	2009-03-12 18:10:00	278	18	4	9	5
1	2009-03-12 18:11:00	322	18	4	9	5
1	2009-03-12 18:12:00	123	18	4	9	5
1	2009-03-12 18:13:00	443	18	4	9	5
1	2009-03-12 18:14:00	0	18	4	9	5
1	2009-03-12 18:15:00	12	18	4	9	5
1	2009-03-12 18:16:00	234	18	4	9	5
1	2009-03-12 18:17:00	123	18	4	9	5
1	2009-03-12 18:18:00	391	18	4	9	5
1	2009-03-12 18:19:00	263	18	4	9	5
1	2009-03-12 18:20:00	86	18	4	9	5
1	2009-03-12 18:21:00	443	18	4	9	5
1	2009-03-12 18:22:00	426	18	4	9	5
1	2009-03-12 18:23:00	111	18	4	9	5
1	2009-03-12 18:24:00	148	18	4	9	5
1	2009-03-12 18:25:00	657	18	4	9	5
1	2009-03-12 18:26:00	1125	18	4	9	5
1	2009-03-12 18:27:00	263	18	4	9	5
1	2009-03-12 18:28:00	746	18	4	9	5
1	2009-03-12 18:29:00	49	18	4	9	5
1	2009-03-12 18:30:00	839	18	4	9	5
1	2009-03-12 18:31:00	249	18	4	9	5
1	2009-03-12 18:32:00	0	18	4	9	5
1	2009-03-12 18:33:00	0	18	4	9	5
1	2009-03-12 18:34:00	219	18	4	9	5
1	2009-03-12 18:35:00	391	18	4	9	5
1	2009-03-12 18:36:00	537	18	4	9	5
1	2009-03-12 18:37:00	234	18	4	9	5
1	2009-03-12 18:38:00	0	18	4	9	5
1	2009-03-12 18:39:00	25	18	4	9	5
1	2009-03-12 18:40:00	0	18	4	9	5
1	2009-03-12 18:41:00	204	18	4	9	5
1	2009-03-12 18:42:00	0	18	4	9	5
1	2009-03-12 18:43:00	0	18	4	9	5
1	2009-03-12 18:44:00	25	18	4	9	5
1	2009-03-12 18:45:00	12	18	4	9	5
1	2009-03-12 18:46:00	0	18	4	9	5
1	2009-03-12 18:47:00	0	18	4	9	5
1	2009-03-12 18:48:00	0	18	4	9	5
1	2009-03-12 18:49:00	37	18	4	9	5
1	2009-03-12 18:50:00	175	18	4	9	5
1	2009-03-12 18:51:00	0	18	4	9	5
1	2009-03-12 18:52:00	0	18	4	9	5
1	2009-03-12 18:53:00	0	18	4	9	5
1	2009-03-12 18:54:00	0	18	4	9	5
1	2009-03-12 18:55:00	0	18	4	9	5
1	2009-03-12 18:56:00	0	18	4	9	5
1	2009-03-12 18:57:00	0	18	4	9	5
1	2009-03-12 18:58:00	0	18	4	9	5
1	2009-03-12 18:59:00	0	18	4	9	5
1	2009-03-12 19:00:00	0	18	4	9	5
1	2009-03-12 19:01:00	0	19	4	9	5
1	2009-03-12 19:02:00	0	19	4	9	5
1	2009-03-12 19:03:00	0	19	4	9	5
1	2009-03-12 19:04:00	0	19	4	9	5
1	2009-03-12 19:05:00	0	19	4	9	5
1	2009-03-12 19:06:00	0	19	4	9	5
1	2009-03-12 19:07:00	0	19	4	9	5
1	2009-03-12 19:08:00	0	19	4	9	5
1	2009-03-12 19:09:00	0	19	4	9	5
1	2009-03-12 19:10:00	0	19	4	9	5
1	2009-03-12 19:11:00	0	19	4	9	5
1	2009-03-12 19:12:00	0	19	4	9	5
1	2009-03-12 19:13:00	0	19	4	9	5
1	2009-03-12 19:14:00	25	19	4	9	5
1	2009-03-12 19:15:00	0	19	4	9	5
1	2009-03-12 19:16:00	25	19	4	9	5
1	2009-03-12 19:17:00	517	19	4	9	5
1	2009-03-12 19:18:00	308	19	4	9	5
1	2009-03-12 19:19:00	249	19	4	9	5
1	2009-03-12 19:20:00	657	19	4	9	5
1	2009-03-12 19:21:00	576	19	4	9	5
1	2009-03-12 19:22:00	219	19	4	9	5
1	2009-03-12 19:23:00	0	19	4	9	5
1	2009-03-12 19:24:00	0	19	4	9	5
1	2009-03-12 19:25:00	0	19	4	9	5
1	2009-03-12 19:26:00	0	19	4	9	5
1	2009-03-12 19:27:00	25	19	4	9	5
1	2009-03-12 19:28:00	0	19	4	9	5
1	2009-03-12 19:29:00	0	19	4	9	5
1	2009-03-12 19:30:00	0	19	4	9	5
1	2009-03-12 19:31:00	0	19	4	9	5
1	2009-03-12 19:32:00	0	19	4	9	5
1	2009-03-12 19:33:00	0	19	4	9	5
1	2009-03-12 19:34:00	0	19	4	9	5
1	2009-03-12 19:35:00	0	19	4	9	5
1	2009-03-12 19:36:00	0	19	4	9	5
1	2009-03-12 19:37:00	0	19	4	9	5
1	2009-03-12 19:38:00	0	19	4	9	5
1	2009-03-12 19:39:00	0	19	4	9	5
1	2009-03-12 19:40:00	0	19	4	9	5
1	2009-03-12 19:41:00	0	19	4	9	5
1	2009-03-12 19:42:00	0	19	4	9	5
1	2009-03-12 19:43:00	0	19	4	9	5
1	2009-03-12 19:44:00	0	19	4	9	5
1	2009-03-12 19:45:00	0	19	4	9	5
1	2009-03-12 19:46:00	0	19	4	9	5
1	2009-03-12 19:47:00	0	19	4	9	5
1	2009-03-12 19:48:00	0	19	4	9	5
1	2009-03-12 19:49:00	0	19	4	9	5
1	2009-03-12 19:50:00	0	19	4	9	5
1	2009-03-12 19:51:00	0	19	4	9	5
1	2009-03-12 19:52:00	0	19	4	9	5
1	2009-03-12 19:53:00	0	19	4	9	5
1	2009-03-12 19:54:00	0	19	4	9	5
1	2009-03-12 19:55:00	357	19	4	9	5
1	2009-03-12 19:56:00	615	19	4	9	5
1	2009-03-12 19:57:00	443	19	4	9	5
1	2009-03-12 19:58:00	123	19	4	9	5
1	2009-03-12 19:59:00	0	19	4	9	5
1	2009-03-12 20:00:00	0	19	4	9	5
1	2009-03-12 20:01:00	0	20	4	9	5
1	2009-03-12 20:02:00	12	20	4	9	5
1	2009-03-12 20:03:00	0	20	4	9	5
1	2009-03-12 20:04:00	0	20	4	9	5
1	2009-03-12 20:05:00	0	20	4	9	5
1	2009-03-12 20:06:00	0	20	4	9	5
1	2009-03-12 20:07:00	12	20	4	9	5
1	2009-03-12 20:08:00	0	20	4	9	5
1	2009-03-12 20:09:00	0	20	4	9	5
1	2009-03-12 20:10:00	12	20	4	9	5
1	2009-03-12 20:11:00	0	20	4	9	5
1	2009-03-12 20:12:00	0	20	4	9	5
1	2009-03-12 20:13:00	0	20	4	9	5
1	2009-03-12 20:14:00	0	20	4	9	5
1	2009-03-12 20:15:00	263	20	4	9	5
1	2009-03-12 20:16:00	815	20	4	9	5
1	2009-03-12 20:17:00	374	20	4	9	5
1	2009-03-12 20:18:00	1214	20	4	9	5
1	2009-03-12 20:19:00	1467	20	4	9	5
1	2009-03-12 20:20:00	938	20	4	9	5
1	2009-03-12 20:21:00	679	20	4	9	5
1	2009-03-12 20:22:00	391	20	4	9	5
1	2009-03-12 20:23:00	679	20	4	9	5
1	2009-03-12 20:24:00	374	20	4	9	5
1	2009-03-12 20:25:00	746	20	4	9	5
1	2009-03-12 20:26:00	135	20	4	9	5
1	2009-03-12 20:27:00	37	20	4	9	5
1	2009-03-12 20:28:00	148	20	4	9	5
1	2009-03-12 20:29:00	0	20	4	9	5
1	2009-03-12 20:30:00	12	20	4	9	5
1	2009-03-12 20:31:00	0	20	4	9	5
1	2009-03-12 20:32:00	0	20	4	9	5
1	2009-03-12 20:33:00	0	20	4	9	5
1	2009-03-12 20:34:00	0	20	4	9	5
1	2009-03-12 20:35:00	0	20	4	9	5
1	2009-03-12 20:36:00	0	20	4	9	5
1	2009-03-12 20:37:00	0	20	4	9	5
1	2009-03-12 20:38:00	0	20	4	9	5
1	2009-03-12 20:39:00	12	20	4	9	5
1	2009-03-12 20:40:00	37	20	4	9	5
1	2009-03-12 20:41:00	0	20	4	9	5
1	2009-03-12 20:42:00	0	20	4	9	5
1	2009-03-12 20:43:00	0	20	4	9	5
1	2009-03-12 20:44:00	0	20	4	9	5
1	2009-03-12 20:45:00	0	20	4	9	5
1	2009-03-12 20:46:00	0	20	4	9	5
1	2009-03-12 20:47:00	0	20	4	9	5
1	2009-03-12 20:48:00	0	20	4	9	5
1	2009-03-12 20:49:00	25	20	4	9	5
1	2009-03-12 20:50:00	0	20	4	9	5
1	2009-03-12 20:51:00	12	20	4	9	5
1	2009-03-12 20:52:00	12	20	4	9	5
1	2009-03-12 20:53:00	0	20	4	9	5
1	2009-03-12 20:54:00	0	20	4	9	5
1	2009-03-12 20:55:00	0	20	4	9	5
1	2009-03-12 20:56:00	0	20	4	9	5
1	2009-03-12 20:57:00	0	20	4	9	5
1	2009-03-12 20:58:00	0	20	4	9	5
1	2009-03-12 20:59:00	0	20	4	9	5
1	2009-03-12 21:00:00	0	20	4	9	5
1	2009-03-12 21:01:00	0	21	4	9	5
1	2009-03-12 21:02:00	0	21	4	9	5
1	2009-03-12 21:03:00	0	21	4	9	5
1	2009-03-12 21:04:00	0	21	4	9	5
1	2009-03-12 21:05:00	0	21	4	9	5
1	2009-03-12 21:06:00	0	21	4	9	5
1	2009-03-12 21:07:00	0	21	4	9	5
1	2009-03-12 21:08:00	0	21	4	9	5
1	2009-03-12 21:09:00	0	21	4	9	5
1	2009-03-12 21:10:00	0	21	4	9	5
1	2009-03-12 21:11:00	0	21	4	9	5
1	2009-03-12 21:12:00	0	21	4	9	5
1	2009-03-12 21:13:00	0	21	4	9	5
1	2009-03-12 21:14:00	0	21	4	9	5
1	2009-03-12 21:15:00	0	21	4	9	5
1	2009-03-12 21:16:00	0	21	4	9	5
1	2009-03-12 21:17:00	0	21	4	9	5
1	2009-03-12 21:18:00	0	21	4	9	5
1	2009-03-12 21:19:00	0	21	4	9	5
1	2009-03-12 21:20:00	0	21	4	9	5
1	2009-03-12 21:21:00	0	21	4	9	5
1	2009-03-12 21:22:00	0	21	4	9	5
1	2009-03-12 21:23:00	0	21	4	9	5
1	2009-03-12 21:24:00	0	21	4	9	5
1	2009-03-12 21:25:00	0	21	4	9	5
1	2009-03-12 21:26:00	0	21	4	9	5
1	2009-03-12 21:27:00	0	21	4	9	5
1	2009-03-12 21:28:00	0	21	4	9	5
1	2009-03-12 21:29:00	0	21	4	9	5
1	2009-03-12 21:30:00	0	21	4	9	5
1	2009-03-12 21:31:00	0	21	4	9	5
1	2009-03-12 21:32:00	0	21	4	9	5
1	2009-03-12 21:33:00	0	21	4	9	5
1	2009-03-12 21:34:00	0	21	4	9	5
1	2009-03-12 21:35:00	0	21	4	9	5
1	2009-03-12 21:36:00	0	21	4	9	5
1	2009-03-12 21:37:00	0	21	4	9	5
1	2009-03-12 21:38:00	0	21	4	9	5
1	2009-03-12 21:39:00	0	21	4	9	5
1	2009-03-12 21:40:00	0	21	4	9	5
1	2009-03-12 21:41:00	0	21	4	9	5
1	2009-03-12 21:42:00	0	21	4	9	5
1	2009-03-12 21:43:00	0	21	4	9	5
1	2009-03-12 21:44:00	0	21	4	9	5
1	2009-03-12 21:45:00	0	21	4	9	5
1	2009-03-12 21:46:00	0	21	4	9	5
1	2009-03-12 21:47:00	0	21	4	9	5
1	2009-03-12 21:48:00	0	21	4	9	5
1	2009-03-12 21:49:00	0	21	4	9	5
1	2009-03-12 21:50:00	0	21	4	9	5
1	2009-03-12 21:51:00	0	21	4	9	5
1	2009-03-12 21:52:00	0	21	4	9	5
1	2009-03-12 21:53:00	0	21	4	9	5
1	2009-03-12 21:54:00	0	21	4	9	5
1	2009-03-12 21:55:00	0	21	4	9	5
1	2009-03-12 21:56:00	0	21	4	9	5
1	2009-03-12 21:57:00	0	21	4	9	5
1	2009-03-12 21:58:00	0	21	4	9	5
1	2009-03-12 21:59:00	0	21	4	9	5
1	2009-03-12 22:00:00	0	21	4	9	5
1	2009-03-12 22:01:00	0	22	4	9	5
1	2009-03-12 22:02:00	0	22	4	9	5
1	2009-03-12 22:03:00	0	22	4	9	5
1	2009-03-12 22:04:00	0	22	4	9	5
1	2009-03-12 22:05:00	0	22	4	9	5
1	2009-03-12 22:06:00	0	22	4	9	5
1	2009-03-12 22:07:00	0	22	4	9	5
1	2009-03-12 22:08:00	0	22	4	9	5
1	2009-03-12 22:09:00	0	22	4	9	5
1	2009-03-12 22:10:00	0	22	4	9	5
1	2009-03-12 22:11:00	0	22	4	9	5
1	2009-03-12 22:12:00	0	22	4	9	5
1	2009-03-12 22:13:00	0	22	4	9	5
1	2009-03-12 22:14:00	0	22	4	9	5
1	2009-03-12 22:15:00	0	22	4	9	5
1	2009-03-12 22:16:00	0	22	4	9	5
1	2009-03-12 22:17:00	0	22	4	9	5
1	2009-03-12 22:18:00	0	22	4	9	5
1	2009-03-12 22:19:00	0	22	4	9	5
1	2009-03-12 22:20:00	0	22	4	9	5
1	2009-03-12 22:21:00	0	22	4	9	5
1	2009-03-12 22:22:00	0	22	4	9	5
1	2009-03-12 22:23:00	0	22	4	9	5
1	2009-03-12 22:24:00	0	22	4	9	5
1	2009-03-12 22:25:00	0	22	4	9	5
1	2009-03-12 22:26:00	49	22	4	9	5
1	2009-03-12 22:27:00	0	22	4	9	5
1	2009-03-12 22:28:00	0	22	4	9	5
1	2009-03-12 22:29:00	0	22	4	9	5
1	2009-03-12 22:30:00	0	22	4	9	5
1	2009-03-12 22:31:00	0	22	4	9	5
1	2009-03-12 22:32:00	0	22	4	9	5
1	2009-03-12 22:33:00	0	22	4	9	5
1	2009-03-12 22:34:00	0	22	4	9	5
1	2009-03-12 22:35:00	0	22	4	9	5
1	2009-03-12 22:36:00	0	22	4	9	5
1	2009-03-12 22:37:00	0	22	4	9	5
1	2009-03-12 22:38:00	0	22	4	9	5
1	2009-03-12 22:39:00	0	22	4	9	5
1	2009-03-12 22:40:00	0	22	4	9	5
1	2009-03-12 22:41:00	0	22	4	9	5
1	2009-03-12 22:42:00	0	22	4	9	5
1	2009-03-12 22:43:00	0	22	4	9	5
1	2009-03-12 22:44:00	0	22	4	9	5
1	2009-03-12 22:45:00	0	22	4	9	5
1	2009-03-12 22:46:00	0	22	4	9	5
1	2009-03-12 22:47:00	0	22	4	9	5
1	2009-03-12 22:48:00	0	22	4	9	5
1	2009-03-12 22:49:00	0	22	4	9	5
1	2009-03-12 22:50:00	0	22	4	9	5
1	2009-03-12 22:51:00	0	22	4	9	5
1	2009-03-12 22:52:00	0	22	4	9	5
1	2009-03-12 22:53:00	0	22	4	9	5
1	2009-03-12 22:54:00	0	22	4	9	5
1	2009-03-12 22:55:00	0	22	4	9	5
1	2009-03-12 22:56:00	0	22	4	9	5
1	2009-03-12 22:57:00	0	22	4	9	5
1	2009-03-12 22:58:00	0	22	4	9	5
1	2009-03-12 22:59:00	0	22	4	9	5
1	2009-03-12 23:00:00	0	22	4	9	5
1	2009-03-12 23:01:00	0	23	4	9	5
1	2009-03-12 23:02:00	0	23	4	9	5
1	2009-03-12 23:03:00	0	23	4	9	5
1	2009-03-12 23:04:00	0	23	4	9	5
1	2009-03-12 23:05:00	0	23	4	9	5
1	2009-03-12 23:06:00	0	23	4	9	5
1	2009-03-12 23:07:00	0	23	4	9	5
1	2009-03-12 23:08:00	0	23	4	9	5
1	2009-03-12 23:09:00	0	23	4	9	5
1	2009-03-12 23:10:00	0	23	4	9	5
1	2009-03-12 23:11:00	0	23	4	9	5
1	2009-03-12 23:12:00	0	23	4	9	5
1	2009-03-12 23:13:00	0	23	4	9	5
1	2009-03-12 23:14:00	0	23	4	9	5
1	2009-03-12 23:15:00	0	23	4	9	5
1	2009-03-12 23:16:00	0	23	4	9	5
1	2009-03-12 23:17:00	0	23	4	9	5
1	2009-03-12 23:18:00	0	23	4	9	5
1	2009-03-12 23:19:00	0	23	4	9	5
1	2009-03-12 23:20:00	0	23	4	9	5
1	2009-03-12 23:21:00	0	23	4	9	5
1	2009-03-12 23:22:00	0	23	4	9	5
1	2009-03-12 23:23:00	0	23	4	9	5
1	2009-03-12 23:24:00	0	23	4	9	5
1	2009-03-12 23:25:00	0	23	4	9	5
1	2009-03-12 23:26:00	0	23	4	9	5
1	2009-03-12 23:27:00	0	23	4	9	5
1	2009-03-12 23:28:00	0	23	4	9	5
1	2009-03-12 23:29:00	0	23	4	9	5
1	2009-03-12 23:30:00	0	23	4	9	5
1	2009-03-12 23:31:00	0	23	4	9	5
1	2009-03-12 23:32:00	0	23	4	9	5
1	2009-03-12 23:33:00	0	23	4	9	5
1	2009-03-12 23:34:00	0	23	4	9	5
1	2009-03-12 23:35:00	0	23	4	9	5
1	2009-03-12 23:36:00	0	23	4	9	5
1	2009-03-12 23:37:00	0	23	4	9	5
1	2009-03-12 23:38:00	0	23	4	9	5
1	2009-03-12 23:39:00	0	23	4	9	5
1	2009-03-12 23:40:00	0	23	4	9	5
1	2009-03-12 23:41:00	0	23	4	9	5
1	2009-03-12 23:42:00	0	23	4	9	5
1	2009-03-12 23:43:00	0	23	4	9	5
1	2009-03-12 23:44:00	0	23	4	9	5
1	2009-03-12 23:45:00	0	23	4	9	5
1	2009-03-12 23:46:00	0	23	4	9	5
1	2009-03-12 23:47:00	0	23	4	9	5
1	2009-03-12 23:48:00	0	23	4	9	5
1	2009-03-12 23:49:00	0	23	4	9	5
1	2009-03-12 23:50:00	0	23	4	9	5
1	2009-03-12 23:51:00	0	23	4	9	5
1	2009-03-12 23:52:00	25	23	4	9	5
1	2009-03-12 23:53:00	0	23	4	9	5
1	2009-03-12 23:54:00	0	23	4	9	5
1	2009-03-12 23:55:00	0	23	4	9	5
1	2009-03-12 23:56:00	0	23	4	9	5
1	2009-03-12 23:57:00	0	23	4	9	5
1	2009-03-12 23:58:00	0	23	4	9	5
1	2009-03-12 23:59:00	0	23	4	9	5
1	2009-03-13	0	23	4	9	5
1	2009-03-13 00:01:00	0	0	1	10	6
1	2009-03-13 00:02:00	0	0	1	10	6
1	2009-03-13 00:03:00	0	0	1	10	6
1	2009-03-13 00:04:00	0	0	1	10	6
1	2009-03-13 00:05:00	0	0	1	10	6
1	2009-03-13 00:06:00	0	0	1	10	6
1	2009-03-13 00:07:00	0	0	1	10	6
1	2009-03-13 00:08:00	0	0	1	10	6
1	2009-03-13 00:09:00	0	0	1	10	6
1	2009-03-13 00:10:00	0	0	1	10	6
1	2009-03-13 00:11:00	0	0	1	10	6
1	2009-03-13 00:12:00	0	0	1	10	6
1	2009-03-13 00:13:00	0	0	1	10	6
1	2009-03-13 00:14:00	0	0	1	10	6
1	2009-03-13 00:15:00	0	0	1	10	6
1	2009-03-13 00:16:00	0	0	1	10	6
1	2009-03-13 00:17:00	0	0	1	10	6
1	2009-03-13 00:18:00	0	0	1	10	6
1	2009-03-13 00:19:00	0	0	1	10	6
1	2009-03-13 00:20:00	0	0	1	10	6
1	2009-03-13 00:21:00	0	0	1	10	6
1	2009-03-13 00:22:00	0	0	1	10	6
1	2009-03-13 00:23:00	0	0	1	10	6
1	2009-03-13 00:24:00	0	0	1	10	6
1	2009-03-13 00:25:00	0	0	1	10	6
1	2009-03-13 00:26:00	0	0	1	10	6
1	2009-03-13 00:27:00	0	0	1	10	6
1	2009-03-13 00:28:00	0	0	1	10	6
1	2009-03-13 00:29:00	37	0	1	10	6
1	2009-03-13 00:30:00	0	0	1	10	6
1	2009-03-13 00:31:00	148	0	1	10	6
1	2009-03-13 00:32:00	0	0	1	10	6
1	2009-03-13 00:33:00	12	0	1	10	6
1	2009-03-13 00:34:00	0	0	1	10	6
1	2009-03-13 00:35:00	0	0	1	10	6
1	2009-03-13 00:36:00	0	0	1	10	6
1	2009-03-13 00:37:00	0	0	1	10	6
1	2009-03-13 00:38:00	0	0	1	10	6
1	2009-03-13 00:39:00	0	0	1	10	6
1	2009-03-13 00:40:00	0	0	1	10	6
1	2009-03-13 00:41:00	0	0	1	10	6
1	2009-03-13 00:42:00	0	0	1	10	6
1	2009-03-13 00:43:00	0	0	1	10	6
1	2009-03-13 00:44:00	0	0	1	10	6
1	2009-03-13 00:45:00	0	0	1	10	6
1	2009-03-13 00:46:00	0	0	1	10	6
1	2009-03-13 00:47:00	0	0	1	10	6
1	2009-03-13 00:48:00	62	0	1	10	6
1	2009-03-13 00:49:00	12	0	1	10	6
1	2009-03-13 00:50:00	37	0	1	10	6
1	2009-03-13 00:51:00	249	0	1	10	6
1	2009-03-13 00:52:00	790	0	1	10	6
1	2009-03-13 00:53:00	278	0	1	10	6
1	2009-03-13 00:54:00	0	0	1	10	6
1	2009-03-13 00:55:00	49	0	1	10	6
1	2009-03-13 00:56:00	0	0	1	10	6
1	2009-03-13 00:57:00	12	0	1	10	6
1	2009-03-13 00:58:00	0	0	1	10	6
1	2009-03-13 00:59:00	62	0	1	10	6
1	2009-03-13 01:00:00	0	0	1	10	6
1	2009-03-13 01:01:00	12	1	1	10	6
1	2009-03-13 01:02:00	0	1	1	10	6
1	2009-03-13 01:03:00	0	1	1	10	6
1	2009-03-13 01:04:00	0	1	1	10	6
1	2009-03-13 01:05:00	0	1	1	10	6
1	2009-03-13 01:06:00	12	1	1	10	6
1	2009-03-13 01:07:00	12	1	1	10	6
1	2009-03-13 01:08:00	0	1	1	10	6
1	2009-03-13 01:09:00	0	1	1	10	6
1	2009-03-13 01:10:00	0	1	1	10	6
1	2009-03-13 01:11:00	0	1	1	10	6
1	2009-03-13 01:12:00	0	1	1	10	6
1	2009-03-13 01:13:00	0	1	1	10	6
1	2009-03-13 01:14:00	0	1	1	10	6
1	2009-03-13 01:15:00	0	1	1	10	6
1	2009-03-13 01:16:00	0	1	1	10	6
1	2009-03-13 01:17:00	0	1	1	10	6
1	2009-03-13 01:18:00	0	1	1	10	6
1	2009-03-13 01:19:00	0	1	1	10	6
1	2009-03-13 01:20:00	0	1	1	10	6
1	2009-03-13 01:21:00	0	1	1	10	6
1	2009-03-13 01:22:00	0	1	1	10	6
1	2009-03-13 01:23:00	0	1	1	10	6
1	2009-03-13 01:24:00	0	1	1	10	6
1	2009-03-13 01:25:00	0	1	1	10	6
1	2009-03-13 01:26:00	0	1	1	10	6
1	2009-03-13 01:27:00	0	1	1	10	6
1	2009-03-13 01:28:00	0	1	1	10	6
1	2009-03-13 01:29:00	0	1	1	10	6
1	2009-03-13 01:30:00	0	1	1	10	6
1	2009-03-13 01:31:00	0	1	1	10	6
1	2009-03-13 01:32:00	0	1	1	10	6
1	2009-03-13 01:33:00	0	1	1	10	6
1	2009-03-13 01:34:00	0	1	1	10	6
1	2009-03-13 01:35:00	0	1	1	10	6
1	2009-03-13 01:36:00	0	1	1	10	6
1	2009-03-13 01:37:00	0	1	1	10	6
1	2009-03-13 01:38:00	0	1	1	10	6
1	2009-03-13 01:39:00	0	1	1	10	6
1	2009-03-13 01:40:00	0	1	1	10	6
1	2009-03-13 01:41:00	0	1	1	10	6
1	2009-03-13 01:42:00	0	1	1	10	6
1	2009-03-13 01:43:00	0	1	1	10	6
1	2009-03-13 01:44:00	0	1	1	10	6
1	2009-03-13 01:45:00	0	1	1	10	6
1	2009-03-13 01:46:00	0	1	1	10	6
1	2009-03-13 01:47:00	0	1	1	10	6
1	2009-03-13 01:48:00	0	1	1	10	6
1	2009-03-13 01:49:00	0	1	1	10	6
1	2009-03-13 01:50:00	175	1	1	10	6
1	2009-03-13 01:51:00	49	1	1	10	6
1	2009-03-13 01:52:00	12	1	1	10	6
1	2009-03-13 01:53:00	37	1	1	10	6
1	2009-03-13 01:54:00	0	1	1	10	6
1	2009-03-13 01:55:00	0	1	1	10	6
1	2009-03-13 01:56:00	0	1	1	10	6
1	2009-03-13 01:57:00	0	1	1	10	6
1	2009-03-13 01:58:00	0	1	1	10	6
1	2009-03-13 01:59:00	0	1	1	10	6
1	2009-03-13 02:00:00	0	1	1	10	6
1	2009-03-13 02:01:00	0	2	1	10	6
1	2009-03-13 02:02:00	0	2	1	10	6
1	2009-03-13 02:03:00	0	2	1	10	6
1	2009-03-13 02:04:00	0	2	1	10	6
1	2009-03-13 02:05:00	0	2	1	10	6
1	2009-03-13 02:06:00	0	2	1	10	6
1	2009-03-13 02:07:00	0	2	1	10	6
1	2009-03-13 02:08:00	0	2	1	10	6
1	2009-03-13 02:09:00	0	2	1	10	6
1	2009-03-13 02:10:00	0	2	1	10	6
1	2009-03-13 02:11:00	0	2	1	10	6
1	2009-03-13 02:12:00	0	2	1	10	6
1	2009-03-13 02:13:00	0	2	1	10	6
1	2009-03-13 02:14:00	0	2	1	10	6
1	2009-03-13 02:15:00	0	2	1	10	6
1	2009-03-13 02:16:00	0	2	1	10	6
1	2009-03-13 02:17:00	0	2	1	10	6
1	2009-03-13 02:18:00	0	2	1	10	6
1	2009-03-13 02:19:00	0	2	1	10	6
1	2009-03-13 02:20:00	0	2	1	10	6
1	2009-03-13 02:21:00	0	2	1	10	6
1	2009-03-13 02:22:00	0	2	1	10	6
1	2009-03-13 02:23:00	0	2	1	10	6
1	2009-03-13 02:24:00	0	2	1	10	6
1	2009-03-13 02:25:00	0	2	1	10	6
1	2009-03-13 02:26:00	0	2	1	10	6
1	2009-03-13 02:27:00	0	2	1	10	6
1	2009-03-13 02:28:00	0	2	1	10	6
1	2009-03-13 02:29:00	0	2	1	10	6
1	2009-03-13 02:30:00	0	2	1	10	6
1	2009-03-13 02:31:00	0	2	1	10	6
1	2009-03-13 02:32:00	0	2	1	10	6
1	2009-03-13 02:33:00	0	2	1	10	6
1	2009-03-13 02:34:00	0	2	1	10	6
1	2009-03-13 02:35:00	0	2	1	10	6
1	2009-03-13 02:36:00	0	2	1	10	6
1	2009-03-13 02:37:00	0	2	1	10	6
1	2009-03-13 02:38:00	0	2	1	10	6
1	2009-03-13 02:39:00	0	2	1	10	6
1	2009-03-13 02:40:00	0	2	1	10	6
1	2009-03-13 02:41:00	0	2	1	10	6
1	2009-03-13 02:42:00	0	2	1	10	6
1	2009-03-13 02:43:00	0	2	1	10	6
1	2009-03-13 02:44:00	0	2	1	10	6
1	2009-03-13 02:45:00	0	2	1	10	6
1	2009-03-13 02:46:00	0	2	1	10	6
1	2009-03-13 02:47:00	0	2	1	10	6
1	2009-03-13 02:48:00	0	2	1	10	6
1	2009-03-13 02:49:00	0	2	1	10	6
1	2009-03-13 02:50:00	0	2	1	10	6
1	2009-03-13 02:51:00	0	2	1	10	6
1	2009-03-13 02:52:00	0	2	1	10	6
1	2009-03-13 02:53:00	0	2	1	10	6
1	2009-03-13 02:54:00	0	2	1	10	6
1	2009-03-13 02:55:00	0	2	1	10	6
1	2009-03-13 02:56:00	0	2	1	10	6
1	2009-03-13 02:57:00	12	2	1	10	6
1	2009-03-13 02:58:00	0	2	1	10	6
1	2009-03-13 02:59:00	0	2	1	10	6
1	2009-03-13 03:00:00	37	2	1	10	6
1	2009-03-13 03:01:00	0	3	1	10	6
1	2009-03-13 03:02:00	0	3	1	10	6
1	2009-03-13 03:03:00	0	3	1	10	6
1	2009-03-13 03:04:00	0	3	1	10	6
1	2009-03-13 03:05:00	0	3	1	10	6
1	2009-03-13 03:06:00	0	3	1	10	6
1	2009-03-13 03:07:00	0	3	1	10	6
1	2009-03-13 03:08:00	0	3	1	10	6
1	2009-03-13 03:09:00	0	3	1	10	6
1	2009-03-13 03:10:00	0	3	1	10	6
1	2009-03-13 03:11:00	0	3	1	10	6
1	2009-03-13 03:12:00	0	3	1	10	6
1	2009-03-13 03:13:00	0	3	1	10	6
1	2009-03-13 03:14:00	0	3	1	10	6
1	2009-03-13 03:15:00	0	3	1	10	6
1	2009-03-13 03:16:00	0	3	1	10	6
1	2009-03-13 03:17:00	0	3	1	10	6
1	2009-03-13 03:18:00	0	3	1	10	6
1	2009-03-13 03:19:00	0	3	1	10	6
1	2009-03-13 03:20:00	0	3	1	10	6
1	2009-03-13 03:21:00	0	3	1	10	6
1	2009-03-13 03:22:00	0	3	1	10	6
1	2009-03-13 03:23:00	0	3	1	10	6
1	2009-03-13 03:24:00	0	3	1	10	6
1	2009-03-13 03:25:00	0	3	1	10	6
1	2009-03-13 03:26:00	0	3	1	10	6
1	2009-03-13 03:27:00	0	3	1	10	6
1	2009-03-13 03:28:00	0	3	1	10	6
1	2009-03-13 03:29:00	0	3	1	10	6
1	2009-03-13 03:30:00	0	3	1	10	6
1	2009-03-13 03:31:00	0	3	1	10	6
1	2009-03-13 03:32:00	0	3	1	10	6
1	2009-03-13 03:33:00	0	3	1	10	6
1	2009-03-13 03:34:00	0	3	1	10	6
1	2009-03-13 03:35:00	0	3	1	10	6
1	2009-03-13 03:36:00	0	3	1	10	6
1	2009-03-13 03:37:00	0	3	1	10	6
1	2009-03-13 03:38:00	0	3	1	10	6
1	2009-03-13 03:39:00	0	3	1	10	6
1	2009-03-13 03:40:00	0	3	1	10	6
1	2009-03-13 03:41:00	0	3	1	10	6
1	2009-03-13 03:42:00	0	3	1	10	6
1	2009-03-13 03:43:00	0	3	1	10	6
1	2009-03-13 03:44:00	0	3	1	10	6
1	2009-03-13 03:45:00	0	3	1	10	6
1	2009-03-13 03:46:00	0	3	1	10	6
1	2009-03-13 03:47:00	0	3	1	10	6
1	2009-03-13 03:48:00	0	3	1	10	6
1	2009-03-13 03:49:00	0	3	1	10	6
1	2009-03-13 03:50:00	0	3	1	10	6
1	2009-03-13 03:51:00	0	3	1	10	6
1	2009-03-13 03:52:00	0	3	1	10	6
1	2009-03-13 03:53:00	0	3	1	10	6
1	2009-03-13 03:54:00	0	3	1	10	6
1	2009-03-13 03:55:00	0	3	1	10	6
1	2009-03-13 03:56:00	0	3	1	10	6
1	2009-03-13 03:57:00	0	3	1	10	6
1	2009-03-13 03:58:00	0	3	1	10	6
1	2009-03-13 03:59:00	0	3	1	10	6
1	2009-03-13 04:00:00	0	3	1	10	6
1	2009-03-13 04:01:00	0	4	1	10	6
1	2009-03-13 04:02:00	0	4	1	10	6
1	2009-03-13 04:03:00	0	4	1	10	6
1	2009-03-13 04:04:00	0	4	1	10	6
1	2009-03-13 04:05:00	0	4	1	10	6
1	2009-03-13 04:06:00	0	4	1	10	6
1	2009-03-13 04:07:00	0	4	1	10	6
1	2009-03-13 04:08:00	0	4	1	10	6
1	2009-03-13 04:09:00	0	4	1	10	6
1	2009-03-13 04:10:00	0	4	1	10	6
1	2009-03-13 04:11:00	0	4	1	10	6
1	2009-03-13 04:12:00	0	4	1	10	6
1	2009-03-13 04:13:00	0	4	1	10	6
1	2009-03-13 04:14:00	0	4	1	10	6
1	2009-03-13 04:15:00	0	4	1	10	6
1	2009-03-13 04:16:00	0	4	1	10	6
1	2009-03-13 04:17:00	0	4	1	10	6
1	2009-03-13 04:18:00	0	4	1	10	6
1	2009-03-13 04:19:00	0	4	1	10	6
1	2009-03-13 04:20:00	0	4	1	10	6
1	2009-03-13 04:21:00	0	4	1	10	6
1	2009-03-13 04:22:00	12	4	1	10	6
1	2009-03-13 04:23:00	0	4	1	10	6
1	2009-03-13 04:24:00	0	4	1	10	6
1	2009-03-13 04:25:00	0	4	1	10	6
1	2009-03-13 04:26:00	0	4	1	10	6
1	2009-03-13 04:27:00	0	4	1	10	6
1	2009-03-13 04:28:00	0	4	1	10	6
1	2009-03-13 04:29:00	0	4	1	10	6
1	2009-03-13 04:30:00	0	4	1	10	6
1	2009-03-13 04:31:00	12	4	1	10	6
1	2009-03-13 04:32:00	0	4	1	10	6
1	2009-03-13 04:33:00	0	4	1	10	6
1	2009-03-13 04:34:00	0	4	1	10	6
1	2009-03-13 04:35:00	0	4	1	10	6
1	2009-03-13 04:36:00	0	4	1	10	6
1	2009-03-13 04:37:00	0	4	1	10	6
1	2009-03-13 04:38:00	0	4	1	10	6
1	2009-03-13 04:39:00	0	4	1	10	6
1	2009-03-13 04:40:00	0	4	1	10	6
1	2009-03-13 04:41:00	0	4	1	10	6
1	2009-03-13 04:42:00	0	4	1	10	6
1	2009-03-13 04:43:00	0	4	1	10	6
1	2009-03-13 04:44:00	0	4	1	10	6
1	2009-03-13 04:45:00	0	4	1	10	6
1	2009-03-13 04:46:00	0	4	1	10	6
1	2009-03-13 04:47:00	0	4	1	10	6
1	2009-03-13 04:48:00	0	4	1	10	6
1	2009-03-13 04:49:00	0	4	1	10	6
1	2009-03-13 04:50:00	0	4	1	10	6
1	2009-03-13 04:51:00	0	4	1	10	6
1	2009-03-13 04:52:00	0	4	1	10	6
1	2009-03-13 04:53:00	0	4	1	10	6
1	2009-03-13 04:54:00	0	4	1	10	6
1	2009-03-13 04:55:00	0	4	1	10	6
1	2009-03-13 04:56:00	111	4	1	10	6
1	2009-03-13 04:57:00	74	4	1	10	6
1	2009-03-13 04:58:00	12	4	1	10	6
1	2009-03-13 04:59:00	37	4	1	10	6
1	2009-03-13 05:00:00	25	4	1	10	6
1	2009-03-13 05:01:00	0	5	1	10	6
1	2009-03-13 05:02:00	0	5	1	10	6
1	2009-03-13 05:03:00	0	5	1	10	6
1	2009-03-13 05:04:00	12	5	1	10	6
1	2009-03-13 05:05:00	0	5	1	10	6
1	2009-03-13 05:06:00	12	5	1	10	6
1	2009-03-13 05:07:00	0	5	1	10	6
1	2009-03-13 05:08:00	0	5	1	10	6
1	2009-03-13 05:09:00	25	5	1	10	6
1	2009-03-13 05:10:00	0	5	1	10	6
1	2009-03-13 05:11:00	0	5	1	10	6
1	2009-03-13 05:12:00	25	5	1	10	6
1	2009-03-13 05:13:00	0	5	1	10	6
1	2009-03-13 05:14:00	25	5	1	10	6
1	2009-03-13 05:15:00	443	5	1	10	6
1	2009-03-13 05:16:00	293	5	1	10	6
1	2009-03-13 05:17:00	517	5	1	10	6
1	2009-03-13 05:18:00	679	5	1	10	6
1	2009-03-13 05:19:00	1044	5	1	10	6
1	2009-03-13 05:20:00	160	5	1	10	6
1	2009-03-13 05:21:00	111	5	1	10	6
1	2009-03-13 05:22:00	74	5	1	10	6
1	2009-03-13 05:23:00	148	5	1	10	6
1	2009-03-13 05:24:00	204	5	1	10	6
1	2009-03-13 05:25:00	111	5	1	10	6
1	2009-03-13 05:26:00	148	5	1	10	6
1	2009-03-13 05:27:00	74	5	1	10	6
1	2009-03-13 05:28:00	62	5	1	10	6
1	2009-03-13 05:29:00	148	5	1	10	6
1	2009-03-13 05:30:00	37	5	1	10	6
1	2009-03-13 05:31:00	62	5	1	10	6
1	2009-03-13 05:32:00	123	5	1	10	6
1	2009-03-13 05:33:00	790	5	1	10	6
1	2009-03-13 05:34:00	790	5	1	10	6
1	2009-03-13 05:35:00	263	5	1	10	6
1	2009-03-13 05:36:00	190	5	1	10	6
1	2009-03-13 05:37:00	49	5	1	10	6
1	2009-03-13 05:38:00	0	5	1	10	6
1	2009-03-13 05:39:00	357	5	1	10	6
1	2009-03-13 05:40:00	635	5	1	10	6
1	2009-03-13 05:41:00	98	5	1	10	6
1	2009-03-13 05:42:00	391	5	1	10	6
1	2009-03-13 05:43:00	1125	5	1	10	6
1	2009-03-13 05:44:00	679	5	1	10	6
1	2009-03-13 05:45:00	123	5	1	10	6
1	2009-03-13 05:46:00	724	5	1	10	6
1	2009-03-13 05:47:00	357	5	1	10	6
1	2009-03-13 05:48:00	576	5	1	10	6
1	2009-03-13 05:49:00	839	5	1	10	6
1	2009-03-13 05:50:00	443	5	1	10	6
1	2009-03-13 05:51:00	839	5	1	10	6
1	2009-03-13 05:52:00	1369	5	1	10	6
1	2009-03-13 05:53:00	517	5	1	10	6
1	2009-03-13 05:54:00	219	5	1	10	6
1	2009-03-13 05:55:00	596	5	1	10	6
1	2009-03-13 05:56:00	497	5	1	10	6
1	2009-03-13 05:57:00	340	5	1	10	6
1	2009-03-13 05:58:00	537	5	1	10	6
1	2009-03-13 05:59:00	576	5	1	10	6
1	2009-03-13 06:00:00	374	5	1	10	6
1	2009-03-13 06:01:00	322	6	2	10	6
1	2009-03-13 06:02:00	204	6	2	10	6
1	2009-03-13 06:03:00	0	6	2	10	6
1	2009-03-13 06:04:00	0	6	2	10	6
1	2009-03-13 06:05:00	0	6	2	10	6
1	2009-03-13 06:06:00	12	6	2	10	6
1	2009-03-13 06:07:00	25	6	2	10	6
1	2009-03-13 06:08:00	0	6	2	10	6
1	2009-03-13 06:09:00	0	6	2	10	6
1	2009-03-13 06:10:00	12	6	2	10	6
1	2009-03-13 06:11:00	0	6	2	10	6
1	2009-03-13 06:12:00	0	6	2	10	6
1	2009-03-13 06:13:00	0	6	2	10	6
1	2009-03-13 06:14:00	0	6	2	10	6
1	2009-03-13 06:15:00	0	6	2	10	6
1	2009-03-13 06:16:00	12	6	2	10	6
1	2009-03-13 06:17:00	0	6	2	10	6
1	2009-03-13 06:18:00	12	6	2	10	6
1	2009-03-13 06:19:00	0	6	2	10	6
1	2009-03-13 06:20:00	0	6	2	10	6
1	2009-03-13 06:21:00	0	6	2	10	6
1	2009-03-13 06:22:00	12	6	2	10	6
1	2009-03-13 06:23:00	0	6	2	10	6
1	2009-03-13 06:24:00	25	6	2	10	6
1	2009-03-13 06:25:00	0	6	2	10	6
1	2009-03-13 06:26:00	0	6	2	10	6
1	2009-03-13 06:27:00	0	6	2	10	6
1	2009-03-13 06:28:00	0	6	2	10	6
1	2009-03-13 06:29:00	0	6	2	10	6
1	2009-03-13 06:30:00	25	6	2	10	6
1	2009-03-13 06:31:00	25	6	2	10	6
1	2009-03-13 06:32:00	0	6	2	10	6
1	2009-03-13 06:33:00	12	6	2	10	6
1	2009-03-13 06:34:00	12	6	2	10	6
1	2009-03-13 06:35:00	0	6	2	10	6
1	2009-03-13 06:36:00	0	6	2	10	6
1	2009-03-13 06:37:00	12	6	2	10	6
1	2009-03-13 06:38:00	0	6	2	10	6
1	2009-03-13 06:39:00	0	6	2	10	6
1	2009-03-13 06:40:00	0	6	2	10	6
1	2009-03-13 06:41:00	0	6	2	10	6
1	2009-03-13 06:42:00	12	6	2	10	6
1	2009-03-13 06:43:00	0	6	2	10	6
1	2009-03-13 06:44:00	0	6	2	10	6
1	2009-03-13 06:45:00	0	6	2	10	6
1	2009-03-13 06:46:00	0	6	2	10	6
1	2009-03-13 06:47:00	0	6	2	10	6
1	2009-03-13 06:48:00	0	6	2	10	6
1	2009-03-13 06:49:00	0	6	2	10	6
1	2009-03-13 06:50:00	0	6	2	10	6
1	2009-03-13 06:51:00	0	6	2	10	6
1	2009-03-13 06:52:00	0	6	2	10	6
1	2009-03-13 06:53:00	0	6	2	10	6
1	2009-03-13 06:54:00	0	6	2	10	6
1	2009-03-13 06:55:00	0	6	2	10	6
1	2009-03-13 06:56:00	0	6	2	10	6
1	2009-03-13 06:57:00	0	6	2	10	6
1	2009-03-13 06:58:00	0	6	2	10	6
1	2009-03-13 06:59:00	0	6	2	10	6
1	2009-03-13 07:00:00	0	6	2	10	6
1	2009-03-13 07:01:00	0	7	2	10	6
1	2009-03-13 07:02:00	0	7	2	10	6
1	2009-03-13 07:03:00	0	7	2	10	6
1	2009-03-13 07:04:00	0	7	2	10	6
1	2009-03-13 07:05:00	0	7	2	10	6
1	2009-03-13 07:06:00	0	7	2	10	6
1	2009-03-13 07:07:00	0	7	2	10	6
1	2009-03-13 07:08:00	0	7	2	10	6
1	2009-03-13 07:09:00	12	7	2	10	6
1	2009-03-13 07:10:00	0	7	2	10	6
1	2009-03-13 07:11:00	0	7	2	10	6
1	2009-03-13 07:12:00	0	7	2	10	6
1	2009-03-13 07:13:00	25	7	2	10	6
1	2009-03-13 07:14:00	0	7	2	10	6
1	2009-03-13 07:15:00	0	7	2	10	6
1	2009-03-13 07:16:00	0	7	2	10	6
1	2009-03-13 07:17:00	0	7	2	10	6
1	2009-03-13 07:18:00	0	7	2	10	6
1	2009-03-13 07:19:00	0	7	2	10	6
1	2009-03-13 07:20:00	0	7	2	10	6
1	2009-03-13 07:21:00	0	7	2	10	6
1	2009-03-13 07:22:00	0	7	2	10	6
1	2009-03-13 07:23:00	37	7	2	10	6
1	2009-03-13 07:24:00	12	7	2	10	6
1	2009-03-13 07:25:00	0	7	2	10	6
1	2009-03-13 07:26:00	0	7	2	10	6
1	2009-03-13 07:27:00	0	7	2	10	6
1	2009-03-13 07:28:00	0	7	2	10	6
1	2009-03-13 07:29:00	98	7	2	10	6
1	2009-03-13 07:30:00	62	7	2	10	6
1	2009-03-13 07:31:00	0	7	2	10	6
1	2009-03-13 07:32:00	12	7	2	10	6
1	2009-03-13 07:33:00	0	7	2	10	6
1	2009-03-13 07:34:00	0	7	2	10	6
1	2009-03-13 07:35:00	12	7	2	10	6
1	2009-03-13 07:36:00	0	7	2	10	6
1	2009-03-13 07:37:00	12	7	2	10	6
1	2009-03-13 07:38:00	12	7	2	10	6
1	2009-03-13 07:39:00	12	7	2	10	6
1	2009-03-13 07:40:00	0	7	2	10	6
1	2009-03-13 07:41:00	0	7	2	10	6
1	2009-03-13 07:42:00	25	7	2	10	6
1	2009-03-13 07:43:00	0	7	2	10	6
1	2009-03-13 07:44:00	0	7	2	10	6
1	2009-03-13 07:45:00	0	7	2	10	6
1	2009-03-13 07:46:00	0	7	2	10	6
1	2009-03-13 07:47:00	0	7	2	10	6
1	2009-03-13 07:48:00	0	7	2	10	6
1	2009-03-13 07:49:00	0	7	2	10	6
1	2009-03-13 07:50:00	0	7	2	10	6
1	2009-03-13 07:51:00	0	7	2	10	6
1	2009-03-13 07:52:00	0	7	2	10	6
1	2009-03-13 07:53:00	0	7	2	10	6
1	2009-03-13 07:54:00	12	7	2	10	6
1	2009-03-13 07:55:00	0	7	2	10	6
1	2009-03-13 07:56:00	0	7	2	10	6
1	2009-03-13 07:57:00	0	7	2	10	6
1	2009-03-13 07:58:00	0	7	2	10	6
1	2009-03-13 07:59:00	0	7	2	10	6
1	2009-03-13 08:00:00	0	7	2	10	6
1	2009-03-13 08:01:00	0	8	2	10	6
1	2009-03-13 08:02:00	0	8	2	10	6
1	2009-03-13 08:03:00	0	8	2	10	6
1	2009-03-13 08:04:00	0	8	2	10	6
1	2009-03-13 08:05:00	0	8	2	10	6
1	2009-03-13 08:06:00	0	8	2	10	6
1	2009-03-13 08:07:00	0	8	2	10	6
1	2009-03-13 08:08:00	12	8	2	10	6
1	2009-03-13 08:09:00	0	8	2	10	6
1	2009-03-13 08:10:00	12	8	2	10	6
1	2009-03-13 08:11:00	0	8	2	10	6
1	2009-03-13 08:12:00	0	8	2	10	6
1	2009-03-13 08:13:00	0	8	2	10	6
1	2009-03-13 08:14:00	0	8	2	10	6
1	2009-03-13 08:15:00	0	8	2	10	6
1	2009-03-13 08:16:00	0	8	2	10	6
1	2009-03-13 08:17:00	0	8	2	10	6
1	2009-03-13 08:18:00	0	8	2	10	6
1	2009-03-13 08:19:00	0	8	2	10	6
1	2009-03-13 08:20:00	0	8	2	10	6
1	2009-03-13 08:21:00	0	8	2	10	6
1	2009-03-13 08:22:00	0	8	2	10	6
1	2009-03-13 08:23:00	0	8	2	10	6
1	2009-03-13 08:24:00	0	8	2	10	6
1	2009-03-13 08:25:00	0	8	2	10	6
1	2009-03-13 08:26:00	0	8	2	10	6
1	2009-03-13 08:27:00	0	8	2	10	6
1	2009-03-13 08:28:00	0	8	2	10	6
1	2009-03-13 08:29:00	0	8	2	10	6
1	2009-03-13 08:30:00	0	8	2	10	6
1	2009-03-13 08:31:00	0	8	2	10	6
1	2009-03-13 08:32:00	0	8	2	10	6
1	2009-03-13 08:33:00	0	8	2	10	6
1	2009-03-13 08:34:00	0	8	2	10	6
1	2009-03-13 08:35:00	0	8	2	10	6
1	2009-03-13 08:36:00	0	8	2	10	6
1	2009-03-13 08:37:00	0	8	2	10	6
1	2009-03-13 08:38:00	0	8	2	10	6
1	2009-03-13 08:39:00	0	8	2	10	6
1	2009-03-13 08:40:00	0	8	2	10	6
1	2009-03-13 08:41:00	0	8	2	10	6
1	2009-03-13 08:42:00	0	8	2	10	6
1	2009-03-13 08:43:00	0	8	2	10	6
1	2009-03-13 08:44:00	0	8	2	10	6
1	2009-03-13 08:45:00	0	8	2	10	6
1	2009-03-13 08:46:00	0	8	2	10	6
1	2009-03-13 08:47:00	0	8	2	10	6
1	2009-03-13 08:48:00	0	8	2	10	6
1	2009-03-13 08:49:00	0	8	2	10	6
1	2009-03-13 08:50:00	0	8	2	10	6
1	2009-03-13 08:51:00	0	8	2	10	6
1	2009-03-13 08:52:00	0	8	2	10	6
1	2009-03-13 08:53:00	0	8	2	10	6
1	2009-03-13 08:54:00	0	8	2	10	6
1	2009-03-13 08:55:00	0	8	2	10	6
1	2009-03-13 08:56:00	0	8	2	10	6
1	2009-03-13 08:57:00	0	8	2	10	6
1	2009-03-13 08:58:00	0	8	2	10	6
1	2009-03-13 08:59:00	0	8	2	10	6
1	2009-03-13 09:00:00	0	8	2	10	6
1	2009-03-13 09:01:00	0	9	2	10	6
1	2009-03-13 09:02:00	0	9	2	10	6
1	2009-03-13 09:03:00	0	9	2	10	6
1	2009-03-13 09:04:00	0	9	2	10	6
1	2009-03-13 09:05:00	0	9	2	10	6
1	2009-03-13 09:06:00	0	9	2	10	6
1	2009-03-13 09:07:00	0	9	2	10	6
1	2009-03-13 09:08:00	12	9	2	10	6
1	2009-03-13 09:09:00	0	9	2	10	6
1	2009-03-13 09:10:00	0	9	2	10	6
1	2009-03-13 09:11:00	12	9	2	10	6
1	2009-03-13 09:12:00	0	9	2	10	6
1	2009-03-13 09:13:00	0	9	2	10	6
1	2009-03-13 09:14:00	0	9	2	10	6
1	2009-03-13 09:15:00	0	9	2	10	6
1	2009-03-13 09:16:00	0	9	2	10	6
1	2009-03-13 09:17:00	0	9	2	10	6
1	2009-03-13 09:18:00	0	9	2	10	6
1	2009-03-13 09:19:00	0	9	2	10	6
1	2009-03-13 09:20:00	0	9	2	10	6
1	2009-03-13 09:21:00	0	9	2	10	6
1	2009-03-13 09:22:00	0	9	2	10	6
1	2009-03-13 09:23:00	0	9	2	10	6
1	2009-03-13 09:24:00	0	9	2	10	6
1	2009-03-13 09:25:00	0	9	2	10	6
1	2009-03-13 09:26:00	0	9	2	10	6
1	2009-03-13 09:27:00	0	9	2	10	6
1	2009-03-13 09:28:00	0	9	2	10	6
1	2009-03-13 09:29:00	0	9	2	10	6
1	2009-03-13 09:30:00	0	9	2	10	6
1	2009-03-13 09:31:00	0	9	2	10	6
1	2009-03-13 09:32:00	0	9	2	10	6
1	2009-03-13 09:33:00	0	9	2	10	6
1	2009-03-13 09:34:00	0	9	2	10	6
1	2009-03-13 09:35:00	0	9	2	10	6
1	2009-03-13 09:36:00	0	9	2	10	6
1	2009-03-13 09:37:00	0	9	2	10	6
1	2009-03-13 09:38:00	0	9	2	10	6
1	2009-03-13 09:39:00	0	9	2	10	6
1	2009-03-13 09:40:00	0	9	2	10	6
1	2009-03-13 09:41:00	0	9	2	10	6
1	2009-03-13 09:42:00	0	9	2	10	6
1	2009-03-13 09:43:00	0	9	2	10	6
1	2009-03-13 09:44:00	0	9	2	10	6
1	2009-03-13 09:45:00	0	9	2	10	6
1	2009-03-13 09:46:00	0	9	2	10	6
1	2009-03-13 09:47:00	0	9	2	10	6
1	2009-03-13 09:48:00	0	9	2	10	6
1	2009-03-13 09:49:00	0	9	2	10	6
1	2009-03-13 09:50:00	0	9	2	10	6
1	2009-03-13 09:51:00	0	9	2	10	6
1	2009-03-13 09:52:00	0	9	2	10	6
1	2009-03-13 09:53:00	0	9	2	10	6
1	2009-03-13 09:54:00	0	9	2	10	6
1	2009-03-13 09:55:00	0	9	2	10	6
1	2009-03-13 09:56:00	0	9	2	10	6
1	2009-03-13 09:57:00	0	9	2	10	6
1	2009-03-13 09:58:00	0	9	2	10	6
1	2009-03-13 09:59:00	0	9	2	10	6
1	2009-03-13 10:00:00	0	9	2	10	6
1	2009-03-13 10:01:00	12	10	2	10	6
1	2009-03-13 10:02:00	0	10	2	10	6
1	2009-03-13 10:03:00	0	10	2	10	6
1	2009-03-13 10:04:00	0	10	2	10	6
1	2009-03-13 10:05:00	0	10	2	10	6
1	2009-03-13 10:06:00	0	10	2	10	6
1	2009-03-13 10:07:00	0	10	2	10	6
1	2009-03-13 10:08:00	25	10	2	10	6
1	2009-03-13 10:09:00	0	10	2	10	6
1	2009-03-13 10:10:00	0	10	2	10	6
1	2009-03-13 10:11:00	0	10	2	10	6
1	2009-03-13 10:12:00	0	10	2	10	6
1	2009-03-13 10:13:00	0	10	2	10	6
1	2009-03-13 10:14:00	0	10	2	10	6
1	2009-03-13 10:15:00	0	10	2	10	6
1	2009-03-13 10:16:00	0	10	2	10	6
1	2009-03-13 10:17:00	0	10	2	10	6
1	2009-03-13 10:18:00	0	10	2	10	6
1	2009-03-13 10:19:00	0	10	2	10	6
1	2009-03-13 10:20:00	0	10	2	10	6
1	2009-03-13 10:21:00	0	10	2	10	6
1	2009-03-13 10:22:00	0	10	2	10	6
1	2009-03-13 10:23:00	0	10	2	10	6
1	2009-03-13 10:24:00	0	10	2	10	6
1	2009-03-13 10:25:00	0	10	2	10	6
1	2009-03-13 10:26:00	0	10	2	10	6
1	2009-03-13 10:27:00	0	10	2	10	6
1	2009-03-13 10:28:00	0	10	2	10	6
1	2009-03-13 10:29:00	0	10	2	10	6
1	2009-03-13 10:30:00	0	10	2	10	6
1	2009-03-13 10:31:00	0	10	2	10	6
1	2009-03-13 10:32:00	0	10	2	10	6
1	2009-03-13 10:33:00	0	10	2	10	6
1	2009-03-13 10:34:00	0	10	2	10	6
1	2009-03-13 10:35:00	0	10	2	10	6
1	2009-03-13 10:36:00	0	10	2	10	6
1	2009-03-13 10:37:00	0	10	2	10	6
1	2009-03-13 10:38:00	0	10	2	10	6
1	2009-03-13 10:39:00	0	10	2	10	6
1	2009-03-13 10:40:00	0	10	2	10	6
1	2009-03-13 10:41:00	12	10	2	10	6
1	2009-03-13 10:42:00	0	10	2	10	6
1	2009-03-13 10:43:00	0	10	2	10	6
1	2009-03-13 10:44:00	0	10	2	10	6
1	2009-03-13 10:45:00	0	10	2	10	6
1	2009-03-13 10:46:00	12	10	2	10	6
1	2009-03-13 10:47:00	0	10	2	10	6
1	2009-03-13 10:48:00	0	10	2	10	6
1	2009-03-13 10:49:00	0	10	2	10	6
1	2009-03-13 10:50:00	0	10	2	10	6
1	2009-03-13 10:51:00	0	10	2	10	6
1	2009-03-13 10:52:00	0	10	2	10	6
1	2009-03-13 10:53:00	0	10	2	10	6
1	2009-03-13 10:54:00	0	10	2	10	6
1	2009-03-13 10:55:00	0	10	2	10	6
1	2009-03-13 10:56:00	0	10	2	10	6
1	2009-03-13 10:57:00	0	10	2	10	6
1	2009-03-13 10:58:00	12	10	2	10	6
1	2009-03-13 10:59:00	0	10	2	10	6
1	2009-03-13 11:00:00	0	10	2	10	6
1	2009-03-13 11:01:00	0	11	2	10	6
1	2009-03-13 11:02:00	0	11	2	10	6
1	2009-03-13 11:03:00	0	11	2	10	6
1	2009-03-13 11:04:00	0	11	2	10	6
1	2009-03-13 11:05:00	0	11	2	10	6
1	2009-03-13 11:06:00	0	11	2	10	6
1	2009-03-13 11:07:00	0	11	2	10	6
1	2009-03-13 11:08:00	0	11	2	10	6
1	2009-03-13 11:09:00	12	11	2	10	6
1	2009-03-13 11:10:00	12	11	2	10	6
1	2009-03-13 11:11:00	25	11	2	10	6
1	2009-03-13 11:12:00	0	11	2	10	6
1	2009-03-13 11:13:00	0	11	2	10	6
1	2009-03-13 11:14:00	0	11	2	10	6
1	2009-03-13 11:15:00	0	11	2	10	6
1	2009-03-13 11:16:00	0	11	2	10	6
1	2009-03-13 11:17:00	0	11	2	10	6
1	2009-03-13 11:18:00	0	11	2	10	6
1	2009-03-13 11:19:00	0	11	2	10	6
1	2009-03-13 11:20:00	0	11	2	10	6
1	2009-03-13 11:21:00	0	11	2	10	6
1	2009-03-13 11:22:00	0	11	2	10	6
1	2009-03-13 11:23:00	0	11	2	10	6
1	2009-03-13 11:24:00	0	11	2	10	6
1	2009-03-13 11:25:00	0	11	2	10	6
1	2009-03-13 11:26:00	0	11	2	10	6
1	2009-03-13 11:27:00	0	11	2	10	6
1	2009-03-13 11:28:00	0	11	2	10	6
1	2009-03-13 11:29:00	0	11	2	10	6
1	2009-03-13 11:30:00	0	11	2	10	6
1	2009-03-13 11:31:00	0	11	2	10	6
1	2009-03-13 11:32:00	0	11	2	10	6
1	2009-03-13 11:33:00	0	11	2	10	6
1	2009-03-13 11:34:00	0	11	2	10	6
1	2009-03-13 11:35:00	0	11	2	10	6
1	2009-03-13 11:36:00	0	11	2	10	6
1	2009-03-13 11:37:00	0	11	2	10	6
1	2009-03-13 11:38:00	0	11	2	10	6
1	2009-03-13 11:39:00	12	11	2	10	6
1	2009-03-13 11:40:00	12	11	2	10	6
1	2009-03-13 11:41:00	0	11	2	10	6
1	2009-03-13 11:42:00	0	11	2	10	6
1	2009-03-13 11:43:00	25	11	2	10	6
1	2009-03-13 11:44:00	25	11	2	10	6
1	2009-03-13 11:45:00	12	11	2	10	6
1	2009-03-13 11:46:00	0	11	2	10	6
1	2009-03-13 11:47:00	12	11	2	10	6
1	2009-03-13 11:48:00	357	11	2	10	6
1	2009-03-13 11:49:00	49	11	2	10	6
1	2009-03-13 11:50:00	0	11	2	10	6
1	2009-03-13 11:51:00	0	11	2	10	6
1	2009-03-13 11:52:00	0	11	2	10	6
1	2009-03-13 11:53:00	0	11	2	10	6
1	2009-03-13 11:54:00	37	11	2	10	6
1	2009-03-13 11:55:00	0	11	2	10	6
1	2009-03-13 11:56:00	0	11	2	10	6
1	2009-03-13 11:57:00	0	11	2	10	6
1	2009-03-13 11:58:00	0	11	2	10	6
1	2009-03-13 11:59:00	0	11	2	10	6
1	2009-03-13 12:00:00	0	11	2	10	6
1	2009-03-13 12:01:00	0	12	3	10	6
1	2009-03-13 12:02:00	0	12	3	10	6
1	2009-03-13 12:03:00	0	12	3	10	6
1	2009-03-13 12:04:00	0	12	3	10	6
1	2009-03-13 12:05:00	0	12	3	10	6
1	2009-03-13 12:06:00	0	12	3	10	6
1	2009-03-13 12:07:00	0	12	3	10	6
1	2009-03-13 12:08:00	0	12	3	10	6
1	2009-03-13 12:09:00	0	12	3	10	6
1	2009-03-13 12:10:00	49	12	3	10	6
1	2009-03-13 12:11:00	0	12	3	10	6
1	2009-03-13 12:12:00	0	12	3	10	6
1	2009-03-13 12:13:00	0	12	3	10	6
1	2009-03-13 12:14:00	0	12	3	10	6
1	2009-03-13 12:15:00	0	12	3	10	6
1	2009-03-13 12:16:00	25	12	3	10	6
1	2009-03-13 12:17:00	0	12	3	10	6
1	2009-03-13 12:18:00	0	12	3	10	6
1	2009-03-13 12:19:00	25	12	3	10	6
1	2009-03-13 12:20:00	0	12	3	10	6
1	2009-03-13 12:21:00	204	12	3	10	6
1	2009-03-13 12:22:00	25	12	3	10	6
1	2009-03-13 12:23:00	12	12	3	10	6
1	2009-03-13 12:24:00	0	12	3	10	6
1	2009-03-13 12:25:00	0	12	3	10	6
1	2009-03-13 12:26:00	0	12	3	10	6
1	2009-03-13 12:27:00	0	12	3	10	6
1	2009-03-13 12:28:00	0	12	3	10	6
1	2009-03-13 12:29:00	0	12	3	10	6
1	2009-03-13 12:30:00	0	12	3	10	6
1	2009-03-13 12:31:00	0	12	3	10	6
1	2009-03-13 12:32:00	12	12	3	10	6
1	2009-03-13 12:33:00	0	12	3	10	6
1	2009-03-13 12:34:00	12	12	3	10	6
1	2009-03-13 12:35:00	0	12	3	10	6
1	2009-03-13 12:36:00	0	12	3	10	6
1	2009-03-13 12:37:00	0	12	3	10	6
1	2009-03-13 12:38:00	0	12	3	10	6
1	2009-03-13 12:39:00	0	12	3	10	6
1	2009-03-13 12:40:00	0	12	3	10	6
1	2009-03-13 12:41:00	25	12	3	10	6
1	2009-03-13 12:42:00	0	12	3	10	6
1	2009-03-13 12:43:00	0	12	3	10	6
1	2009-03-13 12:44:00	0	12	3	10	6
1	2009-03-13 12:45:00	0	12	3	10	6
1	2009-03-13 12:46:00	0	12	3	10	6
1	2009-03-13 12:47:00	0	12	3	10	6
1	2009-03-13 12:48:00	0	12	3	10	6
1	2009-03-13 12:49:00	0	12	3	10	6
1	2009-03-13 12:50:00	0	12	3	10	6
1	2009-03-13 12:51:00	0	12	3	10	6
1	2009-03-13 12:52:00	0	12	3	10	6
1	2009-03-13 12:53:00	0	12	3	10	6
1	2009-03-13 12:54:00	49	12	3	10	6
1	2009-03-13 12:55:00	0	12	3	10	6
1	2009-03-13 12:56:00	0	12	3	10	6
1	2009-03-13 12:57:00	0	12	3	10	6
1	2009-03-13 12:58:00	0	12	3	10	6
1	2009-03-13 12:59:00	0	12	3	10	6
1	2009-03-13 13:00:00	517	12	3	10	6
1	2009-03-13 13:01:00	204	13	3	10	6
1	2009-03-13 13:02:00	0	13	3	10	6
1	2009-03-13 13:03:00	0	13	3	10	6
1	2009-03-13 13:04:00	12	13	3	10	6
1	2009-03-13 13:05:00	0	13	3	10	6
1	2009-03-13 13:06:00	0	13	3	10	6
1	2009-03-13 13:07:00	0	13	3	10	6
1	2009-03-13 13:08:00	0	13	3	10	6
1	2009-03-13 13:09:00	0	13	3	10	6
1	2009-03-13 13:10:00	86	13	3	10	6
1	2009-03-13 13:11:00	135	13	3	10	6
1	2009-03-13 13:12:00	0	13	3	10	6
1	2009-03-13 13:13:00	0	13	3	10	6
1	2009-03-13 13:14:00	0	13	3	10	6
1	2009-03-13 13:15:00	0	13	3	10	6
1	2009-03-13 13:16:00	0	13	3	10	6
1	2009-03-13 13:17:00	0	13	3	10	6
1	2009-03-13 13:18:00	0	13	3	10	6
1	2009-03-13 13:19:00	0	13	3	10	6
1	2009-03-13 13:20:00	0	13	3	10	6
1	2009-03-13 13:21:00	0	13	3	10	6
1	2009-03-13 13:22:00	0	13	3	10	6
1	2009-03-13 13:23:00	12	13	3	10	6
1	2009-03-13 13:24:00	12	13	3	10	6
1	2009-03-13 13:25:00	0	13	3	10	6
1	2009-03-13 13:26:00	25	13	3	10	6
1	2009-03-13 13:27:00	0	13	3	10	6
1	2009-03-13 13:28:00	938	13	3	10	6
1	2009-03-13 13:29:00	1214	13	3	10	6
1	2009-03-13 13:30:00	1243	13	3	10	6
1	2009-03-13 13:31:00	1243	13	3	10	6
1	2009-03-13 13:32:00	340	13	3	10	6
1	2009-03-13 13:33:00	0	13	3	10	6
1	2009-03-13 13:34:00	0	13	3	10	6
1	2009-03-13 13:35:00	37	13	3	10	6
1	2009-03-13 13:36:00	0	13	3	10	6
1	2009-03-13 13:37:00	25	13	3	10	6
1	2009-03-13 13:38:00	0	13	3	10	6
1	2009-03-13 13:39:00	0	13	3	10	6
1	2009-03-13 13:40:00	0	13	3	10	6
1	2009-03-13 13:41:00	219	13	3	10	6
1	2009-03-13 13:42:00	391	13	3	10	6
1	2009-03-13 13:43:00	357	13	3	10	6
1	2009-03-13 13:44:00	135	13	3	10	6
1	2009-03-13 13:45:00	0	13	3	10	6
1	2009-03-13 13:46:00	0	13	3	10	6
1	2009-03-13 13:47:00	0	13	3	10	6
1	2009-03-13 13:48:00	0	13	3	10	6
1	2009-03-13 13:49:00	25	13	3	10	6
1	2009-03-13 13:50:00	12	13	3	10	6
1	2009-03-13 13:51:00	0	13	3	10	6
1	2009-03-13 13:52:00	0	13	3	10	6
1	2009-03-13 13:53:00	0	13	3	10	6
1	2009-03-13 13:54:00	0	13	3	10	6
1	2009-03-13 13:55:00	0	13	3	10	6
1	2009-03-13 13:56:00	0	13	3	10	6
1	2009-03-13 13:57:00	0	13	3	10	6
1	2009-03-13 13:58:00	0	13	3	10	6
1	2009-03-13 13:59:00	74	13	3	10	6
1	2009-03-13 14:00:00	12	13	3	10	6
1	2009-03-13 14:01:00	0	14	3	10	6
1	2009-03-13 14:02:00	0	14	3	10	6
1	2009-03-13 14:03:00	746	14	3	10	6
1	2009-03-13 14:04:00	889	14	3	10	6
1	2009-03-13 14:05:00	148	14	3	10	6
1	2009-03-13 14:06:00	537	14	3	10	6
1	2009-03-13 14:07:00	889	14	3	10	6
1	2009-03-13 14:08:00	556	14	3	10	6
1	2009-03-13 14:09:00	497	14	3	10	6
1	2009-03-13 14:10:00	12	14	3	10	6
1	2009-03-13 14:11:00	37	14	3	10	6
1	2009-03-13 14:12:00	537	14	3	10	6
1	2009-03-13 14:13:00	596	14	3	10	6
1	2009-03-13 14:14:00	278	14	3	10	6
1	2009-03-13 14:15:00	322	14	3	10	6
1	2009-03-13 14:16:00	219	14	3	10	6
1	2009-03-13 14:17:00	0	14	3	10	6
1	2009-03-13 14:18:00	0	14	3	10	6
1	2009-03-13 14:19:00	0	14	3	10	6
1	2009-03-13 14:20:00	576	14	3	10	6
1	2009-03-13 14:21:00	815	14	3	10	6
1	2009-03-13 14:22:00	426	14	3	10	6
1	2009-03-13 14:23:00	308	14	3	10	6
1	2009-03-13 14:24:00	409	14	3	10	6
1	2009-03-13 14:25:00	340	14	3	10	6
1	2009-03-13 14:26:00	0	14	3	10	6
1	2009-03-13 14:27:00	426	14	3	10	6
1	2009-03-13 14:28:00	135	14	3	10	6
1	2009-03-13 14:29:00	234	14	3	10	6
1	2009-03-13 14:30:00	460	14	3	10	6
1	2009-03-13 14:31:00	657	14	3	10	6
1	2009-03-13 14:32:00	864	14	3	10	6
1	2009-03-13 14:33:00	1536	14	3	10	6
1	2009-03-13 14:34:00	517	14	3	10	6
1	2009-03-13 14:35:00	1910	14	3	10	6
1	2009-03-13 14:36:00	175	14	3	10	6
1	2009-03-13 14:37:00	768	14	3	10	6
1	2009-03-13 14:38:00	219	14	3	10	6
1	2009-03-13 14:39:00	0	14	3	10	6
1	2009-03-13 14:40:00	0	14	3	10	6
1	2009-03-13 14:41:00	0	14	3	10	6
1	2009-03-13 14:42:00	0	14	3	10	6
1	2009-03-13 14:43:00	98	14	3	10	6
1	2009-03-13 14:44:00	0	14	3	10	6
1	2009-03-13 14:45:00	12	14	3	10	6
1	2009-03-13 14:46:00	0	14	3	10	6
1	2009-03-13 14:47:00	0	14	3	10	6
1	2009-03-13 14:48:00	12	14	3	10	6
1	2009-03-13 14:49:00	0	14	3	10	6
1	2009-03-13 14:50:00	0	14	3	10	6
1	2009-03-13 14:51:00	0	14	3	10	6
1	2009-03-13 14:52:00	0	14	3	10	6
1	2009-03-13 14:53:00	12	14	3	10	6
1	2009-03-13 14:54:00	0	14	3	10	6
1	2009-03-13 14:55:00	12	14	3	10	6
1	2009-03-13 14:56:00	0	14	3	10	6
1	2009-03-13 14:57:00	0	14	3	10	6
1	2009-03-13 14:58:00	12	14	3	10	6
1	2009-03-13 14:59:00	0	14	3	10	6
1	2009-03-13 15:00:00	0	14	3	10	6
1	2009-03-13 15:01:00	0	15	3	10	6
1	2009-03-13 15:02:00	25	15	3	10	6
1	2009-03-13 15:03:00	25	15	3	10	6
1	2009-03-13 15:04:00	0	15	3	10	6
1	2009-03-13 15:05:00	0	15	3	10	6
1	2009-03-13 15:06:00	0	15	3	10	6
1	2009-03-13 15:07:00	0	15	3	10	6
1	2009-03-13 15:08:00	0	15	3	10	6
1	2009-03-13 15:09:00	0	15	3	10	6
1	2009-03-13 15:10:00	0	15	3	10	6
1	2009-03-13 15:11:00	0	15	3	10	6
1	2009-03-13 15:12:00	12	15	3	10	6
1	2009-03-13 15:13:00	0	15	3	10	6
1	2009-03-13 15:14:00	219	15	3	10	6
1	2009-03-13 15:15:00	249	15	3	10	6
1	2009-03-13 15:16:00	537	15	3	10	6
1	2009-03-13 15:17:00	391	15	3	10	6
1	2009-03-13 15:18:00	374	15	3	10	6
1	2009-03-13 15:19:00	517	15	3	10	6
[truncated: 48,401 more rows]

## Sheet: Pivot Segment
Multiplier	2
x (Low Intensity)	461.065
y (High Intensity)	617.482
	Column Labels
Values	1	2	3	4	5	Grand Total
Average of Activity	60.3265	82.2835	78.7561	73.0408	69.093	72.7347
StdDev of Activity	200.369	267.599	268.528	238.045	229.295	242.351
Count of Activity	10080	10080	10080	10080	9599	49919
Count Above x	472	632	563	580	437
% Above x	0.0468254	0.0626984	0.0558532	0.0575397	0.0455256
Count Above y		433	399	379	295
% Above y		0.0429563	0.0395833	0.0375992	0.0307324

## Sheet: Pivot Weekday
Sum of Activity	Column Labels
Row Labels	1	2	3	4	5	Grand Total
1	58014	126777	116170	89651	63505	454117
2	98755	156031	109036	134846	79021	577689
3	98440	159008	134119	102316	120039	613922
4	117407	95056	85057	104983	116667	519170
5	79616	82005	143989	111778	89454	506842
6	88629	113203	112267	98974	90309	503382
7	67230	97338	93223	93703	104229	455723
Grand Total	608091	829418	793861	736251	663224	3630845
Count of Activity	Column Labels
Row Labels	1	2	3	4	5	Grand Total
1	1440	1440	1440	1440	1440	7200
2	1440	1440	1440	1440	1440	7200
3	1440	1440	1440	1440	1440	7200
4	1440	1440	1440	1440	1440	7200
5	1440	1440	1440	1440	1440	7200
6	1440	1440	1440	1440	1440	7200
7	1440	1440	1440	1440	959	6719
Grand Total	10080	10080	10080	10080	9599	49919

## Sheet: Pivot Quadrant
Sum of Activity	Column Labels
Row Labels	1	2	3	4	5	Grand Total
1	110307	29805	25197	20888	25222	211419
2	73129	206514	258399	202154	199508	939704
3	299532	321138	281018	303068	240410	1445166
4	125123	271961	229247	210141	198084	1034556
Grand Total	608091	829418	793861	736251	663224	3630845
Average	152023	207354	198465	184063	165806
Count of Activity	Column Labels
Row Labels	1	2	3	4	5	Grand Total
1	2520	2520	2520	2520	2520	12600
2	2520	2520	2520	2520	2399	12479
3	2520	2520	2520	2520	2160	12240
4	2520	2520	2520	2520	2520	12600
Grand Total	10080	10080	10080	10080	9599	49919

## Sheet: 3.3.09
Actogram, Copy Raw Data, All Days
Identity:	Bear Kaplan
Filename:	E:\Active Research Files\meloxicam titre canine\cases\disqualified\bear k\Bear Kaplan 3.3.2009.AWC
Gender:	M
Age:	10
Height:	61.0 cm	24.0 in
Weight:	8.6 kg	19.0 lbs
Start Date:	03-Mar-2009 (Tue)
Start Time:	18:00:00
Interval:	1.00 mins
Date Stamp:	Time Stamp:	Activity Data:	Marker Press:
2009-03-03	00:00:00	0
2009-03-03	00:01:00	0
2009-03-03	00:02:00	0
2009-03-03	00:03:00	0
2009-03-03	00:04:00	0
2009-03-03	00:05:00	0
2009-03-03	00:06:00	0
2009-03-03	00:07:00	0
2009-03-03	00:08:00	0
2009-03-03	00:09:00	0
2009-03-03	00:10:00	0
2009-03-03	00:11:00	0
2009-03-03	00:12:00	0
2009-03-03	00:13:00	0
2009-03-03	00:14:00	0
2009-03-03	00:15:00	0
2009-03-03	00:16:00	0
2009-03-03	00:17:00	0
2009-03-03	00:18:00	0
2009-03-03	00:19:00	0
2009-03-03	00:20:00	0
2009-03-03	00:21:00	0
2009-03-03	00:22:00	0
2009-03-03	00:23:00	0
2009-03-03	00:24:00	0
2009-03-03	00:25:00	0
2009-03-03	00:26:00	0
2009-03-03	00:27:00	0
2009-03-03	00:28:00	0
2009-03-03	00:29:00	0
2009-03-03	00:30:00	0
2009-03-03	00:31:00	0
2009-03-03	00:32:00	0
2009-03-03	00:33:00	0
2009-03-03	00:34:00	0
2009-03-03	00:35:00	0
2009-03-03	00:36:00	0
2009-03-03	00:37:00	0
2009-03-03	00:38:00	0
2009-03-03	00:39:00	0
2009-03-03	00:40:00	0
2009-03-03	00:41:00	0
2009-03-03	00:42:00	0
2009-03-03	00:43:00	0
2009-03-03	00:44:00	0
2009-03-03	00:45:00	0
2009-03-03	00:46:00	0
2009-03-03	00:47:00	0
2009-03-03	00:48:00	0
2009-03-03	00:49:00	0
2009-03-03	00:50:00	0
2009-03-03	00:51:00	0
2009-03-03	00:52:00	0
2009-03-03	00:53:00	0
2009-03-03	00:54:00	0
2009-03-03	00:55:00	0
2009-03-03	00:56:00	0
2009-03-03	00:57:00	0
2009-03-03	00:58:00	0
2009-03-03	00:59:00	0
2009-03-03	01:00:00	0
2009-03-03	01:01:00	0
2009-03-03	01:02:00	0
2009-03-03	01:03:00	0
2009-03-03	01:04:00	0
2009-03-03	01:05:00	0
2009-03-03	01:06:00	0
2009-03-03	01:07:00	0
2009-03-03	01:08:00	0
2009-03-03	01:09:00	0
2009-03-03	01:10:00	0
2009-03-03	01:11:00	0
2009-03-03	01:12:00	0
2009-03-03	01:13:00	0
2009-03-03	01:14:00	0
2009-03-03	01:15:00	0
2009-03-03	01:16:00	0
2009-03-03	01:17:00	0
2009-03-03	01:18:00	0
2009-03-03	01:19:00	0
2009-03-03	01:20:00	0
2009-03-03	01:21:00	0
2009-03-03	01:22:00	0
2009-03-03	01:23:00	0
2009-03-03	01:24:00	0
2009-03-03	01:25:00	0
2009-03-03	01:26:00	0
2009-03-03	01:27:00	0
2009-03-03	01:28:00	0
2009-03-03	01:29:00	0
2009-03-03	01:30:00	0
2009-03-03	01:31:00	0
2009-03-03	01:32:00	0
2009-03-03	01:33:00	0
2009-03-03	01:34:00	0
2009-03-03	01:35:00	0
2009-03-03	01:36:00	0
2009-03-03	01:37:00	0
2009-03-03	01:38:00	0
2009-03-03	01:39:00	0
2009-03-03	01:40:00	0
2009-03-03	01:41:00	0
2009-03-03	01:42:00	0
2009-03-03	01:43:00	0
2009-03-03	01:44:00	0
2009-03-03	01:45:00	0
2009-03-03	01:46:00	0
2009-03-03	01:47:00	0
2009-03-03	01:48:00	0
2009-03-03	01:49:00	0
2009-03-03	01:50:00	0
2009-03-03	01:51:00	0
2009-03-03	01:52:00	0
2009-03-03	01:53:00	0
2009-03-03	01:54:00	0
2009-03-03	01:55:00	0
2009-03-03	01:56:00	0
2009-03-03	01:57:00	0
2009-03-03	01:58:00	0
2009-03-03	01:59:00	0
2009-03-03	02:00:00	0
2009-03-03	02:01:00	0
2009-03-03	02:02:00	0
2009-03-03	02:03:00	0
2009-03-03	02:04:00	0
2009-03-03	02:05:00	0
2009-03-03	02:06:00	0
2009-03-03	02:07:00	0
2009-03-03	02:08:00	0
2009-03-03	02:09:00	0
2009-03-03	02:10:00	0
2009-03-03	02:11:00	0
2009-03-03	02:12:00	0
2009-03-03	02:13:00	0
2009-03-03	02:14:00	0
2009-03-03	02:15:00	0
2009-03-03	02:16:00	0
2009-03-03	02:17:00	0
2009-03-03	02:18:00	0
2009-03-03	02:19:00	0
2009-03-03	02:20:00	0
2009-03-03	02:21:00	0
2009-03-03	02:22:00	0
2009-03-03	02:23:00	0
2009-03-03	02:24:00	0
2009-03-03	02:25:00	0
2009-03-03	02:26:00	0
2009-03-03	02:27:00	0
2009-03-03	02:28:00	0
2009-03-03	02:29:00	0
2009-03-03	02:30:00	0
2009-03-03	02:31:00	0
2009-03-03	02:32:00	0
2009-03-03	02:33:00	0
2009-03-03	02:34:00	0
2009-03-03	02:35:00	0
2009-03-03	02:36:00	0
2009-03-03	02:37:00	0
2009-03-03	02:38:00	0
2009-03-03	02:39:00	0
2009-03-03	02:40:00	0
2009-03-03	02:41:00	0
2009-03-03	02:42:00	0
2009-03-03	02:43:00	0
2009-03-03	02:44:00	0
2009-03-03	02:45:00	0
2009-03-03	02:46:00	0
2009-03-03	02:47:00	0
2009-03-03	02:48:00	0
2009-03-03	02:49:00	0
2009-03-03	02:50:00	0
2009-03-03	02:51:00	0
2009-03-03	02:52:00	0
2009-03-03	02:53:00	0
2009-03-03	02:54:00	0
2009-03-03	02:55:00	0
2009-03-03	02:56:00	0
2009-03-03	02:57:00	0
2009-03-03	02:58:00	0
2009-03-03	02:59:00	0
2009-03-03	03:00:00	0
2009-03-03	03:01:00	0
2009-03-03	03:02:00	0
2009-03-03	03:03:00	0
2009-03-03	03:04:00	0
2009-03-03	03:05:00	0
2009-03-03	03:06:00	0
2009-03-03	03:07:00	0
2009-03-03	03:08:00	0
2009-03-03	03:09:00	0
2009-03-03	03:10:00	0
2009-03-03	03:11:00	0
2009-03-03	03:12:00	0
2009-03-03	03:13:00	0
2009-03-03	03:14:00	0
2009-03-03	03:15:00	0
2009-03-03	03:16:00	0
2009-03-03	03:17:00	0
2009-03-03	03:18:00	0
2009-03-03	03:19:00	0
2009-03-03	03:20:00	0
2009-03-03	03:21:00	0
2009-03-03	03:22:00	0
2009-03-03	03:23:00	0
2009-03-03	03:24:00	0
2009-03-03	03:25:00	0
2009-03-03	03:26:00	0
2009-03-03	03:27:00	0
2009-03-03	03:28:00	0
2009-03-03	03:29:00	0
2009-03-03	03:30:00	0
2009-03-03	03:31:00	0
2009-03-03	03:32:00	0
2009-03-03	03:33:00	0
2009-03-03	03:34:00	0
2009-03-03	03:35:00	0
2009-03-03	03:36:00	0
2009-03-03	03:37:00	0
2009-03-03	03:38:00	0
2009-03-03	03:39:00	0
2009-03-03	03:40:00	0
2009-03-03	03:41:00	0
2009-03-03	03:42:00	0
2009-03-03	03:43:00	0
2009-03-03	03:44:00	0
2009-03-03	03:45:00	0
2009-03-03	03:46:00	0
2009-03-03	03:47:00	0
2009-03-03	03:48:00	0
2009-03-03	03:49:00	0
2009-03-03	03:50:00	0
2009-03-03	03:51:00	0
2009-03-03	03:52:00	0
2009-03-03	03:53:00	0
2009-03-03	03:54:00	0
2009-03-03	03:55:00	0
2009-03-03	03:56:00	0
2009-03-03	03:57:00	0
2009-03-03	03:58:00	0
2009-03-03	03:59:00	0
2009-03-03	04:00:00	0
2009-03-03	04:01:00	0
2009-03-03	04:02:00	0
2009-03-03	04:03:00	0
2009-03-03	04:04:00	0
2009-03-03	04:05:00	0
2009-03-03	04:06:00	0
2009-03-03	04:07:00	0
2009-03-03	04:08:00	0
2009-03-03	04:09:00	0
2009-03-03	04:10:00	0
2009-03-03	04:11:00	0
2009-03-03	04:12:00	0
2009-03-03	04:13:00	0
2009-03-03	04:14:00	0
2009-03-03	04:15:00	0
2009-03-03	04:16:00	0
2009-03-03	04:17:00	0
2009-03-03	04:18:00	0
2009-03-03	04:19:00	0
2009-03-03	04:20:00	0
2009-03-03	04:21:00	0
2009-03-03	04:22:00	0
2009-03-03	04:23:00	0
2009-03-03	04:24:00	0
2009-03-03	04:25:00	0
2009-03-03	04:26:00	0
2009-03-03	04:27:00	0
2009-03-03	04:28:00	0
2009-03-03	04:29:00	0
2009-03-03	04:30:00	0
2009-03-03	04:31:00	0
2009-03-03	04:32:00	0
2009-03-03	04:33:00	0
2009-03-03	04:34:00	0
2009-03-03	04:35:00	0
2009-03-03	04:36:00	0
2009-03-03	04:37:00	0
2009-03-03	04:38:00	0
2009-03-03	04:39:00	0
2009-03-03	04:40:00	0
2009-03-03	04:41:00	0
2009-03-03	04:42:00	0
2009-03-03	04:43:00	0
2009-03-03	04:44:00	0
2009-03-03	04:45:00	0
2009-03-03	04:46:00	0
2009-03-03	04:47:00	0
2009-03-03	04:48:00	0
2009-03-03	04:49:00	0
2009-03-03	04:50:00	0
2009-03-03	04:51:00	0
2009-03-03	04:52:00	0
2009-03-03	04:53:00	0
2009-03-03	04:54:00	0
2009-03-03	04:55:00	0
2009-03-03	04:56:00	0
2009-03-03	04:57:00	0
2009-03-03	04:58:00	0
2009-03-03	04:59:00	0
2009-03-03	05:00:00	0
2009-03-03	05:01:00	0
2009-03-03	05:02:00	0
2009-03-03	05:03:00	0
2009-03-03	05:04:00	0
2009-03-03	05:05:00	0
2009-03-03	05:06:00	0
2009-03-03	05:07:00	0
2009-03-03	05:08:00	0
2009-03-03	05:09:00	0
2009-03-03	05:10:00	0
2009-03-03	05:11:00	0
2009-03-03	05:12:00	0
2009-03-03	05:13:00	0
2009-03-03	05:14:00	0
2009-03-03	05:15:00	0
2009-03-03	05:16:00	0
2009-03-03	05:17:00	0
2009-03-03	05:18:00	0
2009-03-03	05:19:00	0
2009-03-03	05:20:00	0
2009-03-03	05:21:00	0
2009-03-03	05:22:00	0
2009-03-03	05:23:00	0
2009-03-03	05:24:00	0
2009-03-03	05:25:00	0
2009-03-03	05:26:00	0
2009-03-03	05:27:00	0
2009-03-03	05:28:00	0
2009-03-03	05:29:00	0
2009-03-03	05:30:00	0
2009-03-03	05:31:00	0
2009-03-03	05:32:00	0
2009-03-03	05:33:00	0
2009-03-03	05:34:00	0
2009-03-03	05:35:00	0
2009-03-03	05:36:00	0
2009-03-03	05:37:00	0
2009-03-03	05:38:00	0
2009-03-03	05:39:00	0
2009-03-03	05:40:00	0
2009-03-03	05:41:00	0
2009-03-03	05:42:00	0
2009-03-03	05:43:00	0
2009-03-03	05:44:00	0
2009-03-03	05:45:00	0
2009-03-03	05:46:00	0
2009-03-03	05:47:00	0
2009-03-03	05:48:00	0
2009-03-03	05:49:00	0
2009-03-03	05:50:00	0
2009-03-03	05:51:00	0
2009-03-03	05:52:00	0
2009-03-03	05:53:00	0
2009-03-03	05:54:00	0
2009-03-03	05:55:00	0
2009-03-03	05:56:00	0
2009-03-03	05:57:00	0
2009-03-03	05:58:00	0
2009-03-03	05:59:00	0
2009-03-03	06:00:00	0
2009-03-03	06:01:00	0
2009-03-03	06:02:00	0
2009-03-03	06:03:00	0
2009-03-03	06:04:00	0
2009-03-03	06:05:00	0
2009-03-03	06:06:00	0
2009-03-03	06:07:00	0
2009-03-03	06:08:00	0
2009-03-03	06:09:00	0
2009-03-03	06:10:00	0
2009-03-03	06:11:00	0
2009-03-03	06:12:00	0
2009-03-03	06:13:00	0
2009-03-03	06:14:00	0
2009-03-03	06:15:00	0
2009-03-03	06:16:00	0
2009-03-03	06:17:00	0
2009-03-03	06:18:00	0
2009-03-03	06:19:00	0
2009-03-03	06:20:00	0
2009-03-03	06:21:00	0
2009-03-03	06:22:00	0
2009-03-03	06:23:00	0
2009-03-03	06:24:00	0
2009-03-03	06:25:00	0
2009-03-03	06:26:00	0
2009-03-03	06:27:00	0
2009-03-03	06:28:00	0
2009-03-03	06:29:00	0
2009-03-03	06:30:00	0
2009-03-03	06:31:00	0
2009-03-03	06:32:00	0
2009-03-03	06:33:00	0
2009-03-03	06:34:00	0
2009-03-03	06:35:00	0
2009-03-03	06:36:00	0
2009-03-03	06:37:00	0
2009-03-03	06:38:00	0
2009-03-03	06:39:00	0
2009-03-03	06:40:00	0
2009-03-03	06:41:00	0
2009-03-03	06:42:00	0
2009-03-03	06:43:00	0
2009-03-03	06:44:00	0
2009-03-03	06:45:00	0
2009-03-03	06:46:00	0
2009-03-03	06:47:00	0
2009-03-03	06:48:00	0
2009-03-03	06:49:00	0
2009-03-03	06:50:00	0
2009-03-03	06:51:00	0
2009-03-03	06:52:00	0
2009-03-03	06:53:00	0
2009-03-03	06:54:00	0
2009-03-03	06:55:00	0
2009-03-03	06:56:00	0
2009-03-03	06:57:00	0
2009-03-03	06:58:00	0
2009-03-03	06:59:00	0
2009-03-03	07:00:00	0
2009-03-03	07:01:00	0
2009-03-03	07:02:00	0
2009-03-03	07:03:00	0
2009-03-03	07:04:00	0
2009-03-03	07:05:00	0
2009-03-03	07:06:00	0
2009-03-03	07:07:00	0
2009-03-03	07:08:00	0
2009-03-03	07:09:00	0
2009-03-03	07:10:00	0
2009-03-03	07:11:00	0
2009-03-03	07:12:00	0
2009-03-03	07:13:00	0
2009-03-03	07:14:00	0
2009-03-03	07:15:00	0
2009-03-03	07:16:00	0
2009-03-03	07:17:00	0
2009-03-03	07:18:00	0
2009-03-03	07:19:00	0
2009-03-03	07:20:00	0
2009-03-03	07:21:00	0
2009-03-03	07:22:00	0
2009-03-03	07:23:00	0
2009-03-03	07:24:00	0
2009-03-03	07:25:00	0
2009-03-03	07:26:00	0
2009-03-03	07:27:00	0
2009-03-03	07:28:00	0
2009-03-03	07:29:00	0
2009-03-03	07:30:00	0
2009-03-03	07:31:00	0
2009-03-03	07:32:00	0
2009-03-03	07:33:00	0
2009-03-03	07:34:00	0
2009-03-03	07:35:00	0
2009-03-03	07:36:00	0
2009-03-03	07:37:00	0
2009-03-03	07:38:00	0
2009-03-03	07:39:00	0
2009-03-03	07:40:00	0
2009-03-03	07:41:00	0
2009-03-03	07:42:00	0
2009-03-03	07:43:00	0
2009-03-03	07:44:00	0
2009-03-03	07:45:00	0
2009-03-03	07:46:00	0
2009-03-03	07:47:00	0
2009-03-03	07:48:00	0
2009-03-03	07:49:00	0
2009-03-03	07:50:00	0
2009-03-03	07:51:00	0
2009-03-03	07:52:00	0
2009-03-03	07:53:00	0
2009-03-03	07:54:00	0
2009-03-03	07:55:00	0
2009-03-03	07:56:00	0
2009-03-03	07:57:00	0
2009-03-03	07:58:00	0
2009-03-03	07:59:00	0
2009-03-03	08:00:00	0
2009-03-03	08:01:00	0
2009-03-03	08:02:00	0
2009-03-03	08:03:00	0
2009-03-03	08:04:00	0
2009-03-03	08:05:00	0
2009-03-03	08:06:00	0
2009-03-03	08:07:00	0
2009-03-03	08:08:00	0
2009-03-03	08:09:00	0
2009-03-03	08:10:00	0
2009-03-03	08:11:00	0
2009-03-03	08:12:00	0
2009-03-03	08:13:00	0
2009-03-03	08:14:00	0
2009-03-03	08:15:00	0
2009-03-03	08:16:00	0
2009-03-03	08:17:00	0
2009-03-03	08:18:00	0
2009-03-03	08:19:00	0
2009-03-03	08:20:00	0
2009-03-03	08:21:00	0
2009-03-03	08:22:00	0
2009-03-03	08:23:00	0
2009-03-03	08:24:00	0
2009-03-03	08:25:00	0
2009-03-03	08:26:00	0
2009-03-03	08:27:00	0
2009-03-03	08:28:00	0
2009-03-03	08:29:00	0
2009-03-03	08:30:00	0
2009-03-03	08:31:00	0
2009-03-03	08:32:00	0
2009-03-03	08:33:00	0
2009-03-03	08:34:00	0
2009-03-03	08:35:00	0
2009-03-03	08:36:00	0
2009-03-03	08:37:00	0
2009-03-03	08:38:00	0
2009-03-03	08:39:00	0
2009-03-03	08:40:00	0
2009-03-03	08:41:00	0
2009-03-03	08:42:00	0
2009-03-03	08:43:00	0
2009-03-03	08:44:00	0
2009-03-03	08:45:00	0
2009-03-03	08:46:00	0
2009-03-03	08:47:00	0
2009-03-03	08:48:00	0
2009-03-03	08:49:00	0
2009-03-03	08:50:00	0
2009-03-03	08:51:00	0
2009-03-03	08:52:00	0
2009-03-03	08:53:00	0
2009-03-03	08:54:00	0
2009-03-03	08:55:00	0
2009-03-03	08:56:00	0
2009-03-03	08:57:00	0
2009-03-03	08:58:00	0
2009-03-03	08:59:00	0
2009-03-03	09:00:00	0
2009-03-03	09:01:00	0
2009-03-03	09:02:00	0
2009-03-03	09:03:00	0
2009-03-03	09:04:00	0
2009-03-03	09:05:00	0
2009-03-03	09:06:00	0
2009-03-03	09:07:00	0
2009-03-03	09:08:00	0
2009-03-03	09:09:00	0
2009-03-03	09:10:00	0
2009-03-03	09:11:00	0
2009-03-03	09:12:00	0
2009-03-03	09:13:00	0
2009-03-03	09:14:00	0
2009-03-03	09:15:00	0
2009-03-03	09:16:00	0
2009-03-03	09:17:00	0
2009-03-03	09:18:00	0
2009-03-03	09:19:00	0
2009-03-03	09:20:00	0
2009-03-03	09:21:00	0
2009-03-03	09:22:00	0
2009-03-03	09:23:00	0
2009-03-03	09:24:00	0
2009-03-03	09:25:00	0
2009-03-03	09:26:00	0
2009-03-03	09:27:00	0
2009-03-03	09:28:00	0
2009-03-03	09:29:00	0
2009-03-03	09:30:00	0
2009-03-03	09:31:00	0
2009-03-03	09:32:00	0
2009-03-03	09:33:00	0
2009-03-03	09:34:00	0
2009-03-03	09:35:00	0
2009-03-03	09:36:00	0
2009-03-03	09:37:00	0
2009-03-03	09:38:00	0
2009-03-03	09:39:00	0
2009-03-03	09:40:00	0
2009-03-03	09:41:00	0
2009-03-03	09:42:00	0
2009-03-03	09:43:00	0
2009-03-03	09:44:00	0
2009-03-03	09:45:00	0
2009-03-03	09:46:00	0
2009-03-03	09:47:00	0
2009-03-03	09:48:00	0
2009-03-03	09:49:00	0
2009-03-03	09:50:00	0
2009-03-03	09:51:00	0
2009-03-03	09:52:00	0
2009-03-03	09:53:00	0
2009-03-03	09:54:00	0
2009-03-03	09:55:00	0
2009-03-03	09:56:00	0
2009-03-03	09:57:00	0
2009-03-03	09:58:00	0
2009-03-03	09:59:00	0
2009-03-03	10:00:00	0
2009-03-03	10:01:00	0
2009-03-03	10:02:00	0
2009-03-03	10:03:00	0
2009-03-03	10:04:00	0
2009-03-03	10:05:00	0
2009-03-03	10:06:00	0
2009-03-03	10:07:00	0
2009-03-03	10:08:00	0
2009-03-03	10:09:00	0
2009-03-03	10:10:00	0
2009-03-03	10:11:00	0
2009-03-03	10:12:00	0
2009-03-03	10:13:00	0
2009-03-03	10:14:00	0
2009-03-03	10:15:00	0
2009-03-03	10:16:00	0
2009-03-03	10:17:00	0
2009-03-03	10:18:00	0
2009-03-03	10:19:00	0
2009-03-03	10:20:00	0
2009-03-03	10:21:00	0
2009-03-03	10:22:00	0
2009-03-03	10:23:00	0
2009-03-03	10:24:00	0
2009-03-03	10:25:00	0
2009-03-03	10:26:00	0
2009-03-03	10:27:00	0
2009-03-03	10:28:00	0
2009-03-03	10:29:00	0
2009-03-03	10:30:00	0
2009-03-03	10:31:00	0
2009-03-03	10:32:00	0
2009-03-03	10:33:00	0
2009-03-03	10:34:00	0
2009-03-03	10:35:00	0
2009-03-03	10:36:00	0
2009-03-03	10:37:00	0
2009-03-03	10:38:00	0
2009-03-03	10:39:00	0
2009-03-03	10:40:00	0
2009-03-03	10:41:00	0
2009-03-03	10:42:00	0
2009-03-03	10:43:00	0
2009-03-03	10:44:00	0
2009-03-03	10:45:00	0
2009-03-03	10:46:00	0
2009-03-03	10:47:00	0
2009-03-03	10:48:00	0
2009-03-03	10:49:00	0
2009-03-03	10:50:00	0
2009-03-03	10:51:00	0
2009-03-03	10:52:00	0
2009-03-03	10:53:00	0
2009-03-03	10:54:00	0
2009-03-03	10:55:00	0
2009-03-03	10:56:00	0
2009-03-03	10:57:00	0
2009-03-03	10:58:00	0
2009-03-03	10:59:00	0
2009-03-03	11:00:00	0
2009-03-03	11:01:00	0
2009-03-03	11:02:00	0
2009-03-03	11:03:00	0
2009-03-03	11:04:00	0
2009-03-03	11:05:00	0
2009-03-03	11:06:00	0
2009-03-03	11:07:00	0
2009-03-03	11:08:00	0
2009-03-03	11:09:00	0
2009-03-03	11:10:00	0
2009-03-03	11:11:00	0
2009-03-03	11:12:00	0
2009-03-03	11:13:00	0
2009-03-03	11:14:00	0
2009-03-03	11:15:00	0
2009-03-03	11:16:00	0
2009-03-03	11:17:00	0
2009-03-03	11:18:00	0
2009-03-03	11:19:00	0
2009-03-03	11:20:00	0
2009-03-03	11:21:00	0
2009-03-03	11:22:00	0
2009-03-03	11:23:00	0
2009-03-03	11:24:00	0
2009-03-03	11:25:00	0
2009-03-03	11:26:00	0
2009-03-03	11:27:00	0
2009-03-03	11:28:00	0
2009-03-03	11:29:00	0
2009-03-03	11:30:00	0
2009-03-03	11:31:00	0
2009-03-03	11:32:00	0
2009-03-03	11:33:00	0
2009-03-03	11:34:00	0
2009-03-03	11:35:00	0
2009-03-03	11:36:00	0
2009-03-03	11:37:00	0
2009-03-03	11:38:00	0
2009-03-03	11:39:00	0
2009-03-03	11:40:00	0
2009-03-03	11:41:00	0
2009-03-03	11:42:00	0
2009-03-03	11:43:00	0
2009-03-03	11:44:00	0
2009-03-03	11:45:00	0
2009-03-03	11:46:00	0
2009-03-03	11:47:00	0
2009-03-03	11:48:00	0
2009-03-03	11:49:00	0
2009-03-03	11:50:00	0
2009-03-03	11:51:00	0
2009-03-03	11:52:00	0
2009-03-03	11:53:00	0
2009-03-03	11:54:00	0
2009-03-03	11:55:00	0
2009-03-03	11:56:00	0
2009-03-03	11:57:00	0
2009-03-03	11:58:00	0
2009-03-03	11:59:00	0
2009-03-03	12:00:00	0
2009-03-03	12:01:00	0
2009-03-03	12:02:00	0
2009-03-03	12:03:00	0
2009-03-03	12:04:00	0
2009-03-03	12:05:00	0
2009-03-03	12:06:00	0
2009-03-03	12:07:00	0
2009-03-03	12:08:00	0
2009-03-03	12:09:00	0
2009-03-03	12:10:00	0
2009-03-03	12:11:00	0
2009-03-03	12:12:00	0
2009-03-03	12:13:00	0
2009-03-03	12:14:00	0
2009-03-03	12:15:00	0
2009-03-03	12:16:00	0
2009-03-03	12:17:00	0
2009-03-03	12:18:00	0
2009-03-03	12:19:00	0
2009-03-03	12:20:00	0
2009-03-03	12:21:00	0
2009-03-03	12:22:00	0
2009-03-03	12:23:00	0
2009-03-03	12:24:00	0
2009-03-03	12:25:00	0
2009-03-03	12:26:00	0
2009-03-03	12:27:00	0
2009-03-03	12:28:00	0
2009-03-03	12:29:00	0
2009-03-03	12:30:00	0
2009-03-03	12:31:00	0
2009-03-03	12:32:00	0
2009-03-03	12:33:00	0
2009-03-03	12:34:00	0
2009-03-03	12:35:00	0
2009-03-03	12:36:00	0
2009-03-03	12:37:00	0
2009-03-03	12:38:00	0
2009-03-03	12:39:00	0
2009-03-03	12:40:00	0
2009-03-03	12:41:00	0
2009-03-03	12:42:00	0
2009-03-03	12:43:00	0
2009-03-03	12:44:00	0
2009-03-03	12:45:00	0
2009-03-03	12:46:00	0
2009-03-03	12:47:00	0
2009-03-03	12:48:00	0
2009-03-03	12:49:00	0
2009-03-03	12:50:00	0
2009-03-03	12:51:00	0
2009-03-03	12:52:00	0
2009-03-03	12:53:00	0
2009-03-03	12:54:00	0
2009-03-03	12:55:00	0
2009-03-03	12:56:00	0
2009-03-03	12:57:00	0
2009-03-03	12:58:00	0
2009-03-03	12:59:00	0
2009-03-03	13:00:00	0
2009-03-03	13:01:00	0
2009-03-03	13:02:00	0
2009-03-03	13:03:00	0
2009-03-03	13:04:00	0
2009-03-03	13:05:00	0
2009-03-03	13:06:00	0
2009-03-03	13:07:00	0
2009-03-03	13:08:00	0
2009-03-03	13:09:00	0
2009-03-03	13:10:00	0
2009-03-03	13:11:00	0
2009-03-03	13:12:00	0
2009-03-03	13:13:00	0
2009-03-03	13:14:00	0
2009-03-03	13:15:00	0
2009-03-03	13:16:00	0
2009-03-03	13:17:00	0
2009-03-03	13:18:00	0
2009-03-03	13:19:00	0
2009-03-03	13:20:00	0
2009-03-03	13:21:00	0
2009-03-03	13:22:00	0
2009-03-03	13:23:00	0
2009-03-03	13:24:00	0
2009-03-03	13:25:00	0
2009-03-03	13:26:00	0
2009-03-03	13:27:00	0
2009-03-03	13:28:00	0
2009-03-03	13:29:00	0
2009-03-03	13:30:00	0
2009-03-03	13:31:00	0
2009-03-03	13:32:00	0
2009-03-03	13:33:00	0
2009-03-03	13:34:00	0
2009-03-03	13:35:00	0
2009-03-03	13:36:00	0
2009-03-03	13:37:00	0
2009-03-03	13:38:00	0
2009-03-03	13:39:00	0
2009-03-03	13:40:00	0
2009-03-03	13:41:00	0
2009-03-03	13:42:00	0
2009-03-03	13:43:00	0
2009-03-03	13:44:00	0
2009-03-03	13:45:00	0
2009-03-03	13:46:00	0
2009-03-03	13:47:00	0
2009-03-03	13:48:00	0
2009-03-03	13:49:00	0
2009-03-03	13:50:00	0
2009-03-03	13:51:00	0
2009-03-03	13:52:00	0
2009-03-03	13:53:00	0
2009-03-03	13:54:00	0
2009-03-03	13:55:00	0
2009-03-03	13:56:00	0
2009-03-03	13:57:00	0
2009-03-03	13:58:00	0
2009-03-03	13:59:00	0
2009-03-03	14:00:00	0
2009-03-03	14:01:00	0
2009-03-03	14:02:00	0
2009-03-03	14:03:00	0
2009-03-03	14:04:00	0
2009-03-03	14:05:00	0
2009-03-03	14:06:00	0
2009-03-03	14:07:00	0
2009-03-03	14:08:00	0
2009-03-03	14:09:00	0
2009-03-03	14:10:00	0
2009-03-03	14:11:00	0
2009-03-03	14:12:00	0
2009-03-03	14:13:00	0
2009-03-03	14:14:00	0
2009-03-03	14:15:00	0
2009-03-03	14:16:00	0
2009-03-03	14:17:00	0
2009-03-03	14:18:00	0
2009-03-03	14:19:00	0
2009-03-03	14:20:00	0
2009-03-03	14:21:00	0
2009-03-03	14:22:00	0
2009-03-03	14:23:00	0
2009-03-03	14:24:00	0
2009-03-03	14:25:00	0
2009-03-03	14:26:00	0
2009-03-03	14:27:00	0
2009-03-03	14:28:00	0
2009-03-03	14:29:00	0
2009-03-03	14:30:00	0
2009-03-03	14:31:00	0
2009-03-03	14:32:00	0
2009-03-03	14:33:00	0
2009-03-03	14:34:00	0
2009-03-03	14:35:00	0
2009-03-03	14:36:00	0
2009-03-03	14:37:00	0
2009-03-03	14:38:00	0
2009-03-03	14:39:00	0
2009-03-03	14:40:00	0
2009-03-03	14:41:00	0
2009-03-03	14:42:00	0
2009-03-03	14:43:00	0
2009-03-03	14:44:00	0
2009-03-03	14:45:00	0
2009-03-03	14:46:00	0
2009-03-03	14:47:00	0
2009-03-03	14:48:00	0
2009-03-03	14:49:00	0
2009-03-03	14:50:00	0
2009-03-03	14:51:00	0
2009-03-03	14:52:00	0
2009-03-03	14:53:00	0
2009-03-03	14:54:00	0
2009-03-03	14:55:00	0
2009-03-03	14:56:00	0
2009-03-03	14:57:00	0
2009-03-03	14:58:00	0
2009-03-03	14:59:00	0
2009-03-03	15:00:00	0
2009-03-03	15:01:00	0
2009-03-03	15:02:00	0
2009-03-03	15:03:00	0
2009-03-03	15:04:00	0
2009-03-03	15:05:00	0
2009-03-03	15:06:00	0
2009-03-03	15:07:00	0
2009-03-03	15:08:00	0
2009-03-03	15:09:00	0
2009-03-03	15:10:00	0
2009-03-03	15:11:00	0
2009-03-03	15:12:00	0
2009-03-03	15:13:00	0
2009-03-03	15:14:00	0
2009-03-03	15:15:00	0
2009-03-03	15:16:00	0
2009-03-03	15:17:00	0
2009-03-03	15:18:00	0
2009-03-03	15:19:00	0
2009-03-03	15:20:00	0
2009-03-03	15:21:00	0
2009-03-03	15:22:00	0
2009-03-03	15:23:00	0
2009-03-03	15:24:00	0
2009-03-03	15:25:00	0
2009-03-03	15:26:00	0
2009-03-03	15:27:00	0
2009-03-03	15:28:00	0
2009-03-03	15:29:00	0
2009-03-03	15:30:00	0
2009-03-03	15:31:00	0
2009-03-03	15:32:00	0
2009-03-03	15:33:00	0
2009-03-03	15:34:00	0
2009-03-03	15:35:00	0
2009-03-03	15:36:00	0
2009-03-03	15:37:00	0
2009-03-03	15:38:00	0
2009-03-03	15:39:00	0
2009-03-03	15:40:00	0
2009-03-03	15:41:00	0
2009-03-03	15:42:00	0
2009-03-03	15:43:00	0
2009-03-03	15:44:00	0
2009-03-03	15:45:00	0
2009-03-03	15:46:00	0
2009-03-03	15:47:00	0
2009-03-03	15:48:00	0
2009-03-03	15:49:00	0
2009-03-03	15:50:00	0
2009-03-03	15:51:00	0
2009-03-03	15:52:00	0
2009-03-03	15:53:00	0
2009-03-03	15:54:00	0
2009-03-03	15:55:00	0
2009-03-03	15:56:00	0
2009-03-03	15:57:00	0
2009-03-03	15:58:00	0
2009-03-03	15:59:00	0
2009-03-03	16:00:00	0
2009-03-03	16:01:00	0
2009-03-03	16:02:00	0
2009-03-03	16:03:00	0
2009-03-03	16:04:00	0
2009-03-03	16:05:00	0
2009-03-03	16:06:00	0
2009-03-03	16:07:00	0
2009-03-03	16:08:00	0
2009-03-03	16:09:00	0
2009-03-03	16:10:00	0
2009-03-03	16:11:00	0
2009-03-03	16:12:00	0
2009-03-03	16:13:00	0
2009-03-03	16:14:00	0
2009-03-03	16:15:00	0
2009-03-03	16:16:00	0
2009-03-03	16:17:00	0
2009-03-03	16:18:00	0
2009-03-03	16:19:00	0
2009-03-03	16:20:00	0
2009-03-03	16:21:00	0
2009-03-03	16:22:00	0
2009-03-03	16:23:00	0
2009-03-03	16:24:00	0
2009-03-03	16:25:00	0
2009-03-03	16:26:00	0
2009-03-03	16:27:00	0
2009-03-03	16:28:00	0
2009-03-03	16:29:00	0
2009-03-03	16:30:00	0
2009-03-03	16:31:00	0
2009-03-03	16:32:00	0
2009-03-03	16:33:00	0
2009-03-03	16:34:00	0
2009-03-03	16:35:00	0
2009-03-03	16:36:00	0
2009-03-03	16:37:00	0
2009-03-03	16:38:00	0
2009-03-03	16:39:00	0
2009-03-03	16:40:00	0
2009-03-03	16:41:00	0
2009-03-03	16:42:00	0
2009-03-03	16:43:00	0
2009-03-03	16:44:00	0
2009-03-03	16:45:00	0
2009-03-03	16:46:00	0
2009-03-03	16:47:00	0
2009-03-03	16:48:00	0
2009-03-03	16:49:00	0
2009-03-03	16:50:00	0
2009-03-03	16:51:00	0
2009-03-03	16:52:00	0
2009-03-03	16:53:00	0
2009-03-03	16:54:00	0
2009-03-03	16:55:00	0
2009-03-03	16:56:00	0
2009-03-03	16:57:00	0
2009-03-03	16:58:00	0
2009-03-03	16:59:00	0
2009-03-03	17:00:00	0
2009-03-03	17:01:00	0
2009-03-03	17:02:00	0
2009-03-03	17:03:00	0
2009-03-03	17:04:00	0
2009-03-03	17:05:00	0
2009-03-03	17:06:00	0
2009-03-03	17:07:00	0
2009-03-03	17:08:00	0
2009-03-03	17:09:00	0
2009-03-03	17:10:00	0
2009-03-03	17:11:00	0
2009-03-03	17:12:00	0
2009-03-03	17:13:00	0
2009-03-03	17:14:00	0
2009-03-03	17:15:00	0
2009-03-03	17:16:00	0
2009-03-03	17:17:00	0
2009-03-03	17:18:00	0
2009-03-03	17:19:00	0
2009-03-03	17:20:00	0
2009-03-03	17:21:00	0
2009-03-03	17:22:00	0
2009-03-03	17:23:00	0
2009-03-03	17:24:00	0
2009-03-03	17:25:00	0
2009-03-03	17:26:00	0
2009-03-03	17:27:00	0
2009-03-03	17:28:00	0
2009-03-03	17:29:00	0
2009-03-03	17:30:00	0
2009-03-03	17:31:00	0
2009-03-03	17:32:00	0
2009-03-03	17:33:00	0
2009-03-03	17:34:00	0
2009-03-03	17:35:00	0
2009-03-03	17:36:00	0
2009-03-03	17:37:00	0
2009-03-03	17:38:00	0
2009-03-03	17:39:00	0
2009-03-03	17:40:00	0
2009-03-03	17:41:00	0
2009-03-03	17:42:00	0
2009-03-03	17:43:00	0
2009-03-03	17:44:00	0
2009-03-03	17:45:00	0
2009-03-03	17:46:00	0
2009-03-03	17:47:00	0
2009-03-03	17:48:00	0
2009-03-03	17:49:00	0
2009-03-03	17:50:00	0
2009-03-03	17:51:00	0
2009-03-03	17:52:00	0
2009-03-03	17:53:00	0
2009-03-03	17:54:00	0
2009-03-03	17:55:00	0
2009-03-03	17:56:00	0
2009-03-03	17:57:00	0
2009-03-03	17:58:00	0
2009-03-03	17:59:00	0
2009-03-03	18:00:00	0
2009-03-03	18:01:00	0
2009-03-03	18:02:00	0
2009-03-03	18:03:00	0
2009-03-03	18:04:00	12
2009-03-03	18:05:00	0
2009-03-03	18:06:00	12
2009-03-03	18:07:00	148
2009-03-03	18:08:00	74
2009-03-03	18:09:00	160
2009-03-03	18:10:00	175
2009-03-03	18:11:00	74
2009-03-03	18:12:00	86
2009-03-03	18:13:00	37
2009-03-03	18:14:00	426
2009-03-03	18:15:00	0
2009-03-03	18:16:00	135
2009-03-03	18:17:00	0
2009-03-03	18:18:00	0
2009-03-03	18:19:00	0
2009-03-03	18:20:00	0
2009-03-03	18:21:00	0
2009-03-03	18:22:00	0
2009-03-03	18:23:00	0
2009-03-03	18:24:00	0
2009-03-03	18:25:00	0
2009-03-03	18:26:00	49
2009-03-03	18:27:00	37
2009-03-03	18:28:00	357
2009-03-03	18:29:00	98
2009-03-03	18:30:00	148
2009-03-03	18:31:00	98
2009-03-03	18:32:00	49
2009-03-03	18:33:00	322
2009-03-03	18:34:00	204
2009-03-03	18:35:00	98
2009-03-03	18:36:00	74
2009-03-03	18:37:00	74
2009-03-03	18:38:00	111
2009-03-03	18:39:00	263
2009-03-03	18:40:00	1017
2009-03-03	18:41:00	679
2009-03-03	18:42:00	556
2009-03-03	18:43:00	576
2009-03-03	18:44:00	889
2009-03-03	18:45:00	596
2009-03-03	18:46:00	190
2009-03-03	18:47:00	340
2009-03-03	18:48:00	249
2009-03-03	18:49:00	596
2009-03-03	18:50:00	340
2009-03-03	18:51:00	148
2009-03-03	18:52:00	0
2009-03-03	18:53:00	0
2009-03-03	18:54:00	0
2009-03-03	18:55:00	0
2009-03-03	18:56:00	0
2009-03-03	18:57:00	0
2009-03-03	18:58:00	0
2009-03-03	18:59:00	0
2009-03-03	19:00:00	0
2009-03-03	19:01:00	12
2009-03-03	19:02:00	12
2009-03-03	19:03:00	0
2009-03-03	19:04:00	0
2009-03-03	19:05:00	12
2009-03-03	19:06:00	0
2009-03-03	19:07:00	0
2009-03-03	19:08:00	0
2009-03-03	19:09:00	0
2009-03-03	19:10:00	0
2009-03-03	19:11:00	0
2009-03-03	19:12:00	0
2009-03-03	19:13:00	25
2009-03-03	19:14:00	0
2009-03-03	19:15:00	0
2009-03-03	19:16:00	0
2009-03-03	19:17:00	0
2009-03-03	19:18:00	12
2009-03-03	19:19:00	0
2009-03-03	19:20:00	0
2009-03-03	19:21:00	0
2009-03-03	19:22:00	0
2009-03-03	19:23:00	0
2009-03-03	19:24:00	0
2009-03-03	19:25:00	234
2009-03-03	19:26:00	204
2009-03-03	19:27:00	790
2009-03-03	19:28:00	1017
2009-03-03	19:29:00	62
2009-03-03	19:30:00	219
2009-03-03	19:31:00	374
2009-03-03	19:32:00	357
2009-03-03	19:33:00	111
2009-03-03	19:34:00	478
2009-03-03	19:35:00	497
2009-03-03	19:36:00	374
2009-03-03	19:37:00	0
2009-03-03	19:38:00	0
2009-03-03	19:39:00	0
2009-03-03	19:40:00	0
2009-03-03	19:41:00	0
2009-03-03	19:42:00	0
2009-03-03	19:43:00	0
2009-03-03	19:44:00	0
2009-03-03	19:45:00	0
2009-03-03	19:46:00	0
2009-03-03	19:47:00	0
2009-03-03	19:48:00	0
2009-03-03	19:49:00	0
2009-03-03	19:50:00	0
2009-03-03	19:51:00	0
2009-03-03	19:52:00	0
2009-03-03	19:53:00	0
2009-03-03	19:54:00	0
2009-03-03	19:55:00	0
2009-03-03	19:56:00	0
2009-03-03	19:57:00	0
2009-03-03	19:58:00	0
2009-03-03	19:59:00	0
2009-03-03	20:00:00	0
2009-03-03	20:01:00	0
2009-03-03	20:02:00	0
2009-03-03	20:03:00	0
2009-03-03	20:04:00	0
2009-03-03	20:05:00	0
2009-03-03	20:06:00	0
2009-03-03	20:07:00	0
2009-03-03	20:08:00	0
2009-03-03	20:09:00	0
2009-03-03	20:10:00	0
2009-03-03	20:11:00	0
2009-03-03	20:12:00	0
2009-03-03	20:13:00	12
2009-03-03	20:14:00	0
2009-03-03	20:15:00	0
2009-03-03	20:16:00	25
2009-03-03	20:17:00	0
2009-03-03	20:18:00	0
2009-03-03	20:19:00	0
2009-03-03	20:20:00	0
2009-03-03	20:21:00	0
2009-03-03	20:22:00	0
2009-03-03	20:23:00	0
2009-03-03	20:24:00	0
2009-03-03	20:25:00	0
2009-03-03	20:26:00	0
2009-03-03	20:27:00	0
2009-03-03	20:28:00	0
2009-03-03	20:29:00	0
2009-03-03	20:30:00	0
2009-03-03	20:31:00	0
2009-03-03	20:32:00	0
2009-03-03	20:33:00	0
2009-03-03	20:34:00	0
2009-03-03	20:35:00	0
2009-03-03	20:36:00	0
2009-03-03	20:37:00	0
2009-03-03	20:38:00	0
2009-03-03	20:39:00	0
2009-03-03	20:40:00	0
2009-03-03	20:41:00	0
2009-03-03	20:42:00	12
2009-03-03	20:43:00	0
2009-03-03	20:44:00	0
2009-03-03	20:45:00	0
2009-03-03	20:46:00	25
2009-03-03	20:47:00	0
2009-03-03	20:48:00	0
2009-03-03	20:49:00	0
2009-03-03	20:50:00	0
2009-03-03	20:51:00	0
2009-03-03	20:52:00	0
2009-03-03	20:53:00	0
2009-03-03	20:54:00	0
2009-03-03	20:55:00	0
2009-03-03	20:56:00	0
2009-03-03	20:57:00	0
2009-03-03	20:58:00	0
2009-03-03	20:59:00	0
2009-03-03	21:00:00	0
2009-03-03	21:01:00	0
2009-03-03	21:02:00	0
2009-03-03	21:03:00	0
2009-03-03	21:04:00	0
2009-03-03	21:05:00	0
2009-03-03	21:06:00	37
2009-03-03	21:07:00	0
2009-03-03	21:08:00	0
2009-03-03	21:09:00	0
2009-03-03	21:10:00	0
2009-03-03	21:11:00	0
2009-03-03	21:12:00	0
2009-03-03	21:13:00	12
2009-03-03	21:14:00	0
2009-03-03	21:15:00	0
2009-03-03	21:16:00	0
2009-03-03	21:17:00	0
2009-03-03	21:18:00	0
2009-03-03	21:19:00	0
2009-03-03	21:20:00	0
2009-03-03	21:21:00	0
2009-03-03	21:22:00	0
2009-03-03	21:23:00	0
2009-03-03	21:24:00	0
2009-03-03	21:25:00	0
2009-03-03	21:26:00	0
2009-03-03	21:27:00	0
2009-03-03	21:28:00	0
2009-03-03	21:29:00	0
2009-03-03	21:30:00	0
2009-03-03	21:31:00	0
2009-03-03	21:32:00	0
2009-03-03	21:33:00	0
2009-03-03	21:34:00	0
2009-03-03	21:35:00	12
2009-03-03	21:36:00	49
2009-03-03	21:37:00	0
2009-03-03	21:38:00	0
2009-03-03	21:39:00	0
2009-03-03	21:40:00	0
2009-03-03	21:41:00	0
2009-03-03	21:42:00	0
2009-03-03	21:43:00	0
2009-03-03	21:44:00	0
2009-03-03	21:45:00	0
2009-03-03	21:46:00	0
2009-03-03	21:47:00	0
2009-03-03	21:48:00	0
2009-03-03	21:49:00	0
2009-03-03	21:50:00	0
2009-03-03	21:51:00	0
2009-03-03	21:52:00	0
2009-03-03	21:53:00	0
2009-03-03	21:54:00	0
2009-03-03	21:55:00	0
2009-03-03	21:56:00	0
2009-03-03	21:57:00	0
2009-03-03	21:58:00	0
2009-03-03	21:59:00	0
2009-03-03	22:00:00	0
2009-03-03	22:01:00	0
2009-03-03	22:02:00	0
2009-03-03	22:03:00	0
2009-03-03	22:04:00	0
2009-03-03	22:05:00	0
2009-03-03	22:06:00	0
2009-03-03	22:07:00	0
2009-03-03	22:08:00	0
2009-03-03	22:09:00	0
2009-03-03	22:10:00	0
2009-03-03	22:11:00	0
2009-03-03	22:12:00	0
2009-03-03	22:13:00	0
2009-03-03	22:14:00	0
2009-03-03	22:15:00	0
2009-03-03	22:16:00	0
2009-03-03	22:17:00	0
2009-03-03	22:18:00	0
2009-03-03	22:19:00	0
2009-03-03	22:20:00	0
2009-03-03	22:21:00	0
2009-03-03	22:22:00	0
2009-03-03	22:23:00	0
2009-03-03	22:24:00	0
2009-03-03	22:25:00	0
2009-03-03	22:26:00	0
2009-03-03	22:27:00	0
2009-03-03	22:28:00	0
2009-03-03	22:29:00	0
2009-03-03	22:30:00	0
2009-03-03	22:31:00	0
2009-03-03	22:32:00	0
2009-03-03	22:33:00	0
2009-03-03	22:34:00	0
2009-03-03	22:35:00	0
2009-03-03	22:36:00	0
2009-03-03	22:37:00	0
2009-03-03	22:38:00	0
2009-03-03	22:39:00	0
2009-03-03	22:40:00	0
2009-03-03	22:41:00	0
2009-03-03	22:42:00	0
2009-03-03	22:43:00	0
2009-03-03	22:44:00	0
2009-03-03	22:45:00	0
2009-03-03	22:46:00	0
2009-03-03	22:47:00	0
2009-03-03	22:48:00	0
2009-03-03	22:49:00	0
2009-03-03	22:50:00	0
2009-03-03	22:51:00	0
2009-03-03	22:52:00	0
2009-03-03	22:53:00	0
2009-03-03	22:54:00	0
2009-03-03	22:55:00	0
2009-03-03	22:56:00	0
2009-03-03	22:57:00	0
2009-03-03	22:58:00	0
2009-03-03	22:59:00	0
2009-03-03	23:00:00	0
2009-03-03	23:01:00	0
2009-03-03	23:02:00	0
2009-03-03	23:03:00	0
2009-03-03	23:04:00	0
2009-03-03	23:05:00	0
2009-03-03	23:06:00	0
2009-03-03	23:07:00	0
2009-03-03	23:08:00	0
2009-03-03	23:09:00	0
2009-03-03	23:10:00	0
2009-03-03	23:11:00	0
2009-03-03	23:12:00	0
2009-03-03	23:13:00	0
2009-03-03	23:14:00	0
2009-03-03	23:15:00	0
2009-03-03	23:16:00	12
2009-03-03	23:17:00	111
2009-03-03	23:18:00	135
2009-03-03	23:19:00	135
2009-03-03	23:20:00	160
2009-03-03	23:21:00	0
2009-03-03	23:22:00	0
2009-03-03	23:23:00	0
2009-03-03	23:24:00	0
2009-03-03	23:25:00	0
2009-03-03	23:26:00	0
2009-03-03	23:27:00	0
2009-03-03	23:28:00	0
2009-03-03	23:29:00	0
2009-03-03	23:30:00	0
2009-03-03	23:31:00	0
2009-03-03	23:32:00	0
2009-03-03	23:33:00	0
2009-03-03	23:34:00	0
2009-03-03	23:35:00	0
2009-03-03	23:36:00	0
2009-03-03	23:37:00	0
2009-03-03	23:38:00	0
2009-03-03	23:39:00	0
2009-03-03	23:40:00	0
2009-03-03	23:41:00	0
2009-03-03	23:42:00	0
2009-03-03	23:43:00	0
2009-03-03	23:44:00	0
2009-03-03	23:45:00	0
2009-03-03	23:46:00	0
2009-03-03	23:47:00	0
2009-03-03	23:48:00	0
2009-03-03	23:49:00	0
2009-03-03	23:50:00	0
2009-03-03	23:51:00	0
2009-03-03	23:52:00	0
2009-03-03	23:53:00	0
2009-03-03	23:54:00	0
2009-03-03	23:55:00	0
2009-03-03	23:56:00	0
2009-03-03	23:57:00	0
2009-03-03	23:58:00	0
2009-03-03	23:59:00	0
2009-03-04	00:00:00	0
2009-03-04	00:01:00	0
2009-03-04	00:02:00	0
2009-03-04	00:03:00	0
2009-03-04	00:04:00	0
2009-03-04	00:05:00	0
2009-03-04	00:06:00	12
2009-03-04	00:07:00	0
2009-03-04	00:08:00	0
2009-03-04	00:09:00	0
2009-03-04	00:10:00	0
2009-03-04	00:11:00	0
2009-03-04	00:12:00	0
2009-03-04	00:13:00	0
2009-03-04	00:14:00	0
2009-03-04	00:15:00	0
2009-03-04	00:16:00	0
2009-03-04	00:17:00	0
2009-03-04	00:18:00	0
2009-03-04	00:19:00	0
2009-03-04	00:20:00	0
2009-03-04	00:21:00	0
2009-03-04	00:22:00	0
2009-03-04	00:23:00	0
2009-03-04	00:24:00	0
2009-03-04	00:25:00	0
2009-03-04	00:26:00	0
2009-03-04	00:27:00	0
2009-03-04	00:28:00	0
2009-03-04	00:29:00	0
2009-03-04	00:30:00	0
2009-03-04	00:31:00	0
2009-03-04	00:32:00	0
2009-03-04	00:33:00	0
2009-03-04	00:34:00	0
2009-03-04	00:35:00	0
2009-03-04	00:36:00	0
2009-03-04	00:37:00	0
2009-03-04	00:38:00	0
2009-03-04	00:39:00	0
2009-03-04	00:40:00	0
2009-03-04	00:41:00	0
2009-03-04	00:42:00	0
2009-03-04	00:43:00	0
2009-03-04	00:44:00	0
2009-03-04	00:45:00	0
2009-03-04	00:46:00	0
2009-03-04	00:47:00	0
2009-03-04	00:48:00	0
2009-03-04	00:49:00	0
2009-03-04	00:50:00	0
2009-03-04	00:51:00	0
2009-03-04	00:52:00	0
2009-03-04	00:53:00	0
2009-03-04	00:54:00	0
2009-03-04	00:55:00	0
2009-03-04	00:56:00	0
2009-03-04	00:57:00	0
2009-03-04	00:58:00	0
2009-03-04	00:59:00	0
2009-03-04	01:00:00	0
2009-03-04	01:01:00	0
2009-03-04	01:02:00	0
2009-03-04	01:03:00	0
2009-03-04	01:04:00	0
2009-03-04	01:05:00	0
2009-03-04	01:06:00	0
2009-03-04	01:07:00	0
2009-03-04	01:08:00	0
2009-03-04	01:09:00	0
2009-03-04	01:10:00	0
2009-03-04	01:11:00	0
2009-03-04	01:12:00	0
2009-03-04	01:13:00	0
2009-03-04	01:14:00	0
2009-03-04	01:15:00	0
2009-03-04	01:16:00	0
2009-03-04	01:17:00	0
2009-03-04	01:18:00	0
2009-03-04	01:19:00	0
2009-03-04	01:20:00	0
2009-03-04	01:21:00	0
2009-03-04	01:22:00	0
2009-03-04	01:23:00	0
2009-03-04	01:24:00	0
2009-03-04	01:25:00	0
2009-03-04	01:26:00	0
2009-03-04	01:27:00	0
2009-03-04	01:28:00	0
2009-03-04	01:29:00	0
2009-03-04	01:30:00	0
2009-03-04	01:31:00	0
2009-03-04	01:32:00	0
2009-03-04	01:33:00	0
2009-03-04	01:34:00	0
2009-03-04	01:35:00	0
2009-03-04	01:36:00	0
2009-03-04	01:37:00	0
2009-03-04	01:38:00	0
2009-03-04	01:39:00	0
2009-03-04	01:40:00	0
2009-03-04	01:41:00	0
2009-03-04	01:42:00	0
2009-03-04	01:43:00	0
2009-03-04	01:44:00	0
2009-03-04	01:45:00	0
2009-03-04	01:46:00	0
2009-03-04	01:47:00	0
2009-03-04	01:48:00	12
2009-03-04	01:49:00	0
2009-03-04	01:50:00	0
2009-03-04	01:51:00	0
2009-03-04	01:52:00	0
2009-03-04	01:53:00	0
2009-03-04	01:54:00	0
2009-03-04	01:55:00	0
2009-03-04	01:56:00	0
2009-03-04	01:57:00	0
2009-03-04	01:58:00	0
2009-03-04	01:59:00	0
2009-03-04	02:00:00	0
2009-03-04	02:01:00	0
2009-03-04	02:02:00	0
2009-03-04	02:03:00	0
2009-03-04	02:04:00	0
2009-03-04	02:05:00	0
2009-03-04	02:06:00	0
2009-03-04	02:07:00	0
2009-03-04	02:08:00	0
2009-03-04	02:09:00	0
2009-03-04	02:10:00	0
2009-03-04	02:11:00	0
2009-03-04	02:12:00	0
2009-03-04	02:13:00	0
2009-03-04	02:14:00	0
2009-03-04	02:15:00	0
2009-03-04	02:16:00	0
2009-03-04	02:17:00	0
2009-03-04	02:18:00	0
2009-03-04	02:19:00	0
2009-03-04	02:20:00	0
2009-03-04	02:21:00	0
2009-03-04	02:22:00	0
2009-03-04	02:23:00	0
2009-03-04	02:24:00	0
2009-03-04	02:25:00	0
2009-03-04	02:26:00	0
2009-03-04	02:27:00	0
2009-03-04	02:28:00	0
2009-03-04	02:29:00	0
2009-03-04	02:30:00	0
2009-03-04	02:31:00	0
2009-03-04	02:32:00	0
2009-03-04	02:33:00	0
2009-03-04	02:34:00	0
2009-03-04	02:35:00	0
2009-03-04	02:36:00	0
2009-03-04	02:37:00	0
2009-03-04	02:38:00	0
2009-03-04	02:39:00	0
2009-03-04	02:40:00	0
2009-03-04	02:41:00	0
2009-03-04	02:42:00	0
2009-03-04	02:43:00	0
2009-03-04	02:44:00	0
2009-03-04	02:45:00	0
2009-03-04	02:46:00	0
2009-03-04	02:47:00	0
2009-03-04	02:48:00	0
2009-03-04	02:49:00	0
2009-03-04	02:50:00	0
2009-03-04	02:51:00	0
2009-03-04	02:52:00	0
2009-03-04	02:53:00	0
2009-03-04	02:54:00	0
2009-03-04	02:55:00	0
2009-03-04	02:56:00	0
2009-03-04	02:57:00	0
2009-03-04	02:58:00	0
2009-03-04	02:59:00	0
2009-03-04	03:00:00	0
2009-03-04	03:01:00	0
2009-03-04	03:02:00	0
2009-03-04	03:03:00	0
2009-03-04	03:04:00	0
2009-03-04	03:05:00	0
2009-03-04	03:06:00	0
2009-03-04	03:07:00	0
2009-03-04	03:08:00	0
2009-03-04	03:09:00	0
2009-03-04	03:10:00	0
2009-03-04	03:11:00	0
2009-03-04	03:12:00	0
2009-03-04	03:13:00	0
2009-03-04	03:14:00	0
2009-03-04	03:15:00	0
2009-03-04	03:16:00	0
2009-03-04	03:17:00	0
2009-03-04	03:18:00	0
2009-03-04	03:19:00	49
2009-03-04	03:20:00	0
2009-03-04	03:21:00	0
2009-03-04	03:22:00	0
2009-03-04	03:23:00	0
2009-03-04	03:24:00	0
2009-03-04	03:25:00	0
2009-03-04	03:26:00	12
2009-03-04	03:27:00	0
2009-03-04	03:28:00	12
2009-03-04	03:29:00	12
2009-03-04	03:30:00	0
2009-03-04	03:31:00	86
2009-03-04	03:32:00	74
2009-03-04	03:33:00	0
2009-03-04	03:34:00	0
2009-03-04	03:35:00	25
2009-03-04	03:36:00	12
2009-03-04	03:37:00	12
2009-03-04	03:38:00	12
2009-03-04	03:39:00	0
2009-03-04	03:40:00	37
2009-03-04	03:41:00	0
2009-03-04	03:42:00	0
2009-03-04	03:43:00	0
2009-03-04	03:44:00	0
2009-03-04	03:45:00	0
2009-03-04	03:46:00	0
2009-03-04	03:47:00	0
2009-03-04	03:48:00	0
2009-03-04	03:49:00	0
2009-03-04	03:50:00	0
2009-03-04	03:51:00	0
2009-03-04	03:52:00	0
2009-03-04	03:53:00	0
2009-03-04	03:54:00	0
2009-03-04	03:55:00	0
2009-03-04	03:56:00	0
2009-03-04	03:57:00	0
2009-03-04	03:58:00	0
2009-03-04	03:59:00	0
2009-03-04	04:00:00	0
2009-03-04	04:01:00	0
2009-03-04	04:02:00	0
2009-03-04	04:03:00	0
2009-03-04	04:04:00	0
2009-03-04	04:05:00	0
2009-03-04	04:06:00	0
2009-03-04	04:07:00	0
2009-03-04	04:08:00	0
2009-03-04	04:09:00	0
2009-03-04	04:10:00	0
2009-03-04	04:11:00	0
2009-03-04	04:12:00	0
2009-03-04	04:13:00	0
2009-03-04	04:14:00	0
2009-03-04	04:15:00	0
2009-03-04	04:16:00	0
2009-03-04	04:17:00	0
2009-03-04	04:18:00	0
2009-03-04	04:19:00	0
2009-03-04	04:20:00	0
2009-03-04	04:21:00	0
2009-03-04	04:22:00	0
2009-03-04	04:23:00	0
2009-03-04	04:24:00	0
2009-03-04	04:25:00	0
2009-03-04	04:26:00	0
2009-03-04	04:27:00	0
2009-03-04	04:28:00	0
2009-03-04	04:29:00	0
2009-03-04	04:30:00	0
2009-03-04	04:31:00	0
2009-03-04	04:32:00	0
2009-03-04	04:33:00	0
2009-03-04	04:34:00	0
2009-03-04	04:35:00	0
2009-03-04	04:36:00	0
2009-03-04	04:37:00	0
2009-03-04	04:38:00	0
2009-03-04	04:39:00	0
2009-03-04	04:40:00	0
2009-03-04	04:41:00	0
2009-03-04	04:42:00	0
2009-03-04	04:43:00	0
2009-03-04	04:44:00	0
2009-03-04	04:45:00	0
2009-03-04	04:46:00	0
2009-03-04	04:47:00	0
2009-03-04	04:48:00	0
2009-03-04	04:49:00	0
2009-03-04	04:50:00	0
2009-03-04	04:51:00	0
2009-03-04	04:52:00	0
2009-03-04	04:53:00	0
2009-03-04	04:54:00	0
2009-03-04	04:55:00	0
2009-03-04	04:56:00	0
2009-03-04	04:57:00	0
2009-03-04	04:58:00	0
2009-03-04	04:59:00	0
2009-03-04	05:00:00	0
2009-03-04	05:01:00	0
2009-03-04	05:02:00	0
2009-03-04	05:03:00	0
2009-03-04	05:04:00	0
2009-03-04	05:05:00	0
2009-03-04	05:06:00	0
2009-03-04	05:07:00	0
2009-03-04	05:08:00	0
2009-03-04	05:09:00	0
2009-03-04	05:10:00	0
2009-03-04	05:11:00	0
2009-03-04	05:12:00	0
2009-03-04	05:13:00	0
2009-03-04	05:14:00	0
2009-03-04	05:15:00	0
2009-03-04	05:16:00	0
2009-03-04	05:17:00	0
2009-03-04	05:18:00	0
2009-03-04	05:19:00	0
2009-03-04	05:20:00	0
2009-03-04	05:21:00	0
2009-03-04	05:22:00	0
2009-03-04	05:23:00	0
2009-03-04	05:24:00	12
2009-03-04	05:25:00	0
2009-03-04	05:26:00	0
2009-03-04	05:27:00	0
2009-03-04	05:28:00	0
2009-03-04	05:29:00	0
2009-03-04	05:30:00	0
2009-03-04	05:31:00	0
2009-03-04	05:32:00	0
2009-03-04	05:33:00	25
2009-03-04	05:34:00	12
2009-03-04	05:35:00	0
2009-03-04	05:36:00	0
2009-03-04	05:37:00	0
2009-03-04	05:38:00	0
2009-03-04	05:39:00	0
2009-03-04	05:40:00	0
2009-03-04	05:41:00	0
2009-03-04	05:42:00	25
2009-03-04	05:43:00	148
2009-03-04	05:44:00	0
2009-03-04	05:45:00	12
2009-03-04	05:46:00	160
2009-03-04	05:47:00	460
2009-03-04	05:48:00	576
2009-03-04	05:49:00	190
2009-03-04	05:50:00	308
2009-03-04	05:51:00	263
2009-03-04	05:52:00	0
2009-03-04	05:53:00	0
2009-03-04	05:54:00	12
2009-03-04	05:55:00	12
2009-03-04	05:56:00	0
2009-03-04	05:57:00	0
2009-03-04	05:58:00	0
2009-03-04	05:59:00	0
2009-03-04	06:00:00	0
2009-03-04	06:01:00	0
2009-03-04	06:02:00	37
2009-03-04	06:03:00	12
2009-03-04	06:04:00	37
2009-03-04	06:05:00	0
2009-03-04	06:06:00	0
2009-03-04	06:07:00	0
2009-03-04	06:08:00	0
2009-03-04	06:09:00	0
2009-03-04	06:10:00	0
2009-03-04	06:11:00	12
2009-03-04	06:12:00	12
2009-03-04	06:13:00	12
2009-03-04	06:14:00	0
2009-03-04	06:15:00	0
2009-03-04	06:16:00	12
2009-03-04	06:17:00	0
2009-03-04	06:18:00	12
2009-03-04	06:19:00	0
2009-03-04	06:20:00	249
2009-03-04	06:21:00	596
2009-03-04	06:22:00	702
2009-03-04	06:23:00	962
2009-03-04	06:24:00	746
2009-03-04	06:25:00	443
2009-03-04	06:26:00	374
2009-03-04	06:27:00	815
2009-03-04	06:28:00	596
2009-03-04	06:29:00	460
2009-03-04	06:30:00	357
2009-03-04	06:31:00	340
2009-03-04	06:32:00	322
2009-03-04	06:33:00	234
2009-03-04	06:34:00	657
2009-03-04	06:35:00	135
2009-03-04	06:36:00	190
2009-03-04	06:37:00	443
2009-03-04	06:38:00	219
2009-03-04	06:39:00	357
2009-03-04	06:40:00	576
2009-03-04	06:41:00	839
2009-03-04	06:42:00	460
2009-03-04	06:43:00	497
2009-03-04	06:44:00	374
2009-03-04	06:45:00	308
2009-03-04	06:46:00	86
2009-03-04	06:47:00	340
2009-03-04	06:48:00	0
2009-03-04	06:49:00	0
2009-03-04	06:50:00	278
2009-03-04	06:51:00	1044
2009-03-04	06:52:00	746
2009-03-04	06:53:00	234
2009-03-04	06:54:00	635
2009-03-04	06:55:00	190
2009-03-04	06:56:00	263
2009-03-04	06:57:00	123
2009-03-04	06:58:00	123
2009-03-04	06:59:00	190
2009-03-04	07:00:00	74
2009-03-04	07:01:00	322
2009-03-04	07:02:00	12
2009-03-04	07:03:00	62
2009-03-04	07:04:00	1753
2009-03-04	07:05:00	1502
2009-03-04	07:06:00	148
2009-03-04	07:07:00	111
2009-03-04	07:08:00	357
2009-03-04	07:09:00	135
2009-03-04	07:10:00	62
2009-03-04	07:11:00	98
2009-03-04	07:12:00	123
2009-03-04	07:13:00	160
2009-03-04	07:14:00	98
2009-03-04	07:15:00	135
2009-03-04	07:16:00	12
2009-03-04	07:17:00	62
2009-03-04	07:18:00	0
2009-03-04	07:19:00	135
2009-03-04	07:20:00	86
2009-03-04	07:21:00	74
2009-03-04	07:22:00	175
2009-03-04	07:23:00	234
2009-03-04	07:24:00	49
2009-03-04	07:25:00	25
2009-03-04	07:26:00	148
2009-03-04	07:27:00	123
2009-03-04	07:28:00	160
2009-03-04	07:29:00	123
2009-03-04	07:30:00	98
2009-03-04	07:31:00	86
2009-03-04	07:32:00	148
2009-03-04	07:33:00	219
2009-03-04	07:34:00	12
2009-03-04	07:35:00	148
2009-03-04	07:36:00	2919
2009-03-04	07:37:00	1871
2009-03-04	07:38:00	1017
2009-03-04	07:39:00	1570
2009-03-04	07:40:00	1642
2009-03-04	07:41:00	278
2009-03-04	07:42:00	175
2009-03-04	07:43:00	391
2009-03-04	07:44:00	249
2009-03-04	07:45:00	0
2009-03-04	07:46:00	0
2009-03-04	07:47:00	0
2009-03-04	07:48:00	0
2009-03-04	07:49:00	0
2009-03-04	07:50:00	0
2009-03-04	07:51:00	0
2009-03-04	07:52:00	0
2009-03-04	07:53:00	0
2009-03-04	07:54:00	0
2009-03-04	07:55:00	25
2009-03-04	07:56:00	0
2009-03-04	07:57:00	0
2009-03-04	07:58:00	160
2009-03-04	07:59:00	0
2009-03-04	08:00:00	0
2009-03-04	08:01:00	0
2009-03-04	08:02:00	0
2009-03-04	08:03:00	234
2009-03-04	08:04:00	263
2009-03-04	08:05:00	74
2009-03-04	08:06:00	135
2009-03-04	08:07:00	263
2009-03-04	08:08:00	0
2009-03-04	08:09:00	12
2009-03-04	08:10:00	12
2009-03-04	08:11:00	0
2009-03-04	08:12:00	0
2009-03-04	08:13:00	219
2009-03-04	08:14:00	86
2009-03-04	08:15:00	517
2009-03-04	08:16:00	409
2009-03-04	08:17:00	175
2009-03-04	08:18:00	0
2009-03-04	08:19:00	0
2009-03-04	08:20:00	0
2009-03-04	08:21:00	234
2009-03-04	08:22:00	86
2009-03-04	08:23:00	74
2009-03-04	08:24:00	62
2009-03-04	08:25:00	74
2009-03-04	08:26:00	37
2009-03-04	08:27:00	322
2009-03-04	08:28:00	0
2009-03-04	08:29:00	0
2009-03-04	08:30:00	0
2009-03-04	08:31:00	0
2009-03-04	08:32:00	0
2009-03-04	08:33:00	0
2009-03-04	08:34:00	0
2009-03-04	08:35:00	0
2009-03-04	08:36:00	0
2009-03-04	08:37:00	0
2009-03-04	08:38:00	0
2009-03-04	08:39:00	391
2009-03-04	08:40:00	111
2009-03-04	08:41:00	0
2009-03-04	08:42:00	135
2009-03-04	08:43:00	0
2009-03-04	08:44:00	768
2009-03-04	08:45:00	556
2009-03-04	08:46:00	37
2009-03-04	08:47:00	0
2009-03-04	08:48:00	0
2009-03-04	08:49:00	0
2009-03-04	08:50:00	0
2009-03-04	08:51:00	0
2009-03-04	08:52:00	0
2009-03-04	08:53:00	0
2009-03-04	08:54:00	12
2009-03-04	08:55:00	0
2009-03-04	08:56:00	12
2009-03-04	08:57:00	12
2009-03-04	08:58:00	0
2009-03-04	08:59:00	0
2009-03-04	09:00:00	0
2009-03-04	09:01:00	0
2009-03-04	09:02:00	0
2009-03-04	09:03:00	0
2009-03-04	09:04:00	0
2009-03-04	09:05:00	0
2009-03-04	09:06:00	0
2009-03-04	09:07:00	0
2009-03-04	09:08:00	0
[truncated: 22,491 more rows]

## Sheet: 3.19.09
Actogram, Copy Raw Data, All Days
Identity:	Bear Kaplan
Filename:	E:\Active Research Files\meloxicam titre canine\cases\disqualified\bear k\Bear Kaplan 3.19.09.AWC
Gender:	M
Age:	10
Height:	61.0 cm	24.0 in
Weight:	20.0 kg	44.1 lbs
Start Date:	19-Mar-2009 (Thu)
Start Time:	18:00:00
Interval:	1.00 mins
Date Stamp:	Time Stamp:	Activity Data:	Marker Press:
2009-03-19	00:00:00	0
2009-03-19	00:01:00	0
2009-03-19	00:02:00	0
2009-03-19	00:03:00	0
2009-03-19	00:04:00	0
2009-03-19	00:05:00	0
2009-03-19	00:06:00	0
2009-03-19	00:07:00	0
2009-03-19	00:08:00	0
2009-03-19	00:09:00	0
2009-03-19	00:10:00	0
2009-03-19	00:11:00	0
2009-03-19	00:12:00	0
2009-03-19	00:13:00	0
2009-03-19	00:14:00	0
2009-03-19	00:15:00	0
2009-03-19	00:16:00	0
2009-03-19	00:17:00	0
2009-03-19	00:18:00	0
2009-03-19	00:19:00	0
2009-03-19	00:20:00	0
2009-03-19	00:21:00	0
2009-03-19	00:22:00	0
2009-03-19	00:23:00	0
2009-03-19	00:24:00	0
2009-03-19	00:25:00	0
2009-03-19	00:26:00	0
2009-03-19	00:27:00	0
2009-03-19	00:28:00	0
2009-03-19	00:29:00	0
2009-03-19	00:30:00	0
2009-03-19	00:31:00	0
2009-03-19	00:32:00	0
2009-03-19	00:33:00	0
2009-03-19	00:34:00	0
2009-03-19	00:35:00	0
2009-03-19	00:36:00	0
2009-03-19	00:37:00	0
2009-03-19	00:38:00	0
2009-03-19	00:39:00	0
2009-03-19	00:40:00	0
2009-03-19	00:41:00	0
2009-03-19	00:42:00	0
2009-03-19	00:43:00	0
2009-03-19	00:44:00	0
2009-03-19	00:45:00	0
2009-03-19	00:46:00	0
2009-03-19	00:47:00	0
2009-03-19	00:48:00	0
2009-03-19	00:49:00	0
2009-03-19	00:50:00	0
2009-03-19	00:51:00	0
2009-03-19	00:52:00	0
2009-03-19	00:53:00	0
2009-03-19	00:54:00	0
2009-03-19	00:55:00	0
2009-03-19	00:56:00	0
2009-03-19	00:57:00	0
2009-03-19	00:58:00	0
2009-03-19	00:59:00	0
2009-03-19	01:00:00	0
2009-03-19	01:01:00	0
2009-03-19	01:02:00	0
2009-03-19	01:03:00	0
2009-03-19	01:04:00	0
2009-03-19	01:05:00	0
2009-03-19	01:06:00	0
2009-03-19	01:07:00	0
2009-03-19	01:08:00	0
2009-03-19	01:09:00	0
2009-03-19	01:10:00	0
2009-03-19	01:11:00	0
2009-03-19	01:12:00	0
2009-03-19	01:13:00	0
2009-03-19	01:14:00	0
2009-03-19	01:15:00	0
2009-03-19	01:16:00	0
2009-03-19	01:17:00	0
2009-03-19	01:18:00	0
2009-03-19	01:19:00	0
2009-03-19	01:20:00	0
2009-03-19	01:21:00	0
2009-03-19	01:22:00	0
2009-03-19	01:23:00	0
2009-03-19	01:24:00	0
2009-03-19	01:25:00	0
2009-03-19	01:26:00	0
2009-03-19	01:27:00	0
2009-03-19	01:28:00	0
2009-03-19	01:29:00	0
2009-03-19	01:30:00	0
2009-03-19	01:31:00	0
2009-03-19	01:32:00	0
2009-03-19	01:33:00	0
2009-03-19	01:34:00	0
2009-03-19	01:35:00	0
2009-03-19	01:36:00	0
2009-03-19	01:37:00	0
2009-03-19	01:38:00	0
2009-03-19	01:39:00	0
2009-03-19	01:40:00	0
2009-03-19	01:41:00	0
2009-03-19	01:42:00	0
2009-03-19	01:43:00	0
2009-03-19	01:44:00	0
2009-03-19	01:45:00	0
2009-03-19	01:46:00	0
2009-03-19	01:47:00	0
2009-03-19	01:48:00	0
2009-03-19	01:49:00	0
2009-03-19	01:50:00	0
2009-03-19	01:51:00	0
2009-03-19	01:52:00	0
2009-03-19	01:53:00	0
2009-03-19	01:54:00	0
2009-03-19	01:55:00	0
2009-03-19	01:56:00	0
2009-03-19	01:57:00	0
2009-03-19	01:58:00	0
2009-03-19	01:59:00	0
2009-03-19	02:00:00	0
2009-03-19	02:01:00	0
2009-03-19	02:02:00	0
2009-03-19	02:03:00	0
2009-03-19	02:04:00	0
2009-03-19	02:05:00	0
2009-03-19	02:06:00	0
2009-03-19	02:07:00	0
2009-03-19	02:08:00	0
2009-03-19	02:09:00	0
2009-03-19	02:10:00	0
2009-03-19	02:11:00	0
2009-03-19	02:12:00	0
2009-03-19	02:13:00	0
2009-03-19	02:14:00	0
2009-03-19	02:15:00	0
2009-03-19	02:16:00	0
2009-03-19	02:17:00	0
2009-03-19	02:18:00	0
2009-03-19	02:19:00	0
2009-03-19	02:20:00	0
2009-03-19	02:21:00	0
2009-03-19	02:22:00	0
2009-03-19	02:23:00	0
2009-03-19	02:24:00	0
2009-03-19	02:25:00	0
2009-03-19	02:26:00	0
2009-03-19	02:27:00	0
2009-03-19	02:28:00	0
2009-03-19	02:29:00	0
2009-03-19	02:30:00	0
2009-03-19	02:31:00	0
2009-03-19	02:32:00	0
2009-03-19	02:33:00	0
2009-03-19	02:34:00	0
2009-03-19	02:35:00	0
2009-03-19	02:36:00	0
2009-03-19	02:37:00	0
2009-03-19	02:38:00	0
2009-03-19	02:39:00	0
2009-03-19	02:40:00	0
2009-03-19	02:41:00	0
2009-03-19	02:42:00	0
2009-03-19	02:43:00	0
2009-03-19	02:44:00	0
2009-03-19	02:45:00	0
2009-03-19	02:46:00	0
2009-03-19	02:47:00	0
2009-03-19	02:48:00	0
2009-03-19	02:49:00	0
2009-03-19	02:50:00	0
2009-03-19	02:51:00	0
2009-03-19	02:52:00	0
2009-03-19	02:53:00	0
2009-03-19	02:54:00	0
2009-03-19	02:55:00	0
2009-03-19	02:56:00	0
2009-03-19	02:57:00	0
2009-03-19	02:58:00	0
2009-03-19	02:59:00	0
2009-03-19	03:00:00	0
2009-03-19	03:01:00	0
2009-03-19	03:02:00	0
2009-03-19	03:03:00	0
2009-03-19	03:04:00	0
2009-03-19	03:05:00	0
2009-03-19	03:06:00	0
2009-03-19	03:07:00	0
2009-03-19	03:08:00	0
2009-03-19	03:09:00	0
2009-03-19	03:10:00	0
2009-03-19	03:11:00	0
2009-03-19	03:12:00	0
2009-03-19	03:13:00	0
2009-03-19	03:14:00	0
2009-03-19	03:15:00	0
2009-03-19	03:16:00	0
2009-03-19	03:17:00	0
2009-03-19	03:18:00	0
2009-03-19	03:19:00	0
2009-03-19	03:20:00	0
2009-03-19	03:21:00	0
2009-03-19	03:22:00	0
2009-03-19	03:23:00	0
2009-03-19	03:24:00	0
2009-03-19	03:25:00	0
2009-03-19	03:26:00	0
2009-03-19	03:27:00	0
2009-03-19	03:28:00	0
2009-03-19	03:29:00	0
2009-03-19	03:30:00	0
2009-03-19	03:31:00	0
2009-03-19	03:32:00	0
2009-03-19	03:33:00	0
2009-03-19	03:34:00	0
2009-03-19	03:35:00	0
2009-03-19	03:36:00	0
2009-03-19	03:37:00	0
2009-03-19	03:38:00	0
2009-03-19	03:39:00	0
2009-03-19	03:40:00	0
2009-03-19	03:41:00	0
2009-03-19	03:42:00	0
2009-03-19	03:43:00	0
2009-03-19	03:44:00	0
2009-03-19	03:45:00	0
2009-03-19	03:46:00	0
2009-03-19	03:47:00	0
2009-03-19	03:48:00	0
2009-03-19	03:49:00	0
2009-03-19	03:50:00	0
2009-03-19	03:51:00	0
2009-03-19	03:52:00	0
2009-03-19	03:53:00	0
2009-03-19	03:54:00	0
2009-03-19	03:55:00	0
2009-03-19	03:56:00	0
2009-03-19	03:57:00	0
2009-03-19	03:58:00	0
2009-03-19	03:59:00	0
2009-03-19	04:00:00	0
2009-03-19	04:01:00	0
2009-03-19	04:02:00	0
2009-03-19	04:03:00	0
2009-03-19	04:04:00	0
2009-03-19	04:05:00	0
2009-03-19	04:06:00	0
2009-03-19	04:07:00	0
2009-03-19	04:08:00	0
2009-03-19	04:09:00	0
2009-03-19	04:10:00	0
2009-03-19	04:11:00	0
2009-03-19	04:12:00	0
2009-03-19	04:13:00	0
2009-03-19	04:14:00	0
2009-03-19	04:15:00	0
2009-03-19	04:16:00	0
2009-03-19	04:17:00	0
2009-03-19	04:18:00	0
2009-03-19	04:19:00	0
2009-03-19	04:20:00	0
2009-03-19	04:21:00	0
2009-03-19	04:22:00	0
2009-03-19	04:23:00	0
2009-03-19	04:24:00	0
2009-03-19	04:25:00	0
2009-03-19	04:26:00	0
2009-03-19	04:27:00	0
2009-03-19	04:28:00	0
2009-03-19	04:29:00	0
2009-03-19	04:30:00	0
2009-03-19	04:31:00	0
2009-03-19	04:32:00	0
2009-03-19	04:33:00	0
2009-03-19	04:34:00	0
2009-03-19	04:35:00	0
2009-03-19	04:36:00	0
2009-03-19	04:37:00	0
2009-03-19	04:38:00	0
2009-03-19	04:39:00	0
2009-03-19	04:40:00	0
2009-03-19	04:41:00	0
2009-03-19	04:42:00	0
2009-03-19	04:43:00	0
2009-03-19	04:44:00	0
2009-03-19	04:45:00	0
2009-03-19	04:46:00	0
2009-03-19	04:47:00	0
2009-03-19	04:48:00	0
2009-03-19	04:49:00	0
2009-03-19	04:50:00	0
2009-03-19	04:51:00	0
2009-03-19	04:52:00	0
2009-03-19	04:53:00	0
2009-03-19	04:54:00	0
2009-03-19	04:55:00	0
2009-03-19	04:56:00	0
2009-03-19	04:57:00	0
2009-03-19	04:58:00	0
2009-03-19	04:59:00	0
2009-03-19	05:00:00	0
2009-03-19	05:01:00	0
2009-03-19	05:02:00	0
2009-03-19	05:03:00	0
2009-03-19	05:04:00	0
2009-03-19	05:05:00	0
2009-03-19	05:06:00	0
2009-03-19	05:07:00	0
2009-03-19	05:08:00	0
2009-03-19	05:09:00	0
2009-03-19	05:10:00	0
2009-03-19	05:11:00	0
2009-03-19	05:12:00	0
2009-03-19	05:13:00	0
2009-03-19	05:14:00	0
2009-03-19	05:15:00	0
2009-03-19	05:16:00	0
2009-03-19	05:17:00	0
2009-03-19	05:18:00	0
2009-03-19	05:19:00	0
2009-03-19	05:20:00	0
2009-03-19	05:21:00	0
2009-03-19	05:22:00	0
2009-03-19	05:23:00	0
2009-03-19	05:24:00	0
2009-03-19	05:25:00	0
2009-03-19	05:26:00	0
2009-03-19	05:27:00	0
2009-03-19	05:28:00	0
2009-03-19	05:29:00	0
2009-03-19	05:30:00	0
2009-03-19	05:31:00	0
2009-03-19	05:32:00	0
2009-03-19	05:33:00	0
2009-03-19	05:34:00	0
2009-03-19	05:35:00	0
2009-03-19	05:36:00	0
2009-03-19	05:37:00	0
2009-03-19	05:38:00	0
2009-03-19	05:39:00	0
2009-03-19	05:40:00	0
2009-03-19	05:41:00	0
2009-03-19	05:42:00	0
2009-03-19	05:43:00	0
2009-03-19	05:44:00	0
2009-03-19	05:45:00	0
2009-03-19	05:46:00	0
2009-03-19	05:47:00	0
2009-03-19	05:48:00	0
2009-03-19	05:49:00	0
2009-03-19	05:50:00	0
2009-03-19	05:51:00	0
2009-03-19	05:52:00	0
2009-03-19	05:53:00	0
2009-03-19	05:54:00	0
2009-03-19	05:55:00	0
2009-03-19	05:56:00	0
2009-03-19	05:57:00	0
2009-03-19	05:58:00	0
2009-03-19	05:59:00	0
2009-03-19	06:00:00	0
2009-03-19	06:01:00	0
2009-03-19	06:02:00	0
2009-03-19	06:03:00	0
2009-03-19	06:04:00	0
2009-03-19	06:05:00	0
2009-03-19	06:06:00	0
2009-03-19	06:07:00	0
2009-03-19	06:08:00	0
2009-03-19	06:09:00	0
2009-03-19	06:10:00	0
2009-03-19	06:11:00	0
2009-03-19	06:12:00	0
2009-03-19	06:13:00	0
2009-03-19	06:14:00	0
2009-03-19	06:15:00	0
2009-03-19	06:16:00	0
2009-03-19	06:17:00	0
2009-03-19	06:18:00	0
2009-03-19	06:19:00	0
2009-03-19	06:20:00	0
2009-03-19	06:21:00	0
2009-03-19	06:22:00	0
2009-03-19	06:23:00	0
2009-03-19	06:24:00	0
2009-03-19	06:25:00	0
2009-03-19	06:26:00	0
2009-03-19	06:27:00	0
2009-03-19	06:28:00	0
2009-03-19	06:29:00	0
2009-03-19	06:30:00	0
2009-03-19	06:31:00	0
2009-03-19	06:32:00	0
2009-03-19	06:33:00	0
2009-03-19	06:34:00	0
2009-03-19	06:35:00	0
2009-03-19	06:36:00	0
2009-03-19	06:37:00	0
2009-03-19	06:38:00	0
2009-03-19	06:39:00	0
2009-03-19	06:40:00	0
2009-03-19	06:41:00	0
2009-03-19	06:42:00	0
2009-03-19	06:43:00	0
2009-03-19	06:44:00	0
2009-03-19	06:45:00	0
2009-03-19	06:46:00	0
2009-03-19	06:47:00	0
2009-03-19	06:48:00	0
2009-03-19	06:49:00	0
2009-03-19	06:50:00	0
2009-03-19	06:51:00	0
2009-03-19	06:52:00	0
2009-03-19	06:53:00	0
2009-03-19	06:54:00	0
2009-03-19	06:55:00	0
2009-03-19	06:56:00	0
2009-03-19	06:57:00	0
2009-03-19	06:58:00	0
2009-03-19	06:59:00	0
2009-03-19	07:00:00	0
2009-03-19	07:01:00	0
2009-03-19	07:02:00	0
2009-03-19	07:03:00	0
2009-03-19	07:04:00	0
2009-03-19	07:05:00	0
2009-03-19	07:06:00	0
2009-03-19	07:07:00	0
2009-03-19	07:08:00	0
2009-03-19	07:09:00	0
2009-03-19	07:10:00	0
2009-03-19	07:11:00	0
2009-03-19	07:12:00	0
2009-03-19	07:13:00	0
2009-03-19	07:14:00	0
2009-03-19	07:15:00	0
2009-03-19	07:16:00	0
2009-03-19	07:17:00	0
2009-03-19	07:18:00	0
2009-03-19	07:19:00	0
2009-03-19	07:20:00	0
2009-03-19	07:21:00	0
2009-03-19	07:22:00	0
2009-03-19	07:23:00	0
2009-03-19	07:24:00	0
2009-03-19	07:25:00	0
2009-03-19	07:26:00	0
2009-03-19	07:27:00	0
2009-03-19	07:28:00	0
2009-03-19	07:29:00	0
2009-03-19	07:30:00	0
2009-03-19	07:31:00	0
2009-03-19	07:32:00	0
2009-03-19	07:33:00	0
2009-03-19	07:34:00	0
2009-03-19	07:35:00	0
2009-03-19	07:36:00	0
2009-03-19	07:37:00	0
2009-03-19	07:38:00	0
2009-03-19	07:39:00	0
2009-03-19	07:40:00	0
2009-03-19	07:41:00	0
2009-03-19	07:42:00	0
2009-03-19	07:43:00	0
2009-03-19	07:44:00	0
2009-03-19	07:45:00	0
2009-03-19	07:46:00	0
2009-03-19	07:47:00	0
2009-03-19	07:48:00	0
2009-03-19	07:49:00	0
2009-03-19	07:50:00	0
2009-03-19	07:51:00	0
2009-03-19	07:52:00	0
2009-03-19	07:53:00	0
2009-03-19	07:54:00	0
2009-03-19	07:55:00	0
2009-03-19	07:56:00	0
2009-03-19	07:57:00	0
2009-03-19	07:58:00	0
2009-03-19	07:59:00	0
2009-03-19	08:00:00	0
2009-03-19	08:01:00	0
2009-03-19	08:02:00	0
2009-03-19	08:03:00	0
2009-03-19	08:04:00	0
2009-03-19	08:05:00	0
2009-03-19	08:06:00	0
2009-03-19	08:07:00	0
2009-03-19	08:08:00	0
2009-03-19	08:09:00	0
2009-03-19	08:10:00	0
2009-03-19	08:11:00	0
2009-03-19	08:12:00	0
2009-03-19	08:13:00	0
2009-03-19	08:14:00	0
2009-03-19	08:15:00	0
2009-03-19	08:16:00	0
2009-03-19	08:17:00	0
2009-03-19	08:18:00	0
2009-03-19	08:19:00	0
2009-03-19	08:20:00	0
2009-03-19	08:21:00	0
2009-03-19	08:22:00	0
2009-03-19	08:23:00	0
2009-03-19	08:24:00	0
2009-03-19	08:25:00	0
2009-03-19	08:26:00	0
2009-03-19	08:27:00	0
2009-03-19	08:28:00	0
2009-03-19	08:29:00	0
2009-03-19	08:30:00	0
2009-03-19	08:31:00	0
2009-03-19	08:32:00	0
2009-03-19	08:33:00	0
2009-03-19	08:34:00	0
2009-03-19	08:35:00	0
2009-03-19	08:36:00	0
2009-03-19	08:37:00	0
2009-03-19	08:38:00	0
2009-03-19	08:39:00	0
2009-03-19	08:40:00	0
2009-03-19	08:41:00	0
2009-03-19	08:42:00	0
2009-03-19	08:43:00	0
2009-03-19	08:44:00	0
2009-03-19	08:45:00	0
2009-03-19	08:46:00	0
2009-03-19	08:47:00	0
2009-03-19	08:48:00	0
2009-03-19	08:49:00	0
2009-03-19	08:50:00	0
2009-03-19	08:51:00	0
2009-03-19	08:52:00	0
2009-03-19	08:53:00	0
2009-03-19	08:54:00	0
2009-03-19	08:55:00	0
2009-03-19	08:56:00	0
2009-03-19	08:57:00	0
2009-03-19	08:58:00	0
2009-03-19	08:59:00	0
2009-03-19	09:00:00	0
2009-03-19	09:01:00	0
2009-03-19	09:02:00	0
2009-03-19	09:03:00	0
2009-03-19	09:04:00	0
2009-03-19	09:05:00	0
2009-03-19	09:06:00	0
2009-03-19	09:07:00	0
2009-03-19	09:08:00	0
2009-03-19	09:09:00	0
2009-03-19	09:10:00	0
2009-03-19	09:11:00	0
2009-03-19	09:12:00	0
2009-03-19	09:13:00	0
2009-03-19	09:14:00	0
2009-03-19	09:15:00	0
2009-03-19	09:16:00	0
2009-03-19	09:17:00	0
2009-03-19	09:18:00	0
2009-03-19	09:19:00	0
2009-03-19	09:20:00	0
2009-03-19	09:21:00	0
2009-03-19	09:22:00	0
2009-03-19	09:23:00	0
2009-03-19	09:24:00	0
2009-03-19	09:25:00	0
2009-03-19	09:26:00	0
2009-03-19	09:27:00	0
2009-03-19	09:28:00	0
2009-03-19	09:29:00	0
2009-03-19	09:30:00	0
2009-03-19	09:31:00	0
2009-03-19	09:32:00	0
2009-03-19	09:33:00	0
2009-03-19	09:34:00	0
2009-03-19	09:35:00	0
2009-03-19	09:36:00	0
2009-03-19	09:37:00	0
2009-03-19	09:38:00	0
2009-03-19	09:39:00	0
2009-03-19	09:40:00	0
2009-03-19	09:41:00	0
2009-03-19	09:42:00	0
2009-03-19	09:43:00	0
2009-03-19	09:44:00	0
2009-03-19	09:45:00	0
2009-03-19	09:46:00	0
2009-03-19	09:47:00	0
2009-03-19	09:48:00	0
2009-03-19	09:49:00	0
2009-03-19	09:50:00	0
2009-03-19	09:51:00	0
2009-03-19	09:52:00	0
2009-03-19	09:53:00	0
2009-03-19	09:54:00	0
2009-03-19	09:55:00	0
2009-03-19	09:56:00	0
2009-03-19	09:57:00	0
2009-03-19	09:58:00	0
2009-03-19	09:59:00	0
2009-03-19	10:00:00	0
2009-03-19	10:01:00	0
2009-03-19	10:02:00	0
2009-03-19	10:03:00	0
2009-03-19	10:04:00	0
2009-03-19	10:05:00	0
2009-03-19	10:06:00	0
2009-03-19	10:07:00	0
2009-03-19	10:08:00	0
2009-03-19	10:09:00	0
2009-03-19	10:10:00	0
2009-03-19	10:11:00	0
2009-03-19	10:12:00	0
2009-03-19	10:13:00	0
2009-03-19	10:14:00	0
2009-03-19	10:15:00	0
2009-03-19	10:16:00	0
2009-03-19	10:17:00	0
2009-03-19	10:18:00	0
2009-03-19	10:19:00	0
2009-03-19	10:20:00	0
2009-03-19	10:21:00	0
2009-03-19	10:22:00	0
2009-03-19	10:23:00	0
2009-03-19	10:24:00	0
2009-03-19	10:25:00	0
2009-03-19	10:26:00	0
2009-03-19	10:27:00	0
2009-03-19	10:28:00	0
2009-03-19	10:29:00	0
2009-03-19	10:30:00	0
2009-03-19	10:31:00	0
2009-03-19	10:32:00	0
2009-03-19	10:33:00	0
2009-03-19	10:34:00	0
2009-03-19	10:35:00	0
2009-03-19	10:36:00	0
2009-03-19	10:37:00	0
2009-03-19	10:38:00	0
2009-03-19	10:39:00	0
2009-03-19	10:40:00	0
2009-03-19	10:41:00	0
2009-03-19	10:42:00	0
2009-03-19	10:43:00	0
2009-03-19	10:44:00	0
2009-03-19	10:45:00	0
2009-03-19	10:46:00	0
2009-03-19	10:47:00	0
2009-03-19	10:48:00	0
2009-03-19	10:49:00	0
2009-03-19	10:50:00	0
2009-03-19	10:51:00	0
2009-03-19	10:52:00	0
2009-03-19	10:53:00	0
2009-03-19	10:54:00	0
2009-03-19	10:55:00	0
2009-03-19	10:56:00	0
2009-03-19	10:57:00	0
2009-03-19	10:58:00	0
2009-03-19	10:59:00	0
2009-03-19	11:00:00	0
2009-03-19	11:01:00	0
2009-03-19	11:02:00	0
2009-03-19	11:03:00	0
2009-03-19	11:04:00	0
2009-03-19	11:05:00	0
2009-03-19	11:06:00	0
2009-03-19	11:07:00	0
2009-03-19	11:08:00	0
2009-03-19	11:09:00	0
2009-03-19	11:10:00	0
2009-03-19	11:11:00	0
2009-03-19	11:12:00	0
2009-03-19	11:13:00	0
2009-03-19	11:14:00	0
2009-03-19	11:15:00	0
2009-03-19	11:16:00	0
2009-03-19	11:17:00	0
2009-03-19	11:18:00	0
2009-03-19	11:19:00	0
2009-03-19	11:20:00	0
2009-03-19	11:21:00	0
2009-03-19	11:22:00	0
2009-03-19	11:23:00	0
2009-03-19	11:24:00	0
2009-03-19	11:25:00	0
2009-03-19	11:26:00	0
2009-03-19	11:27:00	0
2009-03-19	11:28:00	0
2009-03-19	11:29:00	0
2009-03-19	11:30:00	0
2009-03-19	11:31:00	0
2009-03-19	11:32:00	0
2009-03-19	11:33:00	0
2009-03-19	11:34:00	0
2009-03-19	11:35:00	0
2009-03-19	11:36:00	0
2009-03-19	11:37:00	0
2009-03-19	11:38:00	0
2009-03-19	11:39:00	0
2009-03-19	11:40:00	0
2009-03-19	11:41:00	0
2009-03-19	11:42:00	0
2009-03-19	11:43:00	0
2009-03-19	11:44:00	0
2009-03-19	11:45:00	0
2009-03-19	11:46:00	0
2009-03-19	11:47:00	0
2009-03-19	11:48:00	0
2009-03-19	11:49:00	0
2009-03-19	11:50:00	0
2009-03-19	11:51:00	0
2009-03-19	11:52:00	0
2009-03-19	11:53:00	0
2009-03-19	11:54:00	0
2009-03-19	11:55:00	0
2009-03-19	11:56:00	0
2009-03-19	11:57:00	0
2009-03-19	11:58:00	0
2009-03-19	11:59:00	0
2009-03-19	12:00:00	0
2009-03-19	12:01:00	0
2009-03-19	12:02:00	0
2009-03-19	12:03:00	0
2009-03-19	12:04:00	0
2009-03-19	12:05:00	0
2009-03-19	12:06:00	0
2009-03-19	12:07:00	0
2009-03-19	12:08:00	0
2009-03-19	12:09:00	0
2009-03-19	12:10:00	0
2009-03-19	12:11:00	0
2009-03-19	12:12:00	0
2009-03-19	12:13:00	0
2009-03-19	12:14:00	0
2009-03-19	12:15:00	0
2009-03-19	12:16:00	0
2009-03-19	12:17:00	0
2009-03-19	12:18:00	0
2009-03-19	12:19:00	0
2009-03-19	12:20:00	0
2009-03-19	12:21:00	0
2009-03-19	12:22:00	0
2009-03-19	12:23:00	0
2009-03-19	12:24:00	0
2009-03-19	12:25:00	0
2009-03-19	12:26:00	0
2009-03-19	12:27:00	0
2009-03-19	12:28:00	0
2009-03-19	12:29:00	0
2009-03-19	12:30:00	0
2009-03-19	12:31:00	0
2009-03-19	12:32:00	0
2009-03-19	12:33:00	0
2009-03-19	12:34:00	0
2009-03-19	12:35:00	0
2009-03-19	12:36:00	0
2009-03-19	12:37:00	0
2009-03-19	12:38:00	0
2009-03-19	12:39:00	0
2009-03-19	12:40:00	0
2009-03-19	12:41:00	0
2009-03-19	12:42:00	0
2009-03-19	12:43:00	0
2009-03-19	12:44:00	0
2009-03-19	12:45:00	0
2009-03-19	12:46:00	0
2009-03-19	12:47:00	0
2009-03-19	12:48:00	0
2009-03-19	12:49:00	0
2009-03-19	12:50:00	0
2009-03-19	12:51:00	0
2009-03-19	12:52:00	0
2009-03-19	12:53:00	0
2009-03-19	12:54:00	0
2009-03-19	12:55:00	0
2009-03-19	12:56:00	0
2009-03-19	12:57:00	0
2009-03-19	12:58:00	0
2009-03-19	12:59:00	0
2009-03-19	13:00:00	0
2009-03-19	13:01:00	0
2009-03-19	13:02:00	0
2009-03-19	13:03:00	0
2009-03-19	13:04:00	0
2009-03-19	13:05:00	0
2009-03-19	13:06:00	0
2009-03-19	13:07:00	0
2009-03-19	13:08:00	0
2009-03-19	13:09:00	0
2009-03-19	13:10:00	0
2009-03-19	13:11:00	0
2009-03-19	13:12:00	0
2009-03-19	13:13:00	0
2009-03-19	13:14:00	0
2009-03-19	13:15:00	0
2009-03-19	13:16:00	0
2009-03-19	13:17:00	0
2009-03-19	13:18:00	0
2009-03-19	13:19:00	0
2009-03-19	13:20:00	0
2009-03-19	13:21:00	0
2009-03-19	13:22:00	0
2009-03-19	13:23:00	0
2009-03-19	13:24:00	0
2009-03-19	13:25:00	0
2009-03-19	13:26:00	0
2009-03-19	13:27:00	0
2009-03-19	13:28:00	0
2009-03-19	13:29:00	0
2009-03-19	13:30:00	0
2009-03-19	13:31:00	0
2009-03-19	13:32:00	0
2009-03-19	13:33:00	0
2009-03-19	13:34:00	0
2009-03-19	13:35:00	0
2009-03-19	13:36:00	0
2009-03-19	13:37:00	0
2009-03-19	13:38:00	0
2009-03-19	13:39:00	0
2009-03-19	13:40:00	0
2009-03-19	13:41:00	0
2009-03-19	13:42:00	0
2009-03-19	13:43:00	0
2009-03-19	13:44:00	0
2009-03-19	13:45:00	0
2009-03-19	13:46:00	0
2009-03-19	13:47:00	0
2009-03-19	13:48:00	0
2009-03-19	13:49:00	0
2009-03-19	13:50:00	0
2009-03-19	13:51:00	0
2009-03-19	13:52:00	0
2009-03-19	13:53:00	0
2009-03-19	13:54:00	0
2009-03-19	13:55:00	0
2009-03-19	13:56:00	0
2009-03-19	13:57:00	0
2009-03-19	13:58:00	0
2009-03-19	13:59:00	0
2009-03-19	14:00:00	0
2009-03-19	14:01:00	0
2009-03-19	14:02:00	0
2009-03-19	14:03:00	0
2009-03-19	14:04:00	0
2009-03-19	14:05:00	0
2009-03-19	14:06:00	0
2009-03-19	14:07:00	0
2009-03-19	14:08:00	0
2009-03-19	14:09:00	0
2009-03-19	14:10:00	0
2009-03-19	14:11:00	0
2009-03-19	14:12:00	0
2009-03-19	14:13:00	0
2009-03-19	14:14:00	0
2009-03-19	14:15:00	0
2009-03-19	14:16:00	0
2009-03-19	14:17:00	0
2009-03-19	14:18:00	0
2009-03-19	14:19:00	0
2009-03-19	14:20:00	0
2009-03-19	14:21:00	0
2009-03-19	14:22:00	0
2009-03-19	14:23:00	0
2009-03-19	14:24:00	0
2009-03-19	14:25:00	0
2009-03-19	14:26:00	0
2009-03-19	14:27:00	0
2009-03-19	14:28:00	0
2009-03-19	14:29:00	0
2009-03-19	14:30:00	0
2009-03-19	14:31:00	0
2009-03-19	14:32:00	0
2009-03-19	14:33:00	0
2009-03-19	14:34:00	0
2009-03-19	14:35:00	0
2009-03-19	14:36:00	0
2009-03-19	14:37:00	0
2009-03-19	14:38:00	0
2009-03-19	14:39:00	0
2009-03-19	14:40:00	0
2009-03-19	14:41:00	0
2009-03-19	14:42:00	0
2009-03-19	14:43:00	0
2009-03-19	14:44:00	0
2009-03-19	14:45:00	0
2009-03-19	14:46:00	0
2009-03-19	14:47:00	0
2009-03-19	14:48:00	0
2009-03-19	14:49:00	0
2009-03-19	14:50:00	0
2009-03-19	14:51:00	0
2009-03-19	14:52:00	0
2009-03-19	14:53:00	0
2009-03-19	14:54:00	0
2009-03-19	14:55:00	0
2009-03-19	14:56:00	0
2009-03-19	14:57:00	0
2009-03-19	14:58:00	0
2009-03-19	14:59:00	0
2009-03-19	15:00:00	0
2009-03-19	15:01:00	0
2009-03-19	15:02:00	0
2009-03-19	15:03:00	0
2009-03-19	15:04:00	0
2009-03-19	15:05:00	0
2009-03-19	15:06:00	0
2009-03-19	15:07:00	0
2009-03-19	15:08:00	0
2009-03-19	15:09:00	0
2009-03-19	15:10:00	0
2009-03-19	15:11:00	0
2009-03-19	15:12:00	0
2009-03-19	15:13:00	0
2009-03-19	15:14:00	0
2009-03-19	15:15:00	0
2009-03-19	15:16:00	0
2009-03-19	15:17:00	0
2009-03-19	15:18:00	0
2009-03-19	15:19:00	0
2009-03-19	15:20:00	0
2009-03-19	15:21:00	0
2009-03-19	15:22:00	0
2009-03-19	15:23:00	0
2009-03-19	15:24:00	0
2009-03-19	15:25:00	0
2009-03-19	15:26:00	0
2009-03-19	15:27:00	0
2009-03-19	15:28:00	0
2009-03-19	15:29:00	0
2009-03-19	15:30:00	0
2009-03-19	15:31:00	0
2009-03-19	15:32:00	0
2009-03-19	15:33:00	0
2009-03-19	15:34:00	0
2009-03-19	15:35:00	0
2009-03-19	15:36:00	0
2009-03-19	15:37:00	0
2009-03-19	15:38:00	0
2009-03-19	15:39:00	0
2009-03-19	15:40:00	0
2009-03-19	15:41:00	0
2009-03-19	15:42:00	0
2009-03-19	15:43:00	0
2009-03-19	15:44:00	0
2009-03-19	15:45:00	0
2009-03-19	15:46:00	0
2009-03-19	15:47:00	0
2009-03-19	15:48:00	0
2009-03-19	15:49:00	0
2009-03-19	15:50:00	0
2009-03-19	15:51:00	0
2009-03-19	15:52:00	0
2009-03-19	15:53:00	0
2009-03-19	15:54:00	0
2009-03-19	15:55:00	0
2009-03-19	15:56:00	0
2009-03-19	15:57:00	0
2009-03-19	15:58:00	0
2009-03-19	15:59:00	0
2009-03-19	16:00:00	0
2009-03-19	16:01:00	0
2009-03-19	16:02:00	0
2009-03-19	16:03:00	0
2009-03-19	16:04:00	0
2009-03-19	16:05:00	0
2009-03-19	16:06:00	0
2009-03-19	16:07:00	0
2009-03-19	16:08:00	0
2009-03-19	16:09:00	0
2009-03-19	16:10:00	0
2009-03-19	16:11:00	0
2009-03-19	16:12:00	0
2009-03-19	16:13:00	0
2009-03-19	16:14:00	0
2009-03-19	16:15:00	0
2009-03-19	16:16:00	0
2009-03-19	16:17:00	0
2009-03-19	16:18:00	0
2009-03-19	16:19:00	0
2009-03-19	16:20:00	0
2009-03-19	16:21:00	0
2009-03-19	16:22:00	0
2009-03-19	16:23:00	0
2009-03-19	16:24:00	0
2009-03-19	16:25:00	0
2009-03-19	16:26:00	0
2009-03-19	16:27:00	0
2009-03-19	16:28:00	0
2009-03-19	16:29:00	0
2009-03-19	16:30:00	0
2009-03-19	16:31:00	0
2009-03-19	16:32:00	0
2009-03-19	16:33:00	0
2009-03-19	16:34:00	0
2009-03-19	16:35:00	0
2009-03-19	16:36:00	0
2009-03-19	16:37:00	0
2009-03-19	16:38:00	0
2009-03-19	16:39:00	0
2009-03-19	16:40:00	0
2009-03-19	16:41:00	0
2009-03-19	16:42:00	0
2009-03-19	16:43:00	0
2009-03-19	16:44:00	0
2009-03-19	16:45:00	0
2009-03-19	16:46:00	0
2009-03-19	16:47:00	0
2009-03-19	16:48:00	0
2009-03-19	16:49:00	0
2009-03-19	16:50:00	0
2009-03-19	16:51:00	0
2009-03-19	16:52:00	0
2009-03-19	16:53:00	0
2009-03-19	16:54:00	0
2009-03-19	16:55:00	0
2009-03-19	16:56:00	0
2009-03-19	16:57:00	0
2009-03-19	16:58:00	0
2009-03-19	16:59:00	0
2009-03-19	17:00:00	0
2009-03-19	17:01:00	0
2009-03-19	17:02:00	0
2009-03-19	17:03:00	0
2009-03-19	17:04:00	0
2009-03-19	17:05:00	0
2009-03-19	17:06:00	0
2009-03-19	17:07:00	0
2009-03-19	17:08:00	0
2009-03-19	17:09:00	0
2009-03-19	17:10:00	0
2009-03-19	17:11:00	0
2009-03-19	17:12:00	0
2009-03-19	17:13:00	0
2009-03-19	17:14:00	0
2009-03-19	17:15:00	0
2009-03-19	17:16:00	0
2009-03-19	17:17:00	0
2009-03-19	17:18:00	0
2009-03-19	17:19:00	0
2009-03-19	17:20:00	0
2009-03-19	17:21:00	0
2009-03-19	17:22:00	0
2009-03-19	17:23:00	0
2009-03-19	17:24:00	0
2009-03-19	17:25:00	0
2009-03-19	17:26:00	0
2009-03-19	17:27:00	0
2009-03-19	17:28:00	0
2009-03-19	17:29:00	0
2009-03-19	17:30:00	0
2009-03-19	17:31:00	0
2009-03-19	17:32:00	0
2009-03-19	17:33:00	0
2009-03-19	17:34:00	0
2009-03-19	17:35:00	0
2009-03-19	17:36:00	0
2009-03-19	17:37:00	0
2009-03-19	17:38:00	0
2009-03-19	17:39:00	0
2009-03-19	17:40:00	0
2009-03-19	17:41:00	0
2009-03-19	17:42:00	0
2009-03-19	17:43:00	0
2009-03-19	17:44:00	0
2009-03-19	17:45:00	0
2009-03-19	17:46:00	0
2009-03-19	17:47:00	0
2009-03-19	17:48:00	0
2009-03-19	17:49:00	0
2009-03-19	17:50:00	0
2009-03-19	17:51:00	0
2009-03-19	17:52:00	0
2009-03-19	17:53:00	0
2009-03-19	17:54:00	0
2009-03-19	17:55:00	0
2009-03-19	17:56:00	0
2009-03-19	17:57:00	0
2009-03-19	17:58:00	0
2009-03-19	17:59:00	0
2009-03-19	18:00:00	657
2009-03-19	18:01:00	135
2009-03-19	18:02:00	0
2009-03-19	18:03:00	0
2009-03-19	18:04:00	0
2009-03-19	18:05:00	12
2009-03-19	18:06:00	0
2009-03-19	18:07:00	702
2009-03-19	18:08:00	219
2009-03-19	18:09:00	537
2009-03-19	18:10:00	98
2009-03-19	18:11:00	86
2009-03-19	18:12:00	37
2009-03-19	18:13:00	443
2009-03-19	18:14:00	537
2009-03-19	18:15:00	278
2009-03-19	18:16:00	0
2009-03-19	18:17:00	49
2009-03-19	18:18:00	0
2009-03-19	18:19:00	0
2009-03-19	18:20:00	0
2009-03-19	18:21:00	0
2009-03-19	18:22:00	0
2009-03-19	18:23:00	0
2009-03-19	18:24:00	0
2009-03-19	18:25:00	0
2009-03-19	18:26:00	0
2009-03-19	18:27:00	0
2009-03-19	18:28:00	0
2009-03-19	18:29:00	12
2009-03-19	18:30:00	0
2009-03-19	18:31:00	0
2009-03-19	18:32:00	0
2009-03-19	18:33:00	0
2009-03-19	18:34:00	1154
2009-03-19	18:35:00	1154
2009-03-19	18:36:00	123
2009-03-19	18:37:00	74
2009-03-19	18:38:00	0
2009-03-19	18:39:00	0
2009-03-19	18:40:00	12
2009-03-19	18:41:00	12
2009-03-19	18:42:00	12
2009-03-19	18:43:00	0
2009-03-19	18:44:00	0
2009-03-19	18:45:00	0
2009-03-19	18:46:00	62
2009-03-19	18:47:00	0
2009-03-19	18:48:00	12
2009-03-19	18:49:00	0
2009-03-19	18:50:00	12
2009-03-19	18:51:00	12
2009-03-19	18:52:00	234
2009-03-19	18:53:00	190
2009-03-19	18:54:00	148
2009-03-19	18:55:00	135
2009-03-19	18:56:00	249
2009-03-19	18:57:00	160
2009-03-19	18:58:00	160
2009-03-19	18:59:00	204
2009-03-19	19:00:00	160
2009-03-19	19:01:00	234
2009-03-19	19:02:00	111
2009-03-19	19:03:00	308
2009-03-19	19:04:00	12
2009-03-19	19:05:00	0
2009-03-19	19:06:00	0
2009-03-19	19:07:00	478
2009-03-19	19:08:00	913
2009-03-19	19:09:00	1433
2009-03-19	19:10:00	1994
2009-03-19	19:11:00	815
2009-03-19	19:12:00	340
2009-03-19	19:13:00	1071
2009-03-19	19:14:00	175
2009-03-19	19:15:00	135
2009-03-19	19:16:00	357
2009-03-19	19:17:00	596
2009-03-19	19:18:00	12
2009-03-19	19:19:00	0
2009-03-19	19:20:00	12
2009-03-19	19:21:00	12
2009-03-19	19:22:00	0
2009-03-19	19:23:00	0
2009-03-19	19:24:00	0
2009-03-19	19:25:00	0
2009-03-19	19:26:00	0
2009-03-19	19:27:00	0
2009-03-19	19:28:00	0
2009-03-19	19:29:00	12
2009-03-19	19:30:00	0
2009-03-19	19:31:00	0
2009-03-19	19:32:00	0
2009-03-19	19:33:00	0
2009-03-19	19:34:00	0
2009-03-19	19:35:00	0
2009-03-19	19:36:00	0
2009-03-19	19:37:00	25
2009-03-19	19:38:00	0
2009-03-19	19:39:00	0
2009-03-19	19:40:00	0
2009-03-19	19:41:00	0
2009-03-19	19:42:00	0
2009-03-19	19:43:00	0
2009-03-19	19:44:00	249
2009-03-19	19:45:00	12
2009-03-19	19:46:00	263
2009-03-19	19:47:00	426
2009-03-19	19:48:00	123
2009-03-19	19:49:00	0
2009-03-19	19:50:00	12
2009-03-19	19:51:00	12
2009-03-19	19:52:00	0
2009-03-19	19:53:00	0
2009-03-19	19:54:00	0
2009-03-19	19:55:00	0
2009-03-19	19:56:00	0
2009-03-19	19:57:00	0
2009-03-19	19:58:00	0
2009-03-19	19:59:00	12
2009-03-19	20:00:00	111
2009-03-19	20:01:00	204
2009-03-19	20:02:00	0
2009-03-19	20:03:00	815
2009-03-19	20:04:00	889
2009-03-19	20:05:00	746
2009-03-19	20:06:00	160
2009-03-19	20:07:00	175
2009-03-19	20:08:00	962
2009-03-19	20:09:00	864
2009-03-19	20:10:00	86
2009-03-19	20:11:00	1125
2009-03-19	20:12:00	556
2009-03-19	20:13:00	308
2009-03-19	20:14:00	0
2009-03-19	20:15:00	0
2009-03-19	20:16:00	0
2009-03-19	20:17:00	0
2009-03-19	20:18:00	724
2009-03-19	20:19:00	357
2009-03-19	20:20:00	517
2009-03-19	20:21:00	1273
2009-03-19	20:22:00	596
2009-03-19	20:23:00	249
2009-03-19	20:24:00	160
2009-03-19	20:25:00	1952
2009-03-19	20:26:00	556
2009-03-19	20:27:00	340
2009-03-19	20:28:00	702
2009-03-19	20:29:00	25
2009-03-19	20:30:00	2863
2009-03-19	20:31:00	724
2009-03-19	20:32:00	1401
2009-03-19	20:33:00	443
2009-03-19	20:34:00	74
2009-03-19	20:35:00	497
2009-03-19	20:36:00	0
2009-03-19	20:37:00	308
2009-03-19	20:38:00	12
2009-03-19	20:39:00	0
2009-03-19	20:40:00	160
2009-03-19	20:41:00	86
2009-03-19	20:42:00	62
2009-03-19	20:43:00	135
2009-03-19	20:44:00	135
2009-03-19	20:45:00	234
2009-03-19	20:46:00	234
2009-03-19	20:47:00	657
2009-03-19	20:48:00	135
2009-03-19	20:49:00	1502
2009-03-19	20:50:00	249
2009-03-19	20:51:00	190
2009-03-19	20:52:00	426
2009-03-19	20:53:00	0
2009-03-19	20:54:00	0
2009-03-19	20:55:00	0
2009-03-19	20:56:00	0
2009-03-19	20:57:00	0
2009-03-19	20:58:00	0
2009-03-19	20:59:00	12
2009-03-19	21:00:00	0
2009-03-19	21:01:00	0
2009-03-19	21:02:00	0
2009-03-19	21:03:00	0
2009-03-19	21:04:00	0
2009-03-19	21:05:00	0
2009-03-19	21:06:00	0
2009-03-19	21:07:00	0
2009-03-19	21:08:00	0
2009-03-19	21:09:00	0
2009-03-19	21:10:00	0
2009-03-19	21:11:00	0
2009-03-19	21:12:00	12
2009-03-19	21:13:00	0
2009-03-19	21:14:00	12
2009-03-19	21:15:00	0
2009-03-19	21:16:00	0
2009-03-19	21:17:00	0
2009-03-19	21:18:00	0
2009-03-19	21:19:00	12
2009-03-19	21:20:00	0
2009-03-19	21:21:00	12
2009-03-19	21:22:00	497
2009-03-19	21:23:00	357
2009-03-19	21:24:00	322
2009-03-19	21:25:00	12
2009-03-19	21:26:00	0
2009-03-19	21:27:00	0
2009-03-19	21:28:00	0
2009-03-19	21:29:00	0
2009-03-19	21:30:00	0
2009-03-19	21:31:00	0
2009-03-19	21:32:00	0
2009-03-19	21:33:00	12
2009-03-19	21:34:00	0
2009-03-19	21:35:00	0
2009-03-19	21:36:00	0
2009-03-19	21:37:00	0
2009-03-19	21:38:00	0
2009-03-19	21:39:00	0
2009-03-19	21:40:00	0
2009-03-19	21:41:00	0
2009-03-19	21:42:00	0
2009-03-19	21:43:00	0
2009-03-19	21:44:00	0
2009-03-19	21:45:00	0
2009-03-19	21:46:00	0
2009-03-19	21:47:00	0
2009-03-19	21:48:00	0
2009-03-19	21:49:00	0
2009-03-19	21:50:00	0
2009-03-19	21:51:00	0
2009-03-19	21:52:00	0
2009-03-19	21:53:00	0
2009-03-19	21:54:00	0
2009-03-19	21:55:00	0
2009-03-19	21:56:00	0
2009-03-19	21:57:00	0
2009-03-19	21:58:00	0
2009-03-19	21:59:00	0
2009-03-19	22:00:00	0
2009-03-19	22:01:00	0
2009-03-19	22:02:00	0
2009-03-19	22:03:00	0
2009-03-19	22:04:00	0
2009-03-19	22:05:00	0
2009-03-19	22:06:00	0
2009-03-19	22:07:00	0
2009-03-19	22:08:00	0
2009-03-19	22:09:00	0
2009-03-19	22:10:00	0
2009-03-19	22:11:00	0
2009-03-19	22:12:00	0
2009-03-19	22:13:00	0
2009-03-19	22:14:00	0
2009-03-19	22:15:00	0
2009-03-19	22:16:00	0
2009-03-19	22:17:00	0
2009-03-19	22:18:00	0
2009-03-19	22:19:00	0
2009-03-19	22:20:00	0
2009-03-19	22:21:00	0
2009-03-19	22:22:00	0
2009-03-19	22:23:00	0
2009-03-19	22:24:00	0
2009-03-19	22:25:00	0
2009-03-19	22:26:00	0
2009-03-19	22:27:00	0
2009-03-19	22:28:00	0
2009-03-19	22:29:00	0
2009-03-19	22:30:00	0
2009-03-19	22:31:00	0
2009-03-19	22:32:00	0
2009-03-19	22:33:00	0
2009-03-19	22:34:00	0
2009-03-19	22:35:00	0
2009-03-19	22:36:00	0
2009-03-19	22:37:00	0
2009-03-19	22:38:00	0
2009-03-19	22:39:00	0
2009-03-19	22:40:00	0
2009-03-19	22:41:00	0
2009-03-19	22:42:00	0
2009-03-19	22:43:00	0
2009-03-19	22:44:00	0
2009-03-19	22:45:00	0
2009-03-19	22:46:00	0
2009-03-19	22:47:00	0
2009-03-19	22:48:00	0
2009-03-19	22:49:00	0
2009-03-19	22:50:00	0
2009-03-19	22:51:00	0
2009-03-19	22:52:00	0
2009-03-19	22:53:00	0
2009-03-19	22:54:00	0
2009-03-19	22:55:00	0
2009-03-19	22:56:00	0
2009-03-19	22:57:00	0
2009-03-19	22:58:00	0
2009-03-19	22:59:00	0
2009-03-19	23:00:00	0
2009-03-19	23:01:00	0
2009-03-19	23:02:00	0
2009-03-19	23:03:00	0
2009-03-19	23:04:00	0
2009-03-19	23:05:00	0
2009-03-19	23:06:00	0
2009-03-19	23:07:00	0
2009-03-19	23:08:00	0
2009-03-19	23:09:00	0
2009-03-19	23:10:00	0
2009-03-19	23:11:00	0
2009-03-19	23:12:00	0
2009-03-19	23:13:00	0
2009-03-19	23:14:00	0
2009-03-19	23:15:00	0
2009-03-19	23:16:00	0
2009-03-19	23:17:00	0
2009-03-19	23:18:00	0
2009-03-19	23:19:00	0
2009-03-19	23:20:00	0
2009-03-19	23:21:00	0
2009-03-19	23:22:00	0
2009-03-19	23:23:00	0
2009-03-19	23:24:00	0
2009-03-19	23:25:00	0
2009-03-19	23:26:00	0
2009-03-19	23:27:00	0
2009-03-19	23:28:00	0
2009-03-19	23:29:00	0
2009-03-19	23:30:00	0
2009-03-19	23:31:00	0
2009-03-19	23:32:00	0
2009-03-19	23:33:00	0
2009-03-19	23:34:00	0
2009-03-19	23:35:00	0
2009-03-19	23:36:00	0
2009-03-19	23:37:00	0
2009-03-19	23:38:00	0
2009-03-19	23:39:00	0
2009-03-19	23:40:00	0
2009-03-19	23:41:00	0
2009-03-19	23:42:00	0
2009-03-19	23:43:00	0
2009-03-19	23:44:00	0
2009-03-19	23:45:00	0
2009-03-19	23:46:00	0
2009-03-19	23:47:00	0
2009-03-19	23:48:00	0
2009-03-19	23:49:00	0
2009-03-19	23:50:00	0
2009-03-19	23:51:00	0
2009-03-19	23:52:00	0
2009-03-19	23:53:00	0
2009-03-19	23:54:00	0
2009-03-19	23:55:00	0
2009-03-19	23:56:00	0
2009-03-19	23:57:00	263
2009-03-19	23:58:00	938
2009-03-19	23:59:00	148
2009-03-20	00:00:00	0
2009-03-20	00:01:00	25
2009-03-20	00:02:00	0
2009-03-20	00:03:00	0
2009-03-20	00:04:00	0
2009-03-20	00:05:00	0
2009-03-20	00:06:00	0
2009-03-20	00:07:00	0
2009-03-20	00:08:00	0
2009-03-20	00:09:00	0
2009-03-20	00:10:00	0
2009-03-20	00:11:00	0
2009-03-20	00:12:00	0
2009-03-20	00:13:00	0
2009-03-20	00:14:00	0
2009-03-20	00:15:00	0
2009-03-20	00:16:00	0
2009-03-20	00:17:00	0
2009-03-20	00:18:00	0
2009-03-20	00:19:00	0
2009-03-20	00:20:00	0
2009-03-20	00:21:00	0
2009-03-20	00:22:00	0
2009-03-20	00:23:00	0
2009-03-20	00:24:00	0
2009-03-20	00:25:00	0
2009-03-20	00:26:00	0
2009-03-20	00:27:00	0
2009-03-20	00:28:00	0
2009-03-20	00:29:00	0
2009-03-20	00:30:00	0
2009-03-20	00:31:00	0
2009-03-20	00:32:00	0
2009-03-20	00:33:00	0
2009-03-20	00:34:00	0
2009-03-20	00:35:00	0
2009-03-20	00:36:00	0
2009-03-20	00:37:00	0
2009-03-20	00:38:00	0
2009-03-20	00:39:00	0
2009-03-20	00:40:00	0
2009-03-20	00:41:00	0
2009-03-20	00:42:00	0
2009-03-20	00:43:00	0
2009-03-20	00:44:00	0
2009-03-20	00:45:00	0
2009-03-20	00:46:00	0
2009-03-20	00:47:00	0
2009-03-20	00:48:00	0
2009-03-20	00:49:00	0
2009-03-20	00:50:00	0
2009-03-20	00:51:00	0
2009-03-20	00:52:00	0
2009-03-20	00:53:00	0
2009-03-20	00:54:00	0
2009-03-20	00:55:00	0
2009-03-20	00:56:00	0
2009-03-20	00:57:00	0
2009-03-20	00:58:00	0
2009-03-20	00:59:00	0
2009-03-20	01:00:00	0
2009-03-20	01:01:00	0
2009-03-20	01:02:00	0
2009-03-20	01:03:00	0
2009-03-20	01:04:00	0
2009-03-20	01:05:00	0
2009-03-20	01:06:00	0
2009-03-20	01:07:00	0
2009-03-20	01:08:00	0
2009-03-20	01:09:00	0
2009-03-20	01:10:00	0
2009-03-20	01:11:00	0
2009-03-20	01:12:00	0
2009-03-20	01:13:00	0
2009-03-20	01:14:00	0
2009-03-20	01:15:00	0
2009-03-20	01:16:00	0
2009-03-20	01:17:00	0
2009-03-20	01:18:00	0
2009-03-20	01:19:00	0
2009-03-20	01:20:00	0
2009-03-20	01:21:00	0
2009-03-20	01:22:00	0
2009-03-20	01:23:00	0
2009-03-20	01:24:00	0
2009-03-20	01:25:00	0
2009-03-20	01:26:00	0
2009-03-20	01:27:00	0
2009-03-20	01:28:00	0
2009-03-20	01:29:00	0
2009-03-20	01:30:00	0
2009-03-20	01:31:00	0
2009-03-20	01:32:00	0
2009-03-20	01:33:00	0
2009-03-20	01:34:00	0
2009-03-20	01:35:00	0
2009-03-20	01:36:00	0
2009-03-20	01:37:00	0
2009-03-20	01:38:00	0
2009-03-20	01:39:00	0
2009-03-20	01:40:00	0
2009-03-20	01:41:00	0
2009-03-20	01:42:00	0
2009-03-20	01:43:00	0
2009-03-20	01:44:00	0
2009-03-20	01:45:00	0
2009-03-20	01:46:00	0
2009-03-20	01:47:00	0
2009-03-20	01:48:00	0
2009-03-20	01:49:00	0
2009-03-20	01:50:00	0
2009-03-20	01:51:00	0
2009-03-20	01:52:00	0
2009-03-20	01:53:00	0
2009-03-20	01:54:00	0
2009-03-20	01:55:00	0
2009-03-20	01:56:00	0
2009-03-20	01:57:00	0
2009-03-20	01:58:00	0
2009-03-20	01:59:00	0
2009-03-20	02:00:00	0
2009-03-20	02:01:00	0
2009-03-20	02:02:00	0
2009-03-20	02:03:00	0
2009-03-20	02:04:00	0
2009-03-20	02:05:00	0
2009-03-20	02:06:00	0
2009-03-20	02:07:00	0
2009-03-20	02:08:00	0
2009-03-20	02:09:00	0
2009-03-20	02:10:00	0
2009-03-20	02:11:00	0
2009-03-20	02:12:00	0
2009-03-20	02:13:00	0
2009-03-20	02:14:00	0
2009-03-20	02:15:00	0
2009-03-20	02:16:00	0
2009-03-20	02:17:00	0
2009-03-20	02:18:00	0
2009-03-20	02:19:00	0
2009-03-20	02:20:00	0
2009-03-20	02:21:00	0
2009-03-20	02:22:00	0
2009-03-20	02:23:00	0
2009-03-20	02:24:00	0
2009-03-20	02:25:00	25
2009-03-20	02:26:00	160
2009-03-20	02:27:00	12
2009-03-20	02:28:00	0
2009-03-20	02:29:00	0
2009-03-20	02:30:00	0
2009-03-20	02:31:00	0
2009-03-20	02:32:00	0
2009-03-20	02:33:00	0
2009-03-20	02:34:00	0
2009-03-20	02:35:00	0
2009-03-20	02:36:00	0
2009-03-20	02:37:00	0
2009-03-20	02:38:00	0
2009-03-20	02:39:00	0
2009-03-20	02:40:00	0
2009-03-20	02:41:00	0
2009-03-20	02:42:00	0
2009-03-20	02:43:00	0
2009-03-20	02:44:00	0
2009-03-20	02:45:00	0
2009-03-20	02:46:00	0
2009-03-20	02:47:00	0
2009-03-20	02:48:00	0
2009-03-20	02:49:00	0
2009-03-20	02:50:00	0
2009-03-20	02:51:00	0
2009-03-20	02:52:00	0
2009-03-20	02:53:00	0
2009-03-20	02:54:00	0
2009-03-20	02:55:00	0
2009-03-20	02:56:00	0
2009-03-20	02:57:00	0
2009-03-20	02:58:00	0
2009-03-20	02:59:00	0
2009-03-20	03:00:00	0
2009-03-20	03:01:00	0
2009-03-20	03:02:00	0
2009-03-20	03:03:00	0
2009-03-20	03:04:00	0
2009-03-20	03:05:00	0
2009-03-20	03:06:00	0
2009-03-20	03:07:00	0
2009-03-20	03:08:00	0
2009-03-20	03:09:00	0
2009-03-20	03:10:00	0
2009-03-20	03:11:00	0
2009-03-20	03:12:00	0
2009-03-20	03:13:00	0
2009-03-20	03:14:00	0
2009-03-20	03:15:00	0
2009-03-20	03:16:00	0
2009-03-20	03:17:00	0
2009-03-20	03:18:00	0
2009-03-20	03:19:00	0
2009-03-20	03:20:00	0
2009-03-20	03:21:00	0
2009-03-20	03:22:00	0
2009-03-20	03:23:00	0
2009-03-20	03:24:00	0
2009-03-20	03:25:00	0
2009-03-20	03:26:00	0
2009-03-20	03:27:00	0
2009-03-20	03:28:00	0
2009-03-20	03:29:00	0
2009-03-20	03:30:00	0
2009-03-20	03:31:00	0
2009-03-20	03:32:00	0
2009-03-20	03:33:00	0
2009-03-20	03:34:00	0
2009-03-20	03:35:00	0
2009-03-20	03:36:00	0
2009-03-20	03:37:00	0
2009-03-20	03:38:00	0
2009-03-20	03:39:00	0
2009-03-20	03:40:00	0
2009-03-20	03:41:00	0
2009-03-20	03:42:00	0
2009-03-20	03:43:00	0
2009-03-20	03:44:00	0
2009-03-20	03:45:00	0
2009-03-20	03:46:00	0
2009-03-20	03:47:00	0
2009-03-20	03:48:00	0
2009-03-20	03:49:00	0
2009-03-20	03:50:00	0
2009-03-20	03:51:00	0
2009-03-20	03:52:00	0
2009-03-20	03:53:00	0
2009-03-20	03:54:00	0
2009-03-20	03:55:00	0
2009-03-20	03:56:00	0
2009-03-20	03:57:00	0
2009-03-20	03:58:00	0
2009-03-20	03:59:00	0
2009-03-20	04:00:00	0
2009-03-20	04:01:00	0
2009-03-20	04:02:00	0
2009-03-20	04:03:00	0
2009-03-20	04:04:00	0
2009-03-20	04:05:00	0
2009-03-20	04:06:00	0
2009-03-20	04:07:00	0
2009-03-20	04:08:00	0
2009-03-20	04:09:00	0
2009-03-20	04:10:00	0
2009-03-20	04:11:00	0
2009-03-20	04:12:00	0
2009-03-20	04:13:00	0
2009-03-20	04:14:00	0
2009-03-20	04:15:00	0
2009-03-20	04:16:00	0
2009-03-20	04:17:00	0
2009-03-20	04:18:00	0
2009-03-20	04:19:00	12
2009-03-20	04:20:00	0
2009-03-20	04:21:00	25
2009-03-20	04:22:00	12
2009-03-20	04:23:00	0
2009-03-20	04:24:00	12
2009-03-20	04:25:00	25
2009-03-20	04:26:00	12
2009-03-20	04:27:00	0
2009-03-20	04:28:00	12
2009-03-20	04:29:00	0
2009-03-20	04:30:00	443
2009-03-20	04:31:00	426
2009-03-20	04:32:00	25
2009-03-20	04:33:00	12
2009-03-20	04:34:00	12
2009-03-20	04:35:00	12
2009-03-20	04:36:00	49
2009-03-20	04:37:00	0
2009-03-20	04:38:00	0
2009-03-20	04:39:00	0
2009-03-20	04:40:00	0
2009-03-20	04:41:00	0
2009-03-20	04:42:00	0
2009-03-20	04:43:00	0
2009-03-20	04:44:00	0
2009-03-20	04:45:00	25
2009-03-20	04:46:00	0
2009-03-20	04:47:00	0
2009-03-20	04:48:00	0
2009-03-20	04:49:00	0
2009-03-20	04:50:00	0
2009-03-20	04:51:00	0
2009-03-20	04:52:00	0
2009-03-20	04:53:00	0
2009-03-20	04:54:00	0
2009-03-20	04:55:00	0
2009-03-20	04:56:00	0
2009-03-20	04:57:00	0
2009-03-20	04:58:00	0
2009-03-20	04:59:00	37
2009-03-20	05:00:00	0
2009-03-20	05:01:00	0
2009-03-20	05:02:00	0
2009-03-20	05:03:00	0
2009-03-20	05:04:00	0
2009-03-20	05:05:00	0
2009-03-20	05:06:00	0
2009-03-20	05:07:00	0
2009-03-20	05:08:00	0
2009-03-20	05:09:00	0
2009-03-20	05:10:00	0
2009-03-20	05:11:00	25
2009-03-20	05:12:00	0
2009-03-20	05:13:00	0
2009-03-20	05:14:00	0
2009-03-20	05:15:00	0
2009-03-20	05:16:00	0
2009-03-20	05:17:00	0
2009-03-20	05:18:00	0
2009-03-20	05:19:00	0
2009-03-20	05:20:00	0
2009-03-20	05:21:00	0
2009-03-20	05:22:00	0
2009-03-20	05:23:00	0
2009-03-20	05:24:00	0
2009-03-20	05:25:00	0
2009-03-20	05:26:00	0
2009-03-20	05:27:00	0
2009-03-20	05:28:00	0
2009-03-20	05:29:00	0
2009-03-20	05:30:00	0
2009-03-20	05:31:00	0
2009-03-20	05:32:00	0
2009-03-20	05:33:00	0
2009-03-20	05:34:00	0
2009-03-20	05:35:00	0
2009-03-20	05:36:00	0
2009-03-20	05:37:00	0
2009-03-20	05:38:00	0
2009-03-20	05:39:00	0
2009-03-20	05:40:00	0
2009-03-20	05:41:00	0
2009-03-20	05:42:00	0
2009-03-20	05:43:00	0
2009-03-20	05:44:00	0
2009-03-20	05:45:00	0
2009-03-20	05:46:00	0
2009-03-20	05:47:00	0
2009-03-20	05:48:00	0
2009-03-20	05:49:00	0
2009-03-20	05:50:00	0
2009-03-20	05:51:00	0
2009-03-20	05:52:00	0
2009-03-20	05:53:00	0
2009-03-20	05:54:00	0
2009-03-20	05:55:00	0
2009-03-20	05:56:00	0
2009-03-20	05:57:00	12
2009-03-20	05:58:00	148
2009-03-20	05:59:00	37
2009-03-20	06:00:00	0
2009-03-20	06:01:00	0
2009-03-20	06:02:00	0
2009-03-20	06:03:00	0
2009-03-20	06:04:00	0
2009-03-20	06:05:00	0
2009-03-20	06:06:00	0
2009-03-20	06:07:00	0
2009-03-20	06:08:00	0
2009-03-20	06:09:00	0
2009-03-20	06:10:00	0
2009-03-20	06:11:00	0
2009-03-20	06:12:00	0
2009-03-20	06:13:00	0
2009-03-20	06:14:00	0
2009-03-20	06:15:00	0
2009-03-20	06:16:00	0
2009-03-20	06:17:00	0
2009-03-20	06:18:00	0
2009-03-20	06:19:00	0
2009-03-20	06:20:00	0
2009-03-20	06:21:00	0
2009-03-20	06:22:00	0
2009-03-20	06:23:00	0
2009-03-20	06:24:00	0
2009-03-20	06:25:00	0
2009-03-20	06:26:00	0
2009-03-20	06:27:00	0
2009-03-20	06:28:00	0
2009-03-20	06:29:00	0
2009-03-20	06:30:00	0
2009-03-20	06:31:00	0
2009-03-20	06:32:00	0
2009-03-20	06:33:00	0
2009-03-20	06:34:00	25
2009-03-20	06:35:00	0
2009-03-20	06:36:00	0
2009-03-20	06:37:00	0
2009-03-20	06:38:00	148
2009-03-20	06:39:00	25
2009-03-20	06:40:00	12
2009-03-20	06:41:00	340
2009-03-20	06:42:00	111
2009-03-20	06:43:00	322
2009-03-20	06:44:00	25
2009-03-20	06:45:00	37
2009-03-20	06:46:00	98
2009-03-20	06:47:00	25
2009-03-20	06:48:00	1305
2009-03-20	06:49:00	815
2009-03-20	06:50:00	1214
2009-03-20	06:51:00	1401
2009-03-20	06:52:00	657
2009-03-20	06:53:00	1125
2009-03-20	06:54:00	478
2009-03-20	06:55:00	478
2009-03-20	06:56:00	175
2009-03-20	06:57:00	123
2009-03-20	06:58:00	135
2009-03-20	06:59:00	12
2009-03-20	07:00:00	263
2009-03-20	07:01:00	357
2009-03-20	07:02:00	409
2009-03-20	07:03:00	478
2009-03-20	07:04:00	190
2009-03-20	07:05:00	0
2009-03-20	07:06:00	0
2009-03-20	07:07:00	0
2009-03-20	07:08:00	0
2009-03-20	07:09:00	0
2009-03-20	07:10:00	0
2009-03-20	07:11:00	0
2009-03-20	07:12:00	0
2009-03-20	07:13:00	0
2009-03-20	07:14:00	12
2009-03-20	07:15:00	0
2009-03-20	07:16:00	0
2009-03-20	07:17:00	0
2009-03-20	07:18:00	0
2009-03-20	07:19:00	0
2009-03-20	07:20:00	0
2009-03-20	07:21:00	0
2009-03-20	07:22:00	0
2009-03-20	07:23:00	0
2009-03-20	07:24:00	0
2009-03-20	07:25:00	0
2009-03-20	07:26:00	0
2009-03-20	07:27:00	0
2009-03-20	07:28:00	0
2009-03-20	07:29:00	0
2009-03-20	07:30:00	0
2009-03-20	07:31:00	0
2009-03-20	07:32:00	0
2009-03-20	07:33:00	12
2009-03-20	07:34:00	0
2009-03-20	07:35:00	0
2009-03-20	07:36:00	0
2009-03-20	07:37:00	0
2009-03-20	07:38:00	0
2009-03-20	07:39:00	0
2009-03-20	07:40:00	0
2009-03-20	07:41:00	0
2009-03-20	07:42:00	0
2009-03-20	07:43:00	0
2009-03-20	07:44:00	0
2009-03-20	07:45:00	0
2009-03-20	07:46:00	0
2009-03-20	07:47:00	0
2009-03-20	07:48:00	0
2009-03-20	07:49:00	0
2009-03-20	07:50:00	0
2009-03-20	07:51:00	0
2009-03-20	07:52:00	0
2009-03-20	07:53:00	0
2009-03-20	07:54:00	0
2009-03-20	07:55:00	0
2009-03-20	07:56:00	0
2009-03-20	07:57:00	0
2009-03-20	07:58:00	0
2009-03-20	07:59:00	0
2009-03-20	08:00:00	0
2009-03-20	08:01:00	0
2009-03-20	08:02:00	0
2009-03-20	08:03:00	0
2009-03-20	08:04:00	0
2009-03-20	08:05:00	0
2009-03-20	08:06:00	0
2009-03-20	08:07:00	0
2009-03-20	08:08:00	0
2009-03-20	08:09:00	0
2009-03-20	08:10:00	0
2009-03-20	08:11:00	12
2009-03-20	08:12:00	12
2009-03-20	08:13:00	0
2009-03-20	08:14:00	0
2009-03-20	08:15:00	0
2009-03-20	08:16:00	0
2009-03-20	08:17:00	0
2009-03-20	08:18:00	0
2009-03-20	08:19:00	0
2009-03-20	08:20:00	0
2009-03-20	08:21:00	0
2009-03-20	08:22:00	0
2009-03-20	08:23:00	0
2009-03-20	08:24:00	0
2009-03-20	08:25:00	0
2009-03-20	08:26:00	0
2009-03-20	08:27:00	0
2009-03-20	08:28:00	0
2009-03-20	08:29:00	0
2009-03-20	08:30:00	0
2009-03-20	08:31:00	0
2009-03-20	08:32:00	0
2009-03-20	08:33:00	12
2009-03-20	08:34:00	0
2009-03-20	08:35:00	0
2009-03-20	08:36:00	0
2009-03-20	08:37:00	0
2009-03-20	08:38:00	0
2009-03-20	08:39:00	0
2009-03-20	08:40:00	0
2009-03-20	08:41:00	0
2009-03-20	08:42:00	0
2009-03-20	08:43:00	0
2009-03-20	08:44:00	391
2009-03-20	08:45:00	12
2009-03-20	08:46:00	0
2009-03-20	08:47:00	0
2009-03-20	08:48:00	0
2009-03-20	08:49:00	0
2009-03-20	08:50:00	0
2009-03-20	08:51:00	37
2009-03-20	08:52:00	12
2009-03-20	08:53:00	0
2009-03-20	08:54:00	0
2009-03-20	08:55:00	0
2009-03-20	08:56:00	0
2009-03-20	08:57:00	0
2009-03-20	08:58:00	0
2009-03-20	08:59:00	0
2009-03-20	09:00:00	0
2009-03-20	09:01:00	0
2009-03-20	09:02:00	0
2009-03-20	09:03:00	0
2009-03-20	09:04:00	0
2009-03-20	09:05:00	0
2009-03-20	09:06:00	0
2009-03-20	09:07:00	0
2009-03-20	09:08:00	0
[truncated: 19,611 more rows]

## Sheet: 4.2.09
Actogram, Copy Raw Data, All Days
Identity:	Bear Kaplan
Filename:	E:\Active Research Files\meloxicam titre canine\cases\disqualified\bear k\Bear Kaplan 4.2.09.AWC
Gender:	M
Age:	10
Height:	61.0 cm	24.0 in
Weight:	20.0 kg	44.1 lbs
Start Date:	02-Apr-2009 (Thu)
Start Time:	18:00:00
Interval:	1.00 mins
Date Stamp:	Time Stamp:	Activity Data:	Marker Press:
2009-04-02	00:00:00	0
2009-04-02	00:01:00	0
2009-04-02	00:02:00	0
2009-04-02	00:03:00	0
2009-04-02	00:04:00	0
2009-04-02	00:05:00	0
2009-04-02	00:06:00	0
2009-04-02	00:07:00	0
2009-04-02	00:08:00	0
2009-04-02	00:09:00	0
2009-04-02	00:10:00	0
2009-04-02	00:11:00	0
2009-04-02	00:12:00	0
2009-04-02	00:13:00	0
2009-04-02	00:14:00	0
2009-04-02	00:15:00	0
2009-04-02	00:16:00	0
2009-04-02	00:17:00	0
2009-04-02	00:18:00	0
2009-04-02	00:19:00	0
2009-04-02	00:20:00	0
2009-04-02	00:21:00	0
2009-04-02	00:22:00	0
2009-04-02	00:23:00	0
2009-04-02	00:24:00	0
2009-04-02	00:25:00	0
2009-04-02	00:26:00	0
2009-04-02	00:27:00	0
2009-04-02	00:28:00	0
2009-04-02	00:29:00	0
2009-04-02	00:30:00	0
2009-04-02	00:31:00	0
2009-04-02	00:32:00	0
2009-04-02	00:33:00	0
2009-04-02	00:34:00	0
2009-04-02	00:35:00	0
2009-04-02	00:36:00	0
2009-04-02	00:37:00	0
2009-04-02	00:38:00	0
2009-04-02	00:39:00	0
2009-04-02	00:40:00	0
2009-04-02	00:41:00	0
2009-04-02	00:42:00	0
2009-04-02	00:43:00	0
2009-04-02	00:44:00	0
2009-04-02	00:45:00	0
2009-04-02	00:46:00	0
2009-04-02	00:47:00	0
2009-04-02	00:48:00	0
2009-04-02	00:49:00	0
2009-04-02	00:50:00	0
2009-04-02	00:51:00	0
2009-04-02	00:52:00	0
2009-04-02	00:53:00	0
2009-04-02	00:54:00	0
2009-04-02	00:55:00	0
2009-04-02	00:56:00	0
2009-04-02	00:57:00	0
2009-04-02	00:58:00	0
2009-04-02	00:59:00	0
2009-04-02	01:00:00	0
2009-04-02	01:01:00	0
2009-04-02	01:02:00	0
2009-04-02	01:03:00	0
2009-04-02	01:04:00	0
2009-04-02	01:05:00	0
2009-04-02	01:06:00	0
2009-04-02	01:07:00	0
2009-04-02	01:08:00	0
2009-04-02	01:09:00	0
2009-04-02	01:10:00	0
2009-04-02	01:11:00	0
2009-04-02	01:12:00	0
2009-04-02	01:13:00	0
2009-04-02	01:14:00	0
2009-04-02	01:15:00	0
2009-04-02	01:16:00	0
2009-04-02	01:17:00	0
2009-04-02	01:18:00	0
2009-04-02	01:19:00	0
2009-04-02	01:20:00	0
2009-04-02	01:21:00	0
2009-04-02	01:22:00	0
2009-04-02	01:23:00	0
2009-04-02	01:24:00	0
2009-04-02	01:25:00	0
2009-04-02	01:26:00	0
2009-04-02	01:27:00	0
2009-04-02	01:28:00	0
2009-04-02	01:29:00	0
2009-04-02	01:30:00	0
2009-04-02	01:31:00	0
2009-04-02	01:32:00	0
2009-04-02	01:33:00	0
2009-04-02	01:34:00	0
2009-04-02	01:35:00	0
2009-04-02	01:36:00	0
2009-04-02	01:37:00	0
2009-04-02	01:38:00	0
2009-04-02	01:39:00	0
2009-04-02	01:40:00	0
2009-04-02	01:41:00	0
2009-04-02	01:42:00	0
2009-04-02	01:43:00	0
2009-04-02	01:44:00	0
2009-04-02	01:45:00	0
2009-04-02	01:46:00	0
2009-04-02	01:47:00	0
2009-04-02	01:48:00	0
2009-04-02	01:49:00	0
2009-04-02	01:50:00	0
2009-04-02	01:51:00	0
2009-04-02	01:52:00	0
2009-04-02	01:53:00	0
2009-04-02	01:54:00	0
2009-04-02	01:55:00	0
2009-04-02	01:56:00	0
2009-04-02	01:57:00	0
2009-04-02	01:58:00	0
2009-04-02	01:59:00	0
2009-04-02	02:00:00	0
2009-04-02	02:01:00	0
2009-04-02	02:02:00	0
2009-04-02	02:03:00	0
2009-04-02	02:04:00	0
2009-04-02	02:05:00	0
2009-04-02	02:06:00	0
2009-04-02	02:07:00	0
2009-04-02	02:08:00	0
2009-04-02	02:09:00	0
2009-04-02	02:10:00	0
2009-04-02	02:11:00	0
2009-04-02	02:12:00	0
2009-04-02	02:13:00	0
2009-04-02	02:14:00	0
2009-04-02	02:15:00	0
2009-04-02	02:16:00	0
2009-04-02	02:17:00	0
2009-04-02	02:18:00	0
2009-04-02	02:19:00	0
2009-04-02	02:20:00	0
2009-04-02	02:21:00	0
2009-04-02	02:22:00	0
2009-04-02	02:23:00	0
2009-04-02	02:24:00	0
2009-04-02	02:25:00	0
2009-04-02	02:26:00	0
2009-04-02	02:27:00	0
2009-04-02	02:28:00	0
2009-04-02	02:29:00	0
2009-04-02	02:30:00	0
2009-04-02	02:31:00	0
2009-04-02	02:32:00	0
2009-04-02	02:33:00	0
2009-04-02	02:34:00	0
2009-04-02	02:35:00	0
2009-04-02	02:36:00	0
2009-04-02	02:37:00	0
2009-04-02	02:38:00	0
2009-04-02	02:39:00	0
2009-04-02	02:40:00	0
2009-04-02	02:41:00	0
2009-04-02	02:42:00	0
2009-04-02	02:43:00	0
2009-04-02	02:44:00	0
2009-04-02	02:45:00	0
2009-04-02	02:46:00	0
2009-04-02	02:47:00	0
2009-04-02	02:48:00	0
2009-04-02	02:49:00	0
2009-04-02	02:50:00	0
2009-04-02	02:51:00	0
2009-04-02	02:52:00	0
2009-04-02	02:53:00	0
2009-04-02	02:54:00	0
2009-04-02	02:55:00	0
2009-04-02	02:56:00	0
2009-04-02	02:57:00	0
2009-04-02	02:58:00	0
2009-04-02	02:59:00	0
2009-04-02	03:00:00	0
2009-04-02	03:01:00	0
2009-04-02	03:02:00	0
2009-04-02	03:03:00	0
2009-04-02	03:04:00	0
2009-04-02	03:05:00	0
2009-04-02	03:06:00	0
2009-04-02	03:07:00	0
2009-04-02	03:08:00	0
2009-04-02	03:09:00	0
2009-04-02	03:10:00	0
2009-04-02	03:11:00	0
2009-04-02	03:12:00	0
2009-04-02	03:13:00	0
2009-04-02	03:14:00	0
2009-04-02	03:15:00	0
2009-04-02	03:16:00	0
2009-04-02	03:17:00	0
2009-04-02	03:18:00	0
2009-04-02	03:19:00	0
2009-04-02	03:20:00	0
2009-04-02	03:21:00	0
2009-04-02	03:22:00	0
2009-04-02	03:23:00	0
2009-04-02	03:24:00	0
2009-04-02	03:25:00	0
2009-04-02	03:26:00	0
2009-04-02	03:27:00	0
2009-04-02	03:28:00	0
2009-04-02	03:29:00	0
2009-04-02	03:30:00	0
2009-04-02	03:31:00	0
2009-04-02	03:32:00	0
2009-04-02	03:33:00	0
2009-04-02	03:34:00	0
2009-04-02	03:35:00	0
2009-04-02	03:36:00	0
2009-04-02	03:37:00	0
2009-04-02	03:38:00	0
2009-04-02	03:39:00	0
2009-04-02	03:40:00	0
2009-04-02	03:41:00	0
2009-04-02	03:42:00	0
2009-04-02	03:43:00	0
2009-04-02	03:44:00	0
2009-04-02	03:45:00	0
2009-04-02	03:46:00	0
2009-04-02	03:47:00	0
2009-04-02	03:48:00	0
2009-04-02	03:49:00	0
2009-04-02	03:50:00	0
2009-04-02	03:51:00	0
2009-04-02	03:52:00	0
2009-04-02	03:53:00	0
2009-04-02	03:54:00	0
2009-04-02	03:55:00	0
2009-04-02	03:56:00	0
2009-04-02	03:57:00	0
2009-04-02	03:58:00	0
2009-04-02	03:59:00	0
2009-04-02	04:00:00	0
2009-04-02	04:01:00	0
2009-04-02	04:02:00	0
2009-04-02	04:03:00	0
2009-04-02	04:04:00	0
2009-04-02	04:05:00	0
2009-04-02	04:06:00	0
2009-04-02	04:07:00	0
2009-04-02	04:08:00	0
2009-04-02	04:09:00	0
2009-04-02	04:10:00	0
2009-04-02	04:11:00	0
2009-04-02	04:12:00	0
2009-04-02	04:13:00	0
2009-04-02	04:14:00	0
2009-04-02	04:15:00	0
2009-04-02	04:16:00	0
2009-04-02	04:17:00	0
2009-04-02	04:18:00	0
2009-04-02	04:19:00	0
2009-04-02	04:20:00	0
2009-04-02	04:21:00	0
2009-04-02	04:22:00	0
2009-04-02	04:23:00	0
2009-04-02	04:24:00	0
2009-04-02	04:25:00	0
2009-04-02	04:26:00	0
2009-04-02	04:27:00	0
2009-04-02	04:28:00	0
2009-04-02	04:29:00	0
2009-04-02	04:30:00	0
2009-04-02	04:31:00	0
2009-04-02	04:32:00	0
2009-04-02	04:33:00	0
2009-04-02	04:34:00	0
2009-04-02	04:35:00	0
2009-04-02	04:36:00	0
2009-04-02	04:37:00	0
2009-04-02	04:38:00	0
2009-04-02	04:39:00	0
2009-04-02	04:40:00	0
2009-04-02	04:41:00	0
2009-04-02	04:42:00	0
2009-04-02	04:43:00	0
2009-04-02	04:44:00	0
2009-04-02	04:45:00	0
2009-04-02	04:46:00	0
2009-04-02	04:47:00	0
2009-04-02	04:48:00	0
2009-04-02	04:49:00	0
2009-04-02	04:50:00	0
2009-04-02	04:51:00	0
2009-04-02	04:52:00	0
2009-04-02	04:53:00	0
2009-04-02	04:54:00	0
2009-04-02	04:55:00	0
2009-04-02	04:56:00	0
2009-04-02	04:57:00	0
2009-04-02	04:58:00	0
2009-04-02	04:59:00	0
2009-04-02	05:00:00	0
2009-04-02	05:01:00	0
2009-04-02	05:02:00	0
2009-04-02	05:03:00	0
2009-04-02	05:04:00	0
2009-04-02	05:05:00	0
2009-04-02	05:06:00	0
2009-04-02	05:07:00	0
2009-04-02	05:08:00	0
2009-04-02	05:09:00	0
2009-04-02	05:10:00	0
2009-04-02	05:11:00	0
2009-04-02	05:12:00	0
2009-04-02	05:13:00	0
2009-04-02	05:14:00	0
2009-04-02	05:15:00	0
2009-04-02	05:16:00	0
2009-04-02	05:17:00	0
2009-04-02	05:18:00	0
2009-04-02	05:19:00	0
2009-04-02	05:20:00	0
2009-04-02	05:21:00	0
2009-04-02	05:22:00	0
2009-04-02	05:23:00	0
2009-04-02	05:24:00	0
2009-04-02	05:25:00	0
2009-04-02	05:26:00	0
2009-04-02	05:27:00	0
2009-04-02	05:28:00	0
2009-04-02	05:29:00	0
2009-04-02	05:30:00	0
2009-04-02	05:31:00	0
2009-04-02	05:32:00	0
2009-04-02	05:33:00	0
2009-04-02	05:34:00	0
2009-04-02	05:35:00	0
2009-04-02	05:36:00	0
2009-04-02	05:37:00	0
2009-04-02	05:38:00	0
2009-04-02	05:39:00	0
2009-04-02	05:40:00	0
2009-04-02	05:41:00	0
2009-04-02	05:42:00	0
2009-04-02	05:43:00	0
2009-04-02	05:44:00	0
2009-04-02	05:45:00	0
2009-04-02	05:46:00	0
2009-04-02	05:47:00	0
2009-04-02	05:48:00	0
2009-04-02	05:49:00	0
2009-04-02	05:50:00	0
2009-04-02	05:51:00	0
2009-04-02	05:52:00	0
2009-04-02	05:53:00	0
2009-04-02	05:54:00	0
2009-04-02	05:55:00	0
2009-04-02	05:56:00	0
2009-04-02	05:57:00	0
2009-04-02	05:58:00	0
2009-04-02	05:59:00	0
2009-04-02	06:00:00	0
2009-04-02	06:01:00	0
2009-04-02	06:02:00	0
2009-04-02	06:03:00	0
2009-04-02	06:04:00	0
2009-04-02	06:05:00	0
2009-04-02	06:06:00	0
2009-04-02	06:07:00	0
2009-04-02	06:08:00	0
2009-04-02	06:09:00	0
2009-04-02	06:10:00	0
2009-04-02	06:11:00	0
2009-04-02	06:12:00	0
2009-04-02	06:13:00	0
2009-04-02	06:14:00	0
2009-04-02	06:15:00	0
2009-04-02	06:16:00	0
2009-04-02	06:17:00	0
2009-04-02	06:18:00	0
2009-04-02	06:19:00	0
2009-04-02	06:20:00	0
2009-04-02	06:21:00	0
2009-04-02	06:22:00	0
2009-04-02	06:23:00	0
2009-04-02	06:24:00	0
2009-04-02	06:25:00	0
2009-04-02	06:26:00	0
2009-04-02	06:27:00	0
2009-04-02	06:28:00	0
2009-04-02	06:29:00	0
2009-04-02	06:30:00	0
2009-04-02	06:31:00	0
2009-04-02	06:32:00	0
2009-04-02	06:33:00	0
2009-04-02	06:34:00	0
2009-04-02	06:35:00	0
2009-04-02	06:36:00	0
2009-04-02	06:37:00	0
2009-04-02	06:38:00	0
2009-04-02	06:39:00	0
2009-04-02	06:40:00	0
2009-04-02	06:41:00	0
2009-04-02	06:42:00	0
2009-04-02	06:43:00	0
2009-04-02	06:44:00	0
2009-04-02	06:45:00	0
2009-04-02	06:46:00	0
2009-04-02	06:47:00	0
2009-04-02	06:48:00	0
2009-04-02	06:49:00	0
2009-04-02	06:50:00	0
2009-04-02	06:51:00	0
2009-04-02	06:52:00	0
2009-04-02	06:53:00	0
2009-04-02	06:54:00	0
2009-04-02	06:55:00	0
2009-04-02	06:56:00	0
2009-04-02	06:57:00	0
2009-04-02	06:58:00	0
2009-04-02	06:59:00	0
2009-04-02	07:00:00	0
2009-04-02	07:01:00	0
2009-04-02	07:02:00	0
2009-04-02	07:03:00	0
2009-04-02	07:04:00	0
2009-04-02	07:05:00	0
2009-04-02	07:06:00	0
2009-04-02	07:07:00	0
2009-04-02	07:08:00	0
2009-04-02	07:09:00	0
2009-04-02	07:10:00	0
2009-04-02	07:11:00	0
2009-04-02	07:12:00	0
2009-04-02	07:13:00	0
2009-04-02	07:14:00	0
2009-04-02	07:15:00	0
2009-04-02	07:16:00	0
2009-04-02	07:17:00	0
2009-04-02	07:18:00	0
2009-04-02	07:19:00	0
2009-04-02	07:20:00	0
2009-04-02	07:21:00	0
2009-04-02	07:22:00	0
2009-04-02	07:23:00	0
2009-04-02	07:24:00	0
2009-04-02	07:25:00	0
2009-04-02	07:26:00	0
2009-04-02	07:27:00	0
2009-04-02	07:28:00	0
2009-04-02	07:29:00	0
2009-04-02	07:30:00	0
2009-04-02	07:31:00	0
2009-04-02	07:32:00	0
2009-04-02	07:33:00	0
2009-04-02	07:34:00	0
2009-04-02	07:35:00	0
2009-04-02	07:36:00	0
2009-04-02	07:37:00	0
2009-04-02	07:38:00	0
2009-04-02	07:39:00	0
2009-04-02	07:40:00	0
2009-04-02	07:41:00	0
2009-04-02	07:42:00	0
2009-04-02	07:43:00	0
2009-04-02	07:44:00	0
2009-04-02	07:45:00	0
2009-04-02	07:46:00	0
2009-04-02	07:47:00	0
2009-04-02	07:48:00	0
2009-04-02	07:49:00	0
2009-04-02	07:50:00	0
2009-04-02	07:51:00	0
2009-04-02	07:52:00	0
2009-04-02	07:53:00	0
2009-04-02	07:54:00	0
2009-04-02	07:55:00	0
2009-04-02	07:56:00	0
2009-04-02	07:57:00	0
2009-04-02	07:58:00	0
2009-04-02	07:59:00	0
2009-04-02	08:00:00	0
2009-04-02	08:01:00	0
2009-04-02	08:02:00	0
2009-04-02	08:03:00	0
2009-04-02	08:04:00	0
2009-04-02	08:05:00	0
2009-04-02	08:06:00	0
2009-04-02	08:07:00	0
2009-04-02	08:08:00	0
2009-04-02	08:09:00	0
2009-04-02	08:10:00	0
2009-04-02	08:11:00	0
2009-04-02	08:12:00	0
2009-04-02	08:13:00	0
2009-04-02	08:14:00	0
2009-04-02	08:15:00	0
2009-04-02	08:16:00	0
2009-04-02	08:17:00	0
2009-04-02	08:18:00	0
2009-04-02	08:19:00	0
2009-04-02	08:20:00	0
2009-04-02	08:21:00	0
2009-04-02	08:22:00	0
2009-04-02	08:23:00	0
2009-04-02	08:24:00	0
2009-04-02	08:25:00	0
2009-04-02	08:26:00	0
2009-04-02	08:27:00	0
2009-04-02	08:28:00	0
2009-04-02	08:29:00	0
2009-04-02	08:30:00	0
2009-04-02	08:31:00	0
2009-04-02	08:32:00	0
2009-04-02	08:33:00	0
2009-04-02	08:34:00	0
2009-04-02	08:35:00	0
2009-04-02	08:36:00	0
2009-04-02	08:37:00	0
2009-04-02	08:38:00	0
2009-04-02	08:39:00	0
2009-04-02	08:40:00	0
2009-04-02	08:41:00	0
2009-04-02	08:42:00	0
2009-04-02	08:43:00	0
2009-04-02	08:44:00	0
2009-04-02	08:45:00	0
2009-04-02	08:46:00	0
2009-04-02	08:47:00	0
2009-04-02	08:48:00	0
2009-04-02	08:49:00	0
2009-04-02	08:50:00	0
2009-04-02	08:51:00	0
2009-04-02	08:52:00	0
2009-04-02	08:53:00	0
2009-04-02	08:54:00	0
2009-04-02	08:55:00	0
2009-04-02	08:56:00	0
2009-04-02	08:57:00	0
2009-04-02	08:58:00	0
2009-04-02	08:59:00	0
2009-04-02	09:00:00	0
2009-04-02	09:01:00	0
2009-04-02	09:02:00	0
2009-04-02	09:03:00	0
2009-04-02	09:04:00	0
2009-04-02	09:05:00	0
2009-04-02	09:06:00	0
2009-04-02	09:07:00	0
2009-04-02	09:08:00	0
2009-04-02	09:09:00	0
2009-04-02	09:10:00	0
2009-04-02	09:11:00	0
2009-04-02	09:12:00	0
2009-04-02	09:13:00	0
2009-04-02	09:14:00	0
2009-04-02	09:15:00	0
2009-04-02	09:16:00	0
2009-04-02	09:17:00	0
2009-04-02	09:18:00	0
2009-04-02	09:19:00	0
2009-04-02	09:20:00	0
2009-04-02	09:21:00	0
2009-04-02	09:22:00	0
2009-04-02	09:23:00	0
2009-04-02	09:24:00	0
2009-04-02	09:25:00	0
2009-04-02	09:26:00	0
2009-04-02	09:27:00	0
2009-04-02	09:28:00	0
2009-04-02	09:29:00	0
2009-04-02	09:30:00	0
2009-04-02	09:31:00	0
2009-04-02	09:32:00	0
2009-04-02	09:33:00	0
2009-04-02	09:34:00	0
2009-04-02	09:35:00	0
2009-04-02	09:36:00	0
2009-04-02	09:37:00	0
2009-04-02	09:38:00	0
2009-04-02	09:39:00	0
2009-04-02	09:40:00	0
2009-04-02	09:41:00	0
2009-04-02	09:42:00	0
2009-04-02	09:43:00	0
2009-04-02	09:44:00	0
2009-04-02	09:45:00	0
2009-04-02	09:46:00	0
2009-04-02	09:47:00	0
2009-04-02	09:48:00	0
2009-04-02	09:49:00	0
2009-04-02	09:50:00	0
2009-04-02	09:51:00	0
2009-04-02	09:52:00	0
2009-04-02	09:53:00	0
2009-04-02	09:54:00	0
2009-04-02	09:55:00	0
2009-04-02	09:56:00	0
2009-04-02	09:57:00	0
2009-04-02	09:58:00	0
2009-04-02	09:59:00	0
2009-04-02	10:00:00	0
2009-04-02	10:01:00	0
2009-04-02	10:02:00	0
2009-04-02	10:03:00	0
2009-04-02	10:04:00	0
2009-04-02	10:05:00	0
2009-04-02	10:06:00	0
2009-04-02	10:07:00	0
2009-04-02	10:08:00	0
2009-04-02	10:09:00	0
2009-04-02	10:10:00	0
2009-04-02	10:11:00	0
2009-04-02	10:12:00	0
2009-04-02	10:13:00	0
2009-04-02	10:14:00	0
2009-04-02	10:15:00	0
2009-04-02	10:16:00	0
2009-04-02	10:17:00	0
2009-04-02	10:18:00	0
2009-04-02	10:19:00	0
2009-04-02	10:20:00	0
2009-04-02	10:21:00	0
2009-04-02	10:22:00	0
2009-04-02	10:23:00	0
2009-04-02	10:24:00	0
2009-04-02	10:25:00	0
2009-04-02	10:26:00	0
2009-04-02	10:27:00	0
2009-04-02	10:28:00	0
2009-04-02	10:29:00	0
2009-04-02	10:30:00	0
2009-04-02	10:31:00	0
2009-04-02	10:32:00	0
2009-04-02	10:33:00	0
2009-04-02	10:34:00	0
2009-04-02	10:35:00	0
2009-04-02	10:36:00	0
2009-04-02	10:37:00	0
2009-04-02	10:38:00	0
2009-04-02	10:39:00	0
2009-04-02	10:40:00	0
2009-04-02	10:41:00	0
2009-04-02	10:42:00	0
2009-04-02	10:43:00	0
2009-04-02	10:44:00	0
2009-04-02	10:45:00	0
2009-04-02	10:46:00	0
2009-04-02	10:47:00	0
2009-04-02	10:48:00	0
2009-04-02	10:49:00	0
2009-04-02	10:50:00	0
2009-04-02	10:51:00	0
2009-04-02	10:52:00	0
2009-04-02	10:53:00	0
2009-04-02	10:54:00	0
2009-04-02	10:55:00	0
2009-04-02	10:56:00	0
2009-04-02	10:57:00	0
2009-04-02	10:58:00	0
2009-04-02	10:59:00	0
2009-04-02	11:00:00	0
2009-04-02	11:01:00	0
2009-04-02	11:02:00	0
2009-04-02	11:03:00	0
2009-04-02	11:04:00	0
2009-04-02	11:05:00	0
2009-04-02	11:06:00	0
2009-04-02	11:07:00	0
2009-04-02	11:08:00	0
2009-04-02	11:09:00	0
2009-04-02	11:10:00	0
2009-04-02	11:11:00	0
2009-04-02	11:12:00	0
2009-04-02	11:13:00	0
2009-04-02	11:14:00	0
2009-04-02	11:15:00	0
2009-04-02	11:16:00	0
2009-04-02	11:17:00	0
2009-04-02	11:18:00	0
2009-04-02	11:19:00	0
2009-04-02	11:20:00	0
2009-04-02	11:21:00	0
2009-04-02	11:22:00	0
2009-04-02	11:23:00	0
2009-04-02	11:24:00	0
2009-04-02	11:25:00	0
2009-04-02	11:26:00	0
2009-04-02	11:27:00	0
2009-04-02	11:28:00	0
2009-04-02	11:29:00	0
2009-04-02	11:30:00	0
2009-04-02	11:31:00	0
2009-04-02	11:32:00	0
2009-04-02	11:33:00	0
2009-04-02	11:34:00	0
2009-04-02	11:35:00	0
2009-04-02	11:36:00	0
2009-04-02	11:37:00	0
2009-04-02	11:38:00	0
2009-04-02	11:39:00	0
2009-04-02	11:40:00	0
2009-04-02	11:41:00	0
2009-04-02	11:42:00	0
2009-04-02	11:43:00	0
2009-04-02	11:44:00	0
2009-04-02	11:45:00	0
2009-04-02	11:46:00	0
2009-04-02	11:47:00	0
2009-04-02	11:48:00	0
2009-04-02	11:49:00	0
2009-04-02	11:50:00	0
2009-04-02	11:51:00	0
2009-04-02	11:52:00	0
2009-04-02	11:53:00	0
2009-04-02	11:54:00	0
2009-04-02	11:55:00	0
2009-04-02	11:56:00	0
2009-04-02	11:57:00	0
2009-04-02	11:58:00	0
2009-04-02	11:59:00	0
2009-04-02	12:00:00	0
2009-04-02	12:01:00	0
2009-04-02	12:02:00	0
2009-04-02	12:03:00	0
2009-04-02	12:04:00	0
2009-04-02	12:05:00	0
2009-04-02	12:06:00	0
2009-04-02	12:07:00	0
2009-04-02	12:08:00	0
2009-04-02	12:09:00	0
2009-04-02	12:10:00	0
2009-04-02	12:11:00	0
2009-04-02	12:12:00	0
2009-04-02	12:13:00	0
2009-04-02	12:14:00	0
2009-04-02	12:15:00	0
2009-04-02	12:16:00	0
2009-04-02	12:17:00	0
2009-04-02	12:18:00	0
2009-04-02	12:19:00	0
2009-04-02	12:20:00	0
2009-04-02	12:21:00	0
2009-04-02	12:22:00	0
2009-04-02	12:23:00	0
2009-04-02	12:24:00	0
2009-04-02	12:25:00	0
2009-04-02	12:26:00	0
2009-04-02	12:27:00	0
2009-04-02	12:28:00	0
2009-04-02	12:29:00	0
2009-04-02	12:30:00	0
2009-04-02	12:31:00	0
2009-04-02	12:32:00	0
2009-04-02	12:33:00	0
2009-04-02	12:34:00	0
2009-04-02	12:35:00	0
2009-04-02	12:36:00	0
2009-04-02	12:37:00	0
2009-04-02	12:38:00	0
2009-04-02	12:39:00	0
2009-04-02	12:40:00	0
2009-04-02	12:41:00	0
2009-04-02	12:42:00	0
2009-04-02	12:43:00	0
2009-04-02	12:44:00	0
2009-04-02	12:45:00	0
2009-04-02	12:46:00	0
2009-04-02	12:47:00	0
2009-04-02	12:48:00	0
2009-04-02	12:49:00	0
2009-04-02	12:50:00	0
2009-04-02	12:51:00	0
2009-04-02	12:52:00	0
2009-04-02	12:53:00	0
2009-04-02	12:54:00	0
2009-04-02	12:55:00	0
2009-04-02	12:56:00	0
2009-04-02	12:57:00	0
2009-04-02	12:58:00	0
2009-04-02	12:59:00	0
2009-04-02	13:00:00	0
2009-04-02	13:01:00	0
2009-04-02	13:02:00	0
2009-04-02	13:03:00	0
2009-04-02	13:04:00	0
2009-04-02	13:05:00	0
2009-04-02	13:06:00	0
2009-04-02	13:07:00	0
2009-04-02	13:08:00	0
2009-04-02	13:09:00	0
2009-04-02	13:10:00	0
2009-04-02	13:11:00	0
2009-04-02	13:12:00	0
2009-04-02	13:13:00	0
2009-04-02	13:14:00	0
2009-04-02	13:15:00	0
2009-04-02	13:16:00	0
2009-04-02	13:17:00	0
2009-04-02	13:18:00	0
2009-04-02	13:19:00	0
2009-04-02	13:20:00	0
2009-04-02	13:21:00	0
2009-04-02	13:22:00	0
2009-04-02	13:23:00	0
2009-04-02	13:24:00	0
2009-04-02	13:25:00	0
2009-04-02	13:26:00	0
2009-04-02	13:27:00	0
2009-04-02	13:28:00	0
2009-04-02	13:29:00	0
2009-04-02	13:30:00	0
2009-04-02	13:31:00	0
2009-04-02	13:32:00	0
2009-04-02	13:33:00	0
2009-04-02	13:34:00	0
2009-04-02	13:35:00	0
2009-04-02	13:36:00	0
2009-04-02	13:37:00	0
2009-04-02	13:38:00	0
2009-04-02	13:39:00	0
2009-04-02	13:40:00	0
2009-04-02	13:41:00	0
2009-04-02	13:42:00	0
2009-04-02	13:43:00	0
2009-04-02	13:44:00	0
2009-04-02	13:45:00	0
2009-04-02	13:46:00	0
2009-04-02	13:47:00	0
2009-04-02	13:48:00	0
2009-04-02	13:49:00	0
2009-04-02	13:50:00	0
2009-04-02	13:51:00	0
2009-04-02	13:52:00	0
2009-04-02	13:53:00	0
2009-04-02	13:54:00	0
2009-04-02	13:55:00	0
2009-04-02	13:56:00	0
2009-04-02	13:57:00	0
2009-04-02	13:58:00	0
2009-04-02	13:59:00	0
2009-04-02	14:00:00	0
2009-04-02	14:01:00	0
2009-04-02	14:02:00	0
2009-04-02	14:03:00	0
2009-04-02	14:04:00	0
2009-04-02	14:05:00	0
2009-04-02	14:06:00	0
2009-04-02	14:07:00	0
2009-04-02	14:08:00	0
2009-04-02	14:09:00	0
2009-04-02	14:10:00	0
2009-04-02	14:11:00	0
2009-04-02	14:12:00	0
2009-04-02	14:13:00	0
2009-04-02	14:14:00	0
2009-04-02	14:15:00	0
2009-04-02	14:16:00	0
2009-04-02	14:17:00	0
2009-04-02	14:18:00	0
2009-04-02	14:19:00	0
2009-04-02	14:20:00	0
2009-04-02	14:21:00	0
2009-04-02	14:22:00	0
2009-04-02	14:23:00	0
2009-04-02	14:24:00	0
2009-04-02	14:25:00	0
2009-04-02	14:26:00	0
2009-04-02	14:27:00	0
2009-04-02	14:28:00	0
2009-04-02	14:29:00	0
2009-04-02	14:30:00	0
2009-04-02	14:31:00	0
2009-04-02	14:32:00	0
2009-04-02	14:33:00	0
2009-04-02	14:34:00	0
2009-04-02	14:35:00	0
2009-04-02	14:36:00	0
2009-04-02	14:37:00	0
2009-04-02	14:38:00	0
2009-04-02	14:39:00	0
2009-04-02	14:40:00	0
2009-04-02	14:41:00	0
2009-04-02	14:42:00	0
2009-04-02	14:43:00	0
2009-04-02	14:44:00	0
2009-04-02	14:45:00	0
2009-04-02	14:46:00	0
2009-04-02	14:47:00	0
2009-04-02	14:48:00	0
2009-04-02	14:49:00	0
2009-04-02	14:50:00	0
2009-04-02	14:51:00	0
2009-04-02	14:52:00	0
2009-04-02	14:53:00	0
2009-04-02	14:54:00	0
2009-04-02	14:55:00	0
2009-04-02	14:56:00	0
2009-04-02	14:57:00	0
2009-04-02	14:58:00	0
2009-04-02	14:59:00	0
2009-04-02	15:00:00	0
2009-04-02	15:01:00	0
2009-04-02	15:02:00	0
2009-04-02	15:03:00	0
2009-04-02	15:04:00	0
2009-04-02	15:05:00	0
2009-04-02	15:06:00	0
2009-04-02	15:07:00	0
2009-04-02	15:08:00	0
2009-04-02	15:09:00	0
2009-04-02	15:10:00	0
2009-04-02	15:11:00	0
2009-04-02	15:12:00	0
2009-04-02	15:13:00	0
2009-04-02	15:14:00	0
2009-04-02	15:15:00	0
2009-04-02	15:16:00	0
2009-04-02	15:17:00	0
2009-04-02	15:18:00	0
2009-04-02	15:19:00	0
2009-04-02	15:20:00	0
2009-04-02	15:21:00	0
2009-04-02	15:22:00	0
2009-04-02	15:23:00	0
2009-04-02	15:24:00	0
2009-04-02	15:25:00	0
2009-04-02	15:26:00	0
2009-04-02	15:27:00	0
2009-04-02	15:28:00	0
2009-04-02	15:29:00	0
2009-04-02	15:30:00	0
2009-04-02	15:31:00	0
2009-04-02	15:32:00	0
2009-04-02	15:33:00	0
2009-04-02	15:34:00	0
2009-04-02	15:35:00	0
2009-04-02	15:36:00	0
2009-04-02	15:37:00	0
2009-04-02	15:38:00	0
2009-04-02	15:39:00	0
2009-04-02	15:40:00	0
2009-04-02	15:41:00	0
2009-04-02	15:42:00	0
2009-04-02	15:43:00	0
2009-04-02	15:44:00	0
2009-04-02	15:45:00	0
2009-04-02	15:46:00	0
2009-04-02	15:47:00	0
2009-04-02	15:48:00	0
2009-04-02	15:49:00	0
2009-04-02	15:50:00	0
2009-04-02	15:51:00	0
2009-04-02	15:52:00	0
2009-04-02	15:53:00	0
2009-04-02	15:54:00	0
2009-04-02	15:55:00	0
2009-04-02	15:56:00	0
2009-04-02	15:57:00	0
2009-04-02	15:58:00	0
2009-04-02	15:59:00	0
2009-04-02	16:00:00	0
2009-04-02	16:01:00	0
2009-04-02	16:02:00	0
2009-04-02	16:03:00	0
2009-04-02	16:04:00	0
2009-04-02	16:05:00	0
2009-04-02	16:06:00	0
2009-04-02	16:07:00	0
2009-04-02	16:08:00	0
2009-04-02	16:09:00	0
2009-04-02	16:10:00	0
2009-04-02	16:11:00	0
2009-04-02	16:12:00	0
2009-04-02	16:13:00	0
2009-04-02	16:14:00	0
2009-04-02	16:15:00	0
2009-04-02	16:16:00	0
2009-04-02	16:17:00	0
2009-04-02	16:18:00	0
2009-04-02	16:19:00	0
2009-04-02	16:20:00	0
2009-04-02	16:21:00	0
2009-04-02	16:22:00	0
2009-04-02	16:23:00	0
2009-04-02	16:24:00	0
2009-04-02	16:25:00	0
2009-04-02	16:26:00	0
2009-04-02	16:27:00	0
2009-04-02	16:28:00	0
2009-04-02	16:29:00	0
2009-04-02	16:30:00	0
2009-04-02	16:31:00	0
2009-04-02	16:32:00	0
2009-04-02	16:33:00	0
2009-04-02	16:34:00	0
2009-04-02	16:35:00	0
2009-04-02	16:36:00	0
2009-04-02	16:37:00	0
2009-04-02	16:38:00	0
2009-04-02	16:39:00	0
2009-04-02	16:40:00	0
2009-04-02	16:41:00	0
2009-04-02	16:42:00	0
2009-04-02	16:43:00	0
2009-04-02	16:44:00	0
2009-04-02	16:45:00	0
2009-04-02	16:46:00	0
2009-04-02	16:47:00	0
2009-04-02	16:48:00	0
2009-04-02	16:49:00	0
2009-04-02	16:50:00	0
2009-04-02	16:51:00	0
2009-04-02	16:52:00	0
2009-04-02	16:53:00	0
2009-04-02	16:54:00	0
2009-04-02	16:55:00	0
2009-04-02	16:56:00	0
2009-04-02	16:57:00	0
2009-04-02	16:58:00	0
2009-04-02	16:59:00	0
2009-04-02	17:00:00	0
2009-04-02	17:01:00	0
2009-04-02	17:02:00	0
2009-04-02	17:03:00	0
2009-04-02	17:04:00	0
2009-04-02	17:05:00	0
2009-04-02	17:06:00	0
2009-04-02	17:07:00	0
2009-04-02	17:08:00	0
2009-04-02	17:09:00	0
2009-04-02	17:10:00	0
2009-04-02	17:11:00	0
2009-04-02	17:12:00	0
2009-04-02	17:13:00	0
2009-04-02	17:14:00	0
2009-04-02	17:15:00	0
2009-04-02	17:16:00	0
2009-04-02	17:17:00	0
2009-04-02	17:18:00	0
2009-04-02	17:19:00	0
2009-04-02	17:20:00	0
2009-04-02	17:21:00	0
2009-04-02	17:22:00	0
2009-04-02	17:23:00	0
2009-04-02	17:24:00	0
2009-04-02	17:25:00	0
2009-04-02	17:26:00	0
2009-04-02	17:27:00	0
2009-04-02	17:28:00	0
2009-04-02	17:29:00	0
2009-04-02	17:30:00	0
2009-04-02	17:31:00	0
2009-04-02	17:32:00	0
2009-04-02	17:33:00	0
2009-04-02	17:34:00	0
2009-04-02	17:35:00	0
2009-04-02	17:36:00	0
2009-04-02	17:37:00	0
2009-04-02	17:38:00	0
2009-04-02	17:39:00	0
2009-04-02	17:40:00	0
2009-04-02	17:41:00	0
2009-04-02	17:42:00	0
2009-04-02	17:43:00	0
2009-04-02	17:44:00	0
2009-04-02	17:45:00	0
2009-04-02	17:46:00	0
2009-04-02	17:47:00	0
2009-04-02	17:48:00	0
2009-04-02	17:49:00	0
2009-04-02	17:50:00	0
2009-04-02	17:51:00	0
2009-04-02	17:52:00	0
2009-04-02	17:53:00	0
2009-04-02	17:54:00	0
2009-04-02	17:55:00	0
2009-04-02	17:56:00	0
2009-04-02	17:57:00	0
2009-04-02	17:58:00	0
2009-04-02	17:59:00	0
2009-04-02	18:00:00	0
2009-04-02	18:01:00	0
2009-04-02	18:02:00	0
2009-04-02	18:03:00	497
2009-04-02	18:04:00	234
2009-04-02	18:05:00	0
2009-04-02	18:06:00	160
2009-04-02	18:07:00	0
2009-04-02	18:08:00	0
2009-04-02	18:09:00	12
2009-04-02	18:10:00	0
2009-04-02	18:11:00	0
2009-04-02	18:12:00	12
2009-04-02	18:13:00	0
2009-04-02	18:14:00	0
2009-04-02	18:15:00	12
2009-04-02	18:16:00	0
2009-04-02	18:17:00	0
2009-04-02	18:18:00	0
2009-04-02	18:19:00	0
2009-04-02	18:20:00	0
2009-04-02	18:21:00	0
2009-04-02	18:22:00	0
2009-04-02	18:23:00	0
2009-04-02	18:24:00	0
2009-04-02	18:25:00	0
2009-04-02	18:26:00	517
2009-04-02	18:27:00	0
2009-04-02	18:28:00	0
2009-04-02	18:29:00	0
2009-04-02	18:30:00	0
2009-04-02	18:31:00	0
2009-04-02	18:32:00	0
2009-04-02	18:33:00	0
2009-04-02	18:34:00	0
2009-04-02	18:35:00	0
2009-04-02	18:36:00	0
2009-04-02	18:37:00	0
2009-04-02	18:38:00	0
2009-04-02	18:39:00	0
2009-04-02	18:40:00	0
2009-04-02	18:41:00	0
2009-04-02	18:42:00	0
2009-04-02	18:43:00	0
2009-04-02	18:44:00	0
2009-04-02	18:45:00	0
2009-04-02	18:46:00	0
2009-04-02	18:47:00	0
2009-04-02	18:48:00	0
2009-04-02	18:49:00	0
2009-04-02	18:50:00	0
2009-04-02	18:51:00	0
2009-04-02	18:52:00	0
2009-04-02	18:53:00	0
2009-04-02	18:54:00	0
2009-04-02	18:55:00	0
2009-04-02	18:56:00	0
2009-04-02	18:57:00	0
2009-04-02	18:58:00	0
2009-04-02	18:59:00	0
2009-04-02	19:00:00	0
2009-04-02	19:01:00	37
2009-04-02	19:02:00	0
2009-04-02	19:03:00	0
2009-04-02	19:04:00	0
2009-04-02	19:05:00	0
2009-04-02	19:06:00	0
2009-04-02	19:07:00	0
2009-04-02	19:08:00	0
2009-04-02	19:09:00	0
2009-04-02	19:10:00	0
2009-04-02	19:11:00	0
2009-04-02	19:12:00	0
2009-04-02	19:13:00	0
2009-04-02	19:14:00	0
2009-04-02	19:15:00	0
2009-04-02	19:16:00	0
2009-04-02	19:17:00	12
2009-04-02	19:18:00	0
2009-04-02	19:19:00	0
2009-04-02	19:20:00	12
2009-04-02	19:21:00	0
2009-04-02	19:22:00	0
2009-04-02	19:23:00	0
2009-04-02	19:24:00	0
2009-04-02	19:25:00	0
2009-04-02	19:26:00	0
2009-04-02	19:27:00	0
2009-04-02	19:28:00	0
2009-04-02	19:29:00	0
2009-04-02	19:30:00	0
2009-04-02	19:31:00	0
2009-04-02	19:32:00	0
2009-04-02	19:33:00	0
2009-04-02	19:34:00	0
2009-04-02	19:35:00	0
2009-04-02	19:36:00	0
2009-04-02	19:37:00	0
2009-04-02	19:38:00	0
2009-04-02	19:39:00	0
2009-04-02	19:40:00	0
2009-04-02	19:41:00	0
2009-04-02	19:42:00	0
2009-04-02	19:43:00	0
2009-04-02	19:44:00	0
2009-04-02	19:45:00	12
2009-04-02	19:46:00	1753
2009-04-02	19:47:00	1369
2009-04-02	19:48:00	37
2009-04-02	19:49:00	25
2009-04-02	19:50:00	0
2009-04-02	19:51:00	340
2009-04-02	19:52:00	0
2009-04-02	19:53:00	0
2009-04-02	19:54:00	0
2009-04-02	19:55:00	322
2009-04-02	19:56:00	0
2009-04-02	19:57:00	0
2009-04-02	19:58:00	12
2009-04-02	19:59:00	615
2009-04-02	20:00:00	913
2009-04-02	20:01:00	962
2009-04-02	20:02:00	12
2009-04-02	20:03:00	0
2009-04-02	20:04:00	12
2009-04-02	20:05:00	0
2009-04-02	20:06:00	0
2009-04-02	20:07:00	1433
2009-04-02	20:08:00	790
2009-04-02	20:09:00	790
2009-04-02	20:10:00	1125
2009-04-02	20:11:00	1243
2009-04-02	20:12:00	497
2009-04-02	20:13:00	889
2009-04-02	20:14:00	0
2009-04-02	20:15:00	12
2009-04-02	20:16:00	0
2009-04-02	20:17:00	0
2009-04-02	20:18:00	0
2009-04-02	20:19:00	12
2009-04-02	20:20:00	12
2009-04-02	20:21:00	0
2009-04-02	20:22:00	0
2009-04-02	20:23:00	0
2009-04-02	20:24:00	0
2009-04-02	20:25:00	0
2009-04-02	20:26:00	0
2009-04-02	20:27:00	0
2009-04-02	20:28:00	0
2009-04-02	20:29:00	0
2009-04-02	20:30:00	0
2009-04-02	20:31:00	0
2009-04-02	20:32:00	0
2009-04-02	20:33:00	0
2009-04-02	20:34:00	0
2009-04-02	20:35:00	0
2009-04-02	20:36:00	12
2009-04-02	20:37:00	0
2009-04-02	20:38:00	0
2009-04-02	20:39:00	0
2009-04-02	20:40:00	0
2009-04-02	20:41:00	12
2009-04-02	20:42:00	0
2009-04-02	20:43:00	0
2009-04-02	20:44:00	0
2009-04-02	20:45:00	0
2009-04-02	20:46:00	12
2009-04-02	20:47:00	0
2009-04-02	20:48:00	0
2009-04-02	20:49:00	0
2009-04-02	20:50:00	0
2009-04-02	20:51:00	0
2009-04-02	20:52:00	12
2009-04-02	20:53:00	0
2009-04-02	20:54:00	0
2009-04-02	20:55:00	0
2009-04-02	20:56:00	0
2009-04-02	20:57:00	0
2009-04-02	20:58:00	0
2009-04-02	20:59:00	0
2009-04-02	21:00:00	0
2009-04-02	21:01:00	0
2009-04-02	21:02:00	0
2009-04-02	21:03:00	0
2009-04-02	21:04:00	0
2009-04-02	21:05:00	0
2009-04-02	21:06:00	25
2009-04-02	21:07:00	0
2009-04-02	21:08:00	0
2009-04-02	21:09:00	0
2009-04-02	21:10:00	0
2009-04-02	21:11:00	0
2009-04-02	21:12:00	0
2009-04-02	21:13:00	0
2009-04-02	21:14:00	0
2009-04-02	21:15:00	12
2009-04-02	21:16:00	0
2009-04-02	21:17:00	0
2009-04-02	21:18:00	0
2009-04-02	21:19:00	0
2009-04-02	21:20:00	0
2009-04-02	21:21:00	0
2009-04-02	21:22:00	0
2009-04-02	21:23:00	0
2009-04-02	21:24:00	25
2009-04-02	21:25:00	357
2009-04-02	21:26:00	497
2009-04-02	21:27:00	374
2009-04-02	21:28:00	135
2009-04-02	21:29:00	12
2009-04-02	21:30:00	0
2009-04-02	21:31:00	0
2009-04-02	21:32:00	0
2009-04-02	21:33:00	0
2009-04-02	21:34:00	0
2009-04-02	21:35:00	0
2009-04-02	21:36:00	0
2009-04-02	21:37:00	0
2009-04-02	21:38:00	0
2009-04-02	21:39:00	12
2009-04-02	21:40:00	0
2009-04-02	21:41:00	0
2009-04-02	21:42:00	0
2009-04-02	21:43:00	0
2009-04-02	21:44:00	0
2009-04-02	21:45:00	0
2009-04-02	21:46:00	0
2009-04-02	21:47:00	0
2009-04-02	21:48:00	0
2009-04-02	21:49:00	0
2009-04-02	21:50:00	12
2009-04-02	21:51:00	12
2009-04-02	21:52:00	0
2009-04-02	21:53:00	0
2009-04-02	21:54:00	0
2009-04-02	21:55:00	0
2009-04-02	21:56:00	0
2009-04-02	21:57:00	25
2009-04-02	21:58:00	0
2009-04-02	21:59:00	0
2009-04-02	22:00:00	0
2009-04-02	22:01:00	0
2009-04-02	22:02:00	12
2009-04-02	22:03:00	0
2009-04-02	22:04:00	0
2009-04-02	22:05:00	0
2009-04-02	22:06:00	357
2009-04-02	22:07:00	293
2009-04-02	22:08:00	0
2009-04-02	22:09:00	293
2009-04-02	22:10:00	1125
2009-04-02	22:11:00	1369
2009-04-02	22:12:00	278
2009-04-02	22:13:00	2078
2009-04-02	22:14:00	1337
2009-04-02	22:15:00	1570
2009-04-02	22:16:00	702
2009-04-02	22:17:00	0
2009-04-02	22:18:00	391
2009-04-02	22:19:00	864
2009-04-02	22:20:00	1243
2009-04-02	22:21:00	657
2009-04-02	22:22:00	98
2009-04-02	22:23:00	111
2009-04-02	22:24:00	443
2009-04-02	22:25:00	263
2009-04-02	22:26:00	160
2009-04-02	22:27:00	0
2009-04-02	22:28:00	0
2009-04-02	22:29:00	12
2009-04-02	22:30:00	0
2009-04-02	22:31:00	0
2009-04-02	22:32:00	12
2009-04-02	22:33:00	12
2009-04-02	22:34:00	0
2009-04-02	22:35:00	0
2009-04-02	22:36:00	0
2009-04-02	22:37:00	0
2009-04-02	22:38:00	0
2009-04-02	22:39:00	426
2009-04-02	22:40:00	190
2009-04-02	22:41:00	0
2009-04-02	22:42:00	12
2009-04-02	22:43:00	0
2009-04-02	22:44:00	0
2009-04-02	22:45:00	190
2009-04-02	22:46:00	49
2009-04-02	22:47:00	62
2009-04-02	22:48:00	123
2009-04-02	22:49:00	25
2009-04-02	22:50:00	12
2009-04-02	22:51:00	263
2009-04-02	22:52:00	175
2009-04-02	22:53:00	148
2009-04-02	22:54:00	0
2009-04-02	22:55:00	0
2009-04-02	22:56:00	0
2009-04-02	22:57:00	0
2009-04-02	22:58:00	0
2009-04-02	22:59:00	0
2009-04-02	23:00:00	0
2009-04-02	23:01:00	0
2009-04-02	23:02:00	0
2009-04-02	23:03:00	0
2009-04-02	23:04:00	0
2009-04-02	23:05:00	0
2009-04-02	23:06:00	0
2009-04-02	23:07:00	0
2009-04-02	23:08:00	0
2009-04-02	23:09:00	0
2009-04-02	23:10:00	0
2009-04-02	23:11:00	0
2009-04-02	23:12:00	0
2009-04-02	23:13:00	0
2009-04-02	23:14:00	0
2009-04-02	23:15:00	0
2009-04-02	23:16:00	0
2009-04-02	23:17:00	0
2009-04-02	23:18:00	0
2009-04-02	23:19:00	0
2009-04-02	23:20:00	0
2009-04-02	23:21:00	0
2009-04-02	23:22:00	0
2009-04-02	23:23:00	0
2009-04-02	23:24:00	0
2009-04-02	23:25:00	0
2009-04-02	23:26:00	0
2009-04-02	23:27:00	0
2009-04-02	23:28:00	0
2009-04-02	23:29:00	0
2009-04-02	23:30:00	0
2009-04-02	23:31:00	0
2009-04-02	23:32:00	0
2009-04-02	23:33:00	0
2009-04-02	23:34:00	0
2009-04-02	23:35:00	0
2009-04-02	23:36:00	0
2009-04-02	23:37:00	0
2009-04-02	23:38:00	0
2009-04-02	23:39:00	0
2009-04-02	23:40:00	0
2009-04-02	23:41:00	0
2009-04-02	23:42:00	0
2009-04-02	23:43:00	0
2009-04-02	23:44:00	0
2009-04-02	23:45:00	0
2009-04-02	23:46:00	0
2009-04-02	23:47:00	0
2009-04-02	23:48:00	0
2009-04-02	23:49:00	0
2009-04-02	23:50:00	0
2009-04-02	23:51:00	0
2009-04-02	23:52:00	0
2009-04-02	23:53:00	0
2009-04-02	23:54:00	0
2009-04-02	23:55:00	0
2009-04-02	23:56:00	0
2009-04-02	23:57:00	0
2009-04-02	23:58:00	0
2009-04-02	23:59:00	0
2009-04-03	00:00:00	74
2009-04-03	00:01:00	74
2009-04-03	00:02:00	62
2009-04-03	00:03:00	0
2009-04-03	00:04:00	0
2009-04-03	00:05:00	0
2009-04-03	00:06:00	0
2009-04-03	00:07:00	0
2009-04-03	00:08:00	0
2009-04-03	00:09:00	0
2009-04-03	00:10:00	0
2009-04-03	00:11:00	0
2009-04-03	00:12:00	0
2009-04-03	00:13:00	0
2009-04-03	00:14:00	0
2009-04-03	00:15:00	0
2009-04-03	00:16:00	0
2009-04-03	00:17:00	0
2009-04-03	00:18:00	0
2009-04-03	00:19:00	0
2009-04-03	00:20:00	0
2009-04-03	00:21:00	0
2009-04-03	00:22:00	0
2009-04-03	00:23:00	0
2009-04-03	00:24:00	0
2009-04-03	00:25:00	0
2009-04-03	00:26:00	0
2009-04-03	00:27:00	0
2009-04-03	00:28:00	0
2009-04-03	00:29:00	0
2009-04-03	00:30:00	0
2009-04-03	00:31:00	0
2009-04-03	00:32:00	0
2009-04-03	00:33:00	0
2009-04-03	00:34:00	0
2009-04-03	00:35:00	0
2009-04-03	00:36:00	0
2009-04-03	00:37:00	0
2009-04-03	00:38:00	0
2009-04-03	00:39:00	0
2009-04-03	00:40:00	0
2009-04-03	00:41:00	0
2009-04-03	00:42:00	0
2009-04-03	00:43:00	0
2009-04-03	00:44:00	0
2009-04-03	00:45:00	0
2009-04-03	00:46:00	0
2009-04-03	00:47:00	0
2009-04-03	00:48:00	0
2009-04-03	00:49:00	0
2009-04-03	00:50:00	0
2009-04-03	00:51:00	0
2009-04-03	00:52:00	0
2009-04-03	00:53:00	0
2009-04-03	00:54:00	0
2009-04-03	00:55:00	0
2009-04-03	00:56:00	0
2009-04-03	00:57:00	0
2009-04-03	00:58:00	0
2009-04-03	00:59:00	0
2009-04-03	01:00:00	0
2009-04-03	01:01:00	0
2009-04-03	01:02:00	0
2009-04-03	01:03:00	0
2009-04-03	01:04:00	0
2009-04-03	01:05:00	0
2009-04-03	01:06:00	0
2009-04-03	01:07:00	0
2009-04-03	01:08:00	293
2009-04-03	01:09:00	0
2009-04-03	01:10:00	25
2009-04-03	01:11:00	0
2009-04-03	01:12:00	0
2009-04-03	01:13:00	0
2009-04-03	01:14:00	0
2009-04-03	01:15:00	0
2009-04-03	01:16:00	25
2009-04-03	01:17:00	0
2009-04-03	01:18:00	0
2009-04-03	01:19:00	0
2009-04-03	01:20:00	0
2009-04-03	01:21:00	0
2009-04-03	01:22:00	0
2009-04-03	01:23:00	12
2009-04-03	01:24:00	0
2009-04-03	01:25:00	0
2009-04-03	01:26:00	0
2009-04-03	01:27:00	0
2009-04-03	01:28:00	0
2009-04-03	01:29:00	0
2009-04-03	01:30:00	0
2009-04-03	01:31:00	0
2009-04-03	01:32:00	0
2009-04-03	01:33:00	0
2009-04-03	01:34:00	0
2009-04-03	01:35:00	0
2009-04-03	01:36:00	0
2009-04-03	01:37:00	0
2009-04-03	01:38:00	0
2009-04-03	01:39:00	0
2009-04-03	01:40:00	0
2009-04-03	01:41:00	0
2009-04-03	01:42:00	0
2009-04-03	01:43:00	0
2009-04-03	01:44:00	0
2009-04-03	01:45:00	0
2009-04-03	01:46:00	0
2009-04-03	01:47:00	0
2009-04-03	01:48:00	0
2009-04-03	01:49:00	0
2009-04-03	01:50:00	0
2009-04-03	01:51:00	0
2009-04-03	01:52:00	0
2009-04-03	01:53:00	0
2009-04-03	01:54:00	0
2009-04-03	01:55:00	0
2009-04-03	01:56:00	25
2009-04-03	01:57:00	111
2009-04-03	01:58:00	148
2009-04-03	01:59:00	0
2009-04-03	02:00:00	0
2009-04-03	02:01:00	0
2009-04-03	02:02:00	0
2009-04-03	02:03:00	0
2009-04-03	02:04:00	0
2009-04-03	02:05:00	0
2009-04-03	02:06:00	12
2009-04-03	02:07:00	0
2009-04-03	02:08:00	0
2009-04-03	02:09:00	0
2009-04-03	02:10:00	0
2009-04-03	02:11:00	0
2009-04-03	02:12:00	0
2009-04-03	02:13:00	0
2009-04-03	02:14:00	0
2009-04-03	02:15:00	0
2009-04-03	02:16:00	0
2009-04-03	02:17:00	0
2009-04-03	02:18:00	0
2009-04-03	02:19:00	0
2009-04-03	02:20:00	0
2009-04-03	02:21:00	0
2009-04-03	02:22:00	0
2009-04-03	02:23:00	0
2009-04-03	02:24:00	0
2009-04-03	02:25:00	12
2009-04-03	02:26:00	0
2009-04-03	02:27:00	0
2009-04-03	02:28:00	0
2009-04-03	02:29:00	0
2009-04-03	02:30:00	0
2009-04-03	02:31:00	0
2009-04-03	02:32:00	0
2009-04-03	02:33:00	0
2009-04-03	02:34:00	0
2009-04-03	02:35:00	0
2009-04-03	02:36:00	12
2009-04-03	02:37:00	0
2009-04-03	02:38:00	0
2009-04-03	02:39:00	0
2009-04-03	02:40:00	0
2009-04-03	02:41:00	0
2009-04-03	02:42:00	0
2009-04-03	02:43:00	0
2009-04-03	02:44:00	0
2009-04-03	02:45:00	0
2009-04-03	02:46:00	0
2009-04-03	02:47:00	0
2009-04-03	02:48:00	0
2009-04-03	02:49:00	0
2009-04-03	02:50:00	0
2009-04-03	02:51:00	0
2009-04-03	02:52:00	12
2009-04-03	02:53:00	0
2009-04-03	02:54:00	0
2009-04-03	02:55:00	0
2009-04-03	02:56:00	0
2009-04-03	02:57:00	0
2009-04-03	02:58:00	0
2009-04-03	02:59:00	0
2009-04-03	03:00:00	0
2009-04-03	03:01:00	0
2009-04-03	03:02:00	0
2009-04-03	03:03:00	0
2009-04-03	03:04:00	0
2009-04-03	03:05:00	0
2009-04-03	03:06:00	0
2009-04-03	03:07:00	12
2009-04-03	03:08:00	0
2009-04-03	03:09:00	0
2009-04-03	03:10:00	0
2009-04-03	03:11:00	0
2009-04-03	03:12:00	0
2009-04-03	03:13:00	0
2009-04-03	03:14:00	0
2009-04-03	03:15:00	0
2009-04-03	03:16:00	0
2009-04-03	03:17:00	0
2009-04-03	03:18:00	0
2009-04-03	03:19:00	0
2009-04-03	03:20:00	0
2009-04-03	03:21:00	0
2009-04-03	03:22:00	0
2009-04-03	03:23:00	0
2009-04-03	03:24:00	0
2009-04-03	03:25:00	0
2009-04-03	03:26:00	0
2009-04-03	03:27:00	0
2009-04-03	03:28:00	0
2009-04-03	03:29:00	0
2009-04-03	03:30:00	0
2009-04-03	03:31:00	12
2009-04-03	03:32:00	25
2009-04-03	03:33:00	49
2009-04-03	03:34:00	123
2009-04-03	03:35:00	0
2009-04-03	03:36:00	0
2009-04-03	03:37:00	0
2009-04-03	03:38:00	0
2009-04-03	03:39:00	0
2009-04-03	03:40:00	0
2009-04-03	03:41:00	0
2009-04-03	03:42:00	0
2009-04-03	03:43:00	0
2009-04-03	03:44:00	0
2009-04-03	03:45:00	0
2009-04-03	03:46:00	0
2009-04-03	03:47:00	0
2009-04-03	03:48:00	0
2009-04-03	03:49:00	0
2009-04-03	03:50:00	0
2009-04-03	03:51:00	0
2009-04-03	03:52:00	0
2009-04-03	03:53:00	0
2009-04-03	03:54:00	0
2009-04-03	03:55:00	0
2009-04-03	03:56:00	0
2009-04-03	03:57:00	0
2009-04-03	03:58:00	0
2009-04-03	03:59:00	0
2009-04-03	04:00:00	0
2009-04-03	04:01:00	0
2009-04-03	04:02:00	0
2009-04-03	04:03:00	0
2009-04-03	04:04:00	0
2009-04-03	04:05:00	0
2009-04-03	04:06:00	0
2009-04-03	04:07:00	0
2009-04-03	04:08:00	25
2009-04-03	04:09:00	0
2009-04-03	04:10:00	25
2009-04-03	04:11:00	74
2009-04-03	04:12:00	0
2009-04-03	04:13:00	0
2009-04-03	04:14:00	0
2009-04-03	04:15:00	0
2009-04-03	04:16:00	0
2009-04-03	04:17:00	0
2009-04-03	04:18:00	0
2009-04-03	04:19:00	0
2009-04-03	04:20:00	0
2009-04-03	04:21:00	0
2009-04-03	04:22:00	0
2009-04-03	04:23:00	0
2009-04-03	04:24:00	0
2009-04-03	04:25:00	0
2009-04-03	04:26:00	0
2009-04-03	04:27:00	12
2009-04-03	04:28:00	0
2009-04-03	04:29:00	0
2009-04-03	04:30:00	0
2009-04-03	04:31:00	0
2009-04-03	04:32:00	0
2009-04-03	04:33:00	0
2009-04-03	04:34:00	374
2009-04-03	04:35:00	0
2009-04-03	04:36:00	0
2009-04-03	04:37:00	0
2009-04-03	04:38:00	0
2009-04-03	04:39:00	0
2009-04-03	04:40:00	0
2009-04-03	04:41:00	0
2009-04-03	04:42:00	0
2009-04-03	04:43:00	0
2009-04-03	04:44:00	0
2009-04-03	04:45:00	0
2009-04-03	04:46:00	0
2009-04-03	04:47:00	0
2009-04-03	04:48:00	0
2009-04-03	04:49:00	0
2009-04-03	04:50:00	0
2009-04-03	04:51:00	0
2009-04-03	04:52:00	0
2009-04-03	04:53:00	0
2009-04-03	04:54:00	0
2009-04-03	04:55:00	0
2009-04-03	04:56:00	0
2009-04-03	04:57:00	0
2009-04-03	04:58:00	0
2009-04-03	04:59:00	0
2009-04-03	05:00:00	0
2009-04-03	05:01:00	0
2009-04-03	05:02:00	0
2009-04-03	05:03:00	0
2009-04-03	05:04:00	0
2009-04-03	05:05:00	0
2009-04-03	05:06:00	0
2009-04-03	05:07:00	0
2009-04-03	05:08:00	0
2009-04-03	05:09:00	0
2009-04-03	05:10:00	0
2009-04-03	05:11:00	0
2009-04-03	05:12:00	0
2009-04-03	05:13:00	0
2009-04-03	05:14:00	0
2009-04-03	05:15:00	0
2009-04-03	05:16:00	0
2009-04-03	05:17:00	0
2009-04-03	05:18:00	0
2009-04-03	05:19:00	0
2009-04-03	05:20:00	0
2009-04-03	05:21:00	0
2009-04-03	05:22:00	0
2009-04-03	05:23:00	0
2009-04-03	05:24:00	0
2009-04-03	05:25:00	0
2009-04-03	05:26:00	0
2009-04-03	05:27:00	0
2009-04-03	05:28:00	0
2009-04-03	05:29:00	234
2009-04-03	05:30:00	990
2009-04-03	05:31:00	1273
2009-04-03	05:32:00	98
2009-04-03	05:33:00	460
2009-04-03	05:34:00	25
2009-04-03	05:35:00	0
2009-04-03	05:36:00	37
2009-04-03	05:37:00	12
2009-04-03	05:38:00	12
2009-04-03	05:39:00	1017
2009-04-03	05:40:00	426
2009-04-03	05:41:00	0
2009-04-03	05:42:00	0
2009-04-03	05:43:00	0
2009-04-03	05:44:00	0
2009-04-03	05:45:00	0
2009-04-03	05:46:00	0
2009-04-03	05:47:00	0
2009-04-03	05:48:00	0
2009-04-03	05:49:00	0
2009-04-03	05:50:00	0
2009-04-03	05:51:00	0
2009-04-03	05:52:00	0
2009-04-03	05:53:00	0
2009-04-03	05:54:00	0
2009-04-03	05:55:00	0
2009-04-03	05:56:00	0
2009-04-03	05:57:00	12
2009-04-03	05:58:00	190
2009-04-03	05:59:00	49
2009-04-03	06:00:00	25
2009-04-03	06:01:00	25
2009-04-03	06:02:00	0
2009-04-03	06:03:00	0
2009-04-03	06:04:00	25
2009-04-03	06:05:00	768
2009-04-03	06:06:00	0
2009-04-03	06:07:00	0
2009-04-03	06:08:00	0
2009-04-03	06:09:00	0
2009-04-03	06:10:00	0
2009-04-03	06:11:00	12
2009-04-03	06:12:00	0
2009-04-03	06:13:00	25
2009-04-03	06:14:00	0
2009-04-03	06:15:00	12
2009-04-03	06:16:00	0
2009-04-03	06:17:00	0
2009-04-03	06:18:00	0
2009-04-03	06:19:00	0
2009-04-03	06:20:00	0
2009-04-03	06:21:00	0
2009-04-03	06:22:00	12
2009-04-03	06:23:00	0
2009-04-03	06:24:00	0
2009-04-03	06:25:00	0
2009-04-03	06:26:00	12
2009-04-03	06:27:00	0
2009-04-03	06:28:00	0
2009-04-03	06:29:00	0
2009-04-03	06:30:00	0
2009-04-03	06:31:00	62
2009-04-03	06:32:00	497
2009-04-03	06:33:00	74
2009-04-03	06:34:00	190
2009-04-03	06:35:00	746
2009-04-03	06:36:00	0
2009-04-03	06:37:00	0
2009-04-03	06:38:00	0
2009-04-03	06:39:00	0
2009-04-03	06:40:00	25
2009-04-03	06:41:00	12
2009-04-03	06:42:00	0
2009-04-03	06:43:00	0
2009-04-03	06:44:00	0
2009-04-03	06:45:00	556
2009-04-03	06:46:00	12
2009-04-03	06:47:00	409
2009-04-03	06:48:00	679
2009-04-03	06:49:00	990
2009-04-03	06:50:00	1017
2009-04-03	06:51:00	815
2009-04-03	06:52:00	768
2009-04-03	06:53:00	889
2009-04-03	06:54:00	913
2009-04-03	06:55:00	123
2009-04-03	06:56:00	148
2009-04-03	06:57:00	308
2009-04-03	06:58:00	340
2009-04-03	06:59:00	1071
2009-04-03	07:00:00	478
2009-04-03	07:01:00	556
2009-04-03	07:02:00	576
2009-04-03	07:03:00	1305
2009-04-03	07:04:00	1536
2009-04-03	07:05:00	2210
2009-04-03	07:06:00	1184
2009-04-03	07:07:00	1125
2009-04-03	07:08:00	1184
2009-04-03	07:09:00	537
2009-04-03	07:10:00	148
2009-04-03	07:11:00	0
2009-04-03	07:12:00	0
2009-04-03	07:13:00	0
2009-04-03	07:14:00	0
2009-04-03	07:15:00	0
2009-04-03	07:16:00	0
2009-04-03	07:17:00	0
2009-04-03	07:18:00	0
2009-04-03	07:19:00	0
2009-04-03	07:20:00	0
2009-04-03	07:21:00	0
2009-04-03	07:22:00	0
2009-04-03	07:23:00	0
2009-04-03	07:24:00	0
2009-04-03	07:25:00	0
2009-04-03	07:26:00	0
2009-04-03	07:27:00	0
2009-04-03	07:28:00	12
2009-04-03	07:29:00	0
2009-04-03	07:30:00	0
2009-04-03	07:31:00	0
2009-04-03	07:32:00	0
2009-04-03	07:33:00	0
2009-04-03	07:34:00	0
2009-04-03	07:35:00	0
2009-04-03	07:36:00	0
2009-04-03	07:37:00	0
2009-04-03	07:38:00	0
2009-04-03	07:39:00	0
2009-04-03	07:40:00	25
2009-04-03	07:41:00	0
2009-04-03	07:42:00	0
2009-04-03	07:43:00	0
2009-04-03	07:44:00	0
2009-04-03	07:45:00	0
2009-04-03	07:46:00	0
2009-04-03	07:47:00	0
2009-04-03	07:48:00	0
2009-04-03	07:49:00	0
2009-04-03	07:50:00	0
2009-04-03	07:51:00	0
2009-04-03	07:52:00	0
2009-04-03	07:53:00	0
2009-04-03	07:54:00	0
2009-04-03	07:55:00	478
2009-04-03	07:56:00	724
2009-04-03	07:57:00	135
2009-04-03	07:58:00	148
2009-04-03	07:59:00	0
2009-04-03	08:00:00	0
2009-04-03	08:01:00	0
2009-04-03	08:02:00	0
2009-04-03	08:03:00	0
2009-04-03	08:04:00	0
2009-04-03	08:05:00	0
2009-04-03	08:06:00	0
2009-04-03	08:07:00	0
2009-04-03	08:08:00	0
2009-04-03	08:09:00	0
2009-04-03	08:10:00	12
2009-04-03	08:11:00	0
2009-04-03	08:12:00	0
2009-04-03	08:13:00	0
2009-04-03	08:14:00	0
2009-04-03	08:15:00	0
2009-04-03	08:16:00	0
2009-04-03	08:17:00	0
2009-04-03	08:18:00	0
2009-04-03	08:19:00	12
2009-04-03	08:20:00	12
2009-04-03	08:21:00	0
2009-04-03	08:22:00	74
2009-04-03	08:23:00	576
2009-04-03	08:24:00	460
2009-04-03	08:25:00	556
2009-04-03	08:26:00	679
2009-04-03	08:27:00	596
2009-04-03	08:28:00	679
2009-04-03	08:29:00	340
2009-04-03	08:30:00	0
2009-04-03	08:31:00	556
2009-04-03	08:32:00	74
2009-04-03	08:33:00	426
2009-04-03	08:34:00	37
2009-04-03	08:35:00	409
2009-04-03	08:36:00	517
2009-04-03	08:37:00	322
2009-04-03	08:38:00	234
2009-04-03	08:39:00	0
2009-04-03	08:40:00	0
2009-04-03	08:41:00	12
2009-04-03	08:42:00	0
2009-04-03	08:43:00	0
2009-04-03	08:44:00	0
2009-04-03	08:45:00	12
2009-04-03	08:46:00	0
2009-04-03	08:47:00	0
2009-04-03	08:48:00	0
2009-04-03	08:49:00	25
2009-04-03	08:50:00	0
2009-04-03	08:51:00	0
2009-04-03	08:52:00	0
2009-04-03	08:53:00	0
2009-04-03	08:54:00	0
2009-04-03	08:55:00	0
2009-04-03	08:56:00	0
2009-04-03	08:57:00	0
2009-04-03	08:58:00	0
2009-04-03	08:59:00	0
2009-04-03	09:00:00	0
2009-04-03	09:01:00	0
2009-04-03	09:02:00	12
2009-04-03	09:03:00	12
2009-04-03	09:04:00	0
2009-04-03	09:05:00	0
2009-04-03	09:06:00	0
2009-04-03	09:07:00	0
2009-04-03	09:08:00	517
[truncated: 19,611 more rows]

## Sheet: 4.16.09
Actogram, Copy Raw Data, All Days
Identity:	Bear Kaplan
Filename:	E:\Active Research Files\meloxicam titre canine\cases\disqualified\bear k\Bear Kaplan 4.16.09.AWC
Gender:	M
Age:	10
Height:	61.0 cm	24.0 in
Weight:	20.0 kg	44.1 lbs
Start Date:	16-Apr-2009 (Thu)
Start Time:	18:00:00
Interval:	1.00 mins
Date Stamp:	Time Stamp:	Activity Data:	Marker Press:
2009-04-16	00:00:00	0
2009-04-16	00:01:00	0
2009-04-16	00:02:00	0
2009-04-16	00:03:00	0
2009-04-16	00:04:00	0
2009-04-16	00:05:00	0
2009-04-16	00:06:00	0
2009-04-16	00:07:00	0
2009-04-16	00:08:00	0
2009-04-16	00:09:00	0
2009-04-16	00:10:00	0
2009-04-16	00:11:00	0
2009-04-16	00:12:00	0
2009-04-16	00:13:00	0
2009-04-16	00:14:00	0
2009-04-16	00:15:00	0
2009-04-16	00:16:00	0
2009-04-16	00:17:00	0
2009-04-16	00:18:00	0
2009-04-16	00:19:00	0
2009-04-16	00:20:00	0
2009-04-16	00:21:00	0
2009-04-16	00:22:00	0
2009-04-16	00:23:00	0
2009-04-16	00:24:00	0
2009-04-16	00:25:00	0
2009-04-16	00:26:00	0
2009-04-16	00:27:00	0
2009-04-16	00:28:00	0
2009-04-16	00:29:00	0
2009-04-16	00:30:00	0
2009-04-16	00:31:00	0
2009-04-16	00:32:00	0
2009-04-16	00:33:00	0
2009-04-16	00:34:00	0
2009-04-16	00:35:00	0
2009-04-16	00:36:00	0
2009-04-16	00:37:00	0
2009-04-16	00:38:00	0
2009-04-16	00:39:00	0
2009-04-16	00:40:00	0
2009-04-16	00:41:00	0
2009-04-16	00:42:00	0
2009-04-16	00:43:00	0
2009-04-16	00:44:00	0
2009-04-16	00:45:00	0
2009-04-16	00:46:00	0
2009-04-16	00:47:00	0
2009-04-16	00:48:00	0
2009-04-16	00:49:00	0
2009-04-16	00:50:00	0
2009-04-16	00:51:00	0
2009-04-16	00:52:00	0
2009-04-16	00:53:00	0
2009-04-16	00:54:00	0
2009-04-16	00:55:00	0
2009-04-16	00:56:00	0
2009-04-16	00:57:00	0
2009-04-16	00:58:00	0
2009-04-16	00:59:00	0
2009-04-16	01:00:00	0
2009-04-16	01:01:00	0
2009-04-16	01:02:00	0
2009-04-16	01:03:00	0
2009-04-16	01:04:00	0
2009-04-16	01:05:00	0
2009-04-16	01:06:00	0
2009-04-16	01:07:00	0
2009-04-16	01:08:00	0
2009-04-16	01:09:00	0
2009-04-16	01:10:00	0
2009-04-16	01:11:00	0
2009-04-16	01:12:00	0
2009-04-16	01:13:00	0
2009-04-16	01:14:00	0
2009-04-16	01:15:00	0
2009-04-16	01:16:00	0
2009-04-16	01:17:00	0
2009-04-16	01:18:00	0
2009-04-16	01:19:00	0
2009-04-16	01:20:00	0
2009-04-16	01:21:00	0
2009-04-16	01:22:00	0
2009-04-16	01:23:00	0
2009-04-16	01:24:00	0
2009-04-16	01:25:00	0
2009-04-16	01:26:00	0
2009-04-16	01:27:00	0
2009-04-16	01:28:00	0
2009-04-16	01:29:00	0
2009-04-16	01:30:00	0
2009-04-16	01:31:00	0
2009-04-16	01:32:00	0
2009-04-16	01:33:00	0
2009-04-16	01:34:00	0
2009-04-16	01:35:00	0
2009-04-16	01:36:00	0
2009-04-16	01:37:00	0
2009-04-16	01:38:00	0
2009-04-16	01:39:00	0
2009-04-16	01:40:00	0
2009-04-16	01:41:00	0
2009-04-16	01:42:00	0
2009-04-16	01:43:00	0
2009-04-16	01:44:00	0
2009-04-16	01:45:00	0
2009-04-16	01:46:00	0
2009-04-16	01:47:00	0
2009-04-16	01:48:00	0
2009-04-16	01:49:00	0
2009-04-16	01:50:00	0
2009-04-16	01:51:00	0
2009-04-16	01:52:00	0
2009-04-16	01:53:00	0
2009-04-16	01:54:00	0
2009-04-16	01:55:00	0
2009-04-16	01:56:00	0
2009-04-16	01:57:00	0
2009-04-16	01:58:00	0
2009-04-16	01:59:00	0
2009-04-16	02:00:00	0
2009-04-16	02:01:00	0
2009-04-16	02:02:00	0
2009-04-16	02:03:00	0
2009-04-16	02:04:00	0
2009-04-16	02:05:00	0
2009-04-16	02:06:00	0
2009-04-16	02:07:00	0
2009-04-16	02:08:00	0
2009-04-16	02:09:00	0
2009-04-16	02:10:00	0
2009-04-16	02:11:00	0
2009-04-16	02:12:00	0
2009-04-16	02:13:00	0
2009-04-16	02:14:00	0
2009-04-16	02:15:00	0
2009-04-16	02:16:00	0
2009-04-16	02:17:00	0
2009-04-16	02:18:00	0
2009-04-16	02:19:00	0
2009-04-16	02:20:00	0
2009-04-16	02:21:00	0
2009-04-16	02:22:00	0
2009-04-16	02:23:00	0
2009-04-16	02:24:00	0
2009-04-16	02:25:00	0
2009-04-16	02:26:00	0
2009-04-16	02:27:00	0
2009-04-16	02:28:00	0
2009-04-16	02:29:00	0
2009-04-16	02:30:00	0
2009-04-16	02:31:00	0
2009-04-16	02:32:00	0
2009-04-16	02:33:00	0
2009-04-16	02:34:00	0
2009-04-16	02:35:00	0
2009-04-16	02:36:00	0
2009-04-16	02:37:00	0
2009-04-16	02:38:00	0
2009-04-16	02:39:00	0
2009-04-16	02:40:00	0
2009-04-16	02:41:00	0
2009-04-16	02:42:00	0
2009-04-16	02:43:00	0
2009-04-16	02:44:00	0
2009-04-16	02:45:00	0
2009-04-16	02:46:00	0
2009-04-16	02:47:00	0
2009-04-16	02:48:00	0
2009-04-16	02:49:00	0
2009-04-16	02:50:00	0
2009-04-16	02:51:00	0
2009-04-16	02:52:00	0
2009-04-16	02:53:00	0
2009-04-16	02:54:00	0
2009-04-16	02:55:00	0
2009-04-16	02:56:00	0
2009-04-16	02:57:00	0
2009-04-16	02:58:00	0
2009-04-16	02:59:00	0
2009-04-16	03:00:00	0
2009-04-16	03:01:00	0
2009-04-16	03:02:00	0
2009-04-16	03:03:00	0
2009-04-16	03:04:00	0
2009-04-16	03:05:00	0
2009-04-16	03:06:00	0
2009-04-16	03:07:00	0
2009-04-16	03:08:00	0
2009-04-16	03:09:00	0
2009-04-16	03:10:00	0
2009-04-16	03:11:00	0
2009-04-16	03:12:00	0
2009-04-16	03:13:00	0
2009-04-16	03:14:00	0
2009-04-16	03:15:00	0
2009-04-16	03:16:00	0
2009-04-16	03:17:00	0
2009-04-16	03:18:00	0
2009-04-16	03:19:00	0
2009-04-16	03:20:00	0
2009-04-16	03:21:00	0
2009-04-16	03:22:00	0
2009-04-16	03:23:00	0
2009-04-16	03:24:00	0
2009-04-16	03:25:00	0
2009-04-16	03:26:00	0
2009-04-16	03:27:00	0
2009-04-16	03:28:00	0
2009-04-16	03:29:00	0
2009-04-16	03:30:00	0
2009-04-16	03:31:00	0
2009-04-16	03:32:00	0
2009-04-16	03:33:00	0
2009-04-16	03:34:00	0
2009-04-16	03:35:00	0
2009-04-16	03:36:00	0
2009-04-16	03:37:00	0
2009-04-16	03:38:00	0
2009-04-16	03:39:00	0
2009-04-16	03:40:00	0
2009-04-16	03:41:00	0
2009-04-16	03:42:00	0
2009-04-16	03:43:00	0
2009-04-16	03:44:00	0
2009-04-16	03:45:00	0
2009-04-16	03:46:00	0
2009-04-16	03:47:00	0
2009-04-16	03:48:00	0
2009-04-16	03:49:00	0
2009-04-16	03:50:00	0
2009-04-16	03:51:00	0
2009-04-16	03:52:00	0
2009-04-16	03:53:00	0
2009-04-16	03:54:00	0
2009-04-16	03:55:00	0
2009-04-16	03:56:00	0
2009-04-16	03:57:00	0
2009-04-16	03:58:00	0
2009-04-16	03:59:00	0
2009-04-16	04:00:00	0
2009-04-16	04:01:00	0
2009-04-16	04:02:00	0
2009-04-16	04:03:00	0
2009-04-16	04:04:00	0
2009-04-16	04:05:00	0
2009-04-16	04:06:00	0
2009-04-16	04:07:00	0
2009-04-16	04:08:00	0
2009-04-16	04:09:00	0
2009-04-16	04:10:00	0
2009-04-16	04:11:00	0
2009-04-16	04:12:00	0
2009-04-16	04:13:00	0
2009-04-16	04:14:00	0
2009-04-16	04:15:00	0
2009-04-16	04:16:00	0
2009-04-16	04:17:00	0
2009-04-16	04:18:00	0
2009-04-16	04:19:00	0
2009-04-16	04:20:00	0
2009-04-16	04:21:00	0
2009-04-16	04:22:00	0
2009-04-16	04:23:00	0
2009-04-16	04:24:00	0
2009-04-16	04:25:00	0
2009-04-16	04:26:00	0
2009-04-16	04:27:00	0
2009-04-16	04:28:00	0
2009-04-16	04:29:00	0
2009-04-16	04:30:00	0
2009-04-16	04:31:00	0
2009-04-16	04:32:00	0
2009-04-16	04:33:00	0
2009-04-16	04:34:00	0
2009-04-16	04:35:00	0
2009-04-16	04:36:00	0
2009-04-16	04:37:00	0
2009-04-16	04:38:00	0
2009-04-16	04:39:00	0
2009-04-16	04:40:00	0
2009-04-16	04:41:00	0
2009-04-16	04:42:00	0
2009-04-16	04:43:00	0
2009-04-16	04:44:00	0
2009-04-16	04:45:00	0
2009-04-16	04:46:00	0
2009-04-16	04:47:00	0
2009-04-16	04:48:00	0
2009-04-16	04:49:00	0
2009-04-16	04:50:00	0
2009-04-16	04:51:00	0
2009-04-16	04:52:00	0
2009-04-16	04:53:00	0
2009-04-16	04:54:00	0
2009-04-16	04:55:00	0
2009-04-16	04:56:00	0
2009-04-16	04:57:00	0
2009-04-16	04:58:00	0
2009-04-16	04:59:00	0
2009-04-16	05:00:00	0
2009-04-16	05:01:00	0
2009-04-16	05:02:00	0
2009-04-16	05:03:00	0
2009-04-16	05:04:00	0
2009-04-16	05:05:00	0
2009-04-16	05:06:00	0
2009-04-16	05:07:00	0
2009-04-16	05:08:00	0
2009-04-16	05:09:00	0
2009-04-16	05:10:00	0
2009-04-16	05:11:00	0
2009-04-16	05:12:00	0
2009-04-16	05:13:00	0
2009-04-16	05:14:00	0
2009-04-16	05:15:00	0
2009-04-16	05:16:00	0
2009-04-16	05:17:00	0
2009-04-16	05:18:00	0
2009-04-16	05:19:00	0
2009-04-16	05:20:00	0
2009-04-16	05:21:00	0
2009-04-16	05:22:00	0
2009-04-16	05:23:00	0
2009-04-16	05:24:00	0
2009-04-16	05:25:00	0
2009-04-16	05:26:00	0
2009-04-16	05:27:00	0
2009-04-16	05:28:00	0
2009-04-16	05:29:00	0
2009-04-16	05:30:00	0
2009-04-16	05:31:00	0
2009-04-16	05:32:00	0
2009-04-16	05:33:00	0
2009-04-16	05:34:00	0
2009-04-16	05:35:00	0
2009-04-16	05:36:00	0
2009-04-16	05:37:00	0
2009-04-16	05:38:00	0
2009-04-16	05:39:00	0
2009-04-16	05:40:00	0
2009-04-16	05:41:00	0
2009-04-16	05:42:00	0
2009-04-16	05:43:00	0
2009-04-16	05:44:00	0
2009-04-16	05:45:00	0
2009-04-16	05:46:00	0
2009-04-16	05:47:00	0
2009-04-16	05:48:00	0
2009-04-16	05:49:00	0
2009-04-16	05:50:00	0
2009-04-16	05:51:00	0
2009-04-16	05:52:00	0
2009-04-16	05:53:00	0
2009-04-16	05:54:00	0
2009-04-16	05:55:00	0
2009-04-16	05:56:00	0
2009-04-16	05:57:00	0
2009-04-16	05:58:00	0
2009-04-16	05:59:00	0
2009-04-16	06:00:00	0
2009-04-16	06:01:00	0
2009-04-16	06:02:00	0
2009-04-16	06:03:00	0
2009-04-16	06:04:00	0
2009-04-16	06:05:00	0
2009-04-16	06:06:00	0
2009-04-16	06:07:00	0
2009-04-16	06:08:00	0
2009-04-16	06:09:00	0
2009-04-16	06:10:00	0
2009-04-16	06:11:00	0
2009-04-16	06:12:00	0
2009-04-16	06:13:00	0
2009-04-16	06:14:00	0
2009-04-16	06:15:00	0
2009-04-16	06:16:00	0
2009-04-16	06:17:00	0
2009-04-16	06:18:00	0
2009-04-16	06:19:00	0
2009-04-16	06:20:00	0
2009-04-16	06:21:00	0
2009-04-16	06:22:00	0
2009-04-16	06:23:00	0
2009-04-16	06:24:00	0
2009-04-16	06:25:00	0
2009-04-16	06:26:00	0
2009-04-16	06:27:00	0
2009-04-16	06:28:00	0
2009-04-16	06:29:00	0
2009-04-16	06:30:00	0
2009-04-16	06:31:00	0
2009-04-16	06:32:00	0
2009-04-16	06:33:00	0
2009-04-16	06:34:00	0
2009-04-16	06:35:00	0
2009-04-16	06:36:00	0
2009-04-16	06:37:00	0
2009-04-16	06:38:00	0
2009-04-16	06:39:00	0
2009-04-16	06:40:00	0
2009-04-16	06:41:00	0
2009-04-16	06:42:00	0
2009-04-16	06:43:00	0
2009-04-16	06:44:00	0
2009-04-16	06:45:00	0
2009-04-16	06:46:00	0
2009-04-16	06:47:00	0
2009-04-16	06:48:00	0
2009-04-16	06:49:00	0
2009-04-16	06:50:00	0
2009-04-16	06:51:00	0
2009-04-16	06:52:00	0
2009-04-16	06:53:00	0
2009-04-16	06:54:00	0
2009-04-16	06:55:00	0
2009-04-16	06:56:00	0
2009-04-16	06:57:00	0
2009-04-16	06:58:00	0
2009-04-16	06:59:00	0
2009-04-16	07:00:00	0
2009-04-16	07:01:00	0
2009-04-16	07:02:00	0
2009-04-16	07:03:00	0
2009-04-16	07:04:00	0
2009-04-16	07:05:00	0
2009-04-16	07:06:00	0
2009-04-16	07:07:00	0
2009-04-16	07:08:00	0
2009-04-16	07:09:00	0
2009-04-16	07:10:00	0
2009-04-16	07:11:00	0
2009-04-16	07:12:00	0
2009-04-16	07:13:00	0
2009-04-16	07:14:00	0
2009-04-16	07:15:00	0
2009-04-16	07:16:00	0
2009-04-16	07:17:00	0
2009-04-16	07:18:00	0
2009-04-16	07:19:00	0
2009-04-16	07:20:00	0
2009-04-16	07:21:00	0
2009-04-16	07:22:00	0
2009-04-16	07:23:00	0
2009-04-16	07:24:00	0
2009-04-16	07:25:00	0
2009-04-16	07:26:00	0
2009-04-16	07:27:00	0
2009-04-16	07:28:00	0
2009-04-16	07:29:00	0
2009-04-16	07:30:00	0
2009-04-16	07:31:00	0
2009-04-16	07:32:00	0
2009-04-16	07:33:00	0
2009-04-16	07:34:00	0
2009-04-16	07:35:00	0
2009-04-16	07:36:00	0
2009-04-16	07:37:00	0
2009-04-16	07:38:00	0
2009-04-16	07:39:00	0
2009-04-16	07:40:00	0
2009-04-16	07:41:00	0
2009-04-16	07:42:00	0
2009-04-16	07:43:00	0
2009-04-16	07:44:00	0
2009-04-16	07:45:00	0
2009-04-16	07:46:00	0
2009-04-16	07:47:00	0
2009-04-16	07:48:00	0
2009-04-16	07:49:00	0
2009-04-16	07:50:00	0
2009-04-16	07:51:00	0
2009-04-16	07:52:00	0
2009-04-16	07:53:00	0
2009-04-16	07:54:00	0
2009-04-16	07:55:00	0
2009-04-16	07:56:00	0
2009-04-16	07:57:00	0
2009-04-16	07:58:00	0
2009-04-16	07:59:00	0
2009-04-16	08:00:00	0
2009-04-16	08:01:00	0
2009-04-16	08:02:00	0
2009-04-16	08:03:00	0
2009-04-16	08:04:00	0
2009-04-16	08:05:00	0
2009-04-16	08:06:00	0
2009-04-16	08:07:00	0
2009-04-16	08:08:00	0
2009-04-16	08:09:00	0
2009-04-16	08:10:00	0
2009-04-16	08:11:00	0
2009-04-16	08:12:00	0
2009-04-16	08:13:00	0
2009-04-16	08:14:00	0
2009-04-16	08:15:00	0
2009-04-16	08:16:00	0
2009-04-16	08:17:00	0
2009-04-16	08:18:00	0
2009-04-16	08:19:00	0
2009-04-16	08:20:00	0
2009-04-16	08:21:00	0
2009-04-16	08:22:00	0
2009-04-16	08:23:00	0
2009-04-16	08:24:00	0
2009-04-16	08:25:00	0
2009-04-16	08:26:00	0
2009-04-16	08:27:00	0
2009-04-16	08:28:00	0
2009-04-16	08:29:00	0
2009-04-16	08:30:00	0
2009-04-16	08:31:00	0
2009-04-16	08:32:00	0
2009-04-16	08:33:00	0
2009-04-16	08:34:00	0
2009-04-16	08:35:00	0
2009-04-16	08:36:00	0
2009-04-16	08:37:00	0
2009-04-16	08:38:00	0
2009-04-16	08:39:00	0
2009-04-16	08:40:00	0
2009-04-16	08:41:00	0
2009-04-16	08:42:00	0
2009-04-16	08:43:00	0
2009-04-16	08:44:00	0
2009-04-16	08:45:00	0
2009-04-16	08:46:00	0
2009-04-16	08:47:00	0
2009-04-16	08:48:00	0
2009-04-16	08:49:00	0
2009-04-16	08:50:00	0
2009-04-16	08:51:00	0
2009-04-16	08:52:00	0
2009-04-16	08:53:00	0
2009-04-16	08:54:00	0
2009-04-16	08:55:00	0
2009-04-16	08:56:00	0
2009-04-16	08:57:00	0
2009-04-16	08:58:00	0
2009-04-16	08:59:00	0
2009-04-16	09:00:00	0
2009-04-16	09:01:00	0
2009-04-16	09:02:00	0
2009-04-16	09:03:00	0
2009-04-16	09:04:00	0
2009-04-16	09:05:00	0
2009-04-16	09:06:00	0
2009-04-16	09:07:00	0
2009-04-16	09:08:00	0
2009-04-16	09:09:00	0
2009-04-16	09:10:00	0
2009-04-16	09:11:00	0
2009-04-16	09:12:00	0
2009-04-16	09:13:00	0
2009-04-16	09:14:00	0
2009-04-16	09:15:00	0
2009-04-16	09:16:00	0
2009-04-16	09:17:00	0
2009-04-16	09:18:00	0
2009-04-16	09:19:00	0
2009-04-16	09:20:00	0
2009-04-16	09:21:00	0
2009-04-16	09:22:00	0
2009-04-16	09:23:00	0
2009-04-16	09:24:00	0
2009-04-16	09:25:00	0
2009-04-16	09:26:00	0
2009-04-16	09:27:00	0
2009-04-16	09:28:00	0
2009-04-16	09:29:00	0
2009-04-16	09:30:00	0
2009-04-16	09:31:00	0
2009-04-16	09:32:00	0
2009-04-16	09:33:00	0
2009-04-16	09:34:00	0
2009-04-16	09:35:00	0
2009-04-16	09:36:00	0
2009-04-16	09:37:00	0
2009-04-16	09:38:00	0
2009-04-16	09:39:00	0
2009-04-16	09:40:00	0
2009-04-16	09:41:00	0
2009-04-16	09:42:00	0
2009-04-16	09:43:00	0
2009-04-16	09:44:00	0
2009-04-16	09:45:00	0
2009-04-16	09:46:00	0
2009-04-16	09:47:00	0
2009-04-16	09:48:00	0
2009-04-16	09:49:00	0
2009-04-16	09:50:00	0
2009-04-16	09:51:00	0
2009-04-16	09:52:00	0
2009-04-16	09:53:00	0
2009-04-16	09:54:00	0
2009-04-16	09:55:00	0
2009-04-16	09:56:00	0
2009-04-16	09:57:00	0
2009-04-16	09:58:00	0
2009-04-16	09:59:00	0
2009-04-16	10:00:00	0
2009-04-16	10:01:00	0
2009-04-16	10:02:00	0
2009-04-16	10:03:00	0
2009-04-16	10:04:00	0
2009-04-16	10:05:00	0
2009-04-16	10:06:00	0
2009-04-16	10:07:00	0
2009-04-16	10:08:00	0
2009-04-16	10:09:00	0
2009-04-16	10:10:00	0
2009-04-16	10:11:00	0
2009-04-16	10:12:00	0
2009-04-16	10:13:00	0
2009-04-16	10:14:00	0
2009-04-16	10:15:00	0
2009-04-16	10:16:00	0
2009-04-16	10:17:00	0
2009-04-16	10:18:00	0
2009-04-16	10:19:00	0
2009-04-16	10:20:00	0
2009-04-16	10:21:00	0
2009-04-16	10:22:00	0
2009-04-16	10:23:00	0
2009-04-16	10:24:00	0
2009-04-16	10:25:00	0
2009-04-16	10:26:00	0
2009-04-16	10:27:00	0
2009-04-16	10:28:00	0
2009-04-16	10:29:00	0
2009-04-16	10:30:00	0
2009-04-16	10:31:00	0
2009-04-16	10:32:00	0
2009-04-16	10:33:00	0
2009-04-16	10:34:00	0
2009-04-16	10:35:00	0
2009-04-16	10:36:00	0
2009-04-16	10:37:00	0
2009-04-16	10:38:00	0
2009-04-16	10:39:00	0
2009-04-16	10:40:00	0
2009-04-16	10:41:00	0
2009-04-16	10:42:00	0
2009-04-16	10:43:00	0
2009-04-16	10:44:00	0
2009-04-16	10:45:00	0
2009-04-16	10:46:00	0
2009-04-16	10:47:00	0
2009-04-16	10:48:00	0
2009-04-16	10:49:00	0
2009-04-16	10:50:00	0
2009-04-16	10:51:00	0
2009-04-16	10:52:00	0
2009-04-16	10:53:00	0
2009-04-16	10:54:00	0
2009-04-16	10:55:00	0
2009-04-16	10:56:00	0
2009-04-16	10:57:00	0
2009-04-16	10:58:00	0
2009-04-16	10:59:00	0
2009-04-16	11:00:00	0
2009-04-16	11:01:00	0
2009-04-16	11:02:00	0
2009-04-16	11:03:00	0
2009-04-16	11:04:00	0
2009-04-16	11:05:00	0
2009-04-16	11:06:00	0
2009-04-16	11:07:00	0
2009-04-16	11:08:00	0
2009-04-16	11:09:00	0
2009-04-16	11:10:00	0
2009-04-16	11:11:00	0
2009-04-16	11:12:00	0
2009-04-16	11:13:00	0
2009-04-16	11:14:00	0
2009-04-16	11:15:00	0
2009-04-16	11:16:00	0
2009-04-16	11:17:00	0
2009-04-16	11:18:00	0
2009-04-16	11:19:00	0
2009-04-16	11:20:00	0
2009-04-16	11:21:00	0
2009-04-16	11:22:00	0
2009-04-16	11:23:00	0
2009-04-16	11:24:00	0
2009-04-16	11:25:00	0
2009-04-16	11:26:00	0
2009-04-16	11:27:00	0
2009-04-16	11:28:00	0
2009-04-16	11:29:00	0
2009-04-16	11:30:00	0
2009-04-16	11:31:00	0
2009-04-16	11:32:00	0
2009-04-16	11:33:00	0
2009-04-16	11:34:00	0
2009-04-16	11:35:00	0
2009-04-16	11:36:00	0
2009-04-16	11:37:00	0
2009-04-16	11:38:00	0
2009-04-16	11:39:00	0
2009-04-16	11:40:00	0
2009-04-16	11:41:00	0
2009-04-16	11:42:00	0
2009-04-16	11:43:00	0
2009-04-16	11:44:00	0
2009-04-16	11:45:00	0
2009-04-16	11:46:00	0
2009-04-16	11:47:00	0
2009-04-16	11:48:00	0
2009-04-16	11:49:00	0
2009-04-16	11:50:00	0
2009-04-16	11:51:00	0
2009-04-16	11:52:00	0
2009-04-16	11:53:00	0
2009-04-16	11:54:00	0
2009-04-16	11:55:00	0
2009-04-16	11:56:00	0
2009-04-16	11:57:00	0
2009-04-16	11:58:00	0
2009-04-16	11:59:00	0
2009-04-16	12:00:00	0
2009-04-16	12:01:00	0
2009-04-16	12:02:00	0
2009-04-16	12:03:00	0
2009-04-16	12:04:00	0
2009-04-16	12:05:00	0
2009-04-16	12:06:00	0
2009-04-16	12:07:00	0
2009-04-16	12:08:00	0
2009-04-16	12:09:00	0
2009-04-16	12:10:00	0
2009-04-16	12:11:00	0
2009-04-16	12:12:00	0
2009-04-16	12:13:00	0
2009-04-16	12:14:00	0
2009-04-16	12:15:00	0
2009-04-16	12:16:00	0
2009-04-16	12:17:00	0
2009-04-16	12:18:00	0
2009-04-16	12:19:00	0
2009-04-16	12:20:00	0
2009-04-16	12:21:00	0
2009-04-16	12:22:00	0
2009-04-16	12:23:00	0
2009-04-16	12:24:00	0
2009-04-16	12:25:00	0
2009-04-16	12:26:00	0
2009-04-16	12:27:00	0
2009-04-16	12:28:00	0
2009-04-16	12:29:00	0
2009-04-16	12:30:00	0
2009-04-16	12:31:00	0
2009-04-16	12:32:00	0
2009-04-16	12:33:00	0
2009-04-16	12:34:00	0
2009-04-16	12:35:00	0
2009-04-16	12:36:00	0
2009-04-16	12:37:00	0
2009-04-16	12:38:00	0
2009-04-16	12:39:00	0
2009-04-16	12:40:00	0
2009-04-16	12:41:00	0
2009-04-16	12:42:00	0
2009-04-16	12:43:00	0
2009-04-16	12:44:00	0
2009-04-16	12:45:00	0
2009-04-16	12:46:00	0
2009-04-16	12:47:00	0
2009-04-16	12:48:00	0
2009-04-16	12:49:00	0
2009-04-16	12:50:00	0
2009-04-16	12:51:00	0
2009-04-16	12:52:00	0
2009-04-16	12:53:00	0
2009-04-16	12:54:00	0
2009-04-16	12:55:00	0
2009-04-16	12:56:00	0
2009-04-16	12:57:00	0
2009-04-16	12:58:00	0
2009-04-16	12:59:00	0
2009-04-16	13:00:00	0
2009-04-16	13:01:00	0
2009-04-16	13:02:00	0
2009-04-16	13:03:00	0
2009-04-16	13:04:00	0
2009-04-16	13:05:00	0
2009-04-16	13:06:00	0
2009-04-16	13:07:00	0
2009-04-16	13:08:00	0
2009-04-16	13:09:00	0
2009-04-16	13:10:00	0
2009-04-16	13:11:00	0
2009-04-16	13:12:00	0
2009-04-16	13:13:00	0
2009-04-16	13:14:00	0
2009-04-16	13:15:00	0
2009-04-16	13:16:00	0
2009-04-16	13:17:00	0
2009-04-16	13:18:00	0
2009-04-16	13:19:00	0
2009-04-16	13:20:00	0
2009-04-16	13:21:00	0
2009-04-16	13:22:00	0
2009-04-16	13:23:00	0
2009-04-16	13:24:00	0
2009-04-16	13:25:00	0
2009-04-16	13:26:00	0
2009-04-16	13:27:00	0
2009-04-16	13:28:00	0
2009-04-16	13:29:00	0
2009-04-16	13:30:00	0
2009-04-16	13:31:00	0
2009-04-16	13:32:00	0
2009-04-16	13:33:00	0
2009-04-16	13:34:00	0
2009-04-16	13:35:00	0
2009-04-16	13:36:00	0
2009-04-16	13:37:00	0
2009-04-16	13:38:00	0
2009-04-16	13:39:00	0
2009-04-16	13:40:00	0
2009-04-16	13:41:00	0
2009-04-16	13:42:00	0
2009-04-16	13:43:00	0
2009-04-16	13:44:00	0
2009-04-16	13:45:00	0
2009-04-16	13:46:00	0
2009-04-16	13:47:00	0
2009-04-16	13:48:00	0
2009-04-16	13:49:00	0
2009-04-16	13:50:00	0
2009-04-16	13:51:00	0
2009-04-16	13:52:00	0
2009-04-16	13:53:00	0
2009-04-16	13:54:00	0
2009-04-16	13:55:00	0
2009-04-16	13:56:00	0
2009-04-16	13:57:00	0
2009-04-16	13:58:00	0
2009-04-16	13:59:00	0
2009-04-16	14:00:00	0
2009-04-16	14:01:00	0
2009-04-16	14:02:00	0
2009-04-16	14:03:00	0
2009-04-16	14:04:00	0
2009-04-16	14:05:00	0
2009-04-16	14:06:00	0
2009-04-16	14:07:00	0
2009-04-16	14:08:00	0
2009-04-16	14:09:00	0
2009-04-16	14:10:00	0
2009-04-16	14:11:00	0
2009-04-16	14:12:00	0
2009-04-16	14:13:00	0
2009-04-16	14:14:00	0
2009-04-16	14:15:00	0
2009-04-16	14:16:00	0
2009-04-16	14:17:00	0
2009-04-16	14:18:00	0
2009-04-16	14:19:00	0
2009-04-16	14:20:00	0
2009-04-16	14:21:00	0
2009-04-16	14:22:00	0
2009-04-16	14:23:00	0
2009-04-16	14:24:00	0
2009-04-16	14:25:00	0
2009-04-16	14:26:00	0
2009-04-16	14:27:00	0
2009-04-16	14:28:00	0
2009-04-16	14:29:00	0
2009-04-16	14:30:00	0
2009-04-16	14:31:00	0
2009-04-16	14:32:00	0
2009-04-16	14:33:00	0
2009-04-16	14:34:00	0
2009-04-16	14:35:00	0
2009-04-16	14:36:00	0
2009-04-16	14:37:00	0
2009-04-16	14:38:00	0
2009-04-16	14:39:00	0
2009-04-16	14:40:00	0
2009-04-16	14:41:00	0
2009-04-16	14:42:00	0
2009-04-16	14:43:00	0
2009-04-16	14:44:00	0
2009-04-16	14:45:00	0
2009-04-16	14:46:00	0
2009-04-16	14:47:00	0
2009-04-16	14:48:00	0
2009-04-16	14:49:00	0
2009-04-16	14:50:00	0
2009-04-16	14:51:00	0
2009-04-16	14:52:00	0
2009-04-16	14:53:00	0
2009-04-16	14:54:00	0
2009-04-16	14:55:00	0
2009-04-16	14:56:00	0
2009-04-16	14:57:00	0
2009-04-16	14:58:00	0
2009-04-16	14:59:00	0
2009-04-16	15:00:00	0
2009-04-16	15:01:00	0
2009-04-16	15:02:00	0
2009-04-16	15:03:00	0
2009-04-16	15:04:00	0
2009-04-16	15:05:00	0
2009-04-16	15:06:00	0
2009-04-16	15:07:00	0
2009-04-16	15:08:00	0
2009-04-16	15:09:00	0
2009-04-16	15:10:00	0
2009-04-16	15:11:00	0
2009-04-16	15:12:00	0
2009-04-16	15:13:00	0
2009-04-16	15:14:00	0
2009-04-16	15:15:00	0
2009-04-16	15:16:00	0
2009-04-16	15:17:00	0
2009-04-16	15:18:00	0
2009-04-16	15:19:00	0
2009-04-16	15:20:00	0
2009-04-16	15:21:00	0
2009-04-16	15:22:00	0
2009-04-16	15:23:00	0
2009-04-16	15:24:00	0
2009-04-16	15:25:00	0
2009-04-16	15:26:00	0
2009-04-16	15:27:00	0
2009-04-16	15:28:00	0
2009-04-16	15:29:00	0
2009-04-16	15:30:00	0
2009-04-16	15:31:00	0
2009-04-16	15:32:00	0
2009-04-16	15:33:00	0
2009-04-16	15:34:00	0
2009-04-16	15:35:00	0
2009-04-16	15:36:00	0
2009-04-16	15:37:00	0
2009-04-16	15:38:00	0
2009-04-16	15:39:00	0
2009-04-16	15:40:00	0
2009-04-16	15:41:00	0
2009-04-16	15:42:00	0
2009-04-16	15:43:00	0
2009-04-16	15:44:00	0
2009-04-16	15:45:00	0
2009-04-16	15:46:00	0
2009-04-16	15:47:00	0
2009-04-16	15:48:00	0
2009-04-16	15:49:00	0
2009-04-16	15:50:00	0
2009-04-16	15:51:00	0
2009-04-16	15:52:00	0
2009-04-16	15:53:00	0
2009-04-16	15:54:00	0
2009-04-16	15:55:00	0
2009-04-16	15:56:00	0
2009-04-16	15:57:00	0
2009-04-16	15:58:00	0
2009-04-16	15:59:00	0
2009-04-16	16:00:00	0
2009-04-16	16:01:00	0
2009-04-16	16:02:00	0
2009-04-16	16:03:00	0
2009-04-16	16:04:00	0
2009-04-16	16:05:00	0
2009-04-16	16:06:00	0
2009-04-16	16:07:00	0
2009-04-16	16:08:00	0
2009-04-16	16:09:00	0
2009-04-16	16:10:00	0
2009-04-16	16:11:00	0
2009-04-16	16:12:00	0
2009-04-16	16:13:00	0
2009-04-16	16:14:00	0
2009-04-16	16:15:00	0
2009-04-16	16:16:00	0
2009-04-16	16:17:00	0
2009-04-16	16:18:00	0
2009-04-16	16:19:00	0
2009-04-16	16:20:00	0
2009-04-16	16:21:00	0
2009-04-16	16:22:00	0
2009-04-16	16:23:00	0
2009-04-16	16:24:00	0
2009-04-16	16:25:00	0
2009-04-16	16:26:00	0
2009-04-16	16:27:00	0
2009-04-16	16:28:00	0
2009-04-16	16:29:00	0
2009-04-16	16:30:00	0
2009-04-16	16:31:00	0
2009-04-16	16:32:00	0
2009-04-16	16:33:00	0
2009-04-16	16:34:00	0
2009-04-16	16:35:00	0
2009-04-16	16:36:00	0
2009-04-16	16:37:00	0
2009-04-16	16:38:00	0
2009-04-16	16:39:00	0
2009-04-16	16:40:00	0
2009-04-16	16:41:00	0
2009-04-16	16:42:00	0
2009-04-16	16:43:00	0
2009-04-16	16:44:00	0
2009-04-16	16:45:00	0
2009-04-16	16:46:00	0
2009-04-16	16:47:00	0
2009-04-16	16:48:00	0
2009-04-16	16:49:00	0
2009-04-16	16:50:00	0
2009-04-16	16:51:00	0
2009-04-16	16:52:00	0
2009-04-16	16:53:00	0
2009-04-16	16:54:00	0
2009-04-16	16:55:00	0
2009-04-16	16:56:00	0
2009-04-16	16:57:00	0
2009-04-16	16:58:00	0
2009-04-16	16:59:00	0
2009-04-16	17:00:00	0
2009-04-16	17:01:00	0
2009-04-16	17:02:00	0
2009-04-16	17:03:00	0
2009-04-16	17:04:00	0
2009-04-16	17:05:00	0
2009-04-16	17:06:00	0
2009-04-16	17:07:00	0
2009-04-16	17:08:00	0
2009-04-16	17:09:00	0
2009-04-16	17:10:00	0
2009-04-16	17:11:00	0
2009-04-16	17:12:00	0
2009-04-16	17:13:00	0
2009-04-16	17:14:00	0
2009-04-16	17:15:00	0
2009-04-16	17:16:00	0
2009-04-16	17:17:00	0
2009-04-16	17:18:00	0
2009-04-16	17:19:00	0
2009-04-16	17:20:00	0
2009-04-16	17:21:00	0
2009-04-16	17:22:00	0
2009-04-16	17:23:00	0
2009-04-16	17:24:00	0
2009-04-16	17:25:00	0
2009-04-16	17:26:00	0
2009-04-16	17:27:00	0
2009-04-16	17:28:00	0
2009-04-16	17:29:00	0
2009-04-16	17:30:00	0
2009-04-16	17:31:00	0
2009-04-16	17:32:00	0
2009-04-16	17:33:00	0
2009-04-16	17:34:00	0
2009-04-16	17:35:00	0
2009-04-16	17:36:00	0
2009-04-16	17:37:00	0
2009-04-16	17:38:00	0
2009-04-16	17:39:00	0
2009-04-16	17:40:00	0
2009-04-16	17:41:00	0
2009-04-16	17:42:00	0
2009-04-16	17:43:00	0
2009-04-16	17:44:00	0
2009-04-16	17:45:00	0
2009-04-16	17:46:00	0
2009-04-16	17:47:00	0
2009-04-16	17:48:00	0
2009-04-16	17:49:00	0
2009-04-16	17:50:00	0
2009-04-16	17:51:00	0
2009-04-16	17:52:00	0
2009-04-16	17:53:00	0
2009-04-16	17:54:00	0
2009-04-16	17:55:00	0
2009-04-16	17:56:00	0
2009-04-16	17:57:00	0
2009-04-16	17:58:00	0
2009-04-16	17:59:00	0
2009-04-16	18:00:00	0	M
2009-04-16	18:01:00	308
2009-04-16	18:02:00	234
2009-04-16	18:03:00	123
2009-04-16	18:04:00	340
2009-04-16	18:05:00	12
2009-04-16	18:06:00	12
2009-04-16	18:07:00	374
2009-04-16	18:08:00	746
2009-04-16	18:09:00	37
2009-04-16	18:10:00	219
2009-04-16	18:11:00	293
2009-04-16	18:12:00	478
2009-04-16	18:13:00	657
2009-04-16	18:14:00	2078
2009-04-16	18:15:00	1401
2009-04-16	18:16:00	1044
2009-04-16	18:17:00	537
2009-04-16	18:18:00	596
2009-04-16	18:19:00	460
2009-04-16	18:20:00	0
2009-04-16	18:21:00	0
2009-04-16	18:22:00	0
2009-04-16	18:23:00	0
2009-04-16	18:24:00	0
2009-04-16	18:25:00	0
2009-04-16	18:26:00	12
2009-04-16	18:27:00	478
2009-04-16	18:28:00	25
2009-04-16	18:29:00	478
2009-04-16	18:30:00	596
2009-04-16	18:31:00	204
2009-04-16	18:32:00	426
2009-04-16	18:33:00	293
2009-04-16	18:34:00	278
2009-04-16	18:35:00	596
2009-04-16	18:36:00	815
2009-04-16	18:37:00	596
2009-04-16	18:38:00	478
2009-04-16	18:39:00	0
2009-04-16	18:40:00	12
2009-04-16	18:41:00	0
2009-04-16	18:42:00	12
2009-04-16	18:43:00	0
2009-04-16	18:44:00	0
2009-04-16	18:45:00	0
2009-04-16	18:46:00	12
2009-04-16	18:47:00	0
2009-04-16	18:48:00	278
2009-04-16	18:49:00	724
2009-04-16	18:50:00	864
2009-04-16	18:51:00	1098
2009-04-16	18:52:00	724
2009-04-16	18:53:00	724
2009-04-16	18:54:00	478
2009-04-16	18:55:00	815
2009-04-16	18:56:00	190
2009-04-16	18:57:00	234
2009-04-16	18:58:00	1716
2009-04-16	18:59:00	556
2009-04-16	19:00:00	74
2009-04-16	19:01:00	340
2009-04-16	19:02:00	190
2009-04-16	19:03:00	135
2009-04-16	19:04:00	724
2009-04-16	19:05:00	460
2009-04-16	19:06:00	1184
2009-04-16	19:07:00	204
2009-04-16	19:08:00	263
2009-04-16	19:09:00	478
2009-04-16	19:10:00	340
2009-04-16	19:11:00	135
2009-04-16	19:12:00	148
2009-04-16	19:13:00	1017
2009-04-16	19:14:00	1792
2009-04-16	19:15:00	913
2009-04-16	19:16:00	1502
2009-04-16	19:17:00	864
2009-04-16	19:18:00	1831
2009-04-16	19:19:00	1570
2009-04-16	19:20:00	391
2009-04-16	19:21:00	1642
2009-04-16	19:22:00	443
2009-04-16	19:23:00	234
2009-04-16	19:24:00	123
2009-04-16	19:25:00	322
2009-04-16	19:26:00	234
2009-04-16	19:27:00	374
2009-04-16	19:28:00	790
2009-04-16	19:29:00	1243
2009-04-16	19:30:00	679
2009-04-16	19:31:00	478
2009-04-16	19:32:00	1044
2009-04-16	19:33:00	204
2009-04-16	19:34:00	0
2009-04-16	19:35:00	0
2009-04-16	19:36:00	0
2009-04-16	19:37:00	12
2009-04-16	19:38:00	357
2009-04-16	19:39:00	913
2009-04-16	19:40:00	322
2009-04-16	19:41:00	0
2009-04-16	19:42:00	0
2009-04-16	19:43:00	0
2009-04-16	19:44:00	0
2009-04-16	19:45:00	0
2009-04-16	19:46:00	0
2009-04-16	19:47:00	0
2009-04-16	19:48:00	0
2009-04-16	19:49:00	0
2009-04-16	19:50:00	0
2009-04-16	19:51:00	0
2009-04-16	19:52:00	62
2009-04-16	19:53:00	12
2009-04-16	19:54:00	37
2009-04-16	19:55:00	234
2009-04-16	19:56:00	0
2009-04-16	19:57:00	0
2009-04-16	19:58:00	0
2009-04-16	19:59:00	0
2009-04-16	20:00:00	0
2009-04-16	20:01:00	0
2009-04-16	20:02:00	409
2009-04-16	20:03:00	478
2009-04-16	20:04:00	0
2009-04-16	20:05:00	0
2009-04-16	20:06:00	0
2009-04-16	20:07:00	0
2009-04-16	20:08:00	0
2009-04-16	20:09:00	0
2009-04-16	20:10:00	0
2009-04-16	20:11:00	25
2009-04-16	20:12:00	615
2009-04-16	20:13:00	175
2009-04-16	20:14:00	556
2009-04-16	20:15:00	478
2009-04-16	20:16:00	98
2009-04-16	20:17:00	12
2009-04-16	20:18:00	0
2009-04-16	20:19:00	25
2009-04-16	20:20:00	0
2009-04-16	20:21:00	12
2009-04-16	20:22:00	0
2009-04-16	20:23:00	0
2009-04-16	20:24:00	0
2009-04-16	20:25:00	12
2009-04-16	20:26:00	12
2009-04-16	20:27:00	37
2009-04-16	20:28:00	25
2009-04-16	20:29:00	12
2009-04-16	20:30:00	0
2009-04-16	20:31:00	0
2009-04-16	20:32:00	0
2009-04-16	20:33:00	0
2009-04-16	20:34:00	0
2009-04-16	20:35:00	0
2009-04-16	20:36:00	0
2009-04-16	20:37:00	0
2009-04-16	20:38:00	12
2009-04-16	20:39:00	25
2009-04-16	20:40:00	0
2009-04-16	20:41:00	443
2009-04-16	20:42:00	25
2009-04-16	20:43:00	0
2009-04-16	20:44:00	0
2009-04-16	20:45:00	0
2009-04-16	20:46:00	0
2009-04-16	20:47:00	0
2009-04-16	20:48:00	0
2009-04-16	20:49:00	0
2009-04-16	20:50:00	0
2009-04-16	20:51:00	0
2009-04-16	20:52:00	0
2009-04-16	20:53:00	0
2009-04-16	20:54:00	0
2009-04-16	20:55:00	0
2009-04-16	20:56:00	0
2009-04-16	20:57:00	0
2009-04-16	20:58:00	0
2009-04-16	20:59:00	0
2009-04-16	21:00:00	0
2009-04-16	21:01:00	0
2009-04-16	21:02:00	0
2009-04-16	21:03:00	0
2009-04-16	21:04:00	0
2009-04-16	21:05:00	1098
2009-04-16	21:06:00	938
2009-04-16	21:07:00	938
2009-04-16	21:08:00	596
2009-04-16	21:09:00	409
2009-04-16	21:10:00	278
2009-04-16	21:11:00	308
2009-04-16	21:12:00	426
2009-04-16	21:13:00	537
2009-04-16	21:14:00	293
2009-04-16	21:15:00	357
2009-04-16	21:16:00	357
2009-04-16	21:17:00	322
2009-04-16	21:18:00	219
2009-04-16	21:19:00	175
2009-04-16	21:20:00	0
2009-04-16	21:21:00	190
2009-04-16	21:22:00	86
2009-04-16	21:23:00	0
2009-04-16	21:24:00	0
2009-04-16	21:25:00	0
2009-04-16	21:26:00	263
2009-04-16	21:27:00	111
2009-04-16	21:28:00	0
2009-04-16	21:29:00	12
2009-04-16	21:30:00	37
2009-04-16	21:31:00	0
2009-04-16	21:32:00	12
2009-04-16	21:33:00	12
2009-04-16	21:34:00	0
2009-04-16	21:35:00	0
2009-04-16	21:36:00	0
2009-04-16	21:37:00	0
2009-04-16	21:38:00	25
2009-04-16	21:39:00	0
2009-04-16	21:40:00	0
2009-04-16	21:41:00	0
2009-04-16	21:42:00	409
2009-04-16	21:43:00	12
2009-04-16	21:44:00	0
2009-04-16	21:45:00	0
2009-04-16	21:46:00	0
2009-04-16	21:47:00	0
2009-04-16	21:48:00	0
2009-04-16	21:49:00	0
2009-04-16	21:50:00	0
2009-04-16	21:51:00	0
2009-04-16	21:52:00	0
2009-04-16	21:53:00	12
2009-04-16	21:54:00	0
2009-04-16	21:55:00	0
2009-04-16	21:56:00	0
2009-04-16	21:57:00	0
2009-04-16	21:58:00	0
2009-04-16	21:59:00	0
2009-04-16	22:00:00	0
2009-04-16	22:01:00	0
2009-04-16	22:02:00	0
2009-04-16	22:03:00	12
2009-04-16	22:04:00	0
2009-04-16	22:05:00	12
2009-04-16	22:06:00	0
2009-04-16	22:07:00	0
2009-04-16	22:08:00	0
2009-04-16	22:09:00	0
2009-04-16	22:10:00	0
2009-04-16	22:11:00	0
2009-04-16	22:12:00	0
2009-04-16	22:13:00	0
2009-04-16	22:14:00	0
2009-04-16	22:15:00	0
2009-04-16	22:16:00	37
2009-04-16	22:17:00	0
2009-04-16	22:18:00	0
2009-04-16	22:19:00	0
2009-04-16	22:20:00	0
2009-04-16	22:21:00	0
2009-04-16	22:22:00	0
2009-04-16	22:23:00	0
2009-04-16	22:24:00	0
2009-04-16	22:25:00	0
2009-04-16	22:26:00	0
2009-04-16	22:27:00	0
2009-04-16	22:28:00	0
2009-04-16	22:29:00	62
2009-04-16	22:30:00	0
2009-04-16	22:31:00	0
2009-04-16	22:32:00	0
2009-04-16	22:33:00	0
2009-04-16	22:34:00	0
2009-04-16	22:35:00	0
2009-04-16	22:36:00	0
2009-04-16	22:37:00	0
2009-04-16	22:38:00	0
2009-04-16	22:39:00	0
2009-04-16	22:40:00	0
2009-04-16	22:41:00	0
2009-04-16	22:42:00	0
2009-04-16	22:43:00	0
2009-04-16	22:44:00	0
2009-04-16	22:45:00	0
2009-04-16	22:46:00	0
2009-04-16	22:47:00	0
2009-04-16	22:48:00	0
2009-04-16	22:49:00	0
2009-04-16	22:50:00	0
2009-04-16	22:51:00	0
2009-04-16	22:52:00	0
2009-04-16	22:53:00	0
2009-04-16	22:54:00	0
2009-04-16	22:55:00	0
2009-04-16	22:56:00	0
2009-04-16	22:57:00	0
2009-04-16	22:58:00	0
2009-04-16	22:59:00	0
2009-04-16	23:00:00	0
2009-04-16	23:01:00	0
2009-04-16	23:02:00	0
2009-04-16	23:03:00	0
2009-04-16	23:04:00	0
2009-04-16	23:05:00	0
2009-04-16	23:06:00	12
2009-04-16	23:07:00	0
2009-04-16	23:08:00	0
2009-04-16	23:09:00	0
2009-04-16	23:10:00	0
2009-04-16	23:11:00	0
2009-04-16	23:12:00	0
2009-04-16	23:13:00	0
2009-04-16	23:14:00	0
2009-04-16	23:15:00	0
2009-04-16	23:16:00	0
2009-04-16	23:17:00	0
2009-04-16	23:18:00	0
2009-04-16	23:19:00	0
2009-04-16	23:20:00	391
2009-04-16	23:21:00	74
2009-04-16	23:22:00	0
2009-04-16	23:23:00	148
2009-04-16	23:24:00	615
2009-04-16	23:25:00	0
2009-04-16	23:26:00	0
2009-04-16	23:27:00	0
2009-04-16	23:28:00	0
2009-04-16	23:29:00	0
2009-04-16	23:30:00	0
2009-04-16	23:31:00	12
2009-04-16	23:32:00	0
2009-04-16	23:33:00	0
2009-04-16	23:34:00	0
2009-04-16	23:35:00	0
2009-04-16	23:36:00	0
2009-04-16	23:37:00	0
2009-04-16	23:38:00	0
2009-04-16	23:39:00	0
2009-04-16	23:40:00	0
2009-04-16	23:41:00	0
2009-04-16	23:42:00	0
2009-04-16	23:43:00	0
2009-04-16	23:44:00	0
2009-04-16	23:45:00	0
2009-04-16	23:46:00	0
2009-04-16	23:47:00	0
2009-04-16	23:48:00	0
2009-04-16	23:49:00	12
2009-04-16	23:50:00	0
2009-04-16	23:51:00	0
2009-04-16	23:52:00	0
2009-04-16	23:53:00	0
2009-04-16	23:54:00	0
2009-04-16	23:55:00	0
2009-04-16	23:56:00	0
2009-04-16	23:57:00	0
2009-04-16	23:58:00	0
2009-04-16	23:59:00	0
2009-04-17	00:00:00	0
2009-04-17	00:01:00	0
2009-04-17	00:02:00	0
2009-04-17	00:03:00	0
2009-04-17	00:04:00	0
2009-04-17	00:05:00	0
2009-04-17	00:06:00	0
2009-04-17	00:07:00	0
2009-04-17	00:08:00	0
2009-04-17	00:09:00	0
2009-04-17	00:10:00	0
2009-04-17	00:11:00	0
2009-04-17	00:12:00	0
2009-04-17	00:13:00	0
2009-04-17	00:14:00	0
2009-04-17	00:15:00	0
2009-04-17	00:16:00	0
2009-04-17	00:17:00	0
2009-04-17	00:18:00	0
2009-04-17	00:19:00	0
2009-04-17	00:20:00	0
2009-04-17	00:21:00	0
2009-04-17	00:22:00	0
2009-04-17	00:23:00	0
2009-04-17	00:24:00	0
2009-04-17	00:25:00	0
2009-04-17	00:26:00	0
2009-04-17	00:27:00	0
2009-04-17	00:28:00	0
2009-04-17	00:29:00	0
2009-04-17	00:30:00	0
2009-04-17	00:31:00	0
2009-04-17	00:32:00	0
2009-04-17	00:33:00	0
2009-04-17	00:34:00	0
2009-04-17	00:35:00	0
2009-04-17	00:36:00	0
2009-04-17	00:37:00	0
2009-04-17	00:38:00	0
2009-04-17	00:39:00	0
2009-04-17	00:40:00	0
2009-04-17	00:41:00	0
2009-04-17	00:42:00	0
2009-04-17	00:43:00	0
2009-04-17	00:44:00	0
2009-04-17	00:45:00	0
2009-04-17	00:46:00	0
2009-04-17	00:47:00	0
2009-04-17	00:48:00	0
2009-04-17	00:49:00	0
2009-04-17	00:50:00	0
2009-04-17	00:51:00	0
2009-04-17	00:52:00	0
2009-04-17	00:53:00	0
2009-04-17	00:54:00	0
2009-04-17	00:55:00	0
2009-04-17	00:56:00	0
2009-04-17	00:57:00	0
2009-04-17	00:58:00	0
2009-04-17	00:59:00	0
2009-04-17	01:00:00	0
2009-04-17	01:01:00	0
2009-04-17	01:02:00	0
2009-04-17	01:03:00	0
2009-04-17	01:04:00	0
2009-04-17	01:05:00	0
2009-04-17	01:06:00	0
2009-04-17	01:07:00	0
2009-04-17	01:08:00	0
2009-04-17	01:09:00	0
2009-04-17	01:10:00	0
2009-04-17	01:11:00	0
2009-04-17	01:12:00	0
2009-04-17	01:13:00	0
2009-04-17	01:14:00	0
2009-04-17	01:15:00	0
2009-04-17	01:16:00	0
2009-04-17	01:17:00	0
2009-04-17	01:18:00	0
2009-04-17	01:19:00	0
2009-04-17	01:20:00	0
2009-04-17	01:21:00	0
2009-04-17	01:22:00	0
2009-04-17	01:23:00	0
2009-04-17	01:24:00	0
2009-04-17	01:25:00	0
2009-04-17	01:26:00	0
2009-04-17	01:27:00	0
2009-04-17	01:28:00	0
2009-04-17	01:29:00	0
2009-04-17	01:30:00	0
2009-04-17	01:31:00	0
2009-04-17	01:32:00	0
2009-04-17	01:33:00	0
2009-04-17	01:34:00	0
2009-04-17	01:35:00	0
2009-04-17	01:36:00	0
2009-04-17	01:37:00	0
2009-04-17	01:38:00	0
2009-04-17	01:39:00	0
2009-04-17	01:40:00	0
2009-04-17	01:41:00	0
2009-04-17	01:42:00	0
2009-04-17	01:43:00	0
2009-04-17	01:44:00	0
2009-04-17	01:45:00	0
2009-04-17	01:46:00	0
2009-04-17	01:47:00	0
2009-04-17	01:48:00	0
2009-04-17	01:49:00	0
2009-04-17	01:50:00	0
2009-04-17	01:51:00	0
2009-04-17	01:52:00	0
2009-04-17	01:53:00	0
2009-04-17	01:54:00	0
2009-04-17	01:55:00	0
2009-04-17	01:56:00	0
2009-04-17	01:57:00	0
2009-04-17	01:58:00	0
2009-04-17	01:59:00	0
2009-04-17	02:00:00	0
2009-04-17	02:01:00	0
2009-04-17	02:02:00	0
2009-04-17	02:03:00	0
2009-04-17	02:04:00	0
2009-04-17	02:05:00	0
2009-04-17	02:06:00	0
2009-04-17	02:07:00	0
2009-04-17	02:08:00	0
2009-04-17	02:09:00	0
2009-04-17	02:10:00	0
2009-04-17	02:11:00	0
2009-04-17	02:12:00	0
2009-04-17	02:13:00	0
2009-04-17	02:14:00	0
2009-04-17	02:15:00	0
2009-04-17	02:16:00	0
2009-04-17	02:17:00	0
2009-04-17	02:18:00	0
2009-04-17	02:19:00	0
2009-04-17	02:20:00	0
2009-04-17	02:21:00	0
2009-04-17	02:22:00	0
2009-04-17	02:23:00	0
2009-04-17	02:24:00	0
2009-04-17	02:25:00	0
2009-04-17	02:26:00	0
2009-04-17	02:27:00	0
2009-04-17	02:28:00	0
2009-04-17	02:29:00	0
2009-04-17	02:30:00	0
2009-04-17	02:31:00	0
2009-04-17	02:32:00	0
2009-04-17	02:33:00	0
2009-04-17	02:34:00	0
2009-04-17	02:35:00	0
2009-04-17	02:36:00	0
2009-04-17	02:37:00	0
2009-04-17	02:38:00	0
2009-04-17	02:39:00	0
2009-04-17	02:40:00	0
2009-04-17	02:41:00	0
2009-04-17	02:42:00	0
2009-04-17	02:43:00	0
2009-04-17	02:44:00	0
2009-04-17	02:45:00	0
2009-04-17	02:46:00	0
2009-04-17	02:47:00	0
2009-04-17	02:48:00	0
2009-04-17	02:49:00	0
2009-04-17	02:50:00	0
2009-04-17	02:51:00	0
2009-04-17	02:52:00	0
2009-04-17	02:53:00	0
2009-04-17	02:54:00	0
2009-04-17	02:55:00	0
2009-04-17	02:56:00	0
2009-04-17	02:57:00	0
2009-04-17	02:58:00	0
2009-04-17	02:59:00	0
2009-04-17	03:00:00	0
2009-04-17	03:01:00	0
2009-04-17	03:02:00	0
2009-04-17	03:03:00	0
2009-04-17	03:04:00	0
2009-04-17	03:05:00	0
2009-04-17	03:06:00	0
2009-04-17	03:07:00	0
2009-04-17	03:08:00	0
2009-04-17	03:09:00	0
2009-04-17	03:10:00	0
2009-04-17	03:11:00	0
2009-04-17	03:12:00	0
2009-04-17	03:13:00	0
2009-04-17	03:14:00	0
2009-04-17	03:15:00	0
2009-04-17	03:16:00	0
2009-04-17	03:17:00	0
2009-04-17	03:18:00	0
2009-04-17	03:19:00	0
2009-04-17	03:20:00	0
2009-04-17	03:21:00	0
2009-04-17	03:22:00	0
2009-04-17	03:23:00	0
2009-04-17	03:24:00	0
2009-04-17	03:25:00	0
2009-04-17	03:26:00	0
2009-04-17	03:27:00	0
2009-04-17	03:28:00	0
2009-04-17	03:29:00	0
2009-04-17	03:30:00	0
2009-04-17	03:31:00	0
2009-04-17	03:32:00	0
2009-04-17	03:33:00	0
2009-04-17	03:34:00	0
2009-04-17	03:35:00	0
2009-04-17	03:36:00	0
2009-04-17	03:37:00	0
2009-04-17	03:38:00	0
2009-04-17	03:39:00	0
2009-04-17	03:40:00	0
2009-04-17	03:41:00	0
2009-04-17	03:42:00	0
2009-04-17	03:43:00	0
2009-04-17	03:44:00	0
2009-04-17	03:45:00	0
2009-04-17	03:46:00	12
2009-04-17	03:47:00	0
2009-04-17	03:48:00	0
2009-04-17	03:49:00	0
2009-04-17	03:50:00	0
2009-04-17	03:51:00	0
2009-04-17	03:52:00	0
2009-04-17	03:53:00	0
2009-04-17	03:54:00	0
2009-04-17	03:55:00	0
2009-04-17	03:56:00	0
2009-04-17	03:57:00	0
2009-04-17	03:58:00	0
2009-04-17	03:59:00	0
2009-04-17	04:00:00	0
2009-04-17	04:01:00	0
2009-04-17	04:02:00	0
2009-04-17	04:03:00	0
2009-04-17	04:04:00	0
2009-04-17	04:05:00	0
2009-04-17	04:06:00	0
2009-04-17	04:07:00	0
2009-04-17	04:08:00	0
2009-04-17	04:09:00	0
2009-04-17	04:10:00	0
2009-04-17	04:11:00	0
2009-04-17	04:12:00	0
2009-04-17	04:13:00	0
2009-04-17	04:14:00	0
2009-04-17	04:15:00	0
2009-04-17	04:16:00	0
2009-04-17	04:17:00	0
2009-04-17	04:18:00	0
2009-04-17	04:19:00	0
2009-04-17	04:20:00	0
2009-04-17	04:21:00	0
2009-04-17	04:22:00	62
2009-04-17	04:23:00	204
2009-04-17	04:24:00	0
2009-04-17	04:25:00	0
2009-04-17	04:26:00	0
2009-04-17	04:27:00	0
2009-04-17	04:28:00	0
2009-04-17	04:29:00	0
2009-04-17	04:30:00	0
2009-04-17	04:31:00	0
2009-04-17	04:32:00	0
2009-04-17	04:33:00	0
2009-04-17	04:34:00	0
2009-04-17	04:35:00	0
2009-04-17	04:36:00	0
2009-04-17	04:37:00	0
2009-04-17	04:38:00	0
2009-04-17	04:39:00	0
2009-04-17	04:40:00	0
2009-04-17	04:41:00	0
2009-04-17	04:42:00	0
2009-04-17	04:43:00	0
2009-04-17	04:44:00	0
2009-04-17	04:45:00	0
2009-04-17	04:46:00	0
2009-04-17	04:47:00	0
2009-04-17	04:48:00	0
2009-04-17	04:49:00	0
2009-04-17	04:50:00	0
2009-04-17	04:51:00	0
2009-04-17	04:52:00	0
2009-04-17	04:53:00	0
2009-04-17	04:54:00	0
2009-04-17	04:55:00	0
2009-04-17	04:56:00	0
2009-04-17	04:57:00	0
2009-04-17	04:58:00	0
2009-04-17	04:59:00	0
2009-04-17	05:00:00	0
2009-04-17	05:01:00	0
2009-04-17	05:02:00	0
2009-04-17	05:03:00	25
2009-04-17	05:04:00	0
2009-04-17	05:05:00	0
2009-04-17	05:06:00	0
2009-04-17	05:07:00	0
2009-04-17	05:08:00	0
2009-04-17	05:09:00	0
2009-04-17	05:10:00	0
2009-04-17	05:11:00	0
2009-04-17	05:12:00	0
2009-04-17	05:13:00	0
2009-04-17	05:14:00	0
2009-04-17	05:15:00	0
2009-04-17	05:16:00	0
2009-04-17	05:17:00	0
2009-04-17	05:18:00	0
2009-04-17	05:19:00	0
2009-04-17	05:20:00	12
2009-04-17	05:21:00	0
2009-04-17	05:22:00	0
2009-04-17	05:23:00	0
2009-04-17	05:24:00	0
2009-04-17	05:25:00	0
2009-04-17	05:26:00	0
2009-04-17	05:27:00	0
2009-04-17	05:28:00	0
2009-04-17	05:29:00	0
2009-04-17	05:30:00	0
2009-04-17	05:31:00	0
2009-04-17	05:32:00	0
2009-04-17	05:33:00	0
2009-04-17	05:34:00	0
2009-04-17	05:35:00	0
2009-04-17	05:36:00	0
2009-04-17	05:37:00	0
2009-04-17	05:38:00	0
2009-04-17	05:39:00	0
2009-04-17	05:40:00	0
2009-04-17	05:41:00	0
2009-04-17	05:42:00	0
2009-04-17	05:43:00	0
2009-04-17	05:44:00	0
2009-04-17	05:45:00	0
2009-04-17	05:46:00	0
2009-04-17	05:47:00	0
2009-04-17	05:48:00	0
2009-04-17	05:49:00	0
2009-04-17	05:50:00	0
2009-04-17	05:51:00	49
2009-04-17	05:52:00	0
2009-04-17	05:53:00	0
2009-04-17	05:54:00	0
2009-04-17	05:55:00	0
2009-04-17	05:56:00	62
2009-04-17	05:57:00	0
2009-04-17	05:58:00	37
2009-04-17	05:59:00	0
2009-04-17	06:00:00	0
2009-04-17	06:01:00	0
2009-04-17	06:02:00	25
2009-04-17	06:03:00	12
2009-04-17	06:04:00	12
2009-04-17	06:05:00	62
2009-04-17	06:06:00	12
2009-04-17	06:07:00	0
2009-04-17	06:08:00	0
2009-04-17	06:09:00	0
2009-04-17	06:10:00	0
2009-04-17	06:11:00	234
2009-04-17	06:12:00	74
2009-04-17	06:13:00	278
2009-04-17	06:14:00	37
2009-04-17	06:15:00	0
2009-04-17	06:16:00	0
2009-04-17	06:17:00	0
2009-04-17	06:18:00	0
2009-04-17	06:19:00	0
2009-04-17	06:20:00	0
2009-04-17	06:21:00	0
2009-04-17	06:22:00	25
2009-04-17	06:23:00	0
2009-04-17	06:24:00	0
2009-04-17	06:25:00	0
2009-04-17	06:26:00	0
2009-04-17	06:27:00	0
2009-04-17	06:28:00	25
2009-04-17	06:29:00	0
2009-04-17	06:30:00	12
2009-04-17	06:31:00	426
2009-04-17	06:32:00	478
2009-04-17	06:33:00	839
2009-04-17	06:34:00	0
2009-04-17	06:35:00	74
2009-04-17	06:36:00	25
2009-04-17	06:37:00	308
2009-04-17	06:38:00	1605
2009-04-17	06:39:00	1679
2009-04-17	06:40:00	1679
2009-04-17	06:41:00	768
2009-04-17	06:42:00	204
2009-04-17	06:43:00	263
2009-04-17	06:44:00	357
2009-04-17	06:45:00	1044
2009-04-17	06:46:00	308
2009-04-17	06:47:00	249
2009-04-17	06:48:00	263
2009-04-17	06:49:00	12
2009-04-17	06:50:00	175
2009-04-17	06:51:00	25
2009-04-17	06:52:00	190
2009-04-17	06:53:00	1401
2009-04-17	06:54:00	1184
2009-04-17	06:55:00	1502
2009-04-17	06:56:00	1044
2009-04-17	06:57:00	839
2009-04-17	06:58:00	219
2009-04-17	06:59:00	160
2009-04-17	07:00:00	322
2009-04-17	07:01:00	340
2009-04-17	07:02:00	702
2009-04-17	07:03:00	537
2009-04-17	07:04:00	219
2009-04-17	07:05:00	111
2009-04-17	07:06:00	460
2009-04-17	07:07:00	278
2009-04-17	07:08:00	537
2009-04-17	07:09:00	98
2009-04-17	07:10:00	0
2009-04-17	07:11:00	0
2009-04-17	07:12:00	0
2009-04-17	07:13:00	768
2009-04-17	07:14:00	0
2009-04-17	07:15:00	0
2009-04-17	07:16:00	0
2009-04-17	07:17:00	0
2009-04-17	07:18:00	25
2009-04-17	07:19:00	497
2009-04-17	07:20:00	768
2009-04-17	07:21:00	308
2009-04-17	07:22:00	0
2009-04-17	07:23:00	0
2009-04-17	07:24:00	0
2009-04-17	07:25:00	12
2009-04-17	07:26:00	0
2009-04-17	07:27:00	537
2009-04-17	07:28:00	0
2009-04-17	07:29:00	0
2009-04-17	07:30:00	12
2009-04-17	07:31:00	0
2009-04-17	07:32:00	12
2009-04-17	07:33:00	12
2009-04-17	07:34:00	0
2009-04-17	07:35:00	12
2009-04-17	07:36:00	0
2009-04-17	07:37:00	0
2009-04-17	07:38:00	0
2009-04-17	07:39:00	0
2009-04-17	07:40:00	0
2009-04-17	07:41:00	0
2009-04-17	07:42:00	0
2009-04-17	07:43:00	0
2009-04-17	07:44:00	0
2009-04-17	07:45:00	0
2009-04-17	07:46:00	25
2009-04-17	07:47:00	0
2009-04-17	07:48:00	0
2009-04-17	07:49:00	0
2009-04-17	07:50:00	0
2009-04-17	07:51:00	0
2009-04-17	07:52:00	0
2009-04-17	07:53:00	0
2009-04-17	07:54:00	0
2009-04-17	07:55:00	0
2009-04-17	07:56:00	0
2009-04-17	07:57:00	12
2009-04-17	07:58:00	0
2009-04-17	07:59:00	0
2009-04-17	08:00:00	0
2009-04-17	08:01:00	0
2009-04-17	08:02:00	0
2009-04-17	08:03:00	0
2009-04-17	08:04:00	0
2009-04-17	08:05:00	0
2009-04-17	08:06:00	0
2009-04-17	08:07:00	0
2009-04-17	08:08:00	0
2009-04-17	08:09:00	0
2009-04-17	08:10:00	25
2009-04-17	08:11:00	0
2009-04-17	08:12:00	0
2009-04-17	08:13:00	0
2009-04-17	08:14:00	0
2009-04-17	08:15:00	0
2009-04-17	08:16:00	0
2009-04-17	08:17:00	0
2009-04-17	08:18:00	0
2009-04-17	08:19:00	0
2009-04-17	08:20:00	0
2009-04-17	08:21:00	0
2009-04-17	08:22:00	0
2009-04-17	08:23:00	0
2009-04-17	08:24:00	0
2009-04-17	08:25:00	12
2009-04-17	08:26:00	0
2009-04-17	08:27:00	0
2009-04-17	08:28:00	0
2009-04-17	08:29:00	0
2009-04-17	08:30:00	0
2009-04-17	08:31:00	0
2009-04-17	08:32:00	0
2009-04-17	08:33:00	0
2009-04-17	08:34:00	0
2009-04-17	08:35:00	12
2009-04-17	08:36:00	0
2009-04-17	08:37:00	0
2009-04-17	08:38:00	0
2009-04-17	08:39:00	0
2009-04-17	08:40:00	0
2009-04-17	08:41:00	0
2009-04-17	08:42:00	0
2009-04-17	08:43:00	0
2009-04-17	08:44:00	0
2009-04-17	08:45:00	0
2009-04-17	08:46:00	0
2009-04-17	08:47:00	0
2009-04-17	08:48:00	0
2009-04-17	08:49:00	0
2009-04-17	08:50:00	0
2009-04-17	08:51:00	0
2009-04-17	08:52:00	0
2009-04-17	08:53:00	0
2009-04-17	08:54:00	0
2009-04-17	08:55:00	0
2009-04-17	08:56:00	0
2009-04-17	08:57:00	0
2009-04-17	08:58:00	0
2009-04-17	08:59:00	12
2009-04-17	09:00:00	0
2009-04-17	09:01:00	0
2009-04-17	09:02:00	0
2009-04-17	09:03:00	0
2009-04-17	09:04:00	0
2009-04-17	09:05:00	0
2009-04-17	09:06:00	0
2009-04-17	09:07:00	0
2009-04-17	09:08:00	0
[truncated: 19,611 more rows]

## Sheet: 4.30.09
Actogram, Copy Raw Data, All Days
Identity:	Bear Kaplan
Filename:	E:\Active Research Files\meloxicam titre canine\cases\disqualified\bear k\Bear Kaplan 4.30.09.AWC
Gender:	M
Age:	10
Height:	61.0 cm	24.0 in
Weight:	20.0 kg	44.1 lbs
Start Date:	30-Apr-2009 (Thu)
Start Time:	18:00:00
Interval:	1.00 mins
Date Stamp:	Time Stamp:	Activity Data:	Marker Press:
2009-04-30	00:00:00	0
2009-04-30	00:01:00	0
2009-04-30	00:02:00	0
2009-04-30	00:03:00	0
2009-04-30	00:04:00	0
2009-04-30	00:05:00	0
2009-04-30	00:06:00	0
2009-04-30	00:07:00	0
2009-04-30	00:08:00	0
2009-04-30	00:09:00	0
2009-04-30	00:10:00	0
2009-04-30	00:11:00	0
2009-04-30	00:12:00	0
2009-04-30	00:13:00	0
2009-04-30	00:14:00	0
2009-04-30	00:15:00	0
2009-04-30	00:16:00	0
2009-04-30	00:17:00	0
2009-04-30	00:18:00	0
2009-04-30	00:19:00	0
2009-04-30	00:20:00	0
2009-04-30	00:21:00	0
2009-04-30	00:22:00	0
2009-04-30	00:23:00	0
2009-04-30	00:24:00	0
2009-04-30	00:25:00	0
2009-04-30	00:26:00	0
2009-04-30	00:27:00	0
2009-04-30	00:28:00	0
2009-04-30	00:29:00	0
2009-04-30	00:30:00	0
2009-04-30	00:31:00	0
2009-04-30	00:32:00	0
2009-04-30	00:33:00	0
2009-04-30	00:34:00	0
2009-04-30	00:35:00	0
2009-04-30	00:36:00	0
2009-04-30	00:37:00	0
2009-04-30	00:38:00	0
2009-04-30	00:39:00	0
2009-04-30	00:40:00	0
2009-04-30	00:41:00	0
2009-04-30	00:42:00	0
2009-04-30	00:43:00	0
2009-04-30	00:44:00	0
2009-04-30	00:45:00	0
2009-04-30	00:46:00	0
2009-04-30	00:47:00	0
2009-04-30	00:48:00	0
2009-04-30	00:49:00	0
2009-04-30	00:50:00	0
2009-04-30	00:51:00	0
2009-04-30	00:52:00	0
2009-04-30	00:53:00	0
2009-04-30	00:54:00	0
2009-04-30	00:55:00	0
2009-04-30	00:56:00	0
2009-04-30	00:57:00	0
2009-04-30	00:58:00	0
2009-04-30	00:59:00	0
2009-04-30	01:00:00	0
2009-04-30	01:01:00	0
2009-04-30	01:02:00	0
2009-04-30	01:03:00	0
2009-04-30	01:04:00	0
2009-04-30	01:05:00	0
2009-04-30	01:06:00	0
2009-04-30	01:07:00	0
2009-04-30	01:08:00	0
2009-04-30	01:09:00	0
2009-04-30	01:10:00	0
2009-04-30	01:11:00	0
2009-04-30	01:12:00	0
2009-04-30	01:13:00	0
2009-04-30	01:14:00	0
2009-04-30	01:15:00	0
2009-04-30	01:16:00	0
2009-04-30	01:17:00	0
2009-04-30	01:18:00	0
2009-04-30	01:19:00	0
2009-04-30	01:20:00	0
2009-04-30	01:21:00	0
2009-04-30	01:22:00	0
2009-04-30	01:23:00	0
2009-04-30	01:24:00	0
2009-04-30	01:25:00	0
2009-04-30	01:26:00	0
2009-04-30	01:27:00	0
2009-04-30	01:28:00	0
2009-04-30	01:29:00	0
2009-04-30	01:30:00	0
2009-04-30	01:31:00	0
2009-04-30	01:32:00	0
2009-04-30	01:33:00	0
2009-04-30	01:34:00	0
2009-04-30	01:35:00	0
2009-04-30	01:36:00	0
2009-04-30	01:37:00	0
2009-04-30	01:38:00	0
2009-04-30	01:39:00	0
2009-04-30	01:40:00	0
2009-04-30	01:41:00	0
2009-04-30	01:42:00	0
2009-04-30	01:43:00	0
2009-04-30	01:44:00	0
2009-04-30	01:45:00	0
2009-04-30	01:46:00	0
2009-04-30	01:47:00	0
2009-04-30	01:48:00	0
2009-04-30	01:49:00	0
2009-04-30	01:50:00	0
2009-04-30	01:51:00	0
2009-04-30	01:52:00	0
2009-04-30	01:53:00	0
2009-04-30	01:54:00	0
2009-04-30	01:55:00	0
2009-04-30	01:56:00	0
2009-04-30	01:57:00	0
2009-04-30	01:58:00	0
2009-04-30	01:59:00	0
2009-04-30	02:00:00	0
2009-04-30	02:01:00	0
2009-04-30	02:02:00	0
2009-04-30	02:03:00	0
2009-04-30	02:04:00	0
2009-04-30	02:05:00	0
2009-04-30	02:06:00	0
2009-04-30	02:07:00	0
2009-04-30	02:08:00	0
2009-04-30	02:09:00	0
2009-04-30	02:10:00	0
2009-04-30	02:11:00	0
2009-04-30	02:12:00	0
2009-04-30	02:13:00	0
2009-04-30	02:14:00	0
2009-04-30	02:15:00	0
2009-04-30	02:16:00	0
2009-04-30	02:17:00	0
2009-04-30	02:18:00	0
2009-04-30	02:19:00	0
2009-04-30	02:20:00	0
2009-04-30	02:21:00	0
2009-04-30	02:22:00	0
2009-04-30	02:23:00	0
2009-04-30	02:24:00	0
2009-04-30	02:25:00	0
2009-04-30	02:26:00	0
2009-04-30	02:27:00	0
2009-04-30	02:28:00	0
2009-04-30	02:29:00	0
2009-04-30	02:30:00	0
2009-04-30	02:31:00	0
2009-04-30	02:32:00	0
2009-04-30	02:33:00	0
2009-04-30	02:34:00	0
2009-04-30	02:35:00	0
2009-04-30	02:36:00	0
2009-04-30	02:37:00	0
2009-04-30	02:38:00	0
2009-04-30	02:39:00	0
2009-04-30	02:40:00	0
2009-04-30	02:41:00	0
2009-04-30	02:42:00	0
2009-04-30	02:43:00	0
2009-04-30	02:44:00	0
2009-04-30	02:45:00	0
2009-04-30	02:46:00	0
2009-04-30	02:47:00	0
2009-04-30	02:48:00	0
2009-04-30	02:49:00	0
2009-04-30	02:50:00	0
2009-04-30	02:51:00	0
2009-04-30	02:52:00	0
2009-04-30	02:53:00	0
2009-04-30	02:54:00	0
2009-04-30	02:55:00	0
2009-04-30	02:56:00	0
2009-04-30	02:57:00	0
2009-04-30	02:58:00	0
2009-04-30	02:59:00	0
2009-04-30	03:00:00	0
2009-04-30	03:01:00	0
2009-04-30	03:02:00	0
2009-04-30	03:03:00	0
2009-04-30	03:04:00	0
2009-04-30	03:05:00	0
2009-04-30	03:06:00	0
2009-04-30	03:07:00	0
2009-04-30	03:08:00	0
2009-04-30	03:09:00	0
2009-04-30	03:10:00	0
2009-04-30	03:11:00	0
2009-04-30	03:12:00	0
2009-04-30	03:13:00	0
2009-04-30	03:14:00	0
2009-04-30	03:15:00	0
2009-04-30	03:16:00	0
2009-04-30	03:17:00	0
2009-04-30	03:18:00	0
2009-04-30	03:19:00	0
2009-04-30	03:20:00	0
2009-04-30	03:21:00	0
2009-04-30	03:22:00	0
2009-04-30	03:23:00	0
2009-04-30	03:24:00	0
2009-04-30	03:25:00	0
2009-04-30	03:26:00	0
2009-04-30	03:27:00	0
2009-04-30	03:28:00	0
2009-04-30	03:29:00	0
2009-04-30	03:30:00	0
2009-04-30	03:31:00	0
2009-04-30	03:32:00	0
2009-04-30	03:33:00	0
2009-04-30	03:34:00	0
2009-04-30	03:35:00	0
2009-04-30	03:36:00	0
2009-04-30	03:37:00	0
2009-04-30	03:38:00	0
2009-04-30	03:39:00	0
2009-04-30	03:40:00	0
2009-04-30	03:41:00	0
2009-04-30	03:42:00	0
2009-04-30	03:43:00	0
2009-04-30	03:44:00	0
2009-04-30	03:45:00	0
2009-04-30	03:46:00	0
2009-04-30	03:47:00	0
2009-04-30	03:48:00	0
2009-04-30	03:49:00	0
2009-04-30	03:50:00	0
2009-04-30	03:51:00	0
2009-04-30	03:52:00	0
2009-04-30	03:53:00	0
2009-04-30	03:54:00	0
2009-04-30	03:55:00	0
2009-04-30	03:56:00	0
2009-04-30	03:57:00	0
2009-04-30	03:58:00	0
2009-04-30	03:59:00	0
2009-04-30	04:00:00	0
2009-04-30	04:01:00	0
2009-04-30	04:02:00	0
2009-04-30	04:03:00	0
2009-04-30	04:04:00	0
2009-04-30	04:05:00	0
2009-04-30	04:06:00	0
2009-04-30	04:07:00	0
2009-04-30	04:08:00	0
2009-04-30	04:09:00	0
2009-04-30	04:10:00	0
2009-04-30	04:11:00	0
2009-04-30	04:12:00	0
2009-04-30	04:13:00	0
2009-04-30	04:14:00	0
2009-04-30	04:15:00	0
2009-04-30	04:16:00	0
2009-04-30	04:17:00	0
2009-04-30	04:18:00	0
2009-04-30	04:19:00	0
2009-04-30	04:20:00	0
2009-04-30	04:21:00	0
2009-04-30	04:22:00	0
2009-04-30	04:23:00	0
2009-04-30	04:24:00	0
2009-04-30	04:25:00	0
2009-04-30	04:26:00	0
2009-04-30	04:27:00	0
2009-04-30	04:28:00	0
2009-04-30	04:29:00	0
2009-04-30	04:30:00	0
2009-04-30	04:31:00	0
2009-04-30	04:32:00	0
2009-04-30	04:33:00	0
2009-04-30	04:34:00	0
2009-04-30	04:35:00	0
2009-04-30	04:36:00	0
2009-04-30	04:37:00	0
2009-04-30	04:38:00	0
2009-04-30	04:39:00	0
2009-04-30	04:40:00	0
2009-04-30	04:41:00	0
2009-04-30	04:42:00	0
2009-04-30	04:43:00	0
2009-04-30	04:44:00	0
2009-04-30	04:45:00	0
2009-04-30	04:46:00	0
2009-04-30	04:47:00	0
2009-04-30	04:48:00	0
2009-04-30	04:49:00	0
2009-04-30	04:50:00	0
2009-04-30	04:51:00	0
2009-04-30	04:52:00	0
2009-04-30	04:53:00	0
2009-04-30	04:54:00	0
2009-04-30	04:55:00	0
2009-04-30	04:56:00	0
2009-04-30	04:57:00	0
2009-04-30	04:58:00	0
2009-04-30	04:59:00	0
2009-04-30	05:00:00	0
2009-04-30	05:01:00	0
2009-04-30	05:02:00	0
2009-04-30	05:03:00	0
2009-04-30	05:04:00	0
2009-04-30	05:05:00	0
2009-04-30	05:06:00	0
2009-04-30	05:07:00	0
2009-04-30	05:08:00	0
2009-04-30	05:09:00	0
2009-04-30	05:10:00	0
2009-04-30	05:11:00	0
2009-04-30	05:12:00	0
2009-04-30	05:13:00	0
2009-04-30	05:14:00	0
2009-04-30	05:15:00	0
2009-04-30	05:16:00	0
2009-04-30	05:17:00	0
2009-04-30	05:18:00	0
2009-04-30	05:19:00	0
2009-04-30	05:20:00	0
2009-04-30	05:21:00	0
2009-04-30	05:22:00	0
2009-04-30	05:23:00	0
2009-04-30	05:24:00	0
2009-04-30	05:25:00	0
2009-04-30	05:26:00	0
2009-04-30	05:27:00	0
2009-04-30	05:28:00	0
2009-04-30	05:29:00	0
2009-04-30	05:30:00	0
2009-04-30	05:31:00	0
2009-04-30	05:32:00	0
2009-04-30	05:33:00	0
2009-04-30	05:34:00	0
2009-04-30	05:35:00	0
2009-04-30	05:36:00	0
2009-04-30	05:37:00	0
2009-04-30	05:38:00	0
2009-04-30	05:39:00	0
2009-04-30	05:40:00	0
2009-04-30	05:41:00	0
2009-04-30	05:42:00	0
2009-04-30	05:43:00	0
2009-04-30	05:44:00	0
2009-04-30	05:45:00	0
2009-04-30	05:46:00	0
2009-04-30	05:47:00	0
2009-04-30	05:48:00	0
2009-04-30	05:49:00	0
2009-04-30	05:50:00	0
2009-04-30	05:51:00	0
2009-04-30	05:52:00	0
2009-04-30	05:53:00	0
2009-04-30	05:54:00	0
2009-04-30	05:55:00	0
2009-04-30	05:56:00	0
2009-04-30	05:57:00	0
2009-04-30	05:58:00	0
2009-04-30	05:59:00	0
2009-04-30	06:00:00	0
2009-04-30	06:01:00	0
2009-04-30	06:02:00	0
2009-04-30	06:03:00	0
2009-04-30	06:04:00	0
2009-04-30	06:05:00	0
2009-04-30	06:06:00	0
2009-04-30	06:07:00	0
2009-04-30	06:08:00	0
2009-04-30	06:09:00	0
2009-04-30	06:10:00	0
2009-04-30	06:11:00	0
2009-04-30	06:12:00	0
2009-04-30	06:13:00	0
2009-04-30	06:14:00	0
2009-04-30	06:15:00	0
2009-04-30	06:16:00	0
2009-04-30	06:17:00	0
2009-04-30	06:18:00	0
2009-04-30	06:19:00	0
2009-04-30	06:20:00	0
2009-04-30	06:21:00	0
2009-04-30	06:22:00	0
2009-04-30	06:23:00	0
2009-04-30	06:24:00	0
2009-04-30	06:25:00	0
2009-04-30	06:26:00	0
2009-04-30	06:27:00	0
2009-04-30	06:28:00	0
2009-04-30	06:29:00	0
2009-04-30	06:30:00	0
2009-04-30	06:31:00	0
2009-04-30	06:32:00	0
2009-04-30	06:33:00	0
2009-04-30	06:34:00	0
2009-04-30	06:35:00	0
2009-04-30	06:36:00	0
2009-04-30	06:37:00	0
2009-04-30	06:38:00	0
2009-04-30	06:39:00	0
2009-04-30	06:40:00	0
2009-04-30	06:41:00	0
2009-04-30	06:42:00	0
2009-04-30	06:43:00	0
2009-04-30	06:44:00	0
2009-04-30	06:45:00	0
2009-04-30	06:46:00	0
2009-04-30	06:47:00	0
2009-04-30	06:48:00	0
2009-04-30	06:49:00	0
2009-04-30	06:50:00	0
2009-04-30	06:51:00	0
2009-04-30	06:52:00	0
2009-04-30	06:53:00	0
2009-04-30	06:54:00	0
2009-04-30	06:55:00	0
2009-04-30	06:56:00	0
2009-04-30	06:57:00	0
2009-04-30	06:58:00	0
2009-04-30	06:59:00	0
2009-04-30	07:00:00	0
2009-04-30	07:01:00	0
2009-04-30	07:02:00	0
2009-04-30	07:03:00	0
2009-04-30	07:04:00	0
2009-04-30	07:05:00	0
2009-04-30	07:06:00	0
2009-04-30	07:07:00	0
2009-04-30	07:08:00	0
2009-04-30	07:09:00	0
2009-04-30	07:10:00	0
2009-04-30	07:11:00	0
2009-04-30	07:12:00	0
2009-04-30	07:13:00	0
2009-04-30	07:14:00	0
2009-04-30	07:15:00	0
2009-04-30	07:16:00	0
2009-04-30	07:17:00	0
2009-04-30	07:18:00	0
2009-04-30	07:19:00	0
2009-04-30	07:20:00	0
2009-04-30	07:21:00	0
2009-04-30	07:22:00	0
2009-04-30	07:23:00	0
2009-04-30	07:24:00	0
2009-04-30	07:25:00	0
2009-04-30	07:26:00	0
2009-04-30	07:27:00	0
2009-04-30	07:28:00	0
2009-04-30	07:29:00	0
2009-04-30	07:30:00	0
2009-04-30	07:31:00	0
2009-04-30	07:32:00	0
2009-04-30	07:33:00	0
2009-04-30	07:34:00	0
2009-04-30	07:35:00	0
2009-04-30	07:36:00	0
2009-04-30	07:37:00	0
2009-04-30	07:38:00	0
2009-04-30	07:39:00	0
2009-04-30	07:40:00	0
2009-04-30	07:41:00	0
2009-04-30	07:42:00	0
2009-04-30	07:43:00	0
2009-04-30	07:44:00	0
2009-04-30	07:45:00	0
2009-04-30	07:46:00	0
2009-04-30	07:47:00	0
2009-04-30	07:48:00	0
2009-04-30	07:49:00	0
2009-04-30	07:50:00	0
2009-04-30	07:51:00	0
2009-04-30	07:52:00	0
2009-04-30	07:53:00	0
2009-04-30	07:54:00	0
2009-04-30	07:55:00	0
2009-04-30	07:56:00	0
2009-04-30	07:57:00	0
2009-04-30	07:58:00	0
2009-04-30	07:59:00	0
2009-04-30	08:00:00	0
2009-04-30	08:01:00	0
2009-04-30	08:02:00	0
2009-04-30	08:03:00	0
2009-04-30	08:04:00	0
2009-04-30	08:05:00	0
2009-04-30	08:06:00	0
2009-04-30	08:07:00	0
2009-04-30	08:08:00	0
2009-04-30	08:09:00	0
2009-04-30	08:10:00	0
2009-04-30	08:11:00	0
2009-04-30	08:12:00	0
2009-04-30	08:13:00	0
2009-04-30	08:14:00	0
2009-04-30	08:15:00	0
2009-04-30	08:16:00	0
2009-04-30	08:17:00	0
2009-04-30	08:18:00	0
2009-04-30	08:19:00	0
2009-04-30	08:20:00	0
2009-04-30	08:21:00	0
2009-04-30	08:22:00	0
2009-04-30	08:23:00	0
2009-04-30	08:24:00	0
2009-04-30	08:25:00	0
2009-04-30	08:26:00	0
2009-04-30	08:27:00	0
2009-04-30	08:28:00	0
2009-04-30	08:29:00	0
2009-04-30	08:30:00	0
2009-04-30	08:31:00	0
2009-04-30	08:32:00	0
2009-04-30	08:33:00	0
2009-04-30	08:34:00	0
2009-04-30	08:35:00	0
2009-04-30	08:36:00	0
2009-04-30	08:37:00	0
2009-04-30	08:38:00	0
2009-04-30	08:39:00	0
2009-04-30	08:40:00	0
2009-04-30	08:41:00	0
2009-04-30	08:42:00	0
2009-04-30	08:43:00	0
2009-04-30	08:44:00	0
2009-04-30	08:45:00	0
2009-04-30	08:46:00	0
2009-04-30	08:47:00	0
2009-04-30	08:48:00	0
2009-04-30	08:49:00	0
2009-04-30	08:50:00	0
2009-04-30	08:51:00	0
2009-04-30	08:52:00	0
2009-04-30	08:53:00	0
2009-04-30	08:54:00	0
2009-04-30	08:55:00	0
2009-04-30	08:56:00	0
2009-04-30	08:57:00	0
2009-04-30	08:58:00	0
2009-04-30	08:59:00	0
2009-04-30	09:00:00	0
2009-04-30	09:01:00	0
2009-04-30	09:02:00	0
2009-04-30	09:03:00	0
2009-04-30	09:04:00	0
2009-04-30	09:05:00	0
2009-04-30	09:06:00	0
2009-04-30	09:07:00	0
2009-04-30	09:08:00	0
2009-04-30	09:09:00	0
2009-04-30	09:10:00	0
2009-04-30	09:11:00	0
2009-04-30	09:12:00	0
2009-04-30	09:13:00	0
2009-04-30	09:14:00	0
2009-04-30	09:15:00	0
2009-04-30	09:16:00	0
2009-04-30	09:17:00	0
2009-04-30	09:18:00	0
2009-04-30	09:19:00	0
2009-04-30	09:20:00	0
2009-04-30	09:21:00	0
2009-04-30	09:22:00	0
2009-04-30	09:23:00	0
2009-04-30	09:24:00	0
2009-04-30	09:25:00	0
2009-04-30	09:26:00	0
2009-04-30	09:27:00	0
2009-04-30	09:28:00	0
2009-04-30	09:29:00	0
2009-04-30	09:30:00	0
2009-04-30	09:31:00	0
2009-04-30	09:32:00	0
2009-04-30	09:33:00	0
2009-04-30	09:34:00	0
2009-04-30	09:35:00	0
2009-04-30	09:36:00	0
2009-04-30	09:37:00	0
2009-04-30	09:38:00	0
2009-04-30	09:39:00	0
2009-04-30	09:40:00	0
2009-04-30	09:41:00	0
2009-04-30	09:42:00	0
2009-04-30	09:43:00	0
2009-04-30	09:44:00	0
2009-04-30	09:45:00	0
2009-04-30	09:46:00	0
2009-04-30	09:47:00	0
2009-04-30	09:48:00	0
2009-04-30	09:49:00	0
2009-04-30	09:50:00	0
2009-04-30	09:51:00	0
2009-04-30	09:52:00	0
2009-04-30	09:53:00	0
2009-04-30	09:54:00	0
2009-04-30	09:55:00	0
2009-04-30	09:56:00	0
2009-04-30	09:57:00	0
2009-04-30	09:58:00	0
2009-04-30	09:59:00	0
2009-04-30	10:00:00	0
2009-04-30	10:01:00	0
2009-04-30	10:02:00	0
2009-04-30	10:03:00	0
2009-04-30	10:04:00	0
2009-04-30	10:05:00	0
2009-04-30	10:06:00	0
2009-04-30	10:07:00	0
2009-04-30	10:08:00	0
2009-04-30	10:09:00	0
2009-04-30	10:10:00	0
2009-04-30	10:11:00	0
2009-04-30	10:12:00	0
2009-04-30	10:13:00	0
2009-04-30	10:14:00	0
2009-04-30	10:15:00	0
2009-04-30	10:16:00	0
2009-04-30	10:17:00	0
2009-04-30	10:18:00	0
2009-04-30	10:19:00	0
2009-04-30	10:20:00	0
2009-04-30	10:21:00	0
2009-04-30	10:22:00	0
2009-04-30	10:23:00	0
2009-04-30	10:24:00	0
2009-04-30	10:25:00	0
2009-04-30	10:26:00	0
2009-04-30	10:27:00	0
2009-04-30	10:28:00	0
2009-04-30	10:29:00	0
2009-04-30	10:30:00	0
2009-04-30	10:31:00	0
2009-04-30	10:32:00	0
2009-04-30	10:33:00	0
2009-04-30	10:34:00	0
2009-04-30	10:35:00	0
2009-04-30	10:36:00	0
2009-04-30	10:37:00	0
2009-04-30	10:38:00	0
2009-04-30	10:39:00	0
2009-04-30	10:40:00	0
2009-04-30	10:41:00	0
2009-04-30	10:42:00	0
2009-04-30	10:43:00	0
2009-04-30	10:44:00	0
2009-04-30	10:45:00	0
2009-04-30	10:46:00	0
2009-04-30	10:47:00	0
2009-04-30	10:48:00	0
2009-04-30	10:49:00	0
2009-04-30	10:50:00	0
2009-04-30	10:51:00	0
2009-04-30	10:52:00	0
2009-04-30	10:53:00	0
2009-04-30	10:54:00	0
2009-04-30	10:55:00	0
2009-04-30	10:56:00	0
2009-04-30	10:57:00	0
2009-04-30	10:58:00	0
2009-04-30	10:59:00	0
2009-04-30	11:00:00	0
2009-04-30	11:01:00	0
2009-04-30	11:02:00	0
2009-04-30	11:03:00	0
2009-04-30	11:04:00	0
2009-04-30	11:05:00	0
2009-04-30	11:06:00	0
2009-04-30	11:07:00	0
2009-04-30	11:08:00	0
2009-04-30	11:09:00	0
2009-04-30	11:10:00	0
2009-04-30	11:11:00	0
2009-04-30	11:12:00	0
2009-04-30	11:13:00	0
2009-04-30	11:14:00	0
2009-04-30	11:15:00	0
2009-04-30	11:16:00	0
2009-04-30	11:17:00	0
2009-04-30	11:18:00	0
2009-04-30	11:19:00	0
2009-04-30	11:20:00	0
2009-04-30	11:21:00	0
2009-04-30	11:22:00	0
2009-04-30	11:23:00	0
2009-04-30	11:24:00	0
2009-04-30	11:25:00	0
2009-04-30	11:26:00	0
2009-04-30	11:27:00	0
2009-04-30	11:28:00	0
2009-04-30	11:29:00	0
2009-04-30	11:30:00	0
2009-04-30	11:31:00	0
2009-04-30	11:32:00	0
2009-04-30	11:33:00	0
2009-04-30	11:34:00	0
2009-04-30	11:35:00	0
2009-04-30	11:36:00	0
2009-04-30	11:37:00	0
2009-04-30	11:38:00	0
2009-04-30	11:39:00	0
2009-04-30	11:40:00	0
2009-04-30	11:41:00	0
2009-04-30	11:42:00	0
2009-04-30	11:43:00	0
2009-04-30	11:44:00	0
2009-04-30	11:45:00	0
2009-04-30	11:46:00	0
2009-04-30	11:47:00	0
2009-04-30	11:48:00	0
2009-04-30	11:49:00	0
2009-04-30	11:50:00	0
2009-04-30	11:51:00	0
2009-04-30	11:52:00	0
2009-04-30	11:53:00	0
2009-04-30	11:54:00	0
2009-04-30	11:55:00	0
2009-04-30	11:56:00	0
2009-04-30	11:57:00	0
2009-04-30	11:58:00	0
2009-04-30	11:59:00	0
2009-04-30	12:00:00	0
2009-04-30	12:01:00	0
2009-04-30	12:02:00	0
2009-04-30	12:03:00	0
2009-04-30	12:04:00	0
2009-04-30	12:05:00	0
2009-04-30	12:06:00	0
2009-04-30	12:07:00	0
2009-04-30	12:08:00	0
2009-04-30	12:09:00	0
2009-04-30	12:10:00	0
2009-04-30	12:11:00	0
2009-04-30	12:12:00	0
2009-04-30	12:13:00	0
2009-04-30	12:14:00	0
2009-04-30	12:15:00	0
2009-04-30	12:16:00	0
2009-04-30	12:17:00	0
2009-04-30	12:18:00	0
2009-04-30	12:19:00	0
2009-04-30	12:20:00	0
2009-04-30	12:21:00	0
2009-04-30	12:22:00	0
2009-04-30	12:23:00	0
2009-04-30	12:24:00	0
2009-04-30	12:25:00	0
2009-04-30	12:26:00	0
2009-04-30	12:27:00	0
2009-04-30	12:28:00	0
2009-04-30	12:29:00	0
2009-04-30	12:30:00	0
2009-04-30	12:31:00	0
2009-04-30	12:32:00	0
2009-04-30	12:33:00	0
2009-04-30	12:34:00	0
2009-04-30	12:35:00	0
2009-04-30	12:36:00	0
2009-04-30	12:37:00	0
2009-04-30	12:38:00	0
2009-04-30	12:39:00	0
2009-04-30	12:40:00	0
2009-04-30	12:41:00	0
2009-04-30	12:42:00	0
2009-04-30	12:43:00	0
2009-04-30	12:44:00	0
2009-04-30	12:45:00	0
2009-04-30	12:46:00	0
2009-04-30	12:47:00	0
2009-04-30	12:48:00	0
2009-04-30	12:49:00	0
2009-04-30	12:50:00	0
2009-04-30	12:51:00	0
2009-04-30	12:52:00	0
2009-04-30	12:53:00	0
2009-04-30	12:54:00	0
2009-04-30	12:55:00	0
2009-04-30	12:56:00	0
2009-04-30	12:57:00	0
2009-04-30	12:58:00	0
2009-04-30	12:59:00	0
2009-04-30	13:00:00	0
2009-04-30	13:01:00	0
2009-04-30	13:02:00	0
2009-04-30	13:03:00	0
2009-04-30	13:04:00	0
2009-04-30	13:05:00	0
2009-04-30	13:06:00	0
2009-04-30	13:07:00	0
2009-04-30	13:08:00	0
2009-04-30	13:09:00	0
2009-04-30	13:10:00	0
2009-04-30	13:11:00	0
2009-04-30	13:12:00	0
2009-04-30	13:13:00	0
2009-04-30	13:14:00	0
2009-04-30	13:15:00	0
2009-04-30	13:16:00	0
2009-04-30	13:17:00	0
2009-04-30	13:18:00	0
2009-04-30	13:19:00	0
2009-04-30	13:20:00	0
2009-04-30	13:21:00	0
2009-04-30	13:22:00	0
2009-04-30	13:23:00	0
2009-04-30	13:24:00	0
2009-04-30	13:25:00	0
2009-04-30	13:26:00	0
2009-04-30	13:27:00	0
2009-04-30	13:28:00	0
2009-04-30	13:29:00	0
2009-04-30	13:30:00	0
2009-04-30	13:31:00	0
2009-04-30	13:32:00	0
2009-04-30	13:33:00	0
2009-04-30	13:34:00	0
2009-04-30	13:35:00	0
2009-04-30	13:36:00	0
2009-04-30	13:37:00	0
2009-04-30	13:38:00	0
2009-04-30	13:39:00	0
2009-04-30	13:40:00	0
2009-04-30	13:41:00	0
2009-04-30	13:42:00	0
2009-04-30	13:43:00	0
2009-04-30	13:44:00	0
2009-04-30	13:45:00	0
2009-04-30	13:46:00	0
2009-04-30	13:47:00	0
2009-04-30	13:48:00	0
2009-04-30	13:49:00	0
2009-04-30	13:50:00	0
2009-04-30	13:51:00	0
2009-04-30	13:52:00	0
2009-04-30	13:53:00	0
2009-04-30	13:54:00	0
2009-04-30	13:55:00	0
2009-04-30	13:56:00	0
2009-04-30	13:57:00	0
2009-04-30	13:58:00	0
2009-04-30	13:59:00	0
2009-04-30	14:00:00	0
2009-04-30	14:01:00	0
2009-04-30	14:02:00	0
2009-04-30	14:03:00	0
2009-04-30	14:04:00	0
2009-04-30	14:05:00	0
2009-04-30	14:06:00	0
2009-04-30	14:07:00	0
2009-04-30	14:08:00	0
2009-04-30	14:09:00	0
2009-04-30	14:10:00	0
2009-04-30	14:11:00	0
2009-04-30	14:12:00	0
2009-04-30	14:13:00	0
2009-04-30	14:14:00	0
2009-04-30	14:15:00	0
2009-04-30	14:16:00	0
2009-04-30	14:17:00	0
2009-04-30	14:18:00	0
2009-04-30	14:19:00	0
2009-04-30	14:20:00	0
2009-04-30	14:21:00	0
2009-04-30	14:22:00	0
2009-04-30	14:23:00	0
2009-04-30	14:24:00	0
2009-04-30	14:25:00	0
2009-04-30	14:26:00	0
2009-04-30	14:27:00	0
2009-04-30	14:28:00	0
2009-04-30	14:29:00	0
2009-04-30	14:30:00	0
2009-04-30	14:31:00	0
2009-04-30	14:32:00	0
2009-04-30	14:33:00	0
2009-04-30	14:34:00	0
2009-04-30	14:35:00	0
2009-04-30	14:36:00	0
2009-04-30	14:37:00	0
2009-04-30	14:38:00	0
2009-04-30	14:39:00	0
2009-04-30	14:40:00	0
2009-04-30	14:41:00	0
2009-04-30	14:42:00	0
2009-04-30	14:43:00	0
2009-04-30	14:44:00	0
2009-04-30	14:45:00	0
2009-04-30	14:46:00	0
2009-04-30	14:47:00	0
2009-04-30	14:48:00	0
2009-04-30	14:49:00	0
2009-04-30	14:50:00	0
2009-04-30	14:51:00	0
2009-04-30	14:52:00	0
2009-04-30	14:53:00	0
2009-04-30	14:54:00	0
2009-04-30	14:55:00	0
2009-04-30	14:56:00	0
2009-04-30	14:57:00	0
2009-04-30	14:58:00	0
2009-04-30	14:59:00	0
2009-04-30	15:00:00	0
2009-04-30	15:01:00	0
2009-04-30	15:02:00	0
2009-04-30	15:03:00	0
2009-04-30	15:04:00	0
2009-04-30	15:05:00	0
2009-04-30	15:06:00	0
2009-04-30	15:07:00	0
2009-04-30	15:08:00	0
2009-04-30	15:09:00	0
2009-04-30	15:10:00	0
2009-04-30	15:11:00	0
2009-04-30	15:12:00	0
2009-04-30	15:13:00	0
2009-04-30	15:14:00	0
2009-04-30	15:15:00	0
2009-04-30	15:16:00	0
2009-04-30	15:17:00	0
2009-04-30	15:18:00	0
2009-04-30	15:19:00	0
2009-04-30	15:20:00	0
2009-04-30	15:21:00	0
2009-04-30	15:22:00	0
2009-04-30	15:23:00	0
2009-04-30	15:24:00	0
2009-04-30	15:25:00	0
2009-04-30	15:26:00	0
2009-04-30	15:27:00	0
2009-04-30	15:28:00	0
2009-04-30	15:29:00	0
2009-04-30	15:30:00	0
2009-04-30	15:31:00	0
2009-04-30	15:32:00	0
2009-04-30	15:33:00	0
2009-04-30	15:34:00	0
2009-04-30	15:35:00	0
2009-04-30	15:36:00	0
2009-04-30	15:37:00	0
2009-04-30	15:38:00	0
2009-04-30	15:39:00	0
2009-04-30	15:40:00	0
2009-04-30	15:41:00	0
2009-04-30	15:42:00	0
2009-04-30	15:43:00	0
2009-04-30	15:44:00	0
2009-04-30	15:45:00	0
2009-04-30	15:46:00	0
2009-04-30	15:47:00	0
2009-04-30	15:48:00	0
2009-04-30	15:49:00	0
2009-04-30	15:50:00	0
2009-04-30	15:51:00	0
2009-04-30	15:52:00	0
2009-04-30	15:53:00	0
2009-04-30	15:54:00	0
2009-04-30	15:55:00	0
2009-04-30	15:56:00	0
2009-04-30	15:57:00	0
2009-04-30	15:58:00	0
2009-04-30	15:59:00	0
2009-04-30	16:00:00	0
2009-04-30	16:01:00	0
2009-04-30	16:02:00	0
2009-04-30	16:03:00	0
2009-04-30	16:04:00	0
2009-04-30	16:05:00	0
2009-04-30	16:06:00	0
2009-04-30	16:07:00	0
2009-04-30	16:08:00	0
2009-04-30	16:09:00	0
2009-04-30	16:10:00	0
2009-04-30	16:11:00	0
2009-04-30	16:12:00	0
2009-04-30	16:13:00	0
2009-04-30	16:14:00	0
2009-04-30	16:15:00	0
2009-04-30	16:16:00	0
2009-04-30	16:17:00	0
2009-04-30	16:18:00	0
2009-04-30	16:19:00	0
2009-04-30	16:20:00	0
2009-04-30	16:21:00	0
2009-04-30	16:22:00	0
2009-04-30	16:23:00	0
2009-04-30	16:24:00	0
2009-04-30	16:25:00	0
2009-04-30	16:26:00	0
2009-04-30	16:27:00	0
2009-04-30	16:28:00	0
2009-04-30	16:29:00	0
2009-04-30	16:30:00	0
2009-04-30	16:31:00	0
2009-04-30	16:32:00	0
2009-04-30	16:33:00	0
2009-04-30	16:34:00	0
2009-04-30	16:35:00	0
2009-04-30	16:36:00	0
2009-04-30	16:37:00	0
2009-04-30	16:38:00	0
2009-04-30	16:39:00	0
2009-04-30	16:40:00	0
2009-04-30	16:41:00	0
2009-04-30	16:42:00	0
2009-04-30	16:43:00	0
2009-04-30	16:44:00	0
2009-04-30	16:45:00	0
2009-04-30	16:46:00	0
2009-04-30	16:47:00	0
2009-04-30	16:48:00	0
2009-04-30	16:49:00	0
2009-04-30	16:50:00	0
2009-04-30	16:51:00	0
2009-04-30	16:52:00	0
2009-04-30	16:53:00	0
2009-04-30	16:54:00	0
2009-04-30	16:55:00	0
2009-04-30	16:56:00	0
2009-04-30	16:57:00	0
2009-04-30	16:58:00	0
2009-04-30	16:59:00	0
2009-04-30	17:00:00	0
2009-04-30	17:01:00	0
2009-04-30	17:02:00	0
2009-04-30	17:03:00	0
2009-04-30	17:04:00	0
2009-04-30	17:05:00	0
2009-04-30	17:06:00	0
2009-04-30	17:07:00	0
2009-04-30	17:08:00	0
2009-04-30	17:09:00	0
2009-04-30	17:10:00	0
2009-04-30	17:11:00	0
2009-04-30	17:12:00	0
2009-04-30	17:13:00	0
2009-04-30	17:14:00	0
2009-04-30	17:15:00	0
2009-04-30	17:16:00	0
2009-04-30	17:17:00	0
2009-04-30	17:18:00	0
2009-04-30	17:19:00	0
2009-04-30	17:20:00	0
2009-04-30	17:21:00	0
2009-04-30	17:22:00	0
2009-04-30	17:23:00	0
2009-04-30	17:24:00	0
2009-04-30	17:25:00	0
2009-04-30	17:26:00	0
2009-04-30	17:27:00	0
2009-04-30	17:28:00	0
2009-04-30	17:29:00	0
2009-04-30	17:30:00	0
2009-04-30	17:31:00	0
2009-04-30	17:32:00	0
2009-04-30	17:33:00	0
2009-04-30	17:34:00	0
2009-04-30	17:35:00	0
2009-04-30	17:36:00	0
2009-04-30	17:37:00	0
2009-04-30	17:38:00	0
2009-04-30	17:39:00	0
2009-04-30	17:40:00	0
2009-04-30	17:41:00	0
2009-04-30	17:42:00	0
2009-04-30	17:43:00	0
2009-04-30	17:44:00	0
2009-04-30	17:45:00	0
2009-04-30	17:46:00	0
2009-04-30	17:47:00	0
2009-04-30	17:48:00	0
2009-04-30	17:49:00	0
2009-04-30	17:50:00	0
2009-04-30	17:51:00	0
2009-04-30	17:52:00	0
2009-04-30	17:53:00	0
2009-04-30	17:54:00	0
2009-04-30	17:55:00	0
2009-04-30	17:56:00	0
2009-04-30	17:57:00	0
2009-04-30	17:58:00	0
2009-04-30	17:59:00	0
2009-04-30	18:00:00	160
2009-04-30	18:01:00	86
2009-04-30	18:02:00	111
2009-04-30	18:03:00	37
2009-04-30	18:04:00	635
2009-04-30	18:05:00	839
2009-04-30	18:06:00	1305
2009-04-30	18:07:00	1369
2009-04-30	18:08:00	1570
2009-04-30	18:09:00	374
2009-04-30	18:10:00	374
2009-04-30	18:11:00	340
2009-04-30	18:12:00	391
2009-04-30	18:13:00	913
2009-04-30	18:14:00	12
2009-04-30	18:15:00	308
2009-04-30	18:16:00	204
2009-04-30	18:17:00	340
2009-04-30	18:18:00	443
2009-04-30	18:19:00	1125
2009-04-30	18:20:00	1184
2009-04-30	18:21:00	340
2009-04-30	18:22:00	443
2009-04-30	18:23:00	391
2009-04-30	18:24:00	497
2009-04-30	18:25:00	1017
2009-04-30	18:26:00	889
2009-04-30	18:27:00	135
2009-04-30	18:28:00	263
2009-04-30	18:29:00	815
2009-04-30	18:30:00	12
2009-04-30	18:31:00	12
2009-04-30	18:32:00	0
2009-04-30	18:33:00	0
2009-04-30	18:34:00	0
2009-04-30	18:35:00	135
2009-04-30	18:36:00	0
2009-04-30	18:37:00	0
2009-04-30	18:38:00	374
2009-04-30	18:39:00	839
2009-04-30	18:40:00	938
2009-04-30	18:41:00	1952
2009-04-30	18:42:00	990
2009-04-30	18:43:00	657
2009-04-30	18:44:00	49
2009-04-30	18:45:00	357
2009-04-30	18:46:00	0
2009-04-30	18:47:00	0
2009-04-30	18:48:00	0
2009-04-30	18:49:00	0
2009-04-30	18:50:00	278
2009-04-30	18:51:00	679
2009-04-30	18:52:00	308
2009-04-30	18:53:00	12
2009-04-30	18:54:00	0
2009-04-30	18:55:00	0
2009-04-30	18:56:00	12
2009-04-30	18:57:00	12
2009-04-30	18:58:00	0
2009-04-30	18:59:00	0
2009-04-30	19:00:00	0
2009-04-30	19:01:00	0
2009-04-30	19:02:00	497
2009-04-30	19:03:00	374
2009-04-30	19:04:00	49
2009-04-30	19:05:00	12
2009-04-30	19:06:00	0
2009-04-30	19:07:00	0
2009-04-30	19:08:00	12
2009-04-30	19:09:00	0
2009-04-30	19:10:00	12
2009-04-30	19:11:00	0
2009-04-30	19:12:00	0
2009-04-30	19:13:00	0
2009-04-30	19:14:00	0
2009-04-30	19:15:00	0
2009-04-30	19:16:00	12
2009-04-30	19:17:00	0
2009-04-30	19:18:00	0
2009-04-30	19:19:00	0
2009-04-30	19:20:00	0
2009-04-30	19:21:00	1071
2009-04-30	19:22:00	517
2009-04-30	19:23:00	391
2009-04-30	19:24:00	839
2009-04-30	19:25:00	175
2009-04-30	19:26:00	537
2009-04-30	19:27:00	0
2009-04-30	19:28:00	864
2009-04-30	19:29:00	263
2009-04-30	19:30:00	0
2009-04-30	19:31:00	12
2009-04-30	19:32:00	12
2009-04-30	19:33:00	0
2009-04-30	19:34:00	0
2009-04-30	19:35:00	357
2009-04-30	19:36:00	0
2009-04-30	19:37:00	12
2009-04-30	19:38:00	0
2009-04-30	19:39:00	0
2009-04-30	19:40:00	635
2009-04-30	19:41:00	790
2009-04-30	19:42:00	0
2009-04-30	19:43:00	0
2009-04-30	19:44:00	0
2009-04-30	19:45:00	0
2009-04-30	19:46:00	0
2009-04-30	19:47:00	0
2009-04-30	19:48:00	426
2009-04-30	19:49:00	0
2009-04-30	19:50:00	0
2009-04-30	19:51:00	0
2009-04-30	19:52:00	0
2009-04-30	19:53:00	0
2009-04-30	19:54:00	0
2009-04-30	19:55:00	0
2009-04-30	19:56:00	12
2009-04-30	19:57:00	0
2009-04-30	19:58:00	0
2009-04-30	19:59:00	0
2009-04-30	20:00:00	0
2009-04-30	20:01:00	0
2009-04-30	20:02:00	0
2009-04-30	20:03:00	62
2009-04-30	20:04:00	74
2009-04-30	20:05:00	0
2009-04-30	20:06:00	657
2009-04-30	20:07:00	308
2009-04-30	20:08:00	0
2009-04-30	20:09:00	98
2009-04-30	20:10:00	111
2009-04-30	20:11:00	62
2009-04-30	20:12:00	615
2009-04-30	20:13:00	0
2009-04-30	20:14:00	0
2009-04-30	20:15:00	12
2009-04-30	20:16:00	0
2009-04-30	20:17:00	12
2009-04-30	20:18:00	0
2009-04-30	20:19:00	190
2009-04-30	20:20:00	62
2009-04-30	20:21:00	497
2009-04-30	20:22:00	391
2009-04-30	20:23:00	0
2009-04-30	20:24:00	12
2009-04-30	20:25:00	0
2009-04-30	20:26:00	0
2009-04-30	20:27:00	37
2009-04-30	20:28:00	0
2009-04-30	20:29:00	0
2009-04-30	20:30:00	86
2009-04-30	20:31:00	576
2009-04-30	20:32:00	391
2009-04-30	20:33:00	0
2009-04-30	20:34:00	0
2009-04-30	20:35:00	0
2009-04-30	20:36:00	0
2009-04-30	20:37:00	12
2009-04-30	20:38:00	443
2009-04-30	20:39:00	0
2009-04-30	20:40:00	0
2009-04-30	20:41:00	0
2009-04-30	20:42:00	12
2009-04-30	20:43:00	0
2009-04-30	20:44:00	0
2009-04-30	20:45:00	0
2009-04-30	20:46:00	0
2009-04-30	20:47:00	0
2009-04-30	20:48:00	0
2009-04-30	20:49:00	0
2009-04-30	20:50:00	0
2009-04-30	20:51:00	0
2009-04-30	20:52:00	12
2009-04-30	20:53:00	0
2009-04-30	20:54:00	0
2009-04-30	20:55:00	0
2009-04-30	20:56:00	0
2009-04-30	20:57:00	234
2009-04-30	20:58:00	111
2009-04-30	20:59:00	49
2009-04-30	21:00:00	175
2009-04-30	21:01:00	219
2009-04-30	21:02:00	0
2009-04-30	21:03:00	12
2009-04-30	21:04:00	0
2009-04-30	21:05:00	25
2009-04-30	21:06:00	0
2009-04-30	21:07:00	12
2009-04-30	21:08:00	426
2009-04-30	21:09:00	204
2009-04-30	21:10:00	357
2009-04-30	21:11:00	175
2009-04-30	21:12:00	0
2009-04-30	21:13:00	12
2009-04-30	21:14:00	0
2009-04-30	21:15:00	0
2009-04-30	21:16:00	0
2009-04-30	21:17:00	0
2009-04-30	21:18:00	0
2009-04-30	21:19:00	0
2009-04-30	21:20:00	0
2009-04-30	21:21:00	0
2009-04-30	21:22:00	12
2009-04-30	21:23:00	0
2009-04-30	21:24:00	0
2009-04-30	21:25:00	0
2009-04-30	21:26:00	0
2009-04-30	21:27:00	0
2009-04-30	21:28:00	0
2009-04-30	21:29:00	0
2009-04-30	21:30:00	0
2009-04-30	21:31:00	12
2009-04-30	21:32:00	0
2009-04-30	21:33:00	0
2009-04-30	21:34:00	0
2009-04-30	21:35:00	0
2009-04-30	21:36:00	0
2009-04-30	21:37:00	0
2009-04-30	21:38:00	0
2009-04-30	21:39:00	0
2009-04-30	21:40:00	0
2009-04-30	21:41:00	0
2009-04-30	21:42:00	0
2009-04-30	21:43:00	0
2009-04-30	21:44:00	0
2009-04-30	21:45:00	0
2009-04-30	21:46:00	0
2009-04-30	21:47:00	0
2009-04-30	21:48:00	12
2009-04-30	21:49:00	0
2009-04-30	21:50:00	25
2009-04-30	21:51:00	0
2009-04-30	21:52:00	0
2009-04-30	21:53:00	0
2009-04-30	21:54:00	0
2009-04-30	21:55:00	0
2009-04-30	21:56:00	0
2009-04-30	21:57:00	0
2009-04-30	21:58:00	0
2009-04-30	21:59:00	0
2009-04-30	22:00:00	0
2009-04-30	22:01:00	0
2009-04-30	22:02:00	0
2009-04-30	22:03:00	12
2009-04-30	22:04:00	0
2009-04-30	22:05:00	0
2009-04-30	22:06:00	0
2009-04-30	22:07:00	0
2009-04-30	22:08:00	0
2009-04-30	22:09:00	0
2009-04-30	22:10:00	0
2009-04-30	22:11:00	0
2009-04-30	22:12:00	0
2009-04-30	22:13:00	0
2009-04-30	22:14:00	0
2009-04-30	22:15:00	0
2009-04-30	22:16:00	0
2009-04-30	22:17:00	0
2009-04-30	22:18:00	0
2009-04-30	22:19:00	0
2009-04-30	22:20:00	0
2009-04-30	22:21:00	0
2009-04-30	22:22:00	0
2009-04-30	22:23:00	0
2009-04-30	22:24:00	0
2009-04-30	22:25:00	0
2009-04-30	22:26:00	0
2009-04-30	22:27:00	0
2009-04-30	22:28:00	0
2009-04-30	22:29:00	0
2009-04-30	22:30:00	0
2009-04-30	22:31:00	0
2009-04-30	22:32:00	0
2009-04-30	22:33:00	0
2009-04-30	22:34:00	0
2009-04-30	22:35:00	0
2009-04-30	22:36:00	0
2009-04-30	22:37:00	0
2009-04-30	22:38:00	0
2009-04-30	22:39:00	0
2009-04-30	22:40:00	0
2009-04-30	22:41:00	0
2009-04-30	22:42:00	0
2009-04-30	22:43:00	0
2009-04-30	22:44:00	0
2009-04-30	22:45:00	12
2009-04-30	22:46:00	0
2009-04-30	22:47:00	0
2009-04-30	22:48:00	0
2009-04-30	22:49:00	0
2009-04-30	22:50:00	0
2009-04-30	22:51:00	0
2009-04-30	22:52:00	0
2009-04-30	22:53:00	0
2009-04-30	22:54:00	0
2009-04-30	22:55:00	0
2009-04-30	22:56:00	0
2009-04-30	22:57:00	0
2009-04-30	22:58:00	0
2009-04-30	22:59:00	0
2009-04-30	23:00:00	0
2009-04-30	23:01:00	0
2009-04-30	23:02:00	0
2009-04-30	23:03:00	0
2009-04-30	23:04:00	0
2009-04-30	23:05:00	0
2009-04-30	23:06:00	0
2009-04-30	23:07:00	0
2009-04-30	23:08:00	0
2009-04-30	23:09:00	0
2009-04-30	23:10:00	0
2009-04-30	23:11:00	0
2009-04-30	23:12:00	0
2009-04-30	23:13:00	0
2009-04-30	23:14:00	0
2009-04-30	23:15:00	0
2009-04-30	23:16:00	0
2009-04-30	23:17:00	0
2009-04-30	23:18:00	0
2009-04-30	23:19:00	0
2009-04-30	23:20:00	0
2009-04-30	23:21:00	0
2009-04-30	23:22:00	0
2009-04-30	23:23:00	0
2009-04-30	23:24:00	0
2009-04-30	23:25:00	0
2009-04-30	23:26:00	0
2009-04-30	23:27:00	0
2009-04-30	23:28:00	0
2009-04-30	23:29:00	0
2009-04-30	23:30:00	0
2009-04-30	23:31:00	0
2009-04-30	23:32:00	12
2009-04-30	23:33:00	0
2009-04-30	23:34:00	0
2009-04-30	23:35:00	0
2009-04-30	23:36:00	0
2009-04-30	23:37:00	0
2009-04-30	23:38:00	0
2009-04-30	23:39:00	0
2009-04-30	23:40:00	0
2009-04-30	23:41:00	0
2009-04-30	23:42:00	0
2009-04-30	23:43:00	0
2009-04-30	23:44:00	0
2009-04-30	23:45:00	0
2009-04-30	23:46:00	0
2009-04-30	23:47:00	0
2009-04-30	23:48:00	0
2009-04-30	23:49:00	0
2009-04-30	23:50:00	0
2009-04-30	23:51:00	0
2009-04-30	23:52:00	0
2009-04-30	23:53:00	0
2009-04-30	23:54:00	0
2009-04-30	23:55:00	12
2009-04-30	23:56:00	0
2009-04-30	23:57:00	190
2009-04-30	23:58:00	0
2009-04-30	23:59:00	0
2009-05-01	00:00:00	0
2009-05-01	00:01:00	0
2009-05-01	00:02:00	0
2009-05-01	00:03:00	0
2009-05-01	00:04:00	0
2009-05-01	00:05:00	12
2009-05-01	00:06:00	0
2009-05-01	00:07:00	0
2009-05-01	00:08:00	0
2009-05-01	00:09:00	0
2009-05-01	00:10:00	0
2009-05-01	00:11:00	0
2009-05-01	00:12:00	0
2009-05-01	00:13:00	0
2009-05-01	00:14:00	0
2009-05-01	00:15:00	0
2009-05-01	00:16:00	0
2009-05-01	00:17:00	0
2009-05-01	00:18:00	0
2009-05-01	00:19:00	0
2009-05-01	00:20:00	0
2009-05-01	00:21:00	0
2009-05-01	00:22:00	0
2009-05-01	00:23:00	0
2009-05-01	00:24:00	12
2009-05-01	00:25:00	0
2009-05-01	00:26:00	0
2009-05-01	00:27:00	0
2009-05-01	00:28:00	0
2009-05-01	00:29:00	0
2009-05-01	00:30:00	0
2009-05-01	00:31:00	0
2009-05-01	00:32:00	0
2009-05-01	00:33:00	0
2009-05-01	00:34:00	0
2009-05-01	00:35:00	0
2009-05-01	00:36:00	0
2009-05-01	00:37:00	0
2009-05-01	00:38:00	0
2009-05-01	00:39:00	0
2009-05-01	00:40:00	0
2009-05-01	00:41:00	0
2009-05-01	00:42:00	0
2009-05-01	00:43:00	0
2009-05-01	00:44:00	0
2009-05-01	00:45:00	0
2009-05-01	00:46:00	0
2009-05-01	00:47:00	0
2009-05-01	00:48:00	0
2009-05-01	00:49:00	0
2009-05-01	00:50:00	0
2009-05-01	00:51:00	0
2009-05-01	00:52:00	0
2009-05-01	00:53:00	0
2009-05-01	00:54:00	0
2009-05-01	00:55:00	0
2009-05-01	00:56:00	0
2009-05-01	00:57:00	0
2009-05-01	00:58:00	0
2009-05-01	00:59:00	0
2009-05-01	01:00:00	0
2009-05-01	01:01:00	0
2009-05-01	01:02:00	0
2009-05-01	01:03:00	0
2009-05-01	01:04:00	0
2009-05-01	01:05:00	0
2009-05-01	01:06:00	0
2009-05-01	01:07:00	0
2009-05-01	01:08:00	0
2009-05-01	01:09:00	0
2009-05-01	01:10:00	0
2009-05-01	01:11:00	0
2009-05-01	01:12:00	0
2009-05-01	01:13:00	0
2009-05-01	01:14:00	0
2009-05-01	01:15:00	0
2009-05-01	01:16:00	0
2009-05-01	01:17:00	0
2009-05-01	01:18:00	0
2009-05-01	01:19:00	12
2009-05-01	01:20:00	0
2009-05-01	01:21:00	0
2009-05-01	01:22:00	0
2009-05-01	01:23:00	0
2009-05-01	01:24:00	12
2009-05-01	01:25:00	0
2009-05-01	01:26:00	0
2009-05-01	01:27:00	0
2009-05-01	01:28:00	0
2009-05-01	01:29:00	0
2009-05-01	01:30:00	0
2009-05-01	01:31:00	0
2009-05-01	01:32:00	0
2009-05-01	01:33:00	0
2009-05-01	01:34:00	0
2009-05-01	01:35:00	0
2009-05-01	01:36:00	0
2009-05-01	01:37:00	0
2009-05-01	01:38:00	0
2009-05-01	01:39:00	0
2009-05-01	01:40:00	0
2009-05-01	01:41:00	0
2009-05-01	01:42:00	0
2009-05-01	01:43:00	0
2009-05-01	01:44:00	0
2009-05-01	01:45:00	0
2009-05-01	01:46:00	0
2009-05-01	01:47:00	0
2009-05-01	01:48:00	0
2009-05-01	01:49:00	0
2009-05-01	01:50:00	0
2009-05-01	01:51:00	0
2009-05-01	01:52:00	0
2009-05-01	01:53:00	0
2009-05-01	01:54:00	0
2009-05-01	01:55:00	0
2009-05-01	01:56:00	0
2009-05-01	01:57:00	0
2009-05-01	01:58:00	0
2009-05-01	01:59:00	0
2009-05-01	02:00:00	0
2009-05-01	02:01:00	0
2009-05-01	02:02:00	0
2009-05-01	02:03:00	0
2009-05-01	02:04:00	0
2009-05-01	02:05:00	0
2009-05-01	02:06:00	0
2009-05-01	02:07:00	0
2009-05-01	02:08:00	0
2009-05-01	02:09:00	0
2009-05-01	02:10:00	0
2009-05-01	02:11:00	0
2009-05-01	02:12:00	0
2009-05-01	02:13:00	0
2009-05-01	02:14:00	0
2009-05-01	02:15:00	0
2009-05-01	02:16:00	0
2009-05-01	02:17:00	0
2009-05-01	02:18:00	0
2009-05-01	02:19:00	0
2009-05-01	02:20:00	0
2009-05-01	02:21:00	0
2009-05-01	02:22:00	0
2009-05-01	02:23:00	0
2009-05-01	02:24:00	0
2009-05-01	02:25:00	0
2009-05-01	02:26:00	0
2009-05-01	02:27:00	0
2009-05-01	02:28:00	0
2009-05-01	02:29:00	0
2009-05-01	02:30:00	0
2009-05-01	02:31:00	0
2009-05-01	02:32:00	0
2009-05-01	02:33:00	0
2009-05-01	02:34:00	25
2009-05-01	02:35:00	123
2009-05-01	02:36:00	0
2009-05-01	02:37:00	0
2009-05-01	02:38:00	0
2009-05-01	02:39:00	0
2009-05-01	02:40:00	0
2009-05-01	02:41:00	0
2009-05-01	02:42:00	0
2009-05-01	02:43:00	0
2009-05-01	02:44:00	0
2009-05-01	02:45:00	0
2009-05-01	02:46:00	0
2009-05-01	02:47:00	0
2009-05-01	02:48:00	0
2009-05-01	02:49:00	0
2009-05-01	02:50:00	0
2009-05-01	02:51:00	0
2009-05-01	02:52:00	0
2009-05-01	02:53:00	0
2009-05-01	02:54:00	0
2009-05-01	02:55:00	0
2009-05-01	02:56:00	0
2009-05-01	02:57:00	0
2009-05-01	02:58:00	0
2009-05-01	02:59:00	0
2009-05-01	03:00:00	0
2009-05-01	03:01:00	0
2009-05-01	03:02:00	0
2009-05-01	03:03:00	0
2009-05-01	03:04:00	0
2009-05-01	03:05:00	0
2009-05-01	03:06:00	0
2009-05-01	03:07:00	0
2009-05-01	03:08:00	0
2009-05-01	03:09:00	0
2009-05-01	03:10:00	0
2009-05-01	03:11:00	0
2009-05-01	03:12:00	0
2009-05-01	03:13:00	0
2009-05-01	03:14:00	0
2009-05-01	03:15:00	0
2009-05-01	03:16:00	0
2009-05-01	03:17:00	0
2009-05-01	03:18:00	0
2009-05-01	03:19:00	0
2009-05-01	03:20:00	0
2009-05-01	03:21:00	0
2009-05-01	03:22:00	0
2009-05-01	03:23:00	0
2009-05-01	03:24:00	0
2009-05-01	03:25:00	0
2009-05-01	03:26:00	0
2009-05-01	03:27:00	0
2009-05-01	03:28:00	0
2009-05-01	03:29:00	0
2009-05-01	03:30:00	0
2009-05-01	03:31:00	0
2009-05-01	03:32:00	0
2009-05-01	03:33:00	0
2009-05-01	03:34:00	0
2009-05-01	03:35:00	0
2009-05-01	03:36:00	0
2009-05-01	03:37:00	0
2009-05-01	03:38:00	0
2009-05-01	03:39:00	0
2009-05-01	03:40:00	0
2009-05-01	03:41:00	0
2009-05-01	03:42:00	0
2009-05-01	03:43:00	0
2009-05-01	03:44:00	0
2009-05-01	03:45:00	0
2009-05-01	03:46:00	0
2009-05-01	03:47:00	0
2009-05-01	03:48:00	0
2009-05-01	03:49:00	0
2009-05-01	03:50:00	0
2009-05-01	03:51:00	0
2009-05-01	03:52:00	0
2009-05-01	03:53:00	0
2009-05-01	03:54:00	0
2009-05-01	03:55:00	0
2009-05-01	03:56:00	0
2009-05-01	03:57:00	0
2009-05-01	03:58:00	0
2009-05-01	03:59:00	0
2009-05-01	04:00:00	0
2009-05-01	04:01:00	0
2009-05-01	04:02:00	0
2009-05-01	04:03:00	0
2009-05-01	04:04:00	0
2009-05-01	04:05:00	0
2009-05-01	04:06:00	0
2009-05-01	04:07:00	0
2009-05-01	04:08:00	0
2009-05-01	04:09:00	0
2009-05-01	04:10:00	0
2009-05-01	04:11:00	0
2009-05-01	04:12:00	0
2009-05-01	04:13:00	0
2009-05-01	04:14:00	0
2009-05-01	04:15:00	0
2009-05-01	04:16:00	0
2009-05-01	04:17:00	0
2009-05-01	04:18:00	0
2009-05-01	04:19:00	0
2009-05-01	04:20:00	0
2009-05-01	04:21:00	0
2009-05-01	04:22:00	0
2009-05-01	04:23:00	12
2009-05-01	04:24:00	12
2009-05-01	04:25:00	0
2009-05-01	04:26:00	0
2009-05-01	04:27:00	0
2009-05-01	04:28:00	12
2009-05-01	04:29:00	135
2009-05-01	04:30:00	49
2009-05-01	04:31:00	0
2009-05-01	04:32:00	0
2009-05-01	04:33:00	0
2009-05-01	04:34:00	74
2009-05-01	04:35:00	0
2009-05-01	04:36:00	0
2009-05-01	04:37:00	0
2009-05-01	04:38:00	0
2009-05-01	04:39:00	0
2009-05-01	04:40:00	0
2009-05-01	04:41:00	0
2009-05-01	04:42:00	0
2009-05-01	04:43:00	0
2009-05-01	04:44:00	0
2009-05-01	04:45:00	0
2009-05-01	04:46:00	0
2009-05-01	04:47:00	0
2009-05-01	04:48:00	0
2009-05-01	04:49:00	0
2009-05-01	04:50:00	0
2009-05-01	04:51:00	0
2009-05-01	04:52:00	0
2009-05-01	04:53:00	0
2009-05-01	04:54:00	0
2009-05-01	04:55:00	0
2009-05-01	04:56:00	0
2009-05-01	04:57:00	0
2009-05-01	04:58:00	0
2009-05-01	04:59:00	0
2009-05-01	05:00:00	0
2009-05-01	05:01:00	0
2009-05-01	05:02:00	0
2009-05-01	05:03:00	0
2009-05-01	05:04:00	0
2009-05-01	05:05:00	0
2009-05-01	05:06:00	0
2009-05-01	05:07:00	0
2009-05-01	05:08:00	0
2009-05-01	05:09:00	0
2009-05-01	05:10:00	0
2009-05-01	05:11:00	0
2009-05-01	05:12:00	0
2009-05-01	05:13:00	0
2009-05-01	05:14:00	0
2009-05-01	05:15:00	0
2009-05-01	05:16:00	0
2009-05-01	05:17:00	0
2009-05-01	05:18:00	0
2009-05-01	05:19:00	0
2009-05-01	05:20:00	0
2009-05-01	05:21:00	0
2009-05-01	05:22:00	0
2009-05-01	05:23:00	0
2009-05-01	05:24:00	0
2009-05-01	05:25:00	49
2009-05-01	05:26:00	0
2009-05-01	05:27:00	0
2009-05-01	05:28:00	0
2009-05-01	05:29:00	0
2009-05-01	05:30:00	0
2009-05-01	05:31:00	0
2009-05-01	05:32:00	0
2009-05-01	05:33:00	0
2009-05-01	05:34:00	0
2009-05-01	05:35:00	0
2009-05-01	05:36:00	0
2009-05-01	05:37:00	0
2009-05-01	05:38:00	0
2009-05-01	05:39:00	12
2009-05-01	05:40:00	0
2009-05-01	05:41:00	0
2009-05-01	05:42:00	0
2009-05-01	05:43:00	0
2009-05-01	05:44:00	0
2009-05-01	05:45:00	0
2009-05-01	05:46:00	0
2009-05-01	05:47:00	0
2009-05-01	05:48:00	0
2009-05-01	05:49:00	0
2009-05-01	05:50:00	148
2009-05-01	05:51:00	0
2009-05-01	05:52:00	0
2009-05-01	05:53:00	0
2009-05-01	05:54:00	0
2009-05-01	05:55:00	0
2009-05-01	05:56:00	0
2009-05-01	05:57:00	0
2009-05-01	05:58:00	0
2009-05-01	05:59:00	0
2009-05-01	06:00:00	0
2009-05-01	06:01:00	0
2009-05-01	06:02:00	0
2009-05-01	06:03:00	0
2009-05-01	06:04:00	0
2009-05-01	06:05:00	0
2009-05-01	06:06:00	0
2009-05-01	06:07:00	0
2009-05-01	06:08:00	0
2009-05-01	06:09:00	0
2009-05-01	06:10:00	0
2009-05-01	06:11:00	0
2009-05-01	06:12:00	0
2009-05-01	06:13:00	0
2009-05-01	06:14:00	0
2009-05-01	06:15:00	0
2009-05-01	06:16:00	0
2009-05-01	06:17:00	0
2009-05-01	06:18:00	0
2009-05-01	06:19:00	0
2009-05-01	06:20:00	0
2009-05-01	06:21:00	0
2009-05-01	06:22:00	12
2009-05-01	06:23:00	0
2009-05-01	06:24:00	0
2009-05-01	06:25:00	0
2009-05-01	06:26:00	0
2009-05-01	06:27:00	0
2009-05-01	06:28:00	0
2009-05-01	06:29:00	160
2009-05-01	06:30:00	25
2009-05-01	06:31:00	12
2009-05-01	06:32:00	0
2009-05-01	06:33:00	98
2009-05-01	06:34:00	219
2009-05-01	06:35:00	0
2009-05-01	06:36:00	0
2009-05-01	06:37:00	0
2009-05-01	06:38:00	0
2009-05-01	06:39:00	0
2009-05-01	06:40:00	62
2009-05-01	06:41:00	263
2009-05-01	06:42:00	175
2009-05-01	06:43:00	175
2009-05-01	06:44:00	219
2009-05-01	06:45:00	0
2009-05-01	06:46:00	25
2009-05-01	06:47:00	12
2009-05-01	06:48:00	0
2009-05-01	06:49:00	0
2009-05-01	06:50:00	0
2009-05-01	06:51:00	0
2009-05-01	06:52:00	0
2009-05-01	06:53:00	219
2009-05-01	06:54:00	460
2009-05-01	06:55:00	37
2009-05-01	06:56:00	123
2009-05-01	06:57:00	190
2009-05-01	06:58:00	263
2009-05-01	06:59:00	308
2009-05-01	07:00:00	219
2009-05-01	07:01:00	497
2009-05-01	07:02:00	340
2009-05-01	07:03:00	615
2009-05-01	07:04:00	374
2009-05-01	07:05:00	409
2009-05-01	07:06:00	278
2009-05-01	07:07:00	49
2009-05-01	07:08:00	175
2009-05-01	07:09:00	160
2009-05-01	07:10:00	443
2009-05-01	07:11:00	98
2009-05-01	07:12:00	0
2009-05-01	07:13:00	0
2009-05-01	07:14:00	0
2009-05-01	07:15:00	0
2009-05-01	07:16:00	0
2009-05-01	07:17:00	0
2009-05-01	07:18:00	0
2009-05-01	07:19:00	0
2009-05-01	07:20:00	0
2009-05-01	07:21:00	0
2009-05-01	07:22:00	0
2009-05-01	07:23:00	12
2009-05-01	07:24:00	0
2009-05-01	07:25:00	0
2009-05-01	07:26:00	0
2009-05-01	07:27:00	0
2009-05-01	07:28:00	0
2009-05-01	07:29:00	0
2009-05-01	07:30:00	0
2009-05-01	07:31:00	0
2009-05-01	07:32:00	0
2009-05-01	07:33:00	0
2009-05-01	07:34:00	0
2009-05-01	07:35:00	0
2009-05-01	07:36:00	25
2009-05-01	07:37:00	0
2009-05-01	07:38:00	0
2009-05-01	07:39:00	0
2009-05-01	07:40:00	0
2009-05-01	07:41:00	0
2009-05-01	07:42:00	0
2009-05-01	07:43:00	123
2009-05-01	07:44:00	0
2009-05-01	07:45:00	0
2009-05-01	07:46:00	0
2009-05-01	07:47:00	0
2009-05-01	07:48:00	0
2009-05-01	07:49:00	0
2009-05-01	07:50:00	12
2009-05-01	07:51:00	0
2009-05-01	07:52:00	0
2009-05-01	07:53:00	0
2009-05-01	07:54:00	0
2009-05-01	07:55:00	0
2009-05-01	07:56:00	0
2009-05-01	07:57:00	0
2009-05-01	07:58:00	0
2009-05-01	07:59:00	0
2009-05-01	08:00:00	12
2009-05-01	08:01:00	0
2009-05-01	08:02:00	49
2009-05-01	08:03:00	234
2009-05-01	08:04:00	12
2009-05-01	08:05:00	0
2009-05-01	08:06:00	0
2009-05-01	08:07:00	0
2009-05-01	08:08:00	0
2009-05-01	08:09:00	0
2009-05-01	08:10:00	0
2009-05-01	08:11:00	0
2009-05-01	08:12:00	0
2009-05-01	08:13:00	0
2009-05-01	08:14:00	0
2009-05-01	08:15:00	0
2009-05-01	08:16:00	0
2009-05-01	08:17:00	0
2009-05-01	08:18:00	0
2009-05-01	08:19:00	0
2009-05-01	08:20:00	0
2009-05-01	08:21:00	0
2009-05-01	08:22:00	0
2009-05-01	08:23:00	0
2009-05-01	08:24:00	0
2009-05-01	08:25:00	0
2009-05-01	08:26:00	0
2009-05-01	08:27:00	0
2009-05-01	08:28:00	0
2009-05-01	08:29:00	0
2009-05-01	08:30:00	0
2009-05-01	08:31:00	0
2009-05-01	08:32:00	0
2009-05-01	08:33:00	0
2009-05-01	08:34:00	0
2009-05-01	08:35:00	0
2009-05-01	08:36:00	0
2009-05-01	08:37:00	0
2009-05-01	08:38:00	0
2009-05-01	08:39:00	0
2009-05-01	08:40:00	0
2009-05-01	08:41:00	0
2009-05-01	08:42:00	0
2009-05-01	08:43:00	0
2009-05-01	08:44:00	0
2009-05-01	08:45:00	0
2009-05-01	08:46:00	25
2009-05-01	08:47:00	0
2009-05-01	08:48:00	0
2009-05-01	08:49:00	0
2009-05-01	08:50:00	0
2009-05-01	08:51:00	0
2009-05-01	08:52:00	0
2009-05-01	08:53:00	86
2009-05-01	08:54:00	0
2009-05-01	08:55:00	0
2009-05-01	08:56:00	0
2009-05-01	08:57:00	0
2009-05-01	08:58:00	0
2009-05-01	08:59:00	0
2009-05-01	09:00:00	25
2009-05-01	09:01:00	0
2009-05-01	09:02:00	0
2009-05-01	09:03:00	0
2009-05-01	09:04:00	0
2009-05-01	09:05:00	0
2009-05-01	09:06:00	0
2009-05-01	09:07:00	0
2009-05-01	09:08:00	12
[truncated: 19,611 more rows]
