# Supplementary material for: Initial evaluation of nighttime restlessness in a naturally occurring canine model of osteoarthritis pain
Source: PeerJ. 2015 Feb 17;3:e772. doi: 10.7717/peerj.772 (PMC4340376; doi:10.7717/peerj.772)
Supplement: Supplemental Information 36 [file peerj-03-772-s036.xlsx]

## Sheet: Office Visits
Visit Date	Visit Number
2009-03-05 06:00:00	1
2009-03-19 06:00:00	2
2009-04-02 06:00:00	3
2009-04-16 06:00:00	4
2009-04-30 06:00:00	5
2009-05-14 06:00:00	6
2009-05-28 06:00:00	7

## Sheet: 36_Data
Segment	DateTime	Activity	Hour	Quadrant	Study Day	Weekday
1	2009-03-12 06:01:00	0	6	2	7	5
1	2009-03-12 06:02:00	0	6	2	7	5
1	2009-03-12 06:03:00	0	6	2	7	5
1	2009-03-12 06:04:00	0	6	2	7	5
1	2009-03-12 06:05:00	0	6	2	7	5
1	2009-03-12 06:06:00	0	6	2	7	5
1	2009-03-12 06:07:00	0	6	2	7	5
1	2009-03-12 06:08:00	0	6	2	7	5
1	2009-03-12 06:09:00	0	6	2	7	5
1	2009-03-12 06:10:00	84	6	2	7	5
1	2009-03-12 06:11:00	28	6	2	7	5
1	2009-03-12 06:12:00	0	6	2	7	5
1	2009-03-12 06:13:00	0	6	2	7	5
1	2009-03-12 06:14:00	0	6	2	7	5
1	2009-03-12 06:15:00	47	6	2	7	5
1	2009-03-12 06:16:00	24	6	2	7	5
1	2009-03-12 06:17:00	0	6	2	7	5
1	2009-03-12 06:18:00	0	6	2	7	5
1	2009-03-12 06:19:00	214	6	2	7	5
1	2009-03-12 06:20:00	0	6	2	7	5
1	2009-03-12 06:21:00	0	6	2	7	5
1	2009-03-12 06:22:00	0	6	2	7	5
1	2009-03-12 06:23:00	0	6	2	7	5
1	2009-03-12 06:24:00	0	6	2	7	5
1	2009-03-12 06:25:00	0	6	2	7	5
1	2009-03-12 06:26:00	0	6	2	7	5
1	2009-03-12 06:27:00	0	6	2	7	5
1	2009-03-12 06:28:00	0	6	2	7	5
1	2009-03-12 06:29:00	0	6	2	7	5
1	2009-03-12 06:30:00	0	6	2	7	5
1	2009-03-12 06:31:00	0	6	2	7	5
1	2009-03-12 06:32:00	9	6	2	7	5
1	2009-03-12 06:33:00	0	6	2	7	5
1	2009-03-12 06:34:00	0	6	2	7	5
1	2009-03-12 06:35:00	0	6	2	7	5
1	2009-03-12 06:36:00	33	6	2	7	5
1	2009-03-12 06:37:00	24	6	2	7	5
1	2009-03-12 06:38:00	9	6	2	7	5
1	2009-03-12 06:39:00	0	6	2	7	5
1	2009-03-12 06:40:00	1237	6	2	7	5
1	2009-03-12 06:41:00	1309	6	2	7	5
1	2009-03-12 06:42:00	705	6	2	7	5
1	2009-03-12 06:43:00	1384	6	2	7	5
1	2009-03-12 06:44:00	1575	6	2	7	5
1	2009-03-12 06:45:00	62	6	2	7	5
1	2009-03-12 06:46:00	0	6	2	7	5
1	2009-03-12 06:47:00	33	6	2	7	5
1	2009-03-12 06:48:00	38	6	2	7	5
1	2009-03-12 06:49:00	0	6	2	7	5
1	2009-03-12 06:50:00	0	6	2	7	5
1	2009-03-12 06:51:00	47	6	2	7	5
1	2009-03-12 06:52:00	0	6	2	7	5
1	2009-03-12 06:53:00	14	6	2	7	5
1	2009-03-12 06:54:00	24	6	2	7	5
1	2009-03-12 06:55:00	14	6	2	7	5
1	2009-03-12 06:56:00	43	6	2	7	5
1	2009-03-12 06:57:00	578	6	2	7	5
1	2009-03-12 06:58:00	592	6	2	7	5
1	2009-03-12 06:59:00	192	6	2	7	5
1	2009-03-12 07:00:00	304	6	2	7	5
1	2009-03-12 07:01:00	323	7	2	7	5
1	2009-03-12 07:02:00	222	7	2	7	5
1	2009-03-12 07:03:00	101	7	2	7	5
1	2009-03-12 07:04:00	0	7	2	7	5
1	2009-03-12 07:05:00	38	7	2	7	5
1	2009-03-12 07:06:00	0	7	2	7	5
1	2009-03-12 07:07:00	0	7	2	7	5
1	2009-03-12 07:08:00	28	7	2	7	5
1	2009-03-12 07:09:00	38	7	2	7	5
1	2009-03-12 07:10:00	0	7	2	7	5
1	2009-03-12 07:11:00	0	7	2	7	5
1	2009-03-12 07:12:00	0	7	2	7	5
1	2009-03-12 07:13:00	0	7	2	7	5
1	2009-03-12 07:14:00	0	7	2	7	5
1	2009-03-12 07:15:00	19	7	2	7	5
1	2009-03-12 07:16:00	38	7	2	7	5
1	2009-03-12 07:17:00	28	7	2	7	5
1	2009-03-12 07:18:00	0	7	2	7	5
1	2009-03-12 07:19:00	0	7	2	7	5
1	2009-03-12 07:20:00	67	7	2	7	5
1	2009-03-12 07:21:00	0	7	2	7	5
1	2009-03-12 07:22:00	0	7	2	7	5
1	2009-03-12 07:23:00	0	7	2	7	5
1	2009-03-12 07:24:00	0	7	2	7	5
1	2009-03-12 07:25:00	0	7	2	7	5
1	2009-03-12 07:26:00	0	7	2	7	5
1	2009-03-12 07:27:00	0	7	2	7	5
1	2009-03-12 07:28:00	28	7	2	7	5
1	2009-03-12 07:29:00	5	7	2	7	5
1	2009-03-12 07:30:00	0	7	2	7	5
1	2009-03-12 07:31:00	33	7	2	7	5
1	2009-03-12 07:32:00	0	7	2	7	5
1	2009-03-12 07:33:00	0	7	2	7	5
1	2009-03-12 07:34:00	0	7	2	7	5
1	2009-03-12 07:35:00	0	7	2	7	5
1	2009-03-12 07:36:00	0	7	2	7	5
1	2009-03-12 07:37:00	0	7	2	7	5
1	2009-03-12 07:38:00	0	7	2	7	5
1	2009-03-12 07:39:00	0	7	2	7	5
1	2009-03-12 07:40:00	14	7	2	7	5
1	2009-03-12 07:41:00	0	7	2	7	5
1	2009-03-12 07:42:00	0	7	2	7	5
1	2009-03-12 07:43:00	0	7	2	7	5
1	2009-03-12 07:44:00	0	7	2	7	5
1	2009-03-12 07:45:00	52	7	2	7	5
1	2009-03-12 07:46:00	157	7	2	7	5
1	2009-03-12 07:47:00	0	7	2	7	5
1	2009-03-12 07:48:00	0	7	2	7	5
1	2009-03-12 07:49:00	0	7	2	7	5
1	2009-03-12 07:50:00	24	7	2	7	5
1	2009-03-12 07:51:00	14	7	2	7	5
1	2009-03-12 07:52:00	0	7	2	7	5
1	2009-03-12 07:53:00	0	7	2	7	5
1	2009-03-12 07:54:00	0	7	2	7	5
1	2009-03-12 07:55:00	0	7	2	7	5
1	2009-03-12 07:56:00	0	7	2	7	5
1	2009-03-12 07:57:00	0	7	2	7	5
1	2009-03-12 07:58:00	0	7	2	7	5
1	2009-03-12 07:59:00	0	7	2	7	5
1	2009-03-12 08:00:00	0	7	2	7	5
1	2009-03-12 08:01:00	0	8	2	7	5
1	2009-03-12 08:02:00	9	8	2	7	5
1	2009-03-12 08:03:00	0	8	2	7	5
1	2009-03-12 08:04:00	0	8	2	7	5
1	2009-03-12 08:05:00	0	8	2	7	5
1	2009-03-12 08:06:00	0	8	2	7	5
1	2009-03-12 08:07:00	0	8	2	7	5
1	2009-03-12 08:08:00	0	8	2	7	5
1	2009-03-12 08:09:00	0	8	2	7	5
1	2009-03-12 08:10:00	0	8	2	7	5
1	2009-03-12 08:11:00	67	8	2	7	5
1	2009-03-12 08:12:00	0	8	2	7	5
1	2009-03-12 08:13:00	0	8	2	7	5
1	2009-03-12 08:14:00	0	8	2	7	5
1	2009-03-12 08:15:00	0	8	2	7	5
1	2009-03-12 08:16:00	0	8	2	7	5
1	2009-03-12 08:17:00	0	8	2	7	5
1	2009-03-12 08:18:00	0	8	2	7	5
1	2009-03-12 08:19:00	0	8	2	7	5
1	2009-03-12 08:20:00	0	8	2	7	5
1	2009-03-12 08:21:00	0	8	2	7	5
1	2009-03-12 08:22:00	0	8	2	7	5
1	2009-03-12 08:23:00	0	8	2	7	5
1	2009-03-12 08:24:00	0	8	2	7	5
1	2009-03-12 08:25:00	0	8	2	7	5
1	2009-03-12 08:26:00	0	8	2	7	5
1	2009-03-12 08:27:00	47	8	2	7	5
1	2009-03-12 08:28:00	0	8	2	7	5
1	2009-03-12 08:29:00	0	8	2	7	5
1	2009-03-12 08:30:00	0	8	2	7	5
1	2009-03-12 08:31:00	0	8	2	7	5
1	2009-03-12 08:32:00	0	8	2	7	5
1	2009-03-12 08:33:00	0	8	2	7	5
1	2009-03-12 08:34:00	0	8	2	7	5
1	2009-03-12 08:35:00	0	8	2	7	5
1	2009-03-12 08:36:00	0	8	2	7	5
1	2009-03-12 08:37:00	0	8	2	7	5
1	2009-03-12 08:38:00	0	8	2	7	5
1	2009-03-12 08:39:00	0	8	2	7	5
1	2009-03-12 08:40:00	0	8	2	7	5
1	2009-03-12 08:41:00	0	8	2	7	5
1	2009-03-12 08:42:00	0	8	2	7	5
1	2009-03-12 08:43:00	5	8	2	7	5
1	2009-03-12 08:44:00	0	8	2	7	5
1	2009-03-12 08:45:00	0	8	2	7	5
1	2009-03-12 08:46:00	0	8	2	7	5
1	2009-03-12 08:47:00	0	8	2	7	5
1	2009-03-12 08:48:00	0	8	2	7	5
1	2009-03-12 08:49:00	0	8	2	7	5
1	2009-03-12 08:50:00	67	8	2	7	5
1	2009-03-12 08:51:00	38	8	2	7	5
1	2009-03-12 08:52:00	0	8	2	7	5
1	2009-03-12 08:53:00	84	8	2	7	5
1	2009-03-12 08:54:00	0	8	2	7	5
1	2009-03-12 08:55:00	0	8	2	7	5
1	2009-03-12 08:56:00	43	8	2	7	5
1	2009-03-12 08:57:00	0	8	2	7	5
1	2009-03-12 08:58:00	0	8	2	7	5
1	2009-03-12 08:59:00	0	8	2	7	5
1	2009-03-12 09:00:00	0	8	2	7	5
1	2009-03-12 09:01:00	0	9	2	7	5
1	2009-03-12 09:02:00	0	9	2	7	5
1	2009-03-12 09:03:00	0	9	2	7	5
1	2009-03-12 09:04:00	0	9	2	7	5
1	2009-03-12 09:05:00	0	9	2	7	5
1	2009-03-12 09:06:00	0	9	2	7	5
1	2009-03-12 09:07:00	9	9	2	7	5
1	2009-03-12 09:08:00	0	9	2	7	5
1	2009-03-12 09:09:00	0	9	2	7	5
1	2009-03-12 09:10:00	38	9	2	7	5
1	2009-03-12 09:11:00	0	9	2	7	5
1	2009-03-12 09:12:00	0	9	2	7	5
1	2009-03-12 09:13:00	14	9	2	7	5
1	2009-03-12 09:14:00	0	9	2	7	5
1	2009-03-12 09:15:00	0	9	2	7	5
1	2009-03-12 09:16:00	0	9	2	7	5
1	2009-03-12 09:17:00	0	9	2	7	5
1	2009-03-12 09:18:00	79	9	2	7	5
1	2009-03-12 09:19:00	0	9	2	7	5
1	2009-03-12 09:20:00	0	9	2	7	5
1	2009-03-12 09:21:00	0	9	2	7	5
1	2009-03-12 09:22:00	0	9	2	7	5
1	2009-03-12 09:23:00	0	9	2	7	5
1	2009-03-12 09:24:00	0	9	2	7	5
1	2009-03-12 09:25:00	101	9	2	7	5
1	2009-03-12 09:26:00	5	9	2	7	5
1	2009-03-12 09:27:00	0	9	2	7	5
1	2009-03-12 09:28:00	0	9	2	7	5
1	2009-03-12 09:29:00	0	9	2	7	5
1	2009-03-12 09:30:00	0	9	2	7	5
1	2009-03-12 09:31:00	0	9	2	7	5
1	2009-03-12 09:32:00	0	9	2	7	5
1	2009-03-12 09:33:00	0	9	2	7	5
1	2009-03-12 09:34:00	0	9	2	7	5
1	2009-03-12 09:35:00	47	9	2	7	5
1	2009-03-12 09:36:00	0	9	2	7	5
1	2009-03-12 09:37:00	0	9	2	7	5
1	2009-03-12 09:38:00	0	9	2	7	5
1	2009-03-12 09:39:00	0	9	2	7	5
1	2009-03-12 09:40:00	0	9	2	7	5
1	2009-03-12 09:41:00	0	9	2	7	5
1	2009-03-12 09:42:00	0	9	2	7	5
1	2009-03-12 09:43:00	0	9	2	7	5
1	2009-03-12 09:44:00	0	9	2	7	5
1	2009-03-12 09:45:00	0	9	2	7	5
1	2009-03-12 09:46:00	0	9	2	7	5
1	2009-03-12 09:47:00	0	9	2	7	5
1	2009-03-12 09:48:00	0	9	2	7	5
1	2009-03-12 09:49:00	0	9	2	7	5
1	2009-03-12 09:50:00	0	9	2	7	5
1	2009-03-12 09:51:00	0	9	2	7	5
1	2009-03-12 09:52:00	0	9	2	7	5
1	2009-03-12 09:53:00	0	9	2	7	5
1	2009-03-12 09:54:00	0	9	2	7	5
1	2009-03-12 09:55:00	0	9	2	7	5
1	2009-03-12 09:56:00	0	9	2	7	5
1	2009-03-12 09:57:00	0	9	2	7	5
1	2009-03-12 09:58:00	5	9	2	7	5
1	2009-03-12 09:59:00	0	9	2	7	5
1	2009-03-12 10:00:00	0	9	2	7	5
1	2009-03-12 10:01:00	0	10	2	7	5
1	2009-03-12 10:02:00	0	10	2	7	5
1	2009-03-12 10:03:00	0	10	2	7	5
1	2009-03-12 10:04:00	0	10	2	7	5
1	2009-03-12 10:05:00	0	10	2	7	5
1	2009-03-12 10:06:00	0	10	2	7	5
1	2009-03-12 10:07:00	0	10	2	7	5
1	2009-03-12 10:08:00	0	10	2	7	5
1	2009-03-12 10:09:00	0	10	2	7	5
1	2009-03-12 10:10:00	0	10	2	7	5
1	2009-03-12 10:11:00	0	10	2	7	5
1	2009-03-12 10:12:00	0	10	2	7	5
1	2009-03-12 10:13:00	0	10	2	7	5
1	2009-03-12 10:14:00	0	10	2	7	5
1	2009-03-12 10:15:00	0	10	2	7	5
1	2009-03-12 10:16:00	0	10	2	7	5
1	2009-03-12 10:17:00	0	10	2	7	5
1	2009-03-12 10:18:00	0	10	2	7	5
1	2009-03-12 10:19:00	0	10	2	7	5
1	2009-03-12 10:20:00	0	10	2	7	5
1	2009-03-12 10:21:00	62	10	2	7	5
1	2009-03-12 10:22:00	24	10	2	7	5
1	2009-03-12 10:23:00	0	10	2	7	5
1	2009-03-12 10:24:00	24	10	2	7	5
1	2009-03-12 10:25:00	0	10	2	7	5
1	2009-03-12 10:26:00	0	10	2	7	5
1	2009-03-12 10:27:00	0	10	2	7	5
1	2009-03-12 10:28:00	67	10	2	7	5
1	2009-03-12 10:29:00	0	10	2	7	5
1	2009-03-12 10:30:00	0	10	2	7	5
1	2009-03-12 10:31:00	0	10	2	7	5
1	2009-03-12 10:32:00	19	10	2	7	5
1	2009-03-12 10:33:00	19	10	2	7	5
1	2009-03-12 10:34:00	0	10	2	7	5
1	2009-03-12 10:35:00	0	10	2	7	5
1	2009-03-12 10:36:00	0	10	2	7	5
1	2009-03-12 10:37:00	0	10	2	7	5
1	2009-03-12 10:38:00	0	10	2	7	5
1	2009-03-12 10:39:00	0	10	2	7	5
1	2009-03-12 10:40:00	0	10	2	7	5
1	2009-03-12 10:41:00	73	10	2	7	5
1	2009-03-12 10:42:00	0	10	2	7	5
1	2009-03-12 10:43:00	0	10	2	7	5
1	2009-03-12 10:44:00	0	10	2	7	5
1	2009-03-12 10:45:00	0	10	2	7	5
1	2009-03-12 10:46:00	0	10	2	7	5
1	2009-03-12 10:47:00	0	10	2	7	5
1	2009-03-12 10:48:00	0	10	2	7	5
1	2009-03-12 10:49:00	0	10	2	7	5
1	2009-03-12 10:50:00	0	10	2	7	5
1	2009-03-12 10:51:00	0	10	2	7	5
1	2009-03-12 10:52:00	0	10	2	7	5
1	2009-03-12 10:53:00	5	10	2	7	5
1	2009-03-12 10:54:00	5	10	2	7	5
1	2009-03-12 10:55:00	433	10	2	7	5
1	2009-03-12 10:56:00	323	10	2	7	5
1	2009-03-12 10:57:00	5	10	2	7	5
1	2009-03-12 10:58:00	0	10	2	7	5
1	2009-03-12 10:59:00	19	10	2	7	5
1	2009-03-12 11:00:00	0	10	2	7	5
1	2009-03-12 11:01:00	62	11	2	7	5
1	2009-03-12 11:02:00	101	11	2	7	5
1	2009-03-12 11:03:00	578	11	2	7	5
1	2009-03-12 11:04:00	647	11	2	7	5
1	2009-03-12 11:05:00	705	11	2	7	5
1	2009-03-12 11:06:00	207	11	2	7	5
1	2009-03-12 11:07:00	0	11	2	7	5
1	2009-03-12 11:08:00	5	11	2	7	5
1	2009-03-12 11:09:00	0	11	2	7	5
1	2009-03-12 11:10:00	0	11	2	7	5
1	2009-03-12 11:11:00	0	11	2	7	5
1	2009-03-12 11:12:00	0	11	2	7	5
1	2009-03-12 11:13:00	0	11	2	7	5
1	2009-03-12 11:14:00	0	11	2	7	5
1	2009-03-12 11:15:00	0	11	2	7	5
1	2009-03-12 11:16:00	0	11	2	7	5
1	2009-03-12 11:17:00	381	11	2	7	5
1	2009-03-12 11:18:00	0	11	2	7	5
1	2009-03-12 11:19:00	38	11	2	7	5
1	2009-03-12 11:20:00	0	11	2	7	5
1	2009-03-12 11:21:00	0	11	2	7	5
1	2009-03-12 11:22:00	0	11	2	7	5
1	2009-03-12 11:23:00	0	11	2	7	5
1	2009-03-12 11:24:00	0	11	2	7	5
1	2009-03-12 11:25:00	14	11	2	7	5
1	2009-03-12 11:26:00	0	11	2	7	5
1	2009-03-12 11:27:00	0	11	2	7	5
1	2009-03-12 11:28:00	0	11	2	7	5
1	2009-03-12 11:29:00	5	11	2	7	5
1	2009-03-12 11:30:00	67	11	2	7	5
1	2009-03-12 11:31:00	0	11	2	7	5
1	2009-03-12 11:32:00	0	11	2	7	5
1	2009-03-12 11:33:00	0	11	2	7	5
1	2009-03-12 11:34:00	0	11	2	7	5
1	2009-03-12 11:35:00	0	11	2	7	5
1	2009-03-12 11:36:00	0	11	2	7	5
1	2009-03-12 11:37:00	0	11	2	7	5
1	2009-03-12 11:38:00	0	11	2	7	5
1	2009-03-12 11:39:00	0	11	2	7	5
1	2009-03-12 11:40:00	0	11	2	7	5
1	2009-03-12 11:41:00	0	11	2	7	5
1	2009-03-12 11:42:00	0	11	2	7	5
1	2009-03-12 11:43:00	0	11	2	7	5
1	2009-03-12 11:44:00	0	11	2	7	5
1	2009-03-12 11:45:00	28	11	2	7	5
1	2009-03-12 11:46:00	0	11	2	7	5
1	2009-03-12 11:47:00	0	11	2	7	5
1	2009-03-12 11:48:00	0	11	2	7	5
1	2009-03-12 11:49:00	0	11	2	7	5
1	2009-03-12 11:50:00	0	11	2	7	5
1	2009-03-12 11:51:00	0	11	2	7	5
1	2009-03-12 11:52:00	0	11	2	7	5
1	2009-03-12 11:53:00	0	11	2	7	5
1	2009-03-12 11:54:00	0	11	2	7	5
1	2009-03-12 11:55:00	0	11	2	7	5
1	2009-03-12 11:56:00	0	11	2	7	5
1	2009-03-12 11:57:00	0	11	2	7	5
1	2009-03-12 11:58:00	73	11	2	7	5
1	2009-03-12 11:59:00	90	11	2	7	5
1	2009-03-12 12:00:00	24	11	2	7	5
1	2009-03-12 12:01:00	38	12	3	7	5
1	2009-03-12 12:02:00	5	12	3	7	5
1	2009-03-12 12:03:00	24	12	3	7	5
1	2009-03-12 12:04:00	43	12	3	7	5
1	2009-03-12 12:05:00	24	12	3	7	5
1	2009-03-12 12:06:00	67	12	3	7	5
1	2009-03-12 12:07:00	24	12	3	7	5
1	2009-03-12 12:08:00	14	12	3	7	5
1	2009-03-12 12:09:00	192	12	3	7	5
1	2009-03-12 12:10:00	96	12	3	7	5
1	2009-03-12 12:11:00	0	12	3	7	5
1	2009-03-12 12:12:00	0	12	3	7	5
1	2009-03-12 12:13:00	84	12	3	7	5
1	2009-03-12 12:14:00	0	12	3	7	5
1	2009-03-12 12:15:00	0	12	3	7	5
1	2009-03-12 12:16:00	38	12	3	7	5
1	2009-03-12 12:17:00	0	12	3	7	5
1	2009-03-12 12:18:00	19	12	3	7	5
1	2009-03-12 12:19:00	0	12	3	7	5
1	2009-03-12 12:20:00	52	12	3	7	5
1	2009-03-12 12:21:00	73	12	3	7	5
1	2009-03-12 12:22:00	171	12	3	7	5
1	2009-03-12 12:23:00	0	12	3	7	5
1	2009-03-12 12:24:00	0	12	3	7	5
1	2009-03-12 12:25:00	578	12	3	7	5
1	2009-03-12 12:26:00	1146	12	3	7	5
1	2009-03-12 12:27:00	1237	12	3	7	5
1	2009-03-12 12:28:00	245	12	3	7	5
1	2009-03-12 12:29:00	314	12	3	7	5
1	2009-03-12 12:30:00	433	12	3	7	5
1	2009-03-12 12:31:00	539	12	3	7	5
1	2009-03-12 12:32:00	262	12	3	7	5
1	2009-03-12 12:33:00	1575	12	3	7	5
1	2009-03-12 12:34:00	3056	12	3	7	5
1	2009-03-12 12:35:00	1168	12	3	7	5
1	2009-03-12 12:36:00	1951	12	3	7	5
1	2009-03-12 12:37:00	1384	12	3	7	5
1	2009-03-12 12:38:00	381	12	3	7	5
1	2009-03-12 12:39:00	199	12	3	7	5
1	2009-03-12 12:40:00	296	12	3	7	5
1	2009-03-12 12:41:00	222	12	3	7	5
1	2009-03-12 12:42:00	433	12	3	7	5
1	2009-03-12 12:43:00	1917	12	3	7	5
1	2009-03-12 12:44:00	4630	12	3	7	5
1	2009-03-12 12:45:00	2905	12	3	7	5
1	2009-03-12 12:46:00	2578	12	3	7	5
1	2009-03-12 12:47:00	2623	12	3	7	5
1	2009-03-12 12:48:00	1191	12	3	7	5
1	2009-03-12 12:49:00	296	12	3	7	5
1	2009-03-12 12:50:00	33	12	3	7	5
1	2009-03-12 12:51:00	0	12	3	7	5
1	2009-03-12 12:52:00	0	12	3	7	5
1	2009-03-12 12:53:00	905	12	3	7	5
1	2009-03-12 12:54:00	817	12	3	7	5
1	2009-03-12 12:55:00	52	12	3	7	5
1	2009-03-12 12:56:00	2954	12	3	7	5
1	2009-03-12 12:57:00	5541	12	3	7	5
1	2009-03-12 12:58:00	3736	12	3	7	5
1	2009-03-12 12:59:00	3380	12	3	7	5
1	2009-03-12 13:00:00	5541	12	3	7	5
1	2009-03-12 13:01:00	2534	13	3	7	5
1	2009-03-12 13:02:00	157	13	3	7	5
1	2009-03-12 13:03:00	144	13	3	7	5
1	2009-03-12 13:04:00	38	13	3	7	5
1	2009-03-12 13:05:00	151	13	3	7	5
1	2009-03-12 13:06:00	199	13	3	7	5
1	2009-03-12 13:07:00	137	13	3	7	5
1	2009-03-12 13:08:00	28	13	3	7	5
1	2009-03-12 13:09:00	28	13	3	7	5
1	2009-03-12 13:10:00	157	13	3	7	5
1	2009-03-12 13:11:00	96	13	3	7	5
1	2009-03-12 13:12:00	96	13	3	7	5
1	2009-03-12 13:13:00	84	13	3	7	5
1	2009-03-12 13:14:00	96	13	3	7	5
1	2009-03-12 13:15:00	124	13	3	7	5
1	2009-03-12 13:16:00	119	13	3	7	5
1	2009-03-12 13:17:00	0	13	3	7	5
1	2009-03-12 13:18:00	57	13	3	7	5
1	2009-03-12 13:19:00	0	13	3	7	5
1	2009-03-12 13:20:00	0	13	3	7	5
1	2009-03-12 13:21:00	0	13	3	7	5
1	2009-03-12 13:22:00	14	13	3	7	5
1	2009-03-12 13:23:00	0	13	3	7	5
1	2009-03-12 13:24:00	67	13	3	7	5
1	2009-03-12 13:25:00	0	13	3	7	5
1	2009-03-12 13:26:00	0	13	3	7	5
1	2009-03-12 13:27:00	0	13	3	7	5
1	2009-03-12 13:28:00	0	13	3	7	5
1	2009-03-12 13:29:00	0	13	3	7	5
1	2009-03-12 13:30:00	73	13	3	7	5
1	2009-03-12 13:31:00	84	13	3	7	5
1	2009-03-12 13:32:00	199	13	3	7	5
1	2009-03-12 13:33:00	144	13	3	7	5
1	2009-03-12 13:34:00	177	13	3	7	5
1	2009-03-12 13:35:00	270	13	3	7	5
1	2009-03-12 13:36:00	84	13	3	7	5
1	2009-03-12 13:37:00	62	13	3	7	5
1	2009-03-12 13:38:00	0	13	3	7	5
1	2009-03-12 13:39:00	0	13	3	7	5
1	2009-03-12 13:40:00	5	13	3	7	5
1	2009-03-12 13:41:00	0	13	3	7	5
1	2009-03-12 13:42:00	0	13	3	7	5
1	2009-03-12 13:43:00	0	13	3	7	5
1	2009-03-12 13:44:00	0	13	3	7	5
1	2009-03-12 13:45:00	0	13	3	7	5
1	2009-03-12 13:46:00	199	13	3	7	5
1	2009-03-12 13:47:00	675	13	3	7	5
1	2009-03-12 13:48:00	19	13	3	7	5
1	2009-03-12 13:49:00	28	13	3	7	5
1	2009-03-12 13:50:00	24	13	3	7	5
1	2009-03-12 13:51:00	67	13	3	7	5
1	2009-03-12 13:52:00	0	13	3	7	5
1	2009-03-12 13:53:00	0	13	3	7	5
1	2009-03-12 13:54:00	84	13	3	7	5
1	2009-03-12 13:55:00	5	13	3	7	5
1	2009-03-12 13:56:00	0	13	3	7	5
1	2009-03-12 13:57:00	0	13	3	7	5
1	2009-03-12 13:58:00	52	13	3	7	5
1	2009-03-12 13:59:00	0	13	3	7	5
1	2009-03-12 14:00:00	0	13	3	7	5
1	2009-03-12 14:01:00	0	14	3	7	5
1	2009-03-12 14:02:00	0	14	3	7	5
1	2009-03-12 14:03:00	0	14	3	7	5
1	2009-03-12 14:04:00	0	14	3	7	5
1	2009-03-12 14:05:00	84	14	3	7	5
1	2009-03-12 14:06:00	62	14	3	7	5
1	2009-03-12 14:07:00	0	14	3	7	5
1	2009-03-12 14:08:00	0	14	3	7	5
1	2009-03-12 14:09:00	0	14	3	7	5
1	2009-03-12 14:10:00	62	14	3	7	5
1	2009-03-12 14:11:00	9	14	3	7	5
1	2009-03-12 14:12:00	0	14	3	7	5
1	2009-03-12 14:13:00	0	14	3	7	5
1	2009-03-12 14:14:00	62	14	3	7	5
1	2009-03-12 14:15:00	33	14	3	7	5
1	2009-03-12 14:16:00	73	14	3	7	5
1	2009-03-12 14:17:00	0	14	3	7	5
1	2009-03-12 14:18:00	0	14	3	7	5
1	2009-03-12 14:19:00	490	14	3	7	5
1	2009-03-12 14:20:00	1754	14	3	7	5
1	2009-03-12 14:21:00	1603	14	3	7	5
1	2009-03-12 14:22:00	1000	14	3	7	5
1	2009-03-12 14:23:00	184	14	3	7	5
1	2009-03-12 14:24:00	0	14	3	7	5
1	2009-03-12 14:25:00	0	14	3	7	5
1	2009-03-12 14:26:00	0	14	3	7	5
1	2009-03-12 14:27:00	1020	14	3	7	5
1	2009-03-12 14:28:00	1237	14	3	7	5
1	2009-03-12 14:29:00	1986	14	3	7	5
1	2009-03-12 14:30:00	942	14	3	7	5
1	2009-03-12 14:31:00	412	14	3	7	5
1	2009-03-12 14:32:00	137	14	3	7	5
1	2009-03-12 14:33:00	57	14	3	7	5
1	2009-03-12 14:34:00	5	14	3	7	5
1	2009-03-12 14:35:00	0	14	3	7	5
1	2009-03-12 14:36:00	0	14	3	7	5
1	2009-03-12 14:37:00	5	14	3	7	5
1	2009-03-12 14:38:00	0	14	3	7	5
1	2009-03-12 14:39:00	0	14	3	7	5
1	2009-03-12 14:40:00	0	14	3	7	5
1	2009-03-12 14:41:00	1261	14	3	7	5
1	2009-03-12 14:42:00	721	14	3	7	5
1	2009-03-12 14:43:00	5	14	3	7	5
1	2009-03-12 14:44:00	73	14	3	7	5
1	2009-03-12 14:45:00	9	14	3	7	5
1	2009-03-12 14:46:00	38	14	3	7	5
1	2009-03-12 14:47:00	433	14	3	7	5
1	2009-03-12 14:48:00	151	14	3	7	5
1	2009-03-12 14:49:00	869	14	3	7	5
1	2009-03-12 14:50:00	137	14	3	7	5
1	2009-03-12 14:51:00	47	14	3	7	5
1	2009-03-12 14:52:00	144	14	3	7	5
1	2009-03-12 14:53:00	90	14	3	7	5
1	2009-03-12 14:54:00	834	14	3	7	5
1	2009-03-12 14:55:00	67	14	3	7	5
1	2009-03-12 14:56:00	73	14	3	7	5
1	2009-03-12 14:57:00	57	14	3	7	5
1	2009-03-12 14:58:00	67	14	3	7	5
1	2009-03-12 14:59:00	605	14	3	7	5
1	2009-03-12 15:00:00	96	14	3	7	5
1	2009-03-12 15:01:00	5	15	3	7	5
1	2009-03-12 15:02:00	371	15	3	7	5
1	2009-03-12 15:03:00	43	15	3	7	5
1	2009-03-12 15:04:00	0	15	3	7	5
1	2009-03-12 15:05:00	0	15	3	7	5
1	2009-03-12 15:06:00	28	15	3	7	5
1	2009-03-12 15:07:00	0	15	3	7	5
1	2009-03-12 15:08:00	24	15	3	7	5
1	2009-03-12 15:09:00	43	15	3	7	5
1	2009-03-12 15:10:00	0	15	3	7	5
1	2009-03-12 15:11:00	0	15	3	7	5
1	2009-03-12 15:12:00	0	15	3	7	5
1	2009-03-12 15:13:00	0	15	3	7	5
1	2009-03-12 15:14:00	0	15	3	7	5
1	2009-03-12 15:15:00	0	15	3	7	5
1	2009-03-12 15:16:00	67	15	3	7	5
1	2009-03-12 15:17:00	14	15	3	7	5
1	2009-03-12 15:18:00	0	15	3	7	5
1	2009-03-12 15:19:00	0	15	3	7	5
1	2009-03-12 15:20:00	0	15	3	7	5
1	2009-03-12 15:21:00	0	15	3	7	5
1	2009-03-12 15:22:00	0	15	3	7	5
1	2009-03-12 15:23:00	0	15	3	7	5
1	2009-03-12 15:24:00	0	15	3	7	5
1	2009-03-12 15:25:00	0	15	3	7	5
1	2009-03-12 15:26:00	0	15	3	7	5
1	2009-03-12 15:27:00	0	15	3	7	5
1	2009-03-12 15:28:00	0	15	3	7	5
1	2009-03-12 15:29:00	0	15	3	7	5
1	2009-03-12 15:30:00	119	15	3	7	5
1	2009-03-12 15:31:00	0	15	3	7	5
1	2009-03-12 15:32:00	0	15	3	7	5
1	2009-03-12 15:33:00	0	15	3	7	5
1	2009-03-12 15:34:00	0	15	3	7	5
1	2009-03-12 15:35:00	5	15	3	7	5
1	2009-03-12 15:36:00	67	15	3	7	5
1	2009-03-12 15:37:00	304	15	3	7	5
1	2009-03-12 15:38:00	33	15	3	7	5
1	2009-03-12 15:39:00	0	15	3	7	5
1	2009-03-12 15:40:00	47	15	3	7	5
1	2009-03-12 15:41:00	0	15	3	7	5
1	2009-03-12 15:42:00	47	15	3	7	5
1	2009-03-12 15:43:00	79	15	3	7	5
1	2009-03-12 15:44:00	164	15	3	7	5
1	2009-03-12 15:45:00	14	15	3	7	5
1	2009-03-12 15:46:00	14	15	3	7	5
1	2009-03-12 15:47:00	9	15	3	7	5
1	2009-03-12 15:48:00	0	15	3	7	5
1	2009-03-12 15:49:00	0	15	3	7	5
1	2009-03-12 15:50:00	19	15	3	7	5
1	2009-03-12 15:51:00	9	15	3	7	5
1	2009-03-12 15:52:00	52	15	3	7	5
1	2009-03-12 15:53:00	0	15	3	7	5
1	2009-03-12 15:54:00	0	15	3	7	5
1	2009-03-12 15:55:00	0	15	3	7	5
1	2009-03-12 15:56:00	0	15	3	7	5
1	2009-03-12 15:57:00	0	15	3	7	5
1	2009-03-12 15:58:00	0	15	3	7	5
1	2009-03-12 15:59:00	0	15	3	7	5
1	2009-03-12 16:00:00	0	15	3	7	5
1	2009-03-12 16:01:00	0	16	3	7	5
1	2009-03-12 16:02:00	14	16	3	7	5
1	2009-03-12 16:03:00	67	16	3	7	5
1	2009-03-12 16:04:00	9	16	3	7	5
1	2009-03-12 16:05:00	0	16	3	7	5
1	2009-03-12 16:06:00	0	16	3	7	5
1	2009-03-12 16:07:00	157	16	3	7	5
1	2009-03-12 16:08:00	0	16	3	7	5
1	2009-03-12 16:09:00	0	16	3	7	5
1	2009-03-12 16:10:00	0	16	3	7	5
1	2009-03-12 16:11:00	0	16	3	7	5
1	2009-03-12 16:12:00	0	16	3	7	5
1	2009-03-12 16:13:00	0	16	3	7	5
1	2009-03-12 16:14:00	28	16	3	7	5
1	2009-03-12 16:15:00	62	16	3	7	5
1	2009-03-12 16:16:00	752	16	3	7	5
1	2009-03-12 16:17:00	9	16	3	7	5
1	2009-03-12 16:18:00	73	16	3	7	5
1	2009-03-12 16:19:00	14	16	3	7	5
1	2009-03-12 16:20:00	28	16	3	7	5
1	2009-03-12 16:21:00	79	16	3	7	5
1	2009-03-12 16:22:00	0	16	3	7	5
1	2009-03-12 16:23:00	0	16	3	7	5
1	2009-03-12 16:24:00	0	16	3	7	5
1	2009-03-12 16:25:00	0	16	3	7	5
1	2009-03-12 16:26:00	90	16	3	7	5
1	2009-03-12 16:27:00	47	16	3	7	5
1	2009-03-12 16:28:00	0	16	3	7	5
1	2009-03-12 16:29:00	43	16	3	7	5
1	2009-03-12 16:30:00	38	16	3	7	5
1	2009-03-12 16:31:00	24	16	3	7	5
1	2009-03-12 16:32:00	0	16	3	7	5
1	2009-03-12 16:33:00	0	16	3	7	5
1	2009-03-12 16:34:00	57	16	3	7	5
1	2009-03-12 16:35:00	0	16	3	7	5
1	2009-03-12 16:36:00	0	16	3	7	5
1	2009-03-12 16:37:00	43	16	3	7	5
1	2009-03-12 16:38:00	14	16	3	7	5
1	2009-03-12 16:39:00	184	16	3	7	5
1	2009-03-12 16:40:00	9	16	3	7	5
1	2009-03-12 16:41:00	14	16	3	7	5
1	2009-03-12 16:42:00	38	16	3	7	5
1	2009-03-12 16:43:00	24	16	3	7	5
1	2009-03-12 16:44:00	0	16	3	7	5
1	2009-03-12 16:45:00	675	16	3	7	5
1	2009-03-12 16:46:00	157	16	3	7	5
1	2009-03-12 16:47:00	28	16	3	7	5
1	2009-03-12 16:48:00	24	16	3	7	5
1	2009-03-12 16:49:00	0	16	3	7	5
1	2009-03-12 16:50:00	67	16	3	7	5
1	2009-03-12 16:51:00	28	16	3	7	5
1	2009-03-12 16:52:00	24	16	3	7	5
1	2009-03-12 16:53:00	5	16	3	7	5
1	2009-03-12 16:54:00	43	16	3	7	5
1	2009-03-12 16:55:00	24	16	3	7	5
1	2009-03-12 16:56:00	14	16	3	7	5
1	2009-03-12 16:57:00	0	16	3	7	5
1	2009-03-12 16:58:00	0	16	3	7	5
1	2009-03-12 16:59:00	0	16	3	7	5
1	2009-03-12 17:00:00	0	16	3	7	5
1	2009-03-12 17:01:00	24	17	3	7	5
1	2009-03-12 17:02:00	43	17	3	7	5
1	2009-03-12 17:03:00	0	17	3	7	5
1	2009-03-12 17:04:00	38	17	3	7	5
1	2009-03-12 17:05:00	47	17	3	7	5
1	2009-03-12 17:06:00	5	17	3	7	5
1	2009-03-12 17:07:00	0	17	3	7	5
1	2009-03-12 17:08:00	0	17	3	7	5
1	2009-03-12 17:09:00	0	17	3	7	5
1	2009-03-12 17:10:00	0	17	3	7	5
1	2009-03-12 17:11:00	14	17	3	7	5
1	2009-03-12 17:12:00	5	17	3	7	5
1	2009-03-12 17:13:00	0	17	3	7	5
1	2009-03-12 17:14:00	199	17	3	7	5
1	2009-03-12 17:15:00	73	17	3	7	5
1	2009-03-12 17:16:00	5	17	3	7	5
1	2009-03-12 17:17:00	19	17	3	7	5
1	2009-03-12 17:18:00	43	17	3	7	5
1	2009-03-12 17:19:00	0	17	3	7	5
1	2009-03-12 17:20:00	151	17	3	7	5
1	2009-03-12 17:21:00	237	17	3	7	5
1	2009-03-12 17:22:00	5	17	3	7	5
1	2009-03-12 17:23:00	0	17	3	7	5
1	2009-03-12 17:24:00	9	17	3	7	5
1	2009-03-12 17:25:00	0	17	3	7	5
1	2009-03-12 17:26:00	323	17	3	7	5
1	2009-03-12 17:27:00	1309	17	3	7	5
1	2009-03-12 17:28:00	1040	17	3	7	5
1	2009-03-12 17:29:00	1575	17	3	7	5
1	2009-03-12 17:30:00	1261	17	3	7	5
1	2009-03-12 17:31:00	62	17	3	7	5
1	2009-03-12 17:32:00	0	17	3	7	5
1	2009-03-12 17:33:00	0	17	3	7	5
1	2009-03-12 17:34:00	144	17	3	7	5
1	2009-03-12 17:35:00	0	17	3	7	5
1	2009-03-12 17:36:00	9	17	3	7	5
1	2009-03-12 17:37:00	113	17	3	7	5
1	2009-03-12 17:38:00	177	17	3	7	5
1	2009-03-12 17:39:00	73	17	3	7	5
1	2009-03-12 17:40:00	24	17	3	7	5
1	2009-03-12 17:41:00	19	17	3	7	5
1	2009-03-12 17:42:00	14	17	3	7	5
1	2009-03-12 17:43:00	14	17	3	7	5
1	2009-03-12 17:44:00	96	17	3	7	5
1	2009-03-12 17:45:00	0	17	3	7	5
1	2009-03-12 17:46:00	38	17	3	7	5
1	2009-03-12 17:47:00	0	17	3	7	5
1	2009-03-12 17:48:00	24	17	3	7	5
1	2009-03-12 17:49:00	33	17	3	7	5
1	2009-03-12 17:50:00	19	17	3	7	5
1	2009-03-12 17:51:00	131	17	3	7	5
1	2009-03-12 17:52:00	101	17	3	7	5
1	2009-03-12 17:53:00	137	17	3	7	5
1	2009-03-12 17:54:00	47	17	3	7	5
1	2009-03-12 17:55:00	62	17	3	7	5
1	2009-03-12 17:56:00	90	17	3	7	5
1	2009-03-12 17:57:00	0	17	3	7	5
1	2009-03-12 17:58:00	0	17	3	7	5
1	2009-03-12 17:59:00	131	17	3	7	5
1	2009-03-12 18:00:00	214	17	3	7	5
1	2009-03-12 18:01:00	79	18	4	7	5
1	2009-03-12 18:02:00	0	18	4	7	5
1	2009-03-12 18:03:00	24	18	4	7	5
1	2009-03-12 18:04:00	0	18	4	7	5
1	2009-03-12 18:05:00	0	18	4	7	5
1	2009-03-12 18:06:00	0	18	4	7	5
1	2009-03-12 18:07:00	0	18	4	7	5
1	2009-03-12 18:08:00	0	18	4	7	5
1	2009-03-12 18:09:00	19	18	4	7	5
1	2009-03-12 18:10:00	9	18	4	7	5
1	2009-03-12 18:11:00	0	18	4	7	5
1	2009-03-12 18:12:00	73	18	4	7	5
1	2009-03-12 18:13:00	0	18	4	7	5
1	2009-03-12 18:14:00	0	18	4	7	5
1	2009-03-12 18:15:00	0	18	4	7	5
1	2009-03-12 18:16:00	0	18	4	7	5
1	2009-03-12 18:17:00	171	18	4	7	5
1	2009-03-12 18:18:00	28	18	4	7	5
1	2009-03-12 18:19:00	342	18	4	7	5
1	2009-03-12 18:20:00	402	18	4	7	5
1	2009-03-12 18:21:00	490	18	4	7	5
1	2009-03-12 18:22:00	5	18	4	7	5
1	2009-03-12 18:23:00	84	18	4	7	5
1	2009-03-12 18:24:00	96	18	4	7	5
1	2009-03-12 18:25:00	157	18	4	7	5
1	2009-03-12 18:26:00	851	18	4	7	5
1	2009-03-12 18:27:00	490	18	4	7	5
1	2009-03-12 18:28:00	237	18	4	7	5
1	2009-03-12 18:29:00	539	18	4	7	5
1	2009-03-12 18:30:00	445	18	4	7	5
1	2009-03-12 18:31:00	565	18	4	7	5
1	2009-03-12 18:32:00	287	18	4	7	5
1	2009-03-12 18:33:00	0	18	4	7	5
1	2009-03-12 18:34:00	33	18	4	7	5
1	2009-03-12 18:35:00	0	18	4	7	5
1	2009-03-12 18:36:00	33	18	4	7	5
1	2009-03-12 18:37:00	24	18	4	7	5
1	2009-03-12 18:38:00	9	18	4	7	5
1	2009-03-12 18:39:00	0	18	4	7	5
1	2009-03-12 18:40:00	14	18	4	7	5
1	2009-03-12 18:41:00	57	18	4	7	5
1	2009-03-12 18:42:00	0	18	4	7	5
1	2009-03-12 18:43:00	0	18	4	7	5
1	2009-03-12 18:44:00	19	18	4	7	5
1	2009-03-12 18:45:00	0	18	4	7	5
1	2009-03-12 18:46:00	0	18	4	7	5
1	2009-03-12 18:47:00	52	18	4	7	5
1	2009-03-12 18:48:00	0	18	4	7	5
1	2009-03-12 18:49:00	0	18	4	7	5
1	2009-03-12 18:50:00	0	18	4	7	5
1	2009-03-12 18:51:00	0	18	4	7	5
1	2009-03-12 18:52:00	0	18	4	7	5
1	2009-03-12 18:53:00	0	18	4	7	5
1	2009-03-12 18:54:00	0	18	4	7	5
1	2009-03-12 18:55:00	0	18	4	7	5
1	2009-03-12 18:56:00	0	18	4	7	5
1	2009-03-12 18:57:00	0	18	4	7	5
1	2009-03-12 18:58:00	0	18	4	7	5
1	2009-03-12 18:59:00	24	18	4	7	5
1	2009-03-12 19:00:00	14	18	4	7	5
1	2009-03-12 19:01:00	57	19	4	7	5
1	2009-03-12 19:02:00	0	19	4	7	5
1	2009-03-12 19:03:00	0	19	4	7	5
1	2009-03-12 19:04:00	0	19	4	7	5
1	2009-03-12 19:05:00	0	19	4	7	5
1	2009-03-12 19:06:00	0	19	4	7	5
1	2009-03-12 19:07:00	0	19	4	7	5
1	2009-03-12 19:08:00	0	19	4	7	5
1	2009-03-12 19:09:00	0	19	4	7	5
1	2009-03-12 19:10:00	0	19	4	7	5
1	2009-03-12 19:11:00	38	19	4	7	5
1	2009-03-12 19:12:00	0	19	4	7	5
1	2009-03-12 19:13:00	0	19	4	7	5
1	2009-03-12 19:14:00	119	19	4	7	5
1	2009-03-12 19:15:00	24	19	4	7	5
1	2009-03-12 19:16:00	24	19	4	7	5
1	2009-03-12 19:17:00	57	19	4	7	5
1	2009-03-12 19:18:00	28	19	4	7	5
1	2009-03-12 19:19:00	52	19	4	7	5
1	2009-03-12 19:20:00	0	19	4	7	5
1	2009-03-12 19:21:00	0	19	4	7	5
1	2009-03-12 19:22:00	0	19	4	7	5
1	2009-03-12 19:23:00	0	19	4	7	5
1	2009-03-12 19:24:00	24	19	4	7	5
1	2009-03-12 19:25:00	0	19	4	7	5
1	2009-03-12 19:26:00	14	19	4	7	5
1	2009-03-12 19:27:00	333	19	4	7	5
1	2009-03-12 19:28:00	1883	19	4	7	5
1	2009-03-12 19:29:00	90	19	4	7	5
1	2009-03-12 19:30:00	0	19	4	7	5
1	2009-03-12 19:31:00	33	19	4	7	5
1	2009-03-12 19:32:00	565	19	4	7	5
1	2009-03-12 19:33:00	52	19	4	7	5
1	2009-03-12 19:34:00	57	19	4	7	5
1	2009-03-12 19:35:00	9	19	4	7	5
1	2009-03-12 19:36:00	0	19	4	7	5
1	2009-03-12 19:37:00	0	19	4	7	5
1	2009-03-12 19:38:00	43	19	4	7	5
1	2009-03-12 19:39:00	445	19	4	7	5
1	2009-03-12 19:40:00	222	19	4	7	5
1	2009-03-12 19:41:00	90	19	4	7	5
1	2009-03-12 19:42:00	96	19	4	7	5
1	2009-03-12 19:43:00	5	19	4	7	5
1	2009-03-12 19:44:00	352	19	4	7	5
1	2009-03-12 19:45:00	632	19	4	7	5
1	2009-03-12 19:46:00	38	19	4	7	5
1	2009-03-12 19:47:00	28	19	4	7	5
1	2009-03-12 19:48:00	24	19	4	7	5
1	2009-03-12 19:49:00	24	19	4	7	5
1	2009-03-12 19:50:00	199	19	4	7	5
1	2009-03-12 19:51:00	515	19	4	7	5
1	2009-03-12 19:52:00	14	19	4	7	5
1	2009-03-12 19:53:00	96	19	4	7	5
1	2009-03-12 19:54:00	137	19	4	7	5
1	2009-03-12 19:55:00	171	19	4	7	5
1	2009-03-12 19:56:00	0	19	4	7	5
1	2009-03-12 19:57:00	0	19	4	7	5
1	2009-03-12 19:58:00	5	19	4	7	5
1	2009-03-12 19:59:00	5	19	4	7	5
1	2009-03-12 20:00:00	5	19	4	7	5
1	2009-03-12 20:01:00	19	20	4	7	5
1	2009-03-12 20:02:00	5	20	4	7	5
1	2009-03-12 20:03:00	24	20	4	7	5
1	2009-03-12 20:04:00	0	20	4	7	5
1	2009-03-12 20:05:00	0	20	4	7	5
1	2009-03-12 20:06:00	0	20	4	7	5
1	2009-03-12 20:07:00	0	20	4	7	5
1	2009-03-12 20:08:00	0	20	4	7	5
1	2009-03-12 20:09:00	0	20	4	7	5
1	2009-03-12 20:10:00	9	20	4	7	5
1	2009-03-12 20:11:00	0	20	4	7	5
1	2009-03-12 20:12:00	0	20	4	7	5
1	2009-03-12 20:13:00	0	20	4	7	5
1	2009-03-12 20:14:00	0	20	4	7	5
1	2009-03-12 20:15:00	0	20	4	7	5
1	2009-03-12 20:16:00	0	20	4	7	5
1	2009-03-12 20:17:00	0	20	4	7	5
1	2009-03-12 20:18:00	14	20	4	7	5
1	2009-03-12 20:19:00	0	20	4	7	5
1	2009-03-12 20:20:00	0	20	4	7	5
1	2009-03-12 20:21:00	0	20	4	7	5
1	2009-03-12 20:22:00	314	20	4	7	5
1	2009-03-12 20:23:00	1436	20	4	7	5
1	2009-03-12 20:24:00	1359	20	4	7	5
1	2009-03-12 20:25:00	304	20	4	7	5
1	2009-03-12 20:26:00	90	20	4	7	5
1	2009-03-12 20:27:00	28	20	4	7	5
1	2009-03-12 20:28:00	0	20	4	7	5
1	2009-03-12 20:29:00	62	20	4	7	5
1	2009-03-12 20:30:00	0	20	4	7	5
1	2009-03-12 20:31:00	0	20	4	7	5
1	2009-03-12 20:32:00	0	20	4	7	5
1	2009-03-12 20:33:00	0	20	4	7	5
1	2009-03-12 20:34:00	0	20	4	7	5
1	2009-03-12 20:35:00	0	20	4	7	5
1	2009-03-12 20:36:00	0	20	4	7	5
1	2009-03-12 20:37:00	0	20	4	7	5
1	2009-03-12 20:38:00	0	20	4	7	5
1	2009-03-12 20:39:00	0	20	4	7	5
1	2009-03-12 20:40:00	0	20	4	7	5
1	2009-03-12 20:41:00	0	20	4	7	5
1	2009-03-12 20:42:00	0	20	4	7	5
1	2009-03-12 20:43:00	0	20	4	7	5
1	2009-03-12 20:44:00	0	20	4	7	5
1	2009-03-12 20:45:00	0	20	4	7	5
1	2009-03-12 20:46:00	0	20	4	7	5
1	2009-03-12 20:47:00	0	20	4	7	5
1	2009-03-12 20:48:00	0	20	4	7	5
1	2009-03-12 20:49:00	0	20	4	7	5
1	2009-03-12 20:50:00	5	20	4	7	5
1	2009-03-12 20:51:00	0	20	4	7	5
1	2009-03-12 20:52:00	0	20	4	7	5
1	2009-03-12 20:53:00	0	20	4	7	5
1	2009-03-12 20:54:00	0	20	4	7	5
1	2009-03-12 20:55:00	0	20	4	7	5
1	2009-03-12 20:56:00	0	20	4	7	5
1	2009-03-12 20:57:00	0	20	4	7	5
1	2009-03-12 20:58:00	0	20	4	7	5
1	2009-03-12 20:59:00	0	20	4	7	5
1	2009-03-12 21:00:00	0	20	4	7	5
1	2009-03-12 21:01:00	19	21	4	7	5
1	2009-03-12 21:02:00	0	21	4	7	5
1	2009-03-12 21:03:00	0	21	4	7	5
1	2009-03-12 21:04:00	0	21	4	7	5
1	2009-03-12 21:05:00	0	21	4	7	5
1	2009-03-12 21:06:00	0	21	4	7	5
1	2009-03-12 21:07:00	0	21	4	7	5
1	2009-03-12 21:08:00	0	21	4	7	5
1	2009-03-12 21:09:00	0	21	4	7	5
1	2009-03-12 21:10:00	0	21	4	7	5
1	2009-03-12 21:11:00	0	21	4	7	5
1	2009-03-12 21:12:00	0	21	4	7	5
1	2009-03-12 21:13:00	0	21	4	7	5
1	2009-03-12 21:14:00	0	21	4	7	5
1	2009-03-12 21:15:00	0	21	4	7	5
1	2009-03-12 21:16:00	0	21	4	7	5
1	2009-03-12 21:17:00	0	21	4	7	5
1	2009-03-12 21:18:00	0	21	4	7	5
1	2009-03-12 21:19:00	0	21	4	7	5
1	2009-03-12 21:20:00	0	21	4	7	5
1	2009-03-12 21:21:00	0	21	4	7	5
1	2009-03-12 21:22:00	5	21	4	7	5
1	2009-03-12 21:23:00	19	21	4	7	5
1	2009-03-12 21:24:00	0	21	4	7	5
1	2009-03-12 21:25:00	0	21	4	7	5
1	2009-03-12 21:26:00	0	21	4	7	5
1	2009-03-12 21:27:00	0	21	4	7	5
1	2009-03-12 21:28:00	0	21	4	7	5
1	2009-03-12 21:29:00	0	21	4	7	5
1	2009-03-12 21:30:00	0	21	4	7	5
1	2009-03-12 21:31:00	0	21	4	7	5
1	2009-03-12 21:32:00	0	21	4	7	5
1	2009-03-12 21:33:00	0	21	4	7	5
1	2009-03-12 21:34:00	0	21	4	7	5
1	2009-03-12 21:35:00	0	21	4	7	5
1	2009-03-12 21:36:00	0	21	4	7	5
1	2009-03-12 21:37:00	0	21	4	7	5
1	2009-03-12 21:38:00	0	21	4	7	5
1	2009-03-12 21:39:00	0	21	4	7	5
1	2009-03-12 21:40:00	0	21	4	7	5
1	2009-03-12 21:41:00	0	21	4	7	5
1	2009-03-12 21:42:00	0	21	4	7	5
1	2009-03-12 21:43:00	0	21	4	7	5
1	2009-03-12 21:44:00	5	21	4	7	5
1	2009-03-12 21:45:00	5	21	4	7	5
1	2009-03-12 21:46:00	0	21	4	7	5
1	2009-03-12 21:47:00	0	21	4	7	5
1	2009-03-12 21:48:00	0	21	4	7	5
1	2009-03-12 21:49:00	0	21	4	7	5
1	2009-03-12 21:50:00	0	21	4	7	5
1	2009-03-12 21:51:00	0	21	4	7	5
1	2009-03-12 21:52:00	0	21	4	7	5
1	2009-03-12 21:53:00	0	21	4	7	5
1	2009-03-12 21:54:00	144	21	4	7	5
1	2009-03-12 21:55:00	57	21	4	7	5
1	2009-03-12 21:56:00	52	21	4	7	5
1	2009-03-12 21:57:00	67	21	4	7	5
1	2009-03-12 21:58:00	323	21	4	7	5
1	2009-03-12 21:59:00	923	21	4	7	5
1	2009-03-12 22:00:00	214	21	4	7	5
1	2009-03-12 22:01:00	33	22	4	7	5
1	2009-03-12 22:02:00	0	22	4	7	5
1	2009-03-12 22:03:00	0	22	4	7	5
1	2009-03-12 22:04:00	0	22	4	7	5
1	2009-03-12 22:05:00	0	22	4	7	5
1	2009-03-12 22:06:00	0	22	4	7	5
1	2009-03-12 22:07:00	0	22	4	7	5
1	2009-03-12 22:08:00	0	22	4	7	5
1	2009-03-12 22:09:00	0	22	4	7	5
1	2009-03-12 22:10:00	0	22	4	7	5
1	2009-03-12 22:11:00	0	22	4	7	5
1	2009-03-12 22:12:00	0	22	4	7	5
1	2009-03-12 22:13:00	0	22	4	7	5
1	2009-03-12 22:14:00	0	22	4	7	5
1	2009-03-12 22:15:00	0	22	4	7	5
1	2009-03-12 22:16:00	0	22	4	7	5
1	2009-03-12 22:17:00	0	22	4	7	5
1	2009-03-12 22:18:00	0	22	4	7	5
1	2009-03-12 22:19:00	0	22	4	7	5
1	2009-03-12 22:20:00	0	22	4	7	5
1	2009-03-12 22:21:00	0	22	4	7	5
1	2009-03-12 22:22:00	0	22	4	7	5
1	2009-03-12 22:23:00	0	22	4	7	5
1	2009-03-12 22:24:00	0	22	4	7	5
1	2009-03-12 22:25:00	84	22	4	7	5
1	2009-03-12 22:26:00	0	22	4	7	5
1	2009-03-12 22:27:00	0	22	4	7	5
1	2009-03-12 22:28:00	0	22	4	7	5
1	2009-03-12 22:29:00	0	22	4	7	5
1	2009-03-12 22:30:00	0	22	4	7	5
1	2009-03-12 22:31:00	0	22	4	7	5
1	2009-03-12 22:32:00	0	22	4	7	5
1	2009-03-12 22:33:00	0	22	4	7	5
1	2009-03-12 22:34:00	0	22	4	7	5
1	2009-03-12 22:35:00	0	22	4	7	5
1	2009-03-12 22:36:00	0	22	4	7	5
1	2009-03-12 22:37:00	0	22	4	7	5
1	2009-03-12 22:38:00	0	22	4	7	5
1	2009-03-12 22:39:00	0	22	4	7	5
1	2009-03-12 22:40:00	0	22	4	7	5
1	2009-03-12 22:41:00	0	22	4	7	5
1	2009-03-12 22:42:00	0	22	4	7	5
1	2009-03-12 22:43:00	0	22	4	7	5
1	2009-03-12 22:44:00	0	22	4	7	5
1	2009-03-12 22:45:00	0	22	4	7	5
1	2009-03-12 22:46:00	0	22	4	7	5
1	2009-03-12 22:47:00	0	22	4	7	5
1	2009-03-12 22:48:00	0	22	4	7	5
1	2009-03-12 22:49:00	0	22	4	7	5
1	2009-03-12 22:50:00	0	22	4	7	5
1	2009-03-12 22:51:00	0	22	4	7	5
1	2009-03-12 22:52:00	0	22	4	7	5
1	2009-03-12 22:53:00	0	22	4	7	5
1	2009-03-12 22:54:00	0	22	4	7	5
1	2009-03-12 22:55:00	0	22	4	7	5
1	2009-03-12 22:56:00	0	22	4	7	5
1	2009-03-12 22:57:00	5	22	4	7	5
1	2009-03-12 22:58:00	0	22	4	7	5
1	2009-03-12 22:59:00	0	22	4	7	5
1	2009-03-12 23:00:00	0	22	4	7	5
1	2009-03-12 23:01:00	0	23	4	7	5
1	2009-03-12 23:02:00	0	23	4	7	5
1	2009-03-12 23:03:00	0	23	4	7	5
1	2009-03-12 23:04:00	0	23	4	7	5
1	2009-03-12 23:05:00	0	23	4	7	5
1	2009-03-12 23:06:00	0	23	4	7	5
1	2009-03-12 23:07:00	0	23	4	7	5
1	2009-03-12 23:08:00	0	23	4	7	5
1	2009-03-12 23:09:00	0	23	4	7	5
1	2009-03-12 23:10:00	304	23	4	7	5
1	2009-03-12 23:11:00	73	23	4	7	5
1	2009-03-12 23:12:00	33	23	4	7	5
1	2009-03-12 23:13:00	28	23	4	7	5
1	2009-03-12 23:14:00	0	23	4	7	5
1	2009-03-12 23:15:00	192	23	4	7	5
1	2009-03-12 23:16:00	19	23	4	7	5
1	2009-03-12 23:17:00	52	23	4	7	5
1	2009-03-12 23:18:00	0	23	4	7	5
1	2009-03-12 23:19:00	0	23	4	7	5
1	2009-03-12 23:20:00	0	23	4	7	5
1	2009-03-12 23:21:00	0	23	4	7	5
1	2009-03-12 23:22:00	0	23	4	7	5
1	2009-03-12 23:23:00	0	23	4	7	5
1	2009-03-12 23:24:00	0	23	4	7	5
1	2009-03-12 23:25:00	0	23	4	7	5
1	2009-03-12 23:26:00	0	23	4	7	5
1	2009-03-12 23:27:00	0	23	4	7	5
1	2009-03-12 23:28:00	0	23	4	7	5
1	2009-03-12 23:29:00	0	23	4	7	5
1	2009-03-12 23:30:00	0	23	4	7	5
1	2009-03-12 23:31:00	0	23	4	7	5
1	2009-03-12 23:32:00	0	23	4	7	5
1	2009-03-12 23:33:00	0	23	4	7	5
1	2009-03-12 23:34:00	0	23	4	7	5
1	2009-03-12 23:35:00	0	23	4	7	5
1	2009-03-12 23:36:00	0	23	4	7	5
1	2009-03-12 23:37:00	0	23	4	7	5
1	2009-03-12 23:38:00	0	23	4	7	5
1	2009-03-12 23:39:00	0	23	4	7	5
1	2009-03-12 23:40:00	0	23	4	7	5
1	2009-03-12 23:41:00	0	23	4	7	5
1	2009-03-12 23:42:00	19	23	4	7	5
1	2009-03-12 23:43:00	5	23	4	7	5
1	2009-03-12 23:44:00	0	23	4	7	5
1	2009-03-12 23:45:00	28	23	4	7	5
1	2009-03-12 23:46:00	0	23	4	7	5
1	2009-03-12 23:47:00	0	23	4	7	5
1	2009-03-12 23:48:00	0	23	4	7	5
1	2009-03-12 23:49:00	0	23	4	7	5
1	2009-03-12 23:50:00	0	23	4	7	5
1	2009-03-12 23:51:00	0	23	4	7	5
1	2009-03-12 23:52:00	0	23	4	7	5
1	2009-03-12 23:53:00	0	23	4	7	5
1	2009-03-12 23:54:00	0	23	4	7	5
1	2009-03-12 23:55:00	0	23	4	7	5
1	2009-03-12 23:56:00	0	23	4	7	5
1	2009-03-12 23:57:00	0	23	4	7	5
1	2009-03-12 23:58:00	0	23	4	7	5
1	2009-03-12 23:59:00	0	23	4	7	5
1	2009-03-13	0	23	4	7	5
1	2009-03-13 00:01:00	0	0	1	8	6
1	2009-03-13 00:02:00	0	0	1	8	6
1	2009-03-13 00:03:00	0	0	1	8	6
1	2009-03-13 00:04:00	0	0	1	8	6
1	2009-03-13 00:05:00	0	0	1	8	6
1	2009-03-13 00:06:00	0	0	1	8	6
1	2009-03-13 00:07:00	0	0	1	8	6
1	2009-03-13 00:08:00	0	0	1	8	6
1	2009-03-13 00:09:00	0	0	1	8	6
1	2009-03-13 00:10:00	0	0	1	8	6
1	2009-03-13 00:11:00	0	0	1	8	6
1	2009-03-13 00:12:00	0	0	1	8	6
1	2009-03-13 00:13:00	0	0	1	8	6
1	2009-03-13 00:14:00	0	0	1	8	6
1	2009-03-13 00:15:00	0	0	1	8	6
1	2009-03-13 00:16:00	19	0	1	8	6
1	2009-03-13 00:17:00	33	0	1	8	6
1	2009-03-13 00:18:00	199	0	1	8	6
1	2009-03-13 00:19:00	0	0	1	8	6
1	2009-03-13 00:20:00	0	0	1	8	6
1	2009-03-13 00:21:00	0	0	1	8	6
1	2009-03-13 00:22:00	0	0	1	8	6
1	2009-03-13 00:23:00	0	0	1	8	6
1	2009-03-13 00:24:00	0	0	1	8	6
1	2009-03-13 00:25:00	0	0	1	8	6
1	2009-03-13 00:26:00	0	0	1	8	6
1	2009-03-13 00:27:00	0	0	1	8	6
1	2009-03-13 00:28:00	0	0	1	8	6
1	2009-03-13 00:29:00	0	0	1	8	6
1	2009-03-13 00:30:00	0	0	1	8	6
1	2009-03-13 00:31:00	0	0	1	8	6
1	2009-03-13 00:32:00	0	0	1	8	6
1	2009-03-13 00:33:00	0	0	1	8	6
1	2009-03-13 00:34:00	0	0	1	8	6
1	2009-03-13 00:35:00	0	0	1	8	6
1	2009-03-13 00:36:00	0	0	1	8	6
1	2009-03-13 00:37:00	0	0	1	8	6
1	2009-03-13 00:38:00	0	0	1	8	6
1	2009-03-13 00:39:00	0	0	1	8	6
1	2009-03-13 00:40:00	0	0	1	8	6
1	2009-03-13 00:41:00	0	0	1	8	6
1	2009-03-13 00:42:00	0	0	1	8	6
1	2009-03-13 00:43:00	0	0	1	8	6
1	2009-03-13 00:44:00	0	0	1	8	6
1	2009-03-13 00:45:00	0	0	1	8	6
1	2009-03-13 00:46:00	0	0	1	8	6
1	2009-03-13 00:47:00	0	0	1	8	6
1	2009-03-13 00:48:00	84	0	1	8	6
1	2009-03-13 00:49:00	14	0	1	8	6
1	2009-03-13 00:50:00	0	0	1	8	6
1	2009-03-13 00:51:00	0	0	1	8	6
1	2009-03-13 00:52:00	0	0	1	8	6
1	2009-03-13 00:53:00	0	0	1	8	6
1	2009-03-13 00:54:00	0	0	1	8	6
1	2009-03-13 00:55:00	0	0	1	8	6
1	2009-03-13 00:56:00	0	0	1	8	6
1	2009-03-13 00:57:00	0	0	1	8	6
1	2009-03-13 00:58:00	0	0	1	8	6
1	2009-03-13 00:59:00	0	0	1	8	6
1	2009-03-13 01:00:00	0	0	1	8	6
1	2009-03-13 01:01:00	0	1	1	8	6
1	2009-03-13 01:02:00	0	1	1	8	6
1	2009-03-13 01:03:00	0	1	1	8	6
1	2009-03-13 01:04:00	0	1	1	8	6
1	2009-03-13 01:05:00	0	1	1	8	6
1	2009-03-13 01:06:00	0	1	1	8	6
1	2009-03-13 01:07:00	0	1	1	8	6
1	2009-03-13 01:08:00	0	1	1	8	6
1	2009-03-13 01:09:00	5	1	1	8	6
1	2009-03-13 01:10:00	0	1	1	8	6
1	2009-03-13 01:11:00	0	1	1	8	6
1	2009-03-13 01:12:00	62	1	1	8	6
1	2009-03-13 01:13:00	0	1	1	8	6
1	2009-03-13 01:14:00	0	1	1	8	6
1	2009-03-13 01:15:00	0	1	1	8	6
1	2009-03-13 01:16:00	0	1	1	8	6
1	2009-03-13 01:17:00	0	1	1	8	6
1	2009-03-13 01:18:00	0	1	1	8	6
1	2009-03-13 01:19:00	0	1	1	8	6
1	2009-03-13 01:20:00	0	1	1	8	6
1	2009-03-13 01:21:00	0	1	1	8	6
1	2009-03-13 01:22:00	0	1	1	8	6
1	2009-03-13 01:23:00	0	1	1	8	6
1	2009-03-13 01:24:00	0	1	1	8	6
1	2009-03-13 01:25:00	0	1	1	8	6
1	2009-03-13 01:26:00	0	1	1	8	6
1	2009-03-13 01:27:00	0	1	1	8	6
1	2009-03-13 01:28:00	0	1	1	8	6
1	2009-03-13 01:29:00	0	1	1	8	6
1	2009-03-13 01:30:00	5	1	1	8	6
1	2009-03-13 01:31:00	0	1	1	8	6
1	2009-03-13 01:32:00	0	1	1	8	6
1	2009-03-13 01:33:00	0	1	1	8	6
1	2009-03-13 01:34:00	0	1	1	8	6
1	2009-03-13 01:35:00	5	1	1	8	6
1	2009-03-13 01:36:00	5	1	1	8	6
1	2009-03-13 01:37:00	9	1	1	8	6
1	2009-03-13 01:38:00	0	1	1	8	6
1	2009-03-13 01:39:00	0	1	1	8	6
1	2009-03-13 01:40:00	5	1	1	8	6
1	2009-03-13 01:41:00	96	1	1	8	6
1	2009-03-13 01:42:00	237	1	1	8	6
1	2009-03-13 01:43:00	19	1	1	8	6
1	2009-03-13 01:44:00	0	1	1	8	6
1	2009-03-13 01:45:00	0	1	1	8	6
1	2009-03-13 01:46:00	19	1	1	8	6
1	2009-03-13 01:47:00	0	1	1	8	6
1	2009-03-13 01:48:00	0	1	1	8	6
1	2009-03-13 01:49:00	14	1	1	8	6
1	2009-03-13 01:50:00	0	1	1	8	6
1	2009-03-13 01:51:00	52	1	1	8	6
1	2009-03-13 01:52:00	539	1	1	8	6
1	2009-03-13 01:53:00	402	1	1	8	6
1	2009-03-13 01:54:00	43	1	1	8	6
1	2009-03-13 01:55:00	0	1	1	8	6
1	2009-03-13 01:56:00	67	1	1	8	6
1	2009-03-13 01:57:00	0	1	1	8	6
1	2009-03-13 01:58:00	0	1	1	8	6
1	2009-03-13 01:59:00	0	1	1	8	6
1	2009-03-13 02:00:00	0	1	1	8	6
1	2009-03-13 02:01:00	0	2	1	8	6
1	2009-03-13 02:02:00	0	2	1	8	6
1	2009-03-13 02:03:00	0	2	1	8	6
1	2009-03-13 02:04:00	0	2	1	8	6
1	2009-03-13 02:05:00	0	2	1	8	6
1	2009-03-13 02:06:00	0	2	1	8	6
1	2009-03-13 02:07:00	0	2	1	8	6
1	2009-03-13 02:08:00	0	2	1	8	6
1	2009-03-13 02:09:00	0	2	1	8	6
1	2009-03-13 02:10:00	0	2	1	8	6
1	2009-03-13 02:11:00	0	2	1	8	6
1	2009-03-13 02:12:00	0	2	1	8	6
1	2009-03-13 02:13:00	0	2	1	8	6
1	2009-03-13 02:14:00	0	2	1	8	6
1	2009-03-13 02:15:00	0	2	1	8	6
1	2009-03-13 02:16:00	0	2	1	8	6
1	2009-03-13 02:17:00	24	2	1	8	6
1	2009-03-13 02:18:00	43	2	1	8	6
1	2009-03-13 02:19:00	0	2	1	8	6
1	2009-03-13 02:20:00	0	2	1	8	6
1	2009-03-13 02:21:00	0	2	1	8	6
1	2009-03-13 02:22:00	0	2	1	8	6
1	2009-03-13 02:23:00	0	2	1	8	6
1	2009-03-13 02:24:00	0	2	1	8	6
1	2009-03-13 02:25:00	0	2	1	8	6
1	2009-03-13 02:26:00	47	2	1	8	6
1	2009-03-13 02:27:00	199	2	1	8	6
1	2009-03-13 02:28:00	0	2	1	8	6
1	2009-03-13 02:29:00	0	2	1	8	6
1	2009-03-13 02:30:00	0	2	1	8	6
1	2009-03-13 02:31:00	0	2	1	8	6
1	2009-03-13 02:32:00	0	2	1	8	6
1	2009-03-13 02:33:00	0	2	1	8	6
1	2009-03-13 02:34:00	0	2	1	8	6
1	2009-03-13 02:35:00	0	2	1	8	6
1	2009-03-13 02:36:00	0	2	1	8	6
1	2009-03-13 02:37:00	0	2	1	8	6
1	2009-03-13 02:38:00	0	2	1	8	6
1	2009-03-13 02:39:00	0	2	1	8	6
1	2009-03-13 02:40:00	0	2	1	8	6
1	2009-03-13 02:41:00	0	2	1	8	6
1	2009-03-13 02:42:00	0	2	1	8	6
1	2009-03-13 02:43:00	0	2	1	8	6
1	2009-03-13 02:44:00	67	2	1	8	6
1	2009-03-13 02:45:00	0	2	1	8	6
1	2009-03-13 02:46:00	0	2	1	8	6
1	2009-03-13 02:47:00	0	2	1	8	6
1	2009-03-13 02:48:00	0	2	1	8	6
1	2009-03-13 02:49:00	0	2	1	8	6
1	2009-03-13 02:50:00	0	2	1	8	6
1	2009-03-13 02:51:00	0	2	1	8	6
1	2009-03-13 02:52:00	0	2	1	8	6
1	2009-03-13 02:53:00	0	2	1	8	6
1	2009-03-13 02:54:00	0	2	1	8	6
1	2009-03-13 02:55:00	0	2	1	8	6
1	2009-03-13 02:56:00	0	2	1	8	6
1	2009-03-13 02:57:00	0	2	1	8	6
1	2009-03-13 02:58:00	0	2	1	8	6
1	2009-03-13 02:59:00	0	2	1	8	6
1	2009-03-13 03:00:00	0	2	1	8	6
1	2009-03-13 03:01:00	0	3	1	8	6
1	2009-03-13 03:02:00	0	3	1	8	6
1	2009-03-13 03:03:00	0	3	1	8	6
1	2009-03-13 03:04:00	0	3	1	8	6
1	2009-03-13 03:05:00	0	3	1	8	6
1	2009-03-13 03:06:00	0	3	1	8	6
1	2009-03-13 03:07:00	0	3	1	8	6
1	2009-03-13 03:08:00	67	3	1	8	6
1	2009-03-13 03:09:00	0	3	1	8	6
1	2009-03-13 03:10:00	0	3	1	8	6
1	2009-03-13 03:11:00	0	3	1	8	6
1	2009-03-13 03:12:00	0	3	1	8	6
1	2009-03-13 03:13:00	0	3	1	8	6
1	2009-03-13 03:14:00	0	3	1	8	6
1	2009-03-13 03:15:00	0	3	1	8	6
1	2009-03-13 03:16:00	0	3	1	8	6
1	2009-03-13 03:17:00	0	3	1	8	6
1	2009-03-13 03:18:00	0	3	1	8	6
1	2009-03-13 03:19:00	0	3	1	8	6
1	2009-03-13 03:20:00	0	3	1	8	6
1	2009-03-13 03:21:00	0	3	1	8	6
1	2009-03-13 03:22:00	0	3	1	8	6
1	2009-03-13 03:23:00	0	3	1	8	6
1	2009-03-13 03:24:00	0	3	1	8	6
1	2009-03-13 03:25:00	0	3	1	8	6
1	2009-03-13 03:26:00	0	3	1	8	6
1	2009-03-13 03:27:00	0	3	1	8	6
1	2009-03-13 03:28:00	0	3	1	8	6
1	2009-03-13 03:29:00	0	3	1	8	6
1	2009-03-13 03:30:00	5	3	1	8	6
1	2009-03-13 03:31:00	0	3	1	8	6
1	2009-03-13 03:32:00	0	3	1	8	6
1	2009-03-13 03:33:00	62	3	1	8	6
1	2009-03-13 03:34:00	552	3	1	8	6
1	2009-03-13 03:35:00	19	3	1	8	6
1	2009-03-13 03:36:00	0	3	1	8	6
1	2009-03-13 03:37:00	14	3	1	8	6
1	2009-03-13 03:38:00	0	3	1	8	6
1	2009-03-13 03:39:00	0	3	1	8	6
1	2009-03-13 03:40:00	0	3	1	8	6
1	2009-03-13 03:41:00	0	3	1	8	6
1	2009-03-13 03:42:00	0	3	1	8	6
1	2009-03-13 03:43:00	0	3	1	8	6
1	2009-03-13 03:44:00	0	3	1	8	6
1	2009-03-13 03:45:00	0	3	1	8	6
1	2009-03-13 03:46:00	0	3	1	8	6
1	2009-03-13 03:47:00	0	3	1	8	6
1	2009-03-13 03:48:00	0	3	1	8	6
1	2009-03-13 03:49:00	0	3	1	8	6
1	2009-03-13 03:50:00	0	3	1	8	6
1	2009-03-13 03:51:00	0	3	1	8	6
1	2009-03-13 03:52:00	0	3	1	8	6
1	2009-03-13 03:53:00	0	3	1	8	6
1	2009-03-13 03:54:00	0	3	1	8	6
1	2009-03-13 03:55:00	0	3	1	8	6
1	2009-03-13 03:56:00	0	3	1	8	6
1	2009-03-13 03:57:00	0	3	1	8	6
1	2009-03-13 03:58:00	0	3	1	8	6
1	2009-03-13 03:59:00	0	3	1	8	6
1	2009-03-13 04:00:00	0	3	1	8	6
1	2009-03-13 04:01:00	0	4	1	8	6
1	2009-03-13 04:02:00	0	4	1	8	6
1	2009-03-13 04:03:00	0	4	1	8	6
1	2009-03-13 04:04:00	0	4	1	8	6
1	2009-03-13 04:05:00	0	4	1	8	6
1	2009-03-13 04:06:00	0	4	1	8	6
1	2009-03-13 04:07:00	0	4	1	8	6
1	2009-03-13 04:08:00	9	4	1	8	6
1	2009-03-13 04:09:00	0	4	1	8	6
1	2009-03-13 04:10:00	0	4	1	8	6
1	2009-03-13 04:11:00	0	4	1	8	6
1	2009-03-13 04:12:00	0	4	1	8	6
1	2009-03-13 04:13:00	0	4	1	8	6
1	2009-03-13 04:14:00	0	4	1	8	6
1	2009-03-13 04:15:00	0	4	1	8	6
1	2009-03-13 04:16:00	0	4	1	8	6
1	2009-03-13 04:17:00	0	4	1	8	6
1	2009-03-13 04:18:00	0	4	1	8	6
1	2009-03-13 04:19:00	38	4	1	8	6
1	2009-03-13 04:20:00	43	4	1	8	6
1	2009-03-13 04:21:00	0	4	1	8	6
1	2009-03-13 04:22:00	0	4	1	8	6
1	2009-03-13 04:23:00	0	4	1	8	6
1	2009-03-13 04:24:00	0	4	1	8	6
1	2009-03-13 04:25:00	0	4	1	8	6
1	2009-03-13 04:26:00	0	4	1	8	6
1	2009-03-13 04:27:00	0	4	1	8	6
1	2009-03-13 04:28:00	0	4	1	8	6
1	2009-03-13 04:29:00	5	4	1	8	6
1	2009-03-13 04:30:00	0	4	1	8	6
1	2009-03-13 04:31:00	0	4	1	8	6
1	2009-03-13 04:32:00	0	4	1	8	6
1	2009-03-13 04:33:00	0	4	1	8	6
1	2009-03-13 04:34:00	0	4	1	8	6
1	2009-03-13 04:35:00	0	4	1	8	6
1	2009-03-13 04:36:00	0	4	1	8	6
1	2009-03-13 04:37:00	0	4	1	8	6
1	2009-03-13 04:38:00	0	4	1	8	6
1	2009-03-13 04:39:00	0	4	1	8	6
1	2009-03-13 04:40:00	0	4	1	8	6
1	2009-03-13 04:41:00	101	4	1	8	6
1	2009-03-13 04:42:00	33	4	1	8	6
1	2009-03-13 04:43:00	0	4	1	8	6
1	2009-03-13 04:44:00	0	4	1	8	6
1	2009-03-13 04:45:00	0	4	1	8	6
1	2009-03-13 04:46:00	0	4	1	8	6
1	2009-03-13 04:47:00	0	4	1	8	6
1	2009-03-13 04:48:00	0	4	1	8	6
1	2009-03-13 04:49:00	0	4	1	8	6
1	2009-03-13 04:50:00	0	4	1	8	6
1	2009-03-13 04:51:00	0	4	1	8	6
1	2009-03-13 04:52:00	0	4	1	8	6
1	2009-03-13 04:53:00	0	4	1	8	6
1	2009-03-13 04:54:00	0	4	1	8	6
1	2009-03-13 04:55:00	0	4	1	8	6
1	2009-03-13 04:56:00	0	4	1	8	6
1	2009-03-13 04:57:00	0	4	1	8	6
1	2009-03-13 04:58:00	0	4	1	8	6
1	2009-03-13 04:59:00	0	4	1	8	6
1	2009-03-13 05:00:00	0	4	1	8	6
1	2009-03-13 05:01:00	5	5	1	8	6
1	2009-03-13 05:02:00	0	5	1	8	6
1	2009-03-13 05:03:00	0	5	1	8	6
1	2009-03-13 05:04:00	19	5	1	8	6
1	2009-03-13 05:05:00	0	5	1	8	6
1	2009-03-13 05:06:00	62	5	1	8	6
1	2009-03-13 05:07:00	52	5	1	8	6
1	2009-03-13 05:08:00	0	5	1	8	6
1	2009-03-13 05:09:00	0	5	1	8	6
1	2009-03-13 05:10:00	0	5	1	8	6
1	2009-03-13 05:11:00	0	5	1	8	6
1	2009-03-13 05:12:00	0	5	1	8	6
1	2009-03-13 05:13:00	0	5	1	8	6
1	2009-03-13 05:14:00	0	5	1	8	6
1	2009-03-13 05:15:00	0	5	1	8	6
1	2009-03-13 05:16:00	0	5	1	8	6
1	2009-03-13 05:17:00	0	5	1	8	6
1	2009-03-13 05:18:00	0	5	1	8	6
1	2009-03-13 05:19:00	0	5	1	8	6
1	2009-03-13 05:20:00	0	5	1	8	6
1	2009-03-13 05:21:00	0	5	1	8	6
1	2009-03-13 05:22:00	0	5	1	8	6
1	2009-03-13 05:23:00	0	5	1	8	6
1	2009-03-13 05:24:00	0	5	1	8	6
1	2009-03-13 05:25:00	0	5	1	8	6
1	2009-03-13 05:26:00	0	5	1	8	6
1	2009-03-13 05:27:00	0	5	1	8	6
1	2009-03-13 05:28:00	9	5	1	8	6
1	2009-03-13 05:29:00	5	5	1	8	6
1	2009-03-13 05:30:00	296	5	1	8	6
1	2009-03-13 05:31:00	24	5	1	8	6
1	2009-03-13 05:32:00	0	5	1	8	6
1	2009-03-13 05:33:00	0	5	1	8	6
1	2009-03-13 05:34:00	0	5	1	8	6
1	2009-03-13 05:35:00	0	5	1	8	6
1	2009-03-13 05:36:00	0	5	1	8	6
1	2009-03-13 05:37:00	0	5	1	8	6
1	2009-03-13 05:38:00	0	5	1	8	6
1	2009-03-13 05:39:00	0	5	1	8	6
1	2009-03-13 05:40:00	0	5	1	8	6
1	2009-03-13 05:41:00	0	5	1	8	6
1	2009-03-13 05:42:00	0	5	1	8	6
1	2009-03-13 05:43:00	0	5	1	8	6
1	2009-03-13 05:44:00	0	5	1	8	6
1	2009-03-13 05:45:00	0	5	1	8	6
1	2009-03-13 05:46:00	0	5	1	8	6
1	2009-03-13 05:47:00	0	5	1	8	6
1	2009-03-13 05:48:00	0	5	1	8	6
1	2009-03-13 05:49:00	0	5	1	8	6
1	2009-03-13 05:50:00	0	5	1	8	6
1	2009-03-13 05:51:00	0	5	1	8	6
1	2009-03-13 05:52:00	24	5	1	8	6
1	2009-03-13 05:53:00	0	5	1	8	6
1	2009-03-13 05:54:00	0	5	1	8	6
1	2009-03-13 05:55:00	0	5	1	8	6
1	2009-03-13 05:56:00	0	5	1	8	6
1	2009-03-13 05:57:00	0	5	1	8	6
1	2009-03-13 05:58:00	0	5	1	8	6
1	2009-03-13 05:59:00	0	5	1	8	6
1	2009-03-13 06:00:00	0	5	1	8	6
1	2009-03-13 06:01:00	0	6	2	8	6
1	2009-03-13 06:02:00	0	6	2	8	6
1	2009-03-13 06:03:00	9	6	2	8	6
1	2009-03-13 06:04:00	0	6	2	8	6
1	2009-03-13 06:05:00	0	6	2	8	6
1	2009-03-13 06:06:00	0	6	2	8	6
1	2009-03-13 06:07:00	0	6	2	8	6
1	2009-03-13 06:08:00	0	6	2	8	6
1	2009-03-13 06:09:00	0	6	2	8	6
1	2009-03-13 06:10:00	0	6	2	8	6
1	2009-03-13 06:11:00	0	6	2	8	6
1	2009-03-13 06:12:00	0	6	2	8	6
1	2009-03-13 06:13:00	0	6	2	8	6
1	2009-03-13 06:14:00	0	6	2	8	6
1	2009-03-13 06:15:00	0	6	2	8	6
1	2009-03-13 06:16:00	0	6	2	8	6
1	2009-03-13 06:17:00	47	6	2	8	6
1	2009-03-13 06:18:00	24	6	2	8	6
1	2009-03-13 06:19:00	0	6	2	8	6
1	2009-03-13 06:20:00	0	6	2	8	6
1	2009-03-13 06:21:00	0	6	2	8	6
1	2009-03-13 06:22:00	0	6	2	8	6
1	2009-03-13 06:23:00	0	6	2	8	6
1	2009-03-13 06:24:00	0	6	2	8	6
1	2009-03-13 06:25:00	0	6	2	8	6
1	2009-03-13 06:26:00	0	6	2	8	6
1	2009-03-13 06:27:00	0	6	2	8	6
1	2009-03-13 06:28:00	0	6	2	8	6
1	2009-03-13 06:29:00	0	6	2	8	6
1	2009-03-13 06:30:00	0	6	2	8	6
1	2009-03-13 06:31:00	0	6	2	8	6
1	2009-03-13 06:32:00	0	6	2	8	6
1	2009-03-13 06:33:00	0	6	2	8	6
1	2009-03-13 06:34:00	0	6	2	8	6
1	2009-03-13 06:35:00	0	6	2	8	6
1	2009-03-13 06:36:00	0	6	2	8	6
1	2009-03-13 06:37:00	0	6	2	8	6
1	2009-03-13 06:38:00	0	6	2	8	6
1	2009-03-13 06:39:00	0	6	2	8	6
1	2009-03-13 06:40:00	24	6	2	8	6
1	2009-03-13 06:41:00	24	6	2	8	6
1	2009-03-13 06:42:00	0	6	2	8	6
1	2009-03-13 06:43:00	0	6	2	8	6
1	2009-03-13 06:44:00	0	6	2	8	6
1	2009-03-13 06:45:00	253	6	2	8	6
1	2009-03-13 06:46:00	28	6	2	8	6
1	2009-03-13 06:47:00	0	6	2	8	6
1	2009-03-13 06:48:00	0	6	2	8	6
1	2009-03-13 06:49:00	0	6	2	8	6
1	2009-03-13 06:50:00	0	6	2	8	6
1	2009-03-13 06:51:00	0	6	2	8	6
1	2009-03-13 06:52:00	0	6	2	8	6
1	2009-03-13 06:53:00	0	6	2	8	6
1	2009-03-13 06:54:00	28	6	2	8	6
1	2009-03-13 06:55:00	0	6	2	8	6
1	2009-03-13 06:56:00	0	6	2	8	6
1	2009-03-13 06:57:00	0	6	2	8	6
1	2009-03-13 06:58:00	0	6	2	8	6
1	2009-03-13 06:59:00	0	6	2	8	6
1	2009-03-13 07:00:00	0	6	2	8	6
1	2009-03-13 07:01:00	0	7	2	8	6
1	2009-03-13 07:02:00	0	7	2	8	6
1	2009-03-13 07:03:00	0	7	2	8	6
1	2009-03-13 07:04:00	0	7	2	8	6
1	2009-03-13 07:05:00	0	7	2	8	6
1	2009-03-13 07:06:00	0	7	2	8	6
1	2009-03-13 07:07:00	0	7	2	8	6
1	2009-03-13 07:08:00	96	7	2	8	6
1	2009-03-13 07:09:00	0	7	2	8	6
1	2009-03-13 07:10:00	0	7	2	8	6
1	2009-03-13 07:11:00	0	7	2	8	6
1	2009-03-13 07:12:00	0	7	2	8	6
1	2009-03-13 07:13:00	279	7	2	8	6
1	2009-03-13 07:14:00	28	7	2	8	6
1	2009-03-13 07:15:00	253	7	2	8	6
1	2009-03-13 07:16:00	1146	7	2	8	6
1	2009-03-13 07:17:00	1546	7	2	8	6
1	2009-03-13 07:18:00	1986	7	2	8	6
1	2009-03-13 07:19:00	1723	7	2	8	6
1	2009-03-13 07:20:00	1125	7	2	8	6
1	2009-03-13 07:21:00	214	7	2	8	6
1	2009-03-13 07:22:00	14	7	2	8	6
1	2009-03-13 07:23:00	0	7	2	8	6
1	2009-03-13 07:24:00	90	7	2	8	6
1	2009-03-13 07:25:00	14	7	2	8	6
1	2009-03-13 07:26:00	0	7	2	8	6
1	2009-03-13 07:27:00	5	7	2	8	6
1	2009-03-13 07:28:00	14	7	2	8	6
1	2009-03-13 07:29:00	38	7	2	8	6
1	2009-03-13 07:30:00	43	7	2	8	6
1	2009-03-13 07:31:00	0	7	2	8	6
1	2009-03-13 07:32:00	73	7	2	8	6
1	2009-03-13 07:33:00	38	7	2	8	6
1	2009-03-13 07:34:00	0	7	2	8	6
1	2009-03-13 07:35:00	0	7	2	8	6
1	2009-03-13 07:36:00	381	7	2	8	6
1	2009-03-13 07:37:00	131	7	2	8	6
1	2009-03-13 07:38:00	0	7	2	8	6
1	2009-03-13 07:39:00	9	7	2	8	6
1	2009-03-13 07:40:00	0	7	2	8	6
1	2009-03-13 07:41:00	0	7	2	8	6
1	2009-03-13 07:42:00	0	7	2	8	6
1	2009-03-13 07:43:00	0	7	2	8	6
1	2009-03-13 07:44:00	28	7	2	8	6
1	2009-03-13 07:45:00	229	7	2	8	6
1	2009-03-13 07:46:00	137	7	2	8	6
1	2009-03-13 07:47:00	361	7	2	8	6
1	2009-03-13 07:48:00	192	7	2	8	6
1	2009-03-13 07:49:00	270	7	2	8	6
1	2009-03-13 07:50:00	144	7	2	8	6
1	2009-03-13 07:51:00	479	7	2	8	6
1	2009-03-13 07:52:00	177	7	2	8	6
1	2009-03-13 07:53:00	0	7	2	8	6
1	2009-03-13 07:54:00	0	7	2	8	6
1	2009-03-13 07:55:00	14	7	2	8	6
1	2009-03-13 07:56:00	0	7	2	8	6
1	2009-03-13 07:57:00	24	7	2	8	6
1	2009-03-13 07:58:00	0	7	2	8	6
1	2009-03-13 07:59:00	67	7	2	8	6
1	2009-03-13 08:00:00	9	7	2	8	6
1	2009-03-13 08:01:00	19	8	2	8	6
1	2009-03-13 08:02:00	9	8	2	8	6
1	2009-03-13 08:03:00	5	8	2	8	6
1	2009-03-13 08:04:00	0	8	2	8	6
1	2009-03-13 08:05:00	0	8	2	8	6
1	2009-03-13 08:06:00	47	8	2	8	6
1	2009-03-13 08:07:00	0	8	2	8	6
1	2009-03-13 08:08:00	0	8	2	8	6
1	2009-03-13 08:09:00	0	8	2	8	6
1	2009-03-13 08:10:00	5	8	2	8	6
1	2009-03-13 08:11:00	14	8	2	8	6
1	2009-03-13 08:12:00	0	8	2	8	6
1	2009-03-13 08:13:00	0	8	2	8	6
1	2009-03-13 08:14:00	0	8	2	8	6
1	2009-03-13 08:15:00	24	8	2	8	6
1	2009-03-13 08:16:00	171	8	2	8	6
1	2009-03-13 08:17:00	9	8	2	8	6
1	2009-03-13 08:18:00	0	8	2	8	6
1	2009-03-13 08:19:00	0	8	2	8	6
1	2009-03-13 08:20:00	19	8	2	8	6
1	2009-03-13 08:21:00	705	8	2	8	6
1	2009-03-13 08:22:00	253	8	2	8	6
1	2009-03-13 08:23:00	107	8	2	8	6
1	2009-03-13 08:24:00	5	8	2	8	6
1	2009-03-13 08:25:00	47	8	2	8	6
1	2009-03-13 08:26:00	0	8	2	8	6
1	2009-03-13 08:27:00	0	8	2	8	6
1	2009-03-13 08:28:00	9	8	2	8	6
1	2009-03-13 08:29:00	14	8	2	8	6
1	2009-03-13 08:30:00	24	8	2	8	6
1	2009-03-13 08:31:00	52	8	2	8	6
1	2009-03-13 08:32:00	0	8	2	8	6
1	2009-03-13 08:33:00	0	8	2	8	6
1	2009-03-13 08:34:00	0	8	2	8	6
1	2009-03-13 08:35:00	0	8	2	8	6
1	2009-03-13 08:36:00	47	8	2	8	6
1	2009-03-13 08:37:00	0	8	2	8	6
1	2009-03-13 08:38:00	0	8	2	8	6
1	2009-03-13 08:39:00	57	8	2	8	6
1	2009-03-13 08:40:00	9	8	2	8	6
1	2009-03-13 08:41:00	9	8	2	8	6
1	2009-03-13 08:42:00	19	8	2	8	6
1	2009-03-13 08:43:00	0	8	2	8	6
1	2009-03-13 08:44:00	5	8	2	8	6
1	2009-03-13 08:45:00	5	8	2	8	6
1	2009-03-13 08:46:00	9	8	2	8	6
1	2009-03-13 08:47:00	0	8	2	8	6
1	2009-03-13 08:48:00	19	8	2	8	6
1	2009-03-13 08:49:00	5	8	2	8	6
1	2009-03-13 08:50:00	0	8	2	8	6
1	2009-03-13 08:51:00	0	8	2	8	6
1	2009-03-13 08:52:00	0	8	2	8	6
1	2009-03-13 08:53:00	38	8	2	8	6
1	2009-03-13 08:54:00	38	8	2	8	6
1	2009-03-13 08:55:00	0	8	2	8	6
1	2009-03-13 08:56:00	0	8	2	8	6
1	2009-03-13 08:57:00	0	8	2	8	6
1	2009-03-13 08:58:00	0	8	2	8	6
1	2009-03-13 08:59:00	0	8	2	8	6
1	2009-03-13 09:00:00	0	8	2	8	6
1	2009-03-13 09:01:00	52	9	2	8	6
1	2009-03-13 09:02:00	47	9	2	8	6
1	2009-03-13 09:03:00	0	9	2	8	6
1	2009-03-13 09:04:00	0	9	2	8	6
1	2009-03-13 09:05:00	67	9	2	8	6
1	2009-03-13 09:06:00	0	9	2	8	6
1	2009-03-13 09:07:00	0	9	2	8	6
1	2009-03-13 09:08:00	0	9	2	8	6
1	2009-03-13 09:09:00	0	9	2	8	6
1	2009-03-13 09:10:00	0	9	2	8	6
1	2009-03-13 09:11:00	0	9	2	8	6
1	2009-03-13 09:12:00	0	9	2	8	6
1	2009-03-13 09:13:00	5	9	2	8	6
1	2009-03-13 09:14:00	0	9	2	8	6
1	2009-03-13 09:15:00	0	9	2	8	6
1	2009-03-13 09:16:00	0	9	2	8	6
1	2009-03-13 09:17:00	0	9	2	8	6
1	2009-03-13 09:18:00	0	9	2	8	6
1	2009-03-13 09:19:00	0	9	2	8	6
1	2009-03-13 09:20:00	0	9	2	8	6
1	2009-03-13 09:21:00	0	9	2	8	6
1	2009-03-13 09:22:00	0	9	2	8	6
1	2009-03-13 09:23:00	0	9	2	8	6
1	2009-03-13 09:24:00	0	9	2	8	6
1	2009-03-13 09:25:00	0	9	2	8	6
1	2009-03-13 09:26:00	0	9	2	8	6
1	2009-03-13 09:27:00	0	9	2	8	6
1	2009-03-13 09:28:00	0	9	2	8	6
1	2009-03-13 09:29:00	0	9	2	8	6
1	2009-03-13 09:30:00	0	9	2	8	6
1	2009-03-13 09:31:00	0	9	2	8	6
1	2009-03-13 09:32:00	0	9	2	8	6
1	2009-03-13 09:33:00	0	9	2	8	6
1	2009-03-13 09:34:00	0	9	2	8	6
1	2009-03-13 09:35:00	0	9	2	8	6
1	2009-03-13 09:36:00	0	9	2	8	6
1	2009-03-13 09:37:00	0	9	2	8	6
1	2009-03-13 09:38:00	0	9	2	8	6
1	2009-03-13 09:39:00	0	9	2	8	6
1	2009-03-13 09:40:00	0	9	2	8	6
1	2009-03-13 09:41:00	0	9	2	8	6
1	2009-03-13 09:42:00	0	9	2	8	6
1	2009-03-13 09:43:00	0	9	2	8	6
1	2009-03-13 09:44:00	0	9	2	8	6
1	2009-03-13 09:45:00	0	9	2	8	6
1	2009-03-13 09:46:00	0	9	2	8	6
1	2009-03-13 09:47:00	5	9	2	8	6
1	2009-03-13 09:48:00	0	9	2	8	6
1	2009-03-13 09:49:00	0	9	2	8	6
1	2009-03-13 09:50:00	0	9	2	8	6
1	2009-03-13 09:51:00	0	9	2	8	6
1	2009-03-13 09:52:00	5	9	2	8	6
1	2009-03-13 09:53:00	0	9	2	8	6
1	2009-03-13 09:54:00	0	9	2	8	6
1	2009-03-13 09:55:00	14	9	2	8	6
1	2009-03-13 09:56:00	0	9	2	8	6
1	2009-03-13 09:57:00	0	9	2	8	6
1	2009-03-13 09:58:00	0	9	2	8	6
1	2009-03-13 09:59:00	0	9	2	8	6
1	2009-03-13 10:00:00	0	9	2	8	6
1	2009-03-13 10:01:00	0	10	2	8	6
1	2009-03-13 10:02:00	0	10	2	8	6
1	2009-03-13 10:03:00	0	10	2	8	6
1	2009-03-13 10:04:00	0	10	2	8	6
1	2009-03-13 10:05:00	0	10	2	8	6
1	2009-03-13 10:06:00	0	10	2	8	6
1	2009-03-13 10:07:00	0	10	2	8	6
1	2009-03-13 10:08:00	0	10	2	8	6
1	2009-03-13 10:09:00	33	10	2	8	6
1	2009-03-13 10:10:00	33	10	2	8	6
1	2009-03-13 10:11:00	0	10	2	8	6
1	2009-03-13 10:12:00	0	10	2	8	6
1	2009-03-13 10:13:00	0	10	2	8	6
1	2009-03-13 10:14:00	14	10	2	8	6
1	2009-03-13 10:15:00	33	10	2	8	6
1	2009-03-13 10:16:00	0	10	2	8	6
1	2009-03-13 10:17:00	0	10	2	8	6
1	2009-03-13 10:18:00	0	10	2	8	6
1	2009-03-13 10:19:00	0	10	2	8	6
1	2009-03-13 10:20:00	14	10	2	8	6
1	2009-03-13 10:21:00	0	10	2	8	6
1	2009-03-13 10:22:00	5	10	2	8	6
1	2009-03-13 10:23:00	0	10	2	8	6
1	2009-03-13 10:24:00	0	10	2	8	6
1	2009-03-13 10:25:00	0	10	2	8	6
1	2009-03-13 10:26:00	0	10	2	8	6
1	2009-03-13 10:27:00	0	10	2	8	6
1	2009-03-13 10:28:00	0	10	2	8	6
1	2009-03-13 10:29:00	0	10	2	8	6
1	2009-03-13 10:30:00	0	10	2	8	6
1	2009-03-13 10:31:00	0	10	2	8	6
1	2009-03-13 10:32:00	0	10	2	8	6
1	2009-03-13 10:33:00	0	10	2	8	6
1	2009-03-13 10:34:00	38	10	2	8	6
1	2009-03-13 10:35:00	73	10	2	8	6
1	2009-03-13 10:36:00	0	10	2	8	6
1	2009-03-13 10:37:00	0	10	2	8	6
1	2009-03-13 10:38:00	0	10	2	8	6
1	2009-03-13 10:39:00	0	10	2	8	6
1	2009-03-13 10:40:00	0	10	2	8	6
1	2009-03-13 10:41:00	38	10	2	8	6
1	2009-03-13 10:42:00	96	10	2	8	6
1	2009-03-13 10:43:00	5	10	2	8	6
1	2009-03-13 10:44:00	0	10	2	8	6
1	2009-03-13 10:45:00	0	10	2	8	6
1	2009-03-13 10:46:00	0	10	2	8	6
1	2009-03-13 10:47:00	0	10	2	8	6
1	2009-03-13 10:48:00	0	10	2	8	6
1	2009-03-13 10:49:00	0	10	2	8	6
1	2009-03-13 10:50:00	0	10	2	8	6
1	2009-03-13 10:51:00	0	10	2	8	6
1	2009-03-13 10:52:00	0	10	2	8	6
1	2009-03-13 10:53:00	0	10	2	8	6
1	2009-03-13 10:54:00	0	10	2	8	6
1	2009-03-13 10:55:00	0	10	2	8	6
1	2009-03-13 10:56:00	0	10	2	8	6
1	2009-03-13 10:57:00	0	10	2	8	6
1	2009-03-13 10:58:00	0	10	2	8	6
1	2009-03-13 10:59:00	0	10	2	8	6
1	2009-03-13 11:00:00	0	10	2	8	6
1	2009-03-13 11:01:00	0	11	2	8	6
1	2009-03-13 11:02:00	14	11	2	8	6
1	2009-03-13 11:03:00	24	11	2	8	6
1	2009-03-13 11:04:00	0	11	2	8	6
1	2009-03-13 11:05:00	38	11	2	8	6
1	2009-03-13 11:06:00	0	11	2	8	6
1	2009-03-13 11:07:00	62	11	2	8	6
1	2009-03-13 11:08:00	0	11	2	8	6
1	2009-03-13 11:09:00	38	11	2	8	6
1	2009-03-13 11:10:00	9	11	2	8	6
1	2009-03-13 11:11:00	0	11	2	8	6
1	2009-03-13 11:12:00	38	11	2	8	6
1	2009-03-13 11:13:00	0	11	2	8	6
1	2009-03-13 11:14:00	0	11	2	8	6
1	2009-03-13 11:15:00	245	11	2	8	6
1	2009-03-13 11:16:00	24	11	2	8	6
1	2009-03-13 11:17:00	0	11	2	8	6
1	2009-03-13 11:18:00	0	11	2	8	6
1	2009-03-13 11:19:00	0	11	2	8	6
1	2009-03-13 11:20:00	62	11	2	8	6
1	2009-03-13 11:21:00	79	11	2	8	6
1	2009-03-13 11:22:00	0	11	2	8	6
1	2009-03-13 11:23:00	0	11	2	8	6
1	2009-03-13 11:24:00	14	11	2	8	6
1	2009-03-13 11:25:00	0	11	2	8	6
1	2009-03-13 11:26:00	0	11	2	8	6
1	2009-03-13 11:27:00	57	11	2	8	6
1	2009-03-13 11:28:00	0	11	2	8	6
1	2009-03-13 11:29:00	0	11	2	8	6
1	2009-03-13 11:30:00	0	11	2	8	6
1	2009-03-13 11:31:00	0	11	2	8	6
1	2009-03-13 11:32:00	0	11	2	8	6
1	2009-03-13 11:33:00	0	11	2	8	6
1	2009-03-13 11:34:00	0	11	2	8	6
1	2009-03-13 11:35:00	5	11	2	8	6
1	2009-03-13 11:36:00	0	11	2	8	6
1	2009-03-13 11:37:00	0	11	2	8	6
1	2009-03-13 11:38:00	0	11	2	8	6
1	2009-03-13 11:39:00	0	11	2	8	6
1	2009-03-13 11:40:00	0	11	2	8	6
1	2009-03-13 11:41:00	0	11	2	8	6
1	2009-03-13 11:42:00	9	11	2	8	6
1	2009-03-13 11:43:00	618	11	2	8	6
1	2009-03-13 11:44:00	43	11	2	8	6
1	2009-03-13 11:45:00	43	11	2	8	6
1	2009-03-13 11:46:00	605	11	2	8	6
1	2009-03-13 11:47:00	164	11	2	8	6
1	2009-03-13 11:48:00	515	11	2	8	6
1	2009-03-13 11:49:00	0	11	2	8	6
1	2009-03-13 11:50:00	62	11	2	8	6
1	2009-03-13 11:51:00	84	11	2	8	6
1	2009-03-13 11:52:00	171	11	2	8	6
1	2009-03-13 11:53:00	43	11	2	8	6
1	2009-03-13 11:54:00	57	11	2	8	6
1	2009-03-13 11:55:00	171	11	2	8	6
1	2009-03-13 11:56:00	0	11	2	8	6
1	2009-03-13 11:57:00	19	11	2	8	6
1	2009-03-13 11:58:00	62	11	2	8	6
1	2009-03-13 11:59:00	14	11	2	8	6
1	2009-03-13 12:00:00	33	11	2	8	6
1	2009-03-13 12:01:00	851	12	3	8	6
1	2009-03-13 12:02:00	467	12	3	8	6
1	2009-03-13 12:03:00	0	12	3	8	6
1	2009-03-13 12:04:00	5	12	3	8	6
1	2009-03-13 12:05:00	33	12	3	8	6
1	2009-03-13 12:06:00	47	12	3	8	6
1	2009-03-13 12:07:00	0	12	3	8	6
1	2009-03-13 12:08:00	0	12	3	8	6
1	2009-03-13 12:09:00	0	12	3	8	6
1	2009-03-13 12:10:00	19	12	3	8	6
1	2009-03-13 12:11:00	0	12	3	8	6
1	2009-03-13 12:12:00	0	12	3	8	6
1	2009-03-13 12:13:00	43	12	3	8	6
1	2009-03-13 12:14:00	24	12	3	8	6
1	2009-03-13 12:15:00	0	12	3	8	6
1	2009-03-13 12:16:00	0	12	3	8	6
1	2009-03-13 12:17:00	62	12	3	8	6
1	2009-03-13 12:18:00	0	12	3	8	6
1	2009-03-13 12:19:00	0	12	3	8	6
1	2009-03-13 12:20:00	0	12	3	8	6
1	2009-03-13 12:21:00	0	12	3	8	6
1	2009-03-13 12:22:00	0	12	3	8	6
1	2009-03-13 12:23:00	28	12	3	8	6
1	2009-03-13 12:24:00	38	12	3	8	6
1	2009-03-13 12:25:00	0	12	3	8	6
1	2009-03-13 12:26:00	28	12	3	8	6
1	2009-03-13 12:27:00	0	12	3	8	6
1	2009-03-13 12:28:00	0	12	3	8	6
1	2009-03-13 12:29:00	14	12	3	8	6
1	2009-03-13 12:30:00	9	12	3	8	6
1	2009-03-13 12:31:00	113	12	3	8	6
1	2009-03-13 12:32:00	38	12	3	8	6
1	2009-03-13 12:33:00	0	12	3	8	6
1	2009-03-13 12:34:00	0	12	3	8	6
1	2009-03-13 12:35:00	119	12	3	8	6
1	2009-03-13 12:36:00	28	12	3	8	6
1	2009-03-13 12:37:00	33	12	3	8	6
1	2009-03-13 12:38:00	5	12	3	8	6
1	2009-03-13 12:39:00	0	12	3	8	6
1	2009-03-13 12:40:00	14	12	3	8	6
1	2009-03-13 12:41:00	456	12	3	8	6
1	2009-03-13 12:42:00	1662	12	3	8	6
1	2009-03-13 12:43:00	1463	12	3	8	6
1	2009-03-13 12:44:00	605	12	3	8	6
1	2009-03-13 12:45:00	2206	12	3	8	6
1	2009-03-13 12:46:00	2057	12	3	8	6
1	2009-03-13 12:47:00	5	12	3	8	6
1	2009-03-13 12:48:00	28	12	3	8	6
1	2009-03-13 12:49:00	0	12	3	8	6
1	2009-03-13 12:50:00	0	12	3	8	6
1	2009-03-13 12:51:00	67	12	3	8	6
1	2009-03-13 12:52:00	52	12	3	8	6
1	2009-03-13 12:53:00	0	12	3	8	6
1	2009-03-13 12:54:00	28	12	3	8	6
1	2009-03-13 12:55:00	342	12	3	8	6
1	2009-03-13 12:56:00	131	12	3	8	6
1	2009-03-13 12:57:00	124	12	3	8	6
1	2009-03-13 12:58:00	119	12	3	8	6
1	2009-03-13 12:59:00	84	12	3	8	6
1	2009-03-13 13:00:00	101	12	3	8	6
1	2009-03-13 13:01:00	52	13	3	8	6
1	2009-03-13 13:02:00	19	13	3	8	6
1	2009-03-13 13:03:00	19	13	3	8	6
1	2009-03-13 13:04:00	19	13	3	8	6
1	2009-03-13 13:05:00	0	13	3	8	6
1	2009-03-13 13:06:00	28	13	3	8	6
1	2009-03-13 13:07:00	199	13	3	8	6
1	2009-03-13 13:08:00	107	13	3	8	6
1	2009-03-13 13:09:00	0	13	3	8	6
1	2009-03-13 13:10:00	0	13	3	8	6
1	2009-03-13 13:11:00	24	13	3	8	6
1	2009-03-13 13:12:00	0	13	3	8	6
1	2009-03-13 13:13:00	0	13	3	8	6
1	2009-03-13 13:14:00	5	13	3	8	6
1	2009-03-13 13:15:00	0	13	3	8	6
1	2009-03-13 13:16:00	19	13	3	8	6
1	2009-03-13 13:17:00	43	13	3	8	6
1	2009-03-13 13:18:00	0	13	3	8	6
1	2009-03-13 13:19:00	43	13	3	8	6
1	2009-03-13 13:20:00	0	13	3	8	6
1	2009-03-13 13:21:00	0	13	3	8	6
1	2009-03-13 13:22:00	0	13	3	8	6
1	2009-03-13 13:23:00	43	13	3	8	6
1	2009-03-13 13:24:00	0	13	3	8	6
1	2009-03-13 13:25:00	0	13	3	8	6
1	2009-03-13 13:26:00	0	13	3	8	6
1	2009-03-13 13:27:00	33	13	3	8	6
1	2009-03-13 13:28:00	0	13	3	8	6
1	2009-03-13 13:29:00	0	13	3	8	6
1	2009-03-13 13:30:00	0	13	3	8	6
1	2009-03-13 13:31:00	0	13	3	8	6
1	2009-03-13 13:32:00	0	13	3	8	6
1	2009-03-13 13:33:00	0	13	3	8	6
1	2009-03-13 13:34:00	0	13	3	8	6
1	2009-03-13 13:35:00	0	13	3	8	6
1	2009-03-13 13:36:00	0	13	3	8	6
1	2009-03-13 13:37:00	0	13	3	8	6
1	2009-03-13 13:38:00	0	13	3	8	6
1	2009-03-13 13:39:00	0	13	3	8	6
1	2009-03-13 13:40:00	0	13	3	8	6
1	2009-03-13 13:41:00	0	13	3	8	6
1	2009-03-13 13:42:00	0	13	3	8	6
1	2009-03-13 13:43:00	0	13	3	8	6
1	2009-03-13 13:44:00	0	13	3	8	6
1	2009-03-13 13:45:00	0	13	3	8	6
1	2009-03-13 13:46:00	0	13	3	8	6
1	2009-03-13 13:47:00	0	13	3	8	6
1	2009-03-13 13:48:00	19	13	3	8	6
1	2009-03-13 13:49:00	0	13	3	8	6
1	2009-03-13 13:50:00	0	13	3	8	6
1	2009-03-13 13:51:00	0	13	3	8	6
1	2009-03-13 13:52:00	0	13	3	8	6
1	2009-03-13 13:53:00	0	13	3	8	6
1	2009-03-13 13:54:00	0	13	3	8	6
1	2009-03-13 13:55:00	24	13	3	8	6
1	2009-03-13 13:56:00	24	13	3	8	6
1	2009-03-13 13:57:00	0	13	3	8	6
1	2009-03-13 13:58:00	0	13	3	8	6
1	2009-03-13 13:59:00	9	13	3	8	6
1	2009-03-13 14:00:00	0	13	3	8	6
1	2009-03-13 14:01:00	0	14	3	8	6
1	2009-03-13 14:02:00	19	14	3	8	6
1	2009-03-13 14:03:00	28	14	3	8	6
1	2009-03-13 14:04:00	0	14	3	8	6
1	2009-03-13 14:05:00	84	14	3	8	6
1	2009-03-13 14:06:00	0	14	3	8	6
1	2009-03-13 14:07:00	0	14	3	8	6
1	2009-03-13 14:08:00	0	14	3	8	6
1	2009-03-13 14:09:00	0	14	3	8	6
1	2009-03-13 14:10:00	0	14	3	8	6
1	2009-03-13 14:11:00	38	14	3	8	6
1	2009-03-13 14:12:00	0	14	3	8	6
1	2009-03-13 14:13:00	0	14	3	8	6
1	2009-03-13 14:14:00	0	14	3	8	6
1	2009-03-13 14:15:00	0	14	3	8	6
1	2009-03-13 14:16:00	0	14	3	8	6
1	2009-03-13 14:17:00	0	14	3	8	6
1	2009-03-13 14:18:00	0	14	3	8	6
1	2009-03-13 14:19:00	0	14	3	8	6
1	2009-03-13 14:20:00	0	14	3	8	6
1	2009-03-13 14:21:00	0	14	3	8	6
1	2009-03-13 14:22:00	0	14	3	8	6
1	2009-03-13 14:23:00	0	14	3	8	6
1	2009-03-13 14:24:00	0	14	3	8	6
1	2009-03-13 14:25:00	0	14	3	8	6
1	2009-03-13 14:26:00	0	14	3	8	6
1	2009-03-13 14:27:00	0	14	3	8	6
1	2009-03-13 14:28:00	0	14	3	8	6
1	2009-03-13 14:29:00	0	14	3	8	6
1	2009-03-13 14:30:00	0	14	3	8	6
1	2009-03-13 14:31:00	28	14	3	8	6
1	2009-03-13 14:32:00	107	14	3	8	6
1	2009-03-13 14:33:00	19	14	3	8	6
1	2009-03-13 14:34:00	43	14	3	8	6
1	2009-03-13 14:35:00	0	14	3	8	6
1	2009-03-13 14:36:00	0	14	3	8	6
1	2009-03-13 14:37:00	296	14	3	8	6
1	2009-03-13 14:38:00	43	14	3	8	6
1	2009-03-13 14:39:00	24	14	3	8	6
1	2009-03-13 14:40:00	381	14	3	8	6
1	2009-03-13 14:41:00	675	14	3	8	6
1	2009-03-13 14:42:00	33	14	3	8	6
1	2009-03-13 14:43:00	565	14	3	8	6
1	2009-03-13 14:44:00	33	14	3	8	6
1	2009-03-13 14:45:00	0	14	3	8	6
1	2009-03-13 14:46:00	0	14	3	8	6
1	2009-03-13 14:47:00	0	14	3	8	6
1	2009-03-13 14:48:00	0	14	3	8	6
1	2009-03-13 14:49:00	0	14	3	8	6
1	2009-03-13 14:50:00	0	14	3	8	6
1	2009-03-13 14:51:00	0	14	3	8	6
1	2009-03-13 14:52:00	0	14	3	8	6
1	2009-03-13 14:53:00	19	14	3	8	6
1	2009-03-13 14:54:00	0	14	3	8	6
1	2009-03-13 14:55:00	0	14	3	8	6
1	2009-03-13 14:56:00	0	14	3	8	6
1	2009-03-13 14:57:00	0	14	3	8	6
1	2009-03-13 14:58:00	0	14	3	8	6
1	2009-03-13 14:59:00	0	14	3	8	6
1	2009-03-13 15:00:00	52	14	3	8	6
1	2009-03-13 15:01:00	38	15	3	8	6
1	2009-03-13 15:02:00	0	15	3	8	6
1	2009-03-13 15:03:00	0	15	3	8	6
1	2009-03-13 15:04:00	0	15	3	8	6
1	2009-03-13 15:05:00	0	15	3	8	6
1	2009-03-13 15:06:00	0	15	3	8	6
1	2009-03-13 15:07:00	0	15	3	8	6
1	2009-03-13 15:08:00	0	15	3	8	6
1	2009-03-13 15:09:00	0	15	3	8	6
1	2009-03-13 15:10:00	0	15	3	8	6
1	2009-03-13 15:11:00	0	15	3	8	6
1	2009-03-13 15:12:00	0	15	3	8	6
1	2009-03-13 15:13:00	0	15	3	8	6
1	2009-03-13 15:14:00	0	15	3	8	6
1	2009-03-13 15:15:00	0	15	3	8	6
1	2009-03-13 15:16:00	0	15	3	8	6
1	2009-03-13 15:17:00	0	15	3	8	6
1	2009-03-13 15:18:00	0	15	3	8	6
1	2009-03-13 15:19:00	0	15	3	8	6
[truncated: 58,481 more rows]

## Sheet: Pivot Segment
Multiplier	2
x (Low Intensity)	639.59
y (High Intensity)	834.942
	Column Labels
Values	1	2	3	4	5	6	Grand Total
Average of Activity	71.6448	97.6516	103.126	88.3868	83.0292	78.1544	86.9988
StdDev of Activity	283.972	368.645	365.146	295.546	296.533	287.257	318.413
Count of Activity	10080	10080	10080	10080	10080	10080	60480
Count Above x	314	469	485	450	435	383
% Above x	0.0311508	0.0465278	0.0481151	0.0446429	0.0431548	0.037996
Count Above y		360	359	313	322	280
% Above y		0.0357143	0.0356151	0.0310516	0.0319444	0.0277778

## Sheet: Pivot Weekday
Sum of Activity	Column Labels
Row Labels	1	2	3	4	5	6	Grand Total
1	97261	156528	168236	96205	100866	140397	759493
2	63872	159474	148054	110682	91046	93667	666795
3	136802	138609	76176	155949	122866	92331	722733
4	136544	199741	157820	124992	156874	99402	875373
5	127839	82721	205430	158825	112803	86865	774483
6	56722	154411	212677	137554	112324	124328	798016
7	103140	92844	71115	106732	140155	150806	664792
Grand Total	722180	984328	1039508	890939	836934	787796	5261685
Count of Activity	Column Labels
Row Labels	1	2	3	4	5	6	Grand Total
1	1440	1440	1440	1440	1440	1440	8640
2	1440	1440	1440	1440	1440	1440	8640
3	1440	1440	1440	1440	1440	1440	8640
4	1440	1440	1440	1440	1440	1440	8640
5	1440	1440	1440	1440	1440	1440	8640
6	1440	1440	1440	1440	1440	1440	8640
7	1440	1440	1440	1440	1440	1440	8640
Grand Total	10080	10080	10080	10080	10080	10080	60480

## Sheet: Pivot Quadrant
Sum of Activity	Column Labels
Row Labels	1	2	3	4	5	6	Grand Total
1	24012	24133	27985	24589	22714	32933	156366
2	208256	263711	362029	371269	254504	297390	1757159
3	402220	554210	497560	316807	356022	289781	2416600
4	87692	142274	151934	178274	203694	167692	931560
Grand Total	722180	984328	1039508	890939	836934	787796	5261685
Average	180545	246082	259877	222735	209234	196949
Count of Activity	Column Labels
Row Labels	1	2	3	4	5	6	Grand Total
1	2520	2520	2520	2520	2520	2520	15120
2	2520	2520	2520	2520	2520	2520	15120
3	2520	2520	2520	2520	2520	2520	15120
4	2520	2520	2520	2520	2520	2520	15120
Grand Total	10080	10080	10080	10080	10080	10080	60480

## Sheet: 3.5.09
Actogram, Copy Raw Data, All Days
Identity:	Greeley
Filename:	E:\Active Research Files\meloxicam titre canine\cases\greeley\Greeley 3.5.09.AWC
Gender:	F
Age:	7
Height:	76.2 cm	30.0 in
Weight:	38.6 kg	85.1 lbs
Start Date:	05-Mar-2009 (Thu)
Start Time:	18:00:00
Interval:	1.00 mins
Date Stamp:	Time Stamp:	Activity Data:	Marker Press:
2009-03-05	00:00:00	0
2009-03-05	00:01:00	0
2009-03-05	00:02:00	0
2009-03-05	00:03:00	0
2009-03-05	00:04:00	0
2009-03-05	00:05:00	0
2009-03-05	00:06:00	0
2009-03-05	00:07:00	0
2009-03-05	00:08:00	0
2009-03-05	00:09:00	0
2009-03-05	00:10:00	0
2009-03-05	00:11:00	0
2009-03-05	00:12:00	0
2009-03-05	00:13:00	0
2009-03-05	00:14:00	0
2009-03-05	00:15:00	0
2009-03-05	00:16:00	0
2009-03-05	00:17:00	0
2009-03-05	00:18:00	0
2009-03-05	00:19:00	0
2009-03-05	00:20:00	0
2009-03-05	00:21:00	0
2009-03-05	00:22:00	0
2009-03-05	00:23:00	0
2009-03-05	00:24:00	0
2009-03-05	00:25:00	0
2009-03-05	00:26:00	0
2009-03-05	00:27:00	0
2009-03-05	00:28:00	0
2009-03-05	00:29:00	0
2009-03-05	00:30:00	0
2009-03-05	00:31:00	0
2009-03-05	00:32:00	0
2009-03-05	00:33:00	0
2009-03-05	00:34:00	0
2009-03-05	00:35:00	0
2009-03-05	00:36:00	0
2009-03-05	00:37:00	0
2009-03-05	00:38:00	0
2009-03-05	00:39:00	0
2009-03-05	00:40:00	0
2009-03-05	00:41:00	0
2009-03-05	00:42:00	0
2009-03-05	00:43:00	0
2009-03-05	00:44:00	0
2009-03-05	00:45:00	0
2009-03-05	00:46:00	0
2009-03-05	00:47:00	0
2009-03-05	00:48:00	0
2009-03-05	00:49:00	0
2009-03-05	00:50:00	0
2009-03-05	00:51:00	0
2009-03-05	00:52:00	0
2009-03-05	00:53:00	0
2009-03-05	00:54:00	0
2009-03-05	00:55:00	0
2009-03-05	00:56:00	0
2009-03-05	00:57:00	0
2009-03-05	00:58:00	0
2009-03-05	00:59:00	0
2009-03-05	01:00:00	0
2009-03-05	01:01:00	0
2009-03-05	01:02:00	0
2009-03-05	01:03:00	0
2009-03-05	01:04:00	0
2009-03-05	01:05:00	0
2009-03-05	01:06:00	0
2009-03-05	01:07:00	0
2009-03-05	01:08:00	0
2009-03-05	01:09:00	0
2009-03-05	01:10:00	0
2009-03-05	01:11:00	0
2009-03-05	01:12:00	0
2009-03-05	01:13:00	0
2009-03-05	01:14:00	0
2009-03-05	01:15:00	0
2009-03-05	01:16:00	0
2009-03-05	01:17:00	0
2009-03-05	01:18:00	0
2009-03-05	01:19:00	0
2009-03-05	01:20:00	0
2009-03-05	01:21:00	0
2009-03-05	01:22:00	0
2009-03-05	01:23:00	0
2009-03-05	01:24:00	0
2009-03-05	01:25:00	0
2009-03-05	01:26:00	0
2009-03-05	01:27:00	0
2009-03-05	01:28:00	0
2009-03-05	01:29:00	0
2009-03-05	01:30:00	0
2009-03-05	01:31:00	0
2009-03-05	01:32:00	0
2009-03-05	01:33:00	0
2009-03-05	01:34:00	0
2009-03-05	01:35:00	0
2009-03-05	01:36:00	0
2009-03-05	01:37:00	0
2009-03-05	01:38:00	0
2009-03-05	01:39:00	0
2009-03-05	01:40:00	0
2009-03-05	01:41:00	0
2009-03-05	01:42:00	0
2009-03-05	01:43:00	0
2009-03-05	01:44:00	0
2009-03-05	01:45:00	0
2009-03-05	01:46:00	0
2009-03-05	01:47:00	0
2009-03-05	01:48:00	0
2009-03-05	01:49:00	0
2009-03-05	01:50:00	0
2009-03-05	01:51:00	0
2009-03-05	01:52:00	0
2009-03-05	01:53:00	0
2009-03-05	01:54:00	0
2009-03-05	01:55:00	0
2009-03-05	01:56:00	0
2009-03-05	01:57:00	0
2009-03-05	01:58:00	0
2009-03-05	01:59:00	0
2009-03-05	02:00:00	0
2009-03-05	02:01:00	0
2009-03-05	02:02:00	0
2009-03-05	02:03:00	0
2009-03-05	02:04:00	0
2009-03-05	02:05:00	0
2009-03-05	02:06:00	0
2009-03-05	02:07:00	0
2009-03-05	02:08:00	0
2009-03-05	02:09:00	0
2009-03-05	02:10:00	0
2009-03-05	02:11:00	0
2009-03-05	02:12:00	0
2009-03-05	02:13:00	0
2009-03-05	02:14:00	0
2009-03-05	02:15:00	0
2009-03-05	02:16:00	0
2009-03-05	02:17:00	0
2009-03-05	02:18:00	0
2009-03-05	02:19:00	0
2009-03-05	02:20:00	0
2009-03-05	02:21:00	0
2009-03-05	02:22:00	0
2009-03-05	02:23:00	0
2009-03-05	02:24:00	0
2009-03-05	02:25:00	0
2009-03-05	02:26:00	0
2009-03-05	02:27:00	0
2009-03-05	02:28:00	0
2009-03-05	02:29:00	0
2009-03-05	02:30:00	0
2009-03-05	02:31:00	0
2009-03-05	02:32:00	0
2009-03-05	02:33:00	0
2009-03-05	02:34:00	0
2009-03-05	02:35:00	0
2009-03-05	02:36:00	0
2009-03-05	02:37:00	0
2009-03-05	02:38:00	0
2009-03-05	02:39:00	0
2009-03-05	02:40:00	0
2009-03-05	02:41:00	0
2009-03-05	02:42:00	0
2009-03-05	02:43:00	0
2009-03-05	02:44:00	0
2009-03-05	02:45:00	0
2009-03-05	02:46:00	0
2009-03-05	02:47:00	0
2009-03-05	02:48:00	0
2009-03-05	02:49:00	0
2009-03-05	02:50:00	0
2009-03-05	02:51:00	0
2009-03-05	02:52:00	0
2009-03-05	02:53:00	0
2009-03-05	02:54:00	0
2009-03-05	02:55:00	0
2009-03-05	02:56:00	0
2009-03-05	02:57:00	0
2009-03-05	02:58:00	0
2009-03-05	02:59:00	0
2009-03-05	03:00:00	0
2009-03-05	03:01:00	0
2009-03-05	03:02:00	0
2009-03-05	03:03:00	0
2009-03-05	03:04:00	0
2009-03-05	03:05:00	0
2009-03-05	03:06:00	0
2009-03-05	03:07:00	0
2009-03-05	03:08:00	0
2009-03-05	03:09:00	0
2009-03-05	03:10:00	0
2009-03-05	03:11:00	0
2009-03-05	03:12:00	0
2009-03-05	03:13:00	0
2009-03-05	03:14:00	0
2009-03-05	03:15:00	0
2009-03-05	03:16:00	0
2009-03-05	03:17:00	0
2009-03-05	03:18:00	0
2009-03-05	03:19:00	0
2009-03-05	03:20:00	0
2009-03-05	03:21:00	0
2009-03-05	03:22:00	0
2009-03-05	03:23:00	0
2009-03-05	03:24:00	0
2009-03-05	03:25:00	0
2009-03-05	03:26:00	0
2009-03-05	03:27:00	0
2009-03-05	03:28:00	0
2009-03-05	03:29:00	0
2009-03-05	03:30:00	0
2009-03-05	03:31:00	0
2009-03-05	03:32:00	0
2009-03-05	03:33:00	0
2009-03-05	03:34:00	0
2009-03-05	03:35:00	0
2009-03-05	03:36:00	0
2009-03-05	03:37:00	0
2009-03-05	03:38:00	0
2009-03-05	03:39:00	0
2009-03-05	03:40:00	0
2009-03-05	03:41:00	0
2009-03-05	03:42:00	0
2009-03-05	03:43:00	0
2009-03-05	03:44:00	0
2009-03-05	03:45:00	0
2009-03-05	03:46:00	0
2009-03-05	03:47:00	0
2009-03-05	03:48:00	0
2009-03-05	03:49:00	0
2009-03-05	03:50:00	0
2009-03-05	03:51:00	0
2009-03-05	03:52:00	0
2009-03-05	03:53:00	0
2009-03-05	03:54:00	0
2009-03-05	03:55:00	0
2009-03-05	03:56:00	0
2009-03-05	03:57:00	0
2009-03-05	03:58:00	0
2009-03-05	03:59:00	0
2009-03-05	04:00:00	0
2009-03-05	04:01:00	0
2009-03-05	04:02:00	0
2009-03-05	04:03:00	0
2009-03-05	04:04:00	0
2009-03-05	04:05:00	0
2009-03-05	04:06:00	0
2009-03-05	04:07:00	0
2009-03-05	04:08:00	0
2009-03-05	04:09:00	0
2009-03-05	04:10:00	0
2009-03-05	04:11:00	0
2009-03-05	04:12:00	0
2009-03-05	04:13:00	0
2009-03-05	04:14:00	0
2009-03-05	04:15:00	0
2009-03-05	04:16:00	0
2009-03-05	04:17:00	0
2009-03-05	04:18:00	0
2009-03-05	04:19:00	0
2009-03-05	04:20:00	0
2009-03-05	04:21:00	0
2009-03-05	04:22:00	0
2009-03-05	04:23:00	0
2009-03-05	04:24:00	0
2009-03-05	04:25:00	0
2009-03-05	04:26:00	0
2009-03-05	04:27:00	0
2009-03-05	04:28:00	0
2009-03-05	04:29:00	0
2009-03-05	04:30:00	0
2009-03-05	04:31:00	0
2009-03-05	04:32:00	0
2009-03-05	04:33:00	0
2009-03-05	04:34:00	0
2009-03-05	04:35:00	0
2009-03-05	04:36:00	0
2009-03-05	04:37:00	0
2009-03-05	04:38:00	0
2009-03-05	04:39:00	0
2009-03-05	04:40:00	0
2009-03-05	04:41:00	0
2009-03-05	04:42:00	0
2009-03-05	04:43:00	0
2009-03-05	04:44:00	0
2009-03-05	04:45:00	0
2009-03-05	04:46:00	0
2009-03-05	04:47:00	0
2009-03-05	04:48:00	0
2009-03-05	04:49:00	0
2009-03-05	04:50:00	0
2009-03-05	04:51:00	0
2009-03-05	04:52:00	0
2009-03-05	04:53:00	0
2009-03-05	04:54:00	0
2009-03-05	04:55:00	0
2009-03-05	04:56:00	0
2009-03-05	04:57:00	0
2009-03-05	04:58:00	0
2009-03-05	04:59:00	0
2009-03-05	05:00:00	0
2009-03-05	05:01:00	0
2009-03-05	05:02:00	0
2009-03-05	05:03:00	0
2009-03-05	05:04:00	0
2009-03-05	05:05:00	0
2009-03-05	05:06:00	0
2009-03-05	05:07:00	0
2009-03-05	05:08:00	0
2009-03-05	05:09:00	0
2009-03-05	05:10:00	0
2009-03-05	05:11:00	0
2009-03-05	05:12:00	0
2009-03-05	05:13:00	0
2009-03-05	05:14:00	0
2009-03-05	05:15:00	0
2009-03-05	05:16:00	0
2009-03-05	05:17:00	0
2009-03-05	05:18:00	0
2009-03-05	05:19:00	0
2009-03-05	05:20:00	0
2009-03-05	05:21:00	0
2009-03-05	05:22:00	0
2009-03-05	05:23:00	0
2009-03-05	05:24:00	0
2009-03-05	05:25:00	0
2009-03-05	05:26:00	0
2009-03-05	05:27:00	0
2009-03-05	05:28:00	0
2009-03-05	05:29:00	0
2009-03-05	05:30:00	0
2009-03-05	05:31:00	0
2009-03-05	05:32:00	0
2009-03-05	05:33:00	0
2009-03-05	05:34:00	0
2009-03-05	05:35:00	0
2009-03-05	05:36:00	0
2009-03-05	05:37:00	0
2009-03-05	05:38:00	0
2009-03-05	05:39:00	0
2009-03-05	05:40:00	0
2009-03-05	05:41:00	0
2009-03-05	05:42:00	0
2009-03-05	05:43:00	0
2009-03-05	05:44:00	0
2009-03-05	05:45:00	0
2009-03-05	05:46:00	0
2009-03-05	05:47:00	0
2009-03-05	05:48:00	0
2009-03-05	05:49:00	0
2009-03-05	05:50:00	0
2009-03-05	05:51:00	0
2009-03-05	05:52:00	0
2009-03-05	05:53:00	0
2009-03-05	05:54:00	0
2009-03-05	05:55:00	0
2009-03-05	05:56:00	0
2009-03-05	05:57:00	0
2009-03-05	05:58:00	0
2009-03-05	05:59:00	0
2009-03-05	06:00:00	0
2009-03-05	06:01:00	0
2009-03-05	06:02:00	0
2009-03-05	06:03:00	0
2009-03-05	06:04:00	0
2009-03-05	06:05:00	0
2009-03-05	06:06:00	0
2009-03-05	06:07:00	0
2009-03-05	06:08:00	0
2009-03-05	06:09:00	0
2009-03-05	06:10:00	0
2009-03-05	06:11:00	0
2009-03-05	06:12:00	0
2009-03-05	06:13:00	0
2009-03-05	06:14:00	0
2009-03-05	06:15:00	0
2009-03-05	06:16:00	0
2009-03-05	06:17:00	0
2009-03-05	06:18:00	0
2009-03-05	06:19:00	0
2009-03-05	06:20:00	0
2009-03-05	06:21:00	0
2009-03-05	06:22:00	0
2009-03-05	06:23:00	0
2009-03-05	06:24:00	0
2009-03-05	06:25:00	0
2009-03-05	06:26:00	0
2009-03-05	06:27:00	0
2009-03-05	06:28:00	0
2009-03-05	06:29:00	0
2009-03-05	06:30:00	0
2009-03-05	06:31:00	0
2009-03-05	06:32:00	0
2009-03-05	06:33:00	0
2009-03-05	06:34:00	0
2009-03-05	06:35:00	0
2009-03-05	06:36:00	0
2009-03-05	06:37:00	0
2009-03-05	06:38:00	0
2009-03-05	06:39:00	0
2009-03-05	06:40:00	0
2009-03-05	06:41:00	0
2009-03-05	06:42:00	0
2009-03-05	06:43:00	0
2009-03-05	06:44:00	0
2009-03-05	06:45:00	0
2009-03-05	06:46:00	0
2009-03-05	06:47:00	0
2009-03-05	06:48:00	0
2009-03-05	06:49:00	0
2009-03-05	06:50:00	0
2009-03-05	06:51:00	0
2009-03-05	06:52:00	0
2009-03-05	06:53:00	0
2009-03-05	06:54:00	0
2009-03-05	06:55:00	0
2009-03-05	06:56:00	0
2009-03-05	06:57:00	0
2009-03-05	06:58:00	0
2009-03-05	06:59:00	0
2009-03-05	07:00:00	0
2009-03-05	07:01:00	0
2009-03-05	07:02:00	0
2009-03-05	07:03:00	0
2009-03-05	07:04:00	0
2009-03-05	07:05:00	0
2009-03-05	07:06:00	0
2009-03-05	07:07:00	0
2009-03-05	07:08:00	0
2009-03-05	07:09:00	0
2009-03-05	07:10:00	0
2009-03-05	07:11:00	0
2009-03-05	07:12:00	0
2009-03-05	07:13:00	0
2009-03-05	07:14:00	0
2009-03-05	07:15:00	0
2009-03-05	07:16:00	0
2009-03-05	07:17:00	0
2009-03-05	07:18:00	0
2009-03-05	07:19:00	0
2009-03-05	07:20:00	0
2009-03-05	07:21:00	0
2009-03-05	07:22:00	0
2009-03-05	07:23:00	0
2009-03-05	07:24:00	0
2009-03-05	07:25:00	0
2009-03-05	07:26:00	0
2009-03-05	07:27:00	0
2009-03-05	07:28:00	0
2009-03-05	07:29:00	0
2009-03-05	07:30:00	0
2009-03-05	07:31:00	0
2009-03-05	07:32:00	0
2009-03-05	07:33:00	0
2009-03-05	07:34:00	0
2009-03-05	07:35:00	0
2009-03-05	07:36:00	0
2009-03-05	07:37:00	0
2009-03-05	07:38:00	0
2009-03-05	07:39:00	0
2009-03-05	07:40:00	0
2009-03-05	07:41:00	0
2009-03-05	07:42:00	0
2009-03-05	07:43:00	0
2009-03-05	07:44:00	0
2009-03-05	07:45:00	0
2009-03-05	07:46:00	0
2009-03-05	07:47:00	0
2009-03-05	07:48:00	0
2009-03-05	07:49:00	0
2009-03-05	07:50:00	0
2009-03-05	07:51:00	0
2009-03-05	07:52:00	0
2009-03-05	07:53:00	0
2009-03-05	07:54:00	0
2009-03-05	07:55:00	0
2009-03-05	07:56:00	0
2009-03-05	07:57:00	0
2009-03-05	07:58:00	0
2009-03-05	07:59:00	0
2009-03-05	08:00:00	0
2009-03-05	08:01:00	0
2009-03-05	08:02:00	0
2009-03-05	08:03:00	0
2009-03-05	08:04:00	0
2009-03-05	08:05:00	0
2009-03-05	08:06:00	0
2009-03-05	08:07:00	0
2009-03-05	08:08:00	0
2009-03-05	08:09:00	0
2009-03-05	08:10:00	0
2009-03-05	08:11:00	0
2009-03-05	08:12:00	0
2009-03-05	08:13:00	0
2009-03-05	08:14:00	0
2009-03-05	08:15:00	0
2009-03-05	08:16:00	0
2009-03-05	08:17:00	0
2009-03-05	08:18:00	0
2009-03-05	08:19:00	0
2009-03-05	08:20:00	0
2009-03-05	08:21:00	0
2009-03-05	08:22:00	0
2009-03-05	08:23:00	0
2009-03-05	08:24:00	0
2009-03-05	08:25:00	0
2009-03-05	08:26:00	0
2009-03-05	08:27:00	0
2009-03-05	08:28:00	0
2009-03-05	08:29:00	0
2009-03-05	08:30:00	0
2009-03-05	08:31:00	0
2009-03-05	08:32:00	0
2009-03-05	08:33:00	0
2009-03-05	08:34:00	0
2009-03-05	08:35:00	0
2009-03-05	08:36:00	0
2009-03-05	08:37:00	0
2009-03-05	08:38:00	0
2009-03-05	08:39:00	0
2009-03-05	08:40:00	0
2009-03-05	08:41:00	0
2009-03-05	08:42:00	0
2009-03-05	08:43:00	0
2009-03-05	08:44:00	0
2009-03-05	08:45:00	0
2009-03-05	08:46:00	0
2009-03-05	08:47:00	0
2009-03-05	08:48:00	0
2009-03-05	08:49:00	0
2009-03-05	08:50:00	0
2009-03-05	08:51:00	0
2009-03-05	08:52:00	0
2009-03-05	08:53:00	0
2009-03-05	08:54:00	0
2009-03-05	08:55:00	0
2009-03-05	08:56:00	0
2009-03-05	08:57:00	0
2009-03-05	08:58:00	0
2009-03-05	08:59:00	0
2009-03-05	09:00:00	0
2009-03-05	09:01:00	0
2009-03-05	09:02:00	0
2009-03-05	09:03:00	0
2009-03-05	09:04:00	0
2009-03-05	09:05:00	0
2009-03-05	09:06:00	0
2009-03-05	09:07:00	0
2009-03-05	09:08:00	0
2009-03-05	09:09:00	0
2009-03-05	09:10:00	0
2009-03-05	09:11:00	0
2009-03-05	09:12:00	0
2009-03-05	09:13:00	0
2009-03-05	09:14:00	0
2009-03-05	09:15:00	0
2009-03-05	09:16:00	0
2009-03-05	09:17:00	0
2009-03-05	09:18:00	0
2009-03-05	09:19:00	0
2009-03-05	09:20:00	0
2009-03-05	09:21:00	0
2009-03-05	09:22:00	0
2009-03-05	09:23:00	0
2009-03-05	09:24:00	0
2009-03-05	09:25:00	0
2009-03-05	09:26:00	0
2009-03-05	09:27:00	0
2009-03-05	09:28:00	0
2009-03-05	09:29:00	0
2009-03-05	09:30:00	0
2009-03-05	09:31:00	0
2009-03-05	09:32:00	0
2009-03-05	09:33:00	0
2009-03-05	09:34:00	0
2009-03-05	09:35:00	0
2009-03-05	09:36:00	0
2009-03-05	09:37:00	0
2009-03-05	09:38:00	0
2009-03-05	09:39:00	0
2009-03-05	09:40:00	0
2009-03-05	09:41:00	0
2009-03-05	09:42:00	0
2009-03-05	09:43:00	0
2009-03-05	09:44:00	0
2009-03-05	09:45:00	0
2009-03-05	09:46:00	0
2009-03-05	09:47:00	0
2009-03-05	09:48:00	0
2009-03-05	09:49:00	0
2009-03-05	09:50:00	0
2009-03-05	09:51:00	0
2009-03-05	09:52:00	0
2009-03-05	09:53:00	0
2009-03-05	09:54:00	0
2009-03-05	09:55:00	0
2009-03-05	09:56:00	0
2009-03-05	09:57:00	0
2009-03-05	09:58:00	0
2009-03-05	09:59:00	0
2009-03-05	10:00:00	0
2009-03-05	10:01:00	0
2009-03-05	10:02:00	0
2009-03-05	10:03:00	0
2009-03-05	10:04:00	0
2009-03-05	10:05:00	0
2009-03-05	10:06:00	0
2009-03-05	10:07:00	0
2009-03-05	10:08:00	0
2009-03-05	10:09:00	0
2009-03-05	10:10:00	0
2009-03-05	10:11:00	0
2009-03-05	10:12:00	0
2009-03-05	10:13:00	0
2009-03-05	10:14:00	0
2009-03-05	10:15:00	0
2009-03-05	10:16:00	0
2009-03-05	10:17:00	0
2009-03-05	10:18:00	0
2009-03-05	10:19:00	0
2009-03-05	10:20:00	0
2009-03-05	10:21:00	0
2009-03-05	10:22:00	0
2009-03-05	10:23:00	0
2009-03-05	10:24:00	0
2009-03-05	10:25:00	0
2009-03-05	10:26:00	0
2009-03-05	10:27:00	0
2009-03-05	10:28:00	0
2009-03-05	10:29:00	0
2009-03-05	10:30:00	0
2009-03-05	10:31:00	0
2009-03-05	10:32:00	0
2009-03-05	10:33:00	0
2009-03-05	10:34:00	0
2009-03-05	10:35:00	0
2009-03-05	10:36:00	0
2009-03-05	10:37:00	0
2009-03-05	10:38:00	0
2009-03-05	10:39:00	0
2009-03-05	10:40:00	0
2009-03-05	10:41:00	0
2009-03-05	10:42:00	0
2009-03-05	10:43:00	0
2009-03-05	10:44:00	0
2009-03-05	10:45:00	0
2009-03-05	10:46:00	0
2009-03-05	10:47:00	0
2009-03-05	10:48:00	0
2009-03-05	10:49:00	0
2009-03-05	10:50:00	0
2009-03-05	10:51:00	0
2009-03-05	10:52:00	0
2009-03-05	10:53:00	0
2009-03-05	10:54:00	0
2009-03-05	10:55:00	0
2009-03-05	10:56:00	0
2009-03-05	10:57:00	0
2009-03-05	10:58:00	0
2009-03-05	10:59:00	0
2009-03-05	11:00:00	0
2009-03-05	11:01:00	0
2009-03-05	11:02:00	0
2009-03-05	11:03:00	0
2009-03-05	11:04:00	0
2009-03-05	11:05:00	0
2009-03-05	11:06:00	0
2009-03-05	11:07:00	0
2009-03-05	11:08:00	0
2009-03-05	11:09:00	0
2009-03-05	11:10:00	0
2009-03-05	11:11:00	0
2009-03-05	11:12:00	0
2009-03-05	11:13:00	0
2009-03-05	11:14:00	0
2009-03-05	11:15:00	0
2009-03-05	11:16:00	0
2009-03-05	11:17:00	0
2009-03-05	11:18:00	0
2009-03-05	11:19:00	0
2009-03-05	11:20:00	0
2009-03-05	11:21:00	0
2009-03-05	11:22:00	0
2009-03-05	11:23:00	0
2009-03-05	11:24:00	0
2009-03-05	11:25:00	0
2009-03-05	11:26:00	0
2009-03-05	11:27:00	0
2009-03-05	11:28:00	0
2009-03-05	11:29:00	0
2009-03-05	11:30:00	0
2009-03-05	11:31:00	0
2009-03-05	11:32:00	0
2009-03-05	11:33:00	0
2009-03-05	11:34:00	0
2009-03-05	11:35:00	0
2009-03-05	11:36:00	0
2009-03-05	11:37:00	0
2009-03-05	11:38:00	0
2009-03-05	11:39:00	0
2009-03-05	11:40:00	0
2009-03-05	11:41:00	0
2009-03-05	11:42:00	0
2009-03-05	11:43:00	0
2009-03-05	11:44:00	0
2009-03-05	11:45:00	0
2009-03-05	11:46:00	0
2009-03-05	11:47:00	0
2009-03-05	11:48:00	0
2009-03-05	11:49:00	0
2009-03-05	11:50:00	0
2009-03-05	11:51:00	0
2009-03-05	11:52:00	0
2009-03-05	11:53:00	0
2009-03-05	11:54:00	0
2009-03-05	11:55:00	0
2009-03-05	11:56:00	0
2009-03-05	11:57:00	0
2009-03-05	11:58:00	0
2009-03-05	11:59:00	0
2009-03-05	12:00:00	0
2009-03-05	12:01:00	0
2009-03-05	12:02:00	0
2009-03-05	12:03:00	0
2009-03-05	12:04:00	0
2009-03-05	12:05:00	0
2009-03-05	12:06:00	0
2009-03-05	12:07:00	0
2009-03-05	12:08:00	0
2009-03-05	12:09:00	0
2009-03-05	12:10:00	0
2009-03-05	12:11:00	0
2009-03-05	12:12:00	0
2009-03-05	12:13:00	0
2009-03-05	12:14:00	0
2009-03-05	12:15:00	0
2009-03-05	12:16:00	0
2009-03-05	12:17:00	0
2009-03-05	12:18:00	0
2009-03-05	12:19:00	0
2009-03-05	12:20:00	0
2009-03-05	12:21:00	0
2009-03-05	12:22:00	0
2009-03-05	12:23:00	0
2009-03-05	12:24:00	0
2009-03-05	12:25:00	0
2009-03-05	12:26:00	0
2009-03-05	12:27:00	0
2009-03-05	12:28:00	0
2009-03-05	12:29:00	0
2009-03-05	12:30:00	0
2009-03-05	12:31:00	0
2009-03-05	12:32:00	0
2009-03-05	12:33:00	0
2009-03-05	12:34:00	0
2009-03-05	12:35:00	0
2009-03-05	12:36:00	0
2009-03-05	12:37:00	0
2009-03-05	12:38:00	0
2009-03-05	12:39:00	0
2009-03-05	12:40:00	0
2009-03-05	12:41:00	0
2009-03-05	12:42:00	0
2009-03-05	12:43:00	0
2009-03-05	12:44:00	0
2009-03-05	12:45:00	0
2009-03-05	12:46:00	0
2009-03-05	12:47:00	0
2009-03-05	12:48:00	0
2009-03-05	12:49:00	0
2009-03-05	12:50:00	0
2009-03-05	12:51:00	0
2009-03-05	12:52:00	0
2009-03-05	12:53:00	0
2009-03-05	12:54:00	0
2009-03-05	12:55:00	0
2009-03-05	12:56:00	0
2009-03-05	12:57:00	0
2009-03-05	12:58:00	0
2009-03-05	12:59:00	0
2009-03-05	13:00:00	0
2009-03-05	13:01:00	0
2009-03-05	13:02:00	0
2009-03-05	13:03:00	0
2009-03-05	13:04:00	0
2009-03-05	13:05:00	0
2009-03-05	13:06:00	0
2009-03-05	13:07:00	0
2009-03-05	13:08:00	0
2009-03-05	13:09:00	0
2009-03-05	13:10:00	0
2009-03-05	13:11:00	0
2009-03-05	13:12:00	0
2009-03-05	13:13:00	0
2009-03-05	13:14:00	0
2009-03-05	13:15:00	0
2009-03-05	13:16:00	0
2009-03-05	13:17:00	0
2009-03-05	13:18:00	0
2009-03-05	13:19:00	0
2009-03-05	13:20:00	0
2009-03-05	13:21:00	0
2009-03-05	13:22:00	0
2009-03-05	13:23:00	0
2009-03-05	13:24:00	0
2009-03-05	13:25:00	0
2009-03-05	13:26:00	0
2009-03-05	13:27:00	0
2009-03-05	13:28:00	0
2009-03-05	13:29:00	0
2009-03-05	13:30:00	0
2009-03-05	13:31:00	0
2009-03-05	13:32:00	0
2009-03-05	13:33:00	0
2009-03-05	13:34:00	0
2009-03-05	13:35:00	0
2009-03-05	13:36:00	0
2009-03-05	13:37:00	0
2009-03-05	13:38:00	0
2009-03-05	13:39:00	0
2009-03-05	13:40:00	0
2009-03-05	13:41:00	0
2009-03-05	13:42:00	0
2009-03-05	13:43:00	0
2009-03-05	13:44:00	0
2009-03-05	13:45:00	0
2009-03-05	13:46:00	0
2009-03-05	13:47:00	0
2009-03-05	13:48:00	0
2009-03-05	13:49:00	0
2009-03-05	13:50:00	0
2009-03-05	13:51:00	0
2009-03-05	13:52:00	0
2009-03-05	13:53:00	0
2009-03-05	13:54:00	0
2009-03-05	13:55:00	0
2009-03-05	13:56:00	0
2009-03-05	13:57:00	0
2009-03-05	13:58:00	0
2009-03-05	13:59:00	0
2009-03-05	14:00:00	0
2009-03-05	14:01:00	0
2009-03-05	14:02:00	0
2009-03-05	14:03:00	0
2009-03-05	14:04:00	0
2009-03-05	14:05:00	0
2009-03-05	14:06:00	0
2009-03-05	14:07:00	0
2009-03-05	14:08:00	0
2009-03-05	14:09:00	0
2009-03-05	14:10:00	0
2009-03-05	14:11:00	0
2009-03-05	14:12:00	0
2009-03-05	14:13:00	0
2009-03-05	14:14:00	0
2009-03-05	14:15:00	0
2009-03-05	14:16:00	0
2009-03-05	14:17:00	0
2009-03-05	14:18:00	0
2009-03-05	14:19:00	0
2009-03-05	14:20:00	0
2009-03-05	14:21:00	0
2009-03-05	14:22:00	0
2009-03-05	14:23:00	0
2009-03-05	14:24:00	0
2009-03-05	14:25:00	0
2009-03-05	14:26:00	0
2009-03-05	14:27:00	0
2009-03-05	14:28:00	0
2009-03-05	14:29:00	0
2009-03-05	14:30:00	0
2009-03-05	14:31:00	0
2009-03-05	14:32:00	0
2009-03-05	14:33:00	0
2009-03-05	14:34:00	0
2009-03-05	14:35:00	0
2009-03-05	14:36:00	0
2009-03-05	14:37:00	0
2009-03-05	14:38:00	0
2009-03-05	14:39:00	0
2009-03-05	14:40:00	0
2009-03-05	14:41:00	0
2009-03-05	14:42:00	0
2009-03-05	14:43:00	0
2009-03-05	14:44:00	0
2009-03-05	14:45:00	0
2009-03-05	14:46:00	0
2009-03-05	14:47:00	0
2009-03-05	14:48:00	0
2009-03-05	14:49:00	0
2009-03-05	14:50:00	0
2009-03-05	14:51:00	0
2009-03-05	14:52:00	0
2009-03-05	14:53:00	0
2009-03-05	14:54:00	0
2009-03-05	14:55:00	0
2009-03-05	14:56:00	0
2009-03-05	14:57:00	0
2009-03-05	14:58:00	0
2009-03-05	14:59:00	0
2009-03-05	15:00:00	0
2009-03-05	15:01:00	0
2009-03-05	15:02:00	0
2009-03-05	15:03:00	0
2009-03-05	15:04:00	0
2009-03-05	15:05:00	0
2009-03-05	15:06:00	0
2009-03-05	15:07:00	0
2009-03-05	15:08:00	0
2009-03-05	15:09:00	0
2009-03-05	15:10:00	0
2009-03-05	15:11:00	0
2009-03-05	15:12:00	0
2009-03-05	15:13:00	0
2009-03-05	15:14:00	0
2009-03-05	15:15:00	0
2009-03-05	15:16:00	0
2009-03-05	15:17:00	0
2009-03-05	15:18:00	0
2009-03-05	15:19:00	0
2009-03-05	15:20:00	0
2009-03-05	15:21:00	0
2009-03-05	15:22:00	0
2009-03-05	15:23:00	0
2009-03-05	15:24:00	0
2009-03-05	15:25:00	0
2009-03-05	15:26:00	0
2009-03-05	15:27:00	0
2009-03-05	15:28:00	0
2009-03-05	15:29:00	0
2009-03-05	15:30:00	0
2009-03-05	15:31:00	0
2009-03-05	15:32:00	0
2009-03-05	15:33:00	0
2009-03-05	15:34:00	0
2009-03-05	15:35:00	0
2009-03-05	15:36:00	0
2009-03-05	15:37:00	0
2009-03-05	15:38:00	0
2009-03-05	15:39:00	0
2009-03-05	15:40:00	0
2009-03-05	15:41:00	0
2009-03-05	15:42:00	0
2009-03-05	15:43:00	0
2009-03-05	15:44:00	0
2009-03-05	15:45:00	0
2009-03-05	15:46:00	0
2009-03-05	15:47:00	0
2009-03-05	15:48:00	0
2009-03-05	15:49:00	0
2009-03-05	15:50:00	0
2009-03-05	15:51:00	0
2009-03-05	15:52:00	0
2009-03-05	15:53:00	0
2009-03-05	15:54:00	0
2009-03-05	15:55:00	0
2009-03-05	15:56:00	0
2009-03-05	15:57:00	0
2009-03-05	15:58:00	0
2009-03-05	15:59:00	0
2009-03-05	16:00:00	0
2009-03-05	16:01:00	0
2009-03-05	16:02:00	0
2009-03-05	16:03:00	0
2009-03-05	16:04:00	0
2009-03-05	16:05:00	0
2009-03-05	16:06:00	0
2009-03-05	16:07:00	0
2009-03-05	16:08:00	0
2009-03-05	16:09:00	0
2009-03-05	16:10:00	0
2009-03-05	16:11:00	0
2009-03-05	16:12:00	0
2009-03-05	16:13:00	0
2009-03-05	16:14:00	0
2009-03-05	16:15:00	0
2009-03-05	16:16:00	0
2009-03-05	16:17:00	0
2009-03-05	16:18:00	0
2009-03-05	16:19:00	0
2009-03-05	16:20:00	0
2009-03-05	16:21:00	0
2009-03-05	16:22:00	0
2009-03-05	16:23:00	0
2009-03-05	16:24:00	0
2009-03-05	16:25:00	0
2009-03-05	16:26:00	0
2009-03-05	16:27:00	0
2009-03-05	16:28:00	0
2009-03-05	16:29:00	0
2009-03-05	16:30:00	0
2009-03-05	16:31:00	0
2009-03-05	16:32:00	0
2009-03-05	16:33:00	0
2009-03-05	16:34:00	0
2009-03-05	16:35:00	0
2009-03-05	16:36:00	0
2009-03-05	16:37:00	0
2009-03-05	16:38:00	0
2009-03-05	16:39:00	0
2009-03-05	16:40:00	0
2009-03-05	16:41:00	0
2009-03-05	16:42:00	0
2009-03-05	16:43:00	0
2009-03-05	16:44:00	0
2009-03-05	16:45:00	0
2009-03-05	16:46:00	0
2009-03-05	16:47:00	0
2009-03-05	16:48:00	0
2009-03-05	16:49:00	0
2009-03-05	16:50:00	0
2009-03-05	16:51:00	0
2009-03-05	16:52:00	0
2009-03-05	16:53:00	0
2009-03-05	16:54:00	0
2009-03-05	16:55:00	0
2009-03-05	16:56:00	0
2009-03-05	16:57:00	0
2009-03-05	16:58:00	0
2009-03-05	16:59:00	0
2009-03-05	17:00:00	0
2009-03-05	17:01:00	0
2009-03-05	17:02:00	0
2009-03-05	17:03:00	0
2009-03-05	17:04:00	0
2009-03-05	17:05:00	0
2009-03-05	17:06:00	0
2009-03-05	17:07:00	0
2009-03-05	17:08:00	0
2009-03-05	17:09:00	0
2009-03-05	17:10:00	0
2009-03-05	17:11:00	0
2009-03-05	17:12:00	0
2009-03-05	17:13:00	0
2009-03-05	17:14:00	0
2009-03-05	17:15:00	0
2009-03-05	17:16:00	0
2009-03-05	17:17:00	0
2009-03-05	17:18:00	0
2009-03-05	17:19:00	0
2009-03-05	17:20:00	0
2009-03-05	17:21:00	0
2009-03-05	17:22:00	0
2009-03-05	17:23:00	0
2009-03-05	17:24:00	0
2009-03-05	17:25:00	0
2009-03-05	17:26:00	0
2009-03-05	17:27:00	0
2009-03-05	17:28:00	0
2009-03-05	17:29:00	0
2009-03-05	17:30:00	0
2009-03-05	17:31:00	0
2009-03-05	17:32:00	0
2009-03-05	17:33:00	0
2009-03-05	17:34:00	0
2009-03-05	17:35:00	0
2009-03-05	17:36:00	0
2009-03-05	17:37:00	0
2009-03-05	17:38:00	0
2009-03-05	17:39:00	0
2009-03-05	17:40:00	0
2009-03-05	17:41:00	0
2009-03-05	17:42:00	0
2009-03-05	17:43:00	0
2009-03-05	17:44:00	0
2009-03-05	17:45:00	0
2009-03-05	17:46:00	0
2009-03-05	17:47:00	0
2009-03-05	17:48:00	0
2009-03-05	17:49:00	0
2009-03-05	17:50:00	0
2009-03-05	17:51:00	0
2009-03-05	17:52:00	0
2009-03-05	17:53:00	0
2009-03-05	17:54:00	0
2009-03-05	17:55:00	0
2009-03-05	17:56:00	0
2009-03-05	17:57:00	0
2009-03-05	17:58:00	0
2009-03-05	17:59:00	0
2009-03-05	18:00:00	0	M
2009-03-05	18:01:00	490
2009-03-05	18:02:00	33
2009-03-05	18:03:00	0
2009-03-05	18:04:00	24
2009-03-05	18:05:00	0
2009-03-05	18:06:00	0
2009-03-05	18:07:00	0
2009-03-05	18:08:00	47
2009-03-05	18:09:00	0
2009-03-05	18:10:00	0
2009-03-05	18:11:00	0
2009-03-05	18:12:00	0
2009-03-05	18:13:00	0
2009-03-05	18:14:00	0
2009-03-05	18:15:00	43
2009-03-05	18:16:00	0
2009-03-05	18:17:00	0
2009-03-05	18:18:00	0
2009-03-05	18:19:00	0
2009-03-05	18:20:00	0
2009-03-05	18:21:00	0
2009-03-05	18:22:00	0
2009-03-05	18:23:00	0
2009-03-05	18:24:00	0
2009-03-05	18:25:00	0
2009-03-05	18:26:00	0
2009-03-05	18:27:00	1168
2009-03-05	18:28:00	1384
2009-03-05	18:29:00	245
2009-03-05	18:30:00	19
2009-03-05	18:31:00	0
2009-03-05	18:32:00	0
2009-03-05	18:33:00	0
2009-03-05	18:34:00	0
2009-03-05	18:35:00	0
2009-03-05	18:36:00	0
2009-03-05	18:37:00	0
2009-03-05	18:38:00	0
2009-03-05	18:39:00	0
2009-03-05	18:40:00	0
2009-03-05	18:41:00	0
2009-03-05	18:42:00	43
2009-03-05	18:43:00	67
2009-03-05	18:44:00	0
2009-03-05	18:45:00	0
2009-03-05	18:46:00	0
2009-03-05	18:47:00	131
2009-03-05	18:48:00	0
2009-03-05	18:49:00	0
2009-03-05	18:50:00	107
2009-03-05	18:51:00	0
2009-03-05	18:52:00	0
2009-03-05	18:53:00	0
2009-03-05	18:54:00	0
2009-03-05	18:55:00	38
2009-03-05	18:56:00	0
2009-03-05	18:57:00	38
2009-03-05	18:58:00	19
2009-03-05	18:59:00	0
2009-03-05	19:00:00	0
2009-03-05	19:01:00	0
2009-03-05	19:02:00	19
2009-03-05	19:03:00	79
2009-03-05	19:04:00	0
2009-03-05	19:05:00	0
2009-03-05	19:06:00	113
2009-03-05	19:07:00	28
2009-03-05	19:08:00	0
2009-03-05	19:09:00	0
2009-03-05	19:10:00	28
2009-03-05	19:11:00	43
2009-03-05	19:12:00	113
2009-03-05	19:13:00	73
2009-03-05	19:14:00	352
2009-03-05	19:15:00	361
2009-03-05	19:16:00	0
2009-03-05	19:17:00	0
2009-03-05	19:18:00	352
2009-03-05	19:19:00	184
2009-03-05	19:20:00	445
2009-03-05	19:21:00	552
2009-03-05	19:22:00	834
2009-03-05	19:23:00	24
2009-03-05	19:24:00	96
2009-03-05	19:25:00	503
2009-03-05	19:26:00	9
2009-03-05	19:27:00	24
2009-03-05	19:28:00	62
2009-03-05	19:29:00	0
2009-03-05	19:30:00	0
2009-03-05	19:31:00	0
2009-03-05	19:32:00	0
2009-03-05	19:33:00	101
2009-03-05	19:34:00	0
2009-03-05	19:35:00	0
2009-03-05	19:36:00	0
2009-03-05	19:37:00	0
2009-03-05	19:38:00	5
2009-03-05	19:39:00	14
2009-03-05	19:40:00	752
2009-03-05	19:41:00	279
2009-03-05	19:42:00	96
2009-03-05	19:43:00	199
2009-03-05	19:44:00	467
2009-03-05	19:45:00	423
2009-03-05	19:46:00	43
2009-03-05	19:47:00	490
2009-03-05	19:48:00	24
2009-03-05	19:49:00	0
2009-03-05	19:50:00	43
2009-03-05	19:51:00	0
2009-03-05	19:52:00	0
2009-03-05	19:53:00	24
2009-03-05	19:54:00	0
2009-03-05	19:55:00	0
2009-03-05	19:56:00	0
2009-03-05	19:57:00	38
2009-03-05	19:58:00	0
2009-03-05	19:59:00	0
2009-03-05	20:00:00	0
2009-03-05	20:01:00	0
2009-03-05	20:02:00	14
2009-03-05	20:03:00	0
2009-03-05	20:04:00	0
2009-03-05	20:05:00	0
2009-03-05	20:06:00	0
2009-03-05	20:07:00	0
2009-03-05	20:08:00	0
2009-03-05	20:09:00	0
2009-03-05	20:10:00	0
2009-03-05	20:11:00	0
2009-03-05	20:12:00	0
2009-03-05	20:13:00	0
2009-03-05	20:14:00	0
2009-03-05	20:15:00	0
2009-03-05	20:16:00	0
2009-03-05	20:17:00	0
2009-03-05	20:18:00	0
2009-03-05	20:19:00	14
2009-03-05	20:20:00	0
2009-03-05	20:21:00	0
2009-03-05	20:22:00	0
2009-03-05	20:23:00	0
2009-03-05	20:24:00	0
2009-03-05	20:25:00	0
2009-03-05	20:26:00	0
2009-03-05	20:27:00	0
2009-03-05	20:28:00	0
2009-03-05	20:29:00	0
2009-03-05	20:30:00	0
2009-03-05	20:31:00	0
2009-03-05	20:32:00	0
2009-03-05	20:33:00	0
2009-03-05	20:34:00	0
2009-03-05	20:35:00	0
2009-03-05	20:36:00	0
2009-03-05	20:37:00	0
2009-03-05	20:38:00	0
2009-03-05	20:39:00	0
2009-03-05	20:40:00	0
2009-03-05	20:41:00	0
2009-03-05	20:42:00	0
2009-03-05	20:43:00	0
2009-03-05	20:44:00	28
2009-03-05	20:45:00	0
2009-03-05	20:46:00	0
2009-03-05	20:47:00	0
2009-03-05	20:48:00	0
2009-03-05	20:49:00	0
2009-03-05	20:50:00	0
2009-03-05	20:51:00	0
2009-03-05	20:52:00	0
2009-03-05	20:53:00	0
2009-03-05	20:54:00	0
2009-03-05	20:55:00	0
2009-03-05	20:56:00	0
2009-03-05	20:57:00	0
2009-03-05	20:58:00	0
2009-03-05	20:59:00	0
2009-03-05	21:00:00	0
2009-03-05	21:01:00	0
2009-03-05	21:02:00	0
2009-03-05	21:03:00	9
2009-03-05	21:04:00	0
2009-03-05	21:05:00	0
2009-03-05	21:06:00	0
2009-03-05	21:07:00	0
2009-03-05	21:08:00	0
2009-03-05	21:09:00	0
2009-03-05	21:10:00	0
2009-03-05	21:11:00	0
2009-03-05	21:12:00	0
2009-03-05	21:13:00	0
2009-03-05	21:14:00	0
2009-03-05	21:15:00	0
2009-03-05	21:16:00	0
2009-03-05	21:17:00	0
2009-03-05	21:18:00	0
2009-03-05	21:19:00	0
2009-03-05	21:20:00	0
2009-03-05	21:21:00	0
2009-03-05	21:22:00	0
2009-03-05	21:23:00	0
2009-03-05	21:24:00	0
2009-03-05	21:25:00	0
2009-03-05	21:26:00	0
2009-03-05	21:27:00	0
2009-03-05	21:28:00	0
2009-03-05	21:29:00	9
2009-03-05	21:30:00	834
2009-03-05	21:31:00	1309
2009-03-05	21:32:00	1309
2009-03-05	21:33:00	57
2009-03-05	21:34:00	0
2009-03-05	21:35:00	0
2009-03-05	21:36:00	0
2009-03-05	21:37:00	0
2009-03-05	21:38:00	0
2009-03-05	21:39:00	43
2009-03-05	21:40:00	0
2009-03-05	21:41:00	0
2009-03-05	21:42:00	0
2009-03-05	21:43:00	0
2009-03-05	21:44:00	0
2009-03-05	21:45:00	0
2009-03-05	21:46:00	0
2009-03-05	21:47:00	0
2009-03-05	21:48:00	33
2009-03-05	21:49:00	5
2009-03-05	21:50:00	0
2009-03-05	21:51:00	0
2009-03-05	21:52:00	0
2009-03-05	21:53:00	0
2009-03-05	21:54:00	0
2009-03-05	21:55:00	0
2009-03-05	21:56:00	0
2009-03-05	21:57:00	0
2009-03-05	21:58:00	0
2009-03-05	21:59:00	0
2009-03-05	22:00:00	52
2009-03-05	22:01:00	5
2009-03-05	22:02:00	0
2009-03-05	22:03:00	52
2009-03-05	22:04:00	14
2009-03-05	22:05:00	0
2009-03-05	22:06:00	33
2009-03-05	22:07:00	0
2009-03-05	22:08:00	0
2009-03-05	22:09:00	0
2009-03-05	22:10:00	0
2009-03-05	22:11:00	0
2009-03-05	22:12:00	0
2009-03-05	22:13:00	5
2009-03-05	22:14:00	0
2009-03-05	22:15:00	0
2009-03-05	22:16:00	0
2009-03-05	22:17:00	0
2009-03-05	22:18:00	0
2009-03-05	22:19:00	0
2009-03-05	22:20:00	0
2009-03-05	22:21:00	0
2009-03-05	22:22:00	0
2009-03-05	22:23:00	0
2009-03-05	22:24:00	0
2009-03-05	22:25:00	0
2009-03-05	22:26:00	0
2009-03-05	22:27:00	0
2009-03-05	22:28:00	0
2009-03-05	22:29:00	0
2009-03-05	22:30:00	0
2009-03-05	22:31:00	0
2009-03-05	22:32:00	0
2009-03-05	22:33:00	0
2009-03-05	22:34:00	0
2009-03-05	22:35:00	73
2009-03-05	22:36:00	0
2009-03-05	22:37:00	0
2009-03-05	22:38:00	0
2009-03-05	22:39:00	0
2009-03-05	22:40:00	0
2009-03-05	22:41:00	0
2009-03-05	22:42:00	0
2009-03-05	22:43:00	0
2009-03-05	22:44:00	0
2009-03-05	22:45:00	0
2009-03-05	22:46:00	0
2009-03-05	22:47:00	0
2009-03-05	22:48:00	0
2009-03-05	22:49:00	0
2009-03-05	22:50:00	0
2009-03-05	22:51:00	0
2009-03-05	22:52:00	0
2009-03-05	22:53:00	0
2009-03-05	22:54:00	0
2009-03-05	22:55:00	0
2009-03-05	22:56:00	0
2009-03-05	22:57:00	0
2009-03-05	22:58:00	0
2009-03-05	22:59:00	0
2009-03-05	23:00:00	0
2009-03-05	23:01:00	0
2009-03-05	23:02:00	0
2009-03-05	23:03:00	0
2009-03-05	23:04:00	0
2009-03-05	23:05:00	0
2009-03-05	23:06:00	0
2009-03-05	23:07:00	0
2009-03-05	23:08:00	0
2009-03-05	23:09:00	0
2009-03-05	23:10:00	0
2009-03-05	23:11:00	28
2009-03-05	23:12:00	5
2009-03-05	23:13:00	19
2009-03-05	23:14:00	0
2009-03-05	23:15:00	0
2009-03-05	23:16:00	5
2009-03-05	23:17:00	0
2009-03-05	23:18:00	0
2009-03-05	23:19:00	0
2009-03-05	23:20:00	0
2009-03-05	23:21:00	19
2009-03-05	23:22:00	0
2009-03-05	23:23:00	0
2009-03-05	23:24:00	0
2009-03-05	23:25:00	0
2009-03-05	23:26:00	0
2009-03-05	23:27:00	0
2009-03-05	23:28:00	0
2009-03-05	23:29:00	0
2009-03-05	23:30:00	0
2009-03-05	23:31:00	0
2009-03-05	23:32:00	0
2009-03-05	23:33:00	0
2009-03-05	23:34:00	0
2009-03-05	23:35:00	0
2009-03-05	23:36:00	0
2009-03-05	23:37:00	0
2009-03-05	23:38:00	0
2009-03-05	23:39:00	0
2009-03-05	23:40:00	0
2009-03-05	23:41:00	0
2009-03-05	23:42:00	0
2009-03-05	23:43:00	0
2009-03-05	23:44:00	0
2009-03-05	23:45:00	5
2009-03-05	23:46:00	0
2009-03-05	23:47:00	0
2009-03-05	23:48:00	0
2009-03-05	23:49:00	0
2009-03-05	23:50:00	0
2009-03-05	23:51:00	0
2009-03-05	23:52:00	0
2009-03-05	23:53:00	5
2009-03-05	23:54:00	0
2009-03-05	23:55:00	0
2009-03-05	23:56:00	0
2009-03-05	23:57:00	0
2009-03-05	23:58:00	0
2009-03-05	23:59:00	0
2009-03-06	00:00:00	0
2009-03-06	00:01:00	0
2009-03-06	00:02:00	0
2009-03-06	00:03:00	0
2009-03-06	00:04:00	0
2009-03-06	00:05:00	0
2009-03-06	00:06:00	0
2009-03-06	00:07:00	0
2009-03-06	00:08:00	0
2009-03-06	00:09:00	0
2009-03-06	00:10:00	0
2009-03-06	00:11:00	0
2009-03-06	00:12:00	0
2009-03-06	00:13:00	0
2009-03-06	00:14:00	0
2009-03-06	00:15:00	5
2009-03-06	00:16:00	0
2009-03-06	00:17:00	0
2009-03-06	00:18:00	0
2009-03-06	00:19:00	0
2009-03-06	00:20:00	0
2009-03-06	00:21:00	0
2009-03-06	00:22:00	9
2009-03-06	00:23:00	207
2009-03-06	00:24:00	5
2009-03-06	00:25:00	79
2009-03-06	00:26:00	9
2009-03-06	00:27:00	0
2009-03-06	00:28:00	0
2009-03-06	00:29:00	0
2009-03-06	00:30:00	0
2009-03-06	00:31:00	0
2009-03-06	00:32:00	0
2009-03-06	00:33:00	0
2009-03-06	00:34:00	0
2009-03-06	00:35:00	0
2009-03-06	00:36:00	0
2009-03-06	00:37:00	0
2009-03-06	00:38:00	0
2009-03-06	00:39:00	0
2009-03-06	00:40:00	0
2009-03-06	00:41:00	0
2009-03-06	00:42:00	0
2009-03-06	00:43:00	0
2009-03-06	00:44:00	0
2009-03-06	00:45:00	0
2009-03-06	00:46:00	0
2009-03-06	00:47:00	0
2009-03-06	00:48:00	0
2009-03-06	00:49:00	0
2009-03-06	00:50:00	0
2009-03-06	00:51:00	0
2009-03-06	00:52:00	0
2009-03-06	00:53:00	0
2009-03-06	00:54:00	0
2009-03-06	00:55:00	0
2009-03-06	00:56:00	0
2009-03-06	00:57:00	0
2009-03-06	00:58:00	0
2009-03-06	00:59:00	0
2009-03-06	01:00:00	0
2009-03-06	01:01:00	0
2009-03-06	01:02:00	0
2009-03-06	01:03:00	0
2009-03-06	01:04:00	0
2009-03-06	01:05:00	0
2009-03-06	01:06:00	0
2009-03-06	01:07:00	0
2009-03-06	01:08:00	0
2009-03-06	01:09:00	0
2009-03-06	01:10:00	0
2009-03-06	01:11:00	0
2009-03-06	01:12:00	0
2009-03-06	01:13:00	0
2009-03-06	01:14:00	0
2009-03-06	01:15:00	0
2009-03-06	01:16:00	0
2009-03-06	01:17:00	0
2009-03-06	01:18:00	0
2009-03-06	01:19:00	0
2009-03-06	01:20:00	0
2009-03-06	01:21:00	0
2009-03-06	01:22:00	0
2009-03-06	01:23:00	0
2009-03-06	01:24:00	0
2009-03-06	01:25:00	0
2009-03-06	01:26:00	0
2009-03-06	01:27:00	28
2009-03-06	01:28:00	0
2009-03-06	01:29:00	0
2009-03-06	01:30:00	0
2009-03-06	01:31:00	0
2009-03-06	01:32:00	0
2009-03-06	01:33:00	0
2009-03-06	01:34:00	0
2009-03-06	01:35:00	0
2009-03-06	01:36:00	0
2009-03-06	01:37:00	0
2009-03-06	01:38:00	0
2009-03-06	01:39:00	0
2009-03-06	01:40:00	0
2009-03-06	01:41:00	0
2009-03-06	01:42:00	0
2009-03-06	01:43:00	0
2009-03-06	01:44:00	0
2009-03-06	01:45:00	0
2009-03-06	01:46:00	0
2009-03-06	01:47:00	0
2009-03-06	01:48:00	0
2009-03-06	01:49:00	0
2009-03-06	01:50:00	0
2009-03-06	01:51:00	0
2009-03-06	01:52:00	0
2009-03-06	01:53:00	19
2009-03-06	01:54:00	62
2009-03-06	01:55:00	0
2009-03-06	01:56:00	0
2009-03-06	01:57:00	0
2009-03-06	01:58:00	0
2009-03-06	01:59:00	0
2009-03-06	02:00:00	0
2009-03-06	02:01:00	0
2009-03-06	02:02:00	0
2009-03-06	02:03:00	0
2009-03-06	02:04:00	0
2009-03-06	02:05:00	0
2009-03-06	02:06:00	0
2009-03-06	02:07:00	0
2009-03-06	02:08:00	0
2009-03-06	02:09:00	0
2009-03-06	02:10:00	0
2009-03-06	02:11:00	0
2009-03-06	02:12:00	0
2009-03-06	02:13:00	0
2009-03-06	02:14:00	9
2009-03-06	02:15:00	0
2009-03-06	02:16:00	199
2009-03-06	02:17:00	43
2009-03-06	02:18:00	0
2009-03-06	02:19:00	0
2009-03-06	02:20:00	0
2009-03-06	02:21:00	0
2009-03-06	02:22:00	0
2009-03-06	02:23:00	0
2009-03-06	02:24:00	0
2009-03-06	02:25:00	0
2009-03-06	02:26:00	0
2009-03-06	02:27:00	0
2009-03-06	02:28:00	0
2009-03-06	02:29:00	0
2009-03-06	02:30:00	0
2009-03-06	02:31:00	0
2009-03-06	02:32:00	0
2009-03-06	02:33:00	0
2009-03-06	02:34:00	0
2009-03-06	02:35:00	0
2009-03-06	02:36:00	0
2009-03-06	02:37:00	0
2009-03-06	02:38:00	0
2009-03-06	02:39:00	0
2009-03-06	02:40:00	0
2009-03-06	02:41:00	0
2009-03-06	02:42:00	0
2009-03-06	02:43:00	0
2009-03-06	02:44:00	0
2009-03-06	02:45:00	0
2009-03-06	02:46:00	0
2009-03-06	02:47:00	0
2009-03-06	02:48:00	0
2009-03-06	02:49:00	0
2009-03-06	02:50:00	28
2009-03-06	02:51:00	33
2009-03-06	02:52:00	0
2009-03-06	02:53:00	0
2009-03-06	02:54:00	0
2009-03-06	02:55:00	0
2009-03-06	02:56:00	0
2009-03-06	02:57:00	0
2009-03-06	02:58:00	0
2009-03-06	02:59:00	0
2009-03-06	03:00:00	0
2009-03-06	03:01:00	0
2009-03-06	03:02:00	0
2009-03-06	03:03:00	0
2009-03-06	03:04:00	0
2009-03-06	03:05:00	0
2009-03-06	03:06:00	0
2009-03-06	03:07:00	0
2009-03-06	03:08:00	0
2009-03-06	03:09:00	0
2009-03-06	03:10:00	0
2009-03-06	03:11:00	0
2009-03-06	03:12:00	0
2009-03-06	03:13:00	0
2009-03-06	03:14:00	0
2009-03-06	03:15:00	0
2009-03-06	03:16:00	0
2009-03-06	03:17:00	0
2009-03-06	03:18:00	0
2009-03-06	03:19:00	0
2009-03-06	03:20:00	0
2009-03-06	03:21:00	67
2009-03-06	03:22:00	0
2009-03-06	03:23:00	0
2009-03-06	03:24:00	0
2009-03-06	03:25:00	0
2009-03-06	03:26:00	0
2009-03-06	03:27:00	0
2009-03-06	03:28:00	0
2009-03-06	03:29:00	0
2009-03-06	03:30:00	0
2009-03-06	03:31:00	0
2009-03-06	03:32:00	0
2009-03-06	03:33:00	0
2009-03-06	03:34:00	0
2009-03-06	03:35:00	0
2009-03-06	03:36:00	0
2009-03-06	03:37:00	0
2009-03-06	03:38:00	0
2009-03-06	03:39:00	0
2009-03-06	03:40:00	0
2009-03-06	03:41:00	0
2009-03-06	03:42:00	0
2009-03-06	03:43:00	5
2009-03-06	03:44:00	0
2009-03-06	03:45:00	0
2009-03-06	03:46:00	0
2009-03-06	03:47:00	0
2009-03-06	03:48:00	5
2009-03-06	03:49:00	0
2009-03-06	03:50:00	0
2009-03-06	03:51:00	0
2009-03-06	03:52:00	24
2009-03-06	03:53:00	5
2009-03-06	03:54:00	9
2009-03-06	03:55:00	28
2009-03-06	03:56:00	9
2009-03-06	03:57:00	9
2009-03-06	03:58:00	5
2009-03-06	03:59:00	0
2009-03-06	04:00:00	14
2009-03-06	04:01:00	19
2009-03-06	04:02:00	19
2009-03-06	04:03:00	229
2009-03-06	04:04:00	0
2009-03-06	04:05:00	0
2009-03-06	04:06:00	0
2009-03-06	04:07:00	0
2009-03-06	04:08:00	0
2009-03-06	04:09:00	0
2009-03-06	04:10:00	0
2009-03-06	04:11:00	0
2009-03-06	04:12:00	0
2009-03-06	04:13:00	0
2009-03-06	04:14:00	0
2009-03-06	04:15:00	0
2009-03-06	04:16:00	0
2009-03-06	04:17:00	0
2009-03-06	04:18:00	0
2009-03-06	04:19:00	0
2009-03-06	04:20:00	38
2009-03-06	04:21:00	57
2009-03-06	04:22:00	0
2009-03-06	04:23:00	0
2009-03-06	04:24:00	0
2009-03-06	04:25:00	0
2009-03-06	04:26:00	0
2009-03-06	04:27:00	0
2009-03-06	04:28:00	0
2009-03-06	04:29:00	0
2009-03-06	04:30:00	0
2009-03-06	04:31:00	0
2009-03-06	04:32:00	0
2009-03-06	04:33:00	0
2009-03-06	04:34:00	0
2009-03-06	04:35:00	0
2009-03-06	04:36:00	62
2009-03-06	04:37:00	0
2009-03-06	04:38:00	0
2009-03-06	04:39:00	0
2009-03-06	04:40:00	0
2009-03-06	04:41:00	0
2009-03-06	04:42:00	0
2009-03-06	04:43:00	0
2009-03-06	04:44:00	0
2009-03-06	04:45:00	0
2009-03-06	04:46:00	0
2009-03-06	04:47:00	14
2009-03-06	04:48:00	0
2009-03-06	04:49:00	0
2009-03-06	04:50:00	0
2009-03-06	04:51:00	0
2009-03-06	04:52:00	0
2009-03-06	04:53:00	0
2009-03-06	04:54:00	0
2009-03-06	04:55:00	0
2009-03-06	04:56:00	0
2009-03-06	04:57:00	0
2009-03-06	04:58:00	0
2009-03-06	04:59:00	0
2009-03-06	05:00:00	84
2009-03-06	05:01:00	0
2009-03-06	05:02:00	0
2009-03-06	05:03:00	0
2009-03-06	05:04:00	0
2009-03-06	05:05:00	0
2009-03-06	05:06:00	0
2009-03-06	05:07:00	0
2009-03-06	05:08:00	0
2009-03-06	05:09:00	0
2009-03-06	05:10:00	0
2009-03-06	05:11:00	0
2009-03-06	05:12:00	0
2009-03-06	05:13:00	0
2009-03-06	05:14:00	0
2009-03-06	05:15:00	0
2009-03-06	05:16:00	0
2009-03-06	05:17:00	0
2009-03-06	05:18:00	0
2009-03-06	05:19:00	0
2009-03-06	05:20:00	0
2009-03-06	05:21:00	0
2009-03-06	05:22:00	0
2009-03-06	05:23:00	0
2009-03-06	05:24:00	0
2009-03-06	05:25:00	0
2009-03-06	05:26:00	0
2009-03-06	05:27:00	552
2009-03-06	05:28:00	43
2009-03-06	05:29:00	0
2009-03-06	05:30:00	0
2009-03-06	05:31:00	0
2009-03-06	05:32:00	0
2009-03-06	05:33:00	0
2009-03-06	05:34:00	0
2009-03-06	05:35:00	0
2009-03-06	05:36:00	0
2009-03-06	05:37:00	0
2009-03-06	05:38:00	0
2009-03-06	05:39:00	0
2009-03-06	05:40:00	0
2009-03-06	05:41:00	0
2009-03-06	05:42:00	0
2009-03-06	05:43:00	0
2009-03-06	05:44:00	0
2009-03-06	05:45:00	0
2009-03-06	05:46:00	0
2009-03-06	05:47:00	0
2009-03-06	05:48:00	0
2009-03-06	05:49:00	0
2009-03-06	05:50:00	0
2009-03-06	05:51:00	0
2009-03-06	05:52:00	0
2009-03-06	05:53:00	0
2009-03-06	05:54:00	0
2009-03-06	05:55:00	0
2009-03-06	05:56:00	0
2009-03-06	05:57:00	0
2009-03-06	05:58:00	0
2009-03-06	05:59:00	0
2009-03-06	06:00:00	0
2009-03-06	06:01:00	0
2009-03-06	06:02:00	0
2009-03-06	06:03:00	0
2009-03-06	06:04:00	0
2009-03-06	06:05:00	0
2009-03-06	06:06:00	0
2009-03-06	06:07:00	0
2009-03-06	06:08:00	14
2009-03-06	06:09:00	0
2009-03-06	06:10:00	0
2009-03-06	06:11:00	0
2009-03-06	06:12:00	0
2009-03-06	06:13:00	0
2009-03-06	06:14:00	0
2009-03-06	06:15:00	0
2009-03-06	06:16:00	0
2009-03-06	06:17:00	0
2009-03-06	06:18:00	0
2009-03-06	06:19:00	0
2009-03-06	06:20:00	0
2009-03-06	06:21:00	0
2009-03-06	06:22:00	0
2009-03-06	06:23:00	24
2009-03-06	06:24:00	262
2009-03-06	06:25:00	14
2009-03-06	06:26:00	0
2009-03-06	06:27:00	0
2009-03-06	06:28:00	0
2009-03-06	06:29:00	0
2009-03-06	06:30:00	0
2009-03-06	06:31:00	0
2009-03-06	06:32:00	0
2009-03-06	06:33:00	0
2009-03-06	06:34:00	0
2009-03-06	06:35:00	0
2009-03-06	06:36:00	0
2009-03-06	06:37:00	0
2009-03-06	06:38:00	0
2009-03-06	06:39:00	0
2009-03-06	06:40:00	0
2009-03-06	06:41:00	0
2009-03-06	06:42:00	0
2009-03-06	06:43:00	0
2009-03-06	06:44:00	0
2009-03-06	06:45:00	14
2009-03-06	06:46:00	0
2009-03-06	06:47:00	0
2009-03-06	06:48:00	0
2009-03-06	06:49:00	0
2009-03-06	06:50:00	0
2009-03-06	06:51:00	5
2009-03-06	06:52:00	0
2009-03-06	06:53:00	177
2009-03-06	06:54:00	131
2009-03-06	06:55:00	67
2009-03-06	06:56:00	38
2009-03-06	06:57:00	287
2009-03-06	06:58:00	28
2009-03-06	06:59:00	0
2009-03-06	07:00:00	0
2009-03-06	07:01:00	0
2009-03-06	07:02:00	0
2009-03-06	07:03:00	0
2009-03-06	07:04:00	0
2009-03-06	07:05:00	0
2009-03-06	07:06:00	0
2009-03-06	07:07:00	0
2009-03-06	07:08:00	0
2009-03-06	07:09:00	0
2009-03-06	07:10:00	0
2009-03-06	07:11:00	0
2009-03-06	07:12:00	0
2009-03-06	07:13:00	0
2009-03-06	07:14:00	0
2009-03-06	07:15:00	0
2009-03-06	07:16:00	0
2009-03-06	07:17:00	0
2009-03-06	07:18:00	0
2009-03-06	07:19:00	0
2009-03-06	07:20:00	0
2009-03-06	07:21:00	0
2009-03-06	07:22:00	19
2009-03-06	07:23:00	0
2009-03-06	07:24:00	0
2009-03-06	07:25:00	0
2009-03-06	07:26:00	0
2009-03-06	07:27:00	0
2009-03-06	07:28:00	0
2009-03-06	07:29:00	19
2009-03-06	07:30:00	157
2009-03-06	07:31:00	314
2009-03-06	07:32:00	19
2009-03-06	07:33:00	0
2009-03-06	07:34:00	0
2009-03-06	07:35:00	0
2009-03-06	07:36:00	253
2009-03-06	07:37:00	1518
2009-03-06	07:38:00	1082
2009-03-06	07:39:00	1633
2009-03-06	07:40:00	1850
2009-03-06	07:41:00	2245
2009-03-06	07:42:00	647
2009-03-06	07:43:00	5
2009-03-06	07:44:00	0
2009-03-06	07:45:00	33
2009-03-06	07:46:00	157
2009-03-06	07:47:00	38
2009-03-06	07:48:00	9
2009-03-06	07:49:00	43
2009-03-06	07:50:00	0
2009-03-06	07:51:00	0
2009-03-06	07:52:00	24
2009-03-06	07:53:00	33
2009-03-06	07:54:00	24
2009-03-06	07:55:00	14
2009-03-06	07:56:00	43
2009-03-06	07:57:00	5
2009-03-06	07:58:00	62
2009-03-06	07:59:00	38
2009-03-06	08:00:00	5
2009-03-06	08:01:00	381
2009-03-06	08:02:00	752
2009-03-06	08:03:00	467
2009-03-06	08:04:00	279
2009-03-06	08:05:00	184
2009-03-06	08:06:00	361
2009-03-06	08:07:00	5
2009-03-06	08:08:00	33
2009-03-06	08:09:00	0
2009-03-06	08:10:00	14
2009-03-06	08:11:00	33
2009-03-06	08:12:00	0
2009-03-06	08:13:00	0
2009-03-06	08:14:00	0
2009-03-06	08:15:00	5
2009-03-06	08:16:00	28
2009-03-06	08:17:00	0
2009-03-06	08:18:00	0
2009-03-06	08:19:00	0
2009-03-06	08:20:00	43
2009-03-06	08:21:00	0
2009-03-06	08:22:00	0
2009-03-06	08:23:00	0
2009-03-06	08:24:00	9
2009-03-06	08:25:00	0
2009-03-06	08:26:00	0
2009-03-06	08:27:00	0
2009-03-06	08:28:00	0
2009-03-06	08:29:00	0
2009-03-06	08:30:00	0
2009-03-06	08:31:00	0
2009-03-06	08:32:00	14
2009-03-06	08:33:00	0
2009-03-06	08:34:00	14
2009-03-06	08:35:00	0
2009-03-06	08:36:00	0
2009-03-06	08:37:00	0
2009-03-06	08:38:00	0
2009-03-06	08:39:00	14
2009-03-06	08:40:00	0
2009-03-06	08:41:00	0
2009-03-06	08:42:00	5
2009-03-06	08:43:00	19
2009-03-06	08:44:00	9
2009-03-06	08:45:00	5
2009-03-06	08:46:00	0
2009-03-06	08:47:00	0
2009-03-06	08:48:00	0
2009-03-06	08:49:00	0
2009-03-06	08:50:00	0
2009-03-06	08:51:00	0
2009-03-06	08:52:00	0
2009-03-06	08:53:00	0
2009-03-06	08:54:00	0
2009-03-06	08:55:00	0
2009-03-06	08:56:00	19
2009-03-06	08:57:00	33
2009-03-06	08:58:00	47
2009-03-06	08:59:00	19
2009-03-06	09:00:00	0
2009-03-06	09:01:00	0
2009-03-06	09:02:00	0
2009-03-06	09:03:00	164
2009-03-06	09:04:00	0
2009-03-06	09:05:00	0
2009-03-06	09:06:00	0
2009-03-06	09:07:00	0
2009-03-06	09:08:00	0
[truncated: 19,611 more rows]

## Sheet: 3.19.09
Actogram, Copy Raw Data, All Days
Identity:	Greeley
Filename:	E:\Active Research Files\meloxicam titre canine\cases\greeley\Greeley 3.19.09.AWC
Gender:	F
Age:	7
Height:	76.2 cm	30.0 in
Weight:	38.6 kg	85.1 lbs
Start Date:	19-Mar-2009 (Thu)
Start Time:	18:00:00
Interval:	1.00 mins
Date Stamp:	Time Stamp:	Activity Data:	Marker Press:
2009-03-19	00:00:00	0
2009-03-19	00:01:00	0
2009-03-19	00:02:00	0
2009-03-19	00:03:00	0
2009-03-19	00:04:00	0
2009-03-19	00:05:00	0
2009-03-19	00:06:00	0
2009-03-19	00:07:00	0
2009-03-19	00:08:00	0
2009-03-19	00:09:00	0
2009-03-19	00:10:00	0
2009-03-19	00:11:00	0
2009-03-19	00:12:00	0
2009-03-19	00:13:00	0
2009-03-19	00:14:00	0
2009-03-19	00:15:00	0
2009-03-19	00:16:00	0
2009-03-19	00:17:00	0
2009-03-19	00:18:00	0
2009-03-19	00:19:00	0
2009-03-19	00:20:00	0
2009-03-19	00:21:00	0
2009-03-19	00:22:00	0
2009-03-19	00:23:00	0
2009-03-19	00:24:00	0
2009-03-19	00:25:00	0
2009-03-19	00:26:00	0
2009-03-19	00:27:00	0
2009-03-19	00:28:00	0
2009-03-19	00:29:00	0
2009-03-19	00:30:00	0
2009-03-19	00:31:00	0
2009-03-19	00:32:00	0
2009-03-19	00:33:00	0
2009-03-19	00:34:00	0
2009-03-19	00:35:00	0
2009-03-19	00:36:00	0
2009-03-19	00:37:00	0
2009-03-19	00:38:00	0
2009-03-19	00:39:00	0
2009-03-19	00:40:00	0
2009-03-19	00:41:00	0
2009-03-19	00:42:00	0
2009-03-19	00:43:00	0
2009-03-19	00:44:00	0
2009-03-19	00:45:00	0
2009-03-19	00:46:00	0
2009-03-19	00:47:00	0
2009-03-19	00:48:00	0
2009-03-19	00:49:00	0
2009-03-19	00:50:00	0
2009-03-19	00:51:00	0
2009-03-19	00:52:00	0
2009-03-19	00:53:00	0
2009-03-19	00:54:00	0
2009-03-19	00:55:00	0
2009-03-19	00:56:00	0
2009-03-19	00:57:00	0
2009-03-19	00:58:00	0
2009-03-19	00:59:00	0
2009-03-19	01:00:00	0
2009-03-19	01:01:00	0
2009-03-19	01:02:00	0
2009-03-19	01:03:00	0
2009-03-19	01:04:00	0
2009-03-19	01:05:00	0
2009-03-19	01:06:00	0
2009-03-19	01:07:00	0
2009-03-19	01:08:00	0
2009-03-19	01:09:00	0
2009-03-19	01:10:00	0
2009-03-19	01:11:00	0
2009-03-19	01:12:00	0
2009-03-19	01:13:00	0
2009-03-19	01:14:00	0
2009-03-19	01:15:00	0
2009-03-19	01:16:00	0
2009-03-19	01:17:00	0
2009-03-19	01:18:00	0
2009-03-19	01:19:00	0
2009-03-19	01:20:00	0
2009-03-19	01:21:00	0
2009-03-19	01:22:00	0
2009-03-19	01:23:00	0
2009-03-19	01:24:00	0
2009-03-19	01:25:00	0
2009-03-19	01:26:00	0
2009-03-19	01:27:00	0
2009-03-19	01:28:00	0
2009-03-19	01:29:00	0
2009-03-19	01:30:00	0
2009-03-19	01:31:00	0
2009-03-19	01:32:00	0
2009-03-19	01:33:00	0
2009-03-19	01:34:00	0
2009-03-19	01:35:00	0
2009-03-19	01:36:00	0
2009-03-19	01:37:00	0
2009-03-19	01:38:00	0
2009-03-19	01:39:00	0
2009-03-19	01:40:00	0
2009-03-19	01:41:00	0
2009-03-19	01:42:00	0
2009-03-19	01:43:00	0
2009-03-19	01:44:00	0
2009-03-19	01:45:00	0
2009-03-19	01:46:00	0
2009-03-19	01:47:00	0
2009-03-19	01:48:00	0
2009-03-19	01:49:00	0
2009-03-19	01:50:00	0
2009-03-19	01:51:00	0
2009-03-19	01:52:00	0
2009-03-19	01:53:00	0
2009-03-19	01:54:00	0
2009-03-19	01:55:00	0
2009-03-19	01:56:00	0
2009-03-19	01:57:00	0
2009-03-19	01:58:00	0
2009-03-19	01:59:00	0
2009-03-19	02:00:00	0
2009-03-19	02:01:00	0
2009-03-19	02:02:00	0
2009-03-19	02:03:00	0
2009-03-19	02:04:00	0
2009-03-19	02:05:00	0
2009-03-19	02:06:00	0
2009-03-19	02:07:00	0
2009-03-19	02:08:00	0
2009-03-19	02:09:00	0
2009-03-19	02:10:00	0
2009-03-19	02:11:00	0
2009-03-19	02:12:00	0
2009-03-19	02:13:00	0
2009-03-19	02:14:00	0
2009-03-19	02:15:00	0
2009-03-19	02:16:00	0
2009-03-19	02:17:00	0
2009-03-19	02:18:00	0
2009-03-19	02:19:00	0
2009-03-19	02:20:00	0
2009-03-19	02:21:00	0
2009-03-19	02:22:00	0
2009-03-19	02:23:00	0
2009-03-19	02:24:00	0
2009-03-19	02:25:00	0
2009-03-19	02:26:00	0
2009-03-19	02:27:00	0
2009-03-19	02:28:00	0
2009-03-19	02:29:00	0
2009-03-19	02:30:00	0
2009-03-19	02:31:00	0
2009-03-19	02:32:00	0
2009-03-19	02:33:00	0
2009-03-19	02:34:00	0
2009-03-19	02:35:00	0
2009-03-19	02:36:00	0
2009-03-19	02:37:00	0
2009-03-19	02:38:00	0
2009-03-19	02:39:00	0
2009-03-19	02:40:00	0
2009-03-19	02:41:00	0
2009-03-19	02:42:00	0
2009-03-19	02:43:00	0
2009-03-19	02:44:00	0
2009-03-19	02:45:00	0
2009-03-19	02:46:00	0
2009-03-19	02:47:00	0
2009-03-19	02:48:00	0
2009-03-19	02:49:00	0
2009-03-19	02:50:00	0
2009-03-19	02:51:00	0
2009-03-19	02:52:00	0
2009-03-19	02:53:00	0
2009-03-19	02:54:00	0
2009-03-19	02:55:00	0
2009-03-19	02:56:00	0
2009-03-19	02:57:00	0
2009-03-19	02:58:00	0
2009-03-19	02:59:00	0
2009-03-19	03:00:00	0
2009-03-19	03:01:00	0
2009-03-19	03:02:00	0
2009-03-19	03:03:00	0
2009-03-19	03:04:00	0
2009-03-19	03:05:00	0
2009-03-19	03:06:00	0
2009-03-19	03:07:00	0
2009-03-19	03:08:00	0
2009-03-19	03:09:00	0
2009-03-19	03:10:00	0
2009-03-19	03:11:00	0
2009-03-19	03:12:00	0
2009-03-19	03:13:00	0
2009-03-19	03:14:00	0
2009-03-19	03:15:00	0
2009-03-19	03:16:00	0
2009-03-19	03:17:00	0
2009-03-19	03:18:00	0
2009-03-19	03:19:00	0
2009-03-19	03:20:00	0
2009-03-19	03:21:00	0
2009-03-19	03:22:00	0
2009-03-19	03:23:00	0
2009-03-19	03:24:00	0
2009-03-19	03:25:00	0
2009-03-19	03:26:00	0
2009-03-19	03:27:00	0
2009-03-19	03:28:00	0
2009-03-19	03:29:00	0
2009-03-19	03:30:00	0
2009-03-19	03:31:00	0
2009-03-19	03:32:00	0
2009-03-19	03:33:00	0
2009-03-19	03:34:00	0
2009-03-19	03:35:00	0
2009-03-19	03:36:00	0
2009-03-19	03:37:00	0
2009-03-19	03:38:00	0
2009-03-19	03:39:00	0
2009-03-19	03:40:00	0
2009-03-19	03:41:00	0
2009-03-19	03:42:00	0
2009-03-19	03:43:00	0
2009-03-19	03:44:00	0
2009-03-19	03:45:00	0
2009-03-19	03:46:00	0
2009-03-19	03:47:00	0
2009-03-19	03:48:00	0
2009-03-19	03:49:00	0
2009-03-19	03:50:00	0
2009-03-19	03:51:00	0
2009-03-19	03:52:00	0
2009-03-19	03:53:00	0
2009-03-19	03:54:00	0
2009-03-19	03:55:00	0
2009-03-19	03:56:00	0
2009-03-19	03:57:00	0
2009-03-19	03:58:00	0
2009-03-19	03:59:00	0
2009-03-19	04:00:00	0
2009-03-19	04:01:00	0
2009-03-19	04:02:00	0
2009-03-19	04:03:00	0
2009-03-19	04:04:00	0
2009-03-19	04:05:00	0
2009-03-19	04:06:00	0
2009-03-19	04:07:00	0
2009-03-19	04:08:00	0
2009-03-19	04:09:00	0
2009-03-19	04:10:00	0
2009-03-19	04:11:00	0
2009-03-19	04:12:00	0
2009-03-19	04:13:00	0
2009-03-19	04:14:00	0
2009-03-19	04:15:00	0
2009-03-19	04:16:00	0
2009-03-19	04:17:00	0
2009-03-19	04:18:00	0
2009-03-19	04:19:00	0
2009-03-19	04:20:00	0
2009-03-19	04:21:00	0
2009-03-19	04:22:00	0
2009-03-19	04:23:00	0
2009-03-19	04:24:00	0
2009-03-19	04:25:00	0
2009-03-19	04:26:00	0
2009-03-19	04:27:00	0
2009-03-19	04:28:00	0
2009-03-19	04:29:00	0
2009-03-19	04:30:00	0
2009-03-19	04:31:00	0
2009-03-19	04:32:00	0
2009-03-19	04:33:00	0
2009-03-19	04:34:00	0
2009-03-19	04:35:00	0
2009-03-19	04:36:00	0
2009-03-19	04:37:00	0
2009-03-19	04:38:00	0
2009-03-19	04:39:00	0
2009-03-19	04:40:00	0
2009-03-19	04:41:00	0
2009-03-19	04:42:00	0
2009-03-19	04:43:00	0
2009-03-19	04:44:00	0
2009-03-19	04:45:00	0
2009-03-19	04:46:00	0
2009-03-19	04:47:00	0
2009-03-19	04:48:00	0
2009-03-19	04:49:00	0
2009-03-19	04:50:00	0
2009-03-19	04:51:00	0
2009-03-19	04:52:00	0
2009-03-19	04:53:00	0
2009-03-19	04:54:00	0
2009-03-19	04:55:00	0
2009-03-19	04:56:00	0
2009-03-19	04:57:00	0
2009-03-19	04:58:00	0
2009-03-19	04:59:00	0
2009-03-19	05:00:00	0
2009-03-19	05:01:00	0
2009-03-19	05:02:00	0
2009-03-19	05:03:00	0
2009-03-19	05:04:00	0
2009-03-19	05:05:00	0
2009-03-19	05:06:00	0
2009-03-19	05:07:00	0
2009-03-19	05:08:00	0
2009-03-19	05:09:00	0
2009-03-19	05:10:00	0
2009-03-19	05:11:00	0
2009-03-19	05:12:00	0
2009-03-19	05:13:00	0
2009-03-19	05:14:00	0
2009-03-19	05:15:00	0
2009-03-19	05:16:00	0
2009-03-19	05:17:00	0
2009-03-19	05:18:00	0
2009-03-19	05:19:00	0
2009-03-19	05:20:00	0
2009-03-19	05:21:00	0
2009-03-19	05:22:00	0
2009-03-19	05:23:00	0
2009-03-19	05:24:00	0
2009-03-19	05:25:00	0
2009-03-19	05:26:00	0
2009-03-19	05:27:00	0
2009-03-19	05:28:00	0
2009-03-19	05:29:00	0
2009-03-19	05:30:00	0
2009-03-19	05:31:00	0
2009-03-19	05:32:00	0
2009-03-19	05:33:00	0
2009-03-19	05:34:00	0
2009-03-19	05:35:00	0
2009-03-19	05:36:00	0
2009-03-19	05:37:00	0
2009-03-19	05:38:00	0
2009-03-19	05:39:00	0
2009-03-19	05:40:00	0
2009-03-19	05:41:00	0
2009-03-19	05:42:00	0
2009-03-19	05:43:00	0
2009-03-19	05:44:00	0
2009-03-19	05:45:00	0
2009-03-19	05:46:00	0
2009-03-19	05:47:00	0
2009-03-19	05:48:00	0
2009-03-19	05:49:00	0
2009-03-19	05:50:00	0
2009-03-19	05:51:00	0
2009-03-19	05:52:00	0
2009-03-19	05:53:00	0
2009-03-19	05:54:00	0
2009-03-19	05:55:00	0
2009-03-19	05:56:00	0
2009-03-19	05:57:00	0
2009-03-19	05:58:00	0
2009-03-19	05:59:00	0
2009-03-19	06:00:00	0
2009-03-19	06:01:00	0
2009-03-19	06:02:00	0
2009-03-19	06:03:00	0
2009-03-19	06:04:00	0
2009-03-19	06:05:00	0
2009-03-19	06:06:00	0
2009-03-19	06:07:00	0
2009-03-19	06:08:00	0
2009-03-19	06:09:00	0
2009-03-19	06:10:00	0
2009-03-19	06:11:00	0
2009-03-19	06:12:00	0
2009-03-19	06:13:00	0
2009-03-19	06:14:00	0
2009-03-19	06:15:00	0
2009-03-19	06:16:00	0
2009-03-19	06:17:00	0
2009-03-19	06:18:00	0
2009-03-19	06:19:00	0
2009-03-19	06:20:00	0
2009-03-19	06:21:00	0
2009-03-19	06:22:00	0
2009-03-19	06:23:00	0
2009-03-19	06:24:00	0
2009-03-19	06:25:00	0
2009-03-19	06:26:00	0
2009-03-19	06:27:00	0
2009-03-19	06:28:00	0
2009-03-19	06:29:00	0
2009-03-19	06:30:00	0
2009-03-19	06:31:00	0
2009-03-19	06:32:00	0
2009-03-19	06:33:00	0
2009-03-19	06:34:00	0
2009-03-19	06:35:00	0
2009-03-19	06:36:00	0
2009-03-19	06:37:00	0
2009-03-19	06:38:00	0
2009-03-19	06:39:00	0
2009-03-19	06:40:00	0
2009-03-19	06:41:00	0
2009-03-19	06:42:00	0
2009-03-19	06:43:00	0
2009-03-19	06:44:00	0
2009-03-19	06:45:00	0
2009-03-19	06:46:00	0
2009-03-19	06:47:00	0
2009-03-19	06:48:00	0
2009-03-19	06:49:00	0
2009-03-19	06:50:00	0
2009-03-19	06:51:00	0
2009-03-19	06:52:00	0
2009-03-19	06:53:00	0
2009-03-19	06:54:00	0
2009-03-19	06:55:00	0
2009-03-19	06:56:00	0
2009-03-19	06:57:00	0
2009-03-19	06:58:00	0
2009-03-19	06:59:00	0
2009-03-19	07:00:00	0
2009-03-19	07:01:00	0
2009-03-19	07:02:00	0
2009-03-19	07:03:00	0
2009-03-19	07:04:00	0
2009-03-19	07:05:00	0
2009-03-19	07:06:00	0
2009-03-19	07:07:00	0
2009-03-19	07:08:00	0
2009-03-19	07:09:00	0
2009-03-19	07:10:00	0
2009-03-19	07:11:00	0
2009-03-19	07:12:00	0
2009-03-19	07:13:00	0
2009-03-19	07:14:00	0
2009-03-19	07:15:00	0
2009-03-19	07:16:00	0
2009-03-19	07:17:00	0
2009-03-19	07:18:00	0
2009-03-19	07:19:00	0
2009-03-19	07:20:00	0
2009-03-19	07:21:00	0
2009-03-19	07:22:00	0
2009-03-19	07:23:00	0
2009-03-19	07:24:00	0
2009-03-19	07:25:00	0
2009-03-19	07:26:00	0
2009-03-19	07:27:00	0
2009-03-19	07:28:00	0
2009-03-19	07:29:00	0
2009-03-19	07:30:00	0
2009-03-19	07:31:00	0
2009-03-19	07:32:00	0
2009-03-19	07:33:00	0
2009-03-19	07:34:00	0
2009-03-19	07:35:00	0
2009-03-19	07:36:00	0
2009-03-19	07:37:00	0
2009-03-19	07:38:00	0
2009-03-19	07:39:00	0
2009-03-19	07:40:00	0
2009-03-19	07:41:00	0
2009-03-19	07:42:00	0
2009-03-19	07:43:00	0
2009-03-19	07:44:00	0
2009-03-19	07:45:00	0
2009-03-19	07:46:00	0
2009-03-19	07:47:00	0
2009-03-19	07:48:00	0
2009-03-19	07:49:00	0
2009-03-19	07:50:00	0
2009-03-19	07:51:00	0
2009-03-19	07:52:00	0
2009-03-19	07:53:00	0
2009-03-19	07:54:00	0
2009-03-19	07:55:00	0
2009-03-19	07:56:00	0
2009-03-19	07:57:00	0
2009-03-19	07:58:00	0
2009-03-19	07:59:00	0
2009-03-19	08:00:00	0
2009-03-19	08:01:00	0
2009-03-19	08:02:00	0
2009-03-19	08:03:00	0
2009-03-19	08:04:00	0
2009-03-19	08:05:00	0
2009-03-19	08:06:00	0
2009-03-19	08:07:00	0
2009-03-19	08:08:00	0
2009-03-19	08:09:00	0
2009-03-19	08:10:00	0
2009-03-19	08:11:00	0
2009-03-19	08:12:00	0
2009-03-19	08:13:00	0
2009-03-19	08:14:00	0
2009-03-19	08:15:00	0
2009-03-19	08:16:00	0
2009-03-19	08:17:00	0
2009-03-19	08:18:00	0
2009-03-19	08:19:00	0
2009-03-19	08:20:00	0
2009-03-19	08:21:00	0
2009-03-19	08:22:00	0
2009-03-19	08:23:00	0
2009-03-19	08:24:00	0
2009-03-19	08:25:00	0
2009-03-19	08:26:00	0
2009-03-19	08:27:00	0
2009-03-19	08:28:00	0
2009-03-19	08:29:00	0
2009-03-19	08:30:00	0
2009-03-19	08:31:00	0
2009-03-19	08:32:00	0
2009-03-19	08:33:00	0
2009-03-19	08:34:00	0
2009-03-19	08:35:00	0
2009-03-19	08:36:00	0
2009-03-19	08:37:00	0
2009-03-19	08:38:00	0
2009-03-19	08:39:00	0
2009-03-19	08:40:00	0
2009-03-19	08:41:00	0
2009-03-19	08:42:00	0
2009-03-19	08:43:00	0
2009-03-19	08:44:00	0
2009-03-19	08:45:00	0
2009-03-19	08:46:00	0
2009-03-19	08:47:00	0
2009-03-19	08:48:00	0
2009-03-19	08:49:00	0
2009-03-19	08:50:00	0
2009-03-19	08:51:00	0
2009-03-19	08:52:00	0
2009-03-19	08:53:00	0
2009-03-19	08:54:00	0
2009-03-19	08:55:00	0
2009-03-19	08:56:00	0
2009-03-19	08:57:00	0
2009-03-19	08:58:00	0
2009-03-19	08:59:00	0
2009-03-19	09:00:00	0
2009-03-19	09:01:00	0
2009-03-19	09:02:00	0
2009-03-19	09:03:00	0
2009-03-19	09:04:00	0
2009-03-19	09:05:00	0
2009-03-19	09:06:00	0
2009-03-19	09:07:00	0
2009-03-19	09:08:00	0
2009-03-19	09:09:00	0
2009-03-19	09:10:00	0
2009-03-19	09:11:00	0
2009-03-19	09:12:00	0
2009-03-19	09:13:00	0
2009-03-19	09:14:00	0
2009-03-19	09:15:00	0
2009-03-19	09:16:00	0
2009-03-19	09:17:00	0
2009-03-19	09:18:00	0
2009-03-19	09:19:00	0
2009-03-19	09:20:00	0
2009-03-19	09:21:00	0
2009-03-19	09:22:00	0
2009-03-19	09:23:00	0
2009-03-19	09:24:00	0
2009-03-19	09:25:00	0
2009-03-19	09:26:00	0
2009-03-19	09:27:00	0
2009-03-19	09:28:00	0
2009-03-19	09:29:00	0
2009-03-19	09:30:00	0
2009-03-19	09:31:00	0
2009-03-19	09:32:00	0
2009-03-19	09:33:00	0
2009-03-19	09:34:00	0
2009-03-19	09:35:00	0
2009-03-19	09:36:00	0
2009-03-19	09:37:00	0
2009-03-19	09:38:00	0
2009-03-19	09:39:00	0
2009-03-19	09:40:00	0
2009-03-19	09:41:00	0
2009-03-19	09:42:00	0
2009-03-19	09:43:00	0
2009-03-19	09:44:00	0
2009-03-19	09:45:00	0
2009-03-19	09:46:00	0
2009-03-19	09:47:00	0
2009-03-19	09:48:00	0
2009-03-19	09:49:00	0
2009-03-19	09:50:00	0
2009-03-19	09:51:00	0
2009-03-19	09:52:00	0
2009-03-19	09:53:00	0
2009-03-19	09:54:00	0
2009-03-19	09:55:00	0
2009-03-19	09:56:00	0
2009-03-19	09:57:00	0
2009-03-19	09:58:00	0
2009-03-19	09:59:00	0
2009-03-19	10:00:00	0
2009-03-19	10:01:00	0
2009-03-19	10:02:00	0
2009-03-19	10:03:00	0
2009-03-19	10:04:00	0
2009-03-19	10:05:00	0
2009-03-19	10:06:00	0
2009-03-19	10:07:00	0
2009-03-19	10:08:00	0
2009-03-19	10:09:00	0
2009-03-19	10:10:00	0
2009-03-19	10:11:00	0
2009-03-19	10:12:00	0
2009-03-19	10:13:00	0
2009-03-19	10:14:00	0
2009-03-19	10:15:00	0
2009-03-19	10:16:00	0
2009-03-19	10:17:00	0
2009-03-19	10:18:00	0
2009-03-19	10:19:00	0
2009-03-19	10:20:00	0
2009-03-19	10:21:00	0
2009-03-19	10:22:00	0
2009-03-19	10:23:00	0
2009-03-19	10:24:00	0
2009-03-19	10:25:00	0
2009-03-19	10:26:00	0
2009-03-19	10:27:00	0
2009-03-19	10:28:00	0
2009-03-19	10:29:00	0
2009-03-19	10:30:00	0
2009-03-19	10:31:00	0
2009-03-19	10:32:00	0
2009-03-19	10:33:00	0
2009-03-19	10:34:00	0
2009-03-19	10:35:00	0
2009-03-19	10:36:00	0
2009-03-19	10:37:00	0
2009-03-19	10:38:00	0
2009-03-19	10:39:00	0
2009-03-19	10:40:00	0
2009-03-19	10:41:00	0
2009-03-19	10:42:00	0
2009-03-19	10:43:00	0
2009-03-19	10:44:00	0
2009-03-19	10:45:00	0
2009-03-19	10:46:00	0
2009-03-19	10:47:00	0
2009-03-19	10:48:00	0
2009-03-19	10:49:00	0
2009-03-19	10:50:00	0
2009-03-19	10:51:00	0
2009-03-19	10:52:00	0
2009-03-19	10:53:00	0
2009-03-19	10:54:00	0
2009-03-19	10:55:00	0
2009-03-19	10:56:00	0
2009-03-19	10:57:00	0
2009-03-19	10:58:00	0
2009-03-19	10:59:00	0
2009-03-19	11:00:00	0
2009-03-19	11:01:00	0
2009-03-19	11:02:00	0
2009-03-19	11:03:00	0
2009-03-19	11:04:00	0
2009-03-19	11:05:00	0
2009-03-19	11:06:00	0
2009-03-19	11:07:00	0
2009-03-19	11:08:00	0
2009-03-19	11:09:00	0
2009-03-19	11:10:00	0
2009-03-19	11:11:00	0
2009-03-19	11:12:00	0
2009-03-19	11:13:00	0
2009-03-19	11:14:00	0
2009-03-19	11:15:00	0
2009-03-19	11:16:00	0
2009-03-19	11:17:00	0
2009-03-19	11:18:00	0
2009-03-19	11:19:00	0
2009-03-19	11:20:00	0
2009-03-19	11:21:00	0
2009-03-19	11:22:00	0
2009-03-19	11:23:00	0
2009-03-19	11:24:00	0
2009-03-19	11:25:00	0
2009-03-19	11:26:00	0
2009-03-19	11:27:00	0
2009-03-19	11:28:00	0
2009-03-19	11:29:00	0
2009-03-19	11:30:00	0
2009-03-19	11:31:00	0
2009-03-19	11:32:00	0
2009-03-19	11:33:00	0
2009-03-19	11:34:00	0
2009-03-19	11:35:00	0
2009-03-19	11:36:00	0
2009-03-19	11:37:00	0
2009-03-19	11:38:00	0
2009-03-19	11:39:00	0
2009-03-19	11:40:00	0
2009-03-19	11:41:00	0
2009-03-19	11:42:00	0
2009-03-19	11:43:00	0
2009-03-19	11:44:00	0
2009-03-19	11:45:00	0
2009-03-19	11:46:00	0
2009-03-19	11:47:00	0
2009-03-19	11:48:00	0
2009-03-19	11:49:00	0
2009-03-19	11:50:00	0
2009-03-19	11:51:00	0
2009-03-19	11:52:00	0
2009-03-19	11:53:00	0
2009-03-19	11:54:00	0
2009-03-19	11:55:00	0
2009-03-19	11:56:00	0
2009-03-19	11:57:00	0
2009-03-19	11:58:00	0
2009-03-19	11:59:00	0
2009-03-19	12:00:00	0
2009-03-19	12:01:00	0
2009-03-19	12:02:00	0
2009-03-19	12:03:00	0
2009-03-19	12:04:00	0
2009-03-19	12:05:00	0
2009-03-19	12:06:00	0
2009-03-19	12:07:00	0
2009-03-19	12:08:00	0
2009-03-19	12:09:00	0
2009-03-19	12:10:00	0
2009-03-19	12:11:00	0
2009-03-19	12:12:00	0
2009-03-19	12:13:00	0
2009-03-19	12:14:00	0
2009-03-19	12:15:00	0
2009-03-19	12:16:00	0
2009-03-19	12:17:00	0
2009-03-19	12:18:00	0
2009-03-19	12:19:00	0
2009-03-19	12:20:00	0
2009-03-19	12:21:00	0
2009-03-19	12:22:00	0
2009-03-19	12:23:00	0
2009-03-19	12:24:00	0
2009-03-19	12:25:00	0
2009-03-19	12:26:00	0
2009-03-19	12:27:00	0
2009-03-19	12:28:00	0
2009-03-19	12:29:00	0
2009-03-19	12:30:00	0
2009-03-19	12:31:00	0
2009-03-19	12:32:00	0
2009-03-19	12:33:00	0
2009-03-19	12:34:00	0
2009-03-19	12:35:00	0
2009-03-19	12:36:00	0
2009-03-19	12:37:00	0
2009-03-19	12:38:00	0
2009-03-19	12:39:00	0
2009-03-19	12:40:00	0
2009-03-19	12:41:00	0
2009-03-19	12:42:00	0
2009-03-19	12:43:00	0
2009-03-19	12:44:00	0
2009-03-19	12:45:00	0
2009-03-19	12:46:00	0
2009-03-19	12:47:00	0
2009-03-19	12:48:00	0
2009-03-19	12:49:00	0
2009-03-19	12:50:00	0
2009-03-19	12:51:00	0
2009-03-19	12:52:00	0
2009-03-19	12:53:00	0
2009-03-19	12:54:00	0
2009-03-19	12:55:00	0
2009-03-19	12:56:00	0
2009-03-19	12:57:00	0
2009-03-19	12:58:00	0
2009-03-19	12:59:00	0
2009-03-19	13:00:00	0
2009-03-19	13:01:00	0
2009-03-19	13:02:00	0
2009-03-19	13:03:00	0
2009-03-19	13:04:00	0
2009-03-19	13:05:00	0
2009-03-19	13:06:00	0
2009-03-19	13:07:00	0
2009-03-19	13:08:00	0
2009-03-19	13:09:00	0
2009-03-19	13:10:00	0
2009-03-19	13:11:00	0
2009-03-19	13:12:00	0
2009-03-19	13:13:00	0
2009-03-19	13:14:00	0
2009-03-19	13:15:00	0
2009-03-19	13:16:00	0
2009-03-19	13:17:00	0
2009-03-19	13:18:00	0
2009-03-19	13:19:00	0
2009-03-19	13:20:00	0
2009-03-19	13:21:00	0
2009-03-19	13:22:00	0
2009-03-19	13:23:00	0
2009-03-19	13:24:00	0
2009-03-19	13:25:00	0
2009-03-19	13:26:00	0
2009-03-19	13:27:00	0
2009-03-19	13:28:00	0
2009-03-19	13:29:00	0
2009-03-19	13:30:00	0
2009-03-19	13:31:00	0
2009-03-19	13:32:00	0
2009-03-19	13:33:00	0
2009-03-19	13:34:00	0
2009-03-19	13:35:00	0
2009-03-19	13:36:00	0
2009-03-19	13:37:00	0
2009-03-19	13:38:00	0
2009-03-19	13:39:00	0
2009-03-19	13:40:00	0
2009-03-19	13:41:00	0
2009-03-19	13:42:00	0
2009-03-19	13:43:00	0
2009-03-19	13:44:00	0
2009-03-19	13:45:00	0
2009-03-19	13:46:00	0
2009-03-19	13:47:00	0
2009-03-19	13:48:00	0
2009-03-19	13:49:00	0
2009-03-19	13:50:00	0
2009-03-19	13:51:00	0
2009-03-19	13:52:00	0
2009-03-19	13:53:00	0
2009-03-19	13:54:00	0
2009-03-19	13:55:00	0
2009-03-19	13:56:00	0
2009-03-19	13:57:00	0
2009-03-19	13:58:00	0
2009-03-19	13:59:00	0
2009-03-19	14:00:00	0
2009-03-19	14:01:00	0
2009-03-19	14:02:00	0
2009-03-19	14:03:00	0
2009-03-19	14:04:00	0
2009-03-19	14:05:00	0
2009-03-19	14:06:00	0
2009-03-19	14:07:00	0
2009-03-19	14:08:00	0
2009-03-19	14:09:00	0
2009-03-19	14:10:00	0
2009-03-19	14:11:00	0
2009-03-19	14:12:00	0
2009-03-19	14:13:00	0
2009-03-19	14:14:00	0
2009-03-19	14:15:00	0
2009-03-19	14:16:00	0
2009-03-19	14:17:00	0
2009-03-19	14:18:00	0
2009-03-19	14:19:00	0
2009-03-19	14:20:00	0
2009-03-19	14:21:00	0
2009-03-19	14:22:00	0
2009-03-19	14:23:00	0
2009-03-19	14:24:00	0
2009-03-19	14:25:00	0
2009-03-19	14:26:00	0
2009-03-19	14:27:00	0
2009-03-19	14:28:00	0
2009-03-19	14:29:00	0
2009-03-19	14:30:00	0
2009-03-19	14:31:00	0
2009-03-19	14:32:00	0
2009-03-19	14:33:00	0
2009-03-19	14:34:00	0
2009-03-19	14:35:00	0
2009-03-19	14:36:00	0
2009-03-19	14:37:00	0
2009-03-19	14:38:00	0
2009-03-19	14:39:00	0
2009-03-19	14:40:00	0
2009-03-19	14:41:00	0
2009-03-19	14:42:00	0
2009-03-19	14:43:00	0
2009-03-19	14:44:00	0
2009-03-19	14:45:00	0
2009-03-19	14:46:00	0
2009-03-19	14:47:00	0
2009-03-19	14:48:00	0
2009-03-19	14:49:00	0
2009-03-19	14:50:00	0
2009-03-19	14:51:00	0
2009-03-19	14:52:00	0
2009-03-19	14:53:00	0
2009-03-19	14:54:00	0
2009-03-19	14:55:00	0
2009-03-19	14:56:00	0
2009-03-19	14:57:00	0
2009-03-19	14:58:00	0
2009-03-19	14:59:00	0
2009-03-19	15:00:00	0
2009-03-19	15:01:00	0
2009-03-19	15:02:00	0
2009-03-19	15:03:00	0
2009-03-19	15:04:00	0
2009-03-19	15:05:00	0
2009-03-19	15:06:00	0
2009-03-19	15:07:00	0
2009-03-19	15:08:00	0
2009-03-19	15:09:00	0
2009-03-19	15:10:00	0
2009-03-19	15:11:00	0
2009-03-19	15:12:00	0
2009-03-19	15:13:00	0
2009-03-19	15:14:00	0
2009-03-19	15:15:00	0
2009-03-19	15:16:00	0
2009-03-19	15:17:00	0
2009-03-19	15:18:00	0
2009-03-19	15:19:00	0
2009-03-19	15:20:00	0
2009-03-19	15:21:00	0
2009-03-19	15:22:00	0
2009-03-19	15:23:00	0
2009-03-19	15:24:00	0
2009-03-19	15:25:00	0
2009-03-19	15:26:00	0
2009-03-19	15:27:00	0
2009-03-19	15:28:00	0
2009-03-19	15:29:00	0
2009-03-19	15:30:00	0
2009-03-19	15:31:00	0
2009-03-19	15:32:00	0
2009-03-19	15:33:00	0
2009-03-19	15:34:00	0
2009-03-19	15:35:00	0
2009-03-19	15:36:00	0
2009-03-19	15:37:00	0
2009-03-19	15:38:00	0
2009-03-19	15:39:00	0
2009-03-19	15:40:00	0
2009-03-19	15:41:00	0
2009-03-19	15:42:00	0
2009-03-19	15:43:00	0
2009-03-19	15:44:00	0
2009-03-19	15:45:00	0
2009-03-19	15:46:00	0
2009-03-19	15:47:00	0
2009-03-19	15:48:00	0
2009-03-19	15:49:00	0
2009-03-19	15:50:00	0
2009-03-19	15:51:00	0
2009-03-19	15:52:00	0
2009-03-19	15:53:00	0
2009-03-19	15:54:00	0
2009-03-19	15:55:00	0
2009-03-19	15:56:00	0
2009-03-19	15:57:00	0
2009-03-19	15:58:00	0
2009-03-19	15:59:00	0
2009-03-19	16:00:00	0
2009-03-19	16:01:00	0
2009-03-19	16:02:00	0
2009-03-19	16:03:00	0
2009-03-19	16:04:00	0
2009-03-19	16:05:00	0
2009-03-19	16:06:00	0
2009-03-19	16:07:00	0
2009-03-19	16:08:00	0
2009-03-19	16:09:00	0
2009-03-19	16:10:00	0
2009-03-19	16:11:00	0
2009-03-19	16:12:00	0
2009-03-19	16:13:00	0
2009-03-19	16:14:00	0
2009-03-19	16:15:00	0
2009-03-19	16:16:00	0
2009-03-19	16:17:00	0
2009-03-19	16:18:00	0
2009-03-19	16:19:00	0
2009-03-19	16:20:00	0
2009-03-19	16:21:00	0
2009-03-19	16:22:00	0
2009-03-19	16:23:00	0
2009-03-19	16:24:00	0
2009-03-19	16:25:00	0
2009-03-19	16:26:00	0
2009-03-19	16:27:00	0
2009-03-19	16:28:00	0
2009-03-19	16:29:00	0
2009-03-19	16:30:00	0
2009-03-19	16:31:00	0
2009-03-19	16:32:00	0
2009-03-19	16:33:00	0
2009-03-19	16:34:00	0
2009-03-19	16:35:00	0
2009-03-19	16:36:00	0
2009-03-19	16:37:00	0
2009-03-19	16:38:00	0
2009-03-19	16:39:00	0
2009-03-19	16:40:00	0
2009-03-19	16:41:00	0
2009-03-19	16:42:00	0
2009-03-19	16:43:00	0
2009-03-19	16:44:00	0
2009-03-19	16:45:00	0
2009-03-19	16:46:00	0
2009-03-19	16:47:00	0
2009-03-19	16:48:00	0
2009-03-19	16:49:00	0
2009-03-19	16:50:00	0
2009-03-19	16:51:00	0
2009-03-19	16:52:00	0
2009-03-19	16:53:00	0
2009-03-19	16:54:00	0
2009-03-19	16:55:00	0
2009-03-19	16:56:00	0
2009-03-19	16:57:00	0
2009-03-19	16:58:00	0
2009-03-19	16:59:00	0
2009-03-19	17:00:00	0
2009-03-19	17:01:00	0
2009-03-19	17:02:00	0
2009-03-19	17:03:00	0
2009-03-19	17:04:00	0
2009-03-19	17:05:00	0
2009-03-19	17:06:00	0
2009-03-19	17:07:00	0
2009-03-19	17:08:00	0
2009-03-19	17:09:00	0
2009-03-19	17:10:00	0
2009-03-19	17:11:00	0
2009-03-19	17:12:00	0
2009-03-19	17:13:00	0
2009-03-19	17:14:00	0
2009-03-19	17:15:00	0
2009-03-19	17:16:00	0
2009-03-19	17:17:00	0
2009-03-19	17:18:00	0
2009-03-19	17:19:00	0
2009-03-19	17:20:00	0
2009-03-19	17:21:00	0
2009-03-19	17:22:00	0
2009-03-19	17:23:00	0
2009-03-19	17:24:00	0
2009-03-19	17:25:00	0
2009-03-19	17:26:00	0
2009-03-19	17:27:00	0
2009-03-19	17:28:00	0
2009-03-19	17:29:00	0
2009-03-19	17:30:00	0
2009-03-19	17:31:00	0
2009-03-19	17:32:00	0
2009-03-19	17:33:00	0
2009-03-19	17:34:00	0
2009-03-19	17:35:00	0
2009-03-19	17:36:00	0
2009-03-19	17:37:00	0
2009-03-19	17:38:00	0
2009-03-19	17:39:00	0
2009-03-19	17:40:00	0
2009-03-19	17:41:00	0
2009-03-19	17:42:00	0
2009-03-19	17:43:00	0
2009-03-19	17:44:00	0
2009-03-19	17:45:00	0
2009-03-19	17:46:00	0
2009-03-19	17:47:00	0
2009-03-19	17:48:00	0
2009-03-19	17:49:00	0
2009-03-19	17:50:00	0
2009-03-19	17:51:00	0
2009-03-19	17:52:00	0
2009-03-19	17:53:00	0
2009-03-19	17:54:00	0
2009-03-19	17:55:00	0
2009-03-19	17:56:00	0
2009-03-19	17:57:00	0
2009-03-19	17:58:00	0
2009-03-19	17:59:00	0
2009-03-19	18:00:00	323
2009-03-19	18:01:00	73
2009-03-19	18:02:00	84
2009-03-19	18:03:00	67
2009-03-19	18:04:00	90
2009-03-19	18:05:00	79
2009-03-19	18:06:00	43
2009-03-19	18:07:00	38
2009-03-19	18:08:00	14
2009-03-19	18:09:00	0
2009-03-19	18:10:00	33
2009-03-19	18:11:00	52
2009-03-19	18:12:00	5
2009-03-19	18:13:00	0
2009-03-19	18:14:00	28
2009-03-19	18:15:00	0
2009-03-19	18:16:00	9
2009-03-19	18:17:00	361
2009-03-19	18:18:00	5
2009-03-19	18:19:00	28
2009-03-19	18:20:00	113
2009-03-19	18:21:00	19
2009-03-19	18:22:00	323
2009-03-19	18:23:00	314
2009-03-19	18:24:00	67
2009-03-19	18:25:00	214
2009-03-19	18:26:00	592
2009-03-19	18:27:00	851
2009-03-19	18:28:00	527
2009-03-19	18:29:00	1082
2009-03-19	18:30:00	253
2009-03-19	18:31:00	287
2009-03-19	18:32:00	632
2009-03-19	18:33:00	253
2009-03-19	18:34:00	445
2009-03-19	18:35:00	565
2009-03-19	18:36:00	690
2009-03-19	18:37:00	38
2009-03-19	18:38:00	73
2009-03-19	18:39:00	423
2009-03-19	18:40:00	84
2009-03-19	18:41:00	392
2009-03-19	18:42:00	47
2009-03-19	18:43:00	5
2009-03-19	18:44:00	52
2009-03-19	18:45:00	157
2009-03-19	18:46:00	1125
2009-03-19	18:47:00	296
2009-03-19	18:48:00	28
2009-03-19	18:49:00	207
2009-03-19	18:50:00	14
2009-03-19	18:51:00	38
2009-03-19	18:52:00	0
2009-03-19	18:53:00	0
2009-03-19	18:54:00	57
2009-03-19	18:55:00	0
2009-03-19	18:56:00	0
2009-03-19	18:57:00	0
2009-03-19	18:58:00	0
2009-03-19	18:59:00	43
2009-03-19	19:00:00	28
2009-03-19	19:01:00	887
2009-03-19	19:02:00	834
2009-03-19	19:03:00	605
2009-03-19	19:04:00	539
2009-03-19	19:05:00	690
2009-03-19	19:06:00	28
2009-03-19	19:07:00	14
2009-03-19	19:08:00	0
2009-03-19	19:09:00	0
2009-03-19	19:10:00	0
2009-03-19	19:11:00	0
2009-03-19	19:12:00	0
2009-03-19	19:13:00	9
2009-03-19	19:14:00	0
2009-03-19	19:15:00	0
2009-03-19	19:16:00	0
2009-03-19	19:17:00	0
2009-03-19	19:18:00	38
2009-03-19	19:19:00	0
2009-03-19	19:20:00	0
2009-03-19	19:21:00	0
2009-03-19	19:22:00	0
2009-03-19	19:23:00	0
2009-03-19	19:24:00	0
2009-03-19	19:25:00	0
2009-03-19	19:26:00	0
2009-03-19	19:27:00	0
2009-03-19	19:28:00	0
2009-03-19	19:29:00	0
2009-03-19	19:30:00	0
2009-03-19	19:31:00	0
2009-03-19	19:32:00	0
2009-03-19	19:33:00	0
2009-03-19	19:34:00	0
2009-03-19	19:35:00	0
2009-03-19	19:36:00	19
2009-03-19	19:37:00	0
2009-03-19	19:38:00	0
2009-03-19	19:39:00	0
2009-03-19	19:40:00	0
2009-03-19	19:41:00	0
2009-03-19	19:42:00	0
2009-03-19	19:43:00	0
2009-03-19	19:44:00	0
2009-03-19	19:45:00	5
2009-03-19	19:46:00	0
2009-03-19	19:47:00	0
2009-03-19	19:48:00	0
2009-03-19	19:49:00	0
2009-03-19	19:50:00	0
2009-03-19	19:51:00	0
2009-03-19	19:52:00	0
2009-03-19	19:53:00	0
2009-03-19	19:54:00	0
2009-03-19	19:55:00	0
2009-03-19	19:56:00	0
2009-03-19	19:57:00	0
2009-03-19	19:58:00	0
2009-03-19	19:59:00	0
2009-03-19	20:00:00	0
2009-03-19	20:01:00	0
2009-03-19	20:02:00	0
2009-03-19	20:03:00	0
2009-03-19	20:04:00	0
2009-03-19	20:05:00	5
2009-03-19	20:06:00	0
2009-03-19	20:07:00	0
2009-03-19	20:08:00	47
2009-03-19	20:09:00	73
2009-03-19	20:10:00	0
2009-03-19	20:11:00	0
2009-03-19	20:12:00	0
2009-03-19	20:13:00	0
2009-03-19	20:14:00	0
2009-03-19	20:15:00	0
2009-03-19	20:16:00	0
2009-03-19	20:17:00	0
2009-03-19	20:18:00	0
2009-03-19	20:19:00	0
2009-03-19	20:20:00	0
2009-03-19	20:21:00	0
2009-03-19	20:22:00	0
2009-03-19	20:23:00	0
2009-03-19	20:24:00	0
2009-03-19	20:25:00	0
2009-03-19	20:26:00	0
2009-03-19	20:27:00	0
2009-03-19	20:28:00	0
2009-03-19	20:29:00	0
2009-03-19	20:30:00	0
2009-03-19	20:31:00	0
2009-03-19	20:32:00	28
2009-03-19	20:33:00	19
2009-03-19	20:34:00	0
2009-03-19	20:35:00	0
2009-03-19	20:36:00	0
2009-03-19	20:37:00	0
2009-03-19	20:38:00	0
2009-03-19	20:39:00	0
2009-03-19	20:40:00	0
2009-03-19	20:41:00	0
2009-03-19	20:42:00	0
2009-03-19	20:43:00	0
2009-03-19	20:44:00	0
2009-03-19	20:45:00	0
2009-03-19	20:46:00	0
2009-03-19	20:47:00	0
2009-03-19	20:48:00	0
2009-03-19	20:49:00	0
2009-03-19	20:50:00	0
2009-03-19	20:51:00	0
2009-03-19	20:52:00	0
2009-03-19	20:53:00	0
2009-03-19	20:54:00	0
2009-03-19	20:55:00	0
2009-03-19	20:56:00	0
2009-03-19	20:57:00	0
2009-03-19	20:58:00	0
2009-03-19	20:59:00	0
2009-03-19	21:00:00	0
2009-03-19	21:01:00	0
2009-03-19	21:02:00	0
2009-03-19	21:03:00	0
2009-03-19	21:04:00	0
2009-03-19	21:05:00	0
2009-03-19	21:06:00	0
2009-03-19	21:07:00	0
2009-03-19	21:08:00	0
2009-03-19	21:09:00	0
2009-03-19	21:10:00	0
2009-03-19	21:11:00	0
2009-03-19	21:12:00	0
2009-03-19	21:13:00	73
2009-03-19	21:14:00	14
2009-03-19	21:15:00	43
2009-03-19	21:16:00	5
2009-03-19	21:17:00	5
2009-03-19	21:18:00	0
2009-03-19	21:19:00	0
2009-03-19	21:20:00	0
2009-03-19	21:21:00	0
2009-03-19	21:22:00	28
2009-03-19	21:23:00	9
2009-03-19	21:24:00	28
2009-03-19	21:25:00	1546
2009-03-19	21:26:00	1633
2009-03-19	21:27:00	647
2009-03-19	21:28:00	342
2009-03-19	21:29:00	0
2009-03-19	21:30:00	43
2009-03-19	21:31:00	0
2009-03-19	21:32:00	0
2009-03-19	21:33:00	0
2009-03-19	21:34:00	0
2009-03-19	21:35:00	0
2009-03-19	21:36:00	0
2009-03-19	21:37:00	0
2009-03-19	21:38:00	0
2009-03-19	21:39:00	0
2009-03-19	21:40:00	0
2009-03-19	21:41:00	0
2009-03-19	21:42:00	0
2009-03-19	21:43:00	0
2009-03-19	21:44:00	0
2009-03-19	21:45:00	0
2009-03-19	21:46:00	0
2009-03-19	21:47:00	0
2009-03-19	21:48:00	0
2009-03-19	21:49:00	0
2009-03-19	21:50:00	0
2009-03-19	21:51:00	0
2009-03-19	21:52:00	0
2009-03-19	21:53:00	0
2009-03-19	21:54:00	0
2009-03-19	21:55:00	0
2009-03-19	21:56:00	0
2009-03-19	21:57:00	119
2009-03-19	21:58:00	0
2009-03-19	21:59:00	0
2009-03-19	22:00:00	0
2009-03-19	22:01:00	0
2009-03-19	22:02:00	0
2009-03-19	22:03:00	0
2009-03-19	22:04:00	0
2009-03-19	22:05:00	0
2009-03-19	22:06:00	0
2009-03-19	22:07:00	0
2009-03-19	22:08:00	0
2009-03-19	22:09:00	0
2009-03-19	22:10:00	0
2009-03-19	22:11:00	0
2009-03-19	22:12:00	0
2009-03-19	22:13:00	0
2009-03-19	22:14:00	0
2009-03-19	22:15:00	0
2009-03-19	22:16:00	0
2009-03-19	22:17:00	0
2009-03-19	22:18:00	0
2009-03-19	22:19:00	0
2009-03-19	22:20:00	0
2009-03-19	22:21:00	9
2009-03-19	22:22:00	0
2009-03-19	22:23:00	0
2009-03-19	22:24:00	0
2009-03-19	22:25:00	0
2009-03-19	22:26:00	0
2009-03-19	22:27:00	0
2009-03-19	22:28:00	0
2009-03-19	22:29:00	0
2009-03-19	22:30:00	0
2009-03-19	22:31:00	0
2009-03-19	22:32:00	0
2009-03-19	22:33:00	0
2009-03-19	22:34:00	0
2009-03-19	22:35:00	0
2009-03-19	22:36:00	0
2009-03-19	22:37:00	0
2009-03-19	22:38:00	0
2009-03-19	22:39:00	0
2009-03-19	22:40:00	0
2009-03-19	22:41:00	0
2009-03-19	22:42:00	0
2009-03-19	22:43:00	0
2009-03-19	22:44:00	24
2009-03-19	22:45:00	0
2009-03-19	22:46:00	0
2009-03-19	22:47:00	0
2009-03-19	22:48:00	0
2009-03-19	22:49:00	0
2009-03-19	22:50:00	0
2009-03-19	22:51:00	0
2009-03-19	22:52:00	0
2009-03-19	22:53:00	0
2009-03-19	22:54:00	0
2009-03-19	22:55:00	0
2009-03-19	22:56:00	0
2009-03-19	22:57:00	0
2009-03-19	22:58:00	0
2009-03-19	22:59:00	0
2009-03-19	23:00:00	0
2009-03-19	23:01:00	38
2009-03-19	23:02:00	0
2009-03-19	23:03:00	24
2009-03-19	23:04:00	33
2009-03-19	23:05:00	28
2009-03-19	23:06:00	0
2009-03-19	23:07:00	0
2009-03-19	23:08:00	0
2009-03-19	23:09:00	0
2009-03-19	23:10:00	0
2009-03-19	23:11:00	0
2009-03-19	23:12:00	0
2009-03-19	23:13:00	5
2009-03-19	23:14:00	0
2009-03-19	23:15:00	0
2009-03-19	23:16:00	0
2009-03-19	23:17:00	0
2009-03-19	23:18:00	52
2009-03-19	23:19:00	0
2009-03-19	23:20:00	0
2009-03-19	23:21:00	0
2009-03-19	23:22:00	0
2009-03-19	23:23:00	0
2009-03-19	23:24:00	0
2009-03-19	23:25:00	84
2009-03-19	23:26:00	9
2009-03-19	23:27:00	371
2009-03-19	23:28:00	361
2009-03-19	23:29:00	0
2009-03-19	23:30:00	0
2009-03-19	23:31:00	0
2009-03-19	23:32:00	0
2009-03-19	23:33:00	0
2009-03-19	23:34:00	0
2009-03-19	23:35:00	0
2009-03-19	23:36:00	0
2009-03-19	23:37:00	0
2009-03-19	23:38:00	73
2009-03-19	23:39:00	9
2009-03-19	23:40:00	0
2009-03-19	23:41:00	0
2009-03-19	23:42:00	0
2009-03-19	23:43:00	0
2009-03-19	23:44:00	0
2009-03-19	23:45:00	0
2009-03-19	23:46:00	0
2009-03-19	23:47:00	0
2009-03-19	23:48:00	0
2009-03-19	23:49:00	0
2009-03-19	23:50:00	0
2009-03-19	23:51:00	0
2009-03-19	23:52:00	0
2009-03-19	23:53:00	0
2009-03-19	23:54:00	0
2009-03-19	23:55:00	0
2009-03-19	23:56:00	0
2009-03-19	23:57:00	0
2009-03-19	23:58:00	0
2009-03-19	23:59:00	0
2009-03-20	00:00:00	0
2009-03-20	00:01:00	0
2009-03-20	00:02:00	0
2009-03-20	00:03:00	0
2009-03-20	00:04:00	0
2009-03-20	00:05:00	0
2009-03-20	00:06:00	0
2009-03-20	00:07:00	0
2009-03-20	00:08:00	0
2009-03-20	00:09:00	0
2009-03-20	00:10:00	0
2009-03-20	00:11:00	0
2009-03-20	00:12:00	0
2009-03-20	00:13:00	0
2009-03-20	00:14:00	0
2009-03-20	00:15:00	0
2009-03-20	00:16:00	0
2009-03-20	00:17:00	0
2009-03-20	00:18:00	28
2009-03-20	00:19:00	14
2009-03-20	00:20:00	0
2009-03-20	00:21:00	0
2009-03-20	00:22:00	0
2009-03-20	00:23:00	0
2009-03-20	00:24:00	0
2009-03-20	00:25:00	0
2009-03-20	00:26:00	0
2009-03-20	00:27:00	0
2009-03-20	00:28:00	0
2009-03-20	00:29:00	0
2009-03-20	00:30:00	0
2009-03-20	00:31:00	5
2009-03-20	00:32:00	0
2009-03-20	00:33:00	0
2009-03-20	00:34:00	0
2009-03-20	00:35:00	0
2009-03-20	00:36:00	0
2009-03-20	00:37:00	33
2009-03-20	00:38:00	0
2009-03-20	00:39:00	0
2009-03-20	00:40:00	0
2009-03-20	00:41:00	0
2009-03-20	00:42:00	0
2009-03-20	00:43:00	0
2009-03-20	00:44:00	0
2009-03-20	00:45:00	0
2009-03-20	00:46:00	0
2009-03-20	00:47:00	0
2009-03-20	00:48:00	0
2009-03-20	00:49:00	0
2009-03-20	00:50:00	0
2009-03-20	00:51:00	0
2009-03-20	00:52:00	0
2009-03-20	00:53:00	0
2009-03-20	00:54:00	0
2009-03-20	00:55:00	0
2009-03-20	00:56:00	0
2009-03-20	00:57:00	0
2009-03-20	00:58:00	0
2009-03-20	00:59:00	0
2009-03-20	01:00:00	24
2009-03-20	01:01:00	19
2009-03-20	01:02:00	0
2009-03-20	01:03:00	0
2009-03-20	01:04:00	262
2009-03-20	01:05:00	207
2009-03-20	01:06:00	14
2009-03-20	01:07:00	0
2009-03-20	01:08:00	0
2009-03-20	01:09:00	0
2009-03-20	01:10:00	0
2009-03-20	01:11:00	0
2009-03-20	01:12:00	0
2009-03-20	01:13:00	0
2009-03-20	01:14:00	0
2009-03-20	01:15:00	0
2009-03-20	01:16:00	0
2009-03-20	01:17:00	0
2009-03-20	01:18:00	0
2009-03-20	01:19:00	0
2009-03-20	01:20:00	0
2009-03-20	01:21:00	0
2009-03-20	01:22:00	0
2009-03-20	01:23:00	0
2009-03-20	01:24:00	0
2009-03-20	01:25:00	0
2009-03-20	01:26:00	0
2009-03-20	01:27:00	0
2009-03-20	01:28:00	0
2009-03-20	01:29:00	0
2009-03-20	01:30:00	0
2009-03-20	01:31:00	0
2009-03-20	01:32:00	0
2009-03-20	01:33:00	0
2009-03-20	01:34:00	0
2009-03-20	01:35:00	0
2009-03-20	01:36:00	0
2009-03-20	01:37:00	0
2009-03-20	01:38:00	0
2009-03-20	01:39:00	14
2009-03-20	01:40:00	84
2009-03-20	01:41:00	0
2009-03-20	01:42:00	0
2009-03-20	01:43:00	0
2009-03-20	01:44:00	0
2009-03-20	01:45:00	0
2009-03-20	01:46:00	0
2009-03-20	01:47:00	0
2009-03-20	01:48:00	0
2009-03-20	01:49:00	0
2009-03-20	01:50:00	0
2009-03-20	01:51:00	5
2009-03-20	01:52:00	62
2009-03-20	01:53:00	5
2009-03-20	01:54:00	9
2009-03-20	01:55:00	33
2009-03-20	01:56:00	0
2009-03-20	01:57:00	0
2009-03-20	01:58:00	0
2009-03-20	01:59:00	0
2009-03-20	02:00:00	0
2009-03-20	02:01:00	0
2009-03-20	02:02:00	0
2009-03-20	02:03:00	0
2009-03-20	02:04:00	0
2009-03-20	02:05:00	0
2009-03-20	02:06:00	0
2009-03-20	02:07:00	0
2009-03-20	02:08:00	0
2009-03-20	02:09:00	0
2009-03-20	02:10:00	43
2009-03-20	02:11:00	0
2009-03-20	02:12:00	0
2009-03-20	02:13:00	0
2009-03-20	02:14:00	0
2009-03-20	02:15:00	0
2009-03-20	02:16:00	0
2009-03-20	02:17:00	0
2009-03-20	02:18:00	0
2009-03-20	02:19:00	0
2009-03-20	02:20:00	0
2009-03-20	02:21:00	0
2009-03-20	02:22:00	5
2009-03-20	02:23:00	0
2009-03-20	02:24:00	0
2009-03-20	02:25:00	0
2009-03-20	02:26:00	0
2009-03-20	02:27:00	0
2009-03-20	02:28:00	24
2009-03-20	02:29:00	47
2009-03-20	02:30:00	0
2009-03-20	02:31:00	0
2009-03-20	02:32:00	0
2009-03-20	02:33:00	0
2009-03-20	02:34:00	0
2009-03-20	02:35:00	0
2009-03-20	02:36:00	0
2009-03-20	02:37:00	0
2009-03-20	02:38:00	0
2009-03-20	02:39:00	0
2009-03-20	02:40:00	0
2009-03-20	02:41:00	0
2009-03-20	02:42:00	0
2009-03-20	02:43:00	0
2009-03-20	02:44:00	0
2009-03-20	02:45:00	0
2009-03-20	02:46:00	0
2009-03-20	02:47:00	0
2009-03-20	02:48:00	0
2009-03-20	02:49:00	0
2009-03-20	02:50:00	0
2009-03-20	02:51:00	0
2009-03-20	02:52:00	0
2009-03-20	02:53:00	5
2009-03-20	02:54:00	47
2009-03-20	02:55:00	0
2009-03-20	02:56:00	0
2009-03-20	02:57:00	0
2009-03-20	02:58:00	214
2009-03-20	02:59:00	0
2009-03-20	03:00:00	0
2009-03-20	03:01:00	0
2009-03-20	03:02:00	0
2009-03-20	03:03:00	0
2009-03-20	03:04:00	0
2009-03-20	03:05:00	0
2009-03-20	03:06:00	0
2009-03-20	03:07:00	0
2009-03-20	03:08:00	0
2009-03-20	03:09:00	0
2009-03-20	03:10:00	0
2009-03-20	03:11:00	0
2009-03-20	03:12:00	0
2009-03-20	03:13:00	0
2009-03-20	03:14:00	0
2009-03-20	03:15:00	0
2009-03-20	03:16:00	0
2009-03-20	03:17:00	0
2009-03-20	03:18:00	0
2009-03-20	03:19:00	14
2009-03-20	03:20:00	67
2009-03-20	03:21:00	0
2009-03-20	03:22:00	0
2009-03-20	03:23:00	0
2009-03-20	03:24:00	0
2009-03-20	03:25:00	0
2009-03-20	03:26:00	0
2009-03-20	03:27:00	0
2009-03-20	03:28:00	0
2009-03-20	03:29:00	0
2009-03-20	03:30:00	0
2009-03-20	03:31:00	0
2009-03-20	03:32:00	0
2009-03-20	03:33:00	0
2009-03-20	03:34:00	0
2009-03-20	03:35:00	0
2009-03-20	03:36:00	0
2009-03-20	03:37:00	0
2009-03-20	03:38:00	0
2009-03-20	03:39:00	43
2009-03-20	03:40:00	592
2009-03-20	03:41:00	371
2009-03-20	03:42:00	0
2009-03-20	03:43:00	38
2009-03-20	03:44:00	0
2009-03-20	03:45:00	0
2009-03-20	03:46:00	0
2009-03-20	03:47:00	0
2009-03-20	03:48:00	0
2009-03-20	03:49:00	0
2009-03-20	03:50:00	0
2009-03-20	03:51:00	0
2009-03-20	03:52:00	0
2009-03-20	03:53:00	0
2009-03-20	03:54:00	0
2009-03-20	03:55:00	0
2009-03-20	03:56:00	0
2009-03-20	03:57:00	0
2009-03-20	03:58:00	0
2009-03-20	03:59:00	0
2009-03-20	04:00:00	0
2009-03-20	04:01:00	0
2009-03-20	04:02:00	0
2009-03-20	04:03:00	0
2009-03-20	04:04:00	0
2009-03-20	04:05:00	0
2009-03-20	04:06:00	33
2009-03-20	04:07:00	24
2009-03-20	04:08:00	0
2009-03-20	04:09:00	0
2009-03-20	04:10:00	0
2009-03-20	04:11:00	0
2009-03-20	04:12:00	0
2009-03-20	04:13:00	0
2009-03-20	04:14:00	0
2009-03-20	04:15:00	0
2009-03-20	04:16:00	0
2009-03-20	04:17:00	0
2009-03-20	04:18:00	0
2009-03-20	04:19:00	0
2009-03-20	04:20:00	0
2009-03-20	04:21:00	0
2009-03-20	04:22:00	0
2009-03-20	04:23:00	0
2009-03-20	04:24:00	0
2009-03-20	04:25:00	0
2009-03-20	04:26:00	0
2009-03-20	04:27:00	0
2009-03-20	04:28:00	52
2009-03-20	04:29:00	0
2009-03-20	04:30:00	0
2009-03-20	04:31:00	0
2009-03-20	04:32:00	0
2009-03-20	04:33:00	0
2009-03-20	04:34:00	0
2009-03-20	04:35:00	0
2009-03-20	04:36:00	0
2009-03-20	04:37:00	0
2009-03-20	04:38:00	0
2009-03-20	04:39:00	0
2009-03-20	04:40:00	0
2009-03-20	04:41:00	0
2009-03-20	04:42:00	0
2009-03-20	04:43:00	0
2009-03-20	04:44:00	0
2009-03-20	04:45:00	0
2009-03-20	04:46:00	0
2009-03-20	04:47:00	0
2009-03-20	04:48:00	0
2009-03-20	04:49:00	0
2009-03-20	04:50:00	0
2009-03-20	04:51:00	0
2009-03-20	04:52:00	0
2009-03-20	04:53:00	0
2009-03-20	04:54:00	479
2009-03-20	04:55:00	28
2009-03-20	04:56:00	0
2009-03-20	04:57:00	0
2009-03-20	04:58:00	0
2009-03-20	04:59:00	0
2009-03-20	05:00:00	0
2009-03-20	05:01:00	0
2009-03-20	05:02:00	0
2009-03-20	05:03:00	0
2009-03-20	05:04:00	0
2009-03-20	05:05:00	0
2009-03-20	05:06:00	0
2009-03-20	05:07:00	0
2009-03-20	05:08:00	0
2009-03-20	05:09:00	0
2009-03-20	05:10:00	0
2009-03-20	05:11:00	0
2009-03-20	05:12:00	0
2009-03-20	05:13:00	0
2009-03-20	05:14:00	0
2009-03-20	05:15:00	0
2009-03-20	05:16:00	0
2009-03-20	05:17:00	90
2009-03-20	05:18:00	0
2009-03-20	05:19:00	0
2009-03-20	05:20:00	0
2009-03-20	05:21:00	0
2009-03-20	05:22:00	0
2009-03-20	05:23:00	0
2009-03-20	05:24:00	0
2009-03-20	05:25:00	0
2009-03-20	05:26:00	0
2009-03-20	05:27:00	0
2009-03-20	05:28:00	0
2009-03-20	05:29:00	0
2009-03-20	05:30:00	0
2009-03-20	05:31:00	0
2009-03-20	05:32:00	0
2009-03-20	05:33:00	0
2009-03-20	05:34:00	0
2009-03-20	05:35:00	0
2009-03-20	05:36:00	0
2009-03-20	05:37:00	0
2009-03-20	05:38:00	0
2009-03-20	05:39:00	0
2009-03-20	05:40:00	0
2009-03-20	05:41:00	0
2009-03-20	05:42:00	0
2009-03-20	05:43:00	0
2009-03-20	05:44:00	0
2009-03-20	05:45:00	0
2009-03-20	05:46:00	14
2009-03-20	05:47:00	57
2009-03-20	05:48:00	0
2009-03-20	05:49:00	0
2009-03-20	05:50:00	0
2009-03-20	05:51:00	0
2009-03-20	05:52:00	0
2009-03-20	05:53:00	0
2009-03-20	05:54:00	0
2009-03-20	05:55:00	0
2009-03-20	05:56:00	0
2009-03-20	05:57:00	0
2009-03-20	05:58:00	0
2009-03-20	05:59:00	0
2009-03-20	06:00:00	0
2009-03-20	06:01:00	0
2009-03-20	06:02:00	0
2009-03-20	06:03:00	0
2009-03-20	06:04:00	0
2009-03-20	06:05:00	0
2009-03-20	06:06:00	0
2009-03-20	06:07:00	0
2009-03-20	06:08:00	0
2009-03-20	06:09:00	0
2009-03-20	06:10:00	0
2009-03-20	06:11:00	67
2009-03-20	06:12:00	0
2009-03-20	06:13:00	0
2009-03-20	06:14:00	0
2009-03-20	06:15:00	0
2009-03-20	06:16:00	0
2009-03-20	06:17:00	0
2009-03-20	06:18:00	0
2009-03-20	06:19:00	0
2009-03-20	06:20:00	0
2009-03-20	06:21:00	0
2009-03-20	06:22:00	0
2009-03-20	06:23:00	0
2009-03-20	06:24:00	0
2009-03-20	06:25:00	0
2009-03-20	06:26:00	0
2009-03-20	06:27:00	0
2009-03-20	06:28:00	0
2009-03-20	06:29:00	0
2009-03-20	06:30:00	0
2009-03-20	06:31:00	0
2009-03-20	06:32:00	253
2009-03-20	06:33:00	423
2009-03-20	06:34:00	24
2009-03-20	06:35:00	14
2009-03-20	06:36:00	0
2009-03-20	06:37:00	0
2009-03-20	06:38:00	0
2009-03-20	06:39:00	9
2009-03-20	06:40:00	0
2009-03-20	06:41:00	0
2009-03-20	06:42:00	0
2009-03-20	06:43:00	0
2009-03-20	06:44:00	0
2009-03-20	06:45:00	0
2009-03-20	06:46:00	0
2009-03-20	06:47:00	0
2009-03-20	06:48:00	0
2009-03-20	06:49:00	0
2009-03-20	06:50:00	0
2009-03-20	06:51:00	0
2009-03-20	06:52:00	0
2009-03-20	06:53:00	0
2009-03-20	06:54:00	0
2009-03-20	06:55:00	0
2009-03-20	06:56:00	0
2009-03-20	06:57:00	0
2009-03-20	06:58:00	0
2009-03-20	06:59:00	0
2009-03-20	07:00:00	0
2009-03-20	07:01:00	43
2009-03-20	07:02:00	0
2009-03-20	07:03:00	0
2009-03-20	07:04:00	0
2009-03-20	07:05:00	0
2009-03-20	07:06:00	0
2009-03-20	07:07:00	0
2009-03-20	07:08:00	0
2009-03-20	07:09:00	0
2009-03-20	07:10:00	0
2009-03-20	07:11:00	0
2009-03-20	07:12:00	0
2009-03-20	07:13:00	0
2009-03-20	07:14:00	0
2009-03-20	07:15:00	0
2009-03-20	07:16:00	0
2009-03-20	07:17:00	0
2009-03-20	07:18:00	9
2009-03-20	07:19:00	0
2009-03-20	07:20:00	0
2009-03-20	07:21:00	0
2009-03-20	07:22:00	0
2009-03-20	07:23:00	0
2009-03-20	07:24:00	0
2009-03-20	07:25:00	14
2009-03-20	07:26:00	33
2009-03-20	07:27:00	214
2009-03-20	07:28:00	14
2009-03-20	07:29:00	19
2009-03-20	07:30:00	0
2009-03-20	07:31:00	5
2009-03-20	07:32:00	1082
2009-03-20	07:33:00	1214
2009-03-20	07:34:00	851
2009-03-20	07:35:00	1692
2009-03-20	07:36:00	2366
2009-03-20	07:37:00	2578
2009-03-20	07:38:00	1410
2009-03-20	07:39:00	47
2009-03-20	07:40:00	214
2009-03-20	07:41:00	467
2009-03-20	07:42:00	9
2009-03-20	07:43:00	0
2009-03-20	07:44:00	817
2009-03-20	07:45:00	361
2009-03-20	07:46:00	207
2009-03-20	07:47:00	199
2009-03-20	07:48:00	342
2009-03-20	07:49:00	0
2009-03-20	07:50:00	9
2009-03-20	07:51:00	14
2009-03-20	07:52:00	43
2009-03-20	07:53:00	19
2009-03-20	07:54:00	207
2009-03-20	07:55:00	38
2009-03-20	07:56:00	552
2009-03-20	07:57:00	445
2009-03-20	07:58:00	423
2009-03-20	07:59:00	503
2009-03-20	08:00:00	705
2009-03-20	08:01:00	113
2009-03-20	08:02:00	157
2009-03-20	08:03:00	192
2009-03-20	08:04:00	942
2009-03-20	08:05:00	14
2009-03-20	08:06:00	9
2009-03-20	08:07:00	0
2009-03-20	08:08:00	38
2009-03-20	08:09:00	5
2009-03-20	08:10:00	0
2009-03-20	08:11:00	0
2009-03-20	08:12:00	0
2009-03-20	08:13:00	0
2009-03-20	08:14:00	9
2009-03-20	08:15:00	0
2009-03-20	08:16:00	5
2009-03-20	08:17:00	9
2009-03-20	08:18:00	9
2009-03-20	08:19:00	0
2009-03-20	08:20:00	0
2009-03-20	08:21:00	0
2009-03-20	08:22:00	9
2009-03-20	08:23:00	5
2009-03-20	08:24:00	0
2009-03-20	08:25:00	0
2009-03-20	08:26:00	0
2009-03-20	08:27:00	0
2009-03-20	08:28:00	0
2009-03-20	08:29:00	0
2009-03-20	08:30:00	24
2009-03-20	08:31:00	96
2009-03-20	08:32:00	0
2009-03-20	08:33:00	0
2009-03-20	08:34:00	0
2009-03-20	08:35:00	0
2009-03-20	08:36:00	0
2009-03-20	08:37:00	0
2009-03-20	08:38:00	0
2009-03-20	08:39:00	479
2009-03-20	08:40:00	1146
2009-03-20	08:41:00	578
2009-03-20	08:42:00	237
2009-03-20	08:43:00	245
2009-03-20	08:44:00	304
2009-03-20	08:45:00	270
2009-03-20	08:46:00	323
2009-03-20	08:47:00	171
2009-03-20	08:48:00	253
2009-03-20	08:49:00	342
2009-03-20	08:50:00	199
2009-03-20	08:51:00	270
2009-03-20	08:52:00	333
2009-03-20	08:53:00	113
2009-03-20	08:54:00	262
2009-03-20	08:55:00	222
2009-03-20	08:56:00	192
2009-03-20	08:57:00	333
2009-03-20	08:58:00	503
2009-03-20	08:59:00	527
2009-03-20	09:00:00	565
2009-03-20	09:01:00	515
2009-03-20	09:02:00	433
2009-03-20	09:03:00	618
2009-03-20	09:04:00	402
2009-03-20	09:05:00	433
2009-03-20	09:06:00	245
2009-03-20	09:07:00	323
2009-03-20	09:08:00	157
[truncated: 19,611 more rows]

## Sheet: 4.2.09
Actogram, Copy Raw Data, All Days
Identity:	Greeley
Filename:	E:\Active Research Files\meloxicam titre canine\cases\greeley\Greeley 4.2.09.AWC
Gender:	F
Age:	7
Height:	76.2 cm	30.0 in
Weight:	38.6 kg	85.1 lbs
Start Date:	02-Apr-2009 (Thu)
Start Time:	18:00:00
Interval:	1.00 mins
Date Stamp:	Time Stamp:	Activity Data:	Marker Press:
2009-04-02	00:00:00	0
2009-04-02	00:01:00	0
2009-04-02	00:02:00	0
2009-04-02	00:03:00	0
2009-04-02	00:04:00	0
2009-04-02	00:05:00	0
2009-04-02	00:06:00	0
2009-04-02	00:07:00	0
2009-04-02	00:08:00	0
2009-04-02	00:09:00	0
2009-04-02	00:10:00	0
2009-04-02	00:11:00	0
2009-04-02	00:12:00	0
2009-04-02	00:13:00	0
2009-04-02	00:14:00	0
2009-04-02	00:15:00	0
2009-04-02	00:16:00	0
2009-04-02	00:17:00	0
2009-04-02	00:18:00	0
2009-04-02	00:19:00	0
2009-04-02	00:20:00	0
2009-04-02	00:21:00	0
2009-04-02	00:22:00	0
2009-04-02	00:23:00	0
2009-04-02	00:24:00	0
2009-04-02	00:25:00	0
2009-04-02	00:26:00	0
2009-04-02	00:27:00	0
2009-04-02	00:28:00	0
2009-04-02	00:29:00	0
2009-04-02	00:30:00	0
2009-04-02	00:31:00	0
2009-04-02	00:32:00	0
2009-04-02	00:33:00	0
2009-04-02	00:34:00	0
2009-04-02	00:35:00	0
2009-04-02	00:36:00	0
2009-04-02	00:37:00	0
2009-04-02	00:38:00	0
2009-04-02	00:39:00	0
2009-04-02	00:40:00	0
2009-04-02	00:41:00	0
2009-04-02	00:42:00	0
2009-04-02	00:43:00	0
2009-04-02	00:44:00	0
2009-04-02	00:45:00	0
2009-04-02	00:46:00	0
2009-04-02	00:47:00	0
2009-04-02	00:48:00	0
2009-04-02	00:49:00	0
2009-04-02	00:50:00	0
2009-04-02	00:51:00	0
2009-04-02	00:52:00	0
2009-04-02	00:53:00	0
2009-04-02	00:54:00	0
2009-04-02	00:55:00	0
2009-04-02	00:56:00	0
2009-04-02	00:57:00	0
2009-04-02	00:58:00	0
2009-04-02	00:59:00	0
2009-04-02	01:00:00	0
2009-04-02	01:01:00	0
2009-04-02	01:02:00	0
2009-04-02	01:03:00	0
2009-04-02	01:04:00	0
2009-04-02	01:05:00	0
2009-04-02	01:06:00	0
2009-04-02	01:07:00	0
2009-04-02	01:08:00	0
2009-04-02	01:09:00	0
2009-04-02	01:10:00	0
2009-04-02	01:11:00	0
2009-04-02	01:12:00	0
2009-04-02	01:13:00	0
2009-04-02	01:14:00	0
2009-04-02	01:15:00	0
2009-04-02	01:16:00	0
2009-04-02	01:17:00	0
2009-04-02	01:18:00	0
2009-04-02	01:19:00	0
2009-04-02	01:20:00	0
2009-04-02	01:21:00	0
2009-04-02	01:22:00	0
2009-04-02	01:23:00	0
2009-04-02	01:24:00	0
2009-04-02	01:25:00	0
2009-04-02	01:26:00	0
2009-04-02	01:27:00	0
2009-04-02	01:28:00	0
2009-04-02	01:29:00	0
2009-04-02	01:30:00	0
2009-04-02	01:31:00	0
2009-04-02	01:32:00	0
2009-04-02	01:33:00	0
2009-04-02	01:34:00	0
2009-04-02	01:35:00	0
2009-04-02	01:36:00	0
2009-04-02	01:37:00	0
2009-04-02	01:38:00	0
2009-04-02	01:39:00	0
2009-04-02	01:40:00	0
2009-04-02	01:41:00	0
2009-04-02	01:42:00	0
2009-04-02	01:43:00	0
2009-04-02	01:44:00	0
2009-04-02	01:45:00	0
2009-04-02	01:46:00	0
2009-04-02	01:47:00	0
2009-04-02	01:48:00	0
2009-04-02	01:49:00	0
2009-04-02	01:50:00	0
2009-04-02	01:51:00	0
2009-04-02	01:52:00	0
2009-04-02	01:53:00	0
2009-04-02	01:54:00	0
2009-04-02	01:55:00	0
2009-04-02	01:56:00	0
2009-04-02	01:57:00	0
2009-04-02	01:58:00	0
2009-04-02	01:59:00	0
2009-04-02	02:00:00	0
2009-04-02	02:01:00	0
2009-04-02	02:02:00	0
2009-04-02	02:03:00	0
2009-04-02	02:04:00	0
2009-04-02	02:05:00	0
2009-04-02	02:06:00	0
2009-04-02	02:07:00	0
2009-04-02	02:08:00	0
2009-04-02	02:09:00	0
2009-04-02	02:10:00	0
2009-04-02	02:11:00	0
2009-04-02	02:12:00	0
2009-04-02	02:13:00	0
2009-04-02	02:14:00	0
2009-04-02	02:15:00	0
2009-04-02	02:16:00	0
2009-04-02	02:17:00	0
2009-04-02	02:18:00	0
2009-04-02	02:19:00	0
2009-04-02	02:20:00	0
2009-04-02	02:21:00	0
2009-04-02	02:22:00	0
2009-04-02	02:23:00	0
2009-04-02	02:24:00	0
2009-04-02	02:25:00	0
2009-04-02	02:26:00	0
2009-04-02	02:27:00	0
2009-04-02	02:28:00	0
2009-04-02	02:29:00	0
2009-04-02	02:30:00	0
2009-04-02	02:31:00	0
2009-04-02	02:32:00	0
2009-04-02	02:33:00	0
2009-04-02	02:34:00	0
2009-04-02	02:35:00	0
2009-04-02	02:36:00	0
2009-04-02	02:37:00	0
2009-04-02	02:38:00	0
2009-04-02	02:39:00	0
2009-04-02	02:40:00	0
2009-04-02	02:41:00	0
2009-04-02	02:42:00	0
2009-04-02	02:43:00	0
2009-04-02	02:44:00	0
2009-04-02	02:45:00	0
2009-04-02	02:46:00	0
2009-04-02	02:47:00	0
2009-04-02	02:48:00	0
2009-04-02	02:49:00	0
2009-04-02	02:50:00	0
2009-04-02	02:51:00	0
2009-04-02	02:52:00	0
2009-04-02	02:53:00	0
2009-04-02	02:54:00	0
2009-04-02	02:55:00	0
2009-04-02	02:56:00	0
2009-04-02	02:57:00	0
2009-04-02	02:58:00	0
2009-04-02	02:59:00	0
2009-04-02	03:00:00	0
2009-04-02	03:01:00	0
2009-04-02	03:02:00	0
2009-04-02	03:03:00	0
2009-04-02	03:04:00	0
2009-04-02	03:05:00	0
2009-04-02	03:06:00	0
2009-04-02	03:07:00	0
2009-04-02	03:08:00	0
2009-04-02	03:09:00	0
2009-04-02	03:10:00	0
2009-04-02	03:11:00	0
2009-04-02	03:12:00	0
2009-04-02	03:13:00	0
2009-04-02	03:14:00	0
2009-04-02	03:15:00	0
2009-04-02	03:16:00	0
2009-04-02	03:17:00	0
2009-04-02	03:18:00	0
2009-04-02	03:19:00	0
2009-04-02	03:20:00	0
2009-04-02	03:21:00	0
2009-04-02	03:22:00	0
2009-04-02	03:23:00	0
2009-04-02	03:24:00	0
2009-04-02	03:25:00	0
2009-04-02	03:26:00	0
2009-04-02	03:27:00	0
2009-04-02	03:28:00	0
2009-04-02	03:29:00	0
2009-04-02	03:30:00	0
2009-04-02	03:31:00	0
2009-04-02	03:32:00	0
2009-04-02	03:33:00	0
2009-04-02	03:34:00	0
2009-04-02	03:35:00	0
2009-04-02	03:36:00	0
2009-04-02	03:37:00	0
2009-04-02	03:38:00	0
2009-04-02	03:39:00	0
2009-04-02	03:40:00	0
2009-04-02	03:41:00	0
2009-04-02	03:42:00	0
2009-04-02	03:43:00	0
2009-04-02	03:44:00	0
2009-04-02	03:45:00	0
2009-04-02	03:46:00	0
2009-04-02	03:47:00	0
2009-04-02	03:48:00	0
2009-04-02	03:49:00	0
2009-04-02	03:50:00	0
2009-04-02	03:51:00	0
2009-04-02	03:52:00	0
2009-04-02	03:53:00	0
2009-04-02	03:54:00	0
2009-04-02	03:55:00	0
2009-04-02	03:56:00	0
2009-04-02	03:57:00	0
2009-04-02	03:58:00	0
2009-04-02	03:59:00	0
2009-04-02	04:00:00	0
2009-04-02	04:01:00	0
2009-04-02	04:02:00	0
2009-04-02	04:03:00	0
2009-04-02	04:04:00	0
2009-04-02	04:05:00	0
2009-04-02	04:06:00	0
2009-04-02	04:07:00	0
2009-04-02	04:08:00	0
2009-04-02	04:09:00	0
2009-04-02	04:10:00	0
2009-04-02	04:11:00	0
2009-04-02	04:12:00	0
2009-04-02	04:13:00	0
2009-04-02	04:14:00	0
2009-04-02	04:15:00	0
2009-04-02	04:16:00	0
2009-04-02	04:17:00	0
2009-04-02	04:18:00	0
2009-04-02	04:19:00	0
2009-04-02	04:20:00	0
2009-04-02	04:21:00	0
2009-04-02	04:22:00	0
2009-04-02	04:23:00	0
2009-04-02	04:24:00	0
2009-04-02	04:25:00	0
2009-04-02	04:26:00	0
2009-04-02	04:27:00	0
2009-04-02	04:28:00	0
2009-04-02	04:29:00	0
2009-04-02	04:30:00	0
2009-04-02	04:31:00	0
2009-04-02	04:32:00	0
2009-04-02	04:33:00	0
2009-04-02	04:34:00	0
2009-04-02	04:35:00	0
2009-04-02	04:36:00	0
2009-04-02	04:37:00	0
2009-04-02	04:38:00	0
2009-04-02	04:39:00	0
2009-04-02	04:40:00	0
2009-04-02	04:41:00	0
2009-04-02	04:42:00	0
2009-04-02	04:43:00	0
2009-04-02	04:44:00	0
2009-04-02	04:45:00	0
2009-04-02	04:46:00	0
2009-04-02	04:47:00	0
2009-04-02	04:48:00	0
2009-04-02	04:49:00	0
2009-04-02	04:50:00	0
2009-04-02	04:51:00	0
2009-04-02	04:52:00	0
2009-04-02	04:53:00	0
2009-04-02	04:54:00	0
2009-04-02	04:55:00	0
2009-04-02	04:56:00	0
2009-04-02	04:57:00	0
2009-04-02	04:58:00	0
2009-04-02	04:59:00	0
2009-04-02	05:00:00	0
2009-04-02	05:01:00	0
2009-04-02	05:02:00	0
2009-04-02	05:03:00	0
2009-04-02	05:04:00	0
2009-04-02	05:05:00	0
2009-04-02	05:06:00	0
2009-04-02	05:07:00	0
2009-04-02	05:08:00	0
2009-04-02	05:09:00	0
2009-04-02	05:10:00	0
2009-04-02	05:11:00	0
2009-04-02	05:12:00	0
2009-04-02	05:13:00	0
2009-04-02	05:14:00	0
2009-04-02	05:15:00	0
2009-04-02	05:16:00	0
2009-04-02	05:17:00	0
2009-04-02	05:18:00	0
2009-04-02	05:19:00	0
2009-04-02	05:20:00	0
2009-04-02	05:21:00	0
2009-04-02	05:22:00	0
2009-04-02	05:23:00	0
2009-04-02	05:24:00	0
2009-04-02	05:25:00	0
2009-04-02	05:26:00	0
2009-04-02	05:27:00	0
2009-04-02	05:28:00	0
2009-04-02	05:29:00	0
2009-04-02	05:30:00	0
2009-04-02	05:31:00	0
2009-04-02	05:32:00	0
2009-04-02	05:33:00	0
2009-04-02	05:34:00	0
2009-04-02	05:35:00	0
2009-04-02	05:36:00	0
2009-04-02	05:37:00	0
2009-04-02	05:38:00	0
2009-04-02	05:39:00	0
2009-04-02	05:40:00	0
2009-04-02	05:41:00	0
2009-04-02	05:42:00	0
2009-04-02	05:43:00	0
2009-04-02	05:44:00	0
2009-04-02	05:45:00	0
2009-04-02	05:46:00	0
2009-04-02	05:47:00	0
2009-04-02	05:48:00	0
2009-04-02	05:49:00	0
2009-04-02	05:50:00	0
2009-04-02	05:51:00	0
2009-04-02	05:52:00	0
2009-04-02	05:53:00	0
2009-04-02	05:54:00	0
2009-04-02	05:55:00	0
2009-04-02	05:56:00	0
2009-04-02	05:57:00	0
2009-04-02	05:58:00	0
2009-04-02	05:59:00	0
2009-04-02	06:00:00	0
2009-04-02	06:01:00	0
2009-04-02	06:02:00	0
2009-04-02	06:03:00	0
2009-04-02	06:04:00	0
2009-04-02	06:05:00	0
2009-04-02	06:06:00	0
2009-04-02	06:07:00	0
2009-04-02	06:08:00	0
2009-04-02	06:09:00	0
2009-04-02	06:10:00	0
2009-04-02	06:11:00	0
2009-04-02	06:12:00	0
2009-04-02	06:13:00	0
2009-04-02	06:14:00	0
2009-04-02	06:15:00	0
2009-04-02	06:16:00	0
2009-04-02	06:17:00	0
2009-04-02	06:18:00	0
2009-04-02	06:19:00	0
2009-04-02	06:20:00	0
2009-04-02	06:21:00	0
2009-04-02	06:22:00	0
2009-04-02	06:23:00	0
2009-04-02	06:24:00	0
2009-04-02	06:25:00	0
2009-04-02	06:26:00	0
2009-04-02	06:27:00	0
2009-04-02	06:28:00	0
2009-04-02	06:29:00	0
2009-04-02	06:30:00	0
2009-04-02	06:31:00	0
2009-04-02	06:32:00	0
2009-04-02	06:33:00	0
2009-04-02	06:34:00	0
2009-04-02	06:35:00	0
2009-04-02	06:36:00	0
2009-04-02	06:37:00	0
2009-04-02	06:38:00	0
2009-04-02	06:39:00	0
2009-04-02	06:40:00	0
2009-04-02	06:41:00	0
2009-04-02	06:42:00	0
2009-04-02	06:43:00	0
2009-04-02	06:44:00	0
2009-04-02	06:45:00	0
2009-04-02	06:46:00	0
2009-04-02	06:47:00	0
2009-04-02	06:48:00	0
2009-04-02	06:49:00	0
2009-04-02	06:50:00	0
2009-04-02	06:51:00	0
2009-04-02	06:52:00	0
2009-04-02	06:53:00	0
2009-04-02	06:54:00	0
2009-04-02	06:55:00	0
2009-04-02	06:56:00	0
2009-04-02	06:57:00	0
2009-04-02	06:58:00	0
2009-04-02	06:59:00	0
2009-04-02	07:00:00	0
2009-04-02	07:01:00	0
2009-04-02	07:02:00	0
2009-04-02	07:03:00	0
2009-04-02	07:04:00	0
2009-04-02	07:05:00	0
2009-04-02	07:06:00	0
2009-04-02	07:07:00	0
2009-04-02	07:08:00	0
2009-04-02	07:09:00	0
2009-04-02	07:10:00	0
2009-04-02	07:11:00	0
2009-04-02	07:12:00	0
2009-04-02	07:13:00	0
2009-04-02	07:14:00	0
2009-04-02	07:15:00	0
2009-04-02	07:16:00	0
2009-04-02	07:17:00	0
2009-04-02	07:18:00	0
2009-04-02	07:19:00	0
2009-04-02	07:20:00	0
2009-04-02	07:21:00	0
2009-04-02	07:22:00	0
2009-04-02	07:23:00	0
2009-04-02	07:24:00	0
2009-04-02	07:25:00	0
2009-04-02	07:26:00	0
2009-04-02	07:27:00	0
2009-04-02	07:28:00	0
2009-04-02	07:29:00	0
2009-04-02	07:30:00	0
2009-04-02	07:31:00	0
2009-04-02	07:32:00	0
2009-04-02	07:33:00	0
2009-04-02	07:34:00	0
2009-04-02	07:35:00	0
2009-04-02	07:36:00	0
2009-04-02	07:37:00	0
2009-04-02	07:38:00	0
2009-04-02	07:39:00	0
2009-04-02	07:40:00	0
2009-04-02	07:41:00	0
2009-04-02	07:42:00	0
2009-04-02	07:43:00	0
2009-04-02	07:44:00	0
2009-04-02	07:45:00	0
2009-04-02	07:46:00	0
2009-04-02	07:47:00	0
2009-04-02	07:48:00	0
2009-04-02	07:49:00	0
2009-04-02	07:50:00	0
2009-04-02	07:51:00	0
2009-04-02	07:52:00	0
2009-04-02	07:53:00	0
2009-04-02	07:54:00	0
2009-04-02	07:55:00	0
2009-04-02	07:56:00	0
2009-04-02	07:57:00	0
2009-04-02	07:58:00	0
2009-04-02	07:59:00	0
2009-04-02	08:00:00	0
2009-04-02	08:01:00	0
2009-04-02	08:02:00	0
2009-04-02	08:03:00	0
2009-04-02	08:04:00	0
2009-04-02	08:05:00	0
2009-04-02	08:06:00	0
2009-04-02	08:07:00	0
2009-04-02	08:08:00	0
2009-04-02	08:09:00	0
2009-04-02	08:10:00	0
2009-04-02	08:11:00	0
2009-04-02	08:12:00	0
2009-04-02	08:13:00	0
2009-04-02	08:14:00	0
2009-04-02	08:15:00	0
2009-04-02	08:16:00	0
2009-04-02	08:17:00	0
2009-04-02	08:18:00	0
2009-04-02	08:19:00	0
2009-04-02	08:20:00	0
2009-04-02	08:21:00	0
2009-04-02	08:22:00	0
2009-04-02	08:23:00	0
2009-04-02	08:24:00	0
2009-04-02	08:25:00	0
2009-04-02	08:26:00	0
2009-04-02	08:27:00	0
2009-04-02	08:28:00	0
2009-04-02	08:29:00	0
2009-04-02	08:30:00	0
2009-04-02	08:31:00	0
2009-04-02	08:32:00	0
2009-04-02	08:33:00	0
2009-04-02	08:34:00	0
2009-04-02	08:35:00	0
2009-04-02	08:36:00	0
2009-04-02	08:37:00	0
2009-04-02	08:38:00	0
2009-04-02	08:39:00	0
2009-04-02	08:40:00	0
2009-04-02	08:41:00	0
2009-04-02	08:42:00	0
2009-04-02	08:43:00	0
2009-04-02	08:44:00	0
2009-04-02	08:45:00	0
2009-04-02	08:46:00	0
2009-04-02	08:47:00	0
2009-04-02	08:48:00	0
2009-04-02	08:49:00	0
2009-04-02	08:50:00	0
2009-04-02	08:51:00	0
2009-04-02	08:52:00	0
2009-04-02	08:53:00	0
2009-04-02	08:54:00	0
2009-04-02	08:55:00	0
2009-04-02	08:56:00	0
2009-04-02	08:57:00	0
2009-04-02	08:58:00	0
2009-04-02	08:59:00	0
2009-04-02	09:00:00	0
2009-04-02	09:01:00	0
2009-04-02	09:02:00	0
2009-04-02	09:03:00	0
2009-04-02	09:04:00	0
2009-04-02	09:05:00	0
2009-04-02	09:06:00	0
2009-04-02	09:07:00	0
2009-04-02	09:08:00	0
2009-04-02	09:09:00	0
2009-04-02	09:10:00	0
2009-04-02	09:11:00	0
2009-04-02	09:12:00	0
2009-04-02	09:13:00	0
2009-04-02	09:14:00	0
2009-04-02	09:15:00	0
2009-04-02	09:16:00	0
2009-04-02	09:17:00	0
2009-04-02	09:18:00	0
2009-04-02	09:19:00	0
2009-04-02	09:20:00	0
2009-04-02	09:21:00	0
2009-04-02	09:22:00	0
2009-04-02	09:23:00	0
2009-04-02	09:24:00	0
2009-04-02	09:25:00	0
2009-04-02	09:26:00	0
2009-04-02	09:27:00	0
2009-04-02	09:28:00	0
2009-04-02	09:29:00	0
2009-04-02	09:30:00	0
2009-04-02	09:31:00	0
2009-04-02	09:32:00	0
2009-04-02	09:33:00	0
2009-04-02	09:34:00	0
2009-04-02	09:35:00	0
2009-04-02	09:36:00	0
2009-04-02	09:37:00	0
2009-04-02	09:38:00	0
2009-04-02	09:39:00	0
2009-04-02	09:40:00	0
2009-04-02	09:41:00	0
2009-04-02	09:42:00	0
2009-04-02	09:43:00	0
2009-04-02	09:44:00	0
2009-04-02	09:45:00	0
2009-04-02	09:46:00	0
2009-04-02	09:47:00	0
2009-04-02	09:48:00	0
2009-04-02	09:49:00	0
2009-04-02	09:50:00	0
2009-04-02	09:51:00	0
2009-04-02	09:52:00	0
2009-04-02	09:53:00	0
2009-04-02	09:54:00	0
2009-04-02	09:55:00	0
2009-04-02	09:56:00	0
2009-04-02	09:57:00	0
2009-04-02	09:58:00	0
2009-04-02	09:59:00	0
2009-04-02	10:00:00	0
2009-04-02	10:01:00	0
2009-04-02	10:02:00	0
2009-04-02	10:03:00	0
2009-04-02	10:04:00	0
2009-04-02	10:05:00	0
2009-04-02	10:06:00	0
2009-04-02	10:07:00	0
2009-04-02	10:08:00	0
2009-04-02	10:09:00	0
2009-04-02	10:10:00	0
2009-04-02	10:11:00	0
2009-04-02	10:12:00	0
2009-04-02	10:13:00	0
2009-04-02	10:14:00	0
2009-04-02	10:15:00	0
2009-04-02	10:16:00	0
2009-04-02	10:17:00	0
2009-04-02	10:18:00	0
2009-04-02	10:19:00	0
2009-04-02	10:20:00	0
2009-04-02	10:21:00	0
2009-04-02	10:22:00	0
2009-04-02	10:23:00	0
2009-04-02	10:24:00	0
2009-04-02	10:25:00	0
2009-04-02	10:26:00	0
2009-04-02	10:27:00	0
2009-04-02	10:28:00	0
2009-04-02	10:29:00	0
2009-04-02	10:30:00	0
2009-04-02	10:31:00	0
2009-04-02	10:32:00	0
2009-04-02	10:33:00	0
2009-04-02	10:34:00	0
2009-04-02	10:35:00	0
2009-04-02	10:36:00	0
2009-04-02	10:37:00	0
2009-04-02	10:38:00	0
2009-04-02	10:39:00	0
2009-04-02	10:40:00	0
2009-04-02	10:41:00	0
2009-04-02	10:42:00	0
2009-04-02	10:43:00	0
2009-04-02	10:44:00	0
2009-04-02	10:45:00	0
2009-04-02	10:46:00	0
2009-04-02	10:47:00	0
2009-04-02	10:48:00	0
2009-04-02	10:49:00	0
2009-04-02	10:50:00	0
2009-04-02	10:51:00	0
2009-04-02	10:52:00	0
2009-04-02	10:53:00	0
2009-04-02	10:54:00	0
2009-04-02	10:55:00	0
2009-04-02	10:56:00	0
2009-04-02	10:57:00	0
2009-04-02	10:58:00	0
2009-04-02	10:59:00	0
2009-04-02	11:00:00	0
2009-04-02	11:01:00	0
2009-04-02	11:02:00	0
2009-04-02	11:03:00	0
2009-04-02	11:04:00	0
2009-04-02	11:05:00	0
2009-04-02	11:06:00	0
2009-04-02	11:07:00	0
2009-04-02	11:08:00	0
2009-04-02	11:09:00	0
2009-04-02	11:10:00	0
2009-04-02	11:11:00	0
2009-04-02	11:12:00	0
2009-04-02	11:13:00	0
2009-04-02	11:14:00	0
2009-04-02	11:15:00	0
2009-04-02	11:16:00	0
2009-04-02	11:17:00	0
2009-04-02	11:18:00	0
2009-04-02	11:19:00	0
2009-04-02	11:20:00	0
2009-04-02	11:21:00	0
2009-04-02	11:22:00	0
2009-04-02	11:23:00	0
2009-04-02	11:24:00	0
2009-04-02	11:25:00	0
2009-04-02	11:26:00	0
2009-04-02	11:27:00	0
2009-04-02	11:28:00	0
2009-04-02	11:29:00	0
2009-04-02	11:30:00	0
2009-04-02	11:31:00	0
2009-04-02	11:32:00	0
2009-04-02	11:33:00	0
2009-04-02	11:34:00	0
2009-04-02	11:35:00	0
2009-04-02	11:36:00	0
2009-04-02	11:37:00	0
2009-04-02	11:38:00	0
2009-04-02	11:39:00	0
2009-04-02	11:40:00	0
2009-04-02	11:41:00	0
2009-04-02	11:42:00	0
2009-04-02	11:43:00	0
2009-04-02	11:44:00	0
2009-04-02	11:45:00	0
2009-04-02	11:46:00	0
2009-04-02	11:47:00	0
2009-04-02	11:48:00	0
2009-04-02	11:49:00	0
2009-04-02	11:50:00	0
2009-04-02	11:51:00	0
2009-04-02	11:52:00	0
2009-04-02	11:53:00	0
2009-04-02	11:54:00	0
2009-04-02	11:55:00	0
2009-04-02	11:56:00	0
2009-04-02	11:57:00	0
2009-04-02	11:58:00	0
2009-04-02	11:59:00	0
2009-04-02	12:00:00	0
2009-04-02	12:01:00	0
2009-04-02	12:02:00	0
2009-04-02	12:03:00	0
2009-04-02	12:04:00	0
2009-04-02	12:05:00	0
2009-04-02	12:06:00	0
2009-04-02	12:07:00	0
2009-04-02	12:08:00	0
2009-04-02	12:09:00	0
2009-04-02	12:10:00	0
2009-04-02	12:11:00	0
2009-04-02	12:12:00	0
2009-04-02	12:13:00	0
2009-04-02	12:14:00	0
2009-04-02	12:15:00	0
2009-04-02	12:16:00	0
2009-04-02	12:17:00	0
2009-04-02	12:18:00	0
2009-04-02	12:19:00	0
2009-04-02	12:20:00	0
2009-04-02	12:21:00	0
2009-04-02	12:22:00	0
2009-04-02	12:23:00	0
2009-04-02	12:24:00	0
2009-04-02	12:25:00	0
2009-04-02	12:26:00	0
2009-04-02	12:27:00	0
2009-04-02	12:28:00	0
2009-04-02	12:29:00	0
2009-04-02	12:30:00	0
2009-04-02	12:31:00	0
2009-04-02	12:32:00	0
2009-04-02	12:33:00	0
2009-04-02	12:34:00	0
2009-04-02	12:35:00	0
2009-04-02	12:36:00	0
2009-04-02	12:37:00	0
2009-04-02	12:38:00	0
2009-04-02	12:39:00	0
2009-04-02	12:40:00	0
2009-04-02	12:41:00	0
2009-04-02	12:42:00	0
2009-04-02	12:43:00	0
2009-04-02	12:44:00	0
2009-04-02	12:45:00	0
2009-04-02	12:46:00	0
2009-04-02	12:47:00	0
2009-04-02	12:48:00	0
2009-04-02	12:49:00	0
2009-04-02	12:50:00	0
2009-04-02	12:51:00	0
2009-04-02	12:52:00	0
2009-04-02	12:53:00	0
2009-04-02	12:54:00	0
2009-04-02	12:55:00	0
2009-04-02	12:56:00	0
2009-04-02	12:57:00	0
2009-04-02	12:58:00	0
2009-04-02	12:59:00	0
2009-04-02	13:00:00	0
2009-04-02	13:01:00	0
2009-04-02	13:02:00	0
2009-04-02	13:03:00	0
2009-04-02	13:04:00	0
2009-04-02	13:05:00	0
2009-04-02	13:06:00	0
2009-04-02	13:07:00	0
2009-04-02	13:08:00	0
2009-04-02	13:09:00	0
2009-04-02	13:10:00	0
2009-04-02	13:11:00	0
2009-04-02	13:12:00	0
2009-04-02	13:13:00	0
2009-04-02	13:14:00	0
2009-04-02	13:15:00	0
2009-04-02	13:16:00	0
2009-04-02	13:17:00	0
2009-04-02	13:18:00	0
2009-04-02	13:19:00	0
2009-04-02	13:20:00	0
2009-04-02	13:21:00	0
2009-04-02	13:22:00	0
2009-04-02	13:23:00	0
2009-04-02	13:24:00	0
2009-04-02	13:25:00	0
2009-04-02	13:26:00	0
2009-04-02	13:27:00	0
2009-04-02	13:28:00	0
2009-04-02	13:29:00	0
2009-04-02	13:30:00	0
2009-04-02	13:31:00	0
2009-04-02	13:32:00	0
2009-04-02	13:33:00	0
2009-04-02	13:34:00	0
2009-04-02	13:35:00	0
2009-04-02	13:36:00	0
2009-04-02	13:37:00	0
2009-04-02	13:38:00	0
2009-04-02	13:39:00	0
2009-04-02	13:40:00	0
2009-04-02	13:41:00	0
2009-04-02	13:42:00	0
2009-04-02	13:43:00	0
2009-04-02	13:44:00	0
2009-04-02	13:45:00	0
2009-04-02	13:46:00	0
2009-04-02	13:47:00	0
2009-04-02	13:48:00	0
2009-04-02	13:49:00	0
2009-04-02	13:50:00	0
2009-04-02	13:51:00	0
2009-04-02	13:52:00	0
2009-04-02	13:53:00	0
2009-04-02	13:54:00	0
2009-04-02	13:55:00	0
2009-04-02	13:56:00	0
2009-04-02	13:57:00	0
2009-04-02	13:58:00	0
2009-04-02	13:59:00	0
2009-04-02	14:00:00	0
2009-04-02	14:01:00	0
2009-04-02	14:02:00	0
2009-04-02	14:03:00	0
2009-04-02	14:04:00	0
2009-04-02	14:05:00	0
2009-04-02	14:06:00	0
2009-04-02	14:07:00	0
2009-04-02	14:08:00	0
2009-04-02	14:09:00	0
2009-04-02	14:10:00	0
2009-04-02	14:11:00	0
2009-04-02	14:12:00	0
2009-04-02	14:13:00	0
2009-04-02	14:14:00	0
2009-04-02	14:15:00	0
2009-04-02	14:16:00	0
2009-04-02	14:17:00	0
2009-04-02	14:18:00	0
2009-04-02	14:19:00	0
2009-04-02	14:20:00	0
2009-04-02	14:21:00	0
2009-04-02	14:22:00	0
2009-04-02	14:23:00	0
2009-04-02	14:24:00	0
2009-04-02	14:25:00	0
2009-04-02	14:26:00	0
2009-04-02	14:27:00	0
2009-04-02	14:28:00	0
2009-04-02	14:29:00	0
2009-04-02	14:30:00	0
2009-04-02	14:31:00	0
2009-04-02	14:32:00	0
2009-04-02	14:33:00	0
2009-04-02	14:34:00	0
2009-04-02	14:35:00	0
2009-04-02	14:36:00	0
2009-04-02	14:37:00	0
2009-04-02	14:38:00	0
2009-04-02	14:39:00	0
2009-04-02	14:40:00	0
2009-04-02	14:41:00	0
2009-04-02	14:42:00	0
2009-04-02	14:43:00	0
2009-04-02	14:44:00	0
2009-04-02	14:45:00	0
2009-04-02	14:46:00	0
2009-04-02	14:47:00	0
2009-04-02	14:48:00	0
2009-04-02	14:49:00	0
2009-04-02	14:50:00	0
2009-04-02	14:51:00	0
2009-04-02	14:52:00	0
2009-04-02	14:53:00	0
2009-04-02	14:54:00	0
2009-04-02	14:55:00	0
2009-04-02	14:56:00	0
2009-04-02	14:57:00	0
2009-04-02	14:58:00	0
2009-04-02	14:59:00	0
2009-04-02	15:00:00	0
2009-04-02	15:01:00	0
2009-04-02	15:02:00	0
2009-04-02	15:03:00	0
2009-04-02	15:04:00	0
2009-04-02	15:05:00	0
2009-04-02	15:06:00	0
2009-04-02	15:07:00	0
2009-04-02	15:08:00	0
2009-04-02	15:09:00	0
2009-04-02	15:10:00	0
2009-04-02	15:11:00	0
2009-04-02	15:12:00	0
2009-04-02	15:13:00	0
2009-04-02	15:14:00	0
2009-04-02	15:15:00	0
2009-04-02	15:16:00	0
2009-04-02	15:17:00	0
2009-04-02	15:18:00	0
2009-04-02	15:19:00	0
2009-04-02	15:20:00	0
2009-04-02	15:21:00	0
2009-04-02	15:22:00	0
2009-04-02	15:23:00	0
2009-04-02	15:24:00	0
2009-04-02	15:25:00	0
2009-04-02	15:26:00	0
2009-04-02	15:27:00	0
2009-04-02	15:28:00	0
2009-04-02	15:29:00	0
2009-04-02	15:30:00	0
2009-04-02	15:31:00	0
2009-04-02	15:32:00	0
2009-04-02	15:33:00	0
2009-04-02	15:34:00	0
2009-04-02	15:35:00	0
2009-04-02	15:36:00	0
2009-04-02	15:37:00	0
2009-04-02	15:38:00	0
2009-04-02	15:39:00	0
2009-04-02	15:40:00	0
2009-04-02	15:41:00	0
2009-04-02	15:42:00	0
2009-04-02	15:43:00	0
2009-04-02	15:44:00	0
2009-04-02	15:45:00	0
2009-04-02	15:46:00	0
2009-04-02	15:47:00	0
2009-04-02	15:48:00	0
2009-04-02	15:49:00	0
2009-04-02	15:50:00	0
2009-04-02	15:51:00	0
2009-04-02	15:52:00	0
2009-04-02	15:53:00	0
2009-04-02	15:54:00	0
2009-04-02	15:55:00	0
2009-04-02	15:56:00	0
2009-04-02	15:57:00	0
2009-04-02	15:58:00	0
2009-04-02	15:59:00	0
2009-04-02	16:00:00	0
2009-04-02	16:01:00	0
2009-04-02	16:02:00	0
2009-04-02	16:03:00	0
2009-04-02	16:04:00	0
2009-04-02	16:05:00	0
2009-04-02	16:06:00	0
2009-04-02	16:07:00	0
2009-04-02	16:08:00	0
2009-04-02	16:09:00	0
2009-04-02	16:10:00	0
2009-04-02	16:11:00	0
2009-04-02	16:12:00	0
2009-04-02	16:13:00	0
2009-04-02	16:14:00	0
2009-04-02	16:15:00	0
2009-04-02	16:16:00	0
2009-04-02	16:17:00	0
2009-04-02	16:18:00	0
2009-04-02	16:19:00	0
2009-04-02	16:20:00	0
2009-04-02	16:21:00	0
2009-04-02	16:22:00	0
2009-04-02	16:23:00	0
2009-04-02	16:24:00	0
2009-04-02	16:25:00	0
2009-04-02	16:26:00	0
2009-04-02	16:27:00	0
2009-04-02	16:28:00	0
2009-04-02	16:29:00	0
2009-04-02	16:30:00	0
2009-04-02	16:31:00	0
2009-04-02	16:32:00	0
2009-04-02	16:33:00	0
2009-04-02	16:34:00	0
2009-04-02	16:35:00	0
2009-04-02	16:36:00	0
2009-04-02	16:37:00	0
2009-04-02	16:38:00	0
2009-04-02	16:39:00	0
2009-04-02	16:40:00	0
2009-04-02	16:41:00	0
2009-04-02	16:42:00	0
2009-04-02	16:43:00	0
2009-04-02	16:44:00	0
2009-04-02	16:45:00	0
2009-04-02	16:46:00	0
2009-04-02	16:47:00	0
2009-04-02	16:48:00	0
2009-04-02	16:49:00	0
2009-04-02	16:50:00	0
2009-04-02	16:51:00	0
2009-04-02	16:52:00	0
2009-04-02	16:53:00	0
2009-04-02	16:54:00	0
2009-04-02	16:55:00	0
2009-04-02	16:56:00	0
2009-04-02	16:57:00	0
2009-04-02	16:58:00	0
2009-04-02	16:59:00	0
2009-04-02	17:00:00	0
2009-04-02	17:01:00	0
2009-04-02	17:02:00	0
2009-04-02	17:03:00	0
2009-04-02	17:04:00	0
2009-04-02	17:05:00	0
2009-04-02	17:06:00	0
2009-04-02	17:07:00	0
2009-04-02	17:08:00	0
2009-04-02	17:09:00	0
2009-04-02	17:10:00	0
2009-04-02	17:11:00	0
2009-04-02	17:12:00	0
2009-04-02	17:13:00	0
2009-04-02	17:14:00	0
2009-04-02	17:15:00	0
2009-04-02	17:16:00	0
2009-04-02	17:17:00	0
2009-04-02	17:18:00	0
2009-04-02	17:19:00	0
2009-04-02	17:20:00	0
2009-04-02	17:21:00	0
2009-04-02	17:22:00	0
2009-04-02	17:23:00	0
2009-04-02	17:24:00	0
2009-04-02	17:25:00	0
2009-04-02	17:26:00	0
2009-04-02	17:27:00	0
2009-04-02	17:28:00	0
2009-04-02	17:29:00	0
2009-04-02	17:30:00	0
2009-04-02	17:31:00	0
2009-04-02	17:32:00	0
2009-04-02	17:33:00	0
2009-04-02	17:34:00	0
2009-04-02	17:35:00	0
2009-04-02	17:36:00	0
2009-04-02	17:37:00	0
2009-04-02	17:38:00	0
2009-04-02	17:39:00	0
2009-04-02	17:40:00	0
2009-04-02	17:41:00	0
2009-04-02	17:42:00	0
2009-04-02	17:43:00	0
2009-04-02	17:44:00	0
2009-04-02	17:45:00	0
2009-04-02	17:46:00	0
2009-04-02	17:47:00	0
2009-04-02	17:48:00	0
2009-04-02	17:49:00	0
2009-04-02	17:50:00	0
2009-04-02	17:51:00	0
2009-04-02	17:52:00	0
2009-04-02	17:53:00	0
2009-04-02	17:54:00	0
2009-04-02	17:55:00	0
2009-04-02	17:56:00	0
2009-04-02	17:57:00	0
2009-04-02	17:58:00	0
2009-04-02	17:59:00	0
2009-04-02	18:00:00	0
2009-04-02	18:01:00	177
2009-04-02	18:02:00	887
2009-04-02	18:03:00	552
2009-04-02	18:04:00	784
2009-04-02	18:05:00	690
2009-04-02	18:06:00	661
2009-04-02	18:07:00	144
2009-04-02	18:08:00	43
2009-04-02	18:09:00	67
2009-04-02	18:10:00	237
2009-04-02	18:11:00	47
2009-04-02	18:12:00	38
2009-04-02	18:13:00	38
2009-04-02	18:14:00	14
2009-04-02	18:15:00	14
2009-04-02	18:16:00	24
2009-04-02	18:17:00	0
2009-04-02	18:18:00	456
2009-04-02	18:19:00	245
2009-04-02	18:20:00	0
2009-04-02	18:21:00	43
2009-04-02	18:22:00	0
2009-04-02	18:23:00	9
2009-04-02	18:24:00	361
2009-04-02	18:25:00	445
2009-04-02	18:26:00	79
2009-04-02	18:27:00	0
2009-04-02	18:28:00	5
2009-04-02	18:29:00	0
2009-04-02	18:30:00	0
2009-04-02	18:31:00	0
2009-04-02	18:32:00	0
2009-04-02	18:33:00	0
2009-04-02	18:34:00	0
2009-04-02	18:35:00	0
2009-04-02	18:36:00	0
2009-04-02	18:37:00	0
2009-04-02	18:38:00	834
2009-04-02	18:39:00	84
2009-04-02	18:40:00	0
2009-04-02	18:41:00	0
2009-04-02	18:42:00	0
2009-04-02	18:43:00	0
2009-04-02	18:44:00	0
2009-04-02	18:45:00	5
2009-04-02	18:46:00	0
2009-04-02	18:47:00	0
2009-04-02	18:48:00	0
2009-04-02	18:49:00	0
2009-04-02	18:50:00	0
2009-04-02	18:51:00	0
2009-04-02	18:52:00	5
2009-04-02	18:53:00	0
2009-04-02	18:54:00	73
2009-04-02	18:55:00	0
2009-04-02	18:56:00	0
2009-04-02	18:57:00	19
2009-04-02	18:58:00	0
2009-04-02	18:59:00	0
2009-04-02	19:00:00	0
2009-04-02	19:01:00	0
2009-04-02	19:02:00	38
2009-04-02	19:03:00	402
2009-04-02	19:04:00	38
2009-04-02	19:05:00	5
2009-04-02	19:06:00	14
2009-04-02	19:07:00	0
2009-04-02	19:08:00	0
2009-04-02	19:09:00	0
2009-04-02	19:10:00	0
2009-04-02	19:11:00	0
2009-04-02	19:12:00	0
2009-04-02	19:13:00	0
2009-04-02	19:14:00	0
2009-04-02	19:15:00	0
2009-04-02	19:16:00	0
2009-04-02	19:17:00	0
2009-04-02	19:18:00	0
2009-04-02	19:19:00	0
2009-04-02	19:20:00	38
2009-04-02	19:21:00	0
2009-04-02	19:22:00	0
2009-04-02	19:23:00	0
2009-04-02	19:24:00	57
2009-04-02	19:25:00	0
2009-04-02	19:26:00	0
2009-04-02	19:27:00	0
2009-04-02	19:28:00	0
2009-04-02	19:29:00	0
2009-04-02	19:30:00	67
2009-04-02	19:31:00	0
2009-04-02	19:32:00	0
2009-04-02	19:33:00	0
2009-04-02	19:34:00	0
2009-04-02	19:35:00	0
2009-04-02	19:36:00	0
2009-04-02	19:37:00	0
2009-04-02	19:38:00	0
2009-04-02	19:39:00	0
2009-04-02	19:40:00	0
2009-04-02	19:41:00	0
2009-04-02	19:42:00	0
2009-04-02	19:43:00	5
2009-04-02	19:44:00	0
2009-04-02	19:45:00	0
2009-04-02	19:46:00	0
2009-04-02	19:47:00	14
2009-04-02	19:48:00	0
2009-04-02	19:49:00	0
2009-04-02	19:50:00	0
2009-04-02	19:51:00	0
2009-04-02	19:52:00	0
2009-04-02	19:53:00	0
2009-04-02	19:54:00	0
2009-04-02	19:55:00	0
2009-04-02	19:56:00	0
2009-04-02	19:57:00	0
2009-04-02	19:58:00	0
2009-04-02	19:59:00	0
2009-04-02	20:00:00	0
2009-04-02	20:01:00	0
2009-04-02	20:02:00	0
2009-04-02	20:03:00	0
2009-04-02	20:04:00	0
2009-04-02	20:05:00	0
2009-04-02	20:06:00	0
2009-04-02	20:07:00	0
2009-04-02	20:08:00	0
2009-04-02	20:09:00	0
2009-04-02	20:10:00	0
2009-04-02	20:11:00	0
2009-04-02	20:12:00	0
2009-04-02	20:13:00	0
2009-04-02	20:14:00	0
2009-04-02	20:15:00	0
2009-04-02	20:16:00	0
2009-04-02	20:17:00	14
2009-04-02	20:18:00	0
2009-04-02	20:19:00	0
2009-04-02	20:20:00	0
2009-04-02	20:21:00	0
2009-04-02	20:22:00	0
2009-04-02	20:23:00	0
2009-04-02	20:24:00	90
2009-04-02	20:25:00	47
2009-04-02	20:26:00	28
2009-04-02	20:27:00	9
2009-04-02	20:28:00	0
2009-04-02	20:29:00	0
2009-04-02	20:30:00	0
2009-04-02	20:31:00	0
2009-04-02	20:32:00	0
2009-04-02	20:33:00	0
2009-04-02	20:34:00	0
2009-04-02	20:35:00	0
2009-04-02	20:36:00	0
2009-04-02	20:37:00	0
2009-04-02	20:38:00	0
2009-04-02	20:39:00	0
2009-04-02	20:40:00	0
2009-04-02	20:41:00	0
2009-04-02	20:42:00	0
2009-04-02	20:43:00	0
2009-04-02	20:44:00	0
2009-04-02	20:45:00	0
2009-04-02	20:46:00	73
2009-04-02	20:47:00	0
2009-04-02	20:48:00	0
2009-04-02	20:49:00	0
2009-04-02	20:50:00	0
2009-04-02	20:51:00	0
2009-04-02	20:52:00	0
2009-04-02	20:53:00	0
2009-04-02	20:54:00	0
2009-04-02	20:55:00	0
2009-04-02	20:56:00	0
2009-04-02	20:57:00	0
2009-04-02	20:58:00	0
2009-04-02	20:59:00	0
2009-04-02	21:00:00	0
2009-04-02	21:01:00	0
2009-04-02	21:02:00	0
2009-04-02	21:03:00	0
2009-04-02	21:04:00	0
2009-04-02	21:05:00	0
2009-04-02	21:06:00	0
2009-04-02	21:07:00	0
2009-04-02	21:08:00	0
2009-04-02	21:09:00	0
2009-04-02	21:10:00	0
2009-04-02	21:11:00	0
2009-04-02	21:12:00	0
2009-04-02	21:13:00	0
2009-04-02	21:14:00	0
2009-04-02	21:15:00	0
2009-04-02	21:16:00	0
2009-04-02	21:17:00	0
2009-04-02	21:18:00	0
2009-04-02	21:19:00	0
2009-04-02	21:20:00	0
2009-04-02	21:21:00	5
2009-04-02	21:22:00	0
2009-04-02	21:23:00	0
2009-04-02	21:24:00	28
2009-04-02	21:25:00	5
2009-04-02	21:26:00	0
2009-04-02	21:27:00	0
2009-04-02	21:28:00	0
2009-04-02	21:29:00	0
2009-04-02	21:30:00	0
2009-04-02	21:31:00	0
2009-04-02	21:32:00	0
2009-04-02	21:33:00	0
2009-04-02	21:34:00	0
2009-04-02	21:35:00	0
2009-04-02	21:36:00	0
2009-04-02	21:37:00	0
2009-04-02	21:38:00	0
2009-04-02	21:39:00	0
2009-04-02	21:40:00	0
2009-04-02	21:41:00	0
2009-04-02	21:42:00	0
2009-04-02	21:43:00	0
2009-04-02	21:44:00	381
2009-04-02	21:45:00	1237
2009-04-02	21:46:00	1359
2009-04-02	21:47:00	57
2009-04-02	21:48:00	24
2009-04-02	21:49:00	0
2009-04-02	21:50:00	0
2009-04-02	21:51:00	0
2009-04-02	21:52:00	0
2009-04-02	21:53:00	0
2009-04-02	21:54:00	0
2009-04-02	21:55:00	0
2009-04-02	21:56:00	0
2009-04-02	21:57:00	0
2009-04-02	21:58:00	0
2009-04-02	21:59:00	0
2009-04-02	22:00:00	0
2009-04-02	22:01:00	0
2009-04-02	22:02:00	0
2009-04-02	22:03:00	0
2009-04-02	22:04:00	5
2009-04-02	22:05:00	0
2009-04-02	22:06:00	0
2009-04-02	22:07:00	0
2009-04-02	22:08:00	0
2009-04-02	22:09:00	0
2009-04-02	22:10:00	0
2009-04-02	22:11:00	67
2009-04-02	22:12:00	0
2009-04-02	22:13:00	0
2009-04-02	22:14:00	0
2009-04-02	22:15:00	0
2009-04-02	22:16:00	0
2009-04-02	22:17:00	0
2009-04-02	22:18:00	0
2009-04-02	22:19:00	0
2009-04-02	22:20:00	0
2009-04-02	22:21:00	0
2009-04-02	22:22:00	0
2009-04-02	22:23:00	0
2009-04-02	22:24:00	0
2009-04-02	22:25:00	0
2009-04-02	22:26:00	0
2009-04-02	22:27:00	0
2009-04-02	22:28:00	0
2009-04-02	22:29:00	0
2009-04-02	22:30:00	0
2009-04-02	22:31:00	0
2009-04-02	22:32:00	0
2009-04-02	22:33:00	0
2009-04-02	22:34:00	0
2009-04-02	22:35:00	0
2009-04-02	22:36:00	0
2009-04-02	22:37:00	0
2009-04-02	22:38:00	0
2009-04-02	22:39:00	0
2009-04-02	22:40:00	0
2009-04-02	22:41:00	0
2009-04-02	22:42:00	0
2009-04-02	22:43:00	0
2009-04-02	22:44:00	0
2009-04-02	22:45:00	0
2009-04-02	22:46:00	0
2009-04-02	22:47:00	0
2009-04-02	22:48:00	0
2009-04-02	22:49:00	119
2009-04-02	22:50:00	0
2009-04-02	22:51:00	0
2009-04-02	22:52:00	0
2009-04-02	22:53:00	0
2009-04-02	22:54:00	0
2009-04-02	22:55:00	0
2009-04-02	22:56:00	0
2009-04-02	22:57:00	0
2009-04-02	22:58:00	0
2009-04-02	22:59:00	5
2009-04-02	23:00:00	0
2009-04-02	23:01:00	0
2009-04-02	23:02:00	0
2009-04-02	23:03:00	0
2009-04-02	23:04:00	0
2009-04-02	23:05:00	0
2009-04-02	23:06:00	0
2009-04-02	23:07:00	24
2009-04-02	23:08:00	0
2009-04-02	23:09:00	0
2009-04-02	23:10:00	0
2009-04-02	23:11:00	0
2009-04-02	23:12:00	0
2009-04-02	23:13:00	0
2009-04-02	23:14:00	0
2009-04-02	23:15:00	0
2009-04-02	23:16:00	0
2009-04-02	23:17:00	0
2009-04-02	23:18:00	0
2009-04-02	23:19:00	0
2009-04-02	23:20:00	0
2009-04-02	23:21:00	0
2009-04-02	23:22:00	0
2009-04-02	23:23:00	0
2009-04-02	23:24:00	0
2009-04-02	23:25:00	0
2009-04-02	23:26:00	0
2009-04-02	23:27:00	33
2009-04-02	23:28:00	9
2009-04-02	23:29:00	0
2009-04-02	23:30:00	237
2009-04-02	23:31:00	0
2009-04-02	23:32:00	0
2009-04-02	23:33:00	0
2009-04-02	23:34:00	0
2009-04-02	23:35:00	0
2009-04-02	23:36:00	0
2009-04-02	23:37:00	0
2009-04-02	23:38:00	0
2009-04-02	23:39:00	0
2009-04-02	23:40:00	0
2009-04-02	23:41:00	0
2009-04-02	23:42:00	0
2009-04-02	23:43:00	0
2009-04-02	23:44:00	0
2009-04-02	23:45:00	0
2009-04-02	23:46:00	0
2009-04-02	23:47:00	0
2009-04-02	23:48:00	0
2009-04-02	23:49:00	0
2009-04-02	23:50:00	0
2009-04-02	23:51:00	0
2009-04-02	23:52:00	0
2009-04-02	23:53:00	0
2009-04-02	23:54:00	101
2009-04-02	23:55:00	0
2009-04-02	23:56:00	0
2009-04-02	23:57:00	0
2009-04-02	23:58:00	0
2009-04-02	23:59:00	0
2009-04-03	00:00:00	0
2009-04-03	00:01:00	0
2009-04-03	00:02:00	0
2009-04-03	00:03:00	0
2009-04-03	00:04:00	0
2009-04-03	00:05:00	0
2009-04-03	00:06:00	0
2009-04-03	00:07:00	0
2009-04-03	00:08:00	0
2009-04-03	00:09:00	0
2009-04-03	00:10:00	0
2009-04-03	00:11:00	0
2009-04-03	00:12:00	0
2009-04-03	00:13:00	24
2009-04-03	00:14:00	503
2009-04-03	00:15:00	605
2009-04-03	00:16:00	14
2009-04-03	00:17:00	0
2009-04-03	00:18:00	0
2009-04-03	00:19:00	0
2009-04-03	00:20:00	0
2009-04-03	00:21:00	0
2009-04-03	00:22:00	0
2009-04-03	00:23:00	0
2009-04-03	00:24:00	0
2009-04-03	00:25:00	0
2009-04-03	00:26:00	0
2009-04-03	00:27:00	0
2009-04-03	00:28:00	0
2009-04-03	00:29:00	0
2009-04-03	00:30:00	0
2009-04-03	00:31:00	0
2009-04-03	00:32:00	0
2009-04-03	00:33:00	0
2009-04-03	00:34:00	0
2009-04-03	00:35:00	0
2009-04-03	00:36:00	0
2009-04-03	00:37:00	0
2009-04-03	00:38:00	0
2009-04-03	00:39:00	0
2009-04-03	00:40:00	0
2009-04-03	00:41:00	0
2009-04-03	00:42:00	0
2009-04-03	00:43:00	5
2009-04-03	00:44:00	47
2009-04-03	00:45:00	0
2009-04-03	00:46:00	0
2009-04-03	00:47:00	0
2009-04-03	00:48:00	57
2009-04-03	00:49:00	0
2009-04-03	00:50:00	0
2009-04-03	00:51:00	0
2009-04-03	00:52:00	0
2009-04-03	00:53:00	107
2009-04-03	00:54:00	28
2009-04-03	00:55:00	24
2009-04-03	00:56:00	199
2009-04-03	00:57:00	0
2009-04-03	00:58:00	96
2009-04-03	00:59:00	0
2009-04-03	01:00:00	0
2009-04-03	01:01:00	0
2009-04-03	01:02:00	0
2009-04-03	01:03:00	0
2009-04-03	01:04:00	0
2009-04-03	01:05:00	0
2009-04-03	01:06:00	0
2009-04-03	01:07:00	0
2009-04-03	01:08:00	0
2009-04-03	01:09:00	0
2009-04-03	01:10:00	0
2009-04-03	01:11:00	0
2009-04-03	01:12:00	0
2009-04-03	01:13:00	0
2009-04-03	01:14:00	0
2009-04-03	01:15:00	0
2009-04-03	01:16:00	9
2009-04-03	01:17:00	0
2009-04-03	01:18:00	0
2009-04-03	01:19:00	0
2009-04-03	01:20:00	0
2009-04-03	01:21:00	0
2009-04-03	01:22:00	0
2009-04-03	01:23:00	0
2009-04-03	01:24:00	0
2009-04-03	01:25:00	0
2009-04-03	01:26:00	0
2009-04-03	01:27:00	0
2009-04-03	01:28:00	0
2009-04-03	01:29:00	0
2009-04-03	01:30:00	0
2009-04-03	01:31:00	0
2009-04-03	01:32:00	0
2009-04-03	01:33:00	24
2009-04-03	01:34:00	79
2009-04-03	01:35:00	0
2009-04-03	01:36:00	0
2009-04-03	01:37:00	24
2009-04-03	01:38:00	0
2009-04-03	01:39:00	0
2009-04-03	01:40:00	0
2009-04-03	01:41:00	0
2009-04-03	01:42:00	0
2009-04-03	01:43:00	0
2009-04-03	01:44:00	0
2009-04-03	01:45:00	0
2009-04-03	01:46:00	0
2009-04-03	01:47:00	0
2009-04-03	01:48:00	0
2009-04-03	01:49:00	0
2009-04-03	01:50:00	0
2009-04-03	01:51:00	0
2009-04-03	01:52:00	0
2009-04-03	01:53:00	0
2009-04-03	01:54:00	0
2009-04-03	01:55:00	0
2009-04-03	01:56:00	0
2009-04-03	01:57:00	0
2009-04-03	01:58:00	0
2009-04-03	01:59:00	57
2009-04-03	02:00:00	433
2009-04-03	02:01:00	0
2009-04-03	02:02:00	47
2009-04-03	02:03:00	0
2009-04-03	02:04:00	0
2009-04-03	02:05:00	0
2009-04-03	02:06:00	0
2009-04-03	02:07:00	0
2009-04-03	02:08:00	0
2009-04-03	02:09:00	0
2009-04-03	02:10:00	0
2009-04-03	02:11:00	0
2009-04-03	02:12:00	0
2009-04-03	02:13:00	0
2009-04-03	02:14:00	0
2009-04-03	02:15:00	0
2009-04-03	02:16:00	0
2009-04-03	02:17:00	0
2009-04-03	02:18:00	0
2009-04-03	02:19:00	0
2009-04-03	02:20:00	0
2009-04-03	02:21:00	0
2009-04-03	02:22:00	0
2009-04-03	02:23:00	0
2009-04-03	02:24:00	0
2009-04-03	02:25:00	43
2009-04-03	02:26:00	0
2009-04-03	02:27:00	0
2009-04-03	02:28:00	0
2009-04-03	02:29:00	0
2009-04-03	02:30:00	67
2009-04-03	02:31:00	0
2009-04-03	02:32:00	0
2009-04-03	02:33:00	0
2009-04-03	02:34:00	0
2009-04-03	02:35:00	0
2009-04-03	02:36:00	0
2009-04-03	02:37:00	0
2009-04-03	02:38:00	0
2009-04-03	02:39:00	0
2009-04-03	02:40:00	0
2009-04-03	02:41:00	0
2009-04-03	02:42:00	0
2009-04-03	02:43:00	0
2009-04-03	02:44:00	0
2009-04-03	02:45:00	0
2009-04-03	02:46:00	0
2009-04-03	02:47:00	0
2009-04-03	02:48:00	0
2009-04-03	02:49:00	0
2009-04-03	02:50:00	119
2009-04-03	02:51:00	0
2009-04-03	02:52:00	73
2009-04-03	02:53:00	423
2009-04-03	02:54:00	490
2009-04-03	02:55:00	0
2009-04-03	02:56:00	62
2009-04-03	02:57:00	0
2009-04-03	02:58:00	0
2009-04-03	02:59:00	0
2009-04-03	03:00:00	0
2009-04-03	03:01:00	0
2009-04-03	03:02:00	0
2009-04-03	03:03:00	0
2009-04-03	03:04:00	0
2009-04-03	03:05:00	0
2009-04-03	03:06:00	0
2009-04-03	03:07:00	0
2009-04-03	03:08:00	0
2009-04-03	03:09:00	0
2009-04-03	03:10:00	0
2009-04-03	03:11:00	0
2009-04-03	03:12:00	28
2009-04-03	03:13:00	0
2009-04-03	03:14:00	0
2009-04-03	03:15:00	0
2009-04-03	03:16:00	0
2009-04-03	03:17:00	0
2009-04-03	03:18:00	0
2009-04-03	03:19:00	0
2009-04-03	03:20:00	0
2009-04-03	03:21:00	0
2009-04-03	03:22:00	0
2009-04-03	03:23:00	0
2009-04-03	03:24:00	0
2009-04-03	03:25:00	5
2009-04-03	03:26:00	0
2009-04-03	03:27:00	43
2009-04-03	03:28:00	33
2009-04-03	03:29:00	33
2009-04-03	03:30:00	0
2009-04-03	03:31:00	0
2009-04-03	03:32:00	0
2009-04-03	03:33:00	0
2009-04-03	03:34:00	0
2009-04-03	03:35:00	0
2009-04-03	03:36:00	0
2009-04-03	03:37:00	33
2009-04-03	03:38:00	0
2009-04-03	03:39:00	0
2009-04-03	03:40:00	0
2009-04-03	03:41:00	0
2009-04-03	03:42:00	0
2009-04-03	03:43:00	0
2009-04-03	03:44:00	0
2009-04-03	03:45:00	0
2009-04-03	03:46:00	0
2009-04-03	03:47:00	0
2009-04-03	03:48:00	0
2009-04-03	03:49:00	0
2009-04-03	03:50:00	0
2009-04-03	03:51:00	0
2009-04-03	03:52:00	0
2009-04-03	03:53:00	5
2009-04-03	03:54:00	0
2009-04-03	03:55:00	0
2009-04-03	03:56:00	0
2009-04-03	03:57:00	0
2009-04-03	03:58:00	5
2009-04-03	03:59:00	9
2009-04-03	04:00:00	0
2009-04-03	04:01:00	62
2009-04-03	04:02:00	479
2009-04-03	04:03:00	33
2009-04-03	04:04:00	0
2009-04-03	04:05:00	0
2009-04-03	04:06:00	0
2009-04-03	04:07:00	0
2009-04-03	04:08:00	0
2009-04-03	04:09:00	0
2009-04-03	04:10:00	0
2009-04-03	04:11:00	0
2009-04-03	04:12:00	0
2009-04-03	04:13:00	0
2009-04-03	04:14:00	0
2009-04-03	04:15:00	0
2009-04-03	04:16:00	0
2009-04-03	04:17:00	0
2009-04-03	04:18:00	0
2009-04-03	04:19:00	0
2009-04-03	04:20:00	0
2009-04-03	04:21:00	0
2009-04-03	04:22:00	0
2009-04-03	04:23:00	0
2009-04-03	04:24:00	0
2009-04-03	04:25:00	9
2009-04-03	04:26:00	43
2009-04-03	04:27:00	0
2009-04-03	04:28:00	0
2009-04-03	04:29:00	0
2009-04-03	04:30:00	0
2009-04-03	04:31:00	0
2009-04-03	04:32:00	0
2009-04-03	04:33:00	0
2009-04-03	04:34:00	0
2009-04-03	04:35:00	0
2009-04-03	04:36:00	0
2009-04-03	04:37:00	0
2009-04-03	04:38:00	0
2009-04-03	04:39:00	0
2009-04-03	04:40:00	0
2009-04-03	04:41:00	0
2009-04-03	04:42:00	0
2009-04-03	04:43:00	0
2009-04-03	04:44:00	0
2009-04-03	04:45:00	0
2009-04-03	04:46:00	0
2009-04-03	04:47:00	0
2009-04-03	04:48:00	0
2009-04-03	04:49:00	57
2009-04-03	04:50:00	0
2009-04-03	04:51:00	0
2009-04-03	04:52:00	0
2009-04-03	04:53:00	0
2009-04-03	04:54:00	0
2009-04-03	04:55:00	0
2009-04-03	04:56:00	0
2009-04-03	04:57:00	0
2009-04-03	04:58:00	0
2009-04-03	04:59:00	0
2009-04-03	05:00:00	0
2009-04-03	05:01:00	0
2009-04-03	05:02:00	0
2009-04-03	05:03:00	0
2009-04-03	05:04:00	0
2009-04-03	05:05:00	0
2009-04-03	05:06:00	0
2009-04-03	05:07:00	0
2009-04-03	05:08:00	0
2009-04-03	05:09:00	0
2009-04-03	05:10:00	0
2009-04-03	05:11:00	0
2009-04-03	05:12:00	184
2009-04-03	05:13:00	28
2009-04-03	05:14:00	0
2009-04-03	05:15:00	0
2009-04-03	05:16:00	0
2009-04-03	05:17:00	47
2009-04-03	05:18:00	14
2009-04-03	05:19:00	184
2009-04-03	05:20:00	19
2009-04-03	05:21:00	0
2009-04-03	05:22:00	0
2009-04-03	05:23:00	0
2009-04-03	05:24:00	0
2009-04-03	05:25:00	0
2009-04-03	05:26:00	14
2009-04-03	05:27:00	0
2009-04-03	05:28:00	0
2009-04-03	05:29:00	0
2009-04-03	05:30:00	0
2009-04-03	05:31:00	0
2009-04-03	05:32:00	0
2009-04-03	05:33:00	0
2009-04-03	05:34:00	0
2009-04-03	05:35:00	0
2009-04-03	05:36:00	0
2009-04-03	05:37:00	0
2009-04-03	05:38:00	0
2009-04-03	05:39:00	0
2009-04-03	05:40:00	0
2009-04-03	05:41:00	0
2009-04-03	05:42:00	0
2009-04-03	05:43:00	38
2009-04-03	05:44:00	0
2009-04-03	05:45:00	73
2009-04-03	05:46:00	0
2009-04-03	05:47:00	0
2009-04-03	05:48:00	0
2009-04-03	05:49:00	33
2009-04-03	05:50:00	0
2009-04-03	05:51:00	0
2009-04-03	05:52:00	0
2009-04-03	05:53:00	0
2009-04-03	05:54:00	0
2009-04-03	05:55:00	0
2009-04-03	05:56:00	0
2009-04-03	05:57:00	0
2009-04-03	05:58:00	0
2009-04-03	05:59:00	0
2009-04-03	06:00:00	0
2009-04-03	06:01:00	0
2009-04-03	06:02:00	0
2009-04-03	06:03:00	0
2009-04-03	06:04:00	0
2009-04-03	06:05:00	0
2009-04-03	06:06:00	0
2009-04-03	06:07:00	0
2009-04-03	06:08:00	0
2009-04-03	06:09:00	0
2009-04-03	06:10:00	73
2009-04-03	06:11:00	0
2009-04-03	06:12:00	0
2009-04-03	06:13:00	0
2009-04-03	06:14:00	0
2009-04-03	06:15:00	0
2009-04-03	06:16:00	0
2009-04-03	06:17:00	0
2009-04-03	06:18:00	0
2009-04-03	06:19:00	0
2009-04-03	06:20:00	0
2009-04-03	06:21:00	0
2009-04-03	06:22:00	0
2009-04-03	06:23:00	0
2009-04-03	06:24:00	0
2009-04-03	06:25:00	0
2009-04-03	06:26:00	0
2009-04-03	06:27:00	0
2009-04-03	06:28:00	0
2009-04-03	06:29:00	0
2009-04-03	06:30:00	0
2009-04-03	06:31:00	0
2009-04-03	06:32:00	0
2009-04-03	06:33:00	0
2009-04-03	06:34:00	0
2009-04-03	06:35:00	0
2009-04-03	06:36:00	0
2009-04-03	06:37:00	33
2009-04-03	06:38:00	0
2009-04-03	06:39:00	262
2009-04-03	06:40:00	19
2009-04-03	06:41:00	0
2009-04-03	06:42:00	0
2009-04-03	06:43:00	0
2009-04-03	06:44:00	0
2009-04-03	06:45:00	0
2009-04-03	06:46:00	0
2009-04-03	06:47:00	0
2009-04-03	06:48:00	0
2009-04-03	06:49:00	0
2009-04-03	06:50:00	0
2009-04-03	06:51:00	0
2009-04-03	06:52:00	0
2009-04-03	06:53:00	14
2009-04-03	06:54:00	0
2009-04-03	06:55:00	0
2009-04-03	06:56:00	0
2009-04-03	06:57:00	0
2009-04-03	06:58:00	62
2009-04-03	06:59:00	0
2009-04-03	07:00:00	144
2009-04-03	07:01:00	1850
2009-04-03	07:02:00	1490
2009-04-03	07:03:00	1061
2009-04-03	07:04:00	2168
2009-04-03	07:05:00	33
2009-04-03	07:06:00	14
2009-04-03	07:07:00	0
2009-04-03	07:08:00	24
2009-04-03	07:09:00	0
2009-04-03	07:10:00	0
2009-04-03	07:11:00	33
2009-04-03	07:12:00	19
2009-04-03	07:13:00	0
2009-04-03	07:14:00	0
2009-04-03	07:15:00	43
2009-04-03	07:16:00	43
2009-04-03	07:17:00	0
2009-04-03	07:18:00	0
2009-04-03	07:19:00	28
2009-04-03	07:20:00	14
2009-04-03	07:21:00	0
2009-04-03	07:22:00	0
2009-04-03	07:23:00	52
2009-04-03	07:24:00	28
2009-04-03	07:25:00	157
2009-04-03	07:26:00	371
2009-04-03	07:27:00	270
2009-04-03	07:28:00	323
2009-04-03	07:29:00	304
2009-04-03	07:30:00	423
2009-04-03	07:31:00	262
2009-04-03	07:32:00	5
2009-04-03	07:33:00	19
2009-04-03	07:34:00	0
2009-04-03	07:35:00	0
2009-04-03	07:36:00	0
2009-04-03	07:37:00	0
2009-04-03	07:38:00	38
2009-04-03	07:39:00	24
2009-04-03	07:40:00	0
2009-04-03	07:41:00	0
2009-04-03	07:42:00	0
2009-04-03	07:43:00	14
2009-04-03	07:44:00	14
2009-04-03	07:45:00	5
2009-04-03	07:46:00	14
2009-04-03	07:47:00	0
2009-04-03	07:48:00	0
2009-04-03	07:49:00	9
2009-04-03	07:50:00	5
2009-04-03	07:51:00	9
2009-04-03	07:52:00	57
2009-04-03	07:53:00	67
2009-04-03	07:54:00	33
2009-04-03	07:55:00	0
2009-04-03	07:56:00	0
2009-04-03	07:57:00	9
2009-04-03	07:58:00	33
2009-04-03	07:59:00	0
2009-04-03	08:00:00	0
2009-04-03	08:01:00	527
2009-04-03	08:02:00	171
2009-04-03	08:03:00	262
2009-04-03	08:04:00	0
2009-04-03	08:05:00	67
2009-04-03	08:06:00	0
2009-04-03	08:07:00	9
2009-04-03	08:08:00	5
2009-04-03	08:09:00	0
2009-04-03	08:10:00	14
2009-04-03	08:11:00	0
2009-04-03	08:12:00	0
2009-04-03	08:13:00	0
2009-04-03	08:14:00	0
2009-04-03	08:15:00	5
2009-04-03	08:16:00	9
2009-04-03	08:17:00	0
2009-04-03	08:18:00	19
2009-04-03	08:19:00	0
2009-04-03	08:20:00	0
2009-04-03	08:21:00	5
2009-04-03	08:22:00	28
2009-04-03	08:23:00	0
2009-04-03	08:24:00	14
2009-04-03	08:25:00	0
2009-04-03	08:26:00	0
2009-04-03	08:27:00	0
2009-04-03	08:28:00	0
2009-04-03	08:29:00	33
2009-04-03	08:30:00	0
2009-04-03	08:31:00	0
2009-04-03	08:32:00	0
2009-04-03	08:33:00	0
2009-04-03	08:34:00	0
2009-04-03	08:35:00	0
2009-04-03	08:36:00	0
2009-04-03	08:37:00	0
2009-04-03	08:38:00	0
2009-04-03	08:39:00	0
2009-04-03	08:40:00	0
2009-04-03	08:41:00	0
2009-04-03	08:42:00	0
2009-04-03	08:43:00	28
2009-04-03	08:44:00	0
2009-04-03	08:45:00	0
2009-04-03	08:46:00	0
2009-04-03	08:47:00	0
2009-04-03	08:48:00	0
2009-04-03	08:49:00	0
2009-04-03	08:50:00	0
2009-04-03	08:51:00	0
2009-04-03	08:52:00	0
2009-04-03	08:53:00	0
2009-04-03	08:54:00	0
2009-04-03	08:55:00	0
2009-04-03	08:56:00	0
2009-04-03	08:57:00	0
2009-04-03	08:58:00	9
2009-04-03	08:59:00	79
2009-04-03	09:00:00	0
2009-04-03	09:01:00	0
2009-04-03	09:02:00	0
2009-04-03	09:03:00	0
2009-04-03	09:04:00	0
2009-04-03	09:05:00	0
2009-04-03	09:06:00	0
2009-04-03	09:07:00	0
2009-04-03	09:08:00	43
[truncated: 19,611 more rows]

## Sheet: 4.16.09
Actogram, Copy Raw Data, All Days
Identity:	Greeley
Filename:	E:\Active Research Files\meloxicam titre canine\cases\greeley\Greeley 4.16.09.AWC
Gender:	F
Age:	7
Height:	76.2 cm	30.0 in
Weight:	38.6 kg	85.1 lbs
Start Date:	16-Apr-2009 (Thu)
Start Time:	18:00:00
Interval:	1.00 mins
Date Stamp:	Time Stamp:	Activity Data:	Marker Press:
2009-04-16	00:00:00	0
2009-04-16	00:01:00	0
2009-04-16	00:02:00	0
2009-04-16	00:03:00	0
2009-04-16	00:04:00	0
2009-04-16	00:05:00	0
2009-04-16	00:06:00	0
2009-04-16	00:07:00	0
2009-04-16	00:08:00	0
2009-04-16	00:09:00	0
2009-04-16	00:10:00	0
2009-04-16	00:11:00	0
2009-04-16	00:12:00	0
2009-04-16	00:13:00	0
2009-04-16	00:14:00	0
2009-04-16	00:15:00	0
2009-04-16	00:16:00	0
2009-04-16	00:17:00	0
2009-04-16	00:18:00	0
2009-04-16	00:19:00	0
2009-04-16	00:20:00	0
2009-04-16	00:21:00	0
2009-04-16	00:22:00	0
2009-04-16	00:23:00	0
2009-04-16	00:24:00	0
2009-04-16	00:25:00	0
2009-04-16	00:26:00	0
2009-04-16	00:27:00	0
2009-04-16	00:28:00	0
2009-04-16	00:29:00	0
2009-04-16	00:30:00	0
2009-04-16	00:31:00	0
2009-04-16	00:32:00	0
2009-04-16	00:33:00	0
2009-04-16	00:34:00	0
2009-04-16	00:35:00	0
2009-04-16	00:36:00	0
2009-04-16	00:37:00	0
2009-04-16	00:38:00	0
2009-04-16	00:39:00	0
2009-04-16	00:40:00	0
2009-04-16	00:41:00	0
2009-04-16	00:42:00	0
2009-04-16	00:43:00	0
2009-04-16	00:44:00	0
2009-04-16	00:45:00	0
2009-04-16	00:46:00	0
2009-04-16	00:47:00	0
2009-04-16	00:48:00	0
2009-04-16	00:49:00	0
2009-04-16	00:50:00	0
2009-04-16	00:51:00	0
2009-04-16	00:52:00	0
2009-04-16	00:53:00	0
2009-04-16	00:54:00	0
2009-04-16	00:55:00	0
2009-04-16	00:56:00	0
2009-04-16	00:57:00	0
2009-04-16	00:58:00	0
2009-04-16	00:59:00	0
2009-04-16	01:00:00	0
2009-04-16	01:01:00	0
2009-04-16	01:02:00	0
2009-04-16	01:03:00	0
2009-04-16	01:04:00	0
2009-04-16	01:05:00	0
2009-04-16	01:06:00	0
2009-04-16	01:07:00	0
2009-04-16	01:08:00	0
2009-04-16	01:09:00	0
2009-04-16	01:10:00	0
2009-04-16	01:11:00	0
2009-04-16	01:12:00	0
2009-04-16	01:13:00	0
2009-04-16	01:14:00	0
2009-04-16	01:15:00	0
2009-04-16	01:16:00	0
2009-04-16	01:17:00	0
2009-04-16	01:18:00	0
2009-04-16	01:19:00	0
2009-04-16	01:20:00	0
2009-04-16	01:21:00	0
2009-04-16	01:22:00	0
2009-04-16	01:23:00	0
2009-04-16	01:24:00	0
2009-04-16	01:25:00	0
2009-04-16	01:26:00	0
2009-04-16	01:27:00	0
2009-04-16	01:28:00	0
2009-04-16	01:29:00	0
2009-04-16	01:30:00	0
2009-04-16	01:31:00	0
2009-04-16	01:32:00	0
2009-04-16	01:33:00	0
2009-04-16	01:34:00	0
2009-04-16	01:35:00	0
2009-04-16	01:36:00	0
2009-04-16	01:37:00	0
2009-04-16	01:38:00	0
2009-04-16	01:39:00	0
2009-04-16	01:40:00	0
2009-04-16	01:41:00	0
2009-04-16	01:42:00	0
2009-04-16	01:43:00	0
2009-04-16	01:44:00	0
2009-04-16	01:45:00	0
2009-04-16	01:46:00	0
2009-04-16	01:47:00	0
2009-04-16	01:48:00	0
2009-04-16	01:49:00	0
2009-04-16	01:50:00	0
2009-04-16	01:51:00	0
2009-04-16	01:52:00	0
2009-04-16	01:53:00	0
2009-04-16	01:54:00	0
2009-04-16	01:55:00	0
2009-04-16	01:56:00	0
2009-04-16	01:57:00	0
2009-04-16	01:58:00	0
2009-04-16	01:59:00	0
2009-04-16	02:00:00	0
2009-04-16	02:01:00	0
2009-04-16	02:02:00	0
2009-04-16	02:03:00	0
2009-04-16	02:04:00	0
2009-04-16	02:05:00	0
2009-04-16	02:06:00	0
2009-04-16	02:07:00	0
2009-04-16	02:08:00	0
2009-04-16	02:09:00	0
2009-04-16	02:10:00	0
2009-04-16	02:11:00	0
2009-04-16	02:12:00	0
2009-04-16	02:13:00	0
2009-04-16	02:14:00	0
2009-04-16	02:15:00	0
2009-04-16	02:16:00	0
2009-04-16	02:17:00	0
2009-04-16	02:18:00	0
2009-04-16	02:19:00	0
2009-04-16	02:20:00	0
2009-04-16	02:21:00	0
2009-04-16	02:22:00	0
2009-04-16	02:23:00	0
2009-04-16	02:24:00	0
2009-04-16	02:25:00	0
2009-04-16	02:26:00	0
2009-04-16	02:27:00	0
2009-04-16	02:28:00	0
2009-04-16	02:29:00	0
2009-04-16	02:30:00	0
2009-04-16	02:31:00	0
2009-04-16	02:32:00	0
2009-04-16	02:33:00	0
2009-04-16	02:34:00	0
2009-04-16	02:35:00	0
2009-04-16	02:36:00	0
2009-04-16	02:37:00	0
2009-04-16	02:38:00	0
2009-04-16	02:39:00	0
2009-04-16	02:40:00	0
2009-04-16	02:41:00	0
2009-04-16	02:42:00	0
2009-04-16	02:43:00	0
2009-04-16	02:44:00	0
2009-04-16	02:45:00	0
2009-04-16	02:46:00	0
2009-04-16	02:47:00	0
2009-04-16	02:48:00	0
2009-04-16	02:49:00	0
2009-04-16	02:50:00	0
2009-04-16	02:51:00	0
2009-04-16	02:52:00	0
2009-04-16	02:53:00	0
2009-04-16	02:54:00	0
2009-04-16	02:55:00	0
2009-04-16	02:56:00	0
2009-04-16	02:57:00	0
2009-04-16	02:58:00	0
2009-04-16	02:59:00	0
2009-04-16	03:00:00	0
2009-04-16	03:01:00	0
2009-04-16	03:02:00	0
2009-04-16	03:03:00	0
2009-04-16	03:04:00	0
2009-04-16	03:05:00	0
2009-04-16	03:06:00	0
2009-04-16	03:07:00	0
2009-04-16	03:08:00	0
2009-04-16	03:09:00	0
2009-04-16	03:10:00	0
2009-04-16	03:11:00	0
2009-04-16	03:12:00	0
2009-04-16	03:13:00	0
2009-04-16	03:14:00	0
2009-04-16	03:15:00	0
2009-04-16	03:16:00	0
2009-04-16	03:17:00	0
2009-04-16	03:18:00	0
2009-04-16	03:19:00	0
2009-04-16	03:20:00	0
2009-04-16	03:21:00	0
2009-04-16	03:22:00	0
2009-04-16	03:23:00	0
2009-04-16	03:24:00	0
2009-04-16	03:25:00	0
2009-04-16	03:26:00	0
2009-04-16	03:27:00	0
2009-04-16	03:28:00	0
2009-04-16	03:29:00	0
2009-04-16	03:30:00	0
2009-04-16	03:31:00	0
2009-04-16	03:32:00	0
2009-04-16	03:33:00	0
2009-04-16	03:34:00	0
2009-04-16	03:35:00	0
2009-04-16	03:36:00	0
2009-04-16	03:37:00	0
2009-04-16	03:38:00	0
2009-04-16	03:39:00	0
2009-04-16	03:40:00	0
2009-04-16	03:41:00	0
2009-04-16	03:42:00	0
2009-04-16	03:43:00	0
2009-04-16	03:44:00	0
2009-04-16	03:45:00	0
2009-04-16	03:46:00	0
2009-04-16	03:47:00	0
2009-04-16	03:48:00	0
2009-04-16	03:49:00	0
2009-04-16	03:50:00	0
2009-04-16	03:51:00	0
2009-04-16	03:52:00	0
2009-04-16	03:53:00	0
2009-04-16	03:54:00	0
2009-04-16	03:55:00	0
2009-04-16	03:56:00	0
2009-04-16	03:57:00	0
2009-04-16	03:58:00	0
2009-04-16	03:59:00	0
2009-04-16	04:00:00	0
2009-04-16	04:01:00	0
2009-04-16	04:02:00	0
2009-04-16	04:03:00	0
2009-04-16	04:04:00	0
2009-04-16	04:05:00	0
2009-04-16	04:06:00	0
2009-04-16	04:07:00	0
2009-04-16	04:08:00	0
2009-04-16	04:09:00	0
2009-04-16	04:10:00	0
2009-04-16	04:11:00	0
2009-04-16	04:12:00	0
2009-04-16	04:13:00	0
2009-04-16	04:14:00	0
2009-04-16	04:15:00	0
2009-04-16	04:16:00	0
2009-04-16	04:17:00	0
2009-04-16	04:18:00	0
2009-04-16	04:19:00	0
2009-04-16	04:20:00	0
2009-04-16	04:21:00	0
2009-04-16	04:22:00	0
2009-04-16	04:23:00	0
2009-04-16	04:24:00	0
2009-04-16	04:25:00	0
2009-04-16	04:26:00	0
2009-04-16	04:27:00	0
2009-04-16	04:28:00	0
2009-04-16	04:29:00	0
2009-04-16	04:30:00	0
2009-04-16	04:31:00	0
2009-04-16	04:32:00	0
2009-04-16	04:33:00	0
2009-04-16	04:34:00	0
2009-04-16	04:35:00	0
2009-04-16	04:36:00	0
2009-04-16	04:37:00	0
2009-04-16	04:38:00	0
2009-04-16	04:39:00	0
2009-04-16	04:40:00	0
2009-04-16	04:41:00	0
2009-04-16	04:42:00	0
2009-04-16	04:43:00	0
2009-04-16	04:44:00	0
2009-04-16	04:45:00	0
2009-04-16	04:46:00	0
2009-04-16	04:47:00	0
2009-04-16	04:48:00	0
2009-04-16	04:49:00	0
2009-04-16	04:50:00	0
2009-04-16	04:51:00	0
2009-04-16	04:52:00	0
2009-04-16	04:53:00	0
2009-04-16	04:54:00	0
2009-04-16	04:55:00	0
2009-04-16	04:56:00	0
2009-04-16	04:57:00	0
2009-04-16	04:58:00	0
2009-04-16	04:59:00	0
2009-04-16	05:00:00	0
2009-04-16	05:01:00	0
2009-04-16	05:02:00	0
2009-04-16	05:03:00	0
2009-04-16	05:04:00	0
2009-04-16	05:05:00	0
2009-04-16	05:06:00	0
2009-04-16	05:07:00	0
2009-04-16	05:08:00	0
2009-04-16	05:09:00	0
2009-04-16	05:10:00	0
2009-04-16	05:11:00	0
2009-04-16	05:12:00	0
2009-04-16	05:13:00	0
2009-04-16	05:14:00	0
2009-04-16	05:15:00	0
2009-04-16	05:16:00	0
2009-04-16	05:17:00	0
2009-04-16	05:18:00	0
2009-04-16	05:19:00	0
2009-04-16	05:20:00	0
2009-04-16	05:21:00	0
2009-04-16	05:22:00	0
2009-04-16	05:23:00	0
2009-04-16	05:24:00	0
2009-04-16	05:25:00	0
2009-04-16	05:26:00	0
2009-04-16	05:27:00	0
2009-04-16	05:28:00	0
2009-04-16	05:29:00	0
2009-04-16	05:30:00	0
2009-04-16	05:31:00	0
2009-04-16	05:32:00	0
2009-04-16	05:33:00	0
2009-04-16	05:34:00	0
2009-04-16	05:35:00	0
2009-04-16	05:36:00	0
2009-04-16	05:37:00	0
2009-04-16	05:38:00	0
2009-04-16	05:39:00	0
2009-04-16	05:40:00	0
2009-04-16	05:41:00	0
2009-04-16	05:42:00	0
2009-04-16	05:43:00	0
2009-04-16	05:44:00	0
2009-04-16	05:45:00	0
2009-04-16	05:46:00	0
2009-04-16	05:47:00	0
2009-04-16	05:48:00	0
2009-04-16	05:49:00	0
2009-04-16	05:50:00	0
2009-04-16	05:51:00	0
2009-04-16	05:52:00	0
2009-04-16	05:53:00	0
2009-04-16	05:54:00	0
2009-04-16	05:55:00	0
2009-04-16	05:56:00	0
2009-04-16	05:57:00	0
2009-04-16	05:58:00	0
2009-04-16	05:59:00	0
2009-04-16	06:00:00	0
2009-04-16	06:01:00	0
2009-04-16	06:02:00	0
2009-04-16	06:03:00	0
2009-04-16	06:04:00	0
2009-04-16	06:05:00	0
2009-04-16	06:06:00	0
2009-04-16	06:07:00	0
2009-04-16	06:08:00	0
2009-04-16	06:09:00	0
2009-04-16	06:10:00	0
2009-04-16	06:11:00	0
2009-04-16	06:12:00	0
2009-04-16	06:13:00	0
2009-04-16	06:14:00	0
2009-04-16	06:15:00	0
2009-04-16	06:16:00	0
2009-04-16	06:17:00	0
2009-04-16	06:18:00	0
2009-04-16	06:19:00	0
2009-04-16	06:20:00	0
2009-04-16	06:21:00	0
2009-04-16	06:22:00	0
2009-04-16	06:23:00	0
2009-04-16	06:24:00	0
2009-04-16	06:25:00	0
2009-04-16	06:26:00	0
2009-04-16	06:27:00	0
2009-04-16	06:28:00	0
2009-04-16	06:29:00	0
2009-04-16	06:30:00	0
2009-04-16	06:31:00	0
2009-04-16	06:32:00	0
2009-04-16	06:33:00	0
2009-04-16	06:34:00	0
2009-04-16	06:35:00	0
2009-04-16	06:36:00	0
2009-04-16	06:37:00	0
2009-04-16	06:38:00	0
2009-04-16	06:39:00	0
2009-04-16	06:40:00	0
2009-04-16	06:41:00	0
2009-04-16	06:42:00	0
2009-04-16	06:43:00	0
2009-04-16	06:44:00	0
2009-04-16	06:45:00	0
2009-04-16	06:46:00	0
2009-04-16	06:47:00	0
2009-04-16	06:48:00	0
2009-04-16	06:49:00	0
2009-04-16	06:50:00	0
2009-04-16	06:51:00	0
2009-04-16	06:52:00	0
2009-04-16	06:53:00	0
2009-04-16	06:54:00	0
2009-04-16	06:55:00	0
2009-04-16	06:56:00	0
2009-04-16	06:57:00	0
2009-04-16	06:58:00	0
2009-04-16	06:59:00	0
2009-04-16	07:00:00	0
2009-04-16	07:01:00	0
2009-04-16	07:02:00	0
2009-04-16	07:03:00	0
2009-04-16	07:04:00	0
2009-04-16	07:05:00	0
2009-04-16	07:06:00	0
2009-04-16	07:07:00	0
2009-04-16	07:08:00	0
2009-04-16	07:09:00	0
2009-04-16	07:10:00	0
2009-04-16	07:11:00	0
2009-04-16	07:12:00	0
2009-04-16	07:13:00	0
2009-04-16	07:14:00	0
2009-04-16	07:15:00	0
2009-04-16	07:16:00	0
2009-04-16	07:17:00	0
2009-04-16	07:18:00	0
2009-04-16	07:19:00	0
2009-04-16	07:20:00	0
2009-04-16	07:21:00	0
2009-04-16	07:22:00	0
2009-04-16	07:23:00	0
2009-04-16	07:24:00	0
2009-04-16	07:25:00	0
2009-04-16	07:26:00	0
2009-04-16	07:27:00	0
2009-04-16	07:28:00	0
2009-04-16	07:29:00	0
2009-04-16	07:30:00	0
2009-04-16	07:31:00	0
2009-04-16	07:32:00	0
2009-04-16	07:33:00	0
2009-04-16	07:34:00	0
2009-04-16	07:35:00	0
2009-04-16	07:36:00	0
2009-04-16	07:37:00	0
2009-04-16	07:38:00	0
2009-04-16	07:39:00	0
2009-04-16	07:40:00	0
2009-04-16	07:41:00	0
2009-04-16	07:42:00	0
2009-04-16	07:43:00	0
2009-04-16	07:44:00	0
2009-04-16	07:45:00	0
2009-04-16	07:46:00	0
2009-04-16	07:47:00	0
2009-04-16	07:48:00	0
2009-04-16	07:49:00	0
2009-04-16	07:50:00	0
2009-04-16	07:51:00	0
2009-04-16	07:52:00	0
2009-04-16	07:53:00	0
2009-04-16	07:54:00	0
2009-04-16	07:55:00	0
2009-04-16	07:56:00	0
2009-04-16	07:57:00	0
2009-04-16	07:58:00	0
2009-04-16	07:59:00	0
2009-04-16	08:00:00	0
2009-04-16	08:01:00	0
2009-04-16	08:02:00	0
2009-04-16	08:03:00	0
2009-04-16	08:04:00	0
2009-04-16	08:05:00	0
2009-04-16	08:06:00	0
2009-04-16	08:07:00	0
2009-04-16	08:08:00	0
2009-04-16	08:09:00	0
2009-04-16	08:10:00	0
2009-04-16	08:11:00	0
2009-04-16	08:12:00	0
2009-04-16	08:13:00	0
2009-04-16	08:14:00	0
2009-04-16	08:15:00	0
2009-04-16	08:16:00	0
2009-04-16	08:17:00	0
2009-04-16	08:18:00	0
2009-04-16	08:19:00	0
2009-04-16	08:20:00	0
2009-04-16	08:21:00	0
2009-04-16	08:22:00	0
2009-04-16	08:23:00	0
2009-04-16	08:24:00	0
2009-04-16	08:25:00	0
2009-04-16	08:26:00	0
2009-04-16	08:27:00	0
2009-04-16	08:28:00	0
2009-04-16	08:29:00	0
2009-04-16	08:30:00	0
2009-04-16	08:31:00	0
2009-04-16	08:32:00	0
2009-04-16	08:33:00	0
2009-04-16	08:34:00	0
2009-04-16	08:35:00	0
2009-04-16	08:36:00	0
2009-04-16	08:37:00	0
2009-04-16	08:38:00	0
2009-04-16	08:39:00	0
2009-04-16	08:40:00	0
2009-04-16	08:41:00	0
2009-04-16	08:42:00	0
2009-04-16	08:43:00	0
2009-04-16	08:44:00	0
2009-04-16	08:45:00	0
2009-04-16	08:46:00	0
2009-04-16	08:47:00	0
2009-04-16	08:48:00	0
2009-04-16	08:49:00	0
2009-04-16	08:50:00	0
2009-04-16	08:51:00	0
2009-04-16	08:52:00	0
2009-04-16	08:53:00	0
2009-04-16	08:54:00	0
2009-04-16	08:55:00	0
2009-04-16	08:56:00	0
2009-04-16	08:57:00	0
2009-04-16	08:58:00	0
2009-04-16	08:59:00	0
2009-04-16	09:00:00	0
2009-04-16	09:01:00	0
2009-04-16	09:02:00	0
2009-04-16	09:03:00	0
2009-04-16	09:04:00	0
2009-04-16	09:05:00	0
2009-04-16	09:06:00	0
2009-04-16	09:07:00	0
2009-04-16	09:08:00	0
2009-04-16	09:09:00	0
2009-04-16	09:10:00	0
2009-04-16	09:11:00	0
2009-04-16	09:12:00	0
2009-04-16	09:13:00	0
2009-04-16	09:14:00	0
2009-04-16	09:15:00	0
2009-04-16	09:16:00	0
2009-04-16	09:17:00	0
2009-04-16	09:18:00	0
2009-04-16	09:19:00	0
2009-04-16	09:20:00	0
2009-04-16	09:21:00	0
2009-04-16	09:22:00	0
2009-04-16	09:23:00	0
2009-04-16	09:24:00	0
2009-04-16	09:25:00	0
2009-04-16	09:26:00	0
2009-04-16	09:27:00	0
2009-04-16	09:28:00	0
2009-04-16	09:29:00	0
2009-04-16	09:30:00	0
2009-04-16	09:31:00	0
2009-04-16	09:32:00	0
2009-04-16	09:33:00	0
2009-04-16	09:34:00	0
2009-04-16	09:35:00	0
2009-04-16	09:36:00	0
2009-04-16	09:37:00	0
2009-04-16	09:38:00	0
2009-04-16	09:39:00	0
2009-04-16	09:40:00	0
2009-04-16	09:41:00	0
2009-04-16	09:42:00	0
2009-04-16	09:43:00	0
2009-04-16	09:44:00	0
2009-04-16	09:45:00	0
2009-04-16	09:46:00	0
2009-04-16	09:47:00	0
2009-04-16	09:48:00	0
2009-04-16	09:49:00	0
2009-04-16	09:50:00	0
2009-04-16	09:51:00	0
2009-04-16	09:52:00	0
2009-04-16	09:53:00	0
2009-04-16	09:54:00	0
2009-04-16	09:55:00	0
2009-04-16	09:56:00	0
2009-04-16	09:57:00	0
2009-04-16	09:58:00	0
2009-04-16	09:59:00	0
2009-04-16	10:00:00	0
2009-04-16	10:01:00	0
2009-04-16	10:02:00	0
2009-04-16	10:03:00	0
2009-04-16	10:04:00	0
2009-04-16	10:05:00	0
2009-04-16	10:06:00	0
2009-04-16	10:07:00	0
2009-04-16	10:08:00	0
2009-04-16	10:09:00	0
2009-04-16	10:10:00	0
2009-04-16	10:11:00	0
2009-04-16	10:12:00	0
2009-04-16	10:13:00	0
2009-04-16	10:14:00	0
2009-04-16	10:15:00	0
2009-04-16	10:16:00	0
2009-04-16	10:17:00	0
2009-04-16	10:18:00	0
2009-04-16	10:19:00	0
2009-04-16	10:20:00	0
2009-04-16	10:21:00	0
2009-04-16	10:22:00	0
2009-04-16	10:23:00	0
2009-04-16	10:24:00	0
2009-04-16	10:25:00	0
2009-04-16	10:26:00	0
2009-04-16	10:27:00	0
2009-04-16	10:28:00	0
2009-04-16	10:29:00	0
2009-04-16	10:30:00	0
2009-04-16	10:31:00	0
2009-04-16	10:32:00	0
2009-04-16	10:33:00	0
2009-04-16	10:34:00	0
2009-04-16	10:35:00	0
2009-04-16	10:36:00	0
2009-04-16	10:37:00	0
2009-04-16	10:38:00	0
2009-04-16	10:39:00	0
2009-04-16	10:40:00	0
2009-04-16	10:41:00	0
2009-04-16	10:42:00	0
2009-04-16	10:43:00	0
2009-04-16	10:44:00	0
2009-04-16	10:45:00	0
2009-04-16	10:46:00	0
2009-04-16	10:47:00	0
2009-04-16	10:48:00	0
2009-04-16	10:49:00	0
2009-04-16	10:50:00	0
2009-04-16	10:51:00	0
2009-04-16	10:52:00	0
2009-04-16	10:53:00	0
2009-04-16	10:54:00	0
2009-04-16	10:55:00	0
2009-04-16	10:56:00	0
2009-04-16	10:57:00	0
2009-04-16	10:58:00	0
2009-04-16	10:59:00	0
2009-04-16	11:00:00	0
2009-04-16	11:01:00	0
2009-04-16	11:02:00	0
2009-04-16	11:03:00	0
2009-04-16	11:04:00	0
2009-04-16	11:05:00	0
2009-04-16	11:06:00	0
2009-04-16	11:07:00	0
2009-04-16	11:08:00	0
2009-04-16	11:09:00	0
2009-04-16	11:10:00	0
2009-04-16	11:11:00	0
2009-04-16	11:12:00	0
2009-04-16	11:13:00	0
2009-04-16	11:14:00	0
2009-04-16	11:15:00	0
2009-04-16	11:16:00	0
2009-04-16	11:17:00	0
2009-04-16	11:18:00	0
2009-04-16	11:19:00	0
2009-04-16	11:20:00	0
2009-04-16	11:21:00	0
2009-04-16	11:22:00	0
2009-04-16	11:23:00	0
2009-04-16	11:24:00	0
2009-04-16	11:25:00	0
2009-04-16	11:26:00	0
2009-04-16	11:27:00	0
2009-04-16	11:28:00	0
2009-04-16	11:29:00	0
2009-04-16	11:30:00	0
2009-04-16	11:31:00	0
2009-04-16	11:32:00	0
2009-04-16	11:33:00	0
2009-04-16	11:34:00	0
2009-04-16	11:35:00	0
2009-04-16	11:36:00	0
2009-04-16	11:37:00	0
2009-04-16	11:38:00	0
2009-04-16	11:39:00	0
2009-04-16	11:40:00	0
2009-04-16	11:41:00	0
2009-04-16	11:42:00	0
2009-04-16	11:43:00	0
2009-04-16	11:44:00	0
2009-04-16	11:45:00	0
2009-04-16	11:46:00	0
2009-04-16	11:47:00	0
2009-04-16	11:48:00	0
2009-04-16	11:49:00	0
2009-04-16	11:50:00	0
2009-04-16	11:51:00	0
2009-04-16	11:52:00	0
2009-04-16	11:53:00	0
2009-04-16	11:54:00	0
2009-04-16	11:55:00	0
2009-04-16	11:56:00	0
2009-04-16	11:57:00	0
2009-04-16	11:58:00	0
2009-04-16	11:59:00	0
2009-04-16	12:00:00	0
2009-04-16	12:01:00	0
2009-04-16	12:02:00	0
2009-04-16	12:03:00	0
2009-04-16	12:04:00	0
2009-04-16	12:05:00	0
2009-04-16	12:06:00	0
2009-04-16	12:07:00	0
2009-04-16	12:08:00	0
2009-04-16	12:09:00	0
2009-04-16	12:10:00	0
2009-04-16	12:11:00	0
2009-04-16	12:12:00	0
2009-04-16	12:13:00	0
2009-04-16	12:14:00	0
2009-04-16	12:15:00	0
2009-04-16	12:16:00	0
2009-04-16	12:17:00	0
2009-04-16	12:18:00	0
2009-04-16	12:19:00	0
2009-04-16	12:20:00	0
2009-04-16	12:21:00	0
2009-04-16	12:22:00	0
2009-04-16	12:23:00	0
2009-04-16	12:24:00	0
2009-04-16	12:25:00	0
2009-04-16	12:26:00	0
2009-04-16	12:27:00	0
2009-04-16	12:28:00	0
2009-04-16	12:29:00	0
2009-04-16	12:30:00	0
2009-04-16	12:31:00	0
2009-04-16	12:32:00	0
2009-04-16	12:33:00	0
2009-04-16	12:34:00	0
2009-04-16	12:35:00	0
2009-04-16	12:36:00	0
2009-04-16	12:37:00	0
2009-04-16	12:38:00	0
2009-04-16	12:39:00	0
2009-04-16	12:40:00	0
2009-04-16	12:41:00	0
2009-04-16	12:42:00	0
2009-04-16	12:43:00	0
2009-04-16	12:44:00	0
2009-04-16	12:45:00	0
2009-04-16	12:46:00	0
2009-04-16	12:47:00	0
2009-04-16	12:48:00	0
2009-04-16	12:49:00	0
2009-04-16	12:50:00	0
2009-04-16	12:51:00	0
2009-04-16	12:52:00	0
2009-04-16	12:53:00	0
2009-04-16	12:54:00	0
2009-04-16	12:55:00	0
2009-04-16	12:56:00	0
2009-04-16	12:57:00	0
2009-04-16	12:58:00	0
2009-04-16	12:59:00	0
2009-04-16	13:00:00	0
2009-04-16	13:01:00	0
2009-04-16	13:02:00	0
2009-04-16	13:03:00	0
2009-04-16	13:04:00	0
2009-04-16	13:05:00	0
2009-04-16	13:06:00	0
2009-04-16	13:07:00	0
2009-04-16	13:08:00	0
2009-04-16	13:09:00	0
2009-04-16	13:10:00	0
2009-04-16	13:11:00	0
2009-04-16	13:12:00	0
2009-04-16	13:13:00	0
2009-04-16	13:14:00	0
2009-04-16	13:15:00	0
2009-04-16	13:16:00	0
2009-04-16	13:17:00	0
2009-04-16	13:18:00	0
2009-04-16	13:19:00	0
2009-04-16	13:20:00	0
2009-04-16	13:21:00	0
2009-04-16	13:22:00	0
2009-04-16	13:23:00	0
2009-04-16	13:24:00	0
2009-04-16	13:25:00	0
2009-04-16	13:26:00	0
2009-04-16	13:27:00	0
2009-04-16	13:28:00	0
2009-04-16	13:29:00	0
2009-04-16	13:30:00	0
2009-04-16	13:31:00	0
2009-04-16	13:32:00	0
2009-04-16	13:33:00	0
2009-04-16	13:34:00	0
2009-04-16	13:35:00	0
2009-04-16	13:36:00	0
2009-04-16	13:37:00	0
2009-04-16	13:38:00	0
2009-04-16	13:39:00	0
2009-04-16	13:40:00	0
2009-04-16	13:41:00	0
2009-04-16	13:42:00	0
2009-04-16	13:43:00	0
2009-04-16	13:44:00	0
2009-04-16	13:45:00	0
2009-04-16	13:46:00	0
2009-04-16	13:47:00	0
2009-04-16	13:48:00	0
2009-04-16	13:49:00	0
2009-04-16	13:50:00	0
2009-04-16	13:51:00	0
2009-04-16	13:52:00	0
2009-04-16	13:53:00	0
2009-04-16	13:54:00	0
2009-04-16	13:55:00	0
2009-04-16	13:56:00	0
2009-04-16	13:57:00	0
2009-04-16	13:58:00	0
2009-04-16	13:59:00	0
2009-04-16	14:00:00	0
2009-04-16	14:01:00	0
2009-04-16	14:02:00	0
2009-04-16	14:03:00	0
2009-04-16	14:04:00	0
2009-04-16	14:05:00	0
2009-04-16	14:06:00	0
2009-04-16	14:07:00	0
2009-04-16	14:08:00	0
2009-04-16	14:09:00	0
2009-04-16	14:10:00	0
2009-04-16	14:11:00	0
2009-04-16	14:12:00	0
2009-04-16	14:13:00	0
2009-04-16	14:14:00	0
2009-04-16	14:15:00	0
2009-04-16	14:16:00	0
2009-04-16	14:17:00	0
2009-04-16	14:18:00	0
2009-04-16	14:19:00	0
2009-04-16	14:20:00	0
2009-04-16	14:21:00	0
2009-04-16	14:22:00	0
2009-04-16	14:23:00	0
2009-04-16	14:24:00	0
2009-04-16	14:25:00	0
2009-04-16	14:26:00	0
2009-04-16	14:27:00	0
2009-04-16	14:28:00	0
2009-04-16	14:29:00	0
2009-04-16	14:30:00	0
2009-04-16	14:31:00	0
2009-04-16	14:32:00	0
2009-04-16	14:33:00	0
2009-04-16	14:34:00	0
2009-04-16	14:35:00	0
2009-04-16	14:36:00	0
2009-04-16	14:37:00	0
2009-04-16	14:38:00	0
2009-04-16	14:39:00	0
2009-04-16	14:40:00	0
2009-04-16	14:41:00	0
2009-04-16	14:42:00	0
2009-04-16	14:43:00	0
2009-04-16	14:44:00	0
2009-04-16	14:45:00	0
2009-04-16	14:46:00	0
2009-04-16	14:47:00	0
2009-04-16	14:48:00	0
2009-04-16	14:49:00	0
2009-04-16	14:50:00	0
2009-04-16	14:51:00	0
2009-04-16	14:52:00	0
2009-04-16	14:53:00	0
2009-04-16	14:54:00	0
2009-04-16	14:55:00	0
2009-04-16	14:56:00	0
2009-04-16	14:57:00	0
2009-04-16	14:58:00	0
2009-04-16	14:59:00	0
2009-04-16	15:00:00	0
2009-04-16	15:01:00	0
2009-04-16	15:02:00	0
2009-04-16	15:03:00	0
2009-04-16	15:04:00	0
2009-04-16	15:05:00	0
2009-04-16	15:06:00	0
2009-04-16	15:07:00	0
2009-04-16	15:08:00	0
2009-04-16	15:09:00	0
2009-04-16	15:10:00	0
2009-04-16	15:11:00	0
2009-04-16	15:12:00	0
2009-04-16	15:13:00	0
2009-04-16	15:14:00	0
2009-04-16	15:15:00	0
2009-04-16	15:16:00	0
2009-04-16	15:17:00	0
2009-04-16	15:18:00	0
2009-04-16	15:19:00	0
2009-04-16	15:20:00	0
2009-04-16	15:21:00	0
2009-04-16	15:22:00	0
2009-04-16	15:23:00	0
2009-04-16	15:24:00	0
2009-04-16	15:25:00	0
2009-04-16	15:26:00	0
2009-04-16	15:27:00	0
2009-04-16	15:28:00	0
2009-04-16	15:29:00	0
2009-04-16	15:30:00	0
2009-04-16	15:31:00	0
2009-04-16	15:32:00	0
2009-04-16	15:33:00	0
2009-04-16	15:34:00	0
2009-04-16	15:35:00	0
2009-04-16	15:36:00	0
2009-04-16	15:37:00	0
2009-04-16	15:38:00	0
2009-04-16	15:39:00	0
2009-04-16	15:40:00	0
2009-04-16	15:41:00	0
2009-04-16	15:42:00	0
2009-04-16	15:43:00	0
2009-04-16	15:44:00	0
2009-04-16	15:45:00	0
2009-04-16	15:46:00	0
2009-04-16	15:47:00	0
2009-04-16	15:48:00	0
2009-04-16	15:49:00	0
2009-04-16	15:50:00	0
2009-04-16	15:51:00	0
2009-04-16	15:52:00	0
2009-04-16	15:53:00	0
2009-04-16	15:54:00	0
2009-04-16	15:55:00	0
2009-04-16	15:56:00	0
2009-04-16	15:57:00	0
2009-04-16	15:58:00	0
2009-04-16	15:59:00	0
2009-04-16	16:00:00	0
2009-04-16	16:01:00	0
2009-04-16	16:02:00	0
2009-04-16	16:03:00	0
2009-04-16	16:04:00	0
2009-04-16	16:05:00	0
2009-04-16	16:06:00	0
2009-04-16	16:07:00	0
2009-04-16	16:08:00	0
2009-04-16	16:09:00	0
2009-04-16	16:10:00	0
2009-04-16	16:11:00	0
2009-04-16	16:12:00	0
2009-04-16	16:13:00	0
2009-04-16	16:14:00	0
2009-04-16	16:15:00	0
2009-04-16	16:16:00	0
2009-04-16	16:17:00	0
2009-04-16	16:18:00	0
2009-04-16	16:19:00	0
2009-04-16	16:20:00	0
2009-04-16	16:21:00	0
2009-04-16	16:22:00	0
2009-04-16	16:23:00	0
2009-04-16	16:24:00	0
2009-04-16	16:25:00	0
2009-04-16	16:26:00	0
2009-04-16	16:27:00	0
2009-04-16	16:28:00	0
2009-04-16	16:29:00	0
2009-04-16	16:30:00	0
2009-04-16	16:31:00	0
2009-04-16	16:32:00	0
2009-04-16	16:33:00	0
2009-04-16	16:34:00	0
2009-04-16	16:35:00	0
2009-04-16	16:36:00	0
2009-04-16	16:37:00	0
2009-04-16	16:38:00	0
2009-04-16	16:39:00	0
2009-04-16	16:40:00	0
2009-04-16	16:41:00	0
2009-04-16	16:42:00	0
2009-04-16	16:43:00	0
2009-04-16	16:44:00	0
2009-04-16	16:45:00	0
2009-04-16	16:46:00	0
2009-04-16	16:47:00	0
2009-04-16	16:48:00	0
2009-04-16	16:49:00	0
2009-04-16	16:50:00	0
2009-04-16	16:51:00	0
2009-04-16	16:52:00	0
2009-04-16	16:53:00	0
2009-04-16	16:54:00	0
2009-04-16	16:55:00	0
2009-04-16	16:56:00	0
2009-04-16	16:57:00	0
2009-04-16	16:58:00	0
2009-04-16	16:59:00	0
2009-04-16	17:00:00	0
2009-04-16	17:01:00	0
2009-04-16	17:02:00	0
2009-04-16	17:03:00	0
2009-04-16	17:04:00	0
2009-04-16	17:05:00	0
2009-04-16	17:06:00	0
2009-04-16	17:07:00	0
2009-04-16	17:08:00	0
2009-04-16	17:09:00	0
2009-04-16	17:10:00	0
2009-04-16	17:11:00	0
2009-04-16	17:12:00	0
2009-04-16	17:13:00	0
2009-04-16	17:14:00	0
2009-04-16	17:15:00	0
2009-04-16	17:16:00	0
2009-04-16	17:17:00	0
2009-04-16	17:18:00	0
2009-04-16	17:19:00	0
2009-04-16	17:20:00	0
2009-04-16	17:21:00	0
2009-04-16	17:22:00	0
2009-04-16	17:23:00	0
2009-04-16	17:24:00	0
2009-04-16	17:25:00	0
2009-04-16	17:26:00	0
2009-04-16	17:27:00	0
2009-04-16	17:28:00	0
2009-04-16	17:29:00	0
2009-04-16	17:30:00	0
2009-04-16	17:31:00	0
2009-04-16	17:32:00	0
2009-04-16	17:33:00	0
2009-04-16	17:34:00	0
2009-04-16	17:35:00	0
2009-04-16	17:36:00	0
2009-04-16	17:37:00	0
2009-04-16	17:38:00	0
2009-04-16	17:39:00	0
2009-04-16	17:40:00	0
2009-04-16	17:41:00	0
2009-04-16	17:42:00	0
2009-04-16	17:43:00	0
2009-04-16	17:44:00	0
2009-04-16	17:45:00	0
2009-04-16	17:46:00	0
2009-04-16	17:47:00	0
2009-04-16	17:48:00	0
2009-04-16	17:49:00	0
2009-04-16	17:50:00	0
2009-04-16	17:51:00	0
2009-04-16	17:52:00	0
2009-04-16	17:53:00	0
2009-04-16	17:54:00	0
2009-04-16	17:55:00	0
2009-04-16	17:56:00	0
2009-04-16	17:57:00	0
2009-04-16	17:58:00	0
2009-04-16	17:59:00	0
2009-04-16	18:00:00	0	M
2009-04-16	18:01:00	0
2009-04-16	18:02:00	0
2009-04-16	18:03:00	0
2009-04-16	18:04:00	0
2009-04-16	18:05:00	0
2009-04-16	18:06:00	5
2009-04-16	18:07:00	14
2009-04-16	18:08:00	0
2009-04-16	18:09:00	0
2009-04-16	18:10:00	24
2009-04-16	18:11:00	0
2009-04-16	18:12:00	0
2009-04-16	18:13:00	0
2009-04-16	18:14:00	0
2009-04-16	18:15:00	0
2009-04-16	18:16:00	0
2009-04-16	18:17:00	0
2009-04-16	18:18:00	0
2009-04-16	18:19:00	0
2009-04-16	18:20:00	0
2009-04-16	18:21:00	43
2009-04-16	18:22:00	0
2009-04-16	18:23:00	0
2009-04-16	18:24:00	0
2009-04-16	18:25:00	0
2009-04-16	18:26:00	0
2009-04-16	18:27:00	0
2009-04-16	18:28:00	0
2009-04-16	18:29:00	14
2009-04-16	18:30:00	0
2009-04-16	18:31:00	0
2009-04-16	18:32:00	0
2009-04-16	18:33:00	0
2009-04-16	18:34:00	0
2009-04-16	18:35:00	0
2009-04-16	18:36:00	0
2009-04-16	18:37:00	0
2009-04-16	18:38:00	0
2009-04-16	18:39:00	0
2009-04-16	18:40:00	0
2009-04-16	18:41:00	0
2009-04-16	18:42:00	0
2009-04-16	18:43:00	0
2009-04-16	18:44:00	0
2009-04-16	18:45:00	0
2009-04-16	18:46:00	0
2009-04-16	18:47:00	0
2009-04-16	18:48:00	0
2009-04-16	18:49:00	0
2009-04-16	18:50:00	0
2009-04-16	18:51:00	0
2009-04-16	18:52:00	0
2009-04-16	18:53:00	0
2009-04-16	18:54:00	0
2009-04-16	18:55:00	0
2009-04-16	18:56:00	84
2009-04-16	18:57:00	24
2009-04-16	18:58:00	0
2009-04-16	18:59:00	0
2009-04-16	19:00:00	0
2009-04-16	19:01:00	0
2009-04-16	19:02:00	47
2009-04-16	19:03:00	199
2009-04-16	19:04:00	0
2009-04-16	19:05:00	0
2009-04-16	19:06:00	0
2009-04-16	19:07:00	0
2009-04-16	19:08:00	0
2009-04-16	19:09:00	0
2009-04-16	19:10:00	0
2009-04-16	19:11:00	0
2009-04-16	19:12:00	0
2009-04-16	19:13:00	0
2009-04-16	19:14:00	19
2009-04-16	19:15:00	19
2009-04-16	19:16:00	0
2009-04-16	19:17:00	0
2009-04-16	19:18:00	0
2009-04-16	19:19:00	0
2009-04-16	19:20:00	0
2009-04-16	19:21:00	0
2009-04-16	19:22:00	0
2009-04-16	19:23:00	0
2009-04-16	19:24:00	0
2009-04-16	19:25:00	0
2009-04-16	19:26:00	0
2009-04-16	19:27:00	177
2009-04-16	19:28:00	0
2009-04-16	19:29:00	0
2009-04-16	19:30:00	0
2009-04-16	19:31:00	0
2009-04-16	19:32:00	0
2009-04-16	19:33:00	0
2009-04-16	19:34:00	0
2009-04-16	19:35:00	0
2009-04-16	19:36:00	0
2009-04-16	19:37:00	0
2009-04-16	19:38:00	0
2009-04-16	19:39:00	0
2009-04-16	19:40:00	0
2009-04-16	19:41:00	0
2009-04-16	19:42:00	0
2009-04-16	19:43:00	0
2009-04-16	19:44:00	0
2009-04-16	19:45:00	0
2009-04-16	19:46:00	0
2009-04-16	19:47:00	0
2009-04-16	19:48:00	0
2009-04-16	19:49:00	0
2009-04-16	19:50:00	0
2009-04-16	19:51:00	5
2009-04-16	19:52:00	73
2009-04-16	19:53:00	0
2009-04-16	19:54:00	0
2009-04-16	19:55:00	0
2009-04-16	19:56:00	0
2009-04-16	19:57:00	0
2009-04-16	19:58:00	0
2009-04-16	19:59:00	0
2009-04-16	20:00:00	0
2009-04-16	20:01:00	0
2009-04-16	20:02:00	0
2009-04-16	20:03:00	0
2009-04-16	20:04:00	0
2009-04-16	20:05:00	0
2009-04-16	20:06:00	0
2009-04-16	20:07:00	151
2009-04-16	20:08:00	164
2009-04-16	20:09:00	19
2009-04-16	20:10:00	0
2009-04-16	20:11:00	0
2009-04-16	20:12:00	0
2009-04-16	20:13:00	0
2009-04-16	20:14:00	0
2009-04-16	20:15:00	0
2009-04-16	20:16:00	0
2009-04-16	20:17:00	9
2009-04-16	20:18:00	5
2009-04-16	20:19:00	14
2009-04-16	20:20:00	0
2009-04-16	20:21:00	0
2009-04-16	20:22:00	0
2009-04-16	20:23:00	0
2009-04-16	20:24:00	0
2009-04-16	20:25:00	0
2009-04-16	20:26:00	0
2009-04-16	20:27:00	0
2009-04-16	20:28:00	0
2009-04-16	20:29:00	43
2009-04-16	20:30:00	96
2009-04-16	20:31:00	0
2009-04-16	20:32:00	0
2009-04-16	20:33:00	0
2009-04-16	20:34:00	0
2009-04-16	20:35:00	0
2009-04-16	20:36:00	0
2009-04-16	20:37:00	0
2009-04-16	20:38:00	0
2009-04-16	20:39:00	0
2009-04-16	20:40:00	0
2009-04-16	20:41:00	67
2009-04-16	20:42:00	0
2009-04-16	20:43:00	0
2009-04-16	20:44:00	0
2009-04-16	20:45:00	0
2009-04-16	20:46:00	0
2009-04-16	20:47:00	14
2009-04-16	20:48:00	0
2009-04-16	20:49:00	0
2009-04-16	20:50:00	0
2009-04-16	20:51:00	0
2009-04-16	20:52:00	0
2009-04-16	20:53:00	0
2009-04-16	20:54:00	0
2009-04-16	20:55:00	0
2009-04-16	20:56:00	0
2009-04-16	20:57:00	0
2009-04-16	20:58:00	0
2009-04-16	20:59:00	0
2009-04-16	21:00:00	0
2009-04-16	21:01:00	0
2009-04-16	21:02:00	0
2009-04-16	21:03:00	38
2009-04-16	21:04:00	237
2009-04-16	21:05:00	5
2009-04-16	21:06:00	5
2009-04-16	21:07:00	0
2009-04-16	21:08:00	0
2009-04-16	21:09:00	0
2009-04-16	21:10:00	0
2009-04-16	21:11:00	0
2009-04-16	21:12:00	0
2009-04-16	21:13:00	0
2009-04-16	21:14:00	0
2009-04-16	21:15:00	0
2009-04-16	21:16:00	0
2009-04-16	21:17:00	0
2009-04-16	21:18:00	0
2009-04-16	21:19:00	0
2009-04-16	21:20:00	0
2009-04-16	21:21:00	0
2009-04-16	21:22:00	0
2009-04-16	21:23:00	0
2009-04-16	21:24:00	124
2009-04-16	21:25:00	2491
2009-04-16	21:26:00	1237
2009-04-16	21:27:00	2623
2009-04-16	21:28:00	592
2009-04-16	21:29:00	73
2009-04-16	21:30:00	0
2009-04-16	21:31:00	869
2009-04-16	21:32:00	768
2009-04-16	21:33:00	467
2009-04-16	21:34:00	137
2009-04-16	21:35:00	392
2009-04-16	21:36:00	0
2009-04-16	21:37:00	9
2009-04-16	21:38:00	38
2009-04-16	21:39:00	57
2009-04-16	21:40:00	52
2009-04-16	21:41:00	0
2009-04-16	21:42:00	0
2009-04-16	21:43:00	28
2009-04-16	21:44:00	5
2009-04-16	21:45:00	0
2009-04-16	21:46:00	0
2009-04-16	21:47:00	0
2009-04-16	21:48:00	0
2009-04-16	21:49:00	0
2009-04-16	21:50:00	0
2009-04-16	21:51:00	0
2009-04-16	21:52:00	0
2009-04-16	21:53:00	0
2009-04-16	21:54:00	0
2009-04-16	21:55:00	0
2009-04-16	21:56:00	0
2009-04-16	21:57:00	0
2009-04-16	21:58:00	0
2009-04-16	21:59:00	0
2009-04-16	22:00:00	0
2009-04-16	22:01:00	0
2009-04-16	22:02:00	0
2009-04-16	22:03:00	0
2009-04-16	22:04:00	0
2009-04-16	22:05:00	0
2009-04-16	22:06:00	0
2009-04-16	22:07:00	0
2009-04-16	22:08:00	19
2009-04-16	22:09:00	52
2009-04-16	22:10:00	43
2009-04-16	22:11:00	0
2009-04-16	22:12:00	0
2009-04-16	22:13:00	0
2009-04-16	22:14:00	0
2009-04-16	22:15:00	0
2009-04-16	22:16:00	84
2009-04-16	22:17:00	0
2009-04-16	22:18:00	57
2009-04-16	22:19:00	0
2009-04-16	22:20:00	0
2009-04-16	22:21:00	0
2009-04-16	22:22:00	0
2009-04-16	22:23:00	43
2009-04-16	22:24:00	0
2009-04-16	22:25:00	0
2009-04-16	22:26:00	0
2009-04-16	22:27:00	0
2009-04-16	22:28:00	0
2009-04-16	22:29:00	0
2009-04-16	22:30:00	0
2009-04-16	22:31:00	0
2009-04-16	22:32:00	0
2009-04-16	22:33:00	0
2009-04-16	22:34:00	0
2009-04-16	22:35:00	0
2009-04-16	22:36:00	0
2009-04-16	22:37:00	0
2009-04-16	22:38:00	0
2009-04-16	22:39:00	52
2009-04-16	22:40:00	9
2009-04-16	22:41:00	0
2009-04-16	22:42:00	0
2009-04-16	22:43:00	0
2009-04-16	22:44:00	0
2009-04-16	22:45:00	0
2009-04-16	22:46:00	0
2009-04-16	22:47:00	0
2009-04-16	22:48:00	0
2009-04-16	22:49:00	0
2009-04-16	22:50:00	0
2009-04-16	22:51:00	0
2009-04-16	22:52:00	0
2009-04-16	22:53:00	0
2009-04-16	22:54:00	0
2009-04-16	22:55:00	0
2009-04-16	22:56:00	0
2009-04-16	22:57:00	0
2009-04-16	22:58:00	0
2009-04-16	22:59:00	0
2009-04-16	23:00:00	0
2009-04-16	23:01:00	5
2009-04-16	23:02:00	0
2009-04-16	23:03:00	0
2009-04-16	23:04:00	0
2009-04-16	23:05:00	0
2009-04-16	23:06:00	0
2009-04-16	23:07:00	0
2009-04-16	23:08:00	0
2009-04-16	23:09:00	237
2009-04-16	23:10:00	28
2009-04-16	23:11:00	0
2009-04-16	23:12:00	0
2009-04-16	23:13:00	0
2009-04-16	23:14:00	0
2009-04-16	23:15:00	0
2009-04-16	23:16:00	0
2009-04-16	23:17:00	0
2009-04-16	23:18:00	0
2009-04-16	23:19:00	0
2009-04-16	23:20:00	0
2009-04-16	23:21:00	0
2009-04-16	23:22:00	0
2009-04-16	23:23:00	0
2009-04-16	23:24:00	0
2009-04-16	23:25:00	0
2009-04-16	23:26:00	0
2009-04-16	23:27:00	0
2009-04-16	23:28:00	0
2009-04-16	23:29:00	0
2009-04-16	23:30:00	5
2009-04-16	23:31:00	0
2009-04-16	23:32:00	0
2009-04-16	23:33:00	0
2009-04-16	23:34:00	0
2009-04-16	23:35:00	0
2009-04-16	23:36:00	0
2009-04-16	23:37:00	0
2009-04-16	23:38:00	0
2009-04-16	23:39:00	0
2009-04-16	23:40:00	0
2009-04-16	23:41:00	0
2009-04-16	23:42:00	0
2009-04-16	23:43:00	101
2009-04-16	23:44:00	618
2009-04-16	23:45:00	618
2009-04-16	23:46:00	79
2009-04-16	23:47:00	0
2009-04-16	23:48:00	0
2009-04-16	23:49:00	0
2009-04-16	23:50:00	0
2009-04-16	23:51:00	0
2009-04-16	23:52:00	0
2009-04-16	23:53:00	0
2009-04-16	23:54:00	0
2009-04-16	23:55:00	0
2009-04-16	23:56:00	0
2009-04-16	23:57:00	0
2009-04-16	23:58:00	0
2009-04-16	23:59:00	0
2009-04-17	00:00:00	0
2009-04-17	00:01:00	47
2009-04-17	00:02:00	0
2009-04-17	00:03:00	0
2009-04-17	00:04:00	0
2009-04-17	00:05:00	0
2009-04-17	00:06:00	0
2009-04-17	00:07:00	0
2009-04-17	00:08:00	0
2009-04-17	00:09:00	0
2009-04-17	00:10:00	0
2009-04-17	00:11:00	0
2009-04-17	00:12:00	0
2009-04-17	00:13:00	0
2009-04-17	00:14:00	0
2009-04-17	00:15:00	0
2009-04-17	00:16:00	0
2009-04-17	00:17:00	0
2009-04-17	00:18:00	0
2009-04-17	00:19:00	0
2009-04-17	00:20:00	0
2009-04-17	00:21:00	0
2009-04-17	00:22:00	0
2009-04-17	00:23:00	0
2009-04-17	00:24:00	0
2009-04-17	00:25:00	0
2009-04-17	00:26:00	0
2009-04-17	00:27:00	0
2009-04-17	00:28:00	0
2009-04-17	00:29:00	0
2009-04-17	00:30:00	0
2009-04-17	00:31:00	0
2009-04-17	00:32:00	0
2009-04-17	00:33:00	0
2009-04-17	00:34:00	0
2009-04-17	00:35:00	79
2009-04-17	00:36:00	43
2009-04-17	00:37:00	33
2009-04-17	00:38:00	0
2009-04-17	00:39:00	0
2009-04-17	00:40:00	0
2009-04-17	00:41:00	0
2009-04-17	00:42:00	0
2009-04-17	00:43:00	0
2009-04-17	00:44:00	0
2009-04-17	00:45:00	0
2009-04-17	00:46:00	0
2009-04-17	00:47:00	0
2009-04-17	00:48:00	0
2009-04-17	00:49:00	0
2009-04-17	00:50:00	0
2009-04-17	00:51:00	0
2009-04-17	00:52:00	0
2009-04-17	00:53:00	0
2009-04-17	00:54:00	0
2009-04-17	00:55:00	0
2009-04-17	00:56:00	0
2009-04-17	00:57:00	0
2009-04-17	00:58:00	0
2009-04-17	00:59:00	0
2009-04-17	01:00:00	0
2009-04-17	01:01:00	0
2009-04-17	01:02:00	0
2009-04-17	01:03:00	192
2009-04-17	01:04:00	47
2009-04-17	01:05:00	0
2009-04-17	01:06:00	0
2009-04-17	01:07:00	0
2009-04-17	01:08:00	0
2009-04-17	01:09:00	0
2009-04-17	01:10:00	0
2009-04-17	01:11:00	0
2009-04-17	01:12:00	0
2009-04-17	01:13:00	0
2009-04-17	01:14:00	0
2009-04-17	01:15:00	0
2009-04-17	01:16:00	0
2009-04-17	01:17:00	0
2009-04-17	01:18:00	24
2009-04-17	01:19:00	9
2009-04-17	01:20:00	0
2009-04-17	01:21:00	0
2009-04-17	01:22:00	0
2009-04-17	01:23:00	0
2009-04-17	01:24:00	0
2009-04-17	01:25:00	0
2009-04-17	01:26:00	0
2009-04-17	01:27:00	0
2009-04-17	01:28:00	0
2009-04-17	01:29:00	0
2009-04-17	01:30:00	0
2009-04-17	01:31:00	0
2009-04-17	01:32:00	0
2009-04-17	01:33:00	0
2009-04-17	01:34:00	14
2009-04-17	01:35:00	0
2009-04-17	01:36:00	0
2009-04-17	01:37:00	0
2009-04-17	01:38:00	0
2009-04-17	01:39:00	0
2009-04-17	01:40:00	0
2009-04-17	01:41:00	0
2009-04-17	01:42:00	0
2009-04-17	01:43:00	0
2009-04-17	01:44:00	0
2009-04-17	01:45:00	0
2009-04-17	01:46:00	0
2009-04-17	01:47:00	0
2009-04-17	01:48:00	0
2009-04-17	01:49:00	0
2009-04-17	01:50:00	5
2009-04-17	01:51:00	0
2009-04-17	01:52:00	192
2009-04-17	01:53:00	456
2009-04-17	01:54:00	851
2009-04-17	01:55:00	28
2009-04-17	01:56:00	38
2009-04-17	01:57:00	0
2009-04-17	01:58:00	0
2009-04-17	01:59:00	0
2009-04-17	02:00:00	0
2009-04-17	02:01:00	0
2009-04-17	02:02:00	0
2009-04-17	02:03:00	0
2009-04-17	02:04:00	0
2009-04-17	02:05:00	0
2009-04-17	02:06:00	0
2009-04-17	02:07:00	0
2009-04-17	02:08:00	0
2009-04-17	02:09:00	0
2009-04-17	02:10:00	0
2009-04-17	02:11:00	0
2009-04-17	02:12:00	0
2009-04-17	02:13:00	0
2009-04-17	02:14:00	0
2009-04-17	02:15:00	0
2009-04-17	02:16:00	0
2009-04-17	02:17:00	0
2009-04-17	02:18:00	0
2009-04-17	02:19:00	0
2009-04-17	02:20:00	0
2009-04-17	02:21:00	0
2009-04-17	02:22:00	0
2009-04-17	02:23:00	0
2009-04-17	02:24:00	0
2009-04-17	02:25:00	0
2009-04-17	02:26:00	67
2009-04-17	02:27:00	14
2009-04-17	02:28:00	0
2009-04-17	02:29:00	0
2009-04-17	02:30:00	0
2009-04-17	02:31:00	0
2009-04-17	02:32:00	0
2009-04-17	02:33:00	0
2009-04-17	02:34:00	0
2009-04-17	02:35:00	0
2009-04-17	02:36:00	0
2009-04-17	02:37:00	0
2009-04-17	02:38:00	0
2009-04-17	02:39:00	0
2009-04-17	02:40:00	0
2009-04-17	02:41:00	0
2009-04-17	02:42:00	0
2009-04-17	02:43:00	0
2009-04-17	02:44:00	0
2009-04-17	02:45:00	0
2009-04-17	02:46:00	0
2009-04-17	02:47:00	0
2009-04-17	02:48:00	0
2009-04-17	02:49:00	0
2009-04-17	02:50:00	0
2009-04-17	02:51:00	0
2009-04-17	02:52:00	0
2009-04-17	02:53:00	0
2009-04-17	02:54:00	52
2009-04-17	02:55:00	5
2009-04-17	02:56:00	0
2009-04-17	02:57:00	0
2009-04-17	02:58:00	0
2009-04-17	02:59:00	0
2009-04-17	03:00:00	0
2009-04-17	03:01:00	0
2009-04-17	03:02:00	0
2009-04-17	03:03:00	0
2009-04-17	03:04:00	0
2009-04-17	03:05:00	0
2009-04-17	03:06:00	0
2009-04-17	03:07:00	0
2009-04-17	03:08:00	0
2009-04-17	03:09:00	0
2009-04-17	03:10:00	0
2009-04-17	03:11:00	0
2009-04-17	03:12:00	0
2009-04-17	03:13:00	0
2009-04-17	03:14:00	0
2009-04-17	03:15:00	0
2009-04-17	03:16:00	0
2009-04-17	03:17:00	0
2009-04-17	03:18:00	0
2009-04-17	03:19:00	0
2009-04-17	03:20:00	0
2009-04-17	03:21:00	279
2009-04-17	03:22:00	19
2009-04-17	03:23:00	0
2009-04-17	03:24:00	0
2009-04-17	03:25:00	0
2009-04-17	03:26:00	0
2009-04-17	03:27:00	0
2009-04-17	03:28:00	0
2009-04-17	03:29:00	0
2009-04-17	03:30:00	0
2009-04-17	03:31:00	0
2009-04-17	03:32:00	0
2009-04-17	03:33:00	0
2009-04-17	03:34:00	0
2009-04-17	03:35:00	0
2009-04-17	03:36:00	0
2009-04-17	03:37:00	0
2009-04-17	03:38:00	0
2009-04-17	03:39:00	0
2009-04-17	03:40:00	0
2009-04-17	03:41:00	0
2009-04-17	03:42:00	0
2009-04-17	03:43:00	0
2009-04-17	03:44:00	0
2009-04-17	03:45:00	0
2009-04-17	03:46:00	0
2009-04-17	03:47:00	0
2009-04-17	03:48:00	73
2009-04-17	03:49:00	43
2009-04-17	03:50:00	0
2009-04-17	03:51:00	0
2009-04-17	03:52:00	0
2009-04-17	03:53:00	0
2009-04-17	03:54:00	0
2009-04-17	03:55:00	0
2009-04-17	03:56:00	0
2009-04-17	03:57:00	0
2009-04-17	03:58:00	0
2009-04-17	03:59:00	0
2009-04-17	04:00:00	0
2009-04-17	04:01:00	0
2009-04-17	04:02:00	0
2009-04-17	04:03:00	0
2009-04-17	04:04:00	0
2009-04-17	04:05:00	0
2009-04-17	04:06:00	0
2009-04-17	04:07:00	0
2009-04-17	04:08:00	0
2009-04-17	04:09:00	9
2009-04-17	04:10:00	0
2009-04-17	04:11:00	33
2009-04-17	04:12:00	539
2009-04-17	04:13:00	177
2009-04-17	04:14:00	0
2009-04-17	04:15:00	28
2009-04-17	04:16:00	0
2009-04-17	04:17:00	0
2009-04-17	04:18:00	9
2009-04-17	04:19:00	0
2009-04-17	04:20:00	0
2009-04-17	04:21:00	0
2009-04-17	04:22:00	0
2009-04-17	04:23:00	0
2009-04-17	04:24:00	0
2009-04-17	04:25:00	0
2009-04-17	04:26:00	0
2009-04-17	04:27:00	0
2009-04-17	04:28:00	0
2009-04-17	04:29:00	0
2009-04-17	04:30:00	33
2009-04-17	04:31:00	0
2009-04-17	04:32:00	62
2009-04-17	04:33:00	0
2009-04-17	04:34:00	0
2009-04-17	04:35:00	0
2009-04-17	04:36:00	0
2009-04-17	04:37:00	0
2009-04-17	04:38:00	5
2009-04-17	04:39:00	0
2009-04-17	04:40:00	0
2009-04-17	04:41:00	0
2009-04-17	04:42:00	0
2009-04-17	04:43:00	0
2009-04-17	04:44:00	0
2009-04-17	04:45:00	19
2009-04-17	04:46:00	0
2009-04-17	04:47:00	0
2009-04-17	04:48:00	0
2009-04-17	04:49:00	0
2009-04-17	04:50:00	0
2009-04-17	04:51:00	0
2009-04-17	04:52:00	0
2009-04-17	04:53:00	0
2009-04-17	04:54:00	0
2009-04-17	04:55:00	0
2009-04-17	04:56:00	0
2009-04-17	04:57:00	0
2009-04-17	04:58:00	0
2009-04-17	04:59:00	0
2009-04-17	05:00:00	0
2009-04-17	05:01:00	0
2009-04-17	05:02:00	0
2009-04-17	05:03:00	0
2009-04-17	05:04:00	0
2009-04-17	05:05:00	0
2009-04-17	05:06:00	0
2009-04-17	05:07:00	0
2009-04-17	05:08:00	0
2009-04-17	05:09:00	62
2009-04-17	05:10:00	33
2009-04-17	05:11:00	0
2009-04-17	05:12:00	0
2009-04-17	05:13:00	0
2009-04-17	05:14:00	0
2009-04-17	05:15:00	0
2009-04-17	05:16:00	0
2009-04-17	05:17:00	0
2009-04-17	05:18:00	0
2009-04-17	05:19:00	0
2009-04-17	05:20:00	0
2009-04-17	05:21:00	0
2009-04-17	05:22:00	0
2009-04-17	05:23:00	0
2009-04-17	05:24:00	0
2009-04-17	05:25:00	0
2009-04-17	05:26:00	0
2009-04-17	05:27:00	0
2009-04-17	05:28:00	0
2009-04-17	05:29:00	0
2009-04-17	05:30:00	0
2009-04-17	05:31:00	0
2009-04-17	05:32:00	279
2009-04-17	05:33:00	171
2009-04-17	05:34:00	0
2009-04-17	05:35:00	0
2009-04-17	05:36:00	0
2009-04-17	05:37:00	0
2009-04-17	05:38:00	0
2009-04-17	05:39:00	0
2009-04-17	05:40:00	0
2009-04-17	05:41:00	0
2009-04-17	05:42:00	0
2009-04-17	05:43:00	0
2009-04-17	05:44:00	0
2009-04-17	05:45:00	0
2009-04-17	05:46:00	0
2009-04-17	05:47:00	0
2009-04-17	05:48:00	0
2009-04-17	05:49:00	0
2009-04-17	05:50:00	0
2009-04-17	05:51:00	28
2009-04-17	05:52:00	0
2009-04-17	05:53:00	0
2009-04-17	05:54:00	0
2009-04-17	05:55:00	0
2009-04-17	05:56:00	0
2009-04-17	05:57:00	0
2009-04-17	05:58:00	0
2009-04-17	05:59:00	0
2009-04-17	06:00:00	5
2009-04-17	06:01:00	0
2009-04-17	06:02:00	0
2009-04-17	06:03:00	0
2009-04-17	06:04:00	24
2009-04-17	06:05:00	0
2009-04-17	06:06:00	90
2009-04-17	06:07:00	0
2009-04-17	06:08:00	0
2009-04-17	06:09:00	0
2009-04-17	06:10:00	0
2009-04-17	06:11:00	0
2009-04-17	06:12:00	0
2009-04-17	06:13:00	0
2009-04-17	06:14:00	0
2009-04-17	06:15:00	0
2009-04-17	06:16:00	0
2009-04-17	06:17:00	0
2009-04-17	06:18:00	0
2009-04-17	06:19:00	0
2009-04-17	06:20:00	0
2009-04-17	06:21:00	0
2009-04-17	06:22:00	38
2009-04-17	06:23:00	28
2009-04-17	06:24:00	0
2009-04-17	06:25:00	0
2009-04-17	06:26:00	0
2009-04-17	06:27:00	0
2009-04-17	06:28:00	0
2009-04-17	06:29:00	0
2009-04-17	06:30:00	0
2009-04-17	06:31:00	0
2009-04-17	06:32:00	0
2009-04-17	06:33:00	5
2009-04-17	06:34:00	113
2009-04-17	06:35:00	0
2009-04-17	06:36:00	0
2009-04-17	06:37:00	0
2009-04-17	06:38:00	0
2009-04-17	06:39:00	0
2009-04-17	06:40:00	0
2009-04-17	06:41:00	0
2009-04-17	06:42:00	0
2009-04-17	06:43:00	0
2009-04-17	06:44:00	0
2009-04-17	06:45:00	0
2009-04-17	06:46:00	0
2009-04-17	06:47:00	5
2009-04-17	06:48:00	79
2009-04-17	06:49:00	0
2009-04-17	06:50:00	9
2009-04-17	06:51:00	0
2009-04-17	06:52:00	0
2009-04-17	06:53:00	0
2009-04-17	06:54:00	0
2009-04-17	06:55:00	0
2009-04-17	06:56:00	19
2009-04-17	06:57:00	9
2009-04-17	06:58:00	323
2009-04-17	06:59:00	28
2009-04-17	07:00:00	0
2009-04-17	07:01:00	28
2009-04-17	07:02:00	0
2009-04-17	07:03:00	151
2009-04-17	07:04:00	84
2009-04-17	07:05:00	412
2009-04-17	07:06:00	43
2009-04-17	07:07:00	5
2009-04-17	07:08:00	0
2009-04-17	07:09:00	0
2009-04-17	07:10:00	0
2009-04-17	07:11:00	0
2009-04-17	07:12:00	0
2009-04-17	07:13:00	0
2009-04-17	07:14:00	0
2009-04-17	07:15:00	0
2009-04-17	07:16:00	0
2009-04-17	07:17:00	0
2009-04-17	07:18:00	0
2009-04-17	07:19:00	79
2009-04-17	07:20:00	0
2009-04-17	07:21:00	0
2009-04-17	07:22:00	0
2009-04-17	07:23:00	0
2009-04-17	07:24:00	0
2009-04-17	07:25:00	0
2009-04-17	07:26:00	1309
2009-04-17	07:27:00	1518
2009-04-17	07:28:00	1000
2009-04-17	07:29:00	1692
2009-04-17	07:30:00	2325
2009-04-17	07:31:00	1692
2009-04-17	07:32:00	2623
2009-04-17	07:33:00	1384
2009-04-17	07:34:00	262
2009-04-17	07:35:00	229
2009-04-17	07:36:00	253
2009-04-17	07:37:00	552
2009-04-17	07:38:00	402
2009-04-17	07:39:00	253
2009-04-17	07:40:00	0
2009-04-17	07:41:00	19
2009-04-17	07:42:00	0
2009-04-17	07:43:00	0
2009-04-17	07:44:00	0
2009-04-17	07:45:00	19
2009-04-17	07:46:00	0
2009-04-17	07:47:00	0
2009-04-17	07:48:00	24
2009-04-17	07:49:00	0
2009-04-17	07:50:00	9
2009-04-17	07:51:00	5
2009-04-17	07:52:00	9
2009-04-17	07:53:00	342
2009-04-17	07:54:00	24
2009-04-17	07:55:00	0
2009-04-17	07:56:00	0
2009-04-17	07:57:00	0
2009-04-17	07:58:00	0
2009-04-17	07:59:00	0
2009-04-17	08:00:00	38
2009-04-17	08:01:00	0
2009-04-17	08:02:00	0
2009-04-17	08:03:00	0
2009-04-17	08:04:00	0
2009-04-17	08:05:00	0
2009-04-17	08:06:00	0
2009-04-17	08:07:00	0
2009-04-17	08:08:00	0
2009-04-17	08:09:00	0
2009-04-17	08:10:00	0
2009-04-17	08:11:00	19
2009-04-17	08:12:00	96
2009-04-17	08:13:00	33
2009-04-17	08:14:00	0
2009-04-17	08:15:00	0
2009-04-17	08:16:00	0
2009-04-17	08:17:00	0
2009-04-17	08:18:00	0
2009-04-17	08:19:00	0
2009-04-17	08:20:00	0
2009-04-17	08:21:00	33
2009-04-17	08:22:00	57
2009-04-17	08:23:00	0
2009-04-17	08:24:00	0
2009-04-17	08:25:00	0
2009-04-17	08:26:00	0
2009-04-17	08:27:00	0
2009-04-17	08:28:00	9
2009-04-17	08:29:00	0
2009-04-17	08:30:00	0
2009-04-17	08:31:00	0
2009-04-17	08:32:00	0
2009-04-17	08:33:00	0
2009-04-17	08:34:00	0
2009-04-17	08:35:00	0
2009-04-17	08:36:00	0
2009-04-17	08:37:00	0
2009-04-17	08:38:00	0
2009-04-17	08:39:00	0
2009-04-17	08:40:00	24
2009-04-17	08:41:00	0
2009-04-17	08:42:00	0
2009-04-17	08:43:00	0
2009-04-17	08:44:00	0
2009-04-17	08:45:00	0
2009-04-17	08:46:00	0
2009-04-17	08:47:00	38
2009-04-17	08:48:00	0
2009-04-17	08:49:00	0
2009-04-17	08:50:00	0
2009-04-17	08:51:00	0
2009-04-17	08:52:00	124
2009-04-17	08:53:00	0
2009-04-17	08:54:00	119
2009-04-17	08:55:00	24
2009-04-17	08:56:00	19
2009-04-17	08:57:00	19
2009-04-17	08:58:00	5
2009-04-17	08:59:00	28
2009-04-17	09:00:00	1103
2009-04-17	09:01:00	52
2009-04-17	09:02:00	5
2009-04-17	09:03:00	1309
2009-04-17	09:04:00	851
2009-04-17	09:05:00	1785
2009-04-17	09:06:00	1191
2009-04-17	09:07:00	412
2009-04-17	09:08:00	887
[truncated: 19,611 more rows]

## Sheet: 4.30.09
Actogram, Copy Raw Data, All Days
Identity:	Greeley
Filename:	E:\Active Research Files\meloxicam titre canine\cases\greeley\Greeley 4.30.09.AWC
Gender:	F
Age:	7
Height:	76.2 cm	30.0 in
Weight:	38.6 kg	85.1 lbs
Start Date:	30-Apr-2009 (Thu)
Start Time:	18:00:00
Interval:	1.00 mins
Date Stamp:	Time Stamp:	Activity Data:	Marker Press:
2009-04-30	00:00:00	0
2009-04-30	00:01:00	0
2009-04-30	00:02:00	0
2009-04-30	00:03:00	0
2009-04-30	00:04:00	0
2009-04-30	00:05:00	0
2009-04-30	00:06:00	0
2009-04-30	00:07:00	0
2009-04-30	00:08:00	0
2009-04-30	00:09:00	0
2009-04-30	00:10:00	0
2009-04-30	00:11:00	0
2009-04-30	00:12:00	0
2009-04-30	00:13:00	0
2009-04-30	00:14:00	0
2009-04-30	00:15:00	0
2009-04-30	00:16:00	0
2009-04-30	00:17:00	0
2009-04-30	00:18:00	0
2009-04-30	00:19:00	0
2009-04-30	00:20:00	0
2009-04-30	00:21:00	0
2009-04-30	00:22:00	0
2009-04-30	00:23:00	0
2009-04-30	00:24:00	0
2009-04-30	00:25:00	0
2009-04-30	00:26:00	0
2009-04-30	00:27:00	0
2009-04-30	00:28:00	0
2009-04-30	00:29:00	0
2009-04-30	00:30:00	0
2009-04-30	00:31:00	0
2009-04-30	00:32:00	0
2009-04-30	00:33:00	0
2009-04-30	00:34:00	0
2009-04-30	00:35:00	0
2009-04-30	00:36:00	0
2009-04-30	00:37:00	0
2009-04-30	00:38:00	0
2009-04-30	00:39:00	0
2009-04-30	00:40:00	0
2009-04-30	00:41:00	0
2009-04-30	00:42:00	0
2009-04-30	00:43:00	0
2009-04-30	00:44:00	0
2009-04-30	00:45:00	0
2009-04-30	00:46:00	0
2009-04-30	00:47:00	0
2009-04-30	00:48:00	0
2009-04-30	00:49:00	0
2009-04-30	00:50:00	0
2009-04-30	00:51:00	0
2009-04-30	00:52:00	0
2009-04-30	00:53:00	0
2009-04-30	00:54:00	0
2009-04-30	00:55:00	0
2009-04-30	00:56:00	0
2009-04-30	00:57:00	0
2009-04-30	00:58:00	0
2009-04-30	00:59:00	0
2009-04-30	01:00:00	0
2009-04-30	01:01:00	0
2009-04-30	01:02:00	0
2009-04-30	01:03:00	0
2009-04-30	01:04:00	0
2009-04-30	01:05:00	0
2009-04-30	01:06:00	0
2009-04-30	01:07:00	0
2009-04-30	01:08:00	0
2009-04-30	01:09:00	0
2009-04-30	01:10:00	0
2009-04-30	01:11:00	0
2009-04-30	01:12:00	0
2009-04-30	01:13:00	0
2009-04-30	01:14:00	0
2009-04-30	01:15:00	0
2009-04-30	01:16:00	0
2009-04-30	01:17:00	0
2009-04-30	01:18:00	0
2009-04-30	01:19:00	0
2009-04-30	01:20:00	0
2009-04-30	01:21:00	0
2009-04-30	01:22:00	0
2009-04-30	01:23:00	0
2009-04-30	01:24:00	0
2009-04-30	01:25:00	0
2009-04-30	01:26:00	0
2009-04-30	01:27:00	0
2009-04-30	01:28:00	0
2009-04-30	01:29:00	0
2009-04-30	01:30:00	0
2009-04-30	01:31:00	0
2009-04-30	01:32:00	0
2009-04-30	01:33:00	0
2009-04-30	01:34:00	0
2009-04-30	01:35:00	0
2009-04-30	01:36:00	0
2009-04-30	01:37:00	0
2009-04-30	01:38:00	0
2009-04-30	01:39:00	0
2009-04-30	01:40:00	0
2009-04-30	01:41:00	0
2009-04-30	01:42:00	0
2009-04-30	01:43:00	0
2009-04-30	01:44:00	0
2009-04-30	01:45:00	0
2009-04-30	01:46:00	0
2009-04-30	01:47:00	0
2009-04-30	01:48:00	0
2009-04-30	01:49:00	0
2009-04-30	01:50:00	0
2009-04-30	01:51:00	0
2009-04-30	01:52:00	0
2009-04-30	01:53:00	0
2009-04-30	01:54:00	0
2009-04-30	01:55:00	0
2009-04-30	01:56:00	0
2009-04-30	01:57:00	0
2009-04-30	01:58:00	0
2009-04-30	01:59:00	0
2009-04-30	02:00:00	0
2009-04-30	02:01:00	0
2009-04-30	02:02:00	0
2009-04-30	02:03:00	0
2009-04-30	02:04:00	0
2009-04-30	02:05:00	0
2009-04-30	02:06:00	0
2009-04-30	02:07:00	0
2009-04-30	02:08:00	0
2009-04-30	02:09:00	0
2009-04-30	02:10:00	0
2009-04-30	02:11:00	0
2009-04-30	02:12:00	0
2009-04-30	02:13:00	0
2009-04-30	02:14:00	0
2009-04-30	02:15:00	0
2009-04-30	02:16:00	0
2009-04-30	02:17:00	0
2009-04-30	02:18:00	0
2009-04-30	02:19:00	0
2009-04-30	02:20:00	0
2009-04-30	02:21:00	0
2009-04-30	02:22:00	0
2009-04-30	02:23:00	0
2009-04-30	02:24:00	0
2009-04-30	02:25:00	0
2009-04-30	02:26:00	0
2009-04-30	02:27:00	0
2009-04-30	02:28:00	0
2009-04-30	02:29:00	0
2009-04-30	02:30:00	0
2009-04-30	02:31:00	0
2009-04-30	02:32:00	0
2009-04-30	02:33:00	0
2009-04-30	02:34:00	0
2009-04-30	02:35:00	0
2009-04-30	02:36:00	0
2009-04-30	02:37:00	0
2009-04-30	02:38:00	0
2009-04-30	02:39:00	0
2009-04-30	02:40:00	0
2009-04-30	02:41:00	0
2009-04-30	02:42:00	0
2009-04-30	02:43:00	0
2009-04-30	02:44:00	0
2009-04-30	02:45:00	0
2009-04-30	02:46:00	0
2009-04-30	02:47:00	0
2009-04-30	02:48:00	0
2009-04-30	02:49:00	0
2009-04-30	02:50:00	0
2009-04-30	02:51:00	0
2009-04-30	02:52:00	0
2009-04-30	02:53:00	0
2009-04-30	02:54:00	0
2009-04-30	02:55:00	0
2009-04-30	02:56:00	0
2009-04-30	02:57:00	0
2009-04-30	02:58:00	0
2009-04-30	02:59:00	0
2009-04-30	03:00:00	0
2009-04-30	03:01:00	0
2009-04-30	03:02:00	0
2009-04-30	03:03:00	0
2009-04-30	03:04:00	0
2009-04-30	03:05:00	0
2009-04-30	03:06:00	0
2009-04-30	03:07:00	0
2009-04-30	03:08:00	0
2009-04-30	03:09:00	0
2009-04-30	03:10:00	0
2009-04-30	03:11:00	0
2009-04-30	03:12:00	0
2009-04-30	03:13:00	0
2009-04-30	03:14:00	0
2009-04-30	03:15:00	0
2009-04-30	03:16:00	0
2009-04-30	03:17:00	0
2009-04-30	03:18:00	0
2009-04-30	03:19:00	0
2009-04-30	03:20:00	0
2009-04-30	03:21:00	0
2009-04-30	03:22:00	0
2009-04-30	03:23:00	0
2009-04-30	03:24:00	0
2009-04-30	03:25:00	0
2009-04-30	03:26:00	0
2009-04-30	03:27:00	0
2009-04-30	03:28:00	0
2009-04-30	03:29:00	0
2009-04-30	03:30:00	0
2009-04-30	03:31:00	0
2009-04-30	03:32:00	0
2009-04-30	03:33:00	0
2009-04-30	03:34:00	0
2009-04-30	03:35:00	0
2009-04-30	03:36:00	0
2009-04-30	03:37:00	0
2009-04-30	03:38:00	0
2009-04-30	03:39:00	0
2009-04-30	03:40:00	0
2009-04-30	03:41:00	0
2009-04-30	03:42:00	0
2009-04-30	03:43:00	0
2009-04-30	03:44:00	0
2009-04-30	03:45:00	0
2009-04-30	03:46:00	0
2009-04-30	03:47:00	0
2009-04-30	03:48:00	0
2009-04-30	03:49:00	0
2009-04-30	03:50:00	0
2009-04-30	03:51:00	0
2009-04-30	03:52:00	0
2009-04-30	03:53:00	0
2009-04-30	03:54:00	0
2009-04-30	03:55:00	0
2009-04-30	03:56:00	0
2009-04-30	03:57:00	0
2009-04-30	03:58:00	0
2009-04-30	03:59:00	0
2009-04-30	04:00:00	0
2009-04-30	04:01:00	0
2009-04-30	04:02:00	0
2009-04-30	04:03:00	0
2009-04-30	04:04:00	0
2009-04-30	04:05:00	0
2009-04-30	04:06:00	0
2009-04-30	04:07:00	0
2009-04-30	04:08:00	0
2009-04-30	04:09:00	0
2009-04-30	04:10:00	0
2009-04-30	04:11:00	0
2009-04-30	04:12:00	0
2009-04-30	04:13:00	0
2009-04-30	04:14:00	0
2009-04-30	04:15:00	0
2009-04-30	04:16:00	0
2009-04-30	04:17:00	0
2009-04-30	04:18:00	0
2009-04-30	04:19:00	0
2009-04-30	04:20:00	0
2009-04-30	04:21:00	0
2009-04-30	04:22:00	0
2009-04-30	04:23:00	0
2009-04-30	04:24:00	0
2009-04-30	04:25:00	0
2009-04-30	04:26:00	0
2009-04-30	04:27:00	0
2009-04-30	04:28:00	0
2009-04-30	04:29:00	0
2009-04-30	04:30:00	0
2009-04-30	04:31:00	0
2009-04-30	04:32:00	0
2009-04-30	04:33:00	0
2009-04-30	04:34:00	0
2009-04-30	04:35:00	0
2009-04-30	04:36:00	0
2009-04-30	04:37:00	0
2009-04-30	04:38:00	0
2009-04-30	04:39:00	0
2009-04-30	04:40:00	0
2009-04-30	04:41:00	0
2009-04-30	04:42:00	0
2009-04-30	04:43:00	0
2009-04-30	04:44:00	0
2009-04-30	04:45:00	0
2009-04-30	04:46:00	0
2009-04-30	04:47:00	0
2009-04-30	04:48:00	0
2009-04-30	04:49:00	0
2009-04-30	04:50:00	0
2009-04-30	04:51:00	0
2009-04-30	04:52:00	0
2009-04-30	04:53:00	0
2009-04-30	04:54:00	0
2009-04-30	04:55:00	0
2009-04-30	04:56:00	0
2009-04-30	04:57:00	0
2009-04-30	04:58:00	0
2009-04-30	04:59:00	0
2009-04-30	05:00:00	0
2009-04-30	05:01:00	0
2009-04-30	05:02:00	0
2009-04-30	05:03:00	0
2009-04-30	05:04:00	0
2009-04-30	05:05:00	0
2009-04-30	05:06:00	0
2009-04-30	05:07:00	0
2009-04-30	05:08:00	0
2009-04-30	05:09:00	0
2009-04-30	05:10:00	0
2009-04-30	05:11:00	0
2009-04-30	05:12:00	0
2009-04-30	05:13:00	0
2009-04-30	05:14:00	0
2009-04-30	05:15:00	0
2009-04-30	05:16:00	0
2009-04-30	05:17:00	0
2009-04-30	05:18:00	0
2009-04-30	05:19:00	0
2009-04-30	05:20:00	0
2009-04-30	05:21:00	0
2009-04-30	05:22:00	0
2009-04-30	05:23:00	0
2009-04-30	05:24:00	0
2009-04-30	05:25:00	0
2009-04-30	05:26:00	0
2009-04-30	05:27:00	0
2009-04-30	05:28:00	0
2009-04-30	05:29:00	0
2009-04-30	05:30:00	0
2009-04-30	05:31:00	0
2009-04-30	05:32:00	0
2009-04-30	05:33:00	0
2009-04-30	05:34:00	0
2009-04-30	05:35:00	0
2009-04-30	05:36:00	0
2009-04-30	05:37:00	0
2009-04-30	05:38:00	0
2009-04-30	05:39:00	0
2009-04-30	05:40:00	0
2009-04-30	05:41:00	0
2009-04-30	05:42:00	0
2009-04-30	05:43:00	0
2009-04-30	05:44:00	0
2009-04-30	05:45:00	0
2009-04-30	05:46:00	0
2009-04-30	05:47:00	0
2009-04-30	05:48:00	0
2009-04-30	05:49:00	0
2009-04-30	05:50:00	0
2009-04-30	05:51:00	0
2009-04-30	05:52:00	0
2009-04-30	05:53:00	0
2009-04-30	05:54:00	0
2009-04-30	05:55:00	0
2009-04-30	05:56:00	0
2009-04-30	05:57:00	0
2009-04-30	05:58:00	0
2009-04-30	05:59:00	0
2009-04-30	06:00:00	0
2009-04-30	06:01:00	0
2009-04-30	06:02:00	0
2009-04-30	06:03:00	0
2009-04-30	06:04:00	0
2009-04-30	06:05:00	0
2009-04-30	06:06:00	0
2009-04-30	06:07:00	0
2009-04-30	06:08:00	0
2009-04-30	06:09:00	0
2009-04-30	06:10:00	0
2009-04-30	06:11:00	0
2009-04-30	06:12:00	0
2009-04-30	06:13:00	0
2009-04-30	06:14:00	0
2009-04-30	06:15:00	0
2009-04-30	06:16:00	0
2009-04-30	06:17:00	0
2009-04-30	06:18:00	0
2009-04-30	06:19:00	0
2009-04-30	06:20:00	0
2009-04-30	06:21:00	0
2009-04-30	06:22:00	0
2009-04-30	06:23:00	0
2009-04-30	06:24:00	0
2009-04-30	06:25:00	0
2009-04-30	06:26:00	0
2009-04-30	06:27:00	0
2009-04-30	06:28:00	0
2009-04-30	06:29:00	0
2009-04-30	06:30:00	0
2009-04-30	06:31:00	0
2009-04-30	06:32:00	0
2009-04-30	06:33:00	0
2009-04-30	06:34:00	0
2009-04-30	06:35:00	0
2009-04-30	06:36:00	0
2009-04-30	06:37:00	0
2009-04-30	06:38:00	0
2009-04-30	06:39:00	0
2009-04-30	06:40:00	0
2009-04-30	06:41:00	0
2009-04-30	06:42:00	0
2009-04-30	06:43:00	0
2009-04-30	06:44:00	0
2009-04-30	06:45:00	0
2009-04-30	06:46:00	0
2009-04-30	06:47:00	0
2009-04-30	06:48:00	0
2009-04-30	06:49:00	0
2009-04-30	06:50:00	0
2009-04-30	06:51:00	0
2009-04-30	06:52:00	0
2009-04-30	06:53:00	0
2009-04-30	06:54:00	0
2009-04-30	06:55:00	0
2009-04-30	06:56:00	0
2009-04-30	06:57:00	0
2009-04-30	06:58:00	0
2009-04-30	06:59:00	0
2009-04-30	07:00:00	0
2009-04-30	07:01:00	0
2009-04-30	07:02:00	0
2009-04-30	07:03:00	0
2009-04-30	07:04:00	0
2009-04-30	07:05:00	0
2009-04-30	07:06:00	0
2009-04-30	07:07:00	0
2009-04-30	07:08:00	0
2009-04-30	07:09:00	0
2009-04-30	07:10:00	0
2009-04-30	07:11:00	0
2009-04-30	07:12:00	0
2009-04-30	07:13:00	0
2009-04-30	07:14:00	0
2009-04-30	07:15:00	0
2009-04-30	07:16:00	0
2009-04-30	07:17:00	0
2009-04-30	07:18:00	0
2009-04-30	07:19:00	0
2009-04-30	07:20:00	0
2009-04-30	07:21:00	0
2009-04-30	07:22:00	0
2009-04-30	07:23:00	0
2009-04-30	07:24:00	0
2009-04-30	07:25:00	0
2009-04-30	07:26:00	0
2009-04-30	07:27:00	0
2009-04-30	07:28:00	0
2009-04-30	07:29:00	0
2009-04-30	07:30:00	0
2009-04-30	07:31:00	0
2009-04-30	07:32:00	0
2009-04-30	07:33:00	0
2009-04-30	07:34:00	0
2009-04-30	07:35:00	0
2009-04-30	07:36:00	0
2009-04-30	07:37:00	0
2009-04-30	07:38:00	0
2009-04-30	07:39:00	0
2009-04-30	07:40:00	0
2009-04-30	07:41:00	0
2009-04-30	07:42:00	0
2009-04-30	07:43:00	0
2009-04-30	07:44:00	0
2009-04-30	07:45:00	0
2009-04-30	07:46:00	0
2009-04-30	07:47:00	0
2009-04-30	07:48:00	0
2009-04-30	07:49:00	0
2009-04-30	07:50:00	0
2009-04-30	07:51:00	0
2009-04-30	07:52:00	0
2009-04-30	07:53:00	0
2009-04-30	07:54:00	0
2009-04-30	07:55:00	0
2009-04-30	07:56:00	0
2009-04-30	07:57:00	0
2009-04-30	07:58:00	0
2009-04-30	07:59:00	0
2009-04-30	08:00:00	0
2009-04-30	08:01:00	0
2009-04-30	08:02:00	0
2009-04-30	08:03:00	0
2009-04-30	08:04:00	0
2009-04-30	08:05:00	0
2009-04-30	08:06:00	0
2009-04-30	08:07:00	0
2009-04-30	08:08:00	0
2009-04-30	08:09:00	0
2009-04-30	08:10:00	0
2009-04-30	08:11:00	0
2009-04-30	08:12:00	0
2009-04-30	08:13:00	0
2009-04-30	08:14:00	0
2009-04-30	08:15:00	0
2009-04-30	08:16:00	0
2009-04-30	08:17:00	0
2009-04-30	08:18:00	0
2009-04-30	08:19:00	0
2009-04-30	08:20:00	0
2009-04-30	08:21:00	0
2009-04-30	08:22:00	0
2009-04-30	08:23:00	0
2009-04-30	08:24:00	0
2009-04-30	08:25:00	0
2009-04-30	08:26:00	0
2009-04-30	08:27:00	0
2009-04-30	08:28:00	0
2009-04-30	08:29:00	0
2009-04-30	08:30:00	0
2009-04-30	08:31:00	0
2009-04-30	08:32:00	0
2009-04-30	08:33:00	0
2009-04-30	08:34:00	0
2009-04-30	08:35:00	0
2009-04-30	08:36:00	0
2009-04-30	08:37:00	0
2009-04-30	08:38:00	0
2009-04-30	08:39:00	0
2009-04-30	08:40:00	0
2009-04-30	08:41:00	0
2009-04-30	08:42:00	0
2009-04-30	08:43:00	0
2009-04-30	08:44:00	0
2009-04-30	08:45:00	0
2009-04-30	08:46:00	0
2009-04-30	08:47:00	0
2009-04-30	08:48:00	0
2009-04-30	08:49:00	0
2009-04-30	08:50:00	0
2009-04-30	08:51:00	0
2009-04-30	08:52:00	0
2009-04-30	08:53:00	0
2009-04-30	08:54:00	0
2009-04-30	08:55:00	0
2009-04-30	08:56:00	0
2009-04-30	08:57:00	0
2009-04-30	08:58:00	0
2009-04-30	08:59:00	0
2009-04-30	09:00:00	0
2009-04-30	09:01:00	0
2009-04-30	09:02:00	0
2009-04-30	09:03:00	0
2009-04-30	09:04:00	0
2009-04-30	09:05:00	0
2009-04-30	09:06:00	0
2009-04-30	09:07:00	0
2009-04-30	09:08:00	0
2009-04-30	09:09:00	0
2009-04-30	09:10:00	0
2009-04-30	09:11:00	0
2009-04-30	09:12:00	0
2009-04-30	09:13:00	0
2009-04-30	09:14:00	0
2009-04-30	09:15:00	0
2009-04-30	09:16:00	0
2009-04-30	09:17:00	0
2009-04-30	09:18:00	0
2009-04-30	09:19:00	0
2009-04-30	09:20:00	0
2009-04-30	09:21:00	0
2009-04-30	09:22:00	0
2009-04-30	09:23:00	0
2009-04-30	09:24:00	0
2009-04-30	09:25:00	0
2009-04-30	09:26:00	0
2009-04-30	09:27:00	0
2009-04-30	09:28:00	0
2009-04-30	09:29:00	0
2009-04-30	09:30:00	0
2009-04-30	09:31:00	0
2009-04-30	09:32:00	0
2009-04-30	09:33:00	0
2009-04-30	09:34:00	0
2009-04-30	09:35:00	0
2009-04-30	09:36:00	0
2009-04-30	09:37:00	0
2009-04-30	09:38:00	0
2009-04-30	09:39:00	0
2009-04-30	09:40:00	0
2009-04-30	09:41:00	0
2009-04-30	09:42:00	0
2009-04-30	09:43:00	0
2009-04-30	09:44:00	0
2009-04-30	09:45:00	0
2009-04-30	09:46:00	0
2009-04-30	09:47:00	0
2009-04-30	09:48:00	0
2009-04-30	09:49:00	0
2009-04-30	09:50:00	0
2009-04-30	09:51:00	0
2009-04-30	09:52:00	0
2009-04-30	09:53:00	0
2009-04-30	09:54:00	0
2009-04-30	09:55:00	0
2009-04-30	09:56:00	0
2009-04-30	09:57:00	0
2009-04-30	09:58:00	0
2009-04-30	09:59:00	0
2009-04-30	10:00:00	0
2009-04-30	10:01:00	0
2009-04-30	10:02:00	0
2009-04-30	10:03:00	0
2009-04-30	10:04:00	0
2009-04-30	10:05:00	0
2009-04-30	10:06:00	0
2009-04-30	10:07:00	0
2009-04-30	10:08:00	0
2009-04-30	10:09:00	0
2009-04-30	10:10:00	0
2009-04-30	10:11:00	0
2009-04-30	10:12:00	0
2009-04-30	10:13:00	0
2009-04-30	10:14:00	0
2009-04-30	10:15:00	0
2009-04-30	10:16:00	0
2009-04-30	10:17:00	0
2009-04-30	10:18:00	0
2009-04-30	10:19:00	0
2009-04-30	10:20:00	0
2009-04-30	10:21:00	0
2009-04-30	10:22:00	0
2009-04-30	10:23:00	0
2009-04-30	10:24:00	0
2009-04-30	10:25:00	0
2009-04-30	10:26:00	0
2009-04-30	10:27:00	0
2009-04-30	10:28:00	0
2009-04-30	10:29:00	0
2009-04-30	10:30:00	0
2009-04-30	10:31:00	0
2009-04-30	10:32:00	0
2009-04-30	10:33:00	0
2009-04-30	10:34:00	0
2009-04-30	10:35:00	0
2009-04-30	10:36:00	0
2009-04-30	10:37:00	0
2009-04-30	10:38:00	0
2009-04-30	10:39:00	0
2009-04-30	10:40:00	0
2009-04-30	10:41:00	0
2009-04-30	10:42:00	0
2009-04-30	10:43:00	0
2009-04-30	10:44:00	0
2009-04-30	10:45:00	0
2009-04-30	10:46:00	0
2009-04-30	10:47:00	0
2009-04-30	10:48:00	0
2009-04-30	10:49:00	0
2009-04-30	10:50:00	0
2009-04-30	10:51:00	0
2009-04-30	10:52:00	0
2009-04-30	10:53:00	0
2009-04-30	10:54:00	0
2009-04-30	10:55:00	0
2009-04-30	10:56:00	0
2009-04-30	10:57:00	0
2009-04-30	10:58:00	0
2009-04-30	10:59:00	0
2009-04-30	11:00:00	0
2009-04-30	11:01:00	0
2009-04-30	11:02:00	0
2009-04-30	11:03:00	0
2009-04-30	11:04:00	0
2009-04-30	11:05:00	0
2009-04-30	11:06:00	0
2009-04-30	11:07:00	0
2009-04-30	11:08:00	0
2009-04-30	11:09:00	0
2009-04-30	11:10:00	0
2009-04-30	11:11:00	0
2009-04-30	11:12:00	0
2009-04-30	11:13:00	0
2009-04-30	11:14:00	0
2009-04-30	11:15:00	0
2009-04-30	11:16:00	0
2009-04-30	11:17:00	0
2009-04-30	11:18:00	0
2009-04-30	11:19:00	0
2009-04-30	11:20:00	0
2009-04-30	11:21:00	0
2009-04-30	11:22:00	0
2009-04-30	11:23:00	0
2009-04-30	11:24:00	0
2009-04-30	11:25:00	0
2009-04-30	11:26:00	0
2009-04-30	11:27:00	0
2009-04-30	11:28:00	0
2009-04-30	11:29:00	0
2009-04-30	11:30:00	0
2009-04-30	11:31:00	0
2009-04-30	11:32:00	0
2009-04-30	11:33:00	0
2009-04-30	11:34:00	0
2009-04-30	11:35:00	0
2009-04-30	11:36:00	0
2009-04-30	11:37:00	0
2009-04-30	11:38:00	0
2009-04-30	11:39:00	0
2009-04-30	11:40:00	0
2009-04-30	11:41:00	0
2009-04-30	11:42:00	0
2009-04-30	11:43:00	0
2009-04-30	11:44:00	0
2009-04-30	11:45:00	0
2009-04-30	11:46:00	0
2009-04-30	11:47:00	0
2009-04-30	11:48:00	0
2009-04-30	11:49:00	0
2009-04-30	11:50:00	0
2009-04-30	11:51:00	0
2009-04-30	11:52:00	0
2009-04-30	11:53:00	0
2009-04-30	11:54:00	0
2009-04-30	11:55:00	0
2009-04-30	11:56:00	0
2009-04-30	11:57:00	0
2009-04-30	11:58:00	0
2009-04-30	11:59:00	0
2009-04-30	12:00:00	0
2009-04-30	12:01:00	0
2009-04-30	12:02:00	0
2009-04-30	12:03:00	0
2009-04-30	12:04:00	0
2009-04-30	12:05:00	0
2009-04-30	12:06:00	0
2009-04-30	12:07:00	0
2009-04-30	12:08:00	0
2009-04-30	12:09:00	0
2009-04-30	12:10:00	0
2009-04-30	12:11:00	0
2009-04-30	12:12:00	0
2009-04-30	12:13:00	0
2009-04-30	12:14:00	0
2009-04-30	12:15:00	0
2009-04-30	12:16:00	0
2009-04-30	12:17:00	0
2009-04-30	12:18:00	0
2009-04-30	12:19:00	0
2009-04-30	12:20:00	0
2009-04-30	12:21:00	0
2009-04-30	12:22:00	0
2009-04-30	12:23:00	0
2009-04-30	12:24:00	0
2009-04-30	12:25:00	0
2009-04-30	12:26:00	0
2009-04-30	12:27:00	0
2009-04-30	12:28:00	0
2009-04-30	12:29:00	0
2009-04-30	12:30:00	0
2009-04-30	12:31:00	0
2009-04-30	12:32:00	0
2009-04-30	12:33:00	0
2009-04-30	12:34:00	0
2009-04-30	12:35:00	0
2009-04-30	12:36:00	0
2009-04-30	12:37:00	0
2009-04-30	12:38:00	0
2009-04-30	12:39:00	0
2009-04-30	12:40:00	0
2009-04-30	12:41:00	0
2009-04-30	12:42:00	0
2009-04-30	12:43:00	0
2009-04-30	12:44:00	0
2009-04-30	12:45:00	0
2009-04-30	12:46:00	0
2009-04-30	12:47:00	0
2009-04-30	12:48:00	0
2009-04-30	12:49:00	0
2009-04-30	12:50:00	0
2009-04-30	12:51:00	0
2009-04-30	12:52:00	0
2009-04-30	12:53:00	0
2009-04-30	12:54:00	0
2009-04-30	12:55:00	0
2009-04-30	12:56:00	0
2009-04-30	12:57:00	0
2009-04-30	12:58:00	0
2009-04-30	12:59:00	0
2009-04-30	13:00:00	0
2009-04-30	13:01:00	0
2009-04-30	13:02:00	0
2009-04-30	13:03:00	0
2009-04-30	13:04:00	0
2009-04-30	13:05:00	0
2009-04-30	13:06:00	0
2009-04-30	13:07:00	0
2009-04-30	13:08:00	0
2009-04-30	13:09:00	0
2009-04-30	13:10:00	0
2009-04-30	13:11:00	0
2009-04-30	13:12:00	0
2009-04-30	13:13:00	0
2009-04-30	13:14:00	0
2009-04-30	13:15:00	0
2009-04-30	13:16:00	0
2009-04-30	13:17:00	0
2009-04-30	13:18:00	0
2009-04-30	13:19:00	0
2009-04-30	13:20:00	0
2009-04-30	13:21:00	0
2009-04-30	13:22:00	0
2009-04-30	13:23:00	0
2009-04-30	13:24:00	0
2009-04-30	13:25:00	0
2009-04-30	13:26:00	0
2009-04-30	13:27:00	0
2009-04-30	13:28:00	0
2009-04-30	13:29:00	0
2009-04-30	13:30:00	0
2009-04-30	13:31:00	0
2009-04-30	13:32:00	0
2009-04-30	13:33:00	0
2009-04-30	13:34:00	0
2009-04-30	13:35:00	0
2009-04-30	13:36:00	0
2009-04-30	13:37:00	0
2009-04-30	13:38:00	0
2009-04-30	13:39:00	0
2009-04-30	13:40:00	0
2009-04-30	13:41:00	0
2009-04-30	13:42:00	0
2009-04-30	13:43:00	0
2009-04-30	13:44:00	0
2009-04-30	13:45:00	0
2009-04-30	13:46:00	0
2009-04-30	13:47:00	0
2009-04-30	13:48:00	0
2009-04-30	13:49:00	0
2009-04-30	13:50:00	0
2009-04-30	13:51:00	0
2009-04-30	13:52:00	0
2009-04-30	13:53:00	0
2009-04-30	13:54:00	0
2009-04-30	13:55:00	0
2009-04-30	13:56:00	0
2009-04-30	13:57:00	0
2009-04-30	13:58:00	0
2009-04-30	13:59:00	0
2009-04-30	14:00:00	0
2009-04-30	14:01:00	0
2009-04-30	14:02:00	0
2009-04-30	14:03:00	0
2009-04-30	14:04:00	0
2009-04-30	14:05:00	0
2009-04-30	14:06:00	0
2009-04-30	14:07:00	0
2009-04-30	14:08:00	0
2009-04-30	14:09:00	0
2009-04-30	14:10:00	0
2009-04-30	14:11:00	0
2009-04-30	14:12:00	0
2009-04-30	14:13:00	0
2009-04-30	14:14:00	0
2009-04-30	14:15:00	0
2009-04-30	14:16:00	0
2009-04-30	14:17:00	0
2009-04-30	14:18:00	0
2009-04-30	14:19:00	0
2009-04-30	14:20:00	0
2009-04-30	14:21:00	0
2009-04-30	14:22:00	0
2009-04-30	14:23:00	0
2009-04-30	14:24:00	0
2009-04-30	14:25:00	0
2009-04-30	14:26:00	0
2009-04-30	14:27:00	0
2009-04-30	14:28:00	0
2009-04-30	14:29:00	0
2009-04-30	14:30:00	0
2009-04-30	14:31:00	0
2009-04-30	14:32:00	0
2009-04-30	14:33:00	0
2009-04-30	14:34:00	0
2009-04-30	14:35:00	0
2009-04-30	14:36:00	0
2009-04-30	14:37:00	0
2009-04-30	14:38:00	0
2009-04-30	14:39:00	0
2009-04-30	14:40:00	0
2009-04-30	14:41:00	0
2009-04-30	14:42:00	0
2009-04-30	14:43:00	0
2009-04-30	14:44:00	0
2009-04-30	14:45:00	0
2009-04-30	14:46:00	0
2009-04-30	14:47:00	0
2009-04-30	14:48:00	0
2009-04-30	14:49:00	0
2009-04-30	14:50:00	0
2009-04-30	14:51:00	0
2009-04-30	14:52:00	0
2009-04-30	14:53:00	0
2009-04-30	14:54:00	0
2009-04-30	14:55:00	0
2009-04-30	14:56:00	0
2009-04-30	14:57:00	0
2009-04-30	14:58:00	0
2009-04-30	14:59:00	0
2009-04-30	15:00:00	0
2009-04-30	15:01:00	0
2009-04-30	15:02:00	0
2009-04-30	15:03:00	0
2009-04-30	15:04:00	0
2009-04-30	15:05:00	0
2009-04-30	15:06:00	0
2009-04-30	15:07:00	0
2009-04-30	15:08:00	0
2009-04-30	15:09:00	0
2009-04-30	15:10:00	0
2009-04-30	15:11:00	0
2009-04-30	15:12:00	0
2009-04-30	15:13:00	0
2009-04-30	15:14:00	0
2009-04-30	15:15:00	0
2009-04-30	15:16:00	0
2009-04-30	15:17:00	0
2009-04-30	15:18:00	0
2009-04-30	15:19:00	0
2009-04-30	15:20:00	0
2009-04-30	15:21:00	0
2009-04-30	15:22:00	0
2009-04-30	15:23:00	0
2009-04-30	15:24:00	0
2009-04-30	15:25:00	0
2009-04-30	15:26:00	0
2009-04-30	15:27:00	0
2009-04-30	15:28:00	0
2009-04-30	15:29:00	0
2009-04-30	15:30:00	0
2009-04-30	15:31:00	0
2009-04-30	15:32:00	0
2009-04-30	15:33:00	0
2009-04-30	15:34:00	0
2009-04-30	15:35:00	0
2009-04-30	15:36:00	0
2009-04-30	15:37:00	0
2009-04-30	15:38:00	0
2009-04-30	15:39:00	0
2009-04-30	15:40:00	0
2009-04-30	15:41:00	0
2009-04-30	15:42:00	0
2009-04-30	15:43:00	0
2009-04-30	15:44:00	0
2009-04-30	15:45:00	0
2009-04-30	15:46:00	0
2009-04-30	15:47:00	0
2009-04-30	15:48:00	0
2009-04-30	15:49:00	0
2009-04-30	15:50:00	0
2009-04-30	15:51:00	0
2009-04-30	15:52:00	0
2009-04-30	15:53:00	0
2009-04-30	15:54:00	0
2009-04-30	15:55:00	0
2009-04-30	15:56:00	0
2009-04-30	15:57:00	0
2009-04-30	15:58:00	0
2009-04-30	15:59:00	0
2009-04-30	16:00:00	0
2009-04-30	16:01:00	0
2009-04-30	16:02:00	0
2009-04-30	16:03:00	0
2009-04-30	16:04:00	0
2009-04-30	16:05:00	0
2009-04-30	16:06:00	0
2009-04-30	16:07:00	0
2009-04-30	16:08:00	0
2009-04-30	16:09:00	0
2009-04-30	16:10:00	0
2009-04-30	16:11:00	0
2009-04-30	16:12:00	0
2009-04-30	16:13:00	0
2009-04-30	16:14:00	0
2009-04-30	16:15:00	0
2009-04-30	16:16:00	0
2009-04-30	16:17:00	0
2009-04-30	16:18:00	0
2009-04-30	16:19:00	0
2009-04-30	16:20:00	0
2009-04-30	16:21:00	0
2009-04-30	16:22:00	0
2009-04-30	16:23:00	0
2009-04-30	16:24:00	0
2009-04-30	16:25:00	0
2009-04-30	16:26:00	0
2009-04-30	16:27:00	0
2009-04-30	16:28:00	0
2009-04-30	16:29:00	0
2009-04-30	16:30:00	0
2009-04-30	16:31:00	0
2009-04-30	16:32:00	0
2009-04-30	16:33:00	0
2009-04-30	16:34:00	0
2009-04-30	16:35:00	0
2009-04-30	16:36:00	0
2009-04-30	16:37:00	0
2009-04-30	16:38:00	0
2009-04-30	16:39:00	0
2009-04-30	16:40:00	0
2009-04-30	16:41:00	0
2009-04-30	16:42:00	0
2009-04-30	16:43:00	0
2009-04-30	16:44:00	0
2009-04-30	16:45:00	0
2009-04-30	16:46:00	0
2009-04-30	16:47:00	0
2009-04-30	16:48:00	0
2009-04-30	16:49:00	0
2009-04-30	16:50:00	0
2009-04-30	16:51:00	0
2009-04-30	16:52:00	0
2009-04-30	16:53:00	0
2009-04-30	16:54:00	0
2009-04-30	16:55:00	0
2009-04-30	16:56:00	0
2009-04-30	16:57:00	0
2009-04-30	16:58:00	0
2009-04-30	16:59:00	0
2009-04-30	17:00:00	0
2009-04-30	17:01:00	0
2009-04-30	17:02:00	0
2009-04-30	17:03:00	0
2009-04-30	17:04:00	0
2009-04-30	17:05:00	0
2009-04-30	17:06:00	0
2009-04-30	17:07:00	0
2009-04-30	17:08:00	0
2009-04-30	17:09:00	0
2009-04-30	17:10:00	0
2009-04-30	17:11:00	0
2009-04-30	17:12:00	0
2009-04-30	17:13:00	0
2009-04-30	17:14:00	0
2009-04-30	17:15:00	0
2009-04-30	17:16:00	0
2009-04-30	17:17:00	0
2009-04-30	17:18:00	0
2009-04-30	17:19:00	0
2009-04-30	17:20:00	0
2009-04-30	17:21:00	0
2009-04-30	17:22:00	0
2009-04-30	17:23:00	0
2009-04-30	17:24:00	0
2009-04-30	17:25:00	0
2009-04-30	17:26:00	0
2009-04-30	17:27:00	0
2009-04-30	17:28:00	0
2009-04-30	17:29:00	0
2009-04-30	17:30:00	0
2009-04-30	17:31:00	0
2009-04-30	17:32:00	0
2009-04-30	17:33:00	0
2009-04-30	17:34:00	0
2009-04-30	17:35:00	0
2009-04-30	17:36:00	0
2009-04-30	17:37:00	0
2009-04-30	17:38:00	0
2009-04-30	17:39:00	0
2009-04-30	17:40:00	0
2009-04-30	17:41:00	0
2009-04-30	17:42:00	0
2009-04-30	17:43:00	0
2009-04-30	17:44:00	0
2009-04-30	17:45:00	0
2009-04-30	17:46:00	0
2009-04-30	17:47:00	0
2009-04-30	17:48:00	0
2009-04-30	17:49:00	0
2009-04-30	17:50:00	0
2009-04-30	17:51:00	0
2009-04-30	17:52:00	0
2009-04-30	17:53:00	0
2009-04-30	17:54:00	0
2009-04-30	17:55:00	0
2009-04-30	17:56:00	0
2009-04-30	17:57:00	0
2009-04-30	17:58:00	0
2009-04-30	17:59:00	0
2009-04-30	18:00:00	5
2009-04-30	18:01:00	67
2009-04-30	18:02:00	0
2009-04-30	18:03:00	33
2009-04-30	18:04:00	57
2009-04-30	18:05:00	43
2009-04-30	18:06:00	137
2009-04-30	18:07:00	552
2009-04-30	18:08:00	402
2009-04-30	18:09:00	5
2009-04-30	18:10:00	24
2009-04-30	18:11:00	24
2009-04-30	18:12:00	28
2009-04-30	18:13:00	28
2009-04-30	18:14:00	24
2009-04-30	18:15:00	19
2009-04-30	18:16:00	0
2009-04-30	18:17:00	0
2009-04-30	18:18:00	0
2009-04-30	18:19:00	0
2009-04-30	18:20:00	38
2009-04-30	18:21:00	0
2009-04-30	18:22:00	0
2009-04-30	18:23:00	96
2009-04-30	18:24:00	0
2009-04-30	18:25:00	0
2009-04-30	18:26:00	0
2009-04-30	18:27:00	0
2009-04-30	18:28:00	79
2009-04-30	18:29:00	19
2009-04-30	18:30:00	14
2009-04-30	18:31:00	0
2009-04-30	18:32:00	0
2009-04-30	18:33:00	0
2009-04-30	18:34:00	0
2009-04-30	18:35:00	0
2009-04-30	18:36:00	67
2009-04-30	18:37:00	0
2009-04-30	18:38:00	0
2009-04-30	18:39:00	0
2009-04-30	18:40:00	0
2009-04-30	18:41:00	0
2009-04-30	18:42:00	0
2009-04-30	18:43:00	0
2009-04-30	18:44:00	28
2009-04-30	18:45:00	0
2009-04-30	18:46:00	0
2009-04-30	18:47:00	52
2009-04-30	18:48:00	9
2009-04-30	18:49:00	5
2009-04-30	18:50:00	19
2009-04-30	18:51:00	19
2009-04-30	18:52:00	131
2009-04-30	18:53:00	171
2009-04-30	18:54:00	352
2009-04-30	18:55:00	107
2009-04-30	18:56:00	62
2009-04-30	18:57:00	52
2009-04-30	18:58:00	52
2009-04-30	18:59:00	721
2009-04-30	19:00:00	1125
2009-04-30	19:01:00	632
2009-04-30	19:02:00	0
2009-04-30	19:03:00	515
2009-04-30	19:04:00	0
2009-04-30	19:05:00	0
2009-04-30	19:06:00	0
2009-04-30	19:07:00	237
2009-04-30	19:08:00	57
2009-04-30	19:09:00	43
2009-04-30	19:10:00	0
2009-04-30	19:11:00	0
2009-04-30	19:12:00	0
2009-04-30	19:13:00	0
2009-04-30	19:14:00	0
2009-04-30	19:15:00	0
2009-04-30	19:16:00	0
2009-04-30	19:17:00	0
2009-04-30	19:18:00	0
2009-04-30	19:19:00	9
2009-04-30	19:20:00	14
2009-04-30	19:21:00	0
2009-04-30	19:22:00	0
2009-04-30	19:23:00	0
2009-04-30	19:24:00	0
2009-04-30	19:25:00	0
2009-04-30	19:26:00	0
2009-04-30	19:27:00	0
2009-04-30	19:28:00	24
2009-04-30	19:29:00	0
2009-04-30	19:30:00	371
2009-04-30	19:31:00	19
2009-04-30	19:32:00	5
2009-04-30	19:33:00	28
2009-04-30	19:34:00	0
2009-04-30	19:35:00	0
2009-04-30	19:36:00	0
2009-04-30	19:37:00	73
2009-04-30	19:38:00	9
2009-04-30	19:39:00	0
2009-04-30	19:40:00	0
2009-04-30	19:41:00	0
2009-04-30	19:42:00	0
2009-04-30	19:43:00	887
2009-04-30	19:44:00	214
2009-04-30	19:45:00	5
2009-04-30	19:46:00	721
2009-04-30	19:47:00	84
2009-04-30	19:48:00	90
2009-04-30	19:49:00	57
2009-04-30	19:50:00	28
2009-04-30	19:51:00	14
2009-04-30	19:52:00	0
2009-04-30	19:53:00	0
2009-04-30	19:54:00	0
2009-04-30	19:55:00	67
2009-04-30	19:56:00	0
2009-04-30	19:57:00	0
2009-04-30	19:58:00	0
2009-04-30	19:59:00	0
2009-04-30	20:00:00	0
2009-04-30	20:01:00	0
2009-04-30	20:02:00	5
2009-04-30	20:03:00	0
2009-04-30	20:04:00	0
2009-04-30	20:05:00	0
2009-04-30	20:06:00	0
2009-04-30	20:07:00	0
2009-04-30	20:08:00	0
2009-04-30	20:09:00	0
2009-04-30	20:10:00	0
2009-04-30	20:11:00	0
2009-04-30	20:12:00	0
2009-04-30	20:13:00	0
2009-04-30	20:14:00	0
2009-04-30	20:15:00	79
2009-04-30	20:16:00	19
2009-04-30	20:17:00	0
2009-04-30	20:18:00	0
2009-04-30	20:19:00	0
2009-04-30	20:20:00	0
2009-04-30	20:21:00	0
2009-04-30	20:22:00	0
2009-04-30	20:23:00	0
2009-04-30	20:24:00	0
2009-04-30	20:25:00	0
2009-04-30	20:26:00	67
2009-04-30	20:27:00	0
2009-04-30	20:28:00	0
2009-04-30	20:29:00	79
2009-04-30	20:30:00	14
2009-04-30	20:31:00	24
2009-04-30	20:32:00	0
2009-04-30	20:33:00	0
2009-04-30	20:34:00	0
2009-04-30	20:35:00	0
2009-04-30	20:36:00	0
2009-04-30	20:37:00	0
2009-04-30	20:38:00	0
2009-04-30	20:39:00	0
2009-04-30	20:40:00	14
2009-04-30	20:41:00	0
2009-04-30	20:42:00	0
2009-04-30	20:43:00	24
2009-04-30	20:44:00	9
2009-04-30	20:45:00	33
2009-04-30	20:46:00	177
2009-04-30	20:47:00	9
2009-04-30	20:48:00	24
2009-04-30	20:49:00	90
2009-04-30	20:50:00	0
2009-04-30	20:51:00	0
2009-04-30	20:52:00	0
2009-04-30	20:53:00	0
2009-04-30	20:54:00	0
2009-04-30	20:55:00	0
2009-04-30	20:56:00	0
2009-04-30	20:57:00	0
2009-04-30	20:58:00	0
2009-04-30	20:59:00	0
2009-04-30	21:00:00	0
2009-04-30	21:01:00	0
2009-04-30	21:02:00	0
2009-04-30	21:03:00	0
2009-04-30	21:04:00	0
2009-04-30	21:05:00	28
2009-04-30	21:06:00	0
2009-04-30	21:07:00	0
2009-04-30	21:08:00	0
2009-04-30	21:09:00	0
2009-04-30	21:10:00	0
2009-04-30	21:11:00	5
2009-04-30	21:12:00	0
2009-04-30	21:13:00	0
2009-04-30	21:14:00	0
2009-04-30	21:15:00	0
2009-04-30	21:16:00	0
2009-04-30	21:17:00	0
2009-04-30	21:18:00	38
2009-04-30	21:19:00	0
2009-04-30	21:20:00	0
2009-04-30	21:21:00	0
2009-04-30	21:22:00	0
2009-04-30	21:23:00	0
2009-04-30	21:24:00	0
2009-04-30	21:25:00	0
2009-04-30	21:26:00	0
2009-04-30	21:27:00	0
2009-04-30	21:28:00	0
2009-04-30	21:29:00	0
2009-04-30	21:30:00	0
2009-04-30	21:31:00	0
2009-04-30	21:32:00	0
2009-04-30	21:33:00	0
2009-04-30	21:34:00	0
2009-04-30	21:35:00	0
2009-04-30	21:36:00	0
2009-04-30	21:37:00	0
2009-04-30	21:38:00	0
2009-04-30	21:39:00	0
2009-04-30	21:40:00	0
2009-04-30	21:41:00	0
2009-04-30	21:42:00	0
2009-04-30	21:43:00	1334
2009-04-30	21:44:00	1723
2009-04-30	21:45:00	333
2009-04-30	21:46:00	43
2009-04-30	21:47:00	24
2009-04-30	21:48:00	0
2009-04-30	21:49:00	43
2009-04-30	21:50:00	28
2009-04-30	21:51:00	0
2009-04-30	21:52:00	0
2009-04-30	21:53:00	0
2009-04-30	21:54:00	67
2009-04-30	21:55:00	0
2009-04-30	21:56:00	0
2009-04-30	21:57:00	0
2009-04-30	21:58:00	0
2009-04-30	21:59:00	0
2009-04-30	22:00:00	0
2009-04-30	22:01:00	0
2009-04-30	22:02:00	0
2009-04-30	22:03:00	0
2009-04-30	22:04:00	0
2009-04-30	22:05:00	0
2009-04-30	22:06:00	0
2009-04-30	22:07:00	0
2009-04-30	22:08:00	0
2009-04-30	22:09:00	79
2009-04-30	22:10:00	0
2009-04-30	22:11:00	0
2009-04-30	22:12:00	0
2009-04-30	22:13:00	0
2009-04-30	22:14:00	0
2009-04-30	22:15:00	0
2009-04-30	22:16:00	0
2009-04-30	22:17:00	0
2009-04-30	22:18:00	0
2009-04-30	22:19:00	0
2009-04-30	22:20:00	0
2009-04-30	22:21:00	0
2009-04-30	22:22:00	0
2009-04-30	22:23:00	0
2009-04-30	22:24:00	47
2009-04-30	22:25:00	0
2009-04-30	22:26:00	0
2009-04-30	22:27:00	0
2009-04-30	22:28:00	0
2009-04-30	22:29:00	0
2009-04-30	22:30:00	0
2009-04-30	22:31:00	0
2009-04-30	22:32:00	0
2009-04-30	22:33:00	0
2009-04-30	22:34:00	0
2009-04-30	22:35:00	0
2009-04-30	22:36:00	0
2009-04-30	22:37:00	0
2009-04-30	22:38:00	0
2009-04-30	22:39:00	0
2009-04-30	22:40:00	0
2009-04-30	22:41:00	0
2009-04-30	22:42:00	0
2009-04-30	22:43:00	43
2009-04-30	22:44:00	0
2009-04-30	22:45:00	0
2009-04-30	22:46:00	0
2009-04-30	22:47:00	0
2009-04-30	22:48:00	0
2009-04-30	22:49:00	0
2009-04-30	22:50:00	0
2009-04-30	22:51:00	113
2009-04-30	22:52:00	9
2009-04-30	22:53:00	0
2009-04-30	22:54:00	0
2009-04-30	22:55:00	0
2009-04-30	22:56:00	0
2009-04-30	22:57:00	0
2009-04-30	22:58:00	0
2009-04-30	22:59:00	0
2009-04-30	23:00:00	0
2009-04-30	23:01:00	0
2009-04-30	23:02:00	0
2009-04-30	23:03:00	0
2009-04-30	23:04:00	0
2009-04-30	23:05:00	0
2009-04-30	23:06:00	0
2009-04-30	23:07:00	0
2009-04-30	23:08:00	0
2009-04-30	23:09:00	0
2009-04-30	23:10:00	0
2009-04-30	23:11:00	0
2009-04-30	23:12:00	0
2009-04-30	23:13:00	0
2009-04-30	23:14:00	0
2009-04-30	23:15:00	5
2009-04-30	23:16:00	0
2009-04-30	23:17:00	0
2009-04-30	23:18:00	0
2009-04-30	23:19:00	245
2009-04-30	23:20:00	73
2009-04-30	23:21:00	119
2009-04-30	23:22:00	0
2009-04-30	23:23:00	0
2009-04-30	23:24:00	0
2009-04-30	23:25:00	0
2009-04-30	23:26:00	0
2009-04-30	23:27:00	0
2009-04-30	23:28:00	0
2009-04-30	23:29:00	0
2009-04-30	23:30:00	0
2009-04-30	23:31:00	0
2009-04-30	23:32:00	0
2009-04-30	23:33:00	0
2009-04-30	23:34:00	0
2009-04-30	23:35:00	0
2009-04-30	23:36:00	0
2009-04-30	23:37:00	0
2009-04-30	23:38:00	0
2009-04-30	23:39:00	0
2009-04-30	23:40:00	0
2009-04-30	23:41:00	0
2009-04-30	23:42:00	0
2009-04-30	23:43:00	0
2009-04-30	23:44:00	0
2009-04-30	23:45:00	9
2009-04-30	23:46:00	371
2009-04-30	23:47:00	456
2009-04-30	23:48:00	5
2009-04-30	23:49:00	5
2009-04-30	23:50:00	43
2009-04-30	23:51:00	0
2009-04-30	23:52:00	0
2009-04-30	23:53:00	0
2009-04-30	23:54:00	0
2009-04-30	23:55:00	0
2009-04-30	23:56:00	0
2009-04-30	23:57:00	0
2009-04-30	23:58:00	0
2009-04-30	23:59:00	0
2009-05-01	00:00:00	0
2009-05-01	00:01:00	0
2009-05-01	00:02:00	0
2009-05-01	00:03:00	0
2009-05-01	00:04:00	0
2009-05-01	00:05:00	0
2009-05-01	00:06:00	0
2009-05-01	00:07:00	0
2009-05-01	00:08:00	0
2009-05-01	00:09:00	0
2009-05-01	00:10:00	0
2009-05-01	00:11:00	0
2009-05-01	00:12:00	0
2009-05-01	00:13:00	0
2009-05-01	00:14:00	0
2009-05-01	00:15:00	0
2009-05-01	00:16:00	0
2009-05-01	00:17:00	0
2009-05-01	00:18:00	38
2009-05-01	00:19:00	0
2009-05-01	00:20:00	0
2009-05-01	00:21:00	0
2009-05-01	00:22:00	0
2009-05-01	00:23:00	0
2009-05-01	00:24:00	0
2009-05-01	00:25:00	0
2009-05-01	00:26:00	0
2009-05-01	00:27:00	0
2009-05-01	00:28:00	0
2009-05-01	00:29:00	0
2009-05-01	00:30:00	0
2009-05-01	00:31:00	0
2009-05-01	00:32:00	0
2009-05-01	00:33:00	0
2009-05-01	00:34:00	0
2009-05-01	00:35:00	0
2009-05-01	00:36:00	0
2009-05-01	00:37:00	0
2009-05-01	00:38:00	0
2009-05-01	00:39:00	0
2009-05-01	00:40:00	0
2009-05-01	00:41:00	0
2009-05-01	00:42:00	0
2009-05-01	00:43:00	0
2009-05-01	00:44:00	0
2009-05-01	00:45:00	0
2009-05-01	00:46:00	0
2009-05-01	00:47:00	0
2009-05-01	00:48:00	0
2009-05-01	00:49:00	0
2009-05-01	00:50:00	0
2009-05-01	00:51:00	0
2009-05-01	00:52:00	43
2009-05-01	00:53:00	0
2009-05-01	00:54:00	0
2009-05-01	00:55:00	0
2009-05-01	00:56:00	0
2009-05-01	00:57:00	0
2009-05-01	00:58:00	0
2009-05-01	00:59:00	0
2009-05-01	01:00:00	0
2009-05-01	01:01:00	0
2009-05-01	01:02:00	0
2009-05-01	01:03:00	0
2009-05-01	01:04:00	0
2009-05-01	01:05:00	0
2009-05-01	01:06:00	0
2009-05-01	01:07:00	0
2009-05-01	01:08:00	0
2009-05-01	01:09:00	0
2009-05-01	01:10:00	0
2009-05-01	01:11:00	0
2009-05-01	01:12:00	0
2009-05-01	01:13:00	0
2009-05-01	01:14:00	19
2009-05-01	01:15:00	0
2009-05-01	01:16:00	0
2009-05-01	01:17:00	0
2009-05-01	01:18:00	0
2009-05-01	01:19:00	0
2009-05-01	01:20:00	0
2009-05-01	01:21:00	0
2009-05-01	01:22:00	0
2009-05-01	01:23:00	0
2009-05-01	01:24:00	0
2009-05-01	01:25:00	0
2009-05-01	01:26:00	0
2009-05-01	01:27:00	0
2009-05-01	01:28:00	0
2009-05-01	01:29:00	0
2009-05-01	01:30:00	0
2009-05-01	01:31:00	0
2009-05-01	01:32:00	0
2009-05-01	01:33:00	0
2009-05-01	01:34:00	0
2009-05-01	01:35:00	47
2009-05-01	01:36:00	73
2009-05-01	01:37:00	184
2009-05-01	01:38:00	9
2009-05-01	01:39:00	0
2009-05-01	01:40:00	0
2009-05-01	01:41:00	0
2009-05-01	01:42:00	0
2009-05-01	01:43:00	0
2009-05-01	01:44:00	0
2009-05-01	01:45:00	0
2009-05-01	01:46:00	0
2009-05-01	01:47:00	0
2009-05-01	01:48:00	0
2009-05-01	01:49:00	0
2009-05-01	01:50:00	0
2009-05-01	01:51:00	0
2009-05-01	01:52:00	0
2009-05-01	01:53:00	0
2009-05-01	01:54:00	0
2009-05-01	01:55:00	0
2009-05-01	01:56:00	0
2009-05-01	01:57:00	0
2009-05-01	01:58:00	0
2009-05-01	01:59:00	0
2009-05-01	02:00:00	0
2009-05-01	02:01:00	0
2009-05-01	02:02:00	0
2009-05-01	02:03:00	0
2009-05-01	02:04:00	0
2009-05-01	02:05:00	5
2009-05-01	02:06:00	79
2009-05-01	02:07:00	5
2009-05-01	02:08:00	0
2009-05-01	02:09:00	73
2009-05-01	02:10:00	0
2009-05-01	02:11:00	0
2009-05-01	02:12:00	0
2009-05-01	02:13:00	67
2009-05-01	02:14:00	14
2009-05-01	02:15:00	0
2009-05-01	02:16:00	0
2009-05-01	02:17:00	0
2009-05-01	02:18:00	0
2009-05-01	02:19:00	0
2009-05-01	02:20:00	0
2009-05-01	02:21:00	0
2009-05-01	02:22:00	0
2009-05-01	02:23:00	0
2009-05-01	02:24:00	0
2009-05-01	02:25:00	5
2009-05-01	02:26:00	5
2009-05-01	02:27:00	84
2009-05-01	02:28:00	0
2009-05-01	02:29:00	0
2009-05-01	02:30:00	0
2009-05-01	02:31:00	0
2009-05-01	02:32:00	0
2009-05-01	02:33:00	0
2009-05-01	02:34:00	0
2009-05-01	02:35:00	0
2009-05-01	02:36:00	0
2009-05-01	02:37:00	0
2009-05-01	02:38:00	0
2009-05-01	02:39:00	0
2009-05-01	02:40:00	0
2009-05-01	02:41:00	0
2009-05-01	02:42:00	0
2009-05-01	02:43:00	0
2009-05-01	02:44:00	0
2009-05-01	02:45:00	0
2009-05-01	02:46:00	0
2009-05-01	02:47:00	0
2009-05-01	02:48:00	0
2009-05-01	02:49:00	0
2009-05-01	02:50:00	0
2009-05-01	02:51:00	352
2009-05-01	02:52:00	0
2009-05-01	02:53:00	47
2009-05-01	02:54:00	0
2009-05-01	02:55:00	0
2009-05-01	02:56:00	0
2009-05-01	02:57:00	0
2009-05-01	02:58:00	0
2009-05-01	02:59:00	0
2009-05-01	03:00:00	0
2009-05-01	03:01:00	0
2009-05-01	03:02:00	0
2009-05-01	03:03:00	0
2009-05-01	03:04:00	0
2009-05-01	03:05:00	0
2009-05-01	03:06:00	0
2009-05-01	03:07:00	0
2009-05-01	03:08:00	0
2009-05-01	03:09:00	0
2009-05-01	03:10:00	0
2009-05-01	03:11:00	0
2009-05-01	03:12:00	0
2009-05-01	03:13:00	0
2009-05-01	03:14:00	0
2009-05-01	03:15:00	0
2009-05-01	03:16:00	0
2009-05-01	03:17:00	0
2009-05-01	03:18:00	0
2009-05-01	03:19:00	0
2009-05-01	03:20:00	0
2009-05-01	03:21:00	0
2009-05-01	03:22:00	5
2009-05-01	03:23:00	0
2009-05-01	03:24:00	0
2009-05-01	03:25:00	0
2009-05-01	03:26:00	0
2009-05-01	03:27:00	0
2009-05-01	03:28:00	0
2009-05-01	03:29:00	0
2009-05-01	03:30:00	5
2009-05-01	03:31:00	47
2009-05-01	03:32:00	0
2009-05-01	03:33:00	9
2009-05-01	03:34:00	0
2009-05-01	03:35:00	0
2009-05-01	03:36:00	0
2009-05-01	03:37:00	0
2009-05-01	03:38:00	0
2009-05-01	03:39:00	0
2009-05-01	03:40:00	0
2009-05-01	03:41:00	0
2009-05-01	03:42:00	0
2009-05-01	03:43:00	0
2009-05-01	03:44:00	0
2009-05-01	03:45:00	0
2009-05-01	03:46:00	90
2009-05-01	03:47:00	0
2009-05-01	03:48:00	0
2009-05-01	03:49:00	0
2009-05-01	03:50:00	0
2009-05-01	03:51:00	0
2009-05-01	03:52:00	0
2009-05-01	03:53:00	0
2009-05-01	03:54:00	0
2009-05-01	03:55:00	0
2009-05-01	03:56:00	0
2009-05-01	03:57:00	0
2009-05-01	03:58:00	0
2009-05-01	03:59:00	0
2009-05-01	04:00:00	0
2009-05-01	04:01:00	0
2009-05-01	04:02:00	0
2009-05-01	04:03:00	0
2009-05-01	04:04:00	0
2009-05-01	04:05:00	0
2009-05-01	04:06:00	0
2009-05-01	04:07:00	0
2009-05-01	04:08:00	0
2009-05-01	04:09:00	0
2009-05-01	04:10:00	9
2009-05-01	04:11:00	0
2009-05-01	04:12:00	0
2009-05-01	04:13:00	0
2009-05-01	04:14:00	0
2009-05-01	04:15:00	0
2009-05-01	04:16:00	0
2009-05-01	04:17:00	0
2009-05-01	04:18:00	0
2009-05-01	04:19:00	0
2009-05-01	04:20:00	0
2009-05-01	04:21:00	0
2009-05-01	04:22:00	0
2009-05-01	04:23:00	0
2009-05-01	04:24:00	0
2009-05-01	04:25:00	0
2009-05-01	04:26:00	0
2009-05-01	04:27:00	0
2009-05-01	04:28:00	0
2009-05-01	04:29:00	0
2009-05-01	04:30:00	84
2009-05-01	04:31:00	47
2009-05-01	04:32:00	24
2009-05-01	04:33:00	0
2009-05-01	04:34:00	0
2009-05-01	04:35:00	47
2009-05-01	04:36:00	0
2009-05-01	04:37:00	0
2009-05-01	04:38:00	0
2009-05-01	04:39:00	0
2009-05-01	04:40:00	0
2009-05-01	04:41:00	0
2009-05-01	04:42:00	0
2009-05-01	04:43:00	0
2009-05-01	04:44:00	0
2009-05-01	04:45:00	24
2009-05-01	04:46:00	177
2009-05-01	04:47:00	0
2009-05-01	04:48:00	0
2009-05-01	04:49:00	0
2009-05-01	04:50:00	0
2009-05-01	04:51:00	0
2009-05-01	04:52:00	0
2009-05-01	04:53:00	5
2009-05-01	04:54:00	5
2009-05-01	04:55:00	0
2009-05-01	04:56:00	0
2009-05-01	04:57:00	0
2009-05-01	04:58:00	0
2009-05-01	04:59:00	0
2009-05-01	05:00:00	0
2009-05-01	05:01:00	43
2009-05-01	05:02:00	342
2009-05-01	05:03:00	5
2009-05-01	05:04:00	0
2009-05-01	05:05:00	0
2009-05-01	05:06:00	0
2009-05-01	05:07:00	0
2009-05-01	05:08:00	0
2009-05-01	05:09:00	0
2009-05-01	05:10:00	0
2009-05-01	05:11:00	0
2009-05-01	05:12:00	0
2009-05-01	05:13:00	0
2009-05-01	05:14:00	0
2009-05-01	05:15:00	0
2009-05-01	05:16:00	0
2009-05-01	05:17:00	0
2009-05-01	05:18:00	0
2009-05-01	05:19:00	0
2009-05-01	05:20:00	0
2009-05-01	05:21:00	57
2009-05-01	05:22:00	0
2009-05-01	05:23:00	0
2009-05-01	05:24:00	0
2009-05-01	05:25:00	0
2009-05-01	05:26:00	0
2009-05-01	05:27:00	0
2009-05-01	05:28:00	0
2009-05-01	05:29:00	0
2009-05-01	05:30:00	0
2009-05-01	05:31:00	0
2009-05-01	05:32:00	0
2009-05-01	05:33:00	0
2009-05-01	05:34:00	0
2009-05-01	05:35:00	0
2009-05-01	05:36:00	0
2009-05-01	05:37:00	0
2009-05-01	05:38:00	0
2009-05-01	05:39:00	0
2009-05-01	05:40:00	0
2009-05-01	05:41:00	0
2009-05-01	05:42:00	0
2009-05-01	05:43:00	0
2009-05-01	05:44:00	0
2009-05-01	05:45:00	96
2009-05-01	05:46:00	113
2009-05-01	05:47:00	0
2009-05-01	05:48:00	0
2009-05-01	05:49:00	0
2009-05-01	05:50:00	0
2009-05-01	05:51:00	0
2009-05-01	05:52:00	0
2009-05-01	05:53:00	0
2009-05-01	05:54:00	0
2009-05-01	05:55:00	73
2009-05-01	05:56:00	0
2009-05-01	05:57:00	0
2009-05-01	05:58:00	0
2009-05-01	05:59:00	0
2009-05-01	06:00:00	0
2009-05-01	06:01:00	0
2009-05-01	06:02:00	0
2009-05-01	06:03:00	0
2009-05-01	06:04:00	0
2009-05-01	06:05:00	0
2009-05-01	06:06:00	0
2009-05-01	06:07:00	0
2009-05-01	06:08:00	0
2009-05-01	06:09:00	0
2009-05-01	06:10:00	0
2009-05-01	06:11:00	0
2009-05-01	06:12:00	0
2009-05-01	06:13:00	0
2009-05-01	06:14:00	0
2009-05-01	06:15:00	0
2009-05-01	06:16:00	0
2009-05-01	06:17:00	0
2009-05-01	06:18:00	0
2009-05-01	06:19:00	0
2009-05-01	06:20:00	0
2009-05-01	06:21:00	0
2009-05-01	06:22:00	0
2009-05-01	06:23:00	0
2009-05-01	06:24:00	0
2009-05-01	06:25:00	0
2009-05-01	06:26:00	0
2009-05-01	06:27:00	0
2009-05-01	06:28:00	0
2009-05-01	06:29:00	0
2009-05-01	06:30:00	0
2009-05-01	06:31:00	124
2009-05-01	06:32:00	445
2009-05-01	06:33:00	229
2009-05-01	06:34:00	14
2009-05-01	06:35:00	0
2009-05-01	06:36:00	0
2009-05-01	06:37:00	0
2009-05-01	06:38:00	14
2009-05-01	06:39:00	0
2009-05-01	06:40:00	0
2009-05-01	06:41:00	19
2009-05-01	06:42:00	0
2009-05-01	06:43:00	0
2009-05-01	06:44:00	38
2009-05-01	06:45:00	28
2009-05-01	06:46:00	0
2009-05-01	06:47:00	9
2009-05-01	06:48:00	28
2009-05-01	06:49:00	14
2009-05-01	06:50:00	0
2009-05-01	06:51:00	0
2009-05-01	06:52:00	0
2009-05-01	06:53:00	0
2009-05-01	06:54:00	0
2009-05-01	06:55:00	0
2009-05-01	06:56:00	0
2009-05-01	06:57:00	0
2009-05-01	06:58:00	0
2009-05-01	06:59:00	0
2009-05-01	07:00:00	19
2009-05-01	07:01:00	5
2009-05-01	07:02:00	0
2009-05-01	07:03:00	24
2009-05-01	07:04:00	245
2009-05-01	07:05:00	0
2009-05-01	07:06:00	0
2009-05-01	07:07:00	0
2009-05-01	07:08:00	0
2009-05-01	07:09:00	0
2009-05-01	07:10:00	0
2009-05-01	07:11:00	0
2009-05-01	07:12:00	0
2009-05-01	07:13:00	0
2009-05-01	07:14:00	0
2009-05-01	07:15:00	0
2009-05-01	07:16:00	0
2009-05-01	07:17:00	0
2009-05-01	07:18:00	0
2009-05-01	07:19:00	0
2009-05-01	07:20:00	0
2009-05-01	07:21:00	0
2009-05-01	07:22:00	0
2009-05-01	07:23:00	0
2009-05-01	07:24:00	0
2009-05-01	07:25:00	28
2009-05-01	07:26:00	0
2009-05-01	07:27:00	0
2009-05-01	07:28:00	0
2009-05-01	07:29:00	0
2009-05-01	07:30:00	0
2009-05-01	07:31:00	0
2009-05-01	07:32:00	0
2009-05-01	07:33:00	0
2009-05-01	07:34:00	0
2009-05-01	07:35:00	0
2009-05-01	07:36:00	67
2009-05-01	07:37:00	0
2009-05-01	07:38:00	14
2009-05-01	07:39:00	28
2009-05-01	07:40:00	0
2009-05-01	07:41:00	0
2009-05-01	07:42:00	0
2009-05-01	07:43:00	0
2009-05-01	07:44:00	19
2009-05-01	07:45:00	0
2009-05-01	07:46:00	0
2009-05-01	07:47:00	0
2009-05-01	07:48:00	0
2009-05-01	07:49:00	0
2009-05-01	07:50:00	0
2009-05-01	07:51:00	0
2009-05-01	07:52:00	0
2009-05-01	07:53:00	0
2009-05-01	07:54:00	0
2009-05-01	07:55:00	0
2009-05-01	07:56:00	0
2009-05-01	07:57:00	0
2009-05-01	07:58:00	79
2009-05-01	07:59:00	151
2009-05-01	08:00:00	47
2009-05-01	08:01:00	0
2009-05-01	08:02:00	0
2009-05-01	08:03:00	0
2009-05-01	08:04:00	0
2009-05-01	08:05:00	0
2009-05-01	08:06:00	253
2009-05-01	08:07:00	661
2009-05-01	08:08:00	24
2009-05-01	08:09:00	57
2009-05-01	08:10:00	1754
2009-05-01	08:11:00	1334
2009-05-01	08:12:00	1061
2009-05-01	08:13:00	1633
2009-05-01	08:14:00	2206
2009-05-01	08:15:00	1082
2009-05-01	08:16:00	1951
2009-05-01	08:17:00	1237
2009-05-01	08:18:00	5
2009-05-01	08:19:00	0
2009-05-01	08:20:00	0
2009-05-01	08:21:00	28
2009-05-01	08:22:00	57
2009-05-01	08:23:00	73
2009-05-01	08:24:00	24
2009-05-01	08:25:00	0
2009-05-01	08:26:00	24
2009-05-01	08:27:00	79
2009-05-01	08:28:00	84
2009-05-01	08:29:00	33
2009-05-01	08:30:00	5
2009-05-01	08:31:00	47
2009-05-01	08:32:00	62
2009-05-01	08:33:00	43
2009-05-01	08:34:00	24
2009-05-01	08:35:00	0
2009-05-01	08:36:00	0
2009-05-01	08:37:00	0
2009-05-01	08:38:00	38
2009-05-01	08:39:00	47
2009-05-01	08:40:00	184
2009-05-01	08:41:00	5
2009-05-01	08:42:00	33
2009-05-01	08:43:00	296
2009-05-01	08:44:00	0
2009-05-01	08:45:00	67
2009-05-01	08:46:00	270
2009-05-01	08:47:00	690
2009-05-01	08:48:00	0
2009-05-01	08:49:00	0
2009-05-01	08:50:00	0
2009-05-01	08:51:00	199
2009-05-01	08:52:00	107
2009-05-01	08:53:00	43
2009-05-01	08:54:00	0
2009-05-01	08:55:00	0
2009-05-01	08:56:00	0
2009-05-01	08:57:00	0
2009-05-01	08:58:00	0
2009-05-01	08:59:00	57
2009-05-01	09:00:00	9
2009-05-01	09:01:00	0
2009-05-01	09:02:00	0
2009-05-01	09:03:00	5
2009-05-01	09:04:00	0
2009-05-01	09:05:00	0
2009-05-01	09:06:00	0
2009-05-01	09:07:00	0
2009-05-01	09:08:00	0
[truncated: 19,611 more rows]

[truncated: 1 more sheets: 5.14.09]
