# Supplementary material for: Initial evaluation of nighttime restlessness in a naturally occurring canine model of osteoarthritis pain
Source: PeerJ. 2015 Feb 17;3:e772. doi: 10.7717/peerj.772 (PMC4340376; doi:10.7717/peerj.772)
Supplement: Supplemental Information 44 [file peerj-03-772-s044.xlsx]

## Sheet: Office Visits
Visit Date	Visit Number
2009-04-03 06:00:00	1
2009-04-17 06:00:00	2
2009-05-01 06:00:00	3
2009-05-15 06:00:00	4
2009-05-29 06:00:00	5
2009-06-12 06:00:00	6
2009-06-29 06:00:00	7
2009-07-13 06:00:00	8
2009-07-27 06:00:00	9

## Sheet: 44_Data
Segment	DateTime	Activity	Hour	Quadrant	Study Day	Weekday
1	2009-04-10 06:01:00	0	6	2	7	6
1	2009-04-10 06:02:00	0	6	2	7	6
1	2009-04-10 06:03:00	0	6	2	7	6
1	2009-04-10 06:04:00	0	6	2	7	6
1	2009-04-10 06:05:00	0	6	2	7	6
1	2009-04-10 06:06:00	0	6	2	7	6
1	2009-04-10 06:07:00	14	6	2	7	6
1	2009-04-10 06:08:00	0	6	2	7	6
1	2009-04-10 06:09:00	0	6	2	7	6
1	2009-04-10 06:10:00	0	6	2	7	6
1	2009-04-10 06:11:00	0	6	2	7	6
1	2009-04-10 06:12:00	0	6	2	7	6
1	2009-04-10 06:13:00	0	6	2	7	6
1	2009-04-10 06:14:00	0	6	2	7	6
1	2009-04-10 06:15:00	0	6	2	7	6
1	2009-04-10 06:16:00	0	6	2	7	6
1	2009-04-10 06:17:00	0	6	2	7	6
1	2009-04-10 06:18:00	0	6	2	7	6
1	2009-04-10 06:19:00	0	6	2	7	6
1	2009-04-10 06:20:00	0	6	2	7	6
1	2009-04-10 06:21:00	0	6	2	7	6
1	2009-04-10 06:22:00	0	6	2	7	6
1	2009-04-10 06:23:00	0	6	2	7	6
1	2009-04-10 06:24:00	0	6	2	7	6
1	2009-04-10 06:25:00	0	6	2	7	6
1	2009-04-10 06:26:00	0	6	2	7	6
1	2009-04-10 06:27:00	0	6	2	7	6
1	2009-04-10 06:28:00	14	6	2	7	6
1	2009-04-10 06:29:00	0	6	2	7	6
1	2009-04-10 06:30:00	28	6	2	7	6
1	2009-04-10 06:31:00	0	6	2	7	6
1	2009-04-10 06:32:00	0	6	2	7	6
1	2009-04-10 06:33:00	14	6	2	7	6
1	2009-04-10 06:34:00	0	6	2	7	6
1	2009-04-10 06:35:00	0	6	2	7	6
1	2009-04-10 06:36:00	0	6	2	7	6
1	2009-04-10 06:37:00	0	6	2	7	6
1	2009-04-10 06:38:00	0	6	2	7	6
1	2009-04-10 06:39:00	0	6	2	7	6
1	2009-04-10 06:40:00	0	6	2	7	6
1	2009-04-10 06:41:00	0	6	2	7	6
1	2009-04-10 06:42:00	0	6	2	7	6
1	2009-04-10 06:43:00	0	6	2	7	6
1	2009-04-10 06:44:00	0	6	2	7	6
1	2009-04-10 06:45:00	0	6	2	7	6
1	2009-04-10 06:46:00	0	6	2	7	6
1	2009-04-10 06:47:00	0	6	2	7	6
1	2009-04-10 06:48:00	0	6	2	7	6
1	2009-04-10 06:49:00	0	6	2	7	6
1	2009-04-10 06:50:00	0	6	2	7	6
1	2009-04-10 06:51:00	0	6	2	7	6
1	2009-04-10 06:52:00	0	6	2	7	6
1	2009-04-10 06:53:00	0	6	2	7	6
1	2009-04-10 06:54:00	0	6	2	7	6
1	2009-04-10 06:55:00	28	6	2	7	6
1	2009-04-10 06:56:00	14	6	2	7	6
1	2009-04-10 06:57:00	0	6	2	7	6
1	2009-04-10 06:58:00	0	6	2	7	6
1	2009-04-10 06:59:00	0	6	2	7	6
1	2009-04-10 07:00:00	0	6	2	7	6
1	2009-04-10 07:01:00	0	7	2	7	6
1	2009-04-10 07:02:00	0	7	2	7	6
1	2009-04-10 07:03:00	0	7	2	7	6
1	2009-04-10 07:04:00	0	7	2	7	6
1	2009-04-10 07:05:00	0	7	2	7	6
1	2009-04-10 07:06:00	0	7	2	7	6
1	2009-04-10 07:07:00	0	7	2	7	6
1	2009-04-10 07:08:00	0	7	2	7	6
1	2009-04-10 07:09:00	0	7	2	7	6
1	2009-04-10 07:10:00	0	7	2	7	6
1	2009-04-10 07:11:00	0	7	2	7	6
1	2009-04-10 07:12:00	0	7	2	7	6
1	2009-04-10 07:13:00	0	7	2	7	6
1	2009-04-10 07:14:00	0	7	2	7	6
1	2009-04-10 07:15:00	0	7	2	7	6
1	2009-04-10 07:16:00	0	7	2	7	6
1	2009-04-10 07:17:00	0	7	2	7	6
1	2009-04-10 07:18:00	0	7	2	7	6
1	2009-04-10 07:19:00	0	7	2	7	6
1	2009-04-10 07:20:00	0	7	2	7	6
1	2009-04-10 07:21:00	0	7	2	7	6
1	2009-04-10 07:22:00	0	7	2	7	6
1	2009-04-10 07:23:00	0	7	2	7	6
1	2009-04-10 07:24:00	28	7	2	7	6
1	2009-04-10 07:25:00	83	7	2	7	6
1	2009-04-10 07:26:00	42	7	2	7	6
1	2009-04-10 07:27:00	70	7	2	7	6
1	2009-04-10 07:28:00	28	7	2	7	6
1	2009-04-10 07:29:00	0	7	2	7	6
1	2009-04-10 07:30:00	0	7	2	7	6
1	2009-04-10 07:31:00	14	7	2	7	6
1	2009-04-10 07:32:00	0	7	2	7	6
1	2009-04-10 07:33:00	0	7	2	7	6
1	2009-04-10 07:34:00	0	7	2	7	6
1	2009-04-10 07:35:00	0	7	2	7	6
1	2009-04-10 07:36:00	0	7	2	7	6
1	2009-04-10 07:37:00	0	7	2	7	6
1	2009-04-10 07:38:00	0	7	2	7	6
1	2009-04-10 07:39:00	0	7	2	7	6
1	2009-04-10 07:40:00	0	7	2	7	6
1	2009-04-10 07:41:00	0	7	2	7	6
1	2009-04-10 07:42:00	0	7	2	7	6
1	2009-04-10 07:43:00	0	7	2	7	6
1	2009-04-10 07:44:00	0	7	2	7	6
1	2009-04-10 07:45:00	0	7	2	7	6
1	2009-04-10 07:46:00	0	7	2	7	6
1	2009-04-10 07:47:00	0	7	2	7	6
1	2009-04-10 07:48:00	0	7	2	7	6
1	2009-04-10 07:49:00	0	7	2	7	6
1	2009-04-10 07:50:00	0	7	2	7	6
1	2009-04-10 07:51:00	0	7	2	7	6
1	2009-04-10 07:52:00	0	7	2	7	6
1	2009-04-10 07:53:00	0	7	2	7	6
1	2009-04-10 07:54:00	0	7	2	7	6
1	2009-04-10 07:55:00	0	7	2	7	6
1	2009-04-10 07:56:00	14	7	2	7	6
1	2009-04-10 07:57:00	0	7	2	7	6
1	2009-04-10 07:58:00	0	7	2	7	6
1	2009-04-10 07:59:00	0	7	2	7	6
1	2009-04-10 08:00:00	0	7	2	7	6
1	2009-04-10 08:01:00	0	8	2	7	6
1	2009-04-10 08:02:00	0	8	2	7	6
1	2009-04-10 08:03:00	0	8	2	7	6
1	2009-04-10 08:04:00	0	8	2	7	6
1	2009-04-10 08:05:00	14	8	2	7	6
1	2009-04-10 08:06:00	14	8	2	7	6
1	2009-04-10 08:07:00	0	8	2	7	6
1	2009-04-10 08:08:00	14	8	2	7	6
1	2009-04-10 08:09:00	14	8	2	7	6
1	2009-04-10 08:10:00	0	8	2	7	6
1	2009-04-10 08:11:00	56	8	2	7	6
1	2009-04-10 08:12:00	0	8	2	7	6
1	2009-04-10 08:13:00	843	8	2	7	6
1	2009-04-10 08:14:00	1439	8	2	7	6
1	2009-04-10 08:15:00	1439	8	2	7	6
1	2009-04-10 08:16:00	743	8	2	7	6
1	2009-04-10 08:17:00	97	8	2	7	6
1	2009-04-10 08:18:00	718	8	2	7	6
1	2009-04-10 08:19:00	70	8	2	7	6
1	2009-04-10 08:20:00	403	8	2	7	6
1	2009-04-10 08:21:00	28	8	2	7	6
1	2009-04-10 08:22:00	718	8	2	7	6
1	2009-04-10 08:23:00	14	8	2	7	6
1	2009-04-10 08:24:00	501	8	2	7	6
1	2009-04-10 08:25:00	14	8	2	7	6
1	2009-04-10 08:26:00	14	8	2	7	6
1	2009-04-10 08:27:00	264	8	2	7	6
1	2009-04-10 08:28:00	56	8	2	7	6
1	2009-04-10 08:29:00	14	8	2	7	6
1	2009-04-10 08:30:00	0	8	2	7	6
1	2009-04-10 08:31:00	0	8	2	7	6
1	2009-04-10 08:32:00	0	8	2	7	6
1	2009-04-10 08:33:00	607	8	2	7	6
1	2009-04-10 08:34:00	0	8	2	7	6
1	2009-04-10 08:35:00	0	8	2	7	6
1	2009-04-10 08:36:00	28	8	2	7	6
1	2009-04-10 08:37:00	0	8	2	7	6
1	2009-04-10 08:38:00	198	8	2	7	6
1	2009-04-10 08:39:00	540	8	2	7	6
1	2009-04-10 08:40:00	153	8	2	7	6
1	2009-04-10 08:41:00	0	8	2	7	6
1	2009-04-10 08:42:00	0	8	2	7	6
1	2009-04-10 08:43:00	0	8	2	7	6
1	2009-04-10 08:44:00	442	8	2	7	6
1	2009-04-10 08:45:00	56	8	2	7	6
1	2009-04-10 08:46:00	97	8	2	7	6
1	2009-04-10 08:47:00	481	8	2	7	6
1	2009-04-10 08:48:00	231	8	2	7	6
1	2009-04-10 08:49:00	231	8	2	7	6
1	2009-04-10 08:50:00	0	8	2	7	6
1	2009-04-10 08:51:00	0	8	2	7	6
1	2009-04-10 08:52:00	0	8	2	7	6
1	2009-04-10 08:53:00	0	8	2	7	6
1	2009-04-10 08:54:00	0	8	2	7	6
1	2009-04-10 08:55:00	0	8	2	7	6
1	2009-04-10 08:56:00	0	8	2	7	6
1	2009-04-10 08:57:00	0	8	2	7	6
1	2009-04-10 08:58:00	462	8	2	7	6
1	2009-04-10 08:59:00	314	8	2	7	6
1	2009-04-10 09:00:00	0	8	2	7	6
1	2009-04-10 09:01:00	0	9	2	7	6
1	2009-04-10 09:02:00	0	9	2	7	6
1	2009-04-10 09:03:00	0	9	2	7	6
1	2009-04-10 09:04:00	0	9	2	7	6
1	2009-04-10 09:05:00	0	9	2	7	6
1	2009-04-10 09:06:00	0	9	2	7	6
1	2009-04-10 09:07:00	0	9	2	7	6
1	2009-04-10 09:08:00	0	9	2	7	6
1	2009-04-10 09:09:00	0	9	2	7	6
1	2009-04-10 09:10:00	0	9	2	7	6
1	2009-04-10 09:11:00	0	9	2	7	6
1	2009-04-10 09:12:00	0	9	2	7	6
1	2009-04-10 09:13:00	0	9	2	7	6
1	2009-04-10 09:14:00	0	9	2	7	6
1	2009-04-10 09:15:00	0	9	2	7	6
1	2009-04-10 09:16:00	14	9	2	7	6
1	2009-04-10 09:17:00	0	9	2	7	6
1	2009-04-10 09:18:00	0	9	2	7	6
1	2009-04-10 09:19:00	0	9	2	7	6
1	2009-04-10 09:20:00	14	9	2	7	6
1	2009-04-10 09:21:00	1210	9	2	7	6
1	2009-04-10 09:22:00	231	9	2	7	6
1	2009-04-10 09:23:00	0	9	2	7	6
1	2009-04-10 09:24:00	14	9	2	7	6
1	2009-04-10 09:25:00	0	9	2	7	6
1	2009-04-10 09:26:00	14	9	2	7	6
1	2009-04-10 09:27:00	298	9	2	7	6
1	2009-04-10 09:28:00	481	9	2	7	6
1	2009-04-10 09:29:00	1241	9	2	7	6
1	2009-04-10 09:30:00	1149	9	2	7	6
1	2009-04-10 09:31:00	2207	9	2	7	6
1	2009-04-10 09:32:00	1547	9	2	7	6
1	2009-04-10 09:33:00	1060	9	2	7	6
1	2009-04-10 09:34:00	1032	9	2	7	6
1	2009-04-10 09:35:00	1272	9	2	7	6
1	2009-04-10 09:36:00	1583	9	2	7	6
1	2009-04-10 09:37:00	1210	9	2	7	6
1	2009-04-10 09:38:00	214	9	2	7	6
1	2009-04-10 09:39:00	153	9	2	7	6
1	2009-04-10 09:40:00	14	9	2	7	6
1	2009-04-10 09:41:00	0	9	2	7	6
1	2009-04-10 09:42:00	0	9	2	7	6
1	2009-04-10 09:43:00	14	9	2	7	6
1	2009-04-10 09:44:00	70	9	2	7	6
1	2009-04-10 09:45:00	281	9	2	7	6
1	2009-04-10 09:46:00	365	9	2	7	6
1	2009-04-10 09:47:00	0	9	2	7	6
1	2009-04-10 09:48:00	0	9	2	7	6
1	2009-04-10 09:49:00	0	9	2	7	6
1	2009-04-10 09:50:00	0	9	2	7	6
1	2009-04-10 09:51:00	0	9	2	7	6
1	2009-04-10 09:52:00	0	9	2	7	6
1	2009-04-10 09:53:00	0	9	2	7	6
1	2009-04-10 09:54:00	0	9	2	7	6
1	2009-04-10 09:55:00	153	9	2	7	6
1	2009-04-10 09:56:00	181	9	2	7	6
1	2009-04-10 09:57:00	97	9	2	7	6
1	2009-04-10 09:58:00	28	9	2	7	6
1	2009-04-10 09:59:00	214	9	2	7	6
1	2009-04-10 10:00:00	70	9	2	7	6
1	2009-04-10 10:01:00	0	10	2	7	6
1	2009-04-10 10:02:00	0	10	2	7	6
1	2009-04-10 10:03:00	14	10	2	7	6
1	2009-04-10 10:04:00	248	10	2	7	6
1	2009-04-10 10:05:00	0	10	2	7	6
1	2009-04-10 10:06:00	0	10	2	7	6
1	2009-04-10 10:07:00	28	10	2	7	6
1	2009-04-10 10:08:00	70	10	2	7	6
1	2009-04-10 10:09:00	501	10	2	7	6
1	2009-04-10 10:10:00	651	10	2	7	6
1	2009-04-10 10:11:00	248	10	2	7	6
1	2009-04-10 10:12:00	0	10	2	7	6
1	2009-04-10 10:13:00	0	10	2	7	6
1	2009-04-10 10:14:00	0	10	2	7	6
1	2009-04-10 10:15:00	0	10	2	7	6
1	2009-04-10 10:16:00	83	10	2	7	6
1	2009-04-10 10:17:00	28	10	2	7	6
1	2009-04-10 10:18:00	198	10	2	7	6
1	2009-04-10 10:19:00	70	10	2	7	6
1	2009-04-10 10:20:00	42	10	2	7	6
1	2009-04-10 10:21:00	181	10	2	7	6
1	2009-04-10 10:22:00	1149	10	2	7	6
1	2009-04-10 10:23:00	1272	10	2	7	6
1	2009-04-10 10:24:00	1619	10	2	7	6
1	2009-04-10 10:25:00	42	10	2	7	6
1	2009-04-10 10:26:00	696	10	2	7	6
1	2009-04-10 10:27:00	743	10	2	7	6
1	2009-04-10 10:28:00	264	10	2	7	6
1	2009-04-10 10:29:00	462	10	2	7	6
1	2009-04-10 10:30:00	248	10	2	7	6
1	2009-04-10 10:31:00	0	10	2	7	6
1	2009-04-10 10:32:00	214	10	2	7	6
1	2009-04-10 10:33:00	0	10	2	7	6
1	2009-04-10 10:34:00	0	10	2	7	6
1	2009-04-10 10:35:00	384	10	2	7	6
1	2009-04-10 10:36:00	0	10	2	7	6
1	2009-04-10 10:37:00	139	10	2	7	6
1	2009-04-10 10:38:00	97	10	2	7	6
1	2009-04-10 10:39:00	28	10	2	7	6
1	2009-04-10 10:40:00	0	10	2	7	6
1	2009-04-10 10:41:00	181	10	2	7	6
1	2009-04-10 10:42:00	520	10	2	7	6
1	2009-04-10 10:43:00	0	10	2	7	6
1	2009-04-10 10:44:00	0	10	2	7	6
1	2009-04-10 10:45:00	281	10	2	7	6
1	2009-04-10 10:46:00	97	10	2	7	6
1	2009-04-10 10:47:00	28	10	2	7	6
1	2009-04-10 10:48:00	0	10	2	7	6
1	2009-04-10 10:49:00	0	10	2	7	6
1	2009-04-10 10:50:00	0	10	2	7	6
1	2009-04-10 10:51:00	0	10	2	7	6
1	2009-04-10 10:52:00	0	10	2	7	6
1	2009-04-10 10:53:00	0	10	2	7	6
1	2009-04-10 10:54:00	0	10	2	7	6
1	2009-04-10 10:55:00	0	10	2	7	6
1	2009-04-10 10:56:00	0	10	2	7	6
1	2009-04-10 10:57:00	0	10	2	7	6
1	2009-04-10 10:58:00	0	10	2	7	6
1	2009-04-10 10:59:00	0	10	2	7	6
1	2009-04-10 11:00:00	0	10	2	7	6
1	2009-04-10 11:01:00	0	11	2	7	6
1	2009-04-10 11:02:00	0	11	2	7	6
1	2009-04-10 11:03:00	0	11	2	7	6
1	2009-04-10 11:04:00	629	11	2	7	6
1	2009-04-10 11:05:00	298	11	2	7	6
1	2009-04-10 11:06:00	540	11	2	7	6
1	2009-04-10 11:07:00	1088	11	2	7	6
1	2009-04-10 11:08:00	42	11	2	7	6
1	2009-04-10 11:09:00	0	11	2	7	6
1	2009-04-10 11:10:00	14	11	2	7	6
1	2009-04-10 11:11:00	0	11	2	7	6
1	2009-04-10 11:12:00	0	11	2	7	6
1	2009-04-10 11:13:00	0	11	2	7	6
1	2009-04-10 11:14:00	0	11	2	7	6
1	2009-04-10 11:15:00	0	11	2	7	6
1	2009-04-10 11:16:00	0	11	2	7	6
1	2009-04-10 11:17:00	0	11	2	7	6
1	2009-04-10 11:18:00	0	11	2	7	6
1	2009-04-10 11:19:00	0	11	2	7	6
1	2009-04-10 11:20:00	0	11	2	7	6
1	2009-04-10 11:21:00	0	11	2	7	6
1	2009-04-10 11:22:00	0	11	2	7	6
1	2009-04-10 11:23:00	0	11	2	7	6
1	2009-04-10 11:24:00	0	11	2	7	6
1	2009-04-10 11:25:00	0	11	2	7	6
1	2009-04-10 11:26:00	0	11	2	7	6
1	2009-04-10 11:27:00	0	11	2	7	6
1	2009-04-10 11:28:00	0	11	2	7	6
1	2009-04-10 11:29:00	56	11	2	7	6
1	2009-04-10 11:30:00	167	11	2	7	6
1	2009-04-10 11:31:00	56	11	2	7	6
1	2009-04-10 11:32:00	0	11	2	7	6
1	2009-04-10 11:33:00	0	11	2	7	6
1	2009-04-10 11:34:00	0	11	2	7	6
1	2009-04-10 11:35:00	0	11	2	7	6
1	2009-04-10 11:36:00	0	11	2	7	6
1	2009-04-10 11:37:00	0	11	2	7	6
1	2009-04-10 11:38:00	0	11	2	7	6
1	2009-04-10 11:39:00	0	11	2	7	6
1	2009-04-10 11:40:00	0	11	2	7	6
1	2009-04-10 11:41:00	0	11	2	7	6
1	2009-04-10 11:42:00	0	11	2	7	6
1	2009-04-10 11:43:00	0	11	2	7	6
1	2009-04-10 11:44:00	0	11	2	7	6
1	2009-04-10 11:45:00	0	11	2	7	6
1	2009-04-10 11:46:00	0	11	2	7	6
1	2009-04-10 11:47:00	0	11	2	7	6
1	2009-04-10 11:48:00	0	11	2	7	6
1	2009-04-10 11:49:00	0	11	2	7	6
1	2009-04-10 11:50:00	42	11	2	7	6
1	2009-04-10 11:51:00	0	11	2	7	6
1	2009-04-10 11:52:00	0	11	2	7	6
1	2009-04-10 11:53:00	0	11	2	7	6
1	2009-04-10 11:54:00	0	11	2	7	6
1	2009-04-10 11:55:00	0	11	2	7	6
1	2009-04-10 11:56:00	0	11	2	7	6
1	2009-04-10 11:57:00	0	11	2	7	6
1	2009-04-10 11:58:00	0	11	2	7	6
1	2009-04-10 11:59:00	0	11	2	7	6
1	2009-04-10 12:00:00	0	11	2	7	6
1	2009-04-10 12:01:00	0	12	3	7	6
1	2009-04-10 12:02:00	0	12	3	7	6
1	2009-04-10 12:03:00	0	12	3	7	6
1	2009-04-10 12:04:00	0	12	3	7	6
1	2009-04-10 12:05:00	0	12	3	7	6
1	2009-04-10 12:06:00	0	12	3	7	6
1	2009-04-10 12:07:00	0	12	3	7	6
1	2009-04-10 12:08:00	0	12	3	7	6
1	2009-04-10 12:09:00	14	12	3	7	6
1	2009-04-10 12:10:00	0	12	3	7	6
1	2009-04-10 12:11:00	0	12	3	7	6
1	2009-04-10 12:12:00	0	12	3	7	6
1	2009-04-10 12:13:00	0	12	3	7	6
1	2009-04-10 12:14:00	14	12	3	7	6
1	2009-04-10 12:15:00	0	12	3	7	6
1	2009-04-10 12:16:00	0	12	3	7	6
1	2009-04-10 12:17:00	0	12	3	7	6
1	2009-04-10 12:18:00	0	12	3	7	6
1	2009-04-10 12:19:00	0	12	3	7	6
1	2009-04-10 12:20:00	0	12	3	7	6
1	2009-04-10 12:21:00	0	12	3	7	6
1	2009-04-10 12:22:00	0	12	3	7	6
1	2009-04-10 12:23:00	501	12	3	7	6
1	2009-04-10 12:24:00	14	12	3	7	6
1	2009-04-10 12:25:00	0	12	3	7	6
1	2009-04-10 12:26:00	0	12	3	7	6
1	2009-04-10 12:27:00	0	12	3	7	6
1	2009-04-10 12:28:00	0	12	3	7	6
1	2009-04-10 12:29:00	0	12	3	7	6
1	2009-04-10 12:30:00	0	12	3	7	6
1	2009-04-10 12:31:00	0	12	3	7	6
1	2009-04-10 12:32:00	0	12	3	7	6
1	2009-04-10 12:33:00	0	12	3	7	6
1	2009-04-10 12:34:00	0	12	3	7	6
1	2009-04-10 12:35:00	0	12	3	7	6
1	2009-04-10 12:36:00	0	12	3	7	6
1	2009-04-10 12:37:00	0	12	3	7	6
1	2009-04-10 12:38:00	0	12	3	7	6
1	2009-04-10 12:39:00	0	12	3	7	6
1	2009-04-10 12:40:00	0	12	3	7	6
1	2009-04-10 12:41:00	0	12	3	7	6
1	2009-04-10 12:42:00	0	12	3	7	6
1	2009-04-10 12:43:00	0	12	3	7	6
1	2009-04-10 12:44:00	0	12	3	7	6
1	2009-04-10 12:45:00	14	12	3	7	6
1	2009-04-10 12:46:00	0	12	3	7	6
1	2009-04-10 12:47:00	14	12	3	7	6
1	2009-04-10 12:48:00	0	12	3	7	6
1	2009-04-10 12:49:00	0	12	3	7	6
1	2009-04-10 12:50:00	14	12	3	7	6
1	2009-04-10 12:51:00	0	12	3	7	6
1	2009-04-10 12:52:00	0	12	3	7	6
1	2009-04-10 12:53:00	0	12	3	7	6
1	2009-04-10 12:54:00	0	12	3	7	6
1	2009-04-10 12:55:00	0	12	3	7	6
1	2009-04-10 12:56:00	0	12	3	7	6
1	2009-04-10 12:57:00	0	12	3	7	6
1	2009-04-10 12:58:00	0	12	3	7	6
1	2009-04-10 12:59:00	0	12	3	7	6
1	2009-04-10 13:00:00	14	12	3	7	6
1	2009-04-10 13:01:00	56	13	3	7	6
1	2009-04-10 13:02:00	0	13	3	7	6
1	2009-04-10 13:03:00	42	13	3	7	6
1	2009-04-10 13:04:00	198	13	3	7	6
1	2009-04-10 13:05:00	0	13	3	7	6
1	2009-04-10 13:06:00	56	13	3	7	6
1	2009-04-10 13:07:00	0	13	3	7	6
1	2009-04-10 13:08:00	0	13	3	7	6
1	2009-04-10 13:09:00	56	13	3	7	6
1	2009-04-10 13:10:00	28	13	3	7	6
1	2009-04-10 13:11:00	0	13	3	7	6
1	2009-04-10 13:12:00	0	13	3	7	6
1	2009-04-10 13:13:00	0	13	3	7	6
1	2009-04-10 13:14:00	0	13	3	7	6
1	2009-04-10 13:15:00	0	13	3	7	6
1	2009-04-10 13:16:00	0	13	3	7	6
1	2009-04-10 13:17:00	0	13	3	7	6
1	2009-04-10 13:18:00	14	13	3	7	6
1	2009-04-10 13:19:00	0	13	3	7	6
1	2009-04-10 13:20:00	0	13	3	7	6
1	2009-04-10 13:21:00	0	13	3	7	6
1	2009-04-10 13:22:00	0	13	3	7	6
1	2009-04-10 13:23:00	0	13	3	7	6
1	2009-04-10 13:24:00	0	13	3	7	6
1	2009-04-10 13:25:00	0	13	3	7	6
1	2009-04-10 13:26:00	0	13	3	7	6
1	2009-04-10 13:27:00	0	13	3	7	6
1	2009-04-10 13:28:00	0	13	3	7	6
1	2009-04-10 13:29:00	0	13	3	7	6
1	2009-04-10 13:30:00	0	13	3	7	6
1	2009-04-10 13:31:00	0	13	3	7	6
1	2009-04-10 13:32:00	0	13	3	7	6
1	2009-04-10 13:33:00	0	13	3	7	6
1	2009-04-10 13:34:00	0	13	3	7	6
1	2009-04-10 13:35:00	0	13	3	7	6
1	2009-04-10 13:36:00	0	13	3	7	6
1	2009-04-10 13:37:00	0	13	3	7	6
1	2009-04-10 13:38:00	0	13	3	7	6
1	2009-04-10 13:39:00	0	13	3	7	6
1	2009-04-10 13:40:00	0	13	3	7	6
1	2009-04-10 13:41:00	28	13	3	7	6
1	2009-04-10 13:42:00	0	13	3	7	6
1	2009-04-10 13:43:00	0	13	3	7	6
1	2009-04-10 13:44:00	0	13	3	7	6
1	2009-04-10 13:45:00	0	13	3	7	6
1	2009-04-10 13:46:00	0	13	3	7	6
1	2009-04-10 13:47:00	0	13	3	7	6
1	2009-04-10 13:48:00	0	13	3	7	6
1	2009-04-10 13:49:00	0	13	3	7	6
1	2009-04-10 13:50:00	0	13	3	7	6
1	2009-04-10 13:51:00	0	13	3	7	6
1	2009-04-10 13:52:00	0	13	3	7	6
1	2009-04-10 13:53:00	0	13	3	7	6
1	2009-04-10 13:54:00	0	13	3	7	6
1	2009-04-10 13:55:00	0	13	3	7	6
1	2009-04-10 13:56:00	0	13	3	7	6
1	2009-04-10 13:57:00	0	13	3	7	6
1	2009-04-10 13:58:00	0	13	3	7	6
1	2009-04-10 13:59:00	0	13	3	7	6
1	2009-04-10 14:00:00	0	13	3	7	6
1	2009-04-10 14:01:00	0	14	3	7	6
1	2009-04-10 14:02:00	0	14	3	7	6
1	2009-04-10 14:03:00	0	14	3	7	6
1	2009-04-10 14:04:00	0	14	3	7	6
1	2009-04-10 14:05:00	14	14	3	7	6
1	2009-04-10 14:06:00	0	14	3	7	6
1	2009-04-10 14:07:00	0	14	3	7	6
1	2009-04-10 14:08:00	0	14	3	7	6
1	2009-04-10 14:09:00	0	14	3	7	6
1	2009-04-10 14:10:00	0	14	3	7	6
1	2009-04-10 14:11:00	0	14	3	7	6
1	2009-04-10 14:12:00	0	14	3	7	6
1	2009-04-10 14:13:00	0	14	3	7	6
1	2009-04-10 14:14:00	0	14	3	7	6
1	2009-04-10 14:15:00	0	14	3	7	6
1	2009-04-10 14:16:00	0	14	3	7	6
1	2009-04-10 14:17:00	843	14	3	7	6
1	2009-04-10 14:18:00	214	14	3	7	6
1	2009-04-10 14:19:00	181	14	3	7	6
1	2009-04-10 14:20:00	0	14	3	7	6
1	2009-04-10 14:21:00	0	14	3	7	6
1	2009-04-10 14:22:00	2877	14	3	7	6
1	2009-04-10 14:23:00	1583	14	3	7	6
1	2009-04-10 14:24:00	1272	14	3	7	6
1	2009-04-10 14:25:00	264	14	3	7	6
1	2009-04-10 14:26:00	83	14	3	7	6
1	2009-04-10 14:27:00	403	14	3	7	6
1	2009-04-10 14:28:00	629	14	3	7	6
1	2009-04-10 14:29:00	125	14	3	7	6
1	2009-04-10 14:30:00	696	14	3	7	6
1	2009-04-10 14:31:00	540	14	3	7	6
1	2009-04-10 14:32:00	651	14	3	7	6
1	2009-04-10 14:33:00	83	14	3	7	6
1	2009-04-10 14:34:00	198	14	3	7	6
1	2009-04-10 14:35:00	442	14	3	7	6
1	2009-04-10 14:36:00	2070	14	3	7	6
1	2009-04-10 14:37:00	2254	14	3	7	6
1	2009-04-10 14:38:00	153	14	3	7	6
1	2009-04-10 14:39:00	0	14	3	7	6
1	2009-04-10 14:40:00	1119	14	3	7	6
1	2009-04-10 14:41:00	2026	14	3	7	6
1	2009-04-10 14:42:00	2710	14	3	7	6
1	2009-04-10 14:43:00	651	14	3	7	6
1	2009-04-10 14:44:00	2449	14	3	7	6
1	2009-04-10 14:45:00	4216	14	3	7	6
1	2009-04-10 14:46:00	2399	14	3	7	6
1	2009-04-10 14:47:00	3364	14	3	7	6
1	2009-04-10 14:48:00	2115	14	3	7	6
1	2009-04-10 14:49:00	1511	14	3	7	6
1	2009-04-10 14:50:00	2026	14	3	7	6
1	2009-04-10 14:51:00	1736	14	3	7	6
1	2009-04-10 14:52:00	584	14	3	7	6
1	2009-04-10 14:53:00	462	14	3	7	6
1	2009-04-10 14:54:00	462	14	3	7	6
1	2009-04-10 14:55:00	56	14	3	7	6
1	2009-04-10 14:56:00	14	14	3	7	6
1	2009-04-10 14:57:00	56	14	3	7	6
1	2009-04-10 14:58:00	0	14	3	7	6
1	2009-04-10 14:59:00	520	14	3	7	6
1	2009-04-10 15:00:00	0	14	3	7	6
1	2009-04-10 15:01:00	42	15	3	7	6
1	2009-04-10 15:02:00	14	15	3	7	6
1	2009-04-10 15:03:00	14	15	3	7	6
1	2009-04-10 15:04:00	0	15	3	7	6
1	2009-04-10 15:05:00	0	15	3	7	6
1	2009-04-10 15:06:00	56	15	3	7	6
1	2009-04-10 15:07:00	14	15	3	7	6
1	2009-04-10 15:08:00	0	15	3	7	6
1	2009-04-10 15:09:00	0	15	3	7	6
1	2009-04-10 15:10:00	42	15	3	7	6
1	2009-04-10 15:11:00	14	15	3	7	6
1	2009-04-10 15:12:00	0	15	3	7	6
1	2009-04-10 15:13:00	97	15	3	7	6
1	2009-04-10 15:14:00	14	15	3	7	6
1	2009-04-10 15:15:00	83	15	3	7	6
1	2009-04-10 15:16:00	0	15	3	7	6
1	2009-04-10 15:17:00	70	15	3	7	6
1	2009-04-10 15:18:00	70	15	3	7	6
1	2009-04-10 15:19:00	0	15	3	7	6
1	2009-04-10 15:20:00	14	15	3	7	6
1	2009-04-10 15:21:00	0	15	3	7	6
1	2009-04-10 15:22:00	0	15	3	7	6
1	2009-04-10 15:23:00	0	15	3	7	6
1	2009-04-10 15:24:00	28	15	3	7	6
1	2009-04-10 15:25:00	42	15	3	7	6
1	2009-04-10 15:26:00	28	15	3	7	6
1	2009-04-10 15:27:00	0	15	3	7	6
1	2009-04-10 15:28:00	139	15	3	7	6
1	2009-04-10 15:29:00	248	15	3	7	6
1	2009-04-10 15:30:00	0	15	3	7	6
1	2009-04-10 15:31:00	264	15	3	7	6
1	2009-04-10 15:32:00	793	15	3	7	6
1	2009-04-10 15:33:00	83	15	3	7	6
1	2009-04-10 15:34:00	949	15	3	7	6
1	2009-04-10 15:35:00	423	15	3	7	6
1	2009-04-10 15:36:00	14	15	3	7	6
1	2009-04-10 15:37:00	1775	15	3	7	6
1	2009-04-10 15:38:00	696	15	3	7	6
1	2009-04-10 15:39:00	14	15	3	7	6
1	2009-04-10 15:40:00	0	15	3	7	6
1	2009-04-10 15:41:00	0	15	3	7	6
1	2009-04-10 15:42:00	0	15	3	7	6
1	2009-04-10 15:43:00	0	15	3	7	6
1	2009-04-10 15:44:00	0	15	3	7	6
1	2009-04-10 15:45:00	83	15	3	7	6
1	2009-04-10 15:46:00	0	15	3	7	6
1	2009-04-10 15:47:00	28	15	3	7	6
1	2009-04-10 15:48:00	125	15	3	7	6
1	2009-04-10 15:49:00	42	15	3	7	6
1	2009-04-10 15:50:00	0	15	3	7	6
1	2009-04-10 15:51:00	42	15	3	7	6
1	2009-04-10 15:52:00	0	15	3	7	6
1	2009-04-10 15:53:00	0	15	3	7	6
1	2009-04-10 15:54:00	0	15	3	7	6
1	2009-04-10 15:55:00	0	15	3	7	6
1	2009-04-10 15:56:00	0	15	3	7	6
1	2009-04-10 15:57:00	0	15	3	7	6
1	2009-04-10 15:58:00	0	15	3	7	6
1	2009-04-10 15:59:00	28	15	3	7	6
1	2009-04-10 16:00:00	139	15	3	7	6
1	2009-04-10 16:01:00	14	16	3	7	6
1	2009-04-10 16:02:00	0	16	3	7	6
1	2009-04-10 16:03:00	0	16	3	7	6
1	2009-04-10 16:04:00	0	16	3	7	6
1	2009-04-10 16:05:00	83	16	3	7	6
1	2009-04-10 16:06:00	56	16	3	7	6
1	2009-04-10 16:07:00	97	16	3	7	6
1	2009-04-10 16:08:00	0	16	3	7	6
1	2009-04-10 16:09:00	0	16	3	7	6
1	2009-04-10 16:10:00	14	16	3	7	6
1	2009-04-10 16:11:00	56	16	3	7	6
1	2009-04-10 16:12:00	42	16	3	7	6
1	2009-04-10 16:13:00	0	16	3	7	6
1	2009-04-10 16:14:00	0	16	3	7	6
1	2009-04-10 16:15:00	0	16	3	7	6
1	2009-04-10 16:16:00	0	16	3	7	6
1	2009-04-10 16:17:00	0	16	3	7	6
1	2009-04-10 16:18:00	0	16	3	7	6
1	2009-04-10 16:19:00	0	16	3	7	6
1	2009-04-10 16:20:00	0	16	3	7	6
1	2009-04-10 16:21:00	0	16	3	7	6
1	2009-04-10 16:22:00	0	16	3	7	6
1	2009-04-10 16:23:00	0	16	3	7	6
1	2009-04-10 16:24:00	0	16	3	7	6
1	2009-04-10 16:25:00	0	16	3	7	6
1	2009-04-10 16:26:00	0	16	3	7	6
1	2009-04-10 16:27:00	0	16	3	7	6
1	2009-04-10 16:28:00	0	16	3	7	6
1	2009-04-10 16:29:00	0	16	3	7	6
1	2009-04-10 16:30:00	28	16	3	7	6
1	2009-04-10 16:31:00	0	16	3	7	6
1	2009-04-10 16:32:00	0	16	3	7	6
1	2009-04-10 16:33:00	0	16	3	7	6
1	2009-04-10 16:34:00	0	16	3	7	6
1	2009-04-10 16:35:00	0	16	3	7	6
1	2009-04-10 16:36:00	83	16	3	7	6
1	2009-04-10 16:37:00	0	16	3	7	6
1	2009-04-10 16:38:00	0	16	3	7	6
1	2009-04-10 16:39:00	0	16	3	7	6
1	2009-04-10 16:40:00	0	16	3	7	6
1	2009-04-10 16:41:00	0	16	3	7	6
1	2009-04-10 16:42:00	14	16	3	7	6
1	2009-04-10 16:43:00	0	16	3	7	6
1	2009-04-10 16:44:00	0	16	3	7	6
1	2009-04-10 16:45:00	83	16	3	7	6
1	2009-04-10 16:46:00	56	16	3	7	6
1	2009-04-10 16:47:00	83	16	3	7	6
1	2009-04-10 16:48:00	0	16	3	7	6
1	2009-04-10 16:49:00	14	16	3	7	6
1	2009-04-10 16:50:00	0	16	3	7	6
1	2009-04-10 16:51:00	0	16	3	7	6
1	2009-04-10 16:52:00	281	16	3	7	6
1	2009-04-10 16:53:00	1405	16	3	7	6
1	2009-04-10 16:54:00	1619	16	3	7	6
1	2009-04-10 16:55:00	2449	16	3	7	6
1	2009-04-10 16:56:00	1338	16	3	7	6
1	2009-04-10 16:57:00	1241	16	3	7	6
1	2009-04-10 16:58:00	2026	16	3	7	6
1	2009-04-10 16:59:00	1775	16	3	7	6
1	2009-04-10 17:00:00	1272	16	3	7	6
1	2009-04-10 17:01:00	0	17	3	7	6
1	2009-04-10 17:02:00	0	17	3	7	6
1	2009-04-10 17:03:00	14	17	3	7	6
1	2009-04-10 17:04:00	0	17	3	7	6
1	2009-04-10 17:05:00	0	17	3	7	6
1	2009-04-10 17:06:00	14	17	3	7	6
1	2009-04-10 17:07:00	42	17	3	7	6
1	2009-04-10 17:08:00	0	17	3	7	6
1	2009-04-10 17:09:00	14	17	3	7	6
1	2009-04-10 17:10:00	42	17	3	7	6
1	2009-04-10 17:11:00	0	17	3	7	6
1	2009-04-10 17:12:00	0	17	3	7	6
1	2009-04-10 17:13:00	0	17	3	7	6
1	2009-04-10 17:14:00	0	17	3	7	6
1	2009-04-10 17:15:00	0	17	3	7	6
1	2009-04-10 17:16:00	248	17	3	7	6
1	2009-04-10 17:17:00	331	17	3	7	6
1	2009-04-10 17:18:00	198	17	3	7	6
1	2009-04-10 17:19:00	70	17	3	7	6
1	2009-04-10 17:20:00	111	17	3	7	6
1	2009-04-10 17:21:00	977	17	3	7	6
1	2009-04-10 17:22:00	83	17	3	7	6
1	2009-04-10 17:23:00	0	17	3	7	6
1	2009-04-10 17:24:00	0	17	3	7	6
1	2009-04-10 17:25:00	0	17	3	7	6
1	2009-04-10 17:26:00	0	17	3	7	6
1	2009-04-10 17:27:00	42	17	3	7	6
1	2009-04-10 17:28:00	0	17	3	7	6
1	2009-04-10 17:29:00	0	17	3	7	6
1	2009-04-10 17:30:00	0	17	3	7	6
1	2009-04-10 17:31:00	0	17	3	7	6
1	2009-04-10 17:32:00	0	17	3	7	6
1	2009-04-10 17:33:00	0	17	3	7	6
1	2009-04-10 17:34:00	0	17	3	7	6
1	2009-04-10 17:35:00	0	17	3	7	6
1	2009-04-10 17:36:00	0	17	3	7	6
1	2009-04-10 17:37:00	0	17	3	7	6
1	2009-04-10 17:38:00	0	17	3	7	6
1	2009-04-10 17:39:00	1272	17	3	7	6
1	2009-04-10 17:40:00	1119	17	3	7	6
1	2009-04-10 17:41:00	0	17	3	7	6
1	2009-04-10 17:42:00	14	17	3	7	6
1	2009-04-10 17:43:00	0	17	3	7	6
1	2009-04-10 17:44:00	0	17	3	7	6
1	2009-04-10 17:45:00	28	17	3	7	6
1	2009-04-10 17:46:00	0	17	3	7	6
1	2009-04-10 17:47:00	0	17	3	7	6
1	2009-04-10 17:48:00	0	17	3	7	6
1	2009-04-10 17:49:00	0	17	3	7	6
1	2009-04-10 17:50:00	0	17	3	7	6
1	2009-04-10 17:51:00	0	17	3	7	6
1	2009-04-10 17:52:00	0	17	3	7	6
1	2009-04-10 17:53:00	14	17	3	7	6
1	2009-04-10 17:54:00	0	17	3	7	6
1	2009-04-10 17:55:00	0	17	3	7	6
1	2009-04-10 17:56:00	0	17	3	7	6
1	2009-04-10 17:57:00	0	17	3	7	6
1	2009-04-10 17:58:00	0	17	3	7	6
1	2009-04-10 17:59:00	0	17	3	7	6
1	2009-04-10 18:00:00	0	17	3	7	6
1	2009-04-10 18:01:00	0	18	4	7	6
1	2009-04-10 18:02:00	0	18	4	7	6
1	2009-04-10 18:03:00	0	18	4	7	6
1	2009-04-10 18:04:00	0	18	4	7	6
1	2009-04-10 18:05:00	0	18	4	7	6
1	2009-04-10 18:06:00	0	18	4	7	6
1	2009-04-10 18:07:00	28	18	4	7	6
1	2009-04-10 18:08:00	0	18	4	7	6
1	2009-04-10 18:09:00	0	18	4	7	6
1	2009-04-10 18:10:00	0	18	4	7	6
1	2009-04-10 18:11:00	0	18	4	7	6
1	2009-04-10 18:12:00	0	18	4	7	6
1	2009-04-10 18:13:00	0	18	4	7	6
1	2009-04-10 18:14:00	83	18	4	7	6
1	2009-04-10 18:15:00	0	18	4	7	6
1	2009-04-10 18:16:00	0	18	4	7	6
1	2009-04-10 18:17:00	0	18	4	7	6
1	2009-04-10 18:18:00	0	18	4	7	6
1	2009-04-10 18:19:00	14	18	4	7	6
1	2009-04-10 18:20:00	0	18	4	7	6
1	2009-04-10 18:21:00	0	18	4	7	6
1	2009-04-10 18:22:00	0	18	4	7	6
1	2009-04-10 18:23:00	0	18	4	7	6
1	2009-04-10 18:24:00	0	18	4	7	6
1	2009-04-10 18:25:00	0	18	4	7	6
1	2009-04-10 18:26:00	0	18	4	7	6
1	2009-04-10 18:27:00	0	18	4	7	6
1	2009-04-10 18:28:00	83	18	4	7	6
1	2009-04-10 18:29:00	0	18	4	7	6
1	2009-04-10 18:30:00	0	18	4	7	6
1	2009-04-10 18:31:00	0	18	4	7	6
1	2009-04-10 18:32:00	0	18	4	7	6
1	2009-04-10 18:33:00	0	18	4	7	6
1	2009-04-10 18:34:00	0	18	4	7	6
1	2009-04-10 18:35:00	28	18	4	7	6
1	2009-04-10 18:36:00	0	18	4	7	6
1	2009-04-10 18:37:00	0	18	4	7	6
1	2009-04-10 18:38:00	0	18	4	7	6
1	2009-04-10 18:39:00	0	18	4	7	6
1	2009-04-10 18:40:00	0	18	4	7	6
1	2009-04-10 18:41:00	0	18	4	7	6
1	2009-04-10 18:42:00	0	18	4	7	6
1	2009-04-10 18:43:00	0	18	4	7	6
1	2009-04-10 18:44:00	0	18	4	7	6
1	2009-04-10 18:45:00	0	18	4	7	6
1	2009-04-10 18:46:00	14	18	4	7	6
1	2009-04-10 18:47:00	0	18	4	7	6
1	2009-04-10 18:48:00	0	18	4	7	6
1	2009-04-10 18:49:00	0	18	4	7	6
1	2009-04-10 18:50:00	0	18	4	7	6
1	2009-04-10 18:51:00	0	18	4	7	6
1	2009-04-10 18:52:00	0	18	4	7	6
1	2009-04-10 18:53:00	0	18	4	7	6
1	2009-04-10 18:54:00	0	18	4	7	6
1	2009-04-10 18:55:00	0	18	4	7	6
1	2009-04-10 18:56:00	0	18	4	7	6
1	2009-04-10 18:57:00	0	18	4	7	6
1	2009-04-10 18:58:00	0	18	4	7	6
1	2009-04-10 18:59:00	0	18	4	7	6
1	2009-04-10 19:00:00	0	18	4	7	6
1	2009-04-10 19:01:00	0	19	4	7	6
1	2009-04-10 19:02:00	0	19	4	7	6
1	2009-04-10 19:03:00	0	19	4	7	6
1	2009-04-10 19:04:00	0	19	4	7	6
1	2009-04-10 19:05:00	0	19	4	7	6
1	2009-04-10 19:06:00	0	19	4	7	6
1	2009-04-10 19:07:00	0	19	4	7	6
1	2009-04-10 19:08:00	0	19	4	7	6
1	2009-04-10 19:09:00	0	19	4	7	6
1	2009-04-10 19:10:00	0	19	4	7	6
1	2009-04-10 19:11:00	0	19	4	7	6
1	2009-04-10 19:12:00	0	19	4	7	6
1	2009-04-10 19:13:00	0	19	4	7	6
1	2009-04-10 19:14:00	0	19	4	7	6
1	2009-04-10 19:15:00	14	19	4	7	6
1	2009-04-10 19:16:00	0	19	4	7	6
1	2009-04-10 19:17:00	14	19	4	7	6
1	2009-04-10 19:18:00	0	19	4	7	6
1	2009-04-10 19:19:00	0	19	4	7	6
1	2009-04-10 19:20:00	0	19	4	7	6
1	2009-04-10 19:21:00	0	19	4	7	6
1	2009-04-10 19:22:00	83	19	4	7	6
1	2009-04-10 19:23:00	0	19	4	7	6
1	2009-04-10 19:24:00	83	19	4	7	6
1	2009-04-10 19:25:00	0	19	4	7	6
1	2009-04-10 19:26:00	0	19	4	7	6
1	2009-04-10 19:27:00	0	19	4	7	6
1	2009-04-10 19:28:00	0	19	4	7	6
1	2009-04-10 19:29:00	0	19	4	7	6
1	2009-04-10 19:30:00	0	19	4	7	6
1	2009-04-10 19:31:00	0	19	4	7	6
1	2009-04-10 19:32:00	0	19	4	7	6
1	2009-04-10 19:33:00	0	19	4	7	6
1	2009-04-10 19:34:00	0	19	4	7	6
1	2009-04-10 19:35:00	0	19	4	7	6
1	2009-04-10 19:36:00	0	19	4	7	6
1	2009-04-10 19:37:00	0	19	4	7	6
1	2009-04-10 19:38:00	0	19	4	7	6
1	2009-04-10 19:39:00	0	19	4	7	6
1	2009-04-10 19:40:00	0	19	4	7	6
1	2009-04-10 19:41:00	0	19	4	7	6
1	2009-04-10 19:42:00	0	19	4	7	6
1	2009-04-10 19:43:00	0	19	4	7	6
1	2009-04-10 19:44:00	0	19	4	7	6
1	2009-04-10 19:45:00	0	19	4	7	6
1	2009-04-10 19:46:00	0	19	4	7	6
1	2009-04-10 19:47:00	0	19	4	7	6
1	2009-04-10 19:48:00	0	19	4	7	6
1	2009-04-10 19:49:00	0	19	4	7	6
1	2009-04-10 19:50:00	0	19	4	7	6
1	2009-04-10 19:51:00	14	19	4	7	6
1	2009-04-10 19:52:00	0	19	4	7	6
1	2009-04-10 19:53:00	0	19	4	7	6
1	2009-04-10 19:54:00	0	19	4	7	6
1	2009-04-10 19:55:00	0	19	4	7	6
1	2009-04-10 19:56:00	0	19	4	7	6
1	2009-04-10 19:57:00	14	19	4	7	6
1	2009-04-10 19:58:00	111	19	4	7	6
1	2009-04-10 19:59:00	97	19	4	7	6
1	2009-04-10 20:00:00	0	19	4	7	6
1	2009-04-10 20:01:00	83	20	4	7	6
1	2009-04-10 20:02:00	56	20	4	7	6
1	2009-04-10 20:03:00	0	20	4	7	6
1	2009-04-10 20:04:00	0	20	4	7	6
1	2009-04-10 20:05:00	0	20	4	7	6
1	2009-04-10 20:06:00	14	20	4	7	6
1	2009-04-10 20:07:00	56	20	4	7	6
1	2009-04-10 20:08:00	0	20	4	7	6
1	2009-04-10 20:09:00	0	20	4	7	6
1	2009-04-10 20:10:00	0	20	4	7	6
1	2009-04-10 20:11:00	0	20	4	7	6
1	2009-04-10 20:12:00	83	20	4	7	6
1	2009-04-10 20:13:00	14	20	4	7	6
1	2009-04-10 20:14:00	97	20	4	7	6
1	2009-04-10 20:15:00	0	20	4	7	6
1	2009-04-10 20:16:00	0	20	4	7	6
1	2009-04-10 20:17:00	0	20	4	7	6
1	2009-04-10 20:18:00	0	20	4	7	6
1	2009-04-10 20:19:00	14	20	4	7	6
1	2009-04-10 20:20:00	0	20	4	7	6
1	2009-04-10 20:21:00	0	20	4	7	6
1	2009-04-10 20:22:00	14	20	4	7	6
1	2009-04-10 20:23:00	0	20	4	7	6
1	2009-04-10 20:24:00	0	20	4	7	6
1	2009-04-10 20:25:00	0	20	4	7	6
1	2009-04-10 20:26:00	0	20	4	7	6
1	2009-04-10 20:27:00	0	20	4	7	6
1	2009-04-10 20:28:00	0	20	4	7	6
1	2009-04-10 20:29:00	0	20	4	7	6
1	2009-04-10 20:30:00	0	20	4	7	6
1	2009-04-10 20:31:00	0	20	4	7	6
1	2009-04-10 20:32:00	14	20	4	7	6
1	2009-04-10 20:33:00	0	20	4	7	6
1	2009-04-10 20:34:00	0	20	4	7	6
1	2009-04-10 20:35:00	0	20	4	7	6
1	2009-04-10 20:36:00	0	20	4	7	6
1	2009-04-10 20:37:00	0	20	4	7	6
1	2009-04-10 20:38:00	14	20	4	7	6
1	2009-04-10 20:39:00	0	20	4	7	6
1	2009-04-10 20:40:00	0	20	4	7	6
1	2009-04-10 20:41:00	0	20	4	7	6
1	2009-04-10 20:42:00	0	20	4	7	6
1	2009-04-10 20:43:00	14	20	4	7	6
1	2009-04-10 20:44:00	0	20	4	7	6
1	2009-04-10 20:45:00	28	20	4	7	6
1	2009-04-10 20:46:00	0	20	4	7	6
1	2009-04-10 20:47:00	0	20	4	7	6
1	2009-04-10 20:48:00	0	20	4	7	6
1	2009-04-10 20:49:00	0	20	4	7	6
1	2009-04-10 20:50:00	0	20	4	7	6
1	2009-04-10 20:51:00	0	20	4	7	6
1	2009-04-10 20:52:00	0	20	4	7	6
1	2009-04-10 20:53:00	0	20	4	7	6
1	2009-04-10 20:54:00	0	20	4	7	6
1	2009-04-10 20:55:00	0	20	4	7	6
1	2009-04-10 20:56:00	0	20	4	7	6
1	2009-04-10 20:57:00	0	20	4	7	6
1	2009-04-10 20:58:00	0	20	4	7	6
1	2009-04-10 20:59:00	0	20	4	7	6
1	2009-04-10 21:00:00	0	20	4	7	6
1	2009-04-10 21:01:00	0	21	4	7	6
1	2009-04-10 21:02:00	0	21	4	7	6
1	2009-04-10 21:03:00	0	21	4	7	6
1	2009-04-10 21:04:00	0	21	4	7	6
1	2009-04-10 21:05:00	14	21	4	7	6
1	2009-04-10 21:06:00	0	21	4	7	6
1	2009-04-10 21:07:00	0	21	4	7	6
1	2009-04-10 21:08:00	0	21	4	7	6
1	2009-04-10 21:09:00	0	21	4	7	6
1	2009-04-10 21:10:00	153	21	4	7	6
1	2009-04-10 21:11:00	0	21	4	7	6
1	2009-04-10 21:12:00	0	21	4	7	6
1	2009-04-10 21:13:00	0	21	4	7	6
1	2009-04-10 21:14:00	0	21	4	7	6
1	2009-04-10 21:15:00	0	21	4	7	6
1	2009-04-10 21:16:00	1405	21	4	7	6
1	2009-04-10 21:17:00	181	21	4	7	6
1	2009-04-10 21:18:00	0	21	4	7	6
1	2009-04-10 21:19:00	1405	21	4	7	6
1	2009-04-10 21:20:00	1119	21	4	7	6
1	2009-04-10 21:21:00	868	21	4	7	6
1	2009-04-10 21:22:00	921	21	4	7	6
1	2009-04-10 21:23:00	153	21	4	7	6
1	2009-04-10 21:24:00	0	21	4	7	6
1	2009-04-10 21:25:00	0	21	4	7	6
1	2009-04-10 21:26:00	921	21	4	7	6
1	2009-04-10 21:27:00	442	21	4	7	6
1	2009-04-10 21:28:00	70	21	4	7	6
1	2009-04-10 21:29:00	56	21	4	7	6
1	2009-04-10 21:30:00	718	21	4	7	6
1	2009-04-10 21:31:00	231	21	4	7	6
1	2009-04-10 21:32:00	0	21	4	7	6
1	2009-04-10 21:33:00	501	21	4	7	6
1	2009-04-10 21:34:00	42	21	4	7	6
1	2009-04-10 21:35:00	0	21	4	7	6
1	2009-04-10 21:36:00	0	21	4	7	6
1	2009-04-10 21:37:00	365	21	4	7	6
1	2009-04-10 21:38:00	70	21	4	7	6
1	2009-04-10 21:39:00	153	21	4	7	6
1	2009-04-10 21:40:00	42	21	4	7	6
1	2009-04-10 21:41:00	562	21	4	7	6
1	2009-04-10 21:42:00	298	21	4	7	6
1	2009-04-10 21:43:00	125	21	4	7	6
1	2009-04-10 21:44:00	0	21	4	7	6
1	2009-04-10 21:45:00	42	21	4	7	6
1	2009-04-10 21:46:00	298	21	4	7	6
1	2009-04-10 21:47:00	14	21	4	7	6
1	2009-04-10 21:48:00	348	21	4	7	6
1	2009-04-10 21:49:00	167	21	4	7	6
1	2009-04-10 21:50:00	264	21	4	7	6
1	2009-04-10 21:51:00	949	21	4	7	6
1	2009-04-10 21:52:00	314	21	4	7	6
1	2009-04-10 21:53:00	0	21	4	7	6
1	2009-04-10 21:54:00	0	21	4	7	6
1	2009-04-10 21:55:00	0	21	4	7	6
1	2009-04-10 21:56:00	42	21	4	7	6
1	2009-04-10 21:57:00	14	21	4	7	6
1	2009-04-10 21:58:00	14	21	4	7	6
1	2009-04-10 21:59:00	442	21	4	7	6
1	2009-04-10 22:00:00	56	21	4	7	6
1	2009-04-10 22:01:00	0	22	4	7	6
1	2009-04-10 22:02:00	14	22	4	7	6
1	2009-04-10 22:03:00	0	22	4	7	6
1	2009-04-10 22:04:00	0	22	4	7	6
1	2009-04-10 22:05:00	0	22	4	7	6
1	2009-04-10 22:06:00	0	22	4	7	6
1	2009-04-10 22:07:00	97	22	4	7	6
1	2009-04-10 22:08:00	0	22	4	7	6
1	2009-04-10 22:09:00	0	22	4	7	6
1	2009-04-10 22:10:00	0	22	4	7	6
1	2009-04-10 22:11:00	0	22	4	7	6
1	2009-04-10 22:12:00	0	22	4	7	6
1	2009-04-10 22:13:00	0	22	4	7	6
1	2009-04-10 22:14:00	0	22	4	7	6
1	2009-04-10 22:15:00	0	22	4	7	6
1	2009-04-10 22:16:00	14	22	4	7	6
1	2009-04-10 22:17:00	0	22	4	7	6
1	2009-04-10 22:18:00	0	22	4	7	6
1	2009-04-10 22:19:00	0	22	4	7	6
1	2009-04-10 22:20:00	0	22	4	7	6
1	2009-04-10 22:21:00	0	22	4	7	6
1	2009-04-10 22:22:00	0	22	4	7	6
1	2009-04-10 22:23:00	0	22	4	7	6
1	2009-04-10 22:24:00	0	22	4	7	6
1	2009-04-10 22:25:00	0	22	4	7	6
1	2009-04-10 22:26:00	14	22	4	7	6
1	2009-04-10 22:27:00	0	22	4	7	6
1	2009-04-10 22:28:00	0	22	4	7	6
1	2009-04-10 22:29:00	0	22	4	7	6
1	2009-04-10 22:30:00	0	22	4	7	6
1	2009-04-10 22:31:00	0	22	4	7	6
1	2009-04-10 22:32:00	0	22	4	7	6
1	2009-04-10 22:33:00	0	22	4	7	6
1	2009-04-10 22:34:00	0	22	4	7	6
1	2009-04-10 22:35:00	14	22	4	7	6
1	2009-04-10 22:36:00	0	22	4	7	6
1	2009-04-10 22:37:00	0	22	4	7	6
1	2009-04-10 22:38:00	0	22	4	7	6
1	2009-04-10 22:39:00	0	22	4	7	6
1	2009-04-10 22:40:00	0	22	4	7	6
1	2009-04-10 22:41:00	0	22	4	7	6
1	2009-04-10 22:42:00	0	22	4	7	6
1	2009-04-10 22:43:00	0	22	4	7	6
1	2009-04-10 22:44:00	0	22	4	7	6
1	2009-04-10 22:45:00	0	22	4	7	6
1	2009-04-10 22:46:00	0	22	4	7	6
1	2009-04-10 22:47:00	0	22	4	7	6
1	2009-04-10 22:48:00	0	22	4	7	6
1	2009-04-10 22:49:00	0	22	4	7	6
1	2009-04-10 22:50:00	0	22	4	7	6
1	2009-04-10 22:51:00	0	22	4	7	6
1	2009-04-10 22:52:00	0	22	4	7	6
1	2009-04-10 22:53:00	0	22	4	7	6
1	2009-04-10 22:54:00	0	22	4	7	6
1	2009-04-10 22:55:00	0	22	4	7	6
1	2009-04-10 22:56:00	0	22	4	7	6
1	2009-04-10 22:57:00	0	22	4	7	6
1	2009-04-10 22:58:00	0	22	4	7	6
1	2009-04-10 22:59:00	42	22	4	7	6
1	2009-04-10 23:00:00	0	22	4	7	6
1	2009-04-10 23:01:00	0	23	4	7	6
1	2009-04-10 23:02:00	0	23	4	7	6
1	2009-04-10 23:03:00	0	23	4	7	6
1	2009-04-10 23:04:00	0	23	4	7	6
1	2009-04-10 23:05:00	0	23	4	7	6
1	2009-04-10 23:06:00	0	23	4	7	6
1	2009-04-10 23:07:00	0	23	4	7	6
1	2009-04-10 23:08:00	0	23	4	7	6
1	2009-04-10 23:09:00	0	23	4	7	6
1	2009-04-10 23:10:00	0	23	4	7	6
1	2009-04-10 23:11:00	0	23	4	7	6
1	2009-04-10 23:12:00	0	23	4	7	6
1	2009-04-10 23:13:00	0	23	4	7	6
1	2009-04-10 23:14:00	0	23	4	7	6
1	2009-04-10 23:15:00	0	23	4	7	6
1	2009-04-10 23:16:00	0	23	4	7	6
1	2009-04-10 23:17:00	0	23	4	7	6
1	2009-04-10 23:18:00	0	23	4	7	6
1	2009-04-10 23:19:00	0	23	4	7	6
1	2009-04-10 23:20:00	0	23	4	7	6
1	2009-04-10 23:21:00	0	23	4	7	6
1	2009-04-10 23:22:00	42	23	4	7	6
1	2009-04-10 23:23:00	0	23	4	7	6
1	2009-04-10 23:24:00	14	23	4	7	6
1	2009-04-10 23:25:00	0	23	4	7	6
1	2009-04-10 23:26:00	0	23	4	7	6
1	2009-04-10 23:27:00	0	23	4	7	6
1	2009-04-10 23:28:00	0	23	4	7	6
1	2009-04-10 23:29:00	0	23	4	7	6
1	2009-04-10 23:30:00	0	23	4	7	6
1	2009-04-10 23:31:00	0	23	4	7	6
1	2009-04-10 23:32:00	0	23	4	7	6
1	2009-04-10 23:33:00	0	23	4	7	6
1	2009-04-10 23:34:00	0	23	4	7	6
1	2009-04-10 23:35:00	0	23	4	7	6
1	2009-04-10 23:36:00	0	23	4	7	6
1	2009-04-10 23:37:00	0	23	4	7	6
1	2009-04-10 23:38:00	0	23	4	7	6
1	2009-04-10 23:39:00	0	23	4	7	6
1	2009-04-10 23:40:00	0	23	4	7	6
1	2009-04-10 23:41:00	0	23	4	7	6
1	2009-04-10 23:42:00	0	23	4	7	6
1	2009-04-10 23:43:00	0	23	4	7	6
1	2009-04-10 23:44:00	0	23	4	7	6
1	2009-04-10 23:45:00	0	23	4	7	6
1	2009-04-10 23:46:00	0	23	4	7	6
1	2009-04-10 23:47:00	0	23	4	7	6
1	2009-04-10 23:48:00	0	23	4	7	6
1	2009-04-10 23:49:00	0	23	4	7	6
1	2009-04-10 23:50:00	0	23	4	7	6
1	2009-04-10 23:51:00	0	23	4	7	6
1	2009-04-10 23:52:00	0	23	4	7	6
1	2009-04-10 23:53:00	0	23	4	7	6
1	2009-04-10 23:54:00	14	23	4	7	6
1	2009-04-10 23:55:00	14	23	4	7	6
1	2009-04-10 23:56:00	28	23	4	7	6
1	2009-04-10 23:57:00	0	23	4	7	6
1	2009-04-10 23:58:00	0	23	4	7	6
1	2009-04-10 23:59:00	14	23	4	7	6
1	2009-04-11	0	23	4	7	6
1	2009-04-11 00:01:00	0	0	1	8	7
1	2009-04-11 00:02:00	0	0	1	8	7
1	2009-04-11 00:03:00	0	0	1	8	7
1	2009-04-11 00:04:00	0	0	1	8	7
1	2009-04-11 00:05:00	0	0	1	8	7
1	2009-04-11 00:06:00	0	0	1	8	7
1	2009-04-11 00:07:00	70	0	1	8	7
1	2009-04-11 00:08:00	0	0	1	8	7
1	2009-04-11 00:09:00	14	0	1	8	7
1	2009-04-11 00:10:00	70	0	1	8	7
1	2009-04-11 00:11:00	0	0	1	8	7
1	2009-04-11 00:12:00	0	0	1	8	7
1	2009-04-11 00:13:00	0	0	1	8	7
1	2009-04-11 00:14:00	0	0	1	8	7
1	2009-04-11 00:15:00	0	0	1	8	7
1	2009-04-11 00:16:00	0	0	1	8	7
1	2009-04-11 00:17:00	0	0	1	8	7
1	2009-04-11 00:18:00	0	0	1	8	7
1	2009-04-11 00:19:00	0	0	1	8	7
1	2009-04-11 00:20:00	0	0	1	8	7
1	2009-04-11 00:21:00	0	0	1	8	7
1	2009-04-11 00:22:00	0	0	1	8	7
1	2009-04-11 00:23:00	0	0	1	8	7
1	2009-04-11 00:24:00	0	0	1	8	7
1	2009-04-11 00:25:00	0	0	1	8	7
1	2009-04-11 00:26:00	0	0	1	8	7
1	2009-04-11 00:27:00	0	0	1	8	7
1	2009-04-11 00:28:00	0	0	1	8	7
1	2009-04-11 00:29:00	0	0	1	8	7
1	2009-04-11 00:30:00	0	0	1	8	7
1	2009-04-11 00:31:00	0	0	1	8	7
1	2009-04-11 00:32:00	0	0	1	8	7
1	2009-04-11 00:33:00	0	0	1	8	7
1	2009-04-11 00:34:00	0	0	1	8	7
1	2009-04-11 00:35:00	0	0	1	8	7
1	2009-04-11 00:36:00	0	0	1	8	7
1	2009-04-11 00:37:00	28	0	1	8	7
1	2009-04-11 00:38:00	0	0	1	8	7
1	2009-04-11 00:39:00	0	0	1	8	7
1	2009-04-11 00:40:00	0	0	1	8	7
1	2009-04-11 00:41:00	0	0	1	8	7
1	2009-04-11 00:42:00	0	0	1	8	7
1	2009-04-11 00:43:00	0	0	1	8	7
1	2009-04-11 00:44:00	0	0	1	8	7
1	2009-04-11 00:45:00	0	0	1	8	7
1	2009-04-11 00:46:00	0	0	1	8	7
1	2009-04-11 00:47:00	0	0	1	8	7
1	2009-04-11 00:48:00	0	0	1	8	7
1	2009-04-11 00:49:00	0	0	1	8	7
1	2009-04-11 00:50:00	0	0	1	8	7
1	2009-04-11 00:51:00	14	0	1	8	7
1	2009-04-11 00:52:00	56	0	1	8	7
1	2009-04-11 00:53:00	0	0	1	8	7
1	2009-04-11 00:54:00	0	0	1	8	7
1	2009-04-11 00:55:00	0	0	1	8	7
1	2009-04-11 00:56:00	0	0	1	8	7
1	2009-04-11 00:57:00	0	0	1	8	7
1	2009-04-11 00:58:00	0	0	1	8	7
1	2009-04-11 00:59:00	0	0	1	8	7
1	2009-04-11 01:00:00	0	0	1	8	7
1	2009-04-11 01:01:00	14	1	1	8	7
1	2009-04-11 01:02:00	0	1	1	8	7
1	2009-04-11 01:03:00	0	1	1	8	7
1	2009-04-11 01:04:00	0	1	1	8	7
1	2009-04-11 01:05:00	0	1	1	8	7
1	2009-04-11 01:06:00	28	1	1	8	7
1	2009-04-11 01:07:00	0	1	1	8	7
1	2009-04-11 01:08:00	0	1	1	8	7
1	2009-04-11 01:09:00	0	1	1	8	7
1	2009-04-11 01:10:00	0	1	1	8	7
1	2009-04-11 01:11:00	0	1	1	8	7
1	2009-04-11 01:12:00	0	1	1	8	7
1	2009-04-11 01:13:00	0	1	1	8	7
1	2009-04-11 01:14:00	0	1	1	8	7
1	2009-04-11 01:15:00	0	1	1	8	7
1	2009-04-11 01:16:00	0	1	1	8	7
1	2009-04-11 01:17:00	0	1	1	8	7
1	2009-04-11 01:18:00	42	1	1	8	7
1	2009-04-11 01:19:00	97	1	1	8	7
1	2009-04-11 01:20:00	0	1	1	8	7
1	2009-04-11 01:21:00	0	1	1	8	7
1	2009-04-11 01:22:00	0	1	1	8	7
1	2009-04-11 01:23:00	0	1	1	8	7
1	2009-04-11 01:24:00	0	1	1	8	7
1	2009-04-11 01:25:00	0	1	1	8	7
1	2009-04-11 01:26:00	0	1	1	8	7
1	2009-04-11 01:27:00	0	1	1	8	7
1	2009-04-11 01:28:00	0	1	1	8	7
1	2009-04-11 01:29:00	0	1	1	8	7
1	2009-04-11 01:30:00	0	1	1	8	7
1	2009-04-11 01:31:00	0	1	1	8	7
1	2009-04-11 01:32:00	0	1	1	8	7
1	2009-04-11 01:33:00	0	1	1	8	7
1	2009-04-11 01:34:00	0	1	1	8	7
1	2009-04-11 01:35:00	0	1	1	8	7
1	2009-04-11 01:36:00	0	1	1	8	7
1	2009-04-11 01:37:00	0	1	1	8	7
1	2009-04-11 01:38:00	0	1	1	8	7
1	2009-04-11 01:39:00	0	1	1	8	7
1	2009-04-11 01:40:00	0	1	1	8	7
1	2009-04-11 01:41:00	0	1	1	8	7
1	2009-04-11 01:42:00	0	1	1	8	7
1	2009-04-11 01:43:00	0	1	1	8	7
1	2009-04-11 01:44:00	14	1	1	8	7
1	2009-04-11 01:45:00	14	1	1	8	7
1	2009-04-11 01:46:00	0	1	1	8	7
1	2009-04-11 01:47:00	0	1	1	8	7
1	2009-04-11 01:48:00	0	1	1	8	7
1	2009-04-11 01:49:00	0	1	1	8	7
1	2009-04-11 01:50:00	0	1	1	8	7
1	2009-04-11 01:51:00	0	1	1	8	7
1	2009-04-11 01:52:00	0	1	1	8	7
1	2009-04-11 01:53:00	0	1	1	8	7
1	2009-04-11 01:54:00	0	1	1	8	7
1	2009-04-11 01:55:00	0	1	1	8	7
1	2009-04-11 01:56:00	0	1	1	8	7
1	2009-04-11 01:57:00	0	1	1	8	7
1	2009-04-11 01:58:00	0	1	1	8	7
1	2009-04-11 01:59:00	0	1	1	8	7
1	2009-04-11 02:00:00	0	1	1	8	7
1	2009-04-11 02:01:00	28	2	1	8	7
1	2009-04-11 02:02:00	0	2	1	8	7
1	2009-04-11 02:03:00	0	2	1	8	7
1	2009-04-11 02:04:00	0	2	1	8	7
1	2009-04-11 02:05:00	0	2	1	8	7
1	2009-04-11 02:06:00	0	2	1	8	7
1	2009-04-11 02:07:00	0	2	1	8	7
1	2009-04-11 02:08:00	0	2	1	8	7
1	2009-04-11 02:09:00	0	2	1	8	7
1	2009-04-11 02:10:00	0	2	1	8	7
1	2009-04-11 02:11:00	0	2	1	8	7
1	2009-04-11 02:12:00	0	2	1	8	7
1	2009-04-11 02:13:00	0	2	1	8	7
1	2009-04-11 02:14:00	0	2	1	8	7
1	2009-04-11 02:15:00	0	2	1	8	7
1	2009-04-11 02:16:00	0	2	1	8	7
1	2009-04-11 02:17:00	0	2	1	8	7
1	2009-04-11 02:18:00	14	2	1	8	7
1	2009-04-11 02:19:00	0	2	1	8	7
1	2009-04-11 02:20:00	0	2	1	8	7
1	2009-04-11 02:21:00	0	2	1	8	7
1	2009-04-11 02:22:00	0	2	1	8	7
1	2009-04-11 02:23:00	0	2	1	8	7
1	2009-04-11 02:24:00	0	2	1	8	7
1	2009-04-11 02:25:00	0	2	1	8	7
1	2009-04-11 02:26:00	0	2	1	8	7
1	2009-04-11 02:27:00	14	2	1	8	7
1	2009-04-11 02:28:00	0	2	1	8	7
1	2009-04-11 02:29:00	0	2	1	8	7
1	2009-04-11 02:30:00	97	2	1	8	7
1	2009-04-11 02:31:00	28	2	1	8	7
1	2009-04-11 02:32:00	0	2	1	8	7
1	2009-04-11 02:33:00	0	2	1	8	7
1	2009-04-11 02:34:00	0	2	1	8	7
1	2009-04-11 02:35:00	0	2	1	8	7
1	2009-04-11 02:36:00	0	2	1	8	7
1	2009-04-11 02:37:00	0	2	1	8	7
1	2009-04-11 02:38:00	0	2	1	8	7
1	2009-04-11 02:39:00	0	2	1	8	7
1	2009-04-11 02:40:00	0	2	1	8	7
1	2009-04-11 02:41:00	0	2	1	8	7
1	2009-04-11 02:42:00	0	2	1	8	7
1	2009-04-11 02:43:00	0	2	1	8	7
1	2009-04-11 02:44:00	0	2	1	8	7
1	2009-04-11 02:45:00	0	2	1	8	7
1	2009-04-11 02:46:00	0	2	1	8	7
1	2009-04-11 02:47:00	0	2	1	8	7
1	2009-04-11 02:48:00	0	2	1	8	7
1	2009-04-11 02:49:00	0	2	1	8	7
1	2009-04-11 02:50:00	0	2	1	8	7
1	2009-04-11 02:51:00	0	2	1	8	7
1	2009-04-11 02:52:00	0	2	1	8	7
1	2009-04-11 02:53:00	111	2	1	8	7
1	2009-04-11 02:54:00	0	2	1	8	7
1	2009-04-11 02:55:00	0	2	1	8	7
1	2009-04-11 02:56:00	0	2	1	8	7
1	2009-04-11 02:57:00	0	2	1	8	7
1	2009-04-11 02:58:00	0	2	1	8	7
1	2009-04-11 02:59:00	0	2	1	8	7
1	2009-04-11 03:00:00	0	2	1	8	7
1	2009-04-11 03:01:00	0	3	1	8	7
1	2009-04-11 03:02:00	14	3	1	8	7
1	2009-04-11 03:03:00	0	3	1	8	7
1	2009-04-11 03:04:00	0	3	1	8	7
1	2009-04-11 03:05:00	0	3	1	8	7
1	2009-04-11 03:06:00	42	3	1	8	7
1	2009-04-11 03:07:00	83	3	1	8	7
1	2009-04-11 03:08:00	0	3	1	8	7
1	2009-04-11 03:09:00	0	3	1	8	7
1	2009-04-11 03:10:00	0	3	1	8	7
1	2009-04-11 03:11:00	0	3	1	8	7
1	2009-04-11 03:12:00	0	3	1	8	7
1	2009-04-11 03:13:00	0	3	1	8	7
1	2009-04-11 03:14:00	0	3	1	8	7
1	2009-04-11 03:15:00	0	3	1	8	7
1	2009-04-11 03:16:00	0	3	1	8	7
1	2009-04-11 03:17:00	0	3	1	8	7
1	2009-04-11 03:18:00	0	3	1	8	7
1	2009-04-11 03:19:00	0	3	1	8	7
1	2009-04-11 03:20:00	0	3	1	8	7
1	2009-04-11 03:21:00	14	3	1	8	7
1	2009-04-11 03:22:00	14	3	1	8	7
1	2009-04-11 03:23:00	0	3	1	8	7
1	2009-04-11 03:24:00	0	3	1	8	7
1	2009-04-11 03:25:00	0	3	1	8	7
1	2009-04-11 03:26:00	0	3	1	8	7
1	2009-04-11 03:27:00	0	3	1	8	7
1	2009-04-11 03:28:00	0	3	1	8	7
1	2009-04-11 03:29:00	0	3	1	8	7
1	2009-04-11 03:30:00	0	3	1	8	7
1	2009-04-11 03:31:00	28	3	1	8	7
1	2009-04-11 03:32:00	0	3	1	8	7
1	2009-04-11 03:33:00	0	3	1	8	7
1	2009-04-11 03:34:00	0	3	1	8	7
1	2009-04-11 03:35:00	0	3	1	8	7
1	2009-04-11 03:36:00	0	3	1	8	7
1	2009-04-11 03:37:00	14	3	1	8	7
1	2009-04-11 03:38:00	0	3	1	8	7
1	2009-04-11 03:39:00	0	3	1	8	7
1	2009-04-11 03:40:00	0	3	1	8	7
1	2009-04-11 03:41:00	0	3	1	8	7
1	2009-04-11 03:42:00	0	3	1	8	7
1	2009-04-11 03:43:00	0	3	1	8	7
1	2009-04-11 03:44:00	0	3	1	8	7
1	2009-04-11 03:45:00	0	3	1	8	7
1	2009-04-11 03:46:00	0	3	1	8	7
1	2009-04-11 03:47:00	0	3	1	8	7
1	2009-04-11 03:48:00	0	3	1	8	7
1	2009-04-11 03:49:00	14	3	1	8	7
1	2009-04-11 03:50:00	42	3	1	8	7
1	2009-04-11 03:51:00	264	3	1	8	7
1	2009-04-11 03:52:00	28	3	1	8	7
1	2009-04-11 03:53:00	0	3	1	8	7
1	2009-04-11 03:54:00	0	3	1	8	7
1	2009-04-11 03:55:00	0	3	1	8	7
1	2009-04-11 03:56:00	42	3	1	8	7
1	2009-04-11 03:57:00	56	3	1	8	7
1	2009-04-11 03:58:00	0	3	1	8	7
1	2009-04-11 03:59:00	0	3	1	8	7
1	2009-04-11 04:00:00	0	3	1	8	7
1	2009-04-11 04:01:00	0	4	1	8	7
1	2009-04-11 04:02:00	0	4	1	8	7
1	2009-04-11 04:03:00	0	4	1	8	7
1	2009-04-11 04:04:00	0	4	1	8	7
1	2009-04-11 04:05:00	0	4	1	8	7
1	2009-04-11 04:06:00	0	4	1	8	7
1	2009-04-11 04:07:00	0	4	1	8	7
1	2009-04-11 04:08:00	42	4	1	8	7
1	2009-04-11 04:09:00	0	4	1	8	7
1	2009-04-11 04:10:00	0	4	1	8	7
1	2009-04-11 04:11:00	0	4	1	8	7
1	2009-04-11 04:12:00	0	4	1	8	7
1	2009-04-11 04:13:00	0	4	1	8	7
1	2009-04-11 04:14:00	0	4	1	8	7
1	2009-04-11 04:15:00	0	4	1	8	7
1	2009-04-11 04:16:00	0	4	1	8	7
1	2009-04-11 04:17:00	0	4	1	8	7
1	2009-04-11 04:18:00	0	4	1	8	7
1	2009-04-11 04:19:00	0	4	1	8	7
1	2009-04-11 04:20:00	0	4	1	8	7
1	2009-04-11 04:21:00	0	4	1	8	7
1	2009-04-11 04:22:00	0	4	1	8	7
1	2009-04-11 04:23:00	0	4	1	8	7
1	2009-04-11 04:24:00	0	4	1	8	7
1	2009-04-11 04:25:00	0	4	1	8	7
1	2009-04-11 04:26:00	0	4	1	8	7
1	2009-04-11 04:27:00	0	4	1	8	7
1	2009-04-11 04:28:00	0	4	1	8	7
1	2009-04-11 04:29:00	0	4	1	8	7
1	2009-04-11 04:30:00	0	4	1	8	7
1	2009-04-11 04:31:00	0	4	1	8	7
1	2009-04-11 04:32:00	0	4	1	8	7
1	2009-04-11 04:33:00	0	4	1	8	7
1	2009-04-11 04:34:00	0	4	1	8	7
1	2009-04-11 04:35:00	0	4	1	8	7
1	2009-04-11 04:36:00	0	4	1	8	7
1	2009-04-11 04:37:00	0	4	1	8	7
1	2009-04-11 04:38:00	0	4	1	8	7
1	2009-04-11 04:39:00	0	4	1	8	7
1	2009-04-11 04:40:00	0	4	1	8	7
1	2009-04-11 04:41:00	0	4	1	8	7
1	2009-04-11 04:42:00	0	4	1	8	7
1	2009-04-11 04:43:00	0	4	1	8	7
1	2009-04-11 04:44:00	0	4	1	8	7
1	2009-04-11 04:45:00	0	4	1	8	7
1	2009-04-11 04:46:00	0	4	1	8	7
1	2009-04-11 04:47:00	0	4	1	8	7
1	2009-04-11 04:48:00	0	4	1	8	7
1	2009-04-11 04:49:00	42	4	1	8	7
1	2009-04-11 04:50:00	0	4	1	8	7
1	2009-04-11 04:51:00	0	4	1	8	7
1	2009-04-11 04:52:00	0	4	1	8	7
1	2009-04-11 04:53:00	0	4	1	8	7
1	2009-04-11 04:54:00	0	4	1	8	7
1	2009-04-11 04:55:00	56	4	1	8	7
1	2009-04-11 04:56:00	56	4	1	8	7
1	2009-04-11 04:57:00	0	4	1	8	7
1	2009-04-11 04:58:00	0	4	1	8	7
1	2009-04-11 04:59:00	0	4	1	8	7
1	2009-04-11 05:00:00	0	4	1	8	7
1	2009-04-11 05:01:00	0	5	1	8	7
1	2009-04-11 05:02:00	0	5	1	8	7
1	2009-04-11 05:03:00	0	5	1	8	7
1	2009-04-11 05:04:00	0	5	1	8	7
1	2009-04-11 05:05:00	0	5	1	8	7
1	2009-04-11 05:06:00	0	5	1	8	7
1	2009-04-11 05:07:00	0	5	1	8	7
1	2009-04-11 05:08:00	0	5	1	8	7
1	2009-04-11 05:09:00	0	5	1	8	7
1	2009-04-11 05:10:00	0	5	1	8	7
1	2009-04-11 05:11:00	0	5	1	8	7
1	2009-04-11 05:12:00	0	5	1	8	7
1	2009-04-11 05:13:00	0	5	1	8	7
1	2009-04-11 05:14:00	0	5	1	8	7
1	2009-04-11 05:15:00	14	5	1	8	7
1	2009-04-11 05:16:00	0	5	1	8	7
1	2009-04-11 05:17:00	0	5	1	8	7
1	2009-04-11 05:18:00	0	5	1	8	7
1	2009-04-11 05:19:00	0	5	1	8	7
1	2009-04-11 05:20:00	0	5	1	8	7
1	2009-04-11 05:21:00	0	5	1	8	7
1	2009-04-11 05:22:00	0	5	1	8	7
1	2009-04-11 05:23:00	0	5	1	8	7
1	2009-04-11 05:24:00	0	5	1	8	7
1	2009-04-11 05:25:00	0	5	1	8	7
1	2009-04-11 05:26:00	0	5	1	8	7
1	2009-04-11 05:27:00	0	5	1	8	7
1	2009-04-11 05:28:00	0	5	1	8	7
1	2009-04-11 05:29:00	0	5	1	8	7
1	2009-04-11 05:30:00	0	5	1	8	7
1	2009-04-11 05:31:00	0	5	1	8	7
1	2009-04-11 05:32:00	0	5	1	8	7
1	2009-04-11 05:33:00	0	5	1	8	7
1	2009-04-11 05:34:00	0	5	1	8	7
1	2009-04-11 05:35:00	0	5	1	8	7
1	2009-04-11 05:36:00	0	5	1	8	7
1	2009-04-11 05:37:00	0	5	1	8	7
1	2009-04-11 05:38:00	0	5	1	8	7
1	2009-04-11 05:39:00	0	5	1	8	7
1	2009-04-11 05:40:00	0	5	1	8	7
1	2009-04-11 05:41:00	0	5	1	8	7
1	2009-04-11 05:42:00	70	5	1	8	7
1	2009-04-11 05:43:00	0	5	1	8	7
1	2009-04-11 05:44:00	0	5	1	8	7
1	2009-04-11 05:45:00	0	5	1	8	7
1	2009-04-11 05:46:00	0	5	1	8	7
1	2009-04-11 05:47:00	0	5	1	8	7
1	2009-04-11 05:48:00	0	5	1	8	7
1	2009-04-11 05:49:00	0	5	1	8	7
1	2009-04-11 05:50:00	0	5	1	8	7
1	2009-04-11 05:51:00	0	5	1	8	7
1	2009-04-11 05:52:00	0	5	1	8	7
1	2009-04-11 05:53:00	0	5	1	8	7
1	2009-04-11 05:54:00	0	5	1	8	7
1	2009-04-11 05:55:00	0	5	1	8	7
1	2009-04-11 05:56:00	0	5	1	8	7
1	2009-04-11 05:57:00	0	5	1	8	7
1	2009-04-11 05:58:00	0	5	1	8	7
1	2009-04-11 05:59:00	14	5	1	8	7
1	2009-04-11 06:00:00	0	5	1	8	7
1	2009-04-11 06:01:00	0	6	2	8	7
1	2009-04-11 06:02:00	0	6	2	8	7
1	2009-04-11 06:03:00	0	6	2	8	7
1	2009-04-11 06:04:00	0	6	2	8	7
1	2009-04-11 06:05:00	0	6	2	8	7
1	2009-04-11 06:06:00	0	6	2	8	7
1	2009-04-11 06:07:00	0	6	2	8	7
1	2009-04-11 06:08:00	0	6	2	8	7
1	2009-04-11 06:09:00	0	6	2	8	7
1	2009-04-11 06:10:00	0	6	2	8	7
1	2009-04-11 06:11:00	0	6	2	8	7
1	2009-04-11 06:12:00	0	6	2	8	7
1	2009-04-11 06:13:00	0	6	2	8	7
1	2009-04-11 06:14:00	0	6	2	8	7
1	2009-04-11 06:15:00	0	6	2	8	7
1	2009-04-11 06:16:00	42	6	2	8	7
1	2009-04-11 06:17:00	0	6	2	8	7
1	2009-04-11 06:18:00	0	6	2	8	7
1	2009-04-11 06:19:00	0	6	2	8	7
1	2009-04-11 06:20:00	0	6	2	8	7
1	2009-04-11 06:21:00	0	6	2	8	7
1	2009-04-11 06:22:00	0	6	2	8	7
1	2009-04-11 06:23:00	0	6	2	8	7
1	2009-04-11 06:24:00	0	6	2	8	7
1	2009-04-11 06:25:00	28	6	2	8	7
1	2009-04-11 06:26:00	0	6	2	8	7
1	2009-04-11 06:27:00	14	6	2	8	7
1	2009-04-11 06:28:00	0	6	2	8	7
1	2009-04-11 06:29:00	0	6	2	8	7
1	2009-04-11 06:30:00	0	6	2	8	7
1	2009-04-11 06:31:00	0	6	2	8	7
1	2009-04-11 06:32:00	0	6	2	8	7
1	2009-04-11 06:33:00	0	6	2	8	7
1	2009-04-11 06:34:00	0	6	2	8	7
1	2009-04-11 06:35:00	0	6	2	8	7
1	2009-04-11 06:36:00	0	6	2	8	7
1	2009-04-11 06:37:00	97	6	2	8	7
1	2009-04-11 06:38:00	0	6	2	8	7
1	2009-04-11 06:39:00	0	6	2	8	7
1	2009-04-11 06:40:00	28	6	2	8	7
1	2009-04-11 06:41:00	0	6	2	8	7
1	2009-04-11 06:42:00	0	6	2	8	7
1	2009-04-11 06:43:00	0	6	2	8	7
1	2009-04-11 06:44:00	0	6	2	8	7
1	2009-04-11 06:45:00	0	6	2	8	7
1	2009-04-11 06:46:00	0	6	2	8	7
1	2009-04-11 06:47:00	0	6	2	8	7
1	2009-04-11 06:48:00	0	6	2	8	7
1	2009-04-11 06:49:00	0	6	2	8	7
1	2009-04-11 06:50:00	0	6	2	8	7
1	2009-04-11 06:51:00	0	6	2	8	7
1	2009-04-11 06:52:00	0	6	2	8	7
1	2009-04-11 06:53:00	0	6	2	8	7
1	2009-04-11 06:54:00	0	6	2	8	7
1	2009-04-11 06:55:00	0	6	2	8	7
1	2009-04-11 06:56:00	14	6	2	8	7
1	2009-04-11 06:57:00	0	6	2	8	7
1	2009-04-11 06:58:00	0	6	2	8	7
1	2009-04-11 06:59:00	0	6	2	8	7
1	2009-04-11 07:00:00	0	6	2	8	7
1	2009-04-11 07:01:00	0	7	2	8	7
1	2009-04-11 07:02:00	0	7	2	8	7
1	2009-04-11 07:03:00	0	7	2	8	7
1	2009-04-11 07:04:00	0	7	2	8	7
1	2009-04-11 07:05:00	0	7	2	8	7
1	2009-04-11 07:06:00	0	7	2	8	7
1	2009-04-11 07:07:00	0	7	2	8	7
1	2009-04-11 07:08:00	0	7	2	8	7
1	2009-04-11 07:09:00	0	7	2	8	7
1	2009-04-11 07:10:00	42	7	2	8	7
1	2009-04-11 07:11:00	214	7	2	8	7
1	2009-04-11 07:12:00	1149	7	2	8	7
1	2009-04-11 07:13:00	1005	7	2	8	7
1	2009-04-11 07:14:00	868	7	2	8	7
1	2009-04-11 07:15:00	1372	7	2	8	7
1	2009-04-11 07:16:00	462	7	2	8	7
1	2009-04-11 07:17:00	949	7	2	8	7
1	2009-04-11 07:18:00	403	7	2	8	7
1	2009-04-11 07:19:00	28	7	2	8	7
1	2009-04-11 07:20:00	28	7	2	8	7
1	2009-04-11 07:21:00	281	7	2	8	7
1	2009-04-11 07:22:00	14	7	2	8	7
1	2009-04-11 07:23:00	56	7	2	8	7
1	2009-04-11 07:24:00	198	7	2	8	7
1	2009-04-11 07:25:00	28	7	2	8	7
1	2009-04-11 07:26:00	70	7	2	8	7
1	2009-04-11 07:27:00	743	7	2	8	7
1	2009-04-11 07:28:00	442	7	2	8	7
1	2009-04-11 07:29:00	331	7	2	8	7
1	2009-04-11 07:30:00	70	7	2	8	7
1	2009-04-11 07:31:00	264	7	2	8	7
1	2009-04-11 07:32:00	481	7	2	8	7
1	2009-04-11 07:33:00	501	7	2	8	7
1	2009-04-11 07:34:00	14	7	2	8	7
1	2009-04-11 07:35:00	651	7	2	8	7
1	2009-04-11 07:36:00	673	7	2	8	7
1	2009-04-11 07:37:00	0	7	2	8	7
1	2009-04-11 07:38:00	584	7	2	8	7
1	2009-04-11 07:39:00	562	7	2	8	7
1	2009-04-11 07:40:00	14	7	2	8	7
1	2009-04-11 07:41:00	28	7	2	8	7
1	2009-04-11 07:42:00	0	7	2	8	7
1	2009-04-11 07:43:00	1583	7	2	8	7
1	2009-04-11 07:44:00	629	7	2	8	7
1	2009-04-11 07:45:00	14	7	2	8	7
1	2009-04-11 07:46:00	629	7	2	8	7
1	2009-04-11 07:47:00	818	7	2	8	7
1	2009-04-11 07:48:00	125	7	2	8	7
1	2009-04-11 07:49:00	28	7	2	8	7
1	2009-04-11 07:50:00	607	7	2	8	7
1	2009-04-11 07:51:00	0	7	2	8	7
1	2009-04-11 07:52:00	231	7	2	8	7
1	2009-04-11 07:53:00	264	7	2	8	7
1	2009-04-11 07:54:00	607	7	2	8	7
1	2009-04-11 07:55:00	520	7	2	8	7
1	2009-04-11 07:56:00	0	7	2	8	7
1	2009-04-11 07:57:00	562	7	2	8	7
1	2009-04-11 07:58:00	14	7	2	8	7
1	2009-04-11 07:59:00	0	7	2	8	7
1	2009-04-11 08:00:00	0	7	2	8	7
1	2009-04-11 08:01:00	0	8	2	8	7
1	2009-04-11 08:02:00	0	8	2	8	7
1	2009-04-11 08:03:00	0	8	2	8	7
1	2009-04-11 08:04:00	0	8	2	8	7
1	2009-04-11 08:05:00	14	8	2	8	7
1	2009-04-11 08:06:00	0	8	2	8	7
1	2009-04-11 08:07:00	0	8	2	8	7
1	2009-04-11 08:08:00	14	8	2	8	7
1	2009-04-11 08:09:00	0	8	2	8	7
1	2009-04-11 08:10:00	0	8	2	8	7
1	2009-04-11 08:11:00	0	8	2	8	7
1	2009-04-11 08:12:00	0	8	2	8	7
1	2009-04-11 08:13:00	0	8	2	8	7
1	2009-04-11 08:14:00	0	8	2	8	7
1	2009-04-11 08:15:00	0	8	2	8	7
1	2009-04-11 08:16:00	0	8	2	8	7
1	2009-04-11 08:17:00	0	8	2	8	7
1	2009-04-11 08:18:00	14	8	2	8	7
1	2009-04-11 08:19:00	0	8	2	8	7
1	2009-04-11 08:20:00	0	8	2	8	7
1	2009-04-11 08:21:00	0	8	2	8	7
1	2009-04-11 08:22:00	843	8	2	8	7
1	2009-04-11 08:23:00	0	8	2	8	7
1	2009-04-11 08:24:00	14	8	2	8	7
1	2009-04-11 08:25:00	0	8	2	8	7
1	2009-04-11 08:26:00	0	8	2	8	7
1	2009-04-11 08:27:00	0	8	2	8	7
1	2009-04-11 08:28:00	0	8	2	8	7
1	2009-04-11 08:29:00	0	8	2	8	7
1	2009-04-11 08:30:00	0	8	2	8	7
1	2009-04-11 08:31:00	0	8	2	8	7
1	2009-04-11 08:32:00	0	8	2	8	7
1	2009-04-11 08:33:00	0	8	2	8	7
1	2009-04-11 08:34:00	0	8	2	8	7
1	2009-04-11 08:35:00	0	8	2	8	7
1	2009-04-11 08:36:00	0	8	2	8	7
1	2009-04-11 08:37:00	0	8	2	8	7
1	2009-04-11 08:38:00	0	8	2	8	7
1	2009-04-11 08:39:00	0	8	2	8	7
1	2009-04-11 08:40:00	0	8	2	8	7
1	2009-04-11 08:41:00	0	8	2	8	7
1	2009-04-11 08:42:00	0	8	2	8	7
1	2009-04-11 08:43:00	0	8	2	8	7
1	2009-04-11 08:44:00	0	8	2	8	7
1	2009-04-11 08:45:00	0	8	2	8	7
1	2009-04-11 08:46:00	0	8	2	8	7
1	2009-04-11 08:47:00	0	8	2	8	7
1	2009-04-11 08:48:00	0	8	2	8	7
1	2009-04-11 08:49:00	0	8	2	8	7
1	2009-04-11 08:50:00	0	8	2	8	7
1	2009-04-11 08:51:00	0	8	2	8	7
1	2009-04-11 08:52:00	0	8	2	8	7
1	2009-04-11 08:53:00	0	8	2	8	7
1	2009-04-11 08:54:00	0	8	2	8	7
1	2009-04-11 08:55:00	0	8	2	8	7
1	2009-04-11 08:56:00	0	8	2	8	7
1	2009-04-11 08:57:00	0	8	2	8	7
1	2009-04-11 08:58:00	14	8	2	8	7
1	2009-04-11 08:59:00	0	8	2	8	7
1	2009-04-11 09:00:00	0	8	2	8	7
1	2009-04-11 09:01:00	0	9	2	8	7
1	2009-04-11 09:02:00	0	9	2	8	7
1	2009-04-11 09:03:00	0	9	2	8	7
1	2009-04-11 09:04:00	0	9	2	8	7
1	2009-04-11 09:05:00	14	9	2	8	7
1	2009-04-11 09:06:00	14	9	2	8	7
1	2009-04-11 09:07:00	0	9	2	8	7
1	2009-04-11 09:08:00	0	9	2	8	7
1	2009-04-11 09:09:00	0	9	2	8	7
1	2009-04-11 09:10:00	0	9	2	8	7
1	2009-04-11 09:11:00	0	9	2	8	7
1	2009-04-11 09:12:00	0	9	2	8	7
1	2009-04-11 09:13:00	0	9	2	8	7
1	2009-04-11 09:14:00	0	9	2	8	7
1	2009-04-11 09:15:00	0	9	2	8	7
1	2009-04-11 09:16:00	0	9	2	8	7
1	2009-04-11 09:17:00	0	9	2	8	7
1	2009-04-11 09:18:00	0	9	2	8	7
1	2009-04-11 09:19:00	0	9	2	8	7
1	2009-04-11 09:20:00	584	9	2	8	7
1	2009-04-11 09:21:00	718	9	2	8	7
1	2009-04-11 09:22:00	384	9	2	8	7
1	2009-04-11 09:23:00	743	9	2	8	7
1	2009-04-11 09:24:00	0	9	2	8	7
1	2009-04-11 09:25:00	868	9	2	8	7
1	2009-04-11 09:26:00	442	9	2	8	7
1	2009-04-11 09:27:00	1060	9	2	8	7
1	2009-04-11 09:28:00	281	9	2	8	7
1	2009-04-11 09:29:00	2159	9	2	8	7
1	2009-04-11 09:30:00	462	9	2	8	7
1	2009-04-11 09:31:00	1338	9	2	8	7
1	2009-04-11 09:32:00	1060	9	2	8	7
1	2009-04-11 09:33:00	651	9	2	8	7
1	2009-04-11 09:34:00	1856	9	2	8	7
1	2009-04-11 09:35:00	718	9	2	8	7
1	2009-04-11 09:36:00	0	9	2	8	7
1	2009-04-11 09:37:00	0	9	2	8	7
1	2009-04-11 09:38:00	0	9	2	8	7
1	2009-04-11 09:39:00	0	9	2	8	7
1	2009-04-11 09:40:00	0	9	2	8	7
1	2009-04-11 09:41:00	0	9	2	8	7
1	2009-04-11 09:42:00	0	9	2	8	7
1	2009-04-11 09:43:00	28	9	2	8	7
1	2009-04-11 09:44:00	481	9	2	8	7
1	2009-04-11 09:45:00	718	9	2	8	7
1	2009-04-11 09:46:00	696	9	2	8	7
1	2009-04-11 09:47:00	718	9	2	8	7
1	2009-04-11 09:48:00	298	9	2	8	7
1	2009-04-11 09:49:00	584	9	2	8	7
1	2009-04-11 09:50:00	0	9	2	8	7
1	2009-04-11 09:51:00	0	9	2	8	7
1	2009-04-11 09:52:00	0	9	2	8	7
1	2009-04-11 09:53:00	0	9	2	8	7
1	2009-04-11 09:54:00	0	9	2	8	7
1	2009-04-11 09:55:00	14	9	2	8	7
1	2009-04-11 09:56:00	0	9	2	8	7
1	2009-04-11 09:57:00	0	9	2	8	7
1	2009-04-11 09:58:00	70	9	2	8	7
1	2009-04-11 09:59:00	0	9	2	8	7
1	2009-04-11 10:00:00	0	9	2	8	7
1	2009-04-11 10:01:00	70	10	2	8	7
1	2009-04-11 10:02:00	0	10	2	8	7
1	2009-04-11 10:03:00	0	10	2	8	7
1	2009-04-11 10:04:00	0	10	2	8	7
1	2009-04-11 10:05:00	0	10	2	8	7
1	2009-04-11 10:06:00	0	10	2	8	7
1	2009-04-11 10:07:00	0	10	2	8	7
1	2009-04-11 10:08:00	0	10	2	8	7
1	2009-04-11 10:09:00	0	10	2	8	7
1	2009-04-11 10:10:00	0	10	2	8	7
1	2009-04-11 10:11:00	0	10	2	8	7
1	2009-04-11 10:12:00	0	10	2	8	7
1	2009-04-11 10:13:00	0	10	2	8	7
1	2009-04-11 10:14:00	28	10	2	8	7
1	2009-04-11 10:15:00	0	10	2	8	7
1	2009-04-11 10:16:00	0	10	2	8	7
1	2009-04-11 10:17:00	0	10	2	8	7
1	2009-04-11 10:18:00	0	10	2	8	7
1	2009-04-11 10:19:00	0	10	2	8	7
1	2009-04-11 10:20:00	0	10	2	8	7
1	2009-04-11 10:21:00	0	10	2	8	7
1	2009-04-11 10:22:00	0	10	2	8	7
1	2009-04-11 10:23:00	0	10	2	8	7
1	2009-04-11 10:24:00	0	10	2	8	7
1	2009-04-11 10:25:00	125	10	2	8	7
1	2009-04-11 10:26:00	1898	10	2	8	7
1	2009-04-11 10:27:00	111	10	2	8	7
1	2009-04-11 10:28:00	1736	10	2	8	7
1	2009-04-11 10:29:00	1439	10	2	8	7
1	2009-04-11 10:30:00	442	10	2	8	7
1	2009-04-11 10:31:00	0	10	2	8	7
1	2009-04-11 10:32:00	0	10	2	8	7
1	2009-04-11 10:33:00	28	10	2	8	7
1	2009-04-11 10:34:00	42	10	2	8	7
1	2009-04-11 10:35:00	56	10	2	8	7
1	2009-04-11 10:36:00	0	10	2	8	7
1	2009-04-11 10:37:00	0	10	2	8	7
1	2009-04-11 10:38:00	167	10	2	8	7
1	2009-04-11 10:39:00	42	10	2	8	7
1	2009-04-11 10:40:00	0	10	2	8	7
1	2009-04-11 10:41:00	0	10	2	8	7
1	2009-04-11 10:42:00	0	10	2	8	7
1	2009-04-11 10:43:00	14	10	2	8	7
1	2009-04-11 10:44:00	0	10	2	8	7
1	2009-04-11 10:45:00	0	10	2	8	7
1	2009-04-11 10:46:00	0	10	2	8	7
1	2009-04-11 10:47:00	0	10	2	8	7
1	2009-04-11 10:48:00	0	10	2	8	7
1	2009-04-11 10:49:00	0	10	2	8	7
1	2009-04-11 10:50:00	0	10	2	8	7
1	2009-04-11 10:51:00	0	10	2	8	7
1	2009-04-11 10:52:00	0	10	2	8	7
1	2009-04-11 10:53:00	14	10	2	8	7
1	2009-04-11 10:54:00	0	10	2	8	7
1	2009-04-11 10:55:00	0	10	2	8	7
1	2009-04-11 10:56:00	28	10	2	8	7
1	2009-04-11 10:57:00	0	10	2	8	7
1	2009-04-11 10:58:00	0	10	2	8	7
1	2009-04-11 10:59:00	0	10	2	8	7
1	2009-04-11 11:00:00	0	10	2	8	7
1	2009-04-11 11:01:00	0	11	2	8	7
1	2009-04-11 11:02:00	0	11	2	8	7
1	2009-04-11 11:03:00	0	11	2	8	7
1	2009-04-11 11:04:00	0	11	2	8	7
1	2009-04-11 11:05:00	0	11	2	8	7
1	2009-04-11 11:06:00	0	11	2	8	7
1	2009-04-11 11:07:00	0	11	2	8	7
1	2009-04-11 11:08:00	0	11	2	8	7
1	2009-04-11 11:09:00	0	11	2	8	7
1	2009-04-11 11:10:00	0	11	2	8	7
1	2009-04-11 11:11:00	0	11	2	8	7
1	2009-04-11 11:12:00	0	11	2	8	7
1	2009-04-11 11:13:00	651	11	2	8	7
1	2009-04-11 11:14:00	629	11	2	8	7
1	2009-04-11 11:15:00	42	11	2	8	7
1	2009-04-11 11:16:00	818	11	2	8	7
1	2009-04-11 11:17:00	0	11	2	8	7
1	2009-04-11 11:18:00	0	11	2	8	7
1	2009-04-11 11:19:00	0	11	2	8	7
1	2009-04-11 11:20:00	167	11	2	8	7
1	2009-04-11 11:21:00	264	11	2	8	7
1	2009-04-11 11:22:00	718	11	2	8	7
1	2009-04-11 11:23:00	56	11	2	8	7
1	2009-04-11 11:24:00	0	11	2	8	7
1	2009-04-11 11:25:00	0	11	2	8	7
1	2009-04-11 11:26:00	0	11	2	8	7
1	2009-04-11 11:27:00	0	11	2	8	7
1	2009-04-11 11:28:00	0	11	2	8	7
1	2009-04-11 11:29:00	14	11	2	8	7
1	2009-04-11 11:30:00	331	11	2	8	7
1	2009-04-11 11:31:00	0	11	2	8	7
1	2009-04-11 11:32:00	198	11	2	8	7
1	2009-04-11 11:33:00	28	11	2	8	7
1	2009-04-11 11:34:00	70	11	2	8	7
1	2009-04-11 11:35:00	28	11	2	8	7
1	2009-04-11 11:36:00	0	11	2	8	7
1	2009-04-11 11:37:00	28	11	2	8	7
1	2009-04-11 11:38:00	42	11	2	8	7
1	2009-04-11 11:39:00	0	11	2	8	7
1	2009-04-11 11:40:00	0	11	2	8	7
1	2009-04-11 11:41:00	0	11	2	8	7
1	2009-04-11 11:42:00	0	11	2	8	7
1	2009-04-11 11:43:00	0	11	2	8	7
1	2009-04-11 11:44:00	0	11	2	8	7
1	2009-04-11 11:45:00	14	11	2	8	7
1	2009-04-11 11:46:00	0	11	2	8	7
1	2009-04-11 11:47:00	0	11	2	8	7
1	2009-04-11 11:48:00	0	11	2	8	7
1	2009-04-11 11:49:00	0	11	2	8	7
1	2009-04-11 11:50:00	0	11	2	8	7
1	2009-04-11 11:51:00	314	11	2	8	7
1	2009-04-11 11:52:00	893	11	2	8	7
1	2009-04-11 11:53:00	1475	11	2	8	7
1	2009-04-11 11:54:00	818	11	2	8	7
1	2009-04-11 11:55:00	651	11	2	8	7
1	2009-04-11 11:56:00	2605	11	2	8	7
1	2009-04-11 11:57:00	793	11	2	8	7
1	2009-04-11 11:58:00	198	11	2	8	7
1	2009-04-11 11:59:00	562	11	2	8	7
1	2009-04-11 12:00:00	743	11	2	8	7
1	2009-04-11 12:01:00	1939	12	3	8	7
1	2009-04-11 12:02:00	584	12	3	8	7
1	2009-04-11 12:03:00	607	12	3	8	7
1	2009-04-11 12:04:00	584	12	3	8	7
1	2009-04-11 12:05:00	481	12	3	8	7
1	2009-04-11 12:06:00	423	12	3	8	7
1	2009-04-11 12:07:00	949	12	3	8	7
1	2009-04-11 12:08:00	97	12	3	8	7
1	2009-04-11 12:09:00	331	12	3	8	7
1	2009-04-11 12:10:00	0	12	3	8	7
1	2009-04-11 12:11:00	231	12	3	8	7
1	2009-04-11 12:12:00	248	12	3	8	7
1	2009-04-11 12:13:00	298	12	3	8	7
1	2009-04-11 12:14:00	83	12	3	8	7
1	2009-04-11 12:15:00	0	12	3	8	7
1	2009-04-11 12:16:00	0	12	3	8	7
1	2009-04-11 12:17:00	0	12	3	8	7
1	2009-04-11 12:18:00	42	12	3	8	7
1	2009-04-11 12:19:00	0	12	3	8	7
1	2009-04-11 12:20:00	14	12	3	8	7
1	2009-04-11 12:21:00	843	12	3	8	7
1	2009-04-11 12:22:00	139	12	3	8	7
1	2009-04-11 12:23:00	384	12	3	8	7
1	2009-04-11 12:24:00	181	12	3	8	7
1	2009-04-11 12:25:00	214	12	3	8	7
1	2009-04-11 12:26:00	0	12	3	8	7
1	2009-04-11 12:27:00	0	12	3	8	7
1	2009-04-11 12:28:00	0	12	3	8	7
1	2009-04-11 12:29:00	0	12	3	8	7
1	2009-04-11 12:30:00	0	12	3	8	7
1	2009-04-11 12:31:00	0	12	3	8	7
1	2009-04-11 12:32:00	0	12	3	8	7
1	2009-04-11 12:33:00	281	12	3	8	7
1	2009-04-11 12:34:00	214	12	3	8	7
1	2009-04-11 12:35:00	0	12	3	8	7
1	2009-04-11 12:36:00	481	12	3	8	7
1	2009-04-11 12:37:00	0	12	3	8	7
1	2009-04-11 12:38:00	0	12	3	8	7
1	2009-04-11 12:39:00	0	12	3	8	7
1	2009-04-11 12:40:00	14	12	3	8	7
1	2009-04-11 12:41:00	0	12	3	8	7
1	2009-04-11 12:42:00	0	12	3	8	7
1	2009-04-11 12:43:00	0	12	3	8	7
1	2009-04-11 12:44:00	0	12	3	8	7
1	2009-04-11 12:45:00	0	12	3	8	7
1	2009-04-11 12:46:00	0	12	3	8	7
1	2009-04-11 12:47:00	0	12	3	8	7
1	2009-04-11 12:48:00	0	12	3	8	7
1	2009-04-11 12:49:00	0	12	3	8	7
1	2009-04-11 12:50:00	0	12	3	8	7
1	2009-04-11 12:51:00	0	12	3	8	7
1	2009-04-11 12:52:00	0	12	3	8	7
1	2009-04-11 12:53:00	0	12	3	8	7
1	2009-04-11 12:54:00	0	12	3	8	7
1	2009-04-11 12:55:00	0	12	3	8	7
1	2009-04-11 12:56:00	0	12	3	8	7
1	2009-04-11 12:57:00	0	12	3	8	7
1	2009-04-11 12:58:00	0	12	3	8	7
1	2009-04-11 12:59:00	0	12	3	8	7
1	2009-04-11 13:00:00	14	12	3	8	7
1	2009-04-11 13:01:00	14	13	3	8	7
1	2009-04-11 13:02:00	0	13	3	8	7
1	2009-04-11 13:03:00	0	13	3	8	7
1	2009-04-11 13:04:00	0	13	3	8	7
1	2009-04-11 13:05:00	0	13	3	8	7
1	2009-04-11 13:06:00	0	13	3	8	7
1	2009-04-11 13:07:00	0	13	3	8	7
1	2009-04-11 13:08:00	0	13	3	8	7
1	2009-04-11 13:09:00	0	13	3	8	7
1	2009-04-11 13:10:00	0	13	3	8	7
1	2009-04-11 13:11:00	0	13	3	8	7
1	2009-04-11 13:12:00	0	13	3	8	7
1	2009-04-11 13:13:00	0	13	3	8	7
1	2009-04-11 13:14:00	42	13	3	8	7
1	2009-04-11 13:15:00	0	13	3	8	7
1	2009-04-11 13:16:00	0	13	3	8	7
1	2009-04-11 13:17:00	0	13	3	8	7
1	2009-04-11 13:18:00	0	13	3	8	7
1	2009-04-11 13:19:00	1060	13	3	8	7
1	2009-04-11 13:20:00	348	13	3	8	7
1	2009-04-11 13:21:00	1005	13	3	8	7
1	2009-04-11 13:22:00	70	13	3	8	7
1	2009-04-11 13:23:00	0	13	3	8	7
1	2009-04-11 13:24:00	0	13	3	8	7
1	2009-04-11 13:25:00	0	13	3	8	7
1	2009-04-11 13:26:00	0	13	3	8	7
1	2009-04-11 13:27:00	0	13	3	8	7
1	2009-04-11 13:28:00	0	13	3	8	7
1	2009-04-11 13:29:00	42	13	3	8	7
1	2009-04-11 13:30:00	28	13	3	8	7
1	2009-04-11 13:31:00	0	13	3	8	7
1	2009-04-11 13:32:00	0	13	3	8	7
1	2009-04-11 13:33:00	0	13	3	8	7
1	2009-04-11 13:34:00	0	13	3	8	7
1	2009-04-11 13:35:00	0	13	3	8	7
1	2009-04-11 13:36:00	42	13	3	8	7
1	2009-04-11 13:37:00	0	13	3	8	7
1	2009-04-11 13:38:00	0	13	3	8	7
1	2009-04-11 13:39:00	0	13	3	8	7
1	2009-04-11 13:40:00	0	13	3	8	7
1	2009-04-11 13:41:00	0	13	3	8	7
1	2009-04-11 13:42:00	0	13	3	8	7
1	2009-04-11 13:43:00	0	13	3	8	7
1	2009-04-11 13:44:00	0	13	3	8	7
1	2009-04-11 13:45:00	0	13	3	8	7
1	2009-04-11 13:46:00	0	13	3	8	7
1	2009-04-11 13:47:00	0	13	3	8	7
1	2009-04-11 13:48:00	0	13	3	8	7
1	2009-04-11 13:49:00	0	13	3	8	7
1	2009-04-11 13:50:00	14	13	3	8	7
1	2009-04-11 13:51:00	0	13	3	8	7
1	2009-04-11 13:52:00	0	13	3	8	7
1	2009-04-11 13:53:00	14	13	3	8	7
1	2009-04-11 13:54:00	0	13	3	8	7
1	2009-04-11 13:55:00	14	13	3	8	7
1	2009-04-11 13:56:00	28	13	3	8	7
1	2009-04-11 13:57:00	0	13	3	8	7
1	2009-04-11 13:58:00	0	13	3	8	7
1	2009-04-11 13:59:00	0	13	3	8	7
1	2009-04-11 14:00:00	0	13	3	8	7
1	2009-04-11 14:01:00	0	14	3	8	7
1	2009-04-11 14:02:00	0	14	3	8	7
1	2009-04-11 14:03:00	0	14	3	8	7
1	2009-04-11 14:04:00	0	14	3	8	7
1	2009-04-11 14:05:00	0	14	3	8	7
1	2009-04-11 14:06:00	0	14	3	8	7
1	2009-04-11 14:07:00	673	14	3	8	7
1	2009-04-11 14:08:00	348	14	3	8	7
1	2009-04-11 14:09:00	28	14	3	8	7
1	2009-04-11 14:10:00	0	14	3	8	7
1	2009-04-11 14:11:00	28	14	3	8	7
1	2009-04-11 14:12:00	0	14	3	8	7
1	2009-04-11 14:13:00	0	14	3	8	7
1	2009-04-11 14:14:00	28	14	3	8	7
1	2009-04-11 14:15:00	0	14	3	8	7
1	2009-04-11 14:16:00	0	14	3	8	7
1	2009-04-11 14:17:00	0	14	3	8	7
1	2009-04-11 14:18:00	0	14	3	8	7
1	2009-04-11 14:19:00	0	14	3	8	7
1	2009-04-11 14:20:00	0	14	3	8	7
1	2009-04-11 14:21:00	0	14	3	8	7
1	2009-04-11 14:22:00	0	14	3	8	7
1	2009-04-11 14:23:00	0	14	3	8	7
1	2009-04-11 14:24:00	0	14	3	8	7
1	2009-04-11 14:25:00	0	14	3	8	7
1	2009-04-11 14:26:00	0	14	3	8	7
1	2009-04-11 14:27:00	0	14	3	8	7
1	2009-04-11 14:28:00	0	14	3	8	7
1	2009-04-11 14:29:00	0	14	3	8	7
1	2009-04-11 14:30:00	0	14	3	8	7
1	2009-04-11 14:31:00	0	14	3	8	7
1	2009-04-11 14:32:00	0	14	3	8	7
1	2009-04-11 14:33:00	0	14	3	8	7
1	2009-04-11 14:34:00	0	14	3	8	7
1	2009-04-11 14:35:00	0	14	3	8	7
1	2009-04-11 14:36:00	0	14	3	8	7
1	2009-04-11 14:37:00	0	14	3	8	7
1	2009-04-11 14:38:00	0	14	3	8	7
1	2009-04-11 14:39:00	0	14	3	8	7
1	2009-04-11 14:40:00	0	14	3	8	7
1	2009-04-11 14:41:00	0	14	3	8	7
1	2009-04-11 14:42:00	0	14	3	8	7
1	2009-04-11 14:43:00	0	14	3	8	7
1	2009-04-11 14:44:00	0	14	3	8	7
1	2009-04-11 14:45:00	0	14	3	8	7
1	2009-04-11 14:46:00	0	14	3	8	7
1	2009-04-11 14:47:00	0	14	3	8	7
1	2009-04-11 14:48:00	0	14	3	8	7
1	2009-04-11 14:49:00	0	14	3	8	7
1	2009-04-11 14:50:00	14	14	3	8	7
1	2009-04-11 14:51:00	0	14	3	8	7
1	2009-04-11 14:52:00	0	14	3	8	7
1	2009-04-11 14:53:00	0	14	3	8	7
1	2009-04-11 14:54:00	28	14	3	8	7
1	2009-04-11 14:55:00	0	14	3	8	7
1	2009-04-11 14:56:00	0	14	3	8	7
1	2009-04-11 14:57:00	0	14	3	8	7
1	2009-04-11 14:58:00	0	14	3	8	7
1	2009-04-11 14:59:00	0	14	3	8	7
1	2009-04-11 15:00:00	0	14	3	8	7
1	2009-04-11 15:01:00	0	15	3	8	7
1	2009-04-11 15:02:00	0	15	3	8	7
1	2009-04-11 15:03:00	0	15	3	8	7
1	2009-04-11 15:04:00	0	15	3	8	7
1	2009-04-11 15:05:00	0	15	3	8	7
1	2009-04-11 15:06:00	0	15	3	8	7
1	2009-04-11 15:07:00	0	15	3	8	7
1	2009-04-11 15:08:00	0	15	3	8	7
1	2009-04-11 15:09:00	0	15	3	8	7
1	2009-04-11 15:10:00	0	15	3	8	7
1	2009-04-11 15:11:00	0	15	3	8	7
1	2009-04-11 15:12:00	0	15	3	8	7
1	2009-04-11 15:13:00	0	15	3	8	7
1	2009-04-11 15:14:00	0	15	3	8	7
1	2009-04-11 15:15:00	56	15	3	8	7
1	2009-04-11 15:16:00	70	15	3	8	7
1	2009-04-11 15:17:00	0	15	3	8	7
1	2009-04-11 15:18:00	0	15	3	8	7
1	2009-04-11 15:19:00	0	15	3	8	7
[truncated: 78,641 more rows]

## Sheet: Pivot Segment
Multiplier	2
x (Low Intensity)	804.668
y (High Intensity)	834.28
	Column Labels
Values	1	2	3	4	5	6	7	8	Grand Total
Average of Activity	85.7014	95.6546	91.4586	83.812	125.674	63.025	84.2817	60.4737	85.7332
StdDev of Activity	359.483	369.313	336.771	397.64	450.176	315.154	399.663	253.979	365
Count of Activity	10080	10080	7680	10080	9360	10080	10080	10080	77520
Count Above x	305	354	245	260	446	205	274	198
% Above x	0.0302579	0.035119	0.031901	0.0257937	0.0476496	0.0203373	0.0271825	0.0196429
Count Above y		341	238	252	435	196	264	183
% Above y		0.0338294	0.0309896	0.025	0.0464744	0.0194444	0.0261905	0.0181548

## Sheet: Pivot Weekday
Sum of Activity	Column Labels
Row Labels	1	2	3	4	5	6	7	8	Grand Total
1	151121	149434	105888	92064	423667	217053	278960	126181	1544368
2	106312	143642		60196	52036	59908	192629	65171	679894
3	77762	69203	110124	66738	91307	54683	43389	59381	572587
4	120009	118820	105312	54620	123377	54129	64674	67020	707961
5	167927	119889	182055	97486	56738	89516	110250	88977	912838
6	134233	160300	78030	298762	127651	81742	46241	73000	999959
7	106506	202910	120993	174959	301536	78261	113417	129845	1228427
Grand Total	863870	964198	702402	844825	1176312	635292	849560	609575	6646034
Count of Activity	Column Labels
Row Labels	1	2	3	4	5	6	7	8	Grand Total
1	1440	1440	900	1440	1080	1440	1440	1440	10620
2	1440	1440		1440	1080	1440	1440	1440	9720
3	1440	1440	1020	1440	1440	1440	1440	1440	11100
4	1440	1440	1440	1440	1440	1440	1440	1440	11520
5	1440	1440	1440	1440	1440	1440	1440	1440	11520
6	1440	1440	1440	1440	1440	1440	1440	1440	11520
7	1440	1440	1440	1440	1440	1440	1440	1440	11520
Grand Total	10080	10080	7680	10080	9360	10080	10080	10080	77520

## Sheet: Pivot Quadrant
Sum of Activity	Column Labels
Row Labels	1	2	3	4	5	6	7	8	Grand Total
1	27200	41463	61365	26351	12300	32795	25266	31686	258426
2	269962	333876	184143	465849	251111	95918	339395	121763	2062017
3	319352	227301	219569	161064	667876	252395	142589	193706	2183852
4	247356	361558	237325	191561	245025	254184	342310	262420	2141739
Grand Total	863870	964198	702402	844825	1176312	635292	849560	609575	6646034
Average	215968	241050	175600	211206	294078	158823	212390	152394
Count of Activity	Column Labels
Row Labels	1	2	3	4	5	6	7	8	Grand Total
1	2520	2520	1800	2520	2160	2520	2520	2520	19080
2	2520	2520	2100	2520	2520	2520	2520	2520	19740
3	2520	2520	1980	2520	2520	2520	2520	2520	19620
4	2520	2520	1800	2520	2160	2520	2520	2520	19080
Grand Total	10080	10080	7680	10080	9360	10080	10080	10080	77520

## Sheet: 4.3.09
Actogram, Copy Raw Data, All Days
Identity:	Natasha
Filename:	E:\Active Research Files\meloxicam titre canine\cases\natasha\Natasha 4.3.09.AWC
Gender:	F
Age:	8
Height:	91.4 cm	36.0 in
Weight:	29.5 kg	65.0 lbs
Start Date:	03-Apr-2009 (Fri)
Start Time:	18:00:00
Interval:	1.00 mins
Date Stamp:	Time Stamp:	Activity Data:	Marker Press:
2009-04-03	00:00:00	0
2009-04-03	00:01:00	0
2009-04-03	00:02:00	0
2009-04-03	00:03:00	0
2009-04-03	00:04:00	0
2009-04-03	00:05:00	0
2009-04-03	00:06:00	0
2009-04-03	00:07:00	0
2009-04-03	00:08:00	0
2009-04-03	00:09:00	0
2009-04-03	00:10:00	0
2009-04-03	00:11:00	0
2009-04-03	00:12:00	0
2009-04-03	00:13:00	0
2009-04-03	00:14:00	0
2009-04-03	00:15:00	0
2009-04-03	00:16:00	0
2009-04-03	00:17:00	0
2009-04-03	00:18:00	0
2009-04-03	00:19:00	0
2009-04-03	00:20:00	0
2009-04-03	00:21:00	0
2009-04-03	00:22:00	0
2009-04-03	00:23:00	0
2009-04-03	00:24:00	0
2009-04-03	00:25:00	0
2009-04-03	00:26:00	0
2009-04-03	00:27:00	0
2009-04-03	00:28:00	0
2009-04-03	00:29:00	0
2009-04-03	00:30:00	0
2009-04-03	00:31:00	0
2009-04-03	00:32:00	0
2009-04-03	00:33:00	0
2009-04-03	00:34:00	0
2009-04-03	00:35:00	0
2009-04-03	00:36:00	0
2009-04-03	00:37:00	0
2009-04-03	00:38:00	0
2009-04-03	00:39:00	0
2009-04-03	00:40:00	0
2009-04-03	00:41:00	0
2009-04-03	00:42:00	0
2009-04-03	00:43:00	0
2009-04-03	00:44:00	0
2009-04-03	00:45:00	0
2009-04-03	00:46:00	0
2009-04-03	00:47:00	0
2009-04-03	00:48:00	0
2009-04-03	00:49:00	0
2009-04-03	00:50:00	0
2009-04-03	00:51:00	0
2009-04-03	00:52:00	0
2009-04-03	00:53:00	0
2009-04-03	00:54:00	0
2009-04-03	00:55:00	0
2009-04-03	00:56:00	0
2009-04-03	00:57:00	0
2009-04-03	00:58:00	0
2009-04-03	00:59:00	0
2009-04-03	01:00:00	0
2009-04-03	01:01:00	0
2009-04-03	01:02:00	0
2009-04-03	01:03:00	0
2009-04-03	01:04:00	0
2009-04-03	01:05:00	0
2009-04-03	01:06:00	0
2009-04-03	01:07:00	0
2009-04-03	01:08:00	0
2009-04-03	01:09:00	0
2009-04-03	01:10:00	0
2009-04-03	01:11:00	0
2009-04-03	01:12:00	0
2009-04-03	01:13:00	0
2009-04-03	01:14:00	0
2009-04-03	01:15:00	0
2009-04-03	01:16:00	0
2009-04-03	01:17:00	0
2009-04-03	01:18:00	0
2009-04-03	01:19:00	0
2009-04-03	01:20:00	0
2009-04-03	01:21:00	0
2009-04-03	01:22:00	0
2009-04-03	01:23:00	0
2009-04-03	01:24:00	0
2009-04-03	01:25:00	0
2009-04-03	01:26:00	0
2009-04-03	01:27:00	0
2009-04-03	01:28:00	0
2009-04-03	01:29:00	0
2009-04-03	01:30:00	0
2009-04-03	01:31:00	0
2009-04-03	01:32:00	0
2009-04-03	01:33:00	0
2009-04-03	01:34:00	0
2009-04-03	01:35:00	0
2009-04-03	01:36:00	0
2009-04-03	01:37:00	0
2009-04-03	01:38:00	0
2009-04-03	01:39:00	0
2009-04-03	01:40:00	0
2009-04-03	01:41:00	0
2009-04-03	01:42:00	0
2009-04-03	01:43:00	0
2009-04-03	01:44:00	0
2009-04-03	01:45:00	0
2009-04-03	01:46:00	0
2009-04-03	01:47:00	0
2009-04-03	01:48:00	0
2009-04-03	01:49:00	0
2009-04-03	01:50:00	0
2009-04-03	01:51:00	0
2009-04-03	01:52:00	0
2009-04-03	01:53:00	0
2009-04-03	01:54:00	0
2009-04-03	01:55:00	0
2009-04-03	01:56:00	0
2009-04-03	01:57:00	0
2009-04-03	01:58:00	0
2009-04-03	01:59:00	0
2009-04-03	02:00:00	0
2009-04-03	02:01:00	0
2009-04-03	02:02:00	0
2009-04-03	02:03:00	0
2009-04-03	02:04:00	0
2009-04-03	02:05:00	0
2009-04-03	02:06:00	0
2009-04-03	02:07:00	0
2009-04-03	02:08:00	0
2009-04-03	02:09:00	0
2009-04-03	02:10:00	0
2009-04-03	02:11:00	0
2009-04-03	02:12:00	0
2009-04-03	02:13:00	0
2009-04-03	02:14:00	0
2009-04-03	02:15:00	0
2009-04-03	02:16:00	0
2009-04-03	02:17:00	0
2009-04-03	02:18:00	0
2009-04-03	02:19:00	0
2009-04-03	02:20:00	0
2009-04-03	02:21:00	0
2009-04-03	02:22:00	0
2009-04-03	02:23:00	0
2009-04-03	02:24:00	0
2009-04-03	02:25:00	0
2009-04-03	02:26:00	0
2009-04-03	02:27:00	0
2009-04-03	02:28:00	0
2009-04-03	02:29:00	0
2009-04-03	02:30:00	0
2009-04-03	02:31:00	0
2009-04-03	02:32:00	0
2009-04-03	02:33:00	0
2009-04-03	02:34:00	0
2009-04-03	02:35:00	0
2009-04-03	02:36:00	0
2009-04-03	02:37:00	0
2009-04-03	02:38:00	0
2009-04-03	02:39:00	0
2009-04-03	02:40:00	0
2009-04-03	02:41:00	0
2009-04-03	02:42:00	0
2009-04-03	02:43:00	0
2009-04-03	02:44:00	0
2009-04-03	02:45:00	0
2009-04-03	02:46:00	0
2009-04-03	02:47:00	0
2009-04-03	02:48:00	0
2009-04-03	02:49:00	0
2009-04-03	02:50:00	0
2009-04-03	02:51:00	0
2009-04-03	02:52:00	0
2009-04-03	02:53:00	0
2009-04-03	02:54:00	0
2009-04-03	02:55:00	0
2009-04-03	02:56:00	0
2009-04-03	02:57:00	0
2009-04-03	02:58:00	0
2009-04-03	02:59:00	0
2009-04-03	03:00:00	0
2009-04-03	03:01:00	0
2009-04-03	03:02:00	0
2009-04-03	03:03:00	0
2009-04-03	03:04:00	0
2009-04-03	03:05:00	0
2009-04-03	03:06:00	0
2009-04-03	03:07:00	0
2009-04-03	03:08:00	0
2009-04-03	03:09:00	0
2009-04-03	03:10:00	0
2009-04-03	03:11:00	0
2009-04-03	03:12:00	0
2009-04-03	03:13:00	0
2009-04-03	03:14:00	0
2009-04-03	03:15:00	0
2009-04-03	03:16:00	0
2009-04-03	03:17:00	0
2009-04-03	03:18:00	0
2009-04-03	03:19:00	0
2009-04-03	03:20:00	0
2009-04-03	03:21:00	0
2009-04-03	03:22:00	0
2009-04-03	03:23:00	0
2009-04-03	03:24:00	0
2009-04-03	03:25:00	0
2009-04-03	03:26:00	0
2009-04-03	03:27:00	0
2009-04-03	03:28:00	0
2009-04-03	03:29:00	0
2009-04-03	03:30:00	0
2009-04-03	03:31:00	0
2009-04-03	03:32:00	0
2009-04-03	03:33:00	0
2009-04-03	03:34:00	0
2009-04-03	03:35:00	0
2009-04-03	03:36:00	0
2009-04-03	03:37:00	0
2009-04-03	03:38:00	0
2009-04-03	03:39:00	0
2009-04-03	03:40:00	0
2009-04-03	03:41:00	0
2009-04-03	03:42:00	0
2009-04-03	03:43:00	0
2009-04-03	03:44:00	0
2009-04-03	03:45:00	0
2009-04-03	03:46:00	0
2009-04-03	03:47:00	0
2009-04-03	03:48:00	0
2009-04-03	03:49:00	0
2009-04-03	03:50:00	0
2009-04-03	03:51:00	0
2009-04-03	03:52:00	0
2009-04-03	03:53:00	0
2009-04-03	03:54:00	0
2009-04-03	03:55:00	0
2009-04-03	03:56:00	0
2009-04-03	03:57:00	0
2009-04-03	03:58:00	0
2009-04-03	03:59:00	0
2009-04-03	04:00:00	0
2009-04-03	04:01:00	0
2009-04-03	04:02:00	0
2009-04-03	04:03:00	0
2009-04-03	04:04:00	0
2009-04-03	04:05:00	0
2009-04-03	04:06:00	0
2009-04-03	04:07:00	0
2009-04-03	04:08:00	0
2009-04-03	04:09:00	0
2009-04-03	04:10:00	0
2009-04-03	04:11:00	0
2009-04-03	04:12:00	0
2009-04-03	04:13:00	0
2009-04-03	04:14:00	0
2009-04-03	04:15:00	0
2009-04-03	04:16:00	0
2009-04-03	04:17:00	0
2009-04-03	04:18:00	0
2009-04-03	04:19:00	0
2009-04-03	04:20:00	0
2009-04-03	04:21:00	0
2009-04-03	04:22:00	0
2009-04-03	04:23:00	0
2009-04-03	04:24:00	0
2009-04-03	04:25:00	0
2009-04-03	04:26:00	0
2009-04-03	04:27:00	0
2009-04-03	04:28:00	0
2009-04-03	04:29:00	0
2009-04-03	04:30:00	0
2009-04-03	04:31:00	0
2009-04-03	04:32:00	0
2009-04-03	04:33:00	0
2009-04-03	04:34:00	0
2009-04-03	04:35:00	0
2009-04-03	04:36:00	0
2009-04-03	04:37:00	0
2009-04-03	04:38:00	0
2009-04-03	04:39:00	0
2009-04-03	04:40:00	0
2009-04-03	04:41:00	0
2009-04-03	04:42:00	0
2009-04-03	04:43:00	0
2009-04-03	04:44:00	0
2009-04-03	04:45:00	0
2009-04-03	04:46:00	0
2009-04-03	04:47:00	0
2009-04-03	04:48:00	0
2009-04-03	04:49:00	0
2009-04-03	04:50:00	0
2009-04-03	04:51:00	0
2009-04-03	04:52:00	0
2009-04-03	04:53:00	0
2009-04-03	04:54:00	0
2009-04-03	04:55:00	0
2009-04-03	04:56:00	0
2009-04-03	04:57:00	0
2009-04-03	04:58:00	0
2009-04-03	04:59:00	0
2009-04-03	05:00:00	0
2009-04-03	05:01:00	0
2009-04-03	05:02:00	0
2009-04-03	05:03:00	0
2009-04-03	05:04:00	0
2009-04-03	05:05:00	0
2009-04-03	05:06:00	0
2009-04-03	05:07:00	0
2009-04-03	05:08:00	0
2009-04-03	05:09:00	0
2009-04-03	05:10:00	0
2009-04-03	05:11:00	0
2009-04-03	05:12:00	0
2009-04-03	05:13:00	0
2009-04-03	05:14:00	0
2009-04-03	05:15:00	0
2009-04-03	05:16:00	0
2009-04-03	05:17:00	0
2009-04-03	05:18:00	0
2009-04-03	05:19:00	0
2009-04-03	05:20:00	0
2009-04-03	05:21:00	0
2009-04-03	05:22:00	0
2009-04-03	05:23:00	0
2009-04-03	05:24:00	0
2009-04-03	05:25:00	0
2009-04-03	05:26:00	0
2009-04-03	05:27:00	0
2009-04-03	05:28:00	0
2009-04-03	05:29:00	0
2009-04-03	05:30:00	0
2009-04-03	05:31:00	0
2009-04-03	05:32:00	0
2009-04-03	05:33:00	0
2009-04-03	05:34:00	0
2009-04-03	05:35:00	0
2009-04-03	05:36:00	0
2009-04-03	05:37:00	0
2009-04-03	05:38:00	0
2009-04-03	05:39:00	0
2009-04-03	05:40:00	0
2009-04-03	05:41:00	0
2009-04-03	05:42:00	0
2009-04-03	05:43:00	0
2009-04-03	05:44:00	0
2009-04-03	05:45:00	0
2009-04-03	05:46:00	0
2009-04-03	05:47:00	0
2009-04-03	05:48:00	0
2009-04-03	05:49:00	0
2009-04-03	05:50:00	0
2009-04-03	05:51:00	0
2009-04-03	05:52:00	0
2009-04-03	05:53:00	0
2009-04-03	05:54:00	0
2009-04-03	05:55:00	0
2009-04-03	05:56:00	0
2009-04-03	05:57:00	0
2009-04-03	05:58:00	0
2009-04-03	05:59:00	0
2009-04-03	06:00:00	0
2009-04-03	06:01:00	0
2009-04-03	06:02:00	0
2009-04-03	06:03:00	0
2009-04-03	06:04:00	0
2009-04-03	06:05:00	0
2009-04-03	06:06:00	0
2009-04-03	06:07:00	0
2009-04-03	06:08:00	0
2009-04-03	06:09:00	0
2009-04-03	06:10:00	0
2009-04-03	06:11:00	0
2009-04-03	06:12:00	0
2009-04-03	06:13:00	0
2009-04-03	06:14:00	0
2009-04-03	06:15:00	0
2009-04-03	06:16:00	0
2009-04-03	06:17:00	0
2009-04-03	06:18:00	0
2009-04-03	06:19:00	0
2009-04-03	06:20:00	0
2009-04-03	06:21:00	0
2009-04-03	06:22:00	0
2009-04-03	06:23:00	0
2009-04-03	06:24:00	0
2009-04-03	06:25:00	0
2009-04-03	06:26:00	0
2009-04-03	06:27:00	0
2009-04-03	06:28:00	0
2009-04-03	06:29:00	0
2009-04-03	06:30:00	0
2009-04-03	06:31:00	0
2009-04-03	06:32:00	0
2009-04-03	06:33:00	0
2009-04-03	06:34:00	0
2009-04-03	06:35:00	0
2009-04-03	06:36:00	0
2009-04-03	06:37:00	0
2009-04-03	06:38:00	0
2009-04-03	06:39:00	0
2009-04-03	06:40:00	0
2009-04-03	06:41:00	0
2009-04-03	06:42:00	0
2009-04-03	06:43:00	0
2009-04-03	06:44:00	0
2009-04-03	06:45:00	0
2009-04-03	06:46:00	0
2009-04-03	06:47:00	0
2009-04-03	06:48:00	0
2009-04-03	06:49:00	0
2009-04-03	06:50:00	0
2009-04-03	06:51:00	0
2009-04-03	06:52:00	0
2009-04-03	06:53:00	0
2009-04-03	06:54:00	0
2009-04-03	06:55:00	0
2009-04-03	06:56:00	0
2009-04-03	06:57:00	0
2009-04-03	06:58:00	0
2009-04-03	06:59:00	0
2009-04-03	07:00:00	0
2009-04-03	07:01:00	0
2009-04-03	07:02:00	0
2009-04-03	07:03:00	0
2009-04-03	07:04:00	0
2009-04-03	07:05:00	0
2009-04-03	07:06:00	0
2009-04-03	07:07:00	0
2009-04-03	07:08:00	0
2009-04-03	07:09:00	0
2009-04-03	07:10:00	0
2009-04-03	07:11:00	0
2009-04-03	07:12:00	0
2009-04-03	07:13:00	0
2009-04-03	07:14:00	0
2009-04-03	07:15:00	0
2009-04-03	07:16:00	0
2009-04-03	07:17:00	0
2009-04-03	07:18:00	0
2009-04-03	07:19:00	0
2009-04-03	07:20:00	0
2009-04-03	07:21:00	0
2009-04-03	07:22:00	0
2009-04-03	07:23:00	0
2009-04-03	07:24:00	0
2009-04-03	07:25:00	0
2009-04-03	07:26:00	0
2009-04-03	07:27:00	0
2009-04-03	07:28:00	0
2009-04-03	07:29:00	0
2009-04-03	07:30:00	0
2009-04-03	07:31:00	0
2009-04-03	07:32:00	0
2009-04-03	07:33:00	0
2009-04-03	07:34:00	0
2009-04-03	07:35:00	0
2009-04-03	07:36:00	0
2009-04-03	07:37:00	0
2009-04-03	07:38:00	0
2009-04-03	07:39:00	0
2009-04-03	07:40:00	0
2009-04-03	07:41:00	0
2009-04-03	07:42:00	0
2009-04-03	07:43:00	0
2009-04-03	07:44:00	0
2009-04-03	07:45:00	0
2009-04-03	07:46:00	0
2009-04-03	07:47:00	0
2009-04-03	07:48:00	0
2009-04-03	07:49:00	0
2009-04-03	07:50:00	0
2009-04-03	07:51:00	0
2009-04-03	07:52:00	0
2009-04-03	07:53:00	0
2009-04-03	07:54:00	0
2009-04-03	07:55:00	0
2009-04-03	07:56:00	0
2009-04-03	07:57:00	0
2009-04-03	07:58:00	0
2009-04-03	07:59:00	0
2009-04-03	08:00:00	0
2009-04-03	08:01:00	0
2009-04-03	08:02:00	0
2009-04-03	08:03:00	0
2009-04-03	08:04:00	0
2009-04-03	08:05:00	0
2009-04-03	08:06:00	0
2009-04-03	08:07:00	0
2009-04-03	08:08:00	0
2009-04-03	08:09:00	0
2009-04-03	08:10:00	0
2009-04-03	08:11:00	0
2009-04-03	08:12:00	0
2009-04-03	08:13:00	0
2009-04-03	08:14:00	0
2009-04-03	08:15:00	0
2009-04-03	08:16:00	0
2009-04-03	08:17:00	0
2009-04-03	08:18:00	0
2009-04-03	08:19:00	0
2009-04-03	08:20:00	0
2009-04-03	08:21:00	0
2009-04-03	08:22:00	0
2009-04-03	08:23:00	0
2009-04-03	08:24:00	0
2009-04-03	08:25:00	0
2009-04-03	08:26:00	0
2009-04-03	08:27:00	0
2009-04-03	08:28:00	0
2009-04-03	08:29:00	0
2009-04-03	08:30:00	0
2009-04-03	08:31:00	0
2009-04-03	08:32:00	0
2009-04-03	08:33:00	0
2009-04-03	08:34:00	0
2009-04-03	08:35:00	0
2009-04-03	08:36:00	0
2009-04-03	08:37:00	0
2009-04-03	08:38:00	0
2009-04-03	08:39:00	0
2009-04-03	08:40:00	0
2009-04-03	08:41:00	0
2009-04-03	08:42:00	0
2009-04-03	08:43:00	0
2009-04-03	08:44:00	0
2009-04-03	08:45:00	0
2009-04-03	08:46:00	0
2009-04-03	08:47:00	0
2009-04-03	08:48:00	0
2009-04-03	08:49:00	0
2009-04-03	08:50:00	0
2009-04-03	08:51:00	0
2009-04-03	08:52:00	0
2009-04-03	08:53:00	0
2009-04-03	08:54:00	0
2009-04-03	08:55:00	0
2009-04-03	08:56:00	0
2009-04-03	08:57:00	0
2009-04-03	08:58:00	0
2009-04-03	08:59:00	0
2009-04-03	09:00:00	0
2009-04-03	09:01:00	0
2009-04-03	09:02:00	0
2009-04-03	09:03:00	0
2009-04-03	09:04:00	0
2009-04-03	09:05:00	0
2009-04-03	09:06:00	0
2009-04-03	09:07:00	0
2009-04-03	09:08:00	0
2009-04-03	09:09:00	0
2009-04-03	09:10:00	0
2009-04-03	09:11:00	0
2009-04-03	09:12:00	0
2009-04-03	09:13:00	0
2009-04-03	09:14:00	0
2009-04-03	09:15:00	0
2009-04-03	09:16:00	0
2009-04-03	09:17:00	0
2009-04-03	09:18:00	0
2009-04-03	09:19:00	0
2009-04-03	09:20:00	0
2009-04-03	09:21:00	0
2009-04-03	09:22:00	0
2009-04-03	09:23:00	0
2009-04-03	09:24:00	0
2009-04-03	09:25:00	0
2009-04-03	09:26:00	0
2009-04-03	09:27:00	0
2009-04-03	09:28:00	0
2009-04-03	09:29:00	0
2009-04-03	09:30:00	0
2009-04-03	09:31:00	0
2009-04-03	09:32:00	0
2009-04-03	09:33:00	0
2009-04-03	09:34:00	0
2009-04-03	09:35:00	0
2009-04-03	09:36:00	0
2009-04-03	09:37:00	0
2009-04-03	09:38:00	0
2009-04-03	09:39:00	0
2009-04-03	09:40:00	0
2009-04-03	09:41:00	0
2009-04-03	09:42:00	0
2009-04-03	09:43:00	0
2009-04-03	09:44:00	0
2009-04-03	09:45:00	0
2009-04-03	09:46:00	0
2009-04-03	09:47:00	0
2009-04-03	09:48:00	0
2009-04-03	09:49:00	0
2009-04-03	09:50:00	0
2009-04-03	09:51:00	0
2009-04-03	09:52:00	0
2009-04-03	09:53:00	0
2009-04-03	09:54:00	0
2009-04-03	09:55:00	0
2009-04-03	09:56:00	0
2009-04-03	09:57:00	0
2009-04-03	09:58:00	0
2009-04-03	09:59:00	0
2009-04-03	10:00:00	0
2009-04-03	10:01:00	0
2009-04-03	10:02:00	0
2009-04-03	10:03:00	0
2009-04-03	10:04:00	0
2009-04-03	10:05:00	0
2009-04-03	10:06:00	0
2009-04-03	10:07:00	0
2009-04-03	10:08:00	0
2009-04-03	10:09:00	0
2009-04-03	10:10:00	0
2009-04-03	10:11:00	0
2009-04-03	10:12:00	0
2009-04-03	10:13:00	0
2009-04-03	10:14:00	0
2009-04-03	10:15:00	0
2009-04-03	10:16:00	0
2009-04-03	10:17:00	0
2009-04-03	10:18:00	0
2009-04-03	10:19:00	0
2009-04-03	10:20:00	0
2009-04-03	10:21:00	0
2009-04-03	10:22:00	0
2009-04-03	10:23:00	0
2009-04-03	10:24:00	0
2009-04-03	10:25:00	0
2009-04-03	10:26:00	0
2009-04-03	10:27:00	0
2009-04-03	10:28:00	0
2009-04-03	10:29:00	0
2009-04-03	10:30:00	0
2009-04-03	10:31:00	0
2009-04-03	10:32:00	0
2009-04-03	10:33:00	0
2009-04-03	10:34:00	0
2009-04-03	10:35:00	0
2009-04-03	10:36:00	0
2009-04-03	10:37:00	0
2009-04-03	10:38:00	0
2009-04-03	10:39:00	0
2009-04-03	10:40:00	0
2009-04-03	10:41:00	0
2009-04-03	10:42:00	0
2009-04-03	10:43:00	0
2009-04-03	10:44:00	0
2009-04-03	10:45:00	0
2009-04-03	10:46:00	0
2009-04-03	10:47:00	0
2009-04-03	10:48:00	0
2009-04-03	10:49:00	0
2009-04-03	10:50:00	0
2009-04-03	10:51:00	0
2009-04-03	10:52:00	0
2009-04-03	10:53:00	0
2009-04-03	10:54:00	0
2009-04-03	10:55:00	0
2009-04-03	10:56:00	0
2009-04-03	10:57:00	0
2009-04-03	10:58:00	0
2009-04-03	10:59:00	0
2009-04-03	11:00:00	0
2009-04-03	11:01:00	0
2009-04-03	11:02:00	0
2009-04-03	11:03:00	0
2009-04-03	11:04:00	0
2009-04-03	11:05:00	0
2009-04-03	11:06:00	0
2009-04-03	11:07:00	0
2009-04-03	11:08:00	0
2009-04-03	11:09:00	0
2009-04-03	11:10:00	0
2009-04-03	11:11:00	0
2009-04-03	11:12:00	0
2009-04-03	11:13:00	0
2009-04-03	11:14:00	0
2009-04-03	11:15:00	0
2009-04-03	11:16:00	0
2009-04-03	11:17:00	0
2009-04-03	11:18:00	0
2009-04-03	11:19:00	0
2009-04-03	11:20:00	0
2009-04-03	11:21:00	0
2009-04-03	11:22:00	0
2009-04-03	11:23:00	0
2009-04-03	11:24:00	0
2009-04-03	11:25:00	0
2009-04-03	11:26:00	0
2009-04-03	11:27:00	0
2009-04-03	11:28:00	0
2009-04-03	11:29:00	0
2009-04-03	11:30:00	0
2009-04-03	11:31:00	0
2009-04-03	11:32:00	0
2009-04-03	11:33:00	0
2009-04-03	11:34:00	0
2009-04-03	11:35:00	0
2009-04-03	11:36:00	0
2009-04-03	11:37:00	0
2009-04-03	11:38:00	0
2009-04-03	11:39:00	0
2009-04-03	11:40:00	0
2009-04-03	11:41:00	0
2009-04-03	11:42:00	0
2009-04-03	11:43:00	0
2009-04-03	11:44:00	0
2009-04-03	11:45:00	0
2009-04-03	11:46:00	0
2009-04-03	11:47:00	0
2009-04-03	11:48:00	0
2009-04-03	11:49:00	0
2009-04-03	11:50:00	0
2009-04-03	11:51:00	0
2009-04-03	11:52:00	0
2009-04-03	11:53:00	0
2009-04-03	11:54:00	0
2009-04-03	11:55:00	0
2009-04-03	11:56:00	0
2009-04-03	11:57:00	0
2009-04-03	11:58:00	0
2009-04-03	11:59:00	0
2009-04-03	12:00:00	0
2009-04-03	12:01:00	0
2009-04-03	12:02:00	0
2009-04-03	12:03:00	0
2009-04-03	12:04:00	0
2009-04-03	12:05:00	0
2009-04-03	12:06:00	0
2009-04-03	12:07:00	0
2009-04-03	12:08:00	0
2009-04-03	12:09:00	0
2009-04-03	12:10:00	0
2009-04-03	12:11:00	0
2009-04-03	12:12:00	0
2009-04-03	12:13:00	0
2009-04-03	12:14:00	0
2009-04-03	12:15:00	0
2009-04-03	12:16:00	0
2009-04-03	12:17:00	0
2009-04-03	12:18:00	0
2009-04-03	12:19:00	0
2009-04-03	12:20:00	0
2009-04-03	12:21:00	0
2009-04-03	12:22:00	0
2009-04-03	12:23:00	0
2009-04-03	12:24:00	0
2009-04-03	12:25:00	0
2009-04-03	12:26:00	0
2009-04-03	12:27:00	0
2009-04-03	12:28:00	0
2009-04-03	12:29:00	0
2009-04-03	12:30:00	0
2009-04-03	12:31:00	0
2009-04-03	12:32:00	0
2009-04-03	12:33:00	0
2009-04-03	12:34:00	0
2009-04-03	12:35:00	0
2009-04-03	12:36:00	0
2009-04-03	12:37:00	0
2009-04-03	12:38:00	0
2009-04-03	12:39:00	0
2009-04-03	12:40:00	0
2009-04-03	12:41:00	0
2009-04-03	12:42:00	0
2009-04-03	12:43:00	0
2009-04-03	12:44:00	0
2009-04-03	12:45:00	0
2009-04-03	12:46:00	0
2009-04-03	12:47:00	0
2009-04-03	12:48:00	0
2009-04-03	12:49:00	0
2009-04-03	12:50:00	0
2009-04-03	12:51:00	0
2009-04-03	12:52:00	0
2009-04-03	12:53:00	0
2009-04-03	12:54:00	0
2009-04-03	12:55:00	0
2009-04-03	12:56:00	0
2009-04-03	12:57:00	0
2009-04-03	12:58:00	0
2009-04-03	12:59:00	0
2009-04-03	13:00:00	0
2009-04-03	13:01:00	0
2009-04-03	13:02:00	0
2009-04-03	13:03:00	0
2009-04-03	13:04:00	0
2009-04-03	13:05:00	0
2009-04-03	13:06:00	0
2009-04-03	13:07:00	0
2009-04-03	13:08:00	0
2009-04-03	13:09:00	0
2009-04-03	13:10:00	0
2009-04-03	13:11:00	0
2009-04-03	13:12:00	0
2009-04-03	13:13:00	0
2009-04-03	13:14:00	0
2009-04-03	13:15:00	0
2009-04-03	13:16:00	0
2009-04-03	13:17:00	0
2009-04-03	13:18:00	0
2009-04-03	13:19:00	0
2009-04-03	13:20:00	0
2009-04-03	13:21:00	0
2009-04-03	13:22:00	0
2009-04-03	13:23:00	0
2009-04-03	13:24:00	0
2009-04-03	13:25:00	0
2009-04-03	13:26:00	0
2009-04-03	13:27:00	0
2009-04-03	13:28:00	0
2009-04-03	13:29:00	0
2009-04-03	13:30:00	0
2009-04-03	13:31:00	0
2009-04-03	13:32:00	0
2009-04-03	13:33:00	0
2009-04-03	13:34:00	0
2009-04-03	13:35:00	0
2009-04-03	13:36:00	0
2009-04-03	13:37:00	0
2009-04-03	13:38:00	0
2009-04-03	13:39:00	0
2009-04-03	13:40:00	0
2009-04-03	13:41:00	0
2009-04-03	13:42:00	0
2009-04-03	13:43:00	0
2009-04-03	13:44:00	0
2009-04-03	13:45:00	0
2009-04-03	13:46:00	0
2009-04-03	13:47:00	0
2009-04-03	13:48:00	0
2009-04-03	13:49:00	0
2009-04-03	13:50:00	0
2009-04-03	13:51:00	0
2009-04-03	13:52:00	0
2009-04-03	13:53:00	0
2009-04-03	13:54:00	0
2009-04-03	13:55:00	0
2009-04-03	13:56:00	0
2009-04-03	13:57:00	0
2009-04-03	13:58:00	0
2009-04-03	13:59:00	0
2009-04-03	14:00:00	0
2009-04-03	14:01:00	0
2009-04-03	14:02:00	0
2009-04-03	14:03:00	0
2009-04-03	14:04:00	0
2009-04-03	14:05:00	0
2009-04-03	14:06:00	0
2009-04-03	14:07:00	0
2009-04-03	14:08:00	0
2009-04-03	14:09:00	0
2009-04-03	14:10:00	0
2009-04-03	14:11:00	0
2009-04-03	14:12:00	0
2009-04-03	14:13:00	0
2009-04-03	14:14:00	0
2009-04-03	14:15:00	0
2009-04-03	14:16:00	0
2009-04-03	14:17:00	0
2009-04-03	14:18:00	0
2009-04-03	14:19:00	0
2009-04-03	14:20:00	0
2009-04-03	14:21:00	0
2009-04-03	14:22:00	0
2009-04-03	14:23:00	0
2009-04-03	14:24:00	0
2009-04-03	14:25:00	0
2009-04-03	14:26:00	0
2009-04-03	14:27:00	0
2009-04-03	14:28:00	0
2009-04-03	14:29:00	0
2009-04-03	14:30:00	0
2009-04-03	14:31:00	0
2009-04-03	14:32:00	0
2009-04-03	14:33:00	0
2009-04-03	14:34:00	0
2009-04-03	14:35:00	0
2009-04-03	14:36:00	0
2009-04-03	14:37:00	0
2009-04-03	14:38:00	0
2009-04-03	14:39:00	0
2009-04-03	14:40:00	0
2009-04-03	14:41:00	0
2009-04-03	14:42:00	0
2009-04-03	14:43:00	0
2009-04-03	14:44:00	0
2009-04-03	14:45:00	0
2009-04-03	14:46:00	0
2009-04-03	14:47:00	0
2009-04-03	14:48:00	0
2009-04-03	14:49:00	0
2009-04-03	14:50:00	0
2009-04-03	14:51:00	0
2009-04-03	14:52:00	0
2009-04-03	14:53:00	0
2009-04-03	14:54:00	0
2009-04-03	14:55:00	0
2009-04-03	14:56:00	0
2009-04-03	14:57:00	0
2009-04-03	14:58:00	0
2009-04-03	14:59:00	0
2009-04-03	15:00:00	0
2009-04-03	15:01:00	0
2009-04-03	15:02:00	0
2009-04-03	15:03:00	0
2009-04-03	15:04:00	0
2009-04-03	15:05:00	0
2009-04-03	15:06:00	0
2009-04-03	15:07:00	0
2009-04-03	15:08:00	0
2009-04-03	15:09:00	0
2009-04-03	15:10:00	0
2009-04-03	15:11:00	0
2009-04-03	15:12:00	0
2009-04-03	15:13:00	0
2009-04-03	15:14:00	0
2009-04-03	15:15:00	0
2009-04-03	15:16:00	0
2009-04-03	15:17:00	0
2009-04-03	15:18:00	0
2009-04-03	15:19:00	0
2009-04-03	15:20:00	0
2009-04-03	15:21:00	0
2009-04-03	15:22:00	0
2009-04-03	15:23:00	0
2009-04-03	15:24:00	0
2009-04-03	15:25:00	0
2009-04-03	15:26:00	0
2009-04-03	15:27:00	0
2009-04-03	15:28:00	0
2009-04-03	15:29:00	0
2009-04-03	15:30:00	0
2009-04-03	15:31:00	0
2009-04-03	15:32:00	0
2009-04-03	15:33:00	0
2009-04-03	15:34:00	0
2009-04-03	15:35:00	0
2009-04-03	15:36:00	0
2009-04-03	15:37:00	0
2009-04-03	15:38:00	0
2009-04-03	15:39:00	0
2009-04-03	15:40:00	0
2009-04-03	15:41:00	0
2009-04-03	15:42:00	0
2009-04-03	15:43:00	0
2009-04-03	15:44:00	0
2009-04-03	15:45:00	0
2009-04-03	15:46:00	0
2009-04-03	15:47:00	0
2009-04-03	15:48:00	0
2009-04-03	15:49:00	0
2009-04-03	15:50:00	0
2009-04-03	15:51:00	0
2009-04-03	15:52:00	0
2009-04-03	15:53:00	0
2009-04-03	15:54:00	0
2009-04-03	15:55:00	0
2009-04-03	15:56:00	0
2009-04-03	15:57:00	0
2009-04-03	15:58:00	0
2009-04-03	15:59:00	0
2009-04-03	16:00:00	0
2009-04-03	16:01:00	0
2009-04-03	16:02:00	0
2009-04-03	16:03:00	0
2009-04-03	16:04:00	0
2009-04-03	16:05:00	0
2009-04-03	16:06:00	0
2009-04-03	16:07:00	0
2009-04-03	16:08:00	0
2009-04-03	16:09:00	0
2009-04-03	16:10:00	0
2009-04-03	16:11:00	0
2009-04-03	16:12:00	0
2009-04-03	16:13:00	0
2009-04-03	16:14:00	0
2009-04-03	16:15:00	0
2009-04-03	16:16:00	0
2009-04-03	16:17:00	0
2009-04-03	16:18:00	0
2009-04-03	16:19:00	0
2009-04-03	16:20:00	0
2009-04-03	16:21:00	0
2009-04-03	16:22:00	0
2009-04-03	16:23:00	0
2009-04-03	16:24:00	0
2009-04-03	16:25:00	0
2009-04-03	16:26:00	0
2009-04-03	16:27:00	0
2009-04-03	16:28:00	0
2009-04-03	16:29:00	0
2009-04-03	16:30:00	0
2009-04-03	16:31:00	0
2009-04-03	16:32:00	0
2009-04-03	16:33:00	0
2009-04-03	16:34:00	0
2009-04-03	16:35:00	0
2009-04-03	16:36:00	0
2009-04-03	16:37:00	0
2009-04-03	16:38:00	0
2009-04-03	16:39:00	0
2009-04-03	16:40:00	0
2009-04-03	16:41:00	0
2009-04-03	16:42:00	0
2009-04-03	16:43:00	0
2009-04-03	16:44:00	0
2009-04-03	16:45:00	0
2009-04-03	16:46:00	0
2009-04-03	16:47:00	0
2009-04-03	16:48:00	0
2009-04-03	16:49:00	0
2009-04-03	16:50:00	0
2009-04-03	16:51:00	0
2009-04-03	16:52:00	0
2009-04-03	16:53:00	0
2009-04-03	16:54:00	0
2009-04-03	16:55:00	0
2009-04-03	16:56:00	0
2009-04-03	16:57:00	0
2009-04-03	16:58:00	0
2009-04-03	16:59:00	0
2009-04-03	17:00:00	0
2009-04-03	17:01:00	0
2009-04-03	17:02:00	0
2009-04-03	17:03:00	0
2009-04-03	17:04:00	0
2009-04-03	17:05:00	0
2009-04-03	17:06:00	0
2009-04-03	17:07:00	0
2009-04-03	17:08:00	0
2009-04-03	17:09:00	0
2009-04-03	17:10:00	0
2009-04-03	17:11:00	0
2009-04-03	17:12:00	0
2009-04-03	17:13:00	0
2009-04-03	17:14:00	0
2009-04-03	17:15:00	0
2009-04-03	17:16:00	0
2009-04-03	17:17:00	0
2009-04-03	17:18:00	0
2009-04-03	17:19:00	0
2009-04-03	17:20:00	0
2009-04-03	17:21:00	0
2009-04-03	17:22:00	0
2009-04-03	17:23:00	0
2009-04-03	17:24:00	0
2009-04-03	17:25:00	0
2009-04-03	17:26:00	0
2009-04-03	17:27:00	0
2009-04-03	17:28:00	0
2009-04-03	17:29:00	0
2009-04-03	17:30:00	0
2009-04-03	17:31:00	0
2009-04-03	17:32:00	0
2009-04-03	17:33:00	0
2009-04-03	17:34:00	0
2009-04-03	17:35:00	0
2009-04-03	17:36:00	0
2009-04-03	17:37:00	0
2009-04-03	17:38:00	0
2009-04-03	17:39:00	0
2009-04-03	17:40:00	0
2009-04-03	17:41:00	0
2009-04-03	17:42:00	0
2009-04-03	17:43:00	0
2009-04-03	17:44:00	0
2009-04-03	17:45:00	0
2009-04-03	17:46:00	0
2009-04-03	17:47:00	0
2009-04-03	17:48:00	0
2009-04-03	17:49:00	0
2009-04-03	17:50:00	0
2009-04-03	17:51:00	0
2009-04-03	17:52:00	0
2009-04-03	17:53:00	0
2009-04-03	17:54:00	0
2009-04-03	17:55:00	0
2009-04-03	17:56:00	0
2009-04-03	17:57:00	0
2009-04-03	17:58:00	0
2009-04-03	17:59:00	0
2009-04-03	18:00:00	0
2009-04-03	18:01:00	0
2009-04-03	18:02:00	0
2009-04-03	18:03:00	0
2009-04-03	18:04:00	0
2009-04-03	18:05:00	0
2009-04-03	18:06:00	0
2009-04-03	18:07:00	0
2009-04-03	18:08:00	0
2009-04-03	18:09:00	0
2009-04-03	18:10:00	0
2009-04-03	18:11:00	0
2009-04-03	18:12:00	0
2009-04-03	18:13:00	0
2009-04-03	18:14:00	0
2009-04-03	18:15:00	0
2009-04-03	18:16:00	0
2009-04-03	18:17:00	0
2009-04-03	18:18:00	0
2009-04-03	18:19:00	0
2009-04-03	18:20:00	0
2009-04-03	18:21:00	0
2009-04-03	18:22:00	0
2009-04-03	18:23:00	0
2009-04-03	18:24:00	0
2009-04-03	18:25:00	0
2009-04-03	18:26:00	0
2009-04-03	18:27:00	0
2009-04-03	18:28:00	0
2009-04-03	18:29:00	0
2009-04-03	18:30:00	0
2009-04-03	18:31:00	0
2009-04-03	18:32:00	0
2009-04-03	18:33:00	0
2009-04-03	18:34:00	0
2009-04-03	18:35:00	0
2009-04-03	18:36:00	0
2009-04-03	18:37:00	0
2009-04-03	18:38:00	0
2009-04-03	18:39:00	0
2009-04-03	18:40:00	0
2009-04-03	18:41:00	0
2009-04-03	18:42:00	0
2009-04-03	18:43:00	0
2009-04-03	18:44:00	0
2009-04-03	18:45:00	0
2009-04-03	18:46:00	0
2009-04-03	18:47:00	0
2009-04-03	18:48:00	0
2009-04-03	18:49:00	0
2009-04-03	18:50:00	0
2009-04-03	18:51:00	0
2009-04-03	18:52:00	0
2009-04-03	18:53:00	0
2009-04-03	18:54:00	0
2009-04-03	18:55:00	0
2009-04-03	18:56:00	0
2009-04-03	18:57:00	0
2009-04-03	18:58:00	0
2009-04-03	18:59:00	0
2009-04-03	19:00:00	0
2009-04-03	19:01:00	0
2009-04-03	19:02:00	0
2009-04-03	19:03:00	0
2009-04-03	19:04:00	0
2009-04-03	19:05:00	0
2009-04-03	19:06:00	0
2009-04-03	19:07:00	0
2009-04-03	19:08:00	0
2009-04-03	19:09:00	0
2009-04-03	19:10:00	0
2009-04-03	19:11:00	0
2009-04-03	19:12:00	0
2009-04-03	19:13:00	0
2009-04-03	19:14:00	0
2009-04-03	19:15:00	0
2009-04-03	19:16:00	0
2009-04-03	19:17:00	0
2009-04-03	19:18:00	0
2009-04-03	19:19:00	0
2009-04-03	19:20:00	0
2009-04-03	19:21:00	0
2009-04-03	19:22:00	0
2009-04-03	19:23:00	0
2009-04-03	19:24:00	0
2009-04-03	19:25:00	0
2009-04-03	19:26:00	0
2009-04-03	19:27:00	0
2009-04-03	19:28:00	0
2009-04-03	19:29:00	0
2009-04-03	19:30:00	0
2009-04-03	19:31:00	0
2009-04-03	19:32:00	0
2009-04-03	19:33:00	0
2009-04-03	19:34:00	0
2009-04-03	19:35:00	0
2009-04-03	19:36:00	0
2009-04-03	19:37:00	0
2009-04-03	19:38:00	0
2009-04-03	19:39:00	0
2009-04-03	19:40:00	0
2009-04-03	19:41:00	0
2009-04-03	19:42:00	0
2009-04-03	19:43:00	0
2009-04-03	19:44:00	0
2009-04-03	19:45:00	0
2009-04-03	19:46:00	0
2009-04-03	19:47:00	0
2009-04-03	19:48:00	0
2009-04-03	19:49:00	0
2009-04-03	19:50:00	0
2009-04-03	19:51:00	0
2009-04-03	19:52:00	0
2009-04-03	19:53:00	0
2009-04-03	19:54:00	0
2009-04-03	19:55:00	0
2009-04-03	19:56:00	0
2009-04-03	19:57:00	0
2009-04-03	19:58:00	0
2009-04-03	19:59:00	0
2009-04-03	20:00:00	0
2009-04-03	20:01:00	0
2009-04-03	20:02:00	0
2009-04-03	20:03:00	0
2009-04-03	20:04:00	0
2009-04-03	20:05:00	0
2009-04-03	20:06:00	0
2009-04-03	20:07:00	0
2009-04-03	20:08:00	0
2009-04-03	20:09:00	0
2009-04-03	20:10:00	0
2009-04-03	20:11:00	0
2009-04-03	20:12:00	14
2009-04-03	20:13:00	0
2009-04-03	20:14:00	0
2009-04-03	20:15:00	0
2009-04-03	20:16:00	0
2009-04-03	20:17:00	14
2009-04-03	20:18:00	0
2009-04-03	20:19:00	0
2009-04-03	20:20:00	0
2009-04-03	20:21:00	0
2009-04-03	20:22:00	0
2009-04-03	20:23:00	0
2009-04-03	20:24:00	0
2009-04-03	20:25:00	14
2009-04-03	20:26:00	0
2009-04-03	20:27:00	0
2009-04-03	20:28:00	28
2009-04-03	20:29:00	0
2009-04-03	20:30:00	0
2009-04-03	20:31:00	0
2009-04-03	20:32:00	42
2009-04-03	20:33:00	1149
2009-04-03	20:34:00	629
2009-04-03	20:35:00	198
2009-04-03	20:36:00	56
2009-04-03	20:37:00	56
2009-04-03	20:38:00	97
2009-04-03	20:39:00	520
2009-04-03	20:40:00	281
2009-04-03	20:41:00	462
2009-04-03	20:42:00	214
2009-04-03	20:43:00	231
2009-04-03	20:44:00	111
2009-04-03	20:45:00	83
2009-04-03	20:46:00	442
2009-04-03	20:47:00	248
2009-04-03	20:48:00	42
2009-04-03	20:49:00	139
2009-04-03	20:50:00	0
2009-04-03	20:51:00	83
2009-04-03	20:52:00	281
2009-04-03	20:53:00	314
2009-04-03	20:54:00	264
2009-04-03	20:55:00	153
2009-04-03	20:56:00	0
2009-04-03	20:57:00	231
2009-04-03	20:58:00	248
2009-04-03	20:59:00	153
2009-04-03	21:00:00	14
2009-04-03	21:01:00	14
2009-04-03	21:02:00	0
2009-04-03	21:03:00	0
2009-04-03	21:04:00	14
2009-04-03	21:05:00	0
2009-04-03	21:06:00	0
2009-04-03	21:07:00	0
2009-04-03	21:08:00	0
2009-04-03	21:09:00	0
2009-04-03	21:10:00	0
2009-04-03	21:11:00	0
2009-04-03	21:12:00	0
2009-04-03	21:13:00	0
2009-04-03	21:14:00	0
2009-04-03	21:15:00	0
2009-04-03	21:16:00	0
2009-04-03	21:17:00	0
2009-04-03	21:18:00	0
2009-04-03	21:19:00	0
2009-04-03	21:20:00	0
2009-04-03	21:21:00	0
2009-04-03	21:22:00	0
2009-04-03	21:23:00	0
2009-04-03	21:24:00	0
2009-04-03	21:25:00	0
2009-04-03	21:26:00	0
2009-04-03	21:27:00	0
2009-04-03	21:28:00	0
2009-04-03	21:29:00	0
2009-04-03	21:30:00	0
2009-04-03	21:31:00	0
2009-04-03	21:32:00	0
2009-04-03	21:33:00	0
2009-04-03	21:34:00	0
2009-04-03	21:35:00	0
2009-04-03	21:36:00	0
2009-04-03	21:37:00	0
2009-04-03	21:38:00	0
2009-04-03	21:39:00	0
2009-04-03	21:40:00	0
2009-04-03	21:41:00	0
2009-04-03	21:42:00	0
2009-04-03	21:43:00	0
2009-04-03	21:44:00	0
2009-04-03	21:45:00	0
2009-04-03	21:46:00	0
2009-04-03	21:47:00	0
2009-04-03	21:48:00	0
2009-04-03	21:49:00	0
2009-04-03	21:50:00	0
2009-04-03	21:51:00	0
2009-04-03	21:52:00	28
2009-04-03	21:53:00	0
2009-04-03	21:54:00	0
2009-04-03	21:55:00	0
2009-04-03	21:56:00	0
2009-04-03	21:57:00	0
2009-04-03	21:58:00	0
2009-04-03	21:59:00	14
2009-04-03	22:00:00	14
2009-04-03	22:01:00	0
2009-04-03	22:02:00	0
2009-04-03	22:03:00	0
2009-04-03	22:04:00	0
2009-04-03	22:05:00	0
2009-04-03	22:06:00	0
2009-04-03	22:07:00	0
2009-04-03	22:08:00	0
2009-04-03	22:09:00	0
2009-04-03	22:10:00	0
2009-04-03	22:11:00	0
2009-04-03	22:12:00	0
2009-04-03	22:13:00	0
2009-04-03	22:14:00	0
2009-04-03	22:15:00	0
2009-04-03	22:16:00	0
2009-04-03	22:17:00	139
2009-04-03	22:18:00	0
2009-04-03	22:19:00	0
2009-04-03	22:20:00	0
2009-04-03	22:21:00	0
2009-04-03	22:22:00	0
2009-04-03	22:23:00	0
2009-04-03	22:24:00	0
2009-04-03	22:25:00	167
2009-04-03	22:26:00	56
2009-04-03	22:27:00	0
2009-04-03	22:28:00	0
2009-04-03	22:29:00	198
2009-04-03	22:30:00	153
2009-04-03	22:31:00	125
2009-04-03	22:32:00	14
2009-04-03	22:33:00	0
2009-04-03	22:34:00	0
2009-04-03	22:35:00	0
2009-04-03	22:36:00	0
2009-04-03	22:37:00	0
2009-04-03	22:38:00	14
2009-04-03	22:39:00	0
2009-04-03	22:40:00	0
2009-04-03	22:41:00	0
2009-04-03	22:42:00	0
2009-04-03	22:43:00	0
2009-04-03	22:44:00	14
2009-04-03	22:45:00	0
2009-04-03	22:46:00	0
2009-04-03	22:47:00	0
2009-04-03	22:48:00	14
2009-04-03	22:49:00	14
2009-04-03	22:50:00	0
2009-04-03	22:51:00	0
2009-04-03	22:52:00	0
2009-04-03	22:53:00	0
2009-04-03	22:54:00	0
2009-04-03	22:55:00	0
2009-04-03	22:56:00	0
2009-04-03	22:57:00	0
2009-04-03	22:58:00	28
2009-04-03	22:59:00	14
2009-04-03	23:00:00	0
2009-04-03	23:01:00	0
2009-04-03	23:02:00	0
2009-04-03	23:03:00	0
2009-04-03	23:04:00	0
2009-04-03	23:05:00	0
2009-04-03	23:06:00	0
2009-04-03	23:07:00	14
2009-04-03	23:08:00	0
2009-04-03	23:09:00	0
2009-04-03	23:10:00	0
2009-04-03	23:11:00	0
2009-04-03	23:12:00	0
2009-04-03	23:13:00	0
2009-04-03	23:14:00	0
2009-04-03	23:15:00	0
2009-04-03	23:16:00	14
2009-04-03	23:17:00	0
2009-04-03	23:18:00	0
2009-04-03	23:19:00	0
2009-04-03	23:20:00	0
2009-04-03	23:21:00	0
2009-04-03	23:22:00	0
2009-04-03	23:23:00	0
2009-04-03	23:24:00	0
2009-04-03	23:25:00	0
2009-04-03	23:26:00	0
2009-04-03	23:27:00	0
2009-04-03	23:28:00	0
2009-04-03	23:29:00	0
2009-04-03	23:30:00	0
2009-04-03	23:31:00	14
2009-04-03	23:32:00	0
2009-04-03	23:33:00	0
2009-04-03	23:34:00	0
2009-04-03	23:35:00	0
2009-04-03	23:36:00	0
2009-04-03	23:37:00	0
2009-04-03	23:38:00	0
2009-04-03	23:39:00	0
2009-04-03	23:40:00	0
2009-04-03	23:41:00	0
2009-04-03	23:42:00	14
2009-04-03	23:43:00	0
2009-04-03	23:44:00	0
2009-04-03	23:45:00	0
2009-04-03	23:46:00	0
2009-04-03	23:47:00	14
2009-04-03	23:48:00	0
2009-04-03	23:49:00	0
2009-04-03	23:50:00	0
2009-04-03	23:51:00	0
2009-04-03	23:52:00	0
2009-04-03	23:53:00	0
2009-04-03	23:54:00	0
2009-04-03	23:55:00	0
2009-04-03	23:56:00	0
2009-04-03	23:57:00	0
2009-04-03	23:58:00	0
2009-04-03	23:59:00	0
2009-04-04	00:00:00	0
2009-04-04	00:01:00	0
2009-04-04	00:02:00	0
2009-04-04	00:03:00	0
2009-04-04	00:04:00	0
2009-04-04	00:05:00	0
2009-04-04	00:06:00	14
2009-04-04	00:07:00	0
2009-04-04	00:08:00	0
2009-04-04	00:09:00	14
2009-04-04	00:10:00	331
2009-04-04	00:11:00	314
2009-04-04	00:12:00	0
2009-04-04	00:13:00	1210
2009-04-04	00:14:00	1180
2009-04-04	00:15:00	501
2009-04-04	00:16:00	56
2009-04-04	00:17:00	0
2009-04-04	00:18:00	0
2009-04-04	00:19:00	0
2009-04-04	00:20:00	0
2009-04-04	00:21:00	0
2009-04-04	00:22:00	0
2009-04-04	00:23:00	0
2009-04-04	00:24:00	0
2009-04-04	00:25:00	0
2009-04-04	00:26:00	0
2009-04-04	00:27:00	0
2009-04-04	00:28:00	0
2009-04-04	00:29:00	0
2009-04-04	00:30:00	0
2009-04-04	00:31:00	0
2009-04-04	00:32:00	0
2009-04-04	00:33:00	0
2009-04-04	00:34:00	0
2009-04-04	00:35:00	0
2009-04-04	00:36:00	0
2009-04-04	00:37:00	0
2009-04-04	00:38:00	0
2009-04-04	00:39:00	0
2009-04-04	00:40:00	0
2009-04-04	00:41:00	0
2009-04-04	00:42:00	0
2009-04-04	00:43:00	0
2009-04-04	00:44:00	0
2009-04-04	00:45:00	0
2009-04-04	00:46:00	0
2009-04-04	00:47:00	0
2009-04-04	00:48:00	0
2009-04-04	00:49:00	0
2009-04-04	00:50:00	14
2009-04-04	00:51:00	0
2009-04-04	00:52:00	0
2009-04-04	00:53:00	0
2009-04-04	00:54:00	0
2009-04-04	00:55:00	0
2009-04-04	00:56:00	0
2009-04-04	00:57:00	0
2009-04-04	00:58:00	0
2009-04-04	00:59:00	0
2009-04-04	01:00:00	0
2009-04-04	01:01:00	0
2009-04-04	01:02:00	0
2009-04-04	01:03:00	0
2009-04-04	01:04:00	0
2009-04-04	01:05:00	0
2009-04-04	01:06:00	0
2009-04-04	01:07:00	0
2009-04-04	01:08:00	0
2009-04-04	01:09:00	0
2009-04-04	01:10:00	0
2009-04-04	01:11:00	0
2009-04-04	01:12:00	0
2009-04-04	01:13:00	14
2009-04-04	01:14:00	0
2009-04-04	01:15:00	0
2009-04-04	01:16:00	0
2009-04-04	01:17:00	0
2009-04-04	01:18:00	0
2009-04-04	01:19:00	0
2009-04-04	01:20:00	0
2009-04-04	01:21:00	0
2009-04-04	01:22:00	0
2009-04-04	01:23:00	0
2009-04-04	01:24:00	0
2009-04-04	01:25:00	0
2009-04-04	01:26:00	0
2009-04-04	01:27:00	0
2009-04-04	01:28:00	0
2009-04-04	01:29:00	0
2009-04-04	01:30:00	0
2009-04-04	01:31:00	0
2009-04-04	01:32:00	0
2009-04-04	01:33:00	0
2009-04-04	01:34:00	0
2009-04-04	01:35:00	0
2009-04-04	01:36:00	0
2009-04-04	01:37:00	0
2009-04-04	01:38:00	0
2009-04-04	01:39:00	0
2009-04-04	01:40:00	0
2009-04-04	01:41:00	0
2009-04-04	01:42:00	0
2009-04-04	01:43:00	0
2009-04-04	01:44:00	0
2009-04-04	01:45:00	0
2009-04-04	01:46:00	0
2009-04-04	01:47:00	0
2009-04-04	01:48:00	0
2009-04-04	01:49:00	0
2009-04-04	01:50:00	28
2009-04-04	01:51:00	0
2009-04-04	01:52:00	0
2009-04-04	01:53:00	0
2009-04-04	01:54:00	0
2009-04-04	01:55:00	0
2009-04-04	01:56:00	0
2009-04-04	01:57:00	0
2009-04-04	01:58:00	0
2009-04-04	01:59:00	0
2009-04-04	02:00:00	0
2009-04-04	02:01:00	0
2009-04-04	02:02:00	0
2009-04-04	02:03:00	0
2009-04-04	02:04:00	0
2009-04-04	02:05:00	0
2009-04-04	02:06:00	0
2009-04-04	02:07:00	0
2009-04-04	02:08:00	0
2009-04-04	02:09:00	0
2009-04-04	02:10:00	0
2009-04-04	02:11:00	0
2009-04-04	02:12:00	0
2009-04-04	02:13:00	0
2009-04-04	02:14:00	0
2009-04-04	02:15:00	0
2009-04-04	02:16:00	0
2009-04-04	02:17:00	0
2009-04-04	02:18:00	0
2009-04-04	02:19:00	0
2009-04-04	02:20:00	0
2009-04-04	02:21:00	0
2009-04-04	02:22:00	0
2009-04-04	02:23:00	0
2009-04-04	02:24:00	0
2009-04-04	02:25:00	0
2009-04-04	02:26:00	0
2009-04-04	02:27:00	0
2009-04-04	02:28:00	0
2009-04-04	02:29:00	181
2009-04-04	02:30:00	125
2009-04-04	02:31:00	139
2009-04-04	02:32:00	0
2009-04-04	02:33:00	0
2009-04-04	02:34:00	14
2009-04-04	02:35:00	0
2009-04-04	02:36:00	0
2009-04-04	02:37:00	0
2009-04-04	02:38:00	0
2009-04-04	02:39:00	0
2009-04-04	02:40:00	0
2009-04-04	02:41:00	0
2009-04-04	02:42:00	0
2009-04-04	02:43:00	0
2009-04-04	02:44:00	0
2009-04-04	02:45:00	0
2009-04-04	02:46:00	0
2009-04-04	02:47:00	0
2009-04-04	02:48:00	0
2009-04-04	02:49:00	0
2009-04-04	02:50:00	0
2009-04-04	02:51:00	0
2009-04-04	02:52:00	0
2009-04-04	02:53:00	0
2009-04-04	02:54:00	0
2009-04-04	02:55:00	0
2009-04-04	02:56:00	0
2009-04-04	02:57:00	0
2009-04-04	02:58:00	0
2009-04-04	02:59:00	0
2009-04-04	03:00:00	0
2009-04-04	03:01:00	14
2009-04-04	03:02:00	56
2009-04-04	03:03:00	0
2009-04-04	03:04:00	0
2009-04-04	03:05:00	0
2009-04-04	03:06:00	0
2009-04-04	03:07:00	0
2009-04-04	03:08:00	0
2009-04-04	03:09:00	0
2009-04-04	03:10:00	0
2009-04-04	03:11:00	0
2009-04-04	03:12:00	0
2009-04-04	03:13:00	0
2009-04-04	03:14:00	0
2009-04-04	03:15:00	0
2009-04-04	03:16:00	0
2009-04-04	03:17:00	0
2009-04-04	03:18:00	0
2009-04-04	03:19:00	0
2009-04-04	03:20:00	0
2009-04-04	03:21:00	0
2009-04-04	03:22:00	0
2009-04-04	03:23:00	0
2009-04-04	03:24:00	0
2009-04-04	03:25:00	0
2009-04-04	03:26:00	0
2009-04-04	03:27:00	0
2009-04-04	03:28:00	0
2009-04-04	03:29:00	0
2009-04-04	03:30:00	0
2009-04-04	03:31:00	0
2009-04-04	03:32:00	14
2009-04-04	03:33:00	0
2009-04-04	03:34:00	0
2009-04-04	03:35:00	0
2009-04-04	03:36:00	0
2009-04-04	03:37:00	0
2009-04-04	03:38:00	0
2009-04-04	03:39:00	0
2009-04-04	03:40:00	0
2009-04-04	03:41:00	0
2009-04-04	03:42:00	0
2009-04-04	03:43:00	0
2009-04-04	03:44:00	0
2009-04-04	03:45:00	0
2009-04-04	03:46:00	0
2009-04-04	03:47:00	0
2009-04-04	03:48:00	0
2009-04-04	03:49:00	0
2009-04-04	03:50:00	0
2009-04-04	03:51:00	83
2009-04-04	03:52:00	0
2009-04-04	03:53:00	0
2009-04-04	03:54:00	0
2009-04-04	03:55:00	0
2009-04-04	03:56:00	0
2009-04-04	03:57:00	0
2009-04-04	03:58:00	0
2009-04-04	03:59:00	0
2009-04-04	04:00:00	0
2009-04-04	04:01:00	0
2009-04-04	04:02:00	0
2009-04-04	04:03:00	0
2009-04-04	04:04:00	0
2009-04-04	04:05:00	42
2009-04-04	04:06:00	0
2009-04-04	04:07:00	0
2009-04-04	04:08:00	0
2009-04-04	04:09:00	14
2009-04-04	04:10:00	0
2009-04-04	04:11:00	14
2009-04-04	04:12:00	0
2009-04-04	04:13:00	0
2009-04-04	04:14:00	0
2009-04-04	04:15:00	0
2009-04-04	04:16:00	0
2009-04-04	04:17:00	0
2009-04-04	04:18:00	0
2009-04-04	04:19:00	0
2009-04-04	04:20:00	0
2009-04-04	04:21:00	0
2009-04-04	04:22:00	0
2009-04-04	04:23:00	0
2009-04-04	04:24:00	0
2009-04-04	04:25:00	0
2009-04-04	04:26:00	0
2009-04-04	04:27:00	0
2009-04-04	04:28:00	0
2009-04-04	04:29:00	0
2009-04-04	04:30:00	0
2009-04-04	04:31:00	0
2009-04-04	04:32:00	0
2009-04-04	04:33:00	14
2009-04-04	04:34:00	139
2009-04-04	04:35:00	42
2009-04-04	04:36:00	0
2009-04-04	04:37:00	0
2009-04-04	04:38:00	0
2009-04-04	04:39:00	28
2009-04-04	04:40:00	0
2009-04-04	04:41:00	0
2009-04-04	04:42:00	0
2009-04-04	04:43:00	0
2009-04-04	04:44:00	0
2009-04-04	04:45:00	0
2009-04-04	04:46:00	0
2009-04-04	04:47:00	0
2009-04-04	04:48:00	0
2009-04-04	04:49:00	0
2009-04-04	04:50:00	0
2009-04-04	04:51:00	0
2009-04-04	04:52:00	0
2009-04-04	04:53:00	0
2009-04-04	04:54:00	0
2009-04-04	04:55:00	0
2009-04-04	04:56:00	0
2009-04-04	04:57:00	0
2009-04-04	04:58:00	0
2009-04-04	04:59:00	0
2009-04-04	05:00:00	0
2009-04-04	05:01:00	0
2009-04-04	05:02:00	0
2009-04-04	05:03:00	0
2009-04-04	05:04:00	0
2009-04-04	05:05:00	0
2009-04-04	05:06:00	0
2009-04-04	05:07:00	0
2009-04-04	05:08:00	0
2009-04-04	05:09:00	0
2009-04-04	05:10:00	0
2009-04-04	05:11:00	14
2009-04-04	05:12:00	0
2009-04-04	05:13:00	0
2009-04-04	05:14:00	0
2009-04-04	05:15:00	0
2009-04-04	05:16:00	0
2009-04-04	05:17:00	0
2009-04-04	05:18:00	0
2009-04-04	05:19:00	0
2009-04-04	05:20:00	28
2009-04-04	05:21:00	0
2009-04-04	05:22:00	0
2009-04-04	05:23:00	0
2009-04-04	05:24:00	0
2009-04-04	05:25:00	0
2009-04-04	05:26:00	0
2009-04-04	05:27:00	14
2009-04-04	05:28:00	0
2009-04-04	05:29:00	0
2009-04-04	05:30:00	0
2009-04-04	05:31:00	0
2009-04-04	05:32:00	0
2009-04-04	05:33:00	0
2009-04-04	05:34:00	0
2009-04-04	05:35:00	0
2009-04-04	05:36:00	0
2009-04-04	05:37:00	0
2009-04-04	05:38:00	28
2009-04-04	05:39:00	0
2009-04-04	05:40:00	0
2009-04-04	05:41:00	0
2009-04-04	05:42:00	0
2009-04-04	05:43:00	14
2009-04-04	05:44:00	0
2009-04-04	05:45:00	14
2009-04-04	05:46:00	0
2009-04-04	05:47:00	14
2009-04-04	05:48:00	0
2009-04-04	05:49:00	56
2009-04-04	05:50:00	0
2009-04-04	05:51:00	0
2009-04-04	05:52:00	0
2009-04-04	05:53:00	0
2009-04-04	05:54:00	0
2009-04-04	05:55:00	0
2009-04-04	05:56:00	0
2009-04-04	05:57:00	0
2009-04-04	05:58:00	0
2009-04-04	05:59:00	0
2009-04-04	06:00:00	28
2009-04-04	06:01:00	0
2009-04-04	06:02:00	0
2009-04-04	06:03:00	0
2009-04-04	06:04:00	0
2009-04-04	06:05:00	0
2009-04-04	06:06:00	0
2009-04-04	06:07:00	0
2009-04-04	06:08:00	14
2009-04-04	06:09:00	0
2009-04-04	06:10:00	28
2009-04-04	06:11:00	0
2009-04-04	06:12:00	0
2009-04-04	06:13:00	0
2009-04-04	06:14:00	0
2009-04-04	06:15:00	0
2009-04-04	06:16:00	0
2009-04-04	06:17:00	0
2009-04-04	06:18:00	0
2009-04-04	06:19:00	14
2009-04-04	06:20:00	28
2009-04-04	06:21:00	0
2009-04-04	06:22:00	0
2009-04-04	06:23:00	0
2009-04-04	06:24:00	0
2009-04-04	06:25:00	0
2009-04-04	06:26:00	0
2009-04-04	06:27:00	0
2009-04-04	06:28:00	0
2009-04-04	06:29:00	0
2009-04-04	06:30:00	0
2009-04-04	06:31:00	0
2009-04-04	06:32:00	0
2009-04-04	06:33:00	0
2009-04-04	06:34:00	0
2009-04-04	06:35:00	0
2009-04-04	06:36:00	0
2009-04-04	06:37:00	56
2009-04-04	06:38:00	0
2009-04-04	06:39:00	0
2009-04-04	06:40:00	28
2009-04-04	06:41:00	0
2009-04-04	06:42:00	56
2009-04-04	06:43:00	0
2009-04-04	06:44:00	0
2009-04-04	06:45:00	0
2009-04-04	06:46:00	0
2009-04-04	06:47:00	0
2009-04-04	06:48:00	0
2009-04-04	06:49:00	0
2009-04-04	06:50:00	0
2009-04-04	06:51:00	0
2009-04-04	06:52:00	0
2009-04-04	06:53:00	14
2009-04-04	06:54:00	0
2009-04-04	06:55:00	0
2009-04-04	06:56:00	0
2009-04-04	06:57:00	0
2009-04-04	06:58:00	0
2009-04-04	06:59:00	0
2009-04-04	07:00:00	0
2009-04-04	07:01:00	56
2009-04-04	07:02:00	0
2009-04-04	07:03:00	0
2009-04-04	07:04:00	0
2009-04-04	07:05:00	0
2009-04-04	07:06:00	0
2009-04-04	07:07:00	0
2009-04-04	07:08:00	0
2009-04-04	07:09:00	0
2009-04-04	07:10:00	42
2009-04-04	07:11:00	0
2009-04-04	07:12:00	0
2009-04-04	07:13:00	0
2009-04-04	07:14:00	0
2009-04-04	07:15:00	0
2009-04-04	07:16:00	0
2009-04-04	07:17:00	0
2009-04-04	07:18:00	0
2009-04-04	07:19:00	14
2009-04-04	07:20:00	0
2009-04-04	07:21:00	0
2009-04-04	07:22:00	0
2009-04-04	07:23:00	97
2009-04-04	07:24:00	0
2009-04-04	07:25:00	0
2009-04-04	07:26:00	0
2009-04-04	07:27:00	0
2009-04-04	07:28:00	2026
2009-04-04	07:29:00	442
2009-04-04	07:30:00	1305
2009-04-04	07:31:00	843
2009-04-04	07:32:00	2159
2009-04-04	07:33:00	893
2009-04-04	07:34:00	384
2009-04-04	07:35:00	14
2009-04-04	07:36:00	14
2009-04-04	07:37:00	56
2009-04-04	07:38:00	629
2009-04-04	07:39:00	125
2009-04-04	07:40:00	56
2009-04-04	07:41:00	28
2009-04-04	07:42:00	0
2009-04-04	07:43:00	0
2009-04-04	07:44:00	0
2009-04-04	07:45:00	0
2009-04-04	07:46:00	28
2009-04-04	07:47:00	0
2009-04-04	07:48:00	0
2009-04-04	07:49:00	0
2009-04-04	07:50:00	0
2009-04-04	07:51:00	0
2009-04-04	07:52:00	14
2009-04-04	07:53:00	0
2009-04-04	07:54:00	0
2009-04-04	07:55:00	0
2009-04-04	07:56:00	0
2009-04-04	07:57:00	0
2009-04-04	07:58:00	0
2009-04-04	07:59:00	14
2009-04-04	08:00:00	0
2009-04-04	08:01:00	0
2009-04-04	08:02:00	0
2009-04-04	08:03:00	0
2009-04-04	08:04:00	0
2009-04-04	08:05:00	0
2009-04-04	08:06:00	0
2009-04-04	08:07:00	0
2009-04-04	08:08:00	0
2009-04-04	08:09:00	0
2009-04-04	08:10:00	0
2009-04-04	08:11:00	0
2009-04-04	08:12:00	0
2009-04-04	08:13:00	0
2009-04-04	08:14:00	0
2009-04-04	08:15:00	0
2009-04-04	08:16:00	0
2009-04-04	08:17:00	0
2009-04-04	08:18:00	97
2009-04-04	08:19:00	0
2009-04-04	08:20:00	0
2009-04-04	08:21:00	0
2009-04-04	08:22:00	42
2009-04-04	08:23:00	0
2009-04-04	08:24:00	0
2009-04-04	08:25:00	0
2009-04-04	08:26:00	0
2009-04-04	08:27:00	0
2009-04-04	08:28:00	0
2009-04-04	08:29:00	0
2009-04-04	08:30:00	0
2009-04-04	08:31:00	0
2009-04-04	08:32:00	0
2009-04-04	08:33:00	0
2009-04-04	08:34:00	14
2009-04-04	08:35:00	0
2009-04-04	08:36:00	42
2009-04-04	08:37:00	0
2009-04-04	08:38:00	1088
2009-04-04	08:39:00	348
2009-04-04	08:40:00	14
2009-04-04	08:41:00	423
2009-04-04	08:42:00	1272
2009-04-04	08:43:00	629
2009-04-04	08:44:00	651
2009-04-04	08:45:00	977
2009-04-04	08:46:00	214
2009-04-04	08:47:00	83
2009-04-04	08:48:00	153
2009-04-04	08:49:00	181
2009-04-04	08:50:00	198
2009-04-04	08:51:00	540
2009-04-04	08:52:00	214
2009-04-04	08:53:00	111
2009-04-04	08:54:00	0
2009-04-04	08:55:00	70
2009-04-04	08:56:00	97
2009-04-04	08:57:00	181
2009-04-04	08:58:00	70
2009-04-04	08:59:00	0
2009-04-04	09:00:00	0
2009-04-04	09:01:00	28
2009-04-04	09:02:00	0
2009-04-04	09:03:00	70
2009-04-04	09:04:00	14
2009-04-04	09:05:00	83
2009-04-04	09:06:00	111
2009-04-04	09:07:00	14
2009-04-04	09:08:00	28
[truncated: 19,611 more rows]

## Sheet: 4.17.09
Actogram, Copy Raw Data, All Days
Identity:	Natasha
Filename:	E:\Active Research Files\meloxicam titre canine\cases\natasha\Natasha 4.17.09.AWC
Gender:	F
Age:	8
Height:	91.4 cm	36.0 in
Weight:	29.5 kg	65.0 lbs
Start Date:	17-Apr-2009 (Fri)
Start Time:	18:00:00
Interval:	1.00 mins
Date Stamp:	Time Stamp:	Activity Data:	Marker Press:
2009-04-17	00:00:00	0
2009-04-17	00:01:00	0
2009-04-17	00:02:00	0
2009-04-17	00:03:00	0
2009-04-17	00:04:00	0
2009-04-17	00:05:00	0
2009-04-17	00:06:00	0
2009-04-17	00:07:00	0
2009-04-17	00:08:00	0
2009-04-17	00:09:00	0
2009-04-17	00:10:00	0
2009-04-17	00:11:00	0
2009-04-17	00:12:00	0
2009-04-17	00:13:00	0
2009-04-17	00:14:00	0
2009-04-17	00:15:00	0
2009-04-17	00:16:00	0
2009-04-17	00:17:00	0
2009-04-17	00:18:00	0
2009-04-17	00:19:00	0
2009-04-17	00:20:00	0
2009-04-17	00:21:00	0
2009-04-17	00:22:00	0
2009-04-17	00:23:00	0
2009-04-17	00:24:00	0
2009-04-17	00:25:00	0
2009-04-17	00:26:00	0
2009-04-17	00:27:00	0
2009-04-17	00:28:00	0
2009-04-17	00:29:00	0
2009-04-17	00:30:00	0
2009-04-17	00:31:00	0
2009-04-17	00:32:00	0
2009-04-17	00:33:00	0
2009-04-17	00:34:00	0
2009-04-17	00:35:00	0
2009-04-17	00:36:00	0
2009-04-17	00:37:00	0
2009-04-17	00:38:00	0
2009-04-17	00:39:00	0
2009-04-17	00:40:00	0
2009-04-17	00:41:00	0
2009-04-17	00:42:00	0
2009-04-17	00:43:00	0
2009-04-17	00:44:00	0
2009-04-17	00:45:00	0
2009-04-17	00:46:00	0
2009-04-17	00:47:00	0
2009-04-17	00:48:00	0
2009-04-17	00:49:00	0
2009-04-17	00:50:00	0
2009-04-17	00:51:00	0
2009-04-17	00:52:00	0
2009-04-17	00:53:00	0
2009-04-17	00:54:00	0
2009-04-17	00:55:00	0
2009-04-17	00:56:00	0
2009-04-17	00:57:00	0
2009-04-17	00:58:00	0
2009-04-17	00:59:00	0
2009-04-17	01:00:00	0
2009-04-17	01:01:00	0
2009-04-17	01:02:00	0
2009-04-17	01:03:00	0
2009-04-17	01:04:00	0
2009-04-17	01:05:00	0
2009-04-17	01:06:00	0
2009-04-17	01:07:00	0
2009-04-17	01:08:00	0
2009-04-17	01:09:00	0
2009-04-17	01:10:00	0
2009-04-17	01:11:00	0
2009-04-17	01:12:00	0
2009-04-17	01:13:00	0
2009-04-17	01:14:00	0
2009-04-17	01:15:00	0
2009-04-17	01:16:00	0
2009-04-17	01:17:00	0
2009-04-17	01:18:00	0
2009-04-17	01:19:00	0
2009-04-17	01:20:00	0
2009-04-17	01:21:00	0
2009-04-17	01:22:00	0
2009-04-17	01:23:00	0
2009-04-17	01:24:00	0
2009-04-17	01:25:00	0
2009-04-17	01:26:00	0
2009-04-17	01:27:00	0
2009-04-17	01:28:00	0
2009-04-17	01:29:00	0
2009-04-17	01:30:00	0
2009-04-17	01:31:00	0
2009-04-17	01:32:00	0
2009-04-17	01:33:00	0
2009-04-17	01:34:00	0
2009-04-17	01:35:00	0
2009-04-17	01:36:00	0
2009-04-17	01:37:00	0
2009-04-17	01:38:00	0
2009-04-17	01:39:00	0
2009-04-17	01:40:00	0
2009-04-17	01:41:00	0
2009-04-17	01:42:00	0
2009-04-17	01:43:00	0
2009-04-17	01:44:00	0
2009-04-17	01:45:00	0
2009-04-17	01:46:00	0
2009-04-17	01:47:00	0
2009-04-17	01:48:00	0
2009-04-17	01:49:00	0
2009-04-17	01:50:00	0
2009-04-17	01:51:00	0
2009-04-17	01:52:00	0
2009-04-17	01:53:00	0
2009-04-17	01:54:00	0
2009-04-17	01:55:00	0
2009-04-17	01:56:00	0
2009-04-17	01:57:00	0
2009-04-17	01:58:00	0
2009-04-17	01:59:00	0
2009-04-17	02:00:00	0
2009-04-17	02:01:00	0
2009-04-17	02:02:00	0
2009-04-17	02:03:00	0
2009-04-17	02:04:00	0
2009-04-17	02:05:00	0
2009-04-17	02:06:00	0
2009-04-17	02:07:00	0
2009-04-17	02:08:00	0
2009-04-17	02:09:00	0
2009-04-17	02:10:00	0
2009-04-17	02:11:00	0
2009-04-17	02:12:00	0
2009-04-17	02:13:00	0
2009-04-17	02:14:00	0
2009-04-17	02:15:00	0
2009-04-17	02:16:00	0
2009-04-17	02:17:00	0
2009-04-17	02:18:00	0
2009-04-17	02:19:00	0
2009-04-17	02:20:00	0
2009-04-17	02:21:00	0
2009-04-17	02:22:00	0
2009-04-17	02:23:00	0
2009-04-17	02:24:00	0
2009-04-17	02:25:00	0
2009-04-17	02:26:00	0
2009-04-17	02:27:00	0
2009-04-17	02:28:00	0
2009-04-17	02:29:00	0
2009-04-17	02:30:00	0
2009-04-17	02:31:00	0
2009-04-17	02:32:00	0
2009-04-17	02:33:00	0
2009-04-17	02:34:00	0
2009-04-17	02:35:00	0
2009-04-17	02:36:00	0
2009-04-17	02:37:00	0
2009-04-17	02:38:00	0
2009-04-17	02:39:00	0
2009-04-17	02:40:00	0
2009-04-17	02:41:00	0
2009-04-17	02:42:00	0
2009-04-17	02:43:00	0
2009-04-17	02:44:00	0
2009-04-17	02:45:00	0
2009-04-17	02:46:00	0
2009-04-17	02:47:00	0
2009-04-17	02:48:00	0
2009-04-17	02:49:00	0
2009-04-17	02:50:00	0
2009-04-17	02:51:00	0
2009-04-17	02:52:00	0
2009-04-17	02:53:00	0
2009-04-17	02:54:00	0
2009-04-17	02:55:00	0
2009-04-17	02:56:00	0
2009-04-17	02:57:00	0
2009-04-17	02:58:00	0
2009-04-17	02:59:00	0
2009-04-17	03:00:00	0
2009-04-17	03:01:00	0
2009-04-17	03:02:00	0
2009-04-17	03:03:00	0
2009-04-17	03:04:00	0
2009-04-17	03:05:00	0
2009-04-17	03:06:00	0
2009-04-17	03:07:00	0
2009-04-17	03:08:00	0
2009-04-17	03:09:00	0
2009-04-17	03:10:00	0
2009-04-17	03:11:00	0
2009-04-17	03:12:00	0
2009-04-17	03:13:00	0
2009-04-17	03:14:00	0
2009-04-17	03:15:00	0
2009-04-17	03:16:00	0
2009-04-17	03:17:00	0
2009-04-17	03:18:00	0
2009-04-17	03:19:00	0
2009-04-17	03:20:00	0
2009-04-17	03:21:00	0
2009-04-17	03:22:00	0
2009-04-17	03:23:00	0
2009-04-17	03:24:00	0
2009-04-17	03:25:00	0
2009-04-17	03:26:00	0
2009-04-17	03:27:00	0
2009-04-17	03:28:00	0
2009-04-17	03:29:00	0
2009-04-17	03:30:00	0
2009-04-17	03:31:00	0
2009-04-17	03:32:00	0
2009-04-17	03:33:00	0
2009-04-17	03:34:00	0
2009-04-17	03:35:00	0
2009-04-17	03:36:00	0
2009-04-17	03:37:00	0
2009-04-17	03:38:00	0
2009-04-17	03:39:00	0
2009-04-17	03:40:00	0
2009-04-17	03:41:00	0
2009-04-17	03:42:00	0
2009-04-17	03:43:00	0
2009-04-17	03:44:00	0
2009-04-17	03:45:00	0
2009-04-17	03:46:00	0
2009-04-17	03:47:00	0
2009-04-17	03:48:00	0
2009-04-17	03:49:00	0
2009-04-17	03:50:00	0
2009-04-17	03:51:00	0
2009-04-17	03:52:00	0
2009-04-17	03:53:00	0
2009-04-17	03:54:00	0
2009-04-17	03:55:00	0
2009-04-17	03:56:00	0
2009-04-17	03:57:00	0
2009-04-17	03:58:00	0
2009-04-17	03:59:00	0
2009-04-17	04:00:00	0
2009-04-17	04:01:00	0
2009-04-17	04:02:00	0
2009-04-17	04:03:00	0
2009-04-17	04:04:00	0
2009-04-17	04:05:00	0
2009-04-17	04:06:00	0
2009-04-17	04:07:00	0
2009-04-17	04:08:00	0
2009-04-17	04:09:00	0
2009-04-17	04:10:00	0
2009-04-17	04:11:00	0
2009-04-17	04:12:00	0
2009-04-17	04:13:00	0
2009-04-17	04:14:00	0
2009-04-17	04:15:00	0
2009-04-17	04:16:00	0
2009-04-17	04:17:00	0
2009-04-17	04:18:00	0
2009-04-17	04:19:00	0
2009-04-17	04:20:00	0
2009-04-17	04:21:00	0
2009-04-17	04:22:00	0
2009-04-17	04:23:00	0
2009-04-17	04:24:00	0
2009-04-17	04:25:00	0
2009-04-17	04:26:00	0
2009-04-17	04:27:00	0
2009-04-17	04:28:00	0
2009-04-17	04:29:00	0
2009-04-17	04:30:00	0
2009-04-17	04:31:00	0
2009-04-17	04:32:00	0
2009-04-17	04:33:00	0
2009-04-17	04:34:00	0
2009-04-17	04:35:00	0
2009-04-17	04:36:00	0
2009-04-17	04:37:00	0
2009-04-17	04:38:00	0
2009-04-17	04:39:00	0
2009-04-17	04:40:00	0
2009-04-17	04:41:00	0
2009-04-17	04:42:00	0
2009-04-17	04:43:00	0
2009-04-17	04:44:00	0
2009-04-17	04:45:00	0
2009-04-17	04:46:00	0
2009-04-17	04:47:00	0
2009-04-17	04:48:00	0
2009-04-17	04:49:00	0
2009-04-17	04:50:00	0
2009-04-17	04:51:00	0
2009-04-17	04:52:00	0
2009-04-17	04:53:00	0
2009-04-17	04:54:00	0
2009-04-17	04:55:00	0
2009-04-17	04:56:00	0
2009-04-17	04:57:00	0
2009-04-17	04:58:00	0
2009-04-17	04:59:00	0
2009-04-17	05:00:00	0
2009-04-17	05:01:00	0
2009-04-17	05:02:00	0
2009-04-17	05:03:00	0
2009-04-17	05:04:00	0
2009-04-17	05:05:00	0
2009-04-17	05:06:00	0
2009-04-17	05:07:00	0
2009-04-17	05:08:00	0
2009-04-17	05:09:00	0
2009-04-17	05:10:00	0
2009-04-17	05:11:00	0
2009-04-17	05:12:00	0
2009-04-17	05:13:00	0
2009-04-17	05:14:00	0
2009-04-17	05:15:00	0
2009-04-17	05:16:00	0
2009-04-17	05:17:00	0
2009-04-17	05:18:00	0
2009-04-17	05:19:00	0
2009-04-17	05:20:00	0
2009-04-17	05:21:00	0
2009-04-17	05:22:00	0
2009-04-17	05:23:00	0
2009-04-17	05:24:00	0
2009-04-17	05:25:00	0
2009-04-17	05:26:00	0
2009-04-17	05:27:00	0
2009-04-17	05:28:00	0
2009-04-17	05:29:00	0
2009-04-17	05:30:00	0
2009-04-17	05:31:00	0
2009-04-17	05:32:00	0
2009-04-17	05:33:00	0
2009-04-17	05:34:00	0
2009-04-17	05:35:00	0
2009-04-17	05:36:00	0
2009-04-17	05:37:00	0
2009-04-17	05:38:00	0
2009-04-17	05:39:00	0
2009-04-17	05:40:00	0
2009-04-17	05:41:00	0
2009-04-17	05:42:00	0
2009-04-17	05:43:00	0
2009-04-17	05:44:00	0
2009-04-17	05:45:00	0
2009-04-17	05:46:00	0
2009-04-17	05:47:00	0
2009-04-17	05:48:00	0
2009-04-17	05:49:00	0
2009-04-17	05:50:00	0
2009-04-17	05:51:00	0
2009-04-17	05:52:00	0
2009-04-17	05:53:00	0
2009-04-17	05:54:00	0
2009-04-17	05:55:00	0
2009-04-17	05:56:00	0
2009-04-17	05:57:00	0
2009-04-17	05:58:00	0
2009-04-17	05:59:00	0
2009-04-17	06:00:00	0
2009-04-17	06:01:00	0
2009-04-17	06:02:00	0
2009-04-17	06:03:00	0
2009-04-17	06:04:00	0
2009-04-17	06:05:00	0
2009-04-17	06:06:00	0
2009-04-17	06:07:00	0
2009-04-17	06:08:00	0
2009-04-17	06:09:00	0
2009-04-17	06:10:00	0
2009-04-17	06:11:00	0
2009-04-17	06:12:00	0
2009-04-17	06:13:00	0
2009-04-17	06:14:00	0
2009-04-17	06:15:00	0
2009-04-17	06:16:00	0
2009-04-17	06:17:00	0
2009-04-17	06:18:00	0
2009-04-17	06:19:00	0
2009-04-17	06:20:00	0
2009-04-17	06:21:00	0
2009-04-17	06:22:00	0
2009-04-17	06:23:00	0
2009-04-17	06:24:00	0
2009-04-17	06:25:00	0
2009-04-17	06:26:00	0
2009-04-17	06:27:00	0
2009-04-17	06:28:00	0
2009-04-17	06:29:00	0
2009-04-17	06:30:00	0
2009-04-17	06:31:00	0
2009-04-17	06:32:00	0
2009-04-17	06:33:00	0
2009-04-17	06:34:00	0
2009-04-17	06:35:00	0
2009-04-17	06:36:00	0
2009-04-17	06:37:00	0
2009-04-17	06:38:00	0
2009-04-17	06:39:00	0
2009-04-17	06:40:00	0
2009-04-17	06:41:00	0
2009-04-17	06:42:00	0
2009-04-17	06:43:00	0
2009-04-17	06:44:00	0
2009-04-17	06:45:00	0
2009-04-17	06:46:00	0
2009-04-17	06:47:00	0
2009-04-17	06:48:00	0
2009-04-17	06:49:00	0
2009-04-17	06:50:00	0
2009-04-17	06:51:00	0
2009-04-17	06:52:00	0
2009-04-17	06:53:00	0
2009-04-17	06:54:00	0
2009-04-17	06:55:00	0
2009-04-17	06:56:00	0
2009-04-17	06:57:00	0
2009-04-17	06:58:00	0
2009-04-17	06:59:00	0
2009-04-17	07:00:00	0
2009-04-17	07:01:00	0
2009-04-17	07:02:00	0
2009-04-17	07:03:00	0
2009-04-17	07:04:00	0
2009-04-17	07:05:00	0
2009-04-17	07:06:00	0
2009-04-17	07:07:00	0
2009-04-17	07:08:00	0
2009-04-17	07:09:00	0
2009-04-17	07:10:00	0
2009-04-17	07:11:00	0
2009-04-17	07:12:00	0
2009-04-17	07:13:00	0
2009-04-17	07:14:00	0
2009-04-17	07:15:00	0
2009-04-17	07:16:00	0
2009-04-17	07:17:00	0
2009-04-17	07:18:00	0
2009-04-17	07:19:00	0
2009-04-17	07:20:00	0
2009-04-17	07:21:00	0
2009-04-17	07:22:00	0
2009-04-17	07:23:00	0
2009-04-17	07:24:00	0
2009-04-17	07:25:00	0
2009-04-17	07:26:00	0
2009-04-17	07:27:00	0
2009-04-17	07:28:00	0
2009-04-17	07:29:00	0
2009-04-17	07:30:00	0
2009-04-17	07:31:00	0
2009-04-17	07:32:00	0
2009-04-17	07:33:00	0
2009-04-17	07:34:00	0
2009-04-17	07:35:00	0
2009-04-17	07:36:00	0
2009-04-17	07:37:00	0
2009-04-17	07:38:00	0
2009-04-17	07:39:00	0
2009-04-17	07:40:00	0
2009-04-17	07:41:00	0
2009-04-17	07:42:00	0
2009-04-17	07:43:00	0
2009-04-17	07:44:00	0
2009-04-17	07:45:00	0
2009-04-17	07:46:00	0
2009-04-17	07:47:00	0
2009-04-17	07:48:00	0
2009-04-17	07:49:00	0
2009-04-17	07:50:00	0
2009-04-17	07:51:00	0
2009-04-17	07:52:00	0
2009-04-17	07:53:00	0
2009-04-17	07:54:00	0
2009-04-17	07:55:00	0
2009-04-17	07:56:00	0
2009-04-17	07:57:00	0
2009-04-17	07:58:00	0
2009-04-17	07:59:00	0
2009-04-17	08:00:00	0
2009-04-17	08:01:00	0
2009-04-17	08:02:00	0
2009-04-17	08:03:00	0
2009-04-17	08:04:00	0
2009-04-17	08:05:00	0
2009-04-17	08:06:00	0
2009-04-17	08:07:00	0
2009-04-17	08:08:00	0
2009-04-17	08:09:00	0
2009-04-17	08:10:00	0
2009-04-17	08:11:00	0
2009-04-17	08:12:00	0
2009-04-17	08:13:00	0
2009-04-17	08:14:00	0
2009-04-17	08:15:00	0
2009-04-17	08:16:00	0
2009-04-17	08:17:00	0
2009-04-17	08:18:00	0
2009-04-17	08:19:00	0
2009-04-17	08:20:00	0
2009-04-17	08:21:00	0
2009-04-17	08:22:00	0
2009-04-17	08:23:00	0
2009-04-17	08:24:00	0
2009-04-17	08:25:00	0
2009-04-17	08:26:00	0
2009-04-17	08:27:00	0
2009-04-17	08:28:00	0
2009-04-17	08:29:00	0
2009-04-17	08:30:00	0
2009-04-17	08:31:00	0
2009-04-17	08:32:00	0
2009-04-17	08:33:00	0
2009-04-17	08:34:00	0
2009-04-17	08:35:00	0
2009-04-17	08:36:00	0
2009-04-17	08:37:00	0
2009-04-17	08:38:00	0
2009-04-17	08:39:00	0
2009-04-17	08:40:00	0
2009-04-17	08:41:00	0
2009-04-17	08:42:00	0
2009-04-17	08:43:00	0
2009-04-17	08:44:00	0
2009-04-17	08:45:00	0
2009-04-17	08:46:00	0
2009-04-17	08:47:00	0
2009-04-17	08:48:00	0
2009-04-17	08:49:00	0
2009-04-17	08:50:00	0
2009-04-17	08:51:00	0
2009-04-17	08:52:00	0
2009-04-17	08:53:00	0
2009-04-17	08:54:00	0
2009-04-17	08:55:00	0
2009-04-17	08:56:00	0
2009-04-17	08:57:00	0
2009-04-17	08:58:00	0
2009-04-17	08:59:00	0
2009-04-17	09:00:00	0
2009-04-17	09:01:00	0
2009-04-17	09:02:00	0
2009-04-17	09:03:00	0
2009-04-17	09:04:00	0
2009-04-17	09:05:00	0
2009-04-17	09:06:00	0
2009-04-17	09:07:00	0
2009-04-17	09:08:00	0
2009-04-17	09:09:00	0
2009-04-17	09:10:00	0
2009-04-17	09:11:00	0
2009-04-17	09:12:00	0
2009-04-17	09:13:00	0
2009-04-17	09:14:00	0
2009-04-17	09:15:00	0
2009-04-17	09:16:00	0
2009-04-17	09:17:00	0
2009-04-17	09:18:00	0
2009-04-17	09:19:00	0
2009-04-17	09:20:00	0
2009-04-17	09:21:00	0
2009-04-17	09:22:00	0
2009-04-17	09:23:00	0
2009-04-17	09:24:00	0
2009-04-17	09:25:00	0
2009-04-17	09:26:00	0
2009-04-17	09:27:00	0
2009-04-17	09:28:00	0
2009-04-17	09:29:00	0
2009-04-17	09:30:00	0
2009-04-17	09:31:00	0
2009-04-17	09:32:00	0
2009-04-17	09:33:00	0
2009-04-17	09:34:00	0
2009-04-17	09:35:00	0
2009-04-17	09:36:00	0
2009-04-17	09:37:00	0
2009-04-17	09:38:00	0
2009-04-17	09:39:00	0
2009-04-17	09:40:00	0
2009-04-17	09:41:00	0
2009-04-17	09:42:00	0
2009-04-17	09:43:00	0
2009-04-17	09:44:00	0
2009-04-17	09:45:00	0
2009-04-17	09:46:00	0
2009-04-17	09:47:00	0
2009-04-17	09:48:00	0
2009-04-17	09:49:00	0
2009-04-17	09:50:00	0
2009-04-17	09:51:00	0
2009-04-17	09:52:00	0
2009-04-17	09:53:00	0
2009-04-17	09:54:00	0
2009-04-17	09:55:00	0
2009-04-17	09:56:00	0
2009-04-17	09:57:00	0
2009-04-17	09:58:00	0
2009-04-17	09:59:00	0
2009-04-17	10:00:00	0
2009-04-17	10:01:00	0
2009-04-17	10:02:00	0
2009-04-17	10:03:00	0
2009-04-17	10:04:00	0
2009-04-17	10:05:00	0
2009-04-17	10:06:00	0
2009-04-17	10:07:00	0
2009-04-17	10:08:00	0
2009-04-17	10:09:00	0
2009-04-17	10:10:00	0
2009-04-17	10:11:00	0
2009-04-17	10:12:00	0
2009-04-17	10:13:00	0
2009-04-17	10:14:00	0
2009-04-17	10:15:00	0
2009-04-17	10:16:00	0
2009-04-17	10:17:00	0
2009-04-17	10:18:00	0
2009-04-17	10:19:00	0
2009-04-17	10:20:00	0
2009-04-17	10:21:00	0
2009-04-17	10:22:00	0
2009-04-17	10:23:00	0
2009-04-17	10:24:00	0
2009-04-17	10:25:00	0
2009-04-17	10:26:00	0
2009-04-17	10:27:00	0
2009-04-17	10:28:00	0
2009-04-17	10:29:00	0
2009-04-17	10:30:00	0
2009-04-17	10:31:00	0
2009-04-17	10:32:00	0
2009-04-17	10:33:00	0
2009-04-17	10:34:00	0
2009-04-17	10:35:00	0
2009-04-17	10:36:00	0
2009-04-17	10:37:00	0
2009-04-17	10:38:00	0
2009-04-17	10:39:00	0
2009-04-17	10:40:00	0
2009-04-17	10:41:00	0
2009-04-17	10:42:00	0
2009-04-17	10:43:00	0
2009-04-17	10:44:00	0
2009-04-17	10:45:00	0
2009-04-17	10:46:00	0
2009-04-17	10:47:00	0
2009-04-17	10:48:00	0
2009-04-17	10:49:00	0
2009-04-17	10:50:00	0
2009-04-17	10:51:00	0
2009-04-17	10:52:00	0
2009-04-17	10:53:00	0
2009-04-17	10:54:00	0
2009-04-17	10:55:00	0
2009-04-17	10:56:00	0
2009-04-17	10:57:00	0
2009-04-17	10:58:00	0
2009-04-17	10:59:00	0
2009-04-17	11:00:00	0
2009-04-17	11:01:00	0
2009-04-17	11:02:00	0
2009-04-17	11:03:00	0
2009-04-17	11:04:00	0
2009-04-17	11:05:00	0
2009-04-17	11:06:00	0
2009-04-17	11:07:00	0
2009-04-17	11:08:00	0
2009-04-17	11:09:00	0
2009-04-17	11:10:00	0
2009-04-17	11:11:00	0
2009-04-17	11:12:00	0
2009-04-17	11:13:00	0
2009-04-17	11:14:00	0
2009-04-17	11:15:00	0
2009-04-17	11:16:00	0
2009-04-17	11:17:00	0
2009-04-17	11:18:00	0
2009-04-17	11:19:00	0
2009-04-17	11:20:00	0
2009-04-17	11:21:00	0
2009-04-17	11:22:00	0
2009-04-17	11:23:00	0
2009-04-17	11:24:00	0
2009-04-17	11:25:00	0
2009-04-17	11:26:00	0
2009-04-17	11:27:00	0
2009-04-17	11:28:00	0
2009-04-17	11:29:00	0
2009-04-17	11:30:00	0
2009-04-17	11:31:00	0
2009-04-17	11:32:00	0
2009-04-17	11:33:00	0
2009-04-17	11:34:00	0
2009-04-17	11:35:00	0
2009-04-17	11:36:00	0
2009-04-17	11:37:00	0
2009-04-17	11:38:00	0
2009-04-17	11:39:00	0
2009-04-17	11:40:00	0
2009-04-17	11:41:00	0
2009-04-17	11:42:00	0
2009-04-17	11:43:00	0
2009-04-17	11:44:00	0
2009-04-17	11:45:00	0
2009-04-17	11:46:00	0
2009-04-17	11:47:00	0
2009-04-17	11:48:00	0
2009-04-17	11:49:00	0
2009-04-17	11:50:00	0
2009-04-17	11:51:00	0
2009-04-17	11:52:00	0
2009-04-17	11:53:00	0
2009-04-17	11:54:00	0
2009-04-17	11:55:00	0
2009-04-17	11:56:00	0
2009-04-17	11:57:00	0
2009-04-17	11:58:00	0
2009-04-17	11:59:00	0
2009-04-17	12:00:00	0
2009-04-17	12:01:00	0
2009-04-17	12:02:00	0
2009-04-17	12:03:00	0
2009-04-17	12:04:00	0
2009-04-17	12:05:00	0
2009-04-17	12:06:00	0
2009-04-17	12:07:00	0
2009-04-17	12:08:00	0
2009-04-17	12:09:00	0
2009-04-17	12:10:00	0
2009-04-17	12:11:00	0
2009-04-17	12:12:00	0
2009-04-17	12:13:00	0
2009-04-17	12:14:00	0
2009-04-17	12:15:00	0
2009-04-17	12:16:00	0
2009-04-17	12:17:00	0
2009-04-17	12:18:00	0
2009-04-17	12:19:00	0
2009-04-17	12:20:00	0
2009-04-17	12:21:00	0
2009-04-17	12:22:00	0
2009-04-17	12:23:00	0
2009-04-17	12:24:00	0
2009-04-17	12:25:00	0
2009-04-17	12:26:00	0
2009-04-17	12:27:00	0
2009-04-17	12:28:00	0
2009-04-17	12:29:00	0
2009-04-17	12:30:00	0
2009-04-17	12:31:00	0
2009-04-17	12:32:00	0
2009-04-17	12:33:00	0
2009-04-17	12:34:00	0
2009-04-17	12:35:00	0
2009-04-17	12:36:00	0
2009-04-17	12:37:00	0
2009-04-17	12:38:00	0
2009-04-17	12:39:00	0
2009-04-17	12:40:00	0
2009-04-17	12:41:00	0
2009-04-17	12:42:00	0
2009-04-17	12:43:00	0
2009-04-17	12:44:00	0
2009-04-17	12:45:00	0
2009-04-17	12:46:00	0
2009-04-17	12:47:00	0
2009-04-17	12:48:00	0
2009-04-17	12:49:00	0
2009-04-17	12:50:00	0
2009-04-17	12:51:00	0
2009-04-17	12:52:00	0
2009-04-17	12:53:00	0
2009-04-17	12:54:00	0
2009-04-17	12:55:00	0
2009-04-17	12:56:00	0
2009-04-17	12:57:00	0
2009-04-17	12:58:00	0
2009-04-17	12:59:00	0
2009-04-17	13:00:00	0
2009-04-17	13:01:00	0
2009-04-17	13:02:00	0
2009-04-17	13:03:00	0
2009-04-17	13:04:00	0
2009-04-17	13:05:00	0
2009-04-17	13:06:00	0
2009-04-17	13:07:00	0
2009-04-17	13:08:00	0
2009-04-17	13:09:00	0
2009-04-17	13:10:00	0
2009-04-17	13:11:00	0
2009-04-17	13:12:00	0
2009-04-17	13:13:00	0
2009-04-17	13:14:00	0
2009-04-17	13:15:00	0
2009-04-17	13:16:00	0
2009-04-17	13:17:00	0
2009-04-17	13:18:00	0
2009-04-17	13:19:00	0
2009-04-17	13:20:00	0
2009-04-17	13:21:00	0
2009-04-17	13:22:00	0
2009-04-17	13:23:00	0
2009-04-17	13:24:00	0
2009-04-17	13:25:00	0
2009-04-17	13:26:00	0
2009-04-17	13:27:00	0
2009-04-17	13:28:00	0
2009-04-17	13:29:00	0
2009-04-17	13:30:00	0
2009-04-17	13:31:00	0
2009-04-17	13:32:00	0
2009-04-17	13:33:00	0
2009-04-17	13:34:00	0
2009-04-17	13:35:00	0
2009-04-17	13:36:00	0
2009-04-17	13:37:00	0
2009-04-17	13:38:00	0
2009-04-17	13:39:00	0
2009-04-17	13:40:00	0
2009-04-17	13:41:00	0
2009-04-17	13:42:00	0
2009-04-17	13:43:00	0
2009-04-17	13:44:00	0
2009-04-17	13:45:00	0
2009-04-17	13:46:00	0
2009-04-17	13:47:00	0
2009-04-17	13:48:00	0
2009-04-17	13:49:00	0
2009-04-17	13:50:00	0
2009-04-17	13:51:00	0
2009-04-17	13:52:00	0
2009-04-17	13:53:00	0
2009-04-17	13:54:00	0
2009-04-17	13:55:00	0
2009-04-17	13:56:00	0
2009-04-17	13:57:00	0
2009-04-17	13:58:00	0
2009-04-17	13:59:00	0
2009-04-17	14:00:00	0
2009-04-17	14:01:00	0
2009-04-17	14:02:00	0
2009-04-17	14:03:00	0
2009-04-17	14:04:00	0
2009-04-17	14:05:00	0
2009-04-17	14:06:00	0
2009-04-17	14:07:00	0
2009-04-17	14:08:00	0
2009-04-17	14:09:00	0
2009-04-17	14:10:00	0
2009-04-17	14:11:00	0
2009-04-17	14:12:00	0
2009-04-17	14:13:00	0
2009-04-17	14:14:00	0
2009-04-17	14:15:00	0
2009-04-17	14:16:00	0
2009-04-17	14:17:00	0
2009-04-17	14:18:00	0
2009-04-17	14:19:00	0
2009-04-17	14:20:00	0
2009-04-17	14:21:00	0
2009-04-17	14:22:00	0
2009-04-17	14:23:00	0
2009-04-17	14:24:00	0
2009-04-17	14:25:00	0
2009-04-17	14:26:00	0
2009-04-17	14:27:00	0
2009-04-17	14:28:00	0
2009-04-17	14:29:00	0
2009-04-17	14:30:00	0
2009-04-17	14:31:00	0
2009-04-17	14:32:00	0
2009-04-17	14:33:00	0
2009-04-17	14:34:00	0
2009-04-17	14:35:00	0
2009-04-17	14:36:00	0
2009-04-17	14:37:00	0
2009-04-17	14:38:00	0
2009-04-17	14:39:00	0
2009-04-17	14:40:00	0
2009-04-17	14:41:00	0
2009-04-17	14:42:00	0
2009-04-17	14:43:00	0
2009-04-17	14:44:00	0
2009-04-17	14:45:00	0
2009-04-17	14:46:00	0
2009-04-17	14:47:00	0
2009-04-17	14:48:00	0
2009-04-17	14:49:00	0
2009-04-17	14:50:00	0
2009-04-17	14:51:00	0
2009-04-17	14:52:00	0
2009-04-17	14:53:00	0
2009-04-17	14:54:00	0
2009-04-17	14:55:00	0
2009-04-17	14:56:00	0
2009-04-17	14:57:00	0
2009-04-17	14:58:00	0
2009-04-17	14:59:00	0
2009-04-17	15:00:00	0
2009-04-17	15:01:00	0
2009-04-17	15:02:00	0
2009-04-17	15:03:00	0
2009-04-17	15:04:00	0
2009-04-17	15:05:00	0
2009-04-17	15:06:00	0
2009-04-17	15:07:00	0
2009-04-17	15:08:00	0
2009-04-17	15:09:00	0
2009-04-17	15:10:00	0
2009-04-17	15:11:00	0
2009-04-17	15:12:00	0
2009-04-17	15:13:00	0
2009-04-17	15:14:00	0
2009-04-17	15:15:00	0
2009-04-17	15:16:00	0
2009-04-17	15:17:00	0
2009-04-17	15:18:00	0
2009-04-17	15:19:00	0
2009-04-17	15:20:00	0
2009-04-17	15:21:00	0
2009-04-17	15:22:00	0
2009-04-17	15:23:00	0
2009-04-17	15:24:00	0
2009-04-17	15:25:00	0
2009-04-17	15:26:00	0
2009-04-17	15:27:00	0
2009-04-17	15:28:00	0
2009-04-17	15:29:00	0
2009-04-17	15:30:00	0
2009-04-17	15:31:00	0
2009-04-17	15:32:00	0
2009-04-17	15:33:00	0
2009-04-17	15:34:00	0
2009-04-17	15:35:00	0
2009-04-17	15:36:00	0
2009-04-17	15:37:00	0
2009-04-17	15:38:00	0
2009-04-17	15:39:00	0
2009-04-17	15:40:00	0
2009-04-17	15:41:00	0
2009-04-17	15:42:00	0
2009-04-17	15:43:00	0
2009-04-17	15:44:00	0
2009-04-17	15:45:00	0
2009-04-17	15:46:00	0
2009-04-17	15:47:00	0
2009-04-17	15:48:00	0
2009-04-17	15:49:00	0
2009-04-17	15:50:00	0
2009-04-17	15:51:00	0
2009-04-17	15:52:00	0
2009-04-17	15:53:00	0
2009-04-17	15:54:00	0
2009-04-17	15:55:00	0
2009-04-17	15:56:00	0
2009-04-17	15:57:00	0
2009-04-17	15:58:00	0
2009-04-17	15:59:00	0
2009-04-17	16:00:00	0
2009-04-17	16:01:00	0
2009-04-17	16:02:00	0
2009-04-17	16:03:00	0
2009-04-17	16:04:00	0
2009-04-17	16:05:00	0
2009-04-17	16:06:00	0
2009-04-17	16:07:00	0
2009-04-17	16:08:00	0
2009-04-17	16:09:00	0
2009-04-17	16:10:00	0
2009-04-17	16:11:00	0
2009-04-17	16:12:00	0
2009-04-17	16:13:00	0
2009-04-17	16:14:00	0
2009-04-17	16:15:00	0
2009-04-17	16:16:00	0
2009-04-17	16:17:00	0
2009-04-17	16:18:00	0
2009-04-17	16:19:00	0
2009-04-17	16:20:00	0
2009-04-17	16:21:00	0
2009-04-17	16:22:00	0
2009-04-17	16:23:00	0
2009-04-17	16:24:00	0
2009-04-17	16:25:00	0
2009-04-17	16:26:00	0
2009-04-17	16:27:00	0
2009-04-17	16:28:00	0
2009-04-17	16:29:00	0
2009-04-17	16:30:00	0
2009-04-17	16:31:00	0
2009-04-17	16:32:00	0
2009-04-17	16:33:00	0
2009-04-17	16:34:00	0
2009-04-17	16:35:00	0
2009-04-17	16:36:00	0
2009-04-17	16:37:00	0
2009-04-17	16:38:00	0
2009-04-17	16:39:00	0
2009-04-17	16:40:00	0
2009-04-17	16:41:00	0
2009-04-17	16:42:00	0
2009-04-17	16:43:00	0
2009-04-17	16:44:00	0
2009-04-17	16:45:00	0
2009-04-17	16:46:00	0
2009-04-17	16:47:00	0
2009-04-17	16:48:00	0
2009-04-17	16:49:00	0
2009-04-17	16:50:00	0
2009-04-17	16:51:00	0
2009-04-17	16:52:00	0
2009-04-17	16:53:00	0
2009-04-17	16:54:00	0
2009-04-17	16:55:00	0
2009-04-17	16:56:00	0
2009-04-17	16:57:00	0
2009-04-17	16:58:00	0
2009-04-17	16:59:00	0
2009-04-17	17:00:00	0
2009-04-17	17:01:00	0
2009-04-17	17:02:00	0
2009-04-17	17:03:00	0
2009-04-17	17:04:00	0
2009-04-17	17:05:00	0
2009-04-17	17:06:00	0
2009-04-17	17:07:00	0
2009-04-17	17:08:00	0
2009-04-17	17:09:00	0
2009-04-17	17:10:00	0
2009-04-17	17:11:00	0
2009-04-17	17:12:00	0
2009-04-17	17:13:00	0
2009-04-17	17:14:00	0
2009-04-17	17:15:00	0
2009-04-17	17:16:00	0
2009-04-17	17:17:00	0
2009-04-17	17:18:00	0
2009-04-17	17:19:00	0
2009-04-17	17:20:00	0
2009-04-17	17:21:00	0
2009-04-17	17:22:00	0
2009-04-17	17:23:00	0
2009-04-17	17:24:00	0
2009-04-17	17:25:00	0
2009-04-17	17:26:00	0
2009-04-17	17:27:00	0
2009-04-17	17:28:00	0
2009-04-17	17:29:00	0
2009-04-17	17:30:00	0
2009-04-17	17:31:00	0
2009-04-17	17:32:00	0
2009-04-17	17:33:00	0
2009-04-17	17:34:00	0
2009-04-17	17:35:00	0
2009-04-17	17:36:00	0
2009-04-17	17:37:00	0
2009-04-17	17:38:00	0
2009-04-17	17:39:00	0
2009-04-17	17:40:00	0
2009-04-17	17:41:00	0
2009-04-17	17:42:00	0
2009-04-17	17:43:00	0
2009-04-17	17:44:00	0
2009-04-17	17:45:00	0
2009-04-17	17:46:00	0
2009-04-17	17:47:00	0
2009-04-17	17:48:00	0
2009-04-17	17:49:00	0
2009-04-17	17:50:00	0
2009-04-17	17:51:00	0
2009-04-17	17:52:00	0
2009-04-17	17:53:00	0
2009-04-17	17:54:00	0
2009-04-17	17:55:00	0
2009-04-17	17:56:00	0
2009-04-17	17:57:00	0
2009-04-17	17:58:00	0
2009-04-17	17:59:00	0
2009-04-17	18:00:00	0
2009-04-17	18:01:00	0
2009-04-17	18:02:00	0
2009-04-17	18:03:00	0
2009-04-17	18:04:00	0
2009-04-17	18:05:00	0
2009-04-17	18:06:00	0
2009-04-17	18:07:00	0
2009-04-17	18:08:00	0
2009-04-17	18:09:00	0
2009-04-17	18:10:00	0
2009-04-17	18:11:00	14
2009-04-17	18:12:00	14
2009-04-17	18:13:00	0
2009-04-17	18:14:00	0
2009-04-17	18:15:00	0
2009-04-17	18:16:00	14
2009-04-17	18:17:00	28
2009-04-17	18:18:00	0
2009-04-17	18:19:00	0
2009-04-17	18:20:00	0
2009-04-17	18:21:00	0
2009-04-17	18:22:00	0
2009-04-17	18:23:00	0
2009-04-17	18:24:00	83
2009-04-17	18:25:00	14
2009-04-17	18:26:00	70
2009-04-17	18:27:00	0
2009-04-17	18:28:00	0
2009-04-17	18:29:00	0
2009-04-17	18:30:00	0
2009-04-17	18:31:00	0
2009-04-17	18:32:00	0
2009-04-17	18:33:00	0
2009-04-17	18:34:00	0
2009-04-17	18:35:00	0
2009-04-17	18:36:00	0
2009-04-17	18:37:00	0
2009-04-17	18:38:00	0
2009-04-17	18:39:00	0
2009-04-17	18:40:00	0
2009-04-17	18:41:00	0
2009-04-17	18:42:00	0
2009-04-17	18:43:00	56
2009-04-17	18:44:00	28
2009-04-17	18:45:00	214
2009-04-17	18:46:00	0
2009-04-17	18:47:00	0
2009-04-17	18:48:00	0
2009-04-17	18:49:00	0
2009-04-17	18:50:00	0
2009-04-17	18:51:00	0
2009-04-17	18:52:00	0
2009-04-17	18:53:00	0
2009-04-17	18:54:00	14
2009-04-17	18:55:00	28
2009-04-17	18:56:00	0
2009-04-17	18:57:00	0
2009-04-17	18:58:00	56
2009-04-17	18:59:00	42
2009-04-17	19:00:00	0
2009-04-17	19:01:00	0
2009-04-17	19:02:00	0
2009-04-17	19:03:00	42
2009-04-17	19:04:00	0
2009-04-17	19:05:00	0
2009-04-17	19:06:00	0
2009-04-17	19:07:00	0
2009-04-17	19:08:00	0
2009-04-17	19:09:00	0
2009-04-17	19:10:00	0
2009-04-17	19:11:00	0
2009-04-17	19:12:00	0
2009-04-17	19:13:00	0
2009-04-17	19:14:00	0
2009-04-17	19:15:00	629
2009-04-17	19:16:00	1939
2009-04-17	19:17:00	1814
2009-04-17	19:18:00	14
2009-04-17	19:19:00	0
2009-04-17	19:20:00	0
2009-04-17	19:21:00	0
2009-04-17	19:22:00	14
2009-04-17	19:23:00	0
2009-04-17	19:24:00	0
2009-04-17	19:25:00	0
2009-04-17	19:26:00	0
2009-04-17	19:27:00	0
2009-04-17	19:28:00	0
2009-04-17	19:29:00	0
2009-04-17	19:30:00	0
2009-04-17	19:31:00	0
2009-04-17	19:32:00	0
2009-04-17	19:33:00	0
2009-04-17	19:34:00	0
2009-04-17	19:35:00	0
2009-04-17	19:36:00	0
2009-04-17	19:37:00	0
2009-04-17	19:38:00	0
2009-04-17	19:39:00	0
2009-04-17	19:40:00	0
2009-04-17	19:41:00	0
2009-04-17	19:42:00	0
2009-04-17	19:43:00	0
2009-04-17	19:44:00	0
2009-04-17	19:45:00	70
2009-04-17	19:46:00	0
2009-04-17	19:47:00	0
2009-04-17	19:48:00	0
2009-04-17	19:49:00	0
2009-04-17	19:50:00	0
2009-04-17	19:51:00	0
2009-04-17	19:52:00	0
2009-04-17	19:53:00	0
2009-04-17	19:54:00	0
2009-04-17	19:55:00	0
2009-04-17	19:56:00	0
2009-04-17	19:57:00	0
2009-04-17	19:58:00	0
2009-04-17	19:59:00	0
2009-04-17	20:00:00	0
2009-04-17	20:01:00	0
2009-04-17	20:02:00	0
2009-04-17	20:03:00	0
2009-04-17	20:04:00	14
2009-04-17	20:05:00	28
2009-04-17	20:06:00	0
2009-04-17	20:07:00	0
2009-04-17	20:08:00	0
2009-04-17	20:09:00	0
2009-04-17	20:10:00	0
2009-04-17	20:11:00	0
2009-04-17	20:12:00	868
2009-04-17	20:13:00	843
2009-04-17	20:14:00	111
2009-04-17	20:15:00	14
2009-04-17	20:16:00	0
2009-04-17	20:17:00	977
2009-04-17	20:18:00	0
2009-04-17	20:19:00	0
2009-04-17	20:20:00	1088
2009-04-17	20:21:00	403
2009-04-17	20:22:00	562
2009-04-17	20:23:00	0
2009-04-17	20:24:00	28
2009-04-17	20:25:00	0
2009-04-17	20:26:00	0
2009-04-17	20:27:00	0
2009-04-17	20:28:00	0
2009-04-17	20:29:00	97
2009-04-17	20:30:00	0
2009-04-17	20:31:00	14
2009-04-17	20:32:00	0
2009-04-17	20:33:00	0
2009-04-17	20:34:00	0
2009-04-17	20:35:00	0
2009-04-17	20:36:00	28
2009-04-17	20:37:00	0
2009-04-17	20:38:00	0
2009-04-17	20:39:00	14
2009-04-17	20:40:00	14
2009-04-17	20:41:00	0
2009-04-17	20:42:00	0
2009-04-17	20:43:00	0
2009-04-17	20:44:00	0
2009-04-17	20:45:00	0
2009-04-17	20:46:00	0
2009-04-17	20:47:00	0
2009-04-17	20:48:00	0
2009-04-17	20:49:00	0
2009-04-17	20:50:00	0
2009-04-17	20:51:00	0
2009-04-17	20:52:00	0
2009-04-17	20:53:00	0
2009-04-17	20:54:00	0
2009-04-17	20:55:00	673
2009-04-17	20:56:00	1475
2009-04-17	20:57:00	977
2009-04-17	20:58:00	540
2009-04-17	20:59:00	1149
2009-04-17	21:00:00	0
2009-04-17	21:01:00	442
2009-04-17	21:02:00	83
2009-04-17	21:03:00	0
2009-04-17	21:04:00	0
2009-04-17	21:05:00	0
2009-04-17	21:06:00	696
2009-04-17	21:07:00	231
2009-04-17	21:08:00	0
2009-04-17	21:09:00	0
2009-04-17	21:10:00	0
2009-04-17	21:11:00	28
2009-04-17	21:12:00	0
2009-04-17	21:13:00	949
2009-04-17	21:14:00	893
2009-04-17	21:15:00	1005
2009-04-17	21:16:00	14
2009-04-17	21:17:00	56
2009-04-17	21:18:00	70
2009-04-17	21:19:00	83
2009-04-17	21:20:00	70
2009-04-17	21:21:00	56
2009-04-17	21:22:00	83
2009-04-17	21:23:00	14
2009-04-17	21:24:00	0
2009-04-17	21:25:00	0
2009-04-17	21:26:00	0
2009-04-17	21:27:00	0
2009-04-17	21:28:00	0
2009-04-17	21:29:00	0
2009-04-17	21:30:00	0
2009-04-17	21:31:00	0
2009-04-17	21:32:00	0
2009-04-17	21:33:00	0
2009-04-17	21:34:00	0
2009-04-17	21:35:00	0
2009-04-17	21:36:00	0
2009-04-17	21:37:00	562
2009-04-17	21:38:00	768
2009-04-17	21:39:00	629
2009-04-17	21:40:00	442
2009-04-17	21:41:00	331
2009-04-17	21:42:00	384
2009-04-17	21:43:00	56
2009-04-17	21:44:00	42
2009-04-17	21:45:00	14
2009-04-17	21:46:00	42
2009-04-17	21:47:00	28
2009-04-17	21:48:00	14
2009-04-17	21:49:00	14
2009-04-17	21:50:00	481
2009-04-17	21:51:00	111
2009-04-17	21:52:00	167
2009-04-17	21:53:00	56
2009-04-17	21:54:00	1272
2009-04-17	21:55:00	2877
2009-04-17	21:56:00	1736
2009-04-17	21:57:00	629
2009-04-17	21:58:00	818
2009-04-17	21:59:00	56
2009-04-17	22:00:00	0
2009-04-17	22:01:00	0
2009-04-17	22:02:00	0
2009-04-17	22:03:00	14
2009-04-17	22:04:00	0
2009-04-17	22:05:00	42
2009-04-17	22:06:00	0
2009-04-17	22:07:00	0
2009-04-17	22:08:00	562
2009-04-17	22:09:00	42
2009-04-17	22:10:00	0
2009-04-17	22:11:00	14
2009-04-17	22:12:00	14
2009-04-17	22:13:00	0
2009-04-17	22:14:00	0
2009-04-17	22:15:00	0
2009-04-17	22:16:00	0
2009-04-17	22:17:00	0
2009-04-17	22:18:00	0
2009-04-17	22:19:00	0
2009-04-17	22:20:00	0
2009-04-17	22:21:00	0
2009-04-17	22:22:00	0
2009-04-17	22:23:00	0
2009-04-17	22:24:00	14
2009-04-17	22:25:00	83
2009-04-17	22:26:00	56
2009-04-17	22:27:00	28
2009-04-17	22:28:00	28
2009-04-17	22:29:00	42
2009-04-17	22:30:00	14
2009-04-17	22:31:00	42
2009-04-17	22:32:00	125
2009-04-17	22:33:00	56
2009-04-17	22:34:00	56
2009-04-17	22:35:00	83
2009-04-17	22:36:00	83
2009-04-17	22:37:00	14
2009-04-17	22:38:00	83
2009-04-17	22:39:00	14
2009-04-17	22:40:00	0
2009-04-17	22:41:00	0
2009-04-17	22:42:00	0
2009-04-17	22:43:00	0
2009-04-17	22:44:00	0
2009-04-17	22:45:00	0
2009-04-17	22:46:00	0
2009-04-17	22:47:00	0
2009-04-17	22:48:00	0
2009-04-17	22:49:00	0
2009-04-17	22:50:00	0
2009-04-17	22:51:00	0
2009-04-17	22:52:00	14
2009-04-17	22:53:00	0
2009-04-17	22:54:00	0
2009-04-17	22:55:00	0
2009-04-17	22:56:00	0
2009-04-17	22:57:00	0
2009-04-17	22:58:00	0
2009-04-17	22:59:00	0
2009-04-17	23:00:00	0
2009-04-17	23:01:00	0
2009-04-17	23:02:00	0
2009-04-17	23:03:00	0
2009-04-17	23:04:00	0
2009-04-17	23:05:00	0
2009-04-17	23:06:00	0
2009-04-17	23:07:00	0
2009-04-17	23:08:00	0
2009-04-17	23:09:00	0
2009-04-17	23:10:00	0
2009-04-17	23:11:00	0
2009-04-17	23:12:00	0
2009-04-17	23:13:00	0
2009-04-17	23:14:00	0
2009-04-17	23:15:00	0
2009-04-17	23:16:00	0
2009-04-17	23:17:00	0
2009-04-17	23:18:00	0
2009-04-17	23:19:00	14
2009-04-17	23:20:00	0
2009-04-17	23:21:00	0
2009-04-17	23:22:00	0
2009-04-17	23:23:00	0
2009-04-17	23:24:00	0
2009-04-17	23:25:00	0
2009-04-17	23:26:00	0
2009-04-17	23:27:00	0
2009-04-17	23:28:00	0
2009-04-17	23:29:00	0
2009-04-17	23:30:00	0
2009-04-17	23:31:00	0
2009-04-17	23:32:00	0
2009-04-17	23:33:00	0
2009-04-17	23:34:00	0
2009-04-17	23:35:00	0
2009-04-17	23:36:00	0
2009-04-17	23:37:00	0
2009-04-17	23:38:00	0
2009-04-17	23:39:00	0
2009-04-17	23:40:00	42
2009-04-17	23:41:00	28
2009-04-17	23:42:00	0
2009-04-17	23:43:00	14
2009-04-17	23:44:00	0
2009-04-17	23:45:00	28
2009-04-17	23:46:00	0
2009-04-17	23:47:00	0
2009-04-17	23:48:00	0
2009-04-17	23:49:00	0
2009-04-17	23:50:00	0
2009-04-17	23:51:00	0
2009-04-17	23:52:00	0
2009-04-17	23:53:00	0
2009-04-17	23:54:00	0
2009-04-17	23:55:00	0
2009-04-17	23:56:00	0
2009-04-17	23:57:00	0
2009-04-17	23:58:00	0
2009-04-17	23:59:00	0
2009-04-18	00:00:00	0
2009-04-18	00:01:00	0
2009-04-18	00:02:00	0
2009-04-18	00:03:00	0
2009-04-18	00:04:00	0
2009-04-18	00:05:00	0
2009-04-18	00:06:00	0
2009-04-18	00:07:00	0
2009-04-18	00:08:00	0
2009-04-18	00:09:00	0
2009-04-18	00:10:00	0
2009-04-18	00:11:00	0
2009-04-18	00:12:00	0
2009-04-18	00:13:00	28
2009-04-18	00:14:00	14
2009-04-18	00:15:00	83
2009-04-18	00:16:00	42
2009-04-18	00:17:00	28
2009-04-18	00:18:00	0
2009-04-18	00:19:00	0
2009-04-18	00:20:00	0
2009-04-18	00:21:00	0
2009-04-18	00:22:00	0
2009-04-18	00:23:00	0
2009-04-18	00:24:00	0
2009-04-18	00:25:00	0
2009-04-18	00:26:00	0
2009-04-18	00:27:00	0
2009-04-18	00:28:00	0
2009-04-18	00:29:00	0
2009-04-18	00:30:00	0
2009-04-18	00:31:00	0
2009-04-18	00:32:00	0
2009-04-18	00:33:00	0
2009-04-18	00:34:00	0
2009-04-18	00:35:00	0
2009-04-18	00:36:00	0
2009-04-18	00:37:00	0
2009-04-18	00:38:00	0
2009-04-18	00:39:00	0
2009-04-18	00:40:00	0
2009-04-18	00:41:00	0
2009-04-18	00:42:00	0
2009-04-18	00:43:00	0
2009-04-18	00:44:00	0
2009-04-18	00:45:00	0
2009-04-18	00:46:00	0
2009-04-18	00:47:00	0
2009-04-18	00:48:00	0
2009-04-18	00:49:00	0
2009-04-18	00:50:00	0
2009-04-18	00:51:00	0
2009-04-18	00:52:00	0
2009-04-18	00:53:00	0
2009-04-18	00:54:00	0
2009-04-18	00:55:00	14
2009-04-18	00:56:00	0
2009-04-18	00:57:00	0
2009-04-18	00:58:00	0
2009-04-18	00:59:00	0
2009-04-18	01:00:00	0
2009-04-18	01:01:00	0
2009-04-18	01:02:00	0
2009-04-18	01:03:00	0
2009-04-18	01:04:00	1272
2009-04-18	01:05:00	793
2009-04-18	01:06:00	921
2009-04-18	01:07:00	0
2009-04-18	01:08:00	28
2009-04-18	01:09:00	0
2009-04-18	01:10:00	14
2009-04-18	01:11:00	0
2009-04-18	01:12:00	42
2009-04-18	01:13:00	0
2009-04-18	01:14:00	0
2009-04-18	01:15:00	0
2009-04-18	01:16:00	0
2009-04-18	01:17:00	0
2009-04-18	01:18:00	0
2009-04-18	01:19:00	0
2009-04-18	01:20:00	0
2009-04-18	01:21:00	0
2009-04-18	01:22:00	0
2009-04-18	01:23:00	0
2009-04-18	01:24:00	0
2009-04-18	01:25:00	0
2009-04-18	01:26:00	0
2009-04-18	01:27:00	0
2009-04-18	01:28:00	0
2009-04-18	01:29:00	0
2009-04-18	01:30:00	0
2009-04-18	01:31:00	0
2009-04-18	01:32:00	14
2009-04-18	01:33:00	14
2009-04-18	01:34:00	0
2009-04-18	01:35:00	0
2009-04-18	01:36:00	0
2009-04-18	01:37:00	0
2009-04-18	01:38:00	0
2009-04-18	01:39:00	0
2009-04-18	01:40:00	0
2009-04-18	01:41:00	0
2009-04-18	01:42:00	0
2009-04-18	01:43:00	0
2009-04-18	01:44:00	0
2009-04-18	01:45:00	0
2009-04-18	01:46:00	0
2009-04-18	01:47:00	0
2009-04-18	01:48:00	0
2009-04-18	01:49:00	0
2009-04-18	01:50:00	0
2009-04-18	01:51:00	0
2009-04-18	01:52:00	0
2009-04-18	01:53:00	0
2009-04-18	01:54:00	0
2009-04-18	01:55:00	0
2009-04-18	01:56:00	0
2009-04-18	01:57:00	0
2009-04-18	01:58:00	0
2009-04-18	01:59:00	0
2009-04-18	02:00:00	0
2009-04-18	02:01:00	0
2009-04-18	02:02:00	0
2009-04-18	02:03:00	0
2009-04-18	02:04:00	0
2009-04-18	02:05:00	0
2009-04-18	02:06:00	0
2009-04-18	02:07:00	0
2009-04-18	02:08:00	0
2009-04-18	02:09:00	0
2009-04-18	02:10:00	0
2009-04-18	02:11:00	0
2009-04-18	02:12:00	0
2009-04-18	02:13:00	0
2009-04-18	02:14:00	0
2009-04-18	02:15:00	0
2009-04-18	02:16:00	0
2009-04-18	02:17:00	0
2009-04-18	02:18:00	0
2009-04-18	02:19:00	0
2009-04-18	02:20:00	0
2009-04-18	02:21:00	0
2009-04-18	02:22:00	70
2009-04-18	02:23:00	70
2009-04-18	02:24:00	14
2009-04-18	02:25:00	0
2009-04-18	02:26:00	0
2009-04-18	02:27:00	0
2009-04-18	02:28:00	0
2009-04-18	02:29:00	0
2009-04-18	02:30:00	0
2009-04-18	02:31:00	0
2009-04-18	02:32:00	0
2009-04-18	02:33:00	0
2009-04-18	02:34:00	0
2009-04-18	02:35:00	0
2009-04-18	02:36:00	42
2009-04-18	02:37:00	14
2009-04-18	02:38:00	0
2009-04-18	02:39:00	0
2009-04-18	02:40:00	0
2009-04-18	02:41:00	0
2009-04-18	02:42:00	0
2009-04-18	02:43:00	0
2009-04-18	02:44:00	0
2009-04-18	02:45:00	0
2009-04-18	02:46:00	28
2009-04-18	02:47:00	0
2009-04-18	02:48:00	0
2009-04-18	02:49:00	0
2009-04-18	02:50:00	0
2009-04-18	02:51:00	0
2009-04-18	02:52:00	0
2009-04-18	02:53:00	0
2009-04-18	02:54:00	0
2009-04-18	02:55:00	0
2009-04-18	02:56:00	0
2009-04-18	02:57:00	0
2009-04-18	02:58:00	0
2009-04-18	02:59:00	14
2009-04-18	03:00:00	0
2009-04-18	03:01:00	0
2009-04-18	03:02:00	0
2009-04-18	03:03:00	0
2009-04-18	03:04:00	0
2009-04-18	03:05:00	0
2009-04-18	03:06:00	0
2009-04-18	03:07:00	0
2009-04-18	03:08:00	0
2009-04-18	03:09:00	0
2009-04-18	03:10:00	0
2009-04-18	03:11:00	0
2009-04-18	03:12:00	0
2009-04-18	03:13:00	0
2009-04-18	03:14:00	0
2009-04-18	03:15:00	0
2009-04-18	03:16:00	0
2009-04-18	03:17:00	0
2009-04-18	03:18:00	0
2009-04-18	03:19:00	0
2009-04-18	03:20:00	0
2009-04-18	03:21:00	0
2009-04-18	03:22:00	0
2009-04-18	03:23:00	0
2009-04-18	03:24:00	0
2009-04-18	03:25:00	0
2009-04-18	03:26:00	0
2009-04-18	03:27:00	0
2009-04-18	03:28:00	0
2009-04-18	03:29:00	0
2009-04-18	03:30:00	0
2009-04-18	03:31:00	0
2009-04-18	03:32:00	0
2009-04-18	03:33:00	0
2009-04-18	03:34:00	97
2009-04-18	03:35:00	28
2009-04-18	03:36:00	28
2009-04-18	03:37:00	231
2009-04-18	03:38:00	14
2009-04-18	03:39:00	56
2009-04-18	03:40:00	56
2009-04-18	03:41:00	0
2009-04-18	03:42:00	0
2009-04-18	03:43:00	0
2009-04-18	03:44:00	0
2009-04-18	03:45:00	0
2009-04-18	03:46:00	0
2009-04-18	03:47:00	0
2009-04-18	03:48:00	0
2009-04-18	03:49:00	0
2009-04-18	03:50:00	0
2009-04-18	03:51:00	0
2009-04-18	03:52:00	0
2009-04-18	03:53:00	0
2009-04-18	03:54:00	0
2009-04-18	03:55:00	0
2009-04-18	03:56:00	0
2009-04-18	03:57:00	0
2009-04-18	03:58:00	0
2009-04-18	03:59:00	56
2009-04-18	04:00:00	56
2009-04-18	04:01:00	0
2009-04-18	04:02:00	0
2009-04-18	04:03:00	0
2009-04-18	04:04:00	0
2009-04-18	04:05:00	0
2009-04-18	04:06:00	0
2009-04-18	04:07:00	42
2009-04-18	04:08:00	0
2009-04-18	04:09:00	0
2009-04-18	04:10:00	0
2009-04-18	04:11:00	0
2009-04-18	04:12:00	0
2009-04-18	04:13:00	0
2009-04-18	04:14:00	0
2009-04-18	04:15:00	0
2009-04-18	04:16:00	0
2009-04-18	04:17:00	0
2009-04-18	04:18:00	0
2009-04-18	04:19:00	0
2009-04-18	04:20:00	0
2009-04-18	04:21:00	0
2009-04-18	04:22:00	0
2009-04-18	04:23:00	0
2009-04-18	04:24:00	0
2009-04-18	04:25:00	0
2009-04-18	04:26:00	0
2009-04-18	04:27:00	0
2009-04-18	04:28:00	0
2009-04-18	04:29:00	0
2009-04-18	04:30:00	0
2009-04-18	04:31:00	70
2009-04-18	04:32:00	56
2009-04-18	04:33:00	0
2009-04-18	04:34:00	0
2009-04-18	04:35:00	0
2009-04-18	04:36:00	0
2009-04-18	04:37:00	0
2009-04-18	04:38:00	0
2009-04-18	04:39:00	42
2009-04-18	04:40:00	0
2009-04-18	04:41:00	0
2009-04-18	04:42:00	0
2009-04-18	04:43:00	0
2009-04-18	04:44:00	0
2009-04-18	04:45:00	0
2009-04-18	04:46:00	0
2009-04-18	04:47:00	0
2009-04-18	04:48:00	0
2009-04-18	04:49:00	0
2009-04-18	04:50:00	0
2009-04-18	04:51:00	0
2009-04-18	04:52:00	0
2009-04-18	04:53:00	0
2009-04-18	04:54:00	0
2009-04-18	04:55:00	0
2009-04-18	04:56:00	0
2009-04-18	04:57:00	0
2009-04-18	04:58:00	0
2009-04-18	04:59:00	0
2009-04-18	05:00:00	0
2009-04-18	05:01:00	0
2009-04-18	05:02:00	0
2009-04-18	05:03:00	0
2009-04-18	05:04:00	0
2009-04-18	05:05:00	0
2009-04-18	05:06:00	0
2009-04-18	05:07:00	0
2009-04-18	05:08:00	97
2009-04-18	05:09:00	42
2009-04-18	05:10:00	0
2009-04-18	05:11:00	0
2009-04-18	05:12:00	0
2009-04-18	05:13:00	0
2009-04-18	05:14:00	0
2009-04-18	05:15:00	0
2009-04-18	05:16:00	0
2009-04-18	05:17:00	0
2009-04-18	05:18:00	0
2009-04-18	05:19:00	0
2009-04-18	05:20:00	0
2009-04-18	05:21:00	0
2009-04-18	05:22:00	0
2009-04-18	05:23:00	0
2009-04-18	05:24:00	0
2009-04-18	05:25:00	0
2009-04-18	05:26:00	0
2009-04-18	05:27:00	0
2009-04-18	05:28:00	0
2009-04-18	05:29:00	0
2009-04-18	05:30:00	0
2009-04-18	05:31:00	0
2009-04-18	05:32:00	14
2009-04-18	05:33:00	0
2009-04-18	05:34:00	0
2009-04-18	05:35:00	0
2009-04-18	05:36:00	0
2009-04-18	05:37:00	0
2009-04-18	05:38:00	0
2009-04-18	05:39:00	0
2009-04-18	05:40:00	0
2009-04-18	05:41:00	0
2009-04-18	05:42:00	0
2009-04-18	05:43:00	0
2009-04-18	05:44:00	0
2009-04-18	05:45:00	83
2009-04-18	05:46:00	0
2009-04-18	05:47:00	0
2009-04-18	05:48:00	0
2009-04-18	05:49:00	0
2009-04-18	05:50:00	0
2009-04-18	05:51:00	0
2009-04-18	05:52:00	0
2009-04-18	05:53:00	0
2009-04-18	05:54:00	0
2009-04-18	05:55:00	0
2009-04-18	05:56:00	0
2009-04-18	05:57:00	0
2009-04-18	05:58:00	0
2009-04-18	05:59:00	0
2009-04-18	06:00:00	0
2009-04-18	06:01:00	0
2009-04-18	06:02:00	42
2009-04-18	06:03:00	0
2009-04-18	06:04:00	0
2009-04-18	06:05:00	0
2009-04-18	06:06:00	0
2009-04-18	06:07:00	0
2009-04-18	06:08:00	0
2009-04-18	06:09:00	42
2009-04-18	06:10:00	0
2009-04-18	06:11:00	0
2009-04-18	06:12:00	0
2009-04-18	06:13:00	0
2009-04-18	06:14:00	0
2009-04-18	06:15:00	0
2009-04-18	06:16:00	0
2009-04-18	06:17:00	0
2009-04-18	06:18:00	0
2009-04-18	06:19:00	0
2009-04-18	06:20:00	0
2009-04-18	06:21:00	0
2009-04-18	06:22:00	0
2009-04-18	06:23:00	0
2009-04-18	06:24:00	0
2009-04-18	06:25:00	0
2009-04-18	06:26:00	0
2009-04-18	06:27:00	0
2009-04-18	06:28:00	0
2009-04-18	06:29:00	0
2009-04-18	06:30:00	0
2009-04-18	06:31:00	0
2009-04-18	06:32:00	0
2009-04-18	06:33:00	56
2009-04-18	06:34:00	42
2009-04-18	06:35:00	56
2009-04-18	06:36:00	0
2009-04-18	06:37:00	0
2009-04-18	06:38:00	0
2009-04-18	06:39:00	0
2009-04-18	06:40:00	0
2009-04-18	06:41:00	0
2009-04-18	06:42:00	0
2009-04-18	06:43:00	0
2009-04-18	06:44:00	0
2009-04-18	06:45:00	0
2009-04-18	06:46:00	0
2009-04-18	06:47:00	14
2009-04-18	06:48:00	0
2009-04-18	06:49:00	125
2009-04-18	06:50:00	0
2009-04-18	06:51:00	0
2009-04-18	06:52:00	0
2009-04-18	06:53:00	0
2009-04-18	06:54:00	0
2009-04-18	06:55:00	0
2009-04-18	06:56:00	0
2009-04-18	06:57:00	14
2009-04-18	06:58:00	14
2009-04-18	06:59:00	1338
2009-04-18	07:00:00	1856
2009-04-18	07:01:00	14
2009-04-18	07:02:00	2936
2009-04-18	07:03:00	1939
2009-04-18	07:04:00	768
2009-04-18	07:05:00	0
2009-04-18	07:06:00	0
2009-04-18	07:07:00	1405
2009-04-18	07:08:00	673
2009-04-18	07:09:00	0
2009-04-18	07:10:00	0
2009-04-18	07:11:00	0
2009-04-18	07:12:00	949
2009-04-18	07:13:00	298
2009-04-18	07:14:00	818
2009-04-18	07:15:00	607
2009-04-18	07:16:00	793
2009-04-18	07:17:00	198
2009-04-18	07:18:00	0
2009-04-18	07:19:00	0
2009-04-18	07:20:00	0
2009-04-18	07:21:00	0
2009-04-18	07:22:00	0
2009-04-18	07:23:00	0
2009-04-18	07:24:00	0
2009-04-18	07:25:00	0
2009-04-18	07:26:00	0
2009-04-18	07:27:00	0
2009-04-18	07:28:00	28
2009-04-18	07:29:00	0
2009-04-18	07:30:00	0
2009-04-18	07:31:00	0
2009-04-18	07:32:00	0
2009-04-18	07:33:00	0
2009-04-18	07:34:00	0
2009-04-18	07:35:00	0
2009-04-18	07:36:00	28
2009-04-18	07:37:00	0
2009-04-18	07:38:00	0
2009-04-18	07:39:00	0
2009-04-18	07:40:00	0
2009-04-18	07:41:00	0
2009-04-18	07:42:00	0
2009-04-18	07:43:00	0
2009-04-18	07:44:00	0
2009-04-18	07:45:00	0
2009-04-18	07:46:00	0
2009-04-18	07:47:00	0
2009-04-18	07:48:00	629
2009-04-18	07:49:00	348
2009-04-18	07:50:00	562
2009-04-18	07:51:00	1511
2009-04-18	07:52:00	921
2009-04-18	07:53:00	28
2009-04-18	07:54:00	70
2009-04-18	07:55:00	70
2009-04-18	07:56:00	97
2009-04-18	07:57:00	14
2009-04-18	07:58:00	42
2009-04-18	07:59:00	1005
2009-04-18	08:00:00	893
2009-04-18	08:01:00	1372
2009-04-18	08:02:00	0
2009-04-18	08:03:00	14
2009-04-18	08:04:00	28
2009-04-18	08:05:00	28
2009-04-18	08:06:00	0
2009-04-18	08:07:00	0
2009-04-18	08:08:00	0
2009-04-18	08:09:00	14
2009-04-18	08:10:00	0
2009-04-18	08:11:00	0
2009-04-18	08:12:00	0
2009-04-18	08:13:00	0
2009-04-18	08:14:00	0
2009-04-18	08:15:00	0
2009-04-18	08:16:00	0
2009-04-18	08:17:00	0
2009-04-18	08:18:00	0
2009-04-18	08:19:00	0
2009-04-18	08:20:00	0
2009-04-18	08:21:00	14
2009-04-18	08:22:00	0
2009-04-18	08:23:00	0
2009-04-18	08:24:00	0
2009-04-18	08:25:00	0
2009-04-18	08:26:00	0
2009-04-18	08:27:00	14
2009-04-18	08:28:00	0
2009-04-18	08:29:00	0
2009-04-18	08:30:00	0
2009-04-18	08:31:00	0
2009-04-18	08:32:00	0
2009-04-18	08:33:00	0
2009-04-18	08:34:00	0
2009-04-18	08:35:00	0
2009-04-18	08:36:00	0
2009-04-18	08:37:00	0
2009-04-18	08:38:00	42
2009-04-18	08:39:00	0
2009-04-18	08:40:00	0
2009-04-18	08:41:00	0
2009-04-18	08:42:00	0
2009-04-18	08:43:00	0
2009-04-18	08:44:00	0
2009-04-18	08:45:00	0
2009-04-18	08:46:00	14
2009-04-18	08:47:00	0
2009-04-18	08:48:00	0
2009-04-18	08:49:00	384
2009-04-18	08:50:00	562
2009-04-18	08:51:00	0
2009-04-18	08:52:00	0
2009-04-18	08:53:00	0
2009-04-18	08:54:00	0
2009-04-18	08:55:00	0
2009-04-18	08:56:00	0
2009-04-18	08:57:00	0
2009-04-18	08:58:00	0
2009-04-18	08:59:00	0
2009-04-18	09:00:00	0
2009-04-18	09:01:00	0
2009-04-18	09:02:00	28
2009-04-18	09:03:00	0
2009-04-18	09:04:00	0
2009-04-18	09:05:00	0
2009-04-18	09:06:00	14
2009-04-18	09:07:00	0
2009-04-18	09:08:00	0
[truncated: 19,611 more rows]

## Sheet: 5.1.09
Actogram, Copy Raw Data, All Days
Identity:	Natasha
Filename:	E:\Active Research Files\meloxicam titre canine\cases\natasha\Natasha 5.1.09.AWC
Gender:	F
Age:	8
Height:	91.4 cm	36.0 in
Weight:	29.5 kg	65.0 lbs
Start Date:	01-May-2009 (Fri)
Start Time:	18:00:00
Interval:	1.00 mins
Date Stamp:	Time Stamp:	Activity Data:	Marker Press:
2009-05-01	00:00:00	0
2009-05-01	00:01:00	0
2009-05-01	00:02:00	0
2009-05-01	00:03:00	0
2009-05-01	00:04:00	0
2009-05-01	00:05:00	0
2009-05-01	00:06:00	0
2009-05-01	00:07:00	0
2009-05-01	00:08:00	0
2009-05-01	00:09:00	0
2009-05-01	00:10:00	0
2009-05-01	00:11:00	0
2009-05-01	00:12:00	0
2009-05-01	00:13:00	0
2009-05-01	00:14:00	0
2009-05-01	00:15:00	0
2009-05-01	00:16:00	0
2009-05-01	00:17:00	0
2009-05-01	00:18:00	0
2009-05-01	00:19:00	0
2009-05-01	00:20:00	0
2009-05-01	00:21:00	0
2009-05-01	00:22:00	0
2009-05-01	00:23:00	0
2009-05-01	00:24:00	0
2009-05-01	00:25:00	0
2009-05-01	00:26:00	0
2009-05-01	00:27:00	0
2009-05-01	00:28:00	0
2009-05-01	00:29:00	0
2009-05-01	00:30:00	0
2009-05-01	00:31:00	0
2009-05-01	00:32:00	0
2009-05-01	00:33:00	0
2009-05-01	00:34:00	0
2009-05-01	00:35:00	0
2009-05-01	00:36:00	0
2009-05-01	00:37:00	0
2009-05-01	00:38:00	0
2009-05-01	00:39:00	0
2009-05-01	00:40:00	0
2009-05-01	00:41:00	0
2009-05-01	00:42:00	0
2009-05-01	00:43:00	0
2009-05-01	00:44:00	0
2009-05-01	00:45:00	0
2009-05-01	00:46:00	0
2009-05-01	00:47:00	0
2009-05-01	00:48:00	0
2009-05-01	00:49:00	0
2009-05-01	00:50:00	0
2009-05-01	00:51:00	0
2009-05-01	00:52:00	0
2009-05-01	00:53:00	0
2009-05-01	00:54:00	0
2009-05-01	00:55:00	0
2009-05-01	00:56:00	0
2009-05-01	00:57:00	0
2009-05-01	00:58:00	0
2009-05-01	00:59:00	0
2009-05-01	01:00:00	0
2009-05-01	01:01:00	0
2009-05-01	01:02:00	0
2009-05-01	01:03:00	0
2009-05-01	01:04:00	0
2009-05-01	01:05:00	0
2009-05-01	01:06:00	0
2009-05-01	01:07:00	0
2009-05-01	01:08:00	0
2009-05-01	01:09:00	0
2009-05-01	01:10:00	0
2009-05-01	01:11:00	0
2009-05-01	01:12:00	0
2009-05-01	01:13:00	0
2009-05-01	01:14:00	0
2009-05-01	01:15:00	0
2009-05-01	01:16:00	0
2009-05-01	01:17:00	0
2009-05-01	01:18:00	0
2009-05-01	01:19:00	0
2009-05-01	01:20:00	0
2009-05-01	01:21:00	0
2009-05-01	01:22:00	0
2009-05-01	01:23:00	0
2009-05-01	01:24:00	0
2009-05-01	01:25:00	0
2009-05-01	01:26:00	0
2009-05-01	01:27:00	0
2009-05-01	01:28:00	0
2009-05-01	01:29:00	0
2009-05-01	01:30:00	0
2009-05-01	01:31:00	0
2009-05-01	01:32:00	0
2009-05-01	01:33:00	0
2009-05-01	01:34:00	0
2009-05-01	01:35:00	0
2009-05-01	01:36:00	0
2009-05-01	01:37:00	0
2009-05-01	01:38:00	0
2009-05-01	01:39:00	0
2009-05-01	01:40:00	0
2009-05-01	01:41:00	0
2009-05-01	01:42:00	0
2009-05-01	01:43:00	0
2009-05-01	01:44:00	0
2009-05-01	01:45:00	0
2009-05-01	01:46:00	0
2009-05-01	01:47:00	0
2009-05-01	01:48:00	0
2009-05-01	01:49:00	0
2009-05-01	01:50:00	0
2009-05-01	01:51:00	0
2009-05-01	01:52:00	0
2009-05-01	01:53:00	0
2009-05-01	01:54:00	0
2009-05-01	01:55:00	0
2009-05-01	01:56:00	0
2009-05-01	01:57:00	0
2009-05-01	01:58:00	0
2009-05-01	01:59:00	0
2009-05-01	02:00:00	0
2009-05-01	02:01:00	0
2009-05-01	02:02:00	0
2009-05-01	02:03:00	0
2009-05-01	02:04:00	0
2009-05-01	02:05:00	0
2009-05-01	02:06:00	0
2009-05-01	02:07:00	0
2009-05-01	02:08:00	0
2009-05-01	02:09:00	0
2009-05-01	02:10:00	0
2009-05-01	02:11:00	0
2009-05-01	02:12:00	0
2009-05-01	02:13:00	0
2009-05-01	02:14:00	0
2009-05-01	02:15:00	0
2009-05-01	02:16:00	0
2009-05-01	02:17:00	0
2009-05-01	02:18:00	0
2009-05-01	02:19:00	0
2009-05-01	02:20:00	0
2009-05-01	02:21:00	0
2009-05-01	02:22:00	0
2009-05-01	02:23:00	0
2009-05-01	02:24:00	0
2009-05-01	02:25:00	0
2009-05-01	02:26:00	0
2009-05-01	02:27:00	0
2009-05-01	02:28:00	0
2009-05-01	02:29:00	0
2009-05-01	02:30:00	0
2009-05-01	02:31:00	0
2009-05-01	02:32:00	0
2009-05-01	02:33:00	0
2009-05-01	02:34:00	0
2009-05-01	02:35:00	0
2009-05-01	02:36:00	0
2009-05-01	02:37:00	0
2009-05-01	02:38:00	0
2009-05-01	02:39:00	0
2009-05-01	02:40:00	0
2009-05-01	02:41:00	0
2009-05-01	02:42:00	0
2009-05-01	02:43:00	0
2009-05-01	02:44:00	0
2009-05-01	02:45:00	0
2009-05-01	02:46:00	0
2009-05-01	02:47:00	0
2009-05-01	02:48:00	0
2009-05-01	02:49:00	0
2009-05-01	02:50:00	0
2009-05-01	02:51:00	0
2009-05-01	02:52:00	0
2009-05-01	02:53:00	0
2009-05-01	02:54:00	0
2009-05-01	02:55:00	0
2009-05-01	02:56:00	0
2009-05-01	02:57:00	0
2009-05-01	02:58:00	0
2009-05-01	02:59:00	0
2009-05-01	03:00:00	0
2009-05-01	03:01:00	0
2009-05-01	03:02:00	0
2009-05-01	03:03:00	0
2009-05-01	03:04:00	0
2009-05-01	03:05:00	0
2009-05-01	03:06:00	0
2009-05-01	03:07:00	0
2009-05-01	03:08:00	0
2009-05-01	03:09:00	0
2009-05-01	03:10:00	0
2009-05-01	03:11:00	0
2009-05-01	03:12:00	0
2009-05-01	03:13:00	0
2009-05-01	03:14:00	0
2009-05-01	03:15:00	0
2009-05-01	03:16:00	0
2009-05-01	03:17:00	0
2009-05-01	03:18:00	0
2009-05-01	03:19:00	0
2009-05-01	03:20:00	0
2009-05-01	03:21:00	0
2009-05-01	03:22:00	0
2009-05-01	03:23:00	0
2009-05-01	03:24:00	0
2009-05-01	03:25:00	0
2009-05-01	03:26:00	0
2009-05-01	03:27:00	0
2009-05-01	03:28:00	0
2009-05-01	03:29:00	0
2009-05-01	03:30:00	0
2009-05-01	03:31:00	0
2009-05-01	03:32:00	0
2009-05-01	03:33:00	0
2009-05-01	03:34:00	0
2009-05-01	03:35:00	0
2009-05-01	03:36:00	0
2009-05-01	03:37:00	0
2009-05-01	03:38:00	0
2009-05-01	03:39:00	0
2009-05-01	03:40:00	0
2009-05-01	03:41:00	0
2009-05-01	03:42:00	0
2009-05-01	03:43:00	0
2009-05-01	03:44:00	0
2009-05-01	03:45:00	0
2009-05-01	03:46:00	0
2009-05-01	03:47:00	0
2009-05-01	03:48:00	0
2009-05-01	03:49:00	0
2009-05-01	03:50:00	0
2009-05-01	03:51:00	0
2009-05-01	03:52:00	0
2009-05-01	03:53:00	0
2009-05-01	03:54:00	0
2009-05-01	03:55:00	0
2009-05-01	03:56:00	0
2009-05-01	03:57:00	0
2009-05-01	03:58:00	0
2009-05-01	03:59:00	0
2009-05-01	04:00:00	0
2009-05-01	04:01:00	0
2009-05-01	04:02:00	0
2009-05-01	04:03:00	0
2009-05-01	04:04:00	0
2009-05-01	04:05:00	0
2009-05-01	04:06:00	0
2009-05-01	04:07:00	0
2009-05-01	04:08:00	0
2009-05-01	04:09:00	0
2009-05-01	04:10:00	0
2009-05-01	04:11:00	0
2009-05-01	04:12:00	0
2009-05-01	04:13:00	0
2009-05-01	04:14:00	0
2009-05-01	04:15:00	0
2009-05-01	04:16:00	0
2009-05-01	04:17:00	0
2009-05-01	04:18:00	0
2009-05-01	04:19:00	0
2009-05-01	04:20:00	0
2009-05-01	04:21:00	0
2009-05-01	04:22:00	0
2009-05-01	04:23:00	0
2009-05-01	04:24:00	0
2009-05-01	04:25:00	0
2009-05-01	04:26:00	0
2009-05-01	04:27:00	0
2009-05-01	04:28:00	0
2009-05-01	04:29:00	0
2009-05-01	04:30:00	0
2009-05-01	04:31:00	0
2009-05-01	04:32:00	0
2009-05-01	04:33:00	0
2009-05-01	04:34:00	0
2009-05-01	04:35:00	0
2009-05-01	04:36:00	0
2009-05-01	04:37:00	0
2009-05-01	04:38:00	0
2009-05-01	04:39:00	0
2009-05-01	04:40:00	0
2009-05-01	04:41:00	0
2009-05-01	04:42:00	0
2009-05-01	04:43:00	0
2009-05-01	04:44:00	0
2009-05-01	04:45:00	0
2009-05-01	04:46:00	0
2009-05-01	04:47:00	0
2009-05-01	04:48:00	0
2009-05-01	04:49:00	0
2009-05-01	04:50:00	0
2009-05-01	04:51:00	0
2009-05-01	04:52:00	0
2009-05-01	04:53:00	0
2009-05-01	04:54:00	0
2009-05-01	04:55:00	0
2009-05-01	04:56:00	0
2009-05-01	04:57:00	0
2009-05-01	04:58:00	0
2009-05-01	04:59:00	0
2009-05-01	05:00:00	0
2009-05-01	05:01:00	0
2009-05-01	05:02:00	0
2009-05-01	05:03:00	0
2009-05-01	05:04:00	0
2009-05-01	05:05:00	0
2009-05-01	05:06:00	0
2009-05-01	05:07:00	0
2009-05-01	05:08:00	0
2009-05-01	05:09:00	0
2009-05-01	05:10:00	0
2009-05-01	05:11:00	0
2009-05-01	05:12:00	0
2009-05-01	05:13:00	0
2009-05-01	05:14:00	0
2009-05-01	05:15:00	0
2009-05-01	05:16:00	0
2009-05-01	05:17:00	0
2009-05-01	05:18:00	0
2009-05-01	05:19:00	0
2009-05-01	05:20:00	0
2009-05-01	05:21:00	0
2009-05-01	05:22:00	0
2009-05-01	05:23:00	0
2009-05-01	05:24:00	0
2009-05-01	05:25:00	0
2009-05-01	05:26:00	0
2009-05-01	05:27:00	0
2009-05-01	05:28:00	0
2009-05-01	05:29:00	0
2009-05-01	05:30:00	0
2009-05-01	05:31:00	0
2009-05-01	05:32:00	0
2009-05-01	05:33:00	0
2009-05-01	05:34:00	0
2009-05-01	05:35:00	0
2009-05-01	05:36:00	0
2009-05-01	05:37:00	0
2009-05-01	05:38:00	0
2009-05-01	05:39:00	0
2009-05-01	05:40:00	0
2009-05-01	05:41:00	0
2009-05-01	05:42:00	0
2009-05-01	05:43:00	0
2009-05-01	05:44:00	0
2009-05-01	05:45:00	0
2009-05-01	05:46:00	0
2009-05-01	05:47:00	0
2009-05-01	05:48:00	0
2009-05-01	05:49:00	0
2009-05-01	05:50:00	0
2009-05-01	05:51:00	0
2009-05-01	05:52:00	0
2009-05-01	05:53:00	0
2009-05-01	05:54:00	0
2009-05-01	05:55:00	0
2009-05-01	05:56:00	0
2009-05-01	05:57:00	0
2009-05-01	05:58:00	0
2009-05-01	05:59:00	0
2009-05-01	06:00:00	0
2009-05-01	06:01:00	0
2009-05-01	06:02:00	0
2009-05-01	06:03:00	0
2009-05-01	06:04:00	0
2009-05-01	06:05:00	0
2009-05-01	06:06:00	0
2009-05-01	06:07:00	0
2009-05-01	06:08:00	0
2009-05-01	06:09:00	0
2009-05-01	06:10:00	0
2009-05-01	06:11:00	0
2009-05-01	06:12:00	0
2009-05-01	06:13:00	0
2009-05-01	06:14:00	0
2009-05-01	06:15:00	0
2009-05-01	06:16:00	0
2009-05-01	06:17:00	0
2009-05-01	06:18:00	0
2009-05-01	06:19:00	0
2009-05-01	06:20:00	0
2009-05-01	06:21:00	0
2009-05-01	06:22:00	0
2009-05-01	06:23:00	0
2009-05-01	06:24:00	0
2009-05-01	06:25:00	0
2009-05-01	06:26:00	0
2009-05-01	06:27:00	0
2009-05-01	06:28:00	0
2009-05-01	06:29:00	0
2009-05-01	06:30:00	0
2009-05-01	06:31:00	0
2009-05-01	06:32:00	0
2009-05-01	06:33:00	0
2009-05-01	06:34:00	0
2009-05-01	06:35:00	0
2009-05-01	06:36:00	0
2009-05-01	06:37:00	0
2009-05-01	06:38:00	0
2009-05-01	06:39:00	0
2009-05-01	06:40:00	0
2009-05-01	06:41:00	0
2009-05-01	06:42:00	0
2009-05-01	06:43:00	0
2009-05-01	06:44:00	0
2009-05-01	06:45:00	0
2009-05-01	06:46:00	0
2009-05-01	06:47:00	0
2009-05-01	06:48:00	0
2009-05-01	06:49:00	0
2009-05-01	06:50:00	0
2009-05-01	06:51:00	0
2009-05-01	06:52:00	0
2009-05-01	06:53:00	0
2009-05-01	06:54:00	0
2009-05-01	06:55:00	0
2009-05-01	06:56:00	0
2009-05-01	06:57:00	0
2009-05-01	06:58:00	0
2009-05-01	06:59:00	0
2009-05-01	07:00:00	0
2009-05-01	07:01:00	0
2009-05-01	07:02:00	0
2009-05-01	07:03:00	0
2009-05-01	07:04:00	0
2009-05-01	07:05:00	0
2009-05-01	07:06:00	0
2009-05-01	07:07:00	0
2009-05-01	07:08:00	0
2009-05-01	07:09:00	0
2009-05-01	07:10:00	0
2009-05-01	07:11:00	0
2009-05-01	07:12:00	0
2009-05-01	07:13:00	0
2009-05-01	07:14:00	0
2009-05-01	07:15:00	0
2009-05-01	07:16:00	0
2009-05-01	07:17:00	0
2009-05-01	07:18:00	0
2009-05-01	07:19:00	0
2009-05-01	07:20:00	0
2009-05-01	07:21:00	0
2009-05-01	07:22:00	0
2009-05-01	07:23:00	0
2009-05-01	07:24:00	0
2009-05-01	07:25:00	0
2009-05-01	07:26:00	0
2009-05-01	07:27:00	0
2009-05-01	07:28:00	0
2009-05-01	07:29:00	0
2009-05-01	07:30:00	0
2009-05-01	07:31:00	0
2009-05-01	07:32:00	0
2009-05-01	07:33:00	0
2009-05-01	07:34:00	0
2009-05-01	07:35:00	0
2009-05-01	07:36:00	0
2009-05-01	07:37:00	0
2009-05-01	07:38:00	0
2009-05-01	07:39:00	0
2009-05-01	07:40:00	0
2009-05-01	07:41:00	0
2009-05-01	07:42:00	0
2009-05-01	07:43:00	0
2009-05-01	07:44:00	0
2009-05-01	07:45:00	0
2009-05-01	07:46:00	0
2009-05-01	07:47:00	0
2009-05-01	07:48:00	0
2009-05-01	07:49:00	0
2009-05-01	07:50:00	0
2009-05-01	07:51:00	0
2009-05-01	07:52:00	0
2009-05-01	07:53:00	0
2009-05-01	07:54:00	0
2009-05-01	07:55:00	0
2009-05-01	07:56:00	0
2009-05-01	07:57:00	0
2009-05-01	07:58:00	0
2009-05-01	07:59:00	0
2009-05-01	08:00:00	0
2009-05-01	08:01:00	0
2009-05-01	08:02:00	0
2009-05-01	08:03:00	0
2009-05-01	08:04:00	0
2009-05-01	08:05:00	0
2009-05-01	08:06:00	0
2009-05-01	08:07:00	0
2009-05-01	08:08:00	0
2009-05-01	08:09:00	0
2009-05-01	08:10:00	0
2009-05-01	08:11:00	0
2009-05-01	08:12:00	0
2009-05-01	08:13:00	0
2009-05-01	08:14:00	0
2009-05-01	08:15:00	0
2009-05-01	08:16:00	0
2009-05-01	08:17:00	0
2009-05-01	08:18:00	0
2009-05-01	08:19:00	0
2009-05-01	08:20:00	0
2009-05-01	08:21:00	0
2009-05-01	08:22:00	0
2009-05-01	08:23:00	0
2009-05-01	08:24:00	0
2009-05-01	08:25:00	0
2009-05-01	08:26:00	0
2009-05-01	08:27:00	0
2009-05-01	08:28:00	0
2009-05-01	08:29:00	0
2009-05-01	08:30:00	0
2009-05-01	08:31:00	0
2009-05-01	08:32:00	0
2009-05-01	08:33:00	0
2009-05-01	08:34:00	0
2009-05-01	08:35:00	0
2009-05-01	08:36:00	0
2009-05-01	08:37:00	0
2009-05-01	08:38:00	0
2009-05-01	08:39:00	0
2009-05-01	08:40:00	0
2009-05-01	08:41:00	0
2009-05-01	08:42:00	0
2009-05-01	08:43:00	0
2009-05-01	08:44:00	0
2009-05-01	08:45:00	0
2009-05-01	08:46:00	0
2009-05-01	08:47:00	0
2009-05-01	08:48:00	0
2009-05-01	08:49:00	0
2009-05-01	08:50:00	0
2009-05-01	08:51:00	0
2009-05-01	08:52:00	0
2009-05-01	08:53:00	0
2009-05-01	08:54:00	0
2009-05-01	08:55:00	0
2009-05-01	08:56:00	0
2009-05-01	08:57:00	0
2009-05-01	08:58:00	0
2009-05-01	08:59:00	0
2009-05-01	09:00:00	0
2009-05-01	09:01:00	0
2009-05-01	09:02:00	0
2009-05-01	09:03:00	0
2009-05-01	09:04:00	0
2009-05-01	09:05:00	0
2009-05-01	09:06:00	0
2009-05-01	09:07:00	0
2009-05-01	09:08:00	0
2009-05-01	09:09:00	0
2009-05-01	09:10:00	0
2009-05-01	09:11:00	0
2009-05-01	09:12:00	0
2009-05-01	09:13:00	0
2009-05-01	09:14:00	0
2009-05-01	09:15:00	0
2009-05-01	09:16:00	0
2009-05-01	09:17:00	0
2009-05-01	09:18:00	0
2009-05-01	09:19:00	0
2009-05-01	09:20:00	0
2009-05-01	09:21:00	0
2009-05-01	09:22:00	0
2009-05-01	09:23:00	0
2009-05-01	09:24:00	0
2009-05-01	09:25:00	0
2009-05-01	09:26:00	0
2009-05-01	09:27:00	0
2009-05-01	09:28:00	0
2009-05-01	09:29:00	0
2009-05-01	09:30:00	0
2009-05-01	09:31:00	0
2009-05-01	09:32:00	0
2009-05-01	09:33:00	0
2009-05-01	09:34:00	0
2009-05-01	09:35:00	0
2009-05-01	09:36:00	0
2009-05-01	09:37:00	0
2009-05-01	09:38:00	0
2009-05-01	09:39:00	0
2009-05-01	09:40:00	0
2009-05-01	09:41:00	0
2009-05-01	09:42:00	0
2009-05-01	09:43:00	0
2009-05-01	09:44:00	0
2009-05-01	09:45:00	0
2009-05-01	09:46:00	0
2009-05-01	09:47:00	0
2009-05-01	09:48:00	0
2009-05-01	09:49:00	0
2009-05-01	09:50:00	0
2009-05-01	09:51:00	0
2009-05-01	09:52:00	0
2009-05-01	09:53:00	0
2009-05-01	09:54:00	0
2009-05-01	09:55:00	0
2009-05-01	09:56:00	0
2009-05-01	09:57:00	0
2009-05-01	09:58:00	0
2009-05-01	09:59:00	0
2009-05-01	10:00:00	0
2009-05-01	10:01:00	0
2009-05-01	10:02:00	0
2009-05-01	10:03:00	0
2009-05-01	10:04:00	0
2009-05-01	10:05:00	0
2009-05-01	10:06:00	0
2009-05-01	10:07:00	0
2009-05-01	10:08:00	0
2009-05-01	10:09:00	0
2009-05-01	10:10:00	0
2009-05-01	10:11:00	0
2009-05-01	10:12:00	0
2009-05-01	10:13:00	0
2009-05-01	10:14:00	0
2009-05-01	10:15:00	0
2009-05-01	10:16:00	0
2009-05-01	10:17:00	0
2009-05-01	10:18:00	0
2009-05-01	10:19:00	0
2009-05-01	10:20:00	0
2009-05-01	10:21:00	0
2009-05-01	10:22:00	0
2009-05-01	10:23:00	0
2009-05-01	10:24:00	0
2009-05-01	10:25:00	0
2009-05-01	10:26:00	0
2009-05-01	10:27:00	0
2009-05-01	10:28:00	0
2009-05-01	10:29:00	0
2009-05-01	10:30:00	0
2009-05-01	10:31:00	0
2009-05-01	10:32:00	0
2009-05-01	10:33:00	0
2009-05-01	10:34:00	0
2009-05-01	10:35:00	0
2009-05-01	10:36:00	0
2009-05-01	10:37:00	0
2009-05-01	10:38:00	0
2009-05-01	10:39:00	0
2009-05-01	10:40:00	0
2009-05-01	10:41:00	0
2009-05-01	10:42:00	0
2009-05-01	10:43:00	0
2009-05-01	10:44:00	0
2009-05-01	10:45:00	0
2009-05-01	10:46:00	0
2009-05-01	10:47:00	0
2009-05-01	10:48:00	0
2009-05-01	10:49:00	0
2009-05-01	10:50:00	0
2009-05-01	10:51:00	0
2009-05-01	10:52:00	0
2009-05-01	10:53:00	0
2009-05-01	10:54:00	0
2009-05-01	10:55:00	0
2009-05-01	10:56:00	0
2009-05-01	10:57:00	0
2009-05-01	10:58:00	0
2009-05-01	10:59:00	0
2009-05-01	11:00:00	0
2009-05-01	11:01:00	0
2009-05-01	11:02:00	0
2009-05-01	11:03:00	0
2009-05-01	11:04:00	0
2009-05-01	11:05:00	0
2009-05-01	11:06:00	0
2009-05-01	11:07:00	0
2009-05-01	11:08:00	0
2009-05-01	11:09:00	0
2009-05-01	11:10:00	0
2009-05-01	11:11:00	0
2009-05-01	11:12:00	0
2009-05-01	11:13:00	0
2009-05-01	11:14:00	0
2009-05-01	11:15:00	0
2009-05-01	11:16:00	0
2009-05-01	11:17:00	0
2009-05-01	11:18:00	0
2009-05-01	11:19:00	0
2009-05-01	11:20:00	0
2009-05-01	11:21:00	0
2009-05-01	11:22:00	0
2009-05-01	11:23:00	0
2009-05-01	11:24:00	0
2009-05-01	11:25:00	0
2009-05-01	11:26:00	0
2009-05-01	11:27:00	0
2009-05-01	11:28:00	0
2009-05-01	11:29:00	0
2009-05-01	11:30:00	0
2009-05-01	11:31:00	0
2009-05-01	11:32:00	0
2009-05-01	11:33:00	0
2009-05-01	11:34:00	0
2009-05-01	11:35:00	0
2009-05-01	11:36:00	0
2009-05-01	11:37:00	0
2009-05-01	11:38:00	0
2009-05-01	11:39:00	0
2009-05-01	11:40:00	0
2009-05-01	11:41:00	0
2009-05-01	11:42:00	0
2009-05-01	11:43:00	0
2009-05-01	11:44:00	0
2009-05-01	11:45:00	0
2009-05-01	11:46:00	0
2009-05-01	11:47:00	0
2009-05-01	11:48:00	0
2009-05-01	11:49:00	0
2009-05-01	11:50:00	0
2009-05-01	11:51:00	0
2009-05-01	11:52:00	0
2009-05-01	11:53:00	0
2009-05-01	11:54:00	0
2009-05-01	11:55:00	0
2009-05-01	11:56:00	0
2009-05-01	11:57:00	0
2009-05-01	11:58:00	0
2009-05-01	11:59:00	0
2009-05-01	12:00:00	0
2009-05-01	12:01:00	0
2009-05-01	12:02:00	0
2009-05-01	12:03:00	0
2009-05-01	12:04:00	0
2009-05-01	12:05:00	0
2009-05-01	12:06:00	0
2009-05-01	12:07:00	0
2009-05-01	12:08:00	0
2009-05-01	12:09:00	0
2009-05-01	12:10:00	0
2009-05-01	12:11:00	0
2009-05-01	12:12:00	0
2009-05-01	12:13:00	0
2009-05-01	12:14:00	0
2009-05-01	12:15:00	0
2009-05-01	12:16:00	0
2009-05-01	12:17:00	0
2009-05-01	12:18:00	0
2009-05-01	12:19:00	0
2009-05-01	12:20:00	0
2009-05-01	12:21:00	0
2009-05-01	12:22:00	0
2009-05-01	12:23:00	0
2009-05-01	12:24:00	0
2009-05-01	12:25:00	0
2009-05-01	12:26:00	0
2009-05-01	12:27:00	0
2009-05-01	12:28:00	0
2009-05-01	12:29:00	0
2009-05-01	12:30:00	0
2009-05-01	12:31:00	0
2009-05-01	12:32:00	0
2009-05-01	12:33:00	0
2009-05-01	12:34:00	0
2009-05-01	12:35:00	0
2009-05-01	12:36:00	0
2009-05-01	12:37:00	0
2009-05-01	12:38:00	0
2009-05-01	12:39:00	0
2009-05-01	12:40:00	0
2009-05-01	12:41:00	0
2009-05-01	12:42:00	0
2009-05-01	12:43:00	0
2009-05-01	12:44:00	0
2009-05-01	12:45:00	0
2009-05-01	12:46:00	0
2009-05-01	12:47:00	0
2009-05-01	12:48:00	0
2009-05-01	12:49:00	0
2009-05-01	12:50:00	0
2009-05-01	12:51:00	0
2009-05-01	12:52:00	0
2009-05-01	12:53:00	0
2009-05-01	12:54:00	0
2009-05-01	12:55:00	0
2009-05-01	12:56:00	0
2009-05-01	12:57:00	0
2009-05-01	12:58:00	0
2009-05-01	12:59:00	0
2009-05-01	13:00:00	0
2009-05-01	13:01:00	0
2009-05-01	13:02:00	0
2009-05-01	13:03:00	0
2009-05-01	13:04:00	0
2009-05-01	13:05:00	0
2009-05-01	13:06:00	0
2009-05-01	13:07:00	0
2009-05-01	13:08:00	0
2009-05-01	13:09:00	0
2009-05-01	13:10:00	0
2009-05-01	13:11:00	0
2009-05-01	13:12:00	0
2009-05-01	13:13:00	0
2009-05-01	13:14:00	0
2009-05-01	13:15:00	0
2009-05-01	13:16:00	0
2009-05-01	13:17:00	0
2009-05-01	13:18:00	0
2009-05-01	13:19:00	0
2009-05-01	13:20:00	0
2009-05-01	13:21:00	0
2009-05-01	13:22:00	0
2009-05-01	13:23:00	0
2009-05-01	13:24:00	0
2009-05-01	13:25:00	0
2009-05-01	13:26:00	0
2009-05-01	13:27:00	0
2009-05-01	13:28:00	0
2009-05-01	13:29:00	0
2009-05-01	13:30:00	0
2009-05-01	13:31:00	0
2009-05-01	13:32:00	0
2009-05-01	13:33:00	0
2009-05-01	13:34:00	0
2009-05-01	13:35:00	0
2009-05-01	13:36:00	0
2009-05-01	13:37:00	0
2009-05-01	13:38:00	0
2009-05-01	13:39:00	0
2009-05-01	13:40:00	0
2009-05-01	13:41:00	0
2009-05-01	13:42:00	0
2009-05-01	13:43:00	0
2009-05-01	13:44:00	0
2009-05-01	13:45:00	0
2009-05-01	13:46:00	0
2009-05-01	13:47:00	0
2009-05-01	13:48:00	0
2009-05-01	13:49:00	0
2009-05-01	13:50:00	0
2009-05-01	13:51:00	0
2009-05-01	13:52:00	0
2009-05-01	13:53:00	0
2009-05-01	13:54:00	0
2009-05-01	13:55:00	0
2009-05-01	13:56:00	0
2009-05-01	13:57:00	0
2009-05-01	13:58:00	0
2009-05-01	13:59:00	0
2009-05-01	14:00:00	0
2009-05-01	14:01:00	0
2009-05-01	14:02:00	0
2009-05-01	14:03:00	0
2009-05-01	14:04:00	0
2009-05-01	14:05:00	0
2009-05-01	14:06:00	0
2009-05-01	14:07:00	0
2009-05-01	14:08:00	0
2009-05-01	14:09:00	0
2009-05-01	14:10:00	0
2009-05-01	14:11:00	0
2009-05-01	14:12:00	0
2009-05-01	14:13:00	0
2009-05-01	14:14:00	0
2009-05-01	14:15:00	0
2009-05-01	14:16:00	0
2009-05-01	14:17:00	0
2009-05-01	14:18:00	0
2009-05-01	14:19:00	0
2009-05-01	14:20:00	0
2009-05-01	14:21:00	0
2009-05-01	14:22:00	0
2009-05-01	14:23:00	0
2009-05-01	14:24:00	0
2009-05-01	14:25:00	0
2009-05-01	14:26:00	0
2009-05-01	14:27:00	0
2009-05-01	14:28:00	0
2009-05-01	14:29:00	0
2009-05-01	14:30:00	0
2009-05-01	14:31:00	0
2009-05-01	14:32:00	0
2009-05-01	14:33:00	0
2009-05-01	14:34:00	0
2009-05-01	14:35:00	0
2009-05-01	14:36:00	0
2009-05-01	14:37:00	0
2009-05-01	14:38:00	0
2009-05-01	14:39:00	0
2009-05-01	14:40:00	0
2009-05-01	14:41:00	0
2009-05-01	14:42:00	0
2009-05-01	14:43:00	0
2009-05-01	14:44:00	0
2009-05-01	14:45:00	0
2009-05-01	14:46:00	0
2009-05-01	14:47:00	0
2009-05-01	14:48:00	0
2009-05-01	14:49:00	0
2009-05-01	14:50:00	0
2009-05-01	14:51:00	0
2009-05-01	14:52:00	0
2009-05-01	14:53:00	0
2009-05-01	14:54:00	0
2009-05-01	14:55:00	0
2009-05-01	14:56:00	0
2009-05-01	14:57:00	0
2009-05-01	14:58:00	0
2009-05-01	14:59:00	0
2009-05-01	15:00:00	0
2009-05-01	15:01:00	0
2009-05-01	15:02:00	0
2009-05-01	15:03:00	0
2009-05-01	15:04:00	0
2009-05-01	15:05:00	0
2009-05-01	15:06:00	0
2009-05-01	15:07:00	0
2009-05-01	15:08:00	0
2009-05-01	15:09:00	0
2009-05-01	15:10:00	0
2009-05-01	15:11:00	0
2009-05-01	15:12:00	0
2009-05-01	15:13:00	0
2009-05-01	15:14:00	0
2009-05-01	15:15:00	0
2009-05-01	15:16:00	0
2009-05-01	15:17:00	0
2009-05-01	15:18:00	0
2009-05-01	15:19:00	0
2009-05-01	15:20:00	0
2009-05-01	15:21:00	0
2009-05-01	15:22:00	0
2009-05-01	15:23:00	0
2009-05-01	15:24:00	0
2009-05-01	15:25:00	0
2009-05-01	15:26:00	0
2009-05-01	15:27:00	0
2009-05-01	15:28:00	0
2009-05-01	15:29:00	0
2009-05-01	15:30:00	0
2009-05-01	15:31:00	0
2009-05-01	15:32:00	0
2009-05-01	15:33:00	0
2009-05-01	15:34:00	0
2009-05-01	15:35:00	0
2009-05-01	15:36:00	0
2009-05-01	15:37:00	0
2009-05-01	15:38:00	0
2009-05-01	15:39:00	0
2009-05-01	15:40:00	0
2009-05-01	15:41:00	0
2009-05-01	15:42:00	0
2009-05-01	15:43:00	0
2009-05-01	15:44:00	0
2009-05-01	15:45:00	0
2009-05-01	15:46:00	0
2009-05-01	15:47:00	0
2009-05-01	15:48:00	0
2009-05-01	15:49:00	0
2009-05-01	15:50:00	0
2009-05-01	15:51:00	0
2009-05-01	15:52:00	0
2009-05-01	15:53:00	0
2009-05-01	15:54:00	0
2009-05-01	15:55:00	0
2009-05-01	15:56:00	0
2009-05-01	15:57:00	0
2009-05-01	15:58:00	0
2009-05-01	15:59:00	0
2009-05-01	16:00:00	0
2009-05-01	16:01:00	0
2009-05-01	16:02:00	0
2009-05-01	16:03:00	0
2009-05-01	16:04:00	0
2009-05-01	16:05:00	0
2009-05-01	16:06:00	0
2009-05-01	16:07:00	0
2009-05-01	16:08:00	0
2009-05-01	16:09:00	0
2009-05-01	16:10:00	0
2009-05-01	16:11:00	0
2009-05-01	16:12:00	0
2009-05-01	16:13:00	0
2009-05-01	16:14:00	0
2009-05-01	16:15:00	0
2009-05-01	16:16:00	0
2009-05-01	16:17:00	0
2009-05-01	16:18:00	0
2009-05-01	16:19:00	0
2009-05-01	16:20:00	0
2009-05-01	16:21:00	0
2009-05-01	16:22:00	0
2009-05-01	16:23:00	0
2009-05-01	16:24:00	0
2009-05-01	16:25:00	0
2009-05-01	16:26:00	0
2009-05-01	16:27:00	0
2009-05-01	16:28:00	0
2009-05-01	16:29:00	0
2009-05-01	16:30:00	0
2009-05-01	16:31:00	0
2009-05-01	16:32:00	0
2009-05-01	16:33:00	0
2009-05-01	16:34:00	0
2009-05-01	16:35:00	0
2009-05-01	16:36:00	0
2009-05-01	16:37:00	0
2009-05-01	16:38:00	0
2009-05-01	16:39:00	0
2009-05-01	16:40:00	0
2009-05-01	16:41:00	0
2009-05-01	16:42:00	0
2009-05-01	16:43:00	0
2009-05-01	16:44:00	0
2009-05-01	16:45:00	0
2009-05-01	16:46:00	0
2009-05-01	16:47:00	0
2009-05-01	16:48:00	0
2009-05-01	16:49:00	0
2009-05-01	16:50:00	0
2009-05-01	16:51:00	0
2009-05-01	16:52:00	0
2009-05-01	16:53:00	0
2009-05-01	16:54:00	0
2009-05-01	16:55:00	0
2009-05-01	16:56:00	0
2009-05-01	16:57:00	0
2009-05-01	16:58:00	0
2009-05-01	16:59:00	0
2009-05-01	17:00:00	0
2009-05-01	17:01:00	0
2009-05-01	17:02:00	0
2009-05-01	17:03:00	0
2009-05-01	17:04:00	0
2009-05-01	17:05:00	0
2009-05-01	17:06:00	0
2009-05-01	17:07:00	0
2009-05-01	17:08:00	0
2009-05-01	17:09:00	0
2009-05-01	17:10:00	0
2009-05-01	17:11:00	0
2009-05-01	17:12:00	0
2009-05-01	17:13:00	0
2009-05-01	17:14:00	0
2009-05-01	17:15:00	0
2009-05-01	17:16:00	0
2009-05-01	17:17:00	0
2009-05-01	17:18:00	0
2009-05-01	17:19:00	0
2009-05-01	17:20:00	0
2009-05-01	17:21:00	0
2009-05-01	17:22:00	0
2009-05-01	17:23:00	0
2009-05-01	17:24:00	0
2009-05-01	17:25:00	0
2009-05-01	17:26:00	0
2009-05-01	17:27:00	0
2009-05-01	17:28:00	0
2009-05-01	17:29:00	0
2009-05-01	17:30:00	0
2009-05-01	17:31:00	0
2009-05-01	17:32:00	0
2009-05-01	17:33:00	0
2009-05-01	17:34:00	0
2009-05-01	17:35:00	0
2009-05-01	17:36:00	0
2009-05-01	17:37:00	0
2009-05-01	17:38:00	0
2009-05-01	17:39:00	0
2009-05-01	17:40:00	0
2009-05-01	17:41:00	0
2009-05-01	17:42:00	0
2009-05-01	17:43:00	0
2009-05-01	17:44:00	0
2009-05-01	17:45:00	0
2009-05-01	17:46:00	0
2009-05-01	17:47:00	0
2009-05-01	17:48:00	0
2009-05-01	17:49:00	0
2009-05-01	17:50:00	0
2009-05-01	17:51:00	0
2009-05-01	17:52:00	0
2009-05-01	17:53:00	0
2009-05-01	17:54:00	0
2009-05-01	17:55:00	0
2009-05-01	17:56:00	0
2009-05-01	17:57:00	0
2009-05-01	17:58:00	0
2009-05-01	17:59:00	0
2009-05-01	18:00:00	0
2009-05-01	18:01:00	0
2009-05-01	18:02:00	0
2009-05-01	18:03:00	0
2009-05-01	18:04:00	14
2009-05-01	18:05:00	0
2009-05-01	18:06:00	0
2009-05-01	18:07:00	0
2009-05-01	18:08:00	0
2009-05-01	18:09:00	0
2009-05-01	18:10:00	0
2009-05-01	18:11:00	14
2009-05-01	18:12:00	0
2009-05-01	18:13:00	14
2009-05-01	18:14:00	0
2009-05-01	18:15:00	0
2009-05-01	18:16:00	0
2009-05-01	18:17:00	0
2009-05-01	18:18:00	0
2009-05-01	18:19:00	0
2009-05-01	18:20:00	0
2009-05-01	18:21:00	0
2009-05-01	18:22:00	0
2009-05-01	18:23:00	0
2009-05-01	18:24:00	0
2009-05-01	18:25:00	0
2009-05-01	18:26:00	0
2009-05-01	18:27:00	0
2009-05-01	18:28:00	0
2009-05-01	18:29:00	0
2009-05-01	18:30:00	0
2009-05-01	18:31:00	0
2009-05-01	18:32:00	14
2009-05-01	18:33:00	0
2009-05-01	18:34:00	0
2009-05-01	18:35:00	0
2009-05-01	18:36:00	0
2009-05-01	18:37:00	0
2009-05-01	18:38:00	0
2009-05-01	18:39:00	0
2009-05-01	18:40:00	0
2009-05-01	18:41:00	768
2009-05-01	18:42:00	14
2009-05-01	18:43:00	14
2009-05-01	18:44:00	42
2009-05-01	18:45:00	0
2009-05-01	18:46:00	153
2009-05-01	18:47:00	214
2009-05-01	18:48:00	14
2009-05-01	18:49:00	1439
2009-05-01	18:50:00	2207
2009-05-01	18:51:00	520
2009-05-01	18:52:00	403
2009-05-01	18:53:00	0
2009-05-01	18:54:00	97
2009-05-01	18:55:00	348
2009-05-01	18:56:00	0
2009-05-01	18:57:00	28
2009-05-01	18:58:00	0
2009-05-01	18:59:00	0
2009-05-01	19:00:00	0
2009-05-01	19:01:00	28
2009-05-01	19:02:00	281
2009-05-01	19:03:00	56
2009-05-01	19:04:00	42
2009-05-01	19:05:00	0
2009-05-01	19:06:00	0
2009-05-01	19:07:00	0
2009-05-01	19:08:00	42
2009-05-01	19:09:00	28
2009-05-01	19:10:00	0
2009-05-01	19:11:00	0
2009-05-01	19:12:00	0
2009-05-01	19:13:00	0
2009-05-01	19:14:00	0
2009-05-01	19:15:00	97
2009-05-01	19:16:00	0
2009-05-01	19:17:00	0
2009-05-01	19:18:00	0
2009-05-01	19:19:00	0
2009-05-01	19:20:00	42
2009-05-01	19:21:00	0
2009-05-01	19:22:00	0
2009-05-01	19:23:00	0
2009-05-01	19:24:00	0
2009-05-01	19:25:00	0
2009-05-01	19:26:00	0
2009-05-01	19:27:00	0
2009-05-01	19:28:00	0
2009-05-01	19:29:00	0
2009-05-01	19:30:00	0
2009-05-01	19:31:00	83
2009-05-01	19:32:00	0
2009-05-01	19:33:00	0
2009-05-01	19:34:00	28
2009-05-01	19:35:00	0
2009-05-01	19:36:00	0
2009-05-01	19:37:00	0
2009-05-01	19:38:00	0
2009-05-01	19:39:00	0
2009-05-01	19:40:00	0
2009-05-01	19:41:00	0
2009-05-01	19:42:00	0
2009-05-01	19:43:00	0
2009-05-01	19:44:00	0
2009-05-01	19:45:00	0
2009-05-01	19:46:00	0
2009-05-01	19:47:00	921
2009-05-01	19:48:00	501
2009-05-01	19:49:00	893
2009-05-01	19:50:00	214
2009-05-01	19:51:00	167
2009-05-01	19:52:00	264
2009-05-01	19:53:00	0
2009-05-01	19:54:00	0
2009-05-01	19:55:00	0
2009-05-01	19:56:00	0
2009-05-01	19:57:00	0
2009-05-01	19:58:00	0
2009-05-01	19:59:00	584
2009-05-01	20:00:00	139
2009-05-01	20:01:00	28
2009-05-01	20:02:00	0
2009-05-01	20:03:00	0
2009-05-01	20:04:00	0
2009-05-01	20:05:00	0
2009-05-01	20:06:00	0
2009-05-01	20:07:00	0
2009-05-01	20:08:00	0
2009-05-01	20:09:00	0
2009-05-01	20:10:00	0
2009-05-01	20:11:00	0
2009-05-01	20:12:00	0
2009-05-01	20:13:00	0
2009-05-01	20:14:00	42
2009-05-01	20:15:00	0
2009-05-01	20:16:00	0
2009-05-01	20:17:00	0
2009-05-01	20:18:00	0
2009-05-01	20:19:00	0
2009-05-01	20:20:00	0
2009-05-01	20:21:00	0
2009-05-01	20:22:00	0
2009-05-01	20:23:00	0
2009-05-01	20:24:00	0
2009-05-01	20:25:00	0
2009-05-01	20:26:00	0
2009-05-01	20:27:00	0
2009-05-01	20:28:00	0
2009-05-01	20:29:00	0
2009-05-01	20:30:00	0
2009-05-01	20:31:00	0
2009-05-01	20:32:00	0
2009-05-01	20:33:00	0
2009-05-01	20:34:00	0
2009-05-01	20:35:00	0
2009-05-01	20:36:00	0
2009-05-01	20:37:00	0
2009-05-01	20:38:00	0
2009-05-01	20:39:00	0
2009-05-01	20:40:00	0
2009-05-01	20:41:00	0
2009-05-01	20:42:00	0
2009-05-01	20:43:00	0
2009-05-01	20:44:00	0
2009-05-01	20:45:00	584
2009-05-01	20:46:00	501
2009-05-01	20:47:00	97
2009-05-01	20:48:00	14
2009-05-01	20:49:00	0
2009-05-01	20:50:00	0
2009-05-01	20:51:00	0
2009-05-01	20:52:00	0
2009-05-01	20:53:00	0
2009-05-01	20:54:00	14
2009-05-01	20:55:00	0
2009-05-01	20:56:00	0
2009-05-01	20:57:00	0
2009-05-01	20:58:00	14
2009-05-01	20:59:00	0
2009-05-01	21:00:00	0
2009-05-01	21:01:00	0
2009-05-01	21:02:00	0
2009-05-01	21:03:00	0
2009-05-01	21:04:00	0
2009-05-01	21:05:00	0
2009-05-01	21:06:00	0
2009-05-01	21:07:00	0
2009-05-01	21:08:00	0
2009-05-01	21:09:00	0
2009-05-01	21:10:00	0
2009-05-01	21:11:00	28
2009-05-01	21:12:00	0
2009-05-01	21:13:00	0
2009-05-01	21:14:00	0
2009-05-01	21:15:00	0
2009-05-01	21:16:00	0
2009-05-01	21:17:00	0
2009-05-01	21:18:00	14
2009-05-01	21:19:00	0
2009-05-01	21:20:00	28
2009-05-01	21:21:00	56
2009-05-01	21:22:00	0
2009-05-01	21:23:00	14
2009-05-01	21:24:00	0
2009-05-01	21:25:00	56
2009-05-01	21:26:00	14
2009-05-01	21:27:00	0
2009-05-01	21:28:00	153
2009-05-01	21:29:00	384
2009-05-01	21:30:00	673
2009-05-01	21:31:00	743
2009-05-01	21:32:00	56
2009-05-01	21:33:00	0
2009-05-01	21:34:00	949
2009-05-01	21:35:00	768
2009-05-01	21:36:00	1005
2009-05-01	21:37:00	0
2009-05-01	21:38:00	0
2009-05-01	21:39:00	0
2009-05-01	21:40:00	14
2009-05-01	21:41:00	0
2009-05-01	21:42:00	0
2009-05-01	21:43:00	0
2009-05-01	21:44:00	14
2009-05-01	21:45:00	0
2009-05-01	21:46:00	0
2009-05-01	21:47:00	0
2009-05-01	21:48:00	0
2009-05-01	21:49:00	0
2009-05-01	21:50:00	83
2009-05-01	21:51:00	14
2009-05-01	21:52:00	0
2009-05-01	21:53:00	0
2009-05-01	21:54:00	0
2009-05-01	21:55:00	0
2009-05-01	21:56:00	0
2009-05-01	21:57:00	0
2009-05-01	21:58:00	0
2009-05-01	21:59:00	0
2009-05-01	22:00:00	0
2009-05-01	22:01:00	0
2009-05-01	22:02:00	0
2009-05-01	22:03:00	0
2009-05-01	22:04:00	0
2009-05-01	22:05:00	0
2009-05-01	22:06:00	0
2009-05-01	22:07:00	0
2009-05-01	22:08:00	0
2009-05-01	22:09:00	0
2009-05-01	22:10:00	0
2009-05-01	22:11:00	0
2009-05-01	22:12:00	0
2009-05-01	22:13:00	0
2009-05-01	22:14:00	0
2009-05-01	22:15:00	0
2009-05-01	22:16:00	0
2009-05-01	22:17:00	0
2009-05-01	22:18:00	0
2009-05-01	22:19:00	0
2009-05-01	22:20:00	0
2009-05-01	22:21:00	0
2009-05-01	22:22:00	0
2009-05-01	22:23:00	0
2009-05-01	22:24:00	14
2009-05-01	22:25:00	0
2009-05-01	22:26:00	0
2009-05-01	22:27:00	0
2009-05-01	22:28:00	0
2009-05-01	22:29:00	0
2009-05-01	22:30:00	0
2009-05-01	22:31:00	0
2009-05-01	22:32:00	0
2009-05-01	22:33:00	0
2009-05-01	22:34:00	0
2009-05-01	22:35:00	0
2009-05-01	22:36:00	0
2009-05-01	22:37:00	0
2009-05-01	22:38:00	0
2009-05-01	22:39:00	0
2009-05-01	22:40:00	0
2009-05-01	22:41:00	0
2009-05-01	22:42:00	0
2009-05-01	22:43:00	0
2009-05-01	22:44:00	0
2009-05-01	22:45:00	0
2009-05-01	22:46:00	0
2009-05-01	22:47:00	0
2009-05-01	22:48:00	0
2009-05-01	22:49:00	0
2009-05-01	22:50:00	0
2009-05-01	22:51:00	0
2009-05-01	22:52:00	0
2009-05-01	22:53:00	0
2009-05-01	22:54:00	0
2009-05-01	22:55:00	0
2009-05-01	22:56:00	0
2009-05-01	22:57:00	0
2009-05-01	22:58:00	0
2009-05-01	22:59:00	0
2009-05-01	23:00:00	0
2009-05-01	23:01:00	0
2009-05-01	23:02:00	0
2009-05-01	23:03:00	0
2009-05-01	23:04:00	0
2009-05-01	23:05:00	70
2009-05-01	23:06:00	70
2009-05-01	23:07:00	0
2009-05-01	23:08:00	167
2009-05-01	23:09:00	0
2009-05-01	23:10:00	0
2009-05-01	23:11:00	0
2009-05-01	23:12:00	0
2009-05-01	23:13:00	0
2009-05-01	23:14:00	0
2009-05-01	23:15:00	0
2009-05-01	23:16:00	0
2009-05-01	23:17:00	0
2009-05-01	23:18:00	0
2009-05-01	23:19:00	0
2009-05-01	23:20:00	0
2009-05-01	23:21:00	14
2009-05-01	23:22:00	0
2009-05-01	23:23:00	0
2009-05-01	23:24:00	0
2009-05-01	23:25:00	0
2009-05-01	23:26:00	0
2009-05-01	23:27:00	0
2009-05-01	23:28:00	0
2009-05-01	23:29:00	0
2009-05-01	23:30:00	0
2009-05-01	23:31:00	28
2009-05-01	23:32:00	0
2009-05-01	23:33:00	14
2009-05-01	23:34:00	0
2009-05-01	23:35:00	0
2009-05-01	23:36:00	0
2009-05-01	23:37:00	0
2009-05-01	23:38:00	0
2009-05-01	23:39:00	0
2009-05-01	23:40:00	0
2009-05-01	23:41:00	0
2009-05-01	23:42:00	0
2009-05-01	23:43:00	0
2009-05-01	23:44:00	0
2009-05-01	23:45:00	0
2009-05-01	23:46:00	0
2009-05-01	23:47:00	0
2009-05-01	23:48:00	0
2009-05-01	23:49:00	0
2009-05-01	23:50:00	0
2009-05-01	23:51:00	0
2009-05-01	23:52:00	0
2009-05-01	23:53:00	0
2009-05-01	23:54:00	0
2009-05-01	23:55:00	0
2009-05-01	23:56:00	0
2009-05-01	23:57:00	0
2009-05-01	23:58:00	0
2009-05-01	23:59:00	0
2009-05-02	00:00:00	0
2009-05-02	00:01:00	0
2009-05-02	00:02:00	0
2009-05-02	00:03:00	0
2009-05-02	00:04:00	0
2009-05-02	00:05:00	0
2009-05-02	00:06:00	0
2009-05-02	00:07:00	0
2009-05-02	00:08:00	14
2009-05-02	00:09:00	0
2009-05-02	00:10:00	0
2009-05-02	00:11:00	0
2009-05-02	00:12:00	0
2009-05-02	00:13:00	0
2009-05-02	00:14:00	0
2009-05-02	00:15:00	0
2009-05-02	00:16:00	0
2009-05-02	00:17:00	0
2009-05-02	00:18:00	0
2009-05-02	00:19:00	0
2009-05-02	00:20:00	0
2009-05-02	00:21:00	0
2009-05-02	00:22:00	0
2009-05-02	00:23:00	0
2009-05-02	00:24:00	0
2009-05-02	00:25:00	0
2009-05-02	00:26:00	0
2009-05-02	00:27:00	0
2009-05-02	00:28:00	0
2009-05-02	00:29:00	0
2009-05-02	00:30:00	0
2009-05-02	00:31:00	0
2009-05-02	00:32:00	0
2009-05-02	00:33:00	0
2009-05-02	00:34:00	0
2009-05-02	00:35:00	0
2009-05-02	00:36:00	0
2009-05-02	00:37:00	28
2009-05-02	00:38:00	42
2009-05-02	00:39:00	0
2009-05-02	00:40:00	0
2009-05-02	00:41:00	97
2009-05-02	00:42:00	42
2009-05-02	00:43:00	0
2009-05-02	00:44:00	0
2009-05-02	00:45:00	0
2009-05-02	00:46:00	0
2009-05-02	00:47:00	0
2009-05-02	00:48:00	0
2009-05-02	00:49:00	0
2009-05-02	00:50:00	0
2009-05-02	00:51:00	0
2009-05-02	00:52:00	0
2009-05-02	00:53:00	0
2009-05-02	00:54:00	0
2009-05-02	00:55:00	14
2009-05-02	00:56:00	0
2009-05-02	00:57:00	0
2009-05-02	00:58:00	0
2009-05-02	00:59:00	0
2009-05-02	01:00:00	0
2009-05-02	01:01:00	0
2009-05-02	01:02:00	0
2009-05-02	01:03:00	28
2009-05-02	01:04:00	1149
2009-05-02	01:05:00	153
2009-05-02	01:06:00	0
2009-05-02	01:07:00	0
2009-05-02	01:08:00	28
2009-05-02	01:09:00	0
2009-05-02	01:10:00	0
2009-05-02	01:11:00	0
2009-05-02	01:12:00	0
2009-05-02	01:13:00	14
2009-05-02	01:14:00	14
2009-05-02	01:15:00	14
2009-05-02	01:16:00	14
2009-05-02	01:17:00	14
2009-05-02	01:18:00	14
2009-05-02	01:19:00	14
2009-05-02	01:20:00	28
2009-05-02	01:21:00	0
2009-05-02	01:22:00	0
2009-05-02	01:23:00	14
2009-05-02	01:24:00	0
2009-05-02	01:25:00	0
2009-05-02	01:26:00	0
2009-05-02	01:27:00	42
2009-05-02	01:28:00	14
2009-05-02	01:29:00	56
2009-05-02	01:30:00	14
2009-05-02	01:31:00	0
2009-05-02	01:32:00	0
2009-05-02	01:33:00	0
2009-05-02	01:34:00	0
2009-05-02	01:35:00	14
2009-05-02	01:36:00	0
2009-05-02	01:37:00	0
2009-05-02	01:38:00	0
2009-05-02	01:39:00	0
2009-05-02	01:40:00	0
2009-05-02	01:41:00	0
2009-05-02	01:42:00	0
2009-05-02	01:43:00	0
2009-05-02	01:44:00	0
2009-05-02	01:45:00	0
2009-05-02	01:46:00	0
2009-05-02	01:47:00	28
2009-05-02	01:48:00	0
2009-05-02	01:49:00	0
2009-05-02	01:50:00	0
2009-05-02	01:51:00	0
2009-05-02	01:52:00	0
2009-05-02	01:53:00	0
2009-05-02	01:54:00	0
2009-05-02	01:55:00	0
2009-05-02	01:56:00	0
2009-05-02	01:57:00	0
2009-05-02	01:58:00	0
2009-05-02	01:59:00	0
2009-05-02	02:00:00	0
2009-05-02	02:01:00	0
2009-05-02	02:02:00	0
2009-05-02	02:03:00	0
2009-05-02	02:04:00	0
2009-05-02	02:05:00	97
2009-05-02	02:06:00	0
2009-05-02	02:07:00	0
2009-05-02	02:08:00	0
2009-05-02	02:09:00	0
2009-05-02	02:10:00	0
2009-05-02	02:11:00	0
2009-05-02	02:12:00	0
2009-05-02	02:13:00	0
2009-05-02	02:14:00	0
2009-05-02	02:15:00	0
2009-05-02	02:16:00	0
2009-05-02	02:17:00	0
2009-05-02	02:18:00	0
2009-05-02	02:19:00	0
2009-05-02	02:20:00	0
2009-05-02	02:21:00	0
2009-05-02	02:22:00	0
2009-05-02	02:23:00	14
2009-05-02	02:24:00	14
2009-05-02	02:25:00	14
2009-05-02	02:26:00	0
2009-05-02	02:27:00	0
2009-05-02	02:28:00	0
2009-05-02	02:29:00	0
2009-05-02	02:30:00	0
2009-05-02	02:31:00	0
2009-05-02	02:32:00	0
2009-05-02	02:33:00	0
2009-05-02	02:34:00	0
2009-05-02	02:35:00	0
2009-05-02	02:36:00	0
2009-05-02	02:37:00	0
2009-05-02	02:38:00	0
2009-05-02	02:39:00	0
2009-05-02	02:40:00	0
2009-05-02	02:41:00	0
2009-05-02	02:42:00	0
2009-05-02	02:43:00	0
2009-05-02	02:44:00	0
2009-05-02	02:45:00	0
2009-05-02	02:46:00	0
2009-05-02	02:47:00	0
2009-05-02	02:48:00	0
2009-05-02	02:49:00	0
2009-05-02	02:50:00	0
2009-05-02	02:51:00	0
2009-05-02	02:52:00	0
2009-05-02	02:53:00	0
2009-05-02	02:54:00	0
2009-05-02	02:55:00	0
2009-05-02	02:56:00	0
2009-05-02	02:57:00	0
2009-05-02	02:58:00	0
2009-05-02	02:59:00	70
2009-05-02	03:00:00	14
2009-05-02	03:01:00	0
2009-05-02	03:02:00	0
2009-05-02	03:03:00	28
2009-05-02	03:04:00	0
2009-05-02	03:05:00	0
2009-05-02	03:06:00	0
2009-05-02	03:07:00	14
2009-05-02	03:08:00	0
2009-05-02	03:09:00	42
2009-05-02	03:10:00	42
2009-05-02	03:11:00	0
2009-05-02	03:12:00	0
2009-05-02	03:13:00	0
2009-05-02	03:14:00	42
2009-05-02	03:15:00	0
2009-05-02	03:16:00	0
2009-05-02	03:17:00	0
2009-05-02	03:18:00	0
2009-05-02	03:19:00	0
2009-05-02	03:20:00	0
2009-05-02	03:21:00	0
2009-05-02	03:22:00	0
2009-05-02	03:23:00	0
2009-05-02	03:24:00	0
2009-05-02	03:25:00	0
2009-05-02	03:26:00	0
2009-05-02	03:27:00	0
2009-05-02	03:28:00	0
2009-05-02	03:29:00	0
2009-05-02	03:30:00	0
2009-05-02	03:31:00	0
2009-05-02	03:32:00	0
2009-05-02	03:33:00	0
2009-05-02	03:34:00	0
2009-05-02	03:35:00	0
2009-05-02	03:36:00	0
2009-05-02	03:37:00	0
2009-05-02	03:38:00	0
2009-05-02	03:39:00	0
2009-05-02	03:40:00	0
2009-05-02	03:41:00	0
2009-05-02	03:42:00	0
2009-05-02	03:43:00	0
2009-05-02	03:44:00	0
2009-05-02	03:45:00	0
2009-05-02	03:46:00	0
2009-05-02	03:47:00	28
2009-05-02	03:48:00	0
2009-05-02	03:49:00	0
2009-05-02	03:50:00	0
2009-05-02	03:51:00	0
2009-05-02	03:52:00	0
2009-05-02	03:53:00	0
2009-05-02	03:54:00	0
2009-05-02	03:55:00	0
2009-05-02	03:56:00	0
2009-05-02	03:57:00	0
2009-05-02	03:58:00	0
2009-05-02	03:59:00	0
2009-05-02	04:00:00	0
2009-05-02	04:01:00	0
2009-05-02	04:02:00	0
2009-05-02	04:03:00	0
2009-05-02	04:04:00	0
2009-05-02	04:05:00	0
2009-05-02	04:06:00	0
2009-05-02	04:07:00	0
2009-05-02	04:08:00	0
2009-05-02	04:09:00	0
2009-05-02	04:10:00	0
2009-05-02	04:11:00	0
2009-05-02	04:12:00	28
2009-05-02	04:13:00	97
2009-05-02	04:14:00	0
2009-05-02	04:15:00	0
2009-05-02	04:16:00	0
2009-05-02	04:17:00	0
2009-05-02	04:18:00	14
2009-05-02	04:19:00	0
2009-05-02	04:20:00	0
2009-05-02	04:21:00	0
2009-05-02	04:22:00	0
2009-05-02	04:23:00	0
2009-05-02	04:24:00	0
2009-05-02	04:25:00	0
2009-05-02	04:26:00	0
2009-05-02	04:27:00	0
2009-05-02	04:28:00	0
2009-05-02	04:29:00	0
2009-05-02	04:30:00	14
2009-05-02	04:31:00	0
2009-05-02	04:32:00	0
2009-05-02	04:33:00	0
2009-05-02	04:34:00	0
2009-05-02	04:35:00	0
2009-05-02	04:36:00	0
2009-05-02	04:37:00	0
2009-05-02	04:38:00	0
2009-05-02	04:39:00	0
2009-05-02	04:40:00	0
2009-05-02	04:41:00	0
2009-05-02	04:42:00	0
2009-05-02	04:43:00	0
2009-05-02	04:44:00	0
2009-05-02	04:45:00	0
2009-05-02	04:46:00	0
2009-05-02	04:47:00	0
2009-05-02	04:48:00	0
2009-05-02	04:49:00	0
2009-05-02	04:50:00	0
2009-05-02	04:51:00	0
2009-05-02	04:52:00	0
2009-05-02	04:53:00	0
2009-05-02	04:54:00	0
2009-05-02	04:55:00	0
2009-05-02	04:56:00	0
2009-05-02	04:57:00	0
2009-05-02	04:58:00	0
2009-05-02	04:59:00	0
2009-05-02	05:00:00	0
2009-05-02	05:01:00	0
2009-05-02	05:02:00	0
2009-05-02	05:03:00	0
2009-05-02	05:04:00	0
2009-05-02	05:05:00	0
2009-05-02	05:06:00	0
2009-05-02	05:07:00	28
2009-05-02	05:08:00	0
2009-05-02	05:09:00	0
2009-05-02	05:10:00	0
2009-05-02	05:11:00	0
2009-05-02	05:12:00	0
2009-05-02	05:13:00	0
2009-05-02	05:14:00	0
2009-05-02	05:15:00	0
2009-05-02	05:16:00	14
2009-05-02	05:17:00	0
2009-05-02	05:18:00	0
2009-05-02	05:19:00	0
2009-05-02	05:20:00	0
2009-05-02	05:21:00	0
2009-05-02	05:22:00	0
2009-05-02	05:23:00	0
2009-05-02	05:24:00	0
2009-05-02	05:25:00	0
2009-05-02	05:26:00	0
2009-05-02	05:27:00	0
2009-05-02	05:28:00	0
2009-05-02	05:29:00	14
2009-05-02	05:30:00	0
2009-05-02	05:31:00	0
2009-05-02	05:32:00	28
2009-05-02	05:33:00	14
2009-05-02	05:34:00	42
2009-05-02	05:35:00	56
2009-05-02	05:36:00	0
2009-05-02	05:37:00	14
2009-05-02	05:38:00	14
2009-05-02	05:39:00	0
2009-05-02	05:40:00	0
2009-05-02	05:41:00	42
2009-05-02	05:42:00	423
2009-05-02	05:43:00	0
2009-05-02	05:44:00	0
2009-05-02	05:45:00	0
2009-05-02	05:46:00	0
2009-05-02	05:47:00	14
2009-05-02	05:48:00	0
2009-05-02	05:49:00	248
2009-05-02	05:50:00	818
2009-05-02	05:51:00	14
2009-05-02	05:52:00	0
2009-05-02	05:53:00	1272
2009-05-02	05:54:00	520
2009-05-02	05:55:00	0
2009-05-02	05:56:00	14
2009-05-02	05:57:00	0
2009-05-02	05:58:00	0
2009-05-02	05:59:00	0
2009-05-02	06:00:00	0
2009-05-02	06:01:00	0
2009-05-02	06:02:00	0
2009-05-02	06:03:00	0
2009-05-02	06:04:00	0
2009-05-02	06:05:00	0
2009-05-02	06:06:00	0
2009-05-02	06:07:00	0
2009-05-02	06:08:00	0
2009-05-02	06:09:00	0
2009-05-02	06:10:00	0
2009-05-02	06:11:00	0
2009-05-02	06:12:00	0
2009-05-02	06:13:00	0
2009-05-02	06:14:00	0
2009-05-02	06:15:00	0
2009-05-02	06:16:00	0
2009-05-02	06:17:00	0
2009-05-02	06:18:00	0
2009-05-02	06:19:00	0
2009-05-02	06:20:00	0
2009-05-02	06:21:00	0
2009-05-02	06:22:00	0
2009-05-02	06:23:00	0
2009-05-02	06:24:00	0
2009-05-02	06:25:00	0
2009-05-02	06:26:00	0
2009-05-02	06:27:00	0
2009-05-02	06:28:00	0
2009-05-02	06:29:00	0
2009-05-02	06:30:00	14
2009-05-02	06:31:00	0
2009-05-02	06:32:00	0
2009-05-02	06:33:00	0
2009-05-02	06:34:00	0
2009-05-02	06:35:00	0
2009-05-02	06:36:00	0
2009-05-02	06:37:00	0
2009-05-02	06:38:00	0
2009-05-02	06:39:00	0
2009-05-02	06:40:00	0
2009-05-02	06:41:00	0
2009-05-02	06:42:00	14
2009-05-02	06:43:00	0
2009-05-02	06:44:00	0
2009-05-02	06:45:00	0
2009-05-02	06:46:00	0
2009-05-02	06:47:00	0
2009-05-02	06:48:00	0
2009-05-02	06:49:00	0
2009-05-02	06:50:00	0
2009-05-02	06:51:00	0
2009-05-02	06:52:00	0
2009-05-02	06:53:00	0
2009-05-02	06:54:00	0
2009-05-02	06:55:00	0
2009-05-02	06:56:00	0
2009-05-02	06:57:00	0
2009-05-02	06:58:00	0
2009-05-02	06:59:00	0
2009-05-02	07:00:00	0
2009-05-02	07:01:00	231
2009-05-02	07:02:00	111
2009-05-02	07:03:00	198
2009-05-02	07:04:00	520
2009-05-02	07:05:00	0
2009-05-02	07:06:00	384
2009-05-02	07:07:00	949
2009-05-02	07:08:00	977
2009-05-02	07:09:00	0
2009-05-02	07:10:00	56
2009-05-02	07:11:00	0
2009-05-02	07:12:00	0
2009-05-02	07:13:00	14
2009-05-02	07:14:00	0
2009-05-02	07:15:00	0
2009-05-02	07:16:00	0
2009-05-02	07:17:00	111
2009-05-02	07:18:00	231
2009-05-02	07:19:00	0
2009-05-02	07:20:00	0
2009-05-02	07:21:00	607
2009-05-02	07:22:00	893
2009-05-02	07:23:00	198
2009-05-02	07:24:00	214
2009-05-02	07:25:00	111
2009-05-02	07:26:00	0
2009-05-02	07:27:00	0
2009-05-02	07:28:00	0
2009-05-02	07:29:00	0
2009-05-02	07:30:00	949
2009-05-02	07:31:00	14
2009-05-02	07:32:00	281
2009-05-02	07:33:00	28
2009-05-02	07:34:00	0
2009-05-02	07:35:00	0
2009-05-02	07:36:00	28
2009-05-02	07:37:00	0
2009-05-02	07:38:00	0
2009-05-02	07:39:00	0
2009-05-02	07:40:00	0
2009-05-02	07:41:00	0
2009-05-02	07:42:00	0
2009-05-02	07:43:00	0
2009-05-02	07:44:00	0
2009-05-02	07:45:00	0
2009-05-02	07:46:00	0
2009-05-02	07:47:00	14
2009-05-02	07:48:00	0
2009-05-02	07:49:00	0
2009-05-02	07:50:00	0
2009-05-02	07:51:00	0
2009-05-02	07:52:00	28
2009-05-02	07:53:00	28
2009-05-02	07:54:00	0
2009-05-02	07:55:00	0
2009-05-02	07:56:00	0
2009-05-02	07:57:00	0
2009-05-02	07:58:00	0
2009-05-02	07:59:00	0
2009-05-02	08:00:00	0
2009-05-02	08:01:00	0
2009-05-02	08:02:00	28
2009-05-02	08:03:00	0
2009-05-02	08:04:00	0
2009-05-02	08:05:00	0
2009-05-02	08:06:00	0
2009-05-02	08:07:00	0
2009-05-02	08:08:00	0
2009-05-02	08:09:00	0
2009-05-02	08:10:00	540
2009-05-02	08:11:00	348
2009-05-02	08:12:00	181
2009-05-02	08:13:00	331
2009-05-02	08:14:00	384
2009-05-02	08:15:00	331
2009-05-02	08:16:00	442
2009-05-02	08:17:00	520
2009-05-02	08:18:00	540
2009-05-02	08:19:00	629
2009-05-02	08:20:00	768
2009-05-02	08:21:00	314
2009-05-02	08:22:00	0	M
2009-05-02	08:23:00	264
2009-05-02	08:24:00	153
2009-05-02	08:25:00	673
2009-05-02	08:26:00	314
2009-05-02	08:27:00	4374
2009-05-02	08:28:00	5933
2009-05-02	08:29:00	5056
2009-05-02	08:30:00	2301
2009-05-02	08:31:00	442
2009-05-02	08:32:00	540
2009-05-02	08:33:00	793
2009-05-02	08:34:00	3631
2009-05-02	08:35:00	3236
2009-05-02	08:36:00	4294
2009-05-02	08:37:00	651
2009-05-02	08:38:00	921
2009-05-02	08:39:00	298
2009-05-02	08:40:00	607
2009-05-02	08:41:00	696
2009-05-02	08:42:00	153
2009-05-02	08:43:00	520
2009-05-02	08:44:00	673
2009-05-02	08:45:00	0
2009-05-02	08:46:00	14
2009-05-02	08:47:00	0
2009-05-02	08:48:00	0
2009-05-02	08:49:00	0
2009-05-02	08:50:00	0
2009-05-02	08:51:00	0
2009-05-02	08:52:00	0
2009-05-02	08:53:00	0
2009-05-02	08:54:00	28
2009-05-02	08:55:00	14
2009-05-02	08:56:00	0
2009-05-02	08:57:00	0
2009-05-02	08:58:00	0
2009-05-02	08:59:00	0
2009-05-02	09:00:00	0
2009-05-02	09:01:00	0
2009-05-02	09:02:00	14
2009-05-02	09:03:00	0
2009-05-02	09:04:00	0
2009-05-02	09:05:00	14
2009-05-02	09:06:00	0
2009-05-02	09:07:00	0
2009-05-02	09:08:00	0
[truncated: 19,611 more rows]

## Sheet: 5.15.09
Actogram, Copy Raw Data, All Days
Identity:	Natasha
Filename:	E:\Active Research Files\meloxicam titre canine\cases\natasha\Natasha 5.15.09.AWC
Gender:	F
Age:	8
Height:	91.4 cm	36.0 in
Weight:	29.5 kg	65.0 lbs
Start Date:	15-May-2009 (Fri)
Start Time:	18:00:00
Interval:	1.00 mins
Date Stamp:	Time Stamp:	Activity Data:	Marker Press:
2009-05-15	00:00:00	0
2009-05-15	00:01:00	0
2009-05-15	00:02:00	0
2009-05-15	00:03:00	0
2009-05-15	00:04:00	0
2009-05-15	00:05:00	0
2009-05-15	00:06:00	0
2009-05-15	00:07:00	0
2009-05-15	00:08:00	0
2009-05-15	00:09:00	0
2009-05-15	00:10:00	0
2009-05-15	00:11:00	0
2009-05-15	00:12:00	0
2009-05-15	00:13:00	0
2009-05-15	00:14:00	0
2009-05-15	00:15:00	0
2009-05-15	00:16:00	0
2009-05-15	00:17:00	0
2009-05-15	00:18:00	0
2009-05-15	00:19:00	0
2009-05-15	00:20:00	0
2009-05-15	00:21:00	0
2009-05-15	00:22:00	0
2009-05-15	00:23:00	0
2009-05-15	00:24:00	0
2009-05-15	00:25:00	0
2009-05-15	00:26:00	0
2009-05-15	00:27:00	0
2009-05-15	00:28:00	0
2009-05-15	00:29:00	0
2009-05-15	00:30:00	0
2009-05-15	00:31:00	0
2009-05-15	00:32:00	0
2009-05-15	00:33:00	0
2009-05-15	00:34:00	0
2009-05-15	00:35:00	0
2009-05-15	00:36:00	0
2009-05-15	00:37:00	0
2009-05-15	00:38:00	0
2009-05-15	00:39:00	0
2009-05-15	00:40:00	0
2009-05-15	00:41:00	0
2009-05-15	00:42:00	0
2009-05-15	00:43:00	0
2009-05-15	00:44:00	0
2009-05-15	00:45:00	0
2009-05-15	00:46:00	0
2009-05-15	00:47:00	0
2009-05-15	00:48:00	0
2009-05-15	00:49:00	0
2009-05-15	00:50:00	0
2009-05-15	00:51:00	0
2009-05-15	00:52:00	0
2009-05-15	00:53:00	0
2009-05-15	00:54:00	0
2009-05-15	00:55:00	0
2009-05-15	00:56:00	0
2009-05-15	00:57:00	0
2009-05-15	00:58:00	0
2009-05-15	00:59:00	0
2009-05-15	01:00:00	0
2009-05-15	01:01:00	0
2009-05-15	01:02:00	0
2009-05-15	01:03:00	0
2009-05-15	01:04:00	0
2009-05-15	01:05:00	0
2009-05-15	01:06:00	0
2009-05-15	01:07:00	0
2009-05-15	01:08:00	0
2009-05-15	01:09:00	0
2009-05-15	01:10:00	0
2009-05-15	01:11:00	0
2009-05-15	01:12:00	0
2009-05-15	01:13:00	0
2009-05-15	01:14:00	0
2009-05-15	01:15:00	0
2009-05-15	01:16:00	0
2009-05-15	01:17:00	0
2009-05-15	01:18:00	0
2009-05-15	01:19:00	0
2009-05-15	01:20:00	0
2009-05-15	01:21:00	0
2009-05-15	01:22:00	0
2009-05-15	01:23:00	0
2009-05-15	01:24:00	0
2009-05-15	01:25:00	0
2009-05-15	01:26:00	0
2009-05-15	01:27:00	0
2009-05-15	01:28:00	0
2009-05-15	01:29:00	0
2009-05-15	01:30:00	0
2009-05-15	01:31:00	0
2009-05-15	01:32:00	0
2009-05-15	01:33:00	0
2009-05-15	01:34:00	0
2009-05-15	01:35:00	0
2009-05-15	01:36:00	0
2009-05-15	01:37:00	0
2009-05-15	01:38:00	0
2009-05-15	01:39:00	0
2009-05-15	01:40:00	0
2009-05-15	01:41:00	0
2009-05-15	01:42:00	0
2009-05-15	01:43:00	0
2009-05-15	01:44:00	0
2009-05-15	01:45:00	0
2009-05-15	01:46:00	0
2009-05-15	01:47:00	0
2009-05-15	01:48:00	0
2009-05-15	01:49:00	0
2009-05-15	01:50:00	0
2009-05-15	01:51:00	0
2009-05-15	01:52:00	0
2009-05-15	01:53:00	0
2009-05-15	01:54:00	0
2009-05-15	01:55:00	0
2009-05-15	01:56:00	0
2009-05-15	01:57:00	0
2009-05-15	01:58:00	0
2009-05-15	01:59:00	0
2009-05-15	02:00:00	0
2009-05-15	02:01:00	0
2009-05-15	02:02:00	0
2009-05-15	02:03:00	0
2009-05-15	02:04:00	0
2009-05-15	02:05:00	0
2009-05-15	02:06:00	0
2009-05-15	02:07:00	0
2009-05-15	02:08:00	0
2009-05-15	02:09:00	0
2009-05-15	02:10:00	0
2009-05-15	02:11:00	0
2009-05-15	02:12:00	0
2009-05-15	02:13:00	0
2009-05-15	02:14:00	0
2009-05-15	02:15:00	0
2009-05-15	02:16:00	0
2009-05-15	02:17:00	0
2009-05-15	02:18:00	0
2009-05-15	02:19:00	0
2009-05-15	02:20:00	0
2009-05-15	02:21:00	0
2009-05-15	02:22:00	0
2009-05-15	02:23:00	0
2009-05-15	02:24:00	0
2009-05-15	02:25:00	0
2009-05-15	02:26:00	0
2009-05-15	02:27:00	0
2009-05-15	02:28:00	0
2009-05-15	02:29:00	0
2009-05-15	02:30:00	0
2009-05-15	02:31:00	0
2009-05-15	02:32:00	0
2009-05-15	02:33:00	0
2009-05-15	02:34:00	0
2009-05-15	02:35:00	0
2009-05-15	02:36:00	0
2009-05-15	02:37:00	0
2009-05-15	02:38:00	0
2009-05-15	02:39:00	0
2009-05-15	02:40:00	0
2009-05-15	02:41:00	0
2009-05-15	02:42:00	0
2009-05-15	02:43:00	0
2009-05-15	02:44:00	0
2009-05-15	02:45:00	0
2009-05-15	02:46:00	0
2009-05-15	02:47:00	0
2009-05-15	02:48:00	0
2009-05-15	02:49:00	0
2009-05-15	02:50:00	0
2009-05-15	02:51:00	0
2009-05-15	02:52:00	0
2009-05-15	02:53:00	0
2009-05-15	02:54:00	0
2009-05-15	02:55:00	0
2009-05-15	02:56:00	0
2009-05-15	02:57:00	0
2009-05-15	02:58:00	0
2009-05-15	02:59:00	0
2009-05-15	03:00:00	0
2009-05-15	03:01:00	0
2009-05-15	03:02:00	0
2009-05-15	03:03:00	0
2009-05-15	03:04:00	0
2009-05-15	03:05:00	0
2009-05-15	03:06:00	0
2009-05-15	03:07:00	0
2009-05-15	03:08:00	0
2009-05-15	03:09:00	0
2009-05-15	03:10:00	0
2009-05-15	03:11:00	0
2009-05-15	03:12:00	0
2009-05-15	03:13:00	0
2009-05-15	03:14:00	0
2009-05-15	03:15:00	0
2009-05-15	03:16:00	0
2009-05-15	03:17:00	0
2009-05-15	03:18:00	0
2009-05-15	03:19:00	0
2009-05-15	03:20:00	0
2009-05-15	03:21:00	0
2009-05-15	03:22:00	0
2009-05-15	03:23:00	0
2009-05-15	03:24:00	0
2009-05-15	03:25:00	0
2009-05-15	03:26:00	0
2009-05-15	03:27:00	0
2009-05-15	03:28:00	0
2009-05-15	03:29:00	0
2009-05-15	03:30:00	0
2009-05-15	03:31:00	0
2009-05-15	03:32:00	0
2009-05-15	03:33:00	0
2009-05-15	03:34:00	0
2009-05-15	03:35:00	0
2009-05-15	03:36:00	0
2009-05-15	03:37:00	0
2009-05-15	03:38:00	0
2009-05-15	03:39:00	0
2009-05-15	03:40:00	0
2009-05-15	03:41:00	0
2009-05-15	03:42:00	0
2009-05-15	03:43:00	0
2009-05-15	03:44:00	0
2009-05-15	03:45:00	0
2009-05-15	03:46:00	0
2009-05-15	03:47:00	0
2009-05-15	03:48:00	0
2009-05-15	03:49:00	0
2009-05-15	03:50:00	0
2009-05-15	03:51:00	0
2009-05-15	03:52:00	0
2009-05-15	03:53:00	0
2009-05-15	03:54:00	0
2009-05-15	03:55:00	0
2009-05-15	03:56:00	0
2009-05-15	03:57:00	0
2009-05-15	03:58:00	0
2009-05-15	03:59:00	0
2009-05-15	04:00:00	0
2009-05-15	04:01:00	0
2009-05-15	04:02:00	0
2009-05-15	04:03:00	0
2009-05-15	04:04:00	0
2009-05-15	04:05:00	0
2009-05-15	04:06:00	0
2009-05-15	04:07:00	0
2009-05-15	04:08:00	0
2009-05-15	04:09:00	0
2009-05-15	04:10:00	0
2009-05-15	04:11:00	0
2009-05-15	04:12:00	0
2009-05-15	04:13:00	0
2009-05-15	04:14:00	0
2009-05-15	04:15:00	0
2009-05-15	04:16:00	0
2009-05-15	04:17:00	0
2009-05-15	04:18:00	0
2009-05-15	04:19:00	0
2009-05-15	04:20:00	0
2009-05-15	04:21:00	0
2009-05-15	04:22:00	0
2009-05-15	04:23:00	0
2009-05-15	04:24:00	0
2009-05-15	04:25:00	0
2009-05-15	04:26:00	0
2009-05-15	04:27:00	0
2009-05-15	04:28:00	0
2009-05-15	04:29:00	0
2009-05-15	04:30:00	0
2009-05-15	04:31:00	0
2009-05-15	04:32:00	0
2009-05-15	04:33:00	0
2009-05-15	04:34:00	0
2009-05-15	04:35:00	0
2009-05-15	04:36:00	0
2009-05-15	04:37:00	0
2009-05-15	04:38:00	0
2009-05-15	04:39:00	0
2009-05-15	04:40:00	0
2009-05-15	04:41:00	0
2009-05-15	04:42:00	0
2009-05-15	04:43:00	0
2009-05-15	04:44:00	0
2009-05-15	04:45:00	0
2009-05-15	04:46:00	0
2009-05-15	04:47:00	0
2009-05-15	04:48:00	0
2009-05-15	04:49:00	0
2009-05-15	04:50:00	0
2009-05-15	04:51:00	0
2009-05-15	04:52:00	0
2009-05-15	04:53:00	0
2009-05-15	04:54:00	0
2009-05-15	04:55:00	0
2009-05-15	04:56:00	0
2009-05-15	04:57:00	0
2009-05-15	04:58:00	0
2009-05-15	04:59:00	0
2009-05-15	05:00:00	0
2009-05-15	05:01:00	0
2009-05-15	05:02:00	0
2009-05-15	05:03:00	0
2009-05-15	05:04:00	0
2009-05-15	05:05:00	0
2009-05-15	05:06:00	0
2009-05-15	05:07:00	0
2009-05-15	05:08:00	0
2009-05-15	05:09:00	0
2009-05-15	05:10:00	0
2009-05-15	05:11:00	0
2009-05-15	05:12:00	0
2009-05-15	05:13:00	0
2009-05-15	05:14:00	0
2009-05-15	05:15:00	0
2009-05-15	05:16:00	0
2009-05-15	05:17:00	0
2009-05-15	05:18:00	0
2009-05-15	05:19:00	0
2009-05-15	05:20:00	0
2009-05-15	05:21:00	0
2009-05-15	05:22:00	0
2009-05-15	05:23:00	0
2009-05-15	05:24:00	0
2009-05-15	05:25:00	0
2009-05-15	05:26:00	0
2009-05-15	05:27:00	0
2009-05-15	05:28:00	0
2009-05-15	05:29:00	0
2009-05-15	05:30:00	0
2009-05-15	05:31:00	0
2009-05-15	05:32:00	0
2009-05-15	05:33:00	0
2009-05-15	05:34:00	0
2009-05-15	05:35:00	0
2009-05-15	05:36:00	0
2009-05-15	05:37:00	0
2009-05-15	05:38:00	0
2009-05-15	05:39:00	0
2009-05-15	05:40:00	0
2009-05-15	05:41:00	0
2009-05-15	05:42:00	0
2009-05-15	05:43:00	0
2009-05-15	05:44:00	0
2009-05-15	05:45:00	0
2009-05-15	05:46:00	0
2009-05-15	05:47:00	0
2009-05-15	05:48:00	0
2009-05-15	05:49:00	0
2009-05-15	05:50:00	0
2009-05-15	05:51:00	0
2009-05-15	05:52:00	0
2009-05-15	05:53:00	0
2009-05-15	05:54:00	0
2009-05-15	05:55:00	0
2009-05-15	05:56:00	0
2009-05-15	05:57:00	0
2009-05-15	05:58:00	0
2009-05-15	05:59:00	0
2009-05-15	06:00:00	0
2009-05-15	06:01:00	0
2009-05-15	06:02:00	0
2009-05-15	06:03:00	0
2009-05-15	06:04:00	0
2009-05-15	06:05:00	0
2009-05-15	06:06:00	0
2009-05-15	06:07:00	0
2009-05-15	06:08:00	0
2009-05-15	06:09:00	0
2009-05-15	06:10:00	0
2009-05-15	06:11:00	0
2009-05-15	06:12:00	0
2009-05-15	06:13:00	0
2009-05-15	06:14:00	0
2009-05-15	06:15:00	0
2009-05-15	06:16:00	0
2009-05-15	06:17:00	0
2009-05-15	06:18:00	0
2009-05-15	06:19:00	0
2009-05-15	06:20:00	0
2009-05-15	06:21:00	0
2009-05-15	06:22:00	0
2009-05-15	06:23:00	0
2009-05-15	06:24:00	0
2009-05-15	06:25:00	0
2009-05-15	06:26:00	0
2009-05-15	06:27:00	0
2009-05-15	06:28:00	0
2009-05-15	06:29:00	0
2009-05-15	06:30:00	0
2009-05-15	06:31:00	0
2009-05-15	06:32:00	0
2009-05-15	06:33:00	0
2009-05-15	06:34:00	0
2009-05-15	06:35:00	0
2009-05-15	06:36:00	0
2009-05-15	06:37:00	0
2009-05-15	06:38:00	0
2009-05-15	06:39:00	0
2009-05-15	06:40:00	0
2009-05-15	06:41:00	0
2009-05-15	06:42:00	0
2009-05-15	06:43:00	0
2009-05-15	06:44:00	0
2009-05-15	06:45:00	0
2009-05-15	06:46:00	0
2009-05-15	06:47:00	0
2009-05-15	06:48:00	0
2009-05-15	06:49:00	0
2009-05-15	06:50:00	0
2009-05-15	06:51:00	0
2009-05-15	06:52:00	0
2009-05-15	06:53:00	0
2009-05-15	06:54:00	0
2009-05-15	06:55:00	0
2009-05-15	06:56:00	0
2009-05-15	06:57:00	0
2009-05-15	06:58:00	0
2009-05-15	06:59:00	0
2009-05-15	07:00:00	0
2009-05-15	07:01:00	0
2009-05-15	07:02:00	0
2009-05-15	07:03:00	0
2009-05-15	07:04:00	0
2009-05-15	07:05:00	0
2009-05-15	07:06:00	0
2009-05-15	07:07:00	0
2009-05-15	07:08:00	0
2009-05-15	07:09:00	0
2009-05-15	07:10:00	0
2009-05-15	07:11:00	0
2009-05-15	07:12:00	0
2009-05-15	07:13:00	0
2009-05-15	07:14:00	0
2009-05-15	07:15:00	0
2009-05-15	07:16:00	0
2009-05-15	07:17:00	0
2009-05-15	07:18:00	0
2009-05-15	07:19:00	0
2009-05-15	07:20:00	0
2009-05-15	07:21:00	0
2009-05-15	07:22:00	0
2009-05-15	07:23:00	0
2009-05-15	07:24:00	0
2009-05-15	07:25:00	0
2009-05-15	07:26:00	0
2009-05-15	07:27:00	0
2009-05-15	07:28:00	0
2009-05-15	07:29:00	0
2009-05-15	07:30:00	0
2009-05-15	07:31:00	0
2009-05-15	07:32:00	0
2009-05-15	07:33:00	0
2009-05-15	07:34:00	0
2009-05-15	07:35:00	0
2009-05-15	07:36:00	0
2009-05-15	07:37:00	0
2009-05-15	07:38:00	0
2009-05-15	07:39:00	0
2009-05-15	07:40:00	0
2009-05-15	07:41:00	0
2009-05-15	07:42:00	0
2009-05-15	07:43:00	0
2009-05-15	07:44:00	0
2009-05-15	07:45:00	0
2009-05-15	07:46:00	0
2009-05-15	07:47:00	0
2009-05-15	07:48:00	0
2009-05-15	07:49:00	0
2009-05-15	07:50:00	0
2009-05-15	07:51:00	0
2009-05-15	07:52:00	0
2009-05-15	07:53:00	0
2009-05-15	07:54:00	0
2009-05-15	07:55:00	0
2009-05-15	07:56:00	0
2009-05-15	07:57:00	0
2009-05-15	07:58:00	0
2009-05-15	07:59:00	0
2009-05-15	08:00:00	0
2009-05-15	08:01:00	0
2009-05-15	08:02:00	0
2009-05-15	08:03:00	0
2009-05-15	08:04:00	0
2009-05-15	08:05:00	0
2009-05-15	08:06:00	0
2009-05-15	08:07:00	0
2009-05-15	08:08:00	0
2009-05-15	08:09:00	0
2009-05-15	08:10:00	0
2009-05-15	08:11:00	0
2009-05-15	08:12:00	0
2009-05-15	08:13:00	0
2009-05-15	08:14:00	0
2009-05-15	08:15:00	0
2009-05-15	08:16:00	0
2009-05-15	08:17:00	0
2009-05-15	08:18:00	0
2009-05-15	08:19:00	0
2009-05-15	08:20:00	0
2009-05-15	08:21:00	0
2009-05-15	08:22:00	0
2009-05-15	08:23:00	0
2009-05-15	08:24:00	0
2009-05-15	08:25:00	0
2009-05-15	08:26:00	0
2009-05-15	08:27:00	0
2009-05-15	08:28:00	0
2009-05-15	08:29:00	0
2009-05-15	08:30:00	0
2009-05-15	08:31:00	0
2009-05-15	08:32:00	0
2009-05-15	08:33:00	0
2009-05-15	08:34:00	0
2009-05-15	08:35:00	0
2009-05-15	08:36:00	0
2009-05-15	08:37:00	0
2009-05-15	08:38:00	0
2009-05-15	08:39:00	0
2009-05-15	08:40:00	0
2009-05-15	08:41:00	0
2009-05-15	08:42:00	0
2009-05-15	08:43:00	0
2009-05-15	08:44:00	0
2009-05-15	08:45:00	0
2009-05-15	08:46:00	0
2009-05-15	08:47:00	0
2009-05-15	08:48:00	0
2009-05-15	08:49:00	0
2009-05-15	08:50:00	0
2009-05-15	08:51:00	0
2009-05-15	08:52:00	0
2009-05-15	08:53:00	0
2009-05-15	08:54:00	0
2009-05-15	08:55:00	0
2009-05-15	08:56:00	0
2009-05-15	08:57:00	0
2009-05-15	08:58:00	0
2009-05-15	08:59:00	0
2009-05-15	09:00:00	0
2009-05-15	09:01:00	0
2009-05-15	09:02:00	0
2009-05-15	09:03:00	0
2009-05-15	09:04:00	0
2009-05-15	09:05:00	0
2009-05-15	09:06:00	0
2009-05-15	09:07:00	0
2009-05-15	09:08:00	0
2009-05-15	09:09:00	0
2009-05-15	09:10:00	0
2009-05-15	09:11:00	0
2009-05-15	09:12:00	0
2009-05-15	09:13:00	0
2009-05-15	09:14:00	0
2009-05-15	09:15:00	0
2009-05-15	09:16:00	0
2009-05-15	09:17:00	0
2009-05-15	09:18:00	0
2009-05-15	09:19:00	0
2009-05-15	09:20:00	0
2009-05-15	09:21:00	0
2009-05-15	09:22:00	0
2009-05-15	09:23:00	0
2009-05-15	09:24:00	0
2009-05-15	09:25:00	0
2009-05-15	09:26:00	0
2009-05-15	09:27:00	0
2009-05-15	09:28:00	0
2009-05-15	09:29:00	0
2009-05-15	09:30:00	0
2009-05-15	09:31:00	0
2009-05-15	09:32:00	0
2009-05-15	09:33:00	0
2009-05-15	09:34:00	0
2009-05-15	09:35:00	0
2009-05-15	09:36:00	0
2009-05-15	09:37:00	0
2009-05-15	09:38:00	0
2009-05-15	09:39:00	0
2009-05-15	09:40:00	0
2009-05-15	09:41:00	0
2009-05-15	09:42:00	0
2009-05-15	09:43:00	0
2009-05-15	09:44:00	0
2009-05-15	09:45:00	0
2009-05-15	09:46:00	0
2009-05-15	09:47:00	0
2009-05-15	09:48:00	0
2009-05-15	09:49:00	0
2009-05-15	09:50:00	0
2009-05-15	09:51:00	0
2009-05-15	09:52:00	0
2009-05-15	09:53:00	0
2009-05-15	09:54:00	0
2009-05-15	09:55:00	0
2009-05-15	09:56:00	0
2009-05-15	09:57:00	0
2009-05-15	09:58:00	0
2009-05-15	09:59:00	0
2009-05-15	10:00:00	0
2009-05-15	10:01:00	0
2009-05-15	10:02:00	0
2009-05-15	10:03:00	0
2009-05-15	10:04:00	0
2009-05-15	10:05:00	0
2009-05-15	10:06:00	0
2009-05-15	10:07:00	0
2009-05-15	10:08:00	0
2009-05-15	10:09:00	0
2009-05-15	10:10:00	0
2009-05-15	10:11:00	0
2009-05-15	10:12:00	0
2009-05-15	10:13:00	0
2009-05-15	10:14:00	0
2009-05-15	10:15:00	0
2009-05-15	10:16:00	0
2009-05-15	10:17:00	0
2009-05-15	10:18:00	0
2009-05-15	10:19:00	0
2009-05-15	10:20:00	0
2009-05-15	10:21:00	0
2009-05-15	10:22:00	0
2009-05-15	10:23:00	0
2009-05-15	10:24:00	0
2009-05-15	10:25:00	0
2009-05-15	10:26:00	0
2009-05-15	10:27:00	0
2009-05-15	10:28:00	0
2009-05-15	10:29:00	0
2009-05-15	10:30:00	0
2009-05-15	10:31:00	0
2009-05-15	10:32:00	0
2009-05-15	10:33:00	0
2009-05-15	10:34:00	0
2009-05-15	10:35:00	0
2009-05-15	10:36:00	0
2009-05-15	10:37:00	0
2009-05-15	10:38:00	0
2009-05-15	10:39:00	0
2009-05-15	10:40:00	0
2009-05-15	10:41:00	0
2009-05-15	10:42:00	0
2009-05-15	10:43:00	0
2009-05-15	10:44:00	0
2009-05-15	10:45:00	0
2009-05-15	10:46:00	0
2009-05-15	10:47:00	0
2009-05-15	10:48:00	0
2009-05-15	10:49:00	0
2009-05-15	10:50:00	0
2009-05-15	10:51:00	0
2009-05-15	10:52:00	0
2009-05-15	10:53:00	0
2009-05-15	10:54:00	0
2009-05-15	10:55:00	0
2009-05-15	10:56:00	0
2009-05-15	10:57:00	0
2009-05-15	10:58:00	0
2009-05-15	10:59:00	0
2009-05-15	11:00:00	0
2009-05-15	11:01:00	0
2009-05-15	11:02:00	0
2009-05-15	11:03:00	0
2009-05-15	11:04:00	0
2009-05-15	11:05:00	0
2009-05-15	11:06:00	0
2009-05-15	11:07:00	0
2009-05-15	11:08:00	0
2009-05-15	11:09:00	0
2009-05-15	11:10:00	0
2009-05-15	11:11:00	0
2009-05-15	11:12:00	0
2009-05-15	11:13:00	0
2009-05-15	11:14:00	0
2009-05-15	11:15:00	0
2009-05-15	11:16:00	0
2009-05-15	11:17:00	0
2009-05-15	11:18:00	0
2009-05-15	11:19:00	0
2009-05-15	11:20:00	0
2009-05-15	11:21:00	0
2009-05-15	11:22:00	0
2009-05-15	11:23:00	0
2009-05-15	11:24:00	0
2009-05-15	11:25:00	0
2009-05-15	11:26:00	0
2009-05-15	11:27:00	0
2009-05-15	11:28:00	0
2009-05-15	11:29:00	0
2009-05-15	11:30:00	0
2009-05-15	11:31:00	0
2009-05-15	11:32:00	0
2009-05-15	11:33:00	0
2009-05-15	11:34:00	0
2009-05-15	11:35:00	0
2009-05-15	11:36:00	0
2009-05-15	11:37:00	0
2009-05-15	11:38:00	0
2009-05-15	11:39:00	0
2009-05-15	11:40:00	0
2009-05-15	11:41:00	0
2009-05-15	11:42:00	0
2009-05-15	11:43:00	0
2009-05-15	11:44:00	0
2009-05-15	11:45:00	0
2009-05-15	11:46:00	0
2009-05-15	11:47:00	0
2009-05-15	11:48:00	0
2009-05-15	11:49:00	0
2009-05-15	11:50:00	0
2009-05-15	11:51:00	0
2009-05-15	11:52:00	0
2009-05-15	11:53:00	0
2009-05-15	11:54:00	0
2009-05-15	11:55:00	0
2009-05-15	11:56:00	0
2009-05-15	11:57:00	0
2009-05-15	11:58:00	0
2009-05-15	11:59:00	0
2009-05-15	12:00:00	0
2009-05-15	12:01:00	0
2009-05-15	12:02:00	0
2009-05-15	12:03:00	0
2009-05-15	12:04:00	0
2009-05-15	12:05:00	0
2009-05-15	12:06:00	0
2009-05-15	12:07:00	0
2009-05-15	12:08:00	0
2009-05-15	12:09:00	0
2009-05-15	12:10:00	0
2009-05-15	12:11:00	0
2009-05-15	12:12:00	0
2009-05-15	12:13:00	0
2009-05-15	12:14:00	0
2009-05-15	12:15:00	0
2009-05-15	12:16:00	0
2009-05-15	12:17:00	0
2009-05-15	12:18:00	0
2009-05-15	12:19:00	0
2009-05-15	12:20:00	0
2009-05-15	12:21:00	0
2009-05-15	12:22:00	0
2009-05-15	12:23:00	0
2009-05-15	12:24:00	0
2009-05-15	12:25:00	0
2009-05-15	12:26:00	0
2009-05-15	12:27:00	0
2009-05-15	12:28:00	0
2009-05-15	12:29:00	0
2009-05-15	12:30:00	0
2009-05-15	12:31:00	0
2009-05-15	12:32:00	0
2009-05-15	12:33:00	0
2009-05-15	12:34:00	0
2009-05-15	12:35:00	0
2009-05-15	12:36:00	0
2009-05-15	12:37:00	0
2009-05-15	12:38:00	0
2009-05-15	12:39:00	0
2009-05-15	12:40:00	0
2009-05-15	12:41:00	0
2009-05-15	12:42:00	0
2009-05-15	12:43:00	0
2009-05-15	12:44:00	0
2009-05-15	12:45:00	0
2009-05-15	12:46:00	0
2009-05-15	12:47:00	0
2009-05-15	12:48:00	0
2009-05-15	12:49:00	0
2009-05-15	12:50:00	0
2009-05-15	12:51:00	0
2009-05-15	12:52:00	0
2009-05-15	12:53:00	0
2009-05-15	12:54:00	0
2009-05-15	12:55:00	0
2009-05-15	12:56:00	0
2009-05-15	12:57:00	0
2009-05-15	12:58:00	0
2009-05-15	12:59:00	0
2009-05-15	13:00:00	0
2009-05-15	13:01:00	0
2009-05-15	13:02:00	0
2009-05-15	13:03:00	0
2009-05-15	13:04:00	0
2009-05-15	13:05:00	0
2009-05-15	13:06:00	0
2009-05-15	13:07:00	0
2009-05-15	13:08:00	0
2009-05-15	13:09:00	0
2009-05-15	13:10:00	0
2009-05-15	13:11:00	0
2009-05-15	13:12:00	0
2009-05-15	13:13:00	0
2009-05-15	13:14:00	0
2009-05-15	13:15:00	0
2009-05-15	13:16:00	0
2009-05-15	13:17:00	0
2009-05-15	13:18:00	0
2009-05-15	13:19:00	0
2009-05-15	13:20:00	0
2009-05-15	13:21:00	0
2009-05-15	13:22:00	0
2009-05-15	13:23:00	0
2009-05-15	13:24:00	0
2009-05-15	13:25:00	0
2009-05-15	13:26:00	0
2009-05-15	13:27:00	0
2009-05-15	13:28:00	0
2009-05-15	13:29:00	0
2009-05-15	13:30:00	0
2009-05-15	13:31:00	0
2009-05-15	13:32:00	0
2009-05-15	13:33:00	0
2009-05-15	13:34:00	0
2009-05-15	13:35:00	0
2009-05-15	13:36:00	0
2009-05-15	13:37:00	0
2009-05-15	13:38:00	0
2009-05-15	13:39:00	0
2009-05-15	13:40:00	0
2009-05-15	13:41:00	0
2009-05-15	13:42:00	0
2009-05-15	13:43:00	0
2009-05-15	13:44:00	0
2009-05-15	13:45:00	0
2009-05-15	13:46:00	0
2009-05-15	13:47:00	0
2009-05-15	13:48:00	0
2009-05-15	13:49:00	0
2009-05-15	13:50:00	0
2009-05-15	13:51:00	0
2009-05-15	13:52:00	0
2009-05-15	13:53:00	0
2009-05-15	13:54:00	0
2009-05-15	13:55:00	0
2009-05-15	13:56:00	0
2009-05-15	13:57:00	0
2009-05-15	13:58:00	0
2009-05-15	13:59:00	0
2009-05-15	14:00:00	0
2009-05-15	14:01:00	0
2009-05-15	14:02:00	0
2009-05-15	14:03:00	0
2009-05-15	14:04:00	0
2009-05-15	14:05:00	0
2009-05-15	14:06:00	0
2009-05-15	14:07:00	0
2009-05-15	14:08:00	0
2009-05-15	14:09:00	0
2009-05-15	14:10:00	0
2009-05-15	14:11:00	0
2009-05-15	14:12:00	0
2009-05-15	14:13:00	0
2009-05-15	14:14:00	0
2009-05-15	14:15:00	0
2009-05-15	14:16:00	0
2009-05-15	14:17:00	0
2009-05-15	14:18:00	0
2009-05-15	14:19:00	0
2009-05-15	14:20:00	0
2009-05-15	14:21:00	0
2009-05-15	14:22:00	0
2009-05-15	14:23:00	0
2009-05-15	14:24:00	0
2009-05-15	14:25:00	0
2009-05-15	14:26:00	0
2009-05-15	14:27:00	0
2009-05-15	14:28:00	0
2009-05-15	14:29:00	0
2009-05-15	14:30:00	0
2009-05-15	14:31:00	0
2009-05-15	14:32:00	0
2009-05-15	14:33:00	0
2009-05-15	14:34:00	0
2009-05-15	14:35:00	0
2009-05-15	14:36:00	0
2009-05-15	14:37:00	0
2009-05-15	14:38:00	0
2009-05-15	14:39:00	0
2009-05-15	14:40:00	0
2009-05-15	14:41:00	0
2009-05-15	14:42:00	0
2009-05-15	14:43:00	0
2009-05-15	14:44:00	0
2009-05-15	14:45:00	0
2009-05-15	14:46:00	0
2009-05-15	14:47:00	0
2009-05-15	14:48:00	0
2009-05-15	14:49:00	0
2009-05-15	14:50:00	0
2009-05-15	14:51:00	0
2009-05-15	14:52:00	0
2009-05-15	14:53:00	0
2009-05-15	14:54:00	0
2009-05-15	14:55:00	0
2009-05-15	14:56:00	0
2009-05-15	14:57:00	0
2009-05-15	14:58:00	0
2009-05-15	14:59:00	0
2009-05-15	15:00:00	0
2009-05-15	15:01:00	0
2009-05-15	15:02:00	0
2009-05-15	15:03:00	0
2009-05-15	15:04:00	0
2009-05-15	15:05:00	0
2009-05-15	15:06:00	0
2009-05-15	15:07:00	0
2009-05-15	15:08:00	0
2009-05-15	15:09:00	0
2009-05-15	15:10:00	0
2009-05-15	15:11:00	0
2009-05-15	15:12:00	0
2009-05-15	15:13:00	0
2009-05-15	15:14:00	0
2009-05-15	15:15:00	0
2009-05-15	15:16:00	0
2009-05-15	15:17:00	0
2009-05-15	15:18:00	0
2009-05-15	15:19:00	0
2009-05-15	15:20:00	0
2009-05-15	15:21:00	0
2009-05-15	15:22:00	0
2009-05-15	15:23:00	0
2009-05-15	15:24:00	0
2009-05-15	15:25:00	0
2009-05-15	15:26:00	0
2009-05-15	15:27:00	0
2009-05-15	15:28:00	0
2009-05-15	15:29:00	0
2009-05-15	15:30:00	0
2009-05-15	15:31:00	0
2009-05-15	15:32:00	0
2009-05-15	15:33:00	0
2009-05-15	15:34:00	0
2009-05-15	15:35:00	0
2009-05-15	15:36:00	0
2009-05-15	15:37:00	0
2009-05-15	15:38:00	0
2009-05-15	15:39:00	0
2009-05-15	15:40:00	0
2009-05-15	15:41:00	0
2009-05-15	15:42:00	0
2009-05-15	15:43:00	0
2009-05-15	15:44:00	0
2009-05-15	15:45:00	0
2009-05-15	15:46:00	0
2009-05-15	15:47:00	0
2009-05-15	15:48:00	0
2009-05-15	15:49:00	0
2009-05-15	15:50:00	0
2009-05-15	15:51:00	0
2009-05-15	15:52:00	0
2009-05-15	15:53:00	0
2009-05-15	15:54:00	0
2009-05-15	15:55:00	0
2009-05-15	15:56:00	0
2009-05-15	15:57:00	0
2009-05-15	15:58:00	0
2009-05-15	15:59:00	0
2009-05-15	16:00:00	0
2009-05-15	16:01:00	0
2009-05-15	16:02:00	0
2009-05-15	16:03:00	0
2009-05-15	16:04:00	0
2009-05-15	16:05:00	0
2009-05-15	16:06:00	0
2009-05-15	16:07:00	0
2009-05-15	16:08:00	0
2009-05-15	16:09:00	0
2009-05-15	16:10:00	0
2009-05-15	16:11:00	0
2009-05-15	16:12:00	0
2009-05-15	16:13:00	0
2009-05-15	16:14:00	0
2009-05-15	16:15:00	0
2009-05-15	16:16:00	0
2009-05-15	16:17:00	0
2009-05-15	16:18:00	0
2009-05-15	16:19:00	0
2009-05-15	16:20:00	0
2009-05-15	16:21:00	0
2009-05-15	16:22:00	0
2009-05-15	16:23:00	0
2009-05-15	16:24:00	0
2009-05-15	16:25:00	0
2009-05-15	16:26:00	0
2009-05-15	16:27:00	0
2009-05-15	16:28:00	0
2009-05-15	16:29:00	0
2009-05-15	16:30:00	0
2009-05-15	16:31:00	0
2009-05-15	16:32:00	0
2009-05-15	16:33:00	0
2009-05-15	16:34:00	0
2009-05-15	16:35:00	0
2009-05-15	16:36:00	0
2009-05-15	16:37:00	0
2009-05-15	16:38:00	0
2009-05-15	16:39:00	0
2009-05-15	16:40:00	0
2009-05-15	16:41:00	0
2009-05-15	16:42:00	0
2009-05-15	16:43:00	0
2009-05-15	16:44:00	0
2009-05-15	16:45:00	0
2009-05-15	16:46:00	0
2009-05-15	16:47:00	0
2009-05-15	16:48:00	0
2009-05-15	16:49:00	0
2009-05-15	16:50:00	0
2009-05-15	16:51:00	0
2009-05-15	16:52:00	0
2009-05-15	16:53:00	0
2009-05-15	16:54:00	0
2009-05-15	16:55:00	0
2009-05-15	16:56:00	0
2009-05-15	16:57:00	0
2009-05-15	16:58:00	0
2009-05-15	16:59:00	0
2009-05-15	17:00:00	0
2009-05-15	17:01:00	0
2009-05-15	17:02:00	0
2009-05-15	17:03:00	0
2009-05-15	17:04:00	0
2009-05-15	17:05:00	0
2009-05-15	17:06:00	0
2009-05-15	17:07:00	0
2009-05-15	17:08:00	0
2009-05-15	17:09:00	0
2009-05-15	17:10:00	0
2009-05-15	17:11:00	0
2009-05-15	17:12:00	0
2009-05-15	17:13:00	0
2009-05-15	17:14:00	0
2009-05-15	17:15:00	0
2009-05-15	17:16:00	0
2009-05-15	17:17:00	0
2009-05-15	17:18:00	0
2009-05-15	17:19:00	0
2009-05-15	17:20:00	0
2009-05-15	17:21:00	0
2009-05-15	17:22:00	0
2009-05-15	17:23:00	0
2009-05-15	17:24:00	0
2009-05-15	17:25:00	0
2009-05-15	17:26:00	0
2009-05-15	17:27:00	0
2009-05-15	17:28:00	0
2009-05-15	17:29:00	0
2009-05-15	17:30:00	0
2009-05-15	17:31:00	0
2009-05-15	17:32:00	0
2009-05-15	17:33:00	0
2009-05-15	17:34:00	0
2009-05-15	17:35:00	0
2009-05-15	17:36:00	0
2009-05-15	17:37:00	0
2009-05-15	17:38:00	0
2009-05-15	17:39:00	0
2009-05-15	17:40:00	0
2009-05-15	17:41:00	0
2009-05-15	17:42:00	0
2009-05-15	17:43:00	0
2009-05-15	17:44:00	0
2009-05-15	17:45:00	0
2009-05-15	17:46:00	0
2009-05-15	17:47:00	0
2009-05-15	17:48:00	0
2009-05-15	17:49:00	0
2009-05-15	17:50:00	0
2009-05-15	17:51:00	0
2009-05-15	17:52:00	0
2009-05-15	17:53:00	0
2009-05-15	17:54:00	0
2009-05-15	17:55:00	0
2009-05-15	17:56:00	0
2009-05-15	17:57:00	0
2009-05-15	17:58:00	0
2009-05-15	17:59:00	0
2009-05-15	18:00:00	0	M
2009-05-15	18:01:00	0
2009-05-15	18:02:00	0
2009-05-15	18:03:00	0
2009-05-15	18:04:00	0
2009-05-15	18:05:00	14
2009-05-15	18:06:00	14
2009-05-15	18:07:00	0
2009-05-15	18:08:00	42
2009-05-15	18:09:00	0
2009-05-15	18:10:00	0
2009-05-15	18:11:00	0
2009-05-15	18:12:00	0
2009-05-15	18:13:00	0
2009-05-15	18:14:00	0
2009-05-15	18:15:00	111
2009-05-15	18:16:00	14
2009-05-15	18:17:00	0
2009-05-15	18:18:00	0
2009-05-15	18:19:00	0
2009-05-15	18:20:00	0
2009-05-15	18:21:00	0
2009-05-15	18:22:00	14
2009-05-15	18:23:00	70
2009-05-15	18:24:00	42
2009-05-15	18:25:00	0
2009-05-15	18:26:00	0
2009-05-15	18:27:00	0
2009-05-15	18:28:00	0
2009-05-15	18:29:00	0
2009-05-15	18:30:00	0
2009-05-15	18:31:00	0
2009-05-15	18:32:00	0
2009-05-15	18:33:00	14
2009-05-15	18:34:00	0
2009-05-15	18:35:00	0
2009-05-15	18:36:00	0
2009-05-15	18:37:00	0
2009-05-15	18:38:00	0
2009-05-15	18:39:00	0
2009-05-15	18:40:00	0
2009-05-15	18:41:00	0
2009-05-15	18:42:00	0
2009-05-15	18:43:00	0
2009-05-15	18:44:00	0
2009-05-15	18:45:00	0
2009-05-15	18:46:00	0
2009-05-15	18:47:00	0
2009-05-15	18:48:00	0
2009-05-15	18:49:00	0
2009-05-15	18:50:00	28
2009-05-15	18:51:00	14
2009-05-15	18:52:00	0
2009-05-15	18:53:00	0
2009-05-15	18:54:00	0
2009-05-15	18:55:00	28
2009-05-15	18:56:00	0
2009-05-15	18:57:00	0
2009-05-15	18:58:00	0
2009-05-15	18:59:00	0
2009-05-15	19:00:00	0
2009-05-15	19:01:00	0
2009-05-15	19:02:00	0
2009-05-15	19:03:00	0
2009-05-15	19:04:00	0
2009-05-15	19:05:00	0
2009-05-15	19:06:00	97
2009-05-15	19:07:00	14
2009-05-15	19:08:00	0
2009-05-15	19:09:00	0
2009-05-15	19:10:00	0
2009-05-15	19:11:00	0
2009-05-15	19:12:00	0
2009-05-15	19:13:00	14
2009-05-15	19:14:00	14
2009-05-15	19:15:00	0
2009-05-15	19:16:00	14
2009-05-15	19:17:00	0
2009-05-15	19:18:00	0
2009-05-15	19:19:00	0
2009-05-15	19:20:00	0
2009-05-15	19:21:00	0
2009-05-15	19:22:00	0
2009-05-15	19:23:00	0
2009-05-15	19:24:00	0
2009-05-15	19:25:00	14
2009-05-15	19:26:00	0
2009-05-15	19:27:00	0
2009-05-15	19:28:00	0
2009-05-15	19:29:00	0
2009-05-15	19:30:00	0
2009-05-15	19:31:00	0
2009-05-15	19:32:00	0
2009-05-15	19:33:00	0
2009-05-15	19:34:00	0
2009-05-15	19:35:00	0
2009-05-15	19:36:00	0
2009-05-15	19:37:00	0
2009-05-15	19:38:00	0
2009-05-15	19:39:00	0
2009-05-15	19:40:00	28
2009-05-15	19:41:00	14
2009-05-15	19:42:00	0
2009-05-15	19:43:00	42
2009-05-15	19:44:00	0
2009-05-15	19:45:00	0
2009-05-15	19:46:00	462
2009-05-15	19:47:00	348
2009-05-15	19:48:00	111
2009-05-15	19:49:00	231
2009-05-15	19:50:00	365
2009-05-15	19:51:00	28
2009-05-15	19:52:00	0
2009-05-15	19:53:00	0
2009-05-15	19:54:00	0
2009-05-15	19:55:00	14
2009-05-15	19:56:00	0
2009-05-15	19:57:00	0
2009-05-15	19:58:00	0
2009-05-15	19:59:00	0
2009-05-15	20:00:00	28
2009-05-15	20:01:00	0
2009-05-15	20:02:00	0
2009-05-15	20:03:00	42
2009-05-15	20:04:00	0
2009-05-15	20:05:00	14
2009-05-15	20:06:00	298
2009-05-15	20:07:00	56
2009-05-15	20:08:00	298
2009-05-15	20:09:00	56
2009-05-15	20:10:00	56
2009-05-15	20:11:00	56
2009-05-15	20:12:00	248
2009-05-15	20:13:00	0
2009-05-15	20:14:00	56
2009-05-15	20:15:00	28
2009-05-15	20:16:00	42
2009-05-15	20:17:00	0
2009-05-15	20:18:00	231
2009-05-15	20:19:00	651
2009-05-15	20:20:00	1338
2009-05-15	20:21:00	893
2009-05-15	20:22:00	198
2009-05-15	20:23:00	442
2009-05-15	20:24:00	384
2009-05-15	20:25:00	139
2009-05-15	20:26:00	111
2009-05-15	20:27:00	0
2009-05-15	20:28:00	139
2009-05-15	20:29:00	70
2009-05-15	20:30:00	0
2009-05-15	20:31:00	0
2009-05-15	20:32:00	0
2009-05-15	20:33:00	0
2009-05-15	20:34:00	0
2009-05-15	20:35:00	0
2009-05-15	20:36:00	0
2009-05-15	20:37:00	0
2009-05-15	20:38:00	0
2009-05-15	20:39:00	0
2009-05-15	20:40:00	0
2009-05-15	20:41:00	0
2009-05-15	20:42:00	0
2009-05-15	20:43:00	214
2009-05-15	20:44:00	181
2009-05-15	20:45:00	264
2009-05-15	20:46:00	0
2009-05-15	20:47:00	673
2009-05-15	20:48:00	462
2009-05-15	20:49:00	442
2009-05-15	20:50:00	314
2009-05-15	20:51:00	139
2009-05-15	20:52:00	111
2009-05-15	20:53:00	56
2009-05-15	20:54:00	70
2009-05-15	20:55:00	14
2009-05-15	20:56:00	0
2009-05-15	20:57:00	0
2009-05-15	20:58:00	0
2009-05-15	20:59:00	0
2009-05-15	21:00:00	0
2009-05-15	21:01:00	0
2009-05-15	21:02:00	0
2009-05-15	21:03:00	0
2009-05-15	21:04:00	70
2009-05-15	21:05:00	651
2009-05-15	21:06:00	42
2009-05-15	21:07:00	0
2009-05-15	21:08:00	0
2009-05-15	21:09:00	462
2009-05-15	21:10:00	843
2009-05-15	21:11:00	125
2009-05-15	21:12:00	14
2009-05-15	21:13:00	14
2009-05-15	21:14:00	70
2009-05-15	21:15:00	0
2009-05-15	21:16:00	28
2009-05-15	21:17:00	14
2009-05-15	21:18:00	97
2009-05-15	21:19:00	0
2009-05-15	21:20:00	0
2009-05-15	21:21:00	0
2009-05-15	21:22:00	0
2009-05-15	21:23:00	0
2009-05-15	21:24:00	0
2009-05-15	21:25:00	0
2009-05-15	21:26:00	0
2009-05-15	21:27:00	0
2009-05-15	21:28:00	0
2009-05-15	21:29:00	0
2009-05-15	21:30:00	0
2009-05-15	21:31:00	0
2009-05-15	21:32:00	0
2009-05-15	21:33:00	0
2009-05-15	21:34:00	0
2009-05-15	21:35:00	0
2009-05-15	21:36:00	28
2009-05-15	21:37:00	56
2009-05-15	21:38:00	0
2009-05-15	21:39:00	42
2009-05-15	21:40:00	768
2009-05-15	21:41:00	629
2009-05-15	21:42:00	14
2009-05-15	21:43:00	181
2009-05-15	21:44:00	28
2009-05-15	21:45:00	111
2009-05-15	21:46:00	0
2009-05-15	21:47:00	0
2009-05-15	21:48:00	1241
2009-05-15	21:49:00	281
2009-05-15	21:50:00	384
2009-05-15	21:51:00	793
2009-05-15	21:52:00	818
2009-05-15	21:53:00	743
2009-05-15	21:54:00	83
2009-05-15	21:55:00	83
2009-05-15	21:56:00	562
2009-05-15	21:57:00	56
2009-05-15	21:58:00	83
2009-05-15	21:59:00	97
2009-05-15	22:00:00	42
2009-05-15	22:01:00	70
2009-05-15	22:02:00	0
2009-05-15	22:03:00	14
2009-05-15	22:04:00	673
2009-05-15	22:05:00	743
2009-05-15	22:06:00	153
2009-05-15	22:07:00	28
2009-05-15	22:08:00	0
2009-05-15	22:09:00	0
2009-05-15	22:10:00	0
2009-05-15	22:11:00	0
2009-05-15	22:12:00	0
2009-05-15	22:13:00	0
2009-05-15	22:14:00	0
2009-05-15	22:15:00	0
2009-05-15	22:16:00	0
2009-05-15	22:17:00	0
2009-05-15	22:18:00	0
2009-05-15	22:19:00	125
2009-05-15	22:20:00	28
2009-05-15	22:21:00	0
2009-05-15	22:22:00	0
2009-05-15	22:23:00	14
2009-05-15	22:24:00	0
2009-05-15	22:25:00	0
2009-05-15	22:26:00	0
2009-05-15	22:27:00	0
2009-05-15	22:28:00	0
2009-05-15	22:29:00	0
2009-05-15	22:30:00	0
2009-05-15	22:31:00	0
2009-05-15	22:32:00	0
2009-05-15	22:33:00	0
2009-05-15	22:34:00	0
2009-05-15	22:35:00	0
2009-05-15	22:36:00	0
2009-05-15	22:37:00	0
2009-05-15	22:38:00	0
2009-05-15	22:39:00	0
2009-05-15	22:40:00	0
2009-05-15	22:41:00	0
2009-05-15	22:42:00	0
2009-05-15	22:43:00	0
2009-05-15	22:44:00	0
2009-05-15	22:45:00	0
2009-05-15	22:46:00	0
2009-05-15	22:47:00	0
2009-05-15	22:48:00	0
2009-05-15	22:49:00	0
2009-05-15	22:50:00	0
2009-05-15	22:51:00	0
2009-05-15	22:52:00	0
2009-05-15	22:53:00	0
2009-05-15	22:54:00	0
2009-05-15	22:55:00	0
2009-05-15	22:56:00	0
2009-05-15	22:57:00	0
2009-05-15	22:58:00	0
2009-05-15	22:59:00	0
2009-05-15	23:00:00	0
2009-05-15	23:01:00	0
2009-05-15	23:02:00	0
2009-05-15	23:03:00	0
2009-05-15	23:04:00	0
2009-05-15	23:05:00	0
2009-05-15	23:06:00	0
2009-05-15	23:07:00	0
2009-05-15	23:08:00	0
2009-05-15	23:09:00	0
2009-05-15	23:10:00	0
2009-05-15	23:11:00	0
2009-05-15	23:12:00	0
2009-05-15	23:13:00	0
2009-05-15	23:14:00	0
2009-05-15	23:15:00	0
2009-05-15	23:16:00	0
2009-05-15	23:17:00	0
2009-05-15	23:18:00	0
2009-05-15	23:19:00	0
2009-05-15	23:20:00	0
2009-05-15	23:21:00	0
2009-05-15	23:22:00	0
2009-05-15	23:23:00	0
2009-05-15	23:24:00	0
2009-05-15	23:25:00	0
2009-05-15	23:26:00	0
2009-05-15	23:27:00	0
2009-05-15	23:28:00	0
2009-05-15	23:29:00	0
2009-05-15	23:30:00	0
2009-05-15	23:31:00	0
2009-05-15	23:32:00	0
2009-05-15	23:33:00	0
2009-05-15	23:34:00	0
2009-05-15	23:35:00	0
2009-05-15	23:36:00	0
2009-05-15	23:37:00	0
2009-05-15	23:38:00	0
2009-05-15	23:39:00	0
2009-05-15	23:40:00	0
2009-05-15	23:41:00	0
2009-05-15	23:42:00	0
2009-05-15	23:43:00	0
2009-05-15	23:44:00	0
2009-05-15	23:45:00	0
2009-05-15	23:46:00	0
2009-05-15	23:47:00	0
2009-05-15	23:48:00	0
2009-05-15	23:49:00	0
2009-05-15	23:50:00	0
2009-05-15	23:51:00	0
2009-05-15	23:52:00	0
2009-05-15	23:53:00	0
2009-05-15	23:54:00	0
2009-05-15	23:55:00	0
2009-05-15	23:56:00	0
2009-05-15	23:57:00	0
2009-05-15	23:58:00	0
2009-05-15	23:59:00	0
2009-05-16	00:00:00	0
2009-05-16	00:01:00	28
2009-05-16	00:02:00	0
2009-05-16	00:03:00	0
2009-05-16	00:04:00	0
2009-05-16	00:05:00	0
2009-05-16	00:06:00	0
2009-05-16	00:07:00	0
2009-05-16	00:08:00	0
2009-05-16	00:09:00	0
2009-05-16	00:10:00	0
2009-05-16	00:11:00	0
2009-05-16	00:12:00	181
2009-05-16	00:13:00	28
2009-05-16	00:14:00	28
2009-05-16	00:15:00	0
2009-05-16	00:16:00	0
2009-05-16	00:17:00	0
2009-05-16	00:18:00	0
2009-05-16	00:19:00	0
2009-05-16	00:20:00	0
2009-05-16	00:21:00	0
2009-05-16	00:22:00	0
2009-05-16	00:23:00	0
2009-05-16	00:24:00	0
2009-05-16	00:25:00	153
2009-05-16	00:26:00	281
2009-05-16	00:27:00	0
2009-05-16	00:28:00	28
2009-05-16	00:29:00	0
2009-05-16	00:30:00	0
2009-05-16	00:31:00	0
2009-05-16	00:32:00	0
2009-05-16	00:33:00	0
2009-05-16	00:34:00	0
2009-05-16	00:35:00	0
2009-05-16	00:36:00	0
2009-05-16	00:37:00	0
2009-05-16	00:38:00	0
2009-05-16	00:39:00	0
2009-05-16	00:40:00	0
2009-05-16	00:41:00	0
2009-05-16	00:42:00	0
2009-05-16	00:43:00	0
2009-05-16	00:44:00	0
2009-05-16	00:45:00	0
2009-05-16	00:46:00	0
2009-05-16	00:47:00	0
2009-05-16	00:48:00	0
2009-05-16	00:49:00	0
2009-05-16	00:50:00	0
2009-05-16	00:51:00	0
2009-05-16	00:52:00	0
2009-05-16	00:53:00	0
2009-05-16	00:54:00	14
2009-05-16	00:55:00	0
2009-05-16	00:56:00	0
2009-05-16	00:57:00	0
2009-05-16	00:58:00	0
2009-05-16	00:59:00	0
2009-05-16	01:00:00	0
2009-05-16	01:01:00	0
2009-05-16	01:02:00	0
2009-05-16	01:03:00	0
2009-05-16	01:04:00	0
2009-05-16	01:05:00	0
2009-05-16	01:06:00	0
2009-05-16	01:07:00	0
2009-05-16	01:08:00	0
2009-05-16	01:09:00	0
2009-05-16	01:10:00	0
2009-05-16	01:11:00	28
2009-05-16	01:12:00	0
2009-05-16	01:13:00	0
2009-05-16	01:14:00	0
2009-05-16	01:15:00	14
2009-05-16	01:16:00	14
2009-05-16	01:17:00	0
2009-05-16	01:18:00	0
2009-05-16	01:19:00	0
2009-05-16	01:20:00	0
2009-05-16	01:21:00	0
2009-05-16	01:22:00	0
2009-05-16	01:23:00	0
2009-05-16	01:24:00	0
2009-05-16	01:25:00	0
2009-05-16	01:26:00	0
2009-05-16	01:27:00	0
2009-05-16	01:28:00	0
2009-05-16	01:29:00	0
2009-05-16	01:30:00	0
2009-05-16	01:31:00	0
2009-05-16	01:32:00	0
2009-05-16	01:33:00	0
2009-05-16	01:34:00	0
2009-05-16	01:35:00	14
2009-05-16	01:36:00	0
2009-05-16	01:37:00	125
2009-05-16	01:38:00	167
2009-05-16	01:39:00	0
2009-05-16	01:40:00	0
2009-05-16	01:41:00	0
2009-05-16	01:42:00	0
2009-05-16	01:43:00	0
2009-05-16	01:44:00	0
2009-05-16	01:45:00	0
2009-05-16	01:46:00	0
2009-05-16	01:47:00	14
2009-05-16	01:48:00	0
2009-05-16	01:49:00	0
2009-05-16	01:50:00	0
2009-05-16	01:51:00	0
2009-05-16	01:52:00	0
2009-05-16	01:53:00	0
2009-05-16	01:54:00	0
2009-05-16	01:55:00	0
2009-05-16	01:56:00	0
2009-05-16	01:57:00	0
2009-05-16	01:58:00	0
2009-05-16	01:59:00	0
2009-05-16	02:00:00	0
2009-05-16	02:01:00	0
2009-05-16	02:02:00	0
2009-05-16	02:03:00	97
2009-05-16	02:04:00	42
2009-05-16	02:05:00	0
2009-05-16	02:06:00	0
2009-05-16	02:07:00	0
2009-05-16	02:08:00	0
2009-05-16	02:09:00	0
2009-05-16	02:10:00	0
2009-05-16	02:11:00	0
2009-05-16	02:12:00	0
2009-05-16	02:13:00	0
2009-05-16	02:14:00	0
2009-05-16	02:15:00	0
2009-05-16	02:16:00	0
2009-05-16	02:17:00	0
2009-05-16	02:18:00	0
2009-05-16	02:19:00	0
2009-05-16	02:20:00	1119
2009-05-16	02:21:00	298
2009-05-16	02:22:00	42
2009-05-16	02:23:00	0
2009-05-16	02:24:00	0
2009-05-16	02:25:00	0
2009-05-16	02:26:00	0
2009-05-16	02:27:00	0
2009-05-16	02:28:00	14
2009-05-16	02:29:00	0
2009-05-16	02:30:00	0
2009-05-16	02:31:00	0
2009-05-16	02:32:00	0
2009-05-16	02:33:00	0
2009-05-16	02:34:00	0
2009-05-16	02:35:00	0
2009-05-16	02:36:00	0
2009-05-16	02:37:00	0
2009-05-16	02:38:00	0
2009-05-16	02:39:00	0
2009-05-16	02:40:00	0
2009-05-16	02:41:00	0
2009-05-16	02:42:00	0
2009-05-16	02:43:00	0
2009-05-16	02:44:00	0
2009-05-16	02:45:00	0
2009-05-16	02:46:00	0
2009-05-16	02:47:00	0
2009-05-16	02:48:00	0
2009-05-16	02:49:00	0
2009-05-16	02:50:00	0
2009-05-16	02:51:00	0
2009-05-16	02:52:00	0
2009-05-16	02:53:00	0
2009-05-16	02:54:00	0
2009-05-16	02:55:00	0
2009-05-16	02:56:00	0
2009-05-16	02:57:00	0
2009-05-16	02:58:00	0
2009-05-16	02:59:00	0
2009-05-16	03:00:00	0
2009-05-16	03:01:00	0
2009-05-16	03:02:00	42
2009-05-16	03:03:00	0
2009-05-16	03:04:00	0
2009-05-16	03:05:00	0
2009-05-16	03:06:00	0
2009-05-16	03:07:00	0
2009-05-16	03:08:00	0
2009-05-16	03:09:00	0
2009-05-16	03:10:00	0
2009-05-16	03:11:00	0
2009-05-16	03:12:00	0
2009-05-16	03:13:00	0
2009-05-16	03:14:00	0
2009-05-16	03:15:00	0
2009-05-16	03:16:00	0
2009-05-16	03:17:00	0
2009-05-16	03:18:00	0
2009-05-16	03:19:00	0
2009-05-16	03:20:00	0
2009-05-16	03:21:00	0
2009-05-16	03:22:00	0
2009-05-16	03:23:00	0
2009-05-16	03:24:00	0
2009-05-16	03:25:00	0
2009-05-16	03:26:00	0
2009-05-16	03:27:00	0
2009-05-16	03:28:00	0
2009-05-16	03:29:00	0
2009-05-16	03:30:00	0
2009-05-16	03:31:00	0
2009-05-16	03:32:00	0
2009-05-16	03:33:00	0
2009-05-16	03:34:00	0
2009-05-16	03:35:00	0
2009-05-16	03:36:00	0
2009-05-16	03:37:00	0
2009-05-16	03:38:00	0
2009-05-16	03:39:00	0
2009-05-16	03:40:00	0
2009-05-16	03:41:00	0
2009-05-16	03:42:00	0
2009-05-16	03:43:00	0
2009-05-16	03:44:00	0
2009-05-16	03:45:00	0
2009-05-16	03:46:00	0
2009-05-16	03:47:00	0
2009-05-16	03:48:00	0
2009-05-16	03:49:00	0
2009-05-16	03:50:00	0
2009-05-16	03:51:00	42
2009-05-16	03:52:00	0
2009-05-16	03:53:00	0
2009-05-16	03:54:00	0
2009-05-16	03:55:00	0
2009-05-16	03:56:00	0
2009-05-16	03:57:00	0
2009-05-16	03:58:00	0
2009-05-16	03:59:00	0
2009-05-16	04:00:00	0
2009-05-16	04:01:00	0
2009-05-16	04:02:00	0
2009-05-16	04:03:00	0
2009-05-16	04:04:00	0
2009-05-16	04:05:00	0
2009-05-16	04:06:00	0
2009-05-16	04:07:00	0
2009-05-16	04:08:00	0
2009-05-16	04:09:00	0
2009-05-16	04:10:00	0
2009-05-16	04:11:00	0
2009-05-16	04:12:00	0
2009-05-16	04:13:00	0
2009-05-16	04:14:00	0
2009-05-16	04:15:00	0
2009-05-16	04:16:00	0
2009-05-16	04:17:00	0
2009-05-16	04:18:00	0
2009-05-16	04:19:00	0
2009-05-16	04:20:00	0
2009-05-16	04:21:00	0
2009-05-16	04:22:00	0
2009-05-16	04:23:00	14
2009-05-16	04:24:00	42
2009-05-16	04:25:00	0
2009-05-16	04:26:00	0
2009-05-16	04:27:00	0
2009-05-16	04:28:00	0
2009-05-16	04:29:00	0
2009-05-16	04:30:00	0
2009-05-16	04:31:00	0
2009-05-16	04:32:00	0
2009-05-16	04:33:00	0
2009-05-16	04:34:00	0
2009-05-16	04:35:00	0
2009-05-16	04:36:00	0
2009-05-16	04:37:00	0
2009-05-16	04:38:00	0
2009-05-16	04:39:00	0
2009-05-16	04:40:00	0
2009-05-16	04:41:00	0
2009-05-16	04:42:00	0
2009-05-16	04:43:00	0
2009-05-16	04:44:00	0
2009-05-16	04:45:00	0
2009-05-16	04:46:00	0
2009-05-16	04:47:00	0
2009-05-16	04:48:00	0
2009-05-16	04:49:00	0
2009-05-16	04:50:00	0
2009-05-16	04:51:00	0
2009-05-16	04:52:00	0
2009-05-16	04:53:00	0
2009-05-16	04:54:00	0
2009-05-16	04:55:00	0
2009-05-16	04:56:00	0
2009-05-16	04:57:00	0
2009-05-16	04:58:00	0
2009-05-16	04:59:00	0
2009-05-16	05:00:00	0
2009-05-16	05:01:00	0
2009-05-16	05:02:00	0
2009-05-16	05:03:00	0
2009-05-16	05:04:00	0
2009-05-16	05:05:00	0
2009-05-16	05:06:00	0
2009-05-16	05:07:00	0
2009-05-16	05:08:00	0
2009-05-16	05:09:00	0
2009-05-16	05:10:00	0
2009-05-16	05:11:00	0
2009-05-16	05:12:00	0
2009-05-16	05:13:00	0
2009-05-16	05:14:00	0
2009-05-16	05:15:00	0
2009-05-16	05:16:00	0
2009-05-16	05:17:00	0
2009-05-16	05:18:00	0
2009-05-16	05:19:00	0
2009-05-16	05:20:00	0
2009-05-16	05:21:00	14
2009-05-16	05:22:00	0
2009-05-16	05:23:00	0
2009-05-16	05:24:00	0
2009-05-16	05:25:00	0
2009-05-16	05:26:00	0
2009-05-16	05:27:00	0
2009-05-16	05:28:00	0
2009-05-16	05:29:00	0
2009-05-16	05:30:00	0
2009-05-16	05:31:00	0
2009-05-16	05:32:00	0
2009-05-16	05:33:00	0
2009-05-16	05:34:00	0
2009-05-16	05:35:00	0
2009-05-16	05:36:00	0
2009-05-16	05:37:00	0
2009-05-16	05:38:00	0
2009-05-16	05:39:00	0
2009-05-16	05:40:00	0
2009-05-16	05:41:00	0
2009-05-16	05:42:00	0
2009-05-16	05:43:00	0
2009-05-16	05:44:00	0
2009-05-16	05:45:00	0
2009-05-16	05:46:00	0
2009-05-16	05:47:00	0
2009-05-16	05:48:00	0
2009-05-16	05:49:00	0
2009-05-16	05:50:00	0
2009-05-16	05:51:00	0
2009-05-16	05:52:00	0
2009-05-16	05:53:00	0
2009-05-16	05:54:00	0
2009-05-16	05:55:00	0
2009-05-16	05:56:00	0
2009-05-16	05:57:00	0
2009-05-16	05:58:00	0
2009-05-16	05:59:00	0
2009-05-16	06:00:00	0
2009-05-16	06:01:00	83
2009-05-16	06:02:00	0
2009-05-16	06:03:00	0
2009-05-16	06:04:00	0
2009-05-16	06:05:00	0
2009-05-16	06:06:00	0
2009-05-16	06:07:00	0
2009-05-16	06:08:00	0
2009-05-16	06:09:00	0
2009-05-16	06:10:00	0
2009-05-16	06:11:00	0
2009-05-16	06:12:00	0
2009-05-16	06:13:00	0
2009-05-16	06:14:00	0
2009-05-16	06:15:00	0
2009-05-16	06:16:00	0
2009-05-16	06:17:00	0
2009-05-16	06:18:00	0
2009-05-16	06:19:00	0
2009-05-16	06:20:00	0
2009-05-16	06:21:00	0
2009-05-16	06:22:00	0
2009-05-16	06:23:00	0
2009-05-16	06:24:00	0
2009-05-16	06:25:00	0
2009-05-16	06:26:00	0
2009-05-16	06:27:00	0
2009-05-16	06:28:00	0
2009-05-16	06:29:00	0
2009-05-16	06:30:00	0
2009-05-16	06:31:00	0
2009-05-16	06:32:00	0
2009-05-16	06:33:00	0
2009-05-16	06:34:00	0
2009-05-16	06:35:00	0
2009-05-16	06:36:00	0
2009-05-16	06:37:00	0
2009-05-16	06:38:00	0
2009-05-16	06:39:00	0
2009-05-16	06:40:00	0
2009-05-16	06:41:00	0
2009-05-16	06:42:00	0
2009-05-16	06:43:00	0
2009-05-16	06:44:00	0
2009-05-16	06:45:00	0
2009-05-16	06:46:00	0
2009-05-16	06:47:00	0
2009-05-16	06:48:00	0
2009-05-16	06:49:00	0
2009-05-16	06:50:00	0
2009-05-16	06:51:00	0
2009-05-16	06:52:00	0
2009-05-16	06:53:00	0
2009-05-16	06:54:00	0
2009-05-16	06:55:00	0
2009-05-16	06:56:00	0
2009-05-16	06:57:00	0
2009-05-16	06:58:00	0
2009-05-16	06:59:00	70
2009-05-16	07:00:00	818
2009-05-16	07:01:00	868
2009-05-16	07:02:00	1119
2009-05-16	07:03:00	384
2009-05-16	07:04:00	97
2009-05-16	07:05:00	0
2009-05-16	07:06:00	0
2009-05-16	07:07:00	0
2009-05-16	07:08:00	0
2009-05-16	07:09:00	0
2009-05-16	07:10:00	0
2009-05-16	07:11:00	0
2009-05-16	07:12:00	0
2009-05-16	07:13:00	0
2009-05-16	07:14:00	14
2009-05-16	07:15:00	14
2009-05-16	07:16:00	0
2009-05-16	07:17:00	0
2009-05-16	07:18:00	0
2009-05-16	07:19:00	0
2009-05-16	07:20:00	0
2009-05-16	07:21:00	0
2009-05-16	07:22:00	0
2009-05-16	07:23:00	0
2009-05-16	07:24:00	0
2009-05-16	07:25:00	0
2009-05-16	07:26:00	0
2009-05-16	07:27:00	0
2009-05-16	07:28:00	0
2009-05-16	07:29:00	231
2009-05-16	07:30:00	28
2009-05-16	07:31:00	70
2009-05-16	07:32:00	0
2009-05-16	07:33:00	181
2009-05-16	07:34:00	423
2009-05-16	07:35:00	83
2009-05-16	07:36:00	520
2009-05-16	07:37:00	0
2009-05-16	07:38:00	264
2009-05-16	07:39:00	14
2009-05-16	07:40:00	348
2009-05-16	07:41:00	97
2009-05-16	07:42:00	0
2009-05-16	07:43:00	0
2009-05-16	07:44:00	0
2009-05-16	07:45:00	0
2009-05-16	07:46:00	331
2009-05-16	07:47:00	167
2009-05-16	07:48:00	248
2009-05-16	07:49:00	0
2009-05-16	07:50:00	0
2009-05-16	07:51:00	214
2009-05-16	07:52:00	167
2009-05-16	07:53:00	198
2009-05-16	07:54:00	14
2009-05-16	07:55:00	0
2009-05-16	07:56:00	0
2009-05-16	07:57:00	0
2009-05-16	07:58:00	0
2009-05-16	07:59:00	0
2009-05-16	08:00:00	214
2009-05-16	08:01:00	28
2009-05-16	08:02:00	281
2009-05-16	08:03:00	2070
2009-05-16	08:04:00	1547
2009-05-16	08:05:00	2349
2009-05-16	08:06:00	298
2009-05-16	08:07:00	607
2009-05-16	08:08:00	97
2009-05-16	08:09:00	231
2009-05-16	08:10:00	768
2009-05-16	08:11:00	264
2009-05-16	08:12:00	214
2009-05-16	08:13:00	70
2009-05-16	08:14:00	70
2009-05-16	08:15:00	139
2009-05-16	08:16:00	181
2009-05-16	08:17:00	125
2009-05-16	08:18:00	153
2009-05-16	08:19:00	97
2009-05-16	08:20:00	139
2009-05-16	08:21:00	97
2009-05-16	08:22:00	331
2009-05-16	08:23:00	2877
2009-05-16	08:24:00	6364
2009-05-16	08:25:00	4455
2009-05-16	08:26:00	4374
2009-05-16	08:27:00	6364
2009-05-16	08:28:00	4063
2009-05-16	08:29:00	3053
2009-05-16	08:30:00	3236
2009-05-16	08:31:00	743
2009-05-16	08:32:00	83
2009-05-16	08:33:00	42
2009-05-16	08:34:00	42
2009-05-16	08:35:00	28
2009-05-16	08:36:00	83
2009-05-16	08:37:00	42
2009-05-16	08:38:00	56
2009-05-16	08:39:00	167
2009-05-16	08:40:00	56
2009-05-16	08:41:00	97
2009-05-16	08:42:00	83
2009-05-16	08:43:00	70
2009-05-16	08:44:00	111
2009-05-16	08:45:00	125
2009-05-16	08:46:00	97
2009-05-16	08:47:00	56
2009-05-16	08:48:00	70
2009-05-16	08:49:00	97
2009-05-16	08:50:00	520
2009-05-16	08:51:00	264
2009-05-16	08:52:00	365
2009-05-16	08:53:00	4622
2009-05-16	08:54:00	2605
2009-05-16	08:55:00	3770
2009-05-16	08:56:00	4216
2009-05-16	08:57:00	4138
2009-05-16	08:58:00	2499
2009-05-16	08:59:00	1005
2009-05-16	09:00:00	843
2009-05-16	09:01:00	181
2009-05-16	09:02:00	70
2009-05-16	09:03:00	56
2009-05-16	09:04:00	0
2009-05-16	09:05:00	56
2009-05-16	09:06:00	28
2009-05-16	09:07:00	28
2009-05-16	09:08:00	70
[truncated: 19,611 more rows]

## Sheet: 5.29.09
Actogram, Copy Raw Data, All Days
Identity:	Natasha
Filename:	E:\Active Research Files\meloxicam titre canine\cases\natasha\Natasha 5.29.09.AWC
Gender:	F
Age:	8
Height:	91.4 cm	36.0 in
Weight:	29.5 kg	65.0 lbs
Start Date:	29-May-2009 (Fri)
Start Time:	18:00:00
Interval:	1.00 mins
Date Stamp:	Time Stamp:	Activity Data:	Marker Press:
2009-05-29	00:00:00	0
2009-05-29	00:01:00	0
2009-05-29	00:02:00	0
2009-05-29	00:03:00	0
2009-05-29	00:04:00	0
2009-05-29	00:05:00	0
2009-05-29	00:06:00	0
2009-05-29	00:07:00	0
2009-05-29	00:08:00	0
2009-05-29	00:09:00	0
2009-05-29	00:10:00	0
2009-05-29	00:11:00	0
2009-05-29	00:12:00	0
2009-05-29	00:13:00	0
2009-05-29	00:14:00	0
2009-05-29	00:15:00	0
2009-05-29	00:16:00	0
2009-05-29	00:17:00	0
2009-05-29	00:18:00	0
2009-05-29	00:19:00	0
2009-05-29	00:20:00	0
2009-05-29	00:21:00	0
2009-05-29	00:22:00	0
2009-05-29	00:23:00	0
2009-05-29	00:24:00	0
2009-05-29	00:25:00	0
2009-05-29	00:26:00	0
2009-05-29	00:27:00	0
2009-05-29	00:28:00	0
2009-05-29	00:29:00	0
2009-05-29	00:30:00	0
2009-05-29	00:31:00	0
2009-05-29	00:32:00	0
2009-05-29	00:33:00	0
2009-05-29	00:34:00	0
2009-05-29	00:35:00	0
2009-05-29	00:36:00	0
2009-05-29	00:37:00	0
2009-05-29	00:38:00	0
2009-05-29	00:39:00	0
2009-05-29	00:40:00	0
2009-05-29	00:41:00	0
2009-05-29	00:42:00	0
2009-05-29	00:43:00	0
2009-05-29	00:44:00	0
2009-05-29	00:45:00	0
2009-05-29	00:46:00	0
2009-05-29	00:47:00	0
2009-05-29	00:48:00	0
2009-05-29	00:49:00	0
2009-05-29	00:50:00	0
2009-05-29	00:51:00	0
2009-05-29	00:52:00	0
2009-05-29	00:53:00	0
2009-05-29	00:54:00	0
2009-05-29	00:55:00	0
2009-05-29	00:56:00	0
2009-05-29	00:57:00	0
2009-05-29	00:58:00	0
2009-05-29	00:59:00	0
2009-05-29	01:00:00	0
2009-05-29	01:01:00	0
2009-05-29	01:02:00	0
2009-05-29	01:03:00	0
2009-05-29	01:04:00	0
2009-05-29	01:05:00	0
2009-05-29	01:06:00	0
2009-05-29	01:07:00	0
2009-05-29	01:08:00	0
2009-05-29	01:09:00	0
2009-05-29	01:10:00	0
2009-05-29	01:11:00	0
2009-05-29	01:12:00	0
2009-05-29	01:13:00	0
2009-05-29	01:14:00	0
2009-05-29	01:15:00	0
2009-05-29	01:16:00	0
2009-05-29	01:17:00	0
2009-05-29	01:18:00	0
2009-05-29	01:19:00	0
2009-05-29	01:20:00	0
2009-05-29	01:21:00	0
2009-05-29	01:22:00	0
2009-05-29	01:23:00	0
2009-05-29	01:24:00	0
2009-05-29	01:25:00	0
2009-05-29	01:26:00	0
2009-05-29	01:27:00	0
2009-05-29	01:28:00	0
2009-05-29	01:29:00	0
2009-05-29	01:30:00	0
2009-05-29	01:31:00	0
2009-05-29	01:32:00	0
2009-05-29	01:33:00	0
2009-05-29	01:34:00	0
2009-05-29	01:35:00	0
2009-05-29	01:36:00	0
2009-05-29	01:37:00	0
2009-05-29	01:38:00	0
2009-05-29	01:39:00	0
2009-05-29	01:40:00	0
2009-05-29	01:41:00	0
2009-05-29	01:42:00	0
2009-05-29	01:43:00	0
2009-05-29	01:44:00	0
2009-05-29	01:45:00	0
2009-05-29	01:46:00	0
2009-05-29	01:47:00	0
2009-05-29	01:48:00	0
2009-05-29	01:49:00	0
2009-05-29	01:50:00	0
2009-05-29	01:51:00	0
2009-05-29	01:52:00	0
2009-05-29	01:53:00	0
2009-05-29	01:54:00	0
2009-05-29	01:55:00	0
2009-05-29	01:56:00	0
2009-05-29	01:57:00	0
2009-05-29	01:58:00	0
2009-05-29	01:59:00	0
2009-05-29	02:00:00	0
2009-05-29	02:01:00	0
2009-05-29	02:02:00	0
2009-05-29	02:03:00	0
2009-05-29	02:04:00	0
2009-05-29	02:05:00	0
2009-05-29	02:06:00	0
2009-05-29	02:07:00	0
2009-05-29	02:08:00	0
2009-05-29	02:09:00	0
2009-05-29	02:10:00	0
2009-05-29	02:11:00	0
2009-05-29	02:12:00	0
2009-05-29	02:13:00	0
2009-05-29	02:14:00	0
2009-05-29	02:15:00	0
2009-05-29	02:16:00	0
2009-05-29	02:17:00	0
2009-05-29	02:18:00	0
2009-05-29	02:19:00	0
2009-05-29	02:20:00	0
2009-05-29	02:21:00	0
2009-05-29	02:22:00	0
2009-05-29	02:23:00	0
2009-05-29	02:24:00	0
2009-05-29	02:25:00	0
2009-05-29	02:26:00	0
2009-05-29	02:27:00	0
2009-05-29	02:28:00	0
2009-05-29	02:29:00	0
2009-05-29	02:30:00	0
2009-05-29	02:31:00	0
2009-05-29	02:32:00	0
2009-05-29	02:33:00	0
2009-05-29	02:34:00	0
2009-05-29	02:35:00	0
2009-05-29	02:36:00	0
2009-05-29	02:37:00	0
2009-05-29	02:38:00	0
2009-05-29	02:39:00	0
2009-05-29	02:40:00	0
2009-05-29	02:41:00	0
2009-05-29	02:42:00	0
2009-05-29	02:43:00	0
2009-05-29	02:44:00	0
2009-05-29	02:45:00	0
2009-05-29	02:46:00	0
2009-05-29	02:47:00	0
2009-05-29	02:48:00	0
2009-05-29	02:49:00	0
2009-05-29	02:50:00	0
2009-05-29	02:51:00	0
2009-05-29	02:52:00	0
2009-05-29	02:53:00	0
2009-05-29	02:54:00	0
2009-05-29	02:55:00	0
2009-05-29	02:56:00	0
2009-05-29	02:57:00	0
2009-05-29	02:58:00	0
2009-05-29	02:59:00	0
2009-05-29	03:00:00	0
2009-05-29	03:01:00	0
2009-05-29	03:02:00	0
2009-05-29	03:03:00	0
2009-05-29	03:04:00	0
2009-05-29	03:05:00	0
2009-05-29	03:06:00	0
2009-05-29	03:07:00	0
2009-05-29	03:08:00	0
2009-05-29	03:09:00	0
2009-05-29	03:10:00	0
2009-05-29	03:11:00	0
2009-05-29	03:12:00	0
2009-05-29	03:13:00	0
2009-05-29	03:14:00	0
2009-05-29	03:15:00	0
2009-05-29	03:16:00	0
2009-05-29	03:17:00	0
2009-05-29	03:18:00	0
2009-05-29	03:19:00	0
2009-05-29	03:20:00	0
2009-05-29	03:21:00	0
2009-05-29	03:22:00	0
2009-05-29	03:23:00	0
2009-05-29	03:24:00	0
2009-05-29	03:25:00	0
2009-05-29	03:26:00	0
2009-05-29	03:27:00	0
2009-05-29	03:28:00	0
2009-05-29	03:29:00	0
2009-05-29	03:30:00	0
2009-05-29	03:31:00	0
2009-05-29	03:32:00	0
2009-05-29	03:33:00	0
2009-05-29	03:34:00	0
2009-05-29	03:35:00	0
2009-05-29	03:36:00	0
2009-05-29	03:37:00	0
2009-05-29	03:38:00	0
2009-05-29	03:39:00	0
2009-05-29	03:40:00	0
2009-05-29	03:41:00	0
2009-05-29	03:42:00	0
2009-05-29	03:43:00	0
2009-05-29	03:44:00	0
2009-05-29	03:45:00	0
2009-05-29	03:46:00	0
2009-05-29	03:47:00	0
2009-05-29	03:48:00	0
2009-05-29	03:49:00	0
2009-05-29	03:50:00	0
2009-05-29	03:51:00	0
2009-05-29	03:52:00	0
2009-05-29	03:53:00	0
2009-05-29	03:54:00	0
2009-05-29	03:55:00	0
2009-05-29	03:56:00	0
2009-05-29	03:57:00	0
2009-05-29	03:58:00	0
2009-05-29	03:59:00	0
2009-05-29	04:00:00	0
2009-05-29	04:01:00	0
2009-05-29	04:02:00	0
2009-05-29	04:03:00	0
2009-05-29	04:04:00	0
2009-05-29	04:05:00	0
2009-05-29	04:06:00	0
2009-05-29	04:07:00	0
2009-05-29	04:08:00	0
2009-05-29	04:09:00	0
2009-05-29	04:10:00	0
2009-05-29	04:11:00	0
2009-05-29	04:12:00	0
2009-05-29	04:13:00	0
2009-05-29	04:14:00	0
2009-05-29	04:15:00	0
2009-05-29	04:16:00	0
2009-05-29	04:17:00	0
2009-05-29	04:18:00	0
2009-05-29	04:19:00	0
2009-05-29	04:20:00	0
2009-05-29	04:21:00	0
2009-05-29	04:22:00	0
2009-05-29	04:23:00	0
2009-05-29	04:24:00	0
2009-05-29	04:25:00	0
2009-05-29	04:26:00	0
2009-05-29	04:27:00	0
2009-05-29	04:28:00	0
2009-05-29	04:29:00	0
2009-05-29	04:30:00	0
2009-05-29	04:31:00	0
2009-05-29	04:32:00	0
2009-05-29	04:33:00	0
2009-05-29	04:34:00	0
2009-05-29	04:35:00	0
2009-05-29	04:36:00	0
2009-05-29	04:37:00	0
2009-05-29	04:38:00	0
2009-05-29	04:39:00	0
2009-05-29	04:40:00	0
2009-05-29	04:41:00	0
2009-05-29	04:42:00	0
2009-05-29	04:43:00	0
2009-05-29	04:44:00	0
2009-05-29	04:45:00	0
2009-05-29	04:46:00	0
2009-05-29	04:47:00	0
2009-05-29	04:48:00	0
2009-05-29	04:49:00	0
2009-05-29	04:50:00	0
2009-05-29	04:51:00	0
2009-05-29	04:52:00	0
2009-05-29	04:53:00	0
2009-05-29	04:54:00	0
2009-05-29	04:55:00	0
2009-05-29	04:56:00	0
2009-05-29	04:57:00	0
2009-05-29	04:58:00	0
2009-05-29	04:59:00	0
2009-05-29	05:00:00	0
2009-05-29	05:01:00	0
2009-05-29	05:02:00	0
2009-05-29	05:03:00	0
2009-05-29	05:04:00	0
2009-05-29	05:05:00	0
2009-05-29	05:06:00	0
2009-05-29	05:07:00	0
2009-05-29	05:08:00	0
2009-05-29	05:09:00	0
2009-05-29	05:10:00	0
2009-05-29	05:11:00	0
2009-05-29	05:12:00	0
2009-05-29	05:13:00	0
2009-05-29	05:14:00	0
2009-05-29	05:15:00	0
2009-05-29	05:16:00	0
2009-05-29	05:17:00	0
2009-05-29	05:18:00	0
2009-05-29	05:19:00	0
2009-05-29	05:20:00	0
2009-05-29	05:21:00	0
2009-05-29	05:22:00	0
2009-05-29	05:23:00	0
2009-05-29	05:24:00	0
2009-05-29	05:25:00	0
2009-05-29	05:26:00	0
2009-05-29	05:27:00	0
2009-05-29	05:28:00	0
2009-05-29	05:29:00	0
2009-05-29	05:30:00	0
2009-05-29	05:31:00	0
2009-05-29	05:32:00	0
2009-05-29	05:33:00	0
2009-05-29	05:34:00	0
2009-05-29	05:35:00	0
2009-05-29	05:36:00	0
2009-05-29	05:37:00	0
2009-05-29	05:38:00	0
2009-05-29	05:39:00	0
2009-05-29	05:40:00	0
2009-05-29	05:41:00	0
2009-05-29	05:42:00	0
2009-05-29	05:43:00	0
2009-05-29	05:44:00	0
2009-05-29	05:45:00	0
2009-05-29	05:46:00	0
2009-05-29	05:47:00	0
2009-05-29	05:48:00	0
2009-05-29	05:49:00	0
2009-05-29	05:50:00	0
2009-05-29	05:51:00	0
2009-05-29	05:52:00	0
2009-05-29	05:53:00	0
2009-05-29	05:54:00	0
2009-05-29	05:55:00	0
2009-05-29	05:56:00	0
2009-05-29	05:57:00	0
2009-05-29	05:58:00	0
2009-05-29	05:59:00	0
2009-05-29	06:00:00	0
2009-05-29	06:01:00	0
2009-05-29	06:02:00	0
2009-05-29	06:03:00	0
2009-05-29	06:04:00	0
2009-05-29	06:05:00	0
2009-05-29	06:06:00	0
2009-05-29	06:07:00	0
2009-05-29	06:08:00	0
2009-05-29	06:09:00	0
2009-05-29	06:10:00	0
2009-05-29	06:11:00	0
2009-05-29	06:12:00	0
2009-05-29	06:13:00	0
2009-05-29	06:14:00	0
2009-05-29	06:15:00	0
2009-05-29	06:16:00	0
2009-05-29	06:17:00	0
2009-05-29	06:18:00	0
2009-05-29	06:19:00	0
2009-05-29	06:20:00	0
2009-05-29	06:21:00	0
2009-05-29	06:22:00	0
2009-05-29	06:23:00	0
2009-05-29	06:24:00	0
2009-05-29	06:25:00	0
2009-05-29	06:26:00	0
2009-05-29	06:27:00	0
2009-05-29	06:28:00	0
2009-05-29	06:29:00	0
2009-05-29	06:30:00	0
2009-05-29	06:31:00	0
2009-05-29	06:32:00	0
2009-05-29	06:33:00	0
2009-05-29	06:34:00	0
2009-05-29	06:35:00	0
2009-05-29	06:36:00	0
2009-05-29	06:37:00	0
2009-05-29	06:38:00	0
2009-05-29	06:39:00	0
2009-05-29	06:40:00	0
2009-05-29	06:41:00	0
2009-05-29	06:42:00	0
2009-05-29	06:43:00	0
2009-05-29	06:44:00	0
2009-05-29	06:45:00	0
2009-05-29	06:46:00	0
2009-05-29	06:47:00	0
2009-05-29	06:48:00	0
2009-05-29	06:49:00	0
2009-05-29	06:50:00	0
2009-05-29	06:51:00	0
2009-05-29	06:52:00	0
2009-05-29	06:53:00	0
2009-05-29	06:54:00	0
2009-05-29	06:55:00	0
2009-05-29	06:56:00	0
2009-05-29	06:57:00	0
2009-05-29	06:58:00	0
2009-05-29	06:59:00	0
2009-05-29	07:00:00	0
2009-05-29	07:01:00	0
2009-05-29	07:02:00	0
2009-05-29	07:03:00	0
2009-05-29	07:04:00	0
2009-05-29	07:05:00	0
2009-05-29	07:06:00	0
2009-05-29	07:07:00	0
2009-05-29	07:08:00	0
2009-05-29	07:09:00	0
2009-05-29	07:10:00	0
2009-05-29	07:11:00	0
2009-05-29	07:12:00	0
2009-05-29	07:13:00	0
2009-05-29	07:14:00	0
2009-05-29	07:15:00	0
2009-05-29	07:16:00	0
2009-05-29	07:17:00	0
2009-05-29	07:18:00	0
2009-05-29	07:19:00	0
2009-05-29	07:20:00	0
2009-05-29	07:21:00	0
2009-05-29	07:22:00	0
2009-05-29	07:23:00	0
2009-05-29	07:24:00	0
2009-05-29	07:25:00	0
2009-05-29	07:26:00	0
2009-05-29	07:27:00	0
2009-05-29	07:28:00	0
2009-05-29	07:29:00	0
2009-05-29	07:30:00	0
2009-05-29	07:31:00	0
2009-05-29	07:32:00	0
2009-05-29	07:33:00	0
2009-05-29	07:34:00	0
2009-05-29	07:35:00	0
2009-05-29	07:36:00	0
2009-05-29	07:37:00	0
2009-05-29	07:38:00	0
2009-05-29	07:39:00	0
2009-05-29	07:40:00	0
2009-05-29	07:41:00	0
2009-05-29	07:42:00	0
2009-05-29	07:43:00	0
2009-05-29	07:44:00	0
2009-05-29	07:45:00	0
2009-05-29	07:46:00	0
2009-05-29	07:47:00	0
2009-05-29	07:48:00	0
2009-05-29	07:49:00	0
2009-05-29	07:50:00	0
2009-05-29	07:51:00	0
2009-05-29	07:52:00	0
2009-05-29	07:53:00	0
2009-05-29	07:54:00	0
2009-05-29	07:55:00	0
2009-05-29	07:56:00	0
2009-05-29	07:57:00	0
2009-05-29	07:58:00	0
2009-05-29	07:59:00	0
2009-05-29	08:00:00	0
2009-05-29	08:01:00	0
2009-05-29	08:02:00	0
2009-05-29	08:03:00	0
2009-05-29	08:04:00	0
2009-05-29	08:05:00	0
2009-05-29	08:06:00	0
2009-05-29	08:07:00	0
2009-05-29	08:08:00	0
2009-05-29	08:09:00	0
2009-05-29	08:10:00	0
2009-05-29	08:11:00	0
2009-05-29	08:12:00	0
2009-05-29	08:13:00	0
2009-05-29	08:14:00	0
2009-05-29	08:15:00	0
2009-05-29	08:16:00	0
2009-05-29	08:17:00	0
2009-05-29	08:18:00	0
2009-05-29	08:19:00	0
2009-05-29	08:20:00	0
2009-05-29	08:21:00	0
2009-05-29	08:22:00	0
2009-05-29	08:23:00	0
2009-05-29	08:24:00	0
2009-05-29	08:25:00	0
2009-05-29	08:26:00	0
2009-05-29	08:27:00	0
2009-05-29	08:28:00	0
2009-05-29	08:29:00	0
2009-05-29	08:30:00	0
2009-05-29	08:31:00	0
2009-05-29	08:32:00	0
2009-05-29	08:33:00	0
2009-05-29	08:34:00	0
2009-05-29	08:35:00	0
2009-05-29	08:36:00	0
2009-05-29	08:37:00	0
2009-05-29	08:38:00	0
2009-05-29	08:39:00	0
2009-05-29	08:40:00	0
2009-05-29	08:41:00	0
2009-05-29	08:42:00	0
2009-05-29	08:43:00	0
2009-05-29	08:44:00	0
2009-05-29	08:45:00	0
2009-05-29	08:46:00	0
2009-05-29	08:47:00	0
2009-05-29	08:48:00	0
2009-05-29	08:49:00	0
2009-05-29	08:50:00	0
2009-05-29	08:51:00	0
2009-05-29	08:52:00	0
2009-05-29	08:53:00	0
2009-05-29	08:54:00	0
2009-05-29	08:55:00	0
2009-05-29	08:56:00	0
2009-05-29	08:57:00	0
2009-05-29	08:58:00	0
2009-05-29	08:59:00	0
2009-05-29	09:00:00	0
2009-05-29	09:01:00	0
2009-05-29	09:02:00	0
2009-05-29	09:03:00	0
2009-05-29	09:04:00	0
2009-05-29	09:05:00	0
2009-05-29	09:06:00	0
2009-05-29	09:07:00	0
2009-05-29	09:08:00	0
2009-05-29	09:09:00	0
2009-05-29	09:10:00	0
2009-05-29	09:11:00	0
2009-05-29	09:12:00	0
2009-05-29	09:13:00	0
2009-05-29	09:14:00	0
2009-05-29	09:15:00	0
2009-05-29	09:16:00	0
2009-05-29	09:17:00	0
2009-05-29	09:18:00	0
2009-05-29	09:19:00	0
2009-05-29	09:20:00	0
2009-05-29	09:21:00	0
2009-05-29	09:22:00	0
2009-05-29	09:23:00	0
2009-05-29	09:24:00	0
2009-05-29	09:25:00	0
2009-05-29	09:26:00	0
2009-05-29	09:27:00	0
2009-05-29	09:28:00	0
2009-05-29	09:29:00	0
2009-05-29	09:30:00	0
2009-05-29	09:31:00	0
2009-05-29	09:32:00	0
2009-05-29	09:33:00	0
2009-05-29	09:34:00	0
2009-05-29	09:35:00	0
2009-05-29	09:36:00	0
2009-05-29	09:37:00	0
2009-05-29	09:38:00	0
2009-05-29	09:39:00	0
2009-05-29	09:40:00	0
2009-05-29	09:41:00	0
2009-05-29	09:42:00	0
2009-05-29	09:43:00	0
2009-05-29	09:44:00	0
2009-05-29	09:45:00	0
2009-05-29	09:46:00	0
2009-05-29	09:47:00	0
2009-05-29	09:48:00	0
2009-05-29	09:49:00	0
2009-05-29	09:50:00	0
2009-05-29	09:51:00	0
2009-05-29	09:52:00	0
2009-05-29	09:53:00	0
2009-05-29	09:54:00	0
2009-05-29	09:55:00	0
2009-05-29	09:56:00	0
2009-05-29	09:57:00	0
2009-05-29	09:58:00	0
2009-05-29	09:59:00	0
2009-05-29	10:00:00	0
2009-05-29	10:01:00	0
2009-05-29	10:02:00	0
2009-05-29	10:03:00	0
2009-05-29	10:04:00	0
2009-05-29	10:05:00	0
2009-05-29	10:06:00	0
2009-05-29	10:07:00	0
2009-05-29	10:08:00	0
2009-05-29	10:09:00	0
2009-05-29	10:10:00	0
2009-05-29	10:11:00	0
2009-05-29	10:12:00	0
2009-05-29	10:13:00	0
2009-05-29	10:14:00	0
2009-05-29	10:15:00	0
2009-05-29	10:16:00	0
2009-05-29	10:17:00	0
2009-05-29	10:18:00	0
2009-05-29	10:19:00	0
2009-05-29	10:20:00	0
2009-05-29	10:21:00	0
2009-05-29	10:22:00	0
2009-05-29	10:23:00	0
2009-05-29	10:24:00	0
2009-05-29	10:25:00	0
2009-05-29	10:26:00	0
2009-05-29	10:27:00	0
2009-05-29	10:28:00	0
2009-05-29	10:29:00	0
2009-05-29	10:30:00	0
2009-05-29	10:31:00	0
2009-05-29	10:32:00	0
2009-05-29	10:33:00	0
2009-05-29	10:34:00	0
2009-05-29	10:35:00	0
2009-05-29	10:36:00	0
2009-05-29	10:37:00	0
2009-05-29	10:38:00	0
2009-05-29	10:39:00	0
2009-05-29	10:40:00	0
2009-05-29	10:41:00	0
2009-05-29	10:42:00	0
2009-05-29	10:43:00	0
2009-05-29	10:44:00	0
2009-05-29	10:45:00	0
2009-05-29	10:46:00	0
2009-05-29	10:47:00	0
2009-05-29	10:48:00	0
2009-05-29	10:49:00	0
2009-05-29	10:50:00	0
2009-05-29	10:51:00	0
2009-05-29	10:52:00	0
2009-05-29	10:53:00	0
2009-05-29	10:54:00	0
2009-05-29	10:55:00	0
2009-05-29	10:56:00	0
2009-05-29	10:57:00	0
2009-05-29	10:58:00	0
2009-05-29	10:59:00	0
2009-05-29	11:00:00	0
2009-05-29	11:01:00	0
2009-05-29	11:02:00	0
2009-05-29	11:03:00	0
2009-05-29	11:04:00	0
2009-05-29	11:05:00	0
2009-05-29	11:06:00	0
2009-05-29	11:07:00	0
2009-05-29	11:08:00	0
2009-05-29	11:09:00	0
2009-05-29	11:10:00	0
2009-05-29	11:11:00	0
2009-05-29	11:12:00	0
2009-05-29	11:13:00	0
2009-05-29	11:14:00	0
2009-05-29	11:15:00	0
2009-05-29	11:16:00	0
2009-05-29	11:17:00	0
2009-05-29	11:18:00	0
2009-05-29	11:19:00	0
2009-05-29	11:20:00	0
2009-05-29	11:21:00	0
2009-05-29	11:22:00	0
2009-05-29	11:23:00	0
2009-05-29	11:24:00	0
2009-05-29	11:25:00	0
2009-05-29	11:26:00	0
2009-05-29	11:27:00	0
2009-05-29	11:28:00	0
2009-05-29	11:29:00	0
2009-05-29	11:30:00	0
2009-05-29	11:31:00	0
2009-05-29	11:32:00	0
2009-05-29	11:33:00	0
2009-05-29	11:34:00	0
2009-05-29	11:35:00	0
2009-05-29	11:36:00	0
2009-05-29	11:37:00	0
2009-05-29	11:38:00	0
2009-05-29	11:39:00	0
2009-05-29	11:40:00	0
2009-05-29	11:41:00	0
2009-05-29	11:42:00	0
2009-05-29	11:43:00	0
2009-05-29	11:44:00	0
2009-05-29	11:45:00	0
2009-05-29	11:46:00	0
2009-05-29	11:47:00	0
2009-05-29	11:48:00	0
2009-05-29	11:49:00	0
2009-05-29	11:50:00	0
2009-05-29	11:51:00	0
2009-05-29	11:52:00	0
2009-05-29	11:53:00	0
2009-05-29	11:54:00	0
2009-05-29	11:55:00	0
2009-05-29	11:56:00	0
2009-05-29	11:57:00	0
2009-05-29	11:58:00	0
2009-05-29	11:59:00	0
2009-05-29	12:00:00	0
2009-05-29	12:01:00	0
2009-05-29	12:02:00	0
2009-05-29	12:03:00	0
2009-05-29	12:04:00	0
2009-05-29	12:05:00	0
2009-05-29	12:06:00	0
2009-05-29	12:07:00	0
2009-05-29	12:08:00	0
2009-05-29	12:09:00	0
2009-05-29	12:10:00	0
2009-05-29	12:11:00	0
2009-05-29	12:12:00	0
2009-05-29	12:13:00	0
2009-05-29	12:14:00	0
2009-05-29	12:15:00	0
2009-05-29	12:16:00	0
2009-05-29	12:17:00	0
2009-05-29	12:18:00	0
2009-05-29	12:19:00	0
2009-05-29	12:20:00	0
2009-05-29	12:21:00	0
2009-05-29	12:22:00	0
2009-05-29	12:23:00	0
2009-05-29	12:24:00	0
2009-05-29	12:25:00	0
2009-05-29	12:26:00	0
2009-05-29	12:27:00	0
2009-05-29	12:28:00	0
2009-05-29	12:29:00	0
2009-05-29	12:30:00	0
2009-05-29	12:31:00	0
2009-05-29	12:32:00	0
2009-05-29	12:33:00	0
2009-05-29	12:34:00	0
2009-05-29	12:35:00	0
2009-05-29	12:36:00	0
2009-05-29	12:37:00	0
2009-05-29	12:38:00	0
2009-05-29	12:39:00	0
2009-05-29	12:40:00	0
2009-05-29	12:41:00	0
2009-05-29	12:42:00	0
2009-05-29	12:43:00	0
2009-05-29	12:44:00	0
2009-05-29	12:45:00	0
2009-05-29	12:46:00	0
2009-05-29	12:47:00	0
2009-05-29	12:48:00	0
2009-05-29	12:49:00	0
2009-05-29	12:50:00	0
2009-05-29	12:51:00	0
2009-05-29	12:52:00	0
2009-05-29	12:53:00	0
2009-05-29	12:54:00	0
2009-05-29	12:55:00	0
2009-05-29	12:56:00	0
2009-05-29	12:57:00	0
2009-05-29	12:58:00	0
2009-05-29	12:59:00	0
2009-05-29	13:00:00	0
2009-05-29	13:01:00	0
2009-05-29	13:02:00	0
2009-05-29	13:03:00	0
2009-05-29	13:04:00	0
2009-05-29	13:05:00	0
2009-05-29	13:06:00	0
2009-05-29	13:07:00	0
2009-05-29	13:08:00	0
2009-05-29	13:09:00	0
2009-05-29	13:10:00	0
2009-05-29	13:11:00	0
2009-05-29	13:12:00	0
2009-05-29	13:13:00	0
2009-05-29	13:14:00	0
2009-05-29	13:15:00	0
2009-05-29	13:16:00	0
2009-05-29	13:17:00	0
2009-05-29	13:18:00	0
2009-05-29	13:19:00	0
2009-05-29	13:20:00	0
2009-05-29	13:21:00	0
2009-05-29	13:22:00	0
2009-05-29	13:23:00	0
2009-05-29	13:24:00	0
2009-05-29	13:25:00	0
2009-05-29	13:26:00	0
2009-05-29	13:27:00	0
2009-05-29	13:28:00	0
2009-05-29	13:29:00	0
2009-05-29	13:30:00	0
2009-05-29	13:31:00	0
2009-05-29	13:32:00	0
2009-05-29	13:33:00	0
2009-05-29	13:34:00	0
2009-05-29	13:35:00	0
2009-05-29	13:36:00	0
2009-05-29	13:37:00	0
2009-05-29	13:38:00	0
2009-05-29	13:39:00	0
2009-05-29	13:40:00	0
2009-05-29	13:41:00	0
2009-05-29	13:42:00	0
2009-05-29	13:43:00	0
2009-05-29	13:44:00	0
2009-05-29	13:45:00	0
2009-05-29	13:46:00	0
2009-05-29	13:47:00	0
2009-05-29	13:48:00	0
2009-05-29	13:49:00	0
2009-05-29	13:50:00	0
2009-05-29	13:51:00	0
2009-05-29	13:52:00	0
2009-05-29	13:53:00	0
2009-05-29	13:54:00	0
2009-05-29	13:55:00	0
2009-05-29	13:56:00	0
2009-05-29	13:57:00	0
2009-05-29	13:58:00	0
2009-05-29	13:59:00	0
2009-05-29	14:00:00	0
2009-05-29	14:01:00	0
2009-05-29	14:02:00	0
2009-05-29	14:03:00	0
2009-05-29	14:04:00	0
2009-05-29	14:05:00	0
2009-05-29	14:06:00	0
2009-05-29	14:07:00	0
2009-05-29	14:08:00	0
2009-05-29	14:09:00	0
2009-05-29	14:10:00	0
2009-05-29	14:11:00	0
2009-05-29	14:12:00	0
2009-05-29	14:13:00	0
2009-05-29	14:14:00	0
2009-05-29	14:15:00	0
2009-05-29	14:16:00	0
2009-05-29	14:17:00	0
2009-05-29	14:18:00	0
2009-05-29	14:19:00	0
2009-05-29	14:20:00	0
2009-05-29	14:21:00	0
2009-05-29	14:22:00	0
2009-05-29	14:23:00	0
2009-05-29	14:24:00	0
2009-05-29	14:25:00	0
2009-05-29	14:26:00	0
2009-05-29	14:27:00	0
2009-05-29	14:28:00	0
2009-05-29	14:29:00	0
2009-05-29	14:30:00	0
2009-05-29	14:31:00	0
2009-05-29	14:32:00	0
2009-05-29	14:33:00	0
2009-05-29	14:34:00	0
2009-05-29	14:35:00	0
2009-05-29	14:36:00	0
2009-05-29	14:37:00	0
2009-05-29	14:38:00	0
2009-05-29	14:39:00	0
2009-05-29	14:40:00	0
2009-05-29	14:41:00	0
2009-05-29	14:42:00	0
2009-05-29	14:43:00	0
2009-05-29	14:44:00	0
2009-05-29	14:45:00	0
2009-05-29	14:46:00	0
2009-05-29	14:47:00	0
2009-05-29	14:48:00	0
2009-05-29	14:49:00	0
2009-05-29	14:50:00	0
2009-05-29	14:51:00	0
2009-05-29	14:52:00	0
2009-05-29	14:53:00	0
2009-05-29	14:54:00	0
2009-05-29	14:55:00	0
2009-05-29	14:56:00	0
2009-05-29	14:57:00	0
2009-05-29	14:58:00	0
2009-05-29	14:59:00	0
2009-05-29	15:00:00	0
2009-05-29	15:01:00	0
2009-05-29	15:02:00	0
2009-05-29	15:03:00	0
2009-05-29	15:04:00	0
2009-05-29	15:05:00	0
2009-05-29	15:06:00	0
2009-05-29	15:07:00	0
2009-05-29	15:08:00	0
2009-05-29	15:09:00	0
2009-05-29	15:10:00	0
2009-05-29	15:11:00	0
2009-05-29	15:12:00	0
2009-05-29	15:13:00	0
2009-05-29	15:14:00	0
2009-05-29	15:15:00	0
2009-05-29	15:16:00	0
2009-05-29	15:17:00	0
2009-05-29	15:18:00	0
2009-05-29	15:19:00	0
2009-05-29	15:20:00	0
2009-05-29	15:21:00	0
2009-05-29	15:22:00	0
2009-05-29	15:23:00	0
2009-05-29	15:24:00	0
2009-05-29	15:25:00	0
2009-05-29	15:26:00	0
2009-05-29	15:27:00	0
2009-05-29	15:28:00	0
2009-05-29	15:29:00	0
2009-05-29	15:30:00	0
2009-05-29	15:31:00	0
2009-05-29	15:32:00	0
2009-05-29	15:33:00	0
2009-05-29	15:34:00	0
2009-05-29	15:35:00	0
2009-05-29	15:36:00	0
2009-05-29	15:37:00	0
2009-05-29	15:38:00	0
2009-05-29	15:39:00	0
2009-05-29	15:40:00	0
2009-05-29	15:41:00	0
2009-05-29	15:42:00	0
2009-05-29	15:43:00	0
2009-05-29	15:44:00	0
2009-05-29	15:45:00	0
2009-05-29	15:46:00	0
2009-05-29	15:47:00	0
2009-05-29	15:48:00	0
2009-05-29	15:49:00	0
2009-05-29	15:50:00	0
2009-05-29	15:51:00	0
2009-05-29	15:52:00	0
2009-05-29	15:53:00	0
2009-05-29	15:54:00	0
2009-05-29	15:55:00	0
2009-05-29	15:56:00	0
2009-05-29	15:57:00	0
2009-05-29	15:58:00	0
2009-05-29	15:59:00	0
2009-05-29	16:00:00	0
2009-05-29	16:01:00	0
2009-05-29	16:02:00	0
2009-05-29	16:03:00	0
2009-05-29	16:04:00	0
2009-05-29	16:05:00	0
2009-05-29	16:06:00	0
2009-05-29	16:07:00	0
2009-05-29	16:08:00	0
2009-05-29	16:09:00	0
2009-05-29	16:10:00	0
2009-05-29	16:11:00	0
2009-05-29	16:12:00	0
2009-05-29	16:13:00	0
2009-05-29	16:14:00	0
2009-05-29	16:15:00	0
2009-05-29	16:16:00	0
2009-05-29	16:17:00	0
2009-05-29	16:18:00	0
2009-05-29	16:19:00	0
2009-05-29	16:20:00	0
2009-05-29	16:21:00	0
2009-05-29	16:22:00	0
2009-05-29	16:23:00	0
2009-05-29	16:24:00	0
2009-05-29	16:25:00	0
2009-05-29	16:26:00	0
2009-05-29	16:27:00	0
2009-05-29	16:28:00	0
2009-05-29	16:29:00	0
2009-05-29	16:30:00	0
2009-05-29	16:31:00	0
2009-05-29	16:32:00	0
2009-05-29	16:33:00	0
2009-05-29	16:34:00	0
2009-05-29	16:35:00	0
2009-05-29	16:36:00	0
2009-05-29	16:37:00	0
2009-05-29	16:38:00	0
2009-05-29	16:39:00	0
2009-05-29	16:40:00	0
2009-05-29	16:41:00	0
2009-05-29	16:42:00	0
2009-05-29	16:43:00	0
2009-05-29	16:44:00	0
2009-05-29	16:45:00	0
2009-05-29	16:46:00	0
2009-05-29	16:47:00	0
2009-05-29	16:48:00	0
2009-05-29	16:49:00	0
2009-05-29	16:50:00	0
2009-05-29	16:51:00	0
2009-05-29	16:52:00	0
2009-05-29	16:53:00	0
2009-05-29	16:54:00	0
2009-05-29	16:55:00	0
2009-05-29	16:56:00	0
2009-05-29	16:57:00	0
2009-05-29	16:58:00	0
2009-05-29	16:59:00	0
2009-05-29	17:00:00	0
2009-05-29	17:01:00	0
2009-05-29	17:02:00	0
2009-05-29	17:03:00	0
2009-05-29	17:04:00	0
2009-05-29	17:05:00	0
2009-05-29	17:06:00	0
2009-05-29	17:07:00	0
2009-05-29	17:08:00	0
2009-05-29	17:09:00	0
2009-05-29	17:10:00	0
2009-05-29	17:11:00	0
2009-05-29	17:12:00	0
2009-05-29	17:13:00	0
2009-05-29	17:14:00	0
2009-05-29	17:15:00	0
2009-05-29	17:16:00	0
2009-05-29	17:17:00	0
2009-05-29	17:18:00	0
2009-05-29	17:19:00	0
2009-05-29	17:20:00	0
2009-05-29	17:21:00	0
2009-05-29	17:22:00	0
2009-05-29	17:23:00	0
2009-05-29	17:24:00	0
2009-05-29	17:25:00	0
2009-05-29	17:26:00	0
2009-05-29	17:27:00	0
2009-05-29	17:28:00	0
2009-05-29	17:29:00	0
2009-05-29	17:30:00	0
2009-05-29	17:31:00	0
2009-05-29	17:32:00	0
2009-05-29	17:33:00	0
2009-05-29	17:34:00	0
2009-05-29	17:35:00	0
2009-05-29	17:36:00	0
2009-05-29	17:37:00	0
2009-05-29	17:38:00	0
2009-05-29	17:39:00	0
2009-05-29	17:40:00	0
2009-05-29	17:41:00	0
2009-05-29	17:42:00	0
2009-05-29	17:43:00	0
2009-05-29	17:44:00	0
2009-05-29	17:45:00	0
2009-05-29	17:46:00	0
2009-05-29	17:47:00	0
2009-05-29	17:48:00	0
2009-05-29	17:49:00	0
2009-05-29	17:50:00	0
2009-05-29	17:51:00	0
2009-05-29	17:52:00	0
2009-05-29	17:53:00	0
2009-05-29	17:54:00	0
2009-05-29	17:55:00	0
2009-05-29	17:56:00	0
2009-05-29	17:57:00	0
2009-05-29	17:58:00	0
2009-05-29	17:59:00	0
2009-05-29	18:00:00	70
2009-05-29	18:01:00	70
2009-05-29	18:02:00	0
2009-05-29	18:03:00	14
2009-05-29	18:04:00	14
2009-05-29	18:05:00	14
2009-05-29	18:06:00	0
2009-05-29	18:07:00	0
2009-05-29	18:08:00	0
2009-05-29	18:09:00	0
2009-05-29	18:10:00	0
2009-05-29	18:11:00	0
2009-05-29	18:12:00	0
2009-05-29	18:13:00	0
2009-05-29	18:14:00	0
2009-05-29	18:15:00	0
2009-05-29	18:16:00	0
2009-05-29	18:17:00	0
2009-05-29	18:18:00	0
2009-05-29	18:19:00	0
2009-05-29	18:20:00	0
2009-05-29	18:21:00	0
2009-05-29	18:22:00	0
2009-05-29	18:23:00	0
2009-05-29	18:24:00	0
2009-05-29	18:25:00	0
2009-05-29	18:26:00	0
2009-05-29	18:27:00	0
2009-05-29	18:28:00	0
2009-05-29	18:29:00	0
2009-05-29	18:30:00	0
2009-05-29	18:31:00	0
2009-05-29	18:32:00	0
2009-05-29	18:33:00	14
2009-05-29	18:34:00	0
2009-05-29	18:35:00	14
2009-05-29	18:36:00	28
2009-05-29	18:37:00	0
2009-05-29	18:38:00	0
2009-05-29	18:39:00	0
2009-05-29	18:40:00	14
2009-05-29	18:41:00	14
2009-05-29	18:42:00	14
2009-05-29	18:43:00	0
2009-05-29	18:44:00	0
2009-05-29	18:45:00	0
2009-05-29	18:46:00	28
2009-05-29	18:47:00	0
2009-05-29	18:48:00	0
2009-05-29	18:49:00	0
2009-05-29	18:50:00	0
2009-05-29	18:51:00	42
2009-05-29	18:52:00	0
2009-05-29	18:53:00	0
2009-05-29	18:54:00	0
2009-05-29	18:55:00	0
2009-05-29	18:56:00	331
2009-05-29	18:57:00	181
2009-05-29	18:58:00	0
2009-05-29	18:59:00	70
2009-05-29	19:00:00	14
2009-05-29	19:01:00	0
2009-05-29	19:02:00	0
2009-05-29	19:03:00	0
2009-05-29	19:04:00	0
2009-05-29	19:05:00	0
2009-05-29	19:06:00	0
2009-05-29	19:07:00	0
2009-05-29	19:08:00	0
2009-05-29	19:09:00	0
2009-05-29	19:10:00	0
2009-05-29	19:11:00	0
2009-05-29	19:12:00	181
2009-05-29	19:13:00	0
2009-05-29	19:14:00	0
2009-05-29	19:15:00	0
2009-05-29	19:16:00	0
2009-05-29	19:17:00	0
2009-05-29	19:18:00	0
2009-05-29	19:19:00	0
2009-05-29	19:20:00	0
2009-05-29	19:21:00	0
2009-05-29	19:22:00	0
2009-05-29	19:23:00	0
2009-05-29	19:24:00	0
2009-05-29	19:25:00	0
2009-05-29	19:26:00	0
2009-05-29	19:27:00	0
2009-05-29	19:28:00	0
2009-05-29	19:29:00	0
2009-05-29	19:30:00	14
2009-05-29	19:31:00	0
2009-05-29	19:32:00	0
2009-05-29	19:33:00	0
2009-05-29	19:34:00	0
2009-05-29	19:35:00	0
2009-05-29	19:36:00	0
2009-05-29	19:37:00	0
2009-05-29	19:38:00	0
2009-05-29	19:39:00	0
2009-05-29	19:40:00	0
2009-05-29	19:41:00	0
2009-05-29	19:42:00	0
2009-05-29	19:43:00	0
2009-05-29	19:44:00	0
2009-05-29	19:45:00	0
2009-05-29	19:46:00	0
2009-05-29	19:47:00	0
2009-05-29	19:48:00	0
2009-05-29	19:49:00	0
2009-05-29	19:50:00	0
2009-05-29	19:51:00	0
2009-05-29	19:52:00	0
2009-05-29	19:53:00	0
2009-05-29	19:54:00	0
2009-05-29	19:55:00	14
2009-05-29	19:56:00	0
2009-05-29	19:57:00	0
2009-05-29	19:58:00	0
2009-05-29	19:59:00	111
2009-05-29	20:00:00	97
2009-05-29	20:01:00	28
2009-05-29	20:02:00	0
2009-05-29	20:03:00	0
2009-05-29	20:04:00	14
2009-05-29	20:05:00	0
2009-05-29	20:06:00	231
2009-05-29	20:07:00	423
2009-05-29	20:08:00	843
2009-05-29	20:09:00	348
2009-05-29	20:10:00	0
2009-05-29	20:11:00	0
2009-05-29	20:12:00	0
2009-05-29	20:13:00	153
2009-05-29	20:14:00	167
2009-05-29	20:15:00	125
2009-05-29	20:16:00	331
2009-05-29	20:17:00	83
2009-05-29	20:18:00	14
2009-05-29	20:19:00	153
2009-05-29	20:20:00	153
2009-05-29	20:21:00	125
2009-05-29	20:22:00	298
2009-05-29	20:23:00	348
2009-05-29	20:24:00	384
2009-05-29	20:25:00	83
2009-05-29	20:26:00	264
2009-05-29	20:27:00	14
2009-05-29	20:28:00	181
2009-05-29	20:29:00	607
2009-05-29	20:30:00	111
2009-05-29	20:31:00	56
2009-05-29	20:32:00	125
2009-05-29	20:33:00	153
2009-05-29	20:34:00	248
2009-05-29	20:35:00	214
2009-05-29	20:36:00	14
2009-05-29	20:37:00	0
2009-05-29	20:38:00	0
2009-05-29	20:39:00	0
2009-05-29	20:40:00	0
2009-05-29	20:41:00	0
2009-05-29	20:42:00	0
2009-05-29	20:43:00	423
2009-05-29	20:44:00	348
2009-05-29	20:45:00	181
2009-05-29	20:46:00	125
2009-05-29	20:47:00	125
2009-05-29	20:48:00	0
2009-05-29	20:49:00	0
2009-05-29	20:50:00	83
2009-05-29	20:51:00	0
2009-05-29	20:52:00	0
2009-05-29	20:53:00	0
2009-05-29	20:54:00	198
2009-05-29	20:55:00	562
2009-05-29	20:56:00	139
2009-05-29	20:57:00	0
2009-05-29	20:58:00	0
2009-05-29	20:59:00	540
2009-05-29	21:00:00	198
2009-05-29	21:01:00	0
2009-05-29	21:02:00	56
2009-05-29	21:03:00	264
2009-05-29	21:04:00	331
2009-05-29	21:05:00	0
2009-05-29	21:06:00	0
2009-05-29	21:07:00	673
2009-05-29	21:08:00	384
2009-05-29	21:09:00	1583
2009-05-29	21:10:00	83
2009-05-29	21:11:00	0
2009-05-29	21:12:00	0
2009-05-29	21:13:00	0
2009-05-29	21:14:00	0
2009-05-29	21:15:00	0
2009-05-29	21:16:00	0
2009-05-29	21:17:00	0
2009-05-29	21:18:00	0
2009-05-29	21:19:00	0
2009-05-29	21:20:00	0
2009-05-29	21:21:00	14
2009-05-29	21:22:00	0
2009-05-29	21:23:00	0
2009-05-29	21:24:00	0
2009-05-29	21:25:00	0
2009-05-29	21:26:00	0
2009-05-29	21:27:00	0
2009-05-29	21:28:00	0
2009-05-29	21:29:00	0
2009-05-29	21:30:00	0
2009-05-29	21:31:00	0
2009-05-29	21:32:00	0
2009-05-29	21:33:00	0
2009-05-29	21:34:00	0
2009-05-29	21:35:00	0
2009-05-29	21:36:00	0
2009-05-29	21:37:00	0
2009-05-29	21:38:00	0
2009-05-29	21:39:00	14
2009-05-29	21:40:00	0
2009-05-29	21:41:00	0
2009-05-29	21:42:00	0
2009-05-29	21:43:00	0
2009-05-29	21:44:00	0
2009-05-29	21:45:00	0
2009-05-29	21:46:00	0
2009-05-29	21:47:00	0
2009-05-29	21:48:00	0
2009-05-29	21:49:00	0
2009-05-29	21:50:00	0
2009-05-29	21:51:00	0
2009-05-29	21:52:00	0
2009-05-29	21:53:00	0
2009-05-29	21:54:00	0
2009-05-29	21:55:00	0
2009-05-29	21:56:00	0
2009-05-29	21:57:00	0
2009-05-29	21:58:00	42
2009-05-29	21:59:00	0
2009-05-29	22:00:00	0
2009-05-29	22:01:00	0
2009-05-29	22:02:00	0
2009-05-29	22:03:00	0
2009-05-29	22:04:00	0
2009-05-29	22:05:00	0
2009-05-29	22:06:00	0
2009-05-29	22:07:00	0
2009-05-29	22:08:00	0
2009-05-29	22:09:00	0
2009-05-29	22:10:00	0
2009-05-29	22:11:00	0
2009-05-29	22:12:00	0
2009-05-29	22:13:00	0
2009-05-29	22:14:00	0
2009-05-29	22:15:00	0
2009-05-29	22:16:00	0
2009-05-29	22:17:00	0
2009-05-29	22:18:00	0
2009-05-29	22:19:00	0
2009-05-29	22:20:00	0
2009-05-29	22:21:00	0
2009-05-29	22:22:00	0
2009-05-29	22:23:00	0
2009-05-29	22:24:00	0
2009-05-29	22:25:00	0
2009-05-29	22:26:00	0
2009-05-29	22:27:00	0
2009-05-29	22:28:00	0
2009-05-29	22:29:00	0
2009-05-29	22:30:00	0
2009-05-29	22:31:00	0
2009-05-29	22:32:00	0
2009-05-29	22:33:00	0
2009-05-29	22:34:00	14
2009-05-29	22:35:00	0
2009-05-29	22:36:00	0
2009-05-29	22:37:00	0
2009-05-29	22:38:00	0
2009-05-29	22:39:00	0
2009-05-29	22:40:00	0
2009-05-29	22:41:00	0
2009-05-29	22:42:00	42
2009-05-29	22:43:00	0
2009-05-29	22:44:00	0
2009-05-29	22:45:00	0
2009-05-29	22:46:00	0
2009-05-29	22:47:00	0
2009-05-29	22:48:00	0
2009-05-29	22:49:00	0
2009-05-29	22:50:00	0
2009-05-29	22:51:00	0
2009-05-29	22:52:00	0
2009-05-29	22:53:00	0
2009-05-29	22:54:00	0
2009-05-29	22:55:00	0
2009-05-29	22:56:00	0
2009-05-29	22:57:00	0
2009-05-29	22:58:00	14
2009-05-29	22:59:00	0
2009-05-29	23:00:00	0
2009-05-29	23:01:00	0
2009-05-29	23:02:00	0
2009-05-29	23:03:00	125
2009-05-29	23:04:00	696
2009-05-29	23:05:00	843
2009-05-29	23:06:00	520
2009-05-29	23:07:00	125
2009-05-29	23:08:00	70
2009-05-29	23:09:00	423
2009-05-29	23:10:00	0
2009-05-29	23:11:00	0
2009-05-29	23:12:00	0
2009-05-29	23:13:00	0
2009-05-29	23:14:00	0
2009-05-29	23:15:00	0
2009-05-29	23:16:00	0
2009-05-29	23:17:00	0
2009-05-29	23:18:00	0
2009-05-29	23:19:00	0
2009-05-29	23:20:00	0
2009-05-29	23:21:00	0
2009-05-29	23:22:00	0
2009-05-29	23:23:00	0
2009-05-29	23:24:00	0
2009-05-29	23:25:00	0
2009-05-29	23:26:00	0
2009-05-29	23:27:00	0
2009-05-29	23:28:00	0
2009-05-29	23:29:00	0
2009-05-29	23:30:00	0
2009-05-29	23:31:00	0
2009-05-29	23:32:00	14
2009-05-29	23:33:00	0
2009-05-29	23:34:00	0
2009-05-29	23:35:00	0
2009-05-29	23:36:00	0
2009-05-29	23:37:00	0
2009-05-29	23:38:00	0
2009-05-29	23:39:00	0
2009-05-29	23:40:00	0
2009-05-29	23:41:00	0
2009-05-29	23:42:00	0
2009-05-29	23:43:00	0
2009-05-29	23:44:00	0
2009-05-29	23:45:00	0
2009-05-29	23:46:00	0
2009-05-29	23:47:00	0
2009-05-29	23:48:00	0
2009-05-29	23:49:00	0
2009-05-29	23:50:00	0
2009-05-29	23:51:00	0
2009-05-29	23:52:00	56
2009-05-29	23:53:00	14
2009-05-29	23:54:00	0
2009-05-29	23:55:00	0
2009-05-29	23:56:00	0
2009-05-29	23:57:00	0
2009-05-29	23:58:00	0
2009-05-29	23:59:00	0
2009-05-30	00:00:00	0
2009-05-30	00:01:00	0
2009-05-30	00:02:00	0
2009-05-30	00:03:00	0
2009-05-30	00:04:00	0
2009-05-30	00:05:00	0
2009-05-30	00:06:00	0
2009-05-30	00:07:00	0
2009-05-30	00:08:00	0
2009-05-30	00:09:00	0
2009-05-30	00:10:00	0
2009-05-30	00:11:00	0
2009-05-30	00:12:00	0
2009-05-30	00:13:00	0
2009-05-30	00:14:00	0
2009-05-30	00:15:00	0
2009-05-30	00:16:00	0
2009-05-30	00:17:00	0
2009-05-30	00:18:00	0
2009-05-30	00:19:00	0
2009-05-30	00:20:00	0
2009-05-30	00:21:00	0
2009-05-30	00:22:00	0
2009-05-30	00:23:00	0
2009-05-30	00:24:00	0
2009-05-30	00:25:00	0
2009-05-30	00:26:00	0
2009-05-30	00:27:00	0
2009-05-30	00:28:00	0
2009-05-30	00:29:00	0
2009-05-30	00:30:00	0
2009-05-30	00:31:00	0
2009-05-30	00:32:00	0
2009-05-30	00:33:00	0
2009-05-30	00:34:00	83
2009-05-30	00:35:00	1305
2009-05-30	00:36:00	501
2009-05-30	00:37:00	0
2009-05-30	00:38:00	28
2009-05-30	00:39:00	83
2009-05-30	00:40:00	0
2009-05-30	00:41:00	0
2009-05-30	00:42:00	0
2009-05-30	00:43:00	0
2009-05-30	00:44:00	0
2009-05-30	00:45:00	0
2009-05-30	00:46:00	0
2009-05-30	00:47:00	0
2009-05-30	00:48:00	0
2009-05-30	00:49:00	0
2009-05-30	00:50:00	0
2009-05-30	00:51:00	0
2009-05-30	00:52:00	0
2009-05-30	00:53:00	0
2009-05-30	00:54:00	0
2009-05-30	00:55:00	0
2009-05-30	00:56:00	0
2009-05-30	00:57:00	0
2009-05-30	00:58:00	0
2009-05-30	00:59:00	0
2009-05-30	01:00:00	0
2009-05-30	01:01:00	0
2009-05-30	01:02:00	0
2009-05-30	01:03:00	0
2009-05-30	01:04:00	0
2009-05-30	01:05:00	0
2009-05-30	01:06:00	0
2009-05-30	01:07:00	0
2009-05-30	01:08:00	0
2009-05-30	01:09:00	0
2009-05-30	01:10:00	0
2009-05-30	01:11:00	0
2009-05-30	01:12:00	0
2009-05-30	01:13:00	0
2009-05-30	01:14:00	0
2009-05-30	01:15:00	0
2009-05-30	01:16:00	0
2009-05-30	01:17:00	0
2009-05-30	01:18:00	0
2009-05-30	01:19:00	0
2009-05-30	01:20:00	0
2009-05-30	01:21:00	0
2009-05-30	01:22:00	0
2009-05-30	01:23:00	0
2009-05-30	01:24:00	0
2009-05-30	01:25:00	0
2009-05-30	01:26:00	0
2009-05-30	01:27:00	0
2009-05-30	01:28:00	0
2009-05-30	01:29:00	0
2009-05-30	01:30:00	0
2009-05-30	01:31:00	0
2009-05-30	01:32:00	0
2009-05-30	01:33:00	0
2009-05-30	01:34:00	0
2009-05-30	01:35:00	0
2009-05-30	01:36:00	0
2009-05-30	01:37:00	0
2009-05-30	01:38:00	0
2009-05-30	01:39:00	0
2009-05-30	01:40:00	0
2009-05-30	01:41:00	0
2009-05-30	01:42:00	0
2009-05-30	01:43:00	0
2009-05-30	01:44:00	0
2009-05-30	01:45:00	0
2009-05-30	01:46:00	0
2009-05-30	01:47:00	0
2009-05-30	01:48:00	0
2009-05-30	01:49:00	0
2009-05-30	01:50:00	0
2009-05-30	01:51:00	0
2009-05-30	01:52:00	14
2009-05-30	01:53:00	0
2009-05-30	01:54:00	0
2009-05-30	01:55:00	0
2009-05-30	01:56:00	0
2009-05-30	01:57:00	0
2009-05-30	01:58:00	0
2009-05-30	01:59:00	0
2009-05-30	02:00:00	0
2009-05-30	02:01:00	0
2009-05-30	02:02:00	0
2009-05-30	02:03:00	0
2009-05-30	02:04:00	0
2009-05-30	02:05:00	0
2009-05-30	02:06:00	14
2009-05-30	02:07:00	14
2009-05-30	02:08:00	0
2009-05-30	02:09:00	0
2009-05-30	02:10:00	0
2009-05-30	02:11:00	0
2009-05-30	02:12:00	0
2009-05-30	02:13:00	0
2009-05-30	02:14:00	0
2009-05-30	02:15:00	0
2009-05-30	02:16:00	28
2009-05-30	02:17:00	0
2009-05-30	02:18:00	0
2009-05-30	02:19:00	0
2009-05-30	02:20:00	0
2009-05-30	02:21:00	0
2009-05-30	02:22:00	0
2009-05-30	02:23:00	0
2009-05-30	02:24:00	0
2009-05-30	02:25:00	0
2009-05-30	02:26:00	0
2009-05-30	02:27:00	0
2009-05-30	02:28:00	0
2009-05-30	02:29:00	0
2009-05-30	02:30:00	0
2009-05-30	02:31:00	0
2009-05-30	02:32:00	0
2009-05-30	02:33:00	0
2009-05-30	02:34:00	0
2009-05-30	02:35:00	14
2009-05-30	02:36:00	0
2009-05-30	02:37:00	0
2009-05-30	02:38:00	0
2009-05-30	02:39:00	0
2009-05-30	02:40:00	0
2009-05-30	02:41:00	14
2009-05-30	02:42:00	14
2009-05-30	02:43:00	0
2009-05-30	02:44:00	0
2009-05-30	02:45:00	0
2009-05-30	02:46:00	0
2009-05-30	02:47:00	0
2009-05-30	02:48:00	0
2009-05-30	02:49:00	0
2009-05-30	02:50:00	0
2009-05-30	02:51:00	0
2009-05-30	02:52:00	0
2009-05-30	02:53:00	0
2009-05-30	02:54:00	0
2009-05-30	02:55:00	0
2009-05-30	02:56:00	0
2009-05-30	02:57:00	0
2009-05-30	02:58:00	0
2009-05-30	02:59:00	0
2009-05-30	03:00:00	14
2009-05-30	03:01:00	14
2009-05-30	03:02:00	139
2009-05-30	03:03:00	97
2009-05-30	03:04:00	0
2009-05-30	03:05:00	0
2009-05-30	03:06:00	0
2009-05-30	03:07:00	0
2009-05-30	03:08:00	0
2009-05-30	03:09:00	0
2009-05-30	03:10:00	0
2009-05-30	03:11:00	0
2009-05-30	03:12:00	0
2009-05-30	03:13:00	0
2009-05-30	03:14:00	0
2009-05-30	03:15:00	0
2009-05-30	03:16:00	0
2009-05-30	03:17:00	0
2009-05-30	03:18:00	0
2009-05-30	03:19:00	0
2009-05-30	03:20:00	0
2009-05-30	03:21:00	0
2009-05-30	03:22:00	0
2009-05-30	03:23:00	0
2009-05-30	03:24:00	0
2009-05-30	03:25:00	0
2009-05-30	03:26:00	0
2009-05-30	03:27:00	0
2009-05-30	03:28:00	0
2009-05-30	03:29:00	0
2009-05-30	03:30:00	70
2009-05-30	03:31:00	0
2009-05-30	03:32:00	28
2009-05-30	03:33:00	70
2009-05-30	03:34:00	0
2009-05-30	03:35:00	0
2009-05-30	03:36:00	0
2009-05-30	03:37:00	0
2009-05-30	03:38:00	0
2009-05-30	03:39:00	0
2009-05-30	03:40:00	0
2009-05-30	03:41:00	0
2009-05-30	03:42:00	0
2009-05-30	03:43:00	0
2009-05-30	03:44:00	0
2009-05-30	03:45:00	0
2009-05-30	03:46:00	0
2009-05-30	03:47:00	0
2009-05-30	03:48:00	0
2009-05-30	03:49:00	0
2009-05-30	03:50:00	14
2009-05-30	03:51:00	0
2009-05-30	03:52:00	0
2009-05-30	03:53:00	0
2009-05-30	03:54:00	0
2009-05-30	03:55:00	0
2009-05-30	03:56:00	0
2009-05-30	03:57:00	0
2009-05-30	03:58:00	0
2009-05-30	03:59:00	0
2009-05-30	04:00:00	0
2009-05-30	04:01:00	0
2009-05-30	04:02:00	0
2009-05-30	04:03:00	0
2009-05-30	04:04:00	0
2009-05-30	04:05:00	0
2009-05-30	04:06:00	0
2009-05-30	04:07:00	0
2009-05-30	04:08:00	0
2009-05-30	04:09:00	0
2009-05-30	04:10:00	0
2009-05-30	04:11:00	0
2009-05-30	04:12:00	0
2009-05-30	04:13:00	0
2009-05-30	04:14:00	0
2009-05-30	04:15:00	0
2009-05-30	04:16:00	0
2009-05-30	04:17:00	0
2009-05-30	04:18:00	0
2009-05-30	04:19:00	0
2009-05-30	04:20:00	0
2009-05-30	04:21:00	0
2009-05-30	04:22:00	0
2009-05-30	04:23:00	0
2009-05-30	04:24:00	0
2009-05-30	04:25:00	0
2009-05-30	04:26:00	0
2009-05-30	04:27:00	0
2009-05-30	04:28:00	0
2009-05-30	04:29:00	0
2009-05-30	04:30:00	0
2009-05-30	04:31:00	0
2009-05-30	04:32:00	0
2009-05-30	04:33:00	0
2009-05-30	04:34:00	0
2009-05-30	04:35:00	0
2009-05-30	04:36:00	0
2009-05-30	04:37:00	0
2009-05-30	04:38:00	0
2009-05-30	04:39:00	0
2009-05-30	04:40:00	0
2009-05-30	04:41:00	0
2009-05-30	04:42:00	0
2009-05-30	04:43:00	0
2009-05-30	04:44:00	0
2009-05-30	04:45:00	0
2009-05-30	04:46:00	0
2009-05-30	04:47:00	0
2009-05-30	04:48:00	0
2009-05-30	04:49:00	0
2009-05-30	04:50:00	14
2009-05-30	04:51:00	0
2009-05-30	04:52:00	0
2009-05-30	04:53:00	0
2009-05-30	04:54:00	0
2009-05-30	04:55:00	14
2009-05-30	04:56:00	0
2009-05-30	04:57:00	0
2009-05-30	04:58:00	0
2009-05-30	04:59:00	0
2009-05-30	05:00:00	0
2009-05-30	05:01:00	0
2009-05-30	05:02:00	0
2009-05-30	05:03:00	0
2009-05-30	05:04:00	0
2009-05-30	05:05:00	0
2009-05-30	05:06:00	0
2009-05-30	05:07:00	14
2009-05-30	05:08:00	0
2009-05-30	05:09:00	0
2009-05-30	05:10:00	0
2009-05-30	05:11:00	0
2009-05-30	05:12:00	0
2009-05-30	05:13:00	0
2009-05-30	05:14:00	0
2009-05-30	05:15:00	0
2009-05-30	05:16:00	0
2009-05-30	05:17:00	0
2009-05-30	05:18:00	0
2009-05-30	05:19:00	0
2009-05-30	05:20:00	0
2009-05-30	05:21:00	0
2009-05-30	05:22:00	0
2009-05-30	05:23:00	0
2009-05-30	05:24:00	0
2009-05-30	05:25:00	0
2009-05-30	05:26:00	0
2009-05-30	05:27:00	0
2009-05-30	05:28:00	0
2009-05-30	05:29:00	0
2009-05-30	05:30:00	0
2009-05-30	05:31:00	0
2009-05-30	05:32:00	0
2009-05-30	05:33:00	0
2009-05-30	05:34:00	0
2009-05-30	05:35:00	0
2009-05-30	05:36:00	0
2009-05-30	05:37:00	0
2009-05-30	05:38:00	0
2009-05-30	05:39:00	0
2009-05-30	05:40:00	0
2009-05-30	05:41:00	0
2009-05-30	05:42:00	0
2009-05-30	05:43:00	0
2009-05-30	05:44:00	0
2009-05-30	05:45:00	0
2009-05-30	05:46:00	0
2009-05-30	05:47:00	0
2009-05-30	05:48:00	0
2009-05-30	05:49:00	0
2009-05-30	05:50:00	0
2009-05-30	05:51:00	0
2009-05-30	05:52:00	0
2009-05-30	05:53:00	0
2009-05-30	05:54:00	0
2009-05-30	05:55:00	0
2009-05-30	05:56:00	0
2009-05-30	05:57:00	0
2009-05-30	05:58:00	0
2009-05-30	05:59:00	0
2009-05-30	06:00:00	0
2009-05-30	06:01:00	0
2009-05-30	06:02:00	14
2009-05-30	06:03:00	14
2009-05-30	06:04:00	0
2009-05-30	06:05:00	0
2009-05-30	06:06:00	0
2009-05-30	06:07:00	0
2009-05-30	06:08:00	42
2009-05-30	06:09:00	0
2009-05-30	06:10:00	0
2009-05-30	06:11:00	0
2009-05-30	06:12:00	28
2009-05-30	06:13:00	0
2009-05-30	06:14:00	0
2009-05-30	06:15:00	0
2009-05-30	06:16:00	0
2009-05-30	06:17:00	0
2009-05-30	06:18:00	0
2009-05-30	06:19:00	0
2009-05-30	06:20:00	0
2009-05-30	06:21:00	0
2009-05-30	06:22:00	0
2009-05-30	06:23:00	0
2009-05-30	06:24:00	0
2009-05-30	06:25:00	0
2009-05-30	06:26:00	0
2009-05-30	06:27:00	0
2009-05-30	06:28:00	0
2009-05-30	06:29:00	0
2009-05-30	06:30:00	0
2009-05-30	06:31:00	0
2009-05-30	06:32:00	0
2009-05-30	06:33:00	0
2009-05-30	06:34:00	0
2009-05-30	06:35:00	0
2009-05-30	06:36:00	0
2009-05-30	06:37:00	0
2009-05-30	06:38:00	0
2009-05-30	06:39:00	0
2009-05-30	06:40:00	0
2009-05-30	06:41:00	0
2009-05-30	06:42:00	0
2009-05-30	06:43:00	0
2009-05-30	06:44:00	0
2009-05-30	06:45:00	0
2009-05-30	06:46:00	0
2009-05-30	06:47:00	0
2009-05-30	06:48:00	0
2009-05-30	06:49:00	0
2009-05-30	06:50:00	0
2009-05-30	06:51:00	0
2009-05-30	06:52:00	0
2009-05-30	06:53:00	0
2009-05-30	06:54:00	0
2009-05-30	06:55:00	0
2009-05-30	06:56:00	0
2009-05-30	06:57:00	0
2009-05-30	06:58:00	0
2009-05-30	06:59:00	0
2009-05-30	07:00:00	0
2009-05-30	07:01:00	0
2009-05-30	07:02:00	0
2009-05-30	07:03:00	0
2009-05-30	07:04:00	0
2009-05-30	07:05:00	0
2009-05-30	07:06:00	0
2009-05-30	07:07:00	0
2009-05-30	07:08:00	0
2009-05-30	07:09:00	0
2009-05-30	07:10:00	0
2009-05-30	07:11:00	0
2009-05-30	07:12:00	0
2009-05-30	07:13:00	0
2009-05-30	07:14:00	0
2009-05-30	07:15:00	0
2009-05-30	07:16:00	0
2009-05-30	07:17:00	0
2009-05-30	07:18:00	0
2009-05-30	07:19:00	14
2009-05-30	07:20:00	42
2009-05-30	07:21:00	14
2009-05-30	07:22:00	0
2009-05-30	07:23:00	0
2009-05-30	07:24:00	0
2009-05-30	07:25:00	14
2009-05-30	07:26:00	0
2009-05-30	07:27:00	0
2009-05-30	07:28:00	0
2009-05-30	07:29:00	0
2009-05-30	07:30:00	0
2009-05-30	07:31:00	0
2009-05-30	07:32:00	0
2009-05-30	07:33:00	0
2009-05-30	07:34:00	231
2009-05-30	07:35:00	1736
2009-05-30	07:36:00	1005
2009-05-30	07:37:00	1439
2009-05-30	07:38:00	42
2009-05-30	07:39:00	14
2009-05-30	07:40:00	42
2009-05-30	07:41:00	0
2009-05-30	07:42:00	0
2009-05-30	07:43:00	0
2009-05-30	07:44:00	14
2009-05-30	07:45:00	0
2009-05-30	07:46:00	0
2009-05-30	07:47:00	0
2009-05-30	07:48:00	14
2009-05-30	07:49:00	562
2009-05-30	07:50:00	462
2009-05-30	07:51:00	0
2009-05-30	07:52:00	584
2009-05-30	07:53:00	214
2009-05-30	07:54:00	14
2009-05-30	07:55:00	0
2009-05-30	07:56:00	0
2009-05-30	07:57:00	0
2009-05-30	07:58:00	0
2009-05-30	07:59:00	0
2009-05-30	08:00:00	0
2009-05-30	08:01:00	42
2009-05-30	08:02:00	42
2009-05-30	08:03:00	198
2009-05-30	08:04:00	181
2009-05-30	08:05:00	14
2009-05-30	08:06:00	0
2009-05-30	08:07:00	0
2009-05-30	08:08:00	0
2009-05-30	08:09:00	0
2009-05-30	08:10:00	0
2009-05-30	08:11:00	0
2009-05-30	08:12:00	0
2009-05-30	08:13:00	0
2009-05-30	08:14:00	0
2009-05-30	08:15:00	0
2009-05-30	08:16:00	231
2009-05-30	08:17:00	198
2009-05-30	08:18:00	0
2009-05-30	08:19:00	0
2009-05-30	08:20:00	0
2009-05-30	08:21:00	0
2009-05-30	08:22:00	0
2009-05-30	08:23:00	0
2009-05-30	08:24:00	0
2009-05-30	08:25:00	0
2009-05-30	08:26:00	0
2009-05-30	08:27:00	0
2009-05-30	08:28:00	0
2009-05-30	08:29:00	0
2009-05-30	08:30:00	0
2009-05-30	08:31:00	0
2009-05-30	08:32:00	0
2009-05-30	08:33:00	0
2009-05-30	08:34:00	0
2009-05-30	08:35:00	14
2009-05-30	08:36:00	0
2009-05-30	08:37:00	0
2009-05-30	08:38:00	0
2009-05-30	08:39:00	0
2009-05-30	08:40:00	0
2009-05-30	08:41:00	0
2009-05-30	08:42:00	0
2009-05-30	08:43:00	0
2009-05-30	08:44:00	0
2009-05-30	08:45:00	0
2009-05-30	08:46:00	0
2009-05-30	08:47:00	0
2009-05-30	08:48:00	14
2009-05-30	08:49:00	0
2009-05-30	08:50:00	0
2009-05-30	08:51:00	0
2009-05-30	08:52:00	0
2009-05-30	08:53:00	0
2009-05-30	08:54:00	14
2009-05-30	08:55:00	0
2009-05-30	08:56:00	0
2009-05-30	08:57:00	0
2009-05-30	08:58:00	0
2009-05-30	08:59:00	0
2009-05-30	09:00:00	0
2009-05-30	09:01:00	0
2009-05-30	09:02:00	0
2009-05-30	09:03:00	0
2009-05-30	09:04:00	0
2009-05-30	09:05:00	0
2009-05-30	09:06:00	0
2009-05-30	09:07:00	0
2009-05-30	09:08:00	0
[truncated: 19,611 more rows]

[truncated: 3 more sheets: 6.12.06, 6.29.09, 7.13.09]
