# Supplementary material for: Initial evaluation of nighttime restlessness in a naturally occurring canine model of osteoarthritis pain
Source: PeerJ. 2015 Feb 17;3:e772. doi: 10.7717/peerj.772 (PMC4340376; doi:10.7717/peerj.772)
Supplement: Supplemental Information 46 [file peerj-03-772-s046.xlsx]

## Sheet: Office Visits
Visit Date	Visit Number
2009-04-09 06:00:00	1
2009-04-27 06:00:00	2
2009-05-11 06:00:00	3
2009-05-27 06:00:00	4
2009-06-10 06:00:00	5
2009-06-24 06:00:00	6
2009-07-08 06:00:00	7
2009-07-22 06:00:00	8
2009-08-05 06:00:00	9

## Sheet: 46_Data
Segment	DateTime	Activity	Hour	Quadrant	Study Day	Weekday
1	2009-04-20 06:01:00	0	6	2	11	2
1	2009-04-20 06:02:00	0	6	2	11	2
1	2009-04-20 06:03:00	11	6	2	11	2
1	2009-04-20 06:04:00	0	6	2	11	2
1	2009-04-20 06:05:00	0	6	2	11	2
1	2009-04-20 06:06:00	0	6	2	11	2
1	2009-04-20 06:07:00	0	6	2	11	2
1	2009-04-20 06:08:00	0	6	2	11	2
1	2009-04-20 06:09:00	22	6	2	11	2
1	2009-04-20 06:10:00	0	6	2	11	2
1	2009-04-20 06:11:00	22	6	2	11	2
1	2009-04-20 06:12:00	0	6	2	11	2
1	2009-04-20 06:13:00	0	6	2	11	2
1	2009-04-20 06:14:00	99	6	2	11	2
1	2009-04-20 06:15:00	121	6	2	11	2
1	2009-04-20 06:16:00	382	6	2	11	2
1	2009-04-20 06:17:00	210	6	2	11	2
1	2009-04-20 06:18:00	143	6	2	11	2
1	2009-04-20 06:19:00	22	6	2	11	2
1	2009-04-20 06:20:00	236	6	2	11	2
1	2009-04-20 06:21:00	11	6	2	11	2
1	2009-04-20 06:22:00	0	6	2	11	2
1	2009-04-20 06:23:00	0	6	2	11	2
1	2009-04-20 06:24:00	22	6	2	11	2
1	2009-04-20 06:25:00	0	6	2	11	2
1	2009-04-20 06:26:00	0	6	2	11	2
1	2009-04-20 06:27:00	0	6	2	11	2
1	2009-04-20 06:28:00	0	6	2	11	2
1	2009-04-20 06:29:00	0	6	2	11	2
1	2009-04-20 06:30:00	11	6	2	11	2
1	2009-04-20 06:31:00	0	6	2	11	2
1	2009-04-20 06:32:00	0	6	2	11	2
1	2009-04-20 06:33:00	33	6	2	11	2
1	2009-04-20 06:34:00	183	6	2	11	2
1	2009-04-20 06:35:00	1472	6	2	11	2
1	2009-04-20 06:36:00	936	6	2	11	2
1	2009-04-20 06:37:00	1408	6	2	11	2
1	2009-04-20 06:38:00	841	6	2	11	2
1	2009-04-20 06:39:00	320	6	2	11	2
1	2009-04-20 06:40:00	1472	6	2	11	2
1	2009-04-20 06:41:00	936	6	2	11	2
1	2009-04-20 06:42:00	960	6	2	11	2
1	2009-04-20 06:43:00	863	6	2	11	2
1	2009-04-20 06:44:00	841	6	2	11	2
1	2009-04-20 06:45:00	841	6	2	11	2
1	2009-04-20 06:46:00	708	6	2	11	2
1	2009-04-20 06:47:00	887	6	2	11	2
1	2009-04-20 06:48:00	708	6	2	11	2
1	2009-04-20 06:49:00	629	6	2	11	2
1	2009-04-20 06:50:00	730	6	2	11	2
1	2009-04-20 06:51:00	589	6	2	11	2
1	2009-04-20 06:52:00	210	6	2	11	2
1	2009-04-20 06:53:00	589	6	2	11	2
1	2009-04-20 06:54:00	0	6	2	11	2
1	2009-04-20 06:55:00	196	6	2	11	2
1	2009-04-20 06:56:00	132	6	2	11	2
1	2009-04-20 06:57:00	0	6	2	11	2
1	2009-04-20 06:58:00	0	6	2	11	2
1	2009-04-20 06:59:00	121	6	2	11	2
1	2009-04-20 07:00:00	44	6	2	11	2
1	2009-04-20 07:01:00	0	7	2	11	2
1	2009-04-20 07:02:00	481	7	2	11	2
1	2009-04-20 07:03:00	629	7	2	11	2
1	2009-04-20 07:04:00	289	7	2	11	2
1	2009-04-20 07:05:00	397	7	2	11	2
1	2009-04-20 07:06:00	289	7	2	11	2
1	2009-04-20 07:07:00	157	7	2	11	2
1	2009-04-20 07:08:00	223	7	2	11	2
1	2009-04-20 07:09:00	77	7	2	11	2
1	2009-04-20 07:10:00	99	7	2	11	2
1	2009-04-20 07:11:00	22	7	2	11	2
1	2009-04-20 07:12:00	44	7	2	11	2
1	2009-04-20 07:13:00	589	7	2	11	2
1	2009-04-20 07:14:00	428	7	2	11	2
1	2009-04-20 07:15:00	0	7	2	11	2
1	2009-04-20 07:16:00	0	7	2	11	2
1	2009-04-20 07:17:00	0	7	2	11	2
1	2009-04-20 07:18:00	11	7	2	11	2
1	2009-04-20 07:19:00	0	7	2	11	2
1	2009-04-20 07:20:00	33	7	2	11	2
1	2009-04-20 07:21:00	0	7	2	11	2
1	2009-04-20 07:22:00	33	7	2	11	2
1	2009-04-20 07:23:00	0	7	2	11	2
1	2009-04-20 07:24:00	0	7	2	11	2
1	2009-04-20 07:25:00	0	7	2	11	2
1	2009-04-20 07:26:00	132	7	2	11	2
1	2009-04-20 07:27:00	44	7	2	11	2
1	2009-04-20 07:28:00	0	7	2	11	2
1	2009-04-20 07:29:00	0	7	2	11	2
1	2009-04-20 07:30:00	0	7	2	11	2
1	2009-04-20 07:31:00	0	7	2	11	2
1	2009-04-20 07:32:00	44	7	2	11	2
1	2009-04-20 07:33:00	0	7	2	11	2
1	2009-04-20 07:34:00	0	7	2	11	2
1	2009-04-20 07:35:00	0	7	2	11	2
1	2009-04-20 07:36:00	0	7	2	11	2
1	2009-04-20 07:37:00	0	7	2	11	2
1	2009-04-20 07:38:00	66	7	2	11	2
1	2009-04-20 07:39:00	413	7	2	11	2
1	2009-04-20 07:40:00	276	7	2	11	2
1	2009-04-20 07:41:00	569	7	2	11	2
1	2009-04-20 07:42:00	77	7	2	11	2
1	2009-04-20 07:43:00	428	7	2	11	2
1	2009-04-20 07:44:00	887	7	2	11	2
1	2009-04-20 07:45:00	351	7	2	11	2
1	2009-04-20 07:46:00	2150	7	2	11	2
1	2009-04-20 07:47:00	708	7	2	11	2
1	2009-04-20 07:48:00	1472	7	2	11	2
1	2009-04-20 07:49:00	775	7	2	11	2
1	2009-04-20 07:50:00	1198	7	2	11	2
1	2009-04-20 07:51:00	1713	7	2	11	2
1	2009-04-20 07:52:00	936	7	2	11	2
1	2009-04-20 07:53:00	499	7	2	11	2
1	2009-04-20 07:54:00	887	7	2	11	2
1	2009-04-20 07:55:00	609	7	2	11	2
1	2009-04-20 07:56:00	936	7	2	11	2
1	2009-04-20 07:57:00	263	7	2	11	2
1	2009-04-20 07:58:00	289	7	2	11	2
1	2009-04-20 07:59:00	569	7	2	11	2
1	2009-04-20 08:00:00	66	7	2	11	2
1	2009-04-20 08:01:00	33	8	2	11	2
1	2009-04-20 08:02:00	481	8	2	11	2
1	2009-04-20 08:03:00	263	8	2	11	2
1	2009-04-20 08:04:00	382	8	2	11	2
1	2009-04-20 08:05:00	210	8	2	11	2
1	2009-04-20 08:06:00	121	8	2	11	2
1	2009-04-20 08:07:00	0	8	2	11	2
1	2009-04-20 08:08:00	0	8	2	11	2
1	2009-04-20 08:09:00	77	8	2	11	2
1	2009-04-20 08:10:00	44	8	2	11	2
1	2009-04-20 08:11:00	276	8	2	11	2
1	2009-04-20 08:12:00	0	8	2	11	2
1	2009-04-20 08:13:00	0	8	2	11	2
1	2009-04-20 08:14:00	33	8	2	11	2
1	2009-04-20 08:15:00	0	8	2	11	2
1	2009-04-20 08:16:00	305	8	2	11	2
1	2009-04-20 08:17:00	66	8	2	11	2
1	2009-04-20 08:18:00	0	8	2	11	2
1	2009-04-20 08:19:00	0	8	2	11	2
1	2009-04-20 08:20:00	276	8	2	11	2
1	2009-04-20 08:21:00	0	8	2	11	2
1	2009-04-20 08:22:00	33	8	2	11	2
1	2009-04-20 08:23:00	11	8	2	11	2
1	2009-04-20 08:24:00	263	8	2	11	2
1	2009-04-20 08:25:00	516	8	2	11	2
1	2009-04-20 08:26:00	88	8	2	11	2
1	2009-04-20 08:27:00	236	8	2	11	2
1	2009-04-20 08:28:00	0	8	2	11	2
1	2009-04-20 08:29:00	0	8	2	11	2
1	2009-04-20 08:30:00	22	8	2	11	2
1	2009-04-20 08:31:00	22	8	2	11	2
1	2009-04-20 08:32:00	0	8	2	11	2
1	2009-04-20 08:33:00	0	8	2	11	2
1	2009-04-20 08:34:00	11	8	2	11	2
1	2009-04-20 08:35:00	0	8	2	11	2
1	2009-04-20 08:36:00	0	8	2	11	2
1	2009-04-20 08:37:00	0	8	2	11	2
1	2009-04-20 08:38:00	0	8	2	11	2
1	2009-04-20 08:39:00	0	8	2	11	2
1	2009-04-20 08:40:00	0	8	2	11	2
1	2009-04-20 08:41:00	0	8	2	11	2
1	2009-04-20 08:42:00	0	8	2	11	2
1	2009-04-20 08:43:00	0	8	2	11	2
1	2009-04-20 08:44:00	0	8	2	11	2
1	2009-04-20 08:45:00	0	8	2	11	2
1	2009-04-20 08:46:00	0	8	2	11	2
1	2009-04-20 08:47:00	0	8	2	11	2
1	2009-04-20 08:48:00	11	8	2	11	2
1	2009-04-20 08:49:00	22	8	2	11	2
1	2009-04-20 08:50:00	0	8	2	11	2
1	2009-04-20 08:51:00	0	8	2	11	2
1	2009-04-20 08:52:00	0	8	2	11	2
1	2009-04-20 08:53:00	11	8	2	11	2
1	2009-04-20 08:54:00	11	8	2	11	2
1	2009-04-20 08:55:00	0	8	2	11	2
1	2009-04-20 08:56:00	11	8	2	11	2
1	2009-04-20 08:57:00	0	8	2	11	2
1	2009-04-20 08:58:00	0	8	2	11	2
1	2009-04-20 08:59:00	0	8	2	11	2
1	2009-04-20 09:00:00	11	8	2	11	2
1	2009-04-20 09:01:00	0	9	2	11	2
1	2009-04-20 09:02:00	11	9	2	11	2
1	2009-04-20 09:03:00	0	9	2	11	2
1	2009-04-20 09:04:00	22	9	2	11	2
1	2009-04-20 09:05:00	0	9	2	11	2
1	2009-04-20 09:06:00	0	9	2	11	2
1	2009-04-20 09:07:00	0	9	2	11	2
1	2009-04-20 09:08:00	0	9	2	11	2
1	2009-04-20 09:09:00	11	9	2	11	2
1	2009-04-20 09:10:00	0	9	2	11	2
1	2009-04-20 09:11:00	0	9	2	11	2
1	2009-04-20 09:12:00	0	9	2	11	2
1	2009-04-20 09:13:00	11	9	2	11	2
1	2009-04-20 09:14:00	0	9	2	11	2
1	2009-04-20 09:15:00	0	9	2	11	2
1	2009-04-20 09:16:00	0	9	2	11	2
1	2009-04-20 09:17:00	170	9	2	11	2
1	2009-04-20 09:18:00	0	9	2	11	2
1	2009-04-20 09:19:00	0	9	2	11	2
1	2009-04-20 09:20:00	0	9	2	11	2
1	2009-04-20 09:21:00	0	9	2	11	2
1	2009-04-20 09:22:00	0	9	2	11	2
1	2009-04-20 09:23:00	0	9	2	11	2
1	2009-04-20 09:24:00	0	9	2	11	2
1	2009-04-20 09:25:00	0	9	2	11	2
1	2009-04-20 09:26:00	0	9	2	11	2
1	2009-04-20 09:27:00	11	9	2	11	2
1	2009-04-20 09:28:00	22	9	2	11	2
1	2009-04-20 09:29:00	0	9	2	11	2
1	2009-04-20 09:30:00	0	9	2	11	2
1	2009-04-20 09:31:00	0	9	2	11	2
1	2009-04-20 09:32:00	0	9	2	11	2
1	2009-04-20 09:33:00	0	9	2	11	2
1	2009-04-20 09:34:00	0	9	2	11	2
1	2009-04-20 09:35:00	0	9	2	11	2
1	2009-04-20 09:36:00	0	9	2	11	2
1	2009-04-20 09:37:00	0	9	2	11	2
1	2009-04-20 09:38:00	0	9	2	11	2
1	2009-04-20 09:39:00	0	9	2	11	2
1	2009-04-20 09:40:00	0	9	2	11	2
1	2009-04-20 09:41:00	0	9	2	11	2
1	2009-04-20 09:42:00	0	9	2	11	2
1	2009-04-20 09:43:00	0	9	2	11	2
1	2009-04-20 09:44:00	0	9	2	11	2
1	2009-04-20 09:45:00	11	9	2	11	2
1	2009-04-20 09:46:00	22	9	2	11	2
1	2009-04-20 09:47:00	0	9	2	11	2
1	2009-04-20 09:48:00	0	9	2	11	2
1	2009-04-20 09:49:00	0	9	2	11	2
1	2009-04-20 09:50:00	0	9	2	11	2
1	2009-04-20 09:51:00	0	9	2	11	2
1	2009-04-20 09:52:00	0	9	2	11	2
1	2009-04-20 09:53:00	0	9	2	11	2
1	2009-04-20 09:54:00	0	9	2	11	2
1	2009-04-20 09:55:00	0	9	2	11	2
1	2009-04-20 09:56:00	0	9	2	11	2
1	2009-04-20 09:57:00	0	9	2	11	2
1	2009-04-20 09:58:00	0	9	2	11	2
1	2009-04-20 09:59:00	0	9	2	11	2
1	2009-04-20 10:00:00	0	9	2	11	2
1	2009-04-20 10:01:00	0	10	2	11	2
1	2009-04-20 10:02:00	0	10	2	11	2
1	2009-04-20 10:03:00	0	10	2	11	2
1	2009-04-20 10:04:00	0	10	2	11	2
1	2009-04-20 10:05:00	0	10	2	11	2
1	2009-04-20 10:06:00	44	10	2	11	2
1	2009-04-20 10:07:00	428	10	2	11	2
1	2009-04-20 10:08:00	33	10	2	11	2
1	2009-04-20 10:09:00	77	10	2	11	2
1	2009-04-20 10:10:00	0	10	2	11	2
1	2009-04-20 10:11:00	0	10	2	11	2
1	2009-04-20 10:12:00	0	10	2	11	2
1	2009-04-20 10:13:00	0	10	2	11	2
1	2009-04-20 10:14:00	0	10	2	11	2
1	2009-04-20 10:15:00	0	10	2	11	2
1	2009-04-20 10:16:00	0	10	2	11	2
1	2009-04-20 10:17:00	0	10	2	11	2
1	2009-04-20 10:18:00	55	10	2	11	2
1	2009-04-20 10:19:00	0	10	2	11	2
1	2009-04-20 10:20:00	0	10	2	11	2
1	2009-04-20 10:21:00	0	10	2	11	2
1	2009-04-20 10:22:00	0	10	2	11	2
1	2009-04-20 10:23:00	44	10	2	11	2
1	2009-04-20 10:24:00	22	10	2	11	2
1	2009-04-20 10:25:00	0	10	2	11	2
1	2009-04-20 10:26:00	0	10	2	11	2
1	2009-04-20 10:27:00	0	10	2	11	2
1	2009-04-20 10:28:00	0	10	2	11	2
1	2009-04-20 10:29:00	0	10	2	11	2
1	2009-04-20 10:30:00	0	10	2	11	2
1	2009-04-20 10:31:00	0	10	2	11	2
1	2009-04-20 10:32:00	0	10	2	11	2
1	2009-04-20 10:33:00	0	10	2	11	2
1	2009-04-20 10:34:00	0	10	2	11	2
1	2009-04-20 10:35:00	0	10	2	11	2
1	2009-04-20 10:36:00	0	10	2	11	2
1	2009-04-20 10:37:00	0	10	2	11	2
1	2009-04-20 10:38:00	0	10	2	11	2
1	2009-04-20 10:39:00	33	10	2	11	2
1	2009-04-20 10:40:00	0	10	2	11	2
1	2009-04-20 10:41:00	0	10	2	11	2
1	2009-04-20 10:42:00	0	10	2	11	2
1	2009-04-20 10:43:00	0	10	2	11	2
1	2009-04-20 10:44:00	0	10	2	11	2
1	2009-04-20 10:45:00	0	10	2	11	2
1	2009-04-20 10:46:00	0	10	2	11	2
1	2009-04-20 10:47:00	0	10	2	11	2
1	2009-04-20 10:48:00	0	10	2	11	2
1	2009-04-20 10:49:00	0	10	2	11	2
1	2009-04-20 10:50:00	0	10	2	11	2
1	2009-04-20 10:51:00	0	10	2	11	2
1	2009-04-20 10:52:00	121	10	2	11	2
1	2009-04-20 10:53:00	11	10	2	11	2
1	2009-04-20 10:54:00	0	10	2	11	2
1	2009-04-20 10:55:00	157	10	2	11	2
1	2009-04-20 10:56:00	99	10	2	11	2
1	2009-04-20 10:57:00	33	10	2	11	2
1	2009-04-20 10:58:00	0	10	2	11	2
1	2009-04-20 10:59:00	0	10	2	11	2
1	2009-04-20 11:00:00	249	10	2	11	2
1	2009-04-20 11:01:00	629	11	2	11	2
1	2009-04-20 11:02:00	335	11	2	11	2
1	2009-04-20 11:03:00	534	11	2	11	2
1	2009-04-20 11:04:00	730	11	2	11	2
1	2009-04-20 11:05:00	708	11	2	11	2
1	2009-04-20 11:06:00	911	11	2	11	2
1	2009-04-20 11:07:00	730	11	2	11	2
1	2009-04-20 11:08:00	534	11	2	11	2
1	2009-04-20 11:09:00	589	11	2	11	2
1	2009-04-20 11:10:00	589	11	2	11	2
1	2009-04-20 11:11:00	609	11	2	11	2
1	2009-04-20 11:12:00	629	11	2	11	2
1	2009-04-20 11:13:00	446	11	2	11	2
1	2009-04-20 11:14:00	351	11	2	11	2
1	2009-04-20 11:15:00	649	11	2	11	2
1	2009-04-20 11:16:00	210	11	2	11	2
1	2009-04-20 11:17:00	276	11	2	11	2
1	2009-04-20 11:18:00	210	11	2	11	2
1	2009-04-20 11:19:00	170	11	2	11	2
1	2009-04-20 11:20:00	11	11	2	11	2
1	2009-04-20 11:21:00	516	11	2	11	2
1	2009-04-20 11:22:00	183	11	2	11	2
1	2009-04-20 11:23:00	351	11	2	11	2
1	2009-04-20 11:24:00	0	11	2	11	2
1	2009-04-20 11:25:00	0	11	2	11	2
1	2009-04-20 11:26:00	0	11	2	11	2
1	2009-04-20 11:27:00	289	11	2	11	2
1	2009-04-20 11:28:00	77	11	2	11	2
1	2009-04-20 11:29:00	55	11	2	11	2
1	2009-04-20 11:30:00	66	11	2	11	2
1	2009-04-20 11:31:00	320	11	2	11	2
1	2009-04-20 11:32:00	210	11	2	11	2
1	2009-04-20 11:33:00	305	11	2	11	2
1	2009-04-20 11:34:00	569	11	2	11	2
1	2009-04-20 11:35:00	55	11	2	11	2
1	2009-04-20 11:36:00	0	11	2	11	2
1	2009-04-20 11:37:00	11	11	2	11	2
1	2009-04-20 11:38:00	11	11	2	11	2
1	2009-04-20 11:39:00	0	11	2	11	2
1	2009-04-20 11:40:00	33	11	2	11	2
1	2009-04-20 11:41:00	44	11	2	11	2
1	2009-04-20 11:42:00	0	11	2	11	2
1	2009-04-20 11:43:00	22	11	2	11	2
1	2009-04-20 11:44:00	11	11	2	11	2
1	2009-04-20 11:45:00	11	11	2	11	2
1	2009-04-20 11:46:00	0	11	2	11	2
1	2009-04-20 11:47:00	55	11	2	11	2
1	2009-04-20 11:48:00	55	11	2	11	2
1	2009-04-20 11:49:00	0	11	2	11	2
1	2009-04-20 11:50:00	11	11	2	11	2
1	2009-04-20 11:51:00	0	11	2	11	2
1	2009-04-20 11:52:00	0	11	2	11	2
1	2009-04-20 11:53:00	609	11	2	11	2
1	2009-04-20 11:54:00	223	11	2	11	2
1	2009-04-20 11:55:00	77	11	2	11	2
1	2009-04-20 11:56:00	77	11	2	11	2
1	2009-04-20 11:57:00	55	11	2	11	2
1	2009-04-20 11:58:00	0	11	2	11	2
1	2009-04-20 11:59:00	33	11	2	11	2
1	2009-04-20 12:00:00	99	11	2	11	2
1	2009-04-20 12:01:00	22	12	3	11	2
1	2009-04-20 12:02:00	11	12	3	11	2
1	2009-04-20 12:03:00	77	12	3	11	2
1	2009-04-20 12:04:00	33	12	3	11	2
1	2009-04-20 12:05:00	0	12	3	11	2
1	2009-04-20 12:06:00	0	12	3	11	2
1	2009-04-20 12:07:00	33	12	3	11	2
1	2009-04-20 12:08:00	210	12	3	11	2
1	2009-04-20 12:09:00	0	12	3	11	2
1	2009-04-20 12:10:00	0	12	3	11	2
1	2009-04-20 12:11:00	11	12	3	11	2
1	2009-04-20 12:12:00	0	12	3	11	2
1	2009-04-20 12:13:00	77	12	3	11	2
1	2009-04-20 12:14:00	0	12	3	11	2
1	2009-04-20 12:15:00	0	12	3	11	2
1	2009-04-20 12:16:00	0	12	3	11	2
1	2009-04-20 12:17:00	44	12	3	11	2
1	2009-04-20 12:18:00	110	12	3	11	2
1	2009-04-20 12:19:00	55	12	3	11	2
1	2009-04-20 12:20:00	0	12	3	11	2
1	2009-04-20 12:21:00	0	12	3	11	2
1	2009-04-20 12:22:00	0	12	3	11	2
1	2009-04-20 12:23:00	0	12	3	11	2
1	2009-04-20 12:24:00	44	12	3	11	2
1	2009-04-20 12:25:00	223	12	3	11	2
1	2009-04-20 12:26:00	669	12	3	11	2
1	2009-04-20 12:27:00	22	12	3	11	2
1	2009-04-20 12:28:00	55	12	3	11	2
1	2009-04-20 12:29:00	11	12	3	11	2
1	2009-04-20 12:30:00	66	12	3	11	2
1	2009-04-20 12:31:00	289	12	3	11	2
1	2009-04-20 12:32:00	0	12	3	11	2
1	2009-04-20 12:33:00	22	12	3	11	2
1	2009-04-20 12:34:00	984	12	3	11	2
1	2009-04-20 12:35:00	1505	12	3	11	2
1	2009-04-20 12:36:00	413	12	3	11	2
1	2009-04-20 12:37:00	351	12	3	11	2
1	2009-04-20 12:38:00	11	12	3	11	2
1	2009-04-20 12:39:00	0	12	3	11	2
1	2009-04-20 12:40:00	0	12	3	11	2
1	2009-04-20 12:41:00	0	12	3	11	2
1	2009-04-20 12:42:00	11	12	3	11	2
1	2009-04-20 12:43:00	11	12	3	11	2
1	2009-04-20 12:44:00	0	12	3	11	2
1	2009-04-20 12:45:00	366	12	3	11	2
1	2009-04-20 12:46:00	689	12	3	11	2
1	2009-04-20 12:47:00	0	12	3	11	2
1	2009-04-20 12:48:00	0	12	3	11	2
1	2009-04-20 12:49:00	0	12	3	11	2
1	2009-04-20 12:50:00	11	12	3	11	2
1	2009-04-20 12:51:00	0	12	3	11	2
1	2009-04-20 12:52:00	0	12	3	11	2
1	2009-04-20 12:53:00	0	12	3	11	2
1	2009-04-20 12:54:00	0	12	3	11	2
1	2009-04-20 12:55:00	0	12	3	11	2
1	2009-04-20 12:56:00	196	12	3	11	2
1	2009-04-20 12:57:00	196	12	3	11	2
1	2009-04-20 12:58:00	22	12	3	11	2
1	2009-04-20 12:59:00	0	12	3	11	2
1	2009-04-20 13:00:00	0	12	3	11	2
1	2009-04-20 13:01:00	0	13	3	11	2
1	2009-04-20 13:02:00	0	13	3	11	2
1	2009-04-20 13:03:00	0	13	3	11	2
1	2009-04-20 13:04:00	0	13	3	11	2
1	2009-04-20 13:05:00	0	13	3	11	2
1	2009-04-20 13:06:00	0	13	3	11	2
1	2009-04-20 13:07:00	22	13	3	11	2
1	2009-04-20 13:08:00	55	13	3	11	2
1	2009-04-20 13:09:00	0	13	3	11	2
1	2009-04-20 13:10:00	0	13	3	11	2
1	2009-04-20 13:11:00	0	13	3	11	2
1	2009-04-20 13:12:00	0	13	3	11	2
1	2009-04-20 13:13:00	0	13	3	11	2
1	2009-04-20 13:14:00	0	13	3	11	2
1	2009-04-20 13:15:00	0	13	3	11	2
1	2009-04-20 13:16:00	305	13	3	11	2
1	2009-04-20 13:17:00	0	13	3	11	2
1	2009-04-20 13:18:00	0	13	3	11	2
1	2009-04-20 13:19:00	0	13	3	11	2
1	2009-04-20 13:20:00	0	13	3	11	2
1	2009-04-20 13:21:00	0	13	3	11	2
1	2009-04-20 13:22:00	0	13	3	11	2
1	2009-04-20 13:23:00	0	13	3	11	2
1	2009-04-20 13:24:00	0	13	3	11	2
1	2009-04-20 13:25:00	0	13	3	11	2
1	2009-04-20 13:26:00	0	13	3	11	2
1	2009-04-20 13:27:00	0	13	3	11	2
1	2009-04-20 13:28:00	11	13	3	11	2
1	2009-04-20 13:29:00	0	13	3	11	2
1	2009-04-20 13:30:00	0	13	3	11	2
1	2009-04-20 13:31:00	0	13	3	11	2
1	2009-04-20 13:32:00	0	13	3	11	2
1	2009-04-20 13:33:00	0	13	3	11	2
1	2009-04-20 13:34:00	0	13	3	11	2
1	2009-04-20 13:35:00	33	13	3	11	2
1	2009-04-20 13:36:00	33	13	3	11	2
1	2009-04-20 13:37:00	0	13	3	11	2
1	2009-04-20 13:38:00	0	13	3	11	2
1	2009-04-20 13:39:00	0	13	3	11	2
1	2009-04-20 13:40:00	0	13	3	11	2
1	2009-04-20 13:41:00	0	13	3	11	2
1	2009-04-20 13:42:00	0	13	3	11	2
1	2009-04-20 13:43:00	0	13	3	11	2
1	2009-04-20 13:44:00	0	13	3	11	2
1	2009-04-20 13:45:00	0	13	3	11	2
1	2009-04-20 13:46:00	0	13	3	11	2
1	2009-04-20 13:47:00	0	13	3	11	2
1	2009-04-20 13:48:00	0	13	3	11	2
1	2009-04-20 13:49:00	0	13	3	11	2
1	2009-04-20 13:50:00	0	13	3	11	2
1	2009-04-20 13:51:00	0	13	3	11	2
1	2009-04-20 13:52:00	0	13	3	11	2
1	2009-04-20 13:53:00	0	13	3	11	2
1	2009-04-20 13:54:00	0	13	3	11	2
1	2009-04-20 13:55:00	0	13	3	11	2
1	2009-04-20 13:56:00	0	13	3	11	2
1	2009-04-20 13:57:00	0	13	3	11	2
1	2009-04-20 13:58:00	0	13	3	11	2
1	2009-04-20 13:59:00	0	13	3	11	2
1	2009-04-20 14:00:00	0	13	3	11	2
1	2009-04-20 14:01:00	0	14	3	11	2
1	2009-04-20 14:02:00	0	14	3	11	2
1	2009-04-20 14:03:00	0	14	3	11	2
1	2009-04-20 14:04:00	0	14	3	11	2
1	2009-04-20 14:05:00	0	14	3	11	2
1	2009-04-20 14:06:00	0	14	3	11	2
1	2009-04-20 14:07:00	0	14	3	11	2
1	2009-04-20 14:08:00	0	14	3	11	2
1	2009-04-20 14:09:00	0	14	3	11	2
1	2009-04-20 14:10:00	0	14	3	11	2
1	2009-04-20 14:11:00	0	14	3	11	2
1	2009-04-20 14:12:00	0	14	3	11	2
1	2009-04-20 14:13:00	0	14	3	11	2
1	2009-04-20 14:14:00	0	14	3	11	2
1	2009-04-20 14:15:00	0	14	3	11	2
1	2009-04-20 14:16:00	0	14	3	11	2
1	2009-04-20 14:17:00	0	14	3	11	2
1	2009-04-20 14:18:00	0	14	3	11	2
1	2009-04-20 14:19:00	0	14	3	11	2
1	2009-04-20 14:20:00	0	14	3	11	2
1	2009-04-20 14:21:00	0	14	3	11	2
1	2009-04-20 14:22:00	0	14	3	11	2
1	2009-04-20 14:23:00	0	14	3	11	2
1	2009-04-20 14:24:00	0	14	3	11	2
1	2009-04-20 14:25:00	0	14	3	11	2
1	2009-04-20 14:26:00	0	14	3	11	2
1	2009-04-20 14:27:00	0	14	3	11	2
1	2009-04-20 14:28:00	0	14	3	11	2
1	2009-04-20 14:29:00	0	14	3	11	2
1	2009-04-20 14:30:00	0	14	3	11	2
1	2009-04-20 14:31:00	0	14	3	11	2
1	2009-04-20 14:32:00	0	14	3	11	2
1	2009-04-20 14:33:00	0	14	3	11	2
1	2009-04-20 14:34:00	0	14	3	11	2
1	2009-04-20 14:35:00	0	14	3	11	2
1	2009-04-20 14:36:00	11	14	3	11	2
1	2009-04-20 14:37:00	0	14	3	11	2
1	2009-04-20 14:38:00	0	14	3	11	2
1	2009-04-20 14:39:00	0	14	3	11	2
1	2009-04-20 14:40:00	0	14	3	11	2
1	2009-04-20 14:41:00	0	14	3	11	2
1	2009-04-20 14:42:00	0	14	3	11	2
1	2009-04-20 14:43:00	0	14	3	11	2
1	2009-04-20 14:44:00	0	14	3	11	2
1	2009-04-20 14:45:00	0	14	3	11	2
1	2009-04-20 14:46:00	0	14	3	11	2
1	2009-04-20 14:47:00	0	14	3	11	2
1	2009-04-20 14:48:00	0	14	3	11	2
1	2009-04-20 14:49:00	0	14	3	11	2
1	2009-04-20 14:50:00	0	14	3	11	2
1	2009-04-20 14:51:00	0	14	3	11	2
1	2009-04-20 14:52:00	0	14	3	11	2
1	2009-04-20 14:53:00	0	14	3	11	2
1	2009-04-20 14:54:00	0	14	3	11	2
1	2009-04-20 14:55:00	0	14	3	11	2
1	2009-04-20 14:56:00	0	14	3	11	2
1	2009-04-20 14:57:00	0	14	3	11	2
1	2009-04-20 14:58:00	0	14	3	11	2
1	2009-04-20 14:59:00	0	14	3	11	2
1	2009-04-20 15:00:00	0	14	3	11	2
1	2009-04-20 15:01:00	0	15	3	11	2
1	2009-04-20 15:02:00	0	15	3	11	2
1	2009-04-20 15:03:00	0	15	3	11	2
1	2009-04-20 15:04:00	0	15	3	11	2
1	2009-04-20 15:05:00	0	15	3	11	2
1	2009-04-20 15:06:00	0	15	3	11	2
1	2009-04-20 15:07:00	0	15	3	11	2
1	2009-04-20 15:08:00	0	15	3	11	2
1	2009-04-20 15:09:00	0	15	3	11	2
1	2009-04-20 15:10:00	0	15	3	11	2
1	2009-04-20 15:11:00	0	15	3	11	2
1	2009-04-20 15:12:00	0	15	3	11	2
1	2009-04-20 15:13:00	0	15	3	11	2
1	2009-04-20 15:14:00	0	15	3	11	2
1	2009-04-20 15:15:00	0	15	3	11	2
1	2009-04-20 15:16:00	22	15	3	11	2
1	2009-04-20 15:17:00	33	15	3	11	2
1	2009-04-20 15:18:00	236	15	3	11	2
1	2009-04-20 15:19:00	249	15	3	11	2
1	2009-04-20 15:20:00	110	15	3	11	2
1	2009-04-20 15:21:00	110	15	3	11	2
1	2009-04-20 15:22:00	183	15	3	11	2
1	2009-04-20 15:23:00	132	15	3	11	2
1	2009-04-20 15:24:00	463	15	3	11	2
1	2009-04-20 15:25:00	320	15	3	11	2
1	2009-04-20 15:26:00	289	15	3	11	2
1	2009-04-20 15:27:00	183	15	3	11	2
1	2009-04-20 15:28:00	276	15	3	11	2
1	2009-04-20 15:29:00	121	15	3	11	2
1	2009-04-20 15:30:00	99	15	3	11	2
1	2009-04-20 15:31:00	33	15	3	11	2
1	2009-04-20 15:32:00	33	15	3	11	2
1	2009-04-20 15:33:00	44	15	3	11	2
1	2009-04-20 15:34:00	11	15	3	11	2
1	2009-04-20 15:35:00	44	15	3	11	2
1	2009-04-20 15:36:00	157	15	3	11	2
1	2009-04-20 15:37:00	397	15	3	11	2
1	2009-04-20 15:38:00	335	15	3	11	2
1	2009-04-20 15:39:00	446	15	3	11	2
1	2009-04-20 15:40:00	446	15	3	11	2
1	2009-04-20 15:41:00	320	15	3	11	2
1	2009-04-20 15:42:00	183	15	3	11	2
1	2009-04-20 15:43:00	249	15	3	11	2
1	2009-04-20 15:44:00	66	15	3	11	2
1	2009-04-20 15:45:00	121	15	3	11	2
1	2009-04-20 15:46:00	33	15	3	11	2
1	2009-04-20 15:47:00	210	15	3	11	2
1	2009-04-20 15:48:00	0	15	3	11	2
1	2009-04-20 15:49:00	66	15	3	11	2
1	2009-04-20 15:50:00	22	15	3	11	2
1	2009-04-20 15:51:00	223	15	3	11	2
1	2009-04-20 15:52:00	77	15	3	11	2
1	2009-04-20 15:53:00	0	15	3	11	2
1	2009-04-20 15:54:00	33	15	3	11	2
1	2009-04-20 15:55:00	22	15	3	11	2
1	2009-04-20 15:56:00	11	15	3	11	2
1	2009-04-20 15:57:00	841	15	3	11	2
1	2009-04-20 15:58:00	77	15	3	11	2
1	2009-04-20 15:59:00	77	15	3	11	2
1	2009-04-20 16:00:00	797	15	3	11	2
1	2009-04-20 16:01:00	132	16	3	11	2
1	2009-04-20 16:02:00	99	16	3	11	2
1	2009-04-20 16:03:00	196	16	3	11	2
1	2009-04-20 16:04:00	66	16	3	11	2
1	2009-04-20 16:05:00	22	16	3	11	2
1	2009-04-20 16:06:00	11	16	3	11	2
1	2009-04-20 16:07:00	0	16	3	11	2
1	2009-04-20 16:08:00	223	16	3	11	2
1	2009-04-20 16:09:00	289	16	3	11	2
1	2009-04-20 16:10:00	249	16	3	11	2
1	2009-04-20 16:11:00	11	16	3	11	2
1	2009-04-20 16:12:00	11	16	3	11	2
1	2009-04-20 16:13:00	11	16	3	11	2
1	2009-04-20 16:14:00	249	16	3	11	2
1	2009-04-20 16:15:00	223	16	3	11	2
1	2009-04-20 16:16:00	88	16	3	11	2
1	2009-04-20 16:17:00	11	16	3	11	2
1	2009-04-20 16:18:00	55	16	3	11	2
1	2009-04-20 16:19:00	249	16	3	11	2
1	2009-04-20 16:20:00	984	16	3	11	2
1	2009-04-20 16:21:00	841	16	3	11	2
1	2009-04-20 16:22:00	819	16	3	11	2
1	2009-04-20 16:23:00	446	16	3	11	2
1	2009-04-20 16:24:00	569	16	3	11	2
1	2009-04-20 16:25:00	121	16	3	11	2
1	2009-04-20 16:26:00	33	16	3	11	2
1	2009-04-20 16:27:00	0	16	3	11	2
1	2009-04-20 16:28:00	11	16	3	11	2
1	2009-04-20 16:29:00	44	16	3	11	2
1	2009-04-20 16:30:00	44	16	3	11	2
1	2009-04-20 16:31:00	11	16	3	11	2
1	2009-04-20 16:32:00	55	16	3	11	2
1	2009-04-20 16:33:00	0	16	3	11	2
1	2009-04-20 16:34:00	263	16	3	11	2
1	2009-04-20 16:35:00	276	16	3	11	2
1	2009-04-20 16:36:00	55	16	3	11	2
1	2009-04-20 16:37:00	170	16	3	11	2
1	2009-04-20 16:38:00	911	16	3	11	2
1	2009-04-20 16:39:00	730	16	3	11	2
1	2009-04-20 16:40:00	984	16	3	11	2
1	2009-04-20 16:41:00	708	16	3	11	2
1	2009-04-20 16:42:00	1114	16	3	11	2
1	2009-04-20 16:43:00	753	16	3	11	2
1	2009-04-20 16:44:00	753	16	3	11	2
1	2009-04-20 16:45:00	911	16	3	11	2
1	2009-04-20 16:46:00	775	16	3	11	2
1	2009-04-20 16:47:00	841	16	3	11	2
1	2009-04-20 16:48:00	223	16	3	11	2
1	2009-04-20 16:49:00	0	16	3	11	2
1	2009-04-20 16:50:00	841	16	3	11	2
1	2009-04-20 16:51:00	936	16	3	11	2
1	2009-04-20 16:52:00	1227	16	3	11	2
1	2009-04-20 16:53:00	121	16	3	11	2
1	2009-04-20 16:54:00	22	16	3	11	2
1	2009-04-20 16:55:00	629	16	3	11	2
1	2009-04-20 16:56:00	1198	16	3	11	2
1	2009-04-20 16:57:00	1141	16	3	11	2
1	2009-04-20 16:58:00	1062	16	3	11	2
1	2009-04-20 16:59:00	170	16	3	11	2
1	2009-04-20 17:00:00	11	16	3	11	2
1	2009-04-20 17:01:00	534	17	3	11	2
1	2009-04-20 17:02:00	960	17	3	11	2
1	2009-04-20 17:03:00	1141	17	3	11	2
1	2009-04-20 17:04:00	936	17	3	11	2
1	2009-04-20 17:05:00	649	17	3	11	2
1	2009-04-20 17:06:00	609	17	3	11	2
1	2009-04-20 17:07:00	263	17	3	11	2
1	2009-04-20 17:08:00	99	17	3	11	2
1	2009-04-20 17:09:00	366	17	3	11	2
1	2009-04-20 17:10:00	121	17	3	11	2
1	2009-04-20 17:11:00	99	17	3	11	2
1	2009-04-20 17:12:00	183	17	3	11	2
1	2009-04-20 17:13:00	22	17	3	11	2
1	2009-04-20 17:14:00	351	17	3	11	2
1	2009-04-20 17:15:00	689	17	3	11	2
1	2009-04-20 17:16:00	552	17	3	11	2
1	2009-04-20 17:17:00	305	17	3	11	2
1	2009-04-20 17:18:00	397	17	3	11	2
1	2009-04-20 17:19:00	183	17	3	11	2
1	2009-04-20 17:20:00	66	17	3	11	2
1	2009-04-20 17:21:00	0	17	3	11	2
1	2009-04-20 17:22:00	0	17	3	11	2
1	2009-04-20 17:23:00	11	17	3	11	2
1	2009-04-20 17:24:00	0	17	3	11	2
1	2009-04-20 17:25:00	11	17	3	11	2
1	2009-04-20 17:26:00	11	17	3	11	2
1	2009-04-20 17:27:00	99	17	3	11	2
1	2009-04-20 17:28:00	0	17	3	11	2
1	2009-04-20 17:29:00	11	17	3	11	2
1	2009-04-20 17:30:00	0	17	3	11	2
1	2009-04-20 17:31:00	44	17	3	11	2
1	2009-04-20 17:32:00	0	17	3	11	2
1	2009-04-20 17:33:00	44	17	3	11	2
1	2009-04-20 17:34:00	88	17	3	11	2
1	2009-04-20 17:35:00	0	17	3	11	2
1	2009-04-20 17:36:00	22	17	3	11	2
1	2009-04-20 17:37:00	0	17	3	11	2
1	2009-04-20 17:38:00	44	17	3	11	2
1	2009-04-20 17:39:00	44	17	3	11	2
1	2009-04-20 17:40:00	33	17	3	11	2
1	2009-04-20 17:41:00	0	17	3	11	2
1	2009-04-20 17:42:00	121	17	3	11	2
1	2009-04-20 17:43:00	121	17	3	11	2
1	2009-04-20 17:44:00	121	17	3	11	2
1	2009-04-20 17:45:00	99	17	3	11	2
1	2009-04-20 17:46:00	289	17	3	11	2
1	2009-04-20 17:47:00	22	17	3	11	2
1	2009-04-20 17:48:00	77	17	3	11	2
1	2009-04-20 17:49:00	11	17	3	11	2
1	2009-04-20 17:50:00	121	17	3	11	2
1	2009-04-20 17:51:00	77	17	3	11	2
1	2009-04-20 17:52:00	0	17	3	11	2
1	2009-04-20 17:53:00	22	17	3	11	2
1	2009-04-20 17:54:00	77	17	3	11	2
1	2009-04-20 17:55:00	121	17	3	11	2
1	2009-04-20 17:56:00	0	17	3	11	2
1	2009-04-20 17:57:00	534	17	3	11	2
1	2009-04-20 17:58:00	516	17	3	11	2
1	2009-04-20 17:59:00	210	17	3	11	2
1	2009-04-20 18:00:00	132	17	3	11	2
1	2009-04-20 18:01:00	0	18	4	11	2
1	2009-04-20 18:02:00	121	18	4	11	2
1	2009-04-20 18:03:00	143	18	4	11	2
1	2009-04-20 18:04:00	44	18	4	11	2
1	2009-04-20 18:05:00	44	18	4	11	2
1	2009-04-20 18:06:00	11	18	4	11	2
1	2009-04-20 18:07:00	33	18	4	11	2
1	2009-04-20 18:08:00	55	18	4	11	2
1	2009-04-20 18:09:00	11	18	4	11	2
1	2009-04-20 18:10:00	11	18	4	11	2
1	2009-04-20 18:11:00	22	18	4	11	2
1	2009-04-20 18:12:00	0	18	4	11	2
1	2009-04-20 18:13:00	0	18	4	11	2
1	2009-04-20 18:14:00	55	18	4	11	2
1	2009-04-20 18:15:00	88	18	4	11	2
1	2009-04-20 18:16:00	33	18	4	11	2
1	2009-04-20 18:17:00	77	18	4	11	2
1	2009-04-20 18:18:00	77	18	4	11	2
1	2009-04-20 18:19:00	249	18	4	11	2
1	2009-04-20 18:20:00	88	18	4	11	2
1	2009-04-20 18:21:00	11	18	4	11	2
1	2009-04-20 18:22:00	44	18	4	11	2
1	2009-04-20 18:23:00	0	18	4	11	2
1	2009-04-20 18:24:00	55	18	4	11	2
1	2009-04-20 18:25:00	397	18	4	11	2
1	2009-04-20 18:26:00	22	18	4	11	2
1	2009-04-20 18:27:00	22	18	4	11	2
1	2009-04-20 18:28:00	132	18	4	11	2
1	2009-04-20 18:29:00	0	18	4	11	2
1	2009-04-20 18:30:00	55	18	4	11	2
1	2009-04-20 18:31:00	0	18	4	11	2
1	2009-04-20 18:32:00	11	18	4	11	2
1	2009-04-20 18:33:00	11	18	4	11	2
1	2009-04-20 18:34:00	22	18	4	11	2
1	2009-04-20 18:35:00	0	18	4	11	2
1	2009-04-20 18:36:00	55	18	4	11	2
1	2009-04-20 18:37:00	121	18	4	11	2
1	2009-04-20 18:38:00	88	18	4	11	2
1	2009-04-20 18:39:00	236	18	4	11	2
1	2009-04-20 18:40:00	66	18	4	11	2
1	2009-04-20 18:41:00	0	18	4	11	2
1	2009-04-20 18:42:00	11	18	4	11	2
1	2009-04-20 18:43:00	0	18	4	11	2
1	2009-04-20 18:44:00	0	18	4	11	2
1	2009-04-20 18:45:00	305	18	4	11	2
1	2009-04-20 18:46:00	481	18	4	11	2
1	2009-04-20 18:47:00	276	18	4	11	2
1	2009-04-20 18:48:00	0	18	4	11	2
1	2009-04-20 18:49:00	0	18	4	11	2
1	2009-04-20 18:50:00	22	18	4	11	2
1	2009-04-20 18:51:00	0	18	4	11	2
1	2009-04-20 18:52:00	11	18	4	11	2
1	2009-04-20 18:53:00	0	18	4	11	2
1	2009-04-20 18:54:00	0	18	4	11	2
1	2009-04-20 18:55:00	0	18	4	11	2
1	2009-04-20 18:56:00	0	18	4	11	2
1	2009-04-20 18:57:00	0	18	4	11	2
1	2009-04-20 18:58:00	11	18	4	11	2
1	2009-04-20 18:59:00	0	18	4	11	2
1	2009-04-20 19:00:00	0	18	4	11	2
1	2009-04-20 19:01:00	0	19	4	11	2
1	2009-04-20 19:02:00	0	19	4	11	2
1	2009-04-20 19:03:00	0	19	4	11	2
1	2009-04-20 19:04:00	0	19	4	11	2
1	2009-04-20 19:05:00	11	19	4	11	2
1	2009-04-20 19:06:00	0	19	4	11	2
1	2009-04-20 19:07:00	0	19	4	11	2
1	2009-04-20 19:08:00	0	19	4	11	2
1	2009-04-20 19:09:00	0	19	4	11	2
1	2009-04-20 19:10:00	0	19	4	11	2
1	2009-04-20 19:11:00	0	19	4	11	2
1	2009-04-20 19:12:00	44	19	4	11	2
1	2009-04-20 19:13:00	0	19	4	11	2
1	2009-04-20 19:14:00	0	19	4	11	2
1	2009-04-20 19:15:00	0	19	4	11	2
1	2009-04-20 19:16:00	0	19	4	11	2
1	2009-04-20 19:17:00	0	19	4	11	2
1	2009-04-20 19:18:00	0	19	4	11	2
1	2009-04-20 19:19:00	0	19	4	11	2
1	2009-04-20 19:20:00	0	19	4	11	2
1	2009-04-20 19:21:00	0	19	4	11	2
1	2009-04-20 19:22:00	0	19	4	11	2
1	2009-04-20 19:23:00	0	19	4	11	2
1	2009-04-20 19:24:00	0	19	4	11	2
1	2009-04-20 19:25:00	0	19	4	11	2
1	2009-04-20 19:26:00	0	19	4	11	2
1	2009-04-20 19:27:00	0	19	4	11	2
1	2009-04-20 19:28:00	0	19	4	11	2
1	2009-04-20 19:29:00	0	19	4	11	2
1	2009-04-20 19:30:00	22	19	4	11	2
1	2009-04-20 19:31:00	11	19	4	11	2
1	2009-04-20 19:32:00	223	19	4	11	2
1	2009-04-20 19:33:00	428	19	4	11	2
1	2009-04-20 19:34:00	516	19	4	11	2
1	2009-04-20 19:35:00	589	19	4	11	2
1	2009-04-20 19:36:00	382	19	4	11	2
1	2009-04-20 19:37:00	397	19	4	11	2
1	2009-04-20 19:38:00	446	19	4	11	2
1	2009-04-20 19:39:00	320	19	4	11	2
1	2009-04-20 19:40:00	382	19	4	11	2
1	2009-04-20 19:41:00	223	19	4	11	2
1	2009-04-20 19:42:00	22	19	4	11	2
1	2009-04-20 19:43:00	44	19	4	11	2
1	2009-04-20 19:44:00	22	19	4	11	2
1	2009-04-20 19:45:00	0	19	4	11	2
1	2009-04-20 19:46:00	0	19	4	11	2
1	2009-04-20 19:47:00	0	19	4	11	2
1	2009-04-20 19:48:00	0	19	4	11	2
1	2009-04-20 19:49:00	0	19	4	11	2
1	2009-04-20 19:50:00	0	19	4	11	2
1	2009-04-20 19:51:00	0	19	4	11	2
1	2009-04-20 19:52:00	0	19	4	11	2
1	2009-04-20 19:53:00	0	19	4	11	2
1	2009-04-20 19:54:00	0	19	4	11	2
1	2009-04-20 19:55:00	0	19	4	11	2
1	2009-04-20 19:56:00	0	19	4	11	2
1	2009-04-20 19:57:00	0	19	4	11	2
1	2009-04-20 19:58:00	0	19	4	11	2
1	2009-04-20 19:59:00	0	19	4	11	2
1	2009-04-20 20:00:00	0	19	4	11	2
1	2009-04-20 20:01:00	0	20	4	11	2
1	2009-04-20 20:02:00	0	20	4	11	2
1	2009-04-20 20:03:00	0	20	4	11	2
1	2009-04-20 20:04:00	0	20	4	11	2
1	2009-04-20 20:05:00	0	20	4	11	2
1	2009-04-20 20:06:00	0	20	4	11	2
1	2009-04-20 20:07:00	0	20	4	11	2
1	2009-04-20 20:08:00	0	20	4	11	2
1	2009-04-20 20:09:00	0	20	4	11	2
1	2009-04-20 20:10:00	0	20	4	11	2
1	2009-04-20 20:11:00	0	20	4	11	2
1	2009-04-20 20:12:00	0	20	4	11	2
1	2009-04-20 20:13:00	66	20	4	11	2
1	2009-04-20 20:14:00	11	20	4	11	2
1	2009-04-20 20:15:00	223	20	4	11	2
1	2009-04-20 20:16:00	99	20	4	11	2
1	2009-04-20 20:17:00	22	20	4	11	2
1	2009-04-20 20:18:00	0	20	4	11	2
1	2009-04-20 20:19:00	0	20	4	11	2
1	2009-04-20 20:20:00	0	20	4	11	2
1	2009-04-20 20:21:00	0	20	4	11	2
1	2009-04-20 20:22:00	0	20	4	11	2
1	2009-04-20 20:23:00	0	20	4	11	2
1	2009-04-20 20:24:00	0	20	4	11	2
1	2009-04-20 20:25:00	0	20	4	11	2
1	2009-04-20 20:26:00	0	20	4	11	2
1	2009-04-20 20:27:00	0	20	4	11	2
1	2009-04-20 20:28:00	0	20	4	11	2
1	2009-04-20 20:29:00	0	20	4	11	2
1	2009-04-20 20:30:00	0	20	4	11	2
1	2009-04-20 20:31:00	0	20	4	11	2
1	2009-04-20 20:32:00	0	20	4	11	2
1	2009-04-20 20:33:00	0	20	4	11	2
1	2009-04-20 20:34:00	0	20	4	11	2
1	2009-04-20 20:35:00	0	20	4	11	2
1	2009-04-20 20:36:00	0	20	4	11	2
1	2009-04-20 20:37:00	0	20	4	11	2
1	2009-04-20 20:38:00	0	20	4	11	2
1	2009-04-20 20:39:00	0	20	4	11	2
1	2009-04-20 20:40:00	0	20	4	11	2
1	2009-04-20 20:41:00	0	20	4	11	2
1	2009-04-20 20:42:00	0	20	4	11	2
1	2009-04-20 20:43:00	305	20	4	11	2
1	2009-04-20 20:44:00	351	20	4	11	2
1	2009-04-20 20:45:00	276	20	4	11	2
1	2009-04-20 20:46:00	77	20	4	11	2
1	2009-04-20 20:47:00	196	20	4	11	2
1	2009-04-20 20:48:00	22	20	4	11	2
1	2009-04-20 20:49:00	11	20	4	11	2
1	2009-04-20 20:50:00	0	20	4	11	2
1	2009-04-20 20:51:00	44	20	4	11	2
1	2009-04-20 20:52:00	157	20	4	11	2
1	2009-04-20 20:53:00	157	20	4	11	2
1	2009-04-20 20:54:00	22	20	4	11	2
1	2009-04-20 20:55:00	0	20	4	11	2
1	2009-04-20 20:56:00	0	20	4	11	2
1	2009-04-20 20:57:00	33	20	4	11	2
1	2009-04-20 20:58:00	0	20	4	11	2
1	2009-04-20 20:59:00	0	20	4	11	2
1	2009-04-20 21:00:00	0	20	4	11	2
1	2009-04-20 21:01:00	0	21	4	11	2
1	2009-04-20 21:02:00	0	21	4	11	2
1	2009-04-20 21:03:00	0	21	4	11	2
1	2009-04-20 21:04:00	0	21	4	11	2
1	2009-04-20 21:05:00	0	21	4	11	2
1	2009-04-20 21:06:00	11	21	4	11	2
1	2009-04-20 21:07:00	77	21	4	11	2
1	2009-04-20 21:08:00	110	21	4	11	2
1	2009-04-20 21:09:00	0	21	4	11	2
1	2009-04-20 21:10:00	0	21	4	11	2
1	2009-04-20 21:11:00	0	21	4	11	2
1	2009-04-20 21:12:00	0	21	4	11	2
1	2009-04-20 21:13:00	0	21	4	11	2
1	2009-04-20 21:14:00	0	21	4	11	2
1	2009-04-20 21:15:00	0	21	4	11	2
1	2009-04-20 21:16:00	0	21	4	11	2
1	2009-04-20 21:17:00	0	21	4	11	2
1	2009-04-20 21:18:00	11	21	4	11	2
1	2009-04-20 21:19:00	0	21	4	11	2
1	2009-04-20 21:20:00	0	21	4	11	2
1	2009-04-20 21:21:00	0	21	4	11	2
1	2009-04-20 21:22:00	0	21	4	11	2
1	2009-04-20 21:23:00	0	21	4	11	2
1	2009-04-20 21:24:00	0	21	4	11	2
1	2009-04-20 21:25:00	0	21	4	11	2
1	2009-04-20 21:26:00	0	21	4	11	2
1	2009-04-20 21:27:00	0	21	4	11	2
1	2009-04-20 21:28:00	0	21	4	11	2
1	2009-04-20 21:29:00	0	21	4	11	2
1	2009-04-20 21:30:00	0	21	4	11	2
1	2009-04-20 21:31:00	0	21	4	11	2
1	2009-04-20 21:32:00	0	21	4	11	2
1	2009-04-20 21:33:00	0	21	4	11	2
1	2009-04-20 21:34:00	0	21	4	11	2
1	2009-04-20 21:35:00	0	21	4	11	2
1	2009-04-20 21:36:00	0	21	4	11	2
1	2009-04-20 21:37:00	0	21	4	11	2
1	2009-04-20 21:38:00	0	21	4	11	2
1	2009-04-20 21:39:00	0	21	4	11	2
1	2009-04-20 21:40:00	0	21	4	11	2
1	2009-04-20 21:41:00	0	21	4	11	2
1	2009-04-20 21:42:00	0	21	4	11	2
1	2009-04-20 21:43:00	0	21	4	11	2
1	2009-04-20 21:44:00	0	21	4	11	2
1	2009-04-20 21:45:00	0	21	4	11	2
1	2009-04-20 21:46:00	0	21	4	11	2
1	2009-04-20 21:47:00	0	21	4	11	2
1	2009-04-20 21:48:00	0	21	4	11	2
1	2009-04-20 21:49:00	0	21	4	11	2
1	2009-04-20 21:50:00	0	21	4	11	2
1	2009-04-20 21:51:00	0	21	4	11	2
1	2009-04-20 21:52:00	0	21	4	11	2
1	2009-04-20 21:53:00	0	21	4	11	2
1	2009-04-20 21:54:00	0	21	4	11	2
1	2009-04-20 21:55:00	0	21	4	11	2
1	2009-04-20 21:56:00	0	21	4	11	2
1	2009-04-20 21:57:00	0	21	4	11	2
1	2009-04-20 21:58:00	0	21	4	11	2
1	2009-04-20 21:59:00	0	21	4	11	2
1	2009-04-20 22:00:00	0	21	4	11	2
1	2009-04-20 22:01:00	0	22	4	11	2
1	2009-04-20 22:02:00	0	22	4	11	2
1	2009-04-20 22:03:00	0	22	4	11	2
1	2009-04-20 22:04:00	0	22	4	11	2
1	2009-04-20 22:05:00	0	22	4	11	2
1	2009-04-20 22:06:00	0	22	4	11	2
1	2009-04-20 22:07:00	0	22	4	11	2
1	2009-04-20 22:08:00	11	22	4	11	2
1	2009-04-20 22:09:00	0	22	4	11	2
1	2009-04-20 22:10:00	0	22	4	11	2
1	2009-04-20 22:11:00	0	22	4	11	2
1	2009-04-20 22:12:00	0	22	4	11	2
1	2009-04-20 22:13:00	0	22	4	11	2
1	2009-04-20 22:14:00	0	22	4	11	2
1	2009-04-20 22:15:00	0	22	4	11	2
1	2009-04-20 22:16:00	0	22	4	11	2
1	2009-04-20 22:17:00	463	22	4	11	2
1	2009-04-20 22:18:00	428	22	4	11	2
1	2009-04-20 22:19:00	708	22	4	11	2
1	2009-04-20 22:20:00	463	22	4	11	2
1	2009-04-20 22:21:00	730	22	4	11	2
1	2009-04-20 22:22:00	819	22	4	11	2
1	2009-04-20 22:23:00	1538	22	4	11	2
1	2009-04-20 22:24:00	305	22	4	11	2
1	2009-04-20 22:25:00	351	22	4	11	2
1	2009-04-20 22:26:00	382	22	4	11	2
1	2009-04-20 22:27:00	276	22	4	11	2
1	2009-04-20 22:28:00	320	22	4	11	2
1	2009-04-20 22:29:00	351	22	4	11	2
1	2009-04-20 22:30:00	305	22	4	11	2
1	2009-04-20 22:31:00	88	22	4	11	2
1	2009-04-20 22:32:00	351	22	4	11	2
1	2009-04-20 22:33:00	249	22	4	11	2
1	2009-04-20 22:34:00	22	22	4	11	2
1	2009-04-20 22:35:00	33	22	4	11	2
1	2009-04-20 22:36:00	516	22	4	11	2
1	2009-04-20 22:37:00	305	22	4	11	2
1	2009-04-20 22:38:00	33	22	4	11	2
1	2009-04-20 22:39:00	55	22	4	11	2
1	2009-04-20 22:40:00	335	22	4	11	2
1	2009-04-20 22:41:00	0	22	4	11	2
1	2009-04-20 22:42:00	0	22	4	11	2
1	2009-04-20 22:43:00	11	22	4	11	2
1	2009-04-20 22:44:00	0	22	4	11	2
1	2009-04-20 22:45:00	0	22	4	11	2
1	2009-04-20 22:46:00	0	22	4	11	2
1	2009-04-20 22:47:00	0	22	4	11	2
1	2009-04-20 22:48:00	0	22	4	11	2
1	2009-04-20 22:49:00	0	22	4	11	2
1	2009-04-20 22:50:00	0	22	4	11	2
1	2009-04-20 22:51:00	0	22	4	11	2
1	2009-04-20 22:52:00	0	22	4	11	2
1	2009-04-20 22:53:00	0	22	4	11	2
1	2009-04-20 22:54:00	0	22	4	11	2
1	2009-04-20 22:55:00	0	22	4	11	2
1	2009-04-20 22:56:00	0	22	4	11	2
1	2009-04-20 22:57:00	0	22	4	11	2
1	2009-04-20 22:58:00	0	22	4	11	2
1	2009-04-20 22:59:00	0	22	4	11	2
1	2009-04-20 23:00:00	0	22	4	11	2
1	2009-04-20 23:01:00	0	23	4	11	2
1	2009-04-20 23:02:00	0	23	4	11	2
1	2009-04-20 23:03:00	0	23	4	11	2
1	2009-04-20 23:04:00	0	23	4	11	2
1	2009-04-20 23:05:00	0	23	4	11	2
1	2009-04-20 23:06:00	0	23	4	11	2
1	2009-04-20 23:07:00	0	23	4	11	2
1	2009-04-20 23:08:00	0	23	4	11	2
1	2009-04-20 23:09:00	0	23	4	11	2
1	2009-04-20 23:10:00	0	23	4	11	2
1	2009-04-20 23:11:00	0	23	4	11	2
1	2009-04-20 23:12:00	0	23	4	11	2
1	2009-04-20 23:13:00	0	23	4	11	2
1	2009-04-20 23:14:00	0	23	4	11	2
1	2009-04-20 23:15:00	0	23	4	11	2
1	2009-04-20 23:16:00	0	23	4	11	2
1	2009-04-20 23:17:00	0	23	4	11	2
1	2009-04-20 23:18:00	0	23	4	11	2
1	2009-04-20 23:19:00	0	23	4	11	2
1	2009-04-20 23:20:00	0	23	4	11	2
1	2009-04-20 23:21:00	0	23	4	11	2
1	2009-04-20 23:22:00	0	23	4	11	2
1	2009-04-20 23:23:00	0	23	4	11	2
1	2009-04-20 23:24:00	0	23	4	11	2
1	2009-04-20 23:25:00	0	23	4	11	2
1	2009-04-20 23:26:00	0	23	4	11	2
1	2009-04-20 23:27:00	0	23	4	11	2
1	2009-04-20 23:28:00	0	23	4	11	2
1	2009-04-20 23:29:00	0	23	4	11	2
1	2009-04-20 23:30:00	0	23	4	11	2
1	2009-04-20 23:31:00	0	23	4	11	2
1	2009-04-20 23:32:00	0	23	4	11	2
1	2009-04-20 23:33:00	0	23	4	11	2
1	2009-04-20 23:34:00	0	23	4	11	2
1	2009-04-20 23:35:00	0	23	4	11	2
1	2009-04-20 23:36:00	0	23	4	11	2
1	2009-04-20 23:37:00	0	23	4	11	2
1	2009-04-20 23:38:00	0	23	4	11	2
1	2009-04-20 23:39:00	0	23	4	11	2
1	2009-04-20 23:40:00	0	23	4	11	2
1	2009-04-20 23:41:00	0	23	4	11	2
1	2009-04-20 23:42:00	0	23	4	11	2
1	2009-04-20 23:43:00	0	23	4	11	2
1	2009-04-20 23:44:00	0	23	4	11	2
1	2009-04-20 23:45:00	0	23	4	11	2
1	2009-04-20 23:46:00	0	23	4	11	2
1	2009-04-20 23:47:00	0	23	4	11	2
1	2009-04-20 23:48:00	0	23	4	11	2
1	2009-04-20 23:49:00	0	23	4	11	2
1	2009-04-20 23:50:00	0	23	4	11	2
1	2009-04-20 23:51:00	0	23	4	11	2
1	2009-04-20 23:52:00	0	23	4	11	2
1	2009-04-20 23:53:00	0	23	4	11	2
1	2009-04-20 23:54:00	0	23	4	11	2
1	2009-04-20 23:55:00	0	23	4	11	2
1	2009-04-20 23:56:00	0	23	4	11	2
1	2009-04-20 23:57:00	0	23	4	11	2
1	2009-04-20 23:58:00	0	23	4	11	2
1	2009-04-20 23:59:00	0	23	4	11	2
1	2009-04-21	0	23	4	11	2
1	2009-04-21 00:01:00	0	0	1	12	3
1	2009-04-21 00:02:00	0	0	1	12	3
1	2009-04-21 00:03:00	0	0	1	12	3
1	2009-04-21 00:04:00	0	0	1	12	3
1	2009-04-21 00:05:00	0	0	1	12	3
1	2009-04-21 00:06:00	0	0	1	12	3
1	2009-04-21 00:07:00	0	0	1	12	3
1	2009-04-21 00:08:00	0	0	1	12	3
1	2009-04-21 00:09:00	0	0	1	12	3
1	2009-04-21 00:10:00	0	0	1	12	3
1	2009-04-21 00:11:00	0	0	1	12	3
1	2009-04-21 00:12:00	0	0	1	12	3
1	2009-04-21 00:13:00	0	0	1	12	3
1	2009-04-21 00:14:00	0	0	1	12	3
1	2009-04-21 00:15:00	0	0	1	12	3
1	2009-04-21 00:16:00	0	0	1	12	3
1	2009-04-21 00:17:00	0	0	1	12	3
1	2009-04-21 00:18:00	0	0	1	12	3
1	2009-04-21 00:19:00	0	0	1	12	3
1	2009-04-21 00:20:00	0	0	1	12	3
1	2009-04-21 00:21:00	0	0	1	12	3
1	2009-04-21 00:22:00	0	0	1	12	3
1	2009-04-21 00:23:00	0	0	1	12	3
1	2009-04-21 00:24:00	0	0	1	12	3
1	2009-04-21 00:25:00	0	0	1	12	3
1	2009-04-21 00:26:00	0	0	1	12	3
1	2009-04-21 00:27:00	0	0	1	12	3
1	2009-04-21 00:28:00	11	0	1	12	3
1	2009-04-21 00:29:00	0	0	1	12	3
1	2009-04-21 00:30:00	0	0	1	12	3
1	2009-04-21 00:31:00	0	0	1	12	3
1	2009-04-21 00:32:00	0	0	1	12	3
1	2009-04-21 00:33:00	0	0	1	12	3
1	2009-04-21 00:34:00	0	0	1	12	3
1	2009-04-21 00:35:00	0	0	1	12	3
1	2009-04-21 00:36:00	0	0	1	12	3
1	2009-04-21 00:37:00	0	0	1	12	3
1	2009-04-21 00:38:00	0	0	1	12	3
1	2009-04-21 00:39:00	0	0	1	12	3
1	2009-04-21 00:40:00	0	0	1	12	3
1	2009-04-21 00:41:00	0	0	1	12	3
1	2009-04-21 00:42:00	0	0	1	12	3
1	2009-04-21 00:43:00	0	0	1	12	3
1	2009-04-21 00:44:00	0	0	1	12	3
1	2009-04-21 00:45:00	0	0	1	12	3
1	2009-04-21 00:46:00	0	0	1	12	3
1	2009-04-21 00:47:00	0	0	1	12	3
1	2009-04-21 00:48:00	0	0	1	12	3
1	2009-04-21 00:49:00	0	0	1	12	3
1	2009-04-21 00:50:00	0	0	1	12	3
1	2009-04-21 00:51:00	0	0	1	12	3
1	2009-04-21 00:52:00	0	0	1	12	3
1	2009-04-21 00:53:00	0	0	1	12	3
1	2009-04-21 00:54:00	0	0	1	12	3
1	2009-04-21 00:55:00	0	0	1	12	3
1	2009-04-21 00:56:00	0	0	1	12	3
1	2009-04-21 00:57:00	0	0	1	12	3
1	2009-04-21 00:58:00	0	0	1	12	3
1	2009-04-21 00:59:00	0	0	1	12	3
1	2009-04-21 01:00:00	0	0	1	12	3
1	2009-04-21 01:01:00	0	1	1	12	3
1	2009-04-21 01:02:00	11	1	1	12	3
1	2009-04-21 01:03:00	22	1	1	12	3
1	2009-04-21 01:04:00	534	1	1	12	3
1	2009-04-21 01:05:00	730	1	1	12	3
1	2009-04-21 01:06:00	0	1	1	12	3
1	2009-04-21 01:07:00	0	1	1	12	3
1	2009-04-21 01:08:00	0	1	1	12	3
1	2009-04-21 01:09:00	0	1	1	12	3
1	2009-04-21 01:10:00	0	1	1	12	3
1	2009-04-21 01:11:00	0	1	1	12	3
1	2009-04-21 01:12:00	0	1	1	12	3
1	2009-04-21 01:13:00	0	1	1	12	3
1	2009-04-21 01:14:00	0	1	1	12	3
1	2009-04-21 01:15:00	0	1	1	12	3
1	2009-04-21 01:16:00	0	1	1	12	3
1	2009-04-21 01:17:00	0	1	1	12	3
1	2009-04-21 01:18:00	0	1	1	12	3
1	2009-04-21 01:19:00	0	1	1	12	3
1	2009-04-21 01:20:00	0	1	1	12	3
1	2009-04-21 01:21:00	0	1	1	12	3
1	2009-04-21 01:22:00	0	1	1	12	3
1	2009-04-21 01:23:00	0	1	1	12	3
1	2009-04-21 01:24:00	0	1	1	12	3
1	2009-04-21 01:25:00	0	1	1	12	3
1	2009-04-21 01:26:00	0	1	1	12	3
1	2009-04-21 01:27:00	0	1	1	12	3
1	2009-04-21 01:28:00	0	1	1	12	3
1	2009-04-21 01:29:00	0	1	1	12	3
1	2009-04-21 01:30:00	0	1	1	12	3
1	2009-04-21 01:31:00	0	1	1	12	3
1	2009-04-21 01:32:00	0	1	1	12	3
1	2009-04-21 01:33:00	0	1	1	12	3
1	2009-04-21 01:34:00	0	1	1	12	3
1	2009-04-21 01:35:00	0	1	1	12	3
1	2009-04-21 01:36:00	0	1	1	12	3
1	2009-04-21 01:37:00	0	1	1	12	3
1	2009-04-21 01:38:00	0	1	1	12	3
1	2009-04-21 01:39:00	0	1	1	12	3
1	2009-04-21 01:40:00	0	1	1	12	3
1	2009-04-21 01:41:00	0	1	1	12	3
1	2009-04-21 01:42:00	0	1	1	12	3
1	2009-04-21 01:43:00	0	1	1	12	3
1	2009-04-21 01:44:00	0	1	1	12	3
1	2009-04-21 01:45:00	0	1	1	12	3
1	2009-04-21 01:46:00	0	1	1	12	3
1	2009-04-21 01:47:00	0	1	1	12	3
1	2009-04-21 01:48:00	0	1	1	12	3
1	2009-04-21 01:49:00	0	1	1	12	3
1	2009-04-21 01:50:00	0	1	1	12	3
1	2009-04-21 01:51:00	0	1	1	12	3
1	2009-04-21 01:52:00	0	1	1	12	3
1	2009-04-21 01:53:00	0	1	1	12	3
1	2009-04-21 01:54:00	0	1	1	12	3
1	2009-04-21 01:55:00	0	1	1	12	3
1	2009-04-21 01:56:00	0	1	1	12	3
1	2009-04-21 01:57:00	0	1	1	12	3
1	2009-04-21 01:58:00	0	1	1	12	3
1	2009-04-21 01:59:00	0	1	1	12	3
1	2009-04-21 02:00:00	0	1	1	12	3
1	2009-04-21 02:01:00	0	2	1	12	3
1	2009-04-21 02:02:00	0	2	1	12	3
1	2009-04-21 02:03:00	0	2	1	12	3
1	2009-04-21 02:04:00	0	2	1	12	3
1	2009-04-21 02:05:00	0	2	1	12	3
1	2009-04-21 02:06:00	0	2	1	12	3
1	2009-04-21 02:07:00	0	2	1	12	3
1	2009-04-21 02:08:00	0	2	1	12	3
1	2009-04-21 02:09:00	0	2	1	12	3
1	2009-04-21 02:10:00	0	2	1	12	3
1	2009-04-21 02:11:00	0	2	1	12	3
1	2009-04-21 02:12:00	0	2	1	12	3
1	2009-04-21 02:13:00	0	2	1	12	3
1	2009-04-21 02:14:00	0	2	1	12	3
1	2009-04-21 02:15:00	0	2	1	12	3
1	2009-04-21 02:16:00	0	2	1	12	3
1	2009-04-21 02:17:00	0	2	1	12	3
1	2009-04-21 02:18:00	0	2	1	12	3
1	2009-04-21 02:19:00	0	2	1	12	3
1	2009-04-21 02:20:00	0	2	1	12	3
1	2009-04-21 02:21:00	0	2	1	12	3
1	2009-04-21 02:22:00	0	2	1	12	3
1	2009-04-21 02:23:00	0	2	1	12	3
1	2009-04-21 02:24:00	11	2	1	12	3
1	2009-04-21 02:25:00	11	2	1	12	3
1	2009-04-21 02:26:00	0	2	1	12	3
1	2009-04-21 02:27:00	0	2	1	12	3
1	2009-04-21 02:28:00	0	2	1	12	3
1	2009-04-21 02:29:00	0	2	1	12	3
1	2009-04-21 02:30:00	0	2	1	12	3
1	2009-04-21 02:31:00	0	2	1	12	3
1	2009-04-21 02:32:00	0	2	1	12	3
1	2009-04-21 02:33:00	0	2	1	12	3
1	2009-04-21 02:34:00	0	2	1	12	3
1	2009-04-21 02:35:00	0	2	1	12	3
1	2009-04-21 02:36:00	0	2	1	12	3
1	2009-04-21 02:37:00	0	2	1	12	3
1	2009-04-21 02:38:00	0	2	1	12	3
1	2009-04-21 02:39:00	0	2	1	12	3
1	2009-04-21 02:40:00	0	2	1	12	3
1	2009-04-21 02:41:00	0	2	1	12	3
1	2009-04-21 02:42:00	0	2	1	12	3
1	2009-04-21 02:43:00	0	2	1	12	3
1	2009-04-21 02:44:00	0	2	1	12	3
1	2009-04-21 02:45:00	0	2	1	12	3
1	2009-04-21 02:46:00	0	2	1	12	3
1	2009-04-21 02:47:00	0	2	1	12	3
1	2009-04-21 02:48:00	0	2	1	12	3
1	2009-04-21 02:49:00	0	2	1	12	3
1	2009-04-21 02:50:00	0	2	1	12	3
1	2009-04-21 02:51:00	0	2	1	12	3
1	2009-04-21 02:52:00	0	2	1	12	3
1	2009-04-21 02:53:00	276	2	1	12	3
1	2009-04-21 02:54:00	66	2	1	12	3
1	2009-04-21 02:55:00	0	2	1	12	3
1	2009-04-21 02:56:00	0	2	1	12	3
1	2009-04-21 02:57:00	0	2	1	12	3
1	2009-04-21 02:58:00	0	2	1	12	3
1	2009-04-21 02:59:00	0	2	1	12	3
1	2009-04-21 03:00:00	0	2	1	12	3
1	2009-04-21 03:01:00	0	3	1	12	3
1	2009-04-21 03:02:00	0	3	1	12	3
1	2009-04-21 03:03:00	0	3	1	12	3
1	2009-04-21 03:04:00	0	3	1	12	3
1	2009-04-21 03:05:00	0	3	1	12	3
1	2009-04-21 03:06:00	0	3	1	12	3
1	2009-04-21 03:07:00	0	3	1	12	3
1	2009-04-21 03:08:00	0	3	1	12	3
1	2009-04-21 03:09:00	0	3	1	12	3
1	2009-04-21 03:10:00	0	3	1	12	3
1	2009-04-21 03:11:00	11	3	1	12	3
1	2009-04-21 03:12:00	0	3	1	12	3
1	2009-04-21 03:13:00	0	3	1	12	3
1	2009-04-21 03:14:00	0	3	1	12	3
1	2009-04-21 03:15:00	0	3	1	12	3
1	2009-04-21 03:16:00	0	3	1	12	3
1	2009-04-21 03:17:00	0	3	1	12	3
1	2009-04-21 03:18:00	0	3	1	12	3
1	2009-04-21 03:19:00	0	3	1	12	3
1	2009-04-21 03:20:00	0	3	1	12	3
1	2009-04-21 03:21:00	0	3	1	12	3
1	2009-04-21 03:22:00	0	3	1	12	3
1	2009-04-21 03:23:00	0	3	1	12	3
1	2009-04-21 03:24:00	0	3	1	12	3
1	2009-04-21 03:25:00	0	3	1	12	3
1	2009-04-21 03:26:00	0	3	1	12	3
1	2009-04-21 03:27:00	0	3	1	12	3
1	2009-04-21 03:28:00	0	3	1	12	3
1	2009-04-21 03:29:00	0	3	1	12	3
1	2009-04-21 03:30:00	0	3	1	12	3
1	2009-04-21 03:31:00	0	3	1	12	3
1	2009-04-21 03:32:00	0	3	1	12	3
1	2009-04-21 03:33:00	0	3	1	12	3
1	2009-04-21 03:34:00	0	3	1	12	3
1	2009-04-21 03:35:00	0	3	1	12	3
1	2009-04-21 03:36:00	0	3	1	12	3
1	2009-04-21 03:37:00	0	3	1	12	3
1	2009-04-21 03:38:00	0	3	1	12	3
1	2009-04-21 03:39:00	0	3	1	12	3
1	2009-04-21 03:40:00	0	3	1	12	3
1	2009-04-21 03:41:00	0	3	1	12	3
1	2009-04-21 03:42:00	0	3	1	12	3
1	2009-04-21 03:43:00	0	3	1	12	3
1	2009-04-21 03:44:00	0	3	1	12	3
1	2009-04-21 03:45:00	0	3	1	12	3
1	2009-04-21 03:46:00	0	3	1	12	3
1	2009-04-21 03:47:00	0	3	1	12	3
1	2009-04-21 03:48:00	0	3	1	12	3
1	2009-04-21 03:49:00	0	3	1	12	3
1	2009-04-21 03:50:00	0	3	1	12	3
1	2009-04-21 03:51:00	0	3	1	12	3
1	2009-04-21 03:52:00	0	3	1	12	3
1	2009-04-21 03:53:00	0	3	1	12	3
1	2009-04-21 03:54:00	0	3	1	12	3
1	2009-04-21 03:55:00	0	3	1	12	3
1	2009-04-21 03:56:00	0	3	1	12	3
1	2009-04-21 03:57:00	0	3	1	12	3
1	2009-04-21 03:58:00	0	3	1	12	3
1	2009-04-21 03:59:00	0	3	1	12	3
1	2009-04-21 04:00:00	0	3	1	12	3
1	2009-04-21 04:01:00	0	4	1	12	3
1	2009-04-21 04:02:00	0	4	1	12	3
1	2009-04-21 04:03:00	0	4	1	12	3
1	2009-04-21 04:04:00	0	4	1	12	3
1	2009-04-21 04:05:00	0	4	1	12	3
1	2009-04-21 04:06:00	0	4	1	12	3
1	2009-04-21 04:07:00	0	4	1	12	3
1	2009-04-21 04:08:00	0	4	1	12	3
1	2009-04-21 04:09:00	0	4	1	12	3
1	2009-04-21 04:10:00	0	4	1	12	3
1	2009-04-21 04:11:00	0	4	1	12	3
1	2009-04-21 04:12:00	0	4	1	12	3
1	2009-04-21 04:13:00	66	4	1	12	3
1	2009-04-21 04:14:00	589	4	1	12	3
1	2009-04-21 04:15:00	589	4	1	12	3
1	2009-04-21 04:16:00	11	4	1	12	3
1	2009-04-21 04:17:00	0	4	1	12	3
1	2009-04-21 04:18:00	0	4	1	12	3
1	2009-04-21 04:19:00	0	4	1	12	3
1	2009-04-21 04:20:00	0	4	1	12	3
1	2009-04-21 04:21:00	0	4	1	12	3
1	2009-04-21 04:22:00	0	4	1	12	3
1	2009-04-21 04:23:00	0	4	1	12	3
1	2009-04-21 04:24:00	0	4	1	12	3
1	2009-04-21 04:25:00	0	4	1	12	3
1	2009-04-21 04:26:00	0	4	1	12	3
1	2009-04-21 04:27:00	0	4	1	12	3
1	2009-04-21 04:28:00	0	4	1	12	3
1	2009-04-21 04:29:00	0	4	1	12	3
1	2009-04-21 04:30:00	0	4	1	12	3
1	2009-04-21 04:31:00	0	4	1	12	3
1	2009-04-21 04:32:00	0	4	1	12	3
1	2009-04-21 04:33:00	0	4	1	12	3
1	2009-04-21 04:34:00	33	4	1	12	3
1	2009-04-21 04:35:00	0	4	1	12	3
1	2009-04-21 04:36:00	0	4	1	12	3
1	2009-04-21 04:37:00	0	4	1	12	3
1	2009-04-21 04:38:00	0	4	1	12	3
1	2009-04-21 04:39:00	0	4	1	12	3
1	2009-04-21 04:40:00	0	4	1	12	3
1	2009-04-21 04:41:00	11	4	1	12	3
1	2009-04-21 04:42:00	0	4	1	12	3
1	2009-04-21 04:43:00	0	4	1	12	3
1	2009-04-21 04:44:00	0	4	1	12	3
1	2009-04-21 04:45:00	0	4	1	12	3
1	2009-04-21 04:46:00	0	4	1	12	3
1	2009-04-21 04:47:00	0	4	1	12	3
1	2009-04-21 04:48:00	0	4	1	12	3
1	2009-04-21 04:49:00	0	4	1	12	3
1	2009-04-21 04:50:00	0	4	1	12	3
1	2009-04-21 04:51:00	0	4	1	12	3
1	2009-04-21 04:52:00	0	4	1	12	3
1	2009-04-21 04:53:00	0	4	1	12	3
1	2009-04-21 04:54:00	0	4	1	12	3
1	2009-04-21 04:55:00	0	4	1	12	3
1	2009-04-21 04:56:00	0	4	1	12	3
1	2009-04-21 04:57:00	0	4	1	12	3
1	2009-04-21 04:58:00	0	4	1	12	3
1	2009-04-21 04:59:00	0	4	1	12	3
1	2009-04-21 05:00:00	0	4	1	12	3
1	2009-04-21 05:01:00	0	5	1	12	3
1	2009-04-21 05:02:00	33	5	1	12	3
1	2009-04-21 05:03:00	0	5	1	12	3
1	2009-04-21 05:04:00	0	5	1	12	3
1	2009-04-21 05:05:00	0	5	1	12	3
1	2009-04-21 05:06:00	0	5	1	12	3
1	2009-04-21 05:07:00	0	5	1	12	3
1	2009-04-21 05:08:00	11	5	1	12	3
1	2009-04-21 05:09:00	0	5	1	12	3
1	2009-04-21 05:10:00	0	5	1	12	3
1	2009-04-21 05:11:00	0	5	1	12	3
1	2009-04-21 05:12:00	11	5	1	12	3
1	2009-04-21 05:13:00	0	5	1	12	3
1	2009-04-21 05:14:00	0	5	1	12	3
1	2009-04-21 05:15:00	0	5	1	12	3
1	2009-04-21 05:16:00	0	5	1	12	3
1	2009-04-21 05:17:00	0	5	1	12	3
1	2009-04-21 05:18:00	0	5	1	12	3
1	2009-04-21 05:19:00	0	5	1	12	3
1	2009-04-21 05:20:00	0	5	1	12	3
1	2009-04-21 05:21:00	0	5	1	12	3
1	2009-04-21 05:22:00	0	5	1	12	3
1	2009-04-21 05:23:00	0	5	1	12	3
1	2009-04-21 05:24:00	0	5	1	12	3
1	2009-04-21 05:25:00	0	5	1	12	3
1	2009-04-21 05:26:00	0	5	1	12	3
1	2009-04-21 05:27:00	0	5	1	12	3
1	2009-04-21 05:28:00	0	5	1	12	3
1	2009-04-21 05:29:00	0	5	1	12	3
1	2009-04-21 05:30:00	0	5	1	12	3
1	2009-04-21 05:31:00	0	5	1	12	3
1	2009-04-21 05:32:00	0	5	1	12	3
1	2009-04-21 05:33:00	11	5	1	12	3
1	2009-04-21 05:34:00	11	5	1	12	3
1	2009-04-21 05:35:00	11	5	1	12	3
1	2009-04-21 05:36:00	0	5	1	12	3
1	2009-04-21 05:37:00	0	5	1	12	3
1	2009-04-21 05:38:00	0	5	1	12	3
1	2009-04-21 05:39:00	0	5	1	12	3
1	2009-04-21 05:40:00	0	5	1	12	3
1	2009-04-21 05:41:00	0	5	1	12	3
1	2009-04-21 05:42:00	0	5	1	12	3
1	2009-04-21 05:43:00	0	5	1	12	3
1	2009-04-21 05:44:00	0	5	1	12	3
1	2009-04-21 05:45:00	0	5	1	12	3
1	2009-04-21 05:46:00	0	5	1	12	3
1	2009-04-21 05:47:00	0	5	1	12	3
1	2009-04-21 05:48:00	0	5	1	12	3
1	2009-04-21 05:49:00	0	5	1	12	3
1	2009-04-21 05:50:00	0	5	1	12	3
1	2009-04-21 05:51:00	0	5	1	12	3
1	2009-04-21 05:52:00	0	5	1	12	3
1	2009-04-21 05:53:00	0	5	1	12	3
1	2009-04-21 05:54:00	22	5	1	12	3
1	2009-04-21 05:55:00	0	5	1	12	3
1	2009-04-21 05:56:00	0	5	1	12	3
1	2009-04-21 05:57:00	0	5	1	12	3
1	2009-04-21 05:58:00	0	5	1	12	3
1	2009-04-21 05:59:00	0	5	1	12	3
1	2009-04-21 06:00:00	0	5	1	12	3
1	2009-04-21 06:01:00	0	6	2	12	3
1	2009-04-21 06:02:00	0	6	2	12	3
1	2009-04-21 06:03:00	0	6	2	12	3
1	2009-04-21 06:04:00	0	6	2	12	3
1	2009-04-21 06:05:00	0	6	2	12	3
1	2009-04-21 06:06:00	0	6	2	12	3
1	2009-04-21 06:07:00	0	6	2	12	3
1	2009-04-21 06:08:00	0	6	2	12	3
1	2009-04-21 06:09:00	0	6	2	12	3
1	2009-04-21 06:10:00	0	6	2	12	3
1	2009-04-21 06:11:00	0	6	2	12	3
1	2009-04-21 06:12:00	0	6	2	12	3
1	2009-04-21 06:13:00	0	6	2	12	3
1	2009-04-21 06:14:00	11	6	2	12	3
1	2009-04-21 06:15:00	0	6	2	12	3
1	2009-04-21 06:16:00	157	6	2	12	3
1	2009-04-21 06:17:00	44	6	2	12	3
1	2009-04-21 06:18:00	11	6	2	12	3
1	2009-04-21 06:19:00	157	6	2	12	3
1	2009-04-21 06:20:00	730	6	2	12	3
1	2009-04-21 06:21:00	589	6	2	12	3
1	2009-04-21 06:22:00	516	6	2	12	3
1	2009-04-21 06:23:00	276	6	2	12	3
1	2009-04-21 06:24:00	276	6	2	12	3
1	2009-04-21 06:25:00	110	6	2	12	3
1	2009-04-21 06:26:00	516	6	2	12	3
1	2009-04-21 06:27:00	351	6	2	12	3
1	2009-04-21 06:28:00	669	6	2	12	3
1	2009-04-21 06:29:00	157	6	2	12	3
1	2009-04-21 06:30:00	22	6	2	12	3
1	2009-04-21 06:31:00	44	6	2	12	3
1	2009-04-21 06:32:00	0	6	2	12	3
1	2009-04-21 06:33:00	0	6	2	12	3
1	2009-04-21 06:34:00	33	6	2	12	3
1	2009-04-21 06:35:00	22	6	2	12	3
1	2009-04-21 06:36:00	33	6	2	12	3
1	2009-04-21 06:37:00	0	6	2	12	3
1	2009-04-21 06:38:00	196	6	2	12	3
1	2009-04-21 06:39:00	143	6	2	12	3
1	2009-04-21 06:40:00	0	6	2	12	3
1	2009-04-21 06:41:00	0	6	2	12	3
1	2009-04-21 06:42:00	0	6	2	12	3
1	2009-04-21 06:43:00	0	6	2	12	3
1	2009-04-21 06:44:00	0	6	2	12	3
1	2009-04-21 06:45:00	0	6	2	12	3
1	2009-04-21 06:46:00	552	6	2	12	3
1	2009-04-21 06:47:00	366	6	2	12	3
1	2009-04-21 06:48:00	320	6	2	12	3
1	2009-04-21 06:49:00	730	6	2	12	3
1	2009-04-21 06:50:00	44	6	2	12	3
1	2009-04-21 06:51:00	22	6	2	12	3
1	2009-04-21 06:52:00	351	6	2	12	3
1	2009-04-21 06:53:00	236	6	2	12	3
1	2009-04-21 06:54:00	481	6	2	12	3
1	2009-04-21 06:55:00	223	6	2	12	3
1	2009-04-21 06:56:00	99	6	2	12	3
1	2009-04-21 06:57:00	157	6	2	12	3
1	2009-04-21 06:58:00	351	6	2	12	3
1	2009-04-21 06:59:00	196	6	2	12	3
1	2009-04-21 07:00:00	775	6	2	12	3
1	2009-04-21 07:01:00	1114	7	2	12	3
1	2009-04-21 07:02:00	753	7	2	12	3
1	2009-04-21 07:03:00	249	7	2	12	3
1	2009-04-21 07:04:00	143	7	2	12	3
1	2009-04-21 07:05:00	157	7	2	12	3
1	2009-04-21 07:06:00	446	7	2	12	3
1	2009-04-21 07:07:00	170	7	2	12	3
1	2009-04-21 07:08:00	263	7	2	12	3
1	2009-04-21 07:09:00	121	7	2	12	3
1	2009-04-21 07:10:00	110	7	2	12	3
1	2009-04-21 07:11:00	132	7	2	12	3
1	2009-04-21 07:12:00	1377	7	2	12	3
1	2009-04-21 07:13:00	481	7	2	12	3
1	2009-04-21 07:14:00	446	7	2	12	3
1	2009-04-21 07:15:00	819	7	2	12	3
1	2009-04-21 07:16:00	366	7	2	12	3
1	2009-04-21 07:17:00	428	7	2	12	3
1	2009-04-21 07:18:00	305	7	2	12	3
1	2009-04-21 07:19:00	481	7	2	12	3
1	2009-04-21 07:20:00	428	7	2	12	3
1	2009-04-21 07:21:00	552	7	2	12	3
1	2009-04-21 07:22:00	609	7	2	12	3
1	2009-04-21 07:23:00	516	7	2	12	3
1	2009-04-21 07:24:00	863	7	2	12	3
1	2009-04-21 07:25:00	351	7	2	12	3
1	2009-04-21 07:26:00	196	7	2	12	3
1	2009-04-21 07:27:00	11	7	2	12	3
1	2009-04-21 07:28:00	33	7	2	12	3
1	2009-04-21 07:29:00	88	7	2	12	3
1	2009-04-21 07:30:00	44	7	2	12	3
1	2009-04-21 07:31:00	132	7	2	12	3
1	2009-04-21 07:32:00	99	7	2	12	3
1	2009-04-21 07:33:00	11	7	2	12	3
1	2009-04-21 07:34:00	210	7	2	12	3
1	2009-04-21 07:35:00	157	7	2	12	3
1	2009-04-21 07:36:00	110	7	2	12	3
1	2009-04-21 07:37:00	33	7	2	12	3
1	2009-04-21 07:38:00	589	7	2	12	3
1	2009-04-21 07:39:00	335	7	2	12	3
1	2009-04-21 07:40:00	305	7	2	12	3
1	2009-04-21 07:41:00	2108	7	2	12	3
1	2009-04-21 07:42:00	863	7	2	12	3
1	2009-04-21 07:43:00	1256	7	2	12	3
1	2009-04-21 07:44:00	1713	7	2	12	3
1	2009-04-21 07:45:00	1538	7	2	12	3
1	2009-04-21 07:46:00	936	7	2	12	3
1	2009-04-21 07:47:00	1315	7	2	12	3
1	2009-04-21 07:48:00	1408	7	2	12	3
1	2009-04-21 07:49:00	66	7	2	12	3
1	2009-04-21 07:50:00	33	7	2	12	3
1	2009-04-21 07:51:00	33	7	2	12	3
1	2009-04-21 07:52:00	708	7	2	12	3
1	2009-04-21 07:53:00	66	7	2	12	3
1	2009-04-21 07:54:00	629	7	2	12	3
1	2009-04-21 07:55:00	649	7	2	12	3
1	2009-04-21 07:56:00	99	7	2	12	3
1	2009-04-21 07:57:00	170	7	2	12	3
1	2009-04-21 07:58:00	66	7	2	12	3
1	2009-04-21 07:59:00	0	7	2	12	3
1	2009-04-21 08:00:00	11	7	2	12	3
1	2009-04-21 08:01:00	446	8	2	12	3
1	2009-04-21 08:02:00	366	8	2	12	3
1	2009-04-21 08:03:00	44	8	2	12	3
1	2009-04-21 08:04:00	196	8	2	12	3
1	2009-04-21 08:05:00	428	8	2	12	3
1	2009-04-21 08:06:00	196	8	2	12	3
1	2009-04-21 08:07:00	0	8	2	12	3
1	2009-04-21 08:08:00	413	8	2	12	3
1	2009-04-21 08:09:00	305	8	2	12	3
1	2009-04-21 08:10:00	289	8	2	12	3
1	2009-04-21 08:11:00	196	8	2	12	3
1	2009-04-21 08:12:00	196	8	2	12	3
1	2009-04-21 08:13:00	99	8	2	12	3
1	2009-04-21 08:14:00	44	8	2	12	3
1	2009-04-21 08:15:00	0	8	2	12	3
1	2009-04-21 08:16:00	335	8	2	12	3
1	2009-04-21 08:17:00	289	8	2	12	3
1	2009-04-21 08:18:00	249	8	2	12	3
1	2009-04-21 08:19:00	11	8	2	12	3
1	2009-04-21 08:20:00	0	8	2	12	3
1	2009-04-21 08:21:00	0	8	2	12	3
1	2009-04-21 08:22:00	0	8	2	12	3
1	2009-04-21 08:23:00	33	8	2	12	3
1	2009-04-21 08:24:00	11	8	2	12	3
1	2009-04-21 08:25:00	0	8	2	12	3
1	2009-04-21 08:26:00	289	8	2	12	3
1	2009-04-21 08:27:00	534	8	2	12	3
1	2009-04-21 08:28:00	397	8	2	12	3
1	2009-04-21 08:29:00	263	8	2	12	3
1	2009-04-21 08:30:00	210	8	2	12	3
1	2009-04-21 08:31:00	99	8	2	12	3
1	2009-04-21 08:32:00	249	8	2	12	3
1	2009-04-21 08:33:00	210	8	2	12	3
1	2009-04-21 08:34:00	77	8	2	12	3
1	2009-04-21 08:35:00	33	8	2	12	3
1	2009-04-21 08:36:00	55	8	2	12	3
1	2009-04-21 08:37:00	499	8	2	12	3
1	2009-04-21 08:38:00	351	8	2	12	3
1	2009-04-21 08:39:00	0	8	2	12	3
1	2009-04-21 08:40:00	0	8	2	12	3
1	2009-04-21 08:41:00	0	8	2	12	3
1	2009-04-21 08:42:00	11	8	2	12	3
1	2009-04-21 08:43:00	0	8	2	12	3
1	2009-04-21 08:44:00	0	8	2	12	3
1	2009-04-21 08:45:00	0	8	2	12	3
1	2009-04-21 08:46:00	0	8	2	12	3
1	2009-04-21 08:47:00	11	8	2	12	3
1	2009-04-21 08:48:00	0	8	2	12	3
1	2009-04-21 08:49:00	0	8	2	12	3
1	2009-04-21 08:50:00	0	8	2	12	3
1	2009-04-21 08:51:00	0	8	2	12	3
1	2009-04-21 08:52:00	0	8	2	12	3
1	2009-04-21 08:53:00	0	8	2	12	3
1	2009-04-21 08:54:00	0	8	2	12	3
1	2009-04-21 08:55:00	0	8	2	12	3
1	2009-04-21 08:56:00	0	8	2	12	3
1	2009-04-21 08:57:00	0	8	2	12	3
1	2009-04-21 08:58:00	0	8	2	12	3
1	2009-04-21 08:59:00	0	8	2	12	3
1	2009-04-21 09:00:00	0	8	2	12	3
1	2009-04-21 09:01:00	0	9	2	12	3
1	2009-04-21 09:02:00	0	9	2	12	3
1	2009-04-21 09:03:00	0	9	2	12	3
1	2009-04-21 09:04:00	0	9	2	12	3
1	2009-04-21 09:05:00	0	9	2	12	3
1	2009-04-21 09:06:00	463	9	2	12	3
1	2009-04-21 09:07:00	589	9	2	12	3
1	2009-04-21 09:08:00	481	9	2	12	3
1	2009-04-21 09:09:00	463	9	2	12	3
1	2009-04-21 09:10:00	320	9	2	12	3
1	2009-04-21 09:11:00	463	9	2	12	3
1	2009-04-21 09:12:00	516	9	2	12	3
1	2009-04-21 09:13:00	516	9	2	12	3
1	2009-04-21 09:14:00	589	9	2	12	3
1	2009-04-21 09:15:00	775	9	2	12	3
1	2009-04-21 09:16:00	499	9	2	12	3
1	2009-04-21 09:17:00	730	9	2	12	3
1	2009-04-21 09:18:00	753	9	2	12	3
1	2009-04-21 09:19:00	887	9	2	12	3
1	2009-04-21 09:20:00	649	9	2	12	3
1	2009-04-21 09:21:00	669	9	2	12	3
1	2009-04-21 09:22:00	210	9	2	12	3
1	2009-04-21 09:23:00	77	9	2	12	3
1	2009-04-21 09:24:00	210	9	2	12	3
1	2009-04-21 09:25:00	11	9	2	12	3
1	2009-04-21 09:26:00	0	9	2	12	3
1	2009-04-21 09:27:00	33	9	2	12	3
1	2009-04-21 09:28:00	0	9	2	12	3
1	2009-04-21 09:29:00	0	9	2	12	3
1	2009-04-21 09:30:00	22	9	2	12	3
1	2009-04-21 09:31:00	236	9	2	12	3
1	2009-04-21 09:32:00	382	9	2	12	3
1	2009-04-21 09:33:00	552	9	2	12	3
1	2009-04-21 09:34:00	382	9	2	12	3
1	2009-04-21 09:35:00	589	9	2	12	3
1	2009-04-21 09:36:00	552	9	2	12	3
1	2009-04-21 09:37:00	320	9	2	12	3
1	2009-04-21 09:38:00	305	9	2	12	3
1	2009-04-21 09:39:00	132	9	2	12	3
1	2009-04-21 09:40:00	499	9	2	12	3
1	2009-04-21 09:41:00	552	9	2	12	3
1	2009-04-21 09:42:00	689	9	2	12	3
1	2009-04-21 09:43:00	516	9	2	12	3
1	2009-04-21 09:44:00	223	9	2	12	3
1	2009-04-21 09:45:00	249	9	2	12	3
1	2009-04-21 09:46:00	66	9	2	12	3
1	2009-04-21 09:47:00	132	9	2	12	3
1	2009-04-21 09:48:00	143	9	2	12	3
1	2009-04-21 09:49:00	77	9	2	12	3
1	2009-04-21 09:50:00	305	9	2	12	3
1	2009-04-21 09:51:00	236	9	2	12	3
1	2009-04-21 09:52:00	183	9	2	12	3
1	2009-04-21 09:53:00	121	9	2	12	3
1	2009-04-21 09:54:00	22	9	2	12	3
1	2009-04-21 09:55:00	11	9	2	12	3
1	2009-04-21 09:56:00	110	9	2	12	3
1	2009-04-21 09:57:00	463	9	2	12	3
1	2009-04-21 09:58:00	320	9	2	12	3
1	2009-04-21 09:59:00	66	9	2	12	3
1	2009-04-21 10:00:00	210	9	2	12	3
1	2009-04-21 10:01:00	0	10	2	12	3
1	2009-04-21 10:02:00	55	10	2	12	3
1	2009-04-21 10:03:00	11	10	2	12	3
1	2009-04-21 10:04:00	481	10	2	12	3
1	2009-04-21 10:05:00	55	10	2	12	3
1	2009-04-21 10:06:00	305	10	2	12	3
1	2009-04-21 10:07:00	121	10	2	12	3
1	2009-04-21 10:08:00	110	10	2	12	3
1	2009-04-21 10:09:00	33	10	2	12	3
1	2009-04-21 10:10:00	0	10	2	12	3
1	2009-04-21 10:11:00	305	10	2	12	3
1	2009-04-21 10:12:00	223	10	2	12	3
1	2009-04-21 10:13:00	11	10	2	12	3
1	2009-04-21 10:14:00	55	10	2	12	3
1	2009-04-21 10:15:00	11	10	2	12	3
1	2009-04-21 10:16:00	22	10	2	12	3
1	2009-04-21 10:17:00	170	10	2	12	3
1	2009-04-21 10:18:00	11	10	2	12	3
1	2009-04-21 10:19:00	11	10	2	12	3
1	2009-04-21 10:20:00	143	10	2	12	3
1	2009-04-21 10:21:00	170	10	2	12	3
1	2009-04-21 10:22:00	289	10	2	12	3
1	2009-04-21 10:23:00	183	10	2	12	3
1	2009-04-21 10:24:00	88	10	2	12	3
1	2009-04-21 10:25:00	305	10	2	12	3
1	2009-04-21 10:26:00	0	10	2	12	3
1	2009-04-21 10:27:00	0	10	2	12	3
1	2009-04-21 10:28:00	0	10	2	12	3
1	2009-04-21 10:29:00	0	10	2	12	3
1	2009-04-21 10:30:00	0	10	2	12	3
1	2009-04-21 10:31:00	0	10	2	12	3
1	2009-04-21 10:32:00	0	10	2	12	3
1	2009-04-21 10:33:00	0	10	2	12	3
1	2009-04-21 10:34:00	0	10	2	12	3
1	2009-04-21 10:35:00	0	10	2	12	3
1	2009-04-21 10:36:00	0	10	2	12	3
1	2009-04-21 10:37:00	0	10	2	12	3
1	2009-04-21 10:38:00	33	10	2	12	3
1	2009-04-21 10:39:00	0	10	2	12	3
1	2009-04-21 10:40:00	0	10	2	12	3
1	2009-04-21 10:41:00	0	10	2	12	3
1	2009-04-21 10:42:00	11	10	2	12	3
1	2009-04-21 10:43:00	0	10	2	12	3
1	2009-04-21 10:44:00	0	10	2	12	3
1	2009-04-21 10:45:00	0	10	2	12	3
1	2009-04-21 10:46:00	0	10	2	12	3
1	2009-04-21 10:47:00	0	10	2	12	3
1	2009-04-21 10:48:00	0	10	2	12	3
1	2009-04-21 10:49:00	0	10	2	12	3
1	2009-04-21 10:50:00	0	10	2	12	3
1	2009-04-21 10:51:00	0	10	2	12	3
1	2009-04-21 10:52:00	0	10	2	12	3
1	2009-04-21 10:53:00	0	10	2	12	3
1	2009-04-21 10:54:00	0	10	2	12	3
1	2009-04-21 10:55:00	0	10	2	12	3
1	2009-04-21 10:56:00	0	10	2	12	3
1	2009-04-21 10:57:00	0	10	2	12	3
1	2009-04-21 10:58:00	0	10	2	12	3
1	2009-04-21 10:59:00	0	10	2	12	3
1	2009-04-21 11:00:00	0	10	2	12	3
1	2009-04-21 11:01:00	0	11	2	12	3
1	2009-04-21 11:02:00	0	11	2	12	3
1	2009-04-21 11:03:00	0	11	2	12	3
1	2009-04-21 11:04:00	0	11	2	12	3
1	2009-04-21 11:05:00	0	11	2	12	3
1	2009-04-21 11:06:00	0	11	2	12	3
1	2009-04-21 11:07:00	0	11	2	12	3
1	2009-04-21 11:08:00	0	11	2	12	3
1	2009-04-21 11:09:00	0	11	2	12	3
1	2009-04-21 11:10:00	0	11	2	12	3
1	2009-04-21 11:11:00	0	11	2	12	3
1	2009-04-21 11:12:00	0	11	2	12	3
1	2009-04-21 11:13:00	0	11	2	12	3
1	2009-04-21 11:14:00	0	11	2	12	3
1	2009-04-21 11:15:00	0	11	2	12	3
1	2009-04-21 11:16:00	0	11	2	12	3
1	2009-04-21 11:17:00	0	11	2	12	3
1	2009-04-21 11:18:00	0	11	2	12	3
1	2009-04-21 11:19:00	0	11	2	12	3
1	2009-04-21 11:20:00	0	11	2	12	3
1	2009-04-21 11:21:00	0	11	2	12	3
1	2009-04-21 11:22:00	0	11	2	12	3
1	2009-04-21 11:23:00	0	11	2	12	3
1	2009-04-21 11:24:00	0	11	2	12	3
1	2009-04-21 11:25:00	0	11	2	12	3
1	2009-04-21 11:26:00	0	11	2	12	3
1	2009-04-21 11:27:00	0	11	2	12	3
1	2009-04-21 11:28:00	0	11	2	12	3
1	2009-04-21 11:29:00	0	11	2	12	3
1	2009-04-21 11:30:00	22	11	2	12	3
1	2009-04-21 11:31:00	0	11	2	12	3
1	2009-04-21 11:32:00	0	11	2	12	3
1	2009-04-21 11:33:00	0	11	2	12	3
1	2009-04-21 11:34:00	0	11	2	12	3
1	2009-04-21 11:35:00	0	11	2	12	3
1	2009-04-21 11:36:00	0	11	2	12	3
1	2009-04-21 11:37:00	0	11	2	12	3
1	2009-04-21 11:38:00	22	11	2	12	3
1	2009-04-21 11:39:00	0	11	2	12	3
1	2009-04-21 11:40:00	0	11	2	12	3
1	2009-04-21 11:41:00	0	11	2	12	3
1	2009-04-21 11:42:00	0	11	2	12	3
1	2009-04-21 11:43:00	0	11	2	12	3
1	2009-04-21 11:44:00	11	11	2	12	3
1	2009-04-21 11:45:00	0	11	2	12	3
1	2009-04-21 11:46:00	0	11	2	12	3
1	2009-04-21 11:47:00	0	11	2	12	3
1	2009-04-21 11:48:00	0	11	2	12	3
1	2009-04-21 11:49:00	0	11	2	12	3
1	2009-04-21 11:50:00	0	11	2	12	3
1	2009-04-21 11:51:00	0	11	2	12	3
1	2009-04-21 11:52:00	0	11	2	12	3
1	2009-04-21 11:53:00	0	11	2	12	3
1	2009-04-21 11:54:00	0	11	2	12	3
1	2009-04-21 11:55:00	0	11	2	12	3
1	2009-04-21 11:56:00	0	11	2	12	3
1	2009-04-21 11:57:00	0	11	2	12	3
1	2009-04-21 11:58:00	0	11	2	12	3
1	2009-04-21 11:59:00	0	11	2	12	3
1	2009-04-21 12:00:00	0	11	2	12	3
1	2009-04-21 12:01:00	0	12	3	12	3
1	2009-04-21 12:02:00	0	12	3	12	3
1	2009-04-21 12:03:00	0	12	3	12	3
1	2009-04-21 12:04:00	0	12	3	12	3
1	2009-04-21 12:05:00	0	12	3	12	3
1	2009-04-21 12:06:00	11	12	3	12	3
1	2009-04-21 12:07:00	0	12	3	12	3
1	2009-04-21 12:08:00	0	12	3	12	3
1	2009-04-21 12:09:00	0	12	3	12	3
1	2009-04-21 12:10:00	0	12	3	12	3
1	2009-04-21 12:11:00	0	12	3	12	3
1	2009-04-21 12:12:00	11	12	3	12	3
1	2009-04-21 12:13:00	22	12	3	12	3
1	2009-04-21 12:14:00	0	12	3	12	3
1	2009-04-21 12:15:00	0	12	3	12	3
1	2009-04-21 12:16:00	0	12	3	12	3
1	2009-04-21 12:17:00	0	12	3	12	3
1	2009-04-21 12:18:00	0	12	3	12	3
1	2009-04-21 12:19:00	0	12	3	12	3
1	2009-04-21 12:20:00	0	12	3	12	3
1	2009-04-21 12:21:00	0	12	3	12	3
1	2009-04-21 12:22:00	0	12	3	12	3
1	2009-04-21 12:23:00	22	12	3	12	3
1	2009-04-21 12:24:00	0	12	3	12	3
1	2009-04-21 12:25:00	22	12	3	12	3
1	2009-04-21 12:26:00	0	12	3	12	3
1	2009-04-21 12:27:00	11	12	3	12	3
1	2009-04-21 12:28:00	11	12	3	12	3
1	2009-04-21 12:29:00	0	12	3	12	3
1	2009-04-21 12:30:00	0	12	3	12	3
1	2009-04-21 12:31:00	0	12	3	12	3
1	2009-04-21 12:32:00	0	12	3	12	3
1	2009-04-21 12:33:00	0	12	3	12	3
1	2009-04-21 12:34:00	0	12	3	12	3
1	2009-04-21 12:35:00	0	12	3	12	3
1	2009-04-21 12:36:00	0	12	3	12	3
1	2009-04-21 12:37:00	0	12	3	12	3
1	2009-04-21 12:38:00	0	12	3	12	3
1	2009-04-21 12:39:00	0	12	3	12	3
1	2009-04-21 12:40:00	0	12	3	12	3
1	2009-04-21 12:41:00	0	12	3	12	3
1	2009-04-21 12:42:00	0	12	3	12	3
1	2009-04-21 12:43:00	0	12	3	12	3
1	2009-04-21 12:44:00	0	12	3	12	3
1	2009-04-21 12:45:00	0	12	3	12	3
1	2009-04-21 12:46:00	0	12	3	12	3
1	2009-04-21 12:47:00	0	12	3	12	3
1	2009-04-21 12:48:00	0	12	3	12	3
1	2009-04-21 12:49:00	0	12	3	12	3
1	2009-04-21 12:50:00	0	12	3	12	3
1	2009-04-21 12:51:00	0	12	3	12	3
1	2009-04-21 12:52:00	0	12	3	12	3
1	2009-04-21 12:53:00	0	12	3	12	3
1	2009-04-21 12:54:00	55	12	3	12	3
1	2009-04-21 12:55:00	22	12	3	12	3
1	2009-04-21 12:56:00	11	12	3	12	3
1	2009-04-21 12:57:00	0	12	3	12	3
1	2009-04-21 12:58:00	157	12	3	12	3
1	2009-04-21 12:59:00	66	12	3	12	3
1	2009-04-21 13:00:00	0	12	3	12	3
1	2009-04-21 13:01:00	11	13	3	12	3
1	2009-04-21 13:02:00	0	13	3	12	3
1	2009-04-21 13:03:00	11	13	3	12	3
1	2009-04-21 13:04:00	22	13	3	12	3
1	2009-04-21 13:05:00	0	13	3	12	3
1	2009-04-21 13:06:00	0	13	3	12	3
1	2009-04-21 13:07:00	11	13	3	12	3
1	2009-04-21 13:08:00	143	13	3	12	3
1	2009-04-21 13:09:00	11	13	3	12	3
1	2009-04-21 13:10:00	0	13	3	12	3
1	2009-04-21 13:11:00	0	13	3	12	3
1	2009-04-21 13:12:00	11	13	3	12	3
1	2009-04-21 13:13:00	0	13	3	12	3
1	2009-04-21 13:14:00	0	13	3	12	3
1	2009-04-21 13:15:00	11	13	3	12	3
1	2009-04-21 13:16:00	649	13	3	12	3
1	2009-04-21 13:17:00	481	13	3	12	3
1	2009-04-21 13:18:00	499	13	3	12	3
1	2009-04-21 13:19:00	463	13	3	12	3
1	2009-04-21 13:20:00	463	13	3	12	3
1	2009-04-21 13:21:00	609	13	3	12	3
1	2009-04-21 13:22:00	183	13	3	12	3
1	2009-04-21 13:23:00	289	13	3	12	3
1	2009-04-21 13:24:00	121	13	3	12	3
1	2009-04-21 13:25:00	55	13	3	12	3
1	2009-04-21 13:26:00	534	13	3	12	3
1	2009-04-21 13:27:00	196	13	3	12	3
1	2009-04-21 13:28:00	276	13	3	12	3
1	2009-04-21 13:29:00	428	13	3	12	3
1	2009-04-21 13:30:00	569	13	3	12	3
1	2009-04-21 13:31:00	629	13	3	12	3
1	2009-04-21 13:32:00	753	13	3	12	3
1	2009-04-21 13:33:00	552	13	3	12	3
1	2009-04-21 13:34:00	499	13	3	12	3
1	2009-04-21 13:35:00	649	13	3	12	3
1	2009-04-21 13:36:00	534	13	3	12	3
1	2009-04-21 13:37:00	428	13	3	12	3
1	2009-04-21 13:38:00	121	13	3	12	3
1	2009-04-21 13:39:00	99	13	3	12	3
1	2009-04-21 13:40:00	88	13	3	12	3
1	2009-04-21 13:41:00	335	13	3	12	3
1	2009-04-21 13:42:00	629	13	3	12	3
1	2009-04-21 13:43:00	335	13	3	12	3
1	2009-04-21 13:44:00	428	13	3	12	3
1	2009-04-21 13:45:00	366	13	3	12	3
1	2009-04-21 13:46:00	66	13	3	12	3
1	2009-04-21 13:47:00	33	13	3	12	3
1	2009-04-21 13:48:00	0	13	3	12	3
1	2009-04-21 13:49:00	55	13	3	12	3
1	2009-04-21 13:50:00	366	13	3	12	3
1	2009-04-21 13:51:00	305	13	3	12	3
1	2009-04-21 13:52:00	55	13	3	12	3
1	2009-04-21 13:53:00	249	13	3	12	3
1	2009-04-21 13:54:00	305	13	3	12	3
1	2009-04-21 13:55:00	382	13	3	12	3
1	2009-04-21 13:56:00	44	13	3	12	3
1	2009-04-21 13:57:00	55	13	3	12	3
1	2009-04-21 13:58:00	289	13	3	12	3
1	2009-04-21 13:59:00	320	13	3	12	3
1	2009-04-21 14:00:00	77	13	3	12	3
1	2009-04-21 14:01:00	263	14	3	12	3
1	2009-04-21 14:02:00	413	14	3	12	3
1	2009-04-21 14:03:00	413	14	3	12	3
1	2009-04-21 14:04:00	534	14	3	12	3
1	2009-04-21 14:05:00	669	14	3	12	3
1	2009-04-21 14:06:00	132	14	3	12	3
1	2009-04-21 14:07:00	22	14	3	12	3
1	2009-04-21 14:08:00	263	14	3	12	3
1	2009-04-21 14:09:00	289	14	3	12	3
1	2009-04-21 14:10:00	132	14	3	12	3
1	2009-04-21 14:11:00	22	14	3	12	3
1	2009-04-21 14:12:00	11	14	3	12	3
1	2009-04-21 14:13:00	0	14	3	12	3
1	2009-04-21 14:14:00	11	14	3	12	3
1	2009-04-21 14:15:00	55	14	3	12	3
1	2009-04-21 14:16:00	11	14	3	12	3
1	2009-04-21 14:17:00	66	14	3	12	3
1	2009-04-21 14:18:00	0	14	3	12	3
1	2009-04-21 14:19:00	366	14	3	12	3
1	2009-04-21 14:20:00	609	14	3	12	3
1	2009-04-21 14:21:00	121	14	3	12	3
1	2009-04-21 14:22:00	481	14	3	12	3
1	2009-04-21 14:23:00	22	14	3	12	3
1	2009-04-21 14:24:00	55	14	3	12	3
1	2009-04-21 14:25:00	88	14	3	12	3
1	2009-04-21 14:26:00	55	14	3	12	3
1	2009-04-21 14:27:00	320	14	3	12	3
1	2009-04-21 14:28:00	397	14	3	12	3
1	2009-04-21 14:29:00	33	14	3	12	3
1	2009-04-21 14:30:00	0	14	3	12	3
1	2009-04-21 14:31:00	0	14	3	12	3
1	2009-04-21 14:32:00	0	14	3	12	3
1	2009-04-21 14:33:00	0	14	3	12	3
1	2009-04-21 14:34:00	669	14	3	12	3
1	2009-04-21 14:35:00	183	14	3	12	3
1	2009-04-21 14:36:00	66	14	3	12	3
1	2009-04-21 14:37:00	44	14	3	12	3
1	2009-04-21 14:38:00	196	14	3	12	3
1	2009-04-21 14:39:00	397	14	3	12	3
1	2009-04-21 14:40:00	121	14	3	12	3
1	2009-04-21 14:41:00	0	14	3	12	3
1	2009-04-21 14:42:00	0	14	3	12	3
1	2009-04-21 14:43:00	320	14	3	12	3
1	2009-04-21 14:44:00	88	14	3	12	3
1	2009-04-21 14:45:00	11	14	3	12	3
1	2009-04-21 14:46:00	196	14	3	12	3
1	2009-04-21 14:47:00	55	14	3	12	3
1	2009-04-21 14:48:00	223	14	3	12	3
1	2009-04-21 14:49:00	44	14	3	12	3
1	2009-04-21 14:50:00	77	14	3	12	3
1	2009-04-21 14:51:00	0	14	3	12	3
1	2009-04-21 14:52:00	44	14	3	12	3
1	2009-04-21 14:53:00	55	14	3	12	3
1	2009-04-21 14:54:00	22	14	3	12	3
1	2009-04-21 14:55:00	0	14	3	12	3
1	2009-04-21 14:56:00	552	14	3	12	3
1	2009-04-21 14:57:00	413	14	3	12	3
1	2009-04-21 14:58:00	397	14	3	12	3
1	2009-04-21 14:59:00	210	14	3	12	3
1	2009-04-21 15:00:00	382	14	3	12	3
1	2009-04-21 15:01:00	11	15	3	12	3
1	2009-04-21 15:02:00	22	15	3	12	3
1	2009-04-21 15:03:00	183	15	3	12	3
1	2009-04-21 15:04:00	55	15	3	12	3
1	2009-04-21 15:05:00	33	15	3	12	3
1	2009-04-21 15:06:00	99	15	3	12	3
1	2009-04-21 15:07:00	157	15	3	12	3
1	2009-04-21 15:08:00	33	15	3	12	3
1	2009-04-21 15:09:00	66	15	3	12	3
1	2009-04-21 15:10:00	33	15	3	12	3
1	2009-04-21 15:11:00	0	15	3	12	3
1	2009-04-21 15:12:00	0	15	3	12	3
1	2009-04-21 15:13:00	0	15	3	12	3
1	2009-04-21 15:14:00	0	15	3	12	3
1	2009-04-21 15:15:00	0	15	3	12	3
1	2009-04-21 15:16:00	0	15	3	12	3
1	2009-04-21 15:17:00	0	15	3	12	3
1	2009-04-21 15:18:00	236	15	3	12	3
1	2009-04-21 15:19:00	305	15	3	12	3
[truncated: 78,641 more rows]

## Sheet: Pivot Segment
Multiplier	2
x (Low Intensity)	648.688
y (High Intensity)	694.718
	Column Labels
Values	1	2	3	4	5	6	7	8	Grand Total
Average of Activity	108.704	120.328	105.869	107.885	105.133	103.337	114.962	119.047	110.747
StdDev of Activity	269.992	287.195	255.069	262.783	233.009	247.737	286.89	276.836	265.934
Count of Activity	10080	10080	9300	10080	9479	10080	10080	10080	79259
Count Above x	461	547	434	486	469	431	571	550
% Above x	0.0457341	0.0542659	0.0466667	0.0482143	0.0494778	0.0427579	0.0566468	0.0545635
Count Above y		460	347	405	386	355	502	462
% Above y		0.0456349	0.0373118	0.0401786	0.0407216	0.0352183	0.0498016	0.0458333

## Sheet: Pivot Weekday
Sum of Activity	Column Labels
Row Labels	1	2	3	4	5	6	7	8	Grand Total
1	165962	158752	130961	150564	147356	152990	177794	201823	1286202
2	131450	123098	156435	129787	89023	143723	178965	119781	1072262
3	156901	247258	162827	136915	102452	131121	228321	169421	1335216
4	144229	203358	180556	166316	185140	183278	136607	191174	1390658
5	202552	193958	136445	180622	165888	104462	183666	146010	1313603
6	147785	156389	103542	183895	132144	154080	150595	142168	1170598
7	146862	130098	113814	139383	174553	171983	102865	229619	1209177
Grand Total	1095741	1212911	984580	1087482	996556	1041637	1158813	1199996	8777716
Count of Activity	Column Labels
Row Labels	1	2	3	4	5	6	7	8	Grand Total
1	1440	1440	1440	1440	1440	1440	1440	1440	11520
2	1440	1440	1440	1440	839	1440	1440	1440	10919
3	1440	1440	1440	1440	1440	1440	1440	1440	11520
4	1440	1440	1440	1440	1440	1440	1440	1440	11520
5	1440	1440	1140	1440	1440	1440	1440	1440	11220
6	1440	1440	960	1440	1440	1440	1440	1440	11040
7	1440	1440	1440	1440	1440	1440	1440	1440	11520
Grand Total	10080	10080	9300	10080	9479	10080	10080	10080	79259

## Sheet: Pivot Quadrant
Sum of Activity	Column Labels
Row Labels	1	2	3	4	5	6	7	8	Grand Total
1	32448	25585	19862	28116	45770	24699	36130	87962	300572
2	441147	552999	352356	413643	411084	326533	423958	404714	3326434
3	352401	353468	382137	314705	278487	329345	395223	409186	2814952
4	269745	280859	230225	331018	261215	361060	303502	298134	2335758
Grand Total	1095741	1212911	984580	1087482	996556	1041637	1158813	1199996	8777716
Average	273935	303228	246145	271870	249139	260409	289703	299999
Count of Activity	Column Labels
Row Labels	1	2	3	4	5	6	7	8	Grand Total
1	2520	2520	2160	2520	2520	2520	2520	2520	19800
2	2520	2520	2400	2520	2219	2520	2520	2520	19739
3	2520	2520	2520	2520	2220	2520	2520	2520	19860
4	2520	2520	2220	2520	2520	2520	2520	2520	19860
Grand Total	10080	10080	9300	10080	9479	10080	10080	10080	79259

## Sheet: 4.9.09
Actogram, Copy Raw Data, All Days
Identity:	Malakh
Filename:	E:\Active Research Files\meloxicam titre canine\cases\malakh\Malakh 4.9.09.AWC
Gender:	F
Age:	13
Height:	91.4 cm	36.0 in
Weight:	35.0 kg	77.2 lbs
Start Date:	09-Apr-2009 (Thu)
Start Time:	18:00:00
Interval:	1.00 mins
Date Stamp:	Time Stamp:	Activity Data:	Marker Press:
2009-04-09	00:00:00	0
2009-04-09	00:01:00	0
2009-04-09	00:02:00	0
2009-04-09	00:03:00	0
2009-04-09	00:04:00	0
2009-04-09	00:05:00	0
2009-04-09	00:06:00	0
2009-04-09	00:07:00	0
2009-04-09	00:08:00	0
2009-04-09	00:09:00	0
2009-04-09	00:10:00	0
2009-04-09	00:11:00	0
2009-04-09	00:12:00	0
2009-04-09	00:13:00	0
2009-04-09	00:14:00	0
2009-04-09	00:15:00	0
2009-04-09	00:16:00	0
2009-04-09	00:17:00	0
2009-04-09	00:18:00	0
2009-04-09	00:19:00	0
2009-04-09	00:20:00	0
2009-04-09	00:21:00	0
2009-04-09	00:22:00	0
2009-04-09	00:23:00	0
2009-04-09	00:24:00	0
2009-04-09	00:25:00	0
2009-04-09	00:26:00	0
2009-04-09	00:27:00	0
2009-04-09	00:28:00	0
2009-04-09	00:29:00	0
2009-04-09	00:30:00	0
2009-04-09	00:31:00	0
2009-04-09	00:32:00	0
2009-04-09	00:33:00	0
2009-04-09	00:34:00	0
2009-04-09	00:35:00	0
2009-04-09	00:36:00	0
2009-04-09	00:37:00	0
2009-04-09	00:38:00	0
2009-04-09	00:39:00	0
2009-04-09	00:40:00	0
2009-04-09	00:41:00	0
2009-04-09	00:42:00	0
2009-04-09	00:43:00	0
2009-04-09	00:44:00	0
2009-04-09	00:45:00	0
2009-04-09	00:46:00	0
2009-04-09	00:47:00	0
2009-04-09	00:48:00	0
2009-04-09	00:49:00	0
2009-04-09	00:50:00	0
2009-04-09	00:51:00	0
2009-04-09	00:52:00	0
2009-04-09	00:53:00	0
2009-04-09	00:54:00	0
2009-04-09	00:55:00	0
2009-04-09	00:56:00	0
2009-04-09	00:57:00	0
2009-04-09	00:58:00	0
2009-04-09	00:59:00	0
2009-04-09	01:00:00	0
2009-04-09	01:01:00	0
2009-04-09	01:02:00	0
2009-04-09	01:03:00	0
2009-04-09	01:04:00	0
2009-04-09	01:05:00	0
2009-04-09	01:06:00	0
2009-04-09	01:07:00	0
2009-04-09	01:08:00	0
2009-04-09	01:09:00	0
2009-04-09	01:10:00	0
2009-04-09	01:11:00	0
2009-04-09	01:12:00	0
2009-04-09	01:13:00	0
2009-04-09	01:14:00	0
2009-04-09	01:15:00	0
2009-04-09	01:16:00	0
2009-04-09	01:17:00	0
2009-04-09	01:18:00	0
2009-04-09	01:19:00	0
2009-04-09	01:20:00	0
2009-04-09	01:21:00	0
2009-04-09	01:22:00	0
2009-04-09	01:23:00	0
2009-04-09	01:24:00	0
2009-04-09	01:25:00	0
2009-04-09	01:26:00	0
2009-04-09	01:27:00	0
2009-04-09	01:28:00	0
2009-04-09	01:29:00	0
2009-04-09	01:30:00	0
2009-04-09	01:31:00	0
2009-04-09	01:32:00	0
2009-04-09	01:33:00	0
2009-04-09	01:34:00	0
2009-04-09	01:35:00	0
2009-04-09	01:36:00	0
2009-04-09	01:37:00	0
2009-04-09	01:38:00	0
2009-04-09	01:39:00	0
2009-04-09	01:40:00	0
2009-04-09	01:41:00	0
2009-04-09	01:42:00	0
2009-04-09	01:43:00	0
2009-04-09	01:44:00	0
2009-04-09	01:45:00	0
2009-04-09	01:46:00	0
2009-04-09	01:47:00	0
2009-04-09	01:48:00	0
2009-04-09	01:49:00	0
2009-04-09	01:50:00	0
2009-04-09	01:51:00	0
2009-04-09	01:52:00	0
2009-04-09	01:53:00	0
2009-04-09	01:54:00	0
2009-04-09	01:55:00	0
2009-04-09	01:56:00	0
2009-04-09	01:57:00	0
2009-04-09	01:58:00	0
2009-04-09	01:59:00	0
2009-04-09	02:00:00	0
2009-04-09	02:01:00	0
2009-04-09	02:02:00	0
2009-04-09	02:03:00	0
2009-04-09	02:04:00	0
2009-04-09	02:05:00	0
2009-04-09	02:06:00	0
2009-04-09	02:07:00	0
2009-04-09	02:08:00	0
2009-04-09	02:09:00	0
2009-04-09	02:10:00	0
2009-04-09	02:11:00	0
2009-04-09	02:12:00	0
2009-04-09	02:13:00	0
2009-04-09	02:14:00	0
2009-04-09	02:15:00	0
2009-04-09	02:16:00	0
2009-04-09	02:17:00	0
2009-04-09	02:18:00	0
2009-04-09	02:19:00	0
2009-04-09	02:20:00	0
2009-04-09	02:21:00	0
2009-04-09	02:22:00	0
2009-04-09	02:23:00	0
2009-04-09	02:24:00	0
2009-04-09	02:25:00	0
2009-04-09	02:26:00	0
2009-04-09	02:27:00	0
2009-04-09	02:28:00	0
2009-04-09	02:29:00	0
2009-04-09	02:30:00	0
2009-04-09	02:31:00	0
2009-04-09	02:32:00	0
2009-04-09	02:33:00	0
2009-04-09	02:34:00	0
2009-04-09	02:35:00	0
2009-04-09	02:36:00	0
2009-04-09	02:37:00	0
2009-04-09	02:38:00	0
2009-04-09	02:39:00	0
2009-04-09	02:40:00	0
2009-04-09	02:41:00	0
2009-04-09	02:42:00	0
2009-04-09	02:43:00	0
2009-04-09	02:44:00	0
2009-04-09	02:45:00	0
2009-04-09	02:46:00	0
2009-04-09	02:47:00	0
2009-04-09	02:48:00	0
2009-04-09	02:49:00	0
2009-04-09	02:50:00	0
2009-04-09	02:51:00	0
2009-04-09	02:52:00	0
2009-04-09	02:53:00	0
2009-04-09	02:54:00	0
2009-04-09	02:55:00	0
2009-04-09	02:56:00	0
2009-04-09	02:57:00	0
2009-04-09	02:58:00	0
2009-04-09	02:59:00	0
2009-04-09	03:00:00	0
2009-04-09	03:01:00	0
2009-04-09	03:02:00	0
2009-04-09	03:03:00	0
2009-04-09	03:04:00	0
2009-04-09	03:05:00	0
2009-04-09	03:06:00	0
2009-04-09	03:07:00	0
2009-04-09	03:08:00	0
2009-04-09	03:09:00	0
2009-04-09	03:10:00	0
2009-04-09	03:11:00	0
2009-04-09	03:12:00	0
2009-04-09	03:13:00	0
2009-04-09	03:14:00	0
2009-04-09	03:15:00	0
2009-04-09	03:16:00	0
2009-04-09	03:17:00	0
2009-04-09	03:18:00	0
2009-04-09	03:19:00	0
2009-04-09	03:20:00	0
2009-04-09	03:21:00	0
2009-04-09	03:22:00	0
2009-04-09	03:23:00	0
2009-04-09	03:24:00	0
2009-04-09	03:25:00	0
2009-04-09	03:26:00	0
2009-04-09	03:27:00	0
2009-04-09	03:28:00	0
2009-04-09	03:29:00	0
2009-04-09	03:30:00	0
2009-04-09	03:31:00	0
2009-04-09	03:32:00	0
2009-04-09	03:33:00	0
2009-04-09	03:34:00	0
2009-04-09	03:35:00	0
2009-04-09	03:36:00	0
2009-04-09	03:37:00	0
2009-04-09	03:38:00	0
2009-04-09	03:39:00	0
2009-04-09	03:40:00	0
2009-04-09	03:41:00	0
2009-04-09	03:42:00	0
2009-04-09	03:43:00	0
2009-04-09	03:44:00	0
2009-04-09	03:45:00	0
2009-04-09	03:46:00	0
2009-04-09	03:47:00	0
2009-04-09	03:48:00	0
2009-04-09	03:49:00	0
2009-04-09	03:50:00	0
2009-04-09	03:51:00	0
2009-04-09	03:52:00	0
2009-04-09	03:53:00	0
2009-04-09	03:54:00	0
2009-04-09	03:55:00	0
2009-04-09	03:56:00	0
2009-04-09	03:57:00	0
2009-04-09	03:58:00	0
2009-04-09	03:59:00	0
2009-04-09	04:00:00	0
2009-04-09	04:01:00	0
2009-04-09	04:02:00	0
2009-04-09	04:03:00	0
2009-04-09	04:04:00	0
2009-04-09	04:05:00	0
2009-04-09	04:06:00	0
2009-04-09	04:07:00	0
2009-04-09	04:08:00	0
2009-04-09	04:09:00	0
2009-04-09	04:10:00	0
2009-04-09	04:11:00	0
2009-04-09	04:12:00	0
2009-04-09	04:13:00	0
2009-04-09	04:14:00	0
2009-04-09	04:15:00	0
2009-04-09	04:16:00	0
2009-04-09	04:17:00	0
2009-04-09	04:18:00	0
2009-04-09	04:19:00	0
2009-04-09	04:20:00	0
2009-04-09	04:21:00	0
2009-04-09	04:22:00	0
2009-04-09	04:23:00	0
2009-04-09	04:24:00	0
2009-04-09	04:25:00	0
2009-04-09	04:26:00	0
2009-04-09	04:27:00	0
2009-04-09	04:28:00	0
2009-04-09	04:29:00	0
2009-04-09	04:30:00	0
2009-04-09	04:31:00	0
2009-04-09	04:32:00	0
2009-04-09	04:33:00	0
2009-04-09	04:34:00	0
2009-04-09	04:35:00	0
2009-04-09	04:36:00	0
2009-04-09	04:37:00	0
2009-04-09	04:38:00	0
2009-04-09	04:39:00	0
2009-04-09	04:40:00	0
2009-04-09	04:41:00	0
2009-04-09	04:42:00	0
2009-04-09	04:43:00	0
2009-04-09	04:44:00	0
2009-04-09	04:45:00	0
2009-04-09	04:46:00	0
2009-04-09	04:47:00	0
2009-04-09	04:48:00	0
2009-04-09	04:49:00	0
2009-04-09	04:50:00	0
2009-04-09	04:51:00	0
2009-04-09	04:52:00	0
2009-04-09	04:53:00	0
2009-04-09	04:54:00	0
2009-04-09	04:55:00	0
2009-04-09	04:56:00	0
2009-04-09	04:57:00	0
2009-04-09	04:58:00	0
2009-04-09	04:59:00	0
2009-04-09	05:00:00	0
2009-04-09	05:01:00	0
2009-04-09	05:02:00	0
2009-04-09	05:03:00	0
2009-04-09	05:04:00	0
2009-04-09	05:05:00	0
2009-04-09	05:06:00	0
2009-04-09	05:07:00	0
2009-04-09	05:08:00	0
2009-04-09	05:09:00	0
2009-04-09	05:10:00	0
2009-04-09	05:11:00	0
2009-04-09	05:12:00	0
2009-04-09	05:13:00	0
2009-04-09	05:14:00	0
2009-04-09	05:15:00	0
2009-04-09	05:16:00	0
2009-04-09	05:17:00	0
2009-04-09	05:18:00	0
2009-04-09	05:19:00	0
2009-04-09	05:20:00	0
2009-04-09	05:21:00	0
2009-04-09	05:22:00	0
2009-04-09	05:23:00	0
2009-04-09	05:24:00	0
2009-04-09	05:25:00	0
2009-04-09	05:26:00	0
2009-04-09	05:27:00	0
2009-04-09	05:28:00	0
2009-04-09	05:29:00	0
2009-04-09	05:30:00	0
2009-04-09	05:31:00	0
2009-04-09	05:32:00	0
2009-04-09	05:33:00	0
2009-04-09	05:34:00	0
2009-04-09	05:35:00	0
2009-04-09	05:36:00	0
2009-04-09	05:37:00	0
2009-04-09	05:38:00	0
2009-04-09	05:39:00	0
2009-04-09	05:40:00	0
2009-04-09	05:41:00	0
2009-04-09	05:42:00	0
2009-04-09	05:43:00	0
2009-04-09	05:44:00	0
2009-04-09	05:45:00	0
2009-04-09	05:46:00	0
2009-04-09	05:47:00	0
2009-04-09	05:48:00	0
2009-04-09	05:49:00	0
2009-04-09	05:50:00	0
2009-04-09	05:51:00	0
2009-04-09	05:52:00	0
2009-04-09	05:53:00	0
2009-04-09	05:54:00	0
2009-04-09	05:55:00	0
2009-04-09	05:56:00	0
2009-04-09	05:57:00	0
2009-04-09	05:58:00	0
2009-04-09	05:59:00	0
2009-04-09	06:00:00	0
2009-04-09	06:01:00	0
2009-04-09	06:02:00	0
2009-04-09	06:03:00	0
2009-04-09	06:04:00	0
2009-04-09	06:05:00	0
2009-04-09	06:06:00	0
2009-04-09	06:07:00	0
2009-04-09	06:08:00	0
2009-04-09	06:09:00	0
2009-04-09	06:10:00	0
2009-04-09	06:11:00	0
2009-04-09	06:12:00	0
2009-04-09	06:13:00	0
2009-04-09	06:14:00	0
2009-04-09	06:15:00	0
2009-04-09	06:16:00	0
2009-04-09	06:17:00	0
2009-04-09	06:18:00	0
2009-04-09	06:19:00	0
2009-04-09	06:20:00	0
2009-04-09	06:21:00	0
2009-04-09	06:22:00	0
2009-04-09	06:23:00	0
2009-04-09	06:24:00	0
2009-04-09	06:25:00	0
2009-04-09	06:26:00	0
2009-04-09	06:27:00	0
2009-04-09	06:28:00	0
2009-04-09	06:29:00	0
2009-04-09	06:30:00	0
2009-04-09	06:31:00	0
2009-04-09	06:32:00	0
2009-04-09	06:33:00	0
2009-04-09	06:34:00	0
2009-04-09	06:35:00	0
2009-04-09	06:36:00	0
2009-04-09	06:37:00	0
2009-04-09	06:38:00	0
2009-04-09	06:39:00	0
2009-04-09	06:40:00	0
2009-04-09	06:41:00	0
2009-04-09	06:42:00	0
2009-04-09	06:43:00	0
2009-04-09	06:44:00	0
2009-04-09	06:45:00	0
2009-04-09	06:46:00	0
2009-04-09	06:47:00	0
2009-04-09	06:48:00	0
2009-04-09	06:49:00	0
2009-04-09	06:50:00	0
2009-04-09	06:51:00	0
2009-04-09	06:52:00	0
2009-04-09	06:53:00	0
2009-04-09	06:54:00	0
2009-04-09	06:55:00	0
2009-04-09	06:56:00	0
2009-04-09	06:57:00	0
2009-04-09	06:58:00	0
2009-04-09	06:59:00	0
2009-04-09	07:00:00	0
2009-04-09	07:01:00	0
2009-04-09	07:02:00	0
2009-04-09	07:03:00	0
2009-04-09	07:04:00	0
2009-04-09	07:05:00	0
2009-04-09	07:06:00	0
2009-04-09	07:07:00	0
2009-04-09	07:08:00	0
2009-04-09	07:09:00	0
2009-04-09	07:10:00	0
2009-04-09	07:11:00	0
2009-04-09	07:12:00	0
2009-04-09	07:13:00	0
2009-04-09	07:14:00	0
2009-04-09	07:15:00	0
2009-04-09	07:16:00	0
2009-04-09	07:17:00	0
2009-04-09	07:18:00	0
2009-04-09	07:19:00	0
2009-04-09	07:20:00	0
2009-04-09	07:21:00	0
2009-04-09	07:22:00	0
2009-04-09	07:23:00	0
2009-04-09	07:24:00	0
2009-04-09	07:25:00	0
2009-04-09	07:26:00	0
2009-04-09	07:27:00	0
2009-04-09	07:28:00	0
2009-04-09	07:29:00	0
2009-04-09	07:30:00	0
2009-04-09	07:31:00	0
2009-04-09	07:32:00	0
2009-04-09	07:33:00	0
2009-04-09	07:34:00	0
2009-04-09	07:35:00	0
2009-04-09	07:36:00	0
2009-04-09	07:37:00	0
2009-04-09	07:38:00	0
2009-04-09	07:39:00	0
2009-04-09	07:40:00	0
2009-04-09	07:41:00	0
2009-04-09	07:42:00	0
2009-04-09	07:43:00	0
2009-04-09	07:44:00	0
2009-04-09	07:45:00	0
2009-04-09	07:46:00	0
2009-04-09	07:47:00	0
2009-04-09	07:48:00	0
2009-04-09	07:49:00	0
2009-04-09	07:50:00	0
2009-04-09	07:51:00	0
2009-04-09	07:52:00	0
2009-04-09	07:53:00	0
2009-04-09	07:54:00	0
2009-04-09	07:55:00	0
2009-04-09	07:56:00	0
2009-04-09	07:57:00	0
2009-04-09	07:58:00	0
2009-04-09	07:59:00	0
2009-04-09	08:00:00	0
2009-04-09	08:01:00	0
2009-04-09	08:02:00	0
2009-04-09	08:03:00	0
2009-04-09	08:04:00	0
2009-04-09	08:05:00	0
2009-04-09	08:06:00	0
2009-04-09	08:07:00	0
2009-04-09	08:08:00	0
2009-04-09	08:09:00	0
2009-04-09	08:10:00	0
2009-04-09	08:11:00	0
2009-04-09	08:12:00	0
2009-04-09	08:13:00	0
2009-04-09	08:14:00	0
2009-04-09	08:15:00	0
2009-04-09	08:16:00	0
2009-04-09	08:17:00	0
2009-04-09	08:18:00	0
2009-04-09	08:19:00	0
2009-04-09	08:20:00	0
2009-04-09	08:21:00	0
2009-04-09	08:22:00	0
2009-04-09	08:23:00	0
2009-04-09	08:24:00	0
2009-04-09	08:25:00	0
2009-04-09	08:26:00	0
2009-04-09	08:27:00	0
2009-04-09	08:28:00	0
2009-04-09	08:29:00	0
2009-04-09	08:30:00	0
2009-04-09	08:31:00	0
2009-04-09	08:32:00	0
2009-04-09	08:33:00	0
2009-04-09	08:34:00	0
2009-04-09	08:35:00	0
2009-04-09	08:36:00	0
2009-04-09	08:37:00	0
2009-04-09	08:38:00	0
2009-04-09	08:39:00	0
2009-04-09	08:40:00	0
2009-04-09	08:41:00	0
2009-04-09	08:42:00	0
2009-04-09	08:43:00	0
2009-04-09	08:44:00	0
2009-04-09	08:45:00	0
2009-04-09	08:46:00	0
2009-04-09	08:47:00	0
2009-04-09	08:48:00	0
2009-04-09	08:49:00	0
2009-04-09	08:50:00	0
2009-04-09	08:51:00	0
2009-04-09	08:52:00	0
2009-04-09	08:53:00	0
2009-04-09	08:54:00	0
2009-04-09	08:55:00	0
2009-04-09	08:56:00	0
2009-04-09	08:57:00	0
2009-04-09	08:58:00	0
2009-04-09	08:59:00	0
2009-04-09	09:00:00	0
2009-04-09	09:01:00	0
2009-04-09	09:02:00	0
2009-04-09	09:03:00	0
2009-04-09	09:04:00	0
2009-04-09	09:05:00	0
2009-04-09	09:06:00	0
2009-04-09	09:07:00	0
2009-04-09	09:08:00	0
2009-04-09	09:09:00	0
2009-04-09	09:10:00	0
2009-04-09	09:11:00	0
2009-04-09	09:12:00	0
2009-04-09	09:13:00	0
2009-04-09	09:14:00	0
2009-04-09	09:15:00	0
2009-04-09	09:16:00	0
2009-04-09	09:17:00	0
2009-04-09	09:18:00	0
2009-04-09	09:19:00	0
2009-04-09	09:20:00	0
2009-04-09	09:21:00	0
2009-04-09	09:22:00	0
2009-04-09	09:23:00	0
2009-04-09	09:24:00	0
2009-04-09	09:25:00	0
2009-04-09	09:26:00	0
2009-04-09	09:27:00	0
2009-04-09	09:28:00	0
2009-04-09	09:29:00	0
2009-04-09	09:30:00	0
2009-04-09	09:31:00	0
2009-04-09	09:32:00	0
2009-04-09	09:33:00	0
2009-04-09	09:34:00	0
2009-04-09	09:35:00	0
2009-04-09	09:36:00	0
2009-04-09	09:37:00	0
2009-04-09	09:38:00	0
2009-04-09	09:39:00	0
2009-04-09	09:40:00	0
2009-04-09	09:41:00	0
2009-04-09	09:42:00	0
2009-04-09	09:43:00	0
2009-04-09	09:44:00	0
2009-04-09	09:45:00	0
2009-04-09	09:46:00	0
2009-04-09	09:47:00	0
2009-04-09	09:48:00	0
2009-04-09	09:49:00	0
2009-04-09	09:50:00	0
2009-04-09	09:51:00	0
2009-04-09	09:52:00	0
2009-04-09	09:53:00	0
2009-04-09	09:54:00	0
2009-04-09	09:55:00	0
2009-04-09	09:56:00	0
2009-04-09	09:57:00	0
2009-04-09	09:58:00	0
2009-04-09	09:59:00	0
2009-04-09	10:00:00	0
2009-04-09	10:01:00	0
2009-04-09	10:02:00	0
2009-04-09	10:03:00	0
2009-04-09	10:04:00	0
2009-04-09	10:05:00	0
2009-04-09	10:06:00	0
2009-04-09	10:07:00	0
2009-04-09	10:08:00	0
2009-04-09	10:09:00	0
2009-04-09	10:10:00	0
2009-04-09	10:11:00	0
2009-04-09	10:12:00	0
2009-04-09	10:13:00	0
2009-04-09	10:14:00	0
2009-04-09	10:15:00	0
2009-04-09	10:16:00	0
2009-04-09	10:17:00	0
2009-04-09	10:18:00	0
2009-04-09	10:19:00	0
2009-04-09	10:20:00	0
2009-04-09	10:21:00	0
2009-04-09	10:22:00	0
2009-04-09	10:23:00	0
2009-04-09	10:24:00	0
2009-04-09	10:25:00	0
2009-04-09	10:26:00	0
2009-04-09	10:27:00	0
2009-04-09	10:28:00	0
2009-04-09	10:29:00	0
2009-04-09	10:30:00	0
2009-04-09	10:31:00	0
2009-04-09	10:32:00	0
2009-04-09	10:33:00	0
2009-04-09	10:34:00	0
2009-04-09	10:35:00	0
2009-04-09	10:36:00	0
2009-04-09	10:37:00	0
2009-04-09	10:38:00	0
2009-04-09	10:39:00	0
2009-04-09	10:40:00	0
2009-04-09	10:41:00	0
2009-04-09	10:42:00	0
2009-04-09	10:43:00	0
2009-04-09	10:44:00	0
2009-04-09	10:45:00	0
2009-04-09	10:46:00	0
2009-04-09	10:47:00	0
2009-04-09	10:48:00	0
2009-04-09	10:49:00	0
2009-04-09	10:50:00	0
2009-04-09	10:51:00	0
2009-04-09	10:52:00	0
2009-04-09	10:53:00	0
2009-04-09	10:54:00	0
2009-04-09	10:55:00	0
2009-04-09	10:56:00	0
2009-04-09	10:57:00	0
2009-04-09	10:58:00	0
2009-04-09	10:59:00	0
2009-04-09	11:00:00	0
2009-04-09	11:01:00	0
2009-04-09	11:02:00	0
2009-04-09	11:03:00	0
2009-04-09	11:04:00	0
2009-04-09	11:05:00	0
2009-04-09	11:06:00	0
2009-04-09	11:07:00	0
2009-04-09	11:08:00	0
2009-04-09	11:09:00	0
2009-04-09	11:10:00	0
2009-04-09	11:11:00	0
2009-04-09	11:12:00	0
2009-04-09	11:13:00	0
2009-04-09	11:14:00	0
2009-04-09	11:15:00	0
2009-04-09	11:16:00	0
2009-04-09	11:17:00	0
2009-04-09	11:18:00	0
2009-04-09	11:19:00	0
2009-04-09	11:20:00	0
2009-04-09	11:21:00	0
2009-04-09	11:22:00	0
2009-04-09	11:23:00	0
2009-04-09	11:24:00	0
2009-04-09	11:25:00	0
2009-04-09	11:26:00	0
2009-04-09	11:27:00	0
2009-04-09	11:28:00	0
2009-04-09	11:29:00	0
2009-04-09	11:30:00	0
2009-04-09	11:31:00	0
2009-04-09	11:32:00	0
2009-04-09	11:33:00	0
2009-04-09	11:34:00	0
2009-04-09	11:35:00	0
2009-04-09	11:36:00	0
2009-04-09	11:37:00	0
2009-04-09	11:38:00	0
2009-04-09	11:39:00	0
2009-04-09	11:40:00	0
2009-04-09	11:41:00	0
2009-04-09	11:42:00	0
2009-04-09	11:43:00	0
2009-04-09	11:44:00	0
2009-04-09	11:45:00	0
2009-04-09	11:46:00	0
2009-04-09	11:47:00	0
2009-04-09	11:48:00	0
2009-04-09	11:49:00	0
2009-04-09	11:50:00	0
2009-04-09	11:51:00	0
2009-04-09	11:52:00	0
2009-04-09	11:53:00	0
2009-04-09	11:54:00	0
2009-04-09	11:55:00	0
2009-04-09	11:56:00	0
2009-04-09	11:57:00	0
2009-04-09	11:58:00	0
2009-04-09	11:59:00	0
2009-04-09	12:00:00	0
2009-04-09	12:01:00	0
2009-04-09	12:02:00	0
2009-04-09	12:03:00	0
2009-04-09	12:04:00	0
2009-04-09	12:05:00	0
2009-04-09	12:06:00	0
2009-04-09	12:07:00	0
2009-04-09	12:08:00	0
2009-04-09	12:09:00	0
2009-04-09	12:10:00	0
2009-04-09	12:11:00	0
2009-04-09	12:12:00	0
2009-04-09	12:13:00	0
2009-04-09	12:14:00	0
2009-04-09	12:15:00	0
2009-04-09	12:16:00	0
2009-04-09	12:17:00	0
2009-04-09	12:18:00	0
2009-04-09	12:19:00	0
2009-04-09	12:20:00	0
2009-04-09	12:21:00	0
2009-04-09	12:22:00	0
2009-04-09	12:23:00	0
2009-04-09	12:24:00	0
2009-04-09	12:25:00	0
2009-04-09	12:26:00	0
2009-04-09	12:27:00	0
2009-04-09	12:28:00	0
2009-04-09	12:29:00	0
2009-04-09	12:30:00	0
2009-04-09	12:31:00	0
2009-04-09	12:32:00	0
2009-04-09	12:33:00	0
2009-04-09	12:34:00	0
2009-04-09	12:35:00	0
2009-04-09	12:36:00	0
2009-04-09	12:37:00	0
2009-04-09	12:38:00	0
2009-04-09	12:39:00	0
2009-04-09	12:40:00	0
2009-04-09	12:41:00	0
2009-04-09	12:42:00	0
2009-04-09	12:43:00	0
2009-04-09	12:44:00	0
2009-04-09	12:45:00	0
2009-04-09	12:46:00	0
2009-04-09	12:47:00	0
2009-04-09	12:48:00	0
2009-04-09	12:49:00	0
2009-04-09	12:50:00	0
2009-04-09	12:51:00	0
2009-04-09	12:52:00	0
2009-04-09	12:53:00	0
2009-04-09	12:54:00	0
2009-04-09	12:55:00	0
2009-04-09	12:56:00	0
2009-04-09	12:57:00	0
2009-04-09	12:58:00	0
2009-04-09	12:59:00	0
2009-04-09	13:00:00	0
2009-04-09	13:01:00	0
2009-04-09	13:02:00	0
2009-04-09	13:03:00	0
2009-04-09	13:04:00	0
2009-04-09	13:05:00	0
2009-04-09	13:06:00	0
2009-04-09	13:07:00	0
2009-04-09	13:08:00	0
2009-04-09	13:09:00	0
2009-04-09	13:10:00	0
2009-04-09	13:11:00	0
2009-04-09	13:12:00	0
2009-04-09	13:13:00	0
2009-04-09	13:14:00	0
2009-04-09	13:15:00	0
2009-04-09	13:16:00	0
2009-04-09	13:17:00	0
2009-04-09	13:18:00	0
2009-04-09	13:19:00	0
2009-04-09	13:20:00	0
2009-04-09	13:21:00	0
2009-04-09	13:22:00	0
2009-04-09	13:23:00	0
2009-04-09	13:24:00	0
2009-04-09	13:25:00	0
2009-04-09	13:26:00	0
2009-04-09	13:27:00	0
2009-04-09	13:28:00	0
2009-04-09	13:29:00	0
2009-04-09	13:30:00	0
2009-04-09	13:31:00	0
2009-04-09	13:32:00	0
2009-04-09	13:33:00	0
2009-04-09	13:34:00	0
2009-04-09	13:35:00	0
2009-04-09	13:36:00	0
2009-04-09	13:37:00	0
2009-04-09	13:38:00	0
2009-04-09	13:39:00	0
2009-04-09	13:40:00	0
2009-04-09	13:41:00	0
2009-04-09	13:42:00	0
2009-04-09	13:43:00	0
2009-04-09	13:44:00	0
2009-04-09	13:45:00	0
2009-04-09	13:46:00	0
2009-04-09	13:47:00	0
2009-04-09	13:48:00	0
2009-04-09	13:49:00	0
2009-04-09	13:50:00	0
2009-04-09	13:51:00	0
2009-04-09	13:52:00	0
2009-04-09	13:53:00	0
2009-04-09	13:54:00	0
2009-04-09	13:55:00	0
2009-04-09	13:56:00	0
2009-04-09	13:57:00	0
2009-04-09	13:58:00	0
2009-04-09	13:59:00	0
2009-04-09	14:00:00	0
2009-04-09	14:01:00	0
2009-04-09	14:02:00	0
2009-04-09	14:03:00	0
2009-04-09	14:04:00	0
2009-04-09	14:05:00	0
2009-04-09	14:06:00	0
2009-04-09	14:07:00	0
2009-04-09	14:08:00	0
2009-04-09	14:09:00	0
2009-04-09	14:10:00	0
2009-04-09	14:11:00	0
2009-04-09	14:12:00	0
2009-04-09	14:13:00	0
2009-04-09	14:14:00	0
2009-04-09	14:15:00	0
2009-04-09	14:16:00	0
2009-04-09	14:17:00	0
2009-04-09	14:18:00	0
2009-04-09	14:19:00	0
2009-04-09	14:20:00	0
2009-04-09	14:21:00	0
2009-04-09	14:22:00	0
2009-04-09	14:23:00	0
2009-04-09	14:24:00	0
2009-04-09	14:25:00	0
2009-04-09	14:26:00	0
2009-04-09	14:27:00	0
2009-04-09	14:28:00	0
2009-04-09	14:29:00	0
2009-04-09	14:30:00	0
2009-04-09	14:31:00	0
2009-04-09	14:32:00	0
2009-04-09	14:33:00	0
2009-04-09	14:34:00	0
2009-04-09	14:35:00	0
2009-04-09	14:36:00	0
2009-04-09	14:37:00	0
2009-04-09	14:38:00	0
2009-04-09	14:39:00	0
2009-04-09	14:40:00	0
2009-04-09	14:41:00	0
2009-04-09	14:42:00	0
2009-04-09	14:43:00	0
2009-04-09	14:44:00	0
2009-04-09	14:45:00	0
2009-04-09	14:46:00	0
2009-04-09	14:47:00	0
2009-04-09	14:48:00	0
2009-04-09	14:49:00	0
2009-04-09	14:50:00	0
2009-04-09	14:51:00	0
2009-04-09	14:52:00	0
2009-04-09	14:53:00	0
2009-04-09	14:54:00	0
2009-04-09	14:55:00	0
2009-04-09	14:56:00	0
2009-04-09	14:57:00	0
2009-04-09	14:58:00	0
2009-04-09	14:59:00	0
2009-04-09	15:00:00	0
2009-04-09	15:01:00	0
2009-04-09	15:02:00	0
2009-04-09	15:03:00	0
2009-04-09	15:04:00	0
2009-04-09	15:05:00	0
2009-04-09	15:06:00	0
2009-04-09	15:07:00	0
2009-04-09	15:08:00	0
2009-04-09	15:09:00	0
2009-04-09	15:10:00	0
2009-04-09	15:11:00	0
2009-04-09	15:12:00	0
2009-04-09	15:13:00	0
2009-04-09	15:14:00	0
2009-04-09	15:15:00	0
2009-04-09	15:16:00	0
2009-04-09	15:17:00	0
2009-04-09	15:18:00	0
2009-04-09	15:19:00	0
2009-04-09	15:20:00	0
2009-04-09	15:21:00	0
2009-04-09	15:22:00	0
2009-04-09	15:23:00	0
2009-04-09	15:24:00	0
2009-04-09	15:25:00	0
2009-04-09	15:26:00	0
2009-04-09	15:27:00	0
2009-04-09	15:28:00	0
2009-04-09	15:29:00	0
2009-04-09	15:30:00	0
2009-04-09	15:31:00	0
2009-04-09	15:32:00	0
2009-04-09	15:33:00	0
2009-04-09	15:34:00	0
2009-04-09	15:35:00	0
2009-04-09	15:36:00	0
2009-04-09	15:37:00	0
2009-04-09	15:38:00	0
2009-04-09	15:39:00	0
2009-04-09	15:40:00	0
2009-04-09	15:41:00	0
2009-04-09	15:42:00	0
2009-04-09	15:43:00	0
2009-04-09	15:44:00	0
2009-04-09	15:45:00	0
2009-04-09	15:46:00	0
2009-04-09	15:47:00	0
2009-04-09	15:48:00	0
2009-04-09	15:49:00	0
2009-04-09	15:50:00	0
2009-04-09	15:51:00	0
2009-04-09	15:52:00	0
2009-04-09	15:53:00	0
2009-04-09	15:54:00	0
2009-04-09	15:55:00	0
2009-04-09	15:56:00	0
2009-04-09	15:57:00	0
2009-04-09	15:58:00	0
2009-04-09	15:59:00	0
2009-04-09	16:00:00	0
2009-04-09	16:01:00	0
2009-04-09	16:02:00	0
2009-04-09	16:03:00	0
2009-04-09	16:04:00	0
2009-04-09	16:05:00	0
2009-04-09	16:06:00	0
2009-04-09	16:07:00	0
2009-04-09	16:08:00	0
2009-04-09	16:09:00	0
2009-04-09	16:10:00	0
2009-04-09	16:11:00	0
2009-04-09	16:12:00	0
2009-04-09	16:13:00	0
2009-04-09	16:14:00	0
2009-04-09	16:15:00	0
2009-04-09	16:16:00	0
2009-04-09	16:17:00	0
2009-04-09	16:18:00	0
2009-04-09	16:19:00	0
2009-04-09	16:20:00	0
2009-04-09	16:21:00	0
2009-04-09	16:22:00	0
2009-04-09	16:23:00	0
2009-04-09	16:24:00	0
2009-04-09	16:25:00	0
2009-04-09	16:26:00	0
2009-04-09	16:27:00	0
2009-04-09	16:28:00	0
2009-04-09	16:29:00	0
2009-04-09	16:30:00	0
2009-04-09	16:31:00	0
2009-04-09	16:32:00	0
2009-04-09	16:33:00	0
2009-04-09	16:34:00	0
2009-04-09	16:35:00	0
2009-04-09	16:36:00	0
2009-04-09	16:37:00	0
2009-04-09	16:38:00	0
2009-04-09	16:39:00	0
2009-04-09	16:40:00	0
2009-04-09	16:41:00	0
2009-04-09	16:42:00	0
2009-04-09	16:43:00	0
2009-04-09	16:44:00	0
2009-04-09	16:45:00	0
2009-04-09	16:46:00	0
2009-04-09	16:47:00	0
2009-04-09	16:48:00	0
2009-04-09	16:49:00	0
2009-04-09	16:50:00	0
2009-04-09	16:51:00	0
2009-04-09	16:52:00	0
2009-04-09	16:53:00	0
2009-04-09	16:54:00	0
2009-04-09	16:55:00	0
2009-04-09	16:56:00	0
2009-04-09	16:57:00	0
2009-04-09	16:58:00	0
2009-04-09	16:59:00	0
2009-04-09	17:00:00	0
2009-04-09	17:01:00	0
2009-04-09	17:02:00	0
2009-04-09	17:03:00	0
2009-04-09	17:04:00	0
2009-04-09	17:05:00	0
2009-04-09	17:06:00	0
2009-04-09	17:07:00	0
2009-04-09	17:08:00	0
2009-04-09	17:09:00	0
2009-04-09	17:10:00	0
2009-04-09	17:11:00	0
2009-04-09	17:12:00	0
2009-04-09	17:13:00	0
2009-04-09	17:14:00	0
2009-04-09	17:15:00	0
2009-04-09	17:16:00	0
2009-04-09	17:17:00	0
2009-04-09	17:18:00	0
2009-04-09	17:19:00	0
2009-04-09	17:20:00	0
2009-04-09	17:21:00	0
2009-04-09	17:22:00	0
2009-04-09	17:23:00	0
2009-04-09	17:24:00	0
2009-04-09	17:25:00	0
2009-04-09	17:26:00	0
2009-04-09	17:27:00	0
2009-04-09	17:28:00	0
2009-04-09	17:29:00	0
2009-04-09	17:30:00	0
2009-04-09	17:31:00	0
2009-04-09	17:32:00	0
2009-04-09	17:33:00	0
2009-04-09	17:34:00	0
2009-04-09	17:35:00	0
2009-04-09	17:36:00	0
2009-04-09	17:37:00	0
2009-04-09	17:38:00	0
2009-04-09	17:39:00	0
2009-04-09	17:40:00	0
2009-04-09	17:41:00	0
2009-04-09	17:42:00	0
2009-04-09	17:43:00	0
2009-04-09	17:44:00	0
2009-04-09	17:45:00	0
2009-04-09	17:46:00	0
2009-04-09	17:47:00	0
2009-04-09	17:48:00	0
2009-04-09	17:49:00	0
2009-04-09	17:50:00	0
2009-04-09	17:51:00	0
2009-04-09	17:52:00	0
2009-04-09	17:53:00	0
2009-04-09	17:54:00	0
2009-04-09	17:55:00	0
2009-04-09	17:56:00	0
2009-04-09	17:57:00	0
2009-04-09	17:58:00	0
2009-04-09	17:59:00	0
2009-04-09	18:00:00	0	M
2009-04-09	18:01:00	0
2009-04-09	18:02:00	22
2009-04-09	18:03:00	11
2009-04-09	18:04:00	0
2009-04-09	18:05:00	0
2009-04-09	18:06:00	0
2009-04-09	18:07:00	0
2009-04-09	18:08:00	0
2009-04-09	18:09:00	0
2009-04-09	18:10:00	0
2009-04-09	18:11:00	0
2009-04-09	18:12:00	0
2009-04-09	18:13:00	0
2009-04-09	18:14:00	11
2009-04-09	18:15:00	0
2009-04-09	18:16:00	22
2009-04-09	18:17:00	0
2009-04-09	18:18:00	11
2009-04-09	18:19:00	11
2009-04-09	18:20:00	11
2009-04-09	18:21:00	0
2009-04-09	18:22:00	0
2009-04-09	18:23:00	0
2009-04-09	18:24:00	0
2009-04-09	18:25:00	44
2009-04-09	18:26:00	797
2009-04-09	18:27:00	305
2009-04-09	18:28:00	0
2009-04-09	18:29:00	11
2009-04-09	18:30:00	33
2009-04-09	18:31:00	44
2009-04-09	18:32:00	11
2009-04-09	18:33:00	0
2009-04-09	18:34:00	481
2009-04-09	18:35:00	289
2009-04-09	18:36:00	33
2009-04-09	18:37:00	276
2009-04-09	18:38:00	413
2009-04-09	18:39:00	210
2009-04-09	18:40:00	0
2009-04-09	18:41:00	11
2009-04-09	18:42:00	0
2009-04-09	18:43:00	0
2009-04-09	18:44:00	22
2009-04-09	18:45:00	55
2009-04-09	18:46:00	11
2009-04-09	18:47:00	77
2009-04-09	18:48:00	11
2009-04-09	18:49:00	0
2009-04-09	18:50:00	157
2009-04-09	18:51:00	413
2009-04-09	18:52:00	320
2009-04-09	18:53:00	22
2009-04-09	18:54:00	0
2009-04-09	18:55:00	0
2009-04-09	18:56:00	0
2009-04-09	18:57:00	0
2009-04-09	18:58:00	0
2009-04-09	18:59:00	0
2009-04-09	19:00:00	11
2009-04-09	19:01:00	0
2009-04-09	19:02:00	0
2009-04-09	19:03:00	0
2009-04-09	19:04:00	0
2009-04-09	19:05:00	0
2009-04-09	19:06:00	0
2009-04-09	19:07:00	0
2009-04-09	19:08:00	0
2009-04-09	19:09:00	0
2009-04-09	19:10:00	0
2009-04-09	19:11:00	0
2009-04-09	19:12:00	0
2009-04-09	19:13:00	0
2009-04-09	19:14:00	0
2009-04-09	19:15:00	0
2009-04-09	19:16:00	0
2009-04-09	19:17:00	0
2009-04-09	19:18:00	0
2009-04-09	19:19:00	0
2009-04-09	19:20:00	0
2009-04-09	19:21:00	0
2009-04-09	19:22:00	0
2009-04-09	19:23:00	0
2009-04-09	19:24:00	0
2009-04-09	19:25:00	0
2009-04-09	19:26:00	0
2009-04-09	19:27:00	0
2009-04-09	19:28:00	0
2009-04-09	19:29:00	0
2009-04-09	19:30:00	0
2009-04-09	19:31:00	0
2009-04-09	19:32:00	0
2009-04-09	19:33:00	0
2009-04-09	19:34:00	0
2009-04-09	19:35:00	0
2009-04-09	19:36:00	0
2009-04-09	19:37:00	0
2009-04-09	19:38:00	0
2009-04-09	19:39:00	0
2009-04-09	19:40:00	0
2009-04-09	19:41:00	0
2009-04-09	19:42:00	0
2009-04-09	19:43:00	0
2009-04-09	19:44:00	0
2009-04-09	19:45:00	0
2009-04-09	19:46:00	0
2009-04-09	19:47:00	0
2009-04-09	19:48:00	0
2009-04-09	19:49:00	0
2009-04-09	19:50:00	0
2009-04-09	19:51:00	11
2009-04-09	19:52:00	0
2009-04-09	19:53:00	0
2009-04-09	19:54:00	0
2009-04-09	19:55:00	0
2009-04-09	19:56:00	0
2009-04-09	19:57:00	0
2009-04-09	19:58:00	0
2009-04-09	19:59:00	0
2009-04-09	20:00:00	0
2009-04-09	20:01:00	0
2009-04-09	20:02:00	0
2009-04-09	20:03:00	0
2009-04-09	20:04:00	0
2009-04-09	20:05:00	0
2009-04-09	20:06:00	0
2009-04-09	20:07:00	0
2009-04-09	20:08:00	0
2009-04-09	20:09:00	0
2009-04-09	20:10:00	0
2009-04-09	20:11:00	0
2009-04-09	20:12:00	0
2009-04-09	20:13:00	0
2009-04-09	20:14:00	0
2009-04-09	20:15:00	0
2009-04-09	20:16:00	0
2009-04-09	20:17:00	0
2009-04-09	20:18:00	0
2009-04-09	20:19:00	0
2009-04-09	20:20:00	0
2009-04-09	20:21:00	0
2009-04-09	20:22:00	0
2009-04-09	20:23:00	0
2009-04-09	20:24:00	0
2009-04-09	20:25:00	0
2009-04-09	20:26:00	66
2009-04-09	20:27:00	22
2009-04-09	20:28:00	11
2009-04-09	20:29:00	22
2009-04-09	20:30:00	22
2009-04-09	20:31:00	22
2009-04-09	20:32:00	11
2009-04-09	20:33:00	22
2009-04-09	20:34:00	11
2009-04-09	20:35:00	33
2009-04-09	20:36:00	44
2009-04-09	20:37:00	22
2009-04-09	20:38:00	22
2009-04-09	20:39:00	11
2009-04-09	20:40:00	11
2009-04-09	20:41:00	11
2009-04-09	20:42:00	157
2009-04-09	20:43:00	534
2009-04-09	20:44:00	569
2009-04-09	20:45:00	44
2009-04-09	20:46:00	44
2009-04-09	20:47:00	157
2009-04-09	20:48:00	236
2009-04-09	20:49:00	305
2009-04-09	20:50:00	223
2009-04-09	20:51:00	289
2009-04-09	20:52:00	66
2009-04-09	20:53:00	0
2009-04-09	20:54:00	0
2009-04-09	20:55:00	0
2009-04-09	20:56:00	0
2009-04-09	20:57:00	0
2009-04-09	20:58:00	0
2009-04-09	20:59:00	0
2009-04-09	21:00:00	0
2009-04-09	21:01:00	0
2009-04-09	21:02:00	11
2009-04-09	21:03:00	0
2009-04-09	21:04:00	0
2009-04-09	21:05:00	0
2009-04-09	21:06:00	0
2009-04-09	21:07:00	0
2009-04-09	21:08:00	0
2009-04-09	21:09:00	0
2009-04-09	21:10:00	0
2009-04-09	21:11:00	0
2009-04-09	21:12:00	0
2009-04-09	21:13:00	0
2009-04-09	21:14:00	0
2009-04-09	21:15:00	0
2009-04-09	21:16:00	0
2009-04-09	21:17:00	11
2009-04-09	21:18:00	236
2009-04-09	21:19:00	516
2009-04-09	21:20:00	170
2009-04-09	21:21:00	132
2009-04-09	21:22:00	170
2009-04-09	21:23:00	428
2009-04-09	21:24:00	366
2009-04-09	21:25:00	121
2009-04-09	21:26:00	0
2009-04-09	21:27:00	0
2009-04-09	21:28:00	0
2009-04-09	21:29:00	0
2009-04-09	21:30:00	22
2009-04-09	21:31:00	0
2009-04-09	21:32:00	0
2009-04-09	21:33:00	0
2009-04-09	21:34:00	0
2009-04-09	21:35:00	11
2009-04-09	21:36:00	22
2009-04-09	21:37:00	263
2009-04-09	21:38:00	481
2009-04-09	21:39:00	335
2009-04-09	21:40:00	99
2009-04-09	21:41:00	143
2009-04-09	21:42:00	397
2009-04-09	21:43:00	589
2009-04-09	21:44:00	276
2009-04-09	21:45:00	66
2009-04-09	21:46:00	263
2009-04-09	21:47:00	351
2009-04-09	21:48:00	88
2009-04-09	21:49:00	249
2009-04-09	21:50:00	55
2009-04-09	21:51:00	0
2009-04-09	21:52:00	121
2009-04-09	21:53:00	143
2009-04-09	21:54:00	11
2009-04-09	21:55:00	44
2009-04-09	21:56:00	157
2009-04-09	21:57:00	446
2009-04-09	21:58:00	249
2009-04-09	21:59:00	335
2009-04-09	22:00:00	481
2009-04-09	22:01:00	516
2009-04-09	22:02:00	534
2009-04-09	22:03:00	446
2009-04-09	22:04:00	911
2009-04-09	22:05:00	887
2009-04-09	22:06:00	609
2009-04-09	22:07:00	397
2009-04-09	22:08:00	11
2009-04-09	22:09:00	55
2009-04-09	22:10:00	196
2009-04-09	22:11:00	157
2009-04-09	22:12:00	22
2009-04-09	22:13:00	263
2009-04-09	22:14:00	305
2009-04-09	22:15:00	589
2009-04-09	22:16:00	534
2009-04-09	22:17:00	305
2009-04-09	22:18:00	351
2009-04-09	22:19:00	110
2009-04-09	22:20:00	263
2009-04-09	22:21:00	223
2009-04-09	22:22:00	132
2009-04-09	22:23:00	249
2009-04-09	22:24:00	55
2009-04-09	22:25:00	99
2009-04-09	22:26:00	0
2009-04-09	22:27:00	0
2009-04-09	22:28:00	0
2009-04-09	22:29:00	0
2009-04-09	22:30:00	0
2009-04-09	22:31:00	11
2009-04-09	22:32:00	0
2009-04-09	22:33:00	0
2009-04-09	22:34:00	0
2009-04-09	22:35:00	0
2009-04-09	22:36:00	0
2009-04-09	22:37:00	33
2009-04-09	22:38:00	11
2009-04-09	22:39:00	249
2009-04-09	22:40:00	366
2009-04-09	22:41:00	110
2009-04-09	22:42:00	77
2009-04-09	22:43:00	132
2009-04-09	22:44:00	121
2009-04-09	22:45:00	88
2009-04-09	22:46:00	170
2009-04-09	22:47:00	99
2009-04-09	22:48:00	143
2009-04-09	22:49:00	183
2009-04-09	22:50:00	305
2009-04-09	22:51:00	249
2009-04-09	22:52:00	210
2009-04-09	22:53:00	223
2009-04-09	22:54:00	110
2009-04-09	22:55:00	143
2009-04-09	22:56:00	66
2009-04-09	22:57:00	263
2009-04-09	22:58:00	499
2009-04-09	22:59:00	366
2009-04-09	23:00:00	132
2009-04-09	23:01:00	88
2009-04-09	23:02:00	170
2009-04-09	23:03:00	170
2009-04-09	23:04:00	170
2009-04-09	23:05:00	170
2009-04-09	23:06:00	196
2009-04-09	23:07:00	210
2009-04-09	23:08:00	157
2009-04-09	23:09:00	157
2009-04-09	23:10:00	289
2009-04-09	23:11:00	22
2009-04-09	23:12:00	0
2009-04-09	23:13:00	0
2009-04-09	23:14:00	11
2009-04-09	23:15:00	0
2009-04-09	23:16:00	0
2009-04-09	23:17:00	0
2009-04-09	23:18:00	0
2009-04-09	23:19:00	0
2009-04-09	23:20:00	0
2009-04-09	23:21:00	0
2009-04-09	23:22:00	11
2009-04-09	23:23:00	0
2009-04-09	23:24:00	0
2009-04-09	23:25:00	0
2009-04-09	23:26:00	0
2009-04-09	23:27:00	0
2009-04-09	23:28:00	210
2009-04-09	23:29:00	569
2009-04-09	23:30:00	0
2009-04-09	23:31:00	0
2009-04-09	23:32:00	0
2009-04-09	23:33:00	0
2009-04-09	23:34:00	0
2009-04-09	23:35:00	0
2009-04-09	23:36:00	0
2009-04-09	23:37:00	0
2009-04-09	23:38:00	0
2009-04-09	23:39:00	0
2009-04-09	23:40:00	0
2009-04-09	23:41:00	0
2009-04-09	23:42:00	0
2009-04-09	23:43:00	33
2009-04-09	23:44:00	0
2009-04-09	23:45:00	0
2009-04-09	23:46:00	0
2009-04-09	23:47:00	0
2009-04-09	23:48:00	0
2009-04-09	23:49:00	0
2009-04-09	23:50:00	0
2009-04-09	23:51:00	22
2009-04-09	23:52:00	0
2009-04-09	23:53:00	0
2009-04-09	23:54:00	0
2009-04-09	23:55:00	0
2009-04-09	23:56:00	0
2009-04-09	23:57:00	0
2009-04-09	23:58:00	0
2009-04-09	23:59:00	0
2009-04-10	00:00:00	0
2009-04-10	00:01:00	0
2009-04-10	00:02:00	0
2009-04-10	00:03:00	0
2009-04-10	00:04:00	0
2009-04-10	00:05:00	0
2009-04-10	00:06:00	0
2009-04-10	00:07:00	0
2009-04-10	00:08:00	0
2009-04-10	00:09:00	0
2009-04-10	00:10:00	0
2009-04-10	00:11:00	11
2009-04-10	00:12:00	0
2009-04-10	00:13:00	0
2009-04-10	00:14:00	0
2009-04-10	00:15:00	0
2009-04-10	00:16:00	22
2009-04-10	00:17:00	0
2009-04-10	00:18:00	0
2009-04-10	00:19:00	0
2009-04-10	00:20:00	0
2009-04-10	00:21:00	0
2009-04-10	00:22:00	0
2009-04-10	00:23:00	0
2009-04-10	00:24:00	0
2009-04-10	00:25:00	0
2009-04-10	00:26:00	0
2009-04-10	00:27:00	0
2009-04-10	00:28:00	0
2009-04-10	00:29:00	0
2009-04-10	00:30:00	0
2009-04-10	00:31:00	0
2009-04-10	00:32:00	0
2009-04-10	00:33:00	0
2009-04-10	00:34:00	0
2009-04-10	00:35:00	0
2009-04-10	00:36:00	0
2009-04-10	00:37:00	0
2009-04-10	00:38:00	55
2009-04-10	00:39:00	0
2009-04-10	00:40:00	0
2009-04-10	00:41:00	0
2009-04-10	00:42:00	0
2009-04-10	00:43:00	0
2009-04-10	00:44:00	44
2009-04-10	00:45:00	0
2009-04-10	00:46:00	0
2009-04-10	00:47:00	0
2009-04-10	00:48:00	0
2009-04-10	00:49:00	0
2009-04-10	00:50:00	0
2009-04-10	00:51:00	0
2009-04-10	00:52:00	66
2009-04-10	00:53:00	0
2009-04-10	00:54:00	0
2009-04-10	00:55:00	0
2009-04-10	00:56:00	0
2009-04-10	00:57:00	0
2009-04-10	00:58:00	0
2009-04-10	00:59:00	0
2009-04-10	01:00:00	0
2009-04-10	01:01:00	0
2009-04-10	01:02:00	0
2009-04-10	01:03:00	0
2009-04-10	01:04:00	0
2009-04-10	01:05:00	0
2009-04-10	01:06:00	0
2009-04-10	01:07:00	0
2009-04-10	01:08:00	0
2009-04-10	01:09:00	0
2009-04-10	01:10:00	0
2009-04-10	01:11:00	0
2009-04-10	01:12:00	0
2009-04-10	01:13:00	0
2009-04-10	01:14:00	0
2009-04-10	01:15:00	0
2009-04-10	01:16:00	0
2009-04-10	01:17:00	0
2009-04-10	01:18:00	0
2009-04-10	01:19:00	0
2009-04-10	01:20:00	22
2009-04-10	01:21:00	0
2009-04-10	01:22:00	0
2009-04-10	01:23:00	0
2009-04-10	01:24:00	0
2009-04-10	01:25:00	0
2009-04-10	01:26:00	0
2009-04-10	01:27:00	0
2009-04-10	01:28:00	0
2009-04-10	01:29:00	0
2009-04-10	01:30:00	0
2009-04-10	01:31:00	0
2009-04-10	01:32:00	0
2009-04-10	01:33:00	0
2009-04-10	01:34:00	55
2009-04-10	01:35:00	66
2009-04-10	01:36:00	143
2009-04-10	01:37:00	305
2009-04-10	01:38:00	236
2009-04-10	01:39:00	22
2009-04-10	01:40:00	0
2009-04-10	01:41:00	0
2009-04-10	01:42:00	0
2009-04-10	01:43:00	0
2009-04-10	01:44:00	0
2009-04-10	01:45:00	0
2009-04-10	01:46:00	0
2009-04-10	01:47:00	0
2009-04-10	01:48:00	0
2009-04-10	01:49:00	0
2009-04-10	01:50:00	0
2009-04-10	01:51:00	0
2009-04-10	01:52:00	0
2009-04-10	01:53:00	11
2009-04-10	01:54:00	0
2009-04-10	01:55:00	0
2009-04-10	01:56:00	0
2009-04-10	01:57:00	0
2009-04-10	01:58:00	0
2009-04-10	01:59:00	0
2009-04-10	02:00:00	0
2009-04-10	02:01:00	0
2009-04-10	02:02:00	0
2009-04-10	02:03:00	0
2009-04-10	02:04:00	0
2009-04-10	02:05:00	0
2009-04-10	02:06:00	0
2009-04-10	02:07:00	0
2009-04-10	02:08:00	0
2009-04-10	02:09:00	0
2009-04-10	02:10:00	0
2009-04-10	02:11:00	0
2009-04-10	02:12:00	0
2009-04-10	02:13:00	0
2009-04-10	02:14:00	0
2009-04-10	02:15:00	0
2009-04-10	02:16:00	0
2009-04-10	02:17:00	0
2009-04-10	02:18:00	0
2009-04-10	02:19:00	0
2009-04-10	02:20:00	0
2009-04-10	02:21:00	0
2009-04-10	02:22:00	0
2009-04-10	02:23:00	0
2009-04-10	02:24:00	0
2009-04-10	02:25:00	0
2009-04-10	02:26:00	0
2009-04-10	02:27:00	0
2009-04-10	02:28:00	0
2009-04-10	02:29:00	0
2009-04-10	02:30:00	0
2009-04-10	02:31:00	0
2009-04-10	02:32:00	0
2009-04-10	02:33:00	0
2009-04-10	02:34:00	0
2009-04-10	02:35:00	0
2009-04-10	02:36:00	0
2009-04-10	02:37:00	0
2009-04-10	02:38:00	0
2009-04-10	02:39:00	0
2009-04-10	02:40:00	0
2009-04-10	02:41:00	0
2009-04-10	02:42:00	0
2009-04-10	02:43:00	0
2009-04-10	02:44:00	0
2009-04-10	02:45:00	0
2009-04-10	02:46:00	0
2009-04-10	02:47:00	0
2009-04-10	02:48:00	0
2009-04-10	02:49:00	22
2009-04-10	02:50:00	0
2009-04-10	02:51:00	0
2009-04-10	02:52:00	0
2009-04-10	02:53:00	0
2009-04-10	02:54:00	0
2009-04-10	02:55:00	0
2009-04-10	02:56:00	0
2009-04-10	02:57:00	0
2009-04-10	02:58:00	0
2009-04-10	02:59:00	0
2009-04-10	03:00:00	0
2009-04-10	03:01:00	0
2009-04-10	03:02:00	0
2009-04-10	03:03:00	0
2009-04-10	03:04:00	0
2009-04-10	03:05:00	33
2009-04-10	03:06:00	223
2009-04-10	03:07:00	210
2009-04-10	03:08:00	110
2009-04-10	03:09:00	99
2009-04-10	03:10:00	0
2009-04-10	03:11:00	0
2009-04-10	03:12:00	0
2009-04-10	03:13:00	0
2009-04-10	03:14:00	0
2009-04-10	03:15:00	0
2009-04-10	03:16:00	0
2009-04-10	03:17:00	0
2009-04-10	03:18:00	0
2009-04-10	03:19:00	0
2009-04-10	03:20:00	0
2009-04-10	03:21:00	0
2009-04-10	03:22:00	0
2009-04-10	03:23:00	0
2009-04-10	03:24:00	0
2009-04-10	03:25:00	0
2009-04-10	03:26:00	0
2009-04-10	03:27:00	0
2009-04-10	03:28:00	0
2009-04-10	03:29:00	77
2009-04-10	03:30:00	0
2009-04-10	03:31:00	0
2009-04-10	03:32:00	0
2009-04-10	03:33:00	0
2009-04-10	03:34:00	0
2009-04-10	03:35:00	0
2009-04-10	03:36:00	11
2009-04-10	03:37:00	121
2009-04-10	03:38:00	0
2009-04-10	03:39:00	0
2009-04-10	03:40:00	0
2009-04-10	03:41:00	0
2009-04-10	03:42:00	0
2009-04-10	03:43:00	0
2009-04-10	03:44:00	0
2009-04-10	03:45:00	0
2009-04-10	03:46:00	0
2009-04-10	03:47:00	0
2009-04-10	03:48:00	0
2009-04-10	03:49:00	0
2009-04-10	03:50:00	0
2009-04-10	03:51:00	0
2009-04-10	03:52:00	0
2009-04-10	03:53:00	0
2009-04-10	03:54:00	0
2009-04-10	03:55:00	0
2009-04-10	03:56:00	0
2009-04-10	03:57:00	0
2009-04-10	03:58:00	0
2009-04-10	03:59:00	0
2009-04-10	04:00:00	0
2009-04-10	04:01:00	0
2009-04-10	04:02:00	0
2009-04-10	04:03:00	0
2009-04-10	04:04:00	0
2009-04-10	04:05:00	11
2009-04-10	04:06:00	0
2009-04-10	04:07:00	0
2009-04-10	04:08:00	0
2009-04-10	04:09:00	0
2009-04-10	04:10:00	0
2009-04-10	04:11:00	0
2009-04-10	04:12:00	0
2009-04-10	04:13:00	0
2009-04-10	04:14:00	0
2009-04-10	04:15:00	0
2009-04-10	04:16:00	0
2009-04-10	04:17:00	0
2009-04-10	04:18:00	0
2009-04-10	04:19:00	0
2009-04-10	04:20:00	0
2009-04-10	04:21:00	0
2009-04-10	04:22:00	0
2009-04-10	04:23:00	0
2009-04-10	04:24:00	0
2009-04-10	04:25:00	0
2009-04-10	04:26:00	0
2009-04-10	04:27:00	0
2009-04-10	04:28:00	0
2009-04-10	04:29:00	0
2009-04-10	04:30:00	0
2009-04-10	04:31:00	0
2009-04-10	04:32:00	0
2009-04-10	04:33:00	0
2009-04-10	04:34:00	0
2009-04-10	04:35:00	0
2009-04-10	04:36:00	0
2009-04-10	04:37:00	0
2009-04-10	04:38:00	0
2009-04-10	04:39:00	0
2009-04-10	04:40:00	0
2009-04-10	04:41:00	0
2009-04-10	04:42:00	0
2009-04-10	04:43:00	0
2009-04-10	04:44:00	0
2009-04-10	04:45:00	0
2009-04-10	04:46:00	0
2009-04-10	04:47:00	0
2009-04-10	04:48:00	0
2009-04-10	04:49:00	0
2009-04-10	04:50:00	0
2009-04-10	04:51:00	0
2009-04-10	04:52:00	0
2009-04-10	04:53:00	0
2009-04-10	04:54:00	0
2009-04-10	04:55:00	0
2009-04-10	04:56:00	0
2009-04-10	04:57:00	0
2009-04-10	04:58:00	0
2009-04-10	04:59:00	0
2009-04-10	05:00:00	0
2009-04-10	05:01:00	0
2009-04-10	05:02:00	0
2009-04-10	05:03:00	0
2009-04-10	05:04:00	0
2009-04-10	05:05:00	0
2009-04-10	05:06:00	0
2009-04-10	05:07:00	0
2009-04-10	05:08:00	0
2009-04-10	05:09:00	0
2009-04-10	05:10:00	0
2009-04-10	05:11:00	0
2009-04-10	05:12:00	0
2009-04-10	05:13:00	0
2009-04-10	05:14:00	0
2009-04-10	05:15:00	0
2009-04-10	05:16:00	0
2009-04-10	05:17:00	0
2009-04-10	05:18:00	0
2009-04-10	05:19:00	0
2009-04-10	05:20:00	0
2009-04-10	05:21:00	11
2009-04-10	05:22:00	305
2009-04-10	05:23:00	0
2009-04-10	05:24:00	0
2009-04-10	05:25:00	0
2009-04-10	05:26:00	0
2009-04-10	05:27:00	0
2009-04-10	05:28:00	0
2009-04-10	05:29:00	0
2009-04-10	05:30:00	0
2009-04-10	05:31:00	0
2009-04-10	05:32:00	0
2009-04-10	05:33:00	0
2009-04-10	05:34:00	0
2009-04-10	05:35:00	11
2009-04-10	05:36:00	0
2009-04-10	05:37:00	0
2009-04-10	05:38:00	0
2009-04-10	05:39:00	11
2009-04-10	05:40:00	0
2009-04-10	05:41:00	0
2009-04-10	05:42:00	0
2009-04-10	05:43:00	0
2009-04-10	05:44:00	0
2009-04-10	05:45:00	0
2009-04-10	05:46:00	0
2009-04-10	05:47:00	0
2009-04-10	05:48:00	0
2009-04-10	05:49:00	0
2009-04-10	05:50:00	0
2009-04-10	05:51:00	0
2009-04-10	05:52:00	0
2009-04-10	05:53:00	0
2009-04-10	05:54:00	0
2009-04-10	05:55:00	0
2009-04-10	05:56:00	0
2009-04-10	05:57:00	0
2009-04-10	05:58:00	0
2009-04-10	05:59:00	0
2009-04-10	06:00:00	0
2009-04-10	06:01:00	0
2009-04-10	06:02:00	0
2009-04-10	06:03:00	0
2009-04-10	06:04:00	0
2009-04-10	06:05:00	0
2009-04-10	06:06:00	0
2009-04-10	06:07:00	0
2009-04-10	06:08:00	0
2009-04-10	06:09:00	0
2009-04-10	06:10:00	0
2009-04-10	06:11:00	0
2009-04-10	06:12:00	0
2009-04-10	06:13:00	0
2009-04-10	06:14:00	0
2009-04-10	06:15:00	0
2009-04-10	06:16:00	0
2009-04-10	06:17:00	0
2009-04-10	06:18:00	0
2009-04-10	06:19:00	0
2009-04-10	06:20:00	0
2009-04-10	06:21:00	0
2009-04-10	06:22:00	0
2009-04-10	06:23:00	0
2009-04-10	06:24:00	0
2009-04-10	06:25:00	0
2009-04-10	06:26:00	0
2009-04-10	06:27:00	0
2009-04-10	06:28:00	0
2009-04-10	06:29:00	0
2009-04-10	06:30:00	0
2009-04-10	06:31:00	0
2009-04-10	06:32:00	0
2009-04-10	06:33:00	0
2009-04-10	06:34:00	0
2009-04-10	06:35:00	0
2009-04-10	06:36:00	0
2009-04-10	06:37:00	0
2009-04-10	06:38:00	0
2009-04-10	06:39:00	0
2009-04-10	06:40:00	0
2009-04-10	06:41:00	0
2009-04-10	06:42:00	0
2009-04-10	06:43:00	0
2009-04-10	06:44:00	0
2009-04-10	06:45:00	0
2009-04-10	06:46:00	0
2009-04-10	06:47:00	44
2009-04-10	06:48:00	44
2009-04-10	06:49:00	0
2009-04-10	06:50:00	0
2009-04-10	06:51:00	0
2009-04-10	06:52:00	0
2009-04-10	06:53:00	0
2009-04-10	06:54:00	0
2009-04-10	06:55:00	0
2009-04-10	06:56:00	0
2009-04-10	06:57:00	0
2009-04-10	06:58:00	0
2009-04-10	06:59:00	0
2009-04-10	07:00:00	0
2009-04-10	07:01:00	121
2009-04-10	07:02:00	552
2009-04-10	07:03:00	463
2009-04-10	07:04:00	629
2009-04-10	07:05:00	481
2009-04-10	07:06:00	88
2009-04-10	07:07:00	320
2009-04-10	07:08:00	183
2009-04-10	07:09:00	66
2009-04-10	07:10:00	629
2009-04-10	07:11:00	289
2009-04-10	07:12:00	183
2009-04-10	07:13:00	263
2009-04-10	07:14:00	183
2009-04-10	07:15:00	335
2009-04-10	07:16:00	366
2009-04-10	07:17:00	66
2009-04-10	07:18:00	196
2009-04-10	07:19:00	88
2009-04-10	07:20:00	0
2009-04-10	07:21:00	55
2009-04-10	07:22:00	0
2009-04-10	07:23:00	66
2009-04-10	07:24:00	77
2009-04-10	07:25:00	11
2009-04-10	07:26:00	0
2009-04-10	07:27:00	88
2009-04-10	07:28:00	0
2009-04-10	07:29:00	11
2009-04-10	07:30:00	11
2009-04-10	07:31:00	11
2009-04-10	07:32:00	0
2009-04-10	07:33:00	0
2009-04-10	07:34:00	11
2009-04-10	07:35:00	22
2009-04-10	07:36:00	0
2009-04-10	07:37:00	0
2009-04-10	07:38:00	44
2009-04-10	07:39:00	0
2009-04-10	07:40:00	33
2009-04-10	07:41:00	44
2009-04-10	07:42:00	33
2009-04-10	07:43:00	11
2009-04-10	07:44:00	183
2009-04-10	07:45:00	55
2009-04-10	07:46:00	0
2009-04-10	07:47:00	0
2009-04-10	07:48:00	0
2009-04-10	07:49:00	481
2009-04-10	07:50:00	11
2009-04-10	07:51:00	11
2009-04-10	07:52:00	0
2009-04-10	07:53:00	22
2009-04-10	07:54:00	0
2009-04-10	07:55:00	0
2009-04-10	07:56:00	22
2009-04-10	07:57:00	33
2009-04-10	07:58:00	33
2009-04-10	07:59:00	132
2009-04-10	08:00:00	99
2009-04-10	08:01:00	55
2009-04-10	08:02:00	11
2009-04-10	08:03:00	66
2009-04-10	08:04:00	413
2009-04-10	08:05:00	320
2009-04-10	08:06:00	11
2009-04-10	08:07:00	22
2009-04-10	08:08:00	249
2009-04-10	08:09:00	263
2009-04-10	08:10:00	44
2009-04-10	08:11:00	1607
2009-04-10	08:12:00	841
2009-04-10	08:13:00	775
2009-04-10	08:14:00	481
2009-04-10	08:15:00	649
2009-04-10	08:16:00	649
2009-04-10	08:17:00	305
2009-04-10	08:18:00	960
2009-04-10	08:19:00	753
2009-04-10	08:20:00	1408
2009-04-10	08:21:00	960
2009-04-10	08:22:00	1346
2009-04-10	08:23:00	499
2009-04-10	08:24:00	936
2009-04-10	08:25:00	1170
2009-04-10	08:26:00	1062
2009-04-10	08:27:00	276
2009-04-10	08:28:00	428
2009-04-10	08:29:00	249
2009-04-10	08:30:00	289
2009-04-10	08:31:00	428
2009-04-10	08:32:00	351
2009-04-10	08:33:00	534
2009-04-10	08:34:00	413
2009-04-10	08:35:00	569
2009-04-10	08:36:00	413
2009-04-10	08:37:00	609
2009-04-10	08:38:00	1062
2009-04-10	08:39:00	516
2009-04-10	08:40:00	157
2009-04-10	08:41:00	236
2009-04-10	08:42:00	11
2009-04-10	08:43:00	11
2009-04-10	08:44:00	33
2009-04-10	08:45:00	33
2009-04-10	08:46:00	11
2009-04-10	08:47:00	11
2009-04-10	08:48:00	11
2009-04-10	08:49:00	22
2009-04-10	08:50:00	11
2009-04-10	08:51:00	0
2009-04-10	08:52:00	0
2009-04-10	08:53:00	0
2009-04-10	08:54:00	33
2009-04-10	08:55:00	446
2009-04-10	08:56:00	55
2009-04-10	08:57:00	0
2009-04-10	08:58:00	0
2009-04-10	08:59:00	66
2009-04-10	09:00:00	0
2009-04-10	09:01:00	0
2009-04-10	09:02:00	0
2009-04-10	09:03:00	0
2009-04-10	09:04:00	0
2009-04-10	09:05:00	0
2009-04-10	09:06:00	0
2009-04-10	09:07:00	0
2009-04-10	09:08:00	0
[truncated: 25,371 more rows]

## Sheet: 4.27.09
Actogram, Copy Raw Data, All Days
Identity:	Malakh
Filename:	E:\Active Research Files\meloxicam titre canine\cases\malakh\Malakh 4.27.09.AWC
Gender:	F
Age:	13
Height:	91.4 cm	36.0 in
Weight:	35.0 kg	77.2 lbs
Start Date:	27-Apr-2009 (Mon)
Start Time:	18:00:00
Interval:	1.00 mins
Date Stamp:	Time Stamp:	Activity Data:	Marker Press:
2009-04-27	00:00:00	0
2009-04-27	00:01:00	0
2009-04-27	00:02:00	0
2009-04-27	00:03:00	0
2009-04-27	00:04:00	0
2009-04-27	00:05:00	0
2009-04-27	00:06:00	0
2009-04-27	00:07:00	0
2009-04-27	00:08:00	0
2009-04-27	00:09:00	0
2009-04-27	00:10:00	0
2009-04-27	00:11:00	0
2009-04-27	00:12:00	0
2009-04-27	00:13:00	0
2009-04-27	00:14:00	0
2009-04-27	00:15:00	0
2009-04-27	00:16:00	0
2009-04-27	00:17:00	0
2009-04-27	00:18:00	0
2009-04-27	00:19:00	0
2009-04-27	00:20:00	0
2009-04-27	00:21:00	0
2009-04-27	00:22:00	0
2009-04-27	00:23:00	0
2009-04-27	00:24:00	0
2009-04-27	00:25:00	0
2009-04-27	00:26:00	0
2009-04-27	00:27:00	0
2009-04-27	00:28:00	0
2009-04-27	00:29:00	0
2009-04-27	00:30:00	0
2009-04-27	00:31:00	0
2009-04-27	00:32:00	0
2009-04-27	00:33:00	0
2009-04-27	00:34:00	0
2009-04-27	00:35:00	0
2009-04-27	00:36:00	0
2009-04-27	00:37:00	0
2009-04-27	00:38:00	0
2009-04-27	00:39:00	0
2009-04-27	00:40:00	0
2009-04-27	00:41:00	0
2009-04-27	00:42:00	0
2009-04-27	00:43:00	0
2009-04-27	00:44:00	0
2009-04-27	00:45:00	0
2009-04-27	00:46:00	0
2009-04-27	00:47:00	0
2009-04-27	00:48:00	0
2009-04-27	00:49:00	0
2009-04-27	00:50:00	0
2009-04-27	00:51:00	0
2009-04-27	00:52:00	0
2009-04-27	00:53:00	0
2009-04-27	00:54:00	0
2009-04-27	00:55:00	0
2009-04-27	00:56:00	0
2009-04-27	00:57:00	0
2009-04-27	00:58:00	0
2009-04-27	00:59:00	0
2009-04-27	01:00:00	0
2009-04-27	01:01:00	0
2009-04-27	01:02:00	0
2009-04-27	01:03:00	0
2009-04-27	01:04:00	0
2009-04-27	01:05:00	0
2009-04-27	01:06:00	0
2009-04-27	01:07:00	0
2009-04-27	01:08:00	0
2009-04-27	01:09:00	0
2009-04-27	01:10:00	0
2009-04-27	01:11:00	0
2009-04-27	01:12:00	0
2009-04-27	01:13:00	0
2009-04-27	01:14:00	0
2009-04-27	01:15:00	0
2009-04-27	01:16:00	0
2009-04-27	01:17:00	0
2009-04-27	01:18:00	0
2009-04-27	01:19:00	0
2009-04-27	01:20:00	0
2009-04-27	01:21:00	0
2009-04-27	01:22:00	0
2009-04-27	01:23:00	0
2009-04-27	01:24:00	0
2009-04-27	01:25:00	0
2009-04-27	01:26:00	0
2009-04-27	01:27:00	0
2009-04-27	01:28:00	0
2009-04-27	01:29:00	0
2009-04-27	01:30:00	0
2009-04-27	01:31:00	0
2009-04-27	01:32:00	0
2009-04-27	01:33:00	0
2009-04-27	01:34:00	0
2009-04-27	01:35:00	0
2009-04-27	01:36:00	0
2009-04-27	01:37:00	0
2009-04-27	01:38:00	0
2009-04-27	01:39:00	0
2009-04-27	01:40:00	0
2009-04-27	01:41:00	0
2009-04-27	01:42:00	0
2009-04-27	01:43:00	0
2009-04-27	01:44:00	0
2009-04-27	01:45:00	0
2009-04-27	01:46:00	0
2009-04-27	01:47:00	0
2009-04-27	01:48:00	0
2009-04-27	01:49:00	0
2009-04-27	01:50:00	0
2009-04-27	01:51:00	0
2009-04-27	01:52:00	0
2009-04-27	01:53:00	0
2009-04-27	01:54:00	0
2009-04-27	01:55:00	0
2009-04-27	01:56:00	0
2009-04-27	01:57:00	0
2009-04-27	01:58:00	0
2009-04-27	01:59:00	0
2009-04-27	02:00:00	0
2009-04-27	02:01:00	0
2009-04-27	02:02:00	0
2009-04-27	02:03:00	0
2009-04-27	02:04:00	0
2009-04-27	02:05:00	0
2009-04-27	02:06:00	0
2009-04-27	02:07:00	0
2009-04-27	02:08:00	0
2009-04-27	02:09:00	0
2009-04-27	02:10:00	0
2009-04-27	02:11:00	0
2009-04-27	02:12:00	0
2009-04-27	02:13:00	0
2009-04-27	02:14:00	0
2009-04-27	02:15:00	0
2009-04-27	02:16:00	0
2009-04-27	02:17:00	0
2009-04-27	02:18:00	0
2009-04-27	02:19:00	0
2009-04-27	02:20:00	0
2009-04-27	02:21:00	0
2009-04-27	02:22:00	0
2009-04-27	02:23:00	0
2009-04-27	02:24:00	0
2009-04-27	02:25:00	0
2009-04-27	02:26:00	0
2009-04-27	02:27:00	0
2009-04-27	02:28:00	0
2009-04-27	02:29:00	0
2009-04-27	02:30:00	0
2009-04-27	02:31:00	0
2009-04-27	02:32:00	0
2009-04-27	02:33:00	0
2009-04-27	02:34:00	0
2009-04-27	02:35:00	0
2009-04-27	02:36:00	0
2009-04-27	02:37:00	0
2009-04-27	02:38:00	0
2009-04-27	02:39:00	0
2009-04-27	02:40:00	0
2009-04-27	02:41:00	0
2009-04-27	02:42:00	0
2009-04-27	02:43:00	0
2009-04-27	02:44:00	0
2009-04-27	02:45:00	0
2009-04-27	02:46:00	0
2009-04-27	02:47:00	0
2009-04-27	02:48:00	0
2009-04-27	02:49:00	0
2009-04-27	02:50:00	0
2009-04-27	02:51:00	0
2009-04-27	02:52:00	0
2009-04-27	02:53:00	0
2009-04-27	02:54:00	0
2009-04-27	02:55:00	0
2009-04-27	02:56:00	0
2009-04-27	02:57:00	0
2009-04-27	02:58:00	0
2009-04-27	02:59:00	0
2009-04-27	03:00:00	0
2009-04-27	03:01:00	0
2009-04-27	03:02:00	0
2009-04-27	03:03:00	0
2009-04-27	03:04:00	0
2009-04-27	03:05:00	0
2009-04-27	03:06:00	0
2009-04-27	03:07:00	0
2009-04-27	03:08:00	0
2009-04-27	03:09:00	0
2009-04-27	03:10:00	0
2009-04-27	03:11:00	0
2009-04-27	03:12:00	0
2009-04-27	03:13:00	0
2009-04-27	03:14:00	0
2009-04-27	03:15:00	0
2009-04-27	03:16:00	0
2009-04-27	03:17:00	0
2009-04-27	03:18:00	0
2009-04-27	03:19:00	0
2009-04-27	03:20:00	0
2009-04-27	03:21:00	0
2009-04-27	03:22:00	0
2009-04-27	03:23:00	0
2009-04-27	03:24:00	0
2009-04-27	03:25:00	0
2009-04-27	03:26:00	0
2009-04-27	03:27:00	0
2009-04-27	03:28:00	0
2009-04-27	03:29:00	0
2009-04-27	03:30:00	0
2009-04-27	03:31:00	0
2009-04-27	03:32:00	0
2009-04-27	03:33:00	0
2009-04-27	03:34:00	0
2009-04-27	03:35:00	0
2009-04-27	03:36:00	0
2009-04-27	03:37:00	0
2009-04-27	03:38:00	0
2009-04-27	03:39:00	0
2009-04-27	03:40:00	0
2009-04-27	03:41:00	0
2009-04-27	03:42:00	0
2009-04-27	03:43:00	0
2009-04-27	03:44:00	0
2009-04-27	03:45:00	0
2009-04-27	03:46:00	0
2009-04-27	03:47:00	0
2009-04-27	03:48:00	0
2009-04-27	03:49:00	0
2009-04-27	03:50:00	0
2009-04-27	03:51:00	0
2009-04-27	03:52:00	0
2009-04-27	03:53:00	0
2009-04-27	03:54:00	0
2009-04-27	03:55:00	0
2009-04-27	03:56:00	0
2009-04-27	03:57:00	0
2009-04-27	03:58:00	0
2009-04-27	03:59:00	0
2009-04-27	04:00:00	0
2009-04-27	04:01:00	0
2009-04-27	04:02:00	0
2009-04-27	04:03:00	0
2009-04-27	04:04:00	0
2009-04-27	04:05:00	0
2009-04-27	04:06:00	0
2009-04-27	04:07:00	0
2009-04-27	04:08:00	0
2009-04-27	04:09:00	0
2009-04-27	04:10:00	0
2009-04-27	04:11:00	0
2009-04-27	04:12:00	0
2009-04-27	04:13:00	0
2009-04-27	04:14:00	0
2009-04-27	04:15:00	0
2009-04-27	04:16:00	0
2009-04-27	04:17:00	0
2009-04-27	04:18:00	0
2009-04-27	04:19:00	0
2009-04-27	04:20:00	0
2009-04-27	04:21:00	0
2009-04-27	04:22:00	0
2009-04-27	04:23:00	0
2009-04-27	04:24:00	0
2009-04-27	04:25:00	0
2009-04-27	04:26:00	0
2009-04-27	04:27:00	0
2009-04-27	04:28:00	0
2009-04-27	04:29:00	0
2009-04-27	04:30:00	0
2009-04-27	04:31:00	0
2009-04-27	04:32:00	0
2009-04-27	04:33:00	0
2009-04-27	04:34:00	0
2009-04-27	04:35:00	0
2009-04-27	04:36:00	0
2009-04-27	04:37:00	0
2009-04-27	04:38:00	0
2009-04-27	04:39:00	0
2009-04-27	04:40:00	0
2009-04-27	04:41:00	0
2009-04-27	04:42:00	0
2009-04-27	04:43:00	0
2009-04-27	04:44:00	0
2009-04-27	04:45:00	0
2009-04-27	04:46:00	0
2009-04-27	04:47:00	0
2009-04-27	04:48:00	0
2009-04-27	04:49:00	0
2009-04-27	04:50:00	0
2009-04-27	04:51:00	0
2009-04-27	04:52:00	0
2009-04-27	04:53:00	0
2009-04-27	04:54:00	0
2009-04-27	04:55:00	0
2009-04-27	04:56:00	0
2009-04-27	04:57:00	0
2009-04-27	04:58:00	0
2009-04-27	04:59:00	0
2009-04-27	05:00:00	0
2009-04-27	05:01:00	0
2009-04-27	05:02:00	0
2009-04-27	05:03:00	0
2009-04-27	05:04:00	0
2009-04-27	05:05:00	0
2009-04-27	05:06:00	0
2009-04-27	05:07:00	0
2009-04-27	05:08:00	0
2009-04-27	05:09:00	0
2009-04-27	05:10:00	0
2009-04-27	05:11:00	0
2009-04-27	05:12:00	0
2009-04-27	05:13:00	0
2009-04-27	05:14:00	0
2009-04-27	05:15:00	0
2009-04-27	05:16:00	0
2009-04-27	05:17:00	0
2009-04-27	05:18:00	0
2009-04-27	05:19:00	0
2009-04-27	05:20:00	0
2009-04-27	05:21:00	0
2009-04-27	05:22:00	0
2009-04-27	05:23:00	0
2009-04-27	05:24:00	0
2009-04-27	05:25:00	0
2009-04-27	05:26:00	0
2009-04-27	05:27:00	0
2009-04-27	05:28:00	0
2009-04-27	05:29:00	0
2009-04-27	05:30:00	0
2009-04-27	05:31:00	0
2009-04-27	05:32:00	0
2009-04-27	05:33:00	0
2009-04-27	05:34:00	0
2009-04-27	05:35:00	0
2009-04-27	05:36:00	0
2009-04-27	05:37:00	0
2009-04-27	05:38:00	0
2009-04-27	05:39:00	0
2009-04-27	05:40:00	0
2009-04-27	05:41:00	0
2009-04-27	05:42:00	0
2009-04-27	05:43:00	0
2009-04-27	05:44:00	0
2009-04-27	05:45:00	0
2009-04-27	05:46:00	0
2009-04-27	05:47:00	0
2009-04-27	05:48:00	0
2009-04-27	05:49:00	0
2009-04-27	05:50:00	0
2009-04-27	05:51:00	0
2009-04-27	05:52:00	0
2009-04-27	05:53:00	0
2009-04-27	05:54:00	0
2009-04-27	05:55:00	0
2009-04-27	05:56:00	0
2009-04-27	05:57:00	0
2009-04-27	05:58:00	0
2009-04-27	05:59:00	0
2009-04-27	06:00:00	0
2009-04-27	06:01:00	0
2009-04-27	06:02:00	0
2009-04-27	06:03:00	0
2009-04-27	06:04:00	0
2009-04-27	06:05:00	0
2009-04-27	06:06:00	0
2009-04-27	06:07:00	0
2009-04-27	06:08:00	0
2009-04-27	06:09:00	0
2009-04-27	06:10:00	0
2009-04-27	06:11:00	0
2009-04-27	06:12:00	0
2009-04-27	06:13:00	0
2009-04-27	06:14:00	0
2009-04-27	06:15:00	0
2009-04-27	06:16:00	0
2009-04-27	06:17:00	0
2009-04-27	06:18:00	0
2009-04-27	06:19:00	0
2009-04-27	06:20:00	0
2009-04-27	06:21:00	0
2009-04-27	06:22:00	0
2009-04-27	06:23:00	0
2009-04-27	06:24:00	0
2009-04-27	06:25:00	0
2009-04-27	06:26:00	0
2009-04-27	06:27:00	0
2009-04-27	06:28:00	0
2009-04-27	06:29:00	0
2009-04-27	06:30:00	0
2009-04-27	06:31:00	0
2009-04-27	06:32:00	0
2009-04-27	06:33:00	0
2009-04-27	06:34:00	0
2009-04-27	06:35:00	0
2009-04-27	06:36:00	0
2009-04-27	06:37:00	0
2009-04-27	06:38:00	0
2009-04-27	06:39:00	0
2009-04-27	06:40:00	0
2009-04-27	06:41:00	0
2009-04-27	06:42:00	0
2009-04-27	06:43:00	0
2009-04-27	06:44:00	0
2009-04-27	06:45:00	0
2009-04-27	06:46:00	0
2009-04-27	06:47:00	0
2009-04-27	06:48:00	0
2009-04-27	06:49:00	0
2009-04-27	06:50:00	0
2009-04-27	06:51:00	0
2009-04-27	06:52:00	0
2009-04-27	06:53:00	0
2009-04-27	06:54:00	0
2009-04-27	06:55:00	0
2009-04-27	06:56:00	0
2009-04-27	06:57:00	0
2009-04-27	06:58:00	0
2009-04-27	06:59:00	0
2009-04-27	07:00:00	0
2009-04-27	07:01:00	0
2009-04-27	07:02:00	0
2009-04-27	07:03:00	0
2009-04-27	07:04:00	0
2009-04-27	07:05:00	0
2009-04-27	07:06:00	0
2009-04-27	07:07:00	0
2009-04-27	07:08:00	0
2009-04-27	07:09:00	0
2009-04-27	07:10:00	0
2009-04-27	07:11:00	0
2009-04-27	07:12:00	0
2009-04-27	07:13:00	0
2009-04-27	07:14:00	0
2009-04-27	07:15:00	0
2009-04-27	07:16:00	0
2009-04-27	07:17:00	0
2009-04-27	07:18:00	0
2009-04-27	07:19:00	0
2009-04-27	07:20:00	0
2009-04-27	07:21:00	0
2009-04-27	07:22:00	0
2009-04-27	07:23:00	0
2009-04-27	07:24:00	0
2009-04-27	07:25:00	0
2009-04-27	07:26:00	0
2009-04-27	07:27:00	0
2009-04-27	07:28:00	0
2009-04-27	07:29:00	0
2009-04-27	07:30:00	0
2009-04-27	07:31:00	0
2009-04-27	07:32:00	0
2009-04-27	07:33:00	0
2009-04-27	07:34:00	0
2009-04-27	07:35:00	0
2009-04-27	07:36:00	0
2009-04-27	07:37:00	0
2009-04-27	07:38:00	0
2009-04-27	07:39:00	0
2009-04-27	07:40:00	0
2009-04-27	07:41:00	0
2009-04-27	07:42:00	0
2009-04-27	07:43:00	0
2009-04-27	07:44:00	0
2009-04-27	07:45:00	0
2009-04-27	07:46:00	0
2009-04-27	07:47:00	0
2009-04-27	07:48:00	0
2009-04-27	07:49:00	0
2009-04-27	07:50:00	0
2009-04-27	07:51:00	0
2009-04-27	07:52:00	0
2009-04-27	07:53:00	0
2009-04-27	07:54:00	0
2009-04-27	07:55:00	0
2009-04-27	07:56:00	0
2009-04-27	07:57:00	0
2009-04-27	07:58:00	0
2009-04-27	07:59:00	0
2009-04-27	08:00:00	0
2009-04-27	08:01:00	0
2009-04-27	08:02:00	0
2009-04-27	08:03:00	0
2009-04-27	08:04:00	0
2009-04-27	08:05:00	0
2009-04-27	08:06:00	0
2009-04-27	08:07:00	0
2009-04-27	08:08:00	0
2009-04-27	08:09:00	0
2009-04-27	08:10:00	0
2009-04-27	08:11:00	0
2009-04-27	08:12:00	0
2009-04-27	08:13:00	0
2009-04-27	08:14:00	0
2009-04-27	08:15:00	0
2009-04-27	08:16:00	0
2009-04-27	08:17:00	0
2009-04-27	08:18:00	0
2009-04-27	08:19:00	0
2009-04-27	08:20:00	0
2009-04-27	08:21:00	0
2009-04-27	08:22:00	0
2009-04-27	08:23:00	0
2009-04-27	08:24:00	0
2009-04-27	08:25:00	0
2009-04-27	08:26:00	0
2009-04-27	08:27:00	0
2009-04-27	08:28:00	0
2009-04-27	08:29:00	0
2009-04-27	08:30:00	0
2009-04-27	08:31:00	0
2009-04-27	08:32:00	0
2009-04-27	08:33:00	0
2009-04-27	08:34:00	0
2009-04-27	08:35:00	0
2009-04-27	08:36:00	0
2009-04-27	08:37:00	0
2009-04-27	08:38:00	0
2009-04-27	08:39:00	0
2009-04-27	08:40:00	0
2009-04-27	08:41:00	0
2009-04-27	08:42:00	0
2009-04-27	08:43:00	0
2009-04-27	08:44:00	0
2009-04-27	08:45:00	0
2009-04-27	08:46:00	0
2009-04-27	08:47:00	0
2009-04-27	08:48:00	0
2009-04-27	08:49:00	0
2009-04-27	08:50:00	0
2009-04-27	08:51:00	0
2009-04-27	08:52:00	0
2009-04-27	08:53:00	0
2009-04-27	08:54:00	0
2009-04-27	08:55:00	0
2009-04-27	08:56:00	0
2009-04-27	08:57:00	0
2009-04-27	08:58:00	0
2009-04-27	08:59:00	0
2009-04-27	09:00:00	0
2009-04-27	09:01:00	0
2009-04-27	09:02:00	0
2009-04-27	09:03:00	0
2009-04-27	09:04:00	0
2009-04-27	09:05:00	0
2009-04-27	09:06:00	0
2009-04-27	09:07:00	0
2009-04-27	09:08:00	0
2009-04-27	09:09:00	0
2009-04-27	09:10:00	0
2009-04-27	09:11:00	0
2009-04-27	09:12:00	0
2009-04-27	09:13:00	0
2009-04-27	09:14:00	0
2009-04-27	09:15:00	0
2009-04-27	09:16:00	0
2009-04-27	09:17:00	0
2009-04-27	09:18:00	0
2009-04-27	09:19:00	0
2009-04-27	09:20:00	0
2009-04-27	09:21:00	0
2009-04-27	09:22:00	0
2009-04-27	09:23:00	0
2009-04-27	09:24:00	0
2009-04-27	09:25:00	0
2009-04-27	09:26:00	0
2009-04-27	09:27:00	0
2009-04-27	09:28:00	0
2009-04-27	09:29:00	0
2009-04-27	09:30:00	0
2009-04-27	09:31:00	0
2009-04-27	09:32:00	0
2009-04-27	09:33:00	0
2009-04-27	09:34:00	0
2009-04-27	09:35:00	0
2009-04-27	09:36:00	0
2009-04-27	09:37:00	0
2009-04-27	09:38:00	0
2009-04-27	09:39:00	0
2009-04-27	09:40:00	0
2009-04-27	09:41:00	0
2009-04-27	09:42:00	0
2009-04-27	09:43:00	0
2009-04-27	09:44:00	0
2009-04-27	09:45:00	0
2009-04-27	09:46:00	0
2009-04-27	09:47:00	0
2009-04-27	09:48:00	0
2009-04-27	09:49:00	0
2009-04-27	09:50:00	0
2009-04-27	09:51:00	0
2009-04-27	09:52:00	0
2009-04-27	09:53:00	0
2009-04-27	09:54:00	0
2009-04-27	09:55:00	0
2009-04-27	09:56:00	0
2009-04-27	09:57:00	0
2009-04-27	09:58:00	0
2009-04-27	09:59:00	0
2009-04-27	10:00:00	0
2009-04-27	10:01:00	0
2009-04-27	10:02:00	0
2009-04-27	10:03:00	0
2009-04-27	10:04:00	0
2009-04-27	10:05:00	0
2009-04-27	10:06:00	0
2009-04-27	10:07:00	0
2009-04-27	10:08:00	0
2009-04-27	10:09:00	0
2009-04-27	10:10:00	0
2009-04-27	10:11:00	0
2009-04-27	10:12:00	0
2009-04-27	10:13:00	0
2009-04-27	10:14:00	0
2009-04-27	10:15:00	0
2009-04-27	10:16:00	0
2009-04-27	10:17:00	0
2009-04-27	10:18:00	0
2009-04-27	10:19:00	0
2009-04-27	10:20:00	0
2009-04-27	10:21:00	0
2009-04-27	10:22:00	0
2009-04-27	10:23:00	0
2009-04-27	10:24:00	0
2009-04-27	10:25:00	0
2009-04-27	10:26:00	0
2009-04-27	10:27:00	0
2009-04-27	10:28:00	0
2009-04-27	10:29:00	0
2009-04-27	10:30:00	0
2009-04-27	10:31:00	0
2009-04-27	10:32:00	0
2009-04-27	10:33:00	0
2009-04-27	10:34:00	0
2009-04-27	10:35:00	0
2009-04-27	10:36:00	0
2009-04-27	10:37:00	0
2009-04-27	10:38:00	0
2009-04-27	10:39:00	0
2009-04-27	10:40:00	0
2009-04-27	10:41:00	0
2009-04-27	10:42:00	0
2009-04-27	10:43:00	0
2009-04-27	10:44:00	0
2009-04-27	10:45:00	0
2009-04-27	10:46:00	0
2009-04-27	10:47:00	0
2009-04-27	10:48:00	0
2009-04-27	10:49:00	0
2009-04-27	10:50:00	0
2009-04-27	10:51:00	0
2009-04-27	10:52:00	0
2009-04-27	10:53:00	0
2009-04-27	10:54:00	0
2009-04-27	10:55:00	0
2009-04-27	10:56:00	0
2009-04-27	10:57:00	0
2009-04-27	10:58:00	0
2009-04-27	10:59:00	0
2009-04-27	11:00:00	0
2009-04-27	11:01:00	0
2009-04-27	11:02:00	0
2009-04-27	11:03:00	0
2009-04-27	11:04:00	0
2009-04-27	11:05:00	0
2009-04-27	11:06:00	0
2009-04-27	11:07:00	0
2009-04-27	11:08:00	0
2009-04-27	11:09:00	0
2009-04-27	11:10:00	0
2009-04-27	11:11:00	0
2009-04-27	11:12:00	0
2009-04-27	11:13:00	0
2009-04-27	11:14:00	0
2009-04-27	11:15:00	0
2009-04-27	11:16:00	0
2009-04-27	11:17:00	0
2009-04-27	11:18:00	0
2009-04-27	11:19:00	0
2009-04-27	11:20:00	0
2009-04-27	11:21:00	0
2009-04-27	11:22:00	0
2009-04-27	11:23:00	0
2009-04-27	11:24:00	0
2009-04-27	11:25:00	0
2009-04-27	11:26:00	0
2009-04-27	11:27:00	0
2009-04-27	11:28:00	0
2009-04-27	11:29:00	0
2009-04-27	11:30:00	0
2009-04-27	11:31:00	0
2009-04-27	11:32:00	0
2009-04-27	11:33:00	0
2009-04-27	11:34:00	0
2009-04-27	11:35:00	0
2009-04-27	11:36:00	0
2009-04-27	11:37:00	0
2009-04-27	11:38:00	0
2009-04-27	11:39:00	0
2009-04-27	11:40:00	0
2009-04-27	11:41:00	0
2009-04-27	11:42:00	0
2009-04-27	11:43:00	0
2009-04-27	11:44:00	0
2009-04-27	11:45:00	0
2009-04-27	11:46:00	0
2009-04-27	11:47:00	0
2009-04-27	11:48:00	0
2009-04-27	11:49:00	0
2009-04-27	11:50:00	0
2009-04-27	11:51:00	0
2009-04-27	11:52:00	0
2009-04-27	11:53:00	0
2009-04-27	11:54:00	0
2009-04-27	11:55:00	0
2009-04-27	11:56:00	0
2009-04-27	11:57:00	0
2009-04-27	11:58:00	0
2009-04-27	11:59:00	0
2009-04-27	12:00:00	0
2009-04-27	12:01:00	0
2009-04-27	12:02:00	0
2009-04-27	12:03:00	0
2009-04-27	12:04:00	0
2009-04-27	12:05:00	0
2009-04-27	12:06:00	0
2009-04-27	12:07:00	0
2009-04-27	12:08:00	0
2009-04-27	12:09:00	0
2009-04-27	12:10:00	0
2009-04-27	12:11:00	0
2009-04-27	12:12:00	0
2009-04-27	12:13:00	0
2009-04-27	12:14:00	0
2009-04-27	12:15:00	0
2009-04-27	12:16:00	0
2009-04-27	12:17:00	0
2009-04-27	12:18:00	0
2009-04-27	12:19:00	0
2009-04-27	12:20:00	0
2009-04-27	12:21:00	0
2009-04-27	12:22:00	0
2009-04-27	12:23:00	0
2009-04-27	12:24:00	0
2009-04-27	12:25:00	0
2009-04-27	12:26:00	0
2009-04-27	12:27:00	0
2009-04-27	12:28:00	0
2009-04-27	12:29:00	0
2009-04-27	12:30:00	0
2009-04-27	12:31:00	0
2009-04-27	12:32:00	0
2009-04-27	12:33:00	0
2009-04-27	12:34:00	0
2009-04-27	12:35:00	0
2009-04-27	12:36:00	0
2009-04-27	12:37:00	0
2009-04-27	12:38:00	0
2009-04-27	12:39:00	0
2009-04-27	12:40:00	0
2009-04-27	12:41:00	0
2009-04-27	12:42:00	0
2009-04-27	12:43:00	0
2009-04-27	12:44:00	0
2009-04-27	12:45:00	0
2009-04-27	12:46:00	0
2009-04-27	12:47:00	0
2009-04-27	12:48:00	0
2009-04-27	12:49:00	0
2009-04-27	12:50:00	0
2009-04-27	12:51:00	0
2009-04-27	12:52:00	0
2009-04-27	12:53:00	0
2009-04-27	12:54:00	0
2009-04-27	12:55:00	0
2009-04-27	12:56:00	0
2009-04-27	12:57:00	0
2009-04-27	12:58:00	0
2009-04-27	12:59:00	0
2009-04-27	13:00:00	0
2009-04-27	13:01:00	0
2009-04-27	13:02:00	0
2009-04-27	13:03:00	0
2009-04-27	13:04:00	0
2009-04-27	13:05:00	0
2009-04-27	13:06:00	0
2009-04-27	13:07:00	0
2009-04-27	13:08:00	0
2009-04-27	13:09:00	0
2009-04-27	13:10:00	0
2009-04-27	13:11:00	0
2009-04-27	13:12:00	0
2009-04-27	13:13:00	0
2009-04-27	13:14:00	0
2009-04-27	13:15:00	0
2009-04-27	13:16:00	0
2009-04-27	13:17:00	0
2009-04-27	13:18:00	0
2009-04-27	13:19:00	0
2009-04-27	13:20:00	0
2009-04-27	13:21:00	0
2009-04-27	13:22:00	0
2009-04-27	13:23:00	0
2009-04-27	13:24:00	0
2009-04-27	13:25:00	0
2009-04-27	13:26:00	0
2009-04-27	13:27:00	0
2009-04-27	13:28:00	0
2009-04-27	13:29:00	0
2009-04-27	13:30:00	0
2009-04-27	13:31:00	0
2009-04-27	13:32:00	0
2009-04-27	13:33:00	0
2009-04-27	13:34:00	0
2009-04-27	13:35:00	0
2009-04-27	13:36:00	0
2009-04-27	13:37:00	0
2009-04-27	13:38:00	0
2009-04-27	13:39:00	0
2009-04-27	13:40:00	0
2009-04-27	13:41:00	0
2009-04-27	13:42:00	0
2009-04-27	13:43:00	0
2009-04-27	13:44:00	0
2009-04-27	13:45:00	0
2009-04-27	13:46:00	0
2009-04-27	13:47:00	0
2009-04-27	13:48:00	0
2009-04-27	13:49:00	0
2009-04-27	13:50:00	0
2009-04-27	13:51:00	0
2009-04-27	13:52:00	0
2009-04-27	13:53:00	0
2009-04-27	13:54:00	0
2009-04-27	13:55:00	0
2009-04-27	13:56:00	0
2009-04-27	13:57:00	0
2009-04-27	13:58:00	0
2009-04-27	13:59:00	0
2009-04-27	14:00:00	0
2009-04-27	14:01:00	0
2009-04-27	14:02:00	0
2009-04-27	14:03:00	0
2009-04-27	14:04:00	0
2009-04-27	14:05:00	0
2009-04-27	14:06:00	0
2009-04-27	14:07:00	0
2009-04-27	14:08:00	0
2009-04-27	14:09:00	0
2009-04-27	14:10:00	0
2009-04-27	14:11:00	0
2009-04-27	14:12:00	0
2009-04-27	14:13:00	0
2009-04-27	14:14:00	0
2009-04-27	14:15:00	0
2009-04-27	14:16:00	0
2009-04-27	14:17:00	0
2009-04-27	14:18:00	0
2009-04-27	14:19:00	0
2009-04-27	14:20:00	0
2009-04-27	14:21:00	0
2009-04-27	14:22:00	0
2009-04-27	14:23:00	0
2009-04-27	14:24:00	0
2009-04-27	14:25:00	0
2009-04-27	14:26:00	0
2009-04-27	14:27:00	0
2009-04-27	14:28:00	0
2009-04-27	14:29:00	0
2009-04-27	14:30:00	0
2009-04-27	14:31:00	0
2009-04-27	14:32:00	0
2009-04-27	14:33:00	0
2009-04-27	14:34:00	0
2009-04-27	14:35:00	0
2009-04-27	14:36:00	0
2009-04-27	14:37:00	0
2009-04-27	14:38:00	0
2009-04-27	14:39:00	0
2009-04-27	14:40:00	0
2009-04-27	14:41:00	0
2009-04-27	14:42:00	0
2009-04-27	14:43:00	0
2009-04-27	14:44:00	0
2009-04-27	14:45:00	0
2009-04-27	14:46:00	0
2009-04-27	14:47:00	0
2009-04-27	14:48:00	0
2009-04-27	14:49:00	0
2009-04-27	14:50:00	0
2009-04-27	14:51:00	0
2009-04-27	14:52:00	0
2009-04-27	14:53:00	0
2009-04-27	14:54:00	0
2009-04-27	14:55:00	0
2009-04-27	14:56:00	0
2009-04-27	14:57:00	0
2009-04-27	14:58:00	0
2009-04-27	14:59:00	0
2009-04-27	15:00:00	0
2009-04-27	15:01:00	0
2009-04-27	15:02:00	0
2009-04-27	15:03:00	0
2009-04-27	15:04:00	0
2009-04-27	15:05:00	0
2009-04-27	15:06:00	0
2009-04-27	15:07:00	0
2009-04-27	15:08:00	0
2009-04-27	15:09:00	0
2009-04-27	15:10:00	0
2009-04-27	15:11:00	0
2009-04-27	15:12:00	0
2009-04-27	15:13:00	0
2009-04-27	15:14:00	0
2009-04-27	15:15:00	0
2009-04-27	15:16:00	0
2009-04-27	15:17:00	0
2009-04-27	15:18:00	0
2009-04-27	15:19:00	0
2009-04-27	15:20:00	0
2009-04-27	15:21:00	0
2009-04-27	15:22:00	0
2009-04-27	15:23:00	0
2009-04-27	15:24:00	0
2009-04-27	15:25:00	0
2009-04-27	15:26:00	0
2009-04-27	15:27:00	0
2009-04-27	15:28:00	0
2009-04-27	15:29:00	0
2009-04-27	15:30:00	0
2009-04-27	15:31:00	0
2009-04-27	15:32:00	0
2009-04-27	15:33:00	0
2009-04-27	15:34:00	0
2009-04-27	15:35:00	0
2009-04-27	15:36:00	0
2009-04-27	15:37:00	0
2009-04-27	15:38:00	0
2009-04-27	15:39:00	0
2009-04-27	15:40:00	0
2009-04-27	15:41:00	0
2009-04-27	15:42:00	0
2009-04-27	15:43:00	0
2009-04-27	15:44:00	0
2009-04-27	15:45:00	0
2009-04-27	15:46:00	0
2009-04-27	15:47:00	0
2009-04-27	15:48:00	0
2009-04-27	15:49:00	0
2009-04-27	15:50:00	0
2009-04-27	15:51:00	0
2009-04-27	15:52:00	0
2009-04-27	15:53:00	0
2009-04-27	15:54:00	0
2009-04-27	15:55:00	0
2009-04-27	15:56:00	0
2009-04-27	15:57:00	0
2009-04-27	15:58:00	0
2009-04-27	15:59:00	0
2009-04-27	16:00:00	0
2009-04-27	16:01:00	0
2009-04-27	16:02:00	0
2009-04-27	16:03:00	0
2009-04-27	16:04:00	0
2009-04-27	16:05:00	0
2009-04-27	16:06:00	0
2009-04-27	16:07:00	0
2009-04-27	16:08:00	0
2009-04-27	16:09:00	0
2009-04-27	16:10:00	0
2009-04-27	16:11:00	0
2009-04-27	16:12:00	0
2009-04-27	16:13:00	0
2009-04-27	16:14:00	0
2009-04-27	16:15:00	0
2009-04-27	16:16:00	0
2009-04-27	16:17:00	0
2009-04-27	16:18:00	0
2009-04-27	16:19:00	0
2009-04-27	16:20:00	0
2009-04-27	16:21:00	0
2009-04-27	16:22:00	0
2009-04-27	16:23:00	0
2009-04-27	16:24:00	0
2009-04-27	16:25:00	0
2009-04-27	16:26:00	0
2009-04-27	16:27:00	0
2009-04-27	16:28:00	0
2009-04-27	16:29:00	0
2009-04-27	16:30:00	0
2009-04-27	16:31:00	0
2009-04-27	16:32:00	0
2009-04-27	16:33:00	0
2009-04-27	16:34:00	0
2009-04-27	16:35:00	0
2009-04-27	16:36:00	0
2009-04-27	16:37:00	0
2009-04-27	16:38:00	0
2009-04-27	16:39:00	0
2009-04-27	16:40:00	0
2009-04-27	16:41:00	0
2009-04-27	16:42:00	0
2009-04-27	16:43:00	0
2009-04-27	16:44:00	0
2009-04-27	16:45:00	0
2009-04-27	16:46:00	0
2009-04-27	16:47:00	0
2009-04-27	16:48:00	0
2009-04-27	16:49:00	0
2009-04-27	16:50:00	0
2009-04-27	16:51:00	0
2009-04-27	16:52:00	0
2009-04-27	16:53:00	0
2009-04-27	16:54:00	0
2009-04-27	16:55:00	0
2009-04-27	16:56:00	0
2009-04-27	16:57:00	0
2009-04-27	16:58:00	0
2009-04-27	16:59:00	0
2009-04-27	17:00:00	0
2009-04-27	17:01:00	0
2009-04-27	17:02:00	0
2009-04-27	17:03:00	0
2009-04-27	17:04:00	0
2009-04-27	17:05:00	0
2009-04-27	17:06:00	0
2009-04-27	17:07:00	0
2009-04-27	17:08:00	0
2009-04-27	17:09:00	0
2009-04-27	17:10:00	0
2009-04-27	17:11:00	0
2009-04-27	17:12:00	0
2009-04-27	17:13:00	0
2009-04-27	17:14:00	0
2009-04-27	17:15:00	0
2009-04-27	17:16:00	0
2009-04-27	17:17:00	0
2009-04-27	17:18:00	0
2009-04-27	17:19:00	0
2009-04-27	17:20:00	0
2009-04-27	17:21:00	0
2009-04-27	17:22:00	0
2009-04-27	17:23:00	0
2009-04-27	17:24:00	0
2009-04-27	17:25:00	0
2009-04-27	17:26:00	0
2009-04-27	17:27:00	0
2009-04-27	17:28:00	0
2009-04-27	17:29:00	0
2009-04-27	17:30:00	0
2009-04-27	17:31:00	0
2009-04-27	17:32:00	0
2009-04-27	17:33:00	0
2009-04-27	17:34:00	0
2009-04-27	17:35:00	0
2009-04-27	17:36:00	0
2009-04-27	17:37:00	0
2009-04-27	17:38:00	0
2009-04-27	17:39:00	0
2009-04-27	17:40:00	0
2009-04-27	17:41:00	0
2009-04-27	17:42:00	0
2009-04-27	17:43:00	0
2009-04-27	17:44:00	0
2009-04-27	17:45:00	0
2009-04-27	17:46:00	0
2009-04-27	17:47:00	0
2009-04-27	17:48:00	0
2009-04-27	17:49:00	0
2009-04-27	17:50:00	0
2009-04-27	17:51:00	0
2009-04-27	17:52:00	0
2009-04-27	17:53:00	0
2009-04-27	17:54:00	0
2009-04-27	17:55:00	0
2009-04-27	17:56:00	0
2009-04-27	17:57:00	0
2009-04-27	17:58:00	0
2009-04-27	17:59:00	0
2009-04-27	18:00:00	263
2009-04-27	18:01:00	289
2009-04-27	18:02:00	0
2009-04-27	18:03:00	0
2009-04-27	18:04:00	22
2009-04-27	18:05:00	55
2009-04-27	18:06:00	99
2009-04-27	18:07:00	77
2009-04-27	18:08:00	88
2009-04-27	18:09:00	66
2009-04-27	18:10:00	276
2009-04-27	18:11:00	110
2009-04-27	18:12:00	33
2009-04-27	18:13:00	0
2009-04-27	18:14:00	66
2009-04-27	18:15:00	33
2009-04-27	18:16:00	0
2009-04-27	18:17:00	0
2009-04-27	18:18:00	0
2009-04-27	18:19:00	0
2009-04-27	18:20:00	11
2009-04-27	18:21:00	11
2009-04-27	18:22:00	0
2009-04-27	18:23:00	0
2009-04-27	18:24:00	11
2009-04-27	18:25:00	33
2009-04-27	18:26:00	0
2009-04-27	18:27:00	0
2009-04-27	18:28:00	0
2009-04-27	18:29:00	0
2009-04-27	18:30:00	11
2009-04-27	18:31:00	22
2009-04-27	18:32:00	0
2009-04-27	18:33:00	0
2009-04-27	18:34:00	0
2009-04-27	18:35:00	0
2009-04-27	18:36:00	0
2009-04-27	18:37:00	11
2009-04-27	18:38:00	0
2009-04-27	18:39:00	0
2009-04-27	18:40:00	0
2009-04-27	18:41:00	0
2009-04-27	18:42:00	0
2009-04-27	18:43:00	0
2009-04-27	18:44:00	33
2009-04-27	18:45:00	0
2009-04-27	18:46:00	0
2009-04-27	18:47:00	0
2009-04-27	18:48:00	0
2009-04-27	18:49:00	0
2009-04-27	18:50:00	0
2009-04-27	18:51:00	0
2009-04-27	18:52:00	0
2009-04-27	18:53:00	11
2009-04-27	18:54:00	99
2009-04-27	18:55:00	249
2009-04-27	18:56:00	0
2009-04-27	18:57:00	0
2009-04-27	18:58:00	0
2009-04-27	18:59:00	0
2009-04-27	19:00:00	0
2009-04-27	19:01:00	0
2009-04-27	19:02:00	0
2009-04-27	19:03:00	0
2009-04-27	19:04:00	0
2009-04-27	19:05:00	0
2009-04-27	19:06:00	0
2009-04-27	19:07:00	0
2009-04-27	19:08:00	0
2009-04-27	19:09:00	11
2009-04-27	19:10:00	0
2009-04-27	19:11:00	0
2009-04-27	19:12:00	0
2009-04-27	19:13:00	0
2009-04-27	19:14:00	0
2009-04-27	19:15:00	0
2009-04-27	19:16:00	0
2009-04-27	19:17:00	0
2009-04-27	19:18:00	0
2009-04-27	19:19:00	11
2009-04-27	19:20:00	110
2009-04-27	19:21:00	0
2009-04-27	19:22:00	0
2009-04-27	19:23:00	0
2009-04-27	19:24:00	0
2009-04-27	19:25:00	0
2009-04-27	19:26:00	0
2009-04-27	19:27:00	0
2009-04-27	19:28:00	22
2009-04-27	19:29:00	0
2009-04-27	19:30:00	22
2009-04-27	19:31:00	0
2009-04-27	19:32:00	446
2009-04-27	19:33:00	196
2009-04-27	19:34:00	22
2009-04-27	19:35:00	11
2009-04-27	19:36:00	0
2009-04-27	19:37:00	0
2009-04-27	19:38:00	0
2009-04-27	19:39:00	0
2009-04-27	19:40:00	0
2009-04-27	19:41:00	0
2009-04-27	19:42:00	0
2009-04-27	19:43:00	0
2009-04-27	19:44:00	0
2009-04-27	19:45:00	0
2009-04-27	19:46:00	0
2009-04-27	19:47:00	0
2009-04-27	19:48:00	0
2009-04-27	19:49:00	0
2009-04-27	19:50:00	0
2009-04-27	19:51:00	0
2009-04-27	19:52:00	0
2009-04-27	19:53:00	0
2009-04-27	19:54:00	0
2009-04-27	19:55:00	0
2009-04-27	19:56:00	0
2009-04-27	19:57:00	0
2009-04-27	19:58:00	0
2009-04-27	19:59:00	0
2009-04-27	20:00:00	0
2009-04-27	20:01:00	0
2009-04-27	20:02:00	0
2009-04-27	20:03:00	0
2009-04-27	20:04:00	0
2009-04-27	20:05:00	0
2009-04-27	20:06:00	0
2009-04-27	20:07:00	0
2009-04-27	20:08:00	0
2009-04-27	20:09:00	0
2009-04-27	20:10:00	11
2009-04-27	20:11:00	0
2009-04-27	20:12:00	0
2009-04-27	20:13:00	0
2009-04-27	20:14:00	0
2009-04-27	20:15:00	0
2009-04-27	20:16:00	0
2009-04-27	20:17:00	170
2009-04-27	20:18:00	33
2009-04-27	20:19:00	44
2009-04-27	20:20:00	33
2009-04-27	20:21:00	0
2009-04-27	20:22:00	44
2009-04-27	20:23:00	0
2009-04-27	20:24:00	33
2009-04-27	20:25:00	22
2009-04-27	20:26:00	0
2009-04-27	20:27:00	0
2009-04-27	20:28:00	0
2009-04-27	20:29:00	0
2009-04-27	20:30:00	0
2009-04-27	20:31:00	55
2009-04-27	20:32:00	0
2009-04-27	20:33:00	11
2009-04-27	20:34:00	210
2009-04-27	20:35:00	132
2009-04-27	20:36:00	88
2009-04-27	20:37:00	276
2009-04-27	20:38:00	263
2009-04-27	20:39:00	276
2009-04-27	20:40:00	88
2009-04-27	20:41:00	0
2009-04-27	20:42:00	55
2009-04-27	20:43:00	33
2009-04-27	20:44:00	0
2009-04-27	20:45:00	1284
2009-04-27	20:46:00	609
2009-04-27	20:47:00	589
2009-04-27	20:48:00	911
2009-04-27	20:49:00	552
2009-04-27	20:50:00	984
2009-04-27	20:51:00	196
2009-04-27	20:52:00	819
2009-04-27	20:53:00	210
2009-04-27	20:54:00	236
2009-04-27	20:55:00	382
2009-04-27	20:56:00	413
2009-04-27	20:57:00	446
2009-04-27	20:58:00	236
2009-04-27	20:59:00	99
2009-04-27	21:00:00	0
2009-04-27	21:01:00	0
2009-04-27	21:02:00	11
2009-04-27	21:03:00	0
2009-04-27	21:04:00	11
2009-04-27	21:05:00	170
2009-04-27	21:06:00	708
2009-04-27	21:07:00	223
2009-04-27	21:08:00	157
2009-04-27	21:09:00	223
2009-04-27	21:10:00	22
2009-04-27	21:11:00	22
2009-04-27	21:12:00	249
2009-04-27	21:13:00	33
2009-04-27	21:14:00	110
2009-04-27	21:15:00	11
2009-04-27	21:16:00	11
2009-04-27	21:17:00	223
2009-04-27	21:18:00	22
2009-04-27	21:19:00	99
2009-04-27	21:20:00	132
2009-04-27	21:21:00	0
2009-04-27	21:22:00	33
2009-04-27	21:23:00	0
2009-04-27	21:24:00	0
2009-04-27	21:25:00	11
2009-04-27	21:26:00	0
2009-04-27	21:27:00	0
2009-04-27	21:28:00	0
2009-04-27	21:29:00	0
2009-04-27	21:30:00	0
2009-04-27	21:31:00	0
2009-04-27	21:32:00	0
2009-04-27	21:33:00	0
2009-04-27	21:34:00	0
2009-04-27	21:35:00	0
2009-04-27	21:36:00	0
2009-04-27	21:37:00	0
2009-04-27	21:38:00	446
2009-04-27	21:39:00	170
2009-04-27	21:40:00	88
2009-04-27	21:41:00	44
2009-04-27	21:42:00	305
2009-04-27	21:43:00	366
2009-04-27	21:44:00	236
2009-04-27	21:45:00	249
2009-04-27	21:46:00	289
2009-04-27	21:47:00	77
2009-04-27	21:48:00	0
2009-04-27	21:49:00	22
2009-04-27	21:50:00	0
2009-04-27	21:51:00	0
2009-04-27	21:52:00	0
2009-04-27	21:53:00	0
2009-04-27	21:54:00	0
2009-04-27	21:55:00	0
2009-04-27	21:56:00	0
2009-04-27	21:57:00	0
2009-04-27	21:58:00	0
2009-04-27	21:59:00	0
2009-04-27	22:00:00	0
2009-04-27	22:01:00	0
2009-04-27	22:02:00	0
2009-04-27	22:03:00	0
2009-04-27	22:04:00	0
2009-04-27	22:05:00	33
2009-04-27	22:06:00	0
2009-04-27	22:07:00	0
2009-04-27	22:08:00	0
2009-04-27	22:09:00	0
2009-04-27	22:10:00	0
2009-04-27	22:11:00	0
2009-04-27	22:12:00	44
2009-04-27	22:13:00	0
2009-04-27	22:14:00	0
2009-04-27	22:15:00	0
2009-04-27	22:16:00	0
2009-04-27	22:17:00	0
2009-04-27	22:18:00	0
2009-04-27	22:19:00	0
2009-04-27	22:20:00	0
2009-04-27	22:21:00	0
2009-04-27	22:22:00	499
2009-04-27	22:23:00	819
2009-04-27	22:24:00	305
2009-04-27	22:25:00	22
2009-04-27	22:26:00	0
2009-04-27	22:27:00	143
2009-04-27	22:28:00	463
2009-04-27	22:29:00	481
2009-04-27	22:30:00	210
2009-04-27	22:31:00	183
2009-04-27	22:32:00	0
2009-04-27	22:33:00	33
2009-04-27	22:34:00	0
2009-04-27	22:35:00	0
2009-04-27	22:36:00	66
2009-04-27	22:37:00	0
2009-04-27	22:38:00	0
2009-04-27	22:39:00	0
2009-04-27	22:40:00	0
2009-04-27	22:41:00	0
2009-04-27	22:42:00	289
2009-04-27	22:43:00	132
2009-04-27	22:44:00	0
2009-04-27	22:45:00	0
2009-04-27	22:46:00	0
2009-04-27	22:47:00	11
2009-04-27	22:48:00	0
2009-04-27	22:49:00	0
2009-04-27	22:50:00	289
2009-04-27	22:51:00	0
2009-04-27	22:52:00	0
2009-04-27	22:53:00	0
2009-04-27	22:54:00	0
2009-04-27	22:55:00	0
2009-04-27	22:56:00	0
2009-04-27	22:57:00	0
2009-04-27	22:58:00	0
2009-04-27	22:59:00	0
2009-04-27	23:00:00	0
2009-04-27	23:01:00	0
2009-04-27	23:02:00	0
2009-04-27	23:03:00	0
2009-04-27	23:04:00	0
2009-04-27	23:05:00	0
2009-04-27	23:06:00	0
2009-04-27	23:07:00	0
2009-04-27	23:08:00	0
2009-04-27	23:09:00	0
2009-04-27	23:10:00	0
2009-04-27	23:11:00	0
2009-04-27	23:12:00	0
2009-04-27	23:13:00	0
2009-04-27	23:14:00	0
2009-04-27	23:15:00	0
2009-04-27	23:16:00	0
2009-04-27	23:17:00	0
2009-04-27	23:18:00	0
2009-04-27	23:19:00	0
2009-04-27	23:20:00	0
2009-04-27	23:21:00	0
2009-04-27	23:22:00	0
2009-04-27	23:23:00	0
2009-04-27	23:24:00	0
2009-04-27	23:25:00	0
2009-04-27	23:26:00	22
2009-04-27	23:27:00	0
2009-04-27	23:28:00	0
2009-04-27	23:29:00	0
2009-04-27	23:30:00	0
2009-04-27	23:31:00	0
2009-04-27	23:32:00	77
2009-04-27	23:33:00	143
2009-04-27	23:34:00	33
2009-04-27	23:35:00	0
2009-04-27	23:36:00	0
2009-04-27	23:37:00	0
2009-04-27	23:38:00	170
2009-04-27	23:39:00	0
2009-04-27	23:40:00	0
2009-04-27	23:41:00	0
2009-04-27	23:42:00	0
2009-04-27	23:43:00	0
2009-04-27	23:44:00	0
2009-04-27	23:45:00	0
2009-04-27	23:46:00	0
2009-04-27	23:47:00	0
2009-04-27	23:48:00	0
2009-04-27	23:49:00	0
2009-04-27	23:50:00	0
2009-04-27	23:51:00	0
2009-04-27	23:52:00	0
2009-04-27	23:53:00	0
2009-04-27	23:54:00	0
2009-04-27	23:55:00	0
2009-04-27	23:56:00	0
2009-04-27	23:57:00	0
2009-04-27	23:58:00	0
2009-04-27	23:59:00	0
2009-04-28	00:00:00	0
2009-04-28	00:01:00	0
2009-04-28	00:02:00	0
2009-04-28	00:03:00	0
2009-04-28	00:04:00	0
2009-04-28	00:05:00	0
2009-04-28	00:06:00	0
2009-04-28	00:07:00	0
2009-04-28	00:08:00	0
2009-04-28	00:09:00	0
2009-04-28	00:10:00	0
2009-04-28	00:11:00	0
2009-04-28	00:12:00	0
2009-04-28	00:13:00	0
2009-04-28	00:14:00	0
2009-04-28	00:15:00	0
2009-04-28	00:16:00	0
2009-04-28	00:17:00	0
2009-04-28	00:18:00	0
2009-04-28	00:19:00	0
2009-04-28	00:20:00	11
2009-04-28	00:21:00	33
2009-04-28	00:22:00	11
2009-04-28	00:23:00	0
2009-04-28	00:24:00	0
2009-04-28	00:25:00	0
2009-04-28	00:26:00	0
2009-04-28	00:27:00	0
2009-04-28	00:28:00	0
2009-04-28	00:29:00	0
2009-04-28	00:30:00	0
2009-04-28	00:31:00	0
2009-04-28	00:32:00	0
2009-04-28	00:33:00	0
2009-04-28	00:34:00	183
2009-04-28	00:35:00	210
2009-04-28	00:36:00	0
2009-04-28	00:37:00	0
2009-04-28	00:38:00	0
2009-04-28	00:39:00	0
2009-04-28	00:40:00	0
2009-04-28	00:41:00	0
2009-04-28	00:42:00	0
2009-04-28	00:43:00	0
2009-04-28	00:44:00	0
2009-04-28	00:45:00	0
2009-04-28	00:46:00	77
2009-04-28	00:47:00	0
2009-04-28	00:48:00	0
2009-04-28	00:49:00	0
2009-04-28	00:50:00	0
2009-04-28	00:51:00	88
2009-04-28	00:52:00	0
2009-04-28	00:53:00	552
2009-04-28	00:54:00	351
2009-04-28	00:55:00	44
2009-04-28	00:56:00	157
2009-04-28	00:57:00	382
2009-04-28	00:58:00	0
2009-04-28	00:59:00	33
2009-04-28	01:00:00	0
2009-04-28	01:01:00	0
2009-04-28	01:02:00	0
2009-04-28	01:03:00	0
2009-04-28	01:04:00	0
2009-04-28	01:05:00	0
2009-04-28	01:06:00	0
2009-04-28	01:07:00	0
2009-04-28	01:08:00	0
2009-04-28	01:09:00	0
2009-04-28	01:10:00	0
2009-04-28	01:11:00	0
2009-04-28	01:12:00	0
2009-04-28	01:13:00	0
2009-04-28	01:14:00	0
2009-04-28	01:15:00	0
2009-04-28	01:16:00	0
2009-04-28	01:17:00	0
2009-04-28	01:18:00	0
2009-04-28	01:19:00	0
2009-04-28	01:20:00	0
2009-04-28	01:21:00	0
2009-04-28	01:22:00	0
2009-04-28	01:23:00	0
2009-04-28	01:24:00	11
2009-04-28	01:25:00	0
2009-04-28	01:26:00	0
2009-04-28	01:27:00	0
2009-04-28	01:28:00	0
2009-04-28	01:29:00	0
2009-04-28	01:30:00	0
2009-04-28	01:31:00	0
2009-04-28	01:32:00	0
2009-04-28	01:33:00	0
2009-04-28	01:34:00	0
2009-04-28	01:35:00	33
2009-04-28	01:36:00	0
2009-04-28	01:37:00	0
2009-04-28	01:38:00	0
2009-04-28	01:39:00	0
2009-04-28	01:40:00	0
2009-04-28	01:41:00	0
2009-04-28	01:42:00	33
2009-04-28	01:43:00	132
2009-04-28	01:44:00	33
2009-04-28	01:45:00	0
2009-04-28	01:46:00	0
2009-04-28	01:47:00	0
2009-04-28	01:48:00	0
2009-04-28	01:49:00	0
2009-04-28	01:50:00	0
2009-04-28	01:51:00	0
2009-04-28	01:52:00	0
2009-04-28	01:53:00	0
2009-04-28	01:54:00	0
2009-04-28	01:55:00	0
2009-04-28	01:56:00	0
2009-04-28	01:57:00	0
2009-04-28	01:58:00	0
2009-04-28	01:59:00	0
2009-04-28	02:00:00	0
2009-04-28	02:01:00	0
2009-04-28	02:02:00	0
2009-04-28	02:03:00	0
2009-04-28	02:04:00	0
2009-04-28	02:05:00	0
2009-04-28	02:06:00	0
2009-04-28	02:07:00	0
2009-04-28	02:08:00	0
2009-04-28	02:09:00	0
2009-04-28	02:10:00	0
2009-04-28	02:11:00	0
2009-04-28	02:12:00	0
2009-04-28	02:13:00	0
2009-04-28	02:14:00	0
2009-04-28	02:15:00	0
2009-04-28	02:16:00	0
2009-04-28	02:17:00	0
2009-04-28	02:18:00	0
2009-04-28	02:19:00	0
2009-04-28	02:20:00	0
2009-04-28	02:21:00	22
2009-04-28	02:22:00	0
2009-04-28	02:23:00	0
2009-04-28	02:24:00	0
2009-04-28	02:25:00	0
2009-04-28	02:26:00	0
2009-04-28	02:27:00	0
2009-04-28	02:28:00	0
2009-04-28	02:29:00	0
2009-04-28	02:30:00	0
2009-04-28	02:31:00	0
2009-04-28	02:32:00	0
2009-04-28	02:33:00	0
2009-04-28	02:34:00	0
2009-04-28	02:35:00	0
2009-04-28	02:36:00	0
2009-04-28	02:37:00	0
2009-04-28	02:38:00	0
2009-04-28	02:39:00	0
2009-04-28	02:40:00	0
2009-04-28	02:41:00	0
2009-04-28	02:42:00	0
2009-04-28	02:43:00	0
2009-04-28	02:44:00	22
2009-04-28	02:45:00	0
2009-04-28	02:46:00	0
2009-04-28	02:47:00	0
2009-04-28	02:48:00	0
2009-04-28	02:49:00	0
2009-04-28	02:50:00	0
2009-04-28	02:51:00	0
2009-04-28	02:52:00	11
2009-04-28	02:53:00	0
2009-04-28	02:54:00	0
2009-04-28	02:55:00	0
2009-04-28	02:56:00	0
2009-04-28	02:57:00	0
2009-04-28	02:58:00	0
2009-04-28	02:59:00	0
2009-04-28	03:00:00	0
2009-04-28	03:01:00	0
2009-04-28	03:02:00	0
2009-04-28	03:03:00	0
2009-04-28	03:04:00	0
2009-04-28	03:05:00	0
2009-04-28	03:06:00	0
2009-04-28	03:07:00	0
2009-04-28	03:08:00	0
2009-04-28	03:09:00	0
2009-04-28	03:10:00	0
2009-04-28	03:11:00	0
2009-04-28	03:12:00	0
2009-04-28	03:13:00	0
2009-04-28	03:14:00	0
2009-04-28	03:15:00	0
2009-04-28	03:16:00	0
2009-04-28	03:17:00	0
2009-04-28	03:18:00	0
2009-04-28	03:19:00	0
2009-04-28	03:20:00	0
2009-04-28	03:21:00	0
2009-04-28	03:22:00	0
2009-04-28	03:23:00	0
2009-04-28	03:24:00	0
2009-04-28	03:25:00	0
2009-04-28	03:26:00	0
2009-04-28	03:27:00	11
2009-04-28	03:28:00	66
2009-04-28	03:29:00	276
2009-04-28	03:30:00	351
2009-04-28	03:31:00	305
2009-04-28	03:32:00	0
2009-04-28	03:33:00	0
2009-04-28	03:34:00	0
2009-04-28	03:35:00	0
2009-04-28	03:36:00	0
2009-04-28	03:37:00	0
2009-04-28	03:38:00	0
2009-04-28	03:39:00	0
2009-04-28	03:40:00	0
2009-04-28	03:41:00	0
2009-04-28	03:42:00	0
2009-04-28	03:43:00	0
2009-04-28	03:44:00	0
2009-04-28	03:45:00	0
2009-04-28	03:46:00	0
2009-04-28	03:47:00	0
2009-04-28	03:48:00	0
2009-04-28	03:49:00	0
2009-04-28	03:50:00	22
2009-04-28	03:51:00	11
2009-04-28	03:52:00	0
2009-04-28	03:53:00	0
2009-04-28	03:54:00	0
2009-04-28	03:55:00	0
2009-04-28	03:56:00	0
2009-04-28	03:57:00	0
2009-04-28	03:58:00	0
2009-04-28	03:59:00	0
2009-04-28	04:00:00	0
2009-04-28	04:01:00	0
2009-04-28	04:02:00	0
2009-04-28	04:03:00	0
2009-04-28	04:04:00	0
2009-04-28	04:05:00	0
2009-04-28	04:06:00	0
2009-04-28	04:07:00	0
2009-04-28	04:08:00	0
2009-04-28	04:09:00	11
2009-04-28	04:10:00	0
2009-04-28	04:11:00	0
2009-04-28	04:12:00	0
2009-04-28	04:13:00	0
2009-04-28	04:14:00	0
2009-04-28	04:15:00	0
2009-04-28	04:16:00	0
2009-04-28	04:17:00	0
2009-04-28	04:18:00	0
2009-04-28	04:19:00	0
2009-04-28	04:20:00	0
2009-04-28	04:21:00	0
2009-04-28	04:22:00	0
2009-04-28	04:23:00	0
2009-04-28	04:24:00	0
2009-04-28	04:25:00	0
2009-04-28	04:26:00	0
2009-04-28	04:27:00	0
2009-04-28	04:28:00	0
2009-04-28	04:29:00	0
2009-04-28	04:30:00	0
2009-04-28	04:31:00	0
2009-04-28	04:32:00	0
2009-04-28	04:33:00	0
2009-04-28	04:34:00	0
2009-04-28	04:35:00	0
2009-04-28	04:36:00	0
2009-04-28	04:37:00	0
2009-04-28	04:38:00	0
2009-04-28	04:39:00	0
2009-04-28	04:40:00	0
2009-04-28	04:41:00	0
2009-04-28	04:42:00	0
2009-04-28	04:43:00	0
2009-04-28	04:44:00	0
2009-04-28	04:45:00	0
2009-04-28	04:46:00	0
2009-04-28	04:47:00	0
2009-04-28	04:48:00	0
2009-04-28	04:49:00	0
2009-04-28	04:50:00	0
2009-04-28	04:51:00	0
2009-04-28	04:52:00	0
2009-04-28	04:53:00	0
2009-04-28	04:54:00	0
2009-04-28	04:55:00	0
2009-04-28	04:56:00	44
2009-04-28	04:57:00	210
2009-04-28	04:58:00	157
2009-04-28	04:59:00	44
2009-04-28	05:00:00	66
2009-04-28	05:01:00	0
2009-04-28	05:02:00	0
2009-04-28	05:03:00	0
2009-04-28	05:04:00	0
2009-04-28	05:05:00	0
2009-04-28	05:06:00	0
2009-04-28	05:07:00	0
2009-04-28	05:08:00	0
2009-04-28	05:09:00	0
2009-04-28	05:10:00	0
2009-04-28	05:11:00	0
2009-04-28	05:12:00	0
2009-04-28	05:13:00	0
2009-04-28	05:14:00	0
2009-04-28	05:15:00	0
2009-04-28	05:16:00	0
2009-04-28	05:17:00	0
2009-04-28	05:18:00	0
2009-04-28	05:19:00	0
2009-04-28	05:20:00	0
2009-04-28	05:21:00	0
2009-04-28	05:22:00	0
2009-04-28	05:23:00	0
2009-04-28	05:24:00	0
2009-04-28	05:25:00	0
2009-04-28	05:26:00	0
2009-04-28	05:27:00	0
2009-04-28	05:28:00	0
2009-04-28	05:29:00	0
2009-04-28	05:30:00	22
2009-04-28	05:31:00	22
2009-04-28	05:32:00	0
2009-04-28	05:33:00	0
2009-04-28	05:34:00	0
2009-04-28	05:35:00	0
2009-04-28	05:36:00	0
2009-04-28	05:37:00	0
2009-04-28	05:38:00	0
2009-04-28	05:39:00	0
2009-04-28	05:40:00	0
2009-04-28	05:41:00	0
2009-04-28	05:42:00	0
2009-04-28	05:43:00	0
2009-04-28	05:44:00	0
2009-04-28	05:45:00	0
2009-04-28	05:46:00	0
2009-04-28	05:47:00	0
2009-04-28	05:48:00	0
2009-04-28	05:49:00	0
2009-04-28	05:50:00	0
2009-04-28	05:51:00	0
2009-04-28	05:52:00	0
2009-04-28	05:53:00	0
2009-04-28	05:54:00	0
2009-04-28	05:55:00	0
2009-04-28	05:56:00	0
2009-04-28	05:57:00	0
2009-04-28	05:58:00	0
2009-04-28	05:59:00	0
2009-04-28	06:00:00	0
2009-04-28	06:01:00	0
2009-04-28	06:02:00	0
2009-04-28	06:03:00	0
2009-04-28	06:04:00	11
2009-04-28	06:05:00	0
2009-04-28	06:06:00	0
2009-04-28	06:07:00	44
2009-04-28	06:08:00	196
2009-04-28	06:09:00	305
2009-04-28	06:10:00	499
2009-04-28	06:11:00	263
2009-04-28	06:12:00	66
2009-04-28	06:13:00	22
2009-04-28	06:14:00	110
2009-04-28	06:15:00	263
2009-04-28	06:16:00	276
2009-04-28	06:17:00	44
2009-04-28	06:18:00	397
2009-04-28	06:19:00	170
2009-04-28	06:20:00	44
2009-04-28	06:21:00	1825
2009-04-28	06:22:00	1677
2009-04-28	06:23:00	1788
2009-04-28	06:24:00	1170
2009-04-28	06:25:00	516
2009-04-28	06:26:00	1315
2009-04-28	06:27:00	1141
2009-04-28	06:28:00	428
2009-04-28	06:29:00	936
2009-04-28	06:30:00	1088
2009-04-28	06:31:00	1256
2009-04-28	06:32:00	413
2009-04-28	06:33:00	382
2009-04-28	06:34:00	335
2009-04-28	06:35:00	320
2009-04-28	06:36:00	77
2009-04-28	06:37:00	44
2009-04-28	06:38:00	22
2009-04-28	06:39:00	77
2009-04-28	06:40:00	183
2009-04-28	06:41:00	55
2009-04-28	06:42:00	0
2009-04-28	06:43:00	11
2009-04-28	06:44:00	77
2009-04-28	06:45:00	66
2009-04-28	06:46:00	210
2009-04-28	06:47:00	44
2009-04-28	06:48:00	11
2009-04-28	06:49:00	55
2009-04-28	06:50:00	66
2009-04-28	06:51:00	55
2009-04-28	06:52:00	88
2009-04-28	06:53:00	33
2009-04-28	06:54:00	121
2009-04-28	06:55:00	110
2009-04-28	06:56:00	170
2009-04-28	06:57:00	66
2009-04-28	06:58:00	143
2009-04-28	06:59:00	819
2009-04-28	07:00:00	629
2009-04-28	07:01:00	1035
2009-04-28	07:02:00	1198
2009-04-28	07:03:00	841
2009-04-28	07:04:00	797
2009-04-28	07:05:00	289
2009-04-28	07:06:00	143
2009-04-28	07:07:00	88
2009-04-28	07:08:00	552
2009-04-28	07:09:00	589
2009-04-28	07:10:00	428
2009-04-28	07:11:00	569
2009-04-28	07:12:00	263
2009-04-28	07:13:00	196
2009-04-28	07:14:00	351
2009-04-28	07:15:00	534
2009-04-28	07:16:00	1942
2009-04-28	07:17:00	1863
2009-04-28	07:18:00	1009
2009-04-28	07:19:00	775
2009-04-28	07:20:00	689
2009-04-28	07:21:00	320
2009-04-28	07:22:00	841
2009-04-28	07:23:00	984
2009-04-28	07:24:00	481
2009-04-28	07:25:00	196
2009-04-28	07:26:00	730
2009-04-28	07:27:00	819
2009-04-28	07:28:00	44
2009-04-28	07:29:00	210
2009-04-28	07:30:00	263
2009-04-28	07:31:00	887
2009-04-28	07:32:00	276
2009-04-28	07:33:00	1642
2009-04-28	07:34:00	669
2009-04-28	07:35:00	797
2009-04-28	07:36:00	819
2009-04-28	07:37:00	463
2009-04-28	07:38:00	157
2009-04-28	07:39:00	305
2009-04-28	07:40:00	276
2009-04-28	07:41:00	110
2009-04-28	07:42:00	534
2009-04-28	07:43:00	569
2009-04-28	07:44:00	397
2009-04-28	07:45:00	753
2009-04-28	07:46:00	210
2009-04-28	07:47:00	183
2009-04-28	07:48:00	22
2009-04-28	07:49:00	33
2009-04-28	07:50:00	263
2009-04-28	07:51:00	0
2009-04-28	07:52:00	0
2009-04-28	07:53:00	0
2009-04-28	07:54:00	0
2009-04-28	07:55:00	0
2009-04-28	07:56:00	413
2009-04-28	07:57:00	143
2009-04-28	07:58:00	0
2009-04-28	07:59:00	753
2009-04-28	08:00:00	819
2009-04-28	08:01:00	960
2009-04-28	08:02:00	552
2009-04-28	08:03:00	446
2009-04-28	08:04:00	534
2009-04-28	08:05:00	649
2009-04-28	08:06:00	534
2009-04-28	08:07:00	223
2009-04-28	08:08:00	121
2009-04-28	08:09:00	210
2009-04-28	08:10:00	263
2009-04-28	08:11:00	55
2009-04-28	08:12:00	55
2009-04-28	08:13:00	33
2009-04-28	08:14:00	33
2009-04-28	08:15:00	77
2009-04-28	08:16:00	44
2009-04-28	08:17:00	289
2009-04-28	08:18:00	132
2009-04-28	08:19:00	33
2009-04-28	08:20:00	499
2009-04-28	08:21:00	413
2009-04-28	08:22:00	88
2009-04-28	08:23:00	66
2009-04-28	08:24:00	55
2009-04-28	08:25:00	11
2009-04-28	08:26:00	0
2009-04-28	08:27:00	0
2009-04-28	08:28:00	66
2009-04-28	08:29:00	22
2009-04-28	08:30:00	11
2009-04-28	08:31:00	11
2009-04-28	08:32:00	11
2009-04-28	08:33:00	77
2009-04-28	08:34:00	0
2009-04-28	08:35:00	263
2009-04-28	08:36:00	249
2009-04-28	08:37:00	11
2009-04-28	08:38:00	708
2009-04-28	08:39:00	629
2009-04-28	08:40:00	110
2009-04-28	08:41:00	397
2009-04-28	08:42:00	183
2009-04-28	08:43:00	44
2009-04-28	08:44:00	33
2009-04-28	08:45:00	77
2009-04-28	08:46:00	99
2009-04-28	08:47:00	0
2009-04-28	08:48:00	66
2009-04-28	08:49:00	110
2009-04-28	08:50:00	22
2009-04-28	08:51:00	0
2009-04-28	08:52:00	0
2009-04-28	08:53:00	55
2009-04-28	08:54:00	22
2009-04-28	08:55:00	170
2009-04-28	08:56:00	157
2009-04-28	08:57:00	99
2009-04-28	08:58:00	170
2009-04-28	08:59:00	33
2009-04-28	09:00:00	143
2009-04-28	09:01:00	110
2009-04-28	09:02:00	263
2009-04-28	09:03:00	99
2009-04-28	09:04:00	121
2009-04-28	09:05:00	55
2009-04-28	09:06:00	0
2009-04-28	09:07:00	397
2009-04-28	09:08:00	157
[truncated: 19,611 more rows]

## Sheet: 5.11.09
Actogram, Copy Raw Data, All Days
Identity:	Malakh
Filename:	E:\Active Research Files\meloxicam titre canine\cases\malakh\Malakh 5.11.9.AWC
Gender:	F
Age:	13
Height:	91.4 cm	36.0 in
Weight:	35.0 kg	77.2 lbs
Start Date:	11-May-2009 (Mon)
Start Time:	18:00:00
Interval:	1.00 mins
Date Stamp:	Time Stamp:	Activity Data:	Marker Press:
2009-05-11	00:00:00	0
2009-05-11	00:01:00	0
2009-05-11	00:02:00	0
2009-05-11	00:03:00	0
2009-05-11	00:04:00	0
2009-05-11	00:05:00	0
2009-05-11	00:06:00	0
2009-05-11	00:07:00	0
2009-05-11	00:08:00	0
2009-05-11	00:09:00	0
2009-05-11	00:10:00	0
2009-05-11	00:11:00	0
2009-05-11	00:12:00	0
2009-05-11	00:13:00	0
2009-05-11	00:14:00	0
2009-05-11	00:15:00	0
2009-05-11	00:16:00	0
2009-05-11	00:17:00	0
2009-05-11	00:18:00	0
2009-05-11	00:19:00	0
2009-05-11	00:20:00	0
2009-05-11	00:21:00	0
2009-05-11	00:22:00	0
2009-05-11	00:23:00	0
2009-05-11	00:24:00	0
2009-05-11	00:25:00	0
2009-05-11	00:26:00	0
2009-05-11	00:27:00	0
2009-05-11	00:28:00	0
2009-05-11	00:29:00	0
2009-05-11	00:30:00	0
2009-05-11	00:31:00	0
2009-05-11	00:32:00	0
2009-05-11	00:33:00	0
2009-05-11	00:34:00	0
2009-05-11	00:35:00	0
2009-05-11	00:36:00	0
2009-05-11	00:37:00	0
2009-05-11	00:38:00	0
2009-05-11	00:39:00	0
2009-05-11	00:40:00	0
2009-05-11	00:41:00	0
2009-05-11	00:42:00	0
2009-05-11	00:43:00	0
2009-05-11	00:44:00	0
2009-05-11	00:45:00	0
2009-05-11	00:46:00	0
2009-05-11	00:47:00	0
2009-05-11	00:48:00	0
2009-05-11	00:49:00	0
2009-05-11	00:50:00	0
2009-05-11	00:51:00	0
2009-05-11	00:52:00	0
2009-05-11	00:53:00	0
2009-05-11	00:54:00	0
2009-05-11	00:55:00	0
2009-05-11	00:56:00	0
2009-05-11	00:57:00	0
2009-05-11	00:58:00	0
2009-05-11	00:59:00	0
2009-05-11	01:00:00	0
2009-05-11	01:01:00	0
2009-05-11	01:02:00	0
2009-05-11	01:03:00	0
2009-05-11	01:04:00	0
2009-05-11	01:05:00	0
2009-05-11	01:06:00	0
2009-05-11	01:07:00	0
2009-05-11	01:08:00	0
2009-05-11	01:09:00	0
2009-05-11	01:10:00	0
2009-05-11	01:11:00	0
2009-05-11	01:12:00	0
2009-05-11	01:13:00	0
2009-05-11	01:14:00	0
2009-05-11	01:15:00	0
2009-05-11	01:16:00	0
2009-05-11	01:17:00	0
2009-05-11	01:18:00	0
2009-05-11	01:19:00	0
2009-05-11	01:20:00	0
2009-05-11	01:21:00	0
2009-05-11	01:22:00	0
2009-05-11	01:23:00	0
2009-05-11	01:24:00	0
2009-05-11	01:25:00	0
2009-05-11	01:26:00	0
2009-05-11	01:27:00	0
2009-05-11	01:28:00	0
2009-05-11	01:29:00	0
2009-05-11	01:30:00	0
2009-05-11	01:31:00	0
2009-05-11	01:32:00	0
2009-05-11	01:33:00	0
2009-05-11	01:34:00	0
2009-05-11	01:35:00	0
2009-05-11	01:36:00	0
2009-05-11	01:37:00	0
2009-05-11	01:38:00	0
2009-05-11	01:39:00	0
2009-05-11	01:40:00	0
2009-05-11	01:41:00	0
2009-05-11	01:42:00	0
2009-05-11	01:43:00	0
2009-05-11	01:44:00	0
2009-05-11	01:45:00	0
2009-05-11	01:46:00	0
2009-05-11	01:47:00	0
2009-05-11	01:48:00	0
2009-05-11	01:49:00	0
2009-05-11	01:50:00	0
2009-05-11	01:51:00	0
2009-05-11	01:52:00	0
2009-05-11	01:53:00	0
2009-05-11	01:54:00	0
2009-05-11	01:55:00	0
2009-05-11	01:56:00	0
2009-05-11	01:57:00	0
2009-05-11	01:58:00	0
2009-05-11	01:59:00	0
2009-05-11	02:00:00	0
2009-05-11	02:01:00	0
2009-05-11	02:02:00	0
2009-05-11	02:03:00	0
2009-05-11	02:04:00	0
2009-05-11	02:05:00	0
2009-05-11	02:06:00	0
2009-05-11	02:07:00	0
2009-05-11	02:08:00	0
2009-05-11	02:09:00	0
2009-05-11	02:10:00	0
2009-05-11	02:11:00	0
2009-05-11	02:12:00	0
2009-05-11	02:13:00	0
2009-05-11	02:14:00	0
2009-05-11	02:15:00	0
2009-05-11	02:16:00	0
2009-05-11	02:17:00	0
2009-05-11	02:18:00	0
2009-05-11	02:19:00	0
2009-05-11	02:20:00	0
2009-05-11	02:21:00	0
2009-05-11	02:22:00	0
2009-05-11	02:23:00	0
2009-05-11	02:24:00	0
2009-05-11	02:25:00	0
2009-05-11	02:26:00	0
2009-05-11	02:27:00	0
2009-05-11	02:28:00	0
2009-05-11	02:29:00	0
2009-05-11	02:30:00	0
2009-05-11	02:31:00	0
2009-05-11	02:32:00	0
2009-05-11	02:33:00	0
2009-05-11	02:34:00	0
2009-05-11	02:35:00	0
2009-05-11	02:36:00	0
2009-05-11	02:37:00	0
2009-05-11	02:38:00	0
2009-05-11	02:39:00	0
2009-05-11	02:40:00	0
2009-05-11	02:41:00	0
2009-05-11	02:42:00	0
2009-05-11	02:43:00	0
2009-05-11	02:44:00	0
2009-05-11	02:45:00	0
2009-05-11	02:46:00	0
2009-05-11	02:47:00	0
2009-05-11	02:48:00	0
2009-05-11	02:49:00	0
2009-05-11	02:50:00	0
2009-05-11	02:51:00	0
2009-05-11	02:52:00	0
2009-05-11	02:53:00	0
2009-05-11	02:54:00	0
2009-05-11	02:55:00	0
2009-05-11	02:56:00	0
2009-05-11	02:57:00	0
2009-05-11	02:58:00	0
2009-05-11	02:59:00	0
2009-05-11	03:00:00	0
2009-05-11	03:01:00	0
2009-05-11	03:02:00	0
2009-05-11	03:03:00	0
2009-05-11	03:04:00	0
2009-05-11	03:05:00	0
2009-05-11	03:06:00	0
2009-05-11	03:07:00	0
2009-05-11	03:08:00	0
2009-05-11	03:09:00	0
2009-05-11	03:10:00	0
2009-05-11	03:11:00	0
2009-05-11	03:12:00	0
2009-05-11	03:13:00	0
2009-05-11	03:14:00	0
2009-05-11	03:15:00	0
2009-05-11	03:16:00	0
2009-05-11	03:17:00	0
2009-05-11	03:18:00	0
2009-05-11	03:19:00	0
2009-05-11	03:20:00	0
2009-05-11	03:21:00	0
2009-05-11	03:22:00	0
2009-05-11	03:23:00	0
2009-05-11	03:24:00	0
2009-05-11	03:25:00	0
2009-05-11	03:26:00	0
2009-05-11	03:27:00	0
2009-05-11	03:28:00	0
2009-05-11	03:29:00	0
2009-05-11	03:30:00	0
2009-05-11	03:31:00	0
2009-05-11	03:32:00	0
2009-05-11	03:33:00	0
2009-05-11	03:34:00	0
2009-05-11	03:35:00	0
2009-05-11	03:36:00	0
2009-05-11	03:37:00	0
2009-05-11	03:38:00	0
2009-05-11	03:39:00	0
2009-05-11	03:40:00	0
2009-05-11	03:41:00	0
2009-05-11	03:42:00	0
2009-05-11	03:43:00	0
2009-05-11	03:44:00	0
2009-05-11	03:45:00	0
2009-05-11	03:46:00	0
2009-05-11	03:47:00	0
2009-05-11	03:48:00	0
2009-05-11	03:49:00	0
2009-05-11	03:50:00	0
2009-05-11	03:51:00	0
2009-05-11	03:52:00	0
2009-05-11	03:53:00	0
2009-05-11	03:54:00	0
2009-05-11	03:55:00	0
2009-05-11	03:56:00	0
2009-05-11	03:57:00	0
2009-05-11	03:58:00	0
2009-05-11	03:59:00	0
2009-05-11	04:00:00	0
2009-05-11	04:01:00	0
2009-05-11	04:02:00	0
2009-05-11	04:03:00	0
2009-05-11	04:04:00	0
2009-05-11	04:05:00	0
2009-05-11	04:06:00	0
2009-05-11	04:07:00	0
2009-05-11	04:08:00	0
2009-05-11	04:09:00	0
2009-05-11	04:10:00	0
2009-05-11	04:11:00	0
2009-05-11	04:12:00	0
2009-05-11	04:13:00	0
2009-05-11	04:14:00	0
2009-05-11	04:15:00	0
2009-05-11	04:16:00	0
2009-05-11	04:17:00	0
2009-05-11	04:18:00	0
2009-05-11	04:19:00	0
2009-05-11	04:20:00	0
2009-05-11	04:21:00	0
2009-05-11	04:22:00	0
2009-05-11	04:23:00	0
2009-05-11	04:24:00	0
2009-05-11	04:25:00	0
2009-05-11	04:26:00	0
2009-05-11	04:27:00	0
2009-05-11	04:28:00	0
2009-05-11	04:29:00	0
2009-05-11	04:30:00	0
2009-05-11	04:31:00	0
2009-05-11	04:32:00	0
2009-05-11	04:33:00	0
2009-05-11	04:34:00	0
2009-05-11	04:35:00	0
2009-05-11	04:36:00	0
2009-05-11	04:37:00	0
2009-05-11	04:38:00	0
2009-05-11	04:39:00	0
2009-05-11	04:40:00	0
2009-05-11	04:41:00	0
2009-05-11	04:42:00	0
2009-05-11	04:43:00	0
2009-05-11	04:44:00	0
2009-05-11	04:45:00	0
2009-05-11	04:46:00	0
2009-05-11	04:47:00	0
2009-05-11	04:48:00	0
2009-05-11	04:49:00	0
2009-05-11	04:50:00	0
2009-05-11	04:51:00	0
2009-05-11	04:52:00	0
2009-05-11	04:53:00	0
2009-05-11	04:54:00	0
2009-05-11	04:55:00	0
2009-05-11	04:56:00	0
2009-05-11	04:57:00	0
2009-05-11	04:58:00	0
2009-05-11	04:59:00	0
2009-05-11	05:00:00	0
2009-05-11	05:01:00	0
2009-05-11	05:02:00	0
2009-05-11	05:03:00	0
2009-05-11	05:04:00	0
2009-05-11	05:05:00	0
2009-05-11	05:06:00	0
2009-05-11	05:07:00	0
2009-05-11	05:08:00	0
2009-05-11	05:09:00	0
2009-05-11	05:10:00	0
2009-05-11	05:11:00	0
2009-05-11	05:12:00	0
2009-05-11	05:13:00	0
2009-05-11	05:14:00	0
2009-05-11	05:15:00	0
2009-05-11	05:16:00	0
2009-05-11	05:17:00	0
2009-05-11	05:18:00	0
2009-05-11	05:19:00	0
2009-05-11	05:20:00	0
2009-05-11	05:21:00	0
2009-05-11	05:22:00	0
2009-05-11	05:23:00	0
2009-05-11	05:24:00	0
2009-05-11	05:25:00	0
2009-05-11	05:26:00	0
2009-05-11	05:27:00	0
2009-05-11	05:28:00	0
2009-05-11	05:29:00	0
2009-05-11	05:30:00	0
2009-05-11	05:31:00	0
2009-05-11	05:32:00	0
2009-05-11	05:33:00	0
2009-05-11	05:34:00	0
2009-05-11	05:35:00	0
2009-05-11	05:36:00	0
2009-05-11	05:37:00	0
2009-05-11	05:38:00	0
2009-05-11	05:39:00	0
2009-05-11	05:40:00	0
2009-05-11	05:41:00	0
2009-05-11	05:42:00	0
2009-05-11	05:43:00	0
2009-05-11	05:44:00	0
2009-05-11	05:45:00	0
2009-05-11	05:46:00	0
2009-05-11	05:47:00	0
2009-05-11	05:48:00	0
2009-05-11	05:49:00	0
2009-05-11	05:50:00	0
2009-05-11	05:51:00	0
2009-05-11	05:52:00	0
2009-05-11	05:53:00	0
2009-05-11	05:54:00	0
2009-05-11	05:55:00	0
2009-05-11	05:56:00	0
2009-05-11	05:57:00	0
2009-05-11	05:58:00	0
2009-05-11	05:59:00	0
2009-05-11	06:00:00	0
2009-05-11	06:01:00	0
2009-05-11	06:02:00	0
2009-05-11	06:03:00	0
2009-05-11	06:04:00	0
2009-05-11	06:05:00	0
2009-05-11	06:06:00	0
2009-05-11	06:07:00	0
2009-05-11	06:08:00	0
2009-05-11	06:09:00	0
2009-05-11	06:10:00	0
2009-05-11	06:11:00	0
2009-05-11	06:12:00	0
2009-05-11	06:13:00	0
2009-05-11	06:14:00	0
2009-05-11	06:15:00	0
2009-05-11	06:16:00	0
2009-05-11	06:17:00	0
2009-05-11	06:18:00	0
2009-05-11	06:19:00	0
2009-05-11	06:20:00	0
2009-05-11	06:21:00	0
2009-05-11	06:22:00	0
2009-05-11	06:23:00	0
2009-05-11	06:24:00	0
2009-05-11	06:25:00	0
2009-05-11	06:26:00	0
2009-05-11	06:27:00	0
2009-05-11	06:28:00	0
2009-05-11	06:29:00	0
2009-05-11	06:30:00	0
2009-05-11	06:31:00	0
2009-05-11	06:32:00	0
2009-05-11	06:33:00	0
2009-05-11	06:34:00	0
2009-05-11	06:35:00	0
2009-05-11	06:36:00	0
2009-05-11	06:37:00	0
2009-05-11	06:38:00	0
2009-05-11	06:39:00	0
2009-05-11	06:40:00	0
2009-05-11	06:41:00	0
2009-05-11	06:42:00	0
2009-05-11	06:43:00	0
2009-05-11	06:44:00	0
2009-05-11	06:45:00	0
2009-05-11	06:46:00	0
2009-05-11	06:47:00	0
2009-05-11	06:48:00	0
2009-05-11	06:49:00	0
2009-05-11	06:50:00	0
2009-05-11	06:51:00	0
2009-05-11	06:52:00	0
2009-05-11	06:53:00	0
2009-05-11	06:54:00	0
2009-05-11	06:55:00	0
2009-05-11	06:56:00	0
2009-05-11	06:57:00	0
2009-05-11	06:58:00	0
2009-05-11	06:59:00	0
2009-05-11	07:00:00	0
2009-05-11	07:01:00	0
2009-05-11	07:02:00	0
2009-05-11	07:03:00	0
2009-05-11	07:04:00	0
2009-05-11	07:05:00	0
2009-05-11	07:06:00	0
2009-05-11	07:07:00	0
2009-05-11	07:08:00	0
2009-05-11	07:09:00	0
2009-05-11	07:10:00	0
2009-05-11	07:11:00	0
2009-05-11	07:12:00	0
2009-05-11	07:13:00	0
2009-05-11	07:14:00	0
2009-05-11	07:15:00	0
2009-05-11	07:16:00	0
2009-05-11	07:17:00	0
2009-05-11	07:18:00	0
2009-05-11	07:19:00	0
2009-05-11	07:20:00	0
2009-05-11	07:21:00	0
2009-05-11	07:22:00	0
2009-05-11	07:23:00	0
2009-05-11	07:24:00	0
2009-05-11	07:25:00	0
2009-05-11	07:26:00	0
2009-05-11	07:27:00	0
2009-05-11	07:28:00	0
2009-05-11	07:29:00	0
2009-05-11	07:30:00	0
2009-05-11	07:31:00	0
2009-05-11	07:32:00	0
2009-05-11	07:33:00	0
2009-05-11	07:34:00	0
2009-05-11	07:35:00	0
2009-05-11	07:36:00	0
2009-05-11	07:37:00	0
2009-05-11	07:38:00	0
2009-05-11	07:39:00	0
2009-05-11	07:40:00	0
2009-05-11	07:41:00	0
2009-05-11	07:42:00	0
2009-05-11	07:43:00	0
2009-05-11	07:44:00	0
2009-05-11	07:45:00	0
2009-05-11	07:46:00	0
2009-05-11	07:47:00	0
2009-05-11	07:48:00	0
2009-05-11	07:49:00	0
2009-05-11	07:50:00	0
2009-05-11	07:51:00	0
2009-05-11	07:52:00	0
2009-05-11	07:53:00	0
2009-05-11	07:54:00	0
2009-05-11	07:55:00	0
2009-05-11	07:56:00	0
2009-05-11	07:57:00	0
2009-05-11	07:58:00	0
2009-05-11	07:59:00	0
2009-05-11	08:00:00	0
2009-05-11	08:01:00	0
2009-05-11	08:02:00	0
2009-05-11	08:03:00	0
2009-05-11	08:04:00	0
2009-05-11	08:05:00	0
2009-05-11	08:06:00	0
2009-05-11	08:07:00	0
2009-05-11	08:08:00	0
2009-05-11	08:09:00	0
2009-05-11	08:10:00	0
2009-05-11	08:11:00	0
2009-05-11	08:12:00	0
2009-05-11	08:13:00	0
2009-05-11	08:14:00	0
2009-05-11	08:15:00	0
2009-05-11	08:16:00	0
2009-05-11	08:17:00	0
2009-05-11	08:18:00	0
2009-05-11	08:19:00	0
2009-05-11	08:20:00	0
2009-05-11	08:21:00	0
2009-05-11	08:22:00	0
2009-05-11	08:23:00	0
2009-05-11	08:24:00	0
2009-05-11	08:25:00	0
2009-05-11	08:26:00	0
2009-05-11	08:27:00	0
2009-05-11	08:28:00	0
2009-05-11	08:29:00	0
2009-05-11	08:30:00	0
2009-05-11	08:31:00	0
2009-05-11	08:32:00	0
2009-05-11	08:33:00	0
2009-05-11	08:34:00	0
2009-05-11	08:35:00	0
2009-05-11	08:36:00	0
2009-05-11	08:37:00	0
2009-05-11	08:38:00	0
2009-05-11	08:39:00	0
2009-05-11	08:40:00	0
2009-05-11	08:41:00	0
2009-05-11	08:42:00	0
2009-05-11	08:43:00	0
2009-05-11	08:44:00	0
2009-05-11	08:45:00	0
2009-05-11	08:46:00	0
2009-05-11	08:47:00	0
2009-05-11	08:48:00	0
2009-05-11	08:49:00	0
2009-05-11	08:50:00	0
2009-05-11	08:51:00	0
2009-05-11	08:52:00	0
2009-05-11	08:53:00	0
2009-05-11	08:54:00	0
2009-05-11	08:55:00	0
2009-05-11	08:56:00	0
2009-05-11	08:57:00	0
2009-05-11	08:58:00	0
2009-05-11	08:59:00	0
2009-05-11	09:00:00	0
2009-05-11	09:01:00	0
2009-05-11	09:02:00	0
2009-05-11	09:03:00	0
2009-05-11	09:04:00	0
2009-05-11	09:05:00	0
2009-05-11	09:06:00	0
2009-05-11	09:07:00	0
2009-05-11	09:08:00	0
2009-05-11	09:09:00	0
2009-05-11	09:10:00	0
2009-05-11	09:11:00	0
2009-05-11	09:12:00	0
2009-05-11	09:13:00	0
2009-05-11	09:14:00	0
2009-05-11	09:15:00	0
2009-05-11	09:16:00	0
2009-05-11	09:17:00	0
2009-05-11	09:18:00	0
2009-05-11	09:19:00	0
2009-05-11	09:20:00	0
2009-05-11	09:21:00	0
2009-05-11	09:22:00	0
2009-05-11	09:23:00	0
2009-05-11	09:24:00	0
2009-05-11	09:25:00	0
2009-05-11	09:26:00	0
2009-05-11	09:27:00	0
2009-05-11	09:28:00	0
2009-05-11	09:29:00	0
2009-05-11	09:30:00	0
2009-05-11	09:31:00	0
2009-05-11	09:32:00	0
2009-05-11	09:33:00	0
2009-05-11	09:34:00	0
2009-05-11	09:35:00	0
2009-05-11	09:36:00	0
2009-05-11	09:37:00	0
2009-05-11	09:38:00	0
2009-05-11	09:39:00	0
2009-05-11	09:40:00	0
2009-05-11	09:41:00	0
2009-05-11	09:42:00	0
2009-05-11	09:43:00	0
2009-05-11	09:44:00	0
2009-05-11	09:45:00	0
2009-05-11	09:46:00	0
2009-05-11	09:47:00	0
2009-05-11	09:48:00	0
2009-05-11	09:49:00	0
2009-05-11	09:50:00	0
2009-05-11	09:51:00	0
2009-05-11	09:52:00	0
2009-05-11	09:53:00	0
2009-05-11	09:54:00	0
2009-05-11	09:55:00	0
2009-05-11	09:56:00	0
2009-05-11	09:57:00	0
2009-05-11	09:58:00	0
2009-05-11	09:59:00	0
2009-05-11	10:00:00	0
2009-05-11	10:01:00	0
2009-05-11	10:02:00	0
2009-05-11	10:03:00	0
2009-05-11	10:04:00	0
2009-05-11	10:05:00	0
2009-05-11	10:06:00	0
2009-05-11	10:07:00	0
2009-05-11	10:08:00	0
2009-05-11	10:09:00	0
2009-05-11	10:10:00	0
2009-05-11	10:11:00	0
2009-05-11	10:12:00	0
2009-05-11	10:13:00	0
2009-05-11	10:14:00	0
2009-05-11	10:15:00	0
2009-05-11	10:16:00	0
2009-05-11	10:17:00	0
2009-05-11	10:18:00	0
2009-05-11	10:19:00	0
2009-05-11	10:20:00	0
2009-05-11	10:21:00	0
2009-05-11	10:22:00	0
2009-05-11	10:23:00	0
2009-05-11	10:24:00	0
2009-05-11	10:25:00	0
2009-05-11	10:26:00	0
2009-05-11	10:27:00	0
2009-05-11	10:28:00	0
2009-05-11	10:29:00	0
2009-05-11	10:30:00	0
2009-05-11	10:31:00	0
2009-05-11	10:32:00	0
2009-05-11	10:33:00	0
2009-05-11	10:34:00	0
2009-05-11	10:35:00	0
2009-05-11	10:36:00	0
2009-05-11	10:37:00	0
2009-05-11	10:38:00	0
2009-05-11	10:39:00	0
2009-05-11	10:40:00	0
2009-05-11	10:41:00	0
2009-05-11	10:42:00	0
2009-05-11	10:43:00	0
2009-05-11	10:44:00	0
2009-05-11	10:45:00	0
2009-05-11	10:46:00	0
2009-05-11	10:47:00	0
2009-05-11	10:48:00	0
2009-05-11	10:49:00	0
2009-05-11	10:50:00	0
2009-05-11	10:51:00	0
2009-05-11	10:52:00	0
2009-05-11	10:53:00	0
2009-05-11	10:54:00	0
2009-05-11	10:55:00	0
2009-05-11	10:56:00	0
2009-05-11	10:57:00	0
2009-05-11	10:58:00	0
2009-05-11	10:59:00	0
2009-05-11	11:00:00	0
2009-05-11	11:01:00	0
2009-05-11	11:02:00	0
2009-05-11	11:03:00	0
2009-05-11	11:04:00	0
2009-05-11	11:05:00	0
2009-05-11	11:06:00	0
2009-05-11	11:07:00	0
2009-05-11	11:08:00	0
2009-05-11	11:09:00	0
2009-05-11	11:10:00	0
2009-05-11	11:11:00	0
2009-05-11	11:12:00	0
2009-05-11	11:13:00	0
2009-05-11	11:14:00	0
2009-05-11	11:15:00	0
2009-05-11	11:16:00	0
2009-05-11	11:17:00	0
2009-05-11	11:18:00	0
2009-05-11	11:19:00	0
2009-05-11	11:20:00	0
2009-05-11	11:21:00	0
2009-05-11	11:22:00	0
2009-05-11	11:23:00	0
2009-05-11	11:24:00	0
2009-05-11	11:25:00	0
2009-05-11	11:26:00	0
2009-05-11	11:27:00	0
2009-05-11	11:28:00	0
2009-05-11	11:29:00	0
2009-05-11	11:30:00	0
2009-05-11	11:31:00	0
2009-05-11	11:32:00	0
2009-05-11	11:33:00	0
2009-05-11	11:34:00	0
2009-05-11	11:35:00	0
2009-05-11	11:36:00	0
2009-05-11	11:37:00	0
2009-05-11	11:38:00	0
2009-05-11	11:39:00	0
2009-05-11	11:40:00	0
2009-05-11	11:41:00	0
2009-05-11	11:42:00	0
2009-05-11	11:43:00	0
2009-05-11	11:44:00	0
2009-05-11	11:45:00	0
2009-05-11	11:46:00	0
2009-05-11	11:47:00	0
2009-05-11	11:48:00	0
2009-05-11	11:49:00	0
2009-05-11	11:50:00	0
2009-05-11	11:51:00	0
2009-05-11	11:52:00	0
2009-05-11	11:53:00	0
2009-05-11	11:54:00	0
2009-05-11	11:55:00	0
2009-05-11	11:56:00	0
2009-05-11	11:57:00	0
2009-05-11	11:58:00	0
2009-05-11	11:59:00	0
2009-05-11	12:00:00	0
2009-05-11	12:01:00	0
2009-05-11	12:02:00	0
2009-05-11	12:03:00	0
2009-05-11	12:04:00	0
2009-05-11	12:05:00	0
2009-05-11	12:06:00	0
2009-05-11	12:07:00	0
2009-05-11	12:08:00	0
2009-05-11	12:09:00	0
2009-05-11	12:10:00	0
2009-05-11	12:11:00	0
2009-05-11	12:12:00	0
2009-05-11	12:13:00	0
2009-05-11	12:14:00	0
2009-05-11	12:15:00	0
2009-05-11	12:16:00	0
2009-05-11	12:17:00	0
2009-05-11	12:18:00	0
2009-05-11	12:19:00	0
2009-05-11	12:20:00	0
2009-05-11	12:21:00	0
2009-05-11	12:22:00	0
2009-05-11	12:23:00	0
2009-05-11	12:24:00	0
2009-05-11	12:25:00	0
2009-05-11	12:26:00	0
2009-05-11	12:27:00	0
2009-05-11	12:28:00	0
2009-05-11	12:29:00	0
2009-05-11	12:30:00	0
2009-05-11	12:31:00	0
2009-05-11	12:32:00	0
2009-05-11	12:33:00	0
2009-05-11	12:34:00	0
2009-05-11	12:35:00	0
2009-05-11	12:36:00	0
2009-05-11	12:37:00	0
2009-05-11	12:38:00	0
2009-05-11	12:39:00	0
2009-05-11	12:40:00	0
2009-05-11	12:41:00	0
2009-05-11	12:42:00	0
2009-05-11	12:43:00	0
2009-05-11	12:44:00	0
2009-05-11	12:45:00	0
2009-05-11	12:46:00	0
2009-05-11	12:47:00	0
2009-05-11	12:48:00	0
2009-05-11	12:49:00	0
2009-05-11	12:50:00	0
2009-05-11	12:51:00	0
2009-05-11	12:52:00	0
2009-05-11	12:53:00	0
2009-05-11	12:54:00	0
2009-05-11	12:55:00	0
2009-05-11	12:56:00	0
2009-05-11	12:57:00	0
2009-05-11	12:58:00	0
2009-05-11	12:59:00	0
2009-05-11	13:00:00	0
2009-05-11	13:01:00	0
2009-05-11	13:02:00	0
2009-05-11	13:03:00	0
2009-05-11	13:04:00	0
2009-05-11	13:05:00	0
2009-05-11	13:06:00	0
2009-05-11	13:07:00	0
2009-05-11	13:08:00	0
2009-05-11	13:09:00	0
2009-05-11	13:10:00	0
2009-05-11	13:11:00	0
2009-05-11	13:12:00	0
2009-05-11	13:13:00	0
2009-05-11	13:14:00	0
2009-05-11	13:15:00	0
2009-05-11	13:16:00	0
2009-05-11	13:17:00	0
2009-05-11	13:18:00	0
2009-05-11	13:19:00	0
2009-05-11	13:20:00	0
2009-05-11	13:21:00	0
2009-05-11	13:22:00	0
2009-05-11	13:23:00	0
2009-05-11	13:24:00	0
2009-05-11	13:25:00	0
2009-05-11	13:26:00	0
2009-05-11	13:27:00	0
2009-05-11	13:28:00	0
2009-05-11	13:29:00	0
2009-05-11	13:30:00	0
2009-05-11	13:31:00	0
2009-05-11	13:32:00	0
2009-05-11	13:33:00	0
2009-05-11	13:34:00	0
2009-05-11	13:35:00	0
2009-05-11	13:36:00	0
2009-05-11	13:37:00	0
2009-05-11	13:38:00	0
2009-05-11	13:39:00	0
2009-05-11	13:40:00	0
2009-05-11	13:41:00	0
2009-05-11	13:42:00	0
2009-05-11	13:43:00	0
2009-05-11	13:44:00	0
2009-05-11	13:45:00	0
2009-05-11	13:46:00	0
2009-05-11	13:47:00	0
2009-05-11	13:48:00	0
2009-05-11	13:49:00	0
2009-05-11	13:50:00	0
2009-05-11	13:51:00	0
2009-05-11	13:52:00	0
2009-05-11	13:53:00	0
2009-05-11	13:54:00	0
2009-05-11	13:55:00	0
2009-05-11	13:56:00	0
2009-05-11	13:57:00	0
2009-05-11	13:58:00	0
2009-05-11	13:59:00	0
2009-05-11	14:00:00	0
2009-05-11	14:01:00	0
2009-05-11	14:02:00	0
2009-05-11	14:03:00	0
2009-05-11	14:04:00	0
2009-05-11	14:05:00	0
2009-05-11	14:06:00	0
2009-05-11	14:07:00	0
2009-05-11	14:08:00	0
2009-05-11	14:09:00	0
2009-05-11	14:10:00	0
2009-05-11	14:11:00	0
2009-05-11	14:12:00	0
2009-05-11	14:13:00	0
2009-05-11	14:14:00	0
2009-05-11	14:15:00	0
2009-05-11	14:16:00	0
2009-05-11	14:17:00	0
2009-05-11	14:18:00	0
2009-05-11	14:19:00	0
2009-05-11	14:20:00	0
2009-05-11	14:21:00	0
2009-05-11	14:22:00	0
2009-05-11	14:23:00	0
2009-05-11	14:24:00	0
2009-05-11	14:25:00	0
2009-05-11	14:26:00	0
2009-05-11	14:27:00	0
2009-05-11	14:28:00	0
2009-05-11	14:29:00	0
2009-05-11	14:30:00	0
2009-05-11	14:31:00	0
2009-05-11	14:32:00	0
2009-05-11	14:33:00	0
2009-05-11	14:34:00	0
2009-05-11	14:35:00	0
2009-05-11	14:36:00	0
2009-05-11	14:37:00	0
2009-05-11	14:38:00	0
2009-05-11	14:39:00	0
2009-05-11	14:40:00	0
2009-05-11	14:41:00	0
2009-05-11	14:42:00	0
2009-05-11	14:43:00	0
2009-05-11	14:44:00	0
2009-05-11	14:45:00	0
2009-05-11	14:46:00	0
2009-05-11	14:47:00	0
2009-05-11	14:48:00	0
2009-05-11	14:49:00	0
2009-05-11	14:50:00	0
2009-05-11	14:51:00	0
2009-05-11	14:52:00	0
2009-05-11	14:53:00	0
2009-05-11	14:54:00	0
2009-05-11	14:55:00	0
2009-05-11	14:56:00	0
2009-05-11	14:57:00	0
2009-05-11	14:58:00	0
2009-05-11	14:59:00	0
2009-05-11	15:00:00	0
2009-05-11	15:01:00	0
2009-05-11	15:02:00	0
2009-05-11	15:03:00	0
2009-05-11	15:04:00	0
2009-05-11	15:05:00	0
2009-05-11	15:06:00	0
2009-05-11	15:07:00	0
2009-05-11	15:08:00	0
2009-05-11	15:09:00	0
2009-05-11	15:10:00	0
2009-05-11	15:11:00	0
2009-05-11	15:12:00	0
2009-05-11	15:13:00	0
2009-05-11	15:14:00	0
2009-05-11	15:15:00	0
2009-05-11	15:16:00	0
2009-05-11	15:17:00	0
2009-05-11	15:18:00	0
2009-05-11	15:19:00	0
2009-05-11	15:20:00	0
2009-05-11	15:21:00	0
2009-05-11	15:22:00	0
2009-05-11	15:23:00	0
2009-05-11	15:24:00	0
2009-05-11	15:25:00	0
2009-05-11	15:26:00	0
2009-05-11	15:27:00	0
2009-05-11	15:28:00	0
2009-05-11	15:29:00	0
2009-05-11	15:30:00	0
2009-05-11	15:31:00	0
2009-05-11	15:32:00	0
2009-05-11	15:33:00	0
2009-05-11	15:34:00	0
2009-05-11	15:35:00	0
2009-05-11	15:36:00	0
2009-05-11	15:37:00	0
2009-05-11	15:38:00	0
2009-05-11	15:39:00	0
2009-05-11	15:40:00	0
2009-05-11	15:41:00	0
2009-05-11	15:42:00	0
2009-05-11	15:43:00	0
2009-05-11	15:44:00	0
2009-05-11	15:45:00	0
2009-05-11	15:46:00	0
2009-05-11	15:47:00	0
2009-05-11	15:48:00	0
2009-05-11	15:49:00	0
2009-05-11	15:50:00	0
2009-05-11	15:51:00	0
2009-05-11	15:52:00	0
2009-05-11	15:53:00	0
2009-05-11	15:54:00	0
2009-05-11	15:55:00	0
2009-05-11	15:56:00	0
2009-05-11	15:57:00	0
2009-05-11	15:58:00	0
2009-05-11	15:59:00	0
2009-05-11	16:00:00	0
2009-05-11	16:01:00	0
2009-05-11	16:02:00	0
2009-05-11	16:03:00	0
2009-05-11	16:04:00	0
2009-05-11	16:05:00	0
2009-05-11	16:06:00	0
2009-05-11	16:07:00	0
2009-05-11	16:08:00	0
2009-05-11	16:09:00	0
2009-05-11	16:10:00	0
2009-05-11	16:11:00	0
2009-05-11	16:12:00	0
2009-05-11	16:13:00	0
2009-05-11	16:14:00	0
2009-05-11	16:15:00	0
2009-05-11	16:16:00	0
2009-05-11	16:17:00	0
2009-05-11	16:18:00	0
2009-05-11	16:19:00	0
2009-05-11	16:20:00	0
2009-05-11	16:21:00	0
2009-05-11	16:22:00	0
2009-05-11	16:23:00	0
2009-05-11	16:24:00	0
2009-05-11	16:25:00	0
2009-05-11	16:26:00	0
2009-05-11	16:27:00	0
2009-05-11	16:28:00	0
2009-05-11	16:29:00	0
2009-05-11	16:30:00	0
2009-05-11	16:31:00	0
2009-05-11	16:32:00	0
2009-05-11	16:33:00	0
2009-05-11	16:34:00	0
2009-05-11	16:35:00	0
2009-05-11	16:36:00	0
2009-05-11	16:37:00	0
2009-05-11	16:38:00	0
2009-05-11	16:39:00	0
2009-05-11	16:40:00	0
2009-05-11	16:41:00	0
2009-05-11	16:42:00	0
2009-05-11	16:43:00	0
2009-05-11	16:44:00	0
2009-05-11	16:45:00	0
2009-05-11	16:46:00	0
2009-05-11	16:47:00	0
2009-05-11	16:48:00	0
2009-05-11	16:49:00	0
2009-05-11	16:50:00	0
2009-05-11	16:51:00	0
2009-05-11	16:52:00	0
2009-05-11	16:53:00	0
2009-05-11	16:54:00	0
2009-05-11	16:55:00	0
2009-05-11	16:56:00	0
2009-05-11	16:57:00	0
2009-05-11	16:58:00	0
2009-05-11	16:59:00	0
2009-05-11	17:00:00	0
2009-05-11	17:01:00	0
2009-05-11	17:02:00	0
2009-05-11	17:03:00	0
2009-05-11	17:04:00	0
2009-05-11	17:05:00	0
2009-05-11	17:06:00	0
2009-05-11	17:07:00	0
2009-05-11	17:08:00	0
2009-05-11	17:09:00	0
2009-05-11	17:10:00	0
2009-05-11	17:11:00	0
2009-05-11	17:12:00	0
2009-05-11	17:13:00	0
2009-05-11	17:14:00	0
2009-05-11	17:15:00	0
2009-05-11	17:16:00	0
2009-05-11	17:17:00	0
2009-05-11	17:18:00	0
2009-05-11	17:19:00	0
2009-05-11	17:20:00	0
2009-05-11	17:21:00	0
2009-05-11	17:22:00	0
2009-05-11	17:23:00	0
2009-05-11	17:24:00	0
2009-05-11	17:25:00	0
2009-05-11	17:26:00	0
2009-05-11	17:27:00	0
2009-05-11	17:28:00	0
2009-05-11	17:29:00	0
2009-05-11	17:30:00	0
2009-05-11	17:31:00	0
2009-05-11	17:32:00	0
2009-05-11	17:33:00	0
2009-05-11	17:34:00	0
2009-05-11	17:35:00	0
2009-05-11	17:36:00	0
2009-05-11	17:37:00	0
2009-05-11	17:38:00	0
2009-05-11	17:39:00	0
2009-05-11	17:40:00	0
2009-05-11	17:41:00	0
2009-05-11	17:42:00	0
2009-05-11	17:43:00	0
2009-05-11	17:44:00	0
2009-05-11	17:45:00	0
2009-05-11	17:46:00	0
2009-05-11	17:47:00	0
2009-05-11	17:48:00	0
2009-05-11	17:49:00	0
2009-05-11	17:50:00	0
2009-05-11	17:51:00	0
2009-05-11	17:52:00	0
2009-05-11	17:53:00	0
2009-05-11	17:54:00	0
2009-05-11	17:55:00	0
2009-05-11	17:56:00	0
2009-05-11	17:57:00	0
2009-05-11	17:58:00	0
2009-05-11	17:59:00	0
2009-05-11	18:00:00	0	M
2009-05-11	18:01:00	99
2009-05-11	18:02:00	77
2009-05-11	18:03:00	44
2009-05-11	18:04:00	11
2009-05-11	18:05:00	33
2009-05-11	18:06:00	11
2009-05-11	18:07:00	55
2009-05-11	18:08:00	183
2009-05-11	18:09:00	77
2009-05-11	18:10:00	22
2009-05-11	18:11:00	33
2009-05-11	18:12:00	569
2009-05-11	18:13:00	499
2009-05-11	18:14:00	320
2009-05-11	18:15:00	569
2009-05-11	18:16:00	289
2009-05-11	18:17:00	11
2009-05-11	18:18:00	0
2009-05-11	18:19:00	11
2009-05-11	18:20:00	11
2009-05-11	18:21:00	0
2009-05-11	18:22:00	0
2009-05-11	18:23:00	0
2009-05-11	18:24:00	0
2009-05-11	18:25:00	0
2009-05-11	18:26:00	44
2009-05-11	18:27:00	11
2009-05-11	18:28:00	11
2009-05-11	18:29:00	0
2009-05-11	18:30:00	0
2009-05-11	18:31:00	11
2009-05-11	18:32:00	0
2009-05-11	18:33:00	11
2009-05-11	18:34:00	11
2009-05-11	18:35:00	77
2009-05-11	18:36:00	11
2009-05-11	18:37:00	11
2009-05-11	18:38:00	236
2009-05-11	18:39:00	276
2009-05-11	18:40:00	305
2009-05-11	18:41:00	210
2009-05-11	18:42:00	110
2009-05-11	18:43:00	170
2009-05-11	18:44:00	110
2009-05-11	18:45:00	11
2009-05-11	18:46:00	0
2009-05-11	18:47:00	0
2009-05-11	18:48:00	289
2009-05-11	18:49:00	552
2009-05-11	18:50:00	534
2009-05-11	18:51:00	236
2009-05-11	18:52:00	196
2009-05-11	18:53:00	33
2009-05-11	18:54:00	22
2009-05-11	18:55:00	33
2009-05-11	18:56:00	44
2009-05-11	18:57:00	44
2009-05-11	18:58:00	55
2009-05-11	18:59:00	99
2009-05-11	19:00:00	170
2009-05-11	19:01:00	11
2009-05-11	19:02:00	0
2009-05-11	19:03:00	132
2009-05-11	19:04:00	55
2009-05-11	19:05:00	77
2009-05-11	19:06:00	33
2009-05-11	19:07:00	33
2009-05-11	19:08:00	22
2009-05-11	19:09:00	397
2009-05-11	19:10:00	397
2009-05-11	19:11:00	463
2009-05-11	19:12:00	249
2009-05-11	19:13:00	223
2009-05-11	19:14:00	132
2009-05-11	19:15:00	0
2009-05-11	19:16:00	0
2009-05-11	19:17:00	0
2009-05-11	19:18:00	0
2009-05-11	19:19:00	11
2009-05-11	19:20:00	0
2009-05-11	19:21:00	11
2009-05-11	19:22:00	196
2009-05-11	19:23:00	33
2009-05-11	19:24:00	66
2009-05-11	19:25:00	66
2009-05-11	19:26:00	413
2009-05-11	19:27:00	143
2009-05-11	19:28:00	121
2009-05-11	19:29:00	413
2009-05-11	19:30:00	305
2009-05-11	19:31:00	157
2009-05-11	19:32:00	77
2009-05-11	19:33:00	0
2009-05-11	19:34:00	33
2009-05-11	19:35:00	351
2009-05-11	19:36:00	77
2009-05-11	19:37:00	66
2009-05-11	19:38:00	55
2009-05-11	19:39:00	44
2009-05-11	19:40:00	11
2009-05-11	19:41:00	33
2009-05-11	19:42:00	99
2009-05-11	19:43:00	44
2009-05-11	19:44:00	249
2009-05-11	19:45:00	305
2009-05-11	19:46:00	351
2009-05-11	19:47:00	132
2009-05-11	19:48:00	143
2009-05-11	19:49:00	236
2009-05-11	19:50:00	157
2009-05-11	19:51:00	210
2009-05-11	19:52:00	320
2009-05-11	19:53:00	22
2009-05-11	19:54:00	11
2009-05-11	19:55:00	22
2009-05-11	19:56:00	143
2009-05-11	19:57:00	99
2009-05-11	19:58:00	11
2009-05-11	19:59:00	44
2009-05-11	20:00:00	170
2009-05-11	20:01:00	157
2009-05-11	20:02:00	88
2009-05-11	20:03:00	33
2009-05-11	20:04:00	0
2009-05-11	20:05:00	33
2009-05-11	20:06:00	44
2009-05-11	20:07:00	11
2009-05-11	20:08:00	55
2009-05-11	20:09:00	1198
2009-05-11	20:10:00	516
2009-05-11	20:11:00	569
2009-05-11	20:12:00	1198
2009-05-11	20:13:00	797
2009-05-11	20:14:00	841
2009-05-11	20:15:00	351
2009-05-11	20:16:00	708
2009-05-11	20:17:00	351
2009-05-11	20:18:00	77
2009-05-11	20:19:00	11
2009-05-11	20:20:00	0
2009-05-11	20:21:00	33
2009-05-11	20:22:00	44
2009-05-11	20:23:00	11
2009-05-11	20:24:00	0
2009-05-11	20:25:00	0
2009-05-11	20:26:00	121
2009-05-11	20:27:00	33
2009-05-11	20:28:00	0
2009-05-11	20:29:00	366
2009-05-11	20:30:00	289
2009-05-11	20:31:00	55
2009-05-11	20:32:00	132
2009-05-11	20:33:00	413
2009-05-11	20:34:00	351
2009-05-11	20:35:00	157
2009-05-11	20:36:00	481
2009-05-11	20:37:00	689
2009-05-11	20:38:00	753
2009-05-11	20:39:00	66
2009-05-11	20:40:00	55
2009-05-11	20:41:00	0
2009-05-11	20:42:00	99
2009-05-11	20:43:00	44
2009-05-11	20:44:00	0
2009-05-11	20:45:00	0
2009-05-11	20:46:00	0
2009-05-11	20:47:00	110
2009-05-11	20:48:00	196
2009-05-11	20:49:00	819
2009-05-11	20:50:00	1035
2009-05-11	20:51:00	413
2009-05-11	20:52:00	170
2009-05-11	20:53:00	11
2009-05-11	20:54:00	0
2009-05-11	20:55:00	77
2009-05-11	20:56:00	0
2009-05-11	20:57:00	143
2009-05-11	20:58:00	0
2009-05-11	20:59:00	0
2009-05-11	21:00:00	397
2009-05-11	21:01:00	77
2009-05-11	21:02:00	0
2009-05-11	21:03:00	0
2009-05-11	21:04:00	0
2009-05-11	21:05:00	289
2009-05-11	21:06:00	0
2009-05-11	21:07:00	143
2009-05-11	21:08:00	499
2009-05-11	21:09:00	263
2009-05-11	21:10:00	11
2009-05-11	21:11:00	0
2009-05-11	21:12:00	0
2009-05-11	21:13:00	44
2009-05-11	21:14:00	22
2009-05-11	21:15:00	0
2009-05-11	21:16:00	0
2009-05-11	21:17:00	0
2009-05-11	21:18:00	110
2009-05-11	21:19:00	0
2009-05-11	21:20:00	0
2009-05-11	21:21:00	0
2009-05-11	21:22:00	0
2009-05-11	21:23:00	0
2009-05-11	21:24:00	0
2009-05-11	21:25:00	0
2009-05-11	21:26:00	0
2009-05-11	21:27:00	0
2009-05-11	21:28:00	33
2009-05-11	21:29:00	66
2009-05-11	21:30:00	0
2009-05-11	21:31:00	0
2009-05-11	21:32:00	0
2009-05-11	21:33:00	0
2009-05-11	21:34:00	0
2009-05-11	21:35:00	11
2009-05-11	21:36:00	0
2009-05-11	21:37:00	0
2009-05-11	21:38:00	0
2009-05-11	21:39:00	0
2009-05-11	21:40:00	0
2009-05-11	21:41:00	0
2009-05-11	21:42:00	0
2009-05-11	21:43:00	0
2009-05-11	21:44:00	22
2009-05-11	21:45:00	110
2009-05-11	21:46:00	210
2009-05-11	21:47:00	289
2009-05-11	21:48:00	499
2009-05-11	21:49:00	249
2009-05-11	21:50:00	110
2009-05-11	21:51:00	276
2009-05-11	21:52:00	170
2009-05-11	21:53:00	77
2009-05-11	21:54:00	22
2009-05-11	21:55:00	33
2009-05-11	21:56:00	33
2009-05-11	21:57:00	77
2009-05-11	21:58:00	44
2009-05-11	21:59:00	22
2009-05-11	22:00:00	382
2009-05-11	22:01:00	1009
2009-05-11	22:02:00	413
2009-05-11	22:03:00	499
2009-05-11	22:04:00	629
2009-05-11	22:05:00	366
2009-05-11	22:06:00	121
2009-05-11	22:07:00	143
2009-05-11	22:08:00	170
2009-05-11	22:09:00	66
2009-05-11	22:10:00	22
2009-05-11	22:11:00	589
2009-05-11	22:12:00	689
2009-05-11	22:13:00	183
2009-05-11	22:14:00	22
2009-05-11	22:15:00	196
2009-05-11	22:16:00	196
2009-05-11	22:17:00	320
2009-05-11	22:18:00	569
2009-05-11	22:19:00	249
2009-05-11	22:20:00	55
2009-05-11	22:21:00	77
2009-05-11	22:22:00	236
2009-05-11	22:23:00	157
2009-05-11	22:24:00	55
2009-05-11	22:25:00	0
2009-05-11	22:26:00	210
2009-05-11	22:27:00	66
2009-05-11	22:28:00	0
2009-05-11	22:29:00	77
2009-05-11	22:30:00	77
2009-05-11	22:31:00	0
2009-05-11	22:32:00	0
2009-05-11	22:33:00	0
2009-05-11	22:34:00	0
2009-05-11	22:35:00	0
2009-05-11	22:36:00	0
2009-05-11	22:37:00	0
2009-05-11	22:38:00	0
2009-05-11	22:39:00	0
2009-05-11	22:40:00	0
2009-05-11	22:41:00	0
2009-05-11	22:42:00	0
2009-05-11	22:43:00	0
2009-05-11	22:44:00	0
2009-05-11	22:45:00	121
2009-05-11	22:46:00	44
2009-05-11	22:47:00	0
2009-05-11	22:48:00	0
2009-05-11	22:49:00	0
2009-05-11	22:50:00	0
2009-05-11	22:51:00	0
2009-05-11	22:52:00	0
2009-05-11	22:53:00	0
2009-05-11	22:54:00	0
2009-05-11	22:55:00	0
2009-05-11	22:56:00	157
2009-05-11	22:57:00	210
2009-05-11	22:58:00	11
2009-05-11	22:59:00	0
2009-05-11	23:00:00	0
2009-05-11	23:01:00	0
2009-05-11	23:02:00	0
2009-05-11	23:03:00	0
2009-05-11	23:04:00	0
2009-05-11	23:05:00	0
2009-05-11	23:06:00	0
2009-05-11	23:07:00	0
2009-05-11	23:08:00	0
2009-05-11	23:09:00	0
2009-05-11	23:10:00	77
2009-05-11	23:11:00	0
2009-05-11	23:12:00	0
2009-05-11	23:13:00	0
2009-05-11	23:14:00	0
2009-05-11	23:15:00	0
2009-05-11	23:16:00	0
2009-05-11	23:17:00	0
2009-05-11	23:18:00	0
2009-05-11	23:19:00	0
2009-05-11	23:20:00	0
2009-05-11	23:21:00	0
2009-05-11	23:22:00	0
2009-05-11	23:23:00	0
2009-05-11	23:24:00	0
2009-05-11	23:25:00	0
2009-05-11	23:26:00	55
2009-05-11	23:27:00	552
2009-05-11	23:28:00	236
2009-05-11	23:29:00	481
2009-05-11	23:30:00	753
2009-05-11	23:31:00	305
2009-05-11	23:32:00	428
2009-05-11	23:33:00	99
2009-05-11	23:34:00	44
2009-05-11	23:35:00	0
2009-05-11	23:36:00	0
2009-05-11	23:37:00	0
2009-05-11	23:38:00	0
2009-05-11	23:39:00	0
2009-05-11	23:40:00	0
2009-05-11	23:41:00	0
2009-05-11	23:42:00	0
2009-05-11	23:43:00	0
2009-05-11	23:44:00	0
2009-05-11	23:45:00	143
2009-05-11	23:46:00	22
2009-05-11	23:47:00	0
2009-05-11	23:48:00	0
2009-05-11	23:49:00	0
2009-05-11	23:50:00	0
2009-05-11	23:51:00	11
2009-05-11	23:52:00	0
2009-05-11	23:53:00	0
2009-05-11	23:54:00	0
2009-05-11	23:55:00	0
2009-05-11	23:56:00	0
2009-05-11	23:57:00	0
2009-05-11	23:58:00	0
2009-05-11	23:59:00	0
2009-05-12	00:00:00	0
2009-05-12	00:01:00	0
2009-05-12	00:02:00	66
2009-05-12	00:03:00	22
2009-05-12	00:04:00	0
2009-05-12	00:05:00	0
2009-05-12	00:06:00	0
2009-05-12	00:07:00	0
2009-05-12	00:08:00	0
2009-05-12	00:09:00	0
2009-05-12	00:10:00	0
2009-05-12	00:11:00	22
2009-05-12	00:12:00	44
2009-05-12	00:13:00	33
2009-05-12	00:14:00	0
2009-05-12	00:15:00	0
2009-05-12	00:16:00	0
2009-05-12	00:17:00	428
2009-05-12	00:18:00	499
2009-05-12	00:19:00	22
2009-05-12	00:20:00	0
2009-05-12	00:21:00	22
2009-05-12	00:22:00	0
2009-05-12	00:23:00	0
2009-05-12	00:24:00	0
2009-05-12	00:25:00	0
2009-05-12	00:26:00	0
2009-05-12	00:27:00	0
2009-05-12	00:28:00	0
2009-05-12	00:29:00	0
2009-05-12	00:30:00	0
2009-05-12	00:31:00	0
2009-05-12	00:32:00	0
2009-05-12	00:33:00	0
2009-05-12	00:34:00	0
2009-05-12	00:35:00	0
2009-05-12	00:36:00	0
2009-05-12	00:37:00	0
2009-05-12	00:38:00	0
2009-05-12	00:39:00	0
2009-05-12	00:40:00	0
2009-05-12	00:41:00	0
2009-05-12	00:42:00	0
2009-05-12	00:43:00	0
2009-05-12	00:44:00	0
2009-05-12	00:45:00	0
2009-05-12	00:46:00	0
2009-05-12	00:47:00	0
2009-05-12	00:48:00	0
2009-05-12	00:49:00	0
2009-05-12	00:50:00	0
2009-05-12	00:51:00	0
2009-05-12	00:52:00	0
2009-05-12	00:53:00	0
2009-05-12	00:54:00	0
2009-05-12	00:55:00	0
2009-05-12	00:56:00	0
2009-05-12	00:57:00	0
2009-05-12	00:58:00	0
2009-05-12	00:59:00	0
2009-05-12	01:00:00	0
2009-05-12	01:01:00	0
2009-05-12	01:02:00	0
2009-05-12	01:03:00	0
2009-05-12	01:04:00	0
2009-05-12	01:05:00	0
2009-05-12	01:06:00	0
2009-05-12	01:07:00	0
2009-05-12	01:08:00	0
2009-05-12	01:09:00	0
2009-05-12	01:10:00	0
2009-05-12	01:11:00	0
2009-05-12	01:12:00	223
2009-05-12	01:13:00	0
2009-05-12	01:14:00	11
2009-05-12	01:15:00	0
2009-05-12	01:16:00	0
2009-05-12	01:17:00	0
2009-05-12	01:18:00	0
2009-05-12	01:19:00	0
2009-05-12	01:20:00	0
2009-05-12	01:21:00	0
2009-05-12	01:22:00	0
2009-05-12	01:23:00	0
2009-05-12	01:24:00	0
2009-05-12	01:25:00	0
2009-05-12	01:26:00	0
2009-05-12	01:27:00	0
2009-05-12	01:28:00	0
2009-05-12	01:29:00	0
2009-05-12	01:30:00	0
2009-05-12	01:31:00	0
2009-05-12	01:32:00	0
2009-05-12	01:33:00	0
2009-05-12	01:34:00	0
2009-05-12	01:35:00	0
2009-05-12	01:36:00	0
2009-05-12	01:37:00	0
2009-05-12	01:38:00	0
2009-05-12	01:39:00	0
2009-05-12	01:40:00	0
2009-05-12	01:41:00	0
2009-05-12	01:42:00	0
2009-05-12	01:43:00	0
2009-05-12	01:44:00	0
2009-05-12	01:45:00	0
2009-05-12	01:46:00	0
2009-05-12	01:47:00	0
2009-05-12	01:48:00	44
2009-05-12	01:49:00	157
2009-05-12	01:50:00	0
2009-05-12	01:51:00	0
2009-05-12	01:52:00	0
2009-05-12	01:53:00	0
2009-05-12	01:54:00	55
2009-05-12	01:55:00	0
2009-05-12	01:56:00	0
2009-05-12	01:57:00	0
2009-05-12	01:58:00	0
2009-05-12	01:59:00	0
2009-05-12	02:00:00	0
2009-05-12	02:01:00	0
2009-05-12	02:02:00	0
2009-05-12	02:03:00	0
2009-05-12	02:04:00	22
2009-05-12	02:05:00	0
2009-05-12	02:06:00	0
2009-05-12	02:07:00	0
2009-05-12	02:08:00	0
2009-05-12	02:09:00	0
2009-05-12	02:10:00	0
2009-05-12	02:11:00	0
2009-05-12	02:12:00	0
2009-05-12	02:13:00	0
2009-05-12	02:14:00	0
2009-05-12	02:15:00	0
2009-05-12	02:16:00	0
2009-05-12	02:17:00	0
2009-05-12	02:18:00	0
2009-05-12	02:19:00	0
2009-05-12	02:20:00	0
2009-05-12	02:21:00	0
2009-05-12	02:22:00	0
2009-05-12	02:23:00	0
2009-05-12	02:24:00	276
2009-05-12	02:25:00	11
2009-05-12	02:26:00	0
2009-05-12	02:27:00	0
2009-05-12	02:28:00	0
2009-05-12	02:29:00	0
2009-05-12	02:30:00	0
2009-05-12	02:31:00	0
2009-05-12	02:32:00	0
2009-05-12	02:33:00	0
2009-05-12	02:34:00	0
2009-05-12	02:35:00	0
2009-05-12	02:36:00	0
2009-05-12	02:37:00	0
2009-05-12	02:38:00	0
2009-05-12	02:39:00	0
2009-05-12	02:40:00	0
2009-05-12	02:41:00	0
2009-05-12	02:42:00	0
2009-05-12	02:43:00	0
2009-05-12	02:44:00	0
2009-05-12	02:45:00	0
2009-05-12	02:46:00	0
2009-05-12	02:47:00	0
2009-05-12	02:48:00	0
2009-05-12	02:49:00	0
2009-05-12	02:50:00	0
2009-05-12	02:51:00	0
2009-05-12	02:52:00	0
2009-05-12	02:53:00	0
2009-05-12	02:54:00	0
2009-05-12	02:55:00	0
2009-05-12	02:56:00	0
2009-05-12	02:57:00	0
2009-05-12	02:58:00	0
2009-05-12	02:59:00	0
2009-05-12	03:00:00	0
2009-05-12	03:01:00	0
2009-05-12	03:02:00	0
2009-05-12	03:03:00	0
2009-05-12	03:04:00	0
2009-05-12	03:05:00	44
2009-05-12	03:06:00	77
2009-05-12	03:07:00	170
2009-05-12	03:08:00	0
2009-05-12	03:09:00	0
2009-05-12	03:10:00	0
2009-05-12	03:11:00	0
2009-05-12	03:12:00	0
2009-05-12	03:13:00	0
2009-05-12	03:14:00	0
2009-05-12	03:15:00	0
2009-05-12	03:16:00	0
2009-05-12	03:17:00	0
2009-05-12	03:18:00	0
2009-05-12	03:19:00	0
2009-05-12	03:20:00	0
2009-05-12	03:21:00	0
2009-05-12	03:22:00	0
2009-05-12	03:23:00	0
2009-05-12	03:24:00	0
2009-05-12	03:25:00	0
2009-05-12	03:26:00	0
2009-05-12	03:27:00	0
2009-05-12	03:28:00	0
2009-05-12	03:29:00	0
2009-05-12	03:30:00	0
2009-05-12	03:31:00	0
2009-05-12	03:32:00	22
2009-05-12	03:33:00	0
2009-05-12	03:34:00	0
2009-05-12	03:35:00	0
2009-05-12	03:36:00	0
2009-05-12	03:37:00	0
2009-05-12	03:38:00	0
2009-05-12	03:39:00	0
2009-05-12	03:40:00	0
2009-05-12	03:41:00	0
2009-05-12	03:42:00	0
2009-05-12	03:43:00	0
2009-05-12	03:44:00	110
2009-05-12	03:45:00	143
2009-05-12	03:46:00	481
2009-05-12	03:47:00	11
2009-05-12	03:48:00	0
2009-05-12	03:49:00	0
2009-05-12	03:50:00	0
2009-05-12	03:51:00	0
2009-05-12	03:52:00	0
2009-05-12	03:53:00	0
2009-05-12	03:54:00	0
2009-05-12	03:55:00	0
2009-05-12	03:56:00	0
2009-05-12	03:57:00	0
2009-05-12	03:58:00	0
2009-05-12	03:59:00	0
2009-05-12	04:00:00	0
2009-05-12	04:01:00	0
2009-05-12	04:02:00	0
2009-05-12	04:03:00	0
2009-05-12	04:04:00	55
2009-05-12	04:05:00	0
2009-05-12	04:06:00	0
2009-05-12	04:07:00	0
2009-05-12	04:08:00	0
2009-05-12	04:09:00	0
2009-05-12	04:10:00	0
2009-05-12	04:11:00	0
2009-05-12	04:12:00	0
2009-05-12	04:13:00	0
2009-05-12	04:14:00	0
2009-05-12	04:15:00	0
2009-05-12	04:16:00	0
2009-05-12	04:17:00	0
2009-05-12	04:18:00	0
2009-05-12	04:19:00	11
2009-05-12	04:20:00	0
2009-05-12	04:21:00	0
2009-05-12	04:22:00	0
2009-05-12	04:23:00	0
2009-05-12	04:24:00	0
2009-05-12	04:25:00	0
2009-05-12	04:26:00	0
2009-05-12	04:27:00	0
2009-05-12	04:28:00	0
2009-05-12	04:29:00	0
2009-05-12	04:30:00	0
2009-05-12	04:31:00	0
2009-05-12	04:32:00	0
2009-05-12	04:33:00	0
2009-05-12	04:34:00	0
2009-05-12	04:35:00	0
2009-05-12	04:36:00	0
2009-05-12	04:37:00	11
2009-05-12	04:38:00	0
2009-05-12	04:39:00	0
2009-05-12	04:40:00	0
2009-05-12	04:41:00	0
2009-05-12	04:42:00	0
2009-05-12	04:43:00	0
2009-05-12	04:44:00	0
2009-05-12	04:45:00	0
2009-05-12	04:46:00	0
2009-05-12	04:47:00	0
2009-05-12	04:48:00	0
2009-05-12	04:49:00	0
2009-05-12	04:50:00	0
2009-05-12	04:51:00	0
2009-05-12	04:52:00	0
2009-05-12	04:53:00	0
2009-05-12	04:54:00	0
2009-05-12	04:55:00	0
2009-05-12	04:56:00	0
2009-05-12	04:57:00	0
2009-05-12	04:58:00	0
2009-05-12	04:59:00	0
2009-05-12	05:00:00	0
2009-05-12	05:01:00	0
2009-05-12	05:02:00	0
2009-05-12	05:03:00	0
2009-05-12	05:04:00	0
2009-05-12	05:05:00	0
2009-05-12	05:06:00	0
2009-05-12	05:07:00	0
2009-05-12	05:08:00	0
2009-05-12	05:09:00	0
2009-05-12	05:10:00	0
2009-05-12	05:11:00	0
2009-05-12	05:12:00	33
2009-05-12	05:13:00	210
2009-05-12	05:14:00	55
2009-05-12	05:15:00	0
2009-05-12	05:16:00	0
2009-05-12	05:17:00	0
2009-05-12	05:18:00	0
2009-05-12	05:19:00	0
2009-05-12	05:20:00	0
2009-05-12	05:21:00	0
2009-05-12	05:22:00	0
2009-05-12	05:23:00	0
2009-05-12	05:24:00	0
2009-05-12	05:25:00	0
2009-05-12	05:26:00	0
2009-05-12	05:27:00	0
2009-05-12	05:28:00	11
2009-05-12	05:29:00	11
2009-05-12	05:30:00	0
2009-05-12	05:31:00	0
2009-05-12	05:32:00	0
2009-05-12	05:33:00	0
2009-05-12	05:34:00	0
2009-05-12	05:35:00	0
2009-05-12	05:36:00	0
2009-05-12	05:37:00	0
2009-05-12	05:38:00	0
2009-05-12	05:39:00	0
2009-05-12	05:40:00	0
2009-05-12	05:41:00	0
2009-05-12	05:42:00	0
2009-05-12	05:43:00	0
2009-05-12	05:44:00	0
2009-05-12	05:45:00	0
2009-05-12	05:46:00	0
2009-05-12	05:47:00	0
2009-05-12	05:48:00	0
2009-05-12	05:49:00	0
2009-05-12	05:50:00	0
2009-05-12	05:51:00	0
2009-05-12	05:52:00	0
2009-05-12	05:53:00	0
2009-05-12	05:54:00	0
2009-05-12	05:55:00	0
2009-05-12	05:56:00	0
2009-05-12	05:57:00	0
2009-05-12	05:58:00	0
2009-05-12	05:59:00	0
2009-05-12	06:00:00	0
2009-05-12	06:01:00	0
2009-05-12	06:02:00	0
2009-05-12	06:03:00	0
2009-05-12	06:04:00	0
2009-05-12	06:05:00	0
2009-05-12	06:06:00	0
2009-05-12	06:07:00	0
2009-05-12	06:08:00	0
2009-05-12	06:09:00	0
2009-05-12	06:10:00	0
2009-05-12	06:11:00	0
2009-05-12	06:12:00	0
2009-05-12	06:13:00	0
2009-05-12	06:14:00	0
2009-05-12	06:15:00	0
2009-05-12	06:16:00	0
2009-05-12	06:17:00	0
2009-05-12	06:18:00	0
2009-05-12	06:19:00	0
2009-05-12	06:20:00	0
2009-05-12	06:21:00	0
2009-05-12	06:22:00	0
2009-05-12	06:23:00	0
2009-05-12	06:24:00	0
2009-05-12	06:25:00	0
2009-05-12	06:26:00	0
2009-05-12	06:27:00	0
2009-05-12	06:28:00	0
2009-05-12	06:29:00	0
2009-05-12	06:30:00	0
2009-05-12	06:31:00	0
2009-05-12	06:32:00	0
2009-05-12	06:33:00	0
2009-05-12	06:34:00	0
2009-05-12	06:35:00	0
2009-05-12	06:36:00	0
2009-05-12	06:37:00	0
2009-05-12	06:38:00	0
2009-05-12	06:39:00	0
2009-05-12	06:40:00	0
2009-05-12	06:41:00	0
2009-05-12	06:42:00	0
2009-05-12	06:43:00	0
2009-05-12	06:44:00	0
2009-05-12	06:45:00	0
2009-05-12	06:46:00	0
2009-05-12	06:47:00	0
2009-05-12	06:48:00	0
2009-05-12	06:49:00	0
2009-05-12	06:50:00	0
2009-05-12	06:51:00	0
2009-05-12	06:52:00	0
2009-05-12	06:53:00	0
2009-05-12	06:54:00	33
2009-05-12	06:55:00	170
2009-05-12	06:56:00	589
2009-05-12	06:57:00	1062
2009-05-12	06:58:00	305
2009-05-12	06:59:00	276
2009-05-12	07:00:00	320
2009-05-12	07:01:00	289
2009-05-12	07:02:00	157
2009-05-12	07:03:00	66
2009-05-12	07:04:00	0
2009-05-12	07:05:00	33
2009-05-12	07:06:00	44
2009-05-12	07:07:00	11
2009-05-12	07:08:00	88
2009-05-12	07:09:00	263
2009-05-12	07:10:00	170
2009-05-12	07:11:00	183
2009-05-12	07:12:00	11
2009-05-12	07:13:00	11
2009-05-12	07:14:00	210
2009-05-12	07:15:00	210
2009-05-12	07:16:00	143
2009-05-12	07:17:00	77
2009-05-12	07:18:00	210
2009-05-12	07:19:00	335
2009-05-12	07:20:00	170
2009-05-12	07:21:00	289
2009-05-12	07:22:00	276
2009-05-12	07:23:00	132
2009-05-12	07:24:00	55
2009-05-12	07:25:00	33
2009-05-12	07:26:00	841
2009-05-12	07:27:00	516
2009-05-12	07:28:00	236
2009-05-12	07:29:00	481
2009-05-12	07:30:00	236
2009-05-12	07:31:00	210
2009-05-12	07:32:00	77
2009-05-12	07:33:00	22
2009-05-12	07:34:00	305
2009-05-12	07:35:00	569
2009-05-12	07:36:00	121
2009-05-12	07:37:00	382
2009-05-12	07:38:00	397
2009-05-12	07:39:00	320
2009-05-12	07:40:00	609
2009-05-12	07:41:00	382
2009-05-12	07:42:00	499
2009-05-12	07:43:00	320
2009-05-12	07:44:00	351
2009-05-12	07:45:00	121
2009-05-12	07:46:00	88
2009-05-12	07:47:00	66
2009-05-12	07:48:00	99
2009-05-12	07:49:00	11
2009-05-12	07:50:00	55
2009-05-12	07:51:00	0
2009-05-12	07:52:00	55
2009-05-12	07:53:00	0
2009-05-12	07:54:00	55
2009-05-12	07:55:00	11
2009-05-12	07:56:00	170
2009-05-12	07:57:00	305
2009-05-12	07:58:00	223
2009-05-12	07:59:00	463
2009-05-12	08:00:00	320
2009-05-12	08:01:00	276
2009-05-12	08:02:00	22
2009-05-12	08:03:00	33
2009-05-12	08:04:00	0
2009-05-12	08:05:00	0
2009-05-12	08:06:00	44
2009-05-12	08:07:00	33
2009-05-12	08:08:00	183
2009-05-12	08:09:00	0
2009-05-12	08:10:00	11
2009-05-12	08:11:00	11
2009-05-12	08:12:00	170
2009-05-12	08:13:00	0
2009-05-12	08:14:00	0
2009-05-12	08:15:00	0
2009-05-12	08:16:00	11
2009-05-12	08:17:00	0
2009-05-12	08:18:00	1256
2009-05-12	08:19:00	609
2009-05-12	08:20:00	841
2009-05-12	08:21:00	366
2009-05-12	08:22:00	797
2009-05-12	08:23:00	887
2009-05-12	08:24:00	196
2009-05-12	08:25:00	335
2009-05-12	08:26:00	11
2009-05-12	08:27:00	0
2009-05-12	08:28:00	0
2009-05-12	08:29:00	88
2009-05-12	08:30:00	0
2009-05-12	08:31:00	55
2009-05-12	08:32:00	263
2009-05-12	08:33:00	1198
2009-05-12	08:34:00	1505
2009-05-12	08:35:00	516
2009-05-12	08:36:00	1088
2009-05-12	08:37:00	911
2009-05-12	08:38:00	413
2009-05-12	08:39:00	534
2009-05-12	08:40:00	569
2009-05-12	08:41:00	1788
2009-05-12	08:42:00	1088
2009-05-12	08:43:00	775
2009-05-12	08:44:00	534
2009-05-12	08:45:00	33
2009-05-12	08:46:00	33
2009-05-12	08:47:00	66
2009-05-12	08:48:00	22
2009-05-12	08:49:00	210
2009-05-12	08:50:00	382
2009-05-12	08:51:00	397
2009-05-12	08:52:00	305
2009-05-12	08:53:00	669
2009-05-12	08:54:00	629
2009-05-12	08:55:00	609
2009-05-12	08:56:00	305
2009-05-12	08:57:00	609
2009-05-12	08:58:00	534
2009-05-12	08:59:00	534
2009-05-12	09:00:00	413
2009-05-12	09:01:00	708
2009-05-12	09:02:00	1009
2009-05-12	09:03:00	863
2009-05-12	09:04:00	569
2009-05-12	09:05:00	289
2009-05-12	09:06:00	629
2009-05-12	09:07:00	276
2009-05-12	09:08:00	11
[truncated: 22,491 more rows]

## Sheet: 5.27.09
Actogram, Copy Raw Data, All Days
Identity:	Malakh
Filename:	E:\Active Research Files\meloxicam titre canine\cases\malakh\Malakh 5.27.09.AWC
Gender:	F
Age:	13
Height:	91.4 cm	36.0 in
Weight:	35.0 kg	77.2 lbs
Start Date:	27-May-2009 (Wed)
Start Time:	18:00:00
Interval:	1.00 mins
Date Stamp:	Time Stamp:	Activity Data:	Marker Press:
2009-05-27	00:00:00	0
2009-05-27	00:01:00	0
2009-05-27	00:02:00	0
2009-05-27	00:03:00	0
2009-05-27	00:04:00	0
2009-05-27	00:05:00	0
2009-05-27	00:06:00	0
2009-05-27	00:07:00	0
2009-05-27	00:08:00	0
2009-05-27	00:09:00	0
2009-05-27	00:10:00	0
2009-05-27	00:11:00	0
2009-05-27	00:12:00	0
2009-05-27	00:13:00	0
2009-05-27	00:14:00	0
2009-05-27	00:15:00	0
2009-05-27	00:16:00	0
2009-05-27	00:17:00	0
2009-05-27	00:18:00	0
2009-05-27	00:19:00	0
2009-05-27	00:20:00	0
2009-05-27	00:21:00	0
2009-05-27	00:22:00	0
2009-05-27	00:23:00	0
2009-05-27	00:24:00	0
2009-05-27	00:25:00	0
2009-05-27	00:26:00	0
2009-05-27	00:27:00	0
2009-05-27	00:28:00	0
2009-05-27	00:29:00	0
2009-05-27	00:30:00	0
2009-05-27	00:31:00	0
2009-05-27	00:32:00	0
2009-05-27	00:33:00	0
2009-05-27	00:34:00	0
2009-05-27	00:35:00	0
2009-05-27	00:36:00	0
2009-05-27	00:37:00	0
2009-05-27	00:38:00	0
2009-05-27	00:39:00	0
2009-05-27	00:40:00	0
2009-05-27	00:41:00	0
2009-05-27	00:42:00	0
2009-05-27	00:43:00	0
2009-05-27	00:44:00	0
2009-05-27	00:45:00	0
2009-05-27	00:46:00	0
2009-05-27	00:47:00	0
2009-05-27	00:48:00	0
2009-05-27	00:49:00	0
2009-05-27	00:50:00	0
2009-05-27	00:51:00	0
2009-05-27	00:52:00	0
2009-05-27	00:53:00	0
2009-05-27	00:54:00	0
2009-05-27	00:55:00	0
2009-05-27	00:56:00	0
2009-05-27	00:57:00	0
2009-05-27	00:58:00	0
2009-05-27	00:59:00	0
2009-05-27	01:00:00	0
2009-05-27	01:01:00	0
2009-05-27	01:02:00	0
2009-05-27	01:03:00	0
2009-05-27	01:04:00	0
2009-05-27	01:05:00	0
2009-05-27	01:06:00	0
2009-05-27	01:07:00	0
2009-05-27	01:08:00	0
2009-05-27	01:09:00	0
2009-05-27	01:10:00	0
2009-05-27	01:11:00	0
2009-05-27	01:12:00	0
2009-05-27	01:13:00	0
2009-05-27	01:14:00	0
2009-05-27	01:15:00	0
2009-05-27	01:16:00	0
2009-05-27	01:17:00	0
2009-05-27	01:18:00	0
2009-05-27	01:19:00	0
2009-05-27	01:20:00	0
2009-05-27	01:21:00	0
2009-05-27	01:22:00	0
2009-05-27	01:23:00	0
2009-05-27	01:24:00	0
2009-05-27	01:25:00	0
2009-05-27	01:26:00	0
2009-05-27	01:27:00	0
2009-05-27	01:28:00	0
2009-05-27	01:29:00	0
2009-05-27	01:30:00	0
2009-05-27	01:31:00	0
2009-05-27	01:32:00	0
2009-05-27	01:33:00	0
2009-05-27	01:34:00	0
2009-05-27	01:35:00	0
2009-05-27	01:36:00	0
2009-05-27	01:37:00	0
2009-05-27	01:38:00	0
2009-05-27	01:39:00	0
2009-05-27	01:40:00	0
2009-05-27	01:41:00	0
2009-05-27	01:42:00	0
2009-05-27	01:43:00	0
2009-05-27	01:44:00	0
2009-05-27	01:45:00	0
2009-05-27	01:46:00	0
2009-05-27	01:47:00	0
2009-05-27	01:48:00	0
2009-05-27	01:49:00	0
2009-05-27	01:50:00	0
2009-05-27	01:51:00	0
2009-05-27	01:52:00	0
2009-05-27	01:53:00	0
2009-05-27	01:54:00	0
2009-05-27	01:55:00	0
2009-05-27	01:56:00	0
2009-05-27	01:57:00	0
2009-05-27	01:58:00	0
2009-05-27	01:59:00	0
2009-05-27	02:00:00	0
2009-05-27	02:01:00	0
2009-05-27	02:02:00	0
2009-05-27	02:03:00	0
2009-05-27	02:04:00	0
2009-05-27	02:05:00	0
2009-05-27	02:06:00	0
2009-05-27	02:07:00	0
2009-05-27	02:08:00	0
2009-05-27	02:09:00	0
2009-05-27	02:10:00	0
2009-05-27	02:11:00	0
2009-05-27	02:12:00	0
2009-05-27	02:13:00	0
2009-05-27	02:14:00	0
2009-05-27	02:15:00	0
2009-05-27	02:16:00	0
2009-05-27	02:17:00	0
2009-05-27	02:18:00	0
2009-05-27	02:19:00	0
2009-05-27	02:20:00	0
2009-05-27	02:21:00	0
2009-05-27	02:22:00	0
2009-05-27	02:23:00	0
2009-05-27	02:24:00	0
2009-05-27	02:25:00	0
2009-05-27	02:26:00	0
2009-05-27	02:27:00	0
2009-05-27	02:28:00	0
2009-05-27	02:29:00	0
2009-05-27	02:30:00	0
2009-05-27	02:31:00	0
2009-05-27	02:32:00	0
2009-05-27	02:33:00	0
2009-05-27	02:34:00	0
2009-05-27	02:35:00	0
2009-05-27	02:36:00	0
2009-05-27	02:37:00	0
2009-05-27	02:38:00	0
2009-05-27	02:39:00	0
2009-05-27	02:40:00	0
2009-05-27	02:41:00	0
2009-05-27	02:42:00	0
2009-05-27	02:43:00	0
2009-05-27	02:44:00	0
2009-05-27	02:45:00	0
2009-05-27	02:46:00	0
2009-05-27	02:47:00	0
2009-05-27	02:48:00	0
2009-05-27	02:49:00	0
2009-05-27	02:50:00	0
2009-05-27	02:51:00	0
2009-05-27	02:52:00	0
2009-05-27	02:53:00	0
2009-05-27	02:54:00	0
2009-05-27	02:55:00	0
2009-05-27	02:56:00	0
2009-05-27	02:57:00	0
2009-05-27	02:58:00	0
2009-05-27	02:59:00	0
2009-05-27	03:00:00	0
2009-05-27	03:01:00	0
2009-05-27	03:02:00	0
2009-05-27	03:03:00	0
2009-05-27	03:04:00	0
2009-05-27	03:05:00	0
2009-05-27	03:06:00	0
2009-05-27	03:07:00	0
2009-05-27	03:08:00	0
2009-05-27	03:09:00	0
2009-05-27	03:10:00	0
2009-05-27	03:11:00	0
2009-05-27	03:12:00	0
2009-05-27	03:13:00	0
2009-05-27	03:14:00	0
2009-05-27	03:15:00	0
2009-05-27	03:16:00	0
2009-05-27	03:17:00	0
2009-05-27	03:18:00	0
2009-05-27	03:19:00	0
2009-05-27	03:20:00	0
2009-05-27	03:21:00	0
2009-05-27	03:22:00	0
2009-05-27	03:23:00	0
2009-05-27	03:24:00	0
2009-05-27	03:25:00	0
2009-05-27	03:26:00	0
2009-05-27	03:27:00	0
2009-05-27	03:28:00	0
2009-05-27	03:29:00	0
2009-05-27	03:30:00	0
2009-05-27	03:31:00	0
2009-05-27	03:32:00	0
2009-05-27	03:33:00	0
2009-05-27	03:34:00	0
2009-05-27	03:35:00	0
2009-05-27	03:36:00	0
2009-05-27	03:37:00	0
2009-05-27	03:38:00	0
2009-05-27	03:39:00	0
2009-05-27	03:40:00	0
2009-05-27	03:41:00	0
2009-05-27	03:42:00	0
2009-05-27	03:43:00	0
2009-05-27	03:44:00	0
2009-05-27	03:45:00	0
2009-05-27	03:46:00	0
2009-05-27	03:47:00	0
2009-05-27	03:48:00	0
2009-05-27	03:49:00	0
2009-05-27	03:50:00	0
2009-05-27	03:51:00	0
2009-05-27	03:52:00	0
2009-05-27	03:53:00	0
2009-05-27	03:54:00	0
2009-05-27	03:55:00	0
2009-05-27	03:56:00	0
2009-05-27	03:57:00	0
2009-05-27	03:58:00	0
2009-05-27	03:59:00	0
2009-05-27	04:00:00	0
2009-05-27	04:01:00	0
2009-05-27	04:02:00	0
2009-05-27	04:03:00	0
2009-05-27	04:04:00	0
2009-05-27	04:05:00	0
2009-05-27	04:06:00	0
2009-05-27	04:07:00	0
2009-05-27	04:08:00	0
2009-05-27	04:09:00	0
2009-05-27	04:10:00	0
2009-05-27	04:11:00	0
2009-05-27	04:12:00	0
2009-05-27	04:13:00	0
2009-05-27	04:14:00	0
2009-05-27	04:15:00	0
2009-05-27	04:16:00	0
2009-05-27	04:17:00	0
2009-05-27	04:18:00	0
2009-05-27	04:19:00	0
2009-05-27	04:20:00	0
2009-05-27	04:21:00	0
2009-05-27	04:22:00	0
2009-05-27	04:23:00	0
2009-05-27	04:24:00	0
2009-05-27	04:25:00	0
2009-05-27	04:26:00	0
2009-05-27	04:27:00	0
2009-05-27	04:28:00	0
2009-05-27	04:29:00	0
2009-05-27	04:30:00	0
2009-05-27	04:31:00	0
2009-05-27	04:32:00	0
2009-05-27	04:33:00	0
2009-05-27	04:34:00	0
2009-05-27	04:35:00	0
2009-05-27	04:36:00	0
2009-05-27	04:37:00	0
2009-05-27	04:38:00	0
2009-05-27	04:39:00	0
2009-05-27	04:40:00	0
2009-05-27	04:41:00	0
2009-05-27	04:42:00	0
2009-05-27	04:43:00	0
2009-05-27	04:44:00	0
2009-05-27	04:45:00	0
2009-05-27	04:46:00	0
2009-05-27	04:47:00	0
2009-05-27	04:48:00	0
2009-05-27	04:49:00	0
2009-05-27	04:50:00	0
2009-05-27	04:51:00	0
2009-05-27	04:52:00	0
2009-05-27	04:53:00	0
2009-05-27	04:54:00	0
2009-05-27	04:55:00	0
2009-05-27	04:56:00	0
2009-05-27	04:57:00	0
2009-05-27	04:58:00	0
2009-05-27	04:59:00	0
2009-05-27	05:00:00	0
2009-05-27	05:01:00	0
2009-05-27	05:02:00	0
2009-05-27	05:03:00	0
2009-05-27	05:04:00	0
2009-05-27	05:05:00	0
2009-05-27	05:06:00	0
2009-05-27	05:07:00	0
2009-05-27	05:08:00	0
2009-05-27	05:09:00	0
2009-05-27	05:10:00	0
2009-05-27	05:11:00	0
2009-05-27	05:12:00	0
2009-05-27	05:13:00	0
2009-05-27	05:14:00	0
2009-05-27	05:15:00	0
2009-05-27	05:16:00	0
2009-05-27	05:17:00	0
2009-05-27	05:18:00	0
2009-05-27	05:19:00	0
2009-05-27	05:20:00	0
2009-05-27	05:21:00	0
2009-05-27	05:22:00	0
2009-05-27	05:23:00	0
2009-05-27	05:24:00	0
2009-05-27	05:25:00	0
2009-05-27	05:26:00	0
2009-05-27	05:27:00	0
2009-05-27	05:28:00	0
2009-05-27	05:29:00	0
2009-05-27	05:30:00	0
2009-05-27	05:31:00	0
2009-05-27	05:32:00	0
2009-05-27	05:33:00	0
2009-05-27	05:34:00	0
2009-05-27	05:35:00	0
2009-05-27	05:36:00	0
2009-05-27	05:37:00	0
2009-05-27	05:38:00	0
2009-05-27	05:39:00	0
2009-05-27	05:40:00	0
2009-05-27	05:41:00	0
2009-05-27	05:42:00	0
2009-05-27	05:43:00	0
2009-05-27	05:44:00	0
2009-05-27	05:45:00	0
2009-05-27	05:46:00	0
2009-05-27	05:47:00	0
2009-05-27	05:48:00	0
2009-05-27	05:49:00	0
2009-05-27	05:50:00	0
2009-05-27	05:51:00	0
2009-05-27	05:52:00	0
2009-05-27	05:53:00	0
2009-05-27	05:54:00	0
2009-05-27	05:55:00	0
2009-05-27	05:56:00	0
2009-05-27	05:57:00	0
2009-05-27	05:58:00	0
2009-05-27	05:59:00	0
2009-05-27	06:00:00	0
2009-05-27	06:01:00	0
2009-05-27	06:02:00	0
2009-05-27	06:03:00	0
2009-05-27	06:04:00	0
2009-05-27	06:05:00	0
2009-05-27	06:06:00	0
2009-05-27	06:07:00	0
2009-05-27	06:08:00	0
2009-05-27	06:09:00	0
2009-05-27	06:10:00	0
2009-05-27	06:11:00	0
2009-05-27	06:12:00	0
2009-05-27	06:13:00	0
2009-05-27	06:14:00	0
2009-05-27	06:15:00	0
2009-05-27	06:16:00	0
2009-05-27	06:17:00	0
2009-05-27	06:18:00	0
2009-05-27	06:19:00	0
2009-05-27	06:20:00	0
2009-05-27	06:21:00	0
2009-05-27	06:22:00	0
2009-05-27	06:23:00	0
2009-05-27	06:24:00	0
2009-05-27	06:25:00	0
2009-05-27	06:26:00	0
2009-05-27	06:27:00	0
2009-05-27	06:28:00	0
2009-05-27	06:29:00	0
2009-05-27	06:30:00	0
2009-05-27	06:31:00	0
2009-05-27	06:32:00	0
2009-05-27	06:33:00	0
2009-05-27	06:34:00	0
2009-05-27	06:35:00	0
2009-05-27	06:36:00	0
2009-05-27	06:37:00	0
2009-05-27	06:38:00	0
2009-05-27	06:39:00	0
2009-05-27	06:40:00	0
2009-05-27	06:41:00	0
2009-05-27	06:42:00	0
2009-05-27	06:43:00	0
2009-05-27	06:44:00	0
2009-05-27	06:45:00	0
2009-05-27	06:46:00	0
2009-05-27	06:47:00	0
2009-05-27	06:48:00	0
2009-05-27	06:49:00	0
2009-05-27	06:50:00	0
2009-05-27	06:51:00	0
2009-05-27	06:52:00	0
2009-05-27	06:53:00	0
2009-05-27	06:54:00	0
2009-05-27	06:55:00	0
2009-05-27	06:56:00	0
2009-05-27	06:57:00	0
2009-05-27	06:58:00	0
2009-05-27	06:59:00	0
2009-05-27	07:00:00	0
2009-05-27	07:01:00	0
2009-05-27	07:02:00	0
2009-05-27	07:03:00	0
2009-05-27	07:04:00	0
2009-05-27	07:05:00	0
2009-05-27	07:06:00	0
2009-05-27	07:07:00	0
2009-05-27	07:08:00	0
2009-05-27	07:09:00	0
2009-05-27	07:10:00	0
2009-05-27	07:11:00	0
2009-05-27	07:12:00	0
2009-05-27	07:13:00	0
2009-05-27	07:14:00	0
2009-05-27	07:15:00	0
2009-05-27	07:16:00	0
2009-05-27	07:17:00	0
2009-05-27	07:18:00	0
2009-05-27	07:19:00	0
2009-05-27	07:20:00	0
2009-05-27	07:21:00	0
2009-05-27	07:22:00	0
2009-05-27	07:23:00	0
2009-05-27	07:24:00	0
2009-05-27	07:25:00	0
2009-05-27	07:26:00	0
2009-05-27	07:27:00	0
2009-05-27	07:28:00	0
2009-05-27	07:29:00	0
2009-05-27	07:30:00	0
2009-05-27	07:31:00	0
2009-05-27	07:32:00	0
2009-05-27	07:33:00	0
2009-05-27	07:34:00	0
2009-05-27	07:35:00	0
2009-05-27	07:36:00	0
2009-05-27	07:37:00	0
2009-05-27	07:38:00	0
2009-05-27	07:39:00	0
2009-05-27	07:40:00	0
2009-05-27	07:41:00	0
2009-05-27	07:42:00	0
2009-05-27	07:43:00	0
2009-05-27	07:44:00	0
2009-05-27	07:45:00	0
2009-05-27	07:46:00	0
2009-05-27	07:47:00	0
2009-05-27	07:48:00	0
2009-05-27	07:49:00	0
2009-05-27	07:50:00	0
2009-05-27	07:51:00	0
2009-05-27	07:52:00	0
2009-05-27	07:53:00	0
2009-05-27	07:54:00	0
2009-05-27	07:55:00	0
2009-05-27	07:56:00	0
2009-05-27	07:57:00	0
2009-05-27	07:58:00	0
2009-05-27	07:59:00	0
2009-05-27	08:00:00	0
2009-05-27	08:01:00	0
2009-05-27	08:02:00	0
2009-05-27	08:03:00	0
2009-05-27	08:04:00	0
2009-05-27	08:05:00	0
2009-05-27	08:06:00	0
2009-05-27	08:07:00	0
2009-05-27	08:08:00	0
2009-05-27	08:09:00	0
2009-05-27	08:10:00	0
2009-05-27	08:11:00	0
2009-05-27	08:12:00	0
2009-05-27	08:13:00	0
2009-05-27	08:14:00	0
2009-05-27	08:15:00	0
2009-05-27	08:16:00	0
2009-05-27	08:17:00	0
2009-05-27	08:18:00	0
2009-05-27	08:19:00	0
2009-05-27	08:20:00	0
2009-05-27	08:21:00	0
2009-05-27	08:22:00	0
2009-05-27	08:23:00	0
2009-05-27	08:24:00	0
2009-05-27	08:25:00	0
2009-05-27	08:26:00	0
2009-05-27	08:27:00	0
2009-05-27	08:28:00	0
2009-05-27	08:29:00	0
2009-05-27	08:30:00	0
2009-05-27	08:31:00	0
2009-05-27	08:32:00	0
2009-05-27	08:33:00	0
2009-05-27	08:34:00	0
2009-05-27	08:35:00	0
2009-05-27	08:36:00	0
2009-05-27	08:37:00	0
2009-05-27	08:38:00	0
2009-05-27	08:39:00	0
2009-05-27	08:40:00	0
2009-05-27	08:41:00	0
2009-05-27	08:42:00	0
2009-05-27	08:43:00	0
2009-05-27	08:44:00	0
2009-05-27	08:45:00	0
2009-05-27	08:46:00	0
2009-05-27	08:47:00	0
2009-05-27	08:48:00	0
2009-05-27	08:49:00	0
2009-05-27	08:50:00	0
2009-05-27	08:51:00	0
2009-05-27	08:52:00	0
2009-05-27	08:53:00	0
2009-05-27	08:54:00	0
2009-05-27	08:55:00	0
2009-05-27	08:56:00	0
2009-05-27	08:57:00	0
2009-05-27	08:58:00	0
2009-05-27	08:59:00	0
2009-05-27	09:00:00	0
2009-05-27	09:01:00	0
2009-05-27	09:02:00	0
2009-05-27	09:03:00	0
2009-05-27	09:04:00	0
2009-05-27	09:05:00	0
2009-05-27	09:06:00	0
2009-05-27	09:07:00	0
2009-05-27	09:08:00	0
2009-05-27	09:09:00	0
2009-05-27	09:10:00	0
2009-05-27	09:11:00	0
2009-05-27	09:12:00	0
2009-05-27	09:13:00	0
2009-05-27	09:14:00	0
2009-05-27	09:15:00	0
2009-05-27	09:16:00	0
2009-05-27	09:17:00	0
2009-05-27	09:18:00	0
2009-05-27	09:19:00	0
2009-05-27	09:20:00	0
2009-05-27	09:21:00	0
2009-05-27	09:22:00	0
2009-05-27	09:23:00	0
2009-05-27	09:24:00	0
2009-05-27	09:25:00	0
2009-05-27	09:26:00	0
2009-05-27	09:27:00	0
2009-05-27	09:28:00	0
2009-05-27	09:29:00	0
2009-05-27	09:30:00	0
2009-05-27	09:31:00	0
2009-05-27	09:32:00	0
2009-05-27	09:33:00	0
2009-05-27	09:34:00	0
2009-05-27	09:35:00	0
2009-05-27	09:36:00	0
2009-05-27	09:37:00	0
2009-05-27	09:38:00	0
2009-05-27	09:39:00	0
2009-05-27	09:40:00	0
2009-05-27	09:41:00	0
2009-05-27	09:42:00	0
2009-05-27	09:43:00	0
2009-05-27	09:44:00	0
2009-05-27	09:45:00	0
2009-05-27	09:46:00	0
2009-05-27	09:47:00	0
2009-05-27	09:48:00	0
2009-05-27	09:49:00	0
2009-05-27	09:50:00	0
2009-05-27	09:51:00	0
2009-05-27	09:52:00	0
2009-05-27	09:53:00	0
2009-05-27	09:54:00	0
2009-05-27	09:55:00	0
2009-05-27	09:56:00	0
2009-05-27	09:57:00	0
2009-05-27	09:58:00	0
2009-05-27	09:59:00	0
2009-05-27	10:00:00	0
2009-05-27	10:01:00	0
2009-05-27	10:02:00	0
2009-05-27	10:03:00	0
2009-05-27	10:04:00	0
2009-05-27	10:05:00	0
2009-05-27	10:06:00	0
2009-05-27	10:07:00	0
2009-05-27	10:08:00	0
2009-05-27	10:09:00	0
2009-05-27	10:10:00	0
2009-05-27	10:11:00	0
2009-05-27	10:12:00	0
2009-05-27	10:13:00	0
2009-05-27	10:14:00	0
2009-05-27	10:15:00	0
2009-05-27	10:16:00	0
2009-05-27	10:17:00	0
2009-05-27	10:18:00	0
2009-05-27	10:19:00	0
2009-05-27	10:20:00	0
2009-05-27	10:21:00	0
2009-05-27	10:22:00	0
2009-05-27	10:23:00	0
2009-05-27	10:24:00	0
2009-05-27	10:25:00	0
2009-05-27	10:26:00	0
2009-05-27	10:27:00	0
2009-05-27	10:28:00	0
2009-05-27	10:29:00	0
2009-05-27	10:30:00	0
2009-05-27	10:31:00	0
2009-05-27	10:32:00	0
2009-05-27	10:33:00	0
2009-05-27	10:34:00	0
2009-05-27	10:35:00	0
2009-05-27	10:36:00	0
2009-05-27	10:37:00	0
2009-05-27	10:38:00	0
2009-05-27	10:39:00	0
2009-05-27	10:40:00	0
2009-05-27	10:41:00	0
2009-05-27	10:42:00	0
2009-05-27	10:43:00	0
2009-05-27	10:44:00	0
2009-05-27	10:45:00	0
2009-05-27	10:46:00	0
2009-05-27	10:47:00	0
2009-05-27	10:48:00	0
2009-05-27	10:49:00	0
2009-05-27	10:50:00	0
2009-05-27	10:51:00	0
2009-05-27	10:52:00	0
2009-05-27	10:53:00	0
2009-05-27	10:54:00	0
2009-05-27	10:55:00	0
2009-05-27	10:56:00	0
2009-05-27	10:57:00	0
2009-05-27	10:58:00	0
2009-05-27	10:59:00	0
2009-05-27	11:00:00	0
2009-05-27	11:01:00	0
2009-05-27	11:02:00	0
2009-05-27	11:03:00	0
2009-05-27	11:04:00	0
2009-05-27	11:05:00	0
2009-05-27	11:06:00	0
2009-05-27	11:07:00	0
2009-05-27	11:08:00	0
2009-05-27	11:09:00	0
2009-05-27	11:10:00	0
2009-05-27	11:11:00	0
2009-05-27	11:12:00	0
2009-05-27	11:13:00	0
2009-05-27	11:14:00	0
2009-05-27	11:15:00	0
2009-05-27	11:16:00	0
2009-05-27	11:17:00	0
2009-05-27	11:18:00	0
2009-05-27	11:19:00	0
2009-05-27	11:20:00	0
2009-05-27	11:21:00	0
2009-05-27	11:22:00	0
2009-05-27	11:23:00	0
2009-05-27	11:24:00	0
2009-05-27	11:25:00	0
2009-05-27	11:26:00	0
2009-05-27	11:27:00	0
2009-05-27	11:28:00	0
2009-05-27	11:29:00	0
2009-05-27	11:30:00	0
2009-05-27	11:31:00	0
2009-05-27	11:32:00	0
2009-05-27	11:33:00	0
2009-05-27	11:34:00	0
2009-05-27	11:35:00	0
2009-05-27	11:36:00	0
2009-05-27	11:37:00	0
2009-05-27	11:38:00	0
2009-05-27	11:39:00	0
2009-05-27	11:40:00	0
2009-05-27	11:41:00	0
2009-05-27	11:42:00	0
2009-05-27	11:43:00	0
2009-05-27	11:44:00	0
2009-05-27	11:45:00	0
2009-05-27	11:46:00	0
2009-05-27	11:47:00	0
2009-05-27	11:48:00	0
2009-05-27	11:49:00	0
2009-05-27	11:50:00	0
2009-05-27	11:51:00	0
2009-05-27	11:52:00	0
2009-05-27	11:53:00	0
2009-05-27	11:54:00	0
2009-05-27	11:55:00	0
2009-05-27	11:56:00	0
2009-05-27	11:57:00	0
2009-05-27	11:58:00	0
2009-05-27	11:59:00	0
2009-05-27	12:00:00	0
2009-05-27	12:01:00	0
2009-05-27	12:02:00	0
2009-05-27	12:03:00	0
2009-05-27	12:04:00	0
2009-05-27	12:05:00	0
2009-05-27	12:06:00	0
2009-05-27	12:07:00	0
2009-05-27	12:08:00	0
2009-05-27	12:09:00	0
2009-05-27	12:10:00	0
2009-05-27	12:11:00	0
2009-05-27	12:12:00	0
2009-05-27	12:13:00	0
2009-05-27	12:14:00	0
2009-05-27	12:15:00	0
2009-05-27	12:16:00	0
2009-05-27	12:17:00	0
2009-05-27	12:18:00	0
2009-05-27	12:19:00	0
2009-05-27	12:20:00	0
2009-05-27	12:21:00	0
2009-05-27	12:22:00	0
2009-05-27	12:23:00	0
2009-05-27	12:24:00	0
2009-05-27	12:25:00	0
2009-05-27	12:26:00	0
2009-05-27	12:27:00	0
2009-05-27	12:28:00	0
2009-05-27	12:29:00	0
2009-05-27	12:30:00	0
2009-05-27	12:31:00	0
2009-05-27	12:32:00	0
2009-05-27	12:33:00	0
2009-05-27	12:34:00	0
2009-05-27	12:35:00	0
2009-05-27	12:36:00	0
2009-05-27	12:37:00	0
2009-05-27	12:38:00	0
2009-05-27	12:39:00	0
2009-05-27	12:40:00	0
2009-05-27	12:41:00	0
2009-05-27	12:42:00	0
2009-05-27	12:43:00	0
2009-05-27	12:44:00	0
2009-05-27	12:45:00	0
2009-05-27	12:46:00	0
2009-05-27	12:47:00	0
2009-05-27	12:48:00	0
2009-05-27	12:49:00	0
2009-05-27	12:50:00	0
2009-05-27	12:51:00	0
2009-05-27	12:52:00	0
2009-05-27	12:53:00	0
2009-05-27	12:54:00	0
2009-05-27	12:55:00	0
2009-05-27	12:56:00	0
2009-05-27	12:57:00	0
2009-05-27	12:58:00	0
2009-05-27	12:59:00	0
2009-05-27	13:00:00	0
2009-05-27	13:01:00	0
2009-05-27	13:02:00	0
2009-05-27	13:03:00	0
2009-05-27	13:04:00	0
2009-05-27	13:05:00	0
2009-05-27	13:06:00	0
2009-05-27	13:07:00	0
2009-05-27	13:08:00	0
2009-05-27	13:09:00	0
2009-05-27	13:10:00	0
2009-05-27	13:11:00	0
2009-05-27	13:12:00	0
2009-05-27	13:13:00	0
2009-05-27	13:14:00	0
2009-05-27	13:15:00	0
2009-05-27	13:16:00	0
2009-05-27	13:17:00	0
2009-05-27	13:18:00	0
2009-05-27	13:19:00	0
2009-05-27	13:20:00	0
2009-05-27	13:21:00	0
2009-05-27	13:22:00	0
2009-05-27	13:23:00	0
2009-05-27	13:24:00	0
2009-05-27	13:25:00	0
2009-05-27	13:26:00	0
2009-05-27	13:27:00	0
2009-05-27	13:28:00	0
2009-05-27	13:29:00	0
2009-05-27	13:30:00	0
2009-05-27	13:31:00	0
2009-05-27	13:32:00	0
2009-05-27	13:33:00	0
2009-05-27	13:34:00	0
2009-05-27	13:35:00	0
2009-05-27	13:36:00	0
2009-05-27	13:37:00	0
2009-05-27	13:38:00	0
2009-05-27	13:39:00	0
2009-05-27	13:40:00	0
2009-05-27	13:41:00	0
2009-05-27	13:42:00	0
2009-05-27	13:43:00	0
2009-05-27	13:44:00	0
2009-05-27	13:45:00	0
2009-05-27	13:46:00	0
2009-05-27	13:47:00	0
2009-05-27	13:48:00	0
2009-05-27	13:49:00	0
2009-05-27	13:50:00	0
2009-05-27	13:51:00	0
2009-05-27	13:52:00	0
2009-05-27	13:53:00	0
2009-05-27	13:54:00	0
2009-05-27	13:55:00	0
2009-05-27	13:56:00	0
2009-05-27	13:57:00	0
2009-05-27	13:58:00	0
2009-05-27	13:59:00	0
2009-05-27	14:00:00	0
2009-05-27	14:01:00	0
2009-05-27	14:02:00	0
2009-05-27	14:03:00	0
2009-05-27	14:04:00	0
2009-05-27	14:05:00	0
2009-05-27	14:06:00	0
2009-05-27	14:07:00	0
2009-05-27	14:08:00	0
2009-05-27	14:09:00	0
2009-05-27	14:10:00	0
2009-05-27	14:11:00	0
2009-05-27	14:12:00	0
2009-05-27	14:13:00	0
2009-05-27	14:14:00	0
2009-05-27	14:15:00	0
2009-05-27	14:16:00	0
2009-05-27	14:17:00	0
2009-05-27	14:18:00	0
2009-05-27	14:19:00	0
2009-05-27	14:20:00	0
2009-05-27	14:21:00	0
2009-05-27	14:22:00	0
2009-05-27	14:23:00	0
2009-05-27	14:24:00	0
2009-05-27	14:25:00	0
2009-05-27	14:26:00	0
2009-05-27	14:27:00	0
2009-05-27	14:28:00	0
2009-05-27	14:29:00	0
2009-05-27	14:30:00	0
2009-05-27	14:31:00	0
2009-05-27	14:32:00	0
2009-05-27	14:33:00	0
2009-05-27	14:34:00	0
2009-05-27	14:35:00	0
2009-05-27	14:36:00	0
2009-05-27	14:37:00	0
2009-05-27	14:38:00	0
2009-05-27	14:39:00	0
2009-05-27	14:40:00	0
2009-05-27	14:41:00	0
2009-05-27	14:42:00	0
2009-05-27	14:43:00	0
2009-05-27	14:44:00	0
2009-05-27	14:45:00	0
2009-05-27	14:46:00	0
2009-05-27	14:47:00	0
2009-05-27	14:48:00	0
2009-05-27	14:49:00	0
2009-05-27	14:50:00	0
2009-05-27	14:51:00	0
2009-05-27	14:52:00	0
2009-05-27	14:53:00	0
2009-05-27	14:54:00	0
2009-05-27	14:55:00	0
2009-05-27	14:56:00	0
2009-05-27	14:57:00	0
2009-05-27	14:58:00	0
2009-05-27	14:59:00	0
2009-05-27	15:00:00	0
2009-05-27	15:01:00	0
2009-05-27	15:02:00	0
2009-05-27	15:03:00	0
2009-05-27	15:04:00	0
2009-05-27	15:05:00	0
2009-05-27	15:06:00	0
2009-05-27	15:07:00	0
2009-05-27	15:08:00	0
2009-05-27	15:09:00	0
2009-05-27	15:10:00	0
2009-05-27	15:11:00	0
2009-05-27	15:12:00	0
2009-05-27	15:13:00	0
2009-05-27	15:14:00	0
2009-05-27	15:15:00	0
2009-05-27	15:16:00	0
2009-05-27	15:17:00	0
2009-05-27	15:18:00	0
2009-05-27	15:19:00	0
2009-05-27	15:20:00	0
2009-05-27	15:21:00	0
2009-05-27	15:22:00	0
2009-05-27	15:23:00	0
2009-05-27	15:24:00	0
2009-05-27	15:25:00	0
2009-05-27	15:26:00	0
2009-05-27	15:27:00	0
2009-05-27	15:28:00	0
2009-05-27	15:29:00	0
2009-05-27	15:30:00	0
2009-05-27	15:31:00	0
2009-05-27	15:32:00	0
2009-05-27	15:33:00	0
2009-05-27	15:34:00	0
2009-05-27	15:35:00	0
2009-05-27	15:36:00	0
2009-05-27	15:37:00	0
2009-05-27	15:38:00	0
2009-05-27	15:39:00	0
2009-05-27	15:40:00	0
2009-05-27	15:41:00	0
2009-05-27	15:42:00	0
2009-05-27	15:43:00	0
2009-05-27	15:44:00	0
2009-05-27	15:45:00	0
2009-05-27	15:46:00	0
2009-05-27	15:47:00	0
2009-05-27	15:48:00	0
2009-05-27	15:49:00	0
2009-05-27	15:50:00	0
2009-05-27	15:51:00	0
2009-05-27	15:52:00	0
2009-05-27	15:53:00	0
2009-05-27	15:54:00	0
2009-05-27	15:55:00	0
2009-05-27	15:56:00	0
2009-05-27	15:57:00	0
2009-05-27	15:58:00	0
2009-05-27	15:59:00	0
2009-05-27	16:00:00	0
2009-05-27	16:01:00	0
2009-05-27	16:02:00	0
2009-05-27	16:03:00	0
2009-05-27	16:04:00	0
2009-05-27	16:05:00	0
2009-05-27	16:06:00	0
2009-05-27	16:07:00	0
2009-05-27	16:08:00	0
2009-05-27	16:09:00	0
2009-05-27	16:10:00	0
2009-05-27	16:11:00	0
2009-05-27	16:12:00	0
2009-05-27	16:13:00	0
2009-05-27	16:14:00	0
2009-05-27	16:15:00	0
2009-05-27	16:16:00	0
2009-05-27	16:17:00	0
2009-05-27	16:18:00	0
2009-05-27	16:19:00	0
2009-05-27	16:20:00	0
2009-05-27	16:21:00	0
2009-05-27	16:22:00	0
2009-05-27	16:23:00	0
2009-05-27	16:24:00	0
2009-05-27	16:25:00	0
2009-05-27	16:26:00	0
2009-05-27	16:27:00	0
2009-05-27	16:28:00	0
2009-05-27	16:29:00	0
2009-05-27	16:30:00	0
2009-05-27	16:31:00	0
2009-05-27	16:32:00	0
2009-05-27	16:33:00	0
2009-05-27	16:34:00	0
2009-05-27	16:35:00	0
2009-05-27	16:36:00	0
2009-05-27	16:37:00	0
2009-05-27	16:38:00	0
2009-05-27	16:39:00	0
2009-05-27	16:40:00	0
2009-05-27	16:41:00	0
2009-05-27	16:42:00	0
2009-05-27	16:43:00	0
2009-05-27	16:44:00	0
2009-05-27	16:45:00	0
2009-05-27	16:46:00	0
2009-05-27	16:47:00	0
2009-05-27	16:48:00	0
2009-05-27	16:49:00	0
2009-05-27	16:50:00	0
2009-05-27	16:51:00	0
2009-05-27	16:52:00	0
2009-05-27	16:53:00	0
2009-05-27	16:54:00	0
2009-05-27	16:55:00	0
2009-05-27	16:56:00	0
2009-05-27	16:57:00	0
2009-05-27	16:58:00	0
2009-05-27	16:59:00	0
2009-05-27	17:00:00	0
2009-05-27	17:01:00	0
2009-05-27	17:02:00	0
2009-05-27	17:03:00	0
2009-05-27	17:04:00	0
2009-05-27	17:05:00	0
2009-05-27	17:06:00	0
2009-05-27	17:07:00	0
2009-05-27	17:08:00	0
2009-05-27	17:09:00	0
2009-05-27	17:10:00	0
2009-05-27	17:11:00	0
2009-05-27	17:12:00	0
2009-05-27	17:13:00	0
2009-05-27	17:14:00	0
2009-05-27	17:15:00	0
2009-05-27	17:16:00	0
2009-05-27	17:17:00	0
2009-05-27	17:18:00	0
2009-05-27	17:19:00	0
2009-05-27	17:20:00	0
2009-05-27	17:21:00	0
2009-05-27	17:22:00	0
2009-05-27	17:23:00	0
2009-05-27	17:24:00	0
2009-05-27	17:25:00	0
2009-05-27	17:26:00	0
2009-05-27	17:27:00	0
2009-05-27	17:28:00	0
2009-05-27	17:29:00	0
2009-05-27	17:30:00	0
2009-05-27	17:31:00	0
2009-05-27	17:32:00	0
2009-05-27	17:33:00	0
2009-05-27	17:34:00	0
2009-05-27	17:35:00	0
2009-05-27	17:36:00	0
2009-05-27	17:37:00	0
2009-05-27	17:38:00	0
2009-05-27	17:39:00	0
2009-05-27	17:40:00	0
2009-05-27	17:41:00	0
2009-05-27	17:42:00	0
2009-05-27	17:43:00	0
2009-05-27	17:44:00	0
2009-05-27	17:45:00	0
2009-05-27	17:46:00	0
2009-05-27	17:47:00	0
2009-05-27	17:48:00	0
2009-05-27	17:49:00	0
2009-05-27	17:50:00	0
2009-05-27	17:51:00	0
2009-05-27	17:52:00	0
2009-05-27	17:53:00	0
2009-05-27	17:54:00	0
2009-05-27	17:55:00	0
2009-05-27	17:56:00	0
2009-05-27	17:57:00	0
2009-05-27	17:58:00	0
2009-05-27	17:59:00	0
2009-05-27	18:00:00	0
2009-05-27	18:01:00	0
2009-05-27	18:02:00	11
2009-05-27	18:03:00	11
2009-05-27	18:04:00	0
2009-05-27	18:05:00	0
2009-05-27	18:06:00	0
2009-05-27	18:07:00	0
2009-05-27	18:08:00	22
2009-05-27	18:09:00	0
2009-05-27	18:10:00	22
2009-05-27	18:11:00	0
2009-05-27	18:12:00	0
2009-05-27	18:13:00	0
2009-05-27	18:14:00	0
2009-05-27	18:15:00	0
2009-05-27	18:16:00	33
2009-05-27	18:17:00	0
2009-05-27	18:18:00	22
2009-05-27	18:19:00	0
2009-05-27	18:20:00	0
2009-05-27	18:21:00	0
2009-05-27	18:22:00	0
2009-05-27	18:23:00	0
2009-05-27	18:24:00	0
2009-05-27	18:25:00	0
2009-05-27	18:26:00	0
2009-05-27	18:27:00	0
2009-05-27	18:28:00	0
2009-05-27	18:29:00	0
2009-05-27	18:30:00	0
2009-05-27	18:31:00	0
2009-05-27	18:32:00	22
2009-05-27	18:33:00	110
2009-05-27	18:34:00	11
2009-05-27	18:35:00	55
2009-05-27	18:36:00	0
2009-05-27	18:37:00	0
2009-05-27	18:38:00	0
2009-05-27	18:39:00	121
2009-05-27	18:40:00	143
2009-05-27	18:41:00	66
2009-05-27	18:42:00	66
2009-05-27	18:43:00	0
2009-05-27	18:44:00	77
2009-05-27	18:45:00	11
2009-05-27	18:46:00	11
2009-05-27	18:47:00	413
2009-05-27	18:48:00	305
2009-05-27	18:49:00	44
2009-05-27	18:50:00	0
2009-05-27	18:51:00	249
2009-05-27	18:52:00	552
2009-05-27	18:53:00	649
2009-05-27	18:54:00	1088
2009-05-27	18:55:00	609
2009-05-27	18:56:00	775
2009-05-27	18:57:00	499
2009-05-27	18:58:00	320
2009-05-27	18:59:00	33
2009-05-27	19:00:00	33
2009-05-27	19:01:00	44
2009-05-27	19:02:00	22
2009-05-27	19:03:00	22
2009-05-27	19:04:00	11
2009-05-27	19:05:00	66
2009-05-27	19:06:00	0
2009-05-27	19:07:00	0
2009-05-27	19:08:00	88
2009-05-27	19:09:00	157
2009-05-27	19:10:00	170
2009-05-27	19:11:00	132
2009-05-27	19:12:00	649
2009-05-27	19:13:00	863
2009-05-27	19:14:00	887
2009-05-27	19:15:00	569
2009-05-27	19:16:00	609
2009-05-27	19:17:00	446
2009-05-27	19:18:00	689
2009-05-27	19:19:00	730
2009-05-27	19:20:00	1114
2009-05-27	19:21:00	1141
2009-05-27	19:22:00	936
2009-05-27	19:23:00	481
2009-05-27	19:24:00	446
2009-05-27	19:25:00	1009
2009-05-27	19:26:00	841
2009-05-27	19:27:00	708
2009-05-27	19:28:00	1035
2009-05-27	19:29:00	797
2009-05-27	19:30:00	382
2009-05-27	19:31:00	335
2009-05-27	19:32:00	351
2009-05-27	19:33:00	196
2009-05-27	19:34:00	11
2009-05-27	19:35:00	0
2009-05-27	19:36:00	0
2009-05-27	19:37:00	236
2009-05-27	19:38:00	121
2009-05-27	19:39:00	11
2009-05-27	19:40:00	22
2009-05-27	19:41:00	0
2009-05-27	19:42:00	11
2009-05-27	19:43:00	0
2009-05-27	19:44:00	44
2009-05-27	19:45:00	99
2009-05-27	19:46:00	55
2009-05-27	19:47:00	110
2009-05-27	19:48:00	22
2009-05-27	19:49:00	55
2009-05-27	19:50:00	0
2009-05-27	19:51:00	77
2009-05-27	19:52:00	77
2009-05-27	19:53:00	44
2009-05-27	19:54:00	11
2009-05-27	19:55:00	99
2009-05-27	19:56:00	0
2009-05-27	19:57:00	0
2009-05-27	19:58:00	0
2009-05-27	19:59:00	0
2009-05-27	20:00:00	0
2009-05-27	20:01:00	0
2009-05-27	20:02:00	0
2009-05-27	20:03:00	0
2009-05-27	20:04:00	0
2009-05-27	20:05:00	0
2009-05-27	20:06:00	33
2009-05-27	20:07:00	11
2009-05-27	20:08:00	55
2009-05-27	20:09:00	0
2009-05-27	20:10:00	22
2009-05-27	20:11:00	110
2009-05-27	20:12:00	335
2009-05-27	20:13:00	481
2009-05-27	20:14:00	99
2009-05-27	20:15:00	77
2009-05-27	20:16:00	305
2009-05-27	20:17:00	481
2009-05-27	20:18:00	629
2009-05-27	20:19:00	66
2009-05-27	20:20:00	463
2009-05-27	20:21:00	0
2009-05-27	20:22:00	88
2009-05-27	20:23:00	0
2009-05-27	20:24:00	22
2009-05-27	20:25:00	0
2009-05-27	20:26:00	0
2009-05-27	20:27:00	0
2009-05-27	20:28:00	0
2009-05-27	20:29:00	44
2009-05-27	20:30:00	0
2009-05-27	20:31:00	0
2009-05-27	20:32:00	143
2009-05-27	20:33:00	0
2009-05-27	20:34:00	0
2009-05-27	20:35:00	33
2009-05-27	20:36:00	0
2009-05-27	20:37:00	0
2009-05-27	20:38:00	0
2009-05-27	20:39:00	33
2009-05-27	20:40:00	11
2009-05-27	20:41:00	0
2009-05-27	20:42:00	0
2009-05-27	20:43:00	11
2009-05-27	20:44:00	0
2009-05-27	20:45:00	11
2009-05-27	20:46:00	0
2009-05-27	20:47:00	0
2009-05-27	20:48:00	0
2009-05-27	20:49:00	99
2009-05-27	20:50:00	44
2009-05-27	20:51:00	0
2009-05-27	20:52:00	0
2009-05-27	20:53:00	0
2009-05-27	20:54:00	0
2009-05-27	20:55:00	0
2009-05-27	20:56:00	0
2009-05-27	20:57:00	0
2009-05-27	20:58:00	0
2009-05-27	20:59:00	276
2009-05-27	21:00:00	66
2009-05-27	21:01:00	44
2009-05-27	21:02:00	0
2009-05-27	21:03:00	0
2009-05-27	21:04:00	0
2009-05-27	21:05:00	11
2009-05-27	21:06:00	0
2009-05-27	21:07:00	0
2009-05-27	21:08:00	0
2009-05-27	21:09:00	0
2009-05-27	21:10:00	0
2009-05-27	21:11:00	0
2009-05-27	21:12:00	0
2009-05-27	21:13:00	0
2009-05-27	21:14:00	0
2009-05-27	21:15:00	0
2009-05-27	21:16:00	0
2009-05-27	21:17:00	0
2009-05-27	21:18:00	0
2009-05-27	21:19:00	0
2009-05-27	21:20:00	0
2009-05-27	21:21:00	0
2009-05-27	21:22:00	0
2009-05-27	21:23:00	0
2009-05-27	21:24:00	0
2009-05-27	21:25:00	0
2009-05-27	21:26:00	0
2009-05-27	21:27:00	0
2009-05-27	21:28:00	0
2009-05-27	21:29:00	0
2009-05-27	21:30:00	0
2009-05-27	21:31:00	0
2009-05-27	21:32:00	0
2009-05-27	21:33:00	11
2009-05-27	21:34:00	11
2009-05-27	21:35:00	0
2009-05-27	21:36:00	0
2009-05-27	21:37:00	11
2009-05-27	21:38:00	0
2009-05-27	21:39:00	55
2009-05-27	21:40:00	863
2009-05-27	21:41:00	249
2009-05-27	21:42:00	11
2009-05-27	21:43:00	22
2009-05-27	21:44:00	305
2009-05-27	21:45:00	236
2009-05-27	21:46:00	0
2009-05-27	21:47:00	0
2009-05-27	21:48:00	210
2009-05-27	21:49:00	11
2009-05-27	21:50:00	0
2009-05-27	21:51:00	44
2009-05-27	21:52:00	0
2009-05-27	21:53:00	0
2009-05-27	21:54:00	0
2009-05-27	21:55:00	0
2009-05-27	21:56:00	0
2009-05-27	21:57:00	0
2009-05-27	21:58:00	0
2009-05-27	21:59:00	33
2009-05-27	22:00:00	157
2009-05-27	22:01:00	33
2009-05-27	22:02:00	413
2009-05-27	22:03:00	320
2009-05-27	22:04:00	534
2009-05-27	22:05:00	366
2009-05-27	22:06:00	413
2009-05-27	22:07:00	366
2009-05-27	22:08:00	210
2009-05-27	22:09:00	110
2009-05-27	22:10:00	157
2009-05-27	22:11:00	33
2009-05-27	22:12:00	0
2009-05-27	22:13:00	0
2009-05-27	22:14:00	0
2009-05-27	22:15:00	0
2009-05-27	22:16:00	0
2009-05-27	22:17:00	0
2009-05-27	22:18:00	0
2009-05-27	22:19:00	0
2009-05-27	22:20:00	0
2009-05-27	22:21:00	0
2009-05-27	22:22:00	0
2009-05-27	22:23:00	0
2009-05-27	22:24:00	0
2009-05-27	22:25:00	0
2009-05-27	22:26:00	0
2009-05-27	22:27:00	0
2009-05-27	22:28:00	0
2009-05-27	22:29:00	0
2009-05-27	22:30:00	0
2009-05-27	22:31:00	0
2009-05-27	22:32:00	0
2009-05-27	22:33:00	0
2009-05-27	22:34:00	0
2009-05-27	22:35:00	0
2009-05-27	22:36:00	0
2009-05-27	22:37:00	0
2009-05-27	22:38:00	0
2009-05-27	22:39:00	0
2009-05-27	22:40:00	0
2009-05-27	22:41:00	0
2009-05-27	22:42:00	0
2009-05-27	22:43:00	0
2009-05-27	22:44:00	0
2009-05-27	22:45:00	0
2009-05-27	22:46:00	0
2009-05-27	22:47:00	0
2009-05-27	22:48:00	0
2009-05-27	22:49:00	0
2009-05-27	22:50:00	0
2009-05-27	22:51:00	0
2009-05-27	22:52:00	0
2009-05-27	22:53:00	0
2009-05-27	22:54:00	0
2009-05-27	22:55:00	0
2009-05-27	22:56:00	0
2009-05-27	22:57:00	22
2009-05-27	22:58:00	11
2009-05-27	22:59:00	110
2009-05-27	23:00:00	22
2009-05-27	23:01:00	0
2009-05-27	23:02:00	0
2009-05-27	23:03:00	0
2009-05-27	23:04:00	0
2009-05-27	23:05:00	0
2009-05-27	23:06:00	0
2009-05-27	23:07:00	276
2009-05-27	23:08:00	446
2009-05-27	23:09:00	132
2009-05-27	23:10:00	11
2009-05-27	23:11:00	11
2009-05-27	23:12:00	22
2009-05-27	23:13:00	33
2009-05-27	23:14:00	223
2009-05-27	23:15:00	66
2009-05-27	23:16:00	0
2009-05-27	23:17:00	0
2009-05-27	23:18:00	0
2009-05-27	23:19:00	0
2009-05-27	23:20:00	0
2009-05-27	23:21:00	0
2009-05-27	23:22:00	77
2009-05-27	23:23:00	320
2009-05-27	23:24:00	335
2009-05-27	23:25:00	249
2009-05-27	23:26:00	911
2009-05-27	23:27:00	589
2009-05-27	23:28:00	99
2009-05-27	23:29:00	534
2009-05-27	23:30:00	481
2009-05-27	23:31:00	0
2009-05-27	23:32:00	22
2009-05-27	23:33:00	351
2009-05-27	23:34:00	708
2009-05-27	23:35:00	797
2009-05-27	23:36:00	397
2009-05-27	23:37:00	382
2009-05-27	23:38:00	0
2009-05-27	23:39:00	33
2009-05-27	23:40:00	132
2009-05-27	23:41:00	210
2009-05-27	23:42:00	55
2009-05-27	23:43:00	0
2009-05-27	23:44:00	66
2009-05-27	23:45:00	0
2009-05-27	23:46:00	0
2009-05-27	23:47:00	0
2009-05-27	23:48:00	0
2009-05-27	23:49:00	0
2009-05-27	23:50:00	0
2009-05-27	23:51:00	0
2009-05-27	23:52:00	0
2009-05-27	23:53:00	0
2009-05-27	23:54:00	0
2009-05-27	23:55:00	0
2009-05-27	23:56:00	0
2009-05-27	23:57:00	0
2009-05-27	23:58:00	0
2009-05-27	23:59:00	0
2009-05-28	00:00:00	0
2009-05-28	00:01:00	11
2009-05-28	00:02:00	0
2009-05-28	00:03:00	0
2009-05-28	00:04:00	0
2009-05-28	00:05:00	0
2009-05-28	00:06:00	0
2009-05-28	00:07:00	0
2009-05-28	00:08:00	0
2009-05-28	00:09:00	0
2009-05-28	00:10:00	0
2009-05-28	00:11:00	0
2009-05-28	00:12:00	0
2009-05-28	00:13:00	0
2009-05-28	00:14:00	0
2009-05-28	00:15:00	0
2009-05-28	00:16:00	0
2009-05-28	00:17:00	0
2009-05-28	00:18:00	0
2009-05-28	00:19:00	0
2009-05-28	00:20:00	0
2009-05-28	00:21:00	0
2009-05-28	00:22:00	0
2009-05-28	00:23:00	0
2009-05-28	00:24:00	0
2009-05-28	00:25:00	0
2009-05-28	00:26:00	0
2009-05-28	00:27:00	0
2009-05-28	00:28:00	0
2009-05-28	00:29:00	0
2009-05-28	00:30:00	911
2009-05-28	00:31:00	841
2009-05-28	00:32:00	33
2009-05-28	00:33:00	0
2009-05-28	00:34:00	0
2009-05-28	00:35:00	0
2009-05-28	00:36:00	55
2009-05-28	00:37:00	0
2009-05-28	00:38:00	0
2009-05-28	00:39:00	0
2009-05-28	00:40:00	0
2009-05-28	00:41:00	0
2009-05-28	00:42:00	0
2009-05-28	00:43:00	11
2009-05-28	00:44:00	0
2009-05-28	00:45:00	0
2009-05-28	00:46:00	0
2009-05-28	00:47:00	0
2009-05-28	00:48:00	0
2009-05-28	00:49:00	0
2009-05-28	00:50:00	66
2009-05-28	00:51:00	44
2009-05-28	00:52:00	0
2009-05-28	00:53:00	0
2009-05-28	00:54:00	0
2009-05-28	00:55:00	0
2009-05-28	00:56:00	0
2009-05-28	00:57:00	11
2009-05-28	00:58:00	0
2009-05-28	00:59:00	0
2009-05-28	01:00:00	0
2009-05-28	01:01:00	0
2009-05-28	01:02:00	0
2009-05-28	01:03:00	0
2009-05-28	01:04:00	0
2009-05-28	01:05:00	0
2009-05-28	01:06:00	0
2009-05-28	01:07:00	0
2009-05-28	01:08:00	55
2009-05-28	01:09:00	0
2009-05-28	01:10:00	0
2009-05-28	01:11:00	0
2009-05-28	01:12:00	0
2009-05-28	01:13:00	0
2009-05-28	01:14:00	0
2009-05-28	01:15:00	0
2009-05-28	01:16:00	0
2009-05-28	01:17:00	0
2009-05-28	01:18:00	0
2009-05-28	01:19:00	66
2009-05-28	01:20:00	11
2009-05-28	01:21:00	263
2009-05-28	01:22:00	0
2009-05-28	01:23:00	0
2009-05-28	01:24:00	0
2009-05-28	01:25:00	0
2009-05-28	01:26:00	0
2009-05-28	01:27:00	0
2009-05-28	01:28:00	0
2009-05-28	01:29:00	0
2009-05-28	01:30:00	0
2009-05-28	01:31:00	0
2009-05-28	01:32:00	0
2009-05-28	01:33:00	0
2009-05-28	01:34:00	0
2009-05-28	01:35:00	0
2009-05-28	01:36:00	0
2009-05-28	01:37:00	0
2009-05-28	01:38:00	0
2009-05-28	01:39:00	0
2009-05-28	01:40:00	0
2009-05-28	01:41:00	0
2009-05-28	01:42:00	0
2009-05-28	01:43:00	22
2009-05-28	01:44:00	0
2009-05-28	01:45:00	0
2009-05-28	01:46:00	0
2009-05-28	01:47:00	99
2009-05-28	01:48:00	223
2009-05-28	01:49:00	210
2009-05-28	01:50:00	0
2009-05-28	01:51:00	0
2009-05-28	01:52:00	22
2009-05-28	01:53:00	0
2009-05-28	01:54:00	0
2009-05-28	01:55:00	0
2009-05-28	01:56:00	0
2009-05-28	01:57:00	0
2009-05-28	01:58:00	0
2009-05-28	01:59:00	0
2009-05-28	02:00:00	0
2009-05-28	02:01:00	0
2009-05-28	02:02:00	0
2009-05-28	02:03:00	0
2009-05-28	02:04:00	0
2009-05-28	02:05:00	0
2009-05-28	02:06:00	0
2009-05-28	02:07:00	0
2009-05-28	02:08:00	0
2009-05-28	02:09:00	0
2009-05-28	02:10:00	0
2009-05-28	02:11:00	0
2009-05-28	02:12:00	0
2009-05-28	02:13:00	0
2009-05-28	02:14:00	0
2009-05-28	02:15:00	0
2009-05-28	02:16:00	0
2009-05-28	02:17:00	0
2009-05-28	02:18:00	0
2009-05-28	02:19:00	0
2009-05-28	02:20:00	0
2009-05-28	02:21:00	0
2009-05-28	02:22:00	0
2009-05-28	02:23:00	0
2009-05-28	02:24:00	0
2009-05-28	02:25:00	88
2009-05-28	02:26:00	351
2009-05-28	02:27:00	44
2009-05-28	02:28:00	0
2009-05-28	02:29:00	11
2009-05-28	02:30:00	44
2009-05-28	02:31:00	0
2009-05-28	02:32:00	0
2009-05-28	02:33:00	121
2009-05-28	02:34:00	44
2009-05-28	02:35:00	0
2009-05-28	02:36:00	0
2009-05-28	02:37:00	0
2009-05-28	02:38:00	0
2009-05-28	02:39:00	0
2009-05-28	02:40:00	0
2009-05-28	02:41:00	0
2009-05-28	02:42:00	0
2009-05-28	02:43:00	0
2009-05-28	02:44:00	0
2009-05-28	02:45:00	0
2009-05-28	02:46:00	0
2009-05-28	02:47:00	0
2009-05-28	02:48:00	0
2009-05-28	02:49:00	0
2009-05-28	02:50:00	0
2009-05-28	02:51:00	0
2009-05-28	02:52:00	0
2009-05-28	02:53:00	0
2009-05-28	02:54:00	0
2009-05-28	02:55:00	0
2009-05-28	02:56:00	0
2009-05-28	02:57:00	0
2009-05-28	02:58:00	0
2009-05-28	02:59:00	0
2009-05-28	03:00:00	0
2009-05-28	03:01:00	0
2009-05-28	03:02:00	0
2009-05-28	03:03:00	0
2009-05-28	03:04:00	0
2009-05-28	03:05:00	0
2009-05-28	03:06:00	0
2009-05-28	03:07:00	0
2009-05-28	03:08:00	0
2009-05-28	03:09:00	0
2009-05-28	03:10:00	0
2009-05-28	03:11:00	0
2009-05-28	03:12:00	0
2009-05-28	03:13:00	0
2009-05-28	03:14:00	0
2009-05-28	03:15:00	0
2009-05-28	03:16:00	0
2009-05-28	03:17:00	0
2009-05-28	03:18:00	0
2009-05-28	03:19:00	0
2009-05-28	03:20:00	0
2009-05-28	03:21:00	0
2009-05-28	03:22:00	0
2009-05-28	03:23:00	0
2009-05-28	03:24:00	0
2009-05-28	03:25:00	0
2009-05-28	03:26:00	0
2009-05-28	03:27:00	0
2009-05-28	03:28:00	0
2009-05-28	03:29:00	0
2009-05-28	03:30:00	0
2009-05-28	03:31:00	0
2009-05-28	03:32:00	0
2009-05-28	03:33:00	0
2009-05-28	03:34:00	0
2009-05-28	03:35:00	0
2009-05-28	03:36:00	0
2009-05-28	03:37:00	11
2009-05-28	03:38:00	0
2009-05-28	03:39:00	0
2009-05-28	03:40:00	0
2009-05-28	03:41:00	0
2009-05-28	03:42:00	0
2009-05-28	03:43:00	0
2009-05-28	03:44:00	0
2009-05-28	03:45:00	0
2009-05-28	03:46:00	0
2009-05-28	03:47:00	0
2009-05-28	03:48:00	0
2009-05-28	03:49:00	0
2009-05-28	03:50:00	0
2009-05-28	03:51:00	0
2009-05-28	03:52:00	0
2009-05-28	03:53:00	0
2009-05-28	03:54:00	0
2009-05-28	03:55:00	0
2009-05-28	03:56:00	0
2009-05-28	03:57:00	0
2009-05-28	03:58:00	0
2009-05-28	03:59:00	0
2009-05-28	04:00:00	0
2009-05-28	04:01:00	0
2009-05-28	04:02:00	0
2009-05-28	04:03:00	55
2009-05-28	04:04:00	33
2009-05-28	04:05:00	413
2009-05-28	04:06:00	11
2009-05-28	04:07:00	0
2009-05-28	04:08:00	0
2009-05-28	04:09:00	0
2009-05-28	04:10:00	0
2009-05-28	04:11:00	0
2009-05-28	04:12:00	0
2009-05-28	04:13:00	0
2009-05-28	04:14:00	0
2009-05-28	04:15:00	0
2009-05-28	04:16:00	0
2009-05-28	04:17:00	0
2009-05-28	04:18:00	0
2009-05-28	04:19:00	0
2009-05-28	04:20:00	0
2009-05-28	04:21:00	0
2009-05-28	04:22:00	0
2009-05-28	04:23:00	0
2009-05-28	04:24:00	0
2009-05-28	04:25:00	0
2009-05-28	04:26:00	0
2009-05-28	04:27:00	0
2009-05-28	04:28:00	0
2009-05-28	04:29:00	11
2009-05-28	04:30:00	0
2009-05-28	04:31:00	0
2009-05-28	04:32:00	0
2009-05-28	04:33:00	0
2009-05-28	04:34:00	0
2009-05-28	04:35:00	0
2009-05-28	04:36:00	11
2009-05-28	04:37:00	0
2009-05-28	04:38:00	0
2009-05-28	04:39:00	0
2009-05-28	04:40:00	0
2009-05-28	04:41:00	0
2009-05-28	04:42:00	0
2009-05-28	04:43:00	0
2009-05-28	04:44:00	0
2009-05-28	04:45:00	0
2009-05-28	04:46:00	0
2009-05-28	04:47:00	0
2009-05-28	04:48:00	0
2009-05-28	04:49:00	0
2009-05-28	04:50:00	0
2009-05-28	04:51:00	0
2009-05-28	04:52:00	0
2009-05-28	04:53:00	0
2009-05-28	04:54:00	0
2009-05-28	04:55:00	0
2009-05-28	04:56:00	132
2009-05-28	04:57:00	236
2009-05-28	04:58:00	22
2009-05-28	04:59:00	0
2009-05-28	05:00:00	0
2009-05-28	05:01:00	0
2009-05-28	05:02:00	0
2009-05-28	05:03:00	0
2009-05-28	05:04:00	0
2009-05-28	05:05:00	0
2009-05-28	05:06:00	0
2009-05-28	05:07:00	0
2009-05-28	05:08:00	0
2009-05-28	05:09:00	0
2009-05-28	05:10:00	0
2009-05-28	05:11:00	0
2009-05-28	05:12:00	0
2009-05-28	05:13:00	0
2009-05-28	05:14:00	0
2009-05-28	05:15:00	0
2009-05-28	05:16:00	0
2009-05-28	05:17:00	132
2009-05-28	05:18:00	66
2009-05-28	05:19:00	841
2009-05-28	05:20:00	629
2009-05-28	05:21:00	463
2009-05-28	05:22:00	428
2009-05-28	05:23:00	66
2009-05-28	05:24:00	0
2009-05-28	05:25:00	0
2009-05-28	05:26:00	22
2009-05-28	05:27:00	0
2009-05-28	05:28:00	0
2009-05-28	05:29:00	0
2009-05-28	05:30:00	0
2009-05-28	05:31:00	0
2009-05-28	05:32:00	0
2009-05-28	05:33:00	0
2009-05-28	05:34:00	0
2009-05-28	05:35:00	0
2009-05-28	05:36:00	0
2009-05-28	05:37:00	0
2009-05-28	05:38:00	0
2009-05-28	05:39:00	0
2009-05-28	05:40:00	0
2009-05-28	05:41:00	0
2009-05-28	05:42:00	0
2009-05-28	05:43:00	0
2009-05-28	05:44:00	0
2009-05-28	05:45:00	0
2009-05-28	05:46:00	0
2009-05-28	05:47:00	0
2009-05-28	05:48:00	0
2009-05-28	05:49:00	0
2009-05-28	05:50:00	0
2009-05-28	05:51:00	0
2009-05-28	05:52:00	0
2009-05-28	05:53:00	0
2009-05-28	05:54:00	0
2009-05-28	05:55:00	0
2009-05-28	05:56:00	0
2009-05-28	05:57:00	0
2009-05-28	05:58:00	0
2009-05-28	05:59:00	0
2009-05-28	06:00:00	0
2009-05-28	06:01:00	0
2009-05-28	06:02:00	0
2009-05-28	06:03:00	0
2009-05-28	06:04:00	0
2009-05-28	06:05:00	0
2009-05-28	06:06:00	0
2009-05-28	06:07:00	0
2009-05-28	06:08:00	0
2009-05-28	06:09:00	0
2009-05-28	06:10:00	0
2009-05-28	06:11:00	0
2009-05-28	06:12:00	0
2009-05-28	06:13:00	0
2009-05-28	06:14:00	0
2009-05-28	06:15:00	0
2009-05-28	06:16:00	0
2009-05-28	06:17:00	0
2009-05-28	06:18:00	0
2009-05-28	06:19:00	0
2009-05-28	06:20:00	0
2009-05-28	06:21:00	0
2009-05-28	06:22:00	0
2009-05-28	06:23:00	0
2009-05-28	06:24:00	0
2009-05-28	06:25:00	0
2009-05-28	06:26:00	0
2009-05-28	06:27:00	0
2009-05-28	06:28:00	0
2009-05-28	06:29:00	0
2009-05-28	06:30:00	0
2009-05-28	06:31:00	0
2009-05-28	06:32:00	0
2009-05-28	06:33:00	0
2009-05-28	06:34:00	0
2009-05-28	06:35:00	0
2009-05-28	06:36:00	0
2009-05-28	06:37:00	0
2009-05-28	06:38:00	0
2009-05-28	06:39:00	0
2009-05-28	06:40:00	0
2009-05-28	06:41:00	0
2009-05-28	06:42:00	0
2009-05-28	06:43:00	0
2009-05-28	06:44:00	0
2009-05-28	06:45:00	0
2009-05-28	06:46:00	0
2009-05-28	06:47:00	0
2009-05-28	06:48:00	0
2009-05-28	06:49:00	0
2009-05-28	06:50:00	0
2009-05-28	06:51:00	0
2009-05-28	06:52:00	0
2009-05-28	06:53:00	0
2009-05-28	06:54:00	0
2009-05-28	06:55:00	0
2009-05-28	06:56:00	0
2009-05-28	06:57:00	0
2009-05-28	06:58:00	0
2009-05-28	06:59:00	0
2009-05-28	07:00:00	0
2009-05-28	07:01:00	0
2009-05-28	07:02:00	0
2009-05-28	07:03:00	0
2009-05-28	07:04:00	0
2009-05-28	07:05:00	0
2009-05-28	07:06:00	0
2009-05-28	07:07:00	0
2009-05-28	07:08:00	0
2009-05-28	07:09:00	0
2009-05-28	07:10:00	0
2009-05-28	07:11:00	0
2009-05-28	07:12:00	0
2009-05-28	07:13:00	0
2009-05-28	07:14:00	0
2009-05-28	07:15:00	0
2009-05-28	07:16:00	0
2009-05-28	07:17:00	0
2009-05-28	07:18:00	0
2009-05-28	07:19:00	99
2009-05-28	07:20:00	11
2009-05-28	07:21:00	44
2009-05-28	07:22:00	0
2009-05-28	07:23:00	0
2009-05-28	07:24:00	0
2009-05-28	07:25:00	0
2009-05-28	07:26:00	0
2009-05-28	07:27:00	0
2009-05-28	07:28:00	0
2009-05-28	07:29:00	0
2009-05-28	07:30:00	0
2009-05-28	07:31:00	0
2009-05-28	07:32:00	0
2009-05-28	07:33:00	0
2009-05-28	07:34:00	44
2009-05-28	07:35:00	730
2009-05-28	07:36:00	589
2009-05-28	07:37:00	223
2009-05-28	07:38:00	33
2009-05-28	07:39:00	589
2009-05-28	07:40:00	382
2009-05-28	07:41:00	157
2009-05-28	07:42:00	183
2009-05-28	07:43:00	305
2009-05-28	07:44:00	183
2009-05-28	07:45:00	0
2009-05-28	07:46:00	11
2009-05-28	07:47:00	11
2009-05-28	07:48:00	183
2009-05-28	07:49:00	143
2009-05-28	07:50:00	33
2009-05-28	07:51:00	0
2009-05-28	07:52:00	44
2009-05-28	07:53:00	44
2009-05-28	07:54:00	0
2009-05-28	07:55:00	0
2009-05-28	07:56:00	88
2009-05-28	07:57:00	0
2009-05-28	07:58:00	0
2009-05-28	07:59:00	0
2009-05-28	08:00:00	0
2009-05-28	08:01:00	0
2009-05-28	08:02:00	0
2009-05-28	08:03:00	0
2009-05-28	08:04:00	0
2009-05-28	08:05:00	44
2009-05-28	08:06:00	1256
2009-05-28	08:07:00	1062
2009-05-28	08:08:00	936
2009-05-28	08:09:00	936
2009-05-28	08:10:00	589
2009-05-28	08:11:00	708
2009-05-28	08:12:00	708
2009-05-28	08:13:00	143
2009-05-28	08:14:00	1170
2009-05-28	08:15:00	708
2009-05-28	08:16:00	589
2009-05-28	08:17:00	366
2009-05-28	08:18:00	397
2009-05-28	08:19:00	263
2009-05-28	08:20:00	397
2009-05-28	08:21:00	263
2009-05-28	08:22:00	397
2009-05-28	08:23:00	335
2009-05-28	08:24:00	499
2009-05-28	08:25:00	320
2009-05-28	08:26:00	629
2009-05-28	08:27:00	589
2009-05-28	08:28:00	2990
2009-05-28	08:29:00	1346
2009-05-28	08:30:00	797
2009-05-28	08:31:00	1062
2009-05-28	08:32:00	669
2009-05-28	08:33:00	689
2009-05-28	08:34:00	841
2009-05-28	08:35:00	689
2009-05-28	08:36:00	516
2009-05-28	08:37:00	382
2009-05-28	08:38:00	569
2009-05-28	08:39:00	753
2009-05-28	08:40:00	911
2009-05-28	08:41:00	960
2009-05-28	08:42:00	669
2009-05-28	08:43:00	863
2009-05-28	08:44:00	708
2009-05-28	08:45:00	797
2009-05-28	08:46:00	689
2009-05-28	08:47:00	708
2009-05-28	08:48:00	629
2009-05-28	08:49:00	669
2009-05-28	08:50:00	669
2009-05-28	08:51:00	276
2009-05-28	08:52:00	55
2009-05-28	08:53:00	382
2009-05-28	08:54:00	196
2009-05-28	08:55:00	589
2009-05-28	08:56:00	223
2009-05-28	08:57:00	446
2009-05-28	08:58:00	33
2009-05-28	08:59:00	11
2009-05-28	09:00:00	170
2009-05-28	09:01:00	276
2009-05-28	09:02:00	236
2009-05-28	09:03:00	143
2009-05-28	09:04:00	249
2009-05-28	09:05:00	99
2009-05-28	09:06:00	110
2009-05-28	09:07:00	0
2009-05-28	09:08:00	0
[truncated: 19,611 more rows]

## Sheet: 6.10.09
Actogram, Copy Raw Data, All Days
Identity:	Malakh
Filename:	E:\Active Research Files\meloxicam titre canine\cases\malakh\Malakh 6.10.09.AWC
Gender:	F
Age:	13
Height:	91.4 cm	36.0 in
Weight:	35.0 kg	77.2 lbs
Start Date:	10-Jun-2009 (Wed)
Start Time:	18:00:00
Interval:	1.00 mins
Date Stamp:	Time Stamp:	Activity Data:	Marker Press:
2009-06-10	00:00:00	0
2009-06-10	00:01:00	0
2009-06-10	00:02:00	0
2009-06-10	00:03:00	0
2009-06-10	00:04:00	0
2009-06-10	00:05:00	0
2009-06-10	00:06:00	0
2009-06-10	00:07:00	0
2009-06-10	00:08:00	0
2009-06-10	00:09:00	0
2009-06-10	00:10:00	0
2009-06-10	00:11:00	0
2009-06-10	00:12:00	0
2009-06-10	00:13:00	0
2009-06-10	00:14:00	0
2009-06-10	00:15:00	0
2009-06-10	00:16:00	0
2009-06-10	00:17:00	0
2009-06-10	00:18:00	0
2009-06-10	00:19:00	0
2009-06-10	00:20:00	0
2009-06-10	00:21:00	0
2009-06-10	00:22:00	0
2009-06-10	00:23:00	0
2009-06-10	00:24:00	0
2009-06-10	00:25:00	0
2009-06-10	00:26:00	0
2009-06-10	00:27:00	0
2009-06-10	00:28:00	0
2009-06-10	00:29:00	0
2009-06-10	00:30:00	0
2009-06-10	00:31:00	0
2009-06-10	00:32:00	0
2009-06-10	00:33:00	0
2009-06-10	00:34:00	0
2009-06-10	00:35:00	0
2009-06-10	00:36:00	0
2009-06-10	00:37:00	0
2009-06-10	00:38:00	0
2009-06-10	00:39:00	0
2009-06-10	00:40:00	0
2009-06-10	00:41:00	0
2009-06-10	00:42:00	0
2009-06-10	00:43:00	0
2009-06-10	00:44:00	0
2009-06-10	00:45:00	0
2009-06-10	00:46:00	0
2009-06-10	00:47:00	0
2009-06-10	00:48:00	0
2009-06-10	00:49:00	0
2009-06-10	00:50:00	0
2009-06-10	00:51:00	0
2009-06-10	00:52:00	0
2009-06-10	00:53:00	0
2009-06-10	00:54:00	0
2009-06-10	00:55:00	0
2009-06-10	00:56:00	0
2009-06-10	00:57:00	0
2009-06-10	00:58:00	0
2009-06-10	00:59:00	0
2009-06-10	01:00:00	0
2009-06-10	01:01:00	0
2009-06-10	01:02:00	0
2009-06-10	01:03:00	0
2009-06-10	01:04:00	0
2009-06-10	01:05:00	0
2009-06-10	01:06:00	0
2009-06-10	01:07:00	0
2009-06-10	01:08:00	0
2009-06-10	01:09:00	0
2009-06-10	01:10:00	0
2009-06-10	01:11:00	0
2009-06-10	01:12:00	0
2009-06-10	01:13:00	0
2009-06-10	01:14:00	0
2009-06-10	01:15:00	0
2009-06-10	01:16:00	0
2009-06-10	01:17:00	0
2009-06-10	01:18:00	0
2009-06-10	01:19:00	0
2009-06-10	01:20:00	0
2009-06-10	01:21:00	0
2009-06-10	01:22:00	0
2009-06-10	01:23:00	0
2009-06-10	01:24:00	0
2009-06-10	01:25:00	0
2009-06-10	01:26:00	0
2009-06-10	01:27:00	0
2009-06-10	01:28:00	0
2009-06-10	01:29:00	0
2009-06-10	01:30:00	0
2009-06-10	01:31:00	0
2009-06-10	01:32:00	0
2009-06-10	01:33:00	0
2009-06-10	01:34:00	0
2009-06-10	01:35:00	0
2009-06-10	01:36:00	0
2009-06-10	01:37:00	0
2009-06-10	01:38:00	0
2009-06-10	01:39:00	0
2009-06-10	01:40:00	0
2009-06-10	01:41:00	0
2009-06-10	01:42:00	0
2009-06-10	01:43:00	0
2009-06-10	01:44:00	0
2009-06-10	01:45:00	0
2009-06-10	01:46:00	0
2009-06-10	01:47:00	0
2009-06-10	01:48:00	0
2009-06-10	01:49:00	0
2009-06-10	01:50:00	0
2009-06-10	01:51:00	0
2009-06-10	01:52:00	0
2009-06-10	01:53:00	0
2009-06-10	01:54:00	0
2009-06-10	01:55:00	0
2009-06-10	01:56:00	0
2009-06-10	01:57:00	0
2009-06-10	01:58:00	0
2009-06-10	01:59:00	0
2009-06-10	02:00:00	0
2009-06-10	02:01:00	0
2009-06-10	02:02:00	0
2009-06-10	02:03:00	0
2009-06-10	02:04:00	0
2009-06-10	02:05:00	0
2009-06-10	02:06:00	0
2009-06-10	02:07:00	0
2009-06-10	02:08:00	0
2009-06-10	02:09:00	0
2009-06-10	02:10:00	0
2009-06-10	02:11:00	0
2009-06-10	02:12:00	0
2009-06-10	02:13:00	0
2009-06-10	02:14:00	0
2009-06-10	02:15:00	0
2009-06-10	02:16:00	0
2009-06-10	02:17:00	0
2009-06-10	02:18:00	0
2009-06-10	02:19:00	0
2009-06-10	02:20:00	0
2009-06-10	02:21:00	0
2009-06-10	02:22:00	0
2009-06-10	02:23:00	0
2009-06-10	02:24:00	0
2009-06-10	02:25:00	0
2009-06-10	02:26:00	0
2009-06-10	02:27:00	0
2009-06-10	02:28:00	0
2009-06-10	02:29:00	0
2009-06-10	02:30:00	0
2009-06-10	02:31:00	0
2009-06-10	02:32:00	0
2009-06-10	02:33:00	0
2009-06-10	02:34:00	0
2009-06-10	02:35:00	0
2009-06-10	02:36:00	0
2009-06-10	02:37:00	0
2009-06-10	02:38:00	0
2009-06-10	02:39:00	0
2009-06-10	02:40:00	0
2009-06-10	02:41:00	0
2009-06-10	02:42:00	0
2009-06-10	02:43:00	0
2009-06-10	02:44:00	0
2009-06-10	02:45:00	0
2009-06-10	02:46:00	0
2009-06-10	02:47:00	0
2009-06-10	02:48:00	0
2009-06-10	02:49:00	0
2009-06-10	02:50:00	0
2009-06-10	02:51:00	0
2009-06-10	02:52:00	0
2009-06-10	02:53:00	0
2009-06-10	02:54:00	0
2009-06-10	02:55:00	0
2009-06-10	02:56:00	0
2009-06-10	02:57:00	0
2009-06-10	02:58:00	0
2009-06-10	02:59:00	0
2009-06-10	03:00:00	0
2009-06-10	03:01:00	0
2009-06-10	03:02:00	0
2009-06-10	03:03:00	0
2009-06-10	03:04:00	0
2009-06-10	03:05:00	0
2009-06-10	03:06:00	0
2009-06-10	03:07:00	0
2009-06-10	03:08:00	0
2009-06-10	03:09:00	0
2009-06-10	03:10:00	0
2009-06-10	03:11:00	0
2009-06-10	03:12:00	0
2009-06-10	03:13:00	0
2009-06-10	03:14:00	0
2009-06-10	03:15:00	0
2009-06-10	03:16:00	0
2009-06-10	03:17:00	0
2009-06-10	03:18:00	0
2009-06-10	03:19:00	0
2009-06-10	03:20:00	0
2009-06-10	03:21:00	0
2009-06-10	03:22:00	0
2009-06-10	03:23:00	0
2009-06-10	03:24:00	0
2009-06-10	03:25:00	0
2009-06-10	03:26:00	0
2009-06-10	03:27:00	0
2009-06-10	03:28:00	0
2009-06-10	03:29:00	0
2009-06-10	03:30:00	0
2009-06-10	03:31:00	0
2009-06-10	03:32:00	0
2009-06-10	03:33:00	0
2009-06-10	03:34:00	0
2009-06-10	03:35:00	0
2009-06-10	03:36:00	0
2009-06-10	03:37:00	0
2009-06-10	03:38:00	0
2009-06-10	03:39:00	0
2009-06-10	03:40:00	0
2009-06-10	03:41:00	0
2009-06-10	03:42:00	0
2009-06-10	03:43:00	0
2009-06-10	03:44:00	0
2009-06-10	03:45:00	0
2009-06-10	03:46:00	0
2009-06-10	03:47:00	0
2009-06-10	03:48:00	0
2009-06-10	03:49:00	0
2009-06-10	03:50:00	0
2009-06-10	03:51:00	0
2009-06-10	03:52:00	0
2009-06-10	03:53:00	0
2009-06-10	03:54:00	0
2009-06-10	03:55:00	0
2009-06-10	03:56:00	0
2009-06-10	03:57:00	0
2009-06-10	03:58:00	0
2009-06-10	03:59:00	0
2009-06-10	04:00:00	0
2009-06-10	04:01:00	0
2009-06-10	04:02:00	0
2009-06-10	04:03:00	0
2009-06-10	04:04:00	0
2009-06-10	04:05:00	0
2009-06-10	04:06:00	0
2009-06-10	04:07:00	0
2009-06-10	04:08:00	0
2009-06-10	04:09:00	0
2009-06-10	04:10:00	0
2009-06-10	04:11:00	0
2009-06-10	04:12:00	0
2009-06-10	04:13:00	0
2009-06-10	04:14:00	0
2009-06-10	04:15:00	0
2009-06-10	04:16:00	0
2009-06-10	04:17:00	0
2009-06-10	04:18:00	0
2009-06-10	04:19:00	0
2009-06-10	04:20:00	0
2009-06-10	04:21:00	0
2009-06-10	04:22:00	0
2009-06-10	04:23:00	0
2009-06-10	04:24:00	0
2009-06-10	04:25:00	0
2009-06-10	04:26:00	0
2009-06-10	04:27:00	0
2009-06-10	04:28:00	0
2009-06-10	04:29:00	0
2009-06-10	04:30:00	0
2009-06-10	04:31:00	0
2009-06-10	04:32:00	0
2009-06-10	04:33:00	0
2009-06-10	04:34:00	0
2009-06-10	04:35:00	0
2009-06-10	04:36:00	0
2009-06-10	04:37:00	0
2009-06-10	04:38:00	0
2009-06-10	04:39:00	0
2009-06-10	04:40:00	0
2009-06-10	04:41:00	0
2009-06-10	04:42:00	0
2009-06-10	04:43:00	0
2009-06-10	04:44:00	0
2009-06-10	04:45:00	0
2009-06-10	04:46:00	0
2009-06-10	04:47:00	0
2009-06-10	04:48:00	0
2009-06-10	04:49:00	0
2009-06-10	04:50:00	0
2009-06-10	04:51:00	0
2009-06-10	04:52:00	0
2009-06-10	04:53:00	0
2009-06-10	04:54:00	0
2009-06-10	04:55:00	0
2009-06-10	04:56:00	0
2009-06-10	04:57:00	0
2009-06-10	04:58:00	0
2009-06-10	04:59:00	0
2009-06-10	05:00:00	0
2009-06-10	05:01:00	0
2009-06-10	05:02:00	0
2009-06-10	05:03:00	0
2009-06-10	05:04:00	0
2009-06-10	05:05:00	0
2009-06-10	05:06:00	0
2009-06-10	05:07:00	0
2009-06-10	05:08:00	0
2009-06-10	05:09:00	0
2009-06-10	05:10:00	0
2009-06-10	05:11:00	0
2009-06-10	05:12:00	0
2009-06-10	05:13:00	0
2009-06-10	05:14:00	0
2009-06-10	05:15:00	0
2009-06-10	05:16:00	0
2009-06-10	05:17:00	0
2009-06-10	05:18:00	0
2009-06-10	05:19:00	0
2009-06-10	05:20:00	0
2009-06-10	05:21:00	0
2009-06-10	05:22:00	0
2009-06-10	05:23:00	0
2009-06-10	05:24:00	0
2009-06-10	05:25:00	0
2009-06-10	05:26:00	0
2009-06-10	05:27:00	0
2009-06-10	05:28:00	0
2009-06-10	05:29:00	0
2009-06-10	05:30:00	0
2009-06-10	05:31:00	0
2009-06-10	05:32:00	0
2009-06-10	05:33:00	0
2009-06-10	05:34:00	0
2009-06-10	05:35:00	0
2009-06-10	05:36:00	0
2009-06-10	05:37:00	0
2009-06-10	05:38:00	0
2009-06-10	05:39:00	0
2009-06-10	05:40:00	0
2009-06-10	05:41:00	0
2009-06-10	05:42:00	0
2009-06-10	05:43:00	0
2009-06-10	05:44:00	0
2009-06-10	05:45:00	0
2009-06-10	05:46:00	0
2009-06-10	05:47:00	0
2009-06-10	05:48:00	0
2009-06-10	05:49:00	0
2009-06-10	05:50:00	0
2009-06-10	05:51:00	0
2009-06-10	05:52:00	0
2009-06-10	05:53:00	0
2009-06-10	05:54:00	0
2009-06-10	05:55:00	0
2009-06-10	05:56:00	0
2009-06-10	05:57:00	0
2009-06-10	05:58:00	0
2009-06-10	05:59:00	0
2009-06-10	06:00:00	0
2009-06-10	06:01:00	0
2009-06-10	06:02:00	0
2009-06-10	06:03:00	0
2009-06-10	06:04:00	0
2009-06-10	06:05:00	0
2009-06-10	06:06:00	0
2009-06-10	06:07:00	0
2009-06-10	06:08:00	0
2009-06-10	06:09:00	0
2009-06-10	06:10:00	0
2009-06-10	06:11:00	0
2009-06-10	06:12:00	0
2009-06-10	06:13:00	0
2009-06-10	06:14:00	0
2009-06-10	06:15:00	0
2009-06-10	06:16:00	0
2009-06-10	06:17:00	0
2009-06-10	06:18:00	0
2009-06-10	06:19:00	0
2009-06-10	06:20:00	0
2009-06-10	06:21:00	0
2009-06-10	06:22:00	0
2009-06-10	06:23:00	0
2009-06-10	06:24:00	0
2009-06-10	06:25:00	0
2009-06-10	06:26:00	0
2009-06-10	06:27:00	0
2009-06-10	06:28:00	0
2009-06-10	06:29:00	0
2009-06-10	06:30:00	0
2009-06-10	06:31:00	0
2009-06-10	06:32:00	0
2009-06-10	06:33:00	0
2009-06-10	06:34:00	0
2009-06-10	06:35:00	0
2009-06-10	06:36:00	0
2009-06-10	06:37:00	0
2009-06-10	06:38:00	0
2009-06-10	06:39:00	0
2009-06-10	06:40:00	0
2009-06-10	06:41:00	0
2009-06-10	06:42:00	0
2009-06-10	06:43:00	0
2009-06-10	06:44:00	0
2009-06-10	06:45:00	0
2009-06-10	06:46:00	0
2009-06-10	06:47:00	0
2009-06-10	06:48:00	0
2009-06-10	06:49:00	0
2009-06-10	06:50:00	0
2009-06-10	06:51:00	0
2009-06-10	06:52:00	0
2009-06-10	06:53:00	0
2009-06-10	06:54:00	0
2009-06-10	06:55:00	0
2009-06-10	06:56:00	0
2009-06-10	06:57:00	0
2009-06-10	06:58:00	0
2009-06-10	06:59:00	0
2009-06-10	07:00:00	0
2009-06-10	07:01:00	0
2009-06-10	07:02:00	0
2009-06-10	07:03:00	0
2009-06-10	07:04:00	0
2009-06-10	07:05:00	0
2009-06-10	07:06:00	0
2009-06-10	07:07:00	0
2009-06-10	07:08:00	0
2009-06-10	07:09:00	0
2009-06-10	07:10:00	0
2009-06-10	07:11:00	0
2009-06-10	07:12:00	0
2009-06-10	07:13:00	0
2009-06-10	07:14:00	0
2009-06-10	07:15:00	0
2009-06-10	07:16:00	0
2009-06-10	07:17:00	0
2009-06-10	07:18:00	0
2009-06-10	07:19:00	0
2009-06-10	07:20:00	0
2009-06-10	07:21:00	0
2009-06-10	07:22:00	0
2009-06-10	07:23:00	0
2009-06-10	07:24:00	0
2009-06-10	07:25:00	0
2009-06-10	07:26:00	0
2009-06-10	07:27:00	0
2009-06-10	07:28:00	0
2009-06-10	07:29:00	0
2009-06-10	07:30:00	0
2009-06-10	07:31:00	0
2009-06-10	07:32:00	0
2009-06-10	07:33:00	0
2009-06-10	07:34:00	0
2009-06-10	07:35:00	0
2009-06-10	07:36:00	0
2009-06-10	07:37:00	0
2009-06-10	07:38:00	0
2009-06-10	07:39:00	0
2009-06-10	07:40:00	0
2009-06-10	07:41:00	0
2009-06-10	07:42:00	0
2009-06-10	07:43:00	0
2009-06-10	07:44:00	0
2009-06-10	07:45:00	0
2009-06-10	07:46:00	0
2009-06-10	07:47:00	0
2009-06-10	07:48:00	0
2009-06-10	07:49:00	0
2009-06-10	07:50:00	0
2009-06-10	07:51:00	0
2009-06-10	07:52:00	0
2009-06-10	07:53:00	0
2009-06-10	07:54:00	0
2009-06-10	07:55:00	0
2009-06-10	07:56:00	0
2009-06-10	07:57:00	0
2009-06-10	07:58:00	0
2009-06-10	07:59:00	0
2009-06-10	08:00:00	0
2009-06-10	08:01:00	0
2009-06-10	08:02:00	0
2009-06-10	08:03:00	0
2009-06-10	08:04:00	0
2009-06-10	08:05:00	0
2009-06-10	08:06:00	0
2009-06-10	08:07:00	0
2009-06-10	08:08:00	0
2009-06-10	08:09:00	0
2009-06-10	08:10:00	0
2009-06-10	08:11:00	0
2009-06-10	08:12:00	0
2009-06-10	08:13:00	0
2009-06-10	08:14:00	0
2009-06-10	08:15:00	0
2009-06-10	08:16:00	0
2009-06-10	08:17:00	0
2009-06-10	08:18:00	0
2009-06-10	08:19:00	0
2009-06-10	08:20:00	0
2009-06-10	08:21:00	0
2009-06-10	08:22:00	0
2009-06-10	08:23:00	0
2009-06-10	08:24:00	0
2009-06-10	08:25:00	0
2009-06-10	08:26:00	0
2009-06-10	08:27:00	0
2009-06-10	08:28:00	0
2009-06-10	08:29:00	0
2009-06-10	08:30:00	0
2009-06-10	08:31:00	0
2009-06-10	08:32:00	0
2009-06-10	08:33:00	0
2009-06-10	08:34:00	0
2009-06-10	08:35:00	0
2009-06-10	08:36:00	0
2009-06-10	08:37:00	0
2009-06-10	08:38:00	0
2009-06-10	08:39:00	0
2009-06-10	08:40:00	0
2009-06-10	08:41:00	0
2009-06-10	08:42:00	0
2009-06-10	08:43:00	0
2009-06-10	08:44:00	0
2009-06-10	08:45:00	0
2009-06-10	08:46:00	0
2009-06-10	08:47:00	0
2009-06-10	08:48:00	0
2009-06-10	08:49:00	0
2009-06-10	08:50:00	0
2009-06-10	08:51:00	0
2009-06-10	08:52:00	0
2009-06-10	08:53:00	0
2009-06-10	08:54:00	0
2009-06-10	08:55:00	0
2009-06-10	08:56:00	0
2009-06-10	08:57:00	0
2009-06-10	08:58:00	0
2009-06-10	08:59:00	0
2009-06-10	09:00:00	0
2009-06-10	09:01:00	0
2009-06-10	09:02:00	0
2009-06-10	09:03:00	0
2009-06-10	09:04:00	0
2009-06-10	09:05:00	0
2009-06-10	09:06:00	0
2009-06-10	09:07:00	0
2009-06-10	09:08:00	0
2009-06-10	09:09:00	0
2009-06-10	09:10:00	0
2009-06-10	09:11:00	0
2009-06-10	09:12:00	0
2009-06-10	09:13:00	0
2009-06-10	09:14:00	0
2009-06-10	09:15:00	0
2009-06-10	09:16:00	0
2009-06-10	09:17:00	0
2009-06-10	09:18:00	0
2009-06-10	09:19:00	0
2009-06-10	09:20:00	0
2009-06-10	09:21:00	0
2009-06-10	09:22:00	0
2009-06-10	09:23:00	0
2009-06-10	09:24:00	0
2009-06-10	09:25:00	0
2009-06-10	09:26:00	0
2009-06-10	09:27:00	0
2009-06-10	09:28:00	0
2009-06-10	09:29:00	0
2009-06-10	09:30:00	0
2009-06-10	09:31:00	0
2009-06-10	09:32:00	0
2009-06-10	09:33:00	0
2009-06-10	09:34:00	0
2009-06-10	09:35:00	0
2009-06-10	09:36:00	0
2009-06-10	09:37:00	0
2009-06-10	09:38:00	0
2009-06-10	09:39:00	0
2009-06-10	09:40:00	0
2009-06-10	09:41:00	0
2009-06-10	09:42:00	0
2009-06-10	09:43:00	0
2009-06-10	09:44:00	0
2009-06-10	09:45:00	0
2009-06-10	09:46:00	0
2009-06-10	09:47:00	0
2009-06-10	09:48:00	0
2009-06-10	09:49:00	0
2009-06-10	09:50:00	0
2009-06-10	09:51:00	0
2009-06-10	09:52:00	0
2009-06-10	09:53:00	0
2009-06-10	09:54:00	0
2009-06-10	09:55:00	0
2009-06-10	09:56:00	0
2009-06-10	09:57:00	0
2009-06-10	09:58:00	0
2009-06-10	09:59:00	0
2009-06-10	10:00:00	0
2009-06-10	10:01:00	0
2009-06-10	10:02:00	0
2009-06-10	10:03:00	0
2009-06-10	10:04:00	0
2009-06-10	10:05:00	0
2009-06-10	10:06:00	0
2009-06-10	10:07:00	0
2009-06-10	10:08:00	0
2009-06-10	10:09:00	0
2009-06-10	10:10:00	0
2009-06-10	10:11:00	0
2009-06-10	10:12:00	0
2009-06-10	10:13:00	0
2009-06-10	10:14:00	0
2009-06-10	10:15:00	0
2009-06-10	10:16:00	0
2009-06-10	10:17:00	0
2009-06-10	10:18:00	0
2009-06-10	10:19:00	0
2009-06-10	10:20:00	0
2009-06-10	10:21:00	0
2009-06-10	10:22:00	0
2009-06-10	10:23:00	0
2009-06-10	10:24:00	0
2009-06-10	10:25:00	0
2009-06-10	10:26:00	0
2009-06-10	10:27:00	0
2009-06-10	10:28:00	0
2009-06-10	10:29:00	0
2009-06-10	10:30:00	0
2009-06-10	10:31:00	0
2009-06-10	10:32:00	0
2009-06-10	10:33:00	0
2009-06-10	10:34:00	0
2009-06-10	10:35:00	0
2009-06-10	10:36:00	0
2009-06-10	10:37:00	0
2009-06-10	10:38:00	0
2009-06-10	10:39:00	0
2009-06-10	10:40:00	0
2009-06-10	10:41:00	0
2009-06-10	10:42:00	0
2009-06-10	10:43:00	0
2009-06-10	10:44:00	0
2009-06-10	10:45:00	0
2009-06-10	10:46:00	0
2009-06-10	10:47:00	0
2009-06-10	10:48:00	0
2009-06-10	10:49:00	0
2009-06-10	10:50:00	0
2009-06-10	10:51:00	0
2009-06-10	10:52:00	0
2009-06-10	10:53:00	0
2009-06-10	10:54:00	0
2009-06-10	10:55:00	0
2009-06-10	10:56:00	0
2009-06-10	10:57:00	0
2009-06-10	10:58:00	0
2009-06-10	10:59:00	0
2009-06-10	11:00:00	0
2009-06-10	11:01:00	0
2009-06-10	11:02:00	0
2009-06-10	11:03:00	0
2009-06-10	11:04:00	0
2009-06-10	11:05:00	0
2009-06-10	11:06:00	0
2009-06-10	11:07:00	0
2009-06-10	11:08:00	0
2009-06-10	11:09:00	0
2009-06-10	11:10:00	0
2009-06-10	11:11:00	0
2009-06-10	11:12:00	0
2009-06-10	11:13:00	0
2009-06-10	11:14:00	0
2009-06-10	11:15:00	0
2009-06-10	11:16:00	0
2009-06-10	11:17:00	0
2009-06-10	11:18:00	0
2009-06-10	11:19:00	0
2009-06-10	11:20:00	0
2009-06-10	11:21:00	0
2009-06-10	11:22:00	0
2009-06-10	11:23:00	0
2009-06-10	11:24:00	0
2009-06-10	11:25:00	0
2009-06-10	11:26:00	0
2009-06-10	11:27:00	0
2009-06-10	11:28:00	0
2009-06-10	11:29:00	0
2009-06-10	11:30:00	0
2009-06-10	11:31:00	0
2009-06-10	11:32:00	0
2009-06-10	11:33:00	0
2009-06-10	11:34:00	0
2009-06-10	11:35:00	0
2009-06-10	11:36:00	0
2009-06-10	11:37:00	0
2009-06-10	11:38:00	0
2009-06-10	11:39:00	0
2009-06-10	11:40:00	0
2009-06-10	11:41:00	0
2009-06-10	11:42:00	0
2009-06-10	11:43:00	0
2009-06-10	11:44:00	0
2009-06-10	11:45:00	0
2009-06-10	11:46:00	0
2009-06-10	11:47:00	0
2009-06-10	11:48:00	0
2009-06-10	11:49:00	0
2009-06-10	11:50:00	0
2009-06-10	11:51:00	0
2009-06-10	11:52:00	0
2009-06-10	11:53:00	0
2009-06-10	11:54:00	0
2009-06-10	11:55:00	0
2009-06-10	11:56:00	0
2009-06-10	11:57:00	0
2009-06-10	11:58:00	0
2009-06-10	11:59:00	0
2009-06-10	12:00:00	0
2009-06-10	12:01:00	0
2009-06-10	12:02:00	0
2009-06-10	12:03:00	0
2009-06-10	12:04:00	0
2009-06-10	12:05:00	0
2009-06-10	12:06:00	0
2009-06-10	12:07:00	0
2009-06-10	12:08:00	0
2009-06-10	12:09:00	0
2009-06-10	12:10:00	0
2009-06-10	12:11:00	0
2009-06-10	12:12:00	0
2009-06-10	12:13:00	0
2009-06-10	12:14:00	0
2009-06-10	12:15:00	0
2009-06-10	12:16:00	0
2009-06-10	12:17:00	0
2009-06-10	12:18:00	0
2009-06-10	12:19:00	0
2009-06-10	12:20:00	0
2009-06-10	12:21:00	0
2009-06-10	12:22:00	0
2009-06-10	12:23:00	0
2009-06-10	12:24:00	0
2009-06-10	12:25:00	0
2009-06-10	12:26:00	0
2009-06-10	12:27:00	0
2009-06-10	12:28:00	0
2009-06-10	12:29:00	0
2009-06-10	12:30:00	0
2009-06-10	12:31:00	0
2009-06-10	12:32:00	0
2009-06-10	12:33:00	0
2009-06-10	12:34:00	0
2009-06-10	12:35:00	0
2009-06-10	12:36:00	0
2009-06-10	12:37:00	0
2009-06-10	12:38:00	0
2009-06-10	12:39:00	0
2009-06-10	12:40:00	0
2009-06-10	12:41:00	0
2009-06-10	12:42:00	0
2009-06-10	12:43:00	0
2009-06-10	12:44:00	0
2009-06-10	12:45:00	0
2009-06-10	12:46:00	0
2009-06-10	12:47:00	0
2009-06-10	12:48:00	0
2009-06-10	12:49:00	0
2009-06-10	12:50:00	0
2009-06-10	12:51:00	0
2009-06-10	12:52:00	0
2009-06-10	12:53:00	0
2009-06-10	12:54:00	0
2009-06-10	12:55:00	0
2009-06-10	12:56:00	0
2009-06-10	12:57:00	0
2009-06-10	12:58:00	0
2009-06-10	12:59:00	0
2009-06-10	13:00:00	0
2009-06-10	13:01:00	0
2009-06-10	13:02:00	0
2009-06-10	13:03:00	0
2009-06-10	13:04:00	0
2009-06-10	13:05:00	0
2009-06-10	13:06:00	0
2009-06-10	13:07:00	0
2009-06-10	13:08:00	0
2009-06-10	13:09:00	0
2009-06-10	13:10:00	0
2009-06-10	13:11:00	0
2009-06-10	13:12:00	0
2009-06-10	13:13:00	0
2009-06-10	13:14:00	0
2009-06-10	13:15:00	0
2009-06-10	13:16:00	0
2009-06-10	13:17:00	0
2009-06-10	13:18:00	0
2009-06-10	13:19:00	0
2009-06-10	13:20:00	0
2009-06-10	13:21:00	0
2009-06-10	13:22:00	0
2009-06-10	13:23:00	0
2009-06-10	13:24:00	0
2009-06-10	13:25:00	0
2009-06-10	13:26:00	0
2009-06-10	13:27:00	0
2009-06-10	13:28:00	0
2009-06-10	13:29:00	0
2009-06-10	13:30:00	0
2009-06-10	13:31:00	0
2009-06-10	13:32:00	0
2009-06-10	13:33:00	0
2009-06-10	13:34:00	0
2009-06-10	13:35:00	0
2009-06-10	13:36:00	0
2009-06-10	13:37:00	0
2009-06-10	13:38:00	0
2009-06-10	13:39:00	0
2009-06-10	13:40:00	0
2009-06-10	13:41:00	0
2009-06-10	13:42:00	0
2009-06-10	13:43:00	0
2009-06-10	13:44:00	0
2009-06-10	13:45:00	0
2009-06-10	13:46:00	0
2009-06-10	13:47:00	0
2009-06-10	13:48:00	0
2009-06-10	13:49:00	0
2009-06-10	13:50:00	0
2009-06-10	13:51:00	0
2009-06-10	13:52:00	0
2009-06-10	13:53:00	0
2009-06-10	13:54:00	0
2009-06-10	13:55:00	0
2009-06-10	13:56:00	0
2009-06-10	13:57:00	0
2009-06-10	13:58:00	0
2009-06-10	13:59:00	0
2009-06-10	14:00:00	0
2009-06-10	14:01:00	0
2009-06-10	14:02:00	0
2009-06-10	14:03:00	0
2009-06-10	14:04:00	0
2009-06-10	14:05:00	0
2009-06-10	14:06:00	0
2009-06-10	14:07:00	0
2009-06-10	14:08:00	0
2009-06-10	14:09:00	0
2009-06-10	14:10:00	0
2009-06-10	14:11:00	0
2009-06-10	14:12:00	0
2009-06-10	14:13:00	0
2009-06-10	14:14:00	0
2009-06-10	14:15:00	0
2009-06-10	14:16:00	0
2009-06-10	14:17:00	0
2009-06-10	14:18:00	0
2009-06-10	14:19:00	0
2009-06-10	14:20:00	0
2009-06-10	14:21:00	0
2009-06-10	14:22:00	0
2009-06-10	14:23:00	0
2009-06-10	14:24:00	0
2009-06-10	14:25:00	0
2009-06-10	14:26:00	0
2009-06-10	14:27:00	0
2009-06-10	14:28:00	0
2009-06-10	14:29:00	0
2009-06-10	14:30:00	0
2009-06-10	14:31:00	0
2009-06-10	14:32:00	0
2009-06-10	14:33:00	0
2009-06-10	14:34:00	0
2009-06-10	14:35:00	0
2009-06-10	14:36:00	0
2009-06-10	14:37:00	0
2009-06-10	14:38:00	0
2009-06-10	14:39:00	0
2009-06-10	14:40:00	0
2009-06-10	14:41:00	0
2009-06-10	14:42:00	0
2009-06-10	14:43:00	0
2009-06-10	14:44:00	0
2009-06-10	14:45:00	0
2009-06-10	14:46:00	0
2009-06-10	14:47:00	0
2009-06-10	14:48:00	0
2009-06-10	14:49:00	0
2009-06-10	14:50:00	0
2009-06-10	14:51:00	0
2009-06-10	14:52:00	0
2009-06-10	14:53:00	0
2009-06-10	14:54:00	0
2009-06-10	14:55:00	0
2009-06-10	14:56:00	0
2009-06-10	14:57:00	0
2009-06-10	14:58:00	0
2009-06-10	14:59:00	0
2009-06-10	15:00:00	0
2009-06-10	15:01:00	0
2009-06-10	15:02:00	0
2009-06-10	15:03:00	0
2009-06-10	15:04:00	0
2009-06-10	15:05:00	0
2009-06-10	15:06:00	0
2009-06-10	15:07:00	0
2009-06-10	15:08:00	0
2009-06-10	15:09:00	0
2009-06-10	15:10:00	0
2009-06-10	15:11:00	0
2009-06-10	15:12:00	0
2009-06-10	15:13:00	0
2009-06-10	15:14:00	0
2009-06-10	15:15:00	0
2009-06-10	15:16:00	0
2009-06-10	15:17:00	0
2009-06-10	15:18:00	0
2009-06-10	15:19:00	0
2009-06-10	15:20:00	0
2009-06-10	15:21:00	0
2009-06-10	15:22:00	0
2009-06-10	15:23:00	0
2009-06-10	15:24:00	0
2009-06-10	15:25:00	0
2009-06-10	15:26:00	0
2009-06-10	15:27:00	0
2009-06-10	15:28:00	0
2009-06-10	15:29:00	0
2009-06-10	15:30:00	0
2009-06-10	15:31:00	0
2009-06-10	15:32:00	0
2009-06-10	15:33:00	0
2009-06-10	15:34:00	0
2009-06-10	15:35:00	0
2009-06-10	15:36:00	0
2009-06-10	15:37:00	0
2009-06-10	15:38:00	0
2009-06-10	15:39:00	0
2009-06-10	15:40:00	0
2009-06-10	15:41:00	0
2009-06-10	15:42:00	0
2009-06-10	15:43:00	0
2009-06-10	15:44:00	0
2009-06-10	15:45:00	0
2009-06-10	15:46:00	0
2009-06-10	15:47:00	0
2009-06-10	15:48:00	0
2009-06-10	15:49:00	0
2009-06-10	15:50:00	0
2009-06-10	15:51:00	0
2009-06-10	15:52:00	0
2009-06-10	15:53:00	0
2009-06-10	15:54:00	0
2009-06-10	15:55:00	0
2009-06-10	15:56:00	0
2009-06-10	15:57:00	0
2009-06-10	15:58:00	0
2009-06-10	15:59:00	0
2009-06-10	16:00:00	0
2009-06-10	16:01:00	0
2009-06-10	16:02:00	0
2009-06-10	16:03:00	0
2009-06-10	16:04:00	0
2009-06-10	16:05:00	0
2009-06-10	16:06:00	0
2009-06-10	16:07:00	0
2009-06-10	16:08:00	0
2009-06-10	16:09:00	0
2009-06-10	16:10:00	0
2009-06-10	16:11:00	0
2009-06-10	16:12:00	0
2009-06-10	16:13:00	0
2009-06-10	16:14:00	0
2009-06-10	16:15:00	0
2009-06-10	16:16:00	0
2009-06-10	16:17:00	0
2009-06-10	16:18:00	0
2009-06-10	16:19:00	0
2009-06-10	16:20:00	0
2009-06-10	16:21:00	0
2009-06-10	16:22:00	0
2009-06-10	16:23:00	0
2009-06-10	16:24:00	0
2009-06-10	16:25:00	0
2009-06-10	16:26:00	0
2009-06-10	16:27:00	0
2009-06-10	16:28:00	0
2009-06-10	16:29:00	0
2009-06-10	16:30:00	0
2009-06-10	16:31:00	0
2009-06-10	16:32:00	0
2009-06-10	16:33:00	0
2009-06-10	16:34:00	0
2009-06-10	16:35:00	0
2009-06-10	16:36:00	0
2009-06-10	16:37:00	0
2009-06-10	16:38:00	0
2009-06-10	16:39:00	0
2009-06-10	16:40:00	0
2009-06-10	16:41:00	0
2009-06-10	16:42:00	0
2009-06-10	16:43:00	0
2009-06-10	16:44:00	0
2009-06-10	16:45:00	0
2009-06-10	16:46:00	0
2009-06-10	16:47:00	0
2009-06-10	16:48:00	0
2009-06-10	16:49:00	0
2009-06-10	16:50:00	0
2009-06-10	16:51:00	0
2009-06-10	16:52:00	0
2009-06-10	16:53:00	0
2009-06-10	16:54:00	0
2009-06-10	16:55:00	0
2009-06-10	16:56:00	0
2009-06-10	16:57:00	0
2009-06-10	16:58:00	0
2009-06-10	16:59:00	0
2009-06-10	17:00:00	0
2009-06-10	17:01:00	0
2009-06-10	17:02:00	0
2009-06-10	17:03:00	0
2009-06-10	17:04:00	0
2009-06-10	17:05:00	0
2009-06-10	17:06:00	0
2009-06-10	17:07:00	0
2009-06-10	17:08:00	0
2009-06-10	17:09:00	0
2009-06-10	17:10:00	0
2009-06-10	17:11:00	0
2009-06-10	17:12:00	0
2009-06-10	17:13:00	0
2009-06-10	17:14:00	0
2009-06-10	17:15:00	0
2009-06-10	17:16:00	0
2009-06-10	17:17:00	0
2009-06-10	17:18:00	0
2009-06-10	17:19:00	0
2009-06-10	17:20:00	0
2009-06-10	17:21:00	0
2009-06-10	17:22:00	0
2009-06-10	17:23:00	0
2009-06-10	17:24:00	0
2009-06-10	17:25:00	0
2009-06-10	17:26:00	0
2009-06-10	17:27:00	0
2009-06-10	17:28:00	0
2009-06-10	17:29:00	0
2009-06-10	17:30:00	0
2009-06-10	17:31:00	0
2009-06-10	17:32:00	0
2009-06-10	17:33:00	0
2009-06-10	17:34:00	0
2009-06-10	17:35:00	0
2009-06-10	17:36:00	0
2009-06-10	17:37:00	0
2009-06-10	17:38:00	0
2009-06-10	17:39:00	0
2009-06-10	17:40:00	0
2009-06-10	17:41:00	0
2009-06-10	17:42:00	0
2009-06-10	17:43:00	0
2009-06-10	17:44:00	0
2009-06-10	17:45:00	0
2009-06-10	17:46:00	0
2009-06-10	17:47:00	0
2009-06-10	17:48:00	0
2009-06-10	17:49:00	0
2009-06-10	17:50:00	0
2009-06-10	17:51:00	0
2009-06-10	17:52:00	0
2009-06-10	17:53:00	0
2009-06-10	17:54:00	0
2009-06-10	17:55:00	0
2009-06-10	17:56:00	0
2009-06-10	17:57:00	0
2009-06-10	17:58:00	0
2009-06-10	17:59:00	0
2009-06-10	18:00:00	0	M
2009-06-10	18:01:00	33
2009-06-10	18:02:00	0
2009-06-10	18:03:00	0
2009-06-10	18:04:00	0
2009-06-10	18:05:00	66
2009-06-10	18:06:00	0
2009-06-10	18:07:00	0
2009-06-10	18:08:00	0
2009-06-10	18:09:00	0
2009-06-10	18:10:00	0
2009-06-10	18:11:00	0
2009-06-10	18:12:00	22
2009-06-10	18:13:00	22
2009-06-10	18:14:00	0
2009-06-10	18:15:00	55
2009-06-10	18:16:00	11
2009-06-10	18:17:00	22
2009-06-10	18:18:00	33
2009-06-10	18:19:00	0
2009-06-10	18:20:00	0
2009-06-10	18:21:00	0
2009-06-10	18:22:00	0
2009-06-10	18:23:00	0
2009-06-10	18:24:00	0
2009-06-10	18:25:00	0
2009-06-10	18:26:00	0
2009-06-10	18:27:00	0
2009-06-10	18:28:00	99
2009-06-10	18:29:00	11
2009-06-10	18:30:00	11
2009-06-10	18:31:00	66
2009-06-10	18:32:00	3666
2009-06-10	18:33:00	2990
2009-06-10	18:34:00	775
2009-06-10	18:35:00	1315
2009-06-10	18:36:00	1713
2009-06-10	18:37:00	351
2009-06-10	18:38:00	730
2009-06-10	18:39:00	841
2009-06-10	18:40:00	210
2009-06-10	18:41:00	196
2009-06-10	18:42:00	289
2009-06-10	18:43:00	11
2009-06-10	18:44:00	263
2009-06-10	18:45:00	534
2009-06-10	18:46:00	22
2009-06-10	18:47:00	44
2009-06-10	18:48:00	249
2009-06-10	18:49:00	0
2009-06-10	18:50:00	0
2009-06-10	18:51:00	335
2009-06-10	18:52:00	335
2009-06-10	18:53:00	77
2009-06-10	18:54:00	157
2009-06-10	18:55:00	0
2009-06-10	18:56:00	0
2009-06-10	18:57:00	0
2009-06-10	18:58:00	0
2009-06-10	18:59:00	0
2009-06-10	19:00:00	0
2009-06-10	19:01:00	0
2009-06-10	19:02:00	0
2009-06-10	19:03:00	0
2009-06-10	19:04:00	0
2009-06-10	19:05:00	0
2009-06-10	19:06:00	0
2009-06-10	19:07:00	0
2009-06-10	19:08:00	0
2009-06-10	19:09:00	0
2009-06-10	19:10:00	0
2009-06-10	19:11:00	0
2009-06-10	19:12:00	0
2009-06-10	19:13:00	0
2009-06-10	19:14:00	22
2009-06-10	19:15:00	263
2009-06-10	19:16:00	88
2009-06-10	19:17:00	0
2009-06-10	19:18:00	0
2009-06-10	19:19:00	33
2009-06-10	19:20:00	0
2009-06-10	19:21:00	0
2009-06-10	19:22:00	0
2009-06-10	19:23:00	0
2009-06-10	19:24:00	0
2009-06-10	19:25:00	0
2009-06-10	19:26:00	0
2009-06-10	19:27:00	0
2009-06-10	19:28:00	0
2009-06-10	19:29:00	0
2009-06-10	19:30:00	0
2009-06-10	19:31:00	0
2009-06-10	19:32:00	0
2009-06-10	19:33:00	0
2009-06-10	19:34:00	0
2009-06-10	19:35:00	0
2009-06-10	19:36:00	0
2009-06-10	19:37:00	0
2009-06-10	19:38:00	0
2009-06-10	19:39:00	0
2009-06-10	19:40:00	0
2009-06-10	19:41:00	0
2009-06-10	19:42:00	11
2009-06-10	19:43:00	0
2009-06-10	19:44:00	0
2009-06-10	19:45:00	0
2009-06-10	19:46:00	0
2009-06-10	19:47:00	11
2009-06-10	19:48:00	0
2009-06-10	19:49:00	0
2009-06-10	19:50:00	0
2009-06-10	19:51:00	0
2009-06-10	19:52:00	0
2009-06-10	19:53:00	0
2009-06-10	19:54:00	0
2009-06-10	19:55:00	0
2009-06-10	19:56:00	0
2009-06-10	19:57:00	0
2009-06-10	19:58:00	22
2009-06-10	19:59:00	0
2009-06-10	20:00:00	0
2009-06-10	20:01:00	0
2009-06-10	20:02:00	0
2009-06-10	20:03:00	0
2009-06-10	20:04:00	0
2009-06-10	20:05:00	0
2009-06-10	20:06:00	0
2009-06-10	20:07:00	0
2009-06-10	20:08:00	0
2009-06-10	20:09:00	0
2009-06-10	20:10:00	0
2009-06-10	20:11:00	33
2009-06-10	20:12:00	22
2009-06-10	20:13:00	11
2009-06-10	20:14:00	11
2009-06-10	20:15:00	11
2009-06-10	20:16:00	11
2009-06-10	20:17:00	11
2009-06-10	20:18:00	11
2009-06-10	20:19:00	11
2009-06-10	20:20:00	33
2009-06-10	20:21:00	210
2009-06-10	20:22:00	516
2009-06-10	20:23:00	552
2009-06-10	20:24:00	33
2009-06-10	20:25:00	263
2009-06-10	20:26:00	33
2009-06-10	20:27:00	0
2009-06-10	20:28:00	66
2009-06-10	20:29:00	0
2009-06-10	20:30:00	44
2009-06-10	20:31:00	22
2009-06-10	20:32:00	11
2009-06-10	20:33:00	22
2009-06-10	20:34:00	22
2009-06-10	20:35:00	0
2009-06-10	20:36:00	77
2009-06-10	20:37:00	0
2009-06-10	20:38:00	44
2009-06-10	20:39:00	0
2009-06-10	20:40:00	33
2009-06-10	20:41:00	0
2009-06-10	20:42:00	44
2009-06-10	20:43:00	77
2009-06-10	20:44:00	22
2009-06-10	20:45:00	170
2009-06-10	20:46:00	463
2009-06-10	20:47:00	88
2009-06-10	20:48:00	11
2009-06-10	20:49:00	0
2009-06-10	20:50:00	0
2009-06-10	20:51:00	22
2009-06-10	20:52:00	44
2009-06-10	20:53:00	11
2009-06-10	20:54:00	132
2009-06-10	20:55:00	0
2009-06-10	20:56:00	382
2009-06-10	20:57:00	609
2009-06-10	20:58:00	99
2009-06-10	20:59:00	66
2009-06-10	21:00:00	22
2009-06-10	21:01:00	88
2009-06-10	21:02:00	33
2009-06-10	21:03:00	44
2009-06-10	21:04:00	0
2009-06-10	21:05:00	320
2009-06-10	21:06:00	463
2009-06-10	21:07:00	351
2009-06-10	21:08:00	11
2009-06-10	21:09:00	55
2009-06-10	21:10:00	0
2009-06-10	21:11:00	33
2009-06-10	21:12:00	33
2009-06-10	21:13:00	11
2009-06-10	21:14:00	249
2009-06-10	21:15:00	289
2009-06-10	21:16:00	413
2009-06-10	21:17:00	305
2009-06-10	21:18:00	22
2009-06-10	21:19:00	276
2009-06-10	21:20:00	11
2009-06-10	21:21:00	276
2009-06-10	21:22:00	366
2009-06-10	21:23:00	0
2009-06-10	21:24:00	121
2009-06-10	21:25:00	0
2009-06-10	21:26:00	276
2009-06-10	21:27:00	22
2009-06-10	21:28:00	22
2009-06-10	21:29:00	1505
2009-06-10	21:30:00	1982
2009-06-10	21:31:00	629
2009-06-10	21:32:00	463
2009-06-10	21:33:00	481
2009-06-10	21:34:00	689
2009-06-10	21:35:00	730
2009-06-10	21:36:00	366
2009-06-10	21:37:00	569
2009-06-10	21:38:00	428
2009-06-10	21:39:00	170
2009-06-10	21:40:00	609
2009-06-10	21:41:00	382
2009-06-10	21:42:00	305
2009-06-10	21:43:00	351
2009-06-10	21:44:00	157
2009-06-10	21:45:00	11
2009-06-10	21:46:00	0
2009-06-10	21:47:00	44
2009-06-10	21:48:00	0
2009-06-10	21:49:00	0
2009-06-10	21:50:00	0
2009-06-10	21:51:00	0
2009-06-10	21:52:00	516
2009-06-10	21:53:00	366
2009-06-10	21:54:00	366
2009-06-10	21:55:00	22
2009-06-10	21:56:00	11
2009-06-10	21:57:00	22
2009-06-10	21:58:00	157
2009-06-10	21:59:00	649
2009-06-10	22:00:00	132
2009-06-10	22:01:00	0
2009-06-10	22:02:00	44
2009-06-10	22:03:00	66
2009-06-10	22:04:00	11
2009-06-10	22:05:00	77
2009-06-10	22:06:00	0
2009-06-10	22:07:00	0
2009-06-10	22:08:00	0
2009-06-10	22:09:00	0
2009-06-10	22:10:00	0
2009-06-10	22:11:00	0
2009-06-10	22:12:00	157
2009-06-10	22:13:00	0
2009-06-10	22:14:00	0
2009-06-10	22:15:00	0
2009-06-10	22:16:00	0
2009-06-10	22:17:00	0
2009-06-10	22:18:00	44
2009-06-10	22:19:00	0
2009-06-10	22:20:00	0
2009-06-10	22:21:00	0
2009-06-10	22:22:00	0
2009-06-10	22:23:00	121
2009-06-10	22:24:00	55
2009-06-10	22:25:00	0
2009-06-10	22:26:00	0
2009-06-10	22:27:00	99
2009-06-10	22:28:00	11
2009-06-10	22:29:00	0
2009-06-10	22:30:00	0
2009-06-10	22:31:00	0
2009-06-10	22:32:00	11
2009-06-10	22:33:00	775
2009-06-10	22:34:00	183
2009-06-10	22:35:00	11
2009-06-10	22:36:00	0
2009-06-10	22:37:00	0
2009-06-10	22:38:00	0
2009-06-10	22:39:00	0
2009-06-10	22:40:00	0
2009-06-10	22:41:00	0
2009-06-10	22:42:00	0
2009-06-10	22:43:00	0
2009-06-10	22:44:00	0
2009-06-10	22:45:00	0
2009-06-10	22:46:00	170
2009-06-10	22:47:00	0
2009-06-10	22:48:00	33
2009-06-10	22:49:00	22
2009-06-10	22:50:00	0
2009-06-10	22:51:00	44
2009-06-10	22:52:00	210
2009-06-10	22:53:00	11
2009-06-10	22:54:00	66
2009-06-10	22:55:00	0
2009-06-10	22:56:00	276
2009-06-10	22:57:00	1009
2009-06-10	22:58:00	196
2009-06-10	22:59:00	320
2009-06-10	23:00:00	132
2009-06-10	23:01:00	305
2009-06-10	23:02:00	289
2009-06-10	23:03:00	11
2009-06-10	23:04:00	320
2009-06-10	23:05:00	88
2009-06-10	23:06:00	0
2009-06-10	23:07:00	22
2009-06-10	23:08:00	0
2009-06-10	23:09:00	0
2009-06-10	23:10:00	0
2009-06-10	23:11:00	0
2009-06-10	23:12:00	0
2009-06-10	23:13:00	22
2009-06-10	23:14:00	0
2009-06-10	23:15:00	0
2009-06-10	23:16:00	0
2009-06-10	23:17:00	0
2009-06-10	23:18:00	0
2009-06-10	23:19:00	0
2009-06-10	23:20:00	0
2009-06-10	23:21:00	0
2009-06-10	23:22:00	0
2009-06-10	23:23:00	0
2009-06-10	23:24:00	22
2009-06-10	23:25:00	11
2009-06-10	23:26:00	0
2009-06-10	23:27:00	0
2009-06-10	23:28:00	0
2009-06-10	23:29:00	0
2009-06-10	23:30:00	0
2009-06-10	23:31:00	22
2009-06-10	23:32:00	22
2009-06-10	23:33:00	0
2009-06-10	23:34:00	0
2009-06-10	23:35:00	0
2009-06-10	23:36:00	0
2009-06-10	23:37:00	0
2009-06-10	23:38:00	0
2009-06-10	23:39:00	0
2009-06-10	23:40:00	0
2009-06-10	23:41:00	0
2009-06-10	23:42:00	0
2009-06-10	23:43:00	0
2009-06-10	23:44:00	0
2009-06-10	23:45:00	0
2009-06-10	23:46:00	0
2009-06-10	23:47:00	0
2009-06-10	23:48:00	22
2009-06-10	23:49:00	0
2009-06-10	23:50:00	0
2009-06-10	23:51:00	44
2009-06-10	23:52:00	22
2009-06-10	23:53:00	22
2009-06-10	23:54:00	88
2009-06-10	23:55:00	196
2009-06-10	23:56:00	0
2009-06-10	23:57:00	0
2009-06-10	23:58:00	0
2009-06-10	23:59:00	0
2009-06-11	00:00:00	0
2009-06-11	00:01:00	0
2009-06-11	00:02:00	263
2009-06-11	00:03:00	33
2009-06-11	00:04:00	0
2009-06-11	00:05:00	0
2009-06-11	00:06:00	0
2009-06-11	00:07:00	0
2009-06-11	00:08:00	0
2009-06-11	00:09:00	0
2009-06-11	00:10:00	0
2009-06-11	00:11:00	0
2009-06-11	00:12:00	0
2009-06-11	00:13:00	22
2009-06-11	00:14:00	0
2009-06-11	00:15:00	0
2009-06-11	00:16:00	0
2009-06-11	00:17:00	0
2009-06-11	00:18:00	11
2009-06-11	00:19:00	0
2009-06-11	00:20:00	0
2009-06-11	00:21:00	0
2009-06-11	00:22:00	11
2009-06-11	00:23:00	11
2009-06-11	00:24:00	0
2009-06-11	00:25:00	0
2009-06-11	00:26:00	0
2009-06-11	00:27:00	0
2009-06-11	00:28:00	0
2009-06-11	00:29:00	0
2009-06-11	00:30:00	0
2009-06-11	00:31:00	0
2009-06-11	00:32:00	0
2009-06-11	00:33:00	0
2009-06-11	00:34:00	0
2009-06-11	00:35:00	0
2009-06-11	00:36:00	0
2009-06-11	00:37:00	0
2009-06-11	00:38:00	0
2009-06-11	00:39:00	0
2009-06-11	00:40:00	0
2009-06-11	00:41:00	0
2009-06-11	00:42:00	88
2009-06-11	00:43:00	351
2009-06-11	00:44:00	0
2009-06-11	00:45:00	0
2009-06-11	00:46:00	0
2009-06-11	00:47:00	0
2009-06-11	00:48:00	428
2009-06-11	00:49:00	289
2009-06-11	00:50:00	99
2009-06-11	00:51:00	0
2009-06-11	00:52:00	0
2009-06-11	00:53:00	0
2009-06-11	00:54:00	0
2009-06-11	00:55:00	0
2009-06-11	00:56:00	0
2009-06-11	00:57:00	0
2009-06-11	00:58:00	0
2009-06-11	00:59:00	0
2009-06-11	01:00:00	0
2009-06-11	01:01:00	0
2009-06-11	01:02:00	0
2009-06-11	01:03:00	0
2009-06-11	01:04:00	0
2009-06-11	01:05:00	0
2009-06-11	01:06:00	0
2009-06-11	01:07:00	0
2009-06-11	01:08:00	0
2009-06-11	01:09:00	0
2009-06-11	01:10:00	0
2009-06-11	01:11:00	0
2009-06-11	01:12:00	0
2009-06-11	01:13:00	33
2009-06-11	01:14:00	33
2009-06-11	01:15:00	88
2009-06-11	01:16:00	0
2009-06-11	01:17:00	0
2009-06-11	01:18:00	0
2009-06-11	01:19:00	0
2009-06-11	01:20:00	0
2009-06-11	01:21:00	0
2009-06-11	01:22:00	0
2009-06-11	01:23:00	0
2009-06-11	01:24:00	0
2009-06-11	01:25:00	0
2009-06-11	01:26:00	0
2009-06-11	01:27:00	0
2009-06-11	01:28:00	0
2009-06-11	01:29:00	22
2009-06-11	01:30:00	0
2009-06-11	01:31:00	11
2009-06-11	01:32:00	66
2009-06-11	01:33:00	22
2009-06-11	01:34:00	428
2009-06-11	01:35:00	276
2009-06-11	01:36:00	305
2009-06-11	01:37:00	351
2009-06-11	01:38:00	183
2009-06-11	01:39:00	77
2009-06-11	01:40:00	33
2009-06-11	01:41:00	0
2009-06-11	01:42:00	0
2009-06-11	01:43:00	0
2009-06-11	01:44:00	0
2009-06-11	01:45:00	0
2009-06-11	01:46:00	0
2009-06-11	01:47:00	0
2009-06-11	01:48:00	0
2009-06-11	01:49:00	0
2009-06-11	01:50:00	0
2009-06-11	01:51:00	0
2009-06-11	01:52:00	0
2009-06-11	01:53:00	0
2009-06-11	01:54:00	0
2009-06-11	01:55:00	0
2009-06-11	01:56:00	0
2009-06-11	01:57:00	0
2009-06-11	01:58:00	0
2009-06-11	01:59:00	0
2009-06-11	02:00:00	0
2009-06-11	02:01:00	22
2009-06-11	02:02:00	44
2009-06-11	02:03:00	481
2009-06-11	02:04:00	446
2009-06-11	02:05:00	446
2009-06-11	02:06:00	132
2009-06-11	02:07:00	44
2009-06-11	02:08:00	305
2009-06-11	02:09:00	196
2009-06-11	02:10:00	11
2009-06-11	02:11:00	11
2009-06-11	02:12:00	0
2009-06-11	02:13:00	0
2009-06-11	02:14:00	0
2009-06-11	02:15:00	0
2009-06-11	02:16:00	0
2009-06-11	02:17:00	0
2009-06-11	02:18:00	0
2009-06-11	02:19:00	0
2009-06-11	02:20:00	11
2009-06-11	02:21:00	0
2009-06-11	02:22:00	0
2009-06-11	02:23:00	0
2009-06-11	02:24:00	0
2009-06-11	02:25:00	0
2009-06-11	02:26:00	0
2009-06-11	02:27:00	0
2009-06-11	02:28:00	0
2009-06-11	02:29:00	0
2009-06-11	02:30:00	0
2009-06-11	02:31:00	0
2009-06-11	02:32:00	0
2009-06-11	02:33:00	0
2009-06-11	02:34:00	0
2009-06-11	02:35:00	0
2009-06-11	02:36:00	0
2009-06-11	02:37:00	0
2009-06-11	02:38:00	0
2009-06-11	02:39:00	0
2009-06-11	02:40:00	0
2009-06-11	02:41:00	0
2009-06-11	02:42:00	11
2009-06-11	02:43:00	22
2009-06-11	02:44:00	0
2009-06-11	02:45:00	22
2009-06-11	02:46:00	0
2009-06-11	02:47:00	33
2009-06-11	02:48:00	0
2009-06-11	02:49:00	0
2009-06-11	02:50:00	0
2009-06-11	02:51:00	0
2009-06-11	02:52:00	0
2009-06-11	02:53:00	0
2009-06-11	02:54:00	0
2009-06-11	02:55:00	0
2009-06-11	02:56:00	0
2009-06-11	02:57:00	22
2009-06-11	02:58:00	463
2009-06-11	02:59:00	132
2009-06-11	03:00:00	22
2009-06-11	03:01:00	0
2009-06-11	03:02:00	0
2009-06-11	03:03:00	0
2009-06-11	03:04:00	0
2009-06-11	03:05:00	0
2009-06-11	03:06:00	0
2009-06-11	03:07:00	0
2009-06-11	03:08:00	0
2009-06-11	03:09:00	0
2009-06-11	03:10:00	0
2009-06-11	03:11:00	0
2009-06-11	03:12:00	0
2009-06-11	03:13:00	0
2009-06-11	03:14:00	0
2009-06-11	03:15:00	55
2009-06-11	03:16:00	77
2009-06-11	03:17:00	0
2009-06-11	03:18:00	0
2009-06-11	03:19:00	0
2009-06-11	03:20:00	0
2009-06-11	03:21:00	0
2009-06-11	03:22:00	0
2009-06-11	03:23:00	0
2009-06-11	03:24:00	0
2009-06-11	03:25:00	0
2009-06-11	03:26:00	0
2009-06-11	03:27:00	0
2009-06-11	03:28:00	0
2009-06-11	03:29:00	0
2009-06-11	03:30:00	0
2009-06-11	03:31:00	0
2009-06-11	03:32:00	0
2009-06-11	03:33:00	0
2009-06-11	03:34:00	0
2009-06-11	03:35:00	0
2009-06-11	03:36:00	0
2009-06-11	03:37:00	0
2009-06-11	03:38:00	0
2009-06-11	03:39:00	0
2009-06-11	03:40:00	0
2009-06-11	03:41:00	0
2009-06-11	03:42:00	0
2009-06-11	03:43:00	0
2009-06-11	03:44:00	0
2009-06-11	03:45:00	11
2009-06-11	03:46:00	0
2009-06-11	03:47:00	0
2009-06-11	03:48:00	0
2009-06-11	03:49:00	0
2009-06-11	03:50:00	0
2009-06-11	03:51:00	0
2009-06-11	03:52:00	0
2009-06-11	03:53:00	0
2009-06-11	03:54:00	0
2009-06-11	03:55:00	0
2009-06-11	03:56:00	0
2009-06-11	03:57:00	0
2009-06-11	03:58:00	0
2009-06-11	03:59:00	0
2009-06-11	04:00:00	0
2009-06-11	04:01:00	0
2009-06-11	04:02:00	0
2009-06-11	04:03:00	0
2009-06-11	04:04:00	0
2009-06-11	04:05:00	0
2009-06-11	04:06:00	0
2009-06-11	04:07:00	0
2009-06-11	04:08:00	0
2009-06-11	04:09:00	0
2009-06-11	04:10:00	0
2009-06-11	04:11:00	0
2009-06-11	04:12:00	0
2009-06-11	04:13:00	0
2009-06-11	04:14:00	0
2009-06-11	04:15:00	0
2009-06-11	04:16:00	0
2009-06-11	04:17:00	0
2009-06-11	04:18:00	0
2009-06-11	04:19:00	0
2009-06-11	04:20:00	0
2009-06-11	04:21:00	0
2009-06-11	04:22:00	0
2009-06-11	04:23:00	0
2009-06-11	04:24:00	0
2009-06-11	04:25:00	0
2009-06-11	04:26:00	0
2009-06-11	04:27:00	0
2009-06-11	04:28:00	0
2009-06-11	04:29:00	0
2009-06-11	04:30:00	0
2009-06-11	04:31:00	0
2009-06-11	04:32:00	0
2009-06-11	04:33:00	0
2009-06-11	04:34:00	0
2009-06-11	04:35:00	0
2009-06-11	04:36:00	0
2009-06-11	04:37:00	0
2009-06-11	04:38:00	0
2009-06-11	04:39:00	0
2009-06-11	04:40:00	0
2009-06-11	04:41:00	0
2009-06-11	04:42:00	0
2009-06-11	04:43:00	0
2009-06-11	04:44:00	0
2009-06-11	04:45:00	0
2009-06-11	04:46:00	11
2009-06-11	04:47:00	0
2009-06-11	04:48:00	0
2009-06-11	04:49:00	0
2009-06-11	04:50:00	0
2009-06-11	04:51:00	0
2009-06-11	04:52:00	0
2009-06-11	04:53:00	0
2009-06-11	04:54:00	0
2009-06-11	04:55:00	0
2009-06-11	04:56:00	0
2009-06-11	04:57:00	0
2009-06-11	04:58:00	0
2009-06-11	04:59:00	0
2009-06-11	05:00:00	0
2009-06-11	05:01:00	0
2009-06-11	05:02:00	0
2009-06-11	05:03:00	0
2009-06-11	05:04:00	0
2009-06-11	05:05:00	0
2009-06-11	05:06:00	0
2009-06-11	05:07:00	22
2009-06-11	05:08:00	33
2009-06-11	05:09:00	210
2009-06-11	05:10:00	22
2009-06-11	05:11:00	0
2009-06-11	05:12:00	0
2009-06-11	05:13:00	0
2009-06-11	05:14:00	0
2009-06-11	05:15:00	0
2009-06-11	05:16:00	0
2009-06-11	05:17:00	0
2009-06-11	05:18:00	0
2009-06-11	05:19:00	0
2009-06-11	05:20:00	0
2009-06-11	05:21:00	0
2009-06-11	05:22:00	0
2009-06-11	05:23:00	0
2009-06-11	05:24:00	0
2009-06-11	05:25:00	0
2009-06-11	05:26:00	11
2009-06-11	05:27:00	0
2009-06-11	05:28:00	0
2009-06-11	05:29:00	0
2009-06-11	05:30:00	0
2009-06-11	05:31:00	0
2009-06-11	05:32:00	0
2009-06-11	05:33:00	0
2009-06-11	05:34:00	0
2009-06-11	05:35:00	0
2009-06-11	05:36:00	0
2009-06-11	05:37:00	0
2009-06-11	05:38:00	0
2009-06-11	05:39:00	0
2009-06-11	05:40:00	0
2009-06-11	05:41:00	0
2009-06-11	05:42:00	0
2009-06-11	05:43:00	0
2009-06-11	05:44:00	0
2009-06-11	05:45:00	0
2009-06-11	05:46:00	0
2009-06-11	05:47:00	0
2009-06-11	05:48:00	0
2009-06-11	05:49:00	0
2009-06-11	05:50:00	0
2009-06-11	05:51:00	0
2009-06-11	05:52:00	0
2009-06-11	05:53:00	0
2009-06-11	05:54:00	0
2009-06-11	05:55:00	0
2009-06-11	05:56:00	0
2009-06-11	05:57:00	0
2009-06-11	05:58:00	0
2009-06-11	05:59:00	11
2009-06-11	06:00:00	382
2009-06-11	06:01:00	249
2009-06-11	06:02:00	263
2009-06-11	06:03:00	481
2009-06-11	06:04:00	0
2009-06-11	06:05:00	0
2009-06-11	06:06:00	33
2009-06-11	06:07:00	0
2009-06-11	06:08:00	33
2009-06-11	06:09:00	0
2009-06-11	06:10:00	11
2009-06-11	06:11:00	1642
2009-06-11	06:12:00	609
2009-06-11	06:13:00	351
2009-06-11	06:14:00	88
2009-06-11	06:15:00	33
2009-06-11	06:16:00	196
2009-06-11	06:17:00	196
2009-06-11	06:18:00	33
2009-06-11	06:19:00	11
2009-06-11	06:20:00	11
2009-06-11	06:21:00	249
2009-06-11	06:22:00	157
2009-06-11	06:23:00	66
2009-06-11	06:24:00	22
2009-06-11	06:25:00	88
2009-06-11	06:26:00	44
2009-06-11	06:27:00	55
2009-06-11	06:28:00	263
2009-06-11	06:29:00	170
2009-06-11	06:30:00	183
2009-06-11	06:31:00	132
2009-06-11	06:32:00	223
2009-06-11	06:33:00	121
2009-06-11	06:34:00	121
2009-06-11	06:35:00	196
2009-06-11	06:36:00	11
2009-06-11	06:37:00	33
2009-06-11	06:38:00	33
2009-06-11	06:39:00	0
2009-06-11	06:40:00	428
2009-06-11	06:41:00	223
2009-06-11	06:42:00	77
2009-06-11	06:43:00	44
2009-06-11	06:44:00	77
2009-06-11	06:45:00	33
2009-06-11	06:46:00	33
2009-06-11	06:47:00	88
2009-06-11	06:48:00	366
2009-06-11	06:49:00	22
2009-06-11	06:50:00	33
2009-06-11	06:51:00	320
2009-06-11	06:52:00	22
2009-06-11	06:53:00	88
2009-06-11	06:54:00	132
2009-06-11	06:55:00	77
2009-06-11	06:56:00	22
2009-06-11	06:57:00	305
2009-06-11	06:58:00	44
2009-06-11	06:59:00	44
2009-06-11	07:00:00	33
2009-06-11	07:01:00	183
2009-06-11	07:02:00	0
2009-06-11	07:03:00	11
2009-06-11	07:04:00	143
2009-06-11	07:05:00	22
2009-06-11	07:06:00	121
2009-06-11	07:07:00	66
2009-06-11	07:08:00	463
2009-06-11	07:09:00	629
2009-06-11	07:10:00	649
2009-06-11	07:11:00	730
2009-06-11	07:12:00	1256
2009-06-11	07:13:00	609
2009-06-11	07:14:00	428
2009-06-11	07:15:00	569
2009-06-11	07:16:00	649
2009-06-11	07:17:00	44
2009-06-11	07:18:00	569
2009-06-11	07:19:00	629
2009-06-11	07:20:00	499
2009-06-11	07:21:00	249
2009-06-11	07:22:00	132
2009-06-11	07:23:00	223
2009-06-11	07:24:00	88
2009-06-11	07:25:00	44
2009-06-11	07:26:00	11
2009-06-11	07:27:00	55
2009-06-11	07:28:00	33
2009-06-11	07:29:00	55
2009-06-11	07:30:00	0
2009-06-11	07:31:00	55
2009-06-11	07:32:00	1170
2009-06-11	07:33:00	481
2009-06-11	07:34:00	223
2009-06-11	07:35:00	55
2009-06-11	07:36:00	170
2009-06-11	07:37:00	366
2009-06-11	07:38:00	649
2009-06-11	07:39:00	669
2009-06-11	07:40:00	382
2009-06-11	07:41:00	289
2009-06-11	07:42:00	77
2009-06-11	07:43:00	0
2009-06-11	07:44:00	55
2009-06-11	07:45:00	335
2009-06-11	07:46:00	413
2009-06-11	07:47:00	552
2009-06-11	07:48:00	110
2009-06-11	07:49:00	320
2009-06-11	07:50:00	499
2009-06-11	07:51:00	77
2009-06-11	07:52:00	305
2009-06-11	07:53:00	1170
2009-06-11	07:54:00	1408
2009-06-11	07:55:00	649
2009-06-11	07:56:00	236
2009-06-11	07:57:00	428
2009-06-11	07:58:00	1009
2009-06-11	07:59:00	1062
2009-06-11	08:00:00	1009
2009-06-11	08:01:00	516
2009-06-11	08:02:00	289
2009-06-11	08:03:00	669
2009-06-11	08:04:00	351
2009-06-11	08:05:00	196
2009-06-11	08:06:00	276
2009-06-11	08:07:00	351
2009-06-11	08:08:00	110
2009-06-11	08:09:00	88
2009-06-11	08:10:00	0
2009-06-11	08:11:00	22
2009-06-11	08:12:00	11
2009-06-11	08:13:00	0
2009-06-11	08:14:00	887
2009-06-11	08:15:00	499
2009-06-11	08:16:00	263
2009-06-11	08:17:00	110
2009-06-11	08:18:00	481
2009-06-11	08:19:00	649
2009-06-11	08:20:00	289
2009-06-11	08:21:00	397
2009-06-11	08:22:00	276
2009-06-11	08:23:00	534
2009-06-11	08:24:00	249
2009-06-11	08:25:00	397
2009-06-11	08:26:00	397
2009-06-11	08:27:00	516
2009-06-11	08:28:00	1284
2009-06-11	08:29:00	1315
2009-06-11	08:30:00	669
2009-06-11	08:31:00	863
2009-06-11	08:32:00	984
2009-06-11	08:33:00	609
2009-06-11	08:34:00	351
2009-06-11	08:35:00	236
2009-06-11	08:36:00	397
2009-06-11	08:37:00	669
2009-06-11	08:38:00	797
2009-06-11	08:39:00	689
2009-06-11	08:40:00	463
2009-06-11	08:41:00	552
2009-06-11	08:42:00	183
2009-06-11	08:43:00	44
2009-06-11	08:44:00	11
2009-06-11	08:45:00	66
2009-06-11	08:46:00	335
2009-06-11	08:47:00	170
2009-06-11	08:48:00	44
2009-06-11	08:49:00	33
2009-06-11	08:50:00	77
2009-06-11	08:51:00	44
2009-06-11	08:52:00	33
2009-06-11	08:53:00	55
2009-06-11	08:54:00	351
2009-06-11	08:55:00	132
2009-06-11	08:56:00	22
2009-06-11	08:57:00	183
2009-06-11	08:58:00	88
2009-06-11	08:59:00	110
2009-06-11	09:00:00	44
2009-06-11	09:01:00	55
2009-06-11	09:02:00	183
2009-06-11	09:03:00	276
2009-06-11	09:04:00	55
2009-06-11	09:05:00	11
2009-06-11	09:06:00	0
2009-06-11	09:07:00	0
2009-06-11	09:08:00	0
[truncated: 19,611 more rows]

[truncated: 3 more sheets: 6.24.09, 7.8.09, 7.22.09]
