# Supplementary material for: Initial evaluation of nighttime restlessness in a naturally occurring canine model of osteoarthritis pain
Source: PeerJ. 2015 Feb 17;3:e772. doi: 10.7717/peerj.772 (PMC4340376; doi:10.7717/peerj.772)
Supplement: Supplemental Information 53 [file peerj-03-772-s053.xlsx]

## Sheet: Office Visits
Visit Date	Visit Number
2009-05-08 06:00:00	1
2009-05-22 06:00:00	2
2009-06-05 06:00:00	3
2009-06-19 06:00:00	4
2009-07-02 06:00:00	5
2009-07-17 06:00:00	6
2009-07-31 06:00:00	7
2009-07-31 06:00:00	8
2009-08-27 06:00:00	9

## Sheet: 54_Data
Segment	DateTime	Activity	Hour	Quadrant	Study Day	Weekday
1	2009-05-15 06:01:00	0	6	2	7	6
1	2009-05-15 06:02:00	0	6	2	7	6
1	2009-05-15 06:03:00	31	6	2	7	6
1	2009-05-15 06:04:00	0	6	2	7	6
1	2009-05-15 06:05:00	0	6	2	7	6
1	2009-05-15 06:06:00	0	6	2	7	6
1	2009-05-15 06:07:00	0	6	2	7	6
1	2009-05-15 06:08:00	0	6	2	7	6
1	2009-05-15 06:09:00	0	6	2	7	6
1	2009-05-15 06:10:00	10	6	2	7	6
1	2009-05-15 06:11:00	0	6	2	7	6
1	2009-05-15 06:12:00	0	6	2	7	6
1	2009-05-15 06:13:00	0	6	2	7	6
1	2009-05-15 06:14:00	57	6	2	7	6
1	2009-05-15 06:15:00	36	6	2	7	6
1	2009-05-15 06:16:00	0	6	2	7	6
1	2009-05-15 06:17:00	0	6	2	7	6
1	2009-05-15 06:18:00	0	6	2	7	6
1	2009-05-15 06:19:00	0	6	2	7	6
1	2009-05-15 06:20:00	0	6	2	7	6
1	2009-05-15 06:21:00	0	6	2	7	6
1	2009-05-15 06:22:00	0	6	2	7	6
1	2009-05-15 06:23:00	0	6	2	7	6
1	2009-05-15 06:24:00	0	6	2	7	6
1	2009-05-15 06:25:00	0	6	2	7	6
1	2009-05-15 06:26:00	0	6	2	7	6
1	2009-05-15 06:27:00	0	6	2	7	6
1	2009-05-15 06:28:00	0	6	2	7	6
1	2009-05-15 06:29:00	0	6	2	7	6
1	2009-05-15 06:30:00	0	6	2	7	6
1	2009-05-15 06:31:00	0	6	2	7	6
1	2009-05-15 06:32:00	0	6	2	7	6
1	2009-05-15 06:33:00	0	6	2	7	6
1	2009-05-15 06:34:00	0	6	2	7	6
1	2009-05-15 06:35:00	0	6	2	7	6
1	2009-05-15 06:36:00	0	6	2	7	6
1	2009-05-15 06:37:00	0	6	2	7	6
1	2009-05-15 06:38:00	0	6	2	7	6
1	2009-05-15 06:39:00	0	6	2	7	6
1	2009-05-15 06:40:00	0	6	2	7	6
1	2009-05-15 06:41:00	0	6	2	7	6
1	2009-05-15 06:42:00	5	6	2	7	6
1	2009-05-15 06:43:00	0	6	2	7	6
1	2009-05-15 06:44:00	0	6	2	7	6
1	2009-05-15 06:45:00	0	6	2	7	6
1	2009-05-15 06:46:00	0	6	2	7	6
1	2009-05-15 06:47:00	0	6	2	7	6
1	2009-05-15 06:48:00	0	6	2	7	6
1	2009-05-15 06:49:00	0	6	2	7	6
1	2009-05-15 06:50:00	0	6	2	7	6
1	2009-05-15 06:51:00	0	6	2	7	6
1	2009-05-15 06:52:00	0	6	2	7	6
1	2009-05-15 06:53:00	0	6	2	7	6
1	2009-05-15 06:54:00	0	6	2	7	6
1	2009-05-15 06:55:00	0	6	2	7	6
1	2009-05-15 06:56:00	0	6	2	7	6
1	2009-05-15 06:57:00	0	6	2	7	6
1	2009-05-15 06:58:00	0	6	2	7	6
1	2009-05-15 06:59:00	0	6	2	7	6
1	2009-05-15 07:00:00	0	6	2	7	6
1	2009-05-15 07:01:00	0	7	2	7	6
1	2009-05-15 07:02:00	0	7	2	7	6
1	2009-05-15 07:03:00	0	7	2	7	6
1	2009-05-15 07:04:00	0	7	2	7	6
1	2009-05-15 07:05:00	0	7	2	7	6
1	2009-05-15 07:06:00	0	7	2	7	6
1	2009-05-15 07:07:00	0	7	2	7	6
1	2009-05-15 07:08:00	0	7	2	7	6
1	2009-05-15 07:09:00	26	7	2	7	6
1	2009-05-15 07:10:00	15	7	2	7	6
1	2009-05-15 07:11:00	31	7	2	7	6
1	2009-05-15 07:12:00	104	7	2	7	6
1	2009-05-15 07:13:00	5	7	2	7	6
1	2009-05-15 07:14:00	135	7	2	7	6
1	2009-05-15 07:15:00	15	7	2	7	6
1	2009-05-15 07:16:00	0	7	2	7	6
1	2009-05-15 07:17:00	5	7	2	7	6
1	2009-05-15 07:18:00	0	7	2	7	6
1	2009-05-15 07:19:00	0	7	2	7	6
1	2009-05-15 07:20:00	266	7	2	7	6
1	2009-05-15 07:21:00	26	7	2	7	6
1	2009-05-15 07:22:00	15	7	2	7	6
1	2009-05-15 07:23:00	1564	7	2	7	6
1	2009-05-15 07:24:00	1810	7	2	7	6
1	2009-05-15 07:25:00	1321	7	2	7	6
1	2009-05-15 07:26:00	615	7	2	7	6
1	2009-05-15 07:27:00	1026	7	2	7	6
1	2009-05-15 07:28:00	947	7	2	7	6
1	2009-05-15 07:29:00	393	7	2	7	6
1	2009-05-15 07:30:00	52	7	2	7	6
1	2009-05-15 07:31:00	484	7	2	7	6
1	2009-05-15 07:32:00	484	7	2	7	6
1	2009-05-15 07:33:00	659	7	2	7	6
1	2009-05-15 07:34:00	209	7	2	7	6
1	2009-05-15 07:35:00	92	7	2	7	6
1	2009-05-15 07:36:00	561	7	2	7	6
1	2009-05-15 07:37:00	92	7	2	7	6
1	2009-05-15 07:38:00	10	7	2	7	6
1	2009-05-15 07:39:00	0	7	2	7	6
1	2009-05-15 07:40:00	225	7	2	7	6
1	2009-05-15 07:41:00	46	7	2	7	6
1	2009-05-15 07:42:00	5	7	2	7	6
1	2009-05-15 07:43:00	342	7	2	7	6
1	2009-05-15 07:44:00	52	7	2	7	6
1	2009-05-15 07:45:00	26	7	2	7	6
1	2009-05-15 07:46:00	217	7	2	7	6
1	2009-05-15 07:47:00	26	7	2	7	6
1	2009-05-15 07:48:00	36	7	2	7	6
1	2009-05-15 07:49:00	0	7	2	7	6
1	2009-05-15 07:50:00	0	7	2	7	6
1	2009-05-15 07:51:00	10	7	2	7	6
1	2009-05-15 07:52:00	26	7	2	7	6
1	2009-05-15 07:53:00	0	7	2	7	6
1	2009-05-15 07:54:00	46	7	2	7	6
1	2009-05-15 07:55:00	331	7	2	7	6
1	2009-05-15 07:56:00	217	7	2	7	6
1	2009-05-15 07:57:00	0	7	2	7	6
1	2009-05-15 07:58:00	322	7	2	7	6
1	2009-05-15 07:59:00	98	7	2	7	6
1	2009-05-15 08:00:00	0	7	2	7	6
1	2009-05-15 08:01:00	0	8	2	7	6
1	2009-05-15 08:02:00	0	8	2	7	6
1	2009-05-15 08:03:00	5	8	2	7	6
1	2009-05-15 08:04:00	0	8	2	7	6
1	2009-05-15 08:05:00	0	8	2	7	6
1	2009-05-15 08:06:00	0	8	2	7	6
1	2009-05-15 08:07:00	0	8	2	7	6
1	2009-05-15 08:08:00	10	8	2	7	6
1	2009-05-15 08:09:00	0	8	2	7	6
1	2009-05-15 08:10:00	0	8	2	7	6
1	2009-05-15 08:11:00	0	8	2	7	6
1	2009-05-15 08:12:00	0	8	2	7	6
1	2009-05-15 08:13:00	0	8	2	7	6
1	2009-05-15 08:14:00	0	8	2	7	6
1	2009-05-15 08:15:00	0	8	2	7	6
1	2009-05-15 08:16:00	0	8	2	7	6
1	2009-05-15 08:17:00	10	8	2	7	6
1	2009-05-15 08:18:00	0	8	2	7	6
1	2009-05-15 08:19:00	0	8	2	7	6
1	2009-05-15 08:20:00	0	8	2	7	6
1	2009-05-15 08:21:00	0	8	2	7	6
1	2009-05-15 08:22:00	0	8	2	7	6
1	2009-05-15 08:23:00	0	8	2	7	6
1	2009-05-15 08:24:00	0	8	2	7	6
1	2009-05-15 08:25:00	0	8	2	7	6
1	2009-05-15 08:26:00	5	8	2	7	6
1	2009-05-15 08:27:00	10	8	2	7	6
1	2009-05-15 08:28:00	0	8	2	7	6
1	2009-05-15 08:29:00	92	8	2	7	6
1	2009-05-15 08:30:00	5	8	2	7	6
1	2009-05-15 08:31:00	5	8	2	7	6
1	2009-05-15 08:32:00	497	8	2	7	6
1	2009-05-15 08:33:00	630	8	2	7	6
1	2009-05-15 08:34:00	484	8	2	7	6
1	2009-05-15 08:35:00	497	8	2	7	6
1	2009-05-15 08:36:00	5	8	2	7	6
1	2009-05-15 08:37:00	0	8	2	7	6
1	2009-05-15 08:38:00	217	8	2	7	6
1	2009-05-15 08:39:00	689	8	2	7	6
1	2009-05-15 08:40:00	15	8	2	7	6
1	2009-05-15 08:41:00	0	8	2	7	6
1	2009-05-15 08:42:00	98	8	2	7	6
1	2009-05-15 08:43:00	79	8	2	7	6
1	2009-05-15 08:44:00	15	8	2	7	6
1	2009-05-15 08:45:00	0	8	2	7	6
1	2009-05-15 08:46:00	0	8	2	7	6
1	2009-05-15 08:47:00	0	8	2	7	6
1	2009-05-15 08:48:00	276	8	2	7	6
1	2009-05-15 08:49:00	751	8	2	7	6
1	2009-05-15 08:50:00	689	8	2	7	6
1	2009-05-15 08:51:00	908	8	2	7	6
1	2009-05-15 08:52:00	615	8	2	7	6
1	2009-05-15 08:53:00	615	8	2	7	6
1	2009-05-15 08:54:00	142	8	2	7	6
1	2009-05-15 08:55:00	92	8	2	7	6
1	2009-05-15 08:56:00	92	8	2	7	6
1	2009-05-15 08:57:00	10	8	2	7	6
1	2009-05-15 08:58:00	104	8	2	7	6
1	2009-05-15 08:59:00	73	8	2	7	6
1	2009-05-15 09:00:00	110	8	2	7	6
1	2009-05-15 09:01:00	225	9	2	7	6
1	2009-05-15 09:02:00	31	9	2	7	6
1	2009-05-15 09:03:00	0	9	2	7	6
1	2009-05-15 09:04:00	10	9	2	7	6
1	2009-05-15 09:05:00	52	9	2	7	6
1	2009-05-15 09:06:00	86	9	2	7	6
1	2009-05-15 09:07:00	5	9	2	7	6
1	2009-05-15 09:08:00	10	9	2	7	6
1	2009-05-15 09:09:00	0	9	2	7	6
1	2009-05-15 09:10:00	31	9	2	7	6
1	2009-05-15 09:11:00	10	9	2	7	6
1	2009-05-15 09:12:00	415	9	2	7	6
1	2009-05-15 09:13:00	26	9	2	7	6
1	2009-05-15 09:14:00	57	9	2	7	6
1	2009-05-15 09:15:00	5	9	2	7	6
1	2009-05-15 09:16:00	15	9	2	7	6
1	2009-05-15 09:17:00	10	9	2	7	6
1	2009-05-15 09:18:00	352	9	2	7	6
1	2009-05-15 09:19:00	57	9	2	7	6
1	2009-05-15 09:20:00	5	9	2	7	6
1	2009-05-15 09:21:00	21	9	2	7	6
1	2009-05-15 09:22:00	31	9	2	7	6
1	2009-05-15 09:23:00	0	9	2	7	6
1	2009-05-15 09:24:00	73	9	2	7	6
1	2009-05-15 09:25:00	0	9	2	7	6
1	2009-05-15 09:26:00	0	9	2	7	6
1	2009-05-15 09:27:00	0	9	2	7	6
1	2009-05-15 09:28:00	5	9	2	7	6
1	2009-05-15 09:29:00	0	9	2	7	6
1	2009-05-15 09:30:00	0	9	2	7	6
1	2009-05-15 09:31:00	5	9	2	7	6
1	2009-05-15 09:32:00	0	9	2	7	6
1	2009-05-15 09:33:00	0	9	2	7	6
1	2009-05-15 09:34:00	0	9	2	7	6
1	2009-05-15 09:35:00	0	9	2	7	6
1	2009-05-15 09:36:00	0	9	2	7	6
1	2009-05-15 09:37:00	0	9	2	7	6
1	2009-05-15 09:38:00	31	9	2	7	6
1	2009-05-15 09:39:00	0	9	2	7	6
1	2009-05-15 09:40:00	0	9	2	7	6
1	2009-05-15 09:41:00	0	9	2	7	6
1	2009-05-15 09:42:00	0	9	2	7	6
1	2009-05-15 09:43:00	0	9	2	7	6
1	2009-05-15 09:44:00	0	9	2	7	6
1	2009-05-15 09:45:00	0	9	2	7	6
1	2009-05-15 09:46:00	0	9	2	7	6
1	2009-05-15 09:47:00	0	9	2	7	6
1	2009-05-15 09:48:00	0	9	2	7	6
1	2009-05-15 09:49:00	0	9	2	7	6
1	2009-05-15 09:50:00	0	9	2	7	6
1	2009-05-15 09:51:00	0	9	2	7	6
1	2009-05-15 09:52:00	0	9	2	7	6
1	2009-05-15 09:53:00	0	9	2	7	6
1	2009-05-15 09:54:00	0	9	2	7	6
1	2009-05-15 09:55:00	0	9	2	7	6
1	2009-05-15 09:56:00	0	9	2	7	6
1	2009-05-15 09:57:00	0	9	2	7	6
1	2009-05-15 09:58:00	0	9	2	7	6
1	2009-05-15 09:59:00	0	9	2	7	6
1	2009-05-15 10:00:00	0	9	2	7	6
1	2009-05-15 10:01:00	10	10	2	7	6
1	2009-05-15 10:02:00	258	10	2	7	6
1	2009-05-15 10:03:00	46	10	2	7	6
1	2009-05-15 10:04:00	5	10	2	7	6
1	2009-05-15 10:05:00	15	10	2	7	6
1	2009-05-15 10:06:00	0	10	2	7	6
1	2009-05-15 10:07:00	0	10	2	7	6
1	2009-05-15 10:08:00	0	10	2	7	6
1	2009-05-15 10:09:00	0	10	2	7	6
1	2009-05-15 10:10:00	0	10	2	7	6
1	2009-05-15 10:11:00	0	10	2	7	6
1	2009-05-15 10:12:00	0	10	2	7	6
1	2009-05-15 10:13:00	0	10	2	7	6
1	2009-05-15 10:14:00	0	10	2	7	6
1	2009-05-15 10:15:00	0	10	2	7	6
1	2009-05-15 10:16:00	426	10	2	7	6
1	2009-05-15 10:17:00	110	10	2	7	6
1	2009-05-15 10:18:00	0	10	2	7	6
1	2009-05-15 10:19:00	0	10	2	7	6
1	2009-05-15 10:20:00	0	10	2	7	6
1	2009-05-15 10:21:00	0	10	2	7	6
1	2009-05-15 10:22:00	0	10	2	7	6
1	2009-05-15 10:23:00	67	10	2	7	6
1	2009-05-15 10:24:00	258	10	2	7	6
1	2009-05-15 10:25:00	0	10	2	7	6
1	2009-05-15 10:26:00	0	10	2	7	6
1	2009-05-15 10:27:00	0	10	2	7	6
1	2009-05-15 10:28:00	0	10	2	7	6
1	2009-05-15 10:29:00	0	10	2	7	6
1	2009-05-15 10:30:00	0	10	2	7	6
1	2009-05-15 10:31:00	0	10	2	7	6
1	2009-05-15 10:32:00	0	10	2	7	6
1	2009-05-15 10:33:00	0	10	2	7	6
1	2009-05-15 10:34:00	0	10	2	7	6
1	2009-05-15 10:35:00	0	10	2	7	6
1	2009-05-15 10:36:00	0	10	2	7	6
1	2009-05-15 10:37:00	21	10	2	7	6
1	2009-05-15 10:38:00	0	10	2	7	6
1	2009-05-15 10:39:00	0	10	2	7	6
1	2009-05-15 10:40:00	0	10	2	7	6
1	2009-05-15 10:41:00	0	10	2	7	6
1	2009-05-15 10:42:00	0	10	2	7	6
1	2009-05-15 10:43:00	0	10	2	7	6
1	2009-05-15 10:44:00	0	10	2	7	6
1	2009-05-15 10:45:00	0	10	2	7	6
1	2009-05-15 10:46:00	0	10	2	7	6
1	2009-05-15 10:47:00	36	10	2	7	6
1	2009-05-15 10:48:00	1843	10	2	7	6
1	2009-05-15 10:49:00	1535	10	2	7	6
1	2009-05-15 10:50:00	5124	10	2	7	6
1	2009-05-15 10:51:00	3619	10	2	7	6
1	2009-05-15 10:52:00	1623	10	2	7	6
1	2009-05-15 10:53:00	1426	10	2	7	6
1	2009-05-15 10:54:00	4000	10	2	7	6
1	2009-05-15 10:55:00	3217	10	2	7	6
1	2009-05-15 10:56:00	242	10	2	7	6
1	2009-05-15 10:57:00	21	10	2	7	6
1	2009-05-15 10:58:00	497	10	2	7	6
1	2009-05-15 10:59:00	415	10	2	7	6
1	2009-05-15 11:00:00	373	10	2	7	6
1	2009-05-15 11:01:00	601	11	2	7	6
1	2009-05-15 11:02:00	1944	11	2	7	6
1	2009-05-15 11:03:00	819	11	2	7	6
1	2009-05-15 11:04:00	534	11	2	7	6
1	2009-05-15 11:05:00	373	11	2	7	6
1	2009-05-15 11:06:00	164	11	2	7	6
1	2009-05-15 11:07:00	92	11	2	7	6
1	2009-05-15 11:08:00	171	11	2	7	6
1	2009-05-15 11:09:00	242	11	2	7	6
1	2009-05-15 11:10:00	673	11	2	7	6
1	2009-05-15 11:11:00	250	11	2	7	6
1	2009-05-15 11:12:00	819	11	2	7	6
1	2009-05-15 11:13:00	36	11	2	7	6
1	2009-05-15 11:14:00	46	11	2	7	6
1	2009-05-15 11:15:00	104	11	2	7	6
1	2009-05-15 11:16:00	98	11	2	7	6
1	2009-05-15 11:17:00	5	11	2	7	6
1	2009-05-15 11:18:00	157	11	2	7	6
1	2009-05-15 11:19:00	67	11	2	7	6
1	2009-05-15 11:20:00	209	11	2	7	6
1	2009-05-15 11:21:00	276	11	2	7	6
1	2009-05-15 11:22:00	142	11	2	7	6
1	2009-05-15 11:23:00	303	11	2	7	6
1	2009-05-15 11:24:00	276	11	2	7	6
1	2009-05-15 11:25:00	266	11	2	7	6
1	2009-05-15 11:26:00	313	11	2	7	6
1	2009-05-15 11:27:00	164	11	2	7	6
1	2009-05-15 11:28:00	129	11	2	7	6
1	2009-05-15 11:29:00	179	11	2	7	6
1	2009-05-15 11:30:00	98	11	2	7	6
1	2009-05-15 11:31:00	200	11	2	7	6
1	2009-05-15 11:32:00	250	11	2	7	6
1	2009-05-15 11:33:00	179	11	2	7	6
1	2009-05-15 11:34:00	276	11	2	7	6
1	2009-05-15 11:35:00	157	11	2	7	6
1	2009-05-15 11:36:00	117	11	2	7	6
1	2009-05-15 11:37:00	104	11	2	7	6
1	2009-05-15 11:38:00	79	11	2	7	6
1	2009-05-15 11:39:00	92	11	2	7	6
1	2009-05-15 11:40:00	200	11	2	7	6
1	2009-05-15 11:41:00	209	11	2	7	6
1	2009-05-15 11:42:00	86	11	2	7	6
1	2009-05-15 11:43:00	242	11	2	7	6
1	2009-05-15 11:44:00	250	11	2	7	6
1	2009-05-15 11:45:00	117	11	2	7	6
1	2009-05-15 11:46:00	150	11	2	7	6
1	2009-05-15 11:47:00	129	11	2	7	6
1	2009-05-15 11:48:00	250	11	2	7	6
1	2009-05-15 11:49:00	209	11	2	7	6
1	2009-05-15 11:50:00	258	11	2	7	6
1	2009-05-15 11:51:00	294	11	2	7	6
1	2009-05-15 11:52:00	186	11	2	7	6
1	2009-05-15 11:53:00	801	11	2	7	6
1	2009-05-15 11:54:00	1843	11	2	7	6
1	2009-05-15 11:55:00	1910	11	2	7	6
1	2009-05-15 11:56:00	785	11	2	7	6
1	2009-05-15 11:57:00	67	11	2	7	6
1	2009-05-15 11:58:00	1132	11	2	7	6
1	2009-05-15 11:59:00	1132	11	2	7	6
1	2009-05-15 12:00:00	1272	11	2	7	6
1	2009-05-15 12:01:00	373	12	3	7	6
1	2009-05-15 12:02:00	1272	12	3	7	6
1	2009-05-15 12:03:00	704	12	3	7	6
1	2009-05-15 12:04:00	171	12	3	7	6
1	2009-05-15 12:05:00	415	12	3	7	6
1	2009-05-15 12:06:00	561	12	3	7	6
1	2009-05-15 12:07:00	0	12	3	7	6
1	2009-05-15 12:08:00	5	12	3	7	6
1	2009-05-15 12:09:00	5	12	3	7	6
1	2009-05-15 12:10:00	5	12	3	7	6
1	2009-05-15 12:11:00	0	12	3	7	6
1	2009-05-15 12:12:00	0	12	3	7	6
1	2009-05-15 12:13:00	0	12	3	7	6
1	2009-05-15 12:14:00	157	12	3	7	6
1	2009-05-15 12:15:00	31	12	3	7	6
1	2009-05-15 12:16:00	0	12	3	7	6
1	2009-05-15 12:17:00	0	12	3	7	6
1	2009-05-15 12:18:00	0	12	3	7	6
1	2009-05-15 12:19:00	193	12	3	7	6
1	2009-05-15 12:20:00	0	12	3	7	6
1	2009-05-15 12:21:00	0	12	3	7	6
1	2009-05-15 12:22:00	0	12	3	7	6
1	2009-05-15 12:23:00	0	12	3	7	6
1	2009-05-15 12:24:00	0	12	3	7	6
1	2009-05-15 12:25:00	21	12	3	7	6
1	2009-05-15 12:26:00	52	12	3	7	6
1	2009-05-15 12:27:00	5	12	3	7	6
1	2009-05-15 12:28:00	15	12	3	7	6
1	2009-05-15 12:29:00	193	12	3	7	6
1	2009-05-15 12:30:00	15	12	3	7	6
1	2009-05-15 12:31:00	0	12	3	7	6
1	2009-05-15 12:32:00	0	12	3	7	6
1	2009-05-15 12:33:00	0	12	3	7	6
1	2009-05-15 12:34:00	0	12	3	7	6
1	2009-05-15 12:35:00	0	12	3	7	6
1	2009-05-15 12:36:00	0	12	3	7	6
1	2009-05-15 12:37:00	0	12	3	7	6
1	2009-05-15 12:38:00	10	12	3	7	6
1	2009-05-15 12:39:00	0	12	3	7	6
1	2009-05-15 12:40:00	209	12	3	7	6
1	2009-05-15 12:41:00	0	12	3	7	6
1	2009-05-15 12:42:00	0	12	3	7	6
1	2009-05-15 12:43:00	0	12	3	7	6
1	2009-05-15 12:44:00	0	12	3	7	6
1	2009-05-15 12:45:00	0	12	3	7	6
1	2009-05-15 12:46:00	0	12	3	7	6
1	2009-05-15 12:47:00	0	12	3	7	6
1	2009-05-15 12:48:00	31	12	3	7	6
1	2009-05-15 12:49:00	0	12	3	7	6
1	2009-05-15 12:50:00	0	12	3	7	6
1	2009-05-15 12:51:00	0	12	3	7	6
1	2009-05-15 12:52:00	0	12	3	7	6
1	2009-05-15 12:53:00	0	12	3	7	6
1	2009-05-15 12:54:00	0	12	3	7	6
1	2009-05-15 12:55:00	0	12	3	7	6
1	2009-05-15 12:56:00	0	12	3	7	6
1	2009-05-15 12:57:00	0	12	3	7	6
1	2009-05-15 12:58:00	0	12	3	7	6
1	2009-05-15 12:59:00	0	12	3	7	6
1	2009-05-15 13:00:00	0	12	3	7	6
1	2009-05-15 13:01:00	0	13	3	7	6
1	2009-05-15 13:02:00	0	13	3	7	6
1	2009-05-15 13:03:00	0	13	3	7	6
1	2009-05-15 13:04:00	5	13	3	7	6
1	2009-05-15 13:05:00	0	13	3	7	6
1	2009-05-15 13:06:00	0	13	3	7	6
1	2009-05-15 13:07:00	0	13	3	7	6
1	2009-05-15 13:08:00	0	13	3	7	6
1	2009-05-15 13:09:00	0	13	3	7	6
1	2009-05-15 13:10:00	0	13	3	7	6
1	2009-05-15 13:11:00	10	13	3	7	6
1	2009-05-15 13:12:00	0	13	3	7	6
1	2009-05-15 13:13:00	0	13	3	7	6
1	2009-05-15 13:14:00	0	13	3	7	6
1	2009-05-15 13:15:00	0	13	3	7	6
1	2009-05-15 13:16:00	31	13	3	7	6
1	2009-05-15 13:17:00	0	13	3	7	6
1	2009-05-15 13:18:00	0	13	3	7	6
1	2009-05-15 13:19:00	0	13	3	7	6
1	2009-05-15 13:20:00	0	13	3	7	6
1	2009-05-15 13:21:00	0	13	3	7	6
1	2009-05-15 13:22:00	0	13	3	7	6
1	2009-05-15 13:23:00	0	13	3	7	6
1	2009-05-15 13:24:00	0	13	3	7	6
1	2009-05-15 13:25:00	0	13	3	7	6
1	2009-05-15 13:26:00	0	13	3	7	6
1	2009-05-15 13:27:00	0	13	3	7	6
1	2009-05-15 13:28:00	0	13	3	7	6
1	2009-05-15 13:29:00	5	13	3	7	6
1	2009-05-15 13:30:00	0	13	3	7	6
1	2009-05-15 13:31:00	0	13	3	7	6
1	2009-05-15 13:32:00	0	13	3	7	6
1	2009-05-15 13:33:00	0	13	3	7	6
1	2009-05-15 13:34:00	0	13	3	7	6
1	2009-05-15 13:35:00	0	13	3	7	6
1	2009-05-15 13:36:00	0	13	3	7	6
1	2009-05-15 13:37:00	0	13	3	7	6
1	2009-05-15 13:38:00	0	13	3	7	6
1	2009-05-15 13:39:00	0	13	3	7	6
1	2009-05-15 13:40:00	0	13	3	7	6
1	2009-05-15 13:41:00	0	13	3	7	6
1	2009-05-15 13:42:00	0	13	3	7	6
1	2009-05-15 13:43:00	0	13	3	7	6
1	2009-05-15 13:44:00	0	13	3	7	6
1	2009-05-15 13:45:00	0	13	3	7	6
1	2009-05-15 13:46:00	0	13	3	7	6
1	2009-05-15 13:47:00	0	13	3	7	6
1	2009-05-15 13:48:00	0	13	3	7	6
1	2009-05-15 13:49:00	0	13	3	7	6
1	2009-05-15 13:50:00	0	13	3	7	6
1	2009-05-15 13:51:00	0	13	3	7	6
1	2009-05-15 13:52:00	0	13	3	7	6
1	2009-05-15 13:53:00	0	13	3	7	6
1	2009-05-15 13:54:00	0	13	3	7	6
1	2009-05-15 13:55:00	0	13	3	7	6
1	2009-05-15 13:56:00	10	13	3	7	6
1	2009-05-15 13:57:00	0	13	3	7	6
1	2009-05-15 13:58:00	21	13	3	7	6
1	2009-05-15 13:59:00	41	13	3	7	6
1	2009-05-15 14:00:00	0	13	3	7	6
1	2009-05-15 14:01:00	0	14	3	7	6
1	2009-05-15 14:02:00	0	14	3	7	6
1	2009-05-15 14:03:00	26	14	3	7	6
1	2009-05-15 14:04:00	0	14	3	7	6
1	2009-05-15 14:05:00	0	14	3	7	6
1	2009-05-15 14:06:00	26	14	3	7	6
1	2009-05-15 14:07:00	225	14	3	7	6
1	2009-05-15 14:08:00	21	14	3	7	6
1	2009-05-15 14:09:00	15	14	3	7	6
1	2009-05-15 14:10:00	0	14	3	7	6
1	2009-05-15 14:11:00	15	14	3	7	6
1	2009-05-15 14:12:00	0	14	3	7	6
1	2009-05-15 14:13:00	0	14	3	7	6
1	2009-05-15 14:14:00	5	14	3	7	6
1	2009-05-15 14:15:00	0	14	3	7	6
1	2009-05-15 14:16:00	0	14	3	7	6
1	2009-05-15 14:17:00	0	14	3	7	6
1	2009-05-15 14:18:00	15	14	3	7	6
1	2009-05-15 14:19:00	0	14	3	7	6
1	2009-05-15 14:20:00	26	14	3	7	6
1	2009-05-15 14:21:00	46	14	3	7	6
1	2009-05-15 14:22:00	10	14	3	7	6
1	2009-05-15 14:23:00	31	14	3	7	6
1	2009-05-15 14:24:00	26	14	3	7	6
1	2009-05-15 14:25:00	26	14	3	7	6
1	2009-05-15 14:26:00	0	14	3	7	6
1	2009-05-15 14:27:00	67	14	3	7	6
1	2009-05-15 14:28:00	472	14	3	7	6
1	2009-05-15 14:29:00	52	14	3	7	6
1	2009-05-15 14:30:00	0	14	3	7	6
1	2009-05-15 14:31:00	0	14	3	7	6
1	2009-05-15 14:32:00	242	14	3	7	6
1	2009-05-15 14:33:00	331	14	3	7	6
1	2009-05-15 14:34:00	303	14	3	7	6
1	2009-05-15 14:35:00	1479	14	3	7	6
1	2009-05-15 14:36:00	1089	14	3	7	6
1	2009-05-15 14:37:00	1155	14	3	7	6
1	2009-05-15 14:38:00	266	14	3	7	6
1	2009-05-15 14:39:00	1026	14	3	7	6
1	2009-05-15 14:40:00	751	14	3	7	6
1	2009-05-15 14:41:00	36	14	3	7	6
1	2009-05-15 14:42:00	217	14	3	7	6
1	2009-05-15 14:43:00	62	14	3	7	6
1	2009-05-15 14:44:00	5	14	3	7	6
1	2009-05-15 14:45:00	0	14	3	7	6
1	2009-05-15 14:46:00	5	14	3	7	6
1	2009-05-15 14:47:00	5	14	3	7	6
1	2009-05-15 14:48:00	735	14	3	7	6
1	2009-05-15 14:49:00	751	14	3	7	6
1	2009-05-15 14:50:00	5	14	3	7	6
1	2009-05-15 14:51:00	21	14	3	7	6
1	2009-05-15 14:52:00	15	14	3	7	6
1	2009-05-15 14:53:00	157	14	3	7	6
1	2009-05-15 14:54:00	285	14	3	7	6
1	2009-05-15 14:55:00	587	14	3	7	6
1	2009-05-15 14:56:00	0	14	3	7	6
1	2009-05-15 14:57:00	871	14	3	7	6
1	2009-05-15 14:58:00	209	14	3	7	6
1	2009-05-15 14:59:00	574	14	3	7	6
1	2009-05-15 15:00:00	258	14	3	7	6
1	2009-05-15 15:01:00	0	15	3	7	6
1	2009-05-15 15:02:00	0	15	3	7	6
1	2009-05-15 15:03:00	0	15	3	7	6
1	2009-05-15 15:04:00	157	15	3	7	6
1	2009-05-15 15:05:00	704	15	3	7	6
1	2009-05-15 15:06:00	5	15	3	7	6
1	2009-05-15 15:07:00	52	15	3	7	6
1	2009-05-15 15:08:00	15	15	3	7	6
1	2009-05-15 15:09:00	31	15	3	7	6
1	2009-05-15 15:10:00	0	15	3	7	6
1	2009-05-15 15:11:00	10	15	3	7	6
1	2009-05-15 15:12:00	362	15	3	7	6
1	2009-05-15 15:13:00	630	15	3	7	6
1	2009-05-15 15:14:00	393	15	3	7	6
1	2009-05-15 15:15:00	0	15	3	7	6
1	2009-05-15 15:16:00	719	15	3	7	6
1	2009-05-15 15:17:00	735	15	3	7	6
1	2009-05-15 15:18:00	534	15	3	7	6
1	2009-05-15 15:19:00	258	15	3	7	6
1	2009-05-15 15:20:00	362	15	3	7	6
1	2009-05-15 15:21:00	157	15	3	7	6
1	2009-05-15 15:22:00	785	15	3	7	6
1	2009-05-15 15:23:00	362	15	3	7	6
1	2009-05-15 15:24:00	92	15	3	7	6
1	2009-05-15 15:25:00	15	15	3	7	6
1	2009-05-15 15:26:00	1347	15	3	7	6
1	2009-05-15 15:27:00	217	15	3	7	6
1	2009-05-15 15:28:00	908	15	3	7	6
1	2009-05-15 15:29:00	331	15	3	7	6
1	2009-05-15 15:30:00	615	15	3	7	6
1	2009-05-15 15:31:00	438	15	3	7	6
1	2009-05-15 15:32:00	1623	15	3	7	6
1	2009-05-15 15:33:00	1426	15	3	7	6
1	2009-05-15 15:34:00	890	15	3	7	6
1	2009-05-15 15:35:00	460	15	3	7	6
1	2009-05-15 15:36:00	41	15	3	7	6
1	2009-05-15 15:37:00	52	15	3	7	6
1	2009-05-15 15:38:00	438	15	3	7	6
1	2009-05-15 15:39:00	819	15	3	7	6
1	2009-05-15 15:40:00	276	15	3	7	6
1	2009-05-15 15:41:00	547	15	3	7	6
1	2009-05-15 15:42:00	908	15	3	7	6
1	2009-05-15 15:43:00	31	15	3	7	6
1	2009-05-15 15:44:00	200	15	3	7	6
1	2009-05-15 15:45:00	1089	15	3	7	6
1	2009-05-15 15:46:00	62	15	3	7	6
1	2009-05-15 15:47:00	10	15	3	7	6
1	2009-05-15 15:48:00	0	15	3	7	6
1	2009-05-15 15:49:00	5	15	3	7	6
1	2009-05-15 15:50:00	21	15	3	7	6
1	2009-05-15 15:51:00	0	15	3	7	6
1	2009-05-15 15:52:00	5	15	3	7	6
1	2009-05-15 15:53:00	67	15	3	7	6
1	2009-05-15 15:54:00	73	15	3	7	6
1	2009-05-15 15:55:00	0	15	3	7	6
1	2009-05-15 15:56:00	5	15	3	7	6
1	2009-05-15 15:57:00	41	15	3	7	6
1	2009-05-15 15:58:00	26	15	3	7	6
1	2009-05-15 15:59:00	36	15	3	7	6
1	2009-05-15 16:00:00	36	15	3	7	6
1	2009-05-15 16:01:00	31	16	3	7	6
1	2009-05-15 16:02:00	0	16	3	7	6
1	2009-05-15 16:03:00	0	16	3	7	6
1	2009-05-15 16:04:00	0	16	3	7	6
1	2009-05-15 16:05:00	26	16	3	7	6
1	2009-05-15 16:06:00	46	16	3	7	6
1	2009-05-15 16:07:00	0	16	3	7	6
1	2009-05-15 16:08:00	0	16	3	7	6
1	2009-05-15 16:09:00	98	16	3	7	6
1	2009-05-15 16:10:00	673	16	3	7	6
1	2009-05-15 16:11:00	438	16	3	7	6
1	2009-05-15 16:12:00	164	16	3	7	6
1	2009-05-15 16:13:00	322	16	3	7	6
1	2009-05-15 16:14:00	98	16	3	7	6
1	2009-05-15 16:15:00	5	16	3	7	6
1	2009-05-15 16:16:00	0	16	3	7	6
1	2009-05-15 16:17:00	322	16	3	7	6
1	2009-05-15 16:18:00	0	16	3	7	6
1	2009-05-15 16:19:00	21	16	3	7	6
1	2009-05-15 16:20:00	0	16	3	7	6
1	2009-05-15 16:21:00	5	16	3	7	6
1	2009-05-15 16:22:00	5	16	3	7	6
1	2009-05-15 16:23:00	31	16	3	7	6
1	2009-05-15 16:24:00	10	16	3	7	6
1	2009-05-15 16:25:00	10	16	3	7	6
1	2009-05-15 16:26:00	0	16	3	7	6
1	2009-05-15 16:27:00	0	16	3	7	6
1	2009-05-15 16:28:00	10	16	3	7	6
1	2009-05-15 16:29:00	26	16	3	7	6
1	2009-05-15 16:30:00	352	16	3	7	6
1	2009-05-15 16:31:00	1373	16	3	7	6
1	2009-05-15 16:32:00	927	16	3	7	6
1	2009-05-15 16:33:00	659	16	3	7	6
1	2009-05-15 16:34:00	5	16	3	7	6
1	2009-05-15 16:35:00	258	16	3	7	6
1	2009-05-15 16:36:00	123	16	3	7	6
1	2009-05-15 16:37:00	0	16	3	7	6
1	2009-05-15 16:38:00	0	16	3	7	6
1	2009-05-15 16:39:00	393	16	3	7	6
1	2009-05-15 16:40:00	986	16	3	7	6
1	2009-05-15 16:41:00	615	16	3	7	6
1	2009-05-15 16:42:00	313	16	3	7	6
1	2009-05-15 16:43:00	98	16	3	7	6
1	2009-05-15 16:44:00	79	16	3	7	6
1	2009-05-15 16:45:00	21	16	3	7	6
1	2009-05-15 16:46:00	92	16	3	7	6
1	2009-05-15 16:47:00	135	16	3	7	6
1	2009-05-15 16:48:00	0	16	3	7	6
1	2009-05-15 16:49:00	31	16	3	7	6
1	2009-05-15 16:50:00	5	16	3	7	6
1	2009-05-15 16:51:00	15	16	3	7	6
1	2009-05-15 16:52:00	5	16	3	7	6
1	2009-05-15 16:53:00	0	16	3	7	6
1	2009-05-15 16:54:00	0	16	3	7	6
1	2009-05-15 16:55:00	15	16	3	7	6
1	2009-05-15 16:56:00	10	16	3	7	6
1	2009-05-15 16:57:00	5	16	3	7	6
1	2009-05-15 16:58:00	31	16	3	7	6
1	2009-05-15 16:59:00	426	16	3	7	6
1	2009-05-15 17:00:00	36	16	3	7	6
1	2009-05-15 17:01:00	41	17	3	7	6
1	2009-05-15 17:02:00	0	17	3	7	6
1	2009-05-15 17:03:00	10	17	3	7	6
1	2009-05-15 17:04:00	0	17	3	7	6
1	2009-05-15 17:05:00	0	17	3	7	6
1	2009-05-15 17:06:00	497	17	3	7	6
1	2009-05-15 17:07:00	15	17	3	7	6
1	2009-05-15 17:08:00	67	17	3	7	6
1	2009-05-15 17:09:00	79	17	3	7	6
1	2009-05-15 17:10:00	98	17	3	7	6
1	2009-05-15 17:11:00	92	17	3	7	6
1	2009-05-15 17:12:00	46	17	3	7	6
1	2009-05-15 17:13:00	193	17	3	7	6
1	2009-05-15 17:14:00	630	17	3	7	6
1	2009-05-15 17:15:00	0	17	3	7	6
1	2009-05-15 17:16:00	98	17	3	7	6
1	2009-05-15 17:17:00	373	17	3	7	6
1	2009-05-15 17:18:00	10	17	3	7	6
1	2009-05-15 17:19:00	200	17	3	7	6
1	2009-05-15 17:20:00	31	17	3	7	6
1	2009-05-15 17:21:00	15	17	3	7	6
1	2009-05-15 17:22:00	0	17	3	7	6
1	2009-05-15 17:23:00	21	17	3	7	6
1	2009-05-15 17:24:00	5	17	3	7	6
1	2009-05-15 17:25:00	86	17	3	7	6
1	2009-05-15 17:26:00	5	17	3	7	6
1	2009-05-15 17:27:00	10	17	3	7	6
1	2009-05-15 17:28:00	0	17	3	7	6
1	2009-05-15 17:29:00	31	17	3	7	6
1	2009-05-15 17:30:00	801	17	3	7	6
1	2009-05-15 17:31:00	801	17	3	7	6
1	2009-05-15 17:32:00	0	17	3	7	6
1	2009-05-15 17:33:00	0	17	3	7	6
1	2009-05-15 17:34:00	0	17	3	7	6
1	2009-05-15 17:35:00	258	17	3	7	6
1	2009-05-15 17:36:00	484	17	3	7	6
1	2009-05-15 17:37:00	10	17	3	7	6
1	2009-05-15 17:38:00	561	17	3	7	6
1	2009-05-15 17:39:00	460	17	3	7	6
1	2009-05-15 17:40:00	0	17	3	7	6
1	2009-05-15 17:41:00	0	17	3	7	6
1	2009-05-15 17:42:00	123	17	3	7	6
1	2009-05-15 17:43:00	217	17	3	7	6
1	2009-05-15 17:44:00	15	17	3	7	6
1	2009-05-15 17:45:00	150	17	3	7	6
1	2009-05-15 17:46:00	179	17	3	7	6
1	2009-05-15 17:47:00	0	17	3	7	6
1	2009-05-15 17:48:00	0	17	3	7	6
1	2009-05-15 17:49:00	0	17	3	7	6
1	2009-05-15 17:50:00	785	17	3	7	6
1	2009-05-15 17:51:00	1005	17	3	7	6
1	2009-05-15 17:52:00	785	17	3	7	6
1	2009-05-15 17:53:00	704	17	3	7	6
1	2009-05-15 17:54:00	735	17	3	7	6
1	2009-05-15 17:55:00	0	17	3	7	6
1	2009-05-15 17:56:00	908	17	3	7	6
1	2009-05-15 17:57:00	3327	17	3	7	6
1	2009-05-15 17:58:00	4642	17	3	7	6
1	2009-05-15 17:59:00	1810	17	3	7	6
1	2009-05-15 18:00:00	966	17	3	7	6
1	2009-05-15 18:01:00	426	18	4	7	6
1	2009-05-15 18:02:00	449	18	4	7	6
1	2009-05-15 18:03:00	233	18	4	7	6
1	2009-05-15 18:04:00	171	18	4	7	6
1	2009-05-15 18:05:00	186	18	4	7	6
1	2009-05-15 18:06:00	534	18	4	7	6
1	2009-05-15 18:07:00	186	18	4	7	6
1	2009-05-15 18:08:00	5	18	4	7	6
1	2009-05-15 18:09:00	164	18	4	7	6
1	2009-05-15 18:10:00	266	18	4	7	6
1	2009-05-15 18:11:00	0	18	4	7	6
1	2009-05-15 18:12:00	0	18	4	7	6
1	2009-05-15 18:13:00	5	18	4	7	6
1	2009-05-15 18:14:00	104	18	4	7	6
1	2009-05-15 18:15:00	62	18	4	7	6
1	2009-05-15 18:16:00	0	18	4	7	6
1	2009-05-15 18:17:00	10	18	4	7	6
1	2009-05-15 18:18:00	21	18	4	7	6
1	2009-05-15 18:19:00	86	18	4	7	6
1	2009-05-15 18:20:00	294	18	4	7	6
1	2009-05-15 18:21:00	233	18	4	7	6
1	2009-05-15 18:22:00	0	18	4	7	6
1	2009-05-15 18:23:00	0	18	4	7	6
1	2009-05-15 18:24:00	86	18	4	7	6
1	2009-05-15 18:25:00	426	18	4	7	6
1	2009-05-15 18:26:00	0	18	4	7	6
1	2009-05-15 18:27:00	110	18	4	7	6
1	2009-05-15 18:28:00	294	18	4	7	6
1	2009-05-15 18:29:00	10	18	4	7	6
1	2009-05-15 18:30:00	15	18	4	7	6
1	2009-05-15 18:31:00	460	18	4	7	6
1	2009-05-15 18:32:00	415	18	4	7	6
1	2009-05-15 18:33:00	10	18	4	7	6
1	2009-05-15 18:34:00	117	18	4	7	6
1	2009-05-15 18:35:00	285	18	4	7	6
1	2009-05-15 18:36:00	31	18	4	7	6
1	2009-05-15 18:37:00	449	18	4	7	6
1	2009-05-15 18:38:00	62	18	4	7	6
1	2009-05-15 18:39:00	15	18	4	7	6
1	2009-05-15 18:40:00	561	18	4	7	6
1	2009-05-15 18:41:00	509	18	4	7	6
1	2009-05-15 18:42:00	79	18	4	7	6
1	2009-05-15 18:43:00	294	18	4	7	6
1	2009-05-15 18:44:00	31	18	4	7	6
1	2009-05-15 18:45:00	0	18	4	7	6
1	2009-05-15 18:46:00	5	18	4	7	6
1	2009-05-15 18:47:00	5	18	4	7	6
1	2009-05-15 18:48:00	10	18	4	7	6
1	2009-05-15 18:49:00	123	18	4	7	6
1	2009-05-15 18:50:00	10	18	4	7	6
1	2009-05-15 18:51:00	135	18	4	7	6
1	2009-05-15 18:52:00	10	18	4	7	6
1	2009-05-15 18:53:00	36	18	4	7	6
1	2009-05-15 18:54:00	57	18	4	7	6
1	2009-05-15 18:55:00	86	18	4	7	6
1	2009-05-15 18:56:00	62	18	4	7	6
1	2009-05-15 18:57:00	52	18	4	7	6
1	2009-05-15 18:58:00	10	18	4	7	6
1	2009-05-15 18:59:00	0	18	4	7	6
1	2009-05-15 19:00:00	46	18	4	7	6
1	2009-05-15 19:01:00	0	19	4	7	6
1	2009-05-15 19:02:00	5	19	4	7	6
1	2009-05-15 19:03:00	67	19	4	7	6
1	2009-05-15 19:04:00	15	19	4	7	6
1	2009-05-15 19:05:00	31	19	4	7	6
1	2009-05-15 19:06:00	15	19	4	7	6
1	2009-05-15 19:07:00	26	19	4	7	6
1	2009-05-15 19:08:00	0	19	4	7	6
1	2009-05-15 19:09:00	15	19	4	7	6
1	2009-05-15 19:10:00	10	19	4	7	6
1	2009-05-15 19:11:00	561	19	4	7	6
1	2009-05-15 19:12:00	630	19	4	7	6
1	2009-05-15 19:13:00	751	19	4	7	6
1	2009-05-15 19:14:00	242	19	4	7	6
1	2009-05-15 19:15:00	5	19	4	7	6
1	2009-05-15 19:16:00	0	19	4	7	6
1	2009-05-15 19:17:00	10	19	4	7	6
1	2009-05-15 19:18:00	0	19	4	7	6
1	2009-05-15 19:19:00	5	19	4	7	6
1	2009-05-15 19:20:00	15	19	4	7	6
1	2009-05-15 19:21:00	547	19	4	7	6
1	2009-05-15 19:22:00	352	19	4	7	6
1	2009-05-15 19:23:00	1507	19	4	7	6
1	2009-05-15 19:24:00	331	19	4	7	6
1	2009-05-15 19:25:00	322	19	4	7	6
1	2009-05-15 19:26:00	393	19	4	7	6
1	2009-05-15 19:27:00	233	19	4	7	6
1	2009-05-15 19:28:00	41	19	4	7	6
1	2009-05-15 19:29:00	135	19	4	7	6
1	2009-05-15 19:30:00	294	19	4	7	6
1	2009-05-15 19:31:00	704	19	4	7	6
1	2009-05-15 19:32:00	2124	19	4	7	6
1	2009-05-15 19:33:00	484	19	4	7	6
1	2009-05-15 19:34:00	497	19	4	7	6
1	2009-05-15 19:35:00	233	19	4	7	6
1	2009-05-15 19:36:00	179	19	4	7	6
1	2009-05-15 19:37:00	303	19	4	7	6
1	2009-05-15 19:38:00	352	19	4	7	6
1	2009-05-15 19:39:00	250	19	4	7	6
1	2009-05-15 19:40:00	362	19	4	7	6
1	2009-05-15 19:41:00	0	19	4	7	6
1	2009-05-15 19:42:00	362	19	4	7	6
1	2009-05-15 19:43:00	472	19	4	7	6
1	2009-05-15 19:44:00	164	19	4	7	6
1	2009-05-15 19:45:00	15	19	4	7	6
1	2009-05-15 19:46:00	5	19	4	7	6
1	2009-05-15 19:47:00	15	19	4	7	6
1	2009-05-15 19:48:00	472	19	4	7	6
1	2009-05-15 19:49:00	460	19	4	7	6
1	2009-05-15 19:50:00	1426	19	4	7	6
1	2009-05-15 19:51:00	574	19	4	7	6
1	2009-05-15 19:52:00	1067	19	4	7	6
1	2009-05-15 19:53:00	735	19	4	7	6
1	2009-05-15 19:54:00	10	19	4	7	6
1	2009-05-15 19:55:00	86	19	4	7	6
1	2009-05-15 19:56:00	225	19	4	7	6
1	2009-05-15 19:57:00	1623	19	4	7	6
1	2009-05-15 19:58:00	1111	19	4	7	6
1	2009-05-15 19:59:00	41	19	4	7	6
1	2009-05-15 20:00:00	1224	19	4	7	6
1	2009-05-15 20:01:00	521	20	4	7	6
1	2009-05-15 20:02:00	200	20	4	7	6
1	2009-05-15 20:03:00	15	20	4	7	6
1	2009-05-15 20:04:00	276	20	4	7	6
1	2009-05-15 20:05:00	836	20	4	7	6
1	2009-05-15 20:06:00	1910	20	4	7	6
1	2009-05-15 20:07:00	908	20	4	7	6
1	2009-05-15 20:08:00	426	20	4	7	6
1	2009-05-15 20:09:00	1507	20	4	7	6
1	2009-05-15 20:10:00	1026	20	4	7	6
1	2009-05-15 20:11:00	1876	20	4	7	6
1	2009-05-15 20:12:00	2240	20	4	7	6
1	2009-05-15 20:13:00	472	20	4	7	6
1	2009-05-15 20:14:00	1132	20	4	7	6
1	2009-05-15 20:15:00	908	20	4	7	6
1	2009-05-15 20:16:00	1593	20	4	7	6
1	2009-05-15 20:17:00	217	20	4	7	6
1	2009-05-15 20:18:00	258	20	4	7	6
1	2009-05-15 20:19:00	342	20	4	7	6
1	2009-05-15 20:20:00	57	20	4	7	6
1	2009-05-15 20:21:00	331	20	4	7	6
1	2009-05-15 20:22:00	303	20	4	7	6
1	2009-05-15 20:23:00	200	20	4	7	6
1	2009-05-15 20:24:00	735	20	4	7	6
1	2009-05-15 20:25:00	342	20	4	7	6
1	2009-05-15 20:26:00	393	20	4	7	6
1	2009-05-15 20:27:00	342	20	4	7	6
1	2009-05-15 20:28:00	438	20	4	7	6
1	2009-05-15 20:29:00	303	20	4	7	6
1	2009-05-15 20:30:00	179	20	4	7	6
1	2009-05-15 20:31:00	266	20	4	7	6
1	2009-05-15 20:32:00	225	20	4	7	6
1	2009-05-15 20:33:00	258	20	4	7	6
1	2009-05-15 20:34:00	404	20	4	7	6
1	2009-05-15 20:35:00	193	20	4	7	6
1	2009-05-15 20:36:00	200	20	4	7	6
1	2009-05-15 20:37:00	135	20	4	7	6
1	2009-05-15 20:38:00	150	20	4	7	6
1	2009-05-15 20:39:00	294	20	4	7	6
1	2009-05-15 20:40:00	313	20	4	7	6
1	2009-05-15 20:41:00	179	20	4	7	6
1	2009-05-15 20:42:00	313	20	4	7	6
1	2009-05-15 20:43:00	164	20	4	7	6
1	2009-05-15 20:44:00	331	20	4	7	6
1	2009-05-15 20:45:00	129	20	4	7	6
1	2009-05-15 20:46:00	209	20	4	7	6
1	2009-05-15 20:47:00	200	20	4	7	6
1	2009-05-15 20:48:00	117	20	4	7	6
1	2009-05-15 20:49:00	150	20	4	7	6
1	2009-05-15 20:50:00	258	20	4	7	6
1	2009-05-15 20:51:00	362	20	4	7	6
1	2009-05-15 20:52:00	644	20	4	7	6
1	2009-05-15 20:53:00	1047	20	4	7	6
1	2009-05-15 20:54:00	801	20	4	7	6
1	2009-05-15 20:55:00	561	20	4	7	6
1	2009-05-15 20:56:00	854	20	4	7	6
1	2009-05-15 20:57:00	276	20	4	7	6
1	2009-05-15 20:58:00	171	20	4	7	6
1	2009-05-15 20:59:00	193	20	4	7	6
1	2009-05-15 21:00:00	193	20	4	7	6
1	2009-05-15 21:01:00	0	21	4	7	6
1	2009-05-15 21:02:00	0	21	4	7	6
1	2009-05-15 21:03:00	5	21	4	7	6
1	2009-05-15 21:04:00	250	21	4	7	6
1	2009-05-15 21:05:00	36	21	4	7	6
1	2009-05-15 21:06:00	0	21	4	7	6
1	2009-05-15 21:07:00	0	21	4	7	6
1	2009-05-15 21:08:00	15	21	4	7	6
1	2009-05-15 21:09:00	217	21	4	7	6
1	2009-05-15 21:10:00	673	21	4	7	6
1	2009-05-15 21:11:00	561	21	4	7	6
1	2009-05-15 21:12:00	362	21	4	7	6
1	2009-05-15 21:13:00	449	21	4	7	6
1	2009-05-15 21:14:00	5	21	4	7	6
1	2009-05-15 21:15:00	0	21	4	7	6
1	2009-05-15 21:16:00	0	21	4	7	6
1	2009-05-15 21:17:00	0	21	4	7	6
1	2009-05-15 21:18:00	26	21	4	7	6
1	2009-05-15 21:19:00	36	21	4	7	6
1	2009-05-15 21:20:00	10	21	4	7	6
1	2009-05-15 21:21:00	460	21	4	7	6
1	2009-05-15 21:22:00	587	21	4	7	6
1	2009-05-15 21:23:00	10	21	4	7	6
1	2009-05-15 21:24:00	285	21	4	7	6
1	2009-05-15 21:25:00	250	21	4	7	6
1	2009-05-15 21:26:00	21	21	4	7	6
1	2009-05-15 21:27:00	0	21	4	7	6
1	2009-05-15 21:28:00	0	21	4	7	6
1	2009-05-15 21:29:00	0	21	4	7	6
1	2009-05-15 21:30:00	0	21	4	7	6
1	2009-05-15 21:31:00	0	21	4	7	6
1	2009-05-15 21:32:00	5	21	4	7	6
1	2009-05-15 21:33:00	768	21	4	7	6
1	2009-05-15 21:34:00	225	21	4	7	6
1	2009-05-15 21:35:00	294	21	4	7	6
1	2009-05-15 21:36:00	0	21	4	7	6
1	2009-05-15 21:37:00	36	21	4	7	6
1	2009-05-15 21:38:00	0	21	4	7	6
1	2009-05-15 21:39:00	0	21	4	7	6
1	2009-05-15 21:40:00	0	21	4	7	6
1	2009-05-15 21:41:00	31	21	4	7	6
1	2009-05-15 21:42:00	209	21	4	7	6
1	2009-05-15 21:43:00	0	21	4	7	6
1	2009-05-15 21:44:00	0	21	4	7	6
1	2009-05-15 21:45:00	0	21	4	7	6
1	2009-05-15 21:46:00	0	21	4	7	6
1	2009-05-15 21:47:00	0	21	4	7	6
1	2009-05-15 21:48:00	0	21	4	7	6
1	2009-05-15 21:49:00	0	21	4	7	6
1	2009-05-15 21:50:00	0	21	4	7	6
1	2009-05-15 21:51:00	0	21	4	7	6
1	2009-05-15 21:52:00	0	21	4	7	6
1	2009-05-15 21:53:00	0	21	4	7	6
1	2009-05-15 21:54:00	0	21	4	7	6
1	2009-05-15 21:55:00	0	21	4	7	6
1	2009-05-15 21:56:00	0	21	4	7	6
1	2009-05-15 21:57:00	0	21	4	7	6
1	2009-05-15 21:58:00	0	21	4	7	6
1	2009-05-15 21:59:00	46	21	4	7	6
1	2009-05-15 22:00:00	0	21	4	7	6
1	2009-05-15 22:01:00	0	22	4	7	6
1	2009-05-15 22:02:00	21	22	4	7	6
1	2009-05-15 22:03:00	0	22	4	7	6
1	2009-05-15 22:04:00	21	22	4	7	6
1	2009-05-15 22:05:00	0	22	4	7	6
1	2009-05-15 22:06:00	31	22	4	7	6
1	2009-05-15 22:07:00	0	22	4	7	6
1	2009-05-15 22:08:00	0	22	4	7	6
1	2009-05-15 22:09:00	5	22	4	7	6
1	2009-05-15 22:10:00	21	22	4	7	6
1	2009-05-15 22:11:00	36	22	4	7	6
1	2009-05-15 22:12:00	31	22	4	7	6
1	2009-05-15 22:13:00	5	22	4	7	6
1	2009-05-15 22:14:00	26	22	4	7	6
1	2009-05-15 22:15:00	0	22	4	7	6
1	2009-05-15 22:16:00	0	22	4	7	6
1	2009-05-15 22:17:00	52	22	4	7	6
1	2009-05-15 22:18:00	36	22	4	7	6
1	2009-05-15 22:19:00	0	22	4	7	6
1	2009-05-15 22:20:00	0	22	4	7	6
1	2009-05-15 22:21:00	0	22	4	7	6
1	2009-05-15 22:22:00	0	22	4	7	6
1	2009-05-15 22:23:00	0	22	4	7	6
1	2009-05-15 22:24:00	0	22	4	7	6
1	2009-05-15 22:25:00	0	22	4	7	6
1	2009-05-15 22:26:00	31	22	4	7	6
1	2009-05-15 22:27:00	0	22	4	7	6
1	2009-05-15 22:28:00	0	22	4	7	6
1	2009-05-15 22:29:00	0	22	4	7	6
1	2009-05-15 22:30:00	0	22	4	7	6
1	2009-05-15 22:31:00	36	22	4	7	6
1	2009-05-15 22:32:00	0	22	4	7	6
1	2009-05-15 22:33:00	0	22	4	7	6
1	2009-05-15 22:34:00	0	22	4	7	6
1	2009-05-15 22:35:00	0	22	4	7	6
1	2009-05-15 22:36:00	0	22	4	7	6
1	2009-05-15 22:37:00	0	22	4	7	6
1	2009-05-15 22:38:00	21	22	4	7	6
1	2009-05-15 22:39:00	41	22	4	7	6
1	2009-05-15 22:40:00	36	22	4	7	6
1	2009-05-15 22:41:00	92	22	4	7	6
1	2009-05-15 22:42:00	0	22	4	7	6
1	2009-05-15 22:43:00	15	22	4	7	6
1	2009-05-15 22:44:00	46	22	4	7	6
1	2009-05-15 22:45:00	36	22	4	7	6
1	2009-05-15 22:46:00	21	22	4	7	6
1	2009-05-15 22:47:00	313	22	4	7	6
1	2009-05-15 22:48:00	0	22	4	7	6
1	2009-05-15 22:49:00	0	22	4	7	6
1	2009-05-15 22:50:00	26	22	4	7	6
1	2009-05-15 22:51:00	0	22	4	7	6
1	2009-05-15 22:52:00	10	22	4	7	6
1	2009-05-15 22:53:00	52	22	4	7	6
1	2009-05-15 22:54:00	0	22	4	7	6
1	2009-05-15 22:55:00	0	22	4	7	6
1	2009-05-15 22:56:00	0	22	4	7	6
1	2009-05-15 22:57:00	0	22	4	7	6
1	2009-05-15 22:58:00	0	22	4	7	6
1	2009-05-15 22:59:00	0	22	4	7	6
1	2009-05-15 23:00:00	0	22	4	7	6
1	2009-05-15 23:01:00	0	23	4	7	6
1	2009-05-15 23:02:00	0	23	4	7	6
1	2009-05-15 23:03:00	0	23	4	7	6
1	2009-05-15 23:04:00	5	23	4	7	6
1	2009-05-15 23:05:00	62	23	4	7	6
1	2009-05-15 23:06:00	0	23	4	7	6
1	2009-05-15 23:07:00	0	23	4	7	6
1	2009-05-15 23:08:00	0	23	4	7	6
1	2009-05-15 23:09:00	57	23	4	7	6
1	2009-05-15 23:10:00	0	23	4	7	6
1	2009-05-15 23:11:00	21	23	4	7	6
1	2009-05-15 23:12:00	0	23	4	7	6
1	2009-05-15 23:13:00	0	23	4	7	6
1	2009-05-15 23:14:00	0	23	4	7	6
1	2009-05-15 23:15:00	0	23	4	7	6
1	2009-05-15 23:16:00	0	23	4	7	6
1	2009-05-15 23:17:00	0	23	4	7	6
1	2009-05-15 23:18:00	0	23	4	7	6
1	2009-05-15 23:19:00	0	23	4	7	6
1	2009-05-15 23:20:00	0	23	4	7	6
1	2009-05-15 23:21:00	0	23	4	7	6
1	2009-05-15 23:22:00	472	23	4	7	6
1	2009-05-15 23:23:00	5	23	4	7	6
1	2009-05-15 23:24:00	0	23	4	7	6
1	2009-05-15 23:25:00	0	23	4	7	6
1	2009-05-15 23:26:00	0	23	4	7	6
1	2009-05-15 23:27:00	0	23	4	7	6
1	2009-05-15 23:28:00	0	23	4	7	6
1	2009-05-15 23:29:00	0	23	4	7	6
1	2009-05-15 23:30:00	0	23	4	7	6
1	2009-05-15 23:31:00	0	23	4	7	6
1	2009-05-15 23:32:00	0	23	4	7	6
1	2009-05-15 23:33:00	0	23	4	7	6
1	2009-05-15 23:34:00	0	23	4	7	6
1	2009-05-15 23:35:00	0	23	4	7	6
1	2009-05-15 23:36:00	0	23	4	7	6
1	2009-05-15 23:37:00	0	23	4	7	6
1	2009-05-15 23:38:00	0	23	4	7	6
1	2009-05-15 23:39:00	0	23	4	7	6
1	2009-05-15 23:40:00	0	23	4	7	6
1	2009-05-15 23:41:00	10	23	4	7	6
1	2009-05-15 23:42:00	26	23	4	7	6
1	2009-05-15 23:43:00	164	23	4	7	6
1	2009-05-15 23:44:00	157	23	4	7	6
1	2009-05-15 23:45:00	164	23	4	7	6
1	2009-05-15 23:46:00	0	23	4	7	6
1	2009-05-15 23:47:00	5	23	4	7	6
1	2009-05-15 23:48:00	26	23	4	7	6
1	2009-05-15 23:49:00	0	23	4	7	6
1	2009-05-15 23:50:00	0	23	4	7	6
1	2009-05-15 23:51:00	0	23	4	7	6
1	2009-05-15 23:52:00	0	23	4	7	6
1	2009-05-15 23:53:00	0	23	4	7	6
1	2009-05-15 23:54:00	0	23	4	7	6
1	2009-05-15 23:55:00	0	23	4	7	6
1	2009-05-15 23:56:00	41	23	4	7	6
1	2009-05-15 23:57:00	0	23	4	7	6
1	2009-05-15 23:58:00	0	23	4	7	6
1	2009-05-15 23:59:00	0	23	4	7	6
1	2009-05-16	0	23	4	7	6
1	2009-05-16 00:01:00	0	0	1	8	7
1	2009-05-16 00:02:00	0	0	1	8	7
1	2009-05-16 00:03:00	10	0	1	8	7
1	2009-05-16 00:04:00	0	0	1	8	7
1	2009-05-16 00:05:00	908	0	1	8	7
1	2009-05-16 00:06:00	41	0	1	8	7
1	2009-05-16 00:07:00	0	0	1	8	7
1	2009-05-16 00:08:00	0	0	1	8	7
1	2009-05-16 00:09:00	52	0	1	8	7
1	2009-05-16 00:10:00	266	0	1	8	7
1	2009-05-16 00:11:00	0	0	1	8	7
1	2009-05-16 00:12:00	0	0	1	8	7
1	2009-05-16 00:13:00	0	0	1	8	7
1	2009-05-16 00:14:00	10	0	1	8	7
1	2009-05-16 00:15:00	217	0	1	8	7
1	2009-05-16 00:16:00	0	0	1	8	7
1	2009-05-16 00:17:00	0	0	1	8	7
1	2009-05-16 00:18:00	0	0	1	8	7
1	2009-05-16 00:19:00	0	0	1	8	7
1	2009-05-16 00:20:00	0	0	1	8	7
1	2009-05-16 00:21:00	0	0	1	8	7
1	2009-05-16 00:22:00	0	0	1	8	7
1	2009-05-16 00:23:00	0	0	1	8	7
1	2009-05-16 00:24:00	0	0	1	8	7
1	2009-05-16 00:25:00	0	0	1	8	7
1	2009-05-16 00:26:00	0	0	1	8	7
1	2009-05-16 00:27:00	0	0	1	8	7
1	2009-05-16 00:28:00	0	0	1	8	7
1	2009-05-16 00:29:00	0	0	1	8	7
1	2009-05-16 00:30:00	0	0	1	8	7
1	2009-05-16 00:31:00	0	0	1	8	7
1	2009-05-16 00:32:00	0	0	1	8	7
1	2009-05-16 00:33:00	0	0	1	8	7
1	2009-05-16 00:34:00	0	0	1	8	7
1	2009-05-16 00:35:00	0	0	1	8	7
1	2009-05-16 00:36:00	0	0	1	8	7
1	2009-05-16 00:37:00	0	0	1	8	7
1	2009-05-16 00:38:00	0	0	1	8	7
1	2009-05-16 00:39:00	0	0	1	8	7
1	2009-05-16 00:40:00	0	0	1	8	7
1	2009-05-16 00:41:00	0	0	1	8	7
1	2009-05-16 00:42:00	0	0	1	8	7
1	2009-05-16 00:43:00	0	0	1	8	7
1	2009-05-16 00:44:00	0	0	1	8	7
1	2009-05-16 00:45:00	0	0	1	8	7
1	2009-05-16 00:46:00	0	0	1	8	7
1	2009-05-16 00:47:00	0	0	1	8	7
1	2009-05-16 00:48:00	0	0	1	8	7
1	2009-05-16 00:49:00	98	0	1	8	7
1	2009-05-16 00:50:00	41	0	1	8	7
1	2009-05-16 00:51:00	0	0	1	8	7
1	2009-05-16 00:52:00	31	0	1	8	7
1	2009-05-16 00:53:00	0	0	1	8	7
1	2009-05-16 00:54:00	0	0	1	8	7
1	2009-05-16 00:55:00	0	0	1	8	7
1	2009-05-16 00:56:00	0	0	1	8	7
1	2009-05-16 00:57:00	0	0	1	8	7
1	2009-05-16 00:58:00	0	0	1	8	7
1	2009-05-16 00:59:00	0	0	1	8	7
1	2009-05-16 01:00:00	0	0	1	8	7
1	2009-05-16 01:01:00	0	1	1	8	7
1	2009-05-16 01:02:00	0	1	1	8	7
1	2009-05-16 01:03:00	0	1	1	8	7
1	2009-05-16 01:04:00	0	1	1	8	7
1	2009-05-16 01:05:00	0	1	1	8	7
1	2009-05-16 01:06:00	0	1	1	8	7
1	2009-05-16 01:07:00	0	1	1	8	7
1	2009-05-16 01:08:00	0	1	1	8	7
1	2009-05-16 01:09:00	0	1	1	8	7
1	2009-05-16 01:10:00	0	1	1	8	7
1	2009-05-16 01:11:00	0	1	1	8	7
1	2009-05-16 01:12:00	0	1	1	8	7
1	2009-05-16 01:13:00	0	1	1	8	7
1	2009-05-16 01:14:00	0	1	1	8	7
1	2009-05-16 01:15:00	0	1	1	8	7
1	2009-05-16 01:16:00	0	1	1	8	7
1	2009-05-16 01:17:00	0	1	1	8	7
1	2009-05-16 01:18:00	0	1	1	8	7
1	2009-05-16 01:19:00	0	1	1	8	7
1	2009-05-16 01:20:00	0	1	1	8	7
1	2009-05-16 01:21:00	0	1	1	8	7
1	2009-05-16 01:22:00	0	1	1	8	7
1	2009-05-16 01:23:00	0	1	1	8	7
1	2009-05-16 01:24:00	0	1	1	8	7
1	2009-05-16 01:25:00	0	1	1	8	7
1	2009-05-16 01:26:00	0	1	1	8	7
1	2009-05-16 01:27:00	0	1	1	8	7
1	2009-05-16 01:28:00	0	1	1	8	7
1	2009-05-16 01:29:00	0	1	1	8	7
1	2009-05-16 01:30:00	0	1	1	8	7
1	2009-05-16 01:31:00	0	1	1	8	7
1	2009-05-16 01:32:00	0	1	1	8	7
1	2009-05-16 01:33:00	0	1	1	8	7
1	2009-05-16 01:34:00	0	1	1	8	7
1	2009-05-16 01:35:00	0	1	1	8	7
1	2009-05-16 01:36:00	0	1	1	8	7
1	2009-05-16 01:37:00	0	1	1	8	7
1	2009-05-16 01:38:00	0	1	1	8	7
1	2009-05-16 01:39:00	0	1	1	8	7
1	2009-05-16 01:40:00	0	1	1	8	7
1	2009-05-16 01:41:00	31	1	1	8	7
1	2009-05-16 01:42:00	0	1	1	8	7
1	2009-05-16 01:43:00	0	1	1	8	7
1	2009-05-16 01:44:00	0	1	1	8	7
1	2009-05-16 01:45:00	0	1	1	8	7
1	2009-05-16 01:46:00	0	1	1	8	7
1	2009-05-16 01:47:00	0	1	1	8	7
1	2009-05-16 01:48:00	0	1	1	8	7
1	2009-05-16 01:49:00	0	1	1	8	7
1	2009-05-16 01:50:00	0	1	1	8	7
1	2009-05-16 01:51:00	0	1	1	8	7
1	2009-05-16 01:52:00	0	1	1	8	7
1	2009-05-16 01:53:00	0	1	1	8	7
1	2009-05-16 01:54:00	0	1	1	8	7
1	2009-05-16 01:55:00	0	1	1	8	7
1	2009-05-16 01:56:00	0	1	1	8	7
1	2009-05-16 01:57:00	0	1	1	8	7
1	2009-05-16 01:58:00	0	1	1	8	7
1	2009-05-16 01:59:00	0	1	1	8	7
1	2009-05-16 02:00:00	0	1	1	8	7
1	2009-05-16 02:01:00	0	2	1	8	7
1	2009-05-16 02:02:00	0	2	1	8	7
1	2009-05-16 02:03:00	0	2	1	8	7
1	2009-05-16 02:04:00	5	2	1	8	7
1	2009-05-16 02:05:00	21	2	1	8	7
1	2009-05-16 02:06:00	0	2	1	8	7
1	2009-05-16 02:07:00	0	2	1	8	7
1	2009-05-16 02:08:00	0	2	1	8	7
1	2009-05-16 02:09:00	0	2	1	8	7
1	2009-05-16 02:10:00	0	2	1	8	7
1	2009-05-16 02:11:00	0	2	1	8	7
1	2009-05-16 02:12:00	0	2	1	8	7
1	2009-05-16 02:13:00	0	2	1	8	7
1	2009-05-16 02:14:00	0	2	1	8	7
1	2009-05-16 02:15:00	0	2	1	8	7
1	2009-05-16 02:16:00	0	2	1	8	7
1	2009-05-16 02:17:00	0	2	1	8	7
1	2009-05-16 02:18:00	0	2	1	8	7
1	2009-05-16 02:19:00	0	2	1	8	7
1	2009-05-16 02:20:00	0	2	1	8	7
1	2009-05-16 02:21:00	0	2	1	8	7
1	2009-05-16 02:22:00	0	2	1	8	7
1	2009-05-16 02:23:00	0	2	1	8	7
1	2009-05-16 02:24:00	0	2	1	8	7
1	2009-05-16 02:25:00	0	2	1	8	7
1	2009-05-16 02:26:00	0	2	1	8	7
1	2009-05-16 02:27:00	0	2	1	8	7
1	2009-05-16 02:28:00	0	2	1	8	7
1	2009-05-16 02:29:00	0	2	1	8	7
1	2009-05-16 02:30:00	0	2	1	8	7
1	2009-05-16 02:31:00	0	2	1	8	7
1	2009-05-16 02:32:00	0	2	1	8	7
1	2009-05-16 02:33:00	0	2	1	8	7
1	2009-05-16 02:34:00	0	2	1	8	7
1	2009-05-16 02:35:00	0	2	1	8	7
1	2009-05-16 02:36:00	0	2	1	8	7
1	2009-05-16 02:37:00	0	2	1	8	7
1	2009-05-16 02:38:00	0	2	1	8	7
1	2009-05-16 02:39:00	0	2	1	8	7
1	2009-05-16 02:40:00	0	2	1	8	7
1	2009-05-16 02:41:00	0	2	1	8	7
1	2009-05-16 02:42:00	0	2	1	8	7
1	2009-05-16 02:43:00	0	2	1	8	7
1	2009-05-16 02:44:00	0	2	1	8	7
1	2009-05-16 02:45:00	0	2	1	8	7
1	2009-05-16 02:46:00	10	2	1	8	7
1	2009-05-16 02:47:00	36	2	1	8	7
1	2009-05-16 02:48:00	0	2	1	8	7
1	2009-05-16 02:49:00	0	2	1	8	7
1	2009-05-16 02:50:00	0	2	1	8	7
1	2009-05-16 02:51:00	0	2	1	8	7
1	2009-05-16 02:52:00	0	2	1	8	7
1	2009-05-16 02:53:00	0	2	1	8	7
1	2009-05-16 02:54:00	0	2	1	8	7
1	2009-05-16 02:55:00	0	2	1	8	7
1	2009-05-16 02:56:00	0	2	1	8	7
1	2009-05-16 02:57:00	0	2	1	8	7
1	2009-05-16 02:58:00	0	2	1	8	7
1	2009-05-16 02:59:00	10	2	1	8	7
1	2009-05-16 03:00:00	0	2	1	8	7
1	2009-05-16 03:01:00	0	3	1	8	7
1	2009-05-16 03:02:00	0	3	1	8	7
1	2009-05-16 03:03:00	0	3	1	8	7
1	2009-05-16 03:04:00	0	3	1	8	7
1	2009-05-16 03:05:00	0	3	1	8	7
1	2009-05-16 03:06:00	15	3	1	8	7
1	2009-05-16 03:07:00	0	3	1	8	7
1	2009-05-16 03:08:00	0	3	1	8	7
1	2009-05-16 03:09:00	0	3	1	8	7
1	2009-05-16 03:10:00	0	3	1	8	7
1	2009-05-16 03:11:00	0	3	1	8	7
1	2009-05-16 03:12:00	0	3	1	8	7
1	2009-05-16 03:13:00	31	3	1	8	7
1	2009-05-16 03:14:00	0	3	1	8	7
1	2009-05-16 03:15:00	0	3	1	8	7
1	2009-05-16 03:16:00	0	3	1	8	7
1	2009-05-16 03:17:00	0	3	1	8	7
1	2009-05-16 03:18:00	0	3	1	8	7
1	2009-05-16 03:19:00	0	3	1	8	7
1	2009-05-16 03:20:00	0	3	1	8	7
1	2009-05-16 03:21:00	0	3	1	8	7
1	2009-05-16 03:22:00	0	3	1	8	7
1	2009-05-16 03:23:00	0	3	1	8	7
1	2009-05-16 03:24:00	0	3	1	8	7
1	2009-05-16 03:25:00	0	3	1	8	7
1	2009-05-16 03:26:00	242	3	1	8	7
1	2009-05-16 03:27:00	0	3	1	8	7
1	2009-05-16 03:28:00	472	3	1	8	7
1	2009-05-16 03:29:00	0	3	1	8	7
1	2009-05-16 03:30:00	0	3	1	8	7
1	2009-05-16 03:31:00	15	3	1	8	7
1	2009-05-16 03:32:00	0	3	1	8	7
1	2009-05-16 03:33:00	0	3	1	8	7
1	2009-05-16 03:34:00	62	3	1	8	7
1	2009-05-16 03:35:00	0	3	1	8	7
1	2009-05-16 03:36:00	0	3	1	8	7
1	2009-05-16 03:37:00	0	3	1	8	7
1	2009-05-16 03:38:00	0	3	1	8	7
1	2009-05-16 03:39:00	0	3	1	8	7
1	2009-05-16 03:40:00	0	3	1	8	7
1	2009-05-16 03:41:00	0	3	1	8	7
1	2009-05-16 03:42:00	0	3	1	8	7
1	2009-05-16 03:43:00	0	3	1	8	7
1	2009-05-16 03:44:00	0	3	1	8	7
1	2009-05-16 03:45:00	0	3	1	8	7
1	2009-05-16 03:46:00	0	3	1	8	7
1	2009-05-16 03:47:00	0	3	1	8	7
1	2009-05-16 03:48:00	0	3	1	8	7
1	2009-05-16 03:49:00	0	3	1	8	7
1	2009-05-16 03:50:00	0	3	1	8	7
1	2009-05-16 03:51:00	0	3	1	8	7
1	2009-05-16 03:52:00	0	3	1	8	7
1	2009-05-16 03:53:00	5	3	1	8	7
1	2009-05-16 03:54:00	0	3	1	8	7
1	2009-05-16 03:55:00	21	3	1	8	7
1	2009-05-16 03:56:00	0	3	1	8	7
1	2009-05-16 03:57:00	0	3	1	8	7
1	2009-05-16 03:58:00	0	3	1	8	7
1	2009-05-16 03:59:00	0	3	1	8	7
1	2009-05-16 04:00:00	0	3	1	8	7
1	2009-05-16 04:01:00	0	4	1	8	7
1	2009-05-16 04:02:00	0	4	1	8	7
1	2009-05-16 04:03:00	0	4	1	8	7
1	2009-05-16 04:04:00	0	4	1	8	7
1	2009-05-16 04:05:00	0	4	1	8	7
1	2009-05-16 04:06:00	0	4	1	8	7
1	2009-05-16 04:07:00	0	4	1	8	7
1	2009-05-16 04:08:00	0	4	1	8	7
1	2009-05-16 04:09:00	0	4	1	8	7
1	2009-05-16 04:10:00	0	4	1	8	7
1	2009-05-16 04:11:00	0	4	1	8	7
1	2009-05-16 04:12:00	0	4	1	8	7
1	2009-05-16 04:13:00	0	4	1	8	7
1	2009-05-16 04:14:00	0	4	1	8	7
1	2009-05-16 04:15:00	0	4	1	8	7
1	2009-05-16 04:16:00	0	4	1	8	7
1	2009-05-16 04:17:00	0	4	1	8	7
1	2009-05-16 04:18:00	0	4	1	8	7
1	2009-05-16 04:19:00	0	4	1	8	7
1	2009-05-16 04:20:00	0	4	1	8	7
1	2009-05-16 04:21:00	0	4	1	8	7
1	2009-05-16 04:22:00	0	4	1	8	7
1	2009-05-16 04:23:00	0	4	1	8	7
1	2009-05-16 04:24:00	0	4	1	8	7
1	2009-05-16 04:25:00	0	4	1	8	7
1	2009-05-16 04:26:00	0	4	1	8	7
1	2009-05-16 04:27:00	0	4	1	8	7
1	2009-05-16 04:28:00	0	4	1	8	7
1	2009-05-16 04:29:00	0	4	1	8	7
1	2009-05-16 04:30:00	0	4	1	8	7
1	2009-05-16 04:31:00	5	4	1	8	7
1	2009-05-16 04:32:00	10	4	1	8	7
1	2009-05-16 04:33:00	0	4	1	8	7
1	2009-05-16 04:34:00	0	4	1	8	7
1	2009-05-16 04:35:00	0	4	1	8	7
1	2009-05-16 04:36:00	0	4	1	8	7
1	2009-05-16 04:37:00	0	4	1	8	7
1	2009-05-16 04:38:00	0	4	1	8	7
1	2009-05-16 04:39:00	0	4	1	8	7
1	2009-05-16 04:40:00	0	4	1	8	7
1	2009-05-16 04:41:00	0	4	1	8	7
1	2009-05-16 04:42:00	0	4	1	8	7
1	2009-05-16 04:43:00	0	4	1	8	7
1	2009-05-16 04:44:00	10	4	1	8	7
1	2009-05-16 04:45:00	0	4	1	8	7
1	2009-05-16 04:46:00	0	4	1	8	7
1	2009-05-16 04:47:00	0	4	1	8	7
1	2009-05-16 04:48:00	0	4	1	8	7
1	2009-05-16 04:49:00	0	4	1	8	7
1	2009-05-16 04:50:00	0	4	1	8	7
1	2009-05-16 04:51:00	0	4	1	8	7
1	2009-05-16 04:52:00	0	4	1	8	7
1	2009-05-16 04:53:00	0	4	1	8	7
1	2009-05-16 04:54:00	10	4	1	8	7
1	2009-05-16 04:55:00	0	4	1	8	7
1	2009-05-16 04:56:00	0	4	1	8	7
1	2009-05-16 04:57:00	0	4	1	8	7
1	2009-05-16 04:58:00	0	4	1	8	7
1	2009-05-16 04:59:00	0	4	1	8	7
1	2009-05-16 05:00:00	0	4	1	8	7
1	2009-05-16 05:01:00	0	5	1	8	7
1	2009-05-16 05:02:00	0	5	1	8	7
1	2009-05-16 05:03:00	0	5	1	8	7
1	2009-05-16 05:04:00	0	5	1	8	7
1	2009-05-16 05:05:00	0	5	1	8	7
1	2009-05-16 05:06:00	0	5	1	8	7
1	2009-05-16 05:07:00	0	5	1	8	7
1	2009-05-16 05:08:00	0	5	1	8	7
1	2009-05-16 05:09:00	0	5	1	8	7
1	2009-05-16 05:10:00	0	5	1	8	7
1	2009-05-16 05:11:00	0	5	1	8	7
1	2009-05-16 05:12:00	0	5	1	8	7
1	2009-05-16 05:13:00	0	5	1	8	7
1	2009-05-16 05:14:00	0	5	1	8	7
1	2009-05-16 05:15:00	0	5	1	8	7
1	2009-05-16 05:16:00	0	5	1	8	7
1	2009-05-16 05:17:00	0	5	1	8	7
1	2009-05-16 05:18:00	0	5	1	8	7
1	2009-05-16 05:19:00	0	5	1	8	7
1	2009-05-16 05:20:00	0	5	1	8	7
1	2009-05-16 05:21:00	0	5	1	8	7
1	2009-05-16 05:22:00	0	5	1	8	7
1	2009-05-16 05:23:00	0	5	1	8	7
1	2009-05-16 05:24:00	0	5	1	8	7
1	2009-05-16 05:25:00	0	5	1	8	7
1	2009-05-16 05:26:00	0	5	1	8	7
1	2009-05-16 05:27:00	0	5	1	8	7
1	2009-05-16 05:28:00	0	5	1	8	7
1	2009-05-16 05:29:00	0	5	1	8	7
1	2009-05-16 05:30:00	0	5	1	8	7
1	2009-05-16 05:31:00	5	5	1	8	7
1	2009-05-16 05:32:00	0	5	1	8	7
1	2009-05-16 05:33:00	21	5	1	8	7
1	2009-05-16 05:34:00	0	5	1	8	7
1	2009-05-16 05:35:00	0	5	1	8	7
1	2009-05-16 05:36:00	179	5	1	8	7
1	2009-05-16 05:37:00	0	5	1	8	7
1	2009-05-16 05:38:00	0	5	1	8	7
1	2009-05-16 05:39:00	0	5	1	8	7
1	2009-05-16 05:40:00	0	5	1	8	7
1	2009-05-16 05:41:00	0	5	1	8	7
1	2009-05-16 05:42:00	0	5	1	8	7
1	2009-05-16 05:43:00	0	5	1	8	7
1	2009-05-16 05:44:00	46	5	1	8	7
1	2009-05-16 05:45:00	0	5	1	8	7
1	2009-05-16 05:46:00	0	5	1	8	7
1	2009-05-16 05:47:00	0	5	1	8	7
1	2009-05-16 05:48:00	0	5	1	8	7
1	2009-05-16 05:49:00	0	5	1	8	7
1	2009-05-16 05:50:00	0	5	1	8	7
1	2009-05-16 05:51:00	0	5	1	8	7
1	2009-05-16 05:52:00	0	5	1	8	7
1	2009-05-16 05:53:00	0	5	1	8	7
1	2009-05-16 05:54:00	0	5	1	8	7
1	2009-05-16 05:55:00	0	5	1	8	7
1	2009-05-16 05:56:00	0	5	1	8	7
1	2009-05-16 05:57:00	0	5	1	8	7
1	2009-05-16 05:58:00	0	5	1	8	7
1	2009-05-16 05:59:00	0	5	1	8	7
1	2009-05-16 06:00:00	0	5	1	8	7
1	2009-05-16 06:01:00	0	6	2	8	7
1	2009-05-16 06:02:00	0	6	2	8	7
1	2009-05-16 06:03:00	0	6	2	8	7
1	2009-05-16 06:04:00	0	6	2	8	7
1	2009-05-16 06:05:00	0	6	2	8	7
1	2009-05-16 06:06:00	0	6	2	8	7
1	2009-05-16 06:07:00	0	6	2	8	7
1	2009-05-16 06:08:00	26	6	2	8	7
1	2009-05-16 06:09:00	5	6	2	8	7
1	2009-05-16 06:10:00	0	6	2	8	7
1	2009-05-16 06:11:00	0	6	2	8	7
1	2009-05-16 06:12:00	0	6	2	8	7
1	2009-05-16 06:13:00	0	6	2	8	7
1	2009-05-16 06:14:00	0	6	2	8	7
1	2009-05-16 06:15:00	0	6	2	8	7
1	2009-05-16 06:16:00	0	6	2	8	7
1	2009-05-16 06:17:00	0	6	2	8	7
1	2009-05-16 06:18:00	0	6	2	8	7
1	2009-05-16 06:19:00	0	6	2	8	7
1	2009-05-16 06:20:00	0	6	2	8	7
1	2009-05-16 06:21:00	0	6	2	8	7
1	2009-05-16 06:22:00	0	6	2	8	7
1	2009-05-16 06:23:00	0	6	2	8	7
1	2009-05-16 06:24:00	142	6	2	8	7
1	2009-05-16 06:25:00	117	6	2	8	7
1	2009-05-16 06:26:00	0	6	2	8	7
1	2009-05-16 06:27:00	0	6	2	8	7
1	2009-05-16 06:28:00	0	6	2	8	7
1	2009-05-16 06:29:00	0	6	2	8	7
1	2009-05-16 06:30:00	0	6	2	8	7
1	2009-05-16 06:31:00	0	6	2	8	7
1	2009-05-16 06:32:00	0	6	2	8	7
1	2009-05-16 06:33:00	0	6	2	8	7
1	2009-05-16 06:34:00	0	6	2	8	7
1	2009-05-16 06:35:00	0	6	2	8	7
1	2009-05-16 06:36:00	0	6	2	8	7
1	2009-05-16 06:37:00	0	6	2	8	7
1	2009-05-16 06:38:00	0	6	2	8	7
1	2009-05-16 06:39:00	0	6	2	8	7
1	2009-05-16 06:40:00	0	6	2	8	7
1	2009-05-16 06:41:00	0	6	2	8	7
1	2009-05-16 06:42:00	0	6	2	8	7
1	2009-05-16 06:43:00	0	6	2	8	7
1	2009-05-16 06:44:00	57	6	2	8	7
1	2009-05-16 06:45:00	0	6	2	8	7
1	2009-05-16 06:46:00	0	6	2	8	7
1	2009-05-16 06:47:00	0	6	2	8	7
1	2009-05-16 06:48:00	0	6	2	8	7
1	2009-05-16 06:49:00	0	6	2	8	7
1	2009-05-16 06:50:00	0	6	2	8	7
1	2009-05-16 06:51:00	0	6	2	8	7
1	2009-05-16 06:52:00	0	6	2	8	7
1	2009-05-16 06:53:00	26	6	2	8	7
1	2009-05-16 06:54:00	67	6	2	8	7
1	2009-05-16 06:55:00	86	6	2	8	7
1	2009-05-16 06:56:00	26	6	2	8	7
1	2009-05-16 06:57:00	10	6	2	8	7
1	2009-05-16 06:58:00	5	6	2	8	7
1	2009-05-16 06:59:00	67	6	2	8	7
1	2009-05-16 07:00:00	31	6	2	8	7
1	2009-05-16 07:01:00	31	7	2	8	7
1	2009-05-16 07:02:00	41	7	2	8	7
1	2009-05-16 07:03:00	179	7	2	8	7
1	2009-05-16 07:04:00	73	7	2	8	7
1	2009-05-16 07:05:00	67	7	2	8	7
1	2009-05-16 07:06:00	164	7	2	8	7
1	2009-05-16 07:07:00	1778	7	2	8	7
1	2009-05-16 07:08:00	1111	7	2	8	7
1	2009-05-16 07:09:00	1201	7	2	8	7
1	2009-05-16 07:10:00	1201	7	2	8	7
1	2009-05-16 07:11:00	2319	7	2	8	7
1	2009-05-16 07:12:00	1593	7	2	8	7
1	2009-05-16 07:13:00	819	7	2	8	7
1	2009-05-16 07:14:00	352	7	2	8	7
1	2009-05-16 07:15:00	890	7	2	8	7
1	2009-05-16 07:16:00	1067	7	2	8	7
1	2009-05-16 07:17:00	1297	7	2	8	7
1	2009-05-16 07:18:00	1347	7	2	8	7
1	2009-05-16 07:19:00	1746	7	2	8	7
1	2009-05-16 07:20:00	373	7	2	8	7
1	2009-05-16 07:21:00	534	7	2	8	7
1	2009-05-16 07:22:00	472	7	2	8	7
1	2009-05-16 07:23:00	547	7	2	8	7
1	2009-05-16 07:24:00	250	7	2	8	7
1	2009-05-16 07:25:00	0	7	2	8	7
1	2009-05-16 07:26:00	0	7	2	8	7
1	2009-05-16 07:27:00	0	7	2	8	7
1	2009-05-16 07:28:00	0	7	2	8	7
1	2009-05-16 07:29:00	209	7	2	8	7
1	2009-05-16 07:30:00	15	7	2	8	7
1	2009-05-16 07:31:00	0	7	2	8	7
1	2009-05-16 07:32:00	242	7	2	8	7
1	2009-05-16 07:33:00	0	7	2	8	7
1	2009-05-16 07:34:00	0	7	2	8	7
1	2009-05-16 07:35:00	0	7	2	8	7
1	2009-05-16 07:36:00	0	7	2	8	7
1	2009-05-16 07:37:00	0	7	2	8	7
1	2009-05-16 07:38:00	193	7	2	8	7
1	2009-05-16 07:39:00	673	7	2	8	7
1	2009-05-16 07:40:00	497	7	2	8	7
1	2009-05-16 07:41:00	547	7	2	8	7
1	2009-05-16 07:42:00	547	7	2	8	7
1	2009-05-16 07:43:00	21	7	2	8	7
1	2009-05-16 07:44:00	0	7	2	8	7
1	2009-05-16 07:45:00	0	7	2	8	7
1	2009-05-16 07:46:00	0	7	2	8	7
1	2009-05-16 07:47:00	41	7	2	8	7
1	2009-05-16 07:48:00	0	7	2	8	7
1	2009-05-16 07:49:00	86	7	2	8	7
1	2009-05-16 07:50:00	0	7	2	8	7
1	2009-05-16 07:51:00	0	7	2	8	7
1	2009-05-16 07:52:00	0	7	2	8	7
1	2009-05-16 07:53:00	104	7	2	8	7
1	2009-05-16 07:54:00	110	7	2	8	7
1	2009-05-16 07:55:00	0	7	2	8	7
1	2009-05-16 07:56:00	0	7	2	8	7
1	2009-05-16 07:57:00	0	7	2	8	7
1	2009-05-16 07:58:00	0	7	2	8	7
1	2009-05-16 07:59:00	36	7	2	8	7
1	2009-05-16 08:00:00	26	7	2	8	7
1	2009-05-16 08:01:00	0	8	2	8	7
1	2009-05-16 08:02:00	0	8	2	8	7
1	2009-05-16 08:03:00	123	8	2	8	7
1	2009-05-16 08:04:00	449	8	2	8	7
1	2009-05-16 08:05:00	0	8	2	8	7
1	2009-05-16 08:06:00	0	8	2	8	7
1	2009-05-16 08:07:00	110	8	2	8	7
1	2009-05-16 08:08:00	0	8	2	8	7
1	2009-05-16 08:09:00	0	8	2	8	7
1	2009-05-16 08:10:00	0	8	2	8	7
1	2009-05-16 08:11:00	0	8	2	8	7
1	2009-05-16 08:12:00	0	8	2	8	7
1	2009-05-16 08:13:00	0	8	2	8	7
1	2009-05-16 08:14:00	0	8	2	8	7
1	2009-05-16 08:15:00	5	8	2	8	7
1	2009-05-16 08:16:00	92	8	2	8	7
1	2009-05-16 08:17:00	0	8	2	8	7
1	2009-05-16 08:18:00	0	8	2	8	7
1	2009-05-16 08:19:00	67	8	2	8	7
1	2009-05-16 08:20:00	67	8	2	8	7
1	2009-05-16 08:21:00	26	8	2	8	7
1	2009-05-16 08:22:00	171	8	2	8	7
1	2009-05-16 08:23:00	110	8	2	8	7
1	2009-05-16 08:24:00	0	8	2	8	7
1	2009-05-16 08:25:00	986	8	2	8	7
1	2009-05-16 08:26:00	0	8	2	8	7
1	2009-05-16 08:27:00	5	8	2	8	7
1	2009-05-16 08:28:00	15	8	2	8	7
1	2009-05-16 08:29:00	21	8	2	8	7
1	2009-05-16 08:30:00	373	8	2	8	7
1	2009-05-16 08:31:00	10	8	2	8	7
1	2009-05-16 08:32:00	10	8	2	8	7
1	2009-05-16 08:33:00	0	8	2	8	7
1	2009-05-16 08:34:00	0	8	2	8	7
1	2009-05-16 08:35:00	92	8	2	8	7
1	2009-05-16 08:36:00	5	8	2	8	7
1	2009-05-16 08:37:00	383	8	2	8	7
1	2009-05-16 08:38:00	209	8	2	8	7
1	2009-05-16 08:39:00	404	8	2	8	7
1	2009-05-16 08:40:00	193	8	2	8	7
1	2009-05-16 08:41:00	383	8	2	8	7
1	2009-05-16 08:42:00	225	8	2	8	7
1	2009-05-16 08:43:00	21	8	2	8	7
1	2009-05-16 08:44:00	362	8	2	8	7
1	2009-05-16 08:45:00	217	8	2	8	7
1	2009-05-16 08:46:00	26	8	2	8	7
1	2009-05-16 08:47:00	0	8	2	8	7
1	2009-05-16 08:48:00	15	8	2	8	7
1	2009-05-16 08:49:00	21	8	2	8	7
1	2009-05-16 08:50:00	5	8	2	8	7
1	2009-05-16 08:51:00	5	8	2	8	7
1	2009-05-16 08:52:00	15	8	2	8	7
1	2009-05-16 08:53:00	92	8	2	8	7
1	2009-05-16 08:54:00	142	8	2	8	7
1	2009-05-16 08:55:00	179	8	2	8	7
1	2009-05-16 08:56:00	164	8	2	8	7
1	2009-05-16 08:57:00	225	8	2	8	7
1	2009-05-16 08:58:00	233	8	2	8	7
1	2009-05-16 08:59:00	200	8	2	8	7
1	2009-05-16 09:00:00	123	8	2	8	7
1	2009-05-16 09:01:00	322	9	2	8	7
1	2009-05-16 09:02:00	601	9	2	8	7
1	2009-05-16 09:03:00	266	9	2	8	7
1	2009-05-16 09:04:00	233	9	2	8	7
1	2009-05-16 09:05:00	322	9	2	8	7
1	2009-05-16 09:06:00	225	9	2	8	7
1	2009-05-16 09:07:00	104	9	2	8	7
1	2009-05-16 09:08:00	250	9	2	8	7
1	2009-05-16 09:09:00	331	9	2	8	7
1	2009-05-16 09:10:00	186	9	2	8	7
1	2009-05-16 09:11:00	258	9	2	8	7
1	2009-05-16 09:12:00	157	9	2	8	7
1	2009-05-16 09:13:00	150	9	2	8	7
1	2009-05-16 09:14:00	52	9	2	8	7
1	2009-05-16 09:15:00	67	9	2	8	7
1	2009-05-16 09:16:00	98	9	2	8	7
1	2009-05-16 09:17:00	209	9	2	8	7
1	2009-05-16 09:18:00	79	9	2	8	7
1	2009-05-16 09:19:00	142	9	2	8	7
1	2009-05-16 09:20:00	233	9	2	8	7
1	2009-05-16 09:21:00	135	9	2	8	7
1	2009-05-16 09:22:00	79	9	2	8	7
1	2009-05-16 09:23:00	258	9	2	8	7
1	2009-05-16 09:24:00	352	9	2	8	7
1	2009-05-16 09:25:00	73	9	2	8	7
1	2009-05-16 09:26:00	79	9	2	8	7
1	2009-05-16 09:27:00	52	9	2	8	7
1	2009-05-16 09:28:00	10	9	2	8	7
1	2009-05-16 09:29:00	200	9	2	8	7
1	2009-05-16 09:30:00	313	9	2	8	7
1	2009-05-16 09:31:00	79	9	2	8	7
1	2009-05-16 09:32:00	104	9	2	8	7
1	2009-05-16 09:33:00	200	9	2	8	7
1	2009-05-16 09:34:00	233	9	2	8	7
1	2009-05-16 09:35:00	217	9	2	8	7
1	2009-05-16 09:36:00	142	9	2	8	7
1	2009-05-16 09:37:00	86	9	2	8	7
1	2009-05-16 09:38:00	1910	9	2	8	7
1	2009-05-16 09:39:00	1452	9	2	8	7
1	2009-05-16 09:40:00	735	9	2	8	7
1	2009-05-16 09:41:00	373	9	2	8	7
1	2009-05-16 09:42:00	1479	9	2	8	7
1	2009-05-16 09:43:00	735	9	2	8	7
1	2009-05-16 09:44:00	819	9	2	8	7
1	2009-05-16 09:45:00	1224	9	2	8	7
1	2009-05-16 09:46:00	927	9	2	8	7
1	2009-05-16 09:47:00	426	9	2	8	7
1	2009-05-16 09:48:00	659	9	2	8	7
1	2009-05-16 09:49:00	1047	9	2	8	7
1	2009-05-16 09:50:00	31	9	2	8	7
1	2009-05-16 09:51:00	0	9	2	8	7
1	2009-05-16 09:52:00	615	9	2	8	7
1	2009-05-16 09:53:00	342	9	2	8	7
1	2009-05-16 09:54:00	285	9	2	8	7
1	2009-05-16 09:55:00	497	9	2	8	7
1	2009-05-16 09:56:00	225	9	2	8	7
1	2009-05-16 09:57:00	52	9	2	8	7
1	2009-05-16 09:58:00	404	9	2	8	7
1	2009-05-16 09:59:00	342	9	2	8	7
1	2009-05-16 10:00:00	73	9	2	8	7
1	2009-05-16 10:01:00	209	10	2	8	7
1	2009-05-16 10:02:00	0	10	2	8	7
1	2009-05-16 10:03:00	5	10	2	8	7
1	2009-05-16 10:04:00	313	10	2	8	7
1	2009-05-16 10:05:00	0	10	2	8	7
1	2009-05-16 10:06:00	673	10	2	8	7
1	2009-05-16 10:07:00	10	10	2	8	7
1	2009-05-16 10:08:00	5	10	2	8	7
1	2009-05-16 10:09:00	0	10	2	8	7
1	2009-05-16 10:10:00	5	10	2	8	7
1	2009-05-16 10:11:00	0	10	2	8	7
1	2009-05-16 10:12:00	5	10	2	8	7
1	2009-05-16 10:13:00	0	10	2	8	7
1	2009-05-16 10:14:00	0	10	2	8	7
1	2009-05-16 10:15:00	383	10	2	8	7
1	2009-05-16 10:16:00	0	10	2	8	7
1	2009-05-16 10:17:00	0	10	2	8	7
1	2009-05-16 10:18:00	0	10	2	8	7
1	2009-05-16 10:19:00	0	10	2	8	7
1	2009-05-16 10:20:00	0	10	2	8	7
1	2009-05-16 10:21:00	0	10	2	8	7
1	2009-05-16 10:22:00	0	10	2	8	7
1	2009-05-16 10:23:00	5	10	2	8	7
1	2009-05-16 10:24:00	0	10	2	8	7
1	2009-05-16 10:25:00	0	10	2	8	7
1	2009-05-16 10:26:00	0	10	2	8	7
1	2009-05-16 10:27:00	41	10	2	8	7
1	2009-05-16 10:28:00	0	10	2	8	7
1	2009-05-16 10:29:00	615	10	2	8	7
1	2009-05-16 10:30:00	26	10	2	8	7
1	2009-05-16 10:31:00	31	10	2	8	7
1	2009-05-16 10:32:00	0	10	2	8	7
1	2009-05-16 10:33:00	0	10	2	8	7
1	2009-05-16 10:34:00	193	10	2	8	7
1	2009-05-16 10:35:00	5	10	2	8	7
1	2009-05-16 10:36:00	10	10	2	8	7
1	2009-05-16 10:37:00	225	10	2	8	7
1	2009-05-16 10:38:00	10	10	2	8	7
1	2009-05-16 10:39:00	0	10	2	8	7
1	2009-05-16 10:40:00	0	10	2	8	7
1	2009-05-16 10:41:00	0	10	2	8	7
1	2009-05-16 10:42:00	0	10	2	8	7
1	2009-05-16 10:43:00	0	10	2	8	7
1	2009-05-16 10:44:00	5	10	2	8	7
1	2009-05-16 10:45:00	0	10	2	8	7
1	2009-05-16 10:46:00	0	10	2	8	7
1	2009-05-16 10:47:00	0	10	2	8	7
1	2009-05-16 10:48:00	46	10	2	8	7
1	2009-05-16 10:49:00	0	10	2	8	7
1	2009-05-16 10:50:00	0	10	2	8	7
1	2009-05-16 10:51:00	0	10	2	8	7
1	2009-05-16 10:52:00	0	10	2	8	7
1	2009-05-16 10:53:00	0	10	2	8	7
1	2009-05-16 10:54:00	0	10	2	8	7
1	2009-05-16 10:55:00	0	10	2	8	7
1	2009-05-16 10:56:00	0	10	2	8	7
1	2009-05-16 10:57:00	0	10	2	8	7
1	2009-05-16 10:58:00	0	10	2	8	7
1	2009-05-16 10:59:00	0	10	2	8	7
1	2009-05-16 11:00:00	0	10	2	8	7
1	2009-05-16 11:01:00	10	11	2	8	7
1	2009-05-16 11:02:00	0	11	2	8	7
1	2009-05-16 11:03:00	0	11	2	8	7
1	2009-05-16 11:04:00	0	11	2	8	7
1	2009-05-16 11:05:00	0	11	2	8	7
1	2009-05-16 11:06:00	0	11	2	8	7
1	2009-05-16 11:07:00	0	11	2	8	7
1	2009-05-16 11:08:00	0	11	2	8	7
1	2009-05-16 11:09:00	0	11	2	8	7
1	2009-05-16 11:10:00	0	11	2	8	7
1	2009-05-16 11:11:00	0	11	2	8	7
1	2009-05-16 11:12:00	0	11	2	8	7
1	2009-05-16 11:13:00	0	11	2	8	7
1	2009-05-16 11:14:00	0	11	2	8	7
1	2009-05-16 11:15:00	0	11	2	8	7
1	2009-05-16 11:16:00	0	11	2	8	7
1	2009-05-16 11:17:00	0	11	2	8	7
1	2009-05-16 11:18:00	10	11	2	8	7
1	2009-05-16 11:19:00	0	11	2	8	7
1	2009-05-16 11:20:00	0	11	2	8	7
1	2009-05-16 11:21:00	0	11	2	8	7
1	2009-05-16 11:22:00	0	11	2	8	7
1	2009-05-16 11:23:00	0	11	2	8	7
1	2009-05-16 11:24:00	0	11	2	8	7
1	2009-05-16 11:25:00	0	11	2	8	7
1	2009-05-16 11:26:00	0	11	2	8	7
1	2009-05-16 11:27:00	0	11	2	8	7
1	2009-05-16 11:28:00	0	11	2	8	7
1	2009-05-16 11:29:00	0	11	2	8	7
1	2009-05-16 11:30:00	0	11	2	8	7
1	2009-05-16 11:31:00	0	11	2	8	7
1	2009-05-16 11:32:00	5	11	2	8	7
1	2009-05-16 11:33:00	0	11	2	8	7
1	2009-05-16 11:34:00	0	11	2	8	7
1	2009-05-16 11:35:00	0	11	2	8	7
1	2009-05-16 11:36:00	0	11	2	8	7
1	2009-05-16 11:37:00	0	11	2	8	7
1	2009-05-16 11:38:00	0	11	2	8	7
1	2009-05-16 11:39:00	0	11	2	8	7
1	2009-05-16 11:40:00	0	11	2	8	7
1	2009-05-16 11:41:00	0	11	2	8	7
1	2009-05-16 11:42:00	0	11	2	8	7
1	2009-05-16 11:43:00	0	11	2	8	7
1	2009-05-16 11:44:00	0	11	2	8	7
1	2009-05-16 11:45:00	0	11	2	8	7
1	2009-05-16 11:46:00	0	11	2	8	7
1	2009-05-16 11:47:00	0	11	2	8	7
1	2009-05-16 11:48:00	0	11	2	8	7
1	2009-05-16 11:49:00	0	11	2	8	7
1	2009-05-16 11:50:00	0	11	2	8	7
1	2009-05-16 11:51:00	0	11	2	8	7
1	2009-05-16 11:52:00	0	11	2	8	7
1	2009-05-16 11:53:00	0	11	2	8	7
1	2009-05-16 11:54:00	0	11	2	8	7
1	2009-05-16 11:55:00	0	11	2	8	7
1	2009-05-16 11:56:00	0	11	2	8	7
1	2009-05-16 11:57:00	0	11	2	8	7
1	2009-05-16 11:58:00	0	11	2	8	7
1	2009-05-16 11:59:00	0	11	2	8	7
1	2009-05-16 12:00:00	0	11	2	8	7
1	2009-05-16 12:01:00	0	12	3	8	7
1	2009-05-16 12:02:00	0	12	3	8	7
1	2009-05-16 12:03:00	0	12	3	8	7
1	2009-05-16 12:04:00	0	12	3	8	7
1	2009-05-16 12:05:00	0	12	3	8	7
1	2009-05-16 12:06:00	0	12	3	8	7
1	2009-05-16 12:07:00	0	12	3	8	7
1	2009-05-16 12:08:00	0	12	3	8	7
1	2009-05-16 12:09:00	0	12	3	8	7
1	2009-05-16 12:10:00	0	12	3	8	7
1	2009-05-16 12:11:00	0	12	3	8	7
1	2009-05-16 12:12:00	0	12	3	8	7
1	2009-05-16 12:13:00	0	12	3	8	7
1	2009-05-16 12:14:00	0	12	3	8	7
1	2009-05-16 12:15:00	0	12	3	8	7
1	2009-05-16 12:16:00	0	12	3	8	7
1	2009-05-16 12:17:00	0	12	3	8	7
1	2009-05-16 12:18:00	0	12	3	8	7
1	2009-05-16 12:19:00	0	12	3	8	7
1	2009-05-16 12:20:00	0	12	3	8	7
1	2009-05-16 12:21:00	0	12	3	8	7
1	2009-05-16 12:22:00	217	12	3	8	7
1	2009-05-16 12:23:00	0	12	3	8	7
1	2009-05-16 12:24:00	0	12	3	8	7
1	2009-05-16 12:25:00	31	12	3	8	7
1	2009-05-16 12:26:00	352	12	3	8	7
1	2009-05-16 12:27:00	62	12	3	8	7
1	2009-05-16 12:28:00	0	12	3	8	7
1	2009-05-16 12:29:00	0	12	3	8	7
1	2009-05-16 12:30:00	0	12	3	8	7
1	2009-05-16 12:31:00	0	12	3	8	7
1	2009-05-16 12:32:00	0	12	3	8	7
1	2009-05-16 12:33:00	0	12	3	8	7
1	2009-05-16 12:34:00	0	12	3	8	7
1	2009-05-16 12:35:00	5	12	3	8	7
1	2009-05-16 12:36:00	86	12	3	8	7
1	2009-05-16 12:37:00	0	12	3	8	7
1	2009-05-16 12:38:00	21	12	3	8	7
1	2009-05-16 12:39:00	0	12	3	8	7
1	2009-05-16 12:40:00	0	12	3	8	7
1	2009-05-16 12:41:00	0	12	3	8	7
1	2009-05-16 12:42:00	57	12	3	8	7
1	2009-05-16 12:43:00	0	12	3	8	7
1	2009-05-16 12:44:00	0	12	3	8	7
1	2009-05-16 12:45:00	46	12	3	8	7
1	2009-05-16 12:46:00	0	12	3	8	7
1	2009-05-16 12:47:00	0	12	3	8	7
1	2009-05-16 12:48:00	0	12	3	8	7
1	2009-05-16 12:49:00	0	12	3	8	7
1	2009-05-16 12:50:00	0	12	3	8	7
1	2009-05-16 12:51:00	0	12	3	8	7
1	2009-05-16 12:52:00	0	12	3	8	7
1	2009-05-16 12:53:00	0	12	3	8	7
1	2009-05-16 12:54:00	0	12	3	8	7
1	2009-05-16 12:55:00	0	12	3	8	7
1	2009-05-16 12:56:00	0	12	3	8	7
1	2009-05-16 12:57:00	0	12	3	8	7
1	2009-05-16 12:58:00	0	12	3	8	7
1	2009-05-16 12:59:00	0	12	3	8	7
1	2009-05-16 13:00:00	0	12	3	8	7
1	2009-05-16 13:01:00	0	13	3	8	7
1	2009-05-16 13:02:00	0	13	3	8	7
1	2009-05-16 13:03:00	0	13	3	8	7
1	2009-05-16 13:04:00	0	13	3	8	7
1	2009-05-16 13:05:00	0	13	3	8	7
1	2009-05-16 13:06:00	0	13	3	8	7
1	2009-05-16 13:07:00	0	13	3	8	7
1	2009-05-16 13:08:00	0	13	3	8	7
1	2009-05-16 13:09:00	0	13	3	8	7
1	2009-05-16 13:10:00	0	13	3	8	7
1	2009-05-16 13:11:00	0	13	3	8	7
1	2009-05-16 13:12:00	0	13	3	8	7
1	2009-05-16 13:13:00	0	13	3	8	7
1	2009-05-16 13:14:00	0	13	3	8	7
1	2009-05-16 13:15:00	0	13	3	8	7
1	2009-05-16 13:16:00	0	13	3	8	7
1	2009-05-16 13:17:00	0	13	3	8	7
1	2009-05-16 13:18:00	0	13	3	8	7
1	2009-05-16 13:19:00	0	13	3	8	7
1	2009-05-16 13:20:00	0	13	3	8	7
1	2009-05-16 13:21:00	0	13	3	8	7
1	2009-05-16 13:22:00	0	13	3	8	7
1	2009-05-16 13:23:00	0	13	3	8	7
1	2009-05-16 13:24:00	0	13	3	8	7
1	2009-05-16 13:25:00	0	13	3	8	7
1	2009-05-16 13:26:00	0	13	3	8	7
1	2009-05-16 13:27:00	0	13	3	8	7
1	2009-05-16 13:28:00	0	13	3	8	7
1	2009-05-16 13:29:00	0	13	3	8	7
1	2009-05-16 13:30:00	0	13	3	8	7
1	2009-05-16 13:31:00	0	13	3	8	7
1	2009-05-16 13:32:00	0	13	3	8	7
1	2009-05-16 13:33:00	0	13	3	8	7
1	2009-05-16 13:34:00	0	13	3	8	7
1	2009-05-16 13:35:00	0	13	3	8	7
1	2009-05-16 13:36:00	0	13	3	8	7
1	2009-05-16 13:37:00	0	13	3	8	7
1	2009-05-16 13:38:00	15	13	3	8	7
1	2009-05-16 13:39:00	0	13	3	8	7
1	2009-05-16 13:40:00	0	13	3	8	7
1	2009-05-16 13:41:00	0	13	3	8	7
1	2009-05-16 13:42:00	0	13	3	8	7
1	2009-05-16 13:43:00	0	13	3	8	7
1	2009-05-16 13:44:00	0	13	3	8	7
1	2009-05-16 13:45:00	0	13	3	8	7
1	2009-05-16 13:46:00	0	13	3	8	7
1	2009-05-16 13:47:00	0	13	3	8	7
1	2009-05-16 13:48:00	0	13	3	8	7
1	2009-05-16 13:49:00	0	13	3	8	7
1	2009-05-16 13:50:00	0	13	3	8	7
1	2009-05-16 13:51:00	0	13	3	8	7
1	2009-05-16 13:52:00	0	13	3	8	7
1	2009-05-16 13:53:00	0	13	3	8	7
1	2009-05-16 13:54:00	0	13	3	8	7
1	2009-05-16 13:55:00	0	13	3	8	7
1	2009-05-16 13:56:00	0	13	3	8	7
1	2009-05-16 13:57:00	0	13	3	8	7
1	2009-05-16 13:58:00	0	13	3	8	7
1	2009-05-16 13:59:00	0	13	3	8	7
1	2009-05-16 14:00:00	0	13	3	8	7
1	2009-05-16 14:01:00	0	14	3	8	7
1	2009-05-16 14:02:00	0	14	3	8	7
1	2009-05-16 14:03:00	0	14	3	8	7
1	2009-05-16 14:04:00	0	14	3	8	7
1	2009-05-16 14:05:00	0	14	3	8	7
1	2009-05-16 14:06:00	0	14	3	8	7
1	2009-05-16 14:07:00	171	14	3	8	7
1	2009-05-16 14:08:00	986	14	3	8	7
1	2009-05-16 14:09:00	1347	14	3	8	7
1	2009-05-16 14:10:00	1272	14	3	8	7
1	2009-05-16 14:11:00	266	14	3	8	7
1	2009-05-16 14:12:00	157	14	3	8	7
1	2009-05-16 14:13:00	217	14	3	8	7
1	2009-05-16 14:14:00	142	14	3	8	7
1	2009-05-16 14:15:00	460	14	3	8	7
1	2009-05-16 14:16:00	574	14	3	8	7
1	2009-05-16 14:17:00	21	14	3	8	7
1	2009-05-16 14:18:00	129	14	3	8	7
1	2009-05-16 14:19:00	5	14	3	8	7
1	2009-05-16 14:20:00	383	14	3	8	7
1	2009-05-16 14:21:00	785	14	3	8	7
1	2009-05-16 14:22:00	1876	14	3	8	7
1	2009-05-16 14:23:00	3057	14	3	8	7
1	2009-05-16 14:24:00	561	14	3	8	7
1	2009-05-16 14:25:00	313	14	3	8	7
1	2009-05-16 14:26:00	129	14	3	8	7
1	2009-05-16 14:27:00	383	14	3	8	7
1	2009-05-16 14:28:00	322	14	3	8	7
1	2009-05-16 14:29:00	86	14	3	8	7
1	2009-05-16 14:30:00	0	14	3	8	7
1	2009-05-16 14:31:00	5	14	3	8	7
1	2009-05-16 14:32:00	322	14	3	8	7
1	2009-05-16 14:33:00	276	14	3	8	7
1	2009-05-16 14:34:00	0	14	3	8	7
1	2009-05-16 14:35:00	0	14	3	8	7
1	2009-05-16 14:36:00	484	14	3	8	7
1	2009-05-16 14:37:00	15	14	3	8	7
1	2009-05-16 14:38:00	0	14	3	8	7
1	2009-05-16 14:39:00	21	14	3	8	7
1	2009-05-16 14:40:00	0	14	3	8	7
1	2009-05-16 14:41:00	5	14	3	8	7
1	2009-05-16 14:42:00	41	14	3	8	7
1	2009-05-16 14:43:00	0	14	3	8	7
1	2009-05-16 14:44:00	26	14	3	8	7
1	2009-05-16 14:45:00	46	14	3	8	7
1	2009-05-16 14:46:00	313	14	3	8	7
1	2009-05-16 14:47:00	10	14	3	8	7
1	2009-05-16 14:48:00	10	14	3	8	7
1	2009-05-16 14:49:00	5	14	3	8	7
1	2009-05-16 14:50:00	630	14	3	8	7
1	2009-05-16 14:51:00	630	14	3	8	7
1	2009-05-16 14:52:00	15	14	3	8	7
1	2009-05-16 14:53:00	15	14	3	8	7
1	2009-05-16 14:54:00	673	14	3	8	7
1	2009-05-16 14:55:00	785	14	3	8	7
1	2009-05-16 14:56:00	313	14	3	8	7
1	2009-05-16 14:57:00	644	14	3	8	7
1	2009-05-16 14:58:00	142	14	3	8	7
1	2009-05-16 14:59:00	0	14	3	8	7
1	2009-05-16 15:00:00	0	14	3	8	7
1	2009-05-16 15:01:00	157	15	3	8	7
1	2009-05-16 15:02:00	0	15	3	8	7
1	2009-05-16 15:03:00	0	15	3	8	7
1	2009-05-16 15:04:00	242	15	3	8	7
1	2009-05-16 15:05:00	0	15	3	8	7
1	2009-05-16 15:06:00	15	15	3	8	7
1	2009-05-16 15:07:00	313	15	3	8	7
1	2009-05-16 15:08:00	0	15	3	8	7
1	2009-05-16 15:09:00	0	15	3	8	7
1	2009-05-16 15:10:00	5	15	3	8	7
1	2009-05-16 15:11:00	0	15	3	8	7
1	2009-05-16 15:12:00	46	15	3	8	7
1	2009-05-16 15:13:00	15	15	3	8	7
1	2009-05-16 15:14:00	0	15	3	8	7
1	2009-05-16 15:15:00	21	15	3	8	7
1	2009-05-16 15:16:00	193	15	3	8	7
1	2009-05-16 15:17:00	0	15	3	8	7
1	2009-05-16 15:18:00	31	15	3	8	7
1	2009-05-16 15:19:00	0	15	3	8	7
[truncated: 78,641 more rows]

## Sheet: Pivot Segment
Multiplier	2
x (Low Intensity)	829.891
y (High Intensity)	1110.35
	Column Labels
Values	1	2	3	4	5	6	8	Grand Total
Average of Activity	119.065	131.2	135.021	150.487	133.634	135.406	146.223	135.805
StdDev of Activity	355.413	489.576	457.752	483.849	481.593	453.139	439.203	453.55
Count of Activity	10080	10080	10080	10080	10080	20160	10080	80640
Count Above x	357	398	420	505	389	778	488
% Above x	0.0354167	0.0394841	0.0416667	0.0500992	0.0385913	0.0385913	0.0484127
Count Above y		302	302	385	273	498	327
% Above y		0.0299603	0.0299603	0.0381944	0.0270833	0.0247024	0.0324405

## Sheet: Pivot Weekday
Sum of Activity	Column Labels
Row Labels	1	2	3	4	5	6	8	Grand Total
1	132819	216026	217014	200955	262644	410414	275392	1715264
2	186590	189282	170233	199632	139115	404480	164805	1454137
3	146583	189136	255096	156765	176480	282426	201023	1407509
4	189229	166579	136740	227264	235989	393156	223865	1572822
5	173646	137701	163157	183295	154472	307392	279551	1399214
6	209011	247634	203068	209250	207802	481160	168290	1726215
7	162302	176139	215708	339746	170526	450748	161006	1676175
Grand Total	1200180	1322497	1361016	1516907	1347028	2729776	1473932	10951336
Count of Activity	Column Labels
Row Labels	1	2	3	4	5	6	8	Grand Total
1	1440	1440	1440	1440	1440	2880	1440	11520
2	1440	1440	1440	1440	1440	2880	1440	11520
3	1440	1440	1440	1440	1440	2880	1440	11520
4	1440	1440	1440	1440	1440	2880	1440	11520
5	1440	1440	1440	1440	1440	2880	1440	11520
6	1440	1440	1440	1440	1440	2880	1440	11520
7	1440	1440	1440	1440	1440	2880	1440	11520
Grand Total	10080	10080	10080	10080	10080	20160	10080	80640

## Sheet: Pivot Quadrant
Sum of Activity	Column Labels
Row Labels	1	2	3	4	5	6	8	Grand Total
1	15433	43087	105021	59903	142991	259212	128380	754027
2	377487	388251	301545	467679	266717	680926	419976	2902581
3	342956	393822	716548	441386	382637	815428	405862	3498639
4	464304	497337	237902	547939	554683	974210	519714	3796089
Grand Total	1200180	1322497	1361016	1516907	1347028	2729776	1473932	10951336
Average	300045	330624	340254	379227	336757	682444	368483
Count of Activity	Column Labels
Row Labels	1	2	3	4	5	6	8	Grand Total
1	2520	2520	2520	2520	2520	5040	2520	20160
2	2520	2520	2520	2520	2520	5040	2520	20160
3	2520	2520	2520	2520	2520	5040	2520	20160
4	2520	2520	2520	2520	2520	5040	2520	20160
Grand Total	10080	10080	10080	10080	10080	20160	10080	80640

## Sheet: 5.08.09
Actogram, Copy Raw Data, All Days
Identity:	Wally
Filename:	E:\Active Research Files\meloxicam titre canine\cases\wally\Wally Bringhurst 5.08.09.AWC
Gender:	M
Age:	6
Height:	91.4 cm	36.0 in
Weight:	39.0 kg	86.0 lbs
Start Date:	08-May-2009 (Fri)
Start Time:	18:00:00
Interval:	1.00 mins
Date Stamp:	Time Stamp:	Activity Data:	Marker Press:
2009-05-08	00:00:00	0
2009-05-08	00:01:00	0
2009-05-08	00:02:00	0
2009-05-08	00:03:00	0
2009-05-08	00:04:00	0
2009-05-08	00:05:00	0
2009-05-08	00:06:00	0
2009-05-08	00:07:00	0
2009-05-08	00:08:00	0
2009-05-08	00:09:00	0
2009-05-08	00:10:00	0
2009-05-08	00:11:00	0
2009-05-08	00:12:00	0
2009-05-08	00:13:00	0
2009-05-08	00:14:00	0
2009-05-08	00:15:00	0
2009-05-08	00:16:00	0
2009-05-08	00:17:00	0
2009-05-08	00:18:00	0
2009-05-08	00:19:00	0
2009-05-08	00:20:00	0
2009-05-08	00:21:00	0
2009-05-08	00:22:00	0
2009-05-08	00:23:00	0
2009-05-08	00:24:00	0
2009-05-08	00:25:00	0
2009-05-08	00:26:00	0
2009-05-08	00:27:00	0
2009-05-08	00:28:00	0
2009-05-08	00:29:00	0
2009-05-08	00:30:00	0
2009-05-08	00:31:00	0
2009-05-08	00:32:00	0
2009-05-08	00:33:00	0
2009-05-08	00:34:00	0
2009-05-08	00:35:00	0
2009-05-08	00:36:00	0
2009-05-08	00:37:00	0
2009-05-08	00:38:00	0
2009-05-08	00:39:00	0
2009-05-08	00:40:00	0
2009-05-08	00:41:00	0
2009-05-08	00:42:00	0
2009-05-08	00:43:00	0
2009-05-08	00:44:00	0
2009-05-08	00:45:00	0
2009-05-08	00:46:00	0
2009-05-08	00:47:00	0
2009-05-08	00:48:00	0
2009-05-08	00:49:00	0
2009-05-08	00:50:00	0
2009-05-08	00:51:00	0
2009-05-08	00:52:00	0
2009-05-08	00:53:00	0
2009-05-08	00:54:00	0
2009-05-08	00:55:00	0
2009-05-08	00:56:00	0
2009-05-08	00:57:00	0
2009-05-08	00:58:00	0
2009-05-08	00:59:00	0
2009-05-08	01:00:00	0
2009-05-08	01:01:00	0
2009-05-08	01:02:00	0
2009-05-08	01:03:00	0
2009-05-08	01:04:00	0
2009-05-08	01:05:00	0
2009-05-08	01:06:00	0
2009-05-08	01:07:00	0
2009-05-08	01:08:00	0
2009-05-08	01:09:00	0
2009-05-08	01:10:00	0
2009-05-08	01:11:00	0
2009-05-08	01:12:00	0
2009-05-08	01:13:00	0
2009-05-08	01:14:00	0
2009-05-08	01:15:00	0
2009-05-08	01:16:00	0
2009-05-08	01:17:00	0
2009-05-08	01:18:00	0
2009-05-08	01:19:00	0
2009-05-08	01:20:00	0
2009-05-08	01:21:00	0
2009-05-08	01:22:00	0
2009-05-08	01:23:00	0
2009-05-08	01:24:00	0
2009-05-08	01:25:00	0
2009-05-08	01:26:00	0
2009-05-08	01:27:00	0
2009-05-08	01:28:00	0
2009-05-08	01:29:00	0
2009-05-08	01:30:00	0
2009-05-08	01:31:00	0
2009-05-08	01:32:00	0
2009-05-08	01:33:00	0
2009-05-08	01:34:00	0
2009-05-08	01:35:00	0
2009-05-08	01:36:00	0
2009-05-08	01:37:00	0
2009-05-08	01:38:00	0
2009-05-08	01:39:00	0
2009-05-08	01:40:00	0
2009-05-08	01:41:00	0
2009-05-08	01:42:00	0
2009-05-08	01:43:00	0
2009-05-08	01:44:00	0
2009-05-08	01:45:00	0
2009-05-08	01:46:00	0
2009-05-08	01:47:00	0
2009-05-08	01:48:00	0
2009-05-08	01:49:00	0
2009-05-08	01:50:00	0
2009-05-08	01:51:00	0
2009-05-08	01:52:00	0
2009-05-08	01:53:00	0
2009-05-08	01:54:00	0
2009-05-08	01:55:00	0
2009-05-08	01:56:00	0
2009-05-08	01:57:00	0
2009-05-08	01:58:00	0
2009-05-08	01:59:00	0
2009-05-08	02:00:00	0
2009-05-08	02:01:00	0
2009-05-08	02:02:00	0
2009-05-08	02:03:00	0
2009-05-08	02:04:00	0
2009-05-08	02:05:00	0
2009-05-08	02:06:00	0
2009-05-08	02:07:00	0
2009-05-08	02:08:00	0
2009-05-08	02:09:00	0
2009-05-08	02:10:00	0
2009-05-08	02:11:00	0
2009-05-08	02:12:00	0
2009-05-08	02:13:00	0
2009-05-08	02:14:00	0
2009-05-08	02:15:00	0
2009-05-08	02:16:00	0
2009-05-08	02:17:00	0
2009-05-08	02:18:00	0
2009-05-08	02:19:00	0
2009-05-08	02:20:00	0
2009-05-08	02:21:00	0
2009-05-08	02:22:00	0
2009-05-08	02:23:00	0
2009-05-08	02:24:00	0
2009-05-08	02:25:00	0
2009-05-08	02:26:00	0
2009-05-08	02:27:00	0
2009-05-08	02:28:00	0
2009-05-08	02:29:00	0
2009-05-08	02:30:00	0
2009-05-08	02:31:00	0
2009-05-08	02:32:00	0
2009-05-08	02:33:00	0
2009-05-08	02:34:00	0
2009-05-08	02:35:00	0
2009-05-08	02:36:00	0
2009-05-08	02:37:00	0
2009-05-08	02:38:00	0
2009-05-08	02:39:00	0
2009-05-08	02:40:00	0
2009-05-08	02:41:00	0
2009-05-08	02:42:00	0
2009-05-08	02:43:00	0
2009-05-08	02:44:00	0
2009-05-08	02:45:00	0
2009-05-08	02:46:00	0
2009-05-08	02:47:00	0
2009-05-08	02:48:00	0
2009-05-08	02:49:00	0
2009-05-08	02:50:00	0
2009-05-08	02:51:00	0
2009-05-08	02:52:00	0
2009-05-08	02:53:00	0
2009-05-08	02:54:00	0
2009-05-08	02:55:00	0
2009-05-08	02:56:00	0
2009-05-08	02:57:00	0
2009-05-08	02:58:00	0
2009-05-08	02:59:00	0
2009-05-08	03:00:00	0
2009-05-08	03:01:00	0
2009-05-08	03:02:00	0
2009-05-08	03:03:00	0
2009-05-08	03:04:00	0
2009-05-08	03:05:00	0
2009-05-08	03:06:00	0
2009-05-08	03:07:00	0
2009-05-08	03:08:00	0
2009-05-08	03:09:00	0
2009-05-08	03:10:00	0
2009-05-08	03:11:00	0
2009-05-08	03:12:00	0
2009-05-08	03:13:00	0
2009-05-08	03:14:00	0
2009-05-08	03:15:00	0
2009-05-08	03:16:00	0
2009-05-08	03:17:00	0
2009-05-08	03:18:00	0
2009-05-08	03:19:00	0
2009-05-08	03:20:00	0
2009-05-08	03:21:00	0
2009-05-08	03:22:00	0
2009-05-08	03:23:00	0
2009-05-08	03:24:00	0
2009-05-08	03:25:00	0
2009-05-08	03:26:00	0
2009-05-08	03:27:00	0
2009-05-08	03:28:00	0
2009-05-08	03:29:00	0
2009-05-08	03:30:00	0
2009-05-08	03:31:00	0
2009-05-08	03:32:00	0
2009-05-08	03:33:00	0
2009-05-08	03:34:00	0
2009-05-08	03:35:00	0
2009-05-08	03:36:00	0
2009-05-08	03:37:00	0
2009-05-08	03:38:00	0
2009-05-08	03:39:00	0
2009-05-08	03:40:00	0
2009-05-08	03:41:00	0
2009-05-08	03:42:00	0
2009-05-08	03:43:00	0
2009-05-08	03:44:00	0
2009-05-08	03:45:00	0
2009-05-08	03:46:00	0
2009-05-08	03:47:00	0
2009-05-08	03:48:00	0
2009-05-08	03:49:00	0
2009-05-08	03:50:00	0
2009-05-08	03:51:00	0
2009-05-08	03:52:00	0
2009-05-08	03:53:00	0
2009-05-08	03:54:00	0
2009-05-08	03:55:00	0
2009-05-08	03:56:00	0
2009-05-08	03:57:00	0
2009-05-08	03:58:00	0
2009-05-08	03:59:00	0
2009-05-08	04:00:00	0
2009-05-08	04:01:00	0
2009-05-08	04:02:00	0
2009-05-08	04:03:00	0
2009-05-08	04:04:00	0
2009-05-08	04:05:00	0
2009-05-08	04:06:00	0
2009-05-08	04:07:00	0
2009-05-08	04:08:00	0
2009-05-08	04:09:00	0
2009-05-08	04:10:00	0
2009-05-08	04:11:00	0
2009-05-08	04:12:00	0
2009-05-08	04:13:00	0
2009-05-08	04:14:00	0
2009-05-08	04:15:00	0
2009-05-08	04:16:00	0
2009-05-08	04:17:00	0
2009-05-08	04:18:00	0
2009-05-08	04:19:00	0
2009-05-08	04:20:00	0
2009-05-08	04:21:00	0
2009-05-08	04:22:00	0
2009-05-08	04:23:00	0
2009-05-08	04:24:00	0
2009-05-08	04:25:00	0
2009-05-08	04:26:00	0
2009-05-08	04:27:00	0
2009-05-08	04:28:00	0
2009-05-08	04:29:00	0
2009-05-08	04:30:00	0
2009-05-08	04:31:00	0
2009-05-08	04:32:00	0
2009-05-08	04:33:00	0
2009-05-08	04:34:00	0
2009-05-08	04:35:00	0
2009-05-08	04:36:00	0
2009-05-08	04:37:00	0
2009-05-08	04:38:00	0
2009-05-08	04:39:00	0
2009-05-08	04:40:00	0
2009-05-08	04:41:00	0
2009-05-08	04:42:00	0
2009-05-08	04:43:00	0
2009-05-08	04:44:00	0
2009-05-08	04:45:00	0
2009-05-08	04:46:00	0
2009-05-08	04:47:00	0
2009-05-08	04:48:00	0
2009-05-08	04:49:00	0
2009-05-08	04:50:00	0
2009-05-08	04:51:00	0
2009-05-08	04:52:00	0
2009-05-08	04:53:00	0
2009-05-08	04:54:00	0
2009-05-08	04:55:00	0
2009-05-08	04:56:00	0
2009-05-08	04:57:00	0
2009-05-08	04:58:00	0
2009-05-08	04:59:00	0
2009-05-08	05:00:00	0
2009-05-08	05:01:00	0
2009-05-08	05:02:00	0
2009-05-08	05:03:00	0
2009-05-08	05:04:00	0
2009-05-08	05:05:00	0
2009-05-08	05:06:00	0
2009-05-08	05:07:00	0
2009-05-08	05:08:00	0
2009-05-08	05:09:00	0
2009-05-08	05:10:00	0
2009-05-08	05:11:00	0
2009-05-08	05:12:00	0
2009-05-08	05:13:00	0
2009-05-08	05:14:00	0
2009-05-08	05:15:00	0
2009-05-08	05:16:00	0
2009-05-08	05:17:00	0
2009-05-08	05:18:00	0
2009-05-08	05:19:00	0
2009-05-08	05:20:00	0
2009-05-08	05:21:00	0
2009-05-08	05:22:00	0
2009-05-08	05:23:00	0
2009-05-08	05:24:00	0
2009-05-08	05:25:00	0
2009-05-08	05:26:00	0
2009-05-08	05:27:00	0
2009-05-08	05:28:00	0
2009-05-08	05:29:00	0
2009-05-08	05:30:00	0
2009-05-08	05:31:00	0
2009-05-08	05:32:00	0
2009-05-08	05:33:00	0
2009-05-08	05:34:00	0
2009-05-08	05:35:00	0
2009-05-08	05:36:00	0
2009-05-08	05:37:00	0
2009-05-08	05:38:00	0
2009-05-08	05:39:00	0
2009-05-08	05:40:00	0
2009-05-08	05:41:00	0
2009-05-08	05:42:00	0
2009-05-08	05:43:00	0
2009-05-08	05:44:00	0
2009-05-08	05:45:00	0
2009-05-08	05:46:00	0
2009-05-08	05:47:00	0
2009-05-08	05:48:00	0
2009-05-08	05:49:00	0
2009-05-08	05:50:00	0
2009-05-08	05:51:00	0
2009-05-08	05:52:00	0
2009-05-08	05:53:00	0
2009-05-08	05:54:00	0
2009-05-08	05:55:00	0
2009-05-08	05:56:00	0
2009-05-08	05:57:00	0
2009-05-08	05:58:00	0
2009-05-08	05:59:00	0
2009-05-08	06:00:00	0
2009-05-08	06:01:00	0
2009-05-08	06:02:00	0
2009-05-08	06:03:00	0
2009-05-08	06:04:00	0
2009-05-08	06:05:00	0
2009-05-08	06:06:00	0
2009-05-08	06:07:00	0
2009-05-08	06:08:00	0
2009-05-08	06:09:00	0
2009-05-08	06:10:00	0
2009-05-08	06:11:00	0
2009-05-08	06:12:00	0
2009-05-08	06:13:00	0
2009-05-08	06:14:00	0
2009-05-08	06:15:00	0
2009-05-08	06:16:00	0
2009-05-08	06:17:00	0
2009-05-08	06:18:00	0
2009-05-08	06:19:00	0
2009-05-08	06:20:00	0
2009-05-08	06:21:00	0
2009-05-08	06:22:00	0
2009-05-08	06:23:00	0
2009-05-08	06:24:00	0
2009-05-08	06:25:00	0
2009-05-08	06:26:00	0
2009-05-08	06:27:00	0
2009-05-08	06:28:00	0
2009-05-08	06:29:00	0
2009-05-08	06:30:00	0
2009-05-08	06:31:00	0
2009-05-08	06:32:00	0
2009-05-08	06:33:00	0
2009-05-08	06:34:00	0
2009-05-08	06:35:00	0
2009-05-08	06:36:00	0
2009-05-08	06:37:00	0
2009-05-08	06:38:00	0
2009-05-08	06:39:00	0
2009-05-08	06:40:00	0
2009-05-08	06:41:00	0
2009-05-08	06:42:00	0
2009-05-08	06:43:00	0
2009-05-08	06:44:00	0
2009-05-08	06:45:00	0
2009-05-08	06:46:00	0
2009-05-08	06:47:00	0
2009-05-08	06:48:00	0
2009-05-08	06:49:00	0
2009-05-08	06:50:00	0
2009-05-08	06:51:00	0
2009-05-08	06:52:00	0
2009-05-08	06:53:00	0
2009-05-08	06:54:00	0
2009-05-08	06:55:00	0
2009-05-08	06:56:00	0
2009-05-08	06:57:00	0
2009-05-08	06:58:00	0
2009-05-08	06:59:00	0
2009-05-08	07:00:00	0
2009-05-08	07:01:00	0
2009-05-08	07:02:00	0
2009-05-08	07:03:00	0
2009-05-08	07:04:00	0
2009-05-08	07:05:00	0
2009-05-08	07:06:00	0
2009-05-08	07:07:00	0
2009-05-08	07:08:00	0
2009-05-08	07:09:00	0
2009-05-08	07:10:00	0
2009-05-08	07:11:00	0
2009-05-08	07:12:00	0
2009-05-08	07:13:00	0
2009-05-08	07:14:00	0
2009-05-08	07:15:00	0
2009-05-08	07:16:00	0
2009-05-08	07:17:00	0
2009-05-08	07:18:00	0
2009-05-08	07:19:00	0
2009-05-08	07:20:00	0
2009-05-08	07:21:00	0
2009-05-08	07:22:00	0
2009-05-08	07:23:00	0
2009-05-08	07:24:00	0
2009-05-08	07:25:00	0
2009-05-08	07:26:00	0
2009-05-08	07:27:00	0
2009-05-08	07:28:00	0
2009-05-08	07:29:00	0
2009-05-08	07:30:00	0
2009-05-08	07:31:00	0
2009-05-08	07:32:00	0
2009-05-08	07:33:00	0
2009-05-08	07:34:00	0
2009-05-08	07:35:00	0
2009-05-08	07:36:00	0
2009-05-08	07:37:00	0
2009-05-08	07:38:00	0
2009-05-08	07:39:00	0
2009-05-08	07:40:00	0
2009-05-08	07:41:00	0
2009-05-08	07:42:00	0
2009-05-08	07:43:00	0
2009-05-08	07:44:00	0
2009-05-08	07:45:00	0
2009-05-08	07:46:00	0
2009-05-08	07:47:00	0
2009-05-08	07:48:00	0
2009-05-08	07:49:00	0
2009-05-08	07:50:00	0
2009-05-08	07:51:00	0
2009-05-08	07:52:00	0
2009-05-08	07:53:00	0
2009-05-08	07:54:00	0
2009-05-08	07:55:00	0
2009-05-08	07:56:00	0
2009-05-08	07:57:00	0
2009-05-08	07:58:00	0
2009-05-08	07:59:00	0
2009-05-08	08:00:00	0
2009-05-08	08:01:00	0
2009-05-08	08:02:00	0
2009-05-08	08:03:00	0
2009-05-08	08:04:00	0
2009-05-08	08:05:00	0
2009-05-08	08:06:00	0
2009-05-08	08:07:00	0
2009-05-08	08:08:00	0
2009-05-08	08:09:00	0
2009-05-08	08:10:00	0
2009-05-08	08:11:00	0
2009-05-08	08:12:00	0
2009-05-08	08:13:00	0
2009-05-08	08:14:00	0
2009-05-08	08:15:00	0
2009-05-08	08:16:00	0
2009-05-08	08:17:00	0
2009-05-08	08:18:00	0
2009-05-08	08:19:00	0
2009-05-08	08:20:00	0
2009-05-08	08:21:00	0
2009-05-08	08:22:00	0
2009-05-08	08:23:00	0
2009-05-08	08:24:00	0
2009-05-08	08:25:00	0
2009-05-08	08:26:00	0
2009-05-08	08:27:00	0
2009-05-08	08:28:00	0
2009-05-08	08:29:00	0
2009-05-08	08:30:00	0
2009-05-08	08:31:00	0
2009-05-08	08:32:00	0
2009-05-08	08:33:00	0
2009-05-08	08:34:00	0
2009-05-08	08:35:00	0
2009-05-08	08:36:00	0
2009-05-08	08:37:00	0
2009-05-08	08:38:00	0
2009-05-08	08:39:00	0
2009-05-08	08:40:00	0
2009-05-08	08:41:00	0
2009-05-08	08:42:00	0
2009-05-08	08:43:00	0
2009-05-08	08:44:00	0
2009-05-08	08:45:00	0
2009-05-08	08:46:00	0
2009-05-08	08:47:00	0
2009-05-08	08:48:00	0
2009-05-08	08:49:00	0
2009-05-08	08:50:00	0
2009-05-08	08:51:00	0
2009-05-08	08:52:00	0
2009-05-08	08:53:00	0
2009-05-08	08:54:00	0
2009-05-08	08:55:00	0
2009-05-08	08:56:00	0
2009-05-08	08:57:00	0
2009-05-08	08:58:00	0
2009-05-08	08:59:00	0
2009-05-08	09:00:00	0
2009-05-08	09:01:00	0
2009-05-08	09:02:00	0
2009-05-08	09:03:00	0
2009-05-08	09:04:00	0
2009-05-08	09:05:00	0
2009-05-08	09:06:00	0
2009-05-08	09:07:00	0
2009-05-08	09:08:00	0
2009-05-08	09:09:00	0
2009-05-08	09:10:00	0
2009-05-08	09:11:00	0
2009-05-08	09:12:00	0
2009-05-08	09:13:00	0
2009-05-08	09:14:00	0
2009-05-08	09:15:00	0
2009-05-08	09:16:00	0
2009-05-08	09:17:00	0
2009-05-08	09:18:00	0
2009-05-08	09:19:00	0
2009-05-08	09:20:00	0
2009-05-08	09:21:00	0
2009-05-08	09:22:00	0
2009-05-08	09:23:00	0
2009-05-08	09:24:00	0
2009-05-08	09:25:00	0
2009-05-08	09:26:00	0
2009-05-08	09:27:00	0
2009-05-08	09:28:00	0
2009-05-08	09:29:00	0
2009-05-08	09:30:00	0
2009-05-08	09:31:00	0
2009-05-08	09:32:00	0
2009-05-08	09:33:00	0
2009-05-08	09:34:00	0
2009-05-08	09:35:00	0
2009-05-08	09:36:00	0
2009-05-08	09:37:00	0
2009-05-08	09:38:00	0
2009-05-08	09:39:00	0
2009-05-08	09:40:00	0
2009-05-08	09:41:00	0
2009-05-08	09:42:00	0
2009-05-08	09:43:00	0
2009-05-08	09:44:00	0
2009-05-08	09:45:00	0
2009-05-08	09:46:00	0
2009-05-08	09:47:00	0
2009-05-08	09:48:00	0
2009-05-08	09:49:00	0
2009-05-08	09:50:00	0
2009-05-08	09:51:00	0
2009-05-08	09:52:00	0
2009-05-08	09:53:00	0
2009-05-08	09:54:00	0
2009-05-08	09:55:00	0
2009-05-08	09:56:00	0
2009-05-08	09:57:00	0
2009-05-08	09:58:00	0
2009-05-08	09:59:00	0
2009-05-08	10:00:00	0
2009-05-08	10:01:00	0
2009-05-08	10:02:00	0
2009-05-08	10:03:00	0
2009-05-08	10:04:00	0
2009-05-08	10:05:00	0
2009-05-08	10:06:00	0
2009-05-08	10:07:00	0
2009-05-08	10:08:00	0
2009-05-08	10:09:00	0
2009-05-08	10:10:00	0
2009-05-08	10:11:00	0
2009-05-08	10:12:00	0
2009-05-08	10:13:00	0
2009-05-08	10:14:00	0
2009-05-08	10:15:00	0
2009-05-08	10:16:00	0
2009-05-08	10:17:00	0
2009-05-08	10:18:00	0
2009-05-08	10:19:00	0
2009-05-08	10:20:00	0
2009-05-08	10:21:00	0
2009-05-08	10:22:00	0
2009-05-08	10:23:00	0
2009-05-08	10:24:00	0
2009-05-08	10:25:00	0
2009-05-08	10:26:00	0
2009-05-08	10:27:00	0
2009-05-08	10:28:00	0
2009-05-08	10:29:00	0
2009-05-08	10:30:00	0
2009-05-08	10:31:00	0
2009-05-08	10:32:00	0
2009-05-08	10:33:00	0
2009-05-08	10:34:00	0
2009-05-08	10:35:00	0
2009-05-08	10:36:00	0
2009-05-08	10:37:00	0
2009-05-08	10:38:00	0
2009-05-08	10:39:00	0
2009-05-08	10:40:00	0
2009-05-08	10:41:00	0
2009-05-08	10:42:00	0
2009-05-08	10:43:00	0
2009-05-08	10:44:00	0
2009-05-08	10:45:00	0
2009-05-08	10:46:00	0
2009-05-08	10:47:00	0
2009-05-08	10:48:00	0
2009-05-08	10:49:00	0
2009-05-08	10:50:00	0
2009-05-08	10:51:00	0
2009-05-08	10:52:00	0
2009-05-08	10:53:00	0
2009-05-08	10:54:00	0
2009-05-08	10:55:00	0
2009-05-08	10:56:00	0
2009-05-08	10:57:00	0
2009-05-08	10:58:00	0
2009-05-08	10:59:00	0
2009-05-08	11:00:00	0
2009-05-08	11:01:00	0
2009-05-08	11:02:00	0
2009-05-08	11:03:00	0
2009-05-08	11:04:00	0
2009-05-08	11:05:00	0
2009-05-08	11:06:00	0
2009-05-08	11:07:00	0
2009-05-08	11:08:00	0
2009-05-08	11:09:00	0
2009-05-08	11:10:00	0
2009-05-08	11:11:00	0
2009-05-08	11:12:00	0
2009-05-08	11:13:00	0
2009-05-08	11:14:00	0
2009-05-08	11:15:00	0
2009-05-08	11:16:00	0
2009-05-08	11:17:00	0
2009-05-08	11:18:00	0
2009-05-08	11:19:00	0
2009-05-08	11:20:00	0
2009-05-08	11:21:00	0
2009-05-08	11:22:00	0
2009-05-08	11:23:00	0
2009-05-08	11:24:00	0
2009-05-08	11:25:00	0
2009-05-08	11:26:00	0
2009-05-08	11:27:00	0
2009-05-08	11:28:00	0
2009-05-08	11:29:00	0
2009-05-08	11:30:00	0
2009-05-08	11:31:00	0
2009-05-08	11:32:00	0
2009-05-08	11:33:00	0
2009-05-08	11:34:00	0
2009-05-08	11:35:00	0
2009-05-08	11:36:00	0
2009-05-08	11:37:00	0
2009-05-08	11:38:00	0
2009-05-08	11:39:00	0
2009-05-08	11:40:00	0
2009-05-08	11:41:00	0
2009-05-08	11:42:00	0
2009-05-08	11:43:00	0
2009-05-08	11:44:00	0
2009-05-08	11:45:00	0
2009-05-08	11:46:00	0
2009-05-08	11:47:00	0
2009-05-08	11:48:00	0
2009-05-08	11:49:00	0
2009-05-08	11:50:00	0
2009-05-08	11:51:00	0
2009-05-08	11:52:00	0
2009-05-08	11:53:00	0
2009-05-08	11:54:00	0
2009-05-08	11:55:00	0
2009-05-08	11:56:00	0
2009-05-08	11:57:00	0
2009-05-08	11:58:00	0
2009-05-08	11:59:00	0
2009-05-08	12:00:00	0
2009-05-08	12:01:00	0
2009-05-08	12:02:00	0
2009-05-08	12:03:00	0
2009-05-08	12:04:00	0
2009-05-08	12:05:00	0
2009-05-08	12:06:00	0
2009-05-08	12:07:00	0
2009-05-08	12:08:00	0
2009-05-08	12:09:00	0
2009-05-08	12:10:00	0
2009-05-08	12:11:00	0
2009-05-08	12:12:00	0
2009-05-08	12:13:00	0
2009-05-08	12:14:00	0
2009-05-08	12:15:00	0
2009-05-08	12:16:00	0
2009-05-08	12:17:00	0
2009-05-08	12:18:00	0
2009-05-08	12:19:00	0
2009-05-08	12:20:00	0
2009-05-08	12:21:00	0
2009-05-08	12:22:00	0
2009-05-08	12:23:00	0
2009-05-08	12:24:00	0
2009-05-08	12:25:00	0
2009-05-08	12:26:00	0
2009-05-08	12:27:00	0
2009-05-08	12:28:00	0
2009-05-08	12:29:00	0
2009-05-08	12:30:00	0
2009-05-08	12:31:00	0
2009-05-08	12:32:00	0
2009-05-08	12:33:00	0
2009-05-08	12:34:00	0
2009-05-08	12:35:00	0
2009-05-08	12:36:00	0
2009-05-08	12:37:00	0
2009-05-08	12:38:00	0
2009-05-08	12:39:00	0
2009-05-08	12:40:00	0
2009-05-08	12:41:00	0
2009-05-08	12:42:00	0
2009-05-08	12:43:00	0
2009-05-08	12:44:00	0
2009-05-08	12:45:00	0
2009-05-08	12:46:00	0
2009-05-08	12:47:00	0
2009-05-08	12:48:00	0
2009-05-08	12:49:00	0
2009-05-08	12:50:00	0
2009-05-08	12:51:00	0
2009-05-08	12:52:00	0
2009-05-08	12:53:00	0
2009-05-08	12:54:00	0
2009-05-08	12:55:00	0
2009-05-08	12:56:00	0
2009-05-08	12:57:00	0
2009-05-08	12:58:00	0
2009-05-08	12:59:00	0
2009-05-08	13:00:00	0
2009-05-08	13:01:00	0
2009-05-08	13:02:00	0
2009-05-08	13:03:00	0
2009-05-08	13:04:00	0
2009-05-08	13:05:00	0
2009-05-08	13:06:00	0
2009-05-08	13:07:00	0
2009-05-08	13:08:00	0
2009-05-08	13:09:00	0
2009-05-08	13:10:00	0
2009-05-08	13:11:00	0
2009-05-08	13:12:00	0
2009-05-08	13:13:00	0
2009-05-08	13:14:00	0
2009-05-08	13:15:00	0
2009-05-08	13:16:00	0
2009-05-08	13:17:00	0
2009-05-08	13:18:00	0
2009-05-08	13:19:00	0
2009-05-08	13:20:00	0
2009-05-08	13:21:00	0
2009-05-08	13:22:00	0
2009-05-08	13:23:00	0
2009-05-08	13:24:00	0
2009-05-08	13:25:00	0
2009-05-08	13:26:00	0
2009-05-08	13:27:00	0
2009-05-08	13:28:00	0
2009-05-08	13:29:00	0
2009-05-08	13:30:00	0
2009-05-08	13:31:00	0
2009-05-08	13:32:00	0
2009-05-08	13:33:00	0
2009-05-08	13:34:00	0
2009-05-08	13:35:00	0
2009-05-08	13:36:00	0
2009-05-08	13:37:00	0
2009-05-08	13:38:00	0
2009-05-08	13:39:00	0
2009-05-08	13:40:00	0
2009-05-08	13:41:00	0
2009-05-08	13:42:00	0
2009-05-08	13:43:00	0
2009-05-08	13:44:00	0
2009-05-08	13:45:00	0
2009-05-08	13:46:00	0
2009-05-08	13:47:00	0
2009-05-08	13:48:00	0
2009-05-08	13:49:00	0
2009-05-08	13:50:00	0
2009-05-08	13:51:00	0
2009-05-08	13:52:00	0
2009-05-08	13:53:00	0
2009-05-08	13:54:00	0
2009-05-08	13:55:00	0
2009-05-08	13:56:00	0
2009-05-08	13:57:00	0
2009-05-08	13:58:00	0
2009-05-08	13:59:00	0
2009-05-08	14:00:00	0
2009-05-08	14:01:00	0
2009-05-08	14:02:00	0
2009-05-08	14:03:00	0
2009-05-08	14:04:00	0
2009-05-08	14:05:00	0
2009-05-08	14:06:00	0
2009-05-08	14:07:00	0
2009-05-08	14:08:00	0
2009-05-08	14:09:00	0
2009-05-08	14:10:00	0
2009-05-08	14:11:00	0
2009-05-08	14:12:00	0
2009-05-08	14:13:00	0
2009-05-08	14:14:00	0
2009-05-08	14:15:00	0
2009-05-08	14:16:00	0
2009-05-08	14:17:00	0
2009-05-08	14:18:00	0
2009-05-08	14:19:00	0
2009-05-08	14:20:00	0
2009-05-08	14:21:00	0
2009-05-08	14:22:00	0
2009-05-08	14:23:00	0
2009-05-08	14:24:00	0
2009-05-08	14:25:00	0
2009-05-08	14:26:00	0
2009-05-08	14:27:00	0
2009-05-08	14:28:00	0
2009-05-08	14:29:00	0
2009-05-08	14:30:00	0
2009-05-08	14:31:00	0
2009-05-08	14:32:00	0
2009-05-08	14:33:00	0
2009-05-08	14:34:00	0
2009-05-08	14:35:00	0
2009-05-08	14:36:00	0
2009-05-08	14:37:00	0
2009-05-08	14:38:00	0
2009-05-08	14:39:00	0
2009-05-08	14:40:00	0
2009-05-08	14:41:00	0
2009-05-08	14:42:00	0
2009-05-08	14:43:00	0
2009-05-08	14:44:00	0
2009-05-08	14:45:00	0
2009-05-08	14:46:00	0
2009-05-08	14:47:00	0
2009-05-08	14:48:00	0
2009-05-08	14:49:00	0
2009-05-08	14:50:00	0
2009-05-08	14:51:00	0
2009-05-08	14:52:00	0
2009-05-08	14:53:00	0
2009-05-08	14:54:00	0
2009-05-08	14:55:00	0
2009-05-08	14:56:00	0
2009-05-08	14:57:00	0
2009-05-08	14:58:00	0
2009-05-08	14:59:00	0
2009-05-08	15:00:00	0
2009-05-08	15:01:00	0
2009-05-08	15:02:00	0
2009-05-08	15:03:00	0
2009-05-08	15:04:00	0
2009-05-08	15:05:00	0
2009-05-08	15:06:00	0
2009-05-08	15:07:00	0
2009-05-08	15:08:00	0
2009-05-08	15:09:00	0
2009-05-08	15:10:00	0
2009-05-08	15:11:00	0
2009-05-08	15:12:00	0
2009-05-08	15:13:00	0
2009-05-08	15:14:00	0
2009-05-08	15:15:00	0
2009-05-08	15:16:00	0
2009-05-08	15:17:00	0
2009-05-08	15:18:00	0
2009-05-08	15:19:00	0
2009-05-08	15:20:00	0
2009-05-08	15:21:00	0
2009-05-08	15:22:00	0
2009-05-08	15:23:00	0
2009-05-08	15:24:00	0
2009-05-08	15:25:00	0
2009-05-08	15:26:00	0
2009-05-08	15:27:00	0
2009-05-08	15:28:00	0
2009-05-08	15:29:00	0
2009-05-08	15:30:00	0
2009-05-08	15:31:00	0
2009-05-08	15:32:00	0
2009-05-08	15:33:00	0
2009-05-08	15:34:00	0
2009-05-08	15:35:00	0
2009-05-08	15:36:00	0
2009-05-08	15:37:00	0
2009-05-08	15:38:00	0
2009-05-08	15:39:00	0
2009-05-08	15:40:00	0
2009-05-08	15:41:00	0
2009-05-08	15:42:00	0
2009-05-08	15:43:00	0
2009-05-08	15:44:00	0
2009-05-08	15:45:00	0
2009-05-08	15:46:00	0
2009-05-08	15:47:00	0
2009-05-08	15:48:00	0
2009-05-08	15:49:00	0
2009-05-08	15:50:00	0
2009-05-08	15:51:00	0
2009-05-08	15:52:00	0
2009-05-08	15:53:00	0
2009-05-08	15:54:00	0
2009-05-08	15:55:00	0
2009-05-08	15:56:00	0
2009-05-08	15:57:00	0
2009-05-08	15:58:00	0
2009-05-08	15:59:00	0
2009-05-08	16:00:00	0
2009-05-08	16:01:00	0
2009-05-08	16:02:00	0
2009-05-08	16:03:00	0
2009-05-08	16:04:00	0
2009-05-08	16:05:00	0
2009-05-08	16:06:00	0
2009-05-08	16:07:00	0
2009-05-08	16:08:00	0
2009-05-08	16:09:00	0
2009-05-08	16:10:00	0
2009-05-08	16:11:00	0
2009-05-08	16:12:00	0
2009-05-08	16:13:00	0
2009-05-08	16:14:00	0
2009-05-08	16:15:00	0
2009-05-08	16:16:00	0
2009-05-08	16:17:00	0
2009-05-08	16:18:00	0
2009-05-08	16:19:00	0
2009-05-08	16:20:00	0
2009-05-08	16:21:00	0
2009-05-08	16:22:00	0
2009-05-08	16:23:00	0
2009-05-08	16:24:00	0
2009-05-08	16:25:00	0
2009-05-08	16:26:00	0
2009-05-08	16:27:00	0
2009-05-08	16:28:00	0
2009-05-08	16:29:00	0
2009-05-08	16:30:00	0
2009-05-08	16:31:00	0
2009-05-08	16:32:00	0
2009-05-08	16:33:00	0
2009-05-08	16:34:00	0
2009-05-08	16:35:00	0
2009-05-08	16:36:00	0
2009-05-08	16:37:00	0
2009-05-08	16:38:00	0
2009-05-08	16:39:00	0
2009-05-08	16:40:00	0
2009-05-08	16:41:00	0
2009-05-08	16:42:00	0
2009-05-08	16:43:00	0
2009-05-08	16:44:00	0
2009-05-08	16:45:00	0
2009-05-08	16:46:00	0
2009-05-08	16:47:00	0
2009-05-08	16:48:00	0
2009-05-08	16:49:00	0
2009-05-08	16:50:00	0
2009-05-08	16:51:00	0
2009-05-08	16:52:00	0
2009-05-08	16:53:00	0
2009-05-08	16:54:00	0
2009-05-08	16:55:00	0
2009-05-08	16:56:00	0
2009-05-08	16:57:00	0
2009-05-08	16:58:00	0
2009-05-08	16:59:00	0
2009-05-08	17:00:00	0
2009-05-08	17:01:00	0
2009-05-08	17:02:00	0
2009-05-08	17:03:00	0
2009-05-08	17:04:00	0
2009-05-08	17:05:00	0
2009-05-08	17:06:00	0
2009-05-08	17:07:00	0
2009-05-08	17:08:00	0
2009-05-08	17:09:00	0
2009-05-08	17:10:00	0
2009-05-08	17:11:00	0
2009-05-08	17:12:00	0
2009-05-08	17:13:00	0
2009-05-08	17:14:00	0
2009-05-08	17:15:00	0
2009-05-08	17:16:00	0
2009-05-08	17:17:00	0
2009-05-08	17:18:00	0
2009-05-08	17:19:00	0
2009-05-08	17:20:00	0
2009-05-08	17:21:00	0
2009-05-08	17:22:00	0
2009-05-08	17:23:00	0
2009-05-08	17:24:00	0
2009-05-08	17:25:00	0
2009-05-08	17:26:00	0
2009-05-08	17:27:00	0
2009-05-08	17:28:00	0
2009-05-08	17:29:00	0
2009-05-08	17:30:00	0
2009-05-08	17:31:00	0
2009-05-08	17:32:00	0
2009-05-08	17:33:00	0
2009-05-08	17:34:00	0
2009-05-08	17:35:00	0
2009-05-08	17:36:00	0
2009-05-08	17:37:00	0
2009-05-08	17:38:00	0
2009-05-08	17:39:00	0
2009-05-08	17:40:00	0
2009-05-08	17:41:00	0
2009-05-08	17:42:00	0
2009-05-08	17:43:00	0
2009-05-08	17:44:00	0
2009-05-08	17:45:00	0
2009-05-08	17:46:00	0
2009-05-08	17:47:00	0
2009-05-08	17:48:00	0
2009-05-08	17:49:00	0
2009-05-08	17:50:00	0
2009-05-08	17:51:00	0
2009-05-08	17:52:00	0
2009-05-08	17:53:00	0
2009-05-08	17:54:00	0
2009-05-08	17:55:00	0
2009-05-08	17:56:00	0
2009-05-08	17:57:00	0
2009-05-08	17:58:00	0
2009-05-08	17:59:00	0
2009-05-08	18:00:00	79
2009-05-08	18:01:00	123
2009-05-08	18:02:00	52
2009-05-08	18:03:00	73
2009-05-08	18:04:00	104
2009-05-08	18:05:00	123
2009-05-08	18:06:00	129
2009-05-08	18:07:00	123
2009-05-08	18:08:00	31
2009-05-08	18:09:00	179
2009-05-08	18:10:00	404
2009-05-08	18:11:00	276
2009-05-08	18:12:00	373
2009-05-08	18:13:00	426
2009-05-08	18:14:00	561
2009-05-08	18:15:00	497
2009-05-08	18:16:00	303
2009-05-08	18:17:00	601
2009-05-08	18:18:00	908
2009-05-08	18:19:00	601
2009-05-08	18:20:00	1067
2009-05-08	18:21:00	1452
2009-05-08	18:22:00	986
2009-05-08	18:23:00	426
2009-05-08	18:24:00	117
2009-05-08	18:25:00	460
2009-05-08	18:26:00	266
2009-05-08	18:27:00	142
2009-05-08	18:28:00	0
2009-05-08	18:29:00	362
2009-05-08	18:30:00	383
2009-05-08	18:31:00	509
2009-05-08	18:32:00	644
2009-05-08	18:33:00	276
2009-05-08	18:34:00	908
2009-05-08	18:35:00	2087
2009-05-08	18:36:00	2014
2009-05-08	18:37:00	2319
2009-05-08	18:38:00	1373
2009-05-08	18:39:00	460
2009-05-08	18:40:00	836
2009-05-08	18:41:00	689
2009-05-08	18:42:00	415
2009-05-08	18:43:00	472
2009-05-08	18:44:00	426
2009-05-08	18:45:00	217
2009-05-08	18:46:00	200
2009-05-08	18:47:00	150
2009-05-08	18:48:00	449
2009-05-08	18:49:00	0
2009-05-08	18:50:00	322
2009-05-08	18:51:00	250
2009-05-08	18:52:00	438
2009-05-08	18:53:00	404
2009-05-08	18:54:00	258
2009-05-08	18:55:00	393
2009-05-08	18:56:00	266
2009-05-08	18:57:00	497
2009-05-08	18:58:00	179
2009-05-08	18:59:00	164
2009-05-08	19:00:00	57
2009-05-08	19:01:00	123
2009-05-08	19:02:00	179
2009-05-08	19:03:00	41
2009-05-08	19:04:00	258
2009-05-08	19:05:00	342
2009-05-08	19:06:00	342
2009-05-08	19:07:00	534
2009-05-08	19:08:00	225
2009-05-08	19:09:00	0
2009-05-08	19:10:00	26
2009-05-08	19:11:00	46
2009-05-08	19:12:00	258
2009-05-08	19:13:00	142
2009-05-08	19:14:00	98
2009-05-08	19:15:00	5
2009-05-08	19:16:00	86
2009-05-08	19:17:00	110
2009-05-08	19:18:00	5
2009-05-08	19:19:00	15
2009-05-08	19:20:00	117
2009-05-08	19:21:00	164
2009-05-08	19:22:00	135
2009-05-08	19:23:00	92
2009-05-08	19:24:00	362
2009-05-08	19:25:00	689
2009-05-08	19:26:00	217
2009-05-08	19:27:00	751
2009-05-08	19:28:00	415
2009-05-08	19:29:00	225
2009-05-08	19:30:00	460
2009-05-08	19:31:00	294
2009-05-08	19:32:00	276
2009-05-08	19:33:00	250
2009-05-08	19:34:00	5
2009-05-08	19:35:00	104
2009-05-08	19:36:00	0
2009-05-08	19:37:00	0
2009-05-08	19:38:00	200
2009-05-08	19:39:00	98
2009-05-08	19:40:00	294
2009-05-08	19:41:00	509
2009-05-08	19:42:00	36
2009-05-08	19:43:00	5
2009-05-08	19:44:00	10
2009-05-08	19:45:00	0
2009-05-08	19:46:00	0
2009-05-08	19:47:00	0
2009-05-08	19:48:00	179
2009-05-08	19:49:00	258
2009-05-08	19:50:00	150
2009-05-08	19:51:00	258
2009-05-08	19:52:00	129
2009-05-08	19:53:00	276
2009-05-08	19:54:00	373
2009-05-08	19:55:00	242
2009-05-08	19:56:00	193
2009-05-08	19:57:00	285
2009-05-08	19:58:00	225
2009-05-08	19:59:00	209
2009-05-08	20:00:00	15
2009-05-08	20:01:00	117
2009-05-08	20:02:00	73
2009-05-08	20:03:00	110
2009-05-08	20:04:00	46
2009-05-08	20:05:00	0
2009-05-08	20:06:00	164
2009-05-08	20:07:00	484
2009-05-08	20:08:00	266
2009-05-08	20:09:00	547
2009-05-08	20:10:00	472
2009-05-08	20:11:00	331
2009-05-08	20:12:00	404
2009-05-08	20:13:00	135
2009-05-08	20:14:00	460
2009-05-08	20:15:00	46
2009-05-08	20:16:00	0
2009-05-08	20:17:00	0
2009-05-08	20:18:00	5
2009-05-08	20:19:00	123
2009-05-08	20:20:00	10
2009-05-08	20:21:00	15
2009-05-08	20:22:00	0
2009-05-08	20:23:00	0
2009-05-08	20:24:00	0
2009-05-08	20:25:00	0
2009-05-08	20:26:00	0
2009-05-08	20:27:00	57
2009-05-08	20:28:00	0
2009-05-08	20:29:00	0
2009-05-08	20:30:00	0
2009-05-08	20:31:00	52
2009-05-08	20:32:00	0
2009-05-08	20:33:00	15
2009-05-08	20:34:00	179
2009-05-08	20:35:00	521
2009-05-08	20:36:00	704
2009-05-08	20:37:00	534
2009-05-08	20:38:00	41
2009-05-08	20:39:00	225
2009-05-08	20:40:00	659
2009-05-08	20:41:00	233
2009-05-08	20:42:00	673
2009-05-08	20:43:00	449
2009-05-08	20:44:00	31
2009-05-08	20:45:00	322
2009-05-08	20:46:00	21
2009-05-08	20:47:00	225
2009-05-08	20:48:00	534
2009-05-08	20:49:00	0
2009-05-08	20:50:00	0
2009-05-08	20:51:00	0
2009-05-08	20:52:00	0
2009-05-08	20:53:00	15
2009-05-08	20:54:00	0
2009-05-08	20:55:00	21
2009-05-08	20:56:00	0
2009-05-08	20:57:00	0
2009-05-08	20:58:00	0
2009-05-08	20:59:00	0
2009-05-08	21:00:00	5
2009-05-08	21:01:00	200
2009-05-08	21:02:00	5
2009-05-08	21:03:00	0
2009-05-08	21:04:00	331
2009-05-08	21:05:00	0
2009-05-08	21:06:00	0
2009-05-08	21:07:00	0
2009-05-08	21:08:00	0
2009-05-08	21:09:00	0
2009-05-08	21:10:00	0
2009-05-08	21:11:00	5
2009-05-08	21:12:00	0
2009-05-08	21:13:00	0
2009-05-08	21:14:00	0
2009-05-08	21:15:00	0
2009-05-08	21:16:00	0
2009-05-08	21:17:00	10
2009-05-08	21:18:00	0
2009-05-08	21:19:00	0
2009-05-08	21:20:00	0
2009-05-08	21:21:00	62
2009-05-08	21:22:00	294
2009-05-08	21:23:00	10
2009-05-08	21:24:00	276
2009-05-08	21:25:00	233
2009-05-08	21:26:00	186
2009-05-08	21:27:00	123
2009-05-08	21:28:00	242
2009-05-08	21:29:00	0
2009-05-08	21:30:00	0
2009-05-08	21:31:00	0
2009-05-08	21:32:00	73
2009-05-08	21:33:00	0
2009-05-08	21:34:00	393
2009-05-08	21:35:00	21
2009-05-08	21:36:00	0
2009-05-08	21:37:00	0
2009-05-08	21:38:00	0
2009-05-08	21:39:00	0
2009-05-08	21:40:00	0
2009-05-08	21:41:00	0
2009-05-08	21:42:00	0
2009-05-08	21:43:00	0
2009-05-08	21:44:00	0
2009-05-08	21:45:00	0
2009-05-08	21:46:00	0
2009-05-08	21:47:00	0
2009-05-08	21:48:00	0
2009-05-08	21:49:00	0
2009-05-08	21:50:00	0
2009-05-08	21:51:00	0
2009-05-08	21:52:00	110
2009-05-08	21:53:00	67
2009-05-08	21:54:00	0
2009-05-08	21:55:00	0
2009-05-08	21:56:00	0
2009-05-08	21:57:00	67
2009-05-08	21:58:00	0
2009-05-08	21:59:00	0
2009-05-08	22:00:00	0
2009-05-08	22:01:00	0
2009-05-08	22:02:00	0
2009-05-08	22:03:00	0
2009-05-08	22:04:00	0
2009-05-08	22:05:00	0
2009-05-08	22:06:00	41
2009-05-08	22:07:00	0
2009-05-08	22:08:00	0
2009-05-08	22:09:00	46
2009-05-08	22:10:00	0
2009-05-08	22:11:00	0
2009-05-08	22:12:00	0
2009-05-08	22:13:00	0
2009-05-08	22:14:00	52
2009-05-08	22:15:00	0
2009-05-08	22:16:00	0
2009-05-08	22:17:00	225
2009-05-08	22:18:00	966
2009-05-08	22:19:00	472
2009-05-08	22:20:00	373
2009-05-08	22:21:00	1321
2009-05-08	22:22:00	735
2009-05-08	22:23:00	186
2009-05-08	22:24:00	57
2009-05-08	22:25:00	342
2009-05-08	22:26:00	5
2009-05-08	22:27:00	150
2009-05-08	22:28:00	242
2009-05-08	22:29:00	0
2009-05-08	22:30:00	10
2009-05-08	22:31:00	0
2009-05-08	22:32:00	0
2009-05-08	22:33:00	5
2009-05-08	22:34:00	5
2009-05-08	22:35:00	0
2009-05-08	22:36:00	0
2009-05-08	22:37:00	0
2009-05-08	22:38:00	0
2009-05-08	22:39:00	0
2009-05-08	22:40:00	0
2009-05-08	22:41:00	0
2009-05-08	22:42:00	0
2009-05-08	22:43:00	0
2009-05-08	22:44:00	0
2009-05-08	22:45:00	79
2009-05-08	22:46:00	0
2009-05-08	22:47:00	0
2009-05-08	22:48:00	0
2009-05-08	22:49:00	0
2009-05-08	22:50:00	5
2009-05-08	22:51:00	10
2009-05-08	22:52:00	0
2009-05-08	22:53:00	285
2009-05-08	22:54:00	57
2009-05-08	22:55:00	0
2009-05-08	22:56:00	0
2009-05-08	22:57:00	0
2009-05-08	22:58:00	0
2009-05-08	22:59:00	0
2009-05-08	23:00:00	0
2009-05-08	23:01:00	0
2009-05-08	23:02:00	0
2009-05-08	23:03:00	0
2009-05-08	23:04:00	0
2009-05-08	23:05:00	0
2009-05-08	23:06:00	0
2009-05-08	23:07:00	5
2009-05-08	23:08:00	0
2009-05-08	23:09:00	0
2009-05-08	23:10:00	0
2009-05-08	23:11:00	0
2009-05-08	23:12:00	0
2009-05-08	23:13:00	0
2009-05-08	23:14:00	0
2009-05-08	23:15:00	0
2009-05-08	23:16:00	36
2009-05-08	23:17:00	0
2009-05-08	23:18:00	393
2009-05-08	23:19:00	250
2009-05-08	23:20:00	0
2009-05-08	23:21:00	0
2009-05-08	23:22:00	0
2009-05-08	23:23:00	0
2009-05-08	23:24:00	233
2009-05-08	23:25:00	31
2009-05-08	23:26:00	0
2009-05-08	23:27:00	5
2009-05-08	23:28:00	0
2009-05-08	23:29:00	0
2009-05-08	23:30:00	0
2009-05-08	23:31:00	0
2009-05-08	23:32:00	0
2009-05-08	23:33:00	0
2009-05-08	23:34:00	0
2009-05-08	23:35:00	0
2009-05-08	23:36:00	0
2009-05-08	23:37:00	0
2009-05-08	23:38:00	0
2009-05-08	23:39:00	0
2009-05-08	23:40:00	0
2009-05-08	23:41:00	0
2009-05-08	23:42:00	0
2009-05-08	23:43:00	0
2009-05-08	23:44:00	0
2009-05-08	23:45:00	0
2009-05-08	23:46:00	86
2009-05-08	23:47:00	0
2009-05-08	23:48:00	0
2009-05-08	23:49:00	0
2009-05-08	23:50:00	0
2009-05-08	23:51:00	0
2009-05-08	23:52:00	0
2009-05-08	23:53:00	0
2009-05-08	23:54:00	0
2009-05-08	23:55:00	0
2009-05-08	23:56:00	0
2009-05-08	23:57:00	0
2009-05-08	23:58:00	0
2009-05-08	23:59:00	0
2009-05-09	00:00:00	0
2009-05-09	00:01:00	0
2009-05-09	00:02:00	0
2009-05-09	00:03:00	0
2009-05-09	00:04:00	0
2009-05-09	00:05:00	0
2009-05-09	00:06:00	0
2009-05-09	00:07:00	0
2009-05-09	00:08:00	0
2009-05-09	00:09:00	0
2009-05-09	00:10:00	0
2009-05-09	00:11:00	0
2009-05-09	00:12:00	0
2009-05-09	00:13:00	0
2009-05-09	00:14:00	41
2009-05-09	00:15:00	31
2009-05-09	00:16:00	157
2009-05-09	00:17:00	5
2009-05-09	00:18:00	41
2009-05-09	00:19:00	36
2009-05-09	00:20:00	0
2009-05-09	00:21:00	0
2009-05-09	00:22:00	0
2009-05-09	00:23:00	0
2009-05-09	00:24:00	0
2009-05-09	00:25:00	0
2009-05-09	00:26:00	0
2009-05-09	00:27:00	0
2009-05-09	00:28:00	0
2009-05-09	00:29:00	0
2009-05-09	00:30:00	0
2009-05-09	00:31:00	0
2009-05-09	00:32:00	0
2009-05-09	00:33:00	0
2009-05-09	00:34:00	0
2009-05-09	00:35:00	0
2009-05-09	00:36:00	0
2009-05-09	00:37:00	0
2009-05-09	00:38:00	0
2009-05-09	00:39:00	0
2009-05-09	00:40:00	0
2009-05-09	00:41:00	0
2009-05-09	00:42:00	0
2009-05-09	00:43:00	0
2009-05-09	00:44:00	0
2009-05-09	00:45:00	0
2009-05-09	00:46:00	0
2009-05-09	00:47:00	0
2009-05-09	00:48:00	0
2009-05-09	00:49:00	0
2009-05-09	00:50:00	0
2009-05-09	00:51:00	15
2009-05-09	00:52:00	0
2009-05-09	00:53:00	0
2009-05-09	00:54:00	0
2009-05-09	00:55:00	0
2009-05-09	00:56:00	0
2009-05-09	00:57:00	0
2009-05-09	00:58:00	0
2009-05-09	00:59:00	0
2009-05-09	01:00:00	0
2009-05-09	01:01:00	0
2009-05-09	01:02:00	0
2009-05-09	01:03:00	26
2009-05-09	01:04:00	0
2009-05-09	01:05:00	0
2009-05-09	01:06:00	0
2009-05-09	01:07:00	0
2009-05-09	01:08:00	0
2009-05-09	01:09:00	0
2009-05-09	01:10:00	0
2009-05-09	01:11:00	0
2009-05-09	01:12:00	0
2009-05-09	01:13:00	0
2009-05-09	01:14:00	0
2009-05-09	01:15:00	0
2009-05-09	01:16:00	0
2009-05-09	01:17:00	0
2009-05-09	01:18:00	0
2009-05-09	01:19:00	0
2009-05-09	01:20:00	0
2009-05-09	01:21:00	0
2009-05-09	01:22:00	0
2009-05-09	01:23:00	0
2009-05-09	01:24:00	0
2009-05-09	01:25:00	0
2009-05-09	01:26:00	0
2009-05-09	01:27:00	0
2009-05-09	01:28:00	0
2009-05-09	01:29:00	0
2009-05-09	01:30:00	0
2009-05-09	01:31:00	0
2009-05-09	01:32:00	0
2009-05-09	01:33:00	0
2009-05-09	01:34:00	26
2009-05-09	01:35:00	10
2009-05-09	01:36:00	0
2009-05-09	01:37:00	0
2009-05-09	01:38:00	0
2009-05-09	01:39:00	0
2009-05-09	01:40:00	0
2009-05-09	01:41:00	0
2009-05-09	01:42:00	0
2009-05-09	01:43:00	0
2009-05-09	01:44:00	0
2009-05-09	01:45:00	0
2009-05-09	01:46:00	0
2009-05-09	01:47:00	41
2009-05-09	01:48:00	0
2009-05-09	01:49:00	200
2009-05-09	01:50:00	0
2009-05-09	01:51:00	0
2009-05-09	01:52:00	0
2009-05-09	01:53:00	0
2009-05-09	01:54:00	0
2009-05-09	01:55:00	0
2009-05-09	01:56:00	0
2009-05-09	01:57:00	0
2009-05-09	01:58:00	0
2009-05-09	01:59:00	0
2009-05-09	02:00:00	0
2009-05-09	02:01:00	0
2009-05-09	02:02:00	0
2009-05-09	02:03:00	0
2009-05-09	02:04:00	26
2009-05-09	02:05:00	0
2009-05-09	02:06:00	0
2009-05-09	02:07:00	0
2009-05-09	02:08:00	0
2009-05-09	02:09:00	0
2009-05-09	02:10:00	0
2009-05-09	02:11:00	0
2009-05-09	02:12:00	0
2009-05-09	02:13:00	0
2009-05-09	02:14:00	0
2009-05-09	02:15:00	0
2009-05-09	02:16:00	0
2009-05-09	02:17:00	0
2009-05-09	02:18:00	0
2009-05-09	02:19:00	0
2009-05-09	02:20:00	0
2009-05-09	02:21:00	0
2009-05-09	02:22:00	0
2009-05-09	02:23:00	0
2009-05-09	02:24:00	0
2009-05-09	02:25:00	0
2009-05-09	02:26:00	0
2009-05-09	02:27:00	0
2009-05-09	02:28:00	0
2009-05-09	02:29:00	0
2009-05-09	02:30:00	15
2009-05-09	02:31:00	0
2009-05-09	02:32:00	0
2009-05-09	02:33:00	0
2009-05-09	02:34:00	0
2009-05-09	02:35:00	15
2009-05-09	02:36:00	0
2009-05-09	02:37:00	0
2009-05-09	02:38:00	0
2009-05-09	02:39:00	0
2009-05-09	02:40:00	0
2009-05-09	02:41:00	0
2009-05-09	02:42:00	0
2009-05-09	02:43:00	0
2009-05-09	02:44:00	0
2009-05-09	02:45:00	46
2009-05-09	02:46:00	86
2009-05-09	02:47:00	36
2009-05-09	02:48:00	0
2009-05-09	02:49:00	0
2009-05-09	02:50:00	0
2009-05-09	02:51:00	0
2009-05-09	02:52:00	0
2009-05-09	02:53:00	0
2009-05-09	02:54:00	0
2009-05-09	02:55:00	0
2009-05-09	02:56:00	0
2009-05-09	02:57:00	0
2009-05-09	02:58:00	0
2009-05-09	02:59:00	0
2009-05-09	03:00:00	0
2009-05-09	03:01:00	0
2009-05-09	03:02:00	0
2009-05-09	03:03:00	0
2009-05-09	03:04:00	0
2009-05-09	03:05:00	0
2009-05-09	03:06:00	0
2009-05-09	03:07:00	5
2009-05-09	03:08:00	0
2009-05-09	03:09:00	0
2009-05-09	03:10:00	0
2009-05-09	03:11:00	10
2009-05-09	03:12:00	0
2009-05-09	03:13:00	0
2009-05-09	03:14:00	0
2009-05-09	03:15:00	0
2009-05-09	03:16:00	0
2009-05-09	03:17:00	0
2009-05-09	03:18:00	0
2009-05-09	03:19:00	0
2009-05-09	03:20:00	0
2009-05-09	03:21:00	0
2009-05-09	03:22:00	10
2009-05-09	03:23:00	0
2009-05-09	03:24:00	0
2009-05-09	03:25:00	31
2009-05-09	03:26:00	0
2009-05-09	03:27:00	0
2009-05-09	03:28:00	0
2009-05-09	03:29:00	15
2009-05-09	03:30:00	0
2009-05-09	03:31:00	0
2009-05-09	03:32:00	0
2009-05-09	03:33:00	0
2009-05-09	03:34:00	0
2009-05-09	03:35:00	0
2009-05-09	03:36:00	0
2009-05-09	03:37:00	0
2009-05-09	03:38:00	15
2009-05-09	03:39:00	0
2009-05-09	03:40:00	0
2009-05-09	03:41:00	0
2009-05-09	03:42:00	0
2009-05-09	03:43:00	0
2009-05-09	03:44:00	0
2009-05-09	03:45:00	0
2009-05-09	03:46:00	0
2009-05-09	03:47:00	0
2009-05-09	03:48:00	0
2009-05-09	03:49:00	0
2009-05-09	03:50:00	0
2009-05-09	03:51:00	0
2009-05-09	03:52:00	15
2009-05-09	03:53:00	21
2009-05-09	03:54:00	0
2009-05-09	03:55:00	0
2009-05-09	03:56:00	0
2009-05-09	03:57:00	0
2009-05-09	03:58:00	0
2009-05-09	03:59:00	0
2009-05-09	04:00:00	0
2009-05-09	04:01:00	0
2009-05-09	04:02:00	0
2009-05-09	04:03:00	0
2009-05-09	04:04:00	0
2009-05-09	04:05:00	0
2009-05-09	04:06:00	0
2009-05-09	04:07:00	0
2009-05-09	04:08:00	0
2009-05-09	04:09:00	0
2009-05-09	04:10:00	26
2009-05-09	04:11:00	0
2009-05-09	04:12:00	0
2009-05-09	04:13:00	0
2009-05-09	04:14:00	0
2009-05-09	04:15:00	0
2009-05-09	04:16:00	0
2009-05-09	04:17:00	0
2009-05-09	04:18:00	0
2009-05-09	04:19:00	0
2009-05-09	04:20:00	0
2009-05-09	04:21:00	0
2009-05-09	04:22:00	0
2009-05-09	04:23:00	0
2009-05-09	04:24:00	0
2009-05-09	04:25:00	0
2009-05-09	04:26:00	0
2009-05-09	04:27:00	0
2009-05-09	04:28:00	21
2009-05-09	04:29:00	46
2009-05-09	04:30:00	79
2009-05-09	04:31:00	0
2009-05-09	04:32:00	186
2009-05-09	04:33:00	5
2009-05-09	04:34:00	5
2009-05-09	04:35:00	0
2009-05-09	04:36:00	0
2009-05-09	04:37:00	0
2009-05-09	04:38:00	0
2009-05-09	04:39:00	0
2009-05-09	04:40:00	5
2009-05-09	04:41:00	15
2009-05-09	04:42:00	0
2009-05-09	04:43:00	0
2009-05-09	04:44:00	0
2009-05-09	04:45:00	31
2009-05-09	04:46:00	0
2009-05-09	04:47:00	0
2009-05-09	04:48:00	0
2009-05-09	04:49:00	0
2009-05-09	04:50:00	0
2009-05-09	04:51:00	0
2009-05-09	04:52:00	0
2009-05-09	04:53:00	0
2009-05-09	04:54:00	0
2009-05-09	04:55:00	0
2009-05-09	04:56:00	0
2009-05-09	04:57:00	0
2009-05-09	04:58:00	0
2009-05-09	04:59:00	0
2009-05-09	05:00:00	5
2009-05-09	05:01:00	0
2009-05-09	05:02:00	0
2009-05-09	05:03:00	0
2009-05-09	05:04:00	0
2009-05-09	05:05:00	0
2009-05-09	05:06:00	0
2009-05-09	05:07:00	0
2009-05-09	05:08:00	0
2009-05-09	05:09:00	0
2009-05-09	05:10:00	0
2009-05-09	05:11:00	0
2009-05-09	05:12:00	0
2009-05-09	05:13:00	10
2009-05-09	05:14:00	0
2009-05-09	05:15:00	0
2009-05-09	05:16:00	0
2009-05-09	05:17:00	0
2009-05-09	05:18:00	0
2009-05-09	05:19:00	0
2009-05-09	05:20:00	0
2009-05-09	05:21:00	0
2009-05-09	05:22:00	0
2009-05-09	05:23:00	0
2009-05-09	05:24:00	0
2009-05-09	05:25:00	0
2009-05-09	05:26:00	0
2009-05-09	05:27:00	0
2009-05-09	05:28:00	0
2009-05-09	05:29:00	0
2009-05-09	05:30:00	5
2009-05-09	05:31:00	26
2009-05-09	05:32:00	171
2009-05-09	05:33:00	21
2009-05-09	05:34:00	0
2009-05-09	05:35:00	0
2009-05-09	05:36:00	0
2009-05-09	05:37:00	26
2009-05-09	05:38:00	0
2009-05-09	05:39:00	0
2009-05-09	05:40:00	0
2009-05-09	05:41:00	0
2009-05-09	05:42:00	0
2009-05-09	05:43:00	0
2009-05-09	05:44:00	0
2009-05-09	05:45:00	0
2009-05-09	05:46:00	0
2009-05-09	05:47:00	0
2009-05-09	05:48:00	0
2009-05-09	05:49:00	0
2009-05-09	05:50:00	0
2009-05-09	05:51:00	67
2009-05-09	05:52:00	5
2009-05-09	05:53:00	0
2009-05-09	05:54:00	0
2009-05-09	05:55:00	0
2009-05-09	05:56:00	0
2009-05-09	05:57:00	0
2009-05-09	05:58:00	0
2009-05-09	05:59:00	0
2009-05-09	06:00:00	0
2009-05-09	06:01:00	0
2009-05-09	06:02:00	0
2009-05-09	06:03:00	0
2009-05-09	06:04:00	41
2009-05-09	06:05:00	46
2009-05-09	06:06:00	21
2009-05-09	06:07:00	41
2009-05-09	06:08:00	0
2009-05-09	06:09:00	0
2009-05-09	06:10:00	601
2009-05-09	06:11:00	5
2009-05-09	06:12:00	0
2009-05-09	06:13:00	0
2009-05-09	06:14:00	0
2009-05-09	06:15:00	0
2009-05-09	06:16:00	0
2009-05-09	06:17:00	26
2009-05-09	06:18:00	92
2009-05-09	06:19:00	98
2009-05-09	06:20:00	41
2009-05-09	06:21:00	92
2009-05-09	06:22:00	26
2009-05-09	06:23:00	135
2009-05-09	06:24:00	62
2009-05-09	06:25:00	98
2009-05-09	06:26:00	0
2009-05-09	06:27:00	142
2009-05-09	06:28:00	164
2009-05-09	06:29:00	0
2009-05-09	06:30:00	142
2009-05-09	06:31:00	157
2009-05-09	06:32:00	0
2009-05-09	06:33:00	0
2009-05-09	06:34:00	0
2009-05-09	06:35:00	0
2009-05-09	06:36:00	0
2009-05-09	06:37:00	0
2009-05-09	06:38:00	0
2009-05-09	06:39:00	0
2009-05-09	06:40:00	15
2009-05-09	06:41:00	10
2009-05-09	06:42:00	21
2009-05-09	06:43:00	0
2009-05-09	06:44:00	0
2009-05-09	06:45:00	0
2009-05-09	06:46:00	0
2009-05-09	06:47:00	0
2009-05-09	06:48:00	0
2009-05-09	06:49:00	0
2009-05-09	06:50:00	0
2009-05-09	06:51:00	0
2009-05-09	06:52:00	0
2009-05-09	06:53:00	5
2009-05-09	06:54:00	0
2009-05-09	06:55:00	0
2009-05-09	06:56:00	0
2009-05-09	06:57:00	0
2009-05-09	06:58:00	0
2009-05-09	06:59:00	0
2009-05-09	07:00:00	0
2009-05-09	07:01:00	0
2009-05-09	07:02:00	0
2009-05-09	07:03:00	0
2009-05-09	07:04:00	0
2009-05-09	07:05:00	0
2009-05-09	07:06:00	0
2009-05-09	07:07:00	0
2009-05-09	07:08:00	0
2009-05-09	07:09:00	0
2009-05-09	07:10:00	10
2009-05-09	07:11:00	0
2009-05-09	07:12:00	0
2009-05-09	07:13:00	0
2009-05-09	07:14:00	0
2009-05-09	07:15:00	0
2009-05-09	07:16:00	0
2009-05-09	07:17:00	0
2009-05-09	07:18:00	0
2009-05-09	07:19:00	0
2009-05-09	07:20:00	26
2009-05-09	07:21:00	57
2009-05-09	07:22:00	5
2009-05-09	07:23:00	21
2009-05-09	07:24:00	0
2009-05-09	07:25:00	21
2009-05-09	07:26:00	704
2009-05-09	07:27:00	426
2009-05-09	07:28:00	186
2009-05-09	07:29:00	57
2009-05-09	07:30:00	521
2009-05-09	07:31:00	26
2009-05-09	07:32:00	10
2009-05-09	07:33:00	0
2009-05-09	07:34:00	0
2009-05-09	07:35:00	26
2009-05-09	07:36:00	0
2009-05-09	07:37:00	0
2009-05-09	07:38:00	0
2009-05-09	07:39:00	21
2009-05-09	07:40:00	10
2009-05-09	07:41:00	26
2009-05-09	07:42:00	31
2009-05-09	07:43:00	0
2009-05-09	07:44:00	10
2009-05-09	07:45:00	0
2009-05-09	07:46:00	0
2009-05-09	07:47:00	0
2009-05-09	07:48:00	0
2009-05-09	07:49:00	110
2009-05-09	07:50:00	0
2009-05-09	07:51:00	0
2009-05-09	07:52:00	5
2009-05-09	07:53:00	0
2009-05-09	07:54:00	0
2009-05-09	07:55:00	0
2009-05-09	07:56:00	0
2009-05-09	07:57:00	266
2009-05-09	07:58:00	415
2009-05-09	07:59:00	383
2009-05-09	08:00:00	186
2009-05-09	08:01:00	484
2009-05-09	08:02:00	193
2009-05-09	08:03:00	2488
2009-05-09	08:04:00	1132
2009-05-09	08:05:00	1111
2009-05-09	08:06:00	1132
2009-05-09	08:07:00	1810
2009-05-09	08:08:00	927
2009-05-09	08:09:00	836
2009-05-09	08:10:00	587
2009-05-09	08:11:00	587
2009-05-09	08:12:00	615
2009-05-09	08:13:00	1047
2009-05-09	08:14:00	785
2009-05-09	08:15:00	1201
2009-05-09	08:16:00	735
2009-05-09	08:17:00	1843
2009-05-09	08:18:00	1047
2009-05-09	08:19:00	472
2009-05-09	08:20:00	5
2009-05-09	08:21:00	21
2009-05-09	08:22:00	331
2009-05-09	08:23:00	751
2009-05-09	08:24:00	497
2009-05-09	08:25:00	547
2009-05-09	08:26:00	200
2009-05-09	08:27:00	5
2009-05-09	08:28:00	393
2009-05-09	08:29:00	98
2009-05-09	08:30:00	104
2009-05-09	08:31:00	352
2009-05-09	08:32:00	0
2009-05-09	08:33:00	41
2009-05-09	08:34:00	0
2009-05-09	08:35:00	0
2009-05-09	08:36:00	362
2009-05-09	08:37:00	1067
2009-05-09	08:38:00	673
2009-05-09	08:39:00	1684
2009-05-09	08:40:00	719
2009-05-09	08:41:00	142
2009-05-09	08:42:00	719
2009-05-09	08:43:00	460
2009-05-09	08:44:00	258
2009-05-09	08:45:00	0
2009-05-09	08:46:00	157
2009-05-09	08:47:00	10
2009-05-09	08:48:00	217
2009-05-09	08:49:00	0
2009-05-09	08:50:00	0
2009-05-09	08:51:00	342
2009-05-09	08:52:00	129
2009-05-09	08:53:00	819
2009-05-09	08:54:00	1132
2009-05-09	08:55:00	1876
2009-05-09	08:56:00	819
2009-05-09	08:57:00	285
2009-05-09	08:58:00	104
2009-05-09	08:59:00	574
2009-05-09	09:00:00	242
2009-05-09	09:01:00	258
2009-05-09	09:02:00	509
2009-05-09	09:03:00	601
2009-05-09	09:04:00	615
2009-05-09	09:05:00	193
2009-05-09	09:06:00	673
2009-05-09	09:07:00	497
2009-05-09	09:08:00	179
[truncated: 19,611 more rows]

## Sheet: 5.22.09
Actogram, Copy Raw Data, All Days
Identity:	Wally
Filename:	E:\Active Research Files\meloxicam titre canine\cases\wally\Wally 5.22.09.AWC
Gender:	M
Age:	6
Height:	91.4 cm	36.0 in
Weight:	39.0 kg	86.0 lbs
Start Date:	22-May-2009 (Fri)
Start Time:	18:00:00
Interval:	1.00 mins
Date Stamp:	Time Stamp:	Activity Data:	Marker Press:
2009-05-22	00:00:00	0
2009-05-22	00:01:00	0
2009-05-22	00:02:00	0
2009-05-22	00:03:00	0
2009-05-22	00:04:00	0
2009-05-22	00:05:00	0
2009-05-22	00:06:00	0
2009-05-22	00:07:00	0
2009-05-22	00:08:00	0
2009-05-22	00:09:00	0
2009-05-22	00:10:00	0
2009-05-22	00:11:00	0
2009-05-22	00:12:00	0
2009-05-22	00:13:00	0
2009-05-22	00:14:00	0
2009-05-22	00:15:00	0
2009-05-22	00:16:00	0
2009-05-22	00:17:00	0
2009-05-22	00:18:00	0
2009-05-22	00:19:00	0
2009-05-22	00:20:00	0
2009-05-22	00:21:00	0
2009-05-22	00:22:00	0
2009-05-22	00:23:00	0
2009-05-22	00:24:00	0
2009-05-22	00:25:00	0
2009-05-22	00:26:00	0
2009-05-22	00:27:00	0
2009-05-22	00:28:00	0
2009-05-22	00:29:00	0
2009-05-22	00:30:00	0
2009-05-22	00:31:00	0
2009-05-22	00:32:00	0
2009-05-22	00:33:00	0
2009-05-22	00:34:00	0
2009-05-22	00:35:00	0
2009-05-22	00:36:00	0
2009-05-22	00:37:00	0
2009-05-22	00:38:00	0
2009-05-22	00:39:00	0
2009-05-22	00:40:00	0
2009-05-22	00:41:00	0
2009-05-22	00:42:00	0
2009-05-22	00:43:00	0
2009-05-22	00:44:00	0
2009-05-22	00:45:00	0
2009-05-22	00:46:00	0
2009-05-22	00:47:00	0
2009-05-22	00:48:00	0
2009-05-22	00:49:00	0
2009-05-22	00:50:00	0
2009-05-22	00:51:00	0
2009-05-22	00:52:00	0
2009-05-22	00:53:00	0
2009-05-22	00:54:00	0
2009-05-22	00:55:00	0
2009-05-22	00:56:00	0
2009-05-22	00:57:00	0
2009-05-22	00:58:00	0
2009-05-22	00:59:00	0
2009-05-22	01:00:00	0
2009-05-22	01:01:00	0
2009-05-22	01:02:00	0
2009-05-22	01:03:00	0
2009-05-22	01:04:00	0
2009-05-22	01:05:00	0
2009-05-22	01:06:00	0
2009-05-22	01:07:00	0
2009-05-22	01:08:00	0
2009-05-22	01:09:00	0
2009-05-22	01:10:00	0
2009-05-22	01:11:00	0
2009-05-22	01:12:00	0
2009-05-22	01:13:00	0
2009-05-22	01:14:00	0
2009-05-22	01:15:00	0
2009-05-22	01:16:00	0
2009-05-22	01:17:00	0
2009-05-22	01:18:00	0
2009-05-22	01:19:00	0
2009-05-22	01:20:00	0
2009-05-22	01:21:00	0
2009-05-22	01:22:00	0
2009-05-22	01:23:00	0
2009-05-22	01:24:00	0
2009-05-22	01:25:00	0
2009-05-22	01:26:00	0
2009-05-22	01:27:00	0
2009-05-22	01:28:00	0
2009-05-22	01:29:00	0
2009-05-22	01:30:00	0
2009-05-22	01:31:00	0
2009-05-22	01:32:00	0
2009-05-22	01:33:00	0
2009-05-22	01:34:00	0
2009-05-22	01:35:00	0
2009-05-22	01:36:00	0
2009-05-22	01:37:00	0
2009-05-22	01:38:00	0
2009-05-22	01:39:00	0
2009-05-22	01:40:00	0
2009-05-22	01:41:00	0
2009-05-22	01:42:00	0
2009-05-22	01:43:00	0
2009-05-22	01:44:00	0
2009-05-22	01:45:00	0
2009-05-22	01:46:00	0
2009-05-22	01:47:00	0
2009-05-22	01:48:00	0
2009-05-22	01:49:00	0
2009-05-22	01:50:00	0
2009-05-22	01:51:00	0
2009-05-22	01:52:00	0
2009-05-22	01:53:00	0
2009-05-22	01:54:00	0
2009-05-22	01:55:00	0
2009-05-22	01:56:00	0
2009-05-22	01:57:00	0
2009-05-22	01:58:00	0
2009-05-22	01:59:00	0
2009-05-22	02:00:00	0
2009-05-22	02:01:00	0
2009-05-22	02:02:00	0
2009-05-22	02:03:00	0
2009-05-22	02:04:00	0
2009-05-22	02:05:00	0
2009-05-22	02:06:00	0
2009-05-22	02:07:00	0
2009-05-22	02:08:00	0
2009-05-22	02:09:00	0
2009-05-22	02:10:00	0
2009-05-22	02:11:00	0
2009-05-22	02:12:00	0
2009-05-22	02:13:00	0
2009-05-22	02:14:00	0
2009-05-22	02:15:00	0
2009-05-22	02:16:00	0
2009-05-22	02:17:00	0
2009-05-22	02:18:00	0
2009-05-22	02:19:00	0
2009-05-22	02:20:00	0
2009-05-22	02:21:00	0
2009-05-22	02:22:00	0
2009-05-22	02:23:00	0
2009-05-22	02:24:00	0
2009-05-22	02:25:00	0
2009-05-22	02:26:00	0
2009-05-22	02:27:00	0
2009-05-22	02:28:00	0
2009-05-22	02:29:00	0
2009-05-22	02:30:00	0
2009-05-22	02:31:00	0
2009-05-22	02:32:00	0
2009-05-22	02:33:00	0
2009-05-22	02:34:00	0
2009-05-22	02:35:00	0
2009-05-22	02:36:00	0
2009-05-22	02:37:00	0
2009-05-22	02:38:00	0
2009-05-22	02:39:00	0
2009-05-22	02:40:00	0
2009-05-22	02:41:00	0
2009-05-22	02:42:00	0
2009-05-22	02:43:00	0
2009-05-22	02:44:00	0
2009-05-22	02:45:00	0
2009-05-22	02:46:00	0
2009-05-22	02:47:00	0
2009-05-22	02:48:00	0
2009-05-22	02:49:00	0
2009-05-22	02:50:00	0
2009-05-22	02:51:00	0
2009-05-22	02:52:00	0
2009-05-22	02:53:00	0
2009-05-22	02:54:00	0
2009-05-22	02:55:00	0
2009-05-22	02:56:00	0
2009-05-22	02:57:00	0
2009-05-22	02:58:00	0
2009-05-22	02:59:00	0
2009-05-22	03:00:00	0
2009-05-22	03:01:00	0
2009-05-22	03:02:00	0
2009-05-22	03:03:00	0
2009-05-22	03:04:00	0
2009-05-22	03:05:00	0
2009-05-22	03:06:00	0
2009-05-22	03:07:00	0
2009-05-22	03:08:00	0
2009-05-22	03:09:00	0
2009-05-22	03:10:00	0
2009-05-22	03:11:00	0
2009-05-22	03:12:00	0
2009-05-22	03:13:00	0
2009-05-22	03:14:00	0
2009-05-22	03:15:00	0
2009-05-22	03:16:00	0
2009-05-22	03:17:00	0
2009-05-22	03:18:00	0
2009-05-22	03:19:00	0
2009-05-22	03:20:00	0
2009-05-22	03:21:00	0
2009-05-22	03:22:00	0
2009-05-22	03:23:00	0
2009-05-22	03:24:00	0
2009-05-22	03:25:00	0
2009-05-22	03:26:00	0
2009-05-22	03:27:00	0
2009-05-22	03:28:00	0
2009-05-22	03:29:00	0
2009-05-22	03:30:00	0
2009-05-22	03:31:00	0
2009-05-22	03:32:00	0
2009-05-22	03:33:00	0
2009-05-22	03:34:00	0
2009-05-22	03:35:00	0
2009-05-22	03:36:00	0
2009-05-22	03:37:00	0
2009-05-22	03:38:00	0
2009-05-22	03:39:00	0
2009-05-22	03:40:00	0
2009-05-22	03:41:00	0
2009-05-22	03:42:00	0
2009-05-22	03:43:00	0
2009-05-22	03:44:00	0
2009-05-22	03:45:00	0
2009-05-22	03:46:00	0
2009-05-22	03:47:00	0
2009-05-22	03:48:00	0
2009-05-22	03:49:00	0
2009-05-22	03:50:00	0
2009-05-22	03:51:00	0
2009-05-22	03:52:00	0
2009-05-22	03:53:00	0
2009-05-22	03:54:00	0
2009-05-22	03:55:00	0
2009-05-22	03:56:00	0
2009-05-22	03:57:00	0
2009-05-22	03:58:00	0
2009-05-22	03:59:00	0
2009-05-22	04:00:00	0
2009-05-22	04:01:00	0
2009-05-22	04:02:00	0
2009-05-22	04:03:00	0
2009-05-22	04:04:00	0
2009-05-22	04:05:00	0
2009-05-22	04:06:00	0
2009-05-22	04:07:00	0
2009-05-22	04:08:00	0
2009-05-22	04:09:00	0
2009-05-22	04:10:00	0
2009-05-22	04:11:00	0
2009-05-22	04:12:00	0
2009-05-22	04:13:00	0
2009-05-22	04:14:00	0
2009-05-22	04:15:00	0
2009-05-22	04:16:00	0
2009-05-22	04:17:00	0
2009-05-22	04:18:00	0
2009-05-22	04:19:00	0
2009-05-22	04:20:00	0
2009-05-22	04:21:00	0
2009-05-22	04:22:00	0
2009-05-22	04:23:00	0
2009-05-22	04:24:00	0
2009-05-22	04:25:00	0
2009-05-22	04:26:00	0
2009-05-22	04:27:00	0
2009-05-22	04:28:00	0
2009-05-22	04:29:00	0
2009-05-22	04:30:00	0
2009-05-22	04:31:00	0
2009-05-22	04:32:00	0
2009-05-22	04:33:00	0
2009-05-22	04:34:00	0
2009-05-22	04:35:00	0
2009-05-22	04:36:00	0
2009-05-22	04:37:00	0
2009-05-22	04:38:00	0
2009-05-22	04:39:00	0
2009-05-22	04:40:00	0
2009-05-22	04:41:00	0
2009-05-22	04:42:00	0
2009-05-22	04:43:00	0
2009-05-22	04:44:00	0
2009-05-22	04:45:00	0
2009-05-22	04:46:00	0
2009-05-22	04:47:00	0
2009-05-22	04:48:00	0
2009-05-22	04:49:00	0
2009-05-22	04:50:00	0
2009-05-22	04:51:00	0
2009-05-22	04:52:00	0
2009-05-22	04:53:00	0
2009-05-22	04:54:00	0
2009-05-22	04:55:00	0
2009-05-22	04:56:00	0
2009-05-22	04:57:00	0
2009-05-22	04:58:00	0
2009-05-22	04:59:00	0
2009-05-22	05:00:00	0
2009-05-22	05:01:00	0
2009-05-22	05:02:00	0
2009-05-22	05:03:00	0
2009-05-22	05:04:00	0
2009-05-22	05:05:00	0
2009-05-22	05:06:00	0
2009-05-22	05:07:00	0
2009-05-22	05:08:00	0
2009-05-22	05:09:00	0
2009-05-22	05:10:00	0
2009-05-22	05:11:00	0
2009-05-22	05:12:00	0
2009-05-22	05:13:00	0
2009-05-22	05:14:00	0
2009-05-22	05:15:00	0
2009-05-22	05:16:00	0
2009-05-22	05:17:00	0
2009-05-22	05:18:00	0
2009-05-22	05:19:00	0
2009-05-22	05:20:00	0
2009-05-22	05:21:00	0
2009-05-22	05:22:00	0
2009-05-22	05:23:00	0
2009-05-22	05:24:00	0
2009-05-22	05:25:00	0
2009-05-22	05:26:00	0
2009-05-22	05:27:00	0
2009-05-22	05:28:00	0
2009-05-22	05:29:00	0
2009-05-22	05:30:00	0
2009-05-22	05:31:00	0
2009-05-22	05:32:00	0
2009-05-22	05:33:00	0
2009-05-22	05:34:00	0
2009-05-22	05:35:00	0
2009-05-22	05:36:00	0
2009-05-22	05:37:00	0
2009-05-22	05:38:00	0
2009-05-22	05:39:00	0
2009-05-22	05:40:00	0
2009-05-22	05:41:00	0
2009-05-22	05:42:00	0
2009-05-22	05:43:00	0
2009-05-22	05:44:00	0
2009-05-22	05:45:00	0
2009-05-22	05:46:00	0
2009-05-22	05:47:00	0
2009-05-22	05:48:00	0
2009-05-22	05:49:00	0
2009-05-22	05:50:00	0
2009-05-22	05:51:00	0
2009-05-22	05:52:00	0
2009-05-22	05:53:00	0
2009-05-22	05:54:00	0
2009-05-22	05:55:00	0
2009-05-22	05:56:00	0
2009-05-22	05:57:00	0
2009-05-22	05:58:00	0
2009-05-22	05:59:00	0
2009-05-22	06:00:00	0
2009-05-22	06:01:00	0
2009-05-22	06:02:00	0
2009-05-22	06:03:00	0
2009-05-22	06:04:00	0
2009-05-22	06:05:00	0
2009-05-22	06:06:00	0
2009-05-22	06:07:00	0
2009-05-22	06:08:00	0
2009-05-22	06:09:00	0
2009-05-22	06:10:00	0
2009-05-22	06:11:00	0
2009-05-22	06:12:00	0
2009-05-22	06:13:00	0
2009-05-22	06:14:00	0
2009-05-22	06:15:00	0
2009-05-22	06:16:00	0
2009-05-22	06:17:00	0
2009-05-22	06:18:00	0
2009-05-22	06:19:00	0
2009-05-22	06:20:00	0
2009-05-22	06:21:00	0
2009-05-22	06:22:00	0
2009-05-22	06:23:00	0
2009-05-22	06:24:00	0
2009-05-22	06:25:00	0
2009-05-22	06:26:00	0
2009-05-22	06:27:00	0
2009-05-22	06:28:00	0
2009-05-22	06:29:00	0
2009-05-22	06:30:00	0
2009-05-22	06:31:00	0
2009-05-22	06:32:00	0
2009-05-22	06:33:00	0
2009-05-22	06:34:00	0
2009-05-22	06:35:00	0
2009-05-22	06:36:00	0
2009-05-22	06:37:00	0
2009-05-22	06:38:00	0
2009-05-22	06:39:00	0
2009-05-22	06:40:00	0
2009-05-22	06:41:00	0
2009-05-22	06:42:00	0
2009-05-22	06:43:00	0
2009-05-22	06:44:00	0
2009-05-22	06:45:00	0
2009-05-22	06:46:00	0
2009-05-22	06:47:00	0
2009-05-22	06:48:00	0
2009-05-22	06:49:00	0
2009-05-22	06:50:00	0
2009-05-22	06:51:00	0
2009-05-22	06:52:00	0
2009-05-22	06:53:00	0
2009-05-22	06:54:00	0
2009-05-22	06:55:00	0
2009-05-22	06:56:00	0
2009-05-22	06:57:00	0
2009-05-22	06:58:00	0
2009-05-22	06:59:00	0
2009-05-22	07:00:00	0
2009-05-22	07:01:00	0
2009-05-22	07:02:00	0
2009-05-22	07:03:00	0
2009-05-22	07:04:00	0
2009-05-22	07:05:00	0
2009-05-22	07:06:00	0
2009-05-22	07:07:00	0
2009-05-22	07:08:00	0
2009-05-22	07:09:00	0
2009-05-22	07:10:00	0
2009-05-22	07:11:00	0
2009-05-22	07:12:00	0
2009-05-22	07:13:00	0
2009-05-22	07:14:00	0
2009-05-22	07:15:00	0
2009-05-22	07:16:00	0
2009-05-22	07:17:00	0
2009-05-22	07:18:00	0
2009-05-22	07:19:00	0
2009-05-22	07:20:00	0
2009-05-22	07:21:00	0
2009-05-22	07:22:00	0
2009-05-22	07:23:00	0
2009-05-22	07:24:00	0
2009-05-22	07:25:00	0
2009-05-22	07:26:00	0
2009-05-22	07:27:00	0
2009-05-22	07:28:00	0
2009-05-22	07:29:00	0
2009-05-22	07:30:00	0
2009-05-22	07:31:00	0
2009-05-22	07:32:00	0
2009-05-22	07:33:00	0
2009-05-22	07:34:00	0
2009-05-22	07:35:00	0
2009-05-22	07:36:00	0
2009-05-22	07:37:00	0
2009-05-22	07:38:00	0
2009-05-22	07:39:00	0
2009-05-22	07:40:00	0
2009-05-22	07:41:00	0
2009-05-22	07:42:00	0
2009-05-22	07:43:00	0
2009-05-22	07:44:00	0
2009-05-22	07:45:00	0
2009-05-22	07:46:00	0
2009-05-22	07:47:00	0
2009-05-22	07:48:00	0
2009-05-22	07:49:00	0
2009-05-22	07:50:00	0
2009-05-22	07:51:00	0
2009-05-22	07:52:00	0
2009-05-22	07:53:00	0
2009-05-22	07:54:00	0
2009-05-22	07:55:00	0
2009-05-22	07:56:00	0
2009-05-22	07:57:00	0
2009-05-22	07:58:00	0
2009-05-22	07:59:00	0
2009-05-22	08:00:00	0
2009-05-22	08:01:00	0
2009-05-22	08:02:00	0
2009-05-22	08:03:00	0
2009-05-22	08:04:00	0
2009-05-22	08:05:00	0
2009-05-22	08:06:00	0
2009-05-22	08:07:00	0
2009-05-22	08:08:00	0
2009-05-22	08:09:00	0
2009-05-22	08:10:00	0
2009-05-22	08:11:00	0
2009-05-22	08:12:00	0
2009-05-22	08:13:00	0
2009-05-22	08:14:00	0
2009-05-22	08:15:00	0
2009-05-22	08:16:00	0
2009-05-22	08:17:00	0
2009-05-22	08:18:00	0
2009-05-22	08:19:00	0
2009-05-22	08:20:00	0
2009-05-22	08:21:00	0
2009-05-22	08:22:00	0
2009-05-22	08:23:00	0
2009-05-22	08:24:00	0
2009-05-22	08:25:00	0
2009-05-22	08:26:00	0
2009-05-22	08:27:00	0
2009-05-22	08:28:00	0
2009-05-22	08:29:00	0
2009-05-22	08:30:00	0
2009-05-22	08:31:00	0
2009-05-22	08:32:00	0
2009-05-22	08:33:00	0
2009-05-22	08:34:00	0
2009-05-22	08:35:00	0
2009-05-22	08:36:00	0
2009-05-22	08:37:00	0
2009-05-22	08:38:00	0
2009-05-22	08:39:00	0
2009-05-22	08:40:00	0
2009-05-22	08:41:00	0
2009-05-22	08:42:00	0
2009-05-22	08:43:00	0
2009-05-22	08:44:00	0
2009-05-22	08:45:00	0
2009-05-22	08:46:00	0
2009-05-22	08:47:00	0
2009-05-22	08:48:00	0
2009-05-22	08:49:00	0
2009-05-22	08:50:00	0
2009-05-22	08:51:00	0
2009-05-22	08:52:00	0
2009-05-22	08:53:00	0
2009-05-22	08:54:00	0
2009-05-22	08:55:00	0
2009-05-22	08:56:00	0
2009-05-22	08:57:00	0
2009-05-22	08:58:00	0
2009-05-22	08:59:00	0
2009-05-22	09:00:00	0
2009-05-22	09:01:00	0
2009-05-22	09:02:00	0
2009-05-22	09:03:00	0
2009-05-22	09:04:00	0
2009-05-22	09:05:00	0
2009-05-22	09:06:00	0
2009-05-22	09:07:00	0
2009-05-22	09:08:00	0
2009-05-22	09:09:00	0
2009-05-22	09:10:00	0
2009-05-22	09:11:00	0
2009-05-22	09:12:00	0
2009-05-22	09:13:00	0
2009-05-22	09:14:00	0
2009-05-22	09:15:00	0
2009-05-22	09:16:00	0
2009-05-22	09:17:00	0
2009-05-22	09:18:00	0
2009-05-22	09:19:00	0
2009-05-22	09:20:00	0
2009-05-22	09:21:00	0
2009-05-22	09:22:00	0
2009-05-22	09:23:00	0
2009-05-22	09:24:00	0
2009-05-22	09:25:00	0
2009-05-22	09:26:00	0
2009-05-22	09:27:00	0
2009-05-22	09:28:00	0
2009-05-22	09:29:00	0
2009-05-22	09:30:00	0
2009-05-22	09:31:00	0
2009-05-22	09:32:00	0
2009-05-22	09:33:00	0
2009-05-22	09:34:00	0
2009-05-22	09:35:00	0
2009-05-22	09:36:00	0
2009-05-22	09:37:00	0
2009-05-22	09:38:00	0
2009-05-22	09:39:00	0
2009-05-22	09:40:00	0
2009-05-22	09:41:00	0
2009-05-22	09:42:00	0
2009-05-22	09:43:00	0
2009-05-22	09:44:00	0
2009-05-22	09:45:00	0
2009-05-22	09:46:00	0
2009-05-22	09:47:00	0
2009-05-22	09:48:00	0
2009-05-22	09:49:00	0
2009-05-22	09:50:00	0
2009-05-22	09:51:00	0
2009-05-22	09:52:00	0
2009-05-22	09:53:00	0
2009-05-22	09:54:00	0
2009-05-22	09:55:00	0
2009-05-22	09:56:00	0
2009-05-22	09:57:00	0
2009-05-22	09:58:00	0
2009-05-22	09:59:00	0
2009-05-22	10:00:00	0
2009-05-22	10:01:00	0
2009-05-22	10:02:00	0
2009-05-22	10:03:00	0
2009-05-22	10:04:00	0
2009-05-22	10:05:00	0
2009-05-22	10:06:00	0
2009-05-22	10:07:00	0
2009-05-22	10:08:00	0
2009-05-22	10:09:00	0
2009-05-22	10:10:00	0
2009-05-22	10:11:00	0
2009-05-22	10:12:00	0
2009-05-22	10:13:00	0
2009-05-22	10:14:00	0
2009-05-22	10:15:00	0
2009-05-22	10:16:00	0
2009-05-22	10:17:00	0
2009-05-22	10:18:00	0
2009-05-22	10:19:00	0
2009-05-22	10:20:00	0
2009-05-22	10:21:00	0
2009-05-22	10:22:00	0
2009-05-22	10:23:00	0
2009-05-22	10:24:00	0
2009-05-22	10:25:00	0
2009-05-22	10:26:00	0
2009-05-22	10:27:00	0
2009-05-22	10:28:00	0
2009-05-22	10:29:00	0
2009-05-22	10:30:00	0
2009-05-22	10:31:00	0
2009-05-22	10:32:00	0
2009-05-22	10:33:00	0
2009-05-22	10:34:00	0
2009-05-22	10:35:00	0
2009-05-22	10:36:00	0
2009-05-22	10:37:00	0
2009-05-22	10:38:00	0
2009-05-22	10:39:00	0
2009-05-22	10:40:00	0
2009-05-22	10:41:00	0
2009-05-22	10:42:00	0
2009-05-22	10:43:00	0
2009-05-22	10:44:00	0
2009-05-22	10:45:00	0
2009-05-22	10:46:00	0
2009-05-22	10:47:00	0
2009-05-22	10:48:00	0
2009-05-22	10:49:00	0
2009-05-22	10:50:00	0
2009-05-22	10:51:00	0
2009-05-22	10:52:00	0
2009-05-22	10:53:00	0
2009-05-22	10:54:00	0
2009-05-22	10:55:00	0
2009-05-22	10:56:00	0
2009-05-22	10:57:00	0
2009-05-22	10:58:00	0
2009-05-22	10:59:00	0
2009-05-22	11:00:00	0
2009-05-22	11:01:00	0
2009-05-22	11:02:00	0
2009-05-22	11:03:00	0
2009-05-22	11:04:00	0
2009-05-22	11:05:00	0
2009-05-22	11:06:00	0
2009-05-22	11:07:00	0
2009-05-22	11:08:00	0
2009-05-22	11:09:00	0
2009-05-22	11:10:00	0
2009-05-22	11:11:00	0
2009-05-22	11:12:00	0
2009-05-22	11:13:00	0
2009-05-22	11:14:00	0
2009-05-22	11:15:00	0
2009-05-22	11:16:00	0
2009-05-22	11:17:00	0
2009-05-22	11:18:00	0
2009-05-22	11:19:00	0
2009-05-22	11:20:00	0
2009-05-22	11:21:00	0
2009-05-22	11:22:00	0
2009-05-22	11:23:00	0
2009-05-22	11:24:00	0
2009-05-22	11:25:00	0
2009-05-22	11:26:00	0
2009-05-22	11:27:00	0
2009-05-22	11:28:00	0
2009-05-22	11:29:00	0
2009-05-22	11:30:00	0
2009-05-22	11:31:00	0
2009-05-22	11:32:00	0
2009-05-22	11:33:00	0
2009-05-22	11:34:00	0
2009-05-22	11:35:00	0
2009-05-22	11:36:00	0
2009-05-22	11:37:00	0
2009-05-22	11:38:00	0
2009-05-22	11:39:00	0
2009-05-22	11:40:00	0
2009-05-22	11:41:00	0
2009-05-22	11:42:00	0
2009-05-22	11:43:00	0
2009-05-22	11:44:00	0
2009-05-22	11:45:00	0
2009-05-22	11:46:00	0
2009-05-22	11:47:00	0
2009-05-22	11:48:00	0
2009-05-22	11:49:00	0
2009-05-22	11:50:00	0
2009-05-22	11:51:00	0
2009-05-22	11:52:00	0
2009-05-22	11:53:00	0
2009-05-22	11:54:00	0
2009-05-22	11:55:00	0
2009-05-22	11:56:00	0
2009-05-22	11:57:00	0
2009-05-22	11:58:00	0
2009-05-22	11:59:00	0
2009-05-22	12:00:00	0
2009-05-22	12:01:00	0
2009-05-22	12:02:00	0
2009-05-22	12:03:00	0
2009-05-22	12:04:00	0
2009-05-22	12:05:00	0
2009-05-22	12:06:00	0
2009-05-22	12:07:00	0
2009-05-22	12:08:00	0
2009-05-22	12:09:00	0
2009-05-22	12:10:00	0
2009-05-22	12:11:00	0
2009-05-22	12:12:00	0
2009-05-22	12:13:00	0
2009-05-22	12:14:00	0
2009-05-22	12:15:00	0
2009-05-22	12:16:00	0
2009-05-22	12:17:00	0
2009-05-22	12:18:00	0
2009-05-22	12:19:00	0
2009-05-22	12:20:00	0
2009-05-22	12:21:00	0
2009-05-22	12:22:00	0
2009-05-22	12:23:00	0
2009-05-22	12:24:00	0
2009-05-22	12:25:00	0
2009-05-22	12:26:00	0
2009-05-22	12:27:00	0
2009-05-22	12:28:00	0
2009-05-22	12:29:00	0
2009-05-22	12:30:00	0
2009-05-22	12:31:00	0
2009-05-22	12:32:00	0
2009-05-22	12:33:00	0
2009-05-22	12:34:00	0
2009-05-22	12:35:00	0
2009-05-22	12:36:00	0
2009-05-22	12:37:00	0
2009-05-22	12:38:00	0
2009-05-22	12:39:00	0
2009-05-22	12:40:00	0
2009-05-22	12:41:00	0
2009-05-22	12:42:00	0
2009-05-22	12:43:00	0
2009-05-22	12:44:00	0
2009-05-22	12:45:00	0
2009-05-22	12:46:00	0
2009-05-22	12:47:00	0
2009-05-22	12:48:00	0
2009-05-22	12:49:00	0
2009-05-22	12:50:00	0
2009-05-22	12:51:00	0
2009-05-22	12:52:00	0
2009-05-22	12:53:00	0
2009-05-22	12:54:00	0
2009-05-22	12:55:00	0
2009-05-22	12:56:00	0
2009-05-22	12:57:00	0
2009-05-22	12:58:00	0
2009-05-22	12:59:00	0
2009-05-22	13:00:00	0
2009-05-22	13:01:00	0
2009-05-22	13:02:00	0
2009-05-22	13:03:00	0
2009-05-22	13:04:00	0
2009-05-22	13:05:00	0
2009-05-22	13:06:00	0
2009-05-22	13:07:00	0
2009-05-22	13:08:00	0
2009-05-22	13:09:00	0
2009-05-22	13:10:00	0
2009-05-22	13:11:00	0
2009-05-22	13:12:00	0
2009-05-22	13:13:00	0
2009-05-22	13:14:00	0
2009-05-22	13:15:00	0
2009-05-22	13:16:00	0
2009-05-22	13:17:00	0
2009-05-22	13:18:00	0
2009-05-22	13:19:00	0
2009-05-22	13:20:00	0
2009-05-22	13:21:00	0
2009-05-22	13:22:00	0
2009-05-22	13:23:00	0
2009-05-22	13:24:00	0
2009-05-22	13:25:00	0
2009-05-22	13:26:00	0
2009-05-22	13:27:00	0
2009-05-22	13:28:00	0
2009-05-22	13:29:00	0
2009-05-22	13:30:00	0
2009-05-22	13:31:00	0
2009-05-22	13:32:00	0
2009-05-22	13:33:00	0
2009-05-22	13:34:00	0
2009-05-22	13:35:00	0
2009-05-22	13:36:00	0
2009-05-22	13:37:00	0
2009-05-22	13:38:00	0
2009-05-22	13:39:00	0
2009-05-22	13:40:00	0
2009-05-22	13:41:00	0
2009-05-22	13:42:00	0
2009-05-22	13:43:00	0
2009-05-22	13:44:00	0
2009-05-22	13:45:00	0
2009-05-22	13:46:00	0
2009-05-22	13:47:00	0
2009-05-22	13:48:00	0
2009-05-22	13:49:00	0
2009-05-22	13:50:00	0
2009-05-22	13:51:00	0
2009-05-22	13:52:00	0
2009-05-22	13:53:00	0
2009-05-22	13:54:00	0
2009-05-22	13:55:00	0
2009-05-22	13:56:00	0
2009-05-22	13:57:00	0
2009-05-22	13:58:00	0
2009-05-22	13:59:00	0
2009-05-22	14:00:00	0
2009-05-22	14:01:00	0
2009-05-22	14:02:00	0
2009-05-22	14:03:00	0
2009-05-22	14:04:00	0
2009-05-22	14:05:00	0
2009-05-22	14:06:00	0
2009-05-22	14:07:00	0
2009-05-22	14:08:00	0
2009-05-22	14:09:00	0
2009-05-22	14:10:00	0
2009-05-22	14:11:00	0
2009-05-22	14:12:00	0
2009-05-22	14:13:00	0
2009-05-22	14:14:00	0
2009-05-22	14:15:00	0
2009-05-22	14:16:00	0
2009-05-22	14:17:00	0
2009-05-22	14:18:00	0
2009-05-22	14:19:00	0
2009-05-22	14:20:00	0
2009-05-22	14:21:00	0
2009-05-22	14:22:00	0
2009-05-22	14:23:00	0
2009-05-22	14:24:00	0
2009-05-22	14:25:00	0
2009-05-22	14:26:00	0
2009-05-22	14:27:00	0
2009-05-22	14:28:00	0
2009-05-22	14:29:00	0
2009-05-22	14:30:00	0
2009-05-22	14:31:00	0
2009-05-22	14:32:00	0
2009-05-22	14:33:00	0
2009-05-22	14:34:00	0
2009-05-22	14:35:00	0
2009-05-22	14:36:00	0
2009-05-22	14:37:00	0
2009-05-22	14:38:00	0
2009-05-22	14:39:00	0
2009-05-22	14:40:00	0
2009-05-22	14:41:00	0
2009-05-22	14:42:00	0
2009-05-22	14:43:00	0
2009-05-22	14:44:00	0
2009-05-22	14:45:00	0
2009-05-22	14:46:00	0
2009-05-22	14:47:00	0
2009-05-22	14:48:00	0
2009-05-22	14:49:00	0
2009-05-22	14:50:00	0
2009-05-22	14:51:00	0
2009-05-22	14:52:00	0
2009-05-22	14:53:00	0
2009-05-22	14:54:00	0
2009-05-22	14:55:00	0
2009-05-22	14:56:00	0
2009-05-22	14:57:00	0
2009-05-22	14:58:00	0
2009-05-22	14:59:00	0
2009-05-22	15:00:00	0
2009-05-22	15:01:00	0
2009-05-22	15:02:00	0
2009-05-22	15:03:00	0
2009-05-22	15:04:00	0
2009-05-22	15:05:00	0
2009-05-22	15:06:00	0
2009-05-22	15:07:00	0
2009-05-22	15:08:00	0
2009-05-22	15:09:00	0
2009-05-22	15:10:00	0
2009-05-22	15:11:00	0
2009-05-22	15:12:00	0
2009-05-22	15:13:00	0
2009-05-22	15:14:00	0
2009-05-22	15:15:00	0
2009-05-22	15:16:00	0
2009-05-22	15:17:00	0
2009-05-22	15:18:00	0
2009-05-22	15:19:00	0
2009-05-22	15:20:00	0
2009-05-22	15:21:00	0
2009-05-22	15:22:00	0
2009-05-22	15:23:00	0
2009-05-22	15:24:00	0
2009-05-22	15:25:00	0
2009-05-22	15:26:00	0
2009-05-22	15:27:00	0
2009-05-22	15:28:00	0
2009-05-22	15:29:00	0
2009-05-22	15:30:00	0
2009-05-22	15:31:00	0
2009-05-22	15:32:00	0
2009-05-22	15:33:00	0
2009-05-22	15:34:00	0
2009-05-22	15:35:00	0
2009-05-22	15:36:00	0
2009-05-22	15:37:00	0
2009-05-22	15:38:00	0
2009-05-22	15:39:00	0
2009-05-22	15:40:00	0
2009-05-22	15:41:00	0
2009-05-22	15:42:00	0
2009-05-22	15:43:00	0
2009-05-22	15:44:00	0
2009-05-22	15:45:00	0
2009-05-22	15:46:00	0
2009-05-22	15:47:00	0
2009-05-22	15:48:00	0
2009-05-22	15:49:00	0
2009-05-22	15:50:00	0
2009-05-22	15:51:00	0
2009-05-22	15:52:00	0
2009-05-22	15:53:00	0
2009-05-22	15:54:00	0
2009-05-22	15:55:00	0
2009-05-22	15:56:00	0
2009-05-22	15:57:00	0
2009-05-22	15:58:00	0
2009-05-22	15:59:00	0
2009-05-22	16:00:00	0
2009-05-22	16:01:00	0
2009-05-22	16:02:00	0
2009-05-22	16:03:00	0
2009-05-22	16:04:00	0
2009-05-22	16:05:00	0
2009-05-22	16:06:00	0
2009-05-22	16:07:00	0
2009-05-22	16:08:00	0
2009-05-22	16:09:00	0
2009-05-22	16:10:00	0
2009-05-22	16:11:00	0
2009-05-22	16:12:00	0
2009-05-22	16:13:00	0
2009-05-22	16:14:00	0
2009-05-22	16:15:00	0
2009-05-22	16:16:00	0
2009-05-22	16:17:00	0
2009-05-22	16:18:00	0
2009-05-22	16:19:00	0
2009-05-22	16:20:00	0
2009-05-22	16:21:00	0
2009-05-22	16:22:00	0
2009-05-22	16:23:00	0
2009-05-22	16:24:00	0
2009-05-22	16:25:00	0
2009-05-22	16:26:00	0
2009-05-22	16:27:00	0
2009-05-22	16:28:00	0
2009-05-22	16:29:00	0
2009-05-22	16:30:00	0
2009-05-22	16:31:00	0
2009-05-22	16:32:00	0
2009-05-22	16:33:00	0
2009-05-22	16:34:00	0
2009-05-22	16:35:00	0
2009-05-22	16:36:00	0
2009-05-22	16:37:00	0
2009-05-22	16:38:00	0
2009-05-22	16:39:00	0
2009-05-22	16:40:00	0
2009-05-22	16:41:00	0
2009-05-22	16:42:00	0
2009-05-22	16:43:00	0
2009-05-22	16:44:00	0
2009-05-22	16:45:00	0
2009-05-22	16:46:00	0
2009-05-22	16:47:00	0
2009-05-22	16:48:00	0
2009-05-22	16:49:00	0
2009-05-22	16:50:00	0
2009-05-22	16:51:00	0
2009-05-22	16:52:00	0
2009-05-22	16:53:00	0
2009-05-22	16:54:00	0
2009-05-22	16:55:00	0
2009-05-22	16:56:00	0
2009-05-22	16:57:00	0
2009-05-22	16:58:00	0
2009-05-22	16:59:00	0
2009-05-22	17:00:00	0
2009-05-22	17:01:00	0
2009-05-22	17:02:00	0
2009-05-22	17:03:00	0
2009-05-22	17:04:00	0
2009-05-22	17:05:00	0
2009-05-22	17:06:00	0
2009-05-22	17:07:00	0
2009-05-22	17:08:00	0
2009-05-22	17:09:00	0
2009-05-22	17:10:00	0
2009-05-22	17:11:00	0
2009-05-22	17:12:00	0
2009-05-22	17:13:00	0
2009-05-22	17:14:00	0
2009-05-22	17:15:00	0
2009-05-22	17:16:00	0
2009-05-22	17:17:00	0
2009-05-22	17:18:00	0
2009-05-22	17:19:00	0
2009-05-22	17:20:00	0
2009-05-22	17:21:00	0
2009-05-22	17:22:00	0
2009-05-22	17:23:00	0
2009-05-22	17:24:00	0
2009-05-22	17:25:00	0
2009-05-22	17:26:00	0
2009-05-22	17:27:00	0
2009-05-22	17:28:00	0
2009-05-22	17:29:00	0
2009-05-22	17:30:00	0
2009-05-22	17:31:00	0
2009-05-22	17:32:00	0
2009-05-22	17:33:00	0
2009-05-22	17:34:00	0
2009-05-22	17:35:00	0
2009-05-22	17:36:00	0
2009-05-22	17:37:00	0
2009-05-22	17:38:00	0
2009-05-22	17:39:00	0
2009-05-22	17:40:00	0
2009-05-22	17:41:00	0
2009-05-22	17:42:00	0
2009-05-22	17:43:00	0
2009-05-22	17:44:00	0
2009-05-22	17:45:00	0
2009-05-22	17:46:00	0
2009-05-22	17:47:00	0
2009-05-22	17:48:00	0
2009-05-22	17:49:00	0
2009-05-22	17:50:00	0
2009-05-22	17:51:00	0
2009-05-22	17:52:00	0
2009-05-22	17:53:00	0
2009-05-22	17:54:00	0
2009-05-22	17:55:00	0
2009-05-22	17:56:00	0
2009-05-22	17:57:00	0
2009-05-22	17:58:00	0
2009-05-22	17:59:00	0
2009-05-22	18:00:00	644
2009-05-22	18:01:00	404
2009-05-22	18:02:00	186
2009-05-22	18:03:00	768
2009-05-22	18:04:00	362
2009-05-22	18:05:00	547
2009-05-22	18:06:00	704
2009-05-22	18:07:00	438
2009-05-22	18:08:00	57
2009-05-22	18:09:00	200
2009-05-22	18:10:00	472
2009-05-22	18:11:00	438
2009-05-22	18:12:00	460
2009-05-22	18:13:00	73
2009-05-22	18:14:00	209
2009-05-22	18:15:00	129
2009-05-22	18:16:00	86
2009-05-22	18:17:00	117
2009-05-22	18:18:00	404
2009-05-22	18:19:00	1347
2009-05-22	18:20:00	986
2009-05-22	18:21:00	689
2009-05-22	18:22:00	947
2009-05-22	18:23:00	1089
2009-05-22	18:24:00	3057
2009-05-22	18:25:00	5653
2009-05-22	18:26:00	1005
2009-05-22	18:27:00	1047
2009-05-22	18:28:00	785
2009-05-22	18:29:00	352
2009-05-22	18:30:00	689
2009-05-22	18:31:00	1653
2009-05-22	18:32:00	927
2009-05-22	18:33:00	547
2009-05-22	18:34:00	2014
2009-05-22	18:35:00	8888
2009-05-22	18:36:00	3742
2009-05-22	18:37:00	3005
2009-05-22	18:38:00	1201
2009-05-22	18:39:00	171
2009-05-22	18:40:00	615
2009-05-22	18:41:00	509
2009-05-22	18:42:00	3500
2009-05-22	18:43:00	704
2009-05-22	18:44:00	129
2009-05-22	18:45:00	404
2009-05-22	18:46:00	313
2009-05-22	18:47:00	0
2009-05-22	18:48:00	331
2009-05-22	18:49:00	331
2009-05-22	18:50:00	785
2009-05-22	18:51:00	4719
2009-05-22	18:52:00	3163
2009-05-22	18:53:00	2163
2009-05-22	18:54:00	1426
2009-05-22	18:55:00	217
2009-05-22	18:56:00	242
2009-05-22	18:57:00	3742
2009-05-22	18:58:00	1746
2009-05-22	18:59:00	1593
2009-05-22	19:00:00	2488
2009-05-22	19:01:00	644
2009-05-22	19:02:00	644
2009-05-22	19:03:00	258
2009-05-22	19:04:00	331
2009-05-22	19:05:00	426
2009-05-22	19:06:00	171
2009-05-22	19:07:00	164
2009-05-22	19:08:00	104
2009-05-22	19:09:00	52
2009-05-22	19:10:00	186
2009-05-22	19:11:00	322
2009-05-22	19:12:00	10
2009-05-22	19:13:00	5
2009-05-22	19:14:00	5
2009-05-22	19:15:00	15
2009-05-22	19:16:00	5
2009-05-22	19:17:00	164
2009-05-22	19:18:00	561
2009-05-22	19:19:00	200
2009-05-22	19:20:00	200
2009-05-22	19:21:00	73
2009-05-22	19:22:00	5
2009-05-22	19:23:00	186
2009-05-22	19:24:00	129
2009-05-22	19:25:00	0
2009-05-22	19:26:00	62
2009-05-22	19:27:00	36
2009-05-22	19:28:00	26
2009-05-22	19:29:00	57
2009-05-22	19:30:00	233
2009-05-22	19:31:00	225
2009-05-22	19:32:00	123
2009-05-22	19:33:00	15
2009-05-22	19:34:00	0
2009-05-22	19:35:00	10
2009-05-22	19:36:00	10
2009-05-22	19:37:00	10
2009-05-22	19:38:00	0
2009-05-22	19:39:00	362
2009-05-22	19:40:00	5
2009-05-22	19:41:00	0
2009-05-22	19:42:00	0
2009-05-22	19:43:00	0
2009-05-22	19:44:00	362
2009-05-22	19:45:00	31
2009-05-22	19:46:00	0
2009-05-22	19:47:00	0
2009-05-22	19:48:00	0
2009-05-22	19:49:00	0
2009-05-22	19:50:00	0
2009-05-22	19:51:00	98
2009-05-22	19:52:00	21
2009-05-22	19:53:00	0
2009-05-22	19:54:00	0
2009-05-22	19:55:00	0
2009-05-22	19:56:00	15
2009-05-22	19:57:00	21
2009-05-22	19:58:00	217
2009-05-22	19:59:00	0
2009-05-22	20:00:00	0
2009-05-22	20:01:00	0
2009-05-22	20:02:00	79
2009-05-22	20:03:00	164
2009-05-22	20:04:00	0
2009-05-22	20:05:00	0
2009-05-22	20:06:00	0
2009-05-22	20:07:00	0
2009-05-22	20:08:00	5
2009-05-22	20:09:00	41
2009-05-22	20:10:00	0
2009-05-22	20:11:00	0
2009-05-22	20:12:00	21
2009-05-22	20:13:00	5
2009-05-22	20:14:00	5
2009-05-22	20:15:00	52
2009-05-22	20:16:00	0
2009-05-22	20:17:00	5
2009-05-22	20:18:00	15
2009-05-22	20:19:00	10
2009-05-22	20:20:00	135
2009-05-22	20:21:00	67
2009-05-22	20:22:00	98
2009-05-22	20:23:00	0
2009-05-22	20:24:00	10
2009-05-22	20:25:00	0
2009-05-22	20:26:00	0
2009-05-22	20:27:00	5
2009-05-22	20:28:00	110
2009-05-22	20:29:00	31
2009-05-22	20:30:00	0
2009-05-22	20:31:00	0
2009-05-22	20:32:00	0
2009-05-22	20:33:00	0
2009-05-22	20:34:00	0
2009-05-22	20:35:00	21
2009-05-22	20:36:00	0
2009-05-22	20:37:00	0
2009-05-22	20:38:00	0
2009-05-22	20:39:00	41
2009-05-22	20:40:00	0
2009-05-22	20:41:00	383
2009-05-22	20:42:00	689
2009-05-22	20:43:00	871
2009-05-22	20:44:00	150
2009-05-22	20:45:00	0
2009-05-22	20:46:00	0
2009-05-22	20:47:00	0
2009-05-22	20:48:00	164
2009-05-22	20:49:00	142
2009-05-22	20:50:00	0
2009-05-22	20:51:00	0
2009-05-22	20:52:00	0
2009-05-22	20:53:00	0
2009-05-22	20:54:00	0
2009-05-22	20:55:00	0
2009-05-22	20:56:00	0
2009-05-22	20:57:00	0
2009-05-22	20:58:00	0
2009-05-22	20:59:00	0
2009-05-22	21:00:00	5
2009-05-22	21:01:00	10
2009-05-22	21:02:00	0
2009-05-22	21:03:00	21
2009-05-22	21:04:00	0
2009-05-22	21:05:00	0
2009-05-22	21:06:00	0
2009-05-22	21:07:00	0
2009-05-22	21:08:00	0
2009-05-22	21:09:00	0
2009-05-22	21:10:00	0
2009-05-22	21:11:00	0
2009-05-22	21:12:00	0
2009-05-22	21:13:00	0
2009-05-22	21:14:00	0
2009-05-22	21:15:00	0
2009-05-22	21:16:00	0
2009-05-22	21:17:00	0
2009-05-22	21:18:00	0
2009-05-22	21:19:00	0
2009-05-22	21:20:00	0
2009-05-22	21:21:00	0
2009-05-22	21:22:00	0
2009-05-22	21:23:00	0
2009-05-22	21:24:00	0
2009-05-22	21:25:00	0
2009-05-22	21:26:00	0
2009-05-22	21:27:00	10
2009-05-22	21:28:00	0
2009-05-22	21:29:00	0
2009-05-22	21:30:00	0
2009-05-22	21:31:00	0
2009-05-22	21:32:00	0
2009-05-22	21:33:00	0
2009-05-22	21:34:00	0
2009-05-22	21:35:00	0
2009-05-22	21:36:00	0
2009-05-22	21:37:00	0
2009-05-22	21:38:00	0
2009-05-22	21:39:00	0
2009-05-22	21:40:00	0
2009-05-22	21:41:00	0
2009-05-22	21:42:00	0
2009-05-22	21:43:00	0
2009-05-22	21:44:00	0
2009-05-22	21:45:00	0
2009-05-22	21:46:00	0
2009-05-22	21:47:00	0
2009-05-22	21:48:00	0
2009-05-22	21:49:00	0
2009-05-22	21:50:00	0
2009-05-22	21:51:00	0
2009-05-22	21:52:00	0
2009-05-22	21:53:00	0
2009-05-22	21:54:00	0
2009-05-22	21:55:00	0
2009-05-22	21:56:00	0
2009-05-22	21:57:00	62
2009-05-22	21:58:00	36
2009-05-22	21:59:00	31
2009-05-22	22:00:00	26
2009-05-22	22:01:00	10
2009-05-22	22:02:00	0
2009-05-22	22:03:00	5
2009-05-22	22:04:00	5
2009-05-22	22:05:00	0
2009-05-22	22:06:00	0
2009-05-22	22:07:00	0
2009-05-22	22:08:00	0
2009-05-22	22:09:00	52
2009-05-22	22:10:00	31
2009-05-22	22:11:00	0
2009-05-22	22:12:00	0
2009-05-22	22:13:00	31
2009-05-22	22:14:00	0
2009-05-22	22:15:00	0
2009-05-22	22:16:00	0
2009-05-22	22:17:00	0
2009-05-22	22:18:00	0
2009-05-22	22:19:00	0
2009-05-22	22:20:00	0
2009-05-22	22:21:00	0
2009-05-22	22:22:00	0
2009-05-22	22:23:00	0
2009-05-22	22:24:00	0
2009-05-22	22:25:00	0
2009-05-22	22:26:00	0
2009-05-22	22:27:00	0
2009-05-22	22:28:00	0
2009-05-22	22:29:00	0
2009-05-22	22:30:00	0
2009-05-22	22:31:00	0
2009-05-22	22:32:00	0
2009-05-22	22:33:00	0
2009-05-22	22:34:00	0
2009-05-22	22:35:00	0
2009-05-22	22:36:00	0
2009-05-22	22:37:00	26
2009-05-22	22:38:00	0
2009-05-22	22:39:00	0
2009-05-22	22:40:00	0
2009-05-22	22:41:00	0
2009-05-22	22:42:00	0
2009-05-22	22:43:00	0
2009-05-22	22:44:00	0
2009-05-22	22:45:00	0
2009-05-22	22:46:00	0
2009-05-22	22:47:00	0
2009-05-22	22:48:00	0
2009-05-22	22:49:00	135
2009-05-22	22:50:00	258
2009-05-22	22:51:00	26
2009-05-22	22:52:00	0
2009-05-22	22:53:00	0
2009-05-22	22:54:00	57
2009-05-22	22:55:00	0
2009-05-22	22:56:00	0
2009-05-22	22:57:00	0
2009-05-22	22:58:00	0
2009-05-22	22:59:00	0
2009-05-22	23:00:00	0
2009-05-22	23:01:00	0
2009-05-22	23:02:00	46
2009-05-22	23:03:00	0
2009-05-22	23:04:00	0
2009-05-22	23:05:00	0
2009-05-22	23:06:00	57
2009-05-22	23:07:00	0
2009-05-22	23:08:00	0
2009-05-22	23:09:00	0
2009-05-22	23:10:00	52
2009-05-22	23:11:00	704
2009-05-22	23:12:00	1178
2009-05-22	23:13:00	472
2009-05-22	23:14:00	927
2009-05-22	23:15:00	908
2009-05-22	23:16:00	426
2009-05-22	23:17:00	276
2009-05-22	23:18:00	31
2009-05-22	23:19:00	157
2009-05-22	23:20:00	574
2009-05-22	23:21:00	373
2009-05-22	23:22:00	5
2009-05-22	23:23:00	0
2009-05-22	23:24:00	31
2009-05-22	23:25:00	46
2009-05-22	23:26:00	644
2009-05-22	23:27:00	46
2009-05-22	23:28:00	266
2009-05-22	23:29:00	10
2009-05-22	23:30:00	200
2009-05-22	23:31:00	0
2009-05-22	23:32:00	0
2009-05-22	23:33:00	0
2009-05-22	23:34:00	276
2009-05-22	23:35:00	521
2009-05-22	23:36:00	0
2009-05-22	23:37:00	0
2009-05-22	23:38:00	0
2009-05-22	23:39:00	0
2009-05-22	23:40:00	0
2009-05-22	23:41:00	0
2009-05-22	23:42:00	0
2009-05-22	23:43:00	0
2009-05-22	23:44:00	0
2009-05-22	23:45:00	0
2009-05-22	23:46:00	0
2009-05-22	23:47:00	0
2009-05-22	23:48:00	0
2009-05-22	23:49:00	0
2009-05-22	23:50:00	0
2009-05-22	23:51:00	10
2009-05-22	23:52:00	0
2009-05-22	23:53:00	0
2009-05-22	23:54:00	0
2009-05-22	23:55:00	0
2009-05-22	23:56:00	0
2009-05-22	23:57:00	0
2009-05-22	23:58:00	0
2009-05-22	23:59:00	0
2009-05-23	00:00:00	0
2009-05-23	00:01:00	0
2009-05-23	00:02:00	0
2009-05-23	00:03:00	0
2009-05-23	00:04:00	0
2009-05-23	00:05:00	0
2009-05-23	00:06:00	0
2009-05-23	00:07:00	0
2009-05-23	00:08:00	0
2009-05-23	00:09:00	0
2009-05-23	00:10:00	0
2009-05-23	00:11:00	0
2009-05-23	00:12:00	0
2009-05-23	00:13:00	0
2009-05-23	00:14:00	0
2009-05-23	00:15:00	0
2009-05-23	00:16:00	0
2009-05-23	00:17:00	0
2009-05-23	00:18:00	0
2009-05-23	00:19:00	0
2009-05-23	00:20:00	0
2009-05-23	00:21:00	0
2009-05-23	00:22:00	0
2009-05-23	00:23:00	0
2009-05-23	00:24:00	0
2009-05-23	00:25:00	0
2009-05-23	00:26:00	0
2009-05-23	00:27:00	0
2009-05-23	00:28:00	0
2009-05-23	00:29:00	0
2009-05-23	00:30:00	0
2009-05-23	00:31:00	0
2009-05-23	00:32:00	0
2009-05-23	00:33:00	0
2009-05-23	00:34:00	0
2009-05-23	00:35:00	0
2009-05-23	00:36:00	0
2009-05-23	00:37:00	0
2009-05-23	00:38:00	0
2009-05-23	00:39:00	0
2009-05-23	00:40:00	0
2009-05-23	00:41:00	0
2009-05-23	00:42:00	0
2009-05-23	00:43:00	0
2009-05-23	00:44:00	0
2009-05-23	00:45:00	0
2009-05-23	00:46:00	0
2009-05-23	00:47:00	0
2009-05-23	00:48:00	0
2009-05-23	00:49:00	0
2009-05-23	00:50:00	0
2009-05-23	00:51:00	0
2009-05-23	00:52:00	0
2009-05-23	00:53:00	0
2009-05-23	00:54:00	0
2009-05-23	00:55:00	0
2009-05-23	00:56:00	0
2009-05-23	00:57:00	0
2009-05-23	00:58:00	0
2009-05-23	00:59:00	0
2009-05-23	01:00:00	0
2009-05-23	01:01:00	0
2009-05-23	01:02:00	0
2009-05-23	01:03:00	0
2009-05-23	01:04:00	0
2009-05-23	01:05:00	0
2009-05-23	01:06:00	0
2009-05-23	01:07:00	5
2009-05-23	01:08:00	73
2009-05-23	01:09:00	0
2009-05-23	01:10:00	15
2009-05-23	01:11:00	0
2009-05-23	01:12:00	0
2009-05-23	01:13:00	0
2009-05-23	01:14:00	0
2009-05-23	01:15:00	0
2009-05-23	01:16:00	0
2009-05-23	01:17:00	0
2009-05-23	01:18:00	0
2009-05-23	01:19:00	0
2009-05-23	01:20:00	0
2009-05-23	01:21:00	0
2009-05-23	01:22:00	0
2009-05-23	01:23:00	0
2009-05-23	01:24:00	0
2009-05-23	01:25:00	0
2009-05-23	01:26:00	0
2009-05-23	01:27:00	0
2009-05-23	01:28:00	0
2009-05-23	01:29:00	0
2009-05-23	01:30:00	0
2009-05-23	01:31:00	0
2009-05-23	01:32:00	0
2009-05-23	01:33:00	0
2009-05-23	01:34:00	0
2009-05-23	01:35:00	0
2009-05-23	01:36:00	0
2009-05-23	01:37:00	0
2009-05-23	01:38:00	0
2009-05-23	01:39:00	0
2009-05-23	01:40:00	0
2009-05-23	01:41:00	0
2009-05-23	01:42:00	0
2009-05-23	01:43:00	0
2009-05-23	01:44:00	0
2009-05-23	01:45:00	0
2009-05-23	01:46:00	0
2009-05-23	01:47:00	0
2009-05-23	01:48:00	0
2009-05-23	01:49:00	0
2009-05-23	01:50:00	0
2009-05-23	01:51:00	0
2009-05-23	01:52:00	0
2009-05-23	01:53:00	0
2009-05-23	01:54:00	0
2009-05-23	01:55:00	0
2009-05-23	01:56:00	0
2009-05-23	01:57:00	0
2009-05-23	01:58:00	0
2009-05-23	01:59:00	0
2009-05-23	02:00:00	0
2009-05-23	02:01:00	0
2009-05-23	02:02:00	0
2009-05-23	02:03:00	0
2009-05-23	02:04:00	0
2009-05-23	02:05:00	0
2009-05-23	02:06:00	0
2009-05-23	02:07:00	0
2009-05-23	02:08:00	0
2009-05-23	02:09:00	0
2009-05-23	02:10:00	0
2009-05-23	02:11:00	0
2009-05-23	02:12:00	5
2009-05-23	02:13:00	0
2009-05-23	02:14:00	0
2009-05-23	02:15:00	0
2009-05-23	02:16:00	0
2009-05-23	02:17:00	0
2009-05-23	02:18:00	0
2009-05-23	02:19:00	0
2009-05-23	02:20:00	0
2009-05-23	02:21:00	0
2009-05-23	02:22:00	0
2009-05-23	02:23:00	0
2009-05-23	02:24:00	0
2009-05-23	02:25:00	0
2009-05-23	02:26:00	0
2009-05-23	02:27:00	0
2009-05-23	02:28:00	0
2009-05-23	02:29:00	0
2009-05-23	02:30:00	0
2009-05-23	02:31:00	0
2009-05-23	02:32:00	0
2009-05-23	02:33:00	0
2009-05-23	02:34:00	0
2009-05-23	02:35:00	0
2009-05-23	02:36:00	0
2009-05-23	02:37:00	0
2009-05-23	02:38:00	0
2009-05-23	02:39:00	0
2009-05-23	02:40:00	0
2009-05-23	02:41:00	0
2009-05-23	02:42:00	0
2009-05-23	02:43:00	0
2009-05-23	02:44:00	0
2009-05-23	02:45:00	0
2009-05-23	02:46:00	0
2009-05-23	02:47:00	0
2009-05-23	02:48:00	0
2009-05-23	02:49:00	0
2009-05-23	02:50:00	0
2009-05-23	02:51:00	0
2009-05-23	02:52:00	0
2009-05-23	02:53:00	0
2009-05-23	02:54:00	0
2009-05-23	02:55:00	0
2009-05-23	02:56:00	0
2009-05-23	02:57:00	5
2009-05-23	02:58:00	5
2009-05-23	02:59:00	186
2009-05-23	03:00:00	41
2009-05-23	03:01:00	0
2009-05-23	03:02:00	0
2009-05-23	03:03:00	0
2009-05-23	03:04:00	0
2009-05-23	03:05:00	0
2009-05-23	03:06:00	0
2009-05-23	03:07:00	0
2009-05-23	03:08:00	0
2009-05-23	03:09:00	0
2009-05-23	03:10:00	0
2009-05-23	03:11:00	0
2009-05-23	03:12:00	0
2009-05-23	03:13:00	0
2009-05-23	03:14:00	0
2009-05-23	03:15:00	0
2009-05-23	03:16:00	36
2009-05-23	03:17:00	0
2009-05-23	03:18:00	0
2009-05-23	03:19:00	0
2009-05-23	03:20:00	0
2009-05-23	03:21:00	0
2009-05-23	03:22:00	0
2009-05-23	03:23:00	0
2009-05-23	03:24:00	0
2009-05-23	03:25:00	0
2009-05-23	03:26:00	0
2009-05-23	03:27:00	0
2009-05-23	03:28:00	0
2009-05-23	03:29:00	0
2009-05-23	03:30:00	0
2009-05-23	03:31:00	0
2009-05-23	03:32:00	0
2009-05-23	03:33:00	0
2009-05-23	03:34:00	0
2009-05-23	03:35:00	0
2009-05-23	03:36:00	0
2009-05-23	03:37:00	0
2009-05-23	03:38:00	5
2009-05-23	03:39:00	0
2009-05-23	03:40:00	0
2009-05-23	03:41:00	0
2009-05-23	03:42:00	0
2009-05-23	03:43:00	0
2009-05-23	03:44:00	0
2009-05-23	03:45:00	0
2009-05-23	03:46:00	0
2009-05-23	03:47:00	0
2009-05-23	03:48:00	0
2009-05-23	03:49:00	0
2009-05-23	03:50:00	0
2009-05-23	03:51:00	0
2009-05-23	03:52:00	0
2009-05-23	03:53:00	0
2009-05-23	03:54:00	0
2009-05-23	03:55:00	0
2009-05-23	03:56:00	0
2009-05-23	03:57:00	0
2009-05-23	03:58:00	0
2009-05-23	03:59:00	67
2009-05-23	04:00:00	0
2009-05-23	04:01:00	0
2009-05-23	04:02:00	0
2009-05-23	04:03:00	0
2009-05-23	04:04:00	0
2009-05-23	04:05:00	0
2009-05-23	04:06:00	0
2009-05-23	04:07:00	0
2009-05-23	04:08:00	0
2009-05-23	04:09:00	0
2009-05-23	04:10:00	0
2009-05-23	04:11:00	0
2009-05-23	04:12:00	0
2009-05-23	04:13:00	0
2009-05-23	04:14:00	0
2009-05-23	04:15:00	0
2009-05-23	04:16:00	0
2009-05-23	04:17:00	0
2009-05-23	04:18:00	0
2009-05-23	04:19:00	0
2009-05-23	04:20:00	0
2009-05-23	04:21:00	0
2009-05-23	04:22:00	0
2009-05-23	04:23:00	0
2009-05-23	04:24:00	31
2009-05-23	04:25:00	0
2009-05-23	04:26:00	0
2009-05-23	04:27:00	0
2009-05-23	04:28:00	0
2009-05-23	04:29:00	15
2009-05-23	04:30:00	0
2009-05-23	04:31:00	0
2009-05-23	04:32:00	0
2009-05-23	04:33:00	0
2009-05-23	04:34:00	0
2009-05-23	04:35:00	0
2009-05-23	04:36:00	0
2009-05-23	04:37:00	0
2009-05-23	04:38:00	0
2009-05-23	04:39:00	0
2009-05-23	04:40:00	0
2009-05-23	04:41:00	0
2009-05-23	04:42:00	0
2009-05-23	04:43:00	0
2009-05-23	04:44:00	0
2009-05-23	04:45:00	0
2009-05-23	04:46:00	0
2009-05-23	04:47:00	0
2009-05-23	04:48:00	10
2009-05-23	04:49:00	0
2009-05-23	04:50:00	0
2009-05-23	04:51:00	67
2009-05-23	04:52:00	0
2009-05-23	04:53:00	0
2009-05-23	04:54:00	0
2009-05-23	04:55:00	0
2009-05-23	04:56:00	0
2009-05-23	04:57:00	0
2009-05-23	04:58:00	0
2009-05-23	04:59:00	0
2009-05-23	05:00:00	0
2009-05-23	05:01:00	0
2009-05-23	05:02:00	0
2009-05-23	05:03:00	0
2009-05-23	05:04:00	0
2009-05-23	05:05:00	0
2009-05-23	05:06:00	0
2009-05-23	05:07:00	0
2009-05-23	05:08:00	0
2009-05-23	05:09:00	5
2009-05-23	05:10:00	0
2009-05-23	05:11:00	0
2009-05-23	05:12:00	0
2009-05-23	05:13:00	0
2009-05-23	05:14:00	0
2009-05-23	05:15:00	0
2009-05-23	05:16:00	0
2009-05-23	05:17:00	0
2009-05-23	05:18:00	0
2009-05-23	05:19:00	0
2009-05-23	05:20:00	15
2009-05-23	05:21:00	52
2009-05-23	05:22:00	129
2009-05-23	05:23:00	52
2009-05-23	05:24:00	0
2009-05-23	05:25:00	0
2009-05-23	05:26:00	0
2009-05-23	05:27:00	0
2009-05-23	05:28:00	0
2009-05-23	05:29:00	0
2009-05-23	05:30:00	0
2009-05-23	05:31:00	0
2009-05-23	05:32:00	0
2009-05-23	05:33:00	0
2009-05-23	05:34:00	0
2009-05-23	05:35:00	0
2009-05-23	05:36:00	0
2009-05-23	05:37:00	5
2009-05-23	05:38:00	0
2009-05-23	05:39:00	31
2009-05-23	05:40:00	0
2009-05-23	05:41:00	0
2009-05-23	05:42:00	0
2009-05-23	05:43:00	0
2009-05-23	05:44:00	209
2009-05-23	05:45:00	0
2009-05-23	05:46:00	0
2009-05-23	05:47:00	0
2009-05-23	05:48:00	0
2009-05-23	05:49:00	0
2009-05-23	05:50:00	0
2009-05-23	05:51:00	0
2009-05-23	05:52:00	0
2009-05-23	05:53:00	0
2009-05-23	05:54:00	15
2009-05-23	05:55:00	0
2009-05-23	05:56:00	0
2009-05-23	05:57:00	0
2009-05-23	05:58:00	0
2009-05-23	05:59:00	0
2009-05-23	06:00:00	0
2009-05-23	06:01:00	0
2009-05-23	06:02:00	0
2009-05-23	06:03:00	0
2009-05-23	06:04:00	0
2009-05-23	06:05:00	0
2009-05-23	06:06:00	0
2009-05-23	06:07:00	0
2009-05-23	06:08:00	0
2009-05-23	06:09:00	0
2009-05-23	06:10:00	0
2009-05-23	06:11:00	21
2009-05-23	06:12:00	0
2009-05-23	06:13:00	36
2009-05-23	06:14:00	0
2009-05-23	06:15:00	0
2009-05-23	06:16:00	57
2009-05-23	06:17:00	0
2009-05-23	06:18:00	10
2009-05-23	06:19:00	0
2009-05-23	06:20:00	10
2009-05-23	06:21:00	5
2009-05-23	06:22:00	0
2009-05-23	06:23:00	0
2009-05-23	06:24:00	0
2009-05-23	06:25:00	0
2009-05-23	06:26:00	0
2009-05-23	06:27:00	0
2009-05-23	06:28:00	0
2009-05-23	06:29:00	41
2009-05-23	06:30:00	0
2009-05-23	06:31:00	0
2009-05-23	06:32:00	15
2009-05-23	06:33:00	5
2009-05-23	06:34:00	0
2009-05-23	06:35:00	0
2009-05-23	06:36:00	0
2009-05-23	06:37:00	0
2009-05-23	06:38:00	0
2009-05-23	06:39:00	0
2009-05-23	06:40:00	0
2009-05-23	06:41:00	0
2009-05-23	06:42:00	0
2009-05-23	06:43:00	0
2009-05-23	06:44:00	46
2009-05-23	06:45:00	0
2009-05-23	06:46:00	5
2009-05-23	06:47:00	0
2009-05-23	06:48:00	0
2009-05-23	06:49:00	0
2009-05-23	06:50:00	5
2009-05-23	06:51:00	0
2009-05-23	06:52:00	0
2009-05-23	06:53:00	0
2009-05-23	06:54:00	10
2009-05-23	06:55:00	21
2009-05-23	06:56:00	41
2009-05-23	06:57:00	57
2009-05-23	06:58:00	0
2009-05-23	06:59:00	0
2009-05-23	07:00:00	0
2009-05-23	07:01:00	0
2009-05-23	07:02:00	0
2009-05-23	07:03:00	0
2009-05-23	07:04:00	0
2009-05-23	07:05:00	5
2009-05-23	07:06:00	0
2009-05-23	07:07:00	0
2009-05-23	07:08:00	0
2009-05-23	07:09:00	5
2009-05-23	07:10:00	0
2009-05-23	07:11:00	73
2009-05-23	07:12:00	26
2009-05-23	07:13:00	98
2009-05-23	07:14:00	73
2009-05-23	07:15:00	472
2009-05-23	07:16:00	1067
2009-05-23	07:17:00	1224
2009-05-23	07:18:00	1623
2009-05-23	07:19:00	1155
2009-05-23	07:20:00	1297
2009-05-23	07:21:00	2087
2009-05-23	07:22:00	927
2009-05-23	07:23:00	1155
2009-05-23	07:24:00	673
2009-05-23	07:25:00	157
2009-05-23	07:26:00	673
2009-05-23	07:27:00	966
2009-05-23	07:28:00	342
2009-05-23	07:29:00	1155
2009-05-23	07:30:00	1910
2009-05-23	07:31:00	836
2009-05-23	07:32:00	1248
2009-05-23	07:33:00	801
2009-05-23	07:34:00	630
2009-05-23	07:35:00	484
2009-05-23	07:36:00	186
2009-05-23	07:37:00	200
2009-05-23	07:38:00	547
2009-05-23	07:39:00	497
2009-05-23	07:40:00	509
2009-05-23	07:41:00	601
2009-05-23	07:42:00	751
2009-05-23	07:43:00	242
2009-05-23	07:44:00	164
2009-05-23	07:45:00	67
2009-05-23	07:46:00	10
2009-05-23	07:47:00	46
2009-05-23	07:48:00	986
2009-05-23	07:49:00	927
2009-05-23	07:50:00	438
2009-05-23	07:51:00	673
2009-05-23	07:52:00	689
2009-05-23	07:53:00	689
2009-05-23	07:54:00	67
2009-05-23	07:55:00	0
2009-05-23	07:56:00	0
2009-05-23	07:57:00	547
2009-05-23	07:58:00	52
2009-05-23	07:59:00	10
2009-05-23	08:00:00	36
2009-05-23	08:01:00	26
2009-05-23	08:02:00	5
2009-05-23	08:03:00	15
2009-05-23	08:04:00	0
2009-05-23	08:05:00	0
2009-05-23	08:06:00	5
2009-05-23	08:07:00	21
2009-05-23	08:08:00	0
2009-05-23	08:09:00	0
2009-05-23	08:10:00	0
2009-05-23	08:11:00	0
2009-05-23	08:12:00	10
2009-05-23	08:13:00	31
2009-05-23	08:14:00	41
2009-05-23	08:15:00	117
2009-05-23	08:16:00	659
2009-05-23	08:17:00	438
2009-05-23	08:18:00	303
2009-05-23	08:19:00	5
2009-05-23	08:20:00	5
2009-05-23	08:21:00	21
2009-05-23	08:22:00	0
2009-05-23	08:23:00	0
2009-05-23	08:24:00	31
2009-05-23	08:25:00	0
2009-05-23	08:26:00	0
2009-05-23	08:27:00	0
2009-05-23	08:28:00	0
2009-05-23	08:29:00	36
2009-05-23	08:30:00	383
2009-05-23	08:31:00	250
2009-05-23	08:32:00	157
2009-05-23	08:33:00	5
2009-05-23	08:34:00	313
2009-05-23	08:35:00	26
2009-05-23	08:36:00	0
2009-05-23	08:37:00	10
2009-05-23	08:38:00	5
2009-05-23	08:39:00	0
2009-05-23	08:40:00	5
2009-05-23	08:41:00	0
2009-05-23	08:42:00	0
2009-05-23	08:43:00	0
2009-05-23	08:44:00	31
2009-05-23	08:45:00	41
2009-05-23	08:46:00	36
2009-05-23	08:47:00	92
2009-05-23	08:48:00	10
2009-05-23	08:49:00	10
2009-05-23	08:50:00	0
2009-05-23	08:51:00	294
2009-05-23	08:52:00	150
2009-05-23	08:53:00	313
2009-05-23	08:54:00	472
2009-05-23	08:55:00	601
2009-05-23	08:56:00	117
2009-05-23	08:57:00	209
2009-05-23	08:58:00	10
2009-05-23	08:59:00	0
2009-05-23	09:00:00	15
2009-05-23	09:01:00	36
2009-05-23	09:02:00	0
2009-05-23	09:03:00	0
2009-05-23	09:04:00	0
2009-05-23	09:05:00	217
2009-05-23	09:06:00	460
2009-05-23	09:07:00	15
2009-05-23	09:08:00	0
[truncated: 19,611 more rows]

## Sheet: 6.05.09
Actogram, Copy Raw Data, All Days
Identity:	Wally
Filename:	E:\Active Research Files\meloxicam titre canine\cases\wally\Wally Bringhurst 06.05.09.AWC
Gender:	M
Age:	6
Height:	91.4 cm	36.0 in
Weight:	39.0 kg	86.0 lbs
Start Date:	05-Jun-2009 (Fri)
Start Time:	18:00:00
Interval:	1.00 mins
Date Stamp:	Time Stamp:	Activity Data:	Marker Press:
2009-06-05	00:00:00	0
2009-06-05	00:01:00	0
2009-06-05	00:02:00	0
2009-06-05	00:03:00	0
2009-06-05	00:04:00	0
2009-06-05	00:05:00	0
2009-06-05	00:06:00	0
2009-06-05	00:07:00	0
2009-06-05	00:08:00	0
2009-06-05	00:09:00	0
2009-06-05	00:10:00	0
2009-06-05	00:11:00	0
2009-06-05	00:12:00	0
2009-06-05	00:13:00	0
2009-06-05	00:14:00	0
2009-06-05	00:15:00	0
2009-06-05	00:16:00	0
2009-06-05	00:17:00	0
2009-06-05	00:18:00	0
2009-06-05	00:19:00	0
2009-06-05	00:20:00	0
2009-06-05	00:21:00	0
2009-06-05	00:22:00	0
2009-06-05	00:23:00	0
2009-06-05	00:24:00	0
2009-06-05	00:25:00	0
2009-06-05	00:26:00	0
2009-06-05	00:27:00	0
2009-06-05	00:28:00	0
2009-06-05	00:29:00	0
2009-06-05	00:30:00	0
2009-06-05	00:31:00	0
2009-06-05	00:32:00	0
2009-06-05	00:33:00	0
2009-06-05	00:34:00	0
2009-06-05	00:35:00	0
2009-06-05	00:36:00	0
2009-06-05	00:37:00	0
2009-06-05	00:38:00	0
2009-06-05	00:39:00	0
2009-06-05	00:40:00	0
2009-06-05	00:41:00	0
2009-06-05	00:42:00	0
2009-06-05	00:43:00	0
2009-06-05	00:44:00	0
2009-06-05	00:45:00	0
2009-06-05	00:46:00	0
2009-06-05	00:47:00	0
2009-06-05	00:48:00	0
2009-06-05	00:49:00	0
2009-06-05	00:50:00	0
2009-06-05	00:51:00	0
2009-06-05	00:52:00	0
2009-06-05	00:53:00	0
2009-06-05	00:54:00	0
2009-06-05	00:55:00	0
2009-06-05	00:56:00	0
2009-06-05	00:57:00	0
2009-06-05	00:58:00	0
2009-06-05	00:59:00	0
2009-06-05	01:00:00	0
2009-06-05	01:01:00	0
2009-06-05	01:02:00	0
2009-06-05	01:03:00	0
2009-06-05	01:04:00	0
2009-06-05	01:05:00	0
2009-06-05	01:06:00	0
2009-06-05	01:07:00	0
2009-06-05	01:08:00	0
2009-06-05	01:09:00	0
2009-06-05	01:10:00	0
2009-06-05	01:11:00	0
2009-06-05	01:12:00	0
2009-06-05	01:13:00	0
2009-06-05	01:14:00	0
2009-06-05	01:15:00	0
2009-06-05	01:16:00	0
2009-06-05	01:17:00	0
2009-06-05	01:18:00	0
2009-06-05	01:19:00	0
2009-06-05	01:20:00	0
2009-06-05	01:21:00	0
2009-06-05	01:22:00	0
2009-06-05	01:23:00	0
2009-06-05	01:24:00	0
2009-06-05	01:25:00	0
2009-06-05	01:26:00	0
2009-06-05	01:27:00	0
2009-06-05	01:28:00	0
2009-06-05	01:29:00	0
2009-06-05	01:30:00	0
2009-06-05	01:31:00	0
2009-06-05	01:32:00	0
2009-06-05	01:33:00	0
2009-06-05	01:34:00	0
2009-06-05	01:35:00	0
2009-06-05	01:36:00	0
2009-06-05	01:37:00	0
2009-06-05	01:38:00	0
2009-06-05	01:39:00	0
2009-06-05	01:40:00	0
2009-06-05	01:41:00	0
2009-06-05	01:42:00	0
2009-06-05	01:43:00	0
2009-06-05	01:44:00	0
2009-06-05	01:45:00	0
2009-06-05	01:46:00	0
2009-06-05	01:47:00	0
2009-06-05	01:48:00	0
2009-06-05	01:49:00	0
2009-06-05	01:50:00	0
2009-06-05	01:51:00	0
2009-06-05	01:52:00	0
2009-06-05	01:53:00	0
2009-06-05	01:54:00	0
2009-06-05	01:55:00	0
2009-06-05	01:56:00	0
2009-06-05	01:57:00	0
2009-06-05	01:58:00	0
2009-06-05	01:59:00	0
2009-06-05	02:00:00	0
2009-06-05	02:01:00	0
2009-06-05	02:02:00	0
2009-06-05	02:03:00	0
2009-06-05	02:04:00	0
2009-06-05	02:05:00	0
2009-06-05	02:06:00	0
2009-06-05	02:07:00	0
2009-06-05	02:08:00	0
2009-06-05	02:09:00	0
2009-06-05	02:10:00	0
2009-06-05	02:11:00	0
2009-06-05	02:12:00	0
2009-06-05	02:13:00	0
2009-06-05	02:14:00	0
2009-06-05	02:15:00	0
2009-06-05	02:16:00	0
2009-06-05	02:17:00	0
2009-06-05	02:18:00	0
2009-06-05	02:19:00	0
2009-06-05	02:20:00	0
2009-06-05	02:21:00	0
2009-06-05	02:22:00	0
2009-06-05	02:23:00	0
2009-06-05	02:24:00	0
2009-06-05	02:25:00	0
2009-06-05	02:26:00	0
2009-06-05	02:27:00	0
2009-06-05	02:28:00	0
2009-06-05	02:29:00	0
2009-06-05	02:30:00	0
2009-06-05	02:31:00	0
2009-06-05	02:32:00	0
2009-06-05	02:33:00	0
2009-06-05	02:34:00	0
2009-06-05	02:35:00	0
2009-06-05	02:36:00	0
2009-06-05	02:37:00	0
2009-06-05	02:38:00	0
2009-06-05	02:39:00	0
2009-06-05	02:40:00	0
2009-06-05	02:41:00	0
2009-06-05	02:42:00	0
2009-06-05	02:43:00	0
2009-06-05	02:44:00	0
2009-06-05	02:45:00	0
2009-06-05	02:46:00	0
2009-06-05	02:47:00	0
2009-06-05	02:48:00	0
2009-06-05	02:49:00	0
2009-06-05	02:50:00	0
2009-06-05	02:51:00	0
2009-06-05	02:52:00	0
2009-06-05	02:53:00	0
2009-06-05	02:54:00	0
2009-06-05	02:55:00	0
2009-06-05	02:56:00	0
2009-06-05	02:57:00	0
2009-06-05	02:58:00	0
2009-06-05	02:59:00	0
2009-06-05	03:00:00	0
2009-06-05	03:01:00	0
2009-06-05	03:02:00	0
2009-06-05	03:03:00	0
2009-06-05	03:04:00	0
2009-06-05	03:05:00	0
2009-06-05	03:06:00	0
2009-06-05	03:07:00	0
2009-06-05	03:08:00	0
2009-06-05	03:09:00	0
2009-06-05	03:10:00	0
2009-06-05	03:11:00	0
2009-06-05	03:12:00	0
2009-06-05	03:13:00	0
2009-06-05	03:14:00	0
2009-06-05	03:15:00	0
2009-06-05	03:16:00	0
2009-06-05	03:17:00	0
2009-06-05	03:18:00	0
2009-06-05	03:19:00	0
2009-06-05	03:20:00	0
2009-06-05	03:21:00	0
2009-06-05	03:22:00	0
2009-06-05	03:23:00	0
2009-06-05	03:24:00	0
2009-06-05	03:25:00	0
2009-06-05	03:26:00	0
2009-06-05	03:27:00	0
2009-06-05	03:28:00	0
2009-06-05	03:29:00	0
2009-06-05	03:30:00	0
2009-06-05	03:31:00	0
2009-06-05	03:32:00	0
2009-06-05	03:33:00	0
2009-06-05	03:34:00	0
2009-06-05	03:35:00	0
2009-06-05	03:36:00	0
2009-06-05	03:37:00	0
2009-06-05	03:38:00	0
2009-06-05	03:39:00	0
2009-06-05	03:40:00	0
2009-06-05	03:41:00	0
2009-06-05	03:42:00	0
2009-06-05	03:43:00	0
2009-06-05	03:44:00	0
2009-06-05	03:45:00	0
2009-06-05	03:46:00	0
2009-06-05	03:47:00	0
2009-06-05	03:48:00	0
2009-06-05	03:49:00	0
2009-06-05	03:50:00	0
2009-06-05	03:51:00	0
2009-06-05	03:52:00	0
2009-06-05	03:53:00	0
2009-06-05	03:54:00	0
2009-06-05	03:55:00	0
2009-06-05	03:56:00	0
2009-06-05	03:57:00	0
2009-06-05	03:58:00	0
2009-06-05	03:59:00	0
2009-06-05	04:00:00	0
2009-06-05	04:01:00	0
2009-06-05	04:02:00	0
2009-06-05	04:03:00	0
2009-06-05	04:04:00	0
2009-06-05	04:05:00	0
2009-06-05	04:06:00	0
2009-06-05	04:07:00	0
2009-06-05	04:08:00	0
2009-06-05	04:09:00	0
2009-06-05	04:10:00	0
2009-06-05	04:11:00	0
2009-06-05	04:12:00	0
2009-06-05	04:13:00	0
2009-06-05	04:14:00	0
2009-06-05	04:15:00	0
2009-06-05	04:16:00	0
2009-06-05	04:17:00	0
2009-06-05	04:18:00	0
2009-06-05	04:19:00	0
2009-06-05	04:20:00	0
2009-06-05	04:21:00	0
2009-06-05	04:22:00	0
2009-06-05	04:23:00	0
2009-06-05	04:24:00	0
2009-06-05	04:25:00	0
2009-06-05	04:26:00	0
2009-06-05	04:27:00	0
2009-06-05	04:28:00	0
2009-06-05	04:29:00	0
2009-06-05	04:30:00	0
2009-06-05	04:31:00	0
2009-06-05	04:32:00	0
2009-06-05	04:33:00	0
2009-06-05	04:34:00	0
2009-06-05	04:35:00	0
2009-06-05	04:36:00	0
2009-06-05	04:37:00	0
2009-06-05	04:38:00	0
2009-06-05	04:39:00	0
2009-06-05	04:40:00	0
2009-06-05	04:41:00	0
2009-06-05	04:42:00	0
2009-06-05	04:43:00	0
2009-06-05	04:44:00	0
2009-06-05	04:45:00	0
2009-06-05	04:46:00	0
2009-06-05	04:47:00	0
2009-06-05	04:48:00	0
2009-06-05	04:49:00	0
2009-06-05	04:50:00	0
2009-06-05	04:51:00	0
2009-06-05	04:52:00	0
2009-06-05	04:53:00	0
2009-06-05	04:54:00	0
2009-06-05	04:55:00	0
2009-06-05	04:56:00	0
2009-06-05	04:57:00	0
2009-06-05	04:58:00	0
2009-06-05	04:59:00	0
2009-06-05	05:00:00	0
2009-06-05	05:01:00	0
2009-06-05	05:02:00	0
2009-06-05	05:03:00	0
2009-06-05	05:04:00	0
2009-06-05	05:05:00	0
2009-06-05	05:06:00	0
2009-06-05	05:07:00	0
2009-06-05	05:08:00	0
2009-06-05	05:09:00	0
2009-06-05	05:10:00	0
2009-06-05	05:11:00	0
2009-06-05	05:12:00	0
2009-06-05	05:13:00	0
2009-06-05	05:14:00	0
2009-06-05	05:15:00	0
2009-06-05	05:16:00	0
2009-06-05	05:17:00	0
2009-06-05	05:18:00	0
2009-06-05	05:19:00	0
2009-06-05	05:20:00	0
2009-06-05	05:21:00	0
2009-06-05	05:22:00	0
2009-06-05	05:23:00	0
2009-06-05	05:24:00	0
2009-06-05	05:25:00	0
2009-06-05	05:26:00	0
2009-06-05	05:27:00	0
2009-06-05	05:28:00	0
2009-06-05	05:29:00	0
2009-06-05	05:30:00	0
2009-06-05	05:31:00	0
2009-06-05	05:32:00	0
2009-06-05	05:33:00	0
2009-06-05	05:34:00	0
2009-06-05	05:35:00	0
2009-06-05	05:36:00	0
2009-06-05	05:37:00	0
2009-06-05	05:38:00	0
2009-06-05	05:39:00	0
2009-06-05	05:40:00	0
2009-06-05	05:41:00	0
2009-06-05	05:42:00	0
2009-06-05	05:43:00	0
2009-06-05	05:44:00	0
2009-06-05	05:45:00	0
2009-06-05	05:46:00	0
2009-06-05	05:47:00	0
2009-06-05	05:48:00	0
2009-06-05	05:49:00	0
2009-06-05	05:50:00	0
2009-06-05	05:51:00	0
2009-06-05	05:52:00	0
2009-06-05	05:53:00	0
2009-06-05	05:54:00	0
2009-06-05	05:55:00	0
2009-06-05	05:56:00	0
2009-06-05	05:57:00	0
2009-06-05	05:58:00	0
2009-06-05	05:59:00	0
2009-06-05	06:00:00	0
2009-06-05	06:01:00	0
2009-06-05	06:02:00	0
2009-06-05	06:03:00	0
2009-06-05	06:04:00	0
2009-06-05	06:05:00	0
2009-06-05	06:06:00	0
2009-06-05	06:07:00	0
2009-06-05	06:08:00	0
2009-06-05	06:09:00	0
2009-06-05	06:10:00	0
2009-06-05	06:11:00	0
2009-06-05	06:12:00	0
2009-06-05	06:13:00	0
2009-06-05	06:14:00	0
2009-06-05	06:15:00	0
2009-06-05	06:16:00	0
2009-06-05	06:17:00	0
2009-06-05	06:18:00	0
2009-06-05	06:19:00	0
2009-06-05	06:20:00	0
2009-06-05	06:21:00	0
2009-06-05	06:22:00	0
2009-06-05	06:23:00	0
2009-06-05	06:24:00	0
2009-06-05	06:25:00	0
2009-06-05	06:26:00	0
2009-06-05	06:27:00	0
2009-06-05	06:28:00	0
2009-06-05	06:29:00	0
2009-06-05	06:30:00	0
2009-06-05	06:31:00	0
2009-06-05	06:32:00	0
2009-06-05	06:33:00	0
2009-06-05	06:34:00	0
2009-06-05	06:35:00	0
2009-06-05	06:36:00	0
2009-06-05	06:37:00	0
2009-06-05	06:38:00	0
2009-06-05	06:39:00	0
2009-06-05	06:40:00	0
2009-06-05	06:41:00	0
2009-06-05	06:42:00	0
2009-06-05	06:43:00	0
2009-06-05	06:44:00	0
2009-06-05	06:45:00	0
2009-06-05	06:46:00	0
2009-06-05	06:47:00	0
2009-06-05	06:48:00	0
2009-06-05	06:49:00	0
2009-06-05	06:50:00	0
2009-06-05	06:51:00	0
2009-06-05	06:52:00	0
2009-06-05	06:53:00	0
2009-06-05	06:54:00	0
2009-06-05	06:55:00	0
2009-06-05	06:56:00	0
2009-06-05	06:57:00	0
2009-06-05	06:58:00	0
2009-06-05	06:59:00	0
2009-06-05	07:00:00	0
2009-06-05	07:01:00	0
2009-06-05	07:02:00	0
2009-06-05	07:03:00	0
2009-06-05	07:04:00	0
2009-06-05	07:05:00	0
2009-06-05	07:06:00	0
2009-06-05	07:07:00	0
2009-06-05	07:08:00	0
2009-06-05	07:09:00	0
2009-06-05	07:10:00	0
2009-06-05	07:11:00	0
2009-06-05	07:12:00	0
2009-06-05	07:13:00	0
2009-06-05	07:14:00	0
2009-06-05	07:15:00	0
2009-06-05	07:16:00	0
2009-06-05	07:17:00	0
2009-06-05	07:18:00	0
2009-06-05	07:19:00	0
2009-06-05	07:20:00	0
2009-06-05	07:21:00	0
2009-06-05	07:22:00	0
2009-06-05	07:23:00	0
2009-06-05	07:24:00	0
2009-06-05	07:25:00	0
2009-06-05	07:26:00	0
2009-06-05	07:27:00	0
2009-06-05	07:28:00	0
2009-06-05	07:29:00	0
2009-06-05	07:30:00	0
2009-06-05	07:31:00	0
2009-06-05	07:32:00	0
2009-06-05	07:33:00	0
2009-06-05	07:34:00	0
2009-06-05	07:35:00	0
2009-06-05	07:36:00	0
2009-06-05	07:37:00	0
2009-06-05	07:38:00	0
2009-06-05	07:39:00	0
2009-06-05	07:40:00	0
2009-06-05	07:41:00	0
2009-06-05	07:42:00	0
2009-06-05	07:43:00	0
2009-06-05	07:44:00	0
2009-06-05	07:45:00	0
2009-06-05	07:46:00	0
2009-06-05	07:47:00	0
2009-06-05	07:48:00	0
2009-06-05	07:49:00	0
2009-06-05	07:50:00	0
2009-06-05	07:51:00	0
2009-06-05	07:52:00	0
2009-06-05	07:53:00	0
2009-06-05	07:54:00	0
2009-06-05	07:55:00	0
2009-06-05	07:56:00	0
2009-06-05	07:57:00	0
2009-06-05	07:58:00	0
2009-06-05	07:59:00	0
2009-06-05	08:00:00	0
2009-06-05	08:01:00	0
2009-06-05	08:02:00	0
2009-06-05	08:03:00	0
2009-06-05	08:04:00	0
2009-06-05	08:05:00	0
2009-06-05	08:06:00	0
2009-06-05	08:07:00	0
2009-06-05	08:08:00	0
2009-06-05	08:09:00	0
2009-06-05	08:10:00	0
2009-06-05	08:11:00	0
2009-06-05	08:12:00	0
2009-06-05	08:13:00	0
2009-06-05	08:14:00	0
2009-06-05	08:15:00	0
2009-06-05	08:16:00	0
2009-06-05	08:17:00	0
2009-06-05	08:18:00	0
2009-06-05	08:19:00	0
2009-06-05	08:20:00	0
2009-06-05	08:21:00	0
2009-06-05	08:22:00	0
2009-06-05	08:23:00	0
2009-06-05	08:24:00	0
2009-06-05	08:25:00	0
2009-06-05	08:26:00	0
2009-06-05	08:27:00	0
2009-06-05	08:28:00	0
2009-06-05	08:29:00	0
2009-06-05	08:30:00	0
2009-06-05	08:31:00	0
2009-06-05	08:32:00	0
2009-06-05	08:33:00	0
2009-06-05	08:34:00	0
2009-06-05	08:35:00	0
2009-06-05	08:36:00	0
2009-06-05	08:37:00	0
2009-06-05	08:38:00	0
2009-06-05	08:39:00	0
2009-06-05	08:40:00	0
2009-06-05	08:41:00	0
2009-06-05	08:42:00	0
2009-06-05	08:43:00	0
2009-06-05	08:44:00	0
2009-06-05	08:45:00	0
2009-06-05	08:46:00	0
2009-06-05	08:47:00	0
2009-06-05	08:48:00	0
2009-06-05	08:49:00	0
2009-06-05	08:50:00	0
2009-06-05	08:51:00	0
2009-06-05	08:52:00	0
2009-06-05	08:53:00	0
2009-06-05	08:54:00	0
2009-06-05	08:55:00	0
2009-06-05	08:56:00	0
2009-06-05	08:57:00	0
2009-06-05	08:58:00	0
2009-06-05	08:59:00	0
2009-06-05	09:00:00	0
2009-06-05	09:01:00	0
2009-06-05	09:02:00	0
2009-06-05	09:03:00	0
2009-06-05	09:04:00	0
2009-06-05	09:05:00	0
2009-06-05	09:06:00	0
2009-06-05	09:07:00	0
2009-06-05	09:08:00	0
2009-06-05	09:09:00	0
2009-06-05	09:10:00	0
2009-06-05	09:11:00	0
2009-06-05	09:12:00	0
2009-06-05	09:13:00	0
2009-06-05	09:14:00	0
2009-06-05	09:15:00	0
2009-06-05	09:16:00	0
2009-06-05	09:17:00	0
2009-06-05	09:18:00	0
2009-06-05	09:19:00	0
2009-06-05	09:20:00	0
2009-06-05	09:21:00	0
2009-06-05	09:22:00	0
2009-06-05	09:23:00	0
2009-06-05	09:24:00	0
2009-06-05	09:25:00	0
2009-06-05	09:26:00	0
2009-06-05	09:27:00	0
2009-06-05	09:28:00	0
2009-06-05	09:29:00	0
2009-06-05	09:30:00	0
2009-06-05	09:31:00	0
2009-06-05	09:32:00	0
2009-06-05	09:33:00	0
2009-06-05	09:34:00	0
2009-06-05	09:35:00	0
2009-06-05	09:36:00	0
2009-06-05	09:37:00	0
2009-06-05	09:38:00	0
2009-06-05	09:39:00	0
2009-06-05	09:40:00	0
2009-06-05	09:41:00	0
2009-06-05	09:42:00	0
2009-06-05	09:43:00	0
2009-06-05	09:44:00	0
2009-06-05	09:45:00	0
2009-06-05	09:46:00	0
2009-06-05	09:47:00	0
2009-06-05	09:48:00	0
2009-06-05	09:49:00	0
2009-06-05	09:50:00	0
2009-06-05	09:51:00	0
2009-06-05	09:52:00	0
2009-06-05	09:53:00	0
2009-06-05	09:54:00	0
2009-06-05	09:55:00	0
2009-06-05	09:56:00	0
2009-06-05	09:57:00	0
2009-06-05	09:58:00	0
2009-06-05	09:59:00	0
2009-06-05	10:00:00	0
2009-06-05	10:01:00	0
2009-06-05	10:02:00	0
2009-06-05	10:03:00	0
2009-06-05	10:04:00	0
2009-06-05	10:05:00	0
2009-06-05	10:06:00	0
2009-06-05	10:07:00	0
2009-06-05	10:08:00	0
2009-06-05	10:09:00	0
2009-06-05	10:10:00	0
2009-06-05	10:11:00	0
2009-06-05	10:12:00	0
2009-06-05	10:13:00	0
2009-06-05	10:14:00	0
2009-06-05	10:15:00	0
2009-06-05	10:16:00	0
2009-06-05	10:17:00	0
2009-06-05	10:18:00	0
2009-06-05	10:19:00	0
2009-06-05	10:20:00	0
2009-06-05	10:21:00	0
2009-06-05	10:22:00	0
2009-06-05	10:23:00	0
2009-06-05	10:24:00	0
2009-06-05	10:25:00	0
2009-06-05	10:26:00	0
2009-06-05	10:27:00	0
2009-06-05	10:28:00	0
2009-06-05	10:29:00	0
2009-06-05	10:30:00	0
2009-06-05	10:31:00	0
2009-06-05	10:32:00	0
2009-06-05	10:33:00	0
2009-06-05	10:34:00	0
2009-06-05	10:35:00	0
2009-06-05	10:36:00	0
2009-06-05	10:37:00	0
2009-06-05	10:38:00	0
2009-06-05	10:39:00	0
2009-06-05	10:40:00	0
2009-06-05	10:41:00	0
2009-06-05	10:42:00	0
2009-06-05	10:43:00	0
2009-06-05	10:44:00	0
2009-06-05	10:45:00	0
2009-06-05	10:46:00	0
2009-06-05	10:47:00	0
2009-06-05	10:48:00	0
2009-06-05	10:49:00	0
2009-06-05	10:50:00	0
2009-06-05	10:51:00	0
2009-06-05	10:52:00	0
2009-06-05	10:53:00	0
2009-06-05	10:54:00	0
2009-06-05	10:55:00	0
2009-06-05	10:56:00	0
2009-06-05	10:57:00	0
2009-06-05	10:58:00	0
2009-06-05	10:59:00	0
2009-06-05	11:00:00	0
2009-06-05	11:01:00	0
2009-06-05	11:02:00	0
2009-06-05	11:03:00	0
2009-06-05	11:04:00	0
2009-06-05	11:05:00	0
2009-06-05	11:06:00	0
2009-06-05	11:07:00	0
2009-06-05	11:08:00	0
2009-06-05	11:09:00	0
2009-06-05	11:10:00	0
2009-06-05	11:11:00	0
2009-06-05	11:12:00	0
2009-06-05	11:13:00	0
2009-06-05	11:14:00	0
2009-06-05	11:15:00	0
2009-06-05	11:16:00	0
2009-06-05	11:17:00	0
2009-06-05	11:18:00	0
2009-06-05	11:19:00	0
2009-06-05	11:20:00	0
2009-06-05	11:21:00	0
2009-06-05	11:22:00	0
2009-06-05	11:23:00	0
2009-06-05	11:24:00	0
2009-06-05	11:25:00	0
2009-06-05	11:26:00	0
2009-06-05	11:27:00	0
2009-06-05	11:28:00	0
2009-06-05	11:29:00	0
2009-06-05	11:30:00	0
2009-06-05	11:31:00	0
2009-06-05	11:32:00	0
2009-06-05	11:33:00	0
2009-06-05	11:34:00	0
2009-06-05	11:35:00	0
2009-06-05	11:36:00	0
2009-06-05	11:37:00	0
2009-06-05	11:38:00	0
2009-06-05	11:39:00	0
2009-06-05	11:40:00	0
2009-06-05	11:41:00	0
2009-06-05	11:42:00	0
2009-06-05	11:43:00	0
2009-06-05	11:44:00	0
2009-06-05	11:45:00	0
2009-06-05	11:46:00	0
2009-06-05	11:47:00	0
2009-06-05	11:48:00	0
2009-06-05	11:49:00	0
2009-06-05	11:50:00	0
2009-06-05	11:51:00	0
2009-06-05	11:52:00	0
2009-06-05	11:53:00	0
2009-06-05	11:54:00	0
2009-06-05	11:55:00	0
2009-06-05	11:56:00	0
2009-06-05	11:57:00	0
2009-06-05	11:58:00	0
2009-06-05	11:59:00	0
2009-06-05	12:00:00	0
2009-06-05	12:01:00	0
2009-06-05	12:02:00	0
2009-06-05	12:03:00	0
2009-06-05	12:04:00	0
2009-06-05	12:05:00	0
2009-06-05	12:06:00	0
2009-06-05	12:07:00	0
2009-06-05	12:08:00	0
2009-06-05	12:09:00	0
2009-06-05	12:10:00	0
2009-06-05	12:11:00	0
2009-06-05	12:12:00	0
2009-06-05	12:13:00	0
2009-06-05	12:14:00	0
2009-06-05	12:15:00	0
2009-06-05	12:16:00	0
2009-06-05	12:17:00	0
2009-06-05	12:18:00	0
2009-06-05	12:19:00	0
2009-06-05	12:20:00	0
2009-06-05	12:21:00	0
2009-06-05	12:22:00	0
2009-06-05	12:23:00	0
2009-06-05	12:24:00	0
2009-06-05	12:25:00	0
2009-06-05	12:26:00	0
2009-06-05	12:27:00	0
2009-06-05	12:28:00	0
2009-06-05	12:29:00	0
2009-06-05	12:30:00	0
2009-06-05	12:31:00	0
2009-06-05	12:32:00	0
2009-06-05	12:33:00	0
2009-06-05	12:34:00	0
2009-06-05	12:35:00	0
2009-06-05	12:36:00	0
2009-06-05	12:37:00	0
2009-06-05	12:38:00	0
2009-06-05	12:39:00	0
2009-06-05	12:40:00	0
2009-06-05	12:41:00	0
2009-06-05	12:42:00	0
2009-06-05	12:43:00	0
2009-06-05	12:44:00	0
2009-06-05	12:45:00	0
2009-06-05	12:46:00	0
2009-06-05	12:47:00	0
2009-06-05	12:48:00	0
2009-06-05	12:49:00	0
2009-06-05	12:50:00	0
2009-06-05	12:51:00	0
2009-06-05	12:52:00	0
2009-06-05	12:53:00	0
2009-06-05	12:54:00	0
2009-06-05	12:55:00	0
2009-06-05	12:56:00	0
2009-06-05	12:57:00	0
2009-06-05	12:58:00	0
2009-06-05	12:59:00	0
2009-06-05	13:00:00	0
2009-06-05	13:01:00	0
2009-06-05	13:02:00	0
2009-06-05	13:03:00	0
2009-06-05	13:04:00	0
2009-06-05	13:05:00	0
2009-06-05	13:06:00	0
2009-06-05	13:07:00	0
2009-06-05	13:08:00	0
2009-06-05	13:09:00	0
2009-06-05	13:10:00	0
2009-06-05	13:11:00	0
2009-06-05	13:12:00	0
2009-06-05	13:13:00	0
2009-06-05	13:14:00	0
2009-06-05	13:15:00	0
2009-06-05	13:16:00	0
2009-06-05	13:17:00	0
2009-06-05	13:18:00	0
2009-06-05	13:19:00	0
2009-06-05	13:20:00	0
2009-06-05	13:21:00	0
2009-06-05	13:22:00	0
2009-06-05	13:23:00	0
2009-06-05	13:24:00	0
2009-06-05	13:25:00	0
2009-06-05	13:26:00	0
2009-06-05	13:27:00	0
2009-06-05	13:28:00	0
2009-06-05	13:29:00	0
2009-06-05	13:30:00	0
2009-06-05	13:31:00	0
2009-06-05	13:32:00	0
2009-06-05	13:33:00	0
2009-06-05	13:34:00	0
2009-06-05	13:35:00	0
2009-06-05	13:36:00	0
2009-06-05	13:37:00	0
2009-06-05	13:38:00	0
2009-06-05	13:39:00	0
2009-06-05	13:40:00	0
2009-06-05	13:41:00	0
2009-06-05	13:42:00	0
2009-06-05	13:43:00	0
2009-06-05	13:44:00	0
2009-06-05	13:45:00	0
2009-06-05	13:46:00	0
2009-06-05	13:47:00	0
2009-06-05	13:48:00	0
2009-06-05	13:49:00	0
2009-06-05	13:50:00	0
2009-06-05	13:51:00	0
2009-06-05	13:52:00	0
2009-06-05	13:53:00	0
2009-06-05	13:54:00	0
2009-06-05	13:55:00	0
2009-06-05	13:56:00	0
2009-06-05	13:57:00	0
2009-06-05	13:58:00	0
2009-06-05	13:59:00	0
2009-06-05	14:00:00	0
2009-06-05	14:01:00	0
2009-06-05	14:02:00	0
2009-06-05	14:03:00	0
2009-06-05	14:04:00	0
2009-06-05	14:05:00	0
2009-06-05	14:06:00	0
2009-06-05	14:07:00	0
2009-06-05	14:08:00	0
2009-06-05	14:09:00	0
2009-06-05	14:10:00	0
2009-06-05	14:11:00	0
2009-06-05	14:12:00	0
2009-06-05	14:13:00	0
2009-06-05	14:14:00	0
2009-06-05	14:15:00	0
2009-06-05	14:16:00	0
2009-06-05	14:17:00	0
2009-06-05	14:18:00	0
2009-06-05	14:19:00	0
2009-06-05	14:20:00	0
2009-06-05	14:21:00	0
2009-06-05	14:22:00	0
2009-06-05	14:23:00	0
2009-06-05	14:24:00	0
2009-06-05	14:25:00	0
2009-06-05	14:26:00	0
2009-06-05	14:27:00	0
2009-06-05	14:28:00	0
2009-06-05	14:29:00	0
2009-06-05	14:30:00	0
2009-06-05	14:31:00	0
2009-06-05	14:32:00	0
2009-06-05	14:33:00	0
2009-06-05	14:34:00	0
2009-06-05	14:35:00	0
2009-06-05	14:36:00	0
2009-06-05	14:37:00	0
2009-06-05	14:38:00	0
2009-06-05	14:39:00	0
2009-06-05	14:40:00	0
2009-06-05	14:41:00	0
2009-06-05	14:42:00	0
2009-06-05	14:43:00	0
2009-06-05	14:44:00	0
2009-06-05	14:45:00	0
2009-06-05	14:46:00	0
2009-06-05	14:47:00	0
2009-06-05	14:48:00	0
2009-06-05	14:49:00	0
2009-06-05	14:50:00	0
2009-06-05	14:51:00	0
2009-06-05	14:52:00	0
2009-06-05	14:53:00	0
2009-06-05	14:54:00	0
2009-06-05	14:55:00	0
2009-06-05	14:56:00	0
2009-06-05	14:57:00	0
2009-06-05	14:58:00	0
2009-06-05	14:59:00	0
2009-06-05	15:00:00	0
2009-06-05	15:01:00	0
2009-06-05	15:02:00	0
2009-06-05	15:03:00	0
2009-06-05	15:04:00	0
2009-06-05	15:05:00	0
2009-06-05	15:06:00	0
2009-06-05	15:07:00	0
2009-06-05	15:08:00	0
2009-06-05	15:09:00	0
2009-06-05	15:10:00	0
2009-06-05	15:11:00	0
2009-06-05	15:12:00	0
2009-06-05	15:13:00	0
2009-06-05	15:14:00	0
2009-06-05	15:15:00	0
2009-06-05	15:16:00	0
2009-06-05	15:17:00	0
2009-06-05	15:18:00	0
2009-06-05	15:19:00	0
2009-06-05	15:20:00	0
2009-06-05	15:21:00	0
2009-06-05	15:22:00	0
2009-06-05	15:23:00	0
2009-06-05	15:24:00	0
2009-06-05	15:25:00	0
2009-06-05	15:26:00	0
2009-06-05	15:27:00	0
2009-06-05	15:28:00	0
2009-06-05	15:29:00	0
2009-06-05	15:30:00	0
2009-06-05	15:31:00	0
2009-06-05	15:32:00	0
2009-06-05	15:33:00	0
2009-06-05	15:34:00	0
2009-06-05	15:35:00	0
2009-06-05	15:36:00	0
2009-06-05	15:37:00	0
2009-06-05	15:38:00	0
2009-06-05	15:39:00	0
2009-06-05	15:40:00	0
2009-06-05	15:41:00	0
2009-06-05	15:42:00	0
2009-06-05	15:43:00	0
2009-06-05	15:44:00	0
2009-06-05	15:45:00	0
2009-06-05	15:46:00	0
2009-06-05	15:47:00	0
2009-06-05	15:48:00	0
2009-06-05	15:49:00	0
2009-06-05	15:50:00	0
2009-06-05	15:51:00	0
2009-06-05	15:52:00	0
2009-06-05	15:53:00	0
2009-06-05	15:54:00	0
2009-06-05	15:55:00	0
2009-06-05	15:56:00	0
2009-06-05	15:57:00	0
2009-06-05	15:58:00	0
2009-06-05	15:59:00	0
2009-06-05	16:00:00	0
2009-06-05	16:01:00	0
2009-06-05	16:02:00	0
2009-06-05	16:03:00	0
2009-06-05	16:04:00	0
2009-06-05	16:05:00	0
2009-06-05	16:06:00	0
2009-06-05	16:07:00	0
2009-06-05	16:08:00	0
2009-06-05	16:09:00	0
2009-06-05	16:10:00	0
2009-06-05	16:11:00	0
2009-06-05	16:12:00	0
2009-06-05	16:13:00	0
2009-06-05	16:14:00	0
2009-06-05	16:15:00	0
2009-06-05	16:16:00	0
2009-06-05	16:17:00	0
2009-06-05	16:18:00	0
2009-06-05	16:19:00	0
2009-06-05	16:20:00	0
2009-06-05	16:21:00	0
2009-06-05	16:22:00	0
2009-06-05	16:23:00	0
2009-06-05	16:24:00	0
2009-06-05	16:25:00	0
2009-06-05	16:26:00	0
2009-06-05	16:27:00	0
2009-06-05	16:28:00	0
2009-06-05	16:29:00	0
2009-06-05	16:30:00	0
2009-06-05	16:31:00	0
2009-06-05	16:32:00	0
2009-06-05	16:33:00	0
2009-06-05	16:34:00	0
2009-06-05	16:35:00	0
2009-06-05	16:36:00	0
2009-06-05	16:37:00	0
2009-06-05	16:38:00	0
2009-06-05	16:39:00	0
2009-06-05	16:40:00	0
2009-06-05	16:41:00	0
2009-06-05	16:42:00	0
2009-06-05	16:43:00	0
2009-06-05	16:44:00	0
2009-06-05	16:45:00	0
2009-06-05	16:46:00	0
2009-06-05	16:47:00	0
2009-06-05	16:48:00	0
2009-06-05	16:49:00	0
2009-06-05	16:50:00	0
2009-06-05	16:51:00	0
2009-06-05	16:52:00	0
2009-06-05	16:53:00	0
2009-06-05	16:54:00	0
2009-06-05	16:55:00	0
2009-06-05	16:56:00	0
2009-06-05	16:57:00	0
2009-06-05	16:58:00	0
2009-06-05	16:59:00	0
2009-06-05	17:00:00	0
2009-06-05	17:01:00	0
2009-06-05	17:02:00	0
2009-06-05	17:03:00	0
2009-06-05	17:04:00	0
2009-06-05	17:05:00	0
2009-06-05	17:06:00	0
2009-06-05	17:07:00	0
2009-06-05	17:08:00	0
2009-06-05	17:09:00	0
2009-06-05	17:10:00	0
2009-06-05	17:11:00	0
2009-06-05	17:12:00	0
2009-06-05	17:13:00	0
2009-06-05	17:14:00	0
2009-06-05	17:15:00	0
2009-06-05	17:16:00	0
2009-06-05	17:17:00	0
2009-06-05	17:18:00	0
2009-06-05	17:19:00	0
2009-06-05	17:20:00	0
2009-06-05	17:21:00	0
2009-06-05	17:22:00	0
2009-06-05	17:23:00	0
2009-06-05	17:24:00	0
2009-06-05	17:25:00	0
2009-06-05	17:26:00	0
2009-06-05	17:27:00	0
2009-06-05	17:28:00	0
2009-06-05	17:29:00	0
2009-06-05	17:30:00	0
2009-06-05	17:31:00	0
2009-06-05	17:32:00	0
2009-06-05	17:33:00	0
2009-06-05	17:34:00	0
2009-06-05	17:35:00	0
2009-06-05	17:36:00	0
2009-06-05	17:37:00	0
2009-06-05	17:38:00	0
2009-06-05	17:39:00	0
2009-06-05	17:40:00	0
2009-06-05	17:41:00	0
2009-06-05	17:42:00	0
2009-06-05	17:43:00	0
2009-06-05	17:44:00	0
2009-06-05	17:45:00	0
2009-06-05	17:46:00	0
2009-06-05	17:47:00	0
2009-06-05	17:48:00	0
2009-06-05	17:49:00	0
2009-06-05	17:50:00	0
2009-06-05	17:51:00	0
2009-06-05	17:52:00	0
2009-06-05	17:53:00	0
2009-06-05	17:54:00	0
2009-06-05	17:55:00	0
2009-06-05	17:56:00	0
2009-06-05	17:57:00	0
2009-06-05	17:58:00	0
2009-06-05	17:59:00	0
2009-06-05	18:00:00	0	M
2009-06-05	18:01:00	0
2009-06-05	18:02:00	0
2009-06-05	18:03:00	36
2009-06-05	18:04:00	0
2009-06-05	18:05:00	0
2009-06-05	18:06:00	0
2009-06-05	18:07:00	0
2009-06-05	18:08:00	0
2009-06-05	18:09:00	0
2009-06-05	18:10:00	0
2009-06-05	18:11:00	0
2009-06-05	18:12:00	0
2009-06-05	18:13:00	0
2009-06-05	18:14:00	0
2009-06-05	18:15:00	0
2009-06-05	18:16:00	0
2009-06-05	18:17:00	0
2009-06-05	18:18:00	41
2009-06-05	18:19:00	0
2009-06-05	18:20:00	0
2009-06-05	18:21:00	179
2009-06-05	18:22:00	673
2009-06-05	18:23:00	117
2009-06-05	18:24:00	135
2009-06-05	18:25:00	0
2009-06-05	18:26:00	0
2009-06-05	18:27:00	0
2009-06-05	18:28:00	0
2009-06-05	18:29:00	0
2009-06-05	18:30:00	0
2009-06-05	18:31:00	104
2009-06-05	18:32:00	0
2009-06-05	18:33:00	0
2009-06-05	18:34:00	110
2009-06-05	18:35:00	0
2009-06-05	18:36:00	0
2009-06-05	18:37:00	0
2009-06-05	18:38:00	0
2009-06-05	18:39:00	0
2009-06-05	18:40:00	0
2009-06-05	18:41:00	0
2009-06-05	18:42:00	0
2009-06-05	18:43:00	0
2009-06-05	18:44:00	21
2009-06-05	18:45:00	41
2009-06-05	18:46:00	31
2009-06-05	18:47:00	0
2009-06-05	18:48:00	0
2009-06-05	18:49:00	0
2009-06-05	18:50:00	0
2009-06-05	18:51:00	0
2009-06-05	18:52:00	21
2009-06-05	18:53:00	26
2009-06-05	18:54:00	0
2009-06-05	18:55:00	15
2009-06-05	18:56:00	36
2009-06-05	18:57:00	0
2009-06-05	18:58:00	92
2009-06-05	18:59:00	673
2009-06-05	19:00:00	217
2009-06-05	19:01:00	110
2009-06-05	19:02:00	890
2009-06-05	19:03:00	497
2009-06-05	19:04:00	1155
2009-06-05	19:05:00	2444
2009-06-05	19:06:00	5471
2009-06-05	19:07:00	1564
2009-06-05	19:08:00	3442
2009-06-05	19:09:00	4067
2009-06-05	19:10:00	1843
2009-06-05	19:11:00	4566
2009-06-05	19:12:00	1297
2009-06-05	19:13:00	294
2009-06-05	19:14:00	509
2009-06-05	19:15:00	3057
2009-06-05	19:16:00	2905
2009-06-05	19:17:00	3500
2009-06-05	19:18:00	4204
2009-06-05	19:19:00	4204
2009-06-05	19:20:00	4204
2009-06-05	19:21:00	5382
2009-06-05	19:22:00	3742
2009-06-05	19:23:00	4346
2009-06-05	19:24:00	1452
2009-06-05	19:25:00	1248
2009-06-05	19:26:00	3109
2009-06-05	19:27:00	587
2009-06-05	19:28:00	927
2009-06-05	19:29:00	1373
2009-06-05	19:30:00	630
2009-06-05	19:31:00	294
2009-06-05	19:32:00	36
2009-06-05	19:33:00	46
2009-06-05	19:34:00	1248
2009-06-05	19:35:00	785
2009-06-05	19:36:00	352
2009-06-05	19:37:00	404
2009-06-05	19:38:00	276
2009-06-05	19:39:00	250
2009-06-05	19:40:00	258
2009-06-05	19:41:00	41
2009-06-05	19:42:00	217
2009-06-05	19:43:00	362
2009-06-05	19:44:00	10
2009-06-05	19:45:00	46
2009-06-05	19:46:00	644
2009-06-05	19:47:00	10
2009-06-05	19:48:00	5
2009-06-05	19:49:00	129
2009-06-05	19:50:00	157
2009-06-05	19:51:00	41
2009-06-05	19:52:00	5
2009-06-05	19:53:00	21
2009-06-05	19:54:00	0
2009-06-05	19:55:00	15
2009-06-05	19:56:00	15
2009-06-05	19:57:00	193
2009-06-05	19:58:00	0
2009-06-05	19:59:00	5
2009-06-05	20:00:00	36
2009-06-05	20:01:00	10
2009-06-05	20:02:00	67
2009-06-05	20:03:00	31
2009-06-05	20:04:00	10
2009-06-05	20:05:00	0
2009-06-05	20:06:00	0
2009-06-05	20:07:00	36
2009-06-05	20:08:00	0
2009-06-05	20:09:00	5
2009-06-05	20:10:00	79
2009-06-05	20:11:00	242
2009-06-05	20:12:00	5
2009-06-05	20:13:00	5
2009-06-05	20:14:00	10
2009-06-05	20:15:00	10
2009-06-05	20:16:00	0
2009-06-05	20:17:00	0
2009-06-05	20:18:00	0
2009-06-05	20:19:00	0
2009-06-05	20:20:00	36
2009-06-05	20:21:00	0
2009-06-05	20:22:00	0
2009-06-05	20:23:00	0
2009-06-05	20:24:00	0
2009-06-05	20:25:00	0
2009-06-05	20:26:00	0
2009-06-05	20:27:00	0
2009-06-05	20:28:00	0
2009-06-05	20:29:00	0
2009-06-05	20:30:00	5
2009-06-05	20:31:00	0
2009-06-05	20:32:00	5
2009-06-05	20:33:00	0
2009-06-05	20:34:00	62
2009-06-05	20:35:00	200
2009-06-05	20:36:00	31
2009-06-05	20:37:00	15
2009-06-05	20:38:00	10
2009-06-05	20:39:00	0
2009-06-05	20:40:00	0
2009-06-05	20:41:00	62
2009-06-05	20:42:00	31
2009-06-05	20:43:00	0
2009-06-05	20:44:00	0
2009-06-05	20:45:00	0
2009-06-05	20:46:00	0
2009-06-05	20:47:00	0
2009-06-05	20:48:00	0
2009-06-05	20:49:00	0
2009-06-05	20:50:00	0
2009-06-05	20:51:00	21
2009-06-05	20:52:00	673
2009-06-05	20:53:00	294
2009-06-05	20:54:00	0
2009-06-05	20:55:00	0
2009-06-05	20:56:00	0
2009-06-05	20:57:00	0
2009-06-05	20:58:00	15
2009-06-05	20:59:00	472
2009-06-05	21:00:00	5
2009-06-05	21:01:00	41
2009-06-05	21:02:00	10
2009-06-05	21:03:00	15
2009-06-05	21:04:00	10
2009-06-05	21:05:00	117
2009-06-05	21:06:00	86
2009-06-05	21:07:00	15
2009-06-05	21:08:00	10
2009-06-05	21:09:00	1111
2009-06-05	21:10:00	460
2009-06-05	21:11:00	10
2009-06-05	21:12:00	0
2009-06-05	21:13:00	0
2009-06-05	21:14:00	31
2009-06-05	21:15:00	21
2009-06-05	21:16:00	0
2009-06-05	21:17:00	10
2009-06-05	21:18:00	0
2009-06-05	21:19:00	0
2009-06-05	21:20:00	0
2009-06-05	21:21:00	0
2009-06-05	21:22:00	10
2009-06-05	21:23:00	5
2009-06-05	21:24:00	15
2009-06-05	21:25:00	26
2009-06-05	21:26:00	233
2009-06-05	21:27:00	0
2009-06-05	21:28:00	21
2009-06-05	21:29:00	52
2009-06-05	21:30:00	26
2009-06-05	21:31:00	5
2009-06-05	21:32:00	0
2009-06-05	21:33:00	0
2009-06-05	21:34:00	0
2009-06-05	21:35:00	0
2009-06-05	21:36:00	0
2009-06-05	21:37:00	92
2009-06-05	21:38:00	0
2009-06-05	21:39:00	0
2009-06-05	21:40:00	0
2009-06-05	21:41:00	0
2009-06-05	21:42:00	0
2009-06-05	21:43:00	0
2009-06-05	21:44:00	0
2009-06-05	21:45:00	0
2009-06-05	21:46:00	0
2009-06-05	21:47:00	0
2009-06-05	21:48:00	0
2009-06-05	21:49:00	0
2009-06-05	21:50:00	0
2009-06-05	21:51:00	0
2009-06-05	21:52:00	0
2009-06-05	21:53:00	0
2009-06-05	21:54:00	0
2009-06-05	21:55:00	0
2009-06-05	21:56:00	0
2009-06-05	21:57:00	0
2009-06-05	21:58:00	0
2009-06-05	21:59:00	0
2009-06-05	22:00:00	0
2009-06-05	22:01:00	26
2009-06-05	22:02:00	0
2009-06-05	22:03:00	0
2009-06-05	22:04:00	0
2009-06-05	22:05:00	0
2009-06-05	22:06:00	31
2009-06-05	22:07:00	21
2009-06-05	22:08:00	0
2009-06-05	22:09:00	0
2009-06-05	22:10:00	0
2009-06-05	22:11:00	0
2009-06-05	22:12:00	0
2009-06-05	22:13:00	0
2009-06-05	22:14:00	0
2009-06-05	22:15:00	0
2009-06-05	22:16:00	0
2009-06-05	22:17:00	0
2009-06-05	22:18:00	0
2009-06-05	22:19:00	0
2009-06-05	22:20:00	0
2009-06-05	22:21:00	0
2009-06-05	22:22:00	0
2009-06-05	22:23:00	0
2009-06-05	22:24:00	36
2009-06-05	22:25:00	31
2009-06-05	22:26:00	0
2009-06-05	22:27:00	0
2009-06-05	22:28:00	0
2009-06-05	22:29:00	0
2009-06-05	22:30:00	0
2009-06-05	22:31:00	0
2009-06-05	22:32:00	0
2009-06-05	22:33:00	0
2009-06-05	22:34:00	0
2009-06-05	22:35:00	0
2009-06-05	22:36:00	0
2009-06-05	22:37:00	5
2009-06-05	22:38:00	0
2009-06-05	22:39:00	0
2009-06-05	22:40:00	0
2009-06-05	22:41:00	0
2009-06-05	22:42:00	0
2009-06-05	22:43:00	0
2009-06-05	22:44:00	5
2009-06-05	22:45:00	0
2009-06-05	22:46:00	0
2009-06-05	22:47:00	0
2009-06-05	22:48:00	0
2009-06-05	22:49:00	0
2009-06-05	22:50:00	0
2009-06-05	22:51:00	0
2009-06-05	22:52:00	0
2009-06-05	22:53:00	0
2009-06-05	22:54:00	0
2009-06-05	22:55:00	0
2009-06-05	22:56:00	0
2009-06-05	22:57:00	0
2009-06-05	22:58:00	0
2009-06-05	22:59:00	0
2009-06-05	23:00:00	0
2009-06-05	23:01:00	0
2009-06-05	23:02:00	0
2009-06-05	23:03:00	0
2009-06-05	23:04:00	0
2009-06-05	23:05:00	0
2009-06-05	23:06:00	0
2009-06-05	23:07:00	0
2009-06-05	23:08:00	0
2009-06-05	23:09:00	0
2009-06-05	23:10:00	79
2009-06-05	23:11:00	15
2009-06-05	23:12:00	186
2009-06-05	23:13:00	0
2009-06-05	23:14:00	0
2009-06-05	23:15:00	0
2009-06-05	23:16:00	0
2009-06-05	23:17:00	0
2009-06-05	23:18:00	0
2009-06-05	23:19:00	0
2009-06-05	23:20:00	0
2009-06-05	23:21:00	0
2009-06-05	23:22:00	0
2009-06-05	23:23:00	0
2009-06-05	23:24:00	0
2009-06-05	23:25:00	0
2009-06-05	23:26:00	0
2009-06-05	23:27:00	15
2009-06-05	23:28:00	0
2009-06-05	23:29:00	0
2009-06-05	23:30:00	15
2009-06-05	23:31:00	57
2009-06-05	23:32:00	0
2009-06-05	23:33:00	52
2009-06-05	23:34:00	0
2009-06-05	23:35:00	0
2009-06-05	23:36:00	0
2009-06-05	23:37:00	0
2009-06-05	23:38:00	0
2009-06-05	23:39:00	0
2009-06-05	23:40:00	0
2009-06-05	23:41:00	26
2009-06-05	23:42:00	0
2009-06-05	23:43:00	0
2009-06-05	23:44:00	79
2009-06-05	23:45:00	1005
2009-06-05	23:46:00	615
2009-06-05	23:47:00	890
2009-06-05	23:48:00	5
2009-06-05	23:49:00	5
2009-06-05	23:50:00	362
2009-06-05	23:51:00	92
2009-06-05	23:52:00	0
2009-06-05	23:53:00	0
2009-06-05	23:54:00	5
2009-06-05	23:55:00	5
2009-06-05	23:56:00	0
2009-06-05	23:57:00	5
2009-06-05	23:58:00	15
2009-06-05	23:59:00	0
2009-06-06	00:00:00	46
2009-06-06	00:01:00	0
2009-06-06	00:02:00	26
2009-06-06	00:03:00	0
2009-06-06	00:04:00	0
2009-06-06	00:05:00	0
2009-06-06	00:06:00	0
2009-06-06	00:07:00	5
2009-06-06	00:08:00	209
2009-06-06	00:09:00	0
2009-06-06	00:10:00	67
2009-06-06	00:11:00	21
2009-06-06	00:12:00	0
2009-06-06	00:13:00	135
2009-06-06	00:14:00	460
2009-06-06	00:15:00	0
2009-06-06	00:16:00	0
2009-06-06	00:17:00	0
2009-06-06	00:18:00	0
2009-06-06	00:19:00	0
2009-06-06	00:20:00	5
2009-06-06	00:21:00	52
2009-06-06	00:22:00	242
2009-06-06	00:23:00	57
2009-06-06	00:24:00	0
2009-06-06	00:25:00	0
2009-06-06	00:26:00	0
2009-06-06	00:27:00	0
2009-06-06	00:28:00	0
2009-06-06	00:29:00	0
2009-06-06	00:30:00	0
2009-06-06	00:31:00	0
2009-06-06	00:32:00	0
2009-06-06	00:33:00	31
2009-06-06	00:34:00	0
2009-06-06	00:35:00	0
2009-06-06	00:36:00	0
2009-06-06	00:37:00	0
2009-06-06	00:38:00	0
2009-06-06	00:39:00	67
2009-06-06	00:40:00	0
2009-06-06	00:41:00	0
2009-06-06	00:42:00	0
2009-06-06	00:43:00	0
2009-06-06	00:44:00	0
2009-06-06	00:45:00	0
2009-06-06	00:46:00	0
2009-06-06	00:47:00	0
2009-06-06	00:48:00	0
2009-06-06	00:49:00	0
2009-06-06	00:50:00	0
2009-06-06	00:51:00	0
2009-06-06	00:52:00	0
2009-06-06	00:53:00	0
2009-06-06	00:54:00	0
2009-06-06	00:55:00	0
2009-06-06	00:56:00	0
2009-06-06	00:57:00	0
2009-06-06	00:58:00	0
2009-06-06	00:59:00	5
2009-06-06	01:00:00	0
2009-06-06	01:01:00	5
2009-06-06	01:02:00	0
2009-06-06	01:03:00	0
2009-06-06	01:04:00	0
2009-06-06	01:05:00	0
2009-06-06	01:06:00	0
2009-06-06	01:07:00	0
2009-06-06	01:08:00	0
2009-06-06	01:09:00	0
2009-06-06	01:10:00	0
2009-06-06	01:11:00	0
2009-06-06	01:12:00	0
2009-06-06	01:13:00	0
2009-06-06	01:14:00	0
2009-06-06	01:15:00	0
2009-06-06	01:16:00	0
2009-06-06	01:17:00	0
2009-06-06	01:18:00	0
2009-06-06	01:19:00	0
2009-06-06	01:20:00	0
2009-06-06	01:21:00	0
2009-06-06	01:22:00	5
2009-06-06	01:23:00	0
2009-06-06	01:24:00	0
2009-06-06	01:25:00	0
2009-06-06	01:26:00	0
2009-06-06	01:27:00	0
2009-06-06	01:28:00	0
2009-06-06	01:29:00	0
2009-06-06	01:30:00	0
2009-06-06	01:31:00	0
2009-06-06	01:32:00	0
2009-06-06	01:33:00	0
2009-06-06	01:34:00	0
2009-06-06	01:35:00	31
2009-06-06	01:36:00	303
2009-06-06	01:37:00	5
2009-06-06	01:38:00	0
2009-06-06	01:39:00	0
2009-06-06	01:40:00	0
2009-06-06	01:41:00	0
2009-06-06	01:42:00	0
2009-06-06	01:43:00	0
2009-06-06	01:44:00	0
2009-06-06	01:45:00	0
2009-06-06	01:46:00	0
2009-06-06	01:47:00	0
2009-06-06	01:48:00	0
2009-06-06	01:49:00	0
2009-06-06	01:50:00	0
2009-06-06	01:51:00	0
2009-06-06	01:52:00	0
2009-06-06	01:53:00	0
2009-06-06	01:54:00	0
2009-06-06	01:55:00	0
2009-06-06	01:56:00	0
2009-06-06	01:57:00	0
2009-06-06	01:58:00	0
2009-06-06	01:59:00	0
2009-06-06	02:00:00	0
2009-06-06	02:01:00	0
2009-06-06	02:02:00	0
2009-06-06	02:03:00	0
2009-06-06	02:04:00	5
2009-06-06	02:05:00	0
2009-06-06	02:06:00	0
2009-06-06	02:07:00	0
2009-06-06	02:08:00	0
2009-06-06	02:09:00	0
2009-06-06	02:10:00	0
2009-06-06	02:11:00	0
2009-06-06	02:12:00	0
2009-06-06	02:13:00	0
2009-06-06	02:14:00	0
2009-06-06	02:15:00	0
2009-06-06	02:16:00	0
2009-06-06	02:17:00	0
2009-06-06	02:18:00	0
2009-06-06	02:19:00	0
2009-06-06	02:20:00	0
2009-06-06	02:21:00	0
2009-06-06	02:22:00	0
2009-06-06	02:23:00	0
2009-06-06	02:24:00	0
2009-06-06	02:25:00	0
2009-06-06	02:26:00	0
2009-06-06	02:27:00	0
2009-06-06	02:28:00	0
2009-06-06	02:29:00	0
2009-06-06	02:30:00	0
2009-06-06	02:31:00	0
2009-06-06	02:32:00	0
2009-06-06	02:33:00	0
2009-06-06	02:34:00	0
2009-06-06	02:35:00	0
2009-06-06	02:36:00	0
2009-06-06	02:37:00	0
2009-06-06	02:38:00	0
2009-06-06	02:39:00	0
2009-06-06	02:40:00	0
2009-06-06	02:41:00	0
2009-06-06	02:42:00	0
2009-06-06	02:43:00	21
2009-06-06	02:44:00	0
2009-06-06	02:45:00	0
2009-06-06	02:46:00	0
2009-06-06	02:47:00	0
2009-06-06	02:48:00	0
2009-06-06	02:49:00	0
2009-06-06	02:50:00	0
2009-06-06	02:51:00	0
2009-06-06	02:52:00	0
2009-06-06	02:53:00	0
2009-06-06	02:54:00	0
2009-06-06	02:55:00	0
2009-06-06	02:56:00	0
2009-06-06	02:57:00	0
2009-06-06	02:58:00	0
2009-06-06	02:59:00	0
2009-06-06	03:00:00	0
2009-06-06	03:01:00	0
2009-06-06	03:02:00	0
2009-06-06	03:03:00	15
2009-06-06	03:04:00	0
2009-06-06	03:05:00	0
2009-06-06	03:06:00	0
2009-06-06	03:07:00	0
2009-06-06	03:08:00	0
2009-06-06	03:09:00	0
2009-06-06	03:10:00	0
2009-06-06	03:11:00	0
2009-06-06	03:12:00	0
2009-06-06	03:13:00	0
2009-06-06	03:14:00	0
2009-06-06	03:15:00	0
2009-06-06	03:16:00	0
2009-06-06	03:17:00	0
2009-06-06	03:18:00	0
2009-06-06	03:19:00	15
2009-06-06	03:20:00	0
2009-06-06	03:21:00	0
2009-06-06	03:22:00	26
2009-06-06	03:23:00	0
2009-06-06	03:24:00	0
2009-06-06	03:25:00	0
2009-06-06	03:26:00	0
2009-06-06	03:27:00	0
2009-06-06	03:28:00	0
2009-06-06	03:29:00	0
2009-06-06	03:30:00	0
2009-06-06	03:31:00	0
2009-06-06	03:32:00	0
2009-06-06	03:33:00	0
2009-06-06	03:34:00	0
2009-06-06	03:35:00	0
2009-06-06	03:36:00	0
2009-06-06	03:37:00	0
2009-06-06	03:38:00	0
2009-06-06	03:39:00	0
2009-06-06	03:40:00	0
2009-06-06	03:41:00	0
2009-06-06	03:42:00	0
2009-06-06	03:43:00	0
2009-06-06	03:44:00	0
2009-06-06	03:45:00	0
2009-06-06	03:46:00	0
2009-06-06	03:47:00	0
2009-06-06	03:48:00	0
2009-06-06	03:49:00	0
2009-06-06	03:50:00	0
2009-06-06	03:51:00	0
2009-06-06	03:52:00	0
2009-06-06	03:53:00	5
2009-06-06	03:54:00	0
2009-06-06	03:55:00	0
2009-06-06	03:56:00	0
2009-06-06	03:57:00	0
2009-06-06	03:58:00	0
2009-06-06	03:59:00	0
2009-06-06	04:00:00	0
2009-06-06	04:01:00	0
2009-06-06	04:02:00	0
2009-06-06	04:03:00	0
2009-06-06	04:04:00	0
2009-06-06	04:05:00	0
2009-06-06	04:06:00	0
2009-06-06	04:07:00	0
2009-06-06	04:08:00	0
2009-06-06	04:09:00	0
2009-06-06	04:10:00	0
2009-06-06	04:11:00	0
2009-06-06	04:12:00	0
2009-06-06	04:13:00	0
2009-06-06	04:14:00	0
2009-06-06	04:15:00	0
2009-06-06	04:16:00	0
2009-06-06	04:17:00	0
2009-06-06	04:18:00	0
2009-06-06	04:19:00	10
2009-06-06	04:20:00	0
2009-06-06	04:21:00	0
2009-06-06	04:22:00	0
2009-06-06	04:23:00	0
2009-06-06	04:24:00	0
2009-06-06	04:25:00	0
2009-06-06	04:26:00	0
2009-06-06	04:27:00	0
2009-06-06	04:28:00	0
2009-06-06	04:29:00	0
2009-06-06	04:30:00	0
2009-06-06	04:31:00	0
2009-06-06	04:32:00	0
2009-06-06	04:33:00	0
2009-06-06	04:34:00	0
2009-06-06	04:35:00	0
2009-06-06	04:36:00	0
2009-06-06	04:37:00	0
2009-06-06	04:38:00	0
2009-06-06	04:39:00	0
2009-06-06	04:40:00	0
2009-06-06	04:41:00	0
2009-06-06	04:42:00	0
2009-06-06	04:43:00	0
2009-06-06	04:44:00	0
2009-06-06	04:45:00	0
2009-06-06	04:46:00	0
2009-06-06	04:47:00	0
2009-06-06	04:48:00	0
2009-06-06	04:49:00	0
2009-06-06	04:50:00	0
2009-06-06	04:51:00	0
2009-06-06	04:52:00	0
2009-06-06	04:53:00	0
2009-06-06	04:54:00	0
2009-06-06	04:55:00	0
2009-06-06	04:56:00	0
2009-06-06	04:57:00	0
2009-06-06	04:58:00	0
2009-06-06	04:59:00	0
2009-06-06	05:00:00	0
2009-06-06	05:01:00	0
2009-06-06	05:02:00	0
2009-06-06	05:03:00	0
2009-06-06	05:04:00	73
2009-06-06	05:05:00	15
2009-06-06	05:06:00	342
2009-06-06	05:07:00	0
2009-06-06	05:08:00	0
2009-06-06	05:09:00	0
2009-06-06	05:10:00	0
2009-06-06	05:11:00	0
2009-06-06	05:12:00	0
2009-06-06	05:13:00	0
2009-06-06	05:14:00	0
2009-06-06	05:15:00	0
2009-06-06	05:16:00	0
2009-06-06	05:17:00	0
2009-06-06	05:18:00	10
2009-06-06	05:19:00	15
2009-06-06	05:20:00	0
2009-06-06	05:21:00	67
2009-06-06	05:22:00	0
2009-06-06	05:23:00	0
2009-06-06	05:24:00	0
2009-06-06	05:25:00	0
2009-06-06	05:26:00	0
2009-06-06	05:27:00	0
2009-06-06	05:28:00	0
2009-06-06	05:29:00	0
2009-06-06	05:30:00	5
2009-06-06	05:31:00	0
2009-06-06	05:32:00	0
2009-06-06	05:33:00	0
2009-06-06	05:34:00	0
2009-06-06	05:35:00	0
2009-06-06	05:36:00	0
2009-06-06	05:37:00	0
2009-06-06	05:38:00	5
2009-06-06	05:39:00	0
2009-06-06	05:40:00	0
2009-06-06	05:41:00	0
2009-06-06	05:42:00	0
2009-06-06	05:43:00	0
2009-06-06	05:44:00	0
2009-06-06	05:45:00	0
2009-06-06	05:46:00	0
2009-06-06	05:47:00	0
2009-06-06	05:48:00	0
2009-06-06	05:49:00	0
2009-06-06	05:50:00	0
2009-06-06	05:51:00	0
2009-06-06	05:52:00	0
2009-06-06	05:53:00	0
2009-06-06	05:54:00	5
2009-06-06	05:55:00	0
2009-06-06	05:56:00	0
2009-06-06	05:57:00	0
2009-06-06	05:58:00	5
2009-06-06	05:59:00	0
2009-06-06	06:00:00	0
2009-06-06	06:01:00	0
2009-06-06	06:02:00	0
2009-06-06	06:03:00	0
2009-06-06	06:04:00	0
2009-06-06	06:05:00	0
2009-06-06	06:06:00	0
2009-06-06	06:07:00	0
2009-06-06	06:08:00	0
2009-06-06	06:09:00	0
2009-06-06	06:10:00	0
2009-06-06	06:11:00	0
2009-06-06	06:12:00	0
2009-06-06	06:13:00	26
2009-06-06	06:14:00	0
2009-06-06	06:15:00	0
2009-06-06	06:16:00	157
2009-06-06	06:17:00	41
2009-06-06	06:18:00	0
2009-06-06	06:19:00	0
2009-06-06	06:20:00	0
2009-06-06	06:21:00	0
2009-06-06	06:22:00	0
2009-06-06	06:23:00	0
2009-06-06	06:24:00	0
2009-06-06	06:25:00	0
2009-06-06	06:26:00	0
2009-06-06	06:27:00	0
2009-06-06	06:28:00	0
2009-06-06	06:29:00	0
2009-06-06	06:30:00	225
2009-06-06	06:31:00	0
2009-06-06	06:32:00	36
2009-06-06	06:33:00	0
2009-06-06	06:34:00	0
2009-06-06	06:35:00	0
2009-06-06	06:36:00	0
2009-06-06	06:37:00	0
2009-06-06	06:38:00	0
2009-06-06	06:39:00	0
2009-06-06	06:40:00	0
2009-06-06	06:41:00	31
2009-06-06	06:42:00	5
2009-06-06	06:43:00	0
2009-06-06	06:44:00	0
2009-06-06	06:45:00	0
2009-06-06	06:46:00	0
2009-06-06	06:47:00	0
2009-06-06	06:48:00	0
2009-06-06	06:49:00	0
2009-06-06	06:50:00	0
2009-06-06	06:51:00	0
2009-06-06	06:52:00	0
2009-06-06	06:53:00	0
2009-06-06	06:54:00	0
2009-06-06	06:55:00	164
2009-06-06	06:56:00	0
2009-06-06	06:57:00	0
2009-06-06	06:58:00	0
2009-06-06	06:59:00	0
2009-06-06	07:00:00	0
2009-06-06	07:01:00	0
2009-06-06	07:02:00	0
2009-06-06	07:03:00	0
2009-06-06	07:04:00	0
2009-06-06	07:05:00	0
2009-06-06	07:06:00	0
2009-06-06	07:07:00	0
2009-06-06	07:08:00	92
2009-06-06	07:09:00	67
2009-06-06	07:10:00	10
2009-06-06	07:11:00	86
2009-06-06	07:12:00	26
2009-06-06	07:13:00	0
2009-06-06	07:14:00	0
2009-06-06	07:15:00	0
2009-06-06	07:16:00	0
2009-06-06	07:17:00	73
2009-06-06	07:18:00	26
2009-06-06	07:19:00	62
2009-06-06	07:20:00	10
2009-06-06	07:21:00	0
2009-06-06	07:22:00	0
2009-06-06	07:23:00	0
2009-06-06	07:24:00	0
2009-06-06	07:25:00	0
2009-06-06	07:26:00	0
2009-06-06	07:27:00	0
2009-06-06	07:28:00	0
2009-06-06	07:29:00	0
2009-06-06	07:30:00	0
2009-06-06	07:31:00	0
2009-06-06	07:32:00	0
2009-06-06	07:33:00	26
2009-06-06	07:34:00	21
2009-06-06	07:35:00	62
2009-06-06	07:36:00	0
2009-06-06	07:37:00	0
2009-06-06	07:38:00	0
2009-06-06	07:39:00	0
2009-06-06	07:40:00	0
2009-06-06	07:41:00	26
2009-06-06	07:42:00	0
2009-06-06	07:43:00	0
2009-06-06	07:44:00	0
2009-06-06	07:45:00	0
2009-06-06	07:46:00	0
2009-06-06	07:47:00	0
2009-06-06	07:48:00	0
2009-06-06	07:49:00	0
2009-06-06	07:50:00	46
2009-06-06	07:51:00	0
2009-06-06	07:52:00	0
2009-06-06	07:53:00	0
2009-06-06	07:54:00	0
2009-06-06	07:55:00	0
2009-06-06	07:56:00	0
2009-06-06	07:57:00	0
2009-06-06	07:58:00	0
2009-06-06	07:59:00	0
2009-06-06	08:00:00	0
2009-06-06	08:01:00	0
2009-06-06	08:02:00	0
2009-06-06	08:03:00	0
2009-06-06	08:04:00	0
2009-06-06	08:05:00	0
2009-06-06	08:06:00	0
2009-06-06	08:07:00	0
2009-06-06	08:08:00	0
2009-06-06	08:09:00	31
2009-06-06	08:10:00	26
2009-06-06	08:11:00	21
2009-06-06	08:12:00	92
2009-06-06	08:13:00	0
2009-06-06	08:14:00	0
2009-06-06	08:15:00	10
2009-06-06	08:16:00	31
2009-06-06	08:17:00	46
2009-06-06	08:18:00	31
2009-06-06	08:19:00	46
2009-06-06	08:20:00	0
2009-06-06	08:21:00	0
2009-06-06	08:22:00	0
2009-06-06	08:23:00	10
2009-06-06	08:24:00	303
2009-06-06	08:25:00	10
2009-06-06	08:26:00	123
2009-06-06	08:27:00	1178
2009-06-06	08:28:00	1778
2009-06-06	08:29:00	1593
2009-06-06	08:30:00	2531
2009-06-06	08:31:00	2087
2009-06-06	08:32:00	1089
2009-06-06	08:33:00	561
2009-06-06	08:34:00	509
2009-06-06	08:35:00	217
2009-06-06	08:36:00	1347
2009-06-06	08:37:00	415
2009-06-06	08:38:00	751
2009-06-06	08:39:00	1347
2009-06-06	08:40:00	1843
2009-06-06	08:41:00	836
2009-06-06	08:42:00	547
2009-06-06	08:43:00	86
2009-06-06	08:44:00	98
2009-06-06	08:45:00	294
2009-06-06	08:46:00	373
2009-06-06	08:47:00	303
2009-06-06	08:48:00	362
2009-06-06	08:49:00	209
2009-06-06	08:50:00	415
2009-06-06	08:51:00	225
2009-06-06	08:52:00	285
2009-06-06	08:53:00	561
2009-06-06	08:54:00	373
2009-06-06	08:55:00	801
2009-06-06	08:56:00	1201
2009-06-06	08:57:00	1178
2009-06-06	08:58:00	373
2009-06-06	08:59:00	659
2009-06-06	09:00:00	426
2009-06-06	09:01:00	659
2009-06-06	09:02:00	352
2009-06-06	09:03:00	266
2009-06-06	09:04:00	0
2009-06-06	09:05:00	217
2009-06-06	09:06:00	117
2009-06-06	09:07:00	0
2009-06-06	09:08:00	41
[truncated: 19,611 more rows]

## Sheet: 6.19.09
Actogram, Copy Raw Data, All Days
Identity:	Wally
Filename:	E:\Active Research Files\meloxicam titre canine\cases\wally\Wally 6.19.09.AWC
Gender:	M
Age:	6
Height:	91.4 cm	36.0 in
Weight:	39.0 kg	86.0 lbs
Start Date:	19-Jun-2009 (Fri)
Start Time:	18:00:00
Interval:	1.00 mins
Date Stamp:	Time Stamp:	Activity Data:	Marker Press:
2009-06-19	00:00:00	0
2009-06-19	00:01:00	0
2009-06-19	00:02:00	0
2009-06-19	00:03:00	0
2009-06-19	00:04:00	0
2009-06-19	00:05:00	0
2009-06-19	00:06:00	0
2009-06-19	00:07:00	0
2009-06-19	00:08:00	0
2009-06-19	00:09:00	0
2009-06-19	00:10:00	0
2009-06-19	00:11:00	0
2009-06-19	00:12:00	0
2009-06-19	00:13:00	0
2009-06-19	00:14:00	0
2009-06-19	00:15:00	0
2009-06-19	00:16:00	0
2009-06-19	00:17:00	0
2009-06-19	00:18:00	0
2009-06-19	00:19:00	0
2009-06-19	00:20:00	0
2009-06-19	00:21:00	0
2009-06-19	00:22:00	0
2009-06-19	00:23:00	0
2009-06-19	00:24:00	0
2009-06-19	00:25:00	0
2009-06-19	00:26:00	0
2009-06-19	00:27:00	0
2009-06-19	00:28:00	0
2009-06-19	00:29:00	0
2009-06-19	00:30:00	0
2009-06-19	00:31:00	0
2009-06-19	00:32:00	0
2009-06-19	00:33:00	0
2009-06-19	00:34:00	0
2009-06-19	00:35:00	0
2009-06-19	00:36:00	0
2009-06-19	00:37:00	0
2009-06-19	00:38:00	0
2009-06-19	00:39:00	0
2009-06-19	00:40:00	0
2009-06-19	00:41:00	0
2009-06-19	00:42:00	0
2009-06-19	00:43:00	0
2009-06-19	00:44:00	0
2009-06-19	00:45:00	0
2009-06-19	00:46:00	0
2009-06-19	00:47:00	0
2009-06-19	00:48:00	0
2009-06-19	00:49:00	0
2009-06-19	00:50:00	0
2009-06-19	00:51:00	0
2009-06-19	00:52:00	0
2009-06-19	00:53:00	0
2009-06-19	00:54:00	0
2009-06-19	00:55:00	0
2009-06-19	00:56:00	0
2009-06-19	00:57:00	0
2009-06-19	00:58:00	0
2009-06-19	00:59:00	0
2009-06-19	01:00:00	0
2009-06-19	01:01:00	0
2009-06-19	01:02:00	0
2009-06-19	01:03:00	0
2009-06-19	01:04:00	0
2009-06-19	01:05:00	0
2009-06-19	01:06:00	0
2009-06-19	01:07:00	0
2009-06-19	01:08:00	0
2009-06-19	01:09:00	0
2009-06-19	01:10:00	0
2009-06-19	01:11:00	0
2009-06-19	01:12:00	0
2009-06-19	01:13:00	0
2009-06-19	01:14:00	0
2009-06-19	01:15:00	0
2009-06-19	01:16:00	0
2009-06-19	01:17:00	0
2009-06-19	01:18:00	0
2009-06-19	01:19:00	0
2009-06-19	01:20:00	0
2009-06-19	01:21:00	0
2009-06-19	01:22:00	0
2009-06-19	01:23:00	0
2009-06-19	01:24:00	0
2009-06-19	01:25:00	0
2009-06-19	01:26:00	0
2009-06-19	01:27:00	0
2009-06-19	01:28:00	0
2009-06-19	01:29:00	0
2009-06-19	01:30:00	0
2009-06-19	01:31:00	0
2009-06-19	01:32:00	0
2009-06-19	01:33:00	0
2009-06-19	01:34:00	0
2009-06-19	01:35:00	0
2009-06-19	01:36:00	0
2009-06-19	01:37:00	0
2009-06-19	01:38:00	0
2009-06-19	01:39:00	0
2009-06-19	01:40:00	0
2009-06-19	01:41:00	0
2009-06-19	01:42:00	0
2009-06-19	01:43:00	0
2009-06-19	01:44:00	0
2009-06-19	01:45:00	0
2009-06-19	01:46:00	0
2009-06-19	01:47:00	0
2009-06-19	01:48:00	0
2009-06-19	01:49:00	0
2009-06-19	01:50:00	0
2009-06-19	01:51:00	0
2009-06-19	01:52:00	0
2009-06-19	01:53:00	0
2009-06-19	01:54:00	0
2009-06-19	01:55:00	0
2009-06-19	01:56:00	0
2009-06-19	01:57:00	0
2009-06-19	01:58:00	0
2009-06-19	01:59:00	0
2009-06-19	02:00:00	0
2009-06-19	02:01:00	0
2009-06-19	02:02:00	0
2009-06-19	02:03:00	0
2009-06-19	02:04:00	0
2009-06-19	02:05:00	0
2009-06-19	02:06:00	0
2009-06-19	02:07:00	0
2009-06-19	02:08:00	0
2009-06-19	02:09:00	0
2009-06-19	02:10:00	0
2009-06-19	02:11:00	0
2009-06-19	02:12:00	0
2009-06-19	02:13:00	0
2009-06-19	02:14:00	0
2009-06-19	02:15:00	0
2009-06-19	02:16:00	0
2009-06-19	02:17:00	0
2009-06-19	02:18:00	0
2009-06-19	02:19:00	0
2009-06-19	02:20:00	0
2009-06-19	02:21:00	0
2009-06-19	02:22:00	0
2009-06-19	02:23:00	0
2009-06-19	02:24:00	0
2009-06-19	02:25:00	0
2009-06-19	02:26:00	0
2009-06-19	02:27:00	0
2009-06-19	02:28:00	0
2009-06-19	02:29:00	0
2009-06-19	02:30:00	0
2009-06-19	02:31:00	0
2009-06-19	02:32:00	0
2009-06-19	02:33:00	0
2009-06-19	02:34:00	0
2009-06-19	02:35:00	0
2009-06-19	02:36:00	0
2009-06-19	02:37:00	0
2009-06-19	02:38:00	0
2009-06-19	02:39:00	0
2009-06-19	02:40:00	0
2009-06-19	02:41:00	0
2009-06-19	02:42:00	0
2009-06-19	02:43:00	0
2009-06-19	02:44:00	0
2009-06-19	02:45:00	0
2009-06-19	02:46:00	0
2009-06-19	02:47:00	0
2009-06-19	02:48:00	0
2009-06-19	02:49:00	0
2009-06-19	02:50:00	0
2009-06-19	02:51:00	0
2009-06-19	02:52:00	0
2009-06-19	02:53:00	0
2009-06-19	02:54:00	0
2009-06-19	02:55:00	0
2009-06-19	02:56:00	0
2009-06-19	02:57:00	0
2009-06-19	02:58:00	0
2009-06-19	02:59:00	0
2009-06-19	03:00:00	0
2009-06-19	03:01:00	0
2009-06-19	03:02:00	0
2009-06-19	03:03:00	0
2009-06-19	03:04:00	0
2009-06-19	03:05:00	0
2009-06-19	03:06:00	0
2009-06-19	03:07:00	0
2009-06-19	03:08:00	0
2009-06-19	03:09:00	0
2009-06-19	03:10:00	0
2009-06-19	03:11:00	0
2009-06-19	03:12:00	0
2009-06-19	03:13:00	0
2009-06-19	03:14:00	0
2009-06-19	03:15:00	0
2009-06-19	03:16:00	0
2009-06-19	03:17:00	0
2009-06-19	03:18:00	0
2009-06-19	03:19:00	0
2009-06-19	03:20:00	0
2009-06-19	03:21:00	0
2009-06-19	03:22:00	0
2009-06-19	03:23:00	0
2009-06-19	03:24:00	0
2009-06-19	03:25:00	0
2009-06-19	03:26:00	0
2009-06-19	03:27:00	0
2009-06-19	03:28:00	0
2009-06-19	03:29:00	0
2009-06-19	03:30:00	0
2009-06-19	03:31:00	0
2009-06-19	03:32:00	0
2009-06-19	03:33:00	0
2009-06-19	03:34:00	0
2009-06-19	03:35:00	0
2009-06-19	03:36:00	0
2009-06-19	03:37:00	0
2009-06-19	03:38:00	0
2009-06-19	03:39:00	0
2009-06-19	03:40:00	0
2009-06-19	03:41:00	0
2009-06-19	03:42:00	0
2009-06-19	03:43:00	0
2009-06-19	03:44:00	0
2009-06-19	03:45:00	0
2009-06-19	03:46:00	0
2009-06-19	03:47:00	0
2009-06-19	03:48:00	0
2009-06-19	03:49:00	0
2009-06-19	03:50:00	0
2009-06-19	03:51:00	0
2009-06-19	03:52:00	0
2009-06-19	03:53:00	0
2009-06-19	03:54:00	0
2009-06-19	03:55:00	0
2009-06-19	03:56:00	0
2009-06-19	03:57:00	0
2009-06-19	03:58:00	0
2009-06-19	03:59:00	0
2009-06-19	04:00:00	0
2009-06-19	04:01:00	0
2009-06-19	04:02:00	0
2009-06-19	04:03:00	0
2009-06-19	04:04:00	0
2009-06-19	04:05:00	0
2009-06-19	04:06:00	0
2009-06-19	04:07:00	0
2009-06-19	04:08:00	0
2009-06-19	04:09:00	0
2009-06-19	04:10:00	0
2009-06-19	04:11:00	0
2009-06-19	04:12:00	0
2009-06-19	04:13:00	0
2009-06-19	04:14:00	0
2009-06-19	04:15:00	0
2009-06-19	04:16:00	0
2009-06-19	04:17:00	0
2009-06-19	04:18:00	0
2009-06-19	04:19:00	0
2009-06-19	04:20:00	0
2009-06-19	04:21:00	0
2009-06-19	04:22:00	0
2009-06-19	04:23:00	0
2009-06-19	04:24:00	0
2009-06-19	04:25:00	0
2009-06-19	04:26:00	0
2009-06-19	04:27:00	0
2009-06-19	04:28:00	0
2009-06-19	04:29:00	0
2009-06-19	04:30:00	0
2009-06-19	04:31:00	0
2009-06-19	04:32:00	0
2009-06-19	04:33:00	0
2009-06-19	04:34:00	0
2009-06-19	04:35:00	0
2009-06-19	04:36:00	0
2009-06-19	04:37:00	0
2009-06-19	04:38:00	0
2009-06-19	04:39:00	0
2009-06-19	04:40:00	0
2009-06-19	04:41:00	0
2009-06-19	04:42:00	0
2009-06-19	04:43:00	0
2009-06-19	04:44:00	0
2009-06-19	04:45:00	0
2009-06-19	04:46:00	0
2009-06-19	04:47:00	0
2009-06-19	04:48:00	0
2009-06-19	04:49:00	0
2009-06-19	04:50:00	0
2009-06-19	04:51:00	0
2009-06-19	04:52:00	0
2009-06-19	04:53:00	0
2009-06-19	04:54:00	0
2009-06-19	04:55:00	0
2009-06-19	04:56:00	0
2009-06-19	04:57:00	0
2009-06-19	04:58:00	0
2009-06-19	04:59:00	0
2009-06-19	05:00:00	0
2009-06-19	05:01:00	0
2009-06-19	05:02:00	0
2009-06-19	05:03:00	0
2009-06-19	05:04:00	0
2009-06-19	05:05:00	0
2009-06-19	05:06:00	0
2009-06-19	05:07:00	0
2009-06-19	05:08:00	0
2009-06-19	05:09:00	0
2009-06-19	05:10:00	0
2009-06-19	05:11:00	0
2009-06-19	05:12:00	0
2009-06-19	05:13:00	0
2009-06-19	05:14:00	0
2009-06-19	05:15:00	0
2009-06-19	05:16:00	0
2009-06-19	05:17:00	0
2009-06-19	05:18:00	0
2009-06-19	05:19:00	0
2009-06-19	05:20:00	0
2009-06-19	05:21:00	0
2009-06-19	05:22:00	0
2009-06-19	05:23:00	0
2009-06-19	05:24:00	0
2009-06-19	05:25:00	0
2009-06-19	05:26:00	0
2009-06-19	05:27:00	0
2009-06-19	05:28:00	0
2009-06-19	05:29:00	0
2009-06-19	05:30:00	0
2009-06-19	05:31:00	0
2009-06-19	05:32:00	0
2009-06-19	05:33:00	0
2009-06-19	05:34:00	0
2009-06-19	05:35:00	0
2009-06-19	05:36:00	0
2009-06-19	05:37:00	0
2009-06-19	05:38:00	0
2009-06-19	05:39:00	0
2009-06-19	05:40:00	0
2009-06-19	05:41:00	0
2009-06-19	05:42:00	0
2009-06-19	05:43:00	0
2009-06-19	05:44:00	0
2009-06-19	05:45:00	0
2009-06-19	05:46:00	0
2009-06-19	05:47:00	0
2009-06-19	05:48:00	0
2009-06-19	05:49:00	0
2009-06-19	05:50:00	0
2009-06-19	05:51:00	0
2009-06-19	05:52:00	0
2009-06-19	05:53:00	0
2009-06-19	05:54:00	0
2009-06-19	05:55:00	0
2009-06-19	05:56:00	0
2009-06-19	05:57:00	0
2009-06-19	05:58:00	0
2009-06-19	05:59:00	0
2009-06-19	06:00:00	0
2009-06-19	06:01:00	0
2009-06-19	06:02:00	0
2009-06-19	06:03:00	0
2009-06-19	06:04:00	0
2009-06-19	06:05:00	0
2009-06-19	06:06:00	0
2009-06-19	06:07:00	0
2009-06-19	06:08:00	0
2009-06-19	06:09:00	0
2009-06-19	06:10:00	0
2009-06-19	06:11:00	0
2009-06-19	06:12:00	0
2009-06-19	06:13:00	0
2009-06-19	06:14:00	0
2009-06-19	06:15:00	0
2009-06-19	06:16:00	0
2009-06-19	06:17:00	0
2009-06-19	06:18:00	0
2009-06-19	06:19:00	0
2009-06-19	06:20:00	0
2009-06-19	06:21:00	0
2009-06-19	06:22:00	0
2009-06-19	06:23:00	0
2009-06-19	06:24:00	0
2009-06-19	06:25:00	0
2009-06-19	06:26:00	0
2009-06-19	06:27:00	0
2009-06-19	06:28:00	0
2009-06-19	06:29:00	0
2009-06-19	06:30:00	0
2009-06-19	06:31:00	0
2009-06-19	06:32:00	0
2009-06-19	06:33:00	0
2009-06-19	06:34:00	0
2009-06-19	06:35:00	0
2009-06-19	06:36:00	0
2009-06-19	06:37:00	0
2009-06-19	06:38:00	0
2009-06-19	06:39:00	0
2009-06-19	06:40:00	0
2009-06-19	06:41:00	0
2009-06-19	06:42:00	0
2009-06-19	06:43:00	0
2009-06-19	06:44:00	0
2009-06-19	06:45:00	0
2009-06-19	06:46:00	0
2009-06-19	06:47:00	0
2009-06-19	06:48:00	0
2009-06-19	06:49:00	0
2009-06-19	06:50:00	0
2009-06-19	06:51:00	0
2009-06-19	06:52:00	0
2009-06-19	06:53:00	0
2009-06-19	06:54:00	0
2009-06-19	06:55:00	0
2009-06-19	06:56:00	0
2009-06-19	06:57:00	0
2009-06-19	06:58:00	0
2009-06-19	06:59:00	0
2009-06-19	07:00:00	0
2009-06-19	07:01:00	0
2009-06-19	07:02:00	0
2009-06-19	07:03:00	0
2009-06-19	07:04:00	0
2009-06-19	07:05:00	0
2009-06-19	07:06:00	0
2009-06-19	07:07:00	0
2009-06-19	07:08:00	0
2009-06-19	07:09:00	0
2009-06-19	07:10:00	0
2009-06-19	07:11:00	0
2009-06-19	07:12:00	0
2009-06-19	07:13:00	0
2009-06-19	07:14:00	0
2009-06-19	07:15:00	0
2009-06-19	07:16:00	0
2009-06-19	07:17:00	0
2009-06-19	07:18:00	0
2009-06-19	07:19:00	0
2009-06-19	07:20:00	0
2009-06-19	07:21:00	0
2009-06-19	07:22:00	0
2009-06-19	07:23:00	0
2009-06-19	07:24:00	0
2009-06-19	07:25:00	0
2009-06-19	07:26:00	0
2009-06-19	07:27:00	0
2009-06-19	07:28:00	0
2009-06-19	07:29:00	0
2009-06-19	07:30:00	0
2009-06-19	07:31:00	0
2009-06-19	07:32:00	0
2009-06-19	07:33:00	0
2009-06-19	07:34:00	0
2009-06-19	07:35:00	0
2009-06-19	07:36:00	0
2009-06-19	07:37:00	0
2009-06-19	07:38:00	0
2009-06-19	07:39:00	0
2009-06-19	07:40:00	0
2009-06-19	07:41:00	0
2009-06-19	07:42:00	0
2009-06-19	07:43:00	0
2009-06-19	07:44:00	0
2009-06-19	07:45:00	0
2009-06-19	07:46:00	0
2009-06-19	07:47:00	0
2009-06-19	07:48:00	0
2009-06-19	07:49:00	0
2009-06-19	07:50:00	0
2009-06-19	07:51:00	0
2009-06-19	07:52:00	0
2009-06-19	07:53:00	0
2009-06-19	07:54:00	0
2009-06-19	07:55:00	0
2009-06-19	07:56:00	0
2009-06-19	07:57:00	0
2009-06-19	07:58:00	0
2009-06-19	07:59:00	0
2009-06-19	08:00:00	0
2009-06-19	08:01:00	0
2009-06-19	08:02:00	0
2009-06-19	08:03:00	0
2009-06-19	08:04:00	0
2009-06-19	08:05:00	0
2009-06-19	08:06:00	0
2009-06-19	08:07:00	0
2009-06-19	08:08:00	0
2009-06-19	08:09:00	0
2009-06-19	08:10:00	0
2009-06-19	08:11:00	0
2009-06-19	08:12:00	0
2009-06-19	08:13:00	0
2009-06-19	08:14:00	0
2009-06-19	08:15:00	0
2009-06-19	08:16:00	0
2009-06-19	08:17:00	0
2009-06-19	08:18:00	0
2009-06-19	08:19:00	0
2009-06-19	08:20:00	0
2009-06-19	08:21:00	0
2009-06-19	08:22:00	0
2009-06-19	08:23:00	0
2009-06-19	08:24:00	0
2009-06-19	08:25:00	0
2009-06-19	08:26:00	0
2009-06-19	08:27:00	0
2009-06-19	08:28:00	0
2009-06-19	08:29:00	0
2009-06-19	08:30:00	0
2009-06-19	08:31:00	0
2009-06-19	08:32:00	0
2009-06-19	08:33:00	0
2009-06-19	08:34:00	0
2009-06-19	08:35:00	0
2009-06-19	08:36:00	0
2009-06-19	08:37:00	0
2009-06-19	08:38:00	0
2009-06-19	08:39:00	0
2009-06-19	08:40:00	0
2009-06-19	08:41:00	0
2009-06-19	08:42:00	0
2009-06-19	08:43:00	0
2009-06-19	08:44:00	0
2009-06-19	08:45:00	0
2009-06-19	08:46:00	0
2009-06-19	08:47:00	0
2009-06-19	08:48:00	0
2009-06-19	08:49:00	0
2009-06-19	08:50:00	0
2009-06-19	08:51:00	0
2009-06-19	08:52:00	0
2009-06-19	08:53:00	0
2009-06-19	08:54:00	0
2009-06-19	08:55:00	0
2009-06-19	08:56:00	0
2009-06-19	08:57:00	0
2009-06-19	08:58:00	0
2009-06-19	08:59:00	0
2009-06-19	09:00:00	0
2009-06-19	09:01:00	0
2009-06-19	09:02:00	0
2009-06-19	09:03:00	0
2009-06-19	09:04:00	0
2009-06-19	09:05:00	0
2009-06-19	09:06:00	0
2009-06-19	09:07:00	0
2009-06-19	09:08:00	0
2009-06-19	09:09:00	0
2009-06-19	09:10:00	0
2009-06-19	09:11:00	0
2009-06-19	09:12:00	0
2009-06-19	09:13:00	0
2009-06-19	09:14:00	0
2009-06-19	09:15:00	0
2009-06-19	09:16:00	0
2009-06-19	09:17:00	0
2009-06-19	09:18:00	0
2009-06-19	09:19:00	0
2009-06-19	09:20:00	0
2009-06-19	09:21:00	0
2009-06-19	09:22:00	0
2009-06-19	09:23:00	0
2009-06-19	09:24:00	0
2009-06-19	09:25:00	0
2009-06-19	09:26:00	0
2009-06-19	09:27:00	0
2009-06-19	09:28:00	0
2009-06-19	09:29:00	0
2009-06-19	09:30:00	0
2009-06-19	09:31:00	0
2009-06-19	09:32:00	0
2009-06-19	09:33:00	0
2009-06-19	09:34:00	0
2009-06-19	09:35:00	0
2009-06-19	09:36:00	0
2009-06-19	09:37:00	0
2009-06-19	09:38:00	0
2009-06-19	09:39:00	0
2009-06-19	09:40:00	0
2009-06-19	09:41:00	0
2009-06-19	09:42:00	0
2009-06-19	09:43:00	0
2009-06-19	09:44:00	0
2009-06-19	09:45:00	0
2009-06-19	09:46:00	0
2009-06-19	09:47:00	0
2009-06-19	09:48:00	0
2009-06-19	09:49:00	0
2009-06-19	09:50:00	0
2009-06-19	09:51:00	0
2009-06-19	09:52:00	0
2009-06-19	09:53:00	0
2009-06-19	09:54:00	0
2009-06-19	09:55:00	0
2009-06-19	09:56:00	0
2009-06-19	09:57:00	0
2009-06-19	09:58:00	0
2009-06-19	09:59:00	0
2009-06-19	10:00:00	0
2009-06-19	10:01:00	0
2009-06-19	10:02:00	0
2009-06-19	10:03:00	0
2009-06-19	10:04:00	0
2009-06-19	10:05:00	0
2009-06-19	10:06:00	0
2009-06-19	10:07:00	0
2009-06-19	10:08:00	0
2009-06-19	10:09:00	0
2009-06-19	10:10:00	0
2009-06-19	10:11:00	0
2009-06-19	10:12:00	0
2009-06-19	10:13:00	0
2009-06-19	10:14:00	0
2009-06-19	10:15:00	0
2009-06-19	10:16:00	0
2009-06-19	10:17:00	0
2009-06-19	10:18:00	0
2009-06-19	10:19:00	0
2009-06-19	10:20:00	0
2009-06-19	10:21:00	0
2009-06-19	10:22:00	0
2009-06-19	10:23:00	0
2009-06-19	10:24:00	0
2009-06-19	10:25:00	0
2009-06-19	10:26:00	0
2009-06-19	10:27:00	0
2009-06-19	10:28:00	0
2009-06-19	10:29:00	0
2009-06-19	10:30:00	0
2009-06-19	10:31:00	0
2009-06-19	10:32:00	0
2009-06-19	10:33:00	0
2009-06-19	10:34:00	0
2009-06-19	10:35:00	0
2009-06-19	10:36:00	0
2009-06-19	10:37:00	0
2009-06-19	10:38:00	0
2009-06-19	10:39:00	0
2009-06-19	10:40:00	0
2009-06-19	10:41:00	0
2009-06-19	10:42:00	0
2009-06-19	10:43:00	0
2009-06-19	10:44:00	0
2009-06-19	10:45:00	0
2009-06-19	10:46:00	0
2009-06-19	10:47:00	0
2009-06-19	10:48:00	0
2009-06-19	10:49:00	0
2009-06-19	10:50:00	0
2009-06-19	10:51:00	0
2009-06-19	10:52:00	0
2009-06-19	10:53:00	0
2009-06-19	10:54:00	0
2009-06-19	10:55:00	0
2009-06-19	10:56:00	0
2009-06-19	10:57:00	0
2009-06-19	10:58:00	0
2009-06-19	10:59:00	0
2009-06-19	11:00:00	0
2009-06-19	11:01:00	0
2009-06-19	11:02:00	0
2009-06-19	11:03:00	0
2009-06-19	11:04:00	0
2009-06-19	11:05:00	0
2009-06-19	11:06:00	0
2009-06-19	11:07:00	0
2009-06-19	11:08:00	0
2009-06-19	11:09:00	0
2009-06-19	11:10:00	0
2009-06-19	11:11:00	0
2009-06-19	11:12:00	0
2009-06-19	11:13:00	0
2009-06-19	11:14:00	0
2009-06-19	11:15:00	0
2009-06-19	11:16:00	0
2009-06-19	11:17:00	0
2009-06-19	11:18:00	0
2009-06-19	11:19:00	0
2009-06-19	11:20:00	0
2009-06-19	11:21:00	0
2009-06-19	11:22:00	0
2009-06-19	11:23:00	0
2009-06-19	11:24:00	0
2009-06-19	11:25:00	0
2009-06-19	11:26:00	0
2009-06-19	11:27:00	0
2009-06-19	11:28:00	0
2009-06-19	11:29:00	0
2009-06-19	11:30:00	0
2009-06-19	11:31:00	0
2009-06-19	11:32:00	0
2009-06-19	11:33:00	0
2009-06-19	11:34:00	0
2009-06-19	11:35:00	0
2009-06-19	11:36:00	0
2009-06-19	11:37:00	0
2009-06-19	11:38:00	0
2009-06-19	11:39:00	0
2009-06-19	11:40:00	0
2009-06-19	11:41:00	0
2009-06-19	11:42:00	0
2009-06-19	11:43:00	0
2009-06-19	11:44:00	0
2009-06-19	11:45:00	0
2009-06-19	11:46:00	0
2009-06-19	11:47:00	0
2009-06-19	11:48:00	0
2009-06-19	11:49:00	0
2009-06-19	11:50:00	0
2009-06-19	11:51:00	0
2009-06-19	11:52:00	0
2009-06-19	11:53:00	0
2009-06-19	11:54:00	0
2009-06-19	11:55:00	0
2009-06-19	11:56:00	0
2009-06-19	11:57:00	0
2009-06-19	11:58:00	0
2009-06-19	11:59:00	0
2009-06-19	12:00:00	0
2009-06-19	12:01:00	0
2009-06-19	12:02:00	0
2009-06-19	12:03:00	0
2009-06-19	12:04:00	0
2009-06-19	12:05:00	0
2009-06-19	12:06:00	0
2009-06-19	12:07:00	0
2009-06-19	12:08:00	0
2009-06-19	12:09:00	0
2009-06-19	12:10:00	0
2009-06-19	12:11:00	0
2009-06-19	12:12:00	0
2009-06-19	12:13:00	0
2009-06-19	12:14:00	0
2009-06-19	12:15:00	0
2009-06-19	12:16:00	0
2009-06-19	12:17:00	0
2009-06-19	12:18:00	0
2009-06-19	12:19:00	0
2009-06-19	12:20:00	0
2009-06-19	12:21:00	0
2009-06-19	12:22:00	0
2009-06-19	12:23:00	0
2009-06-19	12:24:00	0
2009-06-19	12:25:00	0
2009-06-19	12:26:00	0
2009-06-19	12:27:00	0
2009-06-19	12:28:00	0
2009-06-19	12:29:00	0
2009-06-19	12:30:00	0
2009-06-19	12:31:00	0
2009-06-19	12:32:00	0
2009-06-19	12:33:00	0
2009-06-19	12:34:00	0
2009-06-19	12:35:00	0
2009-06-19	12:36:00	0
2009-06-19	12:37:00	0
2009-06-19	12:38:00	0
2009-06-19	12:39:00	0
2009-06-19	12:40:00	0
2009-06-19	12:41:00	0
2009-06-19	12:42:00	0
2009-06-19	12:43:00	0
2009-06-19	12:44:00	0
2009-06-19	12:45:00	0
2009-06-19	12:46:00	0
2009-06-19	12:47:00	0
2009-06-19	12:48:00	0
2009-06-19	12:49:00	0
2009-06-19	12:50:00	0
2009-06-19	12:51:00	0
2009-06-19	12:52:00	0
2009-06-19	12:53:00	0
2009-06-19	12:54:00	0
2009-06-19	12:55:00	0
2009-06-19	12:56:00	0
2009-06-19	12:57:00	0
2009-06-19	12:58:00	0
2009-06-19	12:59:00	0
2009-06-19	13:00:00	0
2009-06-19	13:01:00	0
2009-06-19	13:02:00	0
2009-06-19	13:03:00	0
2009-06-19	13:04:00	0
2009-06-19	13:05:00	0
2009-06-19	13:06:00	0
2009-06-19	13:07:00	0
2009-06-19	13:08:00	0
2009-06-19	13:09:00	0
2009-06-19	13:10:00	0
2009-06-19	13:11:00	0
2009-06-19	13:12:00	0
2009-06-19	13:13:00	0
2009-06-19	13:14:00	0
2009-06-19	13:15:00	0
2009-06-19	13:16:00	0
2009-06-19	13:17:00	0
2009-06-19	13:18:00	0
2009-06-19	13:19:00	0
2009-06-19	13:20:00	0
2009-06-19	13:21:00	0
2009-06-19	13:22:00	0
2009-06-19	13:23:00	0
2009-06-19	13:24:00	0
2009-06-19	13:25:00	0
2009-06-19	13:26:00	0
2009-06-19	13:27:00	0
2009-06-19	13:28:00	0
2009-06-19	13:29:00	0
2009-06-19	13:30:00	0
2009-06-19	13:31:00	0
2009-06-19	13:32:00	0
2009-06-19	13:33:00	0
2009-06-19	13:34:00	0
2009-06-19	13:35:00	0
2009-06-19	13:36:00	0
2009-06-19	13:37:00	0
2009-06-19	13:38:00	0
2009-06-19	13:39:00	0
2009-06-19	13:40:00	0
2009-06-19	13:41:00	0
2009-06-19	13:42:00	0
2009-06-19	13:43:00	0
2009-06-19	13:44:00	0
2009-06-19	13:45:00	0
2009-06-19	13:46:00	0
2009-06-19	13:47:00	0
2009-06-19	13:48:00	0
2009-06-19	13:49:00	0
2009-06-19	13:50:00	0
2009-06-19	13:51:00	0
2009-06-19	13:52:00	0
2009-06-19	13:53:00	0
2009-06-19	13:54:00	0
2009-06-19	13:55:00	0
2009-06-19	13:56:00	0
2009-06-19	13:57:00	0
2009-06-19	13:58:00	0
2009-06-19	13:59:00	0
2009-06-19	14:00:00	0
2009-06-19	14:01:00	0
2009-06-19	14:02:00	0
2009-06-19	14:03:00	0
2009-06-19	14:04:00	0
2009-06-19	14:05:00	0
2009-06-19	14:06:00	0
2009-06-19	14:07:00	0
2009-06-19	14:08:00	0
2009-06-19	14:09:00	0
2009-06-19	14:10:00	0
2009-06-19	14:11:00	0
2009-06-19	14:12:00	0
2009-06-19	14:13:00	0
2009-06-19	14:14:00	0
2009-06-19	14:15:00	0
2009-06-19	14:16:00	0
2009-06-19	14:17:00	0
2009-06-19	14:18:00	0
2009-06-19	14:19:00	0
2009-06-19	14:20:00	0
2009-06-19	14:21:00	0
2009-06-19	14:22:00	0
2009-06-19	14:23:00	0
2009-06-19	14:24:00	0
2009-06-19	14:25:00	0
2009-06-19	14:26:00	0
2009-06-19	14:27:00	0
2009-06-19	14:28:00	0
2009-06-19	14:29:00	0
2009-06-19	14:30:00	0
2009-06-19	14:31:00	0
2009-06-19	14:32:00	0
2009-06-19	14:33:00	0
2009-06-19	14:34:00	0
2009-06-19	14:35:00	0
2009-06-19	14:36:00	0
2009-06-19	14:37:00	0
2009-06-19	14:38:00	0
2009-06-19	14:39:00	0
2009-06-19	14:40:00	0
2009-06-19	14:41:00	0
2009-06-19	14:42:00	0
2009-06-19	14:43:00	0
2009-06-19	14:44:00	0
2009-06-19	14:45:00	0
2009-06-19	14:46:00	0
2009-06-19	14:47:00	0
2009-06-19	14:48:00	0
2009-06-19	14:49:00	0
2009-06-19	14:50:00	0
2009-06-19	14:51:00	0
2009-06-19	14:52:00	0
2009-06-19	14:53:00	0
2009-06-19	14:54:00	0
2009-06-19	14:55:00	0
2009-06-19	14:56:00	0
2009-06-19	14:57:00	0
2009-06-19	14:58:00	0
2009-06-19	14:59:00	0
2009-06-19	15:00:00	0
2009-06-19	15:01:00	0
2009-06-19	15:02:00	0
2009-06-19	15:03:00	0
2009-06-19	15:04:00	0
2009-06-19	15:05:00	0
2009-06-19	15:06:00	0
2009-06-19	15:07:00	0
2009-06-19	15:08:00	0
2009-06-19	15:09:00	0
2009-06-19	15:10:00	0
2009-06-19	15:11:00	0
2009-06-19	15:12:00	0
2009-06-19	15:13:00	0
2009-06-19	15:14:00	0
2009-06-19	15:15:00	0
2009-06-19	15:16:00	0
2009-06-19	15:17:00	0
2009-06-19	15:18:00	0
2009-06-19	15:19:00	0
2009-06-19	15:20:00	0
2009-06-19	15:21:00	0
2009-06-19	15:22:00	0
2009-06-19	15:23:00	0
2009-06-19	15:24:00	0
2009-06-19	15:25:00	0
2009-06-19	15:26:00	0
2009-06-19	15:27:00	0
2009-06-19	15:28:00	0
2009-06-19	15:29:00	0
2009-06-19	15:30:00	0
2009-06-19	15:31:00	0
2009-06-19	15:32:00	0
2009-06-19	15:33:00	0
2009-06-19	15:34:00	0
2009-06-19	15:35:00	0
2009-06-19	15:36:00	0
2009-06-19	15:37:00	0
2009-06-19	15:38:00	0
2009-06-19	15:39:00	0
2009-06-19	15:40:00	0
2009-06-19	15:41:00	0
2009-06-19	15:42:00	0
2009-06-19	15:43:00	0
2009-06-19	15:44:00	0
2009-06-19	15:45:00	0
2009-06-19	15:46:00	0
2009-06-19	15:47:00	0
2009-06-19	15:48:00	0
2009-06-19	15:49:00	0
2009-06-19	15:50:00	0
2009-06-19	15:51:00	0
2009-06-19	15:52:00	0
2009-06-19	15:53:00	0
2009-06-19	15:54:00	0
2009-06-19	15:55:00	0
2009-06-19	15:56:00	0
2009-06-19	15:57:00	0
2009-06-19	15:58:00	0
2009-06-19	15:59:00	0
2009-06-19	16:00:00	0
2009-06-19	16:01:00	0
2009-06-19	16:02:00	0
2009-06-19	16:03:00	0
2009-06-19	16:04:00	0
2009-06-19	16:05:00	0
2009-06-19	16:06:00	0
2009-06-19	16:07:00	0
2009-06-19	16:08:00	0
2009-06-19	16:09:00	0
2009-06-19	16:10:00	0
2009-06-19	16:11:00	0
2009-06-19	16:12:00	0
2009-06-19	16:13:00	0
2009-06-19	16:14:00	0
2009-06-19	16:15:00	0
2009-06-19	16:16:00	0
2009-06-19	16:17:00	0
2009-06-19	16:18:00	0
2009-06-19	16:19:00	0
2009-06-19	16:20:00	0
2009-06-19	16:21:00	0
2009-06-19	16:22:00	0
2009-06-19	16:23:00	0
2009-06-19	16:24:00	0
2009-06-19	16:25:00	0
2009-06-19	16:26:00	0
2009-06-19	16:27:00	0
2009-06-19	16:28:00	0
2009-06-19	16:29:00	0
2009-06-19	16:30:00	0
2009-06-19	16:31:00	0
2009-06-19	16:32:00	0
2009-06-19	16:33:00	0
2009-06-19	16:34:00	0
2009-06-19	16:35:00	0
2009-06-19	16:36:00	0
2009-06-19	16:37:00	0
2009-06-19	16:38:00	0
2009-06-19	16:39:00	0
2009-06-19	16:40:00	0
2009-06-19	16:41:00	0
2009-06-19	16:42:00	0
2009-06-19	16:43:00	0
2009-06-19	16:44:00	0
2009-06-19	16:45:00	0
2009-06-19	16:46:00	0
2009-06-19	16:47:00	0
2009-06-19	16:48:00	0
2009-06-19	16:49:00	0
2009-06-19	16:50:00	0
2009-06-19	16:51:00	0
2009-06-19	16:52:00	0
2009-06-19	16:53:00	0
2009-06-19	16:54:00	0
2009-06-19	16:55:00	0
2009-06-19	16:56:00	0
2009-06-19	16:57:00	0
2009-06-19	16:58:00	0
2009-06-19	16:59:00	0
2009-06-19	17:00:00	0
2009-06-19	17:01:00	0
2009-06-19	17:02:00	0
2009-06-19	17:03:00	0
2009-06-19	17:04:00	0
2009-06-19	17:05:00	0
2009-06-19	17:06:00	0
2009-06-19	17:07:00	0
2009-06-19	17:08:00	0
2009-06-19	17:09:00	0
2009-06-19	17:10:00	0
2009-06-19	17:11:00	0
2009-06-19	17:12:00	0
2009-06-19	17:13:00	0
2009-06-19	17:14:00	0
2009-06-19	17:15:00	0
2009-06-19	17:16:00	0
2009-06-19	17:17:00	0
2009-06-19	17:18:00	0
2009-06-19	17:19:00	0
2009-06-19	17:20:00	0
2009-06-19	17:21:00	0
2009-06-19	17:22:00	0
2009-06-19	17:23:00	0
2009-06-19	17:24:00	0
2009-06-19	17:25:00	0
2009-06-19	17:26:00	0
2009-06-19	17:27:00	0
2009-06-19	17:28:00	0
2009-06-19	17:29:00	0
2009-06-19	17:30:00	0
2009-06-19	17:31:00	0
2009-06-19	17:32:00	0
2009-06-19	17:33:00	0
2009-06-19	17:34:00	0
2009-06-19	17:35:00	0
2009-06-19	17:36:00	0
2009-06-19	17:37:00	0
2009-06-19	17:38:00	0
2009-06-19	17:39:00	0
2009-06-19	17:40:00	0
2009-06-19	17:41:00	0
2009-06-19	17:42:00	0
2009-06-19	17:43:00	0
2009-06-19	17:44:00	0
2009-06-19	17:45:00	0
2009-06-19	17:46:00	0
2009-06-19	17:47:00	0
2009-06-19	17:48:00	0
2009-06-19	17:49:00	0
2009-06-19	17:50:00	0
2009-06-19	17:51:00	0
2009-06-19	17:52:00	0
2009-06-19	17:53:00	0
2009-06-19	17:54:00	0
2009-06-19	17:55:00	0
2009-06-19	17:56:00	0
2009-06-19	17:57:00	0
2009-06-19	17:58:00	0
2009-06-19	17:59:00	0
2009-06-19	18:00:00	0	M
2009-06-19	18:01:00	46
2009-06-19	18:02:00	57
2009-06-19	18:03:00	0
2009-06-19	18:04:00	0
2009-06-19	18:05:00	0
2009-06-19	18:06:00	0
2009-06-19	18:07:00	0
2009-06-19	18:08:00	0
2009-06-19	18:09:00	0
2009-06-19	18:10:00	0
2009-06-19	18:11:00	0
2009-06-19	18:12:00	0
2009-06-19	18:13:00	0
2009-06-19	18:14:00	5
2009-06-19	18:15:00	0
2009-06-19	18:16:00	0
2009-06-19	18:17:00	0
2009-06-19	18:18:00	0
2009-06-19	18:19:00	73
2009-06-19	18:20:00	258
2009-06-19	18:21:00	449
2009-06-19	18:22:00	250
2009-06-19	18:23:00	497
2009-06-19	18:24:00	110
2009-06-19	18:25:00	135
2009-06-19	18:26:00	104
2009-06-19	18:27:00	10
2009-06-19	18:28:00	142
2009-06-19	18:29:00	438
2009-06-19	18:30:00	587
2009-06-19	18:31:00	484
2009-06-19	18:32:00	2163
2009-06-19	18:33:00	1426
2009-06-19	18:34:00	3559
2009-06-19	18:35:00	4491
2009-06-19	18:36:00	2712
2009-06-19	18:37:00	1944
2009-06-19	18:38:00	1373
2009-06-19	18:39:00	142
2009-06-19	18:40:00	1593
2009-06-19	18:41:00	4135
2009-06-19	18:42:00	484
2009-06-19	18:43:00	404
2009-06-19	18:44:00	193
2009-06-19	18:45:00	294
2009-06-19	18:46:00	186
2009-06-19	18:47:00	117
2009-06-19	18:48:00	266
2009-06-19	18:49:00	5
2009-06-19	18:50:00	10
2009-06-19	18:51:00	404
2009-06-19	18:52:00	15
2009-06-19	18:53:00	15
2009-06-19	18:54:00	193
2009-06-19	18:55:00	10
2009-06-19	18:56:00	5
2009-06-19	18:57:00	0
2009-06-19	18:58:00	0
2009-06-19	18:59:00	0
2009-06-19	19:00:00	21
2009-06-19	19:01:00	5
2009-06-19	19:02:00	0
2009-06-19	19:03:00	0
2009-06-19	19:04:00	250
2009-06-19	19:05:00	15
2009-06-19	19:06:00	0
2009-06-19	19:07:00	0
2009-06-19	19:08:00	0
2009-06-19	19:09:00	0
2009-06-19	19:10:00	41
2009-06-19	19:11:00	179
2009-06-19	19:12:00	242
2009-06-19	19:13:00	73
2009-06-19	19:14:00	5
2009-06-19	19:15:00	0
2009-06-19	19:16:00	0
2009-06-19	19:17:00	0
2009-06-19	19:18:00	0
2009-06-19	19:19:00	0
2009-06-19	19:20:00	0
2009-06-19	19:21:00	0
2009-06-19	19:22:00	0
2009-06-19	19:23:00	0
2009-06-19	19:24:00	0
2009-06-19	19:25:00	0
2009-06-19	19:26:00	362
2009-06-19	19:27:00	186
2009-06-19	19:28:00	1224
2009-06-19	19:29:00	673
2009-06-19	19:30:00	908
2009-06-19	19:31:00	1005
2009-06-19	19:32:00	1067
2009-06-19	19:33:00	200
2009-06-19	19:34:00	0
2009-06-19	19:35:00	117
2009-06-19	19:36:00	98
2009-06-19	19:37:00	0
2009-06-19	19:38:00	5
2009-06-19	19:39:00	0
2009-06-19	19:40:00	0
2009-06-19	19:41:00	0
2009-06-19	19:42:00	123
2009-06-19	19:43:00	313
2009-06-19	19:44:00	10
2009-06-19	19:45:00	26
2009-06-19	19:46:00	0
2009-06-19	19:47:00	0
2009-06-19	19:48:00	0
2009-06-19	19:49:00	0
2009-06-19	19:50:00	0
2009-06-19	19:51:00	5
2009-06-19	19:52:00	0
2009-06-19	19:53:00	0
2009-06-19	19:54:00	0
2009-06-19	19:55:00	0
2009-06-19	19:56:00	26
2009-06-19	19:57:00	0
2009-06-19	19:58:00	0
2009-06-19	19:59:00	123
2009-06-19	20:00:00	86
2009-06-19	20:01:00	21
2009-06-19	20:02:00	5
2009-06-19	20:03:00	21
2009-06-19	20:04:00	342
2009-06-19	20:05:00	484
2009-06-19	20:06:00	689
2009-06-19	20:07:00	373
2009-06-19	20:08:00	217
2009-06-19	20:09:00	0
2009-06-19	20:10:00	0
2009-06-19	20:11:00	0
2009-06-19	20:12:00	0
2009-06-19	20:13:00	0
2009-06-19	20:14:00	0
2009-06-19	20:15:00	0
2009-06-19	20:16:00	0
2009-06-19	20:17:00	0
2009-06-19	20:18:00	0
2009-06-19	20:19:00	0
2009-06-19	20:20:00	0
2009-06-19	20:21:00	52
2009-06-19	20:22:00	15
2009-06-19	20:23:00	21
2009-06-19	20:24:00	0
2009-06-19	20:25:00	0
2009-06-19	20:26:00	200
2009-06-19	20:27:00	179
2009-06-19	20:28:00	0
2009-06-19	20:29:00	10
2009-06-19	20:30:00	15
2009-06-19	20:31:00	0
2009-06-19	20:32:00	10
2009-06-19	20:33:00	0
2009-06-19	20:34:00	0
2009-06-19	20:35:00	0
2009-06-19	20:36:00	0
2009-06-19	20:37:00	0
2009-06-19	20:38:00	0
2009-06-19	20:39:00	0
2009-06-19	20:40:00	0
2009-06-19	20:41:00	0
2009-06-19	20:42:00	0
2009-06-19	20:43:00	0
2009-06-19	20:44:00	0
2009-06-19	20:45:00	0
2009-06-19	20:46:00	449
2009-06-19	20:47:00	15
2009-06-19	20:48:00	0
2009-06-19	20:49:00	10
2009-06-19	20:50:00	15
2009-06-19	20:51:00	0
2009-06-19	20:52:00	0
2009-06-19	20:53:00	0
2009-06-19	20:54:00	0
2009-06-19	20:55:00	0
2009-06-19	20:56:00	0
2009-06-19	20:57:00	0
2009-06-19	20:58:00	0
2009-06-19	20:59:00	41
2009-06-19	21:00:00	21
2009-06-19	21:01:00	10
2009-06-19	21:02:00	179
2009-06-19	21:03:00	0
2009-06-19	21:04:00	21
2009-06-19	21:05:00	0
2009-06-19	21:06:00	0
2009-06-19	21:07:00	73
2009-06-19	21:08:00	62
2009-06-19	21:09:00	21
2009-06-19	21:10:00	0
2009-06-19	21:11:00	0
2009-06-19	21:12:00	31
2009-06-19	21:13:00	521
2009-06-19	21:14:00	0
2009-06-19	21:15:00	0
2009-06-19	21:16:00	0
2009-06-19	21:17:00	0
2009-06-19	21:18:00	0
2009-06-19	21:19:00	0
2009-06-19	21:20:00	0
2009-06-19	21:21:00	0
2009-06-19	21:22:00	0
2009-06-19	21:23:00	0
2009-06-19	21:24:00	5
2009-06-19	21:25:00	10
2009-06-19	21:26:00	0
2009-06-19	21:27:00	0
2009-06-19	21:28:00	0
2009-06-19	21:29:00	0
2009-06-19	21:30:00	0
2009-06-19	21:31:00	26
2009-06-19	21:32:00	0
2009-06-19	21:33:00	36
2009-06-19	21:34:00	0
2009-06-19	21:35:00	0
2009-06-19	21:36:00	0
2009-06-19	21:37:00	0
2009-06-19	21:38:00	0
2009-06-19	21:39:00	0
2009-06-19	21:40:00	52
2009-06-19	21:41:00	31
2009-06-19	21:42:00	15
2009-06-19	21:43:00	5
2009-06-19	21:44:00	123
2009-06-19	21:45:00	0
2009-06-19	21:46:00	0
2009-06-19	21:47:00	0
2009-06-19	21:48:00	0
2009-06-19	21:49:00	0
2009-06-19	21:50:00	5
2009-06-19	21:51:00	0
2009-06-19	21:52:00	0
2009-06-19	21:53:00	0
2009-06-19	21:54:00	0
2009-06-19	21:55:00	0
2009-06-19	21:56:00	21
2009-06-19	21:57:00	5
2009-06-19	21:58:00	5
2009-06-19	21:59:00	0
2009-06-19	22:00:00	0
2009-06-19	22:01:00	0
2009-06-19	22:02:00	0
2009-06-19	22:03:00	0
2009-06-19	22:04:00	0
2009-06-19	22:05:00	0
2009-06-19	22:06:00	0
2009-06-19	22:07:00	0
2009-06-19	22:08:00	0
2009-06-19	22:09:00	0
2009-06-19	22:10:00	0
2009-06-19	22:11:00	0
2009-06-19	22:12:00	0
2009-06-19	22:13:00	0
2009-06-19	22:14:00	0
2009-06-19	22:15:00	0
2009-06-19	22:16:00	0
2009-06-19	22:17:00	0
2009-06-19	22:18:00	0
2009-06-19	22:19:00	0
2009-06-19	22:20:00	0
2009-06-19	22:21:00	0
2009-06-19	22:22:00	62
2009-06-19	22:23:00	0
2009-06-19	22:24:00	0
2009-06-19	22:25:00	0
2009-06-19	22:26:00	0
2009-06-19	22:27:00	0
2009-06-19	22:28:00	0
2009-06-19	22:29:00	0
2009-06-19	22:30:00	0
2009-06-19	22:31:00	0
2009-06-19	22:32:00	0
2009-06-19	22:33:00	0
2009-06-19	22:34:00	0
2009-06-19	22:35:00	0
2009-06-19	22:36:00	0
2009-06-19	22:37:00	0
2009-06-19	22:38:00	0
2009-06-19	22:39:00	0
2009-06-19	22:40:00	0
2009-06-19	22:41:00	0
2009-06-19	22:42:00	0
2009-06-19	22:43:00	0
2009-06-19	22:44:00	0
2009-06-19	22:45:00	0
2009-06-19	22:46:00	0
2009-06-19	22:47:00	5
2009-06-19	22:48:00	0
2009-06-19	22:49:00	0
2009-06-19	22:50:00	10
2009-06-19	22:51:00	57
2009-06-19	22:52:00	0
2009-06-19	22:53:00	5
2009-06-19	22:54:00	0
2009-06-19	22:55:00	0
2009-06-19	22:56:00	0
2009-06-19	22:57:00	0
2009-06-19	22:58:00	0
2009-06-19	22:59:00	0
2009-06-19	23:00:00	0
2009-06-19	23:01:00	0
2009-06-19	23:02:00	0
2009-06-19	23:03:00	0
2009-06-19	23:04:00	0
2009-06-19	23:05:00	0
2009-06-19	23:06:00	0
2009-06-19	23:07:00	0
2009-06-19	23:08:00	0
2009-06-19	23:09:00	0
2009-06-19	23:10:00	0
2009-06-19	23:11:00	0
2009-06-19	23:12:00	0
2009-06-19	23:13:00	0
2009-06-19	23:14:00	0
2009-06-19	23:15:00	0
2009-06-19	23:16:00	26
2009-06-19	23:17:00	5
2009-06-19	23:18:00	0
2009-06-19	23:19:00	0
2009-06-19	23:20:00	0
2009-06-19	23:21:00	0
2009-06-19	23:22:00	0
2009-06-19	23:23:00	0
2009-06-19	23:24:00	0
2009-06-19	23:25:00	0
2009-06-19	23:26:00	0
2009-06-19	23:27:00	0
2009-06-19	23:28:00	26
2009-06-19	23:29:00	62
2009-06-19	23:30:00	10
2009-06-19	23:31:00	0
2009-06-19	23:32:00	0
2009-06-19	23:33:00	0
2009-06-19	23:34:00	0
2009-06-19	23:35:00	0
2009-06-19	23:36:00	0
2009-06-19	23:37:00	0
2009-06-19	23:38:00	0
2009-06-19	23:39:00	0
2009-06-19	23:40:00	0
2009-06-19	23:41:00	0
2009-06-19	23:42:00	0
2009-06-19	23:43:00	0
2009-06-19	23:44:00	135
2009-06-19	23:45:00	673
2009-06-19	23:46:00	1321
2009-06-19	23:47:00	352
2009-06-19	23:48:00	362
2009-06-19	23:49:00	0
2009-06-19	23:50:00	383
2009-06-19	23:51:00	0
2009-06-19	23:52:00	0
2009-06-19	23:53:00	0
2009-06-19	23:54:00	0
2009-06-19	23:55:00	0
2009-06-19	23:56:00	0
2009-06-19	23:57:00	5
2009-06-19	23:58:00	0
2009-06-19	23:59:00	0
2009-06-20	00:00:00	0
2009-06-20	00:01:00	21
2009-06-20	00:02:00	31
2009-06-20	00:03:00	142
2009-06-20	00:04:00	5
2009-06-20	00:05:00	0
2009-06-20	00:06:00	0
2009-06-20	00:07:00	0
2009-06-20	00:08:00	0
2009-06-20	00:09:00	0
2009-06-20	00:10:00	0
2009-06-20	00:11:00	0
2009-06-20	00:12:00	0
2009-06-20	00:13:00	0
2009-06-20	00:14:00	0
2009-06-20	00:15:00	0
2009-06-20	00:16:00	0
2009-06-20	00:17:00	0
2009-06-20	00:18:00	0
2009-06-20	00:19:00	0
2009-06-20	00:20:00	21
2009-06-20	00:21:00	0
2009-06-20	00:22:00	0
2009-06-20	00:23:00	0
2009-06-20	00:24:00	0
2009-06-20	00:25:00	0
2009-06-20	00:26:00	0
2009-06-20	00:27:00	0
2009-06-20	00:28:00	0
2009-06-20	00:29:00	0
2009-06-20	00:30:00	0
2009-06-20	00:31:00	0
2009-06-20	00:32:00	0
2009-06-20	00:33:00	0
2009-06-20	00:34:00	0
2009-06-20	00:35:00	0
2009-06-20	00:36:00	0
2009-06-20	00:37:00	0
2009-06-20	00:38:00	0
2009-06-20	00:39:00	0
2009-06-20	00:40:00	62
2009-06-20	00:41:00	0
2009-06-20	00:42:00	0
2009-06-20	00:43:00	0
2009-06-20	00:44:00	0
2009-06-20	00:45:00	0
2009-06-20	00:46:00	0
2009-06-20	00:47:00	0
2009-06-20	00:48:00	0
2009-06-20	00:49:00	0
2009-06-20	00:50:00	0
2009-06-20	00:51:00	0
2009-06-20	00:52:00	0
2009-06-20	00:53:00	0
2009-06-20	00:54:00	0
2009-06-20	00:55:00	0
2009-06-20	00:56:00	0
2009-06-20	00:57:00	0
2009-06-20	00:58:00	0
2009-06-20	00:59:00	0
2009-06-20	01:00:00	0
2009-06-20	01:01:00	0
2009-06-20	01:02:00	0
2009-06-20	01:03:00	0
2009-06-20	01:04:00	0
2009-06-20	01:05:00	0
2009-06-20	01:06:00	0
2009-06-20	01:07:00	0
2009-06-20	01:08:00	0
2009-06-20	01:09:00	0
2009-06-20	01:10:00	0
2009-06-20	01:11:00	0
2009-06-20	01:12:00	0
2009-06-20	01:13:00	0
2009-06-20	01:14:00	0
2009-06-20	01:15:00	0
2009-06-20	01:16:00	0
2009-06-20	01:17:00	0
2009-06-20	01:18:00	0
2009-06-20	01:19:00	0
2009-06-20	01:20:00	0
2009-06-20	01:21:00	5
2009-06-20	01:22:00	0
2009-06-20	01:23:00	0
2009-06-20	01:24:00	0
2009-06-20	01:25:00	57
2009-06-20	01:26:00	0
2009-06-20	01:27:00	0
2009-06-20	01:28:00	0
2009-06-20	01:29:00	46
2009-06-20	01:30:00	0
2009-06-20	01:31:00	0
2009-06-20	01:32:00	0
2009-06-20	01:33:00	0
2009-06-20	01:34:00	0
2009-06-20	01:35:00	0
2009-06-20	01:36:00	26
2009-06-20	01:37:00	0
2009-06-20	01:38:00	0
2009-06-20	01:39:00	0
2009-06-20	01:40:00	0
2009-06-20	01:41:00	0
2009-06-20	01:42:00	0
2009-06-20	01:43:00	0
2009-06-20	01:44:00	0
2009-06-20	01:45:00	0
2009-06-20	01:46:00	0
2009-06-20	01:47:00	0
2009-06-20	01:48:00	0
2009-06-20	01:49:00	0
2009-06-20	01:50:00	0
2009-06-20	01:51:00	0
2009-06-20	01:52:00	0
2009-06-20	01:53:00	0
2009-06-20	01:54:00	0
2009-06-20	01:55:00	0
2009-06-20	01:56:00	0
2009-06-20	01:57:00	0
2009-06-20	01:58:00	0
2009-06-20	01:59:00	0
2009-06-20	02:00:00	0
2009-06-20	02:01:00	0
2009-06-20	02:02:00	0
2009-06-20	02:03:00	0
2009-06-20	02:04:00	0
2009-06-20	02:05:00	10
2009-06-20	02:06:00	0
2009-06-20	02:07:00	0
2009-06-20	02:08:00	0
2009-06-20	02:09:00	0
2009-06-20	02:10:00	0
2009-06-20	02:11:00	0
2009-06-20	02:12:00	0
2009-06-20	02:13:00	0
2009-06-20	02:14:00	0
2009-06-20	02:15:00	0
2009-06-20	02:16:00	0
2009-06-20	02:17:00	0
2009-06-20	02:18:00	0
2009-06-20	02:19:00	0
2009-06-20	02:20:00	0
2009-06-20	02:21:00	0
2009-06-20	02:22:00	0
2009-06-20	02:23:00	0
2009-06-20	02:24:00	0
2009-06-20	02:25:00	0
2009-06-20	02:26:00	0
2009-06-20	02:27:00	0
2009-06-20	02:28:00	0
2009-06-20	02:29:00	0
2009-06-20	02:30:00	0
2009-06-20	02:31:00	0
2009-06-20	02:32:00	0
2009-06-20	02:33:00	0
2009-06-20	02:34:00	225
2009-06-20	02:35:00	0
2009-06-20	02:36:00	0
2009-06-20	02:37:00	0
2009-06-20	02:38:00	0
2009-06-20	02:39:00	0
2009-06-20	02:40:00	0
2009-06-20	02:41:00	0
2009-06-20	02:42:00	0
2009-06-20	02:43:00	5
2009-06-20	02:44:00	10
2009-06-20	02:45:00	0
2009-06-20	02:46:00	0
2009-06-20	02:47:00	0
2009-06-20	02:48:00	0
2009-06-20	02:49:00	0
2009-06-20	02:50:00	0
2009-06-20	02:51:00	0
2009-06-20	02:52:00	0
2009-06-20	02:53:00	0
2009-06-20	02:54:00	0
2009-06-20	02:55:00	0
2009-06-20	02:56:00	31
2009-06-20	02:57:00	0
2009-06-20	02:58:00	5
2009-06-20	02:59:00	10
2009-06-20	03:00:00	0
2009-06-20	03:01:00	0
2009-06-20	03:02:00	0
2009-06-20	03:03:00	0
2009-06-20	03:04:00	0
2009-06-20	03:05:00	0
2009-06-20	03:06:00	0
2009-06-20	03:07:00	0
2009-06-20	03:08:00	0
2009-06-20	03:09:00	0
2009-06-20	03:10:00	0
2009-06-20	03:11:00	0
2009-06-20	03:12:00	0
2009-06-20	03:13:00	10
2009-06-20	03:14:00	0
2009-06-20	03:15:00	0
2009-06-20	03:16:00	0
2009-06-20	03:17:00	0
2009-06-20	03:18:00	0
2009-06-20	03:19:00	0
2009-06-20	03:20:00	0
2009-06-20	03:21:00	0
2009-06-20	03:22:00	0
2009-06-20	03:23:00	0
2009-06-20	03:24:00	0
2009-06-20	03:25:00	0
2009-06-20	03:26:00	0
2009-06-20	03:27:00	0
2009-06-20	03:28:00	0
2009-06-20	03:29:00	0
2009-06-20	03:30:00	0
2009-06-20	03:31:00	0
2009-06-20	03:32:00	0
2009-06-20	03:33:00	0
2009-06-20	03:34:00	67
2009-06-20	03:35:00	86
2009-06-20	03:36:00	242
2009-06-20	03:37:00	0
2009-06-20	03:38:00	0
2009-06-20	03:39:00	0
2009-06-20	03:40:00	0
2009-06-20	03:41:00	0
2009-06-20	03:42:00	0
2009-06-20	03:43:00	0
2009-06-20	03:44:00	0
2009-06-20	03:45:00	0
2009-06-20	03:46:00	0
2009-06-20	03:47:00	0
2009-06-20	03:48:00	21
2009-06-20	03:49:00	193
2009-06-20	03:50:00	0
2009-06-20	03:51:00	0
2009-06-20	03:52:00	10
2009-06-20	03:53:00	0
2009-06-20	03:54:00	0
2009-06-20	03:55:00	0
2009-06-20	03:56:00	0
2009-06-20	03:57:00	0
2009-06-20	03:58:00	0
2009-06-20	03:59:00	0
2009-06-20	04:00:00	0
2009-06-20	04:01:00	0
2009-06-20	04:02:00	0
2009-06-20	04:03:00	0
2009-06-20	04:04:00	0
2009-06-20	04:05:00	0
2009-06-20	04:06:00	0
2009-06-20	04:07:00	0
2009-06-20	04:08:00	0
2009-06-20	04:09:00	0
2009-06-20	04:10:00	5
2009-06-20	04:11:00	0
2009-06-20	04:12:00	73
2009-06-20	04:13:00	57
2009-06-20	04:14:00	0
2009-06-20	04:15:00	0
2009-06-20	04:16:00	0
2009-06-20	04:17:00	0
2009-06-20	04:18:00	0
2009-06-20	04:19:00	0
2009-06-20	04:20:00	0
2009-06-20	04:21:00	0
2009-06-20	04:22:00	0
2009-06-20	04:23:00	0
2009-06-20	04:24:00	0
2009-06-20	04:25:00	0
2009-06-20	04:26:00	0
2009-06-20	04:27:00	0
2009-06-20	04:28:00	0
2009-06-20	04:29:00	0
2009-06-20	04:30:00	0
2009-06-20	04:31:00	0
2009-06-20	04:32:00	0
2009-06-20	04:33:00	0
2009-06-20	04:34:00	0
2009-06-20	04:35:00	0
2009-06-20	04:36:00	0
2009-06-20	04:37:00	0
2009-06-20	04:38:00	0
2009-06-20	04:39:00	0
2009-06-20	04:40:00	0
2009-06-20	04:41:00	0
2009-06-20	04:42:00	0
2009-06-20	04:43:00	0
2009-06-20	04:44:00	0
2009-06-20	04:45:00	0
2009-06-20	04:46:00	0
2009-06-20	04:47:00	0
2009-06-20	04:48:00	0
2009-06-20	04:49:00	0
2009-06-20	04:50:00	0
2009-06-20	04:51:00	0
2009-06-20	04:52:00	5
2009-06-20	04:53:00	0
2009-06-20	04:54:00	0
2009-06-20	04:55:00	0
2009-06-20	04:56:00	0
2009-06-20	04:57:00	0
2009-06-20	04:58:00	0
2009-06-20	04:59:00	0
2009-06-20	05:00:00	0
2009-06-20	05:01:00	0
2009-06-20	05:02:00	62
2009-06-20	05:03:00	41
2009-06-20	05:04:00	0
2009-06-20	05:05:00	0
2009-06-20	05:06:00	0
2009-06-20	05:07:00	0
2009-06-20	05:08:00	0
2009-06-20	05:09:00	0
2009-06-20	05:10:00	0
2009-06-20	05:11:00	0
2009-06-20	05:12:00	0
2009-06-20	05:13:00	0
2009-06-20	05:14:00	0
2009-06-20	05:15:00	0
2009-06-20	05:16:00	0
2009-06-20	05:17:00	0
2009-06-20	05:18:00	0
2009-06-20	05:19:00	0
2009-06-20	05:20:00	0
2009-06-20	05:21:00	0
2009-06-20	05:22:00	0
2009-06-20	05:23:00	0
2009-06-20	05:24:00	0
2009-06-20	05:25:00	0
2009-06-20	05:26:00	5
2009-06-20	05:27:00	0
2009-06-20	05:28:00	0
2009-06-20	05:29:00	0
2009-06-20	05:30:00	0
2009-06-20	05:31:00	0
2009-06-20	05:32:00	0
2009-06-20	05:33:00	0
2009-06-20	05:34:00	0
2009-06-20	05:35:00	0
2009-06-20	05:36:00	0
2009-06-20	05:37:00	0
2009-06-20	05:38:00	52
2009-06-20	05:39:00	26
2009-06-20	05:40:00	73
2009-06-20	05:41:00	52
2009-06-20	05:42:00	0
2009-06-20	05:43:00	0
2009-06-20	05:44:00	0
2009-06-20	05:45:00	0
2009-06-20	05:46:00	0
2009-06-20	05:47:00	0
2009-06-20	05:48:00	0
2009-06-20	05:49:00	10
2009-06-20	05:50:00	0
2009-06-20	05:51:00	0
2009-06-20	05:52:00	0
2009-06-20	05:53:00	0
2009-06-20	05:54:00	0
2009-06-20	05:55:00	0
2009-06-20	05:56:00	0
2009-06-20	05:57:00	0
2009-06-20	05:58:00	5
2009-06-20	05:59:00	0
2009-06-20	06:00:00	36
2009-06-20	06:01:00	21
2009-06-20	06:02:00	0
2009-06-20	06:03:00	0
2009-06-20	06:04:00	0
2009-06-20	06:05:00	0
2009-06-20	06:06:00	0
2009-06-20	06:07:00	0
2009-06-20	06:08:00	0
2009-06-20	06:09:00	0
2009-06-20	06:10:00	0
2009-06-20	06:11:00	0
2009-06-20	06:12:00	15
2009-06-20	06:13:00	0
2009-06-20	06:14:00	0
2009-06-20	06:15:00	0
2009-06-20	06:16:00	0
2009-06-20	06:17:00	0
2009-06-20	06:18:00	0
2009-06-20	06:19:00	0
2009-06-20	06:20:00	0
2009-06-20	06:21:00	0
2009-06-20	06:22:00	26
2009-06-20	06:23:00	15
2009-06-20	06:24:00	0
2009-06-20	06:25:00	0
2009-06-20	06:26:00	0
2009-06-20	06:27:00	0
2009-06-20	06:28:00	0
2009-06-20	06:29:00	0
2009-06-20	06:30:00	0
2009-06-20	06:31:00	0
2009-06-20	06:32:00	0
2009-06-20	06:33:00	0
2009-06-20	06:34:00	0
2009-06-20	06:35:00	0
2009-06-20	06:36:00	0
2009-06-20	06:37:00	0
2009-06-20	06:38:00	0
2009-06-20	06:39:00	26
2009-06-20	06:40:00	171
2009-06-20	06:41:00	0
2009-06-20	06:42:00	5
2009-06-20	06:43:00	0
2009-06-20	06:44:00	36
2009-06-20	06:45:00	0
2009-06-20	06:46:00	0
2009-06-20	06:47:00	142
2009-06-20	06:48:00	0
2009-06-20	06:49:00	0
2009-06-20	06:50:00	0
2009-06-20	06:51:00	0
2009-06-20	06:52:00	0
2009-06-20	06:53:00	0
2009-06-20	06:54:00	15
2009-06-20	06:55:00	21
2009-06-20	06:56:00	41
2009-06-20	06:57:00	0
2009-06-20	06:58:00	0
2009-06-20	06:59:00	10
2009-06-20	07:00:00	0
2009-06-20	07:01:00	0
2009-06-20	07:02:00	15
2009-06-20	07:03:00	21
2009-06-20	07:04:00	0
2009-06-20	07:05:00	0
2009-06-20	07:06:00	15
2009-06-20	07:07:00	0
2009-06-20	07:08:00	0
2009-06-20	07:09:00	0
2009-06-20	07:10:00	10
2009-06-20	07:11:00	0
2009-06-20	07:12:00	0
2009-06-20	07:13:00	0
2009-06-20	07:14:00	0
2009-06-20	07:15:00	73
2009-06-20	07:16:00	5
2009-06-20	07:17:00	10
2009-06-20	07:18:00	31
2009-06-20	07:19:00	0
2009-06-20	07:20:00	0
2009-06-20	07:21:00	0
2009-06-20	07:22:00	10
2009-06-20	07:23:00	0
2009-06-20	07:24:00	0
2009-06-20	07:25:00	0
2009-06-20	07:26:00	0
2009-06-20	07:27:00	0
2009-06-20	07:28:00	15
2009-06-20	07:29:00	0
2009-06-20	07:30:00	67
2009-06-20	07:31:00	0
2009-06-20	07:32:00	0
2009-06-20	07:33:00	57
2009-06-20	07:34:00	26
2009-06-20	07:35:00	0
2009-06-20	07:36:00	0
2009-06-20	07:37:00	233
2009-06-20	07:38:00	67
2009-06-20	07:39:00	5
2009-06-20	07:40:00	15
2009-06-20	07:41:00	57
2009-06-20	07:42:00	0
2009-06-20	07:43:00	0
2009-06-20	07:44:00	5
2009-06-20	07:45:00	0
2009-06-20	07:46:00	31
2009-06-20	07:47:00	0
2009-06-20	07:48:00	26
2009-06-20	07:49:00	5
2009-06-20	07:50:00	0
2009-06-20	07:51:00	5
2009-06-20	07:52:00	10
2009-06-20	07:53:00	157
2009-06-20	07:54:00	41
2009-06-20	07:55:00	73
2009-06-20	07:56:00	587
2009-06-20	07:57:00	1876
2009-06-20	07:58:00	1047
2009-06-20	07:59:00	393
2009-06-20	08:00:00	947
2009-06-20	08:01:00	1778
2009-06-20	08:02:00	1593
2009-06-20	08:03:00	276
2009-06-20	08:04:00	67
2009-06-20	08:05:00	1426
2009-06-20	08:06:00	785
2009-06-20	08:07:00	373
2009-06-20	08:08:00	142
2009-06-20	08:09:00	217
2009-06-20	08:10:00	46
2009-06-20	08:11:00	5
2009-06-20	08:12:00	1026
2009-06-20	08:13:00	2444
2009-06-20	08:14:00	1005
2009-06-20	08:15:00	472
2009-06-20	08:16:00	497
2009-06-20	08:17:00	233
2009-06-20	08:18:00	871
2009-06-20	08:19:00	1321
2009-06-20	08:20:00	1876
2009-06-20	08:21:00	689
2009-06-20	08:22:00	704
2009-06-20	08:23:00	1026
2009-06-20	08:24:00	426
2009-06-20	08:25:00	534
2009-06-20	08:26:00	659
2009-06-20	08:27:00	393
2009-06-20	08:28:00	73
2009-06-20	08:29:00	615
2009-06-20	08:30:00	472
2009-06-20	08:31:00	10
2009-06-20	08:32:00	521
2009-06-20	08:33:00	574
2009-06-20	08:34:00	460
2009-06-20	08:35:00	217
2009-06-20	08:36:00	2279
2009-06-20	08:37:00	0	M
2009-06-20	08:38:00	1653
2009-06-20	08:39:00	31
2009-06-20	08:40:00	460
2009-06-20	08:41:00	171
2009-06-20	08:42:00	157
2009-06-20	08:43:00	2087
2009-06-20	08:44:00	2319
2009-06-20	08:45:00	1005
2009-06-20	08:46:00	362
2009-06-20	08:47:00	521
2009-06-20	08:48:00	1178
2009-06-20	08:49:00	3163
2009-06-20	08:50:00	3805
2009-06-20	08:51:00	0	M
2009-06-20	08:52:00	313
2009-06-20	08:53:00	484
2009-06-20	08:54:00	92
2009-06-20	08:55:00	0
2009-06-20	08:56:00	0
2009-06-20	08:57:00	0
2009-06-20	08:58:00	294
2009-06-20	08:59:00	561
2009-06-20	09:00:00	233
2009-06-20	09:01:00	1026
2009-06-20	09:02:00	1479
2009-06-20	09:03:00	2050
2009-06-20	09:04:00	233
2009-06-20	09:05:00	242
2009-06-20	09:06:00	266
2009-06-20	09:07:00	250
2009-06-20	09:08:00	164
[truncated: 18,171 more rows]

## Sheet: 7.02.09
Actogram, Copy Raw Data, All Days
Identity:	Wally
Filename:	E:\Active Research Files\meloxicam titre canine\cases\wally\Wally 7.2.09.AWC
Gender:	M
Age:	6
Height:	91.4 cm	36.0 in
Weight:	39.0 kg	86.0 lbs
Start Date:	02-Jul-2009 (Thu)
Start Time:	18:00:00
Interval:	1.00 mins
Date Stamp:	Time Stamp:	Activity Data:	Marker Press:
2009-07-02	00:00:00	0
2009-07-02	00:01:00	0
2009-07-02	00:02:00	0
2009-07-02	00:03:00	0
2009-07-02	00:04:00	0
2009-07-02	00:05:00	0
2009-07-02	00:06:00	0
2009-07-02	00:07:00	0
2009-07-02	00:08:00	0
2009-07-02	00:09:00	0
2009-07-02	00:10:00	0
2009-07-02	00:11:00	0
2009-07-02	00:12:00	0
2009-07-02	00:13:00	0
2009-07-02	00:14:00	0
2009-07-02	00:15:00	0
2009-07-02	00:16:00	0
2009-07-02	00:17:00	0
2009-07-02	00:18:00	0
2009-07-02	00:19:00	0
2009-07-02	00:20:00	0
2009-07-02	00:21:00	0
2009-07-02	00:22:00	0
2009-07-02	00:23:00	0
2009-07-02	00:24:00	0
2009-07-02	00:25:00	0
2009-07-02	00:26:00	0
2009-07-02	00:27:00	0
2009-07-02	00:28:00	0
2009-07-02	00:29:00	0
2009-07-02	00:30:00	0
2009-07-02	00:31:00	0
2009-07-02	00:32:00	0
2009-07-02	00:33:00	0
2009-07-02	00:34:00	0
2009-07-02	00:35:00	0
2009-07-02	00:36:00	0
2009-07-02	00:37:00	0
2009-07-02	00:38:00	0
2009-07-02	00:39:00	0
2009-07-02	00:40:00	0
2009-07-02	00:41:00	0
2009-07-02	00:42:00	0
2009-07-02	00:43:00	0
2009-07-02	00:44:00	0
2009-07-02	00:45:00	0
2009-07-02	00:46:00	0
2009-07-02	00:47:00	0
2009-07-02	00:48:00	0
2009-07-02	00:49:00	0
2009-07-02	00:50:00	0
2009-07-02	00:51:00	0
2009-07-02	00:52:00	0
2009-07-02	00:53:00	0
2009-07-02	00:54:00	0
2009-07-02	00:55:00	0
2009-07-02	00:56:00	0
2009-07-02	00:57:00	0
2009-07-02	00:58:00	0
2009-07-02	00:59:00	0
2009-07-02	01:00:00	0
2009-07-02	01:01:00	0
2009-07-02	01:02:00	0
2009-07-02	01:03:00	0
2009-07-02	01:04:00	0
2009-07-02	01:05:00	0
2009-07-02	01:06:00	0
2009-07-02	01:07:00	0
2009-07-02	01:08:00	0
2009-07-02	01:09:00	0
2009-07-02	01:10:00	0
2009-07-02	01:11:00	0
2009-07-02	01:12:00	0
2009-07-02	01:13:00	0
2009-07-02	01:14:00	0
2009-07-02	01:15:00	0
2009-07-02	01:16:00	0
2009-07-02	01:17:00	0
2009-07-02	01:18:00	0
2009-07-02	01:19:00	0
2009-07-02	01:20:00	0
2009-07-02	01:21:00	0
2009-07-02	01:22:00	0
2009-07-02	01:23:00	0
2009-07-02	01:24:00	0
2009-07-02	01:25:00	0
2009-07-02	01:26:00	0
2009-07-02	01:27:00	0
2009-07-02	01:28:00	0
2009-07-02	01:29:00	0
2009-07-02	01:30:00	0
2009-07-02	01:31:00	0
2009-07-02	01:32:00	0
2009-07-02	01:33:00	0
2009-07-02	01:34:00	0
2009-07-02	01:35:00	0
2009-07-02	01:36:00	0
2009-07-02	01:37:00	0
2009-07-02	01:38:00	0
2009-07-02	01:39:00	0
2009-07-02	01:40:00	0
2009-07-02	01:41:00	0
2009-07-02	01:42:00	0
2009-07-02	01:43:00	0
2009-07-02	01:44:00	0
2009-07-02	01:45:00	0
2009-07-02	01:46:00	0
2009-07-02	01:47:00	0
2009-07-02	01:48:00	0
2009-07-02	01:49:00	0
2009-07-02	01:50:00	0
2009-07-02	01:51:00	0
2009-07-02	01:52:00	0
2009-07-02	01:53:00	0
2009-07-02	01:54:00	0
2009-07-02	01:55:00	0
2009-07-02	01:56:00	0
2009-07-02	01:57:00	0
2009-07-02	01:58:00	0
2009-07-02	01:59:00	0
2009-07-02	02:00:00	0
2009-07-02	02:01:00	0
2009-07-02	02:02:00	0
2009-07-02	02:03:00	0
2009-07-02	02:04:00	0
2009-07-02	02:05:00	0
2009-07-02	02:06:00	0
2009-07-02	02:07:00	0
2009-07-02	02:08:00	0
2009-07-02	02:09:00	0
2009-07-02	02:10:00	0
2009-07-02	02:11:00	0
2009-07-02	02:12:00	0
2009-07-02	02:13:00	0
2009-07-02	02:14:00	0
2009-07-02	02:15:00	0
2009-07-02	02:16:00	0
2009-07-02	02:17:00	0
2009-07-02	02:18:00	0
2009-07-02	02:19:00	0
2009-07-02	02:20:00	0
2009-07-02	02:21:00	0
2009-07-02	02:22:00	0
2009-07-02	02:23:00	0
2009-07-02	02:24:00	0
2009-07-02	02:25:00	0
2009-07-02	02:26:00	0
2009-07-02	02:27:00	0
2009-07-02	02:28:00	0
2009-07-02	02:29:00	0
2009-07-02	02:30:00	0
2009-07-02	02:31:00	0
2009-07-02	02:32:00	0
2009-07-02	02:33:00	0
2009-07-02	02:34:00	0
2009-07-02	02:35:00	0
2009-07-02	02:36:00	0
2009-07-02	02:37:00	0
2009-07-02	02:38:00	0
2009-07-02	02:39:00	0
2009-07-02	02:40:00	0
2009-07-02	02:41:00	0
2009-07-02	02:42:00	0
2009-07-02	02:43:00	0
2009-07-02	02:44:00	0
2009-07-02	02:45:00	0
2009-07-02	02:46:00	0
2009-07-02	02:47:00	0
2009-07-02	02:48:00	0
2009-07-02	02:49:00	0
2009-07-02	02:50:00	0
2009-07-02	02:51:00	0
2009-07-02	02:52:00	0
2009-07-02	02:53:00	0
2009-07-02	02:54:00	0
2009-07-02	02:55:00	0
2009-07-02	02:56:00	0
2009-07-02	02:57:00	0
2009-07-02	02:58:00	0
2009-07-02	02:59:00	0
2009-07-02	03:00:00	0
2009-07-02	03:01:00	0
2009-07-02	03:02:00	0
2009-07-02	03:03:00	0
2009-07-02	03:04:00	0
2009-07-02	03:05:00	0
2009-07-02	03:06:00	0
2009-07-02	03:07:00	0
2009-07-02	03:08:00	0
2009-07-02	03:09:00	0
2009-07-02	03:10:00	0
2009-07-02	03:11:00	0
2009-07-02	03:12:00	0
2009-07-02	03:13:00	0
2009-07-02	03:14:00	0
2009-07-02	03:15:00	0
2009-07-02	03:16:00	0
2009-07-02	03:17:00	0
2009-07-02	03:18:00	0
2009-07-02	03:19:00	0
2009-07-02	03:20:00	0
2009-07-02	03:21:00	0
2009-07-02	03:22:00	0
2009-07-02	03:23:00	0
2009-07-02	03:24:00	0
2009-07-02	03:25:00	0
2009-07-02	03:26:00	0
2009-07-02	03:27:00	0
2009-07-02	03:28:00	0
2009-07-02	03:29:00	0
2009-07-02	03:30:00	0
2009-07-02	03:31:00	0
2009-07-02	03:32:00	0
2009-07-02	03:33:00	0
2009-07-02	03:34:00	0
2009-07-02	03:35:00	0
2009-07-02	03:36:00	0
2009-07-02	03:37:00	0
2009-07-02	03:38:00	0
2009-07-02	03:39:00	0
2009-07-02	03:40:00	0
2009-07-02	03:41:00	0
2009-07-02	03:42:00	0
2009-07-02	03:43:00	0
2009-07-02	03:44:00	0
2009-07-02	03:45:00	0
2009-07-02	03:46:00	0
2009-07-02	03:47:00	0
2009-07-02	03:48:00	0
2009-07-02	03:49:00	0
2009-07-02	03:50:00	0
2009-07-02	03:51:00	0
2009-07-02	03:52:00	0
2009-07-02	03:53:00	0
2009-07-02	03:54:00	0
2009-07-02	03:55:00	0
2009-07-02	03:56:00	0
2009-07-02	03:57:00	0
2009-07-02	03:58:00	0
2009-07-02	03:59:00	0
2009-07-02	04:00:00	0
2009-07-02	04:01:00	0
2009-07-02	04:02:00	0
2009-07-02	04:03:00	0
2009-07-02	04:04:00	0
2009-07-02	04:05:00	0
2009-07-02	04:06:00	0
2009-07-02	04:07:00	0
2009-07-02	04:08:00	0
2009-07-02	04:09:00	0
2009-07-02	04:10:00	0
2009-07-02	04:11:00	0
2009-07-02	04:12:00	0
2009-07-02	04:13:00	0
2009-07-02	04:14:00	0
2009-07-02	04:15:00	0
2009-07-02	04:16:00	0
2009-07-02	04:17:00	0
2009-07-02	04:18:00	0
2009-07-02	04:19:00	0
2009-07-02	04:20:00	0
2009-07-02	04:21:00	0
2009-07-02	04:22:00	0
2009-07-02	04:23:00	0
2009-07-02	04:24:00	0
2009-07-02	04:25:00	0
2009-07-02	04:26:00	0
2009-07-02	04:27:00	0
2009-07-02	04:28:00	0
2009-07-02	04:29:00	0
2009-07-02	04:30:00	0
2009-07-02	04:31:00	0
2009-07-02	04:32:00	0
2009-07-02	04:33:00	0
2009-07-02	04:34:00	0
2009-07-02	04:35:00	0
2009-07-02	04:36:00	0
2009-07-02	04:37:00	0
2009-07-02	04:38:00	0
2009-07-02	04:39:00	0
2009-07-02	04:40:00	0
2009-07-02	04:41:00	0
2009-07-02	04:42:00	0
2009-07-02	04:43:00	0
2009-07-02	04:44:00	0
2009-07-02	04:45:00	0
2009-07-02	04:46:00	0
2009-07-02	04:47:00	0
2009-07-02	04:48:00	0
2009-07-02	04:49:00	0
2009-07-02	04:50:00	0
2009-07-02	04:51:00	0
2009-07-02	04:52:00	0
2009-07-02	04:53:00	0
2009-07-02	04:54:00	0
2009-07-02	04:55:00	0
2009-07-02	04:56:00	0
2009-07-02	04:57:00	0
2009-07-02	04:58:00	0
2009-07-02	04:59:00	0
2009-07-02	05:00:00	0
2009-07-02	05:01:00	0
2009-07-02	05:02:00	0
2009-07-02	05:03:00	0
2009-07-02	05:04:00	0
2009-07-02	05:05:00	0
2009-07-02	05:06:00	0
2009-07-02	05:07:00	0
2009-07-02	05:08:00	0
2009-07-02	05:09:00	0
2009-07-02	05:10:00	0
2009-07-02	05:11:00	0
2009-07-02	05:12:00	0
2009-07-02	05:13:00	0
2009-07-02	05:14:00	0
2009-07-02	05:15:00	0
2009-07-02	05:16:00	0
2009-07-02	05:17:00	0
2009-07-02	05:18:00	0
2009-07-02	05:19:00	0
2009-07-02	05:20:00	0
2009-07-02	05:21:00	0
2009-07-02	05:22:00	0
2009-07-02	05:23:00	0
2009-07-02	05:24:00	0
2009-07-02	05:25:00	0
2009-07-02	05:26:00	0
2009-07-02	05:27:00	0
2009-07-02	05:28:00	0
2009-07-02	05:29:00	0
2009-07-02	05:30:00	0
2009-07-02	05:31:00	0
2009-07-02	05:32:00	0
2009-07-02	05:33:00	0
2009-07-02	05:34:00	0
2009-07-02	05:35:00	0
2009-07-02	05:36:00	0
2009-07-02	05:37:00	0
2009-07-02	05:38:00	0
2009-07-02	05:39:00	0
2009-07-02	05:40:00	0
2009-07-02	05:41:00	0
2009-07-02	05:42:00	0
2009-07-02	05:43:00	0
2009-07-02	05:44:00	0
2009-07-02	05:45:00	0
2009-07-02	05:46:00	0
2009-07-02	05:47:00	0
2009-07-02	05:48:00	0
2009-07-02	05:49:00	0
2009-07-02	05:50:00	0
2009-07-02	05:51:00	0
2009-07-02	05:52:00	0
2009-07-02	05:53:00	0
2009-07-02	05:54:00	0
2009-07-02	05:55:00	0
2009-07-02	05:56:00	0
2009-07-02	05:57:00	0
2009-07-02	05:58:00	0
2009-07-02	05:59:00	0
2009-07-02	06:00:00	0
2009-07-02	06:01:00	0
2009-07-02	06:02:00	0
2009-07-02	06:03:00	0
2009-07-02	06:04:00	0
2009-07-02	06:05:00	0
2009-07-02	06:06:00	0
2009-07-02	06:07:00	0
2009-07-02	06:08:00	0
2009-07-02	06:09:00	0
2009-07-02	06:10:00	0
2009-07-02	06:11:00	0
2009-07-02	06:12:00	0
2009-07-02	06:13:00	0
2009-07-02	06:14:00	0
2009-07-02	06:15:00	0
2009-07-02	06:16:00	0
2009-07-02	06:17:00	0
2009-07-02	06:18:00	0
2009-07-02	06:19:00	0
2009-07-02	06:20:00	0
2009-07-02	06:21:00	0
2009-07-02	06:22:00	0
2009-07-02	06:23:00	0
2009-07-02	06:24:00	0
2009-07-02	06:25:00	0
2009-07-02	06:26:00	0
2009-07-02	06:27:00	0
2009-07-02	06:28:00	0
2009-07-02	06:29:00	0
2009-07-02	06:30:00	0
2009-07-02	06:31:00	0
2009-07-02	06:32:00	0
2009-07-02	06:33:00	0
2009-07-02	06:34:00	0
2009-07-02	06:35:00	0
2009-07-02	06:36:00	0
2009-07-02	06:37:00	0
2009-07-02	06:38:00	0
2009-07-02	06:39:00	0
2009-07-02	06:40:00	0
2009-07-02	06:41:00	0
2009-07-02	06:42:00	0
2009-07-02	06:43:00	0
2009-07-02	06:44:00	0
2009-07-02	06:45:00	0
2009-07-02	06:46:00	0
2009-07-02	06:47:00	0
2009-07-02	06:48:00	0
2009-07-02	06:49:00	0
2009-07-02	06:50:00	0
2009-07-02	06:51:00	0
2009-07-02	06:52:00	0
2009-07-02	06:53:00	0
2009-07-02	06:54:00	0
2009-07-02	06:55:00	0
2009-07-02	06:56:00	0
2009-07-02	06:57:00	0
2009-07-02	06:58:00	0
2009-07-02	06:59:00	0
2009-07-02	07:00:00	0
2009-07-02	07:01:00	0
2009-07-02	07:02:00	0
2009-07-02	07:03:00	0
2009-07-02	07:04:00	0
2009-07-02	07:05:00	0
2009-07-02	07:06:00	0
2009-07-02	07:07:00	0
2009-07-02	07:08:00	0
2009-07-02	07:09:00	0
2009-07-02	07:10:00	0
2009-07-02	07:11:00	0
2009-07-02	07:12:00	0
2009-07-02	07:13:00	0
2009-07-02	07:14:00	0
2009-07-02	07:15:00	0
2009-07-02	07:16:00	0
2009-07-02	07:17:00	0
2009-07-02	07:18:00	0
2009-07-02	07:19:00	0
2009-07-02	07:20:00	0
2009-07-02	07:21:00	0
2009-07-02	07:22:00	0
2009-07-02	07:23:00	0
2009-07-02	07:24:00	0
2009-07-02	07:25:00	0
2009-07-02	07:26:00	0
2009-07-02	07:27:00	0
2009-07-02	07:28:00	0
2009-07-02	07:29:00	0
2009-07-02	07:30:00	0
2009-07-02	07:31:00	0
2009-07-02	07:32:00	0
2009-07-02	07:33:00	0
2009-07-02	07:34:00	0
2009-07-02	07:35:00	0
2009-07-02	07:36:00	0
2009-07-02	07:37:00	0
2009-07-02	07:38:00	0
2009-07-02	07:39:00	0
2009-07-02	07:40:00	0
2009-07-02	07:41:00	0
2009-07-02	07:42:00	0
2009-07-02	07:43:00	0
2009-07-02	07:44:00	0
2009-07-02	07:45:00	0
2009-07-02	07:46:00	0
2009-07-02	07:47:00	0
2009-07-02	07:48:00	0
2009-07-02	07:49:00	0
2009-07-02	07:50:00	0
2009-07-02	07:51:00	0
2009-07-02	07:52:00	0
2009-07-02	07:53:00	0
2009-07-02	07:54:00	0
2009-07-02	07:55:00	0
2009-07-02	07:56:00	0
2009-07-02	07:57:00	0
2009-07-02	07:58:00	0
2009-07-02	07:59:00	0
2009-07-02	08:00:00	0
2009-07-02	08:01:00	0
2009-07-02	08:02:00	0
2009-07-02	08:03:00	0
2009-07-02	08:04:00	0
2009-07-02	08:05:00	0
2009-07-02	08:06:00	0
2009-07-02	08:07:00	0
2009-07-02	08:08:00	0
2009-07-02	08:09:00	0
2009-07-02	08:10:00	0
2009-07-02	08:11:00	0
2009-07-02	08:12:00	0
2009-07-02	08:13:00	0
2009-07-02	08:14:00	0
2009-07-02	08:15:00	0
2009-07-02	08:16:00	0
2009-07-02	08:17:00	0
2009-07-02	08:18:00	0
2009-07-02	08:19:00	0
2009-07-02	08:20:00	0
2009-07-02	08:21:00	0
2009-07-02	08:22:00	0
2009-07-02	08:23:00	0
2009-07-02	08:24:00	0
2009-07-02	08:25:00	0
2009-07-02	08:26:00	0
2009-07-02	08:27:00	0
2009-07-02	08:28:00	0
2009-07-02	08:29:00	0
2009-07-02	08:30:00	0
2009-07-02	08:31:00	0
2009-07-02	08:32:00	0
2009-07-02	08:33:00	0
2009-07-02	08:34:00	0
2009-07-02	08:35:00	0
2009-07-02	08:36:00	0
2009-07-02	08:37:00	0
2009-07-02	08:38:00	0
2009-07-02	08:39:00	0
2009-07-02	08:40:00	0
2009-07-02	08:41:00	0
2009-07-02	08:42:00	0
2009-07-02	08:43:00	0
2009-07-02	08:44:00	0
2009-07-02	08:45:00	0
2009-07-02	08:46:00	0
2009-07-02	08:47:00	0
2009-07-02	08:48:00	0
2009-07-02	08:49:00	0
2009-07-02	08:50:00	0
2009-07-02	08:51:00	0
2009-07-02	08:52:00	0
2009-07-02	08:53:00	0
2009-07-02	08:54:00	0
2009-07-02	08:55:00	0
2009-07-02	08:56:00	0
2009-07-02	08:57:00	0
2009-07-02	08:58:00	0
2009-07-02	08:59:00	0
2009-07-02	09:00:00	0
2009-07-02	09:01:00	0
2009-07-02	09:02:00	0
2009-07-02	09:03:00	0
2009-07-02	09:04:00	0
2009-07-02	09:05:00	0
2009-07-02	09:06:00	0
2009-07-02	09:07:00	0
2009-07-02	09:08:00	0
2009-07-02	09:09:00	0
2009-07-02	09:10:00	0
2009-07-02	09:11:00	0
2009-07-02	09:12:00	0
2009-07-02	09:13:00	0
2009-07-02	09:14:00	0
2009-07-02	09:15:00	0
2009-07-02	09:16:00	0
2009-07-02	09:17:00	0
2009-07-02	09:18:00	0
2009-07-02	09:19:00	0
2009-07-02	09:20:00	0
2009-07-02	09:21:00	0
2009-07-02	09:22:00	0
2009-07-02	09:23:00	0
2009-07-02	09:24:00	0
2009-07-02	09:25:00	0
2009-07-02	09:26:00	0
2009-07-02	09:27:00	0
2009-07-02	09:28:00	0
2009-07-02	09:29:00	0
2009-07-02	09:30:00	0
2009-07-02	09:31:00	0
2009-07-02	09:32:00	0
2009-07-02	09:33:00	0
2009-07-02	09:34:00	0
2009-07-02	09:35:00	0
2009-07-02	09:36:00	0
2009-07-02	09:37:00	0
2009-07-02	09:38:00	0
2009-07-02	09:39:00	0
2009-07-02	09:40:00	0
2009-07-02	09:41:00	0
2009-07-02	09:42:00	0
2009-07-02	09:43:00	0
2009-07-02	09:44:00	0
2009-07-02	09:45:00	0
2009-07-02	09:46:00	0
2009-07-02	09:47:00	0
2009-07-02	09:48:00	0
2009-07-02	09:49:00	0
2009-07-02	09:50:00	0
2009-07-02	09:51:00	0
2009-07-02	09:52:00	0
2009-07-02	09:53:00	0
2009-07-02	09:54:00	0
2009-07-02	09:55:00	0
2009-07-02	09:56:00	0
2009-07-02	09:57:00	0
2009-07-02	09:58:00	0
2009-07-02	09:59:00	0
2009-07-02	10:00:00	0
2009-07-02	10:01:00	0
2009-07-02	10:02:00	0
2009-07-02	10:03:00	0
2009-07-02	10:04:00	0
2009-07-02	10:05:00	0
2009-07-02	10:06:00	0
2009-07-02	10:07:00	0
2009-07-02	10:08:00	0
2009-07-02	10:09:00	0
2009-07-02	10:10:00	0
2009-07-02	10:11:00	0
2009-07-02	10:12:00	0
2009-07-02	10:13:00	0
2009-07-02	10:14:00	0
2009-07-02	10:15:00	0
2009-07-02	10:16:00	0
2009-07-02	10:17:00	0
2009-07-02	10:18:00	0
2009-07-02	10:19:00	0
2009-07-02	10:20:00	0
2009-07-02	10:21:00	0
2009-07-02	10:22:00	0
2009-07-02	10:23:00	0
2009-07-02	10:24:00	0
2009-07-02	10:25:00	0
2009-07-02	10:26:00	0
2009-07-02	10:27:00	0
2009-07-02	10:28:00	0
2009-07-02	10:29:00	0
2009-07-02	10:30:00	0
2009-07-02	10:31:00	0
2009-07-02	10:32:00	0
2009-07-02	10:33:00	0
2009-07-02	10:34:00	0
2009-07-02	10:35:00	0
2009-07-02	10:36:00	0
2009-07-02	10:37:00	0
2009-07-02	10:38:00	0
2009-07-02	10:39:00	0
2009-07-02	10:40:00	0
2009-07-02	10:41:00	0
2009-07-02	10:42:00	0
2009-07-02	10:43:00	0
2009-07-02	10:44:00	0
2009-07-02	10:45:00	0
2009-07-02	10:46:00	0
2009-07-02	10:47:00	0
2009-07-02	10:48:00	0
2009-07-02	10:49:00	0
2009-07-02	10:50:00	0
2009-07-02	10:51:00	0
2009-07-02	10:52:00	0
2009-07-02	10:53:00	0
2009-07-02	10:54:00	0
2009-07-02	10:55:00	0
2009-07-02	10:56:00	0
2009-07-02	10:57:00	0
2009-07-02	10:58:00	0
2009-07-02	10:59:00	0
2009-07-02	11:00:00	0
2009-07-02	11:01:00	0
2009-07-02	11:02:00	0
2009-07-02	11:03:00	0
2009-07-02	11:04:00	0
2009-07-02	11:05:00	0
2009-07-02	11:06:00	0
2009-07-02	11:07:00	0
2009-07-02	11:08:00	0
2009-07-02	11:09:00	0
2009-07-02	11:10:00	0
2009-07-02	11:11:00	0
2009-07-02	11:12:00	0
2009-07-02	11:13:00	0
2009-07-02	11:14:00	0
2009-07-02	11:15:00	0
2009-07-02	11:16:00	0
2009-07-02	11:17:00	0
2009-07-02	11:18:00	0
2009-07-02	11:19:00	0
2009-07-02	11:20:00	0
2009-07-02	11:21:00	0
2009-07-02	11:22:00	0
2009-07-02	11:23:00	0
2009-07-02	11:24:00	0
2009-07-02	11:25:00	0
2009-07-02	11:26:00	0
2009-07-02	11:27:00	0
2009-07-02	11:28:00	0
2009-07-02	11:29:00	0
2009-07-02	11:30:00	0
2009-07-02	11:31:00	0
2009-07-02	11:32:00	0
2009-07-02	11:33:00	0
2009-07-02	11:34:00	0
2009-07-02	11:35:00	0
2009-07-02	11:36:00	0
2009-07-02	11:37:00	0
2009-07-02	11:38:00	0
2009-07-02	11:39:00	0
2009-07-02	11:40:00	0
2009-07-02	11:41:00	0
2009-07-02	11:42:00	0
2009-07-02	11:43:00	0
2009-07-02	11:44:00	0
2009-07-02	11:45:00	0
2009-07-02	11:46:00	0
2009-07-02	11:47:00	0
2009-07-02	11:48:00	0
2009-07-02	11:49:00	0
2009-07-02	11:50:00	0
2009-07-02	11:51:00	0
2009-07-02	11:52:00	0
2009-07-02	11:53:00	0
2009-07-02	11:54:00	0
2009-07-02	11:55:00	0
2009-07-02	11:56:00	0
2009-07-02	11:57:00	0
2009-07-02	11:58:00	0
2009-07-02	11:59:00	0
2009-07-02	12:00:00	0
2009-07-02	12:01:00	0
2009-07-02	12:02:00	0
2009-07-02	12:03:00	0
2009-07-02	12:04:00	0
2009-07-02	12:05:00	0
2009-07-02	12:06:00	0
2009-07-02	12:07:00	0
2009-07-02	12:08:00	0
2009-07-02	12:09:00	0
2009-07-02	12:10:00	0
2009-07-02	12:11:00	0
2009-07-02	12:12:00	0
2009-07-02	12:13:00	0
2009-07-02	12:14:00	0
2009-07-02	12:15:00	0
2009-07-02	12:16:00	0
2009-07-02	12:17:00	0
2009-07-02	12:18:00	0
2009-07-02	12:19:00	0
2009-07-02	12:20:00	0
2009-07-02	12:21:00	0
2009-07-02	12:22:00	0
2009-07-02	12:23:00	0
2009-07-02	12:24:00	0
2009-07-02	12:25:00	0
2009-07-02	12:26:00	0
2009-07-02	12:27:00	0
2009-07-02	12:28:00	0
2009-07-02	12:29:00	0
2009-07-02	12:30:00	0
2009-07-02	12:31:00	0
2009-07-02	12:32:00	0
2009-07-02	12:33:00	0
2009-07-02	12:34:00	0
2009-07-02	12:35:00	0
2009-07-02	12:36:00	0
2009-07-02	12:37:00	0
2009-07-02	12:38:00	0
2009-07-02	12:39:00	0
2009-07-02	12:40:00	0
2009-07-02	12:41:00	0
2009-07-02	12:42:00	0
2009-07-02	12:43:00	0
2009-07-02	12:44:00	0
2009-07-02	12:45:00	0
2009-07-02	12:46:00	0
2009-07-02	12:47:00	0
2009-07-02	12:48:00	0
2009-07-02	12:49:00	0
2009-07-02	12:50:00	0
2009-07-02	12:51:00	0
2009-07-02	12:52:00	0
2009-07-02	12:53:00	0
2009-07-02	12:54:00	0
2009-07-02	12:55:00	0
2009-07-02	12:56:00	0
2009-07-02	12:57:00	0
2009-07-02	12:58:00	0
2009-07-02	12:59:00	0
2009-07-02	13:00:00	0
2009-07-02	13:01:00	0
2009-07-02	13:02:00	0
2009-07-02	13:03:00	0
2009-07-02	13:04:00	0
2009-07-02	13:05:00	0
2009-07-02	13:06:00	0
2009-07-02	13:07:00	0
2009-07-02	13:08:00	0
2009-07-02	13:09:00	0
2009-07-02	13:10:00	0
2009-07-02	13:11:00	0
2009-07-02	13:12:00	0
2009-07-02	13:13:00	0
2009-07-02	13:14:00	0
2009-07-02	13:15:00	0
2009-07-02	13:16:00	0
2009-07-02	13:17:00	0
2009-07-02	13:18:00	0
2009-07-02	13:19:00	0
2009-07-02	13:20:00	0
2009-07-02	13:21:00	0
2009-07-02	13:22:00	0
2009-07-02	13:23:00	0
2009-07-02	13:24:00	0
2009-07-02	13:25:00	0
2009-07-02	13:26:00	0
2009-07-02	13:27:00	0
2009-07-02	13:28:00	0
2009-07-02	13:29:00	0
2009-07-02	13:30:00	0
2009-07-02	13:31:00	0
2009-07-02	13:32:00	0
2009-07-02	13:33:00	0
2009-07-02	13:34:00	0
2009-07-02	13:35:00	0
2009-07-02	13:36:00	0
2009-07-02	13:37:00	0
2009-07-02	13:38:00	0
2009-07-02	13:39:00	0
2009-07-02	13:40:00	0
2009-07-02	13:41:00	0
2009-07-02	13:42:00	0
2009-07-02	13:43:00	0
2009-07-02	13:44:00	0
2009-07-02	13:45:00	0
2009-07-02	13:46:00	0
2009-07-02	13:47:00	0
2009-07-02	13:48:00	0
2009-07-02	13:49:00	0
2009-07-02	13:50:00	0
2009-07-02	13:51:00	0
2009-07-02	13:52:00	0
2009-07-02	13:53:00	0
2009-07-02	13:54:00	0
2009-07-02	13:55:00	0
2009-07-02	13:56:00	0
2009-07-02	13:57:00	0
2009-07-02	13:58:00	0
2009-07-02	13:59:00	0
2009-07-02	14:00:00	0
2009-07-02	14:01:00	0
2009-07-02	14:02:00	0
2009-07-02	14:03:00	0
2009-07-02	14:04:00	0
2009-07-02	14:05:00	0
2009-07-02	14:06:00	0
2009-07-02	14:07:00	0
2009-07-02	14:08:00	0
2009-07-02	14:09:00	0
2009-07-02	14:10:00	0
2009-07-02	14:11:00	0
2009-07-02	14:12:00	0
2009-07-02	14:13:00	0
2009-07-02	14:14:00	0
2009-07-02	14:15:00	0
2009-07-02	14:16:00	0
2009-07-02	14:17:00	0
2009-07-02	14:18:00	0
2009-07-02	14:19:00	0
2009-07-02	14:20:00	0
2009-07-02	14:21:00	0
2009-07-02	14:22:00	0
2009-07-02	14:23:00	0
2009-07-02	14:24:00	0
2009-07-02	14:25:00	0
2009-07-02	14:26:00	0
2009-07-02	14:27:00	0
2009-07-02	14:28:00	0
2009-07-02	14:29:00	0
2009-07-02	14:30:00	0
2009-07-02	14:31:00	0
2009-07-02	14:32:00	0
2009-07-02	14:33:00	0
2009-07-02	14:34:00	0
2009-07-02	14:35:00	0
2009-07-02	14:36:00	0
2009-07-02	14:37:00	0
2009-07-02	14:38:00	0
2009-07-02	14:39:00	0
2009-07-02	14:40:00	0
2009-07-02	14:41:00	0
2009-07-02	14:42:00	0
2009-07-02	14:43:00	0
2009-07-02	14:44:00	0
2009-07-02	14:45:00	0
2009-07-02	14:46:00	0
2009-07-02	14:47:00	0
2009-07-02	14:48:00	0
2009-07-02	14:49:00	0
2009-07-02	14:50:00	0
2009-07-02	14:51:00	0
2009-07-02	14:52:00	0
2009-07-02	14:53:00	0
2009-07-02	14:54:00	0
2009-07-02	14:55:00	0
2009-07-02	14:56:00	0
2009-07-02	14:57:00	0
2009-07-02	14:58:00	0
2009-07-02	14:59:00	0
2009-07-02	15:00:00	0
2009-07-02	15:01:00	0
2009-07-02	15:02:00	0
2009-07-02	15:03:00	0
2009-07-02	15:04:00	0
2009-07-02	15:05:00	0
2009-07-02	15:06:00	0
2009-07-02	15:07:00	0
2009-07-02	15:08:00	0
2009-07-02	15:09:00	0
2009-07-02	15:10:00	0
2009-07-02	15:11:00	0
2009-07-02	15:12:00	0
2009-07-02	15:13:00	0
2009-07-02	15:14:00	0
2009-07-02	15:15:00	0
2009-07-02	15:16:00	0
2009-07-02	15:17:00	0
2009-07-02	15:18:00	0
2009-07-02	15:19:00	0
2009-07-02	15:20:00	0
2009-07-02	15:21:00	0
2009-07-02	15:22:00	0
2009-07-02	15:23:00	0
2009-07-02	15:24:00	0
2009-07-02	15:25:00	0
2009-07-02	15:26:00	0
2009-07-02	15:27:00	0
2009-07-02	15:28:00	0
2009-07-02	15:29:00	0
2009-07-02	15:30:00	0
2009-07-02	15:31:00	0
2009-07-02	15:32:00	0
2009-07-02	15:33:00	0
2009-07-02	15:34:00	0
2009-07-02	15:35:00	0
2009-07-02	15:36:00	0
2009-07-02	15:37:00	0
2009-07-02	15:38:00	0
2009-07-02	15:39:00	0
2009-07-02	15:40:00	0
2009-07-02	15:41:00	0
2009-07-02	15:42:00	0
2009-07-02	15:43:00	0
2009-07-02	15:44:00	0
2009-07-02	15:45:00	0
2009-07-02	15:46:00	0
2009-07-02	15:47:00	0
2009-07-02	15:48:00	0
2009-07-02	15:49:00	0
2009-07-02	15:50:00	0
2009-07-02	15:51:00	0
2009-07-02	15:52:00	0
2009-07-02	15:53:00	0
2009-07-02	15:54:00	0
2009-07-02	15:55:00	0
2009-07-02	15:56:00	0
2009-07-02	15:57:00	0
2009-07-02	15:58:00	0
2009-07-02	15:59:00	0
2009-07-02	16:00:00	0
2009-07-02	16:01:00	0
2009-07-02	16:02:00	0
2009-07-02	16:03:00	0
2009-07-02	16:04:00	0
2009-07-02	16:05:00	0
2009-07-02	16:06:00	0
2009-07-02	16:07:00	0
2009-07-02	16:08:00	0
2009-07-02	16:09:00	0
2009-07-02	16:10:00	0
2009-07-02	16:11:00	0
2009-07-02	16:12:00	0
2009-07-02	16:13:00	0
2009-07-02	16:14:00	0
2009-07-02	16:15:00	0
2009-07-02	16:16:00	0
2009-07-02	16:17:00	0
2009-07-02	16:18:00	0
2009-07-02	16:19:00	0
2009-07-02	16:20:00	0
2009-07-02	16:21:00	0
2009-07-02	16:22:00	0
2009-07-02	16:23:00	0
2009-07-02	16:24:00	0
2009-07-02	16:25:00	0
2009-07-02	16:26:00	0
2009-07-02	16:27:00	0
2009-07-02	16:28:00	0
2009-07-02	16:29:00	0
2009-07-02	16:30:00	0
2009-07-02	16:31:00	0
2009-07-02	16:32:00	0
2009-07-02	16:33:00	0
2009-07-02	16:34:00	0
2009-07-02	16:35:00	0
2009-07-02	16:36:00	0
2009-07-02	16:37:00	0
2009-07-02	16:38:00	0
2009-07-02	16:39:00	0
2009-07-02	16:40:00	0
2009-07-02	16:41:00	0
2009-07-02	16:42:00	0
2009-07-02	16:43:00	0
2009-07-02	16:44:00	0
2009-07-02	16:45:00	0
2009-07-02	16:46:00	0
2009-07-02	16:47:00	0
2009-07-02	16:48:00	0
2009-07-02	16:49:00	0
2009-07-02	16:50:00	0
2009-07-02	16:51:00	0
2009-07-02	16:52:00	0
2009-07-02	16:53:00	0
2009-07-02	16:54:00	0
2009-07-02	16:55:00	0
2009-07-02	16:56:00	0
2009-07-02	16:57:00	0
2009-07-02	16:58:00	0
2009-07-02	16:59:00	0
2009-07-02	17:00:00	0
2009-07-02	17:01:00	0
2009-07-02	17:02:00	0
2009-07-02	17:03:00	0
2009-07-02	17:04:00	0
2009-07-02	17:05:00	0
2009-07-02	17:06:00	0
2009-07-02	17:07:00	0
2009-07-02	17:08:00	0
2009-07-02	17:09:00	0
2009-07-02	17:10:00	0
2009-07-02	17:11:00	0
2009-07-02	17:12:00	0
2009-07-02	17:13:00	0
2009-07-02	17:14:00	0
2009-07-02	17:15:00	0
2009-07-02	17:16:00	0
2009-07-02	17:17:00	0
2009-07-02	17:18:00	0
2009-07-02	17:19:00	0
2009-07-02	17:20:00	0
2009-07-02	17:21:00	0
2009-07-02	17:22:00	0
2009-07-02	17:23:00	0
2009-07-02	17:24:00	0
2009-07-02	17:25:00	0
2009-07-02	17:26:00	0
2009-07-02	17:27:00	0
2009-07-02	17:28:00	0
2009-07-02	17:29:00	0
2009-07-02	17:30:00	0
2009-07-02	17:31:00	0
2009-07-02	17:32:00	0
2009-07-02	17:33:00	0
2009-07-02	17:34:00	0
2009-07-02	17:35:00	0
2009-07-02	17:36:00	0
2009-07-02	17:37:00	0
2009-07-02	17:38:00	0
2009-07-02	17:39:00	0
2009-07-02	17:40:00	0
2009-07-02	17:41:00	0
2009-07-02	17:42:00	0
2009-07-02	17:43:00	0
2009-07-02	17:44:00	0
2009-07-02	17:45:00	0
2009-07-02	17:46:00	0
2009-07-02	17:47:00	0
2009-07-02	17:48:00	0
2009-07-02	17:49:00	0
2009-07-02	17:50:00	0
2009-07-02	17:51:00	0
2009-07-02	17:52:00	0
2009-07-02	17:53:00	0
2009-07-02	17:54:00	0
2009-07-02	17:55:00	0
2009-07-02	17:56:00	0
2009-07-02	17:57:00	0
2009-07-02	17:58:00	0
2009-07-02	17:59:00	0
2009-07-02	18:00:00	0	M
2009-07-02	18:01:00	36
2009-07-02	18:02:00	0
2009-07-02	18:03:00	52
2009-07-02	18:04:00	21
2009-07-02	18:05:00	31
2009-07-02	18:06:00	5
2009-07-02	18:07:00	21
2009-07-02	18:08:00	41
2009-07-02	18:09:00	0
2009-07-02	18:10:00	92
2009-07-02	18:11:00	0
2009-07-02	18:12:00	0
2009-07-02	18:13:00	0
2009-07-02	18:14:00	0
2009-07-02	18:15:00	0
2009-07-02	18:16:00	0
2009-07-02	18:17:00	79
2009-07-02	18:18:00	0
2009-07-02	18:19:00	31
2009-07-02	18:20:00	0
2009-07-02	18:21:00	0
2009-07-02	18:22:00	0
2009-07-02	18:23:00	0
2009-07-02	18:24:00	0
2009-07-02	18:25:00	41
2009-07-02	18:26:00	0
2009-07-02	18:27:00	209
2009-07-02	18:28:00	150
2009-07-02	18:29:00	209
2009-07-02	18:30:00	15
2009-07-02	18:31:00	0
2009-07-02	18:32:00	0
2009-07-02	18:33:00	0
2009-07-02	18:34:00	15
2009-07-02	18:35:00	472
2009-07-02	18:36:00	615
2009-07-02	18:37:00	5
2009-07-02	18:38:00	285
2009-07-02	18:39:00	129
2009-07-02	18:40:00	415
2009-07-02	18:41:00	104
2009-07-02	18:42:00	426
2009-07-02	18:43:00	484
2009-07-02	18:44:00	135
2009-07-02	18:45:00	164
2009-07-02	18:46:00	5
2009-07-02	18:47:00	303
2009-07-02	18:48:00	41
2009-07-02	18:49:00	150
2009-07-02	18:50:00	200
2009-07-02	18:51:00	92
2009-07-02	18:52:00	5
2009-07-02	18:53:00	484
2009-07-02	18:54:00	547
2009-07-02	18:55:00	258
2009-07-02	18:56:00	393
2009-07-02	18:57:00	574
2009-07-02	18:58:00	104
2009-07-02	18:59:00	10
2009-07-02	19:00:00	0
2009-07-02	19:01:00	0
2009-07-02	19:02:00	0
2009-07-02	19:03:00	73
2009-07-02	19:04:00	0
2009-07-02	19:05:00	46
2009-07-02	19:06:00	31
2009-07-02	19:07:00	62
2009-07-02	19:08:00	0
2009-07-02	19:09:00	0
2009-07-02	19:10:00	57
2009-07-02	19:11:00	449
2009-07-02	19:12:00	242
2009-07-02	19:13:00	15
2009-07-02	19:14:00	5
2009-07-02	19:15:00	164
2009-07-02	19:16:00	110
2009-07-02	19:17:00	73
2009-07-02	19:18:00	31
2009-07-02	19:19:00	15
2009-07-02	19:20:00	26
2009-07-02	19:21:00	5
2009-07-02	19:22:00	5
2009-07-02	19:23:00	0
2009-07-02	19:24:00	0
2009-07-02	19:25:00	0
2009-07-02	19:26:00	0
2009-07-02	19:27:00	258
2009-07-02	19:28:00	150
2009-07-02	19:29:00	179
2009-07-02	19:30:00	150
2009-07-02	19:31:00	0
2009-07-02	19:32:00	79
2009-07-02	19:33:00	404
2009-07-02	19:34:00	509
2009-07-02	19:35:00	393
2009-07-02	19:36:00	179
2009-07-02	19:37:00	0
2009-07-02	19:38:00	31
2009-07-02	19:39:00	15
2009-07-02	19:40:00	52
2009-07-02	19:41:00	79
2009-07-02	19:42:00	258
2009-07-02	19:43:00	947
2009-07-02	19:44:00	98
2009-07-02	19:45:00	836
2009-07-02	19:46:00	836
2009-07-02	19:47:00	79
2009-07-02	19:48:00	1715
2009-07-02	19:49:00	4000
2009-07-02	19:50:00	2531
2009-07-02	19:51:00	322
2009-07-02	19:52:00	294
2009-07-02	19:53:00	209
2009-07-02	19:54:00	242
2009-07-02	19:55:00	193
2009-07-02	19:56:00	200
2009-07-02	19:57:00	719
2009-07-02	19:58:00	373
2009-07-02	19:59:00	0
2009-07-02	20:00:00	0
2009-07-02	20:01:00	41
2009-07-02	20:02:00	5
2009-07-02	20:03:00	331
2009-07-02	20:04:00	62
2009-07-02	20:05:00	0
2009-07-02	20:06:00	0
2009-07-02	20:07:00	57
2009-07-02	20:08:00	0
2009-07-02	20:09:00	21
2009-07-02	20:10:00	0
2009-07-02	20:11:00	0
2009-07-02	20:12:00	0
2009-07-02	20:13:00	0
2009-07-02	20:14:00	0
2009-07-02	20:15:00	0
2009-07-02	20:16:00	0
2009-07-02	20:17:00	5
2009-07-02	20:18:00	0
2009-07-02	20:19:00	0
2009-07-02	20:20:00	0
2009-07-02	20:21:00	0
2009-07-02	20:22:00	21
2009-07-02	20:23:00	41
2009-07-02	20:24:00	46
2009-07-02	20:25:00	26
2009-07-02	20:26:00	383
2009-07-02	20:27:00	0
2009-07-02	20:28:00	5
2009-07-02	20:29:00	15
2009-07-02	20:30:00	0
2009-07-02	20:31:00	5
2009-07-02	20:32:00	209
2009-07-02	20:33:00	0
2009-07-02	20:34:00	0
2009-07-02	20:35:00	0
2009-07-02	20:36:00	285
2009-07-02	20:37:00	209
2009-07-02	20:38:00	179
2009-07-02	20:39:00	0
2009-07-02	20:40:00	0
2009-07-02	20:41:00	0
2009-07-02	20:42:00	200
2009-07-02	20:43:00	0
2009-07-02	20:44:00	5
2009-07-02	20:45:00	0
2009-07-02	20:46:00	0
2009-07-02	20:47:00	0
2009-07-02	20:48:00	0
2009-07-02	20:49:00	0
2009-07-02	20:50:00	0
2009-07-02	20:51:00	129
2009-07-02	20:52:00	285
2009-07-02	20:53:00	0
2009-07-02	20:54:00	0
2009-07-02	20:55:00	0
2009-07-02	20:56:00	0
2009-07-02	20:57:00	0
2009-07-02	20:58:00	0
2009-07-02	20:59:00	0
2009-07-02	21:00:00	0
2009-07-02	21:01:00	0
2009-07-02	21:02:00	0
2009-07-02	21:03:00	0
2009-07-02	21:04:00	0
2009-07-02	21:05:00	0
2009-07-02	21:06:00	46
2009-07-02	21:07:00	0
2009-07-02	21:08:00	0
2009-07-02	21:09:00	0
2009-07-02	21:10:00	150
2009-07-02	21:11:00	0
2009-07-02	21:12:00	0
2009-07-02	21:13:00	0
2009-07-02	21:14:00	0
2009-07-02	21:15:00	46
2009-07-02	21:16:00	0
2009-07-02	21:17:00	0
2009-07-02	21:18:00	0
2009-07-02	21:19:00	0
2009-07-02	21:20:00	0
2009-07-02	21:21:00	0
2009-07-02	21:22:00	0
2009-07-02	21:23:00	0
2009-07-02	21:24:00	0
2009-07-02	21:25:00	0
2009-07-02	21:26:00	0
2009-07-02	21:27:00	0
2009-07-02	21:28:00	0
2009-07-02	21:29:00	0
2009-07-02	21:30:00	0
2009-07-02	21:31:00	92
2009-07-02	21:32:00	5
2009-07-02	21:33:00	5
2009-07-02	21:34:00	0
2009-07-02	21:35:00	21
2009-07-02	21:36:00	0
2009-07-02	21:37:00	0
2009-07-02	21:38:00	15
2009-07-02	21:39:00	0
2009-07-02	21:40:00	0
2009-07-02	21:41:00	62
2009-07-02	21:42:00	0
2009-07-02	21:43:00	0
2009-07-02	21:44:00	0
2009-07-02	21:45:00	0
2009-07-02	21:46:00	0
2009-07-02	21:47:00	0
2009-07-02	21:48:00	0
2009-07-02	21:49:00	0
2009-07-02	21:50:00	0
2009-07-02	21:51:00	0
2009-07-02	21:52:00	0
2009-07-02	21:53:00	0
2009-07-02	21:54:00	0
2009-07-02	21:55:00	0
2009-07-02	21:56:00	0
2009-07-02	21:57:00	0
2009-07-02	21:58:00	0
2009-07-02	21:59:00	5
2009-07-02	22:00:00	0
2009-07-02	22:01:00	0
2009-07-02	22:02:00	0
2009-07-02	22:03:00	0
2009-07-02	22:04:00	0
2009-07-02	22:05:00	0
2009-07-02	22:06:00	92
2009-07-02	22:07:00	26
2009-07-02	22:08:00	171
2009-07-02	22:09:00	142
2009-07-02	22:10:00	0
2009-07-02	22:11:00	0
2009-07-02	22:12:00	0
2009-07-02	22:13:00	0
2009-07-02	22:14:00	0
2009-07-02	22:15:00	0
2009-07-02	22:16:00	0
2009-07-02	22:17:00	0
2009-07-02	22:18:00	0
2009-07-02	22:19:00	0
2009-07-02	22:20:00	0
2009-07-02	22:21:00	0
2009-07-02	22:22:00	0
2009-07-02	22:23:00	0
2009-07-02	22:24:00	0
2009-07-02	22:25:00	0
2009-07-02	22:26:00	0
2009-07-02	22:27:00	0
2009-07-02	22:28:00	46
2009-07-02	22:29:00	0
2009-07-02	22:30:00	0
2009-07-02	22:31:00	0
2009-07-02	22:32:00	26
2009-07-02	22:33:00	630
2009-07-02	22:34:00	258
2009-07-02	22:35:00	0
2009-07-02	22:36:00	0
2009-07-02	22:37:00	0
2009-07-02	22:38:00	0
2009-07-02	22:39:00	0
2009-07-02	22:40:00	0
2009-07-02	22:41:00	0
2009-07-02	22:42:00	0
2009-07-02	22:43:00	0
2009-07-02	22:44:00	0
2009-07-02	22:45:00	0
2009-07-02	22:46:00	0
2009-07-02	22:47:00	0
2009-07-02	22:48:00	36
2009-07-02	22:49:00	46
2009-07-02	22:50:00	0
2009-07-02	22:51:00	0
2009-07-02	22:52:00	0
2009-07-02	22:53:00	0
2009-07-02	22:54:00	0
2009-07-02	22:55:00	0
2009-07-02	22:56:00	0
2009-07-02	22:57:00	0
2009-07-02	22:58:00	0
2009-07-02	22:59:00	0
2009-07-02	23:00:00	10
2009-07-02	23:01:00	0
2009-07-02	23:02:00	0
2009-07-02	23:03:00	0
2009-07-02	23:04:00	10
2009-07-02	23:05:00	10
2009-07-02	23:06:00	0
2009-07-02	23:07:00	0
2009-07-02	23:08:00	0
2009-07-02	23:09:00	0
2009-07-02	23:10:00	0
2009-07-02	23:11:00	0
2009-07-02	23:12:00	0
2009-07-02	23:13:00	0
2009-07-02	23:14:00	0
2009-07-02	23:15:00	0
2009-07-02	23:16:00	0
2009-07-02	23:17:00	0
2009-07-02	23:18:00	0
2009-07-02	23:19:00	0
2009-07-02	23:20:00	0
2009-07-02	23:21:00	0
2009-07-02	23:22:00	0
2009-07-02	23:23:00	0
2009-07-02	23:24:00	0
2009-07-02	23:25:00	0
2009-07-02	23:26:00	10
2009-07-02	23:27:00	117
2009-07-02	23:28:00	209
2009-07-02	23:29:00	26
2009-07-02	23:30:00	0
2009-07-02	23:31:00	0
2009-07-02	23:32:00	0
2009-07-02	23:33:00	0
2009-07-02	23:34:00	0
2009-07-02	23:35:00	0
2009-07-02	23:36:00	5
2009-07-02	23:37:00	0
2009-07-02	23:38:00	0
2009-07-02	23:39:00	0
2009-07-02	23:40:00	0
2009-07-02	23:41:00	0
2009-07-02	23:42:00	26
2009-07-02	23:43:00	15
2009-07-02	23:44:00	0
2009-07-02	23:45:00	0
2009-07-02	23:46:00	67
2009-07-02	23:47:00	21
2009-07-02	23:48:00	0
2009-07-02	23:49:00	574
2009-07-02	23:50:00	21
2009-07-02	23:51:00	801
2009-07-02	23:52:00	785
2009-07-02	23:53:00	1653
2009-07-02	23:54:00	460
2009-07-02	23:55:00	0
2009-07-02	23:56:00	15
2009-07-02	23:57:00	117
2009-07-02	23:58:00	266
2009-07-02	23:59:00	0
2009-07-03	00:00:00	0
2009-07-03	00:01:00	0
2009-07-03	00:02:00	0
2009-07-03	00:03:00	0
2009-07-03	00:04:00	0
2009-07-03	00:05:00	0
2009-07-03	00:06:00	0
2009-07-03	00:07:00	0
2009-07-03	00:08:00	0
2009-07-03	00:09:00	0
2009-07-03	00:10:00	0
2009-07-03	00:11:00	0
2009-07-03	00:12:00	0
2009-07-03	00:13:00	0
2009-07-03	00:14:00	0
2009-07-03	00:15:00	0
2009-07-03	00:16:00	0
2009-07-03	00:17:00	0
2009-07-03	00:18:00	0
2009-07-03	00:19:00	0
2009-07-03	00:20:00	0
2009-07-03	00:21:00	0
2009-07-03	00:22:00	0
2009-07-03	00:23:00	0
2009-07-03	00:24:00	0
2009-07-03	00:25:00	0
2009-07-03	00:26:00	0
2009-07-03	00:27:00	0
2009-07-03	00:28:00	0
2009-07-03	00:29:00	0
2009-07-03	00:30:00	0
2009-07-03	00:31:00	0
2009-07-03	00:32:00	0
2009-07-03	00:33:00	0
2009-07-03	00:34:00	0
2009-07-03	00:35:00	0
2009-07-03	00:36:00	0
2009-07-03	00:37:00	0
2009-07-03	00:38:00	0
2009-07-03	00:39:00	0
2009-07-03	00:40:00	15
2009-07-03	00:41:00	62
2009-07-03	00:42:00	0
2009-07-03	00:43:00	0
2009-07-03	00:44:00	0
2009-07-03	00:45:00	0
2009-07-03	00:46:00	0
2009-07-03	00:47:00	0
2009-07-03	00:48:00	0
2009-07-03	00:49:00	0
2009-07-03	00:50:00	0
2009-07-03	00:51:00	0
2009-07-03	00:52:00	0
2009-07-03	00:53:00	0
2009-07-03	00:54:00	0
2009-07-03	00:55:00	0
2009-07-03	00:56:00	0
2009-07-03	00:57:00	0
2009-07-03	00:58:00	0
2009-07-03	00:59:00	0
2009-07-03	01:00:00	0
2009-07-03	01:01:00	0
2009-07-03	01:02:00	0
2009-07-03	01:03:00	0
2009-07-03	01:04:00	0
2009-07-03	01:05:00	0
2009-07-03	01:06:00	0
2009-07-03	01:07:00	0
2009-07-03	01:08:00	0
2009-07-03	01:09:00	0
2009-07-03	01:10:00	0
2009-07-03	01:11:00	0
2009-07-03	01:12:00	0
2009-07-03	01:13:00	92
2009-07-03	01:14:00	0
2009-07-03	01:15:00	0
2009-07-03	01:16:00	0
2009-07-03	01:17:00	0
2009-07-03	01:18:00	0
2009-07-03	01:19:00	0
2009-07-03	01:20:00	0
2009-07-03	01:21:00	0
2009-07-03	01:22:00	0
2009-07-03	01:23:00	0
2009-07-03	01:24:00	0
2009-07-03	01:25:00	0
2009-07-03	01:26:00	0
2009-07-03	01:27:00	0
2009-07-03	01:28:00	0
2009-07-03	01:29:00	0
2009-07-03	01:30:00	0
2009-07-03	01:31:00	0
2009-07-03	01:32:00	0
2009-07-03	01:33:00	0
2009-07-03	01:34:00	0
2009-07-03	01:35:00	0
2009-07-03	01:36:00	0
2009-07-03	01:37:00	0
2009-07-03	01:38:00	0
2009-07-03	01:39:00	10
2009-07-03	01:40:00	0
2009-07-03	01:41:00	0
2009-07-03	01:42:00	0
2009-07-03	01:43:00	0
2009-07-03	01:44:00	0
2009-07-03	01:45:00	0
2009-07-03	01:46:00	0
2009-07-03	01:47:00	0
2009-07-03	01:48:00	0
2009-07-03	01:49:00	0
2009-07-03	01:50:00	0
2009-07-03	01:51:00	0
2009-07-03	01:52:00	0
2009-07-03	01:53:00	0
2009-07-03	01:54:00	0
2009-07-03	01:55:00	15
2009-07-03	01:56:00	0
2009-07-03	01:57:00	26
2009-07-03	01:58:00	266
2009-07-03	01:59:00	179
2009-07-03	02:00:00	0
2009-07-03	02:01:00	0
2009-07-03	02:02:00	0
2009-07-03	02:03:00	0
2009-07-03	02:04:00	0
2009-07-03	02:05:00	0
2009-07-03	02:06:00	0
2009-07-03	02:07:00	0
2009-07-03	02:08:00	0
2009-07-03	02:09:00	0
2009-07-03	02:10:00	0
2009-07-03	02:11:00	0
2009-07-03	02:12:00	0
2009-07-03	02:13:00	0
2009-07-03	02:14:00	0
2009-07-03	02:15:00	0
2009-07-03	02:16:00	0
2009-07-03	02:17:00	0
2009-07-03	02:18:00	0
2009-07-03	02:19:00	0
2009-07-03	02:20:00	36
2009-07-03	02:21:00	0
2009-07-03	02:22:00	0
2009-07-03	02:23:00	0
2009-07-03	02:24:00	0
2009-07-03	02:25:00	0
2009-07-03	02:26:00	0
2009-07-03	02:27:00	0
2009-07-03	02:28:00	0
2009-07-03	02:29:00	0
2009-07-03	02:30:00	0
2009-07-03	02:31:00	0
2009-07-03	02:32:00	0
2009-07-03	02:33:00	0
2009-07-03	02:34:00	0
2009-07-03	02:35:00	0
2009-07-03	02:36:00	0
2009-07-03	02:37:00	0
2009-07-03	02:38:00	0
2009-07-03	02:39:00	0
2009-07-03	02:40:00	0
2009-07-03	02:41:00	0
2009-07-03	02:42:00	0
2009-07-03	02:43:00	0
2009-07-03	02:44:00	0
2009-07-03	02:45:00	0
2009-07-03	02:46:00	0
2009-07-03	02:47:00	0
2009-07-03	02:48:00	0
2009-07-03	02:49:00	0
2009-07-03	02:50:00	0
2009-07-03	02:51:00	0
2009-07-03	02:52:00	0
2009-07-03	02:53:00	0
2009-07-03	02:54:00	0
2009-07-03	02:55:00	0
2009-07-03	02:56:00	0
2009-07-03	02:57:00	0
2009-07-03	02:58:00	0
2009-07-03	02:59:00	0
2009-07-03	03:00:00	0
2009-07-03	03:01:00	0
2009-07-03	03:02:00	5
2009-07-03	03:03:00	0
2009-07-03	03:04:00	0
2009-07-03	03:05:00	0
2009-07-03	03:06:00	0
2009-07-03	03:07:00	0
2009-07-03	03:08:00	0
2009-07-03	03:09:00	0
2009-07-03	03:10:00	0
2009-07-03	03:11:00	0
2009-07-03	03:12:00	0
2009-07-03	03:13:00	0
2009-07-03	03:14:00	0
2009-07-03	03:15:00	0
2009-07-03	03:16:00	0
2009-07-03	03:17:00	0
2009-07-03	03:18:00	0
2009-07-03	03:19:00	0
2009-07-03	03:20:00	0
2009-07-03	03:21:00	31
2009-07-03	03:22:00	0
2009-07-03	03:23:00	0
2009-07-03	03:24:00	0
2009-07-03	03:25:00	0
2009-07-03	03:26:00	0
2009-07-03	03:27:00	0
2009-07-03	03:28:00	0
2009-07-03	03:29:00	0
2009-07-03	03:30:00	0
2009-07-03	03:31:00	0
2009-07-03	03:32:00	0
2009-07-03	03:33:00	0
2009-07-03	03:34:00	0
2009-07-03	03:35:00	0
2009-07-03	03:36:00	0
2009-07-03	03:37:00	0
2009-07-03	03:38:00	0
2009-07-03	03:39:00	0
2009-07-03	03:40:00	0
2009-07-03	03:41:00	0
2009-07-03	03:42:00	0
2009-07-03	03:43:00	0
2009-07-03	03:44:00	0
2009-07-03	03:45:00	5
2009-07-03	03:46:00	15
2009-07-03	03:47:00	0
2009-07-03	03:48:00	0
2009-07-03	03:49:00	0
2009-07-03	03:50:00	0
2009-07-03	03:51:00	0
2009-07-03	03:52:00	0
2009-07-03	03:53:00	0
2009-07-03	03:54:00	0
2009-07-03	03:55:00	0
2009-07-03	03:56:00	0
2009-07-03	03:57:00	0
2009-07-03	03:58:00	0
2009-07-03	03:59:00	0
2009-07-03	04:00:00	0
2009-07-03	04:01:00	0
2009-07-03	04:02:00	0
2009-07-03	04:03:00	0
2009-07-03	04:04:00	0
2009-07-03	04:05:00	0
2009-07-03	04:06:00	0
2009-07-03	04:07:00	0
2009-07-03	04:08:00	0
2009-07-03	04:09:00	0
2009-07-03	04:10:00	0
2009-07-03	04:11:00	0
2009-07-03	04:12:00	0
2009-07-03	04:13:00	0
2009-07-03	04:14:00	0
2009-07-03	04:15:00	0
2009-07-03	04:16:00	0
2009-07-03	04:17:00	0
2009-07-03	04:18:00	0
2009-07-03	04:19:00	0
2009-07-03	04:20:00	0
2009-07-03	04:21:00	0
2009-07-03	04:22:00	0
2009-07-03	04:23:00	0
2009-07-03	04:24:00	0
2009-07-03	04:25:00	0
2009-07-03	04:26:00	0
2009-07-03	04:27:00	0
2009-07-03	04:28:00	0
2009-07-03	04:29:00	0
2009-07-03	04:30:00	0
2009-07-03	04:31:00	31
2009-07-03	04:32:00	233
2009-07-03	04:33:00	0
2009-07-03	04:34:00	0
2009-07-03	04:35:00	0
2009-07-03	04:36:00	0
2009-07-03	04:37:00	0
2009-07-03	04:38:00	0
2009-07-03	04:39:00	0
2009-07-03	04:40:00	0
2009-07-03	04:41:00	0
2009-07-03	04:42:00	0
2009-07-03	04:43:00	0
2009-07-03	04:44:00	5
2009-07-03	04:45:00	10
2009-07-03	04:46:00	0
2009-07-03	04:47:00	0
2009-07-03	04:48:00	0
2009-07-03	04:49:00	0
2009-07-03	04:50:00	0
2009-07-03	04:51:00	0
2009-07-03	04:52:00	0
2009-07-03	04:53:00	0
2009-07-03	04:54:00	0
2009-07-03	04:55:00	0
2009-07-03	04:56:00	0
2009-07-03	04:57:00	0
2009-07-03	04:58:00	0
2009-07-03	04:59:00	0
2009-07-03	05:00:00	0
2009-07-03	05:01:00	0
2009-07-03	05:02:00	0
2009-07-03	05:03:00	0
2009-07-03	05:04:00	0
2009-07-03	05:05:00	0
2009-07-03	05:06:00	46
2009-07-03	05:07:00	0
2009-07-03	05:08:00	0
2009-07-03	05:09:00	0
2009-07-03	05:10:00	0
2009-07-03	05:11:00	0
2009-07-03	05:12:00	0
2009-07-03	05:13:00	0
2009-07-03	05:14:00	0
2009-07-03	05:15:00	0
2009-07-03	05:16:00	0
2009-07-03	05:17:00	0
2009-07-03	05:18:00	0
2009-07-03	05:19:00	0
2009-07-03	05:20:00	0
2009-07-03	05:21:00	0
2009-07-03	05:22:00	0
2009-07-03	05:23:00	0
2009-07-03	05:24:00	0
2009-07-03	05:25:00	0
2009-07-03	05:26:00	0
2009-07-03	05:27:00	0
2009-07-03	05:28:00	0
2009-07-03	05:29:00	52
2009-07-03	05:30:00	5
2009-07-03	05:31:00	0
2009-07-03	05:32:00	0
2009-07-03	05:33:00	62
2009-07-03	05:34:00	41
2009-07-03	05:35:00	5
2009-07-03	05:36:00	0
2009-07-03	05:37:00	0
2009-07-03	05:38:00	0
2009-07-03	05:39:00	0
2009-07-03	05:40:00	0
2009-07-03	05:41:00	0
2009-07-03	05:42:00	5
2009-07-03	05:43:00	0
2009-07-03	05:44:00	0
2009-07-03	05:45:00	31
2009-07-03	05:46:00	0
2009-07-03	05:47:00	0
2009-07-03	05:48:00	0
2009-07-03	05:49:00	0
2009-07-03	05:50:00	41
2009-07-03	05:51:00	0
2009-07-03	05:52:00	0
2009-07-03	05:53:00	0
2009-07-03	05:54:00	0
2009-07-03	05:55:00	0
2009-07-03	05:56:00	0
2009-07-03	05:57:00	0
2009-07-03	05:58:00	0
2009-07-03	05:59:00	0
2009-07-03	06:00:00	0
2009-07-03	06:01:00	0
2009-07-03	06:02:00	0
2009-07-03	06:03:00	0
2009-07-03	06:04:00	0
2009-07-03	06:05:00	0
2009-07-03	06:06:00	0
2009-07-03	06:07:00	0
2009-07-03	06:08:00	0
2009-07-03	06:09:00	0
2009-07-03	06:10:00	0
2009-07-03	06:11:00	0
2009-07-03	06:12:00	0
2009-07-03	06:13:00	0
2009-07-03	06:14:00	0
2009-07-03	06:15:00	0
2009-07-03	06:16:00	0
2009-07-03	06:17:00	0
2009-07-03	06:18:00	0
2009-07-03	06:19:00	0
2009-07-03	06:20:00	0
2009-07-03	06:21:00	0
2009-07-03	06:22:00	36
2009-07-03	06:23:00	5
2009-07-03	06:24:00	0
2009-07-03	06:25:00	0
2009-07-03	06:26:00	0
2009-07-03	06:27:00	0
2009-07-03	06:28:00	0
2009-07-03	06:29:00	0
2009-07-03	06:30:00	0
2009-07-03	06:31:00	5
2009-07-03	06:32:00	15
2009-07-03	06:33:00	98
2009-07-03	06:34:00	104
2009-07-03	06:35:00	10
2009-07-03	06:36:00	15
2009-07-03	06:37:00	117
2009-07-03	06:38:00	0
2009-07-03	06:39:00	0
2009-07-03	06:40:00	0
2009-07-03	06:41:00	0
2009-07-03	06:42:00	0
2009-07-03	06:43:00	0
2009-07-03	06:44:00	0
2009-07-03	06:45:00	0
2009-07-03	06:46:00	0
2009-07-03	06:47:00	10
2009-07-03	06:48:00	0
2009-07-03	06:49:00	0
2009-07-03	06:50:00	0
2009-07-03	06:51:00	0
2009-07-03	06:52:00	0
2009-07-03	06:53:00	0
2009-07-03	06:54:00	15
2009-07-03	06:55:00	0
2009-07-03	06:56:00	0
2009-07-03	06:57:00	0
2009-07-03	06:58:00	0
2009-07-03	06:59:00	0
2009-07-03	07:00:00	0
2009-07-03	07:01:00	26
2009-07-03	07:02:00	0
2009-07-03	07:03:00	0
2009-07-03	07:04:00	0
2009-07-03	07:05:00	0
2009-07-03	07:06:00	0
2009-07-03	07:07:00	0
2009-07-03	07:08:00	0
2009-07-03	07:09:00	0
2009-07-03	07:10:00	0
2009-07-03	07:11:00	0
2009-07-03	07:12:00	21
2009-07-03	07:13:00	0
2009-07-03	07:14:00	0
2009-07-03	07:15:00	0
2009-07-03	07:16:00	46
2009-07-03	07:17:00	5
2009-07-03	07:18:00	41
2009-07-03	07:19:00	57
2009-07-03	07:20:00	46
2009-07-03	07:21:00	36
2009-07-03	07:22:00	21
2009-07-03	07:23:00	0
2009-07-03	07:24:00	15
2009-07-03	07:25:00	15
2009-07-03	07:26:00	15
2009-07-03	07:27:00	21
2009-07-03	07:28:00	31
2009-07-03	07:29:00	0
2009-07-03	07:30:00	46
2009-07-03	07:31:00	36
2009-07-03	07:32:00	0
2009-07-03	07:33:00	0
2009-07-03	07:34:00	0
2009-07-03	07:35:00	0
2009-07-03	07:36:00	0
2009-07-03	07:37:00	0
2009-07-03	07:38:00	0
2009-07-03	07:39:00	0
2009-07-03	07:40:00	0
2009-07-03	07:41:00	67
2009-07-03	07:42:00	0
2009-07-03	07:43:00	62
2009-07-03	07:44:00	79
2009-07-03	07:45:00	322
2009-07-03	07:46:00	67
2009-07-03	07:47:00	10
2009-07-03	07:48:00	57
2009-07-03	07:49:00	0
2009-07-03	07:50:00	313
2009-07-03	07:51:00	62
2009-07-03	07:52:00	313
2009-07-03	07:53:00	67
2009-07-03	07:54:00	57
2009-07-03	07:55:00	117
2009-07-03	07:56:00	986
2009-07-03	07:57:00	1810
2009-07-03	07:58:00	854
2009-07-03	07:59:00	1321
2009-07-03	08:00:00	1026
2009-07-03	08:01:00	574
2009-07-03	08:02:00	630
2009-07-03	08:03:00	587
2009-07-03	08:04:00	1944
2009-07-03	08:05:00	2488
2009-07-03	08:06:00	1272
2009-07-03	08:07:00	1684
2009-07-03	08:08:00	871
2009-07-03	08:09:00	704
2009-07-03	08:10:00	1426
2009-07-03	08:11:00	836
2009-07-03	08:12:00	768
2009-07-03	08:13:00	1347
2009-07-03	08:14:00	1564
2009-07-03	08:15:00	719
2009-07-03	08:16:00	26
2009-07-03	08:17:00	1623
2009-07-03	08:18:00	2124
2009-07-03	08:19:00	41
2009-07-03	08:20:00	472
2009-07-03	08:21:00	574
2009-07-03	08:22:00	352
2009-07-03	08:23:00	785
2009-07-03	08:24:00	630
2009-07-03	08:25:00	547
2009-07-03	08:26:00	1026
2009-07-03	08:27:00	3005
2009-07-03	08:28:00	2665
2009-07-03	08:29:00	689
2009-07-03	08:30:00	52
2009-07-03	08:31:00	15
2009-07-03	08:32:00	193
2009-07-03	08:33:00	1876
2009-07-03	08:34:00	704
2009-07-03	08:35:00	819
2009-07-03	08:36:00	1026
2009-07-03	08:37:00	497
2009-07-03	08:38:00	673
2009-07-03	08:39:00	294
2009-07-03	08:40:00	2087
2009-07-03	08:41:00	1746
2009-07-03	08:42:00	735
2009-07-03	08:43:00	200
2009-07-03	08:44:00	258
2009-07-03	08:45:00	587
2009-07-03	08:46:00	534
2009-07-03	08:47:00	1715
2009-07-03	08:48:00	1399
2009-07-03	08:49:00	2575
2009-07-03	08:50:00	2163
2009-07-03	08:51:00	534
2009-07-03	08:52:00	689
2009-07-03	08:53:00	294
2009-07-03	08:54:00	801
2009-07-03	08:55:00	854
2009-07-03	08:56:00	57
2009-07-03	08:57:00	303
2009-07-03	08:58:00	171
2009-07-03	08:59:00	150
2009-07-03	09:00:00	393
2009-07-03	09:01:00	266
2009-07-03	09:02:00	322
2009-07-03	09:03:00	73
2009-07-03	09:04:00	383
2009-07-03	09:05:00	449
2009-07-03	09:06:00	871
2009-07-03	09:07:00	689
2009-07-03	09:08:00	735
[truncated: 21,051 more rows]

[truncated: 3 more sheets: 7.17.09, 7.31.09, 8.14.09]
