# Supplementary material for: Initial evaluation of nighttime restlessness in a naturally occurring canine model of osteoarthritis pain
Source: PeerJ. 2015 Feb 17;3:e772. doi: 10.7717/peerj.772 (PMC4340376; doi:10.7717/peerj.772)
Supplement: Supplemental Information 54 [file peerj-03-772-s054.xlsx]

## Sheet: Office Visits
Visit Date	Visit Number
2009-05-08 06:00:00	1
2009-05-26 06:00:00	2
2009-06-09 06:00:00	3
2009-06-23 06:00:00	4
2009-07-07 06:00:00	5
2009-07-22 06:00:00	6
2009-07-07 06:00:00	7
2009-08-18 06:00:00	8
2009-09-01 06:00:00	9

## Sheet: 55_Data
Segment	DateTime	Activity	Hour	Quadrant	Study Day	Weekday
1	2009-05-19 06:01:00	215	6	2	11	3
1	2009-05-19 06:02:00	997	6	2	11	3
1	2009-05-19 06:03:00	200	6	2	11	3
1	2009-05-19 06:04:00	229	6	2	11	3
1	2009-05-19 06:05:00	1220	6	2	11	3
1	2009-05-19 06:06:00	333	6	2	11	3
1	2009-05-19 06:07:00	200	6	2	11	3
1	2009-05-19 06:08:00	244	6	2	11	3
1	2009-05-19 06:09:00	507	6	2	11	3
1	2009-05-19 06:10:00	0	6	2	11	3
1	2009-05-19 06:11:00	0	6	2	11	3
1	2009-05-19 06:12:00	12	6	2	11	3
1	2009-05-19 06:13:00	0	6	2	11	3
1	2009-05-19 06:14:00	12	6	2	11	3
1	2009-05-19 06:15:00	401	6	2	11	3
1	2009-05-19 06:16:00	350	6	2	11	3
1	2009-05-19 06:17:00	133	6	2	11	3
1	2009-05-19 06:18:00	215	6	2	11	3
1	2009-05-19 06:19:00	215	6	2	11	3
1	2009-05-19 06:20:00	60	6	2	11	3
1	2009-05-19 06:21:00	12	6	2	11	3
1	2009-05-19 06:22:00	0	6	2	11	3
1	2009-05-19 06:23:00	0	6	2	11	3
1	2009-05-19 06:24:00	0	6	2	11	3
1	2009-05-19 06:25:00	133	6	2	11	3
1	2009-05-19 06:26:00	12	6	2	11	3
1	2009-05-19 06:27:00	12	6	2	11	3
1	2009-05-19 06:28:00	0	6	2	11	3
1	2009-05-19 06:29:00	0	6	2	11	3
1	2009-05-19 06:30:00	0	6	2	11	3
1	2009-05-19 06:31:00	0	6	2	11	3
1	2009-05-19 06:32:00	0	6	2	11	3
1	2009-05-19 06:33:00	0	6	2	11	3
1	2009-05-19 06:34:00	0	6	2	11	3
1	2009-05-19 06:35:00	0	6	2	11	3
1	2009-05-19 06:36:00	0	6	2	11	3
1	2009-05-19 06:37:00	0	6	2	11	3
1	2009-05-19 06:38:00	12	6	2	11	3
1	2009-05-19 06:39:00	0	6	2	11	3
1	2009-05-19 06:40:00	0	6	2	11	3
1	2009-05-19 06:41:00	24	6	2	11	3
1	2009-05-19 06:42:00	0	6	2	11	3
1	2009-05-19 06:43:00	12	6	2	11	3
1	2009-05-19 06:44:00	0	6	2	11	3
1	2009-05-19 06:45:00	97	6	2	11	3
1	2009-05-19 06:46:00	316	6	2	11	3
1	2009-05-19 06:47:00	944	6	2	11	3
1	2009-05-19 06:48:00	229	6	2	11	3
1	2009-05-19 06:49:00	287	6	2	11	3
1	2009-05-19 06:50:00	435	6	2	11	3
1	2009-05-19 06:51:00	488	6	2	11	3
1	2009-05-19 06:52:00	0	6	2	11	3
1	2009-05-19 06:53:00	0	6	2	11	3
1	2009-05-19 06:54:00	0	6	2	11	3
1	2009-05-19 06:55:00	0	6	2	11	3
1	2009-05-19 06:56:00	0	6	2	11	3
1	2009-05-19 06:57:00	0	6	2	11	3
1	2009-05-19 06:58:00	0	6	2	11	3
1	2009-05-19 06:59:00	0	6	2	11	3
1	2009-05-19 07:00:00	0	6	2	11	3
1	2009-05-19 07:01:00	0	7	2	11	3
1	2009-05-19 07:02:00	0	7	2	11	3
1	2009-05-19 07:03:00	0	7	2	11	3
1	2009-05-19 07:04:00	1077	7	2	11	3
1	2009-05-19 07:05:00	452	7	2	11	3
1	2009-05-19 07:06:00	333	7	2	11	3
1	2009-05-19 07:07:00	333	7	2	11	3
1	2009-05-19 07:08:00	350	7	2	11	3
1	2009-05-19 07:09:00	200	7	2	11	3
1	2009-05-19 07:10:00	97	7	2	11	3
1	2009-05-19 07:11:00	12	7	2	11	3
1	2009-05-19 07:12:00	0	7	2	11	3
1	2009-05-19 07:13:00	0	7	2	11	3
1	2009-05-19 07:14:00	244	7	2	11	3
1	2009-05-19 07:15:00	60	7	2	11	3
1	2009-05-19 07:16:00	0	7	2	11	3
1	2009-05-19 07:17:00	302	7	2	11	3
1	2009-05-19 07:18:00	384	7	2	11	3
1	2009-05-19 07:19:00	469	7	2	11	3
1	2009-05-19 07:20:00	469	7	2	11	3
1	2009-05-19 07:21:00	452	7	2	11	3
1	2009-05-19 07:22:00	316	7	2	11	3
1	2009-05-19 07:23:00	133	7	2	11	3
1	2009-05-19 07:24:00	287	7	2	11	3
1	2009-05-19 07:25:00	452	7	2	11	3
1	2009-05-19 07:26:00	367	7	2	11	3
1	2009-05-19 07:27:00	302	7	2	11	3
1	2009-05-19 07:28:00	244	7	2	11	3
1	2009-05-19 07:29:00	215	7	2	11	3
1	2009-05-19 07:30:00	171	7	2	11	3
1	2009-05-19 07:31:00	367	7	2	11	3
1	2009-05-19 07:32:00	244	7	2	11	3
1	2009-05-19 07:33:00	121	7	2	11	3
1	2009-05-19 07:34:00	229	7	2	11	3
1	2009-05-19 07:35:00	145	7	2	11	3
1	2009-05-19 07:36:00	24	7	2	11	3
1	2009-05-19 07:37:00	0	7	2	11	3
1	2009-05-19 07:38:00	0	7	2	11	3
1	2009-05-19 07:39:00	0	7	2	11	3
1	2009-05-19 07:40:00	0	7	2	11	3
1	2009-05-19 07:41:00	0	7	2	11	3
1	2009-05-19 07:42:00	48	7	2	11	3
1	2009-05-19 07:43:00	526	7	2	11	3
1	2009-05-19 07:44:00	435	7	2	11	3
1	2009-05-19 07:45:00	316	7	2	11	3
1	2009-05-19 07:46:00	333	7	2	11	3
1	2009-05-19 07:47:00	72	7	2	11	3
1	2009-05-19 07:48:00	85	7	2	11	3
1	2009-05-19 07:49:00	273	7	2	11	3
1	2009-05-19 07:50:00	186	7	2	11	3
1	2009-05-19 07:51:00	333	7	2	11	3
1	2009-05-19 07:52:00	1220	7	2	11	3
1	2009-05-19 07:53:00	171	7	2	11	3
1	2009-05-19 07:54:00	775	7	2	11	3
1	2009-05-19 07:55:00	350	7	2	11	3
1	2009-05-19 07:56:00	872	7	2	11	3
1	2009-05-19 07:57:00	896	7	2	11	3
1	2009-05-19 07:58:00	200	7	2	11	3
1	2009-05-19 07:59:00	0	7	2	11	3
1	2009-05-19 08:00:00	350	7	2	11	3
1	2009-05-19 08:01:00	121	8	2	11	3
1	2009-05-19 08:02:00	0	8	2	11	3
1	2009-05-19 08:03:00	12	8	2	11	3
1	2009-05-19 08:04:00	0	8	2	11	3
1	2009-05-19 08:05:00	0	8	2	11	3
1	2009-05-19 08:06:00	133	8	2	11	3
1	2009-05-19 08:07:00	710	8	2	11	3
1	2009-05-19 08:08:00	0	8	2	11	3
1	2009-05-19 08:09:00	0	8	2	11	3
1	2009-05-19 08:10:00	0	8	2	11	3
1	2009-05-19 08:11:00	0	8	2	11	3
1	2009-05-19 08:12:00	0	8	2	11	3
1	2009-05-19 08:13:00	0	8	2	11	3
1	2009-05-19 08:14:00	85	8	2	11	3
1	2009-05-19 08:15:00	186	8	2	11	3
1	2009-05-19 08:16:00	12	8	2	11	3
1	2009-05-19 08:17:00	24	8	2	11	3
1	2009-05-19 08:18:00	0	8	2	11	3
1	2009-05-19 08:19:00	0	8	2	11	3
1	2009-05-19 08:20:00	0	8	2	11	3
1	2009-05-19 08:21:00	0	8	2	11	3
1	2009-05-19 08:22:00	0	8	2	11	3
1	2009-05-19 08:23:00	12	8	2	11	3
1	2009-05-19 08:24:00	244	8	2	11	3
1	2009-05-19 08:25:00	350	8	2	11	3
1	2009-05-19 08:26:00	287	8	2	11	3
1	2009-05-19 08:27:00	145	8	2	11	3
1	2009-05-19 08:28:00	273	8	2	11	3
1	2009-05-19 08:29:00	48	8	2	11	3
1	2009-05-19 08:30:00	12	8	2	11	3
1	2009-05-19 08:31:00	0	8	2	11	3
1	2009-05-19 08:32:00	0	8	2	11	3
1	2009-05-19 08:33:00	546	8	2	11	3
1	2009-05-19 08:34:00	0	8	2	11	3
1	2009-05-19 08:35:00	0	8	2	11	3
1	2009-05-19 08:36:00	0	8	2	11	3
1	2009-05-19 08:37:00	0	8	2	11	3
1	2009-05-19 08:38:00	12	8	2	11	3
1	2009-05-19 08:39:00	0	8	2	11	3
1	2009-05-19 08:40:00	0	8	2	11	3
1	2009-05-19 08:41:00	0	8	2	11	3
1	2009-05-19 08:42:00	0	8	2	11	3
1	2009-05-19 08:43:00	0	8	2	11	3
1	2009-05-19 08:44:00	0	8	2	11	3
1	2009-05-19 08:45:00	0	8	2	11	3
1	2009-05-19 08:46:00	0	8	2	11	3
1	2009-05-19 08:47:00	12	8	2	11	3
1	2009-05-19 08:48:00	0	8	2	11	3
1	2009-05-19 08:49:00	0	8	2	11	3
1	2009-05-19 08:50:00	0	8	2	11	3
1	2009-05-19 08:51:00	0	8	2	11	3
1	2009-05-19 08:52:00	0	8	2	11	3
1	2009-05-19 08:53:00	0	8	2	11	3
1	2009-05-19 08:54:00	0	8	2	11	3
1	2009-05-19 08:55:00	12	8	2	11	3
1	2009-05-19 08:56:00	0	8	2	11	3
1	2009-05-19 08:57:00	0	8	2	11	3
1	2009-05-19 08:58:00	0	8	2	11	3
1	2009-05-19 08:59:00	623	8	2	11	3
1	2009-05-19 09:00:00	244	8	2	11	3
1	2009-05-19 09:01:00	60	9	2	11	3
1	2009-05-19 09:02:00	12	9	2	11	3
1	2009-05-19 09:03:00	0	9	2	11	3
1	2009-05-19 09:04:00	24	9	2	11	3
1	2009-05-19 09:05:00	350	9	2	11	3
1	2009-05-19 09:06:00	171	9	2	11	3
1	2009-05-19 09:07:00	0	9	2	11	3
1	2009-05-19 09:08:00	565	9	2	11	3
1	2009-05-19 09:09:00	435	9	2	11	3
1	2009-05-19 09:10:00	24	9	2	11	3
1	2009-05-19 09:11:00	24	9	2	11	3
1	2009-05-19 09:12:00	0	9	2	11	3
1	2009-05-19 09:13:00	121	9	2	11	3
1	2009-05-19 09:14:00	72	9	2	11	3
1	2009-05-19 09:15:00	0	9	2	11	3
1	2009-05-19 09:16:00	0	9	2	11	3
1	2009-05-19 09:17:00	0	9	2	11	3
1	2009-05-19 09:18:00	0	9	2	11	3
1	2009-05-19 09:19:00	0	9	2	11	3
1	2009-05-19 09:20:00	12	9	2	11	3
1	2009-05-19 09:21:00	229	9	2	11	3
1	2009-05-19 09:22:00	157	9	2	11	3
1	2009-05-19 09:23:00	488	9	2	11	3
1	2009-05-19 09:24:00	584	9	2	11	3
1	2009-05-19 09:25:00	418	9	2	11	3
1	2009-05-19 09:26:00	367	9	2	11	3
1	2009-05-19 09:27:00	302	9	2	11	3
1	2009-05-19 09:28:00	186	9	2	11	3
1	2009-05-19 09:29:00	36	9	2	11	3
1	2009-05-19 09:30:00	0	9	2	11	3
1	2009-05-19 09:31:00	367	9	2	11	3
1	2009-05-19 09:32:00	1077	9	2	11	3
1	2009-05-19 09:33:00	12	9	2	11	3
1	2009-05-19 09:34:00	0	9	2	11	3
1	2009-05-19 09:35:00	0	9	2	11	3
1	2009-05-19 09:36:00	72	9	2	11	3
1	2009-05-19 09:37:00	0	9	2	11	3
1	2009-05-19 09:38:00	0	9	2	11	3
1	2009-05-19 09:39:00	0	9	2	11	3
1	2009-05-19 09:40:00	186	9	2	11	3
1	2009-05-19 09:41:00	215	9	2	11	3
1	2009-05-19 09:42:00	488	9	2	11	3
1	2009-05-19 09:43:00	36	9	2	11	3
1	2009-05-19 09:44:00	0	9	2	11	3
1	2009-05-19 09:45:00	0	9	2	11	3
1	2009-05-19 09:46:00	12	9	2	11	3
1	2009-05-19 09:47:00	0	9	2	11	3
1	2009-05-19 09:48:00	0	9	2	11	3
1	2009-05-19 09:49:00	97	9	2	11	3
1	2009-05-19 09:50:00	333	9	2	11	3
1	2009-05-19 09:51:00	775	9	2	11	3
1	2009-05-19 09:52:00	754	9	2	11	3
1	2009-05-19 09:53:00	384	9	2	11	3
1	2009-05-19 09:54:00	302	9	2	11	3
1	2009-05-19 09:55:00	0	9	2	11	3
1	2009-05-19 09:56:00	0	9	2	11	3
1	2009-05-19 09:57:00	0	9	2	11	3
1	2009-05-19 09:58:00	0	9	2	11	3
1	2009-05-19 09:59:00	0	9	2	11	3
1	2009-05-19 10:00:00	0	9	2	11	3
1	2009-05-19 10:01:00	12	10	2	11	3
1	2009-05-19 10:02:00	12	10	2	11	3
1	2009-05-19 10:03:00	157	10	2	11	3
1	2009-05-19 10:04:00	0	10	2	11	3
1	2009-05-19 10:05:00	12	10	2	11	3
1	2009-05-19 10:06:00	350	10	2	11	3
1	2009-05-19 10:07:00	200	10	2	11	3
1	2009-05-19 10:08:00	145	10	2	11	3
1	2009-05-19 10:09:00	48	10	2	11	3
1	2009-05-19 10:10:00	0	10	2	11	3
1	2009-05-19 10:11:00	0	10	2	11	3
1	2009-05-19 10:12:00	0	10	2	11	3
1	2009-05-19 10:13:00	0	10	2	11	3
1	2009-05-19 10:14:00	0	10	2	11	3
1	2009-05-19 10:15:00	0	10	2	11	3
1	2009-05-19 10:16:00	0	10	2	11	3
1	2009-05-19 10:17:00	0	10	2	11	3
1	2009-05-19 10:18:00	0	10	2	11	3
1	2009-05-19 10:19:00	24	10	2	11	3
1	2009-05-19 10:20:00	0	10	2	11	3
1	2009-05-19 10:21:00	0	10	2	11	3
1	2009-05-19 10:22:00	0	10	2	11	3
1	2009-05-19 10:23:00	12	10	2	11	3
1	2009-05-19 10:24:00	36	10	2	11	3
1	2009-05-19 10:25:00	1077	10	2	11	3
1	2009-05-19 10:26:00	872	10	2	11	3
1	2009-05-19 10:27:00	418	10	2	11	3
1	2009-05-19 10:28:00	401	10	2	11	3
1	2009-05-19 10:29:00	401	10	2	11	3
1	2009-05-19 10:30:00	333	10	2	11	3
1	2009-05-19 10:31:00	350	10	2	11	3
1	2009-05-19 10:32:00	133	10	2	11	3
1	2009-05-19 10:33:00	133	10	2	11	3
1	2009-05-19 10:34:00	48	10	2	11	3
1	2009-05-19 10:35:00	0	10	2	11	3
1	2009-05-19 10:36:00	85	10	2	11	3
1	2009-05-19 10:37:00	452	10	2	11	3
1	2009-05-19 10:38:00	384	10	2	11	3
1	2009-05-19 10:39:00	133	10	2	11	3
1	2009-05-19 10:40:00	24	10	2	11	3
1	2009-05-19 10:41:00	24	10	2	11	3
1	2009-05-19 10:42:00	133	10	2	11	3
1	2009-05-19 10:43:00	133	10	2	11	3
1	2009-05-19 10:44:00	186	10	2	11	3
1	2009-05-19 10:45:00	229	10	2	11	3
1	2009-05-19 10:46:00	229	10	2	11	3
1	2009-05-19 10:47:00	244	10	2	11	3
1	2009-05-19 10:48:00	244	10	2	11	3
1	2009-05-19 10:49:00	215	10	2	11	3
1	2009-05-19 10:50:00	48	10	2	11	3
1	2009-05-19 10:51:00	0	10	2	11	3
1	2009-05-19 10:52:00	0	10	2	11	3
1	2009-05-19 10:53:00	0	10	2	11	3
1	2009-05-19 10:54:00	0	10	2	11	3
1	2009-05-19 10:55:00	0	10	2	11	3
1	2009-05-19 10:56:00	0	10	2	11	3
1	2009-05-19 10:57:00	12	10	2	11	3
1	2009-05-19 10:58:00	0	10	2	11	3
1	2009-05-19 10:59:00	0	10	2	11	3
1	2009-05-19 11:00:00	12	10	2	11	3
1	2009-05-19 11:01:00	0	11	2	11	3
1	2009-05-19 11:02:00	0	11	2	11	3
1	2009-05-19 11:03:00	0	11	2	11	3
1	2009-05-19 11:04:00	0	11	2	11	3
1	2009-05-19 11:05:00	0	11	2	11	3
1	2009-05-19 11:06:00	0	11	2	11	3
1	2009-05-19 11:07:00	0	11	2	11	3
1	2009-05-19 11:08:00	85	11	2	11	3
1	2009-05-19 11:09:00	145	11	2	11	3
1	2009-05-19 11:10:00	0	11	2	11	3
1	2009-05-19 11:11:00	0	11	2	11	3
1	2009-05-19 11:12:00	0	11	2	11	3
1	2009-05-19 11:13:00	0	11	2	11	3
1	2009-05-19 11:14:00	0	11	2	11	3
1	2009-05-19 11:15:00	24	11	2	11	3
1	2009-05-19 11:16:00	12	11	2	11	3
1	2009-05-19 11:17:00	0	11	2	11	3
1	2009-05-19 11:18:00	0	11	2	11	3
1	2009-05-19 11:19:00	0	11	2	11	3
1	2009-05-19 11:20:00	0	11	2	11	3
1	2009-05-19 11:21:00	0	11	2	11	3
1	2009-05-19 11:22:00	12	11	2	11	3
1	2009-05-19 11:23:00	0	11	2	11	3
1	2009-05-19 11:24:00	12	11	2	11	3
1	2009-05-19 11:25:00	0	11	2	11	3
1	2009-05-19 11:26:00	0	11	2	11	3
1	2009-05-19 11:27:00	36	11	2	11	3
1	2009-05-19 11:28:00	171	11	2	11	3
1	2009-05-19 11:29:00	60	11	2	11	3
1	2009-05-19 11:30:00	0	11	2	11	3
1	2009-05-19 11:31:00	565	11	2	11	3
1	2009-05-19 11:32:00	1406	11	2	11	3
1	2009-05-19 11:33:00	418	11	2	11	3
1	2009-05-19 11:34:00	157	11	2	11	3
1	2009-05-19 11:35:00	215	11	2	11	3
1	2009-05-19 11:36:00	121	11	2	11	3
1	2009-05-19 11:37:00	171	11	2	11	3
1	2009-05-19 11:38:00	200	11	2	11	3
1	2009-05-19 11:39:00	12	11	2	11	3
1	2009-05-19 11:40:00	24	11	2	11	3
1	2009-05-19 11:41:00	0	11	2	11	3
1	2009-05-19 11:42:00	0	11	2	11	3
1	2009-05-19 11:43:00	12	11	2	11	3
1	2009-05-19 11:44:00	0	11	2	11	3
1	2009-05-19 11:45:00	0	11	2	11	3
1	2009-05-19 11:46:00	0	11	2	11	3
1	2009-05-19 11:47:00	12	11	2	11	3
1	2009-05-19 11:48:00	97	11	2	11	3
1	2009-05-19 11:49:00	896	11	2	11	3
1	2009-05-19 11:50:00	72	11	2	11	3
1	2009-05-19 11:51:00	109	11	2	11	3
1	2009-05-19 11:52:00	469	11	2	11	3
1	2009-05-19 11:53:00	121	11	2	11	3
1	2009-05-19 11:54:00	244	11	2	11	3
1	2009-05-19 11:55:00	350	11	2	11	3
1	2009-05-19 11:56:00	215	11	2	11	3
1	2009-05-19 11:57:00	273	11	2	11	3
1	2009-05-19 11:58:00	12	11	2	11	3
1	2009-05-19 11:59:00	0	11	2	11	3
1	2009-05-19 12:00:00	48	11	2	11	3
1	2009-05-19 12:01:00	157	12	3	11	3
1	2009-05-19 12:02:00	97	12	3	11	3
1	2009-05-19 12:03:00	200	12	3	11	3
1	2009-05-19 12:04:00	0	12	3	11	3
1	2009-05-19 12:05:00	24	12	3	11	3
1	2009-05-19 12:06:00	200	12	3	11	3
1	2009-05-19 12:07:00	215	12	3	11	3
1	2009-05-19 12:08:00	229	12	3	11	3
1	2009-05-19 12:09:00	0	12	3	11	3
1	2009-05-19 12:10:00	0	12	3	11	3
1	2009-05-19 12:11:00	109	12	3	11	3
1	2009-05-19 12:12:00	229	12	3	11	3
1	2009-05-19 12:13:00	0	12	3	11	3
1	2009-05-19 12:14:00	0	12	3	11	3
1	2009-05-19 12:15:00	0	12	3	11	3
1	2009-05-19 12:16:00	0	12	3	11	3
1	2009-05-19 12:17:00	0	12	3	11	3
1	2009-05-19 12:18:00	0	12	3	11	3
1	2009-05-19 12:19:00	0	12	3	11	3
1	2009-05-19 12:20:00	24	12	3	11	3
1	2009-05-19 12:21:00	12	12	3	11	3
1	2009-05-19 12:22:00	0	12	3	11	3
1	2009-05-19 12:23:00	12	12	3	11	3
1	2009-05-19 12:24:00	0	12	3	11	3
1	2009-05-19 12:25:00	667	12	3	11	3
1	2009-05-19 12:26:00	350	12	3	11	3
1	2009-05-19 12:27:00	452	12	3	11	3
1	2009-05-19 12:28:00	565	12	3	11	3
1	2009-05-19 12:29:00	799	12	3	11	3
1	2009-05-19 12:30:00	488	12	3	11	3
1	2009-05-19 12:31:00	507	12	3	11	3
1	2009-05-19 12:32:00	72	12	3	11	3
1	2009-05-19 12:33:00	0	12	3	11	3
1	2009-05-19 12:34:00	0	12	3	11	3
1	2009-05-19 12:35:00	0	12	3	11	3
1	2009-05-19 12:36:00	12	12	3	11	3
1	2009-05-19 12:37:00	12	12	3	11	3
1	2009-05-19 12:38:00	0	12	3	11	3
1	2009-05-19 12:39:00	0	12	3	11	3
1	2009-05-19 12:40:00	0	12	3	11	3
1	2009-05-19 12:41:00	0	12	3	11	3
1	2009-05-19 12:42:00	12	12	3	11	3
1	2009-05-19 12:43:00	0	12	3	11	3
1	2009-05-19 12:44:00	0	12	3	11	3
1	2009-05-19 12:45:00	0	12	3	11	3
1	2009-05-19 12:46:00	0	12	3	11	3
1	2009-05-19 12:47:00	0	12	3	11	3
1	2009-05-19 12:48:00	0	12	3	11	3
1	2009-05-19 12:49:00	0	12	3	11	3
1	2009-05-19 12:50:00	0	12	3	11	3
1	2009-05-19 12:51:00	0	12	3	11	3
1	2009-05-19 12:52:00	0	12	3	11	3
1	2009-05-19 12:53:00	0	12	3	11	3
1	2009-05-19 12:54:00	0	12	3	11	3
1	2009-05-19 12:55:00	0	12	3	11	3
1	2009-05-19 12:56:00	36	12	3	11	3
1	2009-05-19 12:57:00	0	12	3	11	3
1	2009-05-19 12:58:00	0	12	3	11	3
1	2009-05-19 12:59:00	0	12	3	11	3
1	2009-05-19 13:00:00	0	12	3	11	3
1	2009-05-19 13:01:00	0	13	3	11	3
1	2009-05-19 13:02:00	0	13	3	11	3
1	2009-05-19 13:03:00	0	13	3	11	3
1	2009-05-19 13:04:00	0	13	3	11	3
1	2009-05-19 13:05:00	0	13	3	11	3
1	2009-05-19 13:06:00	0	13	3	11	3
1	2009-05-19 13:07:00	0	13	3	11	3
1	2009-05-19 13:08:00	0	13	3	11	3
1	2009-05-19 13:09:00	0	13	3	11	3
1	2009-05-19 13:10:00	0	13	3	11	3
1	2009-05-19 13:11:00	36	13	3	11	3
1	2009-05-19 13:12:00	36	13	3	11	3
1	2009-05-19 13:13:00	157	13	3	11	3
1	2009-05-19 13:14:00	775	13	3	11	3
1	2009-05-19 13:15:00	244	13	3	11	3
1	2009-05-19 13:16:00	97	13	3	11	3
1	2009-05-19 13:17:00	85	13	3	11	3
1	2009-05-19 13:18:00	418	13	3	11	3
1	2009-05-19 13:19:00	384	13	3	11	3
1	2009-05-19 13:20:00	302	13	3	11	3
1	2009-05-19 13:21:00	971	13	3	11	3
1	2009-05-19 13:22:00	401	13	3	11	3
1	2009-05-19 13:23:00	546	13	3	11	3
1	2009-05-19 13:24:00	85	13	3	11	3
1	2009-05-19 13:25:00	36	13	3	11	3
1	2009-05-19 13:26:00	157	13	3	11	3
1	2009-05-19 13:27:00	971	13	3	11	3
1	2009-05-19 13:28:00	1162	13	3	11	3
1	2009-05-19 13:29:00	1051	13	3	11	3
1	2009-05-19 13:30:00	333	13	3	11	3
1	2009-05-19 13:31:00	754	13	3	11	3
1	2009-05-19 13:32:00	920	13	3	11	3
1	2009-05-19 13:33:00	350	13	3	11	3
1	2009-05-19 13:34:00	72	13	3	11	3
1	2009-05-19 13:35:00	0	13	3	11	3
1	2009-05-19 13:36:00	0	13	3	11	3
1	2009-05-19 13:37:00	109	13	3	11	3
1	2009-05-19 13:38:00	0	13	3	11	3
1	2009-05-19 13:39:00	72	13	3	11	3
1	2009-05-19 13:40:00	12	13	3	11	3
1	2009-05-19 13:41:00	60	13	3	11	3
1	2009-05-19 13:42:00	0	13	3	11	3
1	2009-05-19 13:43:00	12	13	3	11	3
1	2009-05-19 13:44:00	0	13	3	11	3
1	2009-05-19 13:45:00	0	13	3	11	3
1	2009-05-19 13:46:00	12	13	3	11	3
1	2009-05-19 13:47:00	0	13	3	11	3
1	2009-05-19 13:48:00	0	13	3	11	3
1	2009-05-19 13:49:00	258	13	3	11	3
1	2009-05-19 13:50:00	97	13	3	11	3
1	2009-05-19 13:51:00	0	13	3	11	3
1	2009-05-19 13:52:00	0	13	3	11	3
1	2009-05-19 13:53:00	0	13	3	11	3
1	2009-05-19 13:54:00	0	13	3	11	3
1	2009-05-19 13:55:00	12	13	3	11	3
1	2009-05-19 13:56:00	0	13	3	11	3
1	2009-05-19 13:57:00	24	13	3	11	3
1	2009-05-19 13:58:00	0	13	3	11	3
1	2009-05-19 13:59:00	171	13	3	11	3
1	2009-05-19 14:00:00	0	13	3	11	3
1	2009-05-19 14:01:00	0	14	3	11	3
1	2009-05-19 14:02:00	0	14	3	11	3
1	2009-05-19 14:03:00	12	14	3	11	3
1	2009-05-19 14:04:00	0	14	3	11	3
1	2009-05-19 14:05:00	60	14	3	11	3
1	2009-05-19 14:06:00	24	14	3	11	3
1	2009-05-19 14:07:00	0	14	3	11	3
1	2009-05-19 14:08:00	60	14	3	11	3
1	2009-05-19 14:09:00	60	14	3	11	3
1	2009-05-19 14:10:00	0	14	3	11	3
1	2009-05-19 14:11:00	0	14	3	11	3
1	2009-05-19 14:12:00	0	14	3	11	3
1	2009-05-19 14:13:00	244	14	3	11	3
1	2009-05-19 14:14:00	12	14	3	11	3
1	2009-05-19 14:15:00	0	14	3	11	3
1	2009-05-19 14:16:00	0	14	3	11	3
1	2009-05-19 14:17:00	0	14	3	11	3
1	2009-05-19 14:18:00	0	14	3	11	3
1	2009-05-19 14:19:00	565	14	3	11	3
1	2009-05-19 14:20:00	24	14	3	11	3
1	2009-05-19 14:21:00	0	14	3	11	3
1	2009-05-19 14:22:00	0	14	3	11	3
1	2009-05-19 14:23:00	0	14	3	11	3
1	2009-05-19 14:24:00	0	14	3	11	3
1	2009-05-19 14:25:00	0	14	3	11	3
1	2009-05-19 14:26:00	0	14	3	11	3
1	2009-05-19 14:27:00	0	14	3	11	3
1	2009-05-19 14:28:00	12	14	3	11	3
1	2009-05-19 14:29:00	0	14	3	11	3
1	2009-05-19 14:30:00	0	14	3	11	3
1	2009-05-19 14:31:00	0	14	3	11	3
1	2009-05-19 14:32:00	0	14	3	11	3
1	2009-05-19 14:33:00	0	14	3	11	3
1	2009-05-19 14:34:00	0	14	3	11	3
1	2009-05-19 14:35:00	0	14	3	11	3
1	2009-05-19 14:36:00	0	14	3	11	3
1	2009-05-19 14:37:00	0	14	3	11	3
1	2009-05-19 14:38:00	0	14	3	11	3
1	2009-05-19 14:39:00	0	14	3	11	3
1	2009-05-19 14:40:00	0	14	3	11	3
1	2009-05-19 14:41:00	0	14	3	11	3
1	2009-05-19 14:42:00	0	14	3	11	3
1	2009-05-19 14:43:00	0	14	3	11	3
1	2009-05-19 14:44:00	0	14	3	11	3
1	2009-05-19 14:45:00	0	14	3	11	3
1	2009-05-19 14:46:00	0	14	3	11	3
1	2009-05-19 14:47:00	0	14	3	11	3
1	2009-05-19 14:48:00	0	14	3	11	3
1	2009-05-19 14:49:00	0	14	3	11	3
1	2009-05-19 14:50:00	0	14	3	11	3
1	2009-05-19 14:51:00	0	14	3	11	3
1	2009-05-19 14:52:00	0	14	3	11	3
1	2009-05-19 14:53:00	0	14	3	11	3
1	2009-05-19 14:54:00	0	14	3	11	3
1	2009-05-19 14:55:00	12	14	3	11	3
1	2009-05-19 14:56:00	0	14	3	11	3
1	2009-05-19 14:57:00	258	14	3	11	3
1	2009-05-19 14:58:00	72	14	3	11	3
1	2009-05-19 14:59:00	0	14	3	11	3
1	2009-05-19 15:00:00	0	14	3	11	3
1	2009-05-19 15:01:00	0	15	3	11	3
1	2009-05-19 15:02:00	0	15	3	11	3
1	2009-05-19 15:03:00	0	15	3	11	3
1	2009-05-19 15:04:00	0	15	3	11	3
1	2009-05-19 15:05:00	85	15	3	11	3
1	2009-05-19 15:06:00	85	15	3	11	3
1	2009-05-19 15:07:00	0	15	3	11	3
1	2009-05-19 15:08:00	12	15	3	11	3
1	2009-05-19 15:09:00	0	15	3	11	3
1	2009-05-19 15:10:00	0	15	3	11	3
1	2009-05-19 15:11:00	24	15	3	11	3
1	2009-05-19 15:12:00	36	15	3	11	3
1	2009-05-19 15:13:00	145	15	3	11	3
1	2009-05-19 15:14:00	85	15	3	11	3
1	2009-05-19 15:15:00	24	15	3	11	3
1	2009-05-19 15:16:00	0	15	3	11	3
1	2009-05-19 15:17:00	12	15	3	11	3
1	2009-05-19 15:18:00	0	15	3	11	3
1	2009-05-19 15:19:00	0	15	3	11	3
1	2009-05-19 15:20:00	0	15	3	11	3
1	2009-05-19 15:21:00	0	15	3	11	3
1	2009-05-19 15:22:00	24	15	3	11	3
1	2009-05-19 15:23:00	121	15	3	11	3
1	2009-05-19 15:24:00	584	15	3	11	3
1	2009-05-19 15:25:00	0	15	3	11	3
1	2009-05-19 15:26:00	0	15	3	11	3
1	2009-05-19 15:27:00	0	15	3	11	3
1	2009-05-19 15:28:00	0	15	3	11	3
1	2009-05-19 15:29:00	0	15	3	11	3
1	2009-05-19 15:30:00	0	15	3	11	3
1	2009-05-19 15:31:00	0	15	3	11	3
1	2009-05-19 15:32:00	0	15	3	11	3
1	2009-05-19 15:33:00	0	15	3	11	3
1	2009-05-19 15:34:00	0	15	3	11	3
1	2009-05-19 15:35:00	0	15	3	11	3
1	2009-05-19 15:36:00	0	15	3	11	3
1	2009-05-19 15:37:00	36	15	3	11	3
1	2009-05-19 15:38:00	0	15	3	11	3
1	2009-05-19 15:39:00	0	15	3	11	3
1	2009-05-19 15:40:00	0	15	3	11	3
1	2009-05-19 15:41:00	0	15	3	11	3
1	2009-05-19 15:42:00	0	15	3	11	3
1	2009-05-19 15:43:00	0	15	3	11	3
1	2009-05-19 15:44:00	0	15	3	11	3
1	2009-05-19 15:45:00	0	15	3	11	3
1	2009-05-19 15:46:00	0	15	3	11	3
1	2009-05-19 15:47:00	0	15	3	11	3
1	2009-05-19 15:48:00	0	15	3	11	3
1	2009-05-19 15:49:00	0	15	3	11	3
1	2009-05-19 15:50:00	0	15	3	11	3
1	2009-05-19 15:51:00	0	15	3	11	3
1	2009-05-19 15:52:00	0	15	3	11	3
1	2009-05-19 15:53:00	0	15	3	11	3
1	2009-05-19 15:54:00	0	15	3	11	3
1	2009-05-19 15:55:00	0	15	3	11	3
1	2009-05-19 15:56:00	0	15	3	11	3
1	2009-05-19 15:57:00	0	15	3	11	3
1	2009-05-19 15:58:00	0	15	3	11	3
1	2009-05-19 15:59:00	24	15	3	11	3
1	2009-05-19 16:00:00	24	15	3	11	3
1	2009-05-19 16:01:00	0	16	3	11	3
1	2009-05-19 16:02:00	0	16	3	11	3
1	2009-05-19 16:03:00	0	16	3	11	3
1	2009-05-19 16:04:00	0	16	3	11	3
1	2009-05-19 16:05:00	0	16	3	11	3
1	2009-05-19 16:06:00	12	16	3	11	3
1	2009-05-19 16:07:00	0	16	3	11	3
1	2009-05-19 16:08:00	0	16	3	11	3
1	2009-05-19 16:09:00	12	16	3	11	3
1	2009-05-19 16:10:00	0	16	3	11	3
1	2009-05-19 16:11:00	526	16	3	11	3
1	2009-05-19 16:12:00	72	16	3	11	3
1	2009-05-19 16:13:00	0	16	3	11	3
1	2009-05-19 16:14:00	0	16	3	11	3
1	2009-05-19 16:15:00	157	16	3	11	3
1	2009-05-19 16:16:00	48	16	3	11	3
1	2009-05-19 16:17:00	0	16	3	11	3
1	2009-05-19 16:18:00	623	16	3	11	3
1	2009-05-19 16:19:00	401	16	3	11	3
1	2009-05-19 16:20:00	0	16	3	11	3
1	2009-05-19 16:21:00	0	16	3	11	3
1	2009-05-19 16:22:00	0	16	3	11	3
1	2009-05-19 16:23:00	0	16	3	11	3
1	2009-05-19 16:24:00	0	16	3	11	3
1	2009-05-19 16:25:00	0	16	3	11	3
1	2009-05-19 16:26:00	1406	16	3	11	3
1	2009-05-19 16:27:00	316	16	3	11	3
1	2009-05-19 16:28:00	36	16	3	11	3
1	2009-05-19 16:29:00	12	16	3	11	3
1	2009-05-19 16:30:00	0	16	3	11	3
1	2009-05-19 16:31:00	0	16	3	11	3
1	2009-05-19 16:32:00	0	16	3	11	3
1	2009-05-19 16:33:00	0	16	3	11	3
1	2009-05-19 16:34:00	0	16	3	11	3
1	2009-05-19 16:35:00	0	16	3	11	3
1	2009-05-19 16:36:00	0	16	3	11	3
1	2009-05-19 16:37:00	0	16	3	11	3
1	2009-05-19 16:38:00	0	16	3	11	3
1	2009-05-19 16:39:00	0	16	3	11	3
1	2009-05-19 16:40:00	12	16	3	11	3
1	2009-05-19 16:41:00	0	16	3	11	3
1	2009-05-19 16:42:00	12	16	3	11	3
1	2009-05-19 16:43:00	12	16	3	11	3
1	2009-05-19 16:44:00	85	16	3	11	3
1	2009-05-19 16:45:00	97	16	3	11	3
1	2009-05-19 16:46:00	36	16	3	11	3
1	2009-05-19 16:47:00	36	16	3	11	3
1	2009-05-19 16:48:00	121	16	3	11	3
1	2009-05-19 16:49:00	623	16	3	11	3
1	2009-05-19 16:50:00	244	16	3	11	3
1	2009-05-19 16:51:00	645	16	3	11	3
1	2009-05-19 16:52:00	12	16	3	11	3
1	2009-05-19 16:53:00	12	16	3	11	3
1	2009-05-19 16:54:00	0	16	3	11	3
1	2009-05-19 16:55:00	0	16	3	11	3
1	2009-05-19 16:56:00	0	16	3	11	3
1	2009-05-19 16:57:00	0	16	3	11	3
1	2009-05-19 16:58:00	12	16	3	11	3
1	2009-05-19 16:59:00	24	16	3	11	3
1	2009-05-19 17:00:00	0	16	3	11	3
1	2009-05-19 17:01:00	12	17	3	11	3
1	2009-05-19 17:02:00	12	17	3	11	3
1	2009-05-19 17:03:00	36	17	3	11	3
1	2009-05-19 17:04:00	0	17	3	11	3
1	2009-05-19 17:05:00	0	17	3	11	3
1	2009-05-19 17:06:00	0	17	3	11	3
1	2009-05-19 17:07:00	0	17	3	11	3
1	2009-05-19 17:08:00	0	17	3	11	3
1	2009-05-19 17:09:00	12	17	3	11	3
1	2009-05-19 17:10:00	0	17	3	11	3
1	2009-05-19 17:11:00	72	17	3	11	3
1	2009-05-19 17:12:00	48	17	3	11	3
1	2009-05-19 17:13:00	0	17	3	11	3
1	2009-05-19 17:14:00	72	17	3	11	3
1	2009-05-19 17:15:00	36	17	3	11	3
1	2009-05-19 17:16:00	0	17	3	11	3
1	2009-05-19 17:17:00	0	17	3	11	3
1	2009-05-19 17:18:00	36	17	3	11	3
1	2009-05-19 17:19:00	0	17	3	11	3
1	2009-05-19 17:20:00	0	17	3	11	3
1	2009-05-19 17:21:00	12	17	3	11	3
1	2009-05-19 17:22:00	0	17	3	11	3
1	2009-05-19 17:23:00	36	17	3	11	3
1	2009-05-19 17:24:00	367	17	3	11	3
1	2009-05-19 17:25:00	920	17	3	11	3
1	2009-05-19 17:26:00	0	17	3	11	3
1	2009-05-19 17:27:00	0	17	3	11	3
1	2009-05-19 17:28:00	0	17	3	11	3
1	2009-05-19 17:29:00	0	17	3	11	3
1	2009-05-19 17:30:00	0	17	3	11	3
1	2009-05-19 17:31:00	0	17	3	11	3
1	2009-05-19 17:32:00	0	17	3	11	3
1	2009-05-19 17:33:00	0	17	3	11	3
1	2009-05-19 17:34:00	0	17	3	11	3
1	2009-05-19 17:35:00	0	17	3	11	3
1	2009-05-19 17:36:00	1051	17	3	11	3
1	2009-05-19 17:37:00	186	17	3	11	3
1	2009-05-19 17:38:00	384	17	3	11	3
1	2009-05-19 17:39:00	316	17	3	11	3
1	2009-05-19 17:40:00	133	17	3	11	3
1	2009-05-19 17:41:00	133	17	3	11	3
1	2009-05-19 17:42:00	121	17	3	11	3
1	2009-05-19 17:43:00	258	17	3	11	3
1	2009-05-19 17:44:00	24	17	3	11	3
1	2009-05-19 17:45:00	273	17	3	11	3
1	2009-05-19 17:46:00	645	17	3	11	3
1	2009-05-19 17:47:00	215	17	3	11	3
1	2009-05-19 17:48:00	872	17	3	11	3
1	2009-05-19 17:49:00	896	17	3	11	3
1	2009-05-19 17:50:00	1374	17	3	11	3
1	2009-05-19 17:51:00	1473	17	3	11	3
1	2009-05-19 17:52:00	97	17	3	11	3
1	2009-05-19 17:53:00	0	17	3	11	3
1	2009-05-19 17:54:00	0	17	3	11	3
1	2009-05-19 17:55:00	0	17	3	11	3
1	2009-05-19 17:56:00	0	17	3	11	3
1	2009-05-19 17:57:00	0	17	3	11	3
1	2009-05-19 17:58:00	0	17	3	11	3
1	2009-05-19 17:59:00	0	17	3	11	3
1	2009-05-19 18:00:00	0	17	3	11	3
1	2009-05-19 18:01:00	0	18	4	11	3
1	2009-05-19 18:02:00	0	18	4	11	3
1	2009-05-19 18:03:00	0	18	4	11	3
1	2009-05-19 18:04:00	0	18	4	11	3
1	2009-05-19 18:05:00	0	18	4	11	3
1	2009-05-19 18:06:00	0	18	4	11	3
1	2009-05-19 18:07:00	12	18	4	11	3
1	2009-05-19 18:08:00	0	18	4	11	3
1	2009-05-19 18:09:00	0	18	4	11	3
1	2009-05-19 18:10:00	0	18	4	11	3
1	2009-05-19 18:11:00	36	18	4	11	3
1	2009-05-19 18:12:00	36	18	4	11	3
1	2009-05-19 18:13:00	0	18	4	11	3
1	2009-05-19 18:14:00	0	18	4	11	3
1	2009-05-19 18:15:00	0	18	4	11	3
1	2009-05-19 18:16:00	732	18	4	11	3
1	2009-05-19 18:17:00	97	18	4	11	3
1	2009-05-19 18:18:00	0	18	4	11	3
1	2009-05-19 18:19:00	0	18	4	11	3
1	2009-05-19 18:20:00	0	18	4	11	3
1	2009-05-19 18:21:00	36	18	4	11	3
1	2009-05-19 18:22:00	1162	18	4	11	3
1	2009-05-19 18:23:00	452	18	4	11	3
1	2009-05-19 18:24:00	604	18	4	11	3
1	2009-05-19 18:25:00	645	18	4	11	3
1	2009-05-19 18:26:00	48	18	4	11	3
1	2009-05-19 18:27:00	12	18	4	11	3
1	2009-05-19 18:28:00	688	18	4	11	3
1	2009-05-19 18:29:00	418	18	4	11	3
1	2009-05-19 18:30:00	333	18	4	11	3
1	2009-05-19 18:31:00	333	18	4	11	3
1	2009-05-19 18:32:00	775	18	4	11	3
1	2009-05-19 18:33:00	85	18	4	11	3
1	2009-05-19 18:34:00	12	18	4	11	3
1	2009-05-19 18:35:00	0	18	4	11	3
1	2009-05-19 18:36:00	0	18	4	11	3
1	2009-05-19 18:37:00	0	18	4	11	3
1	2009-05-19 18:38:00	0	18	4	11	3
1	2009-05-19 18:39:00	0	18	4	11	3
1	2009-05-19 18:40:00	0	18	4	11	3
1	2009-05-19 18:41:00	0	18	4	11	3
1	2009-05-19 18:42:00	0	18	4	11	3
1	2009-05-19 18:43:00	0	18	4	11	3
1	2009-05-19 18:44:00	0	18	4	11	3
1	2009-05-19 18:45:00	0	18	4	11	3
1	2009-05-19 18:46:00	0	18	4	11	3
1	2009-05-19 18:47:00	0	18	4	11	3
1	2009-05-19 18:48:00	0	18	4	11	3
1	2009-05-19 18:49:00	488	18	4	11	3
1	2009-05-19 18:50:00	0	18	4	11	3
1	2009-05-19 18:51:00	0	18	4	11	3
1	2009-05-19 18:52:00	0	18	4	11	3
1	2009-05-19 18:53:00	0	18	4	11	3
1	2009-05-19 18:54:00	0	18	4	11	3
1	2009-05-19 18:55:00	0	18	4	11	3
1	2009-05-19 18:56:00	0	18	4	11	3
1	2009-05-19 18:57:00	0	18	4	11	3
1	2009-05-19 18:58:00	0	18	4	11	3
1	2009-05-19 18:59:00	0	18	4	11	3
1	2009-05-19 19:00:00	36	18	4	11	3
1	2009-05-19 19:01:00	0	19	4	11	3
1	2009-05-19 19:02:00	0	19	4	11	3
1	2009-05-19 19:03:00	732	19	4	11	3
1	2009-05-19 19:04:00	507	19	4	11	3
1	2009-05-19 19:05:00	171	19	4	11	3
1	2009-05-19 19:06:00	367	19	4	11	3
1	2009-05-19 19:07:00	1024	19	4	11	3
1	2009-05-19 19:08:00	604	19	4	11	3
1	2009-05-19 19:09:00	0	19	4	11	3
1	2009-05-19 19:10:00	0	19	4	11	3
1	2009-05-19 19:11:00	0	19	4	11	3
1	2009-05-19 19:12:00	0	19	4	11	3
1	2009-05-19 19:13:00	0	19	4	11	3
1	2009-05-19 19:14:00	0	19	4	11	3
1	2009-05-19 19:15:00	0	19	4	11	3
1	2009-05-19 19:16:00	0	19	4	11	3
1	2009-05-19 19:17:00	0	19	4	11	3
1	2009-05-19 19:18:00	12	19	4	11	3
1	2009-05-19 19:19:00	0	19	4	11	3
1	2009-05-19 19:20:00	0	19	4	11	3
1	2009-05-19 19:21:00	0	19	4	11	3
1	2009-05-19 19:22:00	0	19	4	11	3
1	2009-05-19 19:23:00	0	19	4	11	3
1	2009-05-19 19:24:00	0	19	4	11	3
1	2009-05-19 19:25:00	0	19	4	11	3
1	2009-05-19 19:26:00	2082	19	4	11	3
1	2009-05-19 19:27:00	2449	19	4	11	3
1	2009-05-19 19:28:00	2215	19	4	11	3
1	2009-05-19 19:29:00	971	19	4	11	3
1	2009-05-19 19:30:00	1956	19	4	11	3
1	2009-05-19 19:31:00	1758	19	4	11	3
1	2009-05-19 19:32:00	1104	19	4	11	3
1	2009-05-19 19:33:00	732	19	4	11	3
1	2009-05-19 19:34:00	896	19	4	11	3
1	2009-05-19 19:35:00	1162	19	4	11	3
1	2009-05-19 19:36:00	488	19	4	11	3
1	2009-05-19 19:37:00	645	19	4	11	3
1	2009-05-19 19:38:00	1835	19	4	11	3
1	2009-05-19 19:39:00	48	19	4	11	3
1	2009-05-19 19:40:00	133	19	4	11	3
1	2009-05-19 19:41:00	258	19	4	11	3
1	2009-05-19 19:42:00	145	19	4	11	3
1	2009-05-19 19:43:00	200	19	4	11	3
1	2009-05-19 19:44:00	302	19	4	11	3
1	2009-05-19 19:45:00	507	19	4	11	3
1	2009-05-19 19:46:00	85	19	4	11	3
1	2009-05-19 19:47:00	732	19	4	11	3
1	2009-05-19 19:48:00	584	19	4	11	3
1	2009-05-19 19:49:00	215	19	4	11	3
1	2009-05-19 19:50:00	302	19	4	11	3
1	2009-05-19 19:51:00	526	19	4	11	3
1	2009-05-19 19:52:00	171	19	4	11	3
1	2009-05-19 19:53:00	121	19	4	11	3
1	2009-05-19 19:54:00	488	19	4	11	3
1	2009-05-19 19:55:00	48	19	4	11	3
1	2009-05-19 19:56:00	0	19	4	11	3
1	2009-05-19 19:57:00	244	19	4	11	3
1	2009-05-19 19:58:00	36	19	4	11	3
1	2009-05-19 19:59:00	452	19	4	11	3
1	2009-05-19 20:00:00	526	19	4	11	3
1	2009-05-19 20:01:00	302	20	4	11	3
1	2009-05-19 20:02:00	121	20	4	11	3
1	2009-05-19 20:03:00	546	20	4	11	3
1	2009-05-19 20:04:00	229	20	4	11	3
1	2009-05-19 20:05:00	316	20	4	11	3
1	2009-05-19 20:06:00	452	20	4	11	3
1	2009-05-19 20:07:00	229	20	4	11	3
1	2009-05-19 20:08:00	287	20	4	11	3
1	2009-05-19 20:09:00	258	20	4	11	3
1	2009-05-19 20:10:00	688	20	4	11	3
1	2009-05-19 20:11:00	1956	20	4	11	3
1	2009-05-19 20:12:00	848	20	4	11	3
1	2009-05-19 20:13:00	452	20	4	11	3
1	2009-05-19 20:14:00	121	20	4	11	3
1	2009-05-19 20:15:00	109	20	4	11	3
1	2009-05-19 20:16:00	36	20	4	11	3
1	2009-05-19 20:17:00	418	20	4	11	3
1	2009-05-19 20:18:00	302	20	4	11	3
1	2009-05-19 20:19:00	200	20	4	11	3
1	2009-05-19 20:20:00	287	20	4	11	3
1	2009-05-19 20:21:00	145	20	4	11	3
1	2009-05-19 20:22:00	0	20	4	11	3
1	2009-05-19 20:23:00	258	20	4	11	3
1	2009-05-19 20:24:00	229	20	4	11	3
1	2009-05-19 20:25:00	85	20	4	11	3
1	2009-05-19 20:26:00	452	20	4	11	3
1	2009-05-19 20:27:00	584	20	4	11	3
1	2009-05-19 20:28:00	667	20	4	11	3
1	2009-05-19 20:29:00	85	20	4	11	3
1	2009-05-19 20:30:00	121	20	4	11	3
1	2009-05-19 20:31:00	215	20	4	11	3
1	2009-05-19 20:32:00	333	20	4	11	3
1	2009-05-19 20:33:00	145	20	4	11	3
1	2009-05-19 20:34:00	0	20	4	11	3
1	2009-05-19 20:35:00	0	20	4	11	3
1	2009-05-19 20:36:00	0	20	4	11	3
1	2009-05-19 20:37:00	133	20	4	11	3
1	2009-05-19 20:38:00	1133	20	4	11	3
1	2009-05-19 20:39:00	109	20	4	11	3
1	2009-05-19 20:40:00	157	20	4	11	3
1	2009-05-19 20:41:00	0	20	4	11	3
1	2009-05-19 20:42:00	0	20	4	11	3
1	2009-05-19 20:43:00	0	20	4	11	3
1	2009-05-19 20:44:00	109	20	4	11	3
1	2009-05-19 20:45:00	186	20	4	11	3
1	2009-05-19 20:46:00	799	20	4	11	3
1	2009-05-19 20:47:00	244	20	4	11	3
1	2009-05-19 20:48:00	72	20	4	11	3
1	2009-05-19 20:49:00	0	20	4	11	3
1	2009-05-19 20:50:00	0	20	4	11	3
1	2009-05-19 20:51:00	0	20	4	11	3
1	2009-05-19 20:52:00	0	20	4	11	3
1	2009-05-19 20:53:00	0	20	4	11	3
1	2009-05-19 20:54:00	0	20	4	11	3
1	2009-05-19 20:55:00	0	20	4	11	3
1	2009-05-19 20:56:00	12	20	4	11	3
1	2009-05-19 20:57:00	273	20	4	11	3
1	2009-05-19 20:58:00	60	20	4	11	3
1	2009-05-19 20:59:00	72	20	4	11	3
1	2009-05-19 21:00:00	60	20	4	11	3
1	2009-05-19 21:01:00	775	21	4	11	3
1	2009-05-19 21:02:00	258	21	4	11	3
1	2009-05-19 21:03:00	0	21	4	11	3
1	2009-05-19 21:04:00	0	21	4	11	3
1	2009-05-19 21:05:00	200	21	4	11	3
1	2009-05-19 21:06:00	157	21	4	11	3
1	2009-05-19 21:07:00	109	21	4	11	3
1	2009-05-19 21:08:00	0	21	4	11	3
1	2009-05-19 21:09:00	0	21	4	11	3
1	2009-05-19 21:10:00	0	21	4	11	3
1	2009-05-19 21:11:00	0	21	4	11	3
1	2009-05-19 21:12:00	0	21	4	11	3
1	2009-05-19 21:13:00	0	21	4	11	3
1	2009-05-19 21:14:00	0	21	4	11	3
1	2009-05-19 21:15:00	0	21	4	11	3
1	2009-05-19 21:16:00	0	21	4	11	3
1	2009-05-19 21:17:00	0	21	4	11	3
1	2009-05-19 21:18:00	97	21	4	11	3
1	2009-05-19 21:19:00	350	21	4	11	3
1	2009-05-19 21:20:00	0	21	4	11	3
1	2009-05-19 21:21:00	0	21	4	11	3
1	2009-05-19 21:22:00	0	21	4	11	3
1	2009-05-19 21:23:00	0	21	4	11	3
1	2009-05-19 21:24:00	12	21	4	11	3
1	2009-05-19 21:25:00	0	21	4	11	3
1	2009-05-19 21:26:00	0	21	4	11	3
1	2009-05-19 21:27:00	0	21	4	11	3
1	2009-05-19 21:28:00	12	21	4	11	3
1	2009-05-19 21:29:00	0	21	4	11	3
1	2009-05-19 21:30:00	0	21	4	11	3
1	2009-05-19 21:31:00	24	21	4	11	3
1	2009-05-19 21:32:00	488	21	4	11	3
1	2009-05-19 21:33:00	287	21	4	11	3
1	2009-05-19 21:34:00	0	21	4	11	3
1	2009-05-19 21:35:00	0	21	4	11	3
1	2009-05-19 21:36:00	24	21	4	11	3
1	2009-05-19 21:37:00	0	21	4	11	3
1	2009-05-19 21:38:00	0	21	4	11	3
1	2009-05-19 21:39:00	0	21	4	11	3
1	2009-05-19 21:40:00	0	21	4	11	3
1	2009-05-19 21:41:00	0	21	4	11	3
1	2009-05-19 21:42:00	0	21	4	11	3
1	2009-05-19 21:43:00	0	21	4	11	3
1	2009-05-19 21:44:00	12	21	4	11	3
1	2009-05-19 21:45:00	0	21	4	11	3
1	2009-05-19 21:46:00	0	21	4	11	3
1	2009-05-19 21:47:00	60	21	4	11	3
1	2009-05-19 21:48:00	109	21	4	11	3
1	2009-05-19 21:49:00	229	21	4	11	3
1	2009-05-19 21:50:00	186	21	4	11	3
1	2009-05-19 21:51:00	0	21	4	11	3
1	2009-05-19 21:52:00	12	21	4	11	3
1	2009-05-19 21:53:00	0	21	4	11	3
1	2009-05-19 21:54:00	24	21	4	11	3
1	2009-05-19 21:55:00	0	21	4	11	3
1	2009-05-19 21:56:00	24	21	4	11	3
1	2009-05-19 21:57:00	24	21	4	11	3
1	2009-05-19 21:58:00	12	21	4	11	3
1	2009-05-19 21:59:00	24	21	4	11	3
1	2009-05-19 22:00:00	0	21	4	11	3
1	2009-05-19 22:01:00	12	22	4	11	3
1	2009-05-19 22:02:00	0	22	4	11	3
1	2009-05-19 22:03:00	171	22	4	11	3
1	2009-05-19 22:04:00	229	22	4	11	3
1	2009-05-19 22:05:00	0	22	4	11	3
1	2009-05-19 22:06:00	12	22	4	11	3
1	2009-05-19 22:07:00	0	22	4	11	3
1	2009-05-19 22:08:00	0	22	4	11	3
1	2009-05-19 22:09:00	0	22	4	11	3
1	2009-05-19 22:10:00	0	22	4	11	3
1	2009-05-19 22:11:00	12	22	4	11	3
1	2009-05-19 22:12:00	0	22	4	11	3
1	2009-05-19 22:13:00	0	22	4	11	3
1	2009-05-19 22:14:00	0	22	4	11	3
1	2009-05-19 22:15:00	12	22	4	11	3
1	2009-05-19 22:16:00	0	22	4	11	3
1	2009-05-19 22:17:00	0	22	4	11	3
1	2009-05-19 22:18:00	0	22	4	11	3
1	2009-05-19 22:19:00	0	22	4	11	3
1	2009-05-19 22:20:00	0	22	4	11	3
1	2009-05-19 22:21:00	0	22	4	11	3
1	2009-05-19 22:22:00	0	22	4	11	3
1	2009-05-19 22:23:00	0	22	4	11	3
1	2009-05-19 22:24:00	0	22	4	11	3
1	2009-05-19 22:25:00	0	22	4	11	3
1	2009-05-19 22:26:00	0	22	4	11	3
1	2009-05-19 22:27:00	0	22	4	11	3
1	2009-05-19 22:28:00	0	22	4	11	3
1	2009-05-19 22:29:00	0	22	4	11	3
1	2009-05-19 22:30:00	0	22	4	11	3
1	2009-05-19 22:31:00	0	22	4	11	3
1	2009-05-19 22:32:00	0	22	4	11	3
1	2009-05-19 22:33:00	0	22	4	11	3
1	2009-05-19 22:34:00	0	22	4	11	3
1	2009-05-19 22:35:00	0	22	4	11	3
1	2009-05-19 22:36:00	0	22	4	11	3
1	2009-05-19 22:37:00	0	22	4	11	3
1	2009-05-19 22:38:00	0	22	4	11	3
1	2009-05-19 22:39:00	24	22	4	11	3
1	2009-05-19 22:40:00	0	22	4	11	3
1	2009-05-19 22:41:00	0	22	4	11	3
1	2009-05-19 22:42:00	12	22	4	11	3
1	2009-05-19 22:43:00	0	22	4	11	3
1	2009-05-19 22:44:00	0	22	4	11	3
1	2009-05-19 22:45:00	0	22	4	11	3
1	2009-05-19 22:46:00	0	22	4	11	3
1	2009-05-19 22:47:00	0	22	4	11	3
1	2009-05-19 22:48:00	12	22	4	11	3
1	2009-05-19 22:49:00	0	22	4	11	3
1	2009-05-19 22:50:00	0	22	4	11	3
1	2009-05-19 22:51:00	12	22	4	11	3
1	2009-05-19 22:52:00	0	22	4	11	3
1	2009-05-19 22:53:00	109	22	4	11	3
1	2009-05-19 22:54:00	0	22	4	11	3
1	2009-05-19 22:55:00	0	22	4	11	3
1	2009-05-19 22:56:00	48	22	4	11	3
1	2009-05-19 22:57:00	333	22	4	11	3
1	2009-05-19 22:58:00	60	22	4	11	3
1	2009-05-19 22:59:00	0	22	4	11	3
1	2009-05-19 23:00:00	60	22	4	11	3
1	2009-05-19 23:01:00	0	23	4	11	3
1	2009-05-19 23:02:00	0	23	4	11	3
1	2009-05-19 23:03:00	0	23	4	11	3
1	2009-05-19 23:04:00	0	23	4	11	3
1	2009-05-19 23:05:00	0	23	4	11	3
1	2009-05-19 23:06:00	0	23	4	11	3
1	2009-05-19 23:07:00	0	23	4	11	3
1	2009-05-19 23:08:00	0	23	4	11	3
1	2009-05-19 23:09:00	0	23	4	11	3
1	2009-05-19 23:10:00	0	23	4	11	3
1	2009-05-19 23:11:00	0	23	4	11	3
1	2009-05-19 23:12:00	171	23	4	11	3
1	2009-05-19 23:13:00	0	23	4	11	3
1	2009-05-19 23:14:00	0	23	4	11	3
1	2009-05-19 23:15:00	0	23	4	11	3
1	2009-05-19 23:16:00	0	23	4	11	3
1	2009-05-19 23:17:00	0	23	4	11	3
1	2009-05-19 23:18:00	0	23	4	11	3
1	2009-05-19 23:19:00	0	23	4	11	3
1	2009-05-19 23:20:00	0	23	4	11	3
1	2009-05-19 23:21:00	0	23	4	11	3
1	2009-05-19 23:22:00	0	23	4	11	3
1	2009-05-19 23:23:00	0	23	4	11	3
1	2009-05-19 23:24:00	0	23	4	11	3
1	2009-05-19 23:25:00	0	23	4	11	3
1	2009-05-19 23:26:00	0	23	4	11	3
1	2009-05-19 23:27:00	0	23	4	11	3
1	2009-05-19 23:28:00	0	23	4	11	3
1	2009-05-19 23:29:00	12	23	4	11	3
1	2009-05-19 23:30:00	0	23	4	11	3
1	2009-05-19 23:31:00	0	23	4	11	3
1	2009-05-19 23:32:00	0	23	4	11	3
1	2009-05-19 23:33:00	0	23	4	11	3
1	2009-05-19 23:34:00	0	23	4	11	3
1	2009-05-19 23:35:00	0	23	4	11	3
1	2009-05-19 23:36:00	0	23	4	11	3
1	2009-05-19 23:37:00	0	23	4	11	3
1	2009-05-19 23:38:00	0	23	4	11	3
1	2009-05-19 23:39:00	0	23	4	11	3
1	2009-05-19 23:40:00	0	23	4	11	3
1	2009-05-19 23:41:00	60	23	4	11	3
1	2009-05-19 23:42:00	0	23	4	11	3
1	2009-05-19 23:43:00	0	23	4	11	3
1	2009-05-19 23:44:00	0	23	4	11	3
1	2009-05-19 23:45:00	0	23	4	11	3
1	2009-05-19 23:46:00	0	23	4	11	3
1	2009-05-19 23:47:00	0	23	4	11	3
1	2009-05-19 23:48:00	0	23	4	11	3
1	2009-05-19 23:49:00	0	23	4	11	3
1	2009-05-19 23:50:00	0	23	4	11	3
1	2009-05-19 23:51:00	36	23	4	11	3
1	2009-05-19 23:52:00	0	23	4	11	3
1	2009-05-19 23:53:00	0	23	4	11	3
1	2009-05-19 23:54:00	0	23	4	11	3
1	2009-05-19 23:55:00	0	23	4	11	3
1	2009-05-19 23:56:00	0	23	4	11	3
1	2009-05-19 23:57:00	0	23	4	11	3
1	2009-05-19 23:58:00	0	23	4	11	3
1	2009-05-19 23:59:00	0	23	4	11	3
1	2009-05-20	0	23	4	11	3
1	2009-05-20 00:01:00	0	0	1	12	4
1	2009-05-20 00:02:00	0	0	1	12	4
1	2009-05-20 00:03:00	0	0	1	12	4
1	2009-05-20 00:04:00	12	0	1	12	4
1	2009-05-20 00:05:00	0	0	1	12	4
1	2009-05-20 00:06:00	0	0	1	12	4
1	2009-05-20 00:07:00	0	0	1	12	4
1	2009-05-20 00:08:00	0	0	1	12	4
1	2009-05-20 00:09:00	0	0	1	12	4
1	2009-05-20 00:10:00	0	0	1	12	4
1	2009-05-20 00:11:00	0	0	1	12	4
1	2009-05-20 00:12:00	0	0	1	12	4
1	2009-05-20 00:13:00	0	0	1	12	4
1	2009-05-20 00:14:00	0	0	1	12	4
1	2009-05-20 00:15:00	0	0	1	12	4
1	2009-05-20 00:16:00	0	0	1	12	4
1	2009-05-20 00:17:00	0	0	1	12	4
1	2009-05-20 00:18:00	0	0	1	12	4
1	2009-05-20 00:19:00	0	0	1	12	4
1	2009-05-20 00:20:00	0	0	1	12	4
1	2009-05-20 00:21:00	0	0	1	12	4
1	2009-05-20 00:22:00	0	0	1	12	4
1	2009-05-20 00:23:00	0	0	1	12	4
1	2009-05-20 00:24:00	0	0	1	12	4
1	2009-05-20 00:25:00	0	0	1	12	4
1	2009-05-20 00:26:00	0	0	1	12	4
1	2009-05-20 00:27:00	0	0	1	12	4
1	2009-05-20 00:28:00	0	0	1	12	4
1	2009-05-20 00:29:00	0	0	1	12	4
1	2009-05-20 00:30:00	24	0	1	12	4
1	2009-05-20 00:31:00	12	0	1	12	4
1	2009-05-20 00:32:00	0	0	1	12	4
1	2009-05-20 00:33:00	0	0	1	12	4
1	2009-05-20 00:34:00	0	0	1	12	4
1	2009-05-20 00:35:00	0	0	1	12	4
1	2009-05-20 00:36:00	0	0	1	12	4
1	2009-05-20 00:37:00	0	0	1	12	4
1	2009-05-20 00:38:00	0	0	1	12	4
1	2009-05-20 00:39:00	0	0	1	12	4
1	2009-05-20 00:40:00	0	0	1	12	4
1	2009-05-20 00:41:00	12	0	1	12	4
1	2009-05-20 00:42:00	0	0	1	12	4
1	2009-05-20 00:43:00	0	0	1	12	4
1	2009-05-20 00:44:00	0	0	1	12	4
1	2009-05-20 00:45:00	0	0	1	12	4
1	2009-05-20 00:46:00	0	0	1	12	4
1	2009-05-20 00:47:00	0	0	1	12	4
1	2009-05-20 00:48:00	0	0	1	12	4
1	2009-05-20 00:49:00	0	0	1	12	4
1	2009-05-20 00:50:00	0	0	1	12	4
1	2009-05-20 00:51:00	0	0	1	12	4
1	2009-05-20 00:52:00	0	0	1	12	4
1	2009-05-20 00:53:00	0	0	1	12	4
1	2009-05-20 00:54:00	0	0	1	12	4
1	2009-05-20 00:55:00	0	0	1	12	4
1	2009-05-20 00:56:00	0	0	1	12	4
1	2009-05-20 00:57:00	12	0	1	12	4
1	2009-05-20 00:58:00	0	0	1	12	4
1	2009-05-20 00:59:00	0	0	1	12	4
1	2009-05-20 01:00:00	0	0	1	12	4
1	2009-05-20 01:01:00	0	1	1	12	4
1	2009-05-20 01:02:00	0	1	1	12	4
1	2009-05-20 01:03:00	0	1	1	12	4
1	2009-05-20 01:04:00	0	1	1	12	4
1	2009-05-20 01:05:00	0	1	1	12	4
1	2009-05-20 01:06:00	0	1	1	12	4
1	2009-05-20 01:07:00	0	1	1	12	4
1	2009-05-20 01:08:00	0	1	1	12	4
1	2009-05-20 01:09:00	0	1	1	12	4
1	2009-05-20 01:10:00	0	1	1	12	4
1	2009-05-20 01:11:00	0	1	1	12	4
1	2009-05-20 01:12:00	0	1	1	12	4
1	2009-05-20 01:13:00	0	1	1	12	4
1	2009-05-20 01:14:00	0	1	1	12	4
1	2009-05-20 01:15:00	0	1	1	12	4
1	2009-05-20 01:16:00	0	1	1	12	4
1	2009-05-20 01:17:00	0	1	1	12	4
1	2009-05-20 01:18:00	0	1	1	12	4
1	2009-05-20 01:19:00	0	1	1	12	4
1	2009-05-20 01:20:00	0	1	1	12	4
1	2009-05-20 01:21:00	0	1	1	12	4
1	2009-05-20 01:22:00	0	1	1	12	4
1	2009-05-20 01:23:00	0	1	1	12	4
1	2009-05-20 01:24:00	0	1	1	12	4
1	2009-05-20 01:25:00	0	1	1	12	4
1	2009-05-20 01:26:00	0	1	1	12	4
1	2009-05-20 01:27:00	0	1	1	12	4
1	2009-05-20 01:28:00	0	1	1	12	4
1	2009-05-20 01:29:00	0	1	1	12	4
1	2009-05-20 01:30:00	0	1	1	12	4
1	2009-05-20 01:31:00	0	1	1	12	4
1	2009-05-20 01:32:00	0	1	1	12	4
1	2009-05-20 01:33:00	229	1	1	12	4
1	2009-05-20 01:34:00	526	1	1	12	4
1	2009-05-20 01:35:00	244	1	1	12	4
1	2009-05-20 01:36:00	384	1	1	12	4
1	2009-05-20 01:37:00	623	1	1	12	4
1	2009-05-20 01:38:00	645	1	1	12	4
1	2009-05-20 01:39:00	273	1	1	12	4
1	2009-05-20 01:40:00	12	1	1	12	4
1	2009-05-20 01:41:00	0	1	1	12	4
1	2009-05-20 01:42:00	0	1	1	12	4
1	2009-05-20 01:43:00	0	1	1	12	4
1	2009-05-20 01:44:00	12	1	1	12	4
1	2009-05-20 01:45:00	24	1	1	12	4
1	2009-05-20 01:46:00	0	1	1	12	4
1	2009-05-20 01:47:00	157	1	1	12	4
1	2009-05-20 01:48:00	36	1	1	12	4
1	2009-05-20 01:49:00	0	1	1	12	4
1	2009-05-20 01:50:00	0	1	1	12	4
1	2009-05-20 01:51:00	0	1	1	12	4
1	2009-05-20 01:52:00	0	1	1	12	4
1	2009-05-20 01:53:00	0	1	1	12	4
1	2009-05-20 01:54:00	0	1	1	12	4
1	2009-05-20 01:55:00	0	1	1	12	4
1	2009-05-20 01:56:00	0	1	1	12	4
1	2009-05-20 01:57:00	0	1	1	12	4
1	2009-05-20 01:58:00	0	1	1	12	4
1	2009-05-20 01:59:00	24	1	1	12	4
1	2009-05-20 02:00:00	0	1	1	12	4
1	2009-05-20 02:01:00	0	2	1	12	4
1	2009-05-20 02:02:00	0	2	1	12	4
1	2009-05-20 02:03:00	0	2	1	12	4
1	2009-05-20 02:04:00	0	2	1	12	4
1	2009-05-20 02:05:00	0	2	1	12	4
1	2009-05-20 02:06:00	0	2	1	12	4
1	2009-05-20 02:07:00	0	2	1	12	4
1	2009-05-20 02:08:00	0	2	1	12	4
1	2009-05-20 02:09:00	0	2	1	12	4
1	2009-05-20 02:10:00	0	2	1	12	4
1	2009-05-20 02:11:00	0	2	1	12	4
1	2009-05-20 02:12:00	0	2	1	12	4
1	2009-05-20 02:13:00	0	2	1	12	4
1	2009-05-20 02:14:00	0	2	1	12	4
1	2009-05-20 02:15:00	0	2	1	12	4
1	2009-05-20 02:16:00	0	2	1	12	4
1	2009-05-20 02:17:00	12	2	1	12	4
1	2009-05-20 02:18:00	0	2	1	12	4
1	2009-05-20 02:19:00	0	2	1	12	4
1	2009-05-20 02:20:00	0	2	1	12	4
1	2009-05-20 02:21:00	0	2	1	12	4
1	2009-05-20 02:22:00	0	2	1	12	4
1	2009-05-20 02:23:00	0	2	1	12	4
1	2009-05-20 02:24:00	0	2	1	12	4
1	2009-05-20 02:25:00	0	2	1	12	4
1	2009-05-20 02:26:00	0	2	1	12	4
1	2009-05-20 02:27:00	48	2	1	12	4
1	2009-05-20 02:28:00	97	2	1	12	4
1	2009-05-20 02:29:00	36	2	1	12	4
1	2009-05-20 02:30:00	36	2	1	12	4
1	2009-05-20 02:31:00	0	2	1	12	4
1	2009-05-20 02:32:00	0	2	1	12	4
1	2009-05-20 02:33:00	0	2	1	12	4
1	2009-05-20 02:34:00	0	2	1	12	4
1	2009-05-20 02:35:00	0	2	1	12	4
1	2009-05-20 02:36:00	0	2	1	12	4
1	2009-05-20 02:37:00	0	2	1	12	4
1	2009-05-20 02:38:00	0	2	1	12	4
1	2009-05-20 02:39:00	0	2	1	12	4
1	2009-05-20 02:40:00	0	2	1	12	4
1	2009-05-20 02:41:00	0	2	1	12	4
1	2009-05-20 02:42:00	0	2	1	12	4
1	2009-05-20 02:43:00	0	2	1	12	4
1	2009-05-20 02:44:00	0	2	1	12	4
1	2009-05-20 02:45:00	0	2	1	12	4
1	2009-05-20 02:46:00	0	2	1	12	4
1	2009-05-20 02:47:00	0	2	1	12	4
1	2009-05-20 02:48:00	0	2	1	12	4
1	2009-05-20 02:49:00	0	2	1	12	4
1	2009-05-20 02:50:00	0	2	1	12	4
1	2009-05-20 02:51:00	0	2	1	12	4
1	2009-05-20 02:52:00	0	2	1	12	4
1	2009-05-20 02:53:00	12	2	1	12	4
1	2009-05-20 02:54:00	12	2	1	12	4
1	2009-05-20 02:55:00	0	2	1	12	4
1	2009-05-20 02:56:00	0	2	1	12	4
1	2009-05-20 02:57:00	0	2	1	12	4
1	2009-05-20 02:58:00	24	2	1	12	4
1	2009-05-20 02:59:00	0	2	1	12	4
1	2009-05-20 03:00:00	0	2	1	12	4
1	2009-05-20 03:01:00	0	3	1	12	4
1	2009-05-20 03:02:00	0	3	1	12	4
1	2009-05-20 03:03:00	0	3	1	12	4
1	2009-05-20 03:04:00	0	3	1	12	4
1	2009-05-20 03:05:00	24	3	1	12	4
1	2009-05-20 03:06:00	0	3	1	12	4
1	2009-05-20 03:07:00	0	3	1	12	4
1	2009-05-20 03:08:00	0	3	1	12	4
1	2009-05-20 03:09:00	0	3	1	12	4
1	2009-05-20 03:10:00	0	3	1	12	4
1	2009-05-20 03:11:00	0	3	1	12	4
1	2009-05-20 03:12:00	24	3	1	12	4
1	2009-05-20 03:13:00	0	3	1	12	4
1	2009-05-20 03:14:00	0	3	1	12	4
1	2009-05-20 03:15:00	0	3	1	12	4
1	2009-05-20 03:16:00	0	3	1	12	4
1	2009-05-20 03:17:00	0	3	1	12	4
1	2009-05-20 03:18:00	0	3	1	12	4
1	2009-05-20 03:19:00	0	3	1	12	4
1	2009-05-20 03:20:00	0	3	1	12	4
1	2009-05-20 03:21:00	0	3	1	12	4
1	2009-05-20 03:22:00	0	3	1	12	4
1	2009-05-20 03:23:00	0	3	1	12	4
1	2009-05-20 03:24:00	0	3	1	12	4
1	2009-05-20 03:25:00	0	3	1	12	4
1	2009-05-20 03:26:00	0	3	1	12	4
1	2009-05-20 03:27:00	12	3	1	12	4
1	2009-05-20 03:28:00	36	3	1	12	4
1	2009-05-20 03:29:00	0	3	1	12	4
1	2009-05-20 03:30:00	0	3	1	12	4
1	2009-05-20 03:31:00	0	3	1	12	4
1	2009-05-20 03:32:00	0	3	1	12	4
1	2009-05-20 03:33:00	0	3	1	12	4
1	2009-05-20 03:34:00	0	3	1	12	4
1	2009-05-20 03:35:00	0	3	1	12	4
1	2009-05-20 03:36:00	0	3	1	12	4
1	2009-05-20 03:37:00	0	3	1	12	4
1	2009-05-20 03:38:00	0	3	1	12	4
1	2009-05-20 03:39:00	0	3	1	12	4
1	2009-05-20 03:40:00	0	3	1	12	4
1	2009-05-20 03:41:00	0	3	1	12	4
1	2009-05-20 03:42:00	12	3	1	12	4
1	2009-05-20 03:43:00	0	3	1	12	4
1	2009-05-20 03:44:00	0	3	1	12	4
1	2009-05-20 03:45:00	0	3	1	12	4
1	2009-05-20 03:46:00	0	3	1	12	4
1	2009-05-20 03:47:00	0	3	1	12	4
1	2009-05-20 03:48:00	0	3	1	12	4
1	2009-05-20 03:49:00	0	3	1	12	4
1	2009-05-20 03:50:00	0	3	1	12	4
1	2009-05-20 03:51:00	0	3	1	12	4
1	2009-05-20 03:52:00	0	3	1	12	4
1	2009-05-20 03:53:00	0	3	1	12	4
1	2009-05-20 03:54:00	0	3	1	12	4
1	2009-05-20 03:55:00	0	3	1	12	4
1	2009-05-20 03:56:00	0	3	1	12	4
1	2009-05-20 03:57:00	0	3	1	12	4
1	2009-05-20 03:58:00	0	3	1	12	4
1	2009-05-20 03:59:00	12	3	1	12	4
1	2009-05-20 04:00:00	0	3	1	12	4
1	2009-05-20 04:01:00	36	4	1	12	4
1	2009-05-20 04:02:00	12	4	1	12	4
1	2009-05-20 04:03:00	12	4	1	12	4
1	2009-05-20 04:04:00	0	4	1	12	4
1	2009-05-20 04:05:00	0	4	1	12	4
1	2009-05-20 04:06:00	0	4	1	12	4
1	2009-05-20 04:07:00	0	4	1	12	4
1	2009-05-20 04:08:00	0	4	1	12	4
1	2009-05-20 04:09:00	72	4	1	12	4
1	2009-05-20 04:10:00	36	4	1	12	4
1	2009-05-20 04:11:00	0	4	1	12	4
1	2009-05-20 04:12:00	0	4	1	12	4
1	2009-05-20 04:13:00	0	4	1	12	4
1	2009-05-20 04:14:00	0	4	1	12	4
1	2009-05-20 04:15:00	0	4	1	12	4
1	2009-05-20 04:16:00	0	4	1	12	4
1	2009-05-20 04:17:00	0	4	1	12	4
1	2009-05-20 04:18:00	0	4	1	12	4
1	2009-05-20 04:19:00	0	4	1	12	4
1	2009-05-20 04:20:00	0	4	1	12	4
1	2009-05-20 04:21:00	0	4	1	12	4
1	2009-05-20 04:22:00	0	4	1	12	4
1	2009-05-20 04:23:00	0	4	1	12	4
1	2009-05-20 04:24:00	0	4	1	12	4
1	2009-05-20 04:25:00	0	4	1	12	4
1	2009-05-20 04:26:00	0	4	1	12	4
1	2009-05-20 04:27:00	12	4	1	12	4
1	2009-05-20 04:28:00	12	4	1	12	4
1	2009-05-20 04:29:00	0	4	1	12	4
1	2009-05-20 04:30:00	0	4	1	12	4
1	2009-05-20 04:31:00	0	4	1	12	4
1	2009-05-20 04:32:00	0	4	1	12	4
1	2009-05-20 04:33:00	0	4	1	12	4
1	2009-05-20 04:34:00	0	4	1	12	4
1	2009-05-20 04:35:00	0	4	1	12	4
1	2009-05-20 04:36:00	0	4	1	12	4
1	2009-05-20 04:37:00	0	4	1	12	4
1	2009-05-20 04:38:00	12	4	1	12	4
1	2009-05-20 04:39:00	36	4	1	12	4
1	2009-05-20 04:40:00	12	4	1	12	4
1	2009-05-20 04:41:00	72	4	1	12	4
1	2009-05-20 04:42:00	12	4	1	12	4
1	2009-05-20 04:43:00	60	4	1	12	4
1	2009-05-20 04:44:00	200	4	1	12	4
1	2009-05-20 04:45:00	24	4	1	12	4
1	2009-05-20 04:46:00	0	4	1	12	4
1	2009-05-20 04:47:00	0	4	1	12	4
1	2009-05-20 04:48:00	0	4	1	12	4
1	2009-05-20 04:49:00	0	4	1	12	4
1	2009-05-20 04:50:00	0	4	1	12	4
1	2009-05-20 04:51:00	0	4	1	12	4
1	2009-05-20 04:52:00	0	4	1	12	4
1	2009-05-20 04:53:00	0	4	1	12	4
1	2009-05-20 04:54:00	0	4	1	12	4
1	2009-05-20 04:55:00	0	4	1	12	4
1	2009-05-20 04:56:00	0	4	1	12	4
1	2009-05-20 04:57:00	0	4	1	12	4
1	2009-05-20 04:58:00	0	4	1	12	4
1	2009-05-20 04:59:00	0	4	1	12	4
1	2009-05-20 05:00:00	0	4	1	12	4
1	2009-05-20 05:01:00	24	5	1	12	4
1	2009-05-20 05:02:00	0	5	1	12	4
1	2009-05-20 05:03:00	0	5	1	12	4
1	2009-05-20 05:04:00	0	5	1	12	4
1	2009-05-20 05:05:00	0	5	1	12	4
1	2009-05-20 05:06:00	0	5	1	12	4
1	2009-05-20 05:07:00	0	5	1	12	4
1	2009-05-20 05:08:00	0	5	1	12	4
1	2009-05-20 05:09:00	0	5	1	12	4
1	2009-05-20 05:10:00	0	5	1	12	4
1	2009-05-20 05:11:00	0	5	1	12	4
1	2009-05-20 05:12:00	0	5	1	12	4
1	2009-05-20 05:13:00	0	5	1	12	4
1	2009-05-20 05:14:00	0	5	1	12	4
1	2009-05-20 05:15:00	0	5	1	12	4
1	2009-05-20 05:16:00	0	5	1	12	4
1	2009-05-20 05:17:00	0	5	1	12	4
1	2009-05-20 05:18:00	0	5	1	12	4
1	2009-05-20 05:19:00	0	5	1	12	4
1	2009-05-20 05:20:00	0	5	1	12	4
1	2009-05-20 05:21:00	0	5	1	12	4
1	2009-05-20 05:22:00	0	5	1	12	4
1	2009-05-20 05:23:00	0	5	1	12	4
1	2009-05-20 05:24:00	12	5	1	12	4
1	2009-05-20 05:25:00	0	5	1	12	4
1	2009-05-20 05:26:00	0	5	1	12	4
1	2009-05-20 05:27:00	0	5	1	12	4
1	2009-05-20 05:28:00	0	5	1	12	4
1	2009-05-20 05:29:00	0	5	1	12	4
1	2009-05-20 05:30:00	0	5	1	12	4
1	2009-05-20 05:31:00	12	5	1	12	4
1	2009-05-20 05:32:00	12	5	1	12	4
1	2009-05-20 05:33:00	12	5	1	12	4
1	2009-05-20 05:34:00	0	5	1	12	4
1	2009-05-20 05:35:00	0	5	1	12	4
1	2009-05-20 05:36:00	0	5	1	12	4
1	2009-05-20 05:37:00	384	5	1	12	4
1	2009-05-20 05:38:00	688	5	1	12	4
1	2009-05-20 05:39:00	1611	5	1	12	4
1	2009-05-20 05:40:00	316	5	1	12	4
1	2009-05-20 05:41:00	302	5	1	12	4
1	2009-05-20 05:42:00	215	5	1	12	4
1	2009-05-20 05:43:00	48	5	1	12	4
1	2009-05-20 05:44:00	229	5	1	12	4
1	2009-05-20 05:45:00	350	5	1	12	4
1	2009-05-20 05:46:00	350	5	1	12	4
1	2009-05-20 05:47:00	121	5	1	12	4
1	2009-05-20 05:48:00	316	5	1	12	4
1	2009-05-20 05:49:00	333	5	1	12	4
1	2009-05-20 05:50:00	401	5	1	12	4
1	2009-05-20 05:51:00	0	5	1	12	4
1	2009-05-20 05:52:00	0	5	1	12	4
1	2009-05-20 05:53:00	0	5	1	12	4
1	2009-05-20 05:54:00	0	5	1	12	4
1	2009-05-20 05:55:00	384	5	1	12	4
1	2009-05-20 05:56:00	24	5	1	12	4
1	2009-05-20 05:57:00	0	5	1	12	4
1	2009-05-20 05:58:00	133	5	1	12	4
1	2009-05-20 05:59:00	109	5	1	12	4
1	2009-05-20 06:00:00	12	5	1	12	4
1	2009-05-20 06:01:00	0	6	2	12	4
1	2009-05-20 06:02:00	0	6	2	12	4
1	2009-05-20 06:03:00	0	6	2	12	4
1	2009-05-20 06:04:00	157	6	2	12	4
1	2009-05-20 06:05:00	48	6	2	12	4
1	2009-05-20 06:06:00	775	6	2	12	4
1	2009-05-20 06:07:00	244	6	2	12	4
1	2009-05-20 06:08:00	229	6	2	12	4
1	2009-05-20 06:09:00	565	6	2	12	4
1	2009-05-20 06:10:00	157	6	2	12	4
1	2009-05-20 06:11:00	0	6	2	12	4
1	2009-05-20 06:12:00	0	6	2	12	4
1	2009-05-20 06:13:00	0	6	2	12	4
1	2009-05-20 06:14:00	316	6	2	12	4
1	2009-05-20 06:15:00	418	6	2	12	4
1	2009-05-20 06:16:00	645	6	2	12	4
1	2009-05-20 06:17:00	0	6	2	12	4
1	2009-05-20 06:18:00	0	6	2	12	4
1	2009-05-20 06:19:00	0	6	2	12	4
1	2009-05-20 06:20:00	0	6	2	12	4
1	2009-05-20 06:21:00	0	6	2	12	4
1	2009-05-20 06:22:00	0	6	2	12	4
1	2009-05-20 06:23:00	0	6	2	12	4
1	2009-05-20 06:24:00	0	6	2	12	4
1	2009-05-20 06:25:00	0	6	2	12	4
1	2009-05-20 06:26:00	171	6	2	12	4
1	2009-05-20 06:27:00	452	6	2	12	4
1	2009-05-20 06:28:00	72	6	2	12	4
1	2009-05-20 06:29:00	0	6	2	12	4
1	2009-05-20 06:30:00	0	6	2	12	4
1	2009-05-20 06:31:00	0	6	2	12	4
1	2009-05-20 06:32:00	0	6	2	12	4
1	2009-05-20 06:33:00	0	6	2	12	4
1	2009-05-20 06:34:00	0	6	2	12	4
1	2009-05-20 06:35:00	0	6	2	12	4
1	2009-05-20 06:36:00	0	6	2	12	4
1	2009-05-20 06:37:00	0	6	2	12	4
1	2009-05-20 06:38:00	0	6	2	12	4
1	2009-05-20 06:39:00	754	6	2	12	4
1	2009-05-20 06:40:00	526	6	2	12	4
1	2009-05-20 06:41:00	97	6	2	12	4
1	2009-05-20 06:42:00	12	6	2	12	4
1	2009-05-20 06:43:00	0	6	2	12	4
1	2009-05-20 06:44:00	0	6	2	12	4
1	2009-05-20 06:45:00	24	6	2	12	4
1	2009-05-20 06:46:00	60	6	2	12	4
1	2009-05-20 06:47:00	0	6	2	12	4
1	2009-05-20 06:48:00	0	6	2	12	4
1	2009-05-20 06:49:00	0	6	2	12	4
1	2009-05-20 06:50:00	0	6	2	12	4
1	2009-05-20 06:51:00	0	6	2	12	4
1	2009-05-20 06:52:00	0	6	2	12	4
1	2009-05-20 06:53:00	0	6	2	12	4
1	2009-05-20 06:54:00	0	6	2	12	4
1	2009-05-20 06:55:00	0	6	2	12	4
1	2009-05-20 06:56:00	0	6	2	12	4
1	2009-05-20 06:57:00	0	6	2	12	4
1	2009-05-20 06:58:00	0	6	2	12	4
1	2009-05-20 06:59:00	72	6	2	12	4
1	2009-05-20 07:00:00	507	6	2	12	4
1	2009-05-20 07:01:00	215	7	2	12	4
1	2009-05-20 07:02:00	645	7	2	12	4
1	2009-05-20 07:03:00	133	7	2	12	4
1	2009-05-20 07:04:00	24	7	2	12	4
1	2009-05-20 07:05:00	0	7	2	12	4
1	2009-05-20 07:06:00	0	7	2	12	4
1	2009-05-20 07:07:00	367	7	2	12	4
1	2009-05-20 07:08:00	48	7	2	12	4
1	2009-05-20 07:09:00	200	7	2	12	4
1	2009-05-20 07:10:00	469	7	2	12	4
1	2009-05-20 07:11:00	97	7	2	12	4
1	2009-05-20 07:12:00	526	7	2	12	4
1	2009-05-20 07:13:00	350	7	2	12	4
1	2009-05-20 07:14:00	546	7	2	12	4
1	2009-05-20 07:15:00	350	7	2	12	4
1	2009-05-20 07:16:00	435	7	2	12	4
1	2009-05-20 07:17:00	401	7	2	12	4
1	2009-05-20 07:18:00	667	7	2	12	4
1	2009-05-20 07:19:00	258	7	2	12	4
1	2009-05-20 07:20:00	85	7	2	12	4
1	2009-05-20 07:21:00	244	7	2	12	4
1	2009-05-20 07:22:00	418	7	2	12	4
1	2009-05-20 07:23:00	710	7	2	12	4
1	2009-05-20 07:24:00	258	7	2	12	4
1	2009-05-20 07:25:00	97	7	2	12	4
1	2009-05-20 07:26:00	171	7	2	12	4
1	2009-05-20 07:27:00	0	7	2	12	4
1	2009-05-20 07:28:00	1311	7	2	12	4
1	2009-05-20 07:29:00	333	7	2	12	4
1	2009-05-20 07:30:00	688	7	2	12	4
1	2009-05-20 07:31:00	215	7	2	12	4
1	2009-05-20 07:32:00	121	7	2	12	4
1	2009-05-20 07:33:00	97	7	2	12	4
1	2009-05-20 07:34:00	24	7	2	12	4
1	2009-05-20 07:35:00	0	7	2	12	4
1	2009-05-20 07:36:00	0	7	2	12	4
1	2009-05-20 07:37:00	0	7	2	12	4
1	2009-05-20 07:38:00	0	7	2	12	4
1	2009-05-20 07:39:00	0	7	2	12	4
1	2009-05-20 07:40:00	0	7	2	12	4
1	2009-05-20 07:41:00	0	7	2	12	4
1	2009-05-20 07:42:00	0	7	2	12	4
1	2009-05-20 07:43:00	0	7	2	12	4
1	2009-05-20 07:44:00	0	7	2	12	4
1	2009-05-20 07:45:00	0	7	2	12	4
1	2009-05-20 07:46:00	0	7	2	12	4
1	2009-05-20 07:47:00	0	7	2	12	4
1	2009-05-20 07:48:00	0	7	2	12	4
1	2009-05-20 07:49:00	0	7	2	12	4
1	2009-05-20 07:50:00	0	7	2	12	4
1	2009-05-20 07:51:00	0	7	2	12	4
1	2009-05-20 07:52:00	36	7	2	12	4
1	2009-05-20 07:53:00	48	7	2	12	4
1	2009-05-20 07:54:00	0	7	2	12	4
1	2009-05-20 07:55:00	0	7	2	12	4
1	2009-05-20 07:56:00	48	7	2	12	4
1	2009-05-20 07:57:00	0	7	2	12	4
1	2009-05-20 07:58:00	0	7	2	12	4
1	2009-05-20 07:59:00	145	7	2	12	4
1	2009-05-20 08:00:00	72	7	2	12	4
1	2009-05-20 08:01:00	0	8	2	12	4
1	2009-05-20 08:02:00	12	8	2	12	4
1	2009-05-20 08:03:00	0	8	2	12	4
1	2009-05-20 08:04:00	0	8	2	12	4
1	2009-05-20 08:05:00	0	8	2	12	4
1	2009-05-20 08:06:00	0	8	2	12	4
1	2009-05-20 08:07:00	0	8	2	12	4
1	2009-05-20 08:08:00	0	8	2	12	4
1	2009-05-20 08:09:00	0	8	2	12	4
1	2009-05-20 08:10:00	0	8	2	12	4
1	2009-05-20 08:11:00	0	8	2	12	4
1	2009-05-20 08:12:00	0	8	2	12	4
1	2009-05-20 08:13:00	0	8	2	12	4
1	2009-05-20 08:14:00	0	8	2	12	4
1	2009-05-20 08:15:00	0	8	2	12	4
1	2009-05-20 08:16:00	12	8	2	12	4
1	2009-05-20 08:17:00	0	8	2	12	4
1	2009-05-20 08:18:00	0	8	2	12	4
1	2009-05-20 08:19:00	0	8	2	12	4
1	2009-05-20 08:20:00	0	8	2	12	4
1	2009-05-20 08:21:00	0	8	2	12	4
1	2009-05-20 08:22:00	0	8	2	12	4
1	2009-05-20 08:23:00	0	8	2	12	4
1	2009-05-20 08:24:00	0	8	2	12	4
1	2009-05-20 08:25:00	145	8	2	12	4
1	2009-05-20 08:26:00	36	8	2	12	4
1	2009-05-20 08:27:00	0	8	2	12	4
1	2009-05-20 08:28:00	0	8	2	12	4
1	2009-05-20 08:29:00	0	8	2	12	4
1	2009-05-20 08:30:00	0	8	2	12	4
1	2009-05-20 08:31:00	24	8	2	12	4
1	2009-05-20 08:32:00	12	8	2	12	4
1	2009-05-20 08:33:00	48	8	2	12	4
1	2009-05-20 08:34:00	145	8	2	12	4
1	2009-05-20 08:35:00	12	8	2	12	4
1	2009-05-20 08:36:00	24	8	2	12	4
1	2009-05-20 08:37:00	0	8	2	12	4
1	2009-05-20 08:38:00	0	8	2	12	4
1	2009-05-20 08:39:00	0	8	2	12	4
1	2009-05-20 08:40:00	0	8	2	12	4
1	2009-05-20 08:41:00	0	8	2	12	4
1	2009-05-20 08:42:00	0	8	2	12	4
1	2009-05-20 08:43:00	0	8	2	12	4
1	2009-05-20 08:44:00	0	8	2	12	4
1	2009-05-20 08:45:00	0	8	2	12	4
1	2009-05-20 08:46:00	0	8	2	12	4
1	2009-05-20 08:47:00	0	8	2	12	4
1	2009-05-20 08:48:00	0	8	2	12	4
1	2009-05-20 08:49:00	12	8	2	12	4
1	2009-05-20 08:50:00	0	8	2	12	4
1	2009-05-20 08:51:00	24	8	2	12	4
1	2009-05-20 08:52:00	0	8	2	12	4
1	2009-05-20 08:53:00	0	8	2	12	4
1	2009-05-20 08:54:00	0	8	2	12	4
1	2009-05-20 08:55:00	0	8	2	12	4
1	2009-05-20 08:56:00	0	8	2	12	4
1	2009-05-20 08:57:00	0	8	2	12	4
1	2009-05-20 08:58:00	0	8	2	12	4
1	2009-05-20 08:59:00	0	8	2	12	4
1	2009-05-20 09:00:00	0	8	2	12	4
1	2009-05-20 09:01:00	12	9	2	12	4
1	2009-05-20 09:02:00	0	9	2	12	4
1	2009-05-20 09:03:00	0	9	2	12	4
1	2009-05-20 09:04:00	0	9	2	12	4
1	2009-05-20 09:05:00	0	9	2	12	4
1	2009-05-20 09:06:00	0	9	2	12	4
1	2009-05-20 09:07:00	0	9	2	12	4
1	2009-05-20 09:08:00	0	9	2	12	4
1	2009-05-20 09:09:00	0	9	2	12	4
1	2009-05-20 09:10:00	0	9	2	12	4
1	2009-05-20 09:11:00	0	9	2	12	4
1	2009-05-20 09:12:00	0	9	2	12	4
1	2009-05-20 09:13:00	0	9	2	12	4
1	2009-05-20 09:14:00	0	9	2	12	4
1	2009-05-20 09:15:00	12	9	2	12	4
1	2009-05-20 09:16:00	85	9	2	12	4
1	2009-05-20 09:17:00	36	9	2	12	4
1	2009-05-20 09:18:00	0	9	2	12	4
1	2009-05-20 09:19:00	1647	9	2	12	4
1	2009-05-20 09:20:00	452	9	2	12	4
1	2009-05-20 09:21:00	287	9	2	12	4
1	2009-05-20 09:22:00	435	9	2	12	4
1	2009-05-20 09:23:00	60	9	2	12	4
1	2009-05-20 09:24:00	0	9	2	12	4
1	2009-05-20 09:25:00	0	9	2	12	4
1	2009-05-20 09:26:00	186	9	2	12	4
1	2009-05-20 09:27:00	418	9	2	12	4
1	2009-05-20 09:28:00	667	9	2	12	4
1	2009-05-20 09:29:00	1024	9	2	12	4
1	2009-05-20 09:30:00	316	9	2	12	4
1	2009-05-20 09:31:00	145	9	2	12	4
1	2009-05-20 09:32:00	12	9	2	12	4
1	2009-05-20 09:33:00	0	9	2	12	4
1	2009-05-20 09:34:00	0	9	2	12	4
1	2009-05-20 09:35:00	0	9	2	12	4
1	2009-05-20 09:36:00	215	9	2	12	4
1	2009-05-20 09:37:00	546	9	2	12	4
1	2009-05-20 09:38:00	401	9	2	12	4
1	2009-05-20 09:39:00	109	9	2	12	4
1	2009-05-20 09:40:00	215	9	2	12	4
1	2009-05-20 09:41:00	775	9	2	12	4
1	2009-05-20 09:42:00	171	9	2	12	4
1	2009-05-20 09:43:00	244	9	2	12	4
1	2009-05-20 09:44:00	60	9	2	12	4
1	2009-05-20 09:45:00	200	9	2	12	4
1	2009-05-20 09:46:00	244	9	2	12	4
1	2009-05-20 09:47:00	316	9	2	12	4
1	2009-05-20 09:48:00	171	9	2	12	4
1	2009-05-20 09:49:00	0	9	2	12	4
1	2009-05-20 09:50:00	0	9	2	12	4
1	2009-05-20 09:51:00	0	9	2	12	4
1	2009-05-20 09:52:00	12	9	2	12	4
1	2009-05-20 09:53:00	0	9	2	12	4
1	2009-05-20 09:54:00	24	9	2	12	4
1	2009-05-20 09:55:00	244	9	2	12	4
1	2009-05-20 09:56:00	0	9	2	12	4
1	2009-05-20 09:57:00	0	9	2	12	4
1	2009-05-20 09:58:00	0	9	2	12	4
1	2009-05-20 09:59:00	350	9	2	12	4
1	2009-05-20 10:00:00	121	9	2	12	4
1	2009-05-20 10:01:00	0	10	2	12	4
1	2009-05-20 10:02:00	0	10	2	12	4
1	2009-05-20 10:03:00	0	10	2	12	4
1	2009-05-20 10:04:00	0	10	2	12	4
1	2009-05-20 10:05:00	0	10	2	12	4
1	2009-05-20 10:06:00	12	10	2	12	4
1	2009-05-20 10:07:00	24	10	2	12	4
1	2009-05-20 10:08:00	0	10	2	12	4
1	2009-05-20 10:09:00	0	10	2	12	4
1	2009-05-20 10:10:00	546	10	2	12	4
1	2009-05-20 10:11:00	72	10	2	12	4
1	2009-05-20 10:12:00	507	10	2	12	4
1	2009-05-20 10:13:00	435	10	2	12	4
1	2009-05-20 10:14:00	60	10	2	12	4
1	2009-05-20 10:15:00	384	10	2	12	4
1	2009-05-20 10:16:00	350	10	2	12	4
1	2009-05-20 10:17:00	1051	10	2	12	4
1	2009-05-20 10:18:00	145	10	2	12	4
1	2009-05-20 10:19:00	60	10	2	12	4
1	2009-05-20 10:20:00	287	10	2	12	4
1	2009-05-20 10:21:00	109	10	2	12	4
1	2009-05-20 10:22:00	333	10	2	12	4
1	2009-05-20 10:23:00	109	10	2	12	4
1	2009-05-20 10:24:00	121	10	2	12	4
1	2009-05-20 10:25:00	171	10	2	12	4
1	2009-05-20 10:26:00	72	10	2	12	4
1	2009-05-20 10:27:00	97	10	2	12	4
1	2009-05-20 10:28:00	0	10	2	12	4
1	2009-05-20 10:29:00	229	10	2	12	4
1	2009-05-20 10:30:00	109	10	2	12	4
1	2009-05-20 10:31:00	186	10	2	12	4
1	2009-05-20 10:32:00	287	10	2	12	4
1	2009-05-20 10:33:00	229	10	2	12	4
1	2009-05-20 10:34:00	36	10	2	12	4
1	2009-05-20 10:35:00	0	10	2	12	4
1	2009-05-20 10:36:00	12	10	2	12	4
1	2009-05-20 10:37:00	0	10	2	12	4
1	2009-05-20 10:38:00	60	10	2	12	4
1	2009-05-20 10:39:00	145	10	2	12	4
1	2009-05-20 10:40:00	12	10	2	12	4
1	2009-05-20 10:41:00	85	10	2	12	4
1	2009-05-20 10:42:00	157	10	2	12	4
1	2009-05-20 10:43:00	60	10	2	12	4
1	2009-05-20 10:44:00	0	10	2	12	4
1	2009-05-20 10:45:00	0	10	2	12	4
1	2009-05-20 10:46:00	0	10	2	12	4
1	2009-05-20 10:47:00	0	10	2	12	4
1	2009-05-20 10:48:00	12	10	2	12	4
1	2009-05-20 10:49:00	12	10	2	12	4
1	2009-05-20 10:50:00	0	10	2	12	4
1	2009-05-20 10:51:00	0	10	2	12	4
1	2009-05-20 10:52:00	0	10	2	12	4
1	2009-05-20 10:53:00	0	10	2	12	4
1	2009-05-20 10:54:00	0	10	2	12	4
1	2009-05-20 10:55:00	0	10	2	12	4
1	2009-05-20 10:56:00	0	10	2	12	4
1	2009-05-20 10:57:00	72	10	2	12	4
1	2009-05-20 10:58:00	60	10	2	12	4
1	2009-05-20 10:59:00	171	10	2	12	4
1	2009-05-20 11:00:00	12	10	2	12	4
1	2009-05-20 11:01:00	0	11	2	12	4
1	2009-05-20 11:02:00	645	11	2	12	4
1	2009-05-20 11:03:00	48	11	2	12	4
1	2009-05-20 11:04:00	0	11	2	12	4
1	2009-05-20 11:05:00	0	11	2	12	4
1	2009-05-20 11:06:00	0	11	2	12	4
1	2009-05-20 11:07:00	0	11	2	12	4
1	2009-05-20 11:08:00	0	11	2	12	4
1	2009-05-20 11:09:00	0	11	2	12	4
1	2009-05-20 11:10:00	0	11	2	12	4
1	2009-05-20 11:11:00	0	11	2	12	4
1	2009-05-20 11:12:00	732	11	2	12	4
1	2009-05-20 11:13:00	133	11	2	12	4
1	2009-05-20 11:14:00	0	11	2	12	4
1	2009-05-20 11:15:00	0	11	2	12	4
1	2009-05-20 11:16:00	0	11	2	12	4
1	2009-05-20 11:17:00	97	11	2	12	4
1	2009-05-20 11:18:00	401	11	2	12	4
1	2009-05-20 11:19:00	85	11	2	12	4
1	2009-05-20 11:20:00	157	11	2	12	4
1	2009-05-20 11:21:00	109	11	2	12	4
1	2009-05-20 11:22:00	97	11	2	12	4
1	2009-05-20 11:23:00	0	11	2	12	4
1	2009-05-20 11:24:00	12	11	2	12	4
1	2009-05-20 11:25:00	12	11	2	12	4
1	2009-05-20 11:26:00	121	11	2	12	4
1	2009-05-20 11:27:00	72	11	2	12	4
1	2009-05-20 11:28:00	0	11	2	12	4
1	2009-05-20 11:29:00	0	11	2	12	4
1	2009-05-20 11:30:00	200	11	2	12	4
1	2009-05-20 11:31:00	72	11	2	12	4
1	2009-05-20 11:32:00	0	11	2	12	4
1	2009-05-20 11:33:00	0	11	2	12	4
1	2009-05-20 11:34:00	0	11	2	12	4
1	2009-05-20 11:35:00	0	11	2	12	4
1	2009-05-20 11:36:00	12	11	2	12	4
1	2009-05-20 11:37:00	0	11	2	12	4
1	2009-05-20 11:38:00	0	11	2	12	4
1	2009-05-20 11:39:00	0	11	2	12	4
1	2009-05-20 11:40:00	0	11	2	12	4
1	2009-05-20 11:41:00	121	11	2	12	4
1	2009-05-20 11:42:00	667	11	2	12	4
1	2009-05-20 11:43:00	418	11	2	12	4
1	2009-05-20 11:44:00	12	11	2	12	4
1	2009-05-20 11:45:00	12	11	2	12	4
1	2009-05-20 11:46:00	12	11	2	12	4
1	2009-05-20 11:47:00	0	11	2	12	4
1	2009-05-20 11:48:00	186	11	2	12	4
1	2009-05-20 11:49:00	688	11	2	12	4
1	2009-05-20 11:50:00	244	11	2	12	4
1	2009-05-20 11:51:00	12	11	2	12	4
1	2009-05-20 11:52:00	0	11	2	12	4
1	2009-05-20 11:53:00	384	11	2	12	4
1	2009-05-20 11:54:00	60	11	2	12	4
1	2009-05-20 11:55:00	0	11	2	12	4
1	2009-05-20 11:56:00	24	11	2	12	4
1	2009-05-20 11:57:00	0	11	2	12	4
1	2009-05-20 11:58:00	0	11	2	12	4
1	2009-05-20 11:59:00	0	11	2	12	4
1	2009-05-20 12:00:00	0	11	2	12	4
1	2009-05-20 12:01:00	0	12	3	12	4
1	2009-05-20 12:02:00	0	12	3	12	4
1	2009-05-20 12:03:00	0	12	3	12	4
1	2009-05-20 12:04:00	0	12	3	12	4
1	2009-05-20 12:05:00	0	12	3	12	4
1	2009-05-20 12:06:00	0	12	3	12	4
1	2009-05-20 12:07:00	0	12	3	12	4
1	2009-05-20 12:08:00	0	12	3	12	4
1	2009-05-20 12:09:00	0	12	3	12	4
1	2009-05-20 12:10:00	0	12	3	12	4
1	2009-05-20 12:11:00	0	12	3	12	4
1	2009-05-20 12:12:00	0	12	3	12	4
1	2009-05-20 12:13:00	0	12	3	12	4
1	2009-05-20 12:14:00	0	12	3	12	4
1	2009-05-20 12:15:00	0	12	3	12	4
1	2009-05-20 12:16:00	0	12	3	12	4
1	2009-05-20 12:17:00	0	12	3	12	4
1	2009-05-20 12:18:00	0	12	3	12	4
1	2009-05-20 12:19:00	24	12	3	12	4
1	2009-05-20 12:20:00	171	12	3	12	4
1	2009-05-20 12:21:00	24	12	3	12	4
1	2009-05-20 12:22:00	0	12	3	12	4
1	2009-05-20 12:23:00	121	12	3	12	4
1	2009-05-20 12:24:00	273	12	3	12	4
1	2009-05-20 12:25:00	12	12	3	12	4
1	2009-05-20 12:26:00	0	12	3	12	4
1	2009-05-20 12:27:00	0	12	3	12	4
1	2009-05-20 12:28:00	367	12	3	12	4
1	2009-05-20 12:29:00	171	12	3	12	4
1	2009-05-20 12:30:00	0	12	3	12	4
1	2009-05-20 12:31:00	0	12	3	12	4
1	2009-05-20 12:32:00	12	12	3	12	4
1	2009-05-20 12:33:00	24	12	3	12	4
1	2009-05-20 12:34:00	12	12	3	12	4
1	2009-05-20 12:35:00	85	12	3	12	4
1	2009-05-20 12:36:00	872	12	3	12	4
1	2009-05-20 12:37:00	200	12	3	12	4
1	2009-05-20 12:38:00	0	12	3	12	4
1	2009-05-20 12:39:00	0	12	3	12	4
1	2009-05-20 12:40:00	0	12	3	12	4
1	2009-05-20 12:41:00	920	12	3	12	4
1	2009-05-20 12:42:00	12	12	3	12	4
1	2009-05-20 12:43:00	0	12	3	12	4
1	2009-05-20 12:44:00	0	12	3	12	4
1	2009-05-20 12:45:00	0	12	3	12	4
1	2009-05-20 12:46:00	0	12	3	12	4
1	2009-05-20 12:47:00	0	12	3	12	4
1	2009-05-20 12:48:00	0	12	3	12	4
1	2009-05-20 12:49:00	0	12	3	12	4
1	2009-05-20 12:50:00	0	12	3	12	4
1	2009-05-20 12:51:00	0	12	3	12	4
1	2009-05-20 12:52:00	0	12	3	12	4
1	2009-05-20 12:53:00	0	12	3	12	4
1	2009-05-20 12:54:00	0	12	3	12	4
1	2009-05-20 12:55:00	0	12	3	12	4
1	2009-05-20 12:56:00	0	12	3	12	4
1	2009-05-20 12:57:00	0	12	3	12	4
1	2009-05-20 12:58:00	0	12	3	12	4
1	2009-05-20 12:59:00	0	12	3	12	4
1	2009-05-20 13:00:00	0	12	3	12	4
1	2009-05-20 13:01:00	0	13	3	12	4
1	2009-05-20 13:02:00	0	13	3	12	4
1	2009-05-20 13:03:00	0	13	3	12	4
1	2009-05-20 13:04:00	0	13	3	12	4
1	2009-05-20 13:05:00	0	13	3	12	4
1	2009-05-20 13:06:00	0	13	3	12	4
1	2009-05-20 13:07:00	0	13	3	12	4
1	2009-05-20 13:08:00	0	13	3	12	4
1	2009-05-20 13:09:00	0	13	3	12	4
1	2009-05-20 13:10:00	0	13	3	12	4
1	2009-05-20 13:11:00	0	13	3	12	4
1	2009-05-20 13:12:00	0	13	3	12	4
1	2009-05-20 13:13:00	0	13	3	12	4
1	2009-05-20 13:14:00	0	13	3	12	4
1	2009-05-20 13:15:00	0	13	3	12	4
1	2009-05-20 13:16:00	0	13	3	12	4
1	2009-05-20 13:17:00	0	13	3	12	4
1	2009-05-20 13:18:00	0	13	3	12	4
1	2009-05-20 13:19:00	0	13	3	12	4
1	2009-05-20 13:20:00	0	13	3	12	4
1	2009-05-20 13:21:00	258	13	3	12	4
1	2009-05-20 13:22:00	12	13	3	12	4
1	2009-05-20 13:23:00	0	13	3	12	4
1	2009-05-20 13:24:00	0	13	3	12	4
1	2009-05-20 13:25:00	0	13	3	12	4
1	2009-05-20 13:26:00	0	13	3	12	4
1	2009-05-20 13:27:00	287	13	3	12	4
1	2009-05-20 13:28:00	72	13	3	12	4
1	2009-05-20 13:29:00	12	13	3	12	4
1	2009-05-20 13:30:00	0	13	3	12	4
1	2009-05-20 13:31:00	0	13	3	12	4
1	2009-05-20 13:32:00	0	13	3	12	4
1	2009-05-20 13:33:00	0	13	3	12	4
1	2009-05-20 13:34:00	0	13	3	12	4
1	2009-05-20 13:35:00	0	13	3	12	4
1	2009-05-20 13:36:00	0	13	3	12	4
1	2009-05-20 13:37:00	0	13	3	12	4
1	2009-05-20 13:38:00	0	13	3	12	4
1	2009-05-20 13:39:00	0	13	3	12	4
1	2009-05-20 13:40:00	0	13	3	12	4
1	2009-05-20 13:41:00	0	13	3	12	4
1	2009-05-20 13:42:00	0	13	3	12	4
1	2009-05-20 13:43:00	0	13	3	12	4
1	2009-05-20 13:44:00	0	13	3	12	4
1	2009-05-20 13:45:00	0	13	3	12	4
1	2009-05-20 13:46:00	0	13	3	12	4
1	2009-05-20 13:47:00	0	13	3	12	4
1	2009-05-20 13:48:00	0	13	3	12	4
1	2009-05-20 13:49:00	0	13	3	12	4
1	2009-05-20 13:50:00	0	13	3	12	4
1	2009-05-20 13:51:00	0	13	3	12	4
1	2009-05-20 13:52:00	0	13	3	12	4
1	2009-05-20 13:53:00	0	13	3	12	4
1	2009-05-20 13:54:00	0	13	3	12	4
1	2009-05-20 13:55:00	0	13	3	12	4
1	2009-05-20 13:56:00	85	13	3	12	4
1	2009-05-20 13:57:00	244	13	3	12	4
1	2009-05-20 13:58:00	0	13	3	12	4
1	2009-05-20 13:59:00	0	13	3	12	4
1	2009-05-20 14:00:00	0	13	3	12	4
1	2009-05-20 14:01:00	0	14	3	12	4
1	2009-05-20 14:02:00	0	14	3	12	4
1	2009-05-20 14:03:00	287	14	3	12	4
1	2009-05-20 14:04:00	200	14	3	12	4
1	2009-05-20 14:05:00	0	14	3	12	4
1	2009-05-20 14:06:00	0	14	3	12	4
1	2009-05-20 14:07:00	0	14	3	12	4
1	2009-05-20 14:08:00	12	14	3	12	4
1	2009-05-20 14:09:00	145	14	3	12	4
1	2009-05-20 14:10:00	145	14	3	12	4
1	2009-05-20 14:11:00	0	14	3	12	4
1	2009-05-20 14:12:00	0	14	3	12	4
1	2009-05-20 14:13:00	0	14	3	12	4
1	2009-05-20 14:14:00	0	14	3	12	4
1	2009-05-20 14:15:00	133	14	3	12	4
1	2009-05-20 14:16:00	229	14	3	12	4
1	2009-05-20 14:17:00	215	14	3	12	4
1	2009-05-20 14:18:00	0	14	3	12	4
1	2009-05-20 14:19:00	0	14	3	12	4
1	2009-05-20 14:20:00	0	14	3	12	4
1	2009-05-20 14:21:00	0	14	3	12	4
1	2009-05-20 14:22:00	0	14	3	12	4
1	2009-05-20 14:23:00	0	14	3	12	4
1	2009-05-20 14:24:00	0	14	3	12	4
1	2009-05-20 14:25:00	0	14	3	12	4
1	2009-05-20 14:26:00	0	14	3	12	4
1	2009-05-20 14:27:00	97	14	3	12	4
1	2009-05-20 14:28:00	872	14	3	12	4
1	2009-05-20 14:29:00	12	14	3	12	4
1	2009-05-20 14:30:00	0	14	3	12	4
1	2009-05-20 14:31:00	0	14	3	12	4
1	2009-05-20 14:32:00	24	14	3	12	4
1	2009-05-20 14:33:00	775	14	3	12	4
1	2009-05-20 14:34:00	0	14	3	12	4
1	2009-05-20 14:35:00	0	14	3	12	4
1	2009-05-20 14:36:00	0	14	3	12	4
1	2009-05-20 14:37:00	0	14	3	12	4
1	2009-05-20 14:38:00	0	14	3	12	4
1	2009-05-20 14:39:00	0	14	3	12	4
1	2009-05-20 14:40:00	0	14	3	12	4
1	2009-05-20 14:41:00	0	14	3	12	4
1	2009-05-20 14:42:00	0	14	3	12	4
1	2009-05-20 14:43:00	0	14	3	12	4
1	2009-05-20 14:44:00	0	14	3	12	4
1	2009-05-20 14:45:00	0	14	3	12	4
1	2009-05-20 14:46:00	0	14	3	12	4
1	2009-05-20 14:47:00	24	14	3	12	4
1	2009-05-20 14:48:00	0	14	3	12	4
1	2009-05-20 14:49:00	0	14	3	12	4
1	2009-05-20 14:50:00	0	14	3	12	4
1	2009-05-20 14:51:00	0	14	3	12	4
1	2009-05-20 14:52:00	0	14	3	12	4
1	2009-05-20 14:53:00	0	14	3	12	4
1	2009-05-20 14:54:00	0	14	3	12	4
1	2009-05-20 14:55:00	0	14	3	12	4
1	2009-05-20 14:56:00	0	14	3	12	4
1	2009-05-20 14:57:00	418	14	3	12	4
1	2009-05-20 14:58:00	244	14	3	12	4
1	2009-05-20 14:59:00	157	14	3	12	4
1	2009-05-20 15:00:00	36	14	3	12	4
1	2009-05-20 15:01:00	133	15	3	12	4
1	2009-05-20 15:02:00	0	15	3	12	4
1	2009-05-20 15:03:00	0	15	3	12	4
1	2009-05-20 15:04:00	12	15	3	12	4
1	2009-05-20 15:05:00	12	15	3	12	4
1	2009-05-20 15:06:00	12	15	3	12	4
1	2009-05-20 15:07:00	12	15	3	12	4
1	2009-05-20 15:08:00	0	15	3	12	4
1	2009-05-20 15:09:00	12	15	3	12	4
1	2009-05-20 15:10:00	0	15	3	12	4
1	2009-05-20 15:11:00	12	15	3	12	4
1	2009-05-20 15:12:00	12	15	3	12	4
1	2009-05-20 15:13:00	12	15	3	12	4
1	2009-05-20 15:14:00	0	15	3	12	4
1	2009-05-20 15:15:00	0	15	3	12	4
1	2009-05-20 15:16:00	0	15	3	12	4
1	2009-05-20 15:17:00	48	15	3	12	4
1	2009-05-20 15:18:00	0	15	3	12	4
1	2009-05-20 15:19:00	0	15	3	12	4
[truncated: 78,641 more rows]

## Sheet: Pivot Segment
Multiplier	2
x (Low Intensity)	467.634
y (High Intensity)	559.899
	Column Labels
Values	1	2	3	4	7	8	Grand Total
Average of Activity	74.2113	87.67	73.4951	62.661	78.4056	83.6794	75.1486
StdDev of Activity	196.711	236.114	211.429	189.577	233.901	279.781	223.401
Count of Activity	10080	10080	10080	20160	20160	10080	80640
Count Above x	506	621	518	820	1129	557
% Above x	0.0501984	0.0616071	0.0513889	0.0406746	0.056002	0.0552579
Count Above y		466	407	626	887	439
% Above y		0.0462302	0.040377	0.0310516	0.043998	0.0435516

## Sheet: Pivot Weekday
Sum of Activity	Column Labels
Row Labels	1	2	3	4	7	8	Grand Total
1	86463	142959	117413	170382	230242	138794	886253
2	113541	85946	79939	192600	221020	127327	820373
3	148330	110388	147540	192460	183585	98037	880340
4	92040	126612	121751	157270	269898	105329	872900
5	112361	127285	104285	159340	211949	112875	828095
6	90057	92498	98287	182652	201962	137881	803337
7	105258	198026	71616	208542	262001	123245	968688
Grand Total	748050	883714	740831	1263246	1580657	843488	6059986
Count of Activity	Column Labels
Row Labels	1	2	3	4	7	8	Grand Total
1	1440	1440	1440	2880	2880	1440	11520
2	1440	1440	1440	2880	2880	1440	11520
3	1440	1440	1440	2880	2880	1440	11520
4	1440	1440	1440	2880	2880	1440	11520
5	1440	1440	1440	2880	2880	1440	11520
6	1440	1440	1440	2880	2880	1440	11520
7	1440	1440	1440	2880	2880	1440	11520
Grand Total	10080	10080	10080	20160	20160	10080	80640

## Sheet: Pivot Quadrant
Sum of Activity	Column Labels
Row Labels	1	2	3	4	7	8	Grand Total
1	88205	41269	20569	95846	145033	80783	471705
2	298853	314632	319919	431406	593718	257548	2216076
3	161076	278831	203021	312008	367101	256823	1578860
4	199916	248982	197322	423986	474805	248334	1793345
Grand Total	748050	883714	740831	1263246	1580657	843488	6059986
Average	187012	220928	185208	315812	395164	210872
Count of Activity	Column Labels
Row Labels	1	2	3	4	7	8	Grand Total
1	2520	2520	2520	5040	5040	2520	20160
2	2520	2520	2520	5040	5040	2520	20160
3	2520	2520	2520	5040	5040	2520	20160
4	2520	2520	2520	5040	5040	2520	20160
Grand Total	10080	10080	10080	20160	20160	10080	80640

## Sheet: 5.08.09
Actogram, Copy Raw Data, All Days
Identity:	Kelly
Filename:	E:\Active Research Files\meloxicam titre canine\cases\kelly\Kelly killen 5.08.09.AWC
Gender:	F
Age:	8
Height:	76.2 cm	30.0 in
Weight:	31.0 kg	68.3 lbs
Start Date:	08-May-2009 (Fri)
Start Time:	18:00:00
Interval:	1.00 mins
Date Stamp:	Time Stamp:	Activity Data:	Marker Press:
2009-05-08	00:00:00	0
2009-05-08	00:01:00	0
2009-05-08	00:02:00	0
2009-05-08	00:03:00	0
2009-05-08	00:04:00	0
2009-05-08	00:05:00	0
2009-05-08	00:06:00	0
2009-05-08	00:07:00	0
2009-05-08	00:08:00	0
2009-05-08	00:09:00	0
2009-05-08	00:10:00	0
2009-05-08	00:11:00	0
2009-05-08	00:12:00	0
2009-05-08	00:13:00	0
2009-05-08	00:14:00	0
2009-05-08	00:15:00	0
2009-05-08	00:16:00	0
2009-05-08	00:17:00	0
2009-05-08	00:18:00	0
2009-05-08	00:19:00	0
2009-05-08	00:20:00	0
2009-05-08	00:21:00	0
2009-05-08	00:22:00	0
2009-05-08	00:23:00	0
2009-05-08	00:24:00	0
2009-05-08	00:25:00	0
2009-05-08	00:26:00	0
2009-05-08	00:27:00	0
2009-05-08	00:28:00	0
2009-05-08	00:29:00	0
2009-05-08	00:30:00	0
2009-05-08	00:31:00	0
2009-05-08	00:32:00	0
2009-05-08	00:33:00	0
2009-05-08	00:34:00	0
2009-05-08	00:35:00	0
2009-05-08	00:36:00	0
2009-05-08	00:37:00	0
2009-05-08	00:38:00	0
2009-05-08	00:39:00	0
2009-05-08	00:40:00	0
2009-05-08	00:41:00	0
2009-05-08	00:42:00	0
2009-05-08	00:43:00	0
2009-05-08	00:44:00	0
2009-05-08	00:45:00	0
2009-05-08	00:46:00	0
2009-05-08	00:47:00	0
2009-05-08	00:48:00	0
2009-05-08	00:49:00	0
2009-05-08	00:50:00	0
2009-05-08	00:51:00	0
2009-05-08	00:52:00	0
2009-05-08	00:53:00	0
2009-05-08	00:54:00	0
2009-05-08	00:55:00	0
2009-05-08	00:56:00	0
2009-05-08	00:57:00	0
2009-05-08	00:58:00	0
2009-05-08	00:59:00	0
2009-05-08	01:00:00	0
2009-05-08	01:01:00	0
2009-05-08	01:02:00	0
2009-05-08	01:03:00	0
2009-05-08	01:04:00	0
2009-05-08	01:05:00	0
2009-05-08	01:06:00	0
2009-05-08	01:07:00	0
2009-05-08	01:08:00	0
2009-05-08	01:09:00	0
2009-05-08	01:10:00	0
2009-05-08	01:11:00	0
2009-05-08	01:12:00	0
2009-05-08	01:13:00	0
2009-05-08	01:14:00	0
2009-05-08	01:15:00	0
2009-05-08	01:16:00	0
2009-05-08	01:17:00	0
2009-05-08	01:18:00	0
2009-05-08	01:19:00	0
2009-05-08	01:20:00	0
2009-05-08	01:21:00	0
2009-05-08	01:22:00	0
2009-05-08	01:23:00	0
2009-05-08	01:24:00	0
2009-05-08	01:25:00	0
2009-05-08	01:26:00	0
2009-05-08	01:27:00	0
2009-05-08	01:28:00	0
2009-05-08	01:29:00	0
2009-05-08	01:30:00	0
2009-05-08	01:31:00	0
2009-05-08	01:32:00	0
2009-05-08	01:33:00	0
2009-05-08	01:34:00	0
2009-05-08	01:35:00	0
2009-05-08	01:36:00	0
2009-05-08	01:37:00	0
2009-05-08	01:38:00	0
2009-05-08	01:39:00	0
2009-05-08	01:40:00	0
2009-05-08	01:41:00	0
2009-05-08	01:42:00	0
2009-05-08	01:43:00	0
2009-05-08	01:44:00	0
2009-05-08	01:45:00	0
2009-05-08	01:46:00	0
2009-05-08	01:47:00	0
2009-05-08	01:48:00	0
2009-05-08	01:49:00	0
2009-05-08	01:50:00	0
2009-05-08	01:51:00	0
2009-05-08	01:52:00	0
2009-05-08	01:53:00	0
2009-05-08	01:54:00	0
2009-05-08	01:55:00	0
2009-05-08	01:56:00	0
2009-05-08	01:57:00	0
2009-05-08	01:58:00	0
2009-05-08	01:59:00	0
2009-05-08	02:00:00	0
2009-05-08	02:01:00	0
2009-05-08	02:02:00	0
2009-05-08	02:03:00	0
2009-05-08	02:04:00	0
2009-05-08	02:05:00	0
2009-05-08	02:06:00	0
2009-05-08	02:07:00	0
2009-05-08	02:08:00	0
2009-05-08	02:09:00	0
2009-05-08	02:10:00	0
2009-05-08	02:11:00	0
2009-05-08	02:12:00	0
2009-05-08	02:13:00	0
2009-05-08	02:14:00	0
2009-05-08	02:15:00	0
2009-05-08	02:16:00	0
2009-05-08	02:17:00	0
2009-05-08	02:18:00	0
2009-05-08	02:19:00	0
2009-05-08	02:20:00	0
2009-05-08	02:21:00	0
2009-05-08	02:22:00	0
2009-05-08	02:23:00	0
2009-05-08	02:24:00	0
2009-05-08	02:25:00	0
2009-05-08	02:26:00	0
2009-05-08	02:27:00	0
2009-05-08	02:28:00	0
2009-05-08	02:29:00	0
2009-05-08	02:30:00	0
2009-05-08	02:31:00	0
2009-05-08	02:32:00	0
2009-05-08	02:33:00	0
2009-05-08	02:34:00	0
2009-05-08	02:35:00	0
2009-05-08	02:36:00	0
2009-05-08	02:37:00	0
2009-05-08	02:38:00	0
2009-05-08	02:39:00	0
2009-05-08	02:40:00	0
2009-05-08	02:41:00	0
2009-05-08	02:42:00	0
2009-05-08	02:43:00	0
2009-05-08	02:44:00	0
2009-05-08	02:45:00	0
2009-05-08	02:46:00	0
2009-05-08	02:47:00	0
2009-05-08	02:48:00	0
2009-05-08	02:49:00	0
2009-05-08	02:50:00	0
2009-05-08	02:51:00	0
2009-05-08	02:52:00	0
2009-05-08	02:53:00	0
2009-05-08	02:54:00	0
2009-05-08	02:55:00	0
2009-05-08	02:56:00	0
2009-05-08	02:57:00	0
2009-05-08	02:58:00	0
2009-05-08	02:59:00	0
2009-05-08	03:00:00	0
2009-05-08	03:01:00	0
2009-05-08	03:02:00	0
2009-05-08	03:03:00	0
2009-05-08	03:04:00	0
2009-05-08	03:05:00	0
2009-05-08	03:06:00	0
2009-05-08	03:07:00	0
2009-05-08	03:08:00	0
2009-05-08	03:09:00	0
2009-05-08	03:10:00	0
2009-05-08	03:11:00	0
2009-05-08	03:12:00	0
2009-05-08	03:13:00	0
2009-05-08	03:14:00	0
2009-05-08	03:15:00	0
2009-05-08	03:16:00	0
2009-05-08	03:17:00	0
2009-05-08	03:18:00	0
2009-05-08	03:19:00	0
2009-05-08	03:20:00	0
2009-05-08	03:21:00	0
2009-05-08	03:22:00	0
2009-05-08	03:23:00	0
2009-05-08	03:24:00	0
2009-05-08	03:25:00	0
2009-05-08	03:26:00	0
2009-05-08	03:27:00	0
2009-05-08	03:28:00	0
2009-05-08	03:29:00	0
2009-05-08	03:30:00	0
2009-05-08	03:31:00	0
2009-05-08	03:32:00	0
2009-05-08	03:33:00	0
2009-05-08	03:34:00	0
2009-05-08	03:35:00	0
2009-05-08	03:36:00	0
2009-05-08	03:37:00	0
2009-05-08	03:38:00	0
2009-05-08	03:39:00	0
2009-05-08	03:40:00	0
2009-05-08	03:41:00	0
2009-05-08	03:42:00	0
2009-05-08	03:43:00	0
2009-05-08	03:44:00	0
2009-05-08	03:45:00	0
2009-05-08	03:46:00	0
2009-05-08	03:47:00	0
2009-05-08	03:48:00	0
2009-05-08	03:49:00	0
2009-05-08	03:50:00	0
2009-05-08	03:51:00	0
2009-05-08	03:52:00	0
2009-05-08	03:53:00	0
2009-05-08	03:54:00	0
2009-05-08	03:55:00	0
2009-05-08	03:56:00	0
2009-05-08	03:57:00	0
2009-05-08	03:58:00	0
2009-05-08	03:59:00	0
2009-05-08	04:00:00	0
2009-05-08	04:01:00	0
2009-05-08	04:02:00	0
2009-05-08	04:03:00	0
2009-05-08	04:04:00	0
2009-05-08	04:05:00	0
2009-05-08	04:06:00	0
2009-05-08	04:07:00	0
2009-05-08	04:08:00	0
2009-05-08	04:09:00	0
2009-05-08	04:10:00	0
2009-05-08	04:11:00	0
2009-05-08	04:12:00	0
2009-05-08	04:13:00	0
2009-05-08	04:14:00	0
2009-05-08	04:15:00	0
2009-05-08	04:16:00	0
2009-05-08	04:17:00	0
2009-05-08	04:18:00	0
2009-05-08	04:19:00	0
2009-05-08	04:20:00	0
2009-05-08	04:21:00	0
2009-05-08	04:22:00	0
2009-05-08	04:23:00	0
2009-05-08	04:24:00	0
2009-05-08	04:25:00	0
2009-05-08	04:26:00	0
2009-05-08	04:27:00	0
2009-05-08	04:28:00	0
2009-05-08	04:29:00	0
2009-05-08	04:30:00	0
2009-05-08	04:31:00	0
2009-05-08	04:32:00	0
2009-05-08	04:33:00	0
2009-05-08	04:34:00	0
2009-05-08	04:35:00	0
2009-05-08	04:36:00	0
2009-05-08	04:37:00	0
2009-05-08	04:38:00	0
2009-05-08	04:39:00	0
2009-05-08	04:40:00	0
2009-05-08	04:41:00	0
2009-05-08	04:42:00	0
2009-05-08	04:43:00	0
2009-05-08	04:44:00	0
2009-05-08	04:45:00	0
2009-05-08	04:46:00	0
2009-05-08	04:47:00	0
2009-05-08	04:48:00	0
2009-05-08	04:49:00	0
2009-05-08	04:50:00	0
2009-05-08	04:51:00	0
2009-05-08	04:52:00	0
2009-05-08	04:53:00	0
2009-05-08	04:54:00	0
2009-05-08	04:55:00	0
2009-05-08	04:56:00	0
2009-05-08	04:57:00	0
2009-05-08	04:58:00	0
2009-05-08	04:59:00	0
2009-05-08	05:00:00	0
2009-05-08	05:01:00	0
2009-05-08	05:02:00	0
2009-05-08	05:03:00	0
2009-05-08	05:04:00	0
2009-05-08	05:05:00	0
2009-05-08	05:06:00	0
2009-05-08	05:07:00	0
2009-05-08	05:08:00	0
2009-05-08	05:09:00	0
2009-05-08	05:10:00	0
2009-05-08	05:11:00	0
2009-05-08	05:12:00	0
2009-05-08	05:13:00	0
2009-05-08	05:14:00	0
2009-05-08	05:15:00	0
2009-05-08	05:16:00	0
2009-05-08	05:17:00	0
2009-05-08	05:18:00	0
2009-05-08	05:19:00	0
2009-05-08	05:20:00	0
2009-05-08	05:21:00	0
2009-05-08	05:22:00	0
2009-05-08	05:23:00	0
2009-05-08	05:24:00	0
2009-05-08	05:25:00	0
2009-05-08	05:26:00	0
2009-05-08	05:27:00	0
2009-05-08	05:28:00	0
2009-05-08	05:29:00	0
2009-05-08	05:30:00	0
2009-05-08	05:31:00	0
2009-05-08	05:32:00	0
2009-05-08	05:33:00	0
2009-05-08	05:34:00	0
2009-05-08	05:35:00	0
2009-05-08	05:36:00	0
2009-05-08	05:37:00	0
2009-05-08	05:38:00	0
2009-05-08	05:39:00	0
2009-05-08	05:40:00	0
2009-05-08	05:41:00	0
2009-05-08	05:42:00	0
2009-05-08	05:43:00	0
2009-05-08	05:44:00	0
2009-05-08	05:45:00	0
2009-05-08	05:46:00	0
2009-05-08	05:47:00	0
2009-05-08	05:48:00	0
2009-05-08	05:49:00	0
2009-05-08	05:50:00	0
2009-05-08	05:51:00	0
2009-05-08	05:52:00	0
2009-05-08	05:53:00	0
2009-05-08	05:54:00	0
2009-05-08	05:55:00	0
2009-05-08	05:56:00	0
2009-05-08	05:57:00	0
2009-05-08	05:58:00	0
2009-05-08	05:59:00	0
2009-05-08	06:00:00	0
2009-05-08	06:01:00	0
2009-05-08	06:02:00	0
2009-05-08	06:03:00	0
2009-05-08	06:04:00	0
2009-05-08	06:05:00	0
2009-05-08	06:06:00	0
2009-05-08	06:07:00	0
2009-05-08	06:08:00	0
2009-05-08	06:09:00	0
2009-05-08	06:10:00	0
2009-05-08	06:11:00	0
2009-05-08	06:12:00	0
2009-05-08	06:13:00	0
2009-05-08	06:14:00	0
2009-05-08	06:15:00	0
2009-05-08	06:16:00	0
2009-05-08	06:17:00	0
2009-05-08	06:18:00	0
2009-05-08	06:19:00	0
2009-05-08	06:20:00	0
2009-05-08	06:21:00	0
2009-05-08	06:22:00	0
2009-05-08	06:23:00	0
2009-05-08	06:24:00	0
2009-05-08	06:25:00	0
2009-05-08	06:26:00	0
2009-05-08	06:27:00	0
2009-05-08	06:28:00	0
2009-05-08	06:29:00	0
2009-05-08	06:30:00	0
2009-05-08	06:31:00	0
2009-05-08	06:32:00	0
2009-05-08	06:33:00	0
2009-05-08	06:34:00	0
2009-05-08	06:35:00	0
2009-05-08	06:36:00	0
2009-05-08	06:37:00	0
2009-05-08	06:38:00	0
2009-05-08	06:39:00	0
2009-05-08	06:40:00	0
2009-05-08	06:41:00	0
2009-05-08	06:42:00	0
2009-05-08	06:43:00	0
2009-05-08	06:44:00	0
2009-05-08	06:45:00	0
2009-05-08	06:46:00	0
2009-05-08	06:47:00	0
2009-05-08	06:48:00	0
2009-05-08	06:49:00	0
2009-05-08	06:50:00	0
2009-05-08	06:51:00	0
2009-05-08	06:52:00	0
2009-05-08	06:53:00	0
2009-05-08	06:54:00	0
2009-05-08	06:55:00	0
2009-05-08	06:56:00	0
2009-05-08	06:57:00	0
2009-05-08	06:58:00	0
2009-05-08	06:59:00	0
2009-05-08	07:00:00	0
2009-05-08	07:01:00	0
2009-05-08	07:02:00	0
2009-05-08	07:03:00	0
2009-05-08	07:04:00	0
2009-05-08	07:05:00	0
2009-05-08	07:06:00	0
2009-05-08	07:07:00	0
2009-05-08	07:08:00	0
2009-05-08	07:09:00	0
2009-05-08	07:10:00	0
2009-05-08	07:11:00	0
2009-05-08	07:12:00	0
2009-05-08	07:13:00	0
2009-05-08	07:14:00	0
2009-05-08	07:15:00	0
2009-05-08	07:16:00	0
2009-05-08	07:17:00	0
2009-05-08	07:18:00	0
2009-05-08	07:19:00	0
2009-05-08	07:20:00	0
2009-05-08	07:21:00	0
2009-05-08	07:22:00	0
2009-05-08	07:23:00	0
2009-05-08	07:24:00	0
2009-05-08	07:25:00	0
2009-05-08	07:26:00	0
2009-05-08	07:27:00	0
2009-05-08	07:28:00	0
2009-05-08	07:29:00	0
2009-05-08	07:30:00	0
2009-05-08	07:31:00	0
2009-05-08	07:32:00	0
2009-05-08	07:33:00	0
2009-05-08	07:34:00	0
2009-05-08	07:35:00	0
2009-05-08	07:36:00	0
2009-05-08	07:37:00	0
2009-05-08	07:38:00	0
2009-05-08	07:39:00	0
2009-05-08	07:40:00	0
2009-05-08	07:41:00	0
2009-05-08	07:42:00	0
2009-05-08	07:43:00	0
2009-05-08	07:44:00	0
2009-05-08	07:45:00	0
2009-05-08	07:46:00	0
2009-05-08	07:47:00	0
2009-05-08	07:48:00	0
2009-05-08	07:49:00	0
2009-05-08	07:50:00	0
2009-05-08	07:51:00	0
2009-05-08	07:52:00	0
2009-05-08	07:53:00	0
2009-05-08	07:54:00	0
2009-05-08	07:55:00	0
2009-05-08	07:56:00	0
2009-05-08	07:57:00	0
2009-05-08	07:58:00	0
2009-05-08	07:59:00	0
2009-05-08	08:00:00	0
2009-05-08	08:01:00	0
2009-05-08	08:02:00	0
2009-05-08	08:03:00	0
2009-05-08	08:04:00	0
2009-05-08	08:05:00	0
2009-05-08	08:06:00	0
2009-05-08	08:07:00	0
2009-05-08	08:08:00	0
2009-05-08	08:09:00	0
2009-05-08	08:10:00	0
2009-05-08	08:11:00	0
2009-05-08	08:12:00	0
2009-05-08	08:13:00	0
2009-05-08	08:14:00	0
2009-05-08	08:15:00	0
2009-05-08	08:16:00	0
2009-05-08	08:17:00	0
2009-05-08	08:18:00	0
2009-05-08	08:19:00	0
2009-05-08	08:20:00	0
2009-05-08	08:21:00	0
2009-05-08	08:22:00	0
2009-05-08	08:23:00	0
2009-05-08	08:24:00	0
2009-05-08	08:25:00	0
2009-05-08	08:26:00	0
2009-05-08	08:27:00	0
2009-05-08	08:28:00	0
2009-05-08	08:29:00	0
2009-05-08	08:30:00	0
2009-05-08	08:31:00	0
2009-05-08	08:32:00	0
2009-05-08	08:33:00	0
2009-05-08	08:34:00	0
2009-05-08	08:35:00	0
2009-05-08	08:36:00	0
2009-05-08	08:37:00	0
2009-05-08	08:38:00	0
2009-05-08	08:39:00	0
2009-05-08	08:40:00	0
2009-05-08	08:41:00	0
2009-05-08	08:42:00	0
2009-05-08	08:43:00	0
2009-05-08	08:44:00	0
2009-05-08	08:45:00	0
2009-05-08	08:46:00	0
2009-05-08	08:47:00	0
2009-05-08	08:48:00	0
2009-05-08	08:49:00	0
2009-05-08	08:50:00	0
2009-05-08	08:51:00	0
2009-05-08	08:52:00	0
2009-05-08	08:53:00	0
2009-05-08	08:54:00	0
2009-05-08	08:55:00	0
2009-05-08	08:56:00	0
2009-05-08	08:57:00	0
2009-05-08	08:58:00	0
2009-05-08	08:59:00	0
2009-05-08	09:00:00	0
2009-05-08	09:01:00	0
2009-05-08	09:02:00	0
2009-05-08	09:03:00	0
2009-05-08	09:04:00	0
2009-05-08	09:05:00	0
2009-05-08	09:06:00	0
2009-05-08	09:07:00	0
2009-05-08	09:08:00	0
2009-05-08	09:09:00	0
2009-05-08	09:10:00	0
2009-05-08	09:11:00	0
2009-05-08	09:12:00	0
2009-05-08	09:13:00	0
2009-05-08	09:14:00	0
2009-05-08	09:15:00	0
2009-05-08	09:16:00	0
2009-05-08	09:17:00	0
2009-05-08	09:18:00	0
2009-05-08	09:19:00	0
2009-05-08	09:20:00	0
2009-05-08	09:21:00	0
2009-05-08	09:22:00	0
2009-05-08	09:23:00	0
2009-05-08	09:24:00	0
2009-05-08	09:25:00	0
2009-05-08	09:26:00	0
2009-05-08	09:27:00	0
2009-05-08	09:28:00	0
2009-05-08	09:29:00	0
2009-05-08	09:30:00	0
2009-05-08	09:31:00	0
2009-05-08	09:32:00	0
2009-05-08	09:33:00	0
2009-05-08	09:34:00	0
2009-05-08	09:35:00	0
2009-05-08	09:36:00	0
2009-05-08	09:37:00	0
2009-05-08	09:38:00	0
2009-05-08	09:39:00	0
2009-05-08	09:40:00	0
2009-05-08	09:41:00	0
2009-05-08	09:42:00	0
2009-05-08	09:43:00	0
2009-05-08	09:44:00	0
2009-05-08	09:45:00	0
2009-05-08	09:46:00	0
2009-05-08	09:47:00	0
2009-05-08	09:48:00	0
2009-05-08	09:49:00	0
2009-05-08	09:50:00	0
2009-05-08	09:51:00	0
2009-05-08	09:52:00	0
2009-05-08	09:53:00	0
2009-05-08	09:54:00	0
2009-05-08	09:55:00	0
2009-05-08	09:56:00	0
2009-05-08	09:57:00	0
2009-05-08	09:58:00	0
2009-05-08	09:59:00	0
2009-05-08	10:00:00	0
2009-05-08	10:01:00	0
2009-05-08	10:02:00	0
2009-05-08	10:03:00	0
2009-05-08	10:04:00	0
2009-05-08	10:05:00	0
2009-05-08	10:06:00	0
2009-05-08	10:07:00	0
2009-05-08	10:08:00	0
2009-05-08	10:09:00	0
2009-05-08	10:10:00	0
2009-05-08	10:11:00	0
2009-05-08	10:12:00	0
2009-05-08	10:13:00	0
2009-05-08	10:14:00	0
2009-05-08	10:15:00	0
2009-05-08	10:16:00	0
2009-05-08	10:17:00	0
2009-05-08	10:18:00	0
2009-05-08	10:19:00	0
2009-05-08	10:20:00	0
2009-05-08	10:21:00	0
2009-05-08	10:22:00	0
2009-05-08	10:23:00	0
2009-05-08	10:24:00	0
2009-05-08	10:25:00	0
2009-05-08	10:26:00	0
2009-05-08	10:27:00	0
2009-05-08	10:28:00	0
2009-05-08	10:29:00	0
2009-05-08	10:30:00	0
2009-05-08	10:31:00	0
2009-05-08	10:32:00	0
2009-05-08	10:33:00	0
2009-05-08	10:34:00	0
2009-05-08	10:35:00	0
2009-05-08	10:36:00	0
2009-05-08	10:37:00	0
2009-05-08	10:38:00	0
2009-05-08	10:39:00	0
2009-05-08	10:40:00	0
2009-05-08	10:41:00	0
2009-05-08	10:42:00	0
2009-05-08	10:43:00	0
2009-05-08	10:44:00	0
2009-05-08	10:45:00	0
2009-05-08	10:46:00	0
2009-05-08	10:47:00	0
2009-05-08	10:48:00	0
2009-05-08	10:49:00	0
2009-05-08	10:50:00	0
2009-05-08	10:51:00	0
2009-05-08	10:52:00	0
2009-05-08	10:53:00	0
2009-05-08	10:54:00	0
2009-05-08	10:55:00	0
2009-05-08	10:56:00	0
2009-05-08	10:57:00	0
2009-05-08	10:58:00	0
2009-05-08	10:59:00	0
2009-05-08	11:00:00	0
2009-05-08	11:01:00	0
2009-05-08	11:02:00	0
2009-05-08	11:03:00	0
2009-05-08	11:04:00	0
2009-05-08	11:05:00	0
2009-05-08	11:06:00	0
2009-05-08	11:07:00	0
2009-05-08	11:08:00	0
2009-05-08	11:09:00	0
2009-05-08	11:10:00	0
2009-05-08	11:11:00	0
2009-05-08	11:12:00	0
2009-05-08	11:13:00	0
2009-05-08	11:14:00	0
2009-05-08	11:15:00	0
2009-05-08	11:16:00	0
2009-05-08	11:17:00	0
2009-05-08	11:18:00	0
2009-05-08	11:19:00	0
2009-05-08	11:20:00	0
2009-05-08	11:21:00	0
2009-05-08	11:22:00	0
2009-05-08	11:23:00	0
2009-05-08	11:24:00	0
2009-05-08	11:25:00	0
2009-05-08	11:26:00	0
2009-05-08	11:27:00	0
2009-05-08	11:28:00	0
2009-05-08	11:29:00	0
2009-05-08	11:30:00	0
2009-05-08	11:31:00	0
2009-05-08	11:32:00	0
2009-05-08	11:33:00	0
2009-05-08	11:34:00	0
2009-05-08	11:35:00	0
2009-05-08	11:36:00	0
2009-05-08	11:37:00	0
2009-05-08	11:38:00	0
2009-05-08	11:39:00	0
2009-05-08	11:40:00	0
2009-05-08	11:41:00	0
2009-05-08	11:42:00	0
2009-05-08	11:43:00	0
2009-05-08	11:44:00	0
2009-05-08	11:45:00	0
2009-05-08	11:46:00	0
2009-05-08	11:47:00	0
2009-05-08	11:48:00	0
2009-05-08	11:49:00	0
2009-05-08	11:50:00	0
2009-05-08	11:51:00	0
2009-05-08	11:52:00	0
2009-05-08	11:53:00	0
2009-05-08	11:54:00	0
2009-05-08	11:55:00	0
2009-05-08	11:56:00	0
2009-05-08	11:57:00	0
2009-05-08	11:58:00	0
2009-05-08	11:59:00	0
2009-05-08	12:00:00	0
2009-05-08	12:01:00	0
2009-05-08	12:02:00	0
2009-05-08	12:03:00	0
2009-05-08	12:04:00	0
2009-05-08	12:05:00	0
2009-05-08	12:06:00	0
2009-05-08	12:07:00	0
2009-05-08	12:08:00	0
2009-05-08	12:09:00	0
2009-05-08	12:10:00	0
2009-05-08	12:11:00	0
2009-05-08	12:12:00	0
2009-05-08	12:13:00	0
2009-05-08	12:14:00	0
2009-05-08	12:15:00	0
2009-05-08	12:16:00	0
2009-05-08	12:17:00	0
2009-05-08	12:18:00	0
2009-05-08	12:19:00	0
2009-05-08	12:20:00	0
2009-05-08	12:21:00	0
2009-05-08	12:22:00	0
2009-05-08	12:23:00	0
2009-05-08	12:24:00	0
2009-05-08	12:25:00	0
2009-05-08	12:26:00	0
2009-05-08	12:27:00	0
2009-05-08	12:28:00	0
2009-05-08	12:29:00	0
2009-05-08	12:30:00	0
2009-05-08	12:31:00	0
2009-05-08	12:32:00	0
2009-05-08	12:33:00	0
2009-05-08	12:34:00	0
2009-05-08	12:35:00	0
2009-05-08	12:36:00	0
2009-05-08	12:37:00	0
2009-05-08	12:38:00	0
2009-05-08	12:39:00	0
2009-05-08	12:40:00	0
2009-05-08	12:41:00	0
2009-05-08	12:42:00	0
2009-05-08	12:43:00	0
2009-05-08	12:44:00	0
2009-05-08	12:45:00	0
2009-05-08	12:46:00	0
2009-05-08	12:47:00	0
2009-05-08	12:48:00	0
2009-05-08	12:49:00	0
2009-05-08	12:50:00	0
2009-05-08	12:51:00	0
2009-05-08	12:52:00	0
2009-05-08	12:53:00	0
2009-05-08	12:54:00	0
2009-05-08	12:55:00	0
2009-05-08	12:56:00	0
2009-05-08	12:57:00	0
2009-05-08	12:58:00	0
2009-05-08	12:59:00	0
2009-05-08	13:00:00	0
2009-05-08	13:01:00	0
2009-05-08	13:02:00	0
2009-05-08	13:03:00	0
2009-05-08	13:04:00	0
2009-05-08	13:05:00	0
2009-05-08	13:06:00	0
2009-05-08	13:07:00	0
2009-05-08	13:08:00	0
2009-05-08	13:09:00	0
2009-05-08	13:10:00	0
2009-05-08	13:11:00	0
2009-05-08	13:12:00	0
2009-05-08	13:13:00	0
2009-05-08	13:14:00	0
2009-05-08	13:15:00	0
2009-05-08	13:16:00	0
2009-05-08	13:17:00	0
2009-05-08	13:18:00	0
2009-05-08	13:19:00	0
2009-05-08	13:20:00	0
2009-05-08	13:21:00	0
2009-05-08	13:22:00	0
2009-05-08	13:23:00	0
2009-05-08	13:24:00	0
2009-05-08	13:25:00	0
2009-05-08	13:26:00	0
2009-05-08	13:27:00	0
2009-05-08	13:28:00	0
2009-05-08	13:29:00	0
2009-05-08	13:30:00	0
2009-05-08	13:31:00	0
2009-05-08	13:32:00	0
2009-05-08	13:33:00	0
2009-05-08	13:34:00	0
2009-05-08	13:35:00	0
2009-05-08	13:36:00	0
2009-05-08	13:37:00	0
2009-05-08	13:38:00	0
2009-05-08	13:39:00	0
2009-05-08	13:40:00	0
2009-05-08	13:41:00	0
2009-05-08	13:42:00	0
2009-05-08	13:43:00	0
2009-05-08	13:44:00	0
2009-05-08	13:45:00	0
2009-05-08	13:46:00	0
2009-05-08	13:47:00	0
2009-05-08	13:48:00	0
2009-05-08	13:49:00	0
2009-05-08	13:50:00	0
2009-05-08	13:51:00	0
2009-05-08	13:52:00	0
2009-05-08	13:53:00	0
2009-05-08	13:54:00	0
2009-05-08	13:55:00	0
2009-05-08	13:56:00	0
2009-05-08	13:57:00	0
2009-05-08	13:58:00	0
2009-05-08	13:59:00	0
2009-05-08	14:00:00	0
2009-05-08	14:01:00	0
2009-05-08	14:02:00	0
2009-05-08	14:03:00	0
2009-05-08	14:04:00	0
2009-05-08	14:05:00	0
2009-05-08	14:06:00	0
2009-05-08	14:07:00	0
2009-05-08	14:08:00	0
2009-05-08	14:09:00	0
2009-05-08	14:10:00	0
2009-05-08	14:11:00	0
2009-05-08	14:12:00	0
2009-05-08	14:13:00	0
2009-05-08	14:14:00	0
2009-05-08	14:15:00	0
2009-05-08	14:16:00	0
2009-05-08	14:17:00	0
2009-05-08	14:18:00	0
2009-05-08	14:19:00	0
2009-05-08	14:20:00	0
2009-05-08	14:21:00	0
2009-05-08	14:22:00	0
2009-05-08	14:23:00	0
2009-05-08	14:24:00	0
2009-05-08	14:25:00	0
2009-05-08	14:26:00	0
2009-05-08	14:27:00	0
2009-05-08	14:28:00	0
2009-05-08	14:29:00	0
2009-05-08	14:30:00	0
2009-05-08	14:31:00	0
2009-05-08	14:32:00	0
2009-05-08	14:33:00	0
2009-05-08	14:34:00	0
2009-05-08	14:35:00	0
2009-05-08	14:36:00	0
2009-05-08	14:37:00	0
2009-05-08	14:38:00	0
2009-05-08	14:39:00	0
2009-05-08	14:40:00	0
2009-05-08	14:41:00	0
2009-05-08	14:42:00	0
2009-05-08	14:43:00	0
2009-05-08	14:44:00	0
2009-05-08	14:45:00	0
2009-05-08	14:46:00	0
2009-05-08	14:47:00	0
2009-05-08	14:48:00	0
2009-05-08	14:49:00	0
2009-05-08	14:50:00	0
2009-05-08	14:51:00	0
2009-05-08	14:52:00	0
2009-05-08	14:53:00	0
2009-05-08	14:54:00	0
2009-05-08	14:55:00	0
2009-05-08	14:56:00	0
2009-05-08	14:57:00	0
2009-05-08	14:58:00	0
2009-05-08	14:59:00	0
2009-05-08	15:00:00	0
2009-05-08	15:01:00	0
2009-05-08	15:02:00	0
2009-05-08	15:03:00	0
2009-05-08	15:04:00	0
2009-05-08	15:05:00	0
2009-05-08	15:06:00	0
2009-05-08	15:07:00	0
2009-05-08	15:08:00	0
2009-05-08	15:09:00	0
2009-05-08	15:10:00	0
2009-05-08	15:11:00	0
2009-05-08	15:12:00	0
2009-05-08	15:13:00	0
2009-05-08	15:14:00	0
2009-05-08	15:15:00	0
2009-05-08	15:16:00	0
2009-05-08	15:17:00	0
2009-05-08	15:18:00	0
2009-05-08	15:19:00	0
2009-05-08	15:20:00	0
2009-05-08	15:21:00	0
2009-05-08	15:22:00	0
2009-05-08	15:23:00	0
2009-05-08	15:24:00	0
2009-05-08	15:25:00	0
2009-05-08	15:26:00	0
2009-05-08	15:27:00	0
2009-05-08	15:28:00	0
2009-05-08	15:29:00	0
2009-05-08	15:30:00	0
2009-05-08	15:31:00	0
2009-05-08	15:32:00	0
2009-05-08	15:33:00	0
2009-05-08	15:34:00	0
2009-05-08	15:35:00	0
2009-05-08	15:36:00	0
2009-05-08	15:37:00	0
2009-05-08	15:38:00	0
2009-05-08	15:39:00	0
2009-05-08	15:40:00	0
2009-05-08	15:41:00	0
2009-05-08	15:42:00	0
2009-05-08	15:43:00	0
2009-05-08	15:44:00	0
2009-05-08	15:45:00	0
2009-05-08	15:46:00	0
2009-05-08	15:47:00	0
2009-05-08	15:48:00	0
2009-05-08	15:49:00	0
2009-05-08	15:50:00	0
2009-05-08	15:51:00	0
2009-05-08	15:52:00	0
2009-05-08	15:53:00	0
2009-05-08	15:54:00	0
2009-05-08	15:55:00	0
2009-05-08	15:56:00	0
2009-05-08	15:57:00	0
2009-05-08	15:58:00	0
2009-05-08	15:59:00	0
2009-05-08	16:00:00	0
2009-05-08	16:01:00	0
2009-05-08	16:02:00	0
2009-05-08	16:03:00	0
2009-05-08	16:04:00	0
2009-05-08	16:05:00	0
2009-05-08	16:06:00	0
2009-05-08	16:07:00	0
2009-05-08	16:08:00	0
2009-05-08	16:09:00	0
2009-05-08	16:10:00	0
2009-05-08	16:11:00	0
2009-05-08	16:12:00	0
2009-05-08	16:13:00	0
2009-05-08	16:14:00	0
2009-05-08	16:15:00	0
2009-05-08	16:16:00	0
2009-05-08	16:17:00	0
2009-05-08	16:18:00	0
2009-05-08	16:19:00	0
2009-05-08	16:20:00	0
2009-05-08	16:21:00	0
2009-05-08	16:22:00	0
2009-05-08	16:23:00	0
2009-05-08	16:24:00	0
2009-05-08	16:25:00	0
2009-05-08	16:26:00	0
2009-05-08	16:27:00	0
2009-05-08	16:28:00	0
2009-05-08	16:29:00	0
2009-05-08	16:30:00	0
2009-05-08	16:31:00	0
2009-05-08	16:32:00	0
2009-05-08	16:33:00	0
2009-05-08	16:34:00	0
2009-05-08	16:35:00	0
2009-05-08	16:36:00	0
2009-05-08	16:37:00	0
2009-05-08	16:38:00	0
2009-05-08	16:39:00	0
2009-05-08	16:40:00	0
2009-05-08	16:41:00	0
2009-05-08	16:42:00	0
2009-05-08	16:43:00	0
2009-05-08	16:44:00	0
2009-05-08	16:45:00	0
2009-05-08	16:46:00	0
2009-05-08	16:47:00	0
2009-05-08	16:48:00	0
2009-05-08	16:49:00	0
2009-05-08	16:50:00	0
2009-05-08	16:51:00	0
2009-05-08	16:52:00	0
2009-05-08	16:53:00	0
2009-05-08	16:54:00	0
2009-05-08	16:55:00	0
2009-05-08	16:56:00	0
2009-05-08	16:57:00	0
2009-05-08	16:58:00	0
2009-05-08	16:59:00	0
2009-05-08	17:00:00	0
2009-05-08	17:01:00	0
2009-05-08	17:02:00	0
2009-05-08	17:03:00	0
2009-05-08	17:04:00	0
2009-05-08	17:05:00	0
2009-05-08	17:06:00	0
2009-05-08	17:07:00	0
2009-05-08	17:08:00	0
2009-05-08	17:09:00	0
2009-05-08	17:10:00	0
2009-05-08	17:11:00	0
2009-05-08	17:12:00	0
2009-05-08	17:13:00	0
2009-05-08	17:14:00	0
2009-05-08	17:15:00	0
2009-05-08	17:16:00	0
2009-05-08	17:17:00	0
2009-05-08	17:18:00	0
2009-05-08	17:19:00	0
2009-05-08	17:20:00	0
2009-05-08	17:21:00	0
2009-05-08	17:22:00	0
2009-05-08	17:23:00	0
2009-05-08	17:24:00	0
2009-05-08	17:25:00	0
2009-05-08	17:26:00	0
2009-05-08	17:27:00	0
2009-05-08	17:28:00	0
2009-05-08	17:29:00	0
2009-05-08	17:30:00	0
2009-05-08	17:31:00	0
2009-05-08	17:32:00	0
2009-05-08	17:33:00	0
2009-05-08	17:34:00	0
2009-05-08	17:35:00	0
2009-05-08	17:36:00	0
2009-05-08	17:37:00	0
2009-05-08	17:38:00	0
2009-05-08	17:39:00	0
2009-05-08	17:40:00	0
2009-05-08	17:41:00	0
2009-05-08	17:42:00	0
2009-05-08	17:43:00	0
2009-05-08	17:44:00	0
2009-05-08	17:45:00	0
2009-05-08	17:46:00	0
2009-05-08	17:47:00	0
2009-05-08	17:48:00	0
2009-05-08	17:49:00	0
2009-05-08	17:50:00	0
2009-05-08	17:51:00	0
2009-05-08	17:52:00	0
2009-05-08	17:53:00	0
2009-05-08	17:54:00	0
2009-05-08	17:55:00	0
2009-05-08	17:56:00	0
2009-05-08	17:57:00	0
2009-05-08	17:58:00	0
2009-05-08	17:59:00	0
2009-05-08	18:00:00	0
2009-05-08	18:01:00	0
2009-05-08	18:02:00	0
2009-05-08	18:03:00	0
2009-05-08	18:04:00	0
2009-05-08	18:05:00	0
2009-05-08	18:06:00	0
2009-05-08	18:07:00	0
2009-05-08	18:08:00	0
2009-05-08	18:09:00	0
2009-05-08	18:10:00	0
2009-05-08	18:11:00	0
2009-05-08	18:12:00	0
2009-05-08	18:13:00	36
2009-05-08	18:14:00	157
2009-05-08	18:15:00	0
2009-05-08	18:16:00	0
2009-05-08	18:17:00	0
2009-05-08	18:18:00	72
2009-05-08	18:19:00	0
2009-05-08	18:20:00	0
2009-05-08	18:21:00	0
2009-05-08	18:22:00	0
2009-05-08	18:23:00	0
2009-05-08	18:24:00	0
2009-05-08	18:25:00	0
2009-05-08	18:26:00	0
2009-05-08	18:27:00	0
2009-05-08	18:28:00	0
2009-05-08	18:29:00	0
2009-05-08	18:30:00	0
2009-05-08	18:31:00	0
2009-05-08	18:32:00	0
2009-05-08	18:33:00	0
2009-05-08	18:34:00	12
2009-05-08	18:35:00	60
2009-05-08	18:36:00	48
2009-05-08	18:37:00	0
2009-05-08	18:38:00	60
2009-05-08	18:39:00	0
2009-05-08	18:40:00	0
2009-05-08	18:41:00	0
2009-05-08	18:42:00	36
2009-05-08	18:43:00	109
2009-05-08	18:44:00	258
2009-05-08	18:45:00	171
2009-05-08	18:46:00	0
2009-05-08	18:47:00	0
2009-05-08	18:48:00	0
2009-05-08	18:49:00	0
2009-05-08	18:50:00	0
2009-05-08	18:51:00	0
2009-05-08	18:52:00	0
2009-05-08	18:53:00	0
2009-05-08	18:54:00	0
2009-05-08	18:55:00	0
2009-05-08	18:56:00	0
2009-05-08	18:57:00	0
2009-05-08	18:58:00	0
2009-05-08	18:59:00	0
2009-05-08	19:00:00	0
2009-05-08	19:01:00	0
2009-05-08	19:02:00	0
2009-05-08	19:03:00	0
2009-05-08	19:04:00	0
2009-05-08	19:05:00	0
2009-05-08	19:06:00	0
2009-05-08	19:07:00	0
2009-05-08	19:08:00	0
2009-05-08	19:09:00	0
2009-05-08	19:10:00	12
2009-05-08	19:11:00	0
2009-05-08	19:12:00	0
2009-05-08	19:13:00	0
2009-05-08	19:14:00	0
2009-05-08	19:15:00	0
2009-05-08	19:16:00	0
2009-05-08	19:17:00	0
2009-05-08	19:18:00	0
2009-05-08	19:19:00	0
2009-05-08	19:20:00	0
2009-05-08	19:21:00	0
2009-05-08	19:22:00	0
2009-05-08	19:23:00	12
2009-05-08	19:24:00	12
2009-05-08	19:25:00	0
2009-05-08	19:26:00	0
2009-05-08	19:27:00	0
2009-05-08	19:28:00	0
2009-05-08	19:29:00	109
2009-05-08	19:30:00	0
2009-05-08	19:31:00	0
2009-05-08	19:32:00	0
2009-05-08	19:33:00	0
2009-05-08	19:34:00	0
2009-05-08	19:35:00	0
2009-05-08	19:36:00	0
2009-05-08	19:37:00	0
2009-05-08	19:38:00	0
2009-05-08	19:39:00	0
2009-05-08	19:40:00	12
2009-05-08	19:41:00	0
2009-05-08	19:42:00	0
2009-05-08	19:43:00	0
2009-05-08	19:44:00	0
2009-05-08	19:45:00	0
2009-05-08	19:46:00	0
2009-05-08	19:47:00	0
2009-05-08	19:48:00	0
2009-05-08	19:49:00	0
2009-05-08	19:50:00	0
2009-05-08	19:51:00	0
2009-05-08	19:52:00	0
2009-05-08	19:53:00	0
2009-05-08	19:54:00	0
2009-05-08	19:55:00	0
2009-05-08	19:56:00	0
2009-05-08	19:57:00	0
2009-05-08	19:58:00	0
2009-05-08	19:59:00	0
2009-05-08	20:00:00	0
2009-05-08	20:01:00	0
2009-05-08	20:02:00	0
2009-05-08	20:03:00	0
2009-05-08	20:04:00	0
2009-05-08	20:05:00	0
2009-05-08	20:06:00	0
2009-05-08	20:07:00	0
2009-05-08	20:08:00	0
2009-05-08	20:09:00	0
2009-05-08	20:10:00	0
2009-05-08	20:11:00	24
2009-05-08	20:12:00	0
2009-05-08	20:13:00	72
2009-05-08	20:14:00	48
2009-05-08	20:15:00	0
2009-05-08	20:16:00	0
2009-05-08	20:17:00	0
2009-05-08	20:18:00	0
2009-05-08	20:19:00	0
2009-05-08	20:20:00	0
2009-05-08	20:21:00	0
2009-05-08	20:22:00	0
2009-05-08	20:23:00	229
2009-05-08	20:24:00	1077
2009-05-08	20:25:00	157
2009-05-08	20:26:00	145
2009-05-08	20:27:00	507
2009-05-08	20:28:00	997
2009-05-08	20:29:00	688
2009-05-08	20:30:00	546
2009-05-08	20:31:00	1051
2009-05-08	20:32:00	97
2009-05-08	20:33:00	645
2009-05-08	20:34:00	133
2009-05-08	20:35:00	215
2009-05-08	20:36:00	229
2009-05-08	20:37:00	171
2009-05-08	20:38:00	507
2009-05-08	20:39:00	546
2009-05-08	20:40:00	171
2009-05-08	20:41:00	97
2009-05-08	20:42:00	171
2009-05-08	20:43:00	186
2009-05-08	20:44:00	775
2009-05-08	20:45:00	145
2009-05-08	20:46:00	0
2009-05-08	20:47:00	0
2009-05-08	20:48:00	0
2009-05-08	20:49:00	0
2009-05-08	20:50:00	0
2009-05-08	20:51:00	12
2009-05-08	20:52:00	24
2009-05-08	20:53:00	0
2009-05-08	20:54:00	72
2009-05-08	20:55:00	145
2009-05-08	20:56:00	0
2009-05-08	20:57:00	0
2009-05-08	20:58:00	0
2009-05-08	20:59:00	60
2009-05-08	21:00:00	157
2009-05-08	21:01:00	200
2009-05-08	21:02:00	0
2009-05-08	21:03:00	0
2009-05-08	21:04:00	85
2009-05-08	21:05:00	316
2009-05-08	21:06:00	229
2009-05-08	21:07:00	186
2009-05-08	21:08:00	0
2009-05-08	21:09:00	0
2009-05-08	21:10:00	0
2009-05-08	21:11:00	12
2009-05-08	21:12:00	0
2009-05-08	21:13:00	0
2009-05-08	21:14:00	0
2009-05-08	21:15:00	0
2009-05-08	21:16:00	121
2009-05-08	21:17:00	121
2009-05-08	21:18:00	121
2009-05-08	21:19:00	109
2009-05-08	21:20:00	12
2009-05-08	21:21:00	12
2009-05-08	21:22:00	12
2009-05-08	21:23:00	0
2009-05-08	21:24:00	0
2009-05-08	21:25:00	0
2009-05-08	21:26:00	0
2009-05-08	21:27:00	0
2009-05-08	21:28:00	24
2009-05-08	21:29:00	85
2009-05-08	21:30:00	0
2009-05-08	21:31:00	0
2009-05-08	21:32:00	0
2009-05-08	21:33:00	97
2009-05-08	21:34:00	0
2009-05-08	21:35:00	0
2009-05-08	21:36:00	0
2009-05-08	21:37:00	0
2009-05-08	21:38:00	0
2009-05-08	21:39:00	0
2009-05-08	21:40:00	12
2009-05-08	21:41:00	0
2009-05-08	21:42:00	0
2009-05-08	21:43:00	0
2009-05-08	21:44:00	0
2009-05-08	21:45:00	0
2009-05-08	21:46:00	0
2009-05-08	21:47:00	0
2009-05-08	21:48:00	0
2009-05-08	21:49:00	0
2009-05-08	21:50:00	0
2009-05-08	21:51:00	0
2009-05-08	21:52:00	0
2009-05-08	21:53:00	0
2009-05-08	21:54:00	0
2009-05-08	21:55:00	0
2009-05-08	21:56:00	0
2009-05-08	21:57:00	0
2009-05-08	21:58:00	0
2009-05-08	21:59:00	0
2009-05-08	22:00:00	0
2009-05-08	22:01:00	0
2009-05-08	22:02:00	0
2009-05-08	22:03:00	0
2009-05-08	22:04:00	0
2009-05-08	22:05:00	0
2009-05-08	22:06:00	0
2009-05-08	22:07:00	48
2009-05-08	22:08:00	0
2009-05-08	22:09:00	0
2009-05-08	22:10:00	0
2009-05-08	22:11:00	0
2009-05-08	22:12:00	0
2009-05-08	22:13:00	12
2009-05-08	22:14:00	12
2009-05-08	22:15:00	0
2009-05-08	22:16:00	0
2009-05-08	22:17:00	0
2009-05-08	22:18:00	0
2009-05-08	22:19:00	0
2009-05-08	22:20:00	0
2009-05-08	22:21:00	0
2009-05-08	22:22:00	0
2009-05-08	22:23:00	0
2009-05-08	22:24:00	0
2009-05-08	22:25:00	0
2009-05-08	22:26:00	0
2009-05-08	22:27:00	0
2009-05-08	22:28:00	0
2009-05-08	22:29:00	0
2009-05-08	22:30:00	0
2009-05-08	22:31:00	0
2009-05-08	22:32:00	0
2009-05-08	22:33:00	0
2009-05-08	22:34:00	0
2009-05-08	22:35:00	0
2009-05-08	22:36:00	0
2009-05-08	22:37:00	0
2009-05-08	22:38:00	0
2009-05-08	22:39:00	0
2009-05-08	22:40:00	0
2009-05-08	22:41:00	0
2009-05-08	22:42:00	85
2009-05-08	22:43:00	97
2009-05-08	22:44:00	0
2009-05-08	22:45:00	0
2009-05-08	22:46:00	24
2009-05-08	22:47:00	0
2009-05-08	22:48:00	0
2009-05-08	22:49:00	0
2009-05-08	22:50:00	0
2009-05-08	22:51:00	0
2009-05-08	22:52:00	0
2009-05-08	22:53:00	0
2009-05-08	22:54:00	0
2009-05-08	22:55:00	0
2009-05-08	22:56:00	0
2009-05-08	22:57:00	0
2009-05-08	22:58:00	0
2009-05-08	22:59:00	0
2009-05-08	23:00:00	0
2009-05-08	23:01:00	0
2009-05-08	23:02:00	0
2009-05-08	23:03:00	0
2009-05-08	23:04:00	0
2009-05-08	23:05:00	0
2009-05-08	23:06:00	0
2009-05-08	23:07:00	0
2009-05-08	23:08:00	0
2009-05-08	23:09:00	0
2009-05-08	23:10:00	0
2009-05-08	23:11:00	0
2009-05-08	23:12:00	0
2009-05-08	23:13:00	12
2009-05-08	23:14:00	12
2009-05-08	23:15:00	157
2009-05-08	23:16:00	24
2009-05-08	23:17:00	0
2009-05-08	23:18:00	0
2009-05-08	23:19:00	0
2009-05-08	23:20:00	0
2009-05-08	23:21:00	0
2009-05-08	23:22:00	0
2009-05-08	23:23:00	0
2009-05-08	23:24:00	0
2009-05-08	23:25:00	0
2009-05-08	23:26:00	0
2009-05-08	23:27:00	0
2009-05-08	23:28:00	0
2009-05-08	23:29:00	0
2009-05-08	23:30:00	0
2009-05-08	23:31:00	0
2009-05-08	23:32:00	0
2009-05-08	23:33:00	24
2009-05-08	23:34:00	0
2009-05-08	23:35:00	0
2009-05-08	23:36:00	0
2009-05-08	23:37:00	0
2009-05-08	23:38:00	0
2009-05-08	23:39:00	0
2009-05-08	23:40:00	0
2009-05-08	23:41:00	0
2009-05-08	23:42:00	0
2009-05-08	23:43:00	0
2009-05-08	23:44:00	0
2009-05-08	23:45:00	0
2009-05-08	23:46:00	0
2009-05-08	23:47:00	0
2009-05-08	23:48:00	0
2009-05-08	23:49:00	0
2009-05-08	23:50:00	0
2009-05-08	23:51:00	0
2009-05-08	23:52:00	72
2009-05-08	23:53:00	0
2009-05-08	23:54:00	0
2009-05-08	23:55:00	0
2009-05-08	23:56:00	0
2009-05-08	23:57:00	0
2009-05-08	23:58:00	0
2009-05-08	23:59:00	0
2009-05-09	00:00:00	0
2009-05-09	00:01:00	0
2009-05-09	00:02:00	0
2009-05-09	00:03:00	0
2009-05-09	00:04:00	0
2009-05-09	00:05:00	0
2009-05-09	00:06:00	0
2009-05-09	00:07:00	0
2009-05-09	00:08:00	0
2009-05-09	00:09:00	0
2009-05-09	00:10:00	0
2009-05-09	00:11:00	0
2009-05-09	00:12:00	0
2009-05-09	00:13:00	0
2009-05-09	00:14:00	60
2009-05-09	00:15:00	215
2009-05-09	00:16:00	0
2009-05-09	00:17:00	0
2009-05-09	00:18:00	0
2009-05-09	00:19:00	0
2009-05-09	00:20:00	0
2009-05-09	00:21:00	0
2009-05-09	00:22:00	0
2009-05-09	00:23:00	0
2009-05-09	00:24:00	0
2009-05-09	00:25:00	0
2009-05-09	00:26:00	97
2009-05-09	00:27:00	0
2009-05-09	00:28:00	0
2009-05-09	00:29:00	0
2009-05-09	00:30:00	0
2009-05-09	00:31:00	0
2009-05-09	00:32:00	0
2009-05-09	00:33:00	0
2009-05-09	00:34:00	0
2009-05-09	00:35:00	0
2009-05-09	00:36:00	0
2009-05-09	00:37:00	60
2009-05-09	00:38:00	12
2009-05-09	00:39:00	0
2009-05-09	00:40:00	0
2009-05-09	00:41:00	72
2009-05-09	00:42:00	72
2009-05-09	00:43:00	157
2009-05-09	00:44:00	85
2009-05-09	00:45:00	0
2009-05-09	00:46:00	0
2009-05-09	00:47:00	0
2009-05-09	00:48:00	0
2009-05-09	00:49:00	12
2009-05-09	00:50:00	0
2009-05-09	00:51:00	0
2009-05-09	00:52:00	0
2009-05-09	00:53:00	0
2009-05-09	00:54:00	12
2009-05-09	00:55:00	215
2009-05-09	00:56:00	145
2009-05-09	00:57:00	287
2009-05-09	00:58:00	109
2009-05-09	00:59:00	0
2009-05-09	01:00:00	24
2009-05-09	01:01:00	0
2009-05-09	01:02:00	0
2009-05-09	01:03:00	12
2009-05-09	01:04:00	0
2009-05-09	01:05:00	0
2009-05-09	01:06:00	0
2009-05-09	01:07:00	0
2009-05-09	01:08:00	0
2009-05-09	01:09:00	0
2009-05-09	01:10:00	0
2009-05-09	01:11:00	0
2009-05-09	01:12:00	0
2009-05-09	01:13:00	0
2009-05-09	01:14:00	0
2009-05-09	01:15:00	0
2009-05-09	01:16:00	0
2009-05-09	01:17:00	0
2009-05-09	01:18:00	0
2009-05-09	01:19:00	0
2009-05-09	01:20:00	0
2009-05-09	01:21:00	0
2009-05-09	01:22:00	0
2009-05-09	01:23:00	85
2009-05-09	01:24:00	0
2009-05-09	01:25:00	12
2009-05-09	01:26:00	0
2009-05-09	01:27:00	12
2009-05-09	01:28:00	0
2009-05-09	01:29:00	85
2009-05-09	01:30:00	0
2009-05-09	01:31:00	0
2009-05-09	01:32:00	0
2009-05-09	01:33:00	0
2009-05-09	01:34:00	0
2009-05-09	01:35:00	0
2009-05-09	01:36:00	0
2009-05-09	01:37:00	0
2009-05-09	01:38:00	0
2009-05-09	01:39:00	0
2009-05-09	01:40:00	0
2009-05-09	01:41:00	0
2009-05-09	01:42:00	0
2009-05-09	01:43:00	0
2009-05-09	01:44:00	0
2009-05-09	01:45:00	0
2009-05-09	01:46:00	0
2009-05-09	01:47:00	121
2009-05-09	01:48:00	0
2009-05-09	01:49:00	0
2009-05-09	01:50:00	0
2009-05-09	01:51:00	0
2009-05-09	01:52:00	0
2009-05-09	01:53:00	0
2009-05-09	01:54:00	0
2009-05-09	01:55:00	0
2009-05-09	01:56:00	0
2009-05-09	01:57:00	0
2009-05-09	01:58:00	0
2009-05-09	01:59:00	0
2009-05-09	02:00:00	0
2009-05-09	02:01:00	0
2009-05-09	02:02:00	0
2009-05-09	02:03:00	0
2009-05-09	02:04:00	0
2009-05-09	02:05:00	0
2009-05-09	02:06:00	0
2009-05-09	02:07:00	12
2009-05-09	02:08:00	12
2009-05-09	02:09:00	0
2009-05-09	02:10:00	0
2009-05-09	02:11:00	0
2009-05-09	02:12:00	0
2009-05-09	02:13:00	0
2009-05-09	02:14:00	0
2009-05-09	02:15:00	24
2009-05-09	02:16:00	0
2009-05-09	02:17:00	12
2009-05-09	02:18:00	0
2009-05-09	02:19:00	0
2009-05-09	02:20:00	97
2009-05-09	02:21:00	302
2009-05-09	02:22:00	12
2009-05-09	02:23:00	85
2009-05-09	02:24:00	85
2009-05-09	02:25:00	157
2009-05-09	02:26:00	0
2009-05-09	02:27:00	0
2009-05-09	02:28:00	0
2009-05-09	02:29:00	72
2009-05-09	02:30:00	133
2009-05-09	02:31:00	0
2009-05-09	02:32:00	24
2009-05-09	02:33:00	12
2009-05-09	02:34:00	215
2009-05-09	02:35:00	0
2009-05-09	02:36:00	0
2009-05-09	02:37:00	12
2009-05-09	02:38:00	0
2009-05-09	02:39:00	0
2009-05-09	02:40:00	0
2009-05-09	02:41:00	0
2009-05-09	02:42:00	0
2009-05-09	02:43:00	0
2009-05-09	02:44:00	0
2009-05-09	02:45:00	0
2009-05-09	02:46:00	0
2009-05-09	02:47:00	0
2009-05-09	02:48:00	0
2009-05-09	02:49:00	0
2009-05-09	02:50:00	0
2009-05-09	02:51:00	0
2009-05-09	02:52:00	0
2009-05-09	02:53:00	0
2009-05-09	02:54:00	0
2009-05-09	02:55:00	0
2009-05-09	02:56:00	0
2009-05-09	02:57:00	0
2009-05-09	02:58:00	186
2009-05-09	02:59:00	12
2009-05-09	03:00:00	0
2009-05-09	03:01:00	0
2009-05-09	03:02:00	0
2009-05-09	03:03:00	12
2009-05-09	03:04:00	0
2009-05-09	03:05:00	0
2009-05-09	03:06:00	0
2009-05-09	03:07:00	0
2009-05-09	03:08:00	0
2009-05-09	03:09:00	0
2009-05-09	03:10:00	0
2009-05-09	03:11:00	0
2009-05-09	03:12:00	0
2009-05-09	03:13:00	0
2009-05-09	03:14:00	0
2009-05-09	03:15:00	0
2009-05-09	03:16:00	0
2009-05-09	03:17:00	0
2009-05-09	03:18:00	0
2009-05-09	03:19:00	0
2009-05-09	03:20:00	0
2009-05-09	03:21:00	0
2009-05-09	03:22:00	0
2009-05-09	03:23:00	0
2009-05-09	03:24:00	0
2009-05-09	03:25:00	0
2009-05-09	03:26:00	0
2009-05-09	03:27:00	0
2009-05-09	03:28:00	0
2009-05-09	03:29:00	0
2009-05-09	03:30:00	0
2009-05-09	03:31:00	0
2009-05-09	03:32:00	0
2009-05-09	03:33:00	0
2009-05-09	03:34:00	0
2009-05-09	03:35:00	0
2009-05-09	03:36:00	0
2009-05-09	03:37:00	0
2009-05-09	03:38:00	0
2009-05-09	03:39:00	0
2009-05-09	03:40:00	0
2009-05-09	03:41:00	0
2009-05-09	03:42:00	0
2009-05-09	03:43:00	0
2009-05-09	03:44:00	0
2009-05-09	03:45:00	0
2009-05-09	03:46:00	0
2009-05-09	03:47:00	0
2009-05-09	03:48:00	0
2009-05-09	03:49:00	0
2009-05-09	03:50:00	0
2009-05-09	03:51:00	0
2009-05-09	03:52:00	0
2009-05-09	03:53:00	12
2009-05-09	03:54:00	0
2009-05-09	03:55:00	0
2009-05-09	03:56:00	0
2009-05-09	03:57:00	0
2009-05-09	03:58:00	12
2009-05-09	03:59:00	0
2009-05-09	04:00:00	0
2009-05-09	04:01:00	24
2009-05-09	04:02:00	0
2009-05-09	04:03:00	0
2009-05-09	04:04:00	0
2009-05-09	04:05:00	0
2009-05-09	04:06:00	0
2009-05-09	04:07:00	0
2009-05-09	04:08:00	0
2009-05-09	04:09:00	0
2009-05-09	04:10:00	0
2009-05-09	04:11:00	0
2009-05-09	04:12:00	0
2009-05-09	04:13:00	0
2009-05-09	04:14:00	0
2009-05-09	04:15:00	0
2009-05-09	04:16:00	0
2009-05-09	04:17:00	0
2009-05-09	04:18:00	0
2009-05-09	04:19:00	0
2009-05-09	04:20:00	0
2009-05-09	04:21:00	0
2009-05-09	04:22:00	0
2009-05-09	04:23:00	0
2009-05-09	04:24:00	12
2009-05-09	04:25:00	0
2009-05-09	04:26:00	0
2009-05-09	04:27:00	186
2009-05-09	04:28:00	0
2009-05-09	04:29:00	0
2009-05-09	04:30:00	0
2009-05-09	04:31:00	0
2009-05-09	04:32:00	0
2009-05-09	04:33:00	350
2009-05-09	04:34:00	157
2009-05-09	04:35:00	0
2009-05-09	04:36:00	0
2009-05-09	04:37:00	24
2009-05-09	04:38:00	0
2009-05-09	04:39:00	0
2009-05-09	04:40:00	0
2009-05-09	04:41:00	186
2009-05-09	04:42:00	0
2009-05-09	04:43:00	0
2009-05-09	04:44:00	0
2009-05-09	04:45:00	0
2009-05-09	04:46:00	133
2009-05-09	04:47:00	36
2009-05-09	04:48:00	0
2009-05-09	04:49:00	0
2009-05-09	04:50:00	0
2009-05-09	04:51:00	0
2009-05-09	04:52:00	0
2009-05-09	04:53:00	0
2009-05-09	04:54:00	0
2009-05-09	04:55:00	0
2009-05-09	04:56:00	0
2009-05-09	04:57:00	0
2009-05-09	04:58:00	0
2009-05-09	04:59:00	0
2009-05-09	05:00:00	0
2009-05-09	05:01:00	0
2009-05-09	05:02:00	0
2009-05-09	05:03:00	0
2009-05-09	05:04:00	0
2009-05-09	05:05:00	0
2009-05-09	05:06:00	0
2009-05-09	05:07:00	0
2009-05-09	05:08:00	0
2009-05-09	05:09:00	0
2009-05-09	05:10:00	0
2009-05-09	05:11:00	0
2009-05-09	05:12:00	0
2009-05-09	05:13:00	0
2009-05-09	05:14:00	0
2009-05-09	05:15:00	0
2009-05-09	05:16:00	0
2009-05-09	05:17:00	0
2009-05-09	05:18:00	0
2009-05-09	05:19:00	0
2009-05-09	05:20:00	0
2009-05-09	05:21:00	0
2009-05-09	05:22:00	0
2009-05-09	05:23:00	0
2009-05-09	05:24:00	0
2009-05-09	05:25:00	0
2009-05-09	05:26:00	0
2009-05-09	05:27:00	0
2009-05-09	05:28:00	0
2009-05-09	05:29:00	0
2009-05-09	05:30:00	0
2009-05-09	05:31:00	0
2009-05-09	05:32:00	0
2009-05-09	05:33:00	0
2009-05-09	05:34:00	200
2009-05-09	05:35:00	36
2009-05-09	05:36:00	60
2009-05-09	05:37:00	12
2009-05-09	05:38:00	0
2009-05-09	05:39:00	121
2009-05-09	05:40:00	0
2009-05-09	05:41:00	0
2009-05-09	05:42:00	0
2009-05-09	05:43:00	12
2009-05-09	05:44:00	12
2009-05-09	05:45:00	0
2009-05-09	05:46:00	157
2009-05-09	05:47:00	0
2009-05-09	05:48:00	97
2009-05-09	05:49:00	85
2009-05-09	05:50:00	0
2009-05-09	05:51:00	0
2009-05-09	05:52:00	85
2009-05-09	05:53:00	109
2009-05-09	05:54:00	0
2009-05-09	05:55:00	12
2009-05-09	05:56:00	0
2009-05-09	05:57:00	0
2009-05-09	05:58:00	48
2009-05-09	05:59:00	12
2009-05-09	06:00:00	0
2009-05-09	06:01:00	0
2009-05-09	06:02:00	145
2009-05-09	06:03:00	121
2009-05-09	06:04:00	287
2009-05-09	06:05:00	48
2009-05-09	06:06:00	401
2009-05-09	06:07:00	1758
2009-05-09	06:08:00	85
2009-05-09	06:09:00	97
2009-05-09	06:10:00	316
2009-05-09	06:11:00	258
2009-05-09	06:12:00	401
2009-05-09	06:13:00	1191
2009-05-09	06:14:00	72
2009-05-09	06:15:00	48
2009-05-09	06:16:00	0
2009-05-09	06:17:00	0
2009-05-09	06:18:00	0
2009-05-09	06:19:00	0
2009-05-09	06:20:00	85
2009-05-09	06:21:00	623
2009-05-09	06:22:00	145
2009-05-09	06:23:00	0
2009-05-09	06:24:00	0
2009-05-09	06:25:00	0
2009-05-09	06:26:00	0
2009-05-09	06:27:00	12
2009-05-09	06:28:00	0
2009-05-09	06:29:00	0
2009-05-09	06:30:00	0
2009-05-09	06:31:00	0
2009-05-09	06:32:00	12
2009-05-09	06:33:00	0
2009-05-09	06:34:00	0
2009-05-09	06:35:00	12
2009-05-09	06:36:00	0
2009-05-09	06:37:00	0
2009-05-09	06:38:00	0
2009-05-09	06:39:00	0
2009-05-09	06:40:00	0
2009-05-09	06:41:00	0
2009-05-09	06:42:00	0
2009-05-09	06:43:00	0
2009-05-09	06:44:00	0
2009-05-09	06:45:00	0
2009-05-09	06:46:00	0
2009-05-09	06:47:00	0
2009-05-09	06:48:00	0
2009-05-09	06:49:00	0
2009-05-09	06:50:00	0
2009-05-09	06:51:00	0
2009-05-09	06:52:00	0
2009-05-09	06:53:00	0
2009-05-09	06:54:00	1507
2009-05-09	06:55:00	920
2009-05-09	06:56:00	133
2009-05-09	06:57:00	273
2009-05-09	06:58:00	1051
2009-05-09	06:59:00	645
2009-05-09	07:00:00	452
2009-05-09	07:01:00	435
2009-05-09	07:02:00	1311
2009-05-09	07:03:00	1720
2009-05-09	07:04:00	848
2009-05-09	07:05:00	667
2009-05-09	07:06:00	1024
2009-05-09	07:07:00	1406
2009-05-09	07:08:00	1720
2009-05-09	07:09:00	1439
2009-05-09	07:10:00	872
2009-05-09	07:11:00	302
2009-05-09	07:12:00	1191
2009-05-09	07:13:00	1797
2009-05-09	07:14:00	3152
2009-05-09	07:15:00	85
2009-05-09	07:16:00	435
2009-05-09	07:17:00	775
2009-05-09	07:18:00	1473
2009-05-09	07:19:00	2975
2009-05-09	07:20:00	469
2009-05-09	07:21:00	384
2009-05-09	07:22:00	186
2009-05-09	07:23:00	1797
2009-05-09	07:24:00	971
2009-05-09	07:25:00	273
2009-05-09	07:26:00	1541
2009-05-09	07:27:00	1541
2009-05-09	07:28:00	645
2009-05-09	07:29:00	488
2009-05-09	07:30:00	645
2009-05-09	07:31:00	367
2009-05-09	07:32:00	258
2009-05-09	07:33:00	896
2009-05-09	07:34:00	367
2009-05-09	07:35:00	60
2009-05-09	07:36:00	60
2009-05-09	07:37:00	200
2009-05-09	07:38:00	48
2009-05-09	07:39:00	244
2009-05-09	07:40:00	316
2009-05-09	07:41:00	85
2009-05-09	07:42:00	367
2009-05-09	07:43:00	367
2009-05-09	07:44:00	157
2009-05-09	07:45:00	200
2009-05-09	07:46:00	85
2009-05-09	07:47:00	754
2009-05-09	07:48:00	48
2009-05-09	07:49:00	12
2009-05-09	07:50:00	171
2009-05-09	07:51:00	171
2009-05-09	07:52:00	229
2009-05-09	07:53:00	186
2009-05-09	07:54:00	688
2009-05-09	07:55:00	157
2009-05-09	07:56:00	0
2009-05-09	07:57:00	244
2009-05-09	07:58:00	229
2009-05-09	07:59:00	85
2009-05-09	08:00:00	109
2009-05-09	08:01:00	215
2009-05-09	08:02:00	688
2009-05-09	08:03:00	215
2009-05-09	08:04:00	171
2009-05-09	08:05:00	85
2009-05-09	08:06:00	350
2009-05-09	08:07:00	48
2009-05-09	08:08:00	215
2009-05-09	08:09:00	367
2009-05-09	08:10:00	85
2009-05-09	08:11:00	48
2009-05-09	08:12:00	24
2009-05-09	08:13:00	0
2009-05-09	08:14:00	145
2009-05-09	08:15:00	215
2009-05-09	08:16:00	244
2009-05-09	08:17:00	133
2009-05-09	08:18:00	0
2009-05-09	08:19:00	0
2009-05-09	08:20:00	186
2009-05-09	08:21:00	121
2009-05-09	08:22:00	0
2009-05-09	08:23:00	0
2009-05-09	08:24:00	0
2009-05-09	08:25:00	0
2009-05-09	08:26:00	12
2009-05-09	08:27:00	186
2009-05-09	08:28:00	24
2009-05-09	08:29:00	0
2009-05-09	08:30:00	215
2009-05-09	08:31:00	316
2009-05-09	08:32:00	258
2009-05-09	08:33:00	604
2009-05-09	08:34:00	401
2009-05-09	08:35:00	133
2009-05-09	08:36:00	0
2009-05-09	08:37:00	0
2009-05-09	08:38:00	0
2009-05-09	08:39:00	418
2009-05-09	08:40:00	258
2009-05-09	08:41:00	384
2009-05-09	08:42:00	1249
2009-05-09	08:43:00	350
2009-05-09	08:44:00	401
2009-05-09	08:45:00	171
2009-05-09	08:46:00	133
2009-05-09	08:47:00	200
2009-05-09	08:48:00	418
2009-05-09	08:49:00	186
2009-05-09	08:50:00	0
2009-05-09	08:51:00	24
2009-05-09	08:52:00	145
2009-05-09	08:53:00	0
2009-05-09	08:54:00	24
2009-05-09	08:55:00	507
2009-05-09	08:56:00	488
2009-05-09	08:57:00	0
2009-05-09	08:58:00	0
2009-05-09	08:59:00	0
2009-05-09	09:00:00	121
2009-05-09	09:01:00	0
2009-05-09	09:02:00	24
2009-05-09	09:03:00	0
2009-05-09	09:04:00	0
2009-05-09	09:05:00	0
2009-05-09	09:06:00	215
2009-05-09	09:07:00	0
2009-05-09	09:08:00	0
[truncated: 25,371 more rows]

## Sheet: 5.26.09
Actogram, Copy Raw Data, All Days
Identity:	Kelly
Filename:	E:\Active Research Files\meloxicam titre canine\cases\kelly\Kelly Killan 5.26.09.AWC
Gender:	F
Age:	8
Height:	76.2 cm	30.0 in
Weight:	31.0 kg	68.3 lbs
Start Date:	26-May-2009 (Tue)
Start Time:	18:00:00
Interval:	1.00 mins
Date Stamp:	Time Stamp:	Activity Data:	Marker Press:
2009-05-26	00:00:00	0
2009-05-26	00:01:00	0
2009-05-26	00:02:00	0
2009-05-26	00:03:00	0
2009-05-26	00:04:00	0
2009-05-26	00:05:00	0
2009-05-26	00:06:00	0
2009-05-26	00:07:00	0
2009-05-26	00:08:00	0
2009-05-26	00:09:00	0
2009-05-26	00:10:00	0
2009-05-26	00:11:00	0
2009-05-26	00:12:00	0
2009-05-26	00:13:00	0
2009-05-26	00:14:00	0
2009-05-26	00:15:00	0
2009-05-26	00:16:00	0
2009-05-26	00:17:00	0
2009-05-26	00:18:00	0
2009-05-26	00:19:00	0
2009-05-26	00:20:00	0
2009-05-26	00:21:00	0
2009-05-26	00:22:00	0
2009-05-26	00:23:00	0
2009-05-26	00:24:00	0
2009-05-26	00:25:00	0
2009-05-26	00:26:00	0
2009-05-26	00:27:00	0
2009-05-26	00:28:00	0
2009-05-26	00:29:00	0
2009-05-26	00:30:00	0
2009-05-26	00:31:00	0
2009-05-26	00:32:00	0
2009-05-26	00:33:00	0
2009-05-26	00:34:00	0
2009-05-26	00:35:00	0
2009-05-26	00:36:00	0
2009-05-26	00:37:00	0
2009-05-26	00:38:00	0
2009-05-26	00:39:00	0
2009-05-26	00:40:00	0
2009-05-26	00:41:00	0
2009-05-26	00:42:00	0
2009-05-26	00:43:00	0
2009-05-26	00:44:00	0
2009-05-26	00:45:00	0
2009-05-26	00:46:00	0
2009-05-26	00:47:00	0
2009-05-26	00:48:00	0
2009-05-26	00:49:00	0
2009-05-26	00:50:00	0
2009-05-26	00:51:00	0
2009-05-26	00:52:00	0
2009-05-26	00:53:00	0
2009-05-26	00:54:00	0
2009-05-26	00:55:00	0
2009-05-26	00:56:00	0
2009-05-26	00:57:00	0
2009-05-26	00:58:00	0
2009-05-26	00:59:00	0
2009-05-26	01:00:00	0
2009-05-26	01:01:00	0
2009-05-26	01:02:00	0
2009-05-26	01:03:00	0
2009-05-26	01:04:00	0
2009-05-26	01:05:00	0
2009-05-26	01:06:00	0
2009-05-26	01:07:00	0
2009-05-26	01:08:00	0
2009-05-26	01:09:00	0
2009-05-26	01:10:00	0
2009-05-26	01:11:00	0
2009-05-26	01:12:00	0
2009-05-26	01:13:00	0
2009-05-26	01:14:00	0
2009-05-26	01:15:00	0
2009-05-26	01:16:00	0
2009-05-26	01:17:00	0
2009-05-26	01:18:00	0
2009-05-26	01:19:00	0
2009-05-26	01:20:00	0
2009-05-26	01:21:00	0
2009-05-26	01:22:00	0
2009-05-26	01:23:00	0
2009-05-26	01:24:00	0
2009-05-26	01:25:00	0
2009-05-26	01:26:00	0
2009-05-26	01:27:00	0
2009-05-26	01:28:00	0
2009-05-26	01:29:00	0
2009-05-26	01:30:00	0
2009-05-26	01:31:00	0
2009-05-26	01:32:00	0
2009-05-26	01:33:00	0
2009-05-26	01:34:00	0
2009-05-26	01:35:00	0
2009-05-26	01:36:00	0
2009-05-26	01:37:00	0
2009-05-26	01:38:00	0
2009-05-26	01:39:00	0
2009-05-26	01:40:00	0
2009-05-26	01:41:00	0
2009-05-26	01:42:00	0
2009-05-26	01:43:00	0
2009-05-26	01:44:00	0
2009-05-26	01:45:00	0
2009-05-26	01:46:00	0
2009-05-26	01:47:00	0
2009-05-26	01:48:00	0
2009-05-26	01:49:00	0
2009-05-26	01:50:00	0
2009-05-26	01:51:00	0
2009-05-26	01:52:00	0
2009-05-26	01:53:00	0
2009-05-26	01:54:00	0
2009-05-26	01:55:00	0
2009-05-26	01:56:00	0
2009-05-26	01:57:00	0
2009-05-26	01:58:00	0
2009-05-26	01:59:00	0
2009-05-26	02:00:00	0
2009-05-26	02:01:00	0
2009-05-26	02:02:00	0
2009-05-26	02:03:00	0
2009-05-26	02:04:00	0
2009-05-26	02:05:00	0
2009-05-26	02:06:00	0
2009-05-26	02:07:00	0
2009-05-26	02:08:00	0
2009-05-26	02:09:00	0
2009-05-26	02:10:00	0
2009-05-26	02:11:00	0
2009-05-26	02:12:00	0
2009-05-26	02:13:00	0
2009-05-26	02:14:00	0
2009-05-26	02:15:00	0
2009-05-26	02:16:00	0
2009-05-26	02:17:00	0
2009-05-26	02:18:00	0
2009-05-26	02:19:00	0
2009-05-26	02:20:00	0
2009-05-26	02:21:00	0
2009-05-26	02:22:00	0
2009-05-26	02:23:00	0
2009-05-26	02:24:00	0
2009-05-26	02:25:00	0
2009-05-26	02:26:00	0
2009-05-26	02:27:00	0
2009-05-26	02:28:00	0
2009-05-26	02:29:00	0
2009-05-26	02:30:00	0
2009-05-26	02:31:00	0
2009-05-26	02:32:00	0
2009-05-26	02:33:00	0
2009-05-26	02:34:00	0
2009-05-26	02:35:00	0
2009-05-26	02:36:00	0
2009-05-26	02:37:00	0
2009-05-26	02:38:00	0
2009-05-26	02:39:00	0
2009-05-26	02:40:00	0
2009-05-26	02:41:00	0
2009-05-26	02:42:00	0
2009-05-26	02:43:00	0
2009-05-26	02:44:00	0
2009-05-26	02:45:00	0
2009-05-26	02:46:00	0
2009-05-26	02:47:00	0
2009-05-26	02:48:00	0
2009-05-26	02:49:00	0
2009-05-26	02:50:00	0
2009-05-26	02:51:00	0
2009-05-26	02:52:00	0
2009-05-26	02:53:00	0
2009-05-26	02:54:00	0
2009-05-26	02:55:00	0
2009-05-26	02:56:00	0
2009-05-26	02:57:00	0
2009-05-26	02:58:00	0
2009-05-26	02:59:00	0
2009-05-26	03:00:00	0
2009-05-26	03:01:00	0
2009-05-26	03:02:00	0
2009-05-26	03:03:00	0
2009-05-26	03:04:00	0
2009-05-26	03:05:00	0
2009-05-26	03:06:00	0
2009-05-26	03:07:00	0
2009-05-26	03:08:00	0
2009-05-26	03:09:00	0
2009-05-26	03:10:00	0
2009-05-26	03:11:00	0
2009-05-26	03:12:00	0
2009-05-26	03:13:00	0
2009-05-26	03:14:00	0
2009-05-26	03:15:00	0
2009-05-26	03:16:00	0
2009-05-26	03:17:00	0
2009-05-26	03:18:00	0
2009-05-26	03:19:00	0
2009-05-26	03:20:00	0
2009-05-26	03:21:00	0
2009-05-26	03:22:00	0
2009-05-26	03:23:00	0
2009-05-26	03:24:00	0
2009-05-26	03:25:00	0
2009-05-26	03:26:00	0
2009-05-26	03:27:00	0
2009-05-26	03:28:00	0
2009-05-26	03:29:00	0
2009-05-26	03:30:00	0
2009-05-26	03:31:00	0
2009-05-26	03:32:00	0
2009-05-26	03:33:00	0
2009-05-26	03:34:00	0
2009-05-26	03:35:00	0
2009-05-26	03:36:00	0
2009-05-26	03:37:00	0
2009-05-26	03:38:00	0
2009-05-26	03:39:00	0
2009-05-26	03:40:00	0
2009-05-26	03:41:00	0
2009-05-26	03:42:00	0
2009-05-26	03:43:00	0
2009-05-26	03:44:00	0
2009-05-26	03:45:00	0
2009-05-26	03:46:00	0
2009-05-26	03:47:00	0
2009-05-26	03:48:00	0
2009-05-26	03:49:00	0
2009-05-26	03:50:00	0
2009-05-26	03:51:00	0
2009-05-26	03:52:00	0
2009-05-26	03:53:00	0
2009-05-26	03:54:00	0
2009-05-26	03:55:00	0
2009-05-26	03:56:00	0
2009-05-26	03:57:00	0
2009-05-26	03:58:00	0
2009-05-26	03:59:00	0
2009-05-26	04:00:00	0
2009-05-26	04:01:00	0
2009-05-26	04:02:00	0
2009-05-26	04:03:00	0
2009-05-26	04:04:00	0
2009-05-26	04:05:00	0
2009-05-26	04:06:00	0
2009-05-26	04:07:00	0
2009-05-26	04:08:00	0
2009-05-26	04:09:00	0
2009-05-26	04:10:00	0
2009-05-26	04:11:00	0
2009-05-26	04:12:00	0
2009-05-26	04:13:00	0
2009-05-26	04:14:00	0
2009-05-26	04:15:00	0
2009-05-26	04:16:00	0
2009-05-26	04:17:00	0
2009-05-26	04:18:00	0
2009-05-26	04:19:00	0
2009-05-26	04:20:00	0
2009-05-26	04:21:00	0
2009-05-26	04:22:00	0
2009-05-26	04:23:00	0
2009-05-26	04:24:00	0
2009-05-26	04:25:00	0
2009-05-26	04:26:00	0
2009-05-26	04:27:00	0
2009-05-26	04:28:00	0
2009-05-26	04:29:00	0
2009-05-26	04:30:00	0
2009-05-26	04:31:00	0
2009-05-26	04:32:00	0
2009-05-26	04:33:00	0
2009-05-26	04:34:00	0
2009-05-26	04:35:00	0
2009-05-26	04:36:00	0
2009-05-26	04:37:00	0
2009-05-26	04:38:00	0
2009-05-26	04:39:00	0
2009-05-26	04:40:00	0
2009-05-26	04:41:00	0
2009-05-26	04:42:00	0
2009-05-26	04:43:00	0
2009-05-26	04:44:00	0
2009-05-26	04:45:00	0
2009-05-26	04:46:00	0
2009-05-26	04:47:00	0
2009-05-26	04:48:00	0
2009-05-26	04:49:00	0
2009-05-26	04:50:00	0
2009-05-26	04:51:00	0
2009-05-26	04:52:00	0
2009-05-26	04:53:00	0
2009-05-26	04:54:00	0
2009-05-26	04:55:00	0
2009-05-26	04:56:00	0
2009-05-26	04:57:00	0
2009-05-26	04:58:00	0
2009-05-26	04:59:00	0
2009-05-26	05:00:00	0
2009-05-26	05:01:00	0
2009-05-26	05:02:00	0
2009-05-26	05:03:00	0
2009-05-26	05:04:00	0
2009-05-26	05:05:00	0
2009-05-26	05:06:00	0
2009-05-26	05:07:00	0
2009-05-26	05:08:00	0
2009-05-26	05:09:00	0
2009-05-26	05:10:00	0
2009-05-26	05:11:00	0
2009-05-26	05:12:00	0
2009-05-26	05:13:00	0
2009-05-26	05:14:00	0
2009-05-26	05:15:00	0
2009-05-26	05:16:00	0
2009-05-26	05:17:00	0
2009-05-26	05:18:00	0
2009-05-26	05:19:00	0
2009-05-26	05:20:00	0
2009-05-26	05:21:00	0
2009-05-26	05:22:00	0
2009-05-26	05:23:00	0
2009-05-26	05:24:00	0
2009-05-26	05:25:00	0
2009-05-26	05:26:00	0
2009-05-26	05:27:00	0
2009-05-26	05:28:00	0
2009-05-26	05:29:00	0
2009-05-26	05:30:00	0
2009-05-26	05:31:00	0
2009-05-26	05:32:00	0
2009-05-26	05:33:00	0
2009-05-26	05:34:00	0
2009-05-26	05:35:00	0
2009-05-26	05:36:00	0
2009-05-26	05:37:00	0
2009-05-26	05:38:00	0
2009-05-26	05:39:00	0
2009-05-26	05:40:00	0
2009-05-26	05:41:00	0
2009-05-26	05:42:00	0
2009-05-26	05:43:00	0
2009-05-26	05:44:00	0
2009-05-26	05:45:00	0
2009-05-26	05:46:00	0
2009-05-26	05:47:00	0
2009-05-26	05:48:00	0
2009-05-26	05:49:00	0
2009-05-26	05:50:00	0
2009-05-26	05:51:00	0
2009-05-26	05:52:00	0
2009-05-26	05:53:00	0
2009-05-26	05:54:00	0
2009-05-26	05:55:00	0
2009-05-26	05:56:00	0
2009-05-26	05:57:00	0
2009-05-26	05:58:00	0
2009-05-26	05:59:00	0
2009-05-26	06:00:00	0
2009-05-26	06:01:00	0
2009-05-26	06:02:00	0
2009-05-26	06:03:00	0
2009-05-26	06:04:00	0
2009-05-26	06:05:00	0
2009-05-26	06:06:00	0
2009-05-26	06:07:00	0
2009-05-26	06:08:00	0
2009-05-26	06:09:00	0
2009-05-26	06:10:00	0
2009-05-26	06:11:00	0
2009-05-26	06:12:00	0
2009-05-26	06:13:00	0
2009-05-26	06:14:00	0
2009-05-26	06:15:00	0
2009-05-26	06:16:00	0
2009-05-26	06:17:00	0
2009-05-26	06:18:00	0
2009-05-26	06:19:00	0
2009-05-26	06:20:00	0
2009-05-26	06:21:00	0
2009-05-26	06:22:00	0
2009-05-26	06:23:00	0
2009-05-26	06:24:00	0
2009-05-26	06:25:00	0
2009-05-26	06:26:00	0
2009-05-26	06:27:00	0
2009-05-26	06:28:00	0
2009-05-26	06:29:00	0
2009-05-26	06:30:00	0
2009-05-26	06:31:00	0
2009-05-26	06:32:00	0
2009-05-26	06:33:00	0
2009-05-26	06:34:00	0
2009-05-26	06:35:00	0
2009-05-26	06:36:00	0
2009-05-26	06:37:00	0
2009-05-26	06:38:00	0
2009-05-26	06:39:00	0
2009-05-26	06:40:00	0
2009-05-26	06:41:00	0
2009-05-26	06:42:00	0
2009-05-26	06:43:00	0
2009-05-26	06:44:00	0
2009-05-26	06:45:00	0
2009-05-26	06:46:00	0
2009-05-26	06:47:00	0
2009-05-26	06:48:00	0
2009-05-26	06:49:00	0
2009-05-26	06:50:00	0
2009-05-26	06:51:00	0
2009-05-26	06:52:00	0
2009-05-26	06:53:00	0
2009-05-26	06:54:00	0
2009-05-26	06:55:00	0
2009-05-26	06:56:00	0
2009-05-26	06:57:00	0
2009-05-26	06:58:00	0
2009-05-26	06:59:00	0
2009-05-26	07:00:00	0
2009-05-26	07:01:00	0
2009-05-26	07:02:00	0
2009-05-26	07:03:00	0
2009-05-26	07:04:00	0
2009-05-26	07:05:00	0
2009-05-26	07:06:00	0
2009-05-26	07:07:00	0
2009-05-26	07:08:00	0
2009-05-26	07:09:00	0
2009-05-26	07:10:00	0
2009-05-26	07:11:00	0
2009-05-26	07:12:00	0
2009-05-26	07:13:00	0
2009-05-26	07:14:00	0
2009-05-26	07:15:00	0
2009-05-26	07:16:00	0
2009-05-26	07:17:00	0
2009-05-26	07:18:00	0
2009-05-26	07:19:00	0
2009-05-26	07:20:00	0
2009-05-26	07:21:00	0
2009-05-26	07:22:00	0
2009-05-26	07:23:00	0
2009-05-26	07:24:00	0
2009-05-26	07:25:00	0
2009-05-26	07:26:00	0
2009-05-26	07:27:00	0
2009-05-26	07:28:00	0
2009-05-26	07:29:00	0
2009-05-26	07:30:00	0
2009-05-26	07:31:00	0
2009-05-26	07:32:00	0
2009-05-26	07:33:00	0
2009-05-26	07:34:00	0
2009-05-26	07:35:00	0
2009-05-26	07:36:00	0
2009-05-26	07:37:00	0
2009-05-26	07:38:00	0
2009-05-26	07:39:00	0
2009-05-26	07:40:00	0
2009-05-26	07:41:00	0
2009-05-26	07:42:00	0
2009-05-26	07:43:00	0
2009-05-26	07:44:00	0
2009-05-26	07:45:00	0
2009-05-26	07:46:00	0
2009-05-26	07:47:00	0
2009-05-26	07:48:00	0
2009-05-26	07:49:00	0
2009-05-26	07:50:00	0
2009-05-26	07:51:00	0
2009-05-26	07:52:00	0
2009-05-26	07:53:00	0
2009-05-26	07:54:00	0
2009-05-26	07:55:00	0
2009-05-26	07:56:00	0
2009-05-26	07:57:00	0
2009-05-26	07:58:00	0
2009-05-26	07:59:00	0
2009-05-26	08:00:00	0
2009-05-26	08:01:00	0
2009-05-26	08:02:00	0
2009-05-26	08:03:00	0
2009-05-26	08:04:00	0
2009-05-26	08:05:00	0
2009-05-26	08:06:00	0
2009-05-26	08:07:00	0
2009-05-26	08:08:00	0
2009-05-26	08:09:00	0
2009-05-26	08:10:00	0
2009-05-26	08:11:00	0
2009-05-26	08:12:00	0
2009-05-26	08:13:00	0
2009-05-26	08:14:00	0
2009-05-26	08:15:00	0
2009-05-26	08:16:00	0
2009-05-26	08:17:00	0
2009-05-26	08:18:00	0
2009-05-26	08:19:00	0
2009-05-26	08:20:00	0
2009-05-26	08:21:00	0
2009-05-26	08:22:00	0
2009-05-26	08:23:00	0
2009-05-26	08:24:00	0
2009-05-26	08:25:00	0
2009-05-26	08:26:00	0
2009-05-26	08:27:00	0
2009-05-26	08:28:00	0
2009-05-26	08:29:00	0
2009-05-26	08:30:00	0
2009-05-26	08:31:00	0
2009-05-26	08:32:00	0
2009-05-26	08:33:00	0
2009-05-26	08:34:00	0
2009-05-26	08:35:00	0
2009-05-26	08:36:00	0
2009-05-26	08:37:00	0
2009-05-26	08:38:00	0
2009-05-26	08:39:00	0
2009-05-26	08:40:00	0
2009-05-26	08:41:00	0
2009-05-26	08:42:00	0
2009-05-26	08:43:00	0
2009-05-26	08:44:00	0
2009-05-26	08:45:00	0
2009-05-26	08:46:00	0
2009-05-26	08:47:00	0
2009-05-26	08:48:00	0
2009-05-26	08:49:00	0
2009-05-26	08:50:00	0
2009-05-26	08:51:00	0
2009-05-26	08:52:00	0
2009-05-26	08:53:00	0
2009-05-26	08:54:00	0
2009-05-26	08:55:00	0
2009-05-26	08:56:00	0
2009-05-26	08:57:00	0
2009-05-26	08:58:00	0
2009-05-26	08:59:00	0
2009-05-26	09:00:00	0
2009-05-26	09:01:00	0
2009-05-26	09:02:00	0
2009-05-26	09:03:00	0
2009-05-26	09:04:00	0
2009-05-26	09:05:00	0
2009-05-26	09:06:00	0
2009-05-26	09:07:00	0
2009-05-26	09:08:00	0
2009-05-26	09:09:00	0
2009-05-26	09:10:00	0
2009-05-26	09:11:00	0
2009-05-26	09:12:00	0
2009-05-26	09:13:00	0
2009-05-26	09:14:00	0
2009-05-26	09:15:00	0
2009-05-26	09:16:00	0
2009-05-26	09:17:00	0
2009-05-26	09:18:00	0
2009-05-26	09:19:00	0
2009-05-26	09:20:00	0
2009-05-26	09:21:00	0
2009-05-26	09:22:00	0
2009-05-26	09:23:00	0
2009-05-26	09:24:00	0
2009-05-26	09:25:00	0
2009-05-26	09:26:00	0
2009-05-26	09:27:00	0
2009-05-26	09:28:00	0
2009-05-26	09:29:00	0
2009-05-26	09:30:00	0
2009-05-26	09:31:00	0
2009-05-26	09:32:00	0
2009-05-26	09:33:00	0
2009-05-26	09:34:00	0
2009-05-26	09:35:00	0
2009-05-26	09:36:00	0
2009-05-26	09:37:00	0
2009-05-26	09:38:00	0
2009-05-26	09:39:00	0
2009-05-26	09:40:00	0
2009-05-26	09:41:00	0
2009-05-26	09:42:00	0
2009-05-26	09:43:00	0
2009-05-26	09:44:00	0
2009-05-26	09:45:00	0
2009-05-26	09:46:00	0
2009-05-26	09:47:00	0
2009-05-26	09:48:00	0
2009-05-26	09:49:00	0
2009-05-26	09:50:00	0
2009-05-26	09:51:00	0
2009-05-26	09:52:00	0
2009-05-26	09:53:00	0
2009-05-26	09:54:00	0
2009-05-26	09:55:00	0
2009-05-26	09:56:00	0
2009-05-26	09:57:00	0
2009-05-26	09:58:00	0
2009-05-26	09:59:00	0
2009-05-26	10:00:00	0
2009-05-26	10:01:00	0
2009-05-26	10:02:00	0
2009-05-26	10:03:00	0
2009-05-26	10:04:00	0
2009-05-26	10:05:00	0
2009-05-26	10:06:00	0
2009-05-26	10:07:00	0
2009-05-26	10:08:00	0
2009-05-26	10:09:00	0
2009-05-26	10:10:00	0
2009-05-26	10:11:00	0
2009-05-26	10:12:00	0
2009-05-26	10:13:00	0
2009-05-26	10:14:00	0
2009-05-26	10:15:00	0
2009-05-26	10:16:00	0
2009-05-26	10:17:00	0
2009-05-26	10:18:00	0
2009-05-26	10:19:00	0
2009-05-26	10:20:00	0
2009-05-26	10:21:00	0
2009-05-26	10:22:00	0
2009-05-26	10:23:00	0
2009-05-26	10:24:00	0
2009-05-26	10:25:00	0
2009-05-26	10:26:00	0
2009-05-26	10:27:00	0
2009-05-26	10:28:00	0
2009-05-26	10:29:00	0
2009-05-26	10:30:00	0
2009-05-26	10:31:00	0
2009-05-26	10:32:00	0
2009-05-26	10:33:00	0
2009-05-26	10:34:00	0
2009-05-26	10:35:00	0
2009-05-26	10:36:00	0
2009-05-26	10:37:00	0
2009-05-26	10:38:00	0
2009-05-26	10:39:00	0
2009-05-26	10:40:00	0
2009-05-26	10:41:00	0
2009-05-26	10:42:00	0
2009-05-26	10:43:00	0
2009-05-26	10:44:00	0
2009-05-26	10:45:00	0
2009-05-26	10:46:00	0
2009-05-26	10:47:00	0
2009-05-26	10:48:00	0
2009-05-26	10:49:00	0
2009-05-26	10:50:00	0
2009-05-26	10:51:00	0
2009-05-26	10:52:00	0
2009-05-26	10:53:00	0
2009-05-26	10:54:00	0
2009-05-26	10:55:00	0
2009-05-26	10:56:00	0
2009-05-26	10:57:00	0
2009-05-26	10:58:00	0
2009-05-26	10:59:00	0
2009-05-26	11:00:00	0
2009-05-26	11:01:00	0
2009-05-26	11:02:00	0
2009-05-26	11:03:00	0
2009-05-26	11:04:00	0
2009-05-26	11:05:00	0
2009-05-26	11:06:00	0
2009-05-26	11:07:00	0
2009-05-26	11:08:00	0
2009-05-26	11:09:00	0
2009-05-26	11:10:00	0
2009-05-26	11:11:00	0
2009-05-26	11:12:00	0
2009-05-26	11:13:00	0
2009-05-26	11:14:00	0
2009-05-26	11:15:00	0
2009-05-26	11:16:00	0
2009-05-26	11:17:00	0
2009-05-26	11:18:00	0
2009-05-26	11:19:00	0
2009-05-26	11:20:00	0
2009-05-26	11:21:00	0
2009-05-26	11:22:00	0
2009-05-26	11:23:00	0
2009-05-26	11:24:00	0
2009-05-26	11:25:00	0
2009-05-26	11:26:00	0
2009-05-26	11:27:00	0
2009-05-26	11:28:00	0
2009-05-26	11:29:00	0
2009-05-26	11:30:00	0
2009-05-26	11:31:00	0
2009-05-26	11:32:00	0
2009-05-26	11:33:00	0
2009-05-26	11:34:00	0
2009-05-26	11:35:00	0
2009-05-26	11:36:00	0
2009-05-26	11:37:00	0
2009-05-26	11:38:00	0
2009-05-26	11:39:00	0
2009-05-26	11:40:00	0
2009-05-26	11:41:00	0
2009-05-26	11:42:00	0
2009-05-26	11:43:00	0
2009-05-26	11:44:00	0
2009-05-26	11:45:00	0
2009-05-26	11:46:00	0
2009-05-26	11:47:00	0
2009-05-26	11:48:00	0
2009-05-26	11:49:00	0
2009-05-26	11:50:00	0
2009-05-26	11:51:00	0
2009-05-26	11:52:00	0
2009-05-26	11:53:00	0
2009-05-26	11:54:00	0
2009-05-26	11:55:00	0
2009-05-26	11:56:00	0
2009-05-26	11:57:00	0
2009-05-26	11:58:00	0
2009-05-26	11:59:00	0
2009-05-26	12:00:00	0
2009-05-26	12:01:00	0
2009-05-26	12:02:00	0
2009-05-26	12:03:00	0
2009-05-26	12:04:00	0
2009-05-26	12:05:00	0
2009-05-26	12:06:00	0
2009-05-26	12:07:00	0
2009-05-26	12:08:00	0
2009-05-26	12:09:00	0
2009-05-26	12:10:00	0
2009-05-26	12:11:00	0
2009-05-26	12:12:00	0
2009-05-26	12:13:00	0
2009-05-26	12:14:00	0
2009-05-26	12:15:00	0
2009-05-26	12:16:00	0
2009-05-26	12:17:00	0
2009-05-26	12:18:00	0
2009-05-26	12:19:00	0
2009-05-26	12:20:00	0
2009-05-26	12:21:00	0
2009-05-26	12:22:00	0
2009-05-26	12:23:00	0
2009-05-26	12:24:00	0
2009-05-26	12:25:00	0
2009-05-26	12:26:00	0
2009-05-26	12:27:00	0
2009-05-26	12:28:00	0
2009-05-26	12:29:00	0
2009-05-26	12:30:00	0
2009-05-26	12:31:00	0
2009-05-26	12:32:00	0
2009-05-26	12:33:00	0
2009-05-26	12:34:00	0
2009-05-26	12:35:00	0
2009-05-26	12:36:00	0
2009-05-26	12:37:00	0
2009-05-26	12:38:00	0
2009-05-26	12:39:00	0
2009-05-26	12:40:00	0
2009-05-26	12:41:00	0
2009-05-26	12:42:00	0
2009-05-26	12:43:00	0
2009-05-26	12:44:00	0
2009-05-26	12:45:00	0
2009-05-26	12:46:00	0
2009-05-26	12:47:00	0
2009-05-26	12:48:00	0
2009-05-26	12:49:00	0
2009-05-26	12:50:00	0
2009-05-26	12:51:00	0
2009-05-26	12:52:00	0
2009-05-26	12:53:00	0
2009-05-26	12:54:00	0
2009-05-26	12:55:00	0
2009-05-26	12:56:00	0
2009-05-26	12:57:00	0
2009-05-26	12:58:00	0
2009-05-26	12:59:00	0
2009-05-26	13:00:00	0
2009-05-26	13:01:00	0
2009-05-26	13:02:00	0
2009-05-26	13:03:00	0
2009-05-26	13:04:00	0
2009-05-26	13:05:00	0
2009-05-26	13:06:00	0
2009-05-26	13:07:00	0
2009-05-26	13:08:00	0
2009-05-26	13:09:00	0
2009-05-26	13:10:00	0
2009-05-26	13:11:00	0
2009-05-26	13:12:00	0
2009-05-26	13:13:00	0
2009-05-26	13:14:00	0
2009-05-26	13:15:00	0
2009-05-26	13:16:00	0
2009-05-26	13:17:00	0
2009-05-26	13:18:00	0
2009-05-26	13:19:00	0
2009-05-26	13:20:00	0
2009-05-26	13:21:00	0
2009-05-26	13:22:00	0
2009-05-26	13:23:00	0
2009-05-26	13:24:00	0
2009-05-26	13:25:00	0
2009-05-26	13:26:00	0
2009-05-26	13:27:00	0
2009-05-26	13:28:00	0
2009-05-26	13:29:00	0
2009-05-26	13:30:00	0
2009-05-26	13:31:00	0
2009-05-26	13:32:00	0
2009-05-26	13:33:00	0
2009-05-26	13:34:00	0
2009-05-26	13:35:00	0
2009-05-26	13:36:00	0
2009-05-26	13:37:00	0
2009-05-26	13:38:00	0
2009-05-26	13:39:00	0
2009-05-26	13:40:00	0
2009-05-26	13:41:00	0
2009-05-26	13:42:00	0
2009-05-26	13:43:00	0
2009-05-26	13:44:00	0
2009-05-26	13:45:00	0
2009-05-26	13:46:00	0
2009-05-26	13:47:00	0
2009-05-26	13:48:00	0
2009-05-26	13:49:00	0
2009-05-26	13:50:00	0
2009-05-26	13:51:00	0
2009-05-26	13:52:00	0
2009-05-26	13:53:00	0
2009-05-26	13:54:00	0
2009-05-26	13:55:00	0
2009-05-26	13:56:00	0
2009-05-26	13:57:00	0
2009-05-26	13:58:00	0
2009-05-26	13:59:00	0
2009-05-26	14:00:00	0
2009-05-26	14:01:00	0
2009-05-26	14:02:00	0
2009-05-26	14:03:00	0
2009-05-26	14:04:00	0
2009-05-26	14:05:00	0
2009-05-26	14:06:00	0
2009-05-26	14:07:00	0
2009-05-26	14:08:00	0
2009-05-26	14:09:00	0
2009-05-26	14:10:00	0
2009-05-26	14:11:00	0
2009-05-26	14:12:00	0
2009-05-26	14:13:00	0
2009-05-26	14:14:00	0
2009-05-26	14:15:00	0
2009-05-26	14:16:00	0
2009-05-26	14:17:00	0
2009-05-26	14:18:00	0
2009-05-26	14:19:00	0
2009-05-26	14:20:00	0
2009-05-26	14:21:00	0
2009-05-26	14:22:00	0
2009-05-26	14:23:00	0
2009-05-26	14:24:00	0
2009-05-26	14:25:00	0
2009-05-26	14:26:00	0
2009-05-26	14:27:00	0
2009-05-26	14:28:00	0
2009-05-26	14:29:00	0
2009-05-26	14:30:00	0
2009-05-26	14:31:00	0
2009-05-26	14:32:00	0
2009-05-26	14:33:00	0
2009-05-26	14:34:00	0
2009-05-26	14:35:00	0
2009-05-26	14:36:00	0
2009-05-26	14:37:00	0
2009-05-26	14:38:00	0
2009-05-26	14:39:00	0
2009-05-26	14:40:00	0
2009-05-26	14:41:00	0
2009-05-26	14:42:00	0
2009-05-26	14:43:00	0
2009-05-26	14:44:00	0
2009-05-26	14:45:00	0
2009-05-26	14:46:00	0
2009-05-26	14:47:00	0
2009-05-26	14:48:00	0
2009-05-26	14:49:00	0
2009-05-26	14:50:00	0
2009-05-26	14:51:00	0
2009-05-26	14:52:00	0
2009-05-26	14:53:00	0
2009-05-26	14:54:00	0
2009-05-26	14:55:00	0
2009-05-26	14:56:00	0
2009-05-26	14:57:00	0
2009-05-26	14:58:00	0
2009-05-26	14:59:00	0
2009-05-26	15:00:00	0
2009-05-26	15:01:00	0
2009-05-26	15:02:00	0
2009-05-26	15:03:00	0
2009-05-26	15:04:00	0
2009-05-26	15:05:00	0
2009-05-26	15:06:00	0
2009-05-26	15:07:00	0
2009-05-26	15:08:00	0
2009-05-26	15:09:00	0
2009-05-26	15:10:00	0
2009-05-26	15:11:00	0
2009-05-26	15:12:00	0
2009-05-26	15:13:00	0
2009-05-26	15:14:00	0
2009-05-26	15:15:00	0
2009-05-26	15:16:00	0
2009-05-26	15:17:00	0
2009-05-26	15:18:00	0
2009-05-26	15:19:00	0
2009-05-26	15:20:00	0
2009-05-26	15:21:00	0
2009-05-26	15:22:00	0
2009-05-26	15:23:00	0
2009-05-26	15:24:00	0
2009-05-26	15:25:00	0
2009-05-26	15:26:00	0
2009-05-26	15:27:00	0
2009-05-26	15:28:00	0
2009-05-26	15:29:00	0
2009-05-26	15:30:00	0
2009-05-26	15:31:00	0
2009-05-26	15:32:00	0
2009-05-26	15:33:00	0
2009-05-26	15:34:00	0
2009-05-26	15:35:00	0
2009-05-26	15:36:00	0
2009-05-26	15:37:00	0
2009-05-26	15:38:00	0
2009-05-26	15:39:00	0
2009-05-26	15:40:00	0
2009-05-26	15:41:00	0
2009-05-26	15:42:00	0
2009-05-26	15:43:00	0
2009-05-26	15:44:00	0
2009-05-26	15:45:00	0
2009-05-26	15:46:00	0
2009-05-26	15:47:00	0
2009-05-26	15:48:00	0
2009-05-26	15:49:00	0
2009-05-26	15:50:00	0
2009-05-26	15:51:00	0
2009-05-26	15:52:00	0
2009-05-26	15:53:00	0
2009-05-26	15:54:00	0
2009-05-26	15:55:00	0
2009-05-26	15:56:00	0
2009-05-26	15:57:00	0
2009-05-26	15:58:00	0
2009-05-26	15:59:00	0
2009-05-26	16:00:00	0
2009-05-26	16:01:00	0
2009-05-26	16:02:00	0
2009-05-26	16:03:00	0
2009-05-26	16:04:00	0
2009-05-26	16:05:00	0
2009-05-26	16:06:00	0
2009-05-26	16:07:00	0
2009-05-26	16:08:00	0
2009-05-26	16:09:00	0
2009-05-26	16:10:00	0
2009-05-26	16:11:00	0
2009-05-26	16:12:00	0
2009-05-26	16:13:00	0
2009-05-26	16:14:00	0
2009-05-26	16:15:00	0
2009-05-26	16:16:00	0
2009-05-26	16:17:00	0
2009-05-26	16:18:00	0
2009-05-26	16:19:00	0
2009-05-26	16:20:00	0
2009-05-26	16:21:00	0
2009-05-26	16:22:00	0
2009-05-26	16:23:00	0
2009-05-26	16:24:00	0
2009-05-26	16:25:00	0
2009-05-26	16:26:00	0
2009-05-26	16:27:00	0
2009-05-26	16:28:00	0
2009-05-26	16:29:00	0
2009-05-26	16:30:00	0
2009-05-26	16:31:00	0
2009-05-26	16:32:00	0
2009-05-26	16:33:00	0
2009-05-26	16:34:00	0
2009-05-26	16:35:00	0
2009-05-26	16:36:00	0
2009-05-26	16:37:00	0
2009-05-26	16:38:00	0
2009-05-26	16:39:00	0
2009-05-26	16:40:00	0
2009-05-26	16:41:00	0
2009-05-26	16:42:00	0
2009-05-26	16:43:00	0
2009-05-26	16:44:00	0
2009-05-26	16:45:00	0
2009-05-26	16:46:00	0
2009-05-26	16:47:00	0
2009-05-26	16:48:00	0
2009-05-26	16:49:00	0
2009-05-26	16:50:00	0
2009-05-26	16:51:00	0
2009-05-26	16:52:00	0
2009-05-26	16:53:00	0
2009-05-26	16:54:00	0
2009-05-26	16:55:00	0
2009-05-26	16:56:00	0
2009-05-26	16:57:00	0
2009-05-26	16:58:00	0
2009-05-26	16:59:00	0
2009-05-26	17:00:00	0
2009-05-26	17:01:00	0
2009-05-26	17:02:00	0
2009-05-26	17:03:00	0
2009-05-26	17:04:00	0
2009-05-26	17:05:00	0
2009-05-26	17:06:00	0
2009-05-26	17:07:00	0
2009-05-26	17:08:00	0
2009-05-26	17:09:00	0
2009-05-26	17:10:00	0
2009-05-26	17:11:00	0
2009-05-26	17:12:00	0
2009-05-26	17:13:00	0
2009-05-26	17:14:00	0
2009-05-26	17:15:00	0
2009-05-26	17:16:00	0
2009-05-26	17:17:00	0
2009-05-26	17:18:00	0
2009-05-26	17:19:00	0
2009-05-26	17:20:00	0
2009-05-26	17:21:00	0
2009-05-26	17:22:00	0
2009-05-26	17:23:00	0
2009-05-26	17:24:00	0
2009-05-26	17:25:00	0
2009-05-26	17:26:00	0
2009-05-26	17:27:00	0
2009-05-26	17:28:00	0
2009-05-26	17:29:00	0
2009-05-26	17:30:00	0
2009-05-26	17:31:00	0
2009-05-26	17:32:00	0
2009-05-26	17:33:00	0
2009-05-26	17:34:00	0
2009-05-26	17:35:00	0
2009-05-26	17:36:00	0
2009-05-26	17:37:00	0
2009-05-26	17:38:00	0
2009-05-26	17:39:00	0
2009-05-26	17:40:00	0
2009-05-26	17:41:00	0
2009-05-26	17:42:00	0
2009-05-26	17:43:00	0
2009-05-26	17:44:00	0
2009-05-26	17:45:00	0
2009-05-26	17:46:00	0
2009-05-26	17:47:00	0
2009-05-26	17:48:00	0
2009-05-26	17:49:00	0
2009-05-26	17:50:00	0
2009-05-26	17:51:00	0
2009-05-26	17:52:00	0
2009-05-26	17:53:00	0
2009-05-26	17:54:00	0
2009-05-26	17:55:00	0
2009-05-26	17:56:00	0
2009-05-26	17:57:00	0
2009-05-26	17:58:00	0
2009-05-26	17:59:00	0
2009-05-26	18:00:00	0	M
2009-05-26	18:01:00	0
2009-05-26	18:02:00	0
2009-05-26	18:03:00	0
2009-05-26	18:04:00	0
2009-05-26	18:05:00	0
2009-05-26	18:06:00	0
2009-05-26	18:07:00	0
2009-05-26	18:08:00	0
2009-05-26	18:09:00	12
2009-05-26	18:10:00	0
2009-05-26	18:11:00	0
2009-05-26	18:12:00	0
2009-05-26	18:13:00	0
2009-05-26	18:14:00	36
2009-05-26	18:15:00	0
2009-05-26	18:16:00	0
2009-05-26	18:17:00	12
2009-05-26	18:18:00	0
2009-05-26	18:19:00	12
2009-05-26	18:20:00	200
2009-05-26	18:21:00	109
2009-05-26	18:22:00	60
2009-05-26	18:23:00	109
2009-05-26	18:24:00	0
2009-05-26	18:25:00	0
2009-05-26	18:26:00	0
2009-05-26	18:27:00	0
2009-05-26	18:28:00	0
2009-05-26	18:29:00	24
2009-05-26	18:30:00	12
2009-05-26	18:31:00	0
2009-05-26	18:32:00	0
2009-05-26	18:33:00	0
2009-05-26	18:34:00	0
2009-05-26	18:35:00	0
2009-05-26	18:36:00	0
2009-05-26	18:37:00	0
2009-05-26	18:38:00	12
2009-05-26	18:39:00	0
2009-05-26	18:40:00	0
2009-05-26	18:41:00	12
2009-05-26	18:42:00	0
2009-05-26	18:43:00	0
2009-05-26	18:44:00	0
2009-05-26	18:45:00	0
2009-05-26	18:46:00	0
2009-05-26	18:47:00	0
2009-05-26	18:48:00	0
2009-05-26	18:49:00	24
2009-05-26	18:50:00	0
2009-05-26	18:51:00	12
2009-05-26	18:52:00	0
2009-05-26	18:53:00	0
2009-05-26	18:54:00	12
2009-05-26	18:55:00	0
2009-05-26	18:56:00	0
2009-05-26	18:57:00	12
2009-05-26	18:58:00	244
2009-05-26	18:59:00	799
2009-05-26	19:00:00	526
2009-05-26	19:01:00	258
2009-05-26	19:02:00	316
2009-05-26	19:03:00	72
2009-05-26	19:04:00	24
2009-05-26	19:05:00	48
2009-05-26	19:06:00	0
2009-05-26	19:07:00	85
2009-05-26	19:08:00	48
2009-05-26	19:09:00	157
2009-05-26	19:10:00	97
2009-05-26	19:11:00	97
2009-05-26	19:12:00	121
2009-05-26	19:13:00	244
2009-05-26	19:14:00	215
2009-05-26	19:15:00	418
2009-05-26	19:16:00	244
2009-05-26	19:17:00	97
2009-05-26	19:18:00	24
2009-05-26	19:19:00	215
2009-05-26	19:20:00	799
2009-05-26	19:21:00	121
2009-05-26	19:22:00	36
2009-05-26	19:23:00	85
2009-05-26	19:24:00	97
2009-05-26	19:25:00	645
2009-05-26	19:26:00	36
2009-05-26	19:27:00	0
2009-05-26	19:28:00	0
2009-05-26	19:29:00	0
2009-05-26	19:30:00	0
2009-05-26	19:31:00	12
2009-05-26	19:32:00	0
2009-05-26	19:33:00	0
2009-05-26	19:34:00	0
2009-05-26	19:35:00	0
2009-05-26	19:36:00	12
2009-05-26	19:37:00	0
2009-05-26	19:38:00	0
2009-05-26	19:39:00	0
2009-05-26	19:40:00	12
2009-05-26	19:41:00	0
2009-05-26	19:42:00	36
2009-05-26	19:43:00	109
2009-05-26	19:44:00	0
2009-05-26	19:45:00	0
2009-05-26	19:46:00	0
2009-05-26	19:47:00	0
2009-05-26	19:48:00	0
2009-05-26	19:49:00	0
2009-05-26	19:50:00	0
2009-05-26	19:51:00	0
2009-05-26	19:52:00	0
2009-05-26	19:53:00	0
2009-05-26	19:54:00	0
2009-05-26	19:55:00	0
2009-05-26	19:56:00	0
2009-05-26	19:57:00	24
2009-05-26	19:58:00	0
2009-05-26	19:59:00	0
2009-05-26	20:00:00	0
2009-05-26	20:01:00	0
2009-05-26	20:02:00	0
2009-05-26	20:03:00	0
2009-05-26	20:04:00	0
2009-05-26	20:05:00	0
2009-05-26	20:06:00	0
2009-05-26	20:07:00	0
2009-05-26	20:08:00	0
2009-05-26	20:09:00	24
2009-05-26	20:10:00	12
2009-05-26	20:11:00	0
2009-05-26	20:12:00	0
2009-05-26	20:13:00	0
2009-05-26	20:14:00	0
2009-05-26	20:15:00	12
2009-05-26	20:16:00	0
2009-05-26	20:17:00	24
2009-05-26	20:18:00	0
2009-05-26	20:19:00	0
2009-05-26	20:20:00	0
2009-05-26	20:21:00	0
2009-05-26	20:22:00	48
2009-05-26	20:23:00	0
2009-05-26	20:24:00	0
2009-05-26	20:25:00	24
2009-05-26	20:26:00	24
2009-05-26	20:27:00	0
2009-05-26	20:28:00	0
2009-05-26	20:29:00	0
2009-05-26	20:30:00	0
2009-05-26	20:31:00	0
2009-05-26	20:32:00	12
2009-05-26	20:33:00	0
2009-05-26	20:34:00	0
2009-05-26	20:35:00	0
2009-05-26	20:36:00	0
2009-05-26	20:37:00	12
2009-05-26	20:38:00	0
2009-05-26	20:39:00	0
2009-05-26	20:40:00	12
2009-05-26	20:41:00	0
2009-05-26	20:42:00	0
2009-05-26	20:43:00	36
2009-05-26	20:44:00	0
2009-05-26	20:45:00	0
2009-05-26	20:46:00	0
2009-05-26	20:47:00	157
2009-05-26	20:48:00	200
2009-05-26	20:49:00	258
2009-05-26	20:50:00	186
2009-05-26	20:51:00	133
2009-05-26	20:52:00	171
2009-05-26	20:53:00	145
2009-05-26	20:54:00	186
2009-05-26	20:55:00	133
2009-05-26	20:56:00	12
2009-05-26	20:57:00	36
2009-05-26	20:58:00	0
2009-05-26	20:59:00	0
2009-05-26	21:00:00	0
2009-05-26	21:01:00	0
2009-05-26	21:02:00	0
2009-05-26	21:03:00	0
2009-05-26	21:04:00	0
2009-05-26	21:05:00	0
2009-05-26	21:06:00	0
2009-05-26	21:07:00	0
2009-05-26	21:08:00	0
2009-05-26	21:09:00	0
2009-05-26	21:10:00	0
2009-05-26	21:11:00	0
2009-05-26	21:12:00	0
2009-05-26	21:13:00	36
2009-05-26	21:14:00	0
2009-05-26	21:15:00	0
2009-05-26	21:16:00	0
2009-05-26	21:17:00	0
2009-05-26	21:18:00	0
2009-05-26	21:19:00	0
2009-05-26	21:20:00	0
2009-05-26	21:21:00	0
2009-05-26	21:22:00	0
2009-05-26	21:23:00	0
2009-05-26	21:24:00	0
2009-05-26	21:25:00	0
2009-05-26	21:26:00	0
2009-05-26	21:27:00	0
2009-05-26	21:28:00	0
2009-05-26	21:29:00	0
2009-05-26	21:30:00	0
2009-05-26	21:31:00	0
2009-05-26	21:32:00	0
2009-05-26	21:33:00	0
2009-05-26	21:34:00	0
2009-05-26	21:35:00	12
2009-05-26	21:36:00	0
2009-05-26	21:37:00	24
2009-05-26	21:38:00	0
2009-05-26	21:39:00	0
2009-05-26	21:40:00	0
2009-05-26	21:41:00	0
2009-05-26	21:42:00	0
2009-05-26	21:43:00	0
2009-05-26	21:44:00	0
2009-05-26	21:45:00	0
2009-05-26	21:46:00	0
2009-05-26	21:47:00	0
2009-05-26	21:48:00	0
2009-05-26	21:49:00	0
2009-05-26	21:50:00	36
2009-05-26	21:51:00	0
2009-05-26	21:52:00	0
2009-05-26	21:53:00	0
2009-05-26	21:54:00	0
2009-05-26	21:55:00	0
2009-05-26	21:56:00	0
2009-05-26	21:57:00	0
2009-05-26	21:58:00	0
2009-05-26	21:59:00	0
2009-05-26	22:00:00	0
2009-05-26	22:01:00	0
2009-05-26	22:02:00	0
2009-05-26	22:03:00	0
2009-05-26	22:04:00	0
2009-05-26	22:05:00	0
2009-05-26	22:06:00	0
2009-05-26	22:07:00	0
2009-05-26	22:08:00	0
2009-05-26	22:09:00	0
2009-05-26	22:10:00	0
2009-05-26	22:11:00	24
2009-05-26	22:12:00	0
2009-05-26	22:13:00	0
2009-05-26	22:14:00	0
2009-05-26	22:15:00	0
2009-05-26	22:16:00	24
2009-05-26	22:17:00	0
2009-05-26	22:18:00	0
2009-05-26	22:19:00	0
2009-05-26	22:20:00	0
2009-05-26	22:21:00	0
2009-05-26	22:22:00	0
2009-05-26	22:23:00	0
2009-05-26	22:24:00	121
2009-05-26	22:25:00	488
2009-05-26	22:26:00	0
2009-05-26	22:27:00	36
2009-05-26	22:28:00	0
2009-05-26	22:29:00	0
2009-05-26	22:30:00	0
2009-05-26	22:31:00	133
2009-05-26	22:32:00	97
2009-05-26	22:33:00	0
2009-05-26	22:34:00	60
2009-05-26	22:35:00	0
2009-05-26	22:36:00	0
2009-05-26	22:37:00	0
2009-05-26	22:38:00	0
2009-05-26	22:39:00	0
2009-05-26	22:40:00	0
2009-05-26	22:41:00	0
2009-05-26	22:42:00	0
2009-05-26	22:43:00	0
2009-05-26	22:44:00	0
2009-05-26	22:45:00	0
2009-05-26	22:46:00	0
2009-05-26	22:47:00	0
2009-05-26	22:48:00	0
2009-05-26	22:49:00	0
2009-05-26	22:50:00	0
2009-05-26	22:51:00	0
2009-05-26	22:52:00	0
2009-05-26	22:53:00	0
2009-05-26	22:54:00	0
2009-05-26	22:55:00	0
2009-05-26	22:56:00	0
2009-05-26	22:57:00	0
2009-05-26	22:58:00	0
2009-05-26	22:59:00	0
2009-05-26	23:00:00	0
2009-05-26	23:01:00	0
2009-05-26	23:02:00	0
2009-05-26	23:03:00	0
2009-05-26	23:04:00	0
2009-05-26	23:05:00	0
2009-05-26	23:06:00	0
2009-05-26	23:07:00	0
2009-05-26	23:08:00	0
2009-05-26	23:09:00	0
2009-05-26	23:10:00	0
2009-05-26	23:11:00	0
2009-05-26	23:12:00	0
2009-05-26	23:13:00	0
2009-05-26	23:14:00	0
2009-05-26	23:15:00	0
2009-05-26	23:16:00	0
2009-05-26	23:17:00	0
2009-05-26	23:18:00	133
2009-05-26	23:19:00	0
2009-05-26	23:20:00	0
2009-05-26	23:21:00	0
2009-05-26	23:22:00	0
2009-05-26	23:23:00	0
2009-05-26	23:24:00	0
2009-05-26	23:25:00	0
2009-05-26	23:26:00	0
2009-05-26	23:27:00	0
2009-05-26	23:28:00	0
2009-05-26	23:29:00	0
2009-05-26	23:30:00	0
2009-05-26	23:31:00	0
2009-05-26	23:32:00	0
2009-05-26	23:33:00	0
2009-05-26	23:34:00	0
2009-05-26	23:35:00	0
2009-05-26	23:36:00	0
2009-05-26	23:37:00	0
2009-05-26	23:38:00	0
2009-05-26	23:39:00	0
2009-05-26	23:40:00	0
2009-05-26	23:41:00	0
2009-05-26	23:42:00	0
2009-05-26	23:43:00	0
2009-05-26	23:44:00	0
2009-05-26	23:45:00	0
2009-05-26	23:46:00	0
2009-05-26	23:47:00	0
2009-05-26	23:48:00	0
2009-05-26	23:49:00	0
2009-05-26	23:50:00	0
2009-05-26	23:51:00	0
2009-05-26	23:52:00	0
2009-05-26	23:53:00	0
2009-05-26	23:54:00	0
2009-05-26	23:55:00	0
2009-05-26	23:56:00	0
2009-05-26	23:57:00	0
2009-05-26	23:58:00	0
2009-05-26	23:59:00	0
2009-05-27	00:00:00	60
2009-05-27	00:01:00	0
2009-05-27	00:02:00	0
2009-05-27	00:03:00	0
2009-05-27	00:04:00	0
2009-05-27	00:05:00	0
2009-05-27	00:06:00	0
2009-05-27	00:07:00	0
2009-05-27	00:08:00	0
2009-05-27	00:09:00	0
2009-05-27	00:10:00	0
2009-05-27	00:11:00	0
2009-05-27	00:12:00	0
2009-05-27	00:13:00	0
2009-05-27	00:14:00	0
2009-05-27	00:15:00	0
2009-05-27	00:16:00	0
2009-05-27	00:17:00	0
2009-05-27	00:18:00	0
2009-05-27	00:19:00	0
2009-05-27	00:20:00	0
2009-05-27	00:21:00	0
2009-05-27	00:22:00	0
2009-05-27	00:23:00	0
2009-05-27	00:24:00	0
2009-05-27	00:25:00	0
2009-05-27	00:26:00	24
2009-05-27	00:27:00	0
2009-05-27	00:28:00	12
2009-05-27	00:29:00	48
2009-05-27	00:30:00	333
2009-05-27	00:31:00	48
2009-05-27	00:32:00	12
2009-05-27	00:33:00	0
2009-05-27	00:34:00	0
2009-05-27	00:35:00	0
2009-05-27	00:36:00	0
2009-05-27	00:37:00	0
2009-05-27	00:38:00	0
2009-05-27	00:39:00	0
2009-05-27	00:40:00	0
2009-05-27	00:41:00	0
2009-05-27	00:42:00	0
2009-05-27	00:43:00	0
2009-05-27	00:44:00	0
2009-05-27	00:45:00	0
2009-05-27	00:46:00	0
2009-05-27	00:47:00	0
2009-05-27	00:48:00	0
2009-05-27	00:49:00	0
2009-05-27	00:50:00	0
2009-05-27	00:51:00	0
2009-05-27	00:52:00	0
2009-05-27	00:53:00	0
2009-05-27	00:54:00	0
2009-05-27	00:55:00	0
2009-05-27	00:56:00	0
2009-05-27	00:57:00	0
2009-05-27	00:58:00	0
2009-05-27	00:59:00	0
2009-05-27	01:00:00	0
2009-05-27	01:01:00	0
2009-05-27	01:02:00	0
2009-05-27	01:03:00	0
2009-05-27	01:04:00	0
2009-05-27	01:05:00	0
2009-05-27	01:06:00	0
2009-05-27	01:07:00	0
2009-05-27	01:08:00	0
2009-05-27	01:09:00	0
2009-05-27	01:10:00	0
2009-05-27	01:11:00	48
2009-05-27	01:12:00	0
2009-05-27	01:13:00	0
2009-05-27	01:14:00	0
2009-05-27	01:15:00	0
2009-05-27	01:16:00	0
2009-05-27	01:17:00	0
2009-05-27	01:18:00	0
2009-05-27	01:19:00	0
2009-05-27	01:20:00	0
2009-05-27	01:21:00	0
2009-05-27	01:22:00	0
2009-05-27	01:23:00	171
2009-05-27	01:24:00	0
2009-05-27	01:25:00	0
2009-05-27	01:26:00	0
2009-05-27	01:27:00	0
2009-05-27	01:28:00	0
2009-05-27	01:29:00	0
2009-05-27	01:30:00	12
2009-05-27	01:31:00	0
2009-05-27	01:32:00	0
2009-05-27	01:33:00	0
2009-05-27	01:34:00	0
2009-05-27	01:35:00	0
2009-05-27	01:36:00	0
2009-05-27	01:37:00	0
2009-05-27	01:38:00	0
2009-05-27	01:39:00	0
2009-05-27	01:40:00	145
2009-05-27	01:41:00	0
2009-05-27	01:42:00	12
2009-05-27	01:43:00	12
2009-05-27	01:44:00	0
2009-05-27	01:45:00	0
2009-05-27	01:46:00	0
2009-05-27	01:47:00	0
2009-05-27	01:48:00	0
2009-05-27	01:49:00	0
2009-05-27	01:50:00	0
2009-05-27	01:51:00	0
2009-05-27	01:52:00	0
2009-05-27	01:53:00	0
2009-05-27	01:54:00	0
2009-05-27	01:55:00	0
2009-05-27	01:56:00	0
2009-05-27	01:57:00	0
2009-05-27	01:58:00	0
2009-05-27	01:59:00	0
2009-05-27	02:00:00	0
2009-05-27	02:01:00	0
2009-05-27	02:02:00	0
2009-05-27	02:03:00	0
2009-05-27	02:04:00	0
2009-05-27	02:05:00	0
2009-05-27	02:06:00	0
2009-05-27	02:07:00	0
2009-05-27	02:08:00	0
2009-05-27	02:09:00	0
2009-05-27	02:10:00	0
2009-05-27	02:11:00	0
2009-05-27	02:12:00	0
2009-05-27	02:13:00	0
2009-05-27	02:14:00	0
2009-05-27	02:15:00	0
2009-05-27	02:16:00	0
2009-05-27	02:17:00	0
2009-05-27	02:18:00	0
2009-05-27	02:19:00	0
2009-05-27	02:20:00	12
2009-05-27	02:21:00	12
2009-05-27	02:22:00	0
2009-05-27	02:23:00	0
2009-05-27	02:24:00	0
2009-05-27	02:25:00	0
2009-05-27	02:26:00	0
2009-05-27	02:27:00	0
2009-05-27	02:28:00	0
2009-05-27	02:29:00	0
2009-05-27	02:30:00	0
2009-05-27	02:31:00	0
2009-05-27	02:32:00	0
2009-05-27	02:33:00	0
2009-05-27	02:34:00	0
2009-05-27	02:35:00	0
2009-05-27	02:36:00	0
2009-05-27	02:37:00	0
2009-05-27	02:38:00	0
2009-05-27	02:39:00	0
2009-05-27	02:40:00	0
2009-05-27	02:41:00	0
2009-05-27	02:42:00	0
2009-05-27	02:43:00	0
2009-05-27	02:44:00	0
2009-05-27	02:45:00	97
2009-05-27	02:46:00	36
2009-05-27	02:47:00	0
2009-05-27	02:48:00	0
2009-05-27	02:49:00	0
2009-05-27	02:50:00	0
2009-05-27	02:51:00	0
2009-05-27	02:52:00	0
2009-05-27	02:53:00	0
2009-05-27	02:54:00	0
2009-05-27	02:55:00	12
2009-05-27	02:56:00	0
2009-05-27	02:57:00	0
2009-05-27	02:58:00	0
2009-05-27	02:59:00	0
2009-05-27	03:00:00	0
2009-05-27	03:01:00	0
2009-05-27	03:02:00	0
2009-05-27	03:03:00	0
2009-05-27	03:04:00	0
2009-05-27	03:05:00	0
2009-05-27	03:06:00	0
2009-05-27	03:07:00	0
2009-05-27	03:08:00	0
2009-05-27	03:09:00	0
2009-05-27	03:10:00	0
2009-05-27	03:11:00	0
2009-05-27	03:12:00	0
2009-05-27	03:13:00	0
2009-05-27	03:14:00	0
2009-05-27	03:15:00	0
2009-05-27	03:16:00	0
2009-05-27	03:17:00	0
2009-05-27	03:18:00	0
2009-05-27	03:19:00	0
2009-05-27	03:20:00	0
2009-05-27	03:21:00	0
2009-05-27	03:22:00	0
2009-05-27	03:23:00	0
2009-05-27	03:24:00	0
2009-05-27	03:25:00	0
2009-05-27	03:26:00	0
2009-05-27	03:27:00	0
2009-05-27	03:28:00	0
2009-05-27	03:29:00	0
2009-05-27	03:30:00	0
2009-05-27	03:31:00	0
2009-05-27	03:32:00	0
2009-05-27	03:33:00	0
2009-05-27	03:34:00	0
2009-05-27	03:35:00	0
2009-05-27	03:36:00	0
2009-05-27	03:37:00	0
2009-05-27	03:38:00	0
2009-05-27	03:39:00	0
2009-05-27	03:40:00	0
2009-05-27	03:41:00	0
2009-05-27	03:42:00	0
2009-05-27	03:43:00	0
2009-05-27	03:44:00	0
2009-05-27	03:45:00	0
2009-05-27	03:46:00	0
2009-05-27	03:47:00	0
2009-05-27	03:48:00	12
2009-05-27	03:49:00	0
2009-05-27	03:50:00	0
2009-05-27	03:51:00	24
2009-05-27	03:52:00	0
2009-05-27	03:53:00	0
2009-05-27	03:54:00	12
2009-05-27	03:55:00	0
2009-05-27	03:56:00	0
2009-05-27	03:57:00	0
2009-05-27	03:58:00	0
2009-05-27	03:59:00	0
2009-05-27	04:00:00	0
2009-05-27	04:01:00	0
2009-05-27	04:02:00	0
2009-05-27	04:03:00	0
2009-05-27	04:04:00	0
2009-05-27	04:05:00	0
2009-05-27	04:06:00	0
2009-05-27	04:07:00	0
2009-05-27	04:08:00	0
2009-05-27	04:09:00	0
2009-05-27	04:10:00	0
2009-05-27	04:11:00	0
2009-05-27	04:12:00	0
2009-05-27	04:13:00	0
2009-05-27	04:14:00	0
2009-05-27	04:15:00	0
2009-05-27	04:16:00	0
2009-05-27	04:17:00	0
2009-05-27	04:18:00	0
2009-05-27	04:19:00	0
2009-05-27	04:20:00	0
2009-05-27	04:21:00	0
2009-05-27	04:22:00	0
2009-05-27	04:23:00	0
2009-05-27	04:24:00	0
2009-05-27	04:25:00	0
2009-05-27	04:26:00	0
2009-05-27	04:27:00	0
2009-05-27	04:28:00	0
2009-05-27	04:29:00	0
2009-05-27	04:30:00	0
2009-05-27	04:31:00	0
2009-05-27	04:32:00	0
2009-05-27	04:33:00	0
2009-05-27	04:34:00	0
2009-05-27	04:35:00	0
2009-05-27	04:36:00	0
2009-05-27	04:37:00	0
2009-05-27	04:38:00	0
2009-05-27	04:39:00	0
2009-05-27	04:40:00	0
2009-05-27	04:41:00	0
2009-05-27	04:42:00	0
2009-05-27	04:43:00	0
2009-05-27	04:44:00	0
2009-05-27	04:45:00	0
2009-05-27	04:46:00	0
2009-05-27	04:47:00	0
2009-05-27	04:48:00	0
2009-05-27	04:49:00	0
2009-05-27	04:50:00	0
2009-05-27	04:51:00	12
2009-05-27	04:52:00	0
2009-05-27	04:53:00	48
2009-05-27	04:54:00	0
2009-05-27	04:55:00	0
2009-05-27	04:56:00	0
2009-05-27	04:57:00	0
2009-05-27	04:58:00	0
2009-05-27	04:59:00	0
2009-05-27	05:00:00	0
2009-05-27	05:01:00	97
2009-05-27	05:02:00	72
2009-05-27	05:03:00	0
2009-05-27	05:04:00	0
2009-05-27	05:05:00	0
2009-05-27	05:06:00	0
2009-05-27	05:07:00	0
2009-05-27	05:08:00	0
2009-05-27	05:09:00	0
2009-05-27	05:10:00	0
2009-05-27	05:11:00	0
2009-05-27	05:12:00	0
2009-05-27	05:13:00	0
2009-05-27	05:14:00	12
2009-05-27	05:15:00	0
2009-05-27	05:16:00	0
2009-05-27	05:17:00	0
2009-05-27	05:18:00	0
2009-05-27	05:19:00	0
2009-05-27	05:20:00	0
2009-05-27	05:21:00	0
2009-05-27	05:22:00	0
2009-05-27	05:23:00	0
2009-05-27	05:24:00	12
2009-05-27	05:25:00	0
2009-05-27	05:26:00	0
2009-05-27	05:27:00	0
2009-05-27	05:28:00	0
2009-05-27	05:29:00	0
2009-05-27	05:30:00	0
2009-05-27	05:31:00	0
2009-05-27	05:32:00	0
2009-05-27	05:33:00	24
2009-05-27	05:34:00	0
2009-05-27	05:35:00	0
2009-05-27	05:36:00	0
2009-05-27	05:37:00	12
2009-05-27	05:38:00	0
2009-05-27	05:39:00	0
2009-05-27	05:40:00	0
2009-05-27	05:41:00	0
2009-05-27	05:42:00	0
2009-05-27	05:43:00	0
2009-05-27	05:44:00	0
2009-05-27	05:45:00	0
2009-05-27	05:46:00	0
2009-05-27	05:47:00	0
2009-05-27	05:48:00	0
2009-05-27	05:49:00	0
2009-05-27	05:50:00	0
2009-05-27	05:51:00	0
2009-05-27	05:52:00	0
2009-05-27	05:53:00	0
2009-05-27	05:54:00	0
2009-05-27	05:55:00	0
2009-05-27	05:56:00	0
2009-05-27	05:57:00	0
2009-05-27	05:58:00	0
2009-05-27	05:59:00	0
2009-05-27	06:00:00	0
2009-05-27	06:01:00	0
2009-05-27	06:02:00	186
2009-05-27	06:03:00	488
2009-05-27	06:04:00	546
2009-05-27	06:05:00	215
2009-05-27	06:06:00	896
2009-05-27	06:07:00	546
2009-05-27	06:08:00	604
2009-05-27	06:09:00	302
2009-05-27	06:10:00	872
2009-05-27	06:11:00	97
2009-05-27	06:12:00	258
2009-05-27	06:13:00	36
2009-05-27	06:14:00	48
2009-05-27	06:15:00	48
2009-05-27	06:16:00	186
2009-05-27	06:17:00	171
2009-05-27	06:18:00	72
2009-05-27	06:19:00	72
2009-05-27	06:20:00	0
2009-05-27	06:21:00	12
2009-05-27	06:22:00	72
2009-05-27	06:23:00	36
2009-05-27	06:24:00	0
2009-05-27	06:25:00	0
2009-05-27	06:26:00	0
2009-05-27	06:27:00	0
2009-05-27	06:28:00	12
2009-05-27	06:29:00	0
2009-05-27	06:30:00	0
2009-05-27	06:31:00	0
2009-05-27	06:32:00	0
2009-05-27	06:33:00	0
2009-05-27	06:34:00	0
2009-05-27	06:35:00	0
2009-05-27	06:36:00	0
2009-05-27	06:37:00	85
2009-05-27	06:38:00	0
2009-05-27	06:39:00	0
2009-05-27	06:40:00	0
2009-05-27	06:41:00	0
2009-05-27	06:42:00	0
2009-05-27	06:43:00	0
2009-05-27	06:44:00	0
2009-05-27	06:45:00	0
2009-05-27	06:46:00	0
2009-05-27	06:47:00	0
2009-05-27	06:48:00	0
2009-05-27	06:49:00	12
2009-05-27	06:50:00	0
2009-05-27	06:51:00	0
2009-05-27	06:52:00	0
2009-05-27	06:53:00	0
2009-05-27	06:54:00	0
2009-05-27	06:55:00	0
2009-05-27	06:56:00	0
2009-05-27	06:57:00	0
2009-05-27	06:58:00	0
2009-05-27	06:59:00	0
2009-05-27	07:00:00	0
2009-05-27	07:01:00	0
2009-05-27	07:02:00	12
2009-05-27	07:03:00	60
2009-05-27	07:04:00	12
2009-05-27	07:05:00	0
2009-05-27	07:06:00	24
2009-05-27	07:07:00	0
2009-05-27	07:08:00	0
2009-05-27	07:09:00	971
2009-05-27	07:10:00	488
2009-05-27	07:11:00	24
2009-05-27	07:12:00	145
2009-05-27	07:13:00	302
2009-05-27	07:14:00	418
2009-05-27	07:15:00	418
2009-05-27	07:16:00	1024
2009-05-27	07:17:00	401
2009-05-27	07:18:00	418
2009-05-27	07:19:00	258
2009-05-27	07:20:00	258
2009-05-27	07:21:00	60
2009-05-27	07:22:00	186
2009-05-27	07:23:00	273
2009-05-27	07:24:00	109
2009-05-27	07:25:00	60
2009-05-27	07:26:00	287
2009-05-27	07:27:00	565
2009-05-27	07:28:00	215
2009-05-27	07:29:00	36
2009-05-27	07:30:00	287
2009-05-27	07:31:00	48
2009-05-27	07:32:00	121
2009-05-27	07:33:00	229
2009-05-27	07:34:00	0
2009-05-27	07:35:00	12
2009-05-27	07:36:00	12
2009-05-27	07:37:00	1162
2009-05-27	07:38:00	367
2009-05-27	07:39:00	623
2009-05-27	07:40:00	775
2009-05-27	07:41:00	229
2009-05-27	07:42:00	507
2009-05-27	07:43:00	97
2009-05-27	07:44:00	109
2009-05-27	07:45:00	316
2009-05-27	07:46:00	1343
2009-05-27	07:47:00	401
2009-05-27	07:48:00	1162
2009-05-27	07:49:00	645
2009-05-27	07:50:00	667
2009-05-27	07:51:00	418
2009-05-27	07:52:00	645
2009-05-27	07:53:00	316
2009-05-27	07:54:00	24
2009-05-27	07:55:00	0
2009-05-27	07:56:00	0
2009-05-27	07:57:00	186
2009-05-27	07:58:00	452
2009-05-27	07:59:00	244
2009-05-27	08:00:00	0
2009-05-27	08:01:00	0
2009-05-27	08:02:00	0
2009-05-27	08:03:00	0
2009-05-27	08:04:00	0
2009-05-27	08:05:00	0
2009-05-27	08:06:00	0
2009-05-27	08:07:00	0
2009-05-27	08:08:00	0
2009-05-27	08:09:00	12
2009-05-27	08:10:00	688
2009-05-27	08:11:00	287
2009-05-27	08:12:00	60
2009-05-27	08:13:00	229
2009-05-27	08:14:00	0
2009-05-27	08:15:00	0
2009-05-27	08:16:00	0
2009-05-27	08:17:00	0
2009-05-27	08:18:00	0
2009-05-27	08:19:00	0
2009-05-27	08:20:00	0
2009-05-27	08:21:00	0
2009-05-27	08:22:00	97
2009-05-27	08:23:00	0
2009-05-27	08:24:00	0
2009-05-27	08:25:00	0
2009-05-27	08:26:00	0
2009-05-27	08:27:00	36
2009-05-27	08:28:00	546
2009-05-27	08:29:00	157
2009-05-27	08:30:00	688
2009-05-27	08:31:00	0
2009-05-27	08:32:00	24
2009-05-27	08:33:00	0
2009-05-27	08:34:00	0
2009-05-27	08:35:00	0
2009-05-27	08:36:00	0
2009-05-27	08:37:00	0
2009-05-27	08:38:00	0
2009-05-27	08:39:00	0
2009-05-27	08:40:00	0
2009-05-27	08:41:00	24
2009-05-27	08:42:00	60
2009-05-27	08:43:00	133
2009-05-27	08:44:00	0
2009-05-27	08:45:00	12
2009-05-27	08:46:00	0
2009-05-27	08:47:00	12
2009-05-27	08:48:00	12
2009-05-27	08:49:00	0
2009-05-27	08:50:00	0
2009-05-27	08:51:00	0
2009-05-27	08:52:00	0
2009-05-27	08:53:00	0
2009-05-27	08:54:00	0
2009-05-27	08:55:00	0
2009-05-27	08:56:00	0
2009-05-27	08:57:00	0
2009-05-27	08:58:00	0
2009-05-27	08:59:00	0
2009-05-27	09:00:00	0
2009-05-27	09:01:00	0
2009-05-27	09:02:00	0
2009-05-27	09:03:00	0
2009-05-27	09:04:00	24
2009-05-27	09:05:00	401
2009-05-27	09:06:00	60
2009-05-27	09:07:00	215
2009-05-27	09:08:00	316
[truncated: 19,611 more rows]

## Sheet: 6.09.09
Actogram, Copy Raw Data, All Days
Identity:	Kelly
Filename:	E:\Active Research Files\meloxicam titre canine\cases\kelly\Kelly Killan 6.9.09.AWC
Gender:	F
Age:	8
Height:	76.2 cm	30.0 in
Weight:	31.0 kg	68.3 lbs
Start Date:	09-Jun-2009 (Tue)
Start Time:	18:00:00
Interval:	1.00 mins
Date Stamp:	Time Stamp:	Activity Data:	Marker Press:
2009-06-09	00:00:00	0
2009-06-09	00:01:00	0
2009-06-09	00:02:00	0
2009-06-09	00:03:00	0
2009-06-09	00:04:00	0
2009-06-09	00:05:00	0
2009-06-09	00:06:00	0
2009-06-09	00:07:00	0
2009-06-09	00:08:00	0
2009-06-09	00:09:00	0
2009-06-09	00:10:00	0
2009-06-09	00:11:00	0
2009-06-09	00:12:00	0
2009-06-09	00:13:00	0
2009-06-09	00:14:00	0
2009-06-09	00:15:00	0
2009-06-09	00:16:00	0
2009-06-09	00:17:00	0
2009-06-09	00:18:00	0
2009-06-09	00:19:00	0
2009-06-09	00:20:00	0
2009-06-09	00:21:00	0
2009-06-09	00:22:00	0
2009-06-09	00:23:00	0
2009-06-09	00:24:00	0
2009-06-09	00:25:00	0
2009-06-09	00:26:00	0
2009-06-09	00:27:00	0
2009-06-09	00:28:00	0
2009-06-09	00:29:00	0
2009-06-09	00:30:00	0
2009-06-09	00:31:00	0
2009-06-09	00:32:00	0
2009-06-09	00:33:00	0
2009-06-09	00:34:00	0
2009-06-09	00:35:00	0
2009-06-09	00:36:00	0
2009-06-09	00:37:00	0
2009-06-09	00:38:00	0
2009-06-09	00:39:00	0
2009-06-09	00:40:00	0
2009-06-09	00:41:00	0
2009-06-09	00:42:00	0
2009-06-09	00:43:00	0
2009-06-09	00:44:00	0
2009-06-09	00:45:00	0
2009-06-09	00:46:00	0
2009-06-09	00:47:00	0
2009-06-09	00:48:00	0
2009-06-09	00:49:00	0
2009-06-09	00:50:00	0
2009-06-09	00:51:00	0
2009-06-09	00:52:00	0
2009-06-09	00:53:00	0
2009-06-09	00:54:00	0
2009-06-09	00:55:00	0
2009-06-09	00:56:00	0
2009-06-09	00:57:00	0
2009-06-09	00:58:00	0
2009-06-09	00:59:00	0
2009-06-09	01:00:00	0
2009-06-09	01:01:00	0
2009-06-09	01:02:00	0
2009-06-09	01:03:00	0
2009-06-09	01:04:00	0
2009-06-09	01:05:00	0
2009-06-09	01:06:00	0
2009-06-09	01:07:00	0
2009-06-09	01:08:00	0
2009-06-09	01:09:00	0
2009-06-09	01:10:00	0
2009-06-09	01:11:00	0
2009-06-09	01:12:00	0
2009-06-09	01:13:00	0
2009-06-09	01:14:00	0
2009-06-09	01:15:00	0
2009-06-09	01:16:00	0
2009-06-09	01:17:00	0
2009-06-09	01:18:00	0
2009-06-09	01:19:00	0
2009-06-09	01:20:00	0
2009-06-09	01:21:00	0
2009-06-09	01:22:00	0
2009-06-09	01:23:00	0
2009-06-09	01:24:00	0
2009-06-09	01:25:00	0
2009-06-09	01:26:00	0
2009-06-09	01:27:00	0
2009-06-09	01:28:00	0
2009-06-09	01:29:00	0
2009-06-09	01:30:00	0
2009-06-09	01:31:00	0
2009-06-09	01:32:00	0
2009-06-09	01:33:00	0
2009-06-09	01:34:00	0
2009-06-09	01:35:00	0
2009-06-09	01:36:00	0
2009-06-09	01:37:00	0
2009-06-09	01:38:00	0
2009-06-09	01:39:00	0
2009-06-09	01:40:00	0
2009-06-09	01:41:00	0
2009-06-09	01:42:00	0
2009-06-09	01:43:00	0
2009-06-09	01:44:00	0
2009-06-09	01:45:00	0
2009-06-09	01:46:00	0
2009-06-09	01:47:00	0
2009-06-09	01:48:00	0
2009-06-09	01:49:00	0
2009-06-09	01:50:00	0
2009-06-09	01:51:00	0
2009-06-09	01:52:00	0
2009-06-09	01:53:00	0
2009-06-09	01:54:00	0
2009-06-09	01:55:00	0
2009-06-09	01:56:00	0
2009-06-09	01:57:00	0
2009-06-09	01:58:00	0
2009-06-09	01:59:00	0
2009-06-09	02:00:00	0
2009-06-09	02:01:00	0
2009-06-09	02:02:00	0
2009-06-09	02:03:00	0
2009-06-09	02:04:00	0
2009-06-09	02:05:00	0
2009-06-09	02:06:00	0
2009-06-09	02:07:00	0
2009-06-09	02:08:00	0
2009-06-09	02:09:00	0
2009-06-09	02:10:00	0
2009-06-09	02:11:00	0
2009-06-09	02:12:00	0
2009-06-09	02:13:00	0
2009-06-09	02:14:00	0
2009-06-09	02:15:00	0
2009-06-09	02:16:00	0
2009-06-09	02:17:00	0
2009-06-09	02:18:00	0
2009-06-09	02:19:00	0
2009-06-09	02:20:00	0
2009-06-09	02:21:00	0
2009-06-09	02:22:00	0
2009-06-09	02:23:00	0
2009-06-09	02:24:00	0
2009-06-09	02:25:00	0
2009-06-09	02:26:00	0
2009-06-09	02:27:00	0
2009-06-09	02:28:00	0
2009-06-09	02:29:00	0
2009-06-09	02:30:00	0
2009-06-09	02:31:00	0
2009-06-09	02:32:00	0
2009-06-09	02:33:00	0
2009-06-09	02:34:00	0
2009-06-09	02:35:00	0
2009-06-09	02:36:00	0
2009-06-09	02:37:00	0
2009-06-09	02:38:00	0
2009-06-09	02:39:00	0
2009-06-09	02:40:00	0
2009-06-09	02:41:00	0
2009-06-09	02:42:00	0
2009-06-09	02:43:00	0
2009-06-09	02:44:00	0
2009-06-09	02:45:00	0
2009-06-09	02:46:00	0
2009-06-09	02:47:00	0
2009-06-09	02:48:00	0
2009-06-09	02:49:00	0
2009-06-09	02:50:00	0
2009-06-09	02:51:00	0
2009-06-09	02:52:00	0
2009-06-09	02:53:00	0
2009-06-09	02:54:00	0
2009-06-09	02:55:00	0
2009-06-09	02:56:00	0
2009-06-09	02:57:00	0
2009-06-09	02:58:00	0
2009-06-09	02:59:00	0
2009-06-09	03:00:00	0
2009-06-09	03:01:00	0
2009-06-09	03:02:00	0
2009-06-09	03:03:00	0
2009-06-09	03:04:00	0
2009-06-09	03:05:00	0
2009-06-09	03:06:00	0
2009-06-09	03:07:00	0
2009-06-09	03:08:00	0
2009-06-09	03:09:00	0
2009-06-09	03:10:00	0
2009-06-09	03:11:00	0
2009-06-09	03:12:00	0
2009-06-09	03:13:00	0
2009-06-09	03:14:00	0
2009-06-09	03:15:00	0
2009-06-09	03:16:00	0
2009-06-09	03:17:00	0
2009-06-09	03:18:00	0
2009-06-09	03:19:00	0
2009-06-09	03:20:00	0
2009-06-09	03:21:00	0
2009-06-09	03:22:00	0
2009-06-09	03:23:00	0
2009-06-09	03:24:00	0
2009-06-09	03:25:00	0
2009-06-09	03:26:00	0
2009-06-09	03:27:00	0
2009-06-09	03:28:00	0
2009-06-09	03:29:00	0
2009-06-09	03:30:00	0
2009-06-09	03:31:00	0
2009-06-09	03:32:00	0
2009-06-09	03:33:00	0
2009-06-09	03:34:00	0
2009-06-09	03:35:00	0
2009-06-09	03:36:00	0
2009-06-09	03:37:00	0
2009-06-09	03:38:00	0
2009-06-09	03:39:00	0
2009-06-09	03:40:00	0
2009-06-09	03:41:00	0
2009-06-09	03:42:00	0
2009-06-09	03:43:00	0
2009-06-09	03:44:00	0
2009-06-09	03:45:00	0
2009-06-09	03:46:00	0
2009-06-09	03:47:00	0
2009-06-09	03:48:00	0
2009-06-09	03:49:00	0
2009-06-09	03:50:00	0
2009-06-09	03:51:00	0
2009-06-09	03:52:00	0
2009-06-09	03:53:00	0
2009-06-09	03:54:00	0
2009-06-09	03:55:00	0
2009-06-09	03:56:00	0
2009-06-09	03:57:00	0
2009-06-09	03:58:00	0
2009-06-09	03:59:00	0
2009-06-09	04:00:00	0
2009-06-09	04:01:00	0
2009-06-09	04:02:00	0
2009-06-09	04:03:00	0
2009-06-09	04:04:00	0
2009-06-09	04:05:00	0
2009-06-09	04:06:00	0
2009-06-09	04:07:00	0
2009-06-09	04:08:00	0
2009-06-09	04:09:00	0
2009-06-09	04:10:00	0
2009-06-09	04:11:00	0
2009-06-09	04:12:00	0
2009-06-09	04:13:00	0
2009-06-09	04:14:00	0
2009-06-09	04:15:00	0
2009-06-09	04:16:00	0
2009-06-09	04:17:00	0
2009-06-09	04:18:00	0
2009-06-09	04:19:00	0
2009-06-09	04:20:00	0
2009-06-09	04:21:00	0
2009-06-09	04:22:00	0
2009-06-09	04:23:00	0
2009-06-09	04:24:00	0
2009-06-09	04:25:00	0
2009-06-09	04:26:00	0
2009-06-09	04:27:00	0
2009-06-09	04:28:00	0
2009-06-09	04:29:00	0
2009-06-09	04:30:00	0
2009-06-09	04:31:00	0
2009-06-09	04:32:00	0
2009-06-09	04:33:00	0
2009-06-09	04:34:00	0
2009-06-09	04:35:00	0
2009-06-09	04:36:00	0
2009-06-09	04:37:00	0
2009-06-09	04:38:00	0
2009-06-09	04:39:00	0
2009-06-09	04:40:00	0
2009-06-09	04:41:00	0
2009-06-09	04:42:00	0
2009-06-09	04:43:00	0
2009-06-09	04:44:00	0
2009-06-09	04:45:00	0
2009-06-09	04:46:00	0
2009-06-09	04:47:00	0
2009-06-09	04:48:00	0
2009-06-09	04:49:00	0
2009-06-09	04:50:00	0
2009-06-09	04:51:00	0
2009-06-09	04:52:00	0
2009-06-09	04:53:00	0
2009-06-09	04:54:00	0
2009-06-09	04:55:00	0
2009-06-09	04:56:00	0
2009-06-09	04:57:00	0
2009-06-09	04:58:00	0
2009-06-09	04:59:00	0
2009-06-09	05:00:00	0
2009-06-09	05:01:00	0
2009-06-09	05:02:00	0
2009-06-09	05:03:00	0
2009-06-09	05:04:00	0
2009-06-09	05:05:00	0
2009-06-09	05:06:00	0
2009-06-09	05:07:00	0
2009-06-09	05:08:00	0
2009-06-09	05:09:00	0
2009-06-09	05:10:00	0
2009-06-09	05:11:00	0
2009-06-09	05:12:00	0
2009-06-09	05:13:00	0
2009-06-09	05:14:00	0
2009-06-09	05:15:00	0
2009-06-09	05:16:00	0
2009-06-09	05:17:00	0
2009-06-09	05:18:00	0
2009-06-09	05:19:00	0
2009-06-09	05:20:00	0
2009-06-09	05:21:00	0
2009-06-09	05:22:00	0
2009-06-09	05:23:00	0
2009-06-09	05:24:00	0
2009-06-09	05:25:00	0
2009-06-09	05:26:00	0
2009-06-09	05:27:00	0
2009-06-09	05:28:00	0
2009-06-09	05:29:00	0
2009-06-09	05:30:00	0
2009-06-09	05:31:00	0
2009-06-09	05:32:00	0
2009-06-09	05:33:00	0
2009-06-09	05:34:00	0
2009-06-09	05:35:00	0
2009-06-09	05:36:00	0
2009-06-09	05:37:00	0
2009-06-09	05:38:00	0
2009-06-09	05:39:00	0
2009-06-09	05:40:00	0
2009-06-09	05:41:00	0
2009-06-09	05:42:00	0
2009-06-09	05:43:00	0
2009-06-09	05:44:00	0
2009-06-09	05:45:00	0
2009-06-09	05:46:00	0
2009-06-09	05:47:00	0
2009-06-09	05:48:00	0
2009-06-09	05:49:00	0
2009-06-09	05:50:00	0
2009-06-09	05:51:00	0
2009-06-09	05:52:00	0
2009-06-09	05:53:00	0
2009-06-09	05:54:00	0
2009-06-09	05:55:00	0
2009-06-09	05:56:00	0
2009-06-09	05:57:00	0
2009-06-09	05:58:00	0
2009-06-09	05:59:00	0
2009-06-09	06:00:00	0
2009-06-09	06:01:00	0
2009-06-09	06:02:00	0
2009-06-09	06:03:00	0
2009-06-09	06:04:00	0
2009-06-09	06:05:00	0
2009-06-09	06:06:00	0
2009-06-09	06:07:00	0
2009-06-09	06:08:00	0
2009-06-09	06:09:00	0
2009-06-09	06:10:00	0
2009-06-09	06:11:00	0
2009-06-09	06:12:00	0
2009-06-09	06:13:00	0
2009-06-09	06:14:00	0
2009-06-09	06:15:00	0
2009-06-09	06:16:00	0
2009-06-09	06:17:00	0
2009-06-09	06:18:00	0
2009-06-09	06:19:00	0
2009-06-09	06:20:00	0
2009-06-09	06:21:00	0
2009-06-09	06:22:00	0
2009-06-09	06:23:00	0
2009-06-09	06:24:00	0
2009-06-09	06:25:00	0
2009-06-09	06:26:00	0
2009-06-09	06:27:00	0
2009-06-09	06:28:00	0
2009-06-09	06:29:00	0
2009-06-09	06:30:00	0
2009-06-09	06:31:00	0
2009-06-09	06:32:00	0
2009-06-09	06:33:00	0
2009-06-09	06:34:00	0
2009-06-09	06:35:00	0
2009-06-09	06:36:00	0
2009-06-09	06:37:00	0
2009-06-09	06:38:00	0
2009-06-09	06:39:00	0
2009-06-09	06:40:00	0
2009-06-09	06:41:00	0
2009-06-09	06:42:00	0
2009-06-09	06:43:00	0
2009-06-09	06:44:00	0
2009-06-09	06:45:00	0
2009-06-09	06:46:00	0
2009-06-09	06:47:00	0
2009-06-09	06:48:00	0
2009-06-09	06:49:00	0
2009-06-09	06:50:00	0
2009-06-09	06:51:00	0
2009-06-09	06:52:00	0
2009-06-09	06:53:00	0
2009-06-09	06:54:00	0
2009-06-09	06:55:00	0
2009-06-09	06:56:00	0
2009-06-09	06:57:00	0
2009-06-09	06:58:00	0
2009-06-09	06:59:00	0
2009-06-09	07:00:00	0
2009-06-09	07:01:00	0
2009-06-09	07:02:00	0
2009-06-09	07:03:00	0
2009-06-09	07:04:00	0
2009-06-09	07:05:00	0
2009-06-09	07:06:00	0
2009-06-09	07:07:00	0
2009-06-09	07:08:00	0
2009-06-09	07:09:00	0
2009-06-09	07:10:00	0
2009-06-09	07:11:00	0
2009-06-09	07:12:00	0
2009-06-09	07:13:00	0
2009-06-09	07:14:00	0
2009-06-09	07:15:00	0
2009-06-09	07:16:00	0
2009-06-09	07:17:00	0
2009-06-09	07:18:00	0
2009-06-09	07:19:00	0
2009-06-09	07:20:00	0
2009-06-09	07:21:00	0
2009-06-09	07:22:00	0
2009-06-09	07:23:00	0
2009-06-09	07:24:00	0
2009-06-09	07:25:00	0
2009-06-09	07:26:00	0
2009-06-09	07:27:00	0
2009-06-09	07:28:00	0
2009-06-09	07:29:00	0
2009-06-09	07:30:00	0
2009-06-09	07:31:00	0
2009-06-09	07:32:00	0
2009-06-09	07:33:00	0
2009-06-09	07:34:00	0
2009-06-09	07:35:00	0
2009-06-09	07:36:00	0
2009-06-09	07:37:00	0
2009-06-09	07:38:00	0
2009-06-09	07:39:00	0
2009-06-09	07:40:00	0
2009-06-09	07:41:00	0
2009-06-09	07:42:00	0
2009-06-09	07:43:00	0
2009-06-09	07:44:00	0
2009-06-09	07:45:00	0
2009-06-09	07:46:00	0
2009-06-09	07:47:00	0
2009-06-09	07:48:00	0
2009-06-09	07:49:00	0
2009-06-09	07:50:00	0
2009-06-09	07:51:00	0
2009-06-09	07:52:00	0
2009-06-09	07:53:00	0
2009-06-09	07:54:00	0
2009-06-09	07:55:00	0
2009-06-09	07:56:00	0
2009-06-09	07:57:00	0
2009-06-09	07:58:00	0
2009-06-09	07:59:00	0
2009-06-09	08:00:00	0
2009-06-09	08:01:00	0
2009-06-09	08:02:00	0
2009-06-09	08:03:00	0
2009-06-09	08:04:00	0
2009-06-09	08:05:00	0
2009-06-09	08:06:00	0
2009-06-09	08:07:00	0
2009-06-09	08:08:00	0
2009-06-09	08:09:00	0
2009-06-09	08:10:00	0
2009-06-09	08:11:00	0
2009-06-09	08:12:00	0
2009-06-09	08:13:00	0
2009-06-09	08:14:00	0
2009-06-09	08:15:00	0
2009-06-09	08:16:00	0
2009-06-09	08:17:00	0
2009-06-09	08:18:00	0
2009-06-09	08:19:00	0
2009-06-09	08:20:00	0
2009-06-09	08:21:00	0
2009-06-09	08:22:00	0
2009-06-09	08:23:00	0
2009-06-09	08:24:00	0
2009-06-09	08:25:00	0
2009-06-09	08:26:00	0
2009-06-09	08:27:00	0
2009-06-09	08:28:00	0
2009-06-09	08:29:00	0
2009-06-09	08:30:00	0
2009-06-09	08:31:00	0
2009-06-09	08:32:00	0
2009-06-09	08:33:00	0
2009-06-09	08:34:00	0
2009-06-09	08:35:00	0
2009-06-09	08:36:00	0
2009-06-09	08:37:00	0
2009-06-09	08:38:00	0
2009-06-09	08:39:00	0
2009-06-09	08:40:00	0
2009-06-09	08:41:00	0
2009-06-09	08:42:00	0
2009-06-09	08:43:00	0
2009-06-09	08:44:00	0
2009-06-09	08:45:00	0
2009-06-09	08:46:00	0
2009-06-09	08:47:00	0
2009-06-09	08:48:00	0
2009-06-09	08:49:00	0
2009-06-09	08:50:00	0
2009-06-09	08:51:00	0
2009-06-09	08:52:00	0
2009-06-09	08:53:00	0
2009-06-09	08:54:00	0
2009-06-09	08:55:00	0
2009-06-09	08:56:00	0
2009-06-09	08:57:00	0
2009-06-09	08:58:00	0
2009-06-09	08:59:00	0
2009-06-09	09:00:00	0
2009-06-09	09:01:00	0
2009-06-09	09:02:00	0
2009-06-09	09:03:00	0
2009-06-09	09:04:00	0
2009-06-09	09:05:00	0
2009-06-09	09:06:00	0
2009-06-09	09:07:00	0
2009-06-09	09:08:00	0
2009-06-09	09:09:00	0
2009-06-09	09:10:00	0
2009-06-09	09:11:00	0
2009-06-09	09:12:00	0
2009-06-09	09:13:00	0
2009-06-09	09:14:00	0
2009-06-09	09:15:00	0
2009-06-09	09:16:00	0
2009-06-09	09:17:00	0
2009-06-09	09:18:00	0
2009-06-09	09:19:00	0
2009-06-09	09:20:00	0
2009-06-09	09:21:00	0
2009-06-09	09:22:00	0
2009-06-09	09:23:00	0
2009-06-09	09:24:00	0
2009-06-09	09:25:00	0
2009-06-09	09:26:00	0
2009-06-09	09:27:00	0
2009-06-09	09:28:00	0
2009-06-09	09:29:00	0
2009-06-09	09:30:00	0
2009-06-09	09:31:00	0
2009-06-09	09:32:00	0
2009-06-09	09:33:00	0
2009-06-09	09:34:00	0
2009-06-09	09:35:00	0
2009-06-09	09:36:00	0
2009-06-09	09:37:00	0
2009-06-09	09:38:00	0
2009-06-09	09:39:00	0
2009-06-09	09:40:00	0
2009-06-09	09:41:00	0
2009-06-09	09:42:00	0
2009-06-09	09:43:00	0
2009-06-09	09:44:00	0
2009-06-09	09:45:00	0
2009-06-09	09:46:00	0
2009-06-09	09:47:00	0
2009-06-09	09:48:00	0
2009-06-09	09:49:00	0
2009-06-09	09:50:00	0
2009-06-09	09:51:00	0
2009-06-09	09:52:00	0
2009-06-09	09:53:00	0
2009-06-09	09:54:00	0
2009-06-09	09:55:00	0
2009-06-09	09:56:00	0
2009-06-09	09:57:00	0
2009-06-09	09:58:00	0
2009-06-09	09:59:00	0
2009-06-09	10:00:00	0
2009-06-09	10:01:00	0
2009-06-09	10:02:00	0
2009-06-09	10:03:00	0
2009-06-09	10:04:00	0
2009-06-09	10:05:00	0
2009-06-09	10:06:00	0
2009-06-09	10:07:00	0
2009-06-09	10:08:00	0
2009-06-09	10:09:00	0
2009-06-09	10:10:00	0
2009-06-09	10:11:00	0
2009-06-09	10:12:00	0
2009-06-09	10:13:00	0
2009-06-09	10:14:00	0
2009-06-09	10:15:00	0
2009-06-09	10:16:00	0
2009-06-09	10:17:00	0
2009-06-09	10:18:00	0
2009-06-09	10:19:00	0
2009-06-09	10:20:00	0
2009-06-09	10:21:00	0
2009-06-09	10:22:00	0
2009-06-09	10:23:00	0
2009-06-09	10:24:00	0
2009-06-09	10:25:00	0
2009-06-09	10:26:00	0
2009-06-09	10:27:00	0
2009-06-09	10:28:00	0
2009-06-09	10:29:00	0
2009-06-09	10:30:00	0
2009-06-09	10:31:00	0
2009-06-09	10:32:00	0
2009-06-09	10:33:00	0
2009-06-09	10:34:00	0
2009-06-09	10:35:00	0
2009-06-09	10:36:00	0
2009-06-09	10:37:00	0
2009-06-09	10:38:00	0
2009-06-09	10:39:00	0
2009-06-09	10:40:00	0
2009-06-09	10:41:00	0
2009-06-09	10:42:00	0
2009-06-09	10:43:00	0
2009-06-09	10:44:00	0
2009-06-09	10:45:00	0
2009-06-09	10:46:00	0
2009-06-09	10:47:00	0
2009-06-09	10:48:00	0
2009-06-09	10:49:00	0
2009-06-09	10:50:00	0
2009-06-09	10:51:00	0
2009-06-09	10:52:00	0
2009-06-09	10:53:00	0
2009-06-09	10:54:00	0
2009-06-09	10:55:00	0
2009-06-09	10:56:00	0
2009-06-09	10:57:00	0
2009-06-09	10:58:00	0
2009-06-09	10:59:00	0
2009-06-09	11:00:00	0
2009-06-09	11:01:00	0
2009-06-09	11:02:00	0
2009-06-09	11:03:00	0
2009-06-09	11:04:00	0
2009-06-09	11:05:00	0
2009-06-09	11:06:00	0
2009-06-09	11:07:00	0
2009-06-09	11:08:00	0
2009-06-09	11:09:00	0
2009-06-09	11:10:00	0
2009-06-09	11:11:00	0
2009-06-09	11:12:00	0
2009-06-09	11:13:00	0
2009-06-09	11:14:00	0
2009-06-09	11:15:00	0
2009-06-09	11:16:00	0
2009-06-09	11:17:00	0
2009-06-09	11:18:00	0
2009-06-09	11:19:00	0
2009-06-09	11:20:00	0
2009-06-09	11:21:00	0
2009-06-09	11:22:00	0
2009-06-09	11:23:00	0
2009-06-09	11:24:00	0
2009-06-09	11:25:00	0
2009-06-09	11:26:00	0
2009-06-09	11:27:00	0
2009-06-09	11:28:00	0
2009-06-09	11:29:00	0
2009-06-09	11:30:00	0
2009-06-09	11:31:00	0
2009-06-09	11:32:00	0
2009-06-09	11:33:00	0
2009-06-09	11:34:00	0
2009-06-09	11:35:00	0
2009-06-09	11:36:00	0
2009-06-09	11:37:00	0
2009-06-09	11:38:00	0
2009-06-09	11:39:00	0
2009-06-09	11:40:00	0
2009-06-09	11:41:00	0
2009-06-09	11:42:00	0
2009-06-09	11:43:00	0
2009-06-09	11:44:00	0
2009-06-09	11:45:00	0
2009-06-09	11:46:00	0
2009-06-09	11:47:00	0
2009-06-09	11:48:00	0
2009-06-09	11:49:00	0
2009-06-09	11:50:00	0
2009-06-09	11:51:00	0
2009-06-09	11:52:00	0
2009-06-09	11:53:00	0
2009-06-09	11:54:00	0
2009-06-09	11:55:00	0
2009-06-09	11:56:00	0
2009-06-09	11:57:00	0
2009-06-09	11:58:00	0
2009-06-09	11:59:00	0
2009-06-09	12:00:00	0
2009-06-09	12:01:00	0
2009-06-09	12:02:00	0
2009-06-09	12:03:00	0
2009-06-09	12:04:00	0
2009-06-09	12:05:00	0
2009-06-09	12:06:00	0
2009-06-09	12:07:00	0
2009-06-09	12:08:00	0
2009-06-09	12:09:00	0
2009-06-09	12:10:00	0
2009-06-09	12:11:00	0
2009-06-09	12:12:00	0
2009-06-09	12:13:00	0
2009-06-09	12:14:00	0
2009-06-09	12:15:00	0
2009-06-09	12:16:00	0
2009-06-09	12:17:00	0
2009-06-09	12:18:00	0
2009-06-09	12:19:00	0
2009-06-09	12:20:00	0
2009-06-09	12:21:00	0
2009-06-09	12:22:00	0
2009-06-09	12:23:00	0
2009-06-09	12:24:00	0
2009-06-09	12:25:00	0
2009-06-09	12:26:00	0
2009-06-09	12:27:00	0
2009-06-09	12:28:00	0
2009-06-09	12:29:00	0
2009-06-09	12:30:00	0
2009-06-09	12:31:00	0
2009-06-09	12:32:00	0
2009-06-09	12:33:00	0
2009-06-09	12:34:00	0
2009-06-09	12:35:00	0
2009-06-09	12:36:00	0
2009-06-09	12:37:00	0
2009-06-09	12:38:00	0
2009-06-09	12:39:00	0
2009-06-09	12:40:00	0
2009-06-09	12:41:00	0
2009-06-09	12:42:00	0
2009-06-09	12:43:00	0
2009-06-09	12:44:00	0
2009-06-09	12:45:00	0
2009-06-09	12:46:00	0
2009-06-09	12:47:00	0
2009-06-09	12:48:00	0
2009-06-09	12:49:00	0
2009-06-09	12:50:00	0
2009-06-09	12:51:00	0
2009-06-09	12:52:00	0
2009-06-09	12:53:00	0
2009-06-09	12:54:00	0
2009-06-09	12:55:00	0
2009-06-09	12:56:00	0
2009-06-09	12:57:00	0
2009-06-09	12:58:00	0
2009-06-09	12:59:00	0
2009-06-09	13:00:00	0
2009-06-09	13:01:00	0
2009-06-09	13:02:00	0
2009-06-09	13:03:00	0
2009-06-09	13:04:00	0
2009-06-09	13:05:00	0
2009-06-09	13:06:00	0
2009-06-09	13:07:00	0
2009-06-09	13:08:00	0
2009-06-09	13:09:00	0
2009-06-09	13:10:00	0
2009-06-09	13:11:00	0
2009-06-09	13:12:00	0
2009-06-09	13:13:00	0
2009-06-09	13:14:00	0
2009-06-09	13:15:00	0
2009-06-09	13:16:00	0
2009-06-09	13:17:00	0
2009-06-09	13:18:00	0
2009-06-09	13:19:00	0
2009-06-09	13:20:00	0
2009-06-09	13:21:00	0
2009-06-09	13:22:00	0
2009-06-09	13:23:00	0
2009-06-09	13:24:00	0
2009-06-09	13:25:00	0
2009-06-09	13:26:00	0
2009-06-09	13:27:00	0
2009-06-09	13:28:00	0
2009-06-09	13:29:00	0
2009-06-09	13:30:00	0
2009-06-09	13:31:00	0
2009-06-09	13:32:00	0
2009-06-09	13:33:00	0
2009-06-09	13:34:00	0
2009-06-09	13:35:00	0
2009-06-09	13:36:00	0
2009-06-09	13:37:00	0
2009-06-09	13:38:00	0
2009-06-09	13:39:00	0
2009-06-09	13:40:00	0
2009-06-09	13:41:00	0
2009-06-09	13:42:00	0
2009-06-09	13:43:00	0
2009-06-09	13:44:00	0
2009-06-09	13:45:00	0
2009-06-09	13:46:00	0
2009-06-09	13:47:00	0
2009-06-09	13:48:00	0
2009-06-09	13:49:00	0
2009-06-09	13:50:00	0
2009-06-09	13:51:00	0
2009-06-09	13:52:00	0
2009-06-09	13:53:00	0
2009-06-09	13:54:00	0
2009-06-09	13:55:00	0
2009-06-09	13:56:00	0
2009-06-09	13:57:00	0
2009-06-09	13:58:00	0
2009-06-09	13:59:00	0
2009-06-09	14:00:00	0
2009-06-09	14:01:00	0
2009-06-09	14:02:00	0
2009-06-09	14:03:00	0
2009-06-09	14:04:00	0
2009-06-09	14:05:00	0
2009-06-09	14:06:00	0
2009-06-09	14:07:00	0
2009-06-09	14:08:00	0
2009-06-09	14:09:00	0
2009-06-09	14:10:00	0
2009-06-09	14:11:00	0
2009-06-09	14:12:00	0
2009-06-09	14:13:00	0
2009-06-09	14:14:00	0
2009-06-09	14:15:00	0
2009-06-09	14:16:00	0
2009-06-09	14:17:00	0
2009-06-09	14:18:00	0
2009-06-09	14:19:00	0
2009-06-09	14:20:00	0
2009-06-09	14:21:00	0
2009-06-09	14:22:00	0
2009-06-09	14:23:00	0
2009-06-09	14:24:00	0
2009-06-09	14:25:00	0
2009-06-09	14:26:00	0
2009-06-09	14:27:00	0
2009-06-09	14:28:00	0
2009-06-09	14:29:00	0
2009-06-09	14:30:00	0
2009-06-09	14:31:00	0
2009-06-09	14:32:00	0
2009-06-09	14:33:00	0
2009-06-09	14:34:00	0
2009-06-09	14:35:00	0
2009-06-09	14:36:00	0
2009-06-09	14:37:00	0
2009-06-09	14:38:00	0
2009-06-09	14:39:00	0
2009-06-09	14:40:00	0
2009-06-09	14:41:00	0
2009-06-09	14:42:00	0
2009-06-09	14:43:00	0
2009-06-09	14:44:00	0
2009-06-09	14:45:00	0
2009-06-09	14:46:00	0
2009-06-09	14:47:00	0
2009-06-09	14:48:00	0
2009-06-09	14:49:00	0
2009-06-09	14:50:00	0
2009-06-09	14:51:00	0
2009-06-09	14:52:00	0
2009-06-09	14:53:00	0
2009-06-09	14:54:00	0
2009-06-09	14:55:00	0
2009-06-09	14:56:00	0
2009-06-09	14:57:00	0
2009-06-09	14:58:00	0
2009-06-09	14:59:00	0
2009-06-09	15:00:00	0
2009-06-09	15:01:00	0
2009-06-09	15:02:00	0
2009-06-09	15:03:00	0
2009-06-09	15:04:00	0
2009-06-09	15:05:00	0
2009-06-09	15:06:00	0
2009-06-09	15:07:00	0
2009-06-09	15:08:00	0
2009-06-09	15:09:00	0
2009-06-09	15:10:00	0
2009-06-09	15:11:00	0
2009-06-09	15:12:00	0
2009-06-09	15:13:00	0
2009-06-09	15:14:00	0
2009-06-09	15:15:00	0
2009-06-09	15:16:00	0
2009-06-09	15:17:00	0
2009-06-09	15:18:00	0
2009-06-09	15:19:00	0
2009-06-09	15:20:00	0
2009-06-09	15:21:00	0
2009-06-09	15:22:00	0
2009-06-09	15:23:00	0
2009-06-09	15:24:00	0
2009-06-09	15:25:00	0
2009-06-09	15:26:00	0
2009-06-09	15:27:00	0
2009-06-09	15:28:00	0
2009-06-09	15:29:00	0
2009-06-09	15:30:00	0
2009-06-09	15:31:00	0
2009-06-09	15:32:00	0
2009-06-09	15:33:00	0
2009-06-09	15:34:00	0
2009-06-09	15:35:00	0
2009-06-09	15:36:00	0
2009-06-09	15:37:00	0
2009-06-09	15:38:00	0
2009-06-09	15:39:00	0
2009-06-09	15:40:00	0
2009-06-09	15:41:00	0
2009-06-09	15:42:00	0
2009-06-09	15:43:00	0
2009-06-09	15:44:00	0
2009-06-09	15:45:00	0
2009-06-09	15:46:00	0
2009-06-09	15:47:00	0
2009-06-09	15:48:00	0
2009-06-09	15:49:00	0
2009-06-09	15:50:00	0
2009-06-09	15:51:00	0
2009-06-09	15:52:00	0
2009-06-09	15:53:00	0
2009-06-09	15:54:00	0
2009-06-09	15:55:00	0
2009-06-09	15:56:00	0
2009-06-09	15:57:00	0
2009-06-09	15:58:00	0
2009-06-09	15:59:00	0
2009-06-09	16:00:00	0
2009-06-09	16:01:00	0
2009-06-09	16:02:00	0
2009-06-09	16:03:00	0
2009-06-09	16:04:00	0
2009-06-09	16:05:00	0
2009-06-09	16:06:00	0
2009-06-09	16:07:00	0
2009-06-09	16:08:00	0
2009-06-09	16:09:00	0
2009-06-09	16:10:00	0
2009-06-09	16:11:00	0
2009-06-09	16:12:00	0
2009-06-09	16:13:00	0
2009-06-09	16:14:00	0
2009-06-09	16:15:00	0
2009-06-09	16:16:00	0
2009-06-09	16:17:00	0
2009-06-09	16:18:00	0
2009-06-09	16:19:00	0
2009-06-09	16:20:00	0
2009-06-09	16:21:00	0
2009-06-09	16:22:00	0
2009-06-09	16:23:00	0
2009-06-09	16:24:00	0
2009-06-09	16:25:00	0
2009-06-09	16:26:00	0
2009-06-09	16:27:00	0
2009-06-09	16:28:00	0
2009-06-09	16:29:00	0
2009-06-09	16:30:00	0
2009-06-09	16:31:00	0
2009-06-09	16:32:00	0
2009-06-09	16:33:00	0
2009-06-09	16:34:00	0
2009-06-09	16:35:00	0
2009-06-09	16:36:00	0
2009-06-09	16:37:00	0
2009-06-09	16:38:00	0
2009-06-09	16:39:00	0
2009-06-09	16:40:00	0
2009-06-09	16:41:00	0
2009-06-09	16:42:00	0
2009-06-09	16:43:00	0
2009-06-09	16:44:00	0
2009-06-09	16:45:00	0
2009-06-09	16:46:00	0
2009-06-09	16:47:00	0
2009-06-09	16:48:00	0
2009-06-09	16:49:00	0
2009-06-09	16:50:00	0
2009-06-09	16:51:00	0
2009-06-09	16:52:00	0
2009-06-09	16:53:00	0
2009-06-09	16:54:00	0
2009-06-09	16:55:00	0
2009-06-09	16:56:00	0
2009-06-09	16:57:00	0
2009-06-09	16:58:00	0
2009-06-09	16:59:00	0
2009-06-09	17:00:00	0
2009-06-09	17:01:00	0
2009-06-09	17:02:00	0
2009-06-09	17:03:00	0
2009-06-09	17:04:00	0
2009-06-09	17:05:00	0
2009-06-09	17:06:00	0
2009-06-09	17:07:00	0
2009-06-09	17:08:00	0
2009-06-09	17:09:00	0
2009-06-09	17:10:00	0
2009-06-09	17:11:00	0
2009-06-09	17:12:00	0
2009-06-09	17:13:00	0
2009-06-09	17:14:00	0
2009-06-09	17:15:00	0
2009-06-09	17:16:00	0
2009-06-09	17:17:00	0
2009-06-09	17:18:00	0
2009-06-09	17:19:00	0
2009-06-09	17:20:00	0
2009-06-09	17:21:00	0
2009-06-09	17:22:00	0
2009-06-09	17:23:00	0
2009-06-09	17:24:00	0
2009-06-09	17:25:00	0
2009-06-09	17:26:00	0
2009-06-09	17:27:00	0
2009-06-09	17:28:00	0
2009-06-09	17:29:00	0
2009-06-09	17:30:00	0
2009-06-09	17:31:00	0
2009-06-09	17:32:00	0
2009-06-09	17:33:00	0
2009-06-09	17:34:00	0
2009-06-09	17:35:00	0
2009-06-09	17:36:00	0
2009-06-09	17:37:00	0
2009-06-09	17:38:00	0
2009-06-09	17:39:00	0
2009-06-09	17:40:00	0
2009-06-09	17:41:00	0
2009-06-09	17:42:00	0
2009-06-09	17:43:00	0
2009-06-09	17:44:00	0
2009-06-09	17:45:00	0
2009-06-09	17:46:00	0
2009-06-09	17:47:00	0
2009-06-09	17:48:00	0
2009-06-09	17:49:00	0
2009-06-09	17:50:00	0
2009-06-09	17:51:00	0
2009-06-09	17:52:00	0
2009-06-09	17:53:00	0
2009-06-09	17:54:00	0
2009-06-09	17:55:00	0
2009-06-09	17:56:00	0
2009-06-09	17:57:00	0
2009-06-09	17:58:00	0
2009-06-09	17:59:00	0
2009-06-09	18:00:00	0
2009-06-09	18:01:00	12
2009-06-09	18:02:00	12
2009-06-09	18:03:00	97
2009-06-09	18:04:00	121
2009-06-09	18:05:00	0
2009-06-09	18:06:00	367
2009-06-09	18:07:00	24
2009-06-09	18:08:00	0
2009-06-09	18:09:00	0
2009-06-09	18:10:00	0
2009-06-09	18:11:00	0
2009-06-09	18:12:00	0
2009-06-09	18:13:00	36
2009-06-09	18:14:00	109
2009-06-09	18:15:00	0
2009-06-09	18:16:00	0
2009-06-09	18:17:00	0
2009-06-09	18:18:00	60
2009-06-09	18:19:00	60
2009-06-09	18:20:00	36
2009-06-09	18:21:00	60
2009-06-09	18:22:00	24
2009-06-09	18:23:00	145
2009-06-09	18:24:00	97
2009-06-09	18:25:00	121
2009-06-09	18:26:00	0
2009-06-09	18:27:00	60
2009-06-09	18:28:00	24
2009-06-09	18:29:00	97
2009-06-09	18:30:00	24
2009-06-09	18:31:00	85
2009-06-09	18:32:00	0
2009-06-09	18:33:00	48
2009-06-09	18:34:00	36
2009-06-09	18:35:00	97
2009-06-09	18:36:00	60
2009-06-09	18:37:00	36
2009-06-09	18:38:00	48
2009-06-09	18:39:00	72
2009-06-09	18:40:00	24
2009-06-09	18:41:00	0
2009-06-09	18:42:00	48
2009-06-09	18:43:00	12
2009-06-09	18:44:00	0
2009-06-09	18:45:00	72
2009-06-09	18:46:00	12
2009-06-09	18:47:00	12
2009-06-09	18:48:00	0
2009-06-09	18:49:00	48
2009-06-09	18:50:00	157
2009-06-09	18:51:00	0
2009-06-09	18:52:00	12
2009-06-09	18:53:00	72
2009-06-09	18:54:00	97
2009-06-09	18:55:00	85
2009-06-09	18:56:00	36
2009-06-09	18:57:00	109
2009-06-09	18:58:00	121
2009-06-09	18:59:00	36
2009-06-09	19:00:00	229
2009-06-09	19:01:00	36
2009-06-09	19:02:00	36
2009-06-09	19:03:00	384
2009-06-09	19:04:00	97
2009-06-09	19:05:00	157
2009-06-09	19:06:00	36
2009-06-09	19:07:00	273
2009-06-09	19:08:00	732
2009-06-09	19:09:00	1162
2009-06-09	19:10:00	710
2009-06-09	19:11:00	920
2009-06-09	19:12:00	710
2009-06-09	19:13:00	109
2009-06-09	19:14:00	258
2009-06-09	19:15:00	215
2009-06-09	19:16:00	896
2009-06-09	19:17:00	1024
2009-06-09	19:18:00	1104
2009-06-09	19:19:00	258
2009-06-09	19:20:00	273
2009-06-09	19:21:00	0
2009-06-09	19:22:00	97
2009-06-09	19:23:00	72
2009-06-09	19:24:00	215
2009-06-09	19:25:00	287
2009-06-09	19:26:00	316
2009-06-09	19:27:00	452
2009-06-09	19:28:00	133
2009-06-09	19:29:00	0
2009-06-09	19:30:00	0
2009-06-09	19:31:00	48
2009-06-09	19:32:00	12
2009-06-09	19:33:00	200
2009-06-09	19:34:00	171
2009-06-09	19:35:00	157
2009-06-09	19:36:00	215
2009-06-09	19:37:00	0
2009-06-09	19:38:00	0
2009-06-09	19:39:00	0
2009-06-09	19:40:00	0
2009-06-09	19:41:00	0
2009-06-09	19:42:00	0
2009-06-09	19:43:00	0
2009-06-09	19:44:00	0
2009-06-09	19:45:00	0
2009-06-09	19:46:00	0
2009-06-09	19:47:00	0
2009-06-09	19:48:00	0
2009-06-09	19:49:00	0
2009-06-09	19:50:00	0
2009-06-09	19:51:00	85
2009-06-09	19:52:00	72
2009-06-09	19:53:00	85
2009-06-09	19:54:00	97
2009-06-09	19:55:00	0
2009-06-09	19:56:00	0
2009-06-09	19:57:00	0
2009-06-09	19:58:00	0
2009-06-09	19:59:00	0
2009-06-09	20:00:00	0
2009-06-09	20:01:00	85
2009-06-09	20:02:00	36
2009-06-09	20:03:00	215
2009-06-09	20:04:00	60
2009-06-09	20:05:00	36
2009-06-09	20:06:00	0
2009-06-09	20:07:00	0
2009-06-09	20:08:00	72
2009-06-09	20:09:00	97
2009-06-09	20:10:00	0
2009-06-09	20:11:00	12
2009-06-09	20:12:00	0
2009-06-09	20:13:00	0
2009-06-09	20:14:00	0
2009-06-09	20:15:00	0
2009-06-09	20:16:00	0
2009-06-09	20:17:00	48
2009-06-09	20:18:00	0
2009-06-09	20:19:00	0
2009-06-09	20:20:00	0
2009-06-09	20:21:00	0
2009-06-09	20:22:00	0
2009-06-09	20:23:00	0
2009-06-09	20:24:00	0
2009-06-09	20:25:00	0
2009-06-09	20:26:00	12
2009-06-09	20:27:00	0
2009-06-09	20:28:00	0
2009-06-09	20:29:00	0
2009-06-09	20:30:00	0
2009-06-09	20:31:00	0
2009-06-09	20:32:00	0
2009-06-09	20:33:00	0
2009-06-09	20:34:00	0
2009-06-09	20:35:00	24
2009-06-09	20:36:00	0
2009-06-09	20:37:00	0
2009-06-09	20:38:00	0
2009-06-09	20:39:00	0
2009-06-09	20:40:00	0
2009-06-09	20:41:00	0
2009-06-09	20:42:00	0
2009-06-09	20:43:00	0
2009-06-09	20:44:00	0
2009-06-09	20:45:00	0
2009-06-09	20:46:00	0
2009-06-09	20:47:00	0
2009-06-09	20:48:00	0
2009-06-09	20:49:00	12
2009-06-09	20:50:00	0
2009-06-09	20:51:00	12
2009-06-09	20:52:00	0
2009-06-09	20:53:00	24
2009-06-09	20:54:00	0
2009-06-09	20:55:00	0
2009-06-09	20:56:00	0
2009-06-09	20:57:00	60
2009-06-09	20:58:00	0
2009-06-09	20:59:00	121
2009-06-09	21:00:00	258
2009-06-09	21:01:00	133
2009-06-09	21:02:00	85
2009-06-09	21:03:00	133
2009-06-09	21:04:00	109
2009-06-09	21:05:00	48
2009-06-09	21:06:00	36
2009-06-09	21:07:00	121
2009-06-09	21:08:00	12
2009-06-09	21:09:00	0
2009-06-09	21:10:00	24
2009-06-09	21:11:00	109
2009-06-09	21:12:00	0
2009-06-09	21:13:00	36
2009-06-09	21:14:00	0
2009-06-09	21:15:00	24
2009-06-09	21:16:00	0
2009-06-09	21:17:00	0
2009-06-09	21:18:00	60
2009-06-09	21:19:00	0
2009-06-09	21:20:00	0
2009-06-09	21:21:00	0
2009-06-09	21:22:00	0
2009-06-09	21:23:00	0
2009-06-09	21:24:00	0
2009-06-09	21:25:00	0
2009-06-09	21:26:00	0
2009-06-09	21:27:00	0
2009-06-09	21:28:00	24
2009-06-09	21:29:00	0
2009-06-09	21:30:00	0
2009-06-09	21:31:00	0
2009-06-09	21:32:00	0
2009-06-09	21:33:00	0
2009-06-09	21:34:00	0
2009-06-09	21:35:00	0
2009-06-09	21:36:00	12
2009-06-09	21:37:00	0
2009-06-09	21:38:00	0
2009-06-09	21:39:00	0
2009-06-09	21:40:00	0
2009-06-09	21:41:00	0
2009-06-09	21:42:00	0
2009-06-09	21:43:00	0
2009-06-09	21:44:00	0
2009-06-09	21:45:00	0
2009-06-09	21:46:00	0
2009-06-09	21:47:00	0
2009-06-09	21:48:00	0
2009-06-09	21:49:00	0
2009-06-09	21:50:00	0
2009-06-09	21:51:00	0
2009-06-09	21:52:00	0
2009-06-09	21:53:00	0
2009-06-09	21:54:00	24
2009-06-09	21:55:00	0
2009-06-09	21:56:00	0
2009-06-09	21:57:00	0
2009-06-09	21:58:00	0
2009-06-09	21:59:00	0
2009-06-09	22:00:00	0
2009-06-09	22:01:00	0
2009-06-09	22:02:00	0
2009-06-09	22:03:00	0
2009-06-09	22:04:00	0
2009-06-09	22:05:00	0
2009-06-09	22:06:00	0
2009-06-09	22:07:00	0
2009-06-09	22:08:00	0
2009-06-09	22:09:00	0
2009-06-09	22:10:00	0
2009-06-09	22:11:00	60
2009-06-09	22:12:00	273
2009-06-09	22:13:00	350
2009-06-09	22:14:00	526
2009-06-09	22:15:00	333
2009-06-09	22:16:00	109
2009-06-09	22:17:00	488
2009-06-09	22:18:00	97
2009-06-09	22:19:00	0
2009-06-09	22:20:00	0
2009-06-09	22:21:00	85
2009-06-09	22:22:00	85
2009-06-09	22:23:00	12
2009-06-09	22:24:00	0
2009-06-09	22:25:00	133
2009-06-09	22:26:00	0
2009-06-09	22:27:00	0
2009-06-09	22:28:00	0
2009-06-09	22:29:00	0
2009-06-09	22:30:00	0
2009-06-09	22:31:00	0
2009-06-09	22:32:00	0
2009-06-09	22:33:00	36
2009-06-09	22:34:00	0
2009-06-09	22:35:00	0
2009-06-09	22:36:00	12
2009-06-09	22:37:00	0
2009-06-09	22:38:00	0
2009-06-09	22:39:00	0
2009-06-09	22:40:00	0
2009-06-09	22:41:00	0
2009-06-09	22:42:00	0
2009-06-09	22:43:00	12
2009-06-09	22:44:00	97
2009-06-09	22:45:00	0
2009-06-09	22:46:00	0
2009-06-09	22:47:00	0
2009-06-09	22:48:00	48
2009-06-09	22:49:00	85
2009-06-09	22:50:00	0
2009-06-09	22:51:00	0
2009-06-09	22:52:00	0
2009-06-09	22:53:00	0
2009-06-09	22:54:00	0
2009-06-09	22:55:00	0
2009-06-09	22:56:00	0
2009-06-09	22:57:00	0
2009-06-09	22:58:00	0
2009-06-09	22:59:00	0
2009-06-09	23:00:00	0
2009-06-09	23:01:00	0
2009-06-09	23:02:00	0
2009-06-09	23:03:00	0
2009-06-09	23:04:00	0
2009-06-09	23:05:00	0
2009-06-09	23:06:00	0
2009-06-09	23:07:00	0
2009-06-09	23:08:00	0
2009-06-09	23:09:00	0
2009-06-09	23:10:00	0
2009-06-09	23:11:00	0
2009-06-09	23:12:00	0
2009-06-09	23:13:00	0
2009-06-09	23:14:00	0
2009-06-09	23:15:00	0
2009-06-09	23:16:00	0
2009-06-09	23:17:00	0
2009-06-09	23:18:00	0
2009-06-09	23:19:00	12
2009-06-09	23:20:00	0
2009-06-09	23:21:00	0
2009-06-09	23:22:00	0
2009-06-09	23:23:00	0
2009-06-09	23:24:00	0
2009-06-09	23:25:00	0
2009-06-09	23:26:00	0
2009-06-09	23:27:00	0
2009-06-09	23:28:00	0
2009-06-09	23:29:00	0
2009-06-09	23:30:00	0
2009-06-09	23:31:00	0
2009-06-09	23:32:00	0
2009-06-09	23:33:00	0
2009-06-09	23:34:00	0
2009-06-09	23:35:00	0
2009-06-09	23:36:00	0
2009-06-09	23:37:00	0
2009-06-09	23:38:00	0
2009-06-09	23:39:00	0
2009-06-09	23:40:00	0
2009-06-09	23:41:00	0
2009-06-09	23:42:00	0
2009-06-09	23:43:00	0
2009-06-09	23:44:00	0
2009-06-09	23:45:00	0
2009-06-09	23:46:00	0
2009-06-09	23:47:00	24
2009-06-09	23:48:00	0
2009-06-09	23:49:00	0
2009-06-09	23:50:00	0
2009-06-09	23:51:00	0
2009-06-09	23:52:00	0
2009-06-09	23:53:00	0
2009-06-09	23:54:00	0
2009-06-09	23:55:00	0
2009-06-09	23:56:00	12
2009-06-09	23:57:00	0
2009-06-09	23:58:00	0
2009-06-09	23:59:00	0
2009-06-10	00:00:00	0
2009-06-10	00:01:00	0
2009-06-10	00:02:00	0
2009-06-10	00:03:00	0
2009-06-10	00:04:00	0
2009-06-10	00:05:00	0
2009-06-10	00:06:00	0
2009-06-10	00:07:00	0
2009-06-10	00:08:00	12
2009-06-10	00:09:00	0
2009-06-10	00:10:00	0
2009-06-10	00:11:00	0
2009-06-10	00:12:00	0
2009-06-10	00:13:00	0
2009-06-10	00:14:00	0
2009-06-10	00:15:00	0
2009-06-10	00:16:00	0
2009-06-10	00:17:00	0
2009-06-10	00:18:00	0
2009-06-10	00:19:00	0
2009-06-10	00:20:00	0
2009-06-10	00:21:00	0
2009-06-10	00:22:00	0
2009-06-10	00:23:00	0
2009-06-10	00:24:00	0
2009-06-10	00:25:00	0
2009-06-10	00:26:00	109
2009-06-10	00:27:00	0
2009-06-10	00:28:00	0
2009-06-10	00:29:00	0
2009-06-10	00:30:00	0
2009-06-10	00:31:00	0
2009-06-10	00:32:00	0
2009-06-10	00:33:00	0
2009-06-10	00:34:00	0
2009-06-10	00:35:00	0
2009-06-10	00:36:00	0
2009-06-10	00:37:00	0
2009-06-10	00:38:00	0
2009-06-10	00:39:00	0
2009-06-10	00:40:00	0
2009-06-10	00:41:00	0
2009-06-10	00:42:00	0
2009-06-10	00:43:00	0
2009-06-10	00:44:00	0
2009-06-10	00:45:00	0
2009-06-10	00:46:00	0
2009-06-10	00:47:00	0
2009-06-10	00:48:00	0
2009-06-10	00:49:00	0
2009-06-10	00:50:00	0
2009-06-10	00:51:00	0
2009-06-10	00:52:00	0
2009-06-10	00:53:00	12
2009-06-10	00:54:00	0
2009-06-10	00:55:00	24
2009-06-10	00:56:00	12
2009-06-10	00:57:00	0
2009-06-10	00:58:00	0
2009-06-10	00:59:00	0
2009-06-10	01:00:00	0
2009-06-10	01:01:00	0
2009-06-10	01:02:00	0
2009-06-10	01:03:00	0
2009-06-10	01:04:00	0
2009-06-10	01:05:00	0
2009-06-10	01:06:00	0
2009-06-10	01:07:00	0
2009-06-10	01:08:00	0
2009-06-10	01:09:00	60
2009-06-10	01:10:00	0
2009-06-10	01:11:00	0
2009-06-10	01:12:00	0
2009-06-10	01:13:00	0
2009-06-10	01:14:00	0
2009-06-10	01:15:00	0
2009-06-10	01:16:00	0
2009-06-10	01:17:00	0
2009-06-10	01:18:00	0
2009-06-10	01:19:00	0
2009-06-10	01:20:00	0
2009-06-10	01:21:00	0
2009-06-10	01:22:00	0
2009-06-10	01:23:00	0
2009-06-10	01:24:00	0
2009-06-10	01:25:00	0
2009-06-10	01:26:00	0
2009-06-10	01:27:00	0
2009-06-10	01:28:00	0
2009-06-10	01:29:00	0
2009-06-10	01:30:00	48
2009-06-10	01:31:00	435
2009-06-10	01:32:00	0
2009-06-10	01:33:00	0
2009-06-10	01:34:00	145
2009-06-10	01:35:00	133
2009-06-10	01:36:00	0
2009-06-10	01:37:00	0
2009-06-10	01:38:00	0
2009-06-10	01:39:00	133
2009-06-10	01:40:00	12
2009-06-10	01:41:00	0
2009-06-10	01:42:00	0
2009-06-10	01:43:00	0
2009-06-10	01:44:00	0
2009-06-10	01:45:00	0
2009-06-10	01:46:00	121
2009-06-10	01:47:00	133
2009-06-10	01:48:00	72
2009-06-10	01:49:00	0
2009-06-10	01:50:00	12
2009-06-10	01:51:00	0
2009-06-10	01:52:00	0
2009-06-10	01:53:00	0
2009-06-10	01:54:00	0
2009-06-10	01:55:00	0
2009-06-10	01:56:00	0
2009-06-10	01:57:00	0
2009-06-10	01:58:00	0
2009-06-10	01:59:00	0
2009-06-10	02:00:00	0
2009-06-10	02:01:00	0
2009-06-10	02:02:00	0
2009-06-10	02:03:00	0
2009-06-10	02:04:00	0
2009-06-10	02:05:00	0
2009-06-10	02:06:00	0
2009-06-10	02:07:00	0
2009-06-10	02:08:00	0
2009-06-10	02:09:00	0
2009-06-10	02:10:00	0
2009-06-10	02:11:00	0
2009-06-10	02:12:00	0
2009-06-10	02:13:00	0
2009-06-10	02:14:00	0
2009-06-10	02:15:00	0
2009-06-10	02:16:00	36
2009-06-10	02:17:00	0
2009-06-10	02:18:00	0
2009-06-10	02:19:00	0
2009-06-10	02:20:00	0
2009-06-10	02:21:00	0
2009-06-10	02:22:00	0
2009-06-10	02:23:00	0
2009-06-10	02:24:00	0
2009-06-10	02:25:00	0
2009-06-10	02:26:00	0
2009-06-10	02:27:00	0
2009-06-10	02:28:00	0
2009-06-10	02:29:00	0
2009-06-10	02:30:00	0
2009-06-10	02:31:00	0
2009-06-10	02:32:00	0
2009-06-10	02:33:00	0
2009-06-10	02:34:00	0
2009-06-10	02:35:00	0
2009-06-10	02:36:00	24
2009-06-10	02:37:00	0
2009-06-10	02:38:00	0
2009-06-10	02:39:00	0
2009-06-10	02:40:00	0
2009-06-10	02:41:00	0
2009-06-10	02:42:00	0
2009-06-10	02:43:00	0
2009-06-10	02:44:00	0
2009-06-10	02:45:00	0
2009-06-10	02:46:00	0
2009-06-10	02:47:00	0
2009-06-10	02:48:00	0
2009-06-10	02:49:00	0
2009-06-10	02:50:00	0
2009-06-10	02:51:00	0
2009-06-10	02:52:00	0
2009-06-10	02:53:00	0
2009-06-10	02:54:00	0
2009-06-10	02:55:00	0
2009-06-10	02:56:00	36
2009-06-10	02:57:00	0
2009-06-10	02:58:00	0
2009-06-10	02:59:00	0
2009-06-10	03:00:00	0
2009-06-10	03:01:00	0
2009-06-10	03:02:00	0
2009-06-10	03:03:00	0
2009-06-10	03:04:00	0
2009-06-10	03:05:00	0
2009-06-10	03:06:00	0
2009-06-10	03:07:00	0
2009-06-10	03:08:00	0
2009-06-10	03:09:00	0
2009-06-10	03:10:00	0
2009-06-10	03:11:00	0
2009-06-10	03:12:00	0
2009-06-10	03:13:00	0
2009-06-10	03:14:00	0
2009-06-10	03:15:00	0
2009-06-10	03:16:00	72
2009-06-10	03:17:00	109
2009-06-10	03:18:00	0
2009-06-10	03:19:00	0
2009-06-10	03:20:00	0
2009-06-10	03:21:00	0
2009-06-10	03:22:00	0
2009-06-10	03:23:00	0
2009-06-10	03:24:00	0
2009-06-10	03:25:00	0
2009-06-10	03:26:00	0
2009-06-10	03:27:00	0
2009-06-10	03:28:00	0
2009-06-10	03:29:00	12
2009-06-10	03:30:00	0
2009-06-10	03:31:00	0
2009-06-10	03:32:00	0
2009-06-10	03:33:00	0
2009-06-10	03:34:00	0
2009-06-10	03:35:00	0
2009-06-10	03:36:00	0
2009-06-10	03:37:00	0
2009-06-10	03:38:00	0
2009-06-10	03:39:00	0
2009-06-10	03:40:00	0
2009-06-10	03:41:00	0
2009-06-10	03:42:00	0
2009-06-10	03:43:00	0
2009-06-10	03:44:00	0
2009-06-10	03:45:00	0
2009-06-10	03:46:00	36
2009-06-10	03:47:00	24
2009-06-10	03:48:00	0
2009-06-10	03:49:00	0
2009-06-10	03:50:00	24
2009-06-10	03:51:00	0
2009-06-10	03:52:00	0
2009-06-10	03:53:00	0
2009-06-10	03:54:00	0
2009-06-10	03:55:00	0
2009-06-10	03:56:00	0
2009-06-10	03:57:00	0
2009-06-10	03:58:00	0
2009-06-10	03:59:00	0
2009-06-10	04:00:00	0
2009-06-10	04:01:00	0
2009-06-10	04:02:00	36
2009-06-10	04:03:00	0
2009-06-10	04:04:00	0
2009-06-10	04:05:00	0
2009-06-10	04:06:00	0
2009-06-10	04:07:00	0
2009-06-10	04:08:00	0
2009-06-10	04:09:00	0
2009-06-10	04:10:00	0
2009-06-10	04:11:00	0
2009-06-10	04:12:00	0
2009-06-10	04:13:00	0
2009-06-10	04:14:00	0
2009-06-10	04:15:00	0
2009-06-10	04:16:00	0
2009-06-10	04:17:00	0
2009-06-10	04:18:00	0
2009-06-10	04:19:00	0
2009-06-10	04:20:00	0
2009-06-10	04:21:00	0
2009-06-10	04:22:00	0
2009-06-10	04:23:00	0
2009-06-10	04:24:00	48
2009-06-10	04:25:00	0
2009-06-10	04:26:00	0
2009-06-10	04:27:00	12
2009-06-10	04:28:00	0
2009-06-10	04:29:00	0
2009-06-10	04:30:00	0
2009-06-10	04:31:00	0
2009-06-10	04:32:00	0
2009-06-10	04:33:00	12
2009-06-10	04:34:00	0
2009-06-10	04:35:00	0
2009-06-10	04:36:00	0
2009-06-10	04:37:00	0
2009-06-10	04:38:00	0
2009-06-10	04:39:00	0
2009-06-10	04:40:00	0
2009-06-10	04:41:00	0
2009-06-10	04:42:00	0
2009-06-10	04:43:00	0
2009-06-10	04:44:00	0
2009-06-10	04:45:00	0
2009-06-10	04:46:00	0
2009-06-10	04:47:00	0
2009-06-10	04:48:00	0
2009-06-10	04:49:00	0
2009-06-10	04:50:00	0
2009-06-10	04:51:00	0
2009-06-10	04:52:00	0
2009-06-10	04:53:00	0
2009-06-10	04:54:00	0
2009-06-10	04:55:00	0
2009-06-10	04:56:00	0
2009-06-10	04:57:00	0
2009-06-10	04:58:00	12
2009-06-10	04:59:00	0
2009-06-10	05:00:00	12
2009-06-10	05:01:00	0
2009-06-10	05:02:00	0
2009-06-10	05:03:00	0
2009-06-10	05:04:00	0
2009-06-10	05:05:00	0
2009-06-10	05:06:00	0
2009-06-10	05:07:00	0
2009-06-10	05:08:00	0
2009-06-10	05:09:00	0
2009-06-10	05:10:00	0
2009-06-10	05:11:00	0
2009-06-10	05:12:00	0
2009-06-10	05:13:00	0
2009-06-10	05:14:00	0
2009-06-10	05:15:00	0
2009-06-10	05:16:00	0
2009-06-10	05:17:00	0
2009-06-10	05:18:00	0
2009-06-10	05:19:00	0
2009-06-10	05:20:00	0
2009-06-10	05:21:00	0
2009-06-10	05:22:00	0
2009-06-10	05:23:00	0
2009-06-10	05:24:00	0
2009-06-10	05:25:00	0
2009-06-10	05:26:00	0
2009-06-10	05:27:00	0
2009-06-10	05:28:00	0
2009-06-10	05:29:00	0
2009-06-10	05:30:00	0
2009-06-10	05:31:00	0
2009-06-10	05:32:00	0
2009-06-10	05:33:00	0
2009-06-10	05:34:00	186
2009-06-10	05:35:00	0
2009-06-10	05:36:00	0
2009-06-10	05:37:00	0
2009-06-10	05:38:00	0
2009-06-10	05:39:00	24
2009-06-10	05:40:00	0
2009-06-10	05:41:00	0
2009-06-10	05:42:00	0
2009-06-10	05:43:00	0
2009-06-10	05:44:00	0
2009-06-10	05:45:00	0
2009-06-10	05:46:00	0
2009-06-10	05:47:00	0
2009-06-10	05:48:00	0
2009-06-10	05:49:00	0
2009-06-10	05:50:00	0
2009-06-10	05:51:00	0
2009-06-10	05:52:00	0
2009-06-10	05:53:00	0
2009-06-10	05:54:00	0
2009-06-10	05:55:00	0
2009-06-10	05:56:00	0
2009-06-10	05:57:00	0
2009-06-10	05:58:00	0
2009-06-10	05:59:00	0
2009-06-10	06:00:00	0
2009-06-10	06:01:00	24
2009-06-10	06:02:00	97
2009-06-10	06:03:00	896
2009-06-10	06:04:00	171
2009-06-10	06:05:00	229
2009-06-10	06:06:00	36
2009-06-10	06:07:00	0
2009-06-10	06:08:00	0
2009-06-10	06:09:00	0
2009-06-10	06:10:00	0
2009-06-10	06:11:00	0
2009-06-10	06:12:00	0
2009-06-10	06:13:00	0
2009-06-10	06:14:00	1104
2009-06-10	06:15:00	350
2009-06-10	06:16:00	604
2009-06-10	06:17:00	60
2009-06-10	06:18:00	0
2009-06-10	06:19:00	0
2009-06-10	06:20:00	0
2009-06-10	06:21:00	0
2009-06-10	06:22:00	0
2009-06-10	06:23:00	0
2009-06-10	06:24:00	12
2009-06-10	06:25:00	0
2009-06-10	06:26:00	0
2009-06-10	06:27:00	0
2009-06-10	06:28:00	0
2009-06-10	06:29:00	12
2009-06-10	06:30:00	0
2009-06-10	06:31:00	0
2009-06-10	06:32:00	0
2009-06-10	06:33:00	0
2009-06-10	06:34:00	0
2009-06-10	06:35:00	0
2009-06-10	06:36:00	0
2009-06-10	06:37:00	0
2009-06-10	06:38:00	0
2009-06-10	06:39:00	258
2009-06-10	06:40:00	0
2009-06-10	06:41:00	0
2009-06-10	06:42:00	0
2009-06-10	06:43:00	0
2009-06-10	06:44:00	12
2009-06-10	06:45:00	0
2009-06-10	06:46:00	0
2009-06-10	06:47:00	0
2009-06-10	06:48:00	0
2009-06-10	06:49:00	0
2009-06-10	06:50:00	418
2009-06-10	06:51:00	546
2009-06-10	06:52:00	36
2009-06-10	06:53:00	133
2009-06-10	06:54:00	469
2009-06-10	06:55:00	287
2009-06-10	06:56:00	244
2009-06-10	06:57:00	85
2009-06-10	06:58:00	971
2009-06-10	06:59:00	546
2009-06-10	07:00:00	526
2009-06-10	07:01:00	72
2009-06-10	07:02:00	754
2009-06-10	07:03:00	1249
2009-06-10	07:04:00	244
2009-06-10	07:05:00	367
2009-06-10	07:06:00	60
2009-06-10	07:07:00	157
2009-06-10	07:08:00	435
2009-06-10	07:09:00	367
2009-06-10	07:10:00	546
2009-06-10	07:11:00	171
2009-06-10	07:12:00	12
2009-06-10	07:13:00	24
2009-06-10	07:14:00	0
2009-06-10	07:15:00	12
2009-06-10	07:16:00	0
2009-06-10	07:17:00	0
2009-06-10	07:18:00	12
2009-06-10	07:19:00	186
2009-06-10	07:20:00	186
2009-06-10	07:21:00	273
2009-06-10	07:22:00	258
2009-06-10	07:23:00	565
2009-06-10	07:24:00	72
2009-06-10	07:25:00	0
2009-06-10	07:26:00	0
2009-06-10	07:27:00	0
2009-06-10	07:28:00	0
2009-06-10	07:29:00	24
2009-06-10	07:30:00	0
2009-06-10	07:31:00	12
2009-06-10	07:32:00	0
2009-06-10	07:33:00	12
2009-06-10	07:34:00	24
2009-06-10	07:35:00	0
2009-06-10	07:36:00	0
2009-06-10	07:37:00	0
2009-06-10	07:38:00	48
2009-06-10	07:39:00	0
2009-06-10	07:40:00	12
2009-06-10	07:41:00	0
2009-06-10	07:42:00	12
2009-06-10	07:43:00	12
2009-06-10	07:44:00	12
2009-06-10	07:45:00	97
2009-06-10	07:46:00	0
2009-06-10	07:47:00	0
2009-06-10	07:48:00	0
2009-06-10	07:49:00	0
2009-06-10	07:50:00	0
2009-06-10	07:51:00	0
2009-06-10	07:52:00	0
2009-06-10	07:53:00	12
2009-06-10	07:54:00	1280
2009-06-10	07:55:00	401
2009-06-10	07:56:00	60
2009-06-10	07:57:00	171
2009-06-10	07:58:00	488
2009-06-10	07:59:00	0
2009-06-10	08:00:00	0
2009-06-10	08:01:00	0
2009-06-10	08:02:00	0
2009-06-10	08:03:00	186
2009-06-10	08:04:00	507
2009-06-10	08:05:00	186
2009-06-10	08:06:00	0
2009-06-10	08:07:00	0
2009-06-10	08:08:00	0
2009-06-10	08:09:00	0
2009-06-10	08:10:00	0
2009-06-10	08:11:00	0
2009-06-10	08:12:00	0
2009-06-10	08:13:00	0
2009-06-10	08:14:00	0
2009-06-10	08:15:00	0
2009-06-10	08:16:00	24
2009-06-10	08:17:00	85
2009-06-10	08:18:00	401
2009-06-10	08:19:00	229
2009-06-10	08:20:00	0
2009-06-10	08:21:00	0
2009-06-10	08:22:00	0
2009-06-10	08:23:00	12
2009-06-10	08:24:00	0
2009-06-10	08:25:00	0
2009-06-10	08:26:00	0
2009-06-10	08:27:00	0
2009-06-10	08:28:00	0
2009-06-10	08:29:00	0
2009-06-10	08:30:00	0
2009-06-10	08:31:00	0
2009-06-10	08:32:00	0
2009-06-10	08:33:00	0
2009-06-10	08:34:00	0
2009-06-10	08:35:00	0
2009-06-10	08:36:00	24
2009-06-10	08:37:00	48
2009-06-10	08:38:00	121
2009-06-10	08:39:00	145
2009-06-10	08:40:00	36
2009-06-10	08:41:00	0
2009-06-10	08:42:00	12
2009-06-10	08:43:00	0
2009-06-10	08:44:00	0
2009-06-10	08:45:00	12
2009-06-10	08:46:00	0
2009-06-10	08:47:00	0
2009-06-10	08:48:00	0
2009-06-10	08:49:00	12
2009-06-10	08:50:00	0
2009-06-10	08:51:00	0
2009-06-10	08:52:00	24
2009-06-10	08:53:00	0
2009-06-10	08:54:00	0
2009-06-10	08:55:00	0
2009-06-10	08:56:00	0
2009-06-10	08:57:00	0
2009-06-10	08:58:00	0
2009-06-10	08:59:00	0
2009-06-10	09:00:00	12
2009-06-10	09:01:00	0
2009-06-10	09:02:00	12
2009-06-10	09:03:00	0
2009-06-10	09:04:00	12
2009-06-10	09:05:00	12
2009-06-10	09:06:00	109
2009-06-10	09:07:00	97
2009-06-10	09:08:00	0
[truncated: 19,611 more rows]

## Sheet: 6.23.09
Actogram, Copy Raw Data, All Days
Identity:	Kelly
Filename:	E:\Active Research Files\meloxicam titre canine\cases\kelly\Kelly 6.23.09.AWC
Gender:	F
Age:	8
Height:	76.2 cm	30.0 in
Weight:	30.8 kg	67.9 lbs
Start Date:	23-Jun-2009 (Tue)
Start Time:	18:00:00
Interval:	1.00 mins
Date Stamp:	Time Stamp:	Activity Data:	Marker Press:
2009-06-23	00:00:00	0
2009-06-23	00:01:00	0
2009-06-23	00:02:00	0
2009-06-23	00:03:00	0
2009-06-23	00:04:00	0
2009-06-23	00:05:00	0
2009-06-23	00:06:00	0
2009-06-23	00:07:00	0
2009-06-23	00:08:00	0
2009-06-23	00:09:00	0
2009-06-23	00:10:00	0
2009-06-23	00:11:00	0
2009-06-23	00:12:00	0
2009-06-23	00:13:00	0
2009-06-23	00:14:00	0
2009-06-23	00:15:00	0
2009-06-23	00:16:00	0
2009-06-23	00:17:00	0
2009-06-23	00:18:00	0
2009-06-23	00:19:00	0
2009-06-23	00:20:00	0
2009-06-23	00:21:00	0
2009-06-23	00:22:00	0
2009-06-23	00:23:00	0
2009-06-23	00:24:00	0
2009-06-23	00:25:00	0
2009-06-23	00:26:00	0
2009-06-23	00:27:00	0
2009-06-23	00:28:00	0
2009-06-23	00:29:00	0
2009-06-23	00:30:00	0
2009-06-23	00:31:00	0
2009-06-23	00:32:00	0
2009-06-23	00:33:00	0
2009-06-23	00:34:00	0
2009-06-23	00:35:00	0
2009-06-23	00:36:00	0
2009-06-23	00:37:00	0
2009-06-23	00:38:00	0
2009-06-23	00:39:00	0
2009-06-23	00:40:00	0
2009-06-23	00:41:00	0
2009-06-23	00:42:00	0
2009-06-23	00:43:00	0
2009-06-23	00:44:00	0
2009-06-23	00:45:00	0
2009-06-23	00:46:00	0
2009-06-23	00:47:00	0
2009-06-23	00:48:00	0
2009-06-23	00:49:00	0
2009-06-23	00:50:00	0
2009-06-23	00:51:00	0
2009-06-23	00:52:00	0
2009-06-23	00:53:00	0
2009-06-23	00:54:00	0
2009-06-23	00:55:00	0
2009-06-23	00:56:00	0
2009-06-23	00:57:00	0
2009-06-23	00:58:00	0
2009-06-23	00:59:00	0
2009-06-23	01:00:00	0
2009-06-23	01:01:00	0
2009-06-23	01:02:00	0
2009-06-23	01:03:00	0
2009-06-23	01:04:00	0
2009-06-23	01:05:00	0
2009-06-23	01:06:00	0
2009-06-23	01:07:00	0
2009-06-23	01:08:00	0
2009-06-23	01:09:00	0
2009-06-23	01:10:00	0
2009-06-23	01:11:00	0
2009-06-23	01:12:00	0
2009-06-23	01:13:00	0
2009-06-23	01:14:00	0
2009-06-23	01:15:00	0
2009-06-23	01:16:00	0
2009-06-23	01:17:00	0
2009-06-23	01:18:00	0
2009-06-23	01:19:00	0
2009-06-23	01:20:00	0
2009-06-23	01:21:00	0
2009-06-23	01:22:00	0
2009-06-23	01:23:00	0
2009-06-23	01:24:00	0
2009-06-23	01:25:00	0
2009-06-23	01:26:00	0
2009-06-23	01:27:00	0
2009-06-23	01:28:00	0
2009-06-23	01:29:00	0
2009-06-23	01:30:00	0
2009-06-23	01:31:00	0
2009-06-23	01:32:00	0
2009-06-23	01:33:00	0
2009-06-23	01:34:00	0
2009-06-23	01:35:00	0
2009-06-23	01:36:00	0
2009-06-23	01:37:00	0
2009-06-23	01:38:00	0
2009-06-23	01:39:00	0
2009-06-23	01:40:00	0
2009-06-23	01:41:00	0
2009-06-23	01:42:00	0
2009-06-23	01:43:00	0
2009-06-23	01:44:00	0
2009-06-23	01:45:00	0
2009-06-23	01:46:00	0
2009-06-23	01:47:00	0
2009-06-23	01:48:00	0
2009-06-23	01:49:00	0
2009-06-23	01:50:00	0
2009-06-23	01:51:00	0
2009-06-23	01:52:00	0
2009-06-23	01:53:00	0
2009-06-23	01:54:00	0
2009-06-23	01:55:00	0
2009-06-23	01:56:00	0
2009-06-23	01:57:00	0
2009-06-23	01:58:00	0
2009-06-23	01:59:00	0
2009-06-23	02:00:00	0
2009-06-23	02:01:00	0
2009-06-23	02:02:00	0
2009-06-23	02:03:00	0
2009-06-23	02:04:00	0
2009-06-23	02:05:00	0
2009-06-23	02:06:00	0
2009-06-23	02:07:00	0
2009-06-23	02:08:00	0
2009-06-23	02:09:00	0
2009-06-23	02:10:00	0
2009-06-23	02:11:00	0
2009-06-23	02:12:00	0
2009-06-23	02:13:00	0
2009-06-23	02:14:00	0
2009-06-23	02:15:00	0
2009-06-23	02:16:00	0
2009-06-23	02:17:00	0
2009-06-23	02:18:00	0
2009-06-23	02:19:00	0
2009-06-23	02:20:00	0
2009-06-23	02:21:00	0
2009-06-23	02:22:00	0
2009-06-23	02:23:00	0
2009-06-23	02:24:00	0
2009-06-23	02:25:00	0
2009-06-23	02:26:00	0
2009-06-23	02:27:00	0
2009-06-23	02:28:00	0
2009-06-23	02:29:00	0
2009-06-23	02:30:00	0
2009-06-23	02:31:00	0
2009-06-23	02:32:00	0
2009-06-23	02:33:00	0
2009-06-23	02:34:00	0
2009-06-23	02:35:00	0
2009-06-23	02:36:00	0
2009-06-23	02:37:00	0
2009-06-23	02:38:00	0
2009-06-23	02:39:00	0
2009-06-23	02:40:00	0
2009-06-23	02:41:00	0
2009-06-23	02:42:00	0
2009-06-23	02:43:00	0
2009-06-23	02:44:00	0
2009-06-23	02:45:00	0
2009-06-23	02:46:00	0
2009-06-23	02:47:00	0
2009-06-23	02:48:00	0
2009-06-23	02:49:00	0
2009-06-23	02:50:00	0
2009-06-23	02:51:00	0
2009-06-23	02:52:00	0
2009-06-23	02:53:00	0
2009-06-23	02:54:00	0
2009-06-23	02:55:00	0
2009-06-23	02:56:00	0
2009-06-23	02:57:00	0
2009-06-23	02:58:00	0
2009-06-23	02:59:00	0
2009-06-23	03:00:00	0
2009-06-23	03:01:00	0
2009-06-23	03:02:00	0
2009-06-23	03:03:00	0
2009-06-23	03:04:00	0
2009-06-23	03:05:00	0
2009-06-23	03:06:00	0
2009-06-23	03:07:00	0
2009-06-23	03:08:00	0
2009-06-23	03:09:00	0
2009-06-23	03:10:00	0
2009-06-23	03:11:00	0
2009-06-23	03:12:00	0
2009-06-23	03:13:00	0
2009-06-23	03:14:00	0
2009-06-23	03:15:00	0
2009-06-23	03:16:00	0
2009-06-23	03:17:00	0
2009-06-23	03:18:00	0
2009-06-23	03:19:00	0
2009-06-23	03:20:00	0
2009-06-23	03:21:00	0
2009-06-23	03:22:00	0
2009-06-23	03:23:00	0
2009-06-23	03:24:00	0
2009-06-23	03:25:00	0
2009-06-23	03:26:00	0
2009-06-23	03:27:00	0
2009-06-23	03:28:00	0
2009-06-23	03:29:00	0
2009-06-23	03:30:00	0
2009-06-23	03:31:00	0
2009-06-23	03:32:00	0
2009-06-23	03:33:00	0
2009-06-23	03:34:00	0
2009-06-23	03:35:00	0
2009-06-23	03:36:00	0
2009-06-23	03:37:00	0
2009-06-23	03:38:00	0
2009-06-23	03:39:00	0
2009-06-23	03:40:00	0
2009-06-23	03:41:00	0
2009-06-23	03:42:00	0
2009-06-23	03:43:00	0
2009-06-23	03:44:00	0
2009-06-23	03:45:00	0
2009-06-23	03:46:00	0
2009-06-23	03:47:00	0
2009-06-23	03:48:00	0
2009-06-23	03:49:00	0
2009-06-23	03:50:00	0
2009-06-23	03:51:00	0
2009-06-23	03:52:00	0
2009-06-23	03:53:00	0
2009-06-23	03:54:00	0
2009-06-23	03:55:00	0
2009-06-23	03:56:00	0
2009-06-23	03:57:00	0
2009-06-23	03:58:00	0
2009-06-23	03:59:00	0
2009-06-23	04:00:00	0
2009-06-23	04:01:00	0
2009-06-23	04:02:00	0
2009-06-23	04:03:00	0
2009-06-23	04:04:00	0
2009-06-23	04:05:00	0
2009-06-23	04:06:00	0
2009-06-23	04:07:00	0
2009-06-23	04:08:00	0
2009-06-23	04:09:00	0
2009-06-23	04:10:00	0
2009-06-23	04:11:00	0
2009-06-23	04:12:00	0
2009-06-23	04:13:00	0
2009-06-23	04:14:00	0
2009-06-23	04:15:00	0
2009-06-23	04:16:00	0
2009-06-23	04:17:00	0
2009-06-23	04:18:00	0
2009-06-23	04:19:00	0
2009-06-23	04:20:00	0
2009-06-23	04:21:00	0
2009-06-23	04:22:00	0
2009-06-23	04:23:00	0
2009-06-23	04:24:00	0
2009-06-23	04:25:00	0
2009-06-23	04:26:00	0
2009-06-23	04:27:00	0
2009-06-23	04:28:00	0
2009-06-23	04:29:00	0
2009-06-23	04:30:00	0
2009-06-23	04:31:00	0
2009-06-23	04:32:00	0
2009-06-23	04:33:00	0
2009-06-23	04:34:00	0
2009-06-23	04:35:00	0
2009-06-23	04:36:00	0
2009-06-23	04:37:00	0
2009-06-23	04:38:00	0
2009-06-23	04:39:00	0
2009-06-23	04:40:00	0
2009-06-23	04:41:00	0
2009-06-23	04:42:00	0
2009-06-23	04:43:00	0
2009-06-23	04:44:00	0
2009-06-23	04:45:00	0
2009-06-23	04:46:00	0
2009-06-23	04:47:00	0
2009-06-23	04:48:00	0
2009-06-23	04:49:00	0
2009-06-23	04:50:00	0
2009-06-23	04:51:00	0
2009-06-23	04:52:00	0
2009-06-23	04:53:00	0
2009-06-23	04:54:00	0
2009-06-23	04:55:00	0
2009-06-23	04:56:00	0
2009-06-23	04:57:00	0
2009-06-23	04:58:00	0
2009-06-23	04:59:00	0
2009-06-23	05:00:00	0
2009-06-23	05:01:00	0
2009-06-23	05:02:00	0
2009-06-23	05:03:00	0
2009-06-23	05:04:00	0
2009-06-23	05:05:00	0
2009-06-23	05:06:00	0
2009-06-23	05:07:00	0
2009-06-23	05:08:00	0
2009-06-23	05:09:00	0
2009-06-23	05:10:00	0
2009-06-23	05:11:00	0
2009-06-23	05:12:00	0
2009-06-23	05:13:00	0
2009-06-23	05:14:00	0
2009-06-23	05:15:00	0
2009-06-23	05:16:00	0
2009-06-23	05:17:00	0
2009-06-23	05:18:00	0
2009-06-23	05:19:00	0
2009-06-23	05:20:00	0
2009-06-23	05:21:00	0
2009-06-23	05:22:00	0
2009-06-23	05:23:00	0
2009-06-23	05:24:00	0
2009-06-23	05:25:00	0
2009-06-23	05:26:00	0
2009-06-23	05:27:00	0
2009-06-23	05:28:00	0
2009-06-23	05:29:00	0
2009-06-23	05:30:00	0
2009-06-23	05:31:00	0
2009-06-23	05:32:00	0
2009-06-23	05:33:00	0
2009-06-23	05:34:00	0
2009-06-23	05:35:00	0
2009-06-23	05:36:00	0
2009-06-23	05:37:00	0
2009-06-23	05:38:00	0
2009-06-23	05:39:00	0
2009-06-23	05:40:00	0
2009-06-23	05:41:00	0
2009-06-23	05:42:00	0
2009-06-23	05:43:00	0
2009-06-23	05:44:00	0
2009-06-23	05:45:00	0
2009-06-23	05:46:00	0
2009-06-23	05:47:00	0
2009-06-23	05:48:00	0
2009-06-23	05:49:00	0
2009-06-23	05:50:00	0
2009-06-23	05:51:00	0
2009-06-23	05:52:00	0
2009-06-23	05:53:00	0
2009-06-23	05:54:00	0
2009-06-23	05:55:00	0
2009-06-23	05:56:00	0
2009-06-23	05:57:00	0
2009-06-23	05:58:00	0
2009-06-23	05:59:00	0
2009-06-23	06:00:00	0
2009-06-23	06:01:00	0
2009-06-23	06:02:00	0
2009-06-23	06:03:00	0
2009-06-23	06:04:00	0
2009-06-23	06:05:00	0
2009-06-23	06:06:00	0
2009-06-23	06:07:00	0
2009-06-23	06:08:00	0
2009-06-23	06:09:00	0
2009-06-23	06:10:00	0
2009-06-23	06:11:00	0
2009-06-23	06:12:00	0
2009-06-23	06:13:00	0
2009-06-23	06:14:00	0
2009-06-23	06:15:00	0
2009-06-23	06:16:00	0
2009-06-23	06:17:00	0
2009-06-23	06:18:00	0
2009-06-23	06:19:00	0
2009-06-23	06:20:00	0
2009-06-23	06:21:00	0
2009-06-23	06:22:00	0
2009-06-23	06:23:00	0
2009-06-23	06:24:00	0
2009-06-23	06:25:00	0
2009-06-23	06:26:00	0
2009-06-23	06:27:00	0
2009-06-23	06:28:00	0
2009-06-23	06:29:00	0
2009-06-23	06:30:00	0
2009-06-23	06:31:00	0
2009-06-23	06:32:00	0
2009-06-23	06:33:00	0
2009-06-23	06:34:00	0
2009-06-23	06:35:00	0
2009-06-23	06:36:00	0
2009-06-23	06:37:00	0
2009-06-23	06:38:00	0
2009-06-23	06:39:00	0
2009-06-23	06:40:00	0
2009-06-23	06:41:00	0
2009-06-23	06:42:00	0
2009-06-23	06:43:00	0
2009-06-23	06:44:00	0
2009-06-23	06:45:00	0
2009-06-23	06:46:00	0
2009-06-23	06:47:00	0
2009-06-23	06:48:00	0
2009-06-23	06:49:00	0
2009-06-23	06:50:00	0
2009-06-23	06:51:00	0
2009-06-23	06:52:00	0
2009-06-23	06:53:00	0
2009-06-23	06:54:00	0
2009-06-23	06:55:00	0
2009-06-23	06:56:00	0
2009-06-23	06:57:00	0
2009-06-23	06:58:00	0
2009-06-23	06:59:00	0
2009-06-23	07:00:00	0
2009-06-23	07:01:00	0
2009-06-23	07:02:00	0
2009-06-23	07:03:00	0
2009-06-23	07:04:00	0
2009-06-23	07:05:00	0
2009-06-23	07:06:00	0
2009-06-23	07:07:00	0
2009-06-23	07:08:00	0
2009-06-23	07:09:00	0
2009-06-23	07:10:00	0
2009-06-23	07:11:00	0
2009-06-23	07:12:00	0
2009-06-23	07:13:00	0
2009-06-23	07:14:00	0
2009-06-23	07:15:00	0
2009-06-23	07:16:00	0
2009-06-23	07:17:00	0
2009-06-23	07:18:00	0
2009-06-23	07:19:00	0
2009-06-23	07:20:00	0
2009-06-23	07:21:00	0
2009-06-23	07:22:00	0
2009-06-23	07:23:00	0
2009-06-23	07:24:00	0
2009-06-23	07:25:00	0
2009-06-23	07:26:00	0
2009-06-23	07:27:00	0
2009-06-23	07:28:00	0
2009-06-23	07:29:00	0
2009-06-23	07:30:00	0
2009-06-23	07:31:00	0
2009-06-23	07:32:00	0
2009-06-23	07:33:00	0
2009-06-23	07:34:00	0
2009-06-23	07:35:00	0
2009-06-23	07:36:00	0
2009-06-23	07:37:00	0
2009-06-23	07:38:00	0
2009-06-23	07:39:00	0
2009-06-23	07:40:00	0
2009-06-23	07:41:00	0
2009-06-23	07:42:00	0
2009-06-23	07:43:00	0
2009-06-23	07:44:00	0
2009-06-23	07:45:00	0
2009-06-23	07:46:00	0
2009-06-23	07:47:00	0
2009-06-23	07:48:00	0
2009-06-23	07:49:00	0
2009-06-23	07:50:00	0
2009-06-23	07:51:00	0
2009-06-23	07:52:00	0
2009-06-23	07:53:00	0
2009-06-23	07:54:00	0
2009-06-23	07:55:00	0
2009-06-23	07:56:00	0
2009-06-23	07:57:00	0
2009-06-23	07:58:00	0
2009-06-23	07:59:00	0
2009-06-23	08:00:00	0
2009-06-23	08:01:00	0
2009-06-23	08:02:00	0
2009-06-23	08:03:00	0
2009-06-23	08:04:00	0
2009-06-23	08:05:00	0
2009-06-23	08:06:00	0
2009-06-23	08:07:00	0
2009-06-23	08:08:00	0
2009-06-23	08:09:00	0
2009-06-23	08:10:00	0
2009-06-23	08:11:00	0
2009-06-23	08:12:00	0
2009-06-23	08:13:00	0
2009-06-23	08:14:00	0
2009-06-23	08:15:00	0
2009-06-23	08:16:00	0
2009-06-23	08:17:00	0
2009-06-23	08:18:00	0
2009-06-23	08:19:00	0
2009-06-23	08:20:00	0
2009-06-23	08:21:00	0
2009-06-23	08:22:00	0
2009-06-23	08:23:00	0
2009-06-23	08:24:00	0
2009-06-23	08:25:00	0
2009-06-23	08:26:00	0
2009-06-23	08:27:00	0
2009-06-23	08:28:00	0
2009-06-23	08:29:00	0
2009-06-23	08:30:00	0
2009-06-23	08:31:00	0
2009-06-23	08:32:00	0
2009-06-23	08:33:00	0
2009-06-23	08:34:00	0
2009-06-23	08:35:00	0
2009-06-23	08:36:00	0
2009-06-23	08:37:00	0
2009-06-23	08:38:00	0
2009-06-23	08:39:00	0
2009-06-23	08:40:00	0
2009-06-23	08:41:00	0
2009-06-23	08:42:00	0
2009-06-23	08:43:00	0
2009-06-23	08:44:00	0
2009-06-23	08:45:00	0
2009-06-23	08:46:00	0
2009-06-23	08:47:00	0
2009-06-23	08:48:00	0
2009-06-23	08:49:00	0
2009-06-23	08:50:00	0
2009-06-23	08:51:00	0
2009-06-23	08:52:00	0
2009-06-23	08:53:00	0
2009-06-23	08:54:00	0
2009-06-23	08:55:00	0
2009-06-23	08:56:00	0
2009-06-23	08:57:00	0
2009-06-23	08:58:00	0
2009-06-23	08:59:00	0
2009-06-23	09:00:00	0
2009-06-23	09:01:00	0
2009-06-23	09:02:00	0
2009-06-23	09:03:00	0
2009-06-23	09:04:00	0
2009-06-23	09:05:00	0
2009-06-23	09:06:00	0
2009-06-23	09:07:00	0
2009-06-23	09:08:00	0
2009-06-23	09:09:00	0
2009-06-23	09:10:00	0
2009-06-23	09:11:00	0
2009-06-23	09:12:00	0
2009-06-23	09:13:00	0
2009-06-23	09:14:00	0
2009-06-23	09:15:00	0
2009-06-23	09:16:00	0
2009-06-23	09:17:00	0
2009-06-23	09:18:00	0
2009-06-23	09:19:00	0
2009-06-23	09:20:00	0
2009-06-23	09:21:00	0
2009-06-23	09:22:00	0
2009-06-23	09:23:00	0
2009-06-23	09:24:00	0
2009-06-23	09:25:00	0
2009-06-23	09:26:00	0
2009-06-23	09:27:00	0
2009-06-23	09:28:00	0
2009-06-23	09:29:00	0
2009-06-23	09:30:00	0
2009-06-23	09:31:00	0
2009-06-23	09:32:00	0
2009-06-23	09:33:00	0
2009-06-23	09:34:00	0
2009-06-23	09:35:00	0
2009-06-23	09:36:00	0
2009-06-23	09:37:00	0
2009-06-23	09:38:00	0
2009-06-23	09:39:00	0
2009-06-23	09:40:00	0
2009-06-23	09:41:00	0
2009-06-23	09:42:00	0
2009-06-23	09:43:00	0
2009-06-23	09:44:00	0
2009-06-23	09:45:00	0
2009-06-23	09:46:00	0
2009-06-23	09:47:00	0
2009-06-23	09:48:00	0
2009-06-23	09:49:00	0
2009-06-23	09:50:00	0
2009-06-23	09:51:00	0
2009-06-23	09:52:00	0
2009-06-23	09:53:00	0
2009-06-23	09:54:00	0
2009-06-23	09:55:00	0
2009-06-23	09:56:00	0
2009-06-23	09:57:00	0
2009-06-23	09:58:00	0
2009-06-23	09:59:00	0
2009-06-23	10:00:00	0
2009-06-23	10:01:00	0
2009-06-23	10:02:00	0
2009-06-23	10:03:00	0
2009-06-23	10:04:00	0
2009-06-23	10:05:00	0
2009-06-23	10:06:00	0
2009-06-23	10:07:00	0
2009-06-23	10:08:00	0
2009-06-23	10:09:00	0
2009-06-23	10:10:00	0
2009-06-23	10:11:00	0
2009-06-23	10:12:00	0
2009-06-23	10:13:00	0
2009-06-23	10:14:00	0
2009-06-23	10:15:00	0
2009-06-23	10:16:00	0
2009-06-23	10:17:00	0
2009-06-23	10:18:00	0
2009-06-23	10:19:00	0
2009-06-23	10:20:00	0
2009-06-23	10:21:00	0
2009-06-23	10:22:00	0
2009-06-23	10:23:00	0
2009-06-23	10:24:00	0
2009-06-23	10:25:00	0
2009-06-23	10:26:00	0
2009-06-23	10:27:00	0
2009-06-23	10:28:00	0
2009-06-23	10:29:00	0
2009-06-23	10:30:00	0
2009-06-23	10:31:00	0
2009-06-23	10:32:00	0
2009-06-23	10:33:00	0
2009-06-23	10:34:00	0
2009-06-23	10:35:00	0
2009-06-23	10:36:00	0
2009-06-23	10:37:00	0
2009-06-23	10:38:00	0
2009-06-23	10:39:00	0
2009-06-23	10:40:00	0
2009-06-23	10:41:00	0
2009-06-23	10:42:00	0
2009-06-23	10:43:00	0
2009-06-23	10:44:00	0
2009-06-23	10:45:00	0
2009-06-23	10:46:00	0
2009-06-23	10:47:00	0
2009-06-23	10:48:00	0
2009-06-23	10:49:00	0
2009-06-23	10:50:00	0
2009-06-23	10:51:00	0
2009-06-23	10:52:00	0
2009-06-23	10:53:00	0
2009-06-23	10:54:00	0
2009-06-23	10:55:00	0
2009-06-23	10:56:00	0
2009-06-23	10:57:00	0
2009-06-23	10:58:00	0
2009-06-23	10:59:00	0
2009-06-23	11:00:00	0
2009-06-23	11:01:00	0
2009-06-23	11:02:00	0
2009-06-23	11:03:00	0
2009-06-23	11:04:00	0
2009-06-23	11:05:00	0
2009-06-23	11:06:00	0
2009-06-23	11:07:00	0
2009-06-23	11:08:00	0
2009-06-23	11:09:00	0
2009-06-23	11:10:00	0
2009-06-23	11:11:00	0
2009-06-23	11:12:00	0
2009-06-23	11:13:00	0
2009-06-23	11:14:00	0
2009-06-23	11:15:00	0
2009-06-23	11:16:00	0
2009-06-23	11:17:00	0
2009-06-23	11:18:00	0
2009-06-23	11:19:00	0
2009-06-23	11:20:00	0
2009-06-23	11:21:00	0
2009-06-23	11:22:00	0
2009-06-23	11:23:00	0
2009-06-23	11:24:00	0
2009-06-23	11:25:00	0
2009-06-23	11:26:00	0
2009-06-23	11:27:00	0
2009-06-23	11:28:00	0
2009-06-23	11:29:00	0
2009-06-23	11:30:00	0
2009-06-23	11:31:00	0
2009-06-23	11:32:00	0
2009-06-23	11:33:00	0
2009-06-23	11:34:00	0
2009-06-23	11:35:00	0
2009-06-23	11:36:00	0
2009-06-23	11:37:00	0
2009-06-23	11:38:00	0
2009-06-23	11:39:00	0
2009-06-23	11:40:00	0
2009-06-23	11:41:00	0
2009-06-23	11:42:00	0
2009-06-23	11:43:00	0
2009-06-23	11:44:00	0
2009-06-23	11:45:00	0
2009-06-23	11:46:00	0
2009-06-23	11:47:00	0
2009-06-23	11:48:00	0
2009-06-23	11:49:00	0
2009-06-23	11:50:00	0
2009-06-23	11:51:00	0
2009-06-23	11:52:00	0
2009-06-23	11:53:00	0
2009-06-23	11:54:00	0
2009-06-23	11:55:00	0
2009-06-23	11:56:00	0
2009-06-23	11:57:00	0
2009-06-23	11:58:00	0
2009-06-23	11:59:00	0
2009-06-23	12:00:00	0
2009-06-23	12:01:00	0
2009-06-23	12:02:00	0
2009-06-23	12:03:00	0
2009-06-23	12:04:00	0
2009-06-23	12:05:00	0
2009-06-23	12:06:00	0
2009-06-23	12:07:00	0
2009-06-23	12:08:00	0
2009-06-23	12:09:00	0
2009-06-23	12:10:00	0
2009-06-23	12:11:00	0
2009-06-23	12:12:00	0
2009-06-23	12:13:00	0
2009-06-23	12:14:00	0
2009-06-23	12:15:00	0
2009-06-23	12:16:00	0
2009-06-23	12:17:00	0
2009-06-23	12:18:00	0
2009-06-23	12:19:00	0
2009-06-23	12:20:00	0
2009-06-23	12:21:00	0
2009-06-23	12:22:00	0
2009-06-23	12:23:00	0
2009-06-23	12:24:00	0
2009-06-23	12:25:00	0
2009-06-23	12:26:00	0
2009-06-23	12:27:00	0
2009-06-23	12:28:00	0
2009-06-23	12:29:00	0
2009-06-23	12:30:00	0
2009-06-23	12:31:00	0
2009-06-23	12:32:00	0
2009-06-23	12:33:00	0
2009-06-23	12:34:00	0
2009-06-23	12:35:00	0
2009-06-23	12:36:00	0
2009-06-23	12:37:00	0
2009-06-23	12:38:00	0
2009-06-23	12:39:00	0
2009-06-23	12:40:00	0
2009-06-23	12:41:00	0
2009-06-23	12:42:00	0
2009-06-23	12:43:00	0
2009-06-23	12:44:00	0
2009-06-23	12:45:00	0
2009-06-23	12:46:00	0
2009-06-23	12:47:00	0
2009-06-23	12:48:00	0
2009-06-23	12:49:00	0
2009-06-23	12:50:00	0
2009-06-23	12:51:00	0
2009-06-23	12:52:00	0
2009-06-23	12:53:00	0
2009-06-23	12:54:00	0
2009-06-23	12:55:00	0
2009-06-23	12:56:00	0
2009-06-23	12:57:00	0
2009-06-23	12:58:00	0
2009-06-23	12:59:00	0
2009-06-23	13:00:00	0
2009-06-23	13:01:00	0
2009-06-23	13:02:00	0
2009-06-23	13:03:00	0
2009-06-23	13:04:00	0
2009-06-23	13:05:00	0
2009-06-23	13:06:00	0
2009-06-23	13:07:00	0
2009-06-23	13:08:00	0
2009-06-23	13:09:00	0
2009-06-23	13:10:00	0
2009-06-23	13:11:00	0
2009-06-23	13:12:00	0
2009-06-23	13:13:00	0
2009-06-23	13:14:00	0
2009-06-23	13:15:00	0
2009-06-23	13:16:00	0
2009-06-23	13:17:00	0
2009-06-23	13:18:00	0
2009-06-23	13:19:00	0
2009-06-23	13:20:00	0
2009-06-23	13:21:00	0
2009-06-23	13:22:00	0
2009-06-23	13:23:00	0
2009-06-23	13:24:00	0
2009-06-23	13:25:00	0
2009-06-23	13:26:00	0
2009-06-23	13:27:00	0
2009-06-23	13:28:00	0
2009-06-23	13:29:00	0
2009-06-23	13:30:00	0
2009-06-23	13:31:00	0
2009-06-23	13:32:00	0
2009-06-23	13:33:00	0
2009-06-23	13:34:00	0
2009-06-23	13:35:00	0
2009-06-23	13:36:00	0
2009-06-23	13:37:00	0
2009-06-23	13:38:00	0
2009-06-23	13:39:00	0
2009-06-23	13:40:00	0
2009-06-23	13:41:00	0
2009-06-23	13:42:00	0
2009-06-23	13:43:00	0
2009-06-23	13:44:00	0
2009-06-23	13:45:00	0
2009-06-23	13:46:00	0
2009-06-23	13:47:00	0
2009-06-23	13:48:00	0
2009-06-23	13:49:00	0
2009-06-23	13:50:00	0
2009-06-23	13:51:00	0
2009-06-23	13:52:00	0
2009-06-23	13:53:00	0
2009-06-23	13:54:00	0
2009-06-23	13:55:00	0
2009-06-23	13:56:00	0
2009-06-23	13:57:00	0
2009-06-23	13:58:00	0
2009-06-23	13:59:00	0
2009-06-23	14:00:00	0
2009-06-23	14:01:00	0
2009-06-23	14:02:00	0
2009-06-23	14:03:00	0
2009-06-23	14:04:00	0
2009-06-23	14:05:00	0
2009-06-23	14:06:00	0
2009-06-23	14:07:00	0
2009-06-23	14:08:00	0
2009-06-23	14:09:00	0
2009-06-23	14:10:00	0
2009-06-23	14:11:00	0
2009-06-23	14:12:00	0
2009-06-23	14:13:00	0
2009-06-23	14:14:00	0
2009-06-23	14:15:00	0
2009-06-23	14:16:00	0
2009-06-23	14:17:00	0
2009-06-23	14:18:00	0
2009-06-23	14:19:00	0
2009-06-23	14:20:00	0
2009-06-23	14:21:00	0
2009-06-23	14:22:00	0
2009-06-23	14:23:00	0
2009-06-23	14:24:00	0
2009-06-23	14:25:00	0
2009-06-23	14:26:00	0
2009-06-23	14:27:00	0
2009-06-23	14:28:00	0
2009-06-23	14:29:00	0
2009-06-23	14:30:00	0
2009-06-23	14:31:00	0
2009-06-23	14:32:00	0
2009-06-23	14:33:00	0
2009-06-23	14:34:00	0
2009-06-23	14:35:00	0
2009-06-23	14:36:00	0
2009-06-23	14:37:00	0
2009-06-23	14:38:00	0
2009-06-23	14:39:00	0
2009-06-23	14:40:00	0
2009-06-23	14:41:00	0
2009-06-23	14:42:00	0
2009-06-23	14:43:00	0
2009-06-23	14:44:00	0
2009-06-23	14:45:00	0
2009-06-23	14:46:00	0
2009-06-23	14:47:00	0
2009-06-23	14:48:00	0
2009-06-23	14:49:00	0
2009-06-23	14:50:00	0
2009-06-23	14:51:00	0
2009-06-23	14:52:00	0
2009-06-23	14:53:00	0
2009-06-23	14:54:00	0
2009-06-23	14:55:00	0
2009-06-23	14:56:00	0
2009-06-23	14:57:00	0
2009-06-23	14:58:00	0
2009-06-23	14:59:00	0
2009-06-23	15:00:00	0
2009-06-23	15:01:00	0
2009-06-23	15:02:00	0
2009-06-23	15:03:00	0
2009-06-23	15:04:00	0
2009-06-23	15:05:00	0
2009-06-23	15:06:00	0
2009-06-23	15:07:00	0
2009-06-23	15:08:00	0
2009-06-23	15:09:00	0
2009-06-23	15:10:00	0
2009-06-23	15:11:00	0
2009-06-23	15:12:00	0
2009-06-23	15:13:00	0
2009-06-23	15:14:00	0
2009-06-23	15:15:00	0
2009-06-23	15:16:00	0
2009-06-23	15:17:00	0
2009-06-23	15:18:00	0
2009-06-23	15:19:00	0
2009-06-23	15:20:00	0
2009-06-23	15:21:00	0
2009-06-23	15:22:00	0
2009-06-23	15:23:00	0
2009-06-23	15:24:00	0
2009-06-23	15:25:00	0
2009-06-23	15:26:00	0
2009-06-23	15:27:00	0
2009-06-23	15:28:00	0
2009-06-23	15:29:00	0
2009-06-23	15:30:00	0
2009-06-23	15:31:00	0
2009-06-23	15:32:00	0
2009-06-23	15:33:00	0
2009-06-23	15:34:00	0
2009-06-23	15:35:00	0
2009-06-23	15:36:00	0
2009-06-23	15:37:00	0
2009-06-23	15:38:00	0
2009-06-23	15:39:00	0
2009-06-23	15:40:00	0
2009-06-23	15:41:00	0
2009-06-23	15:42:00	0
2009-06-23	15:43:00	0
2009-06-23	15:44:00	0
2009-06-23	15:45:00	0
2009-06-23	15:46:00	0
2009-06-23	15:47:00	0
2009-06-23	15:48:00	0
2009-06-23	15:49:00	0
2009-06-23	15:50:00	0
2009-06-23	15:51:00	0
2009-06-23	15:52:00	0
2009-06-23	15:53:00	0
2009-06-23	15:54:00	0
2009-06-23	15:55:00	0
2009-06-23	15:56:00	0
2009-06-23	15:57:00	0
2009-06-23	15:58:00	0
2009-06-23	15:59:00	0
2009-06-23	16:00:00	0
2009-06-23	16:01:00	0
2009-06-23	16:02:00	0
2009-06-23	16:03:00	0
2009-06-23	16:04:00	0
2009-06-23	16:05:00	0
2009-06-23	16:06:00	0
2009-06-23	16:07:00	0
2009-06-23	16:08:00	0
2009-06-23	16:09:00	0
2009-06-23	16:10:00	0
2009-06-23	16:11:00	0
2009-06-23	16:12:00	0
2009-06-23	16:13:00	0
2009-06-23	16:14:00	0
2009-06-23	16:15:00	0
2009-06-23	16:16:00	0
2009-06-23	16:17:00	0
2009-06-23	16:18:00	0
2009-06-23	16:19:00	0
2009-06-23	16:20:00	0
2009-06-23	16:21:00	0
2009-06-23	16:22:00	0
2009-06-23	16:23:00	0
2009-06-23	16:24:00	0
2009-06-23	16:25:00	0
2009-06-23	16:26:00	0
2009-06-23	16:27:00	0
2009-06-23	16:28:00	0
2009-06-23	16:29:00	0
2009-06-23	16:30:00	0
2009-06-23	16:31:00	0
2009-06-23	16:32:00	0
2009-06-23	16:33:00	0
2009-06-23	16:34:00	0
2009-06-23	16:35:00	0
2009-06-23	16:36:00	0
2009-06-23	16:37:00	0
2009-06-23	16:38:00	0
2009-06-23	16:39:00	0
2009-06-23	16:40:00	0
2009-06-23	16:41:00	0
2009-06-23	16:42:00	0
2009-06-23	16:43:00	0
2009-06-23	16:44:00	0
2009-06-23	16:45:00	0
2009-06-23	16:46:00	0
2009-06-23	16:47:00	0
2009-06-23	16:48:00	0
2009-06-23	16:49:00	0
2009-06-23	16:50:00	0
2009-06-23	16:51:00	0
2009-06-23	16:52:00	0
2009-06-23	16:53:00	0
2009-06-23	16:54:00	0
2009-06-23	16:55:00	0
2009-06-23	16:56:00	0
2009-06-23	16:57:00	0
2009-06-23	16:58:00	0
2009-06-23	16:59:00	0
2009-06-23	17:00:00	0
2009-06-23	17:01:00	0
2009-06-23	17:02:00	0
2009-06-23	17:03:00	0
2009-06-23	17:04:00	0
2009-06-23	17:05:00	0
2009-06-23	17:06:00	0
2009-06-23	17:07:00	0
2009-06-23	17:08:00	0
2009-06-23	17:09:00	0
2009-06-23	17:10:00	0
2009-06-23	17:11:00	0
2009-06-23	17:12:00	0
2009-06-23	17:13:00	0
2009-06-23	17:14:00	0
2009-06-23	17:15:00	0
2009-06-23	17:16:00	0
2009-06-23	17:17:00	0
2009-06-23	17:18:00	0
2009-06-23	17:19:00	0
2009-06-23	17:20:00	0
2009-06-23	17:21:00	0
2009-06-23	17:22:00	0
2009-06-23	17:23:00	0
2009-06-23	17:24:00	0
2009-06-23	17:25:00	0
2009-06-23	17:26:00	0
2009-06-23	17:27:00	0
2009-06-23	17:28:00	0
2009-06-23	17:29:00	0
2009-06-23	17:30:00	0
2009-06-23	17:31:00	0
2009-06-23	17:32:00	0
2009-06-23	17:33:00	0
2009-06-23	17:34:00	0
2009-06-23	17:35:00	0
2009-06-23	17:36:00	0
2009-06-23	17:37:00	0
2009-06-23	17:38:00	0
2009-06-23	17:39:00	0
2009-06-23	17:40:00	0
2009-06-23	17:41:00	0
2009-06-23	17:42:00	0
2009-06-23	17:43:00	0
2009-06-23	17:44:00	0
2009-06-23	17:45:00	0
2009-06-23	17:46:00	0
2009-06-23	17:47:00	0
2009-06-23	17:48:00	0
2009-06-23	17:49:00	0
2009-06-23	17:50:00	0
2009-06-23	17:51:00	0
2009-06-23	17:52:00	0
2009-06-23	17:53:00	0
2009-06-23	17:54:00	0
2009-06-23	17:55:00	0
2009-06-23	17:56:00	0
2009-06-23	17:57:00	0
2009-06-23	17:58:00	0
2009-06-23	17:59:00	0
2009-06-23	18:00:00	0	M
2009-06-23	18:01:00	85
2009-06-23	18:02:00	1374
2009-06-23	18:03:00	1439
2009-06-23	18:04:00	775
2009-06-23	18:05:00	133
2009-06-23	18:06:00	121
2009-06-23	18:07:00	157
2009-06-23	18:08:00	72
2009-06-23	18:09:00	200
2009-06-23	18:10:00	229
2009-06-23	18:11:00	287
2009-06-23	18:12:00	452
2009-06-23	18:13:00	488
2009-06-23	18:14:00	469
2009-06-23	18:15:00	145
2009-06-23	18:16:00	0
2009-06-23	18:17:00	0
2009-06-23	18:18:00	0
2009-06-23	18:19:00	0
2009-06-23	18:20:00	0
2009-06-23	18:21:00	85
2009-06-23	18:22:00	12
2009-06-23	18:23:00	121
2009-06-23	18:24:00	12
2009-06-23	18:25:00	133
2009-06-23	18:26:00	157
2009-06-23	18:27:00	0
2009-06-23	18:28:00	0
2009-06-23	18:29:00	145
2009-06-23	18:30:00	333
2009-06-23	18:31:00	171
2009-06-23	18:32:00	0
2009-06-23	18:33:00	0
2009-06-23	18:34:00	48
2009-06-23	18:35:00	145
2009-06-23	18:36:00	418
2009-06-23	18:37:00	688
2009-06-23	18:38:00	507
2009-06-23	18:39:00	667
2009-06-23	18:40:00	302
2009-06-23	18:41:00	526
2009-06-23	18:42:00	367
2009-06-23	18:43:00	367
2009-06-23	18:44:00	85
2009-06-23	18:45:00	109
2009-06-23	18:46:00	24
2009-06-23	18:47:00	36
2009-06-23	18:48:00	97
2009-06-23	18:49:00	48
2009-06-23	18:50:00	109
2009-06-23	18:51:00	0
2009-06-23	18:52:00	0
2009-06-23	18:53:00	0
2009-06-23	18:54:00	0
2009-06-23	18:55:00	0
2009-06-23	18:56:00	0
2009-06-23	18:57:00	0
2009-06-23	18:58:00	0
2009-06-23	18:59:00	12
2009-06-23	19:00:00	0
2009-06-23	19:01:00	0
2009-06-23	19:02:00	24
2009-06-23	19:03:00	0
2009-06-23	19:04:00	0
2009-06-23	19:05:00	36
2009-06-23	19:06:00	97
2009-06-23	19:07:00	0
2009-06-23	19:08:00	0
2009-06-23	19:09:00	0
2009-06-23	19:10:00	0
2009-06-23	19:11:00	0
2009-06-23	19:12:00	0
2009-06-23	19:13:00	0
2009-06-23	19:14:00	0
2009-06-23	19:15:00	0
2009-06-23	19:16:00	0
2009-06-23	19:17:00	24
2009-06-23	19:18:00	0
2009-06-23	19:19:00	0
2009-06-23	19:20:00	0
2009-06-23	19:21:00	24
2009-06-23	19:22:00	24
2009-06-23	19:23:00	60
2009-06-23	19:24:00	896
2009-06-23	19:25:00	1647
2009-06-23	19:26:00	452
2009-06-23	19:27:00	48
2009-06-23	19:28:00	0
2009-06-23	19:29:00	0
2009-06-23	19:30:00	0
2009-06-23	19:31:00	72
2009-06-23	19:32:00	97
2009-06-23	19:33:00	0
2009-06-23	19:34:00	0
2009-06-23	19:35:00	0
2009-06-23	19:36:00	0
2009-06-23	19:37:00	0
2009-06-23	19:38:00	0
2009-06-23	19:39:00	72
2009-06-23	19:40:00	0
2009-06-23	19:41:00	121
2009-06-23	19:42:00	109
2009-06-23	19:43:00	0
2009-06-23	19:44:00	0
2009-06-23	19:45:00	0
2009-06-23	19:46:00	0
2009-06-23	19:47:00	0
2009-06-23	19:48:00	97
2009-06-23	19:49:00	546
2009-06-23	19:50:00	418
2009-06-23	19:51:00	452
2009-06-23	19:52:00	546
2009-06-23	19:53:00	997
2009-06-23	19:54:00	1051
2009-06-23	19:55:00	48
2009-06-23	19:56:00	133
2009-06-23	19:57:00	24
2009-06-23	19:58:00	0
2009-06-23	19:59:00	36
2009-06-23	20:00:00	133
2009-06-23	20:01:00	0
2009-06-23	20:02:00	0
2009-06-23	20:03:00	60
2009-06-23	20:04:00	302
2009-06-23	20:05:00	48
2009-06-23	20:06:00	97
2009-06-23	20:07:00	97
2009-06-23	20:08:00	97
2009-06-23	20:09:00	85
2009-06-23	20:10:00	133
2009-06-23	20:11:00	36
2009-06-23	20:12:00	12
2009-06-23	20:13:00	0
2009-06-23	20:14:00	72
2009-06-23	20:15:00	0
2009-06-23	20:16:00	0
2009-06-23	20:17:00	0
2009-06-23	20:18:00	0
2009-06-23	20:19:00	0
2009-06-23	20:20:00	0
2009-06-23	20:21:00	0
2009-06-23	20:22:00	0
2009-06-23	20:23:00	0
2009-06-23	20:24:00	0
2009-06-23	20:25:00	0
2009-06-23	20:26:00	0
2009-06-23	20:27:00	24
2009-06-23	20:28:00	0
2009-06-23	20:29:00	0
2009-06-23	20:30:00	0
2009-06-23	20:31:00	0
2009-06-23	20:32:00	0
2009-06-23	20:33:00	0
2009-06-23	20:34:00	0
2009-06-23	20:35:00	0
2009-06-23	20:36:00	24
2009-06-23	20:37:00	0
2009-06-23	20:38:00	85
2009-06-23	20:39:00	97
2009-06-23	20:40:00	0
2009-06-23	20:41:00	0
2009-06-23	20:42:00	0
2009-06-23	20:43:00	0
2009-06-23	20:44:00	0
2009-06-23	20:45:00	0
2009-06-23	20:46:00	12
2009-06-23	20:47:00	0
2009-06-23	20:48:00	133
2009-06-23	20:49:00	133
2009-06-23	20:50:00	48
2009-06-23	20:51:00	72
2009-06-23	20:52:00	0
2009-06-23	20:53:00	0
2009-06-23	20:54:00	0
2009-06-23	20:55:00	0
2009-06-23	20:56:00	0
2009-06-23	20:57:00	0
2009-06-23	20:58:00	0
2009-06-23	20:59:00	36
2009-06-23	21:00:00	0
2009-06-23	21:01:00	0
2009-06-23	21:02:00	0
2009-06-23	21:03:00	0
2009-06-23	21:04:00	0
2009-06-23	21:05:00	0
2009-06-23	21:06:00	0
2009-06-23	21:07:00	0
2009-06-23	21:08:00	0
2009-06-23	21:09:00	0
2009-06-23	21:10:00	0
2009-06-23	21:11:00	24
2009-06-23	21:12:00	0
2009-06-23	21:13:00	0
2009-06-23	21:14:00	0
2009-06-23	21:15:00	0
2009-06-23	21:16:00	0
2009-06-23	21:17:00	0
2009-06-23	21:18:00	0
2009-06-23	21:19:00	0
2009-06-23	21:20:00	0
2009-06-23	21:21:00	109
2009-06-23	21:22:00	36
2009-06-23	21:23:00	24
2009-06-23	21:24:00	0
2009-06-23	21:25:00	0
2009-06-23	21:26:00	0
2009-06-23	21:27:00	0
2009-06-23	21:28:00	0
2009-06-23	21:29:00	109
2009-06-23	21:30:00	121
2009-06-23	21:31:00	0
2009-06-23	21:32:00	0
2009-06-23	21:33:00	0
2009-06-23	21:34:00	0
2009-06-23	21:35:00	0
2009-06-23	21:36:00	0
2009-06-23	21:37:00	0
2009-06-23	21:38:00	0
2009-06-23	21:39:00	0
2009-06-23	21:40:00	0
2009-06-23	21:41:00	0
2009-06-23	21:42:00	0
2009-06-23	21:43:00	0
2009-06-23	21:44:00	0
2009-06-23	21:45:00	60
2009-06-23	21:46:00	0
2009-06-23	21:47:00	0
2009-06-23	21:48:00	0
2009-06-23	21:49:00	0
2009-06-23	21:50:00	0
2009-06-23	21:51:00	0
2009-06-23	21:52:00	72
2009-06-23	21:53:00	0
2009-06-23	21:54:00	0
2009-06-23	21:55:00	0
2009-06-23	21:56:00	0
2009-06-23	21:57:00	0
2009-06-23	21:58:00	0
2009-06-23	21:59:00	0
2009-06-23	22:00:00	0
2009-06-23	22:01:00	0
2009-06-23	22:02:00	0
2009-06-23	22:03:00	0
2009-06-23	22:04:00	0
2009-06-23	22:05:00	0
2009-06-23	22:06:00	0
2009-06-23	22:07:00	0
2009-06-23	22:08:00	0
2009-06-23	22:09:00	0
2009-06-23	22:10:00	0
2009-06-23	22:11:00	0
2009-06-23	22:12:00	0
2009-06-23	22:13:00	0
2009-06-23	22:14:00	0
2009-06-23	22:15:00	0
2009-06-23	22:16:00	12
2009-06-23	22:17:00	0
2009-06-23	22:18:00	0
2009-06-23	22:19:00	0
2009-06-23	22:20:00	109
2009-06-23	22:21:00	0
2009-06-23	22:22:00	0
2009-06-23	22:23:00	0
2009-06-23	22:24:00	0
2009-06-23	22:25:00	0
2009-06-23	22:26:00	0
2009-06-23	22:27:00	0
2009-06-23	22:28:00	0
2009-06-23	22:29:00	0
2009-06-23	22:30:00	302
2009-06-23	22:31:00	72
2009-06-23	22:32:00	0
2009-06-23	22:33:00	0
2009-06-23	22:34:00	0
2009-06-23	22:35:00	0
2009-06-23	22:36:00	0
2009-06-23	22:37:00	0
2009-06-23	22:38:00	0
2009-06-23	22:39:00	0
2009-06-23	22:40:00	0
2009-06-23	22:41:00	0
2009-06-23	22:42:00	0
2009-06-23	22:43:00	12
2009-06-23	22:44:00	0
2009-06-23	22:45:00	0
2009-06-23	22:46:00	0
2009-06-23	22:47:00	0
2009-06-23	22:48:00	0
2009-06-23	22:49:00	0
2009-06-23	22:50:00	0
2009-06-23	22:51:00	0
2009-06-23	22:52:00	12
2009-06-23	22:53:00	0
2009-06-23	22:54:00	0
2009-06-23	22:55:00	0
2009-06-23	22:56:00	0
2009-06-23	22:57:00	0
2009-06-23	22:58:00	0
2009-06-23	22:59:00	0
2009-06-23	23:00:00	0
2009-06-23	23:01:00	0
2009-06-23	23:02:00	0
2009-06-23	23:03:00	0
2009-06-23	23:04:00	0
2009-06-23	23:05:00	48
2009-06-23	23:06:00	24
2009-06-23	23:07:00	60
2009-06-23	23:08:00	121
2009-06-23	23:09:00	97
2009-06-23	23:10:00	171
2009-06-23	23:11:00	546
2009-06-23	23:12:00	171
2009-06-23	23:13:00	0
2009-06-23	23:14:00	12
2009-06-23	23:15:00	12
2009-06-23	23:16:00	12
2009-06-23	23:17:00	0
2009-06-23	23:18:00	0
2009-06-23	23:19:00	0
2009-06-23	23:20:00	0
2009-06-23	23:21:00	0
2009-06-23	23:22:00	0
2009-06-23	23:23:00	0
2009-06-23	23:24:00	0
2009-06-23	23:25:00	0
2009-06-23	23:26:00	0
2009-06-23	23:27:00	0
2009-06-23	23:28:00	0
2009-06-23	23:29:00	0
2009-06-23	23:30:00	0
2009-06-23	23:31:00	0
2009-06-23	23:32:00	0
2009-06-23	23:33:00	0
2009-06-23	23:34:00	0
2009-06-23	23:35:00	0
2009-06-23	23:36:00	0
2009-06-23	23:37:00	0
2009-06-23	23:38:00	0
2009-06-23	23:39:00	0
2009-06-23	23:40:00	0
2009-06-23	23:41:00	0
2009-06-23	23:42:00	0
2009-06-23	23:43:00	0
2009-06-23	23:44:00	0
2009-06-23	23:45:00	24
2009-06-23	23:46:00	0
2009-06-23	23:47:00	0
2009-06-23	23:48:00	0
2009-06-23	23:49:00	0
2009-06-23	23:50:00	0
2009-06-23	23:51:00	0
2009-06-23	23:52:00	0
2009-06-23	23:53:00	0
2009-06-23	23:54:00	0
2009-06-23	23:55:00	0
2009-06-23	23:56:00	0
2009-06-23	23:57:00	0
2009-06-23	23:58:00	0
2009-06-23	23:59:00	0
2009-06-24	00:00:00	0
2009-06-24	00:01:00	0
2009-06-24	00:02:00	0
2009-06-24	00:03:00	0
2009-06-24	00:04:00	0
2009-06-24	00:05:00	0
2009-06-24	00:06:00	0
2009-06-24	00:07:00	0
2009-06-24	00:08:00	0
2009-06-24	00:09:00	0
2009-06-24	00:10:00	0
2009-06-24	00:11:00	0
2009-06-24	00:12:00	0
2009-06-24	00:13:00	0
2009-06-24	00:14:00	0
2009-06-24	00:15:00	0
2009-06-24	00:16:00	0
2009-06-24	00:17:00	0
2009-06-24	00:18:00	0
2009-06-24	00:19:00	0
2009-06-24	00:20:00	0
2009-06-24	00:21:00	109
2009-06-24	00:22:00	109
2009-06-24	00:23:00	604
2009-06-24	00:24:00	333
2009-06-24	00:25:00	896
2009-06-24	00:26:00	316
2009-06-24	00:27:00	97
2009-06-24	00:28:00	0
2009-06-24	00:29:00	0
2009-06-24	00:30:00	0
2009-06-24	00:31:00	97
2009-06-24	00:32:00	97
2009-06-24	00:33:00	24
2009-06-24	00:34:00	0
2009-06-24	00:35:00	145
2009-06-24	00:36:00	12
2009-06-24	00:37:00	0
2009-06-24	00:38:00	0
2009-06-24	00:39:00	0
2009-06-24	00:40:00	0
2009-06-24	00:41:00	0
2009-06-24	00:42:00	0
2009-06-24	00:43:00	0
2009-06-24	00:44:00	0
2009-06-24	00:45:00	0
2009-06-24	00:46:00	0
2009-06-24	00:47:00	0
2009-06-24	00:48:00	0
2009-06-24	00:49:00	0
2009-06-24	00:50:00	0
2009-06-24	00:51:00	0
2009-06-24	00:52:00	0
2009-06-24	00:53:00	0
2009-06-24	00:54:00	0
2009-06-24	00:55:00	0
2009-06-24	00:56:00	24
2009-06-24	00:57:00	12
2009-06-24	00:58:00	0
2009-06-24	00:59:00	0
2009-06-24	01:00:00	0
2009-06-24	01:01:00	0
2009-06-24	01:02:00	0
2009-06-24	01:03:00	0
2009-06-24	01:04:00	0
2009-06-24	01:05:00	0
2009-06-24	01:06:00	0
2009-06-24	01:07:00	0
2009-06-24	01:08:00	0
2009-06-24	01:09:00	0
2009-06-24	01:10:00	0
2009-06-24	01:11:00	0
2009-06-24	01:12:00	0
2009-06-24	01:13:00	0
2009-06-24	01:14:00	12
2009-06-24	01:15:00	0
2009-06-24	01:16:00	0
2009-06-24	01:17:00	0
2009-06-24	01:18:00	85
2009-06-24	01:19:00	12
2009-06-24	01:20:00	0
2009-06-24	01:21:00	0
2009-06-24	01:22:00	0
2009-06-24	01:23:00	0
2009-06-24	01:24:00	0
2009-06-24	01:25:00	0
2009-06-24	01:26:00	0
2009-06-24	01:27:00	0
2009-06-24	01:28:00	0
2009-06-24	01:29:00	0
2009-06-24	01:30:00	0
2009-06-24	01:31:00	0
2009-06-24	01:32:00	0
2009-06-24	01:33:00	0
2009-06-24	01:34:00	0
2009-06-24	01:35:00	0
2009-06-24	01:36:00	0
2009-06-24	01:37:00	0
2009-06-24	01:38:00	0
2009-06-24	01:39:00	0
2009-06-24	01:40:00	0
2009-06-24	01:41:00	0
2009-06-24	01:42:00	0
2009-06-24	01:43:00	0
2009-06-24	01:44:00	0
2009-06-24	01:45:00	12
2009-06-24	01:46:00	24
2009-06-24	01:47:00	0
2009-06-24	01:48:00	0
2009-06-24	01:49:00	0
2009-06-24	01:50:00	0
2009-06-24	01:51:00	0
2009-06-24	01:52:00	0
2009-06-24	01:53:00	0
2009-06-24	01:54:00	0
2009-06-24	01:55:00	0
2009-06-24	01:56:00	0
2009-06-24	01:57:00	0
2009-06-24	01:58:00	0
2009-06-24	01:59:00	0
2009-06-24	02:00:00	0
2009-06-24	02:01:00	0
2009-06-24	02:02:00	0
2009-06-24	02:03:00	0
2009-06-24	02:04:00	0
2009-06-24	02:05:00	0
2009-06-24	02:06:00	0
2009-06-24	02:07:00	0
2009-06-24	02:08:00	0
2009-06-24	02:09:00	0
2009-06-24	02:10:00	0
2009-06-24	02:11:00	0
2009-06-24	02:12:00	0
2009-06-24	02:13:00	0
2009-06-24	02:14:00	24
2009-06-24	02:15:00	0
2009-06-24	02:16:00	0
2009-06-24	02:17:00	0
2009-06-24	02:18:00	0
2009-06-24	02:19:00	0
2009-06-24	02:20:00	0
2009-06-24	02:21:00	0
2009-06-24	02:22:00	0
2009-06-24	02:23:00	0
2009-06-24	02:24:00	0
2009-06-24	02:25:00	0
2009-06-24	02:26:00	0
2009-06-24	02:27:00	0
2009-06-24	02:28:00	0
2009-06-24	02:29:00	0
2009-06-24	02:30:00	0
2009-06-24	02:31:00	0
2009-06-24	02:32:00	0
2009-06-24	02:33:00	0
2009-06-24	02:34:00	0
2009-06-24	02:35:00	0
2009-06-24	02:36:00	0
2009-06-24	02:37:00	0
2009-06-24	02:38:00	0
2009-06-24	02:39:00	0
2009-06-24	02:40:00	0
2009-06-24	02:41:00	0
2009-06-24	02:42:00	0
2009-06-24	02:43:00	0
2009-06-24	02:44:00	0
2009-06-24	02:45:00	0
2009-06-24	02:46:00	0
2009-06-24	02:47:00	0
2009-06-24	02:48:00	0
2009-06-24	02:49:00	0
2009-06-24	02:50:00	0
2009-06-24	02:51:00	0
2009-06-24	02:52:00	0
2009-06-24	02:53:00	0
2009-06-24	02:54:00	0
2009-06-24	02:55:00	0
2009-06-24	02:56:00	0
2009-06-24	02:57:00	0
2009-06-24	02:58:00	0
2009-06-24	02:59:00	0
2009-06-24	03:00:00	0
2009-06-24	03:01:00	0
2009-06-24	03:02:00	0
2009-06-24	03:03:00	0
2009-06-24	03:04:00	0
2009-06-24	03:05:00	0
2009-06-24	03:06:00	0
2009-06-24	03:07:00	0
2009-06-24	03:08:00	0
2009-06-24	03:09:00	0
2009-06-24	03:10:00	0
2009-06-24	03:11:00	0
2009-06-24	03:12:00	0
2009-06-24	03:13:00	0
2009-06-24	03:14:00	0
2009-06-24	03:15:00	0
2009-06-24	03:16:00	0
2009-06-24	03:17:00	0
2009-06-24	03:18:00	0
2009-06-24	03:19:00	0
2009-06-24	03:20:00	0
2009-06-24	03:21:00	0
2009-06-24	03:22:00	0
2009-06-24	03:23:00	0
2009-06-24	03:24:00	0
2009-06-24	03:25:00	0
2009-06-24	03:26:00	0
2009-06-24	03:27:00	0
2009-06-24	03:28:00	0
2009-06-24	03:29:00	0
2009-06-24	03:30:00	0
2009-06-24	03:31:00	0
2009-06-24	03:32:00	0
2009-06-24	03:33:00	0
2009-06-24	03:34:00	0
2009-06-24	03:35:00	0
2009-06-24	03:36:00	0
2009-06-24	03:37:00	0
2009-06-24	03:38:00	0
2009-06-24	03:39:00	0
2009-06-24	03:40:00	0
2009-06-24	03:41:00	0
2009-06-24	03:42:00	0
2009-06-24	03:43:00	0
2009-06-24	03:44:00	0
2009-06-24	03:45:00	48
2009-06-24	03:46:00	85
2009-06-24	03:47:00	24
2009-06-24	03:48:00	12
2009-06-24	03:49:00	0
2009-06-24	03:50:00	0
2009-06-24	03:51:00	0
2009-06-24	03:52:00	0
2009-06-24	03:53:00	0
2009-06-24	03:54:00	0
2009-06-24	03:55:00	0
2009-06-24	03:56:00	0
2009-06-24	03:57:00	0
2009-06-24	03:58:00	0
2009-06-24	03:59:00	0
2009-06-24	04:00:00	0
2009-06-24	04:01:00	0
2009-06-24	04:02:00	0
2009-06-24	04:03:00	0
2009-06-24	04:04:00	0
2009-06-24	04:05:00	0
2009-06-24	04:06:00	0
2009-06-24	04:07:00	0
2009-06-24	04:08:00	0
2009-06-24	04:09:00	0
2009-06-24	04:10:00	0
2009-06-24	04:11:00	0
2009-06-24	04:12:00	0
2009-06-24	04:13:00	0
2009-06-24	04:14:00	0
2009-06-24	04:15:00	0
2009-06-24	04:16:00	0
2009-06-24	04:17:00	0
2009-06-24	04:18:00	0
2009-06-24	04:19:00	0
2009-06-24	04:20:00	0
2009-06-24	04:21:00	0
2009-06-24	04:22:00	0
2009-06-24	04:23:00	0
2009-06-24	04:24:00	0
2009-06-24	04:25:00	0
2009-06-24	04:26:00	0
2009-06-24	04:27:00	0
2009-06-24	04:28:00	0
2009-06-24	04:29:00	0
2009-06-24	04:30:00	0
2009-06-24	04:31:00	0
2009-06-24	04:32:00	12
2009-06-24	04:33:00	0
2009-06-24	04:34:00	0
2009-06-24	04:35:00	0
2009-06-24	04:36:00	0
2009-06-24	04:37:00	0
2009-06-24	04:38:00	0
2009-06-24	04:39:00	0
2009-06-24	04:40:00	0
2009-06-24	04:41:00	0
2009-06-24	04:42:00	0
2009-06-24	04:43:00	0
2009-06-24	04:44:00	0
2009-06-24	04:45:00	0
2009-06-24	04:46:00	0
2009-06-24	04:47:00	0
2009-06-24	04:48:00	0
2009-06-24	04:49:00	0
2009-06-24	04:50:00	24
2009-06-24	04:51:00	0
2009-06-24	04:52:00	0
2009-06-24	04:53:00	0
2009-06-24	04:54:00	0
2009-06-24	04:55:00	0
2009-06-24	04:56:00	0
2009-06-24	04:57:00	0
2009-06-24	04:58:00	0
2009-06-24	04:59:00	0
2009-06-24	05:00:00	0
2009-06-24	05:01:00	0
2009-06-24	05:02:00	0
2009-06-24	05:03:00	0
2009-06-24	05:04:00	0
2009-06-24	05:05:00	0
2009-06-24	05:06:00	0
2009-06-24	05:07:00	0
2009-06-24	05:08:00	0
2009-06-24	05:09:00	0
2009-06-24	05:10:00	0
2009-06-24	05:11:00	0
2009-06-24	05:12:00	0
2009-06-24	05:13:00	0
2009-06-24	05:14:00	0
2009-06-24	05:15:00	0
2009-06-24	05:16:00	0
2009-06-24	05:17:00	0
2009-06-24	05:18:00	0
2009-06-24	05:19:00	60
2009-06-24	05:20:00	0
2009-06-24	05:21:00	0
2009-06-24	05:22:00	0
2009-06-24	05:23:00	0
2009-06-24	05:24:00	186
2009-06-24	05:25:00	85
2009-06-24	05:26:00	0
2009-06-24	05:27:00	0
2009-06-24	05:28:00	0
2009-06-24	05:29:00	0
2009-06-24	05:30:00	12
2009-06-24	05:31:00	0
2009-06-24	05:32:00	0
2009-06-24	05:33:00	24
2009-06-24	05:34:00	72
2009-06-24	05:35:00	0
2009-06-24	05:36:00	72
2009-06-24	05:37:00	0
2009-06-24	05:38:00	0
2009-06-24	05:39:00	0
2009-06-24	05:40:00	0
2009-06-24	05:41:00	0
2009-06-24	05:42:00	0
2009-06-24	05:43:00	0
2009-06-24	05:44:00	0
2009-06-24	05:45:00	0
2009-06-24	05:46:00	0
2009-06-24	05:47:00	0
2009-06-24	05:48:00	0
2009-06-24	05:49:00	0
2009-06-24	05:50:00	0
2009-06-24	05:51:00	0
2009-06-24	05:52:00	0
2009-06-24	05:53:00	0
2009-06-24	05:54:00	0
2009-06-24	05:55:00	0
2009-06-24	05:56:00	0
2009-06-24	05:57:00	0
2009-06-24	05:58:00	0
2009-06-24	05:59:00	0
2009-06-24	06:00:00	85
2009-06-24	06:01:00	200
2009-06-24	06:02:00	85
2009-06-24	06:03:00	145
2009-06-24	06:04:00	367
2009-06-24	06:05:00	604
2009-06-24	06:06:00	302
2009-06-24	06:07:00	384
2009-06-24	06:08:00	367
2009-06-24	06:09:00	200
2009-06-24	06:10:00	273
2009-06-24	06:11:00	799
2009-06-24	06:12:00	401
2009-06-24	06:13:00	0
2009-06-24	06:14:00	302
2009-06-24	06:15:00	333
2009-06-24	06:16:00	0
2009-06-24	06:17:00	0
2009-06-24	06:18:00	0
2009-06-24	06:19:00	0
2009-06-24	06:20:00	0
2009-06-24	06:21:00	0
2009-06-24	06:22:00	0
2009-06-24	06:23:00	0
2009-06-24	06:24:00	0
2009-06-24	06:25:00	0
2009-06-24	06:26:00	0
2009-06-24	06:27:00	0
2009-06-24	06:28:00	0
2009-06-24	06:29:00	0
2009-06-24	06:30:00	12
2009-06-24	06:31:00	0
2009-06-24	06:32:00	0
2009-06-24	06:33:00	0
2009-06-24	06:34:00	0
2009-06-24	06:35:00	0
2009-06-24	06:36:00	0
2009-06-24	06:37:00	0
2009-06-24	06:38:00	0
2009-06-24	06:39:00	0
2009-06-24	06:40:00	0
2009-06-24	06:41:00	0
2009-06-24	06:42:00	0
2009-06-24	06:43:00	0
2009-06-24	06:44:00	0
2009-06-24	06:45:00	0
2009-06-24	06:46:00	0
2009-06-24	06:47:00	0
2009-06-24	06:48:00	0
2009-06-24	06:49:00	0
2009-06-24	06:50:00	0
2009-06-24	06:51:00	0
2009-06-24	06:52:00	0
2009-06-24	06:53:00	0
2009-06-24	06:54:00	0
2009-06-24	06:55:00	0
2009-06-24	06:56:00	0
2009-06-24	06:57:00	0
2009-06-24	06:58:00	0
2009-06-24	06:59:00	0
2009-06-24	07:00:00	36
2009-06-24	07:01:00	145
2009-06-24	07:02:00	384
2009-06-24	07:03:00	273
2009-06-24	07:04:00	0
2009-06-24	07:05:00	435
2009-06-24	07:06:00	229
2009-06-24	07:07:00	0
2009-06-24	07:08:00	0
2009-06-24	07:09:00	0
2009-06-24	07:10:00	0
2009-06-24	07:11:00	799
2009-06-24	07:12:00	350
2009-06-24	07:13:00	258
2009-06-24	07:14:00	333
2009-06-24	07:15:00	157
2009-06-24	07:16:00	85
2009-06-24	07:17:00	133
2009-06-24	07:18:00	418
2009-06-24	07:19:00	435
2009-06-24	07:20:00	273
2009-06-24	07:21:00	488
2009-06-24	07:22:00	302
2009-06-24	07:23:00	258
2009-06-24	07:24:00	418
2009-06-24	07:25:00	85
2009-06-24	07:26:00	0
2009-06-24	07:27:00	0
2009-06-24	07:28:00	0
2009-06-24	07:29:00	302
2009-06-24	07:30:00	401
2009-06-24	07:31:00	920
2009-06-24	07:32:00	507
2009-06-24	07:33:00	60
2009-06-24	07:34:00	24
2009-06-24	07:35:00	565
2009-06-24	07:36:00	215
2009-06-24	07:37:00	401
2009-06-24	07:38:00	229
2009-06-24	07:39:00	273
2009-06-24	07:40:00	85
2009-06-24	07:41:00	12
2009-06-24	07:42:00	36
2009-06-24	07:43:00	24
2009-06-24	07:44:00	24
2009-06-24	07:45:00	0
2009-06-24	07:46:00	72
2009-06-24	07:47:00	97
2009-06-24	07:48:00	72
2009-06-24	07:49:00	258
2009-06-24	07:50:00	418
2009-06-24	07:51:00	273
2009-06-24	07:52:00	258
2009-06-24	07:53:00	0
2009-06-24	07:54:00	0
2009-06-24	07:55:00	12
2009-06-24	07:56:00	0
2009-06-24	07:57:00	0
2009-06-24	07:58:00	0
2009-06-24	07:59:00	0
2009-06-24	08:00:00	0
2009-06-24	08:01:00	60
2009-06-24	08:02:00	0
2009-06-24	08:03:00	0
2009-06-24	08:04:00	0
2009-06-24	08:05:00	48
2009-06-24	08:06:00	0
2009-06-24	08:07:00	0
2009-06-24	08:08:00	0
2009-06-24	08:09:00	0
2009-06-24	08:10:00	0
2009-06-24	08:11:00	24
2009-06-24	08:12:00	0
2009-06-24	08:13:00	0
2009-06-24	08:14:00	0
2009-06-24	08:15:00	0
2009-06-24	08:16:00	24
2009-06-24	08:17:00	0
2009-06-24	08:18:00	0
2009-06-24	08:19:00	12
2009-06-24	08:20:00	0
2009-06-24	08:21:00	0
2009-06-24	08:22:00	0
2009-06-24	08:23:00	0
2009-06-24	08:24:00	0
2009-06-24	08:25:00	12
2009-06-24	08:26:00	12
2009-06-24	08:27:00	0
2009-06-24	08:28:00	0
2009-06-24	08:29:00	0
2009-06-24	08:30:00	287
2009-06-24	08:31:00	546
2009-06-24	08:32:00	72
2009-06-24	08:33:00	401
2009-06-24	08:34:00	258
2009-06-24	08:35:00	526
2009-06-24	08:36:00	24
2009-06-24	08:37:00	0
2009-06-24	08:38:00	0
2009-06-24	08:39:00	0
2009-06-24	08:40:00	12
2009-06-24	08:41:00	0
2009-06-24	08:42:00	0
2009-06-24	08:43:00	0
2009-06-24	08:44:00	0
2009-06-24	08:45:00	12
2009-06-24	08:46:00	12
2009-06-24	08:47:00	12
2009-06-24	08:48:00	0
2009-06-24	08:49:00	171
2009-06-24	08:50:00	215
2009-06-24	08:51:00	0
2009-06-24	08:52:00	0
2009-06-24	08:53:00	0
2009-06-24	08:54:00	0
2009-06-24	08:55:00	0
2009-06-24	08:56:00	0
2009-06-24	08:57:00	12
2009-06-24	08:58:00	302
2009-06-24	08:59:00	0
2009-06-24	09:00:00	0
2009-06-24	09:01:00	60
2009-06-24	09:02:00	667
2009-06-24	09:03:00	157
2009-06-24	09:04:00	258
2009-06-24	09:05:00	72
2009-06-24	09:06:00	109
2009-06-24	09:07:00	36
2009-06-24	09:08:00	0
[truncated: 19,611 more rows]

## Sheet: 7.07.09
Actogram, Copy Raw Data, All Days
Identity:	Kelly
Filename:	E:\Active Research Files\meloxicam titre canine\cases\kelly\Kelly 7.7.09.AWC
Gender:	F
Age:	8
Height:	76.2 cm	30.0 in
Weight:	30.8 kg	67.9 lbs
Start Date:	07-Jul-2009 (Tue)
Start Time:	18:00:00
Interval:	1.00 mins
Date Stamp:	Time Stamp:	Activity Data:	Marker Press:
2009-07-07	00:00:00	0
2009-07-07	00:01:00	0
2009-07-07	00:02:00	0
2009-07-07	00:03:00	0
2009-07-07	00:04:00	0
2009-07-07	00:05:00	0
2009-07-07	00:06:00	0
2009-07-07	00:07:00	0
2009-07-07	00:08:00	0
2009-07-07	00:09:00	0
2009-07-07	00:10:00	0
2009-07-07	00:11:00	0
2009-07-07	00:12:00	0
2009-07-07	00:13:00	0
2009-07-07	00:14:00	0
2009-07-07	00:15:00	0
2009-07-07	00:16:00	0
2009-07-07	00:17:00	0
2009-07-07	00:18:00	0
2009-07-07	00:19:00	0
2009-07-07	00:20:00	0
2009-07-07	00:21:00	0
2009-07-07	00:22:00	0
2009-07-07	00:23:00	0
2009-07-07	00:24:00	0
2009-07-07	00:25:00	0
2009-07-07	00:26:00	0
2009-07-07	00:27:00	0
2009-07-07	00:28:00	0
2009-07-07	00:29:00	0
2009-07-07	00:30:00	0
2009-07-07	00:31:00	0
2009-07-07	00:32:00	0
2009-07-07	00:33:00	0
2009-07-07	00:34:00	0
2009-07-07	00:35:00	0
2009-07-07	00:36:00	0
2009-07-07	00:37:00	0
2009-07-07	00:38:00	0
2009-07-07	00:39:00	0
2009-07-07	00:40:00	0
2009-07-07	00:41:00	0
2009-07-07	00:42:00	0
2009-07-07	00:43:00	0
2009-07-07	00:44:00	0
2009-07-07	00:45:00	0
2009-07-07	00:46:00	0
2009-07-07	00:47:00	0
2009-07-07	00:48:00	0
2009-07-07	00:49:00	0
2009-07-07	00:50:00	0
2009-07-07	00:51:00	0
2009-07-07	00:52:00	0
2009-07-07	00:53:00	0
2009-07-07	00:54:00	0
2009-07-07	00:55:00	0
2009-07-07	00:56:00	0
2009-07-07	00:57:00	0
2009-07-07	00:58:00	0
2009-07-07	00:59:00	0
2009-07-07	01:00:00	0
2009-07-07	01:01:00	0
2009-07-07	01:02:00	0
2009-07-07	01:03:00	0
2009-07-07	01:04:00	0
2009-07-07	01:05:00	0
2009-07-07	01:06:00	0
2009-07-07	01:07:00	0
2009-07-07	01:08:00	0
2009-07-07	01:09:00	0
2009-07-07	01:10:00	0
2009-07-07	01:11:00	0
2009-07-07	01:12:00	0
2009-07-07	01:13:00	0
2009-07-07	01:14:00	0
2009-07-07	01:15:00	0
2009-07-07	01:16:00	0
2009-07-07	01:17:00	0
2009-07-07	01:18:00	0
2009-07-07	01:19:00	0
2009-07-07	01:20:00	0
2009-07-07	01:21:00	0
2009-07-07	01:22:00	0
2009-07-07	01:23:00	0
2009-07-07	01:24:00	0
2009-07-07	01:25:00	0
2009-07-07	01:26:00	0
2009-07-07	01:27:00	0
2009-07-07	01:28:00	0
2009-07-07	01:29:00	0
2009-07-07	01:30:00	0
2009-07-07	01:31:00	0
2009-07-07	01:32:00	0
2009-07-07	01:33:00	0
2009-07-07	01:34:00	0
2009-07-07	01:35:00	0
2009-07-07	01:36:00	0
2009-07-07	01:37:00	0
2009-07-07	01:38:00	0
2009-07-07	01:39:00	0
2009-07-07	01:40:00	0
2009-07-07	01:41:00	0
2009-07-07	01:42:00	0
2009-07-07	01:43:00	0
2009-07-07	01:44:00	0
2009-07-07	01:45:00	0
2009-07-07	01:46:00	0
2009-07-07	01:47:00	0
2009-07-07	01:48:00	0
2009-07-07	01:49:00	0
2009-07-07	01:50:00	0
2009-07-07	01:51:00	0
2009-07-07	01:52:00	0
2009-07-07	01:53:00	0
2009-07-07	01:54:00	0
2009-07-07	01:55:00	0
2009-07-07	01:56:00	0
2009-07-07	01:57:00	0
2009-07-07	01:58:00	0
2009-07-07	01:59:00	0
2009-07-07	02:00:00	0
2009-07-07	02:01:00	0
2009-07-07	02:02:00	0
2009-07-07	02:03:00	0
2009-07-07	02:04:00	0
2009-07-07	02:05:00	0
2009-07-07	02:06:00	0
2009-07-07	02:07:00	0
2009-07-07	02:08:00	0
2009-07-07	02:09:00	0
2009-07-07	02:10:00	0
2009-07-07	02:11:00	0
2009-07-07	02:12:00	0
2009-07-07	02:13:00	0
2009-07-07	02:14:00	0
2009-07-07	02:15:00	0
2009-07-07	02:16:00	0
2009-07-07	02:17:00	0
2009-07-07	02:18:00	0
2009-07-07	02:19:00	0
2009-07-07	02:20:00	0
2009-07-07	02:21:00	0
2009-07-07	02:22:00	0
2009-07-07	02:23:00	0
2009-07-07	02:24:00	0
2009-07-07	02:25:00	0
2009-07-07	02:26:00	0
2009-07-07	02:27:00	0
2009-07-07	02:28:00	0
2009-07-07	02:29:00	0
2009-07-07	02:30:00	0
2009-07-07	02:31:00	0
2009-07-07	02:32:00	0
2009-07-07	02:33:00	0
2009-07-07	02:34:00	0
2009-07-07	02:35:00	0
2009-07-07	02:36:00	0
2009-07-07	02:37:00	0
2009-07-07	02:38:00	0
2009-07-07	02:39:00	0
2009-07-07	02:40:00	0
2009-07-07	02:41:00	0
2009-07-07	02:42:00	0
2009-07-07	02:43:00	0
2009-07-07	02:44:00	0
2009-07-07	02:45:00	0
2009-07-07	02:46:00	0
2009-07-07	02:47:00	0
2009-07-07	02:48:00	0
2009-07-07	02:49:00	0
2009-07-07	02:50:00	0
2009-07-07	02:51:00	0
2009-07-07	02:52:00	0
2009-07-07	02:53:00	0
2009-07-07	02:54:00	0
2009-07-07	02:55:00	0
2009-07-07	02:56:00	0
2009-07-07	02:57:00	0
2009-07-07	02:58:00	0
2009-07-07	02:59:00	0
2009-07-07	03:00:00	0
2009-07-07	03:01:00	0
2009-07-07	03:02:00	0
2009-07-07	03:03:00	0
2009-07-07	03:04:00	0
2009-07-07	03:05:00	0
2009-07-07	03:06:00	0
2009-07-07	03:07:00	0
2009-07-07	03:08:00	0
2009-07-07	03:09:00	0
2009-07-07	03:10:00	0
2009-07-07	03:11:00	0
2009-07-07	03:12:00	0
2009-07-07	03:13:00	0
2009-07-07	03:14:00	0
2009-07-07	03:15:00	0
2009-07-07	03:16:00	0
2009-07-07	03:17:00	0
2009-07-07	03:18:00	0
2009-07-07	03:19:00	0
2009-07-07	03:20:00	0
2009-07-07	03:21:00	0
2009-07-07	03:22:00	0
2009-07-07	03:23:00	0
2009-07-07	03:24:00	0
2009-07-07	03:25:00	0
2009-07-07	03:26:00	0
2009-07-07	03:27:00	0
2009-07-07	03:28:00	0
2009-07-07	03:29:00	0
2009-07-07	03:30:00	0
2009-07-07	03:31:00	0
2009-07-07	03:32:00	0
2009-07-07	03:33:00	0
2009-07-07	03:34:00	0
2009-07-07	03:35:00	0
2009-07-07	03:36:00	0
2009-07-07	03:37:00	0
2009-07-07	03:38:00	0
2009-07-07	03:39:00	0
2009-07-07	03:40:00	0
2009-07-07	03:41:00	0
2009-07-07	03:42:00	0
2009-07-07	03:43:00	0
2009-07-07	03:44:00	0
2009-07-07	03:45:00	0
2009-07-07	03:46:00	0
2009-07-07	03:47:00	0
2009-07-07	03:48:00	0
2009-07-07	03:49:00	0
2009-07-07	03:50:00	0
2009-07-07	03:51:00	0
2009-07-07	03:52:00	0
2009-07-07	03:53:00	0
2009-07-07	03:54:00	0
2009-07-07	03:55:00	0
2009-07-07	03:56:00	0
2009-07-07	03:57:00	0
2009-07-07	03:58:00	0
2009-07-07	03:59:00	0
2009-07-07	04:00:00	0
2009-07-07	04:01:00	0
2009-07-07	04:02:00	0
2009-07-07	04:03:00	0
2009-07-07	04:04:00	0
2009-07-07	04:05:00	0
2009-07-07	04:06:00	0
2009-07-07	04:07:00	0
2009-07-07	04:08:00	0
2009-07-07	04:09:00	0
2009-07-07	04:10:00	0
2009-07-07	04:11:00	0
2009-07-07	04:12:00	0
2009-07-07	04:13:00	0
2009-07-07	04:14:00	0
2009-07-07	04:15:00	0
2009-07-07	04:16:00	0
2009-07-07	04:17:00	0
2009-07-07	04:18:00	0
2009-07-07	04:19:00	0
2009-07-07	04:20:00	0
2009-07-07	04:21:00	0
2009-07-07	04:22:00	0
2009-07-07	04:23:00	0
2009-07-07	04:24:00	0
2009-07-07	04:25:00	0
2009-07-07	04:26:00	0
2009-07-07	04:27:00	0
2009-07-07	04:28:00	0
2009-07-07	04:29:00	0
2009-07-07	04:30:00	0
2009-07-07	04:31:00	0
2009-07-07	04:32:00	0
2009-07-07	04:33:00	0
2009-07-07	04:34:00	0
2009-07-07	04:35:00	0
2009-07-07	04:36:00	0
2009-07-07	04:37:00	0
2009-07-07	04:38:00	0
2009-07-07	04:39:00	0
2009-07-07	04:40:00	0
2009-07-07	04:41:00	0
2009-07-07	04:42:00	0
2009-07-07	04:43:00	0
2009-07-07	04:44:00	0
2009-07-07	04:45:00	0
2009-07-07	04:46:00	0
2009-07-07	04:47:00	0
2009-07-07	04:48:00	0
2009-07-07	04:49:00	0
2009-07-07	04:50:00	0
2009-07-07	04:51:00	0
2009-07-07	04:52:00	0
2009-07-07	04:53:00	0
2009-07-07	04:54:00	0
2009-07-07	04:55:00	0
2009-07-07	04:56:00	0
2009-07-07	04:57:00	0
2009-07-07	04:58:00	0
2009-07-07	04:59:00	0
2009-07-07	05:00:00	0
2009-07-07	05:01:00	0
2009-07-07	05:02:00	0
2009-07-07	05:03:00	0
2009-07-07	05:04:00	0
2009-07-07	05:05:00	0
2009-07-07	05:06:00	0
2009-07-07	05:07:00	0
2009-07-07	05:08:00	0
2009-07-07	05:09:00	0
2009-07-07	05:10:00	0
2009-07-07	05:11:00	0
2009-07-07	05:12:00	0
2009-07-07	05:13:00	0
2009-07-07	05:14:00	0
2009-07-07	05:15:00	0
2009-07-07	05:16:00	0
2009-07-07	05:17:00	0
2009-07-07	05:18:00	0
2009-07-07	05:19:00	0
2009-07-07	05:20:00	0
2009-07-07	05:21:00	0
2009-07-07	05:22:00	0
2009-07-07	05:23:00	0
2009-07-07	05:24:00	0
2009-07-07	05:25:00	0
2009-07-07	05:26:00	0
2009-07-07	05:27:00	0
2009-07-07	05:28:00	0
2009-07-07	05:29:00	0
2009-07-07	05:30:00	0
2009-07-07	05:31:00	0
2009-07-07	05:32:00	0
2009-07-07	05:33:00	0
2009-07-07	05:34:00	0
2009-07-07	05:35:00	0
2009-07-07	05:36:00	0
2009-07-07	05:37:00	0
2009-07-07	05:38:00	0
2009-07-07	05:39:00	0
2009-07-07	05:40:00	0
2009-07-07	05:41:00	0
2009-07-07	05:42:00	0
2009-07-07	05:43:00	0
2009-07-07	05:44:00	0
2009-07-07	05:45:00	0
2009-07-07	05:46:00	0
2009-07-07	05:47:00	0
2009-07-07	05:48:00	0
2009-07-07	05:49:00	0
2009-07-07	05:50:00	0
2009-07-07	05:51:00	0
2009-07-07	05:52:00	0
2009-07-07	05:53:00	0
2009-07-07	05:54:00	0
2009-07-07	05:55:00	0
2009-07-07	05:56:00	0
2009-07-07	05:57:00	0
2009-07-07	05:58:00	0
2009-07-07	05:59:00	0
2009-07-07	06:00:00	0
2009-07-07	06:01:00	0
2009-07-07	06:02:00	0
2009-07-07	06:03:00	0
2009-07-07	06:04:00	0
2009-07-07	06:05:00	0
2009-07-07	06:06:00	0
2009-07-07	06:07:00	0
2009-07-07	06:08:00	0
2009-07-07	06:09:00	0
2009-07-07	06:10:00	0
2009-07-07	06:11:00	0
2009-07-07	06:12:00	0
2009-07-07	06:13:00	0
2009-07-07	06:14:00	0
2009-07-07	06:15:00	0
2009-07-07	06:16:00	0
2009-07-07	06:17:00	0
2009-07-07	06:18:00	0
2009-07-07	06:19:00	0
2009-07-07	06:20:00	0
2009-07-07	06:21:00	0
2009-07-07	06:22:00	0
2009-07-07	06:23:00	0
2009-07-07	06:24:00	0
2009-07-07	06:25:00	0
2009-07-07	06:26:00	0
2009-07-07	06:27:00	0
2009-07-07	06:28:00	0
2009-07-07	06:29:00	0
2009-07-07	06:30:00	0
2009-07-07	06:31:00	0
2009-07-07	06:32:00	0
2009-07-07	06:33:00	0
2009-07-07	06:34:00	0
2009-07-07	06:35:00	0
2009-07-07	06:36:00	0
2009-07-07	06:37:00	0
2009-07-07	06:38:00	0
2009-07-07	06:39:00	0
2009-07-07	06:40:00	0
2009-07-07	06:41:00	0
2009-07-07	06:42:00	0
2009-07-07	06:43:00	0
2009-07-07	06:44:00	0
2009-07-07	06:45:00	0
2009-07-07	06:46:00	0
2009-07-07	06:47:00	0
2009-07-07	06:48:00	0
2009-07-07	06:49:00	0
2009-07-07	06:50:00	0
2009-07-07	06:51:00	0
2009-07-07	06:52:00	0
2009-07-07	06:53:00	0
2009-07-07	06:54:00	0
2009-07-07	06:55:00	0
2009-07-07	06:56:00	0
2009-07-07	06:57:00	0
2009-07-07	06:58:00	0
2009-07-07	06:59:00	0
2009-07-07	07:00:00	0
2009-07-07	07:01:00	0
2009-07-07	07:02:00	0
2009-07-07	07:03:00	0
2009-07-07	07:04:00	0
2009-07-07	07:05:00	0
2009-07-07	07:06:00	0
2009-07-07	07:07:00	0
2009-07-07	07:08:00	0
2009-07-07	07:09:00	0
2009-07-07	07:10:00	0
2009-07-07	07:11:00	0
2009-07-07	07:12:00	0
2009-07-07	07:13:00	0
2009-07-07	07:14:00	0
2009-07-07	07:15:00	0
2009-07-07	07:16:00	0
2009-07-07	07:17:00	0
2009-07-07	07:18:00	0
2009-07-07	07:19:00	0
2009-07-07	07:20:00	0
2009-07-07	07:21:00	0
2009-07-07	07:22:00	0
2009-07-07	07:23:00	0
2009-07-07	07:24:00	0
2009-07-07	07:25:00	0
2009-07-07	07:26:00	0
2009-07-07	07:27:00	0
2009-07-07	07:28:00	0
2009-07-07	07:29:00	0
2009-07-07	07:30:00	0
2009-07-07	07:31:00	0
2009-07-07	07:32:00	0
2009-07-07	07:33:00	0
2009-07-07	07:34:00	0
2009-07-07	07:35:00	0
2009-07-07	07:36:00	0
2009-07-07	07:37:00	0
2009-07-07	07:38:00	0
2009-07-07	07:39:00	0
2009-07-07	07:40:00	0
2009-07-07	07:41:00	0
2009-07-07	07:42:00	0
2009-07-07	07:43:00	0
2009-07-07	07:44:00	0
2009-07-07	07:45:00	0
2009-07-07	07:46:00	0
2009-07-07	07:47:00	0
2009-07-07	07:48:00	0
2009-07-07	07:49:00	0
2009-07-07	07:50:00	0
2009-07-07	07:51:00	0
2009-07-07	07:52:00	0
2009-07-07	07:53:00	0
2009-07-07	07:54:00	0
2009-07-07	07:55:00	0
2009-07-07	07:56:00	0
2009-07-07	07:57:00	0
2009-07-07	07:58:00	0
2009-07-07	07:59:00	0
2009-07-07	08:00:00	0
2009-07-07	08:01:00	0
2009-07-07	08:02:00	0
2009-07-07	08:03:00	0
2009-07-07	08:04:00	0
2009-07-07	08:05:00	0
2009-07-07	08:06:00	0
2009-07-07	08:07:00	0
2009-07-07	08:08:00	0
2009-07-07	08:09:00	0
2009-07-07	08:10:00	0
2009-07-07	08:11:00	0
2009-07-07	08:12:00	0
2009-07-07	08:13:00	0
2009-07-07	08:14:00	0
2009-07-07	08:15:00	0
2009-07-07	08:16:00	0
2009-07-07	08:17:00	0
2009-07-07	08:18:00	0
2009-07-07	08:19:00	0
2009-07-07	08:20:00	0
2009-07-07	08:21:00	0
2009-07-07	08:22:00	0
2009-07-07	08:23:00	0
2009-07-07	08:24:00	0
2009-07-07	08:25:00	0
2009-07-07	08:26:00	0
2009-07-07	08:27:00	0
2009-07-07	08:28:00	0
2009-07-07	08:29:00	0
2009-07-07	08:30:00	0
2009-07-07	08:31:00	0
2009-07-07	08:32:00	0
2009-07-07	08:33:00	0
2009-07-07	08:34:00	0
2009-07-07	08:35:00	0
2009-07-07	08:36:00	0
2009-07-07	08:37:00	0
2009-07-07	08:38:00	0
2009-07-07	08:39:00	0
2009-07-07	08:40:00	0
2009-07-07	08:41:00	0
2009-07-07	08:42:00	0
2009-07-07	08:43:00	0
2009-07-07	08:44:00	0
2009-07-07	08:45:00	0
2009-07-07	08:46:00	0
2009-07-07	08:47:00	0
2009-07-07	08:48:00	0
2009-07-07	08:49:00	0
2009-07-07	08:50:00	0
2009-07-07	08:51:00	0
2009-07-07	08:52:00	0
2009-07-07	08:53:00	0
2009-07-07	08:54:00	0
2009-07-07	08:55:00	0
2009-07-07	08:56:00	0
2009-07-07	08:57:00	0
2009-07-07	08:58:00	0
2009-07-07	08:59:00	0
2009-07-07	09:00:00	0
2009-07-07	09:01:00	0
2009-07-07	09:02:00	0
2009-07-07	09:03:00	0
2009-07-07	09:04:00	0
2009-07-07	09:05:00	0
2009-07-07	09:06:00	0
2009-07-07	09:07:00	0
2009-07-07	09:08:00	0
2009-07-07	09:09:00	0
2009-07-07	09:10:00	0
2009-07-07	09:11:00	0
2009-07-07	09:12:00	0
2009-07-07	09:13:00	0
2009-07-07	09:14:00	0
2009-07-07	09:15:00	0
2009-07-07	09:16:00	0
2009-07-07	09:17:00	0
2009-07-07	09:18:00	0
2009-07-07	09:19:00	0
2009-07-07	09:20:00	0
2009-07-07	09:21:00	0
2009-07-07	09:22:00	0
2009-07-07	09:23:00	0
2009-07-07	09:24:00	0
2009-07-07	09:25:00	0
2009-07-07	09:26:00	0
2009-07-07	09:27:00	0
2009-07-07	09:28:00	0
2009-07-07	09:29:00	0
2009-07-07	09:30:00	0
2009-07-07	09:31:00	0
2009-07-07	09:32:00	0
2009-07-07	09:33:00	0
2009-07-07	09:34:00	0
2009-07-07	09:35:00	0
2009-07-07	09:36:00	0
2009-07-07	09:37:00	0
2009-07-07	09:38:00	0
2009-07-07	09:39:00	0
2009-07-07	09:40:00	0
2009-07-07	09:41:00	0
2009-07-07	09:42:00	0
2009-07-07	09:43:00	0
2009-07-07	09:44:00	0
2009-07-07	09:45:00	0
2009-07-07	09:46:00	0
2009-07-07	09:47:00	0
2009-07-07	09:48:00	0
2009-07-07	09:49:00	0
2009-07-07	09:50:00	0
2009-07-07	09:51:00	0
2009-07-07	09:52:00	0
2009-07-07	09:53:00	0
2009-07-07	09:54:00	0
2009-07-07	09:55:00	0
2009-07-07	09:56:00	0
2009-07-07	09:57:00	0
2009-07-07	09:58:00	0
2009-07-07	09:59:00	0
2009-07-07	10:00:00	0
2009-07-07	10:01:00	0
2009-07-07	10:02:00	0
2009-07-07	10:03:00	0
2009-07-07	10:04:00	0
2009-07-07	10:05:00	0
2009-07-07	10:06:00	0
2009-07-07	10:07:00	0
2009-07-07	10:08:00	0
2009-07-07	10:09:00	0
2009-07-07	10:10:00	0
2009-07-07	10:11:00	0
2009-07-07	10:12:00	0
2009-07-07	10:13:00	0
2009-07-07	10:14:00	0
2009-07-07	10:15:00	0
2009-07-07	10:16:00	0
2009-07-07	10:17:00	0
2009-07-07	10:18:00	0
2009-07-07	10:19:00	0
2009-07-07	10:20:00	0
2009-07-07	10:21:00	0
2009-07-07	10:22:00	0
2009-07-07	10:23:00	0
2009-07-07	10:24:00	0
2009-07-07	10:25:00	0
2009-07-07	10:26:00	0
2009-07-07	10:27:00	0
2009-07-07	10:28:00	0
2009-07-07	10:29:00	0
2009-07-07	10:30:00	0
2009-07-07	10:31:00	0
2009-07-07	10:32:00	0
2009-07-07	10:33:00	0
2009-07-07	10:34:00	0
2009-07-07	10:35:00	0
2009-07-07	10:36:00	0
2009-07-07	10:37:00	0
2009-07-07	10:38:00	0
2009-07-07	10:39:00	0
2009-07-07	10:40:00	0
2009-07-07	10:41:00	0
2009-07-07	10:42:00	0
2009-07-07	10:43:00	0
2009-07-07	10:44:00	0
2009-07-07	10:45:00	0
2009-07-07	10:46:00	0
2009-07-07	10:47:00	0
2009-07-07	10:48:00	0
2009-07-07	10:49:00	0
2009-07-07	10:50:00	0
2009-07-07	10:51:00	0
2009-07-07	10:52:00	0
2009-07-07	10:53:00	0
2009-07-07	10:54:00	0
2009-07-07	10:55:00	0
2009-07-07	10:56:00	0
2009-07-07	10:57:00	0
2009-07-07	10:58:00	0
2009-07-07	10:59:00	0
2009-07-07	11:00:00	0
2009-07-07	11:01:00	0
2009-07-07	11:02:00	0
2009-07-07	11:03:00	0
2009-07-07	11:04:00	0
2009-07-07	11:05:00	0
2009-07-07	11:06:00	0
2009-07-07	11:07:00	0
2009-07-07	11:08:00	0
2009-07-07	11:09:00	0
2009-07-07	11:10:00	0
2009-07-07	11:11:00	0
2009-07-07	11:12:00	0
2009-07-07	11:13:00	0
2009-07-07	11:14:00	0
2009-07-07	11:15:00	0
2009-07-07	11:16:00	0
2009-07-07	11:17:00	0
2009-07-07	11:18:00	0
2009-07-07	11:19:00	0
2009-07-07	11:20:00	0
2009-07-07	11:21:00	0
2009-07-07	11:22:00	0
2009-07-07	11:23:00	0
2009-07-07	11:24:00	0
2009-07-07	11:25:00	0
2009-07-07	11:26:00	0
2009-07-07	11:27:00	0
2009-07-07	11:28:00	0
2009-07-07	11:29:00	0
2009-07-07	11:30:00	0
2009-07-07	11:31:00	0
2009-07-07	11:32:00	0
2009-07-07	11:33:00	0
2009-07-07	11:34:00	0
2009-07-07	11:35:00	0
2009-07-07	11:36:00	0
2009-07-07	11:37:00	0
2009-07-07	11:38:00	0
2009-07-07	11:39:00	0
2009-07-07	11:40:00	0
2009-07-07	11:41:00	0
2009-07-07	11:42:00	0
2009-07-07	11:43:00	0
2009-07-07	11:44:00	0
2009-07-07	11:45:00	0
2009-07-07	11:46:00	0
2009-07-07	11:47:00	0
2009-07-07	11:48:00	0
2009-07-07	11:49:00	0
2009-07-07	11:50:00	0
2009-07-07	11:51:00	0
2009-07-07	11:52:00	0
2009-07-07	11:53:00	0
2009-07-07	11:54:00	0
2009-07-07	11:55:00	0
2009-07-07	11:56:00	0
2009-07-07	11:57:00	0
2009-07-07	11:58:00	0
2009-07-07	11:59:00	0
2009-07-07	12:00:00	0
2009-07-07	12:01:00	0
2009-07-07	12:02:00	0
2009-07-07	12:03:00	0
2009-07-07	12:04:00	0
2009-07-07	12:05:00	0
2009-07-07	12:06:00	0
2009-07-07	12:07:00	0
2009-07-07	12:08:00	0
2009-07-07	12:09:00	0
2009-07-07	12:10:00	0
2009-07-07	12:11:00	0
2009-07-07	12:12:00	0
2009-07-07	12:13:00	0
2009-07-07	12:14:00	0
2009-07-07	12:15:00	0
2009-07-07	12:16:00	0
2009-07-07	12:17:00	0
2009-07-07	12:18:00	0
2009-07-07	12:19:00	0
2009-07-07	12:20:00	0
2009-07-07	12:21:00	0
2009-07-07	12:22:00	0
2009-07-07	12:23:00	0
2009-07-07	12:24:00	0
2009-07-07	12:25:00	0
2009-07-07	12:26:00	0
2009-07-07	12:27:00	0
2009-07-07	12:28:00	0
2009-07-07	12:29:00	0
2009-07-07	12:30:00	0
2009-07-07	12:31:00	0
2009-07-07	12:32:00	0
2009-07-07	12:33:00	0
2009-07-07	12:34:00	0
2009-07-07	12:35:00	0
2009-07-07	12:36:00	0
2009-07-07	12:37:00	0
2009-07-07	12:38:00	0
2009-07-07	12:39:00	0
2009-07-07	12:40:00	0
2009-07-07	12:41:00	0
2009-07-07	12:42:00	0
2009-07-07	12:43:00	0
2009-07-07	12:44:00	0
2009-07-07	12:45:00	0
2009-07-07	12:46:00	0
2009-07-07	12:47:00	0
2009-07-07	12:48:00	0
2009-07-07	12:49:00	0
2009-07-07	12:50:00	0
2009-07-07	12:51:00	0
2009-07-07	12:52:00	0
2009-07-07	12:53:00	0
2009-07-07	12:54:00	0
2009-07-07	12:55:00	0
2009-07-07	12:56:00	0
2009-07-07	12:57:00	0
2009-07-07	12:58:00	0
2009-07-07	12:59:00	0
2009-07-07	13:00:00	0
2009-07-07	13:01:00	0
2009-07-07	13:02:00	0
2009-07-07	13:03:00	0
2009-07-07	13:04:00	0
2009-07-07	13:05:00	0
2009-07-07	13:06:00	0
2009-07-07	13:07:00	0
2009-07-07	13:08:00	0
2009-07-07	13:09:00	0
2009-07-07	13:10:00	0
2009-07-07	13:11:00	0
2009-07-07	13:12:00	0
2009-07-07	13:13:00	0
2009-07-07	13:14:00	0
2009-07-07	13:15:00	0
2009-07-07	13:16:00	0
2009-07-07	13:17:00	0
2009-07-07	13:18:00	0
2009-07-07	13:19:00	0
2009-07-07	13:20:00	0
2009-07-07	13:21:00	0
2009-07-07	13:22:00	0
2009-07-07	13:23:00	0
2009-07-07	13:24:00	0
2009-07-07	13:25:00	0
2009-07-07	13:26:00	0
2009-07-07	13:27:00	0
2009-07-07	13:28:00	0
2009-07-07	13:29:00	0
2009-07-07	13:30:00	0
2009-07-07	13:31:00	0
2009-07-07	13:32:00	0
2009-07-07	13:33:00	0
2009-07-07	13:34:00	0
2009-07-07	13:35:00	0
2009-07-07	13:36:00	0
2009-07-07	13:37:00	0
2009-07-07	13:38:00	0
2009-07-07	13:39:00	0
2009-07-07	13:40:00	0
2009-07-07	13:41:00	0
2009-07-07	13:42:00	0
2009-07-07	13:43:00	0
2009-07-07	13:44:00	0
2009-07-07	13:45:00	0
2009-07-07	13:46:00	0
2009-07-07	13:47:00	0
2009-07-07	13:48:00	0
2009-07-07	13:49:00	0
2009-07-07	13:50:00	0
2009-07-07	13:51:00	0
2009-07-07	13:52:00	0
2009-07-07	13:53:00	0
2009-07-07	13:54:00	0
2009-07-07	13:55:00	0
2009-07-07	13:56:00	0
2009-07-07	13:57:00	0
2009-07-07	13:58:00	0
2009-07-07	13:59:00	0
2009-07-07	14:00:00	0
2009-07-07	14:01:00	0
2009-07-07	14:02:00	0
2009-07-07	14:03:00	0
2009-07-07	14:04:00	0
2009-07-07	14:05:00	0
2009-07-07	14:06:00	0
2009-07-07	14:07:00	0
2009-07-07	14:08:00	0
2009-07-07	14:09:00	0
2009-07-07	14:10:00	0
2009-07-07	14:11:00	0
2009-07-07	14:12:00	0
2009-07-07	14:13:00	0
2009-07-07	14:14:00	0
2009-07-07	14:15:00	0
2009-07-07	14:16:00	0
2009-07-07	14:17:00	0
2009-07-07	14:18:00	0
2009-07-07	14:19:00	0
2009-07-07	14:20:00	0
2009-07-07	14:21:00	0
2009-07-07	14:22:00	0
2009-07-07	14:23:00	0
2009-07-07	14:24:00	0
2009-07-07	14:25:00	0
2009-07-07	14:26:00	0
2009-07-07	14:27:00	0
2009-07-07	14:28:00	0
2009-07-07	14:29:00	0
2009-07-07	14:30:00	0
2009-07-07	14:31:00	0
2009-07-07	14:32:00	0
2009-07-07	14:33:00	0
2009-07-07	14:34:00	0
2009-07-07	14:35:00	0
2009-07-07	14:36:00	0
2009-07-07	14:37:00	0
2009-07-07	14:38:00	0
2009-07-07	14:39:00	0
2009-07-07	14:40:00	0
2009-07-07	14:41:00	0
2009-07-07	14:42:00	0
2009-07-07	14:43:00	0
2009-07-07	14:44:00	0
2009-07-07	14:45:00	0
2009-07-07	14:46:00	0
2009-07-07	14:47:00	0
2009-07-07	14:48:00	0
2009-07-07	14:49:00	0
2009-07-07	14:50:00	0
2009-07-07	14:51:00	0
2009-07-07	14:52:00	0
2009-07-07	14:53:00	0
2009-07-07	14:54:00	0
2009-07-07	14:55:00	0
2009-07-07	14:56:00	0
2009-07-07	14:57:00	0
2009-07-07	14:58:00	0
2009-07-07	14:59:00	0
2009-07-07	15:00:00	0
2009-07-07	15:01:00	0
2009-07-07	15:02:00	0
2009-07-07	15:03:00	0
2009-07-07	15:04:00	0
2009-07-07	15:05:00	0
2009-07-07	15:06:00	0
2009-07-07	15:07:00	0
2009-07-07	15:08:00	0
2009-07-07	15:09:00	0
2009-07-07	15:10:00	0
2009-07-07	15:11:00	0
2009-07-07	15:12:00	0
2009-07-07	15:13:00	0
2009-07-07	15:14:00	0
2009-07-07	15:15:00	0
2009-07-07	15:16:00	0
2009-07-07	15:17:00	0
2009-07-07	15:18:00	0
2009-07-07	15:19:00	0
2009-07-07	15:20:00	0
2009-07-07	15:21:00	0
2009-07-07	15:22:00	0
2009-07-07	15:23:00	0
2009-07-07	15:24:00	0
2009-07-07	15:25:00	0
2009-07-07	15:26:00	0
2009-07-07	15:27:00	0
2009-07-07	15:28:00	0
2009-07-07	15:29:00	0
2009-07-07	15:30:00	0
2009-07-07	15:31:00	0
2009-07-07	15:32:00	0
2009-07-07	15:33:00	0
2009-07-07	15:34:00	0
2009-07-07	15:35:00	0
2009-07-07	15:36:00	0
2009-07-07	15:37:00	0
2009-07-07	15:38:00	0
2009-07-07	15:39:00	0
2009-07-07	15:40:00	0
2009-07-07	15:41:00	0
2009-07-07	15:42:00	0
2009-07-07	15:43:00	0
2009-07-07	15:44:00	0
2009-07-07	15:45:00	0
2009-07-07	15:46:00	0
2009-07-07	15:47:00	0
2009-07-07	15:48:00	0
2009-07-07	15:49:00	0
2009-07-07	15:50:00	0
2009-07-07	15:51:00	0
2009-07-07	15:52:00	0
2009-07-07	15:53:00	0
2009-07-07	15:54:00	0
2009-07-07	15:55:00	0
2009-07-07	15:56:00	0
2009-07-07	15:57:00	0
2009-07-07	15:58:00	0
2009-07-07	15:59:00	0
2009-07-07	16:00:00	0
2009-07-07	16:01:00	0
2009-07-07	16:02:00	0
2009-07-07	16:03:00	0
2009-07-07	16:04:00	0
2009-07-07	16:05:00	0
2009-07-07	16:06:00	0
2009-07-07	16:07:00	0
2009-07-07	16:08:00	0
2009-07-07	16:09:00	0
2009-07-07	16:10:00	0
2009-07-07	16:11:00	0
2009-07-07	16:12:00	0
2009-07-07	16:13:00	0
2009-07-07	16:14:00	0
2009-07-07	16:15:00	0
2009-07-07	16:16:00	0
2009-07-07	16:17:00	0
2009-07-07	16:18:00	0
2009-07-07	16:19:00	0
2009-07-07	16:20:00	0
2009-07-07	16:21:00	0
2009-07-07	16:22:00	0
2009-07-07	16:23:00	0
2009-07-07	16:24:00	0
2009-07-07	16:25:00	0
2009-07-07	16:26:00	0
2009-07-07	16:27:00	0
2009-07-07	16:28:00	0
2009-07-07	16:29:00	0
2009-07-07	16:30:00	0
2009-07-07	16:31:00	0
2009-07-07	16:32:00	0
2009-07-07	16:33:00	0
2009-07-07	16:34:00	0
2009-07-07	16:35:00	0
2009-07-07	16:36:00	0
2009-07-07	16:37:00	0
2009-07-07	16:38:00	0
2009-07-07	16:39:00	0
2009-07-07	16:40:00	0
2009-07-07	16:41:00	0
2009-07-07	16:42:00	0
2009-07-07	16:43:00	0
2009-07-07	16:44:00	0
2009-07-07	16:45:00	0
2009-07-07	16:46:00	0
2009-07-07	16:47:00	0
2009-07-07	16:48:00	0
2009-07-07	16:49:00	0
2009-07-07	16:50:00	0
2009-07-07	16:51:00	0
2009-07-07	16:52:00	0
2009-07-07	16:53:00	0
2009-07-07	16:54:00	0
2009-07-07	16:55:00	0
2009-07-07	16:56:00	0
2009-07-07	16:57:00	0
2009-07-07	16:58:00	0
2009-07-07	16:59:00	0
2009-07-07	17:00:00	0
2009-07-07	17:01:00	0
2009-07-07	17:02:00	0
2009-07-07	17:03:00	0
2009-07-07	17:04:00	0
2009-07-07	17:05:00	0
2009-07-07	17:06:00	0
2009-07-07	17:07:00	0
2009-07-07	17:08:00	0
2009-07-07	17:09:00	0
2009-07-07	17:10:00	0
2009-07-07	17:11:00	0
2009-07-07	17:12:00	0
2009-07-07	17:13:00	0
2009-07-07	17:14:00	0
2009-07-07	17:15:00	0
2009-07-07	17:16:00	0
2009-07-07	17:17:00	0
2009-07-07	17:18:00	0
2009-07-07	17:19:00	0
2009-07-07	17:20:00	0
2009-07-07	17:21:00	0
2009-07-07	17:22:00	0
2009-07-07	17:23:00	0
2009-07-07	17:24:00	0
2009-07-07	17:25:00	0
2009-07-07	17:26:00	0
2009-07-07	17:27:00	0
2009-07-07	17:28:00	0
2009-07-07	17:29:00	0
2009-07-07	17:30:00	0
2009-07-07	17:31:00	0
2009-07-07	17:32:00	0
2009-07-07	17:33:00	0
2009-07-07	17:34:00	0
2009-07-07	17:35:00	0
2009-07-07	17:36:00	0
2009-07-07	17:37:00	0
2009-07-07	17:38:00	0
2009-07-07	17:39:00	0
2009-07-07	17:40:00	0
2009-07-07	17:41:00	0
2009-07-07	17:42:00	0
2009-07-07	17:43:00	0
2009-07-07	17:44:00	0
2009-07-07	17:45:00	0
2009-07-07	17:46:00	0
2009-07-07	17:47:00	0
2009-07-07	17:48:00	0
2009-07-07	17:49:00	0
2009-07-07	17:50:00	0
2009-07-07	17:51:00	0
2009-07-07	17:52:00	0
2009-07-07	17:53:00	0
2009-07-07	17:54:00	0
2009-07-07	17:55:00	0
2009-07-07	17:56:00	0
2009-07-07	17:57:00	0
2009-07-07	17:58:00	0
2009-07-07	17:59:00	0
2009-07-07	18:00:00	12
2009-07-07	18:01:00	36
2009-07-07	18:02:00	36
2009-07-07	18:03:00	48
2009-07-07	18:04:00	186
2009-07-07	18:05:00	0
2009-07-07	18:06:00	0
2009-07-07	18:07:00	0
2009-07-07	18:08:00	0
2009-07-07	18:09:00	0
2009-07-07	18:10:00	24
2009-07-07	18:11:00	0
2009-07-07	18:12:00	12
2009-07-07	18:13:00	36
2009-07-07	18:14:00	12
2009-07-07	18:15:00	0
2009-07-07	18:16:00	48
2009-07-07	18:17:00	0
2009-07-07	18:18:00	0
2009-07-07	18:19:00	36
2009-07-07	18:20:00	12
2009-07-07	18:21:00	24
2009-07-07	18:22:00	12
2009-07-07	18:23:00	0
2009-07-07	18:24:00	0
2009-07-07	18:25:00	24
2009-07-07	18:26:00	12
2009-07-07	18:27:00	36
2009-07-07	18:28:00	97
2009-07-07	18:29:00	60
2009-07-07	18:30:00	546
2009-07-07	18:31:00	273
2009-07-07	18:32:00	754
2009-07-07	18:33:00	36
2009-07-07	18:34:00	36
2009-07-07	18:35:00	85
2009-07-07	18:36:00	0
2009-07-07	18:37:00	0
2009-07-07	18:38:00	24
2009-07-07	18:39:00	0
2009-07-07	18:40:00	109
2009-07-07	18:41:00	24
2009-07-07	18:42:00	0
2009-07-07	18:43:00	36
2009-07-07	18:44:00	0
2009-07-07	18:45:00	0
2009-07-07	18:46:00	0
2009-07-07	18:47:00	72
2009-07-07	18:48:00	12
2009-07-07	18:49:00	60
2009-07-07	18:50:00	452
2009-07-07	18:51:00	1956
2009-07-07	18:52:00	848
2009-07-07	18:53:00	1191
2009-07-07	18:54:00	1374
2009-07-07	18:55:00	565
2009-07-07	18:56:00	273
2009-07-07	18:57:00	229
2009-07-07	18:58:00	12
2009-07-07	18:59:00	258
2009-07-07	19:00:00	215
2009-07-07	19:01:00	667
2009-07-07	19:02:00	273
2009-07-07	19:03:00	171
2009-07-07	19:04:00	302
2009-07-07	19:05:00	401
2009-07-07	19:06:00	350
2009-07-07	19:07:00	367
2009-07-07	19:08:00	452
2009-07-07	19:09:00	469
2009-07-07	19:10:00	507
2009-07-07	19:11:00	121
2009-07-07	19:12:00	0
2009-07-07	19:13:00	0
2009-07-07	19:14:00	85
2009-07-07	19:15:00	258
2009-07-07	19:16:00	97
2009-07-07	19:17:00	24
2009-07-07	19:18:00	0
2009-07-07	19:19:00	0
2009-07-07	19:20:00	12
2009-07-07	19:21:00	24
2009-07-07	19:22:00	435
2009-07-07	19:23:00	526
2009-07-07	19:24:00	85
2009-07-07	19:25:00	775
2009-07-07	19:26:00	85
2009-07-07	19:27:00	109
2009-07-07	19:28:00	200
2009-07-07	19:29:00	920
2009-07-07	19:30:00	215
2009-07-07	19:31:00	215
2009-07-07	19:32:00	710
2009-07-07	19:33:00	418
2009-07-07	19:34:00	316
2009-07-07	19:35:00	244
2009-07-07	19:36:00	109
2009-07-07	19:37:00	244
2009-07-07	19:38:00	824
2009-07-07	19:39:00	36
2009-07-07	19:40:00	200
2009-07-07	19:41:00	36
2009-07-07	19:42:00	24
2009-07-07	19:43:00	12
2009-07-07	19:44:00	36
2009-07-07	19:45:00	24
2009-07-07	19:46:00	24
2009-07-07	19:47:00	48
2009-07-07	19:48:00	0
2009-07-07	19:49:00	12
2009-07-07	19:50:00	60
2009-07-07	19:51:00	36
2009-07-07	19:52:00	12
2009-07-07	19:53:00	60
2009-07-07	19:54:00	36
2009-07-07	19:55:00	85
2009-07-07	19:56:00	0
2009-07-07	19:57:00	0
2009-07-07	19:58:00	0
2009-07-07	19:59:00	0
2009-07-07	20:00:00	12
2009-07-07	20:01:00	85
2009-07-07	20:02:00	997
2009-07-07	20:03:00	60
2009-07-07	20:04:00	97
2009-07-07	20:05:00	507
2009-07-07	20:06:00	604
2009-07-07	20:07:00	244
2009-07-07	20:08:00	565
2009-07-07	20:09:00	145
2009-07-07	20:10:00	1191
2009-07-07	20:11:00	85
2009-07-07	20:12:00	0
2009-07-07	20:13:00	0
2009-07-07	20:14:00	48
2009-07-07	20:15:00	24
2009-07-07	20:16:00	0
2009-07-07	20:17:00	0
2009-07-07	20:18:00	12
2009-07-07	20:19:00	48
2009-07-07	20:20:00	24
2009-07-07	20:21:00	0
2009-07-07	20:22:00	0
2009-07-07	20:23:00	0
2009-07-07	20:24:00	0
2009-07-07	20:25:00	0
2009-07-07	20:26:00	145
2009-07-07	20:27:00	316
2009-07-07	20:28:00	469
2009-07-07	20:29:00	645
2009-07-07	20:30:00	710
2009-07-07	20:31:00	0
2009-07-07	20:32:00	0
2009-07-07	20:33:00	0
2009-07-07	20:34:00	109
2009-07-07	20:35:00	12
2009-07-07	20:36:00	0
2009-07-07	20:37:00	0
2009-07-07	20:38:00	1758
2009-07-07	20:39:00	2352
2009-07-07	20:40:00	710
2009-07-07	20:41:00	1835
2009-07-07	20:42:00	145
2009-07-07	20:43:00	546
2009-07-07	20:44:00	258
2009-07-07	20:45:00	799
2009-07-07	20:46:00	133
2009-07-07	20:47:00	12
2009-07-07	20:48:00	0
2009-07-07	20:49:00	0
2009-07-07	20:50:00	24
2009-07-07	20:51:00	12
2009-07-07	20:52:00	24
2009-07-07	20:53:00	12
2009-07-07	20:54:00	12
2009-07-07	20:55:00	24
2009-07-07	20:56:00	12
2009-07-07	20:57:00	36
2009-07-07	20:58:00	24
2009-07-07	20:59:00	24
2009-07-07	21:00:00	24
2009-07-07	21:01:00	24
2009-07-07	21:02:00	48
2009-07-07	21:03:00	12
2009-07-07	21:04:00	85
2009-07-07	21:05:00	24
2009-07-07	21:06:00	12
2009-07-07	21:07:00	12
2009-07-07	21:08:00	36
2009-07-07	21:09:00	24
2009-07-07	21:10:00	0
2009-07-07	21:11:00	12
2009-07-07	21:12:00	24
2009-07-07	21:13:00	200
2009-07-07	21:14:00	200
2009-07-07	21:15:00	121
2009-07-07	21:16:00	0
2009-07-07	21:17:00	0
2009-07-07	21:18:00	0
2009-07-07	21:19:00	121
2009-07-07	21:20:00	24
2009-07-07	21:21:00	0
2009-07-07	21:22:00	0
2009-07-07	21:23:00	0
2009-07-07	21:24:00	24
2009-07-07	21:25:00	0
2009-07-07	21:26:00	0
2009-07-07	21:27:00	12
2009-07-07	21:28:00	0
2009-07-07	21:29:00	0
2009-07-07	21:30:00	0
2009-07-07	21:31:00	0
2009-07-07	21:32:00	72
2009-07-07	21:33:00	186
2009-07-07	21:34:00	273
2009-07-07	21:35:00	186
2009-07-07	21:36:00	97
2009-07-07	21:37:00	109
2009-07-07	21:38:00	24
2009-07-07	21:39:00	186
2009-07-07	21:40:00	97
2009-07-07	21:41:00	12
2009-07-07	21:42:00	0
2009-07-07	21:43:00	12
2009-07-07	21:44:00	0
2009-07-07	21:45:00	12
2009-07-07	21:46:00	0
2009-07-07	21:47:00	0
2009-07-07	21:48:00	121
2009-07-07	21:49:00	24
2009-07-07	21:50:00	109
2009-07-07	21:51:00	109
2009-07-07	21:52:00	72
2009-07-07	21:53:00	0
2009-07-07	21:54:00	0
2009-07-07	21:55:00	36
2009-07-07	21:56:00	0
2009-07-07	21:57:00	12
2009-07-07	21:58:00	0
2009-07-07	21:59:00	0
2009-07-07	22:00:00	0
2009-07-07	22:01:00	0
2009-07-07	22:02:00	0
2009-07-07	22:03:00	0
2009-07-07	22:04:00	0
2009-07-07	22:05:00	0
2009-07-07	22:06:00	0
2009-07-07	22:07:00	0
2009-07-07	22:08:00	0
2009-07-07	22:09:00	0
2009-07-07	22:10:00	36
2009-07-07	22:11:00	0
2009-07-07	22:12:00	48
2009-07-07	22:13:00	121
2009-07-07	22:14:00	229
2009-07-07	22:15:00	133
2009-07-07	22:16:00	0
2009-07-07	22:17:00	0
2009-07-07	22:18:00	0
2009-07-07	22:19:00	0
2009-07-07	22:20:00	0
2009-07-07	22:21:00	0
2009-07-07	22:22:00	0
2009-07-07	22:23:00	0
2009-07-07	22:24:00	12
2009-07-07	22:25:00	0
2009-07-07	22:26:00	109
2009-07-07	22:27:00	0
2009-07-07	22:28:00	0
2009-07-07	22:29:00	0
2009-07-07	22:30:00	0
2009-07-07	22:31:00	0
2009-07-07	22:32:00	0
2009-07-07	22:33:00	0
2009-07-07	22:34:00	0
2009-07-07	22:35:00	0
2009-07-07	22:36:00	60
2009-07-07	22:37:00	0
2009-07-07	22:38:00	0
2009-07-07	22:39:00	0
2009-07-07	22:40:00	0
2009-07-07	22:41:00	0
2009-07-07	22:42:00	0
2009-07-07	22:43:00	0
2009-07-07	22:44:00	12
2009-07-07	22:45:00	24
2009-07-07	22:46:00	0
2009-07-07	22:47:00	0
2009-07-07	22:48:00	0
2009-07-07	22:49:00	0
2009-07-07	22:50:00	0
2009-07-07	22:51:00	0
2009-07-07	22:52:00	0
2009-07-07	22:53:00	0
2009-07-07	22:54:00	0
2009-07-07	22:55:00	0
2009-07-07	22:56:00	0
2009-07-07	22:57:00	12
2009-07-07	22:58:00	0
2009-07-07	22:59:00	0
2009-07-07	23:00:00	0
2009-07-07	23:01:00	0
2009-07-07	23:02:00	0
2009-07-07	23:03:00	0
2009-07-07	23:04:00	0
2009-07-07	23:05:00	0
2009-07-07	23:06:00	0
2009-07-07	23:07:00	0
2009-07-07	23:08:00	0
2009-07-07	23:09:00	0
2009-07-07	23:10:00	0
2009-07-07	23:11:00	0
2009-07-07	23:12:00	0
2009-07-07	23:13:00	0
2009-07-07	23:14:00	0
2009-07-07	23:15:00	0
2009-07-07	23:16:00	0
2009-07-07	23:17:00	0
2009-07-07	23:18:00	0
2009-07-07	23:19:00	0
2009-07-07	23:20:00	0
2009-07-07	23:21:00	0
2009-07-07	23:22:00	0
2009-07-07	23:23:00	0
2009-07-07	23:24:00	0
2009-07-07	23:25:00	0
2009-07-07	23:26:00	0
2009-07-07	23:27:00	0
2009-07-07	23:28:00	0
2009-07-07	23:29:00	0
2009-07-07	23:30:00	0
2009-07-07	23:31:00	0
2009-07-07	23:32:00	85
2009-07-07	23:33:00	367
2009-07-07	23:34:00	350
2009-07-07	23:35:00	367
2009-07-07	23:36:00	316
2009-07-07	23:37:00	109
2009-07-07	23:38:00	367
2009-07-07	23:39:00	287
2009-07-07	23:40:00	367
2009-07-07	23:41:00	488
2009-07-07	23:42:00	157
2009-07-07	23:43:00	0
2009-07-07	23:44:00	97
2009-07-07	23:45:00	12
2009-07-07	23:46:00	0
2009-07-07	23:47:00	0
2009-07-07	23:48:00	0
2009-07-07	23:49:00	0
2009-07-07	23:50:00	0
2009-07-07	23:51:00	0
2009-07-07	23:52:00	0
2009-07-07	23:53:00	0
2009-07-07	23:54:00	0
2009-07-07	23:55:00	0
2009-07-07	23:56:00	0
2009-07-07	23:57:00	0
2009-07-07	23:58:00	0
2009-07-07	23:59:00	0
2009-07-08	00:00:00	0
2009-07-08	00:01:00	0
2009-07-08	00:02:00	0
2009-07-08	00:03:00	0
2009-07-08	00:04:00	0
2009-07-08	00:05:00	0
2009-07-08	00:06:00	0
2009-07-08	00:07:00	0
2009-07-08	00:08:00	0
2009-07-08	00:09:00	0
2009-07-08	00:10:00	0
2009-07-08	00:11:00	0
2009-07-08	00:12:00	0
2009-07-08	00:13:00	0
2009-07-08	00:14:00	0
2009-07-08	00:15:00	0
2009-07-08	00:16:00	0
2009-07-08	00:17:00	0
2009-07-08	00:18:00	0
2009-07-08	00:19:00	0
2009-07-08	00:20:00	0
2009-07-08	00:21:00	0
2009-07-08	00:22:00	0
2009-07-08	00:23:00	0
2009-07-08	00:24:00	0
2009-07-08	00:25:00	0
2009-07-08	00:26:00	0
2009-07-08	00:27:00	0
2009-07-08	00:28:00	0
2009-07-08	00:29:00	0
2009-07-08	00:30:00	0
2009-07-08	00:31:00	0
2009-07-08	00:32:00	0
2009-07-08	00:33:00	0
2009-07-08	00:34:00	0
2009-07-08	00:35:00	0
2009-07-08	00:36:00	0
2009-07-08	00:37:00	0
2009-07-08	00:38:00	0
2009-07-08	00:39:00	0
2009-07-08	00:40:00	0
2009-07-08	00:41:00	0
2009-07-08	00:42:00	0
2009-07-08	00:43:00	0
2009-07-08	00:44:00	0
2009-07-08	00:45:00	0
2009-07-08	00:46:00	0
2009-07-08	00:47:00	0
2009-07-08	00:48:00	0
2009-07-08	00:49:00	0
2009-07-08	00:50:00	0
2009-07-08	00:51:00	0
2009-07-08	00:52:00	0
2009-07-08	00:53:00	0
2009-07-08	00:54:00	0
2009-07-08	00:55:00	0
2009-07-08	00:56:00	0
2009-07-08	00:57:00	0
2009-07-08	00:58:00	0
2009-07-08	00:59:00	0
2009-07-08	01:00:00	0
2009-07-08	01:01:00	0
2009-07-08	01:02:00	0
2009-07-08	01:03:00	0
2009-07-08	01:04:00	0
2009-07-08	01:05:00	0
2009-07-08	01:06:00	0
2009-07-08	01:07:00	0
2009-07-08	01:08:00	0
2009-07-08	01:09:00	0
2009-07-08	01:10:00	0
2009-07-08	01:11:00	0
2009-07-08	01:12:00	0
2009-07-08	01:13:00	0
2009-07-08	01:14:00	0
2009-07-08	01:15:00	0
2009-07-08	01:16:00	0
2009-07-08	01:17:00	0
2009-07-08	01:18:00	0
2009-07-08	01:19:00	0
2009-07-08	01:20:00	0
2009-07-08	01:21:00	0
2009-07-08	01:22:00	0
2009-07-08	01:23:00	0
2009-07-08	01:24:00	0
2009-07-08	01:25:00	0
2009-07-08	01:26:00	0
2009-07-08	01:27:00	171
2009-07-08	01:28:00	85
2009-07-08	01:29:00	0
2009-07-08	01:30:00	0
2009-07-08	01:31:00	0
2009-07-08	01:32:00	0
2009-07-08	01:33:00	0
2009-07-08	01:34:00	0
2009-07-08	01:35:00	0
2009-07-08	01:36:00	0
2009-07-08	01:37:00	0
2009-07-08	01:38:00	0
2009-07-08	01:39:00	0
2009-07-08	01:40:00	0
2009-07-08	01:41:00	0
2009-07-08	01:42:00	0
2009-07-08	01:43:00	0
2009-07-08	01:44:00	0
2009-07-08	01:45:00	0
2009-07-08	01:46:00	0
2009-07-08	01:47:00	0
2009-07-08	01:48:00	0
2009-07-08	01:49:00	12
2009-07-08	01:50:00	0
2009-07-08	01:51:00	0
2009-07-08	01:52:00	0
2009-07-08	01:53:00	0
2009-07-08	01:54:00	0
2009-07-08	01:55:00	0
2009-07-08	01:56:00	0
2009-07-08	01:57:00	0
2009-07-08	01:58:00	0
2009-07-08	01:59:00	0
2009-07-08	02:00:00	0
2009-07-08	02:01:00	0
2009-07-08	02:02:00	0
2009-07-08	02:03:00	0
2009-07-08	02:04:00	0
2009-07-08	02:05:00	0
2009-07-08	02:06:00	0
2009-07-08	02:07:00	0
2009-07-08	02:08:00	0
2009-07-08	02:09:00	0
2009-07-08	02:10:00	0
2009-07-08	02:11:00	0
2009-07-08	02:12:00	0
2009-07-08	02:13:00	0
2009-07-08	02:14:00	0
2009-07-08	02:15:00	0
2009-07-08	02:16:00	0
2009-07-08	02:17:00	0
2009-07-08	02:18:00	0
2009-07-08	02:19:00	0
2009-07-08	02:20:00	0
2009-07-08	02:21:00	0
2009-07-08	02:22:00	0
2009-07-08	02:23:00	0
2009-07-08	02:24:00	0
2009-07-08	02:25:00	0
2009-07-08	02:26:00	0
2009-07-08	02:27:00	24
2009-07-08	02:28:00	0
2009-07-08	02:29:00	0
2009-07-08	02:30:00	0
2009-07-08	02:31:00	0
2009-07-08	02:32:00	0
2009-07-08	02:33:00	0
2009-07-08	02:34:00	0
2009-07-08	02:35:00	24
2009-07-08	02:36:00	0
2009-07-08	02:37:00	0
2009-07-08	02:38:00	0
2009-07-08	02:39:00	0
2009-07-08	02:40:00	0
2009-07-08	02:41:00	0
2009-07-08	02:42:00	0
2009-07-08	02:43:00	0
2009-07-08	02:44:00	0
2009-07-08	02:45:00	0
2009-07-08	02:46:00	0
2009-07-08	02:47:00	0
2009-07-08	02:48:00	0
2009-07-08	02:49:00	0
2009-07-08	02:50:00	0
2009-07-08	02:51:00	0
2009-07-08	02:52:00	0
2009-07-08	02:53:00	0
2009-07-08	02:54:00	12
2009-07-08	02:55:00	0
2009-07-08	02:56:00	0
2009-07-08	02:57:00	0
2009-07-08	02:58:00	0
2009-07-08	02:59:00	48
2009-07-08	03:00:00	0
2009-07-08	03:01:00	0
2009-07-08	03:02:00	0
2009-07-08	03:03:00	24
2009-07-08	03:04:00	48
2009-07-08	03:05:00	121
2009-07-08	03:06:00	333
2009-07-08	03:07:00	200
2009-07-08	03:08:00	0
2009-07-08	03:09:00	36
2009-07-08	03:10:00	60
2009-07-08	03:11:00	48
2009-07-08	03:12:00	60
2009-07-08	03:13:00	60
2009-07-08	03:14:00	0
2009-07-08	03:15:00	12
2009-07-08	03:16:00	0
2009-07-08	03:17:00	0
2009-07-08	03:18:00	0
2009-07-08	03:19:00	0
2009-07-08	03:20:00	24
2009-07-08	03:21:00	0
2009-07-08	03:22:00	0
2009-07-08	03:23:00	0
2009-07-08	03:24:00	229
2009-07-08	03:25:00	85
2009-07-08	03:26:00	12
2009-07-08	03:27:00	0
2009-07-08	03:28:00	36
2009-07-08	03:29:00	12
2009-07-08	03:30:00	12
2009-07-08	03:31:00	0
2009-07-08	03:32:00	0
2009-07-08	03:33:00	12
2009-07-08	03:34:00	12
2009-07-08	03:35:00	0
2009-07-08	03:36:00	0
2009-07-08	03:37:00	0
2009-07-08	03:38:00	0
2009-07-08	03:39:00	0
2009-07-08	03:40:00	0
2009-07-08	03:41:00	0
2009-07-08	03:42:00	0
2009-07-08	03:43:00	36
2009-07-08	03:44:00	72
2009-07-08	03:45:00	0
2009-07-08	03:46:00	0
2009-07-08	03:47:00	0
2009-07-08	03:48:00	0
2009-07-08	03:49:00	0
2009-07-08	03:50:00	0
2009-07-08	03:51:00	0
2009-07-08	03:52:00	0
2009-07-08	03:53:00	0
2009-07-08	03:54:00	0
2009-07-08	03:55:00	0
2009-07-08	03:56:00	0
2009-07-08	03:57:00	0
2009-07-08	03:58:00	0
2009-07-08	03:59:00	0
2009-07-08	04:00:00	0
2009-07-08	04:01:00	0
2009-07-08	04:02:00	0
2009-07-08	04:03:00	0
2009-07-08	04:04:00	36
2009-07-08	04:05:00	0
2009-07-08	04:06:00	0
2009-07-08	04:07:00	0
2009-07-08	04:08:00	0
2009-07-08	04:09:00	0
2009-07-08	04:10:00	0
2009-07-08	04:11:00	0
2009-07-08	04:12:00	0
2009-07-08	04:13:00	0
2009-07-08	04:14:00	0
2009-07-08	04:15:00	36
2009-07-08	04:16:00	0
2009-07-08	04:17:00	0
2009-07-08	04:18:00	0
2009-07-08	04:19:00	0
2009-07-08	04:20:00	0
2009-07-08	04:21:00	0
2009-07-08	04:22:00	0
2009-07-08	04:23:00	0
2009-07-08	04:24:00	0
2009-07-08	04:25:00	0
2009-07-08	04:26:00	0
2009-07-08	04:27:00	0
2009-07-08	04:28:00	0
2009-07-08	04:29:00	0
2009-07-08	04:30:00	0
2009-07-08	04:31:00	0
2009-07-08	04:32:00	0
2009-07-08	04:33:00	0
2009-07-08	04:34:00	0
2009-07-08	04:35:00	0
2009-07-08	04:36:00	0
2009-07-08	04:37:00	0
2009-07-08	04:38:00	0
2009-07-08	04:39:00	0
2009-07-08	04:40:00	0
2009-07-08	04:41:00	0
2009-07-08	04:42:00	0
2009-07-08	04:43:00	0
2009-07-08	04:44:00	0
2009-07-08	04:45:00	0
2009-07-08	04:46:00	0
2009-07-08	04:47:00	0
2009-07-08	04:48:00	0
2009-07-08	04:49:00	0
2009-07-08	04:50:00	0
2009-07-08	04:51:00	0
2009-07-08	04:52:00	0
2009-07-08	04:53:00	0
2009-07-08	04:54:00	0
2009-07-08	04:55:00	0
2009-07-08	04:56:00	0
2009-07-08	04:57:00	0
2009-07-08	04:58:00	0
2009-07-08	04:59:00	0
2009-07-08	05:00:00	0
2009-07-08	05:01:00	0
2009-07-08	05:02:00	0
2009-07-08	05:03:00	0
2009-07-08	05:04:00	0
2009-07-08	05:05:00	0
2009-07-08	05:06:00	0
2009-07-08	05:07:00	0
2009-07-08	05:08:00	0
2009-07-08	05:09:00	0
2009-07-08	05:10:00	0
2009-07-08	05:11:00	0
2009-07-08	05:12:00	0
2009-07-08	05:13:00	0
2009-07-08	05:14:00	0
2009-07-08	05:15:00	0
2009-07-08	05:16:00	0
2009-07-08	05:17:00	0
2009-07-08	05:18:00	0
2009-07-08	05:19:00	0
2009-07-08	05:20:00	0
2009-07-08	05:21:00	0
2009-07-08	05:22:00	0
2009-07-08	05:23:00	0
2009-07-08	05:24:00	0
2009-07-08	05:25:00	0
2009-07-08	05:26:00	0
2009-07-08	05:27:00	0
2009-07-08	05:28:00	0
2009-07-08	05:29:00	12
2009-07-08	05:30:00	0
2009-07-08	05:31:00	24
2009-07-08	05:32:00	0
2009-07-08	05:33:00	0
2009-07-08	05:34:00	0
2009-07-08	05:35:00	0
2009-07-08	05:36:00	0
2009-07-08	05:37:00	0
2009-07-08	05:38:00	0
2009-07-08	05:39:00	0
2009-07-08	05:40:00	0
2009-07-08	05:41:00	0
2009-07-08	05:42:00	0
2009-07-08	05:43:00	0
2009-07-08	05:44:00	0
2009-07-08	05:45:00	0
2009-07-08	05:46:00	0
2009-07-08	05:47:00	0
2009-07-08	05:48:00	0
2009-07-08	05:49:00	0
2009-07-08	05:50:00	0
2009-07-08	05:51:00	0
2009-07-08	05:52:00	0
2009-07-08	05:53:00	0
2009-07-08	05:54:00	0
2009-07-08	05:55:00	0
2009-07-08	05:56:00	0
2009-07-08	05:57:00	0
2009-07-08	05:58:00	0
2009-07-08	05:59:00	0
2009-07-08	06:00:00	0
2009-07-08	06:01:00	12
2009-07-08	06:02:00	0
2009-07-08	06:03:00	0
2009-07-08	06:04:00	85
2009-07-08	06:05:00	121
2009-07-08	06:06:00	97
2009-07-08	06:07:00	0
2009-07-08	06:08:00	0
2009-07-08	06:09:00	12
2009-07-08	06:10:00	0
2009-07-08	06:11:00	12
2009-07-08	06:12:00	171
2009-07-08	06:13:00	60
2009-07-08	06:14:00	645
2009-07-08	06:15:00	546
2009-07-08	06:16:00	384
2009-07-08	06:17:00	2756
2009-07-08	06:18:00	1133
2009-07-08	06:19:00	1104
2009-07-08	06:20:00	565
2009-07-08	06:21:00	0
2009-07-08	06:22:00	0
2009-07-08	06:23:00	0
2009-07-08	06:24:00	287
2009-07-08	06:25:00	258
2009-07-08	06:26:00	97
2009-07-08	06:27:00	229
2009-07-08	06:28:00	0
2009-07-08	06:29:00	0
2009-07-08	06:30:00	0
2009-07-08	06:31:00	0
2009-07-08	06:32:00	12
2009-07-08	06:33:00	12
2009-07-08	06:34:00	0
2009-07-08	06:35:00	0
2009-07-08	06:36:00	0
2009-07-08	06:37:00	0
2009-07-08	06:38:00	0
2009-07-08	06:39:00	121
2009-07-08	06:40:00	0
2009-07-08	06:41:00	121
2009-07-08	06:42:00	0
2009-07-08	06:43:00	0
2009-07-08	06:44:00	0
2009-07-08	06:45:00	0
2009-07-08	06:46:00	0
2009-07-08	06:47:00	0
2009-07-08	06:48:00	12
2009-07-08	06:49:00	0
2009-07-08	06:50:00	0
2009-07-08	06:51:00	12
2009-07-08	06:52:00	0
2009-07-08	06:53:00	0
2009-07-08	06:54:00	0
2009-07-08	06:55:00	12
2009-07-08	06:56:00	12
2009-07-08	06:57:00	0
2009-07-08	06:58:00	0
2009-07-08	06:59:00	0
2009-07-08	07:00:00	0
2009-07-08	07:01:00	0
2009-07-08	07:02:00	97
2009-07-08	07:03:00	401
2009-07-08	07:04:00	565
2009-07-08	07:05:00	48
2009-07-08	07:06:00	507
2009-07-08	07:07:00	36
2009-07-08	07:08:00	546
2009-07-08	07:09:00	565
2009-07-08	07:10:00	367
2009-07-08	07:11:00	287
2009-07-08	07:12:00	48
2009-07-08	07:13:00	60
2009-07-08	07:14:00	24
2009-07-08	07:15:00	12
2009-07-08	07:16:00	0
2009-07-08	07:17:00	12
2009-07-08	07:18:00	0
2009-07-08	07:19:00	12
2009-07-08	07:20:00	121
2009-07-08	07:21:00	546
2009-07-08	07:22:00	24
2009-07-08	07:23:00	0
2009-07-08	07:24:00	0
2009-07-08	07:25:00	12
2009-07-08	07:26:00	0
2009-07-08	07:27:00	0
2009-07-08	07:28:00	24
2009-07-08	07:29:00	0
2009-07-08	07:30:00	0
2009-07-08	07:31:00	0
2009-07-08	07:32:00	0
2009-07-08	07:33:00	24
2009-07-08	07:34:00	97
2009-07-08	07:35:00	72
2009-07-08	07:36:00	36
2009-07-08	07:37:00	12
2009-07-08	07:38:00	12
2009-07-08	07:39:00	12
2009-07-08	07:40:00	0
2009-07-08	07:41:00	0
2009-07-08	07:42:00	0
2009-07-08	07:43:00	12
2009-07-08	07:44:00	0
2009-07-08	07:45:00	12
2009-07-08	07:46:00	24
2009-07-08	07:47:00	0
2009-07-08	07:48:00	12
2009-07-08	07:49:00	0
2009-07-08	07:50:00	0
2009-07-08	07:51:00	0
2009-07-08	07:52:00	0
2009-07-08	07:53:00	24
2009-07-08	07:54:00	12
2009-07-08	07:55:00	12
2009-07-08	07:56:00	12
2009-07-08	07:57:00	48
2009-07-08	07:58:00	36
2009-07-08	07:59:00	24
2009-07-08	08:00:00	48
2009-07-08	08:01:00	24
2009-07-08	08:02:00	48
2009-07-08	08:03:00	48
2009-07-08	08:04:00	48
2009-07-08	08:05:00	36
2009-07-08	08:06:00	60
2009-07-08	08:07:00	109
2009-07-08	08:08:00	0
2009-07-08	08:09:00	186
2009-07-08	08:10:00	401
2009-07-08	08:11:00	667
2009-07-08	08:12:00	488
2009-07-08	08:13:00	667
2009-07-08	08:14:00	1611
2009-07-08	08:15:00	469
2009-07-08	08:16:00	0
2009-07-08	08:17:00	24
2009-07-08	08:18:00	24
2009-07-08	08:19:00	48
2009-07-08	08:20:00	36
2009-07-08	08:21:00	48
2009-07-08	08:22:00	48
2009-07-08	08:23:00	60
2009-07-08	08:24:00	60
2009-07-08	08:25:00	60
2009-07-08	08:26:00	12
2009-07-08	08:27:00	97
2009-07-08	08:28:00	48
2009-07-08	08:29:00	72
2009-07-08	08:30:00	85
2009-07-08	08:31:00	12
2009-07-08	08:32:00	0
2009-07-08	08:33:00	0
2009-07-08	08:34:00	0
2009-07-08	08:35:00	0
2009-07-08	08:36:00	24
2009-07-08	08:37:00	60
2009-07-08	08:38:00	72
2009-07-08	08:39:00	848
2009-07-08	08:40:00	604
2009-07-08	08:41:00	302
2009-07-08	08:42:00	24
2009-07-08	08:43:00	0
2009-07-08	08:44:00	229
2009-07-08	08:45:00	710
2009-07-08	08:46:00	604
2009-07-08	08:47:00	85
2009-07-08	08:48:00	171
2009-07-08	08:49:00	667
2009-07-08	08:50:00	145
2009-07-08	08:51:00	258
2009-07-08	08:52:00	546
2009-07-08	08:53:00	0
2009-07-08	08:54:00	0
2009-07-08	08:55:00	584
2009-07-08	08:56:00	1997
2009-07-08	08:57:00	121
2009-07-08	08:58:00	507
2009-07-08	08:59:00	848
2009-07-08	09:00:00	623
2009-07-08	09:01:00	97
2009-07-08	09:02:00	0
2009-07-08	09:03:00	36
2009-07-08	09:04:00	0
2009-07-08	09:05:00	0
2009-07-08	09:06:00	0
2009-07-08	09:07:00	0
2009-07-08	09:08:00	0
[truncated: 21,051 more rows]

[truncated: 3 more sheets: 7.23.09, 8.04.09, 8.18.09]
