# Supplementary material for: Initial evaluation of nighttime restlessness in a naturally occurring canine model of osteoarthritis pain
Source: PeerJ. 2015 Feb 17;3:e772. doi: 10.7717/peerj.772 (PMC4340376; doi:10.7717/peerj.772)
Supplement: Supplemental Information 57 [file peerj-03-772-s057.xlsx]

## Sheet: Office Visits
Visit Date	Visit Number
2009-06-01 06:00:00	1
2009-06-15 06:00:00	2
2009-06-29 06:00:00	3
2009-07-13 06:00:00	4
2009-07-27 06:00:00	5
2009-08-10 06:00:00	6
2009-08-24 06:00:00	7
2009-09-08 06:00:00	8
2009-09-22 06:00:00	9

## Sheet: 60_Data
Segment	DateTime	Activity	Hour	Quadrant	Study Day	Weekday
1	2009-06-08 06:01:00	775	6	2	7	2
1	2009-06-08 06:02:00	143	6	2	7	2
1	2009-06-08 06:03:00	0	6	2	7	2
1	2009-06-08 06:04:00	0	6	2	7	2
1	2009-06-08 06:05:00	0	6	2	7	2
1	2009-06-08 06:06:00	99	6	2	7	2
1	2009-06-08 06:07:00	183	6	2	7	2
1	2009-06-08 06:08:00	121	6	2	7	2
1	2009-06-08 06:09:00	99	6	2	7	2
1	2009-06-08 06:10:00	0	6	2	7	2
1	2009-06-08 06:11:00	170	6	2	7	2
1	2009-06-08 06:12:00	223	6	2	7	2
1	2009-06-08 06:13:00	0	6	2	7	2
1	2009-06-08 06:14:00	0	6	2	7	2
1	2009-06-08 06:15:00	236	6	2	7	2
1	2009-06-08 06:16:00	210	6	2	7	2
1	2009-06-08 06:17:00	132	6	2	7	2
1	2009-06-08 06:18:00	0	6	2	7	2
1	2009-06-08 06:19:00	0	6	2	7	2
1	2009-06-08 06:20:00	0	6	2	7	2
1	2009-06-08 06:21:00	0	6	2	7	2
1	2009-06-08 06:22:00	0	6	2	7	2
1	2009-06-08 06:23:00	0	6	2	7	2
1	2009-06-08 06:24:00	0	6	2	7	2
1	2009-06-08 06:25:00	0	6	2	7	2
1	2009-06-08 06:26:00	0	6	2	7	2
1	2009-06-08 06:27:00	689	6	2	7	2
1	2009-06-08 06:28:00	22	6	2	7	2
1	2009-06-08 06:29:00	0	6	2	7	2
1	2009-06-08 06:30:00	0	6	2	7	2
1	2009-06-08 06:31:00	157	6	2	7	2
1	2009-06-08 06:32:00	0	6	2	7	2
1	2009-06-08 06:33:00	382	6	2	7	2
1	2009-06-08 06:34:00	0	6	2	7	2
1	2009-06-08 06:35:00	33	6	2	7	2
1	2009-06-08 06:36:00	0	6	2	7	2
1	2009-06-08 06:37:00	0	6	2	7	2
1	2009-06-08 06:38:00	0	6	2	7	2
1	2009-06-08 06:39:00	0	6	2	7	2
1	2009-06-08 06:40:00	0	6	2	7	2
1	2009-06-08 06:41:00	0	6	2	7	2
1	2009-06-08 06:42:00	22	6	2	7	2
1	2009-06-08 06:43:00	0	6	2	7	2
1	2009-06-08 06:44:00	481	6	2	7	2
1	2009-06-08 06:45:00	335	6	2	7	2
1	2009-06-08 06:46:00	0	6	2	7	2
1	2009-06-08 06:47:00	0	6	2	7	2
1	2009-06-08 06:48:00	99	6	2	7	2
1	2009-06-08 06:49:00	22	6	2	7	2
1	2009-06-08 06:50:00	0	6	2	7	2
1	2009-06-08 06:51:00	77	6	2	7	2
1	2009-06-08 06:52:00	170	6	2	7	2
1	2009-06-08 06:53:00	157	6	2	7	2
1	2009-06-08 06:54:00	0	6	2	7	2
1	2009-06-08 06:55:00	0	6	2	7	2
1	2009-06-08 06:56:00	0	6	2	7	2
1	2009-06-08 06:57:00	0	6	2	7	2
1	2009-06-08 06:58:00	0	6	2	7	2
1	2009-06-08 06:59:00	0	6	2	7	2
1	2009-06-08 07:00:00	0	6	2	7	2
1	2009-06-08 07:01:00	0	7	2	7	2
1	2009-06-08 07:02:00	629	7	2	7	2
1	2009-06-08 07:03:00	44	7	2	7	2
1	2009-06-08 07:04:00	0	7	2	7	2
1	2009-06-08 07:05:00	0	7	2	7	2
1	2009-06-08 07:06:00	0	7	2	7	2
1	2009-06-08 07:07:00	0	7	2	7	2
1	2009-06-08 07:08:00	0	7	2	7	2
1	2009-06-08 07:09:00	0	7	2	7	2
1	2009-06-08 07:10:00	143	7	2	7	2
1	2009-06-08 07:11:00	413	7	2	7	2
1	2009-06-08 07:12:00	446	7	2	7	2
1	2009-06-08 07:13:00	649	7	2	7	2
1	2009-06-08 07:14:00	446	7	2	7	2
1	2009-06-08 07:15:00	887	7	2	7	2
1	2009-06-08 07:16:00	1284	7	2	7	2
1	2009-06-08 07:17:00	183	7	2	7	2
1	2009-06-08 07:18:00	157	7	2	7	2
1	2009-06-08 07:19:00	157	7	2	7	2
1	2009-06-08 07:20:00	276	7	2	7	2
1	2009-06-08 07:21:00	351	7	2	7	2
1	2009-06-08 07:22:00	0	7	2	7	2
1	2009-06-08 07:23:00	170	7	2	7	2
1	2009-06-08 07:24:00	143	7	2	7	2
1	2009-06-08 07:25:00	0	7	2	7	2
1	2009-06-08 07:26:00	0	7	2	7	2
1	2009-06-08 07:27:00	11	7	2	7	2
1	2009-06-08 07:28:00	0	7	2	7	2
1	2009-06-08 07:29:00	0	7	2	7	2
1	2009-06-08 07:30:00	0	7	2	7	2
1	2009-06-08 07:31:00	0	7	2	7	2
1	2009-06-08 07:32:00	0	7	2	7	2
1	2009-06-08 07:33:00	11	7	2	7	2
1	2009-06-08 07:34:00	0	7	2	7	2
1	2009-06-08 07:35:00	0	7	2	7	2
1	2009-06-08 07:36:00	0	7	2	7	2
1	2009-06-08 07:37:00	0	7	2	7	2
1	2009-06-08 07:38:00	0	7	2	7	2
1	2009-06-08 07:39:00	0	7	2	7	2
1	2009-06-08 07:40:00	0	7	2	7	2
1	2009-06-08 07:41:00	0	7	2	7	2
1	2009-06-08 07:42:00	0	7	2	7	2
1	2009-06-08 07:43:00	0	7	2	7	2
1	2009-06-08 07:44:00	66	7	2	7	2
1	2009-06-08 07:45:00	55	7	2	7	2
1	2009-06-08 07:46:00	0	7	2	7	2
1	2009-06-08 07:47:00	0	7	2	7	2
1	2009-06-08 07:48:00	0	7	2	7	2
1	2009-06-08 07:49:00	0	7	2	7	2
1	2009-06-08 07:50:00	66	7	2	7	2
1	2009-06-08 07:51:00	22	7	2	7	2
1	2009-06-08 07:52:00	0	7	2	7	2
1	2009-06-08 07:53:00	11	7	2	7	2
1	2009-06-08 07:54:00	0	7	2	7	2
1	2009-06-08 07:55:00	0	7	2	7	2
1	2009-06-08 07:56:00	0	7	2	7	2
1	2009-06-08 07:57:00	0	7	2	7	2
1	2009-06-08 07:58:00	0	7	2	7	2
1	2009-06-08 07:59:00	0	7	2	7	2
1	2009-06-08 08:00:00	0	7	2	7	2
1	2009-06-08 08:01:00	0	8	2	7	2
1	2009-06-08 08:02:00	0	8	2	7	2
1	2009-06-08 08:03:00	0	8	2	7	2
1	2009-06-08 08:04:00	0	8	2	7	2
1	2009-06-08 08:05:00	0	8	2	7	2
1	2009-06-08 08:06:00	0	8	2	7	2
1	2009-06-08 08:07:00	0	8	2	7	2
1	2009-06-08 08:08:00	0	8	2	7	2
1	2009-06-08 08:09:00	0	8	2	7	2
1	2009-06-08 08:10:00	11	8	2	7	2
1	2009-06-08 08:11:00	0	8	2	7	2
1	2009-06-08 08:12:00	0	8	2	7	2
1	2009-06-08 08:13:00	0	8	2	7	2
1	2009-06-08 08:14:00	0	8	2	7	2
1	2009-06-08 08:15:00	0	8	2	7	2
1	2009-06-08 08:16:00	0	8	2	7	2
1	2009-06-08 08:17:00	0	8	2	7	2
1	2009-06-08 08:18:00	0	8	2	7	2
1	2009-06-08 08:19:00	0	8	2	7	2
1	2009-06-08 08:20:00	0	8	2	7	2
1	2009-06-08 08:21:00	0	8	2	7	2
1	2009-06-08 08:22:00	0	8	2	7	2
1	2009-06-08 08:23:00	44	8	2	7	2
1	2009-06-08 08:24:00	0	8	2	7	2
1	2009-06-08 08:25:00	0	8	2	7	2
1	2009-06-08 08:26:00	0	8	2	7	2
1	2009-06-08 08:27:00	0	8	2	7	2
1	2009-06-08 08:28:00	0	8	2	7	2
1	2009-06-08 08:29:00	0	8	2	7	2
1	2009-06-08 08:30:00	0	8	2	7	2
1	2009-06-08 08:31:00	0	8	2	7	2
1	2009-06-08 08:32:00	0	8	2	7	2
1	2009-06-08 08:33:00	0	8	2	7	2
1	2009-06-08 08:34:00	0	8	2	7	2
1	2009-06-08 08:35:00	0	8	2	7	2
1	2009-06-08 08:36:00	0	8	2	7	2
1	2009-06-08 08:37:00	0	8	2	7	2
1	2009-06-08 08:38:00	0	8	2	7	2
1	2009-06-08 08:39:00	0	8	2	7	2
1	2009-06-08 08:40:00	0	8	2	7	2
1	2009-06-08 08:41:00	0	8	2	7	2
1	2009-06-08 08:42:00	0	8	2	7	2
1	2009-06-08 08:43:00	0	8	2	7	2
1	2009-06-08 08:44:00	0	8	2	7	2
1	2009-06-08 08:45:00	0	8	2	7	2
1	2009-06-08 08:46:00	0	8	2	7	2
1	2009-06-08 08:47:00	0	8	2	7	2
1	2009-06-08 08:48:00	0	8	2	7	2
1	2009-06-08 08:49:00	0	8	2	7	2
1	2009-06-08 08:50:00	0	8	2	7	2
1	2009-06-08 08:51:00	0	8	2	7	2
1	2009-06-08 08:52:00	0	8	2	7	2
1	2009-06-08 08:53:00	0	8	2	7	2
1	2009-06-08 08:54:00	0	8	2	7	2
1	2009-06-08 08:55:00	11	8	2	7	2
1	2009-06-08 08:56:00	0	8	2	7	2
1	2009-06-08 08:57:00	0	8	2	7	2
1	2009-06-08 08:58:00	0	8	2	7	2
1	2009-06-08 08:59:00	44	8	2	7	2
1	2009-06-08 09:00:00	55	8	2	7	2
1	2009-06-08 09:01:00	11	9	2	7	2
1	2009-06-08 09:02:00	0	9	2	7	2
1	2009-06-08 09:03:00	0	9	2	7	2
1	2009-06-08 09:04:00	0	9	2	7	2
1	2009-06-08 09:05:00	0	9	2	7	2
1	2009-06-08 09:06:00	0	9	2	7	2
1	2009-06-08 09:07:00	0	9	2	7	2
1	2009-06-08 09:08:00	0	9	2	7	2
1	2009-06-08 09:09:00	0	9	2	7	2
1	2009-06-08 09:10:00	0	9	2	7	2
1	2009-06-08 09:11:00	0	9	2	7	2
1	2009-06-08 09:12:00	0	9	2	7	2
1	2009-06-08 09:13:00	0	9	2	7	2
1	2009-06-08 09:14:00	0	9	2	7	2
1	2009-06-08 09:15:00	0	9	2	7	2
1	2009-06-08 09:16:00	0	9	2	7	2
1	2009-06-08 09:17:00	0	9	2	7	2
1	2009-06-08 09:18:00	0	9	2	7	2
1	2009-06-08 09:19:00	0	9	2	7	2
1	2009-06-08 09:20:00	0	9	2	7	2
1	2009-06-08 09:21:00	0	9	2	7	2
1	2009-06-08 09:22:00	0	9	2	7	2
1	2009-06-08 09:23:00	0	9	2	7	2
1	2009-06-08 09:24:00	0	9	2	7	2
1	2009-06-08 09:25:00	0	9	2	7	2
1	2009-06-08 09:26:00	11	9	2	7	2
1	2009-06-08 09:27:00	11	9	2	7	2
1	2009-06-08 09:28:00	110	9	2	7	2
1	2009-06-08 09:29:00	0	9	2	7	2
1	2009-06-08 09:30:00	0	9	2	7	2
1	2009-06-08 09:31:00	0	9	2	7	2
1	2009-06-08 09:32:00	0	9	2	7	2
1	2009-06-08 09:33:00	0	9	2	7	2
1	2009-06-08 09:34:00	11	9	2	7	2
1	2009-06-08 09:35:00	0	9	2	7	2
1	2009-06-08 09:36:00	0	9	2	7	2
1	2009-06-08 09:37:00	11	9	2	7	2
1	2009-06-08 09:38:00	0	9	2	7	2
1	2009-06-08 09:39:00	0	9	2	7	2
1	2009-06-08 09:40:00	0	9	2	7	2
1	2009-06-08 09:41:00	0	9	2	7	2
1	2009-06-08 09:42:00	0	9	2	7	2
1	2009-06-08 09:43:00	0	9	2	7	2
1	2009-06-08 09:44:00	0	9	2	7	2
1	2009-06-08 09:45:00	0	9	2	7	2
1	2009-06-08 09:46:00	0	9	2	7	2
1	2009-06-08 09:47:00	0	9	2	7	2
1	2009-06-08 09:48:00	0	9	2	7	2
1	2009-06-08 09:49:00	0	9	2	7	2
1	2009-06-08 09:50:00	0	9	2	7	2
1	2009-06-08 09:51:00	0	9	2	7	2
1	2009-06-08 09:52:00	0	9	2	7	2
1	2009-06-08 09:53:00	0	9	2	7	2
1	2009-06-08 09:54:00	0	9	2	7	2
1	2009-06-08 09:55:00	0	9	2	7	2
1	2009-06-08 09:56:00	121	9	2	7	2
1	2009-06-08 09:57:00	11	9	2	7	2
1	2009-06-08 09:58:00	0	9	2	7	2
1	2009-06-08 09:59:00	66	9	2	7	2
1	2009-06-08 10:00:00	0	9	2	7	2
1	2009-06-08 10:01:00	0	10	2	7	2
1	2009-06-08 10:02:00	33	10	2	7	2
1	2009-06-08 10:03:00	0	10	2	7	2
1	2009-06-08 10:04:00	0	10	2	7	2
1	2009-06-08 10:05:00	0	10	2	7	2
1	2009-06-08 10:06:00	0	10	2	7	2
1	2009-06-08 10:07:00	0	10	2	7	2
1	2009-06-08 10:08:00	0	10	2	7	2
1	2009-06-08 10:09:00	0	10	2	7	2
1	2009-06-08 10:10:00	0	10	2	7	2
1	2009-06-08 10:11:00	0	10	2	7	2
1	2009-06-08 10:12:00	0	10	2	7	2
1	2009-06-08 10:13:00	0	10	2	7	2
1	2009-06-08 10:14:00	0	10	2	7	2
1	2009-06-08 10:15:00	0	10	2	7	2
1	2009-06-08 10:16:00	0	10	2	7	2
1	2009-06-08 10:17:00	0	10	2	7	2
1	2009-06-08 10:18:00	0	10	2	7	2
1	2009-06-08 10:19:00	0	10	2	7	2
1	2009-06-08 10:20:00	0	10	2	7	2
1	2009-06-08 10:21:00	0	10	2	7	2
1	2009-06-08 10:22:00	0	10	2	7	2
1	2009-06-08 10:23:00	0	10	2	7	2
1	2009-06-08 10:24:00	0	10	2	7	2
1	2009-06-08 10:25:00	0	10	2	7	2
1	2009-06-08 10:26:00	0	10	2	7	2
1	2009-06-08 10:27:00	0	10	2	7	2
1	2009-06-08 10:28:00	0	10	2	7	2
1	2009-06-08 10:29:00	0	10	2	7	2
1	2009-06-08 10:30:00	0	10	2	7	2
1	2009-06-08 10:31:00	0	10	2	7	2
1	2009-06-08 10:32:00	0	10	2	7	2
1	2009-06-08 10:33:00	0	10	2	7	2
1	2009-06-08 10:34:00	55	10	2	7	2
1	2009-06-08 10:35:00	0	10	2	7	2
1	2009-06-08 10:36:00	0	10	2	7	2
1	2009-06-08 10:37:00	0	10	2	7	2
1	2009-06-08 10:38:00	0	10	2	7	2
1	2009-06-08 10:39:00	0	10	2	7	2
1	2009-06-08 10:40:00	11	10	2	7	2
1	2009-06-08 10:41:00	0	10	2	7	2
1	2009-06-08 10:42:00	0	10	2	7	2
1	2009-06-08 10:43:00	0	10	2	7	2
1	2009-06-08 10:44:00	0	10	2	7	2
1	2009-06-08 10:45:00	0	10	2	7	2
1	2009-06-08 10:46:00	0	10	2	7	2
1	2009-06-08 10:47:00	0	10	2	7	2
1	2009-06-08 10:48:00	11	10	2	7	2
1	2009-06-08 10:49:00	0	10	2	7	2
1	2009-06-08 10:50:00	0	10	2	7	2
1	2009-06-08 10:51:00	0	10	2	7	2
1	2009-06-08 10:52:00	0	10	2	7	2
1	2009-06-08 10:53:00	0	10	2	7	2
1	2009-06-08 10:54:00	0	10	2	7	2
1	2009-06-08 10:55:00	0	10	2	7	2
1	2009-06-08 10:56:00	0	10	2	7	2
1	2009-06-08 10:57:00	0	10	2	7	2
1	2009-06-08 10:58:00	0	10	2	7	2
1	2009-06-08 10:59:00	77	10	2	7	2
1	2009-06-08 11:00:00	0	10	2	7	2
1	2009-06-08 11:01:00	0	11	2	7	2
1	2009-06-08 11:02:00	0	11	2	7	2
1	2009-06-08 11:03:00	0	11	2	7	2
1	2009-06-08 11:04:00	0	11	2	7	2
1	2009-06-08 11:05:00	0	11	2	7	2
1	2009-06-08 11:06:00	0	11	2	7	2
1	2009-06-08 11:07:00	0	11	2	7	2
1	2009-06-08 11:08:00	0	11	2	7	2
1	2009-06-08 11:09:00	0	11	2	7	2
1	2009-06-08 11:10:00	0	11	2	7	2
1	2009-06-08 11:11:00	0	11	2	7	2
1	2009-06-08 11:12:00	0	11	2	7	2
1	2009-06-08 11:13:00	0	11	2	7	2
1	2009-06-08 11:14:00	0	11	2	7	2
1	2009-06-08 11:15:00	0	11	2	7	2
1	2009-06-08 11:16:00	0	11	2	7	2
1	2009-06-08 11:17:00	0	11	2	7	2
1	2009-06-08 11:18:00	0	11	2	7	2
1	2009-06-08 11:19:00	0	11	2	7	2
1	2009-06-08 11:20:00	0	11	2	7	2
1	2009-06-08 11:21:00	0	11	2	7	2
1	2009-06-08 11:22:00	0	11	2	7	2
1	2009-06-08 11:23:00	0	11	2	7	2
1	2009-06-08 11:24:00	0	11	2	7	2
1	2009-06-08 11:25:00	0	11	2	7	2
1	2009-06-08 11:26:00	0	11	2	7	2
1	2009-06-08 11:27:00	0	11	2	7	2
1	2009-06-08 11:28:00	0	11	2	7	2
1	2009-06-08 11:29:00	0	11	2	7	2
1	2009-06-08 11:30:00	0	11	2	7	2
1	2009-06-08 11:31:00	11	11	2	7	2
1	2009-06-08 11:32:00	0	11	2	7	2
1	2009-06-08 11:33:00	0	11	2	7	2
1	2009-06-08 11:34:00	0	11	2	7	2
1	2009-06-08 11:35:00	0	11	2	7	2
1	2009-06-08 11:36:00	0	11	2	7	2
1	2009-06-08 11:37:00	0	11	2	7	2
1	2009-06-08 11:38:00	0	11	2	7	2
1	2009-06-08 11:39:00	0	11	2	7	2
1	2009-06-08 11:40:00	0	11	2	7	2
1	2009-06-08 11:41:00	0	11	2	7	2
1	2009-06-08 11:42:00	0	11	2	7	2
1	2009-06-08 11:43:00	0	11	2	7	2
1	2009-06-08 11:44:00	0	11	2	7	2
1	2009-06-08 11:45:00	0	11	2	7	2
1	2009-06-08 11:46:00	0	11	2	7	2
1	2009-06-08 11:47:00	44	11	2	7	2
1	2009-06-08 11:48:00	22	11	2	7	2
1	2009-06-08 11:49:00	0	11	2	7	2
1	2009-06-08 11:50:00	0	11	2	7	2
1	2009-06-08 11:51:00	0	11	2	7	2
1	2009-06-08 11:52:00	0	11	2	7	2
1	2009-06-08 11:53:00	0	11	2	7	2
1	2009-06-08 11:54:00	0	11	2	7	2
1	2009-06-08 11:55:00	0	11	2	7	2
1	2009-06-08 11:56:00	44	11	2	7	2
1	2009-06-08 11:57:00	0	11	2	7	2
1	2009-06-08 11:58:00	0	11	2	7	2
1	2009-06-08 11:59:00	0	11	2	7	2
1	2009-06-08 12:00:00	0	11	2	7	2
1	2009-06-08 12:01:00	0	12	3	7	2
1	2009-06-08 12:02:00	0	12	3	7	2
1	2009-06-08 12:03:00	0	12	3	7	2
1	2009-06-08 12:04:00	0	12	3	7	2
1	2009-06-08 12:05:00	0	12	3	7	2
1	2009-06-08 12:06:00	0	12	3	7	2
1	2009-06-08 12:07:00	0	12	3	7	2
1	2009-06-08 12:08:00	0	12	3	7	2
1	2009-06-08 12:09:00	0	12	3	7	2
1	2009-06-08 12:10:00	0	12	3	7	2
1	2009-06-08 12:11:00	0	12	3	7	2
1	2009-06-08 12:12:00	0	12	3	7	2
1	2009-06-08 12:13:00	0	12	3	7	2
1	2009-06-08 12:14:00	0	12	3	7	2
1	2009-06-08 12:15:00	0	12	3	7	2
1	2009-06-08 12:16:00	0	12	3	7	2
1	2009-06-08 12:17:00	0	12	3	7	2
1	2009-06-08 12:18:00	0	12	3	7	2
1	2009-06-08 12:19:00	0	12	3	7	2
1	2009-06-08 12:20:00	77	12	3	7	2
1	2009-06-08 12:21:00	66	12	3	7	2
1	2009-06-08 12:22:00	22	12	3	7	2
1	2009-06-08 12:23:00	0	12	3	7	2
1	2009-06-08 12:24:00	0	12	3	7	2
1	2009-06-08 12:25:00	0	12	3	7	2
1	2009-06-08 12:26:00	0	12	3	7	2
1	2009-06-08 12:27:00	0	12	3	7	2
1	2009-06-08 12:28:00	0	12	3	7	2
1	2009-06-08 12:29:00	0	12	3	7	2
1	2009-06-08 12:30:00	0	12	3	7	2
1	2009-06-08 12:31:00	0	12	3	7	2
1	2009-06-08 12:32:00	0	12	3	7	2
1	2009-06-08 12:33:00	0	12	3	7	2
1	2009-06-08 12:34:00	0	12	3	7	2
1	2009-06-08 12:35:00	0	12	3	7	2
1	2009-06-08 12:36:00	0	12	3	7	2
1	2009-06-08 12:37:00	0	12	3	7	2
1	2009-06-08 12:38:00	0	12	3	7	2
1	2009-06-08 12:39:00	0	12	3	7	2
1	2009-06-08 12:40:00	66	12	3	7	2
1	2009-06-08 12:41:00	0	12	3	7	2
1	2009-06-08 12:42:00	0	12	3	7	2
1	2009-06-08 12:43:00	0	12	3	7	2
1	2009-06-08 12:44:00	0	12	3	7	2
1	2009-06-08 12:45:00	0	12	3	7	2
1	2009-06-08 12:46:00	0	12	3	7	2
1	2009-06-08 12:47:00	0	12	3	7	2
1	2009-06-08 12:48:00	0	12	3	7	2
1	2009-06-08 12:49:00	0	12	3	7	2
1	2009-06-08 12:50:00	0	12	3	7	2
1	2009-06-08 12:51:00	0	12	3	7	2
1	2009-06-08 12:52:00	55	12	3	7	2
1	2009-06-08 12:53:00	0	12	3	7	2
1	2009-06-08 12:54:00	11	12	3	7	2
1	2009-06-08 12:55:00	0	12	3	7	2
1	2009-06-08 12:56:00	0	12	3	7	2
1	2009-06-08 12:57:00	0	12	3	7	2
1	2009-06-08 12:58:00	0	12	3	7	2
1	2009-06-08 12:59:00	0	12	3	7	2
1	2009-06-08 13:00:00	0	12	3	7	2
1	2009-06-08 13:01:00	0	13	3	7	2
1	2009-06-08 13:02:00	0	13	3	7	2
1	2009-06-08 13:03:00	0	13	3	7	2
1	2009-06-08 13:04:00	0	13	3	7	2
1	2009-06-08 13:05:00	0	13	3	7	2
1	2009-06-08 13:06:00	0	13	3	7	2
1	2009-06-08 13:07:00	0	13	3	7	2
1	2009-06-08 13:08:00	0	13	3	7	2
1	2009-06-08 13:09:00	0	13	3	7	2
1	2009-06-08 13:10:00	0	13	3	7	2
1	2009-06-08 13:11:00	0	13	3	7	2
1	2009-06-08 13:12:00	0	13	3	7	2
1	2009-06-08 13:13:00	0	13	3	7	2
1	2009-06-08 13:14:00	0	13	3	7	2
1	2009-06-08 13:15:00	0	13	3	7	2
1	2009-06-08 13:16:00	0	13	3	7	2
1	2009-06-08 13:17:00	0	13	3	7	2
1	2009-06-08 13:18:00	0	13	3	7	2
1	2009-06-08 13:19:00	0	13	3	7	2
1	2009-06-08 13:20:00	0	13	3	7	2
1	2009-06-08 13:21:00	0	13	3	7	2
1	2009-06-08 13:22:00	0	13	3	7	2
1	2009-06-08 13:23:00	0	13	3	7	2
1	2009-06-08 13:24:00	0	13	3	7	2
1	2009-06-08 13:25:00	0	13	3	7	2
1	2009-06-08 13:26:00	0	13	3	7	2
1	2009-06-08 13:27:00	0	13	3	7	2
1	2009-06-08 13:28:00	0	13	3	7	2
1	2009-06-08 13:29:00	0	13	3	7	2
1	2009-06-08 13:30:00	0	13	3	7	2
1	2009-06-08 13:31:00	0	13	3	7	2
1	2009-06-08 13:32:00	0	13	3	7	2
1	2009-06-08 13:33:00	0	13	3	7	2
1	2009-06-08 13:34:00	0	13	3	7	2
1	2009-06-08 13:35:00	0	13	3	7	2
1	2009-06-08 13:36:00	0	13	3	7	2
1	2009-06-08 13:37:00	0	13	3	7	2
1	2009-06-08 13:38:00	0	13	3	7	2
1	2009-06-08 13:39:00	0	13	3	7	2
1	2009-06-08 13:40:00	0	13	3	7	2
1	2009-06-08 13:41:00	0	13	3	7	2
1	2009-06-08 13:42:00	0	13	3	7	2
1	2009-06-08 13:43:00	0	13	3	7	2
1	2009-06-08 13:44:00	0	13	3	7	2
1	2009-06-08 13:45:00	0	13	3	7	2
1	2009-06-08 13:46:00	0	13	3	7	2
1	2009-06-08 13:47:00	0	13	3	7	2
1	2009-06-08 13:48:00	0	13	3	7	2
1	2009-06-08 13:49:00	0	13	3	7	2
1	2009-06-08 13:50:00	0	13	3	7	2
1	2009-06-08 13:51:00	0	13	3	7	2
1	2009-06-08 13:52:00	0	13	3	7	2
1	2009-06-08 13:53:00	0	13	3	7	2
1	2009-06-08 13:54:00	0	13	3	7	2
1	2009-06-08 13:55:00	0	13	3	7	2
1	2009-06-08 13:56:00	0	13	3	7	2
1	2009-06-08 13:57:00	0	13	3	7	2
1	2009-06-08 13:58:00	0	13	3	7	2
1	2009-06-08 13:59:00	0	13	3	7	2
1	2009-06-08 14:00:00	0	13	3	7	2
1	2009-06-08 14:01:00	11	14	3	7	2
1	2009-06-08 14:02:00	0	14	3	7	2
1	2009-06-08 14:03:00	0	14	3	7	2
1	2009-06-08 14:04:00	0	14	3	7	2
1	2009-06-08 14:05:00	0	14	3	7	2
1	2009-06-08 14:06:00	0	14	3	7	2
1	2009-06-08 14:07:00	0	14	3	7	2
1	2009-06-08 14:08:00	0	14	3	7	2
1	2009-06-08 14:09:00	0	14	3	7	2
1	2009-06-08 14:10:00	0	14	3	7	2
1	2009-06-08 14:11:00	0	14	3	7	2
1	2009-06-08 14:12:00	0	14	3	7	2
1	2009-06-08 14:13:00	0	14	3	7	2
1	2009-06-08 14:14:00	33	14	3	7	2
1	2009-06-08 14:15:00	0	14	3	7	2
1	2009-06-08 14:16:00	0	14	3	7	2
1	2009-06-08 14:17:00	0	14	3	7	2
1	2009-06-08 14:18:00	0	14	3	7	2
1	2009-06-08 14:19:00	0	14	3	7	2
1	2009-06-08 14:20:00	0	14	3	7	2
1	2009-06-08 14:21:00	0	14	3	7	2
1	2009-06-08 14:22:00	0	14	3	7	2
1	2009-06-08 14:23:00	0	14	3	7	2
1	2009-06-08 14:24:00	0	14	3	7	2
1	2009-06-08 14:25:00	0	14	3	7	2
1	2009-06-08 14:26:00	0	14	3	7	2
1	2009-06-08 14:27:00	0	14	3	7	2
1	2009-06-08 14:28:00	0	14	3	7	2
1	2009-06-08 14:29:00	0	14	3	7	2
1	2009-06-08 14:30:00	351	14	3	7	2
1	2009-06-08 14:31:00	77	14	3	7	2
1	2009-06-08 14:32:00	0	14	3	7	2
1	2009-06-08 14:33:00	0	14	3	7	2
1	2009-06-08 14:34:00	0	14	3	7	2
1	2009-06-08 14:35:00	0	14	3	7	2
1	2009-06-08 14:36:00	0	14	3	7	2
1	2009-06-08 14:37:00	0	14	3	7	2
1	2009-06-08 14:38:00	0	14	3	7	2
1	2009-06-08 14:39:00	0	14	3	7	2
1	2009-06-08 14:40:00	0	14	3	7	2
1	2009-06-08 14:41:00	0	14	3	7	2
1	2009-06-08 14:42:00	0	14	3	7	2
1	2009-06-08 14:43:00	0	14	3	7	2
1	2009-06-08 14:44:00	0	14	3	7	2
1	2009-06-08 14:45:00	0	14	3	7	2
1	2009-06-08 14:46:00	0	14	3	7	2
1	2009-06-08 14:47:00	0	14	3	7	2
1	2009-06-08 14:48:00	0	14	3	7	2
1	2009-06-08 14:49:00	0	14	3	7	2
1	2009-06-08 14:50:00	0	14	3	7	2
1	2009-06-08 14:51:00	0	14	3	7	2
1	2009-06-08 14:52:00	0	14	3	7	2
1	2009-06-08 14:53:00	0	14	3	7	2
1	2009-06-08 14:54:00	0	14	3	7	2
1	2009-06-08 14:55:00	0	14	3	7	2
1	2009-06-08 14:56:00	0	14	3	7	2
1	2009-06-08 14:57:00	0	14	3	7	2
1	2009-06-08 14:58:00	0	14	3	7	2
1	2009-06-08 14:59:00	0	14	3	7	2
1	2009-06-08 15:00:00	0	14	3	7	2
1	2009-06-08 15:01:00	11	15	3	7	2
1	2009-06-08 15:02:00	0	15	3	7	2
1	2009-06-08 15:03:00	0	15	3	7	2
1	2009-06-08 15:04:00	0	15	3	7	2
1	2009-06-08 15:05:00	0	15	3	7	2
1	2009-06-08 15:06:00	22	15	3	7	2
1	2009-06-08 15:07:00	0	15	3	7	2
1	2009-06-08 15:08:00	0	15	3	7	2
1	2009-06-08 15:09:00	0	15	3	7	2
1	2009-06-08 15:10:00	0	15	3	7	2
1	2009-06-08 15:11:00	0	15	3	7	2
1	2009-06-08 15:12:00	0	15	3	7	2
1	2009-06-08 15:13:00	0	15	3	7	2
1	2009-06-08 15:14:00	0	15	3	7	2
1	2009-06-08 15:15:00	0	15	3	7	2
1	2009-06-08 15:16:00	0	15	3	7	2
1	2009-06-08 15:17:00	0	15	3	7	2
1	2009-06-08 15:18:00	0	15	3	7	2
1	2009-06-08 15:19:00	0	15	3	7	2
1	2009-06-08 15:20:00	0	15	3	7	2
1	2009-06-08 15:21:00	0	15	3	7	2
1	2009-06-08 15:22:00	0	15	3	7	2
1	2009-06-08 15:23:00	0	15	3	7	2
1	2009-06-08 15:24:00	0	15	3	7	2
1	2009-06-08 15:25:00	0	15	3	7	2
1	2009-06-08 15:26:00	0	15	3	7	2
1	2009-06-08 15:27:00	0	15	3	7	2
1	2009-06-08 15:28:00	0	15	3	7	2
1	2009-06-08 15:29:00	0	15	3	7	2
1	2009-06-08 15:30:00	44	15	3	7	2
1	2009-06-08 15:31:00	0	15	3	7	2
1	2009-06-08 15:32:00	0	15	3	7	2
1	2009-06-08 15:33:00	0	15	3	7	2
1	2009-06-08 15:34:00	0	15	3	7	2
1	2009-06-08 15:35:00	0	15	3	7	2
1	2009-06-08 15:36:00	0	15	3	7	2
1	2009-06-08 15:37:00	0	15	3	7	2
1	2009-06-08 15:38:00	0	15	3	7	2
1	2009-06-08 15:39:00	0	15	3	7	2
1	2009-06-08 15:40:00	0	15	3	7	2
1	2009-06-08 15:41:00	0	15	3	7	2
1	2009-06-08 15:42:00	0	15	3	7	2
1	2009-06-08 15:43:00	0	15	3	7	2
1	2009-06-08 15:44:00	0	15	3	7	2
1	2009-06-08 15:45:00	0	15	3	7	2
1	2009-06-08 15:46:00	0	15	3	7	2
1	2009-06-08 15:47:00	0	15	3	7	2
1	2009-06-08 15:48:00	0	15	3	7	2
1	2009-06-08 15:49:00	0	15	3	7	2
1	2009-06-08 15:50:00	0	15	3	7	2
1	2009-06-08 15:51:00	0	15	3	7	2
1	2009-06-08 15:52:00	0	15	3	7	2
1	2009-06-08 15:53:00	0	15	3	7	2
1	2009-06-08 15:54:00	0	15	3	7	2
1	2009-06-08 15:55:00	0	15	3	7	2
1	2009-06-08 15:56:00	0	15	3	7	2
1	2009-06-08 15:57:00	0	15	3	7	2
1	2009-06-08 15:58:00	0	15	3	7	2
1	2009-06-08 15:59:00	0	15	3	7	2
1	2009-06-08 16:00:00	0	15	3	7	2
1	2009-06-08 16:01:00	0	16	3	7	2
1	2009-06-08 16:02:00	0	16	3	7	2
1	2009-06-08 16:03:00	0	16	3	7	2
1	2009-06-08 16:04:00	0	16	3	7	2
1	2009-06-08 16:05:00	0	16	3	7	2
1	2009-06-08 16:06:00	55	16	3	7	2
1	2009-06-08 16:07:00	0	16	3	7	2
1	2009-06-08 16:08:00	0	16	3	7	2
1	2009-06-08 16:09:00	0	16	3	7	2
1	2009-06-08 16:10:00	0	16	3	7	2
1	2009-06-08 16:11:00	0	16	3	7	2
1	2009-06-08 16:12:00	0	16	3	7	2
1	2009-06-08 16:13:00	0	16	3	7	2
1	2009-06-08 16:14:00	0	16	3	7	2
1	2009-06-08 16:15:00	0	16	3	7	2
1	2009-06-08 16:16:00	0	16	3	7	2
1	2009-06-08 16:17:00	0	16	3	7	2
1	2009-06-08 16:18:00	0	16	3	7	2
1	2009-06-08 16:19:00	0	16	3	7	2
1	2009-06-08 16:20:00	0	16	3	7	2
1	2009-06-08 16:21:00	0	16	3	7	2
1	2009-06-08 16:22:00	0	16	3	7	2
1	2009-06-08 16:23:00	0	16	3	7	2
1	2009-06-08 16:24:00	0	16	3	7	2
1	2009-06-08 16:25:00	0	16	3	7	2
1	2009-06-08 16:26:00	0	16	3	7	2
1	2009-06-08 16:27:00	0	16	3	7	2
1	2009-06-08 16:28:00	0	16	3	7	2
1	2009-06-08 16:29:00	0	16	3	7	2
1	2009-06-08 16:30:00	0	16	3	7	2
1	2009-06-08 16:31:00	0	16	3	7	2
1	2009-06-08 16:32:00	0	16	3	7	2
1	2009-06-08 16:33:00	0	16	3	7	2
1	2009-06-08 16:34:00	0	16	3	7	2
1	2009-06-08 16:35:00	0	16	3	7	2
1	2009-06-08 16:36:00	0	16	3	7	2
1	2009-06-08 16:37:00	0	16	3	7	2
1	2009-06-08 16:38:00	0	16	3	7	2
1	2009-06-08 16:39:00	0	16	3	7	2
1	2009-06-08 16:40:00	0	16	3	7	2
1	2009-06-08 16:41:00	0	16	3	7	2
1	2009-06-08 16:42:00	0	16	3	7	2
1	2009-06-08 16:43:00	0	16	3	7	2
1	2009-06-08 16:44:00	0	16	3	7	2
1	2009-06-08 16:45:00	0	16	3	7	2
1	2009-06-08 16:46:00	0	16	3	7	2
1	2009-06-08 16:47:00	0	16	3	7	2
1	2009-06-08 16:48:00	0	16	3	7	2
1	2009-06-08 16:49:00	0	16	3	7	2
1	2009-06-08 16:50:00	0	16	3	7	2
1	2009-06-08 16:51:00	0	16	3	7	2
1	2009-06-08 16:52:00	0	16	3	7	2
1	2009-06-08 16:53:00	0	16	3	7	2
1	2009-06-08 16:54:00	0	16	3	7	2
1	2009-06-08 16:55:00	0	16	3	7	2
1	2009-06-08 16:56:00	0	16	3	7	2
1	2009-06-08 16:57:00	0	16	3	7	2
1	2009-06-08 16:58:00	1170	16	3	7	2
1	2009-06-08 16:59:00	1750	16	3	7	2
1	2009-06-08 17:00:00	1346	16	3	7	2
1	2009-06-08 17:01:00	499	17	3	7	2
1	2009-06-08 17:02:00	170	17	3	7	2
1	2009-06-08 17:03:00	428	17	3	7	2
1	2009-06-08 17:04:00	413	17	3	7	2
1	2009-06-08 17:05:00	382	17	3	7	2
1	2009-06-08 17:06:00	223	17	3	7	2
1	2009-06-08 17:07:00	397	17	3	7	2
1	2009-06-08 17:08:00	569	17	3	7	2
1	2009-06-08 17:09:00	669	17	3	7	2
1	2009-06-08 17:10:00	552	17	3	7	2
1	2009-06-08 17:11:00	397	17	3	7	2
1	2009-06-08 17:12:00	143	17	3	7	2
1	2009-06-08 17:13:00	335	17	3	7	2
1	2009-06-08 17:14:00	236	17	3	7	2
1	2009-06-08 17:15:00	236	17	3	7	2
1	2009-06-08 17:16:00	708	17	3	7	2
1	2009-06-08 17:17:00	320	17	3	7	2
1	2009-06-08 17:18:00	481	17	3	7	2
1	2009-06-08 17:19:00	132	17	3	7	2
1	2009-06-08 17:20:00	22	17	3	7	2
1	2009-06-08 17:21:00	0	17	3	7	2
1	2009-06-08 17:22:00	77	17	3	7	2
1	2009-06-08 17:23:00	863	17	3	7	2
1	2009-06-08 17:24:00	446	17	3	7	2
1	2009-06-08 17:25:00	305	17	3	7	2
1	2009-06-08 17:26:00	0	17	3	7	2
1	2009-06-08 17:27:00	132	17	3	7	2
1	2009-06-08 17:28:00	157	17	3	7	2
1	2009-06-08 17:29:00	77	17	3	7	2
1	2009-06-08 17:30:00	708	17	3	7	2
1	2009-06-08 17:31:00	1114	17	3	7	2
1	2009-06-08 17:32:00	335	17	3	7	2
1	2009-06-08 17:33:00	609	17	3	7	2
1	2009-06-08 17:34:00	689	17	3	7	2
1	2009-06-08 17:35:00	0	17	3	7	2
1	2009-06-08 17:36:00	0	17	3	7	2
1	2009-06-08 17:37:00	66	17	3	7	2
1	2009-06-08 17:38:00	44	17	3	7	2
1	2009-06-08 17:39:00	11	17	3	7	2
1	2009-06-08 17:40:00	44	17	3	7	2
1	2009-06-08 17:41:00	11	17	3	7	2
1	2009-06-08 17:42:00	0	17	3	7	2
1	2009-06-08 17:43:00	0	17	3	7	2
1	2009-06-08 17:44:00	33	17	3	7	2
1	2009-06-08 17:45:00	0	17	3	7	2
1	2009-06-08 17:46:00	0	17	3	7	2
1	2009-06-08 17:47:00	0	17	3	7	2
1	2009-06-08 17:48:00	0	17	3	7	2
1	2009-06-08 17:49:00	0	17	3	7	2
1	2009-06-08 17:50:00	223	17	3	7	2
1	2009-06-08 17:51:00	121	17	3	7	2
1	2009-06-08 17:52:00	0	17	3	7	2
1	2009-06-08 17:53:00	0	17	3	7	2
1	2009-06-08 17:54:00	0	17	3	7	2
1	2009-06-08 17:55:00	0	17	3	7	2
1	2009-06-08 17:56:00	132	17	3	7	2
1	2009-06-08 17:57:00	66	17	3	7	2
1	2009-06-08 17:58:00	11	17	3	7	2
1	2009-06-08 17:59:00	0	17	3	7	2
1	2009-06-08 18:00:00	0	17	3	7	2
1	2009-06-08 18:01:00	0	18	4	7	2
1	2009-06-08 18:02:00	11	18	4	7	2
1	2009-06-08 18:03:00	0	18	4	7	2
1	2009-06-08 18:04:00	11	18	4	7	2
1	2009-06-08 18:05:00	0	18	4	7	2
1	2009-06-08 18:06:00	0	18	4	7	2
1	2009-06-08 18:07:00	289	18	4	7	2
1	2009-06-08 18:08:00	841	18	4	7	2
1	2009-06-08 18:09:00	157	18	4	7	2
1	2009-06-08 18:10:00	22	18	4	7	2
1	2009-06-08 18:11:00	0	18	4	7	2
1	2009-06-08 18:12:00	0	18	4	7	2
1	2009-06-08 18:13:00	335	18	4	7	2
1	2009-06-08 18:14:00	22	18	4	7	2
1	2009-06-08 18:15:00	44	18	4	7	2
1	2009-06-08 18:16:00	210	18	4	7	2
1	2009-06-08 18:17:00	88	18	4	7	2
1	2009-06-08 18:18:00	55	18	4	7	2
1	2009-06-08 18:19:00	55	18	4	7	2
1	2009-06-08 18:20:00	11	18	4	7	2
1	2009-06-08 18:21:00	335	18	4	7	2
1	2009-06-08 18:22:00	289	18	4	7	2
1	2009-06-08 18:23:00	22	18	4	7	2
1	2009-06-08 18:24:00	88	18	4	7	2
1	2009-06-08 18:25:00	335	18	4	7	2
1	2009-06-08 18:26:00	170	18	4	7	2
1	2009-06-08 18:27:00	66	18	4	7	2
1	2009-06-08 18:28:00	44	18	4	7	2
1	2009-06-08 18:29:00	0	18	4	7	2
1	2009-06-08 18:30:00	143	18	4	7	2
1	2009-06-08 18:31:00	0	18	4	7	2
1	2009-06-08 18:32:00	0	18	4	7	2
1	2009-06-08 18:33:00	0	18	4	7	2
1	2009-06-08 18:34:00	0	18	4	7	2
1	2009-06-08 18:35:00	0	18	4	7	2
1	2009-06-08 18:36:00	0	18	4	7	2
1	2009-06-08 18:37:00	0	18	4	7	2
1	2009-06-08 18:38:00	0	18	4	7	2
1	2009-06-08 18:39:00	0	18	4	7	2
1	2009-06-08 18:40:00	249	18	4	7	2
1	2009-06-08 18:41:00	33	18	4	7	2
1	2009-06-08 18:42:00	110	18	4	7	2
1	2009-06-08 18:43:00	183	18	4	7	2
1	2009-06-08 18:44:00	33	18	4	7	2
1	2009-06-08 18:45:00	55	18	4	7	2
1	2009-06-08 18:46:00	0	18	4	7	2
1	2009-06-08 18:47:00	157	18	4	7	2
1	2009-06-08 18:48:00	66	18	4	7	2
1	2009-06-08 18:49:00	0	18	4	7	2
1	2009-06-08 18:50:00	132	18	4	7	2
1	2009-06-08 18:51:00	77	18	4	7	2
1	2009-06-08 18:52:00	66	18	4	7	2
1	2009-06-08 18:53:00	132	18	4	7	2
1	2009-06-08 18:54:00	0	18	4	7	2
1	2009-06-08 18:55:00	11	18	4	7	2
1	2009-06-08 18:56:00	170	18	4	7	2
1	2009-06-08 18:57:00	132	18	4	7	2
1	2009-06-08 18:58:00	22	18	4	7	2
1	2009-06-08 18:59:00	0	18	4	7	2
1	2009-06-08 19:00:00	88	18	4	7	2
1	2009-06-08 19:01:00	446	19	4	7	2
1	2009-06-08 19:02:00	110	19	4	7	2
1	2009-06-08 19:03:00	143	19	4	7	2
1	2009-06-08 19:04:00	0	19	4	7	2
1	2009-06-08 19:05:00	708	19	4	7	2
1	2009-06-08 19:06:00	936	19	4	7	2
1	2009-06-08 19:07:00	1170	19	4	7	2
1	2009-06-08 19:08:00	276	19	4	7	2
1	2009-06-08 19:09:00	0	19	4	7	2
1	2009-06-08 19:10:00	11	19	4	7	2
1	2009-06-08 19:11:00	132	19	4	7	2
1	2009-06-08 19:12:00	0	19	4	7	2
1	2009-06-08 19:13:00	0	19	4	7	2
1	2009-06-08 19:14:00	0	19	4	7	2
1	2009-06-08 19:15:00	0	19	4	7	2
1	2009-06-08 19:16:00	0	19	4	7	2
1	2009-06-08 19:17:00	0	19	4	7	2
1	2009-06-08 19:18:00	0	19	4	7	2
1	2009-06-08 19:19:00	0	19	4	7	2
1	2009-06-08 19:20:00	0	19	4	7	2
1	2009-06-08 19:21:00	0	19	4	7	2
1	2009-06-08 19:22:00	0	19	4	7	2
1	2009-06-08 19:23:00	0	19	4	7	2
1	2009-06-08 19:24:00	0	19	4	7	2
1	2009-06-08 19:25:00	0	19	4	7	2
1	2009-06-08 19:26:00	11	19	4	7	2
1	2009-06-08 19:27:00	0	19	4	7	2
1	2009-06-08 19:28:00	0	19	4	7	2
1	2009-06-08 19:29:00	0	19	4	7	2
1	2009-06-08 19:30:00	121	19	4	7	2
1	2009-06-08 19:31:00	320	19	4	7	2
1	2009-06-08 19:32:00	320	19	4	7	2
1	2009-06-08 19:33:00	99	19	4	7	2
1	2009-06-08 19:34:00	121	19	4	7	2
1	2009-06-08 19:35:00	77	19	4	7	2
1	2009-06-08 19:36:00	157	19	4	7	2
1	2009-06-08 19:37:00	0	19	4	7	2
1	2009-06-08 19:38:00	0	19	4	7	2
1	2009-06-08 19:39:00	0	19	4	7	2
1	2009-06-08 19:40:00	0	19	4	7	2
1	2009-06-08 19:41:00	249	19	4	7	2
1	2009-06-08 19:42:00	609	19	4	7	2
1	2009-06-08 19:43:00	305	19	4	7	2
1	2009-06-08 19:44:00	121	19	4	7	2
1	2009-06-08 19:45:00	0	19	4	7	2
1	2009-06-08 19:46:00	0	19	4	7	2
1	2009-06-08 19:47:00	249	19	4	7	2
1	2009-06-08 19:48:00	0	19	4	7	2
1	2009-06-08 19:49:00	0	19	4	7	2
1	2009-06-08 19:50:00	0	19	4	7	2
1	2009-06-08 19:51:00	0	19	4	7	2
1	2009-06-08 19:52:00	0	19	4	7	2
1	2009-06-08 19:53:00	0	19	4	7	2
1	2009-06-08 19:54:00	0	19	4	7	2
1	2009-06-08 19:55:00	689	19	4	7	2
1	2009-06-08 19:56:00	11	19	4	7	2
1	2009-06-08 19:57:00	11	19	4	7	2
1	2009-06-08 19:58:00	33	19	4	7	2
1	2009-06-08 19:59:00	66	19	4	7	2
1	2009-06-08 20:00:00	88	19	4	7	2
1	2009-06-08 20:01:00	157	20	4	7	2
1	2009-06-08 20:02:00	428	20	4	7	2
1	2009-06-08 20:03:00	33	20	4	7	2
1	2009-06-08 20:04:00	132	20	4	7	2
1	2009-06-08 20:05:00	77	20	4	7	2
1	2009-06-08 20:06:00	0	20	4	7	2
1	2009-06-08 20:07:00	0	20	4	7	2
1	2009-06-08 20:08:00	0	20	4	7	2
1	2009-06-08 20:09:00	170	20	4	7	2
1	2009-06-08 20:10:00	0	20	4	7	2
1	2009-06-08 20:11:00	0	20	4	7	2
1	2009-06-08 20:12:00	0	20	4	7	2
1	2009-06-08 20:13:00	0	20	4	7	2
1	2009-06-08 20:14:00	0	20	4	7	2
1	2009-06-08 20:15:00	0	20	4	7	2
1	2009-06-08 20:16:00	22	20	4	7	2
1	2009-06-08 20:17:00	0	20	4	7	2
1	2009-06-08 20:18:00	0	20	4	7	2
1	2009-06-08 20:19:00	0	20	4	7	2
1	2009-06-08 20:20:00	0	20	4	7	2
1	2009-06-08 20:21:00	0	20	4	7	2
1	2009-06-08 20:22:00	11	20	4	7	2
1	2009-06-08 20:23:00	88	20	4	7	2
1	2009-06-08 20:24:00	33	20	4	7	2
1	2009-06-08 20:25:00	0	20	4	7	2
1	2009-06-08 20:26:00	0	20	4	7	2
1	2009-06-08 20:27:00	0	20	4	7	2
1	2009-06-08 20:28:00	0	20	4	7	2
1	2009-06-08 20:29:00	0	20	4	7	2
1	2009-06-08 20:30:00	0	20	4	7	2
1	2009-06-08 20:31:00	22	20	4	7	2
1	2009-06-08 20:32:00	33	20	4	7	2
1	2009-06-08 20:33:00	0	20	4	7	2
1	2009-06-08 20:34:00	0	20	4	7	2
1	2009-06-08 20:35:00	0	20	4	7	2
1	2009-06-08 20:36:00	0	20	4	7	2
1	2009-06-08 20:37:00	0	20	4	7	2
1	2009-06-08 20:38:00	0	20	4	7	2
1	2009-06-08 20:39:00	0	20	4	7	2
1	2009-06-08 20:40:00	0	20	4	7	2
1	2009-06-08 20:41:00	0	20	4	7	2
1	2009-06-08 20:42:00	0	20	4	7	2
1	2009-06-08 20:43:00	0	20	4	7	2
1	2009-06-08 20:44:00	55	20	4	7	2
1	2009-06-08 20:45:00	0	20	4	7	2
1	2009-06-08 20:46:00	0	20	4	7	2
1	2009-06-08 20:47:00	0	20	4	7	2
1	2009-06-08 20:48:00	0	20	4	7	2
1	2009-06-08 20:49:00	0	20	4	7	2
1	2009-06-08 20:50:00	0	20	4	7	2
1	2009-06-08 20:51:00	0	20	4	7	2
1	2009-06-08 20:52:00	0	20	4	7	2
1	2009-06-08 20:53:00	0	20	4	7	2
1	2009-06-08 20:54:00	0	20	4	7	2
1	2009-06-08 20:55:00	0	20	4	7	2
1	2009-06-08 20:56:00	0	20	4	7	2
1	2009-06-08 20:57:00	0	20	4	7	2
1	2009-06-08 20:58:00	0	20	4	7	2
1	2009-06-08 20:59:00	0	20	4	7	2
1	2009-06-08 21:00:00	44	20	4	7	2
1	2009-06-08 21:01:00	0	21	4	7	2
1	2009-06-08 21:02:00	0	21	4	7	2
1	2009-06-08 21:03:00	0	21	4	7	2
1	2009-06-08 21:04:00	0	21	4	7	2
1	2009-06-08 21:05:00	0	21	4	7	2
1	2009-06-08 21:06:00	0	21	4	7	2
1	2009-06-08 21:07:00	0	21	4	7	2
1	2009-06-08 21:08:00	0	21	4	7	2
1	2009-06-08 21:09:00	0	21	4	7	2
1	2009-06-08 21:10:00	66	21	4	7	2
1	2009-06-08 21:11:00	335	21	4	7	2
1	2009-06-08 21:12:00	351	21	4	7	2
1	2009-06-08 21:13:00	819	21	4	7	2
1	2009-06-08 21:14:00	382	21	4	7	2
1	2009-06-08 21:15:00	0	21	4	7	2
1	2009-06-08 21:16:00	0	21	4	7	2
1	2009-06-08 21:17:00	0	21	4	7	2
1	2009-06-08 21:18:00	0	21	4	7	2
1	2009-06-08 21:19:00	0	21	4	7	2
1	2009-06-08 21:20:00	0	21	4	7	2
1	2009-06-08 21:21:00	0	21	4	7	2
1	2009-06-08 21:22:00	0	21	4	7	2
1	2009-06-08 21:23:00	121	21	4	7	2
1	2009-06-08 21:24:00	22	21	4	7	2
1	2009-06-08 21:25:00	0	21	4	7	2
1	2009-06-08 21:26:00	0	21	4	7	2
1	2009-06-08 21:27:00	0	21	4	7	2
1	2009-06-08 21:28:00	22	21	4	7	2
1	2009-06-08 21:29:00	0	21	4	7	2
1	2009-06-08 21:30:00	0	21	4	7	2
1	2009-06-08 21:31:00	66	21	4	7	2
1	2009-06-08 21:32:00	0	21	4	7	2
1	2009-06-08 21:33:00	0	21	4	7	2
1	2009-06-08 21:34:00	0	21	4	7	2
1	2009-06-08 21:35:00	0	21	4	7	2
1	2009-06-08 21:36:00	0	21	4	7	2
1	2009-06-08 21:37:00	0	21	4	7	2
1	2009-06-08 21:38:00	0	21	4	7	2
1	2009-06-08 21:39:00	0	21	4	7	2
1	2009-06-08 21:40:00	0	21	4	7	2
1	2009-06-08 21:41:00	0	21	4	7	2
1	2009-06-08 21:42:00	0	21	4	7	2
1	2009-06-08 21:43:00	0	21	4	7	2
1	2009-06-08 21:44:00	0	21	4	7	2
1	2009-06-08 21:45:00	0	21	4	7	2
1	2009-06-08 21:46:00	0	21	4	7	2
1	2009-06-08 21:47:00	0	21	4	7	2
1	2009-06-08 21:48:00	0	21	4	7	2
1	2009-06-08 21:49:00	0	21	4	7	2
1	2009-06-08 21:50:00	0	21	4	7	2
1	2009-06-08 21:51:00	0	21	4	7	2
1	2009-06-08 21:52:00	0	21	4	7	2
1	2009-06-08 21:53:00	0	21	4	7	2
1	2009-06-08 21:54:00	0	21	4	7	2
1	2009-06-08 21:55:00	0	21	4	7	2
1	2009-06-08 21:56:00	0	21	4	7	2
1	2009-06-08 21:57:00	0	21	4	7	2
1	2009-06-08 21:58:00	0	21	4	7	2
1	2009-06-08 21:59:00	0	21	4	7	2
1	2009-06-08 22:00:00	0	21	4	7	2
1	2009-06-08 22:01:00	0	22	4	7	2
1	2009-06-08 22:02:00	0	22	4	7	2
1	2009-06-08 22:03:00	0	22	4	7	2
1	2009-06-08 22:04:00	0	22	4	7	2
1	2009-06-08 22:05:00	0	22	4	7	2
1	2009-06-08 22:06:00	11	22	4	7	2
1	2009-06-08 22:07:00	0	22	4	7	2
1	2009-06-08 22:08:00	44	22	4	7	2
1	2009-06-08 22:09:00	0	22	4	7	2
1	2009-06-08 22:10:00	0	22	4	7	2
1	2009-06-08 22:11:00	0	22	4	7	2
1	2009-06-08 22:12:00	0	22	4	7	2
1	2009-06-08 22:13:00	0	22	4	7	2
1	2009-06-08 22:14:00	0	22	4	7	2
1	2009-06-08 22:15:00	0	22	4	7	2
1	2009-06-08 22:16:00	0	22	4	7	2
1	2009-06-08 22:17:00	0	22	4	7	2
1	2009-06-08 22:18:00	0	22	4	7	2
1	2009-06-08 22:19:00	0	22	4	7	2
1	2009-06-08 22:20:00	0	22	4	7	2
1	2009-06-08 22:21:00	0	22	4	7	2
1	2009-06-08 22:22:00	0	22	4	7	2
1	2009-06-08 22:23:00	0	22	4	7	2
1	2009-06-08 22:24:00	11	22	4	7	2
1	2009-06-08 22:25:00	33	22	4	7	2
1	2009-06-08 22:26:00	0	22	4	7	2
1	2009-06-08 22:27:00	0	22	4	7	2
1	2009-06-08 22:28:00	0	22	4	7	2
1	2009-06-08 22:29:00	0	22	4	7	2
1	2009-06-08 22:30:00	0	22	4	7	2
1	2009-06-08 22:31:00	0	22	4	7	2
1	2009-06-08 22:32:00	0	22	4	7	2
1	2009-06-08 22:33:00	33	22	4	7	2
1	2009-06-08 22:34:00	0	22	4	7	2
1	2009-06-08 22:35:00	44	22	4	7	2
1	2009-06-08 22:36:00	0	22	4	7	2
1	2009-06-08 22:37:00	0	22	4	7	2
1	2009-06-08 22:38:00	0	22	4	7	2
1	2009-06-08 22:39:00	0	22	4	7	2
1	2009-06-08 22:40:00	0	22	4	7	2
1	2009-06-08 22:41:00	0	22	4	7	2
1	2009-06-08 22:42:00	0	22	4	7	2
1	2009-06-08 22:43:00	0	22	4	7	2
1	2009-06-08 22:44:00	0	22	4	7	2
1	2009-06-08 22:45:00	0	22	4	7	2
1	2009-06-08 22:46:00	0	22	4	7	2
1	2009-06-08 22:47:00	0	22	4	7	2
1	2009-06-08 22:48:00	0	22	4	7	2
1	2009-06-08 22:49:00	0	22	4	7	2
1	2009-06-08 22:50:00	0	22	4	7	2
1	2009-06-08 22:51:00	0	22	4	7	2
1	2009-06-08 22:52:00	0	22	4	7	2
1	2009-06-08 22:53:00	0	22	4	7	2
1	2009-06-08 22:54:00	0	22	4	7	2
1	2009-06-08 22:55:00	0	22	4	7	2
1	2009-06-08 22:56:00	22	22	4	7	2
1	2009-06-08 22:57:00	0	22	4	7	2
1	2009-06-08 22:58:00	22	22	4	7	2
1	2009-06-08 22:59:00	0	22	4	7	2
1	2009-06-08 23:00:00	11	22	4	7	2
1	2009-06-08 23:01:00	44	23	4	7	2
1	2009-06-08 23:02:00	0	23	4	7	2
1	2009-06-08 23:03:00	0	23	4	7	2
1	2009-06-08 23:04:00	11	23	4	7	2
1	2009-06-08 23:05:00	0	23	4	7	2
1	2009-06-08 23:06:00	0	23	4	7	2
1	2009-06-08 23:07:00	0	23	4	7	2
1	2009-06-08 23:08:00	0	23	4	7	2
1	2009-06-08 23:09:00	0	23	4	7	2
1	2009-06-08 23:10:00	0	23	4	7	2
1	2009-06-08 23:11:00	0	23	4	7	2
1	2009-06-08 23:12:00	0	23	4	7	2
1	2009-06-08 23:13:00	11	23	4	7	2
1	2009-06-08 23:14:00	22	23	4	7	2
1	2009-06-08 23:15:00	0	23	4	7	2
1	2009-06-08 23:16:00	0	23	4	7	2
1	2009-06-08 23:17:00	0	23	4	7	2
1	2009-06-08 23:18:00	0	23	4	7	2
1	2009-06-08 23:19:00	0	23	4	7	2
1	2009-06-08 23:20:00	0	23	4	7	2
1	2009-06-08 23:21:00	0	23	4	7	2
1	2009-06-08 23:22:00	0	23	4	7	2
1	2009-06-08 23:23:00	0	23	4	7	2
1	2009-06-08 23:24:00	22	23	4	7	2
1	2009-06-08 23:25:00	0	23	4	7	2
1	2009-06-08 23:26:00	0	23	4	7	2
1	2009-06-08 23:27:00	0	23	4	7	2
1	2009-06-08 23:28:00	0	23	4	7	2
1	2009-06-08 23:29:00	0	23	4	7	2
1	2009-06-08 23:30:00	0	23	4	7	2
1	2009-06-08 23:31:00	0	23	4	7	2
1	2009-06-08 23:32:00	0	23	4	7	2
1	2009-06-08 23:33:00	0	23	4	7	2
1	2009-06-08 23:34:00	0	23	4	7	2
1	2009-06-08 23:35:00	0	23	4	7	2
1	2009-06-08 23:36:00	0	23	4	7	2
1	2009-06-08 23:37:00	0	23	4	7	2
1	2009-06-08 23:38:00	33	23	4	7	2
1	2009-06-08 23:39:00	0	23	4	7	2
1	2009-06-08 23:40:00	0	23	4	7	2
1	2009-06-08 23:41:00	0	23	4	7	2
1	2009-06-08 23:42:00	0	23	4	7	2
1	2009-06-08 23:43:00	0	23	4	7	2
1	2009-06-08 23:44:00	0	23	4	7	2
1	2009-06-08 23:45:00	0	23	4	7	2
1	2009-06-08 23:46:00	0	23	4	7	2
1	2009-06-08 23:47:00	0	23	4	7	2
1	2009-06-08 23:48:00	0	23	4	7	2
1	2009-06-08 23:49:00	0	23	4	7	2
1	2009-06-08 23:50:00	0	23	4	7	2
1	2009-06-08 23:51:00	0	23	4	7	2
1	2009-06-08 23:52:00	0	23	4	7	2
1	2009-06-08 23:53:00	0	23	4	7	2
1	2009-06-08 23:54:00	0	23	4	7	2
1	2009-06-08 23:55:00	0	23	4	7	2
1	2009-06-08 23:56:00	22	23	4	7	2
1	2009-06-08 23:57:00	0	23	4	7	2
1	2009-06-08 23:58:00	0	23	4	7	2
1	2009-06-08 23:59:00	0	23	4	7	2
1	2009-06-09	0	23	4	7	2
1	2009-06-09 00:01:00	0	0	1	8	3
1	2009-06-09 00:02:00	0	0	1	8	3
1	2009-06-09 00:03:00	0	0	1	8	3
1	2009-06-09 00:04:00	0	0	1	8	3
1	2009-06-09 00:05:00	0	0	1	8	3
1	2009-06-09 00:06:00	0	0	1	8	3
1	2009-06-09 00:07:00	0	0	1	8	3
1	2009-06-09 00:08:00	0	0	1	8	3
1	2009-06-09 00:09:00	0	0	1	8	3
1	2009-06-09 00:10:00	0	0	1	8	3
1	2009-06-09 00:11:00	0	0	1	8	3
1	2009-06-09 00:12:00	0	0	1	8	3
1	2009-06-09 00:13:00	0	0	1	8	3
1	2009-06-09 00:14:00	0	0	1	8	3
1	2009-06-09 00:15:00	0	0	1	8	3
1	2009-06-09 00:16:00	0	0	1	8	3
1	2009-06-09 00:17:00	0	0	1	8	3
1	2009-06-09 00:18:00	0	0	1	8	3
1	2009-06-09 00:19:00	0	0	1	8	3
1	2009-06-09 00:20:00	0	0	1	8	3
1	2009-06-09 00:21:00	0	0	1	8	3
1	2009-06-09 00:22:00	0	0	1	8	3
1	2009-06-09 00:23:00	0	0	1	8	3
1	2009-06-09 00:24:00	0	0	1	8	3
1	2009-06-09 00:25:00	0	0	1	8	3
1	2009-06-09 00:26:00	0	0	1	8	3
1	2009-06-09 00:27:00	0	0	1	8	3
1	2009-06-09 00:28:00	0	0	1	8	3
1	2009-06-09 00:29:00	0	0	1	8	3
1	2009-06-09 00:30:00	0	0	1	8	3
1	2009-06-09 00:31:00	0	0	1	8	3
1	2009-06-09 00:32:00	0	0	1	8	3
1	2009-06-09 00:33:00	0	0	1	8	3
1	2009-06-09 00:34:00	0	0	1	8	3
1	2009-06-09 00:35:00	0	0	1	8	3
1	2009-06-09 00:36:00	0	0	1	8	3
1	2009-06-09 00:37:00	0	0	1	8	3
1	2009-06-09 00:38:00	0	0	1	8	3
1	2009-06-09 00:39:00	0	0	1	8	3
1	2009-06-09 00:40:00	0	0	1	8	3
1	2009-06-09 00:41:00	0	0	1	8	3
1	2009-06-09 00:42:00	0	0	1	8	3
1	2009-06-09 00:43:00	0	0	1	8	3
1	2009-06-09 00:44:00	0	0	1	8	3
1	2009-06-09 00:45:00	0	0	1	8	3
1	2009-06-09 00:46:00	0	0	1	8	3
1	2009-06-09 00:47:00	0	0	1	8	3
1	2009-06-09 00:48:00	0	0	1	8	3
1	2009-06-09 00:49:00	0	0	1	8	3
1	2009-06-09 00:50:00	0	0	1	8	3
1	2009-06-09 00:51:00	0	0	1	8	3
1	2009-06-09 00:52:00	0	0	1	8	3
1	2009-06-09 00:53:00	0	0	1	8	3
1	2009-06-09 00:54:00	0	0	1	8	3
1	2009-06-09 00:55:00	0	0	1	8	3
1	2009-06-09 00:56:00	0	0	1	8	3
1	2009-06-09 00:57:00	0	0	1	8	3
1	2009-06-09 00:58:00	0	0	1	8	3
1	2009-06-09 00:59:00	0	0	1	8	3
1	2009-06-09 01:00:00	0	0	1	8	3
1	2009-06-09 01:01:00	0	1	1	8	3
1	2009-06-09 01:02:00	0	1	1	8	3
1	2009-06-09 01:03:00	0	1	1	8	3
1	2009-06-09 01:04:00	0	1	1	8	3
1	2009-06-09 01:05:00	22	1	1	8	3
1	2009-06-09 01:06:00	0	1	1	8	3
1	2009-06-09 01:07:00	0	1	1	8	3
1	2009-06-09 01:08:00	0	1	1	8	3
1	2009-06-09 01:09:00	0	1	1	8	3
1	2009-06-09 01:10:00	0	1	1	8	3
1	2009-06-09 01:11:00	0	1	1	8	3
1	2009-06-09 01:12:00	0	1	1	8	3
1	2009-06-09 01:13:00	0	1	1	8	3
1	2009-06-09 01:14:00	0	1	1	8	3
1	2009-06-09 01:15:00	0	1	1	8	3
1	2009-06-09 01:16:00	0	1	1	8	3
1	2009-06-09 01:17:00	0	1	1	8	3
1	2009-06-09 01:18:00	0	1	1	8	3
1	2009-06-09 01:19:00	0	1	1	8	3
1	2009-06-09 01:20:00	0	1	1	8	3
1	2009-06-09 01:21:00	0	1	1	8	3
1	2009-06-09 01:22:00	0	1	1	8	3
1	2009-06-09 01:23:00	0	1	1	8	3
1	2009-06-09 01:24:00	0	1	1	8	3
1	2009-06-09 01:25:00	0	1	1	8	3
1	2009-06-09 01:26:00	0	1	1	8	3
1	2009-06-09 01:27:00	11	1	1	8	3
1	2009-06-09 01:28:00	22	1	1	8	3
1	2009-06-09 01:29:00	0	1	1	8	3
1	2009-06-09 01:30:00	0	1	1	8	3
1	2009-06-09 01:31:00	0	1	1	8	3
1	2009-06-09 01:32:00	0	1	1	8	3
1	2009-06-09 01:33:00	0	1	1	8	3
1	2009-06-09 01:34:00	0	1	1	8	3
1	2009-06-09 01:35:00	0	1	1	8	3
1	2009-06-09 01:36:00	22	1	1	8	3
1	2009-06-09 01:37:00	0	1	1	8	3
1	2009-06-09 01:38:00	0	1	1	8	3
1	2009-06-09 01:39:00	0	1	1	8	3
1	2009-06-09 01:40:00	0	1	1	8	3
1	2009-06-09 01:41:00	0	1	1	8	3
1	2009-06-09 01:42:00	0	1	1	8	3
1	2009-06-09 01:43:00	0	1	1	8	3
1	2009-06-09 01:44:00	0	1	1	8	3
1	2009-06-09 01:45:00	0	1	1	8	3
1	2009-06-09 01:46:00	0	1	1	8	3
1	2009-06-09 01:47:00	0	1	1	8	3
1	2009-06-09 01:48:00	0	1	1	8	3
1	2009-06-09 01:49:00	0	1	1	8	3
1	2009-06-09 01:50:00	0	1	1	8	3
1	2009-06-09 01:51:00	0	1	1	8	3
1	2009-06-09 01:52:00	0	1	1	8	3
1	2009-06-09 01:53:00	0	1	1	8	3
1	2009-06-09 01:54:00	0	1	1	8	3
1	2009-06-09 01:55:00	22	1	1	8	3
1	2009-06-09 01:56:00	44	1	1	8	3
1	2009-06-09 01:57:00	0	1	1	8	3
1	2009-06-09 01:58:00	0	1	1	8	3
1	2009-06-09 01:59:00	110	1	1	8	3
1	2009-06-09 02:00:00	0	1	1	8	3
1	2009-06-09 02:01:00	0	2	1	8	3
1	2009-06-09 02:02:00	0	2	1	8	3
1	2009-06-09 02:03:00	0	2	1	8	3
1	2009-06-09 02:04:00	0	2	1	8	3
1	2009-06-09 02:05:00	0	2	1	8	3
1	2009-06-09 02:06:00	0	2	1	8	3
1	2009-06-09 02:07:00	0	2	1	8	3
1	2009-06-09 02:08:00	0	2	1	8	3
1	2009-06-09 02:09:00	0	2	1	8	3
1	2009-06-09 02:10:00	0	2	1	8	3
1	2009-06-09 02:11:00	0	2	1	8	3
1	2009-06-09 02:12:00	0	2	1	8	3
1	2009-06-09 02:13:00	0	2	1	8	3
1	2009-06-09 02:14:00	0	2	1	8	3
1	2009-06-09 02:15:00	0	2	1	8	3
1	2009-06-09 02:16:00	0	2	1	8	3
1	2009-06-09 02:17:00	0	2	1	8	3
1	2009-06-09 02:18:00	0	2	1	8	3
1	2009-06-09 02:19:00	0	2	1	8	3
1	2009-06-09 02:20:00	22	2	1	8	3
1	2009-06-09 02:21:00	0	2	1	8	3
1	2009-06-09 02:22:00	0	2	1	8	3
1	2009-06-09 02:23:00	0	2	1	8	3
1	2009-06-09 02:24:00	0	2	1	8	3
1	2009-06-09 02:25:00	0	2	1	8	3
1	2009-06-09 02:26:00	0	2	1	8	3
1	2009-06-09 02:27:00	0	2	1	8	3
1	2009-06-09 02:28:00	0	2	1	8	3
1	2009-06-09 02:29:00	0	2	1	8	3
1	2009-06-09 02:30:00	0	2	1	8	3
1	2009-06-09 02:31:00	0	2	1	8	3
1	2009-06-09 02:32:00	0	2	1	8	3
1	2009-06-09 02:33:00	0	2	1	8	3
1	2009-06-09 02:34:00	0	2	1	8	3
1	2009-06-09 02:35:00	77	2	1	8	3
1	2009-06-09 02:36:00	0	2	1	8	3
1	2009-06-09 02:37:00	0	2	1	8	3
1	2009-06-09 02:38:00	0	2	1	8	3
1	2009-06-09 02:39:00	0	2	1	8	3
1	2009-06-09 02:40:00	0	2	1	8	3
1	2009-06-09 02:41:00	0	2	1	8	3
1	2009-06-09 02:42:00	0	2	1	8	3
1	2009-06-09 02:43:00	0	2	1	8	3
1	2009-06-09 02:44:00	0	2	1	8	3
1	2009-06-09 02:45:00	0	2	1	8	3
1	2009-06-09 02:46:00	0	2	1	8	3
1	2009-06-09 02:47:00	0	2	1	8	3
1	2009-06-09 02:48:00	0	2	1	8	3
1	2009-06-09 02:49:00	0	2	1	8	3
1	2009-06-09 02:50:00	0	2	1	8	3
1	2009-06-09 02:51:00	0	2	1	8	3
1	2009-06-09 02:52:00	0	2	1	8	3
1	2009-06-09 02:53:00	0	2	1	8	3
1	2009-06-09 02:54:00	0	2	1	8	3
1	2009-06-09 02:55:00	0	2	1	8	3
1	2009-06-09 02:56:00	0	2	1	8	3
1	2009-06-09 02:57:00	0	2	1	8	3
1	2009-06-09 02:58:00	0	2	1	8	3
1	2009-06-09 02:59:00	0	2	1	8	3
1	2009-06-09 03:00:00	0	2	1	8	3
1	2009-06-09 03:01:00	0	3	1	8	3
1	2009-06-09 03:02:00	0	3	1	8	3
1	2009-06-09 03:03:00	0	3	1	8	3
1	2009-06-09 03:04:00	0	3	1	8	3
1	2009-06-09 03:05:00	0	3	1	8	3
1	2009-06-09 03:06:00	0	3	1	8	3
1	2009-06-09 03:07:00	0	3	1	8	3
1	2009-06-09 03:08:00	0	3	1	8	3
1	2009-06-09 03:09:00	0	3	1	8	3
1	2009-06-09 03:10:00	0	3	1	8	3
1	2009-06-09 03:11:00	0	3	1	8	3
1	2009-06-09 03:12:00	0	3	1	8	3
1	2009-06-09 03:13:00	0	3	1	8	3
1	2009-06-09 03:14:00	0	3	1	8	3
1	2009-06-09 03:15:00	0	3	1	8	3
1	2009-06-09 03:16:00	0	3	1	8	3
1	2009-06-09 03:17:00	0	3	1	8	3
1	2009-06-09 03:18:00	0	3	1	8	3
1	2009-06-09 03:19:00	0	3	1	8	3
1	2009-06-09 03:20:00	0	3	1	8	3
1	2009-06-09 03:21:00	0	3	1	8	3
1	2009-06-09 03:22:00	0	3	1	8	3
1	2009-06-09 03:23:00	55	3	1	8	3
1	2009-06-09 03:24:00	0	3	1	8	3
1	2009-06-09 03:25:00	0	3	1	8	3
1	2009-06-09 03:26:00	0	3	1	8	3
1	2009-06-09 03:27:00	0	3	1	8	3
1	2009-06-09 03:28:00	0	3	1	8	3
1	2009-06-09 03:29:00	0	3	1	8	3
1	2009-06-09 03:30:00	0	3	1	8	3
1	2009-06-09 03:31:00	0	3	1	8	3
1	2009-06-09 03:32:00	0	3	1	8	3
1	2009-06-09 03:33:00	0	3	1	8	3
1	2009-06-09 03:34:00	0	3	1	8	3
1	2009-06-09 03:35:00	0	3	1	8	3
1	2009-06-09 03:36:00	0	3	1	8	3
1	2009-06-09 03:37:00	0	3	1	8	3
1	2009-06-09 03:38:00	0	3	1	8	3
1	2009-06-09 03:39:00	0	3	1	8	3
1	2009-06-09 03:40:00	0	3	1	8	3
1	2009-06-09 03:41:00	0	3	1	8	3
1	2009-06-09 03:42:00	0	3	1	8	3
1	2009-06-09 03:43:00	0	3	1	8	3
1	2009-06-09 03:44:00	0	3	1	8	3
1	2009-06-09 03:45:00	0	3	1	8	3
1	2009-06-09 03:46:00	0	3	1	8	3
1	2009-06-09 03:47:00	0	3	1	8	3
1	2009-06-09 03:48:00	0	3	1	8	3
1	2009-06-09 03:49:00	11	3	1	8	3
1	2009-06-09 03:50:00	0	3	1	8	3
1	2009-06-09 03:51:00	0	3	1	8	3
1	2009-06-09 03:52:00	0	3	1	8	3
1	2009-06-09 03:53:00	0	3	1	8	3
1	2009-06-09 03:54:00	0	3	1	8	3
1	2009-06-09 03:55:00	0	3	1	8	3
1	2009-06-09 03:56:00	0	3	1	8	3
1	2009-06-09 03:57:00	0	3	1	8	3
1	2009-06-09 03:58:00	0	3	1	8	3
1	2009-06-09 03:59:00	0	3	1	8	3
1	2009-06-09 04:00:00	0	3	1	8	3
1	2009-06-09 04:01:00	0	4	1	8	3
1	2009-06-09 04:02:00	0	4	1	8	3
1	2009-06-09 04:03:00	0	4	1	8	3
1	2009-06-09 04:04:00	0	4	1	8	3
1	2009-06-09 04:05:00	0	4	1	8	3
1	2009-06-09 04:06:00	0	4	1	8	3
1	2009-06-09 04:07:00	0	4	1	8	3
1	2009-06-09 04:08:00	0	4	1	8	3
1	2009-06-09 04:09:00	0	4	1	8	3
1	2009-06-09 04:10:00	0	4	1	8	3
1	2009-06-09 04:11:00	0	4	1	8	3
1	2009-06-09 04:12:00	0	4	1	8	3
1	2009-06-09 04:13:00	0	4	1	8	3
1	2009-06-09 04:14:00	0	4	1	8	3
1	2009-06-09 04:15:00	0	4	1	8	3
1	2009-06-09 04:16:00	0	4	1	8	3
1	2009-06-09 04:17:00	0	4	1	8	3
1	2009-06-09 04:18:00	0	4	1	8	3
1	2009-06-09 04:19:00	0	4	1	8	3
1	2009-06-09 04:20:00	0	4	1	8	3
1	2009-06-09 04:21:00	0	4	1	8	3
1	2009-06-09 04:22:00	0	4	1	8	3
1	2009-06-09 04:23:00	22	4	1	8	3
1	2009-06-09 04:24:00	33	4	1	8	3
1	2009-06-09 04:25:00	0	4	1	8	3
1	2009-06-09 04:26:00	0	4	1	8	3
1	2009-06-09 04:27:00	0	4	1	8	3
1	2009-06-09 04:28:00	0	4	1	8	3
1	2009-06-09 04:29:00	0	4	1	8	3
1	2009-06-09 04:30:00	0	4	1	8	3
1	2009-06-09 04:31:00	0	4	1	8	3
1	2009-06-09 04:32:00	0	4	1	8	3
1	2009-06-09 04:33:00	0	4	1	8	3
1	2009-06-09 04:34:00	0	4	1	8	3
1	2009-06-09 04:35:00	0	4	1	8	3
1	2009-06-09 04:36:00	0	4	1	8	3
1	2009-06-09 04:37:00	0	4	1	8	3
1	2009-06-09 04:38:00	0	4	1	8	3
1	2009-06-09 04:39:00	0	4	1	8	3
1	2009-06-09 04:40:00	44	4	1	8	3
1	2009-06-09 04:41:00	0	4	1	8	3
1	2009-06-09 04:42:00	0	4	1	8	3
1	2009-06-09 04:43:00	0	4	1	8	3
1	2009-06-09 04:44:00	0	4	1	8	3
1	2009-06-09 04:45:00	0	4	1	8	3
1	2009-06-09 04:46:00	0	4	1	8	3
1	2009-06-09 04:47:00	0	4	1	8	3
1	2009-06-09 04:48:00	0	4	1	8	3
1	2009-06-09 04:49:00	0	4	1	8	3
1	2009-06-09 04:50:00	0	4	1	8	3
1	2009-06-09 04:51:00	0	4	1	8	3
1	2009-06-09 04:52:00	0	4	1	8	3
1	2009-06-09 04:53:00	0	4	1	8	3
1	2009-06-09 04:54:00	0	4	1	8	3
1	2009-06-09 04:55:00	0	4	1	8	3
1	2009-06-09 04:56:00	0	4	1	8	3
1	2009-06-09 04:57:00	0	4	1	8	3
1	2009-06-09 04:58:00	0	4	1	8	3
1	2009-06-09 04:59:00	0	4	1	8	3
1	2009-06-09 05:00:00	0	4	1	8	3
1	2009-06-09 05:01:00	44	5	1	8	3
1	2009-06-09 05:02:00	0	5	1	8	3
1	2009-06-09 05:03:00	22	5	1	8	3
1	2009-06-09 05:04:00	44	5	1	8	3
1	2009-06-09 05:05:00	0	5	1	8	3
1	2009-06-09 05:06:00	0	5	1	8	3
1	2009-06-09 05:07:00	0	5	1	8	3
1	2009-06-09 05:08:00	0	5	1	8	3
1	2009-06-09 05:09:00	0	5	1	8	3
1	2009-06-09 05:10:00	0	5	1	8	3
1	2009-06-09 05:11:00	0	5	1	8	3
1	2009-06-09 05:12:00	0	5	1	8	3
1	2009-06-09 05:13:00	0	5	1	8	3
1	2009-06-09 05:14:00	0	5	1	8	3
1	2009-06-09 05:15:00	0	5	1	8	3
1	2009-06-09 05:16:00	797	5	1	8	3
1	2009-06-09 05:17:00	0	5	1	8	3
1	2009-06-09 05:18:00	11	5	1	8	3
1	2009-06-09 05:19:00	0	5	1	8	3
1	2009-06-09 05:20:00	0	5	1	8	3
1	2009-06-09 05:21:00	0	5	1	8	3
1	2009-06-09 05:22:00	0	5	1	8	3
1	2009-06-09 05:23:00	44	5	1	8	3
1	2009-06-09 05:24:00	0	5	1	8	3
1	2009-06-09 05:25:00	0	5	1	8	3
1	2009-06-09 05:26:00	183	5	1	8	3
1	2009-06-09 05:27:00	132	5	1	8	3
1	2009-06-09 05:28:00	0	5	1	8	3
1	2009-06-09 05:29:00	11	5	1	8	3
1	2009-06-09 05:30:00	0	5	1	8	3
1	2009-06-09 05:31:00	289	5	1	8	3
1	2009-06-09 05:32:00	589	5	1	8	3
1	2009-06-09 05:33:00	132	5	1	8	3
1	2009-06-09 05:34:00	236	5	1	8	3
1	2009-06-09 05:35:00	0	5	1	8	3
1	2009-06-09 05:36:00	157	5	1	8	3
1	2009-06-09 05:37:00	649	5	1	8	3
1	2009-06-09 05:38:00	589	5	1	8	3
1	2009-06-09 05:39:00	911	5	1	8	3
1	2009-06-09 05:40:00	1062	5	1	8	3
1	2009-06-09 05:41:00	534	5	1	8	3
1	2009-06-09 05:42:00	263	5	1	8	3
1	2009-06-09 05:43:00	44	5	1	8	3
1	2009-06-09 05:44:00	44	5	1	8	3
1	2009-06-09 05:45:00	143	5	1	8	3
1	2009-06-09 05:46:00	121	5	1	8	3
1	2009-06-09 05:47:00	11	5	1	8	3
1	2009-06-09 05:48:00	66	5	1	8	3
1	2009-06-09 05:49:00	44	5	1	8	3
1	2009-06-09 05:50:00	33	5	1	8	3
1	2009-06-09 05:51:00	22	5	1	8	3
1	2009-06-09 05:52:00	11	5	1	8	3
1	2009-06-09 05:53:00	11	5	1	8	3
1	2009-06-09 05:54:00	33	5	1	8	3
1	2009-06-09 05:55:00	22	5	1	8	3
1	2009-06-09 05:56:00	22	5	1	8	3
1	2009-06-09 05:57:00	11	5	1	8	3
1	2009-06-09 05:58:00	44	5	1	8	3
1	2009-06-09 05:59:00	55	5	1	8	3
1	2009-06-09 06:00:00	22	5	1	8	3
1	2009-06-09 06:01:00	11	6	2	8	3
1	2009-06-09 06:02:00	33	6	2	8	3
1	2009-06-09 06:03:00	170	6	2	8	3
1	2009-06-09 06:04:00	210	6	2	8	3
1	2009-06-09 06:05:00	249	6	2	8	3
1	2009-06-09 06:06:00	0	6	2	8	3
1	2009-06-09 06:07:00	0	6	2	8	3
1	2009-06-09 06:08:00	0	6	2	8	3
1	2009-06-09 06:09:00	0	6	2	8	3
1	2009-06-09 06:10:00	0	6	2	8	3
1	2009-06-09 06:11:00	88	6	2	8	3
1	2009-06-09 06:12:00	0	6	2	8	3
1	2009-06-09 06:13:00	0	6	2	8	3
1	2009-06-09 06:14:00	0	6	2	8	3
1	2009-06-09 06:15:00	0	6	2	8	3
1	2009-06-09 06:16:00	0	6	2	8	3
1	2009-06-09 06:17:00	99	6	2	8	3
1	2009-06-09 06:18:00	132	6	2	8	3
1	2009-06-09 06:19:00	11	6	2	8	3
1	2009-06-09 06:20:00	11	6	2	8	3
1	2009-06-09 06:21:00	0	6	2	8	3
1	2009-06-09 06:22:00	0	6	2	8	3
1	2009-06-09 06:23:00	0	6	2	8	3
1	2009-06-09 06:24:00	0	6	2	8	3
1	2009-06-09 06:25:00	0	6	2	8	3
1	2009-06-09 06:26:00	0	6	2	8	3
1	2009-06-09 06:27:00	0	6	2	8	3
1	2009-06-09 06:28:00	0	6	2	8	3
1	2009-06-09 06:29:00	0	6	2	8	3
1	2009-06-09 06:30:00	0	6	2	8	3
1	2009-06-09 06:31:00	0	6	2	8	3
1	2009-06-09 06:32:00	0	6	2	8	3
1	2009-06-09 06:33:00	44	6	2	8	3
1	2009-06-09 06:34:00	0	6	2	8	3
1	2009-06-09 06:35:00	0	6	2	8	3
1	2009-06-09 06:36:00	0	6	2	8	3
1	2009-06-09 06:37:00	0	6	2	8	3
1	2009-06-09 06:38:00	0	6	2	8	3
1	2009-06-09 06:39:00	22	6	2	8	3
1	2009-06-09 06:40:00	66	6	2	8	3
1	2009-06-09 06:41:00	55	6	2	8	3
1	2009-06-09 06:42:00	0	6	2	8	3
1	2009-06-09 06:43:00	0	6	2	8	3
1	2009-06-09 06:44:00	11	6	2	8	3
1	2009-06-09 06:45:00	183	6	2	8	3
1	2009-06-09 06:46:00	132	6	2	8	3
1	2009-06-09 06:47:00	33	6	2	8	3
1	2009-06-09 06:48:00	11	6	2	8	3
1	2009-06-09 06:49:00	11	6	2	8	3
1	2009-06-09 06:50:00	88	6	2	8	3
1	2009-06-09 06:51:00	276	6	2	8	3
1	2009-06-09 06:52:00	11	6	2	8	3
1	2009-06-09 06:53:00	0	6	2	8	3
1	2009-06-09 06:54:00	110	6	2	8	3
1	2009-06-09 06:55:00	0	6	2	8	3
1	2009-06-09 06:56:00	196	6	2	8	3
1	2009-06-09 06:57:00	0	6	2	8	3
1	2009-06-09 06:58:00	0	6	2	8	3
1	2009-06-09 06:59:00	183	6	2	8	3
1	2009-06-09 07:00:00	0	6	2	8	3
1	2009-06-09 07:01:00	589	7	2	8	3
1	2009-06-09 07:02:00	44	7	2	8	3
1	2009-06-09 07:03:00	121	7	2	8	3
1	2009-06-09 07:04:00	11	7	2	8	3
1	2009-06-09 07:05:00	0	7	2	8	3
1	2009-06-09 07:06:00	320	7	2	8	3
1	2009-06-09 07:07:00	11	7	2	8	3
1	2009-06-09 07:08:00	0	7	2	8	3
1	2009-06-09 07:09:00	0	7	2	8	3
1	2009-06-09 07:10:00	689	7	2	8	3
1	2009-06-09 07:11:00	887	7	2	8	3
1	2009-06-09 07:12:00	77	7	2	8	3
1	2009-06-09 07:13:00	289	7	2	8	3
1	2009-06-09 07:14:00	609	7	2	8	3
1	2009-06-09 07:15:00	629	7	2	8	3
1	2009-06-09 07:16:00	0	7	2	8	3
1	2009-06-09 07:17:00	351	7	2	8	3
1	2009-06-09 07:18:00	132	7	2	8	3
1	2009-06-09 07:19:00	183	7	2	8	3
1	2009-06-09 07:20:00	0	7	2	8	3
1	2009-06-09 07:21:00	110	7	2	8	3
1	2009-06-09 07:22:00	0	7	2	8	3
1	2009-06-09 07:23:00	11	7	2	8	3
1	2009-06-09 07:24:00	0	7	2	8	3
1	2009-06-09 07:25:00	0	7	2	8	3
1	2009-06-09 07:26:00	0	7	2	8	3
1	2009-06-09 07:27:00	0	7	2	8	3
1	2009-06-09 07:28:00	0	7	2	8	3
1	2009-06-09 07:29:00	0	7	2	8	3
1	2009-06-09 07:30:00	0	7	2	8	3
1	2009-06-09 07:31:00	0	7	2	8	3
1	2009-06-09 07:32:00	0	7	2	8	3
1	2009-06-09 07:33:00	0	7	2	8	3
1	2009-06-09 07:34:00	0	7	2	8	3
1	2009-06-09 07:35:00	0	7	2	8	3
1	2009-06-09 07:36:00	0	7	2	8	3
1	2009-06-09 07:37:00	0	7	2	8	3
1	2009-06-09 07:38:00	0	7	2	8	3
1	2009-06-09 07:39:00	0	7	2	8	3
1	2009-06-09 07:40:00	0	7	2	8	3
1	2009-06-09 07:41:00	0	7	2	8	3
1	2009-06-09 07:42:00	0	7	2	8	3
1	2009-06-09 07:43:00	0	7	2	8	3
1	2009-06-09 07:44:00	0	7	2	8	3
1	2009-06-09 07:45:00	0	7	2	8	3
1	2009-06-09 07:46:00	0	7	2	8	3
1	2009-06-09 07:47:00	0	7	2	8	3
1	2009-06-09 07:48:00	0	7	2	8	3
1	2009-06-09 07:49:00	0	7	2	8	3
1	2009-06-09 07:50:00	0	7	2	8	3
1	2009-06-09 07:51:00	0	7	2	8	3
1	2009-06-09 07:52:00	0	7	2	8	3
1	2009-06-09 07:53:00	0	7	2	8	3
1	2009-06-09 07:54:00	33	7	2	8	3
1	2009-06-09 07:55:00	0	7	2	8	3
1	2009-06-09 07:56:00	0	7	2	8	3
1	2009-06-09 07:57:00	0	7	2	8	3
1	2009-06-09 07:58:00	0	7	2	8	3
1	2009-06-09 07:59:00	0	7	2	8	3
1	2009-06-09 08:00:00	0	7	2	8	3
1	2009-06-09 08:01:00	0	8	2	8	3
1	2009-06-09 08:02:00	0	8	2	8	3
1	2009-06-09 08:03:00	0	8	2	8	3
1	2009-06-09 08:04:00	0	8	2	8	3
1	2009-06-09 08:05:00	99	8	2	8	3
1	2009-06-09 08:06:00	11	8	2	8	3
1	2009-06-09 08:07:00	0	8	2	8	3
1	2009-06-09 08:08:00	0	8	2	8	3
1	2009-06-09 08:09:00	0	8	2	8	3
1	2009-06-09 08:10:00	0	8	2	8	3
1	2009-06-09 08:11:00	0	8	2	8	3
1	2009-06-09 08:12:00	0	8	2	8	3
1	2009-06-09 08:13:00	0	8	2	8	3
1	2009-06-09 08:14:00	0	8	2	8	3
1	2009-06-09 08:15:00	0	8	2	8	3
1	2009-06-09 08:16:00	0	8	2	8	3
1	2009-06-09 08:17:00	0	8	2	8	3
1	2009-06-09 08:18:00	0	8	2	8	3
1	2009-06-09 08:19:00	0	8	2	8	3
1	2009-06-09 08:20:00	0	8	2	8	3
1	2009-06-09 08:21:00	0	8	2	8	3
1	2009-06-09 08:22:00	0	8	2	8	3
1	2009-06-09 08:23:00	0	8	2	8	3
1	2009-06-09 08:24:00	0	8	2	8	3
1	2009-06-09 08:25:00	99	8	2	8	3
1	2009-06-09 08:26:00	0	8	2	8	3
1	2009-06-09 08:27:00	0	8	2	8	3
1	2009-06-09 08:28:00	0	8	2	8	3
1	2009-06-09 08:29:00	0	8	2	8	3
1	2009-06-09 08:30:00	11	8	2	8	3
1	2009-06-09 08:31:00	0	8	2	8	3
1	2009-06-09 08:32:00	0	8	2	8	3
1	2009-06-09 08:33:00	0	8	2	8	3
1	2009-06-09 08:34:00	0	8	2	8	3
1	2009-06-09 08:35:00	0	8	2	8	3
1	2009-06-09 08:36:00	0	8	2	8	3
1	2009-06-09 08:37:00	0	8	2	8	3
1	2009-06-09 08:38:00	0	8	2	8	3
1	2009-06-09 08:39:00	0	8	2	8	3
1	2009-06-09 08:40:00	0	8	2	8	3
1	2009-06-09 08:41:00	0	8	2	8	3
1	2009-06-09 08:42:00	0	8	2	8	3
1	2009-06-09 08:43:00	0	8	2	8	3
1	2009-06-09 08:44:00	0	8	2	8	3
1	2009-06-09 08:45:00	0	8	2	8	3
1	2009-06-09 08:46:00	0	8	2	8	3
1	2009-06-09 08:47:00	0	8	2	8	3
1	2009-06-09 08:48:00	0	8	2	8	3
1	2009-06-09 08:49:00	0	8	2	8	3
1	2009-06-09 08:50:00	0	8	2	8	3
1	2009-06-09 08:51:00	0	8	2	8	3
1	2009-06-09 08:52:00	0	8	2	8	3
1	2009-06-09 08:53:00	0	8	2	8	3
1	2009-06-09 08:54:00	0	8	2	8	3
1	2009-06-09 08:55:00	0	8	2	8	3
1	2009-06-09 08:56:00	0	8	2	8	3
1	2009-06-09 08:57:00	0	8	2	8	3
1	2009-06-09 08:58:00	0	8	2	8	3
1	2009-06-09 08:59:00	0	8	2	8	3
1	2009-06-09 09:00:00	0	8	2	8	3
1	2009-06-09 09:01:00	0	9	2	8	3
1	2009-06-09 09:02:00	0	9	2	8	3
1	2009-06-09 09:03:00	11	9	2	8	3
1	2009-06-09 09:04:00	0	9	2	8	3
1	2009-06-09 09:05:00	0	9	2	8	3
1	2009-06-09 09:06:00	0	9	2	8	3
1	2009-06-09 09:07:00	0	9	2	8	3
1	2009-06-09 09:08:00	33	9	2	8	3
1	2009-06-09 09:09:00	0	9	2	8	3
1	2009-06-09 09:10:00	0	9	2	8	3
1	2009-06-09 09:11:00	0	9	2	8	3
1	2009-06-09 09:12:00	0	9	2	8	3
1	2009-06-09 09:13:00	0	9	2	8	3
1	2009-06-09 09:14:00	0	9	2	8	3
1	2009-06-09 09:15:00	0	9	2	8	3
1	2009-06-09 09:16:00	0	9	2	8	3
1	2009-06-09 09:17:00	0	9	2	8	3
1	2009-06-09 09:18:00	0	9	2	8	3
1	2009-06-09 09:19:00	0	9	2	8	3
1	2009-06-09 09:20:00	0	9	2	8	3
1	2009-06-09 09:21:00	0	9	2	8	3
1	2009-06-09 09:22:00	0	9	2	8	3
1	2009-06-09 09:23:00	0	9	2	8	3
1	2009-06-09 09:24:00	0	9	2	8	3
1	2009-06-09 09:25:00	0	9	2	8	3
1	2009-06-09 09:26:00	0	9	2	8	3
1	2009-06-09 09:27:00	0	9	2	8	3
1	2009-06-09 09:28:00	11	9	2	8	3
1	2009-06-09 09:29:00	0	9	2	8	3
1	2009-06-09 09:30:00	0	9	2	8	3
1	2009-06-09 09:31:00	0	9	2	8	3
1	2009-06-09 09:32:00	0	9	2	8	3
1	2009-06-09 09:33:00	0	9	2	8	3
1	2009-06-09 09:34:00	22	9	2	8	3
1	2009-06-09 09:35:00	66	9	2	8	3
1	2009-06-09 09:36:00	0	9	2	8	3
1	2009-06-09 09:37:00	0	9	2	8	3
1	2009-06-09 09:38:00	0	9	2	8	3
1	2009-06-09 09:39:00	0	9	2	8	3
1	2009-06-09 09:40:00	0	9	2	8	3
1	2009-06-09 09:41:00	0	9	2	8	3
1	2009-06-09 09:42:00	66	9	2	8	3
1	2009-06-09 09:43:00	0	9	2	8	3
1	2009-06-09 09:44:00	0	9	2	8	3
1	2009-06-09 09:45:00	0	9	2	8	3
1	2009-06-09 09:46:00	0	9	2	8	3
1	2009-06-09 09:47:00	22	9	2	8	3
1	2009-06-09 09:48:00	0	9	2	8	3
1	2009-06-09 09:49:00	0	9	2	8	3
1	2009-06-09 09:50:00	0	9	2	8	3
1	2009-06-09 09:51:00	0	9	2	8	3
1	2009-06-09 09:52:00	0	9	2	8	3
1	2009-06-09 09:53:00	0	9	2	8	3
1	2009-06-09 09:54:00	0	9	2	8	3
1	2009-06-09 09:55:00	0	9	2	8	3
1	2009-06-09 09:56:00	0	9	2	8	3
1	2009-06-09 09:57:00	0	9	2	8	3
1	2009-06-09 09:58:00	0	9	2	8	3
1	2009-06-09 09:59:00	0	9	2	8	3
1	2009-06-09 10:00:00	0	9	2	8	3
1	2009-06-09 10:01:00	0	10	2	8	3
1	2009-06-09 10:02:00	0	10	2	8	3
1	2009-06-09 10:03:00	0	10	2	8	3
1	2009-06-09 10:04:00	0	10	2	8	3
1	2009-06-09 10:05:00	0	10	2	8	3
1	2009-06-09 10:06:00	0	10	2	8	3
1	2009-06-09 10:07:00	0	10	2	8	3
1	2009-06-09 10:08:00	0	10	2	8	3
1	2009-06-09 10:09:00	33	10	2	8	3
1	2009-06-09 10:10:00	0	10	2	8	3
1	2009-06-09 10:11:00	0	10	2	8	3
1	2009-06-09 10:12:00	0	10	2	8	3
1	2009-06-09 10:13:00	0	10	2	8	3
1	2009-06-09 10:14:00	0	10	2	8	3
1	2009-06-09 10:15:00	0	10	2	8	3
1	2009-06-09 10:16:00	0	10	2	8	3
1	2009-06-09 10:17:00	0	10	2	8	3
1	2009-06-09 10:18:00	0	10	2	8	3
1	2009-06-09 10:19:00	44	10	2	8	3
1	2009-06-09 10:20:00	11	10	2	8	3
1	2009-06-09 10:21:00	0	10	2	8	3
1	2009-06-09 10:22:00	0	10	2	8	3
1	2009-06-09 10:23:00	0	10	2	8	3
1	2009-06-09 10:24:00	0	10	2	8	3
1	2009-06-09 10:25:00	0	10	2	8	3
1	2009-06-09 10:26:00	0	10	2	8	3
1	2009-06-09 10:27:00	0	10	2	8	3
1	2009-06-09 10:28:00	0	10	2	8	3
1	2009-06-09 10:29:00	0	10	2	8	3
1	2009-06-09 10:30:00	0	10	2	8	3
1	2009-06-09 10:31:00	0	10	2	8	3
1	2009-06-09 10:32:00	0	10	2	8	3
1	2009-06-09 10:33:00	0	10	2	8	3
1	2009-06-09 10:34:00	0	10	2	8	3
1	2009-06-09 10:35:00	0	10	2	8	3
1	2009-06-09 10:36:00	0	10	2	8	3
1	2009-06-09 10:37:00	0	10	2	8	3
1	2009-06-09 10:38:00	0	10	2	8	3
1	2009-06-09 10:39:00	11	10	2	8	3
1	2009-06-09 10:40:00	0	10	2	8	3
1	2009-06-09 10:41:00	0	10	2	8	3
1	2009-06-09 10:42:00	0	10	2	8	3
1	2009-06-09 10:43:00	0	10	2	8	3
1	2009-06-09 10:44:00	0	10	2	8	3
1	2009-06-09 10:45:00	0	10	2	8	3
1	2009-06-09 10:46:00	0	10	2	8	3
1	2009-06-09 10:47:00	0	10	2	8	3
1	2009-06-09 10:48:00	0	10	2	8	3
1	2009-06-09 10:49:00	55	10	2	8	3
1	2009-06-09 10:50:00	0	10	2	8	3
1	2009-06-09 10:51:00	0	10	2	8	3
1	2009-06-09 10:52:00	0	10	2	8	3
1	2009-06-09 10:53:00	0	10	2	8	3
1	2009-06-09 10:54:00	0	10	2	8	3
1	2009-06-09 10:55:00	0	10	2	8	3
1	2009-06-09 10:56:00	0	10	2	8	3
1	2009-06-09 10:57:00	0	10	2	8	3
1	2009-06-09 10:58:00	0	10	2	8	3
1	2009-06-09 10:59:00	0	10	2	8	3
1	2009-06-09 11:00:00	0	10	2	8	3
1	2009-06-09 11:01:00	0	11	2	8	3
1	2009-06-09 11:02:00	0	11	2	8	3
1	2009-06-09 11:03:00	0	11	2	8	3
1	2009-06-09 11:04:00	44	11	2	8	3
1	2009-06-09 11:05:00	0	11	2	8	3
1	2009-06-09 11:06:00	0	11	2	8	3
1	2009-06-09 11:07:00	0	11	2	8	3
1	2009-06-09 11:08:00	0	11	2	8	3
1	2009-06-09 11:09:00	0	11	2	8	3
1	2009-06-09 11:10:00	0	11	2	8	3
1	2009-06-09 11:11:00	0	11	2	8	3
1	2009-06-09 11:12:00	0	11	2	8	3
1	2009-06-09 11:13:00	0	11	2	8	3
1	2009-06-09 11:14:00	0	11	2	8	3
1	2009-06-09 11:15:00	0	11	2	8	3
1	2009-06-09 11:16:00	99	11	2	8	3
1	2009-06-09 11:17:00	0	11	2	8	3
1	2009-06-09 11:18:00	0	11	2	8	3
1	2009-06-09 11:19:00	0	11	2	8	3
1	2009-06-09 11:20:00	0	11	2	8	3
1	2009-06-09 11:21:00	0	11	2	8	3
1	2009-06-09 11:22:00	0	11	2	8	3
1	2009-06-09 11:23:00	11	11	2	8	3
1	2009-06-09 11:24:00	0	11	2	8	3
1	2009-06-09 11:25:00	0	11	2	8	3
1	2009-06-09 11:26:00	0	11	2	8	3
1	2009-06-09 11:27:00	0	11	2	8	3
1	2009-06-09 11:28:00	0	11	2	8	3
1	2009-06-09 11:29:00	0	11	2	8	3
1	2009-06-09 11:30:00	0	11	2	8	3
1	2009-06-09 11:31:00	0	11	2	8	3
1	2009-06-09 11:32:00	0	11	2	8	3
1	2009-06-09 11:33:00	0	11	2	8	3
1	2009-06-09 11:34:00	0	11	2	8	3
1	2009-06-09 11:35:00	0	11	2	8	3
1	2009-06-09 11:36:00	0	11	2	8	3
1	2009-06-09 11:37:00	0	11	2	8	3
1	2009-06-09 11:38:00	0	11	2	8	3
1	2009-06-09 11:39:00	0	11	2	8	3
1	2009-06-09 11:40:00	0	11	2	8	3
1	2009-06-09 11:41:00	0	11	2	8	3
1	2009-06-09 11:42:00	0	11	2	8	3
1	2009-06-09 11:43:00	0	11	2	8	3
1	2009-06-09 11:44:00	0	11	2	8	3
1	2009-06-09 11:45:00	99	11	2	8	3
1	2009-06-09 11:46:00	170	11	2	8	3
1	2009-06-09 11:47:00	0	11	2	8	3
1	2009-06-09 11:48:00	0	11	2	8	3
1	2009-06-09 11:49:00	0	11	2	8	3
1	2009-06-09 11:50:00	0	11	2	8	3
1	2009-06-09 11:51:00	0	11	2	8	3
1	2009-06-09 11:52:00	0	11	2	8	3
1	2009-06-09 11:53:00	0	11	2	8	3
1	2009-06-09 11:54:00	0	11	2	8	3
1	2009-06-09 11:55:00	0	11	2	8	3
1	2009-06-09 11:56:00	0	11	2	8	3
1	2009-06-09 11:57:00	0	11	2	8	3
1	2009-06-09 11:58:00	0	11	2	8	3
1	2009-06-09 11:59:00	0	11	2	8	3
1	2009-06-09 12:00:00	0	11	2	8	3
1	2009-06-09 12:01:00	0	12	3	8	3
1	2009-06-09 12:02:00	0	12	3	8	3
1	2009-06-09 12:03:00	0	12	3	8	3
1	2009-06-09 12:04:00	0	12	3	8	3
1	2009-06-09 12:05:00	0	12	3	8	3
1	2009-06-09 12:06:00	0	12	3	8	3
1	2009-06-09 12:07:00	0	12	3	8	3
1	2009-06-09 12:08:00	0	12	3	8	3
1	2009-06-09 12:09:00	0	12	3	8	3
1	2009-06-09 12:10:00	0	12	3	8	3
1	2009-06-09 12:11:00	0	12	3	8	3
1	2009-06-09 12:12:00	55	12	3	8	3
1	2009-06-09 12:13:00	0	12	3	8	3
1	2009-06-09 12:14:00	0	12	3	8	3
1	2009-06-09 12:15:00	0	12	3	8	3
1	2009-06-09 12:16:00	0	12	3	8	3
1	2009-06-09 12:17:00	0	12	3	8	3
1	2009-06-09 12:18:00	0	12	3	8	3
1	2009-06-09 12:19:00	0	12	3	8	3
1	2009-06-09 12:20:00	0	12	3	8	3
1	2009-06-09 12:21:00	0	12	3	8	3
1	2009-06-09 12:22:00	0	12	3	8	3
1	2009-06-09 12:23:00	0	12	3	8	3
1	2009-06-09 12:24:00	0	12	3	8	3
1	2009-06-09 12:25:00	0	12	3	8	3
1	2009-06-09 12:26:00	0	12	3	8	3
1	2009-06-09 12:27:00	0	12	3	8	3
1	2009-06-09 12:28:00	0	12	3	8	3
1	2009-06-09 12:29:00	0	12	3	8	3
1	2009-06-09 12:30:00	0	12	3	8	3
1	2009-06-09 12:31:00	0	12	3	8	3
1	2009-06-09 12:32:00	0	12	3	8	3
1	2009-06-09 12:33:00	0	12	3	8	3
1	2009-06-09 12:34:00	0	12	3	8	3
1	2009-06-09 12:35:00	0	12	3	8	3
1	2009-06-09 12:36:00	0	12	3	8	3
1	2009-06-09 12:37:00	0	12	3	8	3
1	2009-06-09 12:38:00	0	12	3	8	3
1	2009-06-09 12:39:00	0	12	3	8	3
1	2009-06-09 12:40:00	0	12	3	8	3
1	2009-06-09 12:41:00	0	12	3	8	3
1	2009-06-09 12:42:00	0	12	3	8	3
1	2009-06-09 12:43:00	0	12	3	8	3
1	2009-06-09 12:44:00	0	12	3	8	3
1	2009-06-09 12:45:00	22	12	3	8	3
1	2009-06-09 12:46:00	0	12	3	8	3
1	2009-06-09 12:47:00	0	12	3	8	3
1	2009-06-09 12:48:00	0	12	3	8	3
1	2009-06-09 12:49:00	0	12	3	8	3
1	2009-06-09 12:50:00	0	12	3	8	3
1	2009-06-09 12:51:00	0	12	3	8	3
1	2009-06-09 12:52:00	0	12	3	8	3
1	2009-06-09 12:53:00	0	12	3	8	3
1	2009-06-09 12:54:00	0	12	3	8	3
1	2009-06-09 12:55:00	0	12	3	8	3
1	2009-06-09 12:56:00	0	12	3	8	3
1	2009-06-09 12:57:00	0	12	3	8	3
1	2009-06-09 12:58:00	0	12	3	8	3
1	2009-06-09 12:59:00	0	12	3	8	3
1	2009-06-09 13:00:00	0	12	3	8	3
1	2009-06-09 13:01:00	0	13	3	8	3
1	2009-06-09 13:02:00	0	13	3	8	3
1	2009-06-09 13:03:00	0	13	3	8	3
1	2009-06-09 13:04:00	11	13	3	8	3
1	2009-06-09 13:05:00	0	13	3	8	3
1	2009-06-09 13:06:00	0	13	3	8	3
1	2009-06-09 13:07:00	0	13	3	8	3
1	2009-06-09 13:08:00	0	13	3	8	3
1	2009-06-09 13:09:00	0	13	3	8	3
1	2009-06-09 13:10:00	0	13	3	8	3
1	2009-06-09 13:11:00	0	13	3	8	3
1	2009-06-09 13:12:00	0	13	3	8	3
1	2009-06-09 13:13:00	0	13	3	8	3
1	2009-06-09 13:14:00	0	13	3	8	3
1	2009-06-09 13:15:00	0	13	3	8	3
1	2009-06-09 13:16:00	0	13	3	8	3
1	2009-06-09 13:17:00	0	13	3	8	3
1	2009-06-09 13:18:00	0	13	3	8	3
1	2009-06-09 13:19:00	0	13	3	8	3
1	2009-06-09 13:20:00	0	13	3	8	3
1	2009-06-09 13:21:00	11	13	3	8	3
1	2009-06-09 13:22:00	0	13	3	8	3
1	2009-06-09 13:23:00	0	13	3	8	3
1	2009-06-09 13:24:00	0	13	3	8	3
1	2009-06-09 13:25:00	0	13	3	8	3
1	2009-06-09 13:26:00	0	13	3	8	3
1	2009-06-09 13:27:00	0	13	3	8	3
1	2009-06-09 13:28:00	0	13	3	8	3
1	2009-06-09 13:29:00	0	13	3	8	3
1	2009-06-09 13:30:00	0	13	3	8	3
1	2009-06-09 13:31:00	0	13	3	8	3
1	2009-06-09 13:32:00	0	13	3	8	3
1	2009-06-09 13:33:00	0	13	3	8	3
1	2009-06-09 13:34:00	0	13	3	8	3
1	2009-06-09 13:35:00	0	13	3	8	3
1	2009-06-09 13:36:00	0	13	3	8	3
1	2009-06-09 13:37:00	0	13	3	8	3
1	2009-06-09 13:38:00	0	13	3	8	3
1	2009-06-09 13:39:00	0	13	3	8	3
1	2009-06-09 13:40:00	0	13	3	8	3
1	2009-06-09 13:41:00	0	13	3	8	3
1	2009-06-09 13:42:00	88	13	3	8	3
1	2009-06-09 13:43:00	0	13	3	8	3
1	2009-06-09 13:44:00	11	13	3	8	3
1	2009-06-09 13:45:00	0	13	3	8	3
1	2009-06-09 13:46:00	0	13	3	8	3
1	2009-06-09 13:47:00	0	13	3	8	3
1	2009-06-09 13:48:00	22	13	3	8	3
1	2009-06-09 13:49:00	11	13	3	8	3
1	2009-06-09 13:50:00	33	13	3	8	3
1	2009-06-09 13:51:00	88	13	3	8	3
1	2009-06-09 13:52:00	0	13	3	8	3
1	2009-06-09 13:53:00	0	13	3	8	3
1	2009-06-09 13:54:00	0	13	3	8	3
1	2009-06-09 13:55:00	0	13	3	8	3
1	2009-06-09 13:56:00	0	13	3	8	3
1	2009-06-09 13:57:00	22	13	3	8	3
1	2009-06-09 13:58:00	33	13	3	8	3
1	2009-06-09 13:59:00	0	13	3	8	3
1	2009-06-09 14:00:00	0	13	3	8	3
1	2009-06-09 14:01:00	0	14	3	8	3
1	2009-06-09 14:02:00	0	14	3	8	3
1	2009-06-09 14:03:00	0	14	3	8	3
1	2009-06-09 14:04:00	0	14	3	8	3
1	2009-06-09 14:05:00	0	14	3	8	3
1	2009-06-09 14:06:00	0	14	3	8	3
1	2009-06-09 14:07:00	0	14	3	8	3
1	2009-06-09 14:08:00	66	14	3	8	3
1	2009-06-09 14:09:00	0	14	3	8	3
1	2009-06-09 14:10:00	0	14	3	8	3
1	2009-06-09 14:11:00	0	14	3	8	3
1	2009-06-09 14:12:00	0	14	3	8	3
1	2009-06-09 14:13:00	0	14	3	8	3
1	2009-06-09 14:14:00	0	14	3	8	3
1	2009-06-09 14:15:00	0	14	3	8	3
1	2009-06-09 14:16:00	0	14	3	8	3
1	2009-06-09 14:17:00	0	14	3	8	3
1	2009-06-09 14:18:00	0	14	3	8	3
1	2009-06-09 14:19:00	0	14	3	8	3
1	2009-06-09 14:20:00	11	14	3	8	3
1	2009-06-09 14:21:00	0	14	3	8	3
1	2009-06-09 14:22:00	0	14	3	8	3
1	2009-06-09 14:23:00	0	14	3	8	3
1	2009-06-09 14:24:00	11	14	3	8	3
1	2009-06-09 14:25:00	0	14	3	8	3
1	2009-06-09 14:26:00	0	14	3	8	3
1	2009-06-09 14:27:00	0	14	3	8	3
1	2009-06-09 14:28:00	0	14	3	8	3
1	2009-06-09 14:29:00	0	14	3	8	3
1	2009-06-09 14:30:00	0	14	3	8	3
1	2009-06-09 14:31:00	11	14	3	8	3
1	2009-06-09 14:32:00	0	14	3	8	3
1	2009-06-09 14:33:00	0	14	3	8	3
1	2009-06-09 14:34:00	0	14	3	8	3
1	2009-06-09 14:35:00	0	14	3	8	3
1	2009-06-09 14:36:00	0	14	3	8	3
1	2009-06-09 14:37:00	0	14	3	8	3
1	2009-06-09 14:38:00	0	14	3	8	3
1	2009-06-09 14:39:00	0	14	3	8	3
1	2009-06-09 14:40:00	0	14	3	8	3
1	2009-06-09 14:41:00	0	14	3	8	3
1	2009-06-09 14:42:00	0	14	3	8	3
1	2009-06-09 14:43:00	0	14	3	8	3
1	2009-06-09 14:44:00	0	14	3	8	3
1	2009-06-09 14:45:00	0	14	3	8	3
1	2009-06-09 14:46:00	0	14	3	8	3
1	2009-06-09 14:47:00	0	14	3	8	3
1	2009-06-09 14:48:00	0	14	3	8	3
1	2009-06-09 14:49:00	0	14	3	8	3
1	2009-06-09 14:50:00	0	14	3	8	3
1	2009-06-09 14:51:00	0	14	3	8	3
1	2009-06-09 14:52:00	0	14	3	8	3
1	2009-06-09 14:53:00	0	14	3	8	3
1	2009-06-09 14:54:00	0	14	3	8	3
1	2009-06-09 14:55:00	0	14	3	8	3
1	2009-06-09 14:56:00	0	14	3	8	3
1	2009-06-09 14:57:00	0	14	3	8	3
1	2009-06-09 14:58:00	0	14	3	8	3
1	2009-06-09 14:59:00	0	14	3	8	3
1	2009-06-09 15:00:00	0	14	3	8	3
1	2009-06-09 15:01:00	0	15	3	8	3
1	2009-06-09 15:02:00	0	15	3	8	3
1	2009-06-09 15:03:00	0	15	3	8	3
1	2009-06-09 15:04:00	0	15	3	8	3
1	2009-06-09 15:05:00	0	15	3	8	3
1	2009-06-09 15:06:00	0	15	3	8	3
1	2009-06-09 15:07:00	0	15	3	8	3
1	2009-06-09 15:08:00	0	15	3	8	3
1	2009-06-09 15:09:00	0	15	3	8	3
1	2009-06-09 15:10:00	0	15	3	8	3
1	2009-06-09 15:11:00	0	15	3	8	3
1	2009-06-09 15:12:00	0	15	3	8	3
1	2009-06-09 15:13:00	0	15	3	8	3
1	2009-06-09 15:14:00	0	15	3	8	3
1	2009-06-09 15:15:00	0	15	3	8	3
1	2009-06-09 15:16:00	0	15	3	8	3
1	2009-06-09 15:17:00	0	15	3	8	3
1	2009-06-09 15:18:00	0	15	3	8	3
1	2009-06-09 15:19:00	0	15	3	8	3
[truncated: 78,641 more rows]

## Sheet: Pivot Segment
Multiplier	2
x (Low Intensity)	321.922
y (High Intensity)	346.109
	Column Labels
Values	1	2	3	4	5	6	7	8	Grand Total
Average of Activity	41.1925	46.4486	54.6892	50.261	48.6172	39.0384	50.7594	48.9267	47.4916
StdDev of Activity	140.365	149.83	178.762	168.21	158.422	161.582	170.323	180.228	164.038
Count of Activity	10080	10080	10080	10080	10080	10080	10080	10080	80640
Count Above x	360	397	483	417	391	301	418	438
% Above x	0.0357143	0.0393849	0.0479167	0.041369	0.0387897	0.0298611	0.0414683	0.0434524
Count Above y		366	469	400	367	279	398	413
% Above y		0.0363095	0.0465278	0.0396825	0.0364087	0.0276786	0.0394841	0.0409722

## Sheet: Pivot Weekday
Sum of Activity	Column Labels
Row Labels	1	2	3	4	5	6	7	8	Grand Total
1	67891	58617	86925	72487	74892	67353	92210	79152	599527
2	53758	66040	85939	67284	63582	34844	82070	63049	516566
3	37627	77728	56304	79960	60563	58293	50123	51935	472533
4	48962	65180	66376	71177	68185	41534	39485	56420	457319
5	57118	71869	64284	65677	76745	67096	68458	68835	540082
6	68236	58348	89546	64542	83168	70475	94245	82682	611242
7	81628	70420	101893	85504	62926	53912	85064	91108	632455
Grand Total	415220	468202	551267	506631	490061	393507	511655	493181	3829724
Count of Activity	Column Labels
Row Labels	1	2	3	4	5	6	7	8	Grand Total
1	1440	1440	1440	1440	1440	1440	1440	1440	11520
2	1440	1440	1440	1440	1440	1440	1440	1440	11520
3	1440	1440	1440	1440	1440	1440	1440	1440	11520
4	1440	1440	1440	1440	1440	1440	1440	1440	11520
5	1440	1440	1440	1440	1440	1440	1440	1440	11520
6	1440	1440	1440	1440	1440	1440	1440	1440	11520
7	1440	1440	1440	1440	1440	1440	1440	1440	11520
Grand Total	10080	10080	10080	10080	10080	10080	10080	10080	80640

## Sheet: Pivot Quadrant
Sum of Activity	Column Labels
Row Labels	1	2	3	4	5	6	7	8	Grand Total
1	39427	46657	40679	34664	37047	34198	38286	56072	327030
2	133071	140266	175604	158066	166756	92816	174968	131964	1173511
3	142424	165694	177612	218294	169431	153898	164382	151427	1343162
4	100298	115585	157372	95607	116827	112595	134019	153718	986021
Grand Total	415220	468202	551267	506631	490061	393507	511655	493181	3829724
Average	103805	117050	137817	126658	122515	98376.8	127914	123295
Count of Activity	Column Labels
Row Labels	1	2	3	4	5	6	7	8	Grand Total
1	2520	2520	2520	2520	2520	2520	2520	2520	20160
2	2520	2520	2520	2520	2520	2520	2520	2520	20160
3	2520	2520	2520	2520	2520	2520	2520	2520	20160
4	2520	2520	2520	2520	2520	2520	2520	2520	20160
Grand Total	10080	10080	10080	10080	10080	10080	10080	10080	80640

## Sheet: 6.01.09
Actogram, Copy Raw Data, All Days
Identity:	Sophie
Filename:	E:\Active Research Files\meloxicam titre canine\cases\sophie\Sophie 6.1.09.AWC
Gender:	F
Age:	8
Height:	61.0 cm	24.0 in
Weight:	27.0 kg	59.5 lbs
Start Date:	01-Jun-2009 (Mon)
Start Time:	18:00:00
Interval:	1.00 mins
Date Stamp:	Time Stamp:	Activity Data:	Marker Press:
2009-06-01	00:00:00	0
2009-06-01	00:01:00	0
2009-06-01	00:02:00	0
2009-06-01	00:03:00	0
2009-06-01	00:04:00	0
2009-06-01	00:05:00	0
2009-06-01	00:06:00	0
2009-06-01	00:07:00	0
2009-06-01	00:08:00	0
2009-06-01	00:09:00	0
2009-06-01	00:10:00	0
2009-06-01	00:11:00	0
2009-06-01	00:12:00	0
2009-06-01	00:13:00	0
2009-06-01	00:14:00	0
2009-06-01	00:15:00	0
2009-06-01	00:16:00	0
2009-06-01	00:17:00	0
2009-06-01	00:18:00	0
2009-06-01	00:19:00	0
2009-06-01	00:20:00	0
2009-06-01	00:21:00	0
2009-06-01	00:22:00	0
2009-06-01	00:23:00	0
2009-06-01	00:24:00	0
2009-06-01	00:25:00	0
2009-06-01	00:26:00	0
2009-06-01	00:27:00	0
2009-06-01	00:28:00	0
2009-06-01	00:29:00	0
2009-06-01	00:30:00	0
2009-06-01	00:31:00	0
2009-06-01	00:32:00	0
2009-06-01	00:33:00	0
2009-06-01	00:34:00	0
2009-06-01	00:35:00	0
2009-06-01	00:36:00	0
2009-06-01	00:37:00	0
2009-06-01	00:38:00	0
2009-06-01	00:39:00	0
2009-06-01	00:40:00	0
2009-06-01	00:41:00	0
2009-06-01	00:42:00	0
2009-06-01	00:43:00	0
2009-06-01	00:44:00	0
2009-06-01	00:45:00	0
2009-06-01	00:46:00	0
2009-06-01	00:47:00	0
2009-06-01	00:48:00	0
2009-06-01	00:49:00	0
2009-06-01	00:50:00	0
2009-06-01	00:51:00	0
2009-06-01	00:52:00	0
2009-06-01	00:53:00	0
2009-06-01	00:54:00	0
2009-06-01	00:55:00	0
2009-06-01	00:56:00	0
2009-06-01	00:57:00	0
2009-06-01	00:58:00	0
2009-06-01	00:59:00	0
2009-06-01	01:00:00	0
2009-06-01	01:01:00	0
2009-06-01	01:02:00	0
2009-06-01	01:03:00	0
2009-06-01	01:04:00	0
2009-06-01	01:05:00	0
2009-06-01	01:06:00	0
2009-06-01	01:07:00	0
2009-06-01	01:08:00	0
2009-06-01	01:09:00	0
2009-06-01	01:10:00	0
2009-06-01	01:11:00	0
2009-06-01	01:12:00	0
2009-06-01	01:13:00	0
2009-06-01	01:14:00	0
2009-06-01	01:15:00	0
2009-06-01	01:16:00	0
2009-06-01	01:17:00	0
2009-06-01	01:18:00	0
2009-06-01	01:19:00	0
2009-06-01	01:20:00	0
2009-06-01	01:21:00	0
2009-06-01	01:22:00	0
2009-06-01	01:23:00	0
2009-06-01	01:24:00	0
2009-06-01	01:25:00	0
2009-06-01	01:26:00	0
2009-06-01	01:27:00	0
2009-06-01	01:28:00	0
2009-06-01	01:29:00	0
2009-06-01	01:30:00	0
2009-06-01	01:31:00	0
2009-06-01	01:32:00	0
2009-06-01	01:33:00	0
2009-06-01	01:34:00	0
2009-06-01	01:35:00	0
2009-06-01	01:36:00	0
2009-06-01	01:37:00	0
2009-06-01	01:38:00	0
2009-06-01	01:39:00	0
2009-06-01	01:40:00	0
2009-06-01	01:41:00	0
2009-06-01	01:42:00	0
2009-06-01	01:43:00	0
2009-06-01	01:44:00	0
2009-06-01	01:45:00	0
2009-06-01	01:46:00	0
2009-06-01	01:47:00	0
2009-06-01	01:48:00	0
2009-06-01	01:49:00	0
2009-06-01	01:50:00	0
2009-06-01	01:51:00	0
2009-06-01	01:52:00	0
2009-06-01	01:53:00	0
2009-06-01	01:54:00	0
2009-06-01	01:55:00	0
2009-06-01	01:56:00	0
2009-06-01	01:57:00	0
2009-06-01	01:58:00	0
2009-06-01	01:59:00	0
2009-06-01	02:00:00	0
2009-06-01	02:01:00	0
2009-06-01	02:02:00	0
2009-06-01	02:03:00	0
2009-06-01	02:04:00	0
2009-06-01	02:05:00	0
2009-06-01	02:06:00	0
2009-06-01	02:07:00	0
2009-06-01	02:08:00	0
2009-06-01	02:09:00	0
2009-06-01	02:10:00	0
2009-06-01	02:11:00	0
2009-06-01	02:12:00	0
2009-06-01	02:13:00	0
2009-06-01	02:14:00	0
2009-06-01	02:15:00	0
2009-06-01	02:16:00	0
2009-06-01	02:17:00	0
2009-06-01	02:18:00	0
2009-06-01	02:19:00	0
2009-06-01	02:20:00	0
2009-06-01	02:21:00	0
2009-06-01	02:22:00	0
2009-06-01	02:23:00	0
2009-06-01	02:24:00	0
2009-06-01	02:25:00	0
2009-06-01	02:26:00	0
2009-06-01	02:27:00	0
2009-06-01	02:28:00	0
2009-06-01	02:29:00	0
2009-06-01	02:30:00	0
2009-06-01	02:31:00	0
2009-06-01	02:32:00	0
2009-06-01	02:33:00	0
2009-06-01	02:34:00	0
2009-06-01	02:35:00	0
2009-06-01	02:36:00	0
2009-06-01	02:37:00	0
2009-06-01	02:38:00	0
2009-06-01	02:39:00	0
2009-06-01	02:40:00	0
2009-06-01	02:41:00	0
2009-06-01	02:42:00	0
2009-06-01	02:43:00	0
2009-06-01	02:44:00	0
2009-06-01	02:45:00	0
2009-06-01	02:46:00	0
2009-06-01	02:47:00	0
2009-06-01	02:48:00	0
2009-06-01	02:49:00	0
2009-06-01	02:50:00	0
2009-06-01	02:51:00	0
2009-06-01	02:52:00	0
2009-06-01	02:53:00	0
2009-06-01	02:54:00	0
2009-06-01	02:55:00	0
2009-06-01	02:56:00	0
2009-06-01	02:57:00	0
2009-06-01	02:58:00	0
2009-06-01	02:59:00	0
2009-06-01	03:00:00	0
2009-06-01	03:01:00	0
2009-06-01	03:02:00	0
2009-06-01	03:03:00	0
2009-06-01	03:04:00	0
2009-06-01	03:05:00	0
2009-06-01	03:06:00	0
2009-06-01	03:07:00	0
2009-06-01	03:08:00	0
2009-06-01	03:09:00	0
2009-06-01	03:10:00	0
2009-06-01	03:11:00	0
2009-06-01	03:12:00	0
2009-06-01	03:13:00	0
2009-06-01	03:14:00	0
2009-06-01	03:15:00	0
2009-06-01	03:16:00	0
2009-06-01	03:17:00	0
2009-06-01	03:18:00	0
2009-06-01	03:19:00	0
2009-06-01	03:20:00	0
2009-06-01	03:21:00	0
2009-06-01	03:22:00	0
2009-06-01	03:23:00	0
2009-06-01	03:24:00	0
2009-06-01	03:25:00	0
2009-06-01	03:26:00	0
2009-06-01	03:27:00	0
2009-06-01	03:28:00	0
2009-06-01	03:29:00	0
2009-06-01	03:30:00	0
2009-06-01	03:31:00	0
2009-06-01	03:32:00	0
2009-06-01	03:33:00	0
2009-06-01	03:34:00	0
2009-06-01	03:35:00	0
2009-06-01	03:36:00	0
2009-06-01	03:37:00	0
2009-06-01	03:38:00	0
2009-06-01	03:39:00	0
2009-06-01	03:40:00	0
2009-06-01	03:41:00	0
2009-06-01	03:42:00	0
2009-06-01	03:43:00	0
2009-06-01	03:44:00	0
2009-06-01	03:45:00	0
2009-06-01	03:46:00	0
2009-06-01	03:47:00	0
2009-06-01	03:48:00	0
2009-06-01	03:49:00	0
2009-06-01	03:50:00	0
2009-06-01	03:51:00	0
2009-06-01	03:52:00	0
2009-06-01	03:53:00	0
2009-06-01	03:54:00	0
2009-06-01	03:55:00	0
2009-06-01	03:56:00	0
2009-06-01	03:57:00	0
2009-06-01	03:58:00	0
2009-06-01	03:59:00	0
2009-06-01	04:00:00	0
2009-06-01	04:01:00	0
2009-06-01	04:02:00	0
2009-06-01	04:03:00	0
2009-06-01	04:04:00	0
2009-06-01	04:05:00	0
2009-06-01	04:06:00	0
2009-06-01	04:07:00	0
2009-06-01	04:08:00	0
2009-06-01	04:09:00	0
2009-06-01	04:10:00	0
2009-06-01	04:11:00	0
2009-06-01	04:12:00	0
2009-06-01	04:13:00	0
2009-06-01	04:14:00	0
2009-06-01	04:15:00	0
2009-06-01	04:16:00	0
2009-06-01	04:17:00	0
2009-06-01	04:18:00	0
2009-06-01	04:19:00	0
2009-06-01	04:20:00	0
2009-06-01	04:21:00	0
2009-06-01	04:22:00	0
2009-06-01	04:23:00	0
2009-06-01	04:24:00	0
2009-06-01	04:25:00	0
2009-06-01	04:26:00	0
2009-06-01	04:27:00	0
2009-06-01	04:28:00	0
2009-06-01	04:29:00	0
2009-06-01	04:30:00	0
2009-06-01	04:31:00	0
2009-06-01	04:32:00	0
2009-06-01	04:33:00	0
2009-06-01	04:34:00	0
2009-06-01	04:35:00	0
2009-06-01	04:36:00	0
2009-06-01	04:37:00	0
2009-06-01	04:38:00	0
2009-06-01	04:39:00	0
2009-06-01	04:40:00	0
2009-06-01	04:41:00	0
2009-06-01	04:42:00	0
2009-06-01	04:43:00	0
2009-06-01	04:44:00	0
2009-06-01	04:45:00	0
2009-06-01	04:46:00	0
2009-06-01	04:47:00	0
2009-06-01	04:48:00	0
2009-06-01	04:49:00	0
2009-06-01	04:50:00	0
2009-06-01	04:51:00	0
2009-06-01	04:52:00	0
2009-06-01	04:53:00	0
2009-06-01	04:54:00	0
2009-06-01	04:55:00	0
2009-06-01	04:56:00	0
2009-06-01	04:57:00	0
2009-06-01	04:58:00	0
2009-06-01	04:59:00	0
2009-06-01	05:00:00	0
2009-06-01	05:01:00	0
2009-06-01	05:02:00	0
2009-06-01	05:03:00	0
2009-06-01	05:04:00	0
2009-06-01	05:05:00	0
2009-06-01	05:06:00	0
2009-06-01	05:07:00	0
2009-06-01	05:08:00	0
2009-06-01	05:09:00	0
2009-06-01	05:10:00	0
2009-06-01	05:11:00	0
2009-06-01	05:12:00	0
2009-06-01	05:13:00	0
2009-06-01	05:14:00	0
2009-06-01	05:15:00	0
2009-06-01	05:16:00	0
2009-06-01	05:17:00	0
2009-06-01	05:18:00	0
2009-06-01	05:19:00	0
2009-06-01	05:20:00	0
2009-06-01	05:21:00	0
2009-06-01	05:22:00	0
2009-06-01	05:23:00	0
2009-06-01	05:24:00	0
2009-06-01	05:25:00	0
2009-06-01	05:26:00	0
2009-06-01	05:27:00	0
2009-06-01	05:28:00	0
2009-06-01	05:29:00	0
2009-06-01	05:30:00	0
2009-06-01	05:31:00	0
2009-06-01	05:32:00	0
2009-06-01	05:33:00	0
2009-06-01	05:34:00	0
2009-06-01	05:35:00	0
2009-06-01	05:36:00	0
2009-06-01	05:37:00	0
2009-06-01	05:38:00	0
2009-06-01	05:39:00	0
2009-06-01	05:40:00	0
2009-06-01	05:41:00	0
2009-06-01	05:42:00	0
2009-06-01	05:43:00	0
2009-06-01	05:44:00	0
2009-06-01	05:45:00	0
2009-06-01	05:46:00	0
2009-06-01	05:47:00	0
2009-06-01	05:48:00	0
2009-06-01	05:49:00	0
2009-06-01	05:50:00	0
2009-06-01	05:51:00	0
2009-06-01	05:52:00	0
2009-06-01	05:53:00	0
2009-06-01	05:54:00	0
2009-06-01	05:55:00	0
2009-06-01	05:56:00	0
2009-06-01	05:57:00	0
2009-06-01	05:58:00	0
2009-06-01	05:59:00	0
2009-06-01	06:00:00	0
2009-06-01	06:01:00	0
2009-06-01	06:02:00	0
2009-06-01	06:03:00	0
2009-06-01	06:04:00	0
2009-06-01	06:05:00	0
2009-06-01	06:06:00	0
2009-06-01	06:07:00	0
2009-06-01	06:08:00	0
2009-06-01	06:09:00	0
2009-06-01	06:10:00	0
2009-06-01	06:11:00	0
2009-06-01	06:12:00	0
2009-06-01	06:13:00	0
2009-06-01	06:14:00	0
2009-06-01	06:15:00	0
2009-06-01	06:16:00	0
2009-06-01	06:17:00	0
2009-06-01	06:18:00	0
2009-06-01	06:19:00	0
2009-06-01	06:20:00	0
2009-06-01	06:21:00	0
2009-06-01	06:22:00	0
2009-06-01	06:23:00	0
2009-06-01	06:24:00	0
2009-06-01	06:25:00	0
2009-06-01	06:26:00	0
2009-06-01	06:27:00	0
2009-06-01	06:28:00	0
2009-06-01	06:29:00	0
2009-06-01	06:30:00	0
2009-06-01	06:31:00	0
2009-06-01	06:32:00	0
2009-06-01	06:33:00	0
2009-06-01	06:34:00	0
2009-06-01	06:35:00	0
2009-06-01	06:36:00	0
2009-06-01	06:37:00	0
2009-06-01	06:38:00	0
2009-06-01	06:39:00	0
2009-06-01	06:40:00	0
2009-06-01	06:41:00	0
2009-06-01	06:42:00	0
2009-06-01	06:43:00	0
2009-06-01	06:44:00	0
2009-06-01	06:45:00	0
2009-06-01	06:46:00	0
2009-06-01	06:47:00	0
2009-06-01	06:48:00	0
2009-06-01	06:49:00	0
2009-06-01	06:50:00	0
2009-06-01	06:51:00	0
2009-06-01	06:52:00	0
2009-06-01	06:53:00	0
2009-06-01	06:54:00	0
2009-06-01	06:55:00	0
2009-06-01	06:56:00	0
2009-06-01	06:57:00	0
2009-06-01	06:58:00	0
2009-06-01	06:59:00	0
2009-06-01	07:00:00	0
2009-06-01	07:01:00	0
2009-06-01	07:02:00	0
2009-06-01	07:03:00	0
2009-06-01	07:04:00	0
2009-06-01	07:05:00	0
2009-06-01	07:06:00	0
2009-06-01	07:07:00	0
2009-06-01	07:08:00	0
2009-06-01	07:09:00	0
2009-06-01	07:10:00	0
2009-06-01	07:11:00	0
2009-06-01	07:12:00	0
2009-06-01	07:13:00	0
2009-06-01	07:14:00	0
2009-06-01	07:15:00	0
2009-06-01	07:16:00	0
2009-06-01	07:17:00	0
2009-06-01	07:18:00	0
2009-06-01	07:19:00	0
2009-06-01	07:20:00	0
2009-06-01	07:21:00	0
2009-06-01	07:22:00	0
2009-06-01	07:23:00	0
2009-06-01	07:24:00	0
2009-06-01	07:25:00	0
2009-06-01	07:26:00	0
2009-06-01	07:27:00	0
2009-06-01	07:28:00	0
2009-06-01	07:29:00	0
2009-06-01	07:30:00	0
2009-06-01	07:31:00	0
2009-06-01	07:32:00	0
2009-06-01	07:33:00	0
2009-06-01	07:34:00	0
2009-06-01	07:35:00	0
2009-06-01	07:36:00	0
2009-06-01	07:37:00	0
2009-06-01	07:38:00	0
2009-06-01	07:39:00	0
2009-06-01	07:40:00	0
2009-06-01	07:41:00	0
2009-06-01	07:42:00	0
2009-06-01	07:43:00	0
2009-06-01	07:44:00	0
2009-06-01	07:45:00	0
2009-06-01	07:46:00	0
2009-06-01	07:47:00	0
2009-06-01	07:48:00	0
2009-06-01	07:49:00	0
2009-06-01	07:50:00	0
2009-06-01	07:51:00	0
2009-06-01	07:52:00	0
2009-06-01	07:53:00	0
2009-06-01	07:54:00	0
2009-06-01	07:55:00	0
2009-06-01	07:56:00	0
2009-06-01	07:57:00	0
2009-06-01	07:58:00	0
2009-06-01	07:59:00	0
2009-06-01	08:00:00	0
2009-06-01	08:01:00	0
2009-06-01	08:02:00	0
2009-06-01	08:03:00	0
2009-06-01	08:04:00	0
2009-06-01	08:05:00	0
2009-06-01	08:06:00	0
2009-06-01	08:07:00	0
2009-06-01	08:08:00	0
2009-06-01	08:09:00	0
2009-06-01	08:10:00	0
2009-06-01	08:11:00	0
2009-06-01	08:12:00	0
2009-06-01	08:13:00	0
2009-06-01	08:14:00	0
2009-06-01	08:15:00	0
2009-06-01	08:16:00	0
2009-06-01	08:17:00	0
2009-06-01	08:18:00	0
2009-06-01	08:19:00	0
2009-06-01	08:20:00	0
2009-06-01	08:21:00	0
2009-06-01	08:22:00	0
2009-06-01	08:23:00	0
2009-06-01	08:24:00	0
2009-06-01	08:25:00	0
2009-06-01	08:26:00	0
2009-06-01	08:27:00	0
2009-06-01	08:28:00	0
2009-06-01	08:29:00	0
2009-06-01	08:30:00	0
2009-06-01	08:31:00	0
2009-06-01	08:32:00	0
2009-06-01	08:33:00	0
2009-06-01	08:34:00	0
2009-06-01	08:35:00	0
2009-06-01	08:36:00	0
2009-06-01	08:37:00	0
2009-06-01	08:38:00	0
2009-06-01	08:39:00	0
2009-06-01	08:40:00	0
2009-06-01	08:41:00	0
2009-06-01	08:42:00	0
2009-06-01	08:43:00	0
2009-06-01	08:44:00	0
2009-06-01	08:45:00	0
2009-06-01	08:46:00	0
2009-06-01	08:47:00	0
2009-06-01	08:48:00	0
2009-06-01	08:49:00	0
2009-06-01	08:50:00	0
2009-06-01	08:51:00	0
2009-06-01	08:52:00	0
2009-06-01	08:53:00	0
2009-06-01	08:54:00	0
2009-06-01	08:55:00	0
2009-06-01	08:56:00	0
2009-06-01	08:57:00	0
2009-06-01	08:58:00	0
2009-06-01	08:59:00	0
2009-06-01	09:00:00	0
2009-06-01	09:01:00	0
2009-06-01	09:02:00	0
2009-06-01	09:03:00	0
2009-06-01	09:04:00	0
2009-06-01	09:05:00	0
2009-06-01	09:06:00	0
2009-06-01	09:07:00	0
2009-06-01	09:08:00	0
2009-06-01	09:09:00	0
2009-06-01	09:10:00	0
2009-06-01	09:11:00	0
2009-06-01	09:12:00	0
2009-06-01	09:13:00	0
2009-06-01	09:14:00	0
2009-06-01	09:15:00	0
2009-06-01	09:16:00	0
2009-06-01	09:17:00	0
2009-06-01	09:18:00	0
2009-06-01	09:19:00	0
2009-06-01	09:20:00	0
2009-06-01	09:21:00	0
2009-06-01	09:22:00	0
2009-06-01	09:23:00	0
2009-06-01	09:24:00	0
2009-06-01	09:25:00	0
2009-06-01	09:26:00	0
2009-06-01	09:27:00	0
2009-06-01	09:28:00	0
2009-06-01	09:29:00	0
2009-06-01	09:30:00	0
2009-06-01	09:31:00	0
2009-06-01	09:32:00	0
2009-06-01	09:33:00	0
2009-06-01	09:34:00	0
2009-06-01	09:35:00	0
2009-06-01	09:36:00	0
2009-06-01	09:37:00	0
2009-06-01	09:38:00	0
2009-06-01	09:39:00	0
2009-06-01	09:40:00	0
2009-06-01	09:41:00	0
2009-06-01	09:42:00	0
2009-06-01	09:43:00	0
2009-06-01	09:44:00	0
2009-06-01	09:45:00	0
2009-06-01	09:46:00	0
2009-06-01	09:47:00	0
2009-06-01	09:48:00	0
2009-06-01	09:49:00	0
2009-06-01	09:50:00	0
2009-06-01	09:51:00	0
2009-06-01	09:52:00	0
2009-06-01	09:53:00	0
2009-06-01	09:54:00	0
2009-06-01	09:55:00	0
2009-06-01	09:56:00	0
2009-06-01	09:57:00	0
2009-06-01	09:58:00	0
2009-06-01	09:59:00	0
2009-06-01	10:00:00	0
2009-06-01	10:01:00	0
2009-06-01	10:02:00	0
2009-06-01	10:03:00	0
2009-06-01	10:04:00	0
2009-06-01	10:05:00	0
2009-06-01	10:06:00	0
2009-06-01	10:07:00	0
2009-06-01	10:08:00	0
2009-06-01	10:09:00	0
2009-06-01	10:10:00	0
2009-06-01	10:11:00	0
2009-06-01	10:12:00	0
2009-06-01	10:13:00	0
2009-06-01	10:14:00	0
2009-06-01	10:15:00	0
2009-06-01	10:16:00	0
2009-06-01	10:17:00	0
2009-06-01	10:18:00	0
2009-06-01	10:19:00	0
2009-06-01	10:20:00	0
2009-06-01	10:21:00	0
2009-06-01	10:22:00	0
2009-06-01	10:23:00	0
2009-06-01	10:24:00	0
2009-06-01	10:25:00	0
2009-06-01	10:26:00	0
2009-06-01	10:27:00	0
2009-06-01	10:28:00	0
2009-06-01	10:29:00	0
2009-06-01	10:30:00	0
2009-06-01	10:31:00	0
2009-06-01	10:32:00	0
2009-06-01	10:33:00	0
2009-06-01	10:34:00	0
2009-06-01	10:35:00	0
2009-06-01	10:36:00	0
2009-06-01	10:37:00	0
2009-06-01	10:38:00	0
2009-06-01	10:39:00	0
2009-06-01	10:40:00	0
2009-06-01	10:41:00	0
2009-06-01	10:42:00	0
2009-06-01	10:43:00	0
2009-06-01	10:44:00	0
2009-06-01	10:45:00	0
2009-06-01	10:46:00	0
2009-06-01	10:47:00	0
2009-06-01	10:48:00	0
2009-06-01	10:49:00	0
2009-06-01	10:50:00	0
2009-06-01	10:51:00	0
2009-06-01	10:52:00	0
2009-06-01	10:53:00	0
2009-06-01	10:54:00	0
2009-06-01	10:55:00	0
2009-06-01	10:56:00	0
2009-06-01	10:57:00	0
2009-06-01	10:58:00	0
2009-06-01	10:59:00	0
2009-06-01	11:00:00	0
2009-06-01	11:01:00	0
2009-06-01	11:02:00	0
2009-06-01	11:03:00	0
2009-06-01	11:04:00	0
2009-06-01	11:05:00	0
2009-06-01	11:06:00	0
2009-06-01	11:07:00	0
2009-06-01	11:08:00	0
2009-06-01	11:09:00	0
2009-06-01	11:10:00	0
2009-06-01	11:11:00	0
2009-06-01	11:12:00	0
2009-06-01	11:13:00	0
2009-06-01	11:14:00	0
2009-06-01	11:15:00	0
2009-06-01	11:16:00	0
2009-06-01	11:17:00	0
2009-06-01	11:18:00	0
2009-06-01	11:19:00	0
2009-06-01	11:20:00	0
2009-06-01	11:21:00	0
2009-06-01	11:22:00	0
2009-06-01	11:23:00	0
2009-06-01	11:24:00	0
2009-06-01	11:25:00	0
2009-06-01	11:26:00	0
2009-06-01	11:27:00	0
2009-06-01	11:28:00	0
2009-06-01	11:29:00	0
2009-06-01	11:30:00	0
2009-06-01	11:31:00	0
2009-06-01	11:32:00	0
2009-06-01	11:33:00	0
2009-06-01	11:34:00	0
2009-06-01	11:35:00	0
2009-06-01	11:36:00	0
2009-06-01	11:37:00	0
2009-06-01	11:38:00	0
2009-06-01	11:39:00	0
2009-06-01	11:40:00	0
2009-06-01	11:41:00	0
2009-06-01	11:42:00	0
2009-06-01	11:43:00	0
2009-06-01	11:44:00	0
2009-06-01	11:45:00	0
2009-06-01	11:46:00	0
2009-06-01	11:47:00	0
2009-06-01	11:48:00	0
2009-06-01	11:49:00	0
2009-06-01	11:50:00	0
2009-06-01	11:51:00	0
2009-06-01	11:52:00	0
2009-06-01	11:53:00	0
2009-06-01	11:54:00	0
2009-06-01	11:55:00	0
2009-06-01	11:56:00	0
2009-06-01	11:57:00	0
2009-06-01	11:58:00	0
2009-06-01	11:59:00	0
2009-06-01	12:00:00	0
2009-06-01	12:01:00	0
2009-06-01	12:02:00	0
2009-06-01	12:03:00	0
2009-06-01	12:04:00	0
2009-06-01	12:05:00	0
2009-06-01	12:06:00	0
2009-06-01	12:07:00	0
2009-06-01	12:08:00	0
2009-06-01	12:09:00	0
2009-06-01	12:10:00	0
2009-06-01	12:11:00	0
2009-06-01	12:12:00	0
2009-06-01	12:13:00	0
2009-06-01	12:14:00	0
2009-06-01	12:15:00	0
2009-06-01	12:16:00	0
2009-06-01	12:17:00	0
2009-06-01	12:18:00	0
2009-06-01	12:19:00	0
2009-06-01	12:20:00	0
2009-06-01	12:21:00	0
2009-06-01	12:22:00	0
2009-06-01	12:23:00	0
2009-06-01	12:24:00	0
2009-06-01	12:25:00	0
2009-06-01	12:26:00	0
2009-06-01	12:27:00	0
2009-06-01	12:28:00	0
2009-06-01	12:29:00	0
2009-06-01	12:30:00	0
2009-06-01	12:31:00	0
2009-06-01	12:32:00	0
2009-06-01	12:33:00	0
2009-06-01	12:34:00	0
2009-06-01	12:35:00	0
2009-06-01	12:36:00	0
2009-06-01	12:37:00	0
2009-06-01	12:38:00	0
2009-06-01	12:39:00	0
2009-06-01	12:40:00	0
2009-06-01	12:41:00	0
2009-06-01	12:42:00	0
2009-06-01	12:43:00	0
2009-06-01	12:44:00	0
2009-06-01	12:45:00	0
2009-06-01	12:46:00	0
2009-06-01	12:47:00	0
2009-06-01	12:48:00	0
2009-06-01	12:49:00	0
2009-06-01	12:50:00	0
2009-06-01	12:51:00	0
2009-06-01	12:52:00	0
2009-06-01	12:53:00	0
2009-06-01	12:54:00	0
2009-06-01	12:55:00	0
2009-06-01	12:56:00	0
2009-06-01	12:57:00	0
2009-06-01	12:58:00	0
2009-06-01	12:59:00	0
2009-06-01	13:00:00	0
2009-06-01	13:01:00	0
2009-06-01	13:02:00	0
2009-06-01	13:03:00	0
2009-06-01	13:04:00	0
2009-06-01	13:05:00	0
2009-06-01	13:06:00	0
2009-06-01	13:07:00	0
2009-06-01	13:08:00	0
2009-06-01	13:09:00	0
2009-06-01	13:10:00	0
2009-06-01	13:11:00	0
2009-06-01	13:12:00	0
2009-06-01	13:13:00	0
2009-06-01	13:14:00	0
2009-06-01	13:15:00	0
2009-06-01	13:16:00	0
2009-06-01	13:17:00	0
2009-06-01	13:18:00	0
2009-06-01	13:19:00	0
2009-06-01	13:20:00	0
2009-06-01	13:21:00	0
2009-06-01	13:22:00	0
2009-06-01	13:23:00	0
2009-06-01	13:24:00	0
2009-06-01	13:25:00	0
2009-06-01	13:26:00	0
2009-06-01	13:27:00	0
2009-06-01	13:28:00	0
2009-06-01	13:29:00	0
2009-06-01	13:30:00	0
2009-06-01	13:31:00	0
2009-06-01	13:32:00	0
2009-06-01	13:33:00	0
2009-06-01	13:34:00	0
2009-06-01	13:35:00	0
2009-06-01	13:36:00	0
2009-06-01	13:37:00	0
2009-06-01	13:38:00	0
2009-06-01	13:39:00	0
2009-06-01	13:40:00	0
2009-06-01	13:41:00	0
2009-06-01	13:42:00	0
2009-06-01	13:43:00	0
2009-06-01	13:44:00	0
2009-06-01	13:45:00	0
2009-06-01	13:46:00	0
2009-06-01	13:47:00	0
2009-06-01	13:48:00	0
2009-06-01	13:49:00	0
2009-06-01	13:50:00	0
2009-06-01	13:51:00	0
2009-06-01	13:52:00	0
2009-06-01	13:53:00	0
2009-06-01	13:54:00	0
2009-06-01	13:55:00	0
2009-06-01	13:56:00	0
2009-06-01	13:57:00	0
2009-06-01	13:58:00	0
2009-06-01	13:59:00	0
2009-06-01	14:00:00	0
2009-06-01	14:01:00	0
2009-06-01	14:02:00	0
2009-06-01	14:03:00	0
2009-06-01	14:04:00	0
2009-06-01	14:05:00	0
2009-06-01	14:06:00	0
2009-06-01	14:07:00	0
2009-06-01	14:08:00	0
2009-06-01	14:09:00	0
2009-06-01	14:10:00	0
2009-06-01	14:11:00	0
2009-06-01	14:12:00	0
2009-06-01	14:13:00	0
2009-06-01	14:14:00	0
2009-06-01	14:15:00	0
2009-06-01	14:16:00	0
2009-06-01	14:17:00	0
2009-06-01	14:18:00	0
2009-06-01	14:19:00	0
2009-06-01	14:20:00	0
2009-06-01	14:21:00	0
2009-06-01	14:22:00	0
2009-06-01	14:23:00	0
2009-06-01	14:24:00	0
2009-06-01	14:25:00	0
2009-06-01	14:26:00	0
2009-06-01	14:27:00	0
2009-06-01	14:28:00	0
2009-06-01	14:29:00	0
2009-06-01	14:30:00	0
2009-06-01	14:31:00	0
2009-06-01	14:32:00	0
2009-06-01	14:33:00	0
2009-06-01	14:34:00	0
2009-06-01	14:35:00	0
2009-06-01	14:36:00	0
2009-06-01	14:37:00	0
2009-06-01	14:38:00	0
2009-06-01	14:39:00	0
2009-06-01	14:40:00	0
2009-06-01	14:41:00	0
2009-06-01	14:42:00	0
2009-06-01	14:43:00	0
2009-06-01	14:44:00	0
2009-06-01	14:45:00	0
2009-06-01	14:46:00	0
2009-06-01	14:47:00	0
2009-06-01	14:48:00	0
2009-06-01	14:49:00	0
2009-06-01	14:50:00	0
2009-06-01	14:51:00	0
2009-06-01	14:52:00	0
2009-06-01	14:53:00	0
2009-06-01	14:54:00	0
2009-06-01	14:55:00	0
2009-06-01	14:56:00	0
2009-06-01	14:57:00	0
2009-06-01	14:58:00	0
2009-06-01	14:59:00	0
2009-06-01	15:00:00	0
2009-06-01	15:01:00	0
2009-06-01	15:02:00	0
2009-06-01	15:03:00	0
2009-06-01	15:04:00	0
2009-06-01	15:05:00	0
2009-06-01	15:06:00	0
2009-06-01	15:07:00	0
2009-06-01	15:08:00	0
2009-06-01	15:09:00	0
2009-06-01	15:10:00	0
2009-06-01	15:11:00	0
2009-06-01	15:12:00	0
2009-06-01	15:13:00	0
2009-06-01	15:14:00	0
2009-06-01	15:15:00	0
2009-06-01	15:16:00	0
2009-06-01	15:17:00	0
2009-06-01	15:18:00	0
2009-06-01	15:19:00	0
2009-06-01	15:20:00	0
2009-06-01	15:21:00	0
2009-06-01	15:22:00	0
2009-06-01	15:23:00	0
2009-06-01	15:24:00	0
2009-06-01	15:25:00	0
2009-06-01	15:26:00	0
2009-06-01	15:27:00	0
2009-06-01	15:28:00	0
2009-06-01	15:29:00	0
2009-06-01	15:30:00	0
2009-06-01	15:31:00	0
2009-06-01	15:32:00	0
2009-06-01	15:33:00	0
2009-06-01	15:34:00	0
2009-06-01	15:35:00	0
2009-06-01	15:36:00	0
2009-06-01	15:37:00	0
2009-06-01	15:38:00	0
2009-06-01	15:39:00	0
2009-06-01	15:40:00	0
2009-06-01	15:41:00	0
2009-06-01	15:42:00	0
2009-06-01	15:43:00	0
2009-06-01	15:44:00	0
2009-06-01	15:45:00	0
2009-06-01	15:46:00	0
2009-06-01	15:47:00	0
2009-06-01	15:48:00	0
2009-06-01	15:49:00	0
2009-06-01	15:50:00	0
2009-06-01	15:51:00	0
2009-06-01	15:52:00	0
2009-06-01	15:53:00	0
2009-06-01	15:54:00	0
2009-06-01	15:55:00	0
2009-06-01	15:56:00	0
2009-06-01	15:57:00	0
2009-06-01	15:58:00	0
2009-06-01	15:59:00	0
2009-06-01	16:00:00	0
2009-06-01	16:01:00	0
2009-06-01	16:02:00	0
2009-06-01	16:03:00	0
2009-06-01	16:04:00	0
2009-06-01	16:05:00	0
2009-06-01	16:06:00	0
2009-06-01	16:07:00	0
2009-06-01	16:08:00	0
2009-06-01	16:09:00	0
2009-06-01	16:10:00	0
2009-06-01	16:11:00	0
2009-06-01	16:12:00	0
2009-06-01	16:13:00	0
2009-06-01	16:14:00	0
2009-06-01	16:15:00	0
2009-06-01	16:16:00	0
2009-06-01	16:17:00	0
2009-06-01	16:18:00	0
2009-06-01	16:19:00	0
2009-06-01	16:20:00	0
2009-06-01	16:21:00	0
2009-06-01	16:22:00	0
2009-06-01	16:23:00	0
2009-06-01	16:24:00	0
2009-06-01	16:25:00	0
2009-06-01	16:26:00	0
2009-06-01	16:27:00	0
2009-06-01	16:28:00	0
2009-06-01	16:29:00	0
2009-06-01	16:30:00	0
2009-06-01	16:31:00	0
2009-06-01	16:32:00	0
2009-06-01	16:33:00	0
2009-06-01	16:34:00	0
2009-06-01	16:35:00	0
2009-06-01	16:36:00	0
2009-06-01	16:37:00	0
2009-06-01	16:38:00	0
2009-06-01	16:39:00	0
2009-06-01	16:40:00	0
2009-06-01	16:41:00	0
2009-06-01	16:42:00	0
2009-06-01	16:43:00	0
2009-06-01	16:44:00	0
2009-06-01	16:45:00	0
2009-06-01	16:46:00	0
2009-06-01	16:47:00	0
2009-06-01	16:48:00	0
2009-06-01	16:49:00	0
2009-06-01	16:50:00	0
2009-06-01	16:51:00	0
2009-06-01	16:52:00	0
2009-06-01	16:53:00	0
2009-06-01	16:54:00	0
2009-06-01	16:55:00	0
2009-06-01	16:56:00	0
2009-06-01	16:57:00	0
2009-06-01	16:58:00	0
2009-06-01	16:59:00	0
2009-06-01	17:00:00	0
2009-06-01	17:01:00	0
2009-06-01	17:02:00	0
2009-06-01	17:03:00	0
2009-06-01	17:04:00	0
2009-06-01	17:05:00	0
2009-06-01	17:06:00	0
2009-06-01	17:07:00	0
2009-06-01	17:08:00	0
2009-06-01	17:09:00	0
2009-06-01	17:10:00	0
2009-06-01	17:11:00	0
2009-06-01	17:12:00	0
2009-06-01	17:13:00	0
2009-06-01	17:14:00	0
2009-06-01	17:15:00	0
2009-06-01	17:16:00	0
2009-06-01	17:17:00	0
2009-06-01	17:18:00	0
2009-06-01	17:19:00	0
2009-06-01	17:20:00	0
2009-06-01	17:21:00	0
2009-06-01	17:22:00	0
2009-06-01	17:23:00	0
2009-06-01	17:24:00	0
2009-06-01	17:25:00	0
2009-06-01	17:26:00	0
2009-06-01	17:27:00	0
2009-06-01	17:28:00	0
2009-06-01	17:29:00	0
2009-06-01	17:30:00	0
2009-06-01	17:31:00	0
2009-06-01	17:32:00	0
2009-06-01	17:33:00	0
2009-06-01	17:34:00	0
2009-06-01	17:35:00	0
2009-06-01	17:36:00	0
2009-06-01	17:37:00	0
2009-06-01	17:38:00	0
2009-06-01	17:39:00	0
2009-06-01	17:40:00	0
2009-06-01	17:41:00	0
2009-06-01	17:42:00	0
2009-06-01	17:43:00	0
2009-06-01	17:44:00	0
2009-06-01	17:45:00	0
2009-06-01	17:46:00	0
2009-06-01	17:47:00	0
2009-06-01	17:48:00	0
2009-06-01	17:49:00	0
2009-06-01	17:50:00	0
2009-06-01	17:51:00	0
2009-06-01	17:52:00	0
2009-06-01	17:53:00	0
2009-06-01	17:54:00	0
2009-06-01	17:55:00	0
2009-06-01	17:56:00	0
2009-06-01	17:57:00	0
2009-06-01	17:58:00	0
2009-06-01	17:59:00	0
2009-06-01	18:00:00	88
2009-06-01	18:01:00	0
2009-06-01	18:02:00	0
2009-06-01	18:03:00	55
2009-06-01	18:04:00	11
2009-06-01	18:05:00	66
2009-06-01	18:06:00	99
2009-06-01	18:07:00	11
2009-06-01	18:08:00	0
2009-06-01	18:09:00	143
2009-06-01	18:10:00	499
2009-06-01	18:11:00	183
2009-06-01	18:12:00	183
2009-06-01	18:13:00	157
2009-06-01	18:14:00	11
2009-06-01	18:15:00	0
2009-06-01	18:16:00	0
2009-06-01	18:17:00	0
2009-06-01	18:18:00	0
2009-06-01	18:19:00	0
2009-06-01	18:20:00	0
2009-06-01	18:21:00	0
2009-06-01	18:22:00	0
2009-06-01	18:23:00	143
2009-06-01	18:24:00	132
2009-06-01	18:25:00	170
2009-06-01	18:26:00	88
2009-06-01	18:27:00	121
2009-06-01	18:28:00	0
2009-06-01	18:29:00	157
2009-06-01	18:30:00	183
2009-06-01	18:31:00	183
2009-06-01	18:32:00	99
2009-06-01	18:33:00	183
2009-06-01	18:34:00	157
2009-06-01	18:35:00	0
2009-06-01	18:36:00	289
2009-06-01	18:37:00	99
2009-06-01	18:38:00	157
2009-06-01	18:39:00	196
2009-06-01	18:40:00	0
2009-06-01	18:41:00	11
2009-06-01	18:42:00	0
2009-06-01	18:43:00	0
2009-06-01	18:44:00	0
2009-06-01	18:45:00	0
2009-06-01	18:46:00	0
2009-06-01	18:47:00	0
2009-06-01	18:48:00	0
2009-06-01	18:49:00	0
2009-06-01	18:50:00	0
2009-06-01	18:51:00	0
2009-06-01	18:52:00	0
2009-06-01	18:53:00	0
2009-06-01	18:54:00	0
2009-06-01	18:55:00	0
2009-06-01	18:56:00	0
2009-06-01	18:57:00	0
2009-06-01	18:58:00	223
2009-06-01	18:59:00	33
2009-06-01	19:00:00	0
2009-06-01	19:01:00	0
2009-06-01	19:02:00	0
2009-06-01	19:03:00	0
2009-06-01	19:04:00	0
2009-06-01	19:05:00	0
2009-06-01	19:06:00	0
2009-06-01	19:07:00	0
2009-06-01	19:08:00	44
2009-06-01	19:09:00	143
2009-06-01	19:10:00	66
2009-06-01	19:11:00	121
2009-06-01	19:12:00	77
2009-06-01	19:13:00	0
2009-06-01	19:14:00	0
2009-06-01	19:15:00	157
2009-06-01	19:16:00	22
2009-06-01	19:17:00	11
2009-06-01	19:18:00	0
2009-06-01	19:19:00	0
2009-06-01	19:20:00	0
2009-06-01	19:21:00	99
2009-06-01	19:22:00	55
2009-06-01	19:23:00	170
2009-06-01	19:24:00	170
2009-06-01	19:25:00	0
2009-06-01	19:26:00	0
2009-06-01	19:27:00	0
2009-06-01	19:28:00	210
2009-06-01	19:29:00	33
2009-06-01	19:30:00	33
2009-06-01	19:31:00	0
2009-06-01	19:32:00	0
2009-06-01	19:33:00	0
2009-06-01	19:34:00	0
2009-06-01	19:35:00	0
2009-06-01	19:36:00	77
2009-06-01	19:37:00	44
2009-06-01	19:38:00	55
2009-06-01	19:39:00	157
2009-06-01	19:40:00	351
2009-06-01	19:41:00	351
2009-06-01	19:42:00	413
2009-06-01	19:43:00	132
2009-06-01	19:44:00	110
2009-06-01	19:45:00	0
2009-06-01	19:46:00	11
2009-06-01	19:47:00	0
2009-06-01	19:48:00	0
2009-06-01	19:49:00	0
2009-06-01	19:50:00	0
2009-06-01	19:51:00	132
2009-06-01	19:52:00	110
2009-06-01	19:53:00	0
2009-06-01	19:54:00	0
2009-06-01	19:55:00	0
2009-06-01	19:56:00	0
2009-06-01	19:57:00	0
2009-06-01	19:58:00	0
2009-06-01	19:59:00	0
2009-06-01	20:00:00	0
2009-06-01	20:01:00	0
2009-06-01	20:02:00	0
2009-06-01	20:03:00	196
2009-06-01	20:04:00	0
2009-06-01	20:05:00	143
2009-06-01	20:06:00	11
2009-06-01	20:07:00	0
2009-06-01	20:08:00	0
2009-06-01	20:09:00	0
2009-06-01	20:10:00	0
2009-06-01	20:11:00	0
2009-06-01	20:12:00	0
2009-06-01	20:13:00	0
2009-06-01	20:14:00	0
2009-06-01	20:15:00	0
2009-06-01	20:16:00	0
2009-06-01	20:17:00	0
2009-06-01	20:18:00	0
2009-06-01	20:19:00	0
2009-06-01	20:20:00	0
2009-06-01	20:21:00	0
2009-06-01	20:22:00	0
2009-06-01	20:23:00	0
2009-06-01	20:24:00	0
2009-06-01	20:25:00	0
2009-06-01	20:26:00	0
2009-06-01	20:27:00	0
2009-06-01	20:28:00	0
2009-06-01	20:29:00	0
2009-06-01	20:30:00	0
2009-06-01	20:31:00	0
2009-06-01	20:32:00	0
2009-06-01	20:33:00	0
2009-06-01	20:34:00	0
2009-06-01	20:35:00	0
2009-06-01	20:36:00	0
2009-06-01	20:37:00	0
2009-06-01	20:38:00	0
2009-06-01	20:39:00	0
2009-06-01	20:40:00	0
2009-06-01	20:41:00	0
2009-06-01	20:42:00	0
2009-06-01	20:43:00	0
2009-06-01	20:44:00	0
2009-06-01	20:45:00	0
2009-06-01	20:46:00	0
2009-06-01	20:47:00	0
2009-06-01	20:48:00	0
2009-06-01	20:49:00	0
2009-06-01	20:50:00	0
2009-06-01	20:51:00	0
2009-06-01	20:52:00	0
2009-06-01	20:53:00	0
2009-06-01	20:54:00	170
2009-06-01	20:55:00	0
2009-06-01	20:56:00	0
2009-06-01	20:57:00	0
2009-06-01	20:58:00	0
2009-06-01	20:59:00	0
2009-06-01	21:00:00	77
2009-06-01	21:01:00	0
2009-06-01	21:02:00	0
2009-06-01	21:03:00	0
2009-06-01	21:04:00	0
2009-06-01	21:05:00	0
2009-06-01	21:06:00	0
2009-06-01	21:07:00	0
2009-06-01	21:08:00	0
2009-06-01	21:09:00	0
2009-06-01	21:10:00	0
2009-06-01	21:11:00	0
2009-06-01	21:12:00	88
2009-06-01	21:13:00	183
2009-06-01	21:14:00	11
2009-06-01	21:15:00	0
2009-06-01	21:16:00	0
2009-06-01	21:17:00	0
2009-06-01	21:18:00	0
2009-06-01	21:19:00	0
2009-06-01	21:20:00	0
2009-06-01	21:21:00	210
2009-06-01	21:22:00	397
2009-06-01	21:23:00	589
2009-06-01	21:24:00	366
2009-06-01	21:25:00	236
2009-06-01	21:26:00	249
2009-06-01	21:27:00	143
2009-06-01	21:28:00	99
2009-06-01	21:29:00	0
2009-06-01	21:30:00	0
2009-06-01	21:31:00	88
2009-06-01	21:32:00	170
2009-06-01	21:33:00	88
2009-06-01	21:34:00	88
2009-06-01	21:35:00	121
2009-06-01	21:36:00	0
2009-06-01	21:37:00	0
2009-06-01	21:38:00	0
2009-06-01	21:39:00	0
2009-06-01	21:40:00	0
2009-06-01	21:41:00	0
2009-06-01	21:42:00	0
2009-06-01	21:43:00	0
2009-06-01	21:44:00	0
2009-06-01	21:45:00	0
2009-06-01	21:46:00	0
2009-06-01	21:47:00	0
2009-06-01	21:48:00	0
2009-06-01	21:49:00	0
2009-06-01	21:50:00	0
2009-06-01	21:51:00	0
2009-06-01	21:52:00	0
2009-06-01	21:53:00	0
2009-06-01	21:54:00	0
2009-06-01	21:55:00	0
2009-06-01	21:56:00	0
2009-06-01	21:57:00	0
2009-06-01	21:58:00	0
2009-06-01	21:59:00	0
2009-06-01	22:00:00	0
2009-06-01	22:01:00	0
2009-06-01	22:02:00	0
2009-06-01	22:03:00	0
2009-06-01	22:04:00	0
2009-06-01	22:05:00	0
2009-06-01	22:06:00	0
2009-06-01	22:07:00	0
2009-06-01	22:08:00	0
2009-06-01	22:09:00	0
2009-06-01	22:10:00	0
2009-06-01	22:11:00	0
2009-06-01	22:12:00	0
2009-06-01	22:13:00	0
2009-06-01	22:14:00	0
2009-06-01	22:15:00	0
2009-06-01	22:16:00	0
2009-06-01	22:17:00	0
2009-06-01	22:18:00	0
2009-06-01	22:19:00	0
2009-06-01	22:20:00	0
2009-06-01	22:21:00	0
2009-06-01	22:22:00	0
2009-06-01	22:23:00	0
2009-06-01	22:24:00	0
2009-06-01	22:25:00	0
2009-06-01	22:26:00	0
2009-06-01	22:27:00	0
2009-06-01	22:28:00	0
2009-06-01	22:29:00	0
2009-06-01	22:30:00	0
2009-06-01	22:31:00	0
2009-06-01	22:32:00	0
2009-06-01	22:33:00	0
2009-06-01	22:34:00	0
2009-06-01	22:35:00	0
2009-06-01	22:36:00	0
2009-06-01	22:37:00	0
2009-06-01	22:38:00	0
2009-06-01	22:39:00	11
2009-06-01	22:40:00	0
2009-06-01	22:41:00	0
2009-06-01	22:42:00	0
2009-06-01	22:43:00	0
2009-06-01	22:44:00	0
2009-06-01	22:45:00	0
2009-06-01	22:46:00	0
2009-06-01	22:47:00	0
2009-06-01	22:48:00	0
2009-06-01	22:49:00	0
2009-06-01	22:50:00	0
2009-06-01	22:51:00	0
2009-06-01	22:52:00	0
2009-06-01	22:53:00	0
2009-06-01	22:54:00	0
2009-06-01	22:55:00	0
2009-06-01	22:56:00	0
2009-06-01	22:57:00	0
2009-06-01	22:58:00	0
2009-06-01	22:59:00	0
2009-06-01	23:00:00	0
2009-06-01	23:01:00	0
2009-06-01	23:02:00	0
2009-06-01	23:03:00	0
2009-06-01	23:04:00	0
2009-06-01	23:05:00	0
2009-06-01	23:06:00	0
2009-06-01	23:07:00	0
2009-06-01	23:08:00	0
2009-06-01	23:09:00	0
2009-06-01	23:10:00	0
2009-06-01	23:11:00	0
2009-06-01	23:12:00	0
2009-06-01	23:13:00	55
2009-06-01	23:14:00	0
2009-06-01	23:15:00	0
2009-06-01	23:16:00	0
2009-06-01	23:17:00	0
2009-06-01	23:18:00	0
2009-06-01	23:19:00	0
2009-06-01	23:20:00	0
2009-06-01	23:21:00	0
2009-06-01	23:22:00	0
2009-06-01	23:23:00	0
2009-06-01	23:24:00	0
2009-06-01	23:25:00	0
2009-06-01	23:26:00	0
2009-06-01	23:27:00	0
2009-06-01	23:28:00	0
2009-06-01	23:29:00	0
2009-06-01	23:30:00	0
2009-06-01	23:31:00	0
2009-06-01	23:32:00	0
2009-06-01	23:33:00	0
2009-06-01	23:34:00	0
2009-06-01	23:35:00	0
2009-06-01	23:36:00	0
2009-06-01	23:37:00	0
2009-06-01	23:38:00	0
2009-06-01	23:39:00	0
2009-06-01	23:40:00	0
2009-06-01	23:41:00	0
2009-06-01	23:42:00	0
2009-06-01	23:43:00	0
2009-06-01	23:44:00	0
2009-06-01	23:45:00	0
2009-06-01	23:46:00	0
2009-06-01	23:47:00	0
2009-06-01	23:48:00	0
2009-06-01	23:49:00	0
2009-06-01	23:50:00	0
2009-06-01	23:51:00	0
2009-06-01	23:52:00	0
2009-06-01	23:53:00	0
2009-06-01	23:54:00	0
2009-06-01	23:55:00	0
2009-06-01	23:56:00	0
2009-06-01	23:57:00	0
2009-06-01	23:58:00	0
2009-06-01	23:59:00	55
2009-06-02	00:00:00	0
2009-06-02	00:01:00	0
2009-06-02	00:02:00	0
2009-06-02	00:03:00	0
2009-06-02	00:04:00	0
2009-06-02	00:05:00	0
2009-06-02	00:06:00	0
2009-06-02	00:07:00	0
2009-06-02	00:08:00	0
2009-06-02	00:09:00	0
2009-06-02	00:10:00	0
2009-06-02	00:11:00	0
2009-06-02	00:12:00	0
2009-06-02	00:13:00	0
2009-06-02	00:14:00	0
2009-06-02	00:15:00	0
2009-06-02	00:16:00	0
2009-06-02	00:17:00	0
2009-06-02	00:18:00	0
2009-06-02	00:19:00	0
2009-06-02	00:20:00	0
2009-06-02	00:21:00	0
2009-06-02	00:22:00	0
2009-06-02	00:23:00	0
2009-06-02	00:24:00	0
2009-06-02	00:25:00	0
2009-06-02	00:26:00	22
2009-06-02	00:27:00	0
2009-06-02	00:28:00	0
2009-06-02	00:29:00	0
2009-06-02	00:30:00	0
2009-06-02	00:31:00	0
2009-06-02	00:32:00	0
2009-06-02	00:33:00	0
2009-06-02	00:34:00	0
2009-06-02	00:35:00	0
2009-06-02	00:36:00	0
2009-06-02	00:37:00	210
2009-06-02	00:38:00	236
2009-06-02	00:39:00	44
2009-06-02	00:40:00	0
2009-06-02	00:41:00	132
2009-06-02	00:42:00	0
2009-06-02	00:43:00	0
2009-06-02	00:44:00	170
2009-06-02	00:45:00	11
2009-06-02	00:46:00	0
2009-06-02	00:47:00	0
2009-06-02	00:48:00	0
2009-06-02	00:49:00	0
2009-06-02	00:50:00	0
2009-06-02	00:51:00	0
2009-06-02	00:52:00	0
2009-06-02	00:53:00	0
2009-06-02	00:54:00	0
2009-06-02	00:55:00	0
2009-06-02	00:56:00	0
2009-06-02	00:57:00	0
2009-06-02	00:58:00	0
2009-06-02	00:59:00	0
2009-06-02	01:00:00	0
2009-06-02	01:01:00	0
2009-06-02	01:02:00	0
2009-06-02	01:03:00	0
2009-06-02	01:04:00	0
2009-06-02	01:05:00	0
2009-06-02	01:06:00	0
2009-06-02	01:07:00	0
2009-06-02	01:08:00	0
2009-06-02	01:09:00	0
2009-06-02	01:10:00	0
2009-06-02	01:11:00	0
2009-06-02	01:12:00	0
2009-06-02	01:13:00	0
2009-06-02	01:14:00	0
2009-06-02	01:15:00	0
2009-06-02	01:16:00	0
2009-06-02	01:17:00	0
2009-06-02	01:18:00	0
2009-06-02	01:19:00	22
2009-06-02	01:20:00	0
2009-06-02	01:21:00	0
2009-06-02	01:22:00	0
2009-06-02	01:23:00	0
2009-06-02	01:24:00	0
2009-06-02	01:25:00	0
2009-06-02	01:26:00	0
2009-06-02	01:27:00	0
2009-06-02	01:28:00	0
2009-06-02	01:29:00	0
2009-06-02	01:30:00	0
2009-06-02	01:31:00	0
2009-06-02	01:32:00	0
2009-06-02	01:33:00	0
2009-06-02	01:34:00	0
2009-06-02	01:35:00	0
2009-06-02	01:36:00	0
2009-06-02	01:37:00	0
2009-06-02	01:38:00	0
2009-06-02	01:39:00	0
2009-06-02	01:40:00	0
2009-06-02	01:41:00	0
2009-06-02	01:42:00	0
2009-06-02	01:43:00	0
2009-06-02	01:44:00	0
2009-06-02	01:45:00	0
2009-06-02	01:46:00	0
2009-06-02	01:47:00	0
2009-06-02	01:48:00	0
2009-06-02	01:49:00	0
2009-06-02	01:50:00	0
2009-06-02	01:51:00	0
2009-06-02	01:52:00	0
2009-06-02	01:53:00	0
2009-06-02	01:54:00	0
2009-06-02	01:55:00	0
2009-06-02	01:56:00	0
2009-06-02	01:57:00	0
2009-06-02	01:58:00	0
2009-06-02	01:59:00	0
2009-06-02	02:00:00	0
2009-06-02	02:01:00	0
2009-06-02	02:02:00	0
2009-06-02	02:03:00	0
2009-06-02	02:04:00	0
2009-06-02	02:05:00	0
2009-06-02	02:06:00	0
2009-06-02	02:07:00	0
2009-06-02	02:08:00	0
2009-06-02	02:09:00	0
2009-06-02	02:10:00	0
2009-06-02	02:11:00	0
2009-06-02	02:12:00	0
2009-06-02	02:13:00	0
2009-06-02	02:14:00	0
2009-06-02	02:15:00	0
2009-06-02	02:16:00	0
2009-06-02	02:17:00	0
2009-06-02	02:18:00	0
2009-06-02	02:19:00	0
2009-06-02	02:20:00	0
2009-06-02	02:21:00	0
2009-06-02	02:22:00	0
2009-06-02	02:23:00	0
2009-06-02	02:24:00	0
2009-06-02	02:25:00	0
2009-06-02	02:26:00	0
2009-06-02	02:27:00	0
2009-06-02	02:28:00	0
2009-06-02	02:29:00	0
2009-06-02	02:30:00	0
2009-06-02	02:31:00	0
2009-06-02	02:32:00	0
2009-06-02	02:33:00	0
2009-06-02	02:34:00	0
2009-06-02	02:35:00	0
2009-06-02	02:36:00	0
2009-06-02	02:37:00	0
2009-06-02	02:38:00	0
2009-06-02	02:39:00	0
2009-06-02	02:40:00	0
2009-06-02	02:41:00	0
2009-06-02	02:42:00	0
2009-06-02	02:43:00	0
2009-06-02	02:44:00	0
2009-06-02	02:45:00	0
2009-06-02	02:46:00	0
2009-06-02	02:47:00	0
2009-06-02	02:48:00	0
2009-06-02	02:49:00	0
2009-06-02	02:50:00	0
2009-06-02	02:51:00	0
2009-06-02	02:52:00	0
2009-06-02	02:53:00	0
2009-06-02	02:54:00	0
2009-06-02	02:55:00	0
2009-06-02	02:56:00	44
2009-06-02	02:57:00	0
2009-06-02	02:58:00	0
2009-06-02	02:59:00	0
2009-06-02	03:00:00	0
2009-06-02	03:01:00	0
2009-06-02	03:02:00	0
2009-06-02	03:03:00	0
2009-06-02	03:04:00	0
2009-06-02	03:05:00	0
2009-06-02	03:06:00	0
2009-06-02	03:07:00	0
2009-06-02	03:08:00	0
2009-06-02	03:09:00	0
2009-06-02	03:10:00	0
2009-06-02	03:11:00	0
2009-06-02	03:12:00	0
2009-06-02	03:13:00	0
2009-06-02	03:14:00	0
2009-06-02	03:15:00	0
2009-06-02	03:16:00	0
2009-06-02	03:17:00	0
2009-06-02	03:18:00	0
2009-06-02	03:19:00	0
2009-06-02	03:20:00	0
2009-06-02	03:21:00	0
2009-06-02	03:22:00	0
2009-06-02	03:23:00	0
2009-06-02	03:24:00	0
2009-06-02	03:25:00	0
2009-06-02	03:26:00	0
2009-06-02	03:27:00	0
2009-06-02	03:28:00	0
2009-06-02	03:29:00	0
2009-06-02	03:30:00	0
2009-06-02	03:31:00	0
2009-06-02	03:32:00	0
2009-06-02	03:33:00	0
2009-06-02	03:34:00	0
2009-06-02	03:35:00	0
2009-06-02	03:36:00	0
2009-06-02	03:37:00	0
2009-06-02	03:38:00	0
2009-06-02	03:39:00	0
2009-06-02	03:40:00	0
2009-06-02	03:41:00	0
2009-06-02	03:42:00	0
2009-06-02	03:43:00	0
2009-06-02	03:44:00	0
2009-06-02	03:45:00	0
2009-06-02	03:46:00	0
2009-06-02	03:47:00	0
2009-06-02	03:48:00	0
2009-06-02	03:49:00	0
2009-06-02	03:50:00	0
2009-06-02	03:51:00	0
2009-06-02	03:52:00	0
2009-06-02	03:53:00	0
2009-06-02	03:54:00	0
2009-06-02	03:55:00	0
2009-06-02	03:56:00	0
2009-06-02	03:57:00	0
2009-06-02	03:58:00	0
2009-06-02	03:59:00	0
2009-06-02	04:00:00	0
2009-06-02	04:01:00	0
2009-06-02	04:02:00	0
2009-06-02	04:03:00	11
2009-06-02	04:04:00	0
2009-06-02	04:05:00	0
2009-06-02	04:06:00	0
2009-06-02	04:07:00	0
2009-06-02	04:08:00	55
2009-06-02	04:09:00	0
2009-06-02	04:10:00	0
2009-06-02	04:11:00	0
2009-06-02	04:12:00	0
2009-06-02	04:13:00	0
2009-06-02	04:14:00	0
2009-06-02	04:15:00	0
2009-06-02	04:16:00	0
2009-06-02	04:17:00	0
2009-06-02	04:18:00	0
2009-06-02	04:19:00	0
2009-06-02	04:20:00	0
2009-06-02	04:21:00	0
2009-06-02	04:22:00	0
2009-06-02	04:23:00	0
2009-06-02	04:24:00	0
2009-06-02	04:25:00	0
2009-06-02	04:26:00	0
2009-06-02	04:27:00	0
2009-06-02	04:28:00	22
2009-06-02	04:29:00	33
2009-06-02	04:30:00	0
2009-06-02	04:31:00	121
2009-06-02	04:32:00	0
2009-06-02	04:33:00	0
2009-06-02	04:34:00	0
2009-06-02	04:35:00	11
2009-06-02	04:36:00	0
2009-06-02	04:37:00	0
2009-06-02	04:38:00	0
2009-06-02	04:39:00	0
2009-06-02	04:40:00	0
2009-06-02	04:41:00	0
2009-06-02	04:42:00	0
2009-06-02	04:43:00	0
2009-06-02	04:44:00	0
2009-06-02	04:45:00	0
2009-06-02	04:46:00	0
2009-06-02	04:47:00	0
2009-06-02	04:48:00	132
2009-06-02	04:49:00	170
2009-06-02	04:50:00	132
2009-06-02	04:51:00	132
2009-06-02	04:52:00	110
2009-06-02	04:53:00	0
2009-06-02	04:54:00	66
2009-06-02	04:55:00	66
2009-06-02	04:56:00	132
2009-06-02	04:57:00	11
2009-06-02	04:58:00	0
2009-06-02	04:59:00	0
2009-06-02	05:00:00	0
2009-06-02	05:01:00	0
2009-06-02	05:02:00	0
2009-06-02	05:03:00	0
2009-06-02	05:04:00	0
2009-06-02	05:05:00	22
2009-06-02	05:06:00	143
2009-06-02	05:07:00	55
2009-06-02	05:08:00	0
2009-06-02	05:09:00	0
2009-06-02	05:10:00	0
2009-06-02	05:11:00	170
2009-06-02	05:12:00	223
2009-06-02	05:13:00	170
2009-06-02	05:14:00	0
2009-06-02	05:15:00	413
2009-06-02	05:16:00	516
2009-06-02	05:17:00	841
2009-06-02	05:18:00	446
2009-06-02	05:19:00	569
2009-06-02	05:20:00	132
2009-06-02	05:21:00	33
2009-06-02	05:22:00	0
2009-06-02	05:23:00	44
2009-06-02	05:24:00	552
2009-06-02	05:25:00	249
2009-06-02	05:26:00	132
2009-06-02	05:27:00	0
2009-06-02	05:28:00	33
2009-06-02	05:29:00	121
2009-06-02	05:30:00	11
2009-06-02	05:31:00	33
2009-06-02	05:32:00	0
2009-06-02	05:33:00	11
2009-06-02	05:34:00	0
2009-06-02	05:35:00	11
2009-06-02	05:36:00	99
2009-06-02	05:37:00	0
2009-06-02	05:38:00	77
2009-06-02	05:39:00	446
2009-06-02	05:40:00	0
2009-06-02	05:41:00	0
2009-06-02	05:42:00	55
2009-06-02	05:43:00	33
2009-06-02	05:44:00	11
2009-06-02	05:45:00	0
2009-06-02	05:46:00	66
2009-06-02	05:47:00	99
2009-06-02	05:48:00	110
2009-06-02	05:49:00	263
2009-06-02	05:50:00	157
2009-06-02	05:51:00	11
2009-06-02	05:52:00	263
2009-06-02	05:53:00	77
2009-06-02	05:54:00	0
2009-06-02	05:55:00	0
2009-06-02	05:56:00	11
2009-06-02	05:57:00	0
2009-06-02	05:58:00	11
2009-06-02	05:59:00	0
2009-06-02	06:00:00	11
2009-06-02	06:01:00	0
2009-06-02	06:02:00	0
2009-06-02	06:03:00	11
2009-06-02	06:04:00	0
2009-06-02	06:05:00	320
2009-06-02	06:06:00	0
2009-06-02	06:07:00	0
2009-06-02	06:08:00	157
2009-06-02	06:09:00	0
2009-06-02	06:10:00	0
2009-06-02	06:11:00	0
2009-06-02	06:12:00	110
2009-06-02	06:13:00	0
2009-06-02	06:14:00	413
2009-06-02	06:15:00	0
2009-06-02	06:16:00	121
2009-06-02	06:17:00	11
2009-06-02	06:18:00	0
2009-06-02	06:19:00	22
2009-06-02	06:20:00	0
2009-06-02	06:21:00	0
2009-06-02	06:22:00	0
2009-06-02	06:23:00	0
2009-06-02	06:24:00	0
2009-06-02	06:25:00	0
2009-06-02	06:26:00	77
2009-06-02	06:27:00	11
2009-06-02	06:28:00	99
2009-06-02	06:29:00	0
2009-06-02	06:30:00	0
2009-06-02	06:31:00	0
2009-06-02	06:32:00	0
2009-06-02	06:33:00	0
2009-06-02	06:34:00	33
2009-06-02	06:35:00	0
2009-06-02	06:36:00	143
2009-06-02	06:37:00	0
2009-06-02	06:38:00	11
2009-06-02	06:39:00	0
2009-06-02	06:40:00	0
2009-06-02	06:41:00	0
2009-06-02	06:42:00	11
2009-06-02	06:43:00	366
2009-06-02	06:44:00	0
2009-06-02	06:45:00	99
2009-06-02	06:46:00	196
2009-06-02	06:47:00	0
2009-06-02	06:48:00	0
2009-06-02	06:49:00	0
2009-06-02	06:50:00	0
2009-06-02	06:51:00	11
2009-06-02	06:52:00	0
2009-06-02	06:53:00	0
2009-06-02	06:54:00	0
2009-06-02	06:55:00	0
2009-06-02	06:56:00	33
2009-06-02	06:57:00	196
2009-06-02	06:58:00	0
2009-06-02	06:59:00	0
2009-06-02	07:00:00	609
2009-06-02	07:01:00	819
2009-06-02	07:02:00	210
2009-06-02	07:03:00	351
2009-06-02	07:04:00	609
2009-06-02	07:05:00	446
2009-06-02	07:06:00	366
2009-06-02	07:07:00	649
2009-06-02	07:08:00	499
2009-06-02	07:09:00	289
2009-06-02	07:10:00	1035
2009-06-02	07:11:00	463
2009-06-02	07:12:00	121
2009-06-02	07:13:00	44
2009-06-02	07:14:00	66
2009-06-02	07:15:00	132
2009-06-02	07:16:00	22
2009-06-02	07:17:00	0
2009-06-02	07:18:00	0
2009-06-02	07:19:00	0
2009-06-02	07:20:00	22
2009-06-02	07:21:00	0
2009-06-02	07:22:00	0
2009-06-02	07:23:00	0
2009-06-02	07:24:00	44
2009-06-02	07:25:00	66
2009-06-02	07:26:00	0
2009-06-02	07:27:00	0
2009-06-02	07:28:00	0
2009-06-02	07:29:00	0
2009-06-02	07:30:00	11
2009-06-02	07:31:00	0
2009-06-02	07:32:00	0
2009-06-02	07:33:00	0
2009-06-02	07:34:00	0
2009-06-02	07:35:00	0
2009-06-02	07:36:00	0
2009-06-02	07:37:00	0
2009-06-02	07:38:00	0
2009-06-02	07:39:00	0
2009-06-02	07:40:00	0
2009-06-02	07:41:00	0
2009-06-02	07:42:00	0
2009-06-02	07:43:00	0
2009-06-02	07:44:00	0
2009-06-02	07:45:00	0
2009-06-02	07:46:00	0
2009-06-02	07:47:00	0
2009-06-02	07:48:00	0
2009-06-02	07:49:00	0
2009-06-02	07:50:00	0
2009-06-02	07:51:00	0
2009-06-02	07:52:00	0
2009-06-02	07:53:00	0
2009-06-02	07:54:00	0
2009-06-02	07:55:00	0
2009-06-02	07:56:00	0
2009-06-02	07:57:00	0
2009-06-02	07:58:00	132
2009-06-02	07:59:00	0
2009-06-02	08:00:00	0
2009-06-02	08:01:00	11
2009-06-02	08:02:00	0
2009-06-02	08:03:00	0
2009-06-02	08:04:00	22
2009-06-02	08:05:00	0
2009-06-02	08:06:00	0
2009-06-02	08:07:00	0
2009-06-02	08:08:00	0
2009-06-02	08:09:00	0
2009-06-02	08:10:00	0
2009-06-02	08:11:00	0
2009-06-02	08:12:00	0
2009-06-02	08:13:00	0
2009-06-02	08:14:00	0
2009-06-02	08:15:00	0
2009-06-02	08:16:00	0
2009-06-02	08:17:00	0
2009-06-02	08:18:00	0
2009-06-02	08:19:00	0
2009-06-02	08:20:00	0
2009-06-02	08:21:00	0
2009-06-02	08:22:00	0
2009-06-02	08:23:00	0
2009-06-02	08:24:00	0
2009-06-02	08:25:00	0
2009-06-02	08:26:00	0
2009-06-02	08:27:00	0
2009-06-02	08:28:00	0
2009-06-02	08:29:00	0
2009-06-02	08:30:00	0
2009-06-02	08:31:00	0
2009-06-02	08:32:00	0
2009-06-02	08:33:00	0
2009-06-02	08:34:00	0
2009-06-02	08:35:00	11
2009-06-02	08:36:00	0
2009-06-02	08:37:00	0
2009-06-02	08:38:00	0
2009-06-02	08:39:00	0
2009-06-02	08:40:00	55
2009-06-02	08:41:00	0
2009-06-02	08:42:00	0
2009-06-02	08:43:00	22
2009-06-02	08:44:00	0
2009-06-02	08:45:00	0
2009-06-02	08:46:00	0
2009-06-02	08:47:00	110
2009-06-02	08:48:00	0
2009-06-02	08:49:00	0
2009-06-02	08:50:00	0
2009-06-02	08:51:00	0
2009-06-02	08:52:00	0
2009-06-02	08:53:00	0
2009-06-02	08:54:00	0
2009-06-02	08:55:00	0
2009-06-02	08:56:00	0
2009-06-02	08:57:00	0
2009-06-02	08:58:00	11
2009-06-02	08:59:00	0
2009-06-02	09:00:00	0
2009-06-02	09:01:00	11
2009-06-02	09:02:00	11
2009-06-02	09:03:00	11
2009-06-02	09:04:00	22
2009-06-02	09:05:00	11
2009-06-02	09:06:00	0
2009-06-02	09:07:00	0
2009-06-02	09:08:00	0
[truncated: 19,611 more rows]

## Sheet: 6.15.09
Actogram, Copy Raw Data, All Days
Identity:	Sophie
Filename:	E:\Active Research Files\meloxicam titre canine\cases\sophie\Sophie 6.15.09.AWC
Gender:	F
Age:	8
Height:	61.0 cm	24.0 in
Weight:	27.0 kg	59.5 lbs
Start Date:	15-Jun-2009 (Mon)
Start Time:	18:00:00
Interval:	1.00 mins
Date Stamp:	Time Stamp:	Activity Data:	Marker Press:
2009-06-15	00:00:00	0
2009-06-15	00:01:00	0
2009-06-15	00:02:00	0
2009-06-15	00:03:00	0
2009-06-15	00:04:00	0
2009-06-15	00:05:00	0
2009-06-15	00:06:00	0
2009-06-15	00:07:00	0
2009-06-15	00:08:00	0
2009-06-15	00:09:00	0
2009-06-15	00:10:00	0
2009-06-15	00:11:00	0
2009-06-15	00:12:00	0
2009-06-15	00:13:00	0
2009-06-15	00:14:00	0
2009-06-15	00:15:00	0
2009-06-15	00:16:00	0
2009-06-15	00:17:00	0
2009-06-15	00:18:00	0
2009-06-15	00:19:00	0
2009-06-15	00:20:00	0
2009-06-15	00:21:00	0
2009-06-15	00:22:00	0
2009-06-15	00:23:00	0
2009-06-15	00:24:00	0
2009-06-15	00:25:00	0
2009-06-15	00:26:00	0
2009-06-15	00:27:00	0
2009-06-15	00:28:00	0
2009-06-15	00:29:00	0
2009-06-15	00:30:00	0
2009-06-15	00:31:00	0
2009-06-15	00:32:00	0
2009-06-15	00:33:00	0
2009-06-15	00:34:00	0
2009-06-15	00:35:00	0
2009-06-15	00:36:00	0
2009-06-15	00:37:00	0
2009-06-15	00:38:00	0
2009-06-15	00:39:00	0
2009-06-15	00:40:00	0
2009-06-15	00:41:00	0
2009-06-15	00:42:00	0
2009-06-15	00:43:00	0
2009-06-15	00:44:00	0
2009-06-15	00:45:00	0
2009-06-15	00:46:00	0
2009-06-15	00:47:00	0
2009-06-15	00:48:00	0
2009-06-15	00:49:00	0
2009-06-15	00:50:00	0
2009-06-15	00:51:00	0
2009-06-15	00:52:00	0
2009-06-15	00:53:00	0
2009-06-15	00:54:00	0
2009-06-15	00:55:00	0
2009-06-15	00:56:00	0
2009-06-15	00:57:00	0
2009-06-15	00:58:00	0
2009-06-15	00:59:00	0
2009-06-15	01:00:00	0
2009-06-15	01:01:00	0
2009-06-15	01:02:00	0
2009-06-15	01:03:00	0
2009-06-15	01:04:00	0
2009-06-15	01:05:00	0
2009-06-15	01:06:00	0
2009-06-15	01:07:00	0
2009-06-15	01:08:00	0
2009-06-15	01:09:00	0
2009-06-15	01:10:00	0
2009-06-15	01:11:00	0
2009-06-15	01:12:00	0
2009-06-15	01:13:00	0
2009-06-15	01:14:00	0
2009-06-15	01:15:00	0
2009-06-15	01:16:00	0
2009-06-15	01:17:00	0
2009-06-15	01:18:00	0
2009-06-15	01:19:00	0
2009-06-15	01:20:00	0
2009-06-15	01:21:00	0
2009-06-15	01:22:00	0
2009-06-15	01:23:00	0
2009-06-15	01:24:00	0
2009-06-15	01:25:00	0
2009-06-15	01:26:00	0
2009-06-15	01:27:00	0
2009-06-15	01:28:00	0
2009-06-15	01:29:00	0
2009-06-15	01:30:00	0
2009-06-15	01:31:00	0
2009-06-15	01:32:00	0
2009-06-15	01:33:00	0
2009-06-15	01:34:00	0
2009-06-15	01:35:00	0
2009-06-15	01:36:00	0
2009-06-15	01:37:00	0
2009-06-15	01:38:00	0
2009-06-15	01:39:00	0
2009-06-15	01:40:00	0
2009-06-15	01:41:00	0
2009-06-15	01:42:00	0
2009-06-15	01:43:00	0
2009-06-15	01:44:00	0
2009-06-15	01:45:00	0
2009-06-15	01:46:00	0
2009-06-15	01:47:00	0
2009-06-15	01:48:00	0
2009-06-15	01:49:00	0
2009-06-15	01:50:00	0
2009-06-15	01:51:00	0
2009-06-15	01:52:00	0
2009-06-15	01:53:00	0
2009-06-15	01:54:00	0
2009-06-15	01:55:00	0
2009-06-15	01:56:00	0
2009-06-15	01:57:00	0
2009-06-15	01:58:00	0
2009-06-15	01:59:00	0
2009-06-15	02:00:00	0
2009-06-15	02:01:00	0
2009-06-15	02:02:00	0
2009-06-15	02:03:00	0
2009-06-15	02:04:00	0
2009-06-15	02:05:00	0
2009-06-15	02:06:00	0
2009-06-15	02:07:00	0
2009-06-15	02:08:00	0
2009-06-15	02:09:00	0
2009-06-15	02:10:00	0
2009-06-15	02:11:00	0
2009-06-15	02:12:00	0
2009-06-15	02:13:00	0
2009-06-15	02:14:00	0
2009-06-15	02:15:00	0
2009-06-15	02:16:00	0
2009-06-15	02:17:00	0
2009-06-15	02:18:00	0
2009-06-15	02:19:00	0
2009-06-15	02:20:00	0
2009-06-15	02:21:00	0
2009-06-15	02:22:00	0
2009-06-15	02:23:00	0
2009-06-15	02:24:00	0
2009-06-15	02:25:00	0
2009-06-15	02:26:00	0
2009-06-15	02:27:00	0
2009-06-15	02:28:00	0
2009-06-15	02:29:00	0
2009-06-15	02:30:00	0
2009-06-15	02:31:00	0
2009-06-15	02:32:00	0
2009-06-15	02:33:00	0
2009-06-15	02:34:00	0
2009-06-15	02:35:00	0
2009-06-15	02:36:00	0
2009-06-15	02:37:00	0
2009-06-15	02:38:00	0
2009-06-15	02:39:00	0
2009-06-15	02:40:00	0
2009-06-15	02:41:00	0
2009-06-15	02:42:00	0
2009-06-15	02:43:00	0
2009-06-15	02:44:00	0
2009-06-15	02:45:00	0
2009-06-15	02:46:00	0
2009-06-15	02:47:00	0
2009-06-15	02:48:00	0
2009-06-15	02:49:00	0
2009-06-15	02:50:00	0
2009-06-15	02:51:00	0
2009-06-15	02:52:00	0
2009-06-15	02:53:00	0
2009-06-15	02:54:00	0
2009-06-15	02:55:00	0
2009-06-15	02:56:00	0
2009-06-15	02:57:00	0
2009-06-15	02:58:00	0
2009-06-15	02:59:00	0
2009-06-15	03:00:00	0
2009-06-15	03:01:00	0
2009-06-15	03:02:00	0
2009-06-15	03:03:00	0
2009-06-15	03:04:00	0
2009-06-15	03:05:00	0
2009-06-15	03:06:00	0
2009-06-15	03:07:00	0
2009-06-15	03:08:00	0
2009-06-15	03:09:00	0
2009-06-15	03:10:00	0
2009-06-15	03:11:00	0
2009-06-15	03:12:00	0
2009-06-15	03:13:00	0
2009-06-15	03:14:00	0
2009-06-15	03:15:00	0
2009-06-15	03:16:00	0
2009-06-15	03:17:00	0
2009-06-15	03:18:00	0
2009-06-15	03:19:00	0
2009-06-15	03:20:00	0
2009-06-15	03:21:00	0
2009-06-15	03:22:00	0
2009-06-15	03:23:00	0
2009-06-15	03:24:00	0
2009-06-15	03:25:00	0
2009-06-15	03:26:00	0
2009-06-15	03:27:00	0
2009-06-15	03:28:00	0
2009-06-15	03:29:00	0
2009-06-15	03:30:00	0
2009-06-15	03:31:00	0
2009-06-15	03:32:00	0
2009-06-15	03:33:00	0
2009-06-15	03:34:00	0
2009-06-15	03:35:00	0
2009-06-15	03:36:00	0
2009-06-15	03:37:00	0
2009-06-15	03:38:00	0
2009-06-15	03:39:00	0
2009-06-15	03:40:00	0
2009-06-15	03:41:00	0
2009-06-15	03:42:00	0
2009-06-15	03:43:00	0
2009-06-15	03:44:00	0
2009-06-15	03:45:00	0
2009-06-15	03:46:00	0
2009-06-15	03:47:00	0
2009-06-15	03:48:00	0
2009-06-15	03:49:00	0
2009-06-15	03:50:00	0
2009-06-15	03:51:00	0
2009-06-15	03:52:00	0
2009-06-15	03:53:00	0
2009-06-15	03:54:00	0
2009-06-15	03:55:00	0
2009-06-15	03:56:00	0
2009-06-15	03:57:00	0
2009-06-15	03:58:00	0
2009-06-15	03:59:00	0
2009-06-15	04:00:00	0
2009-06-15	04:01:00	0
2009-06-15	04:02:00	0
2009-06-15	04:03:00	0
2009-06-15	04:04:00	0
2009-06-15	04:05:00	0
2009-06-15	04:06:00	0
2009-06-15	04:07:00	0
2009-06-15	04:08:00	0
2009-06-15	04:09:00	0
2009-06-15	04:10:00	0
2009-06-15	04:11:00	0
2009-06-15	04:12:00	0
2009-06-15	04:13:00	0
2009-06-15	04:14:00	0
2009-06-15	04:15:00	0
2009-06-15	04:16:00	0
2009-06-15	04:17:00	0
2009-06-15	04:18:00	0
2009-06-15	04:19:00	0
2009-06-15	04:20:00	0
2009-06-15	04:21:00	0
2009-06-15	04:22:00	0
2009-06-15	04:23:00	0
2009-06-15	04:24:00	0
2009-06-15	04:25:00	0
2009-06-15	04:26:00	0
2009-06-15	04:27:00	0
2009-06-15	04:28:00	0
2009-06-15	04:29:00	0
2009-06-15	04:30:00	0
2009-06-15	04:31:00	0
2009-06-15	04:32:00	0
2009-06-15	04:33:00	0
2009-06-15	04:34:00	0
2009-06-15	04:35:00	0
2009-06-15	04:36:00	0
2009-06-15	04:37:00	0
2009-06-15	04:38:00	0
2009-06-15	04:39:00	0
2009-06-15	04:40:00	0
2009-06-15	04:41:00	0
2009-06-15	04:42:00	0
2009-06-15	04:43:00	0
2009-06-15	04:44:00	0
2009-06-15	04:45:00	0
2009-06-15	04:46:00	0
2009-06-15	04:47:00	0
2009-06-15	04:48:00	0
2009-06-15	04:49:00	0
2009-06-15	04:50:00	0
2009-06-15	04:51:00	0
2009-06-15	04:52:00	0
2009-06-15	04:53:00	0
2009-06-15	04:54:00	0
2009-06-15	04:55:00	0
2009-06-15	04:56:00	0
2009-06-15	04:57:00	0
2009-06-15	04:58:00	0
2009-06-15	04:59:00	0
2009-06-15	05:00:00	0
2009-06-15	05:01:00	0
2009-06-15	05:02:00	0
2009-06-15	05:03:00	0
2009-06-15	05:04:00	0
2009-06-15	05:05:00	0
2009-06-15	05:06:00	0
2009-06-15	05:07:00	0
2009-06-15	05:08:00	0
2009-06-15	05:09:00	0
2009-06-15	05:10:00	0
2009-06-15	05:11:00	0
2009-06-15	05:12:00	0
2009-06-15	05:13:00	0
2009-06-15	05:14:00	0
2009-06-15	05:15:00	0
2009-06-15	05:16:00	0
2009-06-15	05:17:00	0
2009-06-15	05:18:00	0
2009-06-15	05:19:00	0
2009-06-15	05:20:00	0
2009-06-15	05:21:00	0
2009-06-15	05:22:00	0
2009-06-15	05:23:00	0
2009-06-15	05:24:00	0
2009-06-15	05:25:00	0
2009-06-15	05:26:00	0
2009-06-15	05:27:00	0
2009-06-15	05:28:00	0
2009-06-15	05:29:00	0
2009-06-15	05:30:00	0
2009-06-15	05:31:00	0
2009-06-15	05:32:00	0
2009-06-15	05:33:00	0
2009-06-15	05:34:00	0
2009-06-15	05:35:00	0
2009-06-15	05:36:00	0
2009-06-15	05:37:00	0
2009-06-15	05:38:00	0
2009-06-15	05:39:00	0
2009-06-15	05:40:00	0
2009-06-15	05:41:00	0
2009-06-15	05:42:00	0
2009-06-15	05:43:00	0
2009-06-15	05:44:00	0
2009-06-15	05:45:00	0
2009-06-15	05:46:00	0
2009-06-15	05:47:00	0
2009-06-15	05:48:00	0
2009-06-15	05:49:00	0
2009-06-15	05:50:00	0
2009-06-15	05:51:00	0
2009-06-15	05:52:00	0
2009-06-15	05:53:00	0
2009-06-15	05:54:00	0
2009-06-15	05:55:00	0
2009-06-15	05:56:00	0
2009-06-15	05:57:00	0
2009-06-15	05:58:00	0
2009-06-15	05:59:00	0
2009-06-15	06:00:00	0
2009-06-15	06:01:00	0
2009-06-15	06:02:00	0
2009-06-15	06:03:00	0
2009-06-15	06:04:00	0
2009-06-15	06:05:00	0
2009-06-15	06:06:00	0
2009-06-15	06:07:00	0
2009-06-15	06:08:00	0
2009-06-15	06:09:00	0
2009-06-15	06:10:00	0
2009-06-15	06:11:00	0
2009-06-15	06:12:00	0
2009-06-15	06:13:00	0
2009-06-15	06:14:00	0
2009-06-15	06:15:00	0
2009-06-15	06:16:00	0
2009-06-15	06:17:00	0
2009-06-15	06:18:00	0
2009-06-15	06:19:00	0
2009-06-15	06:20:00	0
2009-06-15	06:21:00	0
2009-06-15	06:22:00	0
2009-06-15	06:23:00	0
2009-06-15	06:24:00	0
2009-06-15	06:25:00	0
2009-06-15	06:26:00	0
2009-06-15	06:27:00	0
2009-06-15	06:28:00	0
2009-06-15	06:29:00	0
2009-06-15	06:30:00	0
2009-06-15	06:31:00	0
2009-06-15	06:32:00	0
2009-06-15	06:33:00	0
2009-06-15	06:34:00	0
2009-06-15	06:35:00	0
2009-06-15	06:36:00	0
2009-06-15	06:37:00	0
2009-06-15	06:38:00	0
2009-06-15	06:39:00	0
2009-06-15	06:40:00	0
2009-06-15	06:41:00	0
2009-06-15	06:42:00	0
2009-06-15	06:43:00	0
2009-06-15	06:44:00	0
2009-06-15	06:45:00	0
2009-06-15	06:46:00	0
2009-06-15	06:47:00	0
2009-06-15	06:48:00	0
2009-06-15	06:49:00	0
2009-06-15	06:50:00	0
2009-06-15	06:51:00	0
2009-06-15	06:52:00	0
2009-06-15	06:53:00	0
2009-06-15	06:54:00	0
2009-06-15	06:55:00	0
2009-06-15	06:56:00	0
2009-06-15	06:57:00	0
2009-06-15	06:58:00	0
2009-06-15	06:59:00	0
2009-06-15	07:00:00	0
2009-06-15	07:01:00	0
2009-06-15	07:02:00	0
2009-06-15	07:03:00	0
2009-06-15	07:04:00	0
2009-06-15	07:05:00	0
2009-06-15	07:06:00	0
2009-06-15	07:07:00	0
2009-06-15	07:08:00	0
2009-06-15	07:09:00	0
2009-06-15	07:10:00	0
2009-06-15	07:11:00	0
2009-06-15	07:12:00	0
2009-06-15	07:13:00	0
2009-06-15	07:14:00	0
2009-06-15	07:15:00	0
2009-06-15	07:16:00	0
2009-06-15	07:17:00	0
2009-06-15	07:18:00	0
2009-06-15	07:19:00	0
2009-06-15	07:20:00	0
2009-06-15	07:21:00	0
2009-06-15	07:22:00	0
2009-06-15	07:23:00	0
2009-06-15	07:24:00	0
2009-06-15	07:25:00	0
2009-06-15	07:26:00	0
2009-06-15	07:27:00	0
2009-06-15	07:28:00	0
2009-06-15	07:29:00	0
2009-06-15	07:30:00	0
2009-06-15	07:31:00	0
2009-06-15	07:32:00	0
2009-06-15	07:33:00	0
2009-06-15	07:34:00	0
2009-06-15	07:35:00	0
2009-06-15	07:36:00	0
2009-06-15	07:37:00	0
2009-06-15	07:38:00	0
2009-06-15	07:39:00	0
2009-06-15	07:40:00	0
2009-06-15	07:41:00	0
2009-06-15	07:42:00	0
2009-06-15	07:43:00	0
2009-06-15	07:44:00	0
2009-06-15	07:45:00	0
2009-06-15	07:46:00	0
2009-06-15	07:47:00	0
2009-06-15	07:48:00	0
2009-06-15	07:49:00	0
2009-06-15	07:50:00	0
2009-06-15	07:51:00	0
2009-06-15	07:52:00	0
2009-06-15	07:53:00	0
2009-06-15	07:54:00	0
2009-06-15	07:55:00	0
2009-06-15	07:56:00	0
2009-06-15	07:57:00	0
2009-06-15	07:58:00	0
2009-06-15	07:59:00	0
2009-06-15	08:00:00	0
2009-06-15	08:01:00	0
2009-06-15	08:02:00	0
2009-06-15	08:03:00	0
2009-06-15	08:04:00	0
2009-06-15	08:05:00	0
2009-06-15	08:06:00	0
2009-06-15	08:07:00	0
2009-06-15	08:08:00	0
2009-06-15	08:09:00	0
2009-06-15	08:10:00	0
2009-06-15	08:11:00	0
2009-06-15	08:12:00	0
2009-06-15	08:13:00	0
2009-06-15	08:14:00	0
2009-06-15	08:15:00	0
2009-06-15	08:16:00	0
2009-06-15	08:17:00	0
2009-06-15	08:18:00	0
2009-06-15	08:19:00	0
2009-06-15	08:20:00	0
2009-06-15	08:21:00	0
2009-06-15	08:22:00	0
2009-06-15	08:23:00	0
2009-06-15	08:24:00	0
2009-06-15	08:25:00	0
2009-06-15	08:26:00	0
2009-06-15	08:27:00	0
2009-06-15	08:28:00	0
2009-06-15	08:29:00	0
2009-06-15	08:30:00	0
2009-06-15	08:31:00	0
2009-06-15	08:32:00	0
2009-06-15	08:33:00	0
2009-06-15	08:34:00	0
2009-06-15	08:35:00	0
2009-06-15	08:36:00	0
2009-06-15	08:37:00	0
2009-06-15	08:38:00	0
2009-06-15	08:39:00	0
2009-06-15	08:40:00	0
2009-06-15	08:41:00	0
2009-06-15	08:42:00	0
2009-06-15	08:43:00	0
2009-06-15	08:44:00	0
2009-06-15	08:45:00	0
2009-06-15	08:46:00	0
2009-06-15	08:47:00	0
2009-06-15	08:48:00	0
2009-06-15	08:49:00	0
2009-06-15	08:50:00	0
2009-06-15	08:51:00	0
2009-06-15	08:52:00	0
2009-06-15	08:53:00	0
2009-06-15	08:54:00	0
2009-06-15	08:55:00	0
2009-06-15	08:56:00	0
2009-06-15	08:57:00	0
2009-06-15	08:58:00	0
2009-06-15	08:59:00	0
2009-06-15	09:00:00	0
2009-06-15	09:01:00	0
2009-06-15	09:02:00	0
2009-06-15	09:03:00	0
2009-06-15	09:04:00	0
2009-06-15	09:05:00	0
2009-06-15	09:06:00	0
2009-06-15	09:07:00	0
2009-06-15	09:08:00	0
2009-06-15	09:09:00	0
2009-06-15	09:10:00	0
2009-06-15	09:11:00	0
2009-06-15	09:12:00	0
2009-06-15	09:13:00	0
2009-06-15	09:14:00	0
2009-06-15	09:15:00	0
2009-06-15	09:16:00	0
2009-06-15	09:17:00	0
2009-06-15	09:18:00	0
2009-06-15	09:19:00	0
2009-06-15	09:20:00	0
2009-06-15	09:21:00	0
2009-06-15	09:22:00	0
2009-06-15	09:23:00	0
2009-06-15	09:24:00	0
2009-06-15	09:25:00	0
2009-06-15	09:26:00	0
2009-06-15	09:27:00	0
2009-06-15	09:28:00	0
2009-06-15	09:29:00	0
2009-06-15	09:30:00	0
2009-06-15	09:31:00	0
2009-06-15	09:32:00	0
2009-06-15	09:33:00	0
2009-06-15	09:34:00	0
2009-06-15	09:35:00	0
2009-06-15	09:36:00	0
2009-06-15	09:37:00	0
2009-06-15	09:38:00	0
2009-06-15	09:39:00	0
2009-06-15	09:40:00	0
2009-06-15	09:41:00	0
2009-06-15	09:42:00	0
2009-06-15	09:43:00	0
2009-06-15	09:44:00	0
2009-06-15	09:45:00	0
2009-06-15	09:46:00	0
2009-06-15	09:47:00	0
2009-06-15	09:48:00	0
2009-06-15	09:49:00	0
2009-06-15	09:50:00	0
2009-06-15	09:51:00	0
2009-06-15	09:52:00	0
2009-06-15	09:53:00	0
2009-06-15	09:54:00	0
2009-06-15	09:55:00	0
2009-06-15	09:56:00	0
2009-06-15	09:57:00	0
2009-06-15	09:58:00	0
2009-06-15	09:59:00	0
2009-06-15	10:00:00	0
2009-06-15	10:01:00	0
2009-06-15	10:02:00	0
2009-06-15	10:03:00	0
2009-06-15	10:04:00	0
2009-06-15	10:05:00	0
2009-06-15	10:06:00	0
2009-06-15	10:07:00	0
2009-06-15	10:08:00	0
2009-06-15	10:09:00	0
2009-06-15	10:10:00	0
2009-06-15	10:11:00	0
2009-06-15	10:12:00	0
2009-06-15	10:13:00	0
2009-06-15	10:14:00	0
2009-06-15	10:15:00	0
2009-06-15	10:16:00	0
2009-06-15	10:17:00	0
2009-06-15	10:18:00	0
2009-06-15	10:19:00	0
2009-06-15	10:20:00	0
2009-06-15	10:21:00	0
2009-06-15	10:22:00	0
2009-06-15	10:23:00	0
2009-06-15	10:24:00	0
2009-06-15	10:25:00	0
2009-06-15	10:26:00	0
2009-06-15	10:27:00	0
2009-06-15	10:28:00	0
2009-06-15	10:29:00	0
2009-06-15	10:30:00	0
2009-06-15	10:31:00	0
2009-06-15	10:32:00	0
2009-06-15	10:33:00	0
2009-06-15	10:34:00	0
2009-06-15	10:35:00	0
2009-06-15	10:36:00	0
2009-06-15	10:37:00	0
2009-06-15	10:38:00	0
2009-06-15	10:39:00	0
2009-06-15	10:40:00	0
2009-06-15	10:41:00	0
2009-06-15	10:42:00	0
2009-06-15	10:43:00	0
2009-06-15	10:44:00	0
2009-06-15	10:45:00	0
2009-06-15	10:46:00	0
2009-06-15	10:47:00	0
2009-06-15	10:48:00	0
2009-06-15	10:49:00	0
2009-06-15	10:50:00	0
2009-06-15	10:51:00	0
2009-06-15	10:52:00	0
2009-06-15	10:53:00	0
2009-06-15	10:54:00	0
2009-06-15	10:55:00	0
2009-06-15	10:56:00	0
2009-06-15	10:57:00	0
2009-06-15	10:58:00	0
2009-06-15	10:59:00	0
2009-06-15	11:00:00	0
2009-06-15	11:01:00	0
2009-06-15	11:02:00	0
2009-06-15	11:03:00	0
2009-06-15	11:04:00	0
2009-06-15	11:05:00	0
2009-06-15	11:06:00	0
2009-06-15	11:07:00	0
2009-06-15	11:08:00	0
2009-06-15	11:09:00	0
2009-06-15	11:10:00	0
2009-06-15	11:11:00	0
2009-06-15	11:12:00	0
2009-06-15	11:13:00	0
2009-06-15	11:14:00	0
2009-06-15	11:15:00	0
2009-06-15	11:16:00	0
2009-06-15	11:17:00	0
2009-06-15	11:18:00	0
2009-06-15	11:19:00	0
2009-06-15	11:20:00	0
2009-06-15	11:21:00	0
2009-06-15	11:22:00	0
2009-06-15	11:23:00	0
2009-06-15	11:24:00	0
2009-06-15	11:25:00	0
2009-06-15	11:26:00	0
2009-06-15	11:27:00	0
2009-06-15	11:28:00	0
2009-06-15	11:29:00	0
2009-06-15	11:30:00	0
2009-06-15	11:31:00	0
2009-06-15	11:32:00	0
2009-06-15	11:33:00	0
2009-06-15	11:34:00	0
2009-06-15	11:35:00	0
2009-06-15	11:36:00	0
2009-06-15	11:37:00	0
2009-06-15	11:38:00	0
2009-06-15	11:39:00	0
2009-06-15	11:40:00	0
2009-06-15	11:41:00	0
2009-06-15	11:42:00	0
2009-06-15	11:43:00	0
2009-06-15	11:44:00	0
2009-06-15	11:45:00	0
2009-06-15	11:46:00	0
2009-06-15	11:47:00	0
2009-06-15	11:48:00	0
2009-06-15	11:49:00	0
2009-06-15	11:50:00	0
2009-06-15	11:51:00	0
2009-06-15	11:52:00	0
2009-06-15	11:53:00	0
2009-06-15	11:54:00	0
2009-06-15	11:55:00	0
2009-06-15	11:56:00	0
2009-06-15	11:57:00	0
2009-06-15	11:58:00	0
2009-06-15	11:59:00	0
2009-06-15	12:00:00	0
2009-06-15	12:01:00	0
2009-06-15	12:02:00	0
2009-06-15	12:03:00	0
2009-06-15	12:04:00	0
2009-06-15	12:05:00	0
2009-06-15	12:06:00	0
2009-06-15	12:07:00	0
2009-06-15	12:08:00	0
2009-06-15	12:09:00	0
2009-06-15	12:10:00	0
2009-06-15	12:11:00	0
2009-06-15	12:12:00	0
2009-06-15	12:13:00	0
2009-06-15	12:14:00	0
2009-06-15	12:15:00	0
2009-06-15	12:16:00	0
2009-06-15	12:17:00	0
2009-06-15	12:18:00	0
2009-06-15	12:19:00	0
2009-06-15	12:20:00	0
2009-06-15	12:21:00	0
2009-06-15	12:22:00	0
2009-06-15	12:23:00	0
2009-06-15	12:24:00	0
2009-06-15	12:25:00	0
2009-06-15	12:26:00	0
2009-06-15	12:27:00	0
2009-06-15	12:28:00	0
2009-06-15	12:29:00	0
2009-06-15	12:30:00	0
2009-06-15	12:31:00	0
2009-06-15	12:32:00	0
2009-06-15	12:33:00	0
2009-06-15	12:34:00	0
2009-06-15	12:35:00	0
2009-06-15	12:36:00	0
2009-06-15	12:37:00	0
2009-06-15	12:38:00	0
2009-06-15	12:39:00	0
2009-06-15	12:40:00	0
2009-06-15	12:41:00	0
2009-06-15	12:42:00	0
2009-06-15	12:43:00	0
2009-06-15	12:44:00	0
2009-06-15	12:45:00	0
2009-06-15	12:46:00	0
2009-06-15	12:47:00	0
2009-06-15	12:48:00	0
2009-06-15	12:49:00	0
2009-06-15	12:50:00	0
2009-06-15	12:51:00	0
2009-06-15	12:52:00	0
2009-06-15	12:53:00	0
2009-06-15	12:54:00	0
2009-06-15	12:55:00	0
2009-06-15	12:56:00	0
2009-06-15	12:57:00	0
2009-06-15	12:58:00	0
2009-06-15	12:59:00	0
2009-06-15	13:00:00	0
2009-06-15	13:01:00	0
2009-06-15	13:02:00	0
2009-06-15	13:03:00	0
2009-06-15	13:04:00	0
2009-06-15	13:05:00	0
2009-06-15	13:06:00	0
2009-06-15	13:07:00	0
2009-06-15	13:08:00	0
2009-06-15	13:09:00	0
2009-06-15	13:10:00	0
2009-06-15	13:11:00	0
2009-06-15	13:12:00	0
2009-06-15	13:13:00	0
2009-06-15	13:14:00	0
2009-06-15	13:15:00	0
2009-06-15	13:16:00	0
2009-06-15	13:17:00	0
2009-06-15	13:18:00	0
2009-06-15	13:19:00	0
2009-06-15	13:20:00	0
2009-06-15	13:21:00	0
2009-06-15	13:22:00	0
2009-06-15	13:23:00	0
2009-06-15	13:24:00	0
2009-06-15	13:25:00	0
2009-06-15	13:26:00	0
2009-06-15	13:27:00	0
2009-06-15	13:28:00	0
2009-06-15	13:29:00	0
2009-06-15	13:30:00	0
2009-06-15	13:31:00	0
2009-06-15	13:32:00	0
2009-06-15	13:33:00	0
2009-06-15	13:34:00	0
2009-06-15	13:35:00	0
2009-06-15	13:36:00	0
2009-06-15	13:37:00	0
2009-06-15	13:38:00	0
2009-06-15	13:39:00	0
2009-06-15	13:40:00	0
2009-06-15	13:41:00	0
2009-06-15	13:42:00	0
2009-06-15	13:43:00	0
2009-06-15	13:44:00	0
2009-06-15	13:45:00	0
2009-06-15	13:46:00	0
2009-06-15	13:47:00	0
2009-06-15	13:48:00	0
2009-06-15	13:49:00	0
2009-06-15	13:50:00	0
2009-06-15	13:51:00	0
2009-06-15	13:52:00	0
2009-06-15	13:53:00	0
2009-06-15	13:54:00	0
2009-06-15	13:55:00	0
2009-06-15	13:56:00	0
2009-06-15	13:57:00	0
2009-06-15	13:58:00	0
2009-06-15	13:59:00	0
2009-06-15	14:00:00	0
2009-06-15	14:01:00	0
2009-06-15	14:02:00	0
2009-06-15	14:03:00	0
2009-06-15	14:04:00	0
2009-06-15	14:05:00	0
2009-06-15	14:06:00	0
2009-06-15	14:07:00	0
2009-06-15	14:08:00	0
2009-06-15	14:09:00	0
2009-06-15	14:10:00	0
2009-06-15	14:11:00	0
2009-06-15	14:12:00	0
2009-06-15	14:13:00	0
2009-06-15	14:14:00	0
2009-06-15	14:15:00	0
2009-06-15	14:16:00	0
2009-06-15	14:17:00	0
2009-06-15	14:18:00	0
2009-06-15	14:19:00	0
2009-06-15	14:20:00	0
2009-06-15	14:21:00	0
2009-06-15	14:22:00	0
2009-06-15	14:23:00	0
2009-06-15	14:24:00	0
2009-06-15	14:25:00	0
2009-06-15	14:26:00	0
2009-06-15	14:27:00	0
2009-06-15	14:28:00	0
2009-06-15	14:29:00	0
2009-06-15	14:30:00	0
2009-06-15	14:31:00	0
2009-06-15	14:32:00	0
2009-06-15	14:33:00	0
2009-06-15	14:34:00	0
2009-06-15	14:35:00	0
2009-06-15	14:36:00	0
2009-06-15	14:37:00	0
2009-06-15	14:38:00	0
2009-06-15	14:39:00	0
2009-06-15	14:40:00	0
2009-06-15	14:41:00	0
2009-06-15	14:42:00	0
2009-06-15	14:43:00	0
2009-06-15	14:44:00	0
2009-06-15	14:45:00	0
2009-06-15	14:46:00	0
2009-06-15	14:47:00	0
2009-06-15	14:48:00	0
2009-06-15	14:49:00	0
2009-06-15	14:50:00	0
2009-06-15	14:51:00	0
2009-06-15	14:52:00	0
2009-06-15	14:53:00	0
2009-06-15	14:54:00	0
2009-06-15	14:55:00	0
2009-06-15	14:56:00	0
2009-06-15	14:57:00	0
2009-06-15	14:58:00	0
2009-06-15	14:59:00	0
2009-06-15	15:00:00	0
2009-06-15	15:01:00	0
2009-06-15	15:02:00	0
2009-06-15	15:03:00	0
2009-06-15	15:04:00	0
2009-06-15	15:05:00	0
2009-06-15	15:06:00	0
2009-06-15	15:07:00	0
2009-06-15	15:08:00	0
2009-06-15	15:09:00	0
2009-06-15	15:10:00	0
2009-06-15	15:11:00	0
2009-06-15	15:12:00	0
2009-06-15	15:13:00	0
2009-06-15	15:14:00	0
2009-06-15	15:15:00	0
2009-06-15	15:16:00	0
2009-06-15	15:17:00	0
2009-06-15	15:18:00	0
2009-06-15	15:19:00	0
2009-06-15	15:20:00	0
2009-06-15	15:21:00	0
2009-06-15	15:22:00	0
2009-06-15	15:23:00	0
2009-06-15	15:24:00	0
2009-06-15	15:25:00	0
2009-06-15	15:26:00	0
2009-06-15	15:27:00	0
2009-06-15	15:28:00	0
2009-06-15	15:29:00	0
2009-06-15	15:30:00	0
2009-06-15	15:31:00	0
2009-06-15	15:32:00	0
2009-06-15	15:33:00	0
2009-06-15	15:34:00	0
2009-06-15	15:35:00	0
2009-06-15	15:36:00	0
2009-06-15	15:37:00	0
2009-06-15	15:38:00	0
2009-06-15	15:39:00	0
2009-06-15	15:40:00	0
2009-06-15	15:41:00	0
2009-06-15	15:42:00	0
2009-06-15	15:43:00	0
2009-06-15	15:44:00	0
2009-06-15	15:45:00	0
2009-06-15	15:46:00	0
2009-06-15	15:47:00	0
2009-06-15	15:48:00	0
2009-06-15	15:49:00	0
2009-06-15	15:50:00	0
2009-06-15	15:51:00	0
2009-06-15	15:52:00	0
2009-06-15	15:53:00	0
2009-06-15	15:54:00	0
2009-06-15	15:55:00	0
2009-06-15	15:56:00	0
2009-06-15	15:57:00	0
2009-06-15	15:58:00	0
2009-06-15	15:59:00	0
2009-06-15	16:00:00	0
2009-06-15	16:01:00	0
2009-06-15	16:02:00	0
2009-06-15	16:03:00	0
2009-06-15	16:04:00	0
2009-06-15	16:05:00	0
2009-06-15	16:06:00	0
2009-06-15	16:07:00	0
2009-06-15	16:08:00	0
2009-06-15	16:09:00	0
2009-06-15	16:10:00	0
2009-06-15	16:11:00	0
2009-06-15	16:12:00	0
2009-06-15	16:13:00	0
2009-06-15	16:14:00	0
2009-06-15	16:15:00	0
2009-06-15	16:16:00	0
2009-06-15	16:17:00	0
2009-06-15	16:18:00	0
2009-06-15	16:19:00	0
2009-06-15	16:20:00	0
2009-06-15	16:21:00	0
2009-06-15	16:22:00	0
2009-06-15	16:23:00	0
2009-06-15	16:24:00	0
2009-06-15	16:25:00	0
2009-06-15	16:26:00	0
2009-06-15	16:27:00	0
2009-06-15	16:28:00	0
2009-06-15	16:29:00	0
2009-06-15	16:30:00	0
2009-06-15	16:31:00	0
2009-06-15	16:32:00	0
2009-06-15	16:33:00	0
2009-06-15	16:34:00	0
2009-06-15	16:35:00	0
2009-06-15	16:36:00	0
2009-06-15	16:37:00	0
2009-06-15	16:38:00	0
2009-06-15	16:39:00	0
2009-06-15	16:40:00	0
2009-06-15	16:41:00	0
2009-06-15	16:42:00	0
2009-06-15	16:43:00	0
2009-06-15	16:44:00	0
2009-06-15	16:45:00	0
2009-06-15	16:46:00	0
2009-06-15	16:47:00	0
2009-06-15	16:48:00	0
2009-06-15	16:49:00	0
2009-06-15	16:50:00	0
2009-06-15	16:51:00	0
2009-06-15	16:52:00	0
2009-06-15	16:53:00	0
2009-06-15	16:54:00	0
2009-06-15	16:55:00	0
2009-06-15	16:56:00	0
2009-06-15	16:57:00	0
2009-06-15	16:58:00	0
2009-06-15	16:59:00	0
2009-06-15	17:00:00	0
2009-06-15	17:01:00	0
2009-06-15	17:02:00	0
2009-06-15	17:03:00	0
2009-06-15	17:04:00	0
2009-06-15	17:05:00	0
2009-06-15	17:06:00	0
2009-06-15	17:07:00	0
2009-06-15	17:08:00	0
2009-06-15	17:09:00	0
2009-06-15	17:10:00	0
2009-06-15	17:11:00	0
2009-06-15	17:12:00	0
2009-06-15	17:13:00	0
2009-06-15	17:14:00	0
2009-06-15	17:15:00	0
2009-06-15	17:16:00	0
2009-06-15	17:17:00	0
2009-06-15	17:18:00	0
2009-06-15	17:19:00	0
2009-06-15	17:20:00	0
2009-06-15	17:21:00	0
2009-06-15	17:22:00	0
2009-06-15	17:23:00	0
2009-06-15	17:24:00	0
2009-06-15	17:25:00	0
2009-06-15	17:26:00	0
2009-06-15	17:27:00	0
2009-06-15	17:28:00	0
2009-06-15	17:29:00	0
2009-06-15	17:30:00	0
2009-06-15	17:31:00	0
2009-06-15	17:32:00	0
2009-06-15	17:33:00	0
2009-06-15	17:34:00	0
2009-06-15	17:35:00	0
2009-06-15	17:36:00	0
2009-06-15	17:37:00	0
2009-06-15	17:38:00	0
2009-06-15	17:39:00	0
2009-06-15	17:40:00	0
2009-06-15	17:41:00	0
2009-06-15	17:42:00	0
2009-06-15	17:43:00	0
2009-06-15	17:44:00	0
2009-06-15	17:45:00	0
2009-06-15	17:46:00	0
2009-06-15	17:47:00	0
2009-06-15	17:48:00	0
2009-06-15	17:49:00	0
2009-06-15	17:50:00	0
2009-06-15	17:51:00	0
2009-06-15	17:52:00	0
2009-06-15	17:53:00	0
2009-06-15	17:54:00	0
2009-06-15	17:55:00	0
2009-06-15	17:56:00	0
2009-06-15	17:57:00	0
2009-06-15	17:58:00	0
2009-06-15	17:59:00	0
2009-06-15	18:00:00	0
2009-06-15	18:01:00	0
2009-06-15	18:02:00	11
2009-06-15	18:03:00	55
2009-06-15	18:04:00	132
2009-06-15	18:05:00	88
2009-06-15	18:06:00	0
2009-06-15	18:07:00	0
2009-06-15	18:08:00	0
2009-06-15	18:09:00	0
2009-06-15	18:10:00	0
2009-06-15	18:11:00	0
2009-06-15	18:12:00	0
2009-06-15	18:13:00	0
2009-06-15	18:14:00	0
2009-06-15	18:15:00	0
2009-06-15	18:16:00	0
2009-06-15	18:17:00	0
2009-06-15	18:18:00	0
2009-06-15	18:19:00	0
2009-06-15	18:20:00	0
2009-06-15	18:21:00	0
2009-06-15	18:22:00	0
2009-06-15	18:23:00	0
2009-06-15	18:24:00	0
2009-06-15	18:25:00	0
2009-06-15	18:26:00	0
2009-06-15	18:27:00	0
2009-06-15	18:28:00	0
2009-06-15	18:29:00	0
2009-06-15	18:30:00	0
2009-06-15	18:31:00	0
2009-06-15	18:32:00	0
2009-06-15	18:33:00	11
2009-06-15	18:34:00	143
2009-06-15	18:35:00	0
2009-06-15	18:36:00	0
2009-06-15	18:37:00	0
2009-06-15	18:38:00	11
2009-06-15	18:39:00	0
2009-06-15	18:40:00	132
2009-06-15	18:41:00	55
2009-06-15	18:42:00	0
2009-06-15	18:43:00	0
2009-06-15	18:44:00	0
2009-06-15	18:45:00	0
2009-06-15	18:46:00	11
2009-06-15	18:47:00	0
2009-06-15	18:48:00	0
2009-06-15	18:49:00	0
2009-06-15	18:50:00	0
2009-06-15	18:51:00	44
2009-06-15	18:52:00	22
2009-06-15	18:53:00	0
2009-06-15	18:54:00	55
2009-06-15	18:55:00	99
2009-06-15	18:56:00	196
2009-06-15	18:57:00	649
2009-06-15	18:58:00	689
2009-06-15	18:59:00	589
2009-06-15	19:00:00	22
2009-06-15	19:01:00	0
2009-06-15	19:02:00	0
2009-06-15	19:03:00	99
2009-06-15	19:04:00	0
2009-06-15	19:05:00	22
2009-06-15	19:06:00	11
2009-06-15	19:07:00	0
2009-06-15	19:08:00	0
2009-06-15	19:09:00	0
2009-06-15	19:10:00	0
2009-06-15	19:11:00	0
2009-06-15	19:12:00	0
2009-06-15	19:13:00	0
2009-06-15	19:14:00	0
2009-06-15	19:15:00	0
2009-06-15	19:16:00	0
2009-06-15	19:17:00	11
2009-06-15	19:18:00	0
2009-06-15	19:19:00	0
2009-06-15	19:20:00	0
2009-06-15	19:21:00	0
2009-06-15	19:22:00	0
2009-06-15	19:23:00	0
2009-06-15	19:24:00	0
2009-06-15	19:25:00	0
2009-06-15	19:26:00	0
2009-06-15	19:27:00	0
2009-06-15	19:28:00	0
2009-06-15	19:29:00	0
2009-06-15	19:30:00	0
2009-06-15	19:31:00	0
2009-06-15	19:32:00	11
2009-06-15	19:33:00	0
2009-06-15	19:34:00	0
2009-06-15	19:35:00	0
2009-06-15	19:36:00	121
2009-06-15	19:37:00	183
2009-06-15	19:38:00	0
2009-06-15	19:39:00	88
2009-06-15	19:40:00	0
2009-06-15	19:41:00	0
2009-06-15	19:42:00	0
2009-06-15	19:43:00	0
2009-06-15	19:44:00	0
2009-06-15	19:45:00	88
2009-06-15	19:46:00	143
2009-06-15	19:47:00	249
2009-06-15	19:48:00	157
2009-06-15	19:49:00	0
2009-06-15	19:50:00	0
2009-06-15	19:51:00	0
2009-06-15	19:52:00	0
2009-06-15	19:53:00	0
2009-06-15	19:54:00	0
2009-06-15	19:55:00	0
2009-06-15	19:56:00	0
2009-06-15	19:57:00	0
2009-06-15	19:58:00	0
2009-06-15	19:59:00	0
2009-06-15	20:00:00	0
2009-06-15	20:01:00	11
2009-06-15	20:02:00	0
2009-06-15	20:03:00	0
2009-06-15	20:04:00	0
2009-06-15	20:05:00	0
2009-06-15	20:06:00	0
2009-06-15	20:07:00	0
2009-06-15	20:08:00	0
2009-06-15	20:09:00	0
2009-06-15	20:10:00	276
2009-06-15	20:11:00	223
2009-06-15	20:12:00	55
2009-06-15	20:13:00	22
2009-06-15	20:14:00	170
2009-06-15	20:15:00	110
2009-06-15	20:16:00	413
2009-06-15	20:17:00	0
2009-06-15	20:18:00	0
2009-06-15	20:19:00	0
2009-06-15	20:20:00	0
2009-06-15	20:21:00	0
2009-06-15	20:22:00	0
2009-06-15	20:23:00	0
2009-06-15	20:24:00	0
2009-06-15	20:25:00	0
2009-06-15	20:26:00	0
2009-06-15	20:27:00	0
2009-06-15	20:28:00	170
2009-06-15	20:29:00	0
2009-06-15	20:30:00	0
2009-06-15	20:31:00	0
2009-06-15	20:32:00	0
2009-06-15	20:33:00	0
2009-06-15	20:34:00	0
2009-06-15	20:35:00	157
2009-06-15	20:36:00	0
2009-06-15	20:37:00	0
2009-06-15	20:38:00	0
2009-06-15	20:39:00	0
2009-06-15	20:40:00	0
2009-06-15	20:41:00	0
2009-06-15	20:42:00	0
2009-06-15	20:43:00	0
2009-06-15	20:44:00	0
2009-06-15	20:45:00	0
2009-06-15	20:46:00	0
2009-06-15	20:47:00	0
2009-06-15	20:48:00	0
2009-06-15	20:49:00	0
2009-06-15	20:50:00	0
2009-06-15	20:51:00	157
2009-06-15	20:52:00	0
2009-06-15	20:53:00	0
2009-06-15	20:54:00	0
2009-06-15	20:55:00	0
2009-06-15	20:56:00	0
2009-06-15	20:57:00	0
2009-06-15	20:58:00	0
2009-06-15	20:59:00	0
2009-06-15	21:00:00	0
2009-06-15	21:01:00	0
2009-06-15	21:02:00	0
2009-06-15	21:03:00	0
2009-06-15	21:04:00	0
2009-06-15	21:05:00	0
2009-06-15	21:06:00	0
2009-06-15	21:07:00	0
2009-06-15	21:08:00	0
2009-06-15	21:09:00	0
2009-06-15	21:10:00	0
2009-06-15	21:11:00	0
2009-06-15	21:12:00	0
2009-06-15	21:13:00	77
2009-06-15	21:14:00	66
2009-06-15	21:15:00	99
2009-06-15	21:16:00	0
2009-06-15	21:17:00	0
2009-06-15	21:18:00	110
2009-06-15	21:19:00	0
2009-06-15	21:20:00	0
2009-06-15	21:21:00	0
2009-06-15	21:22:00	0
2009-06-15	21:23:00	0
2009-06-15	21:24:00	0
2009-06-15	21:25:00	0
2009-06-15	21:26:00	170
2009-06-15	21:27:00	0
2009-06-15	21:28:00	55
2009-06-15	21:29:00	77
2009-06-15	21:30:00	0
2009-06-15	21:31:00	0
2009-06-15	21:32:00	132
2009-06-15	21:33:00	0
2009-06-15	21:34:00	0
2009-06-15	21:35:00	0
2009-06-15	21:36:00	0
2009-06-15	21:37:00	0
2009-06-15	21:38:00	0
2009-06-15	21:39:00	0
2009-06-15	21:40:00	0
2009-06-15	21:41:00	0
2009-06-15	21:42:00	0
2009-06-15	21:43:00	0
2009-06-15	21:44:00	0
2009-06-15	21:45:00	0
2009-06-15	21:46:00	0
2009-06-15	21:47:00	0
2009-06-15	21:48:00	0
2009-06-15	21:49:00	0
2009-06-15	21:50:00	0
2009-06-15	21:51:00	0
2009-06-15	21:52:00	0
2009-06-15	21:53:00	0
2009-06-15	21:54:00	0
2009-06-15	21:55:00	0
2009-06-15	21:56:00	0
2009-06-15	21:57:00	183
2009-06-15	21:58:00	223
2009-06-15	21:59:00	0
2009-06-15	22:00:00	0
2009-06-15	22:01:00	0
2009-06-15	22:02:00	0
2009-06-15	22:03:00	44
2009-06-15	22:04:00	196
2009-06-15	22:05:00	55
2009-06-15	22:06:00	110
2009-06-15	22:07:00	132
2009-06-15	22:08:00	0
2009-06-15	22:09:00	0
2009-06-15	22:10:00	0
2009-06-15	22:11:00	0
2009-06-15	22:12:00	0
2009-06-15	22:13:00	0
2009-06-15	22:14:00	0
2009-06-15	22:15:00	0
2009-06-15	22:16:00	0
2009-06-15	22:17:00	0
2009-06-15	22:18:00	0
2009-06-15	22:19:00	0
2009-06-15	22:20:00	0
2009-06-15	22:21:00	0
2009-06-15	22:22:00	0
2009-06-15	22:23:00	0
2009-06-15	22:24:00	0
2009-06-15	22:25:00	0
2009-06-15	22:26:00	0
2009-06-15	22:27:00	0
2009-06-15	22:28:00	0
2009-06-15	22:29:00	0
2009-06-15	22:30:00	0
2009-06-15	22:31:00	0
2009-06-15	22:32:00	0
2009-06-15	22:33:00	0
2009-06-15	22:34:00	0
2009-06-15	22:35:00	0
2009-06-15	22:36:00	0
2009-06-15	22:37:00	223
2009-06-15	22:38:00	121
2009-06-15	22:39:00	0
2009-06-15	22:40:00	0
2009-06-15	22:41:00	0
2009-06-15	22:42:00	0
2009-06-15	22:43:00	0
2009-06-15	22:44:00	0
2009-06-15	22:45:00	0
2009-06-15	22:46:00	0
2009-06-15	22:47:00	0
2009-06-15	22:48:00	0
2009-06-15	22:49:00	0
2009-06-15	22:50:00	0
2009-06-15	22:51:00	0
2009-06-15	22:52:00	0
2009-06-15	22:53:00	0
2009-06-15	22:54:00	0
2009-06-15	22:55:00	0
2009-06-15	22:56:00	0
2009-06-15	22:57:00	0
2009-06-15	22:58:00	0
2009-06-15	22:59:00	0
2009-06-15	23:00:00	305
2009-06-15	23:01:00	819
2009-06-15	23:02:00	569
2009-06-15	23:03:00	263
2009-06-15	23:04:00	44
2009-06-15	23:05:00	0
2009-06-15	23:06:00	110
2009-06-15	23:07:00	44
2009-06-15	23:08:00	0
2009-06-15	23:09:00	0
2009-06-15	23:10:00	0
2009-06-15	23:11:00	0
2009-06-15	23:12:00	170
2009-06-15	23:13:00	183
2009-06-15	23:14:00	183
2009-06-15	23:15:00	0
2009-06-15	23:16:00	0
2009-06-15	23:17:00	0
2009-06-15	23:18:00	0
2009-06-15	23:19:00	0
2009-06-15	23:20:00	0
2009-06-15	23:21:00	0
2009-06-15	23:22:00	0
2009-06-15	23:23:00	11
2009-06-15	23:24:00	22
2009-06-15	23:25:00	0
2009-06-15	23:26:00	157
2009-06-15	23:27:00	0
2009-06-15	23:28:00	0
2009-06-15	23:29:00	0
2009-06-15	23:30:00	0
2009-06-15	23:31:00	0
2009-06-15	23:32:00	0
2009-06-15	23:33:00	0
2009-06-15	23:34:00	0
2009-06-15	23:35:00	0
2009-06-15	23:36:00	0
2009-06-15	23:37:00	0
2009-06-15	23:38:00	0
2009-06-15	23:39:00	0
2009-06-15	23:40:00	0
2009-06-15	23:41:00	0
2009-06-15	23:42:00	0
2009-06-15	23:43:00	0
2009-06-15	23:44:00	0
2009-06-15	23:45:00	0
2009-06-15	23:46:00	0
2009-06-15	23:47:00	0
2009-06-15	23:48:00	0
2009-06-15	23:49:00	0
2009-06-15	23:50:00	0
2009-06-15	23:51:00	0
2009-06-15	23:52:00	0
2009-06-15	23:53:00	0
2009-06-15	23:54:00	0
2009-06-15	23:55:00	0
2009-06-15	23:56:00	0
2009-06-15	23:57:00	0
2009-06-15	23:58:00	0
2009-06-15	23:59:00	0
2009-06-16	00:00:00	0
2009-06-16	00:01:00	0
2009-06-16	00:02:00	0
2009-06-16	00:03:00	0
2009-06-16	00:04:00	0
2009-06-16	00:05:00	0
2009-06-16	00:06:00	11
2009-06-16	00:07:00	99
2009-06-16	00:08:00	0
2009-06-16	00:09:00	0
2009-06-16	00:10:00	0
2009-06-16	00:11:00	0
2009-06-16	00:12:00	0
2009-06-16	00:13:00	0
2009-06-16	00:14:00	0
2009-06-16	00:15:00	0
2009-06-16	00:16:00	0
2009-06-16	00:17:00	0
2009-06-16	00:18:00	0
2009-06-16	00:19:00	0
2009-06-16	00:20:00	0
2009-06-16	00:21:00	0
2009-06-16	00:22:00	22
2009-06-16	00:23:00	0
2009-06-16	00:24:00	0
2009-06-16	00:25:00	0
2009-06-16	00:26:00	0
2009-06-16	00:27:00	0
2009-06-16	00:28:00	0
2009-06-16	00:29:00	0
2009-06-16	00:30:00	0
2009-06-16	00:31:00	0
2009-06-16	00:32:00	0
2009-06-16	00:33:00	0
2009-06-16	00:34:00	0
2009-06-16	00:35:00	0
2009-06-16	00:36:00	0
2009-06-16	00:37:00	0
2009-06-16	00:38:00	0
2009-06-16	00:39:00	0
2009-06-16	00:40:00	0
2009-06-16	00:41:00	0
2009-06-16	00:42:00	0
2009-06-16	00:43:00	0
2009-06-16	00:44:00	0
2009-06-16	00:45:00	0
2009-06-16	00:46:00	0
2009-06-16	00:47:00	0
2009-06-16	00:48:00	0
2009-06-16	00:49:00	0
2009-06-16	00:50:00	0
2009-06-16	00:51:00	0
2009-06-16	00:52:00	0
2009-06-16	00:53:00	0
2009-06-16	00:54:00	0
2009-06-16	00:55:00	0
2009-06-16	00:56:00	0
2009-06-16	00:57:00	0
2009-06-16	00:58:00	0
2009-06-16	00:59:00	0
2009-06-16	01:00:00	0
2009-06-16	01:01:00	0
2009-06-16	01:02:00	0
2009-06-16	01:03:00	0
2009-06-16	01:04:00	0
2009-06-16	01:05:00	0
2009-06-16	01:06:00	0
2009-06-16	01:07:00	0
2009-06-16	01:08:00	0
2009-06-16	01:09:00	0
2009-06-16	01:10:00	0
2009-06-16	01:11:00	0
2009-06-16	01:12:00	0
2009-06-16	01:13:00	0
2009-06-16	01:14:00	0
2009-06-16	01:15:00	0
2009-06-16	01:16:00	0
2009-06-16	01:17:00	0
2009-06-16	01:18:00	0
2009-06-16	01:19:00	0
2009-06-16	01:20:00	0
2009-06-16	01:21:00	0
2009-06-16	01:22:00	0
2009-06-16	01:23:00	0
2009-06-16	01:24:00	0
2009-06-16	01:25:00	0
2009-06-16	01:26:00	0
2009-06-16	01:27:00	0
2009-06-16	01:28:00	0
2009-06-16	01:29:00	0
2009-06-16	01:30:00	0
2009-06-16	01:31:00	0
2009-06-16	01:32:00	0
2009-06-16	01:33:00	0
2009-06-16	01:34:00	0
2009-06-16	01:35:00	0
2009-06-16	01:36:00	0
2009-06-16	01:37:00	0
2009-06-16	01:38:00	0
2009-06-16	01:39:00	0
2009-06-16	01:40:00	0
2009-06-16	01:41:00	0
2009-06-16	01:42:00	0
2009-06-16	01:43:00	0
2009-06-16	01:44:00	0
2009-06-16	01:45:00	0
2009-06-16	01:46:00	0
2009-06-16	01:47:00	0
2009-06-16	01:48:00	0
2009-06-16	01:49:00	0
2009-06-16	01:50:00	0
2009-06-16	01:51:00	0
2009-06-16	01:52:00	0
2009-06-16	01:53:00	0
2009-06-16	01:54:00	0
2009-06-16	01:55:00	0
2009-06-16	01:56:00	55
2009-06-16	01:57:00	55
2009-06-16	01:58:00	0
2009-06-16	01:59:00	0
2009-06-16	02:00:00	0
2009-06-16	02:01:00	0
2009-06-16	02:02:00	0
2009-06-16	02:03:00	0
2009-06-16	02:04:00	0
2009-06-16	02:05:00	0
2009-06-16	02:06:00	0
2009-06-16	02:07:00	88
2009-06-16	02:08:00	0
2009-06-16	02:09:00	0
2009-06-16	02:10:00	0
2009-06-16	02:11:00	0
2009-06-16	02:12:00	0
2009-06-16	02:13:00	0
2009-06-16	02:14:00	0
2009-06-16	02:15:00	0
2009-06-16	02:16:00	0
2009-06-16	02:17:00	0
2009-06-16	02:18:00	0
2009-06-16	02:19:00	0
2009-06-16	02:20:00	0
2009-06-16	02:21:00	0
2009-06-16	02:22:00	0
2009-06-16	02:23:00	0
2009-06-16	02:24:00	0
2009-06-16	02:25:00	0
2009-06-16	02:26:00	0
2009-06-16	02:27:00	0
2009-06-16	02:28:00	0
2009-06-16	02:29:00	0
2009-06-16	02:30:00	0
2009-06-16	02:31:00	0
2009-06-16	02:32:00	0
2009-06-16	02:33:00	0
2009-06-16	02:34:00	0
2009-06-16	02:35:00	0
2009-06-16	02:36:00	0
2009-06-16	02:37:00	0
2009-06-16	02:38:00	0
2009-06-16	02:39:00	0
2009-06-16	02:40:00	0
2009-06-16	02:41:00	0
2009-06-16	02:42:00	0
2009-06-16	02:43:00	0
2009-06-16	02:44:00	0
2009-06-16	02:45:00	0
2009-06-16	02:46:00	0
2009-06-16	02:47:00	0
2009-06-16	02:48:00	0
2009-06-16	02:49:00	0
2009-06-16	02:50:00	0
2009-06-16	02:51:00	0
2009-06-16	02:52:00	0
2009-06-16	02:53:00	0
2009-06-16	02:54:00	0
2009-06-16	02:55:00	0
2009-06-16	02:56:00	0
2009-06-16	02:57:00	0
2009-06-16	02:58:00	0
2009-06-16	02:59:00	0
2009-06-16	03:00:00	0
2009-06-16	03:01:00	0
2009-06-16	03:02:00	0
2009-06-16	03:03:00	0
2009-06-16	03:04:00	0
2009-06-16	03:05:00	0
2009-06-16	03:06:00	0
2009-06-16	03:07:00	0
2009-06-16	03:08:00	0
2009-06-16	03:09:00	0
2009-06-16	03:10:00	0
2009-06-16	03:11:00	0
2009-06-16	03:12:00	0
2009-06-16	03:13:00	0
2009-06-16	03:14:00	0
2009-06-16	03:15:00	0
2009-06-16	03:16:00	0
2009-06-16	03:17:00	0
2009-06-16	03:18:00	0
2009-06-16	03:19:00	0
2009-06-16	03:20:00	0
2009-06-16	03:21:00	0
2009-06-16	03:22:00	0
2009-06-16	03:23:00	0
2009-06-16	03:24:00	11
2009-06-16	03:25:00	0
2009-06-16	03:26:00	0
2009-06-16	03:27:00	0
2009-06-16	03:28:00	0
2009-06-16	03:29:00	0
2009-06-16	03:30:00	0
2009-06-16	03:31:00	0
2009-06-16	03:32:00	0
2009-06-16	03:33:00	0
2009-06-16	03:34:00	0
2009-06-16	03:35:00	0
2009-06-16	03:36:00	0
2009-06-16	03:37:00	0
2009-06-16	03:38:00	11
2009-06-16	03:39:00	0
2009-06-16	03:40:00	0
2009-06-16	03:41:00	0
2009-06-16	03:42:00	0
2009-06-16	03:43:00	0
2009-06-16	03:44:00	0
2009-06-16	03:45:00	0
2009-06-16	03:46:00	0
2009-06-16	03:47:00	0
2009-06-16	03:48:00	0
2009-06-16	03:49:00	0
2009-06-16	03:50:00	0
2009-06-16	03:51:00	0
2009-06-16	03:52:00	0
2009-06-16	03:53:00	0
2009-06-16	03:54:00	44
2009-06-16	03:55:00	0
2009-06-16	03:56:00	0
2009-06-16	03:57:00	0
2009-06-16	03:58:00	0
2009-06-16	03:59:00	0
2009-06-16	04:00:00	0
2009-06-16	04:01:00	0
2009-06-16	04:02:00	0
2009-06-16	04:03:00	0
2009-06-16	04:04:00	0
2009-06-16	04:05:00	0
2009-06-16	04:06:00	0
2009-06-16	04:07:00	0
2009-06-16	04:08:00	0
2009-06-16	04:09:00	0
2009-06-16	04:10:00	0
2009-06-16	04:11:00	0
2009-06-16	04:12:00	0
2009-06-16	04:13:00	0
2009-06-16	04:14:00	0
2009-06-16	04:15:00	0
2009-06-16	04:16:00	0
2009-06-16	04:17:00	0
2009-06-16	04:18:00	0
2009-06-16	04:19:00	0
2009-06-16	04:20:00	0
2009-06-16	04:21:00	0
2009-06-16	04:22:00	0
2009-06-16	04:23:00	0
2009-06-16	04:24:00	0
2009-06-16	04:25:00	0
2009-06-16	04:26:00	0
2009-06-16	04:27:00	0
2009-06-16	04:28:00	0
2009-06-16	04:29:00	0
2009-06-16	04:30:00	0
2009-06-16	04:31:00	0
2009-06-16	04:32:00	0
2009-06-16	04:33:00	0
2009-06-16	04:34:00	0
2009-06-16	04:35:00	0
2009-06-16	04:36:00	0
2009-06-16	04:37:00	0
2009-06-16	04:38:00	0
2009-06-16	04:39:00	0
2009-06-16	04:40:00	11
2009-06-16	04:41:00	0
2009-06-16	04:42:00	44
2009-06-16	04:43:00	0
2009-06-16	04:44:00	0
2009-06-16	04:45:00	0
2009-06-16	04:46:00	0
2009-06-16	04:47:00	0
2009-06-16	04:48:00	0
2009-06-16	04:49:00	0
2009-06-16	04:50:00	0
2009-06-16	04:51:00	0
2009-06-16	04:52:00	0
2009-06-16	04:53:00	0
2009-06-16	04:54:00	0
2009-06-16	04:55:00	0
2009-06-16	04:56:00	0
2009-06-16	04:57:00	0
2009-06-16	04:58:00	0
2009-06-16	04:59:00	0
2009-06-16	05:00:00	0
2009-06-16	05:01:00	0
2009-06-16	05:02:00	0
2009-06-16	05:03:00	0
2009-06-16	05:04:00	33
2009-06-16	05:05:00	0
2009-06-16	05:06:00	0
2009-06-16	05:07:00	0
2009-06-16	05:08:00	55
2009-06-16	05:09:00	11
2009-06-16	05:10:00	0
2009-06-16	05:11:00	0
2009-06-16	05:12:00	0
2009-06-16	05:13:00	0
2009-06-16	05:14:00	0
2009-06-16	05:15:00	0
2009-06-16	05:16:00	0
2009-06-16	05:17:00	0
2009-06-16	05:18:00	0
2009-06-16	05:19:00	0
2009-06-16	05:20:00	0
2009-06-16	05:21:00	0
2009-06-16	05:22:00	0
2009-06-16	05:23:00	0
2009-06-16	05:24:00	0
2009-06-16	05:25:00	0
2009-06-16	05:26:00	0
2009-06-16	05:27:00	0
2009-06-16	05:28:00	0
2009-06-16	05:29:00	0
2009-06-16	05:30:00	0
2009-06-16	05:31:00	0
2009-06-16	05:32:00	0
2009-06-16	05:33:00	0
2009-06-16	05:34:00	0
2009-06-16	05:35:00	0
2009-06-16	05:36:00	0
2009-06-16	05:37:00	0
2009-06-16	05:38:00	0
2009-06-16	05:39:00	0
2009-06-16	05:40:00	0
2009-06-16	05:41:00	0
2009-06-16	05:42:00	0
2009-06-16	05:43:00	0
2009-06-16	05:44:00	0
2009-06-16	05:45:00	0
2009-06-16	05:46:00	0
2009-06-16	05:47:00	0
2009-06-16	05:48:00	11
2009-06-16	05:49:00	0
2009-06-16	05:50:00	0
2009-06-16	05:51:00	0
2009-06-16	05:52:00	0
2009-06-16	05:53:00	0
2009-06-16	05:54:00	0
2009-06-16	05:55:00	0
2009-06-16	05:56:00	0
2009-06-16	05:57:00	0
2009-06-16	05:58:00	0
2009-06-16	05:59:00	0
2009-06-16	06:00:00	0
2009-06-16	06:01:00	0
2009-06-16	06:02:00	0
2009-06-16	06:03:00	0
2009-06-16	06:04:00	22
2009-06-16	06:05:00	66
2009-06-16	06:06:00	11
2009-06-16	06:07:00	22
2009-06-16	06:08:00	11
2009-06-16	06:09:00	157
2009-06-16	06:10:00	0
2009-06-16	06:11:00	0
2009-06-16	06:12:00	11
2009-06-16	06:13:00	33
2009-06-16	06:14:00	0
2009-06-16	06:15:00	0
2009-06-16	06:16:00	11
2009-06-16	06:17:00	0
2009-06-16	06:18:00	0
2009-06-16	06:19:00	0
2009-06-16	06:20:00	0
2009-06-16	06:21:00	0
2009-06-16	06:22:00	0
2009-06-16	06:23:00	0
2009-06-16	06:24:00	0
2009-06-16	06:25:00	0
2009-06-16	06:26:00	11
2009-06-16	06:27:00	132
2009-06-16	06:28:00	0
2009-06-16	06:29:00	0
2009-06-16	06:30:00	0
2009-06-16	06:31:00	0
2009-06-16	06:32:00	0
2009-06-16	06:33:00	0
2009-06-16	06:34:00	0
2009-06-16	06:35:00	0
2009-06-16	06:36:00	0
2009-06-16	06:37:00	0
2009-06-16	06:38:00	0
2009-06-16	06:39:00	0
2009-06-16	06:40:00	0
2009-06-16	06:41:00	0
2009-06-16	06:42:00	0
2009-06-16	06:43:00	0
2009-06-16	06:44:00	0
2009-06-16	06:45:00	0
2009-06-16	06:46:00	0
2009-06-16	06:47:00	0
2009-06-16	06:48:00	11
2009-06-16	06:49:00	0
2009-06-16	06:50:00	22
2009-06-16	06:51:00	0
2009-06-16	06:52:00	0
2009-06-16	06:53:00	0
2009-06-16	06:54:00	0
2009-06-16	06:55:00	0
2009-06-16	06:56:00	0
2009-06-16	06:57:00	0
2009-06-16	06:58:00	0
2009-06-16	06:59:00	0
2009-06-16	07:00:00	629
2009-06-16	07:01:00	143
2009-06-16	07:02:00	289
2009-06-16	07:03:00	689
2009-06-16	07:04:00	1677
2009-06-16	07:05:00	382
2009-06-16	07:06:00	320
2009-06-16	07:07:00	157
2009-06-16	07:08:00	366
2009-06-16	07:09:00	0
2009-06-16	07:10:00	0
2009-06-16	07:11:00	132
2009-06-16	07:12:00	0
2009-06-16	07:13:00	22
2009-06-16	07:14:00	11
2009-06-16	07:15:00	183
2009-06-16	07:16:00	0
2009-06-16	07:17:00	0
2009-06-16	07:18:00	22
2009-06-16	07:19:00	0
2009-06-16	07:20:00	0
2009-06-16	07:21:00	99
2009-06-16	07:22:00	33
2009-06-16	07:23:00	0
2009-06-16	07:24:00	0
2009-06-16	07:25:00	0
2009-06-16	07:26:00	0
2009-06-16	07:27:00	0
2009-06-16	07:28:00	0
2009-06-16	07:29:00	0
2009-06-16	07:30:00	0
2009-06-16	07:31:00	0
2009-06-16	07:32:00	11
2009-06-16	07:33:00	0
2009-06-16	07:34:00	132
2009-06-16	07:35:00	0
2009-06-16	07:36:00	0
2009-06-16	07:37:00	0
2009-06-16	07:38:00	0
2009-06-16	07:39:00	0
2009-06-16	07:40:00	0
2009-06-16	07:41:00	0
2009-06-16	07:42:00	0
2009-06-16	07:43:00	0
2009-06-16	07:44:00	0
2009-06-16	07:45:00	0
2009-06-16	07:46:00	0
2009-06-16	07:47:00	11
2009-06-16	07:48:00	0
2009-06-16	07:49:00	0
2009-06-16	07:50:00	0
2009-06-16	07:51:00	0
2009-06-16	07:52:00	0
2009-06-16	07:53:00	0
2009-06-16	07:54:00	0
2009-06-16	07:55:00	110
2009-06-16	07:56:00	223
2009-06-16	07:57:00	0
2009-06-16	07:58:00	0
2009-06-16	07:59:00	0
2009-06-16	08:00:00	183
2009-06-16	08:01:00	11
2009-06-16	08:02:00	0
2009-06-16	08:03:00	0
2009-06-16	08:04:00	0
2009-06-16	08:05:00	11
2009-06-16	08:06:00	0
2009-06-16	08:07:00	0
2009-06-16	08:08:00	11
2009-06-16	08:09:00	0
2009-06-16	08:10:00	157
2009-06-16	08:11:00	143
2009-06-16	08:12:00	0
2009-06-16	08:13:00	0
2009-06-16	08:14:00	0
2009-06-16	08:15:00	110
2009-06-16	08:16:00	382
2009-06-16	08:17:00	11
2009-06-16	08:18:00	0
2009-06-16	08:19:00	0
2009-06-16	08:20:00	0
2009-06-16	08:21:00	0
2009-06-16	08:22:00	0
2009-06-16	08:23:00	170
2009-06-16	08:24:00	88
2009-06-16	08:25:00	11
2009-06-16	08:26:00	276
2009-06-16	08:27:00	99
2009-06-16	08:28:00	0
2009-06-16	08:29:00	77
2009-06-16	08:30:00	196
2009-06-16	08:31:00	236
2009-06-16	08:32:00	382
2009-06-16	08:33:00	305
2009-06-16	08:34:00	196
2009-06-16	08:35:00	0
2009-06-16	08:36:00	66
2009-06-16	08:37:00	0
2009-06-16	08:38:00	55
2009-06-16	08:39:00	99
2009-06-16	08:40:00	77
2009-06-16	08:41:00	0
2009-06-16	08:42:00	0
2009-06-16	08:43:00	77
2009-06-16	08:44:00	0
2009-06-16	08:45:00	0
2009-06-16	08:46:00	0
2009-06-16	08:47:00	0
2009-06-16	08:48:00	0
2009-06-16	08:49:00	0
2009-06-16	08:50:00	320
2009-06-16	08:51:00	0
2009-06-16	08:52:00	22
2009-06-16	08:53:00	183
2009-06-16	08:54:00	11
2009-06-16	08:55:00	0
2009-06-16	08:56:00	320
2009-06-16	08:57:00	132
2009-06-16	08:58:00	0
2009-06-16	08:59:00	55
2009-06-16	09:00:00	99
2009-06-16	09:01:00	196
2009-06-16	09:02:00	0
2009-06-16	09:03:00	33
2009-06-16	09:04:00	66
2009-06-16	09:05:00	0
2009-06-16	09:06:00	55
2009-06-16	09:07:00	11
2009-06-16	09:08:00	730
[truncated: 19,611 more rows]

## Sheet: 6.29.09
Actogram, Copy Raw Data, All Days
Identity:	Sophie
Filename:	E:\Active Research Files\meloxicam titre canine\cases\sophie\Sophie 6.29.09.AWC
Gender:	F
Age:	8
Height:	61.0 cm	24.0 in
Weight:	27.0 kg	59.5 lbs
Start Date:	29-Jun-2009 (Mon)
Start Time:	18:00:00
Interval:	1.00 mins
Date Stamp:	Time Stamp:	Activity Data:	Marker Press:
2009-06-29	00:00:00	0
2009-06-29	00:01:00	0
2009-06-29	00:02:00	0
2009-06-29	00:03:00	0
2009-06-29	00:04:00	0
2009-06-29	00:05:00	0
2009-06-29	00:06:00	0
2009-06-29	00:07:00	0
2009-06-29	00:08:00	0
2009-06-29	00:09:00	0
2009-06-29	00:10:00	0
2009-06-29	00:11:00	0
2009-06-29	00:12:00	0
2009-06-29	00:13:00	0
2009-06-29	00:14:00	0
2009-06-29	00:15:00	0
2009-06-29	00:16:00	0
2009-06-29	00:17:00	0
2009-06-29	00:18:00	0
2009-06-29	00:19:00	0
2009-06-29	00:20:00	0
2009-06-29	00:21:00	0
2009-06-29	00:22:00	0
2009-06-29	00:23:00	0
2009-06-29	00:24:00	0
2009-06-29	00:25:00	0
2009-06-29	00:26:00	0
2009-06-29	00:27:00	0
2009-06-29	00:28:00	0
2009-06-29	00:29:00	0
2009-06-29	00:30:00	0
2009-06-29	00:31:00	0
2009-06-29	00:32:00	0
2009-06-29	00:33:00	0
2009-06-29	00:34:00	0
2009-06-29	00:35:00	0
2009-06-29	00:36:00	0
2009-06-29	00:37:00	0
2009-06-29	00:38:00	0
2009-06-29	00:39:00	0
2009-06-29	00:40:00	0
2009-06-29	00:41:00	0
2009-06-29	00:42:00	0
2009-06-29	00:43:00	0
2009-06-29	00:44:00	0
2009-06-29	00:45:00	0
2009-06-29	00:46:00	0
2009-06-29	00:47:00	0
2009-06-29	00:48:00	0
2009-06-29	00:49:00	0
2009-06-29	00:50:00	0
2009-06-29	00:51:00	0
2009-06-29	00:52:00	0
2009-06-29	00:53:00	0
2009-06-29	00:54:00	0
2009-06-29	00:55:00	0
2009-06-29	00:56:00	0
2009-06-29	00:57:00	0
2009-06-29	00:58:00	0
2009-06-29	00:59:00	0
2009-06-29	01:00:00	0
2009-06-29	01:01:00	0
2009-06-29	01:02:00	0
2009-06-29	01:03:00	0
2009-06-29	01:04:00	0
2009-06-29	01:05:00	0
2009-06-29	01:06:00	0
2009-06-29	01:07:00	0
2009-06-29	01:08:00	0
2009-06-29	01:09:00	0
2009-06-29	01:10:00	0
2009-06-29	01:11:00	0
2009-06-29	01:12:00	0
2009-06-29	01:13:00	0
2009-06-29	01:14:00	0
2009-06-29	01:15:00	0
2009-06-29	01:16:00	0
2009-06-29	01:17:00	0
2009-06-29	01:18:00	0
2009-06-29	01:19:00	0
2009-06-29	01:20:00	0
2009-06-29	01:21:00	0
2009-06-29	01:22:00	0
2009-06-29	01:23:00	0
2009-06-29	01:24:00	0
2009-06-29	01:25:00	0
2009-06-29	01:26:00	0
2009-06-29	01:27:00	0
2009-06-29	01:28:00	0
2009-06-29	01:29:00	0
2009-06-29	01:30:00	0
2009-06-29	01:31:00	0
2009-06-29	01:32:00	0
2009-06-29	01:33:00	0
2009-06-29	01:34:00	0
2009-06-29	01:35:00	0
2009-06-29	01:36:00	0
2009-06-29	01:37:00	0
2009-06-29	01:38:00	0
2009-06-29	01:39:00	0
2009-06-29	01:40:00	0
2009-06-29	01:41:00	0
2009-06-29	01:42:00	0
2009-06-29	01:43:00	0
2009-06-29	01:44:00	0
2009-06-29	01:45:00	0
2009-06-29	01:46:00	0
2009-06-29	01:47:00	0
2009-06-29	01:48:00	0
2009-06-29	01:49:00	0
2009-06-29	01:50:00	0
2009-06-29	01:51:00	0
2009-06-29	01:52:00	0
2009-06-29	01:53:00	0
2009-06-29	01:54:00	0
2009-06-29	01:55:00	0
2009-06-29	01:56:00	0
2009-06-29	01:57:00	0
2009-06-29	01:58:00	0
2009-06-29	01:59:00	0
2009-06-29	02:00:00	0
2009-06-29	02:01:00	0
2009-06-29	02:02:00	0
2009-06-29	02:03:00	0
2009-06-29	02:04:00	0
2009-06-29	02:05:00	0
2009-06-29	02:06:00	0
2009-06-29	02:07:00	0
2009-06-29	02:08:00	0
2009-06-29	02:09:00	0
2009-06-29	02:10:00	0
2009-06-29	02:11:00	0
2009-06-29	02:12:00	0
2009-06-29	02:13:00	0
2009-06-29	02:14:00	0
2009-06-29	02:15:00	0
2009-06-29	02:16:00	0
2009-06-29	02:17:00	0
2009-06-29	02:18:00	0
2009-06-29	02:19:00	0
2009-06-29	02:20:00	0
2009-06-29	02:21:00	0
2009-06-29	02:22:00	0
2009-06-29	02:23:00	0
2009-06-29	02:24:00	0
2009-06-29	02:25:00	0
2009-06-29	02:26:00	0
2009-06-29	02:27:00	0
2009-06-29	02:28:00	0
2009-06-29	02:29:00	0
2009-06-29	02:30:00	0
2009-06-29	02:31:00	0
2009-06-29	02:32:00	0
2009-06-29	02:33:00	0
2009-06-29	02:34:00	0
2009-06-29	02:35:00	0
2009-06-29	02:36:00	0
2009-06-29	02:37:00	0
2009-06-29	02:38:00	0
2009-06-29	02:39:00	0
2009-06-29	02:40:00	0
2009-06-29	02:41:00	0
2009-06-29	02:42:00	0
2009-06-29	02:43:00	0
2009-06-29	02:44:00	0
2009-06-29	02:45:00	0
2009-06-29	02:46:00	0
2009-06-29	02:47:00	0
2009-06-29	02:48:00	0
2009-06-29	02:49:00	0
2009-06-29	02:50:00	0
2009-06-29	02:51:00	0
2009-06-29	02:52:00	0
2009-06-29	02:53:00	0
2009-06-29	02:54:00	0
2009-06-29	02:55:00	0
2009-06-29	02:56:00	0
2009-06-29	02:57:00	0
2009-06-29	02:58:00	0
2009-06-29	02:59:00	0
2009-06-29	03:00:00	0
2009-06-29	03:01:00	0
2009-06-29	03:02:00	0
2009-06-29	03:03:00	0
2009-06-29	03:04:00	0
2009-06-29	03:05:00	0
2009-06-29	03:06:00	0
2009-06-29	03:07:00	0
2009-06-29	03:08:00	0
2009-06-29	03:09:00	0
2009-06-29	03:10:00	0
2009-06-29	03:11:00	0
2009-06-29	03:12:00	0
2009-06-29	03:13:00	0
2009-06-29	03:14:00	0
2009-06-29	03:15:00	0
2009-06-29	03:16:00	0
2009-06-29	03:17:00	0
2009-06-29	03:18:00	0
2009-06-29	03:19:00	0
2009-06-29	03:20:00	0
2009-06-29	03:21:00	0
2009-06-29	03:22:00	0
2009-06-29	03:23:00	0
2009-06-29	03:24:00	0
2009-06-29	03:25:00	0
2009-06-29	03:26:00	0
2009-06-29	03:27:00	0
2009-06-29	03:28:00	0
2009-06-29	03:29:00	0
2009-06-29	03:30:00	0
2009-06-29	03:31:00	0
2009-06-29	03:32:00	0
2009-06-29	03:33:00	0
2009-06-29	03:34:00	0
2009-06-29	03:35:00	0
2009-06-29	03:36:00	0
2009-06-29	03:37:00	0
2009-06-29	03:38:00	0
2009-06-29	03:39:00	0
2009-06-29	03:40:00	0
2009-06-29	03:41:00	0
2009-06-29	03:42:00	0
2009-06-29	03:43:00	0
2009-06-29	03:44:00	0
2009-06-29	03:45:00	0
2009-06-29	03:46:00	0
2009-06-29	03:47:00	0
2009-06-29	03:48:00	0
2009-06-29	03:49:00	0
2009-06-29	03:50:00	0
2009-06-29	03:51:00	0
2009-06-29	03:52:00	0
2009-06-29	03:53:00	0
2009-06-29	03:54:00	0
2009-06-29	03:55:00	0
2009-06-29	03:56:00	0
2009-06-29	03:57:00	0
2009-06-29	03:58:00	0
2009-06-29	03:59:00	0
2009-06-29	04:00:00	0
2009-06-29	04:01:00	0
2009-06-29	04:02:00	0
2009-06-29	04:03:00	0
2009-06-29	04:04:00	0
2009-06-29	04:05:00	0
2009-06-29	04:06:00	0
2009-06-29	04:07:00	0
2009-06-29	04:08:00	0
2009-06-29	04:09:00	0
2009-06-29	04:10:00	0
2009-06-29	04:11:00	0
2009-06-29	04:12:00	0
2009-06-29	04:13:00	0
2009-06-29	04:14:00	0
2009-06-29	04:15:00	0
2009-06-29	04:16:00	0
2009-06-29	04:17:00	0
2009-06-29	04:18:00	0
2009-06-29	04:19:00	0
2009-06-29	04:20:00	0
2009-06-29	04:21:00	0
2009-06-29	04:22:00	0
2009-06-29	04:23:00	0
2009-06-29	04:24:00	0
2009-06-29	04:25:00	0
2009-06-29	04:26:00	0
2009-06-29	04:27:00	0
2009-06-29	04:28:00	0
2009-06-29	04:29:00	0
2009-06-29	04:30:00	0
2009-06-29	04:31:00	0
2009-06-29	04:32:00	0
2009-06-29	04:33:00	0
2009-06-29	04:34:00	0
2009-06-29	04:35:00	0
2009-06-29	04:36:00	0
2009-06-29	04:37:00	0
2009-06-29	04:38:00	0
2009-06-29	04:39:00	0
2009-06-29	04:40:00	0
2009-06-29	04:41:00	0
2009-06-29	04:42:00	0
2009-06-29	04:43:00	0
2009-06-29	04:44:00	0
2009-06-29	04:45:00	0
2009-06-29	04:46:00	0
2009-06-29	04:47:00	0
2009-06-29	04:48:00	0
2009-06-29	04:49:00	0
2009-06-29	04:50:00	0
2009-06-29	04:51:00	0
2009-06-29	04:52:00	0
2009-06-29	04:53:00	0
2009-06-29	04:54:00	0
2009-06-29	04:55:00	0
2009-06-29	04:56:00	0
2009-06-29	04:57:00	0
2009-06-29	04:58:00	0
2009-06-29	04:59:00	0
2009-06-29	05:00:00	0
2009-06-29	05:01:00	0
2009-06-29	05:02:00	0
2009-06-29	05:03:00	0
2009-06-29	05:04:00	0
2009-06-29	05:05:00	0
2009-06-29	05:06:00	0
2009-06-29	05:07:00	0
2009-06-29	05:08:00	0
2009-06-29	05:09:00	0
2009-06-29	05:10:00	0
2009-06-29	05:11:00	0
2009-06-29	05:12:00	0
2009-06-29	05:13:00	0
2009-06-29	05:14:00	0
2009-06-29	05:15:00	0
2009-06-29	05:16:00	0
2009-06-29	05:17:00	0
2009-06-29	05:18:00	0
2009-06-29	05:19:00	0
2009-06-29	05:20:00	0
2009-06-29	05:21:00	0
2009-06-29	05:22:00	0
2009-06-29	05:23:00	0
2009-06-29	05:24:00	0
2009-06-29	05:25:00	0
2009-06-29	05:26:00	0
2009-06-29	05:27:00	0
2009-06-29	05:28:00	0
2009-06-29	05:29:00	0
2009-06-29	05:30:00	0
2009-06-29	05:31:00	0
2009-06-29	05:32:00	0
2009-06-29	05:33:00	0
2009-06-29	05:34:00	0
2009-06-29	05:35:00	0
2009-06-29	05:36:00	0
2009-06-29	05:37:00	0
2009-06-29	05:38:00	0
2009-06-29	05:39:00	0
2009-06-29	05:40:00	0
2009-06-29	05:41:00	0
2009-06-29	05:42:00	0
2009-06-29	05:43:00	0
2009-06-29	05:44:00	0
2009-06-29	05:45:00	0
2009-06-29	05:46:00	0
2009-06-29	05:47:00	0
2009-06-29	05:48:00	0
2009-06-29	05:49:00	0
2009-06-29	05:50:00	0
2009-06-29	05:51:00	0
2009-06-29	05:52:00	0
2009-06-29	05:53:00	0
2009-06-29	05:54:00	0
2009-06-29	05:55:00	0
2009-06-29	05:56:00	0
2009-06-29	05:57:00	0
2009-06-29	05:58:00	0
2009-06-29	05:59:00	0
2009-06-29	06:00:00	0
2009-06-29	06:01:00	0
2009-06-29	06:02:00	0
2009-06-29	06:03:00	0
2009-06-29	06:04:00	0
2009-06-29	06:05:00	0
2009-06-29	06:06:00	0
2009-06-29	06:07:00	0
2009-06-29	06:08:00	0
2009-06-29	06:09:00	0
2009-06-29	06:10:00	0
2009-06-29	06:11:00	0
2009-06-29	06:12:00	0
2009-06-29	06:13:00	0
2009-06-29	06:14:00	0
2009-06-29	06:15:00	0
2009-06-29	06:16:00	0
2009-06-29	06:17:00	0
2009-06-29	06:18:00	0
2009-06-29	06:19:00	0
2009-06-29	06:20:00	0
2009-06-29	06:21:00	0
2009-06-29	06:22:00	0
2009-06-29	06:23:00	0
2009-06-29	06:24:00	0
2009-06-29	06:25:00	0
2009-06-29	06:26:00	0
2009-06-29	06:27:00	0
2009-06-29	06:28:00	0
2009-06-29	06:29:00	0
2009-06-29	06:30:00	0
2009-06-29	06:31:00	0
2009-06-29	06:32:00	0
2009-06-29	06:33:00	0
2009-06-29	06:34:00	0
2009-06-29	06:35:00	0
2009-06-29	06:36:00	0
2009-06-29	06:37:00	0
2009-06-29	06:38:00	0
2009-06-29	06:39:00	0
2009-06-29	06:40:00	0
2009-06-29	06:41:00	0
2009-06-29	06:42:00	0
2009-06-29	06:43:00	0
2009-06-29	06:44:00	0
2009-06-29	06:45:00	0
2009-06-29	06:46:00	0
2009-06-29	06:47:00	0
2009-06-29	06:48:00	0
2009-06-29	06:49:00	0
2009-06-29	06:50:00	0
2009-06-29	06:51:00	0
2009-06-29	06:52:00	0
2009-06-29	06:53:00	0
2009-06-29	06:54:00	0
2009-06-29	06:55:00	0
2009-06-29	06:56:00	0
2009-06-29	06:57:00	0
2009-06-29	06:58:00	0
2009-06-29	06:59:00	0
2009-06-29	07:00:00	0
2009-06-29	07:01:00	0
2009-06-29	07:02:00	0
2009-06-29	07:03:00	0
2009-06-29	07:04:00	0
2009-06-29	07:05:00	0
2009-06-29	07:06:00	0
2009-06-29	07:07:00	0
2009-06-29	07:08:00	0
2009-06-29	07:09:00	0
2009-06-29	07:10:00	0
2009-06-29	07:11:00	0
2009-06-29	07:12:00	0
2009-06-29	07:13:00	0
2009-06-29	07:14:00	0
2009-06-29	07:15:00	0
2009-06-29	07:16:00	0
2009-06-29	07:17:00	0
2009-06-29	07:18:00	0
2009-06-29	07:19:00	0
2009-06-29	07:20:00	0
2009-06-29	07:21:00	0
2009-06-29	07:22:00	0
2009-06-29	07:23:00	0
2009-06-29	07:24:00	0
2009-06-29	07:25:00	0
2009-06-29	07:26:00	0
2009-06-29	07:27:00	0
2009-06-29	07:28:00	0
2009-06-29	07:29:00	0
2009-06-29	07:30:00	0
2009-06-29	07:31:00	0
2009-06-29	07:32:00	0
2009-06-29	07:33:00	0
2009-06-29	07:34:00	0
2009-06-29	07:35:00	0
2009-06-29	07:36:00	0
2009-06-29	07:37:00	0
2009-06-29	07:38:00	0
2009-06-29	07:39:00	0
2009-06-29	07:40:00	0
2009-06-29	07:41:00	0
2009-06-29	07:42:00	0
2009-06-29	07:43:00	0
2009-06-29	07:44:00	0
2009-06-29	07:45:00	0
2009-06-29	07:46:00	0
2009-06-29	07:47:00	0
2009-06-29	07:48:00	0
2009-06-29	07:49:00	0
2009-06-29	07:50:00	0
2009-06-29	07:51:00	0
2009-06-29	07:52:00	0
2009-06-29	07:53:00	0
2009-06-29	07:54:00	0
2009-06-29	07:55:00	0
2009-06-29	07:56:00	0
2009-06-29	07:57:00	0
2009-06-29	07:58:00	0
2009-06-29	07:59:00	0
2009-06-29	08:00:00	0
2009-06-29	08:01:00	0
2009-06-29	08:02:00	0
2009-06-29	08:03:00	0
2009-06-29	08:04:00	0
2009-06-29	08:05:00	0
2009-06-29	08:06:00	0
2009-06-29	08:07:00	0
2009-06-29	08:08:00	0
2009-06-29	08:09:00	0
2009-06-29	08:10:00	0
2009-06-29	08:11:00	0
2009-06-29	08:12:00	0
2009-06-29	08:13:00	0
2009-06-29	08:14:00	0
2009-06-29	08:15:00	0
2009-06-29	08:16:00	0
2009-06-29	08:17:00	0
2009-06-29	08:18:00	0
2009-06-29	08:19:00	0
2009-06-29	08:20:00	0
2009-06-29	08:21:00	0
2009-06-29	08:22:00	0
2009-06-29	08:23:00	0
2009-06-29	08:24:00	0
2009-06-29	08:25:00	0
2009-06-29	08:26:00	0
2009-06-29	08:27:00	0
2009-06-29	08:28:00	0
2009-06-29	08:29:00	0
2009-06-29	08:30:00	0
2009-06-29	08:31:00	0
2009-06-29	08:32:00	0
2009-06-29	08:33:00	0
2009-06-29	08:34:00	0
2009-06-29	08:35:00	0
2009-06-29	08:36:00	0
2009-06-29	08:37:00	0
2009-06-29	08:38:00	0
2009-06-29	08:39:00	0
2009-06-29	08:40:00	0
2009-06-29	08:41:00	0
2009-06-29	08:42:00	0
2009-06-29	08:43:00	0
2009-06-29	08:44:00	0
2009-06-29	08:45:00	0
2009-06-29	08:46:00	0
2009-06-29	08:47:00	0
2009-06-29	08:48:00	0
2009-06-29	08:49:00	0
2009-06-29	08:50:00	0
2009-06-29	08:51:00	0
2009-06-29	08:52:00	0
2009-06-29	08:53:00	0
2009-06-29	08:54:00	0
2009-06-29	08:55:00	0
2009-06-29	08:56:00	0
2009-06-29	08:57:00	0
2009-06-29	08:58:00	0
2009-06-29	08:59:00	0
2009-06-29	09:00:00	0
2009-06-29	09:01:00	0
2009-06-29	09:02:00	0
2009-06-29	09:03:00	0
2009-06-29	09:04:00	0
2009-06-29	09:05:00	0
2009-06-29	09:06:00	0
2009-06-29	09:07:00	0
2009-06-29	09:08:00	0
2009-06-29	09:09:00	0
2009-06-29	09:10:00	0
2009-06-29	09:11:00	0
2009-06-29	09:12:00	0
2009-06-29	09:13:00	0
2009-06-29	09:14:00	0
2009-06-29	09:15:00	0
2009-06-29	09:16:00	0
2009-06-29	09:17:00	0
2009-06-29	09:18:00	0
2009-06-29	09:19:00	0
2009-06-29	09:20:00	0
2009-06-29	09:21:00	0
2009-06-29	09:22:00	0
2009-06-29	09:23:00	0
2009-06-29	09:24:00	0
2009-06-29	09:25:00	0
2009-06-29	09:26:00	0
2009-06-29	09:27:00	0
2009-06-29	09:28:00	0
2009-06-29	09:29:00	0
2009-06-29	09:30:00	0
2009-06-29	09:31:00	0
2009-06-29	09:32:00	0
2009-06-29	09:33:00	0
2009-06-29	09:34:00	0
2009-06-29	09:35:00	0
2009-06-29	09:36:00	0
2009-06-29	09:37:00	0
2009-06-29	09:38:00	0
2009-06-29	09:39:00	0
2009-06-29	09:40:00	0
2009-06-29	09:41:00	0
2009-06-29	09:42:00	0
2009-06-29	09:43:00	0
2009-06-29	09:44:00	0
2009-06-29	09:45:00	0
2009-06-29	09:46:00	0
2009-06-29	09:47:00	0
2009-06-29	09:48:00	0
2009-06-29	09:49:00	0
2009-06-29	09:50:00	0
2009-06-29	09:51:00	0
2009-06-29	09:52:00	0
2009-06-29	09:53:00	0
2009-06-29	09:54:00	0
2009-06-29	09:55:00	0
2009-06-29	09:56:00	0
2009-06-29	09:57:00	0
2009-06-29	09:58:00	0
2009-06-29	09:59:00	0
2009-06-29	10:00:00	0
2009-06-29	10:01:00	0
2009-06-29	10:02:00	0
2009-06-29	10:03:00	0
2009-06-29	10:04:00	0
2009-06-29	10:05:00	0
2009-06-29	10:06:00	0
2009-06-29	10:07:00	0
2009-06-29	10:08:00	0
2009-06-29	10:09:00	0
2009-06-29	10:10:00	0
2009-06-29	10:11:00	0
2009-06-29	10:12:00	0
2009-06-29	10:13:00	0
2009-06-29	10:14:00	0
2009-06-29	10:15:00	0
2009-06-29	10:16:00	0
2009-06-29	10:17:00	0
2009-06-29	10:18:00	0
2009-06-29	10:19:00	0
2009-06-29	10:20:00	0
2009-06-29	10:21:00	0
2009-06-29	10:22:00	0
2009-06-29	10:23:00	0
2009-06-29	10:24:00	0
2009-06-29	10:25:00	0
2009-06-29	10:26:00	0
2009-06-29	10:27:00	0
2009-06-29	10:28:00	0
2009-06-29	10:29:00	0
2009-06-29	10:30:00	0
2009-06-29	10:31:00	0
2009-06-29	10:32:00	0
2009-06-29	10:33:00	0
2009-06-29	10:34:00	0
2009-06-29	10:35:00	0
2009-06-29	10:36:00	0
2009-06-29	10:37:00	0
2009-06-29	10:38:00	0
2009-06-29	10:39:00	0
2009-06-29	10:40:00	0
2009-06-29	10:41:00	0
2009-06-29	10:42:00	0
2009-06-29	10:43:00	0
2009-06-29	10:44:00	0
2009-06-29	10:45:00	0
2009-06-29	10:46:00	0
2009-06-29	10:47:00	0
2009-06-29	10:48:00	0
2009-06-29	10:49:00	0
2009-06-29	10:50:00	0
2009-06-29	10:51:00	0
2009-06-29	10:52:00	0
2009-06-29	10:53:00	0
2009-06-29	10:54:00	0
2009-06-29	10:55:00	0
2009-06-29	10:56:00	0
2009-06-29	10:57:00	0
2009-06-29	10:58:00	0
2009-06-29	10:59:00	0
2009-06-29	11:00:00	0
2009-06-29	11:01:00	0
2009-06-29	11:02:00	0
2009-06-29	11:03:00	0
2009-06-29	11:04:00	0
2009-06-29	11:05:00	0
2009-06-29	11:06:00	0
2009-06-29	11:07:00	0
2009-06-29	11:08:00	0
2009-06-29	11:09:00	0
2009-06-29	11:10:00	0
2009-06-29	11:11:00	0
2009-06-29	11:12:00	0
2009-06-29	11:13:00	0
2009-06-29	11:14:00	0
2009-06-29	11:15:00	0
2009-06-29	11:16:00	0
2009-06-29	11:17:00	0
2009-06-29	11:18:00	0
2009-06-29	11:19:00	0
2009-06-29	11:20:00	0
2009-06-29	11:21:00	0
2009-06-29	11:22:00	0
2009-06-29	11:23:00	0
2009-06-29	11:24:00	0
2009-06-29	11:25:00	0
2009-06-29	11:26:00	0
2009-06-29	11:27:00	0
2009-06-29	11:28:00	0
2009-06-29	11:29:00	0
2009-06-29	11:30:00	0
2009-06-29	11:31:00	0
2009-06-29	11:32:00	0
2009-06-29	11:33:00	0
2009-06-29	11:34:00	0
2009-06-29	11:35:00	0
2009-06-29	11:36:00	0
2009-06-29	11:37:00	0
2009-06-29	11:38:00	0
2009-06-29	11:39:00	0
2009-06-29	11:40:00	0
2009-06-29	11:41:00	0
2009-06-29	11:42:00	0
2009-06-29	11:43:00	0
2009-06-29	11:44:00	0
2009-06-29	11:45:00	0
2009-06-29	11:46:00	0
2009-06-29	11:47:00	0
2009-06-29	11:48:00	0
2009-06-29	11:49:00	0
2009-06-29	11:50:00	0
2009-06-29	11:51:00	0
2009-06-29	11:52:00	0
2009-06-29	11:53:00	0
2009-06-29	11:54:00	0
2009-06-29	11:55:00	0
2009-06-29	11:56:00	0
2009-06-29	11:57:00	0
2009-06-29	11:58:00	0
2009-06-29	11:59:00	0
2009-06-29	12:00:00	0
2009-06-29	12:01:00	0
2009-06-29	12:02:00	0
2009-06-29	12:03:00	0
2009-06-29	12:04:00	0
2009-06-29	12:05:00	0
2009-06-29	12:06:00	0
2009-06-29	12:07:00	0
2009-06-29	12:08:00	0
2009-06-29	12:09:00	0
2009-06-29	12:10:00	0
2009-06-29	12:11:00	0
2009-06-29	12:12:00	0
2009-06-29	12:13:00	0
2009-06-29	12:14:00	0
2009-06-29	12:15:00	0
2009-06-29	12:16:00	0
2009-06-29	12:17:00	0
2009-06-29	12:18:00	0
2009-06-29	12:19:00	0
2009-06-29	12:20:00	0
2009-06-29	12:21:00	0
2009-06-29	12:22:00	0
2009-06-29	12:23:00	0
2009-06-29	12:24:00	0
2009-06-29	12:25:00	0
2009-06-29	12:26:00	0
2009-06-29	12:27:00	0
2009-06-29	12:28:00	0
2009-06-29	12:29:00	0
2009-06-29	12:30:00	0
2009-06-29	12:31:00	0
2009-06-29	12:32:00	0
2009-06-29	12:33:00	0
2009-06-29	12:34:00	0
2009-06-29	12:35:00	0
2009-06-29	12:36:00	0
2009-06-29	12:37:00	0
2009-06-29	12:38:00	0
2009-06-29	12:39:00	0
2009-06-29	12:40:00	0
2009-06-29	12:41:00	0
2009-06-29	12:42:00	0
2009-06-29	12:43:00	0
2009-06-29	12:44:00	0
2009-06-29	12:45:00	0
2009-06-29	12:46:00	0
2009-06-29	12:47:00	0
2009-06-29	12:48:00	0
2009-06-29	12:49:00	0
2009-06-29	12:50:00	0
2009-06-29	12:51:00	0
2009-06-29	12:52:00	0
2009-06-29	12:53:00	0
2009-06-29	12:54:00	0
2009-06-29	12:55:00	0
2009-06-29	12:56:00	0
2009-06-29	12:57:00	0
2009-06-29	12:58:00	0
2009-06-29	12:59:00	0
2009-06-29	13:00:00	0
2009-06-29	13:01:00	0
2009-06-29	13:02:00	0
2009-06-29	13:03:00	0
2009-06-29	13:04:00	0
2009-06-29	13:05:00	0
2009-06-29	13:06:00	0
2009-06-29	13:07:00	0
2009-06-29	13:08:00	0
2009-06-29	13:09:00	0
2009-06-29	13:10:00	0
2009-06-29	13:11:00	0
2009-06-29	13:12:00	0
2009-06-29	13:13:00	0
2009-06-29	13:14:00	0
2009-06-29	13:15:00	0
2009-06-29	13:16:00	0
2009-06-29	13:17:00	0
2009-06-29	13:18:00	0
2009-06-29	13:19:00	0
2009-06-29	13:20:00	0
2009-06-29	13:21:00	0
2009-06-29	13:22:00	0
2009-06-29	13:23:00	0
2009-06-29	13:24:00	0
2009-06-29	13:25:00	0
2009-06-29	13:26:00	0
2009-06-29	13:27:00	0
2009-06-29	13:28:00	0
2009-06-29	13:29:00	0
2009-06-29	13:30:00	0
2009-06-29	13:31:00	0
2009-06-29	13:32:00	0
2009-06-29	13:33:00	0
2009-06-29	13:34:00	0
2009-06-29	13:35:00	0
2009-06-29	13:36:00	0
2009-06-29	13:37:00	0
2009-06-29	13:38:00	0
2009-06-29	13:39:00	0
2009-06-29	13:40:00	0
2009-06-29	13:41:00	0
2009-06-29	13:42:00	0
2009-06-29	13:43:00	0
2009-06-29	13:44:00	0
2009-06-29	13:45:00	0
2009-06-29	13:46:00	0
2009-06-29	13:47:00	0
2009-06-29	13:48:00	0
2009-06-29	13:49:00	0
2009-06-29	13:50:00	0
2009-06-29	13:51:00	0
2009-06-29	13:52:00	0
2009-06-29	13:53:00	0
2009-06-29	13:54:00	0
2009-06-29	13:55:00	0
2009-06-29	13:56:00	0
2009-06-29	13:57:00	0
2009-06-29	13:58:00	0
2009-06-29	13:59:00	0
2009-06-29	14:00:00	0
2009-06-29	14:01:00	0
2009-06-29	14:02:00	0
2009-06-29	14:03:00	0
2009-06-29	14:04:00	0
2009-06-29	14:05:00	0
2009-06-29	14:06:00	0
2009-06-29	14:07:00	0
2009-06-29	14:08:00	0
2009-06-29	14:09:00	0
2009-06-29	14:10:00	0
2009-06-29	14:11:00	0
2009-06-29	14:12:00	0
2009-06-29	14:13:00	0
2009-06-29	14:14:00	0
2009-06-29	14:15:00	0
2009-06-29	14:16:00	0
2009-06-29	14:17:00	0
2009-06-29	14:18:00	0
2009-06-29	14:19:00	0
2009-06-29	14:20:00	0
2009-06-29	14:21:00	0
2009-06-29	14:22:00	0
2009-06-29	14:23:00	0
2009-06-29	14:24:00	0
2009-06-29	14:25:00	0
2009-06-29	14:26:00	0
2009-06-29	14:27:00	0
2009-06-29	14:28:00	0
2009-06-29	14:29:00	0
2009-06-29	14:30:00	0
2009-06-29	14:31:00	0
2009-06-29	14:32:00	0
2009-06-29	14:33:00	0
2009-06-29	14:34:00	0
2009-06-29	14:35:00	0
2009-06-29	14:36:00	0
2009-06-29	14:37:00	0
2009-06-29	14:38:00	0
2009-06-29	14:39:00	0
2009-06-29	14:40:00	0
2009-06-29	14:41:00	0
2009-06-29	14:42:00	0
2009-06-29	14:43:00	0
2009-06-29	14:44:00	0
2009-06-29	14:45:00	0
2009-06-29	14:46:00	0
2009-06-29	14:47:00	0
2009-06-29	14:48:00	0
2009-06-29	14:49:00	0
2009-06-29	14:50:00	0
2009-06-29	14:51:00	0
2009-06-29	14:52:00	0
2009-06-29	14:53:00	0
2009-06-29	14:54:00	0
2009-06-29	14:55:00	0
2009-06-29	14:56:00	0
2009-06-29	14:57:00	0
2009-06-29	14:58:00	0
2009-06-29	14:59:00	0
2009-06-29	15:00:00	0
2009-06-29	15:01:00	0
2009-06-29	15:02:00	0
2009-06-29	15:03:00	0
2009-06-29	15:04:00	0
2009-06-29	15:05:00	0
2009-06-29	15:06:00	0
2009-06-29	15:07:00	0
2009-06-29	15:08:00	0
2009-06-29	15:09:00	0
2009-06-29	15:10:00	0
2009-06-29	15:11:00	0
2009-06-29	15:12:00	0
2009-06-29	15:13:00	0
2009-06-29	15:14:00	0
2009-06-29	15:15:00	0
2009-06-29	15:16:00	0
2009-06-29	15:17:00	0
2009-06-29	15:18:00	0
2009-06-29	15:19:00	0
2009-06-29	15:20:00	0
2009-06-29	15:21:00	0
2009-06-29	15:22:00	0
2009-06-29	15:23:00	0
2009-06-29	15:24:00	0
2009-06-29	15:25:00	0
2009-06-29	15:26:00	0
2009-06-29	15:27:00	0
2009-06-29	15:28:00	0
2009-06-29	15:29:00	0
2009-06-29	15:30:00	0
2009-06-29	15:31:00	0
2009-06-29	15:32:00	0
2009-06-29	15:33:00	0
2009-06-29	15:34:00	0
2009-06-29	15:35:00	0
2009-06-29	15:36:00	0
2009-06-29	15:37:00	0
2009-06-29	15:38:00	0
2009-06-29	15:39:00	0
2009-06-29	15:40:00	0
2009-06-29	15:41:00	0
2009-06-29	15:42:00	0
2009-06-29	15:43:00	0
2009-06-29	15:44:00	0
2009-06-29	15:45:00	0
2009-06-29	15:46:00	0
2009-06-29	15:47:00	0
2009-06-29	15:48:00	0
2009-06-29	15:49:00	0
2009-06-29	15:50:00	0
2009-06-29	15:51:00	0
2009-06-29	15:52:00	0
2009-06-29	15:53:00	0
2009-06-29	15:54:00	0
2009-06-29	15:55:00	0
2009-06-29	15:56:00	0
2009-06-29	15:57:00	0
2009-06-29	15:58:00	0
2009-06-29	15:59:00	0
2009-06-29	16:00:00	0
2009-06-29	16:01:00	0
2009-06-29	16:02:00	0
2009-06-29	16:03:00	0
2009-06-29	16:04:00	0
2009-06-29	16:05:00	0
2009-06-29	16:06:00	0
2009-06-29	16:07:00	0
2009-06-29	16:08:00	0
2009-06-29	16:09:00	0
2009-06-29	16:10:00	0
2009-06-29	16:11:00	0
2009-06-29	16:12:00	0
2009-06-29	16:13:00	0
2009-06-29	16:14:00	0
2009-06-29	16:15:00	0
2009-06-29	16:16:00	0
2009-06-29	16:17:00	0
2009-06-29	16:18:00	0
2009-06-29	16:19:00	0
2009-06-29	16:20:00	0
2009-06-29	16:21:00	0
2009-06-29	16:22:00	0
2009-06-29	16:23:00	0
2009-06-29	16:24:00	0
2009-06-29	16:25:00	0
2009-06-29	16:26:00	0
2009-06-29	16:27:00	0
2009-06-29	16:28:00	0
2009-06-29	16:29:00	0
2009-06-29	16:30:00	0
2009-06-29	16:31:00	0
2009-06-29	16:32:00	0
2009-06-29	16:33:00	0
2009-06-29	16:34:00	0
2009-06-29	16:35:00	0
2009-06-29	16:36:00	0
2009-06-29	16:37:00	0
2009-06-29	16:38:00	0
2009-06-29	16:39:00	0
2009-06-29	16:40:00	0
2009-06-29	16:41:00	0
2009-06-29	16:42:00	0
2009-06-29	16:43:00	0
2009-06-29	16:44:00	0
2009-06-29	16:45:00	0
2009-06-29	16:46:00	0
2009-06-29	16:47:00	0
2009-06-29	16:48:00	0
2009-06-29	16:49:00	0
2009-06-29	16:50:00	0
2009-06-29	16:51:00	0
2009-06-29	16:52:00	0
2009-06-29	16:53:00	0
2009-06-29	16:54:00	0
2009-06-29	16:55:00	0
2009-06-29	16:56:00	0
2009-06-29	16:57:00	0
2009-06-29	16:58:00	0
2009-06-29	16:59:00	0
2009-06-29	17:00:00	0
2009-06-29	17:01:00	0
2009-06-29	17:02:00	0
2009-06-29	17:03:00	0
2009-06-29	17:04:00	0
2009-06-29	17:05:00	0
2009-06-29	17:06:00	0
2009-06-29	17:07:00	0
2009-06-29	17:08:00	0
2009-06-29	17:09:00	0
2009-06-29	17:10:00	0
2009-06-29	17:11:00	0
2009-06-29	17:12:00	0
2009-06-29	17:13:00	0
2009-06-29	17:14:00	0
2009-06-29	17:15:00	0
2009-06-29	17:16:00	0
2009-06-29	17:17:00	0
2009-06-29	17:18:00	0
2009-06-29	17:19:00	0
2009-06-29	17:20:00	0
2009-06-29	17:21:00	0
2009-06-29	17:22:00	0
2009-06-29	17:23:00	0
2009-06-29	17:24:00	0
2009-06-29	17:25:00	0
2009-06-29	17:26:00	0
2009-06-29	17:27:00	0
2009-06-29	17:28:00	0
2009-06-29	17:29:00	0
2009-06-29	17:30:00	0
2009-06-29	17:31:00	0
2009-06-29	17:32:00	0
2009-06-29	17:33:00	0
2009-06-29	17:34:00	0
2009-06-29	17:35:00	0
2009-06-29	17:36:00	0
2009-06-29	17:37:00	0
2009-06-29	17:38:00	0
2009-06-29	17:39:00	0
2009-06-29	17:40:00	0
2009-06-29	17:41:00	0
2009-06-29	17:42:00	0
2009-06-29	17:43:00	0
2009-06-29	17:44:00	0
2009-06-29	17:45:00	0
2009-06-29	17:46:00	0
2009-06-29	17:47:00	0
2009-06-29	17:48:00	0
2009-06-29	17:49:00	0
2009-06-29	17:50:00	0
2009-06-29	17:51:00	0
2009-06-29	17:52:00	0
2009-06-29	17:53:00	0
2009-06-29	17:54:00	0
2009-06-29	17:55:00	0
2009-06-29	17:56:00	0
2009-06-29	17:57:00	0
2009-06-29	17:58:00	0
2009-06-29	17:59:00	0
2009-06-29	18:00:00	0	M
2009-06-29	18:01:00	960
2009-06-29	18:02:00	55
2009-06-29	18:03:00	276
2009-06-29	18:04:00	0
2009-06-29	18:05:00	0
2009-06-29	18:06:00	0
2009-06-29	18:07:00	446
2009-06-29	18:08:00	428
2009-06-29	18:09:00	382
2009-06-29	18:10:00	22
2009-06-29	18:11:00	121
2009-06-29	18:12:00	157
2009-06-29	18:13:00	110
2009-06-29	18:14:00	335
2009-06-29	18:15:00	110
2009-06-29	18:16:00	276
2009-06-29	18:17:00	263
2009-06-29	18:18:00	143
2009-06-29	18:19:00	382
2009-06-29	18:20:00	0
2009-06-29	18:21:00	0
2009-06-29	18:22:00	0
2009-06-29	18:23:00	0
2009-06-29	18:24:00	0
2009-06-29	18:25:00	0
2009-06-29	18:26:00	0
2009-06-29	18:27:00	0
2009-06-29	18:28:00	110
2009-06-29	18:29:00	99
2009-06-29	18:30:00	320
2009-06-29	18:31:00	0
2009-06-29	18:32:00	33
2009-06-29	18:33:00	110
2009-06-29	18:34:00	446
2009-06-29	18:35:00	88
2009-06-29	18:36:00	0
2009-06-29	18:37:00	0
2009-06-29	18:38:00	0
2009-06-29	18:39:00	0
2009-06-29	18:40:00	249
2009-06-29	18:41:00	223
2009-06-29	18:42:00	121
2009-06-29	18:43:00	499
2009-06-29	18:44:00	609
2009-06-29	18:45:00	33
2009-06-29	18:46:00	132
2009-06-29	18:47:00	276
2009-06-29	18:48:00	516
2009-06-29	18:49:00	0
2009-06-29	18:50:00	0
2009-06-29	18:51:00	0
2009-06-29	18:52:00	0
2009-06-29	18:53:00	0
2009-06-29	18:54:00	289
2009-06-29	18:55:00	110
2009-06-29	18:56:00	0
2009-06-29	18:57:00	11
2009-06-29	18:58:00	552
2009-06-29	18:59:00	249
2009-06-29	19:00:00	0
2009-06-29	19:01:00	0
2009-06-29	19:02:00	0
2009-06-29	19:03:00	11
2009-06-29	19:04:00	0
2009-06-29	19:05:00	0
2009-06-29	19:06:00	0
2009-06-29	19:07:00	121
2009-06-29	19:08:00	366
2009-06-29	19:09:00	0
2009-06-29	19:10:00	0
2009-06-29	19:11:00	0
2009-06-29	19:12:00	0
2009-06-29	19:13:00	0
2009-06-29	19:14:00	0
2009-06-29	19:15:00	110
2009-06-29	19:16:00	0
2009-06-29	19:17:00	0
2009-06-29	19:18:00	0
2009-06-29	19:19:00	132
2009-06-29	19:20:00	11
2009-06-29	19:21:00	223
2009-06-29	19:22:00	289
2009-06-29	19:23:00	77
2009-06-29	19:24:00	157
2009-06-29	19:25:00	99
2009-06-29	19:26:00	516
2009-06-29	19:27:00	263
2009-06-29	19:28:00	99
2009-06-29	19:29:00	11
2009-06-29	19:30:00	0
2009-06-29	19:31:00	0
2009-06-29	19:32:00	0
2009-06-29	19:33:00	132
2009-06-29	19:34:00	0
2009-06-29	19:35:00	0
2009-06-29	19:36:00	88
2009-06-29	19:37:00	249
2009-06-29	19:38:00	0
2009-06-29	19:39:00	0
2009-06-29	19:40:00	0
2009-06-29	19:41:00	0
2009-06-29	19:42:00	0
2009-06-29	19:43:00	0
2009-06-29	19:44:00	143
2009-06-29	19:45:00	196
2009-06-29	19:46:00	33
2009-06-29	19:47:00	11
2009-06-29	19:48:00	0
2009-06-29	19:49:00	0
2009-06-29	19:50:00	0
2009-06-29	19:51:00	77
2009-06-29	19:52:00	183
2009-06-29	19:53:00	11
2009-06-29	19:54:00	0
2009-06-29	19:55:00	110
2009-06-29	19:56:00	289
2009-06-29	19:57:00	1141
2009-06-29	19:58:00	629
2009-06-29	19:59:00	22
2009-06-29	20:00:00	0
2009-06-29	20:01:00	55
2009-06-29	20:02:00	55
2009-06-29	20:03:00	0
2009-06-29	20:04:00	0
2009-06-29	20:05:00	22
2009-06-29	20:06:00	11
2009-06-29	20:07:00	22
2009-06-29	20:08:00	157
2009-06-29	20:09:00	11
2009-06-29	20:10:00	0
2009-06-29	20:11:00	0
2009-06-29	20:12:00	0
2009-06-29	20:13:00	55
2009-06-29	20:14:00	0
2009-06-29	20:15:00	0
2009-06-29	20:16:00	0
2009-06-29	20:17:00	0
2009-06-29	20:18:00	0
2009-06-29	20:19:00	0
2009-06-29	20:20:00	99
2009-06-29	20:21:00	0
2009-06-29	20:22:00	0
2009-06-29	20:23:00	0
2009-06-29	20:24:00	0
2009-06-29	20:25:00	0
2009-06-29	20:26:00	11
2009-06-29	20:27:00	0
2009-06-29	20:28:00	0
2009-06-29	20:29:00	0
2009-06-29	20:30:00	0
2009-06-29	20:31:00	22
2009-06-29	20:32:00	77
2009-06-29	20:33:00	0
2009-06-29	20:34:00	0
2009-06-29	20:35:00	0
2009-06-29	20:36:00	0
2009-06-29	20:37:00	0
2009-06-29	20:38:00	0
2009-06-29	20:39:00	0
2009-06-29	20:40:00	0
2009-06-29	20:41:00	0
2009-06-29	20:42:00	0
2009-06-29	20:43:00	0
2009-06-29	20:44:00	0
2009-06-29	20:45:00	33
2009-06-29	20:46:00	0
2009-06-29	20:47:00	0
2009-06-29	20:48:00	0
2009-06-29	20:49:00	0
2009-06-29	20:50:00	0
2009-06-29	20:51:00	0
2009-06-29	20:52:00	0
2009-06-29	20:53:00	0
2009-06-29	20:54:00	0
2009-06-29	20:55:00	0
2009-06-29	20:56:00	0
2009-06-29	20:57:00	0
2009-06-29	20:58:00	0
2009-06-29	20:59:00	0
2009-06-29	21:00:00	0
2009-06-29	21:01:00	0
2009-06-29	21:02:00	0
2009-06-29	21:03:00	0
2009-06-29	21:04:00	276
2009-06-29	21:05:00	66
2009-06-29	21:06:00	0
2009-06-29	21:07:00	0
2009-06-29	21:08:00	110
2009-06-29	21:09:00	0
2009-06-29	21:10:00	0
2009-06-29	21:11:00	0
2009-06-29	21:12:00	0
2009-06-29	21:13:00	0
2009-06-29	21:14:00	0
2009-06-29	21:15:00	0
2009-06-29	21:16:00	0
2009-06-29	21:17:00	320
2009-06-29	21:18:00	911
2009-06-29	21:19:00	1114
2009-06-29	21:20:00	1408
2009-06-29	21:21:00	223
2009-06-29	21:22:00	196
2009-06-29	21:23:00	196
2009-06-29	21:24:00	0
2009-06-29	21:25:00	0
2009-06-29	21:26:00	0
2009-06-29	21:27:00	0
2009-06-29	21:28:00	0
2009-06-29	21:29:00	0
2009-06-29	21:30:00	0
2009-06-29	21:31:00	0
2009-06-29	21:32:00	0
2009-06-29	21:33:00	11
2009-06-29	21:34:00	0
2009-06-29	21:35:00	0
2009-06-29	21:36:00	0
2009-06-29	21:37:00	0
2009-06-29	21:38:00	55
2009-06-29	21:39:00	0
2009-06-29	21:40:00	143
2009-06-29	21:41:00	0
2009-06-29	21:42:00	0
2009-06-29	21:43:00	0
2009-06-29	21:44:00	0
2009-06-29	21:45:00	0
2009-06-29	21:46:00	0
2009-06-29	21:47:00	0
2009-06-29	21:48:00	0
2009-06-29	21:49:00	0
2009-06-29	21:50:00	0
2009-06-29	21:51:00	0
2009-06-29	21:52:00	0
2009-06-29	21:53:00	0
2009-06-29	21:54:00	0
2009-06-29	21:55:00	0
2009-06-29	21:56:00	0
2009-06-29	21:57:00	33
2009-06-29	21:58:00	0
2009-06-29	21:59:00	0
2009-06-29	22:00:00	0
2009-06-29	22:01:00	0
2009-06-29	22:02:00	0
2009-06-29	22:03:00	0
2009-06-29	22:04:00	0
2009-06-29	22:05:00	0
2009-06-29	22:06:00	0
2009-06-29	22:07:00	0
2009-06-29	22:08:00	0
2009-06-29	22:09:00	0
2009-06-29	22:10:00	0
2009-06-29	22:11:00	0
2009-06-29	22:12:00	0
2009-06-29	22:13:00	0
2009-06-29	22:14:00	0
2009-06-29	22:15:00	0
2009-06-29	22:16:00	0
2009-06-29	22:17:00	0
2009-06-29	22:18:00	0
2009-06-29	22:19:00	0
2009-06-29	22:20:00	0
2009-06-29	22:21:00	0
2009-06-29	22:22:00	0
2009-06-29	22:23:00	22
2009-06-29	22:24:00	0
2009-06-29	22:25:00	0
2009-06-29	22:26:00	0
2009-06-29	22:27:00	0
2009-06-29	22:28:00	0
2009-06-29	22:29:00	0
2009-06-29	22:30:00	44
2009-06-29	22:31:00	0
2009-06-29	22:32:00	0
2009-06-29	22:33:00	0
2009-06-29	22:34:00	0
2009-06-29	22:35:00	0
2009-06-29	22:36:00	0
2009-06-29	22:37:00	0
2009-06-29	22:38:00	0
2009-06-29	22:39:00	0
2009-06-29	22:40:00	0
2009-06-29	22:41:00	0
2009-06-29	22:42:00	0
2009-06-29	22:43:00	22
2009-06-29	22:44:00	0
2009-06-29	22:45:00	0
2009-06-29	22:46:00	0
2009-06-29	22:47:00	0
2009-06-29	22:48:00	0
2009-06-29	22:49:00	0
2009-06-29	22:50:00	0
2009-06-29	22:51:00	0
2009-06-29	22:52:00	0
2009-06-29	22:53:00	0
2009-06-29	22:54:00	0
2009-06-29	22:55:00	0
2009-06-29	22:56:00	0
2009-06-29	22:57:00	0
2009-06-29	22:58:00	0
2009-06-29	22:59:00	0
2009-06-29	23:00:00	0
2009-06-29	23:01:00	0
2009-06-29	23:02:00	0
2009-06-29	23:03:00	0
2009-06-29	23:04:00	0
2009-06-29	23:05:00	0
2009-06-29	23:06:00	0
2009-06-29	23:07:00	0
2009-06-29	23:08:00	0
2009-06-29	23:09:00	0
2009-06-29	23:10:00	0
2009-06-29	23:11:00	0
2009-06-29	23:12:00	0
2009-06-29	23:13:00	0
2009-06-29	23:14:00	0
2009-06-29	23:15:00	0
2009-06-29	23:16:00	0
2009-06-29	23:17:00	0
2009-06-29	23:18:00	0
2009-06-29	23:19:00	0
2009-06-29	23:20:00	0
2009-06-29	23:21:00	0
2009-06-29	23:22:00	0
2009-06-29	23:23:00	22
2009-06-29	23:24:00	0
2009-06-29	23:25:00	0
2009-06-29	23:26:00	0
2009-06-29	23:27:00	0
2009-06-29	23:28:00	0
2009-06-29	23:29:00	0
2009-06-29	23:30:00	0
2009-06-29	23:31:00	0
2009-06-29	23:32:00	0
2009-06-29	23:33:00	11
2009-06-29	23:34:00	33
2009-06-29	23:35:00	0
2009-06-29	23:36:00	0
2009-06-29	23:37:00	0
2009-06-29	23:38:00	0
2009-06-29	23:39:00	0
2009-06-29	23:40:00	0
2009-06-29	23:41:00	0
2009-06-29	23:42:00	0
2009-06-29	23:43:00	0
2009-06-29	23:44:00	0
2009-06-29	23:45:00	0
2009-06-29	23:46:00	11
2009-06-29	23:47:00	0
2009-06-29	23:48:00	0
2009-06-29	23:49:00	0
2009-06-29	23:50:00	0
2009-06-29	23:51:00	0
2009-06-29	23:52:00	0
2009-06-29	23:53:00	0
2009-06-29	23:54:00	0
2009-06-29	23:55:00	0
2009-06-29	23:56:00	0
2009-06-29	23:57:00	77
2009-06-29	23:58:00	0
2009-06-29	23:59:00	11
2009-06-30	00:00:00	11
2009-06-30	00:01:00	0
2009-06-30	00:02:00	99
2009-06-30	00:03:00	0
2009-06-30	00:04:00	0
2009-06-30	00:05:00	0
2009-06-30	00:06:00	0
2009-06-30	00:07:00	0
2009-06-30	00:08:00	0
2009-06-30	00:09:00	0
2009-06-30	00:10:00	0
2009-06-30	00:11:00	0
2009-06-30	00:12:00	0
2009-06-30	00:13:00	0
2009-06-30	00:14:00	0
2009-06-30	00:15:00	0
2009-06-30	00:16:00	0
2009-06-30	00:17:00	99
2009-06-30	00:18:00	88
2009-06-30	00:19:00	33
2009-06-30	00:20:00	0
2009-06-30	00:21:00	0
2009-06-30	00:22:00	66
2009-06-30	00:23:00	0
2009-06-30	00:24:00	0
2009-06-30	00:25:00	0
2009-06-30	00:26:00	0
2009-06-30	00:27:00	0
2009-06-30	00:28:00	0
2009-06-30	00:29:00	0
2009-06-30	00:30:00	0
2009-06-30	00:31:00	0
2009-06-30	00:32:00	0
2009-06-30	00:33:00	0
2009-06-30	00:34:00	0
2009-06-30	00:35:00	0
2009-06-30	00:36:00	0
2009-06-30	00:37:00	0
2009-06-30	00:38:00	0
2009-06-30	00:39:00	0
2009-06-30	00:40:00	0
2009-06-30	00:41:00	0
2009-06-30	00:42:00	0
2009-06-30	00:43:00	0
2009-06-30	00:44:00	0
2009-06-30	00:45:00	0
2009-06-30	00:46:00	0
2009-06-30	00:47:00	0
2009-06-30	00:48:00	0
2009-06-30	00:49:00	0
2009-06-30	00:50:00	0
2009-06-30	00:51:00	0
2009-06-30	00:52:00	0
2009-06-30	00:53:00	0
2009-06-30	00:54:00	0
2009-06-30	00:55:00	0
2009-06-30	00:56:00	0
2009-06-30	00:57:00	0
2009-06-30	00:58:00	0
2009-06-30	00:59:00	0
2009-06-30	01:00:00	0
2009-06-30	01:01:00	0
2009-06-30	01:02:00	0
2009-06-30	01:03:00	0
2009-06-30	01:04:00	0
2009-06-30	01:05:00	0
2009-06-30	01:06:00	0
2009-06-30	01:07:00	0
2009-06-30	01:08:00	0
2009-06-30	01:09:00	0
2009-06-30	01:10:00	0
2009-06-30	01:11:00	0
2009-06-30	01:12:00	0
2009-06-30	01:13:00	0
2009-06-30	01:14:00	0
2009-06-30	01:15:00	0
2009-06-30	01:16:00	0
2009-06-30	01:17:00	0
2009-06-30	01:18:00	0
2009-06-30	01:19:00	0
2009-06-30	01:20:00	0
2009-06-30	01:21:00	0
2009-06-30	01:22:00	22
2009-06-30	01:23:00	0
2009-06-30	01:24:00	0
2009-06-30	01:25:00	0
2009-06-30	01:26:00	0
2009-06-30	01:27:00	0
2009-06-30	01:28:00	0
2009-06-30	01:29:00	0
2009-06-30	01:30:00	0
2009-06-30	01:31:00	0
2009-06-30	01:32:00	0
2009-06-30	01:33:00	0
2009-06-30	01:34:00	0
2009-06-30	01:35:00	0
2009-06-30	01:36:00	0
2009-06-30	01:37:00	0
2009-06-30	01:38:00	0
2009-06-30	01:39:00	0
2009-06-30	01:40:00	0
2009-06-30	01:41:00	0
2009-06-30	01:42:00	0
2009-06-30	01:43:00	0
2009-06-30	01:44:00	11
2009-06-30	01:45:00	0
2009-06-30	01:46:00	0
2009-06-30	01:47:00	0
2009-06-30	01:48:00	0
2009-06-30	01:49:00	0
2009-06-30	01:50:00	0
2009-06-30	01:51:00	0
2009-06-30	01:52:00	0
2009-06-30	01:53:00	0
2009-06-30	01:54:00	0
2009-06-30	01:55:00	0
2009-06-30	01:56:00	0
2009-06-30	01:57:00	0
2009-06-30	01:58:00	0
2009-06-30	01:59:00	0
2009-06-30	02:00:00	0
2009-06-30	02:01:00	0
2009-06-30	02:02:00	0
2009-06-30	02:03:00	0
2009-06-30	02:04:00	0
2009-06-30	02:05:00	0
2009-06-30	02:06:00	0
2009-06-30	02:07:00	0
2009-06-30	02:08:00	0
2009-06-30	02:09:00	0
2009-06-30	02:10:00	0
2009-06-30	02:11:00	0
2009-06-30	02:12:00	0
2009-06-30	02:13:00	0
2009-06-30	02:14:00	0
2009-06-30	02:15:00	0
2009-06-30	02:16:00	0
2009-06-30	02:17:00	0
2009-06-30	02:18:00	0
2009-06-30	02:19:00	0
2009-06-30	02:20:00	0
2009-06-30	02:21:00	0
2009-06-30	02:22:00	0
2009-06-30	02:23:00	0
2009-06-30	02:24:00	0
2009-06-30	02:25:00	0
2009-06-30	02:26:00	0
2009-06-30	02:27:00	0
2009-06-30	02:28:00	0
2009-06-30	02:29:00	11
2009-06-30	02:30:00	0
2009-06-30	02:31:00	0
2009-06-30	02:32:00	0
2009-06-30	02:33:00	0
2009-06-30	02:34:00	0
2009-06-30	02:35:00	0
2009-06-30	02:36:00	0
2009-06-30	02:37:00	0
2009-06-30	02:38:00	0
2009-06-30	02:39:00	0
2009-06-30	02:40:00	0
2009-06-30	02:41:00	0
2009-06-30	02:42:00	22
2009-06-30	02:43:00	0
2009-06-30	02:44:00	0
2009-06-30	02:45:00	0
2009-06-30	02:46:00	0
2009-06-30	02:47:00	0
2009-06-30	02:48:00	0
2009-06-30	02:49:00	0
2009-06-30	02:50:00	0
2009-06-30	02:51:00	0
2009-06-30	02:52:00	0
2009-06-30	02:53:00	0
2009-06-30	02:54:00	0
2009-06-30	02:55:00	0
2009-06-30	02:56:00	0
2009-06-30	02:57:00	0
2009-06-30	02:58:00	0
2009-06-30	02:59:00	0
2009-06-30	03:00:00	0
2009-06-30	03:01:00	0
2009-06-30	03:02:00	0
2009-06-30	03:03:00	0
2009-06-30	03:04:00	0
2009-06-30	03:05:00	0
2009-06-30	03:06:00	22
2009-06-30	03:07:00	0
2009-06-30	03:08:00	0
2009-06-30	03:09:00	0
2009-06-30	03:10:00	0
2009-06-30	03:11:00	0
2009-06-30	03:12:00	0
2009-06-30	03:13:00	0
2009-06-30	03:14:00	0
2009-06-30	03:15:00	0
2009-06-30	03:16:00	0
2009-06-30	03:17:00	0
2009-06-30	03:18:00	0
2009-06-30	03:19:00	0
2009-06-30	03:20:00	0
2009-06-30	03:21:00	0
2009-06-30	03:22:00	0
2009-06-30	03:23:00	0
2009-06-30	03:24:00	0
2009-06-30	03:25:00	0
2009-06-30	03:26:00	22
2009-06-30	03:27:00	33
2009-06-30	03:28:00	0
2009-06-30	03:29:00	0
2009-06-30	03:30:00	0
2009-06-30	03:31:00	0
2009-06-30	03:32:00	0
2009-06-30	03:33:00	0
2009-06-30	03:34:00	0
2009-06-30	03:35:00	0
2009-06-30	03:36:00	0
2009-06-30	03:37:00	0
2009-06-30	03:38:00	0
2009-06-30	03:39:00	0
2009-06-30	03:40:00	0
2009-06-30	03:41:00	0
2009-06-30	03:42:00	0
2009-06-30	03:43:00	0
2009-06-30	03:44:00	0
2009-06-30	03:45:00	0
2009-06-30	03:46:00	88
2009-06-30	03:47:00	11
2009-06-30	03:48:00	170
2009-06-30	03:49:00	0
2009-06-30	03:50:00	77
2009-06-30	03:51:00	0
2009-06-30	03:52:00	0
2009-06-30	03:53:00	0
2009-06-30	03:54:00	0
2009-06-30	03:55:00	0
2009-06-30	03:56:00	110
2009-06-30	03:57:00	0
2009-06-30	03:58:00	0
2009-06-30	03:59:00	0
2009-06-30	04:00:00	0
2009-06-30	04:01:00	0
2009-06-30	04:02:00	0
2009-06-30	04:03:00	0
2009-06-30	04:04:00	0
2009-06-30	04:05:00	0
2009-06-30	04:06:00	0
2009-06-30	04:07:00	0
2009-06-30	04:08:00	0
2009-06-30	04:09:00	0
2009-06-30	04:10:00	0
2009-06-30	04:11:00	0
2009-06-30	04:12:00	0
2009-06-30	04:13:00	0
2009-06-30	04:14:00	0
2009-06-30	04:15:00	0
2009-06-30	04:16:00	0
2009-06-30	04:17:00	0
2009-06-30	04:18:00	0
2009-06-30	04:19:00	0
2009-06-30	04:20:00	0
2009-06-30	04:21:00	0
2009-06-30	04:22:00	0
2009-06-30	04:23:00	0
2009-06-30	04:24:00	0
2009-06-30	04:25:00	0
2009-06-30	04:26:00	0
2009-06-30	04:27:00	0
2009-06-30	04:28:00	0
2009-06-30	04:29:00	0
2009-06-30	04:30:00	0
2009-06-30	04:31:00	0
2009-06-30	04:32:00	0
2009-06-30	04:33:00	0
2009-06-30	04:34:00	0
2009-06-30	04:35:00	0
2009-06-30	04:36:00	0
2009-06-30	04:37:00	0
2009-06-30	04:38:00	0
2009-06-30	04:39:00	0
2009-06-30	04:40:00	0
2009-06-30	04:41:00	0
2009-06-30	04:42:00	0
2009-06-30	04:43:00	0
2009-06-30	04:44:00	0
2009-06-30	04:45:00	0
2009-06-30	04:46:00	0
2009-06-30	04:47:00	0
2009-06-30	04:48:00	0
2009-06-30	04:49:00	0
2009-06-30	04:50:00	0
2009-06-30	04:51:00	0
2009-06-30	04:52:00	0
2009-06-30	04:53:00	0
2009-06-30	04:54:00	0
2009-06-30	04:55:00	77
2009-06-30	04:56:00	0
2009-06-30	04:57:00	110
2009-06-30	04:58:00	0
2009-06-30	04:59:00	33
2009-06-30	05:00:00	22
2009-06-30	05:01:00	0
2009-06-30	05:02:00	66
2009-06-30	05:03:00	0
2009-06-30	05:04:00	11
2009-06-30	05:05:00	0
2009-06-30	05:06:00	0
2009-06-30	05:07:00	0
2009-06-30	05:08:00	0
2009-06-30	05:09:00	0
2009-06-30	05:10:00	0
2009-06-30	05:11:00	0
2009-06-30	05:12:00	0
2009-06-30	05:13:00	0
2009-06-30	05:14:00	0
2009-06-30	05:15:00	0
2009-06-30	05:16:00	0
2009-06-30	05:17:00	0
2009-06-30	05:18:00	0
2009-06-30	05:19:00	0
2009-06-30	05:20:00	0
2009-06-30	05:21:00	0
2009-06-30	05:22:00	0
2009-06-30	05:23:00	0
2009-06-30	05:24:00	0
2009-06-30	05:25:00	0
2009-06-30	05:26:00	0
2009-06-30	05:27:00	0
2009-06-30	05:28:00	0
2009-06-30	05:29:00	0
2009-06-30	05:30:00	0
2009-06-30	05:31:00	0
2009-06-30	05:32:00	0
2009-06-30	05:33:00	0
2009-06-30	05:34:00	88
2009-06-30	05:35:00	0
2009-06-30	05:36:00	0
2009-06-30	05:37:00	44
2009-06-30	05:38:00	77
2009-06-30	05:39:00	143
2009-06-30	05:40:00	397
2009-06-30	05:41:00	609
2009-06-30	05:42:00	1346
2009-06-30	05:43:00	481
2009-06-30	05:44:00	382
2009-06-30	05:45:00	428
2009-06-30	05:46:00	99
2009-06-30	05:47:00	55
2009-06-30	05:48:00	0
2009-06-30	05:49:00	0
2009-06-30	05:50:00	170
2009-06-30	05:51:00	0
2009-06-30	05:52:00	0
2009-06-30	05:53:00	0
2009-06-30	05:54:00	516
2009-06-30	05:55:00	305
2009-06-30	05:56:00	0
2009-06-30	05:57:00	0
2009-06-30	05:58:00	110
2009-06-30	05:59:00	121
2009-06-30	06:00:00	99
2009-06-30	06:01:00	66
2009-06-30	06:02:00	649
2009-06-30	06:03:00	335
2009-06-30	06:04:00	0
2009-06-30	06:05:00	397
2009-06-30	06:06:00	366
2009-06-30	06:07:00	110
2009-06-30	06:08:00	0
2009-06-30	06:09:00	0
2009-06-30	06:10:00	481
2009-06-30	06:11:00	0
2009-06-30	06:12:00	11
2009-06-30	06:13:00	0
2009-06-30	06:14:00	0
2009-06-30	06:15:00	446
2009-06-30	06:16:00	382
2009-06-30	06:17:00	88
2009-06-30	06:18:00	22
2009-06-30	06:19:00	132
2009-06-30	06:20:00	0
2009-06-30	06:21:00	0
2009-06-30	06:22:00	0
2009-06-30	06:23:00	0
2009-06-30	06:24:00	0
2009-06-30	06:25:00	66
2009-06-30	06:26:00	11
2009-06-30	06:27:00	170
2009-06-30	06:28:00	0
2009-06-30	06:29:00	0
2009-06-30	06:30:00	11
2009-06-30	06:31:00	55
2009-06-30	06:32:00	66
2009-06-30	06:33:00	0
2009-06-30	06:34:00	0
2009-06-30	06:35:00	33
2009-06-30	06:36:00	110
2009-06-30	06:37:00	0
2009-06-30	06:38:00	22
2009-06-30	06:39:00	320
2009-06-30	06:40:00	11
2009-06-30	06:41:00	11
2009-06-30	06:42:00	33
2009-06-30	06:43:00	44
2009-06-30	06:44:00	236
2009-06-30	06:45:00	223
2009-06-30	06:46:00	0
2009-06-30	06:47:00	0
2009-06-30	06:48:00	0
2009-06-30	06:49:00	77
2009-06-30	06:50:00	0
2009-06-30	06:51:00	33
2009-06-30	06:52:00	22
2009-06-30	06:53:00	11
2009-06-30	06:54:00	0
2009-06-30	06:55:00	55
2009-06-30	06:56:00	33
2009-06-30	06:57:00	0
2009-06-30	06:58:00	66
2009-06-30	06:59:00	33
2009-06-30	07:00:00	183
2009-06-30	07:01:00	0
2009-06-30	07:02:00	66
2009-06-30	07:03:00	753
2009-06-30	07:04:00	170
2009-06-30	07:05:00	516
2009-06-30	07:06:00	33
2009-06-30	07:07:00	22
2009-06-30	07:08:00	33
2009-06-30	07:09:00	11
2009-06-30	07:10:00	0
2009-06-30	07:11:00	0
2009-06-30	07:12:00	0
2009-06-30	07:13:00	0
2009-06-30	07:14:00	0
2009-06-30	07:15:00	0
2009-06-30	07:16:00	0
2009-06-30	07:17:00	0
2009-06-30	07:18:00	0
2009-06-30	07:19:00	33
2009-06-30	07:20:00	0
2009-06-30	07:21:00	0
2009-06-30	07:22:00	66
2009-06-30	07:23:00	0
2009-06-30	07:24:00	0
2009-06-30	07:25:00	0
2009-06-30	07:26:00	0
2009-06-30	07:27:00	0
2009-06-30	07:28:00	0
2009-06-30	07:29:00	0
2009-06-30	07:30:00	0
2009-06-30	07:31:00	0
2009-06-30	07:32:00	0
2009-06-30	07:33:00	0
2009-06-30	07:34:00	0
2009-06-30	07:35:00	33
2009-06-30	07:36:00	0
2009-06-30	07:37:00	0
2009-06-30	07:38:00	0
2009-06-30	07:39:00	0
2009-06-30	07:40:00	0
2009-06-30	07:41:00	0
2009-06-30	07:42:00	0
2009-06-30	07:43:00	0
2009-06-30	07:44:00	0
2009-06-30	07:45:00	0
2009-06-30	07:46:00	55
2009-06-30	07:47:00	22
2009-06-30	07:48:00	55
2009-06-30	07:49:00	0
2009-06-30	07:50:00	11
2009-06-30	07:51:00	249
2009-06-30	07:52:00	11
2009-06-30	07:53:00	11
2009-06-30	07:54:00	0
2009-06-30	07:55:00	88
2009-06-30	07:56:00	183
2009-06-30	07:57:00	0
2009-06-30	07:58:00	0
2009-06-30	07:59:00	0
2009-06-30	08:00:00	0
2009-06-30	08:01:00	0
2009-06-30	08:02:00	0
2009-06-30	08:03:00	0
2009-06-30	08:04:00	534
2009-06-30	08:05:00	110
2009-06-30	08:06:00	223
2009-06-30	08:07:00	463
2009-06-30	08:08:00	0
2009-06-30	08:09:00	170
2009-06-30	08:10:00	11
2009-06-30	08:11:00	121
2009-06-30	08:12:00	143
2009-06-30	08:13:00	0
2009-06-30	08:14:00	0
2009-06-30	08:15:00	0
2009-06-30	08:16:00	0
2009-06-30	08:17:00	0
2009-06-30	08:18:00	88
2009-06-30	08:19:00	33
2009-06-30	08:20:00	0
2009-06-30	08:21:00	263
2009-06-30	08:22:00	88
2009-06-30	08:23:00	0
2009-06-30	08:24:00	143
2009-06-30	08:25:00	0
2009-06-30	08:26:00	11
2009-06-30	08:27:00	0
2009-06-30	08:28:00	0
2009-06-30	08:29:00	0
2009-06-30	08:30:00	1346
2009-06-30	08:31:00	0
2009-06-30	08:32:00	0
2009-06-30	08:33:00	0
2009-06-30	08:34:00	11
2009-06-30	08:35:00	0
2009-06-30	08:36:00	0
2009-06-30	08:37:00	0
2009-06-30	08:38:00	0
2009-06-30	08:39:00	0
2009-06-30	08:40:00	0
2009-06-30	08:41:00	0
2009-06-30	08:42:00	22
2009-06-30	08:43:00	0
2009-06-30	08:44:00	0
2009-06-30	08:45:00	183
2009-06-30	08:46:00	183
2009-06-30	08:47:00	0
2009-06-30	08:48:00	0
2009-06-30	08:49:00	0
2009-06-30	08:50:00	0
2009-06-30	08:51:00	44
2009-06-30	08:52:00	22
2009-06-30	08:53:00	66
2009-06-30	08:54:00	196
2009-06-30	08:55:00	143
2009-06-30	08:56:00	0
2009-06-30	08:57:00	183
2009-06-30	08:58:00	22
2009-06-30	08:59:00	0
2009-06-30	09:00:00	11
2009-06-30	09:01:00	11
2009-06-30	09:02:00	0
2009-06-30	09:03:00	183
2009-06-30	09:04:00	305
2009-06-30	09:05:00	249
2009-06-30	09:06:00	0
2009-06-30	09:07:00	0
2009-06-30	09:08:00	0
[truncated: 19,611 more rows]

## Sheet: 7.13.09
Actogram, Copy Raw Data, All Days
Identity:	Sophie
Filename:	E:\Active Research Files\meloxicam titre canine\cases\sophie\Sophie 7.13.09.AWC
Gender:	F
Age:	8
Height:	61.0 cm	24.0 in
Weight:	27.0 kg	59.5 lbs
Start Date:	13-Jul-2009 (Mon)
Start Time:	18:00:00
Interval:	1.00 mins
Date Stamp:	Time Stamp:	Activity Data:	Marker Press:
2009-07-13	00:00:00	0
2009-07-13	00:01:00	0
2009-07-13	00:02:00	0
2009-07-13	00:03:00	0
2009-07-13	00:04:00	0
2009-07-13	00:05:00	0
2009-07-13	00:06:00	0
2009-07-13	00:07:00	0
2009-07-13	00:08:00	0
2009-07-13	00:09:00	0
2009-07-13	00:10:00	0
2009-07-13	00:11:00	0
2009-07-13	00:12:00	0
2009-07-13	00:13:00	0
2009-07-13	00:14:00	0
2009-07-13	00:15:00	0
2009-07-13	00:16:00	0
2009-07-13	00:17:00	0
2009-07-13	00:18:00	0
2009-07-13	00:19:00	0
2009-07-13	00:20:00	0
2009-07-13	00:21:00	0
2009-07-13	00:22:00	0
2009-07-13	00:23:00	0
2009-07-13	00:24:00	0
2009-07-13	00:25:00	0
2009-07-13	00:26:00	0
2009-07-13	00:27:00	0
2009-07-13	00:28:00	0
2009-07-13	00:29:00	0
2009-07-13	00:30:00	0
2009-07-13	00:31:00	0
2009-07-13	00:32:00	0
2009-07-13	00:33:00	0
2009-07-13	00:34:00	0
2009-07-13	00:35:00	0
2009-07-13	00:36:00	0
2009-07-13	00:37:00	0
2009-07-13	00:38:00	0
2009-07-13	00:39:00	0
2009-07-13	00:40:00	0
2009-07-13	00:41:00	0
2009-07-13	00:42:00	0
2009-07-13	00:43:00	0
2009-07-13	00:44:00	0
2009-07-13	00:45:00	0
2009-07-13	00:46:00	0
2009-07-13	00:47:00	0
2009-07-13	00:48:00	0
2009-07-13	00:49:00	0
2009-07-13	00:50:00	0
2009-07-13	00:51:00	0
2009-07-13	00:52:00	0
2009-07-13	00:53:00	0
2009-07-13	00:54:00	0
2009-07-13	00:55:00	0
2009-07-13	00:56:00	0
2009-07-13	00:57:00	0
2009-07-13	00:58:00	0
2009-07-13	00:59:00	0
2009-07-13	01:00:00	0
2009-07-13	01:01:00	0
2009-07-13	01:02:00	0
2009-07-13	01:03:00	0
2009-07-13	01:04:00	0
2009-07-13	01:05:00	0
2009-07-13	01:06:00	0
2009-07-13	01:07:00	0
2009-07-13	01:08:00	0
2009-07-13	01:09:00	0
2009-07-13	01:10:00	0
2009-07-13	01:11:00	0
2009-07-13	01:12:00	0
2009-07-13	01:13:00	0
2009-07-13	01:14:00	0
2009-07-13	01:15:00	0
2009-07-13	01:16:00	0
2009-07-13	01:17:00	0
2009-07-13	01:18:00	0
2009-07-13	01:19:00	0
2009-07-13	01:20:00	0
2009-07-13	01:21:00	0
2009-07-13	01:22:00	0
2009-07-13	01:23:00	0
2009-07-13	01:24:00	0
2009-07-13	01:25:00	0
2009-07-13	01:26:00	0
2009-07-13	01:27:00	0
2009-07-13	01:28:00	0
2009-07-13	01:29:00	0
2009-07-13	01:30:00	0
2009-07-13	01:31:00	0
2009-07-13	01:32:00	0
2009-07-13	01:33:00	0
2009-07-13	01:34:00	0
2009-07-13	01:35:00	0
2009-07-13	01:36:00	0
2009-07-13	01:37:00	0
2009-07-13	01:38:00	0
2009-07-13	01:39:00	0
2009-07-13	01:40:00	0
2009-07-13	01:41:00	0
2009-07-13	01:42:00	0
2009-07-13	01:43:00	0
2009-07-13	01:44:00	0
2009-07-13	01:45:00	0
2009-07-13	01:46:00	0
2009-07-13	01:47:00	0
2009-07-13	01:48:00	0
2009-07-13	01:49:00	0
2009-07-13	01:50:00	0
2009-07-13	01:51:00	0
2009-07-13	01:52:00	0
2009-07-13	01:53:00	0
2009-07-13	01:54:00	0
2009-07-13	01:55:00	0
2009-07-13	01:56:00	0
2009-07-13	01:57:00	0
2009-07-13	01:58:00	0
2009-07-13	01:59:00	0
2009-07-13	02:00:00	0
2009-07-13	02:01:00	0
2009-07-13	02:02:00	0
2009-07-13	02:03:00	0
2009-07-13	02:04:00	0
2009-07-13	02:05:00	0
2009-07-13	02:06:00	0
2009-07-13	02:07:00	0
2009-07-13	02:08:00	0
2009-07-13	02:09:00	0
2009-07-13	02:10:00	0
2009-07-13	02:11:00	0
2009-07-13	02:12:00	0
2009-07-13	02:13:00	0
2009-07-13	02:14:00	0
2009-07-13	02:15:00	0
2009-07-13	02:16:00	0
2009-07-13	02:17:00	0
2009-07-13	02:18:00	0
2009-07-13	02:19:00	0
2009-07-13	02:20:00	0
2009-07-13	02:21:00	0
2009-07-13	02:22:00	0
2009-07-13	02:23:00	0
2009-07-13	02:24:00	0
2009-07-13	02:25:00	0
2009-07-13	02:26:00	0
2009-07-13	02:27:00	0
2009-07-13	02:28:00	0
2009-07-13	02:29:00	0
2009-07-13	02:30:00	0
2009-07-13	02:31:00	0
2009-07-13	02:32:00	0
2009-07-13	02:33:00	0
2009-07-13	02:34:00	0
2009-07-13	02:35:00	0
2009-07-13	02:36:00	0
2009-07-13	02:37:00	0
2009-07-13	02:38:00	0
2009-07-13	02:39:00	0
2009-07-13	02:40:00	0
2009-07-13	02:41:00	0
2009-07-13	02:42:00	0
2009-07-13	02:43:00	0
2009-07-13	02:44:00	0
2009-07-13	02:45:00	0
2009-07-13	02:46:00	0
2009-07-13	02:47:00	0
2009-07-13	02:48:00	0
2009-07-13	02:49:00	0
2009-07-13	02:50:00	0
2009-07-13	02:51:00	0
2009-07-13	02:52:00	0
2009-07-13	02:53:00	0
2009-07-13	02:54:00	0
2009-07-13	02:55:00	0
2009-07-13	02:56:00	0
2009-07-13	02:57:00	0
2009-07-13	02:58:00	0
2009-07-13	02:59:00	0
2009-07-13	03:00:00	0
2009-07-13	03:01:00	0
2009-07-13	03:02:00	0
2009-07-13	03:03:00	0
2009-07-13	03:04:00	0
2009-07-13	03:05:00	0
2009-07-13	03:06:00	0
2009-07-13	03:07:00	0
2009-07-13	03:08:00	0
2009-07-13	03:09:00	0
2009-07-13	03:10:00	0
2009-07-13	03:11:00	0
2009-07-13	03:12:00	0
2009-07-13	03:13:00	0
2009-07-13	03:14:00	0
2009-07-13	03:15:00	0
2009-07-13	03:16:00	0
2009-07-13	03:17:00	0
2009-07-13	03:18:00	0
2009-07-13	03:19:00	0
2009-07-13	03:20:00	0
2009-07-13	03:21:00	0
2009-07-13	03:22:00	0
2009-07-13	03:23:00	0
2009-07-13	03:24:00	0
2009-07-13	03:25:00	0
2009-07-13	03:26:00	0
2009-07-13	03:27:00	0
2009-07-13	03:28:00	0
2009-07-13	03:29:00	0
2009-07-13	03:30:00	0
2009-07-13	03:31:00	0
2009-07-13	03:32:00	0
2009-07-13	03:33:00	0
2009-07-13	03:34:00	0
2009-07-13	03:35:00	0
2009-07-13	03:36:00	0
2009-07-13	03:37:00	0
2009-07-13	03:38:00	0
2009-07-13	03:39:00	0
2009-07-13	03:40:00	0
2009-07-13	03:41:00	0
2009-07-13	03:42:00	0
2009-07-13	03:43:00	0
2009-07-13	03:44:00	0
2009-07-13	03:45:00	0
2009-07-13	03:46:00	0
2009-07-13	03:47:00	0
2009-07-13	03:48:00	0
2009-07-13	03:49:00	0
2009-07-13	03:50:00	0
2009-07-13	03:51:00	0
2009-07-13	03:52:00	0
2009-07-13	03:53:00	0
2009-07-13	03:54:00	0
2009-07-13	03:55:00	0
2009-07-13	03:56:00	0
2009-07-13	03:57:00	0
2009-07-13	03:58:00	0
2009-07-13	03:59:00	0
2009-07-13	04:00:00	0
2009-07-13	04:01:00	0
2009-07-13	04:02:00	0
2009-07-13	04:03:00	0
2009-07-13	04:04:00	0
2009-07-13	04:05:00	0
2009-07-13	04:06:00	0
2009-07-13	04:07:00	0
2009-07-13	04:08:00	0
2009-07-13	04:09:00	0
2009-07-13	04:10:00	0
2009-07-13	04:11:00	0
2009-07-13	04:12:00	0
2009-07-13	04:13:00	0
2009-07-13	04:14:00	0
2009-07-13	04:15:00	0
2009-07-13	04:16:00	0
2009-07-13	04:17:00	0
2009-07-13	04:18:00	0
2009-07-13	04:19:00	0
2009-07-13	04:20:00	0
2009-07-13	04:21:00	0
2009-07-13	04:22:00	0
2009-07-13	04:23:00	0
2009-07-13	04:24:00	0
2009-07-13	04:25:00	0
2009-07-13	04:26:00	0
2009-07-13	04:27:00	0
2009-07-13	04:28:00	0
2009-07-13	04:29:00	0
2009-07-13	04:30:00	0
2009-07-13	04:31:00	0
2009-07-13	04:32:00	0
2009-07-13	04:33:00	0
2009-07-13	04:34:00	0
2009-07-13	04:35:00	0
2009-07-13	04:36:00	0
2009-07-13	04:37:00	0
2009-07-13	04:38:00	0
2009-07-13	04:39:00	0
2009-07-13	04:40:00	0
2009-07-13	04:41:00	0
2009-07-13	04:42:00	0
2009-07-13	04:43:00	0
2009-07-13	04:44:00	0
2009-07-13	04:45:00	0
2009-07-13	04:46:00	0
2009-07-13	04:47:00	0
2009-07-13	04:48:00	0
2009-07-13	04:49:00	0
2009-07-13	04:50:00	0
2009-07-13	04:51:00	0
2009-07-13	04:52:00	0
2009-07-13	04:53:00	0
2009-07-13	04:54:00	0
2009-07-13	04:55:00	0
2009-07-13	04:56:00	0
2009-07-13	04:57:00	0
2009-07-13	04:58:00	0
2009-07-13	04:59:00	0
2009-07-13	05:00:00	0
2009-07-13	05:01:00	0
2009-07-13	05:02:00	0
2009-07-13	05:03:00	0
2009-07-13	05:04:00	0
2009-07-13	05:05:00	0
2009-07-13	05:06:00	0
2009-07-13	05:07:00	0
2009-07-13	05:08:00	0
2009-07-13	05:09:00	0
2009-07-13	05:10:00	0
2009-07-13	05:11:00	0
2009-07-13	05:12:00	0
2009-07-13	05:13:00	0
2009-07-13	05:14:00	0
2009-07-13	05:15:00	0
2009-07-13	05:16:00	0
2009-07-13	05:17:00	0
2009-07-13	05:18:00	0
2009-07-13	05:19:00	0
2009-07-13	05:20:00	0
2009-07-13	05:21:00	0
2009-07-13	05:22:00	0
2009-07-13	05:23:00	0
2009-07-13	05:24:00	0
2009-07-13	05:25:00	0
2009-07-13	05:26:00	0
2009-07-13	05:27:00	0
2009-07-13	05:28:00	0
2009-07-13	05:29:00	0
2009-07-13	05:30:00	0
2009-07-13	05:31:00	0
2009-07-13	05:32:00	0
2009-07-13	05:33:00	0
2009-07-13	05:34:00	0
2009-07-13	05:35:00	0
2009-07-13	05:36:00	0
2009-07-13	05:37:00	0
2009-07-13	05:38:00	0
2009-07-13	05:39:00	0
2009-07-13	05:40:00	0
2009-07-13	05:41:00	0
2009-07-13	05:42:00	0
2009-07-13	05:43:00	0
2009-07-13	05:44:00	0
2009-07-13	05:45:00	0
2009-07-13	05:46:00	0
2009-07-13	05:47:00	0
2009-07-13	05:48:00	0
2009-07-13	05:49:00	0
2009-07-13	05:50:00	0
2009-07-13	05:51:00	0
2009-07-13	05:52:00	0
2009-07-13	05:53:00	0
2009-07-13	05:54:00	0
2009-07-13	05:55:00	0
2009-07-13	05:56:00	0
2009-07-13	05:57:00	0
2009-07-13	05:58:00	0
2009-07-13	05:59:00	0
2009-07-13	06:00:00	0
2009-07-13	06:01:00	0
2009-07-13	06:02:00	0
2009-07-13	06:03:00	0
2009-07-13	06:04:00	0
2009-07-13	06:05:00	0
2009-07-13	06:06:00	0
2009-07-13	06:07:00	0
2009-07-13	06:08:00	0
2009-07-13	06:09:00	0
2009-07-13	06:10:00	0
2009-07-13	06:11:00	0
2009-07-13	06:12:00	0
2009-07-13	06:13:00	0
2009-07-13	06:14:00	0
2009-07-13	06:15:00	0
2009-07-13	06:16:00	0
2009-07-13	06:17:00	0
2009-07-13	06:18:00	0
2009-07-13	06:19:00	0
2009-07-13	06:20:00	0
2009-07-13	06:21:00	0
2009-07-13	06:22:00	0
2009-07-13	06:23:00	0
2009-07-13	06:24:00	0
2009-07-13	06:25:00	0
2009-07-13	06:26:00	0
2009-07-13	06:27:00	0
2009-07-13	06:28:00	0
2009-07-13	06:29:00	0
2009-07-13	06:30:00	0
2009-07-13	06:31:00	0
2009-07-13	06:32:00	0
2009-07-13	06:33:00	0
2009-07-13	06:34:00	0
2009-07-13	06:35:00	0
2009-07-13	06:36:00	0
2009-07-13	06:37:00	0
2009-07-13	06:38:00	0
2009-07-13	06:39:00	0
2009-07-13	06:40:00	0
2009-07-13	06:41:00	0
2009-07-13	06:42:00	0
2009-07-13	06:43:00	0
2009-07-13	06:44:00	0
2009-07-13	06:45:00	0
2009-07-13	06:46:00	0
2009-07-13	06:47:00	0
2009-07-13	06:48:00	0
2009-07-13	06:49:00	0
2009-07-13	06:50:00	0
2009-07-13	06:51:00	0
2009-07-13	06:52:00	0
2009-07-13	06:53:00	0
2009-07-13	06:54:00	0
2009-07-13	06:55:00	0
2009-07-13	06:56:00	0
2009-07-13	06:57:00	0
2009-07-13	06:58:00	0
2009-07-13	06:59:00	0
2009-07-13	07:00:00	0
2009-07-13	07:01:00	0
2009-07-13	07:02:00	0
2009-07-13	07:03:00	0
2009-07-13	07:04:00	0
2009-07-13	07:05:00	0
2009-07-13	07:06:00	0
2009-07-13	07:07:00	0
2009-07-13	07:08:00	0
2009-07-13	07:09:00	0
2009-07-13	07:10:00	0
2009-07-13	07:11:00	0
2009-07-13	07:12:00	0
2009-07-13	07:13:00	0
2009-07-13	07:14:00	0
2009-07-13	07:15:00	0
2009-07-13	07:16:00	0
2009-07-13	07:17:00	0
2009-07-13	07:18:00	0
2009-07-13	07:19:00	0
2009-07-13	07:20:00	0
2009-07-13	07:21:00	0
2009-07-13	07:22:00	0
2009-07-13	07:23:00	0
2009-07-13	07:24:00	0
2009-07-13	07:25:00	0
2009-07-13	07:26:00	0
2009-07-13	07:27:00	0
2009-07-13	07:28:00	0
2009-07-13	07:29:00	0
2009-07-13	07:30:00	0
2009-07-13	07:31:00	0
2009-07-13	07:32:00	0
2009-07-13	07:33:00	0
2009-07-13	07:34:00	0
2009-07-13	07:35:00	0
2009-07-13	07:36:00	0
2009-07-13	07:37:00	0
2009-07-13	07:38:00	0
2009-07-13	07:39:00	0
2009-07-13	07:40:00	0
2009-07-13	07:41:00	0
2009-07-13	07:42:00	0
2009-07-13	07:43:00	0
2009-07-13	07:44:00	0
2009-07-13	07:45:00	0
2009-07-13	07:46:00	0
2009-07-13	07:47:00	0
2009-07-13	07:48:00	0
2009-07-13	07:49:00	0
2009-07-13	07:50:00	0
2009-07-13	07:51:00	0
2009-07-13	07:52:00	0
2009-07-13	07:53:00	0
2009-07-13	07:54:00	0
2009-07-13	07:55:00	0
2009-07-13	07:56:00	0
2009-07-13	07:57:00	0
2009-07-13	07:58:00	0
2009-07-13	07:59:00	0
2009-07-13	08:00:00	0
2009-07-13	08:01:00	0
2009-07-13	08:02:00	0
2009-07-13	08:03:00	0
2009-07-13	08:04:00	0
2009-07-13	08:05:00	0
2009-07-13	08:06:00	0
2009-07-13	08:07:00	0
2009-07-13	08:08:00	0
2009-07-13	08:09:00	0
2009-07-13	08:10:00	0
2009-07-13	08:11:00	0
2009-07-13	08:12:00	0
2009-07-13	08:13:00	0
2009-07-13	08:14:00	0
2009-07-13	08:15:00	0
2009-07-13	08:16:00	0
2009-07-13	08:17:00	0
2009-07-13	08:18:00	0
2009-07-13	08:19:00	0
2009-07-13	08:20:00	0
2009-07-13	08:21:00	0
2009-07-13	08:22:00	0
2009-07-13	08:23:00	0
2009-07-13	08:24:00	0
2009-07-13	08:25:00	0
2009-07-13	08:26:00	0
2009-07-13	08:27:00	0
2009-07-13	08:28:00	0
2009-07-13	08:29:00	0
2009-07-13	08:30:00	0
2009-07-13	08:31:00	0
2009-07-13	08:32:00	0
2009-07-13	08:33:00	0
2009-07-13	08:34:00	0
2009-07-13	08:35:00	0
2009-07-13	08:36:00	0
2009-07-13	08:37:00	0
2009-07-13	08:38:00	0
2009-07-13	08:39:00	0
2009-07-13	08:40:00	0
2009-07-13	08:41:00	0
2009-07-13	08:42:00	0
2009-07-13	08:43:00	0
2009-07-13	08:44:00	0
2009-07-13	08:45:00	0
2009-07-13	08:46:00	0
2009-07-13	08:47:00	0
2009-07-13	08:48:00	0
2009-07-13	08:49:00	0
2009-07-13	08:50:00	0
2009-07-13	08:51:00	0
2009-07-13	08:52:00	0
2009-07-13	08:53:00	0
2009-07-13	08:54:00	0
2009-07-13	08:55:00	0
2009-07-13	08:56:00	0
2009-07-13	08:57:00	0
2009-07-13	08:58:00	0
2009-07-13	08:59:00	0
2009-07-13	09:00:00	0
2009-07-13	09:01:00	0
2009-07-13	09:02:00	0
2009-07-13	09:03:00	0
2009-07-13	09:04:00	0
2009-07-13	09:05:00	0
2009-07-13	09:06:00	0
2009-07-13	09:07:00	0
2009-07-13	09:08:00	0
2009-07-13	09:09:00	0
2009-07-13	09:10:00	0
2009-07-13	09:11:00	0
2009-07-13	09:12:00	0
2009-07-13	09:13:00	0
2009-07-13	09:14:00	0
2009-07-13	09:15:00	0
2009-07-13	09:16:00	0
2009-07-13	09:17:00	0
2009-07-13	09:18:00	0
2009-07-13	09:19:00	0
2009-07-13	09:20:00	0
2009-07-13	09:21:00	0
2009-07-13	09:22:00	0
2009-07-13	09:23:00	0
2009-07-13	09:24:00	0
2009-07-13	09:25:00	0
2009-07-13	09:26:00	0
2009-07-13	09:27:00	0
2009-07-13	09:28:00	0
2009-07-13	09:29:00	0
2009-07-13	09:30:00	0
2009-07-13	09:31:00	0
2009-07-13	09:32:00	0
2009-07-13	09:33:00	0
2009-07-13	09:34:00	0
2009-07-13	09:35:00	0
2009-07-13	09:36:00	0
2009-07-13	09:37:00	0
2009-07-13	09:38:00	0
2009-07-13	09:39:00	0
2009-07-13	09:40:00	0
2009-07-13	09:41:00	0
2009-07-13	09:42:00	0
2009-07-13	09:43:00	0
2009-07-13	09:44:00	0
2009-07-13	09:45:00	0
2009-07-13	09:46:00	0
2009-07-13	09:47:00	0
2009-07-13	09:48:00	0
2009-07-13	09:49:00	0
2009-07-13	09:50:00	0
2009-07-13	09:51:00	0
2009-07-13	09:52:00	0
2009-07-13	09:53:00	0
2009-07-13	09:54:00	0
2009-07-13	09:55:00	0
2009-07-13	09:56:00	0
2009-07-13	09:57:00	0
2009-07-13	09:58:00	0
2009-07-13	09:59:00	0
2009-07-13	10:00:00	0
2009-07-13	10:01:00	0
2009-07-13	10:02:00	0
2009-07-13	10:03:00	0
2009-07-13	10:04:00	0
2009-07-13	10:05:00	0
2009-07-13	10:06:00	0
2009-07-13	10:07:00	0
2009-07-13	10:08:00	0
2009-07-13	10:09:00	0
2009-07-13	10:10:00	0
2009-07-13	10:11:00	0
2009-07-13	10:12:00	0
2009-07-13	10:13:00	0
2009-07-13	10:14:00	0
2009-07-13	10:15:00	0
2009-07-13	10:16:00	0
2009-07-13	10:17:00	0
2009-07-13	10:18:00	0
2009-07-13	10:19:00	0
2009-07-13	10:20:00	0
2009-07-13	10:21:00	0
2009-07-13	10:22:00	0
2009-07-13	10:23:00	0
2009-07-13	10:24:00	0
2009-07-13	10:25:00	0
2009-07-13	10:26:00	0
2009-07-13	10:27:00	0
2009-07-13	10:28:00	0
2009-07-13	10:29:00	0
2009-07-13	10:30:00	0
2009-07-13	10:31:00	0
2009-07-13	10:32:00	0
2009-07-13	10:33:00	0
2009-07-13	10:34:00	0
2009-07-13	10:35:00	0
2009-07-13	10:36:00	0
2009-07-13	10:37:00	0
2009-07-13	10:38:00	0
2009-07-13	10:39:00	0
2009-07-13	10:40:00	0
2009-07-13	10:41:00	0
2009-07-13	10:42:00	0
2009-07-13	10:43:00	0
2009-07-13	10:44:00	0
2009-07-13	10:45:00	0
2009-07-13	10:46:00	0
2009-07-13	10:47:00	0
2009-07-13	10:48:00	0
2009-07-13	10:49:00	0
2009-07-13	10:50:00	0
2009-07-13	10:51:00	0
2009-07-13	10:52:00	0
2009-07-13	10:53:00	0
2009-07-13	10:54:00	0
2009-07-13	10:55:00	0
2009-07-13	10:56:00	0
2009-07-13	10:57:00	0
2009-07-13	10:58:00	0
2009-07-13	10:59:00	0
2009-07-13	11:00:00	0
2009-07-13	11:01:00	0
2009-07-13	11:02:00	0
2009-07-13	11:03:00	0
2009-07-13	11:04:00	0
2009-07-13	11:05:00	0
2009-07-13	11:06:00	0
2009-07-13	11:07:00	0
2009-07-13	11:08:00	0
2009-07-13	11:09:00	0
2009-07-13	11:10:00	0
2009-07-13	11:11:00	0
2009-07-13	11:12:00	0
2009-07-13	11:13:00	0
2009-07-13	11:14:00	0
2009-07-13	11:15:00	0
2009-07-13	11:16:00	0
2009-07-13	11:17:00	0
2009-07-13	11:18:00	0
2009-07-13	11:19:00	0
2009-07-13	11:20:00	0
2009-07-13	11:21:00	0
2009-07-13	11:22:00	0
2009-07-13	11:23:00	0
2009-07-13	11:24:00	0
2009-07-13	11:25:00	0
2009-07-13	11:26:00	0
2009-07-13	11:27:00	0
2009-07-13	11:28:00	0
2009-07-13	11:29:00	0
2009-07-13	11:30:00	0
2009-07-13	11:31:00	0
2009-07-13	11:32:00	0
2009-07-13	11:33:00	0
2009-07-13	11:34:00	0
2009-07-13	11:35:00	0
2009-07-13	11:36:00	0
2009-07-13	11:37:00	0
2009-07-13	11:38:00	0
2009-07-13	11:39:00	0
2009-07-13	11:40:00	0
2009-07-13	11:41:00	0
2009-07-13	11:42:00	0
2009-07-13	11:43:00	0
2009-07-13	11:44:00	0
2009-07-13	11:45:00	0
2009-07-13	11:46:00	0
2009-07-13	11:47:00	0
2009-07-13	11:48:00	0
2009-07-13	11:49:00	0
2009-07-13	11:50:00	0
2009-07-13	11:51:00	0
2009-07-13	11:52:00	0
2009-07-13	11:53:00	0
2009-07-13	11:54:00	0
2009-07-13	11:55:00	0
2009-07-13	11:56:00	0
2009-07-13	11:57:00	0
2009-07-13	11:58:00	0
2009-07-13	11:59:00	0
2009-07-13	12:00:00	0
2009-07-13	12:01:00	0
2009-07-13	12:02:00	0
2009-07-13	12:03:00	0
2009-07-13	12:04:00	0
2009-07-13	12:05:00	0
2009-07-13	12:06:00	0
2009-07-13	12:07:00	0
2009-07-13	12:08:00	0
2009-07-13	12:09:00	0
2009-07-13	12:10:00	0
2009-07-13	12:11:00	0
2009-07-13	12:12:00	0
2009-07-13	12:13:00	0
2009-07-13	12:14:00	0
2009-07-13	12:15:00	0
2009-07-13	12:16:00	0
2009-07-13	12:17:00	0
2009-07-13	12:18:00	0
2009-07-13	12:19:00	0
2009-07-13	12:20:00	0
2009-07-13	12:21:00	0
2009-07-13	12:22:00	0
2009-07-13	12:23:00	0
2009-07-13	12:24:00	0
2009-07-13	12:25:00	0
2009-07-13	12:26:00	0
2009-07-13	12:27:00	0
2009-07-13	12:28:00	0
2009-07-13	12:29:00	0
2009-07-13	12:30:00	0
2009-07-13	12:31:00	0
2009-07-13	12:32:00	0
2009-07-13	12:33:00	0
2009-07-13	12:34:00	0
2009-07-13	12:35:00	0
2009-07-13	12:36:00	0
2009-07-13	12:37:00	0
2009-07-13	12:38:00	0
2009-07-13	12:39:00	0
2009-07-13	12:40:00	0
2009-07-13	12:41:00	0
2009-07-13	12:42:00	0
2009-07-13	12:43:00	0
2009-07-13	12:44:00	0
2009-07-13	12:45:00	0
2009-07-13	12:46:00	0
2009-07-13	12:47:00	0
2009-07-13	12:48:00	0
2009-07-13	12:49:00	0
2009-07-13	12:50:00	0
2009-07-13	12:51:00	0
2009-07-13	12:52:00	0
2009-07-13	12:53:00	0
2009-07-13	12:54:00	0
2009-07-13	12:55:00	0
2009-07-13	12:56:00	0
2009-07-13	12:57:00	0
2009-07-13	12:58:00	0
2009-07-13	12:59:00	0
2009-07-13	13:00:00	0
2009-07-13	13:01:00	0
2009-07-13	13:02:00	0
2009-07-13	13:03:00	0
2009-07-13	13:04:00	0
2009-07-13	13:05:00	0
2009-07-13	13:06:00	0
2009-07-13	13:07:00	0
2009-07-13	13:08:00	0
2009-07-13	13:09:00	0
2009-07-13	13:10:00	0
2009-07-13	13:11:00	0
2009-07-13	13:12:00	0
2009-07-13	13:13:00	0
2009-07-13	13:14:00	0
2009-07-13	13:15:00	0
2009-07-13	13:16:00	0
2009-07-13	13:17:00	0
2009-07-13	13:18:00	0
2009-07-13	13:19:00	0
2009-07-13	13:20:00	0
2009-07-13	13:21:00	0
2009-07-13	13:22:00	0
2009-07-13	13:23:00	0
2009-07-13	13:24:00	0
2009-07-13	13:25:00	0
2009-07-13	13:26:00	0
2009-07-13	13:27:00	0
2009-07-13	13:28:00	0
2009-07-13	13:29:00	0
2009-07-13	13:30:00	0
2009-07-13	13:31:00	0
2009-07-13	13:32:00	0
2009-07-13	13:33:00	0
2009-07-13	13:34:00	0
2009-07-13	13:35:00	0
2009-07-13	13:36:00	0
2009-07-13	13:37:00	0
2009-07-13	13:38:00	0
2009-07-13	13:39:00	0
2009-07-13	13:40:00	0
2009-07-13	13:41:00	0
2009-07-13	13:42:00	0
2009-07-13	13:43:00	0
2009-07-13	13:44:00	0
2009-07-13	13:45:00	0
2009-07-13	13:46:00	0
2009-07-13	13:47:00	0
2009-07-13	13:48:00	0
2009-07-13	13:49:00	0
2009-07-13	13:50:00	0
2009-07-13	13:51:00	0
2009-07-13	13:52:00	0
2009-07-13	13:53:00	0
2009-07-13	13:54:00	0
2009-07-13	13:55:00	0
2009-07-13	13:56:00	0
2009-07-13	13:57:00	0
2009-07-13	13:58:00	0
2009-07-13	13:59:00	0
2009-07-13	14:00:00	0
2009-07-13	14:01:00	0
2009-07-13	14:02:00	0
2009-07-13	14:03:00	0
2009-07-13	14:04:00	0
2009-07-13	14:05:00	0
2009-07-13	14:06:00	0
2009-07-13	14:07:00	0
2009-07-13	14:08:00	0
2009-07-13	14:09:00	0
2009-07-13	14:10:00	0
2009-07-13	14:11:00	0
2009-07-13	14:12:00	0
2009-07-13	14:13:00	0
2009-07-13	14:14:00	0
2009-07-13	14:15:00	0
2009-07-13	14:16:00	0
2009-07-13	14:17:00	0
2009-07-13	14:18:00	0
2009-07-13	14:19:00	0
2009-07-13	14:20:00	0
2009-07-13	14:21:00	0
2009-07-13	14:22:00	0
2009-07-13	14:23:00	0
2009-07-13	14:24:00	0
2009-07-13	14:25:00	0
2009-07-13	14:26:00	0
2009-07-13	14:27:00	0
2009-07-13	14:28:00	0
2009-07-13	14:29:00	0
2009-07-13	14:30:00	0
2009-07-13	14:31:00	0
2009-07-13	14:32:00	0
2009-07-13	14:33:00	0
2009-07-13	14:34:00	0
2009-07-13	14:35:00	0
2009-07-13	14:36:00	0
2009-07-13	14:37:00	0
2009-07-13	14:38:00	0
2009-07-13	14:39:00	0
2009-07-13	14:40:00	0
2009-07-13	14:41:00	0
2009-07-13	14:42:00	0
2009-07-13	14:43:00	0
2009-07-13	14:44:00	0
2009-07-13	14:45:00	0
2009-07-13	14:46:00	0
2009-07-13	14:47:00	0
2009-07-13	14:48:00	0
2009-07-13	14:49:00	0
2009-07-13	14:50:00	0
2009-07-13	14:51:00	0
2009-07-13	14:52:00	0
2009-07-13	14:53:00	0
2009-07-13	14:54:00	0
2009-07-13	14:55:00	0
2009-07-13	14:56:00	0
2009-07-13	14:57:00	0
2009-07-13	14:58:00	0
2009-07-13	14:59:00	0
2009-07-13	15:00:00	0
2009-07-13	15:01:00	0
2009-07-13	15:02:00	0
2009-07-13	15:03:00	0
2009-07-13	15:04:00	0
2009-07-13	15:05:00	0
2009-07-13	15:06:00	0
2009-07-13	15:07:00	0
2009-07-13	15:08:00	0
2009-07-13	15:09:00	0
2009-07-13	15:10:00	0
2009-07-13	15:11:00	0
2009-07-13	15:12:00	0
2009-07-13	15:13:00	0
2009-07-13	15:14:00	0
2009-07-13	15:15:00	0
2009-07-13	15:16:00	0
2009-07-13	15:17:00	0
2009-07-13	15:18:00	0
2009-07-13	15:19:00	0
2009-07-13	15:20:00	0
2009-07-13	15:21:00	0
2009-07-13	15:22:00	0
2009-07-13	15:23:00	0
2009-07-13	15:24:00	0
2009-07-13	15:25:00	0
2009-07-13	15:26:00	0
2009-07-13	15:27:00	0
2009-07-13	15:28:00	0
2009-07-13	15:29:00	0
2009-07-13	15:30:00	0
2009-07-13	15:31:00	0
2009-07-13	15:32:00	0
2009-07-13	15:33:00	0
2009-07-13	15:34:00	0
2009-07-13	15:35:00	0
2009-07-13	15:36:00	0
2009-07-13	15:37:00	0
2009-07-13	15:38:00	0
2009-07-13	15:39:00	0
2009-07-13	15:40:00	0
2009-07-13	15:41:00	0
2009-07-13	15:42:00	0
2009-07-13	15:43:00	0
2009-07-13	15:44:00	0
2009-07-13	15:45:00	0
2009-07-13	15:46:00	0
2009-07-13	15:47:00	0
2009-07-13	15:48:00	0
2009-07-13	15:49:00	0
2009-07-13	15:50:00	0
2009-07-13	15:51:00	0
2009-07-13	15:52:00	0
2009-07-13	15:53:00	0
2009-07-13	15:54:00	0
2009-07-13	15:55:00	0
2009-07-13	15:56:00	0
2009-07-13	15:57:00	0
2009-07-13	15:58:00	0
2009-07-13	15:59:00	0
2009-07-13	16:00:00	0
2009-07-13	16:01:00	0
2009-07-13	16:02:00	0
2009-07-13	16:03:00	0
2009-07-13	16:04:00	0
2009-07-13	16:05:00	0
2009-07-13	16:06:00	0
2009-07-13	16:07:00	0
2009-07-13	16:08:00	0
2009-07-13	16:09:00	0
2009-07-13	16:10:00	0
2009-07-13	16:11:00	0
2009-07-13	16:12:00	0
2009-07-13	16:13:00	0
2009-07-13	16:14:00	0
2009-07-13	16:15:00	0
2009-07-13	16:16:00	0
2009-07-13	16:17:00	0
2009-07-13	16:18:00	0
2009-07-13	16:19:00	0
2009-07-13	16:20:00	0
2009-07-13	16:21:00	0
2009-07-13	16:22:00	0
2009-07-13	16:23:00	0
2009-07-13	16:24:00	0
2009-07-13	16:25:00	0
2009-07-13	16:26:00	0
2009-07-13	16:27:00	0
2009-07-13	16:28:00	0
2009-07-13	16:29:00	0
2009-07-13	16:30:00	0
2009-07-13	16:31:00	0
2009-07-13	16:32:00	0
2009-07-13	16:33:00	0
2009-07-13	16:34:00	0
2009-07-13	16:35:00	0
2009-07-13	16:36:00	0
2009-07-13	16:37:00	0
2009-07-13	16:38:00	0
2009-07-13	16:39:00	0
2009-07-13	16:40:00	0
2009-07-13	16:41:00	0
2009-07-13	16:42:00	0
2009-07-13	16:43:00	0
2009-07-13	16:44:00	0
2009-07-13	16:45:00	0
2009-07-13	16:46:00	0
2009-07-13	16:47:00	0
2009-07-13	16:48:00	0
2009-07-13	16:49:00	0
2009-07-13	16:50:00	0
2009-07-13	16:51:00	0
2009-07-13	16:52:00	0
2009-07-13	16:53:00	0
2009-07-13	16:54:00	0
2009-07-13	16:55:00	0
2009-07-13	16:56:00	0
2009-07-13	16:57:00	0
2009-07-13	16:58:00	0
2009-07-13	16:59:00	0
2009-07-13	17:00:00	0
2009-07-13	17:01:00	0
2009-07-13	17:02:00	0
2009-07-13	17:03:00	0
2009-07-13	17:04:00	0
2009-07-13	17:05:00	0
2009-07-13	17:06:00	0
2009-07-13	17:07:00	0
2009-07-13	17:08:00	0
2009-07-13	17:09:00	0
2009-07-13	17:10:00	0
2009-07-13	17:11:00	0
2009-07-13	17:12:00	0
2009-07-13	17:13:00	0
2009-07-13	17:14:00	0
2009-07-13	17:15:00	0
2009-07-13	17:16:00	0
2009-07-13	17:17:00	0
2009-07-13	17:18:00	0
2009-07-13	17:19:00	0
2009-07-13	17:20:00	0
2009-07-13	17:21:00	0
2009-07-13	17:22:00	0
2009-07-13	17:23:00	0
2009-07-13	17:24:00	0
2009-07-13	17:25:00	0
2009-07-13	17:26:00	0
2009-07-13	17:27:00	0
2009-07-13	17:28:00	0
2009-07-13	17:29:00	0
2009-07-13	17:30:00	0
2009-07-13	17:31:00	0
2009-07-13	17:32:00	0
2009-07-13	17:33:00	0
2009-07-13	17:34:00	0
2009-07-13	17:35:00	0
2009-07-13	17:36:00	0
2009-07-13	17:37:00	0
2009-07-13	17:38:00	0
2009-07-13	17:39:00	0
2009-07-13	17:40:00	0
2009-07-13	17:41:00	0
2009-07-13	17:42:00	0
2009-07-13	17:43:00	0
2009-07-13	17:44:00	0
2009-07-13	17:45:00	0
2009-07-13	17:46:00	0
2009-07-13	17:47:00	0
2009-07-13	17:48:00	0
2009-07-13	17:49:00	0
2009-07-13	17:50:00	0
2009-07-13	17:51:00	0
2009-07-13	17:52:00	0
2009-07-13	17:53:00	0
2009-07-13	17:54:00	0
2009-07-13	17:55:00	0
2009-07-13	17:56:00	0
2009-07-13	17:57:00	0
2009-07-13	17:58:00	0
2009-07-13	17:59:00	0
2009-07-13	18:00:00	11
2009-07-13	18:01:00	11
2009-07-13	18:02:00	33
2009-07-13	18:03:00	22
2009-07-13	18:04:00	77
2009-07-13	18:05:00	132
2009-07-13	18:06:00	55
2009-07-13	18:07:00	99
2009-07-13	18:08:00	88
2009-07-13	18:09:00	55
2009-07-13	18:10:00	77
2009-07-13	18:11:00	77
2009-07-13	18:12:00	132
2009-07-13	18:13:00	183
2009-07-13	18:14:00	110
2009-07-13	18:15:00	55
2009-07-13	18:16:00	157
2009-07-13	18:17:00	210
2009-07-13	18:18:00	0
2009-07-13	18:19:00	0
2009-07-13	18:20:00	11
2009-07-13	18:21:00	55
2009-07-13	18:22:00	305
2009-07-13	18:23:00	99
2009-07-13	18:24:00	0
2009-07-13	18:25:00	0
2009-07-13	18:26:00	0
2009-07-13	18:27:00	11
2009-07-13	18:28:00	0
2009-07-13	18:29:00	11
2009-07-13	18:30:00	0
2009-07-13	18:31:00	0
2009-07-13	18:32:00	0
2009-07-13	18:33:00	196
2009-07-13	18:34:00	77
2009-07-13	18:35:00	121
2009-07-13	18:36:00	33
2009-07-13	18:37:00	143
2009-07-13	18:38:00	0
2009-07-13	18:39:00	121
2009-07-13	18:40:00	88
2009-07-13	18:41:00	0
2009-07-13	18:42:00	0
2009-07-13	18:43:00	0
2009-07-13	18:44:00	0
2009-07-13	18:45:00	143
2009-07-13	18:46:00	428
2009-07-13	18:47:00	0
2009-07-13	18:48:00	0
2009-07-13	18:49:00	143
2009-07-13	18:50:00	66
2009-07-13	18:51:00	170
2009-07-13	18:52:00	1408
2009-07-13	18:53:00	797
2009-07-13	18:54:00	887
2009-07-13	18:55:00	382
2009-07-13	18:56:00	0
2009-07-13	18:57:00	132
2009-07-13	18:58:00	143
2009-07-13	18:59:00	55
2009-07-13	19:00:00	0
2009-07-13	19:01:00	0
2009-07-13	19:02:00	77
2009-07-13	19:03:00	99
2009-07-13	19:04:00	0
2009-07-13	19:05:00	0
2009-07-13	19:06:00	121
2009-07-13	19:07:00	0
2009-07-13	19:08:00	0
2009-07-13	19:09:00	0
2009-07-13	19:10:00	0
2009-07-13	19:11:00	223
2009-07-13	19:12:00	196
2009-07-13	19:13:00	0
2009-07-13	19:14:00	33
2009-07-13	19:15:00	99
2009-07-13	19:16:00	55
2009-07-13	19:17:00	305
2009-07-13	19:18:00	0
2009-07-13	19:19:00	0
2009-07-13	19:20:00	0
2009-07-13	19:21:00	0
2009-07-13	19:22:00	0
2009-07-13	19:23:00	22
2009-07-13	19:24:00	0
2009-07-13	19:25:00	0
2009-07-13	19:26:00	0
2009-07-13	19:27:00	0
2009-07-13	19:28:00	0
2009-07-13	19:29:00	0
2009-07-13	19:30:00	0
2009-07-13	19:31:00	0
2009-07-13	19:32:00	0
2009-07-13	19:33:00	335
2009-07-13	19:34:00	66
2009-07-13	19:35:00	0
2009-07-13	19:36:00	0
2009-07-13	19:37:00	0
2009-07-13	19:38:00	0
2009-07-13	19:39:00	132
2009-07-13	19:40:00	0
2009-07-13	19:41:00	0
2009-07-13	19:42:00	223
2009-07-13	19:43:00	0
2009-07-13	19:44:00	0
2009-07-13	19:45:00	0
2009-07-13	19:46:00	88
2009-07-13	19:47:00	223
2009-07-13	19:48:00	66
2009-07-13	19:49:00	0
2009-07-13	19:50:00	0
2009-07-13	19:51:00	0
2009-07-13	19:52:00	0
2009-07-13	19:53:00	0
2009-07-13	19:54:00	0
2009-07-13	19:55:00	0
2009-07-13	19:56:00	0
2009-07-13	19:57:00	55
2009-07-13	19:58:00	0
2009-07-13	19:59:00	77
2009-07-13	20:00:00	0
2009-07-13	20:01:00	0
2009-07-13	20:02:00	0
2009-07-13	20:03:00	0
2009-07-13	20:04:00	0
2009-07-13	20:05:00	0
2009-07-13	20:06:00	0
2009-07-13	20:07:00	0
2009-07-13	20:08:00	99
2009-07-13	20:09:00	0
2009-07-13	20:10:00	887
2009-07-13	20:11:00	289
2009-07-13	20:12:00	351
2009-07-13	20:13:00	99
2009-07-13	20:14:00	335
2009-07-13	20:15:00	516
2009-07-13	20:16:00	0
2009-07-13	20:17:00	11
2009-07-13	20:18:00	44
2009-07-13	20:19:00	0
2009-07-13	20:20:00	0
2009-07-13	20:21:00	0
2009-07-13	20:22:00	11
2009-07-13	20:23:00	0
2009-07-13	20:24:00	0
2009-07-13	20:25:00	0
2009-07-13	20:26:00	0
2009-07-13	20:27:00	0
2009-07-13	20:28:00	0
2009-07-13	20:29:00	0
2009-07-13	20:30:00	0
2009-07-13	20:31:00	0
2009-07-13	20:32:00	11
2009-07-13	20:33:00	0
2009-07-13	20:34:00	0
2009-07-13	20:35:00	0
2009-07-13	20:36:00	0
2009-07-13	20:37:00	11
2009-07-13	20:38:00	0
2009-07-13	20:39:00	0
2009-07-13	20:40:00	0
2009-07-13	20:41:00	0
2009-07-13	20:42:00	0
2009-07-13	20:43:00	0
2009-07-13	20:44:00	0
2009-07-13	20:45:00	0
2009-07-13	20:46:00	0
2009-07-13	20:47:00	0
2009-07-13	20:48:00	33
2009-07-13	20:49:00	0
2009-07-13	20:50:00	0
2009-07-13	20:51:00	0
2009-07-13	20:52:00	0
2009-07-13	20:53:00	0
2009-07-13	20:54:00	0
2009-07-13	20:55:00	0
2009-07-13	20:56:00	0
2009-07-13	20:57:00	0
2009-07-13	20:58:00	0
2009-07-13	20:59:00	0
2009-07-13	21:00:00	0
2009-07-13	21:01:00	0
2009-07-13	21:02:00	0
2009-07-13	21:03:00	0
2009-07-13	21:04:00	0
2009-07-13	21:05:00	0
2009-07-13	21:06:00	110
2009-07-13	21:07:00	0
2009-07-13	21:08:00	0
2009-07-13	21:09:00	0
2009-07-13	21:10:00	0
2009-07-13	21:11:00	0
2009-07-13	21:12:00	0
2009-07-13	21:13:00	0
2009-07-13	21:14:00	0
2009-07-13	21:15:00	0
2009-07-13	21:16:00	0
2009-07-13	21:17:00	11
2009-07-13	21:18:00	0
2009-07-13	21:19:00	0
2009-07-13	21:20:00	0
2009-07-13	21:21:00	0
2009-07-13	21:22:00	0
2009-07-13	21:23:00	428
2009-07-13	21:24:00	730
2009-07-13	21:25:00	170
2009-07-13	21:26:00	77
2009-07-13	21:27:00	11
2009-07-13	21:28:00	0
2009-07-13	21:29:00	11
2009-07-13	21:30:00	0
2009-07-13	21:31:00	0
2009-07-13	21:32:00	0
2009-07-13	21:33:00	0
2009-07-13	21:34:00	0
2009-07-13	21:35:00	110
2009-07-13	21:36:00	0
2009-07-13	21:37:00	0
2009-07-13	21:38:00	88
2009-07-13	21:39:00	0
2009-07-13	21:40:00	0
2009-07-13	21:41:00	0
2009-07-13	21:42:00	0
2009-07-13	21:43:00	0
2009-07-13	21:44:00	0
2009-07-13	21:45:00	22
2009-07-13	21:46:00	0
2009-07-13	21:47:00	0
2009-07-13	21:48:00	0
2009-07-13	21:49:00	44
2009-07-13	21:50:00	0
2009-07-13	21:51:00	55
2009-07-13	21:52:00	223
2009-07-13	21:53:00	0
2009-07-13	21:54:00	0
2009-07-13	21:55:00	0
2009-07-13	21:56:00	0
2009-07-13	21:57:00	0
2009-07-13	21:58:00	0
2009-07-13	21:59:00	0
2009-07-13	22:00:00	0
2009-07-13	22:01:00	0
2009-07-13	22:02:00	0
2009-07-13	22:03:00	0
2009-07-13	22:04:00	0
2009-07-13	22:05:00	0
2009-07-13	22:06:00	0
2009-07-13	22:07:00	0
2009-07-13	22:08:00	66
2009-07-13	22:09:00	0
2009-07-13	22:10:00	0
2009-07-13	22:11:00	0
2009-07-13	22:12:00	0
2009-07-13	22:13:00	0
2009-07-13	22:14:00	0
2009-07-13	22:15:00	0
2009-07-13	22:16:00	0
2009-07-13	22:17:00	0
2009-07-13	22:18:00	0
2009-07-13	22:19:00	0
2009-07-13	22:20:00	0
2009-07-13	22:21:00	0
2009-07-13	22:22:00	0
2009-07-13	22:23:00	0
2009-07-13	22:24:00	33
2009-07-13	22:25:00	22
2009-07-13	22:26:00	0
2009-07-13	22:27:00	0
2009-07-13	22:28:00	0
2009-07-13	22:29:00	0
2009-07-13	22:30:00	0
2009-07-13	22:31:00	0
2009-07-13	22:32:00	0
2009-07-13	22:33:00	0
2009-07-13	22:34:00	0
2009-07-13	22:35:00	0
2009-07-13	22:36:00	0
2009-07-13	22:37:00	0
2009-07-13	22:38:00	0
2009-07-13	22:39:00	0
2009-07-13	22:40:00	0
2009-07-13	22:41:00	0
2009-07-13	22:42:00	33
2009-07-13	22:43:00	0
2009-07-13	22:44:00	0
2009-07-13	22:45:00	0
2009-07-13	22:46:00	0
2009-07-13	22:47:00	0
2009-07-13	22:48:00	0
2009-07-13	22:49:00	0
2009-07-13	22:50:00	0
2009-07-13	22:51:00	0
2009-07-13	22:52:00	0
2009-07-13	22:53:00	0
2009-07-13	22:54:00	11
2009-07-13	22:55:00	0
2009-07-13	22:56:00	0
2009-07-13	22:57:00	0
2009-07-13	22:58:00	0
2009-07-13	22:59:00	0
2009-07-13	23:00:00	0
2009-07-13	23:01:00	0
2009-07-13	23:02:00	0
2009-07-13	23:03:00	0
2009-07-13	23:04:00	0
2009-07-13	23:05:00	0
2009-07-13	23:06:00	0
2009-07-13	23:07:00	0
2009-07-13	23:08:00	0
2009-07-13	23:09:00	0
2009-07-13	23:10:00	44
2009-07-13	23:11:00	33
2009-07-13	23:12:00	0
2009-07-13	23:13:00	0
2009-07-13	23:14:00	11
2009-07-13	23:15:00	0
2009-07-13	23:16:00	0
2009-07-13	23:17:00	0
2009-07-13	23:18:00	0
2009-07-13	23:19:00	0
2009-07-13	23:20:00	0
2009-07-13	23:21:00	0
2009-07-13	23:22:00	0
2009-07-13	23:23:00	0
2009-07-13	23:24:00	0
2009-07-13	23:25:00	0
2009-07-13	23:26:00	0
2009-07-13	23:27:00	0
2009-07-13	23:28:00	0
2009-07-13	23:29:00	0
2009-07-13	23:30:00	0
2009-07-13	23:31:00	0
2009-07-13	23:32:00	0
2009-07-13	23:33:00	0
2009-07-13	23:34:00	0
2009-07-13	23:35:00	0
2009-07-13	23:36:00	0
2009-07-13	23:37:00	44
2009-07-13	23:38:00	0
2009-07-13	23:39:00	0
2009-07-13	23:40:00	0
2009-07-13	23:41:00	0
2009-07-13	23:42:00	0
2009-07-13	23:43:00	121
2009-07-13	23:44:00	0
2009-07-13	23:45:00	0
2009-07-13	23:46:00	0
2009-07-13	23:47:00	0
2009-07-13	23:48:00	0
2009-07-13	23:49:00	0
2009-07-13	23:50:00	0
2009-07-13	23:51:00	0
2009-07-13	23:52:00	0
2009-07-13	23:53:00	0
2009-07-13	23:54:00	0
2009-07-13	23:55:00	0
2009-07-13	23:56:00	0
2009-07-13	23:57:00	0
2009-07-13	23:58:00	0
2009-07-13	23:59:00	0
2009-07-14	00:00:00	0
2009-07-14	00:01:00	77
2009-07-14	00:02:00	0
2009-07-14	00:03:00	0
2009-07-14	00:04:00	0
2009-07-14	00:05:00	88
2009-07-14	00:06:00	11
2009-07-14	00:07:00	0
2009-07-14	00:08:00	0
2009-07-14	00:09:00	0
2009-07-14	00:10:00	0
2009-07-14	00:11:00	0
2009-07-14	00:12:00	0
2009-07-14	00:13:00	0
2009-07-14	00:14:00	0
2009-07-14	00:15:00	0
2009-07-14	00:16:00	0
2009-07-14	00:17:00	0
2009-07-14	00:18:00	0
2009-07-14	00:19:00	0
2009-07-14	00:20:00	0
2009-07-14	00:21:00	0
2009-07-14	00:22:00	0
2009-07-14	00:23:00	0
2009-07-14	00:24:00	0
2009-07-14	00:25:00	0
2009-07-14	00:26:00	0
2009-07-14	00:27:00	0
2009-07-14	00:28:00	0
2009-07-14	00:29:00	0
2009-07-14	00:30:00	0
2009-07-14	00:31:00	0
2009-07-14	00:32:00	0
2009-07-14	00:33:00	0
2009-07-14	00:34:00	0
2009-07-14	00:35:00	0
2009-07-14	00:36:00	0
2009-07-14	00:37:00	66
2009-07-14	00:38:00	0
2009-07-14	00:39:00	0
2009-07-14	00:40:00	0
2009-07-14	00:41:00	0
2009-07-14	00:42:00	0
2009-07-14	00:43:00	0
2009-07-14	00:44:00	0
2009-07-14	00:45:00	0
2009-07-14	00:46:00	0
2009-07-14	00:47:00	0
2009-07-14	00:48:00	0
2009-07-14	00:49:00	0
2009-07-14	00:50:00	0
2009-07-14	00:51:00	0
2009-07-14	00:52:00	0
2009-07-14	00:53:00	0
2009-07-14	00:54:00	0
2009-07-14	00:55:00	0
2009-07-14	00:56:00	0
2009-07-14	00:57:00	0
2009-07-14	00:58:00	0
2009-07-14	00:59:00	0
2009-07-14	01:00:00	0
2009-07-14	01:01:00	0
2009-07-14	01:02:00	0
2009-07-14	01:03:00	0
2009-07-14	01:04:00	0
2009-07-14	01:05:00	0
2009-07-14	01:06:00	0
2009-07-14	01:07:00	0
2009-07-14	01:08:00	0
2009-07-14	01:09:00	0
2009-07-14	01:10:00	0
2009-07-14	01:11:00	0
2009-07-14	01:12:00	0
2009-07-14	01:13:00	0
2009-07-14	01:14:00	0
2009-07-14	01:15:00	0
2009-07-14	01:16:00	0
2009-07-14	01:17:00	0
2009-07-14	01:18:00	0
2009-07-14	01:19:00	0
2009-07-14	01:20:00	0
2009-07-14	01:21:00	0
2009-07-14	01:22:00	0
2009-07-14	01:23:00	0
2009-07-14	01:24:00	0
2009-07-14	01:25:00	0
2009-07-14	01:26:00	0
2009-07-14	01:27:00	0
2009-07-14	01:28:00	0
2009-07-14	01:29:00	0
2009-07-14	01:30:00	0
2009-07-14	01:31:00	0
2009-07-14	01:32:00	0
2009-07-14	01:33:00	66
2009-07-14	01:34:00	77
2009-07-14	01:35:00	11
2009-07-14	01:36:00	0
2009-07-14	01:37:00	121
2009-07-14	01:38:00	0
2009-07-14	01:39:00	0
2009-07-14	01:40:00	11
2009-07-14	01:41:00	0
2009-07-14	01:42:00	0
2009-07-14	01:43:00	0
2009-07-14	01:44:00	0
2009-07-14	01:45:00	0
2009-07-14	01:46:00	0
2009-07-14	01:47:00	0
2009-07-14	01:48:00	0
2009-07-14	01:49:00	0
2009-07-14	01:50:00	0
2009-07-14	01:51:00	0
2009-07-14	01:52:00	0
2009-07-14	01:53:00	0
2009-07-14	01:54:00	0
2009-07-14	01:55:00	0
2009-07-14	01:56:00	0
2009-07-14	01:57:00	0
2009-07-14	01:58:00	11
2009-07-14	01:59:00	0
2009-07-14	02:00:00	0
2009-07-14	02:01:00	0
2009-07-14	02:02:00	0
2009-07-14	02:03:00	0
2009-07-14	02:04:00	0
2009-07-14	02:05:00	0
2009-07-14	02:06:00	0
2009-07-14	02:07:00	0
2009-07-14	02:08:00	0
2009-07-14	02:09:00	0
2009-07-14	02:10:00	0
2009-07-14	02:11:00	22
2009-07-14	02:12:00	11
2009-07-14	02:13:00	0
2009-07-14	02:14:00	0
2009-07-14	02:15:00	0
2009-07-14	02:16:00	0
2009-07-14	02:17:00	0
2009-07-14	02:18:00	0
2009-07-14	02:19:00	0
2009-07-14	02:20:00	0
2009-07-14	02:21:00	0
2009-07-14	02:22:00	0
2009-07-14	02:23:00	0
2009-07-14	02:24:00	0
2009-07-14	02:25:00	33
2009-07-14	02:26:00	0
2009-07-14	02:27:00	0
2009-07-14	02:28:00	88
2009-07-14	02:29:00	66
2009-07-14	02:30:00	0
2009-07-14	02:31:00	0
2009-07-14	02:32:00	0
2009-07-14	02:33:00	0
2009-07-14	02:34:00	0
2009-07-14	02:35:00	0
2009-07-14	02:36:00	0
2009-07-14	02:37:00	0
2009-07-14	02:38:00	0
2009-07-14	02:39:00	0
2009-07-14	02:40:00	0
2009-07-14	02:41:00	0
2009-07-14	02:42:00	0
2009-07-14	02:43:00	0
2009-07-14	02:44:00	11
2009-07-14	02:45:00	0
2009-07-14	02:46:00	0
2009-07-14	02:47:00	0
2009-07-14	02:48:00	0
2009-07-14	02:49:00	0
2009-07-14	02:50:00	0
2009-07-14	02:51:00	0
2009-07-14	02:52:00	0
2009-07-14	02:53:00	0
2009-07-14	02:54:00	0
2009-07-14	02:55:00	0
2009-07-14	02:56:00	0
2009-07-14	02:57:00	0
2009-07-14	02:58:00	0
2009-07-14	02:59:00	0
2009-07-14	03:00:00	0
2009-07-14	03:01:00	0
2009-07-14	03:02:00	0
2009-07-14	03:03:00	0
2009-07-14	03:04:00	0
2009-07-14	03:05:00	0
2009-07-14	03:06:00	0
2009-07-14	03:07:00	0
2009-07-14	03:08:00	11
2009-07-14	03:09:00	0
2009-07-14	03:10:00	0
2009-07-14	03:11:00	0
2009-07-14	03:12:00	0
2009-07-14	03:13:00	0
2009-07-14	03:14:00	0
2009-07-14	03:15:00	0
2009-07-14	03:16:00	11
2009-07-14	03:17:00	0
2009-07-14	03:18:00	0
2009-07-14	03:19:00	0
2009-07-14	03:20:00	0
2009-07-14	03:21:00	0
2009-07-14	03:22:00	0
2009-07-14	03:23:00	0
2009-07-14	03:24:00	0
2009-07-14	03:25:00	121
2009-07-14	03:26:00	0
2009-07-14	03:27:00	132
2009-07-14	03:28:00	44
2009-07-14	03:29:00	0
2009-07-14	03:30:00	0
2009-07-14	03:31:00	0
2009-07-14	03:32:00	0
2009-07-14	03:33:00	0
2009-07-14	03:34:00	0
2009-07-14	03:35:00	0
2009-07-14	03:36:00	0
2009-07-14	03:37:00	0
2009-07-14	03:38:00	0
2009-07-14	03:39:00	0
2009-07-14	03:40:00	0
2009-07-14	03:41:00	0
2009-07-14	03:42:00	0
2009-07-14	03:43:00	0
2009-07-14	03:44:00	0
2009-07-14	03:45:00	0
2009-07-14	03:46:00	0
2009-07-14	03:47:00	33
2009-07-14	03:48:00	0
2009-07-14	03:49:00	0
2009-07-14	03:50:00	0
2009-07-14	03:51:00	0
2009-07-14	03:52:00	0
2009-07-14	03:53:00	0
2009-07-14	03:54:00	0
2009-07-14	03:55:00	0
2009-07-14	03:56:00	0
2009-07-14	03:57:00	0
2009-07-14	03:58:00	0
2009-07-14	03:59:00	0
2009-07-14	04:00:00	0
2009-07-14	04:01:00	0
2009-07-14	04:02:00	0
2009-07-14	04:03:00	0
2009-07-14	04:04:00	11
2009-07-14	04:05:00	0
2009-07-14	04:06:00	0
2009-07-14	04:07:00	0
2009-07-14	04:08:00	0
2009-07-14	04:09:00	0
2009-07-14	04:10:00	0
2009-07-14	04:11:00	0
2009-07-14	04:12:00	0
2009-07-14	04:13:00	0
2009-07-14	04:14:00	0
2009-07-14	04:15:00	0
2009-07-14	04:16:00	0
2009-07-14	04:17:00	0
2009-07-14	04:18:00	0
2009-07-14	04:19:00	0
2009-07-14	04:20:00	0
2009-07-14	04:21:00	0
2009-07-14	04:22:00	0
2009-07-14	04:23:00	0
2009-07-14	04:24:00	0
2009-07-14	04:25:00	0
2009-07-14	04:26:00	11
2009-07-14	04:27:00	0
2009-07-14	04:28:00	0
2009-07-14	04:29:00	0
2009-07-14	04:30:00	0
2009-07-14	04:31:00	0
2009-07-14	04:32:00	0
2009-07-14	04:33:00	0
2009-07-14	04:34:00	0
2009-07-14	04:35:00	0
2009-07-14	04:36:00	0
2009-07-14	04:37:00	0
2009-07-14	04:38:00	0
2009-07-14	04:39:00	0
2009-07-14	04:40:00	0
2009-07-14	04:41:00	0
2009-07-14	04:42:00	0
2009-07-14	04:43:00	0
2009-07-14	04:44:00	0
2009-07-14	04:45:00	0
2009-07-14	04:46:00	0
2009-07-14	04:47:00	0
2009-07-14	04:48:00	0
2009-07-14	04:49:00	0
2009-07-14	04:50:00	0
2009-07-14	04:51:00	22
2009-07-14	04:52:00	0
2009-07-14	04:53:00	0
2009-07-14	04:54:00	0
2009-07-14	04:55:00	0
2009-07-14	04:56:00	0
2009-07-14	04:57:00	0
2009-07-14	04:58:00	0
2009-07-14	04:59:00	0
2009-07-14	05:00:00	0
2009-07-14	05:01:00	0
2009-07-14	05:02:00	0
2009-07-14	05:03:00	0
2009-07-14	05:04:00	0
2009-07-14	05:05:00	0
2009-07-14	05:06:00	0
2009-07-14	05:07:00	0
2009-07-14	05:08:00	0
2009-07-14	05:09:00	0
2009-07-14	05:10:00	0
2009-07-14	05:11:00	0
2009-07-14	05:12:00	0
2009-07-14	05:13:00	0
2009-07-14	05:14:00	0
2009-07-14	05:15:00	0
2009-07-14	05:16:00	0
2009-07-14	05:17:00	0
2009-07-14	05:18:00	0
2009-07-14	05:19:00	0
2009-07-14	05:20:00	0
2009-07-14	05:21:00	44
2009-07-14	05:22:00	0
2009-07-14	05:23:00	0
2009-07-14	05:24:00	0
2009-07-14	05:25:00	0
2009-07-14	05:26:00	0
2009-07-14	05:27:00	0
2009-07-14	05:28:00	0
2009-07-14	05:29:00	0
2009-07-14	05:30:00	0
2009-07-14	05:31:00	0
2009-07-14	05:32:00	11
2009-07-14	05:33:00	0
2009-07-14	05:34:00	0
2009-07-14	05:35:00	0
2009-07-14	05:36:00	0
2009-07-14	05:37:00	88
2009-07-14	05:38:00	0
2009-07-14	05:39:00	263
2009-07-14	05:40:00	841
2009-07-14	05:41:00	609
2009-07-14	05:42:00	351
2009-07-14	05:43:00	1284
2009-07-14	05:44:00	689
2009-07-14	05:45:00	1062
2009-07-14	05:46:00	335
2009-07-14	05:47:00	55
2009-07-14	05:48:00	382
2009-07-14	05:49:00	22
2009-07-14	05:50:00	0
2009-07-14	05:51:00	0
2009-07-14	05:52:00	0
2009-07-14	05:53:00	33
2009-07-14	05:54:00	0
2009-07-14	05:55:00	33
2009-07-14	05:56:00	121
2009-07-14	05:57:00	0
2009-07-14	05:58:00	0
2009-07-14	05:59:00	0
2009-07-14	06:00:00	0
2009-07-14	06:01:00	0
2009-07-14	06:02:00	88
2009-07-14	06:03:00	22
2009-07-14	06:04:00	0
2009-07-14	06:05:00	0
2009-07-14	06:06:00	0
2009-07-14	06:07:00	0
2009-07-14	06:08:00	11
2009-07-14	06:09:00	0
2009-07-14	06:10:00	196
2009-07-14	06:11:00	0
2009-07-14	06:12:00	0
2009-07-14	06:13:00	0
2009-07-14	06:14:00	0
2009-07-14	06:15:00	305
2009-07-14	06:16:00	196
2009-07-14	06:17:00	0
2009-07-14	06:18:00	0
2009-07-14	06:19:00	0
2009-07-14	06:20:00	0
2009-07-14	06:21:00	0
2009-07-14	06:22:00	0
2009-07-14	06:23:00	0
2009-07-14	06:24:00	11
2009-07-14	06:25:00	0
2009-07-14	06:26:00	0
2009-07-14	06:27:00	0
2009-07-14	06:28:00	0
2009-07-14	06:29:00	0
2009-07-14	06:30:00	0
2009-07-14	06:31:00	0
2009-07-14	06:32:00	183
2009-07-14	06:33:00	0
2009-07-14	06:34:00	0
2009-07-14	06:35:00	0
2009-07-14	06:36:00	0
2009-07-14	06:37:00	0
2009-07-14	06:38:00	0
2009-07-14	06:39:00	0
2009-07-14	06:40:00	0
2009-07-14	06:41:00	0
2009-07-14	06:42:00	0
2009-07-14	06:43:00	0
2009-07-14	06:44:00	0
2009-07-14	06:45:00	0
2009-07-14	06:46:00	0
2009-07-14	06:47:00	0
2009-07-14	06:48:00	0
2009-07-14	06:49:00	0
2009-07-14	06:50:00	0
2009-07-14	06:51:00	0
2009-07-14	06:52:00	0
2009-07-14	06:53:00	66
2009-07-14	06:54:00	534
2009-07-14	06:55:00	516
2009-07-14	06:56:00	157
2009-07-14	06:57:00	143
2009-07-14	06:58:00	110
2009-07-14	06:59:00	66
2009-07-14	07:00:00	22
2009-07-14	07:01:00	132
2009-07-14	07:02:00	22
2009-07-14	07:03:00	99
2009-07-14	07:04:00	0
2009-07-14	07:05:00	0
2009-07-14	07:06:00	0
2009-07-14	07:07:00	11
2009-07-14	07:08:00	351
2009-07-14	07:09:00	0
2009-07-14	07:10:00	11
2009-07-14	07:11:00	0
2009-07-14	07:12:00	0
2009-07-14	07:13:00	99
2009-07-14	07:14:00	0
2009-07-14	07:15:00	0
2009-07-14	07:16:00	0
2009-07-14	07:17:00	0
2009-07-14	07:18:00	0
2009-07-14	07:19:00	0
2009-07-14	07:20:00	249
2009-07-14	07:21:00	0
2009-07-14	07:22:00	0
2009-07-14	07:23:00	0
2009-07-14	07:24:00	0
2009-07-14	07:25:00	170
2009-07-14	07:26:00	0
2009-07-14	07:27:00	463
2009-07-14	07:28:00	263
2009-07-14	07:29:00	382
2009-07-14	07:30:00	249
2009-07-14	07:31:00	11
2009-07-14	07:32:00	11
2009-07-14	07:33:00	0
2009-07-14	07:34:00	481
2009-07-14	07:35:00	0
2009-07-14	07:36:00	0
2009-07-14	07:37:00	66
2009-07-14	07:38:00	366
2009-07-14	07:39:00	366
2009-07-14	07:40:00	335
2009-07-14	07:41:00	132
2009-07-14	07:42:00	305
2009-07-14	07:43:00	335
2009-07-14	07:44:00	44
2009-07-14	07:45:00	0
2009-07-14	07:46:00	0
2009-07-14	07:47:00	0
2009-07-14	07:48:00	0
2009-07-14	07:49:00	0
2009-07-14	07:50:00	0
2009-07-14	07:51:00	11
2009-07-14	07:52:00	0
2009-07-14	07:53:00	0
2009-07-14	07:54:00	0
2009-07-14	07:55:00	0
2009-07-14	07:56:00	0
2009-07-14	07:57:00	0
2009-07-14	07:58:00	0
2009-07-14	07:59:00	0
2009-07-14	08:00:00	0
2009-07-14	08:01:00	0
2009-07-14	08:02:00	0
2009-07-14	08:03:00	0
2009-07-14	08:04:00	0
2009-07-14	08:05:00	0
2009-07-14	08:06:00	0
2009-07-14	08:07:00	0
2009-07-14	08:08:00	0
2009-07-14	08:09:00	0
2009-07-14	08:10:00	0
2009-07-14	08:11:00	0
2009-07-14	08:12:00	0
2009-07-14	08:13:00	0
2009-07-14	08:14:00	0
2009-07-14	08:15:00	499
2009-07-14	08:16:00	1198
2009-07-14	08:17:00	911
2009-07-14	08:18:00	11
2009-07-14	08:19:00	1315
2009-07-14	08:20:00	276
2009-07-14	08:21:00	552
2009-07-14	08:22:00	366
2009-07-14	08:23:00	1088
2009-07-14	08:24:00	1982
2009-07-14	08:25:00	1505
2009-07-14	08:26:00	1170
2009-07-14	08:27:00	305
2009-07-14	08:28:00	320
2009-07-14	08:29:00	249
2009-07-14	08:30:00	55
2009-07-14	08:31:00	351
2009-07-14	08:32:00	33
2009-07-14	08:33:00	0
2009-07-14	08:34:00	22
2009-07-14	08:35:00	236
2009-07-14	08:36:00	0
2009-07-14	08:37:00	121
2009-07-14	08:38:00	110
2009-07-14	08:39:00	143
2009-07-14	08:40:00	110
2009-07-14	08:41:00	775
2009-07-14	08:42:00	1009
2009-07-14	08:43:00	143
2009-07-14	08:44:00	863
2009-07-14	08:45:00	236
2009-07-14	08:46:00	121
2009-07-14	08:47:00	210
2009-07-14	08:48:00	77
2009-07-14	08:49:00	22
2009-07-14	08:50:00	77
2009-07-14	08:51:00	88
2009-07-14	08:52:00	44
2009-07-14	08:53:00	22
2009-07-14	08:54:00	77
2009-07-14	08:55:00	276
2009-07-14	08:56:00	157
2009-07-14	08:57:00	88
2009-07-14	08:58:00	143
2009-07-14	08:59:00	0
2009-07-14	09:00:00	0
2009-07-14	09:01:00	499
2009-07-14	09:02:00	0
2009-07-14	09:03:00	366
2009-07-14	09:04:00	1114
2009-07-14	09:05:00	1439
2009-07-14	09:06:00	196
2009-07-14	09:07:00	0
2009-07-14	09:08:00	0
[truncated: 19,611 more rows]

## Sheet: 7.27.09
Actogram, Copy Raw Data, All Days
Identity:	Sophie
Filename:	E:\Active Research Files\meloxicam titre canine\cases\sophie\Sophie 7.27.09.AWC
Gender:	F
Age:	8
Height:	61.0 cm	24.0 in
Weight:	27.0 kg	59.5 lbs
Start Date:	27-Jul-2009 (Mon)
Start Time:	18:00:00
Interval:	1.00 mins
Date Stamp:	Time Stamp:	Activity Data:	Marker Press:
2009-07-27	00:00:00	0
2009-07-27	00:01:00	0
2009-07-27	00:02:00	0
2009-07-27	00:03:00	0
2009-07-27	00:04:00	0
2009-07-27	00:05:00	0
2009-07-27	00:06:00	0
2009-07-27	00:07:00	0
2009-07-27	00:08:00	0
2009-07-27	00:09:00	0
2009-07-27	00:10:00	0
2009-07-27	00:11:00	0
2009-07-27	00:12:00	0
2009-07-27	00:13:00	0
2009-07-27	00:14:00	0
2009-07-27	00:15:00	0
2009-07-27	00:16:00	0
2009-07-27	00:17:00	0
2009-07-27	00:18:00	0
2009-07-27	00:19:00	0
2009-07-27	00:20:00	0
2009-07-27	00:21:00	0
2009-07-27	00:22:00	0
2009-07-27	00:23:00	0
2009-07-27	00:24:00	0
2009-07-27	00:25:00	0
2009-07-27	00:26:00	0
2009-07-27	00:27:00	0
2009-07-27	00:28:00	0
2009-07-27	00:29:00	0
2009-07-27	00:30:00	0
2009-07-27	00:31:00	0
2009-07-27	00:32:00	0
2009-07-27	00:33:00	0
2009-07-27	00:34:00	0
2009-07-27	00:35:00	0
2009-07-27	00:36:00	0
2009-07-27	00:37:00	0
2009-07-27	00:38:00	0
2009-07-27	00:39:00	0
2009-07-27	00:40:00	0
2009-07-27	00:41:00	0
2009-07-27	00:42:00	0
2009-07-27	00:43:00	0
2009-07-27	00:44:00	0
2009-07-27	00:45:00	0
2009-07-27	00:46:00	0
2009-07-27	00:47:00	0
2009-07-27	00:48:00	0
2009-07-27	00:49:00	0
2009-07-27	00:50:00	0
2009-07-27	00:51:00	0
2009-07-27	00:52:00	0
2009-07-27	00:53:00	0
2009-07-27	00:54:00	0
2009-07-27	00:55:00	0
2009-07-27	00:56:00	0
2009-07-27	00:57:00	0
2009-07-27	00:58:00	0
2009-07-27	00:59:00	0
2009-07-27	01:00:00	0
2009-07-27	01:01:00	0
2009-07-27	01:02:00	0
2009-07-27	01:03:00	0
2009-07-27	01:04:00	0
2009-07-27	01:05:00	0
2009-07-27	01:06:00	0
2009-07-27	01:07:00	0
2009-07-27	01:08:00	0
2009-07-27	01:09:00	0
2009-07-27	01:10:00	0
2009-07-27	01:11:00	0
2009-07-27	01:12:00	0
2009-07-27	01:13:00	0
2009-07-27	01:14:00	0
2009-07-27	01:15:00	0
2009-07-27	01:16:00	0
2009-07-27	01:17:00	0
2009-07-27	01:18:00	0
2009-07-27	01:19:00	0
2009-07-27	01:20:00	0
2009-07-27	01:21:00	0
2009-07-27	01:22:00	0
2009-07-27	01:23:00	0
2009-07-27	01:24:00	0
2009-07-27	01:25:00	0
2009-07-27	01:26:00	0
2009-07-27	01:27:00	0
2009-07-27	01:28:00	0
2009-07-27	01:29:00	0
2009-07-27	01:30:00	0
2009-07-27	01:31:00	0
2009-07-27	01:32:00	0
2009-07-27	01:33:00	0
2009-07-27	01:34:00	0
2009-07-27	01:35:00	0
2009-07-27	01:36:00	0
2009-07-27	01:37:00	0
2009-07-27	01:38:00	0
2009-07-27	01:39:00	0
2009-07-27	01:40:00	0
2009-07-27	01:41:00	0
2009-07-27	01:42:00	0
2009-07-27	01:43:00	0
2009-07-27	01:44:00	0
2009-07-27	01:45:00	0
2009-07-27	01:46:00	0
2009-07-27	01:47:00	0
2009-07-27	01:48:00	0
2009-07-27	01:49:00	0
2009-07-27	01:50:00	0
2009-07-27	01:51:00	0
2009-07-27	01:52:00	0
2009-07-27	01:53:00	0
2009-07-27	01:54:00	0
2009-07-27	01:55:00	0
2009-07-27	01:56:00	0
2009-07-27	01:57:00	0
2009-07-27	01:58:00	0
2009-07-27	01:59:00	0
2009-07-27	02:00:00	0
2009-07-27	02:01:00	0
2009-07-27	02:02:00	0
2009-07-27	02:03:00	0
2009-07-27	02:04:00	0
2009-07-27	02:05:00	0
2009-07-27	02:06:00	0
2009-07-27	02:07:00	0
2009-07-27	02:08:00	0
2009-07-27	02:09:00	0
2009-07-27	02:10:00	0
2009-07-27	02:11:00	0
2009-07-27	02:12:00	0
2009-07-27	02:13:00	0
2009-07-27	02:14:00	0
2009-07-27	02:15:00	0
2009-07-27	02:16:00	0
2009-07-27	02:17:00	0
2009-07-27	02:18:00	0
2009-07-27	02:19:00	0
2009-07-27	02:20:00	0
2009-07-27	02:21:00	0
2009-07-27	02:22:00	0
2009-07-27	02:23:00	0
2009-07-27	02:24:00	0
2009-07-27	02:25:00	0
2009-07-27	02:26:00	0
2009-07-27	02:27:00	0
2009-07-27	02:28:00	0
2009-07-27	02:29:00	0
2009-07-27	02:30:00	0
2009-07-27	02:31:00	0
2009-07-27	02:32:00	0
2009-07-27	02:33:00	0
2009-07-27	02:34:00	0
2009-07-27	02:35:00	0
2009-07-27	02:36:00	0
2009-07-27	02:37:00	0
2009-07-27	02:38:00	0
2009-07-27	02:39:00	0
2009-07-27	02:40:00	0
2009-07-27	02:41:00	0
2009-07-27	02:42:00	0
2009-07-27	02:43:00	0
2009-07-27	02:44:00	0
2009-07-27	02:45:00	0
2009-07-27	02:46:00	0
2009-07-27	02:47:00	0
2009-07-27	02:48:00	0
2009-07-27	02:49:00	0
2009-07-27	02:50:00	0
2009-07-27	02:51:00	0
2009-07-27	02:52:00	0
2009-07-27	02:53:00	0
2009-07-27	02:54:00	0
2009-07-27	02:55:00	0
2009-07-27	02:56:00	0
2009-07-27	02:57:00	0
2009-07-27	02:58:00	0
2009-07-27	02:59:00	0
2009-07-27	03:00:00	0
2009-07-27	03:01:00	0
2009-07-27	03:02:00	0
2009-07-27	03:03:00	0
2009-07-27	03:04:00	0
2009-07-27	03:05:00	0
2009-07-27	03:06:00	0
2009-07-27	03:07:00	0
2009-07-27	03:08:00	0
2009-07-27	03:09:00	0
2009-07-27	03:10:00	0
2009-07-27	03:11:00	0
2009-07-27	03:12:00	0
2009-07-27	03:13:00	0
2009-07-27	03:14:00	0
2009-07-27	03:15:00	0
2009-07-27	03:16:00	0
2009-07-27	03:17:00	0
2009-07-27	03:18:00	0
2009-07-27	03:19:00	0
2009-07-27	03:20:00	0
2009-07-27	03:21:00	0
2009-07-27	03:22:00	0
2009-07-27	03:23:00	0
2009-07-27	03:24:00	0
2009-07-27	03:25:00	0
2009-07-27	03:26:00	0
2009-07-27	03:27:00	0
2009-07-27	03:28:00	0
2009-07-27	03:29:00	0
2009-07-27	03:30:00	0
2009-07-27	03:31:00	0
2009-07-27	03:32:00	0
2009-07-27	03:33:00	0
2009-07-27	03:34:00	0
2009-07-27	03:35:00	0
2009-07-27	03:36:00	0
2009-07-27	03:37:00	0
2009-07-27	03:38:00	0
2009-07-27	03:39:00	0
2009-07-27	03:40:00	0
2009-07-27	03:41:00	0
2009-07-27	03:42:00	0
2009-07-27	03:43:00	0
2009-07-27	03:44:00	0
2009-07-27	03:45:00	0
2009-07-27	03:46:00	0
2009-07-27	03:47:00	0
2009-07-27	03:48:00	0
2009-07-27	03:49:00	0
2009-07-27	03:50:00	0
2009-07-27	03:51:00	0
2009-07-27	03:52:00	0
2009-07-27	03:53:00	0
2009-07-27	03:54:00	0
2009-07-27	03:55:00	0
2009-07-27	03:56:00	0
2009-07-27	03:57:00	0
2009-07-27	03:58:00	0
2009-07-27	03:59:00	0
2009-07-27	04:00:00	0
2009-07-27	04:01:00	0
2009-07-27	04:02:00	0
2009-07-27	04:03:00	0
2009-07-27	04:04:00	0
2009-07-27	04:05:00	0
2009-07-27	04:06:00	0
2009-07-27	04:07:00	0
2009-07-27	04:08:00	0
2009-07-27	04:09:00	0
2009-07-27	04:10:00	0
2009-07-27	04:11:00	0
2009-07-27	04:12:00	0
2009-07-27	04:13:00	0
2009-07-27	04:14:00	0
2009-07-27	04:15:00	0
2009-07-27	04:16:00	0
2009-07-27	04:17:00	0
2009-07-27	04:18:00	0
2009-07-27	04:19:00	0
2009-07-27	04:20:00	0
2009-07-27	04:21:00	0
2009-07-27	04:22:00	0
2009-07-27	04:23:00	0
2009-07-27	04:24:00	0
2009-07-27	04:25:00	0
2009-07-27	04:26:00	0
2009-07-27	04:27:00	0
2009-07-27	04:28:00	0
2009-07-27	04:29:00	0
2009-07-27	04:30:00	0
2009-07-27	04:31:00	0
2009-07-27	04:32:00	0
2009-07-27	04:33:00	0
2009-07-27	04:34:00	0
2009-07-27	04:35:00	0
2009-07-27	04:36:00	0
2009-07-27	04:37:00	0
2009-07-27	04:38:00	0
2009-07-27	04:39:00	0
2009-07-27	04:40:00	0
2009-07-27	04:41:00	0
2009-07-27	04:42:00	0
2009-07-27	04:43:00	0
2009-07-27	04:44:00	0
2009-07-27	04:45:00	0
2009-07-27	04:46:00	0
2009-07-27	04:47:00	0
2009-07-27	04:48:00	0
2009-07-27	04:49:00	0
2009-07-27	04:50:00	0
2009-07-27	04:51:00	0
2009-07-27	04:52:00	0
2009-07-27	04:53:00	0
2009-07-27	04:54:00	0
2009-07-27	04:55:00	0
2009-07-27	04:56:00	0
2009-07-27	04:57:00	0
2009-07-27	04:58:00	0
2009-07-27	04:59:00	0
2009-07-27	05:00:00	0
2009-07-27	05:01:00	0
2009-07-27	05:02:00	0
2009-07-27	05:03:00	0
2009-07-27	05:04:00	0
2009-07-27	05:05:00	0
2009-07-27	05:06:00	0
2009-07-27	05:07:00	0
2009-07-27	05:08:00	0
2009-07-27	05:09:00	0
2009-07-27	05:10:00	0
2009-07-27	05:11:00	0
2009-07-27	05:12:00	0
2009-07-27	05:13:00	0
2009-07-27	05:14:00	0
2009-07-27	05:15:00	0
2009-07-27	05:16:00	0
2009-07-27	05:17:00	0
2009-07-27	05:18:00	0
2009-07-27	05:19:00	0
2009-07-27	05:20:00	0
2009-07-27	05:21:00	0
2009-07-27	05:22:00	0
2009-07-27	05:23:00	0
2009-07-27	05:24:00	0
2009-07-27	05:25:00	0
2009-07-27	05:26:00	0
2009-07-27	05:27:00	0
2009-07-27	05:28:00	0
2009-07-27	05:29:00	0
2009-07-27	05:30:00	0
2009-07-27	05:31:00	0
2009-07-27	05:32:00	0
2009-07-27	05:33:00	0
2009-07-27	05:34:00	0
2009-07-27	05:35:00	0
2009-07-27	05:36:00	0
2009-07-27	05:37:00	0
2009-07-27	05:38:00	0
2009-07-27	05:39:00	0
2009-07-27	05:40:00	0
2009-07-27	05:41:00	0
2009-07-27	05:42:00	0
2009-07-27	05:43:00	0
2009-07-27	05:44:00	0
2009-07-27	05:45:00	0
2009-07-27	05:46:00	0
2009-07-27	05:47:00	0
2009-07-27	05:48:00	0
2009-07-27	05:49:00	0
2009-07-27	05:50:00	0
2009-07-27	05:51:00	0
2009-07-27	05:52:00	0
2009-07-27	05:53:00	0
2009-07-27	05:54:00	0
2009-07-27	05:55:00	0
2009-07-27	05:56:00	0
2009-07-27	05:57:00	0
2009-07-27	05:58:00	0
2009-07-27	05:59:00	0
2009-07-27	06:00:00	0
2009-07-27	06:01:00	0
2009-07-27	06:02:00	0
2009-07-27	06:03:00	0
2009-07-27	06:04:00	0
2009-07-27	06:05:00	0
2009-07-27	06:06:00	0
2009-07-27	06:07:00	0
2009-07-27	06:08:00	0
2009-07-27	06:09:00	0
2009-07-27	06:10:00	0
2009-07-27	06:11:00	0
2009-07-27	06:12:00	0
2009-07-27	06:13:00	0
2009-07-27	06:14:00	0
2009-07-27	06:15:00	0
2009-07-27	06:16:00	0
2009-07-27	06:17:00	0
2009-07-27	06:18:00	0
2009-07-27	06:19:00	0
2009-07-27	06:20:00	0
2009-07-27	06:21:00	0
2009-07-27	06:22:00	0
2009-07-27	06:23:00	0
2009-07-27	06:24:00	0
2009-07-27	06:25:00	0
2009-07-27	06:26:00	0
2009-07-27	06:27:00	0
2009-07-27	06:28:00	0
2009-07-27	06:29:00	0
2009-07-27	06:30:00	0
2009-07-27	06:31:00	0
2009-07-27	06:32:00	0
2009-07-27	06:33:00	0
2009-07-27	06:34:00	0
2009-07-27	06:35:00	0
2009-07-27	06:36:00	0
2009-07-27	06:37:00	0
2009-07-27	06:38:00	0
2009-07-27	06:39:00	0
2009-07-27	06:40:00	0
2009-07-27	06:41:00	0
2009-07-27	06:42:00	0
2009-07-27	06:43:00	0
2009-07-27	06:44:00	0
2009-07-27	06:45:00	0
2009-07-27	06:46:00	0
2009-07-27	06:47:00	0
2009-07-27	06:48:00	0
2009-07-27	06:49:00	0
2009-07-27	06:50:00	0
2009-07-27	06:51:00	0
2009-07-27	06:52:00	0
2009-07-27	06:53:00	0
2009-07-27	06:54:00	0
2009-07-27	06:55:00	0
2009-07-27	06:56:00	0
2009-07-27	06:57:00	0
2009-07-27	06:58:00	0
2009-07-27	06:59:00	0
2009-07-27	07:00:00	0
2009-07-27	07:01:00	0
2009-07-27	07:02:00	0
2009-07-27	07:03:00	0
2009-07-27	07:04:00	0
2009-07-27	07:05:00	0
2009-07-27	07:06:00	0
2009-07-27	07:07:00	0
2009-07-27	07:08:00	0
2009-07-27	07:09:00	0
2009-07-27	07:10:00	0
2009-07-27	07:11:00	0
2009-07-27	07:12:00	0
2009-07-27	07:13:00	0
2009-07-27	07:14:00	0
2009-07-27	07:15:00	0
2009-07-27	07:16:00	0
2009-07-27	07:17:00	0
2009-07-27	07:18:00	0
2009-07-27	07:19:00	0
2009-07-27	07:20:00	0
2009-07-27	07:21:00	0
2009-07-27	07:22:00	0
2009-07-27	07:23:00	0
2009-07-27	07:24:00	0
2009-07-27	07:25:00	0
2009-07-27	07:26:00	0
2009-07-27	07:27:00	0
2009-07-27	07:28:00	0
2009-07-27	07:29:00	0
2009-07-27	07:30:00	0
2009-07-27	07:31:00	0
2009-07-27	07:32:00	0
2009-07-27	07:33:00	0
2009-07-27	07:34:00	0
2009-07-27	07:35:00	0
2009-07-27	07:36:00	0
2009-07-27	07:37:00	0
2009-07-27	07:38:00	0
2009-07-27	07:39:00	0
2009-07-27	07:40:00	0
2009-07-27	07:41:00	0
2009-07-27	07:42:00	0
2009-07-27	07:43:00	0
2009-07-27	07:44:00	0
2009-07-27	07:45:00	0
2009-07-27	07:46:00	0
2009-07-27	07:47:00	0
2009-07-27	07:48:00	0
2009-07-27	07:49:00	0
2009-07-27	07:50:00	0
2009-07-27	07:51:00	0
2009-07-27	07:52:00	0
2009-07-27	07:53:00	0
2009-07-27	07:54:00	0
2009-07-27	07:55:00	0
2009-07-27	07:56:00	0
2009-07-27	07:57:00	0
2009-07-27	07:58:00	0
2009-07-27	07:59:00	0
2009-07-27	08:00:00	0
2009-07-27	08:01:00	0
2009-07-27	08:02:00	0
2009-07-27	08:03:00	0
2009-07-27	08:04:00	0
2009-07-27	08:05:00	0
2009-07-27	08:06:00	0
2009-07-27	08:07:00	0
2009-07-27	08:08:00	0
2009-07-27	08:09:00	0
2009-07-27	08:10:00	0
2009-07-27	08:11:00	0
2009-07-27	08:12:00	0
2009-07-27	08:13:00	0
2009-07-27	08:14:00	0
2009-07-27	08:15:00	0
2009-07-27	08:16:00	0
2009-07-27	08:17:00	0
2009-07-27	08:18:00	0
2009-07-27	08:19:00	0
2009-07-27	08:20:00	0
2009-07-27	08:21:00	0
2009-07-27	08:22:00	0
2009-07-27	08:23:00	0
2009-07-27	08:24:00	0
2009-07-27	08:25:00	0
2009-07-27	08:26:00	0
2009-07-27	08:27:00	0
2009-07-27	08:28:00	0
2009-07-27	08:29:00	0
2009-07-27	08:30:00	0
2009-07-27	08:31:00	0
2009-07-27	08:32:00	0
2009-07-27	08:33:00	0
2009-07-27	08:34:00	0
2009-07-27	08:35:00	0
2009-07-27	08:36:00	0
2009-07-27	08:37:00	0
2009-07-27	08:38:00	0
2009-07-27	08:39:00	0
2009-07-27	08:40:00	0
2009-07-27	08:41:00	0
2009-07-27	08:42:00	0
2009-07-27	08:43:00	0
2009-07-27	08:44:00	0
2009-07-27	08:45:00	0
2009-07-27	08:46:00	0
2009-07-27	08:47:00	0
2009-07-27	08:48:00	0
2009-07-27	08:49:00	0
2009-07-27	08:50:00	0
2009-07-27	08:51:00	0
2009-07-27	08:52:00	0
2009-07-27	08:53:00	0
2009-07-27	08:54:00	0
2009-07-27	08:55:00	0
2009-07-27	08:56:00	0
2009-07-27	08:57:00	0
2009-07-27	08:58:00	0
2009-07-27	08:59:00	0
2009-07-27	09:00:00	0
2009-07-27	09:01:00	0
2009-07-27	09:02:00	0
2009-07-27	09:03:00	0
2009-07-27	09:04:00	0
2009-07-27	09:05:00	0
2009-07-27	09:06:00	0
2009-07-27	09:07:00	0
2009-07-27	09:08:00	0
2009-07-27	09:09:00	0
2009-07-27	09:10:00	0
2009-07-27	09:11:00	0
2009-07-27	09:12:00	0
2009-07-27	09:13:00	0
2009-07-27	09:14:00	0
2009-07-27	09:15:00	0
2009-07-27	09:16:00	0
2009-07-27	09:17:00	0
2009-07-27	09:18:00	0
2009-07-27	09:19:00	0
2009-07-27	09:20:00	0
2009-07-27	09:21:00	0
2009-07-27	09:22:00	0
2009-07-27	09:23:00	0
2009-07-27	09:24:00	0
2009-07-27	09:25:00	0
2009-07-27	09:26:00	0
2009-07-27	09:27:00	0
2009-07-27	09:28:00	0
2009-07-27	09:29:00	0
2009-07-27	09:30:00	0
2009-07-27	09:31:00	0
2009-07-27	09:32:00	0
2009-07-27	09:33:00	0
2009-07-27	09:34:00	0
2009-07-27	09:35:00	0
2009-07-27	09:36:00	0
2009-07-27	09:37:00	0
2009-07-27	09:38:00	0
2009-07-27	09:39:00	0
2009-07-27	09:40:00	0
2009-07-27	09:41:00	0
2009-07-27	09:42:00	0
2009-07-27	09:43:00	0
2009-07-27	09:44:00	0
2009-07-27	09:45:00	0
2009-07-27	09:46:00	0
2009-07-27	09:47:00	0
2009-07-27	09:48:00	0
2009-07-27	09:49:00	0
2009-07-27	09:50:00	0
2009-07-27	09:51:00	0
2009-07-27	09:52:00	0
2009-07-27	09:53:00	0
2009-07-27	09:54:00	0
2009-07-27	09:55:00	0
2009-07-27	09:56:00	0
2009-07-27	09:57:00	0
2009-07-27	09:58:00	0
2009-07-27	09:59:00	0
2009-07-27	10:00:00	0
2009-07-27	10:01:00	0
2009-07-27	10:02:00	0
2009-07-27	10:03:00	0
2009-07-27	10:04:00	0
2009-07-27	10:05:00	0
2009-07-27	10:06:00	0
2009-07-27	10:07:00	0
2009-07-27	10:08:00	0
2009-07-27	10:09:00	0
2009-07-27	10:10:00	0
2009-07-27	10:11:00	0
2009-07-27	10:12:00	0
2009-07-27	10:13:00	0
2009-07-27	10:14:00	0
2009-07-27	10:15:00	0
2009-07-27	10:16:00	0
2009-07-27	10:17:00	0
2009-07-27	10:18:00	0
2009-07-27	10:19:00	0
2009-07-27	10:20:00	0
2009-07-27	10:21:00	0
2009-07-27	10:22:00	0
2009-07-27	10:23:00	0
2009-07-27	10:24:00	0
2009-07-27	10:25:00	0
2009-07-27	10:26:00	0
2009-07-27	10:27:00	0
2009-07-27	10:28:00	0
2009-07-27	10:29:00	0
2009-07-27	10:30:00	0
2009-07-27	10:31:00	0
2009-07-27	10:32:00	0
2009-07-27	10:33:00	0
2009-07-27	10:34:00	0
2009-07-27	10:35:00	0
2009-07-27	10:36:00	0
2009-07-27	10:37:00	0
2009-07-27	10:38:00	0
2009-07-27	10:39:00	0
2009-07-27	10:40:00	0
2009-07-27	10:41:00	0
2009-07-27	10:42:00	0
2009-07-27	10:43:00	0
2009-07-27	10:44:00	0
2009-07-27	10:45:00	0
2009-07-27	10:46:00	0
2009-07-27	10:47:00	0
2009-07-27	10:48:00	0
2009-07-27	10:49:00	0
2009-07-27	10:50:00	0
2009-07-27	10:51:00	0
2009-07-27	10:52:00	0
2009-07-27	10:53:00	0
2009-07-27	10:54:00	0
2009-07-27	10:55:00	0
2009-07-27	10:56:00	0
2009-07-27	10:57:00	0
2009-07-27	10:58:00	0
2009-07-27	10:59:00	0
2009-07-27	11:00:00	0
2009-07-27	11:01:00	0
2009-07-27	11:02:00	0
2009-07-27	11:03:00	0
2009-07-27	11:04:00	0
2009-07-27	11:05:00	0
2009-07-27	11:06:00	0
2009-07-27	11:07:00	0
2009-07-27	11:08:00	0
2009-07-27	11:09:00	0
2009-07-27	11:10:00	0
2009-07-27	11:11:00	0
2009-07-27	11:12:00	0
2009-07-27	11:13:00	0
2009-07-27	11:14:00	0
2009-07-27	11:15:00	0
2009-07-27	11:16:00	0
2009-07-27	11:17:00	0
2009-07-27	11:18:00	0
2009-07-27	11:19:00	0
2009-07-27	11:20:00	0
2009-07-27	11:21:00	0
2009-07-27	11:22:00	0
2009-07-27	11:23:00	0
2009-07-27	11:24:00	0
2009-07-27	11:25:00	0
2009-07-27	11:26:00	0
2009-07-27	11:27:00	0
2009-07-27	11:28:00	0
2009-07-27	11:29:00	0
2009-07-27	11:30:00	0
2009-07-27	11:31:00	0
2009-07-27	11:32:00	0
2009-07-27	11:33:00	0
2009-07-27	11:34:00	0
2009-07-27	11:35:00	0
2009-07-27	11:36:00	0
2009-07-27	11:37:00	0
2009-07-27	11:38:00	0
2009-07-27	11:39:00	0
2009-07-27	11:40:00	0
2009-07-27	11:41:00	0
2009-07-27	11:42:00	0
2009-07-27	11:43:00	0
2009-07-27	11:44:00	0
2009-07-27	11:45:00	0
2009-07-27	11:46:00	0
2009-07-27	11:47:00	0
2009-07-27	11:48:00	0
2009-07-27	11:49:00	0
2009-07-27	11:50:00	0
2009-07-27	11:51:00	0
2009-07-27	11:52:00	0
2009-07-27	11:53:00	0
2009-07-27	11:54:00	0
2009-07-27	11:55:00	0
2009-07-27	11:56:00	0
2009-07-27	11:57:00	0
2009-07-27	11:58:00	0
2009-07-27	11:59:00	0
2009-07-27	12:00:00	0
2009-07-27	12:01:00	0
2009-07-27	12:02:00	0
2009-07-27	12:03:00	0
2009-07-27	12:04:00	0
2009-07-27	12:05:00	0
2009-07-27	12:06:00	0
2009-07-27	12:07:00	0
2009-07-27	12:08:00	0
2009-07-27	12:09:00	0
2009-07-27	12:10:00	0
2009-07-27	12:11:00	0
2009-07-27	12:12:00	0
2009-07-27	12:13:00	0
2009-07-27	12:14:00	0
2009-07-27	12:15:00	0
2009-07-27	12:16:00	0
2009-07-27	12:17:00	0
2009-07-27	12:18:00	0
2009-07-27	12:19:00	0
2009-07-27	12:20:00	0
2009-07-27	12:21:00	0
2009-07-27	12:22:00	0
2009-07-27	12:23:00	0
2009-07-27	12:24:00	0
2009-07-27	12:25:00	0
2009-07-27	12:26:00	0
2009-07-27	12:27:00	0
2009-07-27	12:28:00	0
2009-07-27	12:29:00	0
2009-07-27	12:30:00	0
2009-07-27	12:31:00	0
2009-07-27	12:32:00	0
2009-07-27	12:33:00	0
2009-07-27	12:34:00	0
2009-07-27	12:35:00	0
2009-07-27	12:36:00	0
2009-07-27	12:37:00	0
2009-07-27	12:38:00	0
2009-07-27	12:39:00	0
2009-07-27	12:40:00	0
2009-07-27	12:41:00	0
2009-07-27	12:42:00	0
2009-07-27	12:43:00	0
2009-07-27	12:44:00	0
2009-07-27	12:45:00	0
2009-07-27	12:46:00	0
2009-07-27	12:47:00	0
2009-07-27	12:48:00	0
2009-07-27	12:49:00	0
2009-07-27	12:50:00	0
2009-07-27	12:51:00	0
2009-07-27	12:52:00	0
2009-07-27	12:53:00	0
2009-07-27	12:54:00	0
2009-07-27	12:55:00	0
2009-07-27	12:56:00	0
2009-07-27	12:57:00	0
2009-07-27	12:58:00	0
2009-07-27	12:59:00	0
2009-07-27	13:00:00	0
2009-07-27	13:01:00	0
2009-07-27	13:02:00	0
2009-07-27	13:03:00	0
2009-07-27	13:04:00	0
2009-07-27	13:05:00	0
2009-07-27	13:06:00	0
2009-07-27	13:07:00	0
2009-07-27	13:08:00	0
2009-07-27	13:09:00	0
2009-07-27	13:10:00	0
2009-07-27	13:11:00	0
2009-07-27	13:12:00	0
2009-07-27	13:13:00	0
2009-07-27	13:14:00	0
2009-07-27	13:15:00	0
2009-07-27	13:16:00	0
2009-07-27	13:17:00	0
2009-07-27	13:18:00	0
2009-07-27	13:19:00	0
2009-07-27	13:20:00	0
2009-07-27	13:21:00	0
2009-07-27	13:22:00	0
2009-07-27	13:23:00	0
2009-07-27	13:24:00	0
2009-07-27	13:25:00	0
2009-07-27	13:26:00	0
2009-07-27	13:27:00	0
2009-07-27	13:28:00	0
2009-07-27	13:29:00	0
2009-07-27	13:30:00	0
2009-07-27	13:31:00	0
2009-07-27	13:32:00	0
2009-07-27	13:33:00	0
2009-07-27	13:34:00	0
2009-07-27	13:35:00	0
2009-07-27	13:36:00	0
2009-07-27	13:37:00	0
2009-07-27	13:38:00	0
2009-07-27	13:39:00	0
2009-07-27	13:40:00	0
2009-07-27	13:41:00	0
2009-07-27	13:42:00	0
2009-07-27	13:43:00	0
2009-07-27	13:44:00	0
2009-07-27	13:45:00	0
2009-07-27	13:46:00	0
2009-07-27	13:47:00	0
2009-07-27	13:48:00	0
2009-07-27	13:49:00	0
2009-07-27	13:50:00	0
2009-07-27	13:51:00	0
2009-07-27	13:52:00	0
2009-07-27	13:53:00	0
2009-07-27	13:54:00	0
2009-07-27	13:55:00	0
2009-07-27	13:56:00	0
2009-07-27	13:57:00	0
2009-07-27	13:58:00	0
2009-07-27	13:59:00	0
2009-07-27	14:00:00	0
2009-07-27	14:01:00	0
2009-07-27	14:02:00	0
2009-07-27	14:03:00	0
2009-07-27	14:04:00	0
2009-07-27	14:05:00	0
2009-07-27	14:06:00	0
2009-07-27	14:07:00	0
2009-07-27	14:08:00	0
2009-07-27	14:09:00	0
2009-07-27	14:10:00	0
2009-07-27	14:11:00	0
2009-07-27	14:12:00	0
2009-07-27	14:13:00	0
2009-07-27	14:14:00	0
2009-07-27	14:15:00	0
2009-07-27	14:16:00	0
2009-07-27	14:17:00	0
2009-07-27	14:18:00	0
2009-07-27	14:19:00	0
2009-07-27	14:20:00	0
2009-07-27	14:21:00	0
2009-07-27	14:22:00	0
2009-07-27	14:23:00	0
2009-07-27	14:24:00	0
2009-07-27	14:25:00	0
2009-07-27	14:26:00	0
2009-07-27	14:27:00	0
2009-07-27	14:28:00	0
2009-07-27	14:29:00	0
2009-07-27	14:30:00	0
2009-07-27	14:31:00	0
2009-07-27	14:32:00	0
2009-07-27	14:33:00	0
2009-07-27	14:34:00	0
2009-07-27	14:35:00	0
2009-07-27	14:36:00	0
2009-07-27	14:37:00	0
2009-07-27	14:38:00	0
2009-07-27	14:39:00	0
2009-07-27	14:40:00	0
2009-07-27	14:41:00	0
2009-07-27	14:42:00	0
2009-07-27	14:43:00	0
2009-07-27	14:44:00	0
2009-07-27	14:45:00	0
2009-07-27	14:46:00	0
2009-07-27	14:47:00	0
2009-07-27	14:48:00	0
2009-07-27	14:49:00	0
2009-07-27	14:50:00	0
2009-07-27	14:51:00	0
2009-07-27	14:52:00	0
2009-07-27	14:53:00	0
2009-07-27	14:54:00	0
2009-07-27	14:55:00	0
2009-07-27	14:56:00	0
2009-07-27	14:57:00	0
2009-07-27	14:58:00	0
2009-07-27	14:59:00	0
2009-07-27	15:00:00	0
2009-07-27	15:01:00	0
2009-07-27	15:02:00	0
2009-07-27	15:03:00	0
2009-07-27	15:04:00	0
2009-07-27	15:05:00	0
2009-07-27	15:06:00	0
2009-07-27	15:07:00	0
2009-07-27	15:08:00	0
2009-07-27	15:09:00	0
2009-07-27	15:10:00	0
2009-07-27	15:11:00	0
2009-07-27	15:12:00	0
2009-07-27	15:13:00	0
2009-07-27	15:14:00	0
2009-07-27	15:15:00	0
2009-07-27	15:16:00	0
2009-07-27	15:17:00	0
2009-07-27	15:18:00	0
2009-07-27	15:19:00	0
2009-07-27	15:20:00	0
2009-07-27	15:21:00	0
2009-07-27	15:22:00	0
2009-07-27	15:23:00	0
2009-07-27	15:24:00	0
2009-07-27	15:25:00	0
2009-07-27	15:26:00	0
2009-07-27	15:27:00	0
2009-07-27	15:28:00	0
2009-07-27	15:29:00	0
2009-07-27	15:30:00	0
2009-07-27	15:31:00	0
2009-07-27	15:32:00	0
2009-07-27	15:33:00	0
2009-07-27	15:34:00	0
2009-07-27	15:35:00	0
2009-07-27	15:36:00	0
2009-07-27	15:37:00	0
2009-07-27	15:38:00	0
2009-07-27	15:39:00	0
2009-07-27	15:40:00	0
2009-07-27	15:41:00	0
2009-07-27	15:42:00	0
2009-07-27	15:43:00	0
2009-07-27	15:44:00	0
2009-07-27	15:45:00	0
2009-07-27	15:46:00	0
2009-07-27	15:47:00	0
2009-07-27	15:48:00	0
2009-07-27	15:49:00	0
2009-07-27	15:50:00	0
2009-07-27	15:51:00	0
2009-07-27	15:52:00	0
2009-07-27	15:53:00	0
2009-07-27	15:54:00	0
2009-07-27	15:55:00	0
2009-07-27	15:56:00	0
2009-07-27	15:57:00	0
2009-07-27	15:58:00	0
2009-07-27	15:59:00	0
2009-07-27	16:00:00	0
2009-07-27	16:01:00	0
2009-07-27	16:02:00	0
2009-07-27	16:03:00	0
2009-07-27	16:04:00	0
2009-07-27	16:05:00	0
2009-07-27	16:06:00	0
2009-07-27	16:07:00	0
2009-07-27	16:08:00	0
2009-07-27	16:09:00	0
2009-07-27	16:10:00	0
2009-07-27	16:11:00	0
2009-07-27	16:12:00	0
2009-07-27	16:13:00	0
2009-07-27	16:14:00	0
2009-07-27	16:15:00	0
2009-07-27	16:16:00	0
2009-07-27	16:17:00	0
2009-07-27	16:18:00	0
2009-07-27	16:19:00	0
2009-07-27	16:20:00	0
2009-07-27	16:21:00	0
2009-07-27	16:22:00	0
2009-07-27	16:23:00	0
2009-07-27	16:24:00	0
2009-07-27	16:25:00	0
2009-07-27	16:26:00	0
2009-07-27	16:27:00	0
2009-07-27	16:28:00	0
2009-07-27	16:29:00	0
2009-07-27	16:30:00	0
2009-07-27	16:31:00	0
2009-07-27	16:32:00	0
2009-07-27	16:33:00	0
2009-07-27	16:34:00	0
2009-07-27	16:35:00	0
2009-07-27	16:36:00	0
2009-07-27	16:37:00	0
2009-07-27	16:38:00	0
2009-07-27	16:39:00	0
2009-07-27	16:40:00	0
2009-07-27	16:41:00	0
2009-07-27	16:42:00	0
2009-07-27	16:43:00	0
2009-07-27	16:44:00	0
2009-07-27	16:45:00	0
2009-07-27	16:46:00	0
2009-07-27	16:47:00	0
2009-07-27	16:48:00	0
2009-07-27	16:49:00	0
2009-07-27	16:50:00	0
2009-07-27	16:51:00	0
2009-07-27	16:52:00	0
2009-07-27	16:53:00	0
2009-07-27	16:54:00	0
2009-07-27	16:55:00	0
2009-07-27	16:56:00	0
2009-07-27	16:57:00	0
2009-07-27	16:58:00	0
2009-07-27	16:59:00	0
2009-07-27	17:00:00	0
2009-07-27	17:01:00	0
2009-07-27	17:02:00	0
2009-07-27	17:03:00	0
2009-07-27	17:04:00	0
2009-07-27	17:05:00	0
2009-07-27	17:06:00	0
2009-07-27	17:07:00	0
2009-07-27	17:08:00	0
2009-07-27	17:09:00	0
2009-07-27	17:10:00	0
2009-07-27	17:11:00	0
2009-07-27	17:12:00	0
2009-07-27	17:13:00	0
2009-07-27	17:14:00	0
2009-07-27	17:15:00	0
2009-07-27	17:16:00	0
2009-07-27	17:17:00	0
2009-07-27	17:18:00	0
2009-07-27	17:19:00	0
2009-07-27	17:20:00	0
2009-07-27	17:21:00	0
2009-07-27	17:22:00	0
2009-07-27	17:23:00	0
2009-07-27	17:24:00	0
2009-07-27	17:25:00	0
2009-07-27	17:26:00	0
2009-07-27	17:27:00	0
2009-07-27	17:28:00	0
2009-07-27	17:29:00	0
2009-07-27	17:30:00	0
2009-07-27	17:31:00	0
2009-07-27	17:32:00	0
2009-07-27	17:33:00	0
2009-07-27	17:34:00	0
2009-07-27	17:35:00	0
2009-07-27	17:36:00	0
2009-07-27	17:37:00	0
2009-07-27	17:38:00	0
2009-07-27	17:39:00	0
2009-07-27	17:40:00	0
2009-07-27	17:41:00	0
2009-07-27	17:42:00	0
2009-07-27	17:43:00	0
2009-07-27	17:44:00	0
2009-07-27	17:45:00	0
2009-07-27	17:46:00	0
2009-07-27	17:47:00	0
2009-07-27	17:48:00	0
2009-07-27	17:49:00	0
2009-07-27	17:50:00	0
2009-07-27	17:51:00	0
2009-07-27	17:52:00	0
2009-07-27	17:53:00	0
2009-07-27	17:54:00	0
2009-07-27	17:55:00	0
2009-07-27	17:56:00	0
2009-07-27	17:57:00	0
2009-07-27	17:58:00	0
2009-07-27	17:59:00	0
2009-07-27	18:00:00	1377
2009-07-27	18:01:00	887
2009-07-27	18:02:00	382
2009-07-27	18:03:00	132
2009-07-27	18:04:00	0
2009-07-27	18:05:00	0
2009-07-27	18:06:00	249
2009-07-27	18:07:00	88
2009-07-27	18:08:00	0
2009-07-27	18:09:00	55
2009-07-27	18:10:00	305
2009-07-27	18:11:00	289
2009-07-27	18:12:00	446
2009-07-27	18:13:00	730
2009-07-27	18:14:00	0
2009-07-27	18:15:00	0
2009-07-27	18:16:00	0
2009-07-27	18:17:00	0
2009-07-27	18:18:00	0
2009-07-27	18:19:00	0
2009-07-27	18:20:00	0
2009-07-27	18:21:00	0
2009-07-27	18:22:00	0
2009-07-27	18:23:00	0
2009-07-27	18:24:00	0
2009-07-27	18:25:00	320
2009-07-27	18:26:00	0
2009-07-27	18:27:00	0
2009-07-27	18:28:00	0
2009-07-27	18:29:00	0
2009-07-27	18:30:00	0
2009-07-27	18:31:00	0
2009-07-27	18:32:00	0
2009-07-27	18:33:00	0
2009-07-27	18:34:00	0
2009-07-27	18:35:00	0
2009-07-27	18:36:00	0
2009-07-27	18:37:00	0
2009-07-27	18:38:00	0
2009-07-27	18:39:00	0
2009-07-27	18:40:00	0
2009-07-27	18:41:00	0
2009-07-27	18:42:00	0
2009-07-27	18:43:00	0
2009-07-27	18:44:00	0
2009-07-27	18:45:00	0
2009-07-27	18:46:00	0
2009-07-27	18:47:00	11
2009-07-27	18:48:00	0
2009-07-27	18:49:00	0
2009-07-27	18:50:00	0
2009-07-27	18:51:00	0
2009-07-27	18:52:00	0
2009-07-27	18:53:00	0
2009-07-27	18:54:00	0
2009-07-27	18:55:00	0
2009-07-27	18:56:00	0
2009-07-27	18:57:00	0
2009-07-27	18:58:00	0
2009-07-27	18:59:00	0
2009-07-27	19:00:00	0
2009-07-27	19:01:00	0
2009-07-27	19:02:00	0
2009-07-27	19:03:00	0
2009-07-27	19:04:00	0
2009-07-27	19:05:00	0
2009-07-27	19:06:00	0
2009-07-27	19:07:00	0
2009-07-27	19:08:00	0
2009-07-27	19:09:00	22
2009-07-27	19:10:00	0
2009-07-27	19:11:00	0
2009-07-27	19:12:00	0
2009-07-27	19:13:00	0
2009-07-27	19:14:00	0
2009-07-27	19:15:00	0
2009-07-27	19:16:00	0
2009-07-27	19:17:00	0
2009-07-27	19:18:00	0
2009-07-27	19:19:00	0
2009-07-27	19:20:00	0
2009-07-27	19:21:00	0
2009-07-27	19:22:00	0
2009-07-27	19:23:00	11
2009-07-27	19:24:00	0
2009-07-27	19:25:00	0
2009-07-27	19:26:00	0
2009-07-27	19:27:00	0
2009-07-27	19:28:00	0
2009-07-27	19:29:00	0
2009-07-27	19:30:00	0
2009-07-27	19:31:00	0
2009-07-27	19:32:00	0
2009-07-27	19:33:00	0
2009-07-27	19:34:00	0
2009-07-27	19:35:00	11
2009-07-27	19:36:00	0
2009-07-27	19:37:00	223
2009-07-27	19:38:00	157
2009-07-27	19:39:00	0
2009-07-27	19:40:00	0
2009-07-27	19:41:00	0
2009-07-27	19:42:00	11
2009-07-27	19:43:00	0
2009-07-27	19:44:00	0
2009-07-27	19:45:00	22
2009-07-27	19:46:00	0
2009-07-27	19:47:00	0
2009-07-27	19:48:00	11
2009-07-27	19:49:00	0
2009-07-27	19:50:00	0
2009-07-27	19:51:00	88
2009-07-27	19:52:00	0
2009-07-27	19:53:00	0
2009-07-27	19:54:00	0
2009-07-27	19:55:00	0
2009-07-27	19:56:00	0
2009-07-27	19:57:00	0
2009-07-27	19:58:00	132
2009-07-27	19:59:00	0
2009-07-27	20:00:00	0
2009-07-27	20:01:00	22
2009-07-27	20:02:00	0
2009-07-27	20:03:00	0
2009-07-27	20:04:00	0
2009-07-27	20:05:00	0
2009-07-27	20:06:00	0
2009-07-27	20:07:00	0
2009-07-27	20:08:00	0
2009-07-27	20:09:00	0
2009-07-27	20:10:00	0
2009-07-27	20:11:00	0
2009-07-27	20:12:00	0
2009-07-27	20:13:00	0
2009-07-27	20:14:00	0
2009-07-27	20:15:00	0
2009-07-27	20:16:00	0
2009-07-27	20:17:00	0
2009-07-27	20:18:00	0
2009-07-27	20:19:00	0
2009-07-27	20:20:00	99
2009-07-27	20:21:00	0
2009-07-27	20:22:00	0
2009-07-27	20:23:00	0
2009-07-27	20:24:00	0
2009-07-27	20:25:00	170
2009-07-27	20:26:00	0
2009-07-27	20:27:00	0
2009-07-27	20:28:00	0
2009-07-27	20:29:00	0
2009-07-27	20:30:00	0
2009-07-27	20:31:00	0
2009-07-27	20:32:00	0
2009-07-27	20:33:00	0
2009-07-27	20:34:00	0
2009-07-27	20:35:00	0
2009-07-27	20:36:00	0
2009-07-27	20:37:00	0
2009-07-27	20:38:00	0
2009-07-27	20:39:00	0
2009-07-27	20:40:00	0
2009-07-27	20:41:00	0
2009-07-27	20:42:00	0
2009-07-27	20:43:00	0
2009-07-27	20:44:00	0
2009-07-27	20:45:00	0
2009-07-27	20:46:00	0
2009-07-27	20:47:00	0
2009-07-27	20:48:00	0
2009-07-27	20:49:00	0
2009-07-27	20:50:00	0
2009-07-27	20:51:00	0
2009-07-27	20:52:00	0
2009-07-27	20:53:00	0
2009-07-27	20:54:00	0
2009-07-27	20:55:00	0
2009-07-27	20:56:00	0
2009-07-27	20:57:00	0
2009-07-27	20:58:00	0
2009-07-27	20:59:00	0
2009-07-27	21:00:00	99
2009-07-27	21:01:00	730
2009-07-27	21:02:00	775
2009-07-27	21:03:00	0
2009-07-27	21:04:00	0
2009-07-27	21:05:00	0
2009-07-27	21:06:00	0
2009-07-27	21:07:00	0
2009-07-27	21:08:00	0
2009-07-27	21:09:00	157
2009-07-27	21:10:00	0
2009-07-27	21:11:00	0
2009-07-27	21:12:00	0
2009-07-27	21:13:00	0
2009-07-27	21:14:00	0
2009-07-27	21:15:00	0
2009-07-27	21:16:00	0
2009-07-27	21:17:00	0
2009-07-27	21:18:00	0
2009-07-27	21:19:00	0
2009-07-27	21:20:00	0
2009-07-27	21:21:00	0
2009-07-27	21:22:00	0
2009-07-27	21:23:00	0
2009-07-27	21:24:00	0
2009-07-27	21:25:00	0
2009-07-27	21:26:00	0
2009-07-27	21:27:00	0
2009-07-27	21:28:00	0
2009-07-27	21:29:00	0
2009-07-27	21:30:00	0
2009-07-27	21:31:00	0
2009-07-27	21:32:00	0
2009-07-27	21:33:00	0
2009-07-27	21:34:00	0
2009-07-27	21:35:00	0
2009-07-27	21:36:00	0
2009-07-27	21:37:00	0
2009-07-27	21:38:00	0
2009-07-27	21:39:00	0
2009-07-27	21:40:00	0
2009-07-27	21:41:00	0
2009-07-27	21:42:00	0
2009-07-27	21:43:00	0
2009-07-27	21:44:00	0
2009-07-27	21:45:00	0
2009-07-27	21:46:00	0
2009-07-27	21:47:00	0
2009-07-27	21:48:00	0
2009-07-27	21:49:00	0
2009-07-27	21:50:00	0
2009-07-27	21:51:00	0
2009-07-27	21:52:00	11
2009-07-27	21:53:00	0
2009-07-27	21:54:00	0
2009-07-27	21:55:00	0
2009-07-27	21:56:00	0
2009-07-27	21:57:00	0
2009-07-27	21:58:00	0
2009-07-27	21:59:00	0
2009-07-27	22:00:00	0
2009-07-27	22:01:00	0
2009-07-27	22:02:00	0
2009-07-27	22:03:00	0
2009-07-27	22:04:00	0
2009-07-27	22:05:00	0
2009-07-27	22:06:00	0
2009-07-27	22:07:00	0
2009-07-27	22:08:00	0
2009-07-27	22:09:00	0
2009-07-27	22:10:00	0
2009-07-27	22:11:00	0
2009-07-27	22:12:00	0
2009-07-27	22:13:00	0
2009-07-27	22:14:00	0
2009-07-27	22:15:00	0
2009-07-27	22:16:00	0
2009-07-27	22:17:00	0
2009-07-27	22:18:00	0
2009-07-27	22:19:00	0
2009-07-27	22:20:00	0
2009-07-27	22:21:00	0
2009-07-27	22:22:00	0
2009-07-27	22:23:00	0
2009-07-27	22:24:00	0
2009-07-27	22:25:00	0
2009-07-27	22:26:00	0
2009-07-27	22:27:00	0
2009-07-27	22:28:00	0
2009-07-27	22:29:00	0
2009-07-27	22:30:00	0
2009-07-27	22:31:00	0
2009-07-27	22:32:00	0
2009-07-27	22:33:00	0
2009-07-27	22:34:00	0
2009-07-27	22:35:00	0
2009-07-27	22:36:00	0
2009-07-27	22:37:00	0
2009-07-27	22:38:00	0
2009-07-27	22:39:00	0
2009-07-27	22:40:00	0
2009-07-27	22:41:00	0
2009-07-27	22:42:00	0
2009-07-27	22:43:00	0
2009-07-27	22:44:00	88
2009-07-27	22:45:00	0
2009-07-27	22:46:00	0
2009-07-27	22:47:00	55
2009-07-27	22:48:00	33
2009-07-27	22:49:00	0
2009-07-27	22:50:00	0
2009-07-27	22:51:00	0
2009-07-27	22:52:00	0
2009-07-27	22:53:00	0
2009-07-27	22:54:00	0
2009-07-27	22:55:00	0
2009-07-27	22:56:00	0
2009-07-27	22:57:00	0
2009-07-27	22:58:00	0
2009-07-27	22:59:00	0
2009-07-27	23:00:00	0
2009-07-27	23:01:00	0
2009-07-27	23:02:00	0
2009-07-27	23:03:00	0
2009-07-27	23:04:00	0
2009-07-27	23:05:00	0
2009-07-27	23:06:00	0
2009-07-27	23:07:00	0
2009-07-27	23:08:00	11
2009-07-27	23:09:00	0
2009-07-27	23:10:00	0
2009-07-27	23:11:00	0
2009-07-27	23:12:00	0
2009-07-27	23:13:00	0
2009-07-27	23:14:00	0
2009-07-27	23:15:00	0
2009-07-27	23:16:00	0
2009-07-27	23:17:00	0
2009-07-27	23:18:00	0
2009-07-27	23:19:00	0
2009-07-27	23:20:00	0
2009-07-27	23:21:00	0
2009-07-27	23:22:00	0
2009-07-27	23:23:00	0
2009-07-27	23:24:00	0
2009-07-27	23:25:00	0
2009-07-27	23:26:00	0
2009-07-27	23:27:00	0
2009-07-27	23:28:00	0
2009-07-27	23:29:00	0
2009-07-27	23:30:00	0
2009-07-27	23:31:00	0
2009-07-27	23:32:00	0
2009-07-27	23:33:00	0
2009-07-27	23:34:00	0
2009-07-27	23:35:00	0
2009-07-27	23:36:00	0
2009-07-27	23:37:00	0
2009-07-27	23:38:00	0
2009-07-27	23:39:00	0
2009-07-27	23:40:00	0
2009-07-27	23:41:00	0
2009-07-27	23:42:00	0
2009-07-27	23:43:00	0
2009-07-27	23:44:00	0
2009-07-27	23:45:00	0
2009-07-27	23:46:00	0
2009-07-27	23:47:00	22
2009-07-27	23:48:00	66
2009-07-27	23:49:00	0
2009-07-27	23:50:00	0
2009-07-27	23:51:00	0
2009-07-27	23:52:00	0
2009-07-27	23:53:00	0
2009-07-27	23:54:00	0
2009-07-27	23:55:00	0
2009-07-27	23:56:00	0
2009-07-27	23:57:00	0
2009-07-27	23:58:00	0
2009-07-27	23:59:00	0
2009-07-28	00:00:00	22
2009-07-28	00:01:00	77
2009-07-28	00:02:00	0
2009-07-28	00:03:00	0
2009-07-28	00:04:00	0
2009-07-28	00:05:00	0
2009-07-28	00:06:00	0
2009-07-28	00:07:00	0
2009-07-28	00:08:00	0
2009-07-28	00:09:00	0
2009-07-28	00:10:00	0
2009-07-28	00:11:00	0
2009-07-28	00:12:00	0
2009-07-28	00:13:00	0
2009-07-28	00:14:00	0
2009-07-28	00:15:00	0
2009-07-28	00:16:00	11
2009-07-28	00:17:00	0
2009-07-28	00:18:00	0
2009-07-28	00:19:00	0
2009-07-28	00:20:00	0
2009-07-28	00:21:00	0
2009-07-28	00:22:00	0
2009-07-28	00:23:00	0
2009-07-28	00:24:00	0
2009-07-28	00:25:00	0
2009-07-28	00:26:00	0
2009-07-28	00:27:00	0
2009-07-28	00:28:00	0
2009-07-28	00:29:00	0
2009-07-28	00:30:00	0
2009-07-28	00:31:00	88
2009-07-28	00:32:00	0
2009-07-28	00:33:00	0
2009-07-28	00:34:00	0
2009-07-28	00:35:00	0
2009-07-28	00:36:00	0
2009-07-28	00:37:00	0
2009-07-28	00:38:00	0
2009-07-28	00:39:00	0
2009-07-28	00:40:00	0
2009-07-28	00:41:00	0
2009-07-28	00:42:00	0
2009-07-28	00:43:00	0
2009-07-28	00:44:00	0
2009-07-28	00:45:00	0
2009-07-28	00:46:00	0
2009-07-28	00:47:00	0
2009-07-28	00:48:00	0
2009-07-28	00:49:00	0
2009-07-28	00:50:00	0
2009-07-28	00:51:00	22
2009-07-28	00:52:00	0
2009-07-28	00:53:00	0
2009-07-28	00:54:00	0
2009-07-28	00:55:00	0
2009-07-28	00:56:00	0
2009-07-28	00:57:00	0
2009-07-28	00:58:00	0
2009-07-28	00:59:00	0
2009-07-28	01:00:00	0
2009-07-28	01:01:00	0
2009-07-28	01:02:00	0
2009-07-28	01:03:00	0
2009-07-28	01:04:00	0
2009-07-28	01:05:00	0
2009-07-28	01:06:00	0
2009-07-28	01:07:00	0
2009-07-28	01:08:00	33
2009-07-28	01:09:00	55
2009-07-28	01:10:00	22
2009-07-28	01:11:00	0
2009-07-28	01:12:00	0
2009-07-28	01:13:00	0
2009-07-28	01:14:00	0
2009-07-28	01:15:00	0
2009-07-28	01:16:00	0
2009-07-28	01:17:00	0
2009-07-28	01:18:00	0
2009-07-28	01:19:00	0
2009-07-28	01:20:00	77
2009-07-28	01:21:00	0
2009-07-28	01:22:00	0
2009-07-28	01:23:00	0
2009-07-28	01:24:00	0
2009-07-28	01:25:00	0
2009-07-28	01:26:00	0
2009-07-28	01:27:00	0
2009-07-28	01:28:00	0
2009-07-28	01:29:00	0
2009-07-28	01:30:00	0
2009-07-28	01:31:00	0
2009-07-28	01:32:00	0
2009-07-28	01:33:00	0
2009-07-28	01:34:00	0
2009-07-28	01:35:00	0
2009-07-28	01:36:00	0
2009-07-28	01:37:00	0
2009-07-28	01:38:00	0
2009-07-28	01:39:00	0
2009-07-28	01:40:00	0
2009-07-28	01:41:00	77
2009-07-28	01:42:00	11
2009-07-28	01:43:00	0
2009-07-28	01:44:00	0
2009-07-28	01:45:00	0
2009-07-28	01:46:00	0
2009-07-28	01:47:00	0
2009-07-28	01:48:00	0
2009-07-28	01:49:00	0
2009-07-28	01:50:00	0
2009-07-28	01:51:00	0
2009-07-28	01:52:00	0
2009-07-28	01:53:00	0
2009-07-28	01:54:00	0
2009-07-28	01:55:00	0
2009-07-28	01:56:00	0
2009-07-28	01:57:00	0
2009-07-28	01:58:00	0
2009-07-28	01:59:00	132
2009-07-28	02:00:00	0
2009-07-28	02:01:00	0
2009-07-28	02:02:00	55
2009-07-28	02:03:00	0
2009-07-28	02:04:00	0
2009-07-28	02:05:00	0
2009-07-28	02:06:00	143
2009-07-28	02:07:00	0
2009-07-28	02:08:00	0
2009-07-28	02:09:00	11
2009-07-28	02:10:00	0
2009-07-28	02:11:00	0
2009-07-28	02:12:00	0
2009-07-28	02:13:00	0
2009-07-28	02:14:00	0
2009-07-28	02:15:00	0
2009-07-28	02:16:00	0
2009-07-28	02:17:00	0
2009-07-28	02:18:00	0
2009-07-28	02:19:00	0
2009-07-28	02:20:00	0
2009-07-28	02:21:00	0
2009-07-28	02:22:00	0
2009-07-28	02:23:00	0
2009-07-28	02:24:00	0
2009-07-28	02:25:00	0
2009-07-28	02:26:00	0
2009-07-28	02:27:00	0
2009-07-28	02:28:00	0
2009-07-28	02:29:00	0
2009-07-28	02:30:00	0
2009-07-28	02:31:00	0
2009-07-28	02:32:00	132
2009-07-28	02:33:00	0
2009-07-28	02:34:00	0
2009-07-28	02:35:00	0
2009-07-28	02:36:00	0
2009-07-28	02:37:00	0
2009-07-28	02:38:00	0
2009-07-28	02:39:00	0
2009-07-28	02:40:00	0
2009-07-28	02:41:00	0
2009-07-28	02:42:00	0
2009-07-28	02:43:00	0
2009-07-28	02:44:00	0
2009-07-28	02:45:00	0
2009-07-28	02:46:00	0
2009-07-28	02:47:00	0
2009-07-28	02:48:00	0
2009-07-28	02:49:00	0
2009-07-28	02:50:00	0
2009-07-28	02:51:00	0
2009-07-28	02:52:00	0
2009-07-28	02:53:00	0
2009-07-28	02:54:00	0
2009-07-28	02:55:00	0
2009-07-28	02:56:00	0
2009-07-28	02:57:00	0
2009-07-28	02:58:00	0
2009-07-28	02:59:00	0
2009-07-28	03:00:00	0
2009-07-28	03:01:00	0
2009-07-28	03:02:00	0
2009-07-28	03:03:00	0
2009-07-28	03:04:00	0
2009-07-28	03:05:00	0
2009-07-28	03:06:00	0
2009-07-28	03:07:00	0
2009-07-28	03:08:00	0
2009-07-28	03:09:00	22
2009-07-28	03:10:00	11
2009-07-28	03:11:00	0
2009-07-28	03:12:00	0
2009-07-28	03:13:00	0
2009-07-28	03:14:00	0
2009-07-28	03:15:00	0
2009-07-28	03:16:00	0
2009-07-28	03:17:00	0
2009-07-28	03:18:00	0
2009-07-28	03:19:00	0
2009-07-28	03:20:00	0
2009-07-28	03:21:00	0
2009-07-28	03:22:00	0
2009-07-28	03:23:00	0
2009-07-28	03:24:00	0
2009-07-28	03:25:00	0
2009-07-28	03:26:00	0
2009-07-28	03:27:00	0
2009-07-28	03:28:00	0
2009-07-28	03:29:00	0
2009-07-28	03:30:00	0
2009-07-28	03:31:00	0
2009-07-28	03:32:00	0
2009-07-28	03:33:00	0
2009-07-28	03:34:00	0
2009-07-28	03:35:00	22
2009-07-28	03:36:00	0
2009-07-28	03:37:00	0
2009-07-28	03:38:00	0
2009-07-28	03:39:00	0
2009-07-28	03:40:00	0
2009-07-28	03:41:00	0
2009-07-28	03:42:00	0
2009-07-28	03:43:00	0
2009-07-28	03:44:00	0
2009-07-28	03:45:00	0
2009-07-28	03:46:00	0
2009-07-28	03:47:00	0
2009-07-28	03:48:00	0
2009-07-28	03:49:00	0
2009-07-28	03:50:00	0
2009-07-28	03:51:00	0
2009-07-28	03:52:00	0
2009-07-28	03:53:00	0
2009-07-28	03:54:00	0
2009-07-28	03:55:00	0
2009-07-28	03:56:00	0
2009-07-28	03:57:00	0
2009-07-28	03:58:00	0
2009-07-28	03:59:00	0
2009-07-28	04:00:00	0
2009-07-28	04:01:00	0
2009-07-28	04:02:00	0
2009-07-28	04:03:00	0
2009-07-28	04:04:00	0
2009-07-28	04:05:00	0
2009-07-28	04:06:00	0
2009-07-28	04:07:00	0
2009-07-28	04:08:00	0
2009-07-28	04:09:00	0
2009-07-28	04:10:00	0
2009-07-28	04:11:00	0
2009-07-28	04:12:00	0
2009-07-28	04:13:00	0
2009-07-28	04:14:00	0
2009-07-28	04:15:00	0
2009-07-28	04:16:00	0
2009-07-28	04:17:00	0
2009-07-28	04:18:00	0
2009-07-28	04:19:00	0
2009-07-28	04:20:00	0
2009-07-28	04:21:00	0
2009-07-28	04:22:00	0
2009-07-28	04:23:00	0
2009-07-28	04:24:00	0
2009-07-28	04:25:00	0
2009-07-28	04:26:00	0
2009-07-28	04:27:00	0
2009-07-28	04:28:00	0
2009-07-28	04:29:00	0
2009-07-28	04:30:00	0
2009-07-28	04:31:00	0
2009-07-28	04:32:00	0
2009-07-28	04:33:00	0
2009-07-28	04:34:00	0
2009-07-28	04:35:00	0
2009-07-28	04:36:00	0
2009-07-28	04:37:00	0
2009-07-28	04:38:00	0
2009-07-28	04:39:00	0
2009-07-28	04:40:00	0
2009-07-28	04:41:00	0
2009-07-28	04:42:00	0
2009-07-28	04:43:00	0
2009-07-28	04:44:00	0
2009-07-28	04:45:00	0
2009-07-28	04:46:00	0
2009-07-28	04:47:00	0
2009-07-28	04:48:00	0
2009-07-28	04:49:00	0
2009-07-28	04:50:00	0
2009-07-28	04:51:00	0
2009-07-28	04:52:00	0
2009-07-28	04:53:00	0
2009-07-28	04:54:00	11
2009-07-28	04:55:00	0
2009-07-28	04:56:00	0
2009-07-28	04:57:00	0
2009-07-28	04:58:00	0
2009-07-28	04:59:00	0
2009-07-28	05:00:00	0
2009-07-28	05:01:00	0
2009-07-28	05:02:00	0
2009-07-28	05:03:00	0
2009-07-28	05:04:00	0
2009-07-28	05:05:00	0
2009-07-28	05:06:00	0
2009-07-28	05:07:00	0
2009-07-28	05:08:00	0
2009-07-28	05:09:00	0
2009-07-28	05:10:00	0
2009-07-28	05:11:00	0
2009-07-28	05:12:00	0
2009-07-28	05:13:00	0
2009-07-28	05:14:00	0
2009-07-28	05:15:00	0
2009-07-28	05:16:00	0
2009-07-28	05:17:00	11
2009-07-28	05:18:00	0
2009-07-28	05:19:00	0
2009-07-28	05:20:00	0
2009-07-28	05:21:00	0
2009-07-28	05:22:00	0
2009-07-28	05:23:00	0
2009-07-28	05:24:00	0
2009-07-28	05:25:00	0
2009-07-28	05:26:00	0
2009-07-28	05:27:00	0
2009-07-28	05:28:00	0
2009-07-28	05:29:00	0
2009-07-28	05:30:00	0
2009-07-28	05:31:00	0
2009-07-28	05:32:00	0
2009-07-28	05:33:00	157
2009-07-28	05:34:00	88
2009-07-28	05:35:00	11
2009-07-28	05:36:00	11
2009-07-28	05:37:00	0
2009-07-28	05:38:00	11
2009-07-28	05:39:00	366
2009-07-28	05:40:00	649
2009-07-28	05:41:00	236
2009-07-28	05:42:00	753
2009-07-28	05:43:00	183
2009-07-28	05:44:00	249
2009-07-28	05:45:00	66
2009-07-28	05:46:00	0
2009-07-28	05:47:00	11
2009-07-28	05:48:00	22
2009-07-28	05:49:00	11
2009-07-28	05:50:00	77
2009-07-28	05:51:00	589
2009-07-28	05:52:00	11
2009-07-28	05:53:00	110
2009-07-28	05:54:00	0
2009-07-28	05:55:00	0
2009-07-28	05:56:00	121
2009-07-28	05:57:00	0
2009-07-28	05:58:00	0
2009-07-28	05:59:00	0
2009-07-28	06:00:00	0
2009-07-28	06:01:00	0
2009-07-28	06:02:00	0
2009-07-28	06:03:00	0
2009-07-28	06:04:00	0
2009-07-28	06:05:00	0
2009-07-28	06:06:00	289
2009-07-28	06:07:00	0
2009-07-28	06:08:00	0
2009-07-28	06:09:00	0
2009-07-28	06:10:00	55
2009-07-28	06:11:00	88
2009-07-28	06:12:00	0
2009-07-28	06:13:00	0
2009-07-28	06:14:00	121
2009-07-28	06:15:00	0
2009-07-28	06:16:00	132
2009-07-28	06:17:00	157
2009-07-28	06:18:00	0
2009-07-28	06:19:00	0
2009-07-28	06:20:00	0
2009-07-28	06:21:00	0
2009-07-28	06:22:00	0
2009-07-28	06:23:00	0
2009-07-28	06:24:00	0
2009-07-28	06:25:00	0
2009-07-28	06:26:00	0
2009-07-28	06:27:00	0
2009-07-28	06:28:00	0
2009-07-28	06:29:00	0
2009-07-28	06:30:00	0
2009-07-28	06:31:00	0
2009-07-28	06:32:00	0
2009-07-28	06:33:00	99
2009-07-28	06:34:00	0
2009-07-28	06:35:00	0
2009-07-28	06:36:00	99
2009-07-28	06:37:00	121
2009-07-28	06:38:00	66
2009-07-28	06:39:00	0
2009-07-28	06:40:00	0
2009-07-28	06:41:00	0
2009-07-28	06:42:00	132
2009-07-28	06:43:00	0
2009-07-28	06:44:00	0
2009-07-28	06:45:00	0
2009-07-28	06:46:00	0
2009-07-28	06:47:00	0
2009-07-28	06:48:00	0
2009-07-28	06:49:00	0
2009-07-28	06:50:00	0
2009-07-28	06:51:00	0
2009-07-28	06:52:00	0
2009-07-28	06:53:00	0
2009-07-28	06:54:00	66
2009-07-28	06:55:00	55
2009-07-28	06:56:00	0
2009-07-28	06:57:00	0
2009-07-28	06:58:00	157
2009-07-28	06:59:00	0
2009-07-28	07:00:00	0
2009-07-28	07:01:00	0
2009-07-28	07:02:00	0
2009-07-28	07:03:00	0
2009-07-28	07:04:00	66
2009-07-28	07:05:00	0
2009-07-28	07:06:00	276
2009-07-28	07:07:00	0
2009-07-28	07:08:00	0
2009-07-28	07:09:00	77
2009-07-28	07:10:00	11
2009-07-28	07:11:00	0
2009-07-28	07:12:00	0
2009-07-28	07:13:00	143
2009-07-28	07:14:00	0
2009-07-28	07:15:00	0
2009-07-28	07:16:00	132
2009-07-28	07:17:00	132
2009-07-28	07:18:00	44
2009-07-28	07:19:00	0
2009-07-28	07:20:00	55
2009-07-28	07:21:00	143
2009-07-28	07:22:00	0
2009-07-28	07:23:00	157
2009-07-28	07:24:00	11
2009-07-28	07:25:00	0
2009-07-28	07:26:00	0
2009-07-28	07:27:00	0
2009-07-28	07:28:00	0
2009-07-28	07:29:00	0
2009-07-28	07:30:00	196
2009-07-28	07:31:00	0
2009-07-28	07:32:00	0
2009-07-28	07:33:00	276
2009-07-28	07:34:00	0
2009-07-28	07:35:00	99
2009-07-28	07:36:00	1114
2009-07-28	07:37:00	1062
2009-07-28	07:38:00	249
2009-07-28	07:39:00	0
2009-07-28	07:40:00	132
2009-07-28	07:41:00	132
2009-07-28	07:42:00	263
2009-07-28	07:43:00	66
2009-07-28	07:44:00	170
2009-07-28	07:45:00	11
2009-07-28	07:46:00	0
2009-07-28	07:47:00	0
2009-07-28	07:48:00	0
2009-07-28	07:49:00	0
2009-07-28	07:50:00	0
2009-07-28	07:51:00	11
2009-07-28	07:52:00	0
2009-07-28	07:53:00	0
2009-07-28	07:54:00	0
2009-07-28	07:55:00	0
2009-07-28	07:56:00	0
2009-07-28	07:57:00	0
2009-07-28	07:58:00	0
2009-07-28	07:59:00	0
2009-07-28	08:00:00	0
2009-07-28	08:01:00	0
2009-07-28	08:02:00	0
2009-07-28	08:03:00	0
2009-07-28	08:04:00	0
2009-07-28	08:05:00	0
2009-07-28	08:06:00	0
2009-07-28	08:07:00	0
2009-07-28	08:08:00	0
2009-07-28	08:09:00	0
2009-07-28	08:10:00	0
2009-07-28	08:11:00	0
2009-07-28	08:12:00	0
2009-07-28	08:13:00	0
2009-07-28	08:14:00	0
2009-07-28	08:15:00	0
2009-07-28	08:16:00	0
2009-07-28	08:17:00	0
2009-07-28	08:18:00	0
2009-07-28	08:19:00	0
2009-07-28	08:20:00	0
2009-07-28	08:21:00	0
2009-07-28	08:22:00	0
2009-07-28	08:23:00	0
2009-07-28	08:24:00	0
2009-07-28	08:25:00	196
2009-07-28	08:26:00	44
2009-07-28	08:27:00	0
2009-07-28	08:28:00	0
2009-07-28	08:29:00	0
2009-07-28	08:30:00	0
2009-07-28	08:31:00	0
2009-07-28	08:32:00	0
2009-07-28	08:33:00	0
2009-07-28	08:34:00	0
2009-07-28	08:35:00	0
2009-07-28	08:36:00	0
2009-07-28	08:37:00	0
2009-07-28	08:38:00	0
2009-07-28	08:39:00	0
2009-07-28	08:40:00	0
2009-07-28	08:41:00	0
2009-07-28	08:42:00	0
2009-07-28	08:43:00	0
2009-07-28	08:44:00	0
2009-07-28	08:45:00	0
2009-07-28	08:46:00	0
2009-07-28	08:47:00	0
2009-07-28	08:48:00	0
2009-07-28	08:49:00	0
2009-07-28	08:50:00	0
2009-07-28	08:51:00	0
2009-07-28	08:52:00	0
2009-07-28	08:53:00	0
2009-07-28	08:54:00	0
2009-07-28	08:55:00	0
2009-07-28	08:56:00	0
2009-07-28	08:57:00	0
2009-07-28	08:58:00	0
2009-07-28	08:59:00	0
2009-07-28	09:00:00	0
2009-07-28	09:01:00	0
2009-07-28	09:02:00	0
2009-07-28	09:03:00	0
2009-07-28	09:04:00	0
2009-07-28	09:05:00	0
2009-07-28	09:06:00	55
2009-07-28	09:07:00	88
2009-07-28	09:08:00	0
[truncated: 19,611 more rows]

[truncated: 3 more sheets: 8.10.09, 8.24.09, 8.08.09]
