# Supplementary material for: Initial evaluation of nighttime restlessness in a naturally occurring canine model of osteoarthritis pain
Source: PeerJ. 2015 Feb 17;3:e772. doi: 10.7717/peerj.772 (PMC4340376; doi:10.7717/peerj.772)
Supplement: Supplemental Information 60 [file peerj-03-772-s060.xlsx]

## Sheet: Office Visits
Visit Date	Visit Number
2009-06-25 06:00:00	1
2009-07-09 06:00:00	2
2009-07-23 06:00:00	3
2009-08-06 06:00:00	4
2009-08-20 06:00:00	5
2009-09-03 06:00:00	6
2009-09-18 06:00:00	7
2009-09-29 06:00:00	8
2009-10-15 06:00:00	9

## Sheet: 64_Data
Segment	DateTime	Activity	Hour	Quadrant	Study Day	Weekday
1	2009-07-02 06:01:00	0	6	2	7	5
1	2009-07-02 06:02:00	0	6	2	7	5
1	2009-07-02 06:03:00	0	6	2	7	5
1	2009-07-02 06:04:00	0	6	2	7	5
1	2009-07-02 06:05:00	0	6	2	7	5
1	2009-07-02 06:06:00	12	6	2	7	5
1	2009-07-02 06:07:00	12	6	2	7	5
1	2009-07-02 06:08:00	0	6	2	7	5
1	2009-07-02 06:09:00	12	6	2	7	5
1	2009-07-02 06:10:00	36	6	2	7	5
1	2009-07-02 06:11:00	0	6	2	7	5
1	2009-07-02 06:12:00	0	6	2	7	5
1	2009-07-02 06:13:00	0	6	2	7	5
1	2009-07-02 06:14:00	0	6	2	7	5
1	2009-07-02 06:15:00	0	6	2	7	5
1	2009-07-02 06:16:00	0	6	2	7	5
1	2009-07-02 06:17:00	0	6	2	7	5
1	2009-07-02 06:18:00	0	6	2	7	5
1	2009-07-02 06:19:00	0	6	2	7	5
1	2009-07-02 06:20:00	0	6	2	7	5
1	2009-07-02 06:21:00	0	6	2	7	5
1	2009-07-02 06:22:00	0	6	2	7	5
1	2009-07-02 06:23:00	0	6	2	7	5
1	2009-07-02 06:24:00	0	6	2	7	5
1	2009-07-02 06:25:00	168	6	2	7	5
1	2009-07-02 06:26:00	410	6	2	7	5
1	2009-07-02 06:27:00	12	6	2	7	5
1	2009-07-02 06:28:00	24	6	2	7	5
1	2009-07-02 06:29:00	0	6	2	7	5
1	2009-07-02 06:30:00	12	6	2	7	5
1	2009-07-02 06:31:00	12	6	2	7	5
1	2009-07-02 06:32:00	12	6	2	7	5
1	2009-07-02 06:33:00	154	6	2	7	5
1	2009-07-02 06:34:00	12	6	2	7	5
1	2009-07-02 06:35:00	0	6	2	7	5
1	2009-07-02 06:36:00	12	6	2	7	5
1	2009-07-02 06:37:00	24	6	2	7	5
1	2009-07-02 06:38:00	12	6	2	7	5
1	2009-07-02 06:39:00	24	6	2	7	5
1	2009-07-02 06:40:00	12	6	2	7	5
1	2009-07-02 06:41:00	12	6	2	7	5
1	2009-07-02 06:42:00	12	6	2	7	5
1	2009-07-02 06:43:00	24	6	2	7	5
1	2009-07-02 06:44:00	0	6	2	7	5
1	2009-07-02 06:45:00	36	6	2	7	5
1	2009-07-02 06:46:00	47	6	2	7	5
1	2009-07-02 06:47:00	12	6	2	7	5
1	2009-07-02 06:48:00	12	6	2	7	5
1	2009-07-02 06:49:00	36	6	2	7	5
1	2009-07-02 06:50:00	0	6	2	7	5
1	2009-07-02 06:51:00	0	6	2	7	5
1	2009-07-02 06:52:00	0	6	2	7	5
1	2009-07-02 06:53:00	0	6	2	7	5
1	2009-07-02 06:54:00	225	6	2	7	5
1	2009-07-02 06:55:00	761	6	2	7	5
1	2009-07-02 06:56:00	71	6	2	7	5
1	2009-07-02 06:57:00	12	6	2	7	5
1	2009-07-02 06:58:00	36	6	2	7	5
1	2009-07-02 06:59:00	0	6	2	7	5
1	2009-07-02 07:00:00	59	6	2	7	5
1	2009-07-02 07:01:00	36	7	2	7	5
1	2009-07-02 07:02:00	12	7	2	7	5
1	2009-07-02 07:03:00	785	7	2	7	5
1	2009-07-02 07:04:00	0	7	2	7	5
1	2009-07-02 07:05:00	24	7	2	7	5
1	2009-07-02 07:06:00	83	7	2	7	5
1	2009-07-02 07:07:00	0	7	2	7	5
1	2009-07-02 07:08:00	24	7	2	7	5
1	2009-07-02 07:09:00	0	7	2	7	5
1	2009-07-02 07:10:00	0	7	2	7	5
1	2009-07-02 07:11:00	0	7	2	7	5
1	2009-07-02 07:12:00	0	7	2	7	5
1	2009-07-02 07:13:00	0	7	2	7	5
1	2009-07-02 07:14:00	0	7	2	7	5
1	2009-07-02 07:15:00	95	7	2	7	5
1	2009-07-02 07:16:00	0	7	2	7	5
1	2009-07-02 07:17:00	0	7	2	7	5
1	2009-07-02 07:18:00	0	7	2	7	5
1	2009-07-02 07:19:00	0	7	2	7	5
1	2009-07-02 07:20:00	0	7	2	7	5
1	2009-07-02 07:21:00	36	7	2	7	5
1	2009-07-02 07:22:00	0	7	2	7	5
1	2009-07-02 07:23:00	0	7	2	7	5
1	2009-07-02 07:24:00	0	7	2	7	5
1	2009-07-02 07:25:00	0	7	2	7	5
1	2009-07-02 07:26:00	0	7	2	7	5
1	2009-07-02 07:27:00	0	7	2	7	5
1	2009-07-02 07:28:00	0	7	2	7	5
1	2009-07-02 07:29:00	0	7	2	7	5
1	2009-07-02 07:30:00	0	7	2	7	5
1	2009-07-02 07:31:00	0	7	2	7	5
1	2009-07-02 07:32:00	36	7	2	7	5
1	2009-07-02 07:33:00	0	7	2	7	5
1	2009-07-02 07:34:00	0	7	2	7	5
1	2009-07-02 07:35:00	498	7	2	7	5
1	2009-07-02 07:36:00	740	7	2	7	5
1	2009-07-02 07:37:00	612	7	2	7	5
1	2009-07-02 07:38:00	536	7	2	7	5
1	2009-07-02 07:39:00	718	7	2	7	5
1	2009-07-02 07:40:00	130	7	2	7	5
1	2009-07-02 07:41:00	12	7	2	7	5
1	2009-07-02 07:42:00	0	7	2	7	5
1	2009-07-02 07:43:00	0	7	2	7	5
1	2009-07-02 07:44:00	0	7	2	7	5
1	2009-07-02 07:45:00	0	7	2	7	5
1	2009-07-02 07:46:00	0	7	2	7	5
1	2009-07-02 07:47:00	0	7	2	7	5
1	2009-07-02 07:48:00	0	7	2	7	5
1	2009-07-02 07:49:00	0	7	2	7	5
1	2009-07-02 07:50:00	130	7	2	7	5
1	2009-07-02 07:51:00	24	7	2	7	5
1	2009-07-02 07:52:00	0	7	2	7	5
1	2009-07-02 07:53:00	0	7	2	7	5
1	2009-07-02 07:54:00	0	7	2	7	5
1	2009-07-02 07:55:00	0	7	2	7	5
1	2009-07-02 07:56:00	83	7	2	7	5
1	2009-07-02 07:57:00	654	7	2	7	5
1	2009-07-02 07:58:00	1479	7	2	7	5
1	2009-07-02 07:59:00	1140	7	2	7	5
1	2009-07-02 08:00:00	536	7	2	7	5
1	2009-07-02 08:01:00	1005	8	2	7	5
1	2009-07-02 08:02:00	498	8	2	7	5
1	2009-07-02 08:03:00	1318	8	2	7	5
1	2009-07-02 08:04:00	2551	8	2	7	5
1	2009-07-02 08:05:00	83	8	2	7	5
1	2009-07-02 08:06:00	327	8	2	7	5
1	2009-07-02 08:07:00	268	8	2	7	5
1	2009-07-02 08:08:00	593	8	2	7	5
1	2009-07-02 08:09:00	0	8	2	7	5
1	2009-07-02 08:10:00	0	8	2	7	5
1	2009-07-02 08:11:00	0	8	2	7	5
1	2009-07-02 08:12:00	0	8	2	7	5
1	2009-07-02 08:13:00	0	8	2	7	5
1	2009-07-02 08:14:00	12	8	2	7	5
1	2009-07-02 08:15:00	12	8	2	7	5
1	2009-07-02 08:16:00	12	8	2	7	5
1	2009-07-02 08:17:00	24	8	2	7	5
1	2009-07-02 08:18:00	0	8	2	7	5
1	2009-07-02 08:19:00	0	8	2	7	5
1	2009-07-02 08:20:00	0	8	2	7	5
1	2009-07-02 08:21:00	12	8	2	7	5
1	2009-07-02 08:22:00	12	8	2	7	5
1	2009-07-02 08:23:00	0	8	2	7	5
1	2009-07-02 08:24:00	0	8	2	7	5
1	2009-07-02 08:25:00	0	8	2	7	5
1	2009-07-02 08:26:00	0	8	2	7	5
1	2009-07-02 08:27:00	0	8	2	7	5
1	2009-07-02 08:28:00	0	8	2	7	5
1	2009-07-02 08:29:00	0	8	2	7	5
1	2009-07-02 08:30:00	0	8	2	7	5
1	2009-07-02 08:31:00	0	8	2	7	5
1	2009-07-02 08:32:00	0	8	2	7	5
1	2009-07-02 08:33:00	0	8	2	7	5
1	2009-07-02 08:34:00	0	8	2	7	5
1	2009-07-02 08:35:00	12	8	2	7	5
1	2009-07-02 08:36:00	0	8	2	7	5
1	2009-07-02 08:37:00	0	8	2	7	5
1	2009-07-02 08:38:00	0	8	2	7	5
1	2009-07-02 08:39:00	0	8	2	7	5
1	2009-07-02 08:40:00	0	8	2	7	5
1	2009-07-02 08:41:00	0	8	2	7	5
1	2009-07-02 08:42:00	0	8	2	7	5
1	2009-07-02 08:43:00	0	8	2	7	5
1	2009-07-02 08:44:00	0	8	2	7	5
1	2009-07-02 08:45:00	0	8	2	7	5
1	2009-07-02 08:46:00	36	8	2	7	5
1	2009-07-02 08:47:00	0	8	2	7	5
1	2009-07-02 08:48:00	36	8	2	7	5
1	2009-07-02 08:49:00	83	8	2	7	5
1	2009-07-02 08:50:00	0	8	2	7	5
1	2009-07-02 08:51:00	0	8	2	7	5
1	2009-07-02 08:52:00	0	8	2	7	5
1	2009-07-02 08:53:00	0	8	2	7	5
1	2009-07-02 08:54:00	0	8	2	7	5
1	2009-07-02 08:55:00	0	8	2	7	5
1	2009-07-02 08:56:00	0	8	2	7	5
1	2009-07-02 08:57:00	0	8	2	7	5
1	2009-07-02 08:58:00	0	8	2	7	5
1	2009-07-02 08:59:00	0	8	2	7	5
1	2009-07-02 09:00:00	0	8	2	7	5
1	2009-07-02 09:01:00	0	9	2	7	5
1	2009-07-02 09:02:00	36	9	2	7	5
1	2009-07-02 09:03:00	0	9	2	7	5
1	2009-07-02 09:04:00	0	9	2	7	5
1	2009-07-02 09:05:00	0	9	2	7	5
1	2009-07-02 09:06:00	47	9	2	7	5
1	2009-07-02 09:07:00	83	9	2	7	5
1	2009-07-02 09:08:00	0	9	2	7	5
1	2009-07-02 09:09:00	0	9	2	7	5
1	2009-07-02 09:10:00	0	9	2	7	5
1	2009-07-02 09:11:00	71	9	2	7	5
1	2009-07-02 09:12:00	12	9	2	7	5
1	2009-07-02 09:13:00	59	9	2	7	5
1	2009-07-02 09:14:00	0	9	2	7	5
1	2009-07-02 09:15:00	0	9	2	7	5
1	2009-07-02 09:16:00	0	9	2	7	5
1	2009-07-02 09:17:00	0	9	2	7	5
1	2009-07-02 09:18:00	12	9	2	7	5
1	2009-07-02 09:19:00	0	9	2	7	5
1	2009-07-02 09:20:00	12	9	2	7	5
1	2009-07-02 09:21:00	0	9	2	7	5
1	2009-07-02 09:22:00	0	9	2	7	5
1	2009-07-02 09:23:00	0	9	2	7	5
1	2009-07-02 09:24:00	0	9	2	7	5
1	2009-07-02 09:25:00	0	9	2	7	5
1	2009-07-02 09:26:00	0	9	2	7	5
1	2009-07-02 09:27:00	0	9	2	7	5
1	2009-07-02 09:28:00	0	9	2	7	5
1	2009-07-02 09:29:00	0	9	2	7	5
1	2009-07-02 09:30:00	0	9	2	7	5
1	2009-07-02 09:31:00	12	9	2	7	5
1	2009-07-02 09:32:00	0	9	2	7	5
1	2009-07-02 09:33:00	36	9	2	7	5
1	2009-07-02 09:34:00	0	9	2	7	5
1	2009-07-02 09:35:00	0	9	2	7	5
1	2009-07-02 09:36:00	0	9	2	7	5
1	2009-07-02 09:37:00	0	9	2	7	5
1	2009-07-02 09:38:00	0	9	2	7	5
1	2009-07-02 09:39:00	0	9	2	7	5
1	2009-07-02 09:40:00	0	9	2	7	5
1	2009-07-02 09:41:00	0	9	2	7	5
1	2009-07-02 09:42:00	0	9	2	7	5
1	2009-07-02 09:43:00	0	9	2	7	5
1	2009-07-02 09:44:00	12	9	2	7	5
1	2009-07-02 09:45:00	36	9	2	7	5
1	2009-07-02 09:46:00	0	9	2	7	5
1	2009-07-02 09:47:00	0	9	2	7	5
1	2009-07-02 09:48:00	0	9	2	7	5
1	2009-07-02 09:49:00	0	9	2	7	5
1	2009-07-02 09:50:00	0	9	2	7	5
1	2009-07-02 09:51:00	0	9	2	7	5
1	2009-07-02 09:52:00	0	9	2	7	5
1	2009-07-02 09:53:00	0	9	2	7	5
1	2009-07-02 09:54:00	0	9	2	7	5
1	2009-07-02 09:55:00	0	9	2	7	5
1	2009-07-02 09:56:00	0	9	2	7	5
1	2009-07-02 09:57:00	0	9	2	7	5
1	2009-07-02 09:58:00	0	9	2	7	5
1	2009-07-02 09:59:00	0	9	2	7	5
1	2009-07-02 10:00:00	0	9	2	7	5
1	2009-07-02 10:01:00	0	10	2	7	5
1	2009-07-02 10:02:00	0	10	2	7	5
1	2009-07-02 10:03:00	0	10	2	7	5
1	2009-07-02 10:04:00	0	10	2	7	5
1	2009-07-02 10:05:00	0	10	2	7	5
1	2009-07-02 10:06:00	0	10	2	7	5
1	2009-07-02 10:07:00	0	10	2	7	5
1	2009-07-02 10:08:00	0	10	2	7	5
1	2009-07-02 10:09:00	0	10	2	7	5
1	2009-07-02 10:10:00	0	10	2	7	5
1	2009-07-02 10:11:00	0	10	2	7	5
1	2009-07-02 10:12:00	0	10	2	7	5
1	2009-07-02 10:13:00	0	10	2	7	5
1	2009-07-02 10:14:00	0	10	2	7	5
1	2009-07-02 10:15:00	0	10	2	7	5
1	2009-07-02 10:16:00	0	10	2	7	5
1	2009-07-02 10:17:00	0	10	2	7	5
1	2009-07-02 10:18:00	344	10	2	7	5
1	2009-07-02 10:19:00	498	10	2	7	5
1	2009-07-02 10:20:00	393	10	2	7	5
1	2009-07-02 10:21:00	0	10	2	7	5
1	2009-07-02 10:22:00	0	10	2	7	5
1	2009-07-02 10:23:00	0	10	2	7	5
1	2009-07-02 10:24:00	0	10	2	7	5
1	2009-07-02 10:25:00	0	10	2	7	5
1	2009-07-02 10:26:00	0	10	2	7	5
1	2009-07-02 10:27:00	0	10	2	7	5
1	2009-07-02 10:28:00	0	10	2	7	5
1	2009-07-02 10:29:00	0	10	2	7	5
1	2009-07-02 10:30:00	36	10	2	7	5
1	2009-07-02 10:31:00	168	10	2	7	5
1	2009-07-02 10:32:00	0	10	2	7	5
1	2009-07-02 10:33:00	0	10	2	7	5
1	2009-07-02 10:34:00	0	10	2	7	5
1	2009-07-02 10:35:00	71	10	2	7	5
1	2009-07-02 10:36:00	0	10	2	7	5
1	2009-07-02 10:37:00	0	10	2	7	5
1	2009-07-02 10:38:00	71	10	2	7	5
1	2009-07-02 10:39:00	36	10	2	7	5
1	2009-07-02 10:40:00	393	10	2	7	5
1	2009-07-02 10:41:00	24	10	2	7	5
1	2009-07-02 10:42:00	12	10	2	7	5
1	2009-07-02 10:43:00	12	10	2	7	5
1	2009-07-02 10:44:00	24	10	2	7	5
1	2009-07-02 10:45:00	12	10	2	7	5
1	2009-07-02 10:46:00	36	10	2	7	5
1	2009-07-02 10:47:00	0	10	2	7	5
1	2009-07-02 10:48:00	36	10	2	7	5
1	2009-07-02 10:49:00	36	10	2	7	5
1	2009-07-02 10:50:00	24	10	2	7	5
1	2009-07-02 10:51:00	0	10	2	7	5
1	2009-07-02 10:52:00	0	10	2	7	5
1	2009-07-02 10:53:00	0	10	2	7	5
1	2009-07-02 10:54:00	0	10	2	7	5
1	2009-07-02 10:55:00	0	10	2	7	5
1	2009-07-02 10:56:00	0	10	2	7	5
1	2009-07-02 10:57:00	0	10	2	7	5
1	2009-07-02 10:58:00	0	10	2	7	5
1	2009-07-02 10:59:00	0	10	2	7	5
1	2009-07-02 11:00:00	0	10	2	7	5
1	2009-07-02 11:01:00	0	11	2	7	5
1	2009-07-02 11:02:00	0	11	2	7	5
1	2009-07-02 11:03:00	0	11	2	7	5
1	2009-07-02 11:04:00	0	11	2	7	5
1	2009-07-02 11:05:00	0	11	2	7	5
1	2009-07-02 11:06:00	12	11	2	7	5
1	2009-07-02 11:07:00	0	11	2	7	5
1	2009-07-02 11:08:00	0	11	2	7	5
1	2009-07-02 11:09:00	0	11	2	7	5
1	2009-07-02 11:10:00	59	11	2	7	5
1	2009-07-02 11:11:00	282	11	2	7	5
1	2009-07-02 11:12:00	0	11	2	7	5
1	2009-07-02 11:13:00	0	11	2	7	5
1	2009-07-02 11:14:00	0	11	2	7	5
1	2009-07-02 11:15:00	0	11	2	7	5
1	2009-07-02 11:16:00	0	11	2	7	5
1	2009-07-02 11:17:00	0	11	2	7	5
1	2009-07-02 11:18:00	0	11	2	7	5
1	2009-07-02 11:19:00	0	11	2	7	5
1	2009-07-02 11:20:00	0	11	2	7	5
1	2009-07-02 11:21:00	0	11	2	7	5
1	2009-07-02 11:22:00	0	11	2	7	5
1	2009-07-02 11:23:00	0	11	2	7	5
1	2009-07-02 11:24:00	0	11	2	7	5
1	2009-07-02 11:25:00	0	11	2	7	5
1	2009-07-02 11:26:00	0	11	2	7	5
1	2009-07-02 11:27:00	0	11	2	7	5
1	2009-07-02 11:28:00	0	11	2	7	5
1	2009-07-02 11:29:00	0	11	2	7	5
1	2009-07-02 11:30:00	0	11	2	7	5
1	2009-07-02 11:31:00	0	11	2	7	5
1	2009-07-02 11:32:00	12	11	2	7	5
1	2009-07-02 11:33:00	0	11	2	7	5
1	2009-07-02 11:34:00	0	11	2	7	5
1	2009-07-02 11:35:00	0	11	2	7	5
1	2009-07-02 11:36:00	0	11	2	7	5
1	2009-07-02 11:37:00	0	11	2	7	5
1	2009-07-02 11:38:00	0	11	2	7	5
1	2009-07-02 11:39:00	0	11	2	7	5
1	2009-07-02 11:40:00	0	11	2	7	5
1	2009-07-02 11:41:00	0	11	2	7	5
1	2009-07-02 11:42:00	0	11	2	7	5
1	2009-07-02 11:43:00	0	11	2	7	5
1	2009-07-02 11:44:00	0	11	2	7	5
1	2009-07-02 11:45:00	0	11	2	7	5
1	2009-07-02 11:46:00	0	11	2	7	5
1	2009-07-02 11:47:00	0	11	2	7	5
1	2009-07-02 11:48:00	0	11	2	7	5
1	2009-07-02 11:49:00	0	11	2	7	5
1	2009-07-02 11:50:00	0	11	2	7	5
1	2009-07-02 11:51:00	24	11	2	7	5
1	2009-07-02 11:52:00	0	11	2	7	5
1	2009-07-02 11:53:00	0	11	2	7	5
1	2009-07-02 11:54:00	95	11	2	7	5
1	2009-07-02 11:55:00	12	11	2	7	5
1	2009-07-02 11:56:00	0	11	2	7	5
1	2009-07-02 11:57:00	0	11	2	7	5
1	2009-07-02 11:58:00	0	11	2	7	5
1	2009-07-02 11:59:00	0	11	2	7	5
1	2009-07-02 12:00:00	0	11	2	7	5
1	2009-07-02 12:01:00	0	12	3	7	5
1	2009-07-02 12:02:00	0	12	3	7	5
1	2009-07-02 12:03:00	36	12	3	7	5
1	2009-07-02 12:04:00	0	12	3	7	5
1	2009-07-02 12:05:00	0	12	3	7	5
1	2009-07-02 12:06:00	12	12	3	7	5
1	2009-07-02 12:07:00	0	12	3	7	5
1	2009-07-02 12:08:00	0	12	3	7	5
1	2009-07-02 12:09:00	0	12	3	7	5
1	2009-07-02 12:10:00	0	12	3	7	5
1	2009-07-02 12:11:00	0	12	3	7	5
1	2009-07-02 12:12:00	0	12	3	7	5
1	2009-07-02 12:13:00	0	12	3	7	5
1	2009-07-02 12:14:00	0	12	3	7	5
1	2009-07-02 12:15:00	0	12	3	7	5
1	2009-07-02 12:16:00	0	12	3	7	5
1	2009-07-02 12:17:00	0	12	3	7	5
1	2009-07-02 12:18:00	0	12	3	7	5
1	2009-07-02 12:19:00	12	12	3	7	5
1	2009-07-02 12:20:00	0	12	3	7	5
1	2009-07-02 12:21:00	0	12	3	7	5
1	2009-07-02 12:22:00	12	12	3	7	5
1	2009-07-02 12:23:00	0	12	3	7	5
1	2009-07-02 12:24:00	0	12	3	7	5
1	2009-07-02 12:25:00	0	12	3	7	5
1	2009-07-02 12:26:00	0	12	3	7	5
1	2009-07-02 12:27:00	0	12	3	7	5
1	2009-07-02 12:28:00	59	12	3	7	5
1	2009-07-02 12:29:00	24	12	3	7	5
1	2009-07-02 12:30:00	59	12	3	7	5
1	2009-07-02 12:31:00	12	12	3	7	5
1	2009-07-02 12:32:00	0	12	3	7	5
1	2009-07-02 12:33:00	0	12	3	7	5
1	2009-07-02 12:34:00	59	12	3	7	5
1	2009-07-02 12:35:00	0	12	3	7	5
1	2009-07-02 12:36:00	0	12	3	7	5
1	2009-07-02 12:37:00	0	12	3	7	5
1	2009-07-02 12:38:00	0	12	3	7	5
1	2009-07-02 12:39:00	59	12	3	7	5
1	2009-07-02 12:40:00	393	12	3	7	5
1	2009-07-02 12:41:00	903	12	3	7	5
1	2009-07-02 12:42:00	536	12	3	7	5
1	2009-07-02 12:43:00	377	12	3	7	5
1	2009-07-02 12:44:00	498	12	3	7	5
1	2009-07-02 12:45:00	24	12	3	7	5
1	2009-07-02 12:46:00	12	12	3	7	5
1	2009-07-02 12:47:00	83	12	3	7	5
1	2009-07-02 12:48:00	377	12	3	7	5
1	2009-07-02 12:49:00	979	12	3	7	5
1	2009-07-02 12:50:00	460	12	3	7	5
1	2009-07-02 12:51:00	393	12	3	7	5
1	2009-07-02 12:52:00	498	12	3	7	5
1	2009-07-02 12:53:00	427	12	3	7	5
1	2009-07-02 12:54:00	377	12	3	7	5
1	2009-07-02 12:55:00	47	12	3	7	5
1	2009-07-02 12:56:00	24	12	3	7	5
1	2009-07-02 12:57:00	71	12	3	7	5
1	2009-07-02 12:58:00	479	12	3	7	5
1	2009-07-02 12:59:00	254	12	3	7	5
1	2009-07-02 13:00:00	0	12	3	7	5
1	2009-07-02 13:01:00	0	13	3	7	5
1	2009-07-02 13:02:00	36	13	3	7	5
1	2009-07-02 13:03:00	0	13	3	7	5
1	2009-07-02 13:04:00	0	13	3	7	5
1	2009-07-02 13:05:00	0	13	3	7	5
1	2009-07-02 13:06:00	0	13	3	7	5
1	2009-07-02 13:07:00	12	13	3	7	5
1	2009-07-02 13:08:00	0	13	3	7	5
1	2009-07-02 13:09:00	24	13	3	7	5
1	2009-07-02 13:10:00	327	13	3	7	5
1	2009-07-02 13:11:00	107	13	3	7	5
1	2009-07-02 13:12:00	12	13	3	7	5
1	2009-07-02 13:13:00	12	13	3	7	5
1	2009-07-02 13:14:00	0	13	3	7	5
1	2009-07-02 13:15:00	12	13	3	7	5
1	2009-07-02 13:16:00	0	13	3	7	5
1	2009-07-02 13:17:00	0	13	3	7	5
1	2009-07-02 13:18:00	0	13	3	7	5
1	2009-07-02 13:19:00	0	13	3	7	5
1	2009-07-02 13:20:00	268	13	3	7	5
1	2009-07-02 13:21:00	12	13	3	7	5
1	2009-07-02 13:22:00	0	13	3	7	5
1	2009-07-02 13:23:00	0	13	3	7	5
1	2009-07-02 13:24:00	0	13	3	7	5
1	2009-07-02 13:25:00	0	13	3	7	5
1	2009-07-02 13:26:00	0	13	3	7	5
1	2009-07-02 13:27:00	239	13	3	7	5
1	2009-07-02 13:28:00	0	13	3	7	5
1	2009-07-02 13:29:00	0	13	3	7	5
1	2009-07-02 13:30:00	0	13	3	7	5
1	2009-07-02 13:31:00	0	13	3	7	5
1	2009-07-02 13:32:00	47	13	3	7	5
1	2009-07-02 13:33:00	168	13	3	7	5
1	2009-07-02 13:34:00	0	13	3	7	5
1	2009-07-02 13:35:00	12	13	3	7	5
1	2009-07-02 13:36:00	0	13	3	7	5
1	2009-07-02 13:37:00	0	13	3	7	5
1	2009-07-02 13:38:00	0	13	3	7	5
1	2009-07-02 13:39:00	0	13	3	7	5
1	2009-07-02 13:40:00	0	13	3	7	5
1	2009-07-02 13:41:00	0	13	3	7	5
1	2009-07-02 13:42:00	0	13	3	7	5
1	2009-07-02 13:43:00	0	13	3	7	5
1	2009-07-02 13:44:00	0	13	3	7	5
1	2009-07-02 13:45:00	0	13	3	7	5
1	2009-07-02 13:46:00	0	13	3	7	5
1	2009-07-02 13:47:00	0	13	3	7	5
1	2009-07-02 13:48:00	0	13	3	7	5
1	2009-07-02 13:49:00	0	13	3	7	5
1	2009-07-02 13:50:00	0	13	3	7	5
1	2009-07-02 13:51:00	0	13	3	7	5
1	2009-07-02 13:52:00	0	13	3	7	5
1	2009-07-02 13:53:00	0	13	3	7	5
1	2009-07-02 13:54:00	0	13	3	7	5
1	2009-07-02 13:55:00	0	13	3	7	5
1	2009-07-02 13:56:00	0	13	3	7	5
1	2009-07-02 13:57:00	0	13	3	7	5
1	2009-07-02 13:58:00	0	13	3	7	5
1	2009-07-02 13:59:00	0	13	3	7	5
1	2009-07-02 14:00:00	0	13	3	7	5
1	2009-07-02 14:01:00	12	14	3	7	5
1	2009-07-02 14:02:00	0	14	3	7	5
1	2009-07-02 14:03:00	0	14	3	7	5
1	2009-07-02 14:04:00	0	14	3	7	5
1	2009-07-02 14:05:00	0	14	3	7	5
1	2009-07-02 14:06:00	12	14	3	7	5
1	2009-07-02 14:07:00	0	14	3	7	5
1	2009-07-02 14:08:00	0	14	3	7	5
1	2009-07-02 14:09:00	0	14	3	7	5
1	2009-07-02 14:10:00	0	14	3	7	5
1	2009-07-02 14:11:00	0	14	3	7	5
1	2009-07-02 14:12:00	0	14	3	7	5
1	2009-07-02 14:13:00	0	14	3	7	5
1	2009-07-02 14:14:00	12	14	3	7	5
1	2009-07-02 14:15:00	0	14	3	7	5
1	2009-07-02 14:16:00	0	14	3	7	5
1	2009-07-02 14:17:00	0	14	3	7	5
1	2009-07-02 14:18:00	183	14	3	7	5
1	2009-07-02 14:19:00	498	14	3	7	5
1	2009-07-02 14:20:00	0	14	3	7	5
1	2009-07-02 14:21:00	0	14	3	7	5
1	2009-07-02 14:22:00	0	14	3	7	5
1	2009-07-02 14:23:00	0	14	3	7	5
1	2009-07-02 14:24:00	0	14	3	7	5
1	2009-07-02 14:25:00	0	14	3	7	5
1	2009-07-02 14:26:00	0	14	3	7	5
1	2009-07-02 14:27:00	0	14	3	7	5
1	2009-07-02 14:28:00	0	14	3	7	5
1	2009-07-02 14:29:00	0	14	3	7	5
1	2009-07-02 14:30:00	36	14	3	7	5
1	2009-07-02 14:31:00	0	14	3	7	5
1	2009-07-02 14:32:00	0	14	3	7	5
1	2009-07-02 14:33:00	0	14	3	7	5
1	2009-07-02 14:34:00	0	14	3	7	5
1	2009-07-02 14:35:00	24	14	3	7	5
1	2009-07-02 14:36:00	0	14	3	7	5
1	2009-07-02 14:37:00	0	14	3	7	5
1	2009-07-02 14:38:00	0	14	3	7	5
1	2009-07-02 14:39:00	0	14	3	7	5
1	2009-07-02 14:40:00	0	14	3	7	5
1	2009-07-02 14:41:00	12	14	3	7	5
1	2009-07-02 14:42:00	0	14	3	7	5
1	2009-07-02 14:43:00	517	14	3	7	5
1	2009-07-02 14:44:00	282	14	3	7	5
1	2009-07-02 14:45:00	95	14	3	7	5
1	2009-07-02 14:46:00	555	14	3	7	5
1	2009-07-02 14:47:00	633	14	3	7	5
1	2009-07-02 14:48:00	832	14	3	7	5
1	2009-07-02 14:49:00	593	14	3	7	5
1	2009-07-02 14:50:00	697	14	3	7	5
1	2009-07-02 14:51:00	225	14	3	7	5
1	2009-07-02 14:52:00	0	14	3	7	5
1	2009-07-02 14:53:00	0	14	3	7	5
1	2009-07-02 14:54:00	0	14	3	7	5
1	2009-07-02 14:55:00	0	14	3	7	5
1	2009-07-02 14:56:00	0	14	3	7	5
1	2009-07-02 14:57:00	183	14	3	7	5
1	2009-07-02 14:58:00	154	14	3	7	5
1	2009-07-02 14:59:00	12	14	3	7	5
1	2009-07-02 15:00:00	107	14	3	7	5
1	2009-07-02 15:01:00	225	15	3	7	5
1	2009-07-02 15:02:00	36	15	3	7	5
1	2009-07-02 15:03:00	0	15	3	7	5
1	2009-07-02 15:04:00	0	15	3	7	5
1	2009-07-02 15:05:00	0	15	3	7	5
1	2009-07-02 15:06:00	0	15	3	7	5
1	2009-07-02 15:07:00	0	15	3	7	5
1	2009-07-02 15:08:00	0	15	3	7	5
1	2009-07-02 15:09:00	0	15	3	7	5
1	2009-07-02 15:10:00	0	15	3	7	5
1	2009-07-02 15:11:00	0	15	3	7	5
1	2009-07-02 15:12:00	0	15	3	7	5
1	2009-07-02 15:13:00	0	15	3	7	5
1	2009-07-02 15:14:00	0	15	3	7	5
1	2009-07-02 15:15:00	0	15	3	7	5
1	2009-07-02 15:16:00	0	15	3	7	5
1	2009-07-02 15:17:00	0	15	3	7	5
1	2009-07-02 15:18:00	0	15	3	7	5
1	2009-07-02 15:19:00	0	15	3	7	5
1	2009-07-02 15:20:00	0	15	3	7	5
1	2009-07-02 15:21:00	0	15	3	7	5
1	2009-07-02 15:22:00	0	15	3	7	5
1	2009-07-02 15:23:00	12	15	3	7	5
1	2009-07-02 15:24:00	0	15	3	7	5
1	2009-07-02 15:25:00	0	15	3	7	5
1	2009-07-02 15:26:00	0	15	3	7	5
1	2009-07-02 15:27:00	0	15	3	7	5
1	2009-07-02 15:28:00	119	15	3	7	5
1	2009-07-02 15:29:00	0	15	3	7	5
1	2009-07-02 15:30:00	0	15	3	7	5
1	2009-07-02 15:31:00	0	15	3	7	5
1	2009-07-02 15:32:00	0	15	3	7	5
1	2009-07-02 15:33:00	0	15	3	7	5
1	2009-07-02 15:34:00	0	15	3	7	5
1	2009-07-02 15:35:00	47	15	3	7	5
1	2009-07-02 15:36:00	0	15	3	7	5
1	2009-07-02 15:37:00	0	15	3	7	5
1	2009-07-02 15:38:00	130	15	3	7	5
1	2009-07-02 15:39:00	130	15	3	7	5
1	2009-07-02 15:40:00	24	15	3	7	5
1	2009-07-02 15:41:00	0	15	3	7	5
1	2009-07-02 15:42:00	479	15	3	7	5
1	2009-07-02 15:43:00	183	15	3	7	5
1	2009-07-02 15:44:00	130	15	3	7	5
1	2009-07-02 15:45:00	142	15	3	7	5
1	2009-07-02 15:46:00	142	15	3	7	5
1	2009-07-02 15:47:00	239	15	3	7	5
1	2009-07-02 15:48:00	47	15	3	7	5
1	2009-07-02 15:49:00	154	15	3	7	5
1	2009-07-02 15:50:00	36	15	3	7	5
1	2009-07-02 15:51:00	460	15	3	7	5
1	2009-07-02 15:52:00	0	15	3	7	5
1	2009-07-02 15:53:00	0	15	3	7	5
1	2009-07-02 15:54:00	0	15	3	7	5
1	2009-07-02 15:55:00	0	15	3	7	5
1	2009-07-02 15:56:00	0	15	3	7	5
1	2009-07-02 15:57:00	0	15	3	7	5
1	2009-07-02 15:58:00	0	15	3	7	5
1	2009-07-02 15:59:00	0	15	3	7	5
1	2009-07-02 16:00:00	0	15	3	7	5
1	2009-07-02 16:01:00	0	16	3	7	5
1	2009-07-02 16:02:00	0	16	3	7	5
1	2009-07-02 16:03:00	0	16	3	7	5
1	2009-07-02 16:04:00	0	16	3	7	5
1	2009-07-02 16:05:00	0	16	3	7	5
1	2009-07-02 16:06:00	0	16	3	7	5
1	2009-07-02 16:07:00	0	16	3	7	5
1	2009-07-02 16:08:00	0	16	3	7	5
1	2009-07-02 16:09:00	12	16	3	7	5
1	2009-07-02 16:10:00	0	16	3	7	5
1	2009-07-02 16:11:00	0	16	3	7	5
1	2009-07-02 16:12:00	0	16	3	7	5
1	2009-07-02 16:13:00	0	16	3	7	5
1	2009-07-02 16:14:00	0	16	3	7	5
1	2009-07-02 16:15:00	0	16	3	7	5
1	2009-07-02 16:16:00	0	16	3	7	5
1	2009-07-02 16:17:00	0	16	3	7	5
1	2009-07-02 16:18:00	0	16	3	7	5
1	2009-07-02 16:19:00	24	16	3	7	5
1	2009-07-02 16:20:00	0	16	3	7	5
1	2009-07-02 16:21:00	0	16	3	7	5
1	2009-07-02 16:22:00	0	16	3	7	5
1	2009-07-02 16:23:00	0	16	3	7	5
1	2009-07-02 16:24:00	0	16	3	7	5
1	2009-07-02 16:25:00	0	16	3	7	5
1	2009-07-02 16:26:00	0	16	3	7	5
1	2009-07-02 16:27:00	12	16	3	7	5
1	2009-07-02 16:28:00	59	16	3	7	5
1	2009-07-02 16:29:00	0	16	3	7	5
1	2009-07-02 16:30:00	0	16	3	7	5
1	2009-07-02 16:31:00	0	16	3	7	5
1	2009-07-02 16:32:00	0	16	3	7	5
1	2009-07-02 16:33:00	0	16	3	7	5
1	2009-07-02 16:34:00	0	16	3	7	5
1	2009-07-02 16:35:00	0	16	3	7	5
1	2009-07-02 16:36:00	0	16	3	7	5
1	2009-07-02 16:37:00	0	16	3	7	5
1	2009-07-02 16:38:00	0	16	3	7	5
1	2009-07-02 16:39:00	0	16	3	7	5
1	2009-07-02 16:40:00	0	16	3	7	5
1	2009-07-02 16:41:00	0	16	3	7	5
1	2009-07-02 16:42:00	0	16	3	7	5
1	2009-07-02 16:43:00	0	16	3	7	5
1	2009-07-02 16:44:00	0	16	3	7	5
1	2009-07-02 16:45:00	0	16	3	7	5
1	2009-07-02 16:46:00	0	16	3	7	5
1	2009-07-02 16:47:00	12	16	3	7	5
1	2009-07-02 16:48:00	12	16	3	7	5
1	2009-07-02 16:49:00	71	16	3	7	5
1	2009-07-02 16:50:00	12	16	3	7	5
1	2009-07-02 16:51:00	0	16	3	7	5
1	2009-07-02 16:52:00	142	16	3	7	5
1	2009-07-02 16:53:00	154	16	3	7	5
1	2009-07-02 16:54:00	0	16	3	7	5
1	2009-07-02 16:55:00	0	16	3	7	5
1	2009-07-02 16:56:00	0	16	3	7	5
1	2009-07-02 16:57:00	0	16	3	7	5
1	2009-07-02 16:58:00	0	16	3	7	5
1	2009-07-02 16:59:00	0	16	3	7	5
1	2009-07-02 17:00:00	0	16	3	7	5
1	2009-07-02 17:01:00	0	17	3	7	5
1	2009-07-02 17:02:00	0	17	3	7	5
1	2009-07-02 17:03:00	0	17	3	7	5
1	2009-07-02 17:04:00	0	17	3	7	5
1	2009-07-02 17:05:00	0	17	3	7	5
1	2009-07-02 17:06:00	0	17	3	7	5
1	2009-07-02 17:07:00	0	17	3	7	5
1	2009-07-02 17:08:00	0	17	3	7	5
1	2009-07-02 17:09:00	0	17	3	7	5
1	2009-07-02 17:10:00	24	17	3	7	5
1	2009-07-02 17:11:00	0	17	3	7	5
1	2009-07-02 17:12:00	856	17	3	7	5
1	2009-07-02 17:13:00	296	17	3	7	5
1	2009-07-02 17:14:00	832	17	3	7	5
1	2009-07-02 17:15:00	410	17	3	7	5
1	2009-07-02 17:16:00	36	17	3	7	5
1	2009-07-02 17:17:00	24	17	3	7	5
1	2009-07-02 17:18:00	0	17	3	7	5
1	2009-07-02 17:19:00	0	17	3	7	5
1	2009-07-02 17:20:00	0	17	3	7	5
1	2009-07-02 17:21:00	0	17	3	7	5
1	2009-07-02 17:22:00	0	17	3	7	5
1	2009-07-02 17:23:00	0	17	3	7	5
1	2009-07-02 17:24:00	0	17	3	7	5
1	2009-07-02 17:25:00	0	17	3	7	5
1	2009-07-02 17:26:00	36	17	3	7	5
1	2009-07-02 17:27:00	36	17	3	7	5
1	2009-07-02 17:28:00	24	17	3	7	5
1	2009-07-02 17:29:00	0	17	3	7	5
1	2009-07-02 17:30:00	0	17	3	7	5
1	2009-07-02 17:31:00	0	17	3	7	5
1	2009-07-02 17:32:00	0	17	3	7	5
1	2009-07-02 17:33:00	12	17	3	7	5
1	2009-07-02 17:34:00	0	17	3	7	5
1	2009-07-02 17:35:00	12	17	3	7	5
1	2009-07-02 17:36:00	12	17	3	7	5
1	2009-07-02 17:37:00	71	17	3	7	5
1	2009-07-02 17:38:00	410	17	3	7	5
1	2009-07-02 17:39:00	593	17	3	7	5
1	2009-07-02 17:40:00	168	17	3	7	5
1	2009-07-02 17:41:00	0	17	3	7	5
1	2009-07-02 17:42:00	0	17	3	7	5
1	2009-07-02 17:43:00	0	17	3	7	5
1	2009-07-02 17:44:00	0	17	3	7	5
1	2009-07-02 17:45:00	0	17	3	7	5
1	2009-07-02 17:46:00	0	17	3	7	5
1	2009-07-02 17:47:00	0	17	3	7	5
1	2009-07-02 17:48:00	0	17	3	7	5
1	2009-07-02 17:49:00	0	17	3	7	5
1	2009-07-02 17:50:00	24	17	3	7	5
1	2009-07-02 17:51:00	0	17	3	7	5
1	2009-07-02 17:52:00	0	17	3	7	5
1	2009-07-02 17:53:00	0	17	3	7	5
1	2009-07-02 17:54:00	0	17	3	7	5
1	2009-07-02 17:55:00	95	17	3	7	5
1	2009-07-02 17:56:00	12	17	3	7	5
1	2009-07-02 17:57:00	0	17	3	7	5
1	2009-07-02 17:58:00	0	17	3	7	5
1	2009-07-02 17:59:00	12	17	3	7	5
1	2009-07-02 18:00:00	1225	17	3	7	5
1	2009-07-02 18:01:00	927	18	4	7	5
1	2009-07-02 18:02:00	697	18	4	7	5
1	2009-07-02 18:03:00	443	18	4	7	5
1	2009-07-02 18:04:00	443	18	4	7	5
1	2009-07-02 18:05:00	1479	18	4	7	5
1	2009-07-02 18:06:00	517	18	4	7	5
1	2009-07-02 18:07:00	119	18	4	7	5
1	2009-07-02 18:08:00	12	18	4	7	5
1	2009-07-02 18:09:00	0	18	4	7	5
1	2009-07-02 18:10:00	0	18	4	7	5
1	2009-07-02 18:11:00	12	18	4	7	5
1	2009-07-02 18:12:00	0	18	4	7	5
1	2009-07-02 18:13:00	0	18	4	7	5
1	2009-07-02 18:14:00	0	18	4	7	5
1	2009-07-02 18:15:00	0	18	4	7	5
1	2009-07-02 18:16:00	36	18	4	7	5
1	2009-07-02 18:17:00	12	18	4	7	5
1	2009-07-02 18:18:00	0	18	4	7	5
1	2009-07-02 18:19:00	0	18	4	7	5
1	2009-07-02 18:20:00	0	18	4	7	5
1	2009-07-02 18:21:00	0	18	4	7	5
1	2009-07-02 18:22:00	0	18	4	7	5
1	2009-07-02 18:23:00	0	18	4	7	5
1	2009-07-02 18:24:00	0	18	4	7	5
1	2009-07-02 18:25:00	0	18	4	7	5
1	2009-07-02 18:26:00	0	18	4	7	5
1	2009-07-02 18:27:00	0	18	4	7	5
1	2009-07-02 18:28:00	0	18	4	7	5
1	2009-07-02 18:29:00	0	18	4	7	5
1	2009-07-02 18:30:00	0	18	4	7	5
1	2009-07-02 18:31:00	0	18	4	7	5
1	2009-07-02 18:32:00	24	18	4	7	5
1	2009-07-02 18:33:00	47	18	4	7	5
1	2009-07-02 18:34:00	0	18	4	7	5
1	2009-07-02 18:35:00	0	18	4	7	5
1	2009-07-02 18:36:00	0	18	4	7	5
1	2009-07-02 18:37:00	0	18	4	7	5
1	2009-07-02 18:38:00	0	18	4	7	5
1	2009-07-02 18:39:00	0	18	4	7	5
1	2009-07-02 18:40:00	0	18	4	7	5
1	2009-07-02 18:41:00	0	18	4	7	5
1	2009-07-02 18:42:00	12	18	4	7	5
1	2009-07-02 18:43:00	0	18	4	7	5
1	2009-07-02 18:44:00	0	18	4	7	5
1	2009-07-02 18:45:00	0	18	4	7	5
1	2009-07-02 18:46:00	0	18	4	7	5
1	2009-07-02 18:47:00	0	18	4	7	5
1	2009-07-02 18:48:00	0	18	4	7	5
1	2009-07-02 18:49:00	0	18	4	7	5
1	2009-07-02 18:50:00	0	18	4	7	5
1	2009-07-02 18:51:00	0	18	4	7	5
1	2009-07-02 18:52:00	0	18	4	7	5
1	2009-07-02 18:53:00	0	18	4	7	5
1	2009-07-02 18:54:00	0	18	4	7	5
1	2009-07-02 18:55:00	0	18	4	7	5
1	2009-07-02 18:56:00	0	18	4	7	5
1	2009-07-02 18:57:00	0	18	4	7	5
1	2009-07-02 18:58:00	0	18	4	7	5
1	2009-07-02 18:59:00	12	18	4	7	5
1	2009-07-02 19:00:00	0	18	4	7	5
1	2009-07-02 19:01:00	0	19	4	7	5
1	2009-07-02 19:02:00	0	19	4	7	5
1	2009-07-02 19:03:00	47	19	4	7	5
1	2009-07-02 19:04:00	0	19	4	7	5
1	2009-07-02 19:05:00	0	19	4	7	5
1	2009-07-02 19:06:00	0	19	4	7	5
1	2009-07-02 19:07:00	0	19	4	7	5
1	2009-07-02 19:08:00	0	19	4	7	5
1	2009-07-02 19:09:00	0	19	4	7	5
1	2009-07-02 19:10:00	0	19	4	7	5
1	2009-07-02 19:11:00	0	19	4	7	5
1	2009-07-02 19:12:00	36	19	4	7	5
1	2009-07-02 19:13:00	59	19	4	7	5
1	2009-07-02 19:14:00	12	19	4	7	5
1	2009-07-02 19:15:00	0	19	4	7	5
1	2009-07-02 19:16:00	0	19	4	7	5
1	2009-07-02 19:17:00	0	19	4	7	5
1	2009-07-02 19:18:00	12	19	4	7	5
1	2009-07-02 19:19:00	633	19	4	7	5
1	2009-07-02 19:20:00	154	19	4	7	5
1	2009-07-02 19:21:00	344	19	4	7	5
1	2009-07-02 19:22:00	225	19	4	7	5
1	2009-07-02 19:23:00	0	19	4	7	5
1	2009-07-02 19:24:00	0	19	4	7	5
1	2009-07-02 19:25:00	0	19	4	7	5
1	2009-07-02 19:26:00	0	19	4	7	5
1	2009-07-02 19:27:00	0	19	4	7	5
1	2009-07-02 19:28:00	0	19	4	7	5
1	2009-07-02 19:29:00	0	19	4	7	5
1	2009-07-02 19:30:00	0	19	4	7	5
1	2009-07-02 19:31:00	0	19	4	7	5
1	2009-07-02 19:32:00	0	19	4	7	5
1	2009-07-02 19:33:00	0	19	4	7	5
1	2009-07-02 19:34:00	47	19	4	7	5
1	2009-07-02 19:35:00	360	19	4	7	5
1	2009-07-02 19:36:00	0	19	4	7	5
1	2009-07-02 19:37:00	0	19	4	7	5
1	2009-07-02 19:38:00	36	19	4	7	5
1	2009-07-02 19:39:00	0	19	4	7	5
1	2009-07-02 19:40:00	0	19	4	7	5
1	2009-07-02 19:41:00	0	19	4	7	5
1	2009-07-02 19:42:00	0	19	4	7	5
1	2009-07-02 19:43:00	0	19	4	7	5
1	2009-07-02 19:44:00	0	19	4	7	5
1	2009-07-02 19:45:00	0	19	4	7	5
1	2009-07-02 19:46:00	0	19	4	7	5
1	2009-07-02 19:47:00	12	19	4	7	5
1	2009-07-02 19:48:00	0	19	4	7	5
1	2009-07-02 19:49:00	0	19	4	7	5
1	2009-07-02 19:50:00	0	19	4	7	5
1	2009-07-02 19:51:00	0	19	4	7	5
1	2009-07-02 19:52:00	12	19	4	7	5
1	2009-07-02 19:53:00	0	19	4	7	5
1	2009-07-02 19:54:00	0	19	4	7	5
1	2009-07-02 19:55:00	12	19	4	7	5
1	2009-07-02 19:56:00	0	19	4	7	5
1	2009-07-02 19:57:00	0	19	4	7	5
1	2009-07-02 19:58:00	0	19	4	7	5
1	2009-07-02 19:59:00	0	19	4	7	5
1	2009-07-02 20:00:00	0	19	4	7	5
1	2009-07-02 20:01:00	0	20	4	7	5
1	2009-07-02 20:02:00	0	20	4	7	5
1	2009-07-02 20:03:00	0	20	4	7	5
1	2009-07-02 20:04:00	0	20	4	7	5
1	2009-07-02 20:05:00	0	20	4	7	5
1	2009-07-02 20:06:00	0	20	4	7	5
1	2009-07-02 20:07:00	0	20	4	7	5
1	2009-07-02 20:08:00	71	20	4	7	5
1	2009-07-02 20:09:00	0	20	4	7	5
1	2009-07-02 20:10:00	0	20	4	7	5
1	2009-07-02 20:11:00	36	20	4	7	5
1	2009-07-02 20:12:00	24	20	4	7	5
1	2009-07-02 20:13:00	47	20	4	7	5
1	2009-07-02 20:14:00	0	20	4	7	5
1	2009-07-02 20:15:00	0	20	4	7	5
1	2009-07-02 20:16:00	0	20	4	7	5
1	2009-07-02 20:17:00	0	20	4	7	5
1	2009-07-02 20:18:00	0	20	4	7	5
1	2009-07-02 20:19:00	0	20	4	7	5
1	2009-07-02 20:20:00	0	20	4	7	5
1	2009-07-02 20:21:00	0	20	4	7	5
1	2009-07-02 20:22:00	0	20	4	7	5
1	2009-07-02 20:23:00	0	20	4	7	5
1	2009-07-02 20:24:00	0	20	4	7	5
1	2009-07-02 20:25:00	24	20	4	7	5
1	2009-07-02 20:26:00	0	20	4	7	5
1	2009-07-02 20:27:00	0	20	4	7	5
1	2009-07-02 20:28:00	0	20	4	7	5
1	2009-07-02 20:29:00	0	20	4	7	5
1	2009-07-02 20:30:00	0	20	4	7	5
1	2009-07-02 20:31:00	12	20	4	7	5
1	2009-07-02 20:32:00	0	20	4	7	5
1	2009-07-02 20:33:00	0	20	4	7	5
1	2009-07-02 20:34:00	0	20	4	7	5
1	2009-07-02 20:35:00	0	20	4	7	5
1	2009-07-02 20:36:00	0	20	4	7	5
1	2009-07-02 20:37:00	0	20	4	7	5
1	2009-07-02 20:38:00	36	20	4	7	5
1	2009-07-02 20:39:00	0	20	4	7	5
1	2009-07-02 20:40:00	0	20	4	7	5
1	2009-07-02 20:41:00	0	20	4	7	5
1	2009-07-02 20:42:00	0	20	4	7	5
1	2009-07-02 20:43:00	0	20	4	7	5
1	2009-07-02 20:44:00	12	20	4	7	5
1	2009-07-02 20:45:00	0	20	4	7	5
1	2009-07-02 20:46:00	0	20	4	7	5
1	2009-07-02 20:47:00	0	20	4	7	5
1	2009-07-02 20:48:00	0	20	4	7	5
1	2009-07-02 20:49:00	0	20	4	7	5
1	2009-07-02 20:50:00	0	20	4	7	5
1	2009-07-02 20:51:00	36	20	4	7	5
1	2009-07-02 20:52:00	107	20	4	7	5
1	2009-07-02 20:53:00	377	20	4	7	5
1	2009-07-02 20:54:00	12	20	4	7	5
1	2009-07-02 20:55:00	0	20	4	7	5
1	2009-07-02 20:56:00	0	20	4	7	5
1	2009-07-02 20:57:00	0	20	4	7	5
1	2009-07-02 20:58:00	12	20	4	7	5
1	2009-07-02 20:59:00	0	20	4	7	5
1	2009-07-02 21:00:00	0	20	4	7	5
1	2009-07-02 21:01:00	0	21	4	7	5
1	2009-07-02 21:02:00	0	21	4	7	5
1	2009-07-02 21:03:00	0	21	4	7	5
1	2009-07-02 21:04:00	24	21	4	7	5
1	2009-07-02 21:05:00	268	21	4	7	5
1	2009-07-02 21:06:00	0	21	4	7	5
1	2009-07-02 21:07:00	0	21	4	7	5
1	2009-07-02 21:08:00	0	21	4	7	5
1	2009-07-02 21:09:00	0	21	4	7	5
1	2009-07-02 21:10:00	0	21	4	7	5
1	2009-07-02 21:11:00	0	21	4	7	5
1	2009-07-02 21:12:00	0	21	4	7	5
1	2009-07-02 21:13:00	0	21	4	7	5
1	2009-07-02 21:14:00	0	21	4	7	5
1	2009-07-02 21:15:00	0	21	4	7	5
1	2009-07-02 21:16:00	0	21	4	7	5
1	2009-07-02 21:17:00	0	21	4	7	5
1	2009-07-02 21:18:00	0	21	4	7	5
1	2009-07-02 21:19:00	0	21	4	7	5
1	2009-07-02 21:20:00	0	21	4	7	5
1	2009-07-02 21:21:00	0	21	4	7	5
1	2009-07-02 21:22:00	0	21	4	7	5
1	2009-07-02 21:23:00	0	21	4	7	5
1	2009-07-02 21:24:00	0	21	4	7	5
1	2009-07-02 21:25:00	0	21	4	7	5
1	2009-07-02 21:26:00	0	21	4	7	5
1	2009-07-02 21:27:00	0	21	4	7	5
1	2009-07-02 21:28:00	0	21	4	7	5
1	2009-07-02 21:29:00	0	21	4	7	5
1	2009-07-02 21:30:00	0	21	4	7	5
1	2009-07-02 21:31:00	0	21	4	7	5
1	2009-07-02 21:32:00	0	21	4	7	5
1	2009-07-02 21:33:00	0	21	4	7	5
1	2009-07-02 21:34:00	0	21	4	7	5
1	2009-07-02 21:35:00	0	21	4	7	5
1	2009-07-02 21:36:00	36	21	4	7	5
1	2009-07-02 21:37:00	0	21	4	7	5
1	2009-07-02 21:38:00	0	21	4	7	5
1	2009-07-02 21:39:00	0	21	4	7	5
1	2009-07-02 21:40:00	0	21	4	7	5
1	2009-07-02 21:41:00	0	21	4	7	5
1	2009-07-02 21:42:00	12	21	4	7	5
1	2009-07-02 21:43:00	0	21	4	7	5
1	2009-07-02 21:44:00	0	21	4	7	5
1	2009-07-02 21:45:00	0	21	4	7	5
1	2009-07-02 21:46:00	0	21	4	7	5
1	2009-07-02 21:47:00	0	21	4	7	5
1	2009-07-02 21:48:00	0	21	4	7	5
1	2009-07-02 21:49:00	0	21	4	7	5
1	2009-07-02 21:50:00	0	21	4	7	5
1	2009-07-02 21:51:00	0	21	4	7	5
1	2009-07-02 21:52:00	0	21	4	7	5
1	2009-07-02 21:53:00	24	21	4	7	5
1	2009-07-02 21:54:00	24	21	4	7	5
1	2009-07-02 21:55:00	36	21	4	7	5
1	2009-07-02 21:56:00	12	21	4	7	5
1	2009-07-02 21:57:00	0	21	4	7	5
1	2009-07-02 21:58:00	0	21	4	7	5
1	2009-07-02 21:59:00	0	21	4	7	5
1	2009-07-02 22:00:00	0	21	4	7	5
1	2009-07-02 22:01:00	0	22	4	7	5
1	2009-07-02 22:02:00	59	22	4	7	5
1	2009-07-02 22:03:00	0	22	4	7	5
1	2009-07-02 22:04:00	0	22	4	7	5
1	2009-07-02 22:05:00	0	22	4	7	5
1	2009-07-02 22:06:00	0	22	4	7	5
1	2009-07-02 22:07:00	12	22	4	7	5
1	2009-07-02 22:08:00	0	22	4	7	5
1	2009-07-02 22:09:00	0	22	4	7	5
1	2009-07-02 22:10:00	0	22	4	7	5
1	2009-07-02 22:11:00	0	22	4	7	5
1	2009-07-02 22:12:00	0	22	4	7	5
1	2009-07-02 22:13:00	0	22	4	7	5
1	2009-07-02 22:14:00	12	22	4	7	5
1	2009-07-02 22:15:00	0	22	4	7	5
1	2009-07-02 22:16:00	0	22	4	7	5
1	2009-07-02 22:17:00	0	22	4	7	5
1	2009-07-02 22:18:00	0	22	4	7	5
1	2009-07-02 22:19:00	0	22	4	7	5
1	2009-07-02 22:20:00	0	22	4	7	5
1	2009-07-02 22:21:00	0	22	4	7	5
1	2009-07-02 22:22:00	71	22	4	7	5
1	2009-07-02 22:23:00	0	22	4	7	5
1	2009-07-02 22:24:00	0	22	4	7	5
1	2009-07-02 22:25:00	0	22	4	7	5
1	2009-07-02 22:26:00	0	22	4	7	5
1	2009-07-02 22:27:00	0	22	4	7	5
1	2009-07-02 22:28:00	0	22	4	7	5
1	2009-07-02 22:29:00	0	22	4	7	5
1	2009-07-02 22:30:00	0	22	4	7	5
1	2009-07-02 22:31:00	0	22	4	7	5
1	2009-07-02 22:32:00	0	22	4	7	5
1	2009-07-02 22:33:00	0	22	4	7	5
1	2009-07-02 22:34:00	0	22	4	7	5
1	2009-07-02 22:35:00	0	22	4	7	5
1	2009-07-02 22:36:00	0	22	4	7	5
1	2009-07-02 22:37:00	0	22	4	7	5
1	2009-07-02 22:38:00	0	22	4	7	5
1	2009-07-02 22:39:00	95	22	4	7	5
1	2009-07-02 22:40:00	83	22	4	7	5
1	2009-07-02 22:41:00	254	22	4	7	5
1	2009-07-02 22:42:00	761	22	4	7	5
1	2009-07-02 22:43:00	393	22	4	7	5
1	2009-07-02 22:44:00	0	22	4	7	5
1	2009-07-02 22:45:00	0	22	4	7	5
1	2009-07-02 22:46:00	0	22	4	7	5
1	2009-07-02 22:47:00	12	22	4	7	5
1	2009-07-02 22:48:00	12	22	4	7	5
1	2009-07-02 22:49:00	0	22	4	7	5
1	2009-07-02 22:50:00	0	22	4	7	5
1	2009-07-02 22:51:00	0	22	4	7	5
1	2009-07-02 22:52:00	0	22	4	7	5
1	2009-07-02 22:53:00	12	22	4	7	5
1	2009-07-02 22:54:00	0	22	4	7	5
1	2009-07-02 22:55:00	0	22	4	7	5
1	2009-07-02 22:56:00	0	22	4	7	5
1	2009-07-02 22:57:00	0	22	4	7	5
1	2009-07-02 22:58:00	0	22	4	7	5
1	2009-07-02 22:59:00	0	22	4	7	5
1	2009-07-02 23:00:00	36	22	4	7	5
1	2009-07-02 23:01:00	0	23	4	7	5
1	2009-07-02 23:02:00	0	23	4	7	5
1	2009-07-02 23:03:00	36	23	4	7	5
1	2009-07-02 23:04:00	0	23	4	7	5
1	2009-07-02 23:05:00	71	23	4	7	5
1	2009-07-02 23:06:00	12	23	4	7	5
1	2009-07-02 23:07:00	0	23	4	7	5
1	2009-07-02 23:08:00	47	23	4	7	5
1	2009-07-02 23:09:00	47	23	4	7	5
1	2009-07-02 23:10:00	47	23	4	7	5
1	2009-07-02 23:11:00	36	23	4	7	5
1	2009-07-02 23:12:00	0	23	4	7	5
1	2009-07-02 23:13:00	47	23	4	7	5
1	2009-07-02 23:14:00	47	23	4	7	5
1	2009-07-02 23:15:00	12	23	4	7	5
1	2009-07-02 23:16:00	12	23	4	7	5
1	2009-07-02 23:17:00	36	23	4	7	5
1	2009-07-02 23:18:00	47	23	4	7	5
1	2009-07-02 23:19:00	12	23	4	7	5
1	2009-07-02 23:20:00	36	23	4	7	5
1	2009-07-02 23:21:00	24	23	4	7	5
1	2009-07-02 23:22:00	12	23	4	7	5
1	2009-07-02 23:23:00	24	23	4	7	5
1	2009-07-02 23:24:00	0	23	4	7	5
1	2009-07-02 23:25:00	12	23	4	7	5
1	2009-07-02 23:26:00	71	23	4	7	5
1	2009-07-02 23:27:00	0	23	4	7	5
1	2009-07-02 23:28:00	0	23	4	7	5
1	2009-07-02 23:29:00	0	23	4	7	5
1	2009-07-02 23:30:00	0	23	4	7	5
1	2009-07-02 23:31:00	0	23	4	7	5
1	2009-07-02 23:32:00	0	23	4	7	5
1	2009-07-02 23:33:00	0	23	4	7	5
1	2009-07-02 23:34:00	0	23	4	7	5
1	2009-07-02 23:35:00	0	23	4	7	5
1	2009-07-02 23:36:00	0	23	4	7	5
1	2009-07-02 23:37:00	12	23	4	7	5
1	2009-07-02 23:38:00	24	23	4	7	5
1	2009-07-02 23:39:00	12	23	4	7	5
1	2009-07-02 23:40:00	0	23	4	7	5
1	2009-07-02 23:41:00	0	23	4	7	5
1	2009-07-02 23:42:00	0	23	4	7	5
1	2009-07-02 23:43:00	0	23	4	7	5
1	2009-07-02 23:44:00	0	23	4	7	5
1	2009-07-02 23:45:00	0	23	4	7	5
1	2009-07-02 23:46:00	0	23	4	7	5
1	2009-07-02 23:47:00	0	23	4	7	5
1	2009-07-02 23:48:00	12	23	4	7	5
1	2009-07-02 23:49:00	0	23	4	7	5
1	2009-07-02 23:50:00	0	23	4	7	5
1	2009-07-02 23:51:00	36	23	4	7	5
1	2009-07-02 23:52:00	0	23	4	7	5
1	2009-07-02 23:53:00	24	23	4	7	5
1	2009-07-02 23:54:00	0	23	4	7	5
1	2009-07-02 23:55:00	0	23	4	7	5
1	2009-07-02 23:56:00	0	23	4	7	5
1	2009-07-02 23:57:00	0	23	4	7	5
1	2009-07-02 23:58:00	0	23	4	7	5
1	2009-07-02 23:59:00	0	23	4	7	5
1	2009-07-03	0	23	4	7	5
1	2009-07-03 00:01:00	0	0	1	8	6
1	2009-07-03 00:02:00	0	0	1	8	6
1	2009-07-03 00:03:00	0	0	1	8	6
1	2009-07-03 00:04:00	0	0	1	8	6
1	2009-07-03 00:05:00	12	0	1	8	6
1	2009-07-03 00:06:00	12	0	1	8	6
1	2009-07-03 00:07:00	12	0	1	8	6
1	2009-07-03 00:08:00	24	0	1	8	6
1	2009-07-03 00:09:00	59	0	1	8	6
1	2009-07-03 00:10:00	0	0	1	8	6
1	2009-07-03 00:11:00	0	0	1	8	6
1	2009-07-03 00:12:00	36	0	1	8	6
1	2009-07-03 00:13:00	59	0	1	8	6
1	2009-07-03 00:14:00	95	0	1	8	6
1	2009-07-03 00:15:00	24	0	1	8	6
1	2009-07-03 00:16:00	0	0	1	8	6
1	2009-07-03 00:17:00	0	0	1	8	6
1	2009-07-03 00:18:00	0	0	1	8	6
1	2009-07-03 00:19:00	0	0	1	8	6
1	2009-07-03 00:20:00	0	0	1	8	6
1	2009-07-03 00:21:00	24	0	1	8	6
1	2009-07-03 00:22:00	12	0	1	8	6
1	2009-07-03 00:23:00	0	0	1	8	6
1	2009-07-03 00:24:00	0	0	1	8	6
1	2009-07-03 00:25:00	0	0	1	8	6
1	2009-07-03 00:26:00	0	0	1	8	6
1	2009-07-03 00:27:00	0	0	1	8	6
1	2009-07-03 00:28:00	0	0	1	8	6
1	2009-07-03 00:29:00	0	0	1	8	6
1	2009-07-03 00:30:00	0	0	1	8	6
1	2009-07-03 00:31:00	0	0	1	8	6
1	2009-07-03 00:32:00	0	0	1	8	6
1	2009-07-03 00:33:00	0	0	1	8	6
1	2009-07-03 00:34:00	24	0	1	8	6
1	2009-07-03 00:35:00	0	0	1	8	6
1	2009-07-03 00:36:00	0	0	1	8	6
1	2009-07-03 00:37:00	154	0	1	8	6
1	2009-07-03 00:38:00	0	0	1	8	6
1	2009-07-03 00:39:00	0	0	1	8	6
1	2009-07-03 00:40:00	0	0	1	8	6
1	2009-07-03 00:41:00	0	0	1	8	6
1	2009-07-03 00:42:00	0	0	1	8	6
1	2009-07-03 00:43:00	0	0	1	8	6
1	2009-07-03 00:44:00	0	0	1	8	6
1	2009-07-03 00:45:00	0	0	1	8	6
1	2009-07-03 00:46:00	0	0	1	8	6
1	2009-07-03 00:47:00	0	0	1	8	6
1	2009-07-03 00:48:00	0	0	1	8	6
1	2009-07-03 00:49:00	0	0	1	8	6
1	2009-07-03 00:50:00	0	0	1	8	6
1	2009-07-03 00:51:00	0	0	1	8	6
1	2009-07-03 00:52:00	0	0	1	8	6
1	2009-07-03 00:53:00	0	0	1	8	6
1	2009-07-03 00:54:00	0	0	1	8	6
1	2009-07-03 00:55:00	0	0	1	8	6
1	2009-07-03 00:56:00	0	0	1	8	6
1	2009-07-03 00:57:00	0	0	1	8	6
1	2009-07-03 00:58:00	0	0	1	8	6
1	2009-07-03 00:59:00	0	0	1	8	6
1	2009-07-03 01:00:00	0	0	1	8	6
1	2009-07-03 01:01:00	0	1	1	8	6
1	2009-07-03 01:02:00	0	1	1	8	6
1	2009-07-03 01:03:00	0	1	1	8	6
1	2009-07-03 01:04:00	0	1	1	8	6
1	2009-07-03 01:05:00	47	1	1	8	6
1	2009-07-03 01:06:00	0	1	1	8	6
1	2009-07-03 01:07:00	24	1	1	8	6
1	2009-07-03 01:08:00	0	1	1	8	6
1	2009-07-03 01:09:00	0	1	1	8	6
1	2009-07-03 01:10:00	0	1	1	8	6
1	2009-07-03 01:11:00	0	1	1	8	6
1	2009-07-03 01:12:00	36	1	1	8	6
1	2009-07-03 01:13:00	0	1	1	8	6
1	2009-07-03 01:14:00	0	1	1	8	6
1	2009-07-03 01:15:00	953	1	1	8	6
1	2009-07-03 01:16:00	12	1	1	8	6
1	2009-07-03 01:17:00	12	1	1	8	6
1	2009-07-03 01:18:00	24	1	1	8	6
1	2009-07-03 01:19:00	12	1	1	8	6
1	2009-07-03 01:20:00	0	1	1	8	6
1	2009-07-03 01:21:00	0	1	1	8	6
1	2009-07-03 01:22:00	0	1	1	8	6
1	2009-07-03 01:23:00	12	1	1	8	6
1	2009-07-03 01:24:00	0	1	1	8	6
1	2009-07-03 01:25:00	0	1	1	8	6
1	2009-07-03 01:26:00	282	1	1	8	6
1	2009-07-03 01:27:00	225	1	1	8	6
1	2009-07-03 01:28:00	479	1	1	8	6
1	2009-07-03 01:29:00	154	1	1	8	6
1	2009-07-03 01:30:00	0	1	1	8	6
1	2009-07-03 01:31:00	0	1	1	8	6
1	2009-07-03 01:32:00	0	1	1	8	6
1	2009-07-03 01:33:00	0	1	1	8	6
1	2009-07-03 01:34:00	0	1	1	8	6
1	2009-07-03 01:35:00	0	1	1	8	6
1	2009-07-03 01:36:00	0	1	1	8	6
1	2009-07-03 01:37:00	211	1	1	8	6
1	2009-07-03 01:38:00	633	1	1	8	6
1	2009-07-03 01:39:00	0	1	1	8	6
1	2009-07-03 01:40:00	12	1	1	8	6
1	2009-07-03 01:41:00	0	1	1	8	6
1	2009-07-03 01:42:00	0	1	1	8	6
1	2009-07-03 01:43:00	0	1	1	8	6
1	2009-07-03 01:44:00	0	1	1	8	6
1	2009-07-03 01:45:00	0	1	1	8	6
1	2009-07-03 01:46:00	0	1	1	8	6
1	2009-07-03 01:47:00	0	1	1	8	6
1	2009-07-03 01:48:00	0	1	1	8	6
1	2009-07-03 01:49:00	0	1	1	8	6
1	2009-07-03 01:50:00	12	1	1	8	6
1	2009-07-03 01:51:00	0	1	1	8	6
1	2009-07-03 01:52:00	0	1	1	8	6
1	2009-07-03 01:53:00	0	1	1	8	6
1	2009-07-03 01:54:00	0	1	1	8	6
1	2009-07-03 01:55:00	0	1	1	8	6
1	2009-07-03 01:56:00	0	1	1	8	6
1	2009-07-03 01:57:00	0	1	1	8	6
1	2009-07-03 01:58:00	0	1	1	8	6
1	2009-07-03 01:59:00	24	1	1	8	6
1	2009-07-03 02:00:00	0	1	1	8	6
1	2009-07-03 02:01:00	0	2	1	8	6
1	2009-07-03 02:02:00	0	2	1	8	6
1	2009-07-03 02:03:00	0	2	1	8	6
1	2009-07-03 02:04:00	296	2	1	8	6
1	2009-07-03 02:05:00	460	2	1	8	6
1	2009-07-03 02:06:00	0	2	1	8	6
1	2009-07-03 02:07:00	0	2	1	8	6
1	2009-07-03 02:08:00	0	2	1	8	6
1	2009-07-03 02:09:00	0	2	1	8	6
1	2009-07-03 02:10:00	0	2	1	8	6
1	2009-07-03 02:11:00	12	2	1	8	6
1	2009-07-03 02:12:00	1380	2	1	8	6
1	2009-07-03 02:13:00	0	2	1	8	6
1	2009-07-03 02:14:00	0	2	1	8	6
1	2009-07-03 02:15:00	0	2	1	8	6
1	2009-07-03 02:16:00	0	2	1	8	6
1	2009-07-03 02:17:00	0	2	1	8	6
1	2009-07-03 02:18:00	0	2	1	8	6
1	2009-07-03 02:19:00	0	2	1	8	6
1	2009-07-03 02:20:00	12	2	1	8	6
1	2009-07-03 02:21:00	0	2	1	8	6
1	2009-07-03 02:22:00	12	2	1	8	6
1	2009-07-03 02:23:00	24	2	1	8	6
1	2009-07-03 02:24:00	0	2	1	8	6
1	2009-07-03 02:25:00	0	2	1	8	6
1	2009-07-03 02:26:00	0	2	1	8	6
1	2009-07-03 02:27:00	12	2	1	8	6
1	2009-07-03 02:28:00	12	2	1	8	6
1	2009-07-03 02:29:00	0	2	1	8	6
1	2009-07-03 02:30:00	12	2	1	8	6
1	2009-07-03 02:31:00	12	2	1	8	6
1	2009-07-03 02:32:00	0	2	1	8	6
1	2009-07-03 02:33:00	0	2	1	8	6
1	2009-07-03 02:34:00	0	2	1	8	6
1	2009-07-03 02:35:00	119	2	1	8	6
1	2009-07-03 02:36:00	0	2	1	8	6
1	2009-07-03 02:37:00	0	2	1	8	6
1	2009-07-03 02:38:00	0	2	1	8	6
1	2009-07-03 02:39:00	0	2	1	8	6
1	2009-07-03 02:40:00	927	2	1	8	6
1	2009-07-03 02:41:00	593	2	1	8	6
1	2009-07-03 02:42:00	785	2	1	8	6
1	2009-07-03 02:43:00	377	2	1	8	6
1	2009-07-03 02:44:00	268	2	1	8	6
1	2009-07-03 02:45:00	0	2	1	8	6
1	2009-07-03 02:46:00	0	2	1	8	6
1	2009-07-03 02:47:00	0	2	1	8	6
1	2009-07-03 02:48:00	0	2	1	8	6
1	2009-07-03 02:49:00	0	2	1	8	6
1	2009-07-03 02:50:00	0	2	1	8	6
1	2009-07-03 02:51:00	0	2	1	8	6
1	2009-07-03 02:52:00	0	2	1	8	6
1	2009-07-03 02:53:00	0	2	1	8	6
1	2009-07-03 02:54:00	0	2	1	8	6
1	2009-07-03 02:55:00	0	2	1	8	6
1	2009-07-03 02:56:00	0	2	1	8	6
1	2009-07-03 02:57:00	0	2	1	8	6
1	2009-07-03 02:58:00	0	2	1	8	6
1	2009-07-03 02:59:00	59	2	1	8	6
1	2009-07-03 03:00:00	36	2	1	8	6
1	2009-07-03 03:01:00	12	3	1	8	6
1	2009-07-03 03:02:00	47	3	1	8	6
1	2009-07-03 03:03:00	0	3	1	8	6
1	2009-07-03 03:04:00	24	3	1	8	6
1	2009-07-03 03:05:00	0	3	1	8	6
1	2009-07-03 03:06:00	0	3	1	8	6
1	2009-07-03 03:07:00	12	3	1	8	6
1	2009-07-03 03:08:00	0	3	1	8	6
1	2009-07-03 03:09:00	0	3	1	8	6
1	2009-07-03 03:10:00	12	3	1	8	6
1	2009-07-03 03:11:00	0	3	1	8	6
1	2009-07-03 03:12:00	0	3	1	8	6
1	2009-07-03 03:13:00	0	3	1	8	6
1	2009-07-03 03:14:00	0	3	1	8	6
1	2009-07-03 03:15:00	59	3	1	8	6
1	2009-07-03 03:16:00	0	3	1	8	6
1	2009-07-03 03:17:00	0	3	1	8	6
1	2009-07-03 03:18:00	0	3	1	8	6
1	2009-07-03 03:19:00	0	3	1	8	6
1	2009-07-03 03:20:00	0	3	1	8	6
1	2009-07-03 03:21:00	0	3	1	8	6
1	2009-07-03 03:22:00	0	3	1	8	6
1	2009-07-03 03:23:00	0	3	1	8	6
1	2009-07-03 03:24:00	0	3	1	8	6
1	2009-07-03 03:25:00	0	3	1	8	6
1	2009-07-03 03:26:00	24	3	1	8	6
1	2009-07-03 03:27:00	12	3	1	8	6
1	2009-07-03 03:28:00	36	3	1	8	6
1	2009-07-03 03:29:00	0	3	1	8	6
1	2009-07-03 03:30:00	0	3	1	8	6
1	2009-07-03 03:31:00	0	3	1	8	6
1	2009-07-03 03:32:00	0	3	1	8	6
1	2009-07-03 03:33:00	0	3	1	8	6
1	2009-07-03 03:34:00	0	3	1	8	6
1	2009-07-03 03:35:00	0	3	1	8	6
1	2009-07-03 03:36:00	0	3	1	8	6
1	2009-07-03 03:37:00	0	3	1	8	6
1	2009-07-03 03:38:00	12	3	1	8	6
1	2009-07-03 03:39:00	612	3	1	8	6
1	2009-07-03 03:40:00	59	3	1	8	6
1	2009-07-03 03:41:00	59	3	1	8	6
1	2009-07-03 03:42:00	36	3	1	8	6
1	2009-07-03 03:43:00	24	3	1	8	6
1	2009-07-03 03:44:00	71	3	1	8	6
1	2009-07-03 03:45:00	0	3	1	8	6
1	2009-07-03 03:46:00	0	3	1	8	6
1	2009-07-03 03:47:00	0	3	1	8	6
1	2009-07-03 03:48:00	0	3	1	8	6
1	2009-07-03 03:49:00	0	3	1	8	6
1	2009-07-03 03:50:00	0	3	1	8	6
1	2009-07-03 03:51:00	0	3	1	8	6
1	2009-07-03 03:52:00	0	3	1	8	6
1	2009-07-03 03:53:00	0	3	1	8	6
1	2009-07-03 03:54:00	0	3	1	8	6
1	2009-07-03 03:55:00	0	3	1	8	6
1	2009-07-03 03:56:00	0	3	1	8	6
1	2009-07-03 03:57:00	0	3	1	8	6
1	2009-07-03 03:58:00	0	3	1	8	6
1	2009-07-03 03:59:00	12	3	1	8	6
1	2009-07-03 04:00:00	36	3	1	8	6
1	2009-07-03 04:01:00	24	4	1	8	6
1	2009-07-03 04:02:00	12	4	1	8	6
1	2009-07-03 04:03:00	36	4	1	8	6
1	2009-07-03 04:04:00	0	4	1	8	6
1	2009-07-03 04:05:00	0	4	1	8	6
1	2009-07-03 04:06:00	0	4	1	8	6
1	2009-07-03 04:07:00	0	4	1	8	6
1	2009-07-03 04:08:00	12	4	1	8	6
1	2009-07-03 04:09:00	0	4	1	8	6
1	2009-07-03 04:10:00	12	4	1	8	6
1	2009-07-03 04:11:00	12	4	1	8	6
1	2009-07-03 04:12:00	0	4	1	8	6
1	2009-07-03 04:13:00	12	4	1	8	6
1	2009-07-03 04:14:00	12	4	1	8	6
1	2009-07-03 04:15:00	36	4	1	8	6
1	2009-07-03 04:16:00	0	4	1	8	6
1	2009-07-03 04:17:00	0	4	1	8	6
1	2009-07-03 04:18:00	0	4	1	8	6
1	2009-07-03 04:19:00	0	4	1	8	6
1	2009-07-03 04:20:00	12	4	1	8	6
1	2009-07-03 04:21:00	0	4	1	8	6
1	2009-07-03 04:22:00	0	4	1	8	6
1	2009-07-03 04:23:00	0	4	1	8	6
1	2009-07-03 04:24:00	0	4	1	8	6
1	2009-07-03 04:25:00	36	4	1	8	6
1	2009-07-03 04:26:00	0	4	1	8	6
1	2009-07-03 04:27:00	71	4	1	8	6
1	2009-07-03 04:28:00	24	4	1	8	6
1	2009-07-03 04:29:00	12	4	1	8	6
1	2009-07-03 04:30:00	0	4	1	8	6
1	2009-07-03 04:31:00	0	4	1	8	6
1	2009-07-03 04:32:00	0	4	1	8	6
1	2009-07-03 04:33:00	0	4	1	8	6
1	2009-07-03 04:34:00	0	4	1	8	6
1	2009-07-03 04:35:00	0	4	1	8	6
1	2009-07-03 04:36:00	0	4	1	8	6
1	2009-07-03 04:37:00	0	4	1	8	6
1	2009-07-03 04:38:00	0	4	1	8	6
1	2009-07-03 04:39:00	0	4	1	8	6
1	2009-07-03 04:40:00	0	4	1	8	6
1	2009-07-03 04:41:00	0	4	1	8	6
1	2009-07-03 04:42:00	0	4	1	8	6
1	2009-07-03 04:43:00	0	4	1	8	6
1	2009-07-03 04:44:00	0	4	1	8	6
1	2009-07-03 04:45:00	0	4	1	8	6
1	2009-07-03 04:46:00	0	4	1	8	6
1	2009-07-03 04:47:00	12	4	1	8	6
1	2009-07-03 04:48:00	0	4	1	8	6
1	2009-07-03 04:49:00	0	4	1	8	6
1	2009-07-03 04:50:00	59	4	1	8	6
1	2009-07-03 04:51:00	0	4	1	8	6
1	2009-07-03 04:52:00	12	4	1	8	6
1	2009-07-03 04:53:00	0	4	1	8	6
1	2009-07-03 04:54:00	0	4	1	8	6
1	2009-07-03 04:55:00	0	4	1	8	6
1	2009-07-03 04:56:00	12	4	1	8	6
1	2009-07-03 04:57:00	59	4	1	8	6
1	2009-07-03 04:58:00	0	4	1	8	6
1	2009-07-03 04:59:00	47	4	1	8	6
1	2009-07-03 05:00:00	311	4	1	8	6
1	2009-07-03 05:01:00	697	5	1	8	6
1	2009-07-03 05:02:00	12	5	1	8	6
1	2009-07-03 05:03:00	593	5	1	8	6
1	2009-07-03 05:04:00	24	5	1	8	6
1	2009-07-03 05:05:00	12	5	1	8	6
1	2009-07-03 05:06:00	0	5	1	8	6
1	2009-07-03 05:07:00	0	5	1	8	6
1	2009-07-03 05:08:00	0	5	1	8	6
1	2009-07-03 05:09:00	0	5	1	8	6
1	2009-07-03 05:10:00	0	5	1	8	6
1	2009-07-03 05:11:00	12	5	1	8	6
1	2009-07-03 05:12:00	0	5	1	8	6
1	2009-07-03 05:13:00	12	5	1	8	6
1	2009-07-03 05:14:00	12	5	1	8	6
1	2009-07-03 05:15:00	0	5	1	8	6
1	2009-07-03 05:16:00	0	5	1	8	6
1	2009-07-03 05:17:00	0	5	1	8	6
1	2009-07-03 05:18:00	0	5	1	8	6
1	2009-07-03 05:19:00	0	5	1	8	6
1	2009-07-03 05:20:00	24	5	1	8	6
1	2009-07-03 05:21:00	24	5	1	8	6
1	2009-07-03 05:22:00	0	5	1	8	6
1	2009-07-03 05:23:00	12	5	1	8	6
1	2009-07-03 05:24:00	12	5	1	8	6
1	2009-07-03 05:25:00	12	5	1	8	6
1	2009-07-03 05:26:00	536	5	1	8	6
1	2009-07-03 05:27:00	107	5	1	8	6
1	2009-07-03 05:28:00	0	5	1	8	6
1	2009-07-03 05:29:00	0	5	1	8	6
1	2009-07-03 05:30:00	0	5	1	8	6
1	2009-07-03 05:31:00	0	5	1	8	6
1	2009-07-03 05:32:00	24	5	1	8	6
1	2009-07-03 05:33:00	24	5	1	8	6
1	2009-07-03 05:34:00	0	5	1	8	6
1	2009-07-03 05:35:00	36	5	1	8	6
1	2009-07-03 05:36:00	0	5	1	8	6
1	2009-07-03 05:37:00	0	5	1	8	6
1	2009-07-03 05:38:00	12	5	1	8	6
1	2009-07-03 05:39:00	0	5	1	8	6
1	2009-07-03 05:40:00	59	5	1	8	6
1	2009-07-03 05:41:00	24	5	1	8	6
1	2009-07-03 05:42:00	12	5	1	8	6
1	2009-07-03 05:43:00	0	5	1	8	6
1	2009-07-03 05:44:00	12	5	1	8	6
1	2009-07-03 05:45:00	12	5	1	8	6
1	2009-07-03 05:46:00	0	5	1	8	6
1	2009-07-03 05:47:00	0	5	1	8	6
1	2009-07-03 05:48:00	0	5	1	8	6
1	2009-07-03 05:49:00	0	5	1	8	6
1	2009-07-03 05:50:00	12	5	1	8	6
1	2009-07-03 05:51:00	0	5	1	8	6
1	2009-07-03 05:52:00	0	5	1	8	6
1	2009-07-03 05:53:00	0	5	1	8	6
1	2009-07-03 05:54:00	0	5	1	8	6
1	2009-07-03 05:55:00	0	5	1	8	6
1	2009-07-03 05:56:00	12	5	1	8	6
1	2009-07-03 05:57:00	12	5	1	8	6
1	2009-07-03 05:58:00	0	5	1	8	6
1	2009-07-03 05:59:00	0	5	1	8	6
1	2009-07-03 06:00:00	0	5	1	8	6
1	2009-07-03 06:01:00	24	6	2	8	6
1	2009-07-03 06:02:00	47	6	2	8	6
1	2009-07-03 06:03:00	71	6	2	8	6
1	2009-07-03 06:04:00	47	6	2	8	6
1	2009-07-03 06:05:00	47	6	2	8	6
1	2009-07-03 06:06:00	24	6	2	8	6
1	2009-07-03 06:07:00	12	6	2	8	6
1	2009-07-03 06:08:00	130	6	2	8	6
1	2009-07-03 06:09:00	47	6	2	8	6
1	2009-07-03 06:10:00	0	6	2	8	6
1	2009-07-03 06:11:00	36	6	2	8	6
1	2009-07-03 06:12:00	12	6	2	8	6
1	2009-07-03 06:13:00	24	6	2	8	6
1	2009-07-03 06:14:00	0	6	2	8	6
1	2009-07-03 06:15:00	24	6	2	8	6
1	2009-07-03 06:16:00	0	6	2	8	6
1	2009-07-03 06:17:00	0	6	2	8	6
1	2009-07-03 06:18:00	0	6	2	8	6
1	2009-07-03 06:19:00	0	6	2	8	6
1	2009-07-03 06:20:00	83	6	2	8	6
1	2009-07-03 06:21:00	24	6	2	8	6
1	2009-07-03 06:22:00	12	6	2	8	6
1	2009-07-03 06:23:00	0	6	2	8	6
1	2009-07-03 06:24:00	0	6	2	8	6
1	2009-07-03 06:25:00	71	6	2	8	6
1	2009-07-03 06:26:00	12	6	2	8	6
1	2009-07-03 06:27:00	0	6	2	8	6
1	2009-07-03 06:28:00	142	6	2	8	6
1	2009-07-03 06:29:00	47	6	2	8	6
1	2009-07-03 06:30:00	24	6	2	8	6
1	2009-07-03 06:31:00	0	6	2	8	6
1	2009-07-03 06:32:00	0	6	2	8	6
1	2009-07-03 06:33:00	95	6	2	8	6
1	2009-07-03 06:34:00	71	6	2	8	6
1	2009-07-03 06:35:00	12	6	2	8	6
1	2009-07-03 06:36:00	36	6	2	8	6
1	2009-07-03 06:37:00	0	6	2	8	6
1	2009-07-03 06:38:00	0	6	2	8	6
1	2009-07-03 06:39:00	0	6	2	8	6
1	2009-07-03 06:40:00	327	6	2	8	6
1	2009-07-03 06:41:00	761	6	2	8	6
1	2009-07-03 06:42:00	393	6	2	8	6
1	2009-07-03 06:43:00	498	6	2	8	6
1	2009-07-03 06:44:00	282	6	2	8	6
1	2009-07-03 06:45:00	142	6	2	8	6
1	2009-07-03 06:46:00	311	6	2	8	6
1	2009-07-03 06:47:00	1920	6	2	8	6
1	2009-07-03 06:48:00	2600	6	2	8	6
1	2009-07-03 06:49:00	832	6	2	8	6
1	2009-07-03 06:50:00	593	6	2	8	6
1	2009-07-03 06:51:00	1169	6	2	8	6
1	2009-07-03 06:52:00	1960	6	2	8	6
1	2009-07-03 06:53:00	1005	6	2	8	6
1	2009-07-03 06:54:00	154	6	2	8	6
1	2009-07-03 06:55:00	377	6	2	8	6
1	2009-07-03 06:56:00	59	6	2	8	6
1	2009-07-03 06:57:00	12	6	2	8	6
1	2009-07-03 06:58:00	0	6	2	8	6
1	2009-07-03 06:59:00	0	6	2	8	6
1	2009-07-03 07:00:00	0	6	2	8	6
1	2009-07-03 07:01:00	0	7	2	8	6
1	2009-07-03 07:02:00	0	7	2	8	6
1	2009-07-03 07:03:00	0	7	2	8	6
1	2009-07-03 07:04:00	0	7	2	8	6
1	2009-07-03 07:05:00	0	7	2	8	6
1	2009-07-03 07:06:00	0	7	2	8	6
1	2009-07-03 07:07:00	0	7	2	8	6
1	2009-07-03 07:08:00	0	7	2	8	6
1	2009-07-03 07:09:00	0	7	2	8	6
1	2009-07-03 07:10:00	0	7	2	8	6
1	2009-07-03 07:11:00	0	7	2	8	6
1	2009-07-03 07:12:00	0	7	2	8	6
1	2009-07-03 07:13:00	0	7	2	8	6
1	2009-07-03 07:14:00	0	7	2	8	6
1	2009-07-03 07:15:00	0	7	2	8	6
1	2009-07-03 07:16:00	0	7	2	8	6
1	2009-07-03 07:17:00	377	7	2	8	6
1	2009-07-03 07:18:00	0	7	2	8	6
1	2009-07-03 07:19:00	47	7	2	8	6
1	2009-07-03 07:20:00	0	7	2	8	6
1	2009-07-03 07:21:00	0	7	2	8	6
1	2009-07-03 07:22:00	0	7	2	8	6
1	2009-07-03 07:23:00	0	7	2	8	6
1	2009-07-03 07:24:00	0	7	2	8	6
1	2009-07-03 07:25:00	71	7	2	8	6
1	2009-07-03 07:26:00	0	7	2	8	6
1	2009-07-03 07:27:00	0	7	2	8	6
1	2009-07-03 07:28:00	0	7	2	8	6
1	2009-07-03 07:29:00	36	7	2	8	6
1	2009-07-03 07:30:00	0	7	2	8	6
1	2009-07-03 07:31:00	0	7	2	8	6
1	2009-07-03 07:32:00	24	7	2	8	6
1	2009-07-03 07:33:00	0	7	2	8	6
1	2009-07-03 07:34:00	0	7	2	8	6
1	2009-07-03 07:35:00	0	7	2	8	6
1	2009-07-03 07:36:00	0	7	2	8	6
1	2009-07-03 07:37:00	0	7	2	8	6
1	2009-07-03 07:38:00	0	7	2	8	6
1	2009-07-03 07:39:00	0	7	2	8	6
1	2009-07-03 07:40:00	0	7	2	8	6
1	2009-07-03 07:41:00	12	7	2	8	6
1	2009-07-03 07:42:00	0	7	2	8	6
1	2009-07-03 07:43:00	12	7	2	8	6
1	2009-07-03 07:44:00	142	7	2	8	6
1	2009-07-03 07:45:00	0	7	2	8	6
1	2009-07-03 07:46:00	0	7	2	8	6
1	2009-07-03 07:47:00	0	7	2	8	6
1	2009-07-03 07:48:00	0	7	2	8	6
1	2009-07-03 07:49:00	0	7	2	8	6
1	2009-07-03 07:50:00	0	7	2	8	6
1	2009-07-03 07:51:00	0	7	2	8	6
1	2009-07-03 07:52:00	0	7	2	8	6
1	2009-07-03 07:53:00	0	7	2	8	6
1	2009-07-03 07:54:00	0	7	2	8	6
1	2009-07-03 07:55:00	36	7	2	8	6
1	2009-07-03 07:56:00	0	7	2	8	6
1	2009-07-03 07:57:00	0	7	2	8	6
1	2009-07-03 07:58:00	0	7	2	8	6
1	2009-07-03 07:59:00	0	7	2	8	6
1	2009-07-03 08:00:00	0	7	2	8	6
1	2009-07-03 08:01:00	0	8	2	8	6
1	2009-07-03 08:02:00	0	8	2	8	6
1	2009-07-03 08:03:00	0	8	2	8	6
1	2009-07-03 08:04:00	0	8	2	8	6
1	2009-07-03 08:05:00	0	8	2	8	6
1	2009-07-03 08:06:00	0	8	2	8	6
1	2009-07-03 08:07:00	0	8	2	8	6
1	2009-07-03 08:08:00	0	8	2	8	6
1	2009-07-03 08:09:00	0	8	2	8	6
1	2009-07-03 08:10:00	0	8	2	8	6
1	2009-07-03 08:11:00	12	8	2	8	6
1	2009-07-03 08:12:00	0	8	2	8	6
1	2009-07-03 08:13:00	36	8	2	8	6
1	2009-07-03 08:14:00	24	8	2	8	6
1	2009-07-03 08:15:00	0	8	2	8	6
1	2009-07-03 08:16:00	59	8	2	8	6
1	2009-07-03 08:17:00	593	8	2	8	6
1	2009-07-03 08:18:00	12	8	2	8	6
1	2009-07-03 08:19:00	0	8	2	8	6
1	2009-07-03 08:20:00	24	8	2	8	6
1	2009-07-03 08:21:00	0	8	2	8	6
1	2009-07-03 08:22:00	0	8	2	8	6
1	2009-07-03 08:23:00	0	8	2	8	6
1	2009-07-03 08:24:00	0	8	2	8	6
1	2009-07-03 08:25:00	0	8	2	8	6
1	2009-07-03 08:26:00	12	8	2	8	6
1	2009-07-03 08:27:00	0	8	2	8	6
1	2009-07-03 08:28:00	0	8	2	8	6
1	2009-07-03 08:29:00	47	8	2	8	6
1	2009-07-03 08:30:00	12	8	2	8	6
1	2009-07-03 08:31:00	0	8	2	8	6
1	2009-07-03 08:32:00	0	8	2	8	6
1	2009-07-03 08:33:00	0	8	2	8	6
1	2009-07-03 08:34:00	36	8	2	8	6
1	2009-07-03 08:35:00	12	8	2	8	6
1	2009-07-03 08:36:00	0	8	2	8	6
1	2009-07-03 08:37:00	0	8	2	8	6
1	2009-07-03 08:38:00	12	8	2	8	6
1	2009-07-03 08:39:00	24	8	2	8	6
1	2009-07-03 08:40:00	0	8	2	8	6
1	2009-07-03 08:41:00	593	8	2	8	6
1	2009-07-03 08:42:00	879	8	2	8	6
1	2009-07-03 08:43:00	344	8	2	8	6
1	2009-07-03 08:44:00	498	8	2	8	6
1	2009-07-03 08:45:00	296	8	2	8	6
1	2009-07-03 08:46:00	83	8	2	8	6
1	2009-07-03 08:47:00	71	8	2	8	6
1	2009-07-03 08:48:00	0	8	2	8	6
1	2009-07-03 08:49:00	1140	8	2	8	6
1	2009-07-03 08:50:00	410	8	2	8	6
1	2009-07-03 08:51:00	633	8	2	8	6
1	2009-07-03 08:52:00	1446	8	2	8	6
1	2009-07-03 08:53:00	311	8	2	8	6
1	2009-07-03 08:54:00	612	8	2	8	6
1	2009-07-03 08:55:00	517	8	2	8	6
1	2009-07-03 08:56:00	479	8	2	8	6
1	2009-07-03 08:57:00	12	8	2	8	6
1	2009-07-03 08:58:00	12	8	2	8	6
1	2009-07-03 08:59:00	0	8	2	8	6
1	2009-07-03 09:00:00	0	8	2	8	6
1	2009-07-03 09:01:00	0	9	2	8	6
1	2009-07-03 09:02:00	0	9	2	8	6
1	2009-07-03 09:03:00	0	9	2	8	6
1	2009-07-03 09:04:00	0	9	2	8	6
1	2009-07-03 09:05:00	0	9	2	8	6
1	2009-07-03 09:06:00	0	9	2	8	6
1	2009-07-03 09:07:00	0	9	2	8	6
1	2009-07-03 09:08:00	0	9	2	8	6
1	2009-07-03 09:09:00	0	9	2	8	6
1	2009-07-03 09:10:00	12	9	2	8	6
1	2009-07-03 09:11:00	0	9	2	8	6
1	2009-07-03 09:12:00	24	9	2	8	6
1	2009-07-03 09:13:00	47	9	2	8	6
1	2009-07-03 09:14:00	168	9	2	8	6
1	2009-07-03 09:15:00	0	9	2	8	6
1	2009-07-03 09:16:00	0	9	2	8	6
1	2009-07-03 09:17:00	0	9	2	8	6
1	2009-07-03 09:18:00	0	9	2	8	6
1	2009-07-03 09:19:00	0	9	2	8	6
1	2009-07-03 09:20:00	0	9	2	8	6
1	2009-07-03 09:21:00	0	9	2	8	6
1	2009-07-03 09:22:00	0	9	2	8	6
1	2009-07-03 09:23:00	0	9	2	8	6
1	2009-07-03 09:24:00	0	9	2	8	6
1	2009-07-03 09:25:00	0	9	2	8	6
1	2009-07-03 09:26:00	0	9	2	8	6
1	2009-07-03 09:27:00	0	9	2	8	6
1	2009-07-03 09:28:00	0	9	2	8	6
1	2009-07-03 09:29:00	0	9	2	8	6
1	2009-07-03 09:30:00	0	9	2	8	6
1	2009-07-03 09:31:00	0	9	2	8	6
1	2009-07-03 09:32:00	0	9	2	8	6
1	2009-07-03 09:33:00	0	9	2	8	6
1	2009-07-03 09:34:00	47	9	2	8	6
1	2009-07-03 09:35:00	47	9	2	8	6
1	2009-07-03 09:36:00	0	9	2	8	6
1	2009-07-03 09:37:00	0	9	2	8	6
1	2009-07-03 09:38:00	0	9	2	8	6
1	2009-07-03 09:39:00	0	9	2	8	6
1	2009-07-03 09:40:00	0	9	2	8	6
1	2009-07-03 09:41:00	0	9	2	8	6
1	2009-07-03 09:42:00	0	9	2	8	6
1	2009-07-03 09:43:00	0	9	2	8	6
1	2009-07-03 09:44:00	0	9	2	8	6
1	2009-07-03 09:45:00	12	9	2	8	6
1	2009-07-03 09:46:00	24	9	2	8	6
1	2009-07-03 09:47:00	0	9	2	8	6
1	2009-07-03 09:48:00	0	9	2	8	6
1	2009-07-03 09:49:00	0	9	2	8	6
1	2009-07-03 09:50:00	0	9	2	8	6
1	2009-07-03 09:51:00	0	9	2	8	6
1	2009-07-03 09:52:00	0	9	2	8	6
1	2009-07-03 09:53:00	0	9	2	8	6
1	2009-07-03 09:54:00	0	9	2	8	6
1	2009-07-03 09:55:00	0	9	2	8	6
1	2009-07-03 09:56:00	0	9	2	8	6
1	2009-07-03 09:57:00	0	9	2	8	6
1	2009-07-03 09:58:00	0	9	2	8	6
1	2009-07-03 09:59:00	12	9	2	8	6
1	2009-07-03 10:00:00	0	9	2	8	6
1	2009-07-03 10:01:00	0	10	2	8	6
1	2009-07-03 10:02:00	0	10	2	8	6
1	2009-07-03 10:03:00	0	10	2	8	6
1	2009-07-03 10:04:00	0	10	2	8	6
1	2009-07-03 10:05:00	0	10	2	8	6
1	2009-07-03 10:06:00	0	10	2	8	6
1	2009-07-03 10:07:00	0	10	2	8	6
1	2009-07-03 10:08:00	0	10	2	8	6
1	2009-07-03 10:09:00	24	10	2	8	6
1	2009-07-03 10:10:00	0	10	2	8	6
1	2009-07-03 10:11:00	0	10	2	8	6
1	2009-07-03 10:12:00	0	10	2	8	6
1	2009-07-03 10:13:00	12	10	2	8	6
1	2009-07-03 10:14:00	0	10	2	8	6
1	2009-07-03 10:15:00	0	10	2	8	6
1	2009-07-03 10:16:00	0	10	2	8	6
1	2009-07-03 10:17:00	0	10	2	8	6
1	2009-07-03 10:18:00	0	10	2	8	6
1	2009-07-03 10:19:00	0	10	2	8	6
1	2009-07-03 10:20:00	0	10	2	8	6
1	2009-07-03 10:21:00	0	10	2	8	6
1	2009-07-03 10:22:00	0	10	2	8	6
1	2009-07-03 10:23:00	0	10	2	8	6
1	2009-07-03 10:24:00	0	10	2	8	6
1	2009-07-03 10:25:00	0	10	2	8	6
1	2009-07-03 10:26:00	0	10	2	8	6
1	2009-07-03 10:27:00	0	10	2	8	6
1	2009-07-03 10:28:00	0	10	2	8	6
1	2009-07-03 10:29:00	0	10	2	8	6
1	2009-07-03 10:30:00	12	10	2	8	6
1	2009-07-03 10:31:00	12	10	2	8	6
1	2009-07-03 10:32:00	0	10	2	8	6
1	2009-07-03 10:33:00	0	10	2	8	6
1	2009-07-03 10:34:00	0	10	2	8	6
1	2009-07-03 10:35:00	12	10	2	8	6
1	2009-07-03 10:36:00	0	10	2	8	6
1	2009-07-03 10:37:00	0	10	2	8	6
1	2009-07-03 10:38:00	12	10	2	8	6
1	2009-07-03 10:39:00	0	10	2	8	6
1	2009-07-03 10:40:00	0	10	2	8	6
1	2009-07-03 10:41:00	0	10	2	8	6
1	2009-07-03 10:42:00	0	10	2	8	6
1	2009-07-03 10:43:00	0	10	2	8	6
1	2009-07-03 10:44:00	0	10	2	8	6
1	2009-07-03 10:45:00	0	10	2	8	6
1	2009-07-03 10:46:00	0	10	2	8	6
1	2009-07-03 10:47:00	0	10	2	8	6
1	2009-07-03 10:48:00	0	10	2	8	6
1	2009-07-03 10:49:00	0	10	2	8	6
1	2009-07-03 10:50:00	0	10	2	8	6
1	2009-07-03 10:51:00	0	10	2	8	6
1	2009-07-03 10:52:00	0	10	2	8	6
1	2009-07-03 10:53:00	0	10	2	8	6
1	2009-07-03 10:54:00	0	10	2	8	6
1	2009-07-03 10:55:00	0	10	2	8	6
1	2009-07-03 10:56:00	0	10	2	8	6
1	2009-07-03 10:57:00	0	10	2	8	6
1	2009-07-03 10:58:00	12	10	2	8	6
1	2009-07-03 10:59:00	0	10	2	8	6
1	2009-07-03 11:00:00	0	10	2	8	6
1	2009-07-03 11:01:00	0	11	2	8	6
1	2009-07-03 11:02:00	0	11	2	8	6
1	2009-07-03 11:03:00	0	11	2	8	6
1	2009-07-03 11:04:00	0	11	2	8	6
1	2009-07-03 11:05:00	0	11	2	8	6
1	2009-07-03 11:06:00	0	11	2	8	6
1	2009-07-03 11:07:00	0	11	2	8	6
1	2009-07-03 11:08:00	24	11	2	8	6
1	2009-07-03 11:09:00	0	11	2	8	6
1	2009-07-03 11:10:00	0	11	2	8	6
1	2009-07-03 11:11:00	0	11	2	8	6
1	2009-07-03 11:12:00	0	11	2	8	6
1	2009-07-03 11:13:00	0	11	2	8	6
1	2009-07-03 11:14:00	0	11	2	8	6
1	2009-07-03 11:15:00	12	11	2	8	6
1	2009-07-03 11:16:00	0	11	2	8	6
1	2009-07-03 11:17:00	83	11	2	8	6
1	2009-07-03 11:18:00	0	11	2	8	6
1	2009-07-03 11:19:00	0	11	2	8	6
1	2009-07-03 11:20:00	0	11	2	8	6
1	2009-07-03 11:21:00	0	11	2	8	6
1	2009-07-03 11:22:00	0	11	2	8	6
1	2009-07-03 11:23:00	0	11	2	8	6
1	2009-07-03 11:24:00	740	11	2	8	6
1	2009-07-03 11:25:00	360	11	2	8	6
1	2009-07-03 11:26:00	24	11	2	8	6
1	2009-07-03 11:27:00	0	11	2	8	6
1	2009-07-03 11:28:00	0	11	2	8	6
1	2009-07-03 11:29:00	0	11	2	8	6
1	2009-07-03 11:30:00	0	11	2	8	6
1	2009-07-03 11:31:00	0	11	2	8	6
1	2009-07-03 11:32:00	0	11	2	8	6
1	2009-07-03 11:33:00	0	11	2	8	6
1	2009-07-03 11:34:00	0	11	2	8	6
1	2009-07-03 11:35:00	12	11	2	8	6
1	2009-07-03 11:36:00	12	11	2	8	6
1	2009-07-03 11:37:00	24	11	2	8	6
1	2009-07-03 11:38:00	12	11	2	8	6
1	2009-07-03 11:39:00	24	11	2	8	6
1	2009-07-03 11:40:00	0	11	2	8	6
1	2009-07-03 11:41:00	0	11	2	8	6
1	2009-07-03 11:42:00	0	11	2	8	6
1	2009-07-03 11:43:00	12	11	2	8	6
1	2009-07-03 11:44:00	24	11	2	8	6
1	2009-07-03 11:45:00	59	11	2	8	6
1	2009-07-03 11:46:00	0	11	2	8	6
1	2009-07-03 11:47:00	0	11	2	8	6
1	2009-07-03 11:48:00	410	11	2	8	6
1	2009-07-03 11:49:00	479	11	2	8	6
1	2009-07-03 11:50:00	377	11	2	8	6
1	2009-07-03 11:51:00	268	11	2	8	6
1	2009-07-03 11:52:00	410	11	2	8	6
1	2009-07-03 11:53:00	0	11	2	8	6
1	2009-07-03 11:54:00	24	11	2	8	6
1	2009-07-03 11:55:00	225	11	2	8	6
1	2009-07-03 11:56:00	0	11	2	8	6
1	2009-07-03 11:57:00	0	11	2	8	6
1	2009-07-03 11:58:00	0	11	2	8	6
1	2009-07-03 11:59:00	0	11	2	8	6
1	2009-07-03 12:00:00	0	11	2	8	6
1	2009-07-03 12:01:00	12	12	3	8	6
1	2009-07-03 12:02:00	0	12	3	8	6
1	2009-07-03 12:03:00	83	12	3	8	6
1	2009-07-03 12:04:00	12	12	3	8	6
1	2009-07-03 12:05:00	0	12	3	8	6
1	2009-07-03 12:06:00	0	12	3	8	6
1	2009-07-03 12:07:00	0	12	3	8	6
1	2009-07-03 12:08:00	0	12	3	8	6
1	2009-07-03 12:09:00	0	12	3	8	6
1	2009-07-03 12:10:00	24	12	3	8	6
1	2009-07-03 12:11:00	0	12	3	8	6
1	2009-07-03 12:12:00	0	12	3	8	6
1	2009-07-03 12:13:00	0	12	3	8	6
1	2009-07-03 12:14:00	0	12	3	8	6
1	2009-07-03 12:15:00	59	12	3	8	6
1	2009-07-03 12:16:00	0	12	3	8	6
1	2009-07-03 12:17:00	12	12	3	8	6
1	2009-07-03 12:18:00	0	12	3	8	6
1	2009-07-03 12:19:00	0	12	3	8	6
1	2009-07-03 12:20:00	12	12	3	8	6
1	2009-07-03 12:21:00	0	12	3	8	6
1	2009-07-03 12:22:00	0	12	3	8	6
1	2009-07-03 12:23:00	0	12	3	8	6
1	2009-07-03 12:24:00	47	12	3	8	6
1	2009-07-03 12:25:00	0	12	3	8	6
1	2009-07-03 12:26:00	12	12	3	8	6
1	2009-07-03 12:27:00	0	12	3	8	6
1	2009-07-03 12:28:00	0	12	3	8	6
1	2009-07-03 12:29:00	47	12	3	8	6
1	2009-07-03 12:30:00	0	12	3	8	6
1	2009-07-03 12:31:00	0	12	3	8	6
1	2009-07-03 12:32:00	0	12	3	8	6
1	2009-07-03 12:33:00	12	12	3	8	6
1	2009-07-03 12:34:00	24	12	3	8	6
1	2009-07-03 12:35:00	0	12	3	8	6
1	2009-07-03 12:36:00	0	12	3	8	6
1	2009-07-03 12:37:00	0	12	3	8	6
1	2009-07-03 12:38:00	0	12	3	8	6
1	2009-07-03 12:39:00	24	12	3	8	6
1	2009-07-03 12:40:00	0	12	3	8	6
1	2009-07-03 12:41:00	0	12	3	8	6
1	2009-07-03 12:42:00	0	12	3	8	6
1	2009-07-03 12:43:00	0	12	3	8	6
1	2009-07-03 12:44:00	0	12	3	8	6
1	2009-07-03 12:45:00	0	12	3	8	6
1	2009-07-03 12:46:00	0	12	3	8	6
1	2009-07-03 12:47:00	0	12	3	8	6
1	2009-07-03 12:48:00	24	12	3	8	6
1	2009-07-03 12:49:00	0	12	3	8	6
1	2009-07-03 12:50:00	0	12	3	8	6
1	2009-07-03 12:51:00	0	12	3	8	6
1	2009-07-03 12:52:00	0	12	3	8	6
1	2009-07-03 12:53:00	0	12	3	8	6
1	2009-07-03 12:54:00	0	12	3	8	6
1	2009-07-03 12:55:00	0	12	3	8	6
1	2009-07-03 12:56:00	0	12	3	8	6
1	2009-07-03 12:57:00	0	12	3	8	6
1	2009-07-03 12:58:00	36	12	3	8	6
1	2009-07-03 12:59:00	0	12	3	8	6
1	2009-07-03 13:00:00	0	12	3	8	6
1	2009-07-03 13:01:00	0	13	3	8	6
1	2009-07-03 13:02:00	0	13	3	8	6
1	2009-07-03 13:03:00	0	13	3	8	6
1	2009-07-03 13:04:00	24	13	3	8	6
1	2009-07-03 13:05:00	0	13	3	8	6
1	2009-07-03 13:06:00	0	13	3	8	6
1	2009-07-03 13:07:00	0	13	3	8	6
1	2009-07-03 13:08:00	59	13	3	8	6
1	2009-07-03 13:09:00	12	13	3	8	6
1	2009-07-03 13:10:00	0	13	3	8	6
1	2009-07-03 13:11:00	183	13	3	8	6
1	2009-07-03 13:12:00	47	13	3	8	6
1	2009-07-03 13:13:00	59	13	3	8	6
1	2009-07-03 13:14:00	154	13	3	8	6
1	2009-07-03 13:15:00	24	13	3	8	6
1	2009-07-03 13:16:00	0	13	3	8	6
1	2009-07-03 13:17:00	59	13	3	8	6
1	2009-07-03 13:18:00	71	13	3	8	6
1	2009-07-03 13:19:00	83	13	3	8	6
1	2009-07-03 13:20:00	183	13	3	8	6
1	2009-07-03 13:21:00	47	13	3	8	6
1	2009-07-03 13:22:00	0	13	3	8	6
1	2009-07-03 13:23:00	0	13	3	8	6
1	2009-07-03 13:24:00	0	13	3	8	6
1	2009-07-03 13:25:00	0	13	3	8	6
1	2009-07-03 13:26:00	0	13	3	8	6
1	2009-07-03 13:27:00	24	13	3	8	6
1	2009-07-03 13:28:00	168	13	3	8	6
1	2009-07-03 13:29:00	71	13	3	8	6
1	2009-07-03 13:30:00	0	13	3	8	6
1	2009-07-03 13:31:00	0	13	3	8	6
1	2009-07-03 13:32:00	0	13	3	8	6
1	2009-07-03 13:33:00	0	13	3	8	6
1	2009-07-03 13:34:00	0	13	3	8	6
1	2009-07-03 13:35:00	0	13	3	8	6
1	2009-07-03 13:36:00	0	13	3	8	6
1	2009-07-03 13:37:00	0	13	3	8	6
1	2009-07-03 13:38:00	0	13	3	8	6
1	2009-07-03 13:39:00	0	13	3	8	6
1	2009-07-03 13:40:00	36	13	3	8	6
1	2009-07-03 13:41:00	0	13	3	8	6
1	2009-07-03 13:42:00	12	13	3	8	6
1	2009-07-03 13:43:00	0	13	3	8	6
1	2009-07-03 13:44:00	0	13	3	8	6
1	2009-07-03 13:45:00	119	13	3	8	6
1	2009-07-03 13:46:00	0	13	3	8	6
1	2009-07-03 13:47:00	36	13	3	8	6
1	2009-07-03 13:48:00	24	13	3	8	6
1	2009-07-03 13:49:00	71	13	3	8	6
1	2009-07-03 13:50:00	0	13	3	8	6
1	2009-07-03 13:51:00	0	13	3	8	6
1	2009-07-03 13:52:00	0	13	3	8	6
1	2009-07-03 13:53:00	740	13	3	8	6
1	2009-07-03 13:54:00	95	13	3	8	6
1	2009-07-03 13:55:00	107	13	3	8	6
1	2009-07-03 13:56:00	12	13	3	8	6
1	2009-07-03 13:57:00	24	13	3	8	6
1	2009-07-03 13:58:00	0	13	3	8	6
1	2009-07-03 13:59:00	59	13	3	8	6
1	2009-07-03 14:00:00	12	13	3	8	6
1	2009-07-03 14:01:00	119	14	3	8	6
1	2009-07-03 14:02:00	327	14	3	8	6
1	2009-07-03 14:03:00	12	14	3	8	6
1	2009-07-03 14:04:00	0	14	3	8	6
1	2009-07-03 14:05:00	0	14	3	8	6
1	2009-07-03 14:06:00	0	14	3	8	6
1	2009-07-03 14:07:00	0	14	3	8	6
1	2009-07-03 14:08:00	24	14	3	8	6
1	2009-07-03 14:09:00	12	14	3	8	6
1	2009-07-03 14:10:00	0	14	3	8	6
1	2009-07-03 14:11:00	36	14	3	8	6
1	2009-07-03 14:12:00	0	14	3	8	6
1	2009-07-03 14:13:00	0	14	3	8	6
1	2009-07-03 14:14:00	0	14	3	8	6
1	2009-07-03 14:15:00	0	14	3	8	6
1	2009-07-03 14:16:00	0	14	3	8	6
1	2009-07-03 14:17:00	612	14	3	8	6
1	2009-07-03 14:18:00	71	14	3	8	6
1	2009-07-03 14:19:00	1960	14	3	8	6
1	2009-07-03 14:20:00	183	14	3	8	6
1	2009-07-03 14:21:00	268	14	3	8	6
1	2009-07-03 14:22:00	119	14	3	8	6
1	2009-07-03 14:23:00	24	14	3	8	6
1	2009-07-03 14:24:00	0	14	3	8	6
1	2009-07-03 14:25:00	0	14	3	8	6
1	2009-07-03 14:26:00	0	14	3	8	6
1	2009-07-03 14:27:00	0	14	3	8	6
1	2009-07-03 14:28:00	0	14	3	8	6
1	2009-07-03 14:29:00	0	14	3	8	6
1	2009-07-03 14:30:00	0	14	3	8	6
1	2009-07-03 14:31:00	0	14	3	8	6
1	2009-07-03 14:32:00	0	14	3	8	6
1	2009-07-03 14:33:00	327	14	3	8	6
1	2009-07-03 14:34:00	311	14	3	8	6
1	2009-07-03 14:35:00	0	14	3	8	6
1	2009-07-03 14:36:00	427	14	3	8	6
1	2009-07-03 14:37:00	808	14	3	8	6
1	2009-07-03 14:38:00	612	14	3	8	6
1	2009-07-03 14:39:00	393	14	3	8	6
1	2009-07-03 14:40:00	183	14	3	8	6
1	2009-07-03 14:41:00	555	14	3	8	6
1	2009-07-03 14:42:00	225	14	3	8	6
1	2009-07-03 14:43:00	443	14	3	8	6
1	2009-07-03 14:44:00	154	14	3	8	6
1	2009-07-03 14:45:00	0	14	3	8	6
1	2009-07-03 14:46:00	0	14	3	8	6
1	2009-07-03 14:47:00	0	14	3	8	6
1	2009-07-03 14:48:00	0	14	3	8	6
1	2009-07-03 14:49:00	0	14	3	8	6
1	2009-07-03 14:50:00	0	14	3	8	6
1	2009-07-03 14:51:00	12	14	3	8	6
1	2009-07-03 14:52:00	36	14	3	8	6
1	2009-07-03 14:53:00	0	14	3	8	6
1	2009-07-03 14:54:00	0	14	3	8	6
1	2009-07-03 14:55:00	0	14	3	8	6
1	2009-07-03 14:56:00	71	14	3	8	6
1	2009-07-03 14:57:00	0	14	3	8	6
1	2009-07-03 14:58:00	0	14	3	8	6
1	2009-07-03 14:59:00	0	14	3	8	6
1	2009-07-03 15:00:00	0	14	3	8	6
1	2009-07-03 15:01:00	0	15	3	8	6
1	2009-07-03 15:02:00	95	15	3	8	6
1	2009-07-03 15:03:00	0	15	3	8	6
1	2009-07-03 15:04:00	12	15	3	8	6
1	2009-07-03 15:05:00	0	15	3	8	6
1	2009-07-03 15:06:00	12	15	3	8	6
1	2009-07-03 15:07:00	654	15	3	8	6
1	2009-07-03 15:08:00	410	15	3	8	6
1	2009-07-03 15:09:00	0	15	3	8	6
1	2009-07-03 15:10:00	0	15	3	8	6
1	2009-07-03 15:11:00	0	15	3	8	6
1	2009-07-03 15:12:00	0	15	3	8	6
1	2009-07-03 15:13:00	0	15	3	8	6
1	2009-07-03 15:14:00	0	15	3	8	6
1	2009-07-03 15:15:00	0	15	3	8	6
1	2009-07-03 15:16:00	0	15	3	8	6
1	2009-07-03 15:17:00	0	15	3	8	6
1	2009-07-03 15:18:00	0	15	3	8	6
1	2009-07-03 15:19:00	0	15	3	8	6
[truncated: 78,641 more rows]

## Sheet: Pivot Segment
Multiplier	2
x (Low Intensity)	507.411
y (High Intensity)	782.574
	Column Labels
Values	1	2	3	4	5	6	7	8	Grand Total
Average of Activity	62.1358	101.163	89.4277	113.108	119.238	202.151	206.189	99.0517	123.318
StdDev of Activity	222.638	340.705	313.934	330.163	395.51	553.407	650.728	340.884	414.752
Count of Activity	10080	10080	10080	10080	10080	10080	9360	10080	79920
Count Above x	394	633	582	682	746	972	877	641
% Above x	0.0390873	0.0627976	0.0577381	0.0676587	0.0740079	0.0964286	0.0936966	0.0635913
Count Above y		438	377	442	480	702	643	371
% Above y		0.0434524	0.0374008	0.0438492	0.047619	0.0696429	0.0686966	0.0368056

## Sheet: Pivot Weekday
Sum of Activity	Column Labels
Row Labels	1	2	3	4	5	6	7	8	Grand Total
1	67275	151620	101607	218576	216670	319414	175696	160380	1411238
2	94059	153896	160501	156498	103637	360820	501721	152960	1684092
3	102673	169698	133884	138888	221467	329219	173046	128332	1397207
4	120521	127992	125005	149469	260449	317481	270738	134508	1506163
5	72707	138409	109797	157826	121221	135637	406203	170223	1312023
6	71096	114670	81077	147712	79943	296180	174901	150985	1116564
7	97998	163441	189560	171156	198537	278936	227628	101053	1428309
Grand Total	626329	1019726	901431	1140125	1201924	2037687	1929933	998441	9855596
Count of Activity	Column Labels
Row Labels	1	2	3	4	5	6	7	8	Grand Total
1	1440	1440	1440	1440	1440	1440	720	1440	10800
2	1440	1440	1440	1440	1440	1440	1440	1440	11520
3	1440	1440	1440	1440	1440	1440	1440	1440	11520
4	1440	1440	1440	1440	1440	1440	1440	1440	11520
5	1440	1440	1440	1440	1440	1440	1440	1440	11520
6	1440	1440	1440	1440	1440	1440	1440	1440	11520
7	1440	1440	1440	1440	1440	1440	1440	1440	11520
Grand Total	10080	10080	10080	10080	10080	10080	9360	10080	79920

## Sheet: Pivot Quadrant
Sum of Activity	Column Labels
Row Labels	1	2	3	4	5	6	7	8	Grand Total
1	129818	218340	171889	233993	197320	307022	307465	163450	1729297
2	213414	285633	232820	310539	371073	462840	382178	245388	2503885
3	188231	334507	248689	219427	336776	601226	523746	421900	2874502
4	94866	181246	248033	376166	296755	666599	716544	167703	2747912
Grand Total	626329	1019726	901431	1140125	1201924	2037687	1929933	998441	9855596
Average	156582	254932	225358	285031	300481	509422	482483	249610
Count of Activity	Column Labels
Row Labels	1	2	3	4	5	6	7	8	Grand Total
1	2520	2520	2520	2520	2520	2520	2340	2520	19980
2	2520	2520	2520	2520	2520	2520	2160	2520	19800
3	2520	2520	2520	2520	2520	2520	2340	2520	19980
4	2520	2520	2520	2520	2520	2520	2520	2520	20160
Grand Total	10080	10080	10080	10080	10080	10080	9360	10080	79920

## Sheet: 6.25.09
Actogram, Copy Raw Data, All Days
Identity:	Geronimo
Filename:	E:\Active Research Files\meloxicam titre canine\cases\geronimo\Geronimo 6.25.09.AWC
Gender:	M
Age:	8
Height:	76.2 cm	30.0 in
Weight:	27.2 kg	60.0 lbs
Start Date:	25-Jun-2009 (Thu)
Start Time:	18:00:00
Interval:	1.00 mins
Date Stamp:	Time Stamp:	Activity Data:	Marker Press:
2009-06-25	00:00:00	0
2009-06-25	00:01:00	0
2009-06-25	00:02:00	0
2009-06-25	00:03:00	0
2009-06-25	00:04:00	0
2009-06-25	00:05:00	0
2009-06-25	00:06:00	0
2009-06-25	00:07:00	0
2009-06-25	00:08:00	0
2009-06-25	00:09:00	0
2009-06-25	00:10:00	0
2009-06-25	00:11:00	0
2009-06-25	00:12:00	0
2009-06-25	00:13:00	0
2009-06-25	00:14:00	0
2009-06-25	00:15:00	0
2009-06-25	00:16:00	0
2009-06-25	00:17:00	0
2009-06-25	00:18:00	0
2009-06-25	00:19:00	0
2009-06-25	00:20:00	0
2009-06-25	00:21:00	0
2009-06-25	00:22:00	0
2009-06-25	00:23:00	0
2009-06-25	00:24:00	0
2009-06-25	00:25:00	0
2009-06-25	00:26:00	0
2009-06-25	00:27:00	0
2009-06-25	00:28:00	0
2009-06-25	00:29:00	0
2009-06-25	00:30:00	0
2009-06-25	00:31:00	0
2009-06-25	00:32:00	0
2009-06-25	00:33:00	0
2009-06-25	00:34:00	0
2009-06-25	00:35:00	0
2009-06-25	00:36:00	0
2009-06-25	00:37:00	0
2009-06-25	00:38:00	0
2009-06-25	00:39:00	0
2009-06-25	00:40:00	0
2009-06-25	00:41:00	0
2009-06-25	00:42:00	0
2009-06-25	00:43:00	0
2009-06-25	00:44:00	0
2009-06-25	00:45:00	0
2009-06-25	00:46:00	0
2009-06-25	00:47:00	0
2009-06-25	00:48:00	0
2009-06-25	00:49:00	0
2009-06-25	00:50:00	0
2009-06-25	00:51:00	0
2009-06-25	00:52:00	0
2009-06-25	00:53:00	0
2009-06-25	00:54:00	0
2009-06-25	00:55:00	0
2009-06-25	00:56:00	0
2009-06-25	00:57:00	0
2009-06-25	00:58:00	0
2009-06-25	00:59:00	0
2009-06-25	01:00:00	0
2009-06-25	01:01:00	0
2009-06-25	01:02:00	0
2009-06-25	01:03:00	0
2009-06-25	01:04:00	0
2009-06-25	01:05:00	0
2009-06-25	01:06:00	0
2009-06-25	01:07:00	0
2009-06-25	01:08:00	0
2009-06-25	01:09:00	0
2009-06-25	01:10:00	0
2009-06-25	01:11:00	0
2009-06-25	01:12:00	0
2009-06-25	01:13:00	0
2009-06-25	01:14:00	0
2009-06-25	01:15:00	0
2009-06-25	01:16:00	0
2009-06-25	01:17:00	0
2009-06-25	01:18:00	0
2009-06-25	01:19:00	0
2009-06-25	01:20:00	0
2009-06-25	01:21:00	0
2009-06-25	01:22:00	0
2009-06-25	01:23:00	0
2009-06-25	01:24:00	0
2009-06-25	01:25:00	0
2009-06-25	01:26:00	0
2009-06-25	01:27:00	0
2009-06-25	01:28:00	0
2009-06-25	01:29:00	0
2009-06-25	01:30:00	0
2009-06-25	01:31:00	0
2009-06-25	01:32:00	0
2009-06-25	01:33:00	0
2009-06-25	01:34:00	0
2009-06-25	01:35:00	0
2009-06-25	01:36:00	0
2009-06-25	01:37:00	0
2009-06-25	01:38:00	0
2009-06-25	01:39:00	0
2009-06-25	01:40:00	0
2009-06-25	01:41:00	0
2009-06-25	01:42:00	0
2009-06-25	01:43:00	0
2009-06-25	01:44:00	0
2009-06-25	01:45:00	0
2009-06-25	01:46:00	0
2009-06-25	01:47:00	0
2009-06-25	01:48:00	0
2009-06-25	01:49:00	0
2009-06-25	01:50:00	0
2009-06-25	01:51:00	0
2009-06-25	01:52:00	0
2009-06-25	01:53:00	0
2009-06-25	01:54:00	0
2009-06-25	01:55:00	0
2009-06-25	01:56:00	0
2009-06-25	01:57:00	0
2009-06-25	01:58:00	0
2009-06-25	01:59:00	0
2009-06-25	02:00:00	0
2009-06-25	02:01:00	0
2009-06-25	02:02:00	0
2009-06-25	02:03:00	0
2009-06-25	02:04:00	0
2009-06-25	02:05:00	0
2009-06-25	02:06:00	0
2009-06-25	02:07:00	0
2009-06-25	02:08:00	0
2009-06-25	02:09:00	0
2009-06-25	02:10:00	0
2009-06-25	02:11:00	0
2009-06-25	02:12:00	0
2009-06-25	02:13:00	0
2009-06-25	02:14:00	0
2009-06-25	02:15:00	0
2009-06-25	02:16:00	0
2009-06-25	02:17:00	0
2009-06-25	02:18:00	0
2009-06-25	02:19:00	0
2009-06-25	02:20:00	0
2009-06-25	02:21:00	0
2009-06-25	02:22:00	0
2009-06-25	02:23:00	0
2009-06-25	02:24:00	0
2009-06-25	02:25:00	0
2009-06-25	02:26:00	0
2009-06-25	02:27:00	0
2009-06-25	02:28:00	0
2009-06-25	02:29:00	0
2009-06-25	02:30:00	0
2009-06-25	02:31:00	0
2009-06-25	02:32:00	0
2009-06-25	02:33:00	0
2009-06-25	02:34:00	0
2009-06-25	02:35:00	0
2009-06-25	02:36:00	0
2009-06-25	02:37:00	0
2009-06-25	02:38:00	0
2009-06-25	02:39:00	0
2009-06-25	02:40:00	0
2009-06-25	02:41:00	0
2009-06-25	02:42:00	0
2009-06-25	02:43:00	0
2009-06-25	02:44:00	0
2009-06-25	02:45:00	0
2009-06-25	02:46:00	0
2009-06-25	02:47:00	0
2009-06-25	02:48:00	0
2009-06-25	02:49:00	0
2009-06-25	02:50:00	0
2009-06-25	02:51:00	0
2009-06-25	02:52:00	0
2009-06-25	02:53:00	0
2009-06-25	02:54:00	0
2009-06-25	02:55:00	0
2009-06-25	02:56:00	0
2009-06-25	02:57:00	0
2009-06-25	02:58:00	0
2009-06-25	02:59:00	0
2009-06-25	03:00:00	0
2009-06-25	03:01:00	0
2009-06-25	03:02:00	0
2009-06-25	03:03:00	0
2009-06-25	03:04:00	0
2009-06-25	03:05:00	0
2009-06-25	03:06:00	0
2009-06-25	03:07:00	0
2009-06-25	03:08:00	0
2009-06-25	03:09:00	0
2009-06-25	03:10:00	0
2009-06-25	03:11:00	0
2009-06-25	03:12:00	0
2009-06-25	03:13:00	0
2009-06-25	03:14:00	0
2009-06-25	03:15:00	0
2009-06-25	03:16:00	0
2009-06-25	03:17:00	0
2009-06-25	03:18:00	0
2009-06-25	03:19:00	0
2009-06-25	03:20:00	0
2009-06-25	03:21:00	0
2009-06-25	03:22:00	0
2009-06-25	03:23:00	0
2009-06-25	03:24:00	0
2009-06-25	03:25:00	0
2009-06-25	03:26:00	0
2009-06-25	03:27:00	0
2009-06-25	03:28:00	0
2009-06-25	03:29:00	0
2009-06-25	03:30:00	0
2009-06-25	03:31:00	0
2009-06-25	03:32:00	0
2009-06-25	03:33:00	0
2009-06-25	03:34:00	0
2009-06-25	03:35:00	0
2009-06-25	03:36:00	0
2009-06-25	03:37:00	0
2009-06-25	03:38:00	0
2009-06-25	03:39:00	0
2009-06-25	03:40:00	0
2009-06-25	03:41:00	0
2009-06-25	03:42:00	0
2009-06-25	03:43:00	0
2009-06-25	03:44:00	0
2009-06-25	03:45:00	0
2009-06-25	03:46:00	0
2009-06-25	03:47:00	0
2009-06-25	03:48:00	0
2009-06-25	03:49:00	0
2009-06-25	03:50:00	0
2009-06-25	03:51:00	0
2009-06-25	03:52:00	0
2009-06-25	03:53:00	0
2009-06-25	03:54:00	0
2009-06-25	03:55:00	0
2009-06-25	03:56:00	0
2009-06-25	03:57:00	0
2009-06-25	03:58:00	0
2009-06-25	03:59:00	0
2009-06-25	04:00:00	0
2009-06-25	04:01:00	0
2009-06-25	04:02:00	0
2009-06-25	04:03:00	0
2009-06-25	04:04:00	0
2009-06-25	04:05:00	0
2009-06-25	04:06:00	0
2009-06-25	04:07:00	0
2009-06-25	04:08:00	0
2009-06-25	04:09:00	0
2009-06-25	04:10:00	0
2009-06-25	04:11:00	0
2009-06-25	04:12:00	0
2009-06-25	04:13:00	0
2009-06-25	04:14:00	0
2009-06-25	04:15:00	0
2009-06-25	04:16:00	0
2009-06-25	04:17:00	0
2009-06-25	04:18:00	0
2009-06-25	04:19:00	0
2009-06-25	04:20:00	0
2009-06-25	04:21:00	0
2009-06-25	04:22:00	0
2009-06-25	04:23:00	0
2009-06-25	04:24:00	0
2009-06-25	04:25:00	0
2009-06-25	04:26:00	0
2009-06-25	04:27:00	0
2009-06-25	04:28:00	0
2009-06-25	04:29:00	0
2009-06-25	04:30:00	0
2009-06-25	04:31:00	0
2009-06-25	04:32:00	0
2009-06-25	04:33:00	0
2009-06-25	04:34:00	0
2009-06-25	04:35:00	0
2009-06-25	04:36:00	0
2009-06-25	04:37:00	0
2009-06-25	04:38:00	0
2009-06-25	04:39:00	0
2009-06-25	04:40:00	0
2009-06-25	04:41:00	0
2009-06-25	04:42:00	0
2009-06-25	04:43:00	0
2009-06-25	04:44:00	0
2009-06-25	04:45:00	0
2009-06-25	04:46:00	0
2009-06-25	04:47:00	0
2009-06-25	04:48:00	0
2009-06-25	04:49:00	0
2009-06-25	04:50:00	0
2009-06-25	04:51:00	0
2009-06-25	04:52:00	0
2009-06-25	04:53:00	0
2009-06-25	04:54:00	0
2009-06-25	04:55:00	0
2009-06-25	04:56:00	0
2009-06-25	04:57:00	0
2009-06-25	04:58:00	0
2009-06-25	04:59:00	0
2009-06-25	05:00:00	0
2009-06-25	05:01:00	0
2009-06-25	05:02:00	0
2009-06-25	05:03:00	0
2009-06-25	05:04:00	0
2009-06-25	05:05:00	0
2009-06-25	05:06:00	0
2009-06-25	05:07:00	0
2009-06-25	05:08:00	0
2009-06-25	05:09:00	0
2009-06-25	05:10:00	0
2009-06-25	05:11:00	0
2009-06-25	05:12:00	0
2009-06-25	05:13:00	0
2009-06-25	05:14:00	0
2009-06-25	05:15:00	0
2009-06-25	05:16:00	0
2009-06-25	05:17:00	0
2009-06-25	05:18:00	0
2009-06-25	05:19:00	0
2009-06-25	05:20:00	0
2009-06-25	05:21:00	0
2009-06-25	05:22:00	0
2009-06-25	05:23:00	0
2009-06-25	05:24:00	0
2009-06-25	05:25:00	0
2009-06-25	05:26:00	0
2009-06-25	05:27:00	0
2009-06-25	05:28:00	0
2009-06-25	05:29:00	0
2009-06-25	05:30:00	0
2009-06-25	05:31:00	0
2009-06-25	05:32:00	0
2009-06-25	05:33:00	0
2009-06-25	05:34:00	0
2009-06-25	05:35:00	0
2009-06-25	05:36:00	0
2009-06-25	05:37:00	0
2009-06-25	05:38:00	0
2009-06-25	05:39:00	0
2009-06-25	05:40:00	0
2009-06-25	05:41:00	0
2009-06-25	05:42:00	0
2009-06-25	05:43:00	0
2009-06-25	05:44:00	0
2009-06-25	05:45:00	0
2009-06-25	05:46:00	0
2009-06-25	05:47:00	0
2009-06-25	05:48:00	0
2009-06-25	05:49:00	0
2009-06-25	05:50:00	0
2009-06-25	05:51:00	0
2009-06-25	05:52:00	0
2009-06-25	05:53:00	0
2009-06-25	05:54:00	0
2009-06-25	05:55:00	0
2009-06-25	05:56:00	0
2009-06-25	05:57:00	0
2009-06-25	05:58:00	0
2009-06-25	05:59:00	0
2009-06-25	06:00:00	0
2009-06-25	06:01:00	0
2009-06-25	06:02:00	0
2009-06-25	06:03:00	0
2009-06-25	06:04:00	0
2009-06-25	06:05:00	0
2009-06-25	06:06:00	0
2009-06-25	06:07:00	0
2009-06-25	06:08:00	0
2009-06-25	06:09:00	0
2009-06-25	06:10:00	0
2009-06-25	06:11:00	0
2009-06-25	06:12:00	0
2009-06-25	06:13:00	0
2009-06-25	06:14:00	0
2009-06-25	06:15:00	0
2009-06-25	06:16:00	0
2009-06-25	06:17:00	0
2009-06-25	06:18:00	0
2009-06-25	06:19:00	0
2009-06-25	06:20:00	0
2009-06-25	06:21:00	0
2009-06-25	06:22:00	0
2009-06-25	06:23:00	0
2009-06-25	06:24:00	0
2009-06-25	06:25:00	0
2009-06-25	06:26:00	0
2009-06-25	06:27:00	0
2009-06-25	06:28:00	0
2009-06-25	06:29:00	0
2009-06-25	06:30:00	0
2009-06-25	06:31:00	0
2009-06-25	06:32:00	0
2009-06-25	06:33:00	0
2009-06-25	06:34:00	0
2009-06-25	06:35:00	0
2009-06-25	06:36:00	0
2009-06-25	06:37:00	0
2009-06-25	06:38:00	0
2009-06-25	06:39:00	0
2009-06-25	06:40:00	0
2009-06-25	06:41:00	0
2009-06-25	06:42:00	0
2009-06-25	06:43:00	0
2009-06-25	06:44:00	0
2009-06-25	06:45:00	0
2009-06-25	06:46:00	0
2009-06-25	06:47:00	0
2009-06-25	06:48:00	0
2009-06-25	06:49:00	0
2009-06-25	06:50:00	0
2009-06-25	06:51:00	0
2009-06-25	06:52:00	0
2009-06-25	06:53:00	0
2009-06-25	06:54:00	0
2009-06-25	06:55:00	0
2009-06-25	06:56:00	0
2009-06-25	06:57:00	0
2009-06-25	06:58:00	0
2009-06-25	06:59:00	0
2009-06-25	07:00:00	0
2009-06-25	07:01:00	0
2009-06-25	07:02:00	0
2009-06-25	07:03:00	0
2009-06-25	07:04:00	0
2009-06-25	07:05:00	0
2009-06-25	07:06:00	0
2009-06-25	07:07:00	0
2009-06-25	07:08:00	0
2009-06-25	07:09:00	0
2009-06-25	07:10:00	0
2009-06-25	07:11:00	0
2009-06-25	07:12:00	0
2009-06-25	07:13:00	0
2009-06-25	07:14:00	0
2009-06-25	07:15:00	0
2009-06-25	07:16:00	0
2009-06-25	07:17:00	0
2009-06-25	07:18:00	0
2009-06-25	07:19:00	0
2009-06-25	07:20:00	0
2009-06-25	07:21:00	0
2009-06-25	07:22:00	0
2009-06-25	07:23:00	0
2009-06-25	07:24:00	0
2009-06-25	07:25:00	0
2009-06-25	07:26:00	0
2009-06-25	07:27:00	0
2009-06-25	07:28:00	0
2009-06-25	07:29:00	0
2009-06-25	07:30:00	0
2009-06-25	07:31:00	0
2009-06-25	07:32:00	0
2009-06-25	07:33:00	0
2009-06-25	07:34:00	0
2009-06-25	07:35:00	0
2009-06-25	07:36:00	0
2009-06-25	07:37:00	0
2009-06-25	07:38:00	0
2009-06-25	07:39:00	0
2009-06-25	07:40:00	0
2009-06-25	07:41:00	0
2009-06-25	07:42:00	0
2009-06-25	07:43:00	0
2009-06-25	07:44:00	0
2009-06-25	07:45:00	0
2009-06-25	07:46:00	0
2009-06-25	07:47:00	0
2009-06-25	07:48:00	0
2009-06-25	07:49:00	0
2009-06-25	07:50:00	0
2009-06-25	07:51:00	0
2009-06-25	07:52:00	0
2009-06-25	07:53:00	0
2009-06-25	07:54:00	0
2009-06-25	07:55:00	0
2009-06-25	07:56:00	0
2009-06-25	07:57:00	0
2009-06-25	07:58:00	0
2009-06-25	07:59:00	0
2009-06-25	08:00:00	0
2009-06-25	08:01:00	0
2009-06-25	08:02:00	0
2009-06-25	08:03:00	0
2009-06-25	08:04:00	0
2009-06-25	08:05:00	0
2009-06-25	08:06:00	0
2009-06-25	08:07:00	0
2009-06-25	08:08:00	0
2009-06-25	08:09:00	0
2009-06-25	08:10:00	0
2009-06-25	08:11:00	0
2009-06-25	08:12:00	0
2009-06-25	08:13:00	0
2009-06-25	08:14:00	0
2009-06-25	08:15:00	0
2009-06-25	08:16:00	0
2009-06-25	08:17:00	0
2009-06-25	08:18:00	0
2009-06-25	08:19:00	0
2009-06-25	08:20:00	0
2009-06-25	08:21:00	0
2009-06-25	08:22:00	0
2009-06-25	08:23:00	0
2009-06-25	08:24:00	0
2009-06-25	08:25:00	0
2009-06-25	08:26:00	0
2009-06-25	08:27:00	0
2009-06-25	08:28:00	0
2009-06-25	08:29:00	0
2009-06-25	08:30:00	0
2009-06-25	08:31:00	0
2009-06-25	08:32:00	0
2009-06-25	08:33:00	0
2009-06-25	08:34:00	0
2009-06-25	08:35:00	0
2009-06-25	08:36:00	0
2009-06-25	08:37:00	0
2009-06-25	08:38:00	0
2009-06-25	08:39:00	0
2009-06-25	08:40:00	0
2009-06-25	08:41:00	0
2009-06-25	08:42:00	0
2009-06-25	08:43:00	0
2009-06-25	08:44:00	0
2009-06-25	08:45:00	0
2009-06-25	08:46:00	0
2009-06-25	08:47:00	0
2009-06-25	08:48:00	0
2009-06-25	08:49:00	0
2009-06-25	08:50:00	0
2009-06-25	08:51:00	0
2009-06-25	08:52:00	0
2009-06-25	08:53:00	0
2009-06-25	08:54:00	0
2009-06-25	08:55:00	0
2009-06-25	08:56:00	0
2009-06-25	08:57:00	0
2009-06-25	08:58:00	0
2009-06-25	08:59:00	0
2009-06-25	09:00:00	0
2009-06-25	09:01:00	0
2009-06-25	09:02:00	0
2009-06-25	09:03:00	0
2009-06-25	09:04:00	0
2009-06-25	09:05:00	0
2009-06-25	09:06:00	0
2009-06-25	09:07:00	0
2009-06-25	09:08:00	0
2009-06-25	09:09:00	0
2009-06-25	09:10:00	0
2009-06-25	09:11:00	0
2009-06-25	09:12:00	0
2009-06-25	09:13:00	0
2009-06-25	09:14:00	0
2009-06-25	09:15:00	0
2009-06-25	09:16:00	0
2009-06-25	09:17:00	0
2009-06-25	09:18:00	0
2009-06-25	09:19:00	0
2009-06-25	09:20:00	0
2009-06-25	09:21:00	0
2009-06-25	09:22:00	0
2009-06-25	09:23:00	0
2009-06-25	09:24:00	0
2009-06-25	09:25:00	0
2009-06-25	09:26:00	0
2009-06-25	09:27:00	0
2009-06-25	09:28:00	0
2009-06-25	09:29:00	0
2009-06-25	09:30:00	0
2009-06-25	09:31:00	0
2009-06-25	09:32:00	0
2009-06-25	09:33:00	0
2009-06-25	09:34:00	0
2009-06-25	09:35:00	0
2009-06-25	09:36:00	0
2009-06-25	09:37:00	0
2009-06-25	09:38:00	0
2009-06-25	09:39:00	0
2009-06-25	09:40:00	0
2009-06-25	09:41:00	0
2009-06-25	09:42:00	0
2009-06-25	09:43:00	0
2009-06-25	09:44:00	0
2009-06-25	09:45:00	0
2009-06-25	09:46:00	0
2009-06-25	09:47:00	0
2009-06-25	09:48:00	0
2009-06-25	09:49:00	0
2009-06-25	09:50:00	0
2009-06-25	09:51:00	0
2009-06-25	09:52:00	0
2009-06-25	09:53:00	0
2009-06-25	09:54:00	0
2009-06-25	09:55:00	0
2009-06-25	09:56:00	0
2009-06-25	09:57:00	0
2009-06-25	09:58:00	0
2009-06-25	09:59:00	0
2009-06-25	10:00:00	0
2009-06-25	10:01:00	0
2009-06-25	10:02:00	0
2009-06-25	10:03:00	0
2009-06-25	10:04:00	0
2009-06-25	10:05:00	0
2009-06-25	10:06:00	0
2009-06-25	10:07:00	0
2009-06-25	10:08:00	0
2009-06-25	10:09:00	0
2009-06-25	10:10:00	0
2009-06-25	10:11:00	0
2009-06-25	10:12:00	0
2009-06-25	10:13:00	0
2009-06-25	10:14:00	0
2009-06-25	10:15:00	0
2009-06-25	10:16:00	0
2009-06-25	10:17:00	0
2009-06-25	10:18:00	0
2009-06-25	10:19:00	0
2009-06-25	10:20:00	0
2009-06-25	10:21:00	0
2009-06-25	10:22:00	0
2009-06-25	10:23:00	0
2009-06-25	10:24:00	0
2009-06-25	10:25:00	0
2009-06-25	10:26:00	0
2009-06-25	10:27:00	0
2009-06-25	10:28:00	0
2009-06-25	10:29:00	0
2009-06-25	10:30:00	0
2009-06-25	10:31:00	0
2009-06-25	10:32:00	0
2009-06-25	10:33:00	0
2009-06-25	10:34:00	0
2009-06-25	10:35:00	0
2009-06-25	10:36:00	0
2009-06-25	10:37:00	0
2009-06-25	10:38:00	0
2009-06-25	10:39:00	0
2009-06-25	10:40:00	0
2009-06-25	10:41:00	0
2009-06-25	10:42:00	0
2009-06-25	10:43:00	0
2009-06-25	10:44:00	0
2009-06-25	10:45:00	0
2009-06-25	10:46:00	0
2009-06-25	10:47:00	0
2009-06-25	10:48:00	0
2009-06-25	10:49:00	0
2009-06-25	10:50:00	0
2009-06-25	10:51:00	0
2009-06-25	10:52:00	0
2009-06-25	10:53:00	0
2009-06-25	10:54:00	0
2009-06-25	10:55:00	0
2009-06-25	10:56:00	0
2009-06-25	10:57:00	0
2009-06-25	10:58:00	0
2009-06-25	10:59:00	0
2009-06-25	11:00:00	0
2009-06-25	11:01:00	0
2009-06-25	11:02:00	0
2009-06-25	11:03:00	0
2009-06-25	11:04:00	0
2009-06-25	11:05:00	0
2009-06-25	11:06:00	0
2009-06-25	11:07:00	0
2009-06-25	11:08:00	0
2009-06-25	11:09:00	0
2009-06-25	11:10:00	0
2009-06-25	11:11:00	0
2009-06-25	11:12:00	0
2009-06-25	11:13:00	0
2009-06-25	11:14:00	0
2009-06-25	11:15:00	0
2009-06-25	11:16:00	0
2009-06-25	11:17:00	0
2009-06-25	11:18:00	0
2009-06-25	11:19:00	0
2009-06-25	11:20:00	0
2009-06-25	11:21:00	0
2009-06-25	11:22:00	0
2009-06-25	11:23:00	0
2009-06-25	11:24:00	0
2009-06-25	11:25:00	0
2009-06-25	11:26:00	0
2009-06-25	11:27:00	0
2009-06-25	11:28:00	0
2009-06-25	11:29:00	0
2009-06-25	11:30:00	0
2009-06-25	11:31:00	0
2009-06-25	11:32:00	0
2009-06-25	11:33:00	0
2009-06-25	11:34:00	0
2009-06-25	11:35:00	0
2009-06-25	11:36:00	0
2009-06-25	11:37:00	0
2009-06-25	11:38:00	0
2009-06-25	11:39:00	0
2009-06-25	11:40:00	0
2009-06-25	11:41:00	0
2009-06-25	11:42:00	0
2009-06-25	11:43:00	0
2009-06-25	11:44:00	0
2009-06-25	11:45:00	0
2009-06-25	11:46:00	0
2009-06-25	11:47:00	0
2009-06-25	11:48:00	0
2009-06-25	11:49:00	0
2009-06-25	11:50:00	0
2009-06-25	11:51:00	0
2009-06-25	11:52:00	0
2009-06-25	11:53:00	0
2009-06-25	11:54:00	0
2009-06-25	11:55:00	0
2009-06-25	11:56:00	0
2009-06-25	11:57:00	0
2009-06-25	11:58:00	0
2009-06-25	11:59:00	0
2009-06-25	12:00:00	0
2009-06-25	12:01:00	0
2009-06-25	12:02:00	0
2009-06-25	12:03:00	0
2009-06-25	12:04:00	0
2009-06-25	12:05:00	0
2009-06-25	12:06:00	0
2009-06-25	12:07:00	0
2009-06-25	12:08:00	0
2009-06-25	12:09:00	0
2009-06-25	12:10:00	0
2009-06-25	12:11:00	0
2009-06-25	12:12:00	0
2009-06-25	12:13:00	0
2009-06-25	12:14:00	0
2009-06-25	12:15:00	0
2009-06-25	12:16:00	0
2009-06-25	12:17:00	0
2009-06-25	12:18:00	0
2009-06-25	12:19:00	0
2009-06-25	12:20:00	0
2009-06-25	12:21:00	0
2009-06-25	12:22:00	0
2009-06-25	12:23:00	0
2009-06-25	12:24:00	0
2009-06-25	12:25:00	0
2009-06-25	12:26:00	0
2009-06-25	12:27:00	0
2009-06-25	12:28:00	0
2009-06-25	12:29:00	0
2009-06-25	12:30:00	0
2009-06-25	12:31:00	0
2009-06-25	12:32:00	0
2009-06-25	12:33:00	0
2009-06-25	12:34:00	0
2009-06-25	12:35:00	0
2009-06-25	12:36:00	0
2009-06-25	12:37:00	0
2009-06-25	12:38:00	0
2009-06-25	12:39:00	0
2009-06-25	12:40:00	0
2009-06-25	12:41:00	0
2009-06-25	12:42:00	0
2009-06-25	12:43:00	0
2009-06-25	12:44:00	0
2009-06-25	12:45:00	0
2009-06-25	12:46:00	0
2009-06-25	12:47:00	0
2009-06-25	12:48:00	0
2009-06-25	12:49:00	0
2009-06-25	12:50:00	0
2009-06-25	12:51:00	0
2009-06-25	12:52:00	0
2009-06-25	12:53:00	0
2009-06-25	12:54:00	0
2009-06-25	12:55:00	0
2009-06-25	12:56:00	0
2009-06-25	12:57:00	0
2009-06-25	12:58:00	0
2009-06-25	12:59:00	0
2009-06-25	13:00:00	0
2009-06-25	13:01:00	0
2009-06-25	13:02:00	0
2009-06-25	13:03:00	0
2009-06-25	13:04:00	0
2009-06-25	13:05:00	0
2009-06-25	13:06:00	0
2009-06-25	13:07:00	0
2009-06-25	13:08:00	0
2009-06-25	13:09:00	0
2009-06-25	13:10:00	0
2009-06-25	13:11:00	0
2009-06-25	13:12:00	0
2009-06-25	13:13:00	0
2009-06-25	13:14:00	0
2009-06-25	13:15:00	0
2009-06-25	13:16:00	0
2009-06-25	13:17:00	0
2009-06-25	13:18:00	0
2009-06-25	13:19:00	0
2009-06-25	13:20:00	0
2009-06-25	13:21:00	0
2009-06-25	13:22:00	0
2009-06-25	13:23:00	0
2009-06-25	13:24:00	0
2009-06-25	13:25:00	0
2009-06-25	13:26:00	0
2009-06-25	13:27:00	0
2009-06-25	13:28:00	0
2009-06-25	13:29:00	0
2009-06-25	13:30:00	0
2009-06-25	13:31:00	0
2009-06-25	13:32:00	0
2009-06-25	13:33:00	0
2009-06-25	13:34:00	0
2009-06-25	13:35:00	0
2009-06-25	13:36:00	0
2009-06-25	13:37:00	0
2009-06-25	13:38:00	0
2009-06-25	13:39:00	0
2009-06-25	13:40:00	0
2009-06-25	13:41:00	0
2009-06-25	13:42:00	0
2009-06-25	13:43:00	0
2009-06-25	13:44:00	0
2009-06-25	13:45:00	0
2009-06-25	13:46:00	0
2009-06-25	13:47:00	0
2009-06-25	13:48:00	0
2009-06-25	13:49:00	0
2009-06-25	13:50:00	0
2009-06-25	13:51:00	0
2009-06-25	13:52:00	0
2009-06-25	13:53:00	0
2009-06-25	13:54:00	0
2009-06-25	13:55:00	0
2009-06-25	13:56:00	0
2009-06-25	13:57:00	0
2009-06-25	13:58:00	0
2009-06-25	13:59:00	0
2009-06-25	14:00:00	0
2009-06-25	14:01:00	0
2009-06-25	14:02:00	0
2009-06-25	14:03:00	0
2009-06-25	14:04:00	0
2009-06-25	14:05:00	0
2009-06-25	14:06:00	0
2009-06-25	14:07:00	0
2009-06-25	14:08:00	0
2009-06-25	14:09:00	0
2009-06-25	14:10:00	0
2009-06-25	14:11:00	0
2009-06-25	14:12:00	0
2009-06-25	14:13:00	0
2009-06-25	14:14:00	0
2009-06-25	14:15:00	0
2009-06-25	14:16:00	0
2009-06-25	14:17:00	0
2009-06-25	14:18:00	0
2009-06-25	14:19:00	0
2009-06-25	14:20:00	0
2009-06-25	14:21:00	0
2009-06-25	14:22:00	0
2009-06-25	14:23:00	0
2009-06-25	14:24:00	0
2009-06-25	14:25:00	0
2009-06-25	14:26:00	0
2009-06-25	14:27:00	0
2009-06-25	14:28:00	0
2009-06-25	14:29:00	0
2009-06-25	14:30:00	0
2009-06-25	14:31:00	0
2009-06-25	14:32:00	0
2009-06-25	14:33:00	0
2009-06-25	14:34:00	0
2009-06-25	14:35:00	0
2009-06-25	14:36:00	0
2009-06-25	14:37:00	0
2009-06-25	14:38:00	0
2009-06-25	14:39:00	0
2009-06-25	14:40:00	0
2009-06-25	14:41:00	0
2009-06-25	14:42:00	0
2009-06-25	14:43:00	0
2009-06-25	14:44:00	0
2009-06-25	14:45:00	0
2009-06-25	14:46:00	0
2009-06-25	14:47:00	0
2009-06-25	14:48:00	0
2009-06-25	14:49:00	0
2009-06-25	14:50:00	0
2009-06-25	14:51:00	0
2009-06-25	14:52:00	0
2009-06-25	14:53:00	0
2009-06-25	14:54:00	0
2009-06-25	14:55:00	0
2009-06-25	14:56:00	0
2009-06-25	14:57:00	0
2009-06-25	14:58:00	0
2009-06-25	14:59:00	0
2009-06-25	15:00:00	0
2009-06-25	15:01:00	0
2009-06-25	15:02:00	0
2009-06-25	15:03:00	0
2009-06-25	15:04:00	0
2009-06-25	15:05:00	0
2009-06-25	15:06:00	0
2009-06-25	15:07:00	0
2009-06-25	15:08:00	0
2009-06-25	15:09:00	0
2009-06-25	15:10:00	0
2009-06-25	15:11:00	0
2009-06-25	15:12:00	0
2009-06-25	15:13:00	0
2009-06-25	15:14:00	0
2009-06-25	15:15:00	0
2009-06-25	15:16:00	0
2009-06-25	15:17:00	0
2009-06-25	15:18:00	0
2009-06-25	15:19:00	0
2009-06-25	15:20:00	0
2009-06-25	15:21:00	0
2009-06-25	15:22:00	0
2009-06-25	15:23:00	0
2009-06-25	15:24:00	0
2009-06-25	15:25:00	0
2009-06-25	15:26:00	0
2009-06-25	15:27:00	0
2009-06-25	15:28:00	0
2009-06-25	15:29:00	0
2009-06-25	15:30:00	0
2009-06-25	15:31:00	0
2009-06-25	15:32:00	0
2009-06-25	15:33:00	0
2009-06-25	15:34:00	0
2009-06-25	15:35:00	0
2009-06-25	15:36:00	0
2009-06-25	15:37:00	0
2009-06-25	15:38:00	0
2009-06-25	15:39:00	0
2009-06-25	15:40:00	0
2009-06-25	15:41:00	0
2009-06-25	15:42:00	0
2009-06-25	15:43:00	0
2009-06-25	15:44:00	0
2009-06-25	15:45:00	0
2009-06-25	15:46:00	0
2009-06-25	15:47:00	0
2009-06-25	15:48:00	0
2009-06-25	15:49:00	0
2009-06-25	15:50:00	0
2009-06-25	15:51:00	0
2009-06-25	15:52:00	0
2009-06-25	15:53:00	0
2009-06-25	15:54:00	0
2009-06-25	15:55:00	0
2009-06-25	15:56:00	0
2009-06-25	15:57:00	0
2009-06-25	15:58:00	0
2009-06-25	15:59:00	0
2009-06-25	16:00:00	0
2009-06-25	16:01:00	0
2009-06-25	16:02:00	0
2009-06-25	16:03:00	0
2009-06-25	16:04:00	0
2009-06-25	16:05:00	0
2009-06-25	16:06:00	0
2009-06-25	16:07:00	0
2009-06-25	16:08:00	0
2009-06-25	16:09:00	0
2009-06-25	16:10:00	0
2009-06-25	16:11:00	0
2009-06-25	16:12:00	0
2009-06-25	16:13:00	0
2009-06-25	16:14:00	0
2009-06-25	16:15:00	0
2009-06-25	16:16:00	0
2009-06-25	16:17:00	0
2009-06-25	16:18:00	0
2009-06-25	16:19:00	0
2009-06-25	16:20:00	0
2009-06-25	16:21:00	0
2009-06-25	16:22:00	0
2009-06-25	16:23:00	0
2009-06-25	16:24:00	0
2009-06-25	16:25:00	0
2009-06-25	16:26:00	0
2009-06-25	16:27:00	0
2009-06-25	16:28:00	0
2009-06-25	16:29:00	0
2009-06-25	16:30:00	0
2009-06-25	16:31:00	0
2009-06-25	16:32:00	0
2009-06-25	16:33:00	0
2009-06-25	16:34:00	0
2009-06-25	16:35:00	0
2009-06-25	16:36:00	0
2009-06-25	16:37:00	0
2009-06-25	16:38:00	0
2009-06-25	16:39:00	0
2009-06-25	16:40:00	0
2009-06-25	16:41:00	0
2009-06-25	16:42:00	0
2009-06-25	16:43:00	0
2009-06-25	16:44:00	0
2009-06-25	16:45:00	0
2009-06-25	16:46:00	0
2009-06-25	16:47:00	0
2009-06-25	16:48:00	0
2009-06-25	16:49:00	0
2009-06-25	16:50:00	0
2009-06-25	16:51:00	0
2009-06-25	16:52:00	0
2009-06-25	16:53:00	0
2009-06-25	16:54:00	0
2009-06-25	16:55:00	0
2009-06-25	16:56:00	0
2009-06-25	16:57:00	0
2009-06-25	16:58:00	0
2009-06-25	16:59:00	0
2009-06-25	17:00:00	0
2009-06-25	17:01:00	0
2009-06-25	17:02:00	0
2009-06-25	17:03:00	0
2009-06-25	17:04:00	0
2009-06-25	17:05:00	0
2009-06-25	17:06:00	0
2009-06-25	17:07:00	0
2009-06-25	17:08:00	0
2009-06-25	17:09:00	0
2009-06-25	17:10:00	0
2009-06-25	17:11:00	0
2009-06-25	17:12:00	0
2009-06-25	17:13:00	0
2009-06-25	17:14:00	0
2009-06-25	17:15:00	0
2009-06-25	17:16:00	0
2009-06-25	17:17:00	0
2009-06-25	17:18:00	0
2009-06-25	17:19:00	0
2009-06-25	17:20:00	0
2009-06-25	17:21:00	0
2009-06-25	17:22:00	0
2009-06-25	17:23:00	0
2009-06-25	17:24:00	0
2009-06-25	17:25:00	0
2009-06-25	17:26:00	0
2009-06-25	17:27:00	0
2009-06-25	17:28:00	0
2009-06-25	17:29:00	0
2009-06-25	17:30:00	0
2009-06-25	17:31:00	0
2009-06-25	17:32:00	0
2009-06-25	17:33:00	0
2009-06-25	17:34:00	0
2009-06-25	17:35:00	0
2009-06-25	17:36:00	0
2009-06-25	17:37:00	0
2009-06-25	17:38:00	0
2009-06-25	17:39:00	0
2009-06-25	17:40:00	0
2009-06-25	17:41:00	0
2009-06-25	17:42:00	0
2009-06-25	17:43:00	0
2009-06-25	17:44:00	0
2009-06-25	17:45:00	0
2009-06-25	17:46:00	0
2009-06-25	17:47:00	0
2009-06-25	17:48:00	0
2009-06-25	17:49:00	0
2009-06-25	17:50:00	0
2009-06-25	17:51:00	0
2009-06-25	17:52:00	0
2009-06-25	17:53:00	0
2009-06-25	17:54:00	0
2009-06-25	17:55:00	0
2009-06-25	17:56:00	0
2009-06-25	17:57:00	0
2009-06-25	17:58:00	0
2009-06-25	17:59:00	0
2009-06-25	18:00:00	0
2009-06-25	18:01:00	0
2009-06-25	18:02:00	12
2009-06-25	18:03:00	0
2009-06-25	18:04:00	12
2009-06-25	18:05:00	0
2009-06-25	18:06:00	24
2009-06-25	18:07:00	0
2009-06-25	18:08:00	36
2009-06-25	18:09:00	24
2009-06-25	18:10:00	83
2009-06-25	18:11:00	59
2009-06-25	18:12:00	36
2009-06-25	18:13:00	24
2009-06-25	18:14:00	12
2009-06-25	18:15:00	12
2009-06-25	18:16:00	24
2009-06-25	18:17:00	36
2009-06-25	18:18:00	12
2009-06-25	18:19:00	0
2009-06-25	18:20:00	24
2009-06-25	18:21:00	59
2009-06-25	18:22:00	12
2009-06-25	18:23:00	0
2009-06-25	18:24:00	24
2009-06-25	18:25:00	761
2009-06-25	18:26:00	697
2009-06-25	18:27:00	498
2009-06-25	18:28:00	879
2009-06-25	18:29:00	761
2009-06-25	18:30:00	296
2009-06-25	18:31:00	536
2009-06-25	18:32:00	393
2009-06-25	18:33:00	574
2009-06-25	18:34:00	879
2009-06-25	18:35:00	593
2009-06-25	18:36:00	612
2009-06-25	18:37:00	633
2009-06-25	18:38:00	517
2009-06-25	18:39:00	761
2009-06-25	18:40:00	479
2009-06-25	18:41:00	12
2009-06-25	18:42:00	0
2009-06-25	18:43:00	0
2009-06-25	18:44:00	0
2009-06-25	18:45:00	0
2009-06-25	18:46:00	0
2009-06-25	18:47:00	71
2009-06-25	18:48:00	0
2009-06-25	18:49:00	0
2009-06-25	18:50:00	0
2009-06-25	18:51:00	0
2009-06-25	18:52:00	0
2009-06-25	18:53:00	47
2009-06-25	18:54:00	0
2009-06-25	18:55:00	0
2009-06-25	18:56:00	0
2009-06-25	18:57:00	59
2009-06-25	18:58:00	0
2009-06-25	18:59:00	0
2009-06-25	19:00:00	0
2009-06-25	19:01:00	0
2009-06-25	19:02:00	0
2009-06-25	19:03:00	0
2009-06-25	19:04:00	0
2009-06-25	19:05:00	0
2009-06-25	19:06:00	0
2009-06-25	19:07:00	0
2009-06-25	19:08:00	0
2009-06-25	19:09:00	0
2009-06-25	19:10:00	0
2009-06-25	19:11:00	0
2009-06-25	19:12:00	0
2009-06-25	19:13:00	0
2009-06-25	19:14:00	0
2009-06-25	19:15:00	107
2009-06-25	19:16:00	24
2009-06-25	19:17:00	24
2009-06-25	19:18:00	36
2009-06-25	19:19:00	36
2009-06-25	19:20:00	107
2009-06-25	19:21:00	83
2009-06-25	19:22:00	12
2009-06-25	19:23:00	59
2009-06-25	19:24:00	0
2009-06-25	19:25:00	0
2009-06-25	19:26:00	0
2009-06-25	19:27:00	0
2009-06-25	19:28:00	0
2009-06-25	19:29:00	0
2009-06-25	19:30:00	71
2009-06-25	19:31:00	24
2009-06-25	19:32:00	0
2009-06-25	19:33:00	119
2009-06-25	19:34:00	130
2009-06-25	19:35:00	12
2009-06-25	19:36:00	0
2009-06-25	19:37:00	59
2009-06-25	19:38:00	130
2009-06-25	19:39:00	0
2009-06-25	19:40:00	0
2009-06-25	19:41:00	0
2009-06-25	19:42:00	0
2009-06-25	19:43:00	0
2009-06-25	19:44:00	0
2009-06-25	19:45:00	24
2009-06-25	19:46:00	12
2009-06-25	19:47:00	24
2009-06-25	19:48:00	59
2009-06-25	19:49:00	47
2009-06-25	19:50:00	0
2009-06-25	19:51:00	12
2009-06-25	19:52:00	95
2009-06-25	19:53:00	517
2009-06-25	19:54:00	296
2009-06-25	19:55:00	0
2009-06-25	19:56:00	0
2009-06-25	19:57:00	0
2009-06-25	19:58:00	0
2009-06-25	19:59:00	0
2009-06-25	20:00:00	0
2009-06-25	20:01:00	0
2009-06-25	20:02:00	0
2009-06-25	20:03:00	0
2009-06-25	20:04:00	0
2009-06-25	20:05:00	0
2009-06-25	20:06:00	0
2009-06-25	20:07:00	0
2009-06-25	20:08:00	0
2009-06-25	20:09:00	0
2009-06-25	20:10:00	0
2009-06-25	20:11:00	47
2009-06-25	20:12:00	12
2009-06-25	20:13:00	12
2009-06-25	20:14:00	0
2009-06-25	20:15:00	0
2009-06-25	20:16:00	0
2009-06-25	20:17:00	0
2009-06-25	20:18:00	0
2009-06-25	20:19:00	0
2009-06-25	20:20:00	0
2009-06-25	20:21:00	0
2009-06-25	20:22:00	0
2009-06-25	20:23:00	0
2009-06-25	20:24:00	0
2009-06-25	20:25:00	0
2009-06-25	20:26:00	0
2009-06-25	20:27:00	0
2009-06-25	20:28:00	0
2009-06-25	20:29:00	0
2009-06-25	20:30:00	0
2009-06-25	20:31:00	0
2009-06-25	20:32:00	12
2009-06-25	20:33:00	47
2009-06-25	20:34:00	36
2009-06-25	20:35:00	12
2009-06-25	20:36:00	0
2009-06-25	20:37:00	0
2009-06-25	20:38:00	0
2009-06-25	20:39:00	0
2009-06-25	20:40:00	0
2009-06-25	20:41:00	0
2009-06-25	20:42:00	0
2009-06-25	20:43:00	0
2009-06-25	20:44:00	0
2009-06-25	20:45:00	0
2009-06-25	20:46:00	0
2009-06-25	20:47:00	0
2009-06-25	20:48:00	0
2009-06-25	20:49:00	0
2009-06-25	20:50:00	0
2009-06-25	20:51:00	0
2009-06-25	20:52:00	0
2009-06-25	20:53:00	0
2009-06-25	20:54:00	0
2009-06-25	20:55:00	0
2009-06-25	20:56:00	0
2009-06-25	20:57:00	0
2009-06-25	20:58:00	0
2009-06-25	20:59:00	0
2009-06-25	21:00:00	0
2009-06-25	21:01:00	0
2009-06-25	21:02:00	0
2009-06-25	21:03:00	0
2009-06-25	21:04:00	0
2009-06-25	21:05:00	0
2009-06-25	21:06:00	0
2009-06-25	21:07:00	0
2009-06-25	21:08:00	0
2009-06-25	21:09:00	0
2009-06-25	21:10:00	0
2009-06-25	21:11:00	0
2009-06-25	21:12:00	0
2009-06-25	21:13:00	0
2009-06-25	21:14:00	0
2009-06-25	21:15:00	0
2009-06-25	21:16:00	0
2009-06-25	21:17:00	0
2009-06-25	21:18:00	0
2009-06-25	21:19:00	0
2009-06-25	21:20:00	0
2009-06-25	21:21:00	12
2009-06-25	21:22:00	0
2009-06-25	21:23:00	0
2009-06-25	21:24:00	0
2009-06-25	21:25:00	0
2009-06-25	21:26:00	0
2009-06-25	21:27:00	0
2009-06-25	21:28:00	168
2009-06-25	21:29:00	0
2009-06-25	21:30:00	0
2009-06-25	21:31:00	0
2009-06-25	21:32:00	0
2009-06-25	21:33:00	0
2009-06-25	21:34:00	0
2009-06-25	21:35:00	0
2009-06-25	21:36:00	0
2009-06-25	21:37:00	0
2009-06-25	21:38:00	0
2009-06-25	21:39:00	0
2009-06-25	21:40:00	0
2009-06-25	21:41:00	0
2009-06-25	21:42:00	0
2009-06-25	21:43:00	0
2009-06-25	21:44:00	0
2009-06-25	21:45:00	0
2009-06-25	21:46:00	0
2009-06-25	21:47:00	0
2009-06-25	21:48:00	0
2009-06-25	21:49:00	0
2009-06-25	21:50:00	0
2009-06-25	21:51:00	0
2009-06-25	21:52:00	0
2009-06-25	21:53:00	0
2009-06-25	21:54:00	0
2009-06-25	21:55:00	0
2009-06-25	21:56:00	0
2009-06-25	21:57:00	0
2009-06-25	21:58:00	0
2009-06-25	21:59:00	12
2009-06-25	22:00:00	130
2009-06-25	22:01:00	36
2009-06-25	22:02:00	197
2009-06-25	22:03:00	197
2009-06-25	22:04:00	0
2009-06-25	22:05:00	0
2009-06-25	22:06:00	36
2009-06-25	22:07:00	24
2009-06-25	22:08:00	36
2009-06-25	22:09:00	12
2009-06-25	22:10:00	0
2009-06-25	22:11:00	12
2009-06-25	22:12:00	0
2009-06-25	22:13:00	0
2009-06-25	22:14:00	0
2009-06-25	22:15:00	0
2009-06-25	22:16:00	0
2009-06-25	22:17:00	0
2009-06-25	22:18:00	0
2009-06-25	22:19:00	0
2009-06-25	22:20:00	0
2009-06-25	22:21:00	0
2009-06-25	22:22:00	0
2009-06-25	22:23:00	0
2009-06-25	22:24:00	0
2009-06-25	22:25:00	0
2009-06-25	22:26:00	0
2009-06-25	22:27:00	0
2009-06-25	22:28:00	0
2009-06-25	22:29:00	0
2009-06-25	22:30:00	0
2009-06-25	22:31:00	0
2009-06-25	22:32:00	0
2009-06-25	22:33:00	12
2009-06-25	22:34:00	0
2009-06-25	22:35:00	0
2009-06-25	22:36:00	0
2009-06-25	22:37:00	47
2009-06-25	22:38:00	0
2009-06-25	22:39:00	0
2009-06-25	22:40:00	0
2009-06-25	22:41:00	0
2009-06-25	22:42:00	0
2009-06-25	22:43:00	0
2009-06-25	22:44:00	0
2009-06-25	22:45:00	0
2009-06-25	22:46:00	0
2009-06-25	22:47:00	0
2009-06-25	22:48:00	0
2009-06-25	22:49:00	0
2009-06-25	22:50:00	0
2009-06-25	22:51:00	0
2009-06-25	22:52:00	0
2009-06-25	22:53:00	0
2009-06-25	22:54:00	0
2009-06-25	22:55:00	0
2009-06-25	22:56:00	0
2009-06-25	22:57:00	0
2009-06-25	22:58:00	0
2009-06-25	22:59:00	0
2009-06-25	23:00:00	0
2009-06-25	23:01:00	0
2009-06-25	23:02:00	0
2009-06-25	23:03:00	0
2009-06-25	23:04:00	0
2009-06-25	23:05:00	0
2009-06-25	23:06:00	0
2009-06-25	23:07:00	12
2009-06-25	23:08:00	83
2009-06-25	23:09:00	12
2009-06-25	23:10:00	24
2009-06-25	23:11:00	36
2009-06-25	23:12:00	24
2009-06-25	23:13:00	183
2009-06-25	23:14:00	239
2009-06-25	23:15:00	168
2009-06-25	23:16:00	24
2009-06-25	23:17:00	12
2009-06-25	23:18:00	119
2009-06-25	23:19:00	168
2009-06-25	23:20:00	59
2009-06-25	23:21:00	225
2009-06-25	23:22:00	197
2009-06-25	23:23:00	36
2009-06-25	23:24:00	36
2009-06-25	23:25:00	95
2009-06-25	23:26:00	47
2009-06-25	23:27:00	36
2009-06-25	23:28:00	183
2009-06-25	23:29:00	36
2009-06-25	23:30:00	59
2009-06-25	23:31:00	211
2009-06-25	23:32:00	36
2009-06-25	23:33:00	12
2009-06-25	23:34:00	12
2009-06-25	23:35:00	12
2009-06-25	23:36:00	12
2009-06-25	23:37:00	71
2009-06-25	23:38:00	130
2009-06-25	23:39:00	59
2009-06-25	23:40:00	593
2009-06-25	23:41:00	0
2009-06-25	23:42:00	24
2009-06-25	23:43:00	0
2009-06-25	23:44:00	0
2009-06-25	23:45:00	0
2009-06-25	23:46:00	0
2009-06-25	23:47:00	0
2009-06-25	23:48:00	0
2009-06-25	23:49:00	0
2009-06-25	23:50:00	0
2009-06-25	23:51:00	0
2009-06-25	23:52:00	0
2009-06-25	23:53:00	0
2009-06-25	23:54:00	0
2009-06-25	23:55:00	0
2009-06-25	23:56:00	0
2009-06-25	23:57:00	0
2009-06-25	23:58:00	0
2009-06-25	23:59:00	0
2009-06-26	00:00:00	0
2009-06-26	00:01:00	0
2009-06-26	00:02:00	0
2009-06-26	00:03:00	0
2009-06-26	00:04:00	0
2009-06-26	00:05:00	0
2009-06-26	00:06:00	0
2009-06-26	00:07:00	0
2009-06-26	00:08:00	0
2009-06-26	00:09:00	0
2009-06-26	00:10:00	0
2009-06-26	00:11:00	0
2009-06-26	00:12:00	0
2009-06-26	00:13:00	0
2009-06-26	00:14:00	0
2009-06-26	00:15:00	0
2009-06-26	00:16:00	0
2009-06-26	00:17:00	0
2009-06-26	00:18:00	47
2009-06-26	00:19:00	0
2009-06-26	00:20:00	0
2009-06-26	00:21:00	0
2009-06-26	00:22:00	0
2009-06-26	00:23:00	0
2009-06-26	00:24:00	0
2009-06-26	00:25:00	0
2009-06-26	00:26:00	0
2009-06-26	00:27:00	0
2009-06-26	00:28:00	0
2009-06-26	00:29:00	36
2009-06-26	00:30:00	59
2009-06-26	00:31:00	36
2009-06-26	00:32:00	47
2009-06-26	00:33:00	24
2009-06-26	00:34:00	36
2009-06-26	00:35:00	12
2009-06-26	00:36:00	0
2009-06-26	00:37:00	12
2009-06-26	00:38:00	0
2009-06-26	00:39:00	0
2009-06-26	00:40:00	0
2009-06-26	00:41:00	0
2009-06-26	00:42:00	0
2009-06-26	00:43:00	0
2009-06-26	00:44:00	0
2009-06-26	00:45:00	0
2009-06-26	00:46:00	12
2009-06-26	00:47:00	0
2009-06-26	00:48:00	0
2009-06-26	00:49:00	0
2009-06-26	00:50:00	0
2009-06-26	00:51:00	12
2009-06-26	00:52:00	12
2009-06-26	00:53:00	12
2009-06-26	00:54:00	0
2009-06-26	00:55:00	0
2009-06-26	00:56:00	0
2009-06-26	00:57:00	0
2009-06-26	00:58:00	0
2009-06-26	00:59:00	0
2009-06-26	01:00:00	0
2009-06-26	01:01:00	0
2009-06-26	01:02:00	0
2009-06-26	01:03:00	0
2009-06-26	01:04:00	24
2009-06-26	01:05:00	12
2009-06-26	01:06:00	0
2009-06-26	01:07:00	0
2009-06-26	01:08:00	59
2009-06-26	01:09:00	12
2009-06-26	01:10:00	0
2009-06-26	01:11:00	12
2009-06-26	01:12:00	107
2009-06-26	01:13:00	107
2009-06-26	01:14:00	12
2009-06-26	01:15:00	12
2009-06-26	01:16:00	12
2009-06-26	01:17:00	12
2009-06-26	01:18:00	12
2009-06-26	01:19:00	0
2009-06-26	01:20:00	0
2009-06-26	01:21:00	0
2009-06-26	01:22:00	0
2009-06-26	01:23:00	36
2009-06-26	01:24:00	0
2009-06-26	01:25:00	0
2009-06-26	01:26:00	0
2009-06-26	01:27:00	12
2009-06-26	01:28:00	0
2009-06-26	01:29:00	0
2009-06-26	01:30:00	0
2009-06-26	01:31:00	0
2009-06-26	01:32:00	0
2009-06-26	01:33:00	0
2009-06-26	01:34:00	0
2009-06-26	01:35:00	0
2009-06-26	01:36:00	0
2009-06-26	01:37:00	0
2009-06-26	01:38:00	0
2009-06-26	01:39:00	0
2009-06-26	01:40:00	0
2009-06-26	01:41:00	0
2009-06-26	01:42:00	0
2009-06-26	01:43:00	0
2009-06-26	01:44:00	0
2009-06-26	01:45:00	0
2009-06-26	01:46:00	0
2009-06-26	01:47:00	0
2009-06-26	01:48:00	0
2009-06-26	01:49:00	0
2009-06-26	01:50:00	0
2009-06-26	01:51:00	0
2009-06-26	01:52:00	0
2009-06-26	01:53:00	0
2009-06-26	01:54:00	0
2009-06-26	01:55:00	0
2009-06-26	01:56:00	0
2009-06-26	01:57:00	0
2009-06-26	01:58:00	0
2009-06-26	01:59:00	0
2009-06-26	02:00:00	0
2009-06-26	02:01:00	0
2009-06-26	02:02:00	0
2009-06-26	02:03:00	12
2009-06-26	02:04:00	71
2009-06-26	02:05:00	0
2009-06-26	02:06:00	0
2009-06-26	02:07:00	12
2009-06-26	02:08:00	47
2009-06-26	02:09:00	0
2009-06-26	02:10:00	0
2009-06-26	02:11:00	0
2009-06-26	02:12:00	0
2009-06-26	02:13:00	0
2009-06-26	02:14:00	0
2009-06-26	02:15:00	0
2009-06-26	02:16:00	0
2009-06-26	02:17:00	0
2009-06-26	02:18:00	0
2009-06-26	02:19:00	0
2009-06-26	02:20:00	0
2009-06-26	02:21:00	0
2009-06-26	02:22:00	0
2009-06-26	02:23:00	12
2009-06-26	02:24:00	0
2009-06-26	02:25:00	12
2009-06-26	02:26:00	12
2009-06-26	02:27:00	0
2009-06-26	02:28:00	0
2009-06-26	02:29:00	0
2009-06-26	02:30:00	0
2009-06-26	02:31:00	0
2009-06-26	02:32:00	0
2009-06-26	02:33:00	0
2009-06-26	02:34:00	0
2009-06-26	02:35:00	0
2009-06-26	02:36:00	0
2009-06-26	02:37:00	12
2009-06-26	02:38:00	0
2009-06-26	02:39:00	12
2009-06-26	02:40:00	0
2009-06-26	02:41:00	0
2009-06-26	02:42:00	0
2009-06-26	02:43:00	0
2009-06-26	02:44:00	0
2009-06-26	02:45:00	0
2009-06-26	02:46:00	0
2009-06-26	02:47:00	0
2009-06-26	02:48:00	0
2009-06-26	02:49:00	0
2009-06-26	02:50:00	0
2009-06-26	02:51:00	12
2009-06-26	02:52:00	36
2009-06-26	02:53:00	0
2009-06-26	02:54:00	0
2009-06-26	02:55:00	0
2009-06-26	02:56:00	0
2009-06-26	02:57:00	0
2009-06-26	02:58:00	12
2009-06-26	02:59:00	12
2009-06-26	03:00:00	0
2009-06-26	03:01:00	12
2009-06-26	03:02:00	0
2009-06-26	03:03:00	0
2009-06-26	03:04:00	0
2009-06-26	03:05:00	0
2009-06-26	03:06:00	0
2009-06-26	03:07:00	0
2009-06-26	03:08:00	24
2009-06-26	03:09:00	12
2009-06-26	03:10:00	24
2009-06-26	03:11:00	0
2009-06-26	03:12:00	0
2009-06-26	03:13:00	0
2009-06-26	03:14:00	0
2009-06-26	03:15:00	0
2009-06-26	03:16:00	12
2009-06-26	03:17:00	12
2009-06-26	03:18:00	24
2009-06-26	03:19:00	47
2009-06-26	03:20:00	59
2009-06-26	03:21:00	59
2009-06-26	03:22:00	24
2009-06-26	03:23:00	344
2009-06-26	03:24:00	377
2009-06-26	03:25:00	393
2009-06-26	03:26:00	119
2009-06-26	03:27:00	0
2009-06-26	03:28:00	36
2009-06-26	03:29:00	555
2009-06-26	03:30:00	24
2009-06-26	03:31:00	71
2009-06-26	03:32:00	47
2009-06-26	03:33:00	36
2009-06-26	03:34:00	47
2009-06-26	03:35:00	24
2009-06-26	03:36:00	12
2009-06-26	03:37:00	47
2009-06-26	03:38:00	0
2009-06-26	03:39:00	154
2009-06-26	03:40:00	0
2009-06-26	03:41:00	0
2009-06-26	03:42:00	0
2009-06-26	03:43:00	24
2009-06-26	03:44:00	0
2009-06-26	03:45:00	12
2009-06-26	03:46:00	0
2009-06-26	03:47:00	0
2009-06-26	03:48:00	0
2009-06-26	03:49:00	0
2009-06-26	03:50:00	0
2009-06-26	03:51:00	0
2009-06-26	03:52:00	12
2009-06-26	03:53:00	12
2009-06-26	03:54:00	12
2009-06-26	03:55:00	0
2009-06-26	03:56:00	0
2009-06-26	03:57:00	0
2009-06-26	03:58:00	0
2009-06-26	03:59:00	0
2009-06-26	04:00:00	12
2009-06-26	04:01:00	0
2009-06-26	04:02:00	0
2009-06-26	04:03:00	0
2009-06-26	04:04:00	24
2009-06-26	04:05:00	0
2009-06-26	04:06:00	0
2009-06-26	04:07:00	95
2009-06-26	04:08:00	71
2009-06-26	04:09:00	47
2009-06-26	04:10:00	47
2009-06-26	04:11:00	12
2009-06-26	04:12:00	119
2009-06-26	04:13:00	47
2009-06-26	04:14:00	119
2009-06-26	04:15:00	59
2009-06-26	04:16:00	183
2009-06-26	04:17:00	0
2009-06-26	04:18:00	12
2009-06-26	04:19:00	36
2009-06-26	04:20:00	59
2009-06-26	04:21:00	12
2009-06-26	04:22:00	0
2009-06-26	04:23:00	0
2009-06-26	04:24:00	0
2009-06-26	04:25:00	0
2009-06-26	04:26:00	0
2009-06-26	04:27:00	0
2009-06-26	04:28:00	0
2009-06-26	04:29:00	59
2009-06-26	04:30:00	0
2009-06-26	04:31:00	142
2009-06-26	04:32:00	0
2009-06-26	04:33:00	0
2009-06-26	04:34:00	12
2009-06-26	04:35:00	0
2009-06-26	04:36:00	0
2009-06-26	04:37:00	0
2009-06-26	04:38:00	0
2009-06-26	04:39:00	12
2009-06-26	04:40:00	0
2009-06-26	04:41:00	0
2009-06-26	04:42:00	12
2009-06-26	04:43:00	0
2009-06-26	04:44:00	0
2009-06-26	04:45:00	0
2009-06-26	04:46:00	0
2009-06-26	04:47:00	0
2009-06-26	04:48:00	0
2009-06-26	04:49:00	0
2009-06-26	04:50:00	47
2009-06-26	04:51:00	119
2009-06-26	04:52:00	59
2009-06-26	04:53:00	0
2009-06-26	04:54:00	0
2009-06-26	04:55:00	0
2009-06-26	04:56:00	0
2009-06-26	04:57:00	0
2009-06-26	04:58:00	0
2009-06-26	04:59:00	0
2009-06-26	05:00:00	0
2009-06-26	05:01:00	0
2009-06-26	05:02:00	0
2009-06-26	05:03:00	0
2009-06-26	05:04:00	0
2009-06-26	05:05:00	0
2009-06-26	05:06:00	0
2009-06-26	05:07:00	0
2009-06-26	05:08:00	0
2009-06-26	05:09:00	0
2009-06-26	05:10:00	12
2009-06-26	05:11:00	0
2009-06-26	05:12:00	0
2009-06-26	05:13:00	0
2009-06-26	05:14:00	0
2009-06-26	05:15:00	0
2009-06-26	05:16:00	0
2009-06-26	05:17:00	0
2009-06-26	05:18:00	0
2009-06-26	05:19:00	0
2009-06-26	05:20:00	12
2009-06-26	05:21:00	0
2009-06-26	05:22:00	0
2009-06-26	05:23:00	95
2009-06-26	05:24:00	119
2009-06-26	05:25:00	130
2009-06-26	05:26:00	119
2009-06-26	05:27:00	107
2009-06-26	05:28:00	71
2009-06-26	05:29:00	24
2009-06-26	05:30:00	12
2009-06-26	05:31:00	142
2009-06-26	05:32:00	593
2009-06-26	05:33:00	718
2009-06-26	05:34:00	311
2009-06-26	05:35:00	0
2009-06-26	05:36:00	0
2009-06-26	05:37:00	0
2009-06-26	05:38:00	0
2009-06-26	05:39:00	0
2009-06-26	05:40:00	0
2009-06-26	05:41:00	0
2009-06-26	05:42:00	0
2009-06-26	05:43:00	36
2009-06-26	05:44:00	0
2009-06-26	05:45:00	12
2009-06-26	05:46:00	0
2009-06-26	05:47:00	119
2009-06-26	05:48:00	1031
2009-06-26	05:49:00	979
2009-06-26	05:50:00	517
2009-06-26	05:51:00	12
2009-06-26	05:52:00	12
2009-06-26	05:53:00	12
2009-06-26	05:54:00	0
2009-06-26	05:55:00	0
2009-06-26	05:56:00	0
2009-06-26	05:57:00	0
2009-06-26	05:58:00	0
2009-06-26	05:59:00	0
2009-06-26	06:00:00	0
2009-06-26	06:01:00	0
2009-06-26	06:02:00	0
2009-06-26	06:03:00	0
2009-06-26	06:04:00	0
2009-06-26	06:05:00	0
2009-06-26	06:06:00	36
2009-06-26	06:07:00	0
2009-06-26	06:08:00	0
2009-06-26	06:09:00	0
2009-06-26	06:10:00	0
2009-06-26	06:11:00	0
2009-06-26	06:12:00	0
2009-06-26	06:13:00	0
2009-06-26	06:14:00	0
2009-06-26	06:15:00	0
2009-06-26	06:16:00	0
2009-06-26	06:17:00	0
2009-06-26	06:18:00	0
2009-06-26	06:19:00	0
2009-06-26	06:20:00	0
2009-06-26	06:21:00	0
2009-06-26	06:22:00	71
2009-06-26	06:23:00	0
2009-06-26	06:24:00	12
2009-06-26	06:25:00	107
2009-06-26	06:26:00	0
2009-06-26	06:27:00	0
2009-06-26	06:28:00	0
2009-06-26	06:29:00	0
2009-06-26	06:30:00	0
2009-06-26	06:31:00	0
2009-06-26	06:32:00	0
2009-06-26	06:33:00	0
2009-06-26	06:34:00	24
2009-06-26	06:35:00	0
2009-06-26	06:36:00	0
2009-06-26	06:37:00	0
2009-06-26	06:38:00	0
2009-06-26	06:39:00	12
2009-06-26	06:40:00	0
2009-06-26	06:41:00	0
2009-06-26	06:42:00	0
2009-06-26	06:43:00	0
2009-06-26	06:44:00	0
2009-06-26	06:45:00	0
2009-06-26	06:46:00	0
2009-06-26	06:47:00	0
2009-06-26	06:48:00	0
2009-06-26	06:49:00	12
2009-06-26	06:50:00	0
2009-06-26	06:51:00	0
2009-06-26	06:52:00	0
2009-06-26	06:53:00	0
2009-06-26	06:54:00	0
2009-06-26	06:55:00	0
2009-06-26	06:56:00	0
2009-06-26	06:57:00	0
2009-06-26	06:58:00	0
2009-06-26	06:59:00	0
2009-06-26	07:00:00	0
2009-06-26	07:01:00	47
2009-06-26	07:02:00	0
2009-06-26	07:03:00	24
2009-06-26	07:04:00	71
2009-06-26	07:05:00	0
2009-06-26	07:06:00	24
2009-06-26	07:07:00	36
2009-06-26	07:08:00	197
2009-06-26	07:09:00	59
2009-06-26	07:10:00	130
2009-06-26	07:11:00	24
2009-06-26	07:12:00	24
2009-06-26	07:13:00	47
2009-06-26	07:14:00	0
2009-06-26	07:15:00	0
2009-06-26	07:16:00	24
2009-06-26	07:17:00	0
2009-06-26	07:18:00	676
2009-06-26	07:19:00	12
2009-06-26	07:20:00	0
2009-06-26	07:21:00	0
2009-06-26	07:22:00	0
2009-06-26	07:23:00	0
2009-06-26	07:24:00	0
2009-06-26	07:25:00	0
2009-06-26	07:26:00	0
2009-06-26	07:27:00	0
2009-06-26	07:28:00	0
2009-06-26	07:29:00	0
2009-06-26	07:30:00	0
2009-06-26	07:31:00	0
2009-06-26	07:32:00	0
2009-06-26	07:33:00	0
2009-06-26	07:34:00	0
2009-06-26	07:35:00	0
2009-06-26	07:36:00	0
2009-06-26	07:37:00	0
2009-06-26	07:38:00	183
2009-06-26	07:39:00	0
2009-06-26	07:40:00	0
2009-06-26	07:41:00	0
2009-06-26	07:42:00	0
2009-06-26	07:43:00	0
2009-06-26	07:44:00	0
2009-06-26	07:45:00	0
2009-06-26	07:46:00	0
2009-06-26	07:47:00	24
2009-06-26	07:48:00	36
2009-06-26	07:49:00	0
2009-06-26	07:50:00	0
2009-06-26	07:51:00	0
2009-06-26	07:52:00	0
2009-06-26	07:53:00	0
2009-06-26	07:54:00	0
2009-06-26	07:55:00	0
2009-06-26	07:56:00	12
2009-06-26	07:57:00	0
2009-06-26	07:58:00	0
2009-06-26	07:59:00	0
2009-06-26	08:00:00	0
2009-06-26	08:01:00	0
2009-06-26	08:02:00	0
2009-06-26	08:03:00	12
2009-06-26	08:04:00	0
2009-06-26	08:05:00	12
2009-06-26	08:06:00	0
2009-06-26	08:07:00	0
2009-06-26	08:08:00	0
2009-06-26	08:09:00	119
2009-06-26	08:10:00	0
2009-06-26	08:11:00	0
2009-06-26	08:12:00	0
2009-06-26	08:13:00	0
2009-06-26	08:14:00	12
2009-06-26	08:15:00	0
2009-06-26	08:16:00	0
2009-06-26	08:17:00	0
2009-06-26	08:18:00	0
2009-06-26	08:19:00	12
2009-06-26	08:20:00	12
2009-06-26	08:21:00	0
2009-06-26	08:22:00	0
2009-06-26	08:23:00	0
2009-06-26	08:24:00	0
2009-06-26	08:25:00	0
2009-06-26	08:26:00	0
2009-06-26	08:27:00	0
2009-06-26	08:28:00	0
2009-06-26	08:29:00	0
2009-06-26	08:30:00	0
2009-06-26	08:31:00	24
2009-06-26	08:32:00	12
2009-06-26	08:33:00	0
2009-06-26	08:34:00	0
2009-06-26	08:35:00	0
2009-06-26	08:36:00	0
2009-06-26	08:37:00	24
2009-06-26	08:38:00	12
2009-06-26	08:39:00	47
2009-06-26	08:40:00	0
2009-06-26	08:41:00	24
2009-06-26	08:42:00	24
2009-06-26	08:43:00	0
2009-06-26	08:44:00	12
2009-06-26	08:45:00	0
2009-06-26	08:46:00	168
2009-06-26	08:47:00	344
2009-06-26	08:48:00	183
2009-06-26	08:49:00	360
2009-06-26	08:50:00	555
2009-06-26	08:51:00	574
2009-06-26	08:52:00	427
2009-06-26	08:53:00	239
2009-06-26	08:54:00	239
2009-06-26	08:55:00	12
2009-06-26	08:56:00	12
2009-06-26	08:57:00	0
2009-06-26	08:58:00	12
2009-06-26	08:59:00	36
2009-06-26	09:00:00	0
2009-06-26	09:01:00	59
2009-06-26	09:02:00	0
2009-06-26	09:03:00	12
2009-06-26	09:04:00	12
2009-06-26	09:05:00	12
2009-06-26	09:06:00	0
2009-06-26	09:07:00	0
2009-06-26	09:08:00	0
[truncated: 19,611 more rows]

## Sheet: 7.9.09
Actogram, Copy Raw Data, All Days
Identity:	Geronimo
Filename:	E:\Active Research Files\meloxicam titre canine\cases\geronimo\Geronimo 7.9.09.AWC
Gender:	M
Age:	8
Height:	76.2 cm	30.0 in
Weight:	27.2 kg	60.0 lbs
Start Date:	09-Jul-2009 (Thu)
Start Time:	18:00:00
Interval:	1.00 mins
Date Stamp:	Time Stamp:	Activity Data:	Marker Press:
2009-07-09	00:00:00	0
2009-07-09	00:01:00	0
2009-07-09	00:02:00	0
2009-07-09	00:03:00	0
2009-07-09	00:04:00	0
2009-07-09	00:05:00	0
2009-07-09	00:06:00	0
2009-07-09	00:07:00	0
2009-07-09	00:08:00	0
2009-07-09	00:09:00	0
2009-07-09	00:10:00	0
2009-07-09	00:11:00	0
2009-07-09	00:12:00	0
2009-07-09	00:13:00	0
2009-07-09	00:14:00	0
2009-07-09	00:15:00	0
2009-07-09	00:16:00	0
2009-07-09	00:17:00	0
2009-07-09	00:18:00	0
2009-07-09	00:19:00	0
2009-07-09	00:20:00	0
2009-07-09	00:21:00	0
2009-07-09	00:22:00	0
2009-07-09	00:23:00	0
2009-07-09	00:24:00	0
2009-07-09	00:25:00	0
2009-07-09	00:26:00	0
2009-07-09	00:27:00	0
2009-07-09	00:28:00	0
2009-07-09	00:29:00	0
2009-07-09	00:30:00	0
2009-07-09	00:31:00	0
2009-07-09	00:32:00	0
2009-07-09	00:33:00	0
2009-07-09	00:34:00	0
2009-07-09	00:35:00	0
2009-07-09	00:36:00	0
2009-07-09	00:37:00	0
2009-07-09	00:38:00	0
2009-07-09	00:39:00	0
2009-07-09	00:40:00	0
2009-07-09	00:41:00	0
2009-07-09	00:42:00	0
2009-07-09	00:43:00	0
2009-07-09	00:44:00	0
2009-07-09	00:45:00	0
2009-07-09	00:46:00	0
2009-07-09	00:47:00	0
2009-07-09	00:48:00	0
2009-07-09	00:49:00	0
2009-07-09	00:50:00	0
2009-07-09	00:51:00	0
2009-07-09	00:52:00	0
2009-07-09	00:53:00	0
2009-07-09	00:54:00	0
2009-07-09	00:55:00	0
2009-07-09	00:56:00	0
2009-07-09	00:57:00	0
2009-07-09	00:58:00	0
2009-07-09	00:59:00	0
2009-07-09	01:00:00	0
2009-07-09	01:01:00	0
2009-07-09	01:02:00	0
2009-07-09	01:03:00	0
2009-07-09	01:04:00	0
2009-07-09	01:05:00	0
2009-07-09	01:06:00	0
2009-07-09	01:07:00	0
2009-07-09	01:08:00	0
2009-07-09	01:09:00	0
2009-07-09	01:10:00	0
2009-07-09	01:11:00	0
2009-07-09	01:12:00	0
2009-07-09	01:13:00	0
2009-07-09	01:14:00	0
2009-07-09	01:15:00	0
2009-07-09	01:16:00	0
2009-07-09	01:17:00	0
2009-07-09	01:18:00	0
2009-07-09	01:19:00	0
2009-07-09	01:20:00	0
2009-07-09	01:21:00	0
2009-07-09	01:22:00	0
2009-07-09	01:23:00	0
2009-07-09	01:24:00	0
2009-07-09	01:25:00	0
2009-07-09	01:26:00	0
2009-07-09	01:27:00	0
2009-07-09	01:28:00	0
2009-07-09	01:29:00	0
2009-07-09	01:30:00	0
2009-07-09	01:31:00	0
2009-07-09	01:32:00	0
2009-07-09	01:33:00	0
2009-07-09	01:34:00	0
2009-07-09	01:35:00	0
2009-07-09	01:36:00	0
2009-07-09	01:37:00	0
2009-07-09	01:38:00	0
2009-07-09	01:39:00	0
2009-07-09	01:40:00	0
2009-07-09	01:41:00	0
2009-07-09	01:42:00	0
2009-07-09	01:43:00	0
2009-07-09	01:44:00	0
2009-07-09	01:45:00	0
2009-07-09	01:46:00	0
2009-07-09	01:47:00	0
2009-07-09	01:48:00	0
2009-07-09	01:49:00	0
2009-07-09	01:50:00	0
2009-07-09	01:51:00	0
2009-07-09	01:52:00	0
2009-07-09	01:53:00	0
2009-07-09	01:54:00	0
2009-07-09	01:55:00	0
2009-07-09	01:56:00	0
2009-07-09	01:57:00	0
2009-07-09	01:58:00	0
2009-07-09	01:59:00	0
2009-07-09	02:00:00	0
2009-07-09	02:01:00	0
2009-07-09	02:02:00	0
2009-07-09	02:03:00	0
2009-07-09	02:04:00	0
2009-07-09	02:05:00	0
2009-07-09	02:06:00	0
2009-07-09	02:07:00	0
2009-07-09	02:08:00	0
2009-07-09	02:09:00	0
2009-07-09	02:10:00	0
2009-07-09	02:11:00	0
2009-07-09	02:12:00	0
2009-07-09	02:13:00	0
2009-07-09	02:14:00	0
2009-07-09	02:15:00	0
2009-07-09	02:16:00	0
2009-07-09	02:17:00	0
2009-07-09	02:18:00	0
2009-07-09	02:19:00	0
2009-07-09	02:20:00	0
2009-07-09	02:21:00	0
2009-07-09	02:22:00	0
2009-07-09	02:23:00	0
2009-07-09	02:24:00	0
2009-07-09	02:25:00	0
2009-07-09	02:26:00	0
2009-07-09	02:27:00	0
2009-07-09	02:28:00	0
2009-07-09	02:29:00	0
2009-07-09	02:30:00	0
2009-07-09	02:31:00	0
2009-07-09	02:32:00	0
2009-07-09	02:33:00	0
2009-07-09	02:34:00	0
2009-07-09	02:35:00	0
2009-07-09	02:36:00	0
2009-07-09	02:37:00	0
2009-07-09	02:38:00	0
2009-07-09	02:39:00	0
2009-07-09	02:40:00	0
2009-07-09	02:41:00	0
2009-07-09	02:42:00	0
2009-07-09	02:43:00	0
2009-07-09	02:44:00	0
2009-07-09	02:45:00	0
2009-07-09	02:46:00	0
2009-07-09	02:47:00	0
2009-07-09	02:48:00	0
2009-07-09	02:49:00	0
2009-07-09	02:50:00	0
2009-07-09	02:51:00	0
2009-07-09	02:52:00	0
2009-07-09	02:53:00	0
2009-07-09	02:54:00	0
2009-07-09	02:55:00	0
2009-07-09	02:56:00	0
2009-07-09	02:57:00	0
2009-07-09	02:58:00	0
2009-07-09	02:59:00	0
2009-07-09	03:00:00	0
2009-07-09	03:01:00	0
2009-07-09	03:02:00	0
2009-07-09	03:03:00	0
2009-07-09	03:04:00	0
2009-07-09	03:05:00	0
2009-07-09	03:06:00	0
2009-07-09	03:07:00	0
2009-07-09	03:08:00	0
2009-07-09	03:09:00	0
2009-07-09	03:10:00	0
2009-07-09	03:11:00	0
2009-07-09	03:12:00	0
2009-07-09	03:13:00	0
2009-07-09	03:14:00	0
2009-07-09	03:15:00	0
2009-07-09	03:16:00	0
2009-07-09	03:17:00	0
2009-07-09	03:18:00	0
2009-07-09	03:19:00	0
2009-07-09	03:20:00	0
2009-07-09	03:21:00	0
2009-07-09	03:22:00	0
2009-07-09	03:23:00	0
2009-07-09	03:24:00	0
2009-07-09	03:25:00	0
2009-07-09	03:26:00	0
2009-07-09	03:27:00	0
2009-07-09	03:28:00	0
2009-07-09	03:29:00	0
2009-07-09	03:30:00	0
2009-07-09	03:31:00	0
2009-07-09	03:32:00	0
2009-07-09	03:33:00	0
2009-07-09	03:34:00	0
2009-07-09	03:35:00	0
2009-07-09	03:36:00	0
2009-07-09	03:37:00	0
2009-07-09	03:38:00	0
2009-07-09	03:39:00	0
2009-07-09	03:40:00	0
2009-07-09	03:41:00	0
2009-07-09	03:42:00	0
2009-07-09	03:43:00	0
2009-07-09	03:44:00	0
2009-07-09	03:45:00	0
2009-07-09	03:46:00	0
2009-07-09	03:47:00	0
2009-07-09	03:48:00	0
2009-07-09	03:49:00	0
2009-07-09	03:50:00	0
2009-07-09	03:51:00	0
2009-07-09	03:52:00	0
2009-07-09	03:53:00	0
2009-07-09	03:54:00	0
2009-07-09	03:55:00	0
2009-07-09	03:56:00	0
2009-07-09	03:57:00	0
2009-07-09	03:58:00	0
2009-07-09	03:59:00	0
2009-07-09	04:00:00	0
2009-07-09	04:01:00	0
2009-07-09	04:02:00	0
2009-07-09	04:03:00	0
2009-07-09	04:04:00	0
2009-07-09	04:05:00	0
2009-07-09	04:06:00	0
2009-07-09	04:07:00	0
2009-07-09	04:08:00	0
2009-07-09	04:09:00	0
2009-07-09	04:10:00	0
2009-07-09	04:11:00	0
2009-07-09	04:12:00	0
2009-07-09	04:13:00	0
2009-07-09	04:14:00	0
2009-07-09	04:15:00	0
2009-07-09	04:16:00	0
2009-07-09	04:17:00	0
2009-07-09	04:18:00	0
2009-07-09	04:19:00	0
2009-07-09	04:20:00	0
2009-07-09	04:21:00	0
2009-07-09	04:22:00	0
2009-07-09	04:23:00	0
2009-07-09	04:24:00	0
2009-07-09	04:25:00	0
2009-07-09	04:26:00	0
2009-07-09	04:27:00	0
2009-07-09	04:28:00	0
2009-07-09	04:29:00	0
2009-07-09	04:30:00	0
2009-07-09	04:31:00	0
2009-07-09	04:32:00	0
2009-07-09	04:33:00	0
2009-07-09	04:34:00	0
2009-07-09	04:35:00	0
2009-07-09	04:36:00	0
2009-07-09	04:37:00	0
2009-07-09	04:38:00	0
2009-07-09	04:39:00	0
2009-07-09	04:40:00	0
2009-07-09	04:41:00	0
2009-07-09	04:42:00	0
2009-07-09	04:43:00	0
2009-07-09	04:44:00	0
2009-07-09	04:45:00	0
2009-07-09	04:46:00	0
2009-07-09	04:47:00	0
2009-07-09	04:48:00	0
2009-07-09	04:49:00	0
2009-07-09	04:50:00	0
2009-07-09	04:51:00	0
2009-07-09	04:52:00	0
2009-07-09	04:53:00	0
2009-07-09	04:54:00	0
2009-07-09	04:55:00	0
2009-07-09	04:56:00	0
2009-07-09	04:57:00	0
2009-07-09	04:58:00	0
2009-07-09	04:59:00	0
2009-07-09	05:00:00	0
2009-07-09	05:01:00	0
2009-07-09	05:02:00	0
2009-07-09	05:03:00	0
2009-07-09	05:04:00	0
2009-07-09	05:05:00	0
2009-07-09	05:06:00	0
2009-07-09	05:07:00	0
2009-07-09	05:08:00	0
2009-07-09	05:09:00	0
2009-07-09	05:10:00	0
2009-07-09	05:11:00	0
2009-07-09	05:12:00	0
2009-07-09	05:13:00	0
2009-07-09	05:14:00	0
2009-07-09	05:15:00	0
2009-07-09	05:16:00	0
2009-07-09	05:17:00	0
2009-07-09	05:18:00	0
2009-07-09	05:19:00	0
2009-07-09	05:20:00	0
2009-07-09	05:21:00	0
2009-07-09	05:22:00	0
2009-07-09	05:23:00	0
2009-07-09	05:24:00	0
2009-07-09	05:25:00	0
2009-07-09	05:26:00	0
2009-07-09	05:27:00	0
2009-07-09	05:28:00	0
2009-07-09	05:29:00	0
2009-07-09	05:30:00	0
2009-07-09	05:31:00	0
2009-07-09	05:32:00	0
2009-07-09	05:33:00	0
2009-07-09	05:34:00	0
2009-07-09	05:35:00	0
2009-07-09	05:36:00	0
2009-07-09	05:37:00	0
2009-07-09	05:38:00	0
2009-07-09	05:39:00	0
2009-07-09	05:40:00	0
2009-07-09	05:41:00	0
2009-07-09	05:42:00	0
2009-07-09	05:43:00	0
2009-07-09	05:44:00	0
2009-07-09	05:45:00	0
2009-07-09	05:46:00	0
2009-07-09	05:47:00	0
2009-07-09	05:48:00	0
2009-07-09	05:49:00	0
2009-07-09	05:50:00	0
2009-07-09	05:51:00	0
2009-07-09	05:52:00	0
2009-07-09	05:53:00	0
2009-07-09	05:54:00	0
2009-07-09	05:55:00	0
2009-07-09	05:56:00	0
2009-07-09	05:57:00	0
2009-07-09	05:58:00	0
2009-07-09	05:59:00	0
2009-07-09	06:00:00	0
2009-07-09	06:01:00	0
2009-07-09	06:02:00	0
2009-07-09	06:03:00	0
2009-07-09	06:04:00	0
2009-07-09	06:05:00	0
2009-07-09	06:06:00	0
2009-07-09	06:07:00	0
2009-07-09	06:08:00	0
2009-07-09	06:09:00	0
2009-07-09	06:10:00	0
2009-07-09	06:11:00	0
2009-07-09	06:12:00	0
2009-07-09	06:13:00	0
2009-07-09	06:14:00	0
2009-07-09	06:15:00	0
2009-07-09	06:16:00	0
2009-07-09	06:17:00	0
2009-07-09	06:18:00	0
2009-07-09	06:19:00	0
2009-07-09	06:20:00	0
2009-07-09	06:21:00	0
2009-07-09	06:22:00	0
2009-07-09	06:23:00	0
2009-07-09	06:24:00	0
2009-07-09	06:25:00	0
2009-07-09	06:26:00	0
2009-07-09	06:27:00	0
2009-07-09	06:28:00	0
2009-07-09	06:29:00	0
2009-07-09	06:30:00	0
2009-07-09	06:31:00	0
2009-07-09	06:32:00	0
2009-07-09	06:33:00	0
2009-07-09	06:34:00	0
2009-07-09	06:35:00	0
2009-07-09	06:36:00	0
2009-07-09	06:37:00	0
2009-07-09	06:38:00	0
2009-07-09	06:39:00	0
2009-07-09	06:40:00	0
2009-07-09	06:41:00	0
2009-07-09	06:42:00	0
2009-07-09	06:43:00	0
2009-07-09	06:44:00	0
2009-07-09	06:45:00	0
2009-07-09	06:46:00	0
2009-07-09	06:47:00	0
2009-07-09	06:48:00	0
2009-07-09	06:49:00	0
2009-07-09	06:50:00	0
2009-07-09	06:51:00	0
2009-07-09	06:52:00	0
2009-07-09	06:53:00	0
2009-07-09	06:54:00	0
2009-07-09	06:55:00	0
2009-07-09	06:56:00	0
2009-07-09	06:57:00	0
2009-07-09	06:58:00	0
2009-07-09	06:59:00	0
2009-07-09	07:00:00	0
2009-07-09	07:01:00	0
2009-07-09	07:02:00	0
2009-07-09	07:03:00	0
2009-07-09	07:04:00	0
2009-07-09	07:05:00	0
2009-07-09	07:06:00	0
2009-07-09	07:07:00	0
2009-07-09	07:08:00	0
2009-07-09	07:09:00	0
2009-07-09	07:10:00	0
2009-07-09	07:11:00	0
2009-07-09	07:12:00	0
2009-07-09	07:13:00	0
2009-07-09	07:14:00	0
2009-07-09	07:15:00	0
2009-07-09	07:16:00	0
2009-07-09	07:17:00	0
2009-07-09	07:18:00	0
2009-07-09	07:19:00	0
2009-07-09	07:20:00	0
2009-07-09	07:21:00	0
2009-07-09	07:22:00	0
2009-07-09	07:23:00	0
2009-07-09	07:24:00	0
2009-07-09	07:25:00	0
2009-07-09	07:26:00	0
2009-07-09	07:27:00	0
2009-07-09	07:28:00	0
2009-07-09	07:29:00	0
2009-07-09	07:30:00	0
2009-07-09	07:31:00	0
2009-07-09	07:32:00	0
2009-07-09	07:33:00	0
2009-07-09	07:34:00	0
2009-07-09	07:35:00	0
2009-07-09	07:36:00	0
2009-07-09	07:37:00	0
2009-07-09	07:38:00	0
2009-07-09	07:39:00	0
2009-07-09	07:40:00	0
2009-07-09	07:41:00	0
2009-07-09	07:42:00	0
2009-07-09	07:43:00	0
2009-07-09	07:44:00	0
2009-07-09	07:45:00	0
2009-07-09	07:46:00	0
2009-07-09	07:47:00	0
2009-07-09	07:48:00	0
2009-07-09	07:49:00	0
2009-07-09	07:50:00	0
2009-07-09	07:51:00	0
2009-07-09	07:52:00	0
2009-07-09	07:53:00	0
2009-07-09	07:54:00	0
2009-07-09	07:55:00	0
2009-07-09	07:56:00	0
2009-07-09	07:57:00	0
2009-07-09	07:58:00	0
2009-07-09	07:59:00	0
2009-07-09	08:00:00	0
2009-07-09	08:01:00	0
2009-07-09	08:02:00	0
2009-07-09	08:03:00	0
2009-07-09	08:04:00	0
2009-07-09	08:05:00	0
2009-07-09	08:06:00	0
2009-07-09	08:07:00	0
2009-07-09	08:08:00	0
2009-07-09	08:09:00	0
2009-07-09	08:10:00	0
2009-07-09	08:11:00	0
2009-07-09	08:12:00	0
2009-07-09	08:13:00	0
2009-07-09	08:14:00	0
2009-07-09	08:15:00	0
2009-07-09	08:16:00	0
2009-07-09	08:17:00	0
2009-07-09	08:18:00	0
2009-07-09	08:19:00	0
2009-07-09	08:20:00	0
2009-07-09	08:21:00	0
2009-07-09	08:22:00	0
2009-07-09	08:23:00	0
2009-07-09	08:24:00	0
2009-07-09	08:25:00	0
2009-07-09	08:26:00	0
2009-07-09	08:27:00	0
2009-07-09	08:28:00	0
2009-07-09	08:29:00	0
2009-07-09	08:30:00	0
2009-07-09	08:31:00	0
2009-07-09	08:32:00	0
2009-07-09	08:33:00	0
2009-07-09	08:34:00	0
2009-07-09	08:35:00	0
2009-07-09	08:36:00	0
2009-07-09	08:37:00	0
2009-07-09	08:38:00	0
2009-07-09	08:39:00	0
2009-07-09	08:40:00	0
2009-07-09	08:41:00	0
2009-07-09	08:42:00	0
2009-07-09	08:43:00	0
2009-07-09	08:44:00	0
2009-07-09	08:45:00	0
2009-07-09	08:46:00	0
2009-07-09	08:47:00	0
2009-07-09	08:48:00	0
2009-07-09	08:49:00	0
2009-07-09	08:50:00	0
2009-07-09	08:51:00	0
2009-07-09	08:52:00	0
2009-07-09	08:53:00	0
2009-07-09	08:54:00	0
2009-07-09	08:55:00	0
2009-07-09	08:56:00	0
2009-07-09	08:57:00	0
2009-07-09	08:58:00	0
2009-07-09	08:59:00	0
2009-07-09	09:00:00	0
2009-07-09	09:01:00	0
2009-07-09	09:02:00	0
2009-07-09	09:03:00	0
2009-07-09	09:04:00	0
2009-07-09	09:05:00	0
2009-07-09	09:06:00	0
2009-07-09	09:07:00	0
2009-07-09	09:08:00	0
2009-07-09	09:09:00	0
2009-07-09	09:10:00	0
2009-07-09	09:11:00	0
2009-07-09	09:12:00	0
2009-07-09	09:13:00	0
2009-07-09	09:14:00	0
2009-07-09	09:15:00	0
2009-07-09	09:16:00	0
2009-07-09	09:17:00	0
2009-07-09	09:18:00	0
2009-07-09	09:19:00	0
2009-07-09	09:20:00	0
2009-07-09	09:21:00	0
2009-07-09	09:22:00	0
2009-07-09	09:23:00	0
2009-07-09	09:24:00	0
2009-07-09	09:25:00	0
2009-07-09	09:26:00	0
2009-07-09	09:27:00	0
2009-07-09	09:28:00	0
2009-07-09	09:29:00	0
2009-07-09	09:30:00	0
2009-07-09	09:31:00	0
2009-07-09	09:32:00	0
2009-07-09	09:33:00	0
2009-07-09	09:34:00	0
2009-07-09	09:35:00	0
2009-07-09	09:36:00	0
2009-07-09	09:37:00	0
2009-07-09	09:38:00	0
2009-07-09	09:39:00	0
2009-07-09	09:40:00	0
2009-07-09	09:41:00	0
2009-07-09	09:42:00	0
2009-07-09	09:43:00	0
2009-07-09	09:44:00	0
2009-07-09	09:45:00	0
2009-07-09	09:46:00	0
2009-07-09	09:47:00	0
2009-07-09	09:48:00	0
2009-07-09	09:49:00	0
2009-07-09	09:50:00	0
2009-07-09	09:51:00	0
2009-07-09	09:52:00	0
2009-07-09	09:53:00	0
2009-07-09	09:54:00	0
2009-07-09	09:55:00	0
2009-07-09	09:56:00	0
2009-07-09	09:57:00	0
2009-07-09	09:58:00	0
2009-07-09	09:59:00	0
2009-07-09	10:00:00	0
2009-07-09	10:01:00	0
2009-07-09	10:02:00	0
2009-07-09	10:03:00	0
2009-07-09	10:04:00	0
2009-07-09	10:05:00	0
2009-07-09	10:06:00	0
2009-07-09	10:07:00	0
2009-07-09	10:08:00	0
2009-07-09	10:09:00	0
2009-07-09	10:10:00	0
2009-07-09	10:11:00	0
2009-07-09	10:12:00	0
2009-07-09	10:13:00	0
2009-07-09	10:14:00	0
2009-07-09	10:15:00	0
2009-07-09	10:16:00	0
2009-07-09	10:17:00	0
2009-07-09	10:18:00	0
2009-07-09	10:19:00	0
2009-07-09	10:20:00	0
2009-07-09	10:21:00	0
2009-07-09	10:22:00	0
2009-07-09	10:23:00	0
2009-07-09	10:24:00	0
2009-07-09	10:25:00	0
2009-07-09	10:26:00	0
2009-07-09	10:27:00	0
2009-07-09	10:28:00	0
2009-07-09	10:29:00	0
2009-07-09	10:30:00	0
2009-07-09	10:31:00	0
2009-07-09	10:32:00	0
2009-07-09	10:33:00	0
2009-07-09	10:34:00	0
2009-07-09	10:35:00	0
2009-07-09	10:36:00	0
2009-07-09	10:37:00	0
2009-07-09	10:38:00	0
2009-07-09	10:39:00	0
2009-07-09	10:40:00	0
2009-07-09	10:41:00	0
2009-07-09	10:42:00	0
2009-07-09	10:43:00	0
2009-07-09	10:44:00	0
2009-07-09	10:45:00	0
2009-07-09	10:46:00	0
2009-07-09	10:47:00	0
2009-07-09	10:48:00	0
2009-07-09	10:49:00	0
2009-07-09	10:50:00	0
2009-07-09	10:51:00	0
2009-07-09	10:52:00	0
2009-07-09	10:53:00	0
2009-07-09	10:54:00	0
2009-07-09	10:55:00	0
2009-07-09	10:56:00	0
2009-07-09	10:57:00	0
2009-07-09	10:58:00	0
2009-07-09	10:59:00	0
2009-07-09	11:00:00	0
2009-07-09	11:01:00	0
2009-07-09	11:02:00	0
2009-07-09	11:03:00	0
2009-07-09	11:04:00	0
2009-07-09	11:05:00	0
2009-07-09	11:06:00	0
2009-07-09	11:07:00	0
2009-07-09	11:08:00	0
2009-07-09	11:09:00	0
2009-07-09	11:10:00	0
2009-07-09	11:11:00	0
2009-07-09	11:12:00	0
2009-07-09	11:13:00	0
2009-07-09	11:14:00	0
2009-07-09	11:15:00	0
2009-07-09	11:16:00	0
2009-07-09	11:17:00	0
2009-07-09	11:18:00	0
2009-07-09	11:19:00	0
2009-07-09	11:20:00	0
2009-07-09	11:21:00	0
2009-07-09	11:22:00	0
2009-07-09	11:23:00	0
2009-07-09	11:24:00	0
2009-07-09	11:25:00	0
2009-07-09	11:26:00	0
2009-07-09	11:27:00	0
2009-07-09	11:28:00	0
2009-07-09	11:29:00	0
2009-07-09	11:30:00	0
2009-07-09	11:31:00	0
2009-07-09	11:32:00	0
2009-07-09	11:33:00	0
2009-07-09	11:34:00	0
2009-07-09	11:35:00	0
2009-07-09	11:36:00	0
2009-07-09	11:37:00	0
2009-07-09	11:38:00	0
2009-07-09	11:39:00	0
2009-07-09	11:40:00	0
2009-07-09	11:41:00	0
2009-07-09	11:42:00	0
2009-07-09	11:43:00	0
2009-07-09	11:44:00	0
2009-07-09	11:45:00	0
2009-07-09	11:46:00	0
2009-07-09	11:47:00	0
2009-07-09	11:48:00	0
2009-07-09	11:49:00	0
2009-07-09	11:50:00	0
2009-07-09	11:51:00	0
2009-07-09	11:52:00	0
2009-07-09	11:53:00	0
2009-07-09	11:54:00	0
2009-07-09	11:55:00	0
2009-07-09	11:56:00	0
2009-07-09	11:57:00	0
2009-07-09	11:58:00	0
2009-07-09	11:59:00	0
2009-07-09	12:00:00	0
2009-07-09	12:01:00	0
2009-07-09	12:02:00	0
2009-07-09	12:03:00	0
2009-07-09	12:04:00	0
2009-07-09	12:05:00	0
2009-07-09	12:06:00	0
2009-07-09	12:07:00	0
2009-07-09	12:08:00	0
2009-07-09	12:09:00	0
2009-07-09	12:10:00	0
2009-07-09	12:11:00	0
2009-07-09	12:12:00	0
2009-07-09	12:13:00	0
2009-07-09	12:14:00	0
2009-07-09	12:15:00	0
2009-07-09	12:16:00	0
2009-07-09	12:17:00	0
2009-07-09	12:18:00	0
2009-07-09	12:19:00	0
2009-07-09	12:20:00	0
2009-07-09	12:21:00	0
2009-07-09	12:22:00	0
2009-07-09	12:23:00	0
2009-07-09	12:24:00	0
2009-07-09	12:25:00	0
2009-07-09	12:26:00	0
2009-07-09	12:27:00	0
2009-07-09	12:28:00	0
2009-07-09	12:29:00	0
2009-07-09	12:30:00	0
2009-07-09	12:31:00	0
2009-07-09	12:32:00	0
2009-07-09	12:33:00	0
2009-07-09	12:34:00	0
2009-07-09	12:35:00	0
2009-07-09	12:36:00	0
2009-07-09	12:37:00	0
2009-07-09	12:38:00	0
2009-07-09	12:39:00	0
2009-07-09	12:40:00	0
2009-07-09	12:41:00	0
2009-07-09	12:42:00	0
2009-07-09	12:43:00	0
2009-07-09	12:44:00	0
2009-07-09	12:45:00	0
2009-07-09	12:46:00	0
2009-07-09	12:47:00	0
2009-07-09	12:48:00	0
2009-07-09	12:49:00	0
2009-07-09	12:50:00	0
2009-07-09	12:51:00	0
2009-07-09	12:52:00	0
2009-07-09	12:53:00	0
2009-07-09	12:54:00	0
2009-07-09	12:55:00	0
2009-07-09	12:56:00	0
2009-07-09	12:57:00	0
2009-07-09	12:58:00	0
2009-07-09	12:59:00	0
2009-07-09	13:00:00	0
2009-07-09	13:01:00	0
2009-07-09	13:02:00	0
2009-07-09	13:03:00	0
2009-07-09	13:04:00	0
2009-07-09	13:05:00	0
2009-07-09	13:06:00	0
2009-07-09	13:07:00	0
2009-07-09	13:08:00	0
2009-07-09	13:09:00	0
2009-07-09	13:10:00	0
2009-07-09	13:11:00	0
2009-07-09	13:12:00	0
2009-07-09	13:13:00	0
2009-07-09	13:14:00	0
2009-07-09	13:15:00	0
2009-07-09	13:16:00	0
2009-07-09	13:17:00	0
2009-07-09	13:18:00	0
2009-07-09	13:19:00	0
2009-07-09	13:20:00	0
2009-07-09	13:21:00	0
2009-07-09	13:22:00	0
2009-07-09	13:23:00	0
2009-07-09	13:24:00	0
2009-07-09	13:25:00	0
2009-07-09	13:26:00	0
2009-07-09	13:27:00	0
2009-07-09	13:28:00	0
2009-07-09	13:29:00	0
2009-07-09	13:30:00	0
2009-07-09	13:31:00	0
2009-07-09	13:32:00	0
2009-07-09	13:33:00	0
2009-07-09	13:34:00	0
2009-07-09	13:35:00	0
2009-07-09	13:36:00	0
2009-07-09	13:37:00	0
2009-07-09	13:38:00	0
2009-07-09	13:39:00	0
2009-07-09	13:40:00	0
2009-07-09	13:41:00	0
2009-07-09	13:42:00	0
2009-07-09	13:43:00	0
2009-07-09	13:44:00	0
2009-07-09	13:45:00	0
2009-07-09	13:46:00	0
2009-07-09	13:47:00	0
2009-07-09	13:48:00	0
2009-07-09	13:49:00	0
2009-07-09	13:50:00	0
2009-07-09	13:51:00	0
2009-07-09	13:52:00	0
2009-07-09	13:53:00	0
2009-07-09	13:54:00	0
2009-07-09	13:55:00	0
2009-07-09	13:56:00	0
2009-07-09	13:57:00	0
2009-07-09	13:58:00	0
2009-07-09	13:59:00	0
2009-07-09	14:00:00	0
2009-07-09	14:01:00	0
2009-07-09	14:02:00	0
2009-07-09	14:03:00	0
2009-07-09	14:04:00	0
2009-07-09	14:05:00	0
2009-07-09	14:06:00	0
2009-07-09	14:07:00	0
2009-07-09	14:08:00	0
2009-07-09	14:09:00	0
2009-07-09	14:10:00	0
2009-07-09	14:11:00	0
2009-07-09	14:12:00	0
2009-07-09	14:13:00	0
2009-07-09	14:14:00	0
2009-07-09	14:15:00	0
2009-07-09	14:16:00	0
2009-07-09	14:17:00	0
2009-07-09	14:18:00	0
2009-07-09	14:19:00	0
2009-07-09	14:20:00	0
2009-07-09	14:21:00	0
2009-07-09	14:22:00	0
2009-07-09	14:23:00	0
2009-07-09	14:24:00	0
2009-07-09	14:25:00	0
2009-07-09	14:26:00	0
2009-07-09	14:27:00	0
2009-07-09	14:28:00	0
2009-07-09	14:29:00	0
2009-07-09	14:30:00	0
2009-07-09	14:31:00	0
2009-07-09	14:32:00	0
2009-07-09	14:33:00	0
2009-07-09	14:34:00	0
2009-07-09	14:35:00	0
2009-07-09	14:36:00	0
2009-07-09	14:37:00	0
2009-07-09	14:38:00	0
2009-07-09	14:39:00	0
2009-07-09	14:40:00	0
2009-07-09	14:41:00	0
2009-07-09	14:42:00	0
2009-07-09	14:43:00	0
2009-07-09	14:44:00	0
2009-07-09	14:45:00	0
2009-07-09	14:46:00	0
2009-07-09	14:47:00	0
2009-07-09	14:48:00	0
2009-07-09	14:49:00	0
2009-07-09	14:50:00	0
2009-07-09	14:51:00	0
2009-07-09	14:52:00	0
2009-07-09	14:53:00	0
2009-07-09	14:54:00	0
2009-07-09	14:55:00	0
2009-07-09	14:56:00	0
2009-07-09	14:57:00	0
2009-07-09	14:58:00	0
2009-07-09	14:59:00	0
2009-07-09	15:00:00	0
2009-07-09	15:01:00	0
2009-07-09	15:02:00	0
2009-07-09	15:03:00	0
2009-07-09	15:04:00	0
2009-07-09	15:05:00	0
2009-07-09	15:06:00	0
2009-07-09	15:07:00	0
2009-07-09	15:08:00	0
2009-07-09	15:09:00	0
2009-07-09	15:10:00	0
2009-07-09	15:11:00	0
2009-07-09	15:12:00	0
2009-07-09	15:13:00	0
2009-07-09	15:14:00	0
2009-07-09	15:15:00	0
2009-07-09	15:16:00	0
2009-07-09	15:17:00	0
2009-07-09	15:18:00	0
2009-07-09	15:19:00	0
2009-07-09	15:20:00	0
2009-07-09	15:21:00	0
2009-07-09	15:22:00	0
2009-07-09	15:23:00	0
2009-07-09	15:24:00	0
2009-07-09	15:25:00	0
2009-07-09	15:26:00	0
2009-07-09	15:27:00	0
2009-07-09	15:28:00	0
2009-07-09	15:29:00	0
2009-07-09	15:30:00	0
2009-07-09	15:31:00	0
2009-07-09	15:32:00	0
2009-07-09	15:33:00	0
2009-07-09	15:34:00	0
2009-07-09	15:35:00	0
2009-07-09	15:36:00	0
2009-07-09	15:37:00	0
2009-07-09	15:38:00	0
2009-07-09	15:39:00	0
2009-07-09	15:40:00	0
2009-07-09	15:41:00	0
2009-07-09	15:42:00	0
2009-07-09	15:43:00	0
2009-07-09	15:44:00	0
2009-07-09	15:45:00	0
2009-07-09	15:46:00	0
2009-07-09	15:47:00	0
2009-07-09	15:48:00	0
2009-07-09	15:49:00	0
2009-07-09	15:50:00	0
2009-07-09	15:51:00	0
2009-07-09	15:52:00	0
2009-07-09	15:53:00	0
2009-07-09	15:54:00	0
2009-07-09	15:55:00	0
2009-07-09	15:56:00	0
2009-07-09	15:57:00	0
2009-07-09	15:58:00	0
2009-07-09	15:59:00	0
2009-07-09	16:00:00	0
2009-07-09	16:01:00	0
2009-07-09	16:02:00	0
2009-07-09	16:03:00	0
2009-07-09	16:04:00	0
2009-07-09	16:05:00	0
2009-07-09	16:06:00	0
2009-07-09	16:07:00	0
2009-07-09	16:08:00	0
2009-07-09	16:09:00	0
2009-07-09	16:10:00	0
2009-07-09	16:11:00	0
2009-07-09	16:12:00	0
2009-07-09	16:13:00	0
2009-07-09	16:14:00	0
2009-07-09	16:15:00	0
2009-07-09	16:16:00	0
2009-07-09	16:17:00	0
2009-07-09	16:18:00	0
2009-07-09	16:19:00	0
2009-07-09	16:20:00	0
2009-07-09	16:21:00	0
2009-07-09	16:22:00	0
2009-07-09	16:23:00	0
2009-07-09	16:24:00	0
2009-07-09	16:25:00	0
2009-07-09	16:26:00	0
2009-07-09	16:27:00	0
2009-07-09	16:28:00	0
2009-07-09	16:29:00	0
2009-07-09	16:30:00	0
2009-07-09	16:31:00	0
2009-07-09	16:32:00	0
2009-07-09	16:33:00	0
2009-07-09	16:34:00	0
2009-07-09	16:35:00	0
2009-07-09	16:36:00	0
2009-07-09	16:37:00	0
2009-07-09	16:38:00	0
2009-07-09	16:39:00	0
2009-07-09	16:40:00	0
2009-07-09	16:41:00	0
2009-07-09	16:42:00	0
2009-07-09	16:43:00	0
2009-07-09	16:44:00	0
2009-07-09	16:45:00	0
2009-07-09	16:46:00	0
2009-07-09	16:47:00	0
2009-07-09	16:48:00	0
2009-07-09	16:49:00	0
2009-07-09	16:50:00	0
2009-07-09	16:51:00	0
2009-07-09	16:52:00	0
2009-07-09	16:53:00	0
2009-07-09	16:54:00	0
2009-07-09	16:55:00	0
2009-07-09	16:56:00	0
2009-07-09	16:57:00	0
2009-07-09	16:58:00	0
2009-07-09	16:59:00	0
2009-07-09	17:00:00	0
2009-07-09	17:01:00	0
2009-07-09	17:02:00	0
2009-07-09	17:03:00	0
2009-07-09	17:04:00	0
2009-07-09	17:05:00	0
2009-07-09	17:06:00	0
2009-07-09	17:07:00	0
2009-07-09	17:08:00	0
2009-07-09	17:09:00	0
2009-07-09	17:10:00	0
2009-07-09	17:11:00	0
2009-07-09	17:12:00	0
2009-07-09	17:13:00	0
2009-07-09	17:14:00	0
2009-07-09	17:15:00	0
2009-07-09	17:16:00	0
2009-07-09	17:17:00	0
2009-07-09	17:18:00	0
2009-07-09	17:19:00	0
2009-07-09	17:20:00	0
2009-07-09	17:21:00	0
2009-07-09	17:22:00	0
2009-07-09	17:23:00	0
2009-07-09	17:24:00	0
2009-07-09	17:25:00	0
2009-07-09	17:26:00	0
2009-07-09	17:27:00	0
2009-07-09	17:28:00	0
2009-07-09	17:29:00	0
2009-07-09	17:30:00	0
2009-07-09	17:31:00	0
2009-07-09	17:32:00	0
2009-07-09	17:33:00	0
2009-07-09	17:34:00	0
2009-07-09	17:35:00	0
2009-07-09	17:36:00	0
2009-07-09	17:37:00	0
2009-07-09	17:38:00	0
2009-07-09	17:39:00	0
2009-07-09	17:40:00	0
2009-07-09	17:41:00	0
2009-07-09	17:42:00	0
2009-07-09	17:43:00	0
2009-07-09	17:44:00	0
2009-07-09	17:45:00	0
2009-07-09	17:46:00	0
2009-07-09	17:47:00	0
2009-07-09	17:48:00	0
2009-07-09	17:49:00	0
2009-07-09	17:50:00	0
2009-07-09	17:51:00	0
2009-07-09	17:52:00	0
2009-07-09	17:53:00	0
2009-07-09	17:54:00	0
2009-07-09	17:55:00	0
2009-07-09	17:56:00	0
2009-07-09	17:57:00	0
2009-07-09	17:58:00	0
2009-07-09	17:59:00	0
2009-07-09	18:00:00	107
2009-07-09	18:01:00	856
2009-07-09	18:02:00	393
2009-07-09	18:03:00	740
2009-07-09	18:04:00	197
2009-07-09	18:05:00	393
2009-07-09	18:06:00	536
2009-07-09	18:07:00	0
2009-07-09	18:08:00	47
2009-07-09	18:09:00	47
2009-07-09	18:10:00	0
2009-07-09	18:11:00	59
2009-07-09	18:12:00	142
2009-07-09	18:13:00	282
2009-07-09	18:14:00	479
2009-07-09	18:15:00	0
2009-07-09	18:16:00	24
2009-07-09	18:17:00	0
2009-07-09	18:18:00	0
2009-07-09	18:19:00	676
2009-07-09	18:20:00	360
2009-07-09	18:21:00	0
2009-07-09	18:22:00	0
2009-07-09	18:23:00	0
2009-07-09	18:24:00	168
2009-07-09	18:25:00	574
2009-07-09	18:26:00	460
2009-07-09	18:27:00	498
2009-07-09	18:28:00	393
2009-07-09	18:29:00	211
2009-07-09	18:30:00	59
2009-07-09	18:31:00	107
2009-07-09	18:32:00	0
2009-07-09	18:33:00	24
2009-07-09	18:34:00	0
2009-07-09	18:35:00	0
2009-07-09	18:36:00	0
2009-07-09	18:37:00	0
2009-07-09	18:38:00	0
2009-07-09	18:39:00	0
2009-07-09	18:40:00	0
2009-07-09	18:41:00	0
2009-07-09	18:42:00	0
2009-07-09	18:43:00	0
2009-07-09	18:44:00	0
2009-07-09	18:45:00	0
2009-07-09	18:46:00	12
2009-07-09	18:47:00	0
2009-07-09	18:48:00	24
2009-07-09	18:49:00	154
2009-07-09	18:50:00	0
2009-07-09	18:51:00	0
2009-07-09	18:52:00	0
2009-07-09	18:53:00	0
2009-07-09	18:54:00	0
2009-07-09	18:55:00	0
2009-07-09	18:56:00	0
2009-07-09	18:57:00	0
2009-07-09	18:58:00	0
2009-07-09	18:59:00	0
2009-07-09	19:00:00	0
2009-07-09	19:01:00	0
2009-07-09	19:02:00	0
2009-07-09	19:03:00	0
2009-07-09	19:04:00	0
2009-07-09	19:05:00	0
2009-07-09	19:06:00	0
2009-07-09	19:07:00	24
2009-07-09	19:08:00	0
2009-07-09	19:09:00	0
2009-07-09	19:10:00	0
2009-07-09	19:11:00	0
2009-07-09	19:12:00	0
2009-07-09	19:13:00	0
2009-07-09	19:14:00	0
2009-07-09	19:15:00	0
2009-07-09	19:16:00	0
2009-07-09	19:17:00	0
2009-07-09	19:18:00	0
2009-07-09	19:19:00	311
2009-07-09	19:20:00	95
2009-07-09	19:21:00	47
2009-07-09	19:22:00	0
2009-07-09	19:23:00	0
2009-07-09	19:24:00	0
2009-07-09	19:25:00	0
2009-07-09	19:26:00	59
2009-07-09	19:27:00	36
2009-07-09	19:28:00	0
2009-07-09	19:29:00	0
2009-07-09	19:30:00	0
2009-07-09	19:31:00	0
2009-07-09	19:32:00	36
2009-07-09	19:33:00	0
2009-07-09	19:34:00	0
2009-07-09	19:35:00	0
2009-07-09	19:36:00	130
2009-07-09	19:37:00	0
2009-07-09	19:38:00	0
2009-07-09	19:39:00	0
2009-07-09	19:40:00	0
2009-07-09	19:41:00	0
2009-07-09	19:42:00	0
2009-07-09	19:43:00	0
2009-07-09	19:44:00	36
2009-07-09	19:45:00	0
2009-07-09	19:46:00	0
2009-07-09	19:47:00	0
2009-07-09	19:48:00	0
2009-07-09	19:49:00	0
2009-07-09	19:50:00	0
2009-07-09	19:51:00	0
2009-07-09	19:52:00	0
2009-07-09	19:53:00	0
2009-07-09	19:54:00	36
2009-07-09	19:55:00	12
2009-07-09	19:56:00	0
2009-07-09	19:57:00	36
2009-07-09	19:58:00	0
2009-07-09	19:59:00	0
2009-07-09	20:00:00	0
2009-07-09	20:01:00	0
2009-07-09	20:02:00	36
2009-07-09	20:03:00	0
2009-07-09	20:04:00	0
2009-07-09	20:05:00	0
2009-07-09	20:06:00	0
2009-07-09	20:07:00	0
2009-07-09	20:08:00	0
2009-07-09	20:09:00	0
2009-07-09	20:10:00	0
2009-07-09	20:11:00	0
2009-07-09	20:12:00	0
2009-07-09	20:13:00	0
2009-07-09	20:14:00	0
2009-07-09	20:15:00	0
2009-07-09	20:16:00	0
2009-07-09	20:17:00	0
2009-07-09	20:18:00	0
2009-07-09	20:19:00	0
2009-07-09	20:20:00	268
2009-07-09	20:21:00	344
2009-07-09	20:22:00	0
2009-07-09	20:23:00	0
2009-07-09	20:24:00	0
2009-07-09	20:25:00	0
2009-07-09	20:26:00	0
2009-07-09	20:27:00	0
2009-07-09	20:28:00	0
2009-07-09	20:29:00	0
2009-07-09	20:30:00	0
2009-07-09	20:31:00	0
2009-07-09	20:32:00	0
2009-07-09	20:33:00	0
2009-07-09	20:34:00	0
2009-07-09	20:35:00	0
2009-07-09	20:36:00	0
2009-07-09	20:37:00	0
2009-07-09	20:38:00	0
2009-07-09	20:39:00	0
2009-07-09	20:40:00	0
2009-07-09	20:41:00	0
2009-07-09	20:42:00	0
2009-07-09	20:43:00	0
2009-07-09	20:44:00	0
2009-07-09	20:45:00	0
2009-07-09	20:46:00	0
2009-07-09	20:47:00	0
2009-07-09	20:48:00	0
2009-07-09	20:49:00	0
2009-07-09	20:50:00	0
2009-07-09	20:51:00	0
2009-07-09	20:52:00	12
2009-07-09	20:53:00	0
2009-07-09	20:54:00	0
2009-07-09	20:55:00	0
2009-07-09	20:56:00	0
2009-07-09	20:57:00	0
2009-07-09	20:58:00	0
2009-07-09	20:59:00	0
2009-07-09	21:00:00	0
2009-07-09	21:01:00	0
2009-07-09	21:02:00	0
2009-07-09	21:03:00	0
2009-07-09	21:04:00	0
2009-07-09	21:05:00	0
2009-07-09	21:06:00	0
2009-07-09	21:07:00	0
2009-07-09	21:08:00	0
2009-07-09	21:09:00	0
2009-07-09	21:10:00	0
2009-07-09	21:11:00	0
2009-07-09	21:12:00	71
2009-07-09	21:13:00	0
2009-07-09	21:14:00	59
2009-07-09	21:15:00	0
2009-07-09	21:16:00	0
2009-07-09	21:17:00	0
2009-07-09	21:18:00	0
2009-07-09	21:19:00	0
2009-07-09	21:20:00	0
2009-07-09	21:21:00	0
2009-07-09	21:22:00	0
2009-07-09	21:23:00	12
2009-07-09	21:24:00	0
2009-07-09	21:25:00	0
2009-07-09	21:26:00	0
2009-07-09	21:27:00	0
2009-07-09	21:28:00	0
2009-07-09	21:29:00	0
2009-07-09	21:30:00	0
2009-07-09	21:31:00	0
2009-07-09	21:32:00	71
2009-07-09	21:33:00	0
2009-07-09	21:34:00	0
2009-07-09	21:35:00	0
2009-07-09	21:36:00	0
2009-07-09	21:37:00	0
2009-07-09	21:38:00	0
2009-07-09	21:39:00	0
2009-07-09	21:40:00	0
2009-07-09	21:41:00	0
2009-07-09	21:42:00	0
2009-07-09	21:43:00	0
2009-07-09	21:44:00	0
2009-07-09	21:45:00	0
2009-07-09	21:46:00	0
2009-07-09	21:47:00	0
2009-07-09	21:48:00	12
2009-07-09	21:49:00	0
2009-07-09	21:50:00	71
2009-07-09	21:51:00	12
2009-07-09	21:52:00	0
2009-07-09	21:53:00	0
2009-07-09	21:54:00	0
2009-07-09	21:55:00	0
2009-07-09	21:56:00	0
2009-07-09	21:57:00	0
2009-07-09	21:58:00	0
2009-07-09	21:59:00	0
2009-07-09	22:00:00	0
2009-07-09	22:01:00	0
2009-07-09	22:02:00	0
2009-07-09	22:03:00	0
2009-07-09	22:04:00	12
2009-07-09	22:05:00	0
2009-07-09	22:06:00	0
2009-07-09	22:07:00	0
2009-07-09	22:08:00	0
2009-07-09	22:09:00	0
2009-07-09	22:10:00	0
2009-07-09	22:11:00	0
2009-07-09	22:12:00	0
2009-07-09	22:13:00	0
2009-07-09	22:14:00	0
2009-07-09	22:15:00	0
2009-07-09	22:16:00	0
2009-07-09	22:17:00	0
2009-07-09	22:18:00	0
2009-07-09	22:19:00	12
2009-07-09	22:20:00	0
2009-07-09	22:21:00	0
2009-07-09	22:22:00	83
2009-07-09	22:23:00	12
2009-07-09	22:24:00	0
2009-07-09	22:25:00	0
2009-07-09	22:26:00	0
2009-07-09	22:27:00	107
2009-07-09	22:28:00	0
2009-07-09	22:29:00	0
2009-07-09	22:30:00	0
2009-07-09	22:31:00	0
2009-07-09	22:32:00	0
2009-07-09	22:33:00	0
2009-07-09	22:34:00	0
2009-07-09	22:35:00	0
2009-07-09	22:36:00	24
2009-07-09	22:37:00	0
2009-07-09	22:38:00	0
2009-07-09	22:39:00	0
2009-07-09	22:40:00	0
2009-07-09	22:41:00	0
2009-07-09	22:42:00	0
2009-07-09	22:43:00	0
2009-07-09	22:44:00	0
2009-07-09	22:45:00	0
2009-07-09	22:46:00	0
2009-07-09	22:47:00	0
2009-07-09	22:48:00	0
2009-07-09	22:49:00	0
2009-07-09	22:50:00	0
2009-07-09	22:51:00	0
2009-07-09	22:52:00	0
2009-07-09	22:53:00	0
2009-07-09	22:54:00	0
2009-07-09	22:55:00	24
2009-07-09	22:56:00	0
2009-07-09	22:57:00	0
2009-07-09	22:58:00	12
2009-07-09	22:59:00	36
2009-07-09	23:00:00	0
2009-07-09	23:01:00	0
2009-07-09	23:02:00	0
2009-07-09	23:03:00	0
2009-07-09	23:04:00	0
2009-07-09	23:05:00	0
2009-07-09	23:06:00	0
2009-07-09	23:07:00	0
2009-07-09	23:08:00	0
2009-07-09	23:09:00	24
2009-07-09	23:10:00	0
2009-07-09	23:11:00	119
2009-07-09	23:12:00	47
2009-07-09	23:13:00	36
2009-07-09	23:14:00	254
2009-07-09	23:15:00	83
2009-07-09	23:16:00	593
2009-07-09	23:17:00	0
2009-07-09	23:18:00	0
2009-07-09	23:19:00	0
2009-07-09	23:20:00	0
2009-07-09	23:21:00	0
2009-07-09	23:22:00	0
2009-07-09	23:23:00	0
2009-07-09	23:24:00	0
2009-07-09	23:25:00	0
2009-07-09	23:26:00	0
2009-07-09	23:27:00	0
2009-07-09	23:28:00	0
2009-07-09	23:29:00	0
2009-07-09	23:30:00	12
2009-07-09	23:31:00	0
2009-07-09	23:32:00	0
2009-07-09	23:33:00	0
2009-07-09	23:34:00	12
2009-07-09	23:35:00	24
2009-07-09	23:36:00	0
2009-07-09	23:37:00	0
2009-07-09	23:38:00	0
2009-07-09	23:39:00	83
2009-07-09	23:40:00	0
2009-07-09	23:41:00	0
2009-07-09	23:42:00	0
2009-07-09	23:43:00	0
2009-07-09	23:44:00	0
2009-07-09	23:45:00	0
2009-07-09	23:46:00	0
2009-07-09	23:47:00	0
2009-07-09	23:48:00	36
2009-07-09	23:49:00	0
2009-07-09	23:50:00	0
2009-07-09	23:51:00	0
2009-07-09	23:52:00	0
2009-07-09	23:53:00	0
2009-07-09	23:54:00	0
2009-07-09	23:55:00	0
2009-07-09	23:56:00	0
2009-07-09	23:57:00	0
2009-07-09	23:58:00	0
2009-07-09	23:59:00	0
2009-07-10	00:00:00	0
2009-07-10	00:01:00	12
2009-07-10	00:02:00	0
2009-07-10	00:03:00	0
2009-07-10	00:04:00	24
2009-07-10	00:05:00	0
2009-07-10	00:06:00	0
2009-07-10	00:07:00	59
2009-07-10	00:08:00	0
2009-07-10	00:09:00	0
2009-07-10	00:10:00	95
2009-07-10	00:11:00	12
2009-07-10	00:12:00	12
2009-07-10	00:13:00	36
2009-07-10	00:14:00	12
2009-07-10	00:15:00	24
2009-07-10	00:16:00	12
2009-07-10	00:17:00	47
2009-07-10	00:18:00	107
2009-07-10	00:19:00	119
2009-07-10	00:20:00	142
2009-07-10	00:21:00	0
2009-07-10	00:22:00	0
2009-07-10	00:23:00	119
2009-07-10	00:24:00	0
2009-07-10	00:25:00	0
2009-07-10	00:26:00	0
2009-07-10	00:27:00	0
2009-07-10	00:28:00	0
2009-07-10	00:29:00	0
2009-07-10	00:30:00	0
2009-07-10	00:31:00	0
2009-07-10	00:32:00	0
2009-07-10	00:33:00	0
2009-07-10	00:34:00	0
2009-07-10	00:35:00	0
2009-07-10	00:36:00	0
2009-07-10	00:37:00	0
2009-07-10	00:38:00	12
2009-07-10	00:39:00	12
2009-07-10	00:40:00	0
2009-07-10	00:41:00	0
2009-07-10	00:42:00	0
2009-07-10	00:43:00	0
2009-07-10	00:44:00	0
2009-07-10	00:45:00	12
2009-07-10	00:46:00	0
2009-07-10	00:47:00	0
2009-07-10	00:48:00	0
2009-07-10	00:49:00	0
2009-07-10	00:50:00	119
2009-07-10	00:51:00	12
2009-07-10	00:52:00	0
2009-07-10	00:53:00	0
2009-07-10	00:54:00	71
2009-07-10	00:55:00	0
2009-07-10	00:56:00	154
2009-07-10	00:57:00	12
2009-07-10	00:58:00	59
2009-07-10	00:59:00	24
2009-07-10	01:00:00	12
2009-07-10	01:01:00	71
2009-07-10	01:02:00	36
2009-07-10	01:03:00	0
2009-07-10	01:04:00	0
2009-07-10	01:05:00	107
2009-07-10	01:06:00	47
2009-07-10	01:07:00	36
2009-07-10	01:08:00	24
2009-07-10	01:09:00	12
2009-07-10	01:10:00	0
2009-07-10	01:11:00	239
2009-07-10	01:12:00	183
2009-07-10	01:13:00	856
2009-07-10	01:14:00	0
2009-07-10	01:15:00	0
2009-07-10	01:16:00	0
2009-07-10	01:17:00	0
2009-07-10	01:18:00	0
2009-07-10	01:19:00	0
2009-07-10	01:20:00	0
2009-07-10	01:21:00	0
2009-07-10	01:22:00	0
2009-07-10	01:23:00	0
2009-07-10	01:24:00	0
2009-07-10	01:25:00	0
2009-07-10	01:26:00	0
2009-07-10	01:27:00	0
2009-07-10	01:28:00	0
2009-07-10	01:29:00	12
2009-07-10	01:30:00	0
2009-07-10	01:31:00	0
2009-07-10	01:32:00	0
2009-07-10	01:33:00	0
2009-07-10	01:34:00	0
2009-07-10	01:35:00	0
2009-07-10	01:36:00	12
2009-07-10	01:37:00	0
2009-07-10	01:38:00	71
2009-07-10	01:39:00	168
2009-07-10	01:40:00	0
2009-07-10	01:41:00	12
2009-07-10	01:42:00	0
2009-07-10	01:43:00	12
2009-07-10	01:44:00	0
2009-07-10	01:45:00	0
2009-07-10	01:46:00	0
2009-07-10	01:47:00	12
2009-07-10	01:48:00	0
2009-07-10	01:49:00	0
2009-07-10	01:50:00	24
2009-07-10	01:51:00	0
2009-07-10	01:52:00	0
2009-07-10	01:53:00	0
2009-07-10	01:54:00	0
2009-07-10	01:55:00	0
2009-07-10	01:56:00	12
2009-07-10	01:57:00	0
2009-07-10	01:58:00	36
2009-07-10	01:59:00	0
2009-07-10	02:00:00	0
2009-07-10	02:01:00	0
2009-07-10	02:02:00	0
2009-07-10	02:03:00	0
2009-07-10	02:04:00	0
2009-07-10	02:05:00	0
2009-07-10	02:06:00	0
2009-07-10	02:07:00	0
2009-07-10	02:08:00	0
2009-07-10	02:09:00	0
2009-07-10	02:10:00	0
2009-07-10	02:11:00	12
2009-07-10	02:12:00	0
2009-07-10	02:13:00	59
2009-07-10	02:14:00	0
2009-07-10	02:15:00	0
2009-07-10	02:16:00	0
2009-07-10	02:17:00	0
2009-07-10	02:18:00	0
2009-07-10	02:19:00	0
2009-07-10	02:20:00	0
2009-07-10	02:21:00	0
2009-07-10	02:22:00	0
2009-07-10	02:23:00	0
2009-07-10	02:24:00	0
2009-07-10	02:25:00	0
2009-07-10	02:26:00	0
2009-07-10	02:27:00	0
2009-07-10	02:28:00	0
2009-07-10	02:29:00	0
2009-07-10	02:30:00	24
2009-07-10	02:31:00	0
2009-07-10	02:32:00	0
2009-07-10	02:33:00	71
2009-07-10	02:34:00	24
2009-07-10	02:35:00	12
2009-07-10	02:36:00	95
2009-07-10	02:37:00	24
2009-07-10	02:38:00	36
2009-07-10	02:39:00	0
2009-07-10	02:40:00	0
2009-07-10	02:41:00	12
2009-07-10	02:42:00	47
2009-07-10	02:43:00	119
2009-07-10	02:44:00	0
2009-07-10	02:45:00	12
2009-07-10	02:46:00	0
2009-07-10	02:47:00	95
2009-07-10	02:48:00	83
2009-07-10	02:49:00	12
2009-07-10	02:50:00	47
2009-07-10	02:51:00	12
2009-07-10	02:52:00	95
2009-07-10	02:53:00	12
2009-07-10	02:54:00	0
2009-07-10	02:55:00	0
2009-07-10	02:56:00	0
2009-07-10	02:57:00	0
2009-07-10	02:58:00	71
2009-07-10	02:59:00	0
2009-07-10	03:00:00	0
2009-07-10	03:01:00	0
2009-07-10	03:02:00	0
2009-07-10	03:03:00	0
2009-07-10	03:04:00	0
2009-07-10	03:05:00	0
2009-07-10	03:06:00	0
2009-07-10	03:07:00	0
2009-07-10	03:08:00	0
2009-07-10	03:09:00	0
2009-07-10	03:10:00	0
2009-07-10	03:11:00	0
2009-07-10	03:12:00	0
2009-07-10	03:13:00	0
2009-07-10	03:14:00	24
2009-07-10	03:15:00	12
2009-07-10	03:16:00	47
2009-07-10	03:17:00	282
2009-07-10	03:18:00	197
2009-07-10	03:19:00	0
2009-07-10	03:20:00	2174
2009-07-10	03:21:00	47
2009-07-10	03:22:00	0
2009-07-10	03:23:00	927
2009-07-10	03:24:00	107
2009-07-10	03:25:00	0
2009-07-10	03:26:00	0
2009-07-10	03:27:00	12
2009-07-10	03:28:00	0
2009-07-10	03:29:00	36
2009-07-10	03:30:00	0
2009-07-10	03:31:00	0
2009-07-10	03:32:00	12
2009-07-10	03:33:00	0
2009-07-10	03:34:00	36
2009-07-10	03:35:00	0
2009-07-10	03:36:00	0
2009-07-10	03:37:00	0
2009-07-10	03:38:00	0
2009-07-10	03:39:00	130
2009-07-10	03:40:00	0
2009-07-10	03:41:00	0
2009-07-10	03:42:00	0
2009-07-10	03:43:00	197
2009-07-10	03:44:00	59
2009-07-10	03:45:00	517
2009-07-10	03:46:00	24
2009-07-10	03:47:00	0
2009-07-10	03:48:00	12
2009-07-10	03:49:00	0
2009-07-10	03:50:00	0
2009-07-10	03:51:00	0
2009-07-10	03:52:00	0
2009-07-10	03:53:00	0
2009-07-10	03:54:00	0
2009-07-10	03:55:00	0
2009-07-10	03:56:00	0
2009-07-10	03:57:00	0
2009-07-10	03:58:00	0
2009-07-10	03:59:00	0
2009-07-10	04:00:00	0
2009-07-10	04:01:00	12
2009-07-10	04:02:00	0
2009-07-10	04:03:00	0
2009-07-10	04:04:00	0
2009-07-10	04:05:00	47
2009-07-10	04:06:00	0
2009-07-10	04:07:00	0
2009-07-10	04:08:00	0
2009-07-10	04:09:00	0
2009-07-10	04:10:00	0
2009-07-10	04:11:00	0
2009-07-10	04:12:00	12
2009-07-10	04:13:00	555
2009-07-10	04:14:00	142
2009-07-10	04:15:00	0
2009-07-10	04:16:00	0
2009-07-10	04:17:00	0
2009-07-10	04:18:00	0
2009-07-10	04:19:00	12
2009-07-10	04:20:00	0
2009-07-10	04:21:00	0
2009-07-10	04:22:00	130
2009-07-10	04:23:00	130
2009-07-10	04:24:00	1140
2009-07-10	04:25:00	0
2009-07-10	04:26:00	83
2009-07-10	04:27:00	0
2009-07-10	04:28:00	0
2009-07-10	04:29:00	0
2009-07-10	04:30:00	0
2009-07-10	04:31:00	0
2009-07-10	04:32:00	0
2009-07-10	04:33:00	0
2009-07-10	04:34:00	0
2009-07-10	04:35:00	0
2009-07-10	04:36:00	0
2009-07-10	04:37:00	0
2009-07-10	04:38:00	0
2009-07-10	04:39:00	24
2009-07-10	04:40:00	0
2009-07-10	04:41:00	633
2009-07-10	04:42:00	0
2009-07-10	04:43:00	0
2009-07-10	04:44:00	12
2009-07-10	04:45:00	0
2009-07-10	04:46:00	12
2009-07-10	04:47:00	0
2009-07-10	04:48:00	0
2009-07-10	04:49:00	1287
2009-07-10	04:50:00	879
2009-07-10	04:51:00	1349
2009-07-10	04:52:00	0
2009-07-10	04:53:00	36
2009-07-10	04:54:00	0
2009-07-10	04:55:00	12
2009-07-10	04:56:00	0
2009-07-10	04:57:00	0
2009-07-10	04:58:00	0
2009-07-10	04:59:00	0
2009-07-10	05:00:00	0
2009-07-10	05:01:00	0
2009-07-10	05:02:00	47
2009-07-10	05:03:00	47
2009-07-10	05:04:00	0
2009-07-10	05:05:00	12
2009-07-10	05:06:00	12
2009-07-10	05:07:00	24
2009-07-10	05:08:00	12
2009-07-10	05:09:00	12
2009-07-10	05:10:00	24
2009-07-10	05:11:00	36
2009-07-10	05:12:00	119
2009-07-10	05:13:00	59
2009-07-10	05:14:00	1380
2009-07-10	05:15:00	47
2009-07-10	05:16:00	12
2009-07-10	05:17:00	59
2009-07-10	05:18:00	59
2009-07-10	05:19:00	0
2009-07-10	05:20:00	0
2009-07-10	05:21:00	0
2009-07-10	05:22:00	119
2009-07-10	05:23:00	0
2009-07-10	05:24:00	0
2009-07-10	05:25:00	0
2009-07-10	05:26:00	0
2009-07-10	05:27:00	0
2009-07-10	05:28:00	0
2009-07-10	05:29:00	0
2009-07-10	05:30:00	0
2009-07-10	05:31:00	0
2009-07-10	05:32:00	0
2009-07-10	05:33:00	0
2009-07-10	05:34:00	95
2009-07-10	05:35:00	0
2009-07-10	05:36:00	0
2009-07-10	05:37:00	0
2009-07-10	05:38:00	0
2009-07-10	05:39:00	0
2009-07-10	05:40:00	0
2009-07-10	05:41:00	0
2009-07-10	05:42:00	0
2009-07-10	05:43:00	0
2009-07-10	05:44:00	0
2009-07-10	05:45:00	0
2009-07-10	05:46:00	0
2009-07-10	05:47:00	0
2009-07-10	05:48:00	0
2009-07-10	05:49:00	879
2009-07-10	05:50:00	71
2009-07-10	05:51:00	168
2009-07-10	05:52:00	479
2009-07-10	05:53:00	344
2009-07-10	05:54:00	211
2009-07-10	05:55:00	0
2009-07-10	05:56:00	0
2009-07-10	05:57:00	0
2009-07-10	05:58:00	0
2009-07-10	05:59:00	0
2009-07-10	06:00:00	0
2009-07-10	06:01:00	0
2009-07-10	06:02:00	107
2009-07-10	06:03:00	0
2009-07-10	06:04:00	12
2009-07-10	06:05:00	0
2009-07-10	06:06:00	12
2009-07-10	06:07:00	59
2009-07-10	06:08:00	879
2009-07-10	06:09:00	1057
2009-07-10	06:10:00	225
2009-07-10	06:11:00	498
2009-07-10	06:12:00	1960
2009-07-10	06:13:00	1512
2009-07-10	06:14:00	1380
2009-07-10	06:15:00	927
2009-07-10	06:16:00	36
2009-07-10	06:17:00	0
2009-07-10	06:18:00	47
2009-07-10	06:19:00	36
2009-07-10	06:20:00	12
2009-07-10	06:21:00	12
2009-07-10	06:22:00	0
2009-07-10	06:23:00	0
2009-07-10	06:24:00	0
2009-07-10	06:25:00	0
2009-07-10	06:26:00	36
2009-07-10	06:27:00	119
2009-07-10	06:28:00	0
2009-07-10	06:29:00	36
2009-07-10	06:30:00	83
2009-07-10	06:31:00	12
2009-07-10	06:32:00	0
2009-07-10	06:33:00	24
2009-07-10	06:34:00	47
2009-07-10	06:35:00	12
2009-07-10	06:36:00	119
2009-07-10	06:37:00	24
2009-07-10	06:38:00	0
2009-07-10	06:39:00	0
2009-07-10	06:40:00	12
2009-07-10	06:41:00	12
2009-07-10	06:42:00	0
2009-07-10	06:43:00	0
2009-07-10	06:44:00	0
2009-07-10	06:45:00	0
2009-07-10	06:46:00	12
2009-07-10	06:47:00	119
2009-07-10	06:48:00	856
2009-07-10	06:49:00	832
2009-07-10	06:50:00	142
2009-07-10	06:51:00	0
2009-07-10	06:52:00	47
2009-07-10	06:53:00	0
2009-07-10	06:54:00	0
2009-07-10	06:55:00	0
2009-07-10	06:56:00	71
2009-07-10	06:57:00	360
2009-07-10	06:58:00	83
2009-07-10	06:59:00	59
2009-07-10	07:00:00	0
2009-07-10	07:01:00	0
2009-07-10	07:02:00	36
2009-07-10	07:03:00	119
2009-07-10	07:04:00	268
2009-07-10	07:05:00	0
2009-07-10	07:06:00	0
2009-07-10	07:07:00	0
2009-07-10	07:08:00	0
2009-07-10	07:09:00	0
2009-07-10	07:10:00	0
2009-07-10	07:11:00	0
2009-07-10	07:12:00	0
2009-07-10	07:13:00	0
2009-07-10	07:14:00	0
2009-07-10	07:15:00	0
2009-07-10	07:16:00	83
2009-07-10	07:17:00	0
2009-07-10	07:18:00	0
2009-07-10	07:19:00	0
2009-07-10	07:20:00	0
2009-07-10	07:21:00	0
2009-07-10	07:22:00	0
2009-07-10	07:23:00	0
2009-07-10	07:24:00	0
2009-07-10	07:25:00	0
2009-07-10	07:26:00	0
2009-07-10	07:27:00	0
2009-07-10	07:28:00	0
2009-07-10	07:29:00	0
2009-07-10	07:30:00	0
2009-07-10	07:31:00	0
2009-07-10	07:32:00	0
2009-07-10	07:33:00	0
2009-07-10	07:34:00	71
2009-07-10	07:35:00	0
2009-07-10	07:36:00	0
2009-07-10	07:37:00	0
2009-07-10	07:38:00	0
2009-07-10	07:39:00	0
2009-07-10	07:40:00	0
2009-07-10	07:41:00	0
2009-07-10	07:42:00	0
2009-07-10	07:43:00	83
2009-07-10	07:44:00	0
2009-07-10	07:45:00	0
2009-07-10	07:46:00	0
2009-07-10	07:47:00	0
2009-07-10	07:48:00	36
2009-07-10	07:49:00	168
2009-07-10	07:50:00	254
2009-07-10	07:51:00	296
2009-07-10	07:52:00	95
2009-07-10	07:53:00	0
2009-07-10	07:54:00	0
2009-07-10	07:55:00	0
2009-07-10	07:56:00	0
2009-07-10	07:57:00	142
2009-07-10	07:58:00	24
2009-07-10	07:59:00	344
2009-07-10	08:00:00	24
2009-07-10	08:01:00	612
2009-07-10	08:02:00	24
2009-07-10	08:03:00	0
2009-07-10	08:04:00	0
2009-07-10	08:05:00	0
2009-07-10	08:06:00	95
2009-07-10	08:07:00	24
2009-07-10	08:08:00	130
2009-07-10	08:09:00	761
2009-07-10	08:10:00	1880
2009-07-10	08:11:00	36
2009-07-10	08:12:00	856
2009-07-10	08:13:00	612
2009-07-10	08:14:00	12
2009-07-10	08:15:00	12
2009-07-10	08:16:00	0
2009-07-10	08:17:00	36
2009-07-10	08:18:00	0
2009-07-10	08:19:00	24
2009-07-10	08:20:00	0
2009-07-10	08:21:00	0
2009-07-10	08:22:00	0
2009-07-10	08:23:00	0
2009-07-10	08:24:00	0
2009-07-10	08:25:00	0
2009-07-10	08:26:00	0
2009-07-10	08:27:00	0
2009-07-10	08:28:00	0
2009-07-10	08:29:00	0
2009-07-10	08:30:00	0
2009-07-10	08:31:00	0
2009-07-10	08:32:00	0
2009-07-10	08:33:00	0
2009-07-10	08:34:00	0
2009-07-10	08:35:00	59
2009-07-10	08:36:00	183
2009-07-10	08:37:00	83
2009-07-10	08:38:00	0
2009-07-10	08:39:00	0
2009-07-10	08:40:00	0
2009-07-10	08:41:00	0
2009-07-10	08:42:00	0
2009-07-10	08:43:00	0
2009-07-10	08:44:00	0
2009-07-10	08:45:00	0
2009-07-10	08:46:00	0
2009-07-10	08:47:00	0
2009-07-10	08:48:00	0
2009-07-10	08:49:00	107
2009-07-10	08:50:00	0
2009-07-10	08:51:00	0
2009-07-10	08:52:00	0
2009-07-10	08:53:00	0
2009-07-10	08:54:00	0
2009-07-10	08:55:00	0
2009-07-10	08:56:00	0
2009-07-10	08:57:00	0
2009-07-10	08:58:00	0
2009-07-10	08:59:00	0
2009-07-10	09:00:00	0
2009-07-10	09:01:00	0
2009-07-10	09:02:00	0
2009-07-10	09:03:00	0
2009-07-10	09:04:00	0
2009-07-10	09:05:00	0
2009-07-10	09:06:00	0
2009-07-10	09:07:00	0
2009-07-10	09:08:00	0
[truncated: 19,611 more rows]

## Sheet: 7.23.09
Actogram, Copy Raw Data, All Days
Identity:	Geronimo
Filename:	E:\Active Research Files\meloxicam titre canine\cases\geronimo\Geronimo 7.23.09.AWC
Gender:	M
Age:	8
Height:	76.2 cm	30.0 in
Weight:	27.2 kg	60.0 lbs
Start Date:	23-Jul-2009 (Thu)
Start Time:	18:00:00
Interval:	1.00 mins
Date Stamp:	Time Stamp:	Activity Data:	Marker Press:
2009-07-23	00:00:00	0
2009-07-23	00:01:00	0
2009-07-23	00:02:00	0
2009-07-23	00:03:00	0
2009-07-23	00:04:00	0
2009-07-23	00:05:00	0
2009-07-23	00:06:00	0
2009-07-23	00:07:00	0
2009-07-23	00:08:00	0
2009-07-23	00:09:00	0
2009-07-23	00:10:00	0
2009-07-23	00:11:00	0
2009-07-23	00:12:00	0
2009-07-23	00:13:00	0
2009-07-23	00:14:00	0
2009-07-23	00:15:00	0
2009-07-23	00:16:00	0
2009-07-23	00:17:00	0
2009-07-23	00:18:00	0
2009-07-23	00:19:00	0
2009-07-23	00:20:00	0
2009-07-23	00:21:00	0
2009-07-23	00:22:00	0
2009-07-23	00:23:00	0
2009-07-23	00:24:00	0
2009-07-23	00:25:00	0
2009-07-23	00:26:00	0
2009-07-23	00:27:00	0
2009-07-23	00:28:00	0
2009-07-23	00:29:00	0
2009-07-23	00:30:00	0
2009-07-23	00:31:00	0
2009-07-23	00:32:00	0
2009-07-23	00:33:00	0
2009-07-23	00:34:00	0
2009-07-23	00:35:00	0
2009-07-23	00:36:00	0
2009-07-23	00:37:00	0
2009-07-23	00:38:00	0
2009-07-23	00:39:00	0
2009-07-23	00:40:00	0
2009-07-23	00:41:00	0
2009-07-23	00:42:00	0
2009-07-23	00:43:00	0
2009-07-23	00:44:00	0
2009-07-23	00:45:00	0
2009-07-23	00:46:00	0
2009-07-23	00:47:00	0
2009-07-23	00:48:00	0
2009-07-23	00:49:00	0
2009-07-23	00:50:00	0
2009-07-23	00:51:00	0
2009-07-23	00:52:00	0
2009-07-23	00:53:00	0
2009-07-23	00:54:00	0
2009-07-23	00:55:00	0
2009-07-23	00:56:00	0
2009-07-23	00:57:00	0
2009-07-23	00:58:00	0
2009-07-23	00:59:00	0
2009-07-23	01:00:00	0
2009-07-23	01:01:00	0
2009-07-23	01:02:00	0
2009-07-23	01:03:00	0
2009-07-23	01:04:00	0
2009-07-23	01:05:00	0
2009-07-23	01:06:00	0
2009-07-23	01:07:00	0
2009-07-23	01:08:00	0
2009-07-23	01:09:00	0
2009-07-23	01:10:00	0
2009-07-23	01:11:00	0
2009-07-23	01:12:00	0
2009-07-23	01:13:00	0
2009-07-23	01:14:00	0
2009-07-23	01:15:00	0
2009-07-23	01:16:00	0
2009-07-23	01:17:00	0
2009-07-23	01:18:00	0
2009-07-23	01:19:00	0
2009-07-23	01:20:00	0
2009-07-23	01:21:00	0
2009-07-23	01:22:00	0
2009-07-23	01:23:00	0
2009-07-23	01:24:00	0
2009-07-23	01:25:00	0
2009-07-23	01:26:00	0
2009-07-23	01:27:00	0
2009-07-23	01:28:00	0
2009-07-23	01:29:00	0
2009-07-23	01:30:00	0
2009-07-23	01:31:00	0
2009-07-23	01:32:00	0
2009-07-23	01:33:00	0
2009-07-23	01:34:00	0
2009-07-23	01:35:00	0
2009-07-23	01:36:00	0
2009-07-23	01:37:00	0
2009-07-23	01:38:00	0
2009-07-23	01:39:00	0
2009-07-23	01:40:00	0
2009-07-23	01:41:00	0
2009-07-23	01:42:00	0
2009-07-23	01:43:00	0
2009-07-23	01:44:00	0
2009-07-23	01:45:00	0
2009-07-23	01:46:00	0
2009-07-23	01:47:00	0
2009-07-23	01:48:00	0
2009-07-23	01:49:00	0
2009-07-23	01:50:00	0
2009-07-23	01:51:00	0
2009-07-23	01:52:00	0
2009-07-23	01:53:00	0
2009-07-23	01:54:00	0
2009-07-23	01:55:00	0
2009-07-23	01:56:00	0
2009-07-23	01:57:00	0
2009-07-23	01:58:00	0
2009-07-23	01:59:00	0
2009-07-23	02:00:00	0
2009-07-23	02:01:00	0
2009-07-23	02:02:00	0
2009-07-23	02:03:00	0
2009-07-23	02:04:00	0
2009-07-23	02:05:00	0
2009-07-23	02:06:00	0
2009-07-23	02:07:00	0
2009-07-23	02:08:00	0
2009-07-23	02:09:00	0
2009-07-23	02:10:00	0
2009-07-23	02:11:00	0
2009-07-23	02:12:00	0
2009-07-23	02:13:00	0
2009-07-23	02:14:00	0
2009-07-23	02:15:00	0
2009-07-23	02:16:00	0
2009-07-23	02:17:00	0
2009-07-23	02:18:00	0
2009-07-23	02:19:00	0
2009-07-23	02:20:00	0
2009-07-23	02:21:00	0
2009-07-23	02:22:00	0
2009-07-23	02:23:00	0
2009-07-23	02:24:00	0
2009-07-23	02:25:00	0
2009-07-23	02:26:00	0
2009-07-23	02:27:00	0
2009-07-23	02:28:00	0
2009-07-23	02:29:00	0
2009-07-23	02:30:00	0
2009-07-23	02:31:00	0
2009-07-23	02:32:00	0
2009-07-23	02:33:00	0
2009-07-23	02:34:00	0
2009-07-23	02:35:00	0
2009-07-23	02:36:00	0
2009-07-23	02:37:00	0
2009-07-23	02:38:00	0
2009-07-23	02:39:00	0
2009-07-23	02:40:00	0
2009-07-23	02:41:00	0
2009-07-23	02:42:00	0
2009-07-23	02:43:00	0
2009-07-23	02:44:00	0
2009-07-23	02:45:00	0
2009-07-23	02:46:00	0
2009-07-23	02:47:00	0
2009-07-23	02:48:00	0
2009-07-23	02:49:00	0
2009-07-23	02:50:00	0
2009-07-23	02:51:00	0
2009-07-23	02:52:00	0
2009-07-23	02:53:00	0
2009-07-23	02:54:00	0
2009-07-23	02:55:00	0
2009-07-23	02:56:00	0
2009-07-23	02:57:00	0
2009-07-23	02:58:00	0
2009-07-23	02:59:00	0
2009-07-23	03:00:00	0
2009-07-23	03:01:00	0
2009-07-23	03:02:00	0
2009-07-23	03:03:00	0
2009-07-23	03:04:00	0
2009-07-23	03:05:00	0
2009-07-23	03:06:00	0
2009-07-23	03:07:00	0
2009-07-23	03:08:00	0
2009-07-23	03:09:00	0
2009-07-23	03:10:00	0
2009-07-23	03:11:00	0
2009-07-23	03:12:00	0
2009-07-23	03:13:00	0
2009-07-23	03:14:00	0
2009-07-23	03:15:00	0
2009-07-23	03:16:00	0
2009-07-23	03:17:00	0
2009-07-23	03:18:00	0
2009-07-23	03:19:00	0
2009-07-23	03:20:00	0
2009-07-23	03:21:00	0
2009-07-23	03:22:00	0
2009-07-23	03:23:00	0
2009-07-23	03:24:00	0
2009-07-23	03:25:00	0
2009-07-23	03:26:00	0
2009-07-23	03:27:00	0
2009-07-23	03:28:00	0
2009-07-23	03:29:00	0
2009-07-23	03:30:00	0
2009-07-23	03:31:00	0
2009-07-23	03:32:00	0
2009-07-23	03:33:00	0
2009-07-23	03:34:00	0
2009-07-23	03:35:00	0
2009-07-23	03:36:00	0
2009-07-23	03:37:00	0
2009-07-23	03:38:00	0
2009-07-23	03:39:00	0
2009-07-23	03:40:00	0
2009-07-23	03:41:00	0
2009-07-23	03:42:00	0
2009-07-23	03:43:00	0
2009-07-23	03:44:00	0
2009-07-23	03:45:00	0
2009-07-23	03:46:00	0
2009-07-23	03:47:00	0
2009-07-23	03:48:00	0
2009-07-23	03:49:00	0
2009-07-23	03:50:00	0
2009-07-23	03:51:00	0
2009-07-23	03:52:00	0
2009-07-23	03:53:00	0
2009-07-23	03:54:00	0
2009-07-23	03:55:00	0
2009-07-23	03:56:00	0
2009-07-23	03:57:00	0
2009-07-23	03:58:00	0
2009-07-23	03:59:00	0
2009-07-23	04:00:00	0
2009-07-23	04:01:00	0
2009-07-23	04:02:00	0
2009-07-23	04:03:00	0
2009-07-23	04:04:00	0
2009-07-23	04:05:00	0
2009-07-23	04:06:00	0
2009-07-23	04:07:00	0
2009-07-23	04:08:00	0
2009-07-23	04:09:00	0
2009-07-23	04:10:00	0
2009-07-23	04:11:00	0
2009-07-23	04:12:00	0
2009-07-23	04:13:00	0
2009-07-23	04:14:00	0
2009-07-23	04:15:00	0
2009-07-23	04:16:00	0
2009-07-23	04:17:00	0
2009-07-23	04:18:00	0
2009-07-23	04:19:00	0
2009-07-23	04:20:00	0
2009-07-23	04:21:00	0
2009-07-23	04:22:00	0
2009-07-23	04:23:00	0
2009-07-23	04:24:00	0
2009-07-23	04:25:00	0
2009-07-23	04:26:00	0
2009-07-23	04:27:00	0
2009-07-23	04:28:00	0
2009-07-23	04:29:00	0
2009-07-23	04:30:00	0
2009-07-23	04:31:00	0
2009-07-23	04:32:00	0
2009-07-23	04:33:00	0
2009-07-23	04:34:00	0
2009-07-23	04:35:00	0
2009-07-23	04:36:00	0
2009-07-23	04:37:00	0
2009-07-23	04:38:00	0
2009-07-23	04:39:00	0
2009-07-23	04:40:00	0
2009-07-23	04:41:00	0
2009-07-23	04:42:00	0
2009-07-23	04:43:00	0
2009-07-23	04:44:00	0
2009-07-23	04:45:00	0
2009-07-23	04:46:00	0
2009-07-23	04:47:00	0
2009-07-23	04:48:00	0
2009-07-23	04:49:00	0
2009-07-23	04:50:00	0
2009-07-23	04:51:00	0
2009-07-23	04:52:00	0
2009-07-23	04:53:00	0
2009-07-23	04:54:00	0
2009-07-23	04:55:00	0
2009-07-23	04:56:00	0
2009-07-23	04:57:00	0
2009-07-23	04:58:00	0
2009-07-23	04:59:00	0
2009-07-23	05:00:00	0
2009-07-23	05:01:00	0
2009-07-23	05:02:00	0
2009-07-23	05:03:00	0
2009-07-23	05:04:00	0
2009-07-23	05:05:00	0
2009-07-23	05:06:00	0
2009-07-23	05:07:00	0
2009-07-23	05:08:00	0
2009-07-23	05:09:00	0
2009-07-23	05:10:00	0
2009-07-23	05:11:00	0
2009-07-23	05:12:00	0
2009-07-23	05:13:00	0
2009-07-23	05:14:00	0
2009-07-23	05:15:00	0
2009-07-23	05:16:00	0
2009-07-23	05:17:00	0
2009-07-23	05:18:00	0
2009-07-23	05:19:00	0
2009-07-23	05:20:00	0
2009-07-23	05:21:00	0
2009-07-23	05:22:00	0
2009-07-23	05:23:00	0
2009-07-23	05:24:00	0
2009-07-23	05:25:00	0
2009-07-23	05:26:00	0
2009-07-23	05:27:00	0
2009-07-23	05:28:00	0
2009-07-23	05:29:00	0
2009-07-23	05:30:00	0
2009-07-23	05:31:00	0
2009-07-23	05:32:00	0
2009-07-23	05:33:00	0
2009-07-23	05:34:00	0
2009-07-23	05:35:00	0
2009-07-23	05:36:00	0
2009-07-23	05:37:00	0
2009-07-23	05:38:00	0
2009-07-23	05:39:00	0
2009-07-23	05:40:00	0
2009-07-23	05:41:00	0
2009-07-23	05:42:00	0
2009-07-23	05:43:00	0
2009-07-23	05:44:00	0
2009-07-23	05:45:00	0
2009-07-23	05:46:00	0
2009-07-23	05:47:00	0
2009-07-23	05:48:00	0
2009-07-23	05:49:00	0
2009-07-23	05:50:00	0
2009-07-23	05:51:00	0
2009-07-23	05:52:00	0
2009-07-23	05:53:00	0
2009-07-23	05:54:00	0
2009-07-23	05:55:00	0
2009-07-23	05:56:00	0
2009-07-23	05:57:00	0
2009-07-23	05:58:00	0
2009-07-23	05:59:00	0
2009-07-23	06:00:00	0
2009-07-23	06:01:00	0
2009-07-23	06:02:00	0
2009-07-23	06:03:00	0
2009-07-23	06:04:00	0
2009-07-23	06:05:00	0
2009-07-23	06:06:00	0
2009-07-23	06:07:00	0
2009-07-23	06:08:00	0
2009-07-23	06:09:00	0
2009-07-23	06:10:00	0
2009-07-23	06:11:00	0
2009-07-23	06:12:00	0
2009-07-23	06:13:00	0
2009-07-23	06:14:00	0
2009-07-23	06:15:00	0
2009-07-23	06:16:00	0
2009-07-23	06:17:00	0
2009-07-23	06:18:00	0
2009-07-23	06:19:00	0
2009-07-23	06:20:00	0
2009-07-23	06:21:00	0
2009-07-23	06:22:00	0
2009-07-23	06:23:00	0
2009-07-23	06:24:00	0
2009-07-23	06:25:00	0
2009-07-23	06:26:00	0
2009-07-23	06:27:00	0
2009-07-23	06:28:00	0
2009-07-23	06:29:00	0
2009-07-23	06:30:00	0
2009-07-23	06:31:00	0
2009-07-23	06:32:00	0
2009-07-23	06:33:00	0
2009-07-23	06:34:00	0
2009-07-23	06:35:00	0
2009-07-23	06:36:00	0
2009-07-23	06:37:00	0
2009-07-23	06:38:00	0
2009-07-23	06:39:00	0
2009-07-23	06:40:00	0
2009-07-23	06:41:00	0
2009-07-23	06:42:00	0
2009-07-23	06:43:00	0
2009-07-23	06:44:00	0
2009-07-23	06:45:00	0
2009-07-23	06:46:00	0
2009-07-23	06:47:00	0
2009-07-23	06:48:00	0
2009-07-23	06:49:00	0
2009-07-23	06:50:00	0
2009-07-23	06:51:00	0
2009-07-23	06:52:00	0
2009-07-23	06:53:00	0
2009-07-23	06:54:00	0
2009-07-23	06:55:00	0
2009-07-23	06:56:00	0
2009-07-23	06:57:00	0
2009-07-23	06:58:00	0
2009-07-23	06:59:00	0
2009-07-23	07:00:00	0
2009-07-23	07:01:00	0
2009-07-23	07:02:00	0
2009-07-23	07:03:00	0
2009-07-23	07:04:00	0
2009-07-23	07:05:00	0
2009-07-23	07:06:00	0
2009-07-23	07:07:00	0
2009-07-23	07:08:00	0
2009-07-23	07:09:00	0
2009-07-23	07:10:00	0
2009-07-23	07:11:00	0
2009-07-23	07:12:00	0
2009-07-23	07:13:00	0
2009-07-23	07:14:00	0
2009-07-23	07:15:00	0
2009-07-23	07:16:00	0
2009-07-23	07:17:00	0
2009-07-23	07:18:00	0
2009-07-23	07:19:00	0
2009-07-23	07:20:00	0
2009-07-23	07:21:00	0
2009-07-23	07:22:00	0
2009-07-23	07:23:00	0
2009-07-23	07:24:00	0
2009-07-23	07:25:00	0
2009-07-23	07:26:00	0
2009-07-23	07:27:00	0
2009-07-23	07:28:00	0
2009-07-23	07:29:00	0
2009-07-23	07:30:00	0
2009-07-23	07:31:00	0
2009-07-23	07:32:00	0
2009-07-23	07:33:00	0
2009-07-23	07:34:00	0
2009-07-23	07:35:00	0
2009-07-23	07:36:00	0
2009-07-23	07:37:00	0
2009-07-23	07:38:00	0
2009-07-23	07:39:00	0
2009-07-23	07:40:00	0
2009-07-23	07:41:00	0
2009-07-23	07:42:00	0
2009-07-23	07:43:00	0
2009-07-23	07:44:00	0
2009-07-23	07:45:00	0
2009-07-23	07:46:00	0
2009-07-23	07:47:00	0
2009-07-23	07:48:00	0
2009-07-23	07:49:00	0
2009-07-23	07:50:00	0
2009-07-23	07:51:00	0
2009-07-23	07:52:00	0
2009-07-23	07:53:00	0
2009-07-23	07:54:00	0
2009-07-23	07:55:00	0
2009-07-23	07:56:00	0
2009-07-23	07:57:00	0
2009-07-23	07:58:00	0
2009-07-23	07:59:00	0
2009-07-23	08:00:00	0
2009-07-23	08:01:00	0
2009-07-23	08:02:00	0
2009-07-23	08:03:00	0
2009-07-23	08:04:00	0
2009-07-23	08:05:00	0
2009-07-23	08:06:00	0
2009-07-23	08:07:00	0
2009-07-23	08:08:00	0
2009-07-23	08:09:00	0
2009-07-23	08:10:00	0
2009-07-23	08:11:00	0
2009-07-23	08:12:00	0
2009-07-23	08:13:00	0
2009-07-23	08:14:00	0
2009-07-23	08:15:00	0
2009-07-23	08:16:00	0
2009-07-23	08:17:00	0
2009-07-23	08:18:00	0
2009-07-23	08:19:00	0
2009-07-23	08:20:00	0
2009-07-23	08:21:00	0
2009-07-23	08:22:00	0
2009-07-23	08:23:00	0
2009-07-23	08:24:00	0
2009-07-23	08:25:00	0
2009-07-23	08:26:00	0
2009-07-23	08:27:00	0
2009-07-23	08:28:00	0
2009-07-23	08:29:00	0
2009-07-23	08:30:00	0
2009-07-23	08:31:00	0
2009-07-23	08:32:00	0
2009-07-23	08:33:00	0
2009-07-23	08:34:00	0
2009-07-23	08:35:00	0
2009-07-23	08:36:00	0
2009-07-23	08:37:00	0
2009-07-23	08:38:00	0
2009-07-23	08:39:00	0
2009-07-23	08:40:00	0
2009-07-23	08:41:00	0
2009-07-23	08:42:00	0
2009-07-23	08:43:00	0
2009-07-23	08:44:00	0
2009-07-23	08:45:00	0
2009-07-23	08:46:00	0
2009-07-23	08:47:00	0
2009-07-23	08:48:00	0
2009-07-23	08:49:00	0
2009-07-23	08:50:00	0
2009-07-23	08:51:00	0
2009-07-23	08:52:00	0
2009-07-23	08:53:00	0
2009-07-23	08:54:00	0
2009-07-23	08:55:00	0
2009-07-23	08:56:00	0
2009-07-23	08:57:00	0
2009-07-23	08:58:00	0
2009-07-23	08:59:00	0
2009-07-23	09:00:00	0
2009-07-23	09:01:00	0
2009-07-23	09:02:00	0
2009-07-23	09:03:00	0
2009-07-23	09:04:00	0
2009-07-23	09:05:00	0
2009-07-23	09:06:00	0
2009-07-23	09:07:00	0
2009-07-23	09:08:00	0
2009-07-23	09:09:00	0
2009-07-23	09:10:00	0
2009-07-23	09:11:00	0
2009-07-23	09:12:00	0
2009-07-23	09:13:00	0
2009-07-23	09:14:00	0
2009-07-23	09:15:00	0
2009-07-23	09:16:00	0
2009-07-23	09:17:00	0
2009-07-23	09:18:00	0
2009-07-23	09:19:00	0
2009-07-23	09:20:00	0
2009-07-23	09:21:00	0
2009-07-23	09:22:00	0
2009-07-23	09:23:00	0
2009-07-23	09:24:00	0
2009-07-23	09:25:00	0
2009-07-23	09:26:00	0
2009-07-23	09:27:00	0
2009-07-23	09:28:00	0
2009-07-23	09:29:00	0
2009-07-23	09:30:00	0
2009-07-23	09:31:00	0
2009-07-23	09:32:00	0
2009-07-23	09:33:00	0
2009-07-23	09:34:00	0
2009-07-23	09:35:00	0
2009-07-23	09:36:00	0
2009-07-23	09:37:00	0
2009-07-23	09:38:00	0
2009-07-23	09:39:00	0
2009-07-23	09:40:00	0
2009-07-23	09:41:00	0
2009-07-23	09:42:00	0
2009-07-23	09:43:00	0
2009-07-23	09:44:00	0
2009-07-23	09:45:00	0
2009-07-23	09:46:00	0
2009-07-23	09:47:00	0
2009-07-23	09:48:00	0
2009-07-23	09:49:00	0
2009-07-23	09:50:00	0
2009-07-23	09:51:00	0
2009-07-23	09:52:00	0
2009-07-23	09:53:00	0
2009-07-23	09:54:00	0
2009-07-23	09:55:00	0
2009-07-23	09:56:00	0
2009-07-23	09:57:00	0
2009-07-23	09:58:00	0
2009-07-23	09:59:00	0
2009-07-23	10:00:00	0
2009-07-23	10:01:00	0
2009-07-23	10:02:00	0
2009-07-23	10:03:00	0
2009-07-23	10:04:00	0
2009-07-23	10:05:00	0
2009-07-23	10:06:00	0
2009-07-23	10:07:00	0
2009-07-23	10:08:00	0
2009-07-23	10:09:00	0
2009-07-23	10:10:00	0
2009-07-23	10:11:00	0
2009-07-23	10:12:00	0
2009-07-23	10:13:00	0
2009-07-23	10:14:00	0
2009-07-23	10:15:00	0
2009-07-23	10:16:00	0
2009-07-23	10:17:00	0
2009-07-23	10:18:00	0
2009-07-23	10:19:00	0
2009-07-23	10:20:00	0
2009-07-23	10:21:00	0
2009-07-23	10:22:00	0
2009-07-23	10:23:00	0
2009-07-23	10:24:00	0
2009-07-23	10:25:00	0
2009-07-23	10:26:00	0
2009-07-23	10:27:00	0
2009-07-23	10:28:00	0
2009-07-23	10:29:00	0
2009-07-23	10:30:00	0
2009-07-23	10:31:00	0
2009-07-23	10:32:00	0
2009-07-23	10:33:00	0
2009-07-23	10:34:00	0
2009-07-23	10:35:00	0
2009-07-23	10:36:00	0
2009-07-23	10:37:00	0
2009-07-23	10:38:00	0
2009-07-23	10:39:00	0
2009-07-23	10:40:00	0
2009-07-23	10:41:00	0
2009-07-23	10:42:00	0
2009-07-23	10:43:00	0
2009-07-23	10:44:00	0
2009-07-23	10:45:00	0
2009-07-23	10:46:00	0
2009-07-23	10:47:00	0
2009-07-23	10:48:00	0
2009-07-23	10:49:00	0
2009-07-23	10:50:00	0
2009-07-23	10:51:00	0
2009-07-23	10:52:00	0
2009-07-23	10:53:00	0
2009-07-23	10:54:00	0
2009-07-23	10:55:00	0
2009-07-23	10:56:00	0
2009-07-23	10:57:00	0
2009-07-23	10:58:00	0
2009-07-23	10:59:00	0
2009-07-23	11:00:00	0
2009-07-23	11:01:00	0
2009-07-23	11:02:00	0
2009-07-23	11:03:00	0
2009-07-23	11:04:00	0
2009-07-23	11:05:00	0
2009-07-23	11:06:00	0
2009-07-23	11:07:00	0
2009-07-23	11:08:00	0
2009-07-23	11:09:00	0
2009-07-23	11:10:00	0
2009-07-23	11:11:00	0
2009-07-23	11:12:00	0
2009-07-23	11:13:00	0
2009-07-23	11:14:00	0
2009-07-23	11:15:00	0
2009-07-23	11:16:00	0
2009-07-23	11:17:00	0
2009-07-23	11:18:00	0
2009-07-23	11:19:00	0
2009-07-23	11:20:00	0
2009-07-23	11:21:00	0
2009-07-23	11:22:00	0
2009-07-23	11:23:00	0
2009-07-23	11:24:00	0
2009-07-23	11:25:00	0
2009-07-23	11:26:00	0
2009-07-23	11:27:00	0
2009-07-23	11:28:00	0
2009-07-23	11:29:00	0
2009-07-23	11:30:00	0
2009-07-23	11:31:00	0
2009-07-23	11:32:00	0
2009-07-23	11:33:00	0
2009-07-23	11:34:00	0
2009-07-23	11:35:00	0
2009-07-23	11:36:00	0
2009-07-23	11:37:00	0
2009-07-23	11:38:00	0
2009-07-23	11:39:00	0
2009-07-23	11:40:00	0
2009-07-23	11:41:00	0
2009-07-23	11:42:00	0
2009-07-23	11:43:00	0
2009-07-23	11:44:00	0
2009-07-23	11:45:00	0
2009-07-23	11:46:00	0
2009-07-23	11:47:00	0
2009-07-23	11:48:00	0
2009-07-23	11:49:00	0
2009-07-23	11:50:00	0
2009-07-23	11:51:00	0
2009-07-23	11:52:00	0
2009-07-23	11:53:00	0
2009-07-23	11:54:00	0
2009-07-23	11:55:00	0
2009-07-23	11:56:00	0
2009-07-23	11:57:00	0
2009-07-23	11:58:00	0
2009-07-23	11:59:00	0
2009-07-23	12:00:00	0
2009-07-23	12:01:00	0
2009-07-23	12:02:00	0
2009-07-23	12:03:00	0
2009-07-23	12:04:00	0
2009-07-23	12:05:00	0
2009-07-23	12:06:00	0
2009-07-23	12:07:00	0
2009-07-23	12:08:00	0
2009-07-23	12:09:00	0
2009-07-23	12:10:00	0
2009-07-23	12:11:00	0
2009-07-23	12:12:00	0
2009-07-23	12:13:00	0
2009-07-23	12:14:00	0
2009-07-23	12:15:00	0
2009-07-23	12:16:00	0
2009-07-23	12:17:00	0
2009-07-23	12:18:00	0
2009-07-23	12:19:00	0
2009-07-23	12:20:00	0
2009-07-23	12:21:00	0
2009-07-23	12:22:00	0
2009-07-23	12:23:00	0
2009-07-23	12:24:00	0
2009-07-23	12:25:00	0
2009-07-23	12:26:00	0
2009-07-23	12:27:00	0
2009-07-23	12:28:00	0
2009-07-23	12:29:00	0
2009-07-23	12:30:00	0
2009-07-23	12:31:00	0
2009-07-23	12:32:00	0
2009-07-23	12:33:00	0
2009-07-23	12:34:00	0
2009-07-23	12:35:00	0
2009-07-23	12:36:00	0
2009-07-23	12:37:00	0
2009-07-23	12:38:00	0
2009-07-23	12:39:00	0
2009-07-23	12:40:00	0
2009-07-23	12:41:00	0
2009-07-23	12:42:00	0
2009-07-23	12:43:00	0
2009-07-23	12:44:00	0
2009-07-23	12:45:00	0
2009-07-23	12:46:00	0
2009-07-23	12:47:00	0
2009-07-23	12:48:00	0
2009-07-23	12:49:00	0
2009-07-23	12:50:00	0
2009-07-23	12:51:00	0
2009-07-23	12:52:00	0
2009-07-23	12:53:00	0
2009-07-23	12:54:00	0
2009-07-23	12:55:00	0
2009-07-23	12:56:00	0
2009-07-23	12:57:00	0
2009-07-23	12:58:00	0
2009-07-23	12:59:00	0
2009-07-23	13:00:00	0
2009-07-23	13:01:00	0
2009-07-23	13:02:00	0
2009-07-23	13:03:00	0
2009-07-23	13:04:00	0
2009-07-23	13:05:00	0
2009-07-23	13:06:00	0
2009-07-23	13:07:00	0
2009-07-23	13:08:00	0
2009-07-23	13:09:00	0
2009-07-23	13:10:00	0
2009-07-23	13:11:00	0
2009-07-23	13:12:00	0
2009-07-23	13:13:00	0
2009-07-23	13:14:00	0
2009-07-23	13:15:00	0
2009-07-23	13:16:00	0
2009-07-23	13:17:00	0
2009-07-23	13:18:00	0
2009-07-23	13:19:00	0
2009-07-23	13:20:00	0
2009-07-23	13:21:00	0
2009-07-23	13:22:00	0
2009-07-23	13:23:00	0
2009-07-23	13:24:00	0
2009-07-23	13:25:00	0
2009-07-23	13:26:00	0
2009-07-23	13:27:00	0
2009-07-23	13:28:00	0
2009-07-23	13:29:00	0
2009-07-23	13:30:00	0
2009-07-23	13:31:00	0
2009-07-23	13:32:00	0
2009-07-23	13:33:00	0
2009-07-23	13:34:00	0
2009-07-23	13:35:00	0
2009-07-23	13:36:00	0
2009-07-23	13:37:00	0
2009-07-23	13:38:00	0
2009-07-23	13:39:00	0
2009-07-23	13:40:00	0
2009-07-23	13:41:00	0
2009-07-23	13:42:00	0
2009-07-23	13:43:00	0
2009-07-23	13:44:00	0
2009-07-23	13:45:00	0
2009-07-23	13:46:00	0
2009-07-23	13:47:00	0
2009-07-23	13:48:00	0
2009-07-23	13:49:00	0
2009-07-23	13:50:00	0
2009-07-23	13:51:00	0
2009-07-23	13:52:00	0
2009-07-23	13:53:00	0
2009-07-23	13:54:00	0
2009-07-23	13:55:00	0
2009-07-23	13:56:00	0
2009-07-23	13:57:00	0
2009-07-23	13:58:00	0
2009-07-23	13:59:00	0
2009-07-23	14:00:00	0
2009-07-23	14:01:00	0
2009-07-23	14:02:00	0
2009-07-23	14:03:00	0
2009-07-23	14:04:00	0
2009-07-23	14:05:00	0
2009-07-23	14:06:00	0
2009-07-23	14:07:00	0
2009-07-23	14:08:00	0
2009-07-23	14:09:00	0
2009-07-23	14:10:00	0
2009-07-23	14:11:00	0
2009-07-23	14:12:00	0
2009-07-23	14:13:00	0
2009-07-23	14:14:00	0
2009-07-23	14:15:00	0
2009-07-23	14:16:00	0
2009-07-23	14:17:00	0
2009-07-23	14:18:00	0
2009-07-23	14:19:00	0
2009-07-23	14:20:00	0
2009-07-23	14:21:00	0
2009-07-23	14:22:00	0
2009-07-23	14:23:00	0
2009-07-23	14:24:00	0
2009-07-23	14:25:00	0
2009-07-23	14:26:00	0
2009-07-23	14:27:00	0
2009-07-23	14:28:00	0
2009-07-23	14:29:00	0
2009-07-23	14:30:00	0
2009-07-23	14:31:00	0
2009-07-23	14:32:00	0
2009-07-23	14:33:00	0
2009-07-23	14:34:00	0
2009-07-23	14:35:00	0
2009-07-23	14:36:00	0
2009-07-23	14:37:00	0
2009-07-23	14:38:00	0
2009-07-23	14:39:00	0
2009-07-23	14:40:00	0
2009-07-23	14:41:00	0
2009-07-23	14:42:00	0
2009-07-23	14:43:00	0
2009-07-23	14:44:00	0
2009-07-23	14:45:00	0
2009-07-23	14:46:00	0
2009-07-23	14:47:00	0
2009-07-23	14:48:00	0
2009-07-23	14:49:00	0
2009-07-23	14:50:00	0
2009-07-23	14:51:00	0
2009-07-23	14:52:00	0
2009-07-23	14:53:00	0
2009-07-23	14:54:00	0
2009-07-23	14:55:00	0
2009-07-23	14:56:00	0
2009-07-23	14:57:00	0
2009-07-23	14:58:00	0
2009-07-23	14:59:00	0
2009-07-23	15:00:00	0
2009-07-23	15:01:00	0
2009-07-23	15:02:00	0
2009-07-23	15:03:00	0
2009-07-23	15:04:00	0
2009-07-23	15:05:00	0
2009-07-23	15:06:00	0
2009-07-23	15:07:00	0
2009-07-23	15:08:00	0
2009-07-23	15:09:00	0
2009-07-23	15:10:00	0
2009-07-23	15:11:00	0
2009-07-23	15:12:00	0
2009-07-23	15:13:00	0
2009-07-23	15:14:00	0
2009-07-23	15:15:00	0
2009-07-23	15:16:00	0
2009-07-23	15:17:00	0
2009-07-23	15:18:00	0
2009-07-23	15:19:00	0
2009-07-23	15:20:00	0
2009-07-23	15:21:00	0
2009-07-23	15:22:00	0
2009-07-23	15:23:00	0
2009-07-23	15:24:00	0
2009-07-23	15:25:00	0
2009-07-23	15:26:00	0
2009-07-23	15:27:00	0
2009-07-23	15:28:00	0
2009-07-23	15:29:00	0
2009-07-23	15:30:00	0
2009-07-23	15:31:00	0
2009-07-23	15:32:00	0
2009-07-23	15:33:00	0
2009-07-23	15:34:00	0
2009-07-23	15:35:00	0
2009-07-23	15:36:00	0
2009-07-23	15:37:00	0
2009-07-23	15:38:00	0
2009-07-23	15:39:00	0
2009-07-23	15:40:00	0
2009-07-23	15:41:00	0
2009-07-23	15:42:00	0
2009-07-23	15:43:00	0
2009-07-23	15:44:00	0
2009-07-23	15:45:00	0
2009-07-23	15:46:00	0
2009-07-23	15:47:00	0
2009-07-23	15:48:00	0
2009-07-23	15:49:00	0
2009-07-23	15:50:00	0
2009-07-23	15:51:00	0
2009-07-23	15:52:00	0
2009-07-23	15:53:00	0
2009-07-23	15:54:00	0
2009-07-23	15:55:00	0
2009-07-23	15:56:00	0
2009-07-23	15:57:00	0
2009-07-23	15:58:00	0
2009-07-23	15:59:00	0
2009-07-23	16:00:00	0
2009-07-23	16:01:00	0
2009-07-23	16:02:00	0
2009-07-23	16:03:00	0
2009-07-23	16:04:00	0
2009-07-23	16:05:00	0
2009-07-23	16:06:00	0
2009-07-23	16:07:00	0
2009-07-23	16:08:00	0
2009-07-23	16:09:00	0
2009-07-23	16:10:00	0
2009-07-23	16:11:00	0
2009-07-23	16:12:00	0
2009-07-23	16:13:00	0
2009-07-23	16:14:00	0
2009-07-23	16:15:00	0
2009-07-23	16:16:00	0
2009-07-23	16:17:00	0
2009-07-23	16:18:00	0
2009-07-23	16:19:00	0
2009-07-23	16:20:00	0
2009-07-23	16:21:00	0
2009-07-23	16:22:00	0
2009-07-23	16:23:00	0
2009-07-23	16:24:00	0
2009-07-23	16:25:00	0
2009-07-23	16:26:00	0
2009-07-23	16:27:00	0
2009-07-23	16:28:00	0
2009-07-23	16:29:00	0
2009-07-23	16:30:00	0
2009-07-23	16:31:00	0
2009-07-23	16:32:00	0
2009-07-23	16:33:00	0
2009-07-23	16:34:00	0
2009-07-23	16:35:00	0
2009-07-23	16:36:00	0
2009-07-23	16:37:00	0
2009-07-23	16:38:00	0
2009-07-23	16:39:00	0
2009-07-23	16:40:00	0
2009-07-23	16:41:00	0
2009-07-23	16:42:00	0
2009-07-23	16:43:00	0
2009-07-23	16:44:00	0
2009-07-23	16:45:00	0
2009-07-23	16:46:00	0
2009-07-23	16:47:00	0
2009-07-23	16:48:00	0
2009-07-23	16:49:00	0
2009-07-23	16:50:00	0
2009-07-23	16:51:00	0
2009-07-23	16:52:00	0
2009-07-23	16:53:00	0
2009-07-23	16:54:00	0
2009-07-23	16:55:00	0
2009-07-23	16:56:00	0
2009-07-23	16:57:00	0
2009-07-23	16:58:00	0
2009-07-23	16:59:00	0
2009-07-23	17:00:00	0
2009-07-23	17:01:00	0
2009-07-23	17:02:00	0
2009-07-23	17:03:00	0
2009-07-23	17:04:00	0
2009-07-23	17:05:00	0
2009-07-23	17:06:00	0
2009-07-23	17:07:00	0
2009-07-23	17:08:00	0
2009-07-23	17:09:00	0
2009-07-23	17:10:00	0
2009-07-23	17:11:00	0
2009-07-23	17:12:00	0
2009-07-23	17:13:00	0
2009-07-23	17:14:00	0
2009-07-23	17:15:00	0
2009-07-23	17:16:00	0
2009-07-23	17:17:00	0
2009-07-23	17:18:00	0
2009-07-23	17:19:00	0
2009-07-23	17:20:00	0
2009-07-23	17:21:00	0
2009-07-23	17:22:00	0
2009-07-23	17:23:00	0
2009-07-23	17:24:00	0
2009-07-23	17:25:00	0
2009-07-23	17:26:00	0
2009-07-23	17:27:00	0
2009-07-23	17:28:00	0
2009-07-23	17:29:00	0
2009-07-23	17:30:00	0
2009-07-23	17:31:00	0
2009-07-23	17:32:00	0
2009-07-23	17:33:00	0
2009-07-23	17:34:00	0
2009-07-23	17:35:00	0
2009-07-23	17:36:00	0
2009-07-23	17:37:00	0
2009-07-23	17:38:00	0
2009-07-23	17:39:00	0
2009-07-23	17:40:00	0
2009-07-23	17:41:00	0
2009-07-23	17:42:00	0
2009-07-23	17:43:00	0
2009-07-23	17:44:00	0
2009-07-23	17:45:00	0
2009-07-23	17:46:00	0
2009-07-23	17:47:00	0
2009-07-23	17:48:00	0
2009-07-23	17:49:00	0
2009-07-23	17:50:00	0
2009-07-23	17:51:00	0
2009-07-23	17:52:00	0
2009-07-23	17:53:00	0
2009-07-23	17:54:00	0
2009-07-23	17:55:00	0
2009-07-23	17:56:00	0
2009-07-23	17:57:00	0
2009-07-23	17:58:00	0
2009-07-23	17:59:00	0
2009-07-23	18:00:00	427
2009-07-23	18:01:00	517
2009-07-23	18:02:00	47
2009-07-23	18:03:00	0
2009-07-23	18:04:00	154
2009-07-23	18:05:00	36
2009-07-23	18:06:00	0
2009-07-23	18:07:00	0
2009-07-23	18:08:00	0
2009-07-23	18:09:00	12
2009-07-23	18:10:00	0
2009-07-23	18:11:00	0
2009-07-23	18:12:00	0
2009-07-23	18:13:00	0
2009-07-23	18:14:00	0
2009-07-23	18:15:00	12
2009-07-23	18:16:00	0
2009-07-23	18:17:00	0
2009-07-23	18:18:00	0
2009-07-23	18:19:00	0
2009-07-23	18:20:00	0
2009-07-23	18:21:00	0
2009-07-23	18:22:00	0
2009-07-23	18:23:00	0
2009-07-23	18:24:00	0
2009-07-23	18:25:00	0
2009-07-23	18:26:00	0
2009-07-23	18:27:00	0
2009-07-23	18:28:00	0
2009-07-23	18:29:00	0
2009-07-23	18:30:00	0
2009-07-23	18:31:00	0
2009-07-23	18:32:00	0
2009-07-23	18:33:00	0
2009-07-23	18:34:00	12
2009-07-23	18:35:00	0
2009-07-23	18:36:00	0
2009-07-23	18:37:00	24
2009-07-23	18:38:00	0
2009-07-23	18:39:00	0
2009-07-23	18:40:00	0
2009-07-23	18:41:00	0
2009-07-23	18:42:00	0
2009-07-23	18:43:00	0
2009-07-23	18:44:00	0
2009-07-23	18:45:00	0
2009-07-23	18:46:00	0
2009-07-23	18:47:00	0
2009-07-23	18:48:00	0
2009-07-23	18:49:00	0
2009-07-23	18:50:00	12
2009-07-23	18:51:00	47
2009-07-23	18:52:00	12
2009-07-23	18:53:00	0
2009-07-23	18:54:00	0
2009-07-23	18:55:00	0
2009-07-23	18:56:00	0
2009-07-23	18:57:00	0
2009-07-23	18:58:00	0
2009-07-23	18:59:00	0
2009-07-23	19:00:00	0
2009-07-23	19:01:00	0
2009-07-23	19:02:00	0
2009-07-23	19:03:00	0
2009-07-23	19:04:00	0
2009-07-23	19:05:00	0
2009-07-23	19:06:00	12
2009-07-23	19:07:00	0
2009-07-23	19:08:00	0
2009-07-23	19:09:00	0
2009-07-23	19:10:00	0
2009-07-23	19:11:00	0
2009-07-23	19:12:00	12
2009-07-23	19:13:00	0
2009-07-23	19:14:00	0
2009-07-23	19:15:00	0
2009-07-23	19:16:00	0
2009-07-23	19:17:00	0
2009-07-23	19:18:00	0
2009-07-23	19:19:00	0
2009-07-23	19:20:00	0
2009-07-23	19:21:00	0
2009-07-23	19:22:00	0
2009-07-23	19:23:00	12
2009-07-23	19:24:00	0
2009-07-23	19:25:00	0
2009-07-23	19:26:00	0
2009-07-23	19:27:00	0
2009-07-23	19:28:00	0
2009-07-23	19:29:00	0
2009-07-23	19:30:00	0
2009-07-23	19:31:00	0
2009-07-23	19:32:00	0
2009-07-23	19:33:00	0
2009-07-23	19:34:00	0
2009-07-23	19:35:00	0
2009-07-23	19:36:00	0
2009-07-23	19:37:00	0
2009-07-23	19:38:00	0
2009-07-23	19:39:00	0
2009-07-23	19:40:00	0
2009-07-23	19:41:00	0
2009-07-23	19:42:00	0
2009-07-23	19:43:00	12
2009-07-23	19:44:00	0
2009-07-23	19:45:00	0
2009-07-23	19:46:00	0
2009-07-23	19:47:00	0
2009-07-23	19:48:00	0
2009-07-23	19:49:00	0
2009-07-23	19:50:00	0
2009-07-23	19:51:00	0
2009-07-23	19:52:00	0
2009-07-23	19:53:00	0
2009-07-23	19:54:00	0
2009-07-23	19:55:00	0
2009-07-23	19:56:00	0
2009-07-23	19:57:00	36
2009-07-23	19:58:00	0
2009-07-23	19:59:00	0
2009-07-23	20:00:00	0
2009-07-23	20:01:00	0
2009-07-23	20:02:00	0
2009-07-23	20:03:00	0
2009-07-23	20:04:00	0
2009-07-23	20:05:00	0
2009-07-23	20:06:00	0
2009-07-23	20:07:00	0
2009-07-23	20:08:00	0
2009-07-23	20:09:00	0
2009-07-23	20:10:00	0
2009-07-23	20:11:00	0
2009-07-23	20:12:00	0
2009-07-23	20:13:00	0
2009-07-23	20:14:00	0
2009-07-23	20:15:00	0
2009-07-23	20:16:00	0
2009-07-23	20:17:00	0
2009-07-23	20:18:00	0
2009-07-23	20:19:00	0
2009-07-23	20:20:00	0
2009-07-23	20:21:00	0
2009-07-23	20:22:00	0
2009-07-23	20:23:00	0
2009-07-23	20:24:00	0
2009-07-23	20:25:00	0
2009-07-23	20:26:00	0
2009-07-23	20:27:00	0
2009-07-23	20:28:00	0
2009-07-23	20:29:00	0
2009-07-23	20:30:00	0
2009-07-23	20:31:00	0
2009-07-23	20:32:00	0
2009-07-23	20:33:00	0
2009-07-23	20:34:00	0
2009-07-23	20:35:00	0
2009-07-23	20:36:00	0
2009-07-23	20:37:00	0
2009-07-23	20:38:00	0
2009-07-23	20:39:00	0
2009-07-23	20:40:00	0
2009-07-23	20:41:00	0
2009-07-23	20:42:00	0
2009-07-23	20:43:00	0
2009-07-23	20:44:00	0
2009-07-23	20:45:00	0
2009-07-23	20:46:00	0
2009-07-23	20:47:00	12
2009-07-23	20:48:00	0
2009-07-23	20:49:00	0
2009-07-23	20:50:00	0
2009-07-23	20:51:00	0
2009-07-23	20:52:00	0
2009-07-23	20:53:00	0
2009-07-23	20:54:00	0
2009-07-23	20:55:00	0
2009-07-23	20:56:00	0
2009-07-23	20:57:00	0
2009-07-23	20:58:00	0
2009-07-23	20:59:00	12
2009-07-23	21:00:00	12
2009-07-23	21:01:00	0
2009-07-23	21:02:00	0
2009-07-23	21:03:00	0
2009-07-23	21:04:00	0
2009-07-23	21:05:00	0
2009-07-23	21:06:00	0
2009-07-23	21:07:00	0
2009-07-23	21:08:00	0
2009-07-23	21:09:00	0
2009-07-23	21:10:00	0
2009-07-23	21:11:00	0
2009-07-23	21:12:00	0
2009-07-23	21:13:00	0
2009-07-23	21:14:00	0
2009-07-23	21:15:00	0
2009-07-23	21:16:00	0
2009-07-23	21:17:00	0
2009-07-23	21:18:00	0
2009-07-23	21:19:00	0
2009-07-23	21:20:00	0
2009-07-23	21:21:00	0
2009-07-23	21:22:00	0
2009-07-23	21:23:00	0
2009-07-23	21:24:00	0
2009-07-23	21:25:00	0
2009-07-23	21:26:00	12
2009-07-23	21:27:00	0
2009-07-23	21:28:00	0
2009-07-23	21:29:00	0
2009-07-23	21:30:00	0
2009-07-23	21:31:00	0
2009-07-23	21:32:00	0
2009-07-23	21:33:00	0
2009-07-23	21:34:00	0
2009-07-23	21:35:00	0
2009-07-23	21:36:00	0
2009-07-23	21:37:00	0
2009-07-23	21:38:00	0
2009-07-23	21:39:00	0
2009-07-23	21:40:00	0
2009-07-23	21:41:00	0
2009-07-23	21:42:00	0
2009-07-23	21:43:00	0
2009-07-23	21:44:00	0
2009-07-23	21:45:00	0
2009-07-23	21:46:00	0
2009-07-23	21:47:00	0
2009-07-23	21:48:00	0
2009-07-23	21:49:00	0
2009-07-23	21:50:00	12
2009-07-23	21:51:00	0
2009-07-23	21:52:00	0
2009-07-23	21:53:00	0
2009-07-23	21:54:00	0
2009-07-23	21:55:00	0
2009-07-23	21:56:00	0
2009-07-23	21:57:00	0
2009-07-23	21:58:00	0
2009-07-23	21:59:00	0
2009-07-23	22:00:00	0
2009-07-23	22:01:00	0
2009-07-23	22:02:00	0
2009-07-23	22:03:00	0
2009-07-23	22:04:00	0
2009-07-23	22:05:00	0
2009-07-23	22:06:00	0
2009-07-23	22:07:00	0
2009-07-23	22:08:00	0
2009-07-23	22:09:00	0
2009-07-23	22:10:00	0
2009-07-23	22:11:00	0
2009-07-23	22:12:00	0
2009-07-23	22:13:00	0
2009-07-23	22:14:00	0
2009-07-23	22:15:00	0
2009-07-23	22:16:00	0
2009-07-23	22:17:00	0
2009-07-23	22:18:00	0
2009-07-23	22:19:00	0
2009-07-23	22:20:00	0
2009-07-23	22:21:00	0
2009-07-23	22:22:00	0
2009-07-23	22:23:00	0
2009-07-23	22:24:00	0
2009-07-23	22:25:00	0
2009-07-23	22:26:00	12
2009-07-23	22:27:00	0
2009-07-23	22:28:00	0
2009-07-23	22:29:00	0
2009-07-23	22:30:00	0
2009-07-23	22:31:00	0
2009-07-23	22:32:00	0
2009-07-23	22:33:00	0
2009-07-23	22:34:00	0
2009-07-23	22:35:00	0
2009-07-23	22:36:00	0
2009-07-23	22:37:00	0
2009-07-23	22:38:00	0
2009-07-23	22:39:00	0
2009-07-23	22:40:00	0
2009-07-23	22:41:00	0
2009-07-23	22:42:00	0
2009-07-23	22:43:00	0
2009-07-23	22:44:00	0
2009-07-23	22:45:00	0
2009-07-23	22:46:00	0
2009-07-23	22:47:00	0
2009-07-23	22:48:00	0
2009-07-23	22:49:00	0
2009-07-23	22:50:00	0
2009-07-23	22:51:00	0
2009-07-23	22:52:00	0
2009-07-23	22:53:00	0
2009-07-23	22:54:00	0
2009-07-23	22:55:00	0
2009-07-23	22:56:00	0
2009-07-23	22:57:00	0
2009-07-23	22:58:00	0
2009-07-23	22:59:00	0
2009-07-23	23:00:00	0
2009-07-23	23:01:00	0
2009-07-23	23:02:00	0
2009-07-23	23:03:00	0
2009-07-23	23:04:00	0
2009-07-23	23:05:00	12
2009-07-23	23:06:00	0
2009-07-23	23:07:00	0
2009-07-23	23:08:00	0
2009-07-23	23:09:00	0
2009-07-23	23:10:00	0
2009-07-23	23:11:00	0
2009-07-23	23:12:00	0
2009-07-23	23:13:00	0
2009-07-23	23:14:00	0
2009-07-23	23:15:00	0
2009-07-23	23:16:00	0
2009-07-23	23:17:00	0
2009-07-23	23:18:00	0
2009-07-23	23:19:00	0
2009-07-23	23:20:00	0
2009-07-23	23:21:00	0
2009-07-23	23:22:00	0
2009-07-23	23:23:00	0
2009-07-23	23:24:00	0
2009-07-23	23:25:00	0
2009-07-23	23:26:00	0
2009-07-23	23:27:00	0
2009-07-23	23:28:00	12
2009-07-23	23:29:00	0
2009-07-23	23:30:00	0
2009-07-23	23:31:00	0
2009-07-23	23:32:00	0
2009-07-23	23:33:00	0
2009-07-23	23:34:00	0
2009-07-23	23:35:00	0
2009-07-23	23:36:00	0
2009-07-23	23:37:00	0
2009-07-23	23:38:00	0
2009-07-23	23:39:00	0
2009-07-23	23:40:00	0
2009-07-23	23:41:00	0
2009-07-23	23:42:00	0
2009-07-23	23:43:00	0
2009-07-23	23:44:00	0
2009-07-23	23:45:00	0
2009-07-23	23:46:00	0
2009-07-23	23:47:00	0
2009-07-23	23:48:00	0
2009-07-23	23:49:00	0
2009-07-23	23:50:00	0
2009-07-23	23:51:00	0
2009-07-23	23:52:00	0
2009-07-23	23:53:00	0
2009-07-23	23:54:00	0
2009-07-23	23:55:00	0
2009-07-23	23:56:00	0
2009-07-23	23:57:00	0
2009-07-23	23:58:00	0
2009-07-23	23:59:00	0
2009-07-24	00:00:00	0
2009-07-24	00:01:00	0
2009-07-24	00:02:00	0
2009-07-24	00:03:00	47
2009-07-24	00:04:00	0
2009-07-24	00:05:00	0
2009-07-24	00:06:00	0
2009-07-24	00:07:00	0
2009-07-24	00:08:00	0
2009-07-24	00:09:00	0
2009-07-24	00:10:00	0
2009-07-24	00:11:00	0
2009-07-24	00:12:00	0
2009-07-24	00:13:00	12
2009-07-24	00:14:00	0
2009-07-24	00:15:00	0
2009-07-24	00:16:00	0
2009-07-24	00:17:00	0
2009-07-24	00:18:00	12
2009-07-24	00:19:00	0
2009-07-24	00:20:00	0
2009-07-24	00:21:00	0
2009-07-24	00:22:00	0
2009-07-24	00:23:00	0
2009-07-24	00:24:00	0
2009-07-24	00:25:00	0
2009-07-24	00:26:00	0
2009-07-24	00:27:00	0
2009-07-24	00:28:00	0
2009-07-24	00:29:00	0
2009-07-24	00:30:00	0
2009-07-24	00:31:00	0
2009-07-24	00:32:00	12
2009-07-24	00:33:00	12
2009-07-24	00:34:00	0
2009-07-24	00:35:00	0
2009-07-24	00:36:00	24
2009-07-24	00:37:00	83
2009-07-24	00:38:00	254
2009-07-24	00:39:00	0
2009-07-24	00:40:00	0
2009-07-24	00:41:00	0
2009-07-24	00:42:00	0
2009-07-24	00:43:00	36
2009-07-24	00:44:00	12
2009-07-24	00:45:00	0
2009-07-24	00:46:00	0
2009-07-24	00:47:00	0
2009-07-24	00:48:00	0
2009-07-24	00:49:00	0
2009-07-24	00:50:00	0
2009-07-24	00:51:00	0
2009-07-24	00:52:00	0
2009-07-24	00:53:00	0
2009-07-24	00:54:00	0
2009-07-24	00:55:00	0
2009-07-24	00:56:00	0
2009-07-24	00:57:00	0
2009-07-24	00:58:00	0
2009-07-24	00:59:00	0
2009-07-24	01:00:00	0
2009-07-24	01:01:00	0
2009-07-24	01:02:00	0
2009-07-24	01:03:00	0
2009-07-24	01:04:00	0
2009-07-24	01:05:00	0
2009-07-24	01:06:00	0
2009-07-24	01:07:00	0
2009-07-24	01:08:00	0
2009-07-24	01:09:00	0
2009-07-24	01:10:00	0
2009-07-24	01:11:00	0
2009-07-24	01:12:00	0
2009-07-24	01:13:00	0
2009-07-24	01:14:00	0
2009-07-24	01:15:00	0
2009-07-24	01:16:00	0
2009-07-24	01:17:00	0
2009-07-24	01:18:00	0
2009-07-24	01:19:00	0
2009-07-24	01:20:00	0
2009-07-24	01:21:00	0
2009-07-24	01:22:00	0
2009-07-24	01:23:00	0
2009-07-24	01:24:00	0
2009-07-24	01:25:00	0
2009-07-24	01:26:00	0
2009-07-24	01:27:00	12
2009-07-24	01:28:00	12
2009-07-24	01:29:00	12
2009-07-24	01:30:00	0
2009-07-24	01:31:00	0
2009-07-24	01:32:00	0
2009-07-24	01:33:00	0
2009-07-24	01:34:00	0
2009-07-24	01:35:00	12
2009-07-24	01:36:00	0
2009-07-24	01:37:00	0
2009-07-24	01:38:00	0
2009-07-24	01:39:00	12
2009-07-24	01:40:00	0
2009-07-24	01:41:00	12
2009-07-24	01:42:00	0
2009-07-24	01:43:00	0
2009-07-24	01:44:00	0
2009-07-24	01:45:00	0
2009-07-24	01:46:00	0
2009-07-24	01:47:00	0
2009-07-24	01:48:00	0
2009-07-24	01:49:00	0
2009-07-24	01:50:00	0
2009-07-24	01:51:00	0
2009-07-24	01:52:00	0
2009-07-24	01:53:00	0
2009-07-24	01:54:00	0
2009-07-24	01:55:00	0
2009-07-24	01:56:00	0
2009-07-24	01:57:00	0
2009-07-24	01:58:00	0
2009-07-24	01:59:00	0
2009-07-24	02:00:00	0
2009-07-24	02:01:00	0
2009-07-24	02:02:00	0
2009-07-24	02:03:00	0
2009-07-24	02:04:00	0
2009-07-24	02:05:00	47
2009-07-24	02:06:00	0
2009-07-24	02:07:00	0
2009-07-24	02:08:00	0
2009-07-24	02:09:00	0
2009-07-24	02:10:00	0
2009-07-24	02:11:00	0
2009-07-24	02:12:00	0
2009-07-24	02:13:00	0
2009-07-24	02:14:00	0
2009-07-24	02:15:00	0
2009-07-24	02:16:00	0
2009-07-24	02:17:00	0
2009-07-24	02:18:00	0
2009-07-24	02:19:00	12
2009-07-24	02:20:00	0
2009-07-24	02:21:00	0
2009-07-24	02:22:00	0
2009-07-24	02:23:00	36
2009-07-24	02:24:00	0
2009-07-24	02:25:00	12
2009-07-24	02:26:00	24
2009-07-24	02:27:00	0
2009-07-24	02:28:00	0
2009-07-24	02:29:00	197
2009-07-24	02:30:00	0
2009-07-24	02:31:00	0
2009-07-24	02:32:00	0
2009-07-24	02:33:00	0
2009-07-24	02:34:00	0
2009-07-24	02:35:00	0
2009-07-24	02:36:00	0
2009-07-24	02:37:00	0
2009-07-24	02:38:00	0
2009-07-24	02:39:00	0
2009-07-24	02:40:00	0
2009-07-24	02:41:00	0
2009-07-24	02:42:00	0
2009-07-24	02:43:00	0
2009-07-24	02:44:00	36
2009-07-24	02:45:00	0
2009-07-24	02:46:00	0
2009-07-24	02:47:00	0
2009-07-24	02:48:00	12
2009-07-24	02:49:00	0
2009-07-24	02:50:00	0
2009-07-24	02:51:00	0
2009-07-24	02:52:00	0
2009-07-24	02:53:00	0
2009-07-24	02:54:00	0
2009-07-24	02:55:00	0
2009-07-24	02:56:00	0
2009-07-24	02:57:00	0
2009-07-24	02:58:00	0
2009-07-24	02:59:00	0
2009-07-24	03:00:00	0
2009-07-24	03:01:00	0
2009-07-24	03:02:00	0
2009-07-24	03:03:00	0
2009-07-24	03:04:00	0
2009-07-24	03:05:00	0
2009-07-24	03:06:00	12
2009-07-24	03:07:00	0
2009-07-24	03:08:00	0
2009-07-24	03:09:00	0
2009-07-24	03:10:00	0
2009-07-24	03:11:00	0
2009-07-24	03:12:00	0
2009-07-24	03:13:00	24
2009-07-24	03:14:00	0
2009-07-24	03:15:00	0
2009-07-24	03:16:00	0
2009-07-24	03:17:00	0
2009-07-24	03:18:00	0
2009-07-24	03:19:00	0
2009-07-24	03:20:00	0
2009-07-24	03:21:00	12
2009-07-24	03:22:00	12
2009-07-24	03:23:00	0
2009-07-24	03:24:00	0
2009-07-24	03:25:00	0
2009-07-24	03:26:00	0
2009-07-24	03:27:00	0
2009-07-24	03:28:00	0
2009-07-24	03:29:00	0
2009-07-24	03:30:00	0
2009-07-24	03:31:00	0
2009-07-24	03:32:00	0
2009-07-24	03:33:00	0
2009-07-24	03:34:00	0
2009-07-24	03:35:00	0
2009-07-24	03:36:00	0
2009-07-24	03:37:00	0
2009-07-24	03:38:00	0
2009-07-24	03:39:00	0
2009-07-24	03:40:00	0
2009-07-24	03:41:00	0
2009-07-24	03:42:00	24
2009-07-24	03:43:00	0
2009-07-24	03:44:00	0
2009-07-24	03:45:00	0
2009-07-24	03:46:00	0
2009-07-24	03:47:00	0
2009-07-24	03:48:00	12
2009-07-24	03:49:00	0
2009-07-24	03:50:00	0
2009-07-24	03:51:00	0
2009-07-24	03:52:00	0
2009-07-24	03:53:00	0
2009-07-24	03:54:00	0
2009-07-24	03:55:00	0
2009-07-24	03:56:00	0
2009-07-24	03:57:00	0
2009-07-24	03:58:00	0
2009-07-24	03:59:00	0
2009-07-24	04:00:00	0
2009-07-24	04:01:00	0
2009-07-24	04:02:00	0
2009-07-24	04:03:00	0
2009-07-24	04:04:00	0
2009-07-24	04:05:00	0
2009-07-24	04:06:00	0
2009-07-24	04:07:00	0
2009-07-24	04:08:00	0
2009-07-24	04:09:00	0
2009-07-24	04:10:00	0
2009-07-24	04:11:00	0
2009-07-24	04:12:00	0
2009-07-24	04:13:00	0
2009-07-24	04:14:00	0
2009-07-24	04:15:00	0
2009-07-24	04:16:00	12
2009-07-24	04:17:00	0
2009-07-24	04:18:00	0
2009-07-24	04:19:00	0
2009-07-24	04:20:00	12
2009-07-24	04:21:00	0
2009-07-24	04:22:00	0
2009-07-24	04:23:00	0
2009-07-24	04:24:00	0
2009-07-24	04:25:00	0
2009-07-24	04:26:00	0
2009-07-24	04:27:00	24
2009-07-24	04:28:00	12
2009-07-24	04:29:00	47
2009-07-24	04:30:00	0
2009-07-24	04:31:00	24
2009-07-24	04:32:00	0
2009-07-24	04:33:00	47
2009-07-24	04:34:00	0
2009-07-24	04:35:00	0
2009-07-24	04:36:00	0
2009-07-24	04:37:00	0
2009-07-24	04:38:00	0
2009-07-24	04:39:00	0
2009-07-24	04:40:00	0
2009-07-24	04:41:00	0
2009-07-24	04:42:00	0
2009-07-24	04:43:00	0
2009-07-24	04:44:00	0
2009-07-24	04:45:00	0
2009-07-24	04:46:00	0
2009-07-24	04:47:00	0
2009-07-24	04:48:00	0
2009-07-24	04:49:00	0
2009-07-24	04:50:00	0
2009-07-24	04:51:00	0
2009-07-24	04:52:00	0
2009-07-24	04:53:00	0
2009-07-24	04:54:00	0
2009-07-24	04:55:00	0
2009-07-24	04:56:00	0
2009-07-24	04:57:00	0
2009-07-24	04:58:00	0
2009-07-24	04:59:00	0
2009-07-24	05:00:00	0
2009-07-24	05:01:00	0
2009-07-24	05:02:00	0
2009-07-24	05:03:00	0
2009-07-24	05:04:00	12
2009-07-24	05:05:00	12
2009-07-24	05:06:00	0
2009-07-24	05:07:00	12
2009-07-24	05:08:00	0
2009-07-24	05:09:00	0
2009-07-24	05:10:00	0
2009-07-24	05:11:00	393
2009-07-24	05:12:00	47
2009-07-24	05:13:00	479
2009-07-24	05:14:00	1169
2009-07-24	05:15:00	296
2009-07-24	05:16:00	47
2009-07-24	05:17:00	12
2009-07-24	05:18:00	4463
2009-07-24	05:19:00	460
2009-07-24	05:20:00	59
2009-07-24	05:21:00	36
2009-07-24	05:22:00	0
2009-07-24	05:23:00	0
2009-07-24	05:24:00	24
2009-07-24	05:25:00	12
2009-07-24	05:26:00	24
2009-07-24	05:27:00	24
2009-07-24	05:28:00	12
2009-07-24	05:29:00	0
2009-07-24	05:30:00	0
2009-07-24	05:31:00	0
2009-07-24	05:32:00	83
2009-07-24	05:33:00	282
2009-07-24	05:34:00	311
2009-07-24	05:35:00	36
2009-07-24	05:36:00	12
2009-07-24	05:37:00	36
2009-07-24	05:38:00	95
2009-07-24	05:39:00	95
2009-07-24	05:40:00	154
2009-07-24	05:41:00	12
2009-07-24	05:42:00	0
2009-07-24	05:43:00	0
2009-07-24	05:44:00	47
2009-07-24	05:45:00	12
2009-07-24	05:46:00	24
2009-07-24	05:47:00	268
2009-07-24	05:48:00	443
2009-07-24	05:49:00	36
2009-07-24	05:50:00	0
2009-07-24	05:51:00	0
2009-07-24	05:52:00	0
2009-07-24	05:53:00	0
2009-07-24	05:54:00	0
2009-07-24	05:55:00	0
2009-07-24	05:56:00	71
2009-07-24	05:57:00	0
2009-07-24	05:58:00	12
2009-07-24	05:59:00	0
2009-07-24	06:00:00	0
2009-07-24	06:01:00	12
2009-07-24	06:02:00	0
2009-07-24	06:03:00	0
2009-07-24	06:04:00	0
2009-07-24	06:05:00	0
2009-07-24	06:06:00	0
2009-07-24	06:07:00	0
2009-07-24	06:08:00	36
2009-07-24	06:09:00	0
2009-07-24	06:10:00	0
2009-07-24	06:11:00	0
2009-07-24	06:12:00	0
2009-07-24	06:13:00	0
2009-07-24	06:14:00	0
2009-07-24	06:15:00	0
2009-07-24	06:16:00	0
2009-07-24	06:17:00	0
2009-07-24	06:18:00	0
2009-07-24	06:19:00	0
2009-07-24	06:20:00	0
2009-07-24	06:21:00	0
2009-07-24	06:22:00	12
2009-07-24	06:23:00	0
2009-07-24	06:24:00	0
2009-07-24	06:25:00	0
2009-07-24	06:26:00	12
2009-07-24	06:27:00	0
2009-07-24	06:28:00	0
2009-07-24	06:29:00	0
2009-07-24	06:30:00	71
2009-07-24	06:31:00	12
2009-07-24	06:32:00	12
2009-07-24	06:33:00	311
2009-07-24	06:34:00	1512
2009-07-24	06:35:00	0
2009-07-24	06:36:00	83
2009-07-24	06:37:00	197
2009-07-24	06:38:00	12
2009-07-24	06:39:00	36
2009-07-24	06:40:00	254
2009-07-24	06:41:00	211
2009-07-24	06:42:00	12
2009-07-24	06:43:00	0
2009-07-24	06:44:00	12
2009-07-24	06:45:00	83
2009-07-24	06:46:00	12
2009-07-24	06:47:00	225
2009-07-24	06:48:00	785
2009-07-24	06:49:00	1413
2009-07-24	06:50:00	71
2009-07-24	06:51:00	36
2009-07-24	06:52:00	12
2009-07-24	06:53:00	154
2009-07-24	06:54:00	979
2009-07-24	06:55:00	211
2009-07-24	06:56:00	0
2009-07-24	06:57:00	24
2009-07-24	06:58:00	0
2009-07-24	06:59:00	0
2009-07-24	07:00:00	0
2009-07-24	07:01:00	0
2009-07-24	07:02:00	0
2009-07-24	07:03:00	0
2009-07-24	07:04:00	0
2009-07-24	07:05:00	0
2009-07-24	07:06:00	0
2009-07-24	07:07:00	0
2009-07-24	07:08:00	0
2009-07-24	07:09:00	0
2009-07-24	07:10:00	0
2009-07-24	07:11:00	0
2009-07-24	07:12:00	0
2009-07-24	07:13:00	0
2009-07-24	07:14:00	0
2009-07-24	07:15:00	0
2009-07-24	07:16:00	0
2009-07-24	07:17:00	12
2009-07-24	07:18:00	0
2009-07-24	07:19:00	0
2009-07-24	07:20:00	0
2009-07-24	07:21:00	0
2009-07-24	07:22:00	0
2009-07-24	07:23:00	71
2009-07-24	07:24:00	0
2009-07-24	07:25:00	12
2009-07-24	07:26:00	197
2009-07-24	07:27:00	2356
2009-07-24	07:28:00	2705
2009-07-24	07:29:00	2309
2009-07-24	07:30:00	574
2009-07-24	07:31:00	0
2009-07-24	07:32:00	0
2009-07-24	07:33:00	0
2009-07-24	07:34:00	0
2009-07-24	07:35:00	0
2009-07-24	07:36:00	0
2009-07-24	07:37:00	0
2009-07-24	07:38:00	0
2009-07-24	07:39:00	0
2009-07-24	07:40:00	0
2009-07-24	07:41:00	0
2009-07-24	07:42:00	0
2009-07-24	07:43:00	0
2009-07-24	07:44:00	0
2009-07-24	07:45:00	0
2009-07-24	07:46:00	12
2009-07-24	07:47:00	24
2009-07-24	07:48:00	0
2009-07-24	07:49:00	36
2009-07-24	07:50:00	12
2009-07-24	07:51:00	36
2009-07-24	07:52:00	0
2009-07-24	07:53:00	47
2009-07-24	07:54:00	12
2009-07-24	07:55:00	0
2009-07-24	07:56:00	47
2009-07-24	07:57:00	0
2009-07-24	07:58:00	36
2009-07-24	07:59:00	47
2009-07-24	08:00:00	0
2009-07-24	08:01:00	12
2009-07-24	08:02:00	12
2009-07-24	08:03:00	12
2009-07-24	08:04:00	12
2009-07-24	08:05:00	0
2009-07-24	08:06:00	0
2009-07-24	08:07:00	0
2009-07-24	08:08:00	0
2009-07-24	08:09:00	0
2009-07-24	08:10:00	0
2009-07-24	08:11:00	0
2009-07-24	08:12:00	0
2009-07-24	08:13:00	12
2009-07-24	08:14:00	0
2009-07-24	08:15:00	12
2009-07-24	08:16:00	0
2009-07-24	08:17:00	12
2009-07-24	08:18:00	12
2009-07-24	08:19:00	225
2009-07-24	08:20:00	0
2009-07-24	08:21:00	0
2009-07-24	08:22:00	0
2009-07-24	08:23:00	0
2009-07-24	08:24:00	0
2009-07-24	08:25:00	0
2009-07-24	08:26:00	0
2009-07-24	08:27:00	0
2009-07-24	08:28:00	0
2009-07-24	08:29:00	0
2009-07-24	08:30:00	0
2009-07-24	08:31:00	142
2009-07-24	08:32:00	697
2009-07-24	08:33:00	0
2009-07-24	08:34:00	0
2009-07-24	08:35:00	0
2009-07-24	08:36:00	0
2009-07-24	08:37:00	0
2009-07-24	08:38:00	24
2009-07-24	08:39:00	0
2009-07-24	08:40:00	0
2009-07-24	08:41:00	0
2009-07-24	08:42:00	1057
2009-07-24	08:43:00	718
2009-07-24	08:44:00	0
2009-07-24	08:45:00	0
2009-07-24	08:46:00	0
2009-07-24	08:47:00	0
2009-07-24	08:48:00	0
2009-07-24	08:49:00	0
2009-07-24	08:50:00	0
2009-07-24	08:51:00	0
2009-07-24	08:52:00	0
2009-07-24	08:53:00	0
2009-07-24	08:54:00	0
2009-07-24	08:55:00	0
2009-07-24	08:56:00	0
2009-07-24	08:57:00	0
2009-07-24	08:58:00	0
2009-07-24	08:59:00	36
2009-07-24	09:00:00	47
2009-07-24	09:01:00	0
2009-07-24	09:02:00	0
2009-07-24	09:03:00	24
2009-07-24	09:04:00	0
2009-07-24	09:05:00	0
2009-07-24	09:06:00	0
2009-07-24	09:07:00	0
2009-07-24	09:08:00	0
[truncated: 19,611 more rows]

## Sheet: 8.6.09
Actogram, Copy Raw Data, All Days
Identity:	Geronimo
Filename:	E:\Active Research Files\meloxicam titre canine\cases\geronimo\Geronimo 8.06.09.AWC
Gender:	M
Age:	8
Height:	76.2 cm	30.0 in
Weight:	22.2 kg	48.9 lbs
Start Date:	06-Aug-2009 (Thu)
Start Time:	18:00:00
Interval:	1.00 mins
Date Stamp:	Time Stamp:	Activity Data:	Marker Press:
2009-08-06	00:00:00	0
2009-08-06	00:01:00	0
2009-08-06	00:02:00	0
2009-08-06	00:03:00	0
2009-08-06	00:04:00	0
2009-08-06	00:05:00	0
2009-08-06	00:06:00	0
2009-08-06	00:07:00	0
2009-08-06	00:08:00	0
2009-08-06	00:09:00	0
2009-08-06	00:10:00	0
2009-08-06	00:11:00	0
2009-08-06	00:12:00	0
2009-08-06	00:13:00	0
2009-08-06	00:14:00	0
2009-08-06	00:15:00	0
2009-08-06	00:16:00	0
2009-08-06	00:17:00	0
2009-08-06	00:18:00	0
2009-08-06	00:19:00	0
2009-08-06	00:20:00	0
2009-08-06	00:21:00	0
2009-08-06	00:22:00	0
2009-08-06	00:23:00	0
2009-08-06	00:24:00	0
2009-08-06	00:25:00	0
2009-08-06	00:26:00	0
2009-08-06	00:27:00	0
2009-08-06	00:28:00	0
2009-08-06	00:29:00	0
2009-08-06	00:30:00	0
2009-08-06	00:31:00	0
2009-08-06	00:32:00	0
2009-08-06	00:33:00	0
2009-08-06	00:34:00	0
2009-08-06	00:35:00	0
2009-08-06	00:36:00	0
2009-08-06	00:37:00	0
2009-08-06	00:38:00	0
2009-08-06	00:39:00	0
2009-08-06	00:40:00	0
2009-08-06	00:41:00	0
2009-08-06	00:42:00	0
2009-08-06	00:43:00	0
2009-08-06	00:44:00	0
2009-08-06	00:45:00	0
2009-08-06	00:46:00	0
2009-08-06	00:47:00	0
2009-08-06	00:48:00	0
2009-08-06	00:49:00	0
2009-08-06	00:50:00	0
2009-08-06	00:51:00	0
2009-08-06	00:52:00	0
2009-08-06	00:53:00	0
2009-08-06	00:54:00	0
2009-08-06	00:55:00	0
2009-08-06	00:56:00	0
2009-08-06	00:57:00	0
2009-08-06	00:58:00	0
2009-08-06	00:59:00	0
2009-08-06	01:00:00	0
2009-08-06	01:01:00	0
2009-08-06	01:02:00	0
2009-08-06	01:03:00	0
2009-08-06	01:04:00	0
2009-08-06	01:05:00	0
2009-08-06	01:06:00	0
2009-08-06	01:07:00	0
2009-08-06	01:08:00	0
2009-08-06	01:09:00	0
2009-08-06	01:10:00	0
2009-08-06	01:11:00	0
2009-08-06	01:12:00	0
2009-08-06	01:13:00	0
2009-08-06	01:14:00	0
2009-08-06	01:15:00	0
2009-08-06	01:16:00	0
2009-08-06	01:17:00	0
2009-08-06	01:18:00	0
2009-08-06	01:19:00	0
2009-08-06	01:20:00	0
2009-08-06	01:21:00	0
2009-08-06	01:22:00	0
2009-08-06	01:23:00	0
2009-08-06	01:24:00	0
2009-08-06	01:25:00	0
2009-08-06	01:26:00	0
2009-08-06	01:27:00	0
2009-08-06	01:28:00	0
2009-08-06	01:29:00	0
2009-08-06	01:30:00	0
2009-08-06	01:31:00	0
2009-08-06	01:32:00	0
2009-08-06	01:33:00	0
2009-08-06	01:34:00	0
2009-08-06	01:35:00	0
2009-08-06	01:36:00	0
2009-08-06	01:37:00	0
2009-08-06	01:38:00	0
2009-08-06	01:39:00	0
2009-08-06	01:40:00	0
2009-08-06	01:41:00	0
2009-08-06	01:42:00	0
2009-08-06	01:43:00	0
2009-08-06	01:44:00	0
2009-08-06	01:45:00	0
2009-08-06	01:46:00	0
2009-08-06	01:47:00	0
2009-08-06	01:48:00	0
2009-08-06	01:49:00	0
2009-08-06	01:50:00	0
2009-08-06	01:51:00	0
2009-08-06	01:52:00	0
2009-08-06	01:53:00	0
2009-08-06	01:54:00	0
2009-08-06	01:55:00	0
2009-08-06	01:56:00	0
2009-08-06	01:57:00	0
2009-08-06	01:58:00	0
2009-08-06	01:59:00	0
2009-08-06	02:00:00	0
2009-08-06	02:01:00	0
2009-08-06	02:02:00	0
2009-08-06	02:03:00	0
2009-08-06	02:04:00	0
2009-08-06	02:05:00	0
2009-08-06	02:06:00	0
2009-08-06	02:07:00	0
2009-08-06	02:08:00	0
2009-08-06	02:09:00	0
2009-08-06	02:10:00	0
2009-08-06	02:11:00	0
2009-08-06	02:12:00	0
2009-08-06	02:13:00	0
2009-08-06	02:14:00	0
2009-08-06	02:15:00	0
2009-08-06	02:16:00	0
2009-08-06	02:17:00	0
2009-08-06	02:18:00	0
2009-08-06	02:19:00	0
2009-08-06	02:20:00	0
2009-08-06	02:21:00	0
2009-08-06	02:22:00	0
2009-08-06	02:23:00	0
2009-08-06	02:24:00	0
2009-08-06	02:25:00	0
2009-08-06	02:26:00	0
2009-08-06	02:27:00	0
2009-08-06	02:28:00	0
2009-08-06	02:29:00	0
2009-08-06	02:30:00	0
2009-08-06	02:31:00	0
2009-08-06	02:32:00	0
2009-08-06	02:33:00	0
2009-08-06	02:34:00	0
2009-08-06	02:35:00	0
2009-08-06	02:36:00	0
2009-08-06	02:37:00	0
2009-08-06	02:38:00	0
2009-08-06	02:39:00	0
2009-08-06	02:40:00	0
2009-08-06	02:41:00	0
2009-08-06	02:42:00	0
2009-08-06	02:43:00	0
2009-08-06	02:44:00	0
2009-08-06	02:45:00	0
2009-08-06	02:46:00	0
2009-08-06	02:47:00	0
2009-08-06	02:48:00	0
2009-08-06	02:49:00	0
2009-08-06	02:50:00	0
2009-08-06	02:51:00	0
2009-08-06	02:52:00	0
2009-08-06	02:53:00	0
2009-08-06	02:54:00	0
2009-08-06	02:55:00	0
2009-08-06	02:56:00	0
2009-08-06	02:57:00	0
2009-08-06	02:58:00	0
2009-08-06	02:59:00	0
2009-08-06	03:00:00	0
2009-08-06	03:01:00	0
2009-08-06	03:02:00	0
2009-08-06	03:03:00	0
2009-08-06	03:04:00	0
2009-08-06	03:05:00	0
2009-08-06	03:06:00	0
2009-08-06	03:07:00	0
2009-08-06	03:08:00	0
2009-08-06	03:09:00	0
2009-08-06	03:10:00	0
2009-08-06	03:11:00	0
2009-08-06	03:12:00	0
2009-08-06	03:13:00	0
2009-08-06	03:14:00	0
2009-08-06	03:15:00	0
2009-08-06	03:16:00	0
2009-08-06	03:17:00	0
2009-08-06	03:18:00	0
2009-08-06	03:19:00	0
2009-08-06	03:20:00	0
2009-08-06	03:21:00	0
2009-08-06	03:22:00	0
2009-08-06	03:23:00	0
2009-08-06	03:24:00	0
2009-08-06	03:25:00	0
2009-08-06	03:26:00	0
2009-08-06	03:27:00	0
2009-08-06	03:28:00	0
2009-08-06	03:29:00	0
2009-08-06	03:30:00	0
2009-08-06	03:31:00	0
2009-08-06	03:32:00	0
2009-08-06	03:33:00	0
2009-08-06	03:34:00	0
2009-08-06	03:35:00	0
2009-08-06	03:36:00	0
2009-08-06	03:37:00	0
2009-08-06	03:38:00	0
2009-08-06	03:39:00	0
2009-08-06	03:40:00	0
2009-08-06	03:41:00	0
2009-08-06	03:42:00	0
2009-08-06	03:43:00	0
2009-08-06	03:44:00	0
2009-08-06	03:45:00	0
2009-08-06	03:46:00	0
2009-08-06	03:47:00	0
2009-08-06	03:48:00	0
2009-08-06	03:49:00	0
2009-08-06	03:50:00	0
2009-08-06	03:51:00	0
2009-08-06	03:52:00	0
2009-08-06	03:53:00	0
2009-08-06	03:54:00	0
2009-08-06	03:55:00	0
2009-08-06	03:56:00	0
2009-08-06	03:57:00	0
2009-08-06	03:58:00	0
2009-08-06	03:59:00	0
2009-08-06	04:00:00	0
2009-08-06	04:01:00	0
2009-08-06	04:02:00	0
2009-08-06	04:03:00	0
2009-08-06	04:04:00	0
2009-08-06	04:05:00	0
2009-08-06	04:06:00	0
2009-08-06	04:07:00	0
2009-08-06	04:08:00	0
2009-08-06	04:09:00	0
2009-08-06	04:10:00	0
2009-08-06	04:11:00	0
2009-08-06	04:12:00	0
2009-08-06	04:13:00	0
2009-08-06	04:14:00	0
2009-08-06	04:15:00	0
2009-08-06	04:16:00	0
2009-08-06	04:17:00	0
2009-08-06	04:18:00	0
2009-08-06	04:19:00	0
2009-08-06	04:20:00	0
2009-08-06	04:21:00	0
2009-08-06	04:22:00	0
2009-08-06	04:23:00	0
2009-08-06	04:24:00	0
2009-08-06	04:25:00	0
2009-08-06	04:26:00	0
2009-08-06	04:27:00	0
2009-08-06	04:28:00	0
2009-08-06	04:29:00	0
2009-08-06	04:30:00	0
2009-08-06	04:31:00	0
2009-08-06	04:32:00	0
2009-08-06	04:33:00	0
2009-08-06	04:34:00	0
2009-08-06	04:35:00	0
2009-08-06	04:36:00	0
2009-08-06	04:37:00	0
2009-08-06	04:38:00	0
2009-08-06	04:39:00	0
2009-08-06	04:40:00	0
2009-08-06	04:41:00	0
2009-08-06	04:42:00	0
2009-08-06	04:43:00	0
2009-08-06	04:44:00	0
2009-08-06	04:45:00	0
2009-08-06	04:46:00	0
2009-08-06	04:47:00	0
2009-08-06	04:48:00	0
2009-08-06	04:49:00	0
2009-08-06	04:50:00	0
2009-08-06	04:51:00	0
2009-08-06	04:52:00	0
2009-08-06	04:53:00	0
2009-08-06	04:54:00	0
2009-08-06	04:55:00	0
2009-08-06	04:56:00	0
2009-08-06	04:57:00	0
2009-08-06	04:58:00	0
2009-08-06	04:59:00	0
2009-08-06	05:00:00	0
2009-08-06	05:01:00	0
2009-08-06	05:02:00	0
2009-08-06	05:03:00	0
2009-08-06	05:04:00	0
2009-08-06	05:05:00	0
2009-08-06	05:06:00	0
2009-08-06	05:07:00	0
2009-08-06	05:08:00	0
2009-08-06	05:09:00	0
2009-08-06	05:10:00	0
2009-08-06	05:11:00	0
2009-08-06	05:12:00	0
2009-08-06	05:13:00	0
2009-08-06	05:14:00	0
2009-08-06	05:15:00	0
2009-08-06	05:16:00	0
2009-08-06	05:17:00	0
2009-08-06	05:18:00	0
2009-08-06	05:19:00	0
2009-08-06	05:20:00	0
2009-08-06	05:21:00	0
2009-08-06	05:22:00	0
2009-08-06	05:23:00	0
2009-08-06	05:24:00	0
2009-08-06	05:25:00	0
2009-08-06	05:26:00	0
2009-08-06	05:27:00	0
2009-08-06	05:28:00	0
2009-08-06	05:29:00	0
2009-08-06	05:30:00	0
2009-08-06	05:31:00	0
2009-08-06	05:32:00	0
2009-08-06	05:33:00	0
2009-08-06	05:34:00	0
2009-08-06	05:35:00	0
2009-08-06	05:36:00	0
2009-08-06	05:37:00	0
2009-08-06	05:38:00	0
2009-08-06	05:39:00	0
2009-08-06	05:40:00	0
2009-08-06	05:41:00	0
2009-08-06	05:42:00	0
2009-08-06	05:43:00	0
2009-08-06	05:44:00	0
2009-08-06	05:45:00	0
2009-08-06	05:46:00	0
2009-08-06	05:47:00	0
2009-08-06	05:48:00	0
2009-08-06	05:49:00	0
2009-08-06	05:50:00	0
2009-08-06	05:51:00	0
2009-08-06	05:52:00	0
2009-08-06	05:53:00	0
2009-08-06	05:54:00	0
2009-08-06	05:55:00	0
2009-08-06	05:56:00	0
2009-08-06	05:57:00	0
2009-08-06	05:58:00	0
2009-08-06	05:59:00	0
2009-08-06	06:00:00	0
2009-08-06	06:01:00	0
2009-08-06	06:02:00	0
2009-08-06	06:03:00	0
2009-08-06	06:04:00	0
2009-08-06	06:05:00	0
2009-08-06	06:06:00	0
2009-08-06	06:07:00	0
2009-08-06	06:08:00	0
2009-08-06	06:09:00	0
2009-08-06	06:10:00	0
2009-08-06	06:11:00	0
2009-08-06	06:12:00	0
2009-08-06	06:13:00	0
2009-08-06	06:14:00	0
2009-08-06	06:15:00	0
2009-08-06	06:16:00	0
2009-08-06	06:17:00	0
2009-08-06	06:18:00	0
2009-08-06	06:19:00	0
2009-08-06	06:20:00	0
2009-08-06	06:21:00	0
2009-08-06	06:22:00	0
2009-08-06	06:23:00	0
2009-08-06	06:24:00	0
2009-08-06	06:25:00	0
2009-08-06	06:26:00	0
2009-08-06	06:27:00	0
2009-08-06	06:28:00	0
2009-08-06	06:29:00	0
2009-08-06	06:30:00	0
2009-08-06	06:31:00	0
2009-08-06	06:32:00	0
2009-08-06	06:33:00	0
2009-08-06	06:34:00	0
2009-08-06	06:35:00	0
2009-08-06	06:36:00	0
2009-08-06	06:37:00	0
2009-08-06	06:38:00	0
2009-08-06	06:39:00	0
2009-08-06	06:40:00	0
2009-08-06	06:41:00	0
2009-08-06	06:42:00	0
2009-08-06	06:43:00	0
2009-08-06	06:44:00	0
2009-08-06	06:45:00	0
2009-08-06	06:46:00	0
2009-08-06	06:47:00	0
2009-08-06	06:48:00	0
2009-08-06	06:49:00	0
2009-08-06	06:50:00	0
2009-08-06	06:51:00	0
2009-08-06	06:52:00	0
2009-08-06	06:53:00	0
2009-08-06	06:54:00	0
2009-08-06	06:55:00	0
2009-08-06	06:56:00	0
2009-08-06	06:57:00	0
2009-08-06	06:58:00	0
2009-08-06	06:59:00	0
2009-08-06	07:00:00	0
2009-08-06	07:01:00	0
2009-08-06	07:02:00	0
2009-08-06	07:03:00	0
2009-08-06	07:04:00	0
2009-08-06	07:05:00	0
2009-08-06	07:06:00	0
2009-08-06	07:07:00	0
2009-08-06	07:08:00	0
2009-08-06	07:09:00	0
2009-08-06	07:10:00	0
2009-08-06	07:11:00	0
2009-08-06	07:12:00	0
2009-08-06	07:13:00	0
2009-08-06	07:14:00	0
2009-08-06	07:15:00	0
2009-08-06	07:16:00	0
2009-08-06	07:17:00	0
2009-08-06	07:18:00	0
2009-08-06	07:19:00	0
2009-08-06	07:20:00	0
2009-08-06	07:21:00	0
2009-08-06	07:22:00	0
2009-08-06	07:23:00	0
2009-08-06	07:24:00	0
2009-08-06	07:25:00	0
2009-08-06	07:26:00	0
2009-08-06	07:27:00	0
2009-08-06	07:28:00	0
2009-08-06	07:29:00	0
2009-08-06	07:30:00	0
2009-08-06	07:31:00	0
2009-08-06	07:32:00	0
2009-08-06	07:33:00	0
2009-08-06	07:34:00	0
2009-08-06	07:35:00	0
2009-08-06	07:36:00	0
2009-08-06	07:37:00	0
2009-08-06	07:38:00	0
2009-08-06	07:39:00	0
2009-08-06	07:40:00	0
2009-08-06	07:41:00	0
2009-08-06	07:42:00	0
2009-08-06	07:43:00	0
2009-08-06	07:44:00	0
2009-08-06	07:45:00	0
2009-08-06	07:46:00	0
2009-08-06	07:47:00	0
2009-08-06	07:48:00	0
2009-08-06	07:49:00	0
2009-08-06	07:50:00	0
2009-08-06	07:51:00	0
2009-08-06	07:52:00	0
2009-08-06	07:53:00	0
2009-08-06	07:54:00	0
2009-08-06	07:55:00	0
2009-08-06	07:56:00	0
2009-08-06	07:57:00	0
2009-08-06	07:58:00	0
2009-08-06	07:59:00	0
2009-08-06	08:00:00	0
2009-08-06	08:01:00	0
2009-08-06	08:02:00	0
2009-08-06	08:03:00	0
2009-08-06	08:04:00	0
2009-08-06	08:05:00	0
2009-08-06	08:06:00	0
2009-08-06	08:07:00	0
2009-08-06	08:08:00	0
2009-08-06	08:09:00	0
2009-08-06	08:10:00	0
2009-08-06	08:11:00	0
2009-08-06	08:12:00	0
2009-08-06	08:13:00	0
2009-08-06	08:14:00	0
2009-08-06	08:15:00	0
2009-08-06	08:16:00	0
2009-08-06	08:17:00	0
2009-08-06	08:18:00	0
2009-08-06	08:19:00	0
2009-08-06	08:20:00	0
2009-08-06	08:21:00	0
2009-08-06	08:22:00	0
2009-08-06	08:23:00	0
2009-08-06	08:24:00	0
2009-08-06	08:25:00	0
2009-08-06	08:26:00	0
2009-08-06	08:27:00	0
2009-08-06	08:28:00	0
2009-08-06	08:29:00	0
2009-08-06	08:30:00	0
2009-08-06	08:31:00	0
2009-08-06	08:32:00	0
2009-08-06	08:33:00	0
2009-08-06	08:34:00	0
2009-08-06	08:35:00	0
2009-08-06	08:36:00	0
2009-08-06	08:37:00	0
2009-08-06	08:38:00	0
2009-08-06	08:39:00	0
2009-08-06	08:40:00	0
2009-08-06	08:41:00	0
2009-08-06	08:42:00	0
2009-08-06	08:43:00	0
2009-08-06	08:44:00	0
2009-08-06	08:45:00	0
2009-08-06	08:46:00	0
2009-08-06	08:47:00	0
2009-08-06	08:48:00	0
2009-08-06	08:49:00	0
2009-08-06	08:50:00	0
2009-08-06	08:51:00	0
2009-08-06	08:52:00	0
2009-08-06	08:53:00	0
2009-08-06	08:54:00	0
2009-08-06	08:55:00	0
2009-08-06	08:56:00	0
2009-08-06	08:57:00	0
2009-08-06	08:58:00	0
2009-08-06	08:59:00	0
2009-08-06	09:00:00	0
2009-08-06	09:01:00	0
2009-08-06	09:02:00	0
2009-08-06	09:03:00	0
2009-08-06	09:04:00	0
2009-08-06	09:05:00	0
2009-08-06	09:06:00	0
2009-08-06	09:07:00	0
2009-08-06	09:08:00	0
2009-08-06	09:09:00	0
2009-08-06	09:10:00	0
2009-08-06	09:11:00	0
2009-08-06	09:12:00	0
2009-08-06	09:13:00	0
2009-08-06	09:14:00	0
2009-08-06	09:15:00	0
2009-08-06	09:16:00	0
2009-08-06	09:17:00	0
2009-08-06	09:18:00	0
2009-08-06	09:19:00	0
2009-08-06	09:20:00	0
2009-08-06	09:21:00	0
2009-08-06	09:22:00	0
2009-08-06	09:23:00	0
2009-08-06	09:24:00	0
2009-08-06	09:25:00	0
2009-08-06	09:26:00	0
2009-08-06	09:27:00	0
2009-08-06	09:28:00	0
2009-08-06	09:29:00	0
2009-08-06	09:30:00	0
2009-08-06	09:31:00	0
2009-08-06	09:32:00	0
2009-08-06	09:33:00	0
2009-08-06	09:34:00	0
2009-08-06	09:35:00	0
2009-08-06	09:36:00	0
2009-08-06	09:37:00	0
2009-08-06	09:38:00	0
2009-08-06	09:39:00	0
2009-08-06	09:40:00	0
2009-08-06	09:41:00	0
2009-08-06	09:42:00	0
2009-08-06	09:43:00	0
2009-08-06	09:44:00	0
2009-08-06	09:45:00	0
2009-08-06	09:46:00	0
2009-08-06	09:47:00	0
2009-08-06	09:48:00	0
2009-08-06	09:49:00	0
2009-08-06	09:50:00	0
2009-08-06	09:51:00	0
2009-08-06	09:52:00	0
2009-08-06	09:53:00	0
2009-08-06	09:54:00	0
2009-08-06	09:55:00	0
2009-08-06	09:56:00	0
2009-08-06	09:57:00	0
2009-08-06	09:58:00	0
2009-08-06	09:59:00	0
2009-08-06	10:00:00	0
2009-08-06	10:01:00	0
2009-08-06	10:02:00	0
2009-08-06	10:03:00	0
2009-08-06	10:04:00	0
2009-08-06	10:05:00	0
2009-08-06	10:06:00	0
2009-08-06	10:07:00	0
2009-08-06	10:08:00	0
2009-08-06	10:09:00	0
2009-08-06	10:10:00	0
2009-08-06	10:11:00	0
2009-08-06	10:12:00	0
2009-08-06	10:13:00	0
2009-08-06	10:14:00	0
2009-08-06	10:15:00	0
2009-08-06	10:16:00	0
2009-08-06	10:17:00	0
2009-08-06	10:18:00	0
2009-08-06	10:19:00	0
2009-08-06	10:20:00	0
2009-08-06	10:21:00	0
2009-08-06	10:22:00	0
2009-08-06	10:23:00	0
2009-08-06	10:24:00	0
2009-08-06	10:25:00	0
2009-08-06	10:26:00	0
2009-08-06	10:27:00	0
2009-08-06	10:28:00	0
2009-08-06	10:29:00	0
2009-08-06	10:30:00	0
2009-08-06	10:31:00	0
2009-08-06	10:32:00	0
2009-08-06	10:33:00	0
2009-08-06	10:34:00	0
2009-08-06	10:35:00	0
2009-08-06	10:36:00	0
2009-08-06	10:37:00	0
2009-08-06	10:38:00	0
2009-08-06	10:39:00	0
2009-08-06	10:40:00	0
2009-08-06	10:41:00	0
2009-08-06	10:42:00	0
2009-08-06	10:43:00	0
2009-08-06	10:44:00	0
2009-08-06	10:45:00	0
2009-08-06	10:46:00	0
2009-08-06	10:47:00	0
2009-08-06	10:48:00	0
2009-08-06	10:49:00	0
2009-08-06	10:50:00	0
2009-08-06	10:51:00	0
2009-08-06	10:52:00	0
2009-08-06	10:53:00	0
2009-08-06	10:54:00	0
2009-08-06	10:55:00	0
2009-08-06	10:56:00	0
2009-08-06	10:57:00	0
2009-08-06	10:58:00	0
2009-08-06	10:59:00	0
2009-08-06	11:00:00	0
2009-08-06	11:01:00	0
2009-08-06	11:02:00	0
2009-08-06	11:03:00	0
2009-08-06	11:04:00	0
2009-08-06	11:05:00	0
2009-08-06	11:06:00	0
2009-08-06	11:07:00	0
2009-08-06	11:08:00	0
2009-08-06	11:09:00	0
2009-08-06	11:10:00	0
2009-08-06	11:11:00	0
2009-08-06	11:12:00	0
2009-08-06	11:13:00	0
2009-08-06	11:14:00	0
2009-08-06	11:15:00	0
2009-08-06	11:16:00	0
2009-08-06	11:17:00	0
2009-08-06	11:18:00	0
2009-08-06	11:19:00	0
2009-08-06	11:20:00	0
2009-08-06	11:21:00	0
2009-08-06	11:22:00	0
2009-08-06	11:23:00	0
2009-08-06	11:24:00	0
2009-08-06	11:25:00	0
2009-08-06	11:26:00	0
2009-08-06	11:27:00	0
2009-08-06	11:28:00	0
2009-08-06	11:29:00	0
2009-08-06	11:30:00	0
2009-08-06	11:31:00	0
2009-08-06	11:32:00	0
2009-08-06	11:33:00	0
2009-08-06	11:34:00	0
2009-08-06	11:35:00	0
2009-08-06	11:36:00	0
2009-08-06	11:37:00	0
2009-08-06	11:38:00	0
2009-08-06	11:39:00	0
2009-08-06	11:40:00	0
2009-08-06	11:41:00	0
2009-08-06	11:42:00	0
2009-08-06	11:43:00	0
2009-08-06	11:44:00	0
2009-08-06	11:45:00	0
2009-08-06	11:46:00	0
2009-08-06	11:47:00	0
2009-08-06	11:48:00	0
2009-08-06	11:49:00	0
2009-08-06	11:50:00	0
2009-08-06	11:51:00	0
2009-08-06	11:52:00	0
2009-08-06	11:53:00	0
2009-08-06	11:54:00	0
2009-08-06	11:55:00	0
2009-08-06	11:56:00	0
2009-08-06	11:57:00	0
2009-08-06	11:58:00	0
2009-08-06	11:59:00	0
2009-08-06	12:00:00	0
2009-08-06	12:01:00	0
2009-08-06	12:02:00	0
2009-08-06	12:03:00	0
2009-08-06	12:04:00	0
2009-08-06	12:05:00	0
2009-08-06	12:06:00	0
2009-08-06	12:07:00	0
2009-08-06	12:08:00	0
2009-08-06	12:09:00	0
2009-08-06	12:10:00	0
2009-08-06	12:11:00	0
2009-08-06	12:12:00	0
2009-08-06	12:13:00	0
2009-08-06	12:14:00	0
2009-08-06	12:15:00	0
2009-08-06	12:16:00	0
2009-08-06	12:17:00	0
2009-08-06	12:18:00	0
2009-08-06	12:19:00	0
2009-08-06	12:20:00	0
2009-08-06	12:21:00	0
2009-08-06	12:22:00	0
2009-08-06	12:23:00	0
2009-08-06	12:24:00	0
2009-08-06	12:25:00	0
2009-08-06	12:26:00	0
2009-08-06	12:27:00	0
2009-08-06	12:28:00	0
2009-08-06	12:29:00	0
2009-08-06	12:30:00	0
2009-08-06	12:31:00	0
2009-08-06	12:32:00	0
2009-08-06	12:33:00	0
2009-08-06	12:34:00	0
2009-08-06	12:35:00	0
2009-08-06	12:36:00	0
2009-08-06	12:37:00	0
2009-08-06	12:38:00	0
2009-08-06	12:39:00	0
2009-08-06	12:40:00	0
2009-08-06	12:41:00	0
2009-08-06	12:42:00	0
2009-08-06	12:43:00	0
2009-08-06	12:44:00	0
2009-08-06	12:45:00	0
2009-08-06	12:46:00	0
2009-08-06	12:47:00	0
2009-08-06	12:48:00	0
2009-08-06	12:49:00	0
2009-08-06	12:50:00	0
2009-08-06	12:51:00	0
2009-08-06	12:52:00	0
2009-08-06	12:53:00	0
2009-08-06	12:54:00	0
2009-08-06	12:55:00	0
2009-08-06	12:56:00	0
2009-08-06	12:57:00	0
2009-08-06	12:58:00	0
2009-08-06	12:59:00	0
2009-08-06	13:00:00	0
2009-08-06	13:01:00	0
2009-08-06	13:02:00	0
2009-08-06	13:03:00	0
2009-08-06	13:04:00	0
2009-08-06	13:05:00	0
2009-08-06	13:06:00	0
2009-08-06	13:07:00	0
2009-08-06	13:08:00	0
2009-08-06	13:09:00	0
2009-08-06	13:10:00	0
2009-08-06	13:11:00	0
2009-08-06	13:12:00	0
2009-08-06	13:13:00	0
2009-08-06	13:14:00	0
2009-08-06	13:15:00	0
2009-08-06	13:16:00	0
2009-08-06	13:17:00	0
2009-08-06	13:18:00	0
2009-08-06	13:19:00	0
2009-08-06	13:20:00	0
2009-08-06	13:21:00	0
2009-08-06	13:22:00	0
2009-08-06	13:23:00	0
2009-08-06	13:24:00	0
2009-08-06	13:25:00	0
2009-08-06	13:26:00	0
2009-08-06	13:27:00	0
2009-08-06	13:28:00	0
2009-08-06	13:29:00	0
2009-08-06	13:30:00	0
2009-08-06	13:31:00	0
2009-08-06	13:32:00	0
2009-08-06	13:33:00	0
2009-08-06	13:34:00	0
2009-08-06	13:35:00	0
2009-08-06	13:36:00	0
2009-08-06	13:37:00	0
2009-08-06	13:38:00	0
2009-08-06	13:39:00	0
2009-08-06	13:40:00	0
2009-08-06	13:41:00	0
2009-08-06	13:42:00	0
2009-08-06	13:43:00	0
2009-08-06	13:44:00	0
2009-08-06	13:45:00	0
2009-08-06	13:46:00	0
2009-08-06	13:47:00	0
2009-08-06	13:48:00	0
2009-08-06	13:49:00	0
2009-08-06	13:50:00	0
2009-08-06	13:51:00	0
2009-08-06	13:52:00	0
2009-08-06	13:53:00	0
2009-08-06	13:54:00	0
2009-08-06	13:55:00	0
2009-08-06	13:56:00	0
2009-08-06	13:57:00	0
2009-08-06	13:58:00	0
2009-08-06	13:59:00	0
2009-08-06	14:00:00	0
2009-08-06	14:01:00	0
2009-08-06	14:02:00	0
2009-08-06	14:03:00	0
2009-08-06	14:04:00	0
2009-08-06	14:05:00	0
2009-08-06	14:06:00	0
2009-08-06	14:07:00	0
2009-08-06	14:08:00	0
2009-08-06	14:09:00	0
2009-08-06	14:10:00	0
2009-08-06	14:11:00	0
2009-08-06	14:12:00	0
2009-08-06	14:13:00	0
2009-08-06	14:14:00	0
2009-08-06	14:15:00	0
2009-08-06	14:16:00	0
2009-08-06	14:17:00	0
2009-08-06	14:18:00	0
2009-08-06	14:19:00	0
2009-08-06	14:20:00	0
2009-08-06	14:21:00	0
2009-08-06	14:22:00	0
2009-08-06	14:23:00	0
2009-08-06	14:24:00	0
2009-08-06	14:25:00	0
2009-08-06	14:26:00	0
2009-08-06	14:27:00	0
2009-08-06	14:28:00	0
2009-08-06	14:29:00	0
2009-08-06	14:30:00	0
2009-08-06	14:31:00	0
2009-08-06	14:32:00	0
2009-08-06	14:33:00	0
2009-08-06	14:34:00	0
2009-08-06	14:35:00	0
2009-08-06	14:36:00	0
2009-08-06	14:37:00	0
2009-08-06	14:38:00	0
2009-08-06	14:39:00	0
2009-08-06	14:40:00	0
2009-08-06	14:41:00	0
2009-08-06	14:42:00	0
2009-08-06	14:43:00	0
2009-08-06	14:44:00	0
2009-08-06	14:45:00	0
2009-08-06	14:46:00	0
2009-08-06	14:47:00	0
2009-08-06	14:48:00	0
2009-08-06	14:49:00	0
2009-08-06	14:50:00	0
2009-08-06	14:51:00	0
2009-08-06	14:52:00	0
2009-08-06	14:53:00	0
2009-08-06	14:54:00	0
2009-08-06	14:55:00	0
2009-08-06	14:56:00	0
2009-08-06	14:57:00	0
2009-08-06	14:58:00	0
2009-08-06	14:59:00	0
2009-08-06	15:00:00	0
2009-08-06	15:01:00	0
2009-08-06	15:02:00	0
2009-08-06	15:03:00	0
2009-08-06	15:04:00	0
2009-08-06	15:05:00	0
2009-08-06	15:06:00	0
2009-08-06	15:07:00	0
2009-08-06	15:08:00	0
2009-08-06	15:09:00	0
2009-08-06	15:10:00	0
2009-08-06	15:11:00	0
2009-08-06	15:12:00	0
2009-08-06	15:13:00	0
2009-08-06	15:14:00	0
2009-08-06	15:15:00	0
2009-08-06	15:16:00	0
2009-08-06	15:17:00	0
2009-08-06	15:18:00	0
2009-08-06	15:19:00	0
2009-08-06	15:20:00	0
2009-08-06	15:21:00	0
2009-08-06	15:22:00	0
2009-08-06	15:23:00	0
2009-08-06	15:24:00	0
2009-08-06	15:25:00	0
2009-08-06	15:26:00	0
2009-08-06	15:27:00	0
2009-08-06	15:28:00	0
2009-08-06	15:29:00	0
2009-08-06	15:30:00	0
2009-08-06	15:31:00	0
2009-08-06	15:32:00	0
2009-08-06	15:33:00	0
2009-08-06	15:34:00	0
2009-08-06	15:35:00	0
2009-08-06	15:36:00	0
2009-08-06	15:37:00	0
2009-08-06	15:38:00	0
2009-08-06	15:39:00	0
2009-08-06	15:40:00	0
2009-08-06	15:41:00	0
2009-08-06	15:42:00	0
2009-08-06	15:43:00	0
2009-08-06	15:44:00	0
2009-08-06	15:45:00	0
2009-08-06	15:46:00	0
2009-08-06	15:47:00	0
2009-08-06	15:48:00	0
2009-08-06	15:49:00	0
2009-08-06	15:50:00	0
2009-08-06	15:51:00	0
2009-08-06	15:52:00	0
2009-08-06	15:53:00	0
2009-08-06	15:54:00	0
2009-08-06	15:55:00	0
2009-08-06	15:56:00	0
2009-08-06	15:57:00	0
2009-08-06	15:58:00	0
2009-08-06	15:59:00	0
2009-08-06	16:00:00	0
2009-08-06	16:01:00	0
2009-08-06	16:02:00	0
2009-08-06	16:03:00	0
2009-08-06	16:04:00	0
2009-08-06	16:05:00	0
2009-08-06	16:06:00	0
2009-08-06	16:07:00	0
2009-08-06	16:08:00	0
2009-08-06	16:09:00	0
2009-08-06	16:10:00	0
2009-08-06	16:11:00	0
2009-08-06	16:12:00	0
2009-08-06	16:13:00	0
2009-08-06	16:14:00	0
2009-08-06	16:15:00	0
2009-08-06	16:16:00	0
2009-08-06	16:17:00	0
2009-08-06	16:18:00	0
2009-08-06	16:19:00	0
2009-08-06	16:20:00	0
2009-08-06	16:21:00	0
2009-08-06	16:22:00	0
2009-08-06	16:23:00	0
2009-08-06	16:24:00	0
2009-08-06	16:25:00	0
2009-08-06	16:26:00	0
2009-08-06	16:27:00	0
2009-08-06	16:28:00	0
2009-08-06	16:29:00	0
2009-08-06	16:30:00	0
2009-08-06	16:31:00	0
2009-08-06	16:32:00	0
2009-08-06	16:33:00	0
2009-08-06	16:34:00	0
2009-08-06	16:35:00	0
2009-08-06	16:36:00	0
2009-08-06	16:37:00	0
2009-08-06	16:38:00	0
2009-08-06	16:39:00	0
2009-08-06	16:40:00	0
2009-08-06	16:41:00	0
2009-08-06	16:42:00	0
2009-08-06	16:43:00	0
2009-08-06	16:44:00	0
2009-08-06	16:45:00	0
2009-08-06	16:46:00	0
2009-08-06	16:47:00	0
2009-08-06	16:48:00	0
2009-08-06	16:49:00	0
2009-08-06	16:50:00	0
2009-08-06	16:51:00	0
2009-08-06	16:52:00	0
2009-08-06	16:53:00	0
2009-08-06	16:54:00	0
2009-08-06	16:55:00	0
2009-08-06	16:56:00	0
2009-08-06	16:57:00	0
2009-08-06	16:58:00	0
2009-08-06	16:59:00	0
2009-08-06	17:00:00	0
2009-08-06	17:01:00	0
2009-08-06	17:02:00	0
2009-08-06	17:03:00	0
2009-08-06	17:04:00	0
2009-08-06	17:05:00	0
2009-08-06	17:06:00	0
2009-08-06	17:07:00	0
2009-08-06	17:08:00	0
2009-08-06	17:09:00	0
2009-08-06	17:10:00	0
2009-08-06	17:11:00	0
2009-08-06	17:12:00	0
2009-08-06	17:13:00	0
2009-08-06	17:14:00	0
2009-08-06	17:15:00	0
2009-08-06	17:16:00	0
2009-08-06	17:17:00	0
2009-08-06	17:18:00	0
2009-08-06	17:19:00	0
2009-08-06	17:20:00	0
2009-08-06	17:21:00	0
2009-08-06	17:22:00	0
2009-08-06	17:23:00	0
2009-08-06	17:24:00	0
2009-08-06	17:25:00	0
2009-08-06	17:26:00	0
2009-08-06	17:27:00	0
2009-08-06	17:28:00	0
2009-08-06	17:29:00	0
2009-08-06	17:30:00	0
2009-08-06	17:31:00	0
2009-08-06	17:32:00	0
2009-08-06	17:33:00	0
2009-08-06	17:34:00	0
2009-08-06	17:35:00	0
2009-08-06	17:36:00	0
2009-08-06	17:37:00	0
2009-08-06	17:38:00	0
2009-08-06	17:39:00	0
2009-08-06	17:40:00	0
2009-08-06	17:41:00	0
2009-08-06	17:42:00	0
2009-08-06	17:43:00	0
2009-08-06	17:44:00	0
2009-08-06	17:45:00	0
2009-08-06	17:46:00	0
2009-08-06	17:47:00	0
2009-08-06	17:48:00	0
2009-08-06	17:49:00	0
2009-08-06	17:50:00	0
2009-08-06	17:51:00	0
2009-08-06	17:52:00	0
2009-08-06	17:53:00	0
2009-08-06	17:54:00	0
2009-08-06	17:55:00	0
2009-08-06	17:56:00	0
2009-08-06	17:57:00	0
2009-08-06	17:58:00	0
2009-08-06	17:59:00	0
2009-08-06	18:00:00	0	M
2009-08-06	18:01:00	0
2009-08-06	18:02:00	59
2009-08-06	18:03:00	36
2009-08-06	18:04:00	0
2009-08-06	18:05:00	47
2009-08-06	18:06:00	0
2009-08-06	18:07:00	24
2009-08-06	18:08:00	83
2009-08-06	18:09:00	12
2009-08-06	18:10:00	36
2009-08-06	18:11:00	83
2009-08-06	18:12:00	12
2009-08-06	18:13:00	12
2009-08-06	18:14:00	24
2009-08-06	18:15:00	225
2009-08-06	18:16:00	360
2009-08-06	18:17:00	1169
2009-08-06	18:18:00	555
2009-08-06	18:19:00	0
2009-08-06	18:20:00	12
2009-08-06	18:21:00	71
2009-08-06	18:22:00	130
2009-08-06	18:23:00	517
2009-08-06	18:24:00	154
2009-08-06	18:25:00	0
2009-08-06	18:26:00	0
2009-08-06	18:27:00	0
2009-08-06	18:28:00	0
2009-08-06	18:29:00	0
2009-08-06	18:30:00	12
2009-08-06	18:31:00	0
2009-08-06	18:32:00	197
2009-08-06	18:33:00	12
2009-08-06	18:34:00	0
2009-08-06	18:35:00	36
2009-08-06	18:36:00	12
2009-08-06	18:37:00	12
2009-08-06	18:38:00	311
2009-08-06	18:39:00	654
2009-08-06	18:40:00	808
2009-08-06	18:41:00	697
2009-08-06	18:42:00	856
2009-08-06	18:43:00	1318
2009-08-06	18:44:00	1197
2009-08-06	18:45:00	168
2009-08-06	18:46:00	168
2009-08-06	18:47:00	296
2009-08-06	18:48:00	360
2009-08-06	18:49:00	36
2009-08-06	18:50:00	119
2009-08-06	18:51:00	268
2009-08-06	18:52:00	856
2009-08-06	18:53:00	168
2009-08-06	18:54:00	0
2009-08-06	18:55:00	36
2009-08-06	18:56:00	59
2009-08-06	18:57:00	83
2009-08-06	18:58:00	59
2009-08-06	18:59:00	71
2009-08-06	19:00:00	24
2009-08-06	19:01:00	460
2009-08-06	19:02:00	633
2009-08-06	19:03:00	0
2009-08-06	19:04:00	0
2009-08-06	19:05:00	0
2009-08-06	19:06:00	0
2009-08-06	19:07:00	0
2009-08-06	19:08:00	0
2009-08-06	19:09:00	0
2009-08-06	19:10:00	0
2009-08-06	19:11:00	168
2009-08-06	19:12:00	0
2009-08-06	19:13:00	0
2009-08-06	19:14:00	47
2009-08-06	19:15:00	24
2009-08-06	19:16:00	71
2009-08-06	19:17:00	0
2009-08-06	19:18:00	71
2009-08-06	19:19:00	0
2009-08-06	19:20:00	0
2009-08-06	19:21:00	12
2009-08-06	19:22:00	24
2009-08-06	19:23:00	71
2009-08-06	19:24:00	71
2009-08-06	19:25:00	0
2009-08-06	19:26:00	0
2009-08-06	19:27:00	0
2009-08-06	19:28:00	0
2009-08-06	19:29:00	0
2009-08-06	19:30:00	47
2009-08-06	19:31:00	0
2009-08-06	19:32:00	0
2009-08-06	19:33:00	0
2009-08-06	19:34:00	0
2009-08-06	19:35:00	0
2009-08-06	19:36:00	0
2009-08-06	19:37:00	12
2009-08-06	19:38:00	0
2009-08-06	19:39:00	0
2009-08-06	19:40:00	24
2009-08-06	19:41:00	119
2009-08-06	19:42:00	107
2009-08-06	19:43:00	47
2009-08-06	19:44:00	0
2009-08-06	19:45:00	24
2009-08-06	19:46:00	0
2009-08-06	19:47:00	0
2009-08-06	19:48:00	0
2009-08-06	19:49:00	0
2009-08-06	19:50:00	47
2009-08-06	19:51:00	154
2009-08-06	19:52:00	12
2009-08-06	19:53:00	36
2009-08-06	19:54:00	154
2009-08-06	19:55:00	24
2009-08-06	19:56:00	59
2009-08-06	19:57:00	24
2009-08-06	19:58:00	12
2009-08-06	19:59:00	12
2009-08-06	20:00:00	47
2009-08-06	20:01:00	0
2009-08-06	20:02:00	239
2009-08-06	20:03:00	95
2009-08-06	20:04:00	0
2009-08-06	20:05:00	0
2009-08-06	20:06:00	0
2009-08-06	20:07:00	0
2009-08-06	20:08:00	0
2009-08-06	20:09:00	0
2009-08-06	20:10:00	0
2009-08-06	20:11:00	0
2009-08-06	20:12:00	0
2009-08-06	20:13:00	0
2009-08-06	20:14:00	0
2009-08-06	20:15:00	0
2009-08-06	20:16:00	0
2009-08-06	20:17:00	0
2009-08-06	20:18:00	0
2009-08-06	20:19:00	0
2009-08-06	20:20:00	0
2009-08-06	20:21:00	0
2009-08-06	20:22:00	0
2009-08-06	20:23:00	0
2009-08-06	20:24:00	0
2009-08-06	20:25:00	0
2009-08-06	20:26:00	0
2009-08-06	20:27:00	0
2009-08-06	20:28:00	12
2009-08-06	20:29:00	0
2009-08-06	20:30:00	0
2009-08-06	20:31:00	0
2009-08-06	20:32:00	0
2009-08-06	20:33:00	0
2009-08-06	20:34:00	0
2009-08-06	20:35:00	0
2009-08-06	20:36:00	0
2009-08-06	20:37:00	0
2009-08-06	20:38:00	0
2009-08-06	20:39:00	0
2009-08-06	20:40:00	0
2009-08-06	20:41:00	0
2009-08-06	20:42:00	0
2009-08-06	20:43:00	0
2009-08-06	20:44:00	0
2009-08-06	20:45:00	0
2009-08-06	20:46:00	36
2009-08-06	20:47:00	12
2009-08-06	20:48:00	0
2009-08-06	20:49:00	0
2009-08-06	20:50:00	0
2009-08-06	20:51:00	0
2009-08-06	20:52:00	0
2009-08-06	20:53:00	0
2009-08-06	20:54:00	0
2009-08-06	20:55:00	59
2009-08-06	20:56:00	0
2009-08-06	20:57:00	0
2009-08-06	20:58:00	0
2009-08-06	20:59:00	0
2009-08-06	21:00:00	0
2009-08-06	21:01:00	36
2009-08-06	21:02:00	36
2009-08-06	21:03:00	0
2009-08-06	21:04:00	0
2009-08-06	21:05:00	0
2009-08-06	21:06:00	0
2009-08-06	21:07:00	0
2009-08-06	21:08:00	0
2009-08-06	21:09:00	0
2009-08-06	21:10:00	0
2009-08-06	21:11:00	0
2009-08-06	21:12:00	0
2009-08-06	21:13:00	0
2009-08-06	21:14:00	0
2009-08-06	21:15:00	0
2009-08-06	21:16:00	0
2009-08-06	21:17:00	24
2009-08-06	21:18:00	24
2009-08-06	21:19:00	0
2009-08-06	21:20:00	0
2009-08-06	21:21:00	0
2009-08-06	21:22:00	0
2009-08-06	21:23:00	0
2009-08-06	21:24:00	0
2009-08-06	21:25:00	0
2009-08-06	21:26:00	0
2009-08-06	21:27:00	0
2009-08-06	21:28:00	0
2009-08-06	21:29:00	0
2009-08-06	21:30:00	0
2009-08-06	21:31:00	0
2009-08-06	21:32:00	0
2009-08-06	21:33:00	0
2009-08-06	21:34:00	0
2009-08-06	21:35:00	0
2009-08-06	21:36:00	0
2009-08-06	21:37:00	0
2009-08-06	21:38:00	0
2009-08-06	21:39:00	0
2009-08-06	21:40:00	95
2009-08-06	21:41:00	0
2009-08-06	21:42:00	0
2009-08-06	21:43:00	0
2009-08-06	21:44:00	0
2009-08-06	21:45:00	0
2009-08-06	21:46:00	0
2009-08-06	21:47:00	0
2009-08-06	21:48:00	0
2009-08-06	21:49:00	0
2009-08-06	21:50:00	0
2009-08-06	21:51:00	0
2009-08-06	21:52:00	59
2009-08-06	21:53:00	0
2009-08-06	21:54:00	0
2009-08-06	21:55:00	0
2009-08-06	21:56:00	0
2009-08-06	21:57:00	0
2009-08-06	21:58:00	0
2009-08-06	21:59:00	71
2009-08-06	22:00:00	1197
2009-08-06	22:01:00	1545
2009-08-06	22:02:00	24
2009-08-06	22:03:00	12
2009-08-06	22:04:00	0
2009-08-06	22:05:00	36
2009-08-06	22:06:00	12
2009-08-06	22:07:00	24
2009-08-06	22:08:00	12
2009-08-06	22:09:00	0
2009-08-06	22:10:00	59
2009-08-06	22:11:00	24
2009-08-06	22:12:00	130
2009-08-06	22:13:00	83
2009-08-06	22:14:00	36
2009-08-06	22:15:00	0
2009-08-06	22:16:00	0
2009-08-06	22:17:00	36
2009-08-06	22:18:00	12
2009-08-06	22:19:00	0
2009-08-06	22:20:00	0
2009-08-06	22:21:00	24
2009-08-06	22:22:00	36
2009-08-06	22:23:00	47
2009-08-06	22:24:00	24
2009-08-06	22:25:00	0
2009-08-06	22:26:00	12
2009-08-06	22:27:00	12
2009-08-06	22:28:00	47
2009-08-06	22:29:00	36
2009-08-06	22:30:00	12
2009-08-06	22:31:00	0
2009-08-06	22:32:00	0
2009-08-06	22:33:00	0
2009-08-06	22:34:00	0
2009-08-06	22:35:00	0
2009-08-06	22:36:00	0
2009-08-06	22:37:00	0
2009-08-06	22:38:00	0
2009-08-06	22:39:00	0
2009-08-06	22:40:00	0
2009-08-06	22:41:00	0
2009-08-06	22:42:00	0
2009-08-06	22:43:00	0
2009-08-06	22:44:00	0
2009-08-06	22:45:00	0
2009-08-06	22:46:00	498
2009-08-06	22:47:00	344
2009-08-06	22:48:00	197
2009-08-06	22:49:00	36
2009-08-06	22:50:00	71
2009-08-06	22:51:00	593
2009-08-06	22:52:00	36
2009-08-06	22:53:00	0
2009-08-06	22:54:00	0
2009-08-06	22:55:00	0
2009-08-06	22:56:00	460
2009-08-06	22:57:00	479
2009-08-06	22:58:00	0
2009-08-06	22:59:00	0
2009-08-06	23:00:00	0
2009-08-06	23:01:00	0
2009-08-06	23:02:00	0
2009-08-06	23:03:00	0
2009-08-06	23:04:00	0
2009-08-06	23:05:00	0
2009-08-06	23:06:00	0
2009-08-06	23:07:00	0
2009-08-06	23:08:00	0
2009-08-06	23:09:00	0
2009-08-06	23:10:00	0
2009-08-06	23:11:00	0
2009-08-06	23:12:00	0
2009-08-06	23:13:00	0
2009-08-06	23:14:00	47
2009-08-06	23:15:00	0
2009-08-06	23:16:00	83
2009-08-06	23:17:00	154
2009-08-06	23:18:00	0
2009-08-06	23:19:00	0
2009-08-06	23:20:00	0
2009-08-06	23:21:00	0
2009-08-06	23:22:00	0
2009-08-06	23:23:00	0
2009-08-06	23:24:00	0
2009-08-06	23:25:00	0
2009-08-06	23:26:00	0
2009-08-06	23:27:00	0
2009-08-06	23:28:00	0
2009-08-06	23:29:00	0
2009-08-06	23:30:00	0
2009-08-06	23:31:00	0
2009-08-06	23:32:00	0
2009-08-06	23:33:00	0
2009-08-06	23:34:00	0
2009-08-06	23:35:00	12
2009-08-06	23:36:00	0
2009-08-06	23:37:00	0
2009-08-06	23:38:00	0
2009-08-06	23:39:00	0
2009-08-06	23:40:00	0
2009-08-06	23:41:00	0
2009-08-06	23:42:00	0
2009-08-06	23:43:00	59
2009-08-06	23:44:00	1005
2009-08-06	23:45:00	183
2009-08-06	23:46:00	0
2009-08-06	23:47:00	0
2009-08-06	23:48:00	0
2009-08-06	23:49:00	0
2009-08-06	23:50:00	0
2009-08-06	23:51:00	0
2009-08-06	23:52:00	0
2009-08-06	23:53:00	0
2009-08-06	23:54:00	0
2009-08-06	23:55:00	0
2009-08-06	23:56:00	0
2009-08-06	23:57:00	0
2009-08-06	23:58:00	0
2009-08-06	23:59:00	0
2009-08-07	00:00:00	0
2009-08-07	00:01:00	0
2009-08-07	00:02:00	0
2009-08-07	00:03:00	36
2009-08-07	00:04:00	0
2009-08-07	00:05:00	0
2009-08-07	00:06:00	0
2009-08-07	00:07:00	0
2009-08-07	00:08:00	239
2009-08-07	00:09:00	393
2009-08-07	00:10:00	119
2009-08-07	00:11:00	12
2009-08-07	00:12:00	36
2009-08-07	00:13:00	12
2009-08-07	00:14:00	83
2009-08-07	00:15:00	36
2009-08-07	00:16:00	24
2009-08-07	00:17:00	12
2009-08-07	00:18:00	12
2009-08-07	00:19:00	498
2009-08-07	00:20:00	36
2009-08-07	00:21:00	83
2009-08-07	00:22:00	360
2009-08-07	00:23:00	95
2009-08-07	00:24:00	12
2009-08-07	00:25:00	12
2009-08-07	00:26:00	59
2009-08-07	00:27:00	107
2009-08-07	00:28:00	0
2009-08-07	00:29:00	12
2009-08-07	00:30:00	71
2009-08-07	00:31:00	197
2009-08-07	00:32:00	130
2009-08-07	00:33:00	59
2009-08-07	00:34:00	0
2009-08-07	00:35:00	0
2009-08-07	00:36:00	12
2009-08-07	00:37:00	0
2009-08-07	00:38:00	24
2009-08-07	00:39:00	0
2009-08-07	00:40:00	0
2009-08-07	00:41:00	12
2009-08-07	00:42:00	0
2009-08-07	00:43:00	0
2009-08-07	00:44:00	0
2009-08-07	00:45:00	12
2009-08-07	00:46:00	254
2009-08-07	00:47:00	71
2009-08-07	00:48:00	0
2009-08-07	00:49:00	0
2009-08-07	00:50:00	0
2009-08-07	00:51:00	0
2009-08-07	00:52:00	0
2009-08-07	00:53:00	0
2009-08-07	00:54:00	0
2009-08-07	00:55:00	0
2009-08-07	00:56:00	0
2009-08-07	00:57:00	83
2009-08-07	00:58:00	24
2009-08-07	00:59:00	0
2009-08-07	01:00:00	0
2009-08-07	01:01:00	0
2009-08-07	01:02:00	142
2009-08-07	01:03:00	12
2009-08-07	01:04:00	24
2009-08-07	01:05:00	24
2009-08-07	01:06:00	24
2009-08-07	01:07:00	59
2009-08-07	01:08:00	197
2009-08-07	01:09:00	225
2009-08-07	01:10:00	12
2009-08-07	01:11:00	59
2009-08-07	01:12:00	36
2009-08-07	01:13:00	0
2009-08-07	01:14:00	0
2009-08-07	01:15:00	59
2009-08-07	01:16:00	0
2009-08-07	01:17:00	24
2009-08-07	01:18:00	59
2009-08-07	01:19:00	12
2009-08-07	01:20:00	24
2009-08-07	01:21:00	697
2009-08-07	01:22:00	856
2009-08-07	01:23:00	697
2009-08-07	01:24:00	0
2009-08-07	01:25:00	24
2009-08-07	01:26:00	36
2009-08-07	01:27:00	0
2009-08-07	01:28:00	12
2009-08-07	01:29:00	0
2009-08-07	01:30:00	311
2009-08-07	01:31:00	83
2009-08-07	01:32:00	119
2009-08-07	01:33:00	71
2009-08-07	01:34:00	36
2009-08-07	01:35:00	0
2009-08-07	01:36:00	36
2009-08-07	01:37:00	24
2009-08-07	01:38:00	0
2009-08-07	01:39:00	0
2009-08-07	01:40:00	0
2009-08-07	01:41:00	0
2009-08-07	01:42:00	0
2009-08-07	01:43:00	0
2009-08-07	01:44:00	0
2009-08-07	01:45:00	0
2009-08-07	01:46:00	0
2009-08-07	01:47:00	0
2009-08-07	01:48:00	0
2009-08-07	01:49:00	0
2009-08-07	01:50:00	0
2009-08-07	01:51:00	0
2009-08-07	01:52:00	0
2009-08-07	01:53:00	0
2009-08-07	01:54:00	0
2009-08-07	01:55:00	0
2009-08-07	01:56:00	282
2009-08-07	01:57:00	0
2009-08-07	01:58:00	0
2009-08-07	01:59:00	0
2009-08-07	02:00:00	0
2009-08-07	02:01:00	12
2009-08-07	02:02:00	0
2009-08-07	02:03:00	0
2009-08-07	02:04:00	0
2009-08-07	02:05:00	427
2009-08-07	02:06:00	296
2009-08-07	02:07:00	71
2009-08-07	02:08:00	536
2009-08-07	02:09:00	612
2009-08-07	02:10:00	344
2009-08-07	02:11:00	498
2009-08-07	02:12:00	24
2009-08-07	02:13:00	1083
2009-08-07	02:14:00	0
2009-08-07	02:15:00	0
2009-08-07	02:16:00	0
2009-08-07	02:17:00	0
2009-08-07	02:18:00	0
2009-08-07	02:19:00	0
2009-08-07	02:20:00	0
2009-08-07	02:21:00	0
2009-08-07	02:22:00	0
2009-08-07	02:23:00	0
2009-08-07	02:24:00	71
2009-08-07	02:25:00	0
2009-08-07	02:26:00	0
2009-08-07	02:27:00	0
2009-08-07	02:28:00	0
2009-08-07	02:29:00	0
2009-08-07	02:30:00	0
2009-08-07	02:31:00	12
2009-08-07	02:32:00	0
2009-08-07	02:33:00	0
2009-08-07	02:34:00	0
2009-08-07	02:35:00	0
2009-08-07	02:36:00	0
2009-08-07	02:37:00	0
2009-08-07	02:38:00	0
2009-08-07	02:39:00	47
2009-08-07	02:40:00	12
2009-08-07	02:41:00	0
2009-08-07	02:42:00	0
2009-08-07	02:43:00	0
2009-08-07	02:44:00	0
2009-08-07	02:45:00	0
2009-08-07	02:46:00	0
2009-08-07	02:47:00	0
2009-08-07	02:48:00	0
2009-08-07	02:49:00	0
2009-08-07	02:50:00	71
2009-08-07	02:51:00	12
2009-08-07	02:52:00	410
2009-08-07	02:53:00	443
2009-08-07	02:54:00	83
2009-08-07	02:55:00	95
2009-08-07	02:56:00	410
2009-08-07	02:57:00	296
2009-08-07	02:58:00	12
2009-08-07	02:59:00	36
2009-08-07	03:00:00	0
2009-08-07	03:01:00	0
2009-08-07	03:02:00	0
2009-08-07	03:03:00	0
2009-08-07	03:04:00	0
2009-08-07	03:05:00	59
2009-08-07	03:06:00	71
2009-08-07	03:07:00	0
2009-08-07	03:08:00	36
2009-08-07	03:09:00	12
2009-08-07	03:10:00	12
2009-08-07	03:11:00	12
2009-08-07	03:12:00	59
2009-08-07	03:13:00	12
2009-08-07	03:14:00	12
2009-08-07	03:15:00	24
2009-08-07	03:16:00	95
2009-08-07	03:17:00	12
2009-08-07	03:18:00	47
2009-08-07	03:19:00	107
2009-08-07	03:20:00	95
2009-08-07	03:21:00	12
2009-08-07	03:22:00	0
2009-08-07	03:23:00	0
2009-08-07	03:24:00	0
2009-08-07	03:25:00	12
2009-08-07	03:26:00	83
2009-08-07	03:27:00	0
2009-08-07	03:28:00	0
2009-08-07	03:29:00	168
2009-08-07	03:30:00	0
2009-08-07	03:31:00	0
2009-08-07	03:32:00	0
2009-08-07	03:33:00	0
2009-08-07	03:34:00	0
2009-08-07	03:35:00	0
2009-08-07	03:36:00	0
2009-08-07	03:37:00	0
2009-08-07	03:38:00	0
2009-08-07	03:39:00	0
2009-08-07	03:40:00	119
2009-08-07	03:41:00	71
2009-08-07	03:42:00	24
2009-08-07	03:43:00	0
2009-08-07	03:44:00	0
2009-08-07	03:45:00	0
2009-08-07	03:46:00	0
2009-08-07	03:47:00	0
2009-08-07	03:48:00	0
2009-08-07	03:49:00	0
2009-08-07	03:50:00	0
2009-08-07	03:51:00	0
2009-08-07	03:52:00	0
2009-08-07	03:53:00	0
2009-08-07	03:54:00	0
2009-08-07	03:55:00	0
2009-08-07	03:56:00	1057
2009-08-07	03:57:00	1031
2009-08-07	03:58:00	808
2009-08-07	03:59:00	71
2009-08-07	04:00:00	59
2009-08-07	04:01:00	0
2009-08-07	04:02:00	83
2009-08-07	04:03:00	0
2009-08-07	04:04:00	0
2009-08-07	04:05:00	0
2009-08-07	04:06:00	0
2009-08-07	04:07:00	0
2009-08-07	04:08:00	0
2009-08-07	04:09:00	0
2009-08-07	04:10:00	0
2009-08-07	04:11:00	0
2009-08-07	04:12:00	0
2009-08-07	04:13:00	0
2009-08-07	04:14:00	0
2009-08-07	04:15:00	0
2009-08-07	04:16:00	0
2009-08-07	04:17:00	0
2009-08-07	04:18:00	0
2009-08-07	04:19:00	0
2009-08-07	04:20:00	0
2009-08-07	04:21:00	0
2009-08-07	04:22:00	0
2009-08-07	04:23:00	1140
2009-08-07	04:24:00	344
2009-08-07	04:25:00	517
2009-08-07	04:26:00	393
2009-08-07	04:27:00	0
2009-08-07	04:28:00	12
2009-08-07	04:29:00	0
2009-08-07	04:30:00	36
2009-08-07	04:31:00	47
2009-08-07	04:32:00	71
2009-08-07	04:33:00	36
2009-08-07	04:34:00	12
2009-08-07	04:35:00	36
2009-08-07	04:36:00	47
2009-08-07	04:37:00	59
2009-08-07	04:38:00	95
2009-08-07	04:39:00	36
2009-08-07	04:40:00	785
2009-08-07	04:41:00	498
2009-08-07	04:42:00	59
2009-08-07	04:43:00	0
2009-08-07	04:44:00	36
2009-08-07	04:45:00	718
2009-08-07	04:46:00	130
2009-08-07	04:47:00	36
2009-08-07	04:48:00	24
2009-08-07	04:49:00	12
2009-08-07	04:50:00	0
2009-08-07	04:51:00	0
2009-08-07	04:52:00	0
2009-08-07	04:53:00	0
2009-08-07	04:54:00	0
2009-08-07	04:55:00	0
2009-08-07	04:56:00	0
2009-08-07	04:57:00	12
2009-08-07	04:58:00	12
2009-08-07	04:59:00	0
2009-08-07	05:00:00	0
2009-08-07	05:01:00	12
2009-08-07	05:02:00	0
2009-08-07	05:03:00	0
2009-08-07	05:04:00	0
2009-08-07	05:05:00	59
2009-08-07	05:06:00	654
2009-08-07	05:07:00	593
2009-08-07	05:08:00	377
2009-08-07	05:09:00	12
2009-08-07	05:10:00	12
2009-08-07	05:11:00	0
2009-08-07	05:12:00	0
2009-08-07	05:13:00	0
2009-08-07	05:14:00	0
2009-08-07	05:15:00	0
2009-08-07	05:16:00	0
2009-08-07	05:17:00	0
2009-08-07	05:18:00	0
2009-08-07	05:19:00	95
2009-08-07	05:20:00	460
2009-08-07	05:21:00	0
2009-08-07	05:22:00	0
2009-08-07	05:23:00	0
2009-08-07	05:24:00	0
2009-08-07	05:25:00	0
2009-08-07	05:26:00	0
2009-08-07	05:27:00	0
2009-08-07	05:28:00	0
2009-08-07	05:29:00	0
2009-08-07	05:30:00	0
2009-08-07	05:31:00	0
2009-08-07	05:32:00	0
2009-08-07	05:33:00	0
2009-08-07	05:34:00	154
2009-08-07	05:35:00	460
2009-08-07	05:36:00	344
2009-08-07	05:37:00	311
2009-08-07	05:38:00	0
2009-08-07	05:39:00	0
2009-08-07	05:40:00	0
2009-08-07	05:41:00	0
2009-08-07	05:42:00	0
2009-08-07	05:43:00	36
2009-08-07	05:44:00	697
2009-08-07	05:45:00	59
2009-08-07	05:46:00	268
2009-08-07	05:47:00	0
2009-08-07	05:48:00	0
2009-08-07	05:49:00	410
2009-08-07	05:50:00	0
2009-08-07	05:51:00	0
2009-08-07	05:52:00	0
2009-08-07	05:53:00	0
2009-08-07	05:54:00	0
2009-08-07	05:55:00	0
2009-08-07	05:56:00	0
2009-08-07	05:57:00	0
2009-08-07	05:58:00	0
2009-08-07	05:59:00	0
2009-08-07	06:00:00	0
2009-08-07	06:01:00	0
2009-08-07	06:02:00	0
2009-08-07	06:03:00	0
2009-08-07	06:04:00	0
2009-08-07	06:05:00	0
2009-08-07	06:06:00	0
2009-08-07	06:07:00	71
2009-08-07	06:08:00	0
2009-08-07	06:09:00	0
2009-08-07	06:10:00	0
2009-08-07	06:11:00	0
2009-08-07	06:12:00	0
2009-08-07	06:13:00	0
2009-08-07	06:14:00	0
2009-08-07	06:15:00	0
2009-08-07	06:16:00	0
2009-08-07	06:17:00	0
2009-08-07	06:18:00	0
2009-08-07	06:19:00	0
2009-08-07	06:20:00	0
2009-08-07	06:21:00	0
2009-08-07	06:22:00	0
2009-08-07	06:23:00	0
2009-08-07	06:24:00	0
2009-08-07	06:25:00	0
2009-08-07	06:26:00	0
2009-08-07	06:27:00	0
2009-08-07	06:28:00	0
2009-08-07	06:29:00	0
2009-08-07	06:30:00	0
2009-08-07	06:31:00	36
2009-08-07	06:32:00	12
2009-08-07	06:33:00	12
2009-08-07	06:34:00	59
2009-08-07	06:35:00	555
2009-08-07	06:36:00	12
2009-08-07	06:37:00	12
2009-08-07	06:38:00	36
2009-08-07	06:39:00	12
2009-08-07	06:40:00	59
2009-08-07	06:41:00	24
2009-08-07	06:42:00	130
2009-08-07	06:43:00	0
2009-08-07	06:44:00	12
2009-08-07	06:45:00	377
2009-08-07	06:46:00	12
2009-08-07	06:47:00	12
2009-08-07	06:48:00	12
2009-08-07	06:49:00	47
2009-08-07	06:50:00	83
2009-08-07	06:51:00	36
2009-08-07	06:52:00	517
2009-08-07	06:53:00	443
2009-08-07	06:54:00	130
2009-08-07	06:55:00	130
2009-08-07	06:56:00	130
2009-08-07	06:57:00	83
2009-08-07	06:58:00	12
2009-08-07	06:59:00	0
2009-08-07	07:00:00	574
2009-08-07	07:01:00	903
2009-08-07	07:02:00	71
2009-08-07	07:03:00	211
2009-08-07	07:04:00	1318
2009-08-07	07:05:00	311
2009-08-07	07:06:00	0
2009-08-07	07:07:00	12
2009-08-07	07:08:00	197
2009-08-07	07:09:00	1920
2009-08-07	07:10:00	574
2009-08-07	07:11:00	36
2009-08-07	07:12:00	0
2009-08-07	07:13:00	979
2009-08-07	07:14:00	377
2009-08-07	07:15:00	0
2009-08-07	07:16:00	154
2009-08-07	07:17:00	0
2009-08-07	07:18:00	12
2009-08-07	07:19:00	0
2009-08-07	07:20:00	0
2009-08-07	07:21:00	0
2009-08-07	07:22:00	47
2009-08-07	07:23:00	0
2009-08-07	07:24:00	0
2009-08-07	07:25:00	95
2009-08-07	07:26:00	47
2009-08-07	07:27:00	0
2009-08-07	07:28:00	0
2009-08-07	07:29:00	0
2009-08-07	07:30:00	0
2009-08-07	07:31:00	0
2009-08-07	07:32:00	0
2009-08-07	07:33:00	0
2009-08-07	07:34:00	0
2009-08-07	07:35:00	12
2009-08-07	07:36:00	0
2009-08-07	07:37:00	0
2009-08-07	07:38:00	0
2009-08-07	07:39:00	0
2009-08-07	07:40:00	0
2009-08-07	07:41:00	0
2009-08-07	07:42:00	95
2009-08-07	07:43:00	0
2009-08-07	07:44:00	0
2009-08-07	07:45:00	0
2009-08-07	07:46:00	0
2009-08-07	07:47:00	0
2009-08-07	07:48:00	0
2009-08-07	07:49:00	0
2009-08-07	07:50:00	0
2009-08-07	07:51:00	0
2009-08-07	07:52:00	0
2009-08-07	07:53:00	0
2009-08-07	07:54:00	0
2009-08-07	07:55:00	0
2009-08-07	07:56:00	0
2009-08-07	07:57:00	0
2009-08-07	07:58:00	0
2009-08-07	07:59:00	0
2009-08-07	08:00:00	0
2009-08-07	08:01:00	0
2009-08-07	08:02:00	0
2009-08-07	08:03:00	0
2009-08-07	08:04:00	0
2009-08-07	08:05:00	0
2009-08-07	08:06:00	0
2009-08-07	08:07:00	0
2009-08-07	08:08:00	0
2009-08-07	08:09:00	0
2009-08-07	08:10:00	59
2009-08-07	08:11:00	12
2009-08-07	08:12:00	0
2009-08-07	08:13:00	168
2009-08-07	08:14:00	154
2009-08-07	08:15:00	130
2009-08-07	08:16:00	740
2009-08-07	08:17:00	12
2009-08-07	08:18:00	59
2009-08-07	08:19:00	268
2009-08-07	08:20:00	24
2009-08-07	08:21:00	12
2009-08-07	08:22:00	36
2009-08-07	08:23:00	24
2009-08-07	08:24:00	0
2009-08-07	08:25:00	12
2009-08-07	08:26:00	154
2009-08-07	08:27:00	12
2009-08-07	08:28:00	36
2009-08-07	08:29:00	24
2009-08-07	08:30:00	24
2009-08-07	08:31:00	377
2009-08-07	08:32:00	1545
2009-08-07	08:33:00	427
2009-08-07	08:34:00	59
2009-08-07	08:35:00	24
2009-08-07	08:36:00	12
2009-08-07	08:37:00	83
2009-08-07	08:38:00	12
2009-08-07	08:39:00	0
2009-08-07	08:40:00	0
2009-08-07	08:41:00	71
2009-08-07	08:42:00	47
2009-08-07	08:43:00	0
2009-08-07	08:44:00	0
2009-08-07	08:45:00	12
2009-08-07	08:46:00	12
2009-08-07	08:47:00	0
2009-08-07	08:48:00	12
2009-08-07	08:49:00	83
2009-08-07	08:50:00	0
2009-08-07	08:51:00	879
2009-08-07	08:52:00	0
2009-08-07	08:53:00	47
2009-08-07	08:54:00	12
2009-08-07	08:55:00	12
2009-08-07	08:56:00	0
2009-08-07	08:57:00	0
2009-08-07	08:58:00	0
2009-08-07	08:59:00	0
2009-08-07	09:00:00	0
2009-08-07	09:01:00	130
2009-08-07	09:02:00	24
2009-08-07	09:03:00	119
2009-08-07	09:04:00	47
2009-08-07	09:05:00	24
2009-08-07	09:06:00	47
2009-08-07	09:07:00	12
2009-08-07	09:08:00	0
[truncated: 19,611 more rows]

## Sheet: 8.20.09
Actogram, Copy Raw Data, All Days
Identity:	Geronimo
Filename:	E:\Active Research Files\meloxicam titre canine\cases\geronimo\Geronimo 8.20.09.AWC
Gender:	M
Age:	8
Height:	76.2 cm	30.0 in
Weight:	22.4 kg	49.4 lbs
Start Date:	20-Aug-2009 (Thu)
Start Time:	18:00:00
Interval:	1.00 mins
Date Stamp:	Time Stamp:	Activity Data:	Marker Press:
2009-08-20	00:00:00	0
2009-08-20	00:01:00	0
2009-08-20	00:02:00	0
2009-08-20	00:03:00	0
2009-08-20	00:04:00	0
2009-08-20	00:05:00	0
2009-08-20	00:06:00	0
2009-08-20	00:07:00	0
2009-08-20	00:08:00	0
2009-08-20	00:09:00	0
2009-08-20	00:10:00	0
2009-08-20	00:11:00	0
2009-08-20	00:12:00	0
2009-08-20	00:13:00	0
2009-08-20	00:14:00	0
2009-08-20	00:15:00	0
2009-08-20	00:16:00	0
2009-08-20	00:17:00	0
2009-08-20	00:18:00	0
2009-08-20	00:19:00	0
2009-08-20	00:20:00	0
2009-08-20	00:21:00	0
2009-08-20	00:22:00	0
2009-08-20	00:23:00	0
2009-08-20	00:24:00	0
2009-08-20	00:25:00	0
2009-08-20	00:26:00	0
2009-08-20	00:27:00	0
2009-08-20	00:28:00	0
2009-08-20	00:29:00	0
2009-08-20	00:30:00	0
2009-08-20	00:31:00	0
2009-08-20	00:32:00	0
2009-08-20	00:33:00	0
2009-08-20	00:34:00	0
2009-08-20	00:35:00	0
2009-08-20	00:36:00	0
2009-08-20	00:37:00	0
2009-08-20	00:38:00	0
2009-08-20	00:39:00	0
2009-08-20	00:40:00	0
2009-08-20	00:41:00	0
2009-08-20	00:42:00	0
2009-08-20	00:43:00	0
2009-08-20	00:44:00	0
2009-08-20	00:45:00	0
2009-08-20	00:46:00	0
2009-08-20	00:47:00	0
2009-08-20	00:48:00	0
2009-08-20	00:49:00	0
2009-08-20	00:50:00	0
2009-08-20	00:51:00	0
2009-08-20	00:52:00	0
2009-08-20	00:53:00	0
2009-08-20	00:54:00	0
2009-08-20	00:55:00	0
2009-08-20	00:56:00	0
2009-08-20	00:57:00	0
2009-08-20	00:58:00	0
2009-08-20	00:59:00	0
2009-08-20	01:00:00	0
2009-08-20	01:01:00	0
2009-08-20	01:02:00	0
2009-08-20	01:03:00	0
2009-08-20	01:04:00	0
2009-08-20	01:05:00	0
2009-08-20	01:06:00	0
2009-08-20	01:07:00	0
2009-08-20	01:08:00	0
2009-08-20	01:09:00	0
2009-08-20	01:10:00	0
2009-08-20	01:11:00	0
2009-08-20	01:12:00	0
2009-08-20	01:13:00	0
2009-08-20	01:14:00	0
2009-08-20	01:15:00	0
2009-08-20	01:16:00	0
2009-08-20	01:17:00	0
2009-08-20	01:18:00	0
2009-08-20	01:19:00	0
2009-08-20	01:20:00	0
2009-08-20	01:21:00	0
2009-08-20	01:22:00	0
2009-08-20	01:23:00	0
2009-08-20	01:24:00	0
2009-08-20	01:25:00	0
2009-08-20	01:26:00	0
2009-08-20	01:27:00	0
2009-08-20	01:28:00	0
2009-08-20	01:29:00	0
2009-08-20	01:30:00	0
2009-08-20	01:31:00	0
2009-08-20	01:32:00	0
2009-08-20	01:33:00	0
2009-08-20	01:34:00	0
2009-08-20	01:35:00	0
2009-08-20	01:36:00	0
2009-08-20	01:37:00	0
2009-08-20	01:38:00	0
2009-08-20	01:39:00	0
2009-08-20	01:40:00	0
2009-08-20	01:41:00	0
2009-08-20	01:42:00	0
2009-08-20	01:43:00	0
2009-08-20	01:44:00	0
2009-08-20	01:45:00	0
2009-08-20	01:46:00	0
2009-08-20	01:47:00	0
2009-08-20	01:48:00	0
2009-08-20	01:49:00	0
2009-08-20	01:50:00	0
2009-08-20	01:51:00	0
2009-08-20	01:52:00	0
2009-08-20	01:53:00	0
2009-08-20	01:54:00	0
2009-08-20	01:55:00	0
2009-08-20	01:56:00	0
2009-08-20	01:57:00	0
2009-08-20	01:58:00	0
2009-08-20	01:59:00	0
2009-08-20	02:00:00	0
2009-08-20	02:01:00	0
2009-08-20	02:02:00	0
2009-08-20	02:03:00	0
2009-08-20	02:04:00	0
2009-08-20	02:05:00	0
2009-08-20	02:06:00	0
2009-08-20	02:07:00	0
2009-08-20	02:08:00	0
2009-08-20	02:09:00	0
2009-08-20	02:10:00	0
2009-08-20	02:11:00	0
2009-08-20	02:12:00	0
2009-08-20	02:13:00	0
2009-08-20	02:14:00	0
2009-08-20	02:15:00	0
2009-08-20	02:16:00	0
2009-08-20	02:17:00	0
2009-08-20	02:18:00	0
2009-08-20	02:19:00	0
2009-08-20	02:20:00	0
2009-08-20	02:21:00	0
2009-08-20	02:22:00	0
2009-08-20	02:23:00	0
2009-08-20	02:24:00	0
2009-08-20	02:25:00	0
2009-08-20	02:26:00	0
2009-08-20	02:27:00	0
2009-08-20	02:28:00	0
2009-08-20	02:29:00	0
2009-08-20	02:30:00	0
2009-08-20	02:31:00	0
2009-08-20	02:32:00	0
2009-08-20	02:33:00	0
2009-08-20	02:34:00	0
2009-08-20	02:35:00	0
2009-08-20	02:36:00	0
2009-08-20	02:37:00	0
2009-08-20	02:38:00	0
2009-08-20	02:39:00	0
2009-08-20	02:40:00	0
2009-08-20	02:41:00	0
2009-08-20	02:42:00	0
2009-08-20	02:43:00	0
2009-08-20	02:44:00	0
2009-08-20	02:45:00	0
2009-08-20	02:46:00	0
2009-08-20	02:47:00	0
2009-08-20	02:48:00	0
2009-08-20	02:49:00	0
2009-08-20	02:50:00	0
2009-08-20	02:51:00	0
2009-08-20	02:52:00	0
2009-08-20	02:53:00	0
2009-08-20	02:54:00	0
2009-08-20	02:55:00	0
2009-08-20	02:56:00	0
2009-08-20	02:57:00	0
2009-08-20	02:58:00	0
2009-08-20	02:59:00	0
2009-08-20	03:00:00	0
2009-08-20	03:01:00	0
2009-08-20	03:02:00	0
2009-08-20	03:03:00	0
2009-08-20	03:04:00	0
2009-08-20	03:05:00	0
2009-08-20	03:06:00	0
2009-08-20	03:07:00	0
2009-08-20	03:08:00	0
2009-08-20	03:09:00	0
2009-08-20	03:10:00	0
2009-08-20	03:11:00	0
2009-08-20	03:12:00	0
2009-08-20	03:13:00	0
2009-08-20	03:14:00	0
2009-08-20	03:15:00	0
2009-08-20	03:16:00	0
2009-08-20	03:17:00	0
2009-08-20	03:18:00	0
2009-08-20	03:19:00	0
2009-08-20	03:20:00	0
2009-08-20	03:21:00	0
2009-08-20	03:22:00	0
2009-08-20	03:23:00	0
2009-08-20	03:24:00	0
2009-08-20	03:25:00	0
2009-08-20	03:26:00	0
2009-08-20	03:27:00	0
2009-08-20	03:28:00	0
2009-08-20	03:29:00	0
2009-08-20	03:30:00	0
2009-08-20	03:31:00	0
2009-08-20	03:32:00	0
2009-08-20	03:33:00	0
2009-08-20	03:34:00	0
2009-08-20	03:35:00	0
2009-08-20	03:36:00	0
2009-08-20	03:37:00	0
2009-08-20	03:38:00	0
2009-08-20	03:39:00	0
2009-08-20	03:40:00	0
2009-08-20	03:41:00	0
2009-08-20	03:42:00	0
2009-08-20	03:43:00	0
2009-08-20	03:44:00	0
2009-08-20	03:45:00	0
2009-08-20	03:46:00	0
2009-08-20	03:47:00	0
2009-08-20	03:48:00	0
2009-08-20	03:49:00	0
2009-08-20	03:50:00	0
2009-08-20	03:51:00	0
2009-08-20	03:52:00	0
2009-08-20	03:53:00	0
2009-08-20	03:54:00	0
2009-08-20	03:55:00	0
2009-08-20	03:56:00	0
2009-08-20	03:57:00	0
2009-08-20	03:58:00	0
2009-08-20	03:59:00	0
2009-08-20	04:00:00	0
2009-08-20	04:01:00	0
2009-08-20	04:02:00	0
2009-08-20	04:03:00	0
2009-08-20	04:04:00	0
2009-08-20	04:05:00	0
2009-08-20	04:06:00	0
2009-08-20	04:07:00	0
2009-08-20	04:08:00	0
2009-08-20	04:09:00	0
2009-08-20	04:10:00	0
2009-08-20	04:11:00	0
2009-08-20	04:12:00	0
2009-08-20	04:13:00	0
2009-08-20	04:14:00	0
2009-08-20	04:15:00	0
2009-08-20	04:16:00	0
2009-08-20	04:17:00	0
2009-08-20	04:18:00	0
2009-08-20	04:19:00	0
2009-08-20	04:20:00	0
2009-08-20	04:21:00	0
2009-08-20	04:22:00	0
2009-08-20	04:23:00	0
2009-08-20	04:24:00	0
2009-08-20	04:25:00	0
2009-08-20	04:26:00	0
2009-08-20	04:27:00	0
2009-08-20	04:28:00	0
2009-08-20	04:29:00	0
2009-08-20	04:30:00	0
2009-08-20	04:31:00	0
2009-08-20	04:32:00	0
2009-08-20	04:33:00	0
2009-08-20	04:34:00	0
2009-08-20	04:35:00	0
2009-08-20	04:36:00	0
2009-08-20	04:37:00	0
2009-08-20	04:38:00	0
2009-08-20	04:39:00	0
2009-08-20	04:40:00	0
2009-08-20	04:41:00	0
2009-08-20	04:42:00	0
2009-08-20	04:43:00	0
2009-08-20	04:44:00	0
2009-08-20	04:45:00	0
2009-08-20	04:46:00	0
2009-08-20	04:47:00	0
2009-08-20	04:48:00	0
2009-08-20	04:49:00	0
2009-08-20	04:50:00	0
2009-08-20	04:51:00	0
2009-08-20	04:52:00	0
2009-08-20	04:53:00	0
2009-08-20	04:54:00	0
2009-08-20	04:55:00	0
2009-08-20	04:56:00	0
2009-08-20	04:57:00	0
2009-08-20	04:58:00	0
2009-08-20	04:59:00	0
2009-08-20	05:00:00	0
2009-08-20	05:01:00	0
2009-08-20	05:02:00	0
2009-08-20	05:03:00	0
2009-08-20	05:04:00	0
2009-08-20	05:05:00	0
2009-08-20	05:06:00	0
2009-08-20	05:07:00	0
2009-08-20	05:08:00	0
2009-08-20	05:09:00	0
2009-08-20	05:10:00	0
2009-08-20	05:11:00	0
2009-08-20	05:12:00	0
2009-08-20	05:13:00	0
2009-08-20	05:14:00	0
2009-08-20	05:15:00	0
2009-08-20	05:16:00	0
2009-08-20	05:17:00	0
2009-08-20	05:18:00	0
2009-08-20	05:19:00	0
2009-08-20	05:20:00	0
2009-08-20	05:21:00	0
2009-08-20	05:22:00	0
2009-08-20	05:23:00	0
2009-08-20	05:24:00	0
2009-08-20	05:25:00	0
2009-08-20	05:26:00	0
2009-08-20	05:27:00	0
2009-08-20	05:28:00	0
2009-08-20	05:29:00	0
2009-08-20	05:30:00	0
2009-08-20	05:31:00	0
2009-08-20	05:32:00	0
2009-08-20	05:33:00	0
2009-08-20	05:34:00	0
2009-08-20	05:35:00	0
2009-08-20	05:36:00	0
2009-08-20	05:37:00	0
2009-08-20	05:38:00	0
2009-08-20	05:39:00	0
2009-08-20	05:40:00	0
2009-08-20	05:41:00	0
2009-08-20	05:42:00	0
2009-08-20	05:43:00	0
2009-08-20	05:44:00	0
2009-08-20	05:45:00	0
2009-08-20	05:46:00	0
2009-08-20	05:47:00	0
2009-08-20	05:48:00	0
2009-08-20	05:49:00	0
2009-08-20	05:50:00	0
2009-08-20	05:51:00	0
2009-08-20	05:52:00	0
2009-08-20	05:53:00	0
2009-08-20	05:54:00	0
2009-08-20	05:55:00	0
2009-08-20	05:56:00	0
2009-08-20	05:57:00	0
2009-08-20	05:58:00	0
2009-08-20	05:59:00	0
2009-08-20	06:00:00	0
2009-08-20	06:01:00	0
2009-08-20	06:02:00	0
2009-08-20	06:03:00	0
2009-08-20	06:04:00	0
2009-08-20	06:05:00	0
2009-08-20	06:06:00	0
2009-08-20	06:07:00	0
2009-08-20	06:08:00	0
2009-08-20	06:09:00	0
2009-08-20	06:10:00	0
2009-08-20	06:11:00	0
2009-08-20	06:12:00	0
2009-08-20	06:13:00	0
2009-08-20	06:14:00	0
2009-08-20	06:15:00	0
2009-08-20	06:16:00	0
2009-08-20	06:17:00	0
2009-08-20	06:18:00	0
2009-08-20	06:19:00	0
2009-08-20	06:20:00	0
2009-08-20	06:21:00	0
2009-08-20	06:22:00	0
2009-08-20	06:23:00	0
2009-08-20	06:24:00	0
2009-08-20	06:25:00	0
2009-08-20	06:26:00	0
2009-08-20	06:27:00	0
2009-08-20	06:28:00	0
2009-08-20	06:29:00	0
2009-08-20	06:30:00	0
2009-08-20	06:31:00	0
2009-08-20	06:32:00	0
2009-08-20	06:33:00	0
2009-08-20	06:34:00	0
2009-08-20	06:35:00	0
2009-08-20	06:36:00	0
2009-08-20	06:37:00	0
2009-08-20	06:38:00	0
2009-08-20	06:39:00	0
2009-08-20	06:40:00	0
2009-08-20	06:41:00	0
2009-08-20	06:42:00	0
2009-08-20	06:43:00	0
2009-08-20	06:44:00	0
2009-08-20	06:45:00	0
2009-08-20	06:46:00	0
2009-08-20	06:47:00	0
2009-08-20	06:48:00	0
2009-08-20	06:49:00	0
2009-08-20	06:50:00	0
2009-08-20	06:51:00	0
2009-08-20	06:52:00	0
2009-08-20	06:53:00	0
2009-08-20	06:54:00	0
2009-08-20	06:55:00	0
2009-08-20	06:56:00	0
2009-08-20	06:57:00	0
2009-08-20	06:58:00	0
2009-08-20	06:59:00	0
2009-08-20	07:00:00	0
2009-08-20	07:01:00	0
2009-08-20	07:02:00	0
2009-08-20	07:03:00	0
2009-08-20	07:04:00	0
2009-08-20	07:05:00	0
2009-08-20	07:06:00	0
2009-08-20	07:07:00	0
2009-08-20	07:08:00	0
2009-08-20	07:09:00	0
2009-08-20	07:10:00	0
2009-08-20	07:11:00	0
2009-08-20	07:12:00	0
2009-08-20	07:13:00	0
2009-08-20	07:14:00	0
2009-08-20	07:15:00	0
2009-08-20	07:16:00	0
2009-08-20	07:17:00	0
2009-08-20	07:18:00	0
2009-08-20	07:19:00	0
2009-08-20	07:20:00	0
2009-08-20	07:21:00	0
2009-08-20	07:22:00	0
2009-08-20	07:23:00	0
2009-08-20	07:24:00	0
2009-08-20	07:25:00	0
2009-08-20	07:26:00	0
2009-08-20	07:27:00	0
2009-08-20	07:28:00	0
2009-08-20	07:29:00	0
2009-08-20	07:30:00	0
2009-08-20	07:31:00	0
2009-08-20	07:32:00	0
2009-08-20	07:33:00	0
2009-08-20	07:34:00	0
2009-08-20	07:35:00	0
2009-08-20	07:36:00	0
2009-08-20	07:37:00	0
2009-08-20	07:38:00	0
2009-08-20	07:39:00	0
2009-08-20	07:40:00	0
2009-08-20	07:41:00	0
2009-08-20	07:42:00	0
2009-08-20	07:43:00	0
2009-08-20	07:44:00	0
2009-08-20	07:45:00	0
2009-08-20	07:46:00	0
2009-08-20	07:47:00	0
2009-08-20	07:48:00	0
2009-08-20	07:49:00	0
2009-08-20	07:50:00	0
2009-08-20	07:51:00	0
2009-08-20	07:52:00	0
2009-08-20	07:53:00	0
2009-08-20	07:54:00	0
2009-08-20	07:55:00	0
2009-08-20	07:56:00	0
2009-08-20	07:57:00	0
2009-08-20	07:58:00	0
2009-08-20	07:59:00	0
2009-08-20	08:00:00	0
2009-08-20	08:01:00	0
2009-08-20	08:02:00	0
2009-08-20	08:03:00	0
2009-08-20	08:04:00	0
2009-08-20	08:05:00	0
2009-08-20	08:06:00	0
2009-08-20	08:07:00	0
2009-08-20	08:08:00	0
2009-08-20	08:09:00	0
2009-08-20	08:10:00	0
2009-08-20	08:11:00	0
2009-08-20	08:12:00	0
2009-08-20	08:13:00	0
2009-08-20	08:14:00	0
2009-08-20	08:15:00	0
2009-08-20	08:16:00	0
2009-08-20	08:17:00	0
2009-08-20	08:18:00	0
2009-08-20	08:19:00	0
2009-08-20	08:20:00	0
2009-08-20	08:21:00	0
2009-08-20	08:22:00	0
2009-08-20	08:23:00	0
2009-08-20	08:24:00	0
2009-08-20	08:25:00	0
2009-08-20	08:26:00	0
2009-08-20	08:27:00	0
2009-08-20	08:28:00	0
2009-08-20	08:29:00	0
2009-08-20	08:30:00	0
2009-08-20	08:31:00	0
2009-08-20	08:32:00	0
2009-08-20	08:33:00	0
2009-08-20	08:34:00	0
2009-08-20	08:35:00	0
2009-08-20	08:36:00	0
2009-08-20	08:37:00	0
2009-08-20	08:38:00	0
2009-08-20	08:39:00	0
2009-08-20	08:40:00	0
2009-08-20	08:41:00	0
2009-08-20	08:42:00	0
2009-08-20	08:43:00	0
2009-08-20	08:44:00	0
2009-08-20	08:45:00	0
2009-08-20	08:46:00	0
2009-08-20	08:47:00	0
2009-08-20	08:48:00	0
2009-08-20	08:49:00	0
2009-08-20	08:50:00	0
2009-08-20	08:51:00	0
2009-08-20	08:52:00	0
2009-08-20	08:53:00	0
2009-08-20	08:54:00	0
2009-08-20	08:55:00	0
2009-08-20	08:56:00	0
2009-08-20	08:57:00	0
2009-08-20	08:58:00	0
2009-08-20	08:59:00	0
2009-08-20	09:00:00	0
2009-08-20	09:01:00	0
2009-08-20	09:02:00	0
2009-08-20	09:03:00	0
2009-08-20	09:04:00	0
2009-08-20	09:05:00	0
2009-08-20	09:06:00	0
2009-08-20	09:07:00	0
2009-08-20	09:08:00	0
2009-08-20	09:09:00	0
2009-08-20	09:10:00	0
2009-08-20	09:11:00	0
2009-08-20	09:12:00	0
2009-08-20	09:13:00	0
2009-08-20	09:14:00	0
2009-08-20	09:15:00	0
2009-08-20	09:16:00	0
2009-08-20	09:17:00	0
2009-08-20	09:18:00	0
2009-08-20	09:19:00	0
2009-08-20	09:20:00	0
2009-08-20	09:21:00	0
2009-08-20	09:22:00	0
2009-08-20	09:23:00	0
2009-08-20	09:24:00	0
2009-08-20	09:25:00	0
2009-08-20	09:26:00	0
2009-08-20	09:27:00	0
2009-08-20	09:28:00	0
2009-08-20	09:29:00	0
2009-08-20	09:30:00	0
2009-08-20	09:31:00	0
2009-08-20	09:32:00	0
2009-08-20	09:33:00	0
2009-08-20	09:34:00	0
2009-08-20	09:35:00	0
2009-08-20	09:36:00	0
2009-08-20	09:37:00	0
2009-08-20	09:38:00	0
2009-08-20	09:39:00	0
2009-08-20	09:40:00	0
2009-08-20	09:41:00	0
2009-08-20	09:42:00	0
2009-08-20	09:43:00	0
2009-08-20	09:44:00	0
2009-08-20	09:45:00	0
2009-08-20	09:46:00	0
2009-08-20	09:47:00	0
2009-08-20	09:48:00	0
2009-08-20	09:49:00	0
2009-08-20	09:50:00	0
2009-08-20	09:51:00	0
2009-08-20	09:52:00	0
2009-08-20	09:53:00	0
2009-08-20	09:54:00	0
2009-08-20	09:55:00	0
2009-08-20	09:56:00	0
2009-08-20	09:57:00	0
2009-08-20	09:58:00	0
2009-08-20	09:59:00	0
2009-08-20	10:00:00	0
2009-08-20	10:01:00	0
2009-08-20	10:02:00	0
2009-08-20	10:03:00	0
2009-08-20	10:04:00	0
2009-08-20	10:05:00	0
2009-08-20	10:06:00	0
2009-08-20	10:07:00	0
2009-08-20	10:08:00	0
2009-08-20	10:09:00	0
2009-08-20	10:10:00	0
2009-08-20	10:11:00	0
2009-08-20	10:12:00	0
2009-08-20	10:13:00	0
2009-08-20	10:14:00	0
2009-08-20	10:15:00	0
2009-08-20	10:16:00	0
2009-08-20	10:17:00	0
2009-08-20	10:18:00	0
2009-08-20	10:19:00	0
2009-08-20	10:20:00	0
2009-08-20	10:21:00	0
2009-08-20	10:22:00	0
2009-08-20	10:23:00	0
2009-08-20	10:24:00	0
2009-08-20	10:25:00	0
2009-08-20	10:26:00	0
2009-08-20	10:27:00	0
2009-08-20	10:28:00	0
2009-08-20	10:29:00	0
2009-08-20	10:30:00	0
2009-08-20	10:31:00	0
2009-08-20	10:32:00	0
2009-08-20	10:33:00	0
2009-08-20	10:34:00	0
2009-08-20	10:35:00	0
2009-08-20	10:36:00	0
2009-08-20	10:37:00	0
2009-08-20	10:38:00	0
2009-08-20	10:39:00	0
2009-08-20	10:40:00	0
2009-08-20	10:41:00	0
2009-08-20	10:42:00	0
2009-08-20	10:43:00	0
2009-08-20	10:44:00	0
2009-08-20	10:45:00	0
2009-08-20	10:46:00	0
2009-08-20	10:47:00	0
2009-08-20	10:48:00	0
2009-08-20	10:49:00	0
2009-08-20	10:50:00	0
2009-08-20	10:51:00	0
2009-08-20	10:52:00	0
2009-08-20	10:53:00	0
2009-08-20	10:54:00	0
2009-08-20	10:55:00	0
2009-08-20	10:56:00	0
2009-08-20	10:57:00	0
2009-08-20	10:58:00	0
2009-08-20	10:59:00	0
2009-08-20	11:00:00	0
2009-08-20	11:01:00	0
2009-08-20	11:02:00	0
2009-08-20	11:03:00	0
2009-08-20	11:04:00	0
2009-08-20	11:05:00	0
2009-08-20	11:06:00	0
2009-08-20	11:07:00	0
2009-08-20	11:08:00	0
2009-08-20	11:09:00	0
2009-08-20	11:10:00	0
2009-08-20	11:11:00	0
2009-08-20	11:12:00	0
2009-08-20	11:13:00	0
2009-08-20	11:14:00	0
2009-08-20	11:15:00	0
2009-08-20	11:16:00	0
2009-08-20	11:17:00	0
2009-08-20	11:18:00	0
2009-08-20	11:19:00	0
2009-08-20	11:20:00	0
2009-08-20	11:21:00	0
2009-08-20	11:22:00	0
2009-08-20	11:23:00	0
2009-08-20	11:24:00	0
2009-08-20	11:25:00	0
2009-08-20	11:26:00	0
2009-08-20	11:27:00	0
2009-08-20	11:28:00	0
2009-08-20	11:29:00	0
2009-08-20	11:30:00	0
2009-08-20	11:31:00	0
2009-08-20	11:32:00	0
2009-08-20	11:33:00	0
2009-08-20	11:34:00	0
2009-08-20	11:35:00	0
2009-08-20	11:36:00	0
2009-08-20	11:37:00	0
2009-08-20	11:38:00	0
2009-08-20	11:39:00	0
2009-08-20	11:40:00	0
2009-08-20	11:41:00	0
2009-08-20	11:42:00	0
2009-08-20	11:43:00	0
2009-08-20	11:44:00	0
2009-08-20	11:45:00	0
2009-08-20	11:46:00	0
2009-08-20	11:47:00	0
2009-08-20	11:48:00	0
2009-08-20	11:49:00	0
2009-08-20	11:50:00	0
2009-08-20	11:51:00	0
2009-08-20	11:52:00	0
2009-08-20	11:53:00	0
2009-08-20	11:54:00	0
2009-08-20	11:55:00	0
2009-08-20	11:56:00	0
2009-08-20	11:57:00	0
2009-08-20	11:58:00	0
2009-08-20	11:59:00	0
2009-08-20	12:00:00	0
2009-08-20	12:01:00	0
2009-08-20	12:02:00	0
2009-08-20	12:03:00	0
2009-08-20	12:04:00	0
2009-08-20	12:05:00	0
2009-08-20	12:06:00	0
2009-08-20	12:07:00	0
2009-08-20	12:08:00	0
2009-08-20	12:09:00	0
2009-08-20	12:10:00	0
2009-08-20	12:11:00	0
2009-08-20	12:12:00	0
2009-08-20	12:13:00	0
2009-08-20	12:14:00	0
2009-08-20	12:15:00	0
2009-08-20	12:16:00	0
2009-08-20	12:17:00	0
2009-08-20	12:18:00	0
2009-08-20	12:19:00	0
2009-08-20	12:20:00	0
2009-08-20	12:21:00	0
2009-08-20	12:22:00	0
2009-08-20	12:23:00	0
2009-08-20	12:24:00	0
2009-08-20	12:25:00	0
2009-08-20	12:26:00	0
2009-08-20	12:27:00	0
2009-08-20	12:28:00	0
2009-08-20	12:29:00	0
2009-08-20	12:30:00	0
2009-08-20	12:31:00	0
2009-08-20	12:32:00	0
2009-08-20	12:33:00	0
2009-08-20	12:34:00	0
2009-08-20	12:35:00	0
2009-08-20	12:36:00	0
2009-08-20	12:37:00	0
2009-08-20	12:38:00	0
2009-08-20	12:39:00	0
2009-08-20	12:40:00	0
2009-08-20	12:41:00	0
2009-08-20	12:42:00	0
2009-08-20	12:43:00	0
2009-08-20	12:44:00	0
2009-08-20	12:45:00	0
2009-08-20	12:46:00	0
2009-08-20	12:47:00	0
2009-08-20	12:48:00	0
2009-08-20	12:49:00	0
2009-08-20	12:50:00	0
2009-08-20	12:51:00	0
2009-08-20	12:52:00	0
2009-08-20	12:53:00	0
2009-08-20	12:54:00	0
2009-08-20	12:55:00	0
2009-08-20	12:56:00	0
2009-08-20	12:57:00	0
2009-08-20	12:58:00	0
2009-08-20	12:59:00	0
2009-08-20	13:00:00	0
2009-08-20	13:01:00	0
2009-08-20	13:02:00	0
2009-08-20	13:03:00	0
2009-08-20	13:04:00	0
2009-08-20	13:05:00	0
2009-08-20	13:06:00	0
2009-08-20	13:07:00	0
2009-08-20	13:08:00	0
2009-08-20	13:09:00	0
2009-08-20	13:10:00	0
2009-08-20	13:11:00	0
2009-08-20	13:12:00	0
2009-08-20	13:13:00	0
2009-08-20	13:14:00	0
2009-08-20	13:15:00	0
2009-08-20	13:16:00	0
2009-08-20	13:17:00	0
2009-08-20	13:18:00	0
2009-08-20	13:19:00	0
2009-08-20	13:20:00	0
2009-08-20	13:21:00	0
2009-08-20	13:22:00	0
2009-08-20	13:23:00	0
2009-08-20	13:24:00	0
2009-08-20	13:25:00	0
2009-08-20	13:26:00	0
2009-08-20	13:27:00	0
2009-08-20	13:28:00	0
2009-08-20	13:29:00	0
2009-08-20	13:30:00	0
2009-08-20	13:31:00	0
2009-08-20	13:32:00	0
2009-08-20	13:33:00	0
2009-08-20	13:34:00	0
2009-08-20	13:35:00	0
2009-08-20	13:36:00	0
2009-08-20	13:37:00	0
2009-08-20	13:38:00	0
2009-08-20	13:39:00	0
2009-08-20	13:40:00	0
2009-08-20	13:41:00	0
2009-08-20	13:42:00	0
2009-08-20	13:43:00	0
2009-08-20	13:44:00	0
2009-08-20	13:45:00	0
2009-08-20	13:46:00	0
2009-08-20	13:47:00	0
2009-08-20	13:48:00	0
2009-08-20	13:49:00	0
2009-08-20	13:50:00	0
2009-08-20	13:51:00	0
2009-08-20	13:52:00	0
2009-08-20	13:53:00	0
2009-08-20	13:54:00	0
2009-08-20	13:55:00	0
2009-08-20	13:56:00	0
2009-08-20	13:57:00	0
2009-08-20	13:58:00	0
2009-08-20	13:59:00	0
2009-08-20	14:00:00	0
2009-08-20	14:01:00	0
2009-08-20	14:02:00	0
2009-08-20	14:03:00	0
2009-08-20	14:04:00	0
2009-08-20	14:05:00	0
2009-08-20	14:06:00	0
2009-08-20	14:07:00	0
2009-08-20	14:08:00	0
2009-08-20	14:09:00	0
2009-08-20	14:10:00	0
2009-08-20	14:11:00	0
2009-08-20	14:12:00	0
2009-08-20	14:13:00	0
2009-08-20	14:14:00	0
2009-08-20	14:15:00	0
2009-08-20	14:16:00	0
2009-08-20	14:17:00	0
2009-08-20	14:18:00	0
2009-08-20	14:19:00	0
2009-08-20	14:20:00	0
2009-08-20	14:21:00	0
2009-08-20	14:22:00	0
2009-08-20	14:23:00	0
2009-08-20	14:24:00	0
2009-08-20	14:25:00	0
2009-08-20	14:26:00	0
2009-08-20	14:27:00	0
2009-08-20	14:28:00	0
2009-08-20	14:29:00	0
2009-08-20	14:30:00	0
2009-08-20	14:31:00	0
2009-08-20	14:32:00	0
2009-08-20	14:33:00	0
2009-08-20	14:34:00	0
2009-08-20	14:35:00	0
2009-08-20	14:36:00	0
2009-08-20	14:37:00	0
2009-08-20	14:38:00	0
2009-08-20	14:39:00	0
2009-08-20	14:40:00	0
2009-08-20	14:41:00	0
2009-08-20	14:42:00	0
2009-08-20	14:43:00	0
2009-08-20	14:44:00	0
2009-08-20	14:45:00	0
2009-08-20	14:46:00	0
2009-08-20	14:47:00	0
2009-08-20	14:48:00	0
2009-08-20	14:49:00	0
2009-08-20	14:50:00	0
2009-08-20	14:51:00	0
2009-08-20	14:52:00	0
2009-08-20	14:53:00	0
2009-08-20	14:54:00	0
2009-08-20	14:55:00	0
2009-08-20	14:56:00	0
2009-08-20	14:57:00	0
2009-08-20	14:58:00	0
2009-08-20	14:59:00	0
2009-08-20	15:00:00	0
2009-08-20	15:01:00	0
2009-08-20	15:02:00	0
2009-08-20	15:03:00	0
2009-08-20	15:04:00	0
2009-08-20	15:05:00	0
2009-08-20	15:06:00	0
2009-08-20	15:07:00	0
2009-08-20	15:08:00	0
2009-08-20	15:09:00	0
2009-08-20	15:10:00	0
2009-08-20	15:11:00	0
2009-08-20	15:12:00	0
2009-08-20	15:13:00	0
2009-08-20	15:14:00	0
2009-08-20	15:15:00	0
2009-08-20	15:16:00	0
2009-08-20	15:17:00	0
2009-08-20	15:18:00	0
2009-08-20	15:19:00	0
2009-08-20	15:20:00	0
2009-08-20	15:21:00	0
2009-08-20	15:22:00	0
2009-08-20	15:23:00	0
2009-08-20	15:24:00	0
2009-08-20	15:25:00	0
2009-08-20	15:26:00	0
2009-08-20	15:27:00	0
2009-08-20	15:28:00	0
2009-08-20	15:29:00	0
2009-08-20	15:30:00	0
2009-08-20	15:31:00	0
2009-08-20	15:32:00	0
2009-08-20	15:33:00	0
2009-08-20	15:34:00	0
2009-08-20	15:35:00	0
2009-08-20	15:36:00	0
2009-08-20	15:37:00	0
2009-08-20	15:38:00	0
2009-08-20	15:39:00	0
2009-08-20	15:40:00	0
2009-08-20	15:41:00	0
2009-08-20	15:42:00	0
2009-08-20	15:43:00	0
2009-08-20	15:44:00	0
2009-08-20	15:45:00	0
2009-08-20	15:46:00	0
2009-08-20	15:47:00	0
2009-08-20	15:48:00	0
2009-08-20	15:49:00	0
2009-08-20	15:50:00	0
2009-08-20	15:51:00	0
2009-08-20	15:52:00	0
2009-08-20	15:53:00	0
2009-08-20	15:54:00	0
2009-08-20	15:55:00	0
2009-08-20	15:56:00	0
2009-08-20	15:57:00	0
2009-08-20	15:58:00	0
2009-08-20	15:59:00	0
2009-08-20	16:00:00	0
2009-08-20	16:01:00	0
2009-08-20	16:02:00	0
2009-08-20	16:03:00	0
2009-08-20	16:04:00	0
2009-08-20	16:05:00	0
2009-08-20	16:06:00	0
2009-08-20	16:07:00	0
2009-08-20	16:08:00	0
2009-08-20	16:09:00	0
2009-08-20	16:10:00	0
2009-08-20	16:11:00	0
2009-08-20	16:12:00	0
2009-08-20	16:13:00	0
2009-08-20	16:14:00	0
2009-08-20	16:15:00	0
2009-08-20	16:16:00	0
2009-08-20	16:17:00	0
2009-08-20	16:18:00	0
2009-08-20	16:19:00	0
2009-08-20	16:20:00	0
2009-08-20	16:21:00	0
2009-08-20	16:22:00	0
2009-08-20	16:23:00	0
2009-08-20	16:24:00	0
2009-08-20	16:25:00	0
2009-08-20	16:26:00	0
2009-08-20	16:27:00	0
2009-08-20	16:28:00	0
2009-08-20	16:29:00	0
2009-08-20	16:30:00	0
2009-08-20	16:31:00	0
2009-08-20	16:32:00	0
2009-08-20	16:33:00	0
2009-08-20	16:34:00	0
2009-08-20	16:35:00	0
2009-08-20	16:36:00	0
2009-08-20	16:37:00	0
2009-08-20	16:38:00	0
2009-08-20	16:39:00	0
2009-08-20	16:40:00	0
2009-08-20	16:41:00	0
2009-08-20	16:42:00	0
2009-08-20	16:43:00	0
2009-08-20	16:44:00	0
2009-08-20	16:45:00	0
2009-08-20	16:46:00	0
2009-08-20	16:47:00	0
2009-08-20	16:48:00	0
2009-08-20	16:49:00	0
2009-08-20	16:50:00	0
2009-08-20	16:51:00	0
2009-08-20	16:52:00	0
2009-08-20	16:53:00	0
2009-08-20	16:54:00	0
2009-08-20	16:55:00	0
2009-08-20	16:56:00	0
2009-08-20	16:57:00	0
2009-08-20	16:58:00	0
2009-08-20	16:59:00	0
2009-08-20	17:00:00	0
2009-08-20	17:01:00	0
2009-08-20	17:02:00	0
2009-08-20	17:03:00	0
2009-08-20	17:04:00	0
2009-08-20	17:05:00	0
2009-08-20	17:06:00	0
2009-08-20	17:07:00	0
2009-08-20	17:08:00	0
2009-08-20	17:09:00	0
2009-08-20	17:10:00	0
2009-08-20	17:11:00	0
2009-08-20	17:12:00	0
2009-08-20	17:13:00	0
2009-08-20	17:14:00	0
2009-08-20	17:15:00	0
2009-08-20	17:16:00	0
2009-08-20	17:17:00	0
2009-08-20	17:18:00	0
2009-08-20	17:19:00	0
2009-08-20	17:20:00	0
2009-08-20	17:21:00	0
2009-08-20	17:22:00	0
2009-08-20	17:23:00	0
2009-08-20	17:24:00	0
2009-08-20	17:25:00	0
2009-08-20	17:26:00	0
2009-08-20	17:27:00	0
2009-08-20	17:28:00	0
2009-08-20	17:29:00	0
2009-08-20	17:30:00	0
2009-08-20	17:31:00	0
2009-08-20	17:32:00	0
2009-08-20	17:33:00	0
2009-08-20	17:34:00	0
2009-08-20	17:35:00	0
2009-08-20	17:36:00	0
2009-08-20	17:37:00	0
2009-08-20	17:38:00	0
2009-08-20	17:39:00	0
2009-08-20	17:40:00	0
2009-08-20	17:41:00	0
2009-08-20	17:42:00	0
2009-08-20	17:43:00	0
2009-08-20	17:44:00	0
2009-08-20	17:45:00	0
2009-08-20	17:46:00	0
2009-08-20	17:47:00	0
2009-08-20	17:48:00	0
2009-08-20	17:49:00	0
2009-08-20	17:50:00	0
2009-08-20	17:51:00	0
2009-08-20	17:52:00	0
2009-08-20	17:53:00	0
2009-08-20	17:54:00	0
2009-08-20	17:55:00	0
2009-08-20	17:56:00	0
2009-08-20	17:57:00	0
2009-08-20	17:58:00	0
2009-08-20	17:59:00	0
2009-08-20	18:00:00	0	M
2009-08-20	18:01:00	2219
2009-08-20	18:02:00	1197
2009-08-20	18:03:00	2129
2009-08-20	18:04:00	1031
2009-08-20	18:05:00	282
2009-08-20	18:06:00	498
2009-08-20	18:07:00	633
2009-08-20	18:08:00	427
2009-08-20	18:09:00	654
2009-08-20	18:10:00	2757
2009-08-20	18:11:00	1112
2009-08-20	18:12:00	1031
2009-08-20	18:13:00	555
2009-08-20	18:14:00	443
2009-08-20	18:15:00	879
2009-08-20	18:16:00	1197
2009-08-20	18:17:00	612
2009-08-20	18:18:00	239
2009-08-20	18:19:00	953
2009-08-20	18:20:00	697
2009-08-20	18:21:00	479
2009-08-20	18:22:00	517
2009-08-20	18:23:00	979
2009-08-20	18:24:00	761
2009-08-20	18:25:00	95
2009-08-20	18:26:00	119
2009-08-20	18:27:00	761
2009-08-20	18:28:00	211
2009-08-20	18:29:00	740
2009-08-20	18:30:00	517
2009-08-20	18:31:00	1225
2009-08-20	18:32:00	1256
2009-08-20	18:33:00	1380
2009-08-20	18:34:00	311
2009-08-20	18:35:00	95
2009-08-20	18:36:00	71
2009-08-20	18:37:00	36
2009-08-20	18:38:00	59
2009-08-20	18:39:00	0
2009-08-20	18:40:00	12
2009-08-20	18:41:00	0
2009-08-20	18:42:00	0
2009-08-20	18:43:00	0
2009-08-20	18:44:00	0
2009-08-20	18:45:00	654
2009-08-20	18:46:00	36
2009-08-20	18:47:00	0
2009-08-20	18:48:00	0
2009-08-20	18:49:00	0
2009-08-20	18:50:00	0
2009-08-20	18:51:00	0
2009-08-20	18:52:00	0
2009-08-20	18:53:00	0
2009-08-20	18:54:00	0
2009-08-20	18:55:00	0
2009-08-20	18:56:00	0
2009-08-20	18:57:00	0
2009-08-20	18:58:00	0
2009-08-20	18:59:00	0
2009-08-20	19:00:00	327
2009-08-20	19:01:00	0
2009-08-20	19:02:00	36
2009-08-20	19:03:00	24
2009-08-20	19:04:00	0
2009-08-20	19:05:00	24
2009-08-20	19:06:00	0
2009-08-20	19:07:00	0
2009-08-20	19:08:00	95
2009-08-20	19:09:00	0
2009-08-20	19:10:00	0
2009-08-20	19:11:00	0
2009-08-20	19:12:00	0
2009-08-20	19:13:00	0
2009-08-20	19:14:00	0
2009-08-20	19:15:00	0
2009-08-20	19:16:00	0
2009-08-20	19:17:00	0
2009-08-20	19:18:00	0
2009-08-20	19:19:00	0
2009-08-20	19:20:00	0
2009-08-20	19:21:00	0
2009-08-20	19:22:00	0
2009-08-20	19:23:00	0
2009-08-20	19:24:00	0
2009-08-20	19:25:00	0
2009-08-20	19:26:00	0
2009-08-20	19:27:00	0
2009-08-20	19:28:00	0
2009-08-20	19:29:00	0
2009-08-20	19:30:00	0
2009-08-20	19:31:00	0
2009-08-20	19:32:00	0
2009-08-20	19:33:00	0
2009-08-20	19:34:00	0
2009-08-20	19:35:00	0
2009-08-20	19:36:00	0
2009-08-20	19:37:00	12
2009-08-20	19:38:00	0
2009-08-20	19:39:00	0
2009-08-20	19:40:00	0
2009-08-20	19:41:00	0
2009-08-20	19:42:00	0
2009-08-20	19:43:00	0
2009-08-20	19:44:00	0
2009-08-20	19:45:00	0
2009-08-20	19:46:00	12
2009-08-20	19:47:00	0
2009-08-20	19:48:00	0
2009-08-20	19:49:00	0
2009-08-20	19:50:00	0
2009-08-20	19:51:00	0
2009-08-20	19:52:00	0
2009-08-20	19:53:00	0
2009-08-20	19:54:00	0
2009-08-20	19:55:00	0
2009-08-20	19:56:00	0
2009-08-20	19:57:00	0
2009-08-20	19:58:00	0
2009-08-20	19:59:00	0
2009-08-20	20:00:00	0
2009-08-20	20:01:00	0
2009-08-20	20:02:00	0
2009-08-20	20:03:00	0
2009-08-20	20:04:00	0
2009-08-20	20:05:00	0
2009-08-20	20:06:00	0
2009-08-20	20:07:00	0
2009-08-20	20:08:00	0
2009-08-20	20:09:00	0
2009-08-20	20:10:00	0
2009-08-20	20:11:00	0
2009-08-20	20:12:00	0
2009-08-20	20:13:00	12
2009-08-20	20:14:00	0
2009-08-20	20:15:00	0
2009-08-20	20:16:00	0
2009-08-20	20:17:00	0
2009-08-20	20:18:00	0
2009-08-20	20:19:00	0
2009-08-20	20:20:00	0
2009-08-20	20:21:00	0
2009-08-20	20:22:00	0
2009-08-20	20:23:00	0
2009-08-20	20:24:00	0
2009-08-20	20:25:00	0
2009-08-20	20:26:00	0
2009-08-20	20:27:00	0
2009-08-20	20:28:00	0
2009-08-20	20:29:00	0
2009-08-20	20:30:00	0
2009-08-20	20:31:00	0
2009-08-20	20:32:00	0
2009-08-20	20:33:00	24
2009-08-20	20:34:00	0
2009-08-20	20:35:00	0
2009-08-20	20:36:00	0
2009-08-20	20:37:00	0
2009-08-20	20:38:00	0
2009-08-20	20:39:00	0
2009-08-20	20:40:00	0
2009-08-20	20:41:00	0
2009-08-20	20:42:00	0
2009-08-20	20:43:00	0
2009-08-20	20:44:00	0
2009-08-20	20:45:00	0
2009-08-20	20:46:00	0
2009-08-20	20:47:00	0
2009-08-20	20:48:00	0
2009-08-20	20:49:00	0
2009-08-20	20:50:00	0
2009-08-20	20:51:00	12
2009-08-20	20:52:00	0
2009-08-20	20:53:00	0
2009-08-20	20:54:00	0
2009-08-20	20:55:00	0
2009-08-20	20:56:00	0
2009-08-20	20:57:00	0
2009-08-20	20:58:00	36
2009-08-20	20:59:00	0
2009-08-20	21:00:00	0
2009-08-20	21:01:00	0
2009-08-20	21:02:00	0
2009-08-20	21:03:00	0
2009-08-20	21:04:00	0
2009-08-20	21:05:00	0
2009-08-20	21:06:00	0
2009-08-20	21:07:00	0
2009-08-20	21:08:00	0
2009-08-20	21:09:00	0
2009-08-20	21:10:00	12
2009-08-20	21:11:00	0
2009-08-20	21:12:00	0
2009-08-20	21:13:00	0
2009-08-20	21:14:00	0
2009-08-20	21:15:00	0
2009-08-20	21:16:00	0
2009-08-20	21:17:00	0
2009-08-20	21:18:00	0
2009-08-20	21:19:00	0
2009-08-20	21:20:00	0
2009-08-20	21:21:00	0
2009-08-20	21:22:00	0
2009-08-20	21:23:00	0
2009-08-20	21:24:00	0
2009-08-20	21:25:00	0
2009-08-20	21:26:00	0
2009-08-20	21:27:00	0
2009-08-20	21:28:00	0
2009-08-20	21:29:00	0
2009-08-20	21:30:00	0
2009-08-20	21:31:00	0
2009-08-20	21:32:00	0
2009-08-20	21:33:00	12
2009-08-20	21:34:00	0
2009-08-20	21:35:00	12
2009-08-20	21:36:00	12
2009-08-20	21:37:00	24
2009-08-20	21:38:00	47
2009-08-20	21:39:00	107
2009-08-20	21:40:00	59
2009-08-20	21:41:00	119
2009-08-20	21:42:00	24
2009-08-20	21:43:00	0
2009-08-20	21:44:00	36
2009-08-20	21:45:00	0
2009-08-20	21:46:00	0
2009-08-20	21:47:00	36
2009-08-20	21:48:00	83
2009-08-20	21:49:00	36
2009-08-20	21:50:00	47
2009-08-20	21:51:00	12
2009-08-20	21:52:00	0
2009-08-20	21:53:00	12
2009-08-20	21:54:00	0
2009-08-20	21:55:00	0
2009-08-20	21:56:00	0
2009-08-20	21:57:00	0
2009-08-20	21:58:00	0
2009-08-20	21:59:00	0
2009-08-20	22:00:00	0
2009-08-20	22:01:00	0
2009-08-20	22:02:00	0
2009-08-20	22:03:00	0
2009-08-20	22:04:00	0
2009-08-20	22:05:00	0
2009-08-20	22:06:00	0
2009-08-20	22:07:00	0
2009-08-20	22:08:00	0
2009-08-20	22:09:00	0
2009-08-20	22:10:00	0
2009-08-20	22:11:00	0
2009-08-20	22:12:00	24
2009-08-20	22:13:00	12
2009-08-20	22:14:00	12
2009-08-20	22:15:00	0
2009-08-20	22:16:00	12
2009-08-20	22:17:00	107
2009-08-20	22:18:00	47
2009-08-20	22:19:00	12
2009-08-20	22:20:00	24
2009-08-20	22:21:00	0
2009-08-20	22:22:00	36
2009-08-20	22:23:00	24
2009-08-20	22:24:00	296
2009-08-20	22:25:00	142
2009-08-20	22:26:00	183
2009-08-20	22:27:00	24
2009-08-20	22:28:00	0
2009-08-20	22:29:00	0
2009-08-20	22:30:00	0
2009-08-20	22:31:00	1112
2009-08-20	22:32:00	282
2009-08-20	22:33:00	0
2009-08-20	22:34:00	0
2009-08-20	22:35:00	0
2009-08-20	22:36:00	0
2009-08-20	22:37:00	0
2009-08-20	22:38:00	0
2009-08-20	22:39:00	0
2009-08-20	22:40:00	0
2009-08-20	22:41:00	0
2009-08-20	22:42:00	0
2009-08-20	22:43:00	0
2009-08-20	22:44:00	0
2009-08-20	22:45:00	12
2009-08-20	22:46:00	0
2009-08-20	22:47:00	0
2009-08-20	22:48:00	24
2009-08-20	22:49:00	0
2009-08-20	22:50:00	0
2009-08-20	22:51:00	0
2009-08-20	22:52:00	12
2009-08-20	22:53:00	0
2009-08-20	22:54:00	0
2009-08-20	22:55:00	0
2009-08-20	22:56:00	12
2009-08-20	22:57:00	0
2009-08-20	22:58:00	12
2009-08-20	22:59:00	0
2009-08-20	23:00:00	0
2009-08-20	23:01:00	71
2009-08-20	23:02:00	71
2009-08-20	23:03:00	24
2009-08-20	23:04:00	36
2009-08-20	23:05:00	0
2009-08-20	23:06:00	183
2009-08-20	23:07:00	12
2009-08-20	23:08:00	0
2009-08-20	23:09:00	36
2009-08-20	23:10:00	59
2009-08-20	23:11:00	225
2009-08-20	23:12:00	59
2009-08-20	23:13:00	0
2009-08-20	23:14:00	2001
2009-08-20	23:15:00	2356
2009-08-20	23:16:00	1413
2009-08-20	23:17:00	0
2009-08-20	23:18:00	24
2009-08-20	23:19:00	12
2009-08-20	23:20:00	59
2009-08-20	23:21:00	311
2009-08-20	23:22:00	95
2009-08-20	23:23:00	130
2009-08-20	23:24:00	0
2009-08-20	23:25:00	24
2009-08-20	23:26:00	0
2009-08-20	23:27:00	0
2009-08-20	23:28:00	0
2009-08-20	23:29:00	0
2009-08-20	23:30:00	0
2009-08-20	23:31:00	0
2009-08-20	23:32:00	0
2009-08-20	23:33:00	254
2009-08-20	23:34:00	154
2009-08-20	23:35:00	12
2009-08-20	23:36:00	0
2009-08-20	23:37:00	12
2009-08-20	23:38:00	12
2009-08-20	23:39:00	12
2009-08-20	23:40:00	0
2009-08-20	23:41:00	0
2009-08-20	23:42:00	0
2009-08-20	23:43:00	0
2009-08-20	23:44:00	0
2009-08-20	23:45:00	0
2009-08-20	23:46:00	0
2009-08-20	23:47:00	0
2009-08-20	23:48:00	0
2009-08-20	23:49:00	0
2009-08-20	23:50:00	0
2009-08-20	23:51:00	0
2009-08-20	23:52:00	0
2009-08-20	23:53:00	0
2009-08-20	23:54:00	0
2009-08-20	23:55:00	0
2009-08-20	23:56:00	0
2009-08-20	23:57:00	0
2009-08-20	23:58:00	0
2009-08-20	23:59:00	0
2009-08-21	00:00:00	0
2009-08-21	00:01:00	0
2009-08-21	00:02:00	0
2009-08-21	00:03:00	0
2009-08-21	00:04:00	0
2009-08-21	00:05:00	0
2009-08-21	00:06:00	0
2009-08-21	00:07:00	0
2009-08-21	00:08:00	0
2009-08-21	00:09:00	0
2009-08-21	00:10:00	0
2009-08-21	00:11:00	0
2009-08-21	00:12:00	0
2009-08-21	00:13:00	0
2009-08-21	00:14:00	0
2009-08-21	00:15:00	0
2009-08-21	00:16:00	0
2009-08-21	00:17:00	0
2009-08-21	00:18:00	0
2009-08-21	00:19:00	142
2009-08-21	00:20:00	0
2009-08-21	00:21:00	142
2009-08-21	00:22:00	168
2009-08-21	00:23:00	225
2009-08-21	00:24:00	71
2009-08-21	00:25:00	47
2009-08-21	00:26:00	12
2009-08-21	00:27:00	36
2009-08-21	00:28:00	36
2009-08-21	00:29:00	0
2009-08-21	00:30:00	59
2009-08-21	00:31:00	47
2009-08-21	00:32:00	36
2009-08-21	00:33:00	0
2009-08-21	00:34:00	36
2009-08-21	00:35:00	211
2009-08-21	00:36:00	59
2009-08-21	00:37:00	59
2009-08-21	00:38:00	24
2009-08-21	00:39:00	0
2009-08-21	00:40:00	24
2009-08-21	00:41:00	0
2009-08-21	00:42:00	0
2009-08-21	00:43:00	12
2009-08-21	00:44:00	0
2009-08-21	00:45:00	154
2009-08-21	00:46:00	254
2009-08-21	00:47:00	12
2009-08-21	00:48:00	24
2009-08-21	00:49:00	36
2009-08-21	00:50:00	12
2009-08-21	00:51:00	12
2009-08-21	00:52:00	0
2009-08-21	00:53:00	0
2009-08-21	00:54:00	0
2009-08-21	00:55:00	24
2009-08-21	00:56:00	154
2009-08-21	00:57:00	59
2009-08-21	00:58:00	47
2009-08-21	00:59:00	36
2009-08-21	01:00:00	24
2009-08-21	01:01:00	12
2009-08-21	01:02:00	12
2009-08-21	01:03:00	0
2009-08-21	01:04:00	0
2009-08-21	01:05:00	0
2009-08-21	01:06:00	36
2009-08-21	01:07:00	0
2009-08-21	01:08:00	0
2009-08-21	01:09:00	0
2009-08-21	01:10:00	0
2009-08-21	01:11:00	0
2009-08-21	01:12:00	0
2009-08-21	01:13:00	0
2009-08-21	01:14:00	0
2009-08-21	01:15:00	0
2009-08-21	01:16:00	0
2009-08-21	01:17:00	0
2009-08-21	01:18:00	0
2009-08-21	01:19:00	0
2009-08-21	01:20:00	0
2009-08-21	01:21:00	0
2009-08-21	01:22:00	12
2009-08-21	01:23:00	0
2009-08-21	01:24:00	0
2009-08-21	01:25:00	0
2009-08-21	01:26:00	0
2009-08-21	01:27:00	0
2009-08-21	01:28:00	12
2009-08-21	01:29:00	0
2009-08-21	01:30:00	0
2009-08-21	01:31:00	0
2009-08-21	01:32:00	0
2009-08-21	01:33:00	0
2009-08-21	01:34:00	0
2009-08-21	01:35:00	0
2009-08-21	01:36:00	12
2009-08-21	01:37:00	0
2009-08-21	01:38:00	0
2009-08-21	01:39:00	83
2009-08-21	01:40:00	59
2009-08-21	01:41:00	71
2009-08-21	01:42:00	555
2009-08-21	01:43:00	612
2009-08-21	01:44:00	12
2009-08-21	01:45:00	59
2009-08-21	01:46:00	95
2009-08-21	01:47:00	0
2009-08-21	01:48:00	0
2009-08-21	01:49:00	0
2009-08-21	01:50:00	0
2009-08-21	01:51:00	0
2009-08-21	01:52:00	0
2009-08-21	01:53:00	12
2009-08-21	01:54:00	0
2009-08-21	01:55:00	47
2009-08-21	01:56:00	0
2009-08-21	01:57:00	24
2009-08-21	01:58:00	24
2009-08-21	01:59:00	0
2009-08-21	02:00:00	1225
2009-08-21	02:01:00	1446
2009-08-21	02:02:00	12
2009-08-21	02:03:00	0
2009-08-21	02:04:00	12
2009-08-21	02:05:00	0
2009-08-21	02:06:00	0
2009-08-21	02:07:00	0
2009-08-21	02:08:00	0
2009-08-21	02:09:00	24
2009-08-21	02:10:00	0
2009-08-21	02:11:00	0
2009-08-21	02:12:00	12
2009-08-21	02:13:00	0
2009-08-21	02:14:00	36
2009-08-21	02:15:00	0
2009-08-21	02:16:00	0
2009-08-21	02:17:00	0
2009-08-21	02:18:00	0
2009-08-21	02:19:00	0
2009-08-21	02:20:00	0
2009-08-21	02:21:00	0
2009-08-21	02:22:00	12
2009-08-21	02:23:00	59
2009-08-21	02:24:00	0
2009-08-21	02:25:00	0
2009-08-21	02:26:00	0
2009-08-21	02:27:00	0
2009-08-21	02:28:00	0
2009-08-21	02:29:00	0
2009-08-21	02:30:00	0
2009-08-21	02:31:00	0
2009-08-21	02:32:00	0
2009-08-21	02:33:00	0
2009-08-21	02:34:00	0
2009-08-21	02:35:00	0
2009-08-21	02:36:00	0
2009-08-21	02:37:00	0
2009-08-21	02:38:00	0
2009-08-21	02:39:00	0
2009-08-21	02:40:00	0
2009-08-21	02:41:00	0
2009-08-21	02:42:00	0
2009-08-21	02:43:00	0
2009-08-21	02:44:00	0
2009-08-21	02:45:00	0
2009-08-21	02:46:00	0
2009-08-21	02:47:00	12
2009-08-21	02:48:00	0
2009-08-21	02:49:00	36
2009-08-21	02:50:00	0
2009-08-21	02:51:00	0
2009-08-21	02:52:00	12
2009-08-21	02:53:00	0
2009-08-21	02:54:00	0
2009-08-21	02:55:00	0
2009-08-21	02:56:00	0
2009-08-21	02:57:00	0
2009-08-21	02:58:00	0
2009-08-21	02:59:00	0
2009-08-21	03:00:00	0
2009-08-21	03:01:00	0
2009-08-21	03:02:00	0
2009-08-21	03:03:00	0
2009-08-21	03:04:00	0
2009-08-21	03:05:00	0
2009-08-21	03:06:00	0
2009-08-21	03:07:00	0
2009-08-21	03:08:00	0
2009-08-21	03:09:00	0
2009-08-21	03:10:00	0
2009-08-21	03:11:00	24
2009-08-21	03:12:00	0
2009-08-21	03:13:00	0
2009-08-21	03:14:00	0
2009-08-21	03:15:00	0
2009-08-21	03:16:00	0
2009-08-21	03:17:00	0
2009-08-21	03:18:00	0
2009-08-21	03:19:00	0
2009-08-21	03:20:00	0
2009-08-21	03:21:00	0
2009-08-21	03:22:00	0
2009-08-21	03:23:00	0
2009-08-21	03:24:00	0
2009-08-21	03:25:00	0
2009-08-21	03:26:00	0
2009-08-21	03:27:00	12
2009-08-21	03:28:00	0
2009-08-21	03:29:00	142
2009-08-21	03:30:00	479
2009-08-21	03:31:00	0
2009-08-21	03:32:00	0
2009-08-21	03:33:00	24
2009-08-21	03:34:00	12
2009-08-21	03:35:00	12
2009-08-21	03:36:00	12
2009-08-21	03:37:00	0
2009-08-21	03:38:00	0
2009-08-21	03:39:00	24
2009-08-21	03:40:00	0
2009-08-21	03:41:00	0
2009-08-21	03:42:00	0
2009-08-21	03:43:00	0
2009-08-21	03:44:00	12
2009-08-21	03:45:00	47
2009-08-21	03:46:00	36
2009-08-21	03:47:00	0
2009-08-21	03:48:00	0
2009-08-21	03:49:00	24
2009-08-21	03:50:00	12
2009-08-21	03:51:00	12
2009-08-21	03:52:00	183
2009-08-21	03:53:00	360
2009-08-21	03:54:00	95
2009-08-21	03:55:00	0
2009-08-21	03:56:00	0
2009-08-21	03:57:00	0
2009-08-21	03:58:00	0
2009-08-21	03:59:00	785
2009-08-21	04:00:00	107
2009-08-21	04:01:00	12
2009-08-21	04:02:00	12
2009-08-21	04:03:00	24
2009-08-21	04:04:00	0
2009-08-21	04:05:00	0
2009-08-21	04:06:00	0
2009-08-21	04:07:00	0
2009-08-21	04:08:00	0
2009-08-21	04:09:00	0
2009-08-21	04:10:00	0
2009-08-21	04:11:00	0
2009-08-21	04:12:00	0
2009-08-21	04:13:00	0
2009-08-21	04:14:00	0
2009-08-21	04:15:00	0
2009-08-21	04:16:00	0
2009-08-21	04:17:00	0
2009-08-21	04:18:00	0
2009-08-21	04:19:00	0
2009-08-21	04:20:00	71
2009-08-21	04:21:00	360
2009-08-21	04:22:00	360
2009-08-21	04:23:00	12
2009-08-21	04:24:00	36
2009-08-21	04:25:00	59
2009-08-21	04:26:00	24
2009-08-21	04:27:00	12
2009-08-21	04:28:00	479
2009-08-21	04:29:00	344
2009-08-21	04:30:00	24
2009-08-21	04:31:00	0
2009-08-21	04:32:00	0
2009-08-21	04:33:00	0
2009-08-21	04:34:00	0
2009-08-21	04:35:00	0
2009-08-21	04:36:00	0
2009-08-21	04:37:00	0
2009-08-21	04:38:00	0
2009-08-21	04:39:00	0
2009-08-21	04:40:00	0
2009-08-21	04:41:00	0
2009-08-21	04:42:00	0
2009-08-21	04:43:00	0
2009-08-21	04:44:00	718
2009-08-21	04:45:00	254
2009-08-21	04:46:00	119
2009-08-21	04:47:00	12
2009-08-21	04:48:00	12
2009-08-21	04:49:00	0
2009-08-21	04:50:00	12
2009-08-21	04:51:00	0
2009-08-21	04:52:00	0
2009-08-21	04:53:00	0
2009-08-21	04:54:00	0
2009-08-21	04:55:00	0
2009-08-21	04:56:00	0
2009-08-21	04:57:00	0
2009-08-21	04:58:00	0
2009-08-21	04:59:00	0
2009-08-21	05:00:00	0
2009-08-21	05:01:00	0
2009-08-21	05:02:00	0
2009-08-21	05:03:00	0
2009-08-21	05:04:00	0
2009-08-21	05:05:00	0
2009-08-21	05:06:00	0
2009-08-21	05:07:00	0
2009-08-21	05:08:00	0
2009-08-21	05:09:00	0
2009-08-21	05:10:00	12
2009-08-21	05:11:00	95
2009-08-21	05:12:00	119
2009-08-21	05:13:00	24
2009-08-21	05:14:00	36
2009-08-21	05:15:00	59
2009-08-21	05:16:00	12
2009-08-21	05:17:00	612
2009-08-21	05:18:00	555
2009-08-21	05:19:00	360
2009-08-21	05:20:00	59
2009-08-21	05:21:00	47
2009-08-21	05:22:00	239
2009-08-21	05:23:00	12
2009-08-21	05:24:00	12
2009-08-21	05:25:00	47
2009-08-21	05:26:00	0
2009-08-21	05:27:00	12
2009-08-21	05:28:00	95
2009-08-21	05:29:00	24
2009-08-21	05:30:00	0
2009-08-21	05:31:00	0
2009-08-21	05:32:00	0
2009-08-21	05:33:00	0
2009-08-21	05:34:00	12
2009-08-21	05:35:00	12
2009-08-21	05:36:00	0
2009-08-21	05:37:00	59
2009-08-21	05:38:00	12
2009-08-21	05:39:00	0
2009-08-21	05:40:00	83
2009-08-21	05:41:00	443
2009-08-21	05:42:00	12
2009-08-21	05:43:00	0
2009-08-21	05:44:00	24
2009-08-21	05:45:00	0
2009-08-21	05:46:00	47
2009-08-21	05:47:00	95
2009-08-21	05:48:00	71
2009-08-21	05:49:00	36
2009-08-21	05:50:00	36
2009-08-21	05:51:00	268
2009-08-21	05:52:00	183
2009-08-21	05:53:00	633
2009-08-21	05:54:00	12
2009-08-21	05:55:00	12
2009-08-21	05:56:00	24
2009-08-21	05:57:00	0
2009-08-21	05:58:00	1197
2009-08-21	05:59:00	59
2009-08-21	06:00:00	0
2009-08-21	06:01:00	0
2009-08-21	06:02:00	1581
2009-08-21	06:03:00	1169
2009-08-21	06:04:00	0
2009-08-21	06:05:00	0
2009-08-21	06:06:00	0
2009-08-21	06:07:00	0
2009-08-21	06:08:00	0
2009-08-21	06:09:00	142
2009-08-21	06:10:00	0
2009-08-21	06:11:00	0
2009-08-21	06:12:00	0
2009-08-21	06:13:00	71
2009-08-21	06:14:00	12
2009-08-21	06:15:00	0
2009-08-21	06:16:00	0
2009-08-21	06:17:00	36
2009-08-21	06:18:00	59
2009-08-21	06:19:00	12
2009-08-21	06:20:00	12
2009-08-21	06:21:00	12
2009-08-21	06:22:00	0
2009-08-21	06:23:00	0
2009-08-21	06:24:00	0
2009-08-21	06:25:00	0
2009-08-21	06:26:00	168
2009-08-21	06:27:00	0
2009-08-21	06:28:00	0
2009-08-21	06:29:00	0
2009-08-21	06:30:00	0
2009-08-21	06:31:00	59
2009-08-21	06:32:00	47
2009-08-21	06:33:00	47
2009-08-21	06:34:00	0
2009-08-21	06:35:00	36
2009-08-21	06:36:00	24
2009-08-21	06:37:00	12
2009-08-21	06:38:00	24
2009-08-21	06:39:00	0
2009-08-21	06:40:00	12
2009-08-21	06:41:00	0
2009-08-21	06:42:00	0
2009-08-21	06:43:00	0
2009-08-21	06:44:00	0
2009-08-21	06:45:00	0
2009-08-21	06:46:00	0
2009-08-21	06:47:00	0
2009-08-21	06:48:00	0
2009-08-21	06:49:00	0
2009-08-21	06:50:00	0
2009-08-21	06:51:00	0
2009-08-21	06:52:00	0
2009-08-21	06:53:00	953
2009-08-21	06:54:00	479
2009-08-21	06:55:00	47
2009-08-21	06:56:00	832
2009-08-21	06:57:00	410
2009-08-21	06:58:00	36
2009-08-21	06:59:00	12
2009-08-21	07:00:00	12
2009-08-21	07:01:00	154
2009-08-21	07:02:00	83
2009-08-21	07:03:00	119
2009-08-21	07:04:00	83
2009-08-21	07:05:00	12
2009-08-21	07:06:00	36
2009-08-21	07:07:00	142
2009-08-21	07:08:00	927
2009-08-21	07:09:00	12
2009-08-21	07:10:00	0
2009-08-21	07:11:00	0
2009-08-21	07:12:00	0
2009-08-21	07:13:00	0
2009-08-21	07:14:00	0
2009-08-21	07:15:00	0
2009-08-21	07:16:00	0
2009-08-21	07:17:00	0
2009-08-21	07:18:00	0
2009-08-21	07:19:00	0
2009-08-21	07:20:00	36
2009-08-21	07:21:00	12
2009-08-21	07:22:00	0
2009-08-21	07:23:00	0
2009-08-21	07:24:00	0
2009-08-21	07:25:00	0
2009-08-21	07:26:00	0
2009-08-21	07:27:00	71
2009-08-21	07:28:00	83
2009-08-21	07:29:00	574
2009-08-21	07:30:00	427
2009-08-21	07:31:00	95
2009-08-21	07:32:00	24
2009-08-21	07:33:00	460
2009-08-21	07:34:00	498
2009-08-21	07:35:00	0
2009-08-21	07:36:00	107
2009-08-21	07:37:00	676
2009-08-21	07:38:00	59
2009-08-21	07:39:00	47
2009-08-21	07:40:00	36
2009-08-21	07:41:00	24
2009-08-21	07:42:00	47
2009-08-21	07:43:00	59
2009-08-21	07:44:00	36
2009-08-21	07:45:00	0
2009-08-21	07:46:00	0
2009-08-21	07:47:00	0
2009-08-21	07:48:00	0
2009-08-21	07:49:00	0
2009-08-21	07:50:00	0
2009-08-21	07:51:00	0
2009-08-21	07:52:00	0
2009-08-21	07:53:00	0
2009-08-21	07:54:00	0
2009-08-21	07:55:00	0
2009-08-21	07:56:00	0
2009-08-21	07:57:00	0
2009-08-21	07:58:00	12
2009-08-21	07:59:00	0
2009-08-21	08:00:00	0
2009-08-21	08:01:00	0
2009-08-21	08:02:00	0
2009-08-21	08:03:00	0
2009-08-21	08:04:00	0
2009-08-21	08:05:00	0
2009-08-21	08:06:00	0
2009-08-21	08:07:00	0
2009-08-21	08:08:00	0
2009-08-21	08:09:00	0
2009-08-21	08:10:00	0
2009-08-21	08:11:00	0
2009-08-21	08:12:00	0
2009-08-21	08:13:00	0
2009-08-21	08:14:00	24
2009-08-21	08:15:00	71
2009-08-21	08:16:00	71
2009-08-21	08:17:00	12
2009-08-21	08:18:00	0
2009-08-21	08:19:00	0
2009-08-21	08:20:00	0
2009-08-21	08:21:00	0
2009-08-21	08:22:00	0
2009-08-21	08:23:00	0
2009-08-21	08:24:00	0
2009-08-21	08:25:00	0
2009-08-21	08:26:00	0
2009-08-21	08:27:00	0
2009-08-21	08:28:00	0
2009-08-21	08:29:00	0
2009-08-21	08:30:00	0
2009-08-21	08:31:00	0
2009-08-21	08:32:00	0
2009-08-21	08:33:00	0
2009-08-21	08:34:00	0
2009-08-21	08:35:00	0
2009-08-21	08:36:00	0
2009-08-21	08:37:00	0
2009-08-21	08:38:00	0
2009-08-21	08:39:00	0
2009-08-21	08:40:00	0
2009-08-21	08:41:00	36
2009-08-21	08:42:00	47
2009-08-21	08:43:00	83
2009-08-21	08:44:00	12
2009-08-21	08:45:00	12
2009-08-21	08:46:00	0
2009-08-21	08:47:00	142
2009-08-21	08:48:00	593
2009-08-21	08:49:00	536
2009-08-21	08:50:00	168
2009-08-21	08:51:00	211
2009-08-21	08:52:00	1005
2009-08-21	08:53:00	142
2009-08-21	08:54:00	12
2009-08-21	08:55:00	142
2009-08-21	08:56:00	12
2009-08-21	08:57:00	47
2009-08-21	08:58:00	24
2009-08-21	08:59:00	36
2009-08-21	09:00:00	36
2009-08-21	09:01:00	12
2009-08-21	09:02:00	107
2009-08-21	09:03:00	24
2009-08-21	09:04:00	12
2009-08-21	09:05:00	1083
2009-08-21	09:06:00	953
2009-08-21	09:07:00	0
2009-08-21	09:08:00	47
[truncated: 19,611 more rows]

[truncated: 3 more sheets: 9.3.09, 9.18.09, 10.1.09 2nd monitor]
