# Supplementary material for: Initial evaluation of nighttime restlessness in a naturally occurring canine model of osteoarthritis pain
Source: PeerJ. 2015 Feb 17;3:e772. doi: 10.7717/peerj.772 (PMC4340376; doi:10.7717/peerj.772)
Supplement: Supplemental Information 62 [file peerj-03-772-s062.xlsx]

## Sheet: Explanation
See Protocol
Treatment given first: A=meloxicam; B=placebo

## Sheet: Day 0
Dog Case Number	Owner name	Start of Study	MR Number	Breed	Sex	Age at Start	Date of Birth	Weight at Start (kg)	Fore/Hind	Predominant limb affected	Treatment Group first	CSOM Activity I	CSOM ACT I	CSOM Activity II	CSOM ACT II	CSOM Activity III	CSOM ACT III	CSOM Activity IV	CSOM ACT IV	CSOM Activity V	CSOM ACT V	Total CSOM Score	SNoRE Qu 1	SNoRE Qu 2	SNoRE Qu 3	SNoRE Qu 4	SNoRE Qu 5	SNoRE Qu 6	Total SNoRE Score	CBPI Qu 1	CBPI Qu 2	CBPI Qu 3	CBPI Qu 4	CBPI Pain score	CBPI Qu 5	CBPI Qu 6	CBPI Qu 7	CBPI Qu 8	CBPI Qu 9	CBPI Qu 10	CBPI Function score	Total CBPI Score	Overall Impression	Adequately assess? (0=no, 1,yes)	HCPI Qu 1	HCPI Qu 2	HCPI Qu 3	HCPI Qu 4	HCPI Qu 5
1	Nicklas, Jodi	2008-10-15	134419	Labrador Retriever	FS	14.5	1994-01-14	26.8	H	both	A	Going down stairs outside in the morning	3	Getting up in the morning after lying down	1	Moving on slippery floors in living room	2	Playing fetch with owner in the evenings	2	Jumping onto furniture in the evenings	3	11	6	2	4	2	2	5	21	7	3	5	5	20	7	6	7	5	8	7	40	60	3	1	2	2	0	2	3
2	Dalton, John	2008-12-18	143876	Basset Hound	FS	9.5	1999-06-06	20.8	H	both	B	Climbing up stairs inside the house in the evening	3	Jumping onto couch in the TV room in the evening	4	Climbing up brick stairs outside in the evening	3	Laying down in the TV room in the evening	1	Getting into dog bed in the TV room in the evening	2	13	6	6	6	7	6	3	34	7	5	6	6	24	6	3	6	2	7	8	32	56	4	1	0	1	2	1	2
3	Storer, Ana	2008-12-30	141259	Labrador Retriever	FS	11.5	1997-05-01	28.2	H	both	B	Getting up from lying down in the morning after a night's rest	1	Going up inside stairs in the evening	2	Going up outside stairs after playing with other dogs	2	Moving after getting up in the morning	1	Getting up onto the bed	2	8	5	9	9	7	9	2	41	7	3	4	4	18	4	2	4	4	6	6	26	44	4	1	1	0	4	1	1
4	Schmidt, Peggy	2009-03-18	145465	Pointer	MC	12.5	1996-11-24	26	H	both	B	Playing with other dogs in the evening	1	Galloping outside in the evening	1	Jumping onto futon in the evening	1					3	6	7	7	5	1	1	27	6	5	5	6	22	3	5	3	3	4	3	21	43	3	1	1	1	0	1	2
5	Howe, Connie	2009-04-13	146101	Labrador Retriever	MC	9.5	1999-12-23	36	H	both	B	Getting up onto the couch in the evenings	1	Galloping on owner's run	1	Getting up from lying down after exercise	2	Getting into the car	1			5	3	6	6	3	4	2	24	4	2	3	3	12	3	1	4	4	3	1	16	28	1	1	0	0	1	0	0
6	Anton, Thomas	2009-08-25	150072	Labrador Retriever	FS	14	1995-08-23	26.8	H	RH	B	Getting up onto rocking chair	1	Going up the inside stairs	2	Going down the inside stairs	1	Playing with other animals in the evening	0			4	6	4	4	3	2	4	23	4	2	3	4	13	3	3	3	3	3	5	20	33	3	1	1	1	1	0	1
7	Vanderklok, Carin	2009-08-25	115573	Labrador Retriever	MC	10	1999-10-20	36.4	F	both	A	Jumping on bed	3	Running greater than 20m	3	Posturing to defecate	1	Climbing stairs	2	Rising after long walk or play with other dogs	2	11	7	5	6	9	3	1	31	7	5	5	5	22	6	3	8	4	8	8	37	59	3	1	0	2	1	2	3
8	Howard, Tammy	2009-09-01	133410	Labrador Retriever	MC	10	1999-09-30	43.2	H	RH	B	Climbing outside stairs	1	Going down outside stairs	1	Jumping onto living room couch	2	Getting up from lying down in the morning	1	Getting up into car	2	7	2	2	2	4	2	5	17	7	1	3	3	14	4	0	3	0	3	5	15	29	4	1	0	0	1	0	0
9	Harris, Tonya	2009-09-01	93427	Golden RetrieverX	FS	9	2000-01-01	37.8	H	both	B	Going up outside stairs in the evening	1	Getting up after lying down in the evening	1	Standing while being brushed over hip region	1					3	5	3	3	4	2	1	18	4	1	1	2	8	2	2	2	2	3	3	14	22	3	1	1	1	2	1	1
10	Purcell, Missy	2009-09-08	150013	Labrador Retriever	MC	8.4	2001-05-05	29.6	F	RF	A	Walking outside in the yard	0	Moving after playing with other dog	1	Moving after rest in evenings	1	Getting off sofa	1			3	5	6	4	4	6	1	26	4	3	2	2	11	3	2	2	1	2	2	12	23	3	1	0	1	1	1	1
11	Fogleman, Brent	2009-09-08	150365	Labrador Retriever	MC	10.5	1999-01-01	34	H	both	A	Moving on hardwood floors	1	Jumping up on back feet to get inside	1	Getting up from lying down after a long rest	1	Cocking leg to urinate	2	Playing fetch with other dog	2	7	2	2	1	3	1	1	10	7	4	5	4	20	4	3	3	3	5	3	21	41	3	1	1	2	1	0	2
12	Hall, Lynn	2009-09-15	150621	Labrador Retriever	MC	11.5	1998-02-01	37.8	H	both	A	Jumping into the side of the mini van	1	Getting up from lying down	1	Moving on slippery floors	1	Jumping up onto owner's bed	1	Going up inside stairs	1	5	2	1	5	3	1	1	13	3	1	2	2	8	1	1	3	1	1	4	11	19	3	1	0	0	0	0	1
14	Killen, Lynne	2009-09-22	150641	English Soringer SpanielX	FS	11	1998-10-12	31.8	Both	Hind Both	B	Jumping into back seat of truck	2	Climbing outside stairs	1	Going down outside stairs	2	Getting up from lying down	1	Playing with other dogs	1	7	2	3	5	2	2	2	16	8	3	5	4	20	3	2	3	1	2	2	13	33	3	1	2	1	0	1	1
15	Oliver, Susan	2009-09-22	147296	Labrador Retriever	FS	9.5	2000-01-31	31.8	H	both	B	Getting up from lying down after evening walk	1	Moving on slippery hardwood floors	1	Descending inside stairs	1	Jumping onto couch	0	Getting into backseat of the car	0	3	3	5	6	5	3	3	25	2	0	1	1	4	1	0	3	1	2	1	8	12	5	1	0	0	1	1	1
16	Pape, Brian	2009-09-22	130389	German Shorthaired Pointer	MC	5.5	2004-03-20	37	H	both	A	Running with owner	1	Getting up from lying down	2	Laying down from a standing position	2	Squatting to defecate	1			4	5	3	3	5	2	1	19	4	3	4	3	14	4	3	5	5	5	5	27	41	3	1	0	0	1	1	1
17	Budd, Michelle	2009-09-16	146337	American Staffordshire	FS	6	2003-09-06	28	H	both	A	Getting up after lying down in the afternoon	2	Climbing stairs	1	Moving after periods of rest	3	Getting up first thing in the morning	3	Getting comfortable at night	2	11	8	5	3	9	1	2	28	8	4	5	6	23	5	3	9	5	3	7	32	55	3	1	0	1	1	0	0
18	Fox, Beth	2009-09-24	81095	Golden Retriever	FS	11.5	1998-02-01	31.6	Both	Hind Both	B	Jumping up on the bed	1	Getting in the car	2	Getting up from laying down after exercise	1	Standing up for long periods of time	1	Going up stairs in house	1	6	4	7	8	7	6	2	34	7	1	3	3	14	1	1	7	3	5	8	25	39	4	1	1	0	2	0	1
19	Law, Mac	2009-10-13	101360	Labrador Retriever	FS	8.3	2001-06-10	37.2	H	both	B	Getting up from slippery floor	2	Playing or retrieving	1	Recovering after running (getting out)	2	Lying down or sitting normally	1			6	4	2	4	5	2	2	19	4	2	3	3	12	4	3	6	3	4	5	25	37	3	1	1	2	1	1	2
20	Parker, Stephanie	2009-10-13	128166	Border Collie	FS	6.5	2003-02-05	27	H	both	B	Getting up after laying for long period	2	Playing in back yard with other pet	1	Moving after rest	3	Jumping into car	1	Jumping onto furniture	2	9	7	1	4	9	3	1	25	9	0	4	7	20	6	2	8	3	4	7	30	50	4	1	1	2	1	1	2
[truncated: 7 more columns]

## Sheet: Day 14
Dog Case Number	Date of Day 14	MR Number	Breed	Sex	Age at Start	Date of Birth	Weight at Start (kg)	Fore/Hind	Predominant limb affected	Treatment Group First	CSOM Activity I	CSOM ACT I	CSOM Activity II	CSOM ACT II	CSOM Activity III	CSOM ACT III	CSOM Activity IV	CSOM ACT IV	CSOM Activity V	CSOM ACT V	Total CSOM Score	SNoRE Qu 1	SNoRE Qu 2	SNoRE Qu 3	SNoRE Qu 4	SNoRE Qu 5	SNoRE Qu 6	Total SNoRE Score	CBPI Qu 1	CBPI Qu 2	CBPI Qu 3	CBPI Qu 4	CBPI Pain score	CBPI Qu 5	CBPI Qu 6	CBPI Qu 7	CBPI Qu 8	CBPI Qu 9	CBPI Qu 10	CBPI Function score	Total CBPI Score	Overall Impression	HCPI Qu 1	HCPI Qu 2	HCPI Qu 3	HCPI Qu 4	HCPI Qu 5	HCPI Qu 6	HCPI Qu 7
1	2008-10-29	134419	Labrador Retriever	FS	1900-01-13 12:00:00	1994-01-14	26.8	H	both	A	Going down stairs outside in the morning	1	Getting up in the morning after lying down	1	Moving on slippery floors in living room	1	Playing fetch with owner in the evenings	2	Jumping onto furniture in the evenings	0	5	3	2	2	2	1	3	13	3	1	2	1	7	3	2	2	2	5	4	18	25	3	0	1	0	1	1	2	0
2	2009-01-01	143876	Basset Hound	FS	9.5	1999-06-06	20.8	H	both	B	Climbing up stairs inside the house in the evening	3	Jumping onto couch in the TV room in the evening	4	Climbing up brick stairs outside in the evening	3	Laying down in the TV room in the evening	2	Getting into dog bed in the TV room in the evening	3	15	9	9	7	8	7	3	43	9	7	7	7	30	7	3	7	3	8	9	37	67	4	0	1	2	1	3	4	4
3	2009-01-14	141259	Labrador Retriever	FS	11.5	1997-05-01	28.2	H	both	B	Getting up from lying down in the morning after a night's rest	1	Going up inside stairs in the evening	2	Going up outside stairs after playing with other dogs	2	Moving after getting up in the morning	1	Getting up onto the bed	2	8	8	8	7	7	8	2	40	6	4	5	5	20	6	6	7	4	4	5	32	52	4	1	1	4	1	1	2	2
4	2009-03-25	145465	Pointer	MC	12.5	1996-11-24	26	H	both	B	Playing with other dogs in the evening	1	Galloping outside in the evening	1	Jumping onto futon in the evening	1					3	5	7	7	5	1	1	26	3	3	3	3	12	4	4	2	1	2	2	15	27	3	0	2	0	0	1	1	1
5	2009-04-27	146101	Labrador Retriever	MC	9.5	1999-12-23	36	H	both	B	Getting up onto the couch in the evenings	1	Galloping on owner's run	1	Getting up from lying down after exercise	1	Getting into the car	0			3	3	5	4	4	3	3	22	4	1	2	3	10	3	1	3	1	2	3	13	23	3	1	1	1	0	0	1	1
6	2009-09-09	150072	Labrador Retriever	FS	14	1995-08-23	26.8	H	RH	B	Getting up onto rocking chair	0	Going up the inside stairs	1	Going down the inside stairs	0	Playing with other animals in the evening	0			1	2	1	3	2	1	2	11	1	0	1	0	2	1	1	0	0	3	1	6	8	4	1	1	0	0	1	3	3
7	2009-09-08	115573	Labrador Retriever	MC	10	1999-10-20	36.4	F	both	A	Jumping on bed	4	Running greater than 20m	3	Posturing to defecate	1	Climbing stairs	2	Rising after long walk or play with other dogs	2	12	5	3	6	6	2	1	23	6	2	5	6	19	4	4	4	3	7	3	25	44	4	1	2	1	2	3	4	3
8	2009-09-15	133410	Labrador Retriever	MC	10	1999-09-30	43.2	H	RH	B	Climbing outside stairs	1	Going down outside stairs	1	Jumping onto living room couch	1	Getting up from lying down in the morning	1	Getting up into car	1	5	3	2	2	3	3	2	15	4	0	2	2	8	1	1	3	0	0	2	7	15	5	0	0	1	0	0	0	2
9	2009-09-15	93427	Golden RetrieverX	FS	9	2000-01-01	37.8	H	both	B	Going up outside stairs in the evening	1	Getting up after lying down in the evening	1	Standing while being brushed over hip region	1					3	4	4	5	5	3	2	23	5	1	3	3	12	3	2	4	3	3	3	18	30	3	0	1	0	1	1	1	1
10	2009-09-22	150013	Labrador Retriever	MC	8.4	2001-05-05	29.6	F	RF	A	Walking outside in the yard	1	Moving after playing with other dog	1	Moving after rest in evenings	1	Getting off sofa	1			4	3	4	4	3	5	1	20	3	2	1	1	7	3	2	2	2	3	2	14	21	3	0	1	0	1	1	1	1
11	2009-09-24	150365	Labrador Retriever	MC	10.5	1999-01-01	34	H	both	A	Moving on hardwood floors	1	Jumping up on back feet to get inside	2	Getting up from lying down after a long rest	1	Cocking leg to urinate	2	Playing fetch with other dog	2	8	2	1	1	2	1	1	8	7	4	5	5	21	4	3	3	3	4	4	21	42	3	1	2	0	1	2	2	3
12	2009-09-29	150621	Labrador Retriever	MC	11.5	1998-02-01	37.8	H	both	A	Jumping into the side of the mini van	1	Getting up from lying down	1	Moving on slippery floors	1	Jumping up onto owner's bed	1	Going up inside stairs	1	5	2	1	2	2	1	1	1	1	1	1	1	4	1	1	1	1	1	1	6	10	3	0	0	0	0	1	1	1
14	2009-10-13	150641	English Soringer SpanielX	FS	11	1998-10-12	31.8	Both	Hind Both	B	Jumping into back seat of truck	2	Climbing outside stairs	1	Going down outside stairs	1	Getting up from lying down	1	Playing with other dogs	1	6	3	2	4	6	2	1	18	10	1	4	3	18	3	2	3	2	3	4	17	35	3	1	1	0	1	1	2	2
15	2009-10-06	147296	Labrador Retriever	FS	9.5	2000-01-31	31.8	H	both	B	Getting up from lying down after evening walk	0	Moving on slippery hardwood floors	0	Descending inside stairs	1	Jumping onto couch	1	Getting into backseat of the car	0	2	3	5	7	5	3	2	25	3	0	1	1	5	2	0	2	1	3	2	10	15	5	0	0	0	0	1	1	1
16	2009-10-06	130389	German Shorthaired Pointer	MC	5.5	2004-03-20	37	H	both	A	Running with owner	1	Getting up from lying down	2	Laying down from a standing position	2	Squatting to defecate	1			6	5	5	3	6	2	1	22	3	3	3	3	12	3	3	6	5	4	3	24	36	4	0	0	0	1	1	1	2
17	2009-10-06	146337	American Staffordshire	FS	6	2003-09-06	28	H	both	A	Getting up after lying down in the afternoon	0	Climbing stairs	0	Moving after periods of rest	0	Getting up first thing in the morning	1	Getting comfortable at night	1	2	3	1	2	4	1	3	14	2	1	1	1	5	1	1	1	1	1	1	6	11	4	0	0	0	0	0	0	0
18	2009-10-20	81095	Golden Retriever	FS	11.5	1998-02-01	31.6	Both	Hind Both	B	Jumping up on the bed	1	Getting in the car	2	Getting up from laying down after exercise	1	Standing up for long periods of time	1	Going up stairs in house	1	6	5	6	6	5	2	4	28	7	1	4	3	15	5	0	5	3	5	7	25	40	4	0	1	2	1	1	2	2
19	2009-10-27	101360	Labrador Retriever	FS	8.3	2001-06-10	37.2	H	both	B	Getting up from slippery floor	1	Playing or retrieving	1	Recovering after running (getting out)	1	Lying down or sitting normally	0			3	2	3	5	3	2	2	17	4	1	2	3	10	2	1	2	1	1	2	9	19	5	1	1	1	1	1	2	1
20	2009-10-27	128166	Border Collie	FS	6.5	2003-02-05	27	H	both	B	Getting up after laying for long period	2	Playing in back yard with other pet	1	Moving after rest	1	Jumping into car	1	Jumping onto furniture	2	7	4	2	3	4	1	1	15	8	0	4	4	16	3	1	5	3	3	3	18	34	4	0	1	0	1	1	1	2
[truncated: 5 more columns]

## Sheet: Day 21
Dog Case Number	Owner name	Date of Day 21	MR Number	Breed	Sex	Age at Start	Date of Birth	Weight at Start (kg)	Fore/Hind	Predominant limb affected	Treatment Group First	CSOM Activity I	CSOM ACT I	CSOM Activity II	CSOM ACT II	CSOM Activity III	CSOM ACT III	CSOM Activity IV	CSOM ACT IV	CSOM Activity V	CSOM ACT V	Total CSOM Score	SNoRE Qu 1	SNoRE Qu 2	SNoRE Qu 3	SNoRE Qu 4	SNoRE Qu 5	SNoRE Qu 6	Total SNoRE Score	CBPI Qu 1	CBPI Qu 2	CBPI Qu 3	CBPI Qu 4	CBPI Pain score	CBPI Qu 5	CBPI Qu 6	CBPI Qu 7	CBPI Qu 8	CBPI Qu 9	CBPI Qu 10	CBPI Function score	Total CBPI Score	Overall Impression	HCPI Qu 1	HCPI Qu 2	HCPI Qu 3	HCPI Qu 4	HCPI Qu 5	HCPI Qu 6
1	Nicklas, Jodi	2008-11-06	134419	Labrador Retriever	FS	1900-01-13 12:00:00	1994-01-14	26.8	H	both	A	Going down stairs outside in the morning	2	Getting up in the morning after lying down	1	Moving on slippery floors in living room	2	Playing fetch with owner in the evenings	2	Jumping onto furniture in the evenings	1	8	8	5	6	8	1	9	37	5	3	4	4	16	5	5	6	6	7	7	36	52	1	2	2	0	2	3	4
2	Dalton, John	2009-01-08	143876	Basset Hound	FS	9.5	1999-06-06	20.8	H	both	B	Climbing up stairs inside the house in the evening	2	Jumping onto couch in the TV room in the evening	4	Climbing up brick stairs outside in the evening	2	Laying down in the TV room in the evening	1	Getting into dog bed in the TV room in the evening	1	10	7	7	7	6	4	4	35	5	4	5	5	19	5	3	6	5	7	7	33	52	4	0	1	1	1	2	4
3	Storer, Ana	2009-01-21	141259	Labrador Retriever	FS	11.5	1997-05-01	28.2	H	both	B	Getting up from lying down in the morning after a night's rest	1	Going up inside stairs in the evening	1	Going up outside stairs after playing with other dogs	2	Moving after getting up in the morning	1	Getting up onto the bed	2	7	8	8	6	6	7	4	39	6	3	4	5	18	3	3	6	3	4	5	24	42	4	1	1	4	1	1	2
4	Schmidt, Peggy	2009-04-01	145465	Pointer	MC	12.5	1996-11-24	26	H	both	B	Playing with other dogs in the evening	1	Galloping outside in the evening	1	Jumping onto futon in the evening	1					3	5	7	7	5	1	1	26	5	5	5	5	20	3	5	3	3	3	3	20	40	3	1	1	0	1	1	1
5	Howe, Connie	2009-05-06	146101	Labrador Retriever	MC	9.5	1999-12-23	36	H	both	B	Getting up onto the couch in the evenings	1	Galloping on owner's run	0	Getting up from lying down after exercise	1	Getting into the car	1			3	2	2	2	3	2	2	13	4	0	1	1	6	1	1	1	0	0	1	4	10	4	0	0	1	0	0	0
6	Anton, Thomas	2009-09-15	150072	Labrador Retriever	FS	14	1995-08-23	26.8	H	RH	B	Getting up onto rocking chair	1	Going up the inside stairs	1	Going down the inside stairs	1	Playing with other animals in the evening	0			3	2	1	3	4	1	2	13	3	0	2	2	7	3	2	2	0	3	2	12	19	3	1	1	0	0	1	3
7	Vanderklok, Carin	2009-09-15	115573	Labrador Retriever	MC	10	1999-10-20	36.4	F	both	A	Jumping on bed	4	Running greater than 20m	3	Posturing to defecate	1	Climbing stairs	2	Rising after long walk or play with other dogs	2	12	4	3	6	7	2	1	23	8	4	6	6	24	7	5	8	4	7	7	38	62	3	1	2	1	2	3	4
8	Howard, Tammy	2009-09-22	133410	Labrador Retriever	MC	10	1999-09-30	43.2	H	RH	B	Climbing outside stairs	1	Going down outside stairs	1	Jumping onto living room couch	2	Getting up from lying down in the morning	2	Getting up into car	3	9	5	3	3	5	4	4	24	7	1	4	4	16	3	1	4	0	4	4	16	32	3	0	1	1	0	1	1
9	Harris, Tonya	2009-09-22	93427	Golden RetrieverX	FS	9	2000-01-01	37.8	H	both	B	Going up outside stairs in the evening	1	Getting up after lying down in the evening	1	Standing while being brushed over hip region	1					3	4	3	4	4	2	1	18	5	2	3	4	14	2	1	2	2	2	2	11	25	3	1	1	1	1	1	1
10	Purcell, Missy	2009-09-29	150013	Labrador Retriever	MC	8.4	2001-05-05	29.6	F	RF	A	Walking outside in the yard	1	Moving after playing with other dog	1	Moving after rest in evenings	1	Getting off sofa	1			4	4	4	4	3	3	1	19	3	1	2	2	8	2	2	2	2	2	2	12	20	3	0	1	1	1	1	2
11	Fogleman, Brent	2009-09-29	150365	Labrador Retriever	MC	10.5	1999-01-01	34	H	both	A	Moving on hardwood floors	1	Jumping up on back feet to get inside	1	Getting up from lying down after a long rest	1	Cocking leg to urinate	1	Playing fetch with other dog	2	6	2	1	1	4	1	3	12	8	4	5	4	21	5	3	4	3	4	5	24	45	3	1	2	0	1	2	2
12	Hall, Lynn	2009-10-06	150621	Labrador Retriever	MC	11.5	1998-02-01	37.8	H	both	A	Jumping into the side of the mini van	1	Getting up from lying down	1	Moving on slippery floors	1	Jumping up onto owner's bed	1	Going up inside stairs	1	5	2	2	2	2	2	2	12	2	2	2	2	8	2	2	2	2	2	2	12	20	3	1	1	1	1	1	1
14	Killen, Lynne		150641	English Soringer SpanielX	FS	11	1998-10-12	31.8	Both	Hind Both	B	Jumping into back seat of truck	2	Climbing outside stairs	2	Going down outside stairs	2	Getting up from lying down	1	Playing with other dogs	1	8	4	3	4	6	2	3	22	7	1	4	3	15	3	2	4	2	4	5	20	35	3	1	1	0	0	1	2
15	Oliver, Susan	2009-10-13	147296	Labrador Retriever	FS	9.5	2000-01-31	31.8	H	both	B	Getting up from lying down after evening walk	0	Moving on slippery hardwood floors	0	Descending inside stairs	1	Jumping onto couch	1	Getting into backseat of the car	0	2	2	3	7	4	2	2	20	3	0	1	1	5	2	0	2	0	2	1	7	12	5	0	0	0	0	0	1
16	Pape, Brian	2009-10-13	130389	German Shorthaired Pointer	MC	5.5	2004-03-20	37	H	both	A	Running with owner	1	Getting up from lying down	2	Laying down from a standing position	2	Squatting to defecate	1			6	3	3	3	2	2	2	15	4	3	3	3	13	5	3	6	5	5	5	29	42	4	0	0	1	1	1	1
17	Budd, Michelle	2009-09-16	146337	American Staffordshire	FS	6	2003-09-06	28	H	both	A	Getting up after lying down in the afternoon	1	Climbing stairs	1	Moving after periods of rest	1	Getting up first thing in the morning	2	Getting comfortable at night	1	6	3	2	5	3	1	2	16	2	1	1	0	4	1	1	1	0	0	2	5	9	5	0	0	0	0	0	0
18	Fox, Beth	2009-10-27	81095	Golden Retriever	FS	11.5	1998-02-01	31.6	Both	Hind Both	B	Jumping up on the bed	1	Getting in the car	2	Getting up from laying down after exercise	1	Standing up for long periods of time	1	Going up stairs in house	1	6	5	4	4	4	2	2	21	7	1	3	2	13	2	1	3	1	2	3	12	25	3	1	1	2	1	1	2
19	Law, Mac	2009-11-03	101360	Labrador Retriever	FS	8.3	2001-06-10	37.2	H	both	B	Getting up from slippery floor	1	Playing or retrieving	1	Recovering after running (getting out)	1	Lying down or sitting normally	1			4	6	3	3	4	3	5	24	5	3	4	3	15	3	3	5	2	3	4	20	35	3	1	1	1	1	2	1
20	Parker, Stephanie	2009-11-04	128166	Border Collie	FS	6.5	2003-02-05	27	H	both	B	Getting up after laying for long period	3	Playing in back yard with other pet	2	Moving after rest	2	Jumping into car	2	Jumping onto furniture	3	12	6	2	4	6	1	1	20	8	3	6	6	23	4	2	4	2	3	2	17	40	2	1	1	0	1	1	2
[truncated: 6 more columns]

## Sheet: Day 35
Dog Case Number	Owner name	Date of Day 35	MR Number	Breed	Sex	Age at Start	Date of Birth	Weight at Start (kg)	Fore/Hind	Predominant limb affected	Treatment Group first	CSOM Activity I	CSOM ACT I	CSOM Activity II	CSOM ACT II	CSOM Activity III	CSOM ACT III	CSOM Activity IV	CSOM ACT IV	CSOM Activity V	CSOM ACT V	Total CSOM Score	SNoRE Qu 1	SNoRE Qu 2	SNoRE Qu 3	SNoRE Qu 4	SNoRE Qu 5	SNoRE Qu 6	Total SNoRE Score	CBPI Qu 1	CBPI Qu 2	CBPI Qu 3	CBPI Qu 4	CBPI Pain score	CBPI Qu 5	CBPI Qu 6	CBPI Qu 7	CBPI Qu 8	CBPI Qu 9	CBPI Qu 10	CBPI Function score	Total CBPI Score	Overall Impression	HCPI Qu 1	HCPI Qu 2	HCPI Qu 3	HCPI Qu 4	HCPI Qu 5	HCPI Qu 6
1	Nicklas, Jodi	2008-11-19	134419	Labrador Retriever	FS	1900-01-13 12:00:00	1994-01-14	26.8	H	both	A	Going down stairs outside in the morning	2	Getting up in the morning after lying down	1	Moving on slippery floors in living room	2	Playing fetch with owner in the evenings	3	Jumping onto furniture in the evenings	1	9	8	5	5	9	1	9	37	7	5	6	6	24	7	6	6	6	7	7	39	63	3	1	3	0	2	3	4
2	Dalton, John	2009-01-22	143876	Basset Hound	FS	9.5	1999-06-06	20.8	H	both	B	Climbing up stairs inside the house in the evening	1	Jumping onto couch in the TV room in the evening	4	Climbing up brick stairs outside in the evening	1	Laying down in the TV room in the evening	1	Getting into dog bed in the TV room in the evening	1	8	5	6	6	6	4	4	31	5	3	4	4	16	5	3	5	4	5	5	27	43	4	0	1	1	1	2	4
3	Storer, Ana	2009-02-04	141259	Labrador Retriever	FS	11.5	1997-05-01	28.2	H	both	B	Getting up from lying down in the morning after a night's rest	1	Going up inside stairs in the evening	2	Going up outside stairs after playing with other dogs	2	Moving after getting up in the morning	1	Getting up onto the bed	2	8	7	5	7	6	6	3	34	7	2	5	4	18	3	2	4	3	4	7	23	41	3	1	1	4	1	1	2
4	Schmidt, Peggy	2009-04-22	145465	Pointer	MC	12.5	1996-11-24	26	H	both	B	Playing with other dogs in the evening	0	Galloping outside in the evening	0	Jumping onto futon in the evening	0					0	3	4	4	4	1	1	17	1	1	1	1	4	1	1	1	1	1	1	6	10	4	0	1	0	1	1	1
5	Howe, Connie	2009-05-18	146101	Labrador Retriever	MC	9.5	1999-12-23	36	H	both	B	Getting up onto the couch in the evenings	1	Galloping on owner's run	1	Getting up from lying down after exercise	1	Getting into the car	1			4	2	2	2	3	2	2	13	1	0	1	1	3	1	1	1	0	1	1	5	8	4	0	0	2	0	0	1
6	Anton, Thomas	2009-10-01	150072	Labrador Retriever	FS	14	1995-08-23	26.8	H	RH	B	Getting up onto rocking chair	2	Going up the inside stairs	2	Going down the inside stairs	1	Playing with other animals in the evening	1			6	6	2	2	5	1	7	23	5	4	4	4	17	3	3	3	2	3	5	19	36	2	1	1	1	1	2	3
7	Vanderklok, Carin	2009-09-29	115573	Labrador Retriever	MC	10	1999-10-20	36.4	F	both	A	Jumping on bed	4	Running greater than 20m	4	Posturing to defecate	1	Climbing stairs	2	Rising after long walk or play with other dogs	2	13	6	6	7	6	2	1	28	8	3	6	6	23	8	5	9	7	9	9	47	70	3	0	2	1	2	3	4
8	Howard, Tammy	2009-10-06	133410	Labrador Retriever	MC	10	1999-09-30	43.2	H	RH	B	Climbing outside stairs	1	Going down outside stairs	1	Jumping onto living room couch	2	Getting up from lying down in the morning	1	Getting up into car	2	7	4	4	4	4	2	4	22	7	3	5	4	19	4	2	4	0	2	4	16	35	3	1	1	1	0	1	1
9	Harris, Tonya	2009-10-06	93427	Golden RetrieverX	FS	9	2000-01-01	37.8	H	both	B	Going up outside stairs in the evening	1	Getting up after lying down in the evening	1	Standing while being brushed over hip region	1					3	2	2	2	2	1	1	10	3	1	2	1	7	2	1	2	1	1	2	9	16	4	0	0	0	0	0	0
10	Purcell, Missy	2009-10-13	150013	Labrador Retriever	MC	8.4	2001-05-05	29.6	F	RF	A	Walking outside in the yard	1	Moving after playing with other dog	1	Moving after rest in evenings	1	Getting off sofa	1			4	3	3	4	3	2	1	16	3	1	1	1	6	2	2	1	1	2	3	11	17	3	0	1	0	1	1	1
11	Fogleman, Brent	2009-10-13	150365	Labrador Retriever	MC	10.5	1999-01-01	34	H	both	A	Moving on hardwood floors	0	Jumping up on back feet to get inside	1	Getting up from lying down after a long rest	1	Cocking leg to urinate	0	Playing fetch with other dog	1	3	1	1	1	2	1	1	7	4	1	2	2	9	2	2	2	1	2	2	11	20	4	0	0	1	0	1	1
12	Hall, Lynn	2009-10-20	150621	Labrador Retriever	MC	11.5	1998-02-01	37.8	H	both	A	Jumping into the side of the mini van	1	Getting up from lying down	1	Moving on slippery floors	1	Jumping up onto owner's bed	1	Going up inside stairs	1	5	2	2	2	2	1	1	10	1	1	1	1	4	1	1	1	1	1	1	6	10	3	0	1	0	0	1	1
14	Killen, Lynne	2009-11-03	150641	English Soringer SpanielX	FS	11	1998-10-12	31.8	Both	Hind Both	B	Jumping into back seat of truck	2	Climbing outside stairs	1	Going down outside stairs	1	Getting up from lying down	1	Playing with other dogs	1	6	6	4	7	6	1	1	25	6	1	2	2	11	2	0	3	0	1	2	8	19	4	1	0	0	0	1	2
15	Oliver, Susan	2009-10-27	147296	Labrador Retriever	FS	9.5	2000-01-31	31.8	H	both	B	Getting up from lying down after evening walk	1	Moving on slippery hardwood floors	1	Descending inside stairs	1	Jumping onto couch	1	Getting into backseat of the car	0	4	3	5	6	5	4	2	25	2	0	1	1	4	1	0	2	2	3	2	10	14	4	0	0	0	0	1	2
16	Pape, Brian	2009-10-27	130389	German Shorthaired Pointer	MC	5.5	2004-03-20	37	H	both	A	Running with owner	1	Getting up from lying down	2	Laying down from a standing position	2	Squatting to defecate	1			6	2	2	2	3	2	2	13	3	2	3	2	10	3	3	5	4	2	4	21	31	4	0	0	0	1	1	1
17	Budd, Michelle	2009-10-27	146337	American Staffordshire	FS	6	2003-09-06	28	H	both	A	Getting up after lying down in the afternoon	3	Climbing stairs	2	Moving after periods of rest	3	Getting up first thing in the morning	3	Getting comfortable at night	2	13	8	1	5	10	1	8	33	8	4	5	5	22	5	4	9	3	5	7	33	55	2	1	3	0	1	1	1
18	Fox, Beth	2009-11-10	81095	Golden Retriever	FS	11.5	1998-02-01	31.6	Both	Hind Both	B	Jumping up on the bed	0	Getting in the car	1	Getting up from laying down after exercise	0	Standing up for long periods of time	0	Going up stairs in house	0	1	3	3	3	2	2	2	15	1	0	1	0	2	2	0	1	0	1	1	5	7	5	0	0	1	0	1	1
19	Law, Mac	2009-11-17	101360	Labrador Retriever	FS	8.3	2001-06-10	37.2	H	both	B	Getting up from slippery floor	2	Playing or retrieving	n/a	Recovering after running (getting out)	1	Lying down or sitting normally	1			4	5	3	4	5	3	5	25	7	2	5	4	18	3	4	7	5	5	7	31	49	3	1	2	2	2	1	2
20	Parker, Stephanie	2009-11-17	128166	Border Collie	FS	6.5	2003-02-05	27	H	both	B	Getting up after laying for long period	1	Playing in back yard with other pet	1	Moving after rest	1	Jumping into car	1	Jumping onto furniture	1	5	3	1	2	3	1	1	11	2	0	2	0	4	1	0	1	1	1	1	5	9	5	0	1	0	0	1	1
[truncated: 6 more columns]
