# Supplementary material for: Initial evaluation of nighttime restlessness in a naturally occurring canine model of osteoarthritis pain
Source: PeerJ. 2015 Feb 17;3:e772. doi: 10.7717/peerj.772 (PMC4340376; doi:10.7717/peerj.772)
Supplement: Supplemental Information 63 [file peerj-03-772-s063.xlsx]

## Sheet: 01_Data
Tx #	DateTime	Activity	DTA vs NTA	Hour	Tx Day	Weekday	Tx Rx	Peak DTA Time?	Last 7 Day?
1	2008-10-15 22:01:00	386	NTA	22	1	4	M
1	2008-10-15 22:02:00	83	NTA	22	1	4	M
1	2008-10-15 22:03:00	270	NTA	22	1	4	M
1	2008-10-15 22:04:00	285	NTA	22	1	4	M
1	2008-10-15 22:05:00	62	NTA	22	1	4	M
1	2008-10-15 22:06:00	52	NTA	22	1	4	M
1	2008-10-15 22:07:00	0	NTA	22	1	4	M
1	2008-10-15 22:08:00	0	NTA	22	1	4	M
1	2008-10-15 22:09:00	0	NTA	22	1	4	M
1	2008-10-15 22:10:00	0	NTA	22	1	4	M
1	2008-10-15 22:11:00	0	NTA	22	1	4	M
1	2008-10-15 22:12:00	0	NTA	22	1	4	M
1	2008-10-15 22:13:00	0	NTA	22	1	4	M
1	2008-10-15 22:14:00	0	NTA	22	1	4	M
1	2008-10-15 22:15:00	0	NTA	22	1	4	M
1	2008-10-15 22:16:00	0	NTA	22	1	4	M
1	2008-10-15 22:17:00	0	NTA	22	1	4	M
1	2008-10-15 22:18:00	0	NTA	22	1	4	M
1	2008-10-15 22:19:00	10	NTA	22	1	4	M
1	2008-10-15 22:20:00	0	NTA	22	1	4	M
1	2008-10-15 22:21:00	0	NTA	22	1	4	M
1	2008-10-15 22:22:00	0	NTA	22	1	4	M
1	2008-10-15 22:23:00	0	NTA	22	1	4	M
1	2008-10-15 22:24:00	0	NTA	22	1	4	M
1	2008-10-15 22:25:00	0	NTA	22	1	4	M
1	2008-10-15 22:26:00	0	NTA	22	1	4	M
1	2008-10-15 22:27:00	0	NTA	22	1	4	M
1	2008-10-15 22:28:00	0	NTA	22	1	4	M
1	2008-10-15 22:29:00	0	NTA	22	1	4	M
1	2008-10-15 22:30:00	0	NTA	22	1	4	M
1	2008-10-15 22:31:00	93	NTA	22	1	4	M
1	2008-10-15 22:32:00	147	NTA	22	1	4	M
1	2008-10-15 22:33:00	159	NTA	22	1	4	M
1	2008-10-15 22:34:00	159	NTA	22	1	4	M
1	2008-10-15 22:35:00	171	NTA	22	1	4	M
1	2008-10-15 22:36:00	62	NTA	22	1	4	M
1	2008-10-15 22:37:00	0	NTA	22	1	4	M
1	2008-10-15 22:38:00	0	NTA	22	1	4	M
1	2008-10-15 22:39:00	0	NTA	22	1	4	M
1	2008-10-15 22:40:00	0	NTA	22	1	4	M
1	2008-10-15 22:41:00	0	NTA	22	1	4	M
1	2008-10-15 22:42:00	10	NTA	22	1	4	M
1	2008-10-15 22:43:00	0	NTA	22	1	4	M
1	2008-10-15 22:44:00	0	NTA	22	1	4	M
1	2008-10-15 22:45:00	0	NTA	22	1	4	M
1	2008-10-15 22:46:00	0	NTA	22	1	4	M
1	2008-10-15 22:47:00	0	NTA	22	1	4	M
1	2008-10-15 22:48:00	0	NTA	22	1	4	M
1	2008-10-15 22:49:00	0	NTA	22	1	4	M
1	2008-10-15 22:50:00	0	NTA	22	1	4	M
1	2008-10-15 22:51:00	0	NTA	22	1	4	M
1	2008-10-15 22:52:00	0	NTA	22	1	4	M
1	2008-10-15 22:53:00	0	NTA	22	1	4	M
1	2008-10-15 22:54:00	0	NTA	22	1	4	M
1	2008-10-15 22:55:00	184	NTA	22	1	4	M
1	2008-10-15 22:56:00	147	NTA	22	1	4	M
1	2008-10-15 22:57:00	0	NTA	22	1	4	M
1	2008-10-15 22:58:00	10	NTA	22	1	4	M
1	2008-10-15 22:59:00	134	NTA	22	1	4	M
1	2008-10-15 23:00:00	10	NTA	22	1	4	M
1	2008-10-15 23:01:00	0	NTA	23	1	4	M
1	2008-10-15 23:02:00	0	NTA	23	1	4	M
1	2008-10-15 23:03:00	0	NTA	23	1	4	M
1	2008-10-15 23:04:00	0	NTA	23	1	4	M
1	2008-10-15 23:05:00	0	NTA	23	1	4	M
1	2008-10-15 23:06:00	0	NTA	23	1	4	M
1	2008-10-15 23:07:00	0	NTA	23	1	4	M
1	2008-10-15 23:08:00	0	NTA	23	1	4	M
1	2008-10-15 23:09:00	0	NTA	23	1	4	M
1	2008-10-15 23:10:00	0	NTA	23	1	4	M
1	2008-10-15 23:11:00	0	NTA	23	1	4	M
1	2008-10-15 23:12:00	0	NTA	23	1	4	M
1	2008-10-15 23:13:00	0	NTA	23	1	4	M
1	2008-10-15 23:14:00	0	NTA	23	1	4	M
1	2008-10-15 23:15:00	0	NTA	23	1	4	M
1	2008-10-15 23:16:00	0	NTA	23	1	4	M
1	2008-10-15 23:17:00	0	NTA	23	1	4	M
1	2008-10-15 23:18:00	0	NTA	23	1	4	M
1	2008-10-15 23:19:00	0	NTA	23	1	4	M
1	2008-10-15 23:20:00	233	NTA	23	1	4	M
1	2008-10-15 23:21:00	62	NTA	23	1	4	M
1	2008-10-15 23:22:00	147	NTA	23	1	4	M
1	2008-10-15 23:23:00	159	NTA	23	1	4	M
1	2008-10-15 23:24:00	52	NTA	23	1	4	M
1	2008-10-15 23:25:00	0	NTA	23	1	4	M
1	2008-10-15 23:26:00	0	NTA	23	1	4	M
1	2008-10-15 23:27:00	0	NTA	23	1	4	M
1	2008-10-15 23:28:00	0	NTA	23	1	4	M
1	2008-10-15 23:29:00	0	NTA	23	1	4	M
1	2008-10-15 23:30:00	0	NTA	23	1	4	M
1	2008-10-15 23:31:00	0	NTA	23	1	4	M
1	2008-10-15 23:32:00	0	NTA	23	1	4	M
1	2008-10-15 23:33:00	0	NTA	23	1	4	M
1	2008-10-15 23:34:00	0	NTA	23	1	4	M
1	2008-10-15 23:35:00	0	NTA	23	1	4	M
1	2008-10-15 23:36:00	0	NTA	23	1	4	M
1	2008-10-15 23:37:00	0	NTA	23	1	4	M
1	2008-10-15 23:38:00	0	NTA	23	1	4	M
1	2008-10-15 23:39:00	0	NTA	23	1	4	M
1	2008-10-15 23:40:00	0	NTA	23	1	4	M
1	2008-10-15 23:41:00	0	NTA	23	1	4	M
1	2008-10-15 23:42:00	0	NTA	23	1	4	M
1	2008-10-15 23:43:00	0	NTA	23	1	4	M
1	2008-10-15 23:44:00	0	NTA	23	1	4	M
1	2008-10-15 23:45:00	0	NTA	23	1	4	M
1	2008-10-15 23:46:00	0	NTA	23	1	4	M
1	2008-10-15 23:47:00	0	NTA	23	1	4	M
1	2008-10-15 23:48:00	0	NTA	23	1	4	M
1	2008-10-15 23:49:00	10	NTA	23	1	4	M
1	2008-10-15 23:50:00	233	NTA	23	1	4	M
1	2008-10-15 23:51:00	0	NTA	23	1	4	M
1	2008-10-15 23:52:00	0	NTA	23	1	4	M
1	2008-10-15 23:53:00	0	NTA	23	1	4	M
1	2008-10-15 23:54:00	0	NTA	23	1	4	M
1	2008-10-15 23:55:00	0	NTA	23	1	4	M
1	2008-10-15 23:56:00	0	NTA	23	1	4	M
1	2008-10-15 23:57:00	0	NTA	23	1	4	M
1	2008-10-15 23:58:00	0	NTA	23	1	4	M
1	2008-10-15 23:59:00	0	NTA	23	1	4	M
1	2008-10-16	0	NTA	23	1	4	M
1	2008-10-16 00:01:00	0	NTA	0	1	5	M
1	2008-10-16 00:02:00	0	NTA	0	1	5	M
1	2008-10-16 00:03:00	0	NTA	0	1	5	M
1	2008-10-16 00:04:00	0	NTA	0	1	5	M
1	2008-10-16 00:05:00	0	NTA	0	1	5	M
1	2008-10-16 00:06:00	0	NTA	0	1	5	M
1	2008-10-16 00:07:00	0	NTA	0	1	5	M
1	2008-10-16 00:08:00	0	NTA	0	1	5	M
1	2008-10-16 00:09:00	0	NTA	0	1	5	M
1	2008-10-16 00:10:00	0	NTA	0	1	5	M
1	2008-10-16 00:11:00	0	NTA	0	1	5	M
1	2008-10-16 00:12:00	0	NTA	0	1	5	M
1	2008-10-16 00:13:00	0	NTA	0	1	5	M
1	2008-10-16 00:14:00	0	NTA	0	1	5	M
1	2008-10-16 00:15:00	0	NTA	0	1	5	M
1	2008-10-16 00:16:00	0	NTA	0	1	5	M
1	2008-10-16 00:17:00	0	NTA	0	1	5	M
1	2008-10-16 00:18:00	0	NTA	0	1	5	M
1	2008-10-16 00:19:00	0	NTA	0	1	5	M
1	2008-10-16 00:20:00	0	NTA	0	1	5	M
1	2008-10-16 00:21:00	0	NTA	0	1	5	M
1	2008-10-16 00:22:00	41	NTA	0	1	5	M
1	2008-10-16 00:23:00	83	NTA	0	1	5	M
1	2008-10-16 00:24:00	0	NTA	0	1	5	M
1	2008-10-16 00:25:00	299	NTA	0	1	5	M
1	2008-10-16 00:26:00	0	NTA	0	1	5	M
1	2008-10-16 00:27:00	0	NTA	0	1	5	M
1	2008-10-16 00:28:00	0	NTA	0	1	5	M
1	2008-10-16 00:29:00	0	NTA	0	1	5	M
1	2008-10-16 00:30:00	0	NTA	0	1	5	M
1	2008-10-16 00:31:00	0	NTA	0	1	5	M
1	2008-10-16 00:32:00	0	NTA	0	1	5	M
1	2008-10-16 00:33:00	0	NTA	0	1	5	M
1	2008-10-16 00:34:00	0	NTA	0	1	5	M
1	2008-10-16 00:35:00	0	NTA	0	1	5	M
1	2008-10-16 00:36:00	0	NTA	0	1	5	M
1	2008-10-16 00:37:00	0	NTA	0	1	5	M
1	2008-10-16 00:38:00	0	NTA	0	1	5	M
1	2008-10-16 00:39:00	0	NTA	0	1	5	M
1	2008-10-16 00:40:00	0	NTA	0	1	5	M
1	2008-10-16 00:41:00	0	NTA	0	1	5	M
1	2008-10-16 00:42:00	0	NTA	0	1	5	M
1	2008-10-16 00:43:00	0	NTA	0	1	5	M
1	2008-10-16 00:44:00	0	NTA	0	1	5	M
1	2008-10-16 00:45:00	221	NTA	0	1	5	M
1	2008-10-16 00:46:00	0	NTA	0	1	5	M
1	2008-10-16 00:47:00	0	NTA	0	1	5	M
1	2008-10-16 00:48:00	0	NTA	0	1	5	M
1	2008-10-16 00:49:00	10	NTA	0	1	5	M
1	2008-10-16 00:50:00	0	NTA	0	1	5	M
1	2008-10-16 00:51:00	0	NTA	0	1	5	M
1	2008-10-16 00:52:00	0	NTA	0	1	5	M
1	2008-10-16 00:53:00	0	NTA	0	1	5	M
1	2008-10-16 00:54:00	0	NTA	0	1	5	M
1	2008-10-16 00:55:00	0	NTA	0	1	5	M
1	2008-10-16 00:56:00	0	NTA	0	1	5	M
1	2008-10-16 00:57:00	0	NTA	0	1	5	M
1	2008-10-16 00:58:00	0	NTA	0	1	5	M
1	2008-10-16 00:59:00	0	NTA	0	1	5	M
1	2008-10-16 01:00:00	0	NTA	0	1	5	M
1	2008-10-16 01:01:00	0	NTA	1	1	5	M
1	2008-10-16 01:02:00	0	NTA	1	1	5	M
1	2008-10-16 01:03:00	0	NTA	1	1	5	M
1	2008-10-16 01:04:00	0	NTA	1	1	5	M
1	2008-10-16 01:05:00	0	NTA	1	1	5	M
1	2008-10-16 01:06:00	0	NTA	1	1	5	M
1	2008-10-16 01:07:00	0	NTA	1	1	5	M
1	2008-10-16 01:08:00	0	NTA	1	1	5	M
1	2008-10-16 01:09:00	0	NTA	1	1	5	M
1	2008-10-16 01:10:00	10	NTA	1	1	5	M
1	2008-10-16 01:11:00	0	NTA	1	1	5	M
1	2008-10-16 01:12:00	0	NTA	1	1	5	M
1	2008-10-16 01:13:00	0	NTA	1	1	5	M
1	2008-10-16 01:14:00	0	NTA	1	1	5	M
1	2008-10-16 01:15:00	0	NTA	1	1	5	M
1	2008-10-16 01:16:00	0	NTA	1	1	5	M
1	2008-10-16 01:17:00	0	NTA	1	1	5	M
1	2008-10-16 01:18:00	0	NTA	1	1	5	M
1	2008-10-16 01:19:00	0	NTA	1	1	5	M
1	2008-10-16 01:20:00	0	NTA	1	1	5	M
1	2008-10-16 01:21:00	0	NTA	1	1	5	M
1	2008-10-16 01:22:00	0	NTA	1	1	5	M
1	2008-10-16 01:23:00	0	NTA	1	1	5	M
1	2008-10-16 01:24:00	0	NTA	1	1	5	M
1	2008-10-16 01:25:00	0	NTA	1	1	5	M
1	2008-10-16 01:26:00	0	NTA	1	1	5	M
1	2008-10-16 01:27:00	0	NTA	1	1	5	M
1	2008-10-16 01:28:00	0	NTA	1	1	5	M
1	2008-10-16 01:29:00	0	NTA	1	1	5	M
1	2008-10-16 01:30:00	0	NTA	1	1	5	M
1	2008-10-16 01:31:00	0	NTA	1	1	5	M
1	2008-10-16 01:32:00	10	NTA	1	1	5	M
1	2008-10-16 01:33:00	246	NTA	1	1	5	M
1	2008-10-16 01:34:00	0	NTA	1	1	5	M
1	2008-10-16 01:35:00	0	NTA	1	1	5	M
1	2008-10-16 01:36:00	0	NTA	1	1	5	M
1	2008-10-16 01:37:00	0	NTA	1	1	5	M
1	2008-10-16 01:38:00	0	NTA	1	1	5	M
1	2008-10-16 01:39:00	0	NTA	1	1	5	M
1	2008-10-16 01:40:00	0	NTA	1	1	5	M
1	2008-10-16 01:41:00	0	NTA	1	1	5	M
1	2008-10-16 01:42:00	0	NTA	1	1	5	M
1	2008-10-16 01:43:00	0	NTA	1	1	5	M
1	2008-10-16 01:44:00	0	NTA	1	1	5	M
1	2008-10-16 01:45:00	0	NTA	1	1	5	M
1	2008-10-16 01:46:00	0	NTA	1	1	5	M
1	2008-10-16 01:47:00	0	NTA	1	1	5	M
1	2008-10-16 01:48:00	0	NTA	1	1	5	M
1	2008-10-16 01:49:00	31	NTA	1	1	5	M
1	2008-10-16 01:50:00	0	NTA	1	1	5	M
1	2008-10-16 01:51:00	0	NTA	1	1	5	M
1	2008-10-16 01:52:00	0	NTA	1	1	5	M
1	2008-10-16 01:53:00	0	NTA	1	1	5	M
1	2008-10-16 01:54:00	0	NTA	1	1	5	M
1	2008-10-16 01:55:00	0	NTA	1	1	5	M
1	2008-10-16 01:56:00	0	NTA	1	1	5	M
1	2008-10-16 01:57:00	0	NTA	1	1	5	M
1	2008-10-16 01:58:00	0	NTA	1	1	5	M
1	2008-10-16 01:59:00	0	NTA	1	1	5	M
1	2008-10-16 02:00:00	0	NTA	1	1	5	M
1	2008-10-16 02:01:00	0	NTA	2	1	5	M
1	2008-10-16 02:02:00	31	NTA	2	1	5	M
1	2008-10-16 02:03:00	0	NTA	2	1	5	M
1	2008-10-16 02:04:00	0	NTA	2	1	5	M
1	2008-10-16 02:05:00	0	NTA	2	1	5	M
1	2008-10-16 02:06:00	31	NTA	2	1	5	M
1	2008-10-16 02:07:00	0	NTA	2	1	5	M
1	2008-10-16 02:08:00	0	NTA	2	1	5	M
1	2008-10-16 02:09:00	0	NTA	2	1	5	M
1	2008-10-16 02:10:00	0	NTA	2	1	5	M
1	2008-10-16 02:11:00	0	NTA	2	1	5	M
1	2008-10-16 02:12:00	0	NTA	2	1	5	M
1	2008-10-16 02:13:00	31	NTA	2	1	5	M
1	2008-10-16 02:14:00	0	NTA	2	1	5	M
1	2008-10-16 02:15:00	41	NTA	2	1	5	M
1	2008-10-16 02:16:00	299	NTA	2	1	5	M
1	2008-10-16 02:17:00	0	NTA	2	1	5	M
1	2008-10-16 02:18:00	0	NTA	2	1	5	M
1	2008-10-16 02:19:00	0	NTA	2	1	5	M
1	2008-10-16 02:20:00	0	NTA	2	1	5	M
1	2008-10-16 02:21:00	0	NTA	2	1	5	M
1	2008-10-16 02:22:00	0	NTA	2	1	5	M
1	2008-10-16 02:23:00	0	NTA	2	1	5	M
1	2008-10-16 02:24:00	0	NTA	2	1	5	M
1	2008-10-16 02:25:00	0	NTA	2	1	5	M
1	2008-10-16 02:26:00	0	NTA	2	1	5	M
1	2008-10-16 02:27:00	0	NTA	2	1	5	M
1	2008-10-16 02:28:00	0	NTA	2	1	5	M
1	2008-10-16 02:29:00	0	NTA	2	1	5	M
1	2008-10-16 02:30:00	0	NTA	2	1	5	M
1	2008-10-16 02:31:00	0	NTA	2	1	5	M
1	2008-10-16 02:32:00	0	NTA	2	1	5	M
1	2008-10-16 02:33:00	52	NTA	2	1	5	M
1	2008-10-16 02:34:00	0	NTA	2	1	5	M
1	2008-10-16 02:35:00	0	NTA	2	1	5	M
1	2008-10-16 02:36:00	0	NTA	2	1	5	M
1	2008-10-16 02:37:00	0	NTA	2	1	5	M
1	2008-10-16 02:38:00	52	NTA	2	1	5	M
1	2008-10-16 02:39:00	0	NTA	2	1	5	M
1	2008-10-16 02:40:00	0	NTA	2	1	5	M
1	2008-10-16 02:41:00	0	NTA	2	1	5	M
1	2008-10-16 02:42:00	0	NTA	2	1	5	M
1	2008-10-16 02:43:00	401	NTA	2	1	5	M
1	2008-10-16 02:44:00	21	NTA	2	1	5	M
1	2008-10-16 02:45:00	21	NTA	2	1	5	M
1	2008-10-16 02:46:00	0	NTA	2	1	5	M
1	2008-10-16 02:47:00	0	NTA	2	1	5	M
1	2008-10-16 02:48:00	0	NTA	2	1	5	M
1	2008-10-16 02:49:00	0	NTA	2	1	5	M
1	2008-10-16 02:50:00	0	NTA	2	1	5	M
1	2008-10-16 02:51:00	0	NTA	2	1	5	M
1	2008-10-16 02:52:00	0	NTA	2	1	5	M
1	2008-10-16 02:53:00	0	NTA	2	1	5	M
1	2008-10-16 02:54:00	0	NTA	2	1	5	M
1	2008-10-16 02:55:00	0	NTA	2	1	5	M
1	2008-10-16 02:56:00	0	NTA	2	1	5	M
1	2008-10-16 02:57:00	0	NTA	2	1	5	M
1	2008-10-16 02:58:00	0	NTA	2	1	5	M
1	2008-10-16 02:59:00	0	NTA	2	1	5	M
1	2008-10-16 03:00:00	0	NTA	2	1	5	M
1	2008-10-16 03:01:00	0	NTA	3	1	5	M
1	2008-10-16 03:02:00	0	NTA	3	1	5	M
1	2008-10-16 03:03:00	0	NTA	3	1	5	M
1	2008-10-16 03:04:00	0	NTA	3	1	5	M
1	2008-10-16 03:05:00	0	NTA	3	1	5	M
1	2008-10-16 03:06:00	0	NTA	3	1	5	M
1	2008-10-16 03:07:00	0	NTA	3	1	5	M
1	2008-10-16 03:08:00	0	NTA	3	1	5	M
1	2008-10-16 03:09:00	0	NTA	3	1	5	M
1	2008-10-16 03:10:00	0	NTA	3	1	5	M
1	2008-10-16 03:11:00	0	NTA	3	1	5	M
1	2008-10-16 03:12:00	0	NTA	3	1	5	M
1	2008-10-16 03:13:00	0	NTA	3	1	5	M
1	2008-10-16 03:14:00	0	NTA	3	1	5	M
1	2008-10-16 03:15:00	0	NTA	3	1	5	M
1	2008-10-16 03:16:00	0	NTA	3	1	5	M
1	2008-10-16 03:17:00	0	NTA	3	1	5	M
1	2008-10-16 03:18:00	0	NTA	3	1	5	M
1	2008-10-16 03:19:00	0	NTA	3	1	5	M
1	2008-10-16 03:20:00	0	NTA	3	1	5	M
1	2008-10-16 03:21:00	0	NTA	3	1	5	M
1	2008-10-16 03:22:00	0	NTA	3	1	5	M
1	2008-10-16 03:23:00	0	NTA	3	1	5	M
1	2008-10-16 03:24:00	0	NTA	3	1	5	M
1	2008-10-16 03:25:00	0	NTA	3	1	5	M
1	2008-10-16 03:26:00	0	NTA	3	1	5	M
1	2008-10-16 03:27:00	0	NTA	3	1	5	M
1	2008-10-16 03:28:00	0	NTA	3	1	5	M
1	2008-10-16 03:29:00	0	NTA	3	1	5	M
1	2008-10-16 03:30:00	0	NTA	3	1	5	M
1	2008-10-16 03:31:00	0	NTA	3	1	5	M
1	2008-10-16 03:32:00	0	NTA	3	1	5	M
1	2008-10-16 03:33:00	0	NTA	3	1	5	M
1	2008-10-16 03:34:00	0	NTA	3	1	5	M
1	2008-10-16 03:35:00	0	NTA	3	1	5	M
1	2008-10-16 03:36:00	0	NTA	3	1	5	M
1	2008-10-16 03:37:00	0	NTA	3	1	5	M
1	2008-10-16 03:38:00	0	NTA	3	1	5	M
1	2008-10-16 03:39:00	21	NTA	3	1	5	M
1	2008-10-16 03:40:00	0	NTA	3	1	5	M
1	2008-10-16 03:41:00	0	NTA	3	1	5	M
1	2008-10-16 03:42:00	0	NTA	3	1	5	M
1	2008-10-16 03:43:00	0	NTA	3	1	5	M
1	2008-10-16 03:44:00	0	NTA	3	1	5	M
1	2008-10-16 03:45:00	0	NTA	3	1	5	M
1	2008-10-16 03:46:00	0	NTA	3	1	5	M
1	2008-10-16 03:47:00	0	NTA	3	1	5	M
1	2008-10-16 03:48:00	0	NTA	3	1	5	M
1	2008-10-16 03:49:00	0	NTA	3	1	5	M
1	2008-10-16 03:50:00	0	NTA	3	1	5	M
1	2008-10-16 03:51:00	0	NTA	3	1	5	M
1	2008-10-16 03:52:00	0	NTA	3	1	5	M
1	2008-10-16 03:53:00	0	NTA	3	1	5	M
1	2008-10-16 03:54:00	0	NTA	3	1	5	M
1	2008-10-16 03:55:00	21	NTA	3	1	5	M
1	2008-10-16 03:56:00	0	NTA	3	1	5	M
1	2008-10-16 03:57:00	0	NTA	3	1	5	M
1	2008-10-16 03:58:00	0	NTA	3	1	5	M
1	2008-10-16 03:59:00	0	NTA	3	1	5	M
1	2008-10-16 04:00:00	0	NTA	3	1	5	M
1	2008-10-16 04:01:00	0	NTA	4	1	5	M
1	2008-10-16 04:02:00	0	NTA	4	1	5	M
1	2008-10-16 04:03:00	0	NTA	4	1	5	M
1	2008-10-16 04:04:00	0	NTA	4	1	5	M
1	2008-10-16 04:05:00	0	NTA	4	1	5	M
1	2008-10-16 04:06:00	0	NTA	4	1	5	M
1	2008-10-16 04:07:00	0	NTA	4	1	5	M
1	2008-10-16 04:08:00	0	NTA	4	1	5	M
1	2008-10-16 04:09:00	0	NTA	4	1	5	M
1	2008-10-16 04:10:00	0	NTA	4	1	5	M
1	2008-10-16 04:11:00	0	NTA	4	1	5	M
1	2008-10-16 04:12:00	0	NTA	4	1	5	M
1	2008-10-16 04:13:00	0	NTA	4	1	5	M
1	2008-10-16 04:14:00	0	NTA	4	1	5	M
1	2008-10-16 04:15:00	0	NTA	4	1	5	M
1	2008-10-16 04:16:00	0	NTA	4	1	5	M
1	2008-10-16 04:17:00	0	NTA	4	1	5	M
1	2008-10-16 04:18:00	0	NTA	4	1	5	M
1	2008-10-16 04:19:00	0	NTA	4	1	5	M
1	2008-10-16 04:20:00	0	NTA	4	1	5	M
1	2008-10-16 04:21:00	0	NTA	4	1	5	M
1	2008-10-16 04:22:00	0	NTA	4	1	5	M
1	2008-10-16 04:23:00	0	NTA	4	1	5	M
1	2008-10-16 04:24:00	0	NTA	4	1	5	M
1	2008-10-16 04:25:00	0	NTA	4	1	5	M
1	2008-10-16 04:26:00	0	NTA	4	1	5	M
1	2008-10-16 04:27:00	0	NTA	4	1	5	M
1	2008-10-16 04:28:00	0	NTA	4	1	5	M
1	2008-10-16 04:29:00	0	NTA	4	1	5	M
1	2008-10-16 04:30:00	0	NTA	4	1	5	M
1	2008-10-16 04:31:00	0	NTA	4	1	5	M
1	2008-10-16 04:32:00	0	NTA	4	1	5	M
1	2008-10-16 04:33:00	0	NTA	4	1	5	M
1	2008-10-16 04:34:00	0	NTA	4	1	5	M
1	2008-10-16 04:35:00	0	NTA	4	1	5	M
1	2008-10-16 04:36:00	0	NTA	4	1	5	M
1	2008-10-16 04:37:00	0	NTA	4	1	5	M
1	2008-10-16 04:38:00	0	NTA	4	1	5	M
1	2008-10-16 04:39:00	0	NTA	4	1	5	M
1	2008-10-16 04:40:00	0	NTA	4	1	5	M
1	2008-10-16 04:41:00	0	NTA	4	1	5	M
1	2008-10-16 04:42:00	0	NTA	4	1	5	M
1	2008-10-16 04:43:00	0	NTA	4	1	5	M
1	2008-10-16 04:44:00	0	NTA	4	1	5	M
1	2008-10-16 04:45:00	0	NTA	4	1	5	M
1	2008-10-16 04:46:00	0	NTA	4	1	5	M
1	2008-10-16 04:47:00	0	NTA	4	1	5	M
1	2008-10-16 04:48:00	0	NTA	4	1	5	M
1	2008-10-16 04:49:00	0	NTA	4	1	5	M
1	2008-10-16 04:50:00	0	NTA	4	1	5	M
1	2008-10-16 04:51:00	0	NTA	4	1	5	M
1	2008-10-16 04:52:00	0	NTA	4	1	5	M
1	2008-10-16 04:53:00	0	NTA	4	1	5	M
1	2008-10-16 04:54:00	0	NTA	4	1	5	M
1	2008-10-16 04:55:00	0	NTA	4	1	5	M
1	2008-10-16 04:56:00	0	NTA	4	1	5	M
1	2008-10-16 04:57:00	0	NTA	4	1	5	M
1	2008-10-16 04:58:00	0	NTA	4	1	5	M
1	2008-10-16 04:59:00	0	NTA	4	1	5	M
1	2008-10-16 05:00:00	72	NTA	4	1	5	M
1	2008-10-16 05:01:00	450	NTA	5	1	5	M
1	2008-10-16 05:02:00	0	NTA	5	1	5	M
1	2008-10-16 05:03:00	0	NTA	5	1	5	M
1	2008-10-16 05:04:00	0	NTA	5	1	5	M
1	2008-10-16 05:05:00	0	NTA	5	1	5	M
1	2008-10-16 05:06:00	0	NTA	5	1	5	M
1	2008-10-16 05:07:00	0	NTA	5	1	5	M
1	2008-10-16 05:08:00	0	NTA	5	1	5	M
1	2008-10-16 05:09:00	0	NTA	5	1	5	M
1	2008-10-16 05:10:00	0	NTA	5	1	5	M
1	2008-10-16 05:11:00	0	NTA	5	1	5	M
1	2008-10-16 05:12:00	0	NTA	5	1	5	M
1	2008-10-16 05:13:00	0	NTA	5	1	5	M
1	2008-10-16 05:14:00	0	NTA	5	1	5	M
1	2008-10-16 05:15:00	0	NTA	5	1	5	M
1	2008-10-16 05:16:00	0	NTA	5	1	5	M
1	2008-10-16 05:17:00	0	NTA	5	1	5	M
1	2008-10-16 05:18:00	0	NTA	5	1	5	M
1	2008-10-16 05:19:00	0	NTA	5	1	5	M
1	2008-10-16 05:20:00	0	NTA	5	1	5	M
1	2008-10-16 05:21:00	0	NTA	5	1	5	M
1	2008-10-16 05:22:00	0	NTA	5	1	5	M
1	2008-10-16 05:23:00	0	NTA	5	1	5	M
1	2008-10-16 05:24:00	0	NTA	5	1	5	M
1	2008-10-16 05:25:00	0	NTA	5	1	5	M
1	2008-10-16 05:26:00	0	NTA	5	1	5	M
1	2008-10-16 05:27:00	0	NTA	5	1	5	M
1	2008-10-16 05:28:00	0	NTA	5	1	5	M
1	2008-10-16 05:29:00	31	NTA	5	1	5	M
1	2008-10-16 05:30:00	0	NTA	5	1	5	M
1	2008-10-16 05:31:00	0	NTA	5	1	5	M
1	2008-10-16 05:32:00	0	NTA	5	1	5	M
1	2008-10-16 05:33:00	0	NTA	5	1	5	M
1	2008-10-16 05:34:00	0	NTA	5	1	5	M
1	2008-10-16 05:35:00	0	NTA	5	1	5	M
1	2008-10-16 05:36:00	52	NTA	5	1	5	M
1	2008-10-16 05:37:00	0	NTA	5	1	5	M
1	2008-10-16 05:38:00	0	NTA	5	1	5	M
1	2008-10-16 05:39:00	0	NTA	5	1	5	M
1	2008-10-16 05:40:00	21	NTA	5	1	5	M
1	2008-10-16 05:41:00	551	NTA	5	1	5	M
1	2008-10-16 05:42:00	31	NTA	5	1	5	M
1	2008-10-16 05:43:00	0	NTA	5	1	5	M
1	2008-10-16 05:44:00	10	NTA	5	1	5	M
1	2008-10-16 05:45:00	1121	NTA	5	1	5	M
1	2008-10-16 05:46:00	401	DTA	5	1	5	M
1	2008-10-16 05:47:00	401	DTA	5	1	5	M
1	2008-10-16 05:48:00	124	DTA	5	1	5	M
1	2008-10-16 05:49:00	83	DTA	5	1	5	M
1	2008-10-16 05:50:00	343	DTA	5	1	5	M
1	2008-10-16 05:51:00	221	DTA	5	1	5	M
1	2008-10-16 05:52:00	196	DTA	5	1	5	M
1	2008-10-16 05:53:00	62	DTA	5	1	5	M
1	2008-10-16 05:54:00	246	DTA	5	1	5	M
1	2008-10-16 05:55:00	41	DTA	5	1	5	M
1	2008-10-16 05:56:00	0	DTA	5	1	5	M
1	2008-10-16 05:57:00	0	DTA	5	1	5	M
1	2008-10-16 05:58:00	10	DTA	5	1	5	M
1	2008-10-16 05:59:00	114	DTA	5	1	5	M
1	2008-10-16 06:00:00	52	DTA	5	1	5	M
1	2008-10-16 06:01:00	10	DTA	6	1	5	M
1	2008-10-16 06:02:00	0	DTA	6	1	5	M
1	2008-10-16 06:03:00	10	DTA	6	1	5	M
1	2008-10-16 06:04:00	0	DTA	6	1	5	M
1	2008-10-16 06:05:00	103	DTA	6	1	5	M
1	2008-10-16 06:06:00	221	DTA	6	1	5	M
1	2008-10-16 06:07:00	147	DTA	6	1	5	M
1	2008-10-16 06:08:00	233	DTA	6	1	5	M
1	2008-10-16 06:09:00	0	DTA	6	1	5	M
1	2008-10-16 06:10:00	0	DTA	6	1	5	M
1	2008-10-16 06:11:00	0	DTA	6	1	5	M
1	2008-10-16 06:12:00	0	DTA	6	1	5	M
1	2008-10-16 06:13:00	0	DTA	6	1	5	M
1	2008-10-16 06:14:00	0	DTA	6	1	5	M
1	2008-10-16 06:15:00	0	DTA	6	1	5	M
1	2008-10-16 06:16:00	21	DTA	6	1	5	M
1	2008-10-16 06:17:00	10	DTA	6	1	5	M
1	2008-10-16 06:18:00	10	DTA	6	1	5	M
1	2008-10-16 06:19:00	0	DTA	6	1	5	M
1	2008-10-16 06:20:00	124	DTA	6	1	5	M
1	2008-10-16 06:21:00	147	DTA	6	1	5	M
1	2008-10-16 06:22:00	10	DTA	6	1	5	M
1	2008-10-16 06:23:00	10	DTA	6	1	5	M
1	2008-10-16 06:24:00	0	DTA	6	1	5	M
1	2008-10-16 06:25:00	159	DTA	6	1	5	M
1	2008-10-16 06:26:00	31	DTA	6	1	5	M
1	2008-10-16 06:27:00	0	DTA	6	1	5	M
1	2008-10-16 06:28:00	0	DTA	6	1	5	M
1	2008-10-16 06:29:00	0	DTA	6	1	5	M
1	2008-10-16 06:30:00	0	DTA	6	1	5	M
1	2008-10-16 06:31:00	0	DTA	6	1	5	M
1	2008-10-16 06:32:00	0	DTA	6	1	5	M
1	2008-10-16 06:33:00	0	DTA	6	1	5	M
1	2008-10-16 06:34:00	31	DTA	6	1	5	M
1	2008-10-16 06:35:00	0	DTA	6	1	5	M
1	2008-10-16 06:36:00	41	DTA	6	1	5	M
1	2008-10-16 06:37:00	0	DTA	6	1	5	M
1	2008-10-16 06:38:00	0	DTA	6	1	5	M
1	2008-10-16 06:39:00	0	DTA	6	1	5	M
1	2008-10-16 06:40:00	0	DTA	6	1	5	M
1	2008-10-16 06:41:00	0	DTA	6	1	5	M
1	2008-10-16 06:42:00	0	DTA	6	1	5	M
1	2008-10-16 06:43:00	0	DTA	6	1	5	M
1	2008-10-16 06:44:00	0	DTA	6	1	5	M
1	2008-10-16 06:45:00	0	DTA	6	1	5	M
1	2008-10-16 06:46:00	0	DTA	6	1	5	M
1	2008-10-16 06:47:00	21	DTA	6	1	5	M
1	2008-10-16 06:48:00	0	DTA	6	1	5	M
1	2008-10-16 06:49:00	0	DTA	6	1	5	M
1	2008-10-16 06:50:00	0	DTA	6	1	5	M
1	2008-10-16 06:51:00	0	DTA	6	1	5	M
1	2008-10-16 06:52:00	0	DTA	6	1	5	M
1	2008-10-16 06:53:00	0	DTA	6	1	5	M
1	2008-10-16 06:54:00	0	DTA	6	1	5	M
1	2008-10-16 06:55:00	0	DTA	6	1	5	M
1	2008-10-16 06:56:00	0	DTA	6	1	5	M
1	2008-10-16 06:57:00	0	DTA	6	1	5	M
1	2008-10-16 06:58:00	0	DTA	6	1	5	M
1	2008-10-16 06:59:00	0	DTA	6	1	5	M
1	2008-10-16 07:00:00	0	DTA	6	1	5	M
1	2008-10-16 07:01:00	0	DTA	7	1	5	M
1	2008-10-16 07:02:00	0	DTA	7	1	5	M
1	2008-10-16 07:03:00	0	DTA	7	1	5	M
1	2008-10-16 07:04:00	0	DTA	7	1	5	M
1	2008-10-16 07:05:00	31	DTA	7	1	5	M
1	2008-10-16 07:06:00	246	DTA	7	1	5	M
1	2008-10-16 07:07:00	10	DTA	7	1	5	M
1	2008-10-16 07:08:00	0	DTA	7	1	5	M
1	2008-10-16 07:09:00	0	DTA	7	1	5	M
1	2008-10-16 07:10:00	0	DTA	7	1	5	M
1	2008-10-16 07:11:00	0	DTA	7	1	5	M
1	2008-10-16 07:12:00	0	DTA	7	1	5	M
1	2008-10-16 07:13:00	0	DTA	7	1	5	M
1	2008-10-16 07:14:00	0	DTA	7	1	5	M
1	2008-10-16 07:15:00	10	DTA	7	1	5	M
1	2008-10-16 07:16:00	0	DTA	7	1	5	M
1	2008-10-16 07:17:00	0	DTA	7	1	5	M
1	2008-10-16 07:18:00	21	DTA	7	1	5	M
1	2008-10-16 07:19:00	0	DTA	7	1	5	M
1	2008-10-16 07:20:00	0	DTA	7	1	5	M
1	2008-10-16 07:21:00	0	DTA	7	1	5	M
1	2008-10-16 07:22:00	0	DTA	7	1	5	M
1	2008-10-16 07:23:00	0	DTA	7	1	5	M
1	2008-10-16 07:24:00	0	DTA	7	1	5	M
1	2008-10-16 07:25:00	0	DTA	7	1	5	M
1	2008-10-16 07:26:00	0	DTA	7	1	5	M
1	2008-10-16 07:27:00	0	DTA	7	1	5	M
1	2008-10-16 07:28:00	0	DTA	7	1	5	M
1	2008-10-16 07:29:00	0	DTA	7	1	5	M
1	2008-10-16 07:30:00	0	DTA	7	1	5	M
1	2008-10-16 07:31:00	0	DTA	7	1	5	M
1	2008-10-16 07:32:00	0	DTA	7	1	5	M
1	2008-10-16 07:33:00	0	DTA	7	1	5	M
1	2008-10-16 07:34:00	0	DTA	7	1	5	M
1	2008-10-16 07:35:00	0	DTA	7	1	5	M
1	2008-10-16 07:36:00	0	DTA	7	1	5	M
1	2008-10-16 07:37:00	0	DTA	7	1	5	M
1	2008-10-16 07:38:00	0	DTA	7	1	5	M
1	2008-10-16 07:39:00	0	DTA	7	1	5	M
1	2008-10-16 07:40:00	159	DTA	7	1	5	M
1	2008-10-16 07:41:00	21	DTA	7	1	5	M
1	2008-10-16 07:42:00	0	DTA	7	1	5	M
1	2008-10-16 07:43:00	0	DTA	7	1	5	M
1	2008-10-16 07:44:00	0	DTA	7	1	5	M
1	2008-10-16 07:45:00	0	DTA	7	1	5	M
1	2008-10-16 07:46:00	0	DTA	7	1	5	M
1	2008-10-16 07:47:00	0	DTA	7	1	5	M
1	2008-10-16 07:48:00	0	DTA	7	1	5	M
1	2008-10-16 07:49:00	0	DTA	7	1	5	M
1	2008-10-16 07:50:00	0	DTA	7	1	5	M
1	2008-10-16 07:51:00	0	DTA	7	1	5	M
1	2008-10-16 07:52:00	0	DTA	7	1	5	M
1	2008-10-16 07:53:00	0	DTA	7	1	5	M
1	2008-10-16 07:54:00	0	DTA	7	1	5	M
1	2008-10-16 07:55:00	0	DTA	7	1	5	M
1	2008-10-16 07:56:00	0	DTA	7	1	5	M
1	2008-10-16 07:57:00	0	DTA	7	1	5	M
1	2008-10-16 07:58:00	0	DTA	7	1	5	M
1	2008-10-16 07:59:00	0	DTA	7	1	5	M
1	2008-10-16 08:00:00	0	DTA	7	1	5	M
1	2008-10-16 08:01:00	0	DTA	8	1	5	M
1	2008-10-16 08:02:00	0	DTA	8	1	5	M
1	2008-10-16 08:03:00	0	DTA	8	1	5	M
1	2008-10-16 08:04:00	0	DTA	8	1	5	M
1	2008-10-16 08:05:00	0	DTA	8	1	5	M
1	2008-10-16 08:06:00	0	DTA	8	1	5	M
1	2008-10-16 08:07:00	0	DTA	8	1	5	M
1	2008-10-16 08:08:00	0	DTA	8	1	5	M
1	2008-10-16 08:09:00	0	DTA	8	1	5	M
1	2008-10-16 08:10:00	0	DTA	8	1	5	M
1	2008-10-16 08:11:00	0	DTA	8	1	5	M
1	2008-10-16 08:12:00	0	DTA	8	1	5	M
1	2008-10-16 08:13:00	0	DTA	8	1	5	M
1	2008-10-16 08:14:00	0	DTA	8	1	5	M
1	2008-10-16 08:15:00	0	DTA	8	1	5	M
1	2008-10-16 08:16:00	0	DTA	8	1	5	M
1	2008-10-16 08:17:00	0	DTA	8	1	5	M
1	2008-10-16 08:18:00	0	DTA	8	1	5	M
1	2008-10-16 08:19:00	10	DTA	8	1	5	M
1	2008-10-16 08:20:00	10	DTA	8	1	5	M
1	2008-10-16 08:21:00	10	DTA	8	1	5	M
1	2008-10-16 08:22:00	184	DTA	8	1	5	M
1	2008-10-16 08:23:00	21	DTA	8	1	5	M
1	2008-10-16 08:24:00	0	DTA	8	1	5	M
1	2008-10-16 08:25:00	10	DTA	8	1	5	M
1	2008-10-16 08:26:00	0	DTA	8	1	5	M
1	2008-10-16 08:27:00	0	DTA	8	1	5	M
1	2008-10-16 08:28:00	41	DTA	8	1	5	M
1	2008-10-16 08:29:00	0	DTA	8	1	5	M
1	2008-10-16 08:30:00	0	DTA	8	1	5	M
1	2008-10-16 08:31:00	0	DTA	8	1	5	M
1	2008-10-16 08:32:00	0	DTA	8	1	5	M
1	2008-10-16 08:33:00	103	DTA	8	1	5	M
1	2008-10-16 08:34:00	0	DTA	8	1	5	M
1	2008-10-16 08:35:00	0	DTA	8	1	5	M
1	2008-10-16 08:36:00	10	DTA	8	1	5	M
1	2008-10-16 08:37:00	0	DTA	8	1	5	M
1	2008-10-16 08:38:00	0	DTA	8	1	5	M
1	2008-10-16 08:39:00	10	DTA	8	1	5	M
1	2008-10-16 08:40:00	0	DTA	8	1	5	M
1	2008-10-16 08:41:00	0	DTA	8	1	5	M
1	2008-10-16 08:42:00	0	DTA	8	1	5	M
1	2008-10-16 08:43:00	0	DTA	8	1	5	M
1	2008-10-16 08:44:00	31	DTA	8	1	5	M
1	2008-10-16 08:45:00	258	DTA	8	1	5	M
1	2008-10-16 08:46:00	0	DTA	8	1	5	M
1	2008-10-16 08:47:00	0	DTA	8	1	5	M
1	2008-10-16 08:48:00	0	DTA	8	1	5	M
1	2008-10-16 08:49:00	0	DTA	8	1	5	M
1	2008-10-16 08:50:00	72	DTA	8	1	5	M
1	2008-10-16 08:51:00	0	DTA	8	1	5	M
1	2008-10-16 08:52:00	0	DTA	8	1	5	M
1	2008-10-16 08:53:00	0	DTA	8	1	5	M
1	2008-10-16 08:54:00	0	DTA	8	1	5	M
1	2008-10-16 08:55:00	52	DTA	8	1	5	M
1	2008-10-16 08:56:00	0	DTA	8	1	5	M
1	2008-10-16 08:57:00	0	DTA	8	1	5	M
1	2008-10-16 08:58:00	0	DTA	8	1	5	M
1	2008-10-16 08:59:00	0	DTA	8	1	5	M
1	2008-10-16 09:00:00	10	DTA	8	1	5	M
1	2008-10-16 09:01:00	0	DTA	9	1	5	M
1	2008-10-16 09:02:00	21	DTA	9	1	5	M
1	2008-10-16 09:03:00	0	DTA	9	1	5	M
1	2008-10-16 09:04:00	0	DTA	9	1	5	M
1	2008-10-16 09:05:00	0	DTA	9	1	5	M
1	2008-10-16 09:06:00	0	DTA	9	1	5	M
1	2008-10-16 09:07:00	0	DTA	9	1	5	M
1	2008-10-16 09:08:00	0	DTA	9	1	5	M
1	2008-10-16 09:09:00	0	DTA	9	1	5	M
1	2008-10-16 09:10:00	0	DTA	9	1	5	M
1	2008-10-16 09:11:00	0	DTA	9	1	5	M
1	2008-10-16 09:12:00	0	DTA	9	1	5	M
1	2008-10-16 09:13:00	41	DTA	9	1	5	M
1	2008-10-16 09:14:00	0	DTA	9	1	5	M
1	2008-10-16 09:15:00	221	DTA	9	1	5	M
1	2008-10-16 09:16:00	0	DTA	9	1	5	M
1	2008-10-16 09:17:00	171	DTA	9	1	5	M
1	2008-10-16 09:18:00	0	DTA	9	1	5	M
1	2008-10-16 09:19:00	0	DTA	9	1	5	M
1	2008-10-16 09:20:00	0	DTA	9	1	5	M
1	2008-10-16 09:21:00	10	DTA	9	1	5	M
1	2008-10-16 09:22:00	0	DTA	9	1	5	M
1	2008-10-16 09:23:00	0	DTA	9	1	5	M
1	2008-10-16 09:24:00	0	DTA	9	1	5	M
1	2008-10-16 09:25:00	0	DTA	9	1	5	M
1	2008-10-16 09:26:00	31	DTA	9	1	5	M
1	2008-10-16 09:27:00	52	DTA	9	1	5	M
1	2008-10-16 09:28:00	0	DTA	9	1	5	M
1	2008-10-16 09:29:00	0	DTA	9	1	5	M
1	2008-10-16 09:30:00	41	DTA	9	1	5	M
1	2008-10-16 09:31:00	233	DTA	9	1	5	M
1	2008-10-16 09:32:00	0	DTA	9	1	5	M
1	2008-10-16 09:33:00	0	DTA	9	1	5	M
1	2008-10-16 09:34:00	0	DTA	9	1	5	M
1	2008-10-16 09:35:00	0	DTA	9	1	5	M
1	2008-10-16 09:36:00	0	DTA	9	1	5	M
1	2008-10-16 09:37:00	21	DTA	9	1	5	M
1	2008-10-16 09:38:00	0	DTA	9	1	5	M
1	2008-10-16 09:39:00	0	DTA	9	1	5	M
1	2008-10-16 09:40:00	0	DTA	9	1	5	M
1	2008-10-16 09:41:00	0	DTA	9	1	5	M
1	2008-10-16 09:42:00	0	DTA	9	1	5	M
1	2008-10-16 09:43:00	270	DTA	9	1	5	M
1	2008-10-16 09:44:00	0	DTA	9	1	5	M
1	2008-10-16 09:45:00	0	DTA	9	1	5	M
1	2008-10-16 09:46:00	0	DTA	9	1	5	M
1	2008-10-16 09:47:00	0	DTA	9	1	5	M
1	2008-10-16 09:48:00	41	DTA	9	1	5	M
1	2008-10-16 09:49:00	0	DTA	9	1	5	M
1	2008-10-16 09:50:00	0	DTA	9	1	5	M
1	2008-10-16 09:51:00	0	DTA	9	1	5	M
1	2008-10-16 09:52:00	0	DTA	9	1	5	M
1	2008-10-16 09:53:00	0	DTA	9	1	5	M
1	2008-10-16 09:54:00	0	DTA	9	1	5	M
1	2008-10-16 09:55:00	0	DTA	9	1	5	M
1	2008-10-16 09:56:00	0	DTA	9	1	5	M
1	2008-10-16 09:57:00	0	DTA	9	1	5	M
1	2008-10-16 09:58:00	0	DTA	9	1	5	M
1	2008-10-16 09:59:00	0	DTA	9	1	5	M
1	2008-10-16 10:00:00	0	DTA	9	1	5	M
1	2008-10-16 10:01:00	0	DTA	10	1	5	M
1	2008-10-16 10:02:00	0	DTA	10	1	5	M
1	2008-10-16 10:03:00	0	DTA	10	1	5	M
1	2008-10-16 10:04:00	0	DTA	10	1	5	M
1	2008-10-16 10:05:00	0	DTA	10	1	5	M
1	2008-10-16 10:06:00	0	DTA	10	1	5	M
1	2008-10-16 10:07:00	0	DTA	10	1	5	M
1	2008-10-16 10:08:00	0	DTA	10	1	5	M
1	2008-10-16 10:09:00	0	DTA	10	1	5	M
1	2008-10-16 10:10:00	0	DTA	10	1	5	M
1	2008-10-16 10:11:00	0	DTA	10	1	5	M
1	2008-10-16 10:12:00	0	DTA	10	1	5	M
1	2008-10-16 10:13:00	0	DTA	10	1	5	M
1	2008-10-16 10:14:00	0	DTA	10	1	5	M
1	2008-10-16 10:15:00	0	DTA	10	1	5	M
1	2008-10-16 10:16:00	0	DTA	10	1	5	M
1	2008-10-16 10:17:00	21	DTA	10	1	5	M
1	2008-10-16 10:18:00	0	DTA	10	1	5	M
1	2008-10-16 10:19:00	10	DTA	10	1	5	M
1	2008-10-16 10:20:00	10	DTA	10	1	5	M
1	2008-10-16 10:21:00	10	DTA	10	1	5	M
1	2008-10-16 10:22:00	0	DTA	10	1	5	M
1	2008-10-16 10:23:00	0	DTA	10	1	5	M
1	2008-10-16 10:24:00	0	DTA	10	1	5	M
1	2008-10-16 10:25:00	0	DTA	10	1	5	M
1	2008-10-16 10:26:00	0	DTA	10	1	5	M
1	2008-10-16 10:27:00	0	DTA	10	1	5	M
1	2008-10-16 10:28:00	0	DTA	10	1	5	M
1	2008-10-16 10:29:00	0	DTA	10	1	5	M
1	2008-10-16 10:30:00	0	DTA	10	1	5	M
1	2008-10-16 10:31:00	0	DTA	10	1	5	M
1	2008-10-16 10:32:00	0	DTA	10	1	5	M
1	2008-10-16 10:33:00	0	DTA	10	1	5	M
1	2008-10-16 10:34:00	0	DTA	10	1	5	M
1	2008-10-16 10:35:00	0	DTA	10	1	5	M
1	2008-10-16 10:36:00	0	DTA	10	1	5	M
1	2008-10-16 10:37:00	0	DTA	10	1	5	M
1	2008-10-16 10:38:00	0	DTA	10	1	5	M
1	2008-10-16 10:39:00	0	DTA	10	1	5	M
1	2008-10-16 10:40:00	0	DTA	10	1	5	M
1	2008-10-16 10:41:00	0	DTA	10	1	5	M
1	2008-10-16 10:42:00	0	DTA	10	1	5	M
1	2008-10-16 10:43:00	0	DTA	10	1	5	M
1	2008-10-16 10:44:00	0	DTA	10	1	5	M
1	2008-10-16 10:45:00	0	DTA	10	1	5	M
1	2008-10-16 10:46:00	0	DTA	10	1	5	M
1	2008-10-16 10:47:00	0	DTA	10	1	5	M
1	2008-10-16 10:48:00	0	DTA	10	1	5	M
1	2008-10-16 10:49:00	0	DTA	10	1	5	M
1	2008-10-16 10:50:00	0	DTA	10	1	5	M
1	2008-10-16 10:51:00	0	DTA	10	1	5	M
1	2008-10-16 10:52:00	0	DTA	10	1	5	M
1	2008-10-16 10:53:00	0	DTA	10	1	5	M
1	2008-10-16 10:54:00	0	DTA	10	1	5	M
1	2008-10-16 10:55:00	0	DTA	10	1	5	M
1	2008-10-16 10:56:00	0	DTA	10	1	5	M
1	2008-10-16 10:57:00	0	DTA	10	1	5	M
1	2008-10-16 10:58:00	21	DTA	10	1	5	M
1	2008-10-16 10:59:00	209	DTA	10	1	5	M
1	2008-10-16 11:00:00	209	DTA	10	1	5	M
1	2008-10-16 11:01:00	0	DTA	11	1	5	M
1	2008-10-16 11:02:00	0	DTA	11	1	5	M
1	2008-10-16 11:03:00	52	DTA	11	1	5	M
1	2008-10-16 11:04:00	0	DTA	11	1	5	M
1	2008-10-16 11:05:00	21	DTA	11	1	5	M
1	2008-10-16 11:06:00	0	DTA	11	1	5	M
1	2008-10-16 11:07:00	0	DTA	11	1	5	M
1	2008-10-16 11:08:00	0	DTA	11	1	5	M
1	2008-10-16 11:09:00	0	DTA	11	1	5	M
1	2008-10-16 11:10:00	0	DTA	11	1	5	M
1	2008-10-16 11:11:00	0	DTA	11	1	5	M
1	2008-10-16 11:12:00	21	DTA	11	1	5	M
1	2008-10-16 11:13:00	72	DTA	11	1	5	M
1	2008-10-16 11:14:00	10	DTA	11	1	5	M
1	2008-10-16 11:15:00	124	DTA	11	1	5	M
1	2008-10-16 11:16:00	103	DTA	11	1	5	M
1	2008-10-16 11:17:00	159	DTA	11	1	5	M
1	2008-10-16 11:18:00	0	DTA	11	1	5	M
1	2008-10-16 11:19:00	52	DTA	11	1	5	M
1	2008-10-16 11:20:00	124	DTA	11	1	5	M
1	2008-10-16 11:21:00	0	DTA	11	1	5	M
1	2008-10-16 11:22:00	41	DTA	11	1	5	M
1	2008-10-16 11:23:00	0	DTA	11	1	5	M
1	2008-10-16 11:24:00	0	DTA	11	1	5	M
1	2008-10-16 11:25:00	0	DTA	11	1	5	M
1	2008-10-16 11:26:00	0	DTA	11	1	5	M
1	2008-10-16 11:27:00	0	DTA	11	1	5	M
1	2008-10-16 11:28:00	21	DTA	11	1	5	M
1	2008-10-16 11:29:00	21	DTA	11	1	5	M
1	2008-10-16 11:30:00	0	DTA	11	1	5	M
1	2008-10-16 11:31:00	0	DTA	11	1	5	M
1	2008-10-16 11:32:00	0	DTA	11	1	5	M
1	2008-10-16 11:33:00	0	DTA	11	1	5	M
1	2008-10-16 11:34:00	0	DTA	11	1	5	M
1	2008-10-16 11:35:00	0	DTA	11	1	5	M
1	2008-10-16 11:36:00	0	DTA	11	1	5	M
1	2008-10-16 11:37:00	0	DTA	11	1	5	M
1	2008-10-16 11:38:00	0	DTA	11	1	5	M
1	2008-10-16 11:39:00	0	DTA	11	1	5	M
1	2008-10-16 11:40:00	52	DTA	11	1	5	M
1	2008-10-16 11:41:00	0	DTA	11	1	5	M
1	2008-10-16 11:42:00	0	DTA	11	1	5	M
1	2008-10-16 11:43:00	0	DTA	11	1	5	M
1	2008-10-16 11:44:00	0	DTA	11	1	5	M
1	2008-10-16 11:45:00	0	DTA	11	1	5	M
1	2008-10-16 11:46:00	0	DTA	11	1	5	M
1	2008-10-16 11:47:00	41	DTA	11	1	5	M
1	2008-10-16 11:48:00	0	DTA	11	1	5	M
1	2008-10-16 11:49:00	0	DTA	11	1	5	M
1	2008-10-16 11:50:00	0	DTA	11	1	5	M
1	2008-10-16 11:51:00	0	DTA	11	1	5	M
1	2008-10-16 11:52:00	0	DTA	11	1	5	M
1	2008-10-16 11:53:00	0	DTA	11	1	5	M
1	2008-10-16 11:54:00	0	DTA	11	1	5	M
1	2008-10-16 11:55:00	0	DTA	11	1	5	M
1	2008-10-16 11:56:00	0	DTA	11	1	5	M
1	2008-10-16 11:57:00	0	DTA	11	1	5	M
1	2008-10-16 11:58:00	41	DTA	11	1	5	M
1	2008-10-16 11:59:00	0	DTA	11	1	5	M
1	2008-10-16 12:00:00	0	DTA	11	1	5	M
1	2008-10-16 12:01:00	0	DTA	12	1	5	M
1	2008-10-16 12:02:00	124	DTA	12	1	5	M
1	2008-10-16 12:03:00	343	DTA	12	1	5	M
1	2008-10-16 12:04:00	41	DTA	12	1	5	M
1	2008-10-16 12:05:00	0	DTA	12	1	5	M
1	2008-10-16 12:06:00	233	DTA	12	1	5	M
1	2008-10-16 12:07:00	993	DTA	12	1	5	M
1	2008-10-16 12:08:00	483	DTA	12	1	5	M
1	2008-10-16 12:09:00	103	DTA	12	1	5	M
1	2008-10-16 12:10:00	0	DTA	12	1	5	M
1	2008-10-16 12:11:00	0	DTA	12	1	5	M
1	2008-10-16 12:12:00	0	DTA	12	1	5	M
1	2008-10-16 12:13:00	0	DTA	12	1	5	M
1	2008-10-16 12:14:00	0	DTA	12	1	5	M
1	2008-10-16 12:15:00	21	DTA	12	1	5	M
1	2008-10-16 12:16:00	0	DTA	12	1	5	M
1	2008-10-16 12:17:00	0	DTA	12	1	5	M
1	2008-10-16 12:18:00	0	DTA	12	1	5	M
1	2008-10-16 12:19:00	0	DTA	12	1	5	M
1	2008-10-16 12:20:00	0	DTA	12	1	5	M
1	2008-10-16 12:21:00	0	DTA	12	1	5	M
1	2008-10-16 12:22:00	0	DTA	12	1	5	M
1	2008-10-16 12:23:00	0	DTA	12	1	5	M
1	2008-10-16 12:24:00	31	DTA	12	1	5	M
1	2008-10-16 12:25:00	0	DTA	12	1	5	M
1	2008-10-16 12:26:00	0	DTA	12	1	5	M
1	2008-10-16 12:27:00	0	DTA	12	1	5	M
1	2008-10-16 12:28:00	0	DTA	12	1	5	M
1	2008-10-16 12:29:00	0	DTA	12	1	5	M
1	2008-10-16 12:30:00	0	DTA	12	1	5	M
1	2008-10-16 12:31:00	0	DTA	12	1	5	M
1	2008-10-16 12:32:00	31	DTA	12	1	5	M
1	2008-10-16 12:33:00	0	DTA	12	1	5	M
1	2008-10-16 12:34:00	0	DTA	12	1	5	M
1	2008-10-16 12:35:00	0	DTA	12	1	5	M
1	2008-10-16 12:36:00	0	DTA	12	1	5	M
1	2008-10-16 12:37:00	0	DTA	12	1	5	M
1	2008-10-16 12:38:00	0	DTA	12	1	5	M
1	2008-10-16 12:39:00	0	DTA	12	1	5	M
1	2008-10-16 12:40:00	0	DTA	12	1	5	M
1	2008-10-16 12:41:00	0	DTA	12	1	5	M
1	2008-10-16 12:42:00	0	DTA	12	1	5	M
1	2008-10-16 12:43:00	0	DTA	12	1	5	M
1	2008-10-16 12:44:00	0	DTA	12	1	5	M
1	2008-10-16 12:45:00	0	DTA	12	1	5	M
1	2008-10-16 12:46:00	0	DTA	12	1	5	M
1	2008-10-16 12:47:00	0	DTA	12	1	5	M
1	2008-10-16 12:48:00	0	DTA	12	1	5	M
1	2008-10-16 12:49:00	0	DTA	12	1	5	M
1	2008-10-16 12:50:00	41	DTA	12	1	5	M
1	2008-10-16 12:51:00	0	DTA	12	1	5	M
1	2008-10-16 12:52:00	0	DTA	12	1	5	M
1	2008-10-16 12:53:00	0	DTA	12	1	5	M
1	2008-10-16 12:54:00	0	DTA	12	1	5	M
1	2008-10-16 12:55:00	0	DTA	12	1	5	M
1	2008-10-16 12:56:00	41	DTA	12	1	5	M
1	2008-10-16 12:57:00	0	DTA	12	1	5	M
1	2008-10-16 12:58:00	0	DTA	12	1	5	M
1	2008-10-16 12:59:00	0	DTA	12	1	5	M
1	2008-10-16 13:00:00	0	DTA	12	1	5	M
1	2008-10-16 13:01:00	0	DTA	13	1	5	M
1	2008-10-16 13:02:00	0	DTA	13	1	5	M
1	2008-10-16 13:03:00	10	DTA	13	1	5	M
1	2008-10-16 13:04:00	0	DTA	13	1	5	M
1	2008-10-16 13:05:00	0	DTA	13	1	5	M
1	2008-10-16 13:06:00	0	DTA	13	1	5	M
1	2008-10-16 13:07:00	0	DTA	13	1	5	M
1	2008-10-16 13:08:00	0	DTA	13	1	5	M
1	2008-10-16 13:09:00	0	DTA	13	1	5	M
1	2008-10-16 13:10:00	0	DTA	13	1	5	M
1	2008-10-16 13:11:00	0	DTA	13	1	5	M
1	2008-10-16 13:12:00	0	DTA	13	1	5	M
1	2008-10-16 13:13:00	0	DTA	13	1	5	M
1	2008-10-16 13:14:00	31	DTA	13	1	5	M
1	2008-10-16 13:15:00	31	DTA	13	1	5	M
1	2008-10-16 13:16:00	417	DTA	13	1	5	M
1	2008-10-16 13:17:00	31	DTA	13	1	5	M
1	2008-10-16 13:18:00	41	DTA	13	1	5	M
1	2008-10-16 13:19:00	357	DTA	13	1	5	M
1	2008-10-16 13:20:00	233	DTA	13	1	5	M
1	2008-10-16 13:21:00	72	DTA	13	1	5	M
1	2008-10-16 13:22:00	31	DTA	13	1	5	M
1	2008-10-16 13:23:00	21	DTA	13	1	5	M
1	2008-10-16 13:24:00	0	DTA	13	1	5	M
1	2008-10-16 13:25:00	10	DTA	13	1	5	M
1	2008-10-16 13:26:00	147	DTA	13	1	5	M
1	2008-10-16 13:27:00	0	DTA	13	1	5	M
1	2008-10-16 13:28:00	0	DTA	13	1	5	M
1	2008-10-16 13:29:00	0	DTA	13	1	5	M
1	2008-10-16 13:30:00	0	DTA	13	1	5	M
1	2008-10-16 13:31:00	21	DTA	13	1	5	M
1	2008-10-16 13:32:00	10	DTA	13	1	5	M
1	2008-10-16 13:33:00	21	DTA	13	1	5	M
1	2008-10-16 13:34:00	0	DTA	13	1	5	M
1	2008-10-16 13:35:00	21	DTA	13	1	5	M
1	2008-10-16 13:36:00	0	DTA	13	1	5	M
1	2008-10-16 13:37:00	171	DTA	13	1	5	M
1	2008-10-16 13:38:00	41	DTA	13	1	5	M
1	2008-10-16 13:39:00	0	DTA	13	1	5	M
1	2008-10-16 13:40:00	0	DTA	13	1	5	M
1	2008-10-16 13:41:00	62	DTA	13	1	5	M
1	2008-10-16 13:42:00	0	DTA	13	1	5	M
1	2008-10-16 13:43:00	0	DTA	13	1	5	M
1	2008-10-16 13:44:00	0	DTA	13	1	5	M
1	2008-10-16 13:45:00	0	DTA	13	1	5	M
1	2008-10-16 13:46:00	0	DTA	13	1	5	M
1	2008-10-16 13:47:00	31	DTA	13	1	5	M
1	2008-10-16 13:48:00	41	DTA	13	1	5	M
1	2008-10-16 13:49:00	0	DTA	13	1	5	M
1	2008-10-16 13:50:00	0	DTA	13	1	5	M
1	2008-10-16 13:51:00	0	DTA	13	1	5	M
1	2008-10-16 13:52:00	0	DTA	13	1	5	M
1	2008-10-16 13:53:00	0	DTA	13	1	5	M
1	2008-10-16 13:54:00	31	DTA	13	1	5	M
1	2008-10-16 13:55:00	0	DTA	13	1	5	M
1	2008-10-16 13:56:00	0	DTA	13	1	5	M
1	2008-10-16 13:57:00	0	DTA	13	1	5	M
1	2008-10-16 13:58:00	0	DTA	13	1	5	M
1	2008-10-16 13:59:00	0	DTA	13	1	5	M
1	2008-10-16 14:00:00	0	DTA	13	1	5	M
1	2008-10-16 14:01:00	0	DTA	14	1	5	M
1	2008-10-16 14:02:00	0	DTA	14	1	5	M
1	2008-10-16 14:03:00	0	DTA	14	1	5	M
1	2008-10-16 14:04:00	0	DTA	14	1	5	M
1	2008-10-16 14:05:00	0	DTA	14	1	5	M
1	2008-10-16 14:06:00	0	DTA	14	1	5	M
1	2008-10-16 14:07:00	0	DTA	14	1	5	M
1	2008-10-16 14:08:00	0	DTA	14	1	5	M
1	2008-10-16 14:09:00	0	DTA	14	1	5	M
1	2008-10-16 14:10:00	0	DTA	14	1	5	M
1	2008-10-16 14:11:00	0	DTA	14	1	5	M
1	2008-10-16 14:12:00	0	DTA	14	1	5	M
1	2008-10-16 14:13:00	0	DTA	14	1	5	M
1	2008-10-16 14:14:00	52	DTA	14	1	5	M
1	2008-10-16 14:15:00	0	DTA	14	1	5	M
1	2008-10-16 14:16:00	0	DTA	14	1	5	M
1	2008-10-16 14:17:00	0	DTA	14	1	5	M
1	2008-10-16 14:18:00	0	DTA	14	1	5	M
1	2008-10-16 14:19:00	31	DTA	14	1	5	M
1	2008-10-16 14:20:00	0	DTA	14	1	5	M
1	2008-10-16 14:21:00	31	DTA	14	1	5	M
1	2008-10-16 14:22:00	0	DTA	14	1	5	M
1	2008-10-16 14:23:00	0	DTA	14	1	5	M
1	2008-10-16 14:24:00	0	DTA	14	1	5	M
1	2008-10-16 14:25:00	147	DTA	14	1	5	M
1	2008-10-16 14:26:00	0	DTA	14	1	5	M
1	2008-10-16 14:27:00	21	DTA	14	1	5	M
1	2008-10-16 14:28:00	0	DTA	14	1	5	M
1	2008-10-16 14:29:00	0	DTA	14	1	5	M
1	2008-10-16 14:30:00	0	DTA	14	1	5	M
1	2008-10-16 14:31:00	0	DTA	14	1	5	M
1	2008-10-16 14:32:00	0	DTA	14	1	5	M
1	2008-10-16 14:33:00	0	DTA	14	1	5	M
1	2008-10-16 14:34:00	0	DTA	14	1	5	M
1	2008-10-16 14:35:00	0	DTA	14	1	5	M	Peak DTA
1	2008-10-16 14:36:00	21	DTA	14	1	5	M	Peak DTA
1	2008-10-16 14:37:00	0	DTA	14	1	5	M	Peak DTA
1	2008-10-16 14:38:00	0	DTA	14	1	5	M	Peak DTA
1	2008-10-16 14:39:00	0	DTA	14	1	5	M	Peak DTA
1	2008-10-16 14:40:00	0	DTA	14	1	5	M	Peak DTA
1	2008-10-16 14:41:00	0	DTA	14	1	5	M	Peak DTA
1	2008-10-16 14:42:00	0	DTA	14	1	5	M	Peak DTA
1	2008-10-16 14:43:00	0	DTA	14	1	5	M	Peak DTA
1	2008-10-16 14:44:00	93	DTA	14	1	5	M	Peak DTA
1	2008-10-16 14:45:00	0	DTA	14	1	5	M	Peak DTA
1	2008-10-16 14:46:00	114	DTA	14	1	5	M	Peak DTA
1	2008-10-16 14:47:00	147	DTA	14	1	5	M	Peak DTA
1	2008-10-16 14:48:00	0	DTA	14	1	5	M	Peak DTA
1	2008-10-16 14:49:00	0	DTA	14	1	5	M	Peak DTA
1	2008-10-16 14:50:00	41	DTA	14	1	5	M	Peak DTA
1	2008-10-16 14:51:00	10	DTA	14	1	5	M	Peak DTA
1	2008-10-16 14:52:00	31	DTA	14	1	5	M	Peak DTA
1	2008-10-16 14:53:00	10	DTA	14	1	5	M	Peak DTA
1	2008-10-16 14:54:00	0	DTA	14	1	5	M	Peak DTA
1	2008-10-16 14:55:00	0	DTA	14	1	5	M	Peak DTA
1	2008-10-16 14:56:00	434	DTA	14	1	5	M	Peak DTA
1	2008-10-16 14:57:00	10	DTA	14	1	5	M	Peak DTA
1	2008-10-16 14:58:00	0	DTA	14	1	5	M	Peak DTA
1	2008-10-16 14:59:00	0	DTA	14	1	5	M	Peak DTA
1	2008-10-16 15:00:00	0	DTA	14	1	5	M	Peak DTA
1	2008-10-16 15:01:00	0	DTA	15	1	5	M	Peak DTA
1	2008-10-16 15:02:00	31	DTA	15	1	5	M	Peak DTA
1	2008-10-16 15:03:00	21	DTA	15	1	5	M	Peak DTA
1	2008-10-16 15:04:00	0	DTA	15	1	5	M	Peak DTA
1	2008-10-16 15:05:00	31	DTA	15	1	5	M	Peak DTA
1	2008-10-16 15:06:00	0	DTA	15	1	5	M	Peak DTA
1	2008-10-16 15:07:00	21	DTA	15	1	5	M	Peak DTA
1	2008-10-16 15:08:00	0	DTA	15	1	5	M	Peak DTA
1	2008-10-16 15:09:00	0	DTA	15	1	5	M	Peak DTA
1	2008-10-16 15:10:00	0	DTA	15	1	5	M	Peak DTA
1	2008-10-16 15:11:00	10	DTA	15	1	5	M	Peak DTA
1	2008-10-16 15:12:00	285	DTA	15	1	5	M	Peak DTA
1	2008-10-16 15:13:00	134	DTA	15	1	5	M	Peak DTA
1	2008-10-16 15:14:00	0	DTA	15	1	5	M	Peak DTA
1	2008-10-16 15:15:00	21	DTA	15	1	5	M	Peak DTA
1	2008-10-16 15:16:00	0	DTA	15	1	5	M	Peak DTA
1	2008-10-16 15:17:00	0	DTA	15	1	5	M	Peak DTA
1	2008-10-16 15:18:00	0	DTA	15	1	5	M	Peak DTA
1	2008-10-16 15:19:00	0	DTA	15	1	5	M	Peak DTA
1	2008-10-16 15:20:00	0	DTA	15	1	5	M	Peak DTA
1	2008-10-16 15:21:00	0	DTA	15	1	5	M	Peak DTA
1	2008-10-16 15:22:00	0	DTA	15	1	5	M	Peak DTA
1	2008-10-16 15:23:00	0	DTA	15	1	5	M	Peak DTA
1	2008-10-16 15:24:00	0	DTA	15	1	5	M	Peak DTA
1	2008-10-16 15:25:00	0	DTA	15	1	5	M	Peak DTA
1	2008-10-16 15:26:00	0	DTA	15	1	5	M	Peak DTA
1	2008-10-16 15:27:00	0	DTA	15	1	5	M	Peak DTA
1	2008-10-16 15:28:00	0	DTA	15	1	5	M	Peak DTA
1	2008-10-16 15:29:00	0	DTA	15	1	5	M	Peak DTA
1	2008-10-16 15:30:00	0	DTA	15	1	5	M	Peak DTA
1	2008-10-16 15:31:00	0	DTA	15	1	5	M	Peak DTA
1	2008-10-16 15:32:00	0	DTA	15	1	5	M	Peak DTA
1	2008-10-16 15:33:00	0	DTA	15	1	5	M	Peak DTA
1	2008-10-16 15:34:00	0	DTA	15	1	5	M	Peak DTA
1	2008-10-16 15:35:00	0	DTA	15	1	5	M	Peak DTA
1	2008-10-16 15:36:00	0	DTA	15	1	5	M	Peak DTA
1	2008-10-16 15:37:00	0	DTA	15	1	5	M	Peak DTA
1	2008-10-16 15:38:00	0	DTA	15	1	5	M	Peak DTA
1	2008-10-16 15:39:00	0	DTA	15	1	5	M	Peak DTA
1	2008-10-16 15:40:00	0	DTA	15	1	5	M	Peak DTA
1	2008-10-16 15:41:00	0	DTA	15	1	5	M	Peak DTA
1	2008-10-16 15:42:00	0	DTA	15	1	5	M	Peak DTA
1	2008-10-16 15:43:00	0	DTA	15	1	5	M	Peak DTA
1	2008-10-16 15:44:00	31	DTA	15	1	5	M	Peak DTA
1	2008-10-16 15:45:00	0	DTA	15	1	5	M	Peak DTA
1	2008-10-16 15:46:00	31	DTA	15	1	5	M	Peak DTA
1	2008-10-16 15:47:00	0	DTA	15	1	5	M	Peak DTA
1	2008-10-16 15:48:00	0	DTA	15	1	5	M	Peak DTA
1	2008-10-16 15:49:00	0	DTA	15	1	5	M	Peak DTA
1	2008-10-16 15:50:00	0	DTA	15	1	5	M	Peak DTA
1	2008-10-16 15:51:00	0	DTA	15	1	5	M	Peak DTA
1	2008-10-16 15:52:00	0	DTA	15	1	5	M	Peak DTA
1	2008-10-16 15:53:00	0	DTA	15	1	5	M	Peak DTA
1	2008-10-16 15:54:00	0	DTA	15	1	5	M	Peak DTA
1	2008-10-16 15:55:00	0	DTA	15	1	5	M	Peak DTA
1	2008-10-16 15:56:00	0	DTA	15	1	5	M	Peak DTA
1	2008-10-16 15:57:00	0	DTA	15	1	5	M	Peak DTA
1	2008-10-16 15:58:00	0	DTA	15	1	5	M	Peak DTA
1	2008-10-16 15:59:00	0	DTA	15	1	5	M	Peak DTA
1	2008-10-16 16:00:00	0	DTA	15	1	5	M	Peak DTA
1	2008-10-16 16:01:00	0	DTA	16	1	5	M	Peak DTA
1	2008-10-16 16:02:00	0	DTA	16	1	5	M	Peak DTA
1	2008-10-16 16:03:00	0	DTA	16	1	5	M	Peak DTA
1	2008-10-16 16:04:00	0	DTA	16	1	5	M	Peak DTA
1	2008-10-16 16:05:00	0	DTA	16	1	5	M	Peak DTA
1	2008-10-16 16:06:00	31	DTA	16	1	5	M	Peak DTA
1	2008-10-16 16:07:00	0	DTA	16	1	5	M	Peak DTA
1	2008-10-16 16:08:00	0	DTA	16	1	5	M	Peak DTA
1	2008-10-16 16:09:00	0	DTA	16	1	5	M	Peak DTA
1	2008-10-16 16:10:00	31	DTA	16	1	5	M	Peak DTA
1	2008-10-16 16:11:00	0	DTA	16	1	5	M	Peak DTA
1	2008-10-16 16:12:00	0	DTA	16	1	5	M	Peak DTA
1	2008-10-16 16:13:00	41	DTA	16	1	5	M	Peak DTA
1	2008-10-16 16:14:00	450	DTA	16	1	5	M	Peak DTA
1	2008-10-16 16:15:00	184	DTA	16	1	5	M	Peak DTA
1	2008-10-16 16:16:00	124	DTA	16	1	5	M	Peak DTA
1	2008-10-16 16:17:00	171	DTA	16	1	5	M	Peak DTA
1	2008-10-16 16:18:00	83	DTA	16	1	5	M	Peak DTA
1	2008-10-16 16:19:00	83	DTA	16	1	5	M	Peak DTA
1	2008-10-16 16:20:00	0	DTA	16	1	5	M	Peak DTA
1	2008-10-16 16:21:00	41	DTA	16	1	5	M	Peak DTA
1	2008-10-16 16:22:00	0	DTA	16	1	5	M	Peak DTA
1	2008-10-16 16:23:00	0	DTA	16	1	5	M	Peak DTA
1	2008-10-16 16:24:00	0	DTA	16	1	5	M	Peak DTA
1	2008-10-16 16:25:00	0	DTA	16	1	5	M	Peak DTA
1	2008-10-16 16:26:00	417	DTA	16	1	5	M	Peak DTA
1	2008-10-16 16:27:00	52	DTA	16	1	5	M	Peak DTA
1	2008-10-16 16:28:00	0	DTA	16	1	5	M	Peak DTA
1	2008-10-16 16:29:00	31	DTA	16	1	5	M	Peak DTA
1	2008-10-16 16:30:00	41	DTA	16	1	5	M	Peak DTA
1	2008-10-16 16:31:00	0	DTA	16	1	5	M	Peak DTA
1	2008-10-16 16:32:00	0	DTA	16	1	5	M	Peak DTA
1	2008-10-16 16:33:00	0	DTA	16	1	5	M	Peak DTA
1	2008-10-16 16:34:00	10	DTA	16	1	5	M	Peak DTA
1	2008-10-16 16:35:00	0	DTA	16	1	5	M	Peak DTA
1	2008-10-16 16:36:00	147	DTA	16	1	5	M	Peak DTA
1	2008-10-16 16:37:00	233	DTA	16	1	5	M	Peak DTA
1	2008-10-16 16:38:00	41	DTA	16	1	5	M	Peak DTA
1	2008-10-16 16:39:00	41	DTA	16	1	5	M	Peak DTA
1	2008-10-16 16:40:00	10	DTA	16	1	5	M	Peak DTA
1	2008-10-16 16:41:00	0	DTA	16	1	5	M	Peak DTA
1	2008-10-16 16:42:00	0	DTA	16	1	5	M	Peak DTA
1	2008-10-16 16:43:00	103	DTA	16	1	5	M	Peak DTA
1	2008-10-16 16:44:00	233	DTA	16	1	5	M	Peak DTA
1	2008-10-16 16:45:00	0	DTA	16	1	5	M	Peak DTA
1	2008-10-16 16:46:00	221	DTA	16	1	5	M	Peak DTA
1	2008-10-16 16:47:00	21	DTA	16	1	5	M	Peak DTA
1	2008-10-16 16:48:00	0	DTA	16	1	5	M	Peak DTA
1	2008-10-16 16:49:00	0	DTA	16	1	5	M	Peak DTA
1	2008-10-16 16:50:00	0	DTA	16	1	5	M	Peak DTA
1	2008-10-16 16:51:00	41	DTA	16	1	5	M	Peak DTA
1	2008-10-16 16:52:00	0	DTA	16	1	5	M	Peak DTA
1	2008-10-16 16:53:00	314	DTA	16	1	5	M	Peak DTA
1	2008-10-16 16:54:00	221	DTA	16	1	5	M	Peak DTA
1	2008-10-16 16:55:00	41	DTA	16	1	5	M	Peak DTA
1	2008-10-16 16:56:00	0	DTA	16	1	5	M	Peak DTA
1	2008-10-16 16:57:00	0	DTA	16	1	5	M	Peak DTA
1	2008-10-16 16:58:00	103	DTA	16	1	5	M	Peak DTA
1	2008-10-16 16:59:00	124	DTA	16	1	5	M	Peak DTA
1	2008-10-16 17:00:00	285	DTA	16	1	5	M	Peak DTA
1	2008-10-16 17:01:00	0	DTA	17	1	5	M	Peak DTA
1	2008-10-16 17:02:00	72	DTA	17	1	5	M	Peak DTA
1	2008-10-16 17:03:00	270	DTA	17	1	5	M	Peak DTA
1	2008-10-16 17:04:00	10	DTA	17	1	5	M	Peak DTA
1	2008-10-16 17:05:00	41	DTA	17	1	5	M	Peak DTA
1	2008-10-16 17:06:00	93	DTA	17	1	5	M	Peak DTA
1	2008-10-16 17:07:00	103	DTA	17	1	5	M	Peak DTA
1	2008-10-16 17:08:00	114	DTA	17	1	5	M	Peak DTA
1	2008-10-16 17:09:00	626	DTA	17	1	5	M	Peak DTA
1	2008-10-16 17:10:00	314	DTA	17	1	5	M	Peak DTA
1	2008-10-16 17:11:00	258	DTA	17	1	5	M	Peak DTA
1	2008-10-16 17:12:00	0	DTA	17	1	5	M	Peak DTA
1	2008-10-16 17:13:00	0	DTA	17	1	5	M	Peak DTA
1	2008-10-16 17:14:00	0	DTA	17	1	5	M	Peak DTA
1	2008-10-16 17:15:00	0	DTA	17	1	5	M	Peak DTA
1	2008-10-16 17:16:00	0	DTA	17	1	5	M	Peak DTA
1	2008-10-16 17:17:00	0	DTA	17	1	5	M	Peak DTA
1	2008-10-16 17:18:00	0	DTA	17	1	5	M	Peak DTA
1	2008-10-16 17:19:00	0	DTA	17	1	5	M	Peak DTA
1	2008-10-16 17:20:00	0	DTA	17	1	5	M	Peak DTA
1	2008-10-16 17:21:00	0	DTA	17	1	5	M	Peak DTA
1	2008-10-16 17:22:00	0	DTA	17	1	5	M	Peak DTA
1	2008-10-16 17:23:00	147	DTA	17	1	5	M	Peak DTA
1	2008-10-16 17:24:00	31	DTA	17	1	5	M	Peak DTA
1	2008-10-16 17:25:00	31	DTA	17	1	5	M	Peak DTA
1	2008-10-16 17:26:00	0	DTA	17	1	5	M	Peak DTA
1	2008-10-16 17:27:00	124	DTA	17	1	5	M	Peak DTA
1	2008-10-16 17:28:00	209	DTA	17	1	5	M	Peak DTA
1	2008-10-16 17:29:00	21	DTA	17	1	5	M	Peak DTA
1	2008-10-16 17:30:00	10	DTA	17	1	5	M	Peak DTA
1	2008-10-16 17:31:00	0	DTA	17	1	5	M	Peak DTA
1	2008-10-16 17:32:00	10	DTA	17	1	5	M	Peak DTA
1	2008-10-16 17:33:00	0	DTA	17	1	5	M	Peak DTA
1	2008-10-16 17:34:00	21	DTA	17	1	5	M	Peak DTA
1	2008-10-16 17:35:00	0	DTA	17	1	5	M	Peak DTA
1	2008-10-16 17:36:00	10	DTA	17	1	5	M	Peak DTA
1	2008-10-16 17:37:00	21	DTA	17	1	5	M	Peak DTA
1	2008-10-16 17:38:00	21	DTA	17	1	5	M	Peak DTA
1	2008-10-16 17:39:00	0	DTA	17	1	5	M	Peak DTA
1	2008-10-16 17:40:00	0	DTA	17	1	5	M	Peak DTA
1	2008-10-16 17:41:00	21	DTA	17	1	5	M	Peak DTA
1	2008-10-16 17:42:00	10	DTA	17	1	5	M	Peak DTA
1	2008-10-16 17:43:00	21	DTA	17	1	5	M	Peak DTA
1	2008-10-16 17:44:00	1569	DTA	17	1	5	M	Peak DTA
1	2008-10-16 17:45:00	943	DTA	17	1	5	M	Peak DTA
1	2008-10-16 17:46:00	968	DTA	17	1	5	M	Peak DTA
1	2008-10-16 17:47:00	588	DTA	17	1	5	M	Peak DTA
1	2008-10-16 17:48:00	1408	DTA	17	1	5	M	Peak DTA
1	2008-10-16 17:49:00	147	DTA	17	1	5	M	Peak DTA
1	2008-10-16 17:50:00	683	DTA	17	1	5	M	Peak DTA
1	2008-10-16 17:51:00	83	DTA	17	1	5	M	Peak DTA
1	2008-10-16 17:52:00	663	DTA	17	1	5	M	Peak DTA
1	2008-10-16 17:53:00	258	DTA	17	1	5	M	Peak DTA
1	2008-10-16 17:54:00	124	DTA	17	1	5	M	Peak DTA
1	2008-10-16 17:55:00	357	DTA	17	1	5	M	Peak DTA
1	2008-10-16 17:56:00	533	DTA	17	1	5	M	Peak DTA
1	2008-10-16 17:57:00	196	DTA	17	1	5	M	Peak DTA
1	2008-10-16 17:58:00	233	DTA	17	1	5	M	Peak DTA
1	2008-10-16 17:59:00	209	DTA	17	1	5	M	Peak DTA
1	2008-10-16 18:00:00	147	DTA	17	1	5	M	Peak DTA
1	2008-10-16 18:01:00	114	DTA	18	1	5	M	Peak DTA
1	2008-10-16 18:02:00	10	DTA	18	1	5	M	Peak DTA
1	2008-10-16 18:03:00	0	DTA	18	1	5	M	Peak DTA
1	2008-10-16 18:04:00	0	DTA	18	1	5	M	Peak DTA
1	2008-10-16 18:05:00	134	DTA	18	1	5	M	Peak DTA
1	2008-10-16 18:06:00	0	DTA	18	1	5	M	Peak DTA
1	2008-10-16 18:07:00	0	DTA	18	1	5	M	Peak DTA
1	2008-10-16 18:08:00	0	DTA	18	1	5	M	Peak DTA
1	2008-10-16 18:09:00	10	DTA	18	1	5	M	Peak DTA
1	2008-10-16 18:10:00	103	DTA	18	1	5	M	Peak DTA
1	2008-10-16 18:11:00	41	DTA	18	1	5	M	Peak DTA
1	2008-10-16 18:12:00	0	DTA	18	1	5	M	Peak DTA
1	2008-10-16 18:13:00	0	DTA	18	1	5	M	Peak DTA
1	2008-10-16 18:14:00	0	DTA	18	1	5	M	Peak DTA
1	2008-10-16 18:15:00	31	DTA	18	1	5	M	Peak DTA
1	2008-10-16 18:16:00	41	DTA	18	1	5	M	Peak DTA
1	2008-10-16 18:17:00	52	DTA	18	1	5	M	Peak DTA
1	2008-10-16 18:18:00	159	DTA	18	1	5	M	Peak DTA
1	2008-10-16 18:19:00	357	DTA	18	1	5	M	Peak DTA
1	2008-10-16 18:20:00	299	DTA	18	1	5	M	Peak DTA
1	2008-10-16 18:21:00	417	DTA	18	1	5	M	Peak DTA
1	2008-10-16 18:22:00	401	DTA	18	1	5	M	Peak DTA
1	2008-10-16 18:23:00	233	DTA	18	1	5	M	Peak DTA
1	2008-10-16 18:24:00	124	DTA	18	1	5	M	Peak DTA
1	2008-10-16 18:25:00	372	DTA	18	1	5	M	Peak DTA
1	2008-10-16 18:26:00	209	DTA	18	1	5	M	Peak DTA
1	2008-10-16 18:27:00	31	DTA	18	1	5	M	Peak DTA
1	2008-10-16 18:28:00	0	DTA	18	1	5	M	Peak DTA
1	2008-10-16 18:29:00	0	DTA	18	1	5	M	Peak DTA
1	2008-10-16 18:30:00	134	DTA	18	1	5	M	Peak DTA
1	2008-10-16 18:31:00	417	DTA	18	1	5	M	Peak DTA
1	2008-10-16 18:32:00	196	DTA	18	1	5	M	Peak DTA
1	2008-10-16 18:33:00	184	DTA	18	1	5	M	Peak DTA
1	2008-10-16 18:34:00	171	DTA	18	1	5	M	Peak DTA
1	2008-10-16 18:35:00	270	DTA	18	1	5	M	Peak DTA
1	2008-10-16 18:36:00	10	DTA	18	1	5	M	Peak DTA
1	2008-10-16 18:37:00	103	DTA	18	1	5	M	Peak DTA
1	2008-10-16 18:38:00	209	DTA	18	1	5	M	Peak DTA
1	2008-10-16 18:39:00	124	DTA	18	1	5	M	Peak DTA
1	2008-10-16 18:40:00	0	DTA	18	1	5	M	Peak DTA
1	2008-10-16 18:41:00	0	DTA	18	1	5	M	Peak DTA
1	2008-10-16 18:42:00	0	DTA	18	1	5	M	Peak DTA
1	2008-10-16 18:43:00	0	DTA	18	1	5	M	Peak DTA
1	2008-10-16 18:44:00	103	DTA	18	1	5	M	Peak DTA
1	2008-10-16 18:45:00	41	DTA	18	1	5	M	Peak DTA
1	2008-10-16 18:46:00	10	DTA	18	1	5	M	Peak DTA
1	2008-10-16 18:47:00	0	DTA	18	1	5	M	Peak DTA
1	2008-10-16 18:48:00	0	DTA	18	1	5	M	Peak DTA
1	2008-10-16 18:49:00	0	DTA	18	1	5	M	Peak DTA
1	2008-10-16 18:50:00	31	DTA	18	1	5	M	Peak DTA
1	2008-10-16 18:51:00	0	DTA	18	1	5	M	Peak DTA
1	2008-10-16 18:52:00	0	DTA	18	1	5	M	Peak DTA
1	2008-10-16 18:53:00	0	DTA	18	1	5	M	Peak DTA
1	2008-10-16 18:54:00	0	DTA	18	1	5	M	Peak DTA
1	2008-10-16 18:55:00	41	DTA	18	1	5	M	Peak DTA
1	2008-10-16 18:56:00	0	DTA	18	1	5	M	Peak DTA
1	2008-10-16 18:57:00	0	DTA	18	1	5	M	Peak DTA
1	2008-10-16 18:58:00	0	DTA	18	1	5	M	Peak DTA
1	2008-10-16 18:59:00	0	DTA	18	1	5	M	Peak DTA
1	2008-10-16 19:00:00	31	DTA	18	1	5	M	Peak DTA
1	2008-10-16 19:01:00	0	DTA	19	1	5	M	Peak DTA
1	2008-10-16 19:02:00	0	DTA	19	1	5	M	Peak DTA
1	2008-10-16 19:03:00	62	DTA	19	1	5	M	Peak DTA
1	2008-10-16 19:04:00	0	DTA	19	1	5	M	Peak DTA
1	2008-10-16 19:05:00	0	DTA	19	1	5	M	Peak DTA
1	2008-10-16 19:06:00	0	DTA	19	1	5	M	Peak DTA
1	2008-10-16 19:07:00	246	DTA	19	1	5	M	Peak DTA
1	2008-10-16 19:08:00	209	DTA	19	1	5	M	Peak DTA
1	2008-10-16 19:09:00	328	DTA	19	1	5	M	Peak DTA
1	2008-10-16 19:10:00	21	DTA	19	1	5	M	Peak DTA
1	2008-10-16 19:11:00	0	DTA	19	1	5	M	Peak DTA
1	2008-10-16 19:12:00	0	DTA	19	1	5	M	Peak DTA
1	2008-10-16 19:13:00	0	DTA	19	1	5	M	Peak DTA
1	2008-10-16 19:14:00	0	DTA	19	1	5	M	Peak DTA
1	2008-10-16 19:15:00	0	DTA	19	1	5	M	Peak DTA
1	2008-10-16 19:16:00	450	DTA	19	1	5	M	Peak DTA
1	2008-10-16 19:17:00	0	DTA	19	1	5	M	Peak DTA
1	2008-10-16 19:18:00	0	DTA	19	1	5	M	Peak DTA
1	2008-10-16 19:19:00	0	DTA	19	1	5	M	Peak DTA
1	2008-10-16 19:20:00	93	DTA	19	1	5	M	Peak DTA
1	2008-10-16 19:21:00	184	DTA	19	1	5	M	Peak DTA
1	2008-10-16 19:22:00	72	DTA	19	1	5	M	Peak DTA
1	2008-10-16 19:23:00	0	DTA	19	1	5	M	Peak DTA
1	2008-10-16 19:24:00	0	DTA	19	1	5	M	Peak DTA
1	2008-10-16 19:25:00	0	DTA	19	1	5	M	Peak DTA
1	2008-10-16 19:26:00	0	DTA	19	1	5	M	Peak DTA
1	2008-10-16 19:27:00	0	DTA	19	1	5	M	Peak DTA
1	2008-10-16 19:28:00	0	DTA	19	1	5	M	Peak DTA
1	2008-10-16 19:29:00	0	DTA	19	1	5	M	Peak DTA
1	2008-10-16 19:30:00	159	DTA	19	1	5	M	Peak DTA
1	2008-10-16 19:31:00	343	DTA	19	1	5	M	Peak DTA
1	2008-10-16 19:32:00	103	DTA	19	1	5	M	Peak DTA
1	2008-10-16 19:33:00	434	DTA	19	1	5	M	Peak DTA
1	2008-10-16 19:34:00	357	DTA	19	1	5	M	Peak DTA
1	2008-10-16 19:35:00	21	DTA	19	1	5	M	Peak DTA
1	2008-10-16 19:36:00	103	DTA	19	1	5	M	Peak DTA
1	2008-10-16 19:37:00	0	DTA	19	1	5	M	Peak DTA
1	2008-10-16 19:38:00	0	DTA	19	1	5	M	Peak DTA
1	2008-10-16 19:39:00	0	DTA	19	1	5	M	Peak DTA
1	2008-10-16 19:40:00	0	DTA	19	1	5	M	Peak DTA
1	2008-10-16 19:41:00	0	DTA	19	1	5	M	Peak DTA
1	2008-10-16 19:42:00	0	DTA	19	1	5	M	Peak DTA
1	2008-10-16 19:43:00	0	DTA	19	1	5	M	Peak DTA
1	2008-10-16 19:44:00	0	DTA	19	1	5	M	Peak DTA
1	2008-10-16 19:45:00	0	DTA	19	1	5	M	Peak DTA
1	2008-10-16 19:46:00	10	DTA	19	1	5	M	Peak DTA
1	2008-10-16 19:47:00	0	DTA	19	1	5	M	Peak DTA
1	2008-10-16 19:48:00	0	DTA	19	1	5	M	Peak DTA
1	2008-10-16 19:49:00	0	DTA	19	1	5	M	Peak DTA
1	2008-10-16 19:50:00	0	DTA	19	1	5	M	Peak DTA
1	2008-10-16 19:51:00	41	DTA	19	1	5	M	Peak DTA
1	2008-10-16 19:52:00	0	DTA	19	1	5	M	Peak DTA
1	2008-10-16 19:53:00	0	DTA	19	1	5	M	Peak DTA
1	2008-10-16 19:54:00	0	DTA	19	1	5	M	Peak DTA
1	2008-10-16 19:55:00	0	DTA	19	1	5	M	Peak DTA
1	2008-10-16 19:56:00	0	DTA	19	1	5	M	Peak DTA
1	2008-10-16 19:57:00	0	DTA	19	1	5	M	Peak DTA
1	2008-10-16 19:58:00	0	DTA	19	1	5	M	Peak DTA
1	2008-10-16 19:59:00	0	DTA	19	1	5	M	Peak DTA
1	2008-10-16 20:00:00	0	DTA	19	1	5	M	Peak DTA
1	2008-10-16 20:01:00	184	DTA	20	1	5	M	Peak DTA
1	2008-10-16 20:02:00	10	DTA	20	1	5	M	Peak DTA
1	2008-10-16 20:03:00	0	DTA	20	1	5	M	Peak DTA
1	2008-10-16 20:04:00	0	DTA	20	1	5	M	Peak DTA
1	2008-10-16 20:05:00	0	DTA	20	1	5	M	Peak DTA
1	2008-10-16 20:06:00	0	DTA	20	1	5	M	Peak DTA
1	2008-10-16 20:07:00	0	DTA	20	1	5	M	Peak DTA
1	2008-10-16 20:08:00	0	DTA	20	1	5	M	Peak DTA
1	2008-10-16 20:09:00	10	DTA	20	1	5	M	Peak DTA
1	2008-10-16 20:10:00	0	DTA	20	1	5	M	Peak DTA
1	2008-10-16 20:11:00	10	DTA	20	1	5	M	Peak DTA
1	2008-10-16 20:12:00	0	DTA	20	1	5	M	Peak DTA
1	2008-10-16 20:13:00	0	DTA	20	1	5	M	Peak DTA
1	2008-10-16 20:14:00	0	DTA	20	1	5	M	Peak DTA
1	2008-10-16 20:15:00	0	DTA	20	1	5	M	Peak DTA
1	2008-10-16 20:16:00	0	DTA	20	1	5	M	Peak DTA
1	2008-10-16 20:17:00	372	DTA	20	1	5	M	Peak DTA
1	2008-10-16 20:18:00	0	DTA	20	1	5	M	Peak DTA
1	2008-10-16 20:19:00	0	DTA	20	1	5	M	Peak DTA
1	2008-10-16 20:20:00	0	DTA	20	1	5	M	Peak DTA
1	2008-10-16 20:21:00	52	DTA	20	1	5	M	Peak DTA
1	2008-10-16 20:22:00	0	DTA	20	1	5	M	Peak DTA
1	2008-10-16 20:23:00	0	DTA	20	1	5	M	Peak DTA
1	2008-10-16 20:24:00	0	DTA	20	1	5	M	Peak DTA
1	2008-10-16 20:25:00	0	DTA	20	1	5	M	Peak DTA
1	2008-10-16 20:26:00	0	DTA	20	1	5	M	Peak DTA
1	2008-10-16 20:27:00	0	DTA	20	1	5	M	Peak DTA
1	2008-10-16 20:28:00	0	DTA	20	1	5	M	Peak DTA
1	2008-10-16 20:29:00	0	DTA	20	1	5	M	Peak DTA
1	2008-10-16 20:30:00	233	DTA	20	1	5	M	Peak DTA
1	2008-10-16 20:31:00	233	DTA	20	1	5	M	Peak DTA
1	2008-10-16 20:32:00	10	DTA	20	1	5	M	Peak DTA
1	2008-10-16 20:33:00	159	DTA	20	1	5	M	Peak DTA
1	2008-10-16 20:34:00	21	DTA	20	1	5	M	Peak DTA
1	2008-10-16 20:35:00	209	DTA	20	1	5	M
1	2008-10-16 20:36:00	159	DTA	20	1	5	M
1	2008-10-16 20:37:00	10	DTA	20	1	5	M
1	2008-10-16 20:38:00	0	DTA	20	1	5	M
1	2008-10-16 20:39:00	62	DTA	20	1	5	M
1	2008-10-16 20:40:00	93	DTA	20	1	5	M
1	2008-10-16 20:41:00	52	DTA	20	1	5	M
1	2008-10-16 20:42:00	0	DTA	20	1	5	M
1	2008-10-16 20:43:00	147	DTA	20	1	5	M
1	2008-10-16 20:44:00	124	DTA	20	1	5	M
1	2008-10-16 20:45:00	0	DTA	20	1	5	M
1	2008-10-16 20:46:00	0	DTA	20	1	5	M
1	2008-10-16 20:47:00	0	DTA	20	1	5	M
1	2008-10-16 20:48:00	0	DTA	20	1	5	M
1	2008-10-16 20:49:00	0	DTA	20	1	5	M
1	2008-10-16 20:50:00	0	DTA	20	1	5	M
1	2008-10-16 20:51:00	0	DTA	20	1	5	M
1	2008-10-16 20:52:00	21	DTA	20	1	5	M
1	2008-10-16 20:53:00	0	DTA	20	1	5	M
1	2008-10-16 20:54:00	83	DTA	20	1	5	M
1	2008-10-16 20:55:00	0	DTA	20	1	5	M
1	2008-10-16 20:56:00	0	DTA	20	1	5	M
1	2008-10-16 20:57:00	0	DTA	20	1	5	M
1	2008-10-16 20:58:00	103	DTA	20	1	5	M
1	2008-10-16 20:59:00	270	DTA	20	1	5	M
1	2008-10-16 21:00:00	0	DTA	20	1	5	M
1	2008-10-16 21:01:00	0	DTA	21	1	5	M
1	2008-10-16 21:02:00	0	DTA	21	1	5	M
1	2008-10-16 21:03:00	0	DTA	21	1	5	M
1	2008-10-16 21:04:00	0	DTA	21	1	5	M
1	2008-10-16 21:05:00	0	DTA	21	1	5	M
1	2008-10-16 21:06:00	0	DTA	21	1	5	M
1	2008-10-16 21:07:00	0	DTA	21	1	5	M
1	2008-10-16 21:08:00	0	DTA	21	1	5	M
1	2008-10-16 21:09:00	0	DTA	21	1	5	M
1	2008-10-16 21:10:00	0	DTA	21	1	5	M
1	2008-10-16 21:11:00	21	DTA	21	1	5	M
1	2008-10-16 21:12:00	21	DTA	21	1	5	M
1	2008-10-16 21:13:00	0	DTA	21	1	5	M
1	2008-10-16 21:14:00	0	DTA	21	1	5	M
1	2008-10-16 21:15:00	0	DTA	21	1	5	M
1	2008-10-16 21:16:00	0	DTA	21	1	5	M
1	2008-10-16 21:17:00	0	DTA	21	1	5	M
1	2008-10-16 21:18:00	0	DTA	21	1	5	M
1	2008-10-16 21:19:00	0	DTA	21	1	5	M
1	2008-10-16 21:20:00	41	DTA	21	1	5	M
1	2008-10-16 21:21:00	372	DTA	21	1	5	M
1	2008-10-16 21:22:00	10	DTA	21	1	5	M
1	2008-10-16 21:23:00	0	DTA	21	1	5	M
1	2008-10-16 21:24:00	0	DTA	21	1	5	M
1	2008-10-16 21:25:00	0	DTA	21	1	5	M
1	2008-10-16 21:26:00	0	DTA	21	1	5	M
1	2008-10-16 21:27:00	0	DTA	21	1	5	M
1	2008-10-16 21:28:00	0	DTA	21	1	5	M
1	2008-10-16 21:29:00	0	DTA	21	1	5	M
1	2008-10-16 21:30:00	0	DTA	21	1	5	M
1	2008-10-16 21:31:00	0	DTA	21	1	5	M
1	2008-10-16 21:32:00	21	DTA	21	1	5	M
1	2008-10-16 21:33:00	0	DTA	21	1	5	M
1	2008-10-16 21:34:00	0	DTA	21	1	5	M
1	2008-10-16 21:35:00	0	DTA	21	1	5	M
1	2008-10-16 21:36:00	0	DTA	21	1	5	M
1	2008-10-16 21:37:00	0	DTA	21	1	5	M
1	2008-10-16 21:38:00	0	DTA	21	1	5	M
1	2008-10-16 21:39:00	0	DTA	21	1	5	M
1	2008-10-16 21:40:00	0	DTA	21	1	5	M
1	2008-10-16 21:41:00	0	DTA	21	1	5	M
1	2008-10-16 21:42:00	41	DTA	21	1	5	M
1	2008-10-16 21:43:00	10	DTA	21	1	5	M
1	2008-10-16 21:44:00	159	DTA	21	1	5	M
1	2008-10-16 21:45:00	21	DTA	21	1	5	M
1	2008-10-16 21:46:00	0	DTA	21	1	5	M
1	2008-10-16 21:47:00	0	DTA	21	1	5	M
1	2008-10-16 21:48:00	0	DTA	21	1	5	M
1	2008-10-16 21:49:00	0	DTA	21	1	5	M
1	2008-10-16 21:50:00	0	DTA	21	1	5	M
1	2008-10-16 21:51:00	0	DTA	21	1	5	M
1	2008-10-16 21:52:00	0	DTA	21	1	5	M
1	2008-10-16 21:53:00	0	DTA	21	1	5	M
1	2008-10-16 21:54:00	0	DTA	21	1	5	M
1	2008-10-16 21:55:00	0	DTA	21	1	5	M
1	2008-10-16 21:56:00	0	DTA	21	1	5	M
1	2008-10-16 21:57:00	0	DTA	21	1	5	M
1	2008-10-16 21:58:00	0	DTA	21	1	5	M
1	2008-10-16 21:59:00	0	DTA	21	1	5	M
1	2008-10-16 22:00:00	0	DTA	21	1	5	M
1	2008-10-16 22:01:00	0	NTA	22	2	5	M
1	2008-10-16 22:02:00	0	NTA	22	2	5	M
1	2008-10-16 22:03:00	0	NTA	22	2	5	M
1	2008-10-16 22:04:00	159	NTA	22	2	5	M
1	2008-10-16 22:05:00	372	NTA	22	2	5	M
1	2008-10-16 22:06:00	663	NTA	22	2	5	M
1	2008-10-16 22:07:00	246	NTA	22	2	5	M
1	2008-10-16 22:08:00	328	NTA	22	2	5	M
1	2008-10-16 22:09:00	171	NTA	22	2	5	M
1	2008-10-16 22:10:00	52	NTA	22	2	5	M
1	2008-10-16 22:11:00	10	NTA	22	2	5	M
1	2008-10-16 22:12:00	0	NTA	22	2	5	M
1	2008-10-16 22:13:00	0	NTA	22	2	5	M
1	2008-10-16 22:14:00	21	NTA	22	2	5	M
1	2008-10-16 22:15:00	10	NTA	22	2	5	M
1	2008-10-16 22:16:00	93	NTA	22	2	5	M
1	2008-10-16 22:17:00	0	NTA	22	2	5	M
1	2008-10-16 22:18:00	0	NTA	22	2	5	M
1	2008-10-16 22:19:00	0	NTA	22	2	5	M
1	2008-10-16 22:20:00	0	NTA	22	2	5	M
1	2008-10-16 22:21:00	0	NTA	22	2	5	M
1	2008-10-16 22:22:00	0	NTA	22	2	5	M
1	2008-10-16 22:23:00	0	NTA	22	2	5	M
1	2008-10-16 22:24:00	0	NTA	22	2	5	M
1	2008-10-16 22:25:00	72	NTA	22	2	5	M
1	2008-10-16 22:26:00	41	NTA	22	2	5	M
1	2008-10-16 22:27:00	0	NTA	22	2	5	M
1	2008-10-16 22:28:00	0	NTA	22	2	5	M
1	2008-10-16 22:29:00	0	NTA	22	2	5	M
1	2008-10-16 22:30:00	0	NTA	22	2	5	M
1	2008-10-16 22:31:00	0	NTA	22	2	5	M
1	2008-10-16 22:32:00	0	NTA	22	2	5	M
1	2008-10-16 22:33:00	0	NTA	22	2	5	M
1	2008-10-16 22:34:00	0	NTA	22	2	5	M
1	2008-10-16 22:35:00	0	NTA	22	2	5	M
1	2008-10-16 22:36:00	0	NTA	22	2	5	M
1	2008-10-16 22:37:00	0	NTA	22	2	5	M
1	2008-10-16 22:38:00	0	NTA	22	2	5	M
1	2008-10-16 22:39:00	0	NTA	22	2	5	M
1	2008-10-16 22:40:00	0	NTA	22	2	5	M
1	2008-10-16 22:41:00	0	NTA	22	2	5	M
1	2008-10-16 22:42:00	0	NTA	22	2	5	M
1	2008-10-16 22:43:00	0	NTA	22	2	5	M
1	2008-10-16 22:44:00	0	NTA	22	2	5	M
1	2008-10-16 22:45:00	0	NTA	22	2	5	M
1	2008-10-16 22:46:00	0	NTA	22	2	5	M
1	2008-10-16 22:47:00	52	NTA	22	2	5	M
1	2008-10-16 22:48:00	285	NTA	22	2	5	M
1	2008-10-16 22:49:00	0	NTA	22	2	5	M
1	2008-10-16 22:50:00	0	NTA	22	2	5	M
1	2008-10-16 22:51:00	41	NTA	22	2	5	M
1	2008-10-16 22:52:00	0	NTA	22	2	5	M
1	2008-10-16 22:53:00	0	NTA	22	2	5	M
1	2008-10-16 22:54:00	0	NTA	22	2	5	M
1	2008-10-16 22:55:00	0	NTA	22	2	5	M
1	2008-10-16 22:56:00	10	NTA	22	2	5	M
1	2008-10-16 22:57:00	299	NTA	22	2	5	M
1	2008-10-16 22:58:00	31	NTA	22	2	5	M
1	2008-10-16 22:59:00	0	NTA	22	2	5	M
1	2008-10-16 23:00:00	0	NTA	22	2	5	M
1	2008-10-16 23:01:00	0	NTA	23	2	5	M
1	2008-10-16 23:02:00	72	NTA	23	2	5	M
1	2008-10-16 23:03:00	0	NTA	23	2	5	M
1	2008-10-16 23:04:00	0	NTA	23	2	5	M
1	2008-10-16 23:05:00	0	NTA	23	2	5	M
1	2008-10-16 23:06:00	0	NTA	23	2	5	M
1	2008-10-16 23:07:00	0	NTA	23	2	5	M
1	2008-10-16 23:08:00	0	NTA	23	2	5	M
1	2008-10-16 23:09:00	0	NTA	23	2	5	M
1	2008-10-16 23:10:00	0	NTA	23	2	5	M
1	2008-10-16 23:11:00	0	NTA	23	2	5	M
1	2008-10-16 23:12:00	0	NTA	23	2	5	M
1	2008-10-16 23:13:00	0	NTA	23	2	5	M
1	2008-10-16 23:14:00	0	NTA	23	2	5	M
1	2008-10-16 23:15:00	0	NTA	23	2	5	M
1	2008-10-16 23:16:00	147	NTA	23	2	5	M
1	2008-10-16 23:17:00	184	NTA	23	2	5	M
1	2008-10-16 23:18:00	0	NTA	23	2	5	M
1	2008-10-16 23:19:00	0	NTA	23	2	5	M
1	2008-10-16 23:20:00	0	NTA	23	2	5	M
1	2008-10-16 23:21:00	10	NTA	23	2	5	M
1	2008-10-16 23:22:00	0	NTA	23	2	5	M
1	2008-10-16 23:23:00	0	NTA	23	2	5	M
1	2008-10-16 23:24:00	0	NTA	23	2	5	M
1	2008-10-16 23:25:00	0	NTA	23	2	5	M
1	2008-10-16 23:26:00	0	NTA	23	2	5	M
1	2008-10-16 23:27:00	0	NTA	23	2	5	M
1	2008-10-16 23:28:00	0	NTA	23	2	5	M
1	2008-10-16 23:29:00	0	NTA	23	2	5	M
1	2008-10-16 23:30:00	0	NTA	23	2	5	M
1	2008-10-16 23:31:00	0	NTA	23	2	5	M
1	2008-10-16 23:32:00	0	NTA	23	2	5	M
1	2008-10-16 23:33:00	0	NTA	23	2	5	M
1	2008-10-16 23:34:00	0	NTA	23	2	5	M
1	2008-10-16 23:35:00	0	NTA	23	2	5	M
1	2008-10-16 23:36:00	0	NTA	23	2	5	M
1	2008-10-16 23:37:00	0	NTA	23	2	5	M
1	2008-10-16 23:38:00	0	NTA	23	2	5	M
1	2008-10-16 23:39:00	0	NTA	23	2	5	M
1	2008-10-16 23:40:00	0	NTA	23	2	5	M
1	2008-10-16 23:41:00	0	NTA	23	2	5	M
1	2008-10-16 23:42:00	0	NTA	23	2	5	M
1	2008-10-16 23:43:00	0	NTA	23	2	5	M
1	2008-10-16 23:44:00	0	NTA	23	2	5	M
1	2008-10-16 23:45:00	0	NTA	23	2	5	M
1	2008-10-16 23:46:00	0	NTA	23	2	5	M
1	2008-10-16 23:47:00	0	NTA	23	2	5	M
1	2008-10-16 23:48:00	0	NTA	23	2	5	M
1	2008-10-16 23:49:00	0	NTA	23	2	5	M
1	2008-10-16 23:50:00	0	NTA	23	2	5	M
1	2008-10-16 23:51:00	0	NTA	23	2	5	M
1	2008-10-16 23:52:00	0	NTA	23	2	5	M
1	2008-10-16 23:53:00	0	NTA	23	2	5	M
1	2008-10-16 23:54:00	0	NTA	23	2	5	M
1	2008-10-16 23:55:00	10	NTA	23	2	5	M
1	2008-10-16 23:56:00	0	NTA	23	2	5	M
1	2008-10-16 23:57:00	0	NTA	23	2	5	M
1	2008-10-16 23:58:00	0	NTA	23	2	5	M
1	2008-10-16 23:59:00	0	NTA	23	2	5	M
1	2008-10-17	0	NTA	23	2	5	M
1	2008-10-17 00:01:00	0	NTA	0	2	6	M
1	2008-10-17 00:02:00	0	NTA	0	2	6	M
1	2008-10-17 00:03:00	0	NTA	0	2	6	M
1	2008-10-17 00:04:00	0	NTA	0	2	6	M
1	2008-10-17 00:05:00	0	NTA	0	2	6	M
1	2008-10-17 00:06:00	0	NTA	0	2	6	M
1	2008-10-17 00:07:00	10	NTA	0	2	6	M
1	2008-10-17 00:08:00	0	NTA	0	2	6	M
1	2008-10-17 00:09:00	0	NTA	0	2	6	M
1	2008-10-17 00:10:00	0	NTA	0	2	6	M
1	2008-10-17 00:11:00	0	NTA	0	2	6	M
1	2008-10-17 00:12:00	0	NTA	0	2	6	M
1	2008-10-17 00:13:00	0	NTA	0	2	6	M
1	2008-10-17 00:14:00	0	NTA	0	2	6	M
1	2008-10-17 00:15:00	0	NTA	0	2	6	M
1	2008-10-17 00:16:00	0	NTA	0	2	6	M
1	2008-10-17 00:17:00	10	NTA	0	2	6	M
1	2008-10-17 00:18:00	0	NTA	0	2	6	M
1	2008-10-17 00:19:00	0	NTA	0	2	6	M
1	2008-10-17 00:20:00	0	NTA	0	2	6	M
1	2008-10-17 00:21:00	0	NTA	0	2	6	M
1	2008-10-17 00:22:00	0	NTA	0	2	6	M
1	2008-10-17 00:23:00	0	NTA	0	2	6	M
1	2008-10-17 00:24:00	0	NTA	0	2	6	M
1	2008-10-17 00:25:00	0	NTA	0	2	6	M
1	2008-10-17 00:26:00	0	NTA	0	2	6	M
1	2008-10-17 00:27:00	0	NTA	0	2	6	M
1	2008-10-17 00:28:00	0	NTA	0	2	6	M
1	2008-10-17 00:29:00	0	NTA	0	2	6	M
1	2008-10-17 00:30:00	0	NTA	0	2	6	M
1	2008-10-17 00:31:00	0	NTA	0	2	6	M
1	2008-10-17 00:32:00	21	NTA	0	2	6	M
1	2008-10-17 00:33:00	386	NTA	0	2	6	M
1	2008-10-17 00:34:00	10	NTA	0	2	6	M
1	2008-10-17 00:35:00	41	NTA	0	2	6	M
1	2008-10-17 00:36:00	0	NTA	0	2	6	M
1	2008-10-17 00:37:00	0	NTA	0	2	6	M
1	2008-10-17 00:38:00	0	NTA	0	2	6	M
1	2008-10-17 00:39:00	0	NTA	0	2	6	M
1	2008-10-17 00:40:00	0	NTA	0	2	6	M
1	2008-10-17 00:41:00	0	NTA	0	2	6	M
1	2008-10-17 00:42:00	0	NTA	0	2	6	M
1	2008-10-17 00:43:00	0	NTA	0	2	6	M
1	2008-10-17 00:44:00	0	NTA	0	2	6	M
1	2008-10-17 00:45:00	0	NTA	0	2	6	M
1	2008-10-17 00:46:00	21	NTA	0	2	6	M
1	2008-10-17 00:47:00	0	NTA	0	2	6	M
1	2008-10-17 00:48:00	10	NTA	0	2	6	M
1	2008-10-17 00:49:00	0	NTA	0	2	6	M
1	2008-10-17 00:50:00	0	NTA	0	2	6	M
1	2008-10-17 00:51:00	0	NTA	0	2	6	M
1	2008-10-17 00:52:00	21	NTA	0	2	6	M
1	2008-10-17 00:53:00	246	NTA	0	2	6	M
1	2008-10-17 00:54:00	0	NTA	0	2	6	M
1	2008-10-17 00:55:00	21	NTA	0	2	6	M
1	2008-10-17 00:56:00	0	NTA	0	2	6	M
1	2008-10-17 00:57:00	0	NTA	0	2	6	M
1	2008-10-17 00:58:00	0	NTA	0	2	6	M
1	2008-10-17 00:59:00	0	NTA	0	2	6	M
1	2008-10-17 01:00:00	0	NTA	0	2	6	M
1	2008-10-17 01:01:00	0	NTA	1	2	6	M
1	2008-10-17 01:02:00	0	NTA	1	2	6	M
1	2008-10-17 01:03:00	0	NTA	1	2	6	M
1	2008-10-17 01:04:00	52	NTA	1	2	6	M
1	2008-10-17 01:05:00	41	NTA	1	2	6	M
1	2008-10-17 01:06:00	0	NTA	1	2	6	M
1	2008-10-17 01:07:00	0	NTA	1	2	6	M
1	2008-10-17 01:08:00	0	NTA	1	2	6	M
1	2008-10-17 01:09:00	0	NTA	1	2	6	M
1	2008-10-17 01:10:00	0	NTA	1	2	6	M
1	2008-10-17 01:11:00	0	NTA	1	2	6	M
1	2008-10-17 01:12:00	0	NTA	1	2	6	M
1	2008-10-17 01:13:00	0	NTA	1	2	6	M
1	2008-10-17 01:14:00	0	NTA	1	2	6	M
1	2008-10-17 01:15:00	0	NTA	1	2	6	M
1	2008-10-17 01:16:00	0	NTA	1	2	6	M
1	2008-10-17 01:17:00	0	NTA	1	2	6	M
1	2008-10-17 01:18:00	0	NTA	1	2	6	M
1	2008-10-17 01:19:00	0	NTA	1	2	6	M
1	2008-10-17 01:20:00	0	NTA	1	2	6	M
1	2008-10-17 01:21:00	0	NTA	1	2	6	M
1	2008-10-17 01:22:00	0	NTA	1	2	6	M
1	2008-10-17 01:23:00	0	NTA	1	2	6	M
1	2008-10-17 01:24:00	0	NTA	1	2	6	M
1	2008-10-17 01:25:00	0	NTA	1	2	6	M
1	2008-10-17 01:26:00	0	NTA	1	2	6	M
1	2008-10-17 01:27:00	0	NTA	1	2	6	M
1	2008-10-17 01:28:00	0	NTA	1	2	6	M
1	2008-10-17 01:29:00	0	NTA	1	2	6	M
1	2008-10-17 01:30:00	0	NTA	1	2	6	M
1	2008-10-17 01:31:00	0	NTA	1	2	6	M
1	2008-10-17 01:32:00	0	NTA	1	2	6	M
1	2008-10-17 01:33:00	0	NTA	1	2	6	M
1	2008-10-17 01:34:00	0	NTA	1	2	6	M
1	2008-10-17 01:35:00	0	NTA	1	2	6	M
1	2008-10-17 01:36:00	0	NTA	1	2	6	M
1	2008-10-17 01:37:00	0	NTA	1	2	6	M
1	2008-10-17 01:38:00	0	NTA	1	2	6	M
1	2008-10-17 01:39:00	0	NTA	1	2	6	M
1	2008-10-17 01:40:00	0	NTA	1	2	6	M
1	2008-10-17 01:41:00	0	NTA	1	2	6	M
1	2008-10-17 01:42:00	10	NTA	1	2	6	M
1	2008-10-17 01:43:00	0	NTA	1	2	6	M
1	2008-10-17 01:44:00	0	NTA	1	2	6	M
1	2008-10-17 01:45:00	0	NTA	1	2	6	M
1	2008-10-17 01:46:00	0	NTA	1	2	6	M
1	2008-10-17 01:47:00	0	NTA	1	2	6	M
1	2008-10-17 01:48:00	0	NTA	1	2	6	M
1	2008-10-17 01:49:00	0	NTA	1	2	6	M
1	2008-10-17 01:50:00	0	NTA	1	2	6	M
1	2008-10-17 01:51:00	0	NTA	1	2	6	M
1	2008-10-17 01:52:00	0	NTA	1	2	6	M
1	2008-10-17 01:53:00	0	NTA	1	2	6	M
1	2008-10-17 01:54:00	0	NTA	1	2	6	M
1	2008-10-17 01:55:00	0	NTA	1	2	6	M
1	2008-10-17 01:56:00	31	NTA	1	2	6	M
1	2008-10-17 01:57:00	401	NTA	1	2	6	M
1	2008-10-17 01:58:00	0	NTA	1	2	6	M
1	2008-10-17 01:59:00	184	NTA	1	2	6	M
1	2008-10-17 02:00:00	299	NTA	1	2	6	M
1	2008-10-17 02:01:00	0	NTA	2	2	6	M
1	2008-10-17 02:02:00	0	NTA	2	2	6	M
1	2008-10-17 02:03:00	62	NTA	2	2	6	M
1	2008-10-17 02:04:00	0	NTA	2	2	6	M
1	2008-10-17 02:05:00	0	NTA	2	2	6	M
1	2008-10-17 02:06:00	10	NTA	2	2	6	M
1	2008-10-17 02:07:00	0	NTA	2	2	6	M
1	2008-10-17 02:08:00	10	NTA	2	2	6	M
1	2008-10-17 02:09:00	0	NTA	2	2	6	M
1	2008-10-17 02:10:00	0	NTA	2	2	6	M
1	2008-10-17 02:11:00	0	NTA	2	2	6	M
1	2008-10-17 02:12:00	0	NTA	2	2	6	M
1	2008-10-17 02:13:00	0	NTA	2	2	6	M
1	2008-10-17 02:14:00	0	NTA	2	2	6	M
1	2008-10-17 02:15:00	0	NTA	2	2	6	M
1	2008-10-17 02:16:00	41	NTA	2	2	6	M
1	2008-10-17 02:17:00	10	NTA	2	2	6	M
1	2008-10-17 02:18:00	285	NTA	2	2	6	M
1	2008-10-17 02:19:00	21	NTA	2	2	6	M
1	2008-10-17 02:20:00	31	NTA	2	2	6	M
1	2008-10-17 02:21:00	21	NTA	2	2	6	M
1	2008-10-17 02:22:00	0	NTA	2	2	6	M
1	2008-10-17 02:23:00	0	NTA	2	2	6	M
1	2008-10-17 02:24:00	0	NTA	2	2	6	M
1	2008-10-17 02:25:00	0	NTA	2	2	6	M
1	2008-10-17 02:26:00	0	NTA	2	2	6	M
1	2008-10-17 02:27:00	0	NTA	2	2	6	M
1	2008-10-17 02:28:00	10	NTA	2	2	6	M
1	2008-10-17 02:29:00	0	NTA	2	2	6	M
1	2008-10-17 02:30:00	0	NTA	2	2	6	M
1	2008-10-17 02:31:00	0	NTA	2	2	6	M
1	2008-10-17 02:32:00	0	NTA	2	2	6	M
1	2008-10-17 02:33:00	0	NTA	2	2	6	M
1	2008-10-17 02:34:00	0	NTA	2	2	6	M
1	2008-10-17 02:35:00	0	NTA	2	2	6	M
1	2008-10-17 02:36:00	0	NTA	2	2	6	M
1	2008-10-17 02:37:00	0	NTA	2	2	6	M
1	2008-10-17 02:38:00	0	NTA	2	2	6	M
1	2008-10-17 02:39:00	0	NTA	2	2	6	M
1	2008-10-17 02:40:00	0	NTA	2	2	6	M
1	2008-10-17 02:41:00	0	NTA	2	2	6	M
1	2008-10-17 02:42:00	31	NTA	2	2	6	M
1	2008-10-17 02:43:00	434	NTA	2	2	6	M
1	2008-10-17 02:44:00	147	NTA	2	2	6	M
1	2008-10-17 02:45:00	0	NTA	2	2	6	M
1	2008-10-17 02:46:00	31	NTA	2	2	6	M
1	2008-10-17 02:47:00	0	NTA	2	2	6	M
1	2008-10-17 02:48:00	0	NTA	2	2	6	M
1	2008-10-17 02:49:00	0	NTA	2	2	6	M
1	2008-10-17 02:50:00	0	NTA	2	2	6	M
1	2008-10-17 02:51:00	0	NTA	2	2	6	M
1	2008-10-17 02:52:00	0	NTA	2	2	6	M
1	2008-10-17 02:53:00	0	NTA	2	2	6	M
1	2008-10-17 02:54:00	0	NTA	2	2	6	M
1	2008-10-17 02:55:00	0	NTA	2	2	6	M
1	2008-10-17 02:56:00	0	NTA	2	2	6	M
1	2008-10-17 02:57:00	0	NTA	2	2	6	M
1	2008-10-17 02:58:00	314	NTA	2	2	6	M
1	2008-10-17 02:59:00	0	NTA	2	2	6	M
1	2008-10-17 03:00:00	0	NTA	2	2	6	M
1	2008-10-17 03:01:00	0	NTA	3	2	6	M
1	2008-10-17 03:02:00	10	NTA	3	2	6	M
1	2008-10-17 03:03:00	0	NTA	3	2	6	M
1	2008-10-17 03:04:00	0	NTA	3	2	6	M
1	2008-10-17 03:05:00	10	NTA	3	2	6	M
1	2008-10-17 03:06:00	0	NTA	3	2	6	M
1	2008-10-17 03:07:00	0	NTA	3	2	6	M
1	2008-10-17 03:08:00	0	NTA	3	2	6	M
1	2008-10-17 03:09:00	0	NTA	3	2	6	M
1	2008-10-17 03:10:00	0	NTA	3	2	6	M
1	2008-10-17 03:11:00	314	NTA	3	2	6	M
1	2008-10-17 03:12:00	10	NTA	3	2	6	M
1	2008-10-17 03:13:00	83	NTA	3	2	6	M
1	2008-10-17 03:14:00	31	NTA	3	2	6	M
1	2008-10-17 03:15:00	0	NTA	3	2	6	M
1	2008-10-17 03:16:00	0	NTA	3	2	6	M
1	2008-10-17 03:17:00	0	NTA	3	2	6	M
1	2008-10-17 03:18:00	0	NTA	3	2	6	M
1	2008-10-17 03:19:00	0	NTA	3	2	6	M
1	2008-10-17 03:20:00	0	NTA	3	2	6	M
1	2008-10-17 03:21:00	0	NTA	3	2	6	M
1	2008-10-17 03:22:00	0	NTA	3	2	6	M
1	2008-10-17 03:23:00	0	NTA	3	2	6	M
1	2008-10-17 03:24:00	0	NTA	3	2	6	M
1	2008-10-17 03:25:00	0	NTA	3	2	6	M
1	2008-10-17 03:26:00	0	NTA	3	2	6	M
1	2008-10-17 03:27:00	0	NTA	3	2	6	M
1	2008-10-17 03:28:00	0	NTA	3	2	6	M
1	2008-10-17 03:29:00	0	NTA	3	2	6	M
1	2008-10-17 03:30:00	0	NTA	3	2	6	M
1	2008-10-17 03:31:00	0	NTA	3	2	6	M
1	2008-10-17 03:32:00	0	NTA	3	2	6	M
1	2008-10-17 03:33:00	0	NTA	3	2	6	M
1	2008-10-17 03:34:00	0	NTA	3	2	6	M
1	2008-10-17 03:35:00	0	NTA	3	2	6	M
1	2008-10-17 03:36:00	0	NTA	3	2	6	M
1	2008-10-17 03:37:00	0	NTA	3	2	6	M
1	2008-10-17 03:38:00	0	NTA	3	2	6	M
1	2008-10-17 03:39:00	0	NTA	3	2	6	M
1	2008-10-17 03:40:00	0	NTA	3	2	6	M
1	2008-10-17 03:41:00	0	NTA	3	2	6	M
1	2008-10-17 03:42:00	0	NTA	3	2	6	M
1	2008-10-17 03:43:00	0	NTA	3	2	6	M
1	2008-10-17 03:44:00	0	NTA	3	2	6	M
1	2008-10-17 03:45:00	0	NTA	3	2	6	M
1	2008-10-17 03:46:00	0	NTA	3	2	6	M
1	2008-10-17 03:47:00	0	NTA	3	2	6	M
1	2008-10-17 03:48:00	0	NTA	3	2	6	M
1	2008-10-17 03:49:00	52	NTA	3	2	6	M
1	2008-10-17 03:50:00	10	NTA	3	2	6	M
1	2008-10-17 03:51:00	0	NTA	3	2	6	M
1	2008-10-17 03:52:00	0	NTA	3	2	6	M
1	2008-10-17 03:53:00	0	NTA	3	2	6	M
1	2008-10-17 03:54:00	0	NTA	3	2	6	M
1	2008-10-17 03:55:00	0	NTA	3	2	6	M
1	2008-10-17 03:56:00	0	NTA	3	2	6	M
1	2008-10-17 03:57:00	0	NTA	3	2	6	M
1	2008-10-17 03:58:00	0	NTA	3	2	6	M
1	2008-10-17 03:59:00	0	NTA	3	2	6	M
1	2008-10-17 04:00:00	0	NTA	3	2	6	M
1	2008-10-17 04:01:00	0	NTA	4	2	6	M
1	2008-10-17 04:02:00	0	NTA	4	2	6	M
1	2008-10-17 04:03:00	0	NTA	4	2	6	M
1	2008-10-17 04:04:00	0	NTA	4	2	6	M
1	2008-10-17 04:05:00	0	NTA	4	2	6	M
1	2008-10-17 04:06:00	0	NTA	4	2	6	M
1	2008-10-17 04:07:00	0	NTA	4	2	6	M
1	2008-10-17 04:08:00	0	NTA	4	2	6	M
1	2008-10-17 04:09:00	0	NTA	4	2	6	M
1	2008-10-17 04:10:00	0	NTA	4	2	6	M
1	2008-10-17 04:11:00	0	NTA	4	2	6	M
1	2008-10-17 04:12:00	0	NTA	4	2	6	M
1	2008-10-17 04:13:00	0	NTA	4	2	6	M
1	2008-10-17 04:14:00	0	NTA	4	2	6	M
1	2008-10-17 04:15:00	0	NTA	4	2	6	M
1	2008-10-17 04:16:00	0	NTA	4	2	6	M
1	2008-10-17 04:17:00	0	NTA	4	2	6	M
1	2008-10-17 04:18:00	0	NTA	4	2	6	M
1	2008-10-17 04:19:00	0	NTA	4	2	6	M
1	2008-10-17 04:20:00	0	NTA	4	2	6	M
1	2008-10-17 04:21:00	0	NTA	4	2	6	M
1	2008-10-17 04:22:00	0	NTA	4	2	6	M
1	2008-10-17 04:23:00	41	NTA	4	2	6	M
1	2008-10-17 04:24:00	516	NTA	4	2	6	M
1	2008-10-17 04:25:00	10	NTA	4	2	6	M
1	2008-10-17 04:26:00	10	NTA	4	2	6	M
1	2008-10-17 04:27:00	0	NTA	4	2	6	M
1	2008-10-17 04:28:00	0	NTA	4	2	6	M
1	2008-10-17 04:29:00	0	NTA	4	2	6	M
1	2008-10-17 04:30:00	0	NTA	4	2	6	M
1	2008-10-17 04:31:00	0	NTA	4	2	6	M
1	2008-10-17 04:32:00	0	NTA	4	2	6	M
1	2008-10-17 04:33:00	0	NTA	4	2	6	M
1	2008-10-17 04:34:00	0	NTA	4	2	6	M
1	2008-10-17 04:35:00	10	NTA	4	2	6	M
1	2008-10-17 04:36:00	0	NTA	4	2	6	M
1	2008-10-17 04:37:00	0	NTA	4	2	6	M
1	2008-10-17 04:38:00	0	NTA	4	2	6	M
1	2008-10-17 04:39:00	0	NTA	4	2	6	M
1	2008-10-17 04:40:00	0	NTA	4	2	6	M
1	2008-10-17 04:41:00	10	NTA	4	2	6	M
1	2008-10-17 04:42:00	0	NTA	4	2	6	M
1	2008-10-17 04:43:00	0	NTA	4	2	6	M
1	2008-10-17 04:44:00	0	NTA	4	2	6	M
1	2008-10-17 04:45:00	0	NTA	4	2	6	M
1	2008-10-17 04:46:00	0	NTA	4	2	6	M
1	2008-10-17 04:47:00	0	NTA	4	2	6	M
1	2008-10-17 04:48:00	0	NTA	4	2	6	M
1	2008-10-17 04:49:00	0	NTA	4	2	6	M
1	2008-10-17 04:50:00	0	NTA	4	2	6	M
1	2008-10-17 04:51:00	0	NTA	4	2	6	M
1	2008-10-17 04:52:00	0	NTA	4	2	6	M
1	2008-10-17 04:53:00	0	NTA	4	2	6	M
1	2008-10-17 04:54:00	0	NTA	4	2	6	M
1	2008-10-17 04:55:00	0	NTA	4	2	6	M
1	2008-10-17 04:56:00	0	NTA	4	2	6	M
1	2008-10-17 04:57:00	0	NTA	4	2	6	M
1	2008-10-17 04:58:00	0	NTA	4	2	6	M
1	2008-10-17 04:59:00	209	NTA	4	2	6	M
1	2008-10-17 05:00:00	10	NTA	4	2	6	M
1	2008-10-17 05:01:00	0	NTA	5	2	6	M
1	2008-10-17 05:02:00	83	NTA	5	2	6	M
1	2008-10-17 05:03:00	0	NTA	5	2	6	M
1	2008-10-17 05:04:00	0	NTA	5	2	6	M
1	2008-10-17 05:05:00	0	NTA	5	2	6	M
1	2008-10-17 05:06:00	0	NTA	5	2	6	M
1	2008-10-17 05:07:00	0	NTA	5	2	6	M
1	2008-10-17 05:08:00	0	NTA	5	2	6	M
1	2008-10-17 05:09:00	0	NTA	5	2	6	M
1	2008-10-17 05:10:00	0	NTA	5	2	6	M
1	2008-10-17 05:11:00	0	NTA	5	2	6	M
1	2008-10-17 05:12:00	0	NTA	5	2	6	M
1	2008-10-17 05:13:00	0	NTA	5	2	6	M
1	2008-10-17 05:14:00	0	NTA	5	2	6	M
1	2008-10-17 05:15:00	0	NTA	5	2	6	M
1	2008-10-17 05:16:00	0	NTA	5	2	6	M
1	2008-10-17 05:17:00	0	NTA	5	2	6	M
1	2008-10-17 05:18:00	0	NTA	5	2	6	M
1	2008-10-17 05:19:00	0	NTA	5	2	6	M
1	2008-10-17 05:20:00	0	NTA	5	2	6	M
1	2008-10-17 05:21:00	0	NTA	5	2	6	M
1	2008-10-17 05:22:00	0	NTA	5	2	6	M
1	2008-10-17 05:23:00	10	NTA	5	2	6	M
1	2008-10-17 05:24:00	0	NTA	5	2	6	M
1	2008-10-17 05:25:00	0	NTA	5	2	6	M
1	2008-10-17 05:26:00	0	NTA	5	2	6	M
1	2008-10-17 05:27:00	0	NTA	5	2	6	M
1	2008-10-17 05:28:00	0	NTA	5	2	6	M
1	2008-10-17 05:29:00	0	NTA	5	2	6	M
1	2008-10-17 05:30:00	0	NTA	5	2	6	M
1	2008-10-17 05:31:00	0	NTA	5	2	6	M
1	2008-10-17 05:32:00	0	NTA	5	2	6	M
1	2008-10-17 05:33:00	0	NTA	5	2	6	M
1	2008-10-17 05:34:00	0	NTA	5	2	6	M
1	2008-10-17 05:35:00	0	NTA	5	2	6	M
1	2008-10-17 05:36:00	0	NTA	5	2	6	M
1	2008-10-17 05:37:00	0	NTA	5	2	6	M
1	2008-10-17 05:38:00	0	NTA	5	2	6	M
1	2008-10-17 05:39:00	0	NTA	5	2	6	M
1	2008-10-17 05:40:00	0	NTA	5	2	6	M
1	2008-10-17 05:41:00	0	NTA	5	2	6	M
1	2008-10-17 05:42:00	0	NTA	5	2	6	M
1	2008-10-17 05:43:00	0	NTA	5	2	6	M
1	2008-10-17 05:44:00	0	NTA	5	2	6	M
1	2008-10-17 05:45:00	0	NTA	5	2	6	M
1	2008-10-17 05:46:00	853	DTA	5	2	6	M
1	2008-10-17 05:47:00	533	DTA	5	2	6	M
1	2008-10-17 05:48:00	314	DTA	5	2	6	M
1	2008-10-17 05:49:00	417	DTA	5	2	6	M
1	2008-10-17 05:50:00	209	DTA	5	2	6	M
1	2008-10-17 05:51:00	417	DTA	5	2	6	M
1	2008-10-17 05:52:00	270	DTA	5	2	6	M
1	2008-10-17 05:53:00	258	DTA	5	2	6	M
1	2008-10-17 05:54:00	171	DTA	5	2	6	M
1	2008-10-17 05:55:00	246	DTA	5	2	6	M
1	2008-10-17 05:56:00	450	DTA	5	2	6	M
1	2008-10-17 05:57:00	386	DTA	5	2	6	M
1	2008-10-17 05:58:00	209	DTA	5	2	6	M
1	2008-10-17 05:59:00	52	DTA	5	2	6	M
1	2008-10-17 06:00:00	10	DTA	5	2	6	M
1	2008-10-17 06:01:00	31	DTA	6	2	6	M
1	2008-10-17 06:02:00	0	DTA	6	2	6	M
1	2008-10-17 06:03:00	0	DTA	6	2	6	M
1	2008-10-17 06:04:00	0	DTA	6	2	6	M
1	2008-10-17 06:05:00	0	DTA	6	2	6	M
1	2008-10-17 06:06:00	124	DTA	6	2	6	M
1	2008-10-17 06:07:00	83	DTA	6	2	6	M
1	2008-10-17 06:08:00	209	DTA	6	2	6	M
1	2008-10-17 06:09:00	246	DTA	6	2	6	M
1	2008-10-17 06:10:00	0	DTA	6	2	6	M
1	2008-10-17 06:11:00	0	DTA	6	2	6	M
1	2008-10-17 06:12:00	0	DTA	6	2	6	M
1	2008-10-17 06:13:00	246	DTA	6	2	6	M
1	2008-10-17 06:14:00	0	DTA	6	2	6	M
1	2008-10-17 06:15:00	10	DTA	6	2	6	M
1	2008-10-17 06:16:00	10	DTA	6	2	6	M
1	2008-10-17 06:17:00	31	DTA	6	2	6	M
1	2008-10-17 06:18:00	62	DTA	6	2	6	M
1	2008-10-17 06:19:00	21	DTA	6	2	6	M
1	2008-10-17 06:20:00	52	DTA	6	2	6	M
1	2008-10-17 06:21:00	52	DTA	6	2	6	M
1	2008-10-17 06:22:00	21	DTA	6	2	6	M
1	2008-10-17 06:23:00	0	DTA	6	2	6	M
1	2008-10-17 06:24:00	159	DTA	6	2	6	M
1	2008-10-17 06:25:00	114	DTA	6	2	6	M
1	2008-10-17 06:26:00	10	DTA	6	2	6	M
1	2008-10-17 06:27:00	10	DTA	6	2	6	M
1	2008-10-17 06:28:00	0	DTA	6	2	6	M
1	2008-10-17 06:29:00	31	DTA	6	2	6	M
1	2008-10-17 06:30:00	0	DTA	6	2	6	M
1	2008-10-17 06:31:00	0	DTA	6	2	6	M
1	2008-10-17 06:32:00	0	DTA	6	2	6	M
1	2008-10-17 06:33:00	0	DTA	6	2	6	M
1	2008-10-17 06:34:00	0	DTA	6	2	6	M
1	2008-10-17 06:35:00	0	DTA	6	2	6	M
1	2008-10-17 06:36:00	0	DTA	6	2	6	M
1	2008-10-17 06:37:00	0	DTA	6	2	6	M
1	2008-10-17 06:38:00	0	DTA	6	2	6	M
1	2008-10-17 06:39:00	0	DTA	6	2	6	M
1	2008-10-17 06:40:00	0	DTA	6	2	6	M
1	2008-10-17 06:41:00	0	DTA	6	2	6	M
1	2008-10-17 06:42:00	0	DTA	6	2	6	M
1	2008-10-17 06:43:00	0	DTA	6	2	6	M
1	2008-10-17 06:44:00	0	DTA	6	2	6	M
1	2008-10-17 06:45:00	0	DTA	6	2	6	M
1	2008-10-17 06:46:00	0	DTA	6	2	6	M
1	2008-10-17 06:47:00	0	DTA	6	2	6	M
1	2008-10-17 06:48:00	0	DTA	6	2	6	M
1	2008-10-17 06:49:00	31	DTA	6	2	6	M
1	2008-10-17 06:50:00	0	DTA	6	2	6	M
1	2008-10-17 06:51:00	0	DTA	6	2	6	M
1	2008-10-17 06:52:00	0	DTA	6	2	6	M
1	2008-10-17 06:53:00	0	DTA	6	2	6	M
1	2008-10-17 06:54:00	0	DTA	6	2	6	M
1	2008-10-17 06:55:00	21	DTA	6	2	6	M
1	2008-10-17 06:56:00	0	DTA	6	2	6	M
1	2008-10-17 06:57:00	314	DTA	6	2	6	M
1	2008-10-17 06:58:00	10	DTA	6	2	6	M
1	2008-10-17 06:59:00	10	DTA	6	2	6	M
1	2008-10-17 07:00:00	31	DTA	6	2	6	M
1	2008-10-17 07:01:00	21	DTA	7	2	6	M
1	2008-10-17 07:02:00	0	DTA	7	2	6	M
1	2008-10-17 07:03:00	41	DTA	7	2	6	M
1	2008-10-17 07:04:00	184	DTA	7	2	6	M
1	2008-10-17 07:05:00	10	DTA	7	2	6	M
1	2008-10-17 07:06:00	31	DTA	7	2	6	M
1	2008-10-17 07:07:00	0	DTA	7	2	6	M
1	2008-10-17 07:08:00	31	DTA	7	2	6	M
1	2008-10-17 07:09:00	0	DTA	7	2	6	M
1	2008-10-17 07:10:00	10	DTA	7	2	6	M
1	2008-10-17 07:11:00	41	DTA	7	2	6	M
1	2008-10-17 07:12:00	0	DTA	7	2	6	M
1	2008-10-17 07:13:00	0	DTA	7	2	6	M
1	2008-10-17 07:14:00	0	DTA	7	2	6	M
1	2008-10-17 07:15:00	0	DTA	7	2	6	M
1	2008-10-17 07:16:00	0	DTA	7	2	6	M
1	2008-10-17 07:17:00	0	DTA	7	2	6	M
1	2008-10-17 07:18:00	0	DTA	7	2	6	M
1	2008-10-17 07:19:00	0	DTA	7	2	6	M
[truncated: 34,931 more rows]

## Sheet: Pivot NTA
Peak DTA Time?	(All)
DTA vs NTA	NTA
Average of Activity	Column Labels
Row Labels	1	2	3	4	5	6	7	8	9	10	11	12	13	14	Grand Total
1	16.4344	17.3785	22.0674	23.5429	10.5195	9.11034	13.4559	10.4968	11.5914	19.661	12.4289	9.32874	11.3879	10.6151	14.196
2	12.671	15.2782	14.059	24.8185	11.3699	27.7355	13.6473	18.9828	18.9828	22.7812	16.6714	16.9613	20.2688		18.0971
Grand Total	14.5527	16.3633	17.863	24.2604	10.9589	18.7333	13.5516	14.7398	15.2871	21.1512	14.477	13.2722	15.6896	10.6151	16.0938

## Sheet: Pivot DTA
Peak DTA Time?	(All)
DTA vs NTA	DTA
Average of Activity	Column Labels
Row Labels	1	2	3	4	5	6	7	8	9	10	11	12	13	Grand Total
1	42.2738	39.7343	46.4794	42.7409	35.0627	27.2636	37.5374	33.0841	29.7795	34.4265	39.5596	66.9661	44.279	39.8737
2	48.3552	63.7502	85.4066	116.645	73.9467	79.0287	79.6031	66.8195	62.2754	100.062	111.39	89.2985		80.721
Grand Total	45.3606	51.3942	65.1277	78.4611	54.2101	53.1462	58.5703	49.9518	46.5124	68.0072	74.3526	78.3068	44.279	59.3747

## Sheet: Pivot PeakDTA
Peak DTA Time?	Peak DTA
DTA vs NTA	DTA
Average of Activity	Column Labels
Row Labels	1	2	3	4	5	6	7	8	9	10	11	12	13	Grand Total
1	74.8806	61.9306	57.1722	55.6972	57.7778	37.0889	59.7361	44.7333	45.5306	38.5111	44.5028	86.8361	61.3611	55.8276
2	67.4	99.9833	128.986	114.514	90.2083	107.506	118.028	89.575	91.5694	128.842	127.272	110.314		106.183
Grand Total	71.1403	80.9569	93.0792	85.1056	73.9931	72.2972	88.8819	67.1542	68.55	83.6764	85.8875	98.575	61.3611	79.9982

## Sheet: 10.15.08
Actogram, Copy Raw Data, All Days
Identity:	Penny
Filename:	E:\Active Research Files\Nighttime Activity\cases\Penny Nicklas\Penny.AWC
Gender:	F
Age:	14
Height:	40.6 cm	16.0 in
Weight:	26.8 kg	59.1 lbs
Start Date:	15-Oct-2008 (Wed)
Start Time:	17:00:00
Interval:	1.00 mins
Date Stamp:	Time Stamp:	Activity Data:	Marker Press:
2008-10-15	00:00:00	0
2008-10-15	00:01:00	0
2008-10-15	00:02:00	0
2008-10-15	00:03:00	0
2008-10-15	00:04:00	0
2008-10-15	00:05:00	0
2008-10-15	00:06:00	0
2008-10-15	00:07:00	0
2008-10-15	00:08:00	0
2008-10-15	00:09:00	0
2008-10-15	00:10:00	0
2008-10-15	00:11:00	0
2008-10-15	00:12:00	0
2008-10-15	00:13:00	0
2008-10-15	00:14:00	0
2008-10-15	00:15:00	0
2008-10-15	00:16:00	0
2008-10-15	00:17:00	0
2008-10-15	00:18:00	0
2008-10-15	00:19:00	0
2008-10-15	00:20:00	0
2008-10-15	00:21:00	0
2008-10-15	00:22:00	0
2008-10-15	00:23:00	0
2008-10-15	00:24:00	0
2008-10-15	00:25:00	0
2008-10-15	00:26:00	0
2008-10-15	00:27:00	0
2008-10-15	00:28:00	0
2008-10-15	00:29:00	0
2008-10-15	00:30:00	0
2008-10-15	00:31:00	0
2008-10-15	00:32:00	0
2008-10-15	00:33:00	0
2008-10-15	00:34:00	0
2008-10-15	00:35:00	0
2008-10-15	00:36:00	0
2008-10-15	00:37:00	0
2008-10-15	00:38:00	0
2008-10-15	00:39:00	0
2008-10-15	00:40:00	0
2008-10-15	00:41:00	0
2008-10-15	00:42:00	0
2008-10-15	00:43:00	0
2008-10-15	00:44:00	0
2008-10-15	00:45:00	0
2008-10-15	00:46:00	0
2008-10-15	00:47:00	0
2008-10-15	00:48:00	0
2008-10-15	00:49:00	0
2008-10-15	00:50:00	0
2008-10-15	00:51:00	0
2008-10-15	00:52:00	0
2008-10-15	00:53:00	0
2008-10-15	00:54:00	0
2008-10-15	00:55:00	0
2008-10-15	00:56:00	0
2008-10-15	00:57:00	0
2008-10-15	00:58:00	0
2008-10-15	00:59:00	0
2008-10-15	01:00:00	0
2008-10-15	01:01:00	0
2008-10-15	01:02:00	0
2008-10-15	01:03:00	0
2008-10-15	01:04:00	0
2008-10-15	01:05:00	0
2008-10-15	01:06:00	0
2008-10-15	01:07:00	0
2008-10-15	01:08:00	0
2008-10-15	01:09:00	0
2008-10-15	01:10:00	0
2008-10-15	01:11:00	0
2008-10-15	01:12:00	0
2008-10-15	01:13:00	0
2008-10-15	01:14:00	0
2008-10-15	01:15:00	0
2008-10-15	01:16:00	0
2008-10-15	01:17:00	0
2008-10-15	01:18:00	0
2008-10-15	01:19:00	0
2008-10-15	01:20:00	0
2008-10-15	01:21:00	0
2008-10-15	01:22:00	0
2008-10-15	01:23:00	0
2008-10-15	01:24:00	0
2008-10-15	01:25:00	0
2008-10-15	01:26:00	0
2008-10-15	01:27:00	0
2008-10-15	01:28:00	0
2008-10-15	01:29:00	0
2008-10-15	01:30:00	0
2008-10-15	01:31:00	0
2008-10-15	01:32:00	0
2008-10-15	01:33:00	0
2008-10-15	01:34:00	0
2008-10-15	01:35:00	0
2008-10-15	01:36:00	0
2008-10-15	01:37:00	0
2008-10-15	01:38:00	0
2008-10-15	01:39:00	0
2008-10-15	01:40:00	0
2008-10-15	01:41:00	0
2008-10-15	01:42:00	0
2008-10-15	01:43:00	0
2008-10-15	01:44:00	0
2008-10-15	01:45:00	0
2008-10-15	01:46:00	0
2008-10-15	01:47:00	0
2008-10-15	01:48:00	0
2008-10-15	01:49:00	0
2008-10-15	01:50:00	0
2008-10-15	01:51:00	0
2008-10-15	01:52:00	0
2008-10-15	01:53:00	0
2008-10-15	01:54:00	0
2008-10-15	01:55:00	0
2008-10-15	01:56:00	0
2008-10-15	01:57:00	0
2008-10-15	01:58:00	0
2008-10-15	01:59:00	0
2008-10-15	02:00:00	0
2008-10-15	02:01:00	0
2008-10-15	02:02:00	0
2008-10-15	02:03:00	0
2008-10-15	02:04:00	0
2008-10-15	02:05:00	0
2008-10-15	02:06:00	0
2008-10-15	02:07:00	0
2008-10-15	02:08:00	0
2008-10-15	02:09:00	0
2008-10-15	02:10:00	0
2008-10-15	02:11:00	0
2008-10-15	02:12:00	0
2008-10-15	02:13:00	0
2008-10-15	02:14:00	0
2008-10-15	02:15:00	0
2008-10-15	02:16:00	0
2008-10-15	02:17:00	0
2008-10-15	02:18:00	0
2008-10-15	02:19:00	0
2008-10-15	02:20:00	0
2008-10-15	02:21:00	0
2008-10-15	02:22:00	0
2008-10-15	02:23:00	0
2008-10-15	02:24:00	0
2008-10-15	02:25:00	0
2008-10-15	02:26:00	0
2008-10-15	02:27:00	0
2008-10-15	02:28:00	0
2008-10-15	02:29:00	0
2008-10-15	02:30:00	0
2008-10-15	02:31:00	0
2008-10-15	02:32:00	0
2008-10-15	02:33:00	0
2008-10-15	02:34:00	0
2008-10-15	02:35:00	0
2008-10-15	02:36:00	0
2008-10-15	02:37:00	0
2008-10-15	02:38:00	0
2008-10-15	02:39:00	0
2008-10-15	02:40:00	0
2008-10-15	02:41:00	0
2008-10-15	02:42:00	0
2008-10-15	02:43:00	0
2008-10-15	02:44:00	0
2008-10-15	02:45:00	0
2008-10-15	02:46:00	0
2008-10-15	02:47:00	0
2008-10-15	02:48:00	0
2008-10-15	02:49:00	0
2008-10-15	02:50:00	0
2008-10-15	02:51:00	0
2008-10-15	02:52:00	0
2008-10-15	02:53:00	0
2008-10-15	02:54:00	0
2008-10-15	02:55:00	0
2008-10-15	02:56:00	0
2008-10-15	02:57:00	0
2008-10-15	02:58:00	0
2008-10-15	02:59:00	0
2008-10-15	03:00:00	0
2008-10-15	03:01:00	0
2008-10-15	03:02:00	0
2008-10-15	03:03:00	0
2008-10-15	03:04:00	0
2008-10-15	03:05:00	0
2008-10-15	03:06:00	0
2008-10-15	03:07:00	0
2008-10-15	03:08:00	0
2008-10-15	03:09:00	0
2008-10-15	03:10:00	0
2008-10-15	03:11:00	0
2008-10-15	03:12:00	0
2008-10-15	03:13:00	0
2008-10-15	03:14:00	0
2008-10-15	03:15:00	0
2008-10-15	03:16:00	0
2008-10-15	03:17:00	0
2008-10-15	03:18:00	0
2008-10-15	03:19:00	0
2008-10-15	03:20:00	0
2008-10-15	03:21:00	0
2008-10-15	03:22:00	0
2008-10-15	03:23:00	0
2008-10-15	03:24:00	0
2008-10-15	03:25:00	0
2008-10-15	03:26:00	0
2008-10-15	03:27:00	0
2008-10-15	03:28:00	0
2008-10-15	03:29:00	0
2008-10-15	03:30:00	0
2008-10-15	03:31:00	0
2008-10-15	03:32:00	0
2008-10-15	03:33:00	0
2008-10-15	03:34:00	0
2008-10-15	03:35:00	0
2008-10-15	03:36:00	0
2008-10-15	03:37:00	0
2008-10-15	03:38:00	0
2008-10-15	03:39:00	0
2008-10-15	03:40:00	0
2008-10-15	03:41:00	0
2008-10-15	03:42:00	0
2008-10-15	03:43:00	0
2008-10-15	03:44:00	0
2008-10-15	03:45:00	0
2008-10-15	03:46:00	0
2008-10-15	03:47:00	0
2008-10-15	03:48:00	0
2008-10-15	03:49:00	0
2008-10-15	03:50:00	0
2008-10-15	03:51:00	0
2008-10-15	03:52:00	0
2008-10-15	03:53:00	0
2008-10-15	03:54:00	0
2008-10-15	03:55:00	0
2008-10-15	03:56:00	0
2008-10-15	03:57:00	0
2008-10-15	03:58:00	0
2008-10-15	03:59:00	0
2008-10-15	04:00:00	0
2008-10-15	04:01:00	0
2008-10-15	04:02:00	0
2008-10-15	04:03:00	0
2008-10-15	04:04:00	0
2008-10-15	04:05:00	0
2008-10-15	04:06:00	0
2008-10-15	04:07:00	0
2008-10-15	04:08:00	0
2008-10-15	04:09:00	0
2008-10-15	04:10:00	0
2008-10-15	04:11:00	0
2008-10-15	04:12:00	0
2008-10-15	04:13:00	0
2008-10-15	04:14:00	0
2008-10-15	04:15:00	0
2008-10-15	04:16:00	0
2008-10-15	04:17:00	0
2008-10-15	04:18:00	0
2008-10-15	04:19:00	0
2008-10-15	04:20:00	0
2008-10-15	04:21:00	0
2008-10-15	04:22:00	0
2008-10-15	04:23:00	0
2008-10-15	04:24:00	0
2008-10-15	04:25:00	0
2008-10-15	04:26:00	0
2008-10-15	04:27:00	0
2008-10-15	04:28:00	0
2008-10-15	04:29:00	0
2008-10-15	04:30:00	0
2008-10-15	04:31:00	0
2008-10-15	04:32:00	0
2008-10-15	04:33:00	0
2008-10-15	04:34:00	0
2008-10-15	04:35:00	0
2008-10-15	04:36:00	0
2008-10-15	04:37:00	0
2008-10-15	04:38:00	0
2008-10-15	04:39:00	0
2008-10-15	04:40:00	0
2008-10-15	04:41:00	0
2008-10-15	04:42:00	0
2008-10-15	04:43:00	0
2008-10-15	04:44:00	0
2008-10-15	04:45:00	0
2008-10-15	04:46:00	0
2008-10-15	04:47:00	0
2008-10-15	04:48:00	0
2008-10-15	04:49:00	0
2008-10-15	04:50:00	0
2008-10-15	04:51:00	0
2008-10-15	04:52:00	0
2008-10-15	04:53:00	0
2008-10-15	04:54:00	0
2008-10-15	04:55:00	0
2008-10-15	04:56:00	0
2008-10-15	04:57:00	0
2008-10-15	04:58:00	0
2008-10-15	04:59:00	0
2008-10-15	05:00:00	0
2008-10-15	05:01:00	0
2008-10-15	05:02:00	0
2008-10-15	05:03:00	0
2008-10-15	05:04:00	0
2008-10-15	05:05:00	0
2008-10-15	05:06:00	0
2008-10-15	05:07:00	0
2008-10-15	05:08:00	0
2008-10-15	05:09:00	0
2008-10-15	05:10:00	0
2008-10-15	05:11:00	0
2008-10-15	05:12:00	0
2008-10-15	05:13:00	0
2008-10-15	05:14:00	0
2008-10-15	05:15:00	0
2008-10-15	05:16:00	0
2008-10-15	05:17:00	0
2008-10-15	05:18:00	0
2008-10-15	05:19:00	0
2008-10-15	05:20:00	0
2008-10-15	05:21:00	0
2008-10-15	05:22:00	0
2008-10-15	05:23:00	0
2008-10-15	05:24:00	0
2008-10-15	05:25:00	0
2008-10-15	05:26:00	0
2008-10-15	05:27:00	0
2008-10-15	05:28:00	0
2008-10-15	05:29:00	0
2008-10-15	05:30:00	0
2008-10-15	05:31:00	0
2008-10-15	05:32:00	0
2008-10-15	05:33:00	0
2008-10-15	05:34:00	0
2008-10-15	05:35:00	0
2008-10-15	05:36:00	0
2008-10-15	05:37:00	0
2008-10-15	05:38:00	0
2008-10-15	05:39:00	0
2008-10-15	05:40:00	0
2008-10-15	05:41:00	0
2008-10-15	05:42:00	0
2008-10-15	05:43:00	0
2008-10-15	05:44:00	0
2008-10-15	05:45:00	0
2008-10-15	05:46:00	0
2008-10-15	05:47:00	0
2008-10-15	05:48:00	0
2008-10-15	05:49:00	0
2008-10-15	05:50:00	0
2008-10-15	05:51:00	0
2008-10-15	05:52:00	0
2008-10-15	05:53:00	0
2008-10-15	05:54:00	0
2008-10-15	05:55:00	0
2008-10-15	05:56:00	0
2008-10-15	05:57:00	0
2008-10-15	05:58:00	0
2008-10-15	05:59:00	0
2008-10-15	06:00:00	0
2008-10-15	06:01:00	0
2008-10-15	06:02:00	0
2008-10-15	06:03:00	0
2008-10-15	06:04:00	0
2008-10-15	06:05:00	0
2008-10-15	06:06:00	0
2008-10-15	06:07:00	0
2008-10-15	06:08:00	0
2008-10-15	06:09:00	0
2008-10-15	06:10:00	0
2008-10-15	06:11:00	0
2008-10-15	06:12:00	0
2008-10-15	06:13:00	0
2008-10-15	06:14:00	0
2008-10-15	06:15:00	0
2008-10-15	06:16:00	0
2008-10-15	06:17:00	0
2008-10-15	06:18:00	0
2008-10-15	06:19:00	0
2008-10-15	06:20:00	0
2008-10-15	06:21:00	0
2008-10-15	06:22:00	0
2008-10-15	06:23:00	0
2008-10-15	06:24:00	0
2008-10-15	06:25:00	0
2008-10-15	06:26:00	0
2008-10-15	06:27:00	0
2008-10-15	06:28:00	0
2008-10-15	06:29:00	0
2008-10-15	06:30:00	0
2008-10-15	06:31:00	0
2008-10-15	06:32:00	0
2008-10-15	06:33:00	0
2008-10-15	06:34:00	0
2008-10-15	06:35:00	0
2008-10-15	06:36:00	0
2008-10-15	06:37:00	0
2008-10-15	06:38:00	0
2008-10-15	06:39:00	0
2008-10-15	06:40:00	0
2008-10-15	06:41:00	0
2008-10-15	06:42:00	0
2008-10-15	06:43:00	0
2008-10-15	06:44:00	0
2008-10-15	06:45:00	0
2008-10-15	06:46:00	0
2008-10-15	06:47:00	0
2008-10-15	06:48:00	0
2008-10-15	06:49:00	0
2008-10-15	06:50:00	0
2008-10-15	06:51:00	0
2008-10-15	06:52:00	0
2008-10-15	06:53:00	0
2008-10-15	06:54:00	0
2008-10-15	06:55:00	0
2008-10-15	06:56:00	0
2008-10-15	06:57:00	0
2008-10-15	06:58:00	0
2008-10-15	06:59:00	0
2008-10-15	07:00:00	0
2008-10-15	07:01:00	0
2008-10-15	07:02:00	0
2008-10-15	07:03:00	0
2008-10-15	07:04:00	0
2008-10-15	07:05:00	0
2008-10-15	07:06:00	0
2008-10-15	07:07:00	0
2008-10-15	07:08:00	0
2008-10-15	07:09:00	0
2008-10-15	07:10:00	0
2008-10-15	07:11:00	0
2008-10-15	07:12:00	0
2008-10-15	07:13:00	0
2008-10-15	07:14:00	0
2008-10-15	07:15:00	0
2008-10-15	07:16:00	0
2008-10-15	07:17:00	0
2008-10-15	07:18:00	0
2008-10-15	07:19:00	0
2008-10-15	07:20:00	0
2008-10-15	07:21:00	0
2008-10-15	07:22:00	0
2008-10-15	07:23:00	0
2008-10-15	07:24:00	0
2008-10-15	07:25:00	0
2008-10-15	07:26:00	0
2008-10-15	07:27:00	0
2008-10-15	07:28:00	0
2008-10-15	07:29:00	0
2008-10-15	07:30:00	0
2008-10-15	07:31:00	0
2008-10-15	07:32:00	0
2008-10-15	07:33:00	0
2008-10-15	07:34:00	0
2008-10-15	07:35:00	0
2008-10-15	07:36:00	0
2008-10-15	07:37:00	0
2008-10-15	07:38:00	0
2008-10-15	07:39:00	0
2008-10-15	07:40:00	0
2008-10-15	07:41:00	0
2008-10-15	07:42:00	0
2008-10-15	07:43:00	0
2008-10-15	07:44:00	0
2008-10-15	07:45:00	0
2008-10-15	07:46:00	0
2008-10-15	07:47:00	0
2008-10-15	07:48:00	0
2008-10-15	07:49:00	0
2008-10-15	07:50:00	0
2008-10-15	07:51:00	0
2008-10-15	07:52:00	0
2008-10-15	07:53:00	0
2008-10-15	07:54:00	0
2008-10-15	07:55:00	0
2008-10-15	07:56:00	0
2008-10-15	07:57:00	0
2008-10-15	07:58:00	0
2008-10-15	07:59:00	0
2008-10-15	08:00:00	0
2008-10-15	08:01:00	0
2008-10-15	08:02:00	0
2008-10-15	08:03:00	0
2008-10-15	08:04:00	0
2008-10-15	08:05:00	0
2008-10-15	08:06:00	0
2008-10-15	08:07:00	0
2008-10-15	08:08:00	0
2008-10-15	08:09:00	0
2008-10-15	08:10:00	0
2008-10-15	08:11:00	0
2008-10-15	08:12:00	0
2008-10-15	08:13:00	0
2008-10-15	08:14:00	0
2008-10-15	08:15:00	0
2008-10-15	08:16:00	0
2008-10-15	08:17:00	0
2008-10-15	08:18:00	0
2008-10-15	08:19:00	0
2008-10-15	08:20:00	0
2008-10-15	08:21:00	0
2008-10-15	08:22:00	0
2008-10-15	08:23:00	0
2008-10-15	08:24:00	0
2008-10-15	08:25:00	0
2008-10-15	08:26:00	0
2008-10-15	08:27:00	0
2008-10-15	08:28:00	0
2008-10-15	08:29:00	0
2008-10-15	08:30:00	0
2008-10-15	08:31:00	0
2008-10-15	08:32:00	0
2008-10-15	08:33:00	0
2008-10-15	08:34:00	0
2008-10-15	08:35:00	0
2008-10-15	08:36:00	0
2008-10-15	08:37:00	0
2008-10-15	08:38:00	0
2008-10-15	08:39:00	0
2008-10-15	08:40:00	0
2008-10-15	08:41:00	0
2008-10-15	08:42:00	0
2008-10-15	08:43:00	0
2008-10-15	08:44:00	0
2008-10-15	08:45:00	0
2008-10-15	08:46:00	0
2008-10-15	08:47:00	0
2008-10-15	08:48:00	0
2008-10-15	08:49:00	0
2008-10-15	08:50:00	0
2008-10-15	08:51:00	0
2008-10-15	08:52:00	0
2008-10-15	08:53:00	0
2008-10-15	08:54:00	0
2008-10-15	08:55:00	0
2008-10-15	08:56:00	0
2008-10-15	08:57:00	0
2008-10-15	08:58:00	0
2008-10-15	08:59:00	0
2008-10-15	09:00:00	0
2008-10-15	09:01:00	0
2008-10-15	09:02:00	0
2008-10-15	09:03:00	0
2008-10-15	09:04:00	0
2008-10-15	09:05:00	0
2008-10-15	09:06:00	0
2008-10-15	09:07:00	0
2008-10-15	09:08:00	0
2008-10-15	09:09:00	0
2008-10-15	09:10:00	0
2008-10-15	09:11:00	0
2008-10-15	09:12:00	0
2008-10-15	09:13:00	0
2008-10-15	09:14:00	0
2008-10-15	09:15:00	0
2008-10-15	09:16:00	0
2008-10-15	09:17:00	0
2008-10-15	09:18:00	0
2008-10-15	09:19:00	0
2008-10-15	09:20:00	0
2008-10-15	09:21:00	0
2008-10-15	09:22:00	0
2008-10-15	09:23:00	0
2008-10-15	09:24:00	0
2008-10-15	09:25:00	0
2008-10-15	09:26:00	0
2008-10-15	09:27:00	0
2008-10-15	09:28:00	0
2008-10-15	09:29:00	0
2008-10-15	09:30:00	0
2008-10-15	09:31:00	0
2008-10-15	09:32:00	0
2008-10-15	09:33:00	0
2008-10-15	09:34:00	0
2008-10-15	09:35:00	0
2008-10-15	09:36:00	0
2008-10-15	09:37:00	0
2008-10-15	09:38:00	0
2008-10-15	09:39:00	0
2008-10-15	09:40:00	0
2008-10-15	09:41:00	0
2008-10-15	09:42:00	0
2008-10-15	09:43:00	0
2008-10-15	09:44:00	0
2008-10-15	09:45:00	0
2008-10-15	09:46:00	0
2008-10-15	09:47:00	0
2008-10-15	09:48:00	0
2008-10-15	09:49:00	0
2008-10-15	09:50:00	0
2008-10-15	09:51:00	0
2008-10-15	09:52:00	0
2008-10-15	09:53:00	0
2008-10-15	09:54:00	0
2008-10-15	09:55:00	0
2008-10-15	09:56:00	0
2008-10-15	09:57:00	0
2008-10-15	09:58:00	0
2008-10-15	09:59:00	0
2008-10-15	10:00:00	0
2008-10-15	10:01:00	0
2008-10-15	10:02:00	0
2008-10-15	10:03:00	0
2008-10-15	10:04:00	0
2008-10-15	10:05:00	0
2008-10-15	10:06:00	0
2008-10-15	10:07:00	0
2008-10-15	10:08:00	0
2008-10-15	10:09:00	0
2008-10-15	10:10:00	0
2008-10-15	10:11:00	0
2008-10-15	10:12:00	0
2008-10-15	10:13:00	0
2008-10-15	10:14:00	0
2008-10-15	10:15:00	0
2008-10-15	10:16:00	0
2008-10-15	10:17:00	0
2008-10-15	10:18:00	0
2008-10-15	10:19:00	0
2008-10-15	10:20:00	0
2008-10-15	10:21:00	0
2008-10-15	10:22:00	0
2008-10-15	10:23:00	0
2008-10-15	10:24:00	0
2008-10-15	10:25:00	0
2008-10-15	10:26:00	0
2008-10-15	10:27:00	0
2008-10-15	10:28:00	0
2008-10-15	10:29:00	0
2008-10-15	10:30:00	0
2008-10-15	10:31:00	0
2008-10-15	10:32:00	0
2008-10-15	10:33:00	0
2008-10-15	10:34:00	0
2008-10-15	10:35:00	0
2008-10-15	10:36:00	0
2008-10-15	10:37:00	0
2008-10-15	10:38:00	0
2008-10-15	10:39:00	0
2008-10-15	10:40:00	0
2008-10-15	10:41:00	0
2008-10-15	10:42:00	0
2008-10-15	10:43:00	0
2008-10-15	10:44:00	0
2008-10-15	10:45:00	0
2008-10-15	10:46:00	0
2008-10-15	10:47:00	0
2008-10-15	10:48:00	0
2008-10-15	10:49:00	0
2008-10-15	10:50:00	0
2008-10-15	10:51:00	0
2008-10-15	10:52:00	0
2008-10-15	10:53:00	0
2008-10-15	10:54:00	0
2008-10-15	10:55:00	0
2008-10-15	10:56:00	0
2008-10-15	10:57:00	0
2008-10-15	10:58:00	0
2008-10-15	10:59:00	0
2008-10-15	11:00:00	0
2008-10-15	11:01:00	0
2008-10-15	11:02:00	0
2008-10-15	11:03:00	0
2008-10-15	11:04:00	0
2008-10-15	11:05:00	0
2008-10-15	11:06:00	0
2008-10-15	11:07:00	0
2008-10-15	11:08:00	0
2008-10-15	11:09:00	0
2008-10-15	11:10:00	0
2008-10-15	11:11:00	0
2008-10-15	11:12:00	0
2008-10-15	11:13:00	0
2008-10-15	11:14:00	0
2008-10-15	11:15:00	0
2008-10-15	11:16:00	0
2008-10-15	11:17:00	0
2008-10-15	11:18:00	0
2008-10-15	11:19:00	0
2008-10-15	11:20:00	0
2008-10-15	11:21:00	0
2008-10-15	11:22:00	0
2008-10-15	11:23:00	0
2008-10-15	11:24:00	0
2008-10-15	11:25:00	0
2008-10-15	11:26:00	0
2008-10-15	11:27:00	0
2008-10-15	11:28:00	0
2008-10-15	11:29:00	0
2008-10-15	11:30:00	0
2008-10-15	11:31:00	0
2008-10-15	11:32:00	0
2008-10-15	11:33:00	0
2008-10-15	11:34:00	0
2008-10-15	11:35:00	0
2008-10-15	11:36:00	0
2008-10-15	11:37:00	0
2008-10-15	11:38:00	0
2008-10-15	11:39:00	0
2008-10-15	11:40:00	0
2008-10-15	11:41:00	0
2008-10-15	11:42:00	0
2008-10-15	11:43:00	0
2008-10-15	11:44:00	0
2008-10-15	11:45:00	0
2008-10-15	11:46:00	0
2008-10-15	11:47:00	0
2008-10-15	11:48:00	0
2008-10-15	11:49:00	0
2008-10-15	11:50:00	0
2008-10-15	11:51:00	0
2008-10-15	11:52:00	0
2008-10-15	11:53:00	0
2008-10-15	11:54:00	0
2008-10-15	11:55:00	0
2008-10-15	11:56:00	0
2008-10-15	11:57:00	0
2008-10-15	11:58:00	0
2008-10-15	11:59:00	0
2008-10-15	12:00:00	0
2008-10-15	12:01:00	0
2008-10-15	12:02:00	0
2008-10-15	12:03:00	0
2008-10-15	12:04:00	0
2008-10-15	12:05:00	0
2008-10-15	12:06:00	0
2008-10-15	12:07:00	0
2008-10-15	12:08:00	0
2008-10-15	12:09:00	0
2008-10-15	12:10:00	0
2008-10-15	12:11:00	0
2008-10-15	12:12:00	0
2008-10-15	12:13:00	0
2008-10-15	12:14:00	0
2008-10-15	12:15:00	0
2008-10-15	12:16:00	0
2008-10-15	12:17:00	0
2008-10-15	12:18:00	0
2008-10-15	12:19:00	0
2008-10-15	12:20:00	0
2008-10-15	12:21:00	0
2008-10-15	12:22:00	0
2008-10-15	12:23:00	0
2008-10-15	12:24:00	0
2008-10-15	12:25:00	0
2008-10-15	12:26:00	0
2008-10-15	12:27:00	0
2008-10-15	12:28:00	0
2008-10-15	12:29:00	0
2008-10-15	12:30:00	0
2008-10-15	12:31:00	0
2008-10-15	12:32:00	0
2008-10-15	12:33:00	0
2008-10-15	12:34:00	0
2008-10-15	12:35:00	0
2008-10-15	12:36:00	0
2008-10-15	12:37:00	0
2008-10-15	12:38:00	0
2008-10-15	12:39:00	0
2008-10-15	12:40:00	0
2008-10-15	12:41:00	0
2008-10-15	12:42:00	0
2008-10-15	12:43:00	0
2008-10-15	12:44:00	0
2008-10-15	12:45:00	0
2008-10-15	12:46:00	0
2008-10-15	12:47:00	0
2008-10-15	12:48:00	0
2008-10-15	12:49:00	0
2008-10-15	12:50:00	0
2008-10-15	12:51:00	0
2008-10-15	12:52:00	0
2008-10-15	12:53:00	0
2008-10-15	12:54:00	0
2008-10-15	12:55:00	0
2008-10-15	12:56:00	0
2008-10-15	12:57:00	0
2008-10-15	12:58:00	0
2008-10-15	12:59:00	0
2008-10-15	13:00:00	0
2008-10-15	13:01:00	0
2008-10-15	13:02:00	0
2008-10-15	13:03:00	0
2008-10-15	13:04:00	0
2008-10-15	13:05:00	0
2008-10-15	13:06:00	0
2008-10-15	13:07:00	0
2008-10-15	13:08:00	0
2008-10-15	13:09:00	0
2008-10-15	13:10:00	0
2008-10-15	13:11:00	0
2008-10-15	13:12:00	0
2008-10-15	13:13:00	0
2008-10-15	13:14:00	0
2008-10-15	13:15:00	0
2008-10-15	13:16:00	0
2008-10-15	13:17:00	0
2008-10-15	13:18:00	0
2008-10-15	13:19:00	0
2008-10-15	13:20:00	0
2008-10-15	13:21:00	0
2008-10-15	13:22:00	0
2008-10-15	13:23:00	0
2008-10-15	13:24:00	0
2008-10-15	13:25:00	0
2008-10-15	13:26:00	0
2008-10-15	13:27:00	0
2008-10-15	13:28:00	0
2008-10-15	13:29:00	0
2008-10-15	13:30:00	0
2008-10-15	13:31:00	0
2008-10-15	13:32:00	0
2008-10-15	13:33:00	0
2008-10-15	13:34:00	0
2008-10-15	13:35:00	0
2008-10-15	13:36:00	0
2008-10-15	13:37:00	0
2008-10-15	13:38:00	0
2008-10-15	13:39:00	0
2008-10-15	13:40:00	0
2008-10-15	13:41:00	0
2008-10-15	13:42:00	0
2008-10-15	13:43:00	0
2008-10-15	13:44:00	0
2008-10-15	13:45:00	0
2008-10-15	13:46:00	0
2008-10-15	13:47:00	0
2008-10-15	13:48:00	0
2008-10-15	13:49:00	0
2008-10-15	13:50:00	0
2008-10-15	13:51:00	0
2008-10-15	13:52:00	0
2008-10-15	13:53:00	0
2008-10-15	13:54:00	0
2008-10-15	13:55:00	0
2008-10-15	13:56:00	0
2008-10-15	13:57:00	0
2008-10-15	13:58:00	0
2008-10-15	13:59:00	0
2008-10-15	14:00:00	0
2008-10-15	14:01:00	0
2008-10-15	14:02:00	0
2008-10-15	14:03:00	0
2008-10-15	14:04:00	0
2008-10-15	14:05:00	0
2008-10-15	14:06:00	0
2008-10-15	14:07:00	0
2008-10-15	14:08:00	0
2008-10-15	14:09:00	0
2008-10-15	14:10:00	0
2008-10-15	14:11:00	0
2008-10-15	14:12:00	0
2008-10-15	14:13:00	0
2008-10-15	14:14:00	0
2008-10-15	14:15:00	0
2008-10-15	14:16:00	0
2008-10-15	14:17:00	0
2008-10-15	14:18:00	0
2008-10-15	14:19:00	0
2008-10-15	14:20:00	0
2008-10-15	14:21:00	0
2008-10-15	14:22:00	0
2008-10-15	14:23:00	0
2008-10-15	14:24:00	0
2008-10-15	14:25:00	0
2008-10-15	14:26:00	0
2008-10-15	14:27:00	0
2008-10-15	14:28:00	0
2008-10-15	14:29:00	0
2008-10-15	14:30:00	0
2008-10-15	14:31:00	0
2008-10-15	14:32:00	0
2008-10-15	14:33:00	0
2008-10-15	14:34:00	0
2008-10-15	14:35:00	0
2008-10-15	14:36:00	0
2008-10-15	14:37:00	0
2008-10-15	14:38:00	0
2008-10-15	14:39:00	0
2008-10-15	14:40:00	0
2008-10-15	14:41:00	0
2008-10-15	14:42:00	0
2008-10-15	14:43:00	0
2008-10-15	14:44:00	0
2008-10-15	14:45:00	0
2008-10-15	14:46:00	0
2008-10-15	14:47:00	0
2008-10-15	14:48:00	0
2008-10-15	14:49:00	0
2008-10-15	14:50:00	0
2008-10-15	14:51:00	0
2008-10-15	14:52:00	0
2008-10-15	14:53:00	0
2008-10-15	14:54:00	0
2008-10-15	14:55:00	0
2008-10-15	14:56:00	0
2008-10-15	14:57:00	0
2008-10-15	14:58:00	0
2008-10-15	14:59:00	0
2008-10-15	15:00:00	0
2008-10-15	15:01:00	0
2008-10-15	15:02:00	0
2008-10-15	15:03:00	0
2008-10-15	15:04:00	0
2008-10-15	15:05:00	0
2008-10-15	15:06:00	0
2008-10-15	15:07:00	0
2008-10-15	15:08:00	0
2008-10-15	15:09:00	0
2008-10-15	15:10:00	0
2008-10-15	15:11:00	0
2008-10-15	15:12:00	0
2008-10-15	15:13:00	0
2008-10-15	15:14:00	0
2008-10-15	15:15:00	0
2008-10-15	15:16:00	0
2008-10-15	15:17:00	0
2008-10-15	15:18:00	0
2008-10-15	15:19:00	0
2008-10-15	15:20:00	0
2008-10-15	15:21:00	0
2008-10-15	15:22:00	0
2008-10-15	15:23:00	0
2008-10-15	15:24:00	0
2008-10-15	15:25:00	0
2008-10-15	15:26:00	0
2008-10-15	15:27:00	0
2008-10-15	15:28:00	0
2008-10-15	15:29:00	0
2008-10-15	15:30:00	0
2008-10-15	15:31:00	0
2008-10-15	15:32:00	0
2008-10-15	15:33:00	0
2008-10-15	15:34:00	0
2008-10-15	15:35:00	0
2008-10-15	15:36:00	0
2008-10-15	15:37:00	0
2008-10-15	15:38:00	0
2008-10-15	15:39:00	0
2008-10-15	15:40:00	0
2008-10-15	15:41:00	0
2008-10-15	15:42:00	0
2008-10-15	15:43:00	0
2008-10-15	15:44:00	0
2008-10-15	15:45:00	0
2008-10-15	15:46:00	0
2008-10-15	15:47:00	0
2008-10-15	15:48:00	0
2008-10-15	15:49:00	0
2008-10-15	15:50:00	0
2008-10-15	15:51:00	0
2008-10-15	15:52:00	0
2008-10-15	15:53:00	0
2008-10-15	15:54:00	0
2008-10-15	15:55:00	0
2008-10-15	15:56:00	0
2008-10-15	15:57:00	0
2008-10-15	15:58:00	0
2008-10-15	15:59:00	0
2008-10-15	16:00:00	0
2008-10-15	16:01:00	0
2008-10-15	16:02:00	0
2008-10-15	16:03:00	0
2008-10-15	16:04:00	0
2008-10-15	16:05:00	0
2008-10-15	16:06:00	0
2008-10-15	16:07:00	0
2008-10-15	16:08:00	0
2008-10-15	16:09:00	0
2008-10-15	16:10:00	0
2008-10-15	16:11:00	0
2008-10-15	16:12:00	0
2008-10-15	16:13:00	0
2008-10-15	16:14:00	0
2008-10-15	16:15:00	0
2008-10-15	16:16:00	0
2008-10-15	16:17:00	0
2008-10-15	16:18:00	0
2008-10-15	16:19:00	0
2008-10-15	16:20:00	0
2008-10-15	16:21:00	0
2008-10-15	16:22:00	0
2008-10-15	16:23:00	0
2008-10-15	16:24:00	0
2008-10-15	16:25:00	0
2008-10-15	16:26:00	0
2008-10-15	16:27:00	0
2008-10-15	16:28:00	0
2008-10-15	16:29:00	0
2008-10-15	16:30:00	0
2008-10-15	16:31:00	0
2008-10-15	16:32:00	0
2008-10-15	16:33:00	0
2008-10-15	16:34:00	0
2008-10-15	16:35:00	0
2008-10-15	16:36:00	0
2008-10-15	16:37:00	0
2008-10-15	16:38:00	0
2008-10-15	16:39:00	0
2008-10-15	16:40:00	0
2008-10-15	16:41:00	0
2008-10-15	16:42:00	0
2008-10-15	16:43:00	0
2008-10-15	16:44:00	0
2008-10-15	16:45:00	0
2008-10-15	16:46:00	0
2008-10-15	16:47:00	0
2008-10-15	16:48:00	0
2008-10-15	16:49:00	0
2008-10-15	16:50:00	0
2008-10-15	16:51:00	0
2008-10-15	16:52:00	0
2008-10-15	16:53:00	0
2008-10-15	16:54:00	0
2008-10-15	16:55:00	0
2008-10-15	16:56:00	0
2008-10-15	16:57:00	0
2008-10-15	16:58:00	0
2008-10-15	16:59:00	0
2008-10-15	17:00:00	0	M
2008-10-15	17:01:00	0
2008-10-15	17:02:00	0
2008-10-15	17:03:00	0
2008-10-15	17:04:00	0
2008-10-15	17:05:00	10
2008-10-15	17:06:00	0
2008-10-15	17:07:00	0
2008-10-15	17:08:00	0
2008-10-15	17:09:00	0
2008-10-15	17:10:00	0
2008-10-15	17:11:00	0
2008-10-15	17:12:00	0
2008-10-15	17:13:00	0
2008-10-15	17:14:00	386
2008-10-15	17:15:00	209
2008-10-15	17:16:00	0
2008-10-15	17:17:00	0
2008-10-15	17:18:00	270
2008-10-15	17:19:00	0
2008-10-15	17:20:00	853
2008-10-15	17:21:00	516
2008-10-15	17:22:00	551
2008-10-15	17:23:00	147
2008-10-15	17:24:00	10
2008-10-15	17:25:00	0
2008-10-15	17:26:00	0
2008-10-15	17:27:00	0
2008-10-15	17:28:00	0
2008-10-15	17:29:00	0
2008-10-15	17:30:00	0
2008-10-15	17:31:00	0
2008-10-15	17:32:00	0
2008-10-15	17:33:00	0
2008-10-15	17:34:00	0
2008-10-15	17:35:00	0
2008-10-15	17:36:00	0
2008-10-15	17:37:00	0
2008-10-15	17:38:00	0
2008-10-15	17:39:00	10
2008-10-15	17:40:00	0
2008-10-15	17:41:00	0
2008-10-15	17:42:00	0
2008-10-15	17:43:00	0
2008-10-15	17:44:00	0
2008-10-15	17:45:00	0
2008-10-15	17:46:00	0
2008-10-15	17:47:00	0
2008-10-15	17:48:00	0
2008-10-15	17:49:00	0
2008-10-15	17:50:00	0
2008-10-15	17:51:00	0
2008-10-15	17:52:00	114
2008-10-15	17:53:00	52
2008-10-15	17:54:00	0
2008-10-15	17:55:00	0
2008-10-15	17:56:00	0
2008-10-15	17:57:00	570
2008-10-15	17:58:00	1346
2008-10-15	17:59:00	1067
2008-10-15	18:00:00	993
2008-10-15	18:01:00	93
2008-10-15	18:02:00	171
2008-10-15	18:03:00	52
2008-10-15	18:04:00	52
2008-10-15	18:05:00	0
2008-10-15	18:06:00	41
2008-10-15	18:07:00	41
2008-10-15	18:08:00	10
2008-10-15	18:09:00	0
2008-10-15	18:10:00	10
2008-10-15	18:11:00	0
2008-10-15	18:12:00	0
2008-10-15	18:13:00	10
2008-10-15	18:14:00	103
2008-10-15	18:15:00	31
2008-10-15	18:16:00	0
2008-10-15	18:17:00	0
2008-10-15	18:18:00	41
2008-10-15	18:19:00	21
2008-10-15	18:20:00	0
2008-10-15	18:21:00	10
2008-10-15	18:22:00	0
2008-10-15	18:23:00	0
2008-10-15	18:24:00	0
2008-10-15	18:25:00	0
2008-10-15	18:26:00	10
2008-10-15	18:27:00	0
2008-10-15	18:28:00	147
2008-10-15	18:29:00	10
2008-10-15	18:30:00	21
2008-10-15	18:31:00	10
2008-10-15	18:32:00	21
2008-10-15	18:33:00	184
2008-10-15	18:34:00	72
2008-10-15	18:35:00	1094
2008-10-15	18:36:00	285
2008-10-15	18:37:00	246
2008-10-15	18:38:00	270
2008-10-15	18:39:00	103
2008-10-15	18:40:00	93
2008-10-15	18:41:00	270
2008-10-15	18:42:00	386
2008-10-15	18:43:00	343
2008-10-15	18:44:00	386
2008-10-15	18:45:00	196
2008-10-15	18:46:00	450
2008-10-15	18:47:00	343
2008-10-15	18:48:00	533
2008-10-15	18:49:00	184
2008-10-15	18:50:00	209
2008-10-15	18:51:00	72
2008-10-15	18:52:00	103
2008-10-15	18:53:00	285
2008-10-15	18:54:00	184
2008-10-15	18:55:00	159
2008-10-15	18:56:00	134
2008-10-15	18:57:00	209
2008-10-15	18:58:00	196
2008-10-15	18:59:00	233
2008-10-15	19:00:00	196
2008-10-15	19:01:00	72
2008-10-15	19:02:00	196
2008-10-15	19:03:00	10
2008-10-15	19:04:00	134
2008-10-15	19:05:00	258
2008-10-15	19:06:00	147
2008-10-15	19:07:00	52
2008-10-15	19:08:00	0
2008-10-15	19:09:00	0
2008-10-15	19:10:00	159
2008-10-15	19:11:00	184
2008-10-15	19:12:00	147
2008-10-15	19:13:00	171
2008-10-15	19:14:00	134
2008-10-15	19:15:00	171
2008-10-15	19:16:00	103
2008-10-15	19:17:00	171
2008-10-15	19:18:00	196
2008-10-15	19:19:00	159
2008-10-15	19:20:00	93
2008-10-15	19:21:00	62
2008-10-15	19:22:00	171
2008-10-15	19:23:00	103
2008-10-15	19:24:00	209
2008-10-15	19:25:00	93
2008-10-15	19:26:00	147
2008-10-15	19:27:00	72
2008-10-15	19:28:00	0
2008-10-15	19:29:00	0
2008-10-15	19:30:00	10
2008-10-15	19:31:00	83
2008-10-15	19:32:00	31
2008-10-15	19:33:00	83
2008-10-15	19:34:00	52
2008-10-15	19:35:00	83
2008-10-15	19:36:00	124
2008-10-15	19:37:00	103
2008-10-15	19:38:00	21
2008-10-15	19:39:00	10
2008-10-15	19:40:00	147
2008-10-15	19:41:00	114
2008-10-15	19:42:00	72
2008-10-15	19:43:00	83
2008-10-15	19:44:00	10
2008-10-15	19:45:00	0
2008-10-15	19:46:00	21
2008-10-15	19:47:00	0
2008-10-15	19:48:00	21
2008-10-15	19:49:00	10
2008-10-15	19:50:00	0
2008-10-15	19:51:00	0
2008-10-15	19:52:00	171
2008-10-15	19:53:00	31
2008-10-15	19:54:00	0
2008-10-15	19:55:00	0
2008-10-15	19:56:00	10
2008-10-15	19:57:00	196
2008-10-15	19:58:00	124
2008-10-15	19:59:00	62
2008-10-15	20:00:00	62
2008-10-15	20:01:00	196
2008-10-15	20:02:00	114
2008-10-15	20:03:00	0
2008-10-15	20:04:00	0
2008-10-15	20:05:00	0
2008-10-15	20:06:00	0
2008-10-15	20:07:00	134
2008-10-15	20:08:00	114
2008-10-15	20:09:00	93
2008-10-15	20:10:00	41
2008-10-15	20:11:00	0
2008-10-15	20:12:00	0
2008-10-15	20:13:00	0
2008-10-15	20:14:00	83
2008-10-15	20:15:00	159
2008-10-15	20:16:00	41
2008-10-15	20:17:00	72
2008-10-15	20:18:00	124
2008-10-15	20:19:00	52
2008-10-15	20:20:00	0
2008-10-15	20:21:00	0
2008-10-15	20:22:00	0
2008-10-15	20:23:00	0
2008-10-15	20:24:00	41
2008-10-15	20:25:00	134
2008-10-15	20:26:00	83
2008-10-15	20:27:00	0
2008-10-15	20:28:00	10
2008-10-15	20:29:00	10
2008-10-15	20:30:00	0
2008-10-15	20:31:00	0
2008-10-15	20:32:00	0
2008-10-15	20:33:00	0
2008-10-15	20:34:00	0
2008-10-15	20:35:00	0
2008-10-15	20:36:00	10
2008-10-15	20:37:00	0
2008-10-15	20:38:00	0
2008-10-15	20:39:00	0
2008-10-15	20:40:00	124
2008-10-15	20:41:00	41
2008-10-15	20:42:00	0
2008-10-15	20:43:00	0
2008-10-15	20:44:00	0
2008-10-15	20:45:00	0
2008-10-15	20:46:00	0
2008-10-15	20:47:00	0
2008-10-15	20:48:00	0
2008-10-15	20:49:00	0
2008-10-15	20:50:00	0
2008-10-15	20:51:00	0
2008-10-15	20:52:00	0
2008-10-15	20:53:00	0
2008-10-15	20:54:00	0
2008-10-15	20:55:00	72
2008-10-15	20:56:00	147
2008-10-15	20:57:00	10
2008-10-15	20:58:00	0
2008-10-15	20:59:00	93
2008-10-15	21:00:00	93
2008-10-15	21:01:00	52
2008-10-15	21:02:00	10
2008-10-15	21:03:00	21
2008-10-15	21:04:00	0
2008-10-15	21:05:00	0
2008-10-15	21:06:00	0
2008-10-15	21:07:00	0
2008-10-15	21:08:00	0
2008-10-15	21:09:00	52
2008-10-15	21:10:00	31
2008-10-15	21:11:00	0
2008-10-15	21:12:00	0
2008-10-15	21:13:00	0
2008-10-15	21:14:00	0
2008-10-15	21:15:00	41
2008-10-15	21:16:00	147
2008-10-15	21:17:00	93
2008-10-15	21:18:00	0
2008-10-15	21:19:00	103
2008-10-15	21:20:00	147
2008-10-15	21:21:00	147
2008-10-15	21:22:00	0
2008-10-15	21:23:00	0
2008-10-15	21:24:00	0
2008-10-15	21:25:00	0
2008-10-15	21:26:00	0
2008-10-15	21:27:00	147
2008-10-15	21:28:00	52
2008-10-15	21:29:00	10
2008-10-15	21:30:00	0
2008-10-15	21:31:00	0
2008-10-15	21:32:00	0
2008-10-15	21:33:00	0
2008-10-15	21:34:00	0
2008-10-15	21:35:00	0
2008-10-15	21:36:00	0
2008-10-15	21:37:00	0
2008-10-15	21:38:00	0
2008-10-15	21:39:00	0
2008-10-15	21:40:00	0
2008-10-15	21:41:00	0
2008-10-15	21:42:00	0
2008-10-15	21:43:00	0
2008-10-15	21:44:00	0
2008-10-15	21:45:00	103
2008-10-15	21:46:00	62
2008-10-15	21:47:00	0
2008-10-15	21:48:00	0
2008-10-15	21:49:00	0
2008-10-15	21:50:00	0
2008-10-15	21:51:00	0
2008-10-15	21:52:00	0
2008-10-15	21:53:00	21
2008-10-15	21:54:00	10
2008-10-15	21:55:00	0
2008-10-15	21:56:00	21
2008-10-15	21:57:00	10
2008-10-15	21:58:00	10
2008-10-15	21:59:00	10
2008-10-15	22:00:00	0
2008-10-15	22:01:00	386
2008-10-15	22:02:00	83
2008-10-15	22:03:00	270
2008-10-15	22:04:00	285
2008-10-15	22:05:00	62
2008-10-15	22:06:00	52
2008-10-15	22:07:00	0
2008-10-15	22:08:00	0
2008-10-15	22:09:00	0
2008-10-15	22:10:00	0
2008-10-15	22:11:00	0
2008-10-15	22:12:00	0
2008-10-15	22:13:00	0
2008-10-15	22:14:00	0
2008-10-15	22:15:00	0
2008-10-15	22:16:00	0
2008-10-15	22:17:00	0
2008-10-15	22:18:00	0
2008-10-15	22:19:00	10
2008-10-15	22:20:00	0
2008-10-15	22:21:00	0
2008-10-15	22:22:00	0
2008-10-15	22:23:00	0
2008-10-15	22:24:00	0
2008-10-15	22:25:00	0
2008-10-15	22:26:00	0
2008-10-15	22:27:00	0
2008-10-15	22:28:00	0
2008-10-15	22:29:00	0
2008-10-15	22:30:00	0
2008-10-15	22:31:00	93
2008-10-15	22:32:00	147
2008-10-15	22:33:00	159
2008-10-15	22:34:00	159
2008-10-15	22:35:00	171
2008-10-15	22:36:00	62
2008-10-15	22:37:00	0
2008-10-15	22:38:00	0
2008-10-15	22:39:00	0
2008-10-15	22:40:00	0
2008-10-15	22:41:00	0
2008-10-15	22:42:00	10
2008-10-15	22:43:00	0
2008-10-15	22:44:00	0
2008-10-15	22:45:00	0
2008-10-15	22:46:00	0
2008-10-15	22:47:00	0
2008-10-15	22:48:00	0
2008-10-15	22:49:00	0
2008-10-15	22:50:00	0
2008-10-15	22:51:00	0
2008-10-15	22:52:00	0
2008-10-15	22:53:00	0
2008-10-15	22:54:00	0
2008-10-15	22:55:00	184
2008-10-15	22:56:00	147
2008-10-15	22:57:00	0
2008-10-15	22:58:00	10
2008-10-15	22:59:00	134
2008-10-15	23:00:00	10
2008-10-15	23:01:00	0
2008-10-15	23:02:00	0
2008-10-15	23:03:00	0
2008-10-15	23:04:00	0
2008-10-15	23:05:00	0
2008-10-15	23:06:00	0
2008-10-15	23:07:00	0
2008-10-15	23:08:00	0
2008-10-15	23:09:00	0
2008-10-15	23:10:00	0
2008-10-15	23:11:00	0
2008-10-15	23:12:00	0
2008-10-15	23:13:00	0
2008-10-15	23:14:00	0
2008-10-15	23:15:00	0
2008-10-15	23:16:00	0
2008-10-15	23:17:00	0
2008-10-15	23:18:00	0
2008-10-15	23:19:00	0
2008-10-15	23:20:00	233
2008-10-15	23:21:00	62
2008-10-15	23:22:00	147
2008-10-15	23:23:00	159
2008-10-15	23:24:00	52
2008-10-15	23:25:00	0
2008-10-15	23:26:00	0
2008-10-15	23:27:00	0
2008-10-15	23:28:00	0
2008-10-15	23:29:00	0
2008-10-15	23:30:00	0
2008-10-15	23:31:00	0
2008-10-15	23:32:00	0
2008-10-15	23:33:00	0
2008-10-15	23:34:00	0
2008-10-15	23:35:00	0
2008-10-15	23:36:00	0
2008-10-15	23:37:00	0
2008-10-15	23:38:00	0
2008-10-15	23:39:00	0
2008-10-15	23:40:00	0
2008-10-15	23:41:00	0
2008-10-15	23:42:00	0
2008-10-15	23:43:00	0
2008-10-15	23:44:00	0
2008-10-15	23:45:00	0
2008-10-15	23:46:00	0
2008-10-15	23:47:00	0
2008-10-15	23:48:00	0
2008-10-15	23:49:00	10
2008-10-15	23:50:00	233
2008-10-15	23:51:00	0
2008-10-15	23:52:00	0
2008-10-15	23:53:00	0
2008-10-15	23:54:00	0
2008-10-15	23:55:00	0
2008-10-15	23:56:00	0
2008-10-15	23:57:00	0
2008-10-15	23:58:00	0
2008-10-15	23:59:00	0
2008-10-16	00:00:00	0
2008-10-16	00:01:00	0
2008-10-16	00:02:00	0
2008-10-16	00:03:00	0
2008-10-16	00:04:00	0
2008-10-16	00:05:00	0
2008-10-16	00:06:00	0
2008-10-16	00:07:00	0
2008-10-16	00:08:00	0
2008-10-16	00:09:00	0
2008-10-16	00:10:00	0
2008-10-16	00:11:00	0
2008-10-16	00:12:00	0
2008-10-16	00:13:00	0
2008-10-16	00:14:00	0
2008-10-16	00:15:00	0
2008-10-16	00:16:00	0
2008-10-16	00:17:00	0
2008-10-16	00:18:00	0
2008-10-16	00:19:00	0
2008-10-16	00:20:00	0
2008-10-16	00:21:00	0
2008-10-16	00:22:00	41
2008-10-16	00:23:00	83
2008-10-16	00:24:00	0
2008-10-16	00:25:00	299
2008-10-16	00:26:00	0
2008-10-16	00:27:00	0
2008-10-16	00:28:00	0
2008-10-16	00:29:00	0
2008-10-16	00:30:00	0
2008-10-16	00:31:00	0
2008-10-16	00:32:00	0
2008-10-16	00:33:00	0
2008-10-16	00:34:00	0
2008-10-16	00:35:00	0
2008-10-16	00:36:00	0
2008-10-16	00:37:00	0
2008-10-16	00:38:00	0
2008-10-16	00:39:00	0
2008-10-16	00:40:00	0
2008-10-16	00:41:00	0
2008-10-16	00:42:00	0
2008-10-16	00:43:00	0
2008-10-16	00:44:00	0
2008-10-16	00:45:00	221
2008-10-16	00:46:00	0
2008-10-16	00:47:00	0
2008-10-16	00:48:00	0
2008-10-16	00:49:00	10
2008-10-16	00:50:00	0
2008-10-16	00:51:00	0
2008-10-16	00:52:00	0
2008-10-16	00:53:00	0
2008-10-16	00:54:00	0
2008-10-16	00:55:00	0
2008-10-16	00:56:00	0
2008-10-16	00:57:00	0
2008-10-16	00:58:00	0
2008-10-16	00:59:00	0
2008-10-16	01:00:00	0
2008-10-16	01:01:00	0
2008-10-16	01:02:00	0
2008-10-16	01:03:00	0
2008-10-16	01:04:00	0
2008-10-16	01:05:00	0
2008-10-16	01:06:00	0
2008-10-16	01:07:00	0
2008-10-16	01:08:00	0
2008-10-16	01:09:00	0
2008-10-16	01:10:00	10
2008-10-16	01:11:00	0
2008-10-16	01:12:00	0
2008-10-16	01:13:00	0
2008-10-16	01:14:00	0
2008-10-16	01:15:00	0
2008-10-16	01:16:00	0
2008-10-16	01:17:00	0
2008-10-16	01:18:00	0
2008-10-16	01:19:00	0
2008-10-16	01:20:00	0
2008-10-16	01:21:00	0
2008-10-16	01:22:00	0
2008-10-16	01:23:00	0
2008-10-16	01:24:00	0
2008-10-16	01:25:00	0
2008-10-16	01:26:00	0
2008-10-16	01:27:00	0
2008-10-16	01:28:00	0
2008-10-16	01:29:00	0
2008-10-16	01:30:00	0
2008-10-16	01:31:00	0
2008-10-16	01:32:00	10
2008-10-16	01:33:00	246
2008-10-16	01:34:00	0
2008-10-16	01:35:00	0
2008-10-16	01:36:00	0
2008-10-16	01:37:00	0
2008-10-16	01:38:00	0
2008-10-16	01:39:00	0
2008-10-16	01:40:00	0
2008-10-16	01:41:00	0
2008-10-16	01:42:00	0
2008-10-16	01:43:00	0
2008-10-16	01:44:00	0
2008-10-16	01:45:00	0
2008-10-16	01:46:00	0
2008-10-16	01:47:00	0
2008-10-16	01:48:00	0
2008-10-16	01:49:00	31
2008-10-16	01:50:00	0
2008-10-16	01:51:00	0
2008-10-16	01:52:00	0
2008-10-16	01:53:00	0
2008-10-16	01:54:00	0
2008-10-16	01:55:00	0
2008-10-16	01:56:00	0
2008-10-16	01:57:00	0
2008-10-16	01:58:00	0
2008-10-16	01:59:00	0
2008-10-16	02:00:00	0
2008-10-16	02:01:00	0
2008-10-16	02:02:00	31
2008-10-16	02:03:00	0
2008-10-16	02:04:00	0
2008-10-16	02:05:00	0
2008-10-16	02:06:00	31
2008-10-16	02:07:00	0
2008-10-16	02:08:00	0
2008-10-16	02:09:00	0
2008-10-16	02:10:00	0
2008-10-16	02:11:00	0
2008-10-16	02:12:00	0
2008-10-16	02:13:00	31
2008-10-16	02:14:00	0
2008-10-16	02:15:00	41
2008-10-16	02:16:00	299
2008-10-16	02:17:00	0
2008-10-16	02:18:00	0
2008-10-16	02:19:00	0
2008-10-16	02:20:00	0
2008-10-16	02:21:00	0
2008-10-16	02:22:00	0
2008-10-16	02:23:00	0
2008-10-16	02:24:00	0
2008-10-16	02:25:00	0
2008-10-16	02:26:00	0
2008-10-16	02:27:00	0
2008-10-16	02:28:00	0
2008-10-16	02:29:00	0
2008-10-16	02:30:00	0
2008-10-16	02:31:00	0
2008-10-16	02:32:00	0
2008-10-16	02:33:00	52
2008-10-16	02:34:00	0
2008-10-16	02:35:00	0
2008-10-16	02:36:00	0
2008-10-16	02:37:00	0
2008-10-16	02:38:00	52
2008-10-16	02:39:00	0
2008-10-16	02:40:00	0
2008-10-16	02:41:00	0
2008-10-16	02:42:00	0
2008-10-16	02:43:00	401
2008-10-16	02:44:00	21
2008-10-16	02:45:00	21
2008-10-16	02:46:00	0
2008-10-16	02:47:00	0
2008-10-16	02:48:00	0
2008-10-16	02:49:00	0
2008-10-16	02:50:00	0
2008-10-16	02:51:00	0
2008-10-16	02:52:00	0
2008-10-16	02:53:00	0
2008-10-16	02:54:00	0
2008-10-16	02:55:00	0
2008-10-16	02:56:00	0
2008-10-16	02:57:00	0
2008-10-16	02:58:00	0
2008-10-16	02:59:00	0
2008-10-16	03:00:00	0
2008-10-16	03:01:00	0
2008-10-16	03:02:00	0
2008-10-16	03:03:00	0
2008-10-16	03:04:00	0
2008-10-16	03:05:00	0
2008-10-16	03:06:00	0
2008-10-16	03:07:00	0
2008-10-16	03:08:00	0
2008-10-16	03:09:00	0
2008-10-16	03:10:00	0
2008-10-16	03:11:00	0
2008-10-16	03:12:00	0
2008-10-16	03:13:00	0
2008-10-16	03:14:00	0
2008-10-16	03:15:00	0
2008-10-16	03:16:00	0
2008-10-16	03:17:00	0
2008-10-16	03:18:00	0
2008-10-16	03:19:00	0
2008-10-16	03:20:00	0
2008-10-16	03:21:00	0
2008-10-16	03:22:00	0
2008-10-16	03:23:00	0
2008-10-16	03:24:00	0
2008-10-16	03:25:00	0
2008-10-16	03:26:00	0
2008-10-16	03:27:00	0
2008-10-16	03:28:00	0
2008-10-16	03:29:00	0
2008-10-16	03:30:00	0
2008-10-16	03:31:00	0
2008-10-16	03:32:00	0
2008-10-16	03:33:00	0
2008-10-16	03:34:00	0
2008-10-16	03:35:00	0
2008-10-16	03:36:00	0
2008-10-16	03:37:00	0
2008-10-16	03:38:00	0
2008-10-16	03:39:00	21
2008-10-16	03:40:00	0
2008-10-16	03:41:00	0
2008-10-16	03:42:00	0
2008-10-16	03:43:00	0
2008-10-16	03:44:00	0
2008-10-16	03:45:00	0
2008-10-16	03:46:00	0
2008-10-16	03:47:00	0
2008-10-16	03:48:00	0
2008-10-16	03:49:00	0
2008-10-16	03:50:00	0
2008-10-16	03:51:00	0
2008-10-16	03:52:00	0
2008-10-16	03:53:00	0
2008-10-16	03:54:00	0
2008-10-16	03:55:00	21
2008-10-16	03:56:00	0
2008-10-16	03:57:00	0
2008-10-16	03:58:00	0
2008-10-16	03:59:00	0
2008-10-16	04:00:00	0
2008-10-16	04:01:00	0
2008-10-16	04:02:00	0
2008-10-16	04:03:00	0
2008-10-16	04:04:00	0
2008-10-16	04:05:00	0
2008-10-16	04:06:00	0
2008-10-16	04:07:00	0
2008-10-16	04:08:00	0
2008-10-16	04:09:00	0
2008-10-16	04:10:00	0
2008-10-16	04:11:00	0
2008-10-16	04:12:00	0
2008-10-16	04:13:00	0
2008-10-16	04:14:00	0
2008-10-16	04:15:00	0
2008-10-16	04:16:00	0
2008-10-16	04:17:00	0
2008-10-16	04:18:00	0
2008-10-16	04:19:00	0
2008-10-16	04:20:00	0
2008-10-16	04:21:00	0
2008-10-16	04:22:00	0
2008-10-16	04:23:00	0
2008-10-16	04:24:00	0
2008-10-16	04:25:00	0
2008-10-16	04:26:00	0
2008-10-16	04:27:00	0
2008-10-16	04:28:00	0
2008-10-16	04:29:00	0
2008-10-16	04:30:00	0
2008-10-16	04:31:00	0
2008-10-16	04:32:00	0
2008-10-16	04:33:00	0
2008-10-16	04:34:00	0
2008-10-16	04:35:00	0
2008-10-16	04:36:00	0
2008-10-16	04:37:00	0
2008-10-16	04:38:00	0
2008-10-16	04:39:00	0
2008-10-16	04:40:00	0
2008-10-16	04:41:00	0
2008-10-16	04:42:00	0
2008-10-16	04:43:00	0
2008-10-16	04:44:00	0
2008-10-16	04:45:00	0
2008-10-16	04:46:00	0
2008-10-16	04:47:00	0
2008-10-16	04:48:00	0
2008-10-16	04:49:00	0
2008-10-16	04:50:00	0
2008-10-16	04:51:00	0
2008-10-16	04:52:00	0
2008-10-16	04:53:00	0
2008-10-16	04:54:00	0
2008-10-16	04:55:00	0
2008-10-16	04:56:00	0
2008-10-16	04:57:00	0
2008-10-16	04:58:00	0
2008-10-16	04:59:00	0
2008-10-16	05:00:00	72
2008-10-16	05:01:00	450
2008-10-16	05:02:00	0
2008-10-16	05:03:00	0
2008-10-16	05:04:00	0
2008-10-16	05:05:00	0
2008-10-16	05:06:00	0
2008-10-16	05:07:00	0
2008-10-16	05:08:00	0
2008-10-16	05:09:00	0
2008-10-16	05:10:00	0
2008-10-16	05:11:00	0
2008-10-16	05:12:00	0
2008-10-16	05:13:00	0
2008-10-16	05:14:00	0
2008-10-16	05:15:00	0
2008-10-16	05:16:00	0
2008-10-16	05:17:00	0
2008-10-16	05:18:00	0
2008-10-16	05:19:00	0
2008-10-16	05:20:00	0
2008-10-16	05:21:00	0
2008-10-16	05:22:00	0
2008-10-16	05:23:00	0
2008-10-16	05:24:00	0
2008-10-16	05:25:00	0
2008-10-16	05:26:00	0
2008-10-16	05:27:00	0
2008-10-16	05:28:00	0
2008-10-16	05:29:00	31
2008-10-16	05:30:00	0
2008-10-16	05:31:00	0
2008-10-16	05:32:00	0
2008-10-16	05:33:00	0
2008-10-16	05:34:00	0
2008-10-16	05:35:00	0
2008-10-16	05:36:00	52
2008-10-16	05:37:00	0
2008-10-16	05:38:00	0
2008-10-16	05:39:00	0
2008-10-16	05:40:00	21
2008-10-16	05:41:00	551
2008-10-16	05:42:00	31
2008-10-16	05:43:00	0
2008-10-16	05:44:00	10
2008-10-16	05:45:00	1121
2008-10-16	05:46:00	401
2008-10-16	05:47:00	401
2008-10-16	05:48:00	124
2008-10-16	05:49:00	83
2008-10-16	05:50:00	343
2008-10-16	05:51:00	221
2008-10-16	05:52:00	196
2008-10-16	05:53:00	62
2008-10-16	05:54:00	246
2008-10-16	05:55:00	41
2008-10-16	05:56:00	0
2008-10-16	05:57:00	0
2008-10-16	05:58:00	10
2008-10-16	05:59:00	114
2008-10-16	06:00:00	52
2008-10-16	06:01:00	10
2008-10-16	06:02:00	0
2008-10-16	06:03:00	10
2008-10-16	06:04:00	0
2008-10-16	06:05:00	103
2008-10-16	06:06:00	221
2008-10-16	06:07:00	147
2008-10-16	06:08:00	233
2008-10-16	06:09:00	0
2008-10-16	06:10:00	0
2008-10-16	06:11:00	0
2008-10-16	06:12:00	0
2008-10-16	06:13:00	0
2008-10-16	06:14:00	0
2008-10-16	06:15:00	0
2008-10-16	06:16:00	21
2008-10-16	06:17:00	10
2008-10-16	06:18:00	10
2008-10-16	06:19:00	0
2008-10-16	06:20:00	124
2008-10-16	06:21:00	147
2008-10-16	06:22:00	10
2008-10-16	06:23:00	10
2008-10-16	06:24:00	0
2008-10-16	06:25:00	159
2008-10-16	06:26:00	31
2008-10-16	06:27:00	0
2008-10-16	06:28:00	0
2008-10-16	06:29:00	0
2008-10-16	06:30:00	0
2008-10-16	06:31:00	0
2008-10-16	06:32:00	0
2008-10-16	06:33:00	0
2008-10-16	06:34:00	31
2008-10-16	06:35:00	0
2008-10-16	06:36:00	41
2008-10-16	06:37:00	0
2008-10-16	06:38:00	0
2008-10-16	06:39:00	0
2008-10-16	06:40:00	0
2008-10-16	06:41:00	0
2008-10-16	06:42:00	0
2008-10-16	06:43:00	0
2008-10-16	06:44:00	0
2008-10-16	06:45:00	0
2008-10-16	06:46:00	0
2008-10-16	06:47:00	21
2008-10-16	06:48:00	0
2008-10-16	06:49:00	0
2008-10-16	06:50:00	0
2008-10-16	06:51:00	0
2008-10-16	06:52:00	0
2008-10-16	06:53:00	0
2008-10-16	06:54:00	0
2008-10-16	06:55:00	0
2008-10-16	06:56:00	0
2008-10-16	06:57:00	0
2008-10-16	06:58:00	0
2008-10-16	06:59:00	0
2008-10-16	07:00:00	0
2008-10-16	07:01:00	0
2008-10-16	07:02:00	0
2008-10-16	07:03:00	0
2008-10-16	07:04:00	0
2008-10-16	07:05:00	31
2008-10-16	07:06:00	246
2008-10-16	07:07:00	10
2008-10-16	07:08:00	0
2008-10-16	07:09:00	0
2008-10-16	07:10:00	0
2008-10-16	07:11:00	0
2008-10-16	07:12:00	0
2008-10-16	07:13:00	0
2008-10-16	07:14:00	0
2008-10-16	07:15:00	10
2008-10-16	07:16:00	0
2008-10-16	07:17:00	0
2008-10-16	07:18:00	21
2008-10-16	07:19:00	0
2008-10-16	07:20:00	0
2008-10-16	07:21:00	0
2008-10-16	07:22:00	0
2008-10-16	07:23:00	0
2008-10-16	07:24:00	0
2008-10-16	07:25:00	0
2008-10-16	07:26:00	0
2008-10-16	07:27:00	0
2008-10-16	07:28:00	0
2008-10-16	07:29:00	0
2008-10-16	07:30:00	0
2008-10-16	07:31:00	0
2008-10-16	07:32:00	0
2008-10-16	07:33:00	0
2008-10-16	07:34:00	0
2008-10-16	07:35:00	0
2008-10-16	07:36:00	0
2008-10-16	07:37:00	0
2008-10-16	07:38:00	0
2008-10-16	07:39:00	0
2008-10-16	07:40:00	159
2008-10-16	07:41:00	21
2008-10-16	07:42:00	0
2008-10-16	07:43:00	0
2008-10-16	07:44:00	0
2008-10-16	07:45:00	0
2008-10-16	07:46:00	0
2008-10-16	07:47:00	0
2008-10-16	07:48:00	0
2008-10-16	07:49:00	0
2008-10-16	07:50:00	0
2008-10-16	07:51:00	0
2008-10-16	07:52:00	0
2008-10-16	07:53:00	0
2008-10-16	07:54:00	0
2008-10-16	07:55:00	0
2008-10-16	07:56:00	0
2008-10-16	07:57:00	0
2008-10-16	07:58:00	0
2008-10-16	07:59:00	0
2008-10-16	08:00:00	0
2008-10-16	08:01:00	0
2008-10-16	08:02:00	0
2008-10-16	08:03:00	0
2008-10-16	08:04:00	0
2008-10-16	08:05:00	0
2008-10-16	08:06:00	0
2008-10-16	08:07:00	0
2008-10-16	08:08:00	0
2008-10-16	08:09:00	0
2008-10-16	08:10:00	0
2008-10-16	08:11:00	0
2008-10-16	08:12:00	0
2008-10-16	08:13:00	0
2008-10-16	08:14:00	0
2008-10-16	08:15:00	0
2008-10-16	08:16:00	0
2008-10-16	08:17:00	0
2008-10-16	08:18:00	0
2008-10-16	08:19:00	10
2008-10-16	08:20:00	10
2008-10-16	08:21:00	10
2008-10-16	08:22:00	184
2008-10-16	08:23:00	21
2008-10-16	08:24:00	0
2008-10-16	08:25:00	10
2008-10-16	08:26:00	0
2008-10-16	08:27:00	0
2008-10-16	08:28:00	41
2008-10-16	08:29:00	0
2008-10-16	08:30:00	0
2008-10-16	08:31:00	0
2008-10-16	08:32:00	0
2008-10-16	08:33:00	103
2008-10-16	08:34:00	0
2008-10-16	08:35:00	0
2008-10-16	08:36:00	10
2008-10-16	08:37:00	0
2008-10-16	08:38:00	0
2008-10-16	08:39:00	10
2008-10-16	08:40:00	0
2008-10-16	08:41:00	0
2008-10-16	08:42:00	0
2008-10-16	08:43:00	0
2008-10-16	08:44:00	31
2008-10-16	08:45:00	258
2008-10-16	08:46:00	0
2008-10-16	08:47:00	0
2008-10-16	08:48:00	0
2008-10-16	08:49:00	0
2008-10-16	08:50:00	72
2008-10-16	08:51:00	0
2008-10-16	08:52:00	0
2008-10-16	08:53:00	0
2008-10-16	08:54:00	0
2008-10-16	08:55:00	52
2008-10-16	08:56:00	0
2008-10-16	08:57:00	0
2008-10-16	08:58:00	0
2008-10-16	08:59:00	0
2008-10-16	09:00:00	10
2008-10-16	09:01:00	0
2008-10-16	09:02:00	21
2008-10-16	09:03:00	0
2008-10-16	09:04:00	0
2008-10-16	09:05:00	0
2008-10-16	09:06:00	0
2008-10-16	09:07:00	0
2008-10-16	09:08:00	0
[truncated: 49,851 more rows]
