# Supplementary material for: Initial evaluation of nighttime restlessness in a naturally occurring canine model of osteoarthritis pain
Source: PeerJ. 2015 Feb 17;3:e772. doi: 10.7717/peerj.772 (PMC4340376; doi:10.7717/peerj.772)
Supplement: Supplemental Information 64 [file peerj-03-772-s064.xlsx]

## Sheet: 02_Data
Tx #	DateTime	Activity	DTA vs NTA	Hour	Tx Day	Weekday	Tx Rx	Peak DTA Time?	Last 7 Day?
1	2008-12-18 21:31:00	0	NTA	21	1	5	P
1	2008-12-18 21:32:00	0	NTA	21	1	5	P
1	2008-12-18 21:33:00	112	NTA	21	1	5	P
1	2008-12-18 21:34:00	71	NTA	21	1	5	P
1	2008-12-18 21:35:00	81	NTA	21	1	5	P
1	2008-12-18 21:36:00	410	NTA	21	1	5	P
1	2008-12-18 21:37:00	81	NTA	21	1	5	P
1	2008-12-18 21:38:00	81	NTA	21	1	5	P
1	2008-12-18 21:39:00	61	NTA	21	1	5	P
1	2008-12-18 21:40:00	295	NTA	21	1	5	P
1	2008-12-18 21:41:00	132	NTA	21	1	5	P
1	2008-12-18 21:42:00	122	NTA	21	1	5	P
1	2008-12-18 21:43:00	169	NTA	21	1	5	P
1	2008-12-18 21:44:00	280	NTA	21	1	5	P
1	2008-12-18 21:45:00	112	NTA	21	1	5	P
1	2008-12-18 21:46:00	51	NTA	21	1	5	P
1	2008-12-18 21:47:00	51	NTA	21	1	5	P
1	2008-12-18 21:48:00	10	NTA	21	1	5	P
1	2008-12-18 21:49:00	0	NTA	21	1	5	P
1	2008-12-18 21:50:00	0	NTA	21	1	5	P
1	2008-12-18 21:51:00	0	NTA	21	1	5	P
1	2008-12-18 21:52:00	0	NTA	21	1	5	P
1	2008-12-18 21:53:00	51	NTA	21	1	5	P
1	2008-12-18 21:54:00	443	NTA	21	1	5	P
1	2008-12-18 21:55:00	542	NTA	21	1	5	P
1	2008-12-18 21:56:00	861	NTA	21	1	5	P
1	2008-12-18 21:57:00	169	NTA	21	1	5	P
1	2008-12-18 21:58:00	475	NTA	21	1	5	P
1	2008-12-18 21:59:00	1611	NTA	21	1	5	P
1	2008-12-18 22:00:00	817	NTA	21	1	5	P
1	2008-12-18 22:01:00	427	NTA	22	1	5	P
1	2008-12-18 22:02:00	1026	NTA	22	1	5	P
1	2008-12-18 22:03:00	524	NTA	22	1	5	P
1	2008-12-18 22:04:00	102	NTA	22	1	5	P
1	2008-12-18 22:05:00	542	NTA	22	1	5	P
1	2008-12-18 22:06:00	20	NTA	22	1	5	P
1	2008-12-18 22:07:00	132	NTA	22	1	5	P
1	2008-12-18 22:08:00	0	NTA	22	1	5	P
1	2008-12-18 22:09:00	0	NTA	22	1	5	P
1	2008-12-18 22:10:00	10	NTA	22	1	5	P
1	2008-12-18 22:11:00	0	NTA	22	1	5	P
1	2008-12-18 22:12:00	0	NTA	22	1	5	P
1	2008-12-18 22:13:00	0	NTA	22	1	5	P
1	2008-12-18 22:14:00	0	NTA	22	1	5	P
1	2008-12-18 22:15:00	0	NTA	22	1	5	P
1	2008-12-18 22:16:00	0	NTA	22	1	5	P
1	2008-12-18 22:17:00	0	NTA	22	1	5	P
1	2008-12-18 22:18:00	30	NTA	22	1	5	P
1	2008-12-18 22:19:00	0	NTA	22	1	5	P
1	2008-12-18 22:20:00	0	NTA	22	1	5	P
1	2008-12-18 22:21:00	0	NTA	22	1	5	P
1	2008-12-18 22:22:00	0	NTA	22	1	5	P
1	2008-12-18 22:23:00	0	NTA	22	1	5	P
1	2008-12-18 22:24:00	0	NTA	22	1	5	P
1	2008-12-18 22:25:00	0	NTA	22	1	5	P
1	2008-12-18 22:26:00	0	NTA	22	1	5	P
1	2008-12-18 22:27:00	0	NTA	22	1	5	P
1	2008-12-18 22:28:00	0	NTA	22	1	5	P
1	2008-12-18 22:29:00	0	NTA	22	1	5	P
1	2008-12-18 22:30:00	0	NTA	22	1	5	P
1	2008-12-18 22:31:00	0	NTA	22	1	5	P
1	2008-12-18 22:32:00	0	NTA	22	1	5	P
1	2008-12-18 22:33:00	0	NTA	22	1	5	P
1	2008-12-18 22:34:00	0	NTA	22	1	5	P
1	2008-12-18 22:35:00	0	NTA	22	1	5	P
1	2008-12-18 22:36:00	0	NTA	22	1	5	P
1	2008-12-18 22:37:00	0	NTA	22	1	5	P
1	2008-12-18 22:38:00	0	NTA	22	1	5	P
1	2008-12-18 22:39:00	0	NTA	22	1	5	P
1	2008-12-18 22:40:00	0	NTA	22	1	5	P
1	2008-12-18 22:41:00	0	NTA	22	1	5	P
1	2008-12-18 22:42:00	0	NTA	22	1	5	P
1	2008-12-18 22:43:00	0	NTA	22	1	5	P
1	2008-12-18 22:44:00	0	NTA	22	1	5	P
1	2008-12-18 22:45:00	0	NTA	22	1	5	P
1	2008-12-18 22:46:00	0	NTA	22	1	5	P
1	2008-12-18 22:47:00	0	NTA	22	1	5	P
1	2008-12-18 22:48:00	0	NTA	22	1	5	P
1	2008-12-18 22:49:00	0	NTA	22	1	5	P
1	2008-12-18 22:50:00	0	NTA	22	1	5	P
1	2008-12-18 22:51:00	0	NTA	22	1	5	P
1	2008-12-18 22:52:00	0	NTA	22	1	5	P
1	2008-12-18 22:53:00	0	NTA	22	1	5	P
1	2008-12-18 22:54:00	0	NTA	22	1	5	P
1	2008-12-18 22:55:00	0	NTA	22	1	5	P
1	2008-12-18 22:56:00	0	NTA	22	1	5	P
1	2008-12-18 22:57:00	0	NTA	22	1	5	P
1	2008-12-18 22:58:00	0	NTA	22	1	5	P
1	2008-12-18 22:59:00	0	NTA	22	1	5	P
1	2008-12-18 23:00:00	0	NTA	22	1	5	P
1	2008-12-18 23:01:00	0	NTA	23	1	5	P
1	2008-12-18 23:02:00	0	NTA	23	1	5	P
1	2008-12-18 23:03:00	0	NTA	23	1	5	P
1	2008-12-18 23:04:00	0	NTA	23	1	5	P
1	2008-12-18 23:05:00	0	NTA	23	1	5	P
1	2008-12-18 23:06:00	0	NTA	23	1	5	P
1	2008-12-18 23:07:00	0	NTA	23	1	5	P
1	2008-12-18 23:08:00	0	NTA	23	1	5	P
1	2008-12-18 23:09:00	0	NTA	23	1	5	P
1	2008-12-18 23:10:00	0	NTA	23	1	5	P
1	2008-12-18 23:11:00	0	NTA	23	1	5	P
1	2008-12-18 23:12:00	0	NTA	23	1	5	P
1	2008-12-18 23:13:00	0	NTA	23	1	5	P
1	2008-12-18 23:14:00	0	NTA	23	1	5	P
1	2008-12-18 23:15:00	0	NTA	23	1	5	P
1	2008-12-18 23:16:00	0	NTA	23	1	5	P
1	2008-12-18 23:17:00	0	NTA	23	1	5	P
1	2008-12-18 23:18:00	0	NTA	23	1	5	P
1	2008-12-18 23:19:00	0	NTA	23	1	5	P
1	2008-12-18 23:20:00	0	NTA	23	1	5	P
1	2008-12-18 23:21:00	0	NTA	23	1	5	P
1	2008-12-18 23:22:00	0	NTA	23	1	5	P
1	2008-12-18 23:23:00	0	NTA	23	1	5	P
1	2008-12-18 23:24:00	0	NTA	23	1	5	P
1	2008-12-18 23:25:00	0	NTA	23	1	5	P
1	2008-12-18 23:26:00	0	NTA	23	1	5	P
1	2008-12-18 23:27:00	0	NTA	23	1	5	P
1	2008-12-18 23:28:00	0	NTA	23	1	5	P
1	2008-12-18 23:29:00	0	NTA	23	1	5	P
1	2008-12-18 23:30:00	0	NTA	23	1	5	P
1	2008-12-18 23:31:00	0	NTA	23	1	5	P
1	2008-12-18 23:32:00	0	NTA	23	1	5	P
1	2008-12-18 23:33:00	0	NTA	23	1	5	P
1	2008-12-18 23:34:00	0	NTA	23	1	5	P
1	2008-12-18 23:35:00	0	NTA	23	1	5	P
1	2008-12-18 23:36:00	0	NTA	23	1	5	P
1	2008-12-18 23:37:00	0	NTA	23	1	5	P
1	2008-12-18 23:38:00	0	NTA	23	1	5	P
1	2008-12-18 23:39:00	0	NTA	23	1	5	P
1	2008-12-18 23:40:00	0	NTA	23	1	5	P
1	2008-12-18 23:41:00	0	NTA	23	1	5	P
1	2008-12-18 23:42:00	0	NTA	23	1	5	P
1	2008-12-18 23:43:00	0	NTA	23	1	5	P
1	2008-12-18 23:44:00	0	NTA	23	1	5	P
1	2008-12-18 23:45:00	0	NTA	23	1	5	P
1	2008-12-18 23:46:00	0	NTA	23	1	5	P
1	2008-12-18 23:47:00	0	NTA	23	1	5	P
1	2008-12-18 23:48:00	0	NTA	23	1	5	P
1	2008-12-18 23:49:00	0	NTA	23	1	5	P
1	2008-12-18 23:50:00	0	NTA	23	1	5	P
1	2008-12-18 23:51:00	0	NTA	23	1	5	P
1	2008-12-18 23:52:00	0	NTA	23	1	5	P
1	2008-12-18 23:53:00	0	NTA	23	1	5	P
1	2008-12-18 23:54:00	0	NTA	23	1	5	P
1	2008-12-18 23:55:00	0	NTA	23	1	5	P
1	2008-12-18 23:56:00	0	NTA	23	1	5	P
1	2008-12-18 23:57:00	0	NTA	23	1	5	P
1	2008-12-18 23:58:00	0	NTA	23	1	5	P
1	2008-12-18 23:59:00	0	NTA	23	1	5	P
1	2008-12-19	0	NTA	23	1	5	P
1	2008-12-19 00:01:00	0	NTA	0	1	6	P
1	2008-12-19 00:02:00	0	NTA	0	1	6	P
1	2008-12-19 00:03:00	0	NTA	0	1	6	P
1	2008-12-19 00:04:00	0	NTA	0	1	6	P
1	2008-12-19 00:05:00	0	NTA	0	1	6	P
1	2008-12-19 00:06:00	0	NTA	0	1	6	P
1	2008-12-19 00:07:00	0	NTA	0	1	6	P
1	2008-12-19 00:08:00	0	NTA	0	1	6	P
1	2008-12-19 00:09:00	0	NTA	0	1	6	P
1	2008-12-19 00:10:00	0	NTA	0	1	6	P
1	2008-12-19 00:11:00	0	NTA	0	1	6	P
1	2008-12-19 00:12:00	0	NTA	0	1	6	P
1	2008-12-19 00:13:00	0	NTA	0	1	6	P
1	2008-12-19 00:14:00	0	NTA	0	1	6	P
1	2008-12-19 00:15:00	0	NTA	0	1	6	P
1	2008-12-19 00:16:00	0	NTA	0	1	6	P
1	2008-12-19 00:17:00	0	NTA	0	1	6	P
1	2008-12-19 00:18:00	0	NTA	0	1	6	P
1	2008-12-19 00:19:00	0	NTA	0	1	6	P
1	2008-12-19 00:20:00	0	NTA	0	1	6	P
1	2008-12-19 00:21:00	0	NTA	0	1	6	P
1	2008-12-19 00:22:00	0	NTA	0	1	6	P
1	2008-12-19 00:23:00	0	NTA	0	1	6	P
1	2008-12-19 00:24:00	0	NTA	0	1	6	P
1	2008-12-19 00:25:00	0	NTA	0	1	6	P
1	2008-12-19 00:26:00	0	NTA	0	1	6	P
1	2008-12-19 00:27:00	0	NTA	0	1	6	P
1	2008-12-19 00:28:00	0	NTA	0	1	6	P
1	2008-12-19 00:29:00	0	NTA	0	1	6	P
1	2008-12-19 00:30:00	0	NTA	0	1	6	P
1	2008-12-19 00:31:00	0	NTA	0	1	6	P
1	2008-12-19 00:32:00	0	NTA	0	1	6	P
1	2008-12-19 00:33:00	0	NTA	0	1	6	P
1	2008-12-19 00:34:00	0	NTA	0	1	6	P
1	2008-12-19 00:35:00	0	NTA	0	1	6	P
1	2008-12-19 00:36:00	0	NTA	0	1	6	P
1	2008-12-19 00:37:00	10	NTA	0	1	6	P
1	2008-12-19 00:38:00	0	NTA	0	1	6	P
1	2008-12-19 00:39:00	0	NTA	0	1	6	P
1	2008-12-19 00:40:00	0	NTA	0	1	6	P
1	2008-12-19 00:41:00	0	NTA	0	1	6	P
1	2008-12-19 00:42:00	0	NTA	0	1	6	P
1	2008-12-19 00:43:00	0	NTA	0	1	6	P
1	2008-12-19 00:44:00	0	NTA	0	1	6	P
1	2008-12-19 00:45:00	0	NTA	0	1	6	P
1	2008-12-19 00:46:00	0	NTA	0	1	6	P
1	2008-12-19 00:47:00	0	NTA	0	1	6	P
1	2008-12-19 00:48:00	0	NTA	0	1	6	P
1	2008-12-19 00:49:00	0	NTA	0	1	6	P
1	2008-12-19 00:50:00	0	NTA	0	1	6	P
1	2008-12-19 00:51:00	0	NTA	0	1	6	P
1	2008-12-19 00:52:00	0	NTA	0	1	6	P
1	2008-12-19 00:53:00	0	NTA	0	1	6	P
1	2008-12-19 00:54:00	0	NTA	0	1	6	P
1	2008-12-19 00:55:00	0	NTA	0	1	6	P
1	2008-12-19 00:56:00	0	NTA	0	1	6	P
1	2008-12-19 00:57:00	0	NTA	0	1	6	P
1	2008-12-19 00:58:00	0	NTA	0	1	6	P
1	2008-12-19 00:59:00	0	NTA	0	1	6	P
1	2008-12-19 01:00:00	0	NTA	0	1	6	P
1	2008-12-19 01:01:00	0	NTA	1	1	6	P
1	2008-12-19 01:02:00	0	NTA	1	1	6	P
1	2008-12-19 01:03:00	0	NTA	1	1	6	P
1	2008-12-19 01:04:00	0	NTA	1	1	6	P
1	2008-12-19 01:05:00	0	NTA	1	1	6	P
1	2008-12-19 01:06:00	0	NTA	1	1	6	P
1	2008-12-19 01:07:00	0	NTA	1	1	6	P
1	2008-12-19 01:08:00	0	NTA	1	1	6	P
1	2008-12-19 01:09:00	0	NTA	1	1	6	P
1	2008-12-19 01:10:00	0	NTA	1	1	6	P
1	2008-12-19 01:11:00	0	NTA	1	1	6	P
1	2008-12-19 01:12:00	0	NTA	1	1	6	P
1	2008-12-19 01:13:00	0	NTA	1	1	6	P
1	2008-12-19 01:14:00	0	NTA	1	1	6	P
1	2008-12-19 01:15:00	0	NTA	1	1	6	P
1	2008-12-19 01:16:00	0	NTA	1	1	6	P
1	2008-12-19 01:17:00	0	NTA	1	1	6	P
1	2008-12-19 01:18:00	0	NTA	1	1	6	P
1	2008-12-19 01:19:00	0	NTA	1	1	6	P
1	2008-12-19 01:20:00	0	NTA	1	1	6	P
1	2008-12-19 01:21:00	0	NTA	1	1	6	P
1	2008-12-19 01:22:00	0	NTA	1	1	6	P
1	2008-12-19 01:23:00	0	NTA	1	1	6	P
1	2008-12-19 01:24:00	0	NTA	1	1	6	P
1	2008-12-19 01:25:00	0	NTA	1	1	6	P
1	2008-12-19 01:26:00	0	NTA	1	1	6	P
1	2008-12-19 01:27:00	0	NTA	1	1	6	P
1	2008-12-19 01:28:00	0	NTA	1	1	6	P
1	2008-12-19 01:29:00	0	NTA	1	1	6	P
1	2008-12-19 01:30:00	0	NTA	1	1	6	P
1	2008-12-19 01:31:00	0	NTA	1	1	6	P
1	2008-12-19 01:32:00	0	NTA	1	1	6	P
1	2008-12-19 01:33:00	0	NTA	1	1	6	P
1	2008-12-19 01:34:00	0	NTA	1	1	6	P
1	2008-12-19 01:35:00	0	NTA	1	1	6	P
1	2008-12-19 01:36:00	0	NTA	1	1	6	P
1	2008-12-19 01:37:00	0	NTA	1	1	6	P
1	2008-12-19 01:38:00	0	NTA	1	1	6	P
1	2008-12-19 01:39:00	0	NTA	1	1	6	P
1	2008-12-19 01:40:00	0	NTA	1	1	6	P
1	2008-12-19 01:41:00	0	NTA	1	1	6	P
1	2008-12-19 01:42:00	0	NTA	1	1	6	P
1	2008-12-19 01:43:00	0	NTA	1	1	6	P
1	2008-12-19 01:44:00	0	NTA	1	1	6	P
1	2008-12-19 01:45:00	0	NTA	1	1	6	P
1	2008-12-19 01:46:00	0	NTA	1	1	6	P
1	2008-12-19 01:47:00	0	NTA	1	1	6	P
1	2008-12-19 01:48:00	0	NTA	1	1	6	P
1	2008-12-19 01:49:00	0	NTA	1	1	6	P
1	2008-12-19 01:50:00	0	NTA	1	1	6	P
1	2008-12-19 01:51:00	0	NTA	1	1	6	P
1	2008-12-19 01:52:00	0	NTA	1	1	6	P
1	2008-12-19 01:53:00	0	NTA	1	1	6	P
1	2008-12-19 01:54:00	0	NTA	1	1	6	P
1	2008-12-19 01:55:00	0	NTA	1	1	6	P
1	2008-12-19 01:56:00	0	NTA	1	1	6	P
1	2008-12-19 01:57:00	0	NTA	1	1	6	P
1	2008-12-19 01:58:00	0	NTA	1	1	6	P
1	2008-12-19 01:59:00	0	NTA	1	1	6	P
1	2008-12-19 02:00:00	0	NTA	1	1	6	P
1	2008-12-19 02:01:00	0	NTA	2	1	6	P
1	2008-12-19 02:02:00	0	NTA	2	1	6	P
1	2008-12-19 02:03:00	0	NTA	2	1	6	P
1	2008-12-19 02:04:00	0	NTA	2	1	6	P
1	2008-12-19 02:05:00	0	NTA	2	1	6	P
1	2008-12-19 02:06:00	0	NTA	2	1	6	P
1	2008-12-19 02:07:00	0	NTA	2	1	6	P
1	2008-12-19 02:08:00	0	NTA	2	1	6	P
1	2008-12-19 02:09:00	0	NTA	2	1	6	P
1	2008-12-19 02:10:00	0	NTA	2	1	6	P
1	2008-12-19 02:11:00	0	NTA	2	1	6	P
1	2008-12-19 02:12:00	0	NTA	2	1	6	P
1	2008-12-19 02:13:00	0	NTA	2	1	6	P
1	2008-12-19 02:14:00	0	NTA	2	1	6	P
1	2008-12-19 02:15:00	0	NTA	2	1	6	P
1	2008-12-19 02:16:00	0	NTA	2	1	6	P
1	2008-12-19 02:17:00	0	NTA	2	1	6	P
1	2008-12-19 02:18:00	0	NTA	2	1	6	P
1	2008-12-19 02:19:00	0	NTA	2	1	6	P
1	2008-12-19 02:20:00	0	NTA	2	1	6	P
1	2008-12-19 02:21:00	0	NTA	2	1	6	P
1	2008-12-19 02:22:00	0	NTA	2	1	6	P
1	2008-12-19 02:23:00	0	NTA	2	1	6	P
1	2008-12-19 02:24:00	0	NTA	2	1	6	P
1	2008-12-19 02:25:00	102	NTA	2	1	6	P
1	2008-12-19 02:26:00	0	NTA	2	1	6	P
1	2008-12-19 02:27:00	0	NTA	2	1	6	P
1	2008-12-19 02:28:00	0	NTA	2	1	6	P
1	2008-12-19 02:29:00	0	NTA	2	1	6	P
1	2008-12-19 02:30:00	30	NTA	2	1	6	P
1	2008-12-19 02:31:00	0	NTA	2	1	6	P
1	2008-12-19 02:32:00	0	NTA	2	1	6	P
1	2008-12-19 02:33:00	0	NTA	2	1	6	P
1	2008-12-19 02:34:00	0	NTA	2	1	6	P
1	2008-12-19 02:35:00	0	NTA	2	1	6	P
1	2008-12-19 02:36:00	0	NTA	2	1	6	P
1	2008-12-19 02:37:00	0	NTA	2	1	6	P
1	2008-12-19 02:38:00	0	NTA	2	1	6	P
1	2008-12-19 02:39:00	0	NTA	2	1	6	P
1	2008-12-19 02:40:00	0	NTA	2	1	6	P
1	2008-12-19 02:41:00	0	NTA	2	1	6	P
1	2008-12-19 02:42:00	0	NTA	2	1	6	P
1	2008-12-19 02:43:00	0	NTA	2	1	6	P
1	2008-12-19 02:44:00	0	NTA	2	1	6	P
1	2008-12-19 02:45:00	0	NTA	2	1	6	P
1	2008-12-19 02:46:00	0	NTA	2	1	6	P
1	2008-12-19 02:47:00	0	NTA	2	1	6	P
1	2008-12-19 02:48:00	0	NTA	2	1	6	P
1	2008-12-19 02:49:00	0	NTA	2	1	6	P
1	2008-12-19 02:50:00	0	NTA	2	1	6	P
1	2008-12-19 02:51:00	0	NTA	2	1	6	P
1	2008-12-19 02:52:00	0	NTA	2	1	6	P
1	2008-12-19 02:53:00	0	NTA	2	1	6	P
1	2008-12-19 02:54:00	0	NTA	2	1	6	P
1	2008-12-19 02:55:00	0	NTA	2	1	6	P
1	2008-12-19 02:56:00	0	NTA	2	1	6	P
1	2008-12-19 02:57:00	0	NTA	2	1	6	P
1	2008-12-19 02:58:00	0	NTA	2	1	6	P
1	2008-12-19 02:59:00	0	NTA	2	1	6	P
1	2008-12-19 03:00:00	0	NTA	2	1	6	P
1	2008-12-19 03:01:00	0	NTA	3	1	6	P
1	2008-12-19 03:02:00	0	NTA	3	1	6	P
1	2008-12-19 03:03:00	0	NTA	3	1	6	P
1	2008-12-19 03:04:00	0	NTA	3	1	6	P
1	2008-12-19 03:05:00	0	NTA	3	1	6	P
1	2008-12-19 03:06:00	0	NTA	3	1	6	P
1	2008-12-19 03:07:00	10	NTA	3	1	6	P
1	2008-12-19 03:08:00	10	NTA	3	1	6	P
1	2008-12-19 03:09:00	41	NTA	3	1	6	P
1	2008-12-19 03:10:00	0	NTA	3	1	6	P
1	2008-12-19 03:11:00	0	NTA	3	1	6	P
1	2008-12-19 03:12:00	0	NTA	3	1	6	P
1	2008-12-19 03:13:00	20	NTA	3	1	6	P
1	2008-12-19 03:14:00	10	NTA	3	1	6	P
1	2008-12-19 03:15:00	0	NTA	3	1	6	P
1	2008-12-19 03:16:00	0	NTA	3	1	6	P
1	2008-12-19 03:17:00	30	NTA	3	1	6	P
1	2008-12-19 03:18:00	0	NTA	3	1	6	P
1	2008-12-19 03:19:00	0	NTA	3	1	6	P
1	2008-12-19 03:20:00	0	NTA	3	1	6	P
1	2008-12-19 03:21:00	0	NTA	3	1	6	P
1	2008-12-19 03:22:00	0	NTA	3	1	6	P
1	2008-12-19 03:23:00	0	NTA	3	1	6	P
1	2008-12-19 03:24:00	0	NTA	3	1	6	P
1	2008-12-19 03:25:00	0	NTA	3	1	6	P
1	2008-12-19 03:26:00	0	NTA	3	1	6	P
1	2008-12-19 03:27:00	0	NTA	3	1	6	P
1	2008-12-19 03:28:00	0	NTA	3	1	6	P
1	2008-12-19 03:29:00	0	NTA	3	1	6	P
1	2008-12-19 03:30:00	0	NTA	3	1	6	P
1	2008-12-19 03:31:00	0	NTA	3	1	6	P
1	2008-12-19 03:32:00	0	NTA	3	1	6	P
1	2008-12-19 03:33:00	0	NTA	3	1	6	P
1	2008-12-19 03:34:00	0	NTA	3	1	6	P
1	2008-12-19 03:35:00	0	NTA	3	1	6	P
1	2008-12-19 03:36:00	0	NTA	3	1	6	P
1	2008-12-19 03:37:00	0	NTA	3	1	6	P
1	2008-12-19 03:38:00	0	NTA	3	1	6	P
1	2008-12-19 03:39:00	0	NTA	3	1	6	P
1	2008-12-19 03:40:00	0	NTA	3	1	6	P
1	2008-12-19 03:41:00	0	NTA	3	1	6	P
1	2008-12-19 03:42:00	0	NTA	3	1	6	P
1	2008-12-19 03:43:00	0	NTA	3	1	6	P
1	2008-12-19 03:44:00	0	NTA	3	1	6	P
1	2008-12-19 03:45:00	0	NTA	3	1	6	P
1	2008-12-19 03:46:00	0	NTA	3	1	6	P
1	2008-12-19 03:47:00	0	NTA	3	1	6	P
1	2008-12-19 03:48:00	0	NTA	3	1	6	P
1	2008-12-19 03:49:00	10	NTA	3	1	6	P
1	2008-12-19 03:50:00	10	NTA	3	1	6	P
1	2008-12-19 03:51:00	10	NTA	3	1	6	P
1	2008-12-19 03:52:00	30	NTA	3	1	6	P
1	2008-12-19 03:53:00	0	NTA	3	1	6	P
1	2008-12-19 03:54:00	0	NTA	3	1	6	P
1	2008-12-19 03:55:00	30	NTA	3	1	6	P
1	2008-12-19 03:56:00	41	NTA	3	1	6	P
1	2008-12-19 03:57:00	10	NTA	3	1	6	P
1	2008-12-19 03:58:00	0	NTA	3	1	6	P
1	2008-12-19 03:59:00	0	NTA	3	1	6	P
1	2008-12-19 04:00:00	0	NTA	3	1	6	P
1	2008-12-19 04:01:00	0	NTA	4	1	6	P
1	2008-12-19 04:02:00	0	NTA	4	1	6	P
1	2008-12-19 04:03:00	0	NTA	4	1	6	P
1	2008-12-19 04:04:00	20	NTA	4	1	6	P
1	2008-12-19 04:05:00	20	NTA	4	1	6	P
1	2008-12-19 04:06:00	0	NTA	4	1	6	P
1	2008-12-19 04:07:00	0	NTA	4	1	6	P
1	2008-12-19 04:08:00	0	NTA	4	1	6	P
1	2008-12-19 04:09:00	0	NTA	4	1	6	P
1	2008-12-19 04:10:00	0	NTA	4	1	6	P
1	2008-12-19 04:11:00	0	NTA	4	1	6	P
1	2008-12-19 04:12:00	0	NTA	4	1	6	P
1	2008-12-19 04:13:00	0	NTA	4	1	6	P
1	2008-12-19 04:14:00	0	NTA	4	1	6	P
1	2008-12-19 04:15:00	0	NTA	4	1	6	P
1	2008-12-19 04:16:00	0	NTA	4	1	6	P
1	2008-12-19 04:17:00	0	NTA	4	1	6	P
1	2008-12-19 04:18:00	0	NTA	4	1	6	P
1	2008-12-19 04:19:00	0	NTA	4	1	6	P
1	2008-12-19 04:20:00	0	NTA	4	1	6	P
1	2008-12-19 04:21:00	0	NTA	4	1	6	P
1	2008-12-19 04:22:00	0	NTA	4	1	6	P
1	2008-12-19 04:23:00	0	NTA	4	1	6	P
1	2008-12-19 04:24:00	0	NTA	4	1	6	P
1	2008-12-19 04:25:00	0	NTA	4	1	6	P
1	2008-12-19 04:26:00	0	NTA	4	1	6	P
1	2008-12-19 04:27:00	0	NTA	4	1	6	P
1	2008-12-19 04:28:00	0	NTA	4	1	6	P
1	2008-12-19 04:29:00	0	NTA	4	1	6	P
1	2008-12-19 04:30:00	0	NTA	4	1	6	P
1	2008-12-19 04:31:00	0	NTA	4	1	6	P
1	2008-12-19 04:32:00	0	NTA	4	1	6	P
1	2008-12-19 04:33:00	0	NTA	4	1	6	P
1	2008-12-19 04:34:00	0	NTA	4	1	6	P
1	2008-12-19 04:35:00	0	NTA	4	1	6	P
1	2008-12-19 04:36:00	0	NTA	4	1	6	P
1	2008-12-19 04:37:00	0	NTA	4	1	6	P
1	2008-12-19 04:38:00	0	NTA	4	1	6	P
1	2008-12-19 04:39:00	0	NTA	4	1	6	P
1	2008-12-19 04:40:00	0	NTA	4	1	6	P
1	2008-12-19 04:41:00	0	NTA	4	1	6	P
1	2008-12-19 04:42:00	0	NTA	4	1	6	P
1	2008-12-19 04:43:00	0	NTA	4	1	6	P
1	2008-12-19 04:44:00	0	NTA	4	1	6	P
1	2008-12-19 04:45:00	0	NTA	4	1	6	P
1	2008-12-19 04:46:00	0	NTA	4	1	6	P
1	2008-12-19 04:47:00	20	NTA	4	1	6	P
1	2008-12-19 04:48:00	0	NTA	4	1	6	P
1	2008-12-19 04:49:00	0	NTA	4	1	6	P
1	2008-12-19 04:50:00	0	NTA	4	1	6	P
1	2008-12-19 04:51:00	0	NTA	4	1	6	P
1	2008-12-19 04:52:00	0	NTA	4	1	6	P
1	2008-12-19 04:53:00	0	NTA	4	1	6	P
1	2008-12-19 04:54:00	0	NTA	4	1	6	P
1	2008-12-19 04:55:00	0	NTA	4	1	6	P
1	2008-12-19 04:56:00	0	NTA	4	1	6	P
1	2008-12-19 04:57:00	0	NTA	4	1	6	P
1	2008-12-19 04:58:00	0	NTA	4	1	6	P
1	2008-12-19 04:59:00	0	NTA	4	1	6	P
1	2008-12-19 05:00:00	0	NTA	4	1	6	P
1	2008-12-19 05:01:00	0	NTA	5	1	6	P
1	2008-12-19 05:02:00	20	NTA	5	1	6	P
1	2008-12-19 05:03:00	0	NTA	5	1	6	P
1	2008-12-19 05:04:00	0	NTA	5	1	6	P
1	2008-12-19 05:05:00	0	NTA	5	1	6	P
1	2008-12-19 05:06:00	0	NTA	5	1	6	P
1	2008-12-19 05:07:00	0	NTA	5	1	6	P
1	2008-12-19 05:08:00	0	NTA	5	1	6	P
1	2008-12-19 05:09:00	0	NTA	5	1	6	P
1	2008-12-19 05:10:00	0	NTA	5	1	6	P
1	2008-12-19 05:11:00	0	NTA	5	1	6	P
1	2008-12-19 05:12:00	0	NTA	5	1	6	P
1	2008-12-19 05:13:00	0	NTA	5	1	6	P
1	2008-12-19 05:14:00	0	NTA	5	1	6	P
1	2008-12-19 05:15:00	0	NTA	5	1	6	P
1	2008-12-19 05:16:00	0	NTA	5	1	6	P
1	2008-12-19 05:17:00	0	NTA	5	1	6	P
1	2008-12-19 05:18:00	0	NTA	5	1	6	P
1	2008-12-19 05:19:00	0	NTA	5	1	6	P
1	2008-12-19 05:20:00	0	NTA	5	1	6	P
1	2008-12-19 05:21:00	0	NTA	5	1	6	P
1	2008-12-19 05:22:00	0	NTA	5	1	6	P
1	2008-12-19 05:23:00	0	NTA	5	1	6	P
1	2008-12-19 05:24:00	0	NTA	5	1	6	P
1	2008-12-19 05:25:00	0	NTA	5	1	6	P
1	2008-12-19 05:26:00	0	NTA	5	1	6	P
1	2008-12-19 05:27:00	0	NTA	5	1	6	P
1	2008-12-19 05:28:00	0	NTA	5	1	6	P
1	2008-12-19 05:29:00	0	NTA	5	1	6	P
1	2008-12-19 05:30:00	112	NTA	5	1	6	P
1	2008-12-19 05:31:00	10	NTA	5	1	6	P
1	2008-12-19 05:32:00	0	NTA	5	1	6	P
1	2008-12-19 05:33:00	0	NTA	5	1	6	P
1	2008-12-19 05:34:00	0	NTA	5	1	6	P
1	2008-12-19 05:35:00	102	NTA	5	1	6	P
1	2008-12-19 05:36:00	10	NTA	5	1	6	P
1	2008-12-19 05:37:00	10	NTA	5	1	6	P
1	2008-12-19 05:38:00	0	NTA	5	1	6	P
1	2008-12-19 05:39:00	0	NTA	5	1	6	P
1	2008-12-19 05:40:00	230	NTA	5	1	6	P
1	2008-12-19 05:41:00	0	NTA	5	1	6	P
1	2008-12-19 05:42:00	10	NTA	5	1	6	P
1	2008-12-19 05:43:00	20	NTA	5	1	6	P
1	2008-12-19 05:44:00	0	NTA	5	1	6	P
1	2008-12-19 05:45:00	0	NTA	5	1	6	P
1	2008-12-19 05:46:00	0	NTA	5	1	6	P
1	2008-12-19 05:47:00	0	NTA	5	1	6	P
1	2008-12-19 05:48:00	0	NTA	5	1	6	P
1	2008-12-19 05:49:00	0	NTA	5	1	6	P
1	2008-12-19 05:50:00	0	NTA	5	1	6	P
1	2008-12-19 05:51:00	0	NTA	5	1	6	P
1	2008-12-19 05:52:00	0	NTA	5	1	6	P
1	2008-12-19 05:53:00	0	NTA	5	1	6	P
1	2008-12-19 05:54:00	0	NTA	5	1	6	P
1	2008-12-19 05:55:00	0	NTA	5	1	6	P
1	2008-12-19 05:56:00	0	NTA	5	1	6	P
1	2008-12-19 05:57:00	0	NTA	5	1	6	P
1	2008-12-19 05:58:00	0	NTA	5	1	6	P
1	2008-12-19 05:59:00	0	NTA	5	1	6	P
1	2008-12-19 06:00:00	0	NTA	5	1	6	P
1	2008-12-19 06:01:00	0	NTA	6	1	6	P
1	2008-12-19 06:02:00	0	NTA	6	1	6	P
1	2008-12-19 06:03:00	0	NTA	6	1	6	P
1	2008-12-19 06:04:00	10	NTA	6	1	6	P
1	2008-12-19 06:05:00	0	NTA	6	1	6	P
1	2008-12-19 06:06:00	0	NTA	6	1	6	P
1	2008-12-19 06:07:00	0	NTA	6	1	6	P
1	2008-12-19 06:08:00	0	NTA	6	1	6	P
1	2008-12-19 06:09:00	0	NTA	6	1	6	P
1	2008-12-19 06:10:00	0	NTA	6	1	6	P
1	2008-12-19 06:11:00	0	NTA	6	1	6	P
1	2008-12-19 06:12:00	0	NTA	6	1	6	P
1	2008-12-19 06:13:00	0	NTA	6	1	6	P
1	2008-12-19 06:14:00	0	NTA	6	1	6	P
1	2008-12-19 06:15:00	0	NTA	6	1	6	P
1	2008-12-19 06:16:00	0	NTA	6	1	6	P
1	2008-12-19 06:17:00	0	NTA	6	1	6	P
1	2008-12-19 06:18:00	0	NTA	6	1	6	P
1	2008-12-19 06:19:00	0	NTA	6	1	6	P
1	2008-12-19 06:20:00	0	NTA	6	1	6	P
1	2008-12-19 06:21:00	0	NTA	6	1	6	P
1	2008-12-19 06:22:00	0	NTA	6	1	6	P
1	2008-12-19 06:23:00	0	NTA	6	1	6	P
1	2008-12-19 06:24:00	0	NTA	6	1	6	P
1	2008-12-19 06:25:00	0	NTA	6	1	6	P
1	2008-12-19 06:26:00	0	NTA	6	1	6	P
1	2008-12-19 06:27:00	0	NTA	6	1	6	P
1	2008-12-19 06:28:00	0	NTA	6	1	6	P
1	2008-12-19 06:29:00	0	NTA	6	1	6	P
1	2008-12-19 06:30:00	0	NTA	6	1	6	P
1	2008-12-19 06:31:00	0	NTA	6	1	6	P
1	2008-12-19 06:32:00	0	NTA	6	1	6	P
1	2008-12-19 06:33:00	0	NTA	6	1	6	P
1	2008-12-19 06:34:00	0	NTA	6	1	6	P
1	2008-12-19 06:35:00	0	NTA	6	1	6	P
1	2008-12-19 06:36:00	0	NTA	6	1	6	P
1	2008-12-19 06:37:00	0	NTA	6	1	6	P
1	2008-12-19 06:38:00	0	NTA	6	1	6	P
1	2008-12-19 06:39:00	0	NTA	6	1	6	P
1	2008-12-19 06:40:00	0	NTA	6	1	6	P
1	2008-12-19 06:41:00	0	NTA	6	1	6	P
1	2008-12-19 06:42:00	10	NTA	6	1	6	P
1	2008-12-19 06:43:00	0	NTA	6	1	6	P
1	2008-12-19 06:44:00	0	NTA	6	1	6	P
1	2008-12-19 06:45:00	0	NTA	6	1	6	P
1	2008-12-19 06:46:00	0	NTA	6	1	6	P
1	2008-12-19 06:47:00	0	NTA	6	1	6	P
1	2008-12-19 06:48:00	0	NTA	6	1	6	P
1	2008-12-19 06:49:00	0	NTA	6	1	6	P
1	2008-12-19 06:50:00	0	NTA	6	1	6	P
1	2008-12-19 06:51:00	0	NTA	6	1	6	P
1	2008-12-19 06:52:00	0	NTA	6	1	6	P
1	2008-12-19 06:53:00	0	NTA	6	1	6	P
1	2008-12-19 06:54:00	0	NTA	6	1	6	P
1	2008-12-19 06:55:00	0	NTA	6	1	6	P
1	2008-12-19 06:56:00	0	NTA	6	1	6	P
1	2008-12-19 06:57:00	0	NTA	6	1	6	P
1	2008-12-19 06:58:00	0	NTA	6	1	6	P
1	2008-12-19 06:59:00	0	NTA	6	1	6	P
1	2008-12-19 07:00:00	10	NTA	6	1	6	P
1	2008-12-19 07:01:00	0	NTA	7	1	6	P
1	2008-12-19 07:02:00	0	NTA	7	1	6	P
1	2008-12-19 07:03:00	0	NTA	7	1	6	P
1	2008-12-19 07:04:00	0	NTA	7	1	6	P
1	2008-12-19 07:05:00	0	NTA	7	1	6	P
1	2008-12-19 07:06:00	0	NTA	7	1	6	P
1	2008-12-19 07:07:00	10	NTA	7	1	6	P
1	2008-12-19 07:08:00	0	NTA	7	1	6	P
1	2008-12-19 07:09:00	0	NTA	7	1	6	P
1	2008-12-19 07:10:00	0	NTA	7	1	6	P
1	2008-12-19 07:11:00	0	NTA	7	1	6	P
1	2008-12-19 07:12:00	0	NTA	7	1	6	P
1	2008-12-19 07:13:00	0	NTA	7	1	6	P
1	2008-12-19 07:14:00	0	NTA	7	1	6	P
1	2008-12-19 07:15:00	0	NTA	7	1	6	P
1	2008-12-19 07:16:00	0	NTA	7	1	6	P
1	2008-12-19 07:17:00	0	NTA	7	1	6	P
1	2008-12-19 07:18:00	0	NTA	7	1	6	P
1	2008-12-19 07:19:00	0	NTA	7	1	6	P
1	2008-12-19 07:20:00	0	NTA	7	1	6	P
1	2008-12-19 07:21:00	0	NTA	7	1	6	P
1	2008-12-19 07:22:00	0	NTA	7	1	6	P
1	2008-12-19 07:23:00	0	NTA	7	1	6	P
1	2008-12-19 07:24:00	10	NTA	7	1	6	P
1	2008-12-19 07:25:00	0	NTA	7	1	6	P
1	2008-12-19 07:26:00	0	NTA	7	1	6	P
1	2008-12-19 07:27:00	10	NTA	7	1	6	P
1	2008-12-19 07:28:00	0	NTA	7	1	6	P
1	2008-12-19 07:29:00	0	NTA	7	1	6	P
1	2008-12-19 07:30:00	0	NTA	7	1	6	P
1	2008-12-19 07:31:00	10	NTA	7	1	6	P
1	2008-12-19 07:32:00	0	NTA	7	1	6	P
1	2008-12-19 07:33:00	0	NTA	7	1	6	P
1	2008-12-19 07:34:00	0	NTA	7	1	6	P
1	2008-12-19 07:35:00	0	NTA	7	1	6	P
1	2008-12-19 07:36:00	0	NTA	7	1	6	P
1	2008-12-19 07:37:00	0	NTA	7	1	6	P
1	2008-12-19 07:38:00	0	NTA	7	1	6	P
1	2008-12-19 07:39:00	10	NTA	7	1	6	P
1	2008-12-19 07:40:00	0	NTA	7	1	6	P
1	2008-12-19 07:41:00	839	NTA	7	1	6	P
1	2008-12-19 07:42:00	508	NTA	7	1	6	P
1	2008-12-19 07:43:00	295	NTA	7	1	6	P
1	2008-12-19 07:44:00	0	NTA	7	1	6	P
1	2008-12-19 07:45:00	0	NTA	7	1	6	P
1	2008-12-19 07:46:00	0	NTA	7	1	6	P
1	2008-12-19 07:47:00	0	NTA	7	1	6	P
1	2008-12-19 07:48:00	0	NTA	7	1	6	P
1	2008-12-19 07:49:00	0	NTA	7	1	6	P
1	2008-12-19 07:50:00	0	NTA	7	1	6	P
1	2008-12-19 07:51:00	0	NTA	7	1	6	P
1	2008-12-19 07:52:00	0	NTA	7	1	6	P
1	2008-12-19 07:53:00	0	NTA	7	1	6	P
1	2008-12-19 07:54:00	0	NTA	7	1	6	P
1	2008-12-19 07:55:00	0	NTA	7	1	6	P
1	2008-12-19 07:56:00	0	NTA	7	1	6	P
1	2008-12-19 07:57:00	0	NTA	7	1	6	P
1	2008-12-19 07:58:00	0	NTA	7	1	6	P
1	2008-12-19 07:59:00	10	NTA	7	1	6	P
1	2008-12-19 08:00:00	0	NTA	7	1	6	P
1	2008-12-19 08:01:00	0	DTA	8	1	6	P
1	2008-12-19 08:02:00	0	DTA	8	1	6	P
1	2008-12-19 08:03:00	0	DTA	8	1	6	P
1	2008-12-19 08:04:00	10	DTA	8	1	6	P
1	2008-12-19 08:05:00	0	DTA	8	1	6	P
1	2008-12-19 08:06:00	0	DTA	8	1	6	P
1	2008-12-19 08:07:00	0	DTA	8	1	6	P
1	2008-12-19 08:08:00	0	DTA	8	1	6	P
1	2008-12-19 08:09:00	0	DTA	8	1	6	P
1	2008-12-19 08:10:00	0	DTA	8	1	6	P
1	2008-12-19 08:11:00	0	DTA	8	1	6	P
1	2008-12-19 08:12:00	0	DTA	8	1	6	P
1	2008-12-19 08:13:00	0	DTA	8	1	6	P
1	2008-12-19 08:14:00	0	DTA	8	1	6	P
1	2008-12-19 08:15:00	0	DTA	8	1	6	P
1	2008-12-19 08:16:00	0	DTA	8	1	6	P
1	2008-12-19 08:17:00	10	DTA	8	1	6	P
1	2008-12-19 08:18:00	0	DTA	8	1	6	P
1	2008-12-19 08:19:00	0	DTA	8	1	6	P
1	2008-12-19 08:20:00	0	DTA	8	1	6	P
1	2008-12-19 08:21:00	0	DTA	8	1	6	P
1	2008-12-19 08:22:00	0	DTA	8	1	6	P
1	2008-12-19 08:23:00	10	DTA	8	1	6	P
1	2008-12-19 08:24:00	0	DTA	8	1	6	P
1	2008-12-19 08:25:00	0	DTA	8	1	6	P
1	2008-12-19 08:26:00	0	DTA	8	1	6	P
1	2008-12-19 08:27:00	0	DTA	8	1	6	P
1	2008-12-19 08:28:00	0	DTA	8	1	6	P
1	2008-12-19 08:29:00	0	DTA	8	1	6	P
1	2008-12-19 08:30:00	0	DTA	8	1	6	P
1	2008-12-19 08:31:00	0	DTA	8	1	6	P
1	2008-12-19 08:32:00	0	DTA	8	1	6	P
1	2008-12-19 08:33:00	0	DTA	8	1	6	P
1	2008-12-19 08:34:00	0	DTA	8	1	6	P
1	2008-12-19 08:35:00	0	DTA	8	1	6	P
1	2008-12-19 08:36:00	0	DTA	8	1	6	P
1	2008-12-19 08:37:00	0	DTA	8	1	6	P
1	2008-12-19 08:38:00	0	DTA	8	1	6	P
1	2008-12-19 08:39:00	0	DTA	8	1	6	P
1	2008-12-19 08:40:00	0	DTA	8	1	6	P
1	2008-12-19 08:41:00	0	DTA	8	1	6	P
1	2008-12-19 08:42:00	0	DTA	8	1	6	P
1	2008-12-19 08:43:00	0	DTA	8	1	6	P
1	2008-12-19 08:44:00	0	DTA	8	1	6	P
1	2008-12-19 08:45:00	0	DTA	8	1	6	P
1	2008-12-19 08:46:00	0	DTA	8	1	6	P
1	2008-12-19 08:47:00	0	DTA	8	1	6	P
1	2008-12-19 08:48:00	10	DTA	8	1	6	P
1	2008-12-19 08:49:00	0	DTA	8	1	6	P
1	2008-12-19 08:50:00	0	DTA	8	1	6	P
1	2008-12-19 08:51:00	0	DTA	8	1	6	P
1	2008-12-19 08:52:00	0	DTA	8	1	6	P
1	2008-12-19 08:53:00	0	DTA	8	1	6	P
1	2008-12-19 08:54:00	337	DTA	8	1	6	P
1	2008-12-19 08:55:00	30	DTA	8	1	6	P
1	2008-12-19 08:56:00	0	DTA	8	1	6	P
1	2008-12-19 08:57:00	0	DTA	8	1	6	P
1	2008-12-19 08:58:00	0	DTA	8	1	6	P
1	2008-12-19 08:59:00	0	DTA	8	1	6	P
1	2008-12-19 09:00:00	0	DTA	8	1	6	P
1	2008-12-19 09:01:00	0	DTA	9	1	6	P
1	2008-12-19 09:02:00	0	DTA	9	1	6	P
1	2008-12-19 09:03:00	0	DTA	9	1	6	P
1	2008-12-19 09:04:00	0	DTA	9	1	6	P
1	2008-12-19 09:05:00	0	DTA	9	1	6	P
1	2008-12-19 09:06:00	0	DTA	9	1	6	P
1	2008-12-19 09:07:00	0	DTA	9	1	6	P
1	2008-12-19 09:08:00	0	DTA	9	1	6	P
1	2008-12-19 09:09:00	0	DTA	9	1	6	P
1	2008-12-19 09:10:00	0	DTA	9	1	6	P
1	2008-12-19 09:11:00	0	DTA	9	1	6	P
1	2008-12-19 09:12:00	0	DTA	9	1	6	P
1	2008-12-19 09:13:00	0	DTA	9	1	6	P
1	2008-12-19 09:14:00	0	DTA	9	1	6	P
1	2008-12-19 09:15:00	0	DTA	9	1	6	P
1	2008-12-19 09:16:00	30	DTA	9	1	6	P
1	2008-12-19 09:17:00	0	DTA	9	1	6	P
1	2008-12-19 09:18:00	0	DTA	9	1	6	P
1	2008-12-19 09:19:00	0	DTA	9	1	6	P
1	2008-12-19 09:20:00	0	DTA	9	1	6	P
1	2008-12-19 09:21:00	0	DTA	9	1	6	P
1	2008-12-19 09:22:00	0	DTA	9	1	6	P
1	2008-12-19 09:23:00	0	DTA	9	1	6	P
1	2008-12-19 09:24:00	0	DTA	9	1	6	P
1	2008-12-19 09:25:00	0	DTA	9	1	6	P
1	2008-12-19 09:26:00	0	DTA	9	1	6	P
1	2008-12-19 09:27:00	0	DTA	9	1	6	P
1	2008-12-19 09:28:00	0	DTA	9	1	6	P
1	2008-12-19 09:29:00	0	DTA	9	1	6	P
1	2008-12-19 09:30:00	0	DTA	9	1	6	P
1	2008-12-19 09:31:00	41	DTA	9	1	6	P
1	2008-12-19 09:32:00	0	DTA	9	1	6	P
1	2008-12-19 09:33:00	0	DTA	9	1	6	P
1	2008-12-19 09:34:00	0	DTA	9	1	6	P
1	2008-12-19 09:35:00	0	DTA	9	1	6	P
1	2008-12-19 09:36:00	0	DTA	9	1	6	P
1	2008-12-19 09:37:00	10	DTA	9	1	6	P
1	2008-12-19 09:38:00	0	DTA	9	1	6	P
1	2008-12-19 09:39:00	0	DTA	9	1	6	P
1	2008-12-19 09:40:00	0	DTA	9	1	6	P
1	2008-12-19 09:41:00	0	DTA	9	1	6	P
1	2008-12-19 09:42:00	0	DTA	9	1	6	P
1	2008-12-19 09:43:00	0	DTA	9	1	6	P
1	2008-12-19 09:44:00	0	DTA	9	1	6	P
1	2008-12-19 09:45:00	0	DTA	9	1	6	P
1	2008-12-19 09:46:00	0	DTA	9	1	6	P
1	2008-12-19 09:47:00	0	DTA	9	1	6	P
1	2008-12-19 09:48:00	0	DTA	9	1	6	P
1	2008-12-19 09:49:00	0	DTA	9	1	6	P
1	2008-12-19 09:50:00	10	DTA	9	1	6	P
1	2008-12-19 09:51:00	0	DTA	9	1	6	P
1	2008-12-19 09:52:00	0	DTA	9	1	6	P
1	2008-12-19 09:53:00	0	DTA	9	1	6	P
1	2008-12-19 09:54:00	0	DTA	9	1	6	P
1	2008-12-19 09:55:00	0	DTA	9	1	6	P
1	2008-12-19 09:56:00	0	DTA	9	1	6	P
1	2008-12-19 09:57:00	0	DTA	9	1	6	P
1	2008-12-19 09:58:00	0	DTA	9	1	6	P
1	2008-12-19 09:59:00	0	DTA	9	1	6	P
1	2008-12-19 10:00:00	0	DTA	9	1	6	P
1	2008-12-19 10:01:00	0	DTA	10	1	6	P
1	2008-12-19 10:02:00	0	DTA	10	1	6	P
1	2008-12-19 10:03:00	0	DTA	10	1	6	P
1	2008-12-19 10:04:00	0	DTA	10	1	6	P
1	2008-12-19 10:05:00	0	DTA	10	1	6	P
1	2008-12-19 10:06:00	0	DTA	10	1	6	P
1	2008-12-19 10:07:00	0	DTA	10	1	6	P
1	2008-12-19 10:08:00	0	DTA	10	1	6	P
1	2008-12-19 10:09:00	0	DTA	10	1	6	P
1	2008-12-19 10:10:00	0	DTA	10	1	6	P
1	2008-12-19 10:11:00	0	DTA	10	1	6	P
1	2008-12-19 10:12:00	10	DTA	10	1	6	P
1	2008-12-19 10:13:00	0	DTA	10	1	6	P
1	2008-12-19 10:14:00	0	DTA	10	1	6	P
1	2008-12-19 10:15:00	0	DTA	10	1	6	P
1	2008-12-19 10:16:00	0	DTA	10	1	6	P
1	2008-12-19 10:17:00	0	DTA	10	1	6	P
1	2008-12-19 10:18:00	0	DTA	10	1	6	P
1	2008-12-19 10:19:00	0	DTA	10	1	6	P
1	2008-12-19 10:20:00	0	DTA	10	1	6	P
1	2008-12-19 10:21:00	0	DTA	10	1	6	P
1	2008-12-19 10:22:00	0	DTA	10	1	6	P
1	2008-12-19 10:23:00	0	DTA	10	1	6	P
1	2008-12-19 10:24:00	0	DTA	10	1	6	P
1	2008-12-19 10:25:00	0	DTA	10	1	6	P
1	2008-12-19 10:26:00	0	DTA	10	1	6	P
1	2008-12-19 10:27:00	0	DTA	10	1	6	P
1	2008-12-19 10:28:00	0	DTA	10	1	6	P
1	2008-12-19 10:29:00	0	DTA	10	1	6	P
1	2008-12-19 10:30:00	0	DTA	10	1	6	P
1	2008-12-19 10:31:00	0	DTA	10	1	6	P
1	2008-12-19 10:32:00	0	DTA	10	1	6	P
1	2008-12-19 10:33:00	0	DTA	10	1	6	P
1	2008-12-19 10:34:00	0	DTA	10	1	6	P
1	2008-12-19 10:35:00	459	DTA	10	1	6	P
1	2008-12-19 10:36:00	169	DTA	10	1	6	P
1	2008-12-19 10:37:00	169	DTA	10	1	6	P
1	2008-12-19 10:38:00	122	DTA	10	1	6	P
1	2008-12-19 10:39:00	30	DTA	10	1	6	P
1	2008-12-19 10:40:00	10	DTA	10	1	6	P
1	2008-12-19 10:41:00	20	DTA	10	1	6	P
1	2008-12-19 10:42:00	144	DTA	10	1	6	P
1	2008-12-19 10:43:00	91	DTA	10	1	6	P
1	2008-12-19 10:44:00	0	DTA	10	1	6	P
1	2008-12-19 10:45:00	0	DTA	10	1	6	P
1	2008-12-19 10:46:00	0	DTA	10	1	6	P
1	2008-12-19 10:47:00	0	DTA	10	1	6	P
1	2008-12-19 10:48:00	0	DTA	10	1	6	P
1	2008-12-19 10:49:00	0	DTA	10	1	6	P
1	2008-12-19 10:50:00	0	DTA	10	1	6	P
1	2008-12-19 10:51:00	0	DTA	10	1	6	P
1	2008-12-19 10:52:00	0	DTA	10	1	6	P
1	2008-12-19 10:53:00	0	DTA	10	1	6	P
1	2008-12-19 10:54:00	0	DTA	10	1	6	P
1	2008-12-19 10:55:00	0	DTA	10	1	6	P
1	2008-12-19 10:56:00	0	DTA	10	1	6	P
1	2008-12-19 10:57:00	0	DTA	10	1	6	P
1	2008-12-19 10:58:00	0	DTA	10	1	6	P
1	2008-12-19 10:59:00	10	DTA	10	1	6	P
1	2008-12-19 11:00:00	0	DTA	10	1	6	P
1	2008-12-19 11:01:00	0	DTA	11	1	6	P
1	2008-12-19 11:02:00	0	DTA	11	1	6	P
1	2008-12-19 11:03:00	10	DTA	11	1	6	P
1	2008-12-19 11:04:00	0	DTA	11	1	6	P
1	2008-12-19 11:05:00	0	DTA	11	1	6	P
1	2008-12-19 11:06:00	0	DTA	11	1	6	P
1	2008-12-19 11:07:00	0	DTA	11	1	6	P
1	2008-12-19 11:08:00	0	DTA	11	1	6	P
1	2008-12-19 11:09:00	0	DTA	11	1	6	P
1	2008-12-19 11:10:00	0	DTA	11	1	6	P
1	2008-12-19 11:11:00	0	DTA	11	1	6	P
1	2008-12-19 11:12:00	0	DTA	11	1	6	P
1	2008-12-19 11:13:00	0	DTA	11	1	6	P
1	2008-12-19 11:14:00	0	DTA	11	1	6	P
1	2008-12-19 11:15:00	0	DTA	11	1	6	P
1	2008-12-19 11:16:00	0	DTA	11	1	6	P
1	2008-12-19 11:17:00	0	DTA	11	1	6	P
1	2008-12-19 11:18:00	0	DTA	11	1	6	P
1	2008-12-19 11:19:00	0	DTA	11	1	6	P
1	2008-12-19 11:20:00	0	DTA	11	1	6	P
1	2008-12-19 11:21:00	0	DTA	11	1	6	P
1	2008-12-19 11:22:00	0	DTA	11	1	6	P
1	2008-12-19 11:23:00	0	DTA	11	1	6	P
1	2008-12-19 11:24:00	0	DTA	11	1	6	P
1	2008-12-19 11:25:00	0	DTA	11	1	6	P
1	2008-12-19 11:26:00	10	DTA	11	1	6	P
1	2008-12-19 11:27:00	0	DTA	11	1	6	P
1	2008-12-19 11:28:00	0	DTA	11	1	6	P
1	2008-12-19 11:29:00	10	DTA	11	1	6	P
1	2008-12-19 11:30:00	0	DTA	11	1	6	P
1	2008-12-19 11:31:00	0	DTA	11	1	6	P
1	2008-12-19 11:32:00	10	DTA	11	1	6	P
1	2008-12-19 11:33:00	0	DTA	11	1	6	P
1	2008-12-19 11:34:00	0	DTA	11	1	6	P
1	2008-12-19 11:35:00	0	DTA	11	1	6	P
1	2008-12-19 11:36:00	0	DTA	11	1	6	P
1	2008-12-19 11:37:00	0	DTA	11	1	6	P
1	2008-12-19 11:38:00	0	DTA	11	1	6	P
1	2008-12-19 11:39:00	0	DTA	11	1	6	P
1	2008-12-19 11:40:00	0	DTA	11	1	6	P
1	2008-12-19 11:41:00	10	DTA	11	1	6	P
1	2008-12-19 11:42:00	0	DTA	11	1	6	P
1	2008-12-19 11:43:00	0	DTA	11	1	6	P
1	2008-12-19 11:44:00	0	DTA	11	1	6	P
1	2008-12-19 11:45:00	0	DTA	11	1	6	P
1	2008-12-19 11:46:00	0	DTA	11	1	6	P
1	2008-12-19 11:47:00	0	DTA	11	1	6	P
1	2008-12-19 11:48:00	0	DTA	11	1	6	P
1	2008-12-19 11:49:00	0	DTA	11	1	6	P
1	2008-12-19 11:50:00	0	DTA	11	1	6	P
1	2008-12-19 11:51:00	0	DTA	11	1	6	P
1	2008-12-19 11:52:00	0	DTA	11	1	6	P
1	2008-12-19 11:53:00	0	DTA	11	1	6	P
1	2008-12-19 11:54:00	0	DTA	11	1	6	P
1	2008-12-19 11:55:00	0	DTA	11	1	6	P
1	2008-12-19 11:56:00	0	DTA	11	1	6	P
1	2008-12-19 11:57:00	0	DTA	11	1	6	P
1	2008-12-19 11:58:00	0	DTA	11	1	6	P
1	2008-12-19 11:59:00	0	DTA	11	1	6	P
1	2008-12-19 12:00:00	0	DTA	11	1	6	P
1	2008-12-19 12:01:00	0	DTA	12	1	6	P
1	2008-12-19 12:02:00	10	DTA	12	1	6	P
1	2008-12-19 12:03:00	41	DTA	12	1	6	P
1	2008-12-19 12:04:00	10	DTA	12	1	6	P
1	2008-12-19 12:05:00	0	DTA	12	1	6	P
1	2008-12-19 12:06:00	0	DTA	12	1	6	P
1	2008-12-19 12:07:00	10	DTA	12	1	6	P
1	2008-12-19 12:08:00	0	DTA	12	1	6	P
1	2008-12-19 12:09:00	0	DTA	12	1	6	P
1	2008-12-19 12:10:00	0	DTA	12	1	6	P
1	2008-12-19 12:11:00	0	DTA	12	1	6	P
1	2008-12-19 12:12:00	410	DTA	12	1	6	P
1	2008-12-19 12:13:00	323	DTA	12	1	6	P
1	2008-12-19 12:14:00	0	DTA	12	1	6	P
1	2008-12-19 12:15:00	0	DTA	12	1	6	P
1	2008-12-19 12:16:00	0	DTA	12	1	6	P
1	2008-12-19 12:17:00	0	DTA	12	1	6	P
1	2008-12-19 12:18:00	0	DTA	12	1	6	P
1	2008-12-19 12:19:00	0	DTA	12	1	6	P
1	2008-12-19 12:20:00	0	DTA	12	1	6	P
1	2008-12-19 12:21:00	0	DTA	12	1	6	P
1	2008-12-19 12:22:00	0	DTA	12	1	6	P
1	2008-12-19 12:23:00	0	DTA	12	1	6	P
1	2008-12-19 12:24:00	0	DTA	12	1	6	P
1	2008-12-19 12:25:00	0	DTA	12	1	6	P
1	2008-12-19 12:26:00	0	DTA	12	1	6	P
1	2008-12-19 12:27:00	0	DTA	12	1	6	P
1	2008-12-19 12:28:00	0	DTA	12	1	6	P
1	2008-12-19 12:29:00	0	DTA	12	1	6	P
1	2008-12-19 12:30:00	0	DTA	12	1	6	P
1	2008-12-19 12:31:00	0	DTA	12	1	6	P
1	2008-12-19 12:32:00	0	DTA	12	1	6	P
1	2008-12-19 12:33:00	0	DTA	12	1	6	P
1	2008-12-19 12:34:00	0	DTA	12	1	6	P
1	2008-12-19 12:35:00	10	DTA	12	1	6	P
1	2008-12-19 12:36:00	0	DTA	12	1	6	P
1	2008-12-19 12:37:00	0	DTA	12	1	6	P
1	2008-12-19 12:38:00	0	DTA	12	1	6	P
1	2008-12-19 12:39:00	0	DTA	12	1	6	P
1	2008-12-19 12:40:00	0	DTA	12	1	6	P
1	2008-12-19 12:41:00	0	DTA	12	1	6	P
1	2008-12-19 12:42:00	0	DTA	12	1	6	P
1	2008-12-19 12:43:00	0	DTA	12	1	6	P
1	2008-12-19 12:44:00	51	DTA	12	1	6	P
1	2008-12-19 12:45:00	0	DTA	12	1	6	P
1	2008-12-19 12:46:00	0	DTA	12	1	6	P
1	2008-12-19 12:47:00	10	DTA	12	1	6	P
1	2008-12-19 12:48:00	0	DTA	12	1	6	P
1	2008-12-19 12:49:00	0	DTA	12	1	6	P
1	2008-12-19 12:50:00	0	DTA	12	1	6	P
1	2008-12-19 12:51:00	0	DTA	12	1	6	P
1	2008-12-19 12:52:00	0	DTA	12	1	6	P
1	2008-12-19 12:53:00	0	DTA	12	1	6	P
1	2008-12-19 12:54:00	0	DTA	12	1	6	P
1	2008-12-19 12:55:00	0	DTA	12	1	6	P
1	2008-12-19 12:56:00	0	DTA	12	1	6	P	Peak DTA
1	2008-12-19 12:57:00	0	DTA	12	1	6	P	Peak DTA
1	2008-12-19 12:58:00	0	DTA	12	1	6	P	Peak DTA
1	2008-12-19 12:59:00	0	DTA	12	1	6	P	Peak DTA
1	2008-12-19 13:00:00	0	DTA	12	1	6	P	Peak DTA
1	2008-12-19 13:01:00	0	DTA	13	1	6	P	Peak DTA
1	2008-12-19 13:02:00	0	DTA	13	1	6	P	Peak DTA
1	2008-12-19 13:03:00	0	DTA	13	1	6	P	Peak DTA
1	2008-12-19 13:04:00	0	DTA	13	1	6	P	Peak DTA
1	2008-12-19 13:05:00	0	DTA	13	1	6	P	Peak DTA
1	2008-12-19 13:06:00	10	DTA	13	1	6	P	Peak DTA
1	2008-12-19 13:07:00	0	DTA	13	1	6	P	Peak DTA
1	2008-12-19 13:08:00	0	DTA	13	1	6	P	Peak DTA
1	2008-12-19 13:09:00	0	DTA	13	1	6	P	Peak DTA
1	2008-12-19 13:10:00	0	DTA	13	1	6	P	Peak DTA
1	2008-12-19 13:11:00	0	DTA	13	1	6	P	Peak DTA
1	2008-12-19 13:12:00	0	DTA	13	1	6	P	Peak DTA
1	2008-12-19 13:13:00	0	DTA	13	1	6	P	Peak DTA
1	2008-12-19 13:14:00	0	DTA	13	1	6	P	Peak DTA
1	2008-12-19 13:15:00	0	DTA	13	1	6	P	Peak DTA
1	2008-12-19 13:16:00	0	DTA	13	1	6	P	Peak DTA
1	2008-12-19 13:17:00	0	DTA	13	1	6	P	Peak DTA
1	2008-12-19 13:18:00	0	DTA	13	1	6	P	Peak DTA
1	2008-12-19 13:19:00	0	DTA	13	1	6	P	Peak DTA
1	2008-12-19 13:20:00	0	DTA	13	1	6	P	Peak DTA
1	2008-12-19 13:21:00	0	DTA	13	1	6	P	Peak DTA
1	2008-12-19 13:22:00	0	DTA	13	1	6	P	Peak DTA
1	2008-12-19 13:23:00	0	DTA	13	1	6	P	Peak DTA
1	2008-12-19 13:24:00	0	DTA	13	1	6	P	Peak DTA
1	2008-12-19 13:25:00	0	DTA	13	1	6	P	Peak DTA
1	2008-12-19 13:26:00	30	DTA	13	1	6	P	Peak DTA
1	2008-12-19 13:27:00	169	DTA	13	1	6	P	Peak DTA
1	2008-12-19 13:28:00	0	DTA	13	1	6	P	Peak DTA
1	2008-12-19 13:29:00	0	DTA	13	1	6	P	Peak DTA
1	2008-12-19 13:30:00	0	DTA	13	1	6	P	Peak DTA
1	2008-12-19 13:31:00	0	DTA	13	1	6	P	Peak DTA
1	2008-12-19 13:32:00	0	DTA	13	1	6	P	Peak DTA
1	2008-12-19 13:33:00	0	DTA	13	1	6	P	Peak DTA
1	2008-12-19 13:34:00	0	DTA	13	1	6	P	Peak DTA
1	2008-12-19 13:35:00	0	DTA	13	1	6	P	Peak DTA
1	2008-12-19 13:36:00	0	DTA	13	1	6	P	Peak DTA
1	2008-12-19 13:37:00	0	DTA	13	1	6	P	Peak DTA
1	2008-12-19 13:38:00	366	DTA	13	1	6	P	Peak DTA
1	2008-12-19 13:39:00	427	DTA	13	1	6	P	Peak DTA
1	2008-12-19 13:40:00	542	DTA	13	1	6	P	Peak DTA
1	2008-12-19 13:41:00	561	DTA	13	1	6	P	Peak DTA
1	2008-12-19 13:42:00	266	DTA	13	1	6	P	Peak DTA
1	2008-12-19 13:43:00	122	DTA	13	1	6	P	Peak DTA
1	2008-12-19 13:44:00	81	DTA	13	1	6	P	Peak DTA
1	2008-12-19 13:45:00	91	DTA	13	1	6	P	Peak DTA
1	2008-12-19 13:46:00	132	DTA	13	1	6	P	Peak DTA
1	2008-12-19 13:47:00	132	DTA	13	1	6	P	Peak DTA
1	2008-12-19 13:48:00	309	DTA	13	1	6	P	Peak DTA
1	2008-12-19 13:49:00	132	DTA	13	1	6	P	Peak DTA
1	2008-12-19 13:50:00	10	DTA	13	1	6	P	Peak DTA
1	2008-12-19 13:51:00	0	DTA	13	1	6	P	Peak DTA
1	2008-12-19 13:52:00	0	DTA	13	1	6	P	Peak DTA
1	2008-12-19 13:53:00	0	DTA	13	1	6	P	Peak DTA
1	2008-12-19 13:54:00	0	DTA	13	1	6	P	Peak DTA
1	2008-12-19 13:55:00	0	DTA	13	1	6	P	Peak DTA
1	2008-12-19 13:56:00	0	DTA	13	1	6	P	Peak DTA
1	2008-12-19 13:57:00	0	DTA	13	1	6	P	Peak DTA
1	2008-12-19 13:58:00	0	DTA	13	1	6	P	Peak DTA
1	2008-12-19 13:59:00	0	DTA	13	1	6	P	Peak DTA
1	2008-12-19 14:00:00	0	DTA	13	1	6	P	Peak DTA
1	2008-12-19 14:01:00	0	DTA	14	1	6	P	Peak DTA
1	2008-12-19 14:02:00	0	DTA	14	1	6	P	Peak DTA
1	2008-12-19 14:03:00	81	DTA	14	1	6	P	Peak DTA
1	2008-12-19 14:04:00	427	DTA	14	1	6	P	Peak DTA
1	2008-12-19 14:05:00	30	DTA	14	1	6	P	Peak DTA
1	2008-12-19 14:06:00	10	DTA	14	1	6	P	Peak DTA
1	2008-12-19 14:07:00	30	DTA	14	1	6	P	Peak DTA
1	2008-12-19 14:08:00	51	DTA	14	1	6	P	Peak DTA
1	2008-12-19 14:09:00	71	DTA	14	1	6	P	Peak DTA
1	2008-12-19 14:10:00	10	DTA	14	1	6	P	Peak DTA
1	2008-12-19 14:11:00	0	DTA	14	1	6	P	Peak DTA
1	2008-12-19 14:12:00	0	DTA	14	1	6	P	Peak DTA
1	2008-12-19 14:13:00	0	DTA	14	1	6	P	Peak DTA
1	2008-12-19 14:14:00	0	DTA	14	1	6	P	Peak DTA
1	2008-12-19 14:15:00	0	DTA	14	1	6	P	Peak DTA
1	2008-12-19 14:16:00	0	DTA	14	1	6	P	Peak DTA
1	2008-12-19 14:17:00	0	DTA	14	1	6	P	Peak DTA
1	2008-12-19 14:18:00	0	DTA	14	1	6	P	Peak DTA
1	2008-12-19 14:19:00	323	DTA	14	1	6	P	Peak DTA
1	2008-12-19 14:20:00	0	DTA	14	1	6	P	Peak DTA
1	2008-12-19 14:21:00	20	DTA	14	1	6	P	Peak DTA
1	2008-12-19 14:22:00	0	DTA	14	1	6	P	Peak DTA
1	2008-12-19 14:23:00	0	DTA	14	1	6	P	Peak DTA
1	2008-12-19 14:24:00	0	DTA	14	1	6	P	Peak DTA
1	2008-12-19 14:25:00	0	DTA	14	1	6	P	Peak DTA
1	2008-12-19 14:26:00	0	DTA	14	1	6	P	Peak DTA
1	2008-12-19 14:27:00	0	DTA	14	1	6	P	Peak DTA
1	2008-12-19 14:28:00	0	DTA	14	1	6	P	Peak DTA
1	2008-12-19 14:29:00	51	DTA	14	1	6	P	Peak DTA
1	2008-12-19 14:30:00	71	DTA	14	1	6	P	Peak DTA
1	2008-12-19 14:31:00	0	DTA	14	1	6	P	Peak DTA
1	2008-12-19 14:32:00	0	DTA	14	1	6	P	Peak DTA
1	2008-12-19 14:33:00	0	DTA	14	1	6	P	Peak DTA
1	2008-12-19 14:34:00	0	DTA	14	1	6	P	Peak DTA
1	2008-12-19 14:35:00	0	DTA	14	1	6	P	Peak DTA
1	2008-12-19 14:36:00	0	DTA	14	1	6	P	Peak DTA
1	2008-12-19 14:37:00	0	DTA	14	1	6	P	Peak DTA
1	2008-12-19 14:38:00	0	DTA	14	1	6	P	Peak DTA
1	2008-12-19 14:39:00	144	DTA	14	1	6	P	Peak DTA
1	2008-12-19 14:40:00	20	DTA	14	1	6	P	Peak DTA
1	2008-12-19 14:41:00	217	DTA	14	1	6	P	Peak DTA
1	2008-12-19 14:42:00	71	DTA	14	1	6	P	Peak DTA
1	2008-12-19 14:43:00	309	DTA	14	1	6	P	Peak DTA
1	2008-12-19 14:44:00	51	DTA	14	1	6	P	Peak DTA
1	2008-12-19 14:45:00	295	DTA	14	1	6	P	Peak DTA
1	2008-12-19 14:46:00	181	DTA	14	1	6	P	Peak DTA
1	2008-12-19 14:47:00	193	DTA	14	1	6	P	Peak DTA
1	2008-12-19 14:48:00	839	DTA	14	1	6	P	Peak DTA
1	2008-12-19 14:49:00	181	DTA	14	1	6	P	Peak DTA
1	2008-12-19 14:50:00	0	DTA	14	1	6	P	Peak DTA
1	2008-12-19 14:51:00	0	DTA	14	1	6	P	Peak DTA
1	2008-12-19 14:52:00	0	DTA	14	1	6	P	Peak DTA
1	2008-12-19 14:53:00	0	DTA	14	1	6	P	Peak DTA
1	2008-12-19 14:54:00	0	DTA	14	1	6	P	Peak DTA
1	2008-12-19 14:55:00	71	DTA	14	1	6	P	Peak DTA
1	2008-12-19 14:56:00	169	DTA	14	1	6	P	Peak DTA
1	2008-12-19 14:57:00	205	DTA	14	1	6	P	Peak DTA
1	2008-12-19 14:58:00	91	DTA	14	1	6	P	Peak DTA
1	2008-12-19 14:59:00	0	DTA	14	1	6	P	Peak DTA
1	2008-12-19 15:00:00	0	DTA	14	1	6	P	Peak DTA
1	2008-12-19 15:01:00	0	DTA	15	1	6	P	Peak DTA
1	2008-12-19 15:02:00	0	DTA	15	1	6	P	Peak DTA
1	2008-12-19 15:03:00	0	DTA	15	1	6	P	Peak DTA
1	2008-12-19 15:04:00	0	DTA	15	1	6	P	Peak DTA
1	2008-12-19 15:05:00	0	DTA	15	1	6	P	Peak DTA
1	2008-12-19 15:06:00	0	DTA	15	1	6	P	Peak DTA
1	2008-12-19 15:07:00	0	DTA	15	1	6	P	Peak DTA
1	2008-12-19 15:08:00	0	DTA	15	1	6	P	Peak DTA
1	2008-12-19 15:09:00	0	DTA	15	1	6	P	Peak DTA
1	2008-12-19 15:10:00	0	DTA	15	1	6	P	Peak DTA
1	2008-12-19 15:11:00	0	DTA	15	1	6	P	Peak DTA
1	2008-12-19 15:12:00	51	DTA	15	1	6	P	Peak DTA
1	2008-12-19 15:13:00	0	DTA	15	1	6	P	Peak DTA
1	2008-12-19 15:14:00	0	DTA	15	1	6	P	Peak DTA
1	2008-12-19 15:15:00	0	DTA	15	1	6	P	Peak DTA
1	2008-12-19 15:16:00	0	DTA	15	1	6	P	Peak DTA
1	2008-12-19 15:17:00	0	DTA	15	1	6	P	Peak DTA
1	2008-12-19 15:18:00	0	DTA	15	1	6	P	Peak DTA
1	2008-12-19 15:19:00	0	DTA	15	1	6	P	Peak DTA
1	2008-12-19 15:20:00	0	DTA	15	1	6	P	Peak DTA
1	2008-12-19 15:21:00	0	DTA	15	1	6	P	Peak DTA
1	2008-12-19 15:22:00	71	DTA	15	1	6	P	Peak DTA
1	2008-12-19 15:23:00	61	DTA	15	1	6	P	Peak DTA
1	2008-12-19 15:24:00	0	DTA	15	1	6	P	Peak DTA
1	2008-12-19 15:25:00	0	DTA	15	1	6	P	Peak DTA
1	2008-12-19 15:26:00	0	DTA	15	1	6	P	Peak DTA
1	2008-12-19 15:27:00	0	DTA	15	1	6	P	Peak DTA
1	2008-12-19 15:28:00	0	DTA	15	1	6	P	Peak DTA
1	2008-12-19 15:29:00	0	DTA	15	1	6	P	Peak DTA
1	2008-12-19 15:30:00	0	DTA	15	1	6	P	Peak DTA
1	2008-12-19 15:31:00	20	DTA	15	1	6	P	Peak DTA
1	2008-12-19 15:32:00	0	DTA	15	1	6	P	Peak DTA
1	2008-12-19 15:33:00	0	DTA	15	1	6	P	Peak DTA
1	2008-12-19 15:34:00	0	DTA	15	1	6	P	Peak DTA
1	2008-12-19 15:35:00	41	DTA	15	1	6	P	Peak DTA
1	2008-12-19 15:36:00	616	DTA	15	1	6	P	Peak DTA
1	2008-12-19 15:37:00	861	DTA	15	1	6	P	Peak DTA
1	2008-12-19 15:38:00	713	DTA	15	1	6	P	Peak DTA
1	2008-12-19 15:39:00	906	DTA	15	1	6	P	Peak DTA
1	2008-12-19 15:40:00	427	DTA	15	1	6	P	Peak DTA
1	2008-12-19 15:41:00	30	DTA	15	1	6	P	Peak DTA
1	2008-12-19 15:42:00	0	DTA	15	1	6	P	Peak DTA
1	2008-12-19 15:43:00	0	DTA	15	1	6	P	Peak DTA
1	2008-12-19 15:44:00	0	DTA	15	1	6	P	Peak DTA
1	2008-12-19 15:45:00	0	DTA	15	1	6	P	Peak DTA
1	2008-12-19 15:46:00	0	DTA	15	1	6	P	Peak DTA
1	2008-12-19 15:47:00	0	DTA	15	1	6	P	Peak DTA
1	2008-12-19 15:48:00	0	DTA	15	1	6	P	Peak DTA
1	2008-12-19 15:49:00	0	DTA	15	1	6	P	Peak DTA
1	2008-12-19 15:50:00	0	DTA	15	1	6	P	Peak DTA
1	2008-12-19 15:51:00	0	DTA	15	1	6	P	Peak DTA
1	2008-12-19 15:52:00	0	DTA	15	1	6	P	Peak DTA
1	2008-12-19 15:53:00	1130	DTA	15	1	6	P	Peak DTA
1	2008-12-19 15:54:00	634	DTA	15	1	6	P	Peak DTA
1	2008-12-19 15:55:00	132	DTA	15	1	6	P	Peak DTA
1	2008-12-19 15:56:00	144	DTA	15	1	6	P	Peak DTA
1	2008-12-19 15:57:00	0	DTA	15	1	6	P	Peak DTA
1	2008-12-19 15:58:00	41	DTA	15	1	6	P	Peak DTA
1	2008-12-19 15:59:00	817	DTA	15	1	6	P	Peak DTA
1	2008-12-19 16:00:00	144	DTA	15	1	6	P	Peak DTA
1	2008-12-19 16:01:00	0	DTA	16	1	6	P	Peak DTA
1	2008-12-19 16:02:00	0	DTA	16	1	6	P	Peak DTA
1	2008-12-19 16:03:00	884	DTA	16	1	6	P	Peak DTA
1	2008-12-19 16:04:00	1026	DTA	16	1	6	P	Peak DTA
1	2008-12-19 16:05:00	122	DTA	16	1	6	P	Peak DTA
1	2008-12-19 16:06:00	71	DTA	16	1	6	P	Peak DTA
1	2008-12-19 16:07:00	41	DTA	16	1	6	P	Peak DTA
1	2008-12-19 16:08:00	132	DTA	16	1	6	P	Peak DTA
1	2008-12-19 16:09:00	41	DTA	16	1	6	P	Peak DTA
1	2008-12-19 16:10:00	81	DTA	16	1	6	P	Peak DTA
1	2008-12-19 16:11:00	51	DTA	16	1	6	P	Peak DTA
1	2008-12-19 16:12:00	20	DTA	16	1	6	P	Peak DTA
1	2008-12-19 16:13:00	0	DTA	16	1	6	P	Peak DTA
1	2008-12-19 16:14:00	0	DTA	16	1	6	P	Peak DTA
1	2008-12-19 16:15:00	20	DTA	16	1	6	P	Peak DTA
1	2008-12-19 16:16:00	0	DTA	16	1	6	P	Peak DTA
1	2008-12-19 16:17:00	0	DTA	16	1	6	P	Peak DTA
1	2008-12-19 16:18:00	0	DTA	16	1	6	P	Peak DTA
1	2008-12-19 16:19:00	0	DTA	16	1	6	P	Peak DTA
1	2008-12-19 16:20:00	169	DTA	16	1	6	P	Peak DTA
1	2008-12-19 16:21:00	91	DTA	16	1	6	P	Peak DTA
1	2008-12-19 16:22:00	1130	DTA	16	1	6	P	Peak DTA
1	2008-12-19 16:23:00	144	DTA	16	1	6	P	Peak DTA
1	2008-12-19 16:24:00	0	DTA	16	1	6	P	Peak DTA
1	2008-12-19 16:25:00	0	DTA	16	1	6	P	Peak DTA
1	2008-12-19 16:26:00	0	DTA	16	1	6	P	Peak DTA
1	2008-12-19 16:27:00	0	DTA	16	1	6	P	Peak DTA
1	2008-12-19 16:28:00	0	DTA	16	1	6	P	Peak DTA
1	2008-12-19 16:29:00	0	DTA	16	1	6	P	Peak DTA
1	2008-12-19 16:30:00	0	DTA	16	1	6	P	Peak DTA
1	2008-12-19 16:31:00	906	DTA	16	1	6	P	Peak DTA
1	2008-12-19 16:32:00	0	DTA	16	1	6	P	Peak DTA
1	2008-12-19 16:33:00	0	DTA	16	1	6	P	Peak DTA
1	2008-12-19 16:34:00	0	DTA	16	1	6	P	Peak DTA
1	2008-12-19 16:35:00	0	DTA	16	1	6	P	Peak DTA
1	2008-12-19 16:36:00	0	DTA	16	1	6	P	Peak DTA
1	2008-12-19 16:37:00	10	DTA	16	1	6	P	Peak DTA
1	2008-12-19 16:38:00	0	DTA	16	1	6	P	Peak DTA
1	2008-12-19 16:39:00	1902	DTA	16	1	6	P	Peak DTA
1	2008-12-19 16:40:00	41	DTA	16	1	6	P	Peak DTA
1	2008-12-19 16:41:00	20	DTA	16	1	6	P	Peak DTA
1	2008-12-19 16:42:00	794	DTA	16	1	6	P	Peak DTA
1	2008-12-19 16:43:00	1416	DTA	16	1	6	P	Peak DTA
1	2008-12-19 16:44:00	51	DTA	16	1	6	P	Peak DTA
1	2008-12-19 16:45:00	508	DTA	16	1	6	P	Peak DTA
1	2008-12-19 16:46:00	169	DTA	16	1	6	P	Peak DTA
1	2008-12-19 16:47:00	394	DTA	16	1	6	P	Peak DTA
1	2008-12-19 16:48:00	953	DTA	16	1	6	P	Peak DTA
1	2008-12-19 16:49:00	410	DTA	16	1	6	P	Peak DTA
1	2008-12-19 16:50:00	295	DTA	16	1	6	P	Peak DTA
1	2008-12-19 16:51:00	1544	DTA	16	1	6	P	Peak DTA
1	2008-12-19 16:52:00	839	DTA	16	1	6	P	Peak DTA
1	2008-12-19 16:53:00	205	DTA	16	1	6	P	Peak DTA
1	2008-12-19 16:54:00	524	DTA	16	1	6	P	Peak DTA
1	2008-12-19 16:55:00	337	DTA	16	1	6	P	Peak DTA
1	2008-12-19 16:56:00	132	DTA	16	1	6	P	Peak DTA
1	2008-12-19 16:57:00	410	DTA	16	1	6	P	Peak DTA
1	2008-12-19 16:58:00	193	DTA	16	1	6	P	Peak DTA
1	2008-12-19 16:59:00	693	DTA	16	1	6	P	Peak DTA
1	2008-12-19 17:00:00	492	DTA	16	1	6	P	Peak DTA
1	2008-12-19 17:01:00	693	DTA	17	1	6	P	Peak DTA
1	2008-12-19 17:02:00	906	DTA	17	1	6	P	Peak DTA
1	2008-12-19 17:03:00	81	DTA	17	1	6	P	Peak DTA
1	2008-12-19 17:04:00	0	DTA	17	1	6	P	Peak DTA
1	2008-12-19 17:05:00	673	DTA	17	1	6	P	Peak DTA
1	2008-12-19 17:06:00	410	DTA	17	1	6	P	Peak DTA
1	2008-12-19 17:07:00	81	DTA	17	1	6	P	Peak DTA
1	2008-12-19 17:08:00	10	DTA	17	1	6	P	Peak DTA
1	2008-12-19 17:09:00	20	DTA	17	1	6	P	Peak DTA
1	2008-12-19 17:10:00	0	DTA	17	1	6	P	Peak DTA
1	2008-12-19 17:11:00	337	DTA	17	1	6	P	Peak DTA
1	2008-12-19 17:12:00	280	DTA	17	1	6	P	Peak DTA
1	2008-12-19 17:13:00	953	DTA	17	1	6	P	Peak DTA
1	2008-12-19 17:14:00	41	DTA	17	1	6	P	Peak DTA
1	2008-12-19 17:15:00	0	DTA	17	1	6	P	Peak DTA
1	2008-12-19 17:16:00	0	DTA	17	1	6	P	Peak DTA
1	2008-12-19 17:17:00	0	DTA	17	1	6	P	Peak DTA
1	2008-12-19 17:18:00	0	DTA	17	1	6	P	Peak DTA
1	2008-12-19 17:19:00	0	DTA	17	1	6	P	Peak DTA
1	2008-12-19 17:20:00	0	DTA	17	1	6	P	Peak DTA
1	2008-12-19 17:21:00	0	DTA	17	1	6	P	Peak DTA
1	2008-12-19 17:22:00	0	DTA	17	1	6	P	Peak DTA
1	2008-12-19 17:23:00	0	DTA	17	1	6	P	Peak DTA
1	2008-12-19 17:24:00	0	DTA	17	1	6	P	Peak DTA
1	2008-12-19 17:25:00	0	DTA	17	1	6	P	Peak DTA
1	2008-12-19 17:26:00	0	DTA	17	1	6	P	Peak DTA
1	2008-12-19 17:27:00	0	DTA	17	1	6	P	Peak DTA
1	2008-12-19 17:28:00	0	DTA	17	1	6	P	Peak DTA
1	2008-12-19 17:29:00	0	DTA	17	1	6	P	Peak DTA
1	2008-12-19 17:30:00	0	DTA	17	1	6	P	Peak DTA
1	2008-12-19 17:31:00	0	DTA	17	1	6	P	Peak DTA
1	2008-12-19 17:32:00	0	DTA	17	1	6	P	Peak DTA
1	2008-12-19 17:33:00	0	DTA	17	1	6	P	Peak DTA
1	2008-12-19 17:34:00	0	DTA	17	1	6	P	Peak DTA
1	2008-12-19 17:35:00	0	DTA	17	1	6	P	Peak DTA
1	2008-12-19 17:36:00	0	DTA	17	1	6	P	Peak DTA
1	2008-12-19 17:37:00	0	DTA	17	1	6	P	Peak DTA
1	2008-12-19 17:38:00	0	DTA	17	1	6	P	Peak DTA
1	2008-12-19 17:39:00	0	DTA	17	1	6	P	Peak DTA
1	2008-12-19 17:40:00	0	DTA	17	1	6	P	Peak DTA
1	2008-12-19 17:41:00	0	DTA	17	1	6	P	Peak DTA
1	2008-12-19 17:42:00	0	DTA	17	1	6	P	Peak DTA
1	2008-12-19 17:43:00	0	DTA	17	1	6	P	Peak DTA
1	2008-12-19 17:44:00	0	DTA	17	1	6	P	Peak DTA
1	2008-12-19 17:45:00	0	DTA	17	1	6	P	Peak DTA
1	2008-12-19 17:46:00	0	DTA	17	1	6	P	Peak DTA
1	2008-12-19 17:47:00	0	DTA	17	1	6	P	Peak DTA
1	2008-12-19 17:48:00	0	DTA	17	1	6	P	Peak DTA
1	2008-12-19 17:49:00	0	DTA	17	1	6	P	Peak DTA
1	2008-12-19 17:50:00	0	DTA	17	1	6	P	Peak DTA
1	2008-12-19 17:51:00	0	DTA	17	1	6	P	Peak DTA
1	2008-12-19 17:52:00	0	DTA	17	1	6	P	Peak DTA
1	2008-12-19 17:53:00	0	DTA	17	1	6	P	Peak DTA
1	2008-12-19 17:54:00	0	DTA	17	1	6	P	Peak DTA
1	2008-12-19 17:55:00	0	DTA	17	1	6	P	Peak DTA
1	2008-12-19 17:56:00	61	DTA	17	1	6	P	Peak DTA
1	2008-12-19 17:57:00	30	DTA	17	1	6	P	Peak DTA
1	2008-12-19 17:58:00	0	DTA	17	1	6	P	Peak DTA
1	2008-12-19 17:59:00	0	DTA	17	1	6	P	Peak DTA
1	2008-12-19 18:00:00	0	DTA	17	1	6	P	Peak DTA
1	2008-12-19 18:01:00	0	DTA	18	1	6	P	Peak DTA
1	2008-12-19 18:02:00	0	DTA	18	1	6	P	Peak DTA
1	2008-12-19 18:03:00	0	DTA	18	1	6	P	Peak DTA
1	2008-12-19 18:04:00	0	DTA	18	1	6	P	Peak DTA
1	2008-12-19 18:05:00	0	DTA	18	1	6	P	Peak DTA
1	2008-12-19 18:06:00	0	DTA	18	1	6	P	Peak DTA
1	2008-12-19 18:07:00	0	DTA	18	1	6	P	Peak DTA
1	2008-12-19 18:08:00	0	DTA	18	1	6	P	Peak DTA
1	2008-12-19 18:09:00	0	DTA	18	1	6	P	Peak DTA
1	2008-12-19 18:10:00	10	DTA	18	1	6	P	Peak DTA
1	2008-12-19 18:11:00	0	DTA	18	1	6	P	Peak DTA
1	2008-12-19 18:12:00	169	DTA	18	1	6	P	Peak DTA
1	2008-12-19 18:13:00	20	DTA	18	1	6	P	Peak DTA
1	2008-12-19 18:14:00	0	DTA	18	1	6	P	Peak DTA
1	2008-12-19 18:15:00	0	DTA	18	1	6	P	Peak DTA
1	2008-12-19 18:16:00	0	DTA	18	1	6	P	Peak DTA
1	2008-12-19 18:17:00	0	DTA	18	1	6	P	Peak DTA
1	2008-12-19 18:18:00	0	DTA	18	1	6	P	Peak DTA
1	2008-12-19 18:19:00	30	DTA	18	1	6	P	Peak DTA
1	2008-12-19 18:20:00	0	DTA	18	1	6	P	Peak DTA
1	2008-12-19 18:21:00	0	DTA	18	1	6	P	Peak DTA
1	2008-12-19 18:22:00	0	DTA	18	1	6	P	Peak DTA
1	2008-12-19 18:23:00	30	DTA	18	1	6	P	Peak DTA
1	2008-12-19 18:24:00	0	DTA	18	1	6	P	Peak DTA
1	2008-12-19 18:25:00	20	DTA	18	1	6	P	Peak DTA
1	2008-12-19 18:26:00	30	DTA	18	1	6	P	Peak DTA
1	2008-12-19 18:27:00	0	DTA	18	1	6	P	Peak DTA
1	2008-12-19 18:28:00	0	DTA	18	1	6	P	Peak DTA
1	2008-12-19 18:29:00	0	DTA	18	1	6	P	Peak DTA
1	2008-12-19 18:30:00	0	DTA	18	1	6	P	Peak DTA
1	2008-12-19 18:31:00	0	DTA	18	1	6	P	Peak DTA
1	2008-12-19 18:32:00	0	DTA	18	1	6	P	Peak DTA
1	2008-12-19 18:33:00	0	DTA	18	1	6	P	Peak DTA
1	2008-12-19 18:34:00	0	DTA	18	1	6	P	Peak DTA
1	2008-12-19 18:35:00	0	DTA	18	1	6	P	Peak DTA
1	2008-12-19 18:36:00	10	DTA	18	1	6	P	Peak DTA
1	2008-12-19 18:37:00	0	DTA	18	1	6	P	Peak DTA
1	2008-12-19 18:38:00	0	DTA	18	1	6	P	Peak DTA
1	2008-12-19 18:39:00	0	DTA	18	1	6	P	Peak DTA
1	2008-12-19 18:40:00	0	DTA	18	1	6	P	Peak DTA
1	2008-12-19 18:41:00	0	DTA	18	1	6	P	Peak DTA
1	2008-12-19 18:42:00	10	DTA	18	1	6	P	Peak DTA
1	2008-12-19 18:43:00	0	DTA	18	1	6	P	Peak DTA
1	2008-12-19 18:44:00	0	DTA	18	1	6	P	Peak DTA
1	2008-12-19 18:45:00	0	DTA	18	1	6	P	Peak DTA
1	2008-12-19 18:46:00	0	DTA	18	1	6	P	Peak DTA
1	2008-12-19 18:47:00	10	DTA	18	1	6	P	Peak DTA
1	2008-12-19 18:48:00	0	DTA	18	1	6	P	Peak DTA
1	2008-12-19 18:49:00	0	DTA	18	1	6	P	Peak DTA
1	2008-12-19 18:50:00	0	DTA	18	1	6	P	Peak DTA
1	2008-12-19 18:51:00	0	DTA	18	1	6	P	Peak DTA
1	2008-12-19 18:52:00	0	DTA	18	1	6	P	Peak DTA
1	2008-12-19 18:53:00	0	DTA	18	1	6	P	Peak DTA
1	2008-12-19 18:54:00	0	DTA	18	1	6	P	Peak DTA
1	2008-12-19 18:55:00	20	DTA	18	1	6	P	Peak DTA
1	2008-12-19 18:56:00	193	DTA	18	1	6	P
1	2008-12-19 18:57:00	0	DTA	18	1	6	P
1	2008-12-19 18:58:00	0	DTA	18	1	6	P
1	2008-12-19 18:59:00	0	DTA	18	1	6	P
1	2008-12-19 19:00:00	0	DTA	18	1	6	P
1	2008-12-19 19:01:00	0	DTA	19	1	6	P
1	2008-12-19 19:02:00	0	DTA	19	1	6	P
1	2008-12-19 19:03:00	0	DTA	19	1	6	P
1	2008-12-19 19:04:00	0	DTA	19	1	6	P
1	2008-12-19 19:05:00	0	DTA	19	1	6	P
1	2008-12-19 19:06:00	0	DTA	19	1	6	P
1	2008-12-19 19:07:00	0	DTA	19	1	6	P
1	2008-12-19 19:08:00	0	DTA	19	1	6	P
1	2008-12-19 19:09:00	0	DTA	19	1	6	P
1	2008-12-19 19:10:00	0	DTA	19	1	6	P
1	2008-12-19 19:11:00	0	DTA	19	1	6	P
1	2008-12-19 19:12:00	0	DTA	19	1	6	P
1	2008-12-19 19:13:00	0	DTA	19	1	6	P
1	2008-12-19 19:14:00	0	DTA	19	1	6	P
1	2008-12-19 19:15:00	0	DTA	19	1	6	P
1	2008-12-19 19:16:00	0	DTA	19	1	6	P
1	2008-12-19 19:17:00	0	DTA	19	1	6	P
1	2008-12-19 19:18:00	0	DTA	19	1	6	P
1	2008-12-19 19:19:00	0	DTA	19	1	6	P
1	2008-12-19 19:20:00	0	DTA	19	1	6	P
1	2008-12-19 19:21:00	0	DTA	19	1	6	P
1	2008-12-19 19:22:00	0	DTA	19	1	6	P
1	2008-12-19 19:23:00	20	DTA	19	1	6	P
1	2008-12-19 19:24:00	0	DTA	19	1	6	P
1	2008-12-19 19:25:00	10	DTA	19	1	6	P
1	2008-12-19 19:26:00	0	DTA	19	1	6	P
1	2008-12-19 19:27:00	0	DTA	19	1	6	P
1	2008-12-19 19:28:00	0	DTA	19	1	6	P
1	2008-12-19 19:29:00	20	DTA	19	1	6	P
1	2008-12-19 19:30:00	10	DTA	19	1	6	P
1	2008-12-19 19:31:00	0	DTA	19	1	6	P
1	2008-12-19 19:32:00	0	DTA	19	1	6	P
1	2008-12-19 19:33:00	0	DTA	19	1	6	P
1	2008-12-19 19:34:00	0	DTA	19	1	6	P
1	2008-12-19 19:35:00	0	DTA	19	1	6	P
1	2008-12-19 19:36:00	0	DTA	19	1	6	P
1	2008-12-19 19:37:00	0	DTA	19	1	6	P
1	2008-12-19 19:38:00	0	DTA	19	1	6	P
1	2008-12-19 19:39:00	0	DTA	19	1	6	P
1	2008-12-19 19:40:00	0	DTA	19	1	6	P
1	2008-12-19 19:41:00	0	DTA	19	1	6	P
1	2008-12-19 19:42:00	0	DTA	19	1	6	P
1	2008-12-19 19:43:00	0	DTA	19	1	6	P
1	2008-12-19 19:44:00	0	DTA	19	1	6	P
1	2008-12-19 19:45:00	0	DTA	19	1	6	P
1	2008-12-19 19:46:00	0	DTA	19	1	6	P
1	2008-12-19 19:47:00	0	DTA	19	1	6	P
1	2008-12-19 19:48:00	20	DTA	19	1	6	P
1	2008-12-19 19:49:00	0	DTA	19	1	6	P
1	2008-12-19 19:50:00	0	DTA	19	1	6	P
1	2008-12-19 19:51:00	1611	DTA	19	1	6	P
1	2008-12-19 19:52:00	51	DTA	19	1	6	P
1	2008-12-19 19:53:00	30	DTA	19	1	6	P
1	2008-12-19 19:54:00	41	DTA	19	1	6	P
1	2008-12-19 19:55:00	41	DTA	19	1	6	P
1	2008-12-19 19:56:00	30	DTA	19	1	6	P
1	2008-12-19 19:57:00	10	DTA	19	1	6	P
1	2008-12-19 19:58:00	30	DTA	19	1	6	P
1	2008-12-19 19:59:00	309	DTA	19	1	6	P
1	2008-12-19 20:00:00	254	DTA	19	1	6	P
1	2008-12-19 20:01:00	193	DTA	20	1	6	P
1	2008-12-19 20:02:00	30	DTA	20	1	6	P
1	2008-12-19 20:03:00	20	DTA	20	1	6	P
1	2008-12-19 20:04:00	102	DTA	20	1	6	P
1	2008-12-19 20:05:00	91	DTA	20	1	6	P
1	2008-12-19 20:06:00	266	DTA	20	1	6	P
1	2008-12-19 20:07:00	230	DTA	20	1	6	P
1	2008-12-19 20:08:00	181	DTA	20	1	6	P
1	2008-12-19 20:09:00	266	DTA	20	1	6	P
1	2008-12-19 20:10:00	242	DTA	20	1	6	P
1	2008-12-19 20:11:00	102	DTA	20	1	6	P
1	2008-12-19 20:12:00	71	DTA	20	1	6	P
1	2008-12-19 20:13:00	217	DTA	20	1	6	P
1	2008-12-19 20:14:00	205	DTA	20	1	6	P
1	2008-12-19 20:15:00	323	DTA	20	1	6	P
1	2008-12-19 20:16:00	61	DTA	20	1	6	P
1	2008-12-19 20:17:00	144	DTA	20	1	6	P
1	2008-12-19 20:18:00	81	DTA	20	1	6	P
1	2008-12-19 20:19:00	295	DTA	20	1	6	P
1	2008-12-19 20:20:00	217	DTA	20	1	6	P
1	2008-12-19 20:21:00	280	DTA	20	1	6	P
1	2008-12-19 20:22:00	193	DTA	20	1	6	P
1	2008-12-19 20:23:00	0	DTA	20	1	6	P
1	2008-12-19 20:24:00	0	DTA	20	1	6	P
1	2008-12-19 20:25:00	30	DTA	20	1	6	P
1	2008-12-19 20:26:00	0	DTA	20	1	6	P
1	2008-12-19 20:27:00	0	DTA	20	1	6	P
1	2008-12-19 20:28:00	0	DTA	20	1	6	P
1	2008-12-19 20:29:00	0	DTA	20	1	6	P
1	2008-12-19 20:30:00	0	DTA	20	1	6	P
1	2008-12-19 20:31:00	0	DTA	20	1	6	P
1	2008-12-19 20:32:00	0	DTA	20	1	6	P
1	2008-12-19 20:33:00	0	DTA	20	1	6	P
1	2008-12-19 20:34:00	0	DTA	20	1	6	P
1	2008-12-19 20:35:00	0	DTA	20	1	6	P
1	2008-12-19 20:36:00	0	DTA	20	1	6	P
1	2008-12-19 20:37:00	0	DTA	20	1	6	P
1	2008-12-19 20:38:00	0	DTA	20	1	6	P
1	2008-12-19 20:39:00	0	DTA	20	1	6	P
1	2008-12-19 20:40:00	0	DTA	20	1	6	P
1	2008-12-19 20:41:00	0	DTA	20	1	6	P
1	2008-12-19 20:42:00	0	DTA	20	1	6	P
1	2008-12-19 20:43:00	0	DTA	20	1	6	P
1	2008-12-19 20:44:00	0	DTA	20	1	6	P
1	2008-12-19 20:45:00	0	DTA	20	1	6	P
1	2008-12-19 20:46:00	0	DTA	20	1	6	P
1	2008-12-19 20:47:00	0	DTA	20	1	6	P
1	2008-12-19 20:48:00	0	DTA	20	1	6	P
1	2008-12-19 20:49:00	0	DTA	20	1	6	P
1	2008-12-19 20:50:00	0	DTA	20	1	6	P
1	2008-12-19 20:51:00	0	DTA	20	1	6	P
1	2008-12-19 20:52:00	0	DTA	20	1	6	P
1	2008-12-19 20:53:00	0	DTA	20	1	6	P
1	2008-12-19 20:54:00	0	DTA	20	1	6	P
1	2008-12-19 20:55:00	0	DTA	20	1	6	P
1	2008-12-19 20:56:00	0	DTA	20	1	6	P
1	2008-12-19 20:57:00	0	DTA	20	1	6	P
1	2008-12-19 20:58:00	0	DTA	20	1	6	P
1	2008-12-19 20:59:00	0	DTA	20	1	6	P
1	2008-12-19 21:00:00	0	DTA	20	1	6	P
1	2008-12-19 21:01:00	0	DTA	21	1	6	P
1	2008-12-19 21:02:00	0	DTA	21	1	6	P
1	2008-12-19 21:03:00	0	DTA	21	1	6	P
1	2008-12-19 21:04:00	0	DTA	21	1	6	P
1	2008-12-19 21:05:00	0	DTA	21	1	6	P
1	2008-12-19 21:06:00	0	DTA	21	1	6	P
1	2008-12-19 21:07:00	0	DTA	21	1	6	P
1	2008-12-19 21:08:00	0	DTA	21	1	6	P
1	2008-12-19 21:09:00	0	DTA	21	1	6	P
1	2008-12-19 21:10:00	0	DTA	21	1	6	P
1	2008-12-19 21:11:00	0	DTA	21	1	6	P
1	2008-12-19 21:12:00	0	DTA	21	1	6	P
1	2008-12-19 21:13:00	0	DTA	21	1	6	P
1	2008-12-19 21:14:00	0	DTA	21	1	6	P
1	2008-12-19 21:15:00	0	DTA	21	1	6	P
1	2008-12-19 21:16:00	0	DTA	21	1	6	P
1	2008-12-19 21:17:00	0	DTA	21	1	6	P
1	2008-12-19 21:18:00	0	DTA	21	1	6	P
1	2008-12-19 21:19:00	0	DTA	21	1	6	P
1	2008-12-19 21:20:00	0	DTA	21	1	6	P
1	2008-12-19 21:21:00	0	DTA	21	1	6	P
1	2008-12-19 21:22:00	0	DTA	21	1	6	P
1	2008-12-19 21:23:00	0	DTA	21	1	6	P
1	2008-12-19 21:24:00	0	DTA	21	1	6	P
1	2008-12-19 21:25:00	0	DTA	21	1	6	P
1	2008-12-19 21:26:00	0	DTA	21	1	6	P
1	2008-12-19 21:27:00	0	DTA	21	1	6	P
1	2008-12-19 21:28:00	0	DTA	21	1	6	P
1	2008-12-19 21:29:00	0	DTA	21	1	6	P
1	2008-12-19 21:30:00	0	DTA	21	1	6	P
1	2008-12-19 21:31:00	0	DTA	21	1	6	P
1	2008-12-19 21:32:00	0	DTA	21	1	6	P
1	2008-12-19 21:33:00	0	DTA	21	1	6	P
1	2008-12-19 21:34:00	10	DTA	21	1	6	P
1	2008-12-19 21:35:00	0	DTA	21	1	6	P
1	2008-12-19 21:36:00	20	DTA	21	1	6	P
1	2008-12-19 21:37:00	20	DTA	21	1	6	P
1	2008-12-19 21:38:00	0	DTA	21	1	6	P
1	2008-12-19 21:39:00	0	DTA	21	1	6	P
1	2008-12-19 21:40:00	0	DTA	21	1	6	P
1	2008-12-19 21:41:00	394	DTA	21	1	6	P
1	2008-12-19 21:42:00	1130	DTA	21	1	6	P
1	2008-12-19 21:43:00	30	DTA	21	1	6	P
1	2008-12-19 21:44:00	102	DTA	21	1	6	P
1	2008-12-19 21:45:00	673	DTA	21	1	6	P
1	2008-12-19 21:46:00	1416	DTA	21	1	6	P
1	2008-12-19 21:47:00	492	DTA	21	1	6	P
1	2008-12-19 21:48:00	242	DTA	21	1	6	P
1	2008-12-19 21:49:00	652	DTA	21	1	6	P
1	2008-12-19 21:50:00	774	DTA	21	1	6	P
1	2008-12-19 21:51:00	122	DTA	21	1	6	P
1	2008-12-19 21:52:00	51	DTA	21	1	6	P
1	2008-12-19 21:53:00	10	DTA	21	1	6	P
1	2008-12-19 21:54:00	242	DTA	21	1	6	P
1	2008-12-19 21:55:00	181	DTA	21	1	6	P
1	2008-12-19 21:56:00	10	DTA	21	1	6	P
1	2008-12-19 21:57:00	309	DTA	21	1	6	P
1	2008-12-19 21:58:00	71	DTA	21	1	6	P
1	2008-12-19 21:59:00	0	DTA	21	1	6	P
1	2008-12-19 22:00:00	0	DTA	21	1	6	P
1	2008-12-19 22:01:00	20	DTA	22	1	6	P
1	2008-12-19 22:02:00	20	DTA	22	1	6	P
1	2008-12-19 22:03:00	0	DTA	22	1	6	P
1	2008-12-19 22:04:00	0	DTA	22	1	6	P
1	2008-12-19 22:05:00	0	DTA	22	1	6	P
1	2008-12-19 22:06:00	0	DTA	22	1	6	P
1	2008-12-19 22:07:00	0	DTA	22	1	6	P
1	2008-12-19 22:08:00	41	DTA	22	1	6	P
1	2008-12-19 22:09:00	30	DTA	22	1	6	P
1	2008-12-19 22:10:00	112	DTA	22	1	6	P
1	2008-12-19 22:11:00	10	DTA	22	1	6	P
1	2008-12-19 22:12:00	20	DTA	22	1	6	P
1	2008-12-19 22:13:00	0	DTA	22	1	6	P
1	2008-12-19 22:14:00	0	DTA	22	1	6	P
1	2008-12-19 22:15:00	0	DTA	22	1	6	P
1	2008-12-19 22:16:00	0	DTA	22	1	6	P
1	2008-12-19 22:17:00	0	DTA	22	1	6	P
1	2008-12-19 22:18:00	0	DTA	22	1	6	P
1	2008-12-19 22:19:00	0	DTA	22	1	6	P
1	2008-12-19 22:20:00	0	DTA	22	1	6	P
1	2008-12-19 22:21:00	0	DTA	22	1	6	P
1	2008-12-19 22:22:00	0	DTA	22	1	6	P
1	2008-12-19 22:23:00	0	DTA	22	1	6	P
1	2008-12-19 22:24:00	0	DTA	22	1	6	P
1	2008-12-19 22:25:00	0	DTA	22	1	6	P
1	2008-12-19 22:26:00	0	DTA	22	1	6	P
1	2008-12-19 22:27:00	0	DTA	22	1	6	P
1	2008-12-19 22:28:00	0	DTA	22	1	6	P
1	2008-12-19 22:29:00	0	DTA	22	1	6	P
1	2008-12-19 22:30:00	0	DTA	22	1	6	P
1	2008-12-19 22:31:00	0	DTA	22	1	6	P
1	2008-12-19 22:32:00	0	DTA	22	1	6	P
1	2008-12-19 22:33:00	0	DTA	22	1	6	P
1	2008-12-19 22:34:00	0	DTA	22	1	6	P
1	2008-12-19 22:35:00	0	DTA	22	1	6	P
1	2008-12-19 22:36:00	0	DTA	22	1	6	P
1	2008-12-19 22:37:00	0	DTA	22	1	6	P
1	2008-12-19 22:38:00	51	DTA	22	1	6	P
1	2008-12-19 22:39:00	0	DTA	22	1	6	P
1	2008-12-19 22:40:00	0	DTA	22	1	6	P
1	2008-12-19 22:41:00	0	DTA	22	1	6	P
1	2008-12-19 22:42:00	0	DTA	22	1	6	P
1	2008-12-19 22:43:00	0	DTA	22	1	6	P
1	2008-12-19 22:44:00	0	DTA	22	1	6	P
1	2008-12-19 22:45:00	0	DTA	22	1	6	P
1	2008-12-19 22:46:00	0	DTA	22	1	6	P
1	2008-12-19 22:47:00	0	DTA	22	1	6	P
1	2008-12-19 22:48:00	0	DTA	22	1	6	P
1	2008-12-19 22:49:00	0	DTA	22	1	6	P
1	2008-12-19 22:50:00	0	DTA	22	1	6	P
1	2008-12-19 22:51:00	0	DTA	22	1	6	P
1	2008-12-19 22:52:00	0	DTA	22	1	6	P
1	2008-12-19 22:53:00	0	DTA	22	1	6	P
1	2008-12-19 22:54:00	0	DTA	22	1	6	P
1	2008-12-19 22:55:00	0	DTA	22	1	6	P
1	2008-12-19 22:56:00	0	DTA	22	1	6	P
1	2008-12-19 22:57:00	0	DTA	22	1	6	P
1	2008-12-19 22:58:00	0	DTA	22	1	6	P
1	2008-12-19 22:59:00	0	DTA	22	1	6	P
1	2008-12-19 23:00:00	10	DTA	22	1	6	P
1	2008-12-19 23:01:00	0	NTA	23	2	6	P
1	2008-12-19 23:02:00	0	NTA	23	2	6	P
1	2008-12-19 23:03:00	0	NTA	23	2	6	P
1	2008-12-19 23:04:00	0	NTA	23	2	6	P
1	2008-12-19 23:05:00	0	NTA	23	2	6	P
1	2008-12-19 23:06:00	0	NTA	23	2	6	P
1	2008-12-19 23:07:00	0	NTA	23	2	6	P
1	2008-12-19 23:08:00	0	NTA	23	2	6	P
1	2008-12-19 23:09:00	0	NTA	23	2	6	P
1	2008-12-19 23:10:00	0	NTA	23	2	6	P
1	2008-12-19 23:11:00	0	NTA	23	2	6	P
1	2008-12-19 23:12:00	0	NTA	23	2	6	P
1	2008-12-19 23:13:00	10	NTA	23	2	6	P
1	2008-12-19 23:14:00	0	NTA	23	2	6	P
1	2008-12-19 23:15:00	0	NTA	23	2	6	P
1	2008-12-19 23:16:00	0	NTA	23	2	6	P
1	2008-12-19 23:17:00	10	NTA	23	2	6	P
1	2008-12-19 23:18:00	0	NTA	23	2	6	P
1	2008-12-19 23:19:00	0	NTA	23	2	6	P
1	2008-12-19 23:20:00	0	NTA	23	2	6	P
1	2008-12-19 23:21:00	0	NTA	23	2	6	P
1	2008-12-19 23:22:00	0	NTA	23	2	6	P
1	2008-12-19 23:23:00	0	NTA	23	2	6	P
1	2008-12-19 23:24:00	0	NTA	23	2	6	P
1	2008-12-19 23:25:00	0	NTA	23	2	6	P
1	2008-12-19 23:26:00	0	NTA	23	2	6	P
1	2008-12-19 23:27:00	0	NTA	23	2	6	P
1	2008-12-19 23:28:00	0	NTA	23	2	6	P
1	2008-12-19 23:29:00	0	NTA	23	2	6	P
1	2008-12-19 23:30:00	0	NTA	23	2	6	P
1	2008-12-19 23:31:00	0	NTA	23	2	6	P
1	2008-12-19 23:32:00	0	NTA	23	2	6	P
1	2008-12-19 23:33:00	0	NTA	23	2	6	P
1	2008-12-19 23:34:00	0	NTA	23	2	6	P
1	2008-12-19 23:35:00	0	NTA	23	2	6	P
1	2008-12-19 23:36:00	0	NTA	23	2	6	P
1	2008-12-19 23:37:00	0	NTA	23	2	6	P
1	2008-12-19 23:38:00	0	NTA	23	2	6	P
1	2008-12-19 23:39:00	0	NTA	23	2	6	P
1	2008-12-19 23:40:00	0	NTA	23	2	6	P
1	2008-12-19 23:41:00	0	NTA	23	2	6	P
1	2008-12-19 23:42:00	0	NTA	23	2	6	P
1	2008-12-19 23:43:00	0	NTA	23	2	6	P
1	2008-12-19 23:44:00	0	NTA	23	2	6	P
1	2008-12-19 23:45:00	10	NTA	23	2	6	P
1	2008-12-19 23:46:00	0	NTA	23	2	6	P
1	2008-12-19 23:47:00	0	NTA	23	2	6	P
1	2008-12-19 23:48:00	0	NTA	23	2	6	P
1	2008-12-19 23:49:00	0	NTA	23	2	6	P
1	2008-12-19 23:50:00	0	NTA	23	2	6	P
1	2008-12-19 23:51:00	0	NTA	23	2	6	P
1	2008-12-19 23:52:00	0	NTA	23	2	6	P
1	2008-12-19 23:53:00	0	NTA	23	2	6	P
1	2008-12-19 23:54:00	0	NTA	23	2	6	P
1	2008-12-19 23:55:00	0	NTA	23	2	6	P
1	2008-12-19 23:56:00	0	NTA	23	2	6	P
1	2008-12-19 23:57:00	0	NTA	23	2	6	P
1	2008-12-19 23:58:00	0	NTA	23	2	6	P
1	2008-12-19 23:59:00	0	NTA	23	2	6	P
1	2008-12-20	0	NTA	23	2	6	P
1	2008-12-20 00:01:00	0	NTA	0	2	7	P
1	2008-12-20 00:02:00	0	NTA	0	2	7	P
1	2008-12-20 00:03:00	0	NTA	0	2	7	P
1	2008-12-20 00:04:00	0	NTA	0	2	7	P
1	2008-12-20 00:05:00	0	NTA	0	2	7	P
1	2008-12-20 00:06:00	0	NTA	0	2	7	P
1	2008-12-20 00:07:00	0	NTA	0	2	7	P
1	2008-12-20 00:08:00	0	NTA	0	2	7	P
1	2008-12-20 00:09:00	0	NTA	0	2	7	P
1	2008-12-20 00:10:00	0	NTA	0	2	7	P
1	2008-12-20 00:11:00	0	NTA	0	2	7	P
1	2008-12-20 00:12:00	0	NTA	0	2	7	P
1	2008-12-20 00:13:00	0	NTA	0	2	7	P
1	2008-12-20 00:14:00	0	NTA	0	2	7	P
1	2008-12-20 00:15:00	0	NTA	0	2	7	P
1	2008-12-20 00:16:00	0	NTA	0	2	7	P
1	2008-12-20 00:17:00	10	NTA	0	2	7	P
1	2008-12-20 00:18:00	10	NTA	0	2	7	P
1	2008-12-20 00:19:00	20	NTA	0	2	7	P
1	2008-12-20 00:20:00	0	NTA	0	2	7	P
1	2008-12-20 00:21:00	156	NTA	0	2	7	P
1	2008-12-20 00:22:00	10	NTA	0	2	7	P
1	2008-12-20 00:23:00	0	NTA	0	2	7	P
1	2008-12-20 00:24:00	0	NTA	0	2	7	P
1	2008-12-20 00:25:00	0	NTA	0	2	7	P
1	2008-12-20 00:26:00	0	NTA	0	2	7	P
1	2008-12-20 00:27:00	0	NTA	0	2	7	P
1	2008-12-20 00:28:00	0	NTA	0	2	7	P
1	2008-12-20 00:29:00	0	NTA	0	2	7	P
1	2008-12-20 00:30:00	0	NTA	0	2	7	P
1	2008-12-20 00:31:00	0	NTA	0	2	7	P
1	2008-12-20 00:32:00	0	NTA	0	2	7	P
1	2008-12-20 00:33:00	0	NTA	0	2	7	P
1	2008-12-20 00:34:00	0	NTA	0	2	7	P
1	2008-12-20 00:35:00	0	NTA	0	2	7	P
1	2008-12-20 00:36:00	0	NTA	0	2	7	P
1	2008-12-20 00:37:00	0	NTA	0	2	7	P
1	2008-12-20 00:38:00	0	NTA	0	2	7	P
1	2008-12-20 00:39:00	0	NTA	0	2	7	P
1	2008-12-20 00:40:00	0	NTA	0	2	7	P
1	2008-12-20 00:41:00	0	NTA	0	2	7	P
1	2008-12-20 00:42:00	0	NTA	0	2	7	P
1	2008-12-20 00:43:00	0	NTA	0	2	7	P
1	2008-12-20 00:44:00	0	NTA	0	2	7	P
1	2008-12-20 00:45:00	0	NTA	0	2	7	P
1	2008-12-20 00:46:00	0	NTA	0	2	7	P
1	2008-12-20 00:47:00	0	NTA	0	2	7	P
1	2008-12-20 00:48:00	0	NTA	0	2	7	P
1	2008-12-20 00:49:00	0	NTA	0	2	7	P
1	2008-12-20 00:50:00	0	NTA	0	2	7	P
1	2008-12-20 00:51:00	0	NTA	0	2	7	P
1	2008-12-20 00:52:00	0	NTA	0	2	7	P
1	2008-12-20 00:53:00	0	NTA	0	2	7	P
1	2008-12-20 00:54:00	0	NTA	0	2	7	P
1	2008-12-20 00:55:00	0	NTA	0	2	7	P
1	2008-12-20 00:56:00	0	NTA	0	2	7	P
1	2008-12-20 00:57:00	0	NTA	0	2	7	P
1	2008-12-20 00:58:00	0	NTA	0	2	7	P
1	2008-12-20 00:59:00	0	NTA	0	2	7	P
1	2008-12-20 01:00:00	0	NTA	0	2	7	P
1	2008-12-20 01:01:00	0	NTA	1	2	7	P
1	2008-12-20 01:02:00	0	NTA	1	2	7	P
1	2008-12-20 01:03:00	0	NTA	1	2	7	P
1	2008-12-20 01:04:00	0	NTA	1	2	7	P
1	2008-12-20 01:05:00	0	NTA	1	2	7	P
1	2008-12-20 01:06:00	0	NTA	1	2	7	P
1	2008-12-20 01:07:00	0	NTA	1	2	7	P
1	2008-12-20 01:08:00	0	NTA	1	2	7	P
1	2008-12-20 01:09:00	0	NTA	1	2	7	P
1	2008-12-20 01:10:00	0	NTA	1	2	7	P
1	2008-12-20 01:11:00	0	NTA	1	2	7	P
1	2008-12-20 01:12:00	0	NTA	1	2	7	P
1	2008-12-20 01:13:00	0	NTA	1	2	7	P
1	2008-12-20 01:14:00	10	NTA	1	2	7	P
1	2008-12-20 01:15:00	20	NTA	1	2	7	P
1	2008-12-20 01:16:00	0	NTA	1	2	7	P
1	2008-12-20 01:17:00	0	NTA	1	2	7	P
1	2008-12-20 01:18:00	0	NTA	1	2	7	P
1	2008-12-20 01:19:00	30	NTA	1	2	7	P
1	2008-12-20 01:20:00	0	NTA	1	2	7	P
1	2008-12-20 01:21:00	0	NTA	1	2	7	P
1	2008-12-20 01:22:00	0	NTA	1	2	7	P
1	2008-12-20 01:23:00	0	NTA	1	2	7	P
1	2008-12-20 01:24:00	0	NTA	1	2	7	P
1	2008-12-20 01:25:00	0	NTA	1	2	7	P
1	2008-12-20 01:26:00	0	NTA	1	2	7	P
1	2008-12-20 01:27:00	0	NTA	1	2	7	P
1	2008-12-20 01:28:00	0	NTA	1	2	7	P
1	2008-12-20 01:29:00	0	NTA	1	2	7	P
1	2008-12-20 01:30:00	0	NTA	1	2	7	P
1	2008-12-20 01:31:00	0	NTA	1	2	7	P
1	2008-12-20 01:32:00	0	NTA	1	2	7	P
1	2008-12-20 01:33:00	0	NTA	1	2	7	P
1	2008-12-20 01:34:00	0	NTA	1	2	7	P
1	2008-12-20 01:35:00	0	NTA	1	2	7	P
1	2008-12-20 01:36:00	0	NTA	1	2	7	P
1	2008-12-20 01:37:00	0	NTA	1	2	7	P
1	2008-12-20 01:38:00	0	NTA	1	2	7	P
1	2008-12-20 01:39:00	0	NTA	1	2	7	P
1	2008-12-20 01:40:00	0	NTA	1	2	7	P
1	2008-12-20 01:41:00	0	NTA	1	2	7	P
1	2008-12-20 01:42:00	0	NTA	1	2	7	P
1	2008-12-20 01:43:00	0	NTA	1	2	7	P
1	2008-12-20 01:44:00	0	NTA	1	2	7	P
1	2008-12-20 01:45:00	0	NTA	1	2	7	P
1	2008-12-20 01:46:00	0	NTA	1	2	7	P
1	2008-12-20 01:47:00	0	NTA	1	2	7	P
1	2008-12-20 01:48:00	0	NTA	1	2	7	P
1	2008-12-20 01:49:00	0	NTA	1	2	7	P
1	2008-12-20 01:50:00	0	NTA	1	2	7	P
1	2008-12-20 01:51:00	0	NTA	1	2	7	P
1	2008-12-20 01:52:00	0	NTA	1	2	7	P
1	2008-12-20 01:53:00	0	NTA	1	2	7	P
1	2008-12-20 01:54:00	0	NTA	1	2	7	P
1	2008-12-20 01:55:00	0	NTA	1	2	7	P
1	2008-12-20 01:56:00	0	NTA	1	2	7	P
1	2008-12-20 01:57:00	0	NTA	1	2	7	P
1	2008-12-20 01:58:00	0	NTA	1	2	7	P
1	2008-12-20 01:59:00	0	NTA	1	2	7	P
1	2008-12-20 02:00:00	0	NTA	1	2	7	P
1	2008-12-20 02:01:00	0	NTA	2	2	7	P
1	2008-12-20 02:02:00	0	NTA	2	2	7	P
1	2008-12-20 02:03:00	0	NTA	2	2	7	P
1	2008-12-20 02:04:00	0	NTA	2	2	7	P
1	2008-12-20 02:05:00	0	NTA	2	2	7	P
1	2008-12-20 02:06:00	0	NTA	2	2	7	P
1	2008-12-20 02:07:00	0	NTA	2	2	7	P
1	2008-12-20 02:08:00	0	NTA	2	2	7	P
1	2008-12-20 02:09:00	0	NTA	2	2	7	P
1	2008-12-20 02:10:00	0	NTA	2	2	7	P
1	2008-12-20 02:11:00	0	NTA	2	2	7	P
1	2008-12-20 02:12:00	0	NTA	2	2	7	P
1	2008-12-20 02:13:00	0	NTA	2	2	7	P
1	2008-12-20 02:14:00	0	NTA	2	2	7	P
1	2008-12-20 02:15:00	10	NTA	2	2	7	P
1	2008-12-20 02:16:00	0	NTA	2	2	7	P
1	2008-12-20 02:17:00	0	NTA	2	2	7	P
1	2008-12-20 02:18:00	0	NTA	2	2	7	P
1	2008-12-20 02:19:00	0	NTA	2	2	7	P
1	2008-12-20 02:20:00	0	NTA	2	2	7	P
1	2008-12-20 02:21:00	0	NTA	2	2	7	P
1	2008-12-20 02:22:00	0	NTA	2	2	7	P
1	2008-12-20 02:23:00	0	NTA	2	2	7	P
1	2008-12-20 02:24:00	10	NTA	2	2	7	P
1	2008-12-20 02:25:00	0	NTA	2	2	7	P
1	2008-12-20 02:26:00	0	NTA	2	2	7	P
1	2008-12-20 02:27:00	0	NTA	2	2	7	P
1	2008-12-20 02:28:00	0	NTA	2	2	7	P
1	2008-12-20 02:29:00	0	NTA	2	2	7	P
1	2008-12-20 02:30:00	0	NTA	2	2	7	P
1	2008-12-20 02:31:00	0	NTA	2	2	7	P
1	2008-12-20 02:32:00	0	NTA	2	2	7	P
1	2008-12-20 02:33:00	0	NTA	2	2	7	P
1	2008-12-20 02:34:00	0	NTA	2	2	7	P
1	2008-12-20 02:35:00	0	NTA	2	2	7	P
1	2008-12-20 02:36:00	20	NTA	2	2	7	P
1	2008-12-20 02:37:00	0	NTA	2	2	7	P
1	2008-12-20 02:38:00	30	NTA	2	2	7	P
1	2008-12-20 02:39:00	10	NTA	2	2	7	P
1	2008-12-20 02:40:00	20	NTA	2	2	7	P
1	2008-12-20 02:41:00	10	NTA	2	2	7	P
1	2008-12-20 02:42:00	0	NTA	2	2	7	P
1	2008-12-20 02:43:00	0	NTA	2	2	7	P
1	2008-12-20 02:44:00	0	NTA	2	2	7	P
1	2008-12-20 02:45:00	0	NTA	2	2	7	P
1	2008-12-20 02:46:00	0	NTA	2	2	7	P
1	2008-12-20 02:47:00	0	NTA	2	2	7	P
1	2008-12-20 02:48:00	0	NTA	2	2	7	P
1	2008-12-20 02:49:00	0	NTA	2	2	7	P
1	2008-12-20 02:50:00	0	NTA	2	2	7	P
1	2008-12-20 02:51:00	0	NTA	2	2	7	P
1	2008-12-20 02:52:00	0	NTA	2	2	7	P
1	2008-12-20 02:53:00	0	NTA	2	2	7	P
1	2008-12-20 02:54:00	0	NTA	2	2	7	P
1	2008-12-20 02:55:00	0	NTA	2	2	7	P
1	2008-12-20 02:56:00	0	NTA	2	2	7	P
1	2008-12-20 02:57:00	0	NTA	2	2	7	P
1	2008-12-20 02:58:00	0	NTA	2	2	7	P
1	2008-12-20 02:59:00	0	NTA	2	2	7	P
1	2008-12-20 03:00:00	0	NTA	2	2	7	P
1	2008-12-20 03:01:00	0	NTA	3	2	7	P
1	2008-12-20 03:02:00	0	NTA	3	2	7	P
1	2008-12-20 03:03:00	0	NTA	3	2	7	P
1	2008-12-20 03:04:00	0	NTA	3	2	7	P
1	2008-12-20 03:05:00	0	NTA	3	2	7	P
1	2008-12-20 03:06:00	0	NTA	3	2	7	P
1	2008-12-20 03:07:00	0	NTA	3	2	7	P
1	2008-12-20 03:08:00	0	NTA	3	2	7	P
1	2008-12-20 03:09:00	0	NTA	3	2	7	P
1	2008-12-20 03:10:00	0	NTA	3	2	7	P
1	2008-12-20 03:11:00	0	NTA	3	2	7	P
1	2008-12-20 03:12:00	0	NTA	3	2	7	P
1	2008-12-20 03:13:00	0	NTA	3	2	7	P
1	2008-12-20 03:14:00	0	NTA	3	2	7	P
1	2008-12-20 03:15:00	0	NTA	3	2	7	P
1	2008-12-20 03:16:00	0	NTA	3	2	7	P
1	2008-12-20 03:17:00	0	NTA	3	2	7	P
1	2008-12-20 03:18:00	0	NTA	3	2	7	P
1	2008-12-20 03:19:00	0	NTA	3	2	7	P
1	2008-12-20 03:20:00	0	NTA	3	2	7	P
1	2008-12-20 03:21:00	0	NTA	3	2	7	P
1	2008-12-20 03:22:00	0	NTA	3	2	7	P
1	2008-12-20 03:23:00	0	NTA	3	2	7	P
1	2008-12-20 03:24:00	0	NTA	3	2	7	P
1	2008-12-20 03:25:00	0	NTA	3	2	7	P
1	2008-12-20 03:26:00	0	NTA	3	2	7	P
1	2008-12-20 03:27:00	0	NTA	3	2	7	P
1	2008-12-20 03:28:00	0	NTA	3	2	7	P
1	2008-12-20 03:29:00	0	NTA	3	2	7	P
1	2008-12-20 03:30:00	0	NTA	3	2	7	P
1	2008-12-20 03:31:00	0	NTA	3	2	7	P
1	2008-12-20 03:32:00	0	NTA	3	2	7	P
1	2008-12-20 03:33:00	0	NTA	3	2	7	P
1	2008-12-20 03:34:00	0	NTA	3	2	7	P
1	2008-12-20 03:35:00	0	NTA	3	2	7	P
1	2008-12-20 03:36:00	0	NTA	3	2	7	P
1	2008-12-20 03:37:00	0	NTA	3	2	7	P
1	2008-12-20 03:38:00	0	NTA	3	2	7	P
1	2008-12-20 03:39:00	0	NTA	3	2	7	P
1	2008-12-20 03:40:00	0	NTA	3	2	7	P
1	2008-12-20 03:41:00	10	NTA	3	2	7	P
1	2008-12-20 03:42:00	0	NTA	3	2	7	P
1	2008-12-20 03:43:00	0	NTA	3	2	7	P
1	2008-12-20 03:44:00	0	NTA	3	2	7	P
1	2008-12-20 03:45:00	0	NTA	3	2	7	P
1	2008-12-20 03:46:00	0	NTA	3	2	7	P
1	2008-12-20 03:47:00	0	NTA	3	2	7	P
1	2008-12-20 03:48:00	0	NTA	3	2	7	P
1	2008-12-20 03:49:00	0	NTA	3	2	7	P
1	2008-12-20 03:50:00	0	NTA	3	2	7	P
1	2008-12-20 03:51:00	0	NTA	3	2	7	P
1	2008-12-20 03:52:00	0	NTA	3	2	7	P
1	2008-12-20 03:53:00	0	NTA	3	2	7	P
1	2008-12-20 03:54:00	0	NTA	3	2	7	P
1	2008-12-20 03:55:00	0	NTA	3	2	7	P
1	2008-12-20 03:56:00	0	NTA	3	2	7	P
1	2008-12-20 03:57:00	0	NTA	3	2	7	P
1	2008-12-20 03:58:00	0	NTA	3	2	7	P
1	2008-12-20 03:59:00	0	NTA	3	2	7	P
1	2008-12-20 04:00:00	0	NTA	3	2	7	P
1	2008-12-20 04:01:00	0	NTA	4	2	7	P
1	2008-12-20 04:02:00	0	NTA	4	2	7	P
1	2008-12-20 04:03:00	0	NTA	4	2	7	P
1	2008-12-20 04:04:00	0	NTA	4	2	7	P
1	2008-12-20 04:05:00	0	NTA	4	2	7	P
1	2008-12-20 04:06:00	0	NTA	4	2	7	P
1	2008-12-20 04:07:00	0	NTA	4	2	7	P
1	2008-12-20 04:08:00	0	NTA	4	2	7	P
1	2008-12-20 04:09:00	0	NTA	4	2	7	P
1	2008-12-20 04:10:00	0	NTA	4	2	7	P
1	2008-12-20 04:11:00	0	NTA	4	2	7	P
1	2008-12-20 04:12:00	0	NTA	4	2	7	P
1	2008-12-20 04:13:00	0	NTA	4	2	7	P
1	2008-12-20 04:14:00	0	NTA	4	2	7	P
1	2008-12-20 04:15:00	0	NTA	4	2	7	P
1	2008-12-20 04:16:00	0	NTA	4	2	7	P
1	2008-12-20 04:17:00	0	NTA	4	2	7	P
1	2008-12-20 04:18:00	0	NTA	4	2	7	P
1	2008-12-20 04:19:00	0	NTA	4	2	7	P
1	2008-12-20 04:20:00	0	NTA	4	2	7	P
1	2008-12-20 04:21:00	0	NTA	4	2	7	P
1	2008-12-20 04:22:00	0	NTA	4	2	7	P
1	2008-12-20 04:23:00	0	NTA	4	2	7	P
1	2008-12-20 04:24:00	0	NTA	4	2	7	P
1	2008-12-20 04:25:00	0	NTA	4	2	7	P
1	2008-12-20 04:26:00	0	NTA	4	2	7	P
1	2008-12-20 04:27:00	0	NTA	4	2	7	P
1	2008-12-20 04:28:00	0	NTA	4	2	7	P
1	2008-12-20 04:29:00	0	NTA	4	2	7	P
1	2008-12-20 04:30:00	0	NTA	4	2	7	P
1	2008-12-20 04:31:00	20	NTA	4	2	7	P
1	2008-12-20 04:32:00	20	NTA	4	2	7	P
1	2008-12-20 04:33:00	0	NTA	4	2	7	P
1	2008-12-20 04:34:00	0	NTA	4	2	7	P
1	2008-12-20 04:35:00	0	NTA	4	2	7	P
1	2008-12-20 04:36:00	0	NTA	4	2	7	P
1	2008-12-20 04:37:00	0	NTA	4	2	7	P
1	2008-12-20 04:38:00	0	NTA	4	2	7	P
1	2008-12-20 04:39:00	0	NTA	4	2	7	P
1	2008-12-20 04:40:00	0	NTA	4	2	7	P
1	2008-12-20 04:41:00	0	NTA	4	2	7	P
1	2008-12-20 04:42:00	0	NTA	4	2	7	P
1	2008-12-20 04:43:00	0	NTA	4	2	7	P
1	2008-12-20 04:44:00	0	NTA	4	2	7	P
1	2008-12-20 04:45:00	0	NTA	4	2	7	P
1	2008-12-20 04:46:00	0	NTA	4	2	7	P
1	2008-12-20 04:47:00	0	NTA	4	2	7	P
1	2008-12-20 04:48:00	0	NTA	4	2	7	P
1	2008-12-20 04:49:00	0	NTA	4	2	7	P
1	2008-12-20 04:50:00	0	NTA	4	2	7	P
1	2008-12-20 04:51:00	0	NTA	4	2	7	P
1	2008-12-20 04:52:00	0	NTA	4	2	7	P
1	2008-12-20 04:53:00	0	NTA	4	2	7	P
1	2008-12-20 04:54:00	0	NTA	4	2	7	P
1	2008-12-20 04:55:00	0	NTA	4	2	7	P
1	2008-12-20 04:56:00	0	NTA	4	2	7	P
1	2008-12-20 04:57:00	0	NTA	4	2	7	P
1	2008-12-20 04:58:00	0	NTA	4	2	7	P
1	2008-12-20 04:59:00	0	NTA	4	2	7	P
1	2008-12-20 05:00:00	0	NTA	4	2	7	P
1	2008-12-20 05:01:00	0	NTA	5	2	7	P
1	2008-12-20 05:02:00	0	NTA	5	2	7	P
1	2008-12-20 05:03:00	0	NTA	5	2	7	P
1	2008-12-20 05:04:00	0	NTA	5	2	7	P
1	2008-12-20 05:05:00	0	NTA	5	2	7	P
1	2008-12-20 05:06:00	0	NTA	5	2	7	P
1	2008-12-20 05:07:00	10	NTA	5	2	7	P
1	2008-12-20 05:08:00	0	NTA	5	2	7	P
1	2008-12-20 05:09:00	0	NTA	5	2	7	P
1	2008-12-20 05:10:00	0	NTA	5	2	7	P
1	2008-12-20 05:11:00	10	NTA	5	2	7	P
1	2008-12-20 05:12:00	0	NTA	5	2	7	P
1	2008-12-20 05:13:00	0	NTA	5	2	7	P
1	2008-12-20 05:14:00	0	NTA	5	2	7	P
1	2008-12-20 05:15:00	0	NTA	5	2	7	P
1	2008-12-20 05:16:00	0	NTA	5	2	7	P
1	2008-12-20 05:17:00	0	NTA	5	2	7	P
1	2008-12-20 05:18:00	0	NTA	5	2	7	P
1	2008-12-20 05:19:00	0	NTA	5	2	7	P
1	2008-12-20 05:20:00	0	NTA	5	2	7	P
1	2008-12-20 05:21:00	0	NTA	5	2	7	P
1	2008-12-20 05:22:00	0	NTA	5	2	7	P
1	2008-12-20 05:23:00	0	NTA	5	2	7	P
1	2008-12-20 05:24:00	0	NTA	5	2	7	P
1	2008-12-20 05:25:00	0	NTA	5	2	7	P
1	2008-12-20 05:26:00	0	NTA	5	2	7	P
1	2008-12-20 05:27:00	0	NTA	5	2	7	P
1	2008-12-20 05:28:00	0	NTA	5	2	7	P
1	2008-12-20 05:29:00	0	NTA	5	2	7	P
1	2008-12-20 05:30:00	0	NTA	5	2	7	P
1	2008-12-20 05:31:00	10	NTA	5	2	7	P
1	2008-12-20 05:32:00	0	NTA	5	2	7	P
1	2008-12-20 05:33:00	0	NTA	5	2	7	P
1	2008-12-20 05:34:00	61	NTA	5	2	7	P
1	2008-12-20 05:35:00	0	NTA	5	2	7	P
1	2008-12-20 05:36:00	0	NTA	5	2	7	P
1	2008-12-20 05:37:00	0	NTA	5	2	7	P
1	2008-12-20 05:38:00	0	NTA	5	2	7	P
1	2008-12-20 05:39:00	0	NTA	5	2	7	P
1	2008-12-20 05:40:00	0	NTA	5	2	7	P
1	2008-12-20 05:41:00	0	NTA	5	2	7	P
1	2008-12-20 05:42:00	0	NTA	5	2	7	P
1	2008-12-20 05:43:00	0	NTA	5	2	7	P
1	2008-12-20 05:44:00	0	NTA	5	2	7	P
1	2008-12-20 05:45:00	0	NTA	5	2	7	P
1	2008-12-20 05:46:00	0	NTA	5	2	7	P
1	2008-12-20 05:47:00	0	NTA	5	2	7	P
1	2008-12-20 05:48:00	0	NTA	5	2	7	P
1	2008-12-20 05:49:00	0	NTA	5	2	7	P
1	2008-12-20 05:50:00	10	NTA	5	2	7	P
1	2008-12-20 05:51:00	10	NTA	5	2	7	P
1	2008-12-20 05:52:00	0	NTA	5	2	7	P
1	2008-12-20 05:53:00	41	NTA	5	2	7	P
1	2008-12-20 05:54:00	0	NTA	5	2	7	P
1	2008-12-20 05:55:00	0	NTA	5	2	7	P
1	2008-12-20 05:56:00	10	NTA	5	2	7	P
1	2008-12-20 05:57:00	0	NTA	5	2	7	P
1	2008-12-20 05:58:00	0	NTA	5	2	7	P
1	2008-12-20 05:59:00	0	NTA	5	2	7	P
1	2008-12-20 06:00:00	0	NTA	5	2	7	P
1	2008-12-20 06:01:00	0	NTA	6	2	7	P
1	2008-12-20 06:02:00	0	NTA	6	2	7	P
1	2008-12-20 06:03:00	0	NTA	6	2	7	P
1	2008-12-20 06:04:00	0	NTA	6	2	7	P
1	2008-12-20 06:05:00	0	NTA	6	2	7	P
1	2008-12-20 06:06:00	0	NTA	6	2	7	P
1	2008-12-20 06:07:00	0	NTA	6	2	7	P
1	2008-12-20 06:08:00	0	NTA	6	2	7	P
1	2008-12-20 06:09:00	0	NTA	6	2	7	P
1	2008-12-20 06:10:00	0	NTA	6	2	7	P
1	2008-12-20 06:11:00	0	NTA	6	2	7	P
1	2008-12-20 06:12:00	0	NTA	6	2	7	P
1	2008-12-20 06:13:00	0	NTA	6	2	7	P
1	2008-12-20 06:14:00	0	NTA	6	2	7	P
1	2008-12-20 06:15:00	0	NTA	6	2	7	P
1	2008-12-20 06:16:00	0	NTA	6	2	7	P
1	2008-12-20 06:17:00	0	NTA	6	2	7	P
1	2008-12-20 06:18:00	0	NTA	6	2	7	P
1	2008-12-20 06:19:00	0	NTA	6	2	7	P
1	2008-12-20 06:20:00	0	NTA	6	2	7	P
1	2008-12-20 06:21:00	0	NTA	6	2	7	P
1	2008-12-20 06:22:00	0	NTA	6	2	7	P
1	2008-12-20 06:23:00	0	NTA	6	2	7	P
1	2008-12-20 06:24:00	0	NTA	6	2	7	P
1	2008-12-20 06:25:00	0	NTA	6	2	7	P
1	2008-12-20 06:26:00	0	NTA	6	2	7	P
1	2008-12-20 06:27:00	0	NTA	6	2	7	P
1	2008-12-20 06:28:00	0	NTA	6	2	7	P
1	2008-12-20 06:29:00	0	NTA	6	2	7	P
1	2008-12-20 06:30:00	0	NTA	6	2	7	P
1	2008-12-20 06:31:00	0	NTA	6	2	7	P
1	2008-12-20 06:32:00	0	NTA	6	2	7	P
1	2008-12-20 06:33:00	0	NTA	6	2	7	P
1	2008-12-20 06:34:00	0	NTA	6	2	7	P
1	2008-12-20 06:35:00	0	NTA	6	2	7	P
1	2008-12-20 06:36:00	0	NTA	6	2	7	P
1	2008-12-20 06:37:00	0	NTA	6	2	7	P
1	2008-12-20 06:38:00	0	NTA	6	2	7	P
1	2008-12-20 06:39:00	0	NTA	6	2	7	P
1	2008-12-20 06:40:00	0	NTA	6	2	7	P
1	2008-12-20 06:41:00	10	NTA	6	2	7	P
1	2008-12-20 06:42:00	0	NTA	6	2	7	P
1	2008-12-20 06:43:00	0	NTA	6	2	7	P
1	2008-12-20 06:44:00	0	NTA	6	2	7	P
1	2008-12-20 06:45:00	0	NTA	6	2	7	P
1	2008-12-20 06:46:00	0	NTA	6	2	7	P
1	2008-12-20 06:47:00	0	NTA	6	2	7	P
1	2008-12-20 06:48:00	0	NTA	6	2	7	P
1	2008-12-20 06:49:00	0	NTA	6	2	7	P
[truncated: 36,881 more rows]

## Sheet: Pivot NTA
Peak DTA Time?	(All)
DTA vs NTA	NTA
Average of Activity	Column Labels
Row Labels	1	2	3	4	5	6	7	8	9	10	11	12	13	14	Grand Total
1	20.0333	41.7681	13.3136	23.3861	35.5889	3.34848	19.2615	2.07639	11.8515	11.2017	29.2474	25.0949	9.3303	4.1463	18.411
2	11.6905	22.3227	6.21111	11.38	16.146	10.2127	2.76825	7.97619	10.9015	10.6889	10.0476	2.8619	11.5603	8.64762	10.3213
Grand Total	15.8619	32.2615	10.1175	17.9288	26.5156	6.70078	11.8922	4.82963	11.3765	10.9588	20.6688	15.161	10.4194	6.57009	14.5721

## Sheet: Pivot DTA
Peak DTA Time?	(All)
DTA vs NTA	DTA
Average of Activity	Column Labels
Row Labels	1	2	3	4	5	6	7	8	9	10	11	12	13	Grand Total
1	58.9656	83.8641	72.9542	75.3083	86.2282	59.3606	25.8111	46.9077	58.9167	74.7708	104.739	60.3872	65.0473	66.803
2	54.2882	78.6274	86.6493	131.443	135.751	86.9864	75.8889	110.214	71.1048	84.3917	66.6889	53.321	71.521	85.0194
Grand Total	56.5885	81.1488	79.9415	105.027	111.457	74.583	52.3229	81.3374	65.2364	79.5812	83.7728	56.7874	68.0609	76.2426

## Sheet: Pivot PeakDTA
Peak DTA Time?	Peak DTA
DTA vs NTA	DTA
Average of Activity	Column Labels
Row Labels	1	2	3	4	5	6	7	8	9	10	11	12	13	Grand Total
1	101.742	111.111	81.925	84.0833	117.803	72.0444	23.6611	63.0083	84.5222	111.733	119.261	82.2389	101.044	88.7829
2	45.1139	126.517	108.606	208.503	140.756	85.7361	108.483	117.989	65.2139	105.167	113.433	59.5861	77.4361	104.811
Grand Total	73.4278	118.814	95.2653	146.293	129.279	78.8903	66.0722	90.4986	74.8681	108.45	116.347	70.9125	89.2403	96.7968

## Sheet: Sheet1
Actogram, Copy Raw Data, All Days
Identity:	Lena
Filename:	E:\Active Research Files\Nighttime Activity\cases\Lena\Lena 12.18.08.AWC
Gender:	F
Age:	9
Height:	40.6 cm	16.0 in
Weight:	21.8 kg	48.1 lbs
Start Date:	18-Dec-2008 (Thu)
Start Time:	17:00:00
Interval:	1.00 mins
Date Stamp:	Time Stamp:	Activity Data:	Marker Press:
2008-12-18	00:00:00	0
2008-12-18	00:01:00	0
2008-12-18	00:02:00	0
2008-12-18	00:03:00	0
2008-12-18	00:04:00	0
2008-12-18	00:05:00	0
2008-12-18	00:06:00	0
2008-12-18	00:07:00	0
2008-12-18	00:08:00	0
2008-12-18	00:09:00	0
2008-12-18	00:10:00	0
2008-12-18	00:11:00	0
2008-12-18	00:12:00	0
2008-12-18	00:13:00	0
2008-12-18	00:14:00	0
2008-12-18	00:15:00	0
2008-12-18	00:16:00	0
2008-12-18	00:17:00	0
2008-12-18	00:18:00	0
2008-12-18	00:19:00	0
2008-12-18	00:20:00	0
2008-12-18	00:21:00	0
2008-12-18	00:22:00	0
2008-12-18	00:23:00	0
2008-12-18	00:24:00	0
2008-12-18	00:25:00	0
2008-12-18	00:26:00	0
2008-12-18	00:27:00	0
2008-12-18	00:28:00	0
2008-12-18	00:29:00	0
2008-12-18	00:30:00	0
2008-12-18	00:31:00	0
2008-12-18	00:32:00	0
2008-12-18	00:33:00	0
2008-12-18	00:34:00	0
2008-12-18	00:35:00	0
2008-12-18	00:36:00	0
2008-12-18	00:37:00	0
2008-12-18	00:38:00	0
2008-12-18	00:39:00	0
2008-12-18	00:40:00	0
2008-12-18	00:41:00	0
2008-12-18	00:42:00	0
2008-12-18	00:43:00	0
2008-12-18	00:44:00	0
2008-12-18	00:45:00	0
2008-12-18	00:46:00	0
2008-12-18	00:47:00	0
2008-12-18	00:48:00	0
2008-12-18	00:49:00	0
2008-12-18	00:50:00	0
2008-12-18	00:51:00	0
2008-12-18	00:52:00	0
2008-12-18	00:53:00	0
2008-12-18	00:54:00	0
2008-12-18	00:55:00	0
2008-12-18	00:56:00	0
2008-12-18	00:57:00	0
2008-12-18	00:58:00	0
2008-12-18	00:59:00	0
2008-12-18	01:00:00	0
2008-12-18	01:01:00	0
2008-12-18	01:02:00	0
2008-12-18	01:03:00	0
2008-12-18	01:04:00	0
2008-12-18	01:05:00	0
2008-12-18	01:06:00	0
2008-12-18	01:07:00	0
2008-12-18	01:08:00	0
2008-12-18	01:09:00	0
2008-12-18	01:10:00	0
2008-12-18	01:11:00	0
2008-12-18	01:12:00	0
2008-12-18	01:13:00	0
2008-12-18	01:14:00	0
2008-12-18	01:15:00	0
2008-12-18	01:16:00	0
2008-12-18	01:17:00	0
2008-12-18	01:18:00	0
2008-12-18	01:19:00	0
2008-12-18	01:20:00	0
2008-12-18	01:21:00	0
2008-12-18	01:22:00	0
2008-12-18	01:23:00	0
2008-12-18	01:24:00	0
2008-12-18	01:25:00	0
2008-12-18	01:26:00	0
2008-12-18	01:27:00	0
2008-12-18	01:28:00	0
2008-12-18	01:29:00	0
2008-12-18	01:30:00	0
2008-12-18	01:31:00	0
2008-12-18	01:32:00	0
2008-12-18	01:33:00	0
2008-12-18	01:34:00	0
2008-12-18	01:35:00	0
2008-12-18	01:36:00	0
2008-12-18	01:37:00	0
2008-12-18	01:38:00	0
2008-12-18	01:39:00	0
2008-12-18	01:40:00	0
2008-12-18	01:41:00	0
2008-12-18	01:42:00	0
2008-12-18	01:43:00	0
2008-12-18	01:44:00	0
2008-12-18	01:45:00	0
2008-12-18	01:46:00	0
2008-12-18	01:47:00	0
2008-12-18	01:48:00	0
2008-12-18	01:49:00	0
2008-12-18	01:50:00	0
2008-12-18	01:51:00	0
2008-12-18	01:52:00	0
2008-12-18	01:53:00	0
2008-12-18	01:54:00	0
2008-12-18	01:55:00	0
2008-12-18	01:56:00	0
2008-12-18	01:57:00	0
2008-12-18	01:58:00	0
2008-12-18	01:59:00	0
2008-12-18	02:00:00	0
2008-12-18	02:01:00	0
2008-12-18	02:02:00	0
2008-12-18	02:03:00	0
2008-12-18	02:04:00	0
2008-12-18	02:05:00	0
2008-12-18	02:06:00	0
2008-12-18	02:07:00	0
2008-12-18	02:08:00	0
2008-12-18	02:09:00	0
2008-12-18	02:10:00	0
2008-12-18	02:11:00	0
2008-12-18	02:12:00	0
2008-12-18	02:13:00	0
2008-12-18	02:14:00	0
2008-12-18	02:15:00	0
2008-12-18	02:16:00	0
2008-12-18	02:17:00	0
2008-12-18	02:18:00	0
2008-12-18	02:19:00	0
2008-12-18	02:20:00	0
2008-12-18	02:21:00	0
2008-12-18	02:22:00	0
2008-12-18	02:23:00	0
2008-12-18	02:24:00	0
2008-12-18	02:25:00	0
2008-12-18	02:26:00	0
2008-12-18	02:27:00	0
2008-12-18	02:28:00	0
2008-12-18	02:29:00	0
2008-12-18	02:30:00	0
2008-12-18	02:31:00	0
2008-12-18	02:32:00	0
2008-12-18	02:33:00	0
2008-12-18	02:34:00	0
2008-12-18	02:35:00	0
2008-12-18	02:36:00	0
2008-12-18	02:37:00	0
2008-12-18	02:38:00	0
2008-12-18	02:39:00	0
2008-12-18	02:40:00	0
2008-12-18	02:41:00	0
2008-12-18	02:42:00	0
2008-12-18	02:43:00	0
2008-12-18	02:44:00	0
2008-12-18	02:45:00	0
2008-12-18	02:46:00	0
2008-12-18	02:47:00	0
2008-12-18	02:48:00	0
2008-12-18	02:49:00	0
2008-12-18	02:50:00	0
2008-12-18	02:51:00	0
2008-12-18	02:52:00	0
2008-12-18	02:53:00	0
2008-12-18	02:54:00	0
2008-12-18	02:55:00	0
2008-12-18	02:56:00	0
2008-12-18	02:57:00	0
2008-12-18	02:58:00	0
2008-12-18	02:59:00	0
2008-12-18	03:00:00	0
2008-12-18	03:01:00	0
2008-12-18	03:02:00	0
2008-12-18	03:03:00	0
2008-12-18	03:04:00	0
2008-12-18	03:05:00	0
2008-12-18	03:06:00	0
2008-12-18	03:07:00	0
2008-12-18	03:08:00	0
2008-12-18	03:09:00	0
2008-12-18	03:10:00	0
2008-12-18	03:11:00	0
2008-12-18	03:12:00	0
2008-12-18	03:13:00	0
2008-12-18	03:14:00	0
2008-12-18	03:15:00	0
2008-12-18	03:16:00	0
2008-12-18	03:17:00	0
2008-12-18	03:18:00	0
2008-12-18	03:19:00	0
2008-12-18	03:20:00	0
2008-12-18	03:21:00	0
2008-12-18	03:22:00	0
2008-12-18	03:23:00	0
2008-12-18	03:24:00	0
2008-12-18	03:25:00	0
2008-12-18	03:26:00	0
2008-12-18	03:27:00	0
2008-12-18	03:28:00	0
2008-12-18	03:29:00	0
2008-12-18	03:30:00	0
2008-12-18	03:31:00	0
2008-12-18	03:32:00	0
2008-12-18	03:33:00	0
2008-12-18	03:34:00	0
2008-12-18	03:35:00	0
2008-12-18	03:36:00	0
2008-12-18	03:37:00	0
2008-12-18	03:38:00	0
2008-12-18	03:39:00	0
2008-12-18	03:40:00	0
2008-12-18	03:41:00	0
2008-12-18	03:42:00	0
2008-12-18	03:43:00	0
2008-12-18	03:44:00	0
2008-12-18	03:45:00	0
2008-12-18	03:46:00	0
2008-12-18	03:47:00	0
2008-12-18	03:48:00	0
2008-12-18	03:49:00	0
2008-12-18	03:50:00	0
2008-12-18	03:51:00	0
2008-12-18	03:52:00	0
2008-12-18	03:53:00	0
2008-12-18	03:54:00	0
2008-12-18	03:55:00	0
2008-12-18	03:56:00	0
2008-12-18	03:57:00	0
2008-12-18	03:58:00	0
2008-12-18	03:59:00	0
2008-12-18	04:00:00	0
2008-12-18	04:01:00	0
2008-12-18	04:02:00	0
2008-12-18	04:03:00	0
2008-12-18	04:04:00	0
2008-12-18	04:05:00	0
2008-12-18	04:06:00	0
2008-12-18	04:07:00	0
2008-12-18	04:08:00	0
2008-12-18	04:09:00	0
2008-12-18	04:10:00	0
2008-12-18	04:11:00	0
2008-12-18	04:12:00	0
2008-12-18	04:13:00	0
2008-12-18	04:14:00	0
2008-12-18	04:15:00	0
2008-12-18	04:16:00	0
2008-12-18	04:17:00	0
2008-12-18	04:18:00	0
2008-12-18	04:19:00	0
2008-12-18	04:20:00	0
2008-12-18	04:21:00	0
2008-12-18	04:22:00	0
2008-12-18	04:23:00	0
2008-12-18	04:24:00	0
2008-12-18	04:25:00	0
2008-12-18	04:26:00	0
2008-12-18	04:27:00	0
2008-12-18	04:28:00	0
2008-12-18	04:29:00	0
2008-12-18	04:30:00	0
2008-12-18	04:31:00	0
2008-12-18	04:32:00	0
2008-12-18	04:33:00	0
2008-12-18	04:34:00	0
2008-12-18	04:35:00	0
2008-12-18	04:36:00	0
2008-12-18	04:37:00	0
2008-12-18	04:38:00	0
2008-12-18	04:39:00	0
2008-12-18	04:40:00	0
2008-12-18	04:41:00	0
2008-12-18	04:42:00	0
2008-12-18	04:43:00	0
2008-12-18	04:44:00	0
2008-12-18	04:45:00	0
2008-12-18	04:46:00	0
2008-12-18	04:47:00	0
2008-12-18	04:48:00	0
2008-12-18	04:49:00	0
2008-12-18	04:50:00	0
2008-12-18	04:51:00	0
2008-12-18	04:52:00	0
2008-12-18	04:53:00	0
2008-12-18	04:54:00	0
2008-12-18	04:55:00	0
2008-12-18	04:56:00	0
2008-12-18	04:57:00	0
2008-12-18	04:58:00	0
2008-12-18	04:59:00	0
2008-12-18	05:00:00	0
2008-12-18	05:01:00	0
2008-12-18	05:02:00	0
2008-12-18	05:03:00	0
2008-12-18	05:04:00	0
2008-12-18	05:05:00	0
2008-12-18	05:06:00	0
2008-12-18	05:07:00	0
2008-12-18	05:08:00	0
2008-12-18	05:09:00	0
2008-12-18	05:10:00	0
2008-12-18	05:11:00	0
2008-12-18	05:12:00	0
2008-12-18	05:13:00	0
2008-12-18	05:14:00	0
2008-12-18	05:15:00	0
2008-12-18	05:16:00	0
2008-12-18	05:17:00	0
2008-12-18	05:18:00	0
2008-12-18	05:19:00	0
2008-12-18	05:20:00	0
2008-12-18	05:21:00	0
2008-12-18	05:22:00	0
2008-12-18	05:23:00	0
2008-12-18	05:24:00	0
2008-12-18	05:25:00	0
2008-12-18	05:26:00	0
2008-12-18	05:27:00	0
2008-12-18	05:28:00	0
2008-12-18	05:29:00	0
2008-12-18	05:30:00	0
2008-12-18	05:31:00	0
2008-12-18	05:32:00	0
2008-12-18	05:33:00	0
2008-12-18	05:34:00	0
2008-12-18	05:35:00	0
2008-12-18	05:36:00	0
2008-12-18	05:37:00	0
2008-12-18	05:38:00	0
2008-12-18	05:39:00	0
2008-12-18	05:40:00	0
2008-12-18	05:41:00	0
2008-12-18	05:42:00	0
2008-12-18	05:43:00	0
2008-12-18	05:44:00	0
2008-12-18	05:45:00	0
2008-12-18	05:46:00	0
2008-12-18	05:47:00	0
2008-12-18	05:48:00	0
2008-12-18	05:49:00	0
2008-12-18	05:50:00	0
2008-12-18	05:51:00	0
2008-12-18	05:52:00	0
2008-12-18	05:53:00	0
2008-12-18	05:54:00	0
2008-12-18	05:55:00	0
2008-12-18	05:56:00	0
2008-12-18	05:57:00	0
2008-12-18	05:58:00	0
2008-12-18	05:59:00	0
2008-12-18	06:00:00	0
2008-12-18	06:01:00	0
2008-12-18	06:02:00	0
2008-12-18	06:03:00	0
2008-12-18	06:04:00	0
2008-12-18	06:05:00	0
2008-12-18	06:06:00	0
2008-12-18	06:07:00	0
2008-12-18	06:08:00	0
2008-12-18	06:09:00	0
2008-12-18	06:10:00	0
2008-12-18	06:11:00	0
2008-12-18	06:12:00	0
2008-12-18	06:13:00	0
2008-12-18	06:14:00	0
2008-12-18	06:15:00	0
2008-12-18	06:16:00	0
2008-12-18	06:17:00	0
2008-12-18	06:18:00	0
2008-12-18	06:19:00	0
2008-12-18	06:20:00	0
2008-12-18	06:21:00	0
2008-12-18	06:22:00	0
2008-12-18	06:23:00	0
2008-12-18	06:24:00	0
2008-12-18	06:25:00	0
2008-12-18	06:26:00	0
2008-12-18	06:27:00	0
2008-12-18	06:28:00	0
2008-12-18	06:29:00	0
2008-12-18	06:30:00	0
2008-12-18	06:31:00	0
2008-12-18	06:32:00	0
2008-12-18	06:33:00	0
2008-12-18	06:34:00	0
2008-12-18	06:35:00	0
2008-12-18	06:36:00	0
2008-12-18	06:37:00	0
2008-12-18	06:38:00	0
2008-12-18	06:39:00	0
2008-12-18	06:40:00	0
2008-12-18	06:41:00	0
2008-12-18	06:42:00	0
2008-12-18	06:43:00	0
2008-12-18	06:44:00	0
2008-12-18	06:45:00	0
2008-12-18	06:46:00	0
2008-12-18	06:47:00	0
2008-12-18	06:48:00	0
2008-12-18	06:49:00	0
2008-12-18	06:50:00	0
2008-12-18	06:51:00	0
2008-12-18	06:52:00	0
2008-12-18	06:53:00	0
2008-12-18	06:54:00	0
2008-12-18	06:55:00	0
2008-12-18	06:56:00	0
2008-12-18	06:57:00	0
2008-12-18	06:58:00	0
2008-12-18	06:59:00	0
2008-12-18	07:00:00	0
2008-12-18	07:01:00	0
2008-12-18	07:02:00	0
2008-12-18	07:03:00	0
2008-12-18	07:04:00	0
2008-12-18	07:05:00	0
2008-12-18	07:06:00	0
2008-12-18	07:07:00	0
2008-12-18	07:08:00	0
2008-12-18	07:09:00	0
2008-12-18	07:10:00	0
2008-12-18	07:11:00	0
2008-12-18	07:12:00	0
2008-12-18	07:13:00	0
2008-12-18	07:14:00	0
2008-12-18	07:15:00	0
2008-12-18	07:16:00	0
2008-12-18	07:17:00	0
2008-12-18	07:18:00	0
2008-12-18	07:19:00	0
2008-12-18	07:20:00	0
2008-12-18	07:21:00	0
2008-12-18	07:22:00	0
2008-12-18	07:23:00	0
2008-12-18	07:24:00	0
2008-12-18	07:25:00	0
2008-12-18	07:26:00	0
2008-12-18	07:27:00	0
2008-12-18	07:28:00	0
2008-12-18	07:29:00	0
2008-12-18	07:30:00	0
2008-12-18	07:31:00	0
2008-12-18	07:32:00	0
2008-12-18	07:33:00	0
2008-12-18	07:34:00	0
2008-12-18	07:35:00	0
2008-12-18	07:36:00	0
2008-12-18	07:37:00	0
2008-12-18	07:38:00	0
2008-12-18	07:39:00	0
2008-12-18	07:40:00	0
2008-12-18	07:41:00	0
2008-12-18	07:42:00	0
2008-12-18	07:43:00	0
2008-12-18	07:44:00	0
2008-12-18	07:45:00	0
2008-12-18	07:46:00	0
2008-12-18	07:47:00	0
2008-12-18	07:48:00	0
2008-12-18	07:49:00	0
2008-12-18	07:50:00	0
2008-12-18	07:51:00	0
2008-12-18	07:52:00	0
2008-12-18	07:53:00	0
2008-12-18	07:54:00	0
2008-12-18	07:55:00	0
2008-12-18	07:56:00	0
2008-12-18	07:57:00	0
2008-12-18	07:58:00	0
2008-12-18	07:59:00	0
2008-12-18	08:00:00	0
2008-12-18	08:01:00	0
2008-12-18	08:02:00	0
2008-12-18	08:03:00	0
2008-12-18	08:04:00	0
2008-12-18	08:05:00	0
2008-12-18	08:06:00	0
2008-12-18	08:07:00	0
2008-12-18	08:08:00	0
2008-12-18	08:09:00	0
2008-12-18	08:10:00	0
2008-12-18	08:11:00	0
2008-12-18	08:12:00	0
2008-12-18	08:13:00	0
2008-12-18	08:14:00	0
2008-12-18	08:15:00	0
2008-12-18	08:16:00	0
2008-12-18	08:17:00	0
2008-12-18	08:18:00	0
2008-12-18	08:19:00	0
2008-12-18	08:20:00	0
2008-12-18	08:21:00	0
2008-12-18	08:22:00	0
2008-12-18	08:23:00	0
2008-12-18	08:24:00	0
2008-12-18	08:25:00	0
2008-12-18	08:26:00	0
2008-12-18	08:27:00	0
2008-12-18	08:28:00	0
2008-12-18	08:29:00	0
2008-12-18	08:30:00	0
2008-12-18	08:31:00	0
2008-12-18	08:32:00	0
2008-12-18	08:33:00	0
2008-12-18	08:34:00	0
2008-12-18	08:35:00	0
2008-12-18	08:36:00	0
2008-12-18	08:37:00	0
2008-12-18	08:38:00	0
2008-12-18	08:39:00	0
2008-12-18	08:40:00	0
2008-12-18	08:41:00	0
2008-12-18	08:42:00	0
2008-12-18	08:43:00	0
2008-12-18	08:44:00	0
2008-12-18	08:45:00	0
2008-12-18	08:46:00	0
2008-12-18	08:47:00	0
2008-12-18	08:48:00	0
2008-12-18	08:49:00	0
2008-12-18	08:50:00	0
2008-12-18	08:51:00	0
2008-12-18	08:52:00	0
2008-12-18	08:53:00	0
2008-12-18	08:54:00	0
2008-12-18	08:55:00	0
2008-12-18	08:56:00	0
2008-12-18	08:57:00	0
2008-12-18	08:58:00	0
2008-12-18	08:59:00	0
2008-12-18	09:00:00	0
2008-12-18	09:01:00	0
2008-12-18	09:02:00	0
2008-12-18	09:03:00	0
2008-12-18	09:04:00	0
2008-12-18	09:05:00	0
2008-12-18	09:06:00	0
2008-12-18	09:07:00	0
2008-12-18	09:08:00	0
2008-12-18	09:09:00	0
2008-12-18	09:10:00	0
2008-12-18	09:11:00	0
2008-12-18	09:12:00	0
2008-12-18	09:13:00	0
2008-12-18	09:14:00	0
2008-12-18	09:15:00	0
2008-12-18	09:16:00	0
2008-12-18	09:17:00	0
2008-12-18	09:18:00	0
2008-12-18	09:19:00	0
2008-12-18	09:20:00	0
2008-12-18	09:21:00	0
2008-12-18	09:22:00	0
2008-12-18	09:23:00	0
2008-12-18	09:24:00	0
2008-12-18	09:25:00	0
2008-12-18	09:26:00	0
2008-12-18	09:27:00	0
2008-12-18	09:28:00	0
2008-12-18	09:29:00	0
2008-12-18	09:30:00	0
2008-12-18	09:31:00	0
2008-12-18	09:32:00	0
2008-12-18	09:33:00	0
2008-12-18	09:34:00	0
2008-12-18	09:35:00	0
2008-12-18	09:36:00	0
2008-12-18	09:37:00	0
2008-12-18	09:38:00	0
2008-12-18	09:39:00	0
2008-12-18	09:40:00	0
2008-12-18	09:41:00	0
2008-12-18	09:42:00	0
2008-12-18	09:43:00	0
2008-12-18	09:44:00	0
2008-12-18	09:45:00	0
2008-12-18	09:46:00	0
2008-12-18	09:47:00	0
2008-12-18	09:48:00	0
2008-12-18	09:49:00	0
2008-12-18	09:50:00	0
2008-12-18	09:51:00	0
2008-12-18	09:52:00	0
2008-12-18	09:53:00	0
2008-12-18	09:54:00	0
2008-12-18	09:55:00	0
2008-12-18	09:56:00	0
2008-12-18	09:57:00	0
2008-12-18	09:58:00	0
2008-12-18	09:59:00	0
2008-12-18	10:00:00	0
2008-12-18	10:01:00	0
2008-12-18	10:02:00	0
2008-12-18	10:03:00	0
2008-12-18	10:04:00	0
2008-12-18	10:05:00	0
2008-12-18	10:06:00	0
2008-12-18	10:07:00	0
2008-12-18	10:08:00	0
2008-12-18	10:09:00	0
2008-12-18	10:10:00	0
2008-12-18	10:11:00	0
2008-12-18	10:12:00	0
2008-12-18	10:13:00	0
2008-12-18	10:14:00	0
2008-12-18	10:15:00	0
2008-12-18	10:16:00	0
2008-12-18	10:17:00	0
2008-12-18	10:18:00	0
2008-12-18	10:19:00	0
2008-12-18	10:20:00	0
2008-12-18	10:21:00	0
2008-12-18	10:22:00	0
2008-12-18	10:23:00	0
2008-12-18	10:24:00	0
2008-12-18	10:25:00	0
2008-12-18	10:26:00	0
2008-12-18	10:27:00	0
2008-12-18	10:28:00	0
2008-12-18	10:29:00	0
2008-12-18	10:30:00	0
2008-12-18	10:31:00	0
2008-12-18	10:32:00	0
2008-12-18	10:33:00	0
2008-12-18	10:34:00	0
2008-12-18	10:35:00	0
2008-12-18	10:36:00	0
2008-12-18	10:37:00	0
2008-12-18	10:38:00	0
2008-12-18	10:39:00	0
2008-12-18	10:40:00	0
2008-12-18	10:41:00	0
2008-12-18	10:42:00	0
2008-12-18	10:43:00	0
2008-12-18	10:44:00	0
2008-12-18	10:45:00	0
2008-12-18	10:46:00	0
2008-12-18	10:47:00	0
2008-12-18	10:48:00	0
2008-12-18	10:49:00	0
2008-12-18	10:50:00	0
2008-12-18	10:51:00	0
2008-12-18	10:52:00	0
2008-12-18	10:53:00	0
2008-12-18	10:54:00	0
2008-12-18	10:55:00	0
2008-12-18	10:56:00	0
2008-12-18	10:57:00	0
2008-12-18	10:58:00	0
2008-12-18	10:59:00	0
2008-12-18	11:00:00	0
2008-12-18	11:01:00	0
2008-12-18	11:02:00	0
2008-12-18	11:03:00	0
2008-12-18	11:04:00	0
2008-12-18	11:05:00	0
2008-12-18	11:06:00	0
2008-12-18	11:07:00	0
2008-12-18	11:08:00	0
2008-12-18	11:09:00	0
2008-12-18	11:10:00	0
2008-12-18	11:11:00	0
2008-12-18	11:12:00	0
2008-12-18	11:13:00	0
2008-12-18	11:14:00	0
2008-12-18	11:15:00	0
2008-12-18	11:16:00	0
2008-12-18	11:17:00	0
2008-12-18	11:18:00	0
2008-12-18	11:19:00	0
2008-12-18	11:20:00	0
2008-12-18	11:21:00	0
2008-12-18	11:22:00	0
2008-12-18	11:23:00	0
2008-12-18	11:24:00	0
2008-12-18	11:25:00	0
2008-12-18	11:26:00	0
2008-12-18	11:27:00	0
2008-12-18	11:28:00	0
2008-12-18	11:29:00	0
2008-12-18	11:30:00	0
2008-12-18	11:31:00	0
2008-12-18	11:32:00	0
2008-12-18	11:33:00	0
2008-12-18	11:34:00	0
2008-12-18	11:35:00	0
2008-12-18	11:36:00	0
2008-12-18	11:37:00	0
2008-12-18	11:38:00	0
2008-12-18	11:39:00	0
2008-12-18	11:40:00	0
2008-12-18	11:41:00	0
2008-12-18	11:42:00	0
2008-12-18	11:43:00	0
2008-12-18	11:44:00	0
2008-12-18	11:45:00	0
2008-12-18	11:46:00	0
2008-12-18	11:47:00	0
2008-12-18	11:48:00	0
2008-12-18	11:49:00	0
2008-12-18	11:50:00	0
2008-12-18	11:51:00	0
2008-12-18	11:52:00	0
2008-12-18	11:53:00	0
2008-12-18	11:54:00	0
2008-12-18	11:55:00	0
2008-12-18	11:56:00	0
2008-12-18	11:57:00	0
2008-12-18	11:58:00	0
2008-12-18	11:59:00	0
2008-12-18	12:00:00	0
2008-12-18	12:01:00	0
2008-12-18	12:02:00	0
2008-12-18	12:03:00	0
2008-12-18	12:04:00	0
2008-12-18	12:05:00	0
2008-12-18	12:06:00	0
2008-12-18	12:07:00	0
2008-12-18	12:08:00	0
2008-12-18	12:09:00	0
2008-12-18	12:10:00	0
2008-12-18	12:11:00	0
2008-12-18	12:12:00	0
2008-12-18	12:13:00	0
2008-12-18	12:14:00	0
2008-12-18	12:15:00	0
2008-12-18	12:16:00	0
2008-12-18	12:17:00	0
2008-12-18	12:18:00	0
2008-12-18	12:19:00	0
2008-12-18	12:20:00	0
2008-12-18	12:21:00	0
2008-12-18	12:22:00	0
2008-12-18	12:23:00	0
2008-12-18	12:24:00	0
2008-12-18	12:25:00	0
2008-12-18	12:26:00	0
2008-12-18	12:27:00	0
2008-12-18	12:28:00	0
2008-12-18	12:29:00	0
2008-12-18	12:30:00	0
2008-12-18	12:31:00	0
2008-12-18	12:32:00	0
2008-12-18	12:33:00	0
2008-12-18	12:34:00	0
2008-12-18	12:35:00	0
2008-12-18	12:36:00	0
2008-12-18	12:37:00	0
2008-12-18	12:38:00	0
2008-12-18	12:39:00	0
2008-12-18	12:40:00	0
2008-12-18	12:41:00	0
2008-12-18	12:42:00	0
2008-12-18	12:43:00	0
2008-12-18	12:44:00	0
2008-12-18	12:45:00	0
2008-12-18	12:46:00	0
2008-12-18	12:47:00	0
2008-12-18	12:48:00	0
2008-12-18	12:49:00	0
2008-12-18	12:50:00	0
2008-12-18	12:51:00	0
2008-12-18	12:52:00	0
2008-12-18	12:53:00	0
2008-12-18	12:54:00	0
2008-12-18	12:55:00	0
2008-12-18	12:56:00	0
2008-12-18	12:57:00	0
2008-12-18	12:58:00	0
2008-12-18	12:59:00	0
2008-12-18	13:00:00	0
2008-12-18	13:01:00	0
2008-12-18	13:02:00	0
2008-12-18	13:03:00	0
2008-12-18	13:04:00	0
2008-12-18	13:05:00	0
2008-12-18	13:06:00	0
2008-12-18	13:07:00	0
2008-12-18	13:08:00	0
2008-12-18	13:09:00	0
2008-12-18	13:10:00	0
2008-12-18	13:11:00	0
2008-12-18	13:12:00	0
2008-12-18	13:13:00	0
2008-12-18	13:14:00	0
2008-12-18	13:15:00	0
2008-12-18	13:16:00	0
2008-12-18	13:17:00	0
2008-12-18	13:18:00	0
2008-12-18	13:19:00	0
2008-12-18	13:20:00	0
2008-12-18	13:21:00	0
2008-12-18	13:22:00	0
2008-12-18	13:23:00	0
2008-12-18	13:24:00	0
2008-12-18	13:25:00	0
2008-12-18	13:26:00	0
2008-12-18	13:27:00	0
2008-12-18	13:28:00	0
2008-12-18	13:29:00	0
2008-12-18	13:30:00	0
2008-12-18	13:31:00	0
2008-12-18	13:32:00	0
2008-12-18	13:33:00	0
2008-12-18	13:34:00	0
2008-12-18	13:35:00	0
2008-12-18	13:36:00	0
2008-12-18	13:37:00	0
2008-12-18	13:38:00	0
2008-12-18	13:39:00	0
2008-12-18	13:40:00	0
2008-12-18	13:41:00	0
2008-12-18	13:42:00	0
2008-12-18	13:43:00	0
2008-12-18	13:44:00	0
2008-12-18	13:45:00	0
2008-12-18	13:46:00	0
2008-12-18	13:47:00	0
2008-12-18	13:48:00	0
2008-12-18	13:49:00	0
2008-12-18	13:50:00	0
2008-12-18	13:51:00	0
2008-12-18	13:52:00	0
2008-12-18	13:53:00	0
2008-12-18	13:54:00	0
2008-12-18	13:55:00	0
2008-12-18	13:56:00	0
2008-12-18	13:57:00	0
2008-12-18	13:58:00	0
2008-12-18	13:59:00	0
2008-12-18	14:00:00	0
2008-12-18	14:01:00	0
2008-12-18	14:02:00	0
2008-12-18	14:03:00	0
2008-12-18	14:04:00	0
2008-12-18	14:05:00	0
2008-12-18	14:06:00	0
2008-12-18	14:07:00	0
2008-12-18	14:08:00	0
2008-12-18	14:09:00	0
2008-12-18	14:10:00	0
2008-12-18	14:11:00	0
2008-12-18	14:12:00	0
2008-12-18	14:13:00	0
2008-12-18	14:14:00	0
2008-12-18	14:15:00	0
2008-12-18	14:16:00	0
2008-12-18	14:17:00	0
2008-12-18	14:18:00	0
2008-12-18	14:19:00	0
2008-12-18	14:20:00	0
2008-12-18	14:21:00	0
2008-12-18	14:22:00	0
2008-12-18	14:23:00	0
2008-12-18	14:24:00	0
2008-12-18	14:25:00	0
2008-12-18	14:26:00	0
2008-12-18	14:27:00	0
2008-12-18	14:28:00	0
2008-12-18	14:29:00	0
2008-12-18	14:30:00	0
2008-12-18	14:31:00	0
2008-12-18	14:32:00	0
2008-12-18	14:33:00	0
2008-12-18	14:34:00	0
2008-12-18	14:35:00	0
2008-12-18	14:36:00	0
2008-12-18	14:37:00	0
2008-12-18	14:38:00	0
2008-12-18	14:39:00	0
2008-12-18	14:40:00	0
2008-12-18	14:41:00	0
2008-12-18	14:42:00	0
2008-12-18	14:43:00	0
2008-12-18	14:44:00	0
2008-12-18	14:45:00	0
2008-12-18	14:46:00	0
2008-12-18	14:47:00	0
2008-12-18	14:48:00	0
2008-12-18	14:49:00	0
2008-12-18	14:50:00	0
2008-12-18	14:51:00	0
2008-12-18	14:52:00	0
2008-12-18	14:53:00	0
2008-12-18	14:54:00	0
2008-12-18	14:55:00	0
2008-12-18	14:56:00	0
2008-12-18	14:57:00	0
2008-12-18	14:58:00	0
2008-12-18	14:59:00	0
2008-12-18	15:00:00	0
2008-12-18	15:01:00	0
2008-12-18	15:02:00	0
2008-12-18	15:03:00	0
2008-12-18	15:04:00	0
2008-12-18	15:05:00	0
2008-12-18	15:06:00	0
2008-12-18	15:07:00	0
2008-12-18	15:08:00	0
2008-12-18	15:09:00	0
2008-12-18	15:10:00	0
2008-12-18	15:11:00	0
2008-12-18	15:12:00	0
2008-12-18	15:13:00	0
2008-12-18	15:14:00	0
2008-12-18	15:15:00	0
2008-12-18	15:16:00	0
2008-12-18	15:17:00	0
2008-12-18	15:18:00	0
2008-12-18	15:19:00	0
2008-12-18	15:20:00	0
2008-12-18	15:21:00	0
2008-12-18	15:22:00	0
2008-12-18	15:23:00	0
2008-12-18	15:24:00	0
2008-12-18	15:25:00	0
2008-12-18	15:26:00	0
2008-12-18	15:27:00	0
2008-12-18	15:28:00	0
2008-12-18	15:29:00	0
2008-12-18	15:30:00	0
2008-12-18	15:31:00	0
2008-12-18	15:32:00	0
2008-12-18	15:33:00	0
2008-12-18	15:34:00	0
2008-12-18	15:35:00	0
2008-12-18	15:36:00	0
2008-12-18	15:37:00	0
2008-12-18	15:38:00	0
2008-12-18	15:39:00	0
2008-12-18	15:40:00	0
2008-12-18	15:41:00	0
2008-12-18	15:42:00	0
2008-12-18	15:43:00	0
2008-12-18	15:44:00	0
2008-12-18	15:45:00	0
2008-12-18	15:46:00	0
2008-12-18	15:47:00	0
2008-12-18	15:48:00	0
2008-12-18	15:49:00	0
2008-12-18	15:50:00	0
2008-12-18	15:51:00	0
2008-12-18	15:52:00	0
2008-12-18	15:53:00	0
2008-12-18	15:54:00	0
2008-12-18	15:55:00	0
2008-12-18	15:56:00	0
2008-12-18	15:57:00	0
2008-12-18	15:58:00	0
2008-12-18	15:59:00	0
2008-12-18	16:00:00	0
2008-12-18	16:01:00	0
2008-12-18	16:02:00	0
2008-12-18	16:03:00	0
2008-12-18	16:04:00	0
2008-12-18	16:05:00	0
2008-12-18	16:06:00	0
2008-12-18	16:07:00	0
2008-12-18	16:08:00	0
2008-12-18	16:09:00	0
2008-12-18	16:10:00	0
2008-12-18	16:11:00	0
2008-12-18	16:12:00	0
2008-12-18	16:13:00	0
2008-12-18	16:14:00	0
2008-12-18	16:15:00	0
2008-12-18	16:16:00	0
2008-12-18	16:17:00	0
2008-12-18	16:18:00	0
2008-12-18	16:19:00	0
2008-12-18	16:20:00	0
2008-12-18	16:21:00	0
2008-12-18	16:22:00	0
2008-12-18	16:23:00	0
2008-12-18	16:24:00	0
2008-12-18	16:25:00	0
2008-12-18	16:26:00	0
2008-12-18	16:27:00	0
2008-12-18	16:28:00	0
2008-12-18	16:29:00	0
2008-12-18	16:30:00	0
2008-12-18	16:31:00	0
2008-12-18	16:32:00	0
2008-12-18	16:33:00	0
2008-12-18	16:34:00	0
2008-12-18	16:35:00	0
2008-12-18	16:36:00	0
2008-12-18	16:37:00	0
2008-12-18	16:38:00	0
2008-12-18	16:39:00	0
2008-12-18	16:40:00	0
2008-12-18	16:41:00	0
2008-12-18	16:42:00	0
2008-12-18	16:43:00	0
2008-12-18	16:44:00	0
2008-12-18	16:45:00	0
2008-12-18	16:46:00	0
2008-12-18	16:47:00	0
2008-12-18	16:48:00	0
2008-12-18	16:49:00	0
2008-12-18	16:50:00	0
2008-12-18	16:51:00	0
2008-12-18	16:52:00	0
2008-12-18	16:53:00	0
2008-12-18	16:54:00	0
2008-12-18	16:55:00	0
2008-12-18	16:56:00	0
2008-12-18	16:57:00	0
2008-12-18	16:58:00	0
2008-12-18	16:59:00	0
2008-12-18	17:00:00	309
2008-12-18	17:01:00	30
2008-12-18	17:02:00	61
2008-12-18	17:03:00	181
2008-12-18	17:04:00	132
2008-12-18	17:05:00	122
2008-12-18	17:06:00	30
2008-12-18	17:07:00	266
2008-12-18	17:08:00	112
2008-12-18	17:09:00	132
2008-12-18	17:10:00	193
2008-12-18	17:11:00	41
2008-12-18	17:12:00	51
2008-12-18	17:13:00	41
2008-12-18	17:14:00	51
2008-12-18	17:15:00	0
2008-12-18	17:16:00	10
2008-12-18	17:17:00	41
2008-12-18	17:18:00	41
2008-12-18	17:19:00	102
2008-12-18	17:20:00	51
2008-12-18	17:21:00	30
2008-12-18	17:22:00	41
2008-12-18	17:23:00	81
2008-12-18	17:24:00	0
2008-12-18	17:25:00	10
2008-12-18	17:26:00	10
2008-12-18	17:27:00	10
2008-12-18	17:28:00	10
2008-12-18	17:29:00	0
2008-12-18	17:30:00	10
2008-12-18	17:31:00	0
2008-12-18	17:32:00	51
2008-12-18	17:33:00	10
2008-12-18	17:34:00	10
2008-12-18	17:35:00	30
2008-12-18	17:36:00	41
2008-12-18	17:37:00	41
2008-12-18	17:38:00	41
2008-12-18	17:39:00	10
2008-12-18	17:40:00	10
2008-12-18	17:41:00	20
2008-12-18	17:42:00	20
2008-12-18	17:43:00	30
2008-12-18	17:44:00	0
2008-12-18	17:45:00	10
2008-12-18	17:46:00	51
2008-12-18	17:47:00	132
2008-12-18	17:48:00	41
2008-12-18	17:49:00	102
2008-12-18	17:50:00	492
2008-12-18	17:51:00	254
2008-12-18	17:52:00	309
2008-12-18	17:53:00	181
2008-12-18	17:54:00	861
2008-12-18	17:55:00	561
2008-12-18	17:56:00	337
2008-12-18	17:57:00	410
2008-12-18	17:58:00	0
2008-12-18	17:59:00	0
2008-12-18	18:00:00	0
2008-12-18	18:01:00	0
2008-12-18	18:02:00	443
2008-12-18	18:03:00	122
2008-12-18	18:04:00	10
2008-12-18	18:05:00	0
2008-12-18	18:06:00	0
2008-12-18	18:07:00	0
2008-12-18	18:08:00	0
2008-12-18	18:09:00	0
2008-12-18	18:10:00	169
2008-12-18	18:11:00	508
2008-12-18	18:12:00	0
2008-12-18	18:13:00	0
2008-12-18	18:14:00	10
2008-12-18	18:15:00	0
2008-12-18	18:16:00	0
2008-12-18	18:17:00	0
2008-12-18	18:18:00	0
2008-12-18	18:19:00	169
2008-12-18	18:20:00	156
2008-12-18	18:21:00	51
2008-12-18	18:22:00	0
2008-12-18	18:23:00	0
2008-12-18	18:24:00	0
2008-12-18	18:25:00	0
2008-12-18	18:26:00	0
2008-12-18	18:27:00	0
2008-12-18	18:28:00	0
2008-12-18	18:29:00	0
2008-12-18	18:30:00	0
2008-12-18	18:31:00	0
2008-12-18	18:32:00	0
2008-12-18	18:33:00	0
2008-12-18	18:34:00	0
2008-12-18	18:35:00	0
2008-12-18	18:36:00	0
2008-12-18	18:37:00	0
2008-12-18	18:38:00	0
2008-12-18	18:39:00	0
2008-12-18	18:40:00	0
2008-12-18	18:41:00	0
2008-12-18	18:42:00	0
2008-12-18	18:43:00	0
2008-12-18	18:44:00	0
2008-12-18	18:45:00	0
2008-12-18	18:46:00	0
2008-12-18	18:47:00	0
2008-12-18	18:48:00	0
2008-12-18	18:49:00	0
2008-12-18	18:50:00	0
2008-12-18	18:51:00	0
2008-12-18	18:52:00	0
2008-12-18	18:53:00	0
2008-12-18	18:54:00	0
2008-12-18	18:55:00	0
2008-12-18	18:56:00	0
2008-12-18	18:57:00	0
2008-12-18	18:58:00	0
2008-12-18	18:59:00	0
2008-12-18	19:00:00	0
2008-12-18	19:01:00	0
2008-12-18	19:02:00	0
2008-12-18	19:03:00	0
2008-12-18	19:04:00	0
2008-12-18	19:05:00	10
2008-12-18	19:06:00	0
2008-12-18	19:07:00	0
2008-12-18	19:08:00	0
2008-12-18	19:09:00	0
2008-12-18	19:10:00	0
2008-12-18	19:11:00	0
2008-12-18	19:12:00	0
2008-12-18	19:13:00	0
2008-12-18	19:14:00	0
2008-12-18	19:15:00	0
2008-12-18	19:16:00	0
2008-12-18	19:17:00	0
2008-12-18	19:18:00	0
2008-12-18	19:19:00	0
2008-12-18	19:20:00	0
2008-12-18	19:21:00	0
2008-12-18	19:22:00	0
2008-12-18	19:23:00	0
2008-12-18	19:24:00	0
2008-12-18	19:25:00	0
2008-12-18	19:26:00	0
2008-12-18	19:27:00	0
2008-12-18	19:28:00	0
2008-12-18	19:29:00	0
2008-12-18	19:30:00	0
2008-12-18	19:31:00	0
2008-12-18	19:32:00	0
2008-12-18	19:33:00	0
2008-12-18	19:34:00	0
2008-12-18	19:35:00	0
2008-12-18	19:36:00	0
2008-12-18	19:37:00	0
2008-12-18	19:38:00	0
2008-12-18	19:39:00	10
2008-12-18	19:40:00	0
2008-12-18	19:41:00	0
2008-12-18	19:42:00	0
2008-12-18	19:43:00	0
2008-12-18	19:44:00	0
2008-12-18	19:45:00	0
2008-12-18	19:46:00	0
2008-12-18	19:47:00	0
2008-12-18	19:48:00	0
2008-12-18	19:49:00	10
2008-12-18	19:50:00	10
2008-12-18	19:51:00	0
2008-12-18	19:52:00	0
2008-12-18	19:53:00	0
2008-12-18	19:54:00	0
2008-12-18	19:55:00	0
2008-12-18	19:56:00	0
2008-12-18	19:57:00	0
2008-12-18	19:58:00	0
2008-12-18	19:59:00	0
2008-12-18	20:00:00	0
2008-12-18	20:01:00	0
2008-12-18	20:02:00	0
2008-12-18	20:03:00	0
2008-12-18	20:04:00	0
2008-12-18	20:05:00	0
2008-12-18	20:06:00	0
2008-12-18	20:07:00	0
2008-12-18	20:08:00	0
2008-12-18	20:09:00	0
2008-12-18	20:10:00	0
2008-12-18	20:11:00	0
2008-12-18	20:12:00	0
2008-12-18	20:13:00	0
2008-12-18	20:14:00	0
2008-12-18	20:15:00	0
2008-12-18	20:16:00	0
2008-12-18	20:17:00	0
2008-12-18	20:18:00	0
2008-12-18	20:19:00	0
2008-12-18	20:20:00	0
2008-12-18	20:21:00	0
2008-12-18	20:22:00	10
2008-12-18	20:23:00	0
2008-12-18	20:24:00	0
2008-12-18	20:25:00	0
2008-12-18	20:26:00	0
2008-12-18	20:27:00	0
2008-12-18	20:28:00	0
2008-12-18	20:29:00	0
2008-12-18	20:30:00	0
2008-12-18	20:31:00	0
2008-12-18	20:32:00	0
2008-12-18	20:33:00	0
2008-12-18	20:34:00	0
2008-12-18	20:35:00	0
2008-12-18	20:36:00	0
2008-12-18	20:37:00	0
2008-12-18	20:38:00	0
2008-12-18	20:39:00	0
2008-12-18	20:40:00	0
2008-12-18	20:41:00	0
2008-12-18	20:42:00	0
2008-12-18	20:43:00	0
2008-12-18	20:44:00	0
2008-12-18	20:45:00	0
2008-12-18	20:46:00	0
2008-12-18	20:47:00	0
2008-12-18	20:48:00	0
2008-12-18	20:49:00	0
2008-12-18	20:50:00	0
2008-12-18	20:51:00	0
2008-12-18	20:52:00	0
2008-12-18	20:53:00	0
2008-12-18	20:54:00	0
2008-12-18	20:55:00	0
2008-12-18	20:56:00	0
2008-12-18	20:57:00	0
2008-12-18	20:58:00	0
2008-12-18	20:59:00	380
2008-12-18	21:00:00	0
2008-12-18	21:01:00	0
2008-12-18	21:02:00	181
2008-12-18	21:03:00	156
2008-12-18	21:04:00	10
2008-12-18	21:05:00	0
2008-12-18	21:06:00	0
2008-12-18	21:07:00	0
2008-12-18	21:08:00	0
2008-12-18	21:09:00	0
2008-12-18	21:10:00	0
2008-12-18	21:11:00	0
2008-12-18	21:12:00	0
2008-12-18	21:13:00	524
2008-12-18	21:14:00	754
2008-12-18	21:15:00	0
2008-12-18	21:16:00	10
2008-12-18	21:17:00	122
2008-12-18	21:18:00	673
2008-12-18	21:19:00	561
2008-12-18	21:20:00	0
2008-12-18	21:21:00	0
2008-12-18	21:22:00	0
2008-12-18	21:23:00	0
2008-12-18	21:24:00	0
2008-12-18	21:25:00	0
2008-12-18	21:26:00	122
2008-12-18	21:27:00	10
2008-12-18	21:28:00	0
2008-12-18	21:29:00	0
2008-12-18	21:30:00	0
2008-12-18	21:31:00	0
2008-12-18	21:32:00	0
2008-12-18	21:33:00	112
2008-12-18	21:34:00	71
2008-12-18	21:35:00	81
2008-12-18	21:36:00	410
2008-12-18	21:37:00	81
2008-12-18	21:38:00	81
2008-12-18	21:39:00	61
2008-12-18	21:40:00	295
2008-12-18	21:41:00	132
2008-12-18	21:42:00	122
2008-12-18	21:43:00	169
2008-12-18	21:44:00	280
2008-12-18	21:45:00	112
2008-12-18	21:46:00	51
2008-12-18	21:47:00	51
2008-12-18	21:48:00	10
2008-12-18	21:49:00	0
2008-12-18	21:50:00	0
2008-12-18	21:51:00	0
2008-12-18	21:52:00	0
2008-12-18	21:53:00	51
2008-12-18	21:54:00	443
2008-12-18	21:55:00	542
2008-12-18	21:56:00	861
2008-12-18	21:57:00	169
2008-12-18	21:58:00	475
2008-12-18	21:59:00	1611
2008-12-18	22:00:00	817
2008-12-18	22:01:00	427
2008-12-18	22:02:00	1026
2008-12-18	22:03:00	524
2008-12-18	22:04:00	102
2008-12-18	22:05:00	542
2008-12-18	22:06:00	20
2008-12-18	22:07:00	132
2008-12-18	22:08:00	0
2008-12-18	22:09:00	0
2008-12-18	22:10:00	10
2008-12-18	22:11:00	0
2008-12-18	22:12:00	0
2008-12-18	22:13:00	0
2008-12-18	22:14:00	0
2008-12-18	22:15:00	0
2008-12-18	22:16:00	0
2008-12-18	22:17:00	0
2008-12-18	22:18:00	30
2008-12-18	22:19:00	0
2008-12-18	22:20:00	0
2008-12-18	22:21:00	0
2008-12-18	22:22:00	0
2008-12-18	22:23:00	0
2008-12-18	22:24:00	0
2008-12-18	22:25:00	0
2008-12-18	22:26:00	0
2008-12-18	22:27:00	0
2008-12-18	22:28:00	0
2008-12-18	22:29:00	0
2008-12-18	22:30:00	0
2008-12-18	22:31:00	0
2008-12-18	22:32:00	0
2008-12-18	22:33:00	0
2008-12-18	22:34:00	0
2008-12-18	22:35:00	0
2008-12-18	22:36:00	0
2008-12-18	22:37:00	0
2008-12-18	22:38:00	0
2008-12-18	22:39:00	0
2008-12-18	22:40:00	0
2008-12-18	22:41:00	0
2008-12-18	22:42:00	0
2008-12-18	22:43:00	0
2008-12-18	22:44:00	0
2008-12-18	22:45:00	0
2008-12-18	22:46:00	0
2008-12-18	22:47:00	0
2008-12-18	22:48:00	0
2008-12-18	22:49:00	0
2008-12-18	22:50:00	0
2008-12-18	22:51:00	0
2008-12-18	22:52:00	0
2008-12-18	22:53:00	0
2008-12-18	22:54:00	0
2008-12-18	22:55:00	0
2008-12-18	22:56:00	0
2008-12-18	22:57:00	0
2008-12-18	22:58:00	0
2008-12-18	22:59:00	0
2008-12-18	23:00:00	0
2008-12-18	23:01:00	0
2008-12-18	23:02:00	0
2008-12-18	23:03:00	0
2008-12-18	23:04:00	0
2008-12-18	23:05:00	0
2008-12-18	23:06:00	0
2008-12-18	23:07:00	0
2008-12-18	23:08:00	0
2008-12-18	23:09:00	0
2008-12-18	23:10:00	0
2008-12-18	23:11:00	0
2008-12-18	23:12:00	0
2008-12-18	23:13:00	0
2008-12-18	23:14:00	0
2008-12-18	23:15:00	0
2008-12-18	23:16:00	0
2008-12-18	23:17:00	0
2008-12-18	23:18:00	0
2008-12-18	23:19:00	0
2008-12-18	23:20:00	0
2008-12-18	23:21:00	0
2008-12-18	23:22:00	0
2008-12-18	23:23:00	0
2008-12-18	23:24:00	0
2008-12-18	23:25:00	0
2008-12-18	23:26:00	0
2008-12-18	23:27:00	0
2008-12-18	23:28:00	0
2008-12-18	23:29:00	0
2008-12-18	23:30:00	0
2008-12-18	23:31:00	0
2008-12-18	23:32:00	0
2008-12-18	23:33:00	0
2008-12-18	23:34:00	0
2008-12-18	23:35:00	0
2008-12-18	23:36:00	0
2008-12-18	23:37:00	0
2008-12-18	23:38:00	0
2008-12-18	23:39:00	0
2008-12-18	23:40:00	0
2008-12-18	23:41:00	0
2008-12-18	23:42:00	0
2008-12-18	23:43:00	0
2008-12-18	23:44:00	0
2008-12-18	23:45:00	0
2008-12-18	23:46:00	0
2008-12-18	23:47:00	0
2008-12-18	23:48:00	0
2008-12-18	23:49:00	0
2008-12-18	23:50:00	0
2008-12-18	23:51:00	0
2008-12-18	23:52:00	0
2008-12-18	23:53:00	0
2008-12-18	23:54:00	0
2008-12-18	23:55:00	0
2008-12-18	23:56:00	0
2008-12-18	23:57:00	0
2008-12-18	23:58:00	0
2008-12-18	23:59:00	0
2008-12-19	00:00:00	0
2008-12-19	00:01:00	0
2008-12-19	00:02:00	0
2008-12-19	00:03:00	0
2008-12-19	00:04:00	0
2008-12-19	00:05:00	0
2008-12-19	00:06:00	0
2008-12-19	00:07:00	0
2008-12-19	00:08:00	0
2008-12-19	00:09:00	0
2008-12-19	00:10:00	0
2008-12-19	00:11:00	0
2008-12-19	00:12:00	0
2008-12-19	00:13:00	0
2008-12-19	00:14:00	0
2008-12-19	00:15:00	0
2008-12-19	00:16:00	0
2008-12-19	00:17:00	0
2008-12-19	00:18:00	0
2008-12-19	00:19:00	0
2008-12-19	00:20:00	0
2008-12-19	00:21:00	0
2008-12-19	00:22:00	0
2008-12-19	00:23:00	0
2008-12-19	00:24:00	0
2008-12-19	00:25:00	0
2008-12-19	00:26:00	0
2008-12-19	00:27:00	0
2008-12-19	00:28:00	0
2008-12-19	00:29:00	0
2008-12-19	00:30:00	0
2008-12-19	00:31:00	0
2008-12-19	00:32:00	0
2008-12-19	00:33:00	0
2008-12-19	00:34:00	0
2008-12-19	00:35:00	0
2008-12-19	00:36:00	0
2008-12-19	00:37:00	10
2008-12-19	00:38:00	0
2008-12-19	00:39:00	0
2008-12-19	00:40:00	0
2008-12-19	00:41:00	0
2008-12-19	00:42:00	0
2008-12-19	00:43:00	0
2008-12-19	00:44:00	0
2008-12-19	00:45:00	0
2008-12-19	00:46:00	0
2008-12-19	00:47:00	0
2008-12-19	00:48:00	0
2008-12-19	00:49:00	0
2008-12-19	00:50:00	0
2008-12-19	00:51:00	0
2008-12-19	00:52:00	0
2008-12-19	00:53:00	0
2008-12-19	00:54:00	0
2008-12-19	00:55:00	0
2008-12-19	00:56:00	0
2008-12-19	00:57:00	0
2008-12-19	00:58:00	0
2008-12-19	00:59:00	0
2008-12-19	01:00:00	0
2008-12-19	01:01:00	0
2008-12-19	01:02:00	0
2008-12-19	01:03:00	0
2008-12-19	01:04:00	0
2008-12-19	01:05:00	0
2008-12-19	01:06:00	0
2008-12-19	01:07:00	0
2008-12-19	01:08:00	0
2008-12-19	01:09:00	0
2008-12-19	01:10:00	0
2008-12-19	01:11:00	0
2008-12-19	01:12:00	0
2008-12-19	01:13:00	0
2008-12-19	01:14:00	0
2008-12-19	01:15:00	0
2008-12-19	01:16:00	0
2008-12-19	01:17:00	0
2008-12-19	01:18:00	0
2008-12-19	01:19:00	0
2008-12-19	01:20:00	0
2008-12-19	01:21:00	0
2008-12-19	01:22:00	0
2008-12-19	01:23:00	0
2008-12-19	01:24:00	0
2008-12-19	01:25:00	0
2008-12-19	01:26:00	0
2008-12-19	01:27:00	0
2008-12-19	01:28:00	0
2008-12-19	01:29:00	0
2008-12-19	01:30:00	0
2008-12-19	01:31:00	0
2008-12-19	01:32:00	0
2008-12-19	01:33:00	0
2008-12-19	01:34:00	0
2008-12-19	01:35:00	0
2008-12-19	01:36:00	0
2008-12-19	01:37:00	0
2008-12-19	01:38:00	0
2008-12-19	01:39:00	0
2008-12-19	01:40:00	0
2008-12-19	01:41:00	0
2008-12-19	01:42:00	0
2008-12-19	01:43:00	0
2008-12-19	01:44:00	0
2008-12-19	01:45:00	0
2008-12-19	01:46:00	0
2008-12-19	01:47:00	0
2008-12-19	01:48:00	0
2008-12-19	01:49:00	0
2008-12-19	01:50:00	0
2008-12-19	01:51:00	0
2008-12-19	01:52:00	0
2008-12-19	01:53:00	0
2008-12-19	01:54:00	0
2008-12-19	01:55:00	0
2008-12-19	01:56:00	0
2008-12-19	01:57:00	0
2008-12-19	01:58:00	0
2008-12-19	01:59:00	0
2008-12-19	02:00:00	0
2008-12-19	02:01:00	0
2008-12-19	02:02:00	0
2008-12-19	02:03:00	0
2008-12-19	02:04:00	0
2008-12-19	02:05:00	0
2008-12-19	02:06:00	0
2008-12-19	02:07:00	0
2008-12-19	02:08:00	0
2008-12-19	02:09:00	0
2008-12-19	02:10:00	0
2008-12-19	02:11:00	0
2008-12-19	02:12:00	0
2008-12-19	02:13:00	0
2008-12-19	02:14:00	0
2008-12-19	02:15:00	0
2008-12-19	02:16:00	0
2008-12-19	02:17:00	0
2008-12-19	02:18:00	0
2008-12-19	02:19:00	0
2008-12-19	02:20:00	0
2008-12-19	02:21:00	0
2008-12-19	02:22:00	0
2008-12-19	02:23:00	0
2008-12-19	02:24:00	0
2008-12-19	02:25:00	102
2008-12-19	02:26:00	0
2008-12-19	02:27:00	0
2008-12-19	02:28:00	0
2008-12-19	02:29:00	0
2008-12-19	02:30:00	30
2008-12-19	02:31:00	0
2008-12-19	02:32:00	0
2008-12-19	02:33:00	0
2008-12-19	02:34:00	0
2008-12-19	02:35:00	0
2008-12-19	02:36:00	0
2008-12-19	02:37:00	0
2008-12-19	02:38:00	0
2008-12-19	02:39:00	0
2008-12-19	02:40:00	0
2008-12-19	02:41:00	0
2008-12-19	02:42:00	0
2008-12-19	02:43:00	0
2008-12-19	02:44:00	0
2008-12-19	02:45:00	0
2008-12-19	02:46:00	0
2008-12-19	02:47:00	0
2008-12-19	02:48:00	0
2008-12-19	02:49:00	0
2008-12-19	02:50:00	0
2008-12-19	02:51:00	0
2008-12-19	02:52:00	0
2008-12-19	02:53:00	0
2008-12-19	02:54:00	0
2008-12-19	02:55:00	0
2008-12-19	02:56:00	0
2008-12-19	02:57:00	0
2008-12-19	02:58:00	0
2008-12-19	02:59:00	0
2008-12-19	03:00:00	0
2008-12-19	03:01:00	0
2008-12-19	03:02:00	0
2008-12-19	03:03:00	0
2008-12-19	03:04:00	0
2008-12-19	03:05:00	0
2008-12-19	03:06:00	0
2008-12-19	03:07:00	10
2008-12-19	03:08:00	10
2008-12-19	03:09:00	41
2008-12-19	03:10:00	0
2008-12-19	03:11:00	0
2008-12-19	03:12:00	0
2008-12-19	03:13:00	20
2008-12-19	03:14:00	10
2008-12-19	03:15:00	0
2008-12-19	03:16:00	0
2008-12-19	03:17:00	30
2008-12-19	03:18:00	0
2008-12-19	03:19:00	0
2008-12-19	03:20:00	0
2008-12-19	03:21:00	0
2008-12-19	03:22:00	0
2008-12-19	03:23:00	0
2008-12-19	03:24:00	0
2008-12-19	03:25:00	0
2008-12-19	03:26:00	0
2008-12-19	03:27:00	0
2008-12-19	03:28:00	0
2008-12-19	03:29:00	0
2008-12-19	03:30:00	0
2008-12-19	03:31:00	0
2008-12-19	03:32:00	0
2008-12-19	03:33:00	0
2008-12-19	03:34:00	0
2008-12-19	03:35:00	0
2008-12-19	03:36:00	0
2008-12-19	03:37:00	0
2008-12-19	03:38:00	0
2008-12-19	03:39:00	0
2008-12-19	03:40:00	0
2008-12-19	03:41:00	0
2008-12-19	03:42:00	0
2008-12-19	03:43:00	0
2008-12-19	03:44:00	0
2008-12-19	03:45:00	0
2008-12-19	03:46:00	0
2008-12-19	03:47:00	0
2008-12-19	03:48:00	0
2008-12-19	03:49:00	10
2008-12-19	03:50:00	10
2008-12-19	03:51:00	10
2008-12-19	03:52:00	30
2008-12-19	03:53:00	0
2008-12-19	03:54:00	0
2008-12-19	03:55:00	30
2008-12-19	03:56:00	41
2008-12-19	03:57:00	10
2008-12-19	03:58:00	0
2008-12-19	03:59:00	0
2008-12-19	04:00:00	0
2008-12-19	04:01:00	0
2008-12-19	04:02:00	0
2008-12-19	04:03:00	0
2008-12-19	04:04:00	20
2008-12-19	04:05:00	20
2008-12-19	04:06:00	0
2008-12-19	04:07:00	0
2008-12-19	04:08:00	0
2008-12-19	04:09:00	0
2008-12-19	04:10:00	0
2008-12-19	04:11:00	0
2008-12-19	04:12:00	0
2008-12-19	04:13:00	0
2008-12-19	04:14:00	0
2008-12-19	04:15:00	0
2008-12-19	04:16:00	0
2008-12-19	04:17:00	0
2008-12-19	04:18:00	0
2008-12-19	04:19:00	0
2008-12-19	04:20:00	0
2008-12-19	04:21:00	0
2008-12-19	04:22:00	0
2008-12-19	04:23:00	0
2008-12-19	04:24:00	0
2008-12-19	04:25:00	0
2008-12-19	04:26:00	0
2008-12-19	04:27:00	0
2008-12-19	04:28:00	0
2008-12-19	04:29:00	0
2008-12-19	04:30:00	0
2008-12-19	04:31:00	0
2008-12-19	04:32:00	0
2008-12-19	04:33:00	0
2008-12-19	04:34:00	0
2008-12-19	04:35:00	0
2008-12-19	04:36:00	0
2008-12-19	04:37:00	0
2008-12-19	04:38:00	0
2008-12-19	04:39:00	0
2008-12-19	04:40:00	0
2008-12-19	04:41:00	0
2008-12-19	04:42:00	0
2008-12-19	04:43:00	0
2008-12-19	04:44:00	0
2008-12-19	04:45:00	0
2008-12-19	04:46:00	0
2008-12-19	04:47:00	20
2008-12-19	04:48:00	0
2008-12-19	04:49:00	0
2008-12-19	04:50:00	0
2008-12-19	04:51:00	0
2008-12-19	04:52:00	0
2008-12-19	04:53:00	0
2008-12-19	04:54:00	0
2008-12-19	04:55:00	0
2008-12-19	04:56:00	0
2008-12-19	04:57:00	0
2008-12-19	04:58:00	0
2008-12-19	04:59:00	0
2008-12-19	05:00:00	0
2008-12-19	05:01:00	0
2008-12-19	05:02:00	20
2008-12-19	05:03:00	0
2008-12-19	05:04:00	0
2008-12-19	05:05:00	0
2008-12-19	05:06:00	0
2008-12-19	05:07:00	0
2008-12-19	05:08:00	0
2008-12-19	05:09:00	0
2008-12-19	05:10:00	0
2008-12-19	05:11:00	0
2008-12-19	05:12:00	0
2008-12-19	05:13:00	0
2008-12-19	05:14:00	0
2008-12-19	05:15:00	0
2008-12-19	05:16:00	0
2008-12-19	05:17:00	0
2008-12-19	05:18:00	0
2008-12-19	05:19:00	0
2008-12-19	05:20:00	0
2008-12-19	05:21:00	0
2008-12-19	05:22:00	0
2008-12-19	05:23:00	0
2008-12-19	05:24:00	0
2008-12-19	05:25:00	0
2008-12-19	05:26:00	0
2008-12-19	05:27:00	0
2008-12-19	05:28:00	0
2008-12-19	05:29:00	0
2008-12-19	05:30:00	112
2008-12-19	05:31:00	10
2008-12-19	05:32:00	0
2008-12-19	05:33:00	0
2008-12-19	05:34:00	0
2008-12-19	05:35:00	102
2008-12-19	05:36:00	10
2008-12-19	05:37:00	10
2008-12-19	05:38:00	0
2008-12-19	05:39:00	0
2008-12-19	05:40:00	230
2008-12-19	05:41:00	0
2008-12-19	05:42:00	10
2008-12-19	05:43:00	20
2008-12-19	05:44:00	0
2008-12-19	05:45:00	0
2008-12-19	05:46:00	0
2008-12-19	05:47:00	0
2008-12-19	05:48:00	0
2008-12-19	05:49:00	0
2008-12-19	05:50:00	0
2008-12-19	05:51:00	0
2008-12-19	05:52:00	0
2008-12-19	05:53:00	0
2008-12-19	05:54:00	0
2008-12-19	05:55:00	0
2008-12-19	05:56:00	0
2008-12-19	05:57:00	0
2008-12-19	05:58:00	0
2008-12-19	05:59:00	0
2008-12-19	06:00:00	0
2008-12-19	06:01:00	0
2008-12-19	06:02:00	0
2008-12-19	06:03:00	0
2008-12-19	06:04:00	10
2008-12-19	06:05:00	0
2008-12-19	06:06:00	0
2008-12-19	06:07:00	0
2008-12-19	06:08:00	0
2008-12-19	06:09:00	0
2008-12-19	06:10:00	0
2008-12-19	06:11:00	0
2008-12-19	06:12:00	0
2008-12-19	06:13:00	0
2008-12-19	06:14:00	0
2008-12-19	06:15:00	0
2008-12-19	06:16:00	0
2008-12-19	06:17:00	0
2008-12-19	06:18:00	0
2008-12-19	06:19:00	0
2008-12-19	06:20:00	0
2008-12-19	06:21:00	0
2008-12-19	06:22:00	0
2008-12-19	06:23:00	0
2008-12-19	06:24:00	0
2008-12-19	06:25:00	0
2008-12-19	06:26:00	0
2008-12-19	06:27:00	0
2008-12-19	06:28:00	0
2008-12-19	06:29:00	0
2008-12-19	06:30:00	0
2008-12-19	06:31:00	0
2008-12-19	06:32:00	0
2008-12-19	06:33:00	0
2008-12-19	06:34:00	0
2008-12-19	06:35:00	0
2008-12-19	06:36:00	0
2008-12-19	06:37:00	0
2008-12-19	06:38:00	0
2008-12-19	06:39:00	0
2008-12-19	06:40:00	0
2008-12-19	06:41:00	0
2008-12-19	06:42:00	10
2008-12-19	06:43:00	0
2008-12-19	06:44:00	0
2008-12-19	06:45:00	0
2008-12-19	06:46:00	0
2008-12-19	06:47:00	0
2008-12-19	06:48:00	0
2008-12-19	06:49:00	0
2008-12-19	06:50:00	0
2008-12-19	06:51:00	0
2008-12-19	06:52:00	0
2008-12-19	06:53:00	0
2008-12-19	06:54:00	0
2008-12-19	06:55:00	0
2008-12-19	06:56:00	0
2008-12-19	06:57:00	0
2008-12-19	06:58:00	0
2008-12-19	06:59:00	0
2008-12-19	07:00:00	10
2008-12-19	07:01:00	0
2008-12-19	07:02:00	0
2008-12-19	07:03:00	0
2008-12-19	07:04:00	0
2008-12-19	07:05:00	0
2008-12-19	07:06:00	0
2008-12-19	07:07:00	10
2008-12-19	07:08:00	0
2008-12-19	07:09:00	0
2008-12-19	07:10:00	0
2008-12-19	07:11:00	0
2008-12-19	07:12:00	0
2008-12-19	07:13:00	0
2008-12-19	07:14:00	0
2008-12-19	07:15:00	0
2008-12-19	07:16:00	0
2008-12-19	07:17:00	0
2008-12-19	07:18:00	0
2008-12-19	07:19:00	0
2008-12-19	07:20:00	0
2008-12-19	07:21:00	0
2008-12-19	07:22:00	0
2008-12-19	07:23:00	0
2008-12-19	07:24:00	10
2008-12-19	07:25:00	0
2008-12-19	07:26:00	0
2008-12-19	07:27:00	10
2008-12-19	07:28:00	0
2008-12-19	07:29:00	0
2008-12-19	07:30:00	0
2008-12-19	07:31:00	10
2008-12-19	07:32:00	0
2008-12-19	07:33:00	0
2008-12-19	07:34:00	0
2008-12-19	07:35:00	0
2008-12-19	07:36:00	0
2008-12-19	07:37:00	0
2008-12-19	07:38:00	0
2008-12-19	07:39:00	10
2008-12-19	07:40:00	0
2008-12-19	07:41:00	839
2008-12-19	07:42:00	508
2008-12-19	07:43:00	295
2008-12-19	07:44:00	0
2008-12-19	07:45:00	0
2008-12-19	07:46:00	0
2008-12-19	07:47:00	0
2008-12-19	07:48:00	0
2008-12-19	07:49:00	0
2008-12-19	07:50:00	0
2008-12-19	07:51:00	0
2008-12-19	07:52:00	0
2008-12-19	07:53:00	0
2008-12-19	07:54:00	0
2008-12-19	07:55:00	0
2008-12-19	07:56:00	0
2008-12-19	07:57:00	0
2008-12-19	07:58:00	0
2008-12-19	07:59:00	10
2008-12-19	08:00:00	0
2008-12-19	08:01:00	0
2008-12-19	08:02:00	0
2008-12-19	08:03:00	0
2008-12-19	08:04:00	10
2008-12-19	08:05:00	0
2008-12-19	08:06:00	0
2008-12-19	08:07:00	0
2008-12-19	08:08:00	0
2008-12-19	08:09:00	0
2008-12-19	08:10:00	0
2008-12-19	08:11:00	0
2008-12-19	08:12:00	0
2008-12-19	08:13:00	0
2008-12-19	08:14:00	0
2008-12-19	08:15:00	0
2008-12-19	08:16:00	0
2008-12-19	08:17:00	10
2008-12-19	08:18:00	0
2008-12-19	08:19:00	0
2008-12-19	08:20:00	0
2008-12-19	08:21:00	0
2008-12-19	08:22:00	0
2008-12-19	08:23:00	10
2008-12-19	08:24:00	0
2008-12-19	08:25:00	0
2008-12-19	08:26:00	0
2008-12-19	08:27:00	0
2008-12-19	08:28:00	0
2008-12-19	08:29:00	0
2008-12-19	08:30:00	0
2008-12-19	08:31:00	0
2008-12-19	08:32:00	0
2008-12-19	08:33:00	0
2008-12-19	08:34:00	0
2008-12-19	08:35:00	0
2008-12-19	08:36:00	0
2008-12-19	08:37:00	0
2008-12-19	08:38:00	0
2008-12-19	08:39:00	0
2008-12-19	08:40:00	0
2008-12-19	08:41:00	0
2008-12-19	08:42:00	0
2008-12-19	08:43:00	0
2008-12-19	08:44:00	0
2008-12-19	08:45:00	0
2008-12-19	08:46:00	0
2008-12-19	08:47:00	0
2008-12-19	08:48:00	10
2008-12-19	08:49:00	0
2008-12-19	08:50:00	0
2008-12-19	08:51:00	0
2008-12-19	08:52:00	0
2008-12-19	08:53:00	0
2008-12-19	08:54:00	337
2008-12-19	08:55:00	30
2008-12-19	08:56:00	0
2008-12-19	08:57:00	0
2008-12-19	08:58:00	0
2008-12-19	08:59:00	0
2008-12-19	09:00:00	0
2008-12-19	09:01:00	0
2008-12-19	09:02:00	0
2008-12-19	09:03:00	0
2008-12-19	09:04:00	0
2008-12-19	09:05:00	0
2008-12-19	09:06:00	0
2008-12-19	09:07:00	0
2008-12-19	09:08:00	0
[truncated: 65,691 more rows]
