# Supplementary material for: Initial evaluation of nighttime restlessness in a naturally occurring canine model of osteoarthritis pain
Source: PeerJ. 2015 Feb 17;3:e772. doi: 10.7717/peerj.772 (PMC4340376; doi:10.7717/peerj.772)
Supplement: Supplemental Information 67 [file peerj-03-772-s067.xlsx]

## Sheet: 05_Data
Tx #	DateTime	Activity	DTA vs NTA	Hour	Tx Day	Weekday	Tx Rx	Peak DTA Time?	Last 7 Day?
1	2009-04-13 20:31:00	0	NTA	20	1	2	P
1	2009-04-13 20:32:00	0	NTA	20	1	2	P
1	2009-04-13 20:33:00	0	NTA	20	1	2	P
1	2009-04-13 20:34:00	0	NTA	20	1	2	P
1	2009-04-13 20:35:00	0	NTA	20	1	2	P
1	2009-04-13 20:36:00	0	NTA	20	1	2	P
1	2009-04-13 20:37:00	0	NTA	20	1	2	P
1	2009-04-13 20:38:00	0	NTA	20	1	2	P
1	2009-04-13 20:39:00	0	NTA	20	1	2	P
1	2009-04-13 20:40:00	0	NTA	20	1	2	P
1	2009-04-13 20:41:00	0	NTA	20	1	2	P
1	2009-04-13 20:42:00	0	NTA	20	1	2	P
1	2009-04-13 20:43:00	0	NTA	20	1	2	P
1	2009-04-13 20:44:00	0	NTA	20	1	2	P
1	2009-04-13 20:45:00	0	NTA	20	1	2	P
1	2009-04-13 20:46:00	0	NTA	20	1	2	P
1	2009-04-13 20:47:00	0	NTA	20	1	2	P
1	2009-04-13 20:48:00	0	NTA	20	1	2	P
1	2009-04-13 20:49:00	0	NTA	20	1	2	P
1	2009-04-13 20:50:00	0	NTA	20	1	2	P
1	2009-04-13 20:51:00	0	NTA	20	1	2	P
1	2009-04-13 20:52:00	0	NTA	20	1	2	P
1	2009-04-13 20:53:00	0	NTA	20	1	2	P
1	2009-04-13 20:54:00	0	NTA	20	1	2	P
1	2009-04-13 20:55:00	12	NTA	20	1	2	P
1	2009-04-13 20:56:00	0	NTA	20	1	2	P
1	2009-04-13 20:57:00	0	NTA	20	1	2	P
1	2009-04-13 20:58:00	0	NTA	20	1	2	P
1	2009-04-13 20:59:00	0	NTA	20	1	2	P
1	2009-04-13 21:00:00	0	NTA	20	1	2	P
1	2009-04-13 21:01:00	0	NTA	21	1	2	P
1	2009-04-13 21:02:00	0	NTA	21	1	2	P
1	2009-04-13 21:03:00	0	NTA	21	1	2	P
1	2009-04-13 21:04:00	0	NTA	21	1	2	P
1	2009-04-13 21:05:00	0	NTA	21	1	2	P
1	2009-04-13 21:06:00	0	NTA	21	1	2	P
1	2009-04-13 21:07:00	0	NTA	21	1	2	P
1	2009-04-13 21:08:00	0	NTA	21	1	2	P
1	2009-04-13 21:09:00	0	NTA	21	1	2	P
1	2009-04-13 21:10:00	0	NTA	21	1	2	P
1	2009-04-13 21:11:00	0	NTA	21	1	2	P
1	2009-04-13 21:12:00	0	NTA	21	1	2	P
1	2009-04-13 21:13:00	0	NTA	21	1	2	P
1	2009-04-13 21:14:00	0	NTA	21	1	2	P
1	2009-04-13 21:15:00	0	NTA	21	1	2	P
1	2009-04-13 21:16:00	0	NTA	21	1	2	P
1	2009-04-13 21:17:00	0	NTA	21	1	2	P
1	2009-04-13 21:18:00	0	NTA	21	1	2	P
1	2009-04-13 21:19:00	0	NTA	21	1	2	P
1	2009-04-13 21:20:00	0	NTA	21	1	2	P
1	2009-04-13 21:21:00	0	NTA	21	1	2	P
1	2009-04-13 21:22:00	72	NTA	21	1	2	P
1	2009-04-13 21:23:00	0	NTA	21	1	2	P
1	2009-04-13 21:24:00	0	NTA	21	1	2	P
1	2009-04-13 21:25:00	0	NTA	21	1	2	P
1	2009-04-13 21:26:00	0	NTA	21	1	2	P
1	2009-04-13 21:27:00	0	NTA	21	1	2	P
1	2009-04-13 21:28:00	0	NTA	21	1	2	P
1	2009-04-13 21:29:00	0	NTA	21	1	2	P
1	2009-04-13 21:30:00	0	NTA	21	1	2	P
1	2009-04-13 21:31:00	0	NTA	21	1	2	P
1	2009-04-13 21:32:00	0	NTA	21	1	2	P
1	2009-04-13 21:33:00	0	NTA	21	1	2	P
1	2009-04-13 21:34:00	0	NTA	21	1	2	P
1	2009-04-13 21:35:00	0	NTA	21	1	2	P
1	2009-04-13 21:36:00	24	NTA	21	1	2	P
1	2009-04-13 21:37:00	0	NTA	21	1	2	P
1	2009-04-13 21:38:00	12	NTA	21	1	2	P
1	2009-04-13 21:39:00	0	NTA	21	1	2	P
1	2009-04-13 21:40:00	12	NTA	21	1	2	P
1	2009-04-13 21:41:00	0	NTA	21	1	2	P
1	2009-04-13 21:42:00	0	NTA	21	1	2	P
1	2009-04-13 21:43:00	0	NTA	21	1	2	P
1	2009-04-13 21:44:00	0	NTA	21	1	2	P
1	2009-04-13 21:45:00	0	NTA	21	1	2	P
1	2009-04-13 21:46:00	0	NTA	21	1	2	P
1	2009-04-13 21:47:00	0	NTA	21	1	2	P
1	2009-04-13 21:48:00	0	NTA	21	1	2	P
1	2009-04-13 21:49:00	0	NTA	21	1	2	P
1	2009-04-13 21:50:00	0	NTA	21	1	2	P
1	2009-04-13 21:51:00	0	NTA	21	1	2	P
1	2009-04-13 21:52:00	0	NTA	21	1	2	P
1	2009-04-13 21:53:00	0	NTA	21	1	2	P
1	2009-04-13 21:54:00	0	NTA	21	1	2	P
1	2009-04-13 21:55:00	0	NTA	21	1	2	P
1	2009-04-13 21:56:00	0	NTA	21	1	2	P
1	2009-04-13 21:57:00	0	NTA	21	1	2	P
1	2009-04-13 21:58:00	0	NTA	21	1	2	P
1	2009-04-13 21:59:00	0	NTA	21	1	2	P
1	2009-04-13 22:00:00	0	NTA	21	1	2	P
1	2009-04-13 22:01:00	12	NTA	22	1	2	P
1	2009-04-13 22:02:00	0	NTA	22	1	2	P
1	2009-04-13 22:03:00	0	NTA	22	1	2	P
1	2009-04-13 22:04:00	171	NTA	22	1	2	P
1	2009-04-13 22:05:00	12	NTA	22	1	2	P
1	2009-04-13 22:06:00	0	NTA	22	1	2	P
1	2009-04-13 22:07:00	12	NTA	22	1	2	P
1	2009-04-13 22:08:00	0	NTA	22	1	2	P
1	2009-04-13 22:09:00	0	NTA	22	1	2	P
1	2009-04-13 22:10:00	0	NTA	22	1	2	P
1	2009-04-13 22:11:00	0	NTA	22	1	2	P
1	2009-04-13 22:12:00	0	NTA	22	1	2	P
1	2009-04-13 22:13:00	0	NTA	22	1	2	P
1	2009-04-13 22:14:00	0	NTA	22	1	2	P
1	2009-04-13 22:15:00	0	NTA	22	1	2	P
1	2009-04-13 22:16:00	0	NTA	22	1	2	P
1	2009-04-13 22:17:00	0	NTA	22	1	2	P
1	2009-04-13 22:18:00	0	NTA	22	1	2	P
1	2009-04-13 22:19:00	0	NTA	22	1	2	P
1	2009-04-13 22:20:00	0	NTA	22	1	2	P
1	2009-04-13 22:21:00	0	NTA	22	1	2	P
1	2009-04-13 22:22:00	0	NTA	22	1	2	P
1	2009-04-13 22:23:00	0	NTA	22	1	2	P
1	2009-04-13 22:24:00	0	NTA	22	1	2	P
1	2009-04-13 22:25:00	0	NTA	22	1	2	P
1	2009-04-13 22:26:00	0	NTA	22	1	2	P
1	2009-04-13 22:27:00	0	NTA	22	1	2	P
1	2009-04-13 22:28:00	0	NTA	22	1	2	P
1	2009-04-13 22:29:00	0	NTA	22	1	2	P
1	2009-04-13 22:30:00	0	NTA	22	1	2	P
1	2009-04-13 22:31:00	0	NTA	22	1	2	P
1	2009-04-13 22:32:00	0	NTA	22	1	2	P
1	2009-04-13 22:33:00	0	NTA	22	1	2	P
1	2009-04-13 22:34:00	0	NTA	22	1	2	P
1	2009-04-13 22:35:00	0	NTA	22	1	2	P
1	2009-04-13 22:36:00	0	NTA	22	1	2	P
1	2009-04-13 22:37:00	0	NTA	22	1	2	P
1	2009-04-13 22:38:00	0	NTA	22	1	2	P
1	2009-04-13 22:39:00	0	NTA	22	1	2	P
1	2009-04-13 22:40:00	0	NTA	22	1	2	P
1	2009-04-13 22:41:00	0	NTA	22	1	2	P
1	2009-04-13 22:42:00	0	NTA	22	1	2	P
1	2009-04-13 22:43:00	0	NTA	22	1	2	P
1	2009-04-13 22:44:00	0	NTA	22	1	2	P
1	2009-04-13 22:45:00	0	NTA	22	1	2	P
1	2009-04-13 22:46:00	0	NTA	22	1	2	P
1	2009-04-13 22:47:00	0	NTA	22	1	2	P
1	2009-04-13 22:48:00	0	NTA	22	1	2	P
1	2009-04-13 22:49:00	0	NTA	22	1	2	P
1	2009-04-13 22:50:00	0	NTA	22	1	2	P
1	2009-04-13 22:51:00	0	NTA	22	1	2	P
1	2009-04-13 22:52:00	0	NTA	22	1	2	P
1	2009-04-13 22:53:00	0	NTA	22	1	2	P
1	2009-04-13 22:54:00	0	NTA	22	1	2	P
1	2009-04-13 22:55:00	0	NTA	22	1	2	P
1	2009-04-13 22:56:00	0	NTA	22	1	2	P
1	2009-04-13 22:57:00	0	NTA	22	1	2	P
1	2009-04-13 22:58:00	0	NTA	22	1	2	P
1	2009-04-13 22:59:00	0	NTA	22	1	2	P
1	2009-04-13 23:00:00	0	NTA	22	1	2	P
1	2009-04-13 23:01:00	0	NTA	23	1	2	P
1	2009-04-13 23:02:00	0	NTA	23	1	2	P
1	2009-04-13 23:03:00	0	NTA	23	1	2	P
1	2009-04-13 23:04:00	0	NTA	23	1	2	P
1	2009-04-13 23:05:00	0	NTA	23	1	2	P
1	2009-04-13 23:06:00	0	NTA	23	1	2	P
1	2009-04-13 23:07:00	0	NTA	23	1	2	P
1	2009-04-13 23:08:00	0	NTA	23	1	2	P
1	2009-04-13 23:09:00	0	NTA	23	1	2	P
1	2009-04-13 23:10:00	0	NTA	23	1	2	P
1	2009-04-13 23:11:00	12	NTA	23	1	2	P
1	2009-04-13 23:12:00	24	NTA	23	1	2	P
1	2009-04-13 23:13:00	0	NTA	23	1	2	P
1	2009-04-13 23:14:00	0	NTA	23	1	2	P
1	2009-04-13 23:15:00	0	NTA	23	1	2	P
1	2009-04-13 23:16:00	0	NTA	23	1	2	P
1	2009-04-13 23:17:00	0	NTA	23	1	2	P
1	2009-04-13 23:18:00	0	NTA	23	1	2	P
1	2009-04-13 23:19:00	0	NTA	23	1	2	P
1	2009-04-13 23:20:00	0	NTA	23	1	2	P
1	2009-04-13 23:21:00	0	NTA	23	1	2	P
1	2009-04-13 23:22:00	0	NTA	23	1	2	P
1	2009-04-13 23:23:00	0	NTA	23	1	2	P
1	2009-04-13 23:24:00	0	NTA	23	1	2	P
1	2009-04-13 23:25:00	60	NTA	23	1	2	P
1	2009-04-13 23:26:00	0	NTA	23	1	2	P
1	2009-04-13 23:27:00	12	NTA	23	1	2	P
1	2009-04-13 23:28:00	0	NTA	23	1	2	P
1	2009-04-13 23:29:00	24	NTA	23	1	2	P
1	2009-04-13 23:30:00	0	NTA	23	1	2	P
1	2009-04-13 23:31:00	0	NTA	23	1	2	P
1	2009-04-13 23:32:00	0	NTA	23	1	2	P
1	2009-04-13 23:33:00	0	NTA	23	1	2	P
1	2009-04-13 23:34:00	0	NTA	23	1	2	P
1	2009-04-13 23:35:00	0	NTA	23	1	2	P
1	2009-04-13 23:36:00	0	NTA	23	1	2	P
1	2009-04-13 23:37:00	0	NTA	23	1	2	P
1	2009-04-13 23:38:00	0	NTA	23	1	2	P
1	2009-04-13 23:39:00	0	NTA	23	1	2	P
1	2009-04-13 23:40:00	0	NTA	23	1	2	P
1	2009-04-13 23:41:00	0	NTA	23	1	2	P
1	2009-04-13 23:42:00	0	NTA	23	1	2	P
1	2009-04-13 23:43:00	0	NTA	23	1	2	P
1	2009-04-13 23:44:00	0	NTA	23	1	2	P
1	2009-04-13 23:45:00	12	NTA	23	1	2	P
1	2009-04-13 23:46:00	0	NTA	23	1	2	P
1	2009-04-13 23:47:00	0	NTA	23	1	2	P
1	2009-04-13 23:48:00	0	NTA	23	1	2	P
1	2009-04-13 23:49:00	0	NTA	23	1	2	P
1	2009-04-13 23:50:00	0	NTA	23	1	2	P
1	2009-04-13 23:51:00	0	NTA	23	1	2	P
1	2009-04-13 23:52:00	0	NTA	23	1	2	P
1	2009-04-13 23:53:00	0	NTA	23	1	2	P
1	2009-04-13 23:54:00	0	NTA	23	1	2	P
1	2009-04-13 23:55:00	0	NTA	23	1	2	P
1	2009-04-13 23:56:00	0	NTA	23	1	2	P
1	2009-04-13 23:57:00	0	NTA	23	1	2	P
1	2009-04-13 23:58:00	0	NTA	23	1	2	P
1	2009-04-13 23:59:00	0	NTA	23	1	2	P
1	2009-04-14	0	NTA	23	1	2	P
1	2009-04-14 00:01:00	0	NTA	0	1	3	P
1	2009-04-14 00:02:00	0	NTA	0	1	3	P
1	2009-04-14 00:03:00	0	NTA	0	1	3	P
1	2009-04-14 00:04:00	0	NTA	0	1	3	P
1	2009-04-14 00:05:00	0	NTA	0	1	3	P
1	2009-04-14 00:06:00	0	NTA	0	1	3	P
1	2009-04-14 00:07:00	0	NTA	0	1	3	P
1	2009-04-14 00:08:00	0	NTA	0	1	3	P
1	2009-04-14 00:09:00	0	NTA	0	1	3	P
1	2009-04-14 00:10:00	0	NTA	0	1	3	P
1	2009-04-14 00:11:00	0	NTA	0	1	3	P
1	2009-04-14 00:12:00	0	NTA	0	1	3	P
1	2009-04-14 00:13:00	0	NTA	0	1	3	P
1	2009-04-14 00:14:00	0	NTA	0	1	3	P
1	2009-04-14 00:15:00	0	NTA	0	1	3	P
1	2009-04-14 00:16:00	0	NTA	0	1	3	P
1	2009-04-14 00:17:00	0	NTA	0	1	3	P
1	2009-04-14 00:18:00	0	NTA	0	1	3	P
1	2009-04-14 00:19:00	0	NTA	0	1	3	P
1	2009-04-14 00:20:00	0	NTA	0	1	3	P
1	2009-04-14 00:21:00	0	NTA	0	1	3	P
1	2009-04-14 00:22:00	0	NTA	0	1	3	P
1	2009-04-14 00:23:00	0	NTA	0	1	3	P
1	2009-04-14 00:24:00	12	NTA	0	1	3	P
1	2009-04-14 00:25:00	0	NTA	0	1	3	P
1	2009-04-14 00:26:00	24	NTA	0	1	3	P
1	2009-04-14 00:27:00	0	NTA	0	1	3	P
1	2009-04-14 00:28:00	0	NTA	0	1	3	P
1	2009-04-14 00:29:00	0	NTA	0	1	3	P
1	2009-04-14 00:30:00	0	NTA	0	1	3	P
1	2009-04-14 00:31:00	0	NTA	0	1	3	P
1	2009-04-14 00:32:00	12	NTA	0	1	3	P
1	2009-04-14 00:33:00	0	NTA	0	1	3	P
1	2009-04-14 00:34:00	12	NTA	0	1	3	P
1	2009-04-14 00:35:00	121	NTA	0	1	3	P
1	2009-04-14 00:36:00	109	NTA	0	1	3	P
1	2009-04-14 00:37:00	302	NTA	0	1	3	P
1	2009-04-14 00:38:00	12	NTA	0	1	3	P
1	2009-04-14 00:39:00	0	NTA	0	1	3	P
1	2009-04-14 00:40:00	0	NTA	0	1	3	P
1	2009-04-14 00:41:00	0	NTA	0	1	3	P
1	2009-04-14 00:42:00	0	NTA	0	1	3	P
1	2009-04-14 00:43:00	0	NTA	0	1	3	P
1	2009-04-14 00:44:00	0	NTA	0	1	3	P
1	2009-04-14 00:45:00	0	NTA	0	1	3	P
1	2009-04-14 00:46:00	0	NTA	0	1	3	P
1	2009-04-14 00:47:00	0	NTA	0	1	3	P
1	2009-04-14 00:48:00	0	NTA	0	1	3	P
1	2009-04-14 00:49:00	0	NTA	0	1	3	P
1	2009-04-14 00:50:00	0	NTA	0	1	3	P
1	2009-04-14 00:51:00	0	NTA	0	1	3	P
1	2009-04-14 00:52:00	0	NTA	0	1	3	P
1	2009-04-14 00:53:00	0	NTA	0	1	3	P
1	2009-04-14 00:54:00	0	NTA	0	1	3	P
1	2009-04-14 00:55:00	0	NTA	0	1	3	P
1	2009-04-14 00:56:00	0	NTA	0	1	3	P
1	2009-04-14 00:57:00	0	NTA	0	1	3	P
1	2009-04-14 00:58:00	36	NTA	0	1	3	P
1	2009-04-14 00:59:00	0	NTA	0	1	3	P
1	2009-04-14 01:00:00	0	NTA	0	1	3	P
1	2009-04-14 01:01:00	0	NTA	1	1	3	P
1	2009-04-14 01:02:00	0	NTA	1	1	3	P
1	2009-04-14 01:03:00	0	NTA	1	1	3	P
1	2009-04-14 01:04:00	0	NTA	1	1	3	P
1	2009-04-14 01:05:00	0	NTA	1	1	3	P
1	2009-04-14 01:06:00	0	NTA	1	1	3	P
1	2009-04-14 01:07:00	0	NTA	1	1	3	P
1	2009-04-14 01:08:00	0	NTA	1	1	3	P
1	2009-04-14 01:09:00	0	NTA	1	1	3	P
1	2009-04-14 01:10:00	0	NTA	1	1	3	P
1	2009-04-14 01:11:00	0	NTA	1	1	3	P
1	2009-04-14 01:12:00	0	NTA	1	1	3	P
1	2009-04-14 01:13:00	0	NTA	1	1	3	P
1	2009-04-14 01:14:00	0	NTA	1	1	3	P
1	2009-04-14 01:15:00	0	NTA	1	1	3	P
1	2009-04-14 01:16:00	0	NTA	1	1	3	P
1	2009-04-14 01:17:00	0	NTA	1	1	3	P
1	2009-04-14 01:18:00	0	NTA	1	1	3	P
1	2009-04-14 01:19:00	0	NTA	1	1	3	P
1	2009-04-14 01:20:00	0	NTA	1	1	3	P
1	2009-04-14 01:21:00	24	NTA	1	1	3	P
1	2009-04-14 01:22:00	0	NTA	1	1	3	P
1	2009-04-14 01:23:00	0	NTA	1	1	3	P
1	2009-04-14 01:24:00	0	NTA	1	1	3	P
1	2009-04-14 01:25:00	0	NTA	1	1	3	P
1	2009-04-14 01:26:00	0	NTA	1	1	3	P
1	2009-04-14 01:27:00	0	NTA	1	1	3	P
1	2009-04-14 01:28:00	0	NTA	1	1	3	P
1	2009-04-14 01:29:00	0	NTA	1	1	3	P
1	2009-04-14 01:30:00	12	NTA	1	1	3	P
1	2009-04-14 01:31:00	316	NTA	1	1	3	P
1	2009-04-14 01:32:00	469	NTA	1	1	3	P
1	2009-04-14 01:33:00	418	NTA	1	1	3	P
1	2009-04-14 01:34:00	401	NTA	1	1	3	P
1	2009-04-14 01:35:00	72	NTA	1	1	3	P
1	2009-04-14 01:36:00	12	NTA	1	1	3	P
1	2009-04-14 01:37:00	0	NTA	1	1	3	P
1	2009-04-14 01:38:00	0	NTA	1	1	3	P
1	2009-04-14 01:39:00	12	NTA	1	1	3	P
1	2009-04-14 01:40:00	0	NTA	1	1	3	P
1	2009-04-14 01:41:00	0	NTA	1	1	3	P
1	2009-04-14 01:42:00	0	NTA	1	1	3	P
1	2009-04-14 01:43:00	0	NTA	1	1	3	P
1	2009-04-14 01:44:00	0	NTA	1	1	3	P
1	2009-04-14 01:45:00	0	NTA	1	1	3	P
1	2009-04-14 01:46:00	0	NTA	1	1	3	P
1	2009-04-14 01:47:00	0	NTA	1	1	3	P
1	2009-04-14 01:48:00	0	NTA	1	1	3	P
1	2009-04-14 01:49:00	0	NTA	1	1	3	P
1	2009-04-14 01:50:00	0	NTA	1	1	3	P
1	2009-04-14 01:51:00	0	NTA	1	1	3	P
1	2009-04-14 01:52:00	0	NTA	1	1	3	P
1	2009-04-14 01:53:00	0	NTA	1	1	3	P
1	2009-04-14 01:54:00	0	NTA	1	1	3	P
1	2009-04-14 01:55:00	0	NTA	1	1	3	P
1	2009-04-14 01:56:00	24	NTA	1	1	3	P
1	2009-04-14 01:57:00	0	NTA	1	1	3	P
1	2009-04-14 01:58:00	0	NTA	1	1	3	P
1	2009-04-14 01:59:00	0	NTA	1	1	3	P
1	2009-04-14 02:00:00	0	NTA	1	1	3	P
1	2009-04-14 02:01:00	0	NTA	2	1	3	P
1	2009-04-14 02:02:00	0	NTA	2	1	3	P
1	2009-04-14 02:03:00	0	NTA	2	1	3	P
1	2009-04-14 02:04:00	0	NTA	2	1	3	P
1	2009-04-14 02:05:00	0	NTA	2	1	3	P
1	2009-04-14 02:06:00	0	NTA	2	1	3	P
1	2009-04-14 02:07:00	0	NTA	2	1	3	P
1	2009-04-14 02:08:00	0	NTA	2	1	3	P
1	2009-04-14 02:09:00	0	NTA	2	1	3	P
1	2009-04-14 02:10:00	0	NTA	2	1	3	P
1	2009-04-14 02:11:00	0	NTA	2	1	3	P
1	2009-04-14 02:12:00	0	NTA	2	1	3	P
1	2009-04-14 02:13:00	0	NTA	2	1	3	P
1	2009-04-14 02:14:00	0	NTA	2	1	3	P
1	2009-04-14 02:15:00	0	NTA	2	1	3	P
1	2009-04-14 02:16:00	0	NTA	2	1	3	P
1	2009-04-14 02:17:00	0	NTA	2	1	3	P
1	2009-04-14 02:18:00	0	NTA	2	1	3	P
1	2009-04-14 02:19:00	0	NTA	2	1	3	P
1	2009-04-14 02:20:00	12	NTA	2	1	3	P
1	2009-04-14 02:21:00	0	NTA	2	1	3	P
1	2009-04-14 02:22:00	0	NTA	2	1	3	P
1	2009-04-14 02:23:00	0	NTA	2	1	3	P
1	2009-04-14 02:24:00	0	NTA	2	1	3	P
1	2009-04-14 02:25:00	0	NTA	2	1	3	P
1	2009-04-14 02:26:00	0	NTA	2	1	3	P
1	2009-04-14 02:27:00	0	NTA	2	1	3	P
1	2009-04-14 02:28:00	0	NTA	2	1	3	P
1	2009-04-14 02:29:00	0	NTA	2	1	3	P
1	2009-04-14 02:30:00	0	NTA	2	1	3	P
1	2009-04-14 02:31:00	0	NTA	2	1	3	P
1	2009-04-14 02:32:00	0	NTA	2	1	3	P
1	2009-04-14 02:33:00	0	NTA	2	1	3	P
1	2009-04-14 02:34:00	0	NTA	2	1	3	P
1	2009-04-14 02:35:00	0	NTA	2	1	3	P
1	2009-04-14 02:36:00	0	NTA	2	1	3	P
1	2009-04-14 02:37:00	0	NTA	2	1	3	P
1	2009-04-14 02:38:00	0	NTA	2	1	3	P
1	2009-04-14 02:39:00	0	NTA	2	1	3	P
1	2009-04-14 02:40:00	0	NTA	2	1	3	P
1	2009-04-14 02:41:00	0	NTA	2	1	3	P
1	2009-04-14 02:42:00	24	NTA	2	1	3	P
1	2009-04-14 02:43:00	0	NTA	2	1	3	P
1	2009-04-14 02:44:00	0	NTA	2	1	3	P
1	2009-04-14 02:45:00	0	NTA	2	1	3	P
1	2009-04-14 02:46:00	0	NTA	2	1	3	P
1	2009-04-14 02:47:00	0	NTA	2	1	3	P
1	2009-04-14 02:48:00	0	NTA	2	1	3	P
1	2009-04-14 02:49:00	0	NTA	2	1	3	P
1	2009-04-14 02:50:00	0	NTA	2	1	3	P
1	2009-04-14 02:51:00	0	NTA	2	1	3	P
1	2009-04-14 02:52:00	12	NTA	2	1	3	P
1	2009-04-14 02:53:00	0	NTA	2	1	3	P
1	2009-04-14 02:54:00	0	NTA	2	1	3	P
1	2009-04-14 02:55:00	0	NTA	2	1	3	P
1	2009-04-14 02:56:00	0	NTA	2	1	3	P
1	2009-04-14 02:57:00	0	NTA	2	1	3	P
1	2009-04-14 02:58:00	0	NTA	2	1	3	P
1	2009-04-14 02:59:00	0	NTA	2	1	3	P
1	2009-04-14 03:00:00	0	NTA	2	1	3	P
1	2009-04-14 03:01:00	0	NTA	3	1	3	P
1	2009-04-14 03:02:00	0	NTA	3	1	3	P
1	2009-04-14 03:03:00	0	NTA	3	1	3	P
1	2009-04-14 03:04:00	0	NTA	3	1	3	P
1	2009-04-14 03:05:00	0	NTA	3	1	3	P
1	2009-04-14 03:06:00	0	NTA	3	1	3	P
1	2009-04-14 03:07:00	0	NTA	3	1	3	P
1	2009-04-14 03:08:00	0	NTA	3	1	3	P
1	2009-04-14 03:09:00	0	NTA	3	1	3	P
1	2009-04-14 03:10:00	0	NTA	3	1	3	P
1	2009-04-14 03:11:00	0	NTA	3	1	3	P
1	2009-04-14 03:12:00	0	NTA	3	1	3	P
1	2009-04-14 03:13:00	0	NTA	3	1	3	P
1	2009-04-14 03:14:00	0	NTA	3	1	3	P
1	2009-04-14 03:15:00	0	NTA	3	1	3	P
1	2009-04-14 03:16:00	0	NTA	3	1	3	P
1	2009-04-14 03:17:00	0	NTA	3	1	3	P
1	2009-04-14 03:18:00	0	NTA	3	1	3	P
1	2009-04-14 03:19:00	0	NTA	3	1	3	P
1	2009-04-14 03:20:00	0	NTA	3	1	3	P
1	2009-04-14 03:21:00	0	NTA	3	1	3	P
1	2009-04-14 03:22:00	0	NTA	3	1	3	P
1	2009-04-14 03:23:00	0	NTA	3	1	3	P
1	2009-04-14 03:24:00	0	NTA	3	1	3	P
1	2009-04-14 03:25:00	0	NTA	3	1	3	P
1	2009-04-14 03:26:00	0	NTA	3	1	3	P
1	2009-04-14 03:27:00	0	NTA	3	1	3	P
1	2009-04-14 03:28:00	0	NTA	3	1	3	P
1	2009-04-14 03:29:00	0	NTA	3	1	3	P
1	2009-04-14 03:30:00	0	NTA	3	1	3	P
1	2009-04-14 03:31:00	0	NTA	3	1	3	P
1	2009-04-14 03:32:00	0	NTA	3	1	3	P
1	2009-04-14 03:33:00	0	NTA	3	1	3	P
1	2009-04-14 03:34:00	0	NTA	3	1	3	P
1	2009-04-14 03:35:00	0	NTA	3	1	3	P
1	2009-04-14 03:36:00	0	NTA	3	1	3	P
1	2009-04-14 03:37:00	0	NTA	3	1	3	P
1	2009-04-14 03:38:00	0	NTA	3	1	3	P
1	2009-04-14 03:39:00	0	NTA	3	1	3	P
1	2009-04-14 03:40:00	0	NTA	3	1	3	P
1	2009-04-14 03:41:00	0	NTA	3	1	3	P
1	2009-04-14 03:42:00	0	NTA	3	1	3	P
1	2009-04-14 03:43:00	0	NTA	3	1	3	P
1	2009-04-14 03:44:00	0	NTA	3	1	3	P
1	2009-04-14 03:45:00	0	NTA	3	1	3	P
1	2009-04-14 03:46:00	0	NTA	3	1	3	P
1	2009-04-14 03:47:00	0	NTA	3	1	3	P
1	2009-04-14 03:48:00	0	NTA	3	1	3	P
1	2009-04-14 03:49:00	0	NTA	3	1	3	P
1	2009-04-14 03:50:00	0	NTA	3	1	3	P
1	2009-04-14 03:51:00	0	NTA	3	1	3	P
1	2009-04-14 03:52:00	0	NTA	3	1	3	P
1	2009-04-14 03:53:00	12	NTA	3	1	3	P
1	2009-04-14 03:54:00	0	NTA	3	1	3	P
1	2009-04-14 03:55:00	0	NTA	3	1	3	P
1	2009-04-14 03:56:00	0	NTA	3	1	3	P
1	2009-04-14 03:57:00	0	NTA	3	1	3	P
1	2009-04-14 03:58:00	0	NTA	3	1	3	P
1	2009-04-14 03:59:00	0	NTA	3	1	3	P
1	2009-04-14 04:00:00	0	NTA	3	1	3	P
1	2009-04-14 04:01:00	0	NTA	4	1	3	P
1	2009-04-14 04:02:00	0	NTA	4	1	3	P
1	2009-04-14 04:03:00	0	NTA	4	1	3	P
1	2009-04-14 04:04:00	0	NTA	4	1	3	P
1	2009-04-14 04:05:00	0	NTA	4	1	3	P
1	2009-04-14 04:06:00	0	NTA	4	1	3	P
1	2009-04-14 04:07:00	12	NTA	4	1	3	P
1	2009-04-14 04:08:00	0	NTA	4	1	3	P
1	2009-04-14 04:09:00	0	NTA	4	1	3	P
1	2009-04-14 04:10:00	0	NTA	4	1	3	P
1	2009-04-14 04:11:00	0	NTA	4	1	3	P
1	2009-04-14 04:12:00	12	NTA	4	1	3	P
1	2009-04-14 04:13:00	0	NTA	4	1	3	P
1	2009-04-14 04:14:00	0	NTA	4	1	3	P
1	2009-04-14 04:15:00	0	NTA	4	1	3	P
1	2009-04-14 04:16:00	0	NTA	4	1	3	P
1	2009-04-14 04:17:00	0	NTA	4	1	3	P
1	2009-04-14 04:18:00	0	NTA	4	1	3	P
1	2009-04-14 04:19:00	0	NTA	4	1	3	P
1	2009-04-14 04:20:00	0	NTA	4	1	3	P
1	2009-04-14 04:21:00	0	NTA	4	1	3	P
1	2009-04-14 04:22:00	0	NTA	4	1	3	P
1	2009-04-14 04:23:00	0	NTA	4	1	3	P
1	2009-04-14 04:24:00	0	NTA	4	1	3	P
1	2009-04-14 04:25:00	0	NTA	4	1	3	P
1	2009-04-14 04:26:00	0	NTA	4	1	3	P
1	2009-04-14 04:27:00	0	NTA	4	1	3	P
1	2009-04-14 04:28:00	0	NTA	4	1	3	P
1	2009-04-14 04:29:00	12	NTA	4	1	3	P
1	2009-04-14 04:30:00	0	NTA	4	1	3	P
1	2009-04-14 04:31:00	0	NTA	4	1	3	P
1	2009-04-14 04:32:00	0	NTA	4	1	3	P
1	2009-04-14 04:33:00	0	NTA	4	1	3	P
1	2009-04-14 04:34:00	0	NTA	4	1	3	P
1	2009-04-14 04:35:00	0	NTA	4	1	3	P
1	2009-04-14 04:36:00	0	NTA	4	1	3	P
1	2009-04-14 04:37:00	0	NTA	4	1	3	P
1	2009-04-14 04:38:00	0	NTA	4	1	3	P
1	2009-04-14 04:39:00	0	NTA	4	1	3	P
1	2009-04-14 04:40:00	0	NTA	4	1	3	P
1	2009-04-14 04:41:00	0	NTA	4	1	3	P
1	2009-04-14 04:42:00	0	NTA	4	1	3	P
1	2009-04-14 04:43:00	0	NTA	4	1	3	P
1	2009-04-14 04:44:00	0	NTA	4	1	3	P
1	2009-04-14 04:45:00	0	NTA	4	1	3	P
1	2009-04-14 04:46:00	0	NTA	4	1	3	P
1	2009-04-14 04:47:00	0	NTA	4	1	3	P
1	2009-04-14 04:48:00	0	NTA	4	1	3	P
1	2009-04-14 04:49:00	0	NTA	4	1	3	P
1	2009-04-14 04:50:00	0	NTA	4	1	3	P
1	2009-04-14 04:51:00	0	NTA	4	1	3	P
1	2009-04-14 04:52:00	0	NTA	4	1	3	P
1	2009-04-14 04:53:00	0	NTA	4	1	3	P
1	2009-04-14 04:54:00	36	NTA	4	1	3	P
1	2009-04-14 04:55:00	0	NTA	4	1	3	P
1	2009-04-14 04:56:00	0	NTA	4	1	3	P
1	2009-04-14 04:57:00	0	NTA	4	1	3	P
1	2009-04-14 04:58:00	0	NTA	4	1	3	P
1	2009-04-14 04:59:00	0	NTA	4	1	3	P
1	2009-04-14 05:00:00	0	NTA	4	1	3	P
1	2009-04-14 05:01:00	0	NTA	5	1	3	P
1	2009-04-14 05:02:00	0	NTA	5	1	3	P
1	2009-04-14 05:03:00	0	NTA	5	1	3	P
1	2009-04-14 05:04:00	0	NTA	5	1	3	P
1	2009-04-14 05:05:00	0	NTA	5	1	3	P
1	2009-04-14 05:06:00	12	NTA	5	1	3	P
1	2009-04-14 05:07:00	0	NTA	5	1	3	P
1	2009-04-14 05:08:00	0	NTA	5	1	3	P
1	2009-04-14 05:09:00	0	NTA	5	1	3	P
1	2009-04-14 05:10:00	0	NTA	5	1	3	P
1	2009-04-14 05:11:00	0	NTA	5	1	3	P
1	2009-04-14 05:12:00	0	NTA	5	1	3	P
1	2009-04-14 05:13:00	0	NTA	5	1	3	P
1	2009-04-14 05:14:00	0	NTA	5	1	3	P
1	2009-04-14 05:15:00	0	NTA	5	1	3	P
1	2009-04-14 05:16:00	0	NTA	5	1	3	P
1	2009-04-14 05:17:00	0	NTA	5	1	3	P
1	2009-04-14 05:18:00	0	NTA	5	1	3	P
1	2009-04-14 05:19:00	0	NTA	5	1	3	P
1	2009-04-14 05:20:00	0	NTA	5	1	3	P
1	2009-04-14 05:21:00	0	NTA	5	1	3	P
1	2009-04-14 05:22:00	0	NTA	5	1	3	P
1	2009-04-14 05:23:00	0	NTA	5	1	3	P
1	2009-04-14 05:24:00	0	NTA	5	1	3	P
1	2009-04-14 05:25:00	12	NTA	5	1	3	P
1	2009-04-14 05:26:00	0	NTA	5	1	3	P
1	2009-04-14 05:27:00	0	NTA	5	1	3	P
1	2009-04-14 05:28:00	0	NTA	5	1	3	P
1	2009-04-14 05:29:00	0	NTA	5	1	3	P
1	2009-04-14 05:30:00	12	NTA	5	1	3	P
1	2009-04-14 05:31:00	0	NTA	5	1	3	P
1	2009-04-14 05:32:00	0	NTA	5	1	3	P
1	2009-04-14 05:33:00	12	NTA	5	1	3	P
1	2009-04-14 05:34:00	0	NTA	5	1	3	P
1	2009-04-14 05:35:00	0	NTA	5	1	3	P
1	2009-04-14 05:36:00	0	NTA	5	1	3	P
1	2009-04-14 05:37:00	12	NTA	5	1	3	P
1	2009-04-14 05:38:00	0	NTA	5	1	3	P
1	2009-04-14 05:39:00	384	NTA	5	1	3	P
1	2009-04-14 05:40:00	0	NTA	5	1	3	P
1	2009-04-14 05:41:00	0	NTA	5	1	3	P
1	2009-04-14 05:42:00	0	NTA	5	1	3	P
1	2009-04-14 05:43:00	0	NTA	5	1	3	P
1	2009-04-14 05:44:00	0	NTA	5	1	3	P
1	2009-04-14 05:45:00	0	NTA	5	1	3	P
1	2009-04-14 05:46:00	0	NTA	5	1	3	P
1	2009-04-14 05:47:00	0	NTA	5	1	3	P
1	2009-04-14 05:48:00	0	NTA	5	1	3	P
1	2009-04-14 05:49:00	0	NTA	5	1	3	P
1	2009-04-14 05:50:00	0	NTA	5	1	3	P
1	2009-04-14 05:51:00	0	NTA	5	1	3	P
1	2009-04-14 05:52:00	0	NTA	5	1	3	P
1	2009-04-14 05:53:00	0	NTA	5	1	3	P
1	2009-04-14 05:54:00	0	NTA	5	1	3	P
1	2009-04-14 05:55:00	0	NTA	5	1	3	P
1	2009-04-14 05:56:00	0	NTA	5	1	3	P
1	2009-04-14 05:57:00	0	NTA	5	1	3	P
1	2009-04-14 05:58:00	0	NTA	5	1	3	P
1	2009-04-14 05:59:00	0	NTA	5	1	3	P
1	2009-04-14 06:00:00	0	NTA	5	1	3	P
1	2009-04-14 06:01:00	0	NTA	6	1	3	P
1	2009-04-14 06:02:00	0	NTA	6	1	3	P
1	2009-04-14 06:03:00	0	NTA	6	1	3	P
1	2009-04-14 06:04:00	0	NTA	6	1	3	P
1	2009-04-14 06:05:00	0	NTA	6	1	3	P
1	2009-04-14 06:06:00	0	NTA	6	1	3	P
1	2009-04-14 06:07:00	0	NTA	6	1	3	P
1	2009-04-14 06:08:00	0	NTA	6	1	3	P
1	2009-04-14 06:09:00	0	NTA	6	1	3	P
1	2009-04-14 06:10:00	0	NTA	6	1	3	P
1	2009-04-14 06:11:00	0	NTA	6	1	3	P
1	2009-04-14 06:12:00	0	NTA	6	1	3	P
1	2009-04-14 06:13:00	0	NTA	6	1	3	P
1	2009-04-14 06:14:00	0	NTA	6	1	3	P
1	2009-04-14 06:15:00	0	NTA	6	1	3	P
1	2009-04-14 06:16:00	0	NTA	6	1	3	P
1	2009-04-14 06:17:00	0	NTA	6	1	3	P
1	2009-04-14 06:18:00	0	NTA	6	1	3	P
1	2009-04-14 06:19:00	0	NTA	6	1	3	P
1	2009-04-14 06:20:00	0	NTA	6	1	3	P
1	2009-04-14 06:21:00	0	NTA	6	1	3	P
1	2009-04-14 06:22:00	12	NTA	6	1	3	P
1	2009-04-14 06:23:00	12	NTA	6	1	3	P
1	2009-04-14 06:24:00	0	NTA	6	1	3	P
1	2009-04-14 06:25:00	0	NTA	6	1	3	P
1	2009-04-14 06:26:00	0	NTA	6	1	3	P
1	2009-04-14 06:27:00	0	NTA	6	1	3	P
1	2009-04-14 06:28:00	0	NTA	6	1	3	P
1	2009-04-14 06:29:00	0	NTA	6	1	3	P
1	2009-04-14 06:30:00	0	NTA	6	1	3	P
1	2009-04-14 06:31:00	0	NTA	6	1	3	P
1	2009-04-14 06:32:00	0	NTA	6	1	3	P
1	2009-04-14 06:33:00	0	NTA	6	1	3	P
1	2009-04-14 06:34:00	0	NTA	6	1	3	P
1	2009-04-14 06:35:00	0	NTA	6	1	3	P
1	2009-04-14 06:36:00	0	NTA	6	1	3	P
1	2009-04-14 06:37:00	0	NTA	6	1	3	P
1	2009-04-14 06:38:00	0	NTA	6	1	3	P
1	2009-04-14 06:39:00	0	NTA	6	1	3	P
1	2009-04-14 06:40:00	0	NTA	6	1	3	P
1	2009-04-14 06:41:00	0	NTA	6	1	3	P
1	2009-04-14 06:42:00	12	NTA	6	1	3	P
1	2009-04-14 06:43:00	0	NTA	6	1	3	P
1	2009-04-14 06:44:00	0	NTA	6	1	3	P
1	2009-04-14 06:45:00	0	NTA	6	1	3	P
1	2009-04-14 06:46:00	0	NTA	6	1	3	P
1	2009-04-14 06:47:00	0	NTA	6	1	3	P
1	2009-04-14 06:48:00	0	NTA	6	1	3	P
1	2009-04-14 06:49:00	0	NTA	6	1	3	P
1	2009-04-14 06:50:00	0	NTA	6	1	3	P
1	2009-04-14 06:51:00	0	NTA	6	1	3	P
1	2009-04-14 06:52:00	0	NTA	6	1	3	P
1	2009-04-14 06:53:00	0	NTA	6	1	3	P
1	2009-04-14 06:54:00	0	NTA	6	1	3	P
1	2009-04-14 06:55:00	0	NTA	6	1	3	P
1	2009-04-14 06:56:00	48	NTA	6	1	3	P
1	2009-04-14 06:57:00	0	NTA	6	1	3	P
1	2009-04-14 06:58:00	0	NTA	6	1	3	P
1	2009-04-14 06:59:00	0	NTA	6	1	3	P
1	2009-04-14 07:00:00	0	NTA	6	1	3	P
1	2009-04-14 07:01:00	0	DTA	7	1	3	P
1	2009-04-14 07:02:00	0	DTA	7	1	3	P
1	2009-04-14 07:03:00	0	DTA	7	1	3	P
1	2009-04-14 07:04:00	0	DTA	7	1	3	P
1	2009-04-14 07:05:00	0	DTA	7	1	3	P
1	2009-04-14 07:06:00	24	DTA	7	1	3	P
1	2009-04-14 07:07:00	0	DTA	7	1	3	P
1	2009-04-14 07:08:00	0	DTA	7	1	3	P
1	2009-04-14 07:09:00	0	DTA	7	1	3	P
1	2009-04-14 07:10:00	0	DTA	7	1	3	P
1	2009-04-14 07:11:00	0	DTA	7	1	3	P
1	2009-04-14 07:12:00	0	DTA	7	1	3	P
1	2009-04-14 07:13:00	0	DTA	7	1	3	P
1	2009-04-14 07:14:00	0	DTA	7	1	3	P
1	2009-04-14 07:15:00	12	DTA	7	1	3	P
1	2009-04-14 07:16:00	36	DTA	7	1	3	P
1	2009-04-14 07:17:00	0	DTA	7	1	3	P
1	2009-04-14 07:18:00	97	DTA	7	1	3	P
1	2009-04-14 07:19:00	60	DTA	7	1	3	P
1	2009-04-14 07:20:00	0	DTA	7	1	3	P
1	2009-04-14 07:21:00	350	DTA	7	1	3	P
1	2009-04-14 07:22:00	367	DTA	7	1	3	P
1	2009-04-14 07:23:00	85	DTA	7	1	3	P
1	2009-04-14 07:24:00	546	DTA	7	1	3	P
1	2009-04-14 07:25:00	824	DTA	7	1	3	P
1	2009-04-14 07:26:00	896	DTA	7	1	3	P
1	2009-04-14 07:27:00	1051	DTA	7	1	3	P
1	2009-04-14 07:28:00	287	DTA	7	1	3	P
1	2009-04-14 07:29:00	604	DTA	7	1	3	P
1	2009-04-14 07:30:00	200	DTA	7	1	3	P
1	2009-04-14 07:31:00	0	DTA	7	1	3	P
1	2009-04-14 07:32:00	0	DTA	7	1	3	P
1	2009-04-14 07:33:00	0	DTA	7	1	3	P
1	2009-04-14 07:34:00	24	DTA	7	1	3	P
1	2009-04-14 07:35:00	24	DTA	7	1	3	P
1	2009-04-14 07:36:00	12	DTA	7	1	3	P
1	2009-04-14 07:37:00	12	DTA	7	1	3	P
1	2009-04-14 07:38:00	0	DTA	7	1	3	P
1	2009-04-14 07:39:00	72	DTA	7	1	3	P
1	2009-04-14 07:40:00	584	DTA	7	1	3	P
1	2009-04-14 07:41:00	24	DTA	7	1	3	P
1	2009-04-14 07:42:00	0	DTA	7	1	3	P
1	2009-04-14 07:43:00	0	DTA	7	1	3	P
1	2009-04-14 07:44:00	0	DTA	7	1	3	P
1	2009-04-14 07:45:00	0	DTA	7	1	3	P
1	2009-04-14 07:46:00	0	DTA	7	1	3	P
1	2009-04-14 07:47:00	0	DTA	7	1	3	P
1	2009-04-14 07:48:00	0	DTA	7	1	3	P
1	2009-04-14 07:49:00	12	DTA	7	1	3	P
1	2009-04-14 07:50:00	12	DTA	7	1	3	P
1	2009-04-14 07:51:00	0	DTA	7	1	3	P
1	2009-04-14 07:52:00	0	DTA	7	1	3	P
1	2009-04-14 07:53:00	0	DTA	7	1	3	P
1	2009-04-14 07:54:00	0	DTA	7	1	3	P
1	2009-04-14 07:55:00	0	DTA	7	1	3	P
1	2009-04-14 07:56:00	0	DTA	7	1	3	P
1	2009-04-14 07:57:00	0	DTA	7	1	3	P
1	2009-04-14 07:58:00	0	DTA	7	1	3	P
1	2009-04-14 07:59:00	0	DTA	7	1	3	P
1	2009-04-14 08:00:00	36	DTA	7	1	3	P
1	2009-04-14 08:01:00	171	DTA	8	1	3	P
1	2009-04-14 08:02:00	0	DTA	8	1	3	P
1	2009-04-14 08:03:00	12	DTA	8	1	3	P
1	2009-04-14 08:04:00	97	DTA	8	1	3	P
1	2009-04-14 08:05:00	333	DTA	8	1	3	P
1	2009-04-14 08:06:00	24	DTA	8	1	3	P
1	2009-04-14 08:07:00	24	DTA	8	1	3	P
1	2009-04-14 08:08:00	229	DTA	8	1	3	P
1	2009-04-14 08:09:00	0	DTA	8	1	3	P
1	2009-04-14 08:10:00	24	DTA	8	1	3	P
1	2009-04-14 08:11:00	0	DTA	8	1	3	P
1	2009-04-14 08:12:00	0	DTA	8	1	3	P
1	2009-04-14 08:13:00	0	DTA	8	1	3	P
1	2009-04-14 08:14:00	0	DTA	8	1	3	P
1	2009-04-14 08:15:00	0	DTA	8	1	3	P
1	2009-04-14 08:16:00	0	DTA	8	1	3	P
1	2009-04-14 08:17:00	0	DTA	8	1	3	P
1	2009-04-14 08:18:00	0	DTA	8	1	3	P
1	2009-04-14 08:19:00	0	DTA	8	1	3	P
1	2009-04-14 08:20:00	12	DTA	8	1	3	P
1	2009-04-14 08:21:00	0	DTA	8	1	3	P
1	2009-04-14 08:22:00	12	DTA	8	1	3	P
1	2009-04-14 08:23:00	0	DTA	8	1	3	P
1	2009-04-14 08:24:00	0	DTA	8	1	3	P
1	2009-04-14 08:25:00	0	DTA	8	1	3	P
1	2009-04-14 08:26:00	0	DTA	8	1	3	P
1	2009-04-14 08:27:00	12	DTA	8	1	3	P
1	2009-04-14 08:28:00	0	DTA	8	1	3	P
1	2009-04-14 08:29:00	0	DTA	8	1	3	P
1	2009-04-14 08:30:00	0	DTA	8	1	3	P
1	2009-04-14 08:31:00	48	DTA	8	1	3	P
1	2009-04-14 08:32:00	12	DTA	8	1	3	P
1	2009-04-14 08:33:00	0	DTA	8	1	3	P
1	2009-04-14 08:34:00	0	DTA	8	1	3	P
1	2009-04-14 08:35:00	273	DTA	8	1	3	P
1	2009-04-14 08:36:00	0	DTA	8	1	3	P
1	2009-04-14 08:37:00	0	DTA	8	1	3	P
1	2009-04-14 08:38:00	12	DTA	8	1	3	P
1	2009-04-14 08:39:00	12	DTA	8	1	3	P
1	2009-04-14 08:40:00	0	DTA	8	1	3	P
1	2009-04-14 08:41:00	0	DTA	8	1	3	P
1	2009-04-14 08:42:00	0	DTA	8	1	3	P
1	2009-04-14 08:43:00	0	DTA	8	1	3	P
1	2009-04-14 08:44:00	186	DTA	8	1	3	P
1	2009-04-14 08:45:00	60	DTA	8	1	3	P
1	2009-04-14 08:46:00	0	DTA	8	1	3	P
1	2009-04-14 08:47:00	24	DTA	8	1	3	P
1	2009-04-14 08:48:00	0	DTA	8	1	3	P
1	2009-04-14 08:49:00	0	DTA	8	1	3	P
1	2009-04-14 08:50:00	244	DTA	8	1	3	P
1	2009-04-14 08:51:00	333	DTA	8	1	3	P
1	2009-04-14 08:52:00	0	DTA	8	1	3	P
1	2009-04-14 08:53:00	0	DTA	8	1	3	P
1	2009-04-14 08:54:00	0	DTA	8	1	3	P
1	2009-04-14 08:55:00	0	DTA	8	1	3	P
1	2009-04-14 08:56:00	0	DTA	8	1	3	P
1	2009-04-14 08:57:00	0	DTA	8	1	3	P
1	2009-04-14 08:58:00	0	DTA	8	1	3	P
1	2009-04-14 08:59:00	0	DTA	8	1	3	P
1	2009-04-14 09:00:00	0	DTA	8	1	3	P
1	2009-04-14 09:01:00	0	DTA	9	1	3	P
1	2009-04-14 09:02:00	0	DTA	9	1	3	P
1	2009-04-14 09:03:00	0	DTA	9	1	3	P
1	2009-04-14 09:04:00	0	DTA	9	1	3	P
1	2009-04-14 09:05:00	0	DTA	9	1	3	P
1	2009-04-14 09:06:00	0	DTA	9	1	3	P
1	2009-04-14 09:07:00	0	DTA	9	1	3	P
1	2009-04-14 09:08:00	0	DTA	9	1	3	P
1	2009-04-14 09:09:00	0	DTA	9	1	3	P
1	2009-04-14 09:10:00	0	DTA	9	1	3	P
1	2009-04-14 09:11:00	0	DTA	9	1	3	P
1	2009-04-14 09:12:00	0	DTA	9	1	3	P
1	2009-04-14 09:13:00	12	DTA	9	1	3	P
1	2009-04-14 09:14:00	0	DTA	9	1	3	P
1	2009-04-14 09:15:00	0	DTA	9	1	3	P
1	2009-04-14 09:16:00	0	DTA	9	1	3	P
1	2009-04-14 09:17:00	0	DTA	9	1	3	P
1	2009-04-14 09:18:00	0	DTA	9	1	3	P
1	2009-04-14 09:19:00	0	DTA	9	1	3	P
1	2009-04-14 09:20:00	0	DTA	9	1	3	P
1	2009-04-14 09:21:00	0	DTA	9	1	3	P
1	2009-04-14 09:22:00	0	DTA	9	1	3	P
1	2009-04-14 09:23:00	0	DTA	9	1	3	P
1	2009-04-14 09:24:00	0	DTA	9	1	3	P
1	2009-04-14 09:25:00	0	DTA	9	1	3	P
1	2009-04-14 09:26:00	0	DTA	9	1	3	P
1	2009-04-14 09:27:00	0	DTA	9	1	3	P
1	2009-04-14 09:28:00	0	DTA	9	1	3	P
1	2009-04-14 09:29:00	0	DTA	9	1	3	P
1	2009-04-14 09:30:00	12	DTA	9	1	3	P
1	2009-04-14 09:31:00	0	DTA	9	1	3	P
1	2009-04-14 09:32:00	0	DTA	9	1	3	P
1	2009-04-14 09:33:00	0	DTA	9	1	3	P
1	2009-04-14 09:34:00	0	DTA	9	1	3	P
1	2009-04-14 09:35:00	0	DTA	9	1	3	P
1	2009-04-14 09:36:00	0	DTA	9	1	3	P
1	2009-04-14 09:37:00	0	DTA	9	1	3	P
1	2009-04-14 09:38:00	0	DTA	9	1	3	P
1	2009-04-14 09:39:00	0	DTA	9	1	3	P
1	2009-04-14 09:40:00	0	DTA	9	1	3	P
1	2009-04-14 09:41:00	0	DTA	9	1	3	P
1	2009-04-14 09:42:00	0	DTA	9	1	3	P
1	2009-04-14 09:43:00	0	DTA	9	1	3	P
1	2009-04-14 09:44:00	12	DTA	9	1	3	P
1	2009-04-14 09:45:00	36	DTA	9	1	3	P
1	2009-04-14 09:46:00	0	DTA	9	1	3	P
1	2009-04-14 09:47:00	0	DTA	9	1	3	P
1	2009-04-14 09:48:00	0	DTA	9	1	3	P
1	2009-04-14 09:49:00	0	DTA	9	1	3	P
1	2009-04-14 09:50:00	12	DTA	9	1	3	P
1	2009-04-14 09:51:00	0	DTA	9	1	3	P
1	2009-04-14 09:52:00	0	DTA	9	1	3	P
1	2009-04-14 09:53:00	0	DTA	9	1	3	P
1	2009-04-14 09:54:00	0	DTA	9	1	3	P
1	2009-04-14 09:55:00	0	DTA	9	1	3	P
1	2009-04-14 09:56:00	0	DTA	9	1	3	P
1	2009-04-14 09:57:00	0	DTA	9	1	3	P
1	2009-04-14 09:58:00	0	DTA	9	1	3	P
1	2009-04-14 09:59:00	0	DTA	9	1	3	P
1	2009-04-14 10:00:00	0	DTA	9	1	3	P
1	2009-04-14 10:01:00	0	DTA	10	1	3	P
1	2009-04-14 10:02:00	0	DTA	10	1	3	P
1	2009-04-14 10:03:00	0	DTA	10	1	3	P
1	2009-04-14 10:04:00	0	DTA	10	1	3	P
1	2009-04-14 10:05:00	0	DTA	10	1	3	P
1	2009-04-14 10:06:00	0	DTA	10	1	3	P
1	2009-04-14 10:07:00	0	DTA	10	1	3	P
1	2009-04-14 10:08:00	0	DTA	10	1	3	P
1	2009-04-14 10:09:00	0	DTA	10	1	3	P
1	2009-04-14 10:10:00	0	DTA	10	1	3	P
1	2009-04-14 10:11:00	0	DTA	10	1	3	P
1	2009-04-14 10:12:00	0	DTA	10	1	3	P
1	2009-04-14 10:13:00	0	DTA	10	1	3	P
1	2009-04-14 10:14:00	0	DTA	10	1	3	P
1	2009-04-14 10:15:00	0	DTA	10	1	3	P
1	2009-04-14 10:16:00	0	DTA	10	1	3	P
1	2009-04-14 10:17:00	0	DTA	10	1	3	P
1	2009-04-14 10:18:00	0	DTA	10	1	3	P
1	2009-04-14 10:19:00	0	DTA	10	1	3	P
1	2009-04-14 10:20:00	0	DTA	10	1	3	P
1	2009-04-14 10:21:00	0	DTA	10	1	3	P
1	2009-04-14 10:22:00	0	DTA	10	1	3	P
1	2009-04-14 10:23:00	0	DTA	10	1	3	P
1	2009-04-14 10:24:00	0	DTA	10	1	3	P
1	2009-04-14 10:25:00	0	DTA	10	1	3	P
1	2009-04-14 10:26:00	0	DTA	10	1	3	P
1	2009-04-14 10:27:00	0	DTA	10	1	3	P
1	2009-04-14 10:28:00	12	DTA	10	1	3	P
1	2009-04-14 10:29:00	12	DTA	10	1	3	P
1	2009-04-14 10:30:00	0	DTA	10	1	3	P
1	2009-04-14 10:31:00	36	DTA	10	1	3	P
1	2009-04-14 10:32:00	0	DTA	10	1	3	P
1	2009-04-14 10:33:00	0	DTA	10	1	3	P
1	2009-04-14 10:34:00	0	DTA	10	1	3	P
1	2009-04-14 10:35:00	0	DTA	10	1	3	P
1	2009-04-14 10:36:00	12	DTA	10	1	3	P
1	2009-04-14 10:37:00	0	DTA	10	1	3	P
1	2009-04-14 10:38:00	0	DTA	10	1	3	P
1	2009-04-14 10:39:00	12	DTA	10	1	3	P
1	2009-04-14 10:40:00	12	DTA	10	1	3	P
1	2009-04-14 10:41:00	12	DTA	10	1	3	P
1	2009-04-14 10:42:00	0	DTA	10	1	3	P
1	2009-04-14 10:43:00	200	DTA	10	1	3	P
1	2009-04-14 10:44:00	186	DTA	10	1	3	P
1	2009-04-14 10:45:00	526	DTA	10	1	3	P
1	2009-04-14 10:46:00	526	DTA	10	1	3	P
1	2009-04-14 10:47:00	12	DTA	10	1	3	P
1	2009-04-14 10:48:00	12	DTA	10	1	3	P
1	2009-04-14 10:49:00	0	DTA	10	1	3	P
1	2009-04-14 10:50:00	0	DTA	10	1	3	P
1	2009-04-14 10:51:00	0	DTA	10	1	3	P
1	2009-04-14 10:52:00	157	DTA	10	1	3	P
1	2009-04-14 10:53:00	109	DTA	10	1	3	P
1	2009-04-14 10:54:00	109	DTA	10	1	3	P
1	2009-04-14 10:55:00	121	DTA	10	1	3	P
1	2009-04-14 10:56:00	526	DTA	10	1	3	P
1	2009-04-14 10:57:00	384	DTA	10	1	3	P
1	2009-04-14 10:58:00	367	DTA	10	1	3	P
1	2009-04-14 10:59:00	384	DTA	10	1	3	P
1	2009-04-14 11:00:00	452	DTA	10	1	3	P
1	2009-04-14 11:01:00	526	DTA	11	1	3	P
1	2009-04-14 11:02:00	145	DTA	11	1	3	P
1	2009-04-14 11:03:00	333	DTA	11	1	3	P
1	2009-04-14 11:04:00	72	DTA	11	1	3	P
1	2009-04-14 11:05:00	710	DTA	11	1	3	P
1	2009-04-14 11:06:00	1077	DTA	11	1	3	P
1	2009-04-14 11:07:00	1311	DTA	11	1	3	P
1	2009-04-14 11:08:00	1191	DTA	11	1	3	P
1	2009-04-14 11:09:00	1104	DTA	11	1	3	P
1	2009-04-14 11:10:00	1191	DTA	11	1	3	P
1	2009-04-14 11:11:00	488	DTA	11	1	3	P
1	2009-04-14 11:12:00	1507	DTA	11	1	3	P
1	2009-04-14 11:13:00	2082	DTA	11	1	3	P
1	2009-04-14 11:14:00	1611	DTA	11	1	3	P	Peak DTA
1	2009-04-14 11:15:00	2352	DTA	11	1	3	P	Peak DTA
1	2009-04-14 11:16:00	1024	DTA	11	1	3	P	Peak DTA
1	2009-04-14 11:17:00	1104	DTA	11	1	3	P	Peak DTA
1	2009-04-14 11:18:00	1220	DTA	11	1	3	P	Peak DTA
1	2009-04-14 11:19:00	1311	DTA	11	1	3	P	Peak DTA
1	2009-04-14 11:20:00	1720	DTA	11	1	3	P	Peak DTA
1	2009-04-14 11:21:00	1611	DTA	11	1	3	P	Peak DTA
1	2009-04-14 11:22:00	1191	DTA	11	1	3	P	Peak DTA
1	2009-04-14 11:23:00	1311	DTA	11	1	3	P	Peak DTA
1	2009-04-14 11:24:00	799	DTA	11	1	3	P	Peak DTA
1	2009-04-14 11:25:00	157	DTA	11	1	3	P	Peak DTA
1	2009-04-14 11:26:00	507	DTA	11	1	3	P	Peak DTA
1	2009-04-14 11:27:00	72	DTA	11	1	3	P	Peak DTA
1	2009-04-14 11:28:00	133	DTA	11	1	3	P	Peak DTA
1	2009-04-14 11:29:00	0	DTA	11	1	3	P	Peak DTA
1	2009-04-14 11:30:00	0	DTA	11	1	3	P	Peak DTA
1	2009-04-14 11:31:00	0	DTA	11	1	3	P	Peak DTA
1	2009-04-14 11:32:00	0	DTA	11	1	3	P	Peak DTA
1	2009-04-14 11:33:00	36	DTA	11	1	3	P	Peak DTA
1	2009-04-14 11:34:00	526	DTA	11	1	3	P	Peak DTA
1	2009-04-14 11:35:00	215	DTA	11	1	3	P	Peak DTA
1	2009-04-14 11:36:00	287	DTA	11	1	3	P	Peak DTA
1	2009-04-14 11:37:00	418	DTA	11	1	3	P	Peak DTA
1	2009-04-14 11:38:00	333	DTA	11	1	3	P	Peak DTA
1	2009-04-14 11:39:00	401	DTA	11	1	3	P	Peak DTA
1	2009-04-14 11:40:00	565	DTA	11	1	3	P	Peak DTA
1	2009-04-14 11:41:00	215	DTA	11	1	3	P	Peak DTA
1	2009-04-14 11:42:00	920	DTA	11	1	3	P	Peak DTA
1	2009-04-14 11:43:00	121	DTA	11	1	3	P	Peak DTA
1	2009-04-14 11:44:00	12	DTA	11	1	3	P	Peak DTA
1	2009-04-14 11:45:00	0	DTA	11	1	3	P	Peak DTA
1	2009-04-14 11:46:00	0	DTA	11	1	3	P	Peak DTA
1	2009-04-14 11:47:00	0	DTA	11	1	3	P	Peak DTA
1	2009-04-14 11:48:00	12	DTA	11	1	3	P	Peak DTA
1	2009-04-14 11:49:00	0	DTA	11	1	3	P	Peak DTA
1	2009-04-14 11:50:00	0	DTA	11	1	3	P	Peak DTA
1	2009-04-14 11:51:00	0	DTA	11	1	3	P	Peak DTA
1	2009-04-14 11:52:00	0	DTA	11	1	3	P	Peak DTA
1	2009-04-14 11:53:00	0	DTA	11	1	3	P	Peak DTA
1	2009-04-14 11:54:00	12	DTA	11	1	3	P	Peak DTA
1	2009-04-14 11:55:00	0	DTA	11	1	3	P	Peak DTA
1	2009-04-14 11:56:00	0	DTA	11	1	3	P	Peak DTA
1	2009-04-14 11:57:00	0	DTA	11	1	3	P	Peak DTA
1	2009-04-14 11:58:00	0	DTA	11	1	3	P	Peak DTA
1	2009-04-14 11:59:00	0	DTA	11	1	3	P	Peak DTA
1	2009-04-14 12:00:00	0	DTA	11	1	3	P	Peak DTA
1	2009-04-14 12:01:00	0	DTA	12	1	3	P	Peak DTA
1	2009-04-14 12:02:00	0	DTA	12	1	3	P	Peak DTA
1	2009-04-14 12:03:00	36	DTA	12	1	3	P	Peak DTA
1	2009-04-14 12:04:00	0	DTA	12	1	3	P	Peak DTA
1	2009-04-14 12:05:00	0	DTA	12	1	3	P	Peak DTA
1	2009-04-14 12:06:00	0	DTA	12	1	3	P	Peak DTA
1	2009-04-14 12:07:00	0	DTA	12	1	3	P	Peak DTA
1	2009-04-14 12:08:00	0	DTA	12	1	3	P	Peak DTA
1	2009-04-14 12:09:00	0	DTA	12	1	3	P	Peak DTA
1	2009-04-14 12:10:00	0	DTA	12	1	3	P	Peak DTA
1	2009-04-14 12:11:00	0	DTA	12	1	3	P	Peak DTA
1	2009-04-14 12:12:00	0	DTA	12	1	3	P	Peak DTA
1	2009-04-14 12:13:00	0	DTA	12	1	3	P	Peak DTA
1	2009-04-14 12:14:00	0	DTA	12	1	3	P	Peak DTA
1	2009-04-14 12:15:00	0	DTA	12	1	3	P	Peak DTA
1	2009-04-14 12:16:00	0	DTA	12	1	3	P	Peak DTA
1	2009-04-14 12:17:00	0	DTA	12	1	3	P	Peak DTA
1	2009-04-14 12:18:00	0	DTA	12	1	3	P	Peak DTA
1	2009-04-14 12:19:00	0	DTA	12	1	3	P	Peak DTA
1	2009-04-14 12:20:00	12	DTA	12	1	3	P	Peak DTA
1	2009-04-14 12:21:00	0	DTA	12	1	3	P	Peak DTA
1	2009-04-14 12:22:00	0	DTA	12	1	3	P	Peak DTA
1	2009-04-14 12:23:00	0	DTA	12	1	3	P	Peak DTA
1	2009-04-14 12:24:00	0	DTA	12	1	3	P	Peak DTA
1	2009-04-14 12:25:00	0	DTA	12	1	3	P	Peak DTA
1	2009-04-14 12:26:00	0	DTA	12	1	3	P	Peak DTA
1	2009-04-14 12:27:00	0	DTA	12	1	3	P	Peak DTA
1	2009-04-14 12:28:00	12	DTA	12	1	3	P	Peak DTA
1	2009-04-14 12:29:00	24	DTA	12	1	3	P	Peak DTA
1	2009-04-14 12:30:00	0	DTA	12	1	3	P	Peak DTA
1	2009-04-14 12:31:00	0	DTA	12	1	3	P	Peak DTA
1	2009-04-14 12:32:00	0	DTA	12	1	3	P	Peak DTA
1	2009-04-14 12:33:00	0	DTA	12	1	3	P	Peak DTA
1	2009-04-14 12:34:00	0	DTA	12	1	3	P	Peak DTA
1	2009-04-14 12:35:00	0	DTA	12	1	3	P	Peak DTA
1	2009-04-14 12:36:00	0	DTA	12	1	3	P	Peak DTA
1	2009-04-14 12:37:00	0	DTA	12	1	3	P	Peak DTA
1	2009-04-14 12:38:00	0	DTA	12	1	3	P	Peak DTA
1	2009-04-14 12:39:00	0	DTA	12	1	3	P	Peak DTA
1	2009-04-14 12:40:00	0	DTA	12	1	3	P	Peak DTA
1	2009-04-14 12:41:00	0	DTA	12	1	3	P	Peak DTA
1	2009-04-14 12:42:00	24	DTA	12	1	3	P	Peak DTA
1	2009-04-14 12:43:00	0	DTA	12	1	3	P	Peak DTA
1	2009-04-14 12:44:00	0	DTA	12	1	3	P	Peak DTA
1	2009-04-14 12:45:00	0	DTA	12	1	3	P	Peak DTA
1	2009-04-14 12:46:00	0	DTA	12	1	3	P	Peak DTA
1	2009-04-14 12:47:00	0	DTA	12	1	3	P	Peak DTA
1	2009-04-14 12:48:00	0	DTA	12	1	3	P	Peak DTA
1	2009-04-14 12:49:00	0	DTA	12	1	3	P	Peak DTA
1	2009-04-14 12:50:00	0	DTA	12	1	3	P	Peak DTA
1	2009-04-14 12:51:00	0	DTA	12	1	3	P	Peak DTA
1	2009-04-14 12:52:00	0	DTA	12	1	3	P	Peak DTA
1	2009-04-14 12:53:00	0	DTA	12	1	3	P	Peak DTA
1	2009-04-14 12:54:00	0	DTA	12	1	3	P	Peak DTA
1	2009-04-14 12:55:00	0	DTA	12	1	3	P	Peak DTA
1	2009-04-14 12:56:00	0	DTA	12	1	3	P	Peak DTA
1	2009-04-14 12:57:00	0	DTA	12	1	3	P	Peak DTA
1	2009-04-14 12:58:00	0	DTA	12	1	3	P	Peak DTA
1	2009-04-14 12:59:00	0	DTA	12	1	3	P	Peak DTA
1	2009-04-14 13:00:00	0	DTA	12	1	3	P	Peak DTA
1	2009-04-14 13:01:00	36	DTA	13	1	3	P	Peak DTA
1	2009-04-14 13:02:00	0	DTA	13	1	3	P	Peak DTA
1	2009-04-14 13:03:00	0	DTA	13	1	3	P	Peak DTA
1	2009-04-14 13:04:00	0	DTA	13	1	3	P	Peak DTA
1	2009-04-14 13:05:00	0	DTA	13	1	3	P	Peak DTA
1	2009-04-14 13:06:00	0	DTA	13	1	3	P	Peak DTA
1	2009-04-14 13:07:00	0	DTA	13	1	3	P	Peak DTA
1	2009-04-14 13:08:00	36	DTA	13	1	3	P	Peak DTA
1	2009-04-14 13:09:00	0	DTA	13	1	3	P	Peak DTA
1	2009-04-14 13:10:00	0	DTA	13	1	3	P	Peak DTA
1	2009-04-14 13:11:00	0	DTA	13	1	3	P	Peak DTA
1	2009-04-14 13:12:00	0	DTA	13	1	3	P	Peak DTA
1	2009-04-14 13:13:00	0	DTA	13	1	3	P	Peak DTA
1	2009-04-14 13:14:00	0	DTA	13	1	3	P	Peak DTA
1	2009-04-14 13:15:00	0	DTA	13	1	3	P	Peak DTA
1	2009-04-14 13:16:00	0	DTA	13	1	3	P	Peak DTA
1	2009-04-14 13:17:00	0	DTA	13	1	3	P	Peak DTA
1	2009-04-14 13:18:00	0	DTA	13	1	3	P	Peak DTA
1	2009-04-14 13:19:00	0	DTA	13	1	3	P	Peak DTA
1	2009-04-14 13:20:00	0	DTA	13	1	3	P	Peak DTA
1	2009-04-14 13:21:00	0	DTA	13	1	3	P	Peak DTA
1	2009-04-14 13:22:00	0	DTA	13	1	3	P	Peak DTA
1	2009-04-14 13:23:00	316	DTA	13	1	3	P	Peak DTA
1	2009-04-14 13:24:00	604	DTA	13	1	3	P	Peak DTA
1	2009-04-14 13:25:00	229	DTA	13	1	3	P	Peak DTA
1	2009-04-14 13:26:00	1249	DTA	13	1	3	P	Peak DTA
1	2009-04-14 13:27:00	667	DTA	13	1	3	P	Peak DTA
1	2009-04-14 13:28:00	0	DTA	13	1	3	P	Peak DTA
1	2009-04-14 13:29:00	0	DTA	13	1	3	P	Peak DTA
1	2009-04-14 13:30:00	24	DTA	13	1	3	P	Peak DTA
1	2009-04-14 13:31:00	0	DTA	13	1	3	P	Peak DTA
1	2009-04-14 13:32:00	48	DTA	13	1	3	P	Peak DTA
1	2009-04-14 13:33:00	229	DTA	13	1	3	P	Peak DTA
1	2009-04-14 13:34:00	60	DTA	13	1	3	P	Peak DTA
1	2009-04-14 13:35:00	24	DTA	13	1	3	P	Peak DTA
1	2009-04-14 13:36:00	0	DTA	13	1	3	P	Peak DTA
1	2009-04-14 13:37:00	0	DTA	13	1	3	P	Peak DTA
1	2009-04-14 13:38:00	0	DTA	13	1	3	P	Peak DTA
1	2009-04-14 13:39:00	0	DTA	13	1	3	P	Peak DTA
1	2009-04-14 13:40:00	0	DTA	13	1	3	P	Peak DTA
1	2009-04-14 13:41:00	0	DTA	13	1	3	P	Peak DTA
1	2009-04-14 13:42:00	0	DTA	13	1	3	P	Peak DTA
1	2009-04-14 13:43:00	0	DTA	13	1	3	P	Peak DTA
1	2009-04-14 13:44:00	0	DTA	13	1	3	P	Peak DTA
1	2009-04-14 13:45:00	0	DTA	13	1	3	P	Peak DTA
1	2009-04-14 13:46:00	0	DTA	13	1	3	P	Peak DTA
1	2009-04-14 13:47:00	0	DTA	13	1	3	P	Peak DTA
1	2009-04-14 13:48:00	0	DTA	13	1	3	P	Peak DTA
1	2009-04-14 13:49:00	0	DTA	13	1	3	P	Peak DTA
1	2009-04-14 13:50:00	0	DTA	13	1	3	P	Peak DTA
1	2009-04-14 13:51:00	0	DTA	13	1	3	P	Peak DTA
1	2009-04-14 13:52:00	0	DTA	13	1	3	P	Peak DTA
1	2009-04-14 13:53:00	0	DTA	13	1	3	P	Peak DTA
1	2009-04-14 13:54:00	0	DTA	13	1	3	P	Peak DTA
1	2009-04-14 13:55:00	0	DTA	13	1	3	P	Peak DTA
1	2009-04-14 13:56:00	0	DTA	13	1	3	P	Peak DTA
1	2009-04-14 13:57:00	0	DTA	13	1	3	P	Peak DTA
1	2009-04-14 13:58:00	0	DTA	13	1	3	P	Peak DTA
1	2009-04-14 13:59:00	0	DTA	13	1	3	P	Peak DTA
1	2009-04-14 14:00:00	0	DTA	13	1	3	P	Peak DTA
1	2009-04-14 14:01:00	0	DTA	14	1	3	P	Peak DTA
1	2009-04-14 14:02:00	0	DTA	14	1	3	P	Peak DTA
1	2009-04-14 14:03:00	0	DTA	14	1	3	P	Peak DTA
1	2009-04-14 14:04:00	0	DTA	14	1	3	P	Peak DTA
1	2009-04-14 14:05:00	0	DTA	14	1	3	P	Peak DTA
1	2009-04-14 14:06:00	0	DTA	14	1	3	P	Peak DTA
1	2009-04-14 14:07:00	0	DTA	14	1	3	P	Peak DTA
1	2009-04-14 14:08:00	0	DTA	14	1	3	P	Peak DTA
1	2009-04-14 14:09:00	0	DTA	14	1	3	P	Peak DTA
1	2009-04-14 14:10:00	0	DTA	14	1	3	P	Peak DTA
1	2009-04-14 14:11:00	0	DTA	14	1	3	P	Peak DTA
1	2009-04-14 14:12:00	0	DTA	14	1	3	P	Peak DTA
1	2009-04-14 14:13:00	0	DTA	14	1	3	P	Peak DTA
1	2009-04-14 14:14:00	0	DTA	14	1	3	P	Peak DTA
1	2009-04-14 14:15:00	0	DTA	14	1	3	P	Peak DTA
1	2009-04-14 14:16:00	0	DTA	14	1	3	P	Peak DTA
1	2009-04-14 14:17:00	0	DTA	14	1	3	P	Peak DTA
1	2009-04-14 14:18:00	0	DTA	14	1	3	P	Peak DTA
1	2009-04-14 14:19:00	0	DTA	14	1	3	P	Peak DTA
1	2009-04-14 14:20:00	0	DTA	14	1	3	P	Peak DTA
1	2009-04-14 14:21:00	0	DTA	14	1	3	P	Peak DTA
1	2009-04-14 14:22:00	0	DTA	14	1	3	P	Peak DTA
1	2009-04-14 14:23:00	0	DTA	14	1	3	P	Peak DTA
1	2009-04-14 14:24:00	0	DTA	14	1	3	P	Peak DTA
1	2009-04-14 14:25:00	0	DTA	14	1	3	P	Peak DTA
1	2009-04-14 14:26:00	24	DTA	14	1	3	P	Peak DTA
1	2009-04-14 14:27:00	109	DTA	14	1	3	P	Peak DTA
1	2009-04-14 14:28:00	12	DTA	14	1	3	P	Peak DTA
1	2009-04-14 14:29:00	0	DTA	14	1	3	P	Peak DTA
1	2009-04-14 14:30:00	0	DTA	14	1	3	P	Peak DTA
1	2009-04-14 14:31:00	0	DTA	14	1	3	P	Peak DTA
1	2009-04-14 14:32:00	12	DTA	14	1	3	P	Peak DTA
1	2009-04-14 14:33:00	229	DTA	14	1	3	P	Peak DTA
1	2009-04-14 14:34:00	12	DTA	14	1	3	P	Peak DTA
1	2009-04-14 14:35:00	36	DTA	14	1	3	P	Peak DTA
1	2009-04-14 14:36:00	0	DTA	14	1	3	P	Peak DTA
1	2009-04-14 14:37:00	0	DTA	14	1	3	P	Peak DTA
1	2009-04-14 14:38:00	0	DTA	14	1	3	P	Peak DTA
1	2009-04-14 14:39:00	0	DTA	14	1	3	P	Peak DTA
1	2009-04-14 14:40:00	0	DTA	14	1	3	P	Peak DTA
1	2009-04-14 14:41:00	0	DTA	14	1	3	P	Peak DTA
1	2009-04-14 14:42:00	0	DTA	14	1	3	P	Peak DTA
1	2009-04-14 14:43:00	0	DTA	14	1	3	P	Peak DTA
1	2009-04-14 14:44:00	12	DTA	14	1	3	P	Peak DTA
1	2009-04-14 14:45:00	0	DTA	14	1	3	P	Peak DTA
1	2009-04-14 14:46:00	0	DTA	14	1	3	P	Peak DTA
1	2009-04-14 14:47:00	0	DTA	14	1	3	P	Peak DTA
1	2009-04-14 14:48:00	0	DTA	14	1	3	P	Peak DTA
1	2009-04-14 14:49:00	12	DTA	14	1	3	P	Peak DTA
1	2009-04-14 14:50:00	24	DTA	14	1	3	P	Peak DTA
1	2009-04-14 14:51:00	121	DTA	14	1	3	P	Peak DTA
1	2009-04-14 14:52:00	0	DTA	14	1	3	P	Peak DTA
1	2009-04-14 14:53:00	12	DTA	14	1	3	P	Peak DTA
1	2009-04-14 14:54:00	0	DTA	14	1	3	P	Peak DTA
1	2009-04-14 14:55:00	401	DTA	14	1	3	P	Peak DTA
1	2009-04-14 14:56:00	367	DTA	14	1	3	P	Peak DTA
1	2009-04-14 14:57:00	72	DTA	14	1	3	P	Peak DTA
1	2009-04-14 14:58:00	229	DTA	14	1	3	P	Peak DTA
1	2009-04-14 14:59:00	384	DTA	14	1	3	P	Peak DTA
1	2009-04-14 15:00:00	367	DTA	14	1	3	P	Peak DTA
1	2009-04-14 15:01:00	200	DTA	15	1	3	P	Peak DTA
1	2009-04-14 15:02:00	1191	DTA	15	1	3	P	Peak DTA
1	2009-04-14 15:03:00	350	DTA	15	1	3	P	Peak DTA
1	2009-04-14 15:04:00	507	DTA	15	1	3	P	Peak DTA
1	2009-04-14 15:05:00	350	DTA	15	1	3	P	Peak DTA
1	2009-04-14 15:06:00	145	DTA	15	1	3	P	Peak DTA
1	2009-04-14 15:07:00	0	DTA	15	1	3	P	Peak DTA
1	2009-04-14 15:08:00	0	DTA	15	1	3	P	Peak DTA
1	2009-04-14 15:09:00	0	DTA	15	1	3	P	Peak DTA
1	2009-04-14 15:10:00	0	DTA	15	1	3	P	Peak DTA
1	2009-04-14 15:11:00	0	DTA	15	1	3	P	Peak DTA
1	2009-04-14 15:12:00	0	DTA	15	1	3	P	Peak DTA
1	2009-04-14 15:13:00	0	DTA	15	1	3	P	Peak DTA
1	2009-04-14 15:14:00	0	DTA	15	1	3	P	Peak DTA
1	2009-04-14 15:15:00	0	DTA	15	1	3	P	Peak DTA
1	2009-04-14 15:16:00	0	DTA	15	1	3	P	Peak DTA
1	2009-04-14 15:17:00	0	DTA	15	1	3	P	Peak DTA
1	2009-04-14 15:18:00	0	DTA	15	1	3	P	Peak DTA
1	2009-04-14 15:19:00	0	DTA	15	1	3	P	Peak DTA
1	2009-04-14 15:20:00	0	DTA	15	1	3	P	Peak DTA
1	2009-04-14 15:21:00	12	DTA	15	1	3	P	Peak DTA
1	2009-04-14 15:22:00	0	DTA	15	1	3	P	Peak DTA
1	2009-04-14 15:23:00	333	DTA	15	1	3	P	Peak DTA
1	2009-04-14 15:24:00	0	DTA	15	1	3	P	Peak DTA
1	2009-04-14 15:25:00	97	DTA	15	1	3	P	Peak DTA
1	2009-04-14 15:26:00	85	DTA	15	1	3	P	Peak DTA
1	2009-04-14 15:27:00	215	DTA	15	1	3	P	Peak DTA
1	2009-04-14 15:28:00	316	DTA	15	1	3	P	Peak DTA
1	2009-04-14 15:29:00	645	DTA	15	1	3	P	Peak DTA
1	2009-04-14 15:30:00	287	DTA	15	1	3	P	Peak DTA
1	2009-04-14 15:31:00	273	DTA	15	1	3	P	Peak DTA
1	2009-04-14 15:32:00	920	DTA	15	1	3	P	Peak DTA
1	2009-04-14 15:33:00	350	DTA	15	1	3	P	Peak DTA
1	2009-04-14 15:34:00	0	DTA	15	1	3	P	Peak DTA
1	2009-04-14 15:35:00	24	DTA	15	1	3	P	Peak DTA
1	2009-04-14 15:36:00	157	DTA	15	1	3	P	Peak DTA
1	2009-04-14 15:37:00	645	DTA	15	1	3	P	Peak DTA
1	2009-04-14 15:38:00	48	DTA	15	1	3	P	Peak DTA
1	2009-04-14 15:39:00	24	DTA	15	1	3	P	Peak DTA
1	2009-04-14 15:40:00	0	DTA	15	1	3	P	Peak DTA
1	2009-04-14 15:41:00	645	DTA	15	1	3	P	Peak DTA
1	2009-04-14 15:42:00	60	DTA	15	1	3	P	Peak DTA
1	2009-04-14 15:43:00	12	DTA	15	1	3	P	Peak DTA
1	2009-04-14 15:44:00	0	DTA	15	1	3	P	Peak DTA
1	2009-04-14 15:45:00	0	DTA	15	1	3	P	Peak DTA
1	2009-04-14 15:46:00	60	DTA	15	1	3	P	Peak DTA
1	2009-04-14 15:47:00	36	DTA	15	1	3	P	Peak DTA
1	2009-04-14 15:48:00	0	DTA	15	1	3	P	Peak DTA
1	2009-04-14 15:49:00	12	DTA	15	1	3	P	Peak DTA
1	2009-04-14 15:50:00	0	DTA	15	1	3	P	Peak DTA
1	2009-04-14 15:51:00	0	DTA	15	1	3	P	Peak DTA
1	2009-04-14 15:52:00	0	DTA	15	1	3	P	Peak DTA
1	2009-04-14 15:53:00	0	DTA	15	1	3	P	Peak DTA
1	2009-04-14 15:54:00	0	DTA	15	1	3	P	Peak DTA
1	2009-04-14 15:55:00	0	DTA	15	1	3	P	Peak DTA
1	2009-04-14 15:56:00	0	DTA	15	1	3	P	Peak DTA
1	2009-04-14 15:57:00	0	DTA	15	1	3	P	Peak DTA
1	2009-04-14 15:58:00	0	DTA	15	1	3	P	Peak DTA
1	2009-04-14 15:59:00	452	DTA	15	1	3	P	Peak DTA
1	2009-04-14 16:00:00	0	DTA	15	1	3	P	Peak DTA
1	2009-04-14 16:01:00	0	DTA	16	1	3	P	Peak DTA
1	2009-04-14 16:02:00	0	DTA	16	1	3	P	Peak DTA
1	2009-04-14 16:03:00	12	DTA	16	1	3	P	Peak DTA
1	2009-04-14 16:04:00	12	DTA	16	1	3	P	Peak DTA
1	2009-04-14 16:05:00	133	DTA	16	1	3	P	Peak DTA
1	2009-04-14 16:06:00	333	DTA	16	1	3	P	Peak DTA
1	2009-04-14 16:07:00	215	DTA	16	1	3	P	Peak DTA
1	2009-04-14 16:08:00	667	DTA	16	1	3	P	Peak DTA
1	2009-04-14 16:09:00	109	DTA	16	1	3	P	Peak DTA
1	2009-04-14 16:10:00	97	DTA	16	1	3	P	Peak DTA
1	2009-04-14 16:11:00	60	DTA	16	1	3	P	Peak DTA
1	2009-04-14 16:12:00	48	DTA	16	1	3	P	Peak DTA
1	2009-04-14 16:13:00	12	DTA	16	1	3	P	Peak DTA
1	2009-04-14 16:14:00	24	DTA	16	1	3	P	Peak DTA
1	2009-04-14 16:15:00	0	DTA	16	1	3	P	Peak DTA
1	2009-04-14 16:16:00	24	DTA	16	1	3	P	Peak DTA
1	2009-04-14 16:17:00	24	DTA	16	1	3	P	Peak DTA
1	2009-04-14 16:18:00	0	DTA	16	1	3	P	Peak DTA
1	2009-04-14 16:19:00	12	DTA	16	1	3	P	Peak DTA
1	2009-04-14 16:20:00	48	DTA	16	1	3	P	Peak DTA
1	2009-04-14 16:21:00	12	DTA	16	1	3	P	Peak DTA
1	2009-04-14 16:22:00	0	DTA	16	1	3	P	Peak DTA
1	2009-04-14 16:23:00	0	DTA	16	1	3	P	Peak DTA
1	2009-04-14 16:24:00	12	DTA	16	1	3	P	Peak DTA
1	2009-04-14 16:25:00	0	DTA	16	1	3	P	Peak DTA
1	2009-04-14 16:26:00	0	DTA	16	1	3	P	Peak DTA
1	2009-04-14 16:27:00	36	DTA	16	1	3	P	Peak DTA
1	2009-04-14 16:28:00	24	DTA	16	1	3	P	Peak DTA
1	2009-04-14 16:29:00	48	DTA	16	1	3	P	Peak DTA
1	2009-04-14 16:30:00	24	DTA	16	1	3	P	Peak DTA
1	2009-04-14 16:31:00	36	DTA	16	1	3	P	Peak DTA
1	2009-04-14 16:32:00	48	DTA	16	1	3	P	Peak DTA
1	2009-04-14 16:33:00	97	DTA	16	1	3	P	Peak DTA
1	2009-04-14 16:34:00	350	DTA	16	1	3	P	Peak DTA
1	2009-04-14 16:35:00	12	DTA	16	1	3	P	Peak DTA
1	2009-04-14 16:36:00	384	DTA	16	1	3	P	Peak DTA
1	2009-04-14 16:37:00	72	DTA	16	1	3	P	Peak DTA
1	2009-04-14 16:38:00	72	DTA	16	1	3	P	Peak DTA
1	2009-04-14 16:39:00	60	DTA	16	1	3	P	Peak DTA
1	2009-04-14 16:40:00	24	DTA	16	1	3	P	Peak DTA
1	2009-04-14 16:41:00	24	DTA	16	1	3	P	Peak DTA
1	2009-04-14 16:42:00	12	DTA	16	1	3	P	Peak DTA
1	2009-04-14 16:43:00	12	DTA	16	1	3	P	Peak DTA
1	2009-04-14 16:44:00	12	DTA	16	1	3	P	Peak DTA
1	2009-04-14 16:45:00	0	DTA	16	1	3	P	Peak DTA
1	2009-04-14 16:46:00	0	DTA	16	1	3	P	Peak DTA
1	2009-04-14 16:47:00	0	DTA	16	1	3	P	Peak DTA
1	2009-04-14 16:48:00	0	DTA	16	1	3	P	Peak DTA
1	2009-04-14 16:49:00	36	DTA	16	1	3	P	Peak DTA
1	2009-04-14 16:50:00	0	DTA	16	1	3	P	Peak DTA
1	2009-04-14 16:51:00	0	DTA	16	1	3	P	Peak DTA
1	2009-04-14 16:52:00	12	DTA	16	1	3	P	Peak DTA
1	2009-04-14 16:53:00	0	DTA	16	1	3	P	Peak DTA
1	2009-04-14 16:54:00	24	DTA	16	1	3	P	Peak DTA
1	2009-04-14 16:55:00	48	DTA	16	1	3	P	Peak DTA
1	2009-04-14 16:56:00	12	DTA	16	1	3	P	Peak DTA
1	2009-04-14 16:57:00	0	DTA	16	1	3	P	Peak DTA
1	2009-04-14 16:58:00	24	DTA	16	1	3	P	Peak DTA
1	2009-04-14 16:59:00	36	DTA	16	1	3	P	Peak DTA
1	2009-04-14 17:00:00	36	DTA	16	1	3	P	Peak DTA
1	2009-04-14 17:01:00	60	DTA	17	1	3	P	Peak DTA
1	2009-04-14 17:02:00	584	DTA	17	1	3	P	Peak DTA
1	2009-04-14 17:03:00	333	DTA	17	1	3	P	Peak DTA
1	2009-04-14 17:04:00	229	DTA	17	1	3	P	Peak DTA
1	2009-04-14 17:05:00	1104	DTA	17	1	3	P	Peak DTA
1	2009-04-14 17:06:00	997	DTA	17	1	3	P	Peak DTA
1	2009-04-14 17:07:00	186	DTA	17	1	3	P	Peak DTA
1	2009-04-14 17:08:00	384	DTA	17	1	3	P	Peak DTA
1	2009-04-14 17:09:00	145	DTA	17	1	3	P	Peak DTA
1	2009-04-14 17:10:00	316	DTA	17	1	3	P	Peak DTA
1	2009-04-14 17:11:00	452	DTA	17	1	3	P	Peak DTA
1	2009-04-14 17:12:00	215	DTA	17	1	3	P	Peak DTA
1	2009-04-14 17:13:00	316	DTA	17	1	3	P	Peak DTA
1	2009-04-14 17:14:00	12	DTA	17	1	3	P
1	2009-04-14 17:15:00	273	DTA	17	1	3	P
1	2009-04-14 17:16:00	97	DTA	17	1	3	P
1	2009-04-14 17:17:00	0	DTA	17	1	3	P
1	2009-04-14 17:18:00	0	DTA	17	1	3	P
1	2009-04-14 17:19:00	0	DTA	17	1	3	P
1	2009-04-14 17:20:00	0	DTA	17	1	3	P
1	2009-04-14 17:21:00	0	DTA	17	1	3	P
1	2009-04-14 17:22:00	0	DTA	17	1	3	P
1	2009-04-14 17:23:00	0	DTA	17	1	3	P
1	2009-04-14 17:24:00	0	DTA	17	1	3	P
1	2009-04-14 17:25:00	0	DTA	17	1	3	P
1	2009-04-14 17:26:00	367	DTA	17	1	3	P
1	2009-04-14 17:27:00	12	DTA	17	1	3	P
1	2009-04-14 17:28:00	12	DTA	17	1	3	P
1	2009-04-14 17:29:00	0	DTA	17	1	3	P
1	2009-04-14 17:30:00	97	DTA	17	1	3	P
1	2009-04-14 17:31:00	0	DTA	17	1	3	P
1	2009-04-14 17:32:00	667	DTA	17	1	3	P
1	2009-04-14 17:33:00	24	DTA	17	1	3	P
1	2009-04-14 17:34:00	12	DTA	17	1	3	P
1	2009-04-14 17:35:00	12	DTA	17	1	3	P
1	2009-04-14 17:36:00	507	DTA	17	1	3	P
1	2009-04-14 17:37:00	418	DTA	17	1	3	P
1	2009-04-14 17:38:00	546	DTA	17	1	3	P
1	2009-04-14 17:39:00	688	DTA	17	1	3	P
1	2009-04-14 17:40:00	775	DTA	17	1	3	P
1	2009-04-14 17:41:00	171	DTA	17	1	3	P
1	2009-04-14 17:42:00	200	DTA	17	1	3	P
1	2009-04-14 17:43:00	12	DTA	17	1	3	P
1	2009-04-14 17:44:00	12	DTA	17	1	3	P
1	2009-04-14 17:45:00	12	DTA	17	1	3	P
1	2009-04-14 17:46:00	0	DTA	17	1	3	P
1	2009-04-14 17:47:00	0	DTA	17	1	3	P
1	2009-04-14 17:48:00	273	DTA	17	1	3	P
1	2009-04-14 17:49:00	109	DTA	17	1	3	P
1	2009-04-14 17:50:00	12	DTA	17	1	3	P
1	2009-04-14 17:51:00	12	DTA	17	1	3	P
1	2009-04-14 17:52:00	0	DTA	17	1	3	P
1	2009-04-14 17:53:00	24	DTA	17	1	3	P
1	2009-04-14 17:54:00	0	DTA	17	1	3	P
1	2009-04-14 17:55:00	12	DTA	17	1	3	P
1	2009-04-14 17:56:00	24	DTA	17	1	3	P
1	2009-04-14 17:57:00	0	DTA	17	1	3	P
1	2009-04-14 17:58:00	48	DTA	17	1	3	P
1	2009-04-14 17:59:00	24	DTA	17	1	3	P
1	2009-04-14 18:00:00	36	DTA	17	1	3	P
1	2009-04-14 18:01:00	0	DTA	18	1	3	P
1	2009-04-14 18:02:00	0	DTA	18	1	3	P
1	2009-04-14 18:03:00	258	DTA	18	1	3	P
1	2009-04-14 18:04:00	133	DTA	18	1	3	P
1	2009-04-14 18:05:00	171	DTA	18	1	3	P
1	2009-04-14 18:06:00	97	DTA	18	1	3	P
1	2009-04-14 18:07:00	24	DTA	18	1	3	P
1	2009-04-14 18:08:00	12	DTA	18	1	3	P
1	2009-04-14 18:09:00	24	DTA	18	1	3	P
1	2009-04-14 18:10:00	48	DTA	18	1	3	P
1	2009-04-14 18:11:00	287	DTA	18	1	3	P
1	2009-04-14 18:12:00	316	DTA	18	1	3	P
1	2009-04-14 18:13:00	754	DTA	18	1	3	P
1	2009-04-14 18:14:00	584	DTA	18	1	3	P
1	2009-04-14 18:15:00	546	DTA	18	1	3	P
1	2009-04-14 18:16:00	302	DTA	18	1	3	P
1	2009-04-14 18:17:00	0	DTA	18	1	3	P
1	2009-04-14 18:18:00	24	DTA	18	1	3	P
1	2009-04-14 18:19:00	0	DTA	18	1	3	P
1	2009-04-14 18:20:00	0	DTA	18	1	3	P
1	2009-04-14 18:21:00	12	DTA	18	1	3	P
1	2009-04-14 18:22:00	0	DTA	18	1	3	P
1	2009-04-14 18:23:00	688	DTA	18	1	3	P
1	2009-04-14 18:24:00	565	DTA	18	1	3	P
1	2009-04-14 18:25:00	896	DTA	18	1	3	P
1	2009-04-14 18:26:00	775	DTA	18	1	3	P
1	2009-04-14 18:27:00	1133	DTA	18	1	3	P
1	2009-04-14 18:28:00	1162	DTA	18	1	3	P
1	2009-04-14 18:29:00	401	DTA	18	1	3	P
1	2009-04-14 18:30:00	824	DTA	18	1	3	P
1	2009-04-14 18:31:00	565	DTA	18	1	3	P
1	2009-04-14 18:32:00	799	DTA	18	1	3	P
1	2009-04-14 18:33:00	1133	DTA	18	1	3	P
1	2009-04-14 18:34:00	896	DTA	18	1	3	P
1	2009-04-14 18:35:00	645	DTA	18	1	3	P
1	2009-04-14 18:36:00	452	DTA	18	1	3	P
1	2009-04-14 18:37:00	133	DTA	18	1	3	P
1	2009-04-14 18:38:00	215	DTA	18	1	3	P
1	2009-04-14 18:39:00	12	DTA	18	1	3	P
1	2009-04-14 18:40:00	0	DTA	18	1	3	P
1	2009-04-14 18:41:00	0	DTA	18	1	3	P
1	2009-04-14 18:42:00	12	DTA	18	1	3	P
1	2009-04-14 18:43:00	0	DTA	18	1	3	P
1	2009-04-14 18:44:00	36	DTA	18	1	3	P
1	2009-04-14 18:45:00	12	DTA	18	1	3	P
1	2009-04-14 18:46:00	0	DTA	18	1	3	P
1	2009-04-14 18:47:00	24	DTA	18	1	3	P
1	2009-04-14 18:48:00	36	DTA	18	1	3	P
1	2009-04-14 18:49:00	85	DTA	18	1	3	P
1	2009-04-14 18:50:00	121	DTA	18	1	3	P
1	2009-04-14 18:51:00	0	DTA	18	1	3	P
1	2009-04-14 18:52:00	0	DTA	18	1	3	P
1	2009-04-14 18:53:00	0	DTA	18	1	3	P
1	2009-04-14 18:54:00	12	DTA	18	1	3	P
1	2009-04-14 18:55:00	0	DTA	18	1	3	P
1	2009-04-14 18:56:00	0	DTA	18	1	3	P
1	2009-04-14 18:57:00	0	DTA	18	1	3	P
1	2009-04-14 18:58:00	48	DTA	18	1	3	P
1	2009-04-14 18:59:00	24	DTA	18	1	3	P
1	2009-04-14 19:00:00	0	DTA	18	1	3	P
1	2009-04-14 19:01:00	0	DTA	19	1	3	P
1	2009-04-14 19:02:00	0	DTA	19	1	3	P
1	2009-04-14 19:03:00	0	DTA	19	1	3	P
1	2009-04-14 19:04:00	0	DTA	19	1	3	P
1	2009-04-14 19:05:00	0	DTA	19	1	3	P
1	2009-04-14 19:06:00	0	DTA	19	1	3	P
1	2009-04-14 19:07:00	848	DTA	19	1	3	P
1	2009-04-14 19:08:00	754	DTA	19	1	3	P
1	2009-04-14 19:09:00	848	DTA	19	1	3	P
1	2009-04-14 19:10:00	121	DTA	19	1	3	P
1	2009-04-14 19:11:00	848	DTA	19	1	3	P
1	2009-04-14 19:12:00	1343	DTA	19	1	3	P
1	2009-04-14 19:13:00	1473	DTA	19	1	3	P
1	2009-04-14 19:14:00	333	DTA	19	1	3	P
1	2009-04-14 19:15:00	1133	DTA	19	1	3	P
1	2009-04-14 19:16:00	1280	DTA	19	1	3	P
1	2009-04-14 19:17:00	667	DTA	19	1	3	P
1	2009-04-14 19:18:00	0	DTA	19	1	3	P
1	2009-04-14 19:19:00	0	DTA	19	1	3	P
1	2009-04-14 19:20:00	171	DTA	19	1	3	P
1	2009-04-14 19:21:00	157	DTA	19	1	3	P
1	2009-04-14 19:22:00	12	DTA	19	1	3	P
1	2009-04-14 19:23:00	0	DTA	19	1	3	P
1	2009-04-14 19:24:00	0	DTA	19	1	3	P
1	2009-04-14 19:25:00	0	DTA	19	1	3	P
1	2009-04-14 19:26:00	0	DTA	19	1	3	P
1	2009-04-14 19:27:00	0	DTA	19	1	3	P
1	2009-04-14 19:28:00	0	DTA	19	1	3	P
1	2009-04-14 19:29:00	0	DTA	19	1	3	P
1	2009-04-14 19:30:00	0	DTA	19	1	3	P
1	2009-04-14 19:31:00	12	DTA	19	1	3	P
1	2009-04-14 19:32:00	0	DTA	19	1	3	P
1	2009-04-14 19:33:00	0	DTA	19	1	3	P
1	2009-04-14 19:34:00	0	DTA	19	1	3	P
1	2009-04-14 19:35:00	0	DTA	19	1	3	P
1	2009-04-14 19:36:00	0	DTA	19	1	3	P
1	2009-04-14 19:37:00	0	DTA	19	1	3	P
1	2009-04-14 19:38:00	0	DTA	19	1	3	P
1	2009-04-14 19:39:00	24	DTA	19	1	3	P
1	2009-04-14 19:40:00	0	DTA	19	1	3	P
1	2009-04-14 19:41:00	0	DTA	19	1	3	P
1	2009-04-14 19:42:00	0	DTA	19	1	3	P
1	2009-04-14 19:43:00	0	DTA	19	1	3	P
1	2009-04-14 19:44:00	12	DTA	19	1	3	P
1	2009-04-14 19:45:00	0	DTA	19	1	3	P
1	2009-04-14 19:46:00	333	DTA	19	1	3	P
1	2009-04-14 19:47:00	85	DTA	19	1	3	P
1	2009-04-14 19:48:00	0	DTA	19	1	3	P
1	2009-04-14 19:49:00	0	DTA	19	1	3	P
1	2009-04-14 19:50:00	12	DTA	19	1	3	P
1	2009-04-14 19:51:00	12	DTA	19	1	3	P
1	2009-04-14 19:52:00	0	DTA	19	1	3	P
1	2009-04-14 19:53:00	0	DTA	19	1	3	P
1	2009-04-14 19:54:00	0	DTA	19	1	3	P
1	2009-04-14 19:55:00	0	DTA	19	1	3	P
1	2009-04-14 19:56:00	0	DTA	19	1	3	P
1	2009-04-14 19:57:00	0	DTA	19	1	3	P
1	2009-04-14 19:58:00	0	DTA	19	1	3	P
1	2009-04-14 19:59:00	0	DTA	19	1	3	P
1	2009-04-14 20:00:00	0	DTA	19	1	3	P
1	2009-04-14 20:01:00	0	DTA	20	1	3	P
1	2009-04-14 20:02:00	0	DTA	20	1	3	P
1	2009-04-14 20:03:00	0	DTA	20	1	3	P
1	2009-04-14 20:04:00	0	DTA	20	1	3	P
1	2009-04-14 20:05:00	0	DTA	20	1	3	P
1	2009-04-14 20:06:00	0	DTA	20	1	3	P
1	2009-04-14 20:07:00	0	DTA	20	1	3	P
1	2009-04-14 20:08:00	0	DTA	20	1	3	P
1	2009-04-14 20:09:00	0	DTA	20	1	3	P
1	2009-04-14 20:10:00	0	DTA	20	1	3	P
1	2009-04-14 20:11:00	0	DTA	20	1	3	P
1	2009-04-14 20:12:00	0	DTA	20	1	3	P
1	2009-04-14 20:13:00	0	DTA	20	1	3	P
1	2009-04-14 20:14:00	384	DTA	20	1	3	P
1	2009-04-14 20:15:00	12	DTA	20	1	3	P
1	2009-04-14 20:16:00	0	DTA	20	1	3	P
1	2009-04-14 20:17:00	0	DTA	20	1	3	P
1	2009-04-14 20:18:00	0	DTA	20	1	3	P
1	2009-04-14 20:19:00	0	DTA	20	1	3	P
1	2009-04-14 20:20:00	0	DTA	20	1	3	P
1	2009-04-14 20:21:00	0	DTA	20	1	3	P
1	2009-04-14 20:22:00	0	DTA	20	1	3	P
1	2009-04-14 20:23:00	0	DTA	20	1	3	P
1	2009-04-14 20:24:00	0	DTA	20	1	3	P
1	2009-04-14 20:25:00	623	DTA	20	1	3	P
1	2009-04-14 20:26:00	24	DTA	20	1	3	P
1	2009-04-14 20:27:00	0	DTA	20	1	3	P
1	2009-04-14 20:28:00	0	DTA	20	1	3	P
1	2009-04-14 20:29:00	0	DTA	20	1	3	P
1	2009-04-14 20:30:00	0	DTA	20	1	3	P
1	2009-04-14 20:31:00	0	DTA	20	1	3	P
1	2009-04-14 20:32:00	12	DTA	20	1	3	P
1	2009-04-14 20:33:00	623	DTA	20	1	3	P
1	2009-04-14 20:34:00	623	DTA	20	1	3	P
1	2009-04-14 20:35:00	824	DTA	20	1	3	P
1	2009-04-14 20:36:00	12	DTA	20	1	3	P
1	2009-04-14 20:37:00	12	DTA	20	1	3	P
1	2009-04-14 20:38:00	24	DTA	20	1	3	P
1	2009-04-14 20:39:00	0	DTA	20	1	3	P
1	2009-04-14 20:40:00	133	DTA	20	1	3	P
1	2009-04-14 20:41:00	0	DTA	20	1	3	P
1	2009-04-14 20:42:00	0	DTA	20	1	3	P
1	2009-04-14 20:43:00	0	DTA	20	1	3	P
1	2009-04-14 20:44:00	0	DTA	20	1	3	P
1	2009-04-14 20:45:00	72	DTA	20	1	3	P
1	2009-04-14 20:46:00	60	DTA	20	1	3	P
1	2009-04-14 20:47:00	0	DTA	20	1	3	P
1	2009-04-14 20:48:00	0	DTA	20	1	3	P
1	2009-04-14 20:49:00	24	DTA	20	1	3	P
1	2009-04-14 20:50:00	0	DTA	20	1	3	P
1	2009-04-14 20:51:00	0	DTA	20	1	3	P
1	2009-04-14 20:52:00	0	DTA	20	1	3	P
1	2009-04-14 20:53:00	0	DTA	20	1	3	P
1	2009-04-14 20:54:00	48	DTA	20	1	3	P
1	2009-04-14 20:55:00	0	DTA	20	1	3	P
1	2009-04-14 20:56:00	0	DTA	20	1	3	P
1	2009-04-14 20:57:00	0	DTA	20	1	3	P
1	2009-04-14 20:58:00	0	DTA	20	1	3	P
1	2009-04-14 20:59:00	0	DTA	20	1	3	P
1	2009-04-14 21:00:00	0	DTA	20	1	3	P
1	2009-04-14 21:01:00	0	DTA	21	1	3	P
1	2009-04-14 21:02:00	0	DTA	21	1	3	P
1	2009-04-14 21:03:00	0	DTA	21	1	3	P
1	2009-04-14 21:04:00	0	DTA	21	1	3	P
1	2009-04-14 21:05:00	0	DTA	21	1	3	P
1	2009-04-14 21:06:00	0	DTA	21	1	3	P
1	2009-04-14 21:07:00	0	DTA	21	1	3	P
1	2009-04-14 21:08:00	0	DTA	21	1	3	P
1	2009-04-14 21:09:00	0	DTA	21	1	3	P
1	2009-04-14 21:10:00	0	DTA	21	1	3	P
1	2009-04-14 21:11:00	0	DTA	21	1	3	P
1	2009-04-14 21:12:00	0	DTA	21	1	3	P
1	2009-04-14 21:13:00	0	DTA	21	1	3	P
1	2009-04-14 21:14:00	0	DTA	21	1	3	P
1	2009-04-14 21:15:00	0	DTA	21	1	3	P
1	2009-04-14 21:16:00	0	DTA	21	1	3	P
1	2009-04-14 21:17:00	0	DTA	21	1	3	P
1	2009-04-14 21:18:00	0	DTA	21	1	3	P
1	2009-04-14 21:19:00	0	DTA	21	1	3	P
1	2009-04-14 21:20:00	0	DTA	21	1	3	P
1	2009-04-14 21:21:00	0	DTA	21	1	3	P
1	2009-04-14 21:22:00	0	DTA	21	1	3	P
1	2009-04-14 21:23:00	0	DTA	21	1	3	P
1	2009-04-14 21:24:00	0	DTA	21	1	3	P
1	2009-04-14 21:25:00	0	DTA	21	1	3	P
1	2009-04-14 21:26:00	0	DTA	21	1	3	P
1	2009-04-14 21:27:00	0	DTA	21	1	3	P
1	2009-04-14 21:28:00	0	DTA	21	1	3	P
1	2009-04-14 21:29:00	0	DTA	21	1	3	P
1	2009-04-14 21:30:00	0	DTA	21	1	3	P
1	2009-04-14 21:31:00	0	DTA	21	1	3	P
1	2009-04-14 21:32:00	0	DTA	21	1	3	P
1	2009-04-14 21:33:00	0	DTA	21	1	3	P
1	2009-04-14 21:34:00	0	DTA	21	1	3	P
1	2009-04-14 21:35:00	0	DTA	21	1	3	P
1	2009-04-14 21:36:00	0	DTA	21	1	3	P
1	2009-04-14 21:37:00	0	DTA	21	1	3	P
1	2009-04-14 21:38:00	0	DTA	21	1	3	P
1	2009-04-14 21:39:00	0	DTA	21	1	3	P
1	2009-04-14 21:40:00	0	DTA	21	1	3	P
1	2009-04-14 21:41:00	0	DTA	21	1	3	P
1	2009-04-14 21:42:00	0	DTA	21	1	3	P
1	2009-04-14 21:43:00	0	DTA	21	1	3	P
1	2009-04-14 21:44:00	0	DTA	21	1	3	P
1	2009-04-14 21:45:00	12	DTA	21	1	3	P
1	2009-04-14 21:46:00	0	DTA	21	1	3	P
1	2009-04-14 21:47:00	0	DTA	21	1	3	P
1	2009-04-14 21:48:00	0	DTA	21	1	3	P
1	2009-04-14 21:49:00	0	DTA	21	1	3	P
1	2009-04-14 21:50:00	0	DTA	21	1	3	P
1	2009-04-14 21:51:00	0	DTA	21	1	3	P
1	2009-04-14 21:52:00	0	DTA	21	1	3	P
1	2009-04-14 21:53:00	0	DTA	21	1	3	P
1	2009-04-14 21:54:00	0	DTA	21	1	3	P
1	2009-04-14 21:55:00	0	DTA	21	1	3	P
1	2009-04-14 21:56:00	0	DTA	21	1	3	P
1	2009-04-14 21:57:00	0	DTA	21	1	3	P
1	2009-04-14 21:58:00	0	DTA	21	1	3	P
1	2009-04-14 21:59:00	0	DTA	21	1	3	P
1	2009-04-14 22:00:00	0	DTA	21	1	3	P
1	2009-04-14 22:01:00	0	NTA	22	2	3	P
1	2009-04-14 22:02:00	0	NTA	22	2	3	P
1	2009-04-14 22:03:00	0	NTA	22	2	3	P
1	2009-04-14 22:04:00	0	NTA	22	2	3	P
1	2009-04-14 22:05:00	0	NTA	22	2	3	P
1	2009-04-14 22:06:00	0	NTA	22	2	3	P
1	2009-04-14 22:07:00	0	NTA	22	2	3	P
1	2009-04-14 22:08:00	0	NTA	22	2	3	P
1	2009-04-14 22:09:00	0	NTA	22	2	3	P
1	2009-04-14 22:10:00	0	NTA	22	2	3	P
1	2009-04-14 22:11:00	0	NTA	22	2	3	P
1	2009-04-14 22:12:00	0	NTA	22	2	3	P
1	2009-04-14 22:13:00	0	NTA	22	2	3	P
1	2009-04-14 22:14:00	0	NTA	22	2	3	P
1	2009-04-14 22:15:00	0	NTA	22	2	3	P
1	2009-04-14 22:16:00	0	NTA	22	2	3	P
1	2009-04-14 22:17:00	0	NTA	22	2	3	P
1	2009-04-14 22:18:00	0	NTA	22	2	3	P
1	2009-04-14 22:19:00	0	NTA	22	2	3	P
1	2009-04-14 22:20:00	0	NTA	22	2	3	P
1	2009-04-14 22:21:00	0	NTA	22	2	3	P
1	2009-04-14 22:22:00	0	NTA	22	2	3	P
1	2009-04-14 22:23:00	0	NTA	22	2	3	P
1	2009-04-14 22:24:00	0	NTA	22	2	3	P
1	2009-04-14 22:25:00	0	NTA	22	2	3	P
1	2009-04-14 22:26:00	0	NTA	22	2	3	P
1	2009-04-14 22:27:00	0	NTA	22	2	3	P
1	2009-04-14 22:28:00	0	NTA	22	2	3	P
1	2009-04-14 22:29:00	0	NTA	22	2	3	P
1	2009-04-14 22:30:00	0	NTA	22	2	3	P
1	2009-04-14 22:31:00	0	NTA	22	2	3	P
1	2009-04-14 22:32:00	0	NTA	22	2	3	P
1	2009-04-14 22:33:00	0	NTA	22	2	3	P
1	2009-04-14 22:34:00	0	NTA	22	2	3	P
1	2009-04-14 22:35:00	0	NTA	22	2	3	P
1	2009-04-14 22:36:00	0	NTA	22	2	3	P
1	2009-04-14 22:37:00	0	NTA	22	2	3	P
1	2009-04-14 22:38:00	0	NTA	22	2	3	P
1	2009-04-14 22:39:00	0	NTA	22	2	3	P
1	2009-04-14 22:40:00	0	NTA	22	2	3	P
1	2009-04-14 22:41:00	0	NTA	22	2	3	P
1	2009-04-14 22:42:00	0	NTA	22	2	3	P
1	2009-04-14 22:43:00	0	NTA	22	2	3	P
1	2009-04-14 22:44:00	0	NTA	22	2	3	P
1	2009-04-14 22:45:00	0	NTA	22	2	3	P
1	2009-04-14 22:46:00	0	NTA	22	2	3	P
1	2009-04-14 22:47:00	0	NTA	22	2	3	P
1	2009-04-14 22:48:00	12	NTA	22	2	3	P
1	2009-04-14 22:49:00	0	NTA	22	2	3	P
1	2009-04-14 22:50:00	0	NTA	22	2	3	P
1	2009-04-14 22:51:00	0	NTA	22	2	3	P
1	2009-04-14 22:52:00	0	NTA	22	2	3	P
1	2009-04-14 22:53:00	0	NTA	22	2	3	P
1	2009-04-14 22:54:00	0	NTA	22	2	3	P
1	2009-04-14 22:55:00	0	NTA	22	2	3	P
1	2009-04-14 22:56:00	0	NTA	22	2	3	P
1	2009-04-14 22:57:00	0	NTA	22	2	3	P
1	2009-04-14 22:58:00	0	NTA	22	2	3	P
1	2009-04-14 22:59:00	0	NTA	22	2	3	P
1	2009-04-14 23:00:00	0	NTA	22	2	3	P
1	2009-04-14 23:01:00	0	NTA	23	2	3	P
1	2009-04-14 23:02:00	0	NTA	23	2	3	P
1	2009-04-14 23:03:00	0	NTA	23	2	3	P
1	2009-04-14 23:04:00	0	NTA	23	2	3	P
1	2009-04-14 23:05:00	0	NTA	23	2	3	P
1	2009-04-14 23:06:00	0	NTA	23	2	3	P
1	2009-04-14 23:07:00	0	NTA	23	2	3	P
1	2009-04-14 23:08:00	0	NTA	23	2	3	P
1	2009-04-14 23:09:00	0	NTA	23	2	3	P
1	2009-04-14 23:10:00	0	NTA	23	2	3	P
1	2009-04-14 23:11:00	171	NTA	23	2	3	P
1	2009-04-14 23:12:00	0	NTA	23	2	3	P
1	2009-04-14 23:13:00	0	NTA	23	2	3	P
1	2009-04-14 23:14:00	0	NTA	23	2	3	P
1	2009-04-14 23:15:00	0	NTA	23	2	3	P
1	2009-04-14 23:16:00	0	NTA	23	2	3	P
1	2009-04-14 23:17:00	0	NTA	23	2	3	P
1	2009-04-14 23:18:00	0	NTA	23	2	3	P
1	2009-04-14 23:19:00	0	NTA	23	2	3	P
1	2009-04-14 23:20:00	0	NTA	23	2	3	P
1	2009-04-14 23:21:00	0	NTA	23	2	3	P
1	2009-04-14 23:22:00	0	NTA	23	2	3	P
1	2009-04-14 23:23:00	0	NTA	23	2	3	P
1	2009-04-14 23:24:00	0	NTA	23	2	3	P
1	2009-04-14 23:25:00	0	NTA	23	2	3	P
1	2009-04-14 23:26:00	0	NTA	23	2	3	P
1	2009-04-14 23:27:00	0	NTA	23	2	3	P
1	2009-04-14 23:28:00	0	NTA	23	2	3	P
1	2009-04-14 23:29:00	0	NTA	23	2	3	P
1	2009-04-14 23:30:00	0	NTA	23	2	3	P
1	2009-04-14 23:31:00	0	NTA	23	2	3	P
1	2009-04-14 23:32:00	0	NTA	23	2	3	P
1	2009-04-14 23:33:00	0	NTA	23	2	3	P
1	2009-04-14 23:34:00	0	NTA	23	2	3	P
1	2009-04-14 23:35:00	0	NTA	23	2	3	P
1	2009-04-14 23:36:00	0	NTA	23	2	3	P
1	2009-04-14 23:37:00	0	NTA	23	2	3	P
1	2009-04-14 23:38:00	0	NTA	23	2	3	P
1	2009-04-14 23:39:00	0	NTA	23	2	3	P
1	2009-04-14 23:40:00	0	NTA	23	2	3	P
1	2009-04-14 23:41:00	0	NTA	23	2	3	P
1	2009-04-14 23:42:00	0	NTA	23	2	3	P
1	2009-04-14 23:43:00	0	NTA	23	2	3	P
1	2009-04-14 23:44:00	0	NTA	23	2	3	P
1	2009-04-14 23:45:00	0	NTA	23	2	3	P
1	2009-04-14 23:46:00	0	NTA	23	2	3	P
1	2009-04-14 23:47:00	0	NTA	23	2	3	P
1	2009-04-14 23:48:00	0	NTA	23	2	3	P
1	2009-04-14 23:49:00	0	NTA	23	2	3	P
1	2009-04-14 23:50:00	0	NTA	23	2	3	P
1	2009-04-14 23:51:00	0	NTA	23	2	3	P
1	2009-04-14 23:52:00	0	NTA	23	2	3	P
1	2009-04-14 23:53:00	0	NTA	23	2	3	P
1	2009-04-14 23:54:00	0	NTA	23	2	3	P
1	2009-04-14 23:55:00	0	NTA	23	2	3	P
1	2009-04-14 23:56:00	0	NTA	23	2	3	P
1	2009-04-14 23:57:00	0	NTA	23	2	3	P
1	2009-04-14 23:58:00	0	NTA	23	2	3	P
1	2009-04-14 23:59:00	0	NTA	23	2	3	P
1	2009-04-15	0	NTA	23	2	3	P
1	2009-04-15 00:01:00	0	NTA	0	2	4	P
1	2009-04-15 00:02:00	0	NTA	0	2	4	P
1	2009-04-15 00:03:00	0	NTA	0	2	4	P
1	2009-04-15 00:04:00	12	NTA	0	2	4	P
1	2009-04-15 00:05:00	0	NTA	0	2	4	P
1	2009-04-15 00:06:00	0	NTA	0	2	4	P
1	2009-04-15 00:07:00	0	NTA	0	2	4	P
1	2009-04-15 00:08:00	0	NTA	0	2	4	P
1	2009-04-15 00:09:00	0	NTA	0	2	4	P
1	2009-04-15 00:10:00	0	NTA	0	2	4	P
1	2009-04-15 00:11:00	0	NTA	0	2	4	P
1	2009-04-15 00:12:00	0	NTA	0	2	4	P
1	2009-04-15 00:13:00	0	NTA	0	2	4	P
1	2009-04-15 00:14:00	0	NTA	0	2	4	P
1	2009-04-15 00:15:00	0	NTA	0	2	4	P
1	2009-04-15 00:16:00	0	NTA	0	2	4	P
1	2009-04-15 00:17:00	0	NTA	0	2	4	P
1	2009-04-15 00:18:00	0	NTA	0	2	4	P
1	2009-04-15 00:19:00	0	NTA	0	2	4	P
1	2009-04-15 00:20:00	0	NTA	0	2	4	P
1	2009-04-15 00:21:00	0	NTA	0	2	4	P
1	2009-04-15 00:22:00	0	NTA	0	2	4	P
1	2009-04-15 00:23:00	0	NTA	0	2	4	P
1	2009-04-15 00:24:00	0	NTA	0	2	4	P
1	2009-04-15 00:25:00	0	NTA	0	2	4	P
1	2009-04-15 00:26:00	0	NTA	0	2	4	P
1	2009-04-15 00:27:00	0	NTA	0	2	4	P
1	2009-04-15 00:28:00	0	NTA	0	2	4	P
1	2009-04-15 00:29:00	0	NTA	0	2	4	P
1	2009-04-15 00:30:00	0	NTA	0	2	4	P
1	2009-04-15 00:31:00	0	NTA	0	2	4	P
1	2009-04-15 00:32:00	0	NTA	0	2	4	P
1	2009-04-15 00:33:00	0	NTA	0	2	4	P
1	2009-04-15 00:34:00	0	NTA	0	2	4	P
1	2009-04-15 00:35:00	12	NTA	0	2	4	P
1	2009-04-15 00:36:00	0	NTA	0	2	4	P
1	2009-04-15 00:37:00	0	NTA	0	2	4	P
1	2009-04-15 00:38:00	0	NTA	0	2	4	P
1	2009-04-15 00:39:00	0	NTA	0	2	4	P
1	2009-04-15 00:40:00	0	NTA	0	2	4	P
1	2009-04-15 00:41:00	0	NTA	0	2	4	P
1	2009-04-15 00:42:00	0	NTA	0	2	4	P
1	2009-04-15 00:43:00	0	NTA	0	2	4	P
1	2009-04-15 00:44:00	0	NTA	0	2	4	P
1	2009-04-15 00:45:00	0	NTA	0	2	4	P
1	2009-04-15 00:46:00	0	NTA	0	2	4	P
1	2009-04-15 00:47:00	0	NTA	0	2	4	P
1	2009-04-15 00:48:00	0	NTA	0	2	4	P
1	2009-04-15 00:49:00	0	NTA	0	2	4	P
1	2009-04-15 00:50:00	0	NTA	0	2	4	P
1	2009-04-15 00:51:00	0	NTA	0	2	4	P
1	2009-04-15 00:52:00	0	NTA	0	2	4	P
1	2009-04-15 00:53:00	0	NTA	0	2	4	P
1	2009-04-15 00:54:00	0	NTA	0	2	4	P
1	2009-04-15 00:55:00	0	NTA	0	2	4	P
1	2009-04-15 00:56:00	0	NTA	0	2	4	P
1	2009-04-15 00:57:00	0	NTA	0	2	4	P
1	2009-04-15 00:58:00	0	NTA	0	2	4	P
1	2009-04-15 00:59:00	0	NTA	0	2	4	P
1	2009-04-15 01:00:00	0	NTA	0	2	4	P
1	2009-04-15 01:01:00	0	NTA	1	2	4	P
1	2009-04-15 01:02:00	0	NTA	1	2	4	P
1	2009-04-15 01:03:00	0	NTA	1	2	4	P
1	2009-04-15 01:04:00	0	NTA	1	2	4	P
1	2009-04-15 01:05:00	0	NTA	1	2	4	P
1	2009-04-15 01:06:00	0	NTA	1	2	4	P
1	2009-04-15 01:07:00	0	NTA	1	2	4	P
1	2009-04-15 01:08:00	0	NTA	1	2	4	P
1	2009-04-15 01:09:00	0	NTA	1	2	4	P
1	2009-04-15 01:10:00	0	NTA	1	2	4	P
1	2009-04-15 01:11:00	0	NTA	1	2	4	P
1	2009-04-15 01:12:00	0	NTA	1	2	4	P
1	2009-04-15 01:13:00	0	NTA	1	2	4	P
1	2009-04-15 01:14:00	0	NTA	1	2	4	P
1	2009-04-15 01:15:00	0	NTA	1	2	4	P
1	2009-04-15 01:16:00	0	NTA	1	2	4	P
1	2009-04-15 01:17:00	0	NTA	1	2	4	P
1	2009-04-15 01:18:00	0	NTA	1	2	4	P
1	2009-04-15 01:19:00	0	NTA	1	2	4	P
1	2009-04-15 01:20:00	24	NTA	1	2	4	P
1	2009-04-15 01:21:00	0	NTA	1	2	4	P
1	2009-04-15 01:22:00	333	NTA	1	2	4	P
1	2009-04-15 01:23:00	36	NTA	1	2	4	P
1	2009-04-15 01:24:00	0	NTA	1	2	4	P
1	2009-04-15 01:25:00	0	NTA	1	2	4	P
1	2009-04-15 01:26:00	0	NTA	1	2	4	P
1	2009-04-15 01:27:00	0	NTA	1	2	4	P
1	2009-04-15 01:28:00	0	NTA	1	2	4	P
1	2009-04-15 01:29:00	12	NTA	1	2	4	P
1	2009-04-15 01:30:00	0	NTA	1	2	4	P
1	2009-04-15 01:31:00	0	NTA	1	2	4	P
1	2009-04-15 01:32:00	0	NTA	1	2	4	P
1	2009-04-15 01:33:00	0	NTA	1	2	4	P
1	2009-04-15 01:34:00	0	NTA	1	2	4	P
1	2009-04-15 01:35:00	0	NTA	1	2	4	P
1	2009-04-15 01:36:00	0	NTA	1	2	4	P
1	2009-04-15 01:37:00	0	NTA	1	2	4	P
1	2009-04-15 01:38:00	0	NTA	1	2	4	P
1	2009-04-15 01:39:00	0	NTA	1	2	4	P
1	2009-04-15 01:40:00	0	NTA	1	2	4	P
1	2009-04-15 01:41:00	12	NTA	1	2	4	P
1	2009-04-15 01:42:00	0	NTA	1	2	4	P
1	2009-04-15 01:43:00	0	NTA	1	2	4	P
1	2009-04-15 01:44:00	0	NTA	1	2	4	P
1	2009-04-15 01:45:00	0	NTA	1	2	4	P
1	2009-04-15 01:46:00	0	NTA	1	2	4	P
1	2009-04-15 01:47:00	0	NTA	1	2	4	P
1	2009-04-15 01:48:00	0	NTA	1	2	4	P
1	2009-04-15 01:49:00	0	NTA	1	2	4	P
1	2009-04-15 01:50:00	0	NTA	1	2	4	P
1	2009-04-15 01:51:00	0	NTA	1	2	4	P
1	2009-04-15 01:52:00	0	NTA	1	2	4	P
1	2009-04-15 01:53:00	0	NTA	1	2	4	P
1	2009-04-15 01:54:00	0	NTA	1	2	4	P
1	2009-04-15 01:55:00	0	NTA	1	2	4	P
1	2009-04-15 01:56:00	0	NTA	1	2	4	P
1	2009-04-15 01:57:00	0	NTA	1	2	4	P
1	2009-04-15 01:58:00	0	NTA	1	2	4	P
1	2009-04-15 01:59:00	0	NTA	1	2	4	P
1	2009-04-15 02:00:00	0	NTA	1	2	4	P
1	2009-04-15 02:01:00	0	NTA	2	2	4	P
1	2009-04-15 02:02:00	0	NTA	2	2	4	P
1	2009-04-15 02:03:00	0	NTA	2	2	4	P
1	2009-04-15 02:04:00	0	NTA	2	2	4	P
1	2009-04-15 02:05:00	0	NTA	2	2	4	P
1	2009-04-15 02:06:00	0	NTA	2	2	4	P
1	2009-04-15 02:07:00	0	NTA	2	2	4	P
1	2009-04-15 02:08:00	0	NTA	2	2	4	P
1	2009-04-15 02:09:00	0	NTA	2	2	4	P
1	2009-04-15 02:10:00	0	NTA	2	2	4	P
1	2009-04-15 02:11:00	0	NTA	2	2	4	P
1	2009-04-15 02:12:00	0	NTA	2	2	4	P
1	2009-04-15 02:13:00	0	NTA	2	2	4	P
1	2009-04-15 02:14:00	0	NTA	2	2	4	P
1	2009-04-15 02:15:00	0	NTA	2	2	4	P
1	2009-04-15 02:16:00	24	NTA	2	2	4	P
1	2009-04-15 02:17:00	0	NTA	2	2	4	P
1	2009-04-15 02:18:00	0	NTA	2	2	4	P
1	2009-04-15 02:19:00	0	NTA	2	2	4	P
1	2009-04-15 02:20:00	0	NTA	2	2	4	P
1	2009-04-15 02:21:00	0	NTA	2	2	4	P
1	2009-04-15 02:22:00	0	NTA	2	2	4	P
1	2009-04-15 02:23:00	0	NTA	2	2	4	P
1	2009-04-15 02:24:00	0	NTA	2	2	4	P
1	2009-04-15 02:25:00	0	NTA	2	2	4	P
1	2009-04-15 02:26:00	36	NTA	2	2	4	P
1	2009-04-15 02:27:00	0	NTA	2	2	4	P
1	2009-04-15 02:28:00	0	NTA	2	2	4	P
1	2009-04-15 02:29:00	0	NTA	2	2	4	P
1	2009-04-15 02:30:00	0	NTA	2	2	4	P
1	2009-04-15 02:31:00	0	NTA	2	2	4	P
1	2009-04-15 02:32:00	0	NTA	2	2	4	P
1	2009-04-15 02:33:00	0	NTA	2	2	4	P
1	2009-04-15 02:34:00	0	NTA	2	2	4	P
1	2009-04-15 02:35:00	0	NTA	2	2	4	P
1	2009-04-15 02:36:00	0	NTA	2	2	4	P
1	2009-04-15 02:37:00	0	NTA	2	2	4	P
1	2009-04-15 02:38:00	0	NTA	2	2	4	P
1	2009-04-15 02:39:00	0	NTA	2	2	4	P
1	2009-04-15 02:40:00	0	NTA	2	2	4	P
1	2009-04-15 02:41:00	0	NTA	2	2	4	P
1	2009-04-15 02:42:00	0	NTA	2	2	4	P
1	2009-04-15 02:43:00	0	NTA	2	2	4	P
1	2009-04-15 02:44:00	0	NTA	2	2	4	P
1	2009-04-15 02:45:00	0	NTA	2	2	4	P
1	2009-04-15 02:46:00	0	NTA	2	2	4	P
1	2009-04-15 02:47:00	0	NTA	2	2	4	P
1	2009-04-15 02:48:00	0	NTA	2	2	4	P
1	2009-04-15 02:49:00	0	NTA	2	2	4	P
1	2009-04-15 02:50:00	0	NTA	2	2	4	P
1	2009-04-15 02:51:00	0	NTA	2	2	4	P
1	2009-04-15 02:52:00	0	NTA	2	2	4	P
1	2009-04-15 02:53:00	0	NTA	2	2	4	P
1	2009-04-15 02:54:00	0	NTA	2	2	4	P
1	2009-04-15 02:55:00	0	NTA	2	2	4	P
1	2009-04-15 02:56:00	0	NTA	2	2	4	P
1	2009-04-15 02:57:00	0	NTA	2	2	4	P
1	2009-04-15 02:58:00	0	NTA	2	2	4	P
1	2009-04-15 02:59:00	0	NTA	2	2	4	P
1	2009-04-15 03:00:00	0	NTA	2	2	4	P
1	2009-04-15 03:01:00	0	NTA	3	2	4	P
1	2009-04-15 03:02:00	0	NTA	3	2	4	P
1	2009-04-15 03:03:00	0	NTA	3	2	4	P
1	2009-04-15 03:04:00	12	NTA	3	2	4	P
1	2009-04-15 03:05:00	60	NTA	3	2	4	P
1	2009-04-15 03:06:00	0	NTA	3	2	4	P
1	2009-04-15 03:07:00	0	NTA	3	2	4	P
1	2009-04-15 03:08:00	0	NTA	3	2	4	P
1	2009-04-15 03:09:00	0	NTA	3	2	4	P
1	2009-04-15 03:10:00	0	NTA	3	2	4	P
1	2009-04-15 03:11:00	0	NTA	3	2	4	P
1	2009-04-15 03:12:00	0	NTA	3	2	4	P
1	2009-04-15 03:13:00	0	NTA	3	2	4	P
1	2009-04-15 03:14:00	0	NTA	3	2	4	P
1	2009-04-15 03:15:00	0	NTA	3	2	4	P
1	2009-04-15 03:16:00	0	NTA	3	2	4	P
1	2009-04-15 03:17:00	0	NTA	3	2	4	P
1	2009-04-15 03:18:00	0	NTA	3	2	4	P
1	2009-04-15 03:19:00	12	NTA	3	2	4	P
1	2009-04-15 03:20:00	0	NTA	3	2	4	P
1	2009-04-15 03:21:00	0	NTA	3	2	4	P
1	2009-04-15 03:22:00	0	NTA	3	2	4	P
1	2009-04-15 03:23:00	0	NTA	3	2	4	P
1	2009-04-15 03:24:00	0	NTA	3	2	4	P
1	2009-04-15 03:25:00	0	NTA	3	2	4	P
1	2009-04-15 03:26:00	0	NTA	3	2	4	P
1	2009-04-15 03:27:00	12	NTA	3	2	4	P
1	2009-04-15 03:28:00	0	NTA	3	2	4	P
1	2009-04-15 03:29:00	0	NTA	3	2	4	P
1	2009-04-15 03:30:00	0	NTA	3	2	4	P
1	2009-04-15 03:31:00	0	NTA	3	2	4	P
1	2009-04-15 03:32:00	0	NTA	3	2	4	P
1	2009-04-15 03:33:00	0	NTA	3	2	4	P
1	2009-04-15 03:34:00	0	NTA	3	2	4	P
1	2009-04-15 03:35:00	12	NTA	3	2	4	P
1	2009-04-15 03:36:00	72	NTA	3	2	4	P
1	2009-04-15 03:37:00	0	NTA	3	2	4	P
1	2009-04-15 03:38:00	0	NTA	3	2	4	P
1	2009-04-15 03:39:00	12	NTA	3	2	4	P
1	2009-04-15 03:40:00	12	NTA	3	2	4	P
1	2009-04-15 03:41:00	0	NTA	3	2	4	P
1	2009-04-15 03:42:00	0	NTA	3	2	4	P
1	2009-04-15 03:43:00	0	NTA	3	2	4	P
1	2009-04-15 03:44:00	0	NTA	3	2	4	P
1	2009-04-15 03:45:00	0	NTA	3	2	4	P
1	2009-04-15 03:46:00	0	NTA	3	2	4	P
1	2009-04-15 03:47:00	0	NTA	3	2	4	P
1	2009-04-15 03:48:00	0	NTA	3	2	4	P
1	2009-04-15 03:49:00	0	NTA	3	2	4	P
1	2009-04-15 03:50:00	0	NTA	3	2	4	P
1	2009-04-15 03:51:00	0	NTA	3	2	4	P
1	2009-04-15 03:52:00	0	NTA	3	2	4	P
1	2009-04-15 03:53:00	0	NTA	3	2	4	P
1	2009-04-15 03:54:00	0	NTA	3	2	4	P
1	2009-04-15 03:55:00	0	NTA	3	2	4	P
1	2009-04-15 03:56:00	0	NTA	3	2	4	P
1	2009-04-15 03:57:00	0	NTA	3	2	4	P
1	2009-04-15 03:58:00	0	NTA	3	2	4	P
1	2009-04-15 03:59:00	0	NTA	3	2	4	P
1	2009-04-15 04:00:00	0	NTA	3	2	4	P
1	2009-04-15 04:01:00	0	NTA	4	2	4	P
1	2009-04-15 04:02:00	0	NTA	4	2	4	P
1	2009-04-15 04:03:00	0	NTA	4	2	4	P
1	2009-04-15 04:04:00	0	NTA	4	2	4	P
1	2009-04-15 04:05:00	0	NTA	4	2	4	P
1	2009-04-15 04:06:00	0	NTA	4	2	4	P
1	2009-04-15 04:07:00	0	NTA	4	2	4	P
1	2009-04-15 04:08:00	0	NTA	4	2	4	P
1	2009-04-15 04:09:00	0	NTA	4	2	4	P
1	2009-04-15 04:10:00	0	NTA	4	2	4	P
1	2009-04-15 04:11:00	0	NTA	4	2	4	P
1	2009-04-15 04:12:00	0	NTA	4	2	4	P
1	2009-04-15 04:13:00	0	NTA	4	2	4	P
1	2009-04-15 04:14:00	0	NTA	4	2	4	P
1	2009-04-15 04:15:00	0	NTA	4	2	4	P
1	2009-04-15 04:16:00	0	NTA	4	2	4	P
1	2009-04-15 04:17:00	0	NTA	4	2	4	P
1	2009-04-15 04:18:00	0	NTA	4	2	4	P
1	2009-04-15 04:19:00	0	NTA	4	2	4	P
1	2009-04-15 04:20:00	0	NTA	4	2	4	P
1	2009-04-15 04:21:00	0	NTA	4	2	4	P
1	2009-04-15 04:22:00	0	NTA	4	2	4	P
1	2009-04-15 04:23:00	0	NTA	4	2	4	P
1	2009-04-15 04:24:00	0	NTA	4	2	4	P
1	2009-04-15 04:25:00	0	NTA	4	2	4	P
1	2009-04-15 04:26:00	0	NTA	4	2	4	P
1	2009-04-15 04:27:00	0	NTA	4	2	4	P
1	2009-04-15 04:28:00	0	NTA	4	2	4	P
1	2009-04-15 04:29:00	0	NTA	4	2	4	P
1	2009-04-15 04:30:00	0	NTA	4	2	4	P
1	2009-04-15 04:31:00	0	NTA	4	2	4	P
1	2009-04-15 04:32:00	0	NTA	4	2	4	P
1	2009-04-15 04:33:00	0	NTA	4	2	4	P
1	2009-04-15 04:34:00	0	NTA	4	2	4	P
1	2009-04-15 04:35:00	0	NTA	4	2	4	P
1	2009-04-15 04:36:00	0	NTA	4	2	4	P
1	2009-04-15 04:37:00	0	NTA	4	2	4	P
1	2009-04-15 04:38:00	0	NTA	4	2	4	P
1	2009-04-15 04:39:00	0	NTA	4	2	4	P
1	2009-04-15 04:40:00	0	NTA	4	2	4	P
1	2009-04-15 04:41:00	0	NTA	4	2	4	P
1	2009-04-15 04:42:00	0	NTA	4	2	4	P
1	2009-04-15 04:43:00	0	NTA	4	2	4	P
1	2009-04-15 04:44:00	0	NTA	4	2	4	P
1	2009-04-15 04:45:00	0	NTA	4	2	4	P
1	2009-04-15 04:46:00	0	NTA	4	2	4	P
1	2009-04-15 04:47:00	0	NTA	4	2	4	P
1	2009-04-15 04:48:00	0	NTA	4	2	4	P
1	2009-04-15 04:49:00	0	NTA	4	2	4	P
1	2009-04-15 04:50:00	0	NTA	4	2	4	P
1	2009-04-15 04:51:00	0	NTA	4	2	4	P
1	2009-04-15 04:52:00	0	NTA	4	2	4	P
1	2009-04-15 04:53:00	0	NTA	4	2	4	P
1	2009-04-15 04:54:00	0	NTA	4	2	4	P
1	2009-04-15 04:55:00	0	NTA	4	2	4	P
1	2009-04-15 04:56:00	0	NTA	4	2	4	P
1	2009-04-15 04:57:00	0	NTA	4	2	4	P
1	2009-04-15 04:58:00	0	NTA	4	2	4	P
1	2009-04-15 04:59:00	0	NTA	4	2	4	P
1	2009-04-15 05:00:00	0	NTA	4	2	4	P
1	2009-04-15 05:01:00	0	NTA	5	2	4	P
1	2009-04-15 05:02:00	0	NTA	5	2	4	P
1	2009-04-15 05:03:00	0	NTA	5	2	4	P
1	2009-04-15 05:04:00	0	NTA	5	2	4	P
1	2009-04-15 05:05:00	0	NTA	5	2	4	P
1	2009-04-15 05:06:00	0	NTA	5	2	4	P
1	2009-04-15 05:07:00	0	NTA	5	2	4	P
1	2009-04-15 05:08:00	0	NTA	5	2	4	P
1	2009-04-15 05:09:00	0	NTA	5	2	4	P
1	2009-04-15 05:10:00	0	NTA	5	2	4	P
1	2009-04-15 05:11:00	0	NTA	5	2	4	P
1	2009-04-15 05:12:00	0	NTA	5	2	4	P
1	2009-04-15 05:13:00	0	NTA	5	2	4	P
1	2009-04-15 05:14:00	0	NTA	5	2	4	P
1	2009-04-15 05:15:00	0	NTA	5	2	4	P
1	2009-04-15 05:16:00	0	NTA	5	2	4	P
1	2009-04-15 05:17:00	0	NTA	5	2	4	P
1	2009-04-15 05:18:00	0	NTA	5	2	4	P
1	2009-04-15 05:19:00	0	NTA	5	2	4	P
1	2009-04-15 05:20:00	0	NTA	5	2	4	P
1	2009-04-15 05:21:00	0	NTA	5	2	4	P
1	2009-04-15 05:22:00	0	NTA	5	2	4	P
1	2009-04-15 05:23:00	0	NTA	5	2	4	P
1	2009-04-15 05:24:00	0	NTA	5	2	4	P
1	2009-04-15 05:25:00	0	NTA	5	2	4	P
1	2009-04-15 05:26:00	0	NTA	5	2	4	P
1	2009-04-15 05:27:00	0	NTA	5	2	4	P
1	2009-04-15 05:28:00	0	NTA	5	2	4	P
1	2009-04-15 05:29:00	0	NTA	5	2	4	P
1	2009-04-15 05:30:00	0	NTA	5	2	4	P
1	2009-04-15 05:31:00	0	NTA	5	2	4	P
1	2009-04-15 05:32:00	0	NTA	5	2	4	P
1	2009-04-15 05:33:00	12	NTA	5	2	4	P
1	2009-04-15 05:34:00	0	NTA	5	2	4	P
1	2009-04-15 05:35:00	60	NTA	5	2	4	P
1	2009-04-15 05:36:00	0	NTA	5	2	4	P
1	2009-04-15 05:37:00	0	NTA	5	2	4	P
1	2009-04-15 05:38:00	12	NTA	5	2	4	P
1	2009-04-15 05:39:00	0	NTA	5	2	4	P
1	2009-04-15 05:40:00	0	NTA	5	2	4	P
1	2009-04-15 05:41:00	0	NTA	5	2	4	P
1	2009-04-15 05:42:00	0	NTA	5	2	4	P
1	2009-04-15 05:43:00	0	NTA	5	2	4	P
1	2009-04-15 05:44:00	0	NTA	5	2	4	P
1	2009-04-15 05:45:00	0	NTA	5	2	4	P
1	2009-04-15 05:46:00	0	NTA	5	2	4	P
1	2009-04-15 05:47:00	0	NTA	5	2	4	P
1	2009-04-15 05:48:00	0	NTA	5	2	4	P
1	2009-04-15 05:49:00	0	NTA	5	2	4	P
[truncated: 36,536 more rows]

## Sheet: Pivot NTA
Peak DTA Time?	(All)
DTA vs NTA	NTA
Average of Activity	Column Labels
Row Labels	1	2	3	4	5	6	7	8	9	10	11	12	13	14	Grand Total
1	5.62381	2.75273	1.9	37.4952	4.56394	4.24872	11.4147	8.14717	8.06706	4.61961	7.06167	45.441	6.8875	2.20808	11.2302
2	4.95152	54.2146	4.90652	11.0783	14.2037	61.7574	2.27647	5.70392	1.60404	6.02342	12.3414	13.8275	3.10286	10.5281	14.5197
Grand Total	5.328	26.735	3.283	23.4062	9.6824	36.7536	7.71587	6.94904	4.87425	5.35117	9.4484	29.8045	4.91045	6.66103	12.8468

## Sheet: Pivot DTA
Peak DTA Time?	(All)
DTA vs NTA	DTA
Average of Activity	Column Labels
Row Labels	1	2	3	4	5	6	7	8	9	10	11	12	13	Grand Total
1	114.07	264.485	130.679	104.868	220.866	169.845	200.379	127.745	211.667	160.785	185.791	249.661	223.545	181.996
2	72.2876	98.5177	221.59	95.0022	227.138	110.584	69.5215	280.186	366.954	110.113	121.068	278.948	68.5076	161.947
Grand Total	92.0273	179.736	176.634	100.055	223.704	138.049	129.211	202.361	288.529	134.402	152.966	264.329	149.283	171.895

## Sheet: Pivot PeakDTA
Peak DTA Time?	Peak DTA
DTA vs NTA	DTA
Average of Activity	Column Labels
Row Labels	1	2	3	4	5	6	7	8	9	10	11	12	13	Grand Total
1	120.728	374.667	161.392	92.8194	408.614	111.067	40.2028	57.1889	35.3056	114.358	107.456	405.919	133.347	166.39
2	44.6972	51.4056	117.003	137.272	487.958	135.628	54.8556	202.375	120.722	151.014	236.203	352.575	56.1583	165.221
Grand Total	82.7125	213.036	139.197	115.046	448.286	123.347	47.5292	129.782	78.0139	132.686	171.829	379.247	94.7528	165.805

## Sheet: 4.13.09
Actogram, Copy Raw Data, All Days
Identity:	Nemo
Filename:	E:\Active Research Files\Nighttime Activity\cases\Nemo\Nemo 4.13.09.AWC
Gender:	M
Age:	9
Height:	91.4 cm	36.0 in
Weight:	34.0 kg	75.0 lbs
Start Date:	13-Apr-2009 (Mon)
Start Time:	18:00:00
Interval:	1.00 mins
Date Stamp:	Time Stamp:	Activity Data:	Marker Press:
2009-04-13	00:00:00	0
2009-04-13	00:01:00	0
2009-04-13	00:02:00	0
2009-04-13	00:03:00	0
2009-04-13	00:04:00	0
2009-04-13	00:05:00	0
2009-04-13	00:06:00	0
2009-04-13	00:07:00	0
2009-04-13	00:08:00	0
2009-04-13	00:09:00	0
2009-04-13	00:10:00	0
2009-04-13	00:11:00	0
2009-04-13	00:12:00	0
2009-04-13	00:13:00	0
2009-04-13	00:14:00	0
2009-04-13	00:15:00	0
2009-04-13	00:16:00	0
2009-04-13	00:17:00	0
2009-04-13	00:18:00	0
2009-04-13	00:19:00	0
2009-04-13	00:20:00	0
2009-04-13	00:21:00	0
2009-04-13	00:22:00	0
2009-04-13	00:23:00	0
2009-04-13	00:24:00	0
2009-04-13	00:25:00	0
2009-04-13	00:26:00	0
2009-04-13	00:27:00	0
2009-04-13	00:28:00	0
2009-04-13	00:29:00	0
2009-04-13	00:30:00	0
2009-04-13	00:31:00	0
2009-04-13	00:32:00	0
2009-04-13	00:33:00	0
2009-04-13	00:34:00	0
2009-04-13	00:35:00	0
2009-04-13	00:36:00	0
2009-04-13	00:37:00	0
2009-04-13	00:38:00	0
2009-04-13	00:39:00	0
2009-04-13	00:40:00	0
2009-04-13	00:41:00	0
2009-04-13	00:42:00	0
2009-04-13	00:43:00	0
2009-04-13	00:44:00	0
2009-04-13	00:45:00	0
2009-04-13	00:46:00	0
2009-04-13	00:47:00	0
2009-04-13	00:48:00	0
2009-04-13	00:49:00	0
2009-04-13	00:50:00	0
2009-04-13	00:51:00	0
2009-04-13	00:52:00	0
2009-04-13	00:53:00	0
2009-04-13	00:54:00	0
2009-04-13	00:55:00	0
2009-04-13	00:56:00	0
2009-04-13	00:57:00	0
2009-04-13	00:58:00	0
2009-04-13	00:59:00	0
2009-04-13	01:00:00	0
2009-04-13	01:01:00	0
2009-04-13	01:02:00	0
2009-04-13	01:03:00	0
2009-04-13	01:04:00	0
2009-04-13	01:05:00	0
2009-04-13	01:06:00	0
2009-04-13	01:07:00	0
2009-04-13	01:08:00	0
2009-04-13	01:09:00	0
2009-04-13	01:10:00	0
2009-04-13	01:11:00	0
2009-04-13	01:12:00	0
2009-04-13	01:13:00	0
2009-04-13	01:14:00	0
2009-04-13	01:15:00	0
2009-04-13	01:16:00	0
2009-04-13	01:17:00	0
2009-04-13	01:18:00	0
2009-04-13	01:19:00	0
2009-04-13	01:20:00	0
2009-04-13	01:21:00	0
2009-04-13	01:22:00	0
2009-04-13	01:23:00	0
2009-04-13	01:24:00	0
2009-04-13	01:25:00	0
2009-04-13	01:26:00	0
2009-04-13	01:27:00	0
2009-04-13	01:28:00	0
2009-04-13	01:29:00	0
2009-04-13	01:30:00	0
2009-04-13	01:31:00	0
2009-04-13	01:32:00	0
2009-04-13	01:33:00	0
2009-04-13	01:34:00	0
2009-04-13	01:35:00	0
2009-04-13	01:36:00	0
2009-04-13	01:37:00	0
2009-04-13	01:38:00	0
2009-04-13	01:39:00	0
2009-04-13	01:40:00	0
2009-04-13	01:41:00	0
2009-04-13	01:42:00	0
2009-04-13	01:43:00	0
2009-04-13	01:44:00	0
2009-04-13	01:45:00	0
2009-04-13	01:46:00	0
2009-04-13	01:47:00	0
2009-04-13	01:48:00	0
2009-04-13	01:49:00	0
2009-04-13	01:50:00	0
2009-04-13	01:51:00	0
2009-04-13	01:52:00	0
2009-04-13	01:53:00	0
2009-04-13	01:54:00	0
2009-04-13	01:55:00	0
2009-04-13	01:56:00	0
2009-04-13	01:57:00	0
2009-04-13	01:58:00	0
2009-04-13	01:59:00	0
2009-04-13	02:00:00	0
2009-04-13	02:01:00	0
2009-04-13	02:02:00	0
2009-04-13	02:03:00	0
2009-04-13	02:04:00	0
2009-04-13	02:05:00	0
2009-04-13	02:06:00	0
2009-04-13	02:07:00	0
2009-04-13	02:08:00	0
2009-04-13	02:09:00	0
2009-04-13	02:10:00	0
2009-04-13	02:11:00	0
2009-04-13	02:12:00	0
2009-04-13	02:13:00	0
2009-04-13	02:14:00	0
2009-04-13	02:15:00	0
2009-04-13	02:16:00	0
2009-04-13	02:17:00	0
2009-04-13	02:18:00	0
2009-04-13	02:19:00	0
2009-04-13	02:20:00	0
2009-04-13	02:21:00	0
2009-04-13	02:22:00	0
2009-04-13	02:23:00	0
2009-04-13	02:24:00	0
2009-04-13	02:25:00	0
2009-04-13	02:26:00	0
2009-04-13	02:27:00	0
2009-04-13	02:28:00	0
2009-04-13	02:29:00	0
2009-04-13	02:30:00	0
2009-04-13	02:31:00	0
2009-04-13	02:32:00	0
2009-04-13	02:33:00	0
2009-04-13	02:34:00	0
2009-04-13	02:35:00	0
2009-04-13	02:36:00	0
2009-04-13	02:37:00	0
2009-04-13	02:38:00	0
2009-04-13	02:39:00	0
2009-04-13	02:40:00	0
2009-04-13	02:41:00	0
2009-04-13	02:42:00	0
2009-04-13	02:43:00	0
2009-04-13	02:44:00	0
2009-04-13	02:45:00	0
2009-04-13	02:46:00	0
2009-04-13	02:47:00	0
2009-04-13	02:48:00	0
2009-04-13	02:49:00	0
2009-04-13	02:50:00	0
2009-04-13	02:51:00	0
2009-04-13	02:52:00	0
2009-04-13	02:53:00	0
2009-04-13	02:54:00	0
2009-04-13	02:55:00	0
2009-04-13	02:56:00	0
2009-04-13	02:57:00	0
2009-04-13	02:58:00	0
2009-04-13	02:59:00	0
2009-04-13	03:00:00	0
2009-04-13	03:01:00	0
2009-04-13	03:02:00	0
2009-04-13	03:03:00	0
2009-04-13	03:04:00	0
2009-04-13	03:05:00	0
2009-04-13	03:06:00	0
2009-04-13	03:07:00	0
2009-04-13	03:08:00	0
2009-04-13	03:09:00	0
2009-04-13	03:10:00	0
2009-04-13	03:11:00	0
2009-04-13	03:12:00	0
2009-04-13	03:13:00	0
2009-04-13	03:14:00	0
2009-04-13	03:15:00	0
2009-04-13	03:16:00	0
2009-04-13	03:17:00	0
2009-04-13	03:18:00	0
2009-04-13	03:19:00	0
2009-04-13	03:20:00	0
2009-04-13	03:21:00	0
2009-04-13	03:22:00	0
2009-04-13	03:23:00	0
2009-04-13	03:24:00	0
2009-04-13	03:25:00	0
2009-04-13	03:26:00	0
2009-04-13	03:27:00	0
2009-04-13	03:28:00	0
2009-04-13	03:29:00	0
2009-04-13	03:30:00	0
2009-04-13	03:31:00	0
2009-04-13	03:32:00	0
2009-04-13	03:33:00	0
2009-04-13	03:34:00	0
2009-04-13	03:35:00	0
2009-04-13	03:36:00	0
2009-04-13	03:37:00	0
2009-04-13	03:38:00	0
2009-04-13	03:39:00	0
2009-04-13	03:40:00	0
2009-04-13	03:41:00	0
2009-04-13	03:42:00	0
2009-04-13	03:43:00	0
2009-04-13	03:44:00	0
2009-04-13	03:45:00	0
2009-04-13	03:46:00	0
2009-04-13	03:47:00	0
2009-04-13	03:48:00	0
2009-04-13	03:49:00	0
2009-04-13	03:50:00	0
2009-04-13	03:51:00	0
2009-04-13	03:52:00	0
2009-04-13	03:53:00	0
2009-04-13	03:54:00	0
2009-04-13	03:55:00	0
2009-04-13	03:56:00	0
2009-04-13	03:57:00	0
2009-04-13	03:58:00	0
2009-04-13	03:59:00	0
2009-04-13	04:00:00	0
2009-04-13	04:01:00	0
2009-04-13	04:02:00	0
2009-04-13	04:03:00	0
2009-04-13	04:04:00	0
2009-04-13	04:05:00	0
2009-04-13	04:06:00	0
2009-04-13	04:07:00	0
2009-04-13	04:08:00	0
2009-04-13	04:09:00	0
2009-04-13	04:10:00	0
2009-04-13	04:11:00	0
2009-04-13	04:12:00	0
2009-04-13	04:13:00	0
2009-04-13	04:14:00	0
2009-04-13	04:15:00	0
2009-04-13	04:16:00	0
2009-04-13	04:17:00	0
2009-04-13	04:18:00	0
2009-04-13	04:19:00	0
2009-04-13	04:20:00	0
2009-04-13	04:21:00	0
2009-04-13	04:22:00	0
2009-04-13	04:23:00	0
2009-04-13	04:24:00	0
2009-04-13	04:25:00	0
2009-04-13	04:26:00	0
2009-04-13	04:27:00	0
2009-04-13	04:28:00	0
2009-04-13	04:29:00	0
2009-04-13	04:30:00	0
2009-04-13	04:31:00	0
2009-04-13	04:32:00	0
2009-04-13	04:33:00	0
2009-04-13	04:34:00	0
2009-04-13	04:35:00	0
2009-04-13	04:36:00	0
2009-04-13	04:37:00	0
2009-04-13	04:38:00	0
2009-04-13	04:39:00	0
2009-04-13	04:40:00	0
2009-04-13	04:41:00	0
2009-04-13	04:42:00	0
2009-04-13	04:43:00	0
2009-04-13	04:44:00	0
2009-04-13	04:45:00	0
2009-04-13	04:46:00	0
2009-04-13	04:47:00	0
2009-04-13	04:48:00	0
2009-04-13	04:49:00	0
2009-04-13	04:50:00	0
2009-04-13	04:51:00	0
2009-04-13	04:52:00	0
2009-04-13	04:53:00	0
2009-04-13	04:54:00	0
2009-04-13	04:55:00	0
2009-04-13	04:56:00	0
2009-04-13	04:57:00	0
2009-04-13	04:58:00	0
2009-04-13	04:59:00	0
2009-04-13	05:00:00	0
2009-04-13	05:01:00	0
2009-04-13	05:02:00	0
2009-04-13	05:03:00	0
2009-04-13	05:04:00	0
2009-04-13	05:05:00	0
2009-04-13	05:06:00	0
2009-04-13	05:07:00	0
2009-04-13	05:08:00	0
2009-04-13	05:09:00	0
2009-04-13	05:10:00	0
2009-04-13	05:11:00	0
2009-04-13	05:12:00	0
2009-04-13	05:13:00	0
2009-04-13	05:14:00	0
2009-04-13	05:15:00	0
2009-04-13	05:16:00	0
2009-04-13	05:17:00	0
2009-04-13	05:18:00	0
2009-04-13	05:19:00	0
2009-04-13	05:20:00	0
2009-04-13	05:21:00	0
2009-04-13	05:22:00	0
2009-04-13	05:23:00	0
2009-04-13	05:24:00	0
2009-04-13	05:25:00	0
2009-04-13	05:26:00	0
2009-04-13	05:27:00	0
2009-04-13	05:28:00	0
2009-04-13	05:29:00	0
2009-04-13	05:30:00	0
2009-04-13	05:31:00	0
2009-04-13	05:32:00	0
2009-04-13	05:33:00	0
2009-04-13	05:34:00	0
2009-04-13	05:35:00	0
2009-04-13	05:36:00	0
2009-04-13	05:37:00	0
2009-04-13	05:38:00	0
2009-04-13	05:39:00	0
2009-04-13	05:40:00	0
2009-04-13	05:41:00	0
2009-04-13	05:42:00	0
2009-04-13	05:43:00	0
2009-04-13	05:44:00	0
2009-04-13	05:45:00	0
2009-04-13	05:46:00	0
2009-04-13	05:47:00	0
2009-04-13	05:48:00	0
2009-04-13	05:49:00	0
2009-04-13	05:50:00	0
2009-04-13	05:51:00	0
2009-04-13	05:52:00	0
2009-04-13	05:53:00	0
2009-04-13	05:54:00	0
2009-04-13	05:55:00	0
2009-04-13	05:56:00	0
2009-04-13	05:57:00	0
2009-04-13	05:58:00	0
2009-04-13	05:59:00	0
2009-04-13	06:00:00	0
2009-04-13	06:01:00	0
2009-04-13	06:02:00	0
2009-04-13	06:03:00	0
2009-04-13	06:04:00	0
2009-04-13	06:05:00	0
2009-04-13	06:06:00	0
2009-04-13	06:07:00	0
2009-04-13	06:08:00	0
2009-04-13	06:09:00	0
2009-04-13	06:10:00	0
2009-04-13	06:11:00	0
2009-04-13	06:12:00	0
2009-04-13	06:13:00	0
2009-04-13	06:14:00	0
2009-04-13	06:15:00	0
2009-04-13	06:16:00	0
2009-04-13	06:17:00	0
2009-04-13	06:18:00	0
2009-04-13	06:19:00	0
2009-04-13	06:20:00	0
2009-04-13	06:21:00	0
2009-04-13	06:22:00	0
2009-04-13	06:23:00	0
2009-04-13	06:24:00	0
2009-04-13	06:25:00	0
2009-04-13	06:26:00	0
2009-04-13	06:27:00	0
2009-04-13	06:28:00	0
2009-04-13	06:29:00	0
2009-04-13	06:30:00	0
2009-04-13	06:31:00	0
2009-04-13	06:32:00	0
2009-04-13	06:33:00	0
2009-04-13	06:34:00	0
2009-04-13	06:35:00	0
2009-04-13	06:36:00	0
2009-04-13	06:37:00	0
2009-04-13	06:38:00	0
2009-04-13	06:39:00	0
2009-04-13	06:40:00	0
2009-04-13	06:41:00	0
2009-04-13	06:42:00	0
2009-04-13	06:43:00	0
2009-04-13	06:44:00	0
2009-04-13	06:45:00	0
2009-04-13	06:46:00	0
2009-04-13	06:47:00	0
2009-04-13	06:48:00	0
2009-04-13	06:49:00	0
2009-04-13	06:50:00	0
2009-04-13	06:51:00	0
2009-04-13	06:52:00	0
2009-04-13	06:53:00	0
2009-04-13	06:54:00	0
2009-04-13	06:55:00	0
2009-04-13	06:56:00	0
2009-04-13	06:57:00	0
2009-04-13	06:58:00	0
2009-04-13	06:59:00	0
2009-04-13	07:00:00	0
2009-04-13	07:01:00	0
2009-04-13	07:02:00	0
2009-04-13	07:03:00	0
2009-04-13	07:04:00	0
2009-04-13	07:05:00	0
2009-04-13	07:06:00	0
2009-04-13	07:07:00	0
2009-04-13	07:08:00	0
2009-04-13	07:09:00	0
2009-04-13	07:10:00	0
2009-04-13	07:11:00	0
2009-04-13	07:12:00	0
2009-04-13	07:13:00	0
2009-04-13	07:14:00	0
2009-04-13	07:15:00	0
2009-04-13	07:16:00	0
2009-04-13	07:17:00	0
2009-04-13	07:18:00	0
2009-04-13	07:19:00	0
2009-04-13	07:20:00	0
2009-04-13	07:21:00	0
2009-04-13	07:22:00	0
2009-04-13	07:23:00	0
2009-04-13	07:24:00	0
2009-04-13	07:25:00	0
2009-04-13	07:26:00	0
2009-04-13	07:27:00	0
2009-04-13	07:28:00	0
2009-04-13	07:29:00	0
2009-04-13	07:30:00	0
2009-04-13	07:31:00	0
2009-04-13	07:32:00	0
2009-04-13	07:33:00	0
2009-04-13	07:34:00	0
2009-04-13	07:35:00	0
2009-04-13	07:36:00	0
2009-04-13	07:37:00	0
2009-04-13	07:38:00	0
2009-04-13	07:39:00	0
2009-04-13	07:40:00	0
2009-04-13	07:41:00	0
2009-04-13	07:42:00	0
2009-04-13	07:43:00	0
2009-04-13	07:44:00	0
2009-04-13	07:45:00	0
2009-04-13	07:46:00	0
2009-04-13	07:47:00	0
2009-04-13	07:48:00	0
2009-04-13	07:49:00	0
2009-04-13	07:50:00	0
2009-04-13	07:51:00	0
2009-04-13	07:52:00	0
2009-04-13	07:53:00	0
2009-04-13	07:54:00	0
2009-04-13	07:55:00	0
2009-04-13	07:56:00	0
2009-04-13	07:57:00	0
2009-04-13	07:58:00	0
2009-04-13	07:59:00	0
2009-04-13	08:00:00	0
2009-04-13	08:01:00	0
2009-04-13	08:02:00	0
2009-04-13	08:03:00	0
2009-04-13	08:04:00	0
2009-04-13	08:05:00	0
2009-04-13	08:06:00	0
2009-04-13	08:07:00	0
2009-04-13	08:08:00	0
2009-04-13	08:09:00	0
2009-04-13	08:10:00	0
2009-04-13	08:11:00	0
2009-04-13	08:12:00	0
2009-04-13	08:13:00	0
2009-04-13	08:14:00	0
2009-04-13	08:15:00	0
2009-04-13	08:16:00	0
2009-04-13	08:17:00	0
2009-04-13	08:18:00	0
2009-04-13	08:19:00	0
2009-04-13	08:20:00	0
2009-04-13	08:21:00	0
2009-04-13	08:22:00	0
2009-04-13	08:23:00	0
2009-04-13	08:24:00	0
2009-04-13	08:25:00	0
2009-04-13	08:26:00	0
2009-04-13	08:27:00	0
2009-04-13	08:28:00	0
2009-04-13	08:29:00	0
2009-04-13	08:30:00	0
2009-04-13	08:31:00	0
2009-04-13	08:32:00	0
2009-04-13	08:33:00	0
2009-04-13	08:34:00	0
2009-04-13	08:35:00	0
2009-04-13	08:36:00	0
2009-04-13	08:37:00	0
2009-04-13	08:38:00	0
2009-04-13	08:39:00	0
2009-04-13	08:40:00	0
2009-04-13	08:41:00	0
2009-04-13	08:42:00	0
2009-04-13	08:43:00	0
2009-04-13	08:44:00	0
2009-04-13	08:45:00	0
2009-04-13	08:46:00	0
2009-04-13	08:47:00	0
2009-04-13	08:48:00	0
2009-04-13	08:49:00	0
2009-04-13	08:50:00	0
2009-04-13	08:51:00	0
2009-04-13	08:52:00	0
2009-04-13	08:53:00	0
2009-04-13	08:54:00	0
2009-04-13	08:55:00	0
2009-04-13	08:56:00	0
2009-04-13	08:57:00	0
2009-04-13	08:58:00	0
2009-04-13	08:59:00	0
2009-04-13	09:00:00	0
2009-04-13	09:01:00	0
2009-04-13	09:02:00	0
2009-04-13	09:03:00	0
2009-04-13	09:04:00	0
2009-04-13	09:05:00	0
2009-04-13	09:06:00	0
2009-04-13	09:07:00	0
2009-04-13	09:08:00	0
2009-04-13	09:09:00	0
2009-04-13	09:10:00	0
2009-04-13	09:11:00	0
2009-04-13	09:12:00	0
2009-04-13	09:13:00	0
2009-04-13	09:14:00	0
2009-04-13	09:15:00	0
2009-04-13	09:16:00	0
2009-04-13	09:17:00	0
2009-04-13	09:18:00	0
2009-04-13	09:19:00	0
2009-04-13	09:20:00	0
2009-04-13	09:21:00	0
2009-04-13	09:22:00	0
2009-04-13	09:23:00	0
2009-04-13	09:24:00	0
2009-04-13	09:25:00	0
2009-04-13	09:26:00	0
2009-04-13	09:27:00	0
2009-04-13	09:28:00	0
2009-04-13	09:29:00	0
2009-04-13	09:30:00	0
2009-04-13	09:31:00	0
2009-04-13	09:32:00	0
2009-04-13	09:33:00	0
2009-04-13	09:34:00	0
2009-04-13	09:35:00	0
2009-04-13	09:36:00	0
2009-04-13	09:37:00	0
2009-04-13	09:38:00	0
2009-04-13	09:39:00	0
2009-04-13	09:40:00	0
2009-04-13	09:41:00	0
2009-04-13	09:42:00	0
2009-04-13	09:43:00	0
2009-04-13	09:44:00	0
2009-04-13	09:45:00	0
2009-04-13	09:46:00	0
2009-04-13	09:47:00	0
2009-04-13	09:48:00	0
2009-04-13	09:49:00	0
2009-04-13	09:50:00	0
2009-04-13	09:51:00	0
2009-04-13	09:52:00	0
2009-04-13	09:53:00	0
2009-04-13	09:54:00	0
2009-04-13	09:55:00	0
2009-04-13	09:56:00	0
2009-04-13	09:57:00	0
2009-04-13	09:58:00	0
2009-04-13	09:59:00	0
2009-04-13	10:00:00	0
2009-04-13	10:01:00	0
2009-04-13	10:02:00	0
2009-04-13	10:03:00	0
2009-04-13	10:04:00	0
2009-04-13	10:05:00	0
2009-04-13	10:06:00	0
2009-04-13	10:07:00	0
2009-04-13	10:08:00	0
2009-04-13	10:09:00	0
2009-04-13	10:10:00	0
2009-04-13	10:11:00	0
2009-04-13	10:12:00	0
2009-04-13	10:13:00	0
2009-04-13	10:14:00	0
2009-04-13	10:15:00	0
2009-04-13	10:16:00	0
2009-04-13	10:17:00	0
2009-04-13	10:18:00	0
2009-04-13	10:19:00	0
2009-04-13	10:20:00	0
2009-04-13	10:21:00	0
2009-04-13	10:22:00	0
2009-04-13	10:23:00	0
2009-04-13	10:24:00	0
2009-04-13	10:25:00	0
2009-04-13	10:26:00	0
2009-04-13	10:27:00	0
2009-04-13	10:28:00	0
2009-04-13	10:29:00	0
2009-04-13	10:30:00	0
2009-04-13	10:31:00	0
2009-04-13	10:32:00	0
2009-04-13	10:33:00	0
2009-04-13	10:34:00	0
2009-04-13	10:35:00	0
2009-04-13	10:36:00	0
2009-04-13	10:37:00	0
2009-04-13	10:38:00	0
2009-04-13	10:39:00	0
2009-04-13	10:40:00	0
2009-04-13	10:41:00	0
2009-04-13	10:42:00	0
2009-04-13	10:43:00	0
2009-04-13	10:44:00	0
2009-04-13	10:45:00	0
2009-04-13	10:46:00	0
2009-04-13	10:47:00	0
2009-04-13	10:48:00	0
2009-04-13	10:49:00	0
2009-04-13	10:50:00	0
2009-04-13	10:51:00	0
2009-04-13	10:52:00	0
2009-04-13	10:53:00	0
2009-04-13	10:54:00	0
2009-04-13	10:55:00	0
2009-04-13	10:56:00	0
2009-04-13	10:57:00	0
2009-04-13	10:58:00	0
2009-04-13	10:59:00	0
2009-04-13	11:00:00	0
2009-04-13	11:01:00	0
2009-04-13	11:02:00	0
2009-04-13	11:03:00	0
2009-04-13	11:04:00	0
2009-04-13	11:05:00	0
2009-04-13	11:06:00	0
2009-04-13	11:07:00	0
2009-04-13	11:08:00	0
2009-04-13	11:09:00	0
2009-04-13	11:10:00	0
2009-04-13	11:11:00	0
2009-04-13	11:12:00	0
2009-04-13	11:13:00	0
2009-04-13	11:14:00	0
2009-04-13	11:15:00	0
2009-04-13	11:16:00	0
2009-04-13	11:17:00	0
2009-04-13	11:18:00	0
2009-04-13	11:19:00	0
2009-04-13	11:20:00	0
2009-04-13	11:21:00	0
2009-04-13	11:22:00	0
2009-04-13	11:23:00	0
2009-04-13	11:24:00	0
2009-04-13	11:25:00	0
2009-04-13	11:26:00	0
2009-04-13	11:27:00	0
2009-04-13	11:28:00	0
2009-04-13	11:29:00	0
2009-04-13	11:30:00	0
2009-04-13	11:31:00	0
2009-04-13	11:32:00	0
2009-04-13	11:33:00	0
2009-04-13	11:34:00	0
2009-04-13	11:35:00	0
2009-04-13	11:36:00	0
2009-04-13	11:37:00	0
2009-04-13	11:38:00	0
2009-04-13	11:39:00	0
2009-04-13	11:40:00	0
2009-04-13	11:41:00	0
2009-04-13	11:42:00	0
2009-04-13	11:43:00	0
2009-04-13	11:44:00	0
2009-04-13	11:45:00	0
2009-04-13	11:46:00	0
2009-04-13	11:47:00	0
2009-04-13	11:48:00	0
2009-04-13	11:49:00	0
2009-04-13	11:50:00	0
2009-04-13	11:51:00	0
2009-04-13	11:52:00	0
2009-04-13	11:53:00	0
2009-04-13	11:54:00	0
2009-04-13	11:55:00	0
2009-04-13	11:56:00	0
2009-04-13	11:57:00	0
2009-04-13	11:58:00	0
2009-04-13	11:59:00	0
2009-04-13	12:00:00	0
2009-04-13	12:01:00	0
2009-04-13	12:02:00	0
2009-04-13	12:03:00	0
2009-04-13	12:04:00	0
2009-04-13	12:05:00	0
2009-04-13	12:06:00	0
2009-04-13	12:07:00	0
2009-04-13	12:08:00	0
2009-04-13	12:09:00	0
2009-04-13	12:10:00	0
2009-04-13	12:11:00	0
2009-04-13	12:12:00	0
2009-04-13	12:13:00	0
2009-04-13	12:14:00	0
2009-04-13	12:15:00	0
2009-04-13	12:16:00	0
2009-04-13	12:17:00	0
2009-04-13	12:18:00	0
2009-04-13	12:19:00	0
2009-04-13	12:20:00	0
2009-04-13	12:21:00	0
2009-04-13	12:22:00	0
2009-04-13	12:23:00	0
2009-04-13	12:24:00	0
2009-04-13	12:25:00	0
2009-04-13	12:26:00	0
2009-04-13	12:27:00	0
2009-04-13	12:28:00	0
2009-04-13	12:29:00	0
2009-04-13	12:30:00	0
2009-04-13	12:31:00	0
2009-04-13	12:32:00	0
2009-04-13	12:33:00	0
2009-04-13	12:34:00	0
2009-04-13	12:35:00	0
2009-04-13	12:36:00	0
2009-04-13	12:37:00	0
2009-04-13	12:38:00	0
2009-04-13	12:39:00	0
2009-04-13	12:40:00	0
2009-04-13	12:41:00	0
2009-04-13	12:42:00	0
2009-04-13	12:43:00	0
2009-04-13	12:44:00	0
2009-04-13	12:45:00	0
2009-04-13	12:46:00	0
2009-04-13	12:47:00	0
2009-04-13	12:48:00	0
2009-04-13	12:49:00	0
2009-04-13	12:50:00	0
2009-04-13	12:51:00	0
2009-04-13	12:52:00	0
2009-04-13	12:53:00	0
2009-04-13	12:54:00	0
2009-04-13	12:55:00	0
2009-04-13	12:56:00	0
2009-04-13	12:57:00	0
2009-04-13	12:58:00	0
2009-04-13	12:59:00	0
2009-04-13	13:00:00	0
2009-04-13	13:01:00	0
2009-04-13	13:02:00	0
2009-04-13	13:03:00	0
2009-04-13	13:04:00	0
2009-04-13	13:05:00	0
2009-04-13	13:06:00	0
2009-04-13	13:07:00	0
2009-04-13	13:08:00	0
2009-04-13	13:09:00	0
2009-04-13	13:10:00	0
2009-04-13	13:11:00	0
2009-04-13	13:12:00	0
2009-04-13	13:13:00	0
2009-04-13	13:14:00	0
2009-04-13	13:15:00	0
2009-04-13	13:16:00	0
2009-04-13	13:17:00	0
2009-04-13	13:18:00	0
2009-04-13	13:19:00	0
2009-04-13	13:20:00	0
2009-04-13	13:21:00	0
2009-04-13	13:22:00	0
2009-04-13	13:23:00	0
2009-04-13	13:24:00	0
2009-04-13	13:25:00	0
2009-04-13	13:26:00	0
2009-04-13	13:27:00	0
2009-04-13	13:28:00	0
2009-04-13	13:29:00	0
2009-04-13	13:30:00	0
2009-04-13	13:31:00	0
2009-04-13	13:32:00	0
2009-04-13	13:33:00	0
2009-04-13	13:34:00	0
2009-04-13	13:35:00	0
2009-04-13	13:36:00	0
2009-04-13	13:37:00	0
2009-04-13	13:38:00	0
2009-04-13	13:39:00	0
2009-04-13	13:40:00	0
2009-04-13	13:41:00	0
2009-04-13	13:42:00	0
2009-04-13	13:43:00	0
2009-04-13	13:44:00	0
2009-04-13	13:45:00	0
2009-04-13	13:46:00	0
2009-04-13	13:47:00	0
2009-04-13	13:48:00	0
2009-04-13	13:49:00	0
2009-04-13	13:50:00	0
2009-04-13	13:51:00	0
2009-04-13	13:52:00	0
2009-04-13	13:53:00	0
2009-04-13	13:54:00	0
2009-04-13	13:55:00	0
2009-04-13	13:56:00	0
2009-04-13	13:57:00	0
2009-04-13	13:58:00	0
2009-04-13	13:59:00	0
2009-04-13	14:00:00	0
2009-04-13	14:01:00	0
2009-04-13	14:02:00	0
2009-04-13	14:03:00	0
2009-04-13	14:04:00	0
2009-04-13	14:05:00	0
2009-04-13	14:06:00	0
2009-04-13	14:07:00	0
2009-04-13	14:08:00	0
2009-04-13	14:09:00	0
2009-04-13	14:10:00	0
2009-04-13	14:11:00	0
2009-04-13	14:12:00	0
2009-04-13	14:13:00	0
2009-04-13	14:14:00	0
2009-04-13	14:15:00	0
2009-04-13	14:16:00	0
2009-04-13	14:17:00	0
2009-04-13	14:18:00	0
2009-04-13	14:19:00	0
2009-04-13	14:20:00	0
2009-04-13	14:21:00	0
2009-04-13	14:22:00	0
2009-04-13	14:23:00	0
2009-04-13	14:24:00	0
2009-04-13	14:25:00	0
2009-04-13	14:26:00	0
2009-04-13	14:27:00	0
2009-04-13	14:28:00	0
2009-04-13	14:29:00	0
2009-04-13	14:30:00	0
2009-04-13	14:31:00	0
2009-04-13	14:32:00	0
2009-04-13	14:33:00	0
2009-04-13	14:34:00	0
2009-04-13	14:35:00	0
2009-04-13	14:36:00	0
2009-04-13	14:37:00	0
2009-04-13	14:38:00	0
2009-04-13	14:39:00	0
2009-04-13	14:40:00	0
2009-04-13	14:41:00	0
2009-04-13	14:42:00	0
2009-04-13	14:43:00	0
2009-04-13	14:44:00	0
2009-04-13	14:45:00	0
2009-04-13	14:46:00	0
2009-04-13	14:47:00	0
2009-04-13	14:48:00	0
2009-04-13	14:49:00	0
2009-04-13	14:50:00	0
2009-04-13	14:51:00	0
2009-04-13	14:52:00	0
2009-04-13	14:53:00	0
2009-04-13	14:54:00	0
2009-04-13	14:55:00	0
2009-04-13	14:56:00	0
2009-04-13	14:57:00	0
2009-04-13	14:58:00	0
2009-04-13	14:59:00	0
2009-04-13	15:00:00	0
2009-04-13	15:01:00	0
2009-04-13	15:02:00	0
2009-04-13	15:03:00	0
2009-04-13	15:04:00	0
2009-04-13	15:05:00	0
2009-04-13	15:06:00	0
2009-04-13	15:07:00	0
2009-04-13	15:08:00	0
2009-04-13	15:09:00	0
2009-04-13	15:10:00	0
2009-04-13	15:11:00	0
2009-04-13	15:12:00	0
2009-04-13	15:13:00	0
2009-04-13	15:14:00	0
2009-04-13	15:15:00	0
2009-04-13	15:16:00	0
2009-04-13	15:17:00	0
2009-04-13	15:18:00	0
2009-04-13	15:19:00	0
2009-04-13	15:20:00	0
2009-04-13	15:21:00	0
2009-04-13	15:22:00	0
2009-04-13	15:23:00	0
2009-04-13	15:24:00	0
2009-04-13	15:25:00	0
2009-04-13	15:26:00	0
2009-04-13	15:27:00	0
2009-04-13	15:28:00	0
2009-04-13	15:29:00	0
2009-04-13	15:30:00	0
2009-04-13	15:31:00	0
2009-04-13	15:32:00	0
2009-04-13	15:33:00	0
2009-04-13	15:34:00	0
2009-04-13	15:35:00	0
2009-04-13	15:36:00	0
2009-04-13	15:37:00	0
2009-04-13	15:38:00	0
2009-04-13	15:39:00	0
2009-04-13	15:40:00	0
2009-04-13	15:41:00	0
2009-04-13	15:42:00	0
2009-04-13	15:43:00	0
2009-04-13	15:44:00	0
2009-04-13	15:45:00	0
2009-04-13	15:46:00	0
2009-04-13	15:47:00	0
2009-04-13	15:48:00	0
2009-04-13	15:49:00	0
2009-04-13	15:50:00	0
2009-04-13	15:51:00	0
2009-04-13	15:52:00	0
2009-04-13	15:53:00	0
2009-04-13	15:54:00	0
2009-04-13	15:55:00	0
2009-04-13	15:56:00	0
2009-04-13	15:57:00	0
2009-04-13	15:58:00	0
2009-04-13	15:59:00	0
2009-04-13	16:00:00	0
2009-04-13	16:01:00	0
2009-04-13	16:02:00	0
2009-04-13	16:03:00	0
2009-04-13	16:04:00	0
2009-04-13	16:05:00	0
2009-04-13	16:06:00	0
2009-04-13	16:07:00	0
2009-04-13	16:08:00	0
2009-04-13	16:09:00	0
2009-04-13	16:10:00	0
2009-04-13	16:11:00	0
2009-04-13	16:12:00	0
2009-04-13	16:13:00	0
2009-04-13	16:14:00	0
2009-04-13	16:15:00	0
2009-04-13	16:16:00	0
2009-04-13	16:17:00	0
2009-04-13	16:18:00	0
2009-04-13	16:19:00	0
2009-04-13	16:20:00	0
2009-04-13	16:21:00	0
2009-04-13	16:22:00	0
2009-04-13	16:23:00	0
2009-04-13	16:24:00	0
2009-04-13	16:25:00	0
2009-04-13	16:26:00	0
2009-04-13	16:27:00	0
2009-04-13	16:28:00	0
2009-04-13	16:29:00	0
2009-04-13	16:30:00	0
2009-04-13	16:31:00	0
2009-04-13	16:32:00	0
2009-04-13	16:33:00	0
2009-04-13	16:34:00	0
2009-04-13	16:35:00	0
2009-04-13	16:36:00	0
2009-04-13	16:37:00	0
2009-04-13	16:38:00	0
2009-04-13	16:39:00	0
2009-04-13	16:40:00	0
2009-04-13	16:41:00	0
2009-04-13	16:42:00	0
2009-04-13	16:43:00	0
2009-04-13	16:44:00	0
2009-04-13	16:45:00	0
2009-04-13	16:46:00	0
2009-04-13	16:47:00	0
2009-04-13	16:48:00	0
2009-04-13	16:49:00	0
2009-04-13	16:50:00	0
2009-04-13	16:51:00	0
2009-04-13	16:52:00	0
2009-04-13	16:53:00	0
2009-04-13	16:54:00	0
2009-04-13	16:55:00	0
2009-04-13	16:56:00	0
2009-04-13	16:57:00	0
2009-04-13	16:58:00	0
2009-04-13	16:59:00	0
2009-04-13	17:00:00	0
2009-04-13	17:01:00	0
2009-04-13	17:02:00	0
2009-04-13	17:03:00	0
2009-04-13	17:04:00	0
2009-04-13	17:05:00	0
2009-04-13	17:06:00	0
2009-04-13	17:07:00	0
2009-04-13	17:08:00	0
2009-04-13	17:09:00	0
2009-04-13	17:10:00	0
2009-04-13	17:11:00	0
2009-04-13	17:12:00	0
2009-04-13	17:13:00	0
2009-04-13	17:14:00	0
2009-04-13	17:15:00	0
2009-04-13	17:16:00	0
2009-04-13	17:17:00	0
2009-04-13	17:18:00	0
2009-04-13	17:19:00	0
2009-04-13	17:20:00	0
2009-04-13	17:21:00	0
2009-04-13	17:22:00	0
2009-04-13	17:23:00	0
2009-04-13	17:24:00	0
2009-04-13	17:25:00	0
2009-04-13	17:26:00	0
2009-04-13	17:27:00	0
2009-04-13	17:28:00	0
2009-04-13	17:29:00	0
2009-04-13	17:30:00	0
2009-04-13	17:31:00	0
2009-04-13	17:32:00	0
2009-04-13	17:33:00	0
2009-04-13	17:34:00	0
2009-04-13	17:35:00	0
2009-04-13	17:36:00	0
2009-04-13	17:37:00	0
2009-04-13	17:38:00	0
2009-04-13	17:39:00	0
2009-04-13	17:40:00	0
2009-04-13	17:41:00	0
2009-04-13	17:42:00	0
2009-04-13	17:43:00	0
2009-04-13	17:44:00	0
2009-04-13	17:45:00	0
2009-04-13	17:46:00	0
2009-04-13	17:47:00	0
2009-04-13	17:48:00	0
2009-04-13	17:49:00	0
2009-04-13	17:50:00	0
2009-04-13	17:51:00	0
2009-04-13	17:52:00	0
2009-04-13	17:53:00	0
2009-04-13	17:54:00	0
2009-04-13	17:55:00	0
2009-04-13	17:56:00	0
2009-04-13	17:57:00	0
2009-04-13	17:58:00	0
2009-04-13	17:59:00	0
2009-04-13	18:00:00	0	M
2009-04-13	18:01:00	507
2009-04-13	18:02:00	435
2009-04-13	18:03:00	121
2009-04-13	18:04:00	565
2009-04-13	18:05:00	896
2009-04-13	18:06:00	971
2009-04-13	18:07:00	688
2009-04-13	18:08:00	565
2009-04-13	18:09:00	273
2009-04-13	18:10:00	469
2009-04-13	18:11:00	507
2009-04-13	18:12:00	171
2009-04-13	18:13:00	12
2009-04-13	18:14:00	0
2009-04-13	18:15:00	0
2009-04-13	18:16:00	0
2009-04-13	18:17:00	0
2009-04-13	18:18:00	0
2009-04-13	18:19:00	244
2009-04-13	18:20:00	97
2009-04-13	18:21:00	258
2009-04-13	18:22:00	710
2009-04-13	18:23:00	799
2009-04-13	18:24:00	732
2009-04-13	18:25:00	848
2009-04-13	18:26:00	645
2009-04-13	18:27:00	623
2009-04-13	18:28:00	0
2009-04-13	18:29:00	109
2009-04-13	18:30:00	333
2009-04-13	18:31:00	418
2009-04-13	18:32:00	435
2009-04-13	18:33:00	302
2009-04-13	18:34:00	186
2009-04-13	18:35:00	229
2009-04-13	18:36:00	200
2009-04-13	18:37:00	244
2009-04-13	18:38:00	1133
2009-04-13	18:39:00	171
2009-04-13	18:40:00	145
2009-04-13	18:41:00	36
2009-04-13	18:42:00	24
2009-04-13	18:43:00	896
2009-04-13	18:44:00	12
2009-04-13	18:45:00	0
2009-04-13	18:46:00	12
2009-04-13	18:47:00	157
2009-04-13	18:48:00	0
2009-04-13	18:49:00	302
2009-04-13	18:50:00	12
2009-04-13	18:51:00	0
2009-04-13	18:52:00	0
2009-04-13	18:53:00	0
2009-04-13	18:54:00	0
2009-04-13	18:55:00	0
2009-04-13	18:56:00	0
2009-04-13	18:57:00	0
2009-04-13	18:58:00	0
2009-04-13	18:59:00	0
2009-04-13	19:00:00	0
2009-04-13	19:01:00	0
2009-04-13	19:02:00	0
2009-04-13	19:03:00	0
2009-04-13	19:04:00	0
2009-04-13	19:05:00	0
2009-04-13	19:06:00	0
2009-04-13	19:07:00	12
2009-04-13	19:08:00	584
2009-04-13	19:09:00	0
2009-04-13	19:10:00	0
2009-04-13	19:11:00	24
2009-04-13	19:12:00	273
2009-04-13	19:13:00	0
2009-04-13	19:14:00	0
2009-04-13	19:15:00	0
2009-04-13	19:16:00	287
2009-04-13	19:17:00	200
2009-04-13	19:18:00	12
2009-04-13	19:19:00	24
2009-04-13	19:20:00	0
2009-04-13	19:21:00	0
2009-04-13	19:22:00	0
2009-04-13	19:23:00	0
2009-04-13	19:24:00	0
2009-04-13	19:25:00	0
2009-04-13	19:26:00	0
2009-04-13	19:27:00	0
2009-04-13	19:28:00	0
2009-04-13	19:29:00	0
2009-04-13	19:30:00	0
2009-04-13	19:31:00	0
2009-04-13	19:32:00	0
2009-04-13	19:33:00	0
2009-04-13	19:34:00	0
2009-04-13	19:35:00	0
2009-04-13	19:36:00	0
2009-04-13	19:37:00	0
2009-04-13	19:38:00	0
2009-04-13	19:39:00	0
2009-04-13	19:40:00	0
2009-04-13	19:41:00	0
2009-04-13	19:42:00	0
2009-04-13	19:43:00	0
2009-04-13	19:44:00	0
2009-04-13	19:45:00	0
2009-04-13	19:46:00	0
2009-04-13	19:47:00	0
2009-04-13	19:48:00	0
2009-04-13	19:49:00	0
2009-04-13	19:50:00	0
2009-04-13	19:51:00	0
2009-04-13	19:52:00	0
2009-04-13	19:53:00	0
2009-04-13	19:54:00	12
2009-04-13	19:55:00	0
2009-04-13	19:56:00	0
2009-04-13	19:57:00	12
2009-04-13	19:58:00	0
2009-04-13	19:59:00	0
2009-04-13	20:00:00	12
2009-04-13	20:01:00	0
2009-04-13	20:02:00	0
2009-04-13	20:03:00	0
2009-04-13	20:04:00	824
2009-04-13	20:05:00	302
2009-04-13	20:06:00	157
2009-04-13	20:07:00	133
2009-04-13	20:08:00	244
2009-04-13	20:09:00	121
2009-04-13	20:10:00	0
2009-04-13	20:11:00	0
2009-04-13	20:12:00	0
2009-04-13	20:13:00	12
2009-04-13	20:14:00	133
2009-04-13	20:15:00	287
2009-04-13	20:16:00	384
2009-04-13	20:17:00	229
2009-04-13	20:18:00	0
2009-04-13	20:19:00	0
2009-04-13	20:20:00	0
2009-04-13	20:21:00	0
2009-04-13	20:22:00	0
2009-04-13	20:23:00	0
2009-04-13	20:24:00	0
2009-04-13	20:25:00	0
2009-04-13	20:26:00	0
2009-04-13	20:27:00	0
2009-04-13	20:28:00	0
2009-04-13	20:29:00	0
2009-04-13	20:30:00	0
2009-04-13	20:31:00	0
2009-04-13	20:32:00	0
2009-04-13	20:33:00	0
2009-04-13	20:34:00	0
2009-04-13	20:35:00	0
2009-04-13	20:36:00	0
2009-04-13	20:37:00	0
2009-04-13	20:38:00	0
2009-04-13	20:39:00	0
2009-04-13	20:40:00	0
2009-04-13	20:41:00	0
2009-04-13	20:42:00	0
2009-04-13	20:43:00	0
2009-04-13	20:44:00	0
2009-04-13	20:45:00	0
2009-04-13	20:46:00	0
2009-04-13	20:47:00	0
2009-04-13	20:48:00	0
2009-04-13	20:49:00	0
2009-04-13	20:50:00	0
2009-04-13	20:51:00	0
2009-04-13	20:52:00	0
2009-04-13	20:53:00	0
2009-04-13	20:54:00	0
2009-04-13	20:55:00	12
2009-04-13	20:56:00	0
2009-04-13	20:57:00	0
2009-04-13	20:58:00	0
2009-04-13	20:59:00	0
2009-04-13	21:00:00	0
2009-04-13	21:01:00	0
2009-04-13	21:02:00	0
2009-04-13	21:03:00	0
2009-04-13	21:04:00	0
2009-04-13	21:05:00	0
2009-04-13	21:06:00	0
2009-04-13	21:07:00	0
2009-04-13	21:08:00	0
2009-04-13	21:09:00	0
2009-04-13	21:10:00	0
2009-04-13	21:11:00	0
2009-04-13	21:12:00	0
2009-04-13	21:13:00	0
2009-04-13	21:14:00	0
2009-04-13	21:15:00	0
2009-04-13	21:16:00	0
2009-04-13	21:17:00	0
2009-04-13	21:18:00	0
2009-04-13	21:19:00	0
2009-04-13	21:20:00	0
2009-04-13	21:21:00	0
2009-04-13	21:22:00	72
2009-04-13	21:23:00	0
2009-04-13	21:24:00	0
2009-04-13	21:25:00	0
2009-04-13	21:26:00	0
2009-04-13	21:27:00	0
2009-04-13	21:28:00	0
2009-04-13	21:29:00	0
2009-04-13	21:30:00	0
2009-04-13	21:31:00	0
2009-04-13	21:32:00	0
2009-04-13	21:33:00	0
2009-04-13	21:34:00	0
2009-04-13	21:35:00	0
2009-04-13	21:36:00	24
2009-04-13	21:37:00	0
2009-04-13	21:38:00	12
2009-04-13	21:39:00	0
2009-04-13	21:40:00	12
2009-04-13	21:41:00	0
2009-04-13	21:42:00	0
2009-04-13	21:43:00	0
2009-04-13	21:44:00	0
2009-04-13	21:45:00	0
2009-04-13	21:46:00	0
2009-04-13	21:47:00	0
2009-04-13	21:48:00	0
2009-04-13	21:49:00	0
2009-04-13	21:50:00	0
2009-04-13	21:51:00	0
2009-04-13	21:52:00	0
2009-04-13	21:53:00	0
2009-04-13	21:54:00	0
2009-04-13	21:55:00	0
2009-04-13	21:56:00	0
2009-04-13	21:57:00	0
2009-04-13	21:58:00	0
2009-04-13	21:59:00	0
2009-04-13	22:00:00	0
2009-04-13	22:01:00	12
2009-04-13	22:02:00	0
2009-04-13	22:03:00	0
2009-04-13	22:04:00	171
2009-04-13	22:05:00	12
2009-04-13	22:06:00	0
2009-04-13	22:07:00	12
2009-04-13	22:08:00	0
2009-04-13	22:09:00	0
2009-04-13	22:10:00	0
2009-04-13	22:11:00	0
2009-04-13	22:12:00	0
2009-04-13	22:13:00	0
2009-04-13	22:14:00	0
2009-04-13	22:15:00	0
2009-04-13	22:16:00	0
2009-04-13	22:17:00	0
2009-04-13	22:18:00	0
2009-04-13	22:19:00	0
2009-04-13	22:20:00	0
2009-04-13	22:21:00	0
2009-04-13	22:22:00	0
2009-04-13	22:23:00	0
2009-04-13	22:24:00	0
2009-04-13	22:25:00	0
2009-04-13	22:26:00	0
2009-04-13	22:27:00	0
2009-04-13	22:28:00	0
2009-04-13	22:29:00	0
2009-04-13	22:30:00	0
2009-04-13	22:31:00	0
2009-04-13	22:32:00	0
2009-04-13	22:33:00	0
2009-04-13	22:34:00	0
2009-04-13	22:35:00	0
2009-04-13	22:36:00	0
2009-04-13	22:37:00	0
2009-04-13	22:38:00	0
2009-04-13	22:39:00	0
2009-04-13	22:40:00	0
2009-04-13	22:41:00	0
2009-04-13	22:42:00	0
2009-04-13	22:43:00	0
2009-04-13	22:44:00	0
2009-04-13	22:45:00	0
2009-04-13	22:46:00	0
2009-04-13	22:47:00	0
2009-04-13	22:48:00	0
2009-04-13	22:49:00	0
2009-04-13	22:50:00	0
2009-04-13	22:51:00	0
2009-04-13	22:52:00	0
2009-04-13	22:53:00	0
2009-04-13	22:54:00	0
2009-04-13	22:55:00	0
2009-04-13	22:56:00	0
2009-04-13	22:57:00	0
2009-04-13	22:58:00	0
2009-04-13	22:59:00	0
2009-04-13	23:00:00	0
2009-04-13	23:01:00	0
2009-04-13	23:02:00	0
2009-04-13	23:03:00	0
2009-04-13	23:04:00	0
2009-04-13	23:05:00	0
2009-04-13	23:06:00	0
2009-04-13	23:07:00	0
2009-04-13	23:08:00	0
2009-04-13	23:09:00	0
2009-04-13	23:10:00	0
2009-04-13	23:11:00	12
2009-04-13	23:12:00	24
2009-04-13	23:13:00	0
2009-04-13	23:14:00	0
2009-04-13	23:15:00	0
2009-04-13	23:16:00	0
2009-04-13	23:17:00	0
2009-04-13	23:18:00	0
2009-04-13	23:19:00	0
2009-04-13	23:20:00	0
2009-04-13	23:21:00	0
2009-04-13	23:22:00	0
2009-04-13	23:23:00	0
2009-04-13	23:24:00	0
2009-04-13	23:25:00	60
2009-04-13	23:26:00	0
2009-04-13	23:27:00	12
2009-04-13	23:28:00	0
2009-04-13	23:29:00	24
2009-04-13	23:30:00	0
2009-04-13	23:31:00	0
2009-04-13	23:32:00	0
2009-04-13	23:33:00	0
2009-04-13	23:34:00	0
2009-04-13	23:35:00	0
2009-04-13	23:36:00	0
2009-04-13	23:37:00	0
2009-04-13	23:38:00	0
2009-04-13	23:39:00	0
2009-04-13	23:40:00	0
2009-04-13	23:41:00	0
2009-04-13	23:42:00	0
2009-04-13	23:43:00	0
2009-04-13	23:44:00	0
2009-04-13	23:45:00	12
2009-04-13	23:46:00	0
2009-04-13	23:47:00	0
2009-04-13	23:48:00	0
2009-04-13	23:49:00	0
2009-04-13	23:50:00	0
2009-04-13	23:51:00	0
2009-04-13	23:52:00	0
2009-04-13	23:53:00	0
2009-04-13	23:54:00	0
2009-04-13	23:55:00	0
2009-04-13	23:56:00	0
2009-04-13	23:57:00	0
2009-04-13	23:58:00	0
2009-04-13	23:59:00	0
2009-04-14	00:00:00	0
2009-04-14	00:01:00	0
2009-04-14	00:02:00	0
2009-04-14	00:03:00	0
2009-04-14	00:04:00	0
2009-04-14	00:05:00	0
2009-04-14	00:06:00	0
2009-04-14	00:07:00	0
2009-04-14	00:08:00	0
2009-04-14	00:09:00	0
2009-04-14	00:10:00	0
2009-04-14	00:11:00	0
2009-04-14	00:12:00	0
2009-04-14	00:13:00	0
2009-04-14	00:14:00	0
2009-04-14	00:15:00	0
2009-04-14	00:16:00	0
2009-04-14	00:17:00	0
2009-04-14	00:18:00	0
2009-04-14	00:19:00	0
2009-04-14	00:20:00	0
2009-04-14	00:21:00	0
2009-04-14	00:22:00	0
2009-04-14	00:23:00	0
2009-04-14	00:24:00	12
2009-04-14	00:25:00	0
2009-04-14	00:26:00	24
2009-04-14	00:27:00	0
2009-04-14	00:28:00	0
2009-04-14	00:29:00	0
2009-04-14	00:30:00	0
2009-04-14	00:31:00	0
2009-04-14	00:32:00	12
2009-04-14	00:33:00	0
2009-04-14	00:34:00	12
2009-04-14	00:35:00	121
2009-04-14	00:36:00	109
2009-04-14	00:37:00	302
2009-04-14	00:38:00	12
2009-04-14	00:39:00	0
2009-04-14	00:40:00	0
2009-04-14	00:41:00	0
2009-04-14	00:42:00	0
2009-04-14	00:43:00	0
2009-04-14	00:44:00	0
2009-04-14	00:45:00	0
2009-04-14	00:46:00	0
2009-04-14	00:47:00	0
2009-04-14	00:48:00	0
2009-04-14	00:49:00	0
2009-04-14	00:50:00	0
2009-04-14	00:51:00	0
2009-04-14	00:52:00	0
2009-04-14	00:53:00	0
2009-04-14	00:54:00	0
2009-04-14	00:55:00	0
2009-04-14	00:56:00	0
2009-04-14	00:57:00	0
2009-04-14	00:58:00	36
2009-04-14	00:59:00	0
2009-04-14	01:00:00	0
2009-04-14	01:01:00	0
2009-04-14	01:02:00	0
2009-04-14	01:03:00	0
2009-04-14	01:04:00	0
2009-04-14	01:05:00	0
2009-04-14	01:06:00	0
2009-04-14	01:07:00	0
2009-04-14	01:08:00	0
2009-04-14	01:09:00	0
2009-04-14	01:10:00	0
2009-04-14	01:11:00	0
2009-04-14	01:12:00	0
2009-04-14	01:13:00	0
2009-04-14	01:14:00	0
2009-04-14	01:15:00	0
2009-04-14	01:16:00	0
2009-04-14	01:17:00	0
2009-04-14	01:18:00	0
2009-04-14	01:19:00	0
2009-04-14	01:20:00	0
2009-04-14	01:21:00	24
2009-04-14	01:22:00	0
2009-04-14	01:23:00	0
2009-04-14	01:24:00	0
2009-04-14	01:25:00	0
2009-04-14	01:26:00	0
2009-04-14	01:27:00	0
2009-04-14	01:28:00	0
2009-04-14	01:29:00	0
2009-04-14	01:30:00	12
2009-04-14	01:31:00	316
2009-04-14	01:32:00	469
2009-04-14	01:33:00	418
2009-04-14	01:34:00	401
2009-04-14	01:35:00	72
2009-04-14	01:36:00	12
2009-04-14	01:37:00	0
2009-04-14	01:38:00	0
2009-04-14	01:39:00	12
2009-04-14	01:40:00	0
2009-04-14	01:41:00	0
2009-04-14	01:42:00	0
2009-04-14	01:43:00	0
2009-04-14	01:44:00	0
2009-04-14	01:45:00	0
2009-04-14	01:46:00	0
2009-04-14	01:47:00	0
2009-04-14	01:48:00	0
2009-04-14	01:49:00	0
2009-04-14	01:50:00	0
2009-04-14	01:51:00	0
2009-04-14	01:52:00	0
2009-04-14	01:53:00	0
2009-04-14	01:54:00	0
2009-04-14	01:55:00	0
2009-04-14	01:56:00	24
2009-04-14	01:57:00	0
2009-04-14	01:58:00	0
2009-04-14	01:59:00	0
2009-04-14	02:00:00	0
2009-04-14	02:01:00	0
2009-04-14	02:02:00	0
2009-04-14	02:03:00	0
2009-04-14	02:04:00	0
2009-04-14	02:05:00	0
2009-04-14	02:06:00	0
2009-04-14	02:07:00	0
2009-04-14	02:08:00	0
2009-04-14	02:09:00	0
2009-04-14	02:10:00	0
2009-04-14	02:11:00	0
2009-04-14	02:12:00	0
2009-04-14	02:13:00	0
2009-04-14	02:14:00	0
2009-04-14	02:15:00	0
2009-04-14	02:16:00	0
2009-04-14	02:17:00	0
2009-04-14	02:18:00	0
2009-04-14	02:19:00	0
2009-04-14	02:20:00	12
2009-04-14	02:21:00	0
2009-04-14	02:22:00	0
2009-04-14	02:23:00	0
2009-04-14	02:24:00	0
2009-04-14	02:25:00	0
2009-04-14	02:26:00	0
2009-04-14	02:27:00	0
2009-04-14	02:28:00	0
2009-04-14	02:29:00	0
2009-04-14	02:30:00	0
2009-04-14	02:31:00	0
2009-04-14	02:32:00	0
2009-04-14	02:33:00	0
2009-04-14	02:34:00	0
2009-04-14	02:35:00	0
2009-04-14	02:36:00	0
2009-04-14	02:37:00	0
2009-04-14	02:38:00	0
2009-04-14	02:39:00	0
2009-04-14	02:40:00	0
2009-04-14	02:41:00	0
2009-04-14	02:42:00	24
2009-04-14	02:43:00	0
2009-04-14	02:44:00	0
2009-04-14	02:45:00	0
2009-04-14	02:46:00	0
2009-04-14	02:47:00	0
2009-04-14	02:48:00	0
2009-04-14	02:49:00	0
2009-04-14	02:50:00	0
2009-04-14	02:51:00	0
2009-04-14	02:52:00	12
2009-04-14	02:53:00	0
2009-04-14	02:54:00	0
2009-04-14	02:55:00	0
2009-04-14	02:56:00	0
2009-04-14	02:57:00	0
2009-04-14	02:58:00	0
2009-04-14	02:59:00	0
2009-04-14	03:00:00	0
2009-04-14	03:01:00	0
2009-04-14	03:02:00	0
2009-04-14	03:03:00	0
2009-04-14	03:04:00	0
2009-04-14	03:05:00	0
2009-04-14	03:06:00	0
2009-04-14	03:07:00	0
2009-04-14	03:08:00	0
2009-04-14	03:09:00	0
2009-04-14	03:10:00	0
2009-04-14	03:11:00	0
2009-04-14	03:12:00	0
2009-04-14	03:13:00	0
2009-04-14	03:14:00	0
2009-04-14	03:15:00	0
2009-04-14	03:16:00	0
2009-04-14	03:17:00	0
2009-04-14	03:18:00	0
2009-04-14	03:19:00	0
2009-04-14	03:20:00	0
2009-04-14	03:21:00	0
2009-04-14	03:22:00	0
2009-04-14	03:23:00	0
2009-04-14	03:24:00	0
2009-04-14	03:25:00	0
2009-04-14	03:26:00	0
2009-04-14	03:27:00	0
2009-04-14	03:28:00	0
2009-04-14	03:29:00	0
2009-04-14	03:30:00	0
2009-04-14	03:31:00	0
2009-04-14	03:32:00	0
2009-04-14	03:33:00	0
2009-04-14	03:34:00	0
2009-04-14	03:35:00	0
2009-04-14	03:36:00	0
2009-04-14	03:37:00	0
2009-04-14	03:38:00	0
2009-04-14	03:39:00	0
2009-04-14	03:40:00	0
2009-04-14	03:41:00	0
2009-04-14	03:42:00	0
2009-04-14	03:43:00	0
2009-04-14	03:44:00	0
2009-04-14	03:45:00	0
2009-04-14	03:46:00	0
2009-04-14	03:47:00	0
2009-04-14	03:48:00	0
2009-04-14	03:49:00	0
2009-04-14	03:50:00	0
2009-04-14	03:51:00	0
2009-04-14	03:52:00	0
2009-04-14	03:53:00	12
2009-04-14	03:54:00	0
2009-04-14	03:55:00	0
2009-04-14	03:56:00	0
2009-04-14	03:57:00	0
2009-04-14	03:58:00	0
2009-04-14	03:59:00	0
2009-04-14	04:00:00	0
2009-04-14	04:01:00	0
2009-04-14	04:02:00	0
2009-04-14	04:03:00	0
2009-04-14	04:04:00	0
2009-04-14	04:05:00	0
2009-04-14	04:06:00	0
2009-04-14	04:07:00	12
2009-04-14	04:08:00	0
2009-04-14	04:09:00	0
2009-04-14	04:10:00	0
2009-04-14	04:11:00	0
2009-04-14	04:12:00	12
2009-04-14	04:13:00	0
2009-04-14	04:14:00	0
2009-04-14	04:15:00	0
2009-04-14	04:16:00	0
2009-04-14	04:17:00	0
2009-04-14	04:18:00	0
2009-04-14	04:19:00	0
2009-04-14	04:20:00	0
2009-04-14	04:21:00	0
2009-04-14	04:22:00	0
2009-04-14	04:23:00	0
2009-04-14	04:24:00	0
2009-04-14	04:25:00	0
2009-04-14	04:26:00	0
2009-04-14	04:27:00	0
2009-04-14	04:28:00	0
2009-04-14	04:29:00	12
2009-04-14	04:30:00	0
2009-04-14	04:31:00	0
2009-04-14	04:32:00	0
2009-04-14	04:33:00	0
2009-04-14	04:34:00	0
2009-04-14	04:35:00	0
2009-04-14	04:36:00	0
2009-04-14	04:37:00	0
2009-04-14	04:38:00	0
2009-04-14	04:39:00	0
2009-04-14	04:40:00	0
2009-04-14	04:41:00	0
2009-04-14	04:42:00	0
2009-04-14	04:43:00	0
2009-04-14	04:44:00	0
2009-04-14	04:45:00	0
2009-04-14	04:46:00	0
2009-04-14	04:47:00	0
2009-04-14	04:48:00	0
2009-04-14	04:49:00	0
2009-04-14	04:50:00	0
2009-04-14	04:51:00	0
2009-04-14	04:52:00	0
2009-04-14	04:53:00	0
2009-04-14	04:54:00	36
2009-04-14	04:55:00	0
2009-04-14	04:56:00	0
2009-04-14	04:57:00	0
2009-04-14	04:58:00	0
2009-04-14	04:59:00	0
2009-04-14	05:00:00	0
2009-04-14	05:01:00	0
2009-04-14	05:02:00	0
2009-04-14	05:03:00	0
2009-04-14	05:04:00	0
2009-04-14	05:05:00	0
2009-04-14	05:06:00	12
2009-04-14	05:07:00	0
2009-04-14	05:08:00	0
2009-04-14	05:09:00	0
2009-04-14	05:10:00	0
2009-04-14	05:11:00	0
2009-04-14	05:12:00	0
2009-04-14	05:13:00	0
2009-04-14	05:14:00	0
2009-04-14	05:15:00	0
2009-04-14	05:16:00	0
2009-04-14	05:17:00	0
2009-04-14	05:18:00	0
2009-04-14	05:19:00	0
2009-04-14	05:20:00	0
2009-04-14	05:21:00	0
2009-04-14	05:22:00	0
2009-04-14	05:23:00	0
2009-04-14	05:24:00	0
2009-04-14	05:25:00	12
2009-04-14	05:26:00	0
2009-04-14	05:27:00	0
2009-04-14	05:28:00	0
2009-04-14	05:29:00	0
2009-04-14	05:30:00	12
2009-04-14	05:31:00	0
2009-04-14	05:32:00	0
2009-04-14	05:33:00	12
2009-04-14	05:34:00	0
2009-04-14	05:35:00	0
2009-04-14	05:36:00	0
2009-04-14	05:37:00	12
2009-04-14	05:38:00	0
2009-04-14	05:39:00	384
2009-04-14	05:40:00	0
2009-04-14	05:41:00	0
2009-04-14	05:42:00	0
2009-04-14	05:43:00	0
2009-04-14	05:44:00	0
2009-04-14	05:45:00	0
2009-04-14	05:46:00	0
2009-04-14	05:47:00	0
2009-04-14	05:48:00	0
2009-04-14	05:49:00	0
2009-04-14	05:50:00	0
2009-04-14	05:51:00	0
2009-04-14	05:52:00	0
2009-04-14	05:53:00	0
2009-04-14	05:54:00	0
2009-04-14	05:55:00	0
2009-04-14	05:56:00	0
2009-04-14	05:57:00	0
2009-04-14	05:58:00	0
2009-04-14	05:59:00	0
2009-04-14	06:00:00	0
2009-04-14	06:01:00	0
2009-04-14	06:02:00	0
2009-04-14	06:03:00	0
2009-04-14	06:04:00	0
2009-04-14	06:05:00	0
2009-04-14	06:06:00	0
2009-04-14	06:07:00	0
2009-04-14	06:08:00	0
2009-04-14	06:09:00	0
2009-04-14	06:10:00	0
2009-04-14	06:11:00	0
2009-04-14	06:12:00	0
2009-04-14	06:13:00	0
2009-04-14	06:14:00	0
2009-04-14	06:15:00	0
2009-04-14	06:16:00	0
2009-04-14	06:17:00	0
2009-04-14	06:18:00	0
2009-04-14	06:19:00	0
2009-04-14	06:20:00	0
2009-04-14	06:21:00	0
2009-04-14	06:22:00	12
2009-04-14	06:23:00	12
2009-04-14	06:24:00	0
2009-04-14	06:25:00	0
2009-04-14	06:26:00	0
2009-04-14	06:27:00	0
2009-04-14	06:28:00	0
2009-04-14	06:29:00	0
2009-04-14	06:30:00	0
2009-04-14	06:31:00	0
2009-04-14	06:32:00	0
2009-04-14	06:33:00	0
2009-04-14	06:34:00	0
2009-04-14	06:35:00	0
2009-04-14	06:36:00	0
2009-04-14	06:37:00	0
2009-04-14	06:38:00	0
2009-04-14	06:39:00	0
2009-04-14	06:40:00	0
2009-04-14	06:41:00	0
2009-04-14	06:42:00	12
2009-04-14	06:43:00	0
2009-04-14	06:44:00	0
2009-04-14	06:45:00	0
2009-04-14	06:46:00	0
2009-04-14	06:47:00	0
2009-04-14	06:48:00	0
2009-04-14	06:49:00	0
2009-04-14	06:50:00	0
2009-04-14	06:51:00	0
2009-04-14	06:52:00	0
2009-04-14	06:53:00	0
2009-04-14	06:54:00	0
2009-04-14	06:55:00	0
2009-04-14	06:56:00	48
2009-04-14	06:57:00	0
2009-04-14	06:58:00	0
2009-04-14	06:59:00	0
2009-04-14	07:00:00	0
2009-04-14	07:01:00	0
2009-04-14	07:02:00	0
2009-04-14	07:03:00	0
2009-04-14	07:04:00	0
2009-04-14	07:05:00	0
2009-04-14	07:06:00	24
2009-04-14	07:07:00	0
2009-04-14	07:08:00	0
2009-04-14	07:09:00	0
2009-04-14	07:10:00	0
2009-04-14	07:11:00	0
2009-04-14	07:12:00	0
2009-04-14	07:13:00	0
2009-04-14	07:14:00	0
2009-04-14	07:15:00	12
2009-04-14	07:16:00	36
2009-04-14	07:17:00	0
2009-04-14	07:18:00	97
2009-04-14	07:19:00	60
2009-04-14	07:20:00	0
2009-04-14	07:21:00	350
2009-04-14	07:22:00	367
2009-04-14	07:23:00	85
2009-04-14	07:24:00	546
2009-04-14	07:25:00	824
2009-04-14	07:26:00	896
2009-04-14	07:27:00	1051
2009-04-14	07:28:00	287
2009-04-14	07:29:00	604
2009-04-14	07:30:00	200
2009-04-14	07:31:00	0
2009-04-14	07:32:00	0
2009-04-14	07:33:00	0
2009-04-14	07:34:00	24
2009-04-14	07:35:00	24
2009-04-14	07:36:00	12
2009-04-14	07:37:00	12
2009-04-14	07:38:00	0
2009-04-14	07:39:00	72
2009-04-14	07:40:00	584
2009-04-14	07:41:00	24
2009-04-14	07:42:00	0
2009-04-14	07:43:00	0
2009-04-14	07:44:00	0
2009-04-14	07:45:00	0
2009-04-14	07:46:00	0
2009-04-14	07:47:00	0
2009-04-14	07:48:00	0
2009-04-14	07:49:00	12
2009-04-14	07:50:00	12
2009-04-14	07:51:00	0
2009-04-14	07:52:00	0
2009-04-14	07:53:00	0
2009-04-14	07:54:00	0
2009-04-14	07:55:00	0
2009-04-14	07:56:00	0
2009-04-14	07:57:00	0
2009-04-14	07:58:00	0
2009-04-14	07:59:00	0
2009-04-14	08:00:00	36
2009-04-14	08:01:00	171
2009-04-14	08:02:00	0
2009-04-14	08:03:00	12
2009-04-14	08:04:00	97
2009-04-14	08:05:00	333
2009-04-14	08:06:00	24
2009-04-14	08:07:00	24
2009-04-14	08:08:00	229
2009-04-14	08:09:00	0
2009-04-14	08:10:00	24
2009-04-14	08:11:00	0
2009-04-14	08:12:00	0
2009-04-14	08:13:00	0
2009-04-14	08:14:00	0
2009-04-14	08:15:00	0
2009-04-14	08:16:00	0
2009-04-14	08:17:00	0
2009-04-14	08:18:00	0
2009-04-14	08:19:00	0
2009-04-14	08:20:00	12
2009-04-14	08:21:00	0
2009-04-14	08:22:00	12
2009-04-14	08:23:00	0
2009-04-14	08:24:00	0
2009-04-14	08:25:00	0
2009-04-14	08:26:00	0
2009-04-14	08:27:00	12
2009-04-14	08:28:00	0
2009-04-14	08:29:00	0
2009-04-14	08:30:00	0
2009-04-14	08:31:00	48
2009-04-14	08:32:00	12
2009-04-14	08:33:00	0
2009-04-14	08:34:00	0
2009-04-14	08:35:00	273
2009-04-14	08:36:00	0
2009-04-14	08:37:00	0
2009-04-14	08:38:00	12
2009-04-14	08:39:00	12
2009-04-14	08:40:00	0
2009-04-14	08:41:00	0
2009-04-14	08:42:00	0
2009-04-14	08:43:00	0
2009-04-14	08:44:00	186
2009-04-14	08:45:00	60
2009-04-14	08:46:00	0
2009-04-14	08:47:00	24
2009-04-14	08:48:00	0
2009-04-14	08:49:00	0
2009-04-14	08:50:00	244
2009-04-14	08:51:00	333
2009-04-14	08:52:00	0
2009-04-14	08:53:00	0
2009-04-14	08:54:00	0
2009-04-14	08:55:00	0
2009-04-14	08:56:00	0
2009-04-14	08:57:00	0
2009-04-14	08:58:00	0
2009-04-14	08:59:00	0
2009-04-14	09:00:00	0
2009-04-14	09:01:00	0
2009-04-14	09:02:00	0
2009-04-14	09:03:00	0
2009-04-14	09:04:00	0
2009-04-14	09:05:00	0
2009-04-14	09:06:00	0
2009-04-14	09:07:00	0
2009-04-14	09:08:00	0
[truncated: 49,851 more rows]
