# Supplementary material for: Initial evaluation of nighttime restlessness in a naturally occurring canine model of osteoarthritis pain
Source: PeerJ. 2015 Feb 17;3:e772. doi: 10.7717/peerj.772 (PMC4340376; doi:10.7717/peerj.772)
Supplement: Supplemental Information 69 [file peerj-03-772-s069.xlsx]

## Sheet: 07_Data
Tx #	DateTime	Activity	DTA vs NTA	Hour	Tx Day	Weekday	Tx Rx	Peak DTA Time?	Last 7 Day?
1	2009-08-25 21:31:00	0	NTA	21	1	3	M
1	2009-08-25 21:32:00	351	NTA	21	1	3	M
1	2009-08-25 21:33:00	295	NTA	21	1	3	M
1	2009-08-25 21:34:00	30	NTA	21	1	3	M
1	2009-08-25 21:35:00	0	NTA	21	1	3	M
1	2009-08-25 21:36:00	0	NTA	21	1	3	M
1	2009-08-25 21:37:00	0	NTA	21	1	3	M
1	2009-08-25 21:38:00	0	NTA	21	1	3	M
1	2009-08-25 21:39:00	0	NTA	21	1	3	M
1	2009-08-25 21:40:00	0	NTA	21	1	3	M
1	2009-08-25 21:41:00	0	NTA	21	1	3	M
1	2009-08-25 21:42:00	0	NTA	21	1	3	M
1	2009-08-25 21:43:00	0	NTA	21	1	3	M
1	2009-08-25 21:44:00	169	NTA	21	1	3	M
1	2009-08-25 21:45:00	0	NTA	21	1	3	M
1	2009-08-25 21:46:00	0	NTA	21	1	3	M
1	2009-08-25 21:47:00	0	NTA	21	1	3	M
1	2009-08-25 21:48:00	0	NTA	21	1	3	M
1	2009-08-25 21:49:00	0	NTA	21	1	3	M
1	2009-08-25 21:50:00	0	NTA	21	1	3	M
1	2009-08-25 21:51:00	0	NTA	21	1	3	M
1	2009-08-25 21:52:00	0	NTA	21	1	3	M
1	2009-08-25 21:53:00	0	NTA	21	1	3	M
1	2009-08-25 21:54:00	0	NTA	21	1	3	M
1	2009-08-25 21:55:00	0	NTA	21	1	3	M
1	2009-08-25 21:56:00	0	NTA	21	1	3	M
1	2009-08-25 21:57:00	0	NTA	21	1	3	M
1	2009-08-25 21:58:00	0	NTA	21	1	3	M
1	2009-08-25 21:59:00	0	NTA	21	1	3	M
1	2009-08-25 22:00:00	10	NTA	21	1	3	M
1	2009-08-25 22:01:00	0	NTA	22	1	3	M
1	2009-08-25 22:02:00	0	NTA	22	1	3	M
1	2009-08-25 22:03:00	0	NTA	22	1	3	M
1	2009-08-25 22:04:00	10	NTA	22	1	3	M
1	2009-08-25 22:05:00	0	NTA	22	1	3	M
1	2009-08-25 22:06:00	0	NTA	22	1	3	M
1	2009-08-25 22:07:00	0	NTA	22	1	3	M
1	2009-08-25 22:08:00	0	NTA	22	1	3	M
1	2009-08-25 22:09:00	0	NTA	22	1	3	M
1	2009-08-25 22:10:00	0	NTA	22	1	3	M
1	2009-08-25 22:11:00	0	NTA	22	1	3	M
1	2009-08-25 22:12:00	0	NTA	22	1	3	M
1	2009-08-25 22:13:00	0	NTA	22	1	3	M
1	2009-08-25 22:14:00	0	NTA	22	1	3	M
1	2009-08-25 22:15:00	0	NTA	22	1	3	M
1	2009-08-25 22:16:00	0	NTA	22	1	3	M
1	2009-08-25 22:17:00	0	NTA	22	1	3	M
1	2009-08-25 22:18:00	0	NTA	22	1	3	M
1	2009-08-25 22:19:00	0	NTA	22	1	3	M
1	2009-08-25 22:20:00	0	NTA	22	1	3	M
1	2009-08-25 22:21:00	0	NTA	22	1	3	M
1	2009-08-25 22:22:00	0	NTA	22	1	3	M
1	2009-08-25 22:23:00	0	NTA	22	1	3	M
1	2009-08-25 22:24:00	0	NTA	22	1	3	M
1	2009-08-25 22:25:00	10	NTA	22	1	3	M
1	2009-08-25 22:26:00	0	NTA	22	1	3	M
1	2009-08-25 22:27:00	0	NTA	22	1	3	M
1	2009-08-25 22:28:00	0	NTA	22	1	3	M
1	2009-08-25 22:29:00	0	NTA	22	1	3	M
1	2009-08-25 22:30:00	0	NTA	22	1	3	M
1	2009-08-25 22:31:00	0	NTA	22	1	3	M
1	2009-08-25 22:32:00	0	NTA	22	1	3	M
1	2009-08-25 22:33:00	0	NTA	22	1	3	M
1	2009-08-25 22:34:00	0	NTA	22	1	3	M
1	2009-08-25 22:35:00	0	NTA	22	1	3	M
1	2009-08-25 22:36:00	0	NTA	22	1	3	M
1	2009-08-25 22:37:00	0	NTA	22	1	3	M
1	2009-08-25 22:38:00	0	NTA	22	1	3	M
1	2009-08-25 22:39:00	0	NTA	22	1	3	M
1	2009-08-25 22:40:00	0	NTA	22	1	3	M
1	2009-08-25 22:41:00	0	NTA	22	1	3	M
1	2009-08-25 22:42:00	0	NTA	22	1	3	M
1	2009-08-25 22:43:00	0	NTA	22	1	3	M
1	2009-08-25 22:44:00	0	NTA	22	1	3	M
1	2009-08-25 22:45:00	0	NTA	22	1	3	M
1	2009-08-25 22:46:00	0	NTA	22	1	3	M
1	2009-08-25 22:47:00	0	NTA	22	1	3	M
1	2009-08-25 22:48:00	0	NTA	22	1	3	M
1	2009-08-25 22:49:00	0	NTA	22	1	3	M
1	2009-08-25 22:50:00	0	NTA	22	1	3	M
1	2009-08-25 22:51:00	0	NTA	22	1	3	M
1	2009-08-25 22:52:00	0	NTA	22	1	3	M
1	2009-08-25 22:53:00	0	NTA	22	1	3	M
1	2009-08-25 22:54:00	0	NTA	22	1	3	M
1	2009-08-25 22:55:00	0	NTA	22	1	3	M
1	2009-08-25 22:56:00	0	NTA	22	1	3	M
1	2009-08-25 22:57:00	0	NTA	22	1	3	M
1	2009-08-25 22:58:00	0	NTA	22	1	3	M
1	2009-08-25 22:59:00	41	NTA	22	1	3	M
1	2009-08-25 23:00:00	81	NTA	22	1	3	M
1	2009-08-25 23:01:00	0	NTA	23	1	3	M
1	2009-08-25 23:02:00	0	NTA	23	1	3	M
1	2009-08-25 23:03:00	0	NTA	23	1	3	M
1	2009-08-25 23:04:00	0	NTA	23	1	3	M
1	2009-08-25 23:05:00	0	NTA	23	1	3	M
1	2009-08-25 23:06:00	0	NTA	23	1	3	M
1	2009-08-25 23:07:00	0	NTA	23	1	3	M
1	2009-08-25 23:08:00	0	NTA	23	1	3	M
1	2009-08-25 23:09:00	0	NTA	23	1	3	M
1	2009-08-25 23:10:00	0	NTA	23	1	3	M
1	2009-08-25 23:11:00	0	NTA	23	1	3	M
1	2009-08-25 23:12:00	0	NTA	23	1	3	M
1	2009-08-25 23:13:00	0	NTA	23	1	3	M
1	2009-08-25 23:14:00	0	NTA	23	1	3	M
1	2009-08-25 23:15:00	0	NTA	23	1	3	M
1	2009-08-25 23:16:00	0	NTA	23	1	3	M
1	2009-08-25 23:17:00	0	NTA	23	1	3	M
1	2009-08-25 23:18:00	0	NTA	23	1	3	M
1	2009-08-25 23:19:00	0	NTA	23	1	3	M
1	2009-08-25 23:20:00	0	NTA	23	1	3	M
1	2009-08-25 23:21:00	0	NTA	23	1	3	M
1	2009-08-25 23:22:00	41	NTA	23	1	3	M
1	2009-08-25 23:23:00	156	NTA	23	1	3	M
1	2009-08-25 23:24:00	71	NTA	23	1	3	M
1	2009-08-25 23:25:00	193	NTA	23	1	3	M
1	2009-08-25 23:26:00	0	NTA	23	1	3	M
1	2009-08-25 23:27:00	0	NTA	23	1	3	M
1	2009-08-25 23:28:00	0	NTA	23	1	3	M
1	2009-08-25 23:29:00	0	NTA	23	1	3	M
1	2009-08-25 23:30:00	0	NTA	23	1	3	M
1	2009-08-25 23:31:00	0	NTA	23	1	3	M
1	2009-08-25 23:32:00	0	NTA	23	1	3	M
1	2009-08-25 23:33:00	0	NTA	23	1	3	M
1	2009-08-25 23:34:00	0	NTA	23	1	3	M
1	2009-08-25 23:35:00	10	NTA	23	1	3	M
1	2009-08-25 23:36:00	0	NTA	23	1	3	M
1	2009-08-25 23:37:00	0	NTA	23	1	3	M
1	2009-08-25 23:38:00	0	NTA	23	1	3	M
1	2009-08-25 23:39:00	0	NTA	23	1	3	M
1	2009-08-25 23:40:00	0	NTA	23	1	3	M
1	2009-08-25 23:41:00	0	NTA	23	1	3	M
1	2009-08-25 23:42:00	0	NTA	23	1	3	M
1	2009-08-25 23:43:00	0	NTA	23	1	3	M
1	2009-08-25 23:44:00	0	NTA	23	1	3	M
1	2009-08-25 23:45:00	0	NTA	23	1	3	M
1	2009-08-25 23:46:00	51	NTA	23	1	3	M
1	2009-08-25 23:47:00	0	NTA	23	1	3	M
1	2009-08-25 23:48:00	0	NTA	23	1	3	M
1	2009-08-25 23:49:00	0	NTA	23	1	3	M
1	2009-08-25 23:50:00	0	NTA	23	1	3	M
1	2009-08-25 23:51:00	0	NTA	23	1	3	M
1	2009-08-25 23:52:00	0	NTA	23	1	3	M
1	2009-08-25 23:53:00	0	NTA	23	1	3	M
1	2009-08-25 23:54:00	0	NTA	23	1	3	M
1	2009-08-25 23:55:00	0	NTA	23	1	3	M
1	2009-08-25 23:56:00	0	NTA	23	1	3	M
1	2009-08-25 23:57:00	0	NTA	23	1	3	M
1	2009-08-25 23:58:00	0	NTA	23	1	3	M
1	2009-08-25 23:59:00	0	NTA	23	1	3	M
1	2009-08-26	0	NTA	23	1	3	M
1	2009-08-26 00:01:00	0	NTA	0	1	4	M
1	2009-08-26 00:02:00	0	NTA	0	1	4	M
1	2009-08-26 00:03:00	0	NTA	0	1	4	M
1	2009-08-26 00:04:00	0	NTA	0	1	4	M
1	2009-08-26 00:05:00	0	NTA	0	1	4	M
1	2009-08-26 00:06:00	0	NTA	0	1	4	M
1	2009-08-26 00:07:00	0	NTA	0	1	4	M
1	2009-08-26 00:08:00	0	NTA	0	1	4	M
1	2009-08-26 00:09:00	0	NTA	0	1	4	M
1	2009-08-26 00:10:00	0	NTA	0	1	4	M
1	2009-08-26 00:11:00	0	NTA	0	1	4	M
1	2009-08-26 00:12:00	0	NTA	0	1	4	M
1	2009-08-26 00:13:00	0	NTA	0	1	4	M
1	2009-08-26 00:14:00	0	NTA	0	1	4	M
1	2009-08-26 00:15:00	0	NTA	0	1	4	M
1	2009-08-26 00:16:00	0	NTA	0	1	4	M
1	2009-08-26 00:17:00	0	NTA	0	1	4	M
1	2009-08-26 00:18:00	0	NTA	0	1	4	M
1	2009-08-26 00:19:00	0	NTA	0	1	4	M
1	2009-08-26 00:20:00	20	NTA	0	1	4	M
1	2009-08-26 00:21:00	0	NTA	0	1	4	M
1	2009-08-26 00:22:00	0	NTA	0	1	4	M
1	2009-08-26 00:23:00	81	NTA	0	1	4	M
1	2009-08-26 00:24:00	20	NTA	0	1	4	M
1	2009-08-26 00:25:00	0	NTA	0	1	4	M
1	2009-08-26 00:26:00	0	NTA	0	1	4	M
1	2009-08-26 00:27:00	0	NTA	0	1	4	M
1	2009-08-26 00:28:00	0	NTA	0	1	4	M
1	2009-08-26 00:29:00	0	NTA	0	1	4	M
1	2009-08-26 00:30:00	30	NTA	0	1	4	M
1	2009-08-26 00:31:00	0	NTA	0	1	4	M
1	2009-08-26 00:32:00	0	NTA	0	1	4	M
1	2009-08-26 00:33:00	0	NTA	0	1	4	M
1	2009-08-26 00:34:00	0	NTA	0	1	4	M
1	2009-08-26 00:35:00	0	NTA	0	1	4	M
1	2009-08-26 00:36:00	0	NTA	0	1	4	M
1	2009-08-26 00:37:00	0	NTA	0	1	4	M
1	2009-08-26 00:38:00	0	NTA	0	1	4	M
1	2009-08-26 00:39:00	0	NTA	0	1	4	M
1	2009-08-26 00:40:00	0	NTA	0	1	4	M
1	2009-08-26 00:41:00	0	NTA	0	1	4	M
1	2009-08-26 00:42:00	0	NTA	0	1	4	M
1	2009-08-26 00:43:00	0	NTA	0	1	4	M
1	2009-08-26 00:44:00	0	NTA	0	1	4	M
1	2009-08-26 00:45:00	0	NTA	0	1	4	M
1	2009-08-26 00:46:00	0	NTA	0	1	4	M
1	2009-08-26 00:47:00	0	NTA	0	1	4	M
1	2009-08-26 00:48:00	0	NTA	0	1	4	M
1	2009-08-26 00:49:00	0	NTA	0	1	4	M
1	2009-08-26 00:50:00	0	NTA	0	1	4	M
1	2009-08-26 00:51:00	0	NTA	0	1	4	M
1	2009-08-26 00:52:00	0	NTA	0	1	4	M
1	2009-08-26 00:53:00	20	NTA	0	1	4	M
1	2009-08-26 00:54:00	0	NTA	0	1	4	M
1	2009-08-26 00:55:00	0	NTA	0	1	4	M
1	2009-08-26 00:56:00	0	NTA	0	1	4	M
1	2009-08-26 00:57:00	0	NTA	0	1	4	M
1	2009-08-26 00:58:00	0	NTA	0	1	4	M
1	2009-08-26 00:59:00	0	NTA	0	1	4	M
1	2009-08-26 01:00:00	0	NTA	0	1	4	M
1	2009-08-26 01:01:00	0	NTA	1	1	4	M
1	2009-08-26 01:02:00	0	NTA	1	1	4	M
1	2009-08-26 01:03:00	0	NTA	1	1	4	M
1	2009-08-26 01:04:00	0	NTA	1	1	4	M
1	2009-08-26 01:05:00	0	NTA	1	1	4	M
1	2009-08-26 01:06:00	0	NTA	1	1	4	M
1	2009-08-26 01:07:00	0	NTA	1	1	4	M
1	2009-08-26 01:08:00	0	NTA	1	1	4	M
1	2009-08-26 01:09:00	0	NTA	1	1	4	M
1	2009-08-26 01:10:00	0	NTA	1	1	4	M
1	2009-08-26 01:11:00	0	NTA	1	1	4	M
1	2009-08-26 01:12:00	0	NTA	1	1	4	M
1	2009-08-26 01:13:00	0	NTA	1	1	4	M
1	2009-08-26 01:14:00	0	NTA	1	1	4	M
1	2009-08-26 01:15:00	0	NTA	1	1	4	M
1	2009-08-26 01:16:00	0	NTA	1	1	4	M
1	2009-08-26 01:17:00	0	NTA	1	1	4	M
1	2009-08-26 01:18:00	0	NTA	1	1	4	M
1	2009-08-26 01:19:00	0	NTA	1	1	4	M
1	2009-08-26 01:20:00	0	NTA	1	1	4	M
1	2009-08-26 01:21:00	0	NTA	1	1	4	M
1	2009-08-26 01:22:00	0	NTA	1	1	4	M
1	2009-08-26 01:23:00	0	NTA	1	1	4	M
1	2009-08-26 01:24:00	0	NTA	1	1	4	M
1	2009-08-26 01:25:00	0	NTA	1	1	4	M
1	2009-08-26 01:26:00	0	NTA	1	1	4	M
1	2009-08-26 01:27:00	0	NTA	1	1	4	M
1	2009-08-26 01:28:00	0	NTA	1	1	4	M
1	2009-08-26 01:29:00	0	NTA	1	1	4	M
1	2009-08-26 01:30:00	0	NTA	1	1	4	M
1	2009-08-26 01:31:00	0	NTA	1	1	4	M
1	2009-08-26 01:32:00	0	NTA	1	1	4	M
1	2009-08-26 01:33:00	0	NTA	1	1	4	M
1	2009-08-26 01:34:00	0	NTA	1	1	4	M
1	2009-08-26 01:35:00	0	NTA	1	1	4	M
1	2009-08-26 01:36:00	0	NTA	1	1	4	M
1	2009-08-26 01:37:00	0	NTA	1	1	4	M
1	2009-08-26 01:38:00	0	NTA	1	1	4	M
1	2009-08-26 01:39:00	0	NTA	1	1	4	M
1	2009-08-26 01:40:00	0	NTA	1	1	4	M
1	2009-08-26 01:41:00	0	NTA	1	1	4	M
1	2009-08-26 01:42:00	0	NTA	1	1	4	M
1	2009-08-26 01:43:00	10	NTA	1	1	4	M
1	2009-08-26 01:44:00	0	NTA	1	1	4	M
1	2009-08-26 01:45:00	0	NTA	1	1	4	M
1	2009-08-26 01:46:00	0	NTA	1	1	4	M
1	2009-08-26 01:47:00	0	NTA	1	1	4	M
1	2009-08-26 01:48:00	0	NTA	1	1	4	M
1	2009-08-26 01:49:00	0	NTA	1	1	4	M
1	2009-08-26 01:50:00	0	NTA	1	1	4	M
1	2009-08-26 01:51:00	0	NTA	1	1	4	M
1	2009-08-26 01:52:00	0	NTA	1	1	4	M
1	2009-08-26 01:53:00	0	NTA	1	1	4	M
1	2009-08-26 01:54:00	0	NTA	1	1	4	M
1	2009-08-26 01:55:00	0	NTA	1	1	4	M
1	2009-08-26 01:56:00	0	NTA	1	1	4	M
1	2009-08-26 01:57:00	0	NTA	1	1	4	M
1	2009-08-26 01:58:00	0	NTA	1	1	4	M
1	2009-08-26 01:59:00	0	NTA	1	1	4	M
1	2009-08-26 02:00:00	0	NTA	1	1	4	M
1	2009-08-26 02:01:00	0	NTA	2	1	4	M
1	2009-08-26 02:02:00	0	NTA	2	1	4	M
1	2009-08-26 02:03:00	0	NTA	2	1	4	M
1	2009-08-26 02:04:00	0	NTA	2	1	4	M
1	2009-08-26 02:05:00	0	NTA	2	1	4	M
1	2009-08-26 02:06:00	0	NTA	2	1	4	M
1	2009-08-26 02:07:00	30	NTA	2	1	4	M
1	2009-08-26 02:08:00	0	NTA	2	1	4	M
1	2009-08-26 02:09:00	0	NTA	2	1	4	M
1	2009-08-26 02:10:00	0	NTA	2	1	4	M
1	2009-08-26 02:11:00	0	NTA	2	1	4	M
1	2009-08-26 02:12:00	0	NTA	2	1	4	M
1	2009-08-26 02:13:00	0	NTA	2	1	4	M
1	2009-08-26 02:14:00	0	NTA	2	1	4	M
1	2009-08-26 02:15:00	0	NTA	2	1	4	M
1	2009-08-26 02:16:00	0	NTA	2	1	4	M
1	2009-08-26 02:17:00	0	NTA	2	1	4	M
1	2009-08-26 02:18:00	0	NTA	2	1	4	M
1	2009-08-26 02:19:00	0	NTA	2	1	4	M
1	2009-08-26 02:20:00	0	NTA	2	1	4	M
1	2009-08-26 02:21:00	0	NTA	2	1	4	M
1	2009-08-26 02:22:00	0	NTA	2	1	4	M
1	2009-08-26 02:23:00	0	NTA	2	1	4	M
1	2009-08-26 02:24:00	0	NTA	2	1	4	M
1	2009-08-26 02:25:00	0	NTA	2	1	4	M
1	2009-08-26 02:26:00	0	NTA	2	1	4	M
1	2009-08-26 02:27:00	0	NTA	2	1	4	M
1	2009-08-26 02:28:00	0	NTA	2	1	4	M
1	2009-08-26 02:29:00	0	NTA	2	1	4	M
1	2009-08-26 02:30:00	0	NTA	2	1	4	M
1	2009-08-26 02:31:00	0	NTA	2	1	4	M
1	2009-08-26 02:32:00	0	NTA	2	1	4	M
1	2009-08-26 02:33:00	0	NTA	2	1	4	M
1	2009-08-26 02:34:00	61	NTA	2	1	4	M
1	2009-08-26 02:35:00	132	NTA	2	1	4	M
1	2009-08-26 02:36:00	81	NTA	2	1	4	M
1	2009-08-26 02:37:00	0	NTA	2	1	4	M
1	2009-08-26 02:38:00	0	NTA	2	1	4	M
1	2009-08-26 02:39:00	0	NTA	2	1	4	M
1	2009-08-26 02:40:00	0	NTA	2	1	4	M
1	2009-08-26 02:41:00	0	NTA	2	1	4	M
1	2009-08-26 02:42:00	0	NTA	2	1	4	M
1	2009-08-26 02:43:00	0	NTA	2	1	4	M
1	2009-08-26 02:44:00	0	NTA	2	1	4	M
1	2009-08-26 02:45:00	0	NTA	2	1	4	M
1	2009-08-26 02:46:00	0	NTA	2	1	4	M
1	2009-08-26 02:47:00	0	NTA	2	1	4	M
1	2009-08-26 02:48:00	0	NTA	2	1	4	M
1	2009-08-26 02:49:00	0	NTA	2	1	4	M
1	2009-08-26 02:50:00	0	NTA	2	1	4	M
1	2009-08-26 02:51:00	0	NTA	2	1	4	M
1	2009-08-26 02:52:00	0	NTA	2	1	4	M
1	2009-08-26 02:53:00	0	NTA	2	1	4	M
1	2009-08-26 02:54:00	0	NTA	2	1	4	M
1	2009-08-26 02:55:00	0	NTA	2	1	4	M
1	2009-08-26 02:56:00	0	NTA	2	1	4	M
1	2009-08-26 02:57:00	0	NTA	2	1	4	M
1	2009-08-26 02:58:00	0	NTA	2	1	4	M
1	2009-08-26 02:59:00	61	NTA	2	1	4	M
1	2009-08-26 03:00:00	0	NTA	2	1	4	M
1	2009-08-26 03:01:00	0	NTA	3	1	4	M
1	2009-08-26 03:02:00	0	NTA	3	1	4	M
1	2009-08-26 03:03:00	30	NTA	3	1	4	M
1	2009-08-26 03:04:00	0	NTA	3	1	4	M
1	2009-08-26 03:05:00	0	NTA	3	1	4	M
1	2009-08-26 03:06:00	0	NTA	3	1	4	M
1	2009-08-26 03:07:00	0	NTA	3	1	4	M
1	2009-08-26 03:08:00	0	NTA	3	1	4	M
1	2009-08-26 03:09:00	0	NTA	3	1	4	M
1	2009-08-26 03:10:00	0	NTA	3	1	4	M
1	2009-08-26 03:11:00	0	NTA	3	1	4	M
1	2009-08-26 03:12:00	0	NTA	3	1	4	M
1	2009-08-26 03:13:00	0	NTA	3	1	4	M
1	2009-08-26 03:14:00	0	NTA	3	1	4	M
1	2009-08-26 03:15:00	0	NTA	3	1	4	M
1	2009-08-26 03:16:00	0	NTA	3	1	4	M
1	2009-08-26 03:17:00	0	NTA	3	1	4	M
1	2009-08-26 03:18:00	0	NTA	3	1	4	M
1	2009-08-26 03:19:00	0	NTA	3	1	4	M
1	2009-08-26 03:20:00	0	NTA	3	1	4	M
1	2009-08-26 03:21:00	0	NTA	3	1	4	M
1	2009-08-26 03:22:00	0	NTA	3	1	4	M
1	2009-08-26 03:23:00	0	NTA	3	1	4	M
1	2009-08-26 03:24:00	0	NTA	3	1	4	M
1	2009-08-26 03:25:00	0	NTA	3	1	4	M
1	2009-08-26 03:26:00	0	NTA	3	1	4	M
1	2009-08-26 03:27:00	0	NTA	3	1	4	M
1	2009-08-26 03:28:00	0	NTA	3	1	4	M
1	2009-08-26 03:29:00	20	NTA	3	1	4	M
1	2009-08-26 03:30:00	61	NTA	3	1	4	M
1	2009-08-26 03:31:00	0	NTA	3	1	4	M
1	2009-08-26 03:32:00	0	NTA	3	1	4	M
1	2009-08-26 03:33:00	0	NTA	3	1	4	M
1	2009-08-26 03:34:00	0	NTA	3	1	4	M
1	2009-08-26 03:35:00	0	NTA	3	1	4	M
1	2009-08-26 03:36:00	0	NTA	3	1	4	M
1	2009-08-26 03:37:00	0	NTA	3	1	4	M
1	2009-08-26 03:38:00	0	NTA	3	1	4	M
1	2009-08-26 03:39:00	0	NTA	3	1	4	M
1	2009-08-26 03:40:00	0	NTA	3	1	4	M
1	2009-08-26 03:41:00	0	NTA	3	1	4	M
1	2009-08-26 03:42:00	0	NTA	3	1	4	M
1	2009-08-26 03:43:00	0	NTA	3	1	4	M
1	2009-08-26 03:44:00	0	NTA	3	1	4	M
1	2009-08-26 03:45:00	0	NTA	3	1	4	M
1	2009-08-26 03:46:00	0	NTA	3	1	4	M
1	2009-08-26 03:47:00	10	NTA	3	1	4	M
1	2009-08-26 03:48:00	91	NTA	3	1	4	M
1	2009-08-26 03:49:00	475	NTA	3	1	4	M
1	2009-08-26 03:50:00	20	NTA	3	1	4	M
1	2009-08-26 03:51:00	0	NTA	3	1	4	M
1	2009-08-26 03:52:00	0	NTA	3	1	4	M
1	2009-08-26 03:53:00	0	NTA	3	1	4	M
1	2009-08-26 03:54:00	0	NTA	3	1	4	M
1	2009-08-26 03:55:00	0	NTA	3	1	4	M
1	2009-08-26 03:56:00	0	NTA	3	1	4	M
1	2009-08-26 03:57:00	0	NTA	3	1	4	M
1	2009-08-26 03:58:00	0	NTA	3	1	4	M
1	2009-08-26 03:59:00	0	NTA	3	1	4	M
1	2009-08-26 04:00:00	0	NTA	3	1	4	M
1	2009-08-26 04:01:00	0	NTA	4	1	4	M
1	2009-08-26 04:02:00	0	NTA	4	1	4	M
1	2009-08-26 04:03:00	0	NTA	4	1	4	M
1	2009-08-26 04:04:00	0	NTA	4	1	4	M
1	2009-08-26 04:05:00	0	NTA	4	1	4	M
1	2009-08-26 04:06:00	0	NTA	4	1	4	M
1	2009-08-26 04:07:00	0	NTA	4	1	4	M
1	2009-08-26 04:08:00	51	NTA	4	1	4	M
1	2009-08-26 04:09:00	0	NTA	4	1	4	M
1	2009-08-26 04:10:00	0	NTA	4	1	4	M
1	2009-08-26 04:11:00	0	NTA	4	1	4	M
1	2009-08-26 04:12:00	0	NTA	4	1	4	M
1	2009-08-26 04:13:00	0	NTA	4	1	4	M
1	2009-08-26 04:14:00	0	NTA	4	1	4	M
1	2009-08-26 04:15:00	0	NTA	4	1	4	M
1	2009-08-26 04:16:00	0	NTA	4	1	4	M
1	2009-08-26 04:17:00	0	NTA	4	1	4	M
1	2009-08-26 04:18:00	0	NTA	4	1	4	M
1	2009-08-26 04:19:00	0	NTA	4	1	4	M
1	2009-08-26 04:20:00	0	NTA	4	1	4	M
1	2009-08-26 04:21:00	0	NTA	4	1	4	M
1	2009-08-26 04:22:00	0	NTA	4	1	4	M
1	2009-08-26 04:23:00	0	NTA	4	1	4	M
1	2009-08-26 04:24:00	0	NTA	4	1	4	M
1	2009-08-26 04:25:00	0	NTA	4	1	4	M
1	2009-08-26 04:26:00	0	NTA	4	1	4	M
1	2009-08-26 04:27:00	0	NTA	4	1	4	M
1	2009-08-26 04:28:00	0	NTA	4	1	4	M
1	2009-08-26 04:29:00	0	NTA	4	1	4	M
1	2009-08-26 04:30:00	0	NTA	4	1	4	M
1	2009-08-26 04:31:00	0	NTA	4	1	4	M
1	2009-08-26 04:32:00	0	NTA	4	1	4	M
1	2009-08-26 04:33:00	0	NTA	4	1	4	M
1	2009-08-26 04:34:00	0	NTA	4	1	4	M
1	2009-08-26 04:35:00	0	NTA	4	1	4	M
1	2009-08-26 04:36:00	0	NTA	4	1	4	M
1	2009-08-26 04:37:00	0	NTA	4	1	4	M
1	2009-08-26 04:38:00	0	NTA	4	1	4	M
1	2009-08-26 04:39:00	0	NTA	4	1	4	M
1	2009-08-26 04:40:00	20	NTA	4	1	4	M
1	2009-08-26 04:41:00	0	NTA	4	1	4	M
1	2009-08-26 04:42:00	0	NTA	4	1	4	M
1	2009-08-26 04:43:00	0	NTA	4	1	4	M
1	2009-08-26 04:44:00	0	NTA	4	1	4	M
1	2009-08-26 04:45:00	0	NTA	4	1	4	M
1	2009-08-26 04:46:00	0	NTA	4	1	4	M
1	2009-08-26 04:47:00	0	NTA	4	1	4	M
1	2009-08-26 04:48:00	0	NTA	4	1	4	M
1	2009-08-26 04:49:00	0	NTA	4	1	4	M
1	2009-08-26 04:50:00	71	NTA	4	1	4	M
1	2009-08-26 04:51:00	0	NTA	4	1	4	M
1	2009-08-26 04:52:00	10	NTA	4	1	4	M
1	2009-08-26 04:53:00	0	NTA	4	1	4	M
1	2009-08-26 04:54:00	144	NTA	4	1	4	M
1	2009-08-26 04:55:00	0	NTA	4	1	4	M
1	2009-08-26 04:56:00	0	NTA	4	1	4	M
1	2009-08-26 04:57:00	0	NTA	4	1	4	M
1	2009-08-26 04:58:00	0	NTA	4	1	4	M
1	2009-08-26 04:59:00	0	NTA	4	1	4	M
1	2009-08-26 05:00:00	0	NTA	4	1	4	M
1	2009-08-26 05:01:00	61	NTA	5	1	4	M
1	2009-08-26 05:02:00	0	NTA	5	1	4	M
1	2009-08-26 05:03:00	0	NTA	5	1	4	M
1	2009-08-26 05:04:00	0	NTA	5	1	4	M
1	2009-08-26 05:05:00	0	NTA	5	1	4	M
1	2009-08-26 05:06:00	0	NTA	5	1	4	M
1	2009-08-26 05:07:00	0	NTA	5	1	4	M
1	2009-08-26 05:08:00	0	NTA	5	1	4	M
1	2009-08-26 05:09:00	0	NTA	5	1	4	M
1	2009-08-26 05:10:00	0	NTA	5	1	4	M
1	2009-08-26 05:11:00	0	NTA	5	1	4	M
1	2009-08-26 05:12:00	0	NTA	5	1	4	M
1	2009-08-26 05:13:00	0	NTA	5	1	4	M
1	2009-08-26 05:14:00	0	NTA	5	1	4	M
1	2009-08-26 05:15:00	0	NTA	5	1	4	M
1	2009-08-26 05:16:00	0	NTA	5	1	4	M
1	2009-08-26 05:17:00	0	NTA	5	1	4	M
1	2009-08-26 05:18:00	0	NTA	5	1	4	M
1	2009-08-26 05:19:00	0	NTA	5	1	4	M
1	2009-08-26 05:20:00	0	NTA	5	1	4	M
1	2009-08-26 05:21:00	0	NTA	5	1	4	M
1	2009-08-26 05:22:00	0	NTA	5	1	4	M
1	2009-08-26 05:23:00	0	NTA	5	1	4	M
1	2009-08-26 05:24:00	0	NTA	5	1	4	M
1	2009-08-26 05:25:00	0	NTA	5	1	4	M
1	2009-08-26 05:26:00	0	NTA	5	1	4	M
1	2009-08-26 05:27:00	0	NTA	5	1	4	M
1	2009-08-26 05:28:00	0	NTA	5	1	4	M
1	2009-08-26 05:29:00	0	NTA	5	1	4	M
1	2009-08-26 05:30:00	20	NTA	5	1	4	M
1	2009-08-26 05:31:00	0	NTA	5	1	4	M
1	2009-08-26 05:32:00	30	NTA	5	1	4	M
1	2009-08-26 05:33:00	0	NTA	5	1	4	M
1	2009-08-26 05:34:00	0	NTA	5	1	4	M
1	2009-08-26 05:35:00	230	NTA	5	1	4	M
1	2009-08-26 05:36:00	91	NTA	5	1	4	M
1	2009-08-26 05:37:00	0	NTA	5	1	4	M
1	2009-08-26 05:38:00	0	NTA	5	1	4	M
1	2009-08-26 05:39:00	0	NTA	5	1	4	M
1	2009-08-26 05:40:00	0	NTA	5	1	4	M
1	2009-08-26 05:41:00	0	NTA	5	1	4	M
1	2009-08-26 05:42:00	0	NTA	5	1	4	M
1	2009-08-26 05:43:00	0	NTA	5	1	4	M
1	2009-08-26 05:44:00	0	NTA	5	1	4	M
1	2009-08-26 05:45:00	0	NTA	5	1	4	M
1	2009-08-26 05:46:00	0	NTA	5	1	4	M
1	2009-08-26 05:47:00	0	NTA	5	1	4	M
1	2009-08-26 05:48:00	0	NTA	5	1	4	M
1	2009-08-26 05:49:00	0	NTA	5	1	4	M
1	2009-08-26 05:50:00	0	NTA	5	1	4	M
1	2009-08-26 05:51:00	0	NTA	5	1	4	M
1	2009-08-26 05:52:00	0	NTA	5	1	4	M
1	2009-08-26 05:53:00	122	NTA	5	1	4	M
1	2009-08-26 05:54:00	0	NTA	5	1	4	M
1	2009-08-26 05:55:00	0	NTA	5	1	4	M
1	2009-08-26 05:56:00	0	NTA	5	1	4	M
1	2009-08-26 05:57:00	0	NTA	5	1	4	M
1	2009-08-26 05:58:00	20	NTA	5	1	4	M
1	2009-08-26 05:59:00	0	NTA	5	1	4	M
1	2009-08-26 06:00:00	0	NTA	5	1	4	M
1	2009-08-26 06:01:00	0	NTA	6	1	4	M
1	2009-08-26 06:02:00	0	NTA	6	1	4	M
1	2009-08-26 06:03:00	0	NTA	6	1	4	M
1	2009-08-26 06:04:00	61	NTA	6	1	4	M
1	2009-08-26 06:05:00	0	NTA	6	1	4	M
1	2009-08-26 06:06:00	0	NTA	6	1	4	M
1	2009-08-26 06:07:00	169	NTA	6	1	4	M
1	2009-08-26 06:08:00	0	NTA	6	1	4	M
1	2009-08-26 06:09:00	693	NTA	6	1	4	M
1	2009-08-26 06:10:00	410	NTA	6	1	4	M
1	2009-08-26 06:11:00	0	DTA	6	1	4	M
1	2009-08-26 06:12:00	280	DTA	6	1	4	M
1	2009-08-26 06:13:00	1940	DTA	6	1	4	M
1	2009-08-26 06:14:00	1544	DTA	6	1	4	M
1	2009-08-26 06:15:00	427	DTA	6	1	4	M
1	2009-08-26 06:16:00	0	DTA	6	1	4	M
1	2009-08-26 06:17:00	0	DTA	6	1	4	M
1	2009-08-26 06:18:00	0	DTA	6	1	4	M
1	2009-08-26 06:19:00	0	DTA	6	1	4	M
1	2009-08-26 06:20:00	0	DTA	6	1	4	M
1	2009-08-26 06:21:00	0	DTA	6	1	4	M
1	2009-08-26 06:22:00	0	DTA	6	1	4	M
1	2009-08-26 06:23:00	20	DTA	6	1	4	M
1	2009-08-26 06:24:00	71	DTA	6	1	4	M
1	2009-08-26 06:25:00	30	DTA	6	1	4	M
1	2009-08-26 06:26:00	30	DTA	6	1	4	M
1	2009-08-26 06:27:00	0	DTA	6	1	4	M
1	2009-08-26 06:28:00	0	DTA	6	1	4	M
1	2009-08-26 06:29:00	0	DTA	6	1	4	M
1	2009-08-26 06:30:00	0	DTA	6	1	4	M
1	2009-08-26 06:31:00	0	DTA	6	1	4	M
1	2009-08-26 06:32:00	0	DTA	6	1	4	M
1	2009-08-26 06:33:00	0	DTA	6	1	4	M
1	2009-08-26 06:34:00	0	DTA	6	1	4	M
1	2009-08-26 06:35:00	71	DTA	6	1	4	M
1	2009-08-26 06:36:00	217	DTA	6	1	4	M
1	2009-08-26 06:37:00	132	DTA	6	1	4	M
1	2009-08-26 06:38:00	475	DTA	6	1	4	M
1	2009-08-26 06:39:00	394	DTA	6	1	4	M
1	2009-08-26 06:40:00	102	DTA	6	1	4	M
1	2009-08-26 06:41:00	579	DTA	6	1	4	M
1	2009-08-26 06:42:00	652	DTA	6	1	4	M
1	2009-08-26 06:43:00	1156	DTA	6	1	4	M
1	2009-08-26 06:44:00	20	DTA	6	1	4	M
1	2009-08-26 06:45:00	774	DTA	6	1	4	M
1	2009-08-26 06:46:00	475	DTA	6	1	4	M
1	2009-08-26 06:47:00	217	DTA	6	1	4	M
1	2009-08-26 06:48:00	0	DTA	6	1	4	M
1	2009-08-26 06:49:00	0	DTA	6	1	4	M
1	2009-08-26 06:50:00	337	DTA	6	1	4	M
1	2009-08-26 06:51:00	337	DTA	6	1	4	M
1	2009-08-26 06:52:00	230	DTA	6	1	4	M
1	2009-08-26 06:53:00	20	DTA	6	1	4	M
1	2009-08-26 06:54:00	0	DTA	6	1	4	M
1	2009-08-26 06:55:00	0	DTA	6	1	4	M
1	2009-08-26 06:56:00	0	DTA	6	1	4	M
1	2009-08-26 06:57:00	0	DTA	6	1	4	M
1	2009-08-26 06:58:00	0	DTA	6	1	4	M
1	2009-08-26 06:59:00	0	DTA	6	1	4	M
1	2009-08-26 07:00:00	0	DTA	6	1	4	M
1	2009-08-26 07:01:00	0	DTA	7	1	4	M
1	2009-08-26 07:02:00	81	DTA	7	1	4	M
1	2009-08-26 07:03:00	817	DTA	7	1	4	M
1	2009-08-26 07:04:00	1863	DTA	7	1	4	M
1	2009-08-26 07:05:00	2702	DTA	7	1	4	M
1	2009-08-26 07:06:00	3194	DTA	7	1	4	M
1	2009-08-26 07:07:00	2859	DTA	7	1	4	M
1	2009-08-26 07:08:00	1239	DTA	7	1	4	M
1	2009-08-26 07:09:00	3135	DTA	7	1	4	M
1	2009-08-26 07:10:00	193	DTA	7	1	4	M
1	2009-08-26 07:11:00	30	DTA	7	1	4	M
1	2009-08-26 07:12:00	10	DTA	7	1	4	M
1	2009-08-26 07:13:00	0	DTA	7	1	4	M
1	2009-08-26 07:14:00	122	DTA	7	1	4	M
1	2009-08-26 07:15:00	0	DTA	7	1	4	M
1	2009-08-26 07:16:00	0	DTA	7	1	4	M
1	2009-08-26 07:17:00	0	DTA	7	1	4	M
1	2009-08-26 07:18:00	0	DTA	7	1	4	M
1	2009-08-26 07:19:00	0	DTA	7	1	4	M
1	2009-08-26 07:20:00	0	DTA	7	1	4	M
1	2009-08-26 07:21:00	0	DTA	7	1	4	M
1	2009-08-26 07:22:00	0	DTA	7	1	4	M
1	2009-08-26 07:23:00	0	DTA	7	1	4	M
1	2009-08-26 07:24:00	0	DTA	7	1	4	M
1	2009-08-26 07:25:00	0	DTA	7	1	4	M
1	2009-08-26 07:26:00	0	DTA	7	1	4	M
1	2009-08-26 07:27:00	20	DTA	7	1	4	M
1	2009-08-26 07:28:00	0	DTA	7	1	4	M
1	2009-08-26 07:29:00	0	DTA	7	1	4	M
1	2009-08-26 07:30:00	0	DTA	7	1	4	M
1	2009-08-26 07:31:00	217	DTA	7	1	4	M
1	2009-08-26 07:32:00	193	DTA	7	1	4	M
1	2009-08-26 07:33:00	0	DTA	7	1	4	M
1	2009-08-26 07:34:00	41	DTA	7	1	4	M
1	2009-08-26 07:35:00	0	DTA	7	1	4	M
1	2009-08-26 07:36:00	0	DTA	7	1	4	M
1	2009-08-26 07:37:00	0	DTA	7	1	4	M
1	2009-08-26 07:38:00	337	DTA	7	1	4	M
1	2009-08-26 07:39:00	542	DTA	7	1	4	M
1	2009-08-26 07:40:00	41	DTA	7	1	4	M
1	2009-08-26 07:41:00	0	DTA	7	1	4	M
1	2009-08-26 07:42:00	0	DTA	7	1	4	M
1	2009-08-26 07:43:00	0	DTA	7	1	4	M
1	2009-08-26 07:44:00	61	DTA	7	1	4	M
1	2009-08-26 07:45:00	0	DTA	7	1	4	M
1	2009-08-26 07:46:00	0	DTA	7	1	4	M
1	2009-08-26 07:47:00	0	DTA	7	1	4	M
1	2009-08-26 07:48:00	0	DTA	7	1	4	M
1	2009-08-26 07:49:00	0	DTA	7	1	4	M
1	2009-08-26 07:50:00	156	DTA	7	1	4	M
1	2009-08-26 07:51:00	0	DTA	7	1	4	M
1	2009-08-26 07:52:00	30	DTA	7	1	4	M
1	2009-08-26 07:53:00	0	DTA	7	1	4	M
1	2009-08-26 07:54:00	0	DTA	7	1	4	M
1	2009-08-26 07:55:00	0	DTA	7	1	4	M
1	2009-08-26 07:56:00	0	DTA	7	1	4	M
1	2009-08-26 07:57:00	0	DTA	7	1	4	M
1	2009-08-26 07:58:00	0	DTA	7	1	4	M
1	2009-08-26 07:59:00	0	DTA	7	1	4	M
1	2009-08-26 08:00:00	0	DTA	7	1	4	M
1	2009-08-26 08:01:00	20	DTA	8	1	4	M
1	2009-08-26 08:02:00	41	DTA	8	1	4	M
1	2009-08-26 08:03:00	0	DTA	8	1	4	M
1	2009-08-26 08:04:00	0	DTA	8	1	4	M
1	2009-08-26 08:05:00	0	DTA	8	1	4	M
1	2009-08-26 08:06:00	0	DTA	8	1	4	M
1	2009-08-26 08:07:00	0	DTA	8	1	4	M
1	2009-08-26 08:08:00	61	DTA	8	1	4	M
1	2009-08-26 08:09:00	280	DTA	8	1	4	M
1	2009-08-26 08:10:00	156	DTA	8	1	4	M
1	2009-08-26 08:11:00	0	DTA	8	1	4	M
1	2009-08-26 08:12:00	0	DTA	8	1	4	M
1	2009-08-26 08:13:00	0	DTA	8	1	4	M
1	2009-08-26 08:14:00	0	DTA	8	1	4	M
1	2009-08-26 08:15:00	0	DTA	8	1	4	M
1	2009-08-26 08:16:00	81	DTA	8	1	4	M
1	2009-08-26 08:17:00	0	DTA	8	1	4	M
1	2009-08-26 08:18:00	254	DTA	8	1	4	M
1	2009-08-26 08:19:00	230	DTA	8	1	4	M
1	2009-08-26 08:20:00	366	DTA	8	1	4	M
1	2009-08-26 08:21:00	81	DTA	8	1	4	M
1	2009-08-26 08:22:00	51	DTA	8	1	4	M
1	2009-08-26 08:23:00	0	DTA	8	1	4	M
1	2009-08-26 08:24:00	0	DTA	8	1	4	M
1	2009-08-26 08:25:00	0	DTA	8	1	4	M
1	2009-08-26 08:26:00	0	DTA	8	1	4	M
1	2009-08-26 08:27:00	51	DTA	8	1	4	M
1	2009-08-26 08:28:00	0	DTA	8	1	4	M
1	2009-08-26 08:29:00	0	DTA	8	1	4	M
1	2009-08-26 08:30:00	0	DTA	8	1	4	M
1	2009-08-26 08:31:00	30	DTA	8	1	4	M
1	2009-08-26 08:32:00	10	DTA	8	1	4	M
1	2009-08-26 08:33:00	0	DTA	8	1	4	M
1	2009-08-26 08:34:00	20	DTA	8	1	4	M
1	2009-08-26 08:35:00	0	DTA	8	1	4	M
1	2009-08-26 08:36:00	0	DTA	8	1	4	M
1	2009-08-26 08:37:00	0	DTA	8	1	4	M
1	2009-08-26 08:38:00	0	DTA	8	1	4	M
1	2009-08-26 08:39:00	0	DTA	8	1	4	M
1	2009-08-26 08:40:00	0	DTA	8	1	4	M
1	2009-08-26 08:41:00	0	DTA	8	1	4	M
1	2009-08-26 08:42:00	309	DTA	8	1	4	M
1	2009-08-26 08:43:00	254	DTA	8	1	4	M
1	2009-08-26 08:44:00	673	DTA	8	1	4	M
1	2009-08-26 08:45:00	10	DTA	8	1	4	M
1	2009-08-26 08:46:00	0	DTA	8	1	4	M
1	2009-08-26 08:47:00	0	DTA	8	1	4	M
1	2009-08-26 08:48:00	0	DTA	8	1	4	M
1	2009-08-26 08:49:00	0	DTA	8	1	4	M
1	2009-08-26 08:50:00	41	DTA	8	1	4	M
1	2009-08-26 08:51:00	0	DTA	8	1	4	M
1	2009-08-26 08:52:00	0	DTA	8	1	4	M
1	2009-08-26 08:53:00	0	DTA	8	1	4	M
1	2009-08-26 08:54:00	0	DTA	8	1	4	M
1	2009-08-26 08:55:00	0	DTA	8	1	4	M
1	2009-08-26 08:56:00	0	DTA	8	1	4	M
1	2009-08-26 08:57:00	0	DTA	8	1	4	M
1	2009-08-26 08:58:00	0	DTA	8	1	4	M
1	2009-08-26 08:59:00	0	DTA	8	1	4	M
1	2009-08-26 09:00:00	0	DTA	8	1	4	M
1	2009-08-26 09:01:00	0	DTA	9	1	4	M
1	2009-08-26 09:02:00	0	DTA	9	1	4	M
1	2009-08-26 09:03:00	0	DTA	9	1	4	M
1	2009-08-26 09:04:00	0	DTA	9	1	4	M
1	2009-08-26 09:05:00	0	DTA	9	1	4	M
1	2009-08-26 09:06:00	0	DTA	9	1	4	M	Peak DTA
1	2009-08-26 09:07:00	0	DTA	9	1	4	M	Peak DTA
1	2009-08-26 09:08:00	51	DTA	9	1	4	M	Peak DTA
1	2009-08-26 09:09:00	112	DTA	9	1	4	M	Peak DTA
1	2009-08-26 09:10:00	10	DTA	9	1	4	M	Peak DTA
1	2009-08-26 09:11:00	0	DTA	9	1	4	M	Peak DTA
1	2009-08-26 09:12:00	0	DTA	9	1	4	M	Peak DTA
1	2009-08-26 09:13:00	0	DTA	9	1	4	M	Peak DTA
1	2009-08-26 09:14:00	0	DTA	9	1	4	M	Peak DTA
1	2009-08-26 09:15:00	0	DTA	9	1	4	M	Peak DTA
1	2009-08-26 09:16:00	181	DTA	9	1	4	M	Peak DTA
1	2009-08-26 09:17:00	366	DTA	9	1	4	M	Peak DTA
1	2009-08-26 09:18:00	81	DTA	9	1	4	M	Peak DTA
1	2009-08-26 09:19:00	30	DTA	9	1	4	M	Peak DTA
1	2009-08-26 09:20:00	0	DTA	9	1	4	M	Peak DTA
1	2009-08-26 09:21:00	10	DTA	9	1	4	M	Peak DTA
1	2009-08-26 09:22:00	0	DTA	9	1	4	M	Peak DTA
1	2009-08-26 09:23:00	61	DTA	9	1	4	M	Peak DTA
1	2009-08-26 09:24:00	10	DTA	9	1	4	M	Peak DTA
1	2009-08-26 09:25:00	122	DTA	9	1	4	M	Peak DTA
1	2009-08-26 09:26:00	61	DTA	9	1	4	M	Peak DTA
1	2009-08-26 09:27:00	181	DTA	9	1	4	M	Peak DTA
1	2009-08-26 09:28:00	542	DTA	9	1	4	M	Peak DTA
1	2009-08-26 09:29:00	0	DTA	9	1	4	M	Peak DTA
1	2009-08-26 09:30:00	230	DTA	9	1	4	M	Peak DTA
1	2009-08-26 09:31:00	205	DTA	9	1	4	M	Peak DTA
1	2009-08-26 09:32:00	0	DTA	9	1	4	M	Peak DTA
1	2009-08-26 09:33:00	132	DTA	9	1	4	M	Peak DTA
1	2009-08-26 09:34:00	10	DTA	9	1	4	M	Peak DTA
1	2009-08-26 09:35:00	0	DTA	9	1	4	M	Peak DTA
1	2009-08-26 09:36:00	0	DTA	9	1	4	M	Peak DTA
1	2009-08-26 09:37:00	0	DTA	9	1	4	M	Peak DTA
1	2009-08-26 09:38:00	30	DTA	9	1	4	M	Peak DTA
1	2009-08-26 09:39:00	242	DTA	9	1	4	M	Peak DTA
1	2009-08-26 09:40:00	0	DTA	9	1	4	M	Peak DTA
1	2009-08-26 09:41:00	0	DTA	9	1	4	M	Peak DTA
1	2009-08-26 09:42:00	0	DTA	9	1	4	M	Peak DTA
1	2009-08-26 09:43:00	0	DTA	9	1	4	M	Peak DTA
1	2009-08-26 09:44:00	0	DTA	9	1	4	M	Peak DTA
1	2009-08-26 09:45:00	0	DTA	9	1	4	M	Peak DTA
1	2009-08-26 09:46:00	61	DTA	9	1	4	M	Peak DTA
1	2009-08-26 09:47:00	0	DTA	9	1	4	M	Peak DTA
1	2009-08-26 09:48:00	0	DTA	9	1	4	M	Peak DTA
1	2009-08-26 09:49:00	51	DTA	9	1	4	M	Peak DTA
1	2009-08-26 09:50:00	0	DTA	9	1	4	M	Peak DTA
1	2009-08-26 09:51:00	0	DTA	9	1	4	M	Peak DTA
1	2009-08-26 09:52:00	0	DTA	9	1	4	M	Peak DTA
1	2009-08-26 09:53:00	542	DTA	9	1	4	M	Peak DTA
1	2009-08-26 09:54:00	41	DTA	9	1	4	M	Peak DTA
1	2009-08-26 09:55:00	280	DTA	9	1	4	M	Peak DTA
1	2009-08-26 09:56:00	309	DTA	9	1	4	M	Peak DTA
1	2009-08-26 09:57:00	144	DTA	9	1	4	M	Peak DTA
1	2009-08-26 09:58:00	0	DTA	9	1	4	M	Peak DTA
1	2009-08-26 09:59:00	524	DTA	9	1	4	M	Peak DTA
1	2009-08-26 10:00:00	410	DTA	9	1	4	M	Peak DTA
1	2009-08-26 10:01:00	10	DTA	10	1	4	M	Peak DTA
1	2009-08-26 10:02:00	0	DTA	10	1	4	M	Peak DTA
1	2009-08-26 10:03:00	652	DTA	10	1	4	M	Peak DTA
1	2009-08-26 10:04:00	693	DTA	10	1	4	M	Peak DTA
1	2009-08-26 10:05:00	144	DTA	10	1	4	M	Peak DTA
1	2009-08-26 10:06:00	51	DTA	10	1	4	M	Peak DTA
1	2009-08-26 10:07:00	0	DTA	10	1	4	M	Peak DTA
1	2009-08-26 10:08:00	122	DTA	10	1	4	M	Peak DTA
1	2009-08-26 10:09:00	713	DTA	10	1	4	M	Peak DTA
1	2009-08-26 10:10:00	394	DTA	10	1	4	M	Peak DTA
1	2009-08-26 10:11:00	492	DTA	10	1	4	M	Peak DTA
1	2009-08-26 10:12:00	351	DTA	10	1	4	M	Peak DTA
1	2009-08-26 10:13:00	561	DTA	10	1	4	M	Peak DTA
1	2009-08-26 10:14:00	102	DTA	10	1	4	M	Peak DTA
1	2009-08-26 10:15:00	0	DTA	10	1	4	M	Peak DTA
1	2009-08-26 10:16:00	122	DTA	10	1	4	M	Peak DTA
1	2009-08-26 10:17:00	0	DTA	10	1	4	M	Peak DTA
1	2009-08-26 10:18:00	0	DTA	10	1	4	M	Peak DTA
1	2009-08-26 10:19:00	0	DTA	10	1	4	M	Peak DTA
1	2009-08-26 10:20:00	0	DTA	10	1	4	M	Peak DTA
1	2009-08-26 10:21:00	41	DTA	10	1	4	M	Peak DTA
1	2009-08-26 10:22:00	459	DTA	10	1	4	M	Peak DTA
1	2009-08-26 10:23:00	193	DTA	10	1	4	M	Peak DTA
1	2009-08-26 10:24:00	380	DTA	10	1	4	M	Peak DTA
1	2009-08-26 10:25:00	366	DTA	10	1	4	M	Peak DTA
1	2009-08-26 10:26:00	492	DTA	10	1	4	M	Peak DTA
1	2009-08-26 10:27:00	579	DTA	10	1	4	M	Peak DTA
1	2009-08-26 10:28:00	61	DTA	10	1	4	M	Peak DTA
1	2009-08-26 10:29:00	0	DTA	10	1	4	M	Peak DTA
1	2009-08-26 10:30:00	0	DTA	10	1	4	M	Peak DTA
1	2009-08-26 10:31:00	10	DTA	10	1	4	M	Peak DTA
1	2009-08-26 10:32:00	0	DTA	10	1	4	M	Peak DTA
1	2009-08-26 10:33:00	0	DTA	10	1	4	M	Peak DTA
1	2009-08-26 10:34:00	0	DTA	10	1	4	M	Peak DTA
1	2009-08-26 10:35:00	906	DTA	10	1	4	M	Peak DTA
1	2009-08-26 10:36:00	132	DTA	10	1	4	M	Peak DTA
1	2009-08-26 10:37:00	61	DTA	10	1	4	M	Peak DTA
1	2009-08-26 10:38:00	524	DTA	10	1	4	M	Peak DTA
1	2009-08-26 10:39:00	0	DTA	10	1	4	M	Peak DTA
1	2009-08-26 10:40:00	20	DTA	10	1	4	M	Peak DTA
1	2009-08-26 10:41:00	0	DTA	10	1	4	M	Peak DTA
1	2009-08-26 10:42:00	0	DTA	10	1	4	M	Peak DTA
1	2009-08-26 10:43:00	0	DTA	10	1	4	M	Peak DTA
1	2009-08-26 10:44:00	0	DTA	10	1	4	M	Peak DTA
1	2009-08-26 10:45:00	0	DTA	10	1	4	M	Peak DTA
1	2009-08-26 10:46:00	0	DTA	10	1	4	M	Peak DTA
1	2009-08-26 10:47:00	0	DTA	10	1	4	M	Peak DTA
1	2009-08-26 10:48:00	0	DTA	10	1	4	M	Peak DTA
1	2009-08-26 10:49:00	0	DTA	10	1	4	M	Peak DTA
1	2009-08-26 10:50:00	0	DTA	10	1	4	M	Peak DTA
1	2009-08-26 10:51:00	0	DTA	10	1	4	M	Peak DTA
1	2009-08-26 10:52:00	0	DTA	10	1	4	M	Peak DTA
1	2009-08-26 10:53:00	0	DTA	10	1	4	M	Peak DTA
1	2009-08-26 10:54:00	0	DTA	10	1	4	M	Peak DTA
1	2009-08-26 10:55:00	0	DTA	10	1	4	M	Peak DTA
1	2009-08-26 10:56:00	0	DTA	10	1	4	M	Peak DTA
1	2009-08-26 10:57:00	0	DTA	10	1	4	M	Peak DTA
1	2009-08-26 10:58:00	61	DTA	10	1	4	M	Peak DTA
1	2009-08-26 10:59:00	51	DTA	10	1	4	M	Peak DTA
1	2009-08-26 11:00:00	0	DTA	10	1	4	M	Peak DTA
1	2009-08-26 11:01:00	102	DTA	11	1	4	M	Peak DTA
1	2009-08-26 11:02:00	0	DTA	11	1	4	M	Peak DTA
1	2009-08-26 11:03:00	0	DTA	11	1	4	M	Peak DTA
1	2009-08-26 11:04:00	0	DTA	11	1	4	M	Peak DTA
1	2009-08-26 11:05:00	0	DTA	11	1	4	M	Peak DTA
1	2009-08-26 11:06:00	81	DTA	11	1	4	M	Peak DTA
1	2009-08-26 11:07:00	122	DTA	11	1	4	M	Peak DTA
1	2009-08-26 11:08:00	193	DTA	11	1	4	M	Peak DTA
1	2009-08-26 11:09:00	10	DTA	11	1	4	M	Peak DTA
1	2009-08-26 11:10:00	0	DTA	11	1	4	M	Peak DTA
1	2009-08-26 11:11:00	51	DTA	11	1	4	M	Peak DTA
1	2009-08-26 11:12:00	0	DTA	11	1	4	M	Peak DTA
1	2009-08-26 11:13:00	0	DTA	11	1	4	M	Peak DTA
1	2009-08-26 11:14:00	0	DTA	11	1	4	M	Peak DTA
1	2009-08-26 11:15:00	0	DTA	11	1	4	M	Peak DTA
1	2009-08-26 11:16:00	0	DTA	11	1	4	M	Peak DTA
1	2009-08-26 11:17:00	0	DTA	11	1	4	M	Peak DTA
1	2009-08-26 11:18:00	0	DTA	11	1	4	M	Peak DTA
1	2009-08-26 11:19:00	0	DTA	11	1	4	M	Peak DTA
1	2009-08-26 11:20:00	0	DTA	11	1	4	M	Peak DTA
1	2009-08-26 11:21:00	0	DTA	11	1	4	M	Peak DTA
1	2009-08-26 11:22:00	0	DTA	11	1	4	M	Peak DTA
1	2009-08-26 11:23:00	0	DTA	11	1	4	M	Peak DTA
1	2009-08-26 11:24:00	0	DTA	11	1	4	M	Peak DTA
1	2009-08-26 11:25:00	0	DTA	11	1	4	M	Peak DTA
1	2009-08-26 11:26:00	0	DTA	11	1	4	M	Peak DTA
1	2009-08-26 11:27:00	0	DTA	11	1	4	M	Peak DTA
1	2009-08-26 11:28:00	0	DTA	11	1	4	M	Peak DTA
1	2009-08-26 11:29:00	0	DTA	11	1	4	M	Peak DTA
1	2009-08-26 11:30:00	20	DTA	11	1	4	M	Peak DTA
1	2009-08-26 11:31:00	51	DTA	11	1	4	M	Peak DTA
1	2009-08-26 11:32:00	0	DTA	11	1	4	M	Peak DTA
1	2009-08-26 11:33:00	0	DTA	11	1	4	M	Peak DTA
1	2009-08-26 11:34:00	10	DTA	11	1	4	M	Peak DTA
1	2009-08-26 11:35:00	41	DTA	11	1	4	M	Peak DTA
1	2009-08-26 11:36:00	0	DTA	11	1	4	M	Peak DTA
1	2009-08-26 11:37:00	30	DTA	11	1	4	M	Peak DTA
1	2009-08-26 11:38:00	0	DTA	11	1	4	M	Peak DTA
1	2009-08-26 11:39:00	0	DTA	11	1	4	M	Peak DTA
1	2009-08-26 11:40:00	20	DTA	11	1	4	M	Peak DTA
1	2009-08-26 11:41:00	10	DTA	11	1	4	M	Peak DTA
1	2009-08-26 11:42:00	71	DTA	11	1	4	M	Peak DTA
1	2009-08-26 11:43:00	91	DTA	11	1	4	M	Peak DTA
1	2009-08-26 11:44:00	0	DTA	11	1	4	M	Peak DTA
1	2009-08-26 11:45:00	0	DTA	11	1	4	M	Peak DTA
1	2009-08-26 11:46:00	30	DTA	11	1	4	M	Peak DTA
1	2009-08-26 11:47:00	10	DTA	11	1	4	M	Peak DTA
1	2009-08-26 11:48:00	0	DTA	11	1	4	M	Peak DTA
1	2009-08-26 11:49:00	0	DTA	11	1	4	M	Peak DTA
1	2009-08-26 11:50:00	0	DTA	11	1	4	M	Peak DTA
1	2009-08-26 11:51:00	0	DTA	11	1	4	M	Peak DTA
1	2009-08-26 11:52:00	0	DTA	11	1	4	M	Peak DTA
1	2009-08-26 11:53:00	254	DTA	11	1	4	M	Peak DTA
1	2009-08-26 11:54:00	30	DTA	11	1	4	M	Peak DTA
1	2009-08-26 11:55:00	10	DTA	11	1	4	M	Peak DTA
1	2009-08-26 11:56:00	10	DTA	11	1	4	M	Peak DTA
1	2009-08-26 11:57:00	0	DTA	11	1	4	M	Peak DTA
1	2009-08-26 11:58:00	10	DTA	11	1	4	M	Peak DTA
1	2009-08-26 11:59:00	337	DTA	11	1	4	M	Peak DTA
1	2009-08-26 12:00:00	0	DTA	11	1	4	M	Peak DTA
1	2009-08-26 12:01:00	0	DTA	12	1	4	M	Peak DTA
1	2009-08-26 12:02:00	0	DTA	12	1	4	M	Peak DTA
1	2009-08-26 12:03:00	0	DTA	12	1	4	M	Peak DTA
1	2009-08-26 12:04:00	295	DTA	12	1	4	M	Peak DTA
1	2009-08-26 12:05:00	0	DTA	12	1	4	M	Peak DTA
1	2009-08-26 12:06:00	156	DTA	12	1	4	M	Peak DTA
1	2009-08-26 12:07:00	1103	DTA	12	1	4	M	Peak DTA
1	2009-08-26 12:08:00	1788	DTA	12	1	4	M	Peak DTA
1	2009-08-26 12:09:00	3562	DTA	12	1	4	M	Peak DTA
1	2009-08-26 12:10:00	4332	DTA	12	1	4	M	Peak DTA
1	2009-08-26 12:11:00	4332	DTA	12	1	4	M	Peak DTA
1	2009-08-26 12:12:00	1788	DTA	12	1	4	M	Peak DTA
1	2009-08-26 12:13:00	459	DTA	12	1	4	M	Peak DTA
1	2009-08-26 12:14:00	1268	DTA	12	1	4	M	Peak DTA
1	2009-08-26 12:15:00	459	DTA	12	1	4	M	Peak DTA
1	2009-08-26 12:16:00	0	DTA	12	1	4	M	Peak DTA
1	2009-08-26 12:17:00	754	DTA	12	1	4	M	Peak DTA
1	2009-08-26 12:18:00	61	DTA	12	1	4	M	Peak DTA
1	2009-08-26 12:19:00	0	DTA	12	1	4	M	Peak DTA
1	2009-08-26 12:20:00	0	DTA	12	1	4	M	Peak DTA
1	2009-08-26 12:21:00	0	DTA	12	1	4	M	Peak DTA
1	2009-08-26 12:22:00	0	DTA	12	1	4	M	Peak DTA
1	2009-08-26 12:23:00	181	DTA	12	1	4	M	Peak DTA
1	2009-08-26 12:24:00	0	DTA	12	1	4	M	Peak DTA
1	2009-08-26 12:25:00	561	DTA	12	1	4	M	Peak DTA
1	2009-08-26 12:26:00	0	DTA	12	1	4	M	Peak DTA
1	2009-08-26 12:27:00	81	DTA	12	1	4	M	Peak DTA
1	2009-08-26 12:28:00	0	DTA	12	1	4	M	Peak DTA
1	2009-08-26 12:29:00	492	DTA	12	1	4	M	Peak DTA
1	2009-08-26 12:30:00	10	DTA	12	1	4	M	Peak DTA
1	2009-08-26 12:31:00	10	DTA	12	1	4	M	Peak DTA
1	2009-08-26 12:32:00	0	DTA	12	1	4	M	Peak DTA
1	2009-08-26 12:33:00	0	DTA	12	1	4	M	Peak DTA
1	2009-08-26 12:34:00	0	DTA	12	1	4	M	Peak DTA
1	2009-08-26 12:35:00	0	DTA	12	1	4	M	Peak DTA
1	2009-08-26 12:36:00	0	DTA	12	1	4	M	Peak DTA
1	2009-08-26 12:37:00	0	DTA	12	1	4	M	Peak DTA
1	2009-08-26 12:38:00	0	DTA	12	1	4	M	Peak DTA
1	2009-08-26 12:39:00	0	DTA	12	1	4	M	Peak DTA
1	2009-08-26 12:40:00	0	DTA	12	1	4	M	Peak DTA
1	2009-08-26 12:41:00	0	DTA	12	1	4	M	Peak DTA
1	2009-08-26 12:42:00	0	DTA	12	1	4	M	Peak DTA
1	2009-08-26 12:43:00	0	DTA	12	1	4	M	Peak DTA
1	2009-08-26 12:44:00	0	DTA	12	1	4	M	Peak DTA
1	2009-08-26 12:45:00	0	DTA	12	1	4	M	Peak DTA
1	2009-08-26 12:46:00	0	DTA	12	1	4	M	Peak DTA
1	2009-08-26 12:47:00	0	DTA	12	1	4	M	Peak DTA
1	2009-08-26 12:48:00	0	DTA	12	1	4	M	Peak DTA
1	2009-08-26 12:49:00	10	DTA	12	1	4	M	Peak DTA
1	2009-08-26 12:50:00	0	DTA	12	1	4	M	Peak DTA
1	2009-08-26 12:51:00	0	DTA	12	1	4	M	Peak DTA
1	2009-08-26 12:52:00	323	DTA	12	1	4	M	Peak DTA
1	2009-08-26 12:53:00	169	DTA	12	1	4	M	Peak DTA
1	2009-08-26 12:54:00	156	DTA	12	1	4	M	Peak DTA
1	2009-08-26 12:55:00	20	DTA	12	1	4	M	Peak DTA
1	2009-08-26 12:56:00	0	DTA	12	1	4	M	Peak DTA
1	2009-08-26 12:57:00	0	DTA	12	1	4	M	Peak DTA
1	2009-08-26 12:58:00	0	DTA	12	1	4	M	Peak DTA
1	2009-08-26 12:59:00	0	DTA	12	1	4	M	Peak DTA
1	2009-08-26 13:00:00	30	DTA	12	1	4	M	Peak DTA
1	2009-08-26 13:01:00	0	DTA	13	1	4	M	Peak DTA
1	2009-08-26 13:02:00	20	DTA	13	1	4	M	Peak DTA
1	2009-08-26 13:03:00	0	DTA	13	1	4	M	Peak DTA
1	2009-08-26 13:04:00	0	DTA	13	1	4	M	Peak DTA
1	2009-08-26 13:05:00	0	DTA	13	1	4	M	Peak DTA
1	2009-08-26 13:06:00	0	DTA	13	1	4	M	Peak DTA
1	2009-08-26 13:07:00	0	DTA	13	1	4	M	Peak DTA
1	2009-08-26 13:08:00	0	DTA	13	1	4	M	Peak DTA
1	2009-08-26 13:09:00	20	DTA	13	1	4	M	Peak DTA
1	2009-08-26 13:10:00	0	DTA	13	1	4	M	Peak DTA
1	2009-08-26 13:11:00	0	DTA	13	1	4	M	Peak DTA
1	2009-08-26 13:12:00	0	DTA	13	1	4	M	Peak DTA
1	2009-08-26 13:13:00	0	DTA	13	1	4	M	Peak DTA
1	2009-08-26 13:14:00	20	DTA	13	1	4	M	Peak DTA
1	2009-08-26 13:15:00	0	DTA	13	1	4	M	Peak DTA
1	2009-08-26 13:16:00	0	DTA	13	1	4	M	Peak DTA
1	2009-08-26 13:17:00	0	DTA	13	1	4	M	Peak DTA
1	2009-08-26 13:18:00	0	DTA	13	1	4	M	Peak DTA
1	2009-08-26 13:19:00	0	DTA	13	1	4	M	Peak DTA
1	2009-08-26 13:20:00	0	DTA	13	1	4	M	Peak DTA
1	2009-08-26 13:21:00	0	DTA	13	1	4	M	Peak DTA
1	2009-08-26 13:22:00	0	DTA	13	1	4	M	Peak DTA
1	2009-08-26 13:23:00	10	DTA	13	1	4	M	Peak DTA
1	2009-08-26 13:24:00	0	DTA	13	1	4	M	Peak DTA
1	2009-08-26 13:25:00	0	DTA	13	1	4	M	Peak DTA
1	2009-08-26 13:26:00	0	DTA	13	1	4	M	Peak DTA
1	2009-08-26 13:27:00	0	DTA	13	1	4	M	Peak DTA
1	2009-08-26 13:28:00	0	DTA	13	1	4	M	Peak DTA
1	2009-08-26 13:29:00	0	DTA	13	1	4	M	Peak DTA
1	2009-08-26 13:30:00	0	DTA	13	1	4	M	Peak DTA
1	2009-08-26 13:31:00	0	DTA	13	1	4	M	Peak DTA
1	2009-08-26 13:32:00	0	DTA	13	1	4	M	Peak DTA
1	2009-08-26 13:33:00	0	DTA	13	1	4	M	Peak DTA
1	2009-08-26 13:34:00	30	DTA	13	1	4	M	Peak DTA
1	2009-08-26 13:35:00	61	DTA	13	1	4	M	Peak DTA
1	2009-08-26 13:36:00	0	DTA	13	1	4	M	Peak DTA
1	2009-08-26 13:37:00	0	DTA	13	1	4	M	Peak DTA
1	2009-08-26 13:38:00	0	DTA	13	1	4	M	Peak DTA
1	2009-08-26 13:39:00	20	DTA	13	1	4	M	Peak DTA
1	2009-08-26 13:40:00	10	DTA	13	1	4	M	Peak DTA
1	2009-08-26 13:41:00	0	DTA	13	1	4	M	Peak DTA
1	2009-08-26 13:42:00	0	DTA	13	1	4	M	Peak DTA
1	2009-08-26 13:43:00	0	DTA	13	1	4	M	Peak DTA
1	2009-08-26 13:44:00	81	DTA	13	1	4	M	Peak DTA
1	2009-08-26 13:45:00	10	DTA	13	1	4	M	Peak DTA
1	2009-08-26 13:46:00	0	DTA	13	1	4	M	Peak DTA
1	2009-08-26 13:47:00	10	DTA	13	1	4	M	Peak DTA
1	2009-08-26 13:48:00	0	DTA	13	1	4	M	Peak DTA
1	2009-08-26 13:49:00	0	DTA	13	1	4	M	Peak DTA
1	2009-08-26 13:50:00	427	DTA	13	1	4	M	Peak DTA
1	2009-08-26 13:51:00	10	DTA	13	1	4	M	Peak DTA
1	2009-08-26 13:52:00	51	DTA	13	1	4	M	Peak DTA
1	2009-08-26 13:53:00	0	DTA	13	1	4	M	Peak DTA
1	2009-08-26 13:54:00	0	DTA	13	1	4	M	Peak DTA
1	2009-08-26 13:55:00	0	DTA	13	1	4	M	Peak DTA
1	2009-08-26 13:56:00	0	DTA	13	1	4	M	Peak DTA
1	2009-08-26 13:57:00	0	DTA	13	1	4	M	Peak DTA
1	2009-08-26 13:58:00	20	DTA	13	1	4	M	Peak DTA
1	2009-08-26 13:59:00	380	DTA	13	1	4	M	Peak DTA
1	2009-08-26 14:00:00	0	DTA	13	1	4	M	Peak DTA
1	2009-08-26 14:01:00	0	DTA	14	1	4	M	Peak DTA
1	2009-08-26 14:02:00	0	DTA	14	1	4	M	Peak DTA
1	2009-08-26 14:03:00	0	DTA	14	1	4	M	Peak DTA
1	2009-08-26 14:04:00	0	DTA	14	1	4	M	Peak DTA
1	2009-08-26 14:05:00	0	DTA	14	1	4	M	Peak DTA
1	2009-08-26 14:06:00	0	DTA	14	1	4	M	Peak DTA
1	2009-08-26 14:07:00	0	DTA	14	1	4	M	Peak DTA
1	2009-08-26 14:08:00	0	DTA	14	1	4	M	Peak DTA
1	2009-08-26 14:09:00	0	DTA	14	1	4	M	Peak DTA
1	2009-08-26 14:10:00	0	DTA	14	1	4	M	Peak DTA
1	2009-08-26 14:11:00	0	DTA	14	1	4	M	Peak DTA
1	2009-08-26 14:12:00	0	DTA	14	1	4	M	Peak DTA
1	2009-08-26 14:13:00	0	DTA	14	1	4	M	Peak DTA
1	2009-08-26 14:14:00	0	DTA	14	1	4	M	Peak DTA
1	2009-08-26 14:15:00	0	DTA	14	1	4	M	Peak DTA
1	2009-08-26 14:16:00	0	DTA	14	1	4	M	Peak DTA
1	2009-08-26 14:17:00	0	DTA	14	1	4	M	Peak DTA
1	2009-08-26 14:18:00	0	DTA	14	1	4	M	Peak DTA
1	2009-08-26 14:19:00	30	DTA	14	1	4	M	Peak DTA
1	2009-08-26 14:20:00	10	DTA	14	1	4	M	Peak DTA
1	2009-08-26 14:21:00	0	DTA	14	1	4	M	Peak DTA
1	2009-08-26 14:22:00	10	DTA	14	1	4	M	Peak DTA
1	2009-08-26 14:23:00	0	DTA	14	1	4	M	Peak DTA
1	2009-08-26 14:24:00	0	DTA	14	1	4	M	Peak DTA
1	2009-08-26 14:25:00	0	DTA	14	1	4	M	Peak DTA
1	2009-08-26 14:26:00	0	DTA	14	1	4	M	Peak DTA
1	2009-08-26 14:27:00	0	DTA	14	1	4	M	Peak DTA
1	2009-08-26 14:28:00	0	DTA	14	1	4	M	Peak DTA
1	2009-08-26 14:29:00	0	DTA	14	1	4	M	Peak DTA
1	2009-08-26 14:30:00	0	DTA	14	1	4	M	Peak DTA
1	2009-08-26 14:31:00	0	DTA	14	1	4	M	Peak DTA
1	2009-08-26 14:32:00	0	DTA	14	1	4	M	Peak DTA
1	2009-08-26 14:33:00	0	DTA	14	1	4	M	Peak DTA
1	2009-08-26 14:34:00	0	DTA	14	1	4	M	Peak DTA
1	2009-08-26 14:35:00	0	DTA	14	1	4	M	Peak DTA
1	2009-08-26 14:36:00	0	DTA	14	1	4	M	Peak DTA
1	2009-08-26 14:37:00	0	DTA	14	1	4	M	Peak DTA
1	2009-08-26 14:38:00	30	DTA	14	1	4	M	Peak DTA
1	2009-08-26 14:39:00	20	DTA	14	1	4	M	Peak DTA
1	2009-08-26 14:40:00	0	DTA	14	1	4	M	Peak DTA
1	2009-08-26 14:41:00	0	DTA	14	1	4	M	Peak DTA
1	2009-08-26 14:42:00	71	DTA	14	1	4	M	Peak DTA
1	2009-08-26 14:43:00	41	DTA	14	1	4	M	Peak DTA
1	2009-08-26 14:44:00	81	DTA	14	1	4	M	Peak DTA
1	2009-08-26 14:45:00	10	DTA	14	1	4	M	Peak DTA
1	2009-08-26 14:46:00	0	DTA	14	1	4	M	Peak DTA
1	2009-08-26 14:47:00	0	DTA	14	1	4	M	Peak DTA
1	2009-08-26 14:48:00	0	DTA	14	1	4	M	Peak DTA
1	2009-08-26 14:49:00	693	DTA	14	1	4	M	Peak DTA
1	2009-08-26 14:50:00	51	DTA	14	1	4	M	Peak DTA
1	2009-08-26 14:51:00	337	DTA	14	1	4	M	Peak DTA
1	2009-08-26 14:52:00	169	DTA	14	1	4	M	Peak DTA
1	2009-08-26 14:53:00	0	DTA	14	1	4	M	Peak DTA
1	2009-08-26 14:54:00	0	DTA	14	1	4	M	Peak DTA
1	2009-08-26 14:55:00	0	DTA	14	1	4	M	Peak DTA
1	2009-08-26 14:56:00	10	DTA	14	1	4	M	Peak DTA
1	2009-08-26 14:57:00	0	DTA	14	1	4	M	Peak DTA
1	2009-08-26 14:58:00	0	DTA	14	1	4	M	Peak DTA
1	2009-08-26 14:59:00	0	DTA	14	1	4	M	Peak DTA
1	2009-08-26 15:00:00	0	DTA	14	1	4	M	Peak DTA
1	2009-08-26 15:01:00	351	DTA	15	1	4	M	Peak DTA
1	2009-08-26 15:02:00	0	DTA	15	1	4	M	Peak DTA
1	2009-08-26 15:03:00	0	DTA	15	1	4	M	Peak DTA
1	2009-08-26 15:04:00	0	DTA	15	1	4	M	Peak DTA
1	2009-08-26 15:05:00	0	DTA	15	1	4	M	Peak DTA
1	2009-08-26 15:06:00	0	DTA	15	1	4	M
1	2009-08-26 15:07:00	0	DTA	15	1	4	M
1	2009-08-26 15:08:00	0	DTA	15	1	4	M
1	2009-08-26 15:09:00	0	DTA	15	1	4	M
1	2009-08-26 15:10:00	0	DTA	15	1	4	M
1	2009-08-26 15:11:00	0	DTA	15	1	4	M
1	2009-08-26 15:12:00	0	DTA	15	1	4	M
1	2009-08-26 15:13:00	0	DTA	15	1	4	M
1	2009-08-26 15:14:00	0	DTA	15	1	4	M
1	2009-08-26 15:15:00	61	DTA	15	1	4	M
1	2009-08-26 15:16:00	0	DTA	15	1	4	M
1	2009-08-26 15:17:00	0	DTA	15	1	4	M
1	2009-08-26 15:18:00	0	DTA	15	1	4	M
1	2009-08-26 15:19:00	0	DTA	15	1	4	M
1	2009-08-26 15:20:00	0	DTA	15	1	4	M
1	2009-08-26 15:21:00	10	DTA	15	1	4	M
1	2009-08-26 15:22:00	508	DTA	15	1	4	M
1	2009-08-26 15:23:00	0	DTA	15	1	4	M
1	2009-08-26 15:24:00	0	DTA	15	1	4	M
1	2009-08-26 15:25:00	0	DTA	15	1	4	M
1	2009-08-26 15:26:00	0	DTA	15	1	4	M
1	2009-08-26 15:27:00	0	DTA	15	1	4	M
1	2009-08-26 15:28:00	0	DTA	15	1	4	M
1	2009-08-26 15:29:00	0	DTA	15	1	4	M
1	2009-08-26 15:30:00	0	DTA	15	1	4	M
1	2009-08-26 15:31:00	0	DTA	15	1	4	M
1	2009-08-26 15:32:00	0	DTA	15	1	4	M
1	2009-08-26 15:33:00	0	DTA	15	1	4	M
1	2009-08-26 15:34:00	0	DTA	15	1	4	M
1	2009-08-26 15:35:00	0	DTA	15	1	4	M
1	2009-08-26 15:36:00	0	DTA	15	1	4	M
1	2009-08-26 15:37:00	0	DTA	15	1	4	M
1	2009-08-26 15:38:00	30	DTA	15	1	4	M
1	2009-08-26 15:39:00	0	DTA	15	1	4	M
1	2009-08-26 15:40:00	0	DTA	15	1	4	M
1	2009-08-26 15:41:00	0	DTA	15	1	4	M
1	2009-08-26 15:42:00	0	DTA	15	1	4	M
1	2009-08-26 15:43:00	0	DTA	15	1	4	M
1	2009-08-26 15:44:00	0	DTA	15	1	4	M
1	2009-08-26 15:45:00	0	DTA	15	1	4	M
1	2009-08-26 15:46:00	0	DTA	15	1	4	M
1	2009-08-26 15:47:00	0	DTA	15	1	4	M
1	2009-08-26 15:48:00	0	DTA	15	1	4	M
1	2009-08-26 15:49:00	20	DTA	15	1	4	M
1	2009-08-26 15:50:00	0	DTA	15	1	4	M
1	2009-08-26 15:51:00	0	DTA	15	1	4	M
1	2009-08-26 15:52:00	0	DTA	15	1	4	M
1	2009-08-26 15:53:00	0	DTA	15	1	4	M
1	2009-08-26 15:54:00	0	DTA	15	1	4	M
1	2009-08-26 15:55:00	0	DTA	15	1	4	M
1	2009-08-26 15:56:00	0	DTA	15	1	4	M
1	2009-08-26 15:57:00	10	DTA	15	1	4	M
1	2009-08-26 15:58:00	0	DTA	15	1	4	M
1	2009-08-26 15:59:00	242	DTA	15	1	4	M
1	2009-08-26 16:00:00	20	DTA	15	1	4	M
1	2009-08-26 16:01:00	0	DTA	16	1	4	M
1	2009-08-26 16:02:00	0	DTA	16	1	4	M
1	2009-08-26 16:03:00	20	DTA	16	1	4	M
1	2009-08-26 16:04:00	169	DTA	16	1	4	M
1	2009-08-26 16:05:00	102	DTA	16	1	4	M
1	2009-08-26 16:06:00	0	DTA	16	1	4	M
1	2009-08-26 16:07:00	0	DTA	16	1	4	M
1	2009-08-26 16:08:00	0	DTA	16	1	4	M
1	2009-08-26 16:09:00	0	DTA	16	1	4	M
1	2009-08-26 16:10:00	0	DTA	16	1	4	M
1	2009-08-26 16:11:00	30	DTA	16	1	4	M
1	2009-08-26 16:12:00	30	DTA	16	1	4	M
1	2009-08-26 16:13:00	0	DTA	16	1	4	M
1	2009-08-26 16:14:00	0	DTA	16	1	4	M
1	2009-08-26 16:15:00	0	DTA	16	1	4	M
1	2009-08-26 16:16:00	0	DTA	16	1	4	M
1	2009-08-26 16:17:00	20	DTA	16	1	4	M
1	2009-08-26 16:18:00	91	DTA	16	1	4	M
1	2009-08-26 16:19:00	51	DTA	16	1	4	M
1	2009-08-26 16:20:00	91	DTA	16	1	4	M
1	2009-08-26 16:21:00	0	DTA	16	1	4	M
1	2009-08-26 16:22:00	0	DTA	16	1	4	M
1	2009-08-26 16:23:00	0	DTA	16	1	4	M
1	2009-08-26 16:24:00	0	DTA	16	1	4	M
1	2009-08-26 16:25:00	0	DTA	16	1	4	M
1	2009-08-26 16:26:00	0	DTA	16	1	4	M
1	2009-08-26 16:27:00	0	DTA	16	1	4	M
1	2009-08-26 16:28:00	0	DTA	16	1	4	M
1	2009-08-26 16:29:00	0	DTA	16	1	4	M
1	2009-08-26 16:30:00	0	DTA	16	1	4	M
1	2009-08-26 16:31:00	0	DTA	16	1	4	M
1	2009-08-26 16:32:00	0	DTA	16	1	4	M
1	2009-08-26 16:33:00	0	DTA	16	1	4	M
1	2009-08-26 16:34:00	0	DTA	16	1	4	M
1	2009-08-26 16:35:00	0	DTA	16	1	4	M
1	2009-08-26 16:36:00	0	DTA	16	1	4	M
1	2009-08-26 16:37:00	30	DTA	16	1	4	M
1	2009-08-26 16:38:00	10	DTA	16	1	4	M
1	2009-08-26 16:39:00	10	DTA	16	1	4	M
1	2009-08-26 16:40:00	0	DTA	16	1	4	M
1	2009-08-26 16:41:00	0	DTA	16	1	4	M
1	2009-08-26 16:42:00	0	DTA	16	1	4	M
1	2009-08-26 16:43:00	0	DTA	16	1	4	M
1	2009-08-26 16:44:00	0	DTA	16	1	4	M
1	2009-08-26 16:45:00	0	DTA	16	1	4	M
1	2009-08-26 16:46:00	0	DTA	16	1	4	M
1	2009-08-26 16:47:00	0	DTA	16	1	4	M
1	2009-08-26 16:48:00	0	DTA	16	1	4	M
1	2009-08-26 16:49:00	0	DTA	16	1	4	M
1	2009-08-26 16:50:00	0	DTA	16	1	4	M
1	2009-08-26 16:51:00	0	DTA	16	1	4	M
1	2009-08-26 16:52:00	0	DTA	16	1	4	M
1	2009-08-26 16:53:00	10	DTA	16	1	4	M
1	2009-08-26 16:54:00	0	DTA	16	1	4	M
1	2009-08-26 16:55:00	295	DTA	16	1	4	M
1	2009-08-26 16:56:00	0	DTA	16	1	4	M
1	2009-08-26 16:57:00	10	DTA	16	1	4	M
1	2009-08-26 16:58:00	10	DTA	16	1	4	M
1	2009-08-26 16:59:00	10	DTA	16	1	4	M
1	2009-08-26 17:00:00	0	DTA	16	1	4	M
1	2009-08-26 17:01:00	0	DTA	17	1	4	M
1	2009-08-26 17:02:00	0	DTA	17	1	4	M
1	2009-08-26 17:03:00	30	DTA	17	1	4	M
1	2009-08-26 17:04:00	10	DTA	17	1	4	M
1	2009-08-26 17:05:00	0	DTA	17	1	4	M
1	2009-08-26 17:06:00	0	DTA	17	1	4	M
1	2009-08-26 17:07:00	0	DTA	17	1	4	M
1	2009-08-26 17:08:00	0	DTA	17	1	4	M
1	2009-08-26 17:09:00	0	DTA	17	1	4	M
1	2009-08-26 17:10:00	0	DTA	17	1	4	M
1	2009-08-26 17:11:00	0	DTA	17	1	4	M
1	2009-08-26 17:12:00	0	DTA	17	1	4	M
1	2009-08-26 17:13:00	0	DTA	17	1	4	M
1	2009-08-26 17:14:00	0	DTA	17	1	4	M
1	2009-08-26 17:15:00	0	DTA	17	1	4	M
1	2009-08-26 17:16:00	0	DTA	17	1	4	M
1	2009-08-26 17:17:00	0	DTA	17	1	4	M
1	2009-08-26 17:18:00	0	DTA	17	1	4	M
1	2009-08-26 17:19:00	0	DTA	17	1	4	M
1	2009-08-26 17:20:00	0	DTA	17	1	4	M
1	2009-08-26 17:21:00	0	DTA	17	1	4	M
1	2009-08-26 17:22:00	0	DTA	17	1	4	M
1	2009-08-26 17:23:00	0	DTA	17	1	4	M
1	2009-08-26 17:24:00	0	DTA	17	1	4	M
1	2009-08-26 17:25:00	0	DTA	17	1	4	M
1	2009-08-26 17:26:00	0	DTA	17	1	4	M
1	2009-08-26 17:27:00	0	DTA	17	1	4	M
1	2009-08-26 17:28:00	0	DTA	17	1	4	M
1	2009-08-26 17:29:00	0	DTA	17	1	4	M
1	2009-08-26 17:30:00	0	DTA	17	1	4	M
1	2009-08-26 17:31:00	0	DTA	17	1	4	M
1	2009-08-26 17:32:00	0	DTA	17	1	4	M
1	2009-08-26 17:33:00	0	DTA	17	1	4	M
1	2009-08-26 17:34:00	0	DTA	17	1	4	M
1	2009-08-26 17:35:00	61	DTA	17	1	4	M
1	2009-08-26 17:36:00	0	DTA	17	1	4	M
1	2009-08-26 17:37:00	0	DTA	17	1	4	M
1	2009-08-26 17:38:00	0	DTA	17	1	4	M
1	2009-08-26 17:39:00	30	DTA	17	1	4	M
1	2009-08-26 17:40:00	51	DTA	17	1	4	M
1	2009-08-26 17:41:00	156	DTA	17	1	4	M
1	2009-08-26 17:42:00	10	DTA	17	1	4	M
1	2009-08-26 17:43:00	10	DTA	17	1	4	M
1	2009-08-26 17:44:00	0	DTA	17	1	4	M
1	2009-08-26 17:45:00	0	DTA	17	1	4	M
1	2009-08-26 17:46:00	0	DTA	17	1	4	M
1	2009-08-26 17:47:00	144	DTA	17	1	4	M
1	2009-08-26 17:48:00	366	DTA	17	1	4	M
1	2009-08-26 17:49:00	20	DTA	17	1	4	M
1	2009-08-26 17:50:00	0	DTA	17	1	4	M
1	2009-08-26 17:51:00	0	DTA	17	1	4	M
1	2009-08-26 17:52:00	0	DTA	17	1	4	M
1	2009-08-26 17:53:00	295	DTA	17	1	4	M
1	2009-08-26 17:54:00	794	DTA	17	1	4	M
1	2009-08-26 17:55:00	713	DTA	17	1	4	M
1	2009-08-26 17:56:00	652	DTA	17	1	4	M
1	2009-08-26 17:57:00	3253	DTA	17	1	4	M
1	2009-08-26 17:58:00	1296	DTA	17	1	4	M
1	2009-08-26 17:59:00	2702	DTA	17	1	4	M
1	2009-08-26 18:00:00	156	DTA	17	1	4	M
1	2009-08-26 18:01:00	20	DTA	18	1	4	M
1	2009-08-26 18:02:00	10	DTA	18	1	4	M
1	2009-08-26 18:03:00	20	DTA	18	1	4	M
1	2009-08-26 18:04:00	977	DTA	18	1	4	M
1	2009-08-26 18:05:00	839	DTA	18	1	4	M
1	2009-08-26 18:06:00	597	DTA	18	1	4	M
1	2009-08-26 18:07:00	0	DTA	18	1	4	M
1	2009-08-26 18:08:00	169	DTA	18	1	4	M
1	2009-08-26 18:09:00	112	DTA	18	1	4	M
1	2009-08-26 18:10:00	337	DTA	18	1	4	M
1	2009-08-26 18:11:00	0	DTA	18	1	4	M
1	2009-08-26 18:12:00	0	DTA	18	1	4	M
1	2009-08-26 18:13:00	0	DTA	18	1	4	M
1	2009-08-26 18:14:00	0	DTA	18	1	4	M
1	2009-08-26 18:15:00	20	DTA	18	1	4	M
1	2009-08-26 18:16:00	0	DTA	18	1	4	M
1	2009-08-26 18:17:00	0	DTA	18	1	4	M
1	2009-08-26 18:18:00	0	DTA	18	1	4	M
1	2009-08-26 18:19:00	0	DTA	18	1	4	M
1	2009-08-26 18:20:00	20	DTA	18	1	4	M
1	2009-08-26 18:21:00	0	DTA	18	1	4	M
1	2009-08-26 18:22:00	132	DTA	18	1	4	M
1	2009-08-26 18:23:00	394	DTA	18	1	4	M
1	2009-08-26 18:24:00	10	DTA	18	1	4	M
1	2009-08-26 18:25:00	20	DTA	18	1	4	M
1	2009-08-26 18:26:00	30	DTA	18	1	4	M
1	2009-08-26 18:27:00	0	DTA	18	1	4	M
1	2009-08-26 18:28:00	0	DTA	18	1	4	M
1	2009-08-26 18:29:00	91	DTA	18	1	4	M
1	2009-08-26 18:30:00	561	DTA	18	1	4	M
1	2009-08-26 18:31:00	977	DTA	18	1	4	M
1	2009-08-26 18:32:00	953	DTA	18	1	4	M
1	2009-08-26 18:33:00	380	DTA	18	1	4	M
1	2009-08-26 18:34:00	266	DTA	18	1	4	M
1	2009-08-26 18:35:00	30	DTA	18	1	4	M
1	2009-08-26 18:36:00	0	DTA	18	1	4	M
1	2009-08-26 18:37:00	733	DTA	18	1	4	M
1	2009-08-26 18:38:00	906	DTA	18	1	4	M
1	2009-08-26 18:39:00	977	DTA	18	1	4	M
1	2009-08-26 18:40:00	169	DTA	18	1	4	M
1	2009-08-26 18:41:00	30	DTA	18	1	4	M
1	2009-08-26 18:42:00	524	DTA	18	1	4	M
1	2009-08-26 18:43:00	0	DTA	18	1	4	M
1	2009-08-26 18:44:00	0	DTA	18	1	4	M
1	2009-08-26 18:45:00	30	DTA	18	1	4	M
1	2009-08-26 18:46:00	41	DTA	18	1	4	M
1	2009-08-26 18:47:00	0	DTA	18	1	4	M
1	2009-08-26 18:48:00	0	DTA	18	1	4	M
1	2009-08-26 18:49:00	3499	DTA	18	1	4	M
1	2009-08-26 18:50:00	1646	DTA	18	1	4	M
1	2009-08-26 18:51:00	1512	DTA	18	1	4	M
1	2009-08-26 18:52:00	475	DTA	18	1	4	M
1	2009-08-26 18:53:00	30	DTA	18	1	4	M
1	2009-08-26 18:54:00	1479	DTA	18	1	4	M
1	2009-08-26 18:55:00	524	DTA	18	1	4	M
1	2009-08-26 18:56:00	1863	DTA	18	1	4	M
1	2009-08-26 18:57:00	1026	DTA	18	1	4	M
1	2009-08-26 18:58:00	254	DTA	18	1	4	M
1	2009-08-26 18:59:00	51	DTA	18	1	4	M
1	2009-08-26 19:00:00	20	DTA	18	1	4	M
1	2009-08-26 19:01:00	193	DTA	19	1	4	M
1	2009-08-26 19:02:00	693	DTA	19	1	4	M
1	2009-08-26 19:03:00	144	DTA	19	1	4	M
1	2009-08-26 19:04:00	112	DTA	19	1	4	M
1	2009-08-26 19:05:00	71	DTA	19	1	4	M
1	2009-08-26 19:06:00	10	DTA	19	1	4	M
1	2009-08-26 19:07:00	41	DTA	19	1	4	M
1	2009-08-26 19:08:00	10	DTA	19	1	4	M
1	2009-08-26 19:09:00	0	DTA	19	1	4	M
1	2009-08-26 19:10:00	144	DTA	19	1	4	M
1	2009-08-26 19:11:00	30	DTA	19	1	4	M
1	2009-08-26 19:12:00	81	DTA	19	1	4	M
1	2009-08-26 19:13:00	0	DTA	19	1	4	M
1	2009-08-26 19:14:00	0	DTA	19	1	4	M
1	2009-08-26 19:15:00	0	DTA	19	1	4	M
1	2009-08-26 19:16:00	0	DTA	19	1	4	M
1	2009-08-26 19:17:00	0	DTA	19	1	4	M
1	2009-08-26 19:18:00	0	DTA	19	1	4	M
1	2009-08-26 19:19:00	0	DTA	19	1	4	M
1	2009-08-26 19:20:00	0	DTA	19	1	4	M
1	2009-08-26 19:21:00	0	DTA	19	1	4	M
1	2009-08-26 19:22:00	0	DTA	19	1	4	M
1	2009-08-26 19:23:00	0	DTA	19	1	4	M
1	2009-08-26 19:24:00	0	DTA	19	1	4	M
1	2009-08-26 19:25:00	0	DTA	19	1	4	M
1	2009-08-26 19:26:00	0	DTA	19	1	4	M
1	2009-08-26 19:27:00	0	DTA	19	1	4	M
1	2009-08-26 19:28:00	0	DTA	19	1	4	M
1	2009-08-26 19:29:00	0	DTA	19	1	4	M
1	2009-08-26 19:30:00	0	DTA	19	1	4	M
1	2009-08-26 19:31:00	51	DTA	19	1	4	M
1	2009-08-26 19:32:00	0	DTA	19	1	4	M
1	2009-08-26 19:33:00	0	DTA	19	1	4	M
1	2009-08-26 19:34:00	61	DTA	19	1	4	M
1	2009-08-26 19:35:00	884	DTA	19	1	4	M
1	2009-08-26 19:36:00	51	DTA	19	1	4	M
1	2009-08-26 19:37:00	0	DTA	19	1	4	M
1	2009-08-26 19:38:00	0	DTA	19	1	4	M
1	2009-08-26 19:39:00	0	DTA	19	1	4	M
1	2009-08-26 19:40:00	0	DTA	19	1	4	M
1	2009-08-26 19:41:00	91	DTA	19	1	4	M
1	2009-08-26 19:42:00	144	DTA	19	1	4	M
1	2009-08-26 19:43:00	10	DTA	19	1	4	M
1	2009-08-26 19:44:00	0	DTA	19	1	4	M
1	2009-08-26 19:45:00	0	DTA	19	1	4	M
1	2009-08-26 19:46:00	10	DTA	19	1	4	M
1	2009-08-26 19:47:00	0	DTA	19	1	4	M
1	2009-08-26 19:48:00	0	DTA	19	1	4	M
1	2009-08-26 19:49:00	0	DTA	19	1	4	M
1	2009-08-26 19:50:00	0	DTA	19	1	4	M
1	2009-08-26 19:51:00	30	DTA	19	1	4	M
1	2009-08-26 19:52:00	0	DTA	19	1	4	M
1	2009-08-26 19:53:00	41	DTA	19	1	4	M
1	2009-08-26 19:54:00	0	DTA	19	1	4	M
1	2009-08-26 19:55:00	0	DTA	19	1	4	M
1	2009-08-26 19:56:00	0	DTA	19	1	4	M
1	2009-08-26 19:57:00	0	DTA	19	1	4	M
1	2009-08-26 19:58:00	0	DTA	19	1	4	M
1	2009-08-26 19:59:00	10	DTA	19	1	4	M
1	2009-08-26 20:00:00	30	DTA	19	1	4	M
1	2009-08-26 20:01:00	0	DTA	20	1	4	M
1	2009-08-26 20:02:00	41	DTA	20	1	4	M
1	2009-08-26 20:03:00	0	DTA	20	1	4	M
1	2009-08-26 20:04:00	0	DTA	20	1	4	M
1	2009-08-26 20:05:00	0	DTA	20	1	4	M
1	2009-08-26 20:06:00	0	DTA	20	1	4	M
1	2009-08-26 20:07:00	0	DTA	20	1	4	M
1	2009-08-26 20:08:00	30	DTA	20	1	4	M
1	2009-08-26 20:09:00	0	DTA	20	1	4	M
1	2009-08-26 20:10:00	0	DTA	20	1	4	M
1	2009-08-26 20:11:00	0	DTA	20	1	4	M
1	2009-08-26 20:12:00	102	DTA	20	1	4	M
1	2009-08-26 20:13:00	144	DTA	20	1	4	M
1	2009-08-26 20:14:00	132	DTA	20	1	4	M
1	2009-08-26 20:15:00	205	DTA	20	1	4	M
1	2009-08-26 20:16:00	61	DTA	20	1	4	M
1	2009-08-26 20:17:00	10	DTA	20	1	4	M
1	2009-08-26 20:18:00	41	DTA	20	1	4	M
1	2009-08-26 20:19:00	156	DTA	20	1	4	M
1	2009-08-26 20:20:00	492	DTA	20	1	4	M
1	2009-08-26 20:21:00	0	DTA	20	1	4	M
1	2009-08-26 20:22:00	0	DTA	20	1	4	M
1	2009-08-26 20:23:00	0	DTA	20	1	4	M
1	2009-08-26 20:24:00	0	DTA	20	1	4	M
1	2009-08-26 20:25:00	0	DTA	20	1	4	M
1	2009-08-26 20:26:00	0	DTA	20	1	4	M
1	2009-08-26 20:27:00	0	DTA	20	1	4	M
1	2009-08-26 20:28:00	20	DTA	20	1	4	M
1	2009-08-26 20:29:00	10	DTA	20	1	4	M
1	2009-08-26 20:30:00	0	DTA	20	1	4	M
1	2009-08-26 20:31:00	0	DTA	20	1	4	M
1	2009-08-26 20:32:00	0	DTA	20	1	4	M
1	2009-08-26 20:33:00	0	DTA	20	1	4	M
1	2009-08-26 20:34:00	0	DTA	20	1	4	M
1	2009-08-26 20:35:00	30	DTA	20	1	4	M
1	2009-08-26 20:36:00	0	DTA	20	1	4	M
1	2009-08-26 20:37:00	0	DTA	20	1	4	M
1	2009-08-26 20:38:00	0	DTA	20	1	4	M
1	2009-08-26 20:39:00	0	DTA	20	1	4	M
1	2009-08-26 20:40:00	0	DTA	20	1	4	M
1	2009-08-26 20:41:00	0	DTA	20	1	4	M
1	2009-08-26 20:42:00	0	DTA	20	1	4	M
1	2009-08-26 20:43:00	0	DTA	20	1	4	M
1	2009-08-26 20:44:00	0	DTA	20	1	4	M
1	2009-08-26 20:45:00	30	DTA	20	1	4	M
1	2009-08-26 20:46:00	51	DTA	20	1	4	M
1	2009-08-26 20:47:00	0	DTA	20	1	4	M
1	2009-08-26 20:48:00	144	DTA	20	1	4	M
1	2009-08-26 20:49:00	81	DTA	20	1	4	M
1	2009-08-26 20:50:00	0	DTA	20	1	4	M
1	2009-08-26 20:51:00	0	DTA	20	1	4	M
1	2009-08-26 20:52:00	10	DTA	20	1	4	M
1	2009-08-26 20:53:00	10	DTA	20	1	4	M
1	2009-08-26 20:54:00	0	DTA	20	1	4	M
1	2009-08-26 20:55:00	0	DTA	20	1	4	M
1	2009-08-26 20:56:00	0	DTA	20	1	4	M
1	2009-08-26 20:57:00	30	DTA	20	1	4	M
1	2009-08-26 20:58:00	0	DTA	20	1	4	M
1	2009-08-26 20:59:00	10	DTA	20	1	4	M
1	2009-08-26 21:00:00	0	DTA	20	1	4	M
1	2009-08-26 21:01:00	0	DTA	21	1	4	M
1	2009-08-26 21:02:00	0	DTA	21	1	4	M
1	2009-08-26 21:03:00	0	DTA	21	1	4	M
1	2009-08-26 21:04:00	0	DTA	21	1	4	M
1	2009-08-26 21:05:00	51	DTA	21	1	4	M
1	2009-08-26 21:06:00	20	DTA	21	1	4	M
1	2009-08-26 21:07:00	20	DTA	21	1	4	M
1	2009-08-26 21:08:00	10	DTA	21	1	4	M
1	2009-08-26 21:09:00	41	DTA	21	1	4	M
1	2009-08-26 21:10:00	1386	DTA	21	1	4	M
1	2009-08-26 21:11:00	508	DTA	21	1	4	M
1	2009-08-26 21:12:00	380	DTA	21	1	4	M
1	2009-08-26 21:13:00	156	DTA	21	1	4	M
1	2009-08-26 21:14:00	205	DTA	21	1	4	M
1	2009-08-26 21:15:00	81	DTA	21	1	4	M
1	2009-08-26 21:16:00	61	DTA	21	1	4	M
1	2009-08-26 21:17:00	30	DTA	21	1	4	M
1	2009-08-26 21:18:00	0	DTA	21	1	4	M
1	2009-08-26 21:19:00	266	DTA	21	1	4	M
1	2009-08-26 21:20:00	81	DTA	21	1	4	M
1	2009-08-26 21:21:00	91	DTA	21	1	4	M
1	2009-08-26 21:22:00	0	DTA	21	1	4	M
1	2009-08-26 21:23:00	0	DTA	21	1	4	M
1	2009-08-26 21:24:00	0	DTA	21	1	4	M
1	2009-08-26 21:25:00	0	DTA	21	1	4	M
1	2009-08-26 21:26:00	102	DTA	21	1	4	M
1	2009-08-26 21:27:00	0	DTA	21	1	4	M
1	2009-08-26 21:28:00	0	DTA	21	1	4	M
1	2009-08-26 21:29:00	0	DTA	21	1	4	M
1	2009-08-26 21:30:00	0	DTA	21	1	4	M
1	2009-08-26 21:31:00	0	DTA	21	1	4	M
1	2009-08-26 21:32:00	102	DTA	21	1	4	M
1	2009-08-26 21:33:00	10	DTA	21	1	4	M
1	2009-08-26 21:34:00	0	DTA	21	1	4	M
1	2009-08-26 21:35:00	0	DTA	21	1	4	M
1	2009-08-26 21:36:00	0	DTA	21	1	4	M
1	2009-08-26 21:37:00	10	DTA	21	1	4	M
1	2009-08-26 21:38:00	10	DTA	21	1	4	M
1	2009-08-26 21:39:00	20	DTA	21	1	4	M
1	2009-08-26 21:40:00	0	DTA	21	1	4	M
1	2009-08-26 21:41:00	0	DTA	21	1	4	M
1	2009-08-26 21:42:00	0	DTA	21	1	4	M
1	2009-08-26 21:43:00	10	DTA	21	1	4	M
1	2009-08-26 21:44:00	0	DTA	21	1	4	M
1	2009-08-26 21:45:00	0	DTA	21	1	4	M
1	2009-08-26 21:46:00	0	DTA	21	1	4	M
1	2009-08-26 21:47:00	0	DTA	21	1	4	M
1	2009-08-26 21:48:00	0	DTA	21	1	4	M
1	2009-08-26 21:49:00	0	DTA	21	1	4	M
1	2009-08-26 21:50:00	0	DTA	21	1	4	M
1	2009-08-26 21:51:00	0	DTA	21	1	4	M
1	2009-08-26 21:52:00	0	DTA	21	1	4	M
1	2009-08-26 21:53:00	0	DTA	21	1	4	M
1	2009-08-26 21:54:00	0	DTA	21	1	4	M
1	2009-08-26 21:55:00	10	DTA	21	1	4	M
1	2009-08-26 21:56:00	0	DTA	21	1	4	M
1	2009-08-26 21:57:00	0	DTA	21	1	4	M
1	2009-08-26 21:58:00	0	DTA	21	1	4	M
1	2009-08-26 21:59:00	0	DTA	21	1	4	M
1	2009-08-26 22:00:00	0	DTA	21	1	4	M
1	2009-08-26 22:01:00	0	DTA	22	1	4	M
1	2009-08-26 22:02:00	0	DTA	22	1	4	M
1	2009-08-26 22:03:00	30	DTA	22	1	4	M
1	2009-08-26 22:04:00	0	DTA	22	1	4	M
1	2009-08-26 22:05:00	542	DTA	22	1	4	M
1	2009-08-26 22:06:00	1325	DTA	22	1	4	M
1	2009-08-26 22:07:00	1715	DTA	22	1	4	M
1	2009-08-26 22:08:00	906	DTA	22	1	4	M
1	2009-08-26 22:09:00	30	DTA	22	1	4	M
1	2009-08-26 22:10:00	20	DTA	22	1	4	M
1	2009-08-26 22:11:00	61	DTA	22	1	4	M
1	2009-08-26 22:12:00	20	DTA	22	1	4	M
1	2009-08-26 22:13:00	51	DTA	22	1	4	M
1	2009-08-26 22:14:00	41	DTA	22	1	4	M
1	2009-08-26 22:15:00	51	DTA	22	1	4	M
1	2009-08-26 22:16:00	51	DTA	22	1	4	M
1	2009-08-26 22:17:00	524	DTA	22	1	4	M
1	2009-08-26 22:18:00	733	DTA	22	1	4	M
1	2009-08-26 22:19:00	323	DTA	22	1	4	M
1	2009-08-26 22:20:00	459	DTA	22	1	4	M
1	2009-08-26 22:21:00	217	DTA	22	1	4	M
1	2009-08-26 22:22:00	156	DTA	22	1	4	M
1	2009-08-26 22:23:00	579	DTA	22	1	4	M
1	2009-08-26 22:24:00	774	DTA	22	1	4	M
1	2009-08-26 22:25:00	713	DTA	22	1	4	M
1	2009-08-26 22:26:00	1940	DTA	22	1	4	M
1	2009-08-26 22:27:00	542	DTA	22	1	4	M
1	2009-08-26 22:28:00	0	DTA	22	1	4	M
1	2009-08-26 22:29:00	0	DTA	22	1	4	M
1	2009-08-26 22:30:00	112	DTA	22	1	4	M
1	2009-08-26 22:31:00	217	DTA	22	1	4	M
1	2009-08-26 22:32:00	71	DTA	22	1	4	M
1	2009-08-26 22:33:00	51	DTA	22	1	4	M
1	2009-08-26 22:34:00	102	DTA	22	1	4	M
1	2009-08-26 22:35:00	102	DTA	22	1	4	M
1	2009-08-26 22:36:00	366	DTA	22	1	4	M
1	2009-08-26 22:37:00	0	DTA	22	1	4	M
1	2009-08-26 22:38:00	0	DTA	22	1	4	M
1	2009-08-26 22:39:00	0	DTA	22	1	4	M
1	2009-08-26 22:40:00	0	DTA	22	1	4	M
1	2009-08-26 22:41:00	0	DTA	22	1	4	M
1	2009-08-26 22:42:00	0	DTA	22	1	4	M
1	2009-08-26 22:43:00	0	DTA	22	1	4	M
1	2009-08-26 22:44:00	0	DTA	22	1	4	M
1	2009-08-26 22:45:00	0	DTA	22	1	4	M
1	2009-08-26 22:46:00	20	DTA	22	1	4	M
1	2009-08-26 22:47:00	0	DTA	22	1	4	M
1	2009-08-26 22:48:00	0	DTA	22	1	4	M
1	2009-08-26 22:49:00	0	DTA	22	1	4	M
1	2009-08-26 22:50:00	0	DTA	22	1	4	M
1	2009-08-26 22:51:00	0	DTA	22	1	4	M
1	2009-08-26 22:52:00	0	DTA	22	1	4	M
1	2009-08-26 22:53:00	0	DTA	22	1	4	M
1	2009-08-26 22:54:00	0	DTA	22	1	4	M
1	2009-08-26 22:55:00	0	DTA	22	1	4	M
1	2009-08-26 22:56:00	0	DTA	22	1	4	M
1	2009-08-26 22:57:00	0	DTA	22	1	4	M
1	2009-08-26 22:58:00	0	DTA	22	1	4	M
1	2009-08-26 22:59:00	0	DTA	22	1	4	M
1	2009-08-26 23:00:00	20	DTA	22	1	4	M
1	2009-08-26 23:01:00	713	NTA	23	2	4	M
1	2009-08-26 23:02:00	71	NTA	23	2	4	M
1	2009-08-26 23:03:00	20	NTA	23	2	4	M
1	2009-08-26 23:04:00	156	NTA	23	2	4	M
1	2009-08-26 23:05:00	169	NTA	23	2	4	M
1	2009-08-26 23:06:00	0	NTA	23	2	4	M
1	2009-08-26 23:07:00	0	NTA	23	2	4	M
1	2009-08-26 23:08:00	0	NTA	23	2	4	M
1	2009-08-26 23:09:00	0	NTA	23	2	4	M
1	2009-08-26 23:10:00	0	NTA	23	2	4	M
1	2009-08-26 23:11:00	0	NTA	23	2	4	M
1	2009-08-26 23:12:00	0	NTA	23	2	4	M
1	2009-08-26 23:13:00	0	NTA	23	2	4	M
1	2009-08-26 23:14:00	0	NTA	23	2	4	M
1	2009-08-26 23:15:00	0	NTA	23	2	4	M
1	2009-08-26 23:16:00	0	NTA	23	2	4	M
1	2009-08-26 23:17:00	0	NTA	23	2	4	M
1	2009-08-26 23:18:00	0	NTA	23	2	4	M
1	2009-08-26 23:19:00	20	NTA	23	2	4	M
1	2009-08-26 23:20:00	0	NTA	23	2	4	M
1	2009-08-26 23:21:00	0	NTA	23	2	4	M
1	2009-08-26 23:22:00	0	NTA	23	2	4	M
1	2009-08-26 23:23:00	0	NTA	23	2	4	M
1	2009-08-26 23:24:00	0	NTA	23	2	4	M
1	2009-08-26 23:25:00	0	NTA	23	2	4	M
1	2009-08-26 23:26:00	0	NTA	23	2	4	M
1	2009-08-26 23:27:00	0	NTA	23	2	4	M
1	2009-08-26 23:28:00	0	NTA	23	2	4	M
1	2009-08-26 23:29:00	0	NTA	23	2	4	M
1	2009-08-26 23:30:00	0	NTA	23	2	4	M
1	2009-08-26 23:31:00	0	NTA	23	2	4	M
1	2009-08-26 23:32:00	0	NTA	23	2	4	M
1	2009-08-26 23:33:00	0	NTA	23	2	4	M
1	2009-08-26 23:34:00	0	NTA	23	2	4	M
1	2009-08-26 23:35:00	0	NTA	23	2	4	M
1	2009-08-26 23:36:00	0	NTA	23	2	4	M
1	2009-08-26 23:37:00	0	NTA	23	2	4	M
1	2009-08-26 23:38:00	0	NTA	23	2	4	M
1	2009-08-26 23:39:00	0	NTA	23	2	4	M
1	2009-08-26 23:40:00	10	NTA	23	2	4	M
1	2009-08-26 23:41:00	0	NTA	23	2	4	M
1	2009-08-26 23:42:00	0	NTA	23	2	4	M
1	2009-08-26 23:43:00	0	NTA	23	2	4	M
1	2009-08-26 23:44:00	0	NTA	23	2	4	M
1	2009-08-26 23:45:00	366	NTA	23	2	4	M
1	2009-08-26 23:46:00	61	NTA	23	2	4	M
1	2009-08-26 23:47:00	492	NTA	23	2	4	M
1	2009-08-26 23:48:00	0	NTA	23	2	4	M
1	2009-08-26 23:49:00	102	NTA	23	2	4	M
1	2009-08-26 23:50:00	0	NTA	23	2	4	M
1	2009-08-26 23:51:00	0	NTA	23	2	4	M
1	2009-08-26 23:52:00	0	NTA	23	2	4	M
1	2009-08-26 23:53:00	0	NTA	23	2	4	M
1	2009-08-26 23:54:00	0	NTA	23	2	4	M
1	2009-08-26 23:55:00	0	NTA	23	2	4	M
1	2009-08-26 23:56:00	0	NTA	23	2	4	M
1	2009-08-26 23:57:00	0	NTA	23	2	4	M
1	2009-08-26 23:58:00	0	NTA	23	2	4	M
1	2009-08-26 23:59:00	0	NTA	23	2	4	M
1	2009-08-27	0	NTA	23	2	4	M
1	2009-08-27 00:01:00	0	NTA	0	2	5	M
1	2009-08-27 00:02:00	0	NTA	0	2	5	M
1	2009-08-27 00:03:00	0	NTA	0	2	5	M
1	2009-08-27 00:04:00	0	NTA	0	2	5	M
1	2009-08-27 00:05:00	0	NTA	0	2	5	M
1	2009-08-27 00:06:00	0	NTA	0	2	5	M
1	2009-08-27 00:07:00	0	NTA	0	2	5	M
1	2009-08-27 00:08:00	0	NTA	0	2	5	M
1	2009-08-27 00:09:00	0	NTA	0	2	5	M
1	2009-08-27 00:10:00	41	NTA	0	2	5	M
1	2009-08-27 00:11:00	41	NTA	0	2	5	M
1	2009-08-27 00:12:00	0	NTA	0	2	5	M
1	2009-08-27 00:13:00	0	NTA	0	2	5	M
1	2009-08-27 00:14:00	0	NTA	0	2	5	M
1	2009-08-27 00:15:00	0	NTA	0	2	5	M
1	2009-08-27 00:16:00	0	NTA	0	2	5	M
1	2009-08-27 00:17:00	0	NTA	0	2	5	M
1	2009-08-27 00:18:00	0	NTA	0	2	5	M
1	2009-08-27 00:19:00	0	NTA	0	2	5	M
1	2009-08-27 00:20:00	0	NTA	0	2	5	M
1	2009-08-27 00:21:00	0	NTA	0	2	5	M
1	2009-08-27 00:22:00	0	NTA	0	2	5	M
1	2009-08-27 00:23:00	0	NTA	0	2	5	M
1	2009-08-27 00:24:00	0	NTA	0	2	5	M
1	2009-08-27 00:25:00	0	NTA	0	2	5	M
1	2009-08-27 00:26:00	0	NTA	0	2	5	M
1	2009-08-27 00:27:00	0	NTA	0	2	5	M
1	2009-08-27 00:28:00	0	NTA	0	2	5	M
1	2009-08-27 00:29:00	0	NTA	0	2	5	M
1	2009-08-27 00:30:00	0	NTA	0	2	5	M
1	2009-08-27 00:31:00	0	NTA	0	2	5	M
1	2009-08-27 00:32:00	0	NTA	0	2	5	M
1	2009-08-27 00:33:00	0	NTA	0	2	5	M
1	2009-08-27 00:34:00	0	NTA	0	2	5	M
1	2009-08-27 00:35:00	0	NTA	0	2	5	M
1	2009-08-27 00:36:00	0	NTA	0	2	5	M
1	2009-08-27 00:37:00	0	NTA	0	2	5	M
1	2009-08-27 00:38:00	0	NTA	0	2	5	M
1	2009-08-27 00:39:00	0	NTA	0	2	5	M
1	2009-08-27 00:40:00	0	NTA	0	2	5	M
1	2009-08-27 00:41:00	0	NTA	0	2	5	M
1	2009-08-27 00:42:00	0	NTA	0	2	5	M
1	2009-08-27 00:43:00	0	NTA	0	2	5	M
1	2009-08-27 00:44:00	0	NTA	0	2	5	M
1	2009-08-27 00:45:00	0	NTA	0	2	5	M
1	2009-08-27 00:46:00	0	NTA	0	2	5	M
1	2009-08-27 00:47:00	0	NTA	0	2	5	M
1	2009-08-27 00:48:00	0	NTA	0	2	5	M
1	2009-08-27 00:49:00	0	NTA	0	2	5	M
1	2009-08-27 00:50:00	0	NTA	0	2	5	M
1	2009-08-27 00:51:00	0	NTA	0	2	5	M
1	2009-08-27 00:52:00	0	NTA	0	2	5	M
1	2009-08-27 00:53:00	0	NTA	0	2	5	M
1	2009-08-27 00:54:00	0	NTA	0	2	5	M
1	2009-08-27 00:55:00	0	NTA	0	2	5	M
1	2009-08-27 00:56:00	41	NTA	0	2	5	M
1	2009-08-27 00:57:00	51	NTA	0	2	5	M
1	2009-08-27 00:58:00	0	NTA	0	2	5	M
1	2009-08-27 00:59:00	10	NTA	0	2	5	M
1	2009-08-27 01:00:00	0	NTA	0	2	5	M
1	2009-08-27 01:01:00	0	NTA	1	2	5	M
1	2009-08-27 01:02:00	0	NTA	1	2	5	M
1	2009-08-27 01:03:00	0	NTA	1	2	5	M
1	2009-08-27 01:04:00	0	NTA	1	2	5	M
1	2009-08-27 01:05:00	0	NTA	1	2	5	M
1	2009-08-27 01:06:00	0	NTA	1	2	5	M
1	2009-08-27 01:07:00	0	NTA	1	2	5	M
1	2009-08-27 01:08:00	0	NTA	1	2	5	M
1	2009-08-27 01:09:00	0	NTA	1	2	5	M
1	2009-08-27 01:10:00	0	NTA	1	2	5	M
1	2009-08-27 01:11:00	0	NTA	1	2	5	M
1	2009-08-27 01:12:00	0	NTA	1	2	5	M
1	2009-08-27 01:13:00	0	NTA	1	2	5	M
1	2009-08-27 01:14:00	0	NTA	1	2	5	M
1	2009-08-27 01:15:00	0	NTA	1	2	5	M
1	2009-08-27 01:16:00	0	NTA	1	2	5	M
1	2009-08-27 01:17:00	0	NTA	1	2	5	M
1	2009-08-27 01:18:00	0	NTA	1	2	5	M
1	2009-08-27 01:19:00	0	NTA	1	2	5	M
1	2009-08-27 01:20:00	0	NTA	1	2	5	M
1	2009-08-27 01:21:00	0	NTA	1	2	5	M
1	2009-08-27 01:22:00	0	NTA	1	2	5	M
1	2009-08-27 01:23:00	0	NTA	1	2	5	M
1	2009-08-27 01:24:00	0	NTA	1	2	5	M
1	2009-08-27 01:25:00	41	NTA	1	2	5	M
1	2009-08-27 01:26:00	112	NTA	1	2	5	M
1	2009-08-27 01:27:00	71	NTA	1	2	5	M
1	2009-08-27 01:28:00	0	NTA	1	2	5	M
1	2009-08-27 01:29:00	0	NTA	1	2	5	M
1	2009-08-27 01:30:00	0	NTA	1	2	5	M
1	2009-08-27 01:31:00	0	NTA	1	2	5	M
1	2009-08-27 01:32:00	0	NTA	1	2	5	M
1	2009-08-27 01:33:00	0	NTA	1	2	5	M
1	2009-08-27 01:34:00	0	NTA	1	2	5	M
1	2009-08-27 01:35:00	0	NTA	1	2	5	M
1	2009-08-27 01:36:00	0	NTA	1	2	5	M
1	2009-08-27 01:37:00	0	NTA	1	2	5	M
1	2009-08-27 01:38:00	0	NTA	1	2	5	M
1	2009-08-27 01:39:00	0	NTA	1	2	5	M
1	2009-08-27 01:40:00	0	NTA	1	2	5	M
1	2009-08-27 01:41:00	0	NTA	1	2	5	M
1	2009-08-27 01:42:00	0	NTA	1	2	5	M
1	2009-08-27 01:43:00	0	NTA	1	2	5	M
1	2009-08-27 01:44:00	0	NTA	1	2	5	M
1	2009-08-27 01:45:00	0	NTA	1	2	5	M
1	2009-08-27 01:46:00	0	NTA	1	2	5	M
1	2009-08-27 01:47:00	0	NTA	1	2	5	M
1	2009-08-27 01:48:00	0	NTA	1	2	5	M
1	2009-08-27 01:49:00	0	NTA	1	2	5	M
1	2009-08-27 01:50:00	41	NTA	1	2	5	M
1	2009-08-27 01:51:00	0	NTA	1	2	5	M
1	2009-08-27 01:52:00	10	NTA	1	2	5	M
1	2009-08-27 01:53:00	0	NTA	1	2	5	M
1	2009-08-27 01:54:00	0	NTA	1	2	5	M
1	2009-08-27 01:55:00	0	NTA	1	2	5	M
1	2009-08-27 01:56:00	0	NTA	1	2	5	M
1	2009-08-27 01:57:00	0	NTA	1	2	5	M
1	2009-08-27 01:58:00	0	NTA	1	2	5	M
1	2009-08-27 01:59:00	0	NTA	1	2	5	M
1	2009-08-27 02:00:00	0	NTA	1	2	5	M
1	2009-08-27 02:01:00	0	NTA	2	2	5	M
1	2009-08-27 02:02:00	0	NTA	2	2	5	M
1	2009-08-27 02:03:00	0	NTA	2	2	5	M
1	2009-08-27 02:04:00	0	NTA	2	2	5	M
1	2009-08-27 02:05:00	0	NTA	2	2	5	M
1	2009-08-27 02:06:00	0	NTA	2	2	5	M
1	2009-08-27 02:07:00	30	NTA	2	2	5	M
1	2009-08-27 02:08:00	0	NTA	2	2	5	M
1	2009-08-27 02:09:00	0	NTA	2	2	5	M
1	2009-08-27 02:10:00	0	NTA	2	2	5	M
1	2009-08-27 02:11:00	0	NTA	2	2	5	M
1	2009-08-27 02:12:00	0	NTA	2	2	5	M
1	2009-08-27 02:13:00	0	NTA	2	2	5	M
1	2009-08-27 02:14:00	0	NTA	2	2	5	M
1	2009-08-27 02:15:00	0	NTA	2	2	5	M
1	2009-08-27 02:16:00	0	NTA	2	2	5	M
1	2009-08-27 02:17:00	0	NTA	2	2	5	M
1	2009-08-27 02:18:00	0	NTA	2	2	5	M
1	2009-08-27 02:19:00	0	NTA	2	2	5	M
1	2009-08-27 02:20:00	0	NTA	2	2	5	M
1	2009-08-27 02:21:00	0	NTA	2	2	5	M
1	2009-08-27 02:22:00	0	NTA	2	2	5	M
1	2009-08-27 02:23:00	0	NTA	2	2	5	M
1	2009-08-27 02:24:00	0	NTA	2	2	5	M
1	2009-08-27 02:25:00	0	NTA	2	2	5	M
1	2009-08-27 02:26:00	0	NTA	2	2	5	M
1	2009-08-27 02:27:00	0	NTA	2	2	5	M
1	2009-08-27 02:28:00	0	NTA	2	2	5	M
1	2009-08-27 02:29:00	0	NTA	2	2	5	M
1	2009-08-27 02:30:00	0	NTA	2	2	5	M
1	2009-08-27 02:31:00	0	NTA	2	2	5	M
1	2009-08-27 02:32:00	0	NTA	2	2	5	M
1	2009-08-27 02:33:00	10	NTA	2	2	5	M
1	2009-08-27 02:34:00	102	NTA	2	2	5	M
1	2009-08-27 02:35:00	0	NTA	2	2	5	M
1	2009-08-27 02:36:00	0	NTA	2	2	5	M
1	2009-08-27 02:37:00	51	NTA	2	2	5	M
1	2009-08-27 02:38:00	0	NTA	2	2	5	M
1	2009-08-27 02:39:00	61	NTA	2	2	5	M
1	2009-08-27 02:40:00	10	NTA	2	2	5	M
1	2009-08-27 02:41:00	0	NTA	2	2	5	M
1	2009-08-27 02:42:00	0	NTA	2	2	5	M
1	2009-08-27 02:43:00	0	NTA	2	2	5	M
1	2009-08-27 02:44:00	0	NTA	2	2	5	M
1	2009-08-27 02:45:00	0	NTA	2	2	5	M
1	2009-08-27 02:46:00	0	NTA	2	2	5	M
1	2009-08-27 02:47:00	0	NTA	2	2	5	M
1	2009-08-27 02:48:00	0	NTA	2	2	5	M
1	2009-08-27 02:49:00	0	NTA	2	2	5	M
1	2009-08-27 02:50:00	0	NTA	2	2	5	M
1	2009-08-27 02:51:00	0	NTA	2	2	5	M
1	2009-08-27 02:52:00	0	NTA	2	2	5	M
1	2009-08-27 02:53:00	0	NTA	2	2	5	M
1	2009-08-27 02:54:00	0	NTA	2	2	5	M
1	2009-08-27 02:55:00	0	NTA	2	2	5	M
1	2009-08-27 02:56:00	0	NTA	2	2	5	M
1	2009-08-27 02:57:00	0	NTA	2	2	5	M
1	2009-08-27 02:58:00	0	NTA	2	2	5	M
1	2009-08-27 02:59:00	0	NTA	2	2	5	M
1	2009-08-27 03:00:00	0	NTA	2	2	5	M
1	2009-08-27 03:01:00	0	NTA	3	2	5	M
1	2009-08-27 03:02:00	0	NTA	3	2	5	M
1	2009-08-27 03:03:00	0	NTA	3	2	5	M
1	2009-08-27 03:04:00	0	NTA	3	2	5	M
1	2009-08-27 03:05:00	0	NTA	3	2	5	M
1	2009-08-27 03:06:00	0	NTA	3	2	5	M
1	2009-08-27 03:07:00	0	NTA	3	2	5	M
1	2009-08-27 03:08:00	0	NTA	3	2	5	M
1	2009-08-27 03:09:00	0	NTA	3	2	5	M
1	2009-08-27 03:10:00	0	NTA	3	2	5	M
1	2009-08-27 03:11:00	0	NTA	3	2	5	M
1	2009-08-27 03:12:00	0	NTA	3	2	5	M
1	2009-08-27 03:13:00	0	NTA	3	2	5	M
1	2009-08-27 03:14:00	0	NTA	3	2	5	M
1	2009-08-27 03:15:00	0	NTA	3	2	5	M
1	2009-08-27 03:16:00	0	NTA	3	2	5	M
1	2009-08-27 03:17:00	0	NTA	3	2	5	M
1	2009-08-27 03:18:00	0	NTA	3	2	5	M
1	2009-08-27 03:19:00	0	NTA	3	2	5	M
1	2009-08-27 03:20:00	0	NTA	3	2	5	M
1	2009-08-27 03:21:00	0	NTA	3	2	5	M
1	2009-08-27 03:22:00	0	NTA	3	2	5	M
1	2009-08-27 03:23:00	0	NTA	3	2	5	M
1	2009-08-27 03:24:00	0	NTA	3	2	5	M
1	2009-08-27 03:25:00	10	NTA	3	2	5	M
1	2009-08-27 03:26:00	0	NTA	3	2	5	M
1	2009-08-27 03:27:00	30	NTA	3	2	5	M
1	2009-08-27 03:28:00	20	NTA	3	2	5	M
1	2009-08-27 03:29:00	0	NTA	3	2	5	M
1	2009-08-27 03:30:00	144	NTA	3	2	5	M
1	2009-08-27 03:31:00	0	NTA	3	2	5	M
1	2009-08-27 03:32:00	0	NTA	3	2	5	M
1	2009-08-27 03:33:00	0	NTA	3	2	5	M
1	2009-08-27 03:34:00	0	NTA	3	2	5	M
1	2009-08-27 03:35:00	0	NTA	3	2	5	M
1	2009-08-27 03:36:00	0	NTA	3	2	5	M
1	2009-08-27 03:37:00	71	NTA	3	2	5	M
1	2009-08-27 03:38:00	51	NTA	3	2	5	M
1	2009-08-27 03:39:00	0	NTA	3	2	5	M
1	2009-08-27 03:40:00	0	NTA	3	2	5	M
1	2009-08-27 03:41:00	0	NTA	3	2	5	M
1	2009-08-27 03:42:00	0	NTA	3	2	5	M
1	2009-08-27 03:43:00	0	NTA	3	2	5	M
1	2009-08-27 03:44:00	0	NTA	3	2	5	M
1	2009-08-27 03:45:00	0	NTA	3	2	5	M
1	2009-08-27 03:46:00	0	NTA	3	2	5	M
1	2009-08-27 03:47:00	0	NTA	3	2	5	M
1	2009-08-27 03:48:00	0	NTA	3	2	5	M
1	2009-08-27 03:49:00	0	NTA	3	2	5	M
1	2009-08-27 03:50:00	0	NTA	3	2	5	M
1	2009-08-27 03:51:00	0	NTA	3	2	5	M
1	2009-08-27 03:52:00	0	NTA	3	2	5	M
1	2009-08-27 03:53:00	0	NTA	3	2	5	M
1	2009-08-27 03:54:00	0	NTA	3	2	5	M
1	2009-08-27 03:55:00	0	NTA	3	2	5	M
1	2009-08-27 03:56:00	0	NTA	3	2	5	M
1	2009-08-27 03:57:00	0	NTA	3	2	5	M
1	2009-08-27 03:58:00	0	NTA	3	2	5	M
1	2009-08-27 03:59:00	0	NTA	3	2	5	M
1	2009-08-27 04:00:00	0	NTA	3	2	5	M
1	2009-08-27 04:01:00	0	NTA	4	2	5	M
1	2009-08-27 04:02:00	0	NTA	4	2	5	M
1	2009-08-27 04:03:00	122	NTA	4	2	5	M
1	2009-08-27 04:04:00	0	NTA	4	2	5	M
1	2009-08-27 04:05:00	0	NTA	4	2	5	M
1	2009-08-27 04:06:00	0	NTA	4	2	5	M
1	2009-08-27 04:07:00	0	NTA	4	2	5	M
1	2009-08-27 04:08:00	0	NTA	4	2	5	M
1	2009-08-27 04:09:00	0	NTA	4	2	5	M
1	2009-08-27 04:10:00	0	NTA	4	2	5	M
1	2009-08-27 04:11:00	0	NTA	4	2	5	M
1	2009-08-27 04:12:00	0	NTA	4	2	5	M
1	2009-08-27 04:13:00	0	NTA	4	2	5	M
1	2009-08-27 04:14:00	0	NTA	4	2	5	M
1	2009-08-27 04:15:00	0	NTA	4	2	5	M
1	2009-08-27 04:16:00	0	NTA	4	2	5	M
1	2009-08-27 04:17:00	0	NTA	4	2	5	M
1	2009-08-27 04:18:00	0	NTA	4	2	5	M
1	2009-08-27 04:19:00	0	NTA	4	2	5	M
1	2009-08-27 04:20:00	0	NTA	4	2	5	M
1	2009-08-27 04:21:00	0	NTA	4	2	5	M
1	2009-08-27 04:22:00	0	NTA	4	2	5	M
1	2009-08-27 04:23:00	0	NTA	4	2	5	M
1	2009-08-27 04:24:00	0	NTA	4	2	5	M
1	2009-08-27 04:25:00	0	NTA	4	2	5	M
1	2009-08-27 04:26:00	0	NTA	4	2	5	M
1	2009-08-27 04:27:00	0	NTA	4	2	5	M
1	2009-08-27 04:28:00	0	NTA	4	2	5	M
1	2009-08-27 04:29:00	0	NTA	4	2	5	M
1	2009-08-27 04:30:00	0	NTA	4	2	5	M
1	2009-08-27 04:31:00	0	NTA	4	2	5	M
1	2009-08-27 04:32:00	0	NTA	4	2	5	M
1	2009-08-27 04:33:00	0	NTA	4	2	5	M
1	2009-08-27 04:34:00	0	NTA	4	2	5	M
1	2009-08-27 04:35:00	0	NTA	4	2	5	M
1	2009-08-27 04:36:00	102	NTA	4	2	5	M
1	2009-08-27 04:37:00	0	NTA	4	2	5	M
1	2009-08-27 04:38:00	0	NTA	4	2	5	M
1	2009-08-27 04:39:00	0	NTA	4	2	5	M
1	2009-08-27 04:40:00	41	NTA	4	2	5	M
1	2009-08-27 04:41:00	0	NTA	4	2	5	M
1	2009-08-27 04:42:00	0	NTA	4	2	5	M
1	2009-08-27 04:43:00	0	NTA	4	2	5	M
1	2009-08-27 04:44:00	0	NTA	4	2	5	M
1	2009-08-27 04:45:00	0	NTA	4	2	5	M
1	2009-08-27 04:46:00	0	NTA	4	2	5	M
1	2009-08-27 04:47:00	71	NTA	4	2	5	M
1	2009-08-27 04:48:00	71	NTA	4	2	5	M
1	2009-08-27 04:49:00	20	NTA	4	2	5	M
1	2009-08-27 04:50:00	0	NTA	4	2	5	M
1	2009-08-27 04:51:00	0	NTA	4	2	5	M
1	2009-08-27 04:52:00	30	NTA	4	2	5	M
1	2009-08-27 04:53:00	0	NTA	4	2	5	M
1	2009-08-27 04:54:00	122	NTA	4	2	5	M
1	2009-08-27 04:55:00	0	NTA	4	2	5	M
1	2009-08-27 04:56:00	0	NTA	4	2	5	M
1	2009-08-27 04:57:00	0	NTA	4	2	5	M
1	2009-08-27 04:58:00	0	NTA	4	2	5	M
1	2009-08-27 04:59:00	0	NTA	4	2	5	M
1	2009-08-27 05:00:00	0	NTA	4	2	5	M
1	2009-08-27 05:01:00	0	NTA	5	2	5	M
1	2009-08-27 05:02:00	0	NTA	5	2	5	M
1	2009-08-27 05:03:00	71	NTA	5	2	5	M
1	2009-08-27 05:04:00	10	NTA	5	2	5	M
1	2009-08-27 05:05:00	0	NTA	5	2	5	M
1	2009-08-27 05:06:00	0	NTA	5	2	5	M
1	2009-08-27 05:07:00	0	NTA	5	2	5	M
1	2009-08-27 05:08:00	0	NTA	5	2	5	M
1	2009-08-27 05:09:00	0	NTA	5	2	5	M
1	2009-08-27 05:10:00	0	NTA	5	2	5	M
1	2009-08-27 05:11:00	0	NTA	5	2	5	M
1	2009-08-27 05:12:00	0	NTA	5	2	5	M
1	2009-08-27 05:13:00	0	NTA	5	2	5	M
1	2009-08-27 05:14:00	0	NTA	5	2	5	M
1	2009-08-27 05:15:00	0	NTA	5	2	5	M
1	2009-08-27 05:16:00	0	NTA	5	2	5	M
1	2009-08-27 05:17:00	0	NTA	5	2	5	M
1	2009-08-27 05:18:00	0	NTA	5	2	5	M
1	2009-08-27 05:19:00	0	NTA	5	2	5	M
1	2009-08-27 05:20:00	0	NTA	5	2	5	M
1	2009-08-27 05:21:00	0	NTA	5	2	5	M
1	2009-08-27 05:22:00	0	NTA	5	2	5	M
1	2009-08-27 05:23:00	0	NTA	5	2	5	M
1	2009-08-27 05:24:00	0	NTA	5	2	5	M
1	2009-08-27 05:25:00	0	NTA	5	2	5	M
1	2009-08-27 05:26:00	0	NTA	5	2	5	M
1	2009-08-27 05:27:00	0	NTA	5	2	5	M
1	2009-08-27 05:28:00	0	NTA	5	2	5	M
1	2009-08-27 05:29:00	0	NTA	5	2	5	M
1	2009-08-27 05:30:00	0	NTA	5	2	5	M
1	2009-08-27 05:31:00	0	NTA	5	2	5	M
1	2009-08-27 05:32:00	0	NTA	5	2	5	M
1	2009-08-27 05:33:00	0	NTA	5	2	5	M
1	2009-08-27 05:34:00	0	NTA	5	2	5	M
1	2009-08-27 05:35:00	0	NTA	5	2	5	M
1	2009-08-27 05:36:00	0	NTA	5	2	5	M
1	2009-08-27 05:37:00	0	NTA	5	2	5	M
1	2009-08-27 05:38:00	0	NTA	5	2	5	M
1	2009-08-27 05:39:00	0	NTA	5	2	5	M
1	2009-08-27 05:40:00	0	NTA	5	2	5	M
1	2009-08-27 05:41:00	0	NTA	5	2	5	M
1	2009-08-27 05:42:00	0	NTA	5	2	5	M
1	2009-08-27 05:43:00	0	NTA	5	2	5	M
1	2009-08-27 05:44:00	0	NTA	5	2	5	M
1	2009-08-27 05:45:00	0	NTA	5	2	5	M
1	2009-08-27 05:46:00	0	NTA	5	2	5	M
1	2009-08-27 05:47:00	0	NTA	5	2	5	M
1	2009-08-27 05:48:00	20	NTA	5	2	5	M
1	2009-08-27 05:49:00	144	NTA	5	2	5	M
1	2009-08-27 05:50:00	0	NTA	5	2	5	M
1	2009-08-27 05:51:00	0	NTA	5	2	5	M
1	2009-08-27 05:52:00	0	NTA	5	2	5	M
1	2009-08-27 05:53:00	0	NTA	5	2	5	M
1	2009-08-27 05:54:00	0	NTA	5	2	5	M
1	2009-08-27 05:55:00	0	NTA	5	2	5	M
1	2009-08-27 05:56:00	0	NTA	5	2	5	M
1	2009-08-27 05:57:00	0	NTA	5	2	5	M
1	2009-08-27 05:58:00	0	NTA	5	2	5	M
1	2009-08-27 05:59:00	0	NTA	5	2	5	M
1	2009-08-27 06:00:00	169	NTA	5	2	5	M
1	2009-08-27 06:01:00	10	NTA	6	2	5	M
1	2009-08-27 06:02:00	0	NTA	6	2	5	M
1	2009-08-27 06:03:00	0	NTA	6	2	5	M
1	2009-08-27 06:04:00	0	NTA	6	2	5	M
1	2009-08-27 06:05:00	0	NTA	6	2	5	M
1	2009-08-27 06:06:00	0	NTA	6	2	5	M
1	2009-08-27 06:07:00	0	NTA	6	2	5	M
1	2009-08-27 06:08:00	0	NTA	6	2	5	M
1	2009-08-27 06:09:00	0	NTA	6	2	5	M
1	2009-08-27 06:10:00	0	NTA	6	2	5	M
1	2009-08-27 06:11:00	10	NTA	6	2	5	M
1	2009-08-27 06:12:00	0	NTA	6	2	5	M
1	2009-08-27 06:13:00	0	NTA	6	2	5	M
1	2009-08-27 06:14:00	0	NTA	6	2	5	M
1	2009-08-27 06:15:00	0	NTA	6	2	5	M
1	2009-08-27 06:16:00	10	NTA	6	2	5	M
1	2009-08-27 06:17:00	0	NTA	6	2	5	M
1	2009-08-27 06:18:00	51	NTA	6	2	5	M
1	2009-08-27 06:19:00	0	NTA	6	2	5	M
1	2009-08-27 06:20:00	91	NTA	6	2	5	M
1	2009-08-27 06:21:00	71	NTA	6	2	5	M
1	2009-08-27 06:22:00	205	NTA	6	2	5	M
1	2009-08-27 06:23:00	144	NTA	6	2	5	M
1	2009-08-27 06:24:00	91	NTA	6	2	5	M
1	2009-08-27 06:25:00	169	NTA	6	2	5	M
1	2009-08-27 06:26:00	102	NTA	6	2	5	M
1	2009-08-27 06:27:00	0	NTA	6	2	5	M
1	2009-08-27 06:28:00	0	NTA	6	2	5	M
1	2009-08-27 06:29:00	0	NTA	6	2	5	M
1	2009-08-27 06:30:00	0	NTA	6	2	5	M
1	2009-08-27 06:31:00	0	DTA	6	2	5	M
1	2009-08-27 06:32:00	0	DTA	6	2	5	M
1	2009-08-27 06:33:00	0	DTA	6	2	5	M
1	2009-08-27 06:34:00	0	DTA	6	2	5	M
1	2009-08-27 06:35:00	0	DTA	6	2	5	M
1	2009-08-27 06:36:00	0	DTA	6	2	5	M
1	2009-08-27 06:37:00	0	DTA	6	2	5	M
1	2009-08-27 06:38:00	0	DTA	6	2	5	M
1	2009-08-27 06:39:00	0	DTA	6	2	5	M
1	2009-08-27 06:40:00	0	DTA	6	2	5	M
1	2009-08-27 06:41:00	30	DTA	6	2	5	M
1	2009-08-27 06:42:00	0	DTA	6	2	5	M
1	2009-08-27 06:43:00	0	DTA	6	2	5	M
1	2009-08-27 06:44:00	0	DTA	6	2	5	M
1	2009-08-27 06:45:00	0	DTA	6	2	5	M
1	2009-08-27 06:46:00	122	DTA	6	2	5	M
1	2009-08-27 06:47:00	0	DTA	6	2	5	M
1	2009-08-27 06:48:00	839	DTA	6	2	5	M
1	2009-08-27 06:49:00	309	DTA	6	2	5	M
[truncated: 36,546 more rows]

## Sheet: Pivot NTA
Peak DTA Time?	(All)
DTA vs NTA	NTA
Average of Activity	Column Labels
Row Labels	1	2	3	4	5	6	7	8	9	10	11	12	13	14	Grand Total
1	9.56731	11.5022	8.75135	9.18974	7.05397	4.23232	6.74231	8.7871	15.1067	15.6303	13.9505	6.70781	6.61091	5.56774	9.15486
2	7.61296	15.5235	7.07312	6.66458	38.2407	9.10962	5.68679	9.43226	13.6292	24.8343	12.5517	9.21839	9.63925	15.2523	13.607
Grand Total	8.5717	13.6385	7.98627	8.05164	22.4594	6.73103	6.20952	9.10968	14.401	20.2323	13.3032	7.72372	8.10415	10.749	11.3254

## Sheet: Pivot DTA
Peak DTA Time?	(All)
DTA vs NTA	DTA
Average of Activity	Column Labels
Row Labels	1	2	3	4	5	6	7	8	9	10	11	12	13	Grand Total
1	127.715	99.3533	127.588	242.949	419.178	109.751	237.335	115.455	102.126	173.379	128.833	222.884	277.758	178.042
2	165.77	144.537	187.601	153.374	257.695	134.553	165.107	110.051	125.869	116.251	133.22	133.582	136.946	149.257
Grand Total	146.259	122.674	156.043	211.471	336.254	121.621	199.883	112.732	113.905	143.517	131.21	175.696	206.744	163.691

## Sheet: Pivot PeakDTA
Peak DTA Time?	Peak DTA
DTA vs NTA	DTA
Average of Activity	Column Labels
Row Labels	1	2	3	4	5	6	7	8	9	10	11	12	13	Grand Total
1	113.5	70.4806	97.6972	307.864	612.042	151.347	186.317	103.611	87.325	238.908	88.0861	410.117	278.439	211.21
2	147.517	138.019	176.072	203.77	472.986	76.6639	258.711	87.1583	63.5278	49.4944	230.203	70.8167	110.503	158.003
Grand Total	130.508	104.25	136.885	282.996	542.514	114.006	222.514	95.3847	75.4264	144.201	159.144	240.467	194.471	185.328

## Sheet: 8.25.09
Actogram, Copy Raw Data, All Days
Identity:	Ziggy
Filename:	E:\Active Research Files\Nighttime Activity\cases\ziggy\Ziggy.AWC
Gender:	M
Age:	9
Height:	91.4 cm	36.0 in
Weight:	36.4 kg	80.2 lbs
Start Date:	25-Aug-2009 (Tue)
Start Time:	18:00:00
Interval:	1.00 mins
Date Stamp:	Time Stamp:	Activity Data:	Marker Press:
2009-08-25	00:00:00	0
2009-08-25	00:01:00	0
2009-08-25	00:02:00	0
2009-08-25	00:03:00	0
2009-08-25	00:04:00	0
2009-08-25	00:05:00	0
2009-08-25	00:06:00	0
2009-08-25	00:07:00	0
2009-08-25	00:08:00	0
2009-08-25	00:09:00	0
2009-08-25	00:10:00	0
2009-08-25	00:11:00	0
2009-08-25	00:12:00	0
2009-08-25	00:13:00	0
2009-08-25	00:14:00	0
2009-08-25	00:15:00	0
2009-08-25	00:16:00	0
2009-08-25	00:17:00	0
2009-08-25	00:18:00	0
2009-08-25	00:19:00	0
2009-08-25	00:20:00	0
2009-08-25	00:21:00	0
2009-08-25	00:22:00	0
2009-08-25	00:23:00	0
2009-08-25	00:24:00	0
2009-08-25	00:25:00	0
2009-08-25	00:26:00	0
2009-08-25	00:27:00	0
2009-08-25	00:28:00	0
2009-08-25	00:29:00	0
2009-08-25	00:30:00	0
2009-08-25	00:31:00	0
2009-08-25	00:32:00	0
2009-08-25	00:33:00	0
2009-08-25	00:34:00	0
2009-08-25	00:35:00	0
2009-08-25	00:36:00	0
2009-08-25	00:37:00	0
2009-08-25	00:38:00	0
2009-08-25	00:39:00	0
2009-08-25	00:40:00	0
2009-08-25	00:41:00	0
2009-08-25	00:42:00	0
2009-08-25	00:43:00	0
2009-08-25	00:44:00	0
2009-08-25	00:45:00	0
2009-08-25	00:46:00	0
2009-08-25	00:47:00	0
2009-08-25	00:48:00	0
2009-08-25	00:49:00	0
2009-08-25	00:50:00	0
2009-08-25	00:51:00	0
2009-08-25	00:52:00	0
2009-08-25	00:53:00	0
2009-08-25	00:54:00	0
2009-08-25	00:55:00	0
2009-08-25	00:56:00	0
2009-08-25	00:57:00	0
2009-08-25	00:58:00	0
2009-08-25	00:59:00	0
2009-08-25	01:00:00	0
2009-08-25	01:01:00	0
2009-08-25	01:02:00	0
2009-08-25	01:03:00	0
2009-08-25	01:04:00	0
2009-08-25	01:05:00	0
2009-08-25	01:06:00	0
2009-08-25	01:07:00	0
2009-08-25	01:08:00	0
2009-08-25	01:09:00	0
2009-08-25	01:10:00	0
2009-08-25	01:11:00	0
2009-08-25	01:12:00	0
2009-08-25	01:13:00	0
2009-08-25	01:14:00	0
2009-08-25	01:15:00	0
2009-08-25	01:16:00	0
2009-08-25	01:17:00	0
2009-08-25	01:18:00	0
2009-08-25	01:19:00	0
2009-08-25	01:20:00	0
2009-08-25	01:21:00	0
2009-08-25	01:22:00	0
2009-08-25	01:23:00	0
2009-08-25	01:24:00	0
2009-08-25	01:25:00	0
2009-08-25	01:26:00	0
2009-08-25	01:27:00	0
2009-08-25	01:28:00	0
2009-08-25	01:29:00	0
2009-08-25	01:30:00	0
2009-08-25	01:31:00	0
2009-08-25	01:32:00	0
2009-08-25	01:33:00	0
2009-08-25	01:34:00	0
2009-08-25	01:35:00	0
2009-08-25	01:36:00	0
2009-08-25	01:37:00	0
2009-08-25	01:38:00	0
2009-08-25	01:39:00	0
2009-08-25	01:40:00	0
2009-08-25	01:41:00	0
2009-08-25	01:42:00	0
2009-08-25	01:43:00	0
2009-08-25	01:44:00	0
2009-08-25	01:45:00	0
2009-08-25	01:46:00	0
2009-08-25	01:47:00	0
2009-08-25	01:48:00	0
2009-08-25	01:49:00	0
2009-08-25	01:50:00	0
2009-08-25	01:51:00	0
2009-08-25	01:52:00	0
2009-08-25	01:53:00	0
2009-08-25	01:54:00	0
2009-08-25	01:55:00	0
2009-08-25	01:56:00	0
2009-08-25	01:57:00	0
2009-08-25	01:58:00	0
2009-08-25	01:59:00	0
2009-08-25	02:00:00	0
2009-08-25	02:01:00	0
2009-08-25	02:02:00	0
2009-08-25	02:03:00	0
2009-08-25	02:04:00	0
2009-08-25	02:05:00	0
2009-08-25	02:06:00	0
2009-08-25	02:07:00	0
2009-08-25	02:08:00	0
2009-08-25	02:09:00	0
2009-08-25	02:10:00	0
2009-08-25	02:11:00	0
2009-08-25	02:12:00	0
2009-08-25	02:13:00	0
2009-08-25	02:14:00	0
2009-08-25	02:15:00	0
2009-08-25	02:16:00	0
2009-08-25	02:17:00	0
2009-08-25	02:18:00	0
2009-08-25	02:19:00	0
2009-08-25	02:20:00	0
2009-08-25	02:21:00	0
2009-08-25	02:22:00	0
2009-08-25	02:23:00	0
2009-08-25	02:24:00	0
2009-08-25	02:25:00	0
2009-08-25	02:26:00	0
2009-08-25	02:27:00	0
2009-08-25	02:28:00	0
2009-08-25	02:29:00	0
2009-08-25	02:30:00	0
2009-08-25	02:31:00	0
2009-08-25	02:32:00	0
2009-08-25	02:33:00	0
2009-08-25	02:34:00	0
2009-08-25	02:35:00	0
2009-08-25	02:36:00	0
2009-08-25	02:37:00	0
2009-08-25	02:38:00	0
2009-08-25	02:39:00	0
2009-08-25	02:40:00	0
2009-08-25	02:41:00	0
2009-08-25	02:42:00	0
2009-08-25	02:43:00	0
2009-08-25	02:44:00	0
2009-08-25	02:45:00	0
2009-08-25	02:46:00	0
2009-08-25	02:47:00	0
2009-08-25	02:48:00	0
2009-08-25	02:49:00	0
2009-08-25	02:50:00	0
2009-08-25	02:51:00	0
2009-08-25	02:52:00	0
2009-08-25	02:53:00	0
2009-08-25	02:54:00	0
2009-08-25	02:55:00	0
2009-08-25	02:56:00	0
2009-08-25	02:57:00	0
2009-08-25	02:58:00	0
2009-08-25	02:59:00	0
2009-08-25	03:00:00	0
2009-08-25	03:01:00	0
2009-08-25	03:02:00	0
2009-08-25	03:03:00	0
2009-08-25	03:04:00	0
2009-08-25	03:05:00	0
2009-08-25	03:06:00	0
2009-08-25	03:07:00	0
2009-08-25	03:08:00	0
2009-08-25	03:09:00	0
2009-08-25	03:10:00	0
2009-08-25	03:11:00	0
2009-08-25	03:12:00	0
2009-08-25	03:13:00	0
2009-08-25	03:14:00	0
2009-08-25	03:15:00	0
2009-08-25	03:16:00	0
2009-08-25	03:17:00	0
2009-08-25	03:18:00	0
2009-08-25	03:19:00	0
2009-08-25	03:20:00	0
2009-08-25	03:21:00	0
2009-08-25	03:22:00	0
2009-08-25	03:23:00	0
2009-08-25	03:24:00	0
2009-08-25	03:25:00	0
2009-08-25	03:26:00	0
2009-08-25	03:27:00	0
2009-08-25	03:28:00	0
2009-08-25	03:29:00	0
2009-08-25	03:30:00	0
2009-08-25	03:31:00	0
2009-08-25	03:32:00	0
2009-08-25	03:33:00	0
2009-08-25	03:34:00	0
2009-08-25	03:35:00	0
2009-08-25	03:36:00	0
2009-08-25	03:37:00	0
2009-08-25	03:38:00	0
2009-08-25	03:39:00	0
2009-08-25	03:40:00	0
2009-08-25	03:41:00	0
2009-08-25	03:42:00	0
2009-08-25	03:43:00	0
2009-08-25	03:44:00	0
2009-08-25	03:45:00	0
2009-08-25	03:46:00	0
2009-08-25	03:47:00	0
2009-08-25	03:48:00	0
2009-08-25	03:49:00	0
2009-08-25	03:50:00	0
2009-08-25	03:51:00	0
2009-08-25	03:52:00	0
2009-08-25	03:53:00	0
2009-08-25	03:54:00	0
2009-08-25	03:55:00	0
2009-08-25	03:56:00	0
2009-08-25	03:57:00	0
2009-08-25	03:58:00	0
2009-08-25	03:59:00	0
2009-08-25	04:00:00	0
2009-08-25	04:01:00	0
2009-08-25	04:02:00	0
2009-08-25	04:03:00	0
2009-08-25	04:04:00	0
2009-08-25	04:05:00	0
2009-08-25	04:06:00	0
2009-08-25	04:07:00	0
2009-08-25	04:08:00	0
2009-08-25	04:09:00	0
2009-08-25	04:10:00	0
2009-08-25	04:11:00	0
2009-08-25	04:12:00	0
2009-08-25	04:13:00	0
2009-08-25	04:14:00	0
2009-08-25	04:15:00	0
2009-08-25	04:16:00	0
2009-08-25	04:17:00	0
2009-08-25	04:18:00	0
2009-08-25	04:19:00	0
2009-08-25	04:20:00	0
2009-08-25	04:21:00	0
2009-08-25	04:22:00	0
2009-08-25	04:23:00	0
2009-08-25	04:24:00	0
2009-08-25	04:25:00	0
2009-08-25	04:26:00	0
2009-08-25	04:27:00	0
2009-08-25	04:28:00	0
2009-08-25	04:29:00	0
2009-08-25	04:30:00	0
2009-08-25	04:31:00	0
2009-08-25	04:32:00	0
2009-08-25	04:33:00	0
2009-08-25	04:34:00	0
2009-08-25	04:35:00	0
2009-08-25	04:36:00	0
2009-08-25	04:37:00	0
2009-08-25	04:38:00	0
2009-08-25	04:39:00	0
2009-08-25	04:40:00	0
2009-08-25	04:41:00	0
2009-08-25	04:42:00	0
2009-08-25	04:43:00	0
2009-08-25	04:44:00	0
2009-08-25	04:45:00	0
2009-08-25	04:46:00	0
2009-08-25	04:47:00	0
2009-08-25	04:48:00	0
2009-08-25	04:49:00	0
2009-08-25	04:50:00	0
2009-08-25	04:51:00	0
2009-08-25	04:52:00	0
2009-08-25	04:53:00	0
2009-08-25	04:54:00	0
2009-08-25	04:55:00	0
2009-08-25	04:56:00	0
2009-08-25	04:57:00	0
2009-08-25	04:58:00	0
2009-08-25	04:59:00	0
2009-08-25	05:00:00	0
2009-08-25	05:01:00	0
2009-08-25	05:02:00	0
2009-08-25	05:03:00	0
2009-08-25	05:04:00	0
2009-08-25	05:05:00	0
2009-08-25	05:06:00	0
2009-08-25	05:07:00	0
2009-08-25	05:08:00	0
2009-08-25	05:09:00	0
2009-08-25	05:10:00	0
2009-08-25	05:11:00	0
2009-08-25	05:12:00	0
2009-08-25	05:13:00	0
2009-08-25	05:14:00	0
2009-08-25	05:15:00	0
2009-08-25	05:16:00	0
2009-08-25	05:17:00	0
2009-08-25	05:18:00	0
2009-08-25	05:19:00	0
2009-08-25	05:20:00	0
2009-08-25	05:21:00	0
2009-08-25	05:22:00	0
2009-08-25	05:23:00	0
2009-08-25	05:24:00	0
2009-08-25	05:25:00	0
2009-08-25	05:26:00	0
2009-08-25	05:27:00	0
2009-08-25	05:28:00	0
2009-08-25	05:29:00	0
2009-08-25	05:30:00	0
2009-08-25	05:31:00	0
2009-08-25	05:32:00	0
2009-08-25	05:33:00	0
2009-08-25	05:34:00	0
2009-08-25	05:35:00	0
2009-08-25	05:36:00	0
2009-08-25	05:37:00	0
2009-08-25	05:38:00	0
2009-08-25	05:39:00	0
2009-08-25	05:40:00	0
2009-08-25	05:41:00	0
2009-08-25	05:42:00	0
2009-08-25	05:43:00	0
2009-08-25	05:44:00	0
2009-08-25	05:45:00	0
2009-08-25	05:46:00	0
2009-08-25	05:47:00	0
2009-08-25	05:48:00	0
2009-08-25	05:49:00	0
2009-08-25	05:50:00	0
2009-08-25	05:51:00	0
2009-08-25	05:52:00	0
2009-08-25	05:53:00	0
2009-08-25	05:54:00	0
2009-08-25	05:55:00	0
2009-08-25	05:56:00	0
2009-08-25	05:57:00	0
2009-08-25	05:58:00	0
2009-08-25	05:59:00	0
2009-08-25	06:00:00	0
2009-08-25	06:01:00	0
2009-08-25	06:02:00	0
2009-08-25	06:03:00	0
2009-08-25	06:04:00	0
2009-08-25	06:05:00	0
2009-08-25	06:06:00	0
2009-08-25	06:07:00	0
2009-08-25	06:08:00	0
2009-08-25	06:09:00	0
2009-08-25	06:10:00	0
2009-08-25	06:11:00	0
2009-08-25	06:12:00	0
2009-08-25	06:13:00	0
2009-08-25	06:14:00	0
2009-08-25	06:15:00	0
2009-08-25	06:16:00	0
2009-08-25	06:17:00	0
2009-08-25	06:18:00	0
2009-08-25	06:19:00	0
2009-08-25	06:20:00	0
2009-08-25	06:21:00	0
2009-08-25	06:22:00	0
2009-08-25	06:23:00	0
2009-08-25	06:24:00	0
2009-08-25	06:25:00	0
2009-08-25	06:26:00	0
2009-08-25	06:27:00	0
2009-08-25	06:28:00	0
2009-08-25	06:29:00	0
2009-08-25	06:30:00	0
2009-08-25	06:31:00	0
2009-08-25	06:32:00	0
2009-08-25	06:33:00	0
2009-08-25	06:34:00	0
2009-08-25	06:35:00	0
2009-08-25	06:36:00	0
2009-08-25	06:37:00	0
2009-08-25	06:38:00	0
2009-08-25	06:39:00	0
2009-08-25	06:40:00	0
2009-08-25	06:41:00	0
2009-08-25	06:42:00	0
2009-08-25	06:43:00	0
2009-08-25	06:44:00	0
2009-08-25	06:45:00	0
2009-08-25	06:46:00	0
2009-08-25	06:47:00	0
2009-08-25	06:48:00	0
2009-08-25	06:49:00	0
2009-08-25	06:50:00	0
2009-08-25	06:51:00	0
2009-08-25	06:52:00	0
2009-08-25	06:53:00	0
2009-08-25	06:54:00	0
2009-08-25	06:55:00	0
2009-08-25	06:56:00	0
2009-08-25	06:57:00	0
2009-08-25	06:58:00	0
2009-08-25	06:59:00	0
2009-08-25	07:00:00	0
2009-08-25	07:01:00	0
2009-08-25	07:02:00	0
2009-08-25	07:03:00	0
2009-08-25	07:04:00	0
2009-08-25	07:05:00	0
2009-08-25	07:06:00	0
2009-08-25	07:07:00	0
2009-08-25	07:08:00	0
2009-08-25	07:09:00	0
2009-08-25	07:10:00	0
2009-08-25	07:11:00	0
2009-08-25	07:12:00	0
2009-08-25	07:13:00	0
2009-08-25	07:14:00	0
2009-08-25	07:15:00	0
2009-08-25	07:16:00	0
2009-08-25	07:17:00	0
2009-08-25	07:18:00	0
2009-08-25	07:19:00	0
2009-08-25	07:20:00	0
2009-08-25	07:21:00	0
2009-08-25	07:22:00	0
2009-08-25	07:23:00	0
2009-08-25	07:24:00	0
2009-08-25	07:25:00	0
2009-08-25	07:26:00	0
2009-08-25	07:27:00	0
2009-08-25	07:28:00	0
2009-08-25	07:29:00	0
2009-08-25	07:30:00	0
2009-08-25	07:31:00	0
2009-08-25	07:32:00	0
2009-08-25	07:33:00	0
2009-08-25	07:34:00	0
2009-08-25	07:35:00	0
2009-08-25	07:36:00	0
2009-08-25	07:37:00	0
2009-08-25	07:38:00	0
2009-08-25	07:39:00	0
2009-08-25	07:40:00	0
2009-08-25	07:41:00	0
2009-08-25	07:42:00	0
2009-08-25	07:43:00	0
2009-08-25	07:44:00	0
2009-08-25	07:45:00	0
2009-08-25	07:46:00	0
2009-08-25	07:47:00	0
2009-08-25	07:48:00	0
2009-08-25	07:49:00	0
2009-08-25	07:50:00	0
2009-08-25	07:51:00	0
2009-08-25	07:52:00	0
2009-08-25	07:53:00	0
2009-08-25	07:54:00	0
2009-08-25	07:55:00	0
2009-08-25	07:56:00	0
2009-08-25	07:57:00	0
2009-08-25	07:58:00	0
2009-08-25	07:59:00	0
2009-08-25	08:00:00	0
2009-08-25	08:01:00	0
2009-08-25	08:02:00	0
2009-08-25	08:03:00	0
2009-08-25	08:04:00	0
2009-08-25	08:05:00	0
2009-08-25	08:06:00	0
2009-08-25	08:07:00	0
2009-08-25	08:08:00	0
2009-08-25	08:09:00	0
2009-08-25	08:10:00	0
2009-08-25	08:11:00	0
2009-08-25	08:12:00	0
2009-08-25	08:13:00	0
2009-08-25	08:14:00	0
2009-08-25	08:15:00	0
2009-08-25	08:16:00	0
2009-08-25	08:17:00	0
2009-08-25	08:18:00	0
2009-08-25	08:19:00	0
2009-08-25	08:20:00	0
2009-08-25	08:21:00	0
2009-08-25	08:22:00	0
2009-08-25	08:23:00	0
2009-08-25	08:24:00	0
2009-08-25	08:25:00	0
2009-08-25	08:26:00	0
2009-08-25	08:27:00	0
2009-08-25	08:28:00	0
2009-08-25	08:29:00	0
2009-08-25	08:30:00	0
2009-08-25	08:31:00	0
2009-08-25	08:32:00	0
2009-08-25	08:33:00	0
2009-08-25	08:34:00	0
2009-08-25	08:35:00	0
2009-08-25	08:36:00	0
2009-08-25	08:37:00	0
2009-08-25	08:38:00	0
2009-08-25	08:39:00	0
2009-08-25	08:40:00	0
2009-08-25	08:41:00	0
2009-08-25	08:42:00	0
2009-08-25	08:43:00	0
2009-08-25	08:44:00	0
2009-08-25	08:45:00	0
2009-08-25	08:46:00	0
2009-08-25	08:47:00	0
2009-08-25	08:48:00	0
2009-08-25	08:49:00	0
2009-08-25	08:50:00	0
2009-08-25	08:51:00	0
2009-08-25	08:52:00	0
2009-08-25	08:53:00	0
2009-08-25	08:54:00	0
2009-08-25	08:55:00	0
2009-08-25	08:56:00	0
2009-08-25	08:57:00	0
2009-08-25	08:58:00	0
2009-08-25	08:59:00	0
2009-08-25	09:00:00	0
2009-08-25	09:01:00	0
2009-08-25	09:02:00	0
2009-08-25	09:03:00	0
2009-08-25	09:04:00	0
2009-08-25	09:05:00	0
2009-08-25	09:06:00	0
2009-08-25	09:07:00	0
2009-08-25	09:08:00	0
2009-08-25	09:09:00	0
2009-08-25	09:10:00	0
2009-08-25	09:11:00	0
2009-08-25	09:12:00	0
2009-08-25	09:13:00	0
2009-08-25	09:14:00	0
2009-08-25	09:15:00	0
2009-08-25	09:16:00	0
2009-08-25	09:17:00	0
2009-08-25	09:18:00	0
2009-08-25	09:19:00	0
2009-08-25	09:20:00	0
2009-08-25	09:21:00	0
2009-08-25	09:22:00	0
2009-08-25	09:23:00	0
2009-08-25	09:24:00	0
2009-08-25	09:25:00	0
2009-08-25	09:26:00	0
2009-08-25	09:27:00	0
2009-08-25	09:28:00	0
2009-08-25	09:29:00	0
2009-08-25	09:30:00	0
2009-08-25	09:31:00	0
2009-08-25	09:32:00	0
2009-08-25	09:33:00	0
2009-08-25	09:34:00	0
2009-08-25	09:35:00	0
2009-08-25	09:36:00	0
2009-08-25	09:37:00	0
2009-08-25	09:38:00	0
2009-08-25	09:39:00	0
2009-08-25	09:40:00	0
2009-08-25	09:41:00	0
2009-08-25	09:42:00	0
2009-08-25	09:43:00	0
2009-08-25	09:44:00	0
2009-08-25	09:45:00	0
2009-08-25	09:46:00	0
2009-08-25	09:47:00	0
2009-08-25	09:48:00	0
2009-08-25	09:49:00	0
2009-08-25	09:50:00	0
2009-08-25	09:51:00	0
2009-08-25	09:52:00	0
2009-08-25	09:53:00	0
2009-08-25	09:54:00	0
2009-08-25	09:55:00	0
2009-08-25	09:56:00	0
2009-08-25	09:57:00	0
2009-08-25	09:58:00	0
2009-08-25	09:59:00	0
2009-08-25	10:00:00	0
2009-08-25	10:01:00	0
2009-08-25	10:02:00	0
2009-08-25	10:03:00	0
2009-08-25	10:04:00	0
2009-08-25	10:05:00	0
2009-08-25	10:06:00	0
2009-08-25	10:07:00	0
2009-08-25	10:08:00	0
2009-08-25	10:09:00	0
2009-08-25	10:10:00	0
2009-08-25	10:11:00	0
2009-08-25	10:12:00	0
2009-08-25	10:13:00	0
2009-08-25	10:14:00	0
2009-08-25	10:15:00	0
2009-08-25	10:16:00	0
2009-08-25	10:17:00	0
2009-08-25	10:18:00	0
2009-08-25	10:19:00	0
2009-08-25	10:20:00	0
2009-08-25	10:21:00	0
2009-08-25	10:22:00	0
2009-08-25	10:23:00	0
2009-08-25	10:24:00	0
2009-08-25	10:25:00	0
2009-08-25	10:26:00	0
2009-08-25	10:27:00	0
2009-08-25	10:28:00	0
2009-08-25	10:29:00	0
2009-08-25	10:30:00	0
2009-08-25	10:31:00	0
2009-08-25	10:32:00	0
2009-08-25	10:33:00	0
2009-08-25	10:34:00	0
2009-08-25	10:35:00	0
2009-08-25	10:36:00	0
2009-08-25	10:37:00	0
2009-08-25	10:38:00	0
2009-08-25	10:39:00	0
2009-08-25	10:40:00	0
2009-08-25	10:41:00	0
2009-08-25	10:42:00	0
2009-08-25	10:43:00	0
2009-08-25	10:44:00	0
2009-08-25	10:45:00	0
2009-08-25	10:46:00	0
2009-08-25	10:47:00	0
2009-08-25	10:48:00	0
2009-08-25	10:49:00	0
2009-08-25	10:50:00	0
2009-08-25	10:51:00	0
2009-08-25	10:52:00	0
2009-08-25	10:53:00	0
2009-08-25	10:54:00	0
2009-08-25	10:55:00	0
2009-08-25	10:56:00	0
2009-08-25	10:57:00	0
2009-08-25	10:58:00	0
2009-08-25	10:59:00	0
2009-08-25	11:00:00	0
2009-08-25	11:01:00	0
2009-08-25	11:02:00	0
2009-08-25	11:03:00	0
2009-08-25	11:04:00	0
2009-08-25	11:05:00	0
2009-08-25	11:06:00	0
2009-08-25	11:07:00	0
2009-08-25	11:08:00	0
2009-08-25	11:09:00	0
2009-08-25	11:10:00	0
2009-08-25	11:11:00	0
2009-08-25	11:12:00	0
2009-08-25	11:13:00	0
2009-08-25	11:14:00	0
2009-08-25	11:15:00	0
2009-08-25	11:16:00	0
2009-08-25	11:17:00	0
2009-08-25	11:18:00	0
2009-08-25	11:19:00	0
2009-08-25	11:20:00	0
2009-08-25	11:21:00	0
2009-08-25	11:22:00	0
2009-08-25	11:23:00	0
2009-08-25	11:24:00	0
2009-08-25	11:25:00	0
2009-08-25	11:26:00	0
2009-08-25	11:27:00	0
2009-08-25	11:28:00	0
2009-08-25	11:29:00	0
2009-08-25	11:30:00	0
2009-08-25	11:31:00	0
2009-08-25	11:32:00	0
2009-08-25	11:33:00	0
2009-08-25	11:34:00	0
2009-08-25	11:35:00	0
2009-08-25	11:36:00	0
2009-08-25	11:37:00	0
2009-08-25	11:38:00	0
2009-08-25	11:39:00	0
2009-08-25	11:40:00	0
2009-08-25	11:41:00	0
2009-08-25	11:42:00	0
2009-08-25	11:43:00	0
2009-08-25	11:44:00	0
2009-08-25	11:45:00	0
2009-08-25	11:46:00	0
2009-08-25	11:47:00	0
2009-08-25	11:48:00	0
2009-08-25	11:49:00	0
2009-08-25	11:50:00	0
2009-08-25	11:51:00	0
2009-08-25	11:52:00	0
2009-08-25	11:53:00	0
2009-08-25	11:54:00	0
2009-08-25	11:55:00	0
2009-08-25	11:56:00	0
2009-08-25	11:57:00	0
2009-08-25	11:58:00	0
2009-08-25	11:59:00	0
2009-08-25	12:00:00	0
2009-08-25	12:01:00	0
2009-08-25	12:02:00	0
2009-08-25	12:03:00	0
2009-08-25	12:04:00	0
2009-08-25	12:05:00	0
2009-08-25	12:06:00	0
2009-08-25	12:07:00	0
2009-08-25	12:08:00	0
2009-08-25	12:09:00	0
2009-08-25	12:10:00	0
2009-08-25	12:11:00	0
2009-08-25	12:12:00	0
2009-08-25	12:13:00	0
2009-08-25	12:14:00	0
2009-08-25	12:15:00	0
2009-08-25	12:16:00	0
2009-08-25	12:17:00	0
2009-08-25	12:18:00	0
2009-08-25	12:19:00	0
2009-08-25	12:20:00	0
2009-08-25	12:21:00	0
2009-08-25	12:22:00	0
2009-08-25	12:23:00	0
2009-08-25	12:24:00	0
2009-08-25	12:25:00	0
2009-08-25	12:26:00	0
2009-08-25	12:27:00	0
2009-08-25	12:28:00	0
2009-08-25	12:29:00	0
2009-08-25	12:30:00	0
2009-08-25	12:31:00	0
2009-08-25	12:32:00	0
2009-08-25	12:33:00	0
2009-08-25	12:34:00	0
2009-08-25	12:35:00	0
2009-08-25	12:36:00	0
2009-08-25	12:37:00	0
2009-08-25	12:38:00	0
2009-08-25	12:39:00	0
2009-08-25	12:40:00	0
2009-08-25	12:41:00	0
2009-08-25	12:42:00	0
2009-08-25	12:43:00	0
2009-08-25	12:44:00	0
2009-08-25	12:45:00	0
2009-08-25	12:46:00	0
2009-08-25	12:47:00	0
2009-08-25	12:48:00	0
2009-08-25	12:49:00	0
2009-08-25	12:50:00	0
2009-08-25	12:51:00	0
2009-08-25	12:52:00	0
2009-08-25	12:53:00	0
2009-08-25	12:54:00	0
2009-08-25	12:55:00	0
2009-08-25	12:56:00	0
2009-08-25	12:57:00	0
2009-08-25	12:58:00	0
2009-08-25	12:59:00	0
2009-08-25	13:00:00	0
2009-08-25	13:01:00	0
2009-08-25	13:02:00	0
2009-08-25	13:03:00	0
2009-08-25	13:04:00	0
2009-08-25	13:05:00	0
2009-08-25	13:06:00	0
2009-08-25	13:07:00	0
2009-08-25	13:08:00	0
2009-08-25	13:09:00	0
2009-08-25	13:10:00	0
2009-08-25	13:11:00	0
2009-08-25	13:12:00	0
2009-08-25	13:13:00	0
2009-08-25	13:14:00	0
2009-08-25	13:15:00	0
2009-08-25	13:16:00	0
2009-08-25	13:17:00	0
2009-08-25	13:18:00	0
2009-08-25	13:19:00	0
2009-08-25	13:20:00	0
2009-08-25	13:21:00	0
2009-08-25	13:22:00	0
2009-08-25	13:23:00	0
2009-08-25	13:24:00	0
2009-08-25	13:25:00	0
2009-08-25	13:26:00	0
2009-08-25	13:27:00	0
2009-08-25	13:28:00	0
2009-08-25	13:29:00	0
2009-08-25	13:30:00	0
2009-08-25	13:31:00	0
2009-08-25	13:32:00	0
2009-08-25	13:33:00	0
2009-08-25	13:34:00	0
2009-08-25	13:35:00	0
2009-08-25	13:36:00	0
2009-08-25	13:37:00	0
2009-08-25	13:38:00	0
2009-08-25	13:39:00	0
2009-08-25	13:40:00	0
2009-08-25	13:41:00	0
2009-08-25	13:42:00	0
2009-08-25	13:43:00	0
2009-08-25	13:44:00	0
2009-08-25	13:45:00	0
2009-08-25	13:46:00	0
2009-08-25	13:47:00	0
2009-08-25	13:48:00	0
2009-08-25	13:49:00	0
2009-08-25	13:50:00	0
2009-08-25	13:51:00	0
2009-08-25	13:52:00	0
2009-08-25	13:53:00	0
2009-08-25	13:54:00	0
2009-08-25	13:55:00	0
2009-08-25	13:56:00	0
2009-08-25	13:57:00	0
2009-08-25	13:58:00	0
2009-08-25	13:59:00	0
2009-08-25	14:00:00	0
2009-08-25	14:01:00	0
2009-08-25	14:02:00	0
2009-08-25	14:03:00	0
2009-08-25	14:04:00	0
2009-08-25	14:05:00	0
2009-08-25	14:06:00	0
2009-08-25	14:07:00	0
2009-08-25	14:08:00	0
2009-08-25	14:09:00	0
2009-08-25	14:10:00	0
2009-08-25	14:11:00	0
2009-08-25	14:12:00	0
2009-08-25	14:13:00	0
2009-08-25	14:14:00	0
2009-08-25	14:15:00	0
2009-08-25	14:16:00	0
2009-08-25	14:17:00	0
2009-08-25	14:18:00	0
2009-08-25	14:19:00	0
2009-08-25	14:20:00	0
2009-08-25	14:21:00	0
2009-08-25	14:22:00	0
2009-08-25	14:23:00	0
2009-08-25	14:24:00	0
2009-08-25	14:25:00	0
2009-08-25	14:26:00	0
2009-08-25	14:27:00	0
2009-08-25	14:28:00	0
2009-08-25	14:29:00	0
2009-08-25	14:30:00	0
2009-08-25	14:31:00	0
2009-08-25	14:32:00	0
2009-08-25	14:33:00	0
2009-08-25	14:34:00	0
2009-08-25	14:35:00	0
2009-08-25	14:36:00	0
2009-08-25	14:37:00	0
2009-08-25	14:38:00	0
2009-08-25	14:39:00	0
2009-08-25	14:40:00	0
2009-08-25	14:41:00	0
2009-08-25	14:42:00	0
2009-08-25	14:43:00	0
2009-08-25	14:44:00	0
2009-08-25	14:45:00	0
2009-08-25	14:46:00	0
2009-08-25	14:47:00	0
2009-08-25	14:48:00	0
2009-08-25	14:49:00	0
2009-08-25	14:50:00	0
2009-08-25	14:51:00	0
2009-08-25	14:52:00	0
2009-08-25	14:53:00	0
2009-08-25	14:54:00	0
2009-08-25	14:55:00	0
2009-08-25	14:56:00	0
2009-08-25	14:57:00	0
2009-08-25	14:58:00	0
2009-08-25	14:59:00	0
2009-08-25	15:00:00	0
2009-08-25	15:01:00	0
2009-08-25	15:02:00	0
2009-08-25	15:03:00	0
2009-08-25	15:04:00	0
2009-08-25	15:05:00	0
2009-08-25	15:06:00	0
2009-08-25	15:07:00	0
2009-08-25	15:08:00	0
2009-08-25	15:09:00	0
2009-08-25	15:10:00	0
2009-08-25	15:11:00	0
2009-08-25	15:12:00	0
2009-08-25	15:13:00	0
2009-08-25	15:14:00	0
2009-08-25	15:15:00	0
2009-08-25	15:16:00	0
2009-08-25	15:17:00	0
2009-08-25	15:18:00	0
2009-08-25	15:19:00	0
2009-08-25	15:20:00	0
2009-08-25	15:21:00	0
2009-08-25	15:22:00	0
2009-08-25	15:23:00	0
2009-08-25	15:24:00	0
2009-08-25	15:25:00	0
2009-08-25	15:26:00	0
2009-08-25	15:27:00	0
2009-08-25	15:28:00	0
2009-08-25	15:29:00	0
2009-08-25	15:30:00	0
2009-08-25	15:31:00	0
2009-08-25	15:32:00	0
2009-08-25	15:33:00	0
2009-08-25	15:34:00	0
2009-08-25	15:35:00	0
2009-08-25	15:36:00	0
2009-08-25	15:37:00	0
2009-08-25	15:38:00	0
2009-08-25	15:39:00	0
2009-08-25	15:40:00	0
2009-08-25	15:41:00	0
2009-08-25	15:42:00	0
2009-08-25	15:43:00	0
2009-08-25	15:44:00	0
2009-08-25	15:45:00	0
2009-08-25	15:46:00	0
2009-08-25	15:47:00	0
2009-08-25	15:48:00	0
2009-08-25	15:49:00	0
2009-08-25	15:50:00	0
2009-08-25	15:51:00	0
2009-08-25	15:52:00	0
2009-08-25	15:53:00	0
2009-08-25	15:54:00	0
2009-08-25	15:55:00	0
2009-08-25	15:56:00	0
2009-08-25	15:57:00	0
2009-08-25	15:58:00	0
2009-08-25	15:59:00	0
2009-08-25	16:00:00	0
2009-08-25	16:01:00	0
2009-08-25	16:02:00	0
2009-08-25	16:03:00	0
2009-08-25	16:04:00	0
2009-08-25	16:05:00	0
2009-08-25	16:06:00	0
2009-08-25	16:07:00	0
2009-08-25	16:08:00	0
2009-08-25	16:09:00	0
2009-08-25	16:10:00	0
2009-08-25	16:11:00	0
2009-08-25	16:12:00	0
2009-08-25	16:13:00	0
2009-08-25	16:14:00	0
2009-08-25	16:15:00	0
2009-08-25	16:16:00	0
2009-08-25	16:17:00	0
2009-08-25	16:18:00	0
2009-08-25	16:19:00	0
2009-08-25	16:20:00	0
2009-08-25	16:21:00	0
2009-08-25	16:22:00	0
2009-08-25	16:23:00	0
2009-08-25	16:24:00	0
2009-08-25	16:25:00	0
2009-08-25	16:26:00	0
2009-08-25	16:27:00	0
2009-08-25	16:28:00	0
2009-08-25	16:29:00	0
2009-08-25	16:30:00	0
2009-08-25	16:31:00	0
2009-08-25	16:32:00	0
2009-08-25	16:33:00	0
2009-08-25	16:34:00	0
2009-08-25	16:35:00	0
2009-08-25	16:36:00	0
2009-08-25	16:37:00	0
2009-08-25	16:38:00	0
2009-08-25	16:39:00	0
2009-08-25	16:40:00	0
2009-08-25	16:41:00	0
2009-08-25	16:42:00	0
2009-08-25	16:43:00	0
2009-08-25	16:44:00	0
2009-08-25	16:45:00	0
2009-08-25	16:46:00	0
2009-08-25	16:47:00	0
2009-08-25	16:48:00	0
2009-08-25	16:49:00	0
2009-08-25	16:50:00	0
2009-08-25	16:51:00	0
2009-08-25	16:52:00	0
2009-08-25	16:53:00	0
2009-08-25	16:54:00	0
2009-08-25	16:55:00	0
2009-08-25	16:56:00	0
2009-08-25	16:57:00	0
2009-08-25	16:58:00	0
2009-08-25	16:59:00	0
2009-08-25	17:00:00	0
2009-08-25	17:01:00	0
2009-08-25	17:02:00	0
2009-08-25	17:03:00	0
2009-08-25	17:04:00	0
2009-08-25	17:05:00	0
2009-08-25	17:06:00	0
2009-08-25	17:07:00	0
2009-08-25	17:08:00	0
2009-08-25	17:09:00	0
2009-08-25	17:10:00	0
2009-08-25	17:11:00	0
2009-08-25	17:12:00	0
2009-08-25	17:13:00	0
2009-08-25	17:14:00	0
2009-08-25	17:15:00	0
2009-08-25	17:16:00	0
2009-08-25	17:17:00	0
2009-08-25	17:18:00	0
2009-08-25	17:19:00	0
2009-08-25	17:20:00	0
2009-08-25	17:21:00	0
2009-08-25	17:22:00	0
2009-08-25	17:23:00	0
2009-08-25	17:24:00	0
2009-08-25	17:25:00	0
2009-08-25	17:26:00	0
2009-08-25	17:27:00	0
2009-08-25	17:28:00	0
2009-08-25	17:29:00	0
2009-08-25	17:30:00	0
2009-08-25	17:31:00	0
2009-08-25	17:32:00	0
2009-08-25	17:33:00	0
2009-08-25	17:34:00	0
2009-08-25	17:35:00	0
2009-08-25	17:36:00	0
2009-08-25	17:37:00	0
2009-08-25	17:38:00	0
2009-08-25	17:39:00	0
2009-08-25	17:40:00	0
2009-08-25	17:41:00	0
2009-08-25	17:42:00	0
2009-08-25	17:43:00	0
2009-08-25	17:44:00	0
2009-08-25	17:45:00	0
2009-08-25	17:46:00	0
2009-08-25	17:47:00	0
2009-08-25	17:48:00	0
2009-08-25	17:49:00	0
2009-08-25	17:50:00	0
2009-08-25	17:51:00	0
2009-08-25	17:52:00	0
2009-08-25	17:53:00	0
2009-08-25	17:54:00	0
2009-08-25	17:55:00	0
2009-08-25	17:56:00	0
2009-08-25	17:57:00	0
2009-08-25	17:58:00	0
2009-08-25	17:59:00	0
2009-08-25	18:00:00	0	M
2009-08-25	18:01:00	0
2009-08-25	18:02:00	0
2009-08-25	18:03:00	0
2009-08-25	18:04:00	0
2009-08-25	18:05:00	295
2009-08-25	18:06:00	61
2009-08-25	18:07:00	0
2009-08-25	18:08:00	30
2009-08-25	18:09:00	30
2009-08-25	18:10:00	51
2009-08-25	18:11:00	0
2009-08-25	18:12:00	0
2009-08-25	18:13:00	0
2009-08-25	18:14:00	0
2009-08-25	18:15:00	0
2009-08-25	18:16:00	0
2009-08-25	18:17:00	0
2009-08-25	18:18:00	0
2009-08-25	18:19:00	0
2009-08-25	18:20:00	0
2009-08-25	18:21:00	0
2009-08-25	18:22:00	0
2009-08-25	18:23:00	0
2009-08-25	18:24:00	10
2009-08-25	18:25:00	156
2009-08-25	18:26:00	929
2009-08-25	18:27:00	713
2009-08-25	18:28:00	1386
2009-08-25	18:29:00	839
2009-08-25	18:30:00	337
2009-08-25	18:31:00	30
2009-08-25	18:32:00	443
2009-08-25	18:33:00	309
2009-08-25	18:34:00	0
2009-08-25	18:35:00	0
2009-08-25	18:36:00	0
2009-08-25	18:37:00	0
2009-08-25	18:38:00	0
2009-08-25	18:39:00	0
2009-08-25	18:40:00	0
2009-08-25	18:41:00	10
2009-08-25	18:42:00	0
2009-08-25	18:43:00	20
2009-08-25	18:44:00	51
2009-08-25	18:45:00	20
2009-08-25	18:46:00	475
2009-08-25	18:47:00	71
2009-08-25	18:48:00	0
2009-08-25	18:49:00	51
2009-08-25	18:50:00	20
2009-08-25	18:51:00	0
2009-08-25	18:52:00	0
2009-08-25	18:53:00	144
2009-08-25	18:54:00	366
2009-08-25	18:55:00	295
2009-08-25	18:56:00	410
2009-08-25	18:57:00	20
2009-08-25	18:58:00	132
2009-08-25	18:59:00	30
2009-08-25	19:00:00	0
2009-08-25	19:01:00	0
2009-08-25	19:02:00	0
2009-08-25	19:03:00	0
2009-08-25	19:04:00	10
2009-08-25	19:05:00	0
2009-08-25	19:06:00	0
2009-08-25	19:07:00	0
2009-08-25	19:08:00	817
2009-08-25	19:09:00	1751
2009-08-25	19:10:00	1863
2009-08-25	19:11:00	634
2009-08-25	19:12:00	81
2009-08-25	19:13:00	0
2009-08-25	19:14:00	0
2009-08-25	19:15:00	0
2009-08-25	19:16:00	0
2009-08-25	19:17:00	0
2009-08-25	19:18:00	0
2009-08-25	19:19:00	30
2009-08-25	19:20:00	929
2009-08-25	19:21:00	309
2009-08-25	19:22:00	693
2009-08-25	19:23:00	41
2009-08-25	19:24:00	0
2009-08-25	19:25:00	0
2009-08-25	19:26:00	410
2009-08-25	19:27:00	91
2009-08-25	19:28:00	10
2009-08-25	19:29:00	0
2009-08-25	19:30:00	0
2009-08-25	19:31:00	0
2009-08-25	19:32:00	169
2009-08-25	19:33:00	51
2009-08-25	19:34:00	10
2009-08-25	19:35:00	61
2009-08-25	19:36:00	41
2009-08-25	19:37:00	0
2009-08-25	19:38:00	0
2009-08-25	19:39:00	0
2009-08-25	19:40:00	0
2009-08-25	19:41:00	0
2009-08-25	19:42:00	0
2009-08-25	19:43:00	0
2009-08-25	19:44:00	0
2009-08-25	19:45:00	0
2009-08-25	19:46:00	0
2009-08-25	19:47:00	0
2009-08-25	19:48:00	0
2009-08-25	19:49:00	71
2009-08-25	19:50:00	132
2009-08-25	19:51:00	0
2009-08-25	19:52:00	0
2009-08-25	19:53:00	0
2009-08-25	19:54:00	0
2009-08-25	19:55:00	61
2009-08-25	19:56:00	181
2009-08-25	19:57:00	51
2009-08-25	19:58:00	10
2009-08-25	19:59:00	524
2009-08-25	20:00:00	1825
2009-08-25	20:01:00	1577
2009-08-25	20:02:00	2186
2009-08-25	20:03:00	2363
2009-08-25	20:04:00	929
2009-08-25	20:05:00	1050
2009-08-25	20:06:00	1902
2009-08-25	20:07:00	2101
2009-08-25	20:08:00	1751
2009-08-25	20:09:00	0
2009-08-25	20:10:00	0
2009-08-25	20:11:00	309
2009-08-25	20:12:00	0
2009-08-25	20:13:00	10
2009-08-25	20:14:00	61
2009-08-25	20:15:00	41
2009-08-25	20:16:00	0
2009-08-25	20:17:00	0
2009-08-25	20:18:00	0
2009-08-25	20:19:00	0
2009-08-25	20:20:00	10
2009-08-25	20:21:00	0
2009-08-25	20:22:00	0
2009-08-25	20:23:00	0
2009-08-25	20:24:00	0
2009-08-25	20:25:00	0
2009-08-25	20:26:00	0
2009-08-25	20:27:00	10
2009-08-25	20:28:00	10
2009-08-25	20:29:00	0
2009-08-25	20:30:00	10
2009-08-25	20:31:00	0
2009-08-25	20:32:00	0
2009-08-25	20:33:00	0
2009-08-25	20:34:00	0
2009-08-25	20:35:00	0
2009-08-25	20:36:00	41
2009-08-25	20:37:00	0
2009-08-25	20:38:00	0
2009-08-25	20:39:00	0
2009-08-25	20:40:00	0
2009-08-25	20:41:00	0
2009-08-25	20:42:00	0
2009-08-25	20:43:00	91
2009-08-25	20:44:00	0
2009-08-25	20:45:00	0
2009-08-25	20:46:00	0
2009-08-25	20:47:00	0
2009-08-25	20:48:00	81
2009-08-25	20:49:00	0
2009-08-25	20:50:00	0
2009-08-25	20:51:00	0
2009-08-25	20:52:00	0
2009-08-25	20:53:00	0
2009-08-25	20:54:00	0
2009-08-25	20:55:00	0
2009-08-25	20:56:00	0
2009-08-25	20:57:00	0
2009-08-25	20:58:00	0
2009-08-25	20:59:00	0
2009-08-25	21:00:00	0
2009-08-25	21:01:00	0
2009-08-25	21:02:00	0
2009-08-25	21:03:00	0
2009-08-25	21:04:00	0
2009-08-25	21:05:00	0
2009-08-25	21:06:00	0
2009-08-25	21:07:00	0
2009-08-25	21:08:00	0
2009-08-25	21:09:00	0
2009-08-25	21:10:00	0
2009-08-25	21:11:00	0
2009-08-25	21:12:00	0
2009-08-25	21:13:00	0
2009-08-25	21:14:00	0
2009-08-25	21:15:00	0
2009-08-25	21:16:00	0
2009-08-25	21:17:00	0
2009-08-25	21:18:00	0
2009-08-25	21:19:00	0
2009-08-25	21:20:00	71
2009-08-25	21:21:00	0
2009-08-25	21:22:00	0
2009-08-25	21:23:00	10
2009-08-25	21:24:00	30
2009-08-25	21:25:00	0
2009-08-25	21:26:00	10
2009-08-25	21:27:00	0
2009-08-25	21:28:00	0
2009-08-25	21:29:00	0
2009-08-25	21:30:00	0
2009-08-25	21:31:00	0
2009-08-25	21:32:00	351
2009-08-25	21:33:00	295
2009-08-25	21:34:00	30
2009-08-25	21:35:00	0
2009-08-25	21:36:00	0
2009-08-25	21:37:00	0
2009-08-25	21:38:00	0
2009-08-25	21:39:00	0
2009-08-25	21:40:00	0
2009-08-25	21:41:00	0
2009-08-25	21:42:00	0
2009-08-25	21:43:00	0
2009-08-25	21:44:00	169
2009-08-25	21:45:00	0
2009-08-25	21:46:00	0
2009-08-25	21:47:00	0
2009-08-25	21:48:00	0
2009-08-25	21:49:00	0
2009-08-25	21:50:00	0
2009-08-25	21:51:00	0
2009-08-25	21:52:00	0
2009-08-25	21:53:00	0
2009-08-25	21:54:00	0
2009-08-25	21:55:00	0
2009-08-25	21:56:00	0
2009-08-25	21:57:00	0
2009-08-25	21:58:00	0
2009-08-25	21:59:00	0
2009-08-25	22:00:00	10
2009-08-25	22:01:00	0
2009-08-25	22:02:00	0
2009-08-25	22:03:00	0
2009-08-25	22:04:00	10
2009-08-25	22:05:00	0
2009-08-25	22:06:00	0
2009-08-25	22:07:00	0
2009-08-25	22:08:00	0
2009-08-25	22:09:00	0
2009-08-25	22:10:00	0
2009-08-25	22:11:00	0
2009-08-25	22:12:00	0
2009-08-25	22:13:00	0
2009-08-25	22:14:00	0
2009-08-25	22:15:00	0
2009-08-25	22:16:00	0
2009-08-25	22:17:00	0
2009-08-25	22:18:00	0
2009-08-25	22:19:00	0
2009-08-25	22:20:00	0
2009-08-25	22:21:00	0
2009-08-25	22:22:00	0
2009-08-25	22:23:00	0
2009-08-25	22:24:00	0
2009-08-25	22:25:00	10
2009-08-25	22:26:00	0
2009-08-25	22:27:00	0
2009-08-25	22:28:00	0
2009-08-25	22:29:00	0
2009-08-25	22:30:00	0
2009-08-25	22:31:00	0
2009-08-25	22:32:00	0
2009-08-25	22:33:00	0
2009-08-25	22:34:00	0
2009-08-25	22:35:00	0
2009-08-25	22:36:00	0
2009-08-25	22:37:00	0
2009-08-25	22:38:00	0
2009-08-25	22:39:00	0
2009-08-25	22:40:00	0
2009-08-25	22:41:00	0
2009-08-25	22:42:00	0
2009-08-25	22:43:00	0
2009-08-25	22:44:00	0
2009-08-25	22:45:00	0
2009-08-25	22:46:00	0
2009-08-25	22:47:00	0
2009-08-25	22:48:00	0
2009-08-25	22:49:00	0
2009-08-25	22:50:00	0
2009-08-25	22:51:00	0
2009-08-25	22:52:00	0
2009-08-25	22:53:00	0
2009-08-25	22:54:00	0
2009-08-25	22:55:00	0
2009-08-25	22:56:00	0
2009-08-25	22:57:00	0
2009-08-25	22:58:00	0
2009-08-25	22:59:00	41
2009-08-25	23:00:00	81
2009-08-25	23:01:00	0
2009-08-25	23:02:00	0
2009-08-25	23:03:00	0
2009-08-25	23:04:00	0
2009-08-25	23:05:00	0
2009-08-25	23:06:00	0
2009-08-25	23:07:00	0
2009-08-25	23:08:00	0
2009-08-25	23:09:00	0
2009-08-25	23:10:00	0
2009-08-25	23:11:00	0
2009-08-25	23:12:00	0
2009-08-25	23:13:00	0
2009-08-25	23:14:00	0
2009-08-25	23:15:00	0
2009-08-25	23:16:00	0
2009-08-25	23:17:00	0
2009-08-25	23:18:00	0
2009-08-25	23:19:00	0
2009-08-25	23:20:00	0
2009-08-25	23:21:00	0
2009-08-25	23:22:00	41
2009-08-25	23:23:00	156
2009-08-25	23:24:00	71
2009-08-25	23:25:00	193
2009-08-25	23:26:00	0
2009-08-25	23:27:00	0
2009-08-25	23:28:00	0
2009-08-25	23:29:00	0
2009-08-25	23:30:00	0
2009-08-25	23:31:00	0
2009-08-25	23:32:00	0
2009-08-25	23:33:00	0
2009-08-25	23:34:00	0
2009-08-25	23:35:00	10
2009-08-25	23:36:00	0
2009-08-25	23:37:00	0
2009-08-25	23:38:00	0
2009-08-25	23:39:00	0
2009-08-25	23:40:00	0
2009-08-25	23:41:00	0
2009-08-25	23:42:00	0
2009-08-25	23:43:00	0
2009-08-25	23:44:00	0
2009-08-25	23:45:00	0
2009-08-25	23:46:00	51
2009-08-25	23:47:00	0
2009-08-25	23:48:00	0
2009-08-25	23:49:00	0
2009-08-25	23:50:00	0
2009-08-25	23:51:00	0
2009-08-25	23:52:00	0
2009-08-25	23:53:00	0
2009-08-25	23:54:00	0
2009-08-25	23:55:00	0
2009-08-25	23:56:00	0
2009-08-25	23:57:00	0
2009-08-25	23:58:00	0
2009-08-25	23:59:00	0
2009-08-26	00:00:00	0
2009-08-26	00:01:00	0
2009-08-26	00:02:00	0
2009-08-26	00:03:00	0
2009-08-26	00:04:00	0
2009-08-26	00:05:00	0
2009-08-26	00:06:00	0
2009-08-26	00:07:00	0
2009-08-26	00:08:00	0
2009-08-26	00:09:00	0
2009-08-26	00:10:00	0
2009-08-26	00:11:00	0
2009-08-26	00:12:00	0
2009-08-26	00:13:00	0
2009-08-26	00:14:00	0
2009-08-26	00:15:00	0
2009-08-26	00:16:00	0
2009-08-26	00:17:00	0
2009-08-26	00:18:00	0
2009-08-26	00:19:00	0
2009-08-26	00:20:00	20
2009-08-26	00:21:00	0
2009-08-26	00:22:00	0
2009-08-26	00:23:00	81
2009-08-26	00:24:00	20
2009-08-26	00:25:00	0
2009-08-26	00:26:00	0
2009-08-26	00:27:00	0
2009-08-26	00:28:00	0
2009-08-26	00:29:00	0
2009-08-26	00:30:00	30
2009-08-26	00:31:00	0
2009-08-26	00:32:00	0
2009-08-26	00:33:00	0
2009-08-26	00:34:00	0
2009-08-26	00:35:00	0
2009-08-26	00:36:00	0
2009-08-26	00:37:00	0
2009-08-26	00:38:00	0
2009-08-26	00:39:00	0
2009-08-26	00:40:00	0
2009-08-26	00:41:00	0
2009-08-26	00:42:00	0
2009-08-26	00:43:00	0
2009-08-26	00:44:00	0
2009-08-26	00:45:00	0
2009-08-26	00:46:00	0
2009-08-26	00:47:00	0
2009-08-26	00:48:00	0
2009-08-26	00:49:00	0
2009-08-26	00:50:00	0
2009-08-26	00:51:00	0
2009-08-26	00:52:00	0
2009-08-26	00:53:00	20
2009-08-26	00:54:00	0
2009-08-26	00:55:00	0
2009-08-26	00:56:00	0
2009-08-26	00:57:00	0
2009-08-26	00:58:00	0
2009-08-26	00:59:00	0
2009-08-26	01:00:00	0
2009-08-26	01:01:00	0
2009-08-26	01:02:00	0
2009-08-26	01:03:00	0
2009-08-26	01:04:00	0
2009-08-26	01:05:00	0
2009-08-26	01:06:00	0
2009-08-26	01:07:00	0
2009-08-26	01:08:00	0
2009-08-26	01:09:00	0
2009-08-26	01:10:00	0
2009-08-26	01:11:00	0
2009-08-26	01:12:00	0
2009-08-26	01:13:00	0
2009-08-26	01:14:00	0
2009-08-26	01:15:00	0
2009-08-26	01:16:00	0
2009-08-26	01:17:00	0
2009-08-26	01:18:00	0
2009-08-26	01:19:00	0
2009-08-26	01:20:00	0
2009-08-26	01:21:00	0
2009-08-26	01:22:00	0
2009-08-26	01:23:00	0
2009-08-26	01:24:00	0
2009-08-26	01:25:00	0
2009-08-26	01:26:00	0
2009-08-26	01:27:00	0
2009-08-26	01:28:00	0
2009-08-26	01:29:00	0
2009-08-26	01:30:00	0
2009-08-26	01:31:00	0
2009-08-26	01:32:00	0
2009-08-26	01:33:00	0
2009-08-26	01:34:00	0
2009-08-26	01:35:00	0
2009-08-26	01:36:00	0
2009-08-26	01:37:00	0
2009-08-26	01:38:00	0
2009-08-26	01:39:00	0
2009-08-26	01:40:00	0
2009-08-26	01:41:00	0
2009-08-26	01:42:00	0
2009-08-26	01:43:00	10
2009-08-26	01:44:00	0
2009-08-26	01:45:00	0
2009-08-26	01:46:00	0
2009-08-26	01:47:00	0
2009-08-26	01:48:00	0
2009-08-26	01:49:00	0
2009-08-26	01:50:00	0
2009-08-26	01:51:00	0
2009-08-26	01:52:00	0
2009-08-26	01:53:00	0
2009-08-26	01:54:00	0
2009-08-26	01:55:00	0
2009-08-26	01:56:00	0
2009-08-26	01:57:00	0
2009-08-26	01:58:00	0
2009-08-26	01:59:00	0
2009-08-26	02:00:00	0
2009-08-26	02:01:00	0
2009-08-26	02:02:00	0
2009-08-26	02:03:00	0
2009-08-26	02:04:00	0
2009-08-26	02:05:00	0
2009-08-26	02:06:00	0
2009-08-26	02:07:00	30
2009-08-26	02:08:00	0
2009-08-26	02:09:00	0
2009-08-26	02:10:00	0
2009-08-26	02:11:00	0
2009-08-26	02:12:00	0
2009-08-26	02:13:00	0
2009-08-26	02:14:00	0
2009-08-26	02:15:00	0
2009-08-26	02:16:00	0
2009-08-26	02:17:00	0
2009-08-26	02:18:00	0
2009-08-26	02:19:00	0
2009-08-26	02:20:00	0
2009-08-26	02:21:00	0
2009-08-26	02:22:00	0
2009-08-26	02:23:00	0
2009-08-26	02:24:00	0
2009-08-26	02:25:00	0
2009-08-26	02:26:00	0
2009-08-26	02:27:00	0
2009-08-26	02:28:00	0
2009-08-26	02:29:00	0
2009-08-26	02:30:00	0
2009-08-26	02:31:00	0
2009-08-26	02:32:00	0
2009-08-26	02:33:00	0
2009-08-26	02:34:00	61
2009-08-26	02:35:00	132
2009-08-26	02:36:00	81
2009-08-26	02:37:00	0
2009-08-26	02:38:00	0
2009-08-26	02:39:00	0
2009-08-26	02:40:00	0
2009-08-26	02:41:00	0
2009-08-26	02:42:00	0
2009-08-26	02:43:00	0
2009-08-26	02:44:00	0
2009-08-26	02:45:00	0
2009-08-26	02:46:00	0
2009-08-26	02:47:00	0
2009-08-26	02:48:00	0
2009-08-26	02:49:00	0
2009-08-26	02:50:00	0
2009-08-26	02:51:00	0
2009-08-26	02:52:00	0
2009-08-26	02:53:00	0
2009-08-26	02:54:00	0
2009-08-26	02:55:00	0
2009-08-26	02:56:00	0
2009-08-26	02:57:00	0
2009-08-26	02:58:00	0
2009-08-26	02:59:00	61
2009-08-26	03:00:00	0
2009-08-26	03:01:00	0
2009-08-26	03:02:00	0
2009-08-26	03:03:00	30
2009-08-26	03:04:00	0
2009-08-26	03:05:00	0
2009-08-26	03:06:00	0
2009-08-26	03:07:00	0
2009-08-26	03:08:00	0
2009-08-26	03:09:00	0
2009-08-26	03:10:00	0
2009-08-26	03:11:00	0
2009-08-26	03:12:00	0
2009-08-26	03:13:00	0
2009-08-26	03:14:00	0
2009-08-26	03:15:00	0
2009-08-26	03:16:00	0
2009-08-26	03:17:00	0
2009-08-26	03:18:00	0
2009-08-26	03:19:00	0
2009-08-26	03:20:00	0
2009-08-26	03:21:00	0
2009-08-26	03:22:00	0
2009-08-26	03:23:00	0
2009-08-26	03:24:00	0
2009-08-26	03:25:00	0
2009-08-26	03:26:00	0
2009-08-26	03:27:00	0
2009-08-26	03:28:00	0
2009-08-26	03:29:00	20
2009-08-26	03:30:00	61
2009-08-26	03:31:00	0
2009-08-26	03:32:00	0
2009-08-26	03:33:00	0
2009-08-26	03:34:00	0
2009-08-26	03:35:00	0
2009-08-26	03:36:00	0
2009-08-26	03:37:00	0
2009-08-26	03:38:00	0
2009-08-26	03:39:00	0
2009-08-26	03:40:00	0
2009-08-26	03:41:00	0
2009-08-26	03:42:00	0
2009-08-26	03:43:00	0
2009-08-26	03:44:00	0
2009-08-26	03:45:00	0
2009-08-26	03:46:00	0
2009-08-26	03:47:00	10
2009-08-26	03:48:00	91
2009-08-26	03:49:00	475
2009-08-26	03:50:00	20
2009-08-26	03:51:00	0
2009-08-26	03:52:00	0
2009-08-26	03:53:00	0
2009-08-26	03:54:00	0
2009-08-26	03:55:00	0
2009-08-26	03:56:00	0
2009-08-26	03:57:00	0
2009-08-26	03:58:00	0
2009-08-26	03:59:00	0
2009-08-26	04:00:00	0
2009-08-26	04:01:00	0
2009-08-26	04:02:00	0
2009-08-26	04:03:00	0
2009-08-26	04:04:00	0
2009-08-26	04:05:00	0
2009-08-26	04:06:00	0
2009-08-26	04:07:00	0
2009-08-26	04:08:00	51
2009-08-26	04:09:00	0
2009-08-26	04:10:00	0
2009-08-26	04:11:00	0
2009-08-26	04:12:00	0
2009-08-26	04:13:00	0
2009-08-26	04:14:00	0
2009-08-26	04:15:00	0
2009-08-26	04:16:00	0
2009-08-26	04:17:00	0
2009-08-26	04:18:00	0
2009-08-26	04:19:00	0
2009-08-26	04:20:00	0
2009-08-26	04:21:00	0
2009-08-26	04:22:00	0
2009-08-26	04:23:00	0
2009-08-26	04:24:00	0
2009-08-26	04:25:00	0
2009-08-26	04:26:00	0
2009-08-26	04:27:00	0
2009-08-26	04:28:00	0
2009-08-26	04:29:00	0
2009-08-26	04:30:00	0
2009-08-26	04:31:00	0
2009-08-26	04:32:00	0
2009-08-26	04:33:00	0
2009-08-26	04:34:00	0
2009-08-26	04:35:00	0
2009-08-26	04:36:00	0
2009-08-26	04:37:00	0
2009-08-26	04:38:00	0
2009-08-26	04:39:00	0
2009-08-26	04:40:00	20
2009-08-26	04:41:00	0
2009-08-26	04:42:00	0
2009-08-26	04:43:00	0
2009-08-26	04:44:00	0
2009-08-26	04:45:00	0
2009-08-26	04:46:00	0
2009-08-26	04:47:00	0
2009-08-26	04:48:00	0
2009-08-26	04:49:00	0
2009-08-26	04:50:00	71
2009-08-26	04:51:00	0
2009-08-26	04:52:00	10
2009-08-26	04:53:00	0
2009-08-26	04:54:00	144
2009-08-26	04:55:00	0
2009-08-26	04:56:00	0
2009-08-26	04:57:00	0
2009-08-26	04:58:00	0
2009-08-26	04:59:00	0
2009-08-26	05:00:00	0
2009-08-26	05:01:00	61
2009-08-26	05:02:00	0
2009-08-26	05:03:00	0
2009-08-26	05:04:00	0
2009-08-26	05:05:00	0
2009-08-26	05:06:00	0
2009-08-26	05:07:00	0
2009-08-26	05:08:00	0
2009-08-26	05:09:00	0
2009-08-26	05:10:00	0
2009-08-26	05:11:00	0
2009-08-26	05:12:00	0
2009-08-26	05:13:00	0
2009-08-26	05:14:00	0
2009-08-26	05:15:00	0
2009-08-26	05:16:00	0
2009-08-26	05:17:00	0
2009-08-26	05:18:00	0
2009-08-26	05:19:00	0
2009-08-26	05:20:00	0
2009-08-26	05:21:00	0
2009-08-26	05:22:00	0
2009-08-26	05:23:00	0
2009-08-26	05:24:00	0
2009-08-26	05:25:00	0
2009-08-26	05:26:00	0
2009-08-26	05:27:00	0
2009-08-26	05:28:00	0
2009-08-26	05:29:00	0
2009-08-26	05:30:00	20
2009-08-26	05:31:00	0
2009-08-26	05:32:00	30
2009-08-26	05:33:00	0
2009-08-26	05:34:00	0
2009-08-26	05:35:00	230
2009-08-26	05:36:00	91
2009-08-26	05:37:00	0
2009-08-26	05:38:00	0
2009-08-26	05:39:00	0
2009-08-26	05:40:00	0
2009-08-26	05:41:00	0
2009-08-26	05:42:00	0
2009-08-26	05:43:00	0
2009-08-26	05:44:00	0
2009-08-26	05:45:00	0
2009-08-26	05:46:00	0
2009-08-26	05:47:00	0
2009-08-26	05:48:00	0
2009-08-26	05:49:00	0
2009-08-26	05:50:00	0
2009-08-26	05:51:00	0
2009-08-26	05:52:00	0
2009-08-26	05:53:00	122
2009-08-26	05:54:00	0
2009-08-26	05:55:00	0
2009-08-26	05:56:00	0
2009-08-26	05:57:00	0
2009-08-26	05:58:00	20
2009-08-26	05:59:00	0
2009-08-26	06:00:00	0
2009-08-26	06:01:00	0
2009-08-26	06:02:00	0
2009-08-26	06:03:00	0
2009-08-26	06:04:00	61
2009-08-26	06:05:00	0
2009-08-26	06:06:00	0
2009-08-26	06:07:00	169
2009-08-26	06:08:00	0
2009-08-26	06:09:00	693
2009-08-26	06:10:00	410
2009-08-26	06:11:00	0
2009-08-26	06:12:00	280
2009-08-26	06:13:00	1940
2009-08-26	06:14:00	1544
2009-08-26	06:15:00	427
2009-08-26	06:16:00	0
2009-08-26	06:17:00	0
2009-08-26	06:18:00	0
2009-08-26	06:19:00	0
2009-08-26	06:20:00	0
2009-08-26	06:21:00	0
2009-08-26	06:22:00	0
2009-08-26	06:23:00	20
2009-08-26	06:24:00	71
2009-08-26	06:25:00	30
2009-08-26	06:26:00	30
2009-08-26	06:27:00	0
2009-08-26	06:28:00	0
2009-08-26	06:29:00	0
2009-08-26	06:30:00	0
2009-08-26	06:31:00	0
2009-08-26	06:32:00	0
2009-08-26	06:33:00	0
2009-08-26	06:34:00	0
2009-08-26	06:35:00	71
2009-08-26	06:36:00	217
2009-08-26	06:37:00	132
2009-08-26	06:38:00	475
2009-08-26	06:39:00	394
2009-08-26	06:40:00	102
2009-08-26	06:41:00	579
2009-08-26	06:42:00	652
2009-08-26	06:43:00	1156
2009-08-26	06:44:00	20
2009-08-26	06:45:00	774
2009-08-26	06:46:00	475
2009-08-26	06:47:00	217
2009-08-26	06:48:00	0
2009-08-26	06:49:00	0
2009-08-26	06:50:00	337
2009-08-26	06:51:00	337
2009-08-26	06:52:00	230
2009-08-26	06:53:00	20
2009-08-26	06:54:00	0
2009-08-26	06:55:00	0
2009-08-26	06:56:00	0
2009-08-26	06:57:00	0
2009-08-26	06:58:00	0
2009-08-26	06:59:00	0
2009-08-26	07:00:00	0
2009-08-26	07:01:00	0
2009-08-26	07:02:00	81
2009-08-26	07:03:00	817
2009-08-26	07:04:00	1863
2009-08-26	07:05:00	2702
2009-08-26	07:06:00	3194
2009-08-26	07:07:00	2859
2009-08-26	07:08:00	1239
2009-08-26	07:09:00	3135
2009-08-26	07:10:00	193
2009-08-26	07:11:00	30
2009-08-26	07:12:00	10
2009-08-26	07:13:00	0
2009-08-26	07:14:00	122
2009-08-26	07:15:00	0
2009-08-26	07:16:00	0
2009-08-26	07:17:00	0
2009-08-26	07:18:00	0
2009-08-26	07:19:00	0
2009-08-26	07:20:00	0
2009-08-26	07:21:00	0
2009-08-26	07:22:00	0
2009-08-26	07:23:00	0
2009-08-26	07:24:00	0
2009-08-26	07:25:00	0
2009-08-26	07:26:00	0
2009-08-26	07:27:00	20
2009-08-26	07:28:00	0
2009-08-26	07:29:00	0
2009-08-26	07:30:00	0
2009-08-26	07:31:00	217
2009-08-26	07:32:00	193
2009-08-26	07:33:00	0
2009-08-26	07:34:00	41
2009-08-26	07:35:00	0
2009-08-26	07:36:00	0
2009-08-26	07:37:00	0
2009-08-26	07:38:00	337
2009-08-26	07:39:00	542
2009-08-26	07:40:00	41
2009-08-26	07:41:00	0
2009-08-26	07:42:00	0
2009-08-26	07:43:00	0
2009-08-26	07:44:00	61
2009-08-26	07:45:00	0
2009-08-26	07:46:00	0
2009-08-26	07:47:00	0
2009-08-26	07:48:00	0
2009-08-26	07:49:00	0
2009-08-26	07:50:00	156
2009-08-26	07:51:00	0
2009-08-26	07:52:00	30
2009-08-26	07:53:00	0
2009-08-26	07:54:00	0
2009-08-26	07:55:00	0
2009-08-26	07:56:00	0
2009-08-26	07:57:00	0
2009-08-26	07:58:00	0
2009-08-26	07:59:00	0
2009-08-26	08:00:00	0
2009-08-26	08:01:00	20
2009-08-26	08:02:00	41
2009-08-26	08:03:00	0
2009-08-26	08:04:00	0
2009-08-26	08:05:00	0
2009-08-26	08:06:00	0
2009-08-26	08:07:00	0
2009-08-26	08:08:00	61
2009-08-26	08:09:00	280
2009-08-26	08:10:00	156
2009-08-26	08:11:00	0
2009-08-26	08:12:00	0
2009-08-26	08:13:00	0
2009-08-26	08:14:00	0
2009-08-26	08:15:00	0
2009-08-26	08:16:00	81
2009-08-26	08:17:00	0
2009-08-26	08:18:00	254
2009-08-26	08:19:00	230
2009-08-26	08:20:00	366
2009-08-26	08:21:00	81
2009-08-26	08:22:00	51
2009-08-26	08:23:00	0
2009-08-26	08:24:00	0
2009-08-26	08:25:00	0
2009-08-26	08:26:00	0
2009-08-26	08:27:00	51
2009-08-26	08:28:00	0
2009-08-26	08:29:00	0
2009-08-26	08:30:00	0
2009-08-26	08:31:00	30
2009-08-26	08:32:00	10
2009-08-26	08:33:00	0
2009-08-26	08:34:00	20
2009-08-26	08:35:00	0
2009-08-26	08:36:00	0
2009-08-26	08:37:00	0
2009-08-26	08:38:00	0
2009-08-26	08:39:00	0
2009-08-26	08:40:00	0
2009-08-26	08:41:00	0
2009-08-26	08:42:00	309
2009-08-26	08:43:00	254
2009-08-26	08:44:00	673
2009-08-26	08:45:00	10
2009-08-26	08:46:00	0
2009-08-26	08:47:00	0
2009-08-26	08:48:00	0
2009-08-26	08:49:00	0
2009-08-26	08:50:00	41
2009-08-26	08:51:00	0
2009-08-26	08:52:00	0
2009-08-26	08:53:00	0
2009-08-26	08:54:00	0
2009-08-26	08:55:00	0
2009-08-26	08:56:00	0
2009-08-26	08:57:00	0
2009-08-26	08:58:00	0
2009-08-26	08:59:00	0
2009-08-26	09:00:00	0
2009-08-26	09:01:00	0
2009-08-26	09:02:00	0
2009-08-26	09:03:00	0
2009-08-26	09:04:00	0
2009-08-26	09:05:00	0
2009-08-26	09:06:00	0
2009-08-26	09:07:00	0
2009-08-26	09:08:00	51
[truncated: 49,851 more rows]
