# Supplementary material for: Initial evaluation of nighttime restlessness in a naturally occurring canine model of osteoarthritis pain
Source: PeerJ. 2015 Feb 17;3:e772. doi: 10.7717/peerj.772 (PMC4340376; doi:10.7717/peerj.772)
Supplement: Supplemental Information 70 [file peerj-03-772-s070.xlsx]

## Sheet: 09_Data
Tx #	DateTime	Activity	DTA vs NTA	Hour	Tx Day	Weekday	Tx Rx	Peak DTA Time?	Last 7 Day?
1	2009-09-01 22:31:00	0	NTA	22	1	3	P
1	2009-09-01 22:32:00	0	NTA	22	1	3	P
1	2009-09-01 22:33:00	0	NTA	22	1	3	P
1	2009-09-01 22:34:00	154	NTA	22	1	3	P
1	2009-09-01 22:35:00	0	NTA	22	1	3	P
1	2009-09-01 22:36:00	0	NTA	22	1	3	P
1	2009-09-01 22:37:00	0	NTA	22	1	3	P
1	2009-09-01 22:38:00	0	NTA	22	1	3	P
1	2009-09-01 22:39:00	0	NTA	22	1	3	P
1	2009-09-01 22:40:00	0	NTA	22	1	3	P
1	2009-09-01 22:41:00	95	NTA	22	1	3	P
1	2009-09-01 22:42:00	0	NTA	22	1	3	P
1	2009-09-01 22:43:00	0	NTA	22	1	3	P
1	2009-09-01 22:44:00	0	NTA	22	1	3	P
1	2009-09-01 22:45:00	0	NTA	22	1	3	P
1	2009-09-01 22:46:00	0	NTA	22	1	3	P
1	2009-09-01 22:47:00	0	NTA	22	1	3	P
1	2009-09-01 22:48:00	0	NTA	22	1	3	P
1	2009-09-01 22:49:00	0	NTA	22	1	3	P
1	2009-09-01 22:50:00	0	NTA	22	1	3	P
1	2009-09-01 22:51:00	0	NTA	22	1	3	P
1	2009-09-01 22:52:00	0	NTA	22	1	3	P
1	2009-09-01 22:53:00	0	NTA	22	1	3	P
1	2009-09-01 22:54:00	0	NTA	22	1	3	P
1	2009-09-01 22:55:00	0	NTA	22	1	3	P
1	2009-09-01 22:56:00	0	NTA	22	1	3	P
1	2009-09-01 22:57:00	0	NTA	22	1	3	P
1	2009-09-01 22:58:00	0	NTA	22	1	3	P
1	2009-09-01 22:59:00	0	NTA	22	1	3	P
1	2009-09-01 23:00:00	0	NTA	22	1	3	P
1	2009-09-01 23:01:00	0	NTA	23	1	3	P
1	2009-09-01 23:02:00	0	NTA	23	1	3	P
1	2009-09-01 23:03:00	0	NTA	23	1	3	P
1	2009-09-01 23:04:00	0	NTA	23	1	3	P
1	2009-09-01 23:05:00	0	NTA	23	1	3	P
1	2009-09-01 23:06:00	0	NTA	23	1	3	P
1	2009-09-01 23:07:00	0	NTA	23	1	3	P
1	2009-09-01 23:08:00	0	NTA	23	1	3	P
1	2009-09-01 23:09:00	0	NTA	23	1	3	P
1	2009-09-01 23:10:00	0	NTA	23	1	3	P
1	2009-09-01 23:11:00	0	NTA	23	1	3	P
1	2009-09-01 23:12:00	0	NTA	23	1	3	P
1	2009-09-01 23:13:00	0	NTA	23	1	3	P
1	2009-09-01 23:14:00	0	NTA	23	1	3	P
1	2009-09-01 23:15:00	0	NTA	23	1	3	P
1	2009-09-01 23:16:00	24	NTA	23	1	3	P
1	2009-09-01 23:17:00	0	NTA	23	1	3	P
1	2009-09-01 23:18:00	0	NTA	23	1	3	P
1	2009-09-01 23:19:00	427	NTA	23	1	3	P
1	2009-09-01 23:20:00	71	NTA	23	1	3	P
1	2009-09-01 23:21:00	95	NTA	23	1	3	P
1	2009-09-01 23:22:00	0	NTA	23	1	3	P
1	2009-09-01 23:23:00	0	NTA	23	1	3	P
1	2009-09-01 23:24:00	0	NTA	23	1	3	P
1	2009-09-01 23:25:00	0	NTA	23	1	3	P
1	2009-09-01 23:26:00	0	NTA	23	1	3	P
1	2009-09-01 23:27:00	0	NTA	23	1	3	P
1	2009-09-01 23:28:00	0	NTA	23	1	3	P
1	2009-09-01 23:29:00	0	NTA	23	1	3	P
1	2009-09-01 23:30:00	0	NTA	23	1	3	P
1	2009-09-01 23:31:00	0	NTA	23	1	3	P
1	2009-09-01 23:32:00	0	NTA	23	1	3	P
1	2009-09-01 23:33:00	0	NTA	23	1	3	P
1	2009-09-01 23:34:00	0	NTA	23	1	3	P
1	2009-09-01 23:35:00	0	NTA	23	1	3	P
1	2009-09-01 23:36:00	0	NTA	23	1	3	P
1	2009-09-01 23:37:00	0	NTA	23	1	3	P
1	2009-09-01 23:38:00	0	NTA	23	1	3	P
1	2009-09-01 23:39:00	0	NTA	23	1	3	P
1	2009-09-01 23:40:00	0	NTA	23	1	3	P
1	2009-09-01 23:41:00	0	NTA	23	1	3	P
1	2009-09-01 23:42:00	0	NTA	23	1	3	P
1	2009-09-01 23:43:00	0	NTA	23	1	3	P
1	2009-09-01 23:44:00	0	NTA	23	1	3	P
1	2009-09-01 23:45:00	0	NTA	23	1	3	P
1	2009-09-01 23:46:00	0	NTA	23	1	3	P
1	2009-09-01 23:47:00	0	NTA	23	1	3	P
1	2009-09-01 23:48:00	0	NTA	23	1	3	P
1	2009-09-01 23:49:00	0	NTA	23	1	3	P
1	2009-09-01 23:50:00	0	NTA	23	1	3	P
1	2009-09-01 23:51:00	0	NTA	23	1	3	P
1	2009-09-01 23:52:00	0	NTA	23	1	3	P
1	2009-09-01 23:53:00	0	NTA	23	1	3	P
1	2009-09-01 23:54:00	0	NTA	23	1	3	P
1	2009-09-01 23:55:00	0	NTA	23	1	3	P
1	2009-09-01 23:56:00	0	NTA	23	1	3	P
1	2009-09-01 23:57:00	0	NTA	23	1	3	P
1	2009-09-01 23:58:00	0	NTA	23	1	3	P
1	2009-09-01 23:59:00	0	NTA	23	1	3	P
1	2009-09-02	0	NTA	23	1	3	P
1	2009-09-02 00:01:00	0	NTA	0	1	4	P
1	2009-09-02 00:02:00	0	NTA	0	1	4	P
1	2009-09-02 00:03:00	0	NTA	0	1	4	P
1	2009-09-02 00:04:00	0	NTA	0	1	4	P
1	2009-09-02 00:05:00	0	NTA	0	1	4	P
1	2009-09-02 00:06:00	0	NTA	0	1	4	P
1	2009-09-02 00:07:00	0	NTA	0	1	4	P
1	2009-09-02 00:08:00	0	NTA	0	1	4	P
1	2009-09-02 00:09:00	0	NTA	0	1	4	P
1	2009-09-02 00:10:00	0	NTA	0	1	4	P
1	2009-09-02 00:11:00	0	NTA	0	1	4	P
1	2009-09-02 00:12:00	0	NTA	0	1	4	P
1	2009-09-02 00:13:00	0	NTA	0	1	4	P
1	2009-09-02 00:14:00	0	NTA	0	1	4	P
1	2009-09-02 00:15:00	0	NTA	0	1	4	P
1	2009-09-02 00:16:00	0	NTA	0	1	4	P
1	2009-09-02 00:17:00	0	NTA	0	1	4	P
1	2009-09-02 00:18:00	0	NTA	0	1	4	P
1	2009-09-02 00:19:00	0	NTA	0	1	4	P
1	2009-09-02 00:20:00	0	NTA	0	1	4	P
1	2009-09-02 00:21:00	0	NTA	0	1	4	P
1	2009-09-02 00:22:00	0	NTA	0	1	4	P
1	2009-09-02 00:23:00	0	NTA	0	1	4	P
1	2009-09-02 00:24:00	0	NTA	0	1	4	P
1	2009-09-02 00:25:00	0	NTA	0	1	4	P
1	2009-09-02 00:26:00	0	NTA	0	1	4	P
1	2009-09-02 00:27:00	0	NTA	0	1	4	P
1	2009-09-02 00:28:00	0	NTA	0	1	4	P
1	2009-09-02 00:29:00	0	NTA	0	1	4	P
1	2009-09-02 00:30:00	0	NTA	0	1	4	P
1	2009-09-02 00:31:00	0	NTA	0	1	4	P
1	2009-09-02 00:32:00	0	NTA	0	1	4	P
1	2009-09-02 00:33:00	0	NTA	0	1	4	P
1	2009-09-02 00:34:00	0	NTA	0	1	4	P
1	2009-09-02 00:35:00	0	NTA	0	1	4	P
1	2009-09-02 00:36:00	0	NTA	0	1	4	P
1	2009-09-02 00:37:00	0	NTA	0	1	4	P
1	2009-09-02 00:38:00	0	NTA	0	1	4	P
1	2009-09-02 00:39:00	36	NTA	0	1	4	P
1	2009-09-02 00:40:00	0	NTA	0	1	4	P
1	2009-09-02 00:41:00	0	NTA	0	1	4	P
1	2009-09-02 00:42:00	0	NTA	0	1	4	P
1	2009-09-02 00:43:00	0	NTA	0	1	4	P
1	2009-09-02 00:44:00	0	NTA	0	1	4	P
1	2009-09-02 00:45:00	0	NTA	0	1	4	P
1	2009-09-02 00:46:00	0	NTA	0	1	4	P
1	2009-09-02 00:47:00	0	NTA	0	1	4	P
1	2009-09-02 00:48:00	0	NTA	0	1	4	P
1	2009-09-02 00:49:00	197	NTA	0	1	4	P
1	2009-09-02 00:50:00	36	NTA	0	1	4	P
1	2009-09-02 00:51:00	211	NTA	0	1	4	P
1	2009-09-02 00:52:00	0	NTA	0	1	4	P
1	2009-09-02 00:53:00	0	NTA	0	1	4	P
1	2009-09-02 00:54:00	0	NTA	0	1	4	P
1	2009-09-02 00:55:00	0	NTA	0	1	4	P
1	2009-09-02 00:56:00	0	NTA	0	1	4	P
1	2009-09-02 00:57:00	0	NTA	0	1	4	P
1	2009-09-02 00:58:00	0	NTA	0	1	4	P
1	2009-09-02 00:59:00	0	NTA	0	1	4	P
1	2009-09-02 01:00:00	0	NTA	0	1	4	P
1	2009-09-02 01:01:00	0	NTA	1	1	4	P
1	2009-09-02 01:02:00	0	NTA	1	1	4	P
1	2009-09-02 01:03:00	0	NTA	1	1	4	P
1	2009-09-02 01:04:00	0	NTA	1	1	4	P
1	2009-09-02 01:05:00	0	NTA	1	1	4	P
1	2009-09-02 01:06:00	0	NTA	1	1	4	P
1	2009-09-02 01:07:00	0	NTA	1	1	4	P
1	2009-09-02 01:08:00	0	NTA	1	1	4	P
1	2009-09-02 01:09:00	0	NTA	1	1	4	P
1	2009-09-02 01:10:00	0	NTA	1	1	4	P
1	2009-09-02 01:11:00	0	NTA	1	1	4	P
1	2009-09-02 01:12:00	0	NTA	1	1	4	P
1	2009-09-02 01:13:00	0	NTA	1	1	4	P
1	2009-09-02 01:14:00	0	NTA	1	1	4	P
1	2009-09-02 01:15:00	0	NTA	1	1	4	P
1	2009-09-02 01:16:00	0	NTA	1	1	4	P
1	2009-09-02 01:17:00	0	NTA	1	1	4	P
1	2009-09-02 01:18:00	0	NTA	1	1	4	P
1	2009-09-02 01:19:00	0	NTA	1	1	4	P
1	2009-09-02 01:20:00	0	NTA	1	1	4	P
1	2009-09-02 01:21:00	0	NTA	1	1	4	P
1	2009-09-02 01:22:00	0	NTA	1	1	4	P
1	2009-09-02 01:23:00	0	NTA	1	1	4	P
1	2009-09-02 01:24:00	0	NTA	1	1	4	P
1	2009-09-02 01:25:00	0	NTA	1	1	4	P
1	2009-09-02 01:26:00	0	NTA	1	1	4	P
1	2009-09-02 01:27:00	0	NTA	1	1	4	P
1	2009-09-02 01:28:00	0	NTA	1	1	4	P
1	2009-09-02 01:29:00	0	NTA	1	1	4	P
1	2009-09-02 01:30:00	36	NTA	1	1	4	P
1	2009-09-02 01:31:00	0	NTA	1	1	4	P
1	2009-09-02 01:32:00	0	NTA	1	1	4	P
1	2009-09-02 01:33:00	0	NTA	1	1	4	P
1	2009-09-02 01:34:00	0	NTA	1	1	4	P
1	2009-09-02 01:35:00	0	NTA	1	1	4	P
1	2009-09-02 01:36:00	0	NTA	1	1	4	P
1	2009-09-02 01:37:00	0	NTA	1	1	4	P
1	2009-09-02 01:38:00	0	NTA	1	1	4	P
1	2009-09-02 01:39:00	0	NTA	1	1	4	P
1	2009-09-02 01:40:00	0	NTA	1	1	4	P
1	2009-09-02 01:41:00	0	NTA	1	1	4	P
1	2009-09-02 01:42:00	0	NTA	1	1	4	P
1	2009-09-02 01:43:00	0	NTA	1	1	4	P
1	2009-09-02 01:44:00	0	NTA	1	1	4	P
1	2009-09-02 01:45:00	0	NTA	1	1	4	P
1	2009-09-02 01:46:00	0	NTA	1	1	4	P
1	2009-09-02 01:47:00	0	NTA	1	1	4	P
1	2009-09-02 01:48:00	0	NTA	1	1	4	P
1	2009-09-02 01:49:00	0	NTA	1	1	4	P
1	2009-09-02 01:50:00	12	NTA	1	1	4	P
1	2009-09-02 01:51:00	0	NTA	1	1	4	P
1	2009-09-02 01:52:00	0	NTA	1	1	4	P
1	2009-09-02 01:53:00	0	NTA	1	1	4	P
1	2009-09-02 01:54:00	0	NTA	1	1	4	P
1	2009-09-02 01:55:00	24	NTA	1	1	4	P
1	2009-09-02 01:56:00	0	NTA	1	1	4	P
1	2009-09-02 01:57:00	0	NTA	1	1	4	P
1	2009-09-02 01:58:00	183	NTA	1	1	4	P
1	2009-09-02 01:59:00	24	NTA	1	1	4	P
1	2009-09-02 02:00:00	95	NTA	1	1	4	P
1	2009-09-02 02:01:00	0	NTA	2	1	4	P
1	2009-09-02 02:02:00	0	NTA	2	1	4	P
1	2009-09-02 02:03:00	0	NTA	2	1	4	P
1	2009-09-02 02:04:00	0	NTA	2	1	4	P
1	2009-09-02 02:05:00	0	NTA	2	1	4	P
1	2009-09-02 02:06:00	0	NTA	2	1	4	P
1	2009-09-02 02:07:00	0	NTA	2	1	4	P
1	2009-09-02 02:08:00	0	NTA	2	1	4	P
1	2009-09-02 02:09:00	0	NTA	2	1	4	P
1	2009-09-02 02:10:00	0	NTA	2	1	4	P
1	2009-09-02 02:11:00	0	NTA	2	1	4	P
1	2009-09-02 02:12:00	0	NTA	2	1	4	P
1	2009-09-02 02:13:00	0	NTA	2	1	4	P
1	2009-09-02 02:14:00	0	NTA	2	1	4	P
1	2009-09-02 02:15:00	0	NTA	2	1	4	P
1	2009-09-02 02:16:00	0	NTA	2	1	4	P
1	2009-09-02 02:17:00	0	NTA	2	1	4	P
1	2009-09-02 02:18:00	0	NTA	2	1	4	P
1	2009-09-02 02:19:00	0	NTA	2	1	4	P
1	2009-09-02 02:20:00	0	NTA	2	1	4	P
1	2009-09-02 02:21:00	0	NTA	2	1	4	P
1	2009-09-02 02:22:00	0	NTA	2	1	4	P
1	2009-09-02 02:23:00	0	NTA	2	1	4	P
1	2009-09-02 02:24:00	0	NTA	2	1	4	P
1	2009-09-02 02:25:00	0	NTA	2	1	4	P
1	2009-09-02 02:26:00	0	NTA	2	1	4	P
1	2009-09-02 02:27:00	0	NTA	2	1	4	P
1	2009-09-02 02:28:00	0	NTA	2	1	4	P
1	2009-09-02 02:29:00	0	NTA	2	1	4	P
1	2009-09-02 02:30:00	0	NTA	2	1	4	P
1	2009-09-02 02:31:00	0	NTA	2	1	4	P
1	2009-09-02 02:32:00	0	NTA	2	1	4	P
1	2009-09-02 02:33:00	0	NTA	2	1	4	P
1	2009-09-02 02:34:00	0	NTA	2	1	4	P
1	2009-09-02 02:35:00	0	NTA	2	1	4	P
1	2009-09-02 02:36:00	0	NTA	2	1	4	P
1	2009-09-02 02:37:00	0	NTA	2	1	4	P
1	2009-09-02 02:38:00	0	NTA	2	1	4	P
1	2009-09-02 02:39:00	0	NTA	2	1	4	P
1	2009-09-02 02:40:00	0	NTA	2	1	4	P
1	2009-09-02 02:41:00	0	NTA	2	1	4	P
1	2009-09-02 02:42:00	0	NTA	2	1	4	P
1	2009-09-02 02:43:00	0	NTA	2	1	4	P
1	2009-09-02 02:44:00	0	NTA	2	1	4	P
1	2009-09-02 02:45:00	0	NTA	2	1	4	P
1	2009-09-02 02:46:00	0	NTA	2	1	4	P
1	2009-09-02 02:47:00	0	NTA	2	1	4	P
1	2009-09-02 02:48:00	0	NTA	2	1	4	P
1	2009-09-02 02:49:00	0	NTA	2	1	4	P
1	2009-09-02 02:50:00	0	NTA	2	1	4	P
1	2009-09-02 02:51:00	0	NTA	2	1	4	P
1	2009-09-02 02:52:00	0	NTA	2	1	4	P
1	2009-09-02 02:53:00	0	NTA	2	1	4	P
1	2009-09-02 02:54:00	0	NTA	2	1	4	P
1	2009-09-02 02:55:00	0	NTA	2	1	4	P
1	2009-09-02 02:56:00	0	NTA	2	1	4	P
1	2009-09-02 02:57:00	0	NTA	2	1	4	P
1	2009-09-02 02:58:00	0	NTA	2	1	4	P
1	2009-09-02 02:59:00	0	NTA	2	1	4	P
1	2009-09-02 03:00:00	0	NTA	2	1	4	P
1	2009-09-02 03:01:00	0	NTA	3	1	4	P
1	2009-09-02 03:02:00	0	NTA	3	1	4	P
1	2009-09-02 03:03:00	0	NTA	3	1	4	P
1	2009-09-02 03:04:00	0	NTA	3	1	4	P
1	2009-09-02 03:05:00	0	NTA	3	1	4	P
1	2009-09-02 03:06:00	0	NTA	3	1	4	P
1	2009-09-02 03:07:00	0	NTA	3	1	4	P
1	2009-09-02 03:08:00	0	NTA	3	1	4	P
1	2009-09-02 03:09:00	0	NTA	3	1	4	P
1	2009-09-02 03:10:00	0	NTA	3	1	4	P
1	2009-09-02 03:11:00	0	NTA	3	1	4	P
1	2009-09-02 03:12:00	0	NTA	3	1	4	P
1	2009-09-02 03:13:00	0	NTA	3	1	4	P
1	2009-09-02 03:14:00	0	NTA	3	1	4	P
1	2009-09-02 03:15:00	0	NTA	3	1	4	P
1	2009-09-02 03:16:00	0	NTA	3	1	4	P
1	2009-09-02 03:17:00	0	NTA	3	1	4	P
1	2009-09-02 03:18:00	0	NTA	3	1	4	P
1	2009-09-02 03:19:00	0	NTA	3	1	4	P
1	2009-09-02 03:20:00	0	NTA	3	1	4	P
1	2009-09-02 03:21:00	0	NTA	3	1	4	P
1	2009-09-02 03:22:00	0	NTA	3	1	4	P
1	2009-09-02 03:23:00	0	NTA	3	1	4	P
1	2009-09-02 03:24:00	0	NTA	3	1	4	P
1	2009-09-02 03:25:00	0	NTA	3	1	4	P
1	2009-09-02 03:26:00	0	NTA	3	1	4	P
1	2009-09-02 03:27:00	0	NTA	3	1	4	P
1	2009-09-02 03:28:00	0	NTA	3	1	4	P
1	2009-09-02 03:29:00	0	NTA	3	1	4	P
1	2009-09-02 03:30:00	0	NTA	3	1	4	P
1	2009-09-02 03:31:00	0	NTA	3	1	4	P
1	2009-09-02 03:32:00	0	NTA	3	1	4	P
1	2009-09-02 03:33:00	0	NTA	3	1	4	P
1	2009-09-02 03:34:00	0	NTA	3	1	4	P
1	2009-09-02 03:35:00	0	NTA	3	1	4	P
1	2009-09-02 03:36:00	0	NTA	3	1	4	P
1	2009-09-02 03:37:00	0	NTA	3	1	4	P
1	2009-09-02 03:38:00	0	NTA	3	1	4	P
1	2009-09-02 03:39:00	0	NTA	3	1	4	P
1	2009-09-02 03:40:00	0	NTA	3	1	4	P
1	2009-09-02 03:41:00	0	NTA	3	1	4	P
1	2009-09-02 03:42:00	0	NTA	3	1	4	P
1	2009-09-02 03:43:00	0	NTA	3	1	4	P
1	2009-09-02 03:44:00	0	NTA	3	1	4	P
1	2009-09-02 03:45:00	0	NTA	3	1	4	P
1	2009-09-02 03:46:00	0	NTA	3	1	4	P
1	2009-09-02 03:47:00	0	NTA	3	1	4	P
1	2009-09-02 03:48:00	0	NTA	3	1	4	P
1	2009-09-02 03:49:00	0	NTA	3	1	4	P
1	2009-09-02 03:50:00	0	NTA	3	1	4	P
1	2009-09-02 03:51:00	0	NTA	3	1	4	P
1	2009-09-02 03:52:00	0	NTA	3	1	4	P
1	2009-09-02 03:53:00	0	NTA	3	1	4	P
1	2009-09-02 03:54:00	0	NTA	3	1	4	P
1	2009-09-02 03:55:00	0	NTA	3	1	4	P
1	2009-09-02 03:56:00	0	NTA	3	1	4	P
1	2009-09-02 03:57:00	0	NTA	3	1	4	P
1	2009-09-02 03:58:00	0	NTA	3	1	4	P
1	2009-09-02 03:59:00	0	NTA	3	1	4	P
1	2009-09-02 04:00:00	0	NTA	3	1	4	P
1	2009-09-02 04:01:00	0	NTA	4	1	4	P
1	2009-09-02 04:02:00	0	NTA	4	1	4	P
1	2009-09-02 04:03:00	0	NTA	4	1	4	P
1	2009-09-02 04:04:00	0	NTA	4	1	4	P
1	2009-09-02 04:05:00	0	NTA	4	1	4	P
1	2009-09-02 04:06:00	0	NTA	4	1	4	P
1	2009-09-02 04:07:00	0	NTA	4	1	4	P
1	2009-09-02 04:08:00	0	NTA	4	1	4	P
1	2009-09-02 04:09:00	0	NTA	4	1	4	P
1	2009-09-02 04:10:00	0	NTA	4	1	4	P
1	2009-09-02 04:11:00	0	NTA	4	1	4	P
1	2009-09-02 04:12:00	36	NTA	4	1	4	P
1	2009-09-02 04:13:00	0	NTA	4	1	4	P
1	2009-09-02 04:14:00	0	NTA	4	1	4	P
1	2009-09-02 04:15:00	0	NTA	4	1	4	P
1	2009-09-02 04:16:00	0	NTA	4	1	4	P
1	2009-09-02 04:17:00	0	NTA	4	1	4	P
1	2009-09-02 04:18:00	0	NTA	4	1	4	P
1	2009-09-02 04:19:00	0	NTA	4	1	4	P
1	2009-09-02 04:20:00	0	NTA	4	1	4	P
1	2009-09-02 04:21:00	0	NTA	4	1	4	P
1	2009-09-02 04:22:00	0	NTA	4	1	4	P
1	2009-09-02 04:23:00	0	NTA	4	1	4	P
1	2009-09-02 04:24:00	0	NTA	4	1	4	P
1	2009-09-02 04:25:00	0	NTA	4	1	4	P
1	2009-09-02 04:26:00	0	NTA	4	1	4	P
1	2009-09-02 04:27:00	0	NTA	4	1	4	P
1	2009-09-02 04:28:00	0	NTA	4	1	4	P
1	2009-09-02 04:29:00	0	NTA	4	1	4	P
1	2009-09-02 04:30:00	0	NTA	4	1	4	P
1	2009-09-02 04:31:00	0	NTA	4	1	4	P
1	2009-09-02 04:32:00	0	NTA	4	1	4	P
1	2009-09-02 04:33:00	0	NTA	4	1	4	P
1	2009-09-02 04:34:00	393	NTA	4	1	4	P
1	2009-09-02 04:35:00	254	NTA	4	1	4	P
1	2009-09-02 04:36:00	183	NTA	4	1	4	P
1	2009-09-02 04:37:00	0	NTA	4	1	4	P
1	2009-09-02 04:38:00	0	NTA	4	1	4	P
1	2009-09-02 04:39:00	0	NTA	4	1	4	P
1	2009-09-02 04:40:00	0	NTA	4	1	4	P
1	2009-09-02 04:41:00	0	NTA	4	1	4	P
1	2009-09-02 04:42:00	0	NTA	4	1	4	P
1	2009-09-02 04:43:00	0	NTA	4	1	4	P
1	2009-09-02 04:44:00	0	NTA	4	1	4	P
1	2009-09-02 04:45:00	0	NTA	4	1	4	P
1	2009-09-02 04:46:00	0	NTA	4	1	4	P
1	2009-09-02 04:47:00	0	NTA	4	1	4	P
1	2009-09-02 04:48:00	0	NTA	4	1	4	P
1	2009-09-02 04:49:00	0	NTA	4	1	4	P
1	2009-09-02 04:50:00	0	NTA	4	1	4	P
1	2009-09-02 04:51:00	0	NTA	4	1	4	P
1	2009-09-02 04:52:00	0	NTA	4	1	4	P
1	2009-09-02 04:53:00	0	NTA	4	1	4	P
1	2009-09-02 04:54:00	0	NTA	4	1	4	P
1	2009-09-02 04:55:00	0	NTA	4	1	4	P
1	2009-09-02 04:56:00	0	NTA	4	1	4	P
1	2009-09-02 04:57:00	0	NTA	4	1	4	P
1	2009-09-02 04:58:00	142	NTA	4	1	4	P
1	2009-09-02 04:59:00	47	NTA	4	1	4	P
1	2009-09-02 05:00:00	0	NTA	4	1	4	P
1	2009-09-02 05:01:00	0	NTA	5	1	4	P
1	2009-09-02 05:02:00	0	NTA	5	1	4	P
1	2009-09-02 05:03:00	0	NTA	5	1	4	P
1	2009-09-02 05:04:00	0	NTA	5	1	4	P
1	2009-09-02 05:05:00	0	NTA	5	1	4	P
1	2009-09-02 05:06:00	0	NTA	5	1	4	P
1	2009-09-02 05:07:00	0	NTA	5	1	4	P
1	2009-09-02 05:08:00	0	NTA	5	1	4	P
1	2009-09-02 05:09:00	0	NTA	5	1	4	P
1	2009-09-02 05:10:00	0	NTA	5	1	4	P
1	2009-09-02 05:11:00	0	NTA	5	1	4	P
1	2009-09-02 05:12:00	0	NTA	5	1	4	P
1	2009-09-02 05:13:00	0	NTA	5	1	4	P
1	2009-09-02 05:14:00	0	NTA	5	1	4	P
1	2009-09-02 05:15:00	0	NTA	5	1	4	P
1	2009-09-02 05:16:00	0	NTA	5	1	4	P
1	2009-09-02 05:17:00	0	NTA	5	1	4	P
1	2009-09-02 05:18:00	0	NTA	5	1	4	P
1	2009-09-02 05:19:00	0	NTA	5	1	4	P
1	2009-09-02 05:20:00	12	NTA	5	1	4	P
1	2009-09-02 05:21:00	0	NTA	5	1	4	P
1	2009-09-02 05:22:00	36	NTA	5	1	4	P
1	2009-09-02 05:23:00	0	NTA	5	1	4	P
1	2009-09-02 05:24:00	0	NTA	5	1	4	P
1	2009-09-02 05:25:00	0	NTA	5	1	4	P
1	2009-09-02 05:26:00	0	NTA	5	1	4	P
1	2009-09-02 05:27:00	0	NTA	5	1	4	P
1	2009-09-02 05:28:00	0	NTA	5	1	4	P
1	2009-09-02 05:29:00	0	NTA	5	1	4	P
1	2009-09-02 05:30:00	0	NTA	5	1	4	P
1	2009-09-02 05:31:00	0	NTA	5	1	4	P
1	2009-09-02 05:32:00	0	NTA	5	1	4	P
1	2009-09-02 05:33:00	0	NTA	5	1	4	P
1	2009-09-02 05:34:00	0	NTA	5	1	4	P
1	2009-09-02 05:35:00	0	NTA	5	1	4	P
1	2009-09-02 05:36:00	0	NTA	5	1	4	P
1	2009-09-02 05:37:00	0	NTA	5	1	4	P
1	2009-09-02 05:38:00	0	NTA	5	1	4	P
1	2009-09-02 05:39:00	0	NTA	5	1	4	P
1	2009-09-02 05:40:00	0	NTA	5	1	4	P
1	2009-09-02 05:41:00	0	NTA	5	1	4	P
1	2009-09-02 05:42:00	0	NTA	5	1	4	P
1	2009-09-02 05:43:00	0	NTA	5	1	4	P
1	2009-09-02 05:44:00	0	NTA	5	1	4	P
1	2009-09-02 05:45:00	0	NTA	5	1	4	P
1	2009-09-02 05:46:00	0	NTA	5	1	4	P
1	2009-09-02 05:47:00	0	NTA	5	1	4	P
1	2009-09-02 05:48:00	0	NTA	5	1	4	P
1	2009-09-02 05:49:00	0	NTA	5	1	4	P
1	2009-09-02 05:50:00	0	NTA	5	1	4	P
1	2009-09-02 05:51:00	12	NTA	5	1	4	P
1	2009-09-02 05:52:00	0	NTA	5	1	4	P
1	2009-09-02 05:53:00	0	NTA	5	1	4	P
1	2009-09-02 05:54:00	0	NTA	5	1	4	P
1	2009-09-02 05:55:00	0	NTA	5	1	4	P
1	2009-09-02 05:56:00	0	NTA	5	1	4	P
1	2009-09-02 05:57:00	0	NTA	5	1	4	P
1	2009-09-02 05:58:00	0	NTA	5	1	4	P
1	2009-09-02 05:59:00	0	NTA	5	1	4	P
1	2009-09-02 06:00:00	0	NTA	5	1	4	P
1	2009-09-02 06:01:00	0	NTA	6	1	4	P
1	2009-09-02 06:02:00	0	NTA	6	1	4	P
1	2009-09-02 06:03:00	0	NTA	6	1	4	P
1	2009-09-02 06:04:00	0	NTA	6	1	4	P
1	2009-09-02 06:05:00	0	NTA	6	1	4	P
1	2009-09-02 06:06:00	0	NTA	6	1	4	P
1	2009-09-02 06:07:00	0	NTA	6	1	4	P
1	2009-09-02 06:08:00	0	NTA	6	1	4	P
1	2009-09-02 06:09:00	0	NTA	6	1	4	P
1	2009-09-02 06:10:00	0	NTA	6	1	4	P
1	2009-09-02 06:11:00	0	NTA	6	1	4	P
1	2009-09-02 06:12:00	0	NTA	6	1	4	P
1	2009-09-02 06:13:00	0	NTA	6	1	4	P
1	2009-09-02 06:14:00	0	NTA	6	1	4	P
1	2009-09-02 06:15:00	0	NTA	6	1	4	P
1	2009-09-02 06:16:00	0	NTA	6	1	4	P
1	2009-09-02 06:17:00	0	NTA	6	1	4	P
1	2009-09-02 06:18:00	0	NTA	6	1	4	P
1	2009-09-02 06:19:00	0	NTA	6	1	4	P
1	2009-09-02 06:20:00	0	NTA	6	1	4	P
1	2009-09-02 06:21:00	0	NTA	6	1	4	P
1	2009-09-02 06:22:00	0	NTA	6	1	4	P
1	2009-09-02 06:23:00	0	NTA	6	1	4	P
1	2009-09-02 06:24:00	0	NTA	6	1	4	P
1	2009-09-02 06:25:00	0	NTA	6	1	4	P
1	2009-09-02 06:26:00	0	NTA	6	1	4	P
1	2009-09-02 06:27:00	0	NTA	6	1	4	P
1	2009-09-02 06:28:00	0	NTA	6	1	4	P
1	2009-09-02 06:29:00	0	NTA	6	1	4	P
1	2009-09-02 06:30:00	0	NTA	6	1	4	P
1	2009-09-02 06:31:00	0	DTA	6	1	4	P
1	2009-09-02 06:32:00	71	DTA	6	1	4	P
1	2009-09-02 06:33:00	59	DTA	6	1	4	P
1	2009-09-02 06:34:00	0	DTA	6	1	4	P
1	2009-09-02 06:35:00	0	DTA	6	1	4	P
1	2009-09-02 06:36:00	0	DTA	6	1	4	P
1	2009-09-02 06:37:00	0	DTA	6	1	4	P
1	2009-09-02 06:38:00	0	DTA	6	1	4	P
1	2009-09-02 06:39:00	0	DTA	6	1	4	P
1	2009-09-02 06:40:00	0	DTA	6	1	4	P
1	2009-09-02 06:41:00	0	DTA	6	1	4	P
1	2009-09-02 06:42:00	0	DTA	6	1	4	P
1	2009-09-02 06:43:00	0	DTA	6	1	4	P
1	2009-09-02 06:44:00	0	DTA	6	1	4	P
1	2009-09-02 06:45:00	0	DTA	6	1	4	P
1	2009-09-02 06:46:00	130	DTA	6	1	4	P
1	2009-09-02 06:47:00	83	DTA	6	1	4	P
1	2009-09-02 06:48:00	0	DTA	6	1	4	P
1	2009-09-02 06:49:00	0	DTA	6	1	4	P
1	2009-09-02 06:50:00	0	DTA	6	1	4	P
1	2009-09-02 06:51:00	0	DTA	6	1	4	P
1	2009-09-02 06:52:00	0	DTA	6	1	4	P
1	2009-09-02 06:53:00	0	DTA	6	1	4	P
1	2009-09-02 06:54:00	0	DTA	6	1	4	P
1	2009-09-02 06:55:00	0	DTA	6	1	4	P
1	2009-09-02 06:56:00	0	DTA	6	1	4	P
1	2009-09-02 06:57:00	0	DTA	6	1	4	P
1	2009-09-02 06:58:00	0	DTA	6	1	4	P
1	2009-09-02 06:59:00	0	DTA	6	1	4	P
1	2009-09-02 07:00:00	0	DTA	6	1	4	P
1	2009-09-02 07:01:00	0	DTA	7	1	4	P
1	2009-09-02 07:02:00	0	DTA	7	1	4	P
1	2009-09-02 07:03:00	0	DTA	7	1	4	P
1	2009-09-02 07:04:00	0	DTA	7	1	4	P
1	2009-09-02 07:05:00	0	DTA	7	1	4	P
1	2009-09-02 07:06:00	0	DTA	7	1	4	P
1	2009-09-02 07:07:00	0	DTA	7	1	4	P
1	2009-09-02 07:08:00	0	DTA	7	1	4	P
1	2009-09-02 07:09:00	0	DTA	7	1	4	P
1	2009-09-02 07:10:00	0	DTA	7	1	4	P
1	2009-09-02 07:11:00	0	DTA	7	1	4	P
1	2009-09-02 07:12:00	0	DTA	7	1	4	P
1	2009-09-02 07:13:00	0	DTA	7	1	4	P
1	2009-09-02 07:14:00	0	DTA	7	1	4	P
1	2009-09-02 07:15:00	0	DTA	7	1	4	P
1	2009-09-02 07:16:00	0	DTA	7	1	4	P
1	2009-09-02 07:17:00	0	DTA	7	1	4	P
1	2009-09-02 07:18:00	0	DTA	7	1	4	P
1	2009-09-02 07:19:00	0	DTA	7	1	4	P
1	2009-09-02 07:20:00	225	DTA	7	1	4	P
1	2009-09-02 07:21:00	808	DTA	7	1	4	P
1	2009-09-02 07:22:00	1512	DTA	7	1	4	P
1	2009-09-02 07:23:00	1031	DTA	7	1	4	P
1	2009-09-02 07:24:00	536	DTA	7	1	4	P
1	2009-09-02 07:25:00	443	DTA	7	1	4	P
1	2009-09-02 07:26:00	1801	DTA	7	1	4	P
1	2009-09-02 07:27:00	1349	DTA	7	1	4	P
1	2009-09-02 07:28:00	1512	DTA	7	1	4	P
1	2009-09-02 07:29:00	1287	DTA	7	1	4	P
1	2009-09-02 07:30:00	393	DTA	7	1	4	P
1	2009-09-02 07:31:00	268	DTA	7	1	4	P
1	2009-09-02 07:32:00	83	DTA	7	1	4	P
1	2009-09-02 07:33:00	0	DTA	7	1	4	P
1	2009-09-02 07:34:00	0	DTA	7	1	4	P
1	2009-09-02 07:35:00	0	DTA	7	1	4	P
1	2009-09-02 07:36:00	0	DTA	7	1	4	P
1	2009-09-02 07:37:00	0	DTA	7	1	4	P
1	2009-09-02 07:38:00	0	DTA	7	1	4	P
1	2009-09-02 07:39:00	0	DTA	7	1	4	P
1	2009-09-02 07:40:00	0	DTA	7	1	4	P
1	2009-09-02 07:41:00	0	DTA	7	1	4	P
1	2009-09-02 07:42:00	0	DTA	7	1	4	P
1	2009-09-02 07:43:00	0	DTA	7	1	4	P
1	2009-09-02 07:44:00	0	DTA	7	1	4	P
1	2009-09-02 07:45:00	0	DTA	7	1	4	P
1	2009-09-02 07:46:00	0	DTA	7	1	4	P
1	2009-09-02 07:47:00	0	DTA	7	1	4	P
1	2009-09-02 07:48:00	0	DTA	7	1	4	P
1	2009-09-02 07:49:00	0	DTA	7	1	4	P
1	2009-09-02 07:50:00	0	DTA	7	1	4	P
1	2009-09-02 07:51:00	0	DTA	7	1	4	P
1	2009-09-02 07:52:00	0	DTA	7	1	4	P
1	2009-09-02 07:53:00	168	DTA	7	1	4	P
1	2009-09-02 07:54:00	183	DTA	7	1	4	P
1	2009-09-02 07:55:00	59	DTA	7	1	4	P
1	2009-09-02 07:56:00	0	DTA	7	1	4	P
1	2009-09-02 07:57:00	0	DTA	7	1	4	P
1	2009-09-02 07:58:00	498	DTA	7	1	4	P
1	2009-09-02 07:59:00	377	DTA	7	1	4	P
1	2009-09-02 08:00:00	36	DTA	7	1	4	P
1	2009-09-02 08:01:00	36	DTA	8	1	4	P
1	2009-09-02 08:02:00	0	DTA	8	1	4	P
1	2009-09-02 08:03:00	47	DTA	8	1	4	P
1	2009-09-02 08:04:00	282	DTA	8	1	4	P
1	2009-09-02 08:05:00	0	DTA	8	1	4	P
1	2009-09-02 08:06:00	0	DTA	8	1	4	P
1	2009-09-02 08:07:00	0	DTA	8	1	4	P
1	2009-09-02 08:08:00	0	DTA	8	1	4	P
1	2009-09-02 08:09:00	0	DTA	8	1	4	P
1	2009-09-02 08:10:00	0	DTA	8	1	4	P
1	2009-09-02 08:11:00	0	DTA	8	1	4	P
1	2009-09-02 08:12:00	0	DTA	8	1	4	P
1	2009-09-02 08:13:00	0	DTA	8	1	4	P
1	2009-09-02 08:14:00	0	DTA	8	1	4	P
1	2009-09-02 08:15:00	0	DTA	8	1	4	P
1	2009-09-02 08:16:00	154	DTA	8	1	4	P
1	2009-09-02 08:17:00	95	DTA	8	1	4	P
1	2009-09-02 08:18:00	142	DTA	8	1	4	P
1	2009-09-02 08:19:00	12	DTA	8	1	4	P
1	2009-09-02 08:20:00	107	DTA	8	1	4	P
1	2009-09-02 08:21:00	0	DTA	8	1	4	P
1	2009-09-02 08:22:00	0	DTA	8	1	4	P
1	2009-09-02 08:23:00	24	DTA	8	1	4	P
1	2009-09-02 08:24:00	0	DTA	8	1	4	P
1	2009-09-02 08:25:00	0	DTA	8	1	4	P
1	2009-09-02 08:26:00	377	DTA	8	1	4	P
1	2009-09-02 08:27:00	71	DTA	8	1	4	P
1	2009-09-02 08:28:00	12	DTA	8	1	4	P
1	2009-09-02 08:29:00	12	DTA	8	1	4	P
1	2009-09-02 08:30:00	0	DTA	8	1	4	P
1	2009-09-02 08:31:00	12	DTA	8	1	4	P
1	2009-09-02 08:32:00	36	DTA	8	1	4	P
1	2009-09-02 08:33:00	254	DTA	8	1	4	P
1	2009-09-02 08:34:00	239	DTA	8	1	4	P
1	2009-09-02 08:35:00	479	DTA	8	1	4	P
1	2009-09-02 08:36:00	393	DTA	8	1	4	P
1	2009-09-02 08:37:00	0	DTA	8	1	4	P
1	2009-09-02 08:38:00	0	DTA	8	1	4	P
1	2009-09-02 08:39:00	0	DTA	8	1	4	P
1	2009-09-02 08:40:00	0	DTA	8	1	4	P
1	2009-09-02 08:41:00	0	DTA	8	1	4	P
1	2009-09-02 08:42:00	0	DTA	8	1	4	P
1	2009-09-02 08:43:00	0	DTA	8	1	4	P
1	2009-09-02 08:44:00	0	DTA	8	1	4	P
1	2009-09-02 08:45:00	296	DTA	8	1	4	P
1	2009-09-02 08:46:00	154	DTA	8	1	4	P
1	2009-09-02 08:47:00	211	DTA	8	1	4	P
1	2009-09-02 08:48:00	130	DTA	8	1	4	P
1	2009-09-02 08:49:00	0	DTA	8	1	4	P
1	2009-09-02 08:50:00	0	DTA	8	1	4	P
1	2009-09-02 08:51:00	24	DTA	8	1	4	P
1	2009-09-02 08:52:00	0	DTA	8	1	4	P
1	2009-09-02 08:53:00	0	DTA	8	1	4	P
1	2009-09-02 08:54:00	0	DTA	8	1	4	P
1	2009-09-02 08:55:00	107	DTA	8	1	4	P
1	2009-09-02 08:56:00	0	DTA	8	1	4	P
1	2009-09-02 08:57:00	12	DTA	8	1	4	P
1	2009-09-02 08:58:00	95	DTA	8	1	4	P
1	2009-09-02 08:59:00	47	DTA	8	1	4	P
1	2009-09-02 09:00:00	0	DTA	8	1	4	P
1	2009-09-02 09:01:00	0	DTA	9	1	4	P
1	2009-09-02 09:02:00	0	DTA	9	1	4	P
1	2009-09-02 09:03:00	0	DTA	9	1	4	P
1	2009-09-02 09:04:00	0	DTA	9	1	4	P
1	2009-09-02 09:05:00	311	DTA	9	1	4	P
1	2009-09-02 09:06:00	0	DTA	9	1	4	P
1	2009-09-02 09:07:00	0	DTA	9	1	4	P
1	2009-09-02 09:08:00	0	DTA	9	1	4	P
1	2009-09-02 09:09:00	0	DTA	9	1	4	P
1	2009-09-02 09:10:00	0	DTA	9	1	4	P
1	2009-09-02 09:11:00	0	DTA	9	1	4	P
1	2009-09-02 09:12:00	0	DTA	9	1	4	P
1	2009-09-02 09:13:00	0	DTA	9	1	4	P
1	2009-09-02 09:14:00	0	DTA	9	1	4	P
1	2009-09-02 09:15:00	0	DTA	9	1	4	P
1	2009-09-02 09:16:00	0	DTA	9	1	4	P
1	2009-09-02 09:17:00	0	DTA	9	1	4	P
1	2009-09-02 09:18:00	0	DTA	9	1	4	P
1	2009-09-02 09:19:00	0	DTA	9	1	4	P
1	2009-09-02 09:20:00	0	DTA	9	1	4	P
1	2009-09-02 09:21:00	239	DTA	9	1	4	P
1	2009-09-02 09:22:00	36	DTA	9	1	4	P
1	2009-09-02 09:23:00	211	DTA	9	1	4	P
1	2009-09-02 09:24:00	24	DTA	9	1	4	P
1	2009-09-02 09:25:00	12	DTA	9	1	4	P
1	2009-09-02 09:26:00	0	DTA	9	1	4	P
1	2009-09-02 09:27:00	0	DTA	9	1	4	P
1	2009-09-02 09:28:00	0	DTA	9	1	4	P
1	2009-09-02 09:29:00	0	DTA	9	1	4	P
1	2009-09-02 09:30:00	0	DTA	9	1	4	P
1	2009-09-02 09:31:00	0	DTA	9	1	4	P
1	2009-09-02 09:32:00	59	DTA	9	1	4	P
1	2009-09-02 09:33:00	12	DTA	9	1	4	P
1	2009-09-02 09:34:00	0	DTA	9	1	4	P
1	2009-09-02 09:35:00	24	DTA	9	1	4	P
1	2009-09-02 09:36:00	0	DTA	9	1	4	P
1	2009-09-02 09:37:00	0	DTA	9	1	4	P
1	2009-09-02 09:38:00	0	DTA	9	1	4	P
1	2009-09-02 09:39:00	0	DTA	9	1	4	P
1	2009-09-02 09:40:00	0	DTA	9	1	4	P
1	2009-09-02 09:41:00	24	DTA	9	1	4	P
1	2009-09-02 09:42:00	0	DTA	9	1	4	P
1	2009-09-02 09:43:00	0	DTA	9	1	4	P
1	2009-09-02 09:44:00	12	DTA	9	1	4	P
1	2009-09-02 09:45:00	0	DTA	9	1	4	P
1	2009-09-02 09:46:00	0	DTA	9	1	4	P
1	2009-09-02 09:47:00	12	DTA	9	1	4	P
1	2009-09-02 09:48:00	12	DTA	9	1	4	P
1	2009-09-02 09:49:00	0	DTA	9	1	4	P
1	2009-09-02 09:50:00	0	DTA	9	1	4	P
1	2009-09-02 09:51:00	0	DTA	9	1	4	P
1	2009-09-02 09:52:00	0	DTA	9	1	4	P
1	2009-09-02 09:53:00	12	DTA	9	1	4	P
1	2009-09-02 09:54:00	107	DTA	9	1	4	P
1	2009-09-02 09:55:00	0	DTA	9	1	4	P
1	2009-09-02 09:56:00	24	DTA	9	1	4	P
1	2009-09-02 09:57:00	0	DTA	9	1	4	P
1	2009-09-02 09:58:00	0	DTA	9	1	4	P
1	2009-09-02 09:59:00	0	DTA	9	1	4	P
1	2009-09-02 10:00:00	0	DTA	9	1	4	P
1	2009-09-02 10:01:00	0	DTA	10	1	4	P
1	2009-09-02 10:02:00	0	DTA	10	1	4	P
1	2009-09-02 10:03:00	0	DTA	10	1	4	P
1	2009-09-02 10:04:00	0	DTA	10	1	4	P
1	2009-09-02 10:05:00	0	DTA	10	1	4	P
1	2009-09-02 10:06:00	47	DTA	10	1	4	P
1	2009-09-02 10:07:00	0	DTA	10	1	4	P
1	2009-09-02 10:08:00	311	DTA	10	1	4	P
1	2009-09-02 10:09:00	24	DTA	10	1	4	P
1	2009-09-02 10:10:00	0	DTA	10	1	4	P
1	2009-09-02 10:11:00	0	DTA	10	1	4	P
1	2009-09-02 10:12:00	0	DTA	10	1	4	P
1	2009-09-02 10:13:00	0	DTA	10	1	4	P
1	2009-09-02 10:14:00	0	DTA	10	1	4	P
1	2009-09-02 10:15:00	0	DTA	10	1	4	P
1	2009-09-02 10:16:00	0	DTA	10	1	4	P
1	2009-09-02 10:17:00	0	DTA	10	1	4	P
1	2009-09-02 10:18:00	12	DTA	10	1	4	P
1	2009-09-02 10:19:00	119	DTA	10	1	4	P
1	2009-09-02 10:20:00	36	DTA	10	1	4	P
1	2009-09-02 10:21:00	95	DTA	10	1	4	P
1	2009-09-02 10:22:00	0	DTA	10	1	4	P
1	2009-09-02 10:23:00	0	DTA	10	1	4	P
1	2009-09-02 10:24:00	12	DTA	10	1	4	P
1	2009-09-02 10:25:00	0	DTA	10	1	4	P
1	2009-09-02 10:26:00	119	DTA	10	1	4	P
1	2009-09-02 10:27:00	24	DTA	10	1	4	P
1	2009-09-02 10:28:00	0	DTA	10	1	4	P
1	2009-09-02 10:29:00	0	DTA	10	1	4	P
1	2009-09-02 10:30:00	0	DTA	10	1	4	P
1	2009-09-02 10:31:00	0	DTA	10	1	4	P
1	2009-09-02 10:32:00	0	DTA	10	1	4	P
1	2009-09-02 10:33:00	0	DTA	10	1	4	P
1	2009-09-02 10:34:00	0	DTA	10	1	4	P
1	2009-09-02 10:35:00	0	DTA	10	1	4	P
1	2009-09-02 10:36:00	24	DTA	10	1	4	P
1	2009-09-02 10:37:00	0	DTA	10	1	4	P
1	2009-09-02 10:38:00	24	DTA	10	1	4	P
1	2009-09-02 10:39:00	0	DTA	10	1	4	P
1	2009-09-02 10:40:00	0	DTA	10	1	4	P
1	2009-09-02 10:41:00	0	DTA	10	1	4	P
1	2009-09-02 10:42:00	0	DTA	10	1	4	P
1	2009-09-02 10:43:00	0	DTA	10	1	4	P
1	2009-09-02 10:44:00	95	DTA	10	1	4	P
1	2009-09-02 10:45:00	211	DTA	10	1	4	P
1	2009-09-02 10:46:00	0	DTA	10	1	4	P
1	2009-09-02 10:47:00	0	DTA	10	1	4	P
1	2009-09-02 10:48:00	12	DTA	10	1	4	P
1	2009-09-02 10:49:00	12	DTA	10	1	4	P
1	2009-09-02 10:50:00	36	DTA	10	1	4	P
1	2009-09-02 10:51:00	0	DTA	10	1	4	P
1	2009-09-02 10:52:00	0	DTA	10	1	4	P
1	2009-09-02 10:53:00	0	DTA	10	1	4	P
1	2009-09-02 10:54:00	12	DTA	10	1	4	P
1	2009-09-02 10:55:00	0	DTA	10	1	4	P
1	2009-09-02 10:56:00	0	DTA	10	1	4	P
1	2009-09-02 10:57:00	0	DTA	10	1	4	P
1	2009-09-02 10:58:00	327	DTA	10	1	4	P
1	2009-09-02 10:59:00	377	DTA	10	1	4	P
1	2009-09-02 11:00:00	612	DTA	10	1	4	P
1	2009-09-02 11:01:00	142	DTA	11	1	4	P
1	2009-09-02 11:02:00	130	DTA	11	1	4	P
1	2009-09-02 11:03:00	0	DTA	11	1	4	P
1	2009-09-02 11:04:00	536	DTA	11	1	4	P
1	2009-09-02 11:05:00	0	DTA	11	1	4	P
1	2009-09-02 11:06:00	0	DTA	11	1	4	P
1	2009-09-02 11:07:00	0	DTA	11	1	4	P
1	2009-09-02 11:08:00	0	DTA	11	1	4	P
1	2009-09-02 11:09:00	0	DTA	11	1	4	P
1	2009-09-02 11:10:00	0	DTA	11	1	4	P
1	2009-09-02 11:11:00	0	DTA	11	1	4	P
1	2009-09-02 11:12:00	517	DTA	11	1	4	P
1	2009-09-02 11:13:00	211	DTA	11	1	4	P
1	2009-09-02 11:14:00	142	DTA	11	1	4	P
1	2009-09-02 11:15:00	0	DTA	11	1	4	P
1	2009-09-02 11:16:00	0	DTA	11	1	4	P
1	2009-09-02 11:17:00	0	DTA	11	1	4	P
1	2009-09-02 11:18:00	12	DTA	11	1	4	P
1	2009-09-02 11:19:00	0	DTA	11	1	4	P
1	2009-09-02 11:20:00	282	DTA	11	1	4	P
1	2009-09-02 11:21:00	410	DTA	11	1	4	P
1	2009-09-02 11:22:00	142	DTA	11	1	4	P
1	2009-09-02 11:23:00	83	DTA	11	1	4	P
1	2009-09-02 11:24:00	0	DTA	11	1	4	P
1	2009-09-02 11:25:00	0	DTA	11	1	4	P
1	2009-09-02 11:26:00	0	DTA	11	1	4	P
1	2009-09-02 11:27:00	0	DTA	11	1	4	P
1	2009-09-02 11:28:00	0	DTA	11	1	4	P
1	2009-09-02 11:29:00	0	DTA	11	1	4	P
1	2009-09-02 11:30:00	0	DTA	11	1	4	P
1	2009-09-02 11:31:00	0	DTA	11	1	4	P
1	2009-09-02 11:32:00	0	DTA	11	1	4	P
1	2009-09-02 11:33:00	0	DTA	11	1	4	P
1	2009-09-02 11:34:00	0	DTA	11	1	4	P
1	2009-09-02 11:35:00	0	DTA	11	1	4	P
1	2009-09-02 11:36:00	0	DTA	11	1	4	P
1	2009-09-02 11:37:00	0	DTA	11	1	4	P
1	2009-09-02 11:38:00	12	DTA	11	1	4	P
1	2009-09-02 11:39:00	0	DTA	11	1	4	P
1	2009-09-02 11:40:00	0	DTA	11	1	4	P
1	2009-09-02 11:41:00	0	DTA	11	1	4	P
1	2009-09-02 11:42:00	0	DTA	11	1	4	P
1	2009-09-02 11:43:00	0	DTA	11	1	4	P
1	2009-09-02 11:44:00	0	DTA	11	1	4	P
1	2009-09-02 11:45:00	0	DTA	11	1	4	P
1	2009-09-02 11:46:00	0	DTA	11	1	4	P
1	2009-09-02 11:47:00	0	DTA	11	1	4	P
1	2009-09-02 11:48:00	0	DTA	11	1	4	P
1	2009-09-02 11:49:00	0	DTA	11	1	4	P
1	2009-09-02 11:50:00	0	DTA	11	1	4	P
1	2009-09-02 11:51:00	0	DTA	11	1	4	P
1	2009-09-02 11:52:00	0	DTA	11	1	4	P
1	2009-09-02 11:53:00	0	DTA	11	1	4	P
1	2009-09-02 11:54:00	0	DTA	11	1	4	P
1	2009-09-02 11:55:00	0	DTA	11	1	4	P
1	2009-09-02 11:56:00	0	DTA	11	1	4	P
1	2009-09-02 11:57:00	0	DTA	11	1	4	P
1	2009-09-02 11:58:00	0	DTA	11	1	4	P
1	2009-09-02 11:59:00	0	DTA	11	1	4	P
1	2009-09-02 12:00:00	12	DTA	11	1	4	P
1	2009-09-02 12:01:00	0	DTA	12	1	4	P
1	2009-09-02 12:02:00	0	DTA	12	1	4	P
1	2009-09-02 12:03:00	24	DTA	12	1	4	P
1	2009-09-02 12:04:00	0	DTA	12	1	4	P
1	2009-09-02 12:05:00	0	DTA	12	1	4	P
1	2009-09-02 12:06:00	0	DTA	12	1	4	P
1	2009-09-02 12:07:00	0	DTA	12	1	4	P
1	2009-09-02 12:08:00	0	DTA	12	1	4	P
1	2009-09-02 12:09:00	0	DTA	12	1	4	P
1	2009-09-02 12:10:00	0	DTA	12	1	4	P
1	2009-09-02 12:11:00	36	DTA	12	1	4	P
1	2009-09-02 12:12:00	697	DTA	12	1	4	P
1	2009-09-02 12:13:00	183	DTA	12	1	4	P
1	2009-09-02 12:14:00	282	DTA	12	1	4	P
1	2009-09-02 12:15:00	0	DTA	12	1	4	P
1	2009-09-02 12:16:00	0	DTA	12	1	4	P
1	2009-09-02 12:17:00	0	DTA	12	1	4	P
1	2009-09-02 12:18:00	0	DTA	12	1	4	P
1	2009-09-02 12:19:00	12	DTA	12	1	4	P
1	2009-09-02 12:20:00	0	DTA	12	1	4	P
1	2009-09-02 12:21:00	0	DTA	12	1	4	P
1	2009-09-02 12:22:00	0	DTA	12	1	4	P
1	2009-09-02 12:23:00	0	DTA	12	1	4	P
1	2009-09-02 12:24:00	0	DTA	12	1	4	P
1	2009-09-02 12:25:00	0	DTA	12	1	4	P
1	2009-09-02 12:26:00	0	DTA	12	1	4	P
1	2009-09-02 12:27:00	0	DTA	12	1	4	P
1	2009-09-02 12:28:00	0	DTA	12	1	4	P
1	2009-09-02 12:29:00	0	DTA	12	1	4	P
1	2009-09-02 12:30:00	0	DTA	12	1	4	P
1	2009-09-02 12:31:00	12	DTA	12	1	4	P
1	2009-09-02 12:32:00	0	DTA	12	1	4	P
1	2009-09-02 12:33:00	0	DTA	12	1	4	P
1	2009-09-02 12:34:00	0	DTA	12	1	4	P
1	2009-09-02 12:35:00	0	DTA	12	1	4	P
1	2009-09-02 12:36:00	0	DTA	12	1	4	P
1	2009-09-02 12:37:00	0	DTA	12	1	4	P
1	2009-09-02 12:38:00	0	DTA	12	1	4	P
1	2009-09-02 12:39:00	0	DTA	12	1	4	P
1	2009-09-02 12:40:00	0	DTA	12	1	4	P
1	2009-09-02 12:41:00	0	DTA	12	1	4	P
1	2009-09-02 12:42:00	0	DTA	12	1	4	P
1	2009-09-02 12:43:00	0	DTA	12	1	4	P
1	2009-09-02 12:44:00	0	DTA	12	1	4	P
1	2009-09-02 12:45:00	0	DTA	12	1	4	P
1	2009-09-02 12:46:00	0	DTA	12	1	4	P
1	2009-09-02 12:47:00	0	DTA	12	1	4	P
1	2009-09-02 12:48:00	0	DTA	12	1	4	P
1	2009-09-02 12:49:00	0	DTA	12	1	4	P
1	2009-09-02 12:50:00	0	DTA	12	1	4	P
1	2009-09-02 12:51:00	0	DTA	12	1	4	P
1	2009-09-02 12:52:00	0	DTA	12	1	4	P
1	2009-09-02 12:53:00	0	DTA	12	1	4	P
1	2009-09-02 12:54:00	239	DTA	12	1	4	P
1	2009-09-02 12:55:00	197	DTA	12	1	4	P
1	2009-09-02 12:56:00	0	DTA	12	1	4	P
1	2009-09-02 12:57:00	0	DTA	12	1	4	P
1	2009-09-02 12:58:00	0	DTA	12	1	4	P
1	2009-09-02 12:59:00	0	DTA	12	1	4	P
1	2009-09-02 13:00:00	0	DTA	12	1	4	P
1	2009-09-02 13:01:00	0	DTA	13	1	4	P
1	2009-09-02 13:02:00	0	DTA	13	1	4	P
1	2009-09-02 13:03:00	0	DTA	13	1	4	P
1	2009-09-02 13:04:00	0	DTA	13	1	4	P
1	2009-09-02 13:05:00	0	DTA	13	1	4	P
1	2009-09-02 13:06:00	0	DTA	13	1	4	P
1	2009-09-02 13:07:00	0	DTA	13	1	4	P
1	2009-09-02 13:08:00	0	DTA	13	1	4	P
1	2009-09-02 13:09:00	0	DTA	13	1	4	P
1	2009-09-02 13:10:00	0	DTA	13	1	4	P
1	2009-09-02 13:11:00	0	DTA	13	1	4	P
1	2009-09-02 13:12:00	0	DTA	13	1	4	P
1	2009-09-02 13:13:00	0	DTA	13	1	4	P
1	2009-09-02 13:14:00	0	DTA	13	1	4	P
1	2009-09-02 13:15:00	0	DTA	13	1	4	P
1	2009-09-02 13:16:00	0	DTA	13	1	4	P
1	2009-09-02 13:17:00	0	DTA	13	1	4	P
1	2009-09-02 13:18:00	239	DTA	13	1	4	P
1	2009-09-02 13:19:00	47	DTA	13	1	4	P
1	2009-09-02 13:20:00	0	DTA	13	1	4	P
1	2009-09-02 13:21:00	0	DTA	13	1	4	P
1	2009-09-02 13:22:00	0	DTA	13	1	4	P
1	2009-09-02 13:23:00	0	DTA	13	1	4	P
1	2009-09-02 13:24:00	12	DTA	13	1	4	P
1	2009-09-02 13:25:00	0	DTA	13	1	4	P
1	2009-09-02 13:26:00	0	DTA	13	1	4	P
1	2009-09-02 13:27:00	12	DTA	13	1	4	P
1	2009-09-02 13:28:00	0	DTA	13	1	4	P
1	2009-09-02 13:29:00	0	DTA	13	1	4	P
1	2009-09-02 13:30:00	0	DTA	13	1	4	P
1	2009-09-02 13:31:00	0	DTA	13	1	4	P
1	2009-09-02 13:32:00	0	DTA	13	1	4	P
1	2009-09-02 13:33:00	0	DTA	13	1	4	P
1	2009-09-02 13:34:00	0	DTA	13	1	4	P
1	2009-09-02 13:35:00	0	DTA	13	1	4	P
1	2009-09-02 13:36:00	0	DTA	13	1	4	P
1	2009-09-02 13:37:00	0	DTA	13	1	4	P
1	2009-09-02 13:38:00	0	DTA	13	1	4	P
1	2009-09-02 13:39:00	0	DTA	13	1	4	P
1	2009-09-02 13:40:00	0	DTA	13	1	4	P
1	2009-09-02 13:41:00	0	DTA	13	1	4	P
1	2009-09-02 13:42:00	0	DTA	13	1	4	P
1	2009-09-02 13:43:00	0	DTA	13	1	4	P
1	2009-09-02 13:44:00	0	DTA	13	1	4	P
1	2009-09-02 13:45:00	0	DTA	13	1	4	P
1	2009-09-02 13:46:00	0	DTA	13	1	4	P
1	2009-09-02 13:47:00	0	DTA	13	1	4	P
1	2009-09-02 13:48:00	0	DTA	13	1	4	P
1	2009-09-02 13:49:00	0	DTA	13	1	4	P
1	2009-09-02 13:50:00	0	DTA	13	1	4	P
1	2009-09-02 13:51:00	0	DTA	13	1	4	P
1	2009-09-02 13:52:00	0	DTA	13	1	4	P
1	2009-09-02 13:53:00	0	DTA	13	1	4	P
1	2009-09-02 13:54:00	0	DTA	13	1	4	P
1	2009-09-02 13:55:00	0	DTA	13	1	4	P
1	2009-09-02 13:56:00	0	DTA	13	1	4	P
1	2009-09-02 13:57:00	0	DTA	13	1	4	P
1	2009-09-02 13:58:00	0	DTA	13	1	4	P
1	2009-09-02 13:59:00	0	DTA	13	1	4	P
1	2009-09-02 14:00:00	0	DTA	13	1	4	P
1	2009-09-02 14:01:00	0	DTA	14	1	4	P
1	2009-09-02 14:02:00	0	DTA	14	1	4	P
1	2009-09-02 14:03:00	0	DTA	14	1	4	P
1	2009-09-02 14:04:00	0	DTA	14	1	4	P
1	2009-09-02 14:05:00	24	DTA	14	1	4	P
1	2009-09-02 14:06:00	0	DTA	14	1	4	P
1	2009-09-02 14:07:00	0	DTA	14	1	4	P
1	2009-09-02 14:08:00	0	DTA	14	1	4	P
1	2009-09-02 14:09:00	0	DTA	14	1	4	P
1	2009-09-02 14:10:00	0	DTA	14	1	4	P
1	2009-09-02 14:11:00	0	DTA	14	1	4	P
1	2009-09-02 14:12:00	0	DTA	14	1	4	P
1	2009-09-02 14:13:00	0	DTA	14	1	4	P
1	2009-09-02 14:14:00	0	DTA	14	1	4	P
1	2009-09-02 14:15:00	0	DTA	14	1	4	P
1	2009-09-02 14:16:00	0	DTA	14	1	4	P
1	2009-09-02 14:17:00	0	DTA	14	1	4	P
1	2009-09-02 14:18:00	0	DTA	14	1	4	P
1	2009-09-02 14:19:00	0	DTA	14	1	4	P
1	2009-09-02 14:20:00	0	DTA	14	1	4	P
1	2009-09-02 14:21:00	0	DTA	14	1	4	P
1	2009-09-02 14:22:00	0	DTA	14	1	4	P
1	2009-09-02 14:23:00	0	DTA	14	1	4	P
1	2009-09-02 14:24:00	0	DTA	14	1	4	P
1	2009-09-02 14:25:00	0	DTA	14	1	4	P
1	2009-09-02 14:26:00	0	DTA	14	1	4	P
1	2009-09-02 14:27:00	0	DTA	14	1	4	P
1	2009-09-02 14:28:00	154	DTA	14	1	4	P
1	2009-09-02 14:29:00	282	DTA	14	1	4	P
1	2009-09-02 14:30:00	0	DTA	14	1	4	P
1	2009-09-02 14:31:00	0	DTA	14	1	4	P
1	2009-09-02 14:32:00	0	DTA	14	1	4	P
1	2009-09-02 14:33:00	0	DTA	14	1	4	P
1	2009-09-02 14:34:00	24	DTA	14	1	4	P
1	2009-09-02 14:35:00	0	DTA	14	1	4	P
1	2009-09-02 14:36:00	0	DTA	14	1	4	P
1	2009-09-02 14:37:00	0	DTA	14	1	4	P
1	2009-09-02 14:38:00	0	DTA	14	1	4	P
1	2009-09-02 14:39:00	0	DTA	14	1	4	P
1	2009-09-02 14:40:00	0	DTA	14	1	4	P
1	2009-09-02 14:41:00	0	DTA	14	1	4	P
1	2009-09-02 14:42:00	47	DTA	14	1	4	P
1	2009-09-02 14:43:00	0	DTA	14	1	4	P
1	2009-09-02 14:44:00	0	DTA	14	1	4	P
1	2009-09-02 14:45:00	36	DTA	14	1	4	P
1	2009-09-02 14:46:00	0	DTA	14	1	4	P
1	2009-09-02 14:47:00	0	DTA	14	1	4	P
1	2009-09-02 14:48:00	0	DTA	14	1	4	P
1	2009-09-02 14:49:00	0	DTA	14	1	4	P
1	2009-09-02 14:50:00	0	DTA	14	1	4	P
1	2009-09-02 14:51:00	0	DTA	14	1	4	P
1	2009-09-02 14:52:00	0	DTA	14	1	4	P
1	2009-09-02 14:53:00	0	DTA	14	1	4	P
1	2009-09-02 14:54:00	0	DTA	14	1	4	P
1	2009-09-02 14:55:00	0	DTA	14	1	4	P
1	2009-09-02 14:56:00	0	DTA	14	1	4	P
1	2009-09-02 14:57:00	0	DTA	14	1	4	P
1	2009-09-02 14:58:00	0	DTA	14	1	4	P	Peak DTA
1	2009-09-02 14:59:00	0	DTA	14	1	4	P	Peak DTA
1	2009-09-02 15:00:00	0	DTA	14	1	4	P	Peak DTA
1	2009-09-02 15:01:00	0	DTA	15	1	4	P	Peak DTA
1	2009-09-02 15:02:00	0	DTA	15	1	4	P	Peak DTA
1	2009-09-02 15:03:00	0	DTA	15	1	4	P	Peak DTA
1	2009-09-02 15:04:00	0	DTA	15	1	4	P	Peak DTA
1	2009-09-02 15:05:00	0	DTA	15	1	4	P	Peak DTA
1	2009-09-02 15:06:00	0	DTA	15	1	4	P	Peak DTA
1	2009-09-02 15:07:00	0	DTA	15	1	4	P	Peak DTA
1	2009-09-02 15:08:00	0	DTA	15	1	4	P	Peak DTA
1	2009-09-02 15:09:00	0	DTA	15	1	4	P	Peak DTA
1	2009-09-02 15:10:00	0	DTA	15	1	4	P	Peak DTA
1	2009-09-02 15:11:00	0	DTA	15	1	4	P	Peak DTA
1	2009-09-02 15:12:00	0	DTA	15	1	4	P	Peak DTA
1	2009-09-02 15:13:00	0	DTA	15	1	4	P	Peak DTA
1	2009-09-02 15:14:00	0	DTA	15	1	4	P	Peak DTA
1	2009-09-02 15:15:00	0	DTA	15	1	4	P	Peak DTA
1	2009-09-02 15:16:00	0	DTA	15	1	4	P	Peak DTA
1	2009-09-02 15:17:00	0	DTA	15	1	4	P	Peak DTA
1	2009-09-02 15:18:00	0	DTA	15	1	4	P	Peak DTA
1	2009-09-02 15:19:00	0	DTA	15	1	4	P	Peak DTA
1	2009-09-02 15:20:00	0	DTA	15	1	4	P	Peak DTA
1	2009-09-02 15:21:00	0	DTA	15	1	4	P	Peak DTA
1	2009-09-02 15:22:00	0	DTA	15	1	4	P	Peak DTA
1	2009-09-02 15:23:00	0	DTA	15	1	4	P	Peak DTA
1	2009-09-02 15:24:00	0	DTA	15	1	4	P	Peak DTA
1	2009-09-02 15:25:00	0	DTA	15	1	4	P	Peak DTA
1	2009-09-02 15:26:00	0	DTA	15	1	4	P	Peak DTA
1	2009-09-02 15:27:00	0	DTA	15	1	4	P	Peak DTA
1	2009-09-02 15:28:00	0	DTA	15	1	4	P	Peak DTA
1	2009-09-02 15:29:00	0	DTA	15	1	4	P	Peak DTA
1	2009-09-02 15:30:00	0	DTA	15	1	4	P	Peak DTA
1	2009-09-02 15:31:00	0	DTA	15	1	4	P	Peak DTA
1	2009-09-02 15:32:00	0	DTA	15	1	4	P	Peak DTA
1	2009-09-02 15:33:00	0	DTA	15	1	4	P	Peak DTA
1	2009-09-02 15:34:00	0	DTA	15	1	4	P	Peak DTA
1	2009-09-02 15:35:00	0	DTA	15	1	4	P	Peak DTA
1	2009-09-02 15:36:00	0	DTA	15	1	4	P	Peak DTA
1	2009-09-02 15:37:00	0	DTA	15	1	4	P	Peak DTA
1	2009-09-02 15:38:00	0	DTA	15	1	4	P	Peak DTA
1	2009-09-02 15:39:00	36	DTA	15	1	4	P	Peak DTA
1	2009-09-02 15:40:00	24	DTA	15	1	4	P	Peak DTA
1	2009-09-02 15:41:00	0	DTA	15	1	4	P	Peak DTA
1	2009-09-02 15:42:00	0	DTA	15	1	4	P	Peak DTA
1	2009-09-02 15:43:00	0	DTA	15	1	4	P	Peak DTA
1	2009-09-02 15:44:00	0	DTA	15	1	4	P	Peak DTA
1	2009-09-02 15:45:00	0	DTA	15	1	4	P	Peak DTA
1	2009-09-02 15:46:00	0	DTA	15	1	4	P	Peak DTA
1	2009-09-02 15:47:00	0	DTA	15	1	4	P	Peak DTA
1	2009-09-02 15:48:00	0	DTA	15	1	4	P	Peak DTA
1	2009-09-02 15:49:00	0	DTA	15	1	4	P	Peak DTA
1	2009-09-02 15:50:00	0	DTA	15	1	4	P	Peak DTA
1	2009-09-02 15:51:00	0	DTA	15	1	4	P	Peak DTA
1	2009-09-02 15:52:00	0	DTA	15	1	4	P	Peak DTA
1	2009-09-02 15:53:00	0	DTA	15	1	4	P	Peak DTA
1	2009-09-02 15:54:00	0	DTA	15	1	4	P	Peak DTA
1	2009-09-02 15:55:00	0	DTA	15	1	4	P	Peak DTA
1	2009-09-02 15:56:00	0	DTA	15	1	4	P	Peak DTA
1	2009-09-02 15:57:00	0	DTA	15	1	4	P	Peak DTA
1	2009-09-02 15:58:00	0	DTA	15	1	4	P	Peak DTA
1	2009-09-02 15:59:00	0	DTA	15	1	4	P	Peak DTA
1	2009-09-02 16:00:00	0	DTA	15	1	4	P	Peak DTA
1	2009-09-02 16:01:00	0	DTA	16	1	4	P	Peak DTA
1	2009-09-02 16:02:00	0	DTA	16	1	4	P	Peak DTA
1	2009-09-02 16:03:00	0	DTA	16	1	4	P	Peak DTA
1	2009-09-02 16:04:00	142	DTA	16	1	4	P	Peak DTA
1	2009-09-02 16:05:00	225	DTA	16	1	4	P	Peak DTA
1	2009-09-02 16:06:00	0	DTA	16	1	4	P	Peak DTA
1	2009-09-02 16:07:00	0	DTA	16	1	4	P	Peak DTA
1	2009-09-02 16:08:00	0	DTA	16	1	4	P	Peak DTA
1	2009-09-02 16:09:00	0	DTA	16	1	4	P	Peak DTA
1	2009-09-02 16:10:00	0	DTA	16	1	4	P	Peak DTA
1	2009-09-02 16:11:00	0	DTA	16	1	4	P	Peak DTA
1	2009-09-02 16:12:00	0	DTA	16	1	4	P	Peak DTA
1	2009-09-02 16:13:00	0	DTA	16	1	4	P	Peak DTA
1	2009-09-02 16:14:00	0	DTA	16	1	4	P	Peak DTA
1	2009-09-02 16:15:00	0	DTA	16	1	4	P	Peak DTA
1	2009-09-02 16:16:00	0	DTA	16	1	4	P	Peak DTA
1	2009-09-02 16:17:00	0	DTA	16	1	4	P	Peak DTA
1	2009-09-02 16:18:00	0	DTA	16	1	4	P	Peak DTA
1	2009-09-02 16:19:00	0	DTA	16	1	4	P	Peak DTA
1	2009-09-02 16:20:00	0	DTA	16	1	4	P	Peak DTA
1	2009-09-02 16:21:00	0	DTA	16	1	4	P	Peak DTA
1	2009-09-02 16:22:00	0	DTA	16	1	4	P	Peak DTA
1	2009-09-02 16:23:00	0	DTA	16	1	4	P	Peak DTA
1	2009-09-02 16:24:00	12	DTA	16	1	4	P	Peak DTA
1	2009-09-02 16:25:00	0	DTA	16	1	4	P	Peak DTA
1	2009-09-02 16:26:00	0	DTA	16	1	4	P	Peak DTA
1	2009-09-02 16:27:00	0	DTA	16	1	4	P	Peak DTA
1	2009-09-02 16:28:00	0	DTA	16	1	4	P	Peak DTA
1	2009-09-02 16:29:00	12	DTA	16	1	4	P	Peak DTA
1	2009-09-02 16:30:00	0	DTA	16	1	4	P	Peak DTA
1	2009-09-02 16:31:00	12	DTA	16	1	4	P	Peak DTA
1	2009-09-02 16:32:00	360	DTA	16	1	4	P	Peak DTA
1	2009-09-02 16:33:00	593	DTA	16	1	4	P	Peak DTA
1	2009-09-02 16:34:00	0	DTA	16	1	4	P	Peak DTA
1	2009-09-02 16:35:00	0	DTA	16	1	4	P	Peak DTA
1	2009-09-02 16:36:00	0	DTA	16	1	4	P	Peak DTA
1	2009-09-02 16:37:00	0	DTA	16	1	4	P	Peak DTA
1	2009-09-02 16:38:00	0	DTA	16	1	4	P	Peak DTA
1	2009-09-02 16:39:00	344	DTA	16	1	4	P	Peak DTA
1	2009-09-02 16:40:00	808	DTA	16	1	4	P	Peak DTA
1	2009-09-02 16:41:00	1446	DTA	16	1	4	P	Peak DTA
1	2009-09-02 16:42:00	1256	DTA	16	1	4	P	Peak DTA
1	2009-09-02 16:43:00	879	DTA	16	1	4	P	Peak DTA
1	2009-09-02 16:44:00	979	DTA	16	1	4	P	Peak DTA
1	2009-09-02 16:45:00	1581	DTA	16	1	4	P	Peak DTA
1	2009-09-02 16:46:00	71	DTA	16	1	4	P	Peak DTA
1	2009-09-02 16:47:00	12	DTA	16	1	4	P	Peak DTA
1	2009-09-02 16:48:00	0	DTA	16	1	4	P	Peak DTA
1	2009-09-02 16:49:00	0	DTA	16	1	4	P	Peak DTA
1	2009-09-02 16:50:00	0	DTA	16	1	4	P	Peak DTA
1	2009-09-02 16:51:00	0	DTA	16	1	4	P	Peak DTA
1	2009-09-02 16:52:00	0	DTA	16	1	4	P	Peak DTA
1	2009-09-02 16:53:00	12	DTA	16	1	4	P	Peak DTA
1	2009-09-02 16:54:00	0	DTA	16	1	4	P	Peak DTA
1	2009-09-02 16:55:00	0	DTA	16	1	4	P	Peak DTA
1	2009-09-02 16:56:00	0	DTA	16	1	4	P	Peak DTA
1	2009-09-02 16:57:00	12	DTA	16	1	4	P	Peak DTA
1	2009-09-02 16:58:00	12	DTA	16	1	4	P	Peak DTA
1	2009-09-02 16:59:00	1057	DTA	16	1	4	P	Peak DTA
1	2009-09-02 17:00:00	1256	DTA	16	1	4	P	Peak DTA
1	2009-09-02 17:01:00	296	DTA	17	1	4	P	Peak DTA
1	2009-09-02 17:02:00	107	DTA	17	1	4	P	Peak DTA
1	2009-09-02 17:03:00	0	DTA	17	1	4	P	Peak DTA
1	2009-09-02 17:04:00	0	DTA	17	1	4	P	Peak DTA
1	2009-09-02 17:05:00	0	DTA	17	1	4	P	Peak DTA
1	2009-09-02 17:06:00	0	DTA	17	1	4	P	Peak DTA
1	2009-09-02 17:07:00	0	DTA	17	1	4	P	Peak DTA
1	2009-09-02 17:08:00	0	DTA	17	1	4	P	Peak DTA
1	2009-09-02 17:09:00	0	DTA	17	1	4	P	Peak DTA
1	2009-09-02 17:10:00	0	DTA	17	1	4	P	Peak DTA
1	2009-09-02 17:11:00	0	DTA	17	1	4	P	Peak DTA
1	2009-09-02 17:12:00	0	DTA	17	1	4	P	Peak DTA
1	2009-09-02 17:13:00	0	DTA	17	1	4	P	Peak DTA
1	2009-09-02 17:14:00	0	DTA	17	1	4	P	Peak DTA
1	2009-09-02 17:15:00	0	DTA	17	1	4	P	Peak DTA
1	2009-09-02 17:16:00	0	DTA	17	1	4	P	Peak DTA
1	2009-09-02 17:17:00	24	DTA	17	1	4	P	Peak DTA
1	2009-09-02 17:18:00	36	DTA	17	1	4	P	Peak DTA
1	2009-09-02 17:19:00	0	DTA	17	1	4	P	Peak DTA
1	2009-09-02 17:20:00	0	DTA	17	1	4	P	Peak DTA
1	2009-09-02 17:21:00	0	DTA	17	1	4	P	Peak DTA
1	2009-09-02 17:22:00	0	DTA	17	1	4	P	Peak DTA
1	2009-09-02 17:23:00	0	DTA	17	1	4	P	Peak DTA
1	2009-09-02 17:24:00	593	DTA	17	1	4	P	Peak DTA
1	2009-09-02 17:25:00	1225	DTA	17	1	4	P	Peak DTA
1	2009-09-02 17:26:00	676	DTA	17	1	4	P	Peak DTA
1	2009-09-02 17:27:00	612	DTA	17	1	4	P	Peak DTA
1	2009-09-02 17:28:00	239	DTA	17	1	4	P	Peak DTA
1	2009-09-02 17:29:00	282	DTA	17	1	4	P	Peak DTA
1	2009-09-02 17:30:00	282	DTA	17	1	4	P	Peak DTA
1	2009-09-02 17:31:00	460	DTA	17	1	4	P	Peak DTA
1	2009-09-02 17:32:00	211	DTA	17	1	4	P	Peak DTA
1	2009-09-02 17:33:00	0	DTA	17	1	4	P	Peak DTA
1	2009-09-02 17:34:00	0	DTA	17	1	4	P	Peak DTA
1	2009-09-02 17:35:00	95	DTA	17	1	4	P	Peak DTA
1	2009-09-02 17:36:00	83	DTA	17	1	4	P	Peak DTA
1	2009-09-02 17:37:00	268	DTA	17	1	4	P	Peak DTA
1	2009-09-02 17:38:00	327	DTA	17	1	4	P	Peak DTA
1	2009-09-02 17:39:00	410	DTA	17	1	4	P	Peak DTA
1	2009-09-02 17:40:00	83	DTA	17	1	4	P	Peak DTA
1	2009-09-02 17:41:00	225	DTA	17	1	4	P	Peak DTA
1	2009-09-02 17:42:00	12	DTA	17	1	4	P	Peak DTA
1	2009-09-02 17:43:00	71	DTA	17	1	4	P	Peak DTA
1	2009-09-02 17:44:00	360	DTA	17	1	4	P	Peak DTA
1	2009-09-02 17:45:00	344	DTA	17	1	4	P	Peak DTA
1	2009-09-02 17:46:00	36	DTA	17	1	4	P	Peak DTA
1	2009-09-02 17:47:00	130	DTA	17	1	4	P	Peak DTA
1	2009-09-02 17:48:00	154	DTA	17	1	4	P	Peak DTA
1	2009-09-02 17:49:00	979	DTA	17	1	4	P	Peak DTA
1	2009-09-02 17:50:00	427	DTA	17	1	4	P	Peak DTA
1	2009-09-02 17:51:00	2001	DTA	17	1	4	P	Peak DTA
1	2009-09-02 17:52:00	1688	DTA	17	1	4	P	Peak DTA
1	2009-09-02 17:53:00	1960	DTA	17	1	4	P	Peak DTA
1	2009-09-02 17:54:00	1920	DTA	17	1	4	P	Peak DTA
1	2009-09-02 17:55:00	1839	DTA	17	1	4	P	Peak DTA
1	2009-09-02 17:56:00	2001	DTA	17	1	4	P	Peak DTA
1	2009-09-02 17:57:00	2129	DTA	17	1	4	P	Peak DTA
1	2009-09-02 17:58:00	2086	DTA	17	1	4	P	Peak DTA
1	2009-09-02 17:59:00	1801	DTA	17	1	4	P	Peak DTA
1	2009-09-02 18:00:00	2264	DTA	17	1	4	P	Peak DTA
1	2009-09-02 18:01:00	2219	DTA	18	1	4	P	Peak DTA
1	2009-09-02 18:02:00	1920	DTA	18	1	4	P	Peak DTA
1	2009-09-02 18:03:00	1920	DTA	18	1	4	P	Peak DTA
1	2009-09-02 18:04:00	1688	DTA	18	1	4	P	Peak DTA
1	2009-09-02 18:05:00	1581	DTA	18	1	4	P	Peak DTA
1	2009-09-02 18:06:00	1764	DTA	18	1	4	P	Peak DTA
1	2009-09-02 18:07:00	1764	DTA	18	1	4	P	Peak DTA
1	2009-09-02 18:08:00	1764	DTA	18	1	4	P	Peak DTA
1	2009-09-02 18:09:00	1726	DTA	18	1	4	P	Peak DTA
1	2009-09-02 18:10:00	1617	DTA	18	1	4	P	Peak DTA
1	2009-09-02 18:11:00	2219	DTA	18	1	4	P	Peak DTA
1	2009-09-02 18:12:00	2501	DTA	18	1	4	P	Peak DTA
1	2009-09-02 18:13:00	979	DTA	18	1	4	P	Peak DTA
1	2009-09-02 18:14:00	197	DTA	18	1	4	P	Peak DTA
1	2009-09-02 18:15:00	0	DTA	18	1	4	P	Peak DTA
1	2009-09-02 18:16:00	24	DTA	18	1	4	P	Peak DTA
1	2009-09-02 18:17:00	154	DTA	18	1	4	P	Peak DTA
1	2009-09-02 18:18:00	107	DTA	18	1	4	P	Peak DTA
1	2009-09-02 18:19:00	225	DTA	18	1	4	P	Peak DTA
1	2009-09-02 18:20:00	517	DTA	18	1	4	P	Peak DTA
1	2009-09-02 18:21:00	197	DTA	18	1	4	P	Peak DTA
1	2009-09-02 18:22:00	633	DTA	18	1	4	P	Peak DTA
1	2009-09-02 18:23:00	344	DTA	18	1	4	P	Peak DTA
1	2009-09-02 18:24:00	12	DTA	18	1	4	P	Peak DTA
1	2009-09-02 18:25:00	0	DTA	18	1	4	P	Peak DTA
1	2009-09-02 18:26:00	0	DTA	18	1	4	P	Peak DTA
1	2009-09-02 18:27:00	239	DTA	18	1	4	P	Peak DTA
1	2009-09-02 18:28:00	225	DTA	18	1	4	P	Peak DTA
1	2009-09-02 18:29:00	197	DTA	18	1	4	P	Peak DTA
1	2009-09-02 18:30:00	142	DTA	18	1	4	P	Peak DTA
1	2009-09-02 18:31:00	95	DTA	18	1	4	P	Peak DTA
1	2009-09-02 18:32:00	107	DTA	18	1	4	P	Peak DTA
1	2009-09-02 18:33:00	154	DTA	18	1	4	P	Peak DTA
1	2009-09-02 18:34:00	633	DTA	18	1	4	P	Peak DTA
1	2009-09-02 18:35:00	979	DTA	18	1	4	P	Peak DTA
1	2009-09-02 18:36:00	832	DTA	18	1	4	P	Peak DTA
1	2009-09-02 18:37:00	47	DTA	18	1	4	P	Peak DTA
1	2009-09-02 18:38:00	0	DTA	18	1	4	P	Peak DTA
1	2009-09-02 18:39:00	0	DTA	18	1	4	P	Peak DTA
1	2009-09-02 18:40:00	0	DTA	18	1	4	P	Peak DTA
1	2009-09-02 18:41:00	0	DTA	18	1	4	P	Peak DTA
1	2009-09-02 18:42:00	0	DTA	18	1	4	P	Peak DTA
1	2009-09-02 18:43:00	0	DTA	18	1	4	P	Peak DTA
1	2009-09-02 18:44:00	0	DTA	18	1	4	P	Peak DTA
1	2009-09-02 18:45:00	0	DTA	18	1	4	P	Peak DTA
1	2009-09-02 18:46:00	183	DTA	18	1	4	P	Peak DTA
1	2009-09-02 18:47:00	225	DTA	18	1	4	P	Peak DTA
1	2009-09-02 18:48:00	0	DTA	18	1	4	P	Peak DTA
1	2009-09-02 18:49:00	12	DTA	18	1	4	P	Peak DTA
1	2009-09-02 18:50:00	0	DTA	18	1	4	P	Peak DTA
1	2009-09-02 18:51:00	0	DTA	18	1	4	P	Peak DTA
1	2009-09-02 18:52:00	0	DTA	18	1	4	P	Peak DTA
1	2009-09-02 18:53:00	0	DTA	18	1	4	P	Peak DTA
1	2009-09-02 18:54:00	0	DTA	18	1	4	P	Peak DTA
1	2009-09-02 18:55:00	0	DTA	18	1	4	P	Peak DTA
1	2009-09-02 18:56:00	0	DTA	18	1	4	P	Peak DTA
1	2009-09-02 18:57:00	0	DTA	18	1	4	P	Peak DTA
1	2009-09-02 18:58:00	119	DTA	18	1	4	P	Peak DTA
1	2009-09-02 18:59:00	0	DTA	18	1	4	P	Peak DTA
1	2009-09-02 19:00:00	0	DTA	18	1	4	P	Peak DTA
1	2009-09-02 19:01:00	0	DTA	19	1	4	P	Peak DTA
1	2009-09-02 19:02:00	0	DTA	19	1	4	P	Peak DTA
1	2009-09-02 19:03:00	0	DTA	19	1	4	P	Peak DTA
1	2009-09-02 19:04:00	0	DTA	19	1	4	P	Peak DTA
1	2009-09-02 19:05:00	0	DTA	19	1	4	P	Peak DTA
1	2009-09-02 19:06:00	0	DTA	19	1	4	P	Peak DTA
1	2009-09-02 19:07:00	47	DTA	19	1	4	P	Peak DTA
1	2009-09-02 19:08:00	0	DTA	19	1	4	P	Peak DTA
1	2009-09-02 19:09:00	0	DTA	19	1	4	P	Peak DTA
1	2009-09-02 19:10:00	0	DTA	19	1	4	P	Peak DTA
1	2009-09-02 19:11:00	0	DTA	19	1	4	P	Peak DTA
1	2009-09-02 19:12:00	0	DTA	19	1	4	P	Peak DTA
1	2009-09-02 19:13:00	0	DTA	19	1	4	P	Peak DTA
1	2009-09-02 19:14:00	0	DTA	19	1	4	P	Peak DTA
1	2009-09-02 19:15:00	0	DTA	19	1	4	P	Peak DTA
1	2009-09-02 19:16:00	0	DTA	19	1	4	P	Peak DTA
1	2009-09-02 19:17:00	0	DTA	19	1	4	P	Peak DTA
1	2009-09-02 19:18:00	0	DTA	19	1	4	P	Peak DTA
1	2009-09-02 19:19:00	12	DTA	19	1	4	P	Peak DTA
1	2009-09-02 19:20:00	0	DTA	19	1	4	P	Peak DTA
1	2009-09-02 19:21:00	0	DTA	19	1	4	P	Peak DTA
1	2009-09-02 19:22:00	0	DTA	19	1	4	P	Peak DTA
1	2009-09-02 19:23:00	0	DTA	19	1	4	P	Peak DTA
1	2009-09-02 19:24:00	0	DTA	19	1	4	P	Peak DTA
1	2009-09-02 19:25:00	0	DTA	19	1	4	P	Peak DTA
1	2009-09-02 19:26:00	12	DTA	19	1	4	P	Peak DTA
1	2009-09-02 19:27:00	0	DTA	19	1	4	P	Peak DTA
1	2009-09-02 19:28:00	0	DTA	19	1	4	P	Peak DTA
1	2009-09-02 19:29:00	0	DTA	19	1	4	P	Peak DTA
1	2009-09-02 19:30:00	0	DTA	19	1	4	P	Peak DTA
1	2009-09-02 19:31:00	0	DTA	19	1	4	P	Peak DTA
1	2009-09-02 19:32:00	0	DTA	19	1	4	P	Peak DTA
1	2009-09-02 19:33:00	0	DTA	19	1	4	P	Peak DTA
1	2009-09-02 19:34:00	0	DTA	19	1	4	P	Peak DTA
1	2009-09-02 19:35:00	0	DTA	19	1	4	P	Peak DTA
1	2009-09-02 19:36:00	0	DTA	19	1	4	P	Peak DTA
1	2009-09-02 19:37:00	0	DTA	19	1	4	P	Peak DTA
1	2009-09-02 19:38:00	0	DTA	19	1	4	P	Peak DTA
1	2009-09-02 19:39:00	0	DTA	19	1	4	P	Peak DTA
1	2009-09-02 19:40:00	0	DTA	19	1	4	P	Peak DTA
1	2009-09-02 19:41:00	0	DTA	19	1	4	P	Peak DTA
1	2009-09-02 19:42:00	36	DTA	19	1	4	P	Peak DTA
1	2009-09-02 19:43:00	0	DTA	19	1	4	P	Peak DTA
1	2009-09-02 19:44:00	0	DTA	19	1	4	P	Peak DTA
1	2009-09-02 19:45:00	0	DTA	19	1	4	P	Peak DTA
1	2009-09-02 19:46:00	0	DTA	19	1	4	P	Peak DTA
1	2009-09-02 19:47:00	0	DTA	19	1	4	P	Peak DTA
1	2009-09-02 19:48:00	0	DTA	19	1	4	P	Peak DTA
1	2009-09-02 19:49:00	0	DTA	19	1	4	P	Peak DTA
1	2009-09-02 19:50:00	0	DTA	19	1	4	P	Peak DTA
1	2009-09-02 19:51:00	0	DTA	19	1	4	P	Peak DTA
1	2009-09-02 19:52:00	0	DTA	19	1	4	P	Peak DTA
1	2009-09-02 19:53:00	12	DTA	19	1	4	P	Peak DTA
1	2009-09-02 19:54:00	36	DTA	19	1	4	P	Peak DTA
1	2009-09-02 19:55:00	0	DTA	19	1	4	P	Peak DTA
1	2009-09-02 19:56:00	0	DTA	19	1	4	P	Peak DTA
1	2009-09-02 19:57:00	0	DTA	19	1	4	P	Peak DTA
1	2009-09-02 19:58:00	0	DTA	19	1	4	P	Peak DTA
1	2009-09-02 19:59:00	12	DTA	19	1	4	P	Peak DTA
1	2009-09-02 20:00:00	0	DTA	19	1	4	P	Peak DTA
1	2009-09-02 20:01:00	0	DTA	20	1	4	P	Peak DTA
1	2009-09-02 20:02:00	0	DTA	20	1	4	P	Peak DTA
1	2009-09-02 20:03:00	0	DTA	20	1	4	P	Peak DTA
1	2009-09-02 20:04:00	107	DTA	20	1	4	P	Peak DTA
1	2009-09-02 20:05:00	0	DTA	20	1	4	P	Peak DTA
1	2009-09-02 20:06:00	0	DTA	20	1	4	P	Peak DTA
1	2009-09-02 20:07:00	0	DTA	20	1	4	P	Peak DTA
1	2009-09-02 20:08:00	479	DTA	20	1	4	P	Peak DTA
1	2009-09-02 20:09:00	154	DTA	20	1	4	P	Peak DTA
1	2009-09-02 20:10:00	12	DTA	20	1	4	P	Peak DTA
1	2009-09-02 20:11:00	36	DTA	20	1	4	P	Peak DTA
1	2009-09-02 20:12:00	36	DTA	20	1	4	P	Peak DTA
1	2009-09-02 20:13:00	12	DTA	20	1	4	P	Peak DTA
1	2009-09-02 20:14:00	12	DTA	20	1	4	P	Peak DTA
1	2009-09-02 20:15:00	83	DTA	20	1	4	P	Peak DTA
1	2009-09-02 20:16:00	47	DTA	20	1	4	P	Peak DTA
1	2009-09-02 20:17:00	36	DTA	20	1	4	P	Peak DTA
1	2009-09-02 20:18:00	154	DTA	20	1	4	P	Peak DTA
1	2009-09-02 20:19:00	517	DTA	20	1	4	P	Peak DTA
1	2009-09-02 20:20:00	239	DTA	20	1	4	P	Peak DTA
1	2009-09-02 20:21:00	0	DTA	20	1	4	P	Peak DTA
1	2009-09-02 20:22:00	0	DTA	20	1	4	P	Peak DTA
1	2009-09-02 20:23:00	0	DTA	20	1	4	P	Peak DTA
1	2009-09-02 20:24:00	0	DTA	20	1	4	P	Peak DTA
1	2009-09-02 20:25:00	0	DTA	20	1	4	P	Peak DTA
1	2009-09-02 20:26:00	0	DTA	20	1	4	P	Peak DTA
1	2009-09-02 20:27:00	0	DTA	20	1	4	P	Peak DTA
1	2009-09-02 20:28:00	0	DTA	20	1	4	P	Peak DTA
1	2009-09-02 20:29:00	0	DTA	20	1	4	P	Peak DTA
1	2009-09-02 20:30:00	0	DTA	20	1	4	P	Peak DTA
1	2009-09-02 20:31:00	12	DTA	20	1	4	P	Peak DTA
1	2009-09-02 20:32:00	0	DTA	20	1	4	P	Peak DTA
1	2009-09-02 20:33:00	0	DTA	20	1	4	P	Peak DTA
1	2009-09-02 20:34:00	0	DTA	20	1	4	P	Peak DTA
1	2009-09-02 20:35:00	36	DTA	20	1	4	P	Peak DTA
1	2009-09-02 20:36:00	0	DTA	20	1	4	P	Peak DTA
1	2009-09-02 20:37:00	0	DTA	20	1	4	P	Peak DTA
1	2009-09-02 20:38:00	0	DTA	20	1	4	P	Peak DTA
1	2009-09-02 20:39:00	0	DTA	20	1	4	P	Peak DTA
1	2009-09-02 20:40:00	12	DTA	20	1	4	P	Peak DTA
1	2009-09-02 20:41:00	0	DTA	20	1	4	P	Peak DTA
1	2009-09-02 20:42:00	0	DTA	20	1	4	P	Peak DTA
1	2009-09-02 20:43:00	0	DTA	20	1	4	P	Peak DTA
1	2009-09-02 20:44:00	0	DTA	20	1	4	P	Peak DTA
1	2009-09-02 20:45:00	0	DTA	20	1	4	P	Peak DTA
1	2009-09-02 20:46:00	0	DTA	20	1	4	P	Peak DTA
1	2009-09-02 20:47:00	0	DTA	20	1	4	P	Peak DTA
1	2009-09-02 20:48:00	0	DTA	20	1	4	P	Peak DTA
1	2009-09-02 20:49:00	0	DTA	20	1	4	P	Peak DTA
1	2009-09-02 20:50:00	0	DTA	20	1	4	P	Peak DTA
1	2009-09-02 20:51:00	24	DTA	20	1	4	P	Peak DTA
1	2009-09-02 20:52:00	130	DTA	20	1	4	P	Peak DTA
1	2009-09-02 20:53:00	0	DTA	20	1	4	P	Peak DTA
1	2009-09-02 20:54:00	0	DTA	20	1	4	P	Peak DTA
1	2009-09-02 20:55:00	0	DTA	20	1	4	P	Peak DTA
1	2009-09-02 20:56:00	0	DTA	20	1	4	P	Peak DTA
1	2009-09-02 20:57:00	0	DTA	20	1	4	P	Peak DTA
1	2009-09-02 20:58:00	12	DTA	20	1	4	P
1	2009-09-02 20:59:00	24	DTA	20	1	4	P
1	2009-09-02 21:00:00	0	DTA	20	1	4	P
1	2009-09-02 21:01:00	0	DTA	21	1	4	P
1	2009-09-02 21:02:00	0	DTA	21	1	4	P
1	2009-09-02 21:03:00	0	DTA	21	1	4	P
1	2009-09-02 21:04:00	83	DTA	21	1	4	P
1	2009-09-02 21:05:00	0	DTA	21	1	4	P
1	2009-09-02 21:06:00	0	DTA	21	1	4	P
1	2009-09-02 21:07:00	0	DTA	21	1	4	P
1	2009-09-02 21:08:00	0	DTA	21	1	4	P
1	2009-09-02 21:09:00	0	DTA	21	1	4	P
1	2009-09-02 21:10:00	0	DTA	21	1	4	P
1	2009-09-02 21:11:00	12	DTA	21	1	4	P
1	2009-09-02 21:12:00	0	DTA	21	1	4	P
1	2009-09-02 21:13:00	0	DTA	21	1	4	P
1	2009-09-02 21:14:00	0	DTA	21	1	4	P
1	2009-09-02 21:15:00	0	DTA	21	1	4	P
1	2009-09-02 21:16:00	12	DTA	21	1	4	P
1	2009-09-02 21:17:00	0	DTA	21	1	4	P
1	2009-09-02 21:18:00	0	DTA	21	1	4	P
1	2009-09-02 21:19:00	24	DTA	21	1	4	P
1	2009-09-02 21:20:00	296	DTA	21	1	4	P
1	2009-09-02 21:21:00	460	DTA	21	1	4	P
1	2009-09-02 21:22:00	676	DTA	21	1	4	P
1	2009-09-02 21:23:00	296	DTA	21	1	4	P
1	2009-09-02 21:24:00	377	DTA	21	1	4	P
1	2009-09-02 21:25:00	12	DTA	21	1	4	P
1	2009-09-02 21:26:00	12	DTA	21	1	4	P
1	2009-09-02 21:27:00	0	DTA	21	1	4	P
1	2009-09-02 21:28:00	0	DTA	21	1	4	P
1	2009-09-02 21:29:00	0	DTA	21	1	4	P
1	2009-09-02 21:30:00	183	DTA	21	1	4	P
1	2009-09-02 21:31:00	12	NTA	21	2	4	P
1	2009-09-02 21:32:00	555	NTA	21	2	4	P
1	2009-09-02 21:33:00	460	NTA	21	2	4	P
1	2009-09-02 21:34:00	555	NTA	21	2	4	P
1	2009-09-02 21:35:00	327	NTA	21	2	4	P
1	2009-09-02 21:36:00	71	NTA	21	2	4	P
1	2009-09-02 21:37:00	393	NTA	21	2	4	P
1	2009-09-02 21:38:00	360	NTA	21	2	4	P
1	2009-09-02 21:39:00	130	NTA	21	2	4	P
1	2009-09-02 21:40:00	225	NTA	21	2	4	P
1	2009-09-02 21:41:00	12	NTA	21	2	4	P
1	2009-09-02 21:42:00	0	NTA	21	2	4	P
1	2009-09-02 21:43:00	0	NTA	21	2	4	P
1	2009-09-02 21:44:00	0	NTA	21	2	4	P
1	2009-09-02 21:45:00	0	NTA	21	2	4	P
1	2009-09-02 21:46:00	0	NTA	21	2	4	P
1	2009-09-02 21:47:00	24	NTA	21	2	4	P
1	2009-09-02 21:48:00	0	NTA	21	2	4	P
1	2009-09-02 21:49:00	0	NTA	21	2	4	P
1	2009-09-02 21:50:00	344	NTA	21	2	4	P
1	2009-09-02 21:51:00	142	NTA	21	2	4	P
1	2009-09-02 21:52:00	574	NTA	21	2	4	P
1	2009-09-02 21:53:00	0	NTA	21	2	4	P
1	2009-09-02 21:54:00	0	NTA	21	2	4	P
1	2009-09-02 21:55:00	0	NTA	21	2	4	P
1	2009-09-02 21:56:00	0	NTA	21	2	4	P
1	2009-09-02 21:57:00	0	NTA	21	2	4	P
1	2009-09-02 21:58:00	12	NTA	21	2	4	P
1	2009-09-02 21:59:00	36	NTA	21	2	4	P
1	2009-09-02 22:00:00	0	NTA	21	2	4	P
1	2009-09-02 22:01:00	0	NTA	22	2	4	P
1	2009-09-02 22:02:00	0	NTA	22	2	4	P
1	2009-09-02 22:03:00	0	NTA	22	2	4	P
1	2009-09-02 22:04:00	0	NTA	22	2	4	P
1	2009-09-02 22:05:00	0	NTA	22	2	4	P
1	2009-09-02 22:06:00	0	NTA	22	2	4	P
1	2009-09-02 22:07:00	0	NTA	22	2	4	P
1	2009-09-02 22:08:00	0	NTA	22	2	4	P
1	2009-09-02 22:09:00	0	NTA	22	2	4	P
1	2009-09-02 22:10:00	0	NTA	22	2	4	P
1	2009-09-02 22:11:00	0	NTA	22	2	4	P
1	2009-09-02 22:12:00	0	NTA	22	2	4	P
1	2009-09-02 22:13:00	0	NTA	22	2	4	P
1	2009-09-02 22:14:00	0	NTA	22	2	4	P
1	2009-09-02 22:15:00	0	NTA	22	2	4	P
1	2009-09-02 22:16:00	0	NTA	22	2	4	P
1	2009-09-02 22:17:00	0	NTA	22	2	4	P
1	2009-09-02 22:18:00	0	NTA	22	2	4	P
1	2009-09-02 22:19:00	0	NTA	22	2	4	P
1	2009-09-02 22:20:00	0	NTA	22	2	4	P
1	2009-09-02 22:21:00	0	NTA	22	2	4	P
1	2009-09-02 22:22:00	0	NTA	22	2	4	P
1	2009-09-02 22:23:00	0	NTA	22	2	4	P
1	2009-09-02 22:24:00	0	NTA	22	2	4	P
1	2009-09-02 22:25:00	0	NTA	22	2	4	P
1	2009-09-02 22:26:00	0	NTA	22	2	4	P
1	2009-09-02 22:27:00	0	NTA	22	2	4	P
1	2009-09-02 22:28:00	0	NTA	22	2	4	P
1	2009-09-02 22:29:00	0	NTA	22	2	4	P
1	2009-09-02 22:30:00	0	NTA	22	2	4	P
1	2009-09-02 22:31:00	0	NTA	22	2	4	P
1	2009-09-02 22:32:00	0	NTA	22	2	4	P
1	2009-09-02 22:33:00	0	NTA	22	2	4	P
1	2009-09-02 22:34:00	0	NTA	22	2	4	P
1	2009-09-02 22:35:00	0	NTA	22	2	4	P
1	2009-09-02 22:36:00	0	NTA	22	2	4	P
1	2009-09-02 22:37:00	0	NTA	22	2	4	P
1	2009-09-02 22:38:00	0	NTA	22	2	4	P
1	2009-09-02 22:39:00	0	NTA	22	2	4	P
1	2009-09-02 22:40:00	0	NTA	22	2	4	P
1	2009-09-02 22:41:00	0	NTA	22	2	4	P
1	2009-09-02 22:42:00	0	NTA	22	2	4	P
1	2009-09-02 22:43:00	0	NTA	22	2	4	P
1	2009-09-02 22:44:00	0	NTA	22	2	4	P
1	2009-09-02 22:45:00	0	NTA	22	2	4	P
1	2009-09-02 22:46:00	0	NTA	22	2	4	P
1	2009-09-02 22:47:00	0	NTA	22	2	4	P
1	2009-09-02 22:48:00	0	NTA	22	2	4	P
1	2009-09-02 22:49:00	0	NTA	22	2	4	P
1	2009-09-02 22:50:00	0	NTA	22	2	4	P
1	2009-09-02 22:51:00	0	NTA	22	2	4	P
1	2009-09-02 22:52:00	0	NTA	22	2	4	P
1	2009-09-02 22:53:00	0	NTA	22	2	4	P
1	2009-09-02 22:54:00	0	NTA	22	2	4	P
1	2009-09-02 22:55:00	0	NTA	22	2	4	P
1	2009-09-02 22:56:00	0	NTA	22	2	4	P
1	2009-09-02 22:57:00	0	NTA	22	2	4	P
1	2009-09-02 22:58:00	0	NTA	22	2	4	P
1	2009-09-02 22:59:00	0	NTA	22	2	4	P
1	2009-09-02 23:00:00	0	NTA	22	2	4	P
1	2009-09-02 23:01:00	0	NTA	23	2	4	P
1	2009-09-02 23:02:00	0	NTA	23	2	4	P
1	2009-09-02 23:03:00	0	NTA	23	2	4	P
1	2009-09-02 23:04:00	0	NTA	23	2	4	P
1	2009-09-02 23:05:00	0	NTA	23	2	4	P
1	2009-09-02 23:06:00	0	NTA	23	2	4	P
1	2009-09-02 23:07:00	0	NTA	23	2	4	P
1	2009-09-02 23:08:00	0	NTA	23	2	4	P
1	2009-09-02 23:09:00	0	NTA	23	2	4	P
1	2009-09-02 23:10:00	0	NTA	23	2	4	P
1	2009-09-02 23:11:00	0	NTA	23	2	4	P
1	2009-09-02 23:12:00	0	NTA	23	2	4	P
1	2009-09-02 23:13:00	0	NTA	23	2	4	P
1	2009-09-02 23:14:00	0	NTA	23	2	4	P
1	2009-09-02 23:15:00	0	NTA	23	2	4	P
1	2009-09-02 23:16:00	0	NTA	23	2	4	P
1	2009-09-02 23:17:00	0	NTA	23	2	4	P
1	2009-09-02 23:18:00	0	NTA	23	2	4	P
1	2009-09-02 23:19:00	0	NTA	23	2	4	P
1	2009-09-02 23:20:00	0	NTA	23	2	4	P
1	2009-09-02 23:21:00	0	NTA	23	2	4	P
1	2009-09-02 23:22:00	0	NTA	23	2	4	P
1	2009-09-02 23:23:00	0	NTA	23	2	4	P
1	2009-09-02 23:24:00	0	NTA	23	2	4	P
1	2009-09-02 23:25:00	0	NTA	23	2	4	P
1	2009-09-02 23:26:00	0	NTA	23	2	4	P
1	2009-09-02 23:27:00	0	NTA	23	2	4	P
1	2009-09-02 23:28:00	0	NTA	23	2	4	P
1	2009-09-02 23:29:00	0	NTA	23	2	4	P
1	2009-09-02 23:30:00	0	NTA	23	2	4	P
1	2009-09-02 23:31:00	0	NTA	23	2	4	P
1	2009-09-02 23:32:00	0	NTA	23	2	4	P
1	2009-09-02 23:33:00	0	NTA	23	2	4	P
1	2009-09-02 23:34:00	0	NTA	23	2	4	P
1	2009-09-02 23:35:00	0	NTA	23	2	4	P
1	2009-09-02 23:36:00	0	NTA	23	2	4	P
1	2009-09-02 23:37:00	0	NTA	23	2	4	P
1	2009-09-02 23:38:00	0	NTA	23	2	4	P
1	2009-09-02 23:39:00	0	NTA	23	2	4	P
1	2009-09-02 23:40:00	0	NTA	23	2	4	P
1	2009-09-02 23:41:00	0	NTA	23	2	4	P
1	2009-09-02 23:42:00	0	NTA	23	2	4	P
1	2009-09-02 23:43:00	0	NTA	23	2	4	P
1	2009-09-02 23:44:00	0	NTA	23	2	4	P
1	2009-09-02 23:45:00	0	NTA	23	2	4	P
1	2009-09-02 23:46:00	0	NTA	23	2	4	P
1	2009-09-02 23:47:00	0	NTA	23	2	4	P
1	2009-09-02 23:48:00	0	NTA	23	2	4	P
1	2009-09-02 23:49:00	36	NTA	23	2	4	P
1	2009-09-02 23:50:00	0	NTA	23	2	4	P
1	2009-09-02 23:51:00	0	NTA	23	2	4	P
1	2009-09-02 23:52:00	0	NTA	23	2	4	P
1	2009-09-02 23:53:00	0	NTA	23	2	4	P
1	2009-09-02 23:54:00	0	NTA	23	2	4	P
1	2009-09-02 23:55:00	0	NTA	23	2	4	P
1	2009-09-02 23:56:00	0	NTA	23	2	4	P
1	2009-09-02 23:57:00	0	NTA	23	2	4	P
1	2009-09-02 23:58:00	0	NTA	23	2	4	P
1	2009-09-02 23:59:00	0	NTA	23	2	4	P
1	2009-09-03	24	NTA	23	2	4	P
1	2009-09-03 00:01:00	654	NTA	0	2	5	P
1	2009-09-03 00:02:00	0	NTA	0	2	5	P
1	2009-09-03 00:03:00	197	NTA	0	2	5	P
1	2009-09-03 00:04:00	0	NTA	0	2	5	P
1	2009-09-03 00:05:00	24	NTA	0	2	5	P
1	2009-09-03 00:06:00	0	NTA	0	2	5	P
1	2009-09-03 00:07:00	0	NTA	0	2	5	P
1	2009-09-03 00:08:00	0	NTA	0	2	5	P
1	2009-09-03 00:09:00	0	NTA	0	2	5	P
1	2009-09-03 00:10:00	0	NTA	0	2	5	P
1	2009-09-03 00:11:00	0	NTA	0	2	5	P
1	2009-09-03 00:12:00	0	NTA	0	2	5	P
1	2009-09-03 00:13:00	0	NTA	0	2	5	P
1	2009-09-03 00:14:00	0	NTA	0	2	5	P
1	2009-09-03 00:15:00	0	NTA	0	2	5	P
1	2009-09-03 00:16:00	0	NTA	0	2	5	P
1	2009-09-03 00:17:00	0	NTA	0	2	5	P
1	2009-09-03 00:18:00	0	NTA	0	2	5	P
1	2009-09-03 00:19:00	0	NTA	0	2	5	P
1	2009-09-03 00:20:00	0	NTA	0	2	5	P
1	2009-09-03 00:21:00	0	NTA	0	2	5	P
1	2009-09-03 00:22:00	0	NTA	0	2	5	P
1	2009-09-03 00:23:00	0	NTA	0	2	5	P
1	2009-09-03 00:24:00	0	NTA	0	2	5	P
1	2009-09-03 00:25:00	0	NTA	0	2	5	P
1	2009-09-03 00:26:00	0	NTA	0	2	5	P
1	2009-09-03 00:27:00	0	NTA	0	2	5	P
1	2009-09-03 00:28:00	0	NTA	0	2	5	P
1	2009-09-03 00:29:00	0	NTA	0	2	5	P
1	2009-09-03 00:30:00	0	NTA	0	2	5	P
1	2009-09-03 00:31:00	0	NTA	0	2	5	P
1	2009-09-03 00:32:00	119	NTA	0	2	5	P
1	2009-09-03 00:33:00	119	NTA	0	2	5	P
1	2009-09-03 00:34:00	107	NTA	0	2	5	P
1	2009-09-03 00:35:00	427	NTA	0	2	5	P
1	2009-09-03 00:36:00	0	NTA	0	2	5	P
1	2009-09-03 00:37:00	0	NTA	0	2	5	P
1	2009-09-03 00:38:00	0	NTA	0	2	5	P
1	2009-09-03 00:39:00	0	NTA	0	2	5	P
1	2009-09-03 00:40:00	0	NTA	0	2	5	P
1	2009-09-03 00:41:00	0	NTA	0	2	5	P
1	2009-09-03 00:42:00	0	NTA	0	2	5	P
1	2009-09-03 00:43:00	0	NTA	0	2	5	P
1	2009-09-03 00:44:00	0	NTA	0	2	5	P
1	2009-09-03 00:45:00	0	NTA	0	2	5	P
1	2009-09-03 00:46:00	0	NTA	0	2	5	P
1	2009-09-03 00:47:00	0	NTA	0	2	5	P
1	2009-09-03 00:48:00	0	NTA	0	2	5	P
1	2009-09-03 00:49:00	0	NTA	0	2	5	P
1	2009-09-03 00:50:00	0	NTA	0	2	5	P
1	2009-09-03 00:51:00	0	NTA	0	2	5	P
1	2009-09-03 00:52:00	0	NTA	0	2	5	P
1	2009-09-03 00:53:00	0	NTA	0	2	5	P
1	2009-09-03 00:54:00	0	NTA	0	2	5	P
1	2009-09-03 00:55:00	0	NTA	0	2	5	P
1	2009-09-03 00:56:00	0	NTA	0	2	5	P
1	2009-09-03 00:57:00	130	NTA	0	2	5	P
1	2009-09-03 00:58:00	83	NTA	0	2	5	P
1	2009-09-03 00:59:00	0	NTA	0	2	5	P
1	2009-09-03 01:00:00	0	NTA	0	2	5	P
1	2009-09-03 01:01:00	0	NTA	1	2	5	P
1	2009-09-03 01:02:00	0	NTA	1	2	5	P
1	2009-09-03 01:03:00	0	NTA	1	2	5	P
1	2009-09-03 01:04:00	0	NTA	1	2	5	P
1	2009-09-03 01:05:00	0	NTA	1	2	5	P
1	2009-09-03 01:06:00	0	NTA	1	2	5	P
1	2009-09-03 01:07:00	0	NTA	1	2	5	P
1	2009-09-03 01:08:00	0	NTA	1	2	5	P
1	2009-09-03 01:09:00	0	NTA	1	2	5	P
1	2009-09-03 01:10:00	0	NTA	1	2	5	P
1	2009-09-03 01:11:00	0	NTA	1	2	5	P
1	2009-09-03 01:12:00	0	NTA	1	2	5	P
1	2009-09-03 01:13:00	0	NTA	1	2	5	P
1	2009-09-03 01:14:00	0	NTA	1	2	5	P
1	2009-09-03 01:15:00	0	NTA	1	2	5	P
1	2009-09-03 01:16:00	0	NTA	1	2	5	P
1	2009-09-03 01:17:00	0	NTA	1	2	5	P
1	2009-09-03 01:18:00	0	NTA	1	2	5	P
1	2009-09-03 01:19:00	0	NTA	1	2	5	P
1	2009-09-03 01:20:00	0	NTA	1	2	5	P
1	2009-09-03 01:21:00	0	NTA	1	2	5	P
1	2009-09-03 01:22:00	0	NTA	1	2	5	P
1	2009-09-03 01:23:00	0	NTA	1	2	5	P
1	2009-09-03 01:24:00	0	NTA	1	2	5	P
1	2009-09-03 01:25:00	0	NTA	1	2	5	P
1	2009-09-03 01:26:00	0	NTA	1	2	5	P
1	2009-09-03 01:27:00	0	NTA	1	2	5	P
1	2009-09-03 01:28:00	0	NTA	1	2	5	P
1	2009-09-03 01:29:00	0	NTA	1	2	5	P
1	2009-09-03 01:30:00	0	NTA	1	2	5	P
1	2009-09-03 01:31:00	0	NTA	1	2	5	P
1	2009-09-03 01:32:00	24	NTA	1	2	5	P
1	2009-09-03 01:33:00	0	NTA	1	2	5	P
1	2009-09-03 01:34:00	0	NTA	1	2	5	P
1	2009-09-03 01:35:00	0	NTA	1	2	5	P
1	2009-09-03 01:36:00	0	NTA	1	2	5	P
1	2009-09-03 01:37:00	0	NTA	1	2	5	P
1	2009-09-03 01:38:00	0	NTA	1	2	5	P
1	2009-09-03 01:39:00	0	NTA	1	2	5	P
1	2009-09-03 01:40:00	0	NTA	1	2	5	P
1	2009-09-03 01:41:00	0	NTA	1	2	5	P
1	2009-09-03 01:42:00	24	NTA	1	2	5	P
1	2009-09-03 01:43:00	0	NTA	1	2	5	P
1	2009-09-03 01:44:00	0	NTA	1	2	5	P
1	2009-09-03 01:45:00	0	NTA	1	2	5	P
1	2009-09-03 01:46:00	0	NTA	1	2	5	P
1	2009-09-03 01:47:00	0	NTA	1	2	5	P
1	2009-09-03 01:48:00	0	NTA	1	2	5	P
1	2009-09-03 01:49:00	0	NTA	1	2	5	P
1	2009-09-03 01:50:00	0	NTA	1	2	5	P
1	2009-09-03 01:51:00	0	NTA	1	2	5	P
1	2009-09-03 01:52:00	0	NTA	1	2	5	P
1	2009-09-03 01:53:00	0	NTA	1	2	5	P
1	2009-09-03 01:54:00	0	NTA	1	2	5	P
1	2009-09-03 01:55:00	0	NTA	1	2	5	P
1	2009-09-03 01:56:00	0	NTA	1	2	5	P
1	2009-09-03 01:57:00	0	NTA	1	2	5	P
1	2009-09-03 01:58:00	0	NTA	1	2	5	P
1	2009-09-03 01:59:00	0	NTA	1	2	5	P
1	2009-09-03 02:00:00	0	NTA	1	2	5	P
1	2009-09-03 02:01:00	24	NTA	2	2	5	P
1	2009-09-03 02:02:00	0	NTA	2	2	5	P
1	2009-09-03 02:03:00	0	NTA	2	2	5	P
1	2009-09-03 02:04:00	0	NTA	2	2	5	P
1	2009-09-03 02:05:00	0	NTA	2	2	5	P
1	2009-09-03 02:06:00	0	NTA	2	2	5	P
1	2009-09-03 02:07:00	0	NTA	2	2	5	P
1	2009-09-03 02:08:00	0	NTA	2	2	5	P
1	2009-09-03 02:09:00	0	NTA	2	2	5	P
1	2009-09-03 02:10:00	0	NTA	2	2	5	P
1	2009-09-03 02:11:00	0	NTA	2	2	5	P
1	2009-09-03 02:12:00	0	NTA	2	2	5	P
1	2009-09-03 02:13:00	0	NTA	2	2	5	P
1	2009-09-03 02:14:00	0	NTA	2	2	5	P
1	2009-09-03 02:15:00	0	NTA	2	2	5	P
1	2009-09-03 02:16:00	0	NTA	2	2	5	P
1	2009-09-03 02:17:00	0	NTA	2	2	5	P
1	2009-09-03 02:18:00	0	NTA	2	2	5	P
1	2009-09-03 02:19:00	0	NTA	2	2	5	P
1	2009-09-03 02:20:00	0	NTA	2	2	5	P
1	2009-09-03 02:21:00	0	NTA	2	2	5	P
1	2009-09-03 02:22:00	12	NTA	2	2	5	P
1	2009-09-03 02:23:00	0	NTA	2	2	5	P
1	2009-09-03 02:24:00	0	NTA	2	2	5	P
1	2009-09-03 02:25:00	0	NTA	2	2	5	P
1	2009-09-03 02:26:00	0	NTA	2	2	5	P
1	2009-09-03 02:27:00	0	NTA	2	2	5	P
1	2009-09-03 02:28:00	24	NTA	2	2	5	P
1	2009-09-03 02:29:00	0	NTA	2	2	5	P
1	2009-09-03 02:30:00	0	NTA	2	2	5	P
1	2009-09-03 02:31:00	0	NTA	2	2	5	P
1	2009-09-03 02:32:00	0	NTA	2	2	5	P
1	2009-09-03 02:33:00	0	NTA	2	2	5	P
1	2009-09-03 02:34:00	0	NTA	2	2	5	P
1	2009-09-03 02:35:00	0	NTA	2	2	5	P
1	2009-09-03 02:36:00	0	NTA	2	2	5	P
1	2009-09-03 02:37:00	0	NTA	2	2	5	P
1	2009-09-03 02:38:00	0	NTA	2	2	5	P
1	2009-09-03 02:39:00	0	NTA	2	2	5	P
1	2009-09-03 02:40:00	0	NTA	2	2	5	P
1	2009-09-03 02:41:00	0	NTA	2	2	5	P
1	2009-09-03 02:42:00	0	NTA	2	2	5	P
1	2009-09-03 02:43:00	0	NTA	2	2	5	P
1	2009-09-03 02:44:00	24	NTA	2	2	5	P
1	2009-09-03 02:45:00	0	NTA	2	2	5	P
1	2009-09-03 02:46:00	0	NTA	2	2	5	P
1	2009-09-03 02:47:00	0	NTA	2	2	5	P
1	2009-09-03 02:48:00	0	NTA	2	2	5	P
1	2009-09-03 02:49:00	0	NTA	2	2	5	P
1	2009-09-03 02:50:00	0	NTA	2	2	5	P
1	2009-09-03 02:51:00	0	NTA	2	2	5	P
1	2009-09-03 02:52:00	0	NTA	2	2	5	P
1	2009-09-03 02:53:00	0	NTA	2	2	5	P
1	2009-09-03 02:54:00	0	NTA	2	2	5	P
1	2009-09-03 02:55:00	0	NTA	2	2	5	P
1	2009-09-03 02:56:00	0	NTA	2	2	5	P
1	2009-09-03 02:57:00	0	NTA	2	2	5	P
1	2009-09-03 02:58:00	0	NTA	2	2	5	P
1	2009-09-03 02:59:00	0	NTA	2	2	5	P
1	2009-09-03 03:00:00	0	NTA	2	2	5	P
1	2009-09-03 03:01:00	0	NTA	3	2	5	P
1	2009-09-03 03:02:00	0	NTA	3	2	5	P
1	2009-09-03 03:03:00	0	NTA	3	2	5	P
1	2009-09-03 03:04:00	0	NTA	3	2	5	P
1	2009-09-03 03:05:00	0	NTA	3	2	5	P
1	2009-09-03 03:06:00	24	NTA	3	2	5	P
1	2009-09-03 03:07:00	0	NTA	3	2	5	P
1	2009-09-03 03:08:00	0	NTA	3	2	5	P
1	2009-09-03 03:09:00	0	NTA	3	2	5	P
1	2009-09-03 03:10:00	0	NTA	3	2	5	P
1	2009-09-03 03:11:00	0	NTA	3	2	5	P
1	2009-09-03 03:12:00	12	NTA	3	2	5	P
1	2009-09-03 03:13:00	0	NTA	3	2	5	P
1	2009-09-03 03:14:00	0	NTA	3	2	5	P
1	2009-09-03 03:15:00	0	NTA	3	2	5	P
1	2009-09-03 03:16:00	0	NTA	3	2	5	P
1	2009-09-03 03:17:00	12	NTA	3	2	5	P
1	2009-09-03 03:18:00	0	NTA	3	2	5	P
1	2009-09-03 03:19:00	0	NTA	3	2	5	P
1	2009-09-03 03:20:00	0	NTA	3	2	5	P
1	2009-09-03 03:21:00	0	NTA	3	2	5	P
1	2009-09-03 03:22:00	0	NTA	3	2	5	P
1	2009-09-03 03:23:00	0	NTA	3	2	5	P
1	2009-09-03 03:24:00	0	NTA	3	2	5	P
1	2009-09-03 03:25:00	0	NTA	3	2	5	P
1	2009-09-03 03:26:00	0	NTA	3	2	5	P
1	2009-09-03 03:27:00	0	NTA	3	2	5	P
1	2009-09-03 03:28:00	0	NTA	3	2	5	P
1	2009-09-03 03:29:00	0	NTA	3	2	5	P
1	2009-09-03 03:30:00	0	NTA	3	2	5	P
1	2009-09-03 03:31:00	0	NTA	3	2	5	P
1	2009-09-03 03:32:00	0	NTA	3	2	5	P
1	2009-09-03 03:33:00	24	NTA	3	2	5	P
1	2009-09-03 03:34:00	12	NTA	3	2	5	P
1	2009-09-03 03:35:00	0	NTA	3	2	5	P
1	2009-09-03 03:36:00	0	NTA	3	2	5	P
1	2009-09-03 03:37:00	0	NTA	3	2	5	P
1	2009-09-03 03:38:00	0	NTA	3	2	5	P
1	2009-09-03 03:39:00	0	NTA	3	2	5	P
1	2009-09-03 03:40:00	0	NTA	3	2	5	P
1	2009-09-03 03:41:00	0	NTA	3	2	5	P
1	2009-09-03 03:42:00	0	NTA	3	2	5	P
1	2009-09-03 03:43:00	0	NTA	3	2	5	P
1	2009-09-03 03:44:00	0	NTA	3	2	5	P
1	2009-09-03 03:45:00	0	NTA	3	2	5	P
1	2009-09-03 03:46:00	0	NTA	3	2	5	P
1	2009-09-03 03:47:00	0	NTA	3	2	5	P
1	2009-09-03 03:48:00	0	NTA	3	2	5	P
1	2009-09-03 03:49:00	0	NTA	3	2	5	P
1	2009-09-03 03:50:00	0	NTA	3	2	5	P
1	2009-09-03 03:51:00	0	NTA	3	2	5	P
1	2009-09-03 03:52:00	0	NTA	3	2	5	P
1	2009-09-03 03:53:00	0	NTA	3	2	5	P
1	2009-09-03 03:54:00	0	NTA	3	2	5	P
1	2009-09-03 03:55:00	0	NTA	3	2	5	P
1	2009-09-03 03:56:00	0	NTA	3	2	5	P
1	2009-09-03 03:57:00	0	NTA	3	2	5	P
1	2009-09-03 03:58:00	0	NTA	3	2	5	P
1	2009-09-03 03:59:00	0	NTA	3	2	5	P
1	2009-09-03 04:00:00	0	NTA	3	2	5	P
1	2009-09-03 04:01:00	0	NTA	4	2	5	P
1	2009-09-03 04:02:00	12	NTA	4	2	5	P
1	2009-09-03 04:03:00	0	NTA	4	2	5	P
1	2009-09-03 04:04:00	24	NTA	4	2	5	P
1	2009-09-03 04:05:00	0	NTA	4	2	5	P
1	2009-09-03 04:06:00	0	NTA	4	2	5	P
1	2009-09-03 04:07:00	327	NTA	4	2	5	P
1	2009-09-03 04:08:00	197	NTA	4	2	5	P
1	2009-09-03 04:09:00	0	NTA	4	2	5	P
1	2009-09-03 04:10:00	0	NTA	4	2	5	P
1	2009-09-03 04:11:00	12	NTA	4	2	5	P
1	2009-09-03 04:12:00	12	NTA	4	2	5	P
1	2009-09-03 04:13:00	0	NTA	4	2	5	P
1	2009-09-03 04:14:00	0	NTA	4	2	5	P
1	2009-09-03 04:15:00	0	NTA	4	2	5	P
1	2009-09-03 04:16:00	0	NTA	4	2	5	P
1	2009-09-03 04:17:00	0	NTA	4	2	5	P
1	2009-09-03 04:18:00	0	NTA	4	2	5	P
1	2009-09-03 04:19:00	0	NTA	4	2	5	P
1	2009-09-03 04:20:00	0	NTA	4	2	5	P
1	2009-09-03 04:21:00	0	NTA	4	2	5	P
1	2009-09-03 04:22:00	12	NTA	4	2	5	P
1	2009-09-03 04:23:00	0	NTA	4	2	5	P
1	2009-09-03 04:24:00	0	NTA	4	2	5	P
1	2009-09-03 04:25:00	0	NTA	4	2	5	P
1	2009-09-03 04:26:00	0	NTA	4	2	5	P
1	2009-09-03 04:27:00	0	NTA	4	2	5	P
1	2009-09-03 04:28:00	0	NTA	4	2	5	P
1	2009-09-03 04:29:00	12	NTA	4	2	5	P
1	2009-09-03 04:30:00	0	NTA	4	2	5	P
1	2009-09-03 04:31:00	0	NTA	4	2	5	P
1	2009-09-03 04:32:00	0	NTA	4	2	5	P
1	2009-09-03 04:33:00	0	NTA	4	2	5	P
1	2009-09-03 04:34:00	0	NTA	4	2	5	P
1	2009-09-03 04:35:00	0	NTA	4	2	5	P
1	2009-09-03 04:36:00	0	NTA	4	2	5	P
1	2009-09-03 04:37:00	0	NTA	4	2	5	P
1	2009-09-03 04:38:00	0	NTA	4	2	5	P
1	2009-09-03 04:39:00	0	NTA	4	2	5	P
1	2009-09-03 04:40:00	0	NTA	4	2	5	P
1	2009-09-03 04:41:00	0	NTA	4	2	5	P
1	2009-09-03 04:42:00	0	NTA	4	2	5	P
1	2009-09-03 04:43:00	0	NTA	4	2	5	P
1	2009-09-03 04:44:00	0	NTA	4	2	5	P
1	2009-09-03 04:45:00	0	NTA	4	2	5	P
1	2009-09-03 04:46:00	71	NTA	4	2	5	P
1	2009-09-03 04:47:00	0	NTA	4	2	5	P
1	2009-09-03 04:48:00	0	NTA	4	2	5	P
1	2009-09-03 04:49:00	107	NTA	4	2	5	P
1	2009-09-03 04:50:00	47	NTA	4	2	5	P
1	2009-09-03 04:51:00	0	NTA	4	2	5	P
1	2009-09-03 04:52:00	12	NTA	4	2	5	P
1	2009-09-03 04:53:00	0	NTA	4	2	5	P
1	2009-09-03 04:54:00	0	NTA	4	2	5	P
1	2009-09-03 04:55:00	0	NTA	4	2	5	P
1	2009-09-03 04:56:00	36	NTA	4	2	5	P
1	2009-09-03 04:57:00	12	NTA	4	2	5	P
1	2009-09-03 04:58:00	0	NTA	4	2	5	P
1	2009-09-03 04:59:00	12	NTA	4	2	5	P
1	2009-09-03 05:00:00	107	NTA	4	2	5	P
1	2009-09-03 05:01:00	0	NTA	5	2	5	P
1	2009-09-03 05:02:00	0	NTA	5	2	5	P
1	2009-09-03 05:03:00	107	NTA	5	2	5	P
1	2009-09-03 05:04:00	24	NTA	5	2	5	P
1	2009-09-03 05:05:00	12	NTA	5	2	5	P
1	2009-09-03 05:06:00	0	NTA	5	2	5	P
1	2009-09-03 05:07:00	0	NTA	5	2	5	P
1	2009-09-03 05:08:00	0	NTA	5	2	5	P
1	2009-09-03 05:09:00	0	NTA	5	2	5	P
1	2009-09-03 05:10:00	12	NTA	5	2	5	P
1	2009-09-03 05:11:00	168	NTA	5	2	5	P
1	2009-09-03 05:12:00	36	NTA	5	2	5	P
1	2009-09-03 05:13:00	0	NTA	5	2	5	P
1	2009-09-03 05:14:00	0	NTA	5	2	5	P
1	2009-09-03 05:15:00	0	NTA	5	2	5	P
1	2009-09-03 05:16:00	47	NTA	5	2	5	P
1	2009-09-03 05:17:00	24	NTA	5	2	5	P
1	2009-09-03 05:18:00	0	NTA	5	2	5	P
1	2009-09-03 05:19:00	0	NTA	5	2	5	P
1	2009-09-03 05:20:00	0	NTA	5	2	5	P
1	2009-09-03 05:21:00	0	NTA	5	2	5	P
1	2009-09-03 05:22:00	0	NTA	5	2	5	P
1	2009-09-03 05:23:00	0	NTA	5	2	5	P
1	2009-09-03 05:24:00	0	NTA	5	2	5	P
1	2009-09-03 05:25:00	0	NTA	5	2	5	P
1	2009-09-03 05:26:00	0	NTA	5	2	5	P
1	2009-09-03 05:27:00	0	NTA	5	2	5	P
1	2009-09-03 05:28:00	0	NTA	5	2	5	P
1	2009-09-03 05:29:00	0	NTA	5	2	5	P
1	2009-09-03 05:30:00	0	NTA	5	2	5	P
1	2009-09-03 05:31:00	0	NTA	5	2	5	P
1	2009-09-03 05:32:00	0	NTA	5	2	5	P
1	2009-09-03 05:33:00	0	NTA	5	2	5	P
1	2009-09-03 05:34:00	0	NTA	5	2	5	P
1	2009-09-03 05:35:00	0	NTA	5	2	5	P
1	2009-09-03 05:36:00	0	NTA	5	2	5	P
1	2009-09-03 05:37:00	0	NTA	5	2	5	P
1	2009-09-03 05:38:00	0	NTA	5	2	5	P
1	2009-09-03 05:39:00	24	NTA	5	2	5	P
1	2009-09-03 05:40:00	168	NTA	5	2	5	P
1	2009-09-03 05:41:00	0	NTA	5	2	5	P
1	2009-09-03 05:42:00	0	NTA	5	2	5	P
1	2009-09-03 05:43:00	0	NTA	5	2	5	P
1	2009-09-03 05:44:00	0	NTA	5	2	5	P
1	2009-09-03 05:45:00	0	NTA	5	2	5	P
1	2009-09-03 05:46:00	12	NTA	5	2	5	P
1	2009-09-03 05:47:00	12	NTA	5	2	5	P
1	2009-09-03 05:48:00	0	NTA	5	2	5	P
1	2009-09-03 05:49:00	0	NTA	5	2	5	P
1	2009-09-03 05:50:00	0	NTA	5	2	5	P
1	2009-09-03 05:51:00	0	NTA	5	2	5	P
1	2009-09-03 05:52:00	0	NTA	5	2	5	P
1	2009-09-03 05:53:00	0	NTA	5	2	5	P
1	2009-09-03 05:54:00	0	NTA	5	2	5	P
1	2009-09-03 05:55:00	0	NTA	5	2	5	P
1	2009-09-03 05:56:00	0	NTA	5	2	5	P
1	2009-09-03 05:57:00	0	NTA	5	2	5	P
1	2009-09-03 05:58:00	0	NTA	5	2	5	P
1	2009-09-03 05:59:00	0	NTA	5	2	5	P
1	2009-09-03 06:00:00	0	NTA	5	2	5	P
1	2009-09-03 06:01:00	0	DTA	6	2	5	P
1	2009-09-03 06:02:00	0	DTA	6	2	5	P
1	2009-09-03 06:03:00	0	DTA	6	2	5	P
1	2009-09-03 06:04:00	0	DTA	6	2	5	P
1	2009-09-03 06:05:00	24	DTA	6	2	5	P
1	2009-09-03 06:06:00	12	DTA	6	2	5	P
1	2009-09-03 06:07:00	0	DTA	6	2	5	P
1	2009-09-03 06:08:00	0	DTA	6	2	5	P
1	2009-09-03 06:09:00	0	DTA	6	2	5	P
1	2009-09-03 06:10:00	0	DTA	6	2	5	P
1	2009-09-03 06:11:00	0	DTA	6	2	5	P
1	2009-09-03 06:12:00	0	DTA	6	2	5	P
1	2009-09-03 06:13:00	0	DTA	6	2	5	P
1	2009-09-03 06:14:00	0	DTA	6	2	5	P
1	2009-09-03 06:15:00	0	DTA	6	2	5	P
1	2009-09-03 06:16:00	0	DTA	6	2	5	P
1	2009-09-03 06:17:00	0	DTA	6	2	5	P
1	2009-09-03 06:18:00	0	DTA	6	2	5	P
1	2009-09-03 06:19:00	0	DTA	6	2	5	P
1	2009-09-03 06:20:00	0	DTA	6	2	5	P
1	2009-09-03 06:21:00	0	DTA	6	2	5	P
1	2009-09-03 06:22:00	0	DTA	6	2	5	P
1	2009-09-03 06:23:00	0	DTA	6	2	5	P
1	2009-09-03 06:24:00	0	DTA	6	2	5	P
1	2009-09-03 06:25:00	0	DTA	6	2	5	P
1	2009-09-03 06:26:00	0	DTA	6	2	5	P
1	2009-09-03 06:27:00	0	DTA	6	2	5	P
1	2009-09-03 06:28:00	593	DTA	6	2	5	P
1	2009-09-03 06:29:00	2264	DTA	6	2	5	P
1	2009-09-03 06:30:00	953	DTA	6	2	5	P
1	2009-09-03 06:31:00	740	DTA	6	2	5	P
1	2009-09-03 06:32:00	1413	DTA	6	2	5	P
1	2009-09-03 06:33:00	1057	DTA	6	2	5	P
1	2009-09-03 06:34:00	1380	DTA	6	2	5	P
1	2009-09-03 06:35:00	1960	DTA	6	2	5	P
1	2009-09-03 06:36:00	953	DTA	6	2	5	P
1	2009-09-03 06:37:00	327	DTA	6	2	5	P
1	2009-09-03 06:38:00	95	DTA	6	2	5	P
1	2009-09-03 06:39:00	119	DTA	6	2	5	P
1	2009-09-03 06:40:00	327	DTA	6	2	5	P
1	2009-09-03 06:41:00	12	DTA	6	2	5	P
1	2009-09-03 06:42:00	0	DTA	6	2	5	P
1	2009-09-03 06:43:00	0	DTA	6	2	5	P
1	2009-09-03 06:44:00	0	DTA	6	2	5	P
1	2009-09-03 06:45:00	0	DTA	6	2	5	P
1	2009-09-03 06:46:00	0	DTA	6	2	5	P
1	2009-09-03 06:47:00	0	DTA	6	2	5	P
1	2009-09-03 06:48:00	0	DTA	6	2	5	P
1	2009-09-03 06:49:00	0	DTA	6	2	5	P
1	2009-09-03 06:50:00	0	DTA	6	2	5	P
1	2009-09-03 06:51:00	0	DTA	6	2	5	P
1	2009-09-03 06:52:00	0	DTA	6	2	5	P
1	2009-09-03 06:53:00	0	DTA	6	2	5	P
1	2009-09-03 06:54:00	0	DTA	6	2	5	P
1	2009-09-03 06:55:00	0	DTA	6	2	5	P
1	2009-09-03 06:56:00	0	DTA	6	2	5	P
1	2009-09-03 06:57:00	24	DTA	6	2	5	P
1	2009-09-03 06:58:00	0	DTA	6	2	5	P
1	2009-09-03 06:59:00	0	DTA	6	2	5	P
1	2009-09-03 07:00:00	0	DTA	6	2	5	P
1	2009-09-03 07:01:00	0	DTA	7	2	5	P
1	2009-09-03 07:02:00	0	DTA	7	2	5	P
1	2009-09-03 07:03:00	327	DTA	7	2	5	P
1	2009-09-03 07:04:00	393	DTA	7	2	5	P
1	2009-09-03 07:05:00	718	DTA	7	2	5	P
1	2009-09-03 07:06:00	197	DTA	7	2	5	P
1	2009-09-03 07:07:00	0	DTA	7	2	5	P
1	2009-09-03 07:08:00	0	DTA	7	2	5	P
1	2009-09-03 07:09:00	0	DTA	7	2	5	P
1	2009-09-03 07:10:00	0	DTA	7	2	5	P
1	2009-09-03 07:11:00	12	DTA	7	2	5	P
1	2009-09-03 07:12:00	0	DTA	7	2	5	P
1	2009-09-03 07:13:00	0	DTA	7	2	5	P
1	2009-09-03 07:14:00	0	DTA	7	2	5	P
1	2009-09-03 07:15:00	0	DTA	7	2	5	P
1	2009-09-03 07:16:00	0	DTA	7	2	5	P
1	2009-09-03 07:17:00	0	DTA	7	2	5	P
1	2009-09-03 07:18:00	0	DTA	7	2	5	P
1	2009-09-03 07:19:00	0	DTA	7	2	5	P
1	2009-09-03 07:20:00	0	DTA	7	2	5	P
1	2009-09-03 07:21:00	0	DTA	7	2	5	P
1	2009-09-03 07:22:00	0	DTA	7	2	5	P
1	2009-09-03 07:23:00	0	DTA	7	2	5	P
1	2009-09-03 07:24:00	0	DTA	7	2	5	P
1	2009-09-03 07:25:00	0	DTA	7	2	5	P
1	2009-09-03 07:26:00	0	DTA	7	2	5	P
1	2009-09-03 07:27:00	0	DTA	7	2	5	P
1	2009-09-03 07:28:00	0	DTA	7	2	5	P
1	2009-09-03 07:29:00	0	DTA	7	2	5	P
1	2009-09-03 07:30:00	0	DTA	7	2	5	P
1	2009-09-03 07:31:00	0	DTA	7	2	5	P
1	2009-09-03 07:32:00	0	DTA	7	2	5	P
1	2009-09-03 07:33:00	0	DTA	7	2	5	P
1	2009-09-03 07:34:00	0	DTA	7	2	5	P
1	2009-09-03 07:35:00	0	DTA	7	2	5	P
1	2009-09-03 07:36:00	0	DTA	7	2	5	P
1	2009-09-03 07:37:00	47	DTA	7	2	5	P
1	2009-09-03 07:38:00	59	DTA	7	2	5	P
1	2009-09-03 07:39:00	24	DTA	7	2	5	P
1	2009-09-03 07:40:00	0	DTA	7	2	5	P
1	2009-09-03 07:41:00	0	DTA	7	2	5	P
1	2009-09-03 07:42:00	0	DTA	7	2	5	P
1	2009-09-03 07:43:00	0	DTA	7	2	5	P
1	2009-09-03 07:44:00	0	DTA	7	2	5	P
1	2009-09-03 07:45:00	12	DTA	7	2	5	P
1	2009-09-03 07:46:00	0	DTA	7	2	5	P
1	2009-09-03 07:47:00	0	DTA	7	2	5	P
1	2009-09-03 07:48:00	0	DTA	7	2	5	P
1	2009-09-03 07:49:00	0	DTA	7	2	5	P
[truncated: 36,386 more rows]

## Sheet: Pivot NTA
Peak DTA Time?	(All)
DTA vs NTA	NTA
Average of Activity	Column Labels
Row Labels	1	2	3	4	5	6	7	8	9	10	11	12	13	14	Grand Total
1	5.90625	15.7373	10.2731	8.83725	12.1444	11.3725	7.45	12.2259	11.1729	6.36667	11.6457	5.87525	8.13333	10.0626	9.90449
2	8.78542	10.8343	6.03111	15.7157	6.0625	38.6529	19.497	8.82526	6.83191	10.4896	5.88444	15.7896	5.97011	15.4471	12.7564
Grand Total	7.34583	13.3224	8.18689	12.2765	9.28235	25.0127	13.5662	10.6345	9.02526	8.56556	8.98667	10.7066	7.07006	12.795	11.3106

## Sheet: Pivot DTA
Peak DTA Time?	(All)
DTA vs NTA	DTA
Average of Activity	Column Labels
Row Labels	1	2	3	4	5	6	7	8	9	10	11	12	13	Grand Total
1	111.729	55.4946	60.7343	69.628	129.2	79.0885	96.963	82.5432	74.5206	56.2167	174.173	45.1934	97.0709	86.6508
2	41.1806	54.0716	55.5879	124.022	48.1172	52.3577	122.806	68.1714	55.549	63.796	70.5303	72.9247	63.6167	68.696
Grand Total	75.8765	54.7556	58.1995	97.2566	89.6807	65.1708	109.885	75.1108	65.1287	59.9498	120.871	59.1718	80.2121	77.5882

## Sheet: Pivot PeakDTA
Peak DTA Time?	Peak DTA
DTA vs NTA	DTA
Average of Activity	Column Labels
Row Labels	1	2	3	4	5	6	7	8	9	10	11	12	13	Grand Total
1	201.231	82.1528	118.292	89.8861	121.153	94.7722	210.769	170.114	155.5	79.2222	158.583	61.3694	201.106	134.165
2	63.7917	96.0306	25.4306	160.639	57.1889	91.4417	260.222	105.347	88.1444	78.9167	113.633	88.4972	131.264	104.657
Grand Total	132.511	89.0917	71.8611	125.263	89.1708	93.1069	235.496	137.731	121.822	79.0694	136.108	74.9333	166.185	119.411

## Sheet: 9.1.09
Actogram, Copy Raw Data, All Days
Identity:	Sierra
Filename:	E:\Active Research Files\Nighttime Activity\cases\sierra\Sierra.AWC
Gender:	F
Age:	9
Height:	91.4 cm	36.0 in
Weight:	37.4 kg	82.5 lbs
Start Date:	01-Sep-2009 (Tue)
Start Time:	18:00:00
Interval:	1.00 mins
Date Stamp:	Time Stamp:	Activity Data:	Marker Press:
2009-09-01	00:00:00	0
2009-09-01	00:01:00	0
2009-09-01	00:02:00	0
2009-09-01	00:03:00	0
2009-09-01	00:04:00	0
2009-09-01	00:05:00	0
2009-09-01	00:06:00	0
2009-09-01	00:07:00	0
2009-09-01	00:08:00	0
2009-09-01	00:09:00	0
2009-09-01	00:10:00	0
2009-09-01	00:11:00	0
2009-09-01	00:12:00	0
2009-09-01	00:13:00	0
2009-09-01	00:14:00	0
2009-09-01	00:15:00	0
2009-09-01	00:16:00	0
2009-09-01	00:17:00	0
2009-09-01	00:18:00	0
2009-09-01	00:19:00	0
2009-09-01	00:20:00	0
2009-09-01	00:21:00	0
2009-09-01	00:22:00	0
2009-09-01	00:23:00	0
2009-09-01	00:24:00	0
2009-09-01	00:25:00	0
2009-09-01	00:26:00	0
2009-09-01	00:27:00	0
2009-09-01	00:28:00	0
2009-09-01	00:29:00	0
2009-09-01	00:30:00	0
2009-09-01	00:31:00	0
2009-09-01	00:32:00	0
2009-09-01	00:33:00	0
2009-09-01	00:34:00	0
2009-09-01	00:35:00	0
2009-09-01	00:36:00	0
2009-09-01	00:37:00	0
2009-09-01	00:38:00	0
2009-09-01	00:39:00	0
2009-09-01	00:40:00	0
2009-09-01	00:41:00	0
2009-09-01	00:42:00	0
2009-09-01	00:43:00	0
2009-09-01	00:44:00	0
2009-09-01	00:45:00	0
2009-09-01	00:46:00	0
2009-09-01	00:47:00	0
2009-09-01	00:48:00	0
2009-09-01	00:49:00	0
2009-09-01	00:50:00	0
2009-09-01	00:51:00	0
2009-09-01	00:52:00	0
2009-09-01	00:53:00	0
2009-09-01	00:54:00	0
2009-09-01	00:55:00	0
2009-09-01	00:56:00	0
2009-09-01	00:57:00	0
2009-09-01	00:58:00	0
2009-09-01	00:59:00	0
2009-09-01	01:00:00	0
2009-09-01	01:01:00	0
2009-09-01	01:02:00	0
2009-09-01	01:03:00	0
2009-09-01	01:04:00	0
2009-09-01	01:05:00	0
2009-09-01	01:06:00	0
2009-09-01	01:07:00	0
2009-09-01	01:08:00	0
2009-09-01	01:09:00	0
2009-09-01	01:10:00	0
2009-09-01	01:11:00	0
2009-09-01	01:12:00	0
2009-09-01	01:13:00	0
2009-09-01	01:14:00	0
2009-09-01	01:15:00	0
2009-09-01	01:16:00	0
2009-09-01	01:17:00	0
2009-09-01	01:18:00	0
2009-09-01	01:19:00	0
2009-09-01	01:20:00	0
2009-09-01	01:21:00	0
2009-09-01	01:22:00	0
2009-09-01	01:23:00	0
2009-09-01	01:24:00	0
2009-09-01	01:25:00	0
2009-09-01	01:26:00	0
2009-09-01	01:27:00	0
2009-09-01	01:28:00	0
2009-09-01	01:29:00	0
2009-09-01	01:30:00	0
2009-09-01	01:31:00	0
2009-09-01	01:32:00	0
2009-09-01	01:33:00	0
2009-09-01	01:34:00	0
2009-09-01	01:35:00	0
2009-09-01	01:36:00	0
2009-09-01	01:37:00	0
2009-09-01	01:38:00	0
2009-09-01	01:39:00	0
2009-09-01	01:40:00	0
2009-09-01	01:41:00	0
2009-09-01	01:42:00	0
2009-09-01	01:43:00	0
2009-09-01	01:44:00	0
2009-09-01	01:45:00	0
2009-09-01	01:46:00	0
2009-09-01	01:47:00	0
2009-09-01	01:48:00	0
2009-09-01	01:49:00	0
2009-09-01	01:50:00	0
2009-09-01	01:51:00	0
2009-09-01	01:52:00	0
2009-09-01	01:53:00	0
2009-09-01	01:54:00	0
2009-09-01	01:55:00	0
2009-09-01	01:56:00	0
2009-09-01	01:57:00	0
2009-09-01	01:58:00	0
2009-09-01	01:59:00	0
2009-09-01	02:00:00	0
2009-09-01	02:01:00	0
2009-09-01	02:02:00	0
2009-09-01	02:03:00	0
2009-09-01	02:04:00	0
2009-09-01	02:05:00	0
2009-09-01	02:06:00	0
2009-09-01	02:07:00	0
2009-09-01	02:08:00	0
2009-09-01	02:09:00	0
2009-09-01	02:10:00	0
2009-09-01	02:11:00	0
2009-09-01	02:12:00	0
2009-09-01	02:13:00	0
2009-09-01	02:14:00	0
2009-09-01	02:15:00	0
2009-09-01	02:16:00	0
2009-09-01	02:17:00	0
2009-09-01	02:18:00	0
2009-09-01	02:19:00	0
2009-09-01	02:20:00	0
2009-09-01	02:21:00	0
2009-09-01	02:22:00	0
2009-09-01	02:23:00	0
2009-09-01	02:24:00	0
2009-09-01	02:25:00	0
2009-09-01	02:26:00	0
2009-09-01	02:27:00	0
2009-09-01	02:28:00	0
2009-09-01	02:29:00	0
2009-09-01	02:30:00	0
2009-09-01	02:31:00	0
2009-09-01	02:32:00	0
2009-09-01	02:33:00	0
2009-09-01	02:34:00	0
2009-09-01	02:35:00	0
2009-09-01	02:36:00	0
2009-09-01	02:37:00	0
2009-09-01	02:38:00	0
2009-09-01	02:39:00	0
2009-09-01	02:40:00	0
2009-09-01	02:41:00	0
2009-09-01	02:42:00	0
2009-09-01	02:43:00	0
2009-09-01	02:44:00	0
2009-09-01	02:45:00	0
2009-09-01	02:46:00	0
2009-09-01	02:47:00	0
2009-09-01	02:48:00	0
2009-09-01	02:49:00	0
2009-09-01	02:50:00	0
2009-09-01	02:51:00	0
2009-09-01	02:52:00	0
2009-09-01	02:53:00	0
2009-09-01	02:54:00	0
2009-09-01	02:55:00	0
2009-09-01	02:56:00	0
2009-09-01	02:57:00	0
2009-09-01	02:58:00	0
2009-09-01	02:59:00	0
2009-09-01	03:00:00	0
2009-09-01	03:01:00	0
2009-09-01	03:02:00	0
2009-09-01	03:03:00	0
2009-09-01	03:04:00	0
2009-09-01	03:05:00	0
2009-09-01	03:06:00	0
2009-09-01	03:07:00	0
2009-09-01	03:08:00	0
2009-09-01	03:09:00	0
2009-09-01	03:10:00	0
2009-09-01	03:11:00	0
2009-09-01	03:12:00	0
2009-09-01	03:13:00	0
2009-09-01	03:14:00	0
2009-09-01	03:15:00	0
2009-09-01	03:16:00	0
2009-09-01	03:17:00	0
2009-09-01	03:18:00	0
2009-09-01	03:19:00	0
2009-09-01	03:20:00	0
2009-09-01	03:21:00	0
2009-09-01	03:22:00	0
2009-09-01	03:23:00	0
2009-09-01	03:24:00	0
2009-09-01	03:25:00	0
2009-09-01	03:26:00	0
2009-09-01	03:27:00	0
2009-09-01	03:28:00	0
2009-09-01	03:29:00	0
2009-09-01	03:30:00	0
2009-09-01	03:31:00	0
2009-09-01	03:32:00	0
2009-09-01	03:33:00	0
2009-09-01	03:34:00	0
2009-09-01	03:35:00	0
2009-09-01	03:36:00	0
2009-09-01	03:37:00	0
2009-09-01	03:38:00	0
2009-09-01	03:39:00	0
2009-09-01	03:40:00	0
2009-09-01	03:41:00	0
2009-09-01	03:42:00	0
2009-09-01	03:43:00	0
2009-09-01	03:44:00	0
2009-09-01	03:45:00	0
2009-09-01	03:46:00	0
2009-09-01	03:47:00	0
2009-09-01	03:48:00	0
2009-09-01	03:49:00	0
2009-09-01	03:50:00	0
2009-09-01	03:51:00	0
2009-09-01	03:52:00	0
2009-09-01	03:53:00	0
2009-09-01	03:54:00	0
2009-09-01	03:55:00	0
2009-09-01	03:56:00	0
2009-09-01	03:57:00	0
2009-09-01	03:58:00	0
2009-09-01	03:59:00	0
2009-09-01	04:00:00	0
2009-09-01	04:01:00	0
2009-09-01	04:02:00	0
2009-09-01	04:03:00	0
2009-09-01	04:04:00	0
2009-09-01	04:05:00	0
2009-09-01	04:06:00	0
2009-09-01	04:07:00	0
2009-09-01	04:08:00	0
2009-09-01	04:09:00	0
2009-09-01	04:10:00	0
2009-09-01	04:11:00	0
2009-09-01	04:12:00	0
2009-09-01	04:13:00	0
2009-09-01	04:14:00	0
2009-09-01	04:15:00	0
2009-09-01	04:16:00	0
2009-09-01	04:17:00	0
2009-09-01	04:18:00	0
2009-09-01	04:19:00	0
2009-09-01	04:20:00	0
2009-09-01	04:21:00	0
2009-09-01	04:22:00	0
2009-09-01	04:23:00	0
2009-09-01	04:24:00	0
2009-09-01	04:25:00	0
2009-09-01	04:26:00	0
2009-09-01	04:27:00	0
2009-09-01	04:28:00	0
2009-09-01	04:29:00	0
2009-09-01	04:30:00	0
2009-09-01	04:31:00	0
2009-09-01	04:32:00	0
2009-09-01	04:33:00	0
2009-09-01	04:34:00	0
2009-09-01	04:35:00	0
2009-09-01	04:36:00	0
2009-09-01	04:37:00	0
2009-09-01	04:38:00	0
2009-09-01	04:39:00	0
2009-09-01	04:40:00	0
2009-09-01	04:41:00	0
2009-09-01	04:42:00	0
2009-09-01	04:43:00	0
2009-09-01	04:44:00	0
2009-09-01	04:45:00	0
2009-09-01	04:46:00	0
2009-09-01	04:47:00	0
2009-09-01	04:48:00	0
2009-09-01	04:49:00	0
2009-09-01	04:50:00	0
2009-09-01	04:51:00	0
2009-09-01	04:52:00	0
2009-09-01	04:53:00	0
2009-09-01	04:54:00	0
2009-09-01	04:55:00	0
2009-09-01	04:56:00	0
2009-09-01	04:57:00	0
2009-09-01	04:58:00	0
2009-09-01	04:59:00	0
2009-09-01	05:00:00	0
2009-09-01	05:01:00	0
2009-09-01	05:02:00	0
2009-09-01	05:03:00	0
2009-09-01	05:04:00	0
2009-09-01	05:05:00	0
2009-09-01	05:06:00	0
2009-09-01	05:07:00	0
2009-09-01	05:08:00	0
2009-09-01	05:09:00	0
2009-09-01	05:10:00	0
2009-09-01	05:11:00	0
2009-09-01	05:12:00	0
2009-09-01	05:13:00	0
2009-09-01	05:14:00	0
2009-09-01	05:15:00	0
2009-09-01	05:16:00	0
2009-09-01	05:17:00	0
2009-09-01	05:18:00	0
2009-09-01	05:19:00	0
2009-09-01	05:20:00	0
2009-09-01	05:21:00	0
2009-09-01	05:22:00	0
2009-09-01	05:23:00	0
2009-09-01	05:24:00	0
2009-09-01	05:25:00	0
2009-09-01	05:26:00	0
2009-09-01	05:27:00	0
2009-09-01	05:28:00	0
2009-09-01	05:29:00	0
2009-09-01	05:30:00	0
2009-09-01	05:31:00	0
2009-09-01	05:32:00	0
2009-09-01	05:33:00	0
2009-09-01	05:34:00	0
2009-09-01	05:35:00	0
2009-09-01	05:36:00	0
2009-09-01	05:37:00	0
2009-09-01	05:38:00	0
2009-09-01	05:39:00	0
2009-09-01	05:40:00	0
2009-09-01	05:41:00	0
2009-09-01	05:42:00	0
2009-09-01	05:43:00	0
2009-09-01	05:44:00	0
2009-09-01	05:45:00	0
2009-09-01	05:46:00	0
2009-09-01	05:47:00	0
2009-09-01	05:48:00	0
2009-09-01	05:49:00	0
2009-09-01	05:50:00	0
2009-09-01	05:51:00	0
2009-09-01	05:52:00	0
2009-09-01	05:53:00	0
2009-09-01	05:54:00	0
2009-09-01	05:55:00	0
2009-09-01	05:56:00	0
2009-09-01	05:57:00	0
2009-09-01	05:58:00	0
2009-09-01	05:59:00	0
2009-09-01	06:00:00	0
2009-09-01	06:01:00	0
2009-09-01	06:02:00	0
2009-09-01	06:03:00	0
2009-09-01	06:04:00	0
2009-09-01	06:05:00	0
2009-09-01	06:06:00	0
2009-09-01	06:07:00	0
2009-09-01	06:08:00	0
2009-09-01	06:09:00	0
2009-09-01	06:10:00	0
2009-09-01	06:11:00	0
2009-09-01	06:12:00	0
2009-09-01	06:13:00	0
2009-09-01	06:14:00	0
2009-09-01	06:15:00	0
2009-09-01	06:16:00	0
2009-09-01	06:17:00	0
2009-09-01	06:18:00	0
2009-09-01	06:19:00	0
2009-09-01	06:20:00	0
2009-09-01	06:21:00	0
2009-09-01	06:22:00	0
2009-09-01	06:23:00	0
2009-09-01	06:24:00	0
2009-09-01	06:25:00	0
2009-09-01	06:26:00	0
2009-09-01	06:27:00	0
2009-09-01	06:28:00	0
2009-09-01	06:29:00	0
2009-09-01	06:30:00	0
2009-09-01	06:31:00	0
2009-09-01	06:32:00	0
2009-09-01	06:33:00	0
2009-09-01	06:34:00	0
2009-09-01	06:35:00	0
2009-09-01	06:36:00	0
2009-09-01	06:37:00	0
2009-09-01	06:38:00	0
2009-09-01	06:39:00	0
2009-09-01	06:40:00	0
2009-09-01	06:41:00	0
2009-09-01	06:42:00	0
2009-09-01	06:43:00	0
2009-09-01	06:44:00	0
2009-09-01	06:45:00	0
2009-09-01	06:46:00	0
2009-09-01	06:47:00	0
2009-09-01	06:48:00	0
2009-09-01	06:49:00	0
2009-09-01	06:50:00	0
2009-09-01	06:51:00	0
2009-09-01	06:52:00	0
2009-09-01	06:53:00	0
2009-09-01	06:54:00	0
2009-09-01	06:55:00	0
2009-09-01	06:56:00	0
2009-09-01	06:57:00	0
2009-09-01	06:58:00	0
2009-09-01	06:59:00	0
2009-09-01	07:00:00	0
2009-09-01	07:01:00	0
2009-09-01	07:02:00	0
2009-09-01	07:03:00	0
2009-09-01	07:04:00	0
2009-09-01	07:05:00	0
2009-09-01	07:06:00	0
2009-09-01	07:07:00	0
2009-09-01	07:08:00	0
2009-09-01	07:09:00	0
2009-09-01	07:10:00	0
2009-09-01	07:11:00	0
2009-09-01	07:12:00	0
2009-09-01	07:13:00	0
2009-09-01	07:14:00	0
2009-09-01	07:15:00	0
2009-09-01	07:16:00	0
2009-09-01	07:17:00	0
2009-09-01	07:18:00	0
2009-09-01	07:19:00	0
2009-09-01	07:20:00	0
2009-09-01	07:21:00	0
2009-09-01	07:22:00	0
2009-09-01	07:23:00	0
2009-09-01	07:24:00	0
2009-09-01	07:25:00	0
2009-09-01	07:26:00	0
2009-09-01	07:27:00	0
2009-09-01	07:28:00	0
2009-09-01	07:29:00	0
2009-09-01	07:30:00	0
2009-09-01	07:31:00	0
2009-09-01	07:32:00	0
2009-09-01	07:33:00	0
2009-09-01	07:34:00	0
2009-09-01	07:35:00	0
2009-09-01	07:36:00	0
2009-09-01	07:37:00	0
2009-09-01	07:38:00	0
2009-09-01	07:39:00	0
2009-09-01	07:40:00	0
2009-09-01	07:41:00	0
2009-09-01	07:42:00	0
2009-09-01	07:43:00	0
2009-09-01	07:44:00	0
2009-09-01	07:45:00	0
2009-09-01	07:46:00	0
2009-09-01	07:47:00	0
2009-09-01	07:48:00	0
2009-09-01	07:49:00	0
2009-09-01	07:50:00	0
2009-09-01	07:51:00	0
2009-09-01	07:52:00	0
2009-09-01	07:53:00	0
2009-09-01	07:54:00	0
2009-09-01	07:55:00	0
2009-09-01	07:56:00	0
2009-09-01	07:57:00	0
2009-09-01	07:58:00	0
2009-09-01	07:59:00	0
2009-09-01	08:00:00	0
2009-09-01	08:01:00	0
2009-09-01	08:02:00	0
2009-09-01	08:03:00	0
2009-09-01	08:04:00	0
2009-09-01	08:05:00	0
2009-09-01	08:06:00	0
2009-09-01	08:07:00	0
2009-09-01	08:08:00	0
2009-09-01	08:09:00	0
2009-09-01	08:10:00	0
2009-09-01	08:11:00	0
2009-09-01	08:12:00	0
2009-09-01	08:13:00	0
2009-09-01	08:14:00	0
2009-09-01	08:15:00	0
2009-09-01	08:16:00	0
2009-09-01	08:17:00	0
2009-09-01	08:18:00	0
2009-09-01	08:19:00	0
2009-09-01	08:20:00	0
2009-09-01	08:21:00	0
2009-09-01	08:22:00	0
2009-09-01	08:23:00	0
2009-09-01	08:24:00	0
2009-09-01	08:25:00	0
2009-09-01	08:26:00	0
2009-09-01	08:27:00	0
2009-09-01	08:28:00	0
2009-09-01	08:29:00	0
2009-09-01	08:30:00	0
2009-09-01	08:31:00	0
2009-09-01	08:32:00	0
2009-09-01	08:33:00	0
2009-09-01	08:34:00	0
2009-09-01	08:35:00	0
2009-09-01	08:36:00	0
2009-09-01	08:37:00	0
2009-09-01	08:38:00	0
2009-09-01	08:39:00	0
2009-09-01	08:40:00	0
2009-09-01	08:41:00	0
2009-09-01	08:42:00	0
2009-09-01	08:43:00	0
2009-09-01	08:44:00	0
2009-09-01	08:45:00	0
2009-09-01	08:46:00	0
2009-09-01	08:47:00	0
2009-09-01	08:48:00	0
2009-09-01	08:49:00	0
2009-09-01	08:50:00	0
2009-09-01	08:51:00	0
2009-09-01	08:52:00	0
2009-09-01	08:53:00	0
2009-09-01	08:54:00	0
2009-09-01	08:55:00	0
2009-09-01	08:56:00	0
2009-09-01	08:57:00	0
2009-09-01	08:58:00	0
2009-09-01	08:59:00	0
2009-09-01	09:00:00	0
2009-09-01	09:01:00	0
2009-09-01	09:02:00	0
2009-09-01	09:03:00	0
2009-09-01	09:04:00	0
2009-09-01	09:05:00	0
2009-09-01	09:06:00	0
2009-09-01	09:07:00	0
2009-09-01	09:08:00	0
2009-09-01	09:09:00	0
2009-09-01	09:10:00	0
2009-09-01	09:11:00	0
2009-09-01	09:12:00	0
2009-09-01	09:13:00	0
2009-09-01	09:14:00	0
2009-09-01	09:15:00	0
2009-09-01	09:16:00	0
2009-09-01	09:17:00	0
2009-09-01	09:18:00	0
2009-09-01	09:19:00	0
2009-09-01	09:20:00	0
2009-09-01	09:21:00	0
2009-09-01	09:22:00	0
2009-09-01	09:23:00	0
2009-09-01	09:24:00	0
2009-09-01	09:25:00	0
2009-09-01	09:26:00	0
2009-09-01	09:27:00	0
2009-09-01	09:28:00	0
2009-09-01	09:29:00	0
2009-09-01	09:30:00	0
2009-09-01	09:31:00	0
2009-09-01	09:32:00	0
2009-09-01	09:33:00	0
2009-09-01	09:34:00	0
2009-09-01	09:35:00	0
2009-09-01	09:36:00	0
2009-09-01	09:37:00	0
2009-09-01	09:38:00	0
2009-09-01	09:39:00	0
2009-09-01	09:40:00	0
2009-09-01	09:41:00	0
2009-09-01	09:42:00	0
2009-09-01	09:43:00	0
2009-09-01	09:44:00	0
2009-09-01	09:45:00	0
2009-09-01	09:46:00	0
2009-09-01	09:47:00	0
2009-09-01	09:48:00	0
2009-09-01	09:49:00	0
2009-09-01	09:50:00	0
2009-09-01	09:51:00	0
2009-09-01	09:52:00	0
2009-09-01	09:53:00	0
2009-09-01	09:54:00	0
2009-09-01	09:55:00	0
2009-09-01	09:56:00	0
2009-09-01	09:57:00	0
2009-09-01	09:58:00	0
2009-09-01	09:59:00	0
2009-09-01	10:00:00	0
2009-09-01	10:01:00	0
2009-09-01	10:02:00	0
2009-09-01	10:03:00	0
2009-09-01	10:04:00	0
2009-09-01	10:05:00	0
2009-09-01	10:06:00	0
2009-09-01	10:07:00	0
2009-09-01	10:08:00	0
2009-09-01	10:09:00	0
2009-09-01	10:10:00	0
2009-09-01	10:11:00	0
2009-09-01	10:12:00	0
2009-09-01	10:13:00	0
2009-09-01	10:14:00	0
2009-09-01	10:15:00	0
2009-09-01	10:16:00	0
2009-09-01	10:17:00	0
2009-09-01	10:18:00	0
2009-09-01	10:19:00	0
2009-09-01	10:20:00	0
2009-09-01	10:21:00	0
2009-09-01	10:22:00	0
2009-09-01	10:23:00	0
2009-09-01	10:24:00	0
2009-09-01	10:25:00	0
2009-09-01	10:26:00	0
2009-09-01	10:27:00	0
2009-09-01	10:28:00	0
2009-09-01	10:29:00	0
2009-09-01	10:30:00	0
2009-09-01	10:31:00	0
2009-09-01	10:32:00	0
2009-09-01	10:33:00	0
2009-09-01	10:34:00	0
2009-09-01	10:35:00	0
2009-09-01	10:36:00	0
2009-09-01	10:37:00	0
2009-09-01	10:38:00	0
2009-09-01	10:39:00	0
2009-09-01	10:40:00	0
2009-09-01	10:41:00	0
2009-09-01	10:42:00	0
2009-09-01	10:43:00	0
2009-09-01	10:44:00	0
2009-09-01	10:45:00	0
2009-09-01	10:46:00	0
2009-09-01	10:47:00	0
2009-09-01	10:48:00	0
2009-09-01	10:49:00	0
2009-09-01	10:50:00	0
2009-09-01	10:51:00	0
2009-09-01	10:52:00	0
2009-09-01	10:53:00	0
2009-09-01	10:54:00	0
2009-09-01	10:55:00	0
2009-09-01	10:56:00	0
2009-09-01	10:57:00	0
2009-09-01	10:58:00	0
2009-09-01	10:59:00	0
2009-09-01	11:00:00	0
2009-09-01	11:01:00	0
2009-09-01	11:02:00	0
2009-09-01	11:03:00	0
2009-09-01	11:04:00	0
2009-09-01	11:05:00	0
2009-09-01	11:06:00	0
2009-09-01	11:07:00	0
2009-09-01	11:08:00	0
2009-09-01	11:09:00	0
2009-09-01	11:10:00	0
2009-09-01	11:11:00	0
2009-09-01	11:12:00	0
2009-09-01	11:13:00	0
2009-09-01	11:14:00	0
2009-09-01	11:15:00	0
2009-09-01	11:16:00	0
2009-09-01	11:17:00	0
2009-09-01	11:18:00	0
2009-09-01	11:19:00	0
2009-09-01	11:20:00	0
2009-09-01	11:21:00	0
2009-09-01	11:22:00	0
2009-09-01	11:23:00	0
2009-09-01	11:24:00	0
2009-09-01	11:25:00	0
2009-09-01	11:26:00	0
2009-09-01	11:27:00	0
2009-09-01	11:28:00	0
2009-09-01	11:29:00	0
2009-09-01	11:30:00	0
2009-09-01	11:31:00	0
2009-09-01	11:32:00	0
2009-09-01	11:33:00	0
2009-09-01	11:34:00	0
2009-09-01	11:35:00	0
2009-09-01	11:36:00	0
2009-09-01	11:37:00	0
2009-09-01	11:38:00	0
2009-09-01	11:39:00	0
2009-09-01	11:40:00	0
2009-09-01	11:41:00	0
2009-09-01	11:42:00	0
2009-09-01	11:43:00	0
2009-09-01	11:44:00	0
2009-09-01	11:45:00	0
2009-09-01	11:46:00	0
2009-09-01	11:47:00	0
2009-09-01	11:48:00	0
2009-09-01	11:49:00	0
2009-09-01	11:50:00	0
2009-09-01	11:51:00	0
2009-09-01	11:52:00	0
2009-09-01	11:53:00	0
2009-09-01	11:54:00	0
2009-09-01	11:55:00	0
2009-09-01	11:56:00	0
2009-09-01	11:57:00	0
2009-09-01	11:58:00	0
2009-09-01	11:59:00	0
2009-09-01	12:00:00	0
2009-09-01	12:01:00	0
2009-09-01	12:02:00	0
2009-09-01	12:03:00	0
2009-09-01	12:04:00	0
2009-09-01	12:05:00	0
2009-09-01	12:06:00	0
2009-09-01	12:07:00	0
2009-09-01	12:08:00	0
2009-09-01	12:09:00	0
2009-09-01	12:10:00	0
2009-09-01	12:11:00	0
2009-09-01	12:12:00	0
2009-09-01	12:13:00	0
2009-09-01	12:14:00	0
2009-09-01	12:15:00	0
2009-09-01	12:16:00	0
2009-09-01	12:17:00	0
2009-09-01	12:18:00	0
2009-09-01	12:19:00	0
2009-09-01	12:20:00	0
2009-09-01	12:21:00	0
2009-09-01	12:22:00	0
2009-09-01	12:23:00	0
2009-09-01	12:24:00	0
2009-09-01	12:25:00	0
2009-09-01	12:26:00	0
2009-09-01	12:27:00	0
2009-09-01	12:28:00	0
2009-09-01	12:29:00	0
2009-09-01	12:30:00	0
2009-09-01	12:31:00	0
2009-09-01	12:32:00	0
2009-09-01	12:33:00	0
2009-09-01	12:34:00	0
2009-09-01	12:35:00	0
2009-09-01	12:36:00	0
2009-09-01	12:37:00	0
2009-09-01	12:38:00	0
2009-09-01	12:39:00	0
2009-09-01	12:40:00	0
2009-09-01	12:41:00	0
2009-09-01	12:42:00	0
2009-09-01	12:43:00	0
2009-09-01	12:44:00	0
2009-09-01	12:45:00	0
2009-09-01	12:46:00	0
2009-09-01	12:47:00	0
2009-09-01	12:48:00	0
2009-09-01	12:49:00	0
2009-09-01	12:50:00	0
2009-09-01	12:51:00	0
2009-09-01	12:52:00	0
2009-09-01	12:53:00	0
2009-09-01	12:54:00	0
2009-09-01	12:55:00	0
2009-09-01	12:56:00	0
2009-09-01	12:57:00	0
2009-09-01	12:58:00	0
2009-09-01	12:59:00	0
2009-09-01	13:00:00	0
2009-09-01	13:01:00	0
2009-09-01	13:02:00	0
2009-09-01	13:03:00	0
2009-09-01	13:04:00	0
2009-09-01	13:05:00	0
2009-09-01	13:06:00	0
2009-09-01	13:07:00	0
2009-09-01	13:08:00	0
2009-09-01	13:09:00	0
2009-09-01	13:10:00	0
2009-09-01	13:11:00	0
2009-09-01	13:12:00	0
2009-09-01	13:13:00	0
2009-09-01	13:14:00	0
2009-09-01	13:15:00	0
2009-09-01	13:16:00	0
2009-09-01	13:17:00	0
2009-09-01	13:18:00	0
2009-09-01	13:19:00	0
2009-09-01	13:20:00	0
2009-09-01	13:21:00	0
2009-09-01	13:22:00	0
2009-09-01	13:23:00	0
2009-09-01	13:24:00	0
2009-09-01	13:25:00	0
2009-09-01	13:26:00	0
2009-09-01	13:27:00	0
2009-09-01	13:28:00	0
2009-09-01	13:29:00	0
2009-09-01	13:30:00	0
2009-09-01	13:31:00	0
2009-09-01	13:32:00	0
2009-09-01	13:33:00	0
2009-09-01	13:34:00	0
2009-09-01	13:35:00	0
2009-09-01	13:36:00	0
2009-09-01	13:37:00	0
2009-09-01	13:38:00	0
2009-09-01	13:39:00	0
2009-09-01	13:40:00	0
2009-09-01	13:41:00	0
2009-09-01	13:42:00	0
2009-09-01	13:43:00	0
2009-09-01	13:44:00	0
2009-09-01	13:45:00	0
2009-09-01	13:46:00	0
2009-09-01	13:47:00	0
2009-09-01	13:48:00	0
2009-09-01	13:49:00	0
2009-09-01	13:50:00	0
2009-09-01	13:51:00	0
2009-09-01	13:52:00	0
2009-09-01	13:53:00	0
2009-09-01	13:54:00	0
2009-09-01	13:55:00	0
2009-09-01	13:56:00	0
2009-09-01	13:57:00	0
2009-09-01	13:58:00	0
2009-09-01	13:59:00	0
2009-09-01	14:00:00	0
2009-09-01	14:01:00	0
2009-09-01	14:02:00	0
2009-09-01	14:03:00	0
2009-09-01	14:04:00	0
2009-09-01	14:05:00	0
2009-09-01	14:06:00	0
2009-09-01	14:07:00	0
2009-09-01	14:08:00	0
2009-09-01	14:09:00	0
2009-09-01	14:10:00	0
2009-09-01	14:11:00	0
2009-09-01	14:12:00	0
2009-09-01	14:13:00	0
2009-09-01	14:14:00	0
2009-09-01	14:15:00	0
2009-09-01	14:16:00	0
2009-09-01	14:17:00	0
2009-09-01	14:18:00	0
2009-09-01	14:19:00	0
2009-09-01	14:20:00	0
2009-09-01	14:21:00	0
2009-09-01	14:22:00	0
2009-09-01	14:23:00	0
2009-09-01	14:24:00	0
2009-09-01	14:25:00	0
2009-09-01	14:26:00	0
2009-09-01	14:27:00	0
2009-09-01	14:28:00	0
2009-09-01	14:29:00	0
2009-09-01	14:30:00	0
2009-09-01	14:31:00	0
2009-09-01	14:32:00	0
2009-09-01	14:33:00	0
2009-09-01	14:34:00	0
2009-09-01	14:35:00	0
2009-09-01	14:36:00	0
2009-09-01	14:37:00	0
2009-09-01	14:38:00	0
2009-09-01	14:39:00	0
2009-09-01	14:40:00	0
2009-09-01	14:41:00	0
2009-09-01	14:42:00	0
2009-09-01	14:43:00	0
2009-09-01	14:44:00	0
2009-09-01	14:45:00	0
2009-09-01	14:46:00	0
2009-09-01	14:47:00	0
2009-09-01	14:48:00	0
2009-09-01	14:49:00	0
2009-09-01	14:50:00	0
2009-09-01	14:51:00	0
2009-09-01	14:52:00	0
2009-09-01	14:53:00	0
2009-09-01	14:54:00	0
2009-09-01	14:55:00	0
2009-09-01	14:56:00	0
2009-09-01	14:57:00	0
2009-09-01	14:58:00	0
2009-09-01	14:59:00	0
2009-09-01	15:00:00	0
2009-09-01	15:01:00	0
2009-09-01	15:02:00	0
2009-09-01	15:03:00	0
2009-09-01	15:04:00	0
2009-09-01	15:05:00	0
2009-09-01	15:06:00	0
2009-09-01	15:07:00	0
2009-09-01	15:08:00	0
2009-09-01	15:09:00	0
2009-09-01	15:10:00	0
2009-09-01	15:11:00	0
2009-09-01	15:12:00	0
2009-09-01	15:13:00	0
2009-09-01	15:14:00	0
2009-09-01	15:15:00	0
2009-09-01	15:16:00	0
2009-09-01	15:17:00	0
2009-09-01	15:18:00	0
2009-09-01	15:19:00	0
2009-09-01	15:20:00	0
2009-09-01	15:21:00	0
2009-09-01	15:22:00	0
2009-09-01	15:23:00	0
2009-09-01	15:24:00	0
2009-09-01	15:25:00	0
2009-09-01	15:26:00	0
2009-09-01	15:27:00	0
2009-09-01	15:28:00	0
2009-09-01	15:29:00	0
2009-09-01	15:30:00	0
2009-09-01	15:31:00	0
2009-09-01	15:32:00	0
2009-09-01	15:33:00	0
2009-09-01	15:34:00	0
2009-09-01	15:35:00	0
2009-09-01	15:36:00	0
2009-09-01	15:37:00	0
2009-09-01	15:38:00	0
2009-09-01	15:39:00	0
2009-09-01	15:40:00	0
2009-09-01	15:41:00	0
2009-09-01	15:42:00	0
2009-09-01	15:43:00	0
2009-09-01	15:44:00	0
2009-09-01	15:45:00	0
2009-09-01	15:46:00	0
2009-09-01	15:47:00	0
2009-09-01	15:48:00	0
2009-09-01	15:49:00	0
2009-09-01	15:50:00	0
2009-09-01	15:51:00	0
2009-09-01	15:52:00	0
2009-09-01	15:53:00	0
2009-09-01	15:54:00	0
2009-09-01	15:55:00	0
2009-09-01	15:56:00	0
2009-09-01	15:57:00	0
2009-09-01	15:58:00	0
2009-09-01	15:59:00	0
2009-09-01	16:00:00	0
2009-09-01	16:01:00	0
2009-09-01	16:02:00	0
2009-09-01	16:03:00	0
2009-09-01	16:04:00	0
2009-09-01	16:05:00	0
2009-09-01	16:06:00	0
2009-09-01	16:07:00	0
2009-09-01	16:08:00	0
2009-09-01	16:09:00	0
2009-09-01	16:10:00	0
2009-09-01	16:11:00	0
2009-09-01	16:12:00	0
2009-09-01	16:13:00	0
2009-09-01	16:14:00	0
2009-09-01	16:15:00	0
2009-09-01	16:16:00	0
2009-09-01	16:17:00	0
2009-09-01	16:18:00	0
2009-09-01	16:19:00	0
2009-09-01	16:20:00	0
2009-09-01	16:21:00	0
2009-09-01	16:22:00	0
2009-09-01	16:23:00	0
2009-09-01	16:24:00	0
2009-09-01	16:25:00	0
2009-09-01	16:26:00	0
2009-09-01	16:27:00	0
2009-09-01	16:28:00	0
2009-09-01	16:29:00	0
2009-09-01	16:30:00	0
2009-09-01	16:31:00	0
2009-09-01	16:32:00	0
2009-09-01	16:33:00	0
2009-09-01	16:34:00	0
2009-09-01	16:35:00	0
2009-09-01	16:36:00	0
2009-09-01	16:37:00	0
2009-09-01	16:38:00	0
2009-09-01	16:39:00	0
2009-09-01	16:40:00	0
2009-09-01	16:41:00	0
2009-09-01	16:42:00	0
2009-09-01	16:43:00	0
2009-09-01	16:44:00	0
2009-09-01	16:45:00	0
2009-09-01	16:46:00	0
2009-09-01	16:47:00	0
2009-09-01	16:48:00	0
2009-09-01	16:49:00	0
2009-09-01	16:50:00	0
2009-09-01	16:51:00	0
2009-09-01	16:52:00	0
2009-09-01	16:53:00	0
2009-09-01	16:54:00	0
2009-09-01	16:55:00	0
2009-09-01	16:56:00	0
2009-09-01	16:57:00	0
2009-09-01	16:58:00	0
2009-09-01	16:59:00	0
2009-09-01	17:00:00	0
2009-09-01	17:01:00	0
2009-09-01	17:02:00	0
2009-09-01	17:03:00	0
2009-09-01	17:04:00	0
2009-09-01	17:05:00	0
2009-09-01	17:06:00	0
2009-09-01	17:07:00	0
2009-09-01	17:08:00	0
2009-09-01	17:09:00	0
2009-09-01	17:10:00	0
2009-09-01	17:11:00	0
2009-09-01	17:12:00	0
2009-09-01	17:13:00	0
2009-09-01	17:14:00	0
2009-09-01	17:15:00	0
2009-09-01	17:16:00	0
2009-09-01	17:17:00	0
2009-09-01	17:18:00	0
2009-09-01	17:19:00	0
2009-09-01	17:20:00	0
2009-09-01	17:21:00	0
2009-09-01	17:22:00	0
2009-09-01	17:23:00	0
2009-09-01	17:24:00	0
2009-09-01	17:25:00	0
2009-09-01	17:26:00	0
2009-09-01	17:27:00	0
2009-09-01	17:28:00	0
2009-09-01	17:29:00	0
2009-09-01	17:30:00	0
2009-09-01	17:31:00	0
2009-09-01	17:32:00	0
2009-09-01	17:33:00	0
2009-09-01	17:34:00	0
2009-09-01	17:35:00	0
2009-09-01	17:36:00	0
2009-09-01	17:37:00	0
2009-09-01	17:38:00	0
2009-09-01	17:39:00	0
2009-09-01	17:40:00	0
2009-09-01	17:41:00	0
2009-09-01	17:42:00	0
2009-09-01	17:43:00	0
2009-09-01	17:44:00	0
2009-09-01	17:45:00	0
2009-09-01	17:46:00	0
2009-09-01	17:47:00	0
2009-09-01	17:48:00	0
2009-09-01	17:49:00	0
2009-09-01	17:50:00	0
2009-09-01	17:51:00	0
2009-09-01	17:52:00	0
2009-09-01	17:53:00	0
2009-09-01	17:54:00	0
2009-09-01	17:55:00	0
2009-09-01	17:56:00	0
2009-09-01	17:57:00	0
2009-09-01	17:58:00	0
2009-09-01	17:59:00	0
2009-09-01	18:00:00	0
2009-09-01	18:01:00	12
2009-09-01	18:02:00	0
2009-09-01	18:03:00	24
2009-09-01	18:04:00	0
2009-09-01	18:05:00	0
2009-09-01	18:06:00	0
2009-09-01	18:07:00	0
2009-09-01	18:08:00	0
2009-09-01	18:09:00	12
2009-09-01	18:10:00	0
2009-09-01	18:11:00	0
2009-09-01	18:12:00	0
2009-09-01	18:13:00	0
2009-09-01	18:14:00	0
2009-09-01	18:15:00	0
2009-09-01	18:16:00	225
2009-09-01	18:17:00	344
2009-09-01	18:18:00	59
2009-09-01	18:19:00	142
2009-09-01	18:20:00	0
2009-09-01	18:21:00	0
2009-09-01	18:22:00	0
2009-09-01	18:23:00	0
2009-09-01	18:24:00	0
2009-09-01	18:25:00	0
2009-09-01	18:26:00	0
2009-09-01	18:27:00	0
2009-09-01	18:28:00	0
2009-09-01	18:29:00	0
2009-09-01	18:30:00	0
2009-09-01	18:31:00	0
2009-09-01	18:32:00	0
2009-09-01	18:33:00	0
2009-09-01	18:34:00	0
2009-09-01	18:35:00	0
2009-09-01	18:36:00	0
2009-09-01	18:37:00	0
2009-09-01	18:38:00	0
2009-09-01	18:39:00	0
2009-09-01	18:40:00	0
2009-09-01	18:41:00	0
2009-09-01	18:42:00	0
2009-09-01	18:43:00	0
2009-09-01	18:44:00	0
2009-09-01	18:45:00	0
2009-09-01	18:46:00	0
2009-09-01	18:47:00	0
2009-09-01	18:48:00	0
2009-09-01	18:49:00	593
2009-09-01	18:50:00	268
2009-09-01	18:51:00	517
2009-09-01	18:52:00	211
2009-09-01	18:53:00	225
2009-09-01	18:54:00	183
2009-09-01	18:55:00	0
2009-09-01	18:56:00	0
2009-09-01	18:57:00	0
2009-09-01	18:58:00	0
2009-09-01	18:59:00	0
2009-09-01	19:00:00	0
2009-09-01	19:01:00	0
2009-09-01	19:02:00	0
2009-09-01	19:03:00	0
2009-09-01	19:04:00	0
2009-09-01	19:05:00	0
2009-09-01	19:06:00	0
2009-09-01	19:07:00	0
2009-09-01	19:08:00	0
2009-09-01	19:09:00	24
2009-09-01	19:10:00	0
2009-09-01	19:11:00	0
2009-09-01	19:12:00	0
2009-09-01	19:13:00	0
2009-09-01	19:14:00	0
2009-09-01	19:15:00	0
2009-09-01	19:16:00	0
2009-09-01	19:17:00	0
2009-09-01	19:18:00	0
2009-09-01	19:19:00	0
2009-09-01	19:20:00	0
2009-09-01	19:21:00	0
2009-09-01	19:22:00	0
2009-09-01	19:23:00	0
2009-09-01	19:24:00	0
2009-09-01	19:25:00	0
2009-09-01	19:26:00	0
2009-09-01	19:27:00	0
2009-09-01	19:28:00	0
2009-09-01	19:29:00	0
2009-09-01	19:30:00	0
2009-09-01	19:31:00	0
2009-09-01	19:32:00	0
2009-09-01	19:33:00	0
2009-09-01	19:34:00	0
2009-09-01	19:35:00	0
2009-09-01	19:36:00	0
2009-09-01	19:37:00	0
2009-09-01	19:38:00	0
2009-09-01	19:39:00	0
2009-09-01	19:40:00	0
2009-09-01	19:41:00	0
2009-09-01	19:42:00	0
2009-09-01	19:43:00	0
2009-09-01	19:44:00	0
2009-09-01	19:45:00	0
2009-09-01	19:46:00	0
2009-09-01	19:47:00	0
2009-09-01	19:48:00	0
2009-09-01	19:49:00	24
2009-09-01	19:50:00	0
2009-09-01	19:51:00	0
2009-09-01	19:52:00	0
2009-09-01	19:53:00	0
2009-09-01	19:54:00	0
2009-09-01	19:55:00	0
2009-09-01	19:56:00	0
2009-09-01	19:57:00	0
2009-09-01	19:58:00	0
2009-09-01	19:59:00	0
2009-09-01	20:00:00	0
2009-09-01	20:01:00	0
2009-09-01	20:02:00	0
2009-09-01	20:03:00	0
2009-09-01	20:04:00	0
2009-09-01	20:05:00	0
2009-09-01	20:06:00	0
2009-09-01	20:07:00	0
2009-09-01	20:08:00	0
2009-09-01	20:09:00	0
2009-09-01	20:10:00	0
2009-09-01	20:11:00	0
2009-09-01	20:12:00	0
2009-09-01	20:13:00	0
2009-09-01	20:14:00	0
2009-09-01	20:15:00	0
2009-09-01	20:16:00	0
2009-09-01	20:17:00	0
2009-09-01	20:18:00	0
2009-09-01	20:19:00	0
2009-09-01	20:20:00	12
2009-09-01	20:21:00	12
2009-09-01	20:22:00	0
2009-09-01	20:23:00	0
2009-09-01	20:24:00	0
2009-09-01	20:25:00	0
2009-09-01	20:26:00	0
2009-09-01	20:27:00	0
2009-09-01	20:28:00	0
2009-09-01	20:29:00	0
2009-09-01	20:30:00	0
2009-09-01	20:31:00	24
2009-09-01	20:32:00	0
2009-09-01	20:33:00	0
2009-09-01	20:34:00	0
2009-09-01	20:35:00	0
2009-09-01	20:36:00	0
2009-09-01	20:37:00	0
2009-09-01	20:38:00	296
2009-09-01	20:39:00	197
2009-09-01	20:40:00	83
2009-09-01	20:41:00	0
2009-09-01	20:42:00	0
2009-09-01	20:43:00	0
2009-09-01	20:44:00	0
2009-09-01	20:45:00	0
2009-09-01	20:46:00	0
2009-09-01	20:47:00	0
2009-09-01	20:48:00	12
2009-09-01	20:49:00	0
2009-09-01	20:50:00	0
2009-09-01	20:51:00	0
2009-09-01	20:52:00	0
2009-09-01	20:53:00	0
2009-09-01	20:54:00	0
2009-09-01	20:55:00	0
2009-09-01	20:56:00	0
2009-09-01	20:57:00	0
2009-09-01	20:58:00	0
2009-09-01	20:59:00	0
2009-09-01	21:00:00	0
2009-09-01	21:01:00	0
2009-09-01	21:02:00	0
2009-09-01	21:03:00	0
2009-09-01	21:04:00	360
2009-09-01	21:05:00	130
2009-09-01	21:06:00	0
2009-09-01	21:07:00	0
2009-09-01	21:08:00	0
2009-09-01	21:09:00	0
2009-09-01	21:10:00	0
2009-09-01	21:11:00	0
2009-09-01	21:12:00	718
2009-09-01	21:13:00	633
2009-09-01	21:14:00	12
2009-09-01	21:15:00	427
2009-09-01	21:16:00	536
2009-09-01	21:17:00	24
2009-09-01	21:18:00	718
2009-09-01	21:19:00	36
2009-09-01	21:20:00	36
2009-09-01	21:21:00	47
2009-09-01	21:22:00	107
2009-09-01	21:23:00	593
2009-09-01	21:24:00	225
2009-09-01	21:25:00	0
2009-09-01	21:26:00	536
2009-09-01	21:27:00	83
2009-09-01	21:28:00	24
2009-09-01	21:29:00	24
2009-09-01	21:30:00	0
2009-09-01	21:31:00	0
2009-09-01	21:32:00	24
2009-09-01	21:33:00	360
2009-09-01	21:34:00	59
2009-09-01	21:35:00	0
2009-09-01	21:36:00	0
2009-09-01	21:37:00	612
2009-09-01	21:38:00	460
2009-09-01	21:39:00	47
2009-09-01	21:40:00	0
2009-09-01	21:41:00	0
2009-09-01	21:42:00	0
2009-09-01	21:43:00	12
2009-09-01	21:44:00	0
2009-09-01	21:45:00	0
2009-09-01	21:46:00	0
2009-09-01	21:47:00	0
2009-09-01	21:48:00	183
2009-09-01	21:49:00	1349
2009-09-01	21:50:00	1652
2009-09-01	21:51:00	282
2009-09-01	21:52:00	183
2009-09-01	21:53:00	344
2009-09-01	21:54:00	154
2009-09-01	21:55:00	0
2009-09-01	21:56:00	0
2009-09-01	21:57:00	0
2009-09-01	21:58:00	0
2009-09-01	21:59:00	0
2009-09-01	22:00:00	225
2009-09-01	22:01:00	593
2009-09-01	22:02:00	536
2009-09-01	22:03:00	197
2009-09-01	22:04:00	36
2009-09-01	22:05:00	154
2009-09-01	22:06:00	479
2009-09-01	22:07:00	225
2009-09-01	22:08:00	282
2009-09-01	22:09:00	443
2009-09-01	22:10:00	239
2009-09-01	22:11:00	393
2009-09-01	22:12:00	36
2009-09-01	22:13:00	0
2009-09-01	22:14:00	211
2009-09-01	22:15:00	36
2009-09-01	22:16:00	142
2009-09-01	22:17:00	0
2009-09-01	22:18:00	0
2009-09-01	22:19:00	12
2009-09-01	22:20:00	0
2009-09-01	22:21:00	12
2009-09-01	22:22:00	36
2009-09-01	22:23:00	107
2009-09-01	22:24:00	47
2009-09-01	22:25:00	254
2009-09-01	22:26:00	168
2009-09-01	22:27:00	47
2009-09-01	22:28:00	83
2009-09-01	22:29:00	254
2009-09-01	22:30:00	0
2009-09-01	22:31:00	0
2009-09-01	22:32:00	0
2009-09-01	22:33:00	0
2009-09-01	22:34:00	154
2009-09-01	22:35:00	0
2009-09-01	22:36:00	0
2009-09-01	22:37:00	0
2009-09-01	22:38:00	0
2009-09-01	22:39:00	0
2009-09-01	22:40:00	0
2009-09-01	22:41:00	95
2009-09-01	22:42:00	0
2009-09-01	22:43:00	0
2009-09-01	22:44:00	0
2009-09-01	22:45:00	0
2009-09-01	22:46:00	0
2009-09-01	22:47:00	0
2009-09-01	22:48:00	0
2009-09-01	22:49:00	0
2009-09-01	22:50:00	0
2009-09-01	22:51:00	0
2009-09-01	22:52:00	0
2009-09-01	22:53:00	0
2009-09-01	22:54:00	0
2009-09-01	22:55:00	0
2009-09-01	22:56:00	0
2009-09-01	22:57:00	0
2009-09-01	22:58:00	0
2009-09-01	22:59:00	0
2009-09-01	23:00:00	0
2009-09-01	23:01:00	0
2009-09-01	23:02:00	0
2009-09-01	23:03:00	0
2009-09-01	23:04:00	0
2009-09-01	23:05:00	0
2009-09-01	23:06:00	0
2009-09-01	23:07:00	0
2009-09-01	23:08:00	0
2009-09-01	23:09:00	0
2009-09-01	23:10:00	0
2009-09-01	23:11:00	0
2009-09-01	23:12:00	0
2009-09-01	23:13:00	0
2009-09-01	23:14:00	0
2009-09-01	23:15:00	0
2009-09-01	23:16:00	24
2009-09-01	23:17:00	0
2009-09-01	23:18:00	0
2009-09-01	23:19:00	427
2009-09-01	23:20:00	71
2009-09-01	23:21:00	95
2009-09-01	23:22:00	0
2009-09-01	23:23:00	0
2009-09-01	23:24:00	0
2009-09-01	23:25:00	0
2009-09-01	23:26:00	0
2009-09-01	23:27:00	0
2009-09-01	23:28:00	0
2009-09-01	23:29:00	0
2009-09-01	23:30:00	0
2009-09-01	23:31:00	0
2009-09-01	23:32:00	0
2009-09-01	23:33:00	0
2009-09-01	23:34:00	0
2009-09-01	23:35:00	0
2009-09-01	23:36:00	0
2009-09-01	23:37:00	0
2009-09-01	23:38:00	0
2009-09-01	23:39:00	0
2009-09-01	23:40:00	0
2009-09-01	23:41:00	0
2009-09-01	23:42:00	0
2009-09-01	23:43:00	0
2009-09-01	23:44:00	0
2009-09-01	23:45:00	0
2009-09-01	23:46:00	0
2009-09-01	23:47:00	0
2009-09-01	23:48:00	0
2009-09-01	23:49:00	0
2009-09-01	23:50:00	0
2009-09-01	23:51:00	0
2009-09-01	23:52:00	0
2009-09-01	23:53:00	0
2009-09-01	23:54:00	0
2009-09-01	23:55:00	0
2009-09-01	23:56:00	0
2009-09-01	23:57:00	0
2009-09-01	23:58:00	0
2009-09-01	23:59:00	0
2009-09-02	00:00:00	0
2009-09-02	00:01:00	0
2009-09-02	00:02:00	0
2009-09-02	00:03:00	0
2009-09-02	00:04:00	0
2009-09-02	00:05:00	0
2009-09-02	00:06:00	0
2009-09-02	00:07:00	0
2009-09-02	00:08:00	0
2009-09-02	00:09:00	0
2009-09-02	00:10:00	0
2009-09-02	00:11:00	0
2009-09-02	00:12:00	0
2009-09-02	00:13:00	0
2009-09-02	00:14:00	0
2009-09-02	00:15:00	0
2009-09-02	00:16:00	0
2009-09-02	00:17:00	0
2009-09-02	00:18:00	0
2009-09-02	00:19:00	0
2009-09-02	00:20:00	0
2009-09-02	00:21:00	0
2009-09-02	00:22:00	0
2009-09-02	00:23:00	0
2009-09-02	00:24:00	0
2009-09-02	00:25:00	0
2009-09-02	00:26:00	0
2009-09-02	00:27:00	0
2009-09-02	00:28:00	0
2009-09-02	00:29:00	0
2009-09-02	00:30:00	0
2009-09-02	00:31:00	0
2009-09-02	00:32:00	0
2009-09-02	00:33:00	0
2009-09-02	00:34:00	0
2009-09-02	00:35:00	0
2009-09-02	00:36:00	0
2009-09-02	00:37:00	0
2009-09-02	00:38:00	0
2009-09-02	00:39:00	36
2009-09-02	00:40:00	0
2009-09-02	00:41:00	0
2009-09-02	00:42:00	0
2009-09-02	00:43:00	0
2009-09-02	00:44:00	0
2009-09-02	00:45:00	0
2009-09-02	00:46:00	0
2009-09-02	00:47:00	0
2009-09-02	00:48:00	0
2009-09-02	00:49:00	197
2009-09-02	00:50:00	36
2009-09-02	00:51:00	211
2009-09-02	00:52:00	0
2009-09-02	00:53:00	0
2009-09-02	00:54:00	0
2009-09-02	00:55:00	0
2009-09-02	00:56:00	0
2009-09-02	00:57:00	0
2009-09-02	00:58:00	0
2009-09-02	00:59:00	0
2009-09-02	01:00:00	0
2009-09-02	01:01:00	0
2009-09-02	01:02:00	0
2009-09-02	01:03:00	0
2009-09-02	01:04:00	0
2009-09-02	01:05:00	0
2009-09-02	01:06:00	0
2009-09-02	01:07:00	0
2009-09-02	01:08:00	0
2009-09-02	01:09:00	0
2009-09-02	01:10:00	0
2009-09-02	01:11:00	0
2009-09-02	01:12:00	0
2009-09-02	01:13:00	0
2009-09-02	01:14:00	0
2009-09-02	01:15:00	0
2009-09-02	01:16:00	0
2009-09-02	01:17:00	0
2009-09-02	01:18:00	0
2009-09-02	01:19:00	0
2009-09-02	01:20:00	0
2009-09-02	01:21:00	0
2009-09-02	01:22:00	0
2009-09-02	01:23:00	0
2009-09-02	01:24:00	0
2009-09-02	01:25:00	0
2009-09-02	01:26:00	0
2009-09-02	01:27:00	0
2009-09-02	01:28:00	0
2009-09-02	01:29:00	0
2009-09-02	01:30:00	36
2009-09-02	01:31:00	0
2009-09-02	01:32:00	0
2009-09-02	01:33:00	0
2009-09-02	01:34:00	0
2009-09-02	01:35:00	0
2009-09-02	01:36:00	0
2009-09-02	01:37:00	0
2009-09-02	01:38:00	0
2009-09-02	01:39:00	0
2009-09-02	01:40:00	0
2009-09-02	01:41:00	0
2009-09-02	01:42:00	0
2009-09-02	01:43:00	0
2009-09-02	01:44:00	0
2009-09-02	01:45:00	0
2009-09-02	01:46:00	0
2009-09-02	01:47:00	0
2009-09-02	01:48:00	0
2009-09-02	01:49:00	0
2009-09-02	01:50:00	12
2009-09-02	01:51:00	0
2009-09-02	01:52:00	0
2009-09-02	01:53:00	0
2009-09-02	01:54:00	0
2009-09-02	01:55:00	24
2009-09-02	01:56:00	0
2009-09-02	01:57:00	0
2009-09-02	01:58:00	183
2009-09-02	01:59:00	24
2009-09-02	02:00:00	95
2009-09-02	02:01:00	0
2009-09-02	02:02:00	0
2009-09-02	02:03:00	0
2009-09-02	02:04:00	0
2009-09-02	02:05:00	0
2009-09-02	02:06:00	0
2009-09-02	02:07:00	0
2009-09-02	02:08:00	0
2009-09-02	02:09:00	0
2009-09-02	02:10:00	0
2009-09-02	02:11:00	0
2009-09-02	02:12:00	0
2009-09-02	02:13:00	0
2009-09-02	02:14:00	0
2009-09-02	02:15:00	0
2009-09-02	02:16:00	0
2009-09-02	02:17:00	0
2009-09-02	02:18:00	0
2009-09-02	02:19:00	0
2009-09-02	02:20:00	0
2009-09-02	02:21:00	0
2009-09-02	02:22:00	0
2009-09-02	02:23:00	0
2009-09-02	02:24:00	0
2009-09-02	02:25:00	0
2009-09-02	02:26:00	0
2009-09-02	02:27:00	0
2009-09-02	02:28:00	0
2009-09-02	02:29:00	0
2009-09-02	02:30:00	0
2009-09-02	02:31:00	0
2009-09-02	02:32:00	0
2009-09-02	02:33:00	0
2009-09-02	02:34:00	0
2009-09-02	02:35:00	0
2009-09-02	02:36:00	0
2009-09-02	02:37:00	0
2009-09-02	02:38:00	0
2009-09-02	02:39:00	0
2009-09-02	02:40:00	0
2009-09-02	02:41:00	0
2009-09-02	02:42:00	0
2009-09-02	02:43:00	0
2009-09-02	02:44:00	0
2009-09-02	02:45:00	0
2009-09-02	02:46:00	0
2009-09-02	02:47:00	0
2009-09-02	02:48:00	0
2009-09-02	02:49:00	0
2009-09-02	02:50:00	0
2009-09-02	02:51:00	0
2009-09-02	02:52:00	0
2009-09-02	02:53:00	0
2009-09-02	02:54:00	0
2009-09-02	02:55:00	0
2009-09-02	02:56:00	0
2009-09-02	02:57:00	0
2009-09-02	02:58:00	0
2009-09-02	02:59:00	0
2009-09-02	03:00:00	0
2009-09-02	03:01:00	0
2009-09-02	03:02:00	0
2009-09-02	03:03:00	0
2009-09-02	03:04:00	0
2009-09-02	03:05:00	0
2009-09-02	03:06:00	0
2009-09-02	03:07:00	0
2009-09-02	03:08:00	0
2009-09-02	03:09:00	0
2009-09-02	03:10:00	0
2009-09-02	03:11:00	0
2009-09-02	03:12:00	0
2009-09-02	03:13:00	0
2009-09-02	03:14:00	0
2009-09-02	03:15:00	0
2009-09-02	03:16:00	0
2009-09-02	03:17:00	0
2009-09-02	03:18:00	0
2009-09-02	03:19:00	0
2009-09-02	03:20:00	0
2009-09-02	03:21:00	0
2009-09-02	03:22:00	0
2009-09-02	03:23:00	0
2009-09-02	03:24:00	0
2009-09-02	03:25:00	0
2009-09-02	03:26:00	0
2009-09-02	03:27:00	0
2009-09-02	03:28:00	0
2009-09-02	03:29:00	0
2009-09-02	03:30:00	0
2009-09-02	03:31:00	0
2009-09-02	03:32:00	0
2009-09-02	03:33:00	0
2009-09-02	03:34:00	0
2009-09-02	03:35:00	0
2009-09-02	03:36:00	0
2009-09-02	03:37:00	0
2009-09-02	03:38:00	0
2009-09-02	03:39:00	0
2009-09-02	03:40:00	0
2009-09-02	03:41:00	0
2009-09-02	03:42:00	0
2009-09-02	03:43:00	0
2009-09-02	03:44:00	0
2009-09-02	03:45:00	0
2009-09-02	03:46:00	0
2009-09-02	03:47:00	0
2009-09-02	03:48:00	0
2009-09-02	03:49:00	0
2009-09-02	03:50:00	0
2009-09-02	03:51:00	0
2009-09-02	03:52:00	0
2009-09-02	03:53:00	0
2009-09-02	03:54:00	0
2009-09-02	03:55:00	0
2009-09-02	03:56:00	0
2009-09-02	03:57:00	0
2009-09-02	03:58:00	0
2009-09-02	03:59:00	0
2009-09-02	04:00:00	0
2009-09-02	04:01:00	0
2009-09-02	04:02:00	0
2009-09-02	04:03:00	0
2009-09-02	04:04:00	0
2009-09-02	04:05:00	0
2009-09-02	04:06:00	0
2009-09-02	04:07:00	0
2009-09-02	04:08:00	0
2009-09-02	04:09:00	0
2009-09-02	04:10:00	0
2009-09-02	04:11:00	0
2009-09-02	04:12:00	36
2009-09-02	04:13:00	0
2009-09-02	04:14:00	0
2009-09-02	04:15:00	0
2009-09-02	04:16:00	0
2009-09-02	04:17:00	0
2009-09-02	04:18:00	0
2009-09-02	04:19:00	0
2009-09-02	04:20:00	0
2009-09-02	04:21:00	0
2009-09-02	04:22:00	0
2009-09-02	04:23:00	0
2009-09-02	04:24:00	0
2009-09-02	04:25:00	0
2009-09-02	04:26:00	0
2009-09-02	04:27:00	0
2009-09-02	04:28:00	0
2009-09-02	04:29:00	0
2009-09-02	04:30:00	0
2009-09-02	04:31:00	0
2009-09-02	04:32:00	0
2009-09-02	04:33:00	0
2009-09-02	04:34:00	393
2009-09-02	04:35:00	254
2009-09-02	04:36:00	183
2009-09-02	04:37:00	0
2009-09-02	04:38:00	0
2009-09-02	04:39:00	0
2009-09-02	04:40:00	0
2009-09-02	04:41:00	0
2009-09-02	04:42:00	0
2009-09-02	04:43:00	0
2009-09-02	04:44:00	0
2009-09-02	04:45:00	0
2009-09-02	04:46:00	0
2009-09-02	04:47:00	0
2009-09-02	04:48:00	0
2009-09-02	04:49:00	0
2009-09-02	04:50:00	0
2009-09-02	04:51:00	0
2009-09-02	04:52:00	0
2009-09-02	04:53:00	0
2009-09-02	04:54:00	0
2009-09-02	04:55:00	0
2009-09-02	04:56:00	0
2009-09-02	04:57:00	0
2009-09-02	04:58:00	142
2009-09-02	04:59:00	47
2009-09-02	05:00:00	0
2009-09-02	05:01:00	0
2009-09-02	05:02:00	0
2009-09-02	05:03:00	0
2009-09-02	05:04:00	0
2009-09-02	05:05:00	0
2009-09-02	05:06:00	0
2009-09-02	05:07:00	0
2009-09-02	05:08:00	0
2009-09-02	05:09:00	0
2009-09-02	05:10:00	0
2009-09-02	05:11:00	0
2009-09-02	05:12:00	0
2009-09-02	05:13:00	0
2009-09-02	05:14:00	0
2009-09-02	05:15:00	0
2009-09-02	05:16:00	0
2009-09-02	05:17:00	0
2009-09-02	05:18:00	0
2009-09-02	05:19:00	0
2009-09-02	05:20:00	12
2009-09-02	05:21:00	0
2009-09-02	05:22:00	36
2009-09-02	05:23:00	0
2009-09-02	05:24:00	0
2009-09-02	05:25:00	0
2009-09-02	05:26:00	0
2009-09-02	05:27:00	0
2009-09-02	05:28:00	0
2009-09-02	05:29:00	0
2009-09-02	05:30:00	0
2009-09-02	05:31:00	0
2009-09-02	05:32:00	0
2009-09-02	05:33:00	0
2009-09-02	05:34:00	0
2009-09-02	05:35:00	0
2009-09-02	05:36:00	0
2009-09-02	05:37:00	0
2009-09-02	05:38:00	0
2009-09-02	05:39:00	0
2009-09-02	05:40:00	0
2009-09-02	05:41:00	0
2009-09-02	05:42:00	0
2009-09-02	05:43:00	0
2009-09-02	05:44:00	0
2009-09-02	05:45:00	0
2009-09-02	05:46:00	0
2009-09-02	05:47:00	0
2009-09-02	05:48:00	0
2009-09-02	05:49:00	0
2009-09-02	05:50:00	0
2009-09-02	05:51:00	12
2009-09-02	05:52:00	0
2009-09-02	05:53:00	0
2009-09-02	05:54:00	0
2009-09-02	05:55:00	0
2009-09-02	05:56:00	0
2009-09-02	05:57:00	0
2009-09-02	05:58:00	0
2009-09-02	05:59:00	0
2009-09-02	06:00:00	0
2009-09-02	06:01:00	0
2009-09-02	06:02:00	0
2009-09-02	06:03:00	0
2009-09-02	06:04:00	0
2009-09-02	06:05:00	0
2009-09-02	06:06:00	0
2009-09-02	06:07:00	0
2009-09-02	06:08:00	0
2009-09-02	06:09:00	0
2009-09-02	06:10:00	0
2009-09-02	06:11:00	0
2009-09-02	06:12:00	0
2009-09-02	06:13:00	0
2009-09-02	06:14:00	0
2009-09-02	06:15:00	0
2009-09-02	06:16:00	0
2009-09-02	06:17:00	0
2009-09-02	06:18:00	0
2009-09-02	06:19:00	0
2009-09-02	06:20:00	0
2009-09-02	06:21:00	0
2009-09-02	06:22:00	0
2009-09-02	06:23:00	0
2009-09-02	06:24:00	0
2009-09-02	06:25:00	0
2009-09-02	06:26:00	0
2009-09-02	06:27:00	0
2009-09-02	06:28:00	0
2009-09-02	06:29:00	0
2009-09-02	06:30:00	0
2009-09-02	06:31:00	0
2009-09-02	06:32:00	71
2009-09-02	06:33:00	59
2009-09-02	06:34:00	0
2009-09-02	06:35:00	0
2009-09-02	06:36:00	0
2009-09-02	06:37:00	0
2009-09-02	06:38:00	0
2009-09-02	06:39:00	0
2009-09-02	06:40:00	0
2009-09-02	06:41:00	0
2009-09-02	06:42:00	0
2009-09-02	06:43:00	0
2009-09-02	06:44:00	0
2009-09-02	06:45:00	0
2009-09-02	06:46:00	130
2009-09-02	06:47:00	83
2009-09-02	06:48:00	0
2009-09-02	06:49:00	0
2009-09-02	06:50:00	0
2009-09-02	06:51:00	0
2009-09-02	06:52:00	0
2009-09-02	06:53:00	0
2009-09-02	06:54:00	0
2009-09-02	06:55:00	0
2009-09-02	06:56:00	0
2009-09-02	06:57:00	0
2009-09-02	06:58:00	0
2009-09-02	06:59:00	0
2009-09-02	07:00:00	0
2009-09-02	07:01:00	0
2009-09-02	07:02:00	0
2009-09-02	07:03:00	0
2009-09-02	07:04:00	0
2009-09-02	07:05:00	0
2009-09-02	07:06:00	0
2009-09-02	07:07:00	0
2009-09-02	07:08:00	0
2009-09-02	07:09:00	0
2009-09-02	07:10:00	0
2009-09-02	07:11:00	0
2009-09-02	07:12:00	0
2009-09-02	07:13:00	0
2009-09-02	07:14:00	0
2009-09-02	07:15:00	0
2009-09-02	07:16:00	0
2009-09-02	07:17:00	0
2009-09-02	07:18:00	0
2009-09-02	07:19:00	0
2009-09-02	07:20:00	225
2009-09-02	07:21:00	808
2009-09-02	07:22:00	1512
2009-09-02	07:23:00	1031
2009-09-02	07:24:00	536
2009-09-02	07:25:00	443
2009-09-02	07:26:00	1801
2009-09-02	07:27:00	1349
2009-09-02	07:28:00	1512
2009-09-02	07:29:00	1287
2009-09-02	07:30:00	393
2009-09-02	07:31:00	268
2009-09-02	07:32:00	83
2009-09-02	07:33:00	0
2009-09-02	07:34:00	0
2009-09-02	07:35:00	0
2009-09-02	07:36:00	0
2009-09-02	07:37:00	0
2009-09-02	07:38:00	0
2009-09-02	07:39:00	0
2009-09-02	07:40:00	0
2009-09-02	07:41:00	0
2009-09-02	07:42:00	0
2009-09-02	07:43:00	0
2009-09-02	07:44:00	0
2009-09-02	07:45:00	0
2009-09-02	07:46:00	0
2009-09-02	07:47:00	0
2009-09-02	07:48:00	0
2009-09-02	07:49:00	0
2009-09-02	07:50:00	0
2009-09-02	07:51:00	0
2009-09-02	07:52:00	0
2009-09-02	07:53:00	168
2009-09-02	07:54:00	183
2009-09-02	07:55:00	59
2009-09-02	07:56:00	0
2009-09-02	07:57:00	0
2009-09-02	07:58:00	498
2009-09-02	07:59:00	377
2009-09-02	08:00:00	36
2009-09-02	08:01:00	36
2009-09-02	08:02:00	0
2009-09-02	08:03:00	47
2009-09-02	08:04:00	282
2009-09-02	08:05:00	0
2009-09-02	08:06:00	0
2009-09-02	08:07:00	0
2009-09-02	08:08:00	0
2009-09-02	08:09:00	0
2009-09-02	08:10:00	0
2009-09-02	08:11:00	0
2009-09-02	08:12:00	0
2009-09-02	08:13:00	0
2009-09-02	08:14:00	0
2009-09-02	08:15:00	0
2009-09-02	08:16:00	154
2009-09-02	08:17:00	95
2009-09-02	08:18:00	142
2009-09-02	08:19:00	12
2009-09-02	08:20:00	107
2009-09-02	08:21:00	0
2009-09-02	08:22:00	0
2009-09-02	08:23:00	24
2009-09-02	08:24:00	0
2009-09-02	08:25:00	0
2009-09-02	08:26:00	377
2009-09-02	08:27:00	71
2009-09-02	08:28:00	12
2009-09-02	08:29:00	12
2009-09-02	08:30:00	0
2009-09-02	08:31:00	12
2009-09-02	08:32:00	36
2009-09-02	08:33:00	254
2009-09-02	08:34:00	239
2009-09-02	08:35:00	479
2009-09-02	08:36:00	393
2009-09-02	08:37:00	0
2009-09-02	08:38:00	0
2009-09-02	08:39:00	0
2009-09-02	08:40:00	0
2009-09-02	08:41:00	0
2009-09-02	08:42:00	0
2009-09-02	08:43:00	0
2009-09-02	08:44:00	0
2009-09-02	08:45:00	296
2009-09-02	08:46:00	154
2009-09-02	08:47:00	211
2009-09-02	08:48:00	130
2009-09-02	08:49:00	0
2009-09-02	08:50:00	0
2009-09-02	08:51:00	24
2009-09-02	08:52:00	0
2009-09-02	08:53:00	0
2009-09-02	08:54:00	0
2009-09-02	08:55:00	107
2009-09-02	08:56:00	0
2009-09-02	08:57:00	12
2009-09-02	08:58:00	95
2009-09-02	08:59:00	47
2009-09-02	09:00:00	0
2009-09-02	09:01:00	0
2009-09-02	09:02:00	0
2009-09-02	09:03:00	0
2009-09-02	09:04:00	0
2009-09-02	09:05:00	311
2009-09-02	09:06:00	0
2009-09-02	09:07:00	0
2009-09-02	09:08:00	0
[truncated: 49,851 more rows]
