# Supplementary material for: Initial evaluation of nighttime restlessness in a naturally occurring canine model of osteoarthritis pain
Source: PeerJ. 2015 Feb 17;3:e772. doi: 10.7717/peerj.772 (PMC4340376; doi:10.7717/peerj.772)
Supplement: Supplemental Information 71 [file peerj-03-772-s071.xlsx]

## Sheet: 12_Data
Tx #	DateTime	Activity	DTA vs NTA	Hour	Tx Day	Weekday	Tx Rx	Peak DTA Time?	Last 7 Day?
1	2009-09-15 23:16:00	0	NTA	23	1	3	M
1	2009-09-15 23:17:00	0	NTA	23	1	3	M
1	2009-09-15 23:18:00	0	NTA	23	1	3	M
1	2009-09-15 23:19:00	0	NTA	23	1	3	M
1	2009-09-15 23:20:00	0	NTA	23	1	3	M
1	2009-09-15 23:21:00	21	NTA	23	1	3	M
1	2009-09-15 23:22:00	60	NTA	23	1	3	M
1	2009-09-15 23:23:00	0	NTA	23	1	3	M
1	2009-09-15 23:24:00	0	NTA	23	1	3	M
1	2009-09-15 23:25:00	0	NTA	23	1	3	M
1	2009-09-15 23:26:00	0	NTA	23	1	3	M
1	2009-09-15 23:27:00	0	NTA	23	1	3	M
1	2009-09-15 23:28:00	0	NTA	23	1	3	M
1	2009-09-15 23:29:00	0	NTA	23	1	3	M
1	2009-09-15 23:30:00	4	NTA	23	1	3	M
1	2009-09-15 23:31:00	25	NTA	23	1	3	M
1	2009-09-15 23:32:00	25	NTA	23	1	3	M
1	2009-09-15 23:33:00	0	NTA	23	1	3	M
1	2009-09-15 23:34:00	0	NTA	23	1	3	M
1	2009-09-15 23:35:00	0	NTA	23	1	3	M
1	2009-09-15 23:36:00	13	NTA	23	1	3	M
1	2009-09-15 23:37:00	4	NTA	23	1	3	M
1	2009-09-15 23:38:00	0	NTA	23	1	3	M
1	2009-09-15 23:39:00	0	NTA	23	1	3	M
1	2009-09-15 23:40:00	4	NTA	23	1	3	M
1	2009-09-15 23:41:00	0	NTA	23	1	3	M
1	2009-09-15 23:42:00	0	NTA	23	1	3	M
1	2009-09-15 23:43:00	21	NTA	23	1	3	M
1	2009-09-15 23:44:00	0	NTA	23	1	3	M
1	2009-09-15 23:45:00	8	NTA	23	1	3	M
1	2009-09-15 23:46:00	34	NTA	23	1	3	M
1	2009-09-15 23:47:00	129	NTA	23	1	3	M
1	2009-09-15 23:48:00	0	NTA	23	1	3	M
1	2009-09-15 23:49:00	0	NTA	23	1	3	M
1	2009-09-15 23:50:00	0	NTA	23	1	3	M
1	2009-09-15 23:51:00	0	NTA	23	1	3	M
1	2009-09-15 23:52:00	0	NTA	23	1	3	M
1	2009-09-15 23:53:00	0	NTA	23	1	3	M
1	2009-09-15 23:54:00	0	NTA	23	1	3	M
1	2009-09-15 23:55:00	0	NTA	23	1	3	M
1	2009-09-15 23:56:00	0	NTA	23	1	3	M
1	2009-09-15 23:57:00	0	NTA	23	1	3	M
1	2009-09-15 23:58:00	0	NTA	23	1	3	M
1	2009-09-15 23:59:00	0	NTA	23	1	3	M
1	2009-09-16	0	NTA	23	1	3	M
1	2009-09-16 00:01:00	0	NTA	0	1	4	M
1	2009-09-16 00:02:00	0	NTA	0	1	4	M
1	2009-09-16 00:03:00	8	NTA	0	1	4	M
1	2009-09-16 00:04:00	30	NTA	0	1	4	M
1	2009-09-16 00:05:00	0	NTA	0	1	4	M
1	2009-09-16 00:06:00	25	NTA	0	1	4	M
1	2009-09-16 00:07:00	0	NTA	0	1	4	M
1	2009-09-16 00:08:00	0	NTA	0	1	4	M
1	2009-09-16 00:09:00	0	NTA	0	1	4	M
1	2009-09-16 00:10:00	0	NTA	0	1	4	M
1	2009-09-16 00:11:00	0	NTA	0	1	4	M
1	2009-09-16 00:12:00	0	NTA	0	1	4	M
1	2009-09-16 00:13:00	0	NTA	0	1	4	M
1	2009-09-16 00:14:00	0	NTA	0	1	4	M
1	2009-09-16 00:15:00	4	NTA	0	1	4	M
1	2009-09-16 00:16:00	0	NTA	0	1	4	M
1	2009-09-16 00:17:00	0	NTA	0	1	4	M
1	2009-09-16 00:18:00	0	NTA	0	1	4	M
1	2009-09-16 00:19:00	0	NTA	0	1	4	M
1	2009-09-16 00:20:00	0	NTA	0	1	4	M
1	2009-09-16 00:21:00	0	NTA	0	1	4	M
1	2009-09-16 00:22:00	0	NTA	0	1	4	M
1	2009-09-16 00:23:00	0	NTA	0	1	4	M
1	2009-09-16 00:24:00	13	NTA	0	1	4	M
1	2009-09-16 00:25:00	4	NTA	0	1	4	M
1	2009-09-16 00:26:00	25	NTA	0	1	4	M
1	2009-09-16 00:27:00	13	NTA	0	1	4	M
1	2009-09-16 00:28:00	0	NTA	0	1	4	M
1	2009-09-16 00:29:00	0	NTA	0	1	4	M
1	2009-09-16 00:30:00	0	NTA	0	1	4	M
1	2009-09-16 00:31:00	0	NTA	0	1	4	M
1	2009-09-16 00:32:00	0	NTA	0	1	4	M
1	2009-09-16 00:33:00	0	NTA	0	1	4	M
1	2009-09-16 00:34:00	0	NTA	0	1	4	M
1	2009-09-16 00:35:00	13	NTA	0	1	4	M
1	2009-09-16 00:36:00	38	NTA	0	1	4	M
1	2009-09-16 00:37:00	4	NTA	0	1	4	M
1	2009-09-16 00:38:00	0	NTA	0	1	4	M
1	2009-09-16 00:39:00	0	NTA	0	1	4	M
1	2009-09-16 00:40:00	21	NTA	0	1	4	M
1	2009-09-16 00:41:00	0	NTA	0	1	4	M
1	2009-09-16 00:42:00	0	NTA	0	1	4	M
1	2009-09-16 00:43:00	0	NTA	0	1	4	M
1	2009-09-16 00:44:00	0	NTA	0	1	4	M
1	2009-09-16 00:45:00	0	NTA	0	1	4	M
1	2009-09-16 00:46:00	25	NTA	0	1	4	M
1	2009-09-16 00:47:00	55	NTA	0	1	4	M
1	2009-09-16 00:48:00	0	NTA	0	1	4	M
1	2009-09-16 00:49:00	8	NTA	0	1	4	M
1	2009-09-16 00:50:00	0	NTA	0	1	4	M
1	2009-09-16 00:51:00	81	NTA	0	1	4	M
1	2009-09-16 00:52:00	0	NTA	0	1	4	M
1	2009-09-16 00:53:00	0	NTA	0	1	4	M
1	2009-09-16 00:54:00	0	NTA	0	1	4	M
1	2009-09-16 00:55:00	0	NTA	0	1	4	M
1	2009-09-16 00:56:00	123	NTA	0	1	4	M
1	2009-09-16 00:57:00	0	NTA	0	1	4	M
1	2009-09-16 00:58:00	123	NTA	0	1	4	M
1	2009-09-16 00:59:00	101	NTA	0	1	4	M
1	2009-09-16 01:00:00	185	NTA	0	1	4	M
1	2009-09-16 01:01:00	81	NTA	1	1	4	M
1	2009-09-16 01:02:00	81	NTA	1	1	4	M
1	2009-09-16 01:03:00	55	NTA	1	1	4	M
1	2009-09-16 01:04:00	0	NTA	1	1	4	M
1	2009-09-16 01:05:00	0	NTA	1	1	4	M
1	2009-09-16 01:06:00	91	NTA	1	1	4	M
1	2009-09-16 01:07:00	0	NTA	1	1	4	M
1	2009-09-16 01:08:00	101	NTA	1	1	4	M
1	2009-09-16 01:09:00	0	NTA	1	1	4	M
1	2009-09-16 01:10:00	75	NTA	1	1	4	M
1	2009-09-16 01:11:00	147	NTA	1	1	4	M
1	2009-09-16 01:12:00	4	NTA	1	1	4	M
1	2009-09-16 01:13:00	0	NTA	1	1	4	M
1	2009-09-16 01:14:00	111	NTA	1	1	4	M
1	2009-09-16 01:15:00	70	NTA	1	1	4	M
1	2009-09-16 01:16:00	42	NTA	1	1	4	M
1	2009-09-16 01:17:00	106	NTA	1	1	4	M
1	2009-09-16 01:18:00	289	NTA	1	1	4	M
1	2009-09-16 01:19:00	117	NTA	1	1	4	M
1	2009-09-16 01:20:00	0	NTA	1	1	4	M
1	2009-09-16 01:21:00	0	NTA	1	1	4	M
1	2009-09-16 01:22:00	0	NTA	1	1	4	M
1	2009-09-16 01:23:00	0	NTA	1	1	4	M
1	2009-09-16 01:24:00	0	NTA	1	1	4	M
1	2009-09-16 01:25:00	0	NTA	1	1	4	M
1	2009-09-16 01:26:00	0	NTA	1	1	4	M
1	2009-09-16 01:27:00	0	NTA	1	1	4	M
1	2009-09-16 01:28:00	0	NTA	1	1	4	M
1	2009-09-16 01:29:00	0	NTA	1	1	4	M
1	2009-09-16 01:30:00	0	NTA	1	1	4	M
1	2009-09-16 01:31:00	0	NTA	1	1	4	M
1	2009-09-16 01:32:00	0	NTA	1	1	4	M
1	2009-09-16 01:33:00	0	NTA	1	1	4	M
1	2009-09-16 01:34:00	0	NTA	1	1	4	M
1	2009-09-16 01:35:00	65	NTA	1	1	4	M
1	2009-09-16 01:36:00	101	NTA	1	1	4	M
1	2009-09-16 01:37:00	38	NTA	1	1	4	M
1	2009-09-16 01:38:00	21	NTA	1	1	4	M
1	2009-09-16 01:39:00	0	NTA	1	1	4	M
1	2009-09-16 01:40:00	91	NTA	1	1	4	M
1	2009-09-16 01:41:00	34	NTA	1	1	4	M
1	2009-09-16 01:42:00	482	NTA	1	1	4	M
1	2009-09-16 01:43:00	0	NTA	1	1	4	M
1	2009-09-16 01:44:00	0	NTA	1	1	4	M
1	2009-09-16 01:45:00	0	NTA	1	1	4	M
1	2009-09-16 01:46:00	0	NTA	1	1	4	M
1	2009-09-16 01:47:00	0	NTA	1	1	4	M
1	2009-09-16 01:48:00	0	NTA	1	1	4	M
1	2009-09-16 01:49:00	0	NTA	1	1	4	M
1	2009-09-16 01:50:00	0	NTA	1	1	4	M
1	2009-09-16 01:51:00	0	NTA	1	1	4	M
1	2009-09-16 01:52:00	0	NTA	1	1	4	M
1	2009-09-16 01:53:00	0	NTA	1	1	4	M
1	2009-09-16 01:54:00	0	NTA	1	1	4	M
1	2009-09-16 01:55:00	0	NTA	1	1	4	M
1	2009-09-16 01:56:00	0	NTA	1	1	4	M
1	2009-09-16 01:57:00	0	NTA	1	1	4	M
1	2009-09-16 01:58:00	0	NTA	1	1	4	M
1	2009-09-16 01:59:00	0	NTA	1	1	4	M
1	2009-09-16 02:00:00	0	NTA	1	1	4	M
1	2009-09-16 02:01:00	60	NTA	2	1	4	M
1	2009-09-16 02:02:00	4	NTA	2	1	4	M
1	2009-09-16 02:03:00	106	NTA	2	1	4	M
1	2009-09-16 02:04:00	147	NTA	2	1	4	M
1	2009-09-16 02:05:00	0	NTA	2	1	4	M
1	2009-09-16 02:06:00	0	NTA	2	1	4	M
1	2009-09-16 02:07:00	0	NTA	2	1	4	M
1	2009-09-16 02:08:00	0	NTA	2	1	4	M
1	2009-09-16 02:09:00	0	NTA	2	1	4	M
1	2009-09-16 02:10:00	0	NTA	2	1	4	M
1	2009-09-16 02:11:00	30	NTA	2	1	4	M
1	2009-09-16 02:12:00	0	NTA	2	1	4	M
1	2009-09-16 02:13:00	0	NTA	2	1	4	M
1	2009-09-16 02:14:00	0	NTA	2	1	4	M
1	2009-09-16 02:15:00	0	NTA	2	1	4	M
1	2009-09-16 02:16:00	0	NTA	2	1	4	M
1	2009-09-16 02:17:00	0	NTA	2	1	4	M
1	2009-09-16 02:18:00	0	NTA	2	1	4	M
1	2009-09-16 02:19:00	0	NTA	2	1	4	M
1	2009-09-16 02:20:00	0	NTA	2	1	4	M
1	2009-09-16 02:21:00	0	NTA	2	1	4	M
1	2009-09-16 02:22:00	0	NTA	2	1	4	M
1	2009-09-16 02:23:00	0	NTA	2	1	4	M
1	2009-09-16 02:24:00	0	NTA	2	1	4	M
1	2009-09-16 02:25:00	0	NTA	2	1	4	M
1	2009-09-16 02:26:00	0	NTA	2	1	4	M
1	2009-09-16 02:27:00	0	NTA	2	1	4	M
1	2009-09-16 02:28:00	0	NTA	2	1	4	M
1	2009-09-16 02:29:00	0	NTA	2	1	4	M
1	2009-09-16 02:30:00	0	NTA	2	1	4	M
1	2009-09-16 02:31:00	0	NTA	2	1	4	M
1	2009-09-16 02:32:00	0	NTA	2	1	4	M
1	2009-09-16 02:33:00	0	NTA	2	1	4	M
1	2009-09-16 02:34:00	0	NTA	2	1	4	M
1	2009-09-16 02:35:00	0	NTA	2	1	4	M
1	2009-09-16 02:36:00	0	NTA	2	1	4	M
1	2009-09-16 02:37:00	0	NTA	2	1	4	M
1	2009-09-16 02:38:00	0	NTA	2	1	4	M
1	2009-09-16 02:39:00	0	NTA	2	1	4	M
1	2009-09-16 02:40:00	0	NTA	2	1	4	M
1	2009-09-16 02:41:00	0	NTA	2	1	4	M
1	2009-09-16 02:42:00	0	NTA	2	1	4	M
1	2009-09-16 02:43:00	0	NTA	2	1	4	M
1	2009-09-16 02:44:00	0	NTA	2	1	4	M
1	2009-09-16 02:45:00	0	NTA	2	1	4	M
1	2009-09-16 02:46:00	86	NTA	2	1	4	M
1	2009-09-16 02:47:00	212	NTA	2	1	4	M
1	2009-09-16 02:48:00	51	NTA	2	1	4	M
1	2009-09-16 02:49:00	17	NTA	2	1	4	M
1	2009-09-16 02:50:00	226	NTA	2	1	4	M
1	2009-09-16 02:51:00	17	NTA	2	1	4	M
1	2009-09-16 02:52:00	0	NTA	2	1	4	M
1	2009-09-16 02:53:00	0	NTA	2	1	4	M
1	2009-09-16 02:54:00	0	NTA	2	1	4	M
1	2009-09-16 02:55:00	0	NTA	2	1	4	M
1	2009-09-16 02:56:00	75	NTA	2	1	4	M
1	2009-09-16 02:57:00	192	NTA	2	1	4	M
1	2009-09-16 02:58:00	178	NTA	2	1	4	M
1	2009-09-16 02:59:00	106	NTA	2	1	4	M
1	2009-09-16 03:00:00	0	NTA	2	1	4	M
1	2009-09-16 03:01:00	0	NTA	3	1	4	M
1	2009-09-16 03:02:00	0	NTA	3	1	4	M
1	2009-09-16 03:03:00	0	NTA	3	1	4	M
1	2009-09-16 03:04:00	0	NTA	3	1	4	M
1	2009-09-16 03:05:00	0	NTA	3	1	4	M
1	2009-09-16 03:06:00	0	NTA	3	1	4	M
1	2009-09-16 03:07:00	341	NTA	3	1	4	M
1	2009-09-16 03:08:00	147	NTA	3	1	4	M
1	2009-09-16 03:09:00	117	NTA	3	1	4	M
1	2009-09-16 03:10:00	0	NTA	3	1	4	M
1	2009-09-16 03:11:00	0	NTA	3	1	4	M
1	2009-09-16 03:12:00	0	NTA	3	1	4	M
1	2009-09-16 03:13:00	0	NTA	3	1	4	M
1	2009-09-16 03:14:00	0	NTA	3	1	4	M
1	2009-09-16 03:15:00	0	NTA	3	1	4	M
1	2009-09-16 03:16:00	0	NTA	3	1	4	M
1	2009-09-16 03:17:00	0	NTA	3	1	4	M
1	2009-09-16 03:18:00	47	NTA	3	1	4	M
1	2009-09-16 03:19:00	30	NTA	3	1	4	M
1	2009-09-16 03:20:00	0	NTA	3	1	4	M
1	2009-09-16 03:21:00	0	NTA	3	1	4	M
1	2009-09-16 03:22:00	0	NTA	3	1	4	M
1	2009-09-16 03:23:00	0	NTA	3	1	4	M
1	2009-09-16 03:24:00	0	NTA	3	1	4	M
1	2009-09-16 03:25:00	0	NTA	3	1	4	M
1	2009-09-16 03:26:00	0	NTA	3	1	4	M
1	2009-09-16 03:27:00	0	NTA	3	1	4	M
1	2009-09-16 03:28:00	0	NTA	3	1	4	M
1	2009-09-16 03:29:00	0	NTA	3	1	4	M
1	2009-09-16 03:30:00	0	NTA	3	1	4	M
1	2009-09-16 03:31:00	0	NTA	3	1	4	M
1	2009-09-16 03:32:00	0	NTA	3	1	4	M
1	2009-09-16 03:33:00	0	NTA	3	1	4	M
1	2009-09-16 03:34:00	0	NTA	3	1	4	M
1	2009-09-16 03:35:00	0	NTA	3	1	4	M
1	2009-09-16 03:36:00	0	NTA	3	1	4	M
1	2009-09-16 03:37:00	0	NTA	3	1	4	M
1	2009-09-16 03:38:00	0	NTA	3	1	4	M
1	2009-09-16 03:39:00	0	NTA	3	1	4	M
1	2009-09-16 03:40:00	0	NTA	3	1	4	M
1	2009-09-16 03:41:00	0	NTA	3	1	4	M
1	2009-09-16 03:42:00	0	NTA	3	1	4	M
1	2009-09-16 03:43:00	0	NTA	3	1	4	M
1	2009-09-16 03:44:00	0	NTA	3	1	4	M
1	2009-09-16 03:45:00	0	NTA	3	1	4	M
1	2009-09-16 03:46:00	0	NTA	3	1	4	M
1	2009-09-16 03:47:00	0	NTA	3	1	4	M
1	2009-09-16 03:48:00	0	NTA	3	1	4	M
1	2009-09-16 03:49:00	0	NTA	3	1	4	M
1	2009-09-16 03:50:00	0	NTA	3	1	4	M
1	2009-09-16 03:51:00	0	NTA	3	1	4	M
1	2009-09-16 03:52:00	0	NTA	3	1	4	M
1	2009-09-16 03:53:00	0	NTA	3	1	4	M
1	2009-09-16 03:54:00	0	NTA	3	1	4	M
1	2009-09-16 03:55:00	0	NTA	3	1	4	M
1	2009-09-16 03:56:00	0	NTA	3	1	4	M
1	2009-09-16 03:57:00	0	NTA	3	1	4	M
1	2009-09-16 03:58:00	0	NTA	3	1	4	M
1	2009-09-16 03:59:00	0	NTA	3	1	4	M
1	2009-09-16 04:00:00	81	NTA	3	1	4	M
1	2009-09-16 04:01:00	81	NTA	4	1	4	M
1	2009-09-16 04:02:00	30	NTA	4	1	4	M
1	2009-09-16 04:03:00	198	NTA	4	1	4	M
1	2009-09-16 04:04:00	21	NTA	4	1	4	M
1	2009-09-16 04:05:00	0	NTA	4	1	4	M
1	2009-09-16 04:06:00	164	NTA	4	1	4	M
1	2009-09-16 04:07:00	75	NTA	4	1	4	M
1	2009-09-16 04:08:00	0	NTA	4	1	4	M
1	2009-09-16 04:09:00	0	NTA	4	1	4	M
1	2009-09-16 04:10:00	0	NTA	4	1	4	M
1	2009-09-16 04:11:00	0	NTA	4	1	4	M
1	2009-09-16 04:12:00	0	NTA	4	1	4	M
1	2009-09-16 04:13:00	86	NTA	4	1	4	M
1	2009-09-16 04:14:00	0	NTA	4	1	4	M
1	2009-09-16 04:15:00	0	NTA	4	1	4	M
1	2009-09-16 04:16:00	0	NTA	4	1	4	M
1	2009-09-16 04:17:00	0	NTA	4	1	4	M
1	2009-09-16 04:18:00	0	NTA	4	1	4	M
1	2009-09-16 04:19:00	0	NTA	4	1	4	M
1	2009-09-16 04:20:00	0	NTA	4	1	4	M
1	2009-09-16 04:21:00	0	NTA	4	1	4	M
1	2009-09-16 04:22:00	0	NTA	4	1	4	M
1	2009-09-16 04:23:00	0	NTA	4	1	4	M
1	2009-09-16 04:24:00	0	NTA	4	1	4	M
1	2009-09-16 04:25:00	0	NTA	4	1	4	M
1	2009-09-16 04:26:00	0	NTA	4	1	4	M
1	2009-09-16 04:27:00	0	NTA	4	1	4	M
1	2009-09-16 04:28:00	0	NTA	4	1	4	M
1	2009-09-16 04:29:00	0	NTA	4	1	4	M
1	2009-09-16 04:30:00	0	NTA	4	1	4	M
1	2009-09-16 04:31:00	0	NTA	4	1	4	M
1	2009-09-16 04:32:00	0	NTA	4	1	4	M
1	2009-09-16 04:33:00	0	NTA	4	1	4	M
1	2009-09-16 04:34:00	0	NTA	4	1	4	M
1	2009-09-16 04:35:00	0	NTA	4	1	4	M
1	2009-09-16 04:36:00	0	NTA	4	1	4	M
1	2009-09-16 04:37:00	0	NTA	4	1	4	M
1	2009-09-16 04:38:00	0	NTA	4	1	4	M
1	2009-09-16 04:39:00	0	NTA	4	1	4	M
1	2009-09-16 04:40:00	0	NTA	4	1	4	M
1	2009-09-16 04:41:00	0	NTA	4	1	4	M
1	2009-09-16 04:42:00	4	NTA	4	1	4	M
1	2009-09-16 04:43:00	0	NTA	4	1	4	M
1	2009-09-16 04:44:00	0	NTA	4	1	4	M
1	2009-09-16 04:45:00	0	NTA	4	1	4	M
1	2009-09-16 04:46:00	0	NTA	4	1	4	M
1	2009-09-16 04:47:00	0	NTA	4	1	4	M
1	2009-09-16 04:48:00	0	NTA	4	1	4	M
1	2009-09-16 04:49:00	0	NTA	4	1	4	M
1	2009-09-16 04:50:00	0	NTA	4	1	4	M
1	2009-09-16 04:51:00	0	NTA	4	1	4	M
1	2009-09-16 04:52:00	0	NTA	4	1	4	M
1	2009-09-16 04:53:00	0	NTA	4	1	4	M
1	2009-09-16 04:54:00	0	NTA	4	1	4	M
1	2009-09-16 04:55:00	0	NTA	4	1	4	M
1	2009-09-16 04:56:00	0	NTA	4	1	4	M
1	2009-09-16 04:57:00	0	NTA	4	1	4	M
1	2009-09-16 04:58:00	0	NTA	4	1	4	M
1	2009-09-16 04:59:00	0	NTA	4	1	4	M
1	2009-09-16 05:00:00	0	NTA	4	1	4	M
1	2009-09-16 05:01:00	0	NTA	5	1	4	M
1	2009-09-16 05:02:00	111	NTA	5	1	4	M
1	2009-09-16 05:03:00	0	NTA	5	1	4	M
1	2009-09-16 05:04:00	86	NTA	5	1	4	M
1	2009-09-16 05:05:00	117	NTA	5	1	4	M
1	2009-09-16 05:06:00	42	NTA	5	1	4	M
1	2009-09-16 05:07:00	0	NTA	5	1	4	M
1	2009-09-16 05:08:00	0	NTA	5	1	4	M
1	2009-09-16 05:09:00	0	NTA	5	1	4	M
1	2009-09-16 05:10:00	47	NTA	5	1	4	M
1	2009-09-16 05:11:00	101	NTA	5	1	4	M
1	2009-09-16 05:12:00	226	NTA	5	1	4	M
1	2009-09-16 05:13:00	212	NTA	5	1	4	M
1	2009-09-16 05:14:00	171	NTA	5	1	4	M
1	2009-09-16 05:15:00	117	NTA	5	1	4	M
1	2009-09-16 05:16:00	171	NTA	5	1	4	M
1	2009-09-16 05:17:00	198	NTA	5	1	4	M
1	2009-09-16 05:18:00	810	NTA	5	1	4	M
1	2009-09-16 05:19:00	894	NTA	5	1	4	M
1	2009-09-16 05:20:00	604	NTA	5	1	4	M
1	2009-09-16 05:21:00	387	NTA	5	1	4	M
1	2009-09-16 05:22:00	123	NTA	5	1	4	M
1	2009-09-16 05:23:00	0	NTA	5	1	4	M
1	2009-09-16 05:24:00	0	NTA	5	1	4	M
1	2009-09-16 05:25:00	60	NTA	5	1	4	M
1	2009-09-16 05:26:00	0	NTA	5	1	4	M
1	2009-09-16 05:27:00	0	NTA	5	1	4	M
1	2009-09-16 05:28:00	0	NTA	5	1	4	M
1	2009-09-16 05:29:00	0	NTA	5	1	4	M
1	2009-09-16 05:30:00	0	NTA	5	1	4	M
1	2009-09-16 05:31:00	60	NTA	5	1	4	M
1	2009-09-16 05:32:00	0	NTA	5	1	4	M
1	2009-09-16 05:33:00	0	NTA	5	1	4	M
1	2009-09-16 05:34:00	0	NTA	5	1	4	M
1	2009-09-16 05:35:00	0	NTA	5	1	4	M
1	2009-09-16 05:36:00	0	NTA	5	1	4	M
1	2009-09-16 05:37:00	25	NTA	5	1	4	M
1	2009-09-16 05:38:00	65	NTA	5	1	4	M
1	2009-09-16 05:39:00	96	NTA	5	1	4	M
1	2009-09-16 05:40:00	0	NTA	5	1	4	M
1	2009-09-16 05:41:00	0	NTA	5	1	4	M
1	2009-09-16 05:42:00	0	NTA	5	1	4	M
1	2009-09-16 05:43:00	0	NTA	5	1	4	M
1	2009-09-16 05:44:00	0	NTA	5	1	4	M
1	2009-09-16 05:45:00	0	NTA	5	1	4	M
1	2009-09-16 05:46:00	51	NTA	5	1	4	M
1	2009-09-16 05:47:00	60	NTA	5	1	4	M
1	2009-09-16 05:48:00	0	NTA	5	1	4	M
1	2009-09-16 05:49:00	0	NTA	5	1	4	M
1	2009-09-16 05:50:00	0	NTA	5	1	4	M
1	2009-09-16 05:51:00	0	NTA	5	1	4	M
1	2009-09-16 05:52:00	264	NTA	5	1	4	M
1	2009-09-16 05:53:00	212	NTA	5	1	4	M
1	2009-09-16 05:54:00	234	NTA	5	1	4	M
1	2009-09-16 05:55:00	205	NTA	5	1	4	M
1	2009-09-16 05:56:00	0	NTA	5	1	4	M
1	2009-09-16 05:57:00	0	NTA	5	1	4	M
1	2009-09-16 05:58:00	0	NTA	5	1	4	M
1	2009-09-16 05:59:00	0	NTA	5	1	4	M
1	2009-09-16 06:00:00	17	NTA	5	1	4	M
1	2009-09-16 06:01:00	0	NTA	6	1	4	M
1	2009-09-16 06:02:00	0	NTA	6	1	4	M
1	2009-09-16 06:03:00	0	NTA	6	1	4	M
1	2009-09-16 06:04:00	17	NTA	6	1	4	M
1	2009-09-16 06:05:00	0	NTA	6	1	4	M
1	2009-09-16 06:06:00	4	NTA	6	1	4	M
1	2009-09-16 06:07:00	17	NTA	6	1	4	M
1	2009-09-16 06:08:00	21	NTA	6	1	4	M
1	2009-09-16 06:09:00	0	NTA	6	1	4	M
1	2009-09-16 06:10:00	0	NTA	6	1	4	M
1	2009-09-16 06:11:00	81	NTA	6	1	4	M
1	2009-09-16 06:12:00	460	NTA	6	1	4	M
1	2009-09-16 06:13:00	0	NTA	6	1	4	M
1	2009-09-16 06:14:00	0	NTA	6	1	4	M
1	2009-09-16 06:15:00	289	NTA	6	1	4	M
1	2009-09-16 06:16:00	111	DTA	6	1	4	M
1	2009-09-16 06:17:00	715	DTA	6	1	4	M
1	2009-09-16 06:18:00	967	DTA	6	1	4	M
1	2009-09-16 06:19:00	1127	DTA	6	1	4	M
1	2009-09-16 06:20:00	1005	DTA	6	1	4	M
1	2009-09-16 06:21:00	1005	DTA	6	1	4	M
1	2009-09-16 06:22:00	793	DTA	6	1	4	M
1	2009-09-16 06:23:00	553	DTA	6	1	4	M
1	2009-09-16 06:24:00	553	DTA	6	1	4	M
1	2009-09-16 06:25:00	578	DTA	6	1	4	M
1	2009-09-16 06:26:00	826	DTA	6	1	4	M
1	2009-09-16 06:27:00	967	DTA	6	1	4	M
1	2009-09-16 06:28:00	860	DTA	6	1	4	M
1	2009-09-16 06:29:00	289	DTA	6	1	4	M
1	2009-09-16 06:30:00	106	DTA	6	1	4	M
1	2009-09-16 06:31:00	25	DTA	6	1	4	M
1	2009-09-16 06:32:00	281	DTA	6	1	4	M
1	2009-09-16 06:33:00	81	DTA	6	1	4	M
1	2009-09-16 06:34:00	205	DTA	6	1	4	M
1	2009-09-16 06:35:00	178	DTA	6	1	4	M
1	2009-09-16 06:36:00	793	DTA	6	1	4	M
1	2009-09-16 06:37:00	272	DTA	6	1	4	M
1	2009-09-16 06:38:00	281	DTA	6	1	4	M
1	2009-09-16 06:39:00	298	DTA	6	1	4	M
1	2009-09-16 06:40:00	0	DTA	6	1	4	M
1	2009-09-16 06:41:00	0	DTA	6	1	4	M
1	2009-09-16 06:42:00	0	DTA	6	1	4	M
1	2009-09-16 06:43:00	0	DTA	6	1	4	M
1	2009-09-16 06:44:00	0	DTA	6	1	4	M
1	2009-09-16 06:45:00	65	DTA	6	1	4	M
1	2009-09-16 06:46:00	0	DTA	6	1	4	M
1	2009-09-16 06:47:00	0	DTA	6	1	4	M
1	2009-09-16 06:48:00	0	DTA	6	1	4	M
1	2009-09-16 06:49:00	0	DTA	6	1	4	M
1	2009-09-16 06:50:00	387	DTA	6	1	4	M
1	2009-09-16 06:51:00	0	DTA	6	1	4	M
1	2009-09-16 06:52:00	0	DTA	6	1	4	M
1	2009-09-16 06:53:00	0	DTA	6	1	4	M
1	2009-09-16 06:54:00	0	DTA	6	1	4	M
1	2009-09-16 06:55:00	0	DTA	6	1	4	M
1	2009-09-16 06:56:00	0	DTA	6	1	4	M
1	2009-09-16 06:57:00	604	DTA	6	1	4	M
1	2009-09-16 06:58:00	0	DTA	6	1	4	M
1	2009-09-16 06:59:00	0	DTA	6	1	4	M
1	2009-09-16 07:00:00	13	DTA	6	1	4	M
1	2009-09-16 07:01:00	0	DTA	7	1	4	M
1	2009-09-16 07:02:00	0	DTA	7	1	4	M
1	2009-09-16 07:03:00	0	DTA	7	1	4	M
1	2009-09-16 07:04:00	0	DTA	7	1	4	M
1	2009-09-16 07:05:00	0	DTA	7	1	4	M
1	2009-09-16 07:06:00	8	DTA	7	1	4	M
1	2009-09-16 07:07:00	4	DTA	7	1	4	M
1	2009-09-16 07:08:00	0	DTA	7	1	4	M
1	2009-09-16 07:09:00	21	DTA	7	1	4	M
1	2009-09-16 07:10:00	0	DTA	7	1	4	M
1	2009-09-16 07:11:00	0	DTA	7	1	4	M
1	2009-09-16 07:12:00	0	DTA	7	1	4	M
1	2009-09-16 07:13:00	0	DTA	7	1	4	M
1	2009-09-16 07:14:00	0	DTA	7	1	4	M
1	2009-09-16 07:15:00	0	DTA	7	1	4	M
1	2009-09-16 07:16:00	0	DTA	7	1	4	M
1	2009-09-16 07:17:00	0	DTA	7	1	4	M
1	2009-09-16 07:18:00	51	DTA	7	1	4	M
1	2009-09-16 07:19:00	0	DTA	7	1	4	M
1	2009-09-16 07:20:00	0	DTA	7	1	4	M
1	2009-09-16 07:21:00	0	DTA	7	1	4	M
1	2009-09-16 07:22:00	164	DTA	7	1	4	M
1	2009-09-16 07:23:00	331	DTA	7	1	4	M
1	2009-09-16 07:24:00	0	DTA	7	1	4	M
1	2009-09-16 07:25:00	0	DTA	7	1	4	M
1	2009-09-16 07:26:00	0	DTA	7	1	4	M
1	2009-09-16 07:27:00	13	DTA	7	1	4	M
1	2009-09-16 07:28:00	51	DTA	7	1	4	M
1	2009-09-16 07:29:00	0	DTA	7	1	4	M
1	2009-09-16 07:30:00	0	DTA	7	1	4	M
1	2009-09-16 07:31:00	0	DTA	7	1	4	M
1	2009-09-16 07:32:00	0	DTA	7	1	4	M
1	2009-09-16 07:33:00	0	DTA	7	1	4	M
1	2009-09-16 07:34:00	0	DTA	7	1	4	M
1	2009-09-16 07:35:00	0	DTA	7	1	4	M
1	2009-09-16 07:36:00	0	DTA	7	1	4	M
1	2009-09-16 07:37:00	0	DTA	7	1	4	M
1	2009-09-16 07:38:00	0	DTA	7	1	4	M
1	2009-09-16 07:39:00	0	DTA	7	1	4	M
1	2009-09-16 07:40:00	0	DTA	7	1	4	M
1	2009-09-16 07:41:00	0	DTA	7	1	4	M
1	2009-09-16 07:42:00	0	DTA	7	1	4	M
1	2009-09-16 07:43:00	38	DTA	7	1	4	M
1	2009-09-16 07:44:00	0	DTA	7	1	4	M
1	2009-09-16 07:45:00	0	DTA	7	1	4	M
1	2009-09-16 07:46:00	0	DTA	7	1	4	M
1	2009-09-16 07:47:00	0	DTA	7	1	4	M
1	2009-09-16 07:48:00	0	DTA	7	1	4	M
1	2009-09-16 07:49:00	0	DTA	7	1	4	M
1	2009-09-16 07:50:00	0	DTA	7	1	4	M
1	2009-09-16 07:51:00	0	DTA	7	1	4	M
1	2009-09-16 07:52:00	0	DTA	7	1	4	M
1	2009-09-16 07:53:00	0	DTA	7	1	4	M
1	2009-09-16 07:54:00	0	DTA	7	1	4	M
1	2009-09-16 07:55:00	0	DTA	7	1	4	M
1	2009-09-16 07:56:00	0	DTA	7	1	4	M
1	2009-09-16 07:57:00	0	DTA	7	1	4	M
1	2009-09-16 07:58:00	0	DTA	7	1	4	M
1	2009-09-16 07:59:00	0	DTA	7	1	4	M
1	2009-09-16 08:00:00	0	DTA	7	1	4	M
1	2009-09-16 08:01:00	0	DTA	8	1	4	M
1	2009-09-16 08:02:00	0	DTA	8	1	4	M
1	2009-09-16 08:03:00	0	DTA	8	1	4	M
1	2009-09-16 08:04:00	0	DTA	8	1	4	M
1	2009-09-16 08:05:00	38	DTA	8	1	4	M
1	2009-09-16 08:06:00	0	DTA	8	1	4	M
1	2009-09-16 08:07:00	0	DTA	8	1	4	M
1	2009-09-16 08:08:00	0	DTA	8	1	4	M
1	2009-09-16 08:09:00	0	DTA	8	1	4	M
1	2009-09-16 08:10:00	0	DTA	8	1	4	M
1	2009-09-16 08:11:00	0	DTA	8	1	4	M
1	2009-09-16 08:12:00	0	DTA	8	1	4	M
1	2009-09-16 08:13:00	0	DTA	8	1	4	M
1	2009-09-16 08:14:00	0	DTA	8	1	4	M
1	2009-09-16 08:15:00	0	DTA	8	1	4	M
1	2009-09-16 08:16:00	0	DTA	8	1	4	M
1	2009-09-16 08:17:00	0	DTA	8	1	4	M
1	2009-09-16 08:18:00	42	DTA	8	1	4	M
1	2009-09-16 08:19:00	0	DTA	8	1	4	M
1	2009-09-16 08:20:00	0	DTA	8	1	4	M
1	2009-09-16 08:21:00	0	DTA	8	1	4	M
1	2009-09-16 08:22:00	0	DTA	8	1	4	M
1	2009-09-16 08:23:00	0	DTA	8	1	4	M
1	2009-09-16 08:24:00	0	DTA	8	1	4	M
1	2009-09-16 08:25:00	0	DTA	8	1	4	M
1	2009-09-16 08:26:00	0	DTA	8	1	4	M
1	2009-09-16 08:27:00	0	DTA	8	1	4	M
1	2009-09-16 08:28:00	0	DTA	8	1	4	M
1	2009-09-16 08:29:00	0	DTA	8	1	4	M
1	2009-09-16 08:30:00	0	DTA	8	1	4	M
1	2009-09-16 08:31:00	0	DTA	8	1	4	M
1	2009-09-16 08:32:00	0	DTA	8	1	4	M
1	2009-09-16 08:33:00	0	DTA	8	1	4	M
1	2009-09-16 08:34:00	0	DTA	8	1	4	M
1	2009-09-16 08:35:00	13	DTA	8	1	4	M
1	2009-09-16 08:36:00	38	DTA	8	1	4	M
1	2009-09-16 08:37:00	0	DTA	8	1	4	M
1	2009-09-16 08:38:00	0	DTA	8	1	4	M
1	2009-09-16 08:39:00	0	DTA	8	1	4	M
1	2009-09-16 08:40:00	0	DTA	8	1	4	M
1	2009-09-16 08:41:00	0	DTA	8	1	4	M
1	2009-09-16 08:42:00	0	DTA	8	1	4	M
1	2009-09-16 08:43:00	0	DTA	8	1	4	M
1	2009-09-16 08:44:00	0	DTA	8	1	4	M
1	2009-09-16 08:45:00	0	DTA	8	1	4	M
1	2009-09-16 08:46:00	0	DTA	8	1	4	M
1	2009-09-16 08:47:00	0	DTA	8	1	4	M
1	2009-09-16 08:48:00	0	DTA	8	1	4	M
1	2009-09-16 08:49:00	96	DTA	8	1	4	M
1	2009-09-16 08:50:00	0	DTA	8	1	4	M
1	2009-09-16 08:51:00	0	DTA	8	1	4	M
1	2009-09-16 08:52:00	0	DTA	8	1	4	M
1	2009-09-16 08:53:00	0	DTA	8	1	4	M
1	2009-09-16 08:54:00	0	DTA	8	1	4	M
1	2009-09-16 08:55:00	0	DTA	8	1	4	M
1	2009-09-16 08:56:00	0	DTA	8	1	4	M
1	2009-09-16 08:57:00	0	DTA	8	1	4	M
1	2009-09-16 08:58:00	0	DTA	8	1	4	M
1	2009-09-16 08:59:00	0	DTA	8	1	4	M
1	2009-09-16 09:00:00	0	DTA	8	1	4	M
1	2009-09-16 09:01:00	0	DTA	9	1	4	M
1	2009-09-16 09:02:00	0	DTA	9	1	4	M
1	2009-09-16 09:03:00	0	DTA	9	1	4	M
1	2009-09-16 09:04:00	13	DTA	9	1	4	M
1	2009-09-16 09:05:00	0	DTA	9	1	4	M
1	2009-09-16 09:06:00	47	DTA	9	1	4	M
1	2009-09-16 09:07:00	0	DTA	9	1	4	M
1	2009-09-16 09:08:00	0	DTA	9	1	4	M
1	2009-09-16 09:09:00	0	DTA	9	1	4	M
1	2009-09-16 09:10:00	0	DTA	9	1	4	M
1	2009-09-16 09:11:00	0	DTA	9	1	4	M
1	2009-09-16 09:12:00	0	DTA	9	1	4	M
1	2009-09-16 09:13:00	0	DTA	9	1	4	M
1	2009-09-16 09:14:00	0	DTA	9	1	4	M
1	2009-09-16 09:15:00	0	DTA	9	1	4	M
1	2009-09-16 09:16:00	0	DTA	9	1	4	M
1	2009-09-16 09:17:00	0	DTA	9	1	4	M
1	2009-09-16 09:18:00	0	DTA	9	1	4	M
1	2009-09-16 09:19:00	0	DTA	9	1	4	M
1	2009-09-16 09:20:00	0	DTA	9	1	4	M
1	2009-09-16 09:21:00	0	DTA	9	1	4	M
1	2009-09-16 09:22:00	34	DTA	9	1	4	M
1	2009-09-16 09:23:00	25	DTA	9	1	4	M
1	2009-09-16 09:24:00	0	DTA	9	1	4	M
1	2009-09-16 09:25:00	0	DTA	9	1	4	M
1	2009-09-16 09:26:00	4	DTA	9	1	4	M
1	2009-09-16 09:27:00	0	DTA	9	1	4	M
1	2009-09-16 09:28:00	47	DTA	9	1	4	M
1	2009-09-16 09:29:00	0	DTA	9	1	4	M
1	2009-09-16 09:30:00	0	DTA	9	1	4	M
1	2009-09-16 09:31:00	0	DTA	9	1	4	M
1	2009-09-16 09:32:00	0	DTA	9	1	4	M
1	2009-09-16 09:33:00	0	DTA	9	1	4	M
1	2009-09-16 09:34:00	0	DTA	9	1	4	M
1	2009-09-16 09:35:00	0	DTA	9	1	4	M
1	2009-09-16 09:36:00	0	DTA	9	1	4	M
1	2009-09-16 09:37:00	0	DTA	9	1	4	M
1	2009-09-16 09:38:00	0	DTA	9	1	4	M
1	2009-09-16 09:39:00	0	DTA	9	1	4	M
1	2009-09-16 09:40:00	0	DTA	9	1	4	M
1	2009-09-16 09:41:00	0	DTA	9	1	4	M
1	2009-09-16 09:42:00	0	DTA	9	1	4	M
1	2009-09-16 09:43:00	0	DTA	9	1	4	M
1	2009-09-16 09:44:00	0	DTA	9	1	4	M
1	2009-09-16 09:45:00	0	DTA	9	1	4	M
1	2009-09-16 09:46:00	0	DTA	9	1	4	M
1	2009-09-16 09:47:00	0	DTA	9	1	4	M
1	2009-09-16 09:48:00	0	DTA	9	1	4	M
1	2009-09-16 09:49:00	0	DTA	9	1	4	M
1	2009-09-16 09:50:00	0	DTA	9	1	4	M
1	2009-09-16 09:51:00	0	DTA	9	1	4	M
1	2009-09-16 09:52:00	0	DTA	9	1	4	M
1	2009-09-16 09:53:00	0	DTA	9	1	4	M
1	2009-09-16 09:54:00	0	DTA	9	1	4	M
1	2009-09-16 09:55:00	4	DTA	9	1	4	M
1	2009-09-16 09:56:00	0	DTA	9	1	4	M
1	2009-09-16 09:57:00	0	DTA	9	1	4	M
1	2009-09-16 09:58:00	0	DTA	9	1	4	M
1	2009-09-16 09:59:00	0	DTA	9	1	4	M
1	2009-09-16 10:00:00	0	DTA	9	1	4	M
1	2009-09-16 10:01:00	0	DTA	10	1	4	M
1	2009-09-16 10:02:00	0	DTA	10	1	4	M
1	2009-09-16 10:03:00	55	DTA	10	1	4	M
1	2009-09-16 10:04:00	0	DTA	10	1	4	M
1	2009-09-16 10:05:00	0	DTA	10	1	4	M
1	2009-09-16 10:06:00	0	DTA	10	1	4	M
1	2009-09-16 10:07:00	4	DTA	10	1	4	M
1	2009-09-16 10:08:00	81	DTA	10	1	4	M
1	2009-09-16 10:09:00	0	DTA	10	1	4	M
1	2009-09-16 10:10:00	81	DTA	10	1	4	M
1	2009-09-16 10:11:00	75	DTA	10	1	4	M
1	2009-09-16 10:12:00	17	DTA	10	1	4	M
1	2009-09-16 10:13:00	65	DTA	10	1	4	M
1	2009-09-16 10:14:00	0	DTA	10	1	4	M
1	2009-09-16 10:15:00	0	DTA	10	1	4	M
1	2009-09-16 10:16:00	0	DTA	10	1	4	M
1	2009-09-16 10:17:00	0	DTA	10	1	4	M
1	2009-09-16 10:18:00	0	DTA	10	1	4	M
1	2009-09-16 10:19:00	17	DTA	10	1	4	M
1	2009-09-16 10:20:00	0	DTA	10	1	4	M
1	2009-09-16 10:21:00	0	DTA	10	1	4	M
1	2009-09-16 10:22:00	0	DTA	10	1	4	M
1	2009-09-16 10:23:00	0	DTA	10	1	4	M
1	2009-09-16 10:24:00	101	DTA	10	1	4	M
1	2009-09-16 10:25:00	17	DTA	10	1	4	M
1	2009-09-16 10:26:00	4	DTA	10	1	4	M
1	2009-09-16 10:27:00	30	DTA	10	1	4	M
1	2009-09-16 10:28:00	0	DTA	10	1	4	M
1	2009-09-16 10:29:00	0	DTA	10	1	4	M
1	2009-09-16 10:30:00	0	DTA	10	1	4	M
1	2009-09-16 10:31:00	0	DTA	10	1	4	M
1	2009-09-16 10:32:00	0	DTA	10	1	4	M
1	2009-09-16 10:33:00	0	DTA	10	1	4	M
1	2009-09-16 10:34:00	0	DTA	10	1	4	M
1	2009-09-16 10:35:00	0	DTA	10	1	4	M
1	2009-09-16 10:36:00	0	DTA	10	1	4	M
1	2009-09-16 10:37:00	0	DTA	10	1	4	M
1	2009-09-16 10:38:00	0	DTA	10	1	4	M
1	2009-09-16 10:39:00	0	DTA	10	1	4	M
1	2009-09-16 10:40:00	0	DTA	10	1	4	M
1	2009-09-16 10:41:00	0	DTA	10	1	4	M
1	2009-09-16 10:42:00	0	DTA	10	1	4	M
1	2009-09-16 10:43:00	0	DTA	10	1	4	M
1	2009-09-16 10:44:00	0	DTA	10	1	4	M
1	2009-09-16 10:45:00	0	DTA	10	1	4	M
1	2009-09-16 10:46:00	4	DTA	10	1	4	M
1	2009-09-16 10:47:00	0	DTA	10	1	4	M
1	2009-09-16 10:48:00	0	DTA	10	1	4	M
1	2009-09-16 10:49:00	141	DTA	10	1	4	M
1	2009-09-16 10:50:00	4	DTA	10	1	4	M
1	2009-09-16 10:51:00	0	DTA	10	1	4	M
1	2009-09-16 10:52:00	141	DTA	10	1	4	M
1	2009-09-16 10:53:00	34	DTA	10	1	4	M
1	2009-09-16 10:54:00	0	DTA	10	1	4	M
1	2009-09-16 10:55:00	0	DTA	10	1	4	M
1	2009-09-16 10:56:00	0	DTA	10	1	4	M
1	2009-09-16 10:57:00	147	DTA	10	1	4	M
1	2009-09-16 10:58:00	60	DTA	10	1	4	M
1	2009-09-16 10:59:00	111	DTA	10	1	4	M
1	2009-09-16 11:00:00	0	DTA	10	1	4	M
1	2009-09-16 11:01:00	0	DTA	11	1	4	M
1	2009-09-16 11:02:00	0	DTA	11	1	4	M
1	2009-09-16 11:03:00	0	DTA	11	1	4	M
1	2009-09-16 11:04:00	135	DTA	11	1	4	M
1	2009-09-16 11:05:00	13	DTA	11	1	4	M
1	2009-09-16 11:06:00	0	DTA	11	1	4	M
1	2009-09-16 11:07:00	0	DTA	11	1	4	M
1	2009-09-16 11:08:00	0	DTA	11	1	4	M
1	2009-09-16 11:09:00	123	DTA	11	1	4	M
1	2009-09-16 11:10:00	0	DTA	11	1	4	M
1	2009-09-16 11:11:00	96	DTA	11	1	4	M
1	2009-09-16 11:12:00	38	DTA	11	1	4	M
1	2009-09-16 11:13:00	0	DTA	11	1	4	M
1	2009-09-16 11:14:00	0	DTA	11	1	4	M
1	2009-09-16 11:15:00	0	DTA	11	1	4	M
1	2009-09-16 11:16:00	0	DTA	11	1	4	M
1	2009-09-16 11:17:00	123	DTA	11	1	4	M
1	2009-09-16 11:18:00	0	DTA	11	1	4	M
1	2009-09-16 11:19:00	101	DTA	11	1	4	M
1	2009-09-16 11:20:00	65	DTA	11	1	4	M
1	2009-09-16 11:21:00	178	DTA	11	1	4	M
1	2009-09-16 11:22:00	0	DTA	11	1	4	M
1	2009-09-16 11:23:00	0	DTA	11	1	4	M
1	2009-09-16 11:24:00	0	DTA	11	1	4	M
1	2009-09-16 11:25:00	0	DTA	11	1	4	M
1	2009-09-16 11:26:00	0	DTA	11	1	4	M
1	2009-09-16 11:27:00	0	DTA	11	1	4	M
1	2009-09-16 11:28:00	21	DTA	11	1	4	M
1	2009-09-16 11:29:00	0	DTA	11	1	4	M
1	2009-09-16 11:30:00	0	DTA	11	1	4	M
1	2009-09-16 11:31:00	0	DTA	11	1	4	M
1	2009-09-16 11:32:00	0	DTA	11	1	4	M
1	2009-09-16 11:33:00	0	DTA	11	1	4	M
1	2009-09-16 11:34:00	0	DTA	11	1	4	M
1	2009-09-16 11:35:00	55	DTA	11	1	4	M
1	2009-09-16 11:36:00	34	DTA	11	1	4	M
1	2009-09-16 11:37:00	0	DTA	11	1	4	M
1	2009-09-16 11:38:00	0	DTA	11	1	4	M
1	2009-09-16 11:39:00	0	DTA	11	1	4	M
1	2009-09-16 11:40:00	0	DTA	11	1	4	M
1	2009-09-16 11:41:00	0	DTA	11	1	4	M
1	2009-09-16 11:42:00	0	DTA	11	1	4	M
1	2009-09-16 11:43:00	0	DTA	11	1	4	M
1	2009-09-16 11:44:00	0	DTA	11	1	4	M
1	2009-09-16 11:45:00	0	DTA	11	1	4	M
1	2009-09-16 11:46:00	0	DTA	11	1	4	M
1	2009-09-16 11:47:00	0	DTA	11	1	4	M
1	2009-09-16 11:48:00	0	DTA	11	1	4	M
1	2009-09-16 11:49:00	0	DTA	11	1	4	M
1	2009-09-16 11:50:00	0	DTA	11	1	4	M
1	2009-09-16 11:51:00	0	DTA	11	1	4	M
1	2009-09-16 11:52:00	0	DTA	11	1	4	M
1	2009-09-16 11:53:00	75	DTA	11	1	4	M
1	2009-09-16 11:54:00	4	DTA	11	1	4	M
1	2009-09-16 11:55:00	4	DTA	11	1	4	M
1	2009-09-16 11:56:00	96	DTA	11	1	4	M
1	2009-09-16 11:57:00	60	DTA	11	1	4	M
1	2009-09-16 11:58:00	0	DTA	11	1	4	M
1	2009-09-16 11:59:00	0	DTA	11	1	4	M
1	2009-09-16 12:00:00	0	DTA	11	1	4	M
1	2009-09-16 12:01:00	701	DTA	12	1	4	M
1	2009-09-16 12:02:00	314	DTA	12	1	4	M
1	2009-09-16 12:03:00	30	DTA	12	1	4	M
1	2009-09-16 12:04:00	0	DTA	12	1	4	M
1	2009-09-16 12:05:00	0	DTA	12	1	4	M
1	2009-09-16 12:06:00	0	DTA	12	1	4	M
1	2009-09-16 12:07:00	0	DTA	12	1	4	M
1	2009-09-16 12:08:00	0	DTA	12	1	4	M
1	2009-09-16 12:09:00	0	DTA	12	1	4	M
1	2009-09-16 12:10:00	0	DTA	12	1	4	M
1	2009-09-16 12:11:00	0	DTA	12	1	4	M
1	2009-09-16 12:12:00	0	DTA	12	1	4	M
1	2009-09-16 12:13:00	0	DTA	12	1	4	M
1	2009-09-16 12:14:00	0	DTA	12	1	4	M
1	2009-09-16 12:15:00	0	DTA	12	1	4	M
1	2009-09-16 12:16:00	0	DTA	12	1	4	M
1	2009-09-16 12:17:00	0	DTA	12	1	4	M
1	2009-09-16 12:18:00	0	DTA	12	1	4	M
1	2009-09-16 12:19:00	75	DTA	12	1	4	M
1	2009-09-16 12:20:00	0	DTA	12	1	4	M
1	2009-09-16 12:21:00	0	DTA	12	1	4	M
1	2009-09-16 12:22:00	0	DTA	12	1	4	M
1	2009-09-16 12:23:00	0	DTA	12	1	4	M
1	2009-09-16 12:24:00	0	DTA	12	1	4	M
1	2009-09-16 12:25:00	0	DTA	12	1	4	M
1	2009-09-16 12:26:00	0	DTA	12	1	4	M
1	2009-09-16 12:27:00	0	DTA	12	1	4	M
1	2009-09-16 12:28:00	0	DTA	12	1	4	M
1	2009-09-16 12:29:00	0	DTA	12	1	4	M
1	2009-09-16 12:30:00	0	DTA	12	1	4	M
1	2009-09-16 12:31:00	0	DTA	12	1	4	M
1	2009-09-16 12:32:00	0	DTA	12	1	4	M
1	2009-09-16 12:33:00	0	DTA	12	1	4	M
1	2009-09-16 12:34:00	0	DTA	12	1	4	M
1	2009-09-16 12:35:00	0	DTA	12	1	4	M
1	2009-09-16 12:36:00	0	DTA	12	1	4	M
1	2009-09-16 12:37:00	21	DTA	12	1	4	M
1	2009-09-16 12:38:00	0	DTA	12	1	4	M
1	2009-09-16 12:39:00	0	DTA	12	1	4	M
1	2009-09-16 12:40:00	0	DTA	12	1	4	M
1	2009-09-16 12:41:00	306	DTA	12	1	4	M
1	2009-09-16 12:42:00	178	DTA	12	1	4	M
1	2009-09-16 12:43:00	0	DTA	12	1	4	M
1	2009-09-16 12:44:00	0	DTA	12	1	4	M
1	2009-09-16 12:45:00	0	DTA	12	1	4	M
1	2009-09-16 12:46:00	0	DTA	12	1	4	M
1	2009-09-16 12:47:00	0	DTA	12	1	4	M
1	2009-09-16 12:48:00	0	DTA	12	1	4	M
1	2009-09-16 12:49:00	0	DTA	12	1	4	M
1	2009-09-16 12:50:00	0	DTA	12	1	4	M
1	2009-09-16 12:51:00	0	DTA	12	1	4	M
1	2009-09-16 12:52:00	0	DTA	12	1	4	M
1	2009-09-16 12:53:00	4	DTA	12	1	4	M
1	2009-09-16 12:54:00	0	DTA	12	1	4	M
1	2009-09-16 12:55:00	0	DTA	12	1	4	M
1	2009-09-16 12:56:00	0	DTA	12	1	4	M
1	2009-09-16 12:57:00	13	DTA	12	1	4	M
1	2009-09-16 12:58:00	0	DTA	12	1	4	M
1	2009-09-16 12:59:00	0	DTA	12	1	4	M
1	2009-09-16 13:00:00	0	DTA	12	1	4	M
1	2009-09-16 13:01:00	0	DTA	13	1	4	M
1	2009-09-16 13:02:00	0	DTA	13	1	4	M
1	2009-09-16 13:03:00	42	DTA	13	1	4	M
1	2009-09-16 13:04:00	0	DTA	13	1	4	M
1	2009-09-16 13:05:00	0	DTA	13	1	4	M
1	2009-09-16 13:06:00	0	DTA	13	1	4	M
1	2009-09-16 13:07:00	117	DTA	13	1	4	M
1	2009-09-16 13:08:00	0	DTA	13	1	4	M
1	2009-09-16 13:09:00	0	DTA	13	1	4	M
1	2009-09-16 13:10:00	0	DTA	13	1	4	M
1	2009-09-16 13:11:00	0	DTA	13	1	4	M
1	2009-09-16 13:12:00	0	DTA	13	1	4	M
1	2009-09-16 13:13:00	0	DTA	13	1	4	M
1	2009-09-16 13:14:00	0	DTA	13	1	4	M
1	2009-09-16 13:15:00	0	DTA	13	1	4	M
1	2009-09-16 13:16:00	0	DTA	13	1	4	M
1	2009-09-16 13:17:00	0	DTA	13	1	4	M
1	2009-09-16 13:18:00	0	DTA	13	1	4	M
1	2009-09-16 13:19:00	0	DTA	13	1	4	M
1	2009-09-16 13:20:00	0	DTA	13	1	4	M
1	2009-09-16 13:21:00	0	DTA	13	1	4	M
1	2009-09-16 13:22:00	0	DTA	13	1	4	M
1	2009-09-16 13:23:00	0	DTA	13	1	4	M
1	2009-09-16 13:24:00	0	DTA	13	1	4	M
1	2009-09-16 13:25:00	0	DTA	13	1	4	M
1	2009-09-16 13:26:00	0	DTA	13	1	4	M
1	2009-09-16 13:27:00	21	DTA	13	1	4	M
1	2009-09-16 13:28:00	13	DTA	13	1	4	M
1	2009-09-16 13:29:00	0	DTA	13	1	4	M
1	2009-09-16 13:30:00	0	DTA	13	1	4	M
1	2009-09-16 13:31:00	0	DTA	13	1	4	M
1	2009-09-16 13:32:00	0	DTA	13	1	4	M
1	2009-09-16 13:33:00	0	DTA	13	1	4	M
1	2009-09-16 13:34:00	4	DTA	13	1	4	M
1	2009-09-16 13:35:00	0	DTA	13	1	4	M
1	2009-09-16 13:36:00	0	DTA	13	1	4	M
1	2009-09-16 13:37:00	4	DTA	13	1	4	M
1	2009-09-16 13:38:00	21	DTA	13	1	4	M
1	2009-09-16 13:39:00	0	DTA	13	1	4	M
1	2009-09-16 13:40:00	0	DTA	13	1	4	M
1	2009-09-16 13:41:00	0	DTA	13	1	4	M
1	2009-09-16 13:42:00	65	DTA	13	1	4	M
1	2009-09-16 13:43:00	0	DTA	13	1	4	M
1	2009-09-16 13:44:00	47	DTA	13	1	4	M
1	2009-09-16 13:45:00	0	DTA	13	1	4	M
1	2009-09-16 13:46:00	51	DTA	13	1	4	M
1	2009-09-16 13:47:00	0	DTA	13	1	4	M
1	2009-09-16 13:48:00	0	DTA	13	1	4	M
1	2009-09-16 13:49:00	0	DTA	13	1	4	M
1	2009-09-16 13:50:00	0	DTA	13	1	4	M
1	2009-09-16 13:51:00	0	DTA	13	1	4	M
1	2009-09-16 13:52:00	0	DTA	13	1	4	M
1	2009-09-16 13:53:00	0	DTA	13	1	4	M
1	2009-09-16 13:54:00	0	DTA	13	1	4	M
1	2009-09-16 13:55:00	0	DTA	13	1	4	M
1	2009-09-16 13:56:00	0	DTA	13	1	4	M
1	2009-09-16 13:57:00	0	DTA	13	1	4	M
1	2009-09-16 13:58:00	0	DTA	13	1	4	M
1	2009-09-16 13:59:00	0	DTA	13	1	4	M
1	2009-09-16 14:00:00	0	DTA	13	1	4	M
1	2009-09-16 14:01:00	0	DTA	14	1	4	M
1	2009-09-16 14:02:00	0	DTA	14	1	4	M
1	2009-09-16 14:03:00	0	DTA	14	1	4	M
1	2009-09-16 14:04:00	0	DTA	14	1	4	M
1	2009-09-16 14:05:00	0	DTA	14	1	4	M
1	2009-09-16 14:06:00	0	DTA	14	1	4	M
1	2009-09-16 14:07:00	65	DTA	14	1	4	M
1	2009-09-16 14:08:00	0	DTA	14	1	4	M
1	2009-09-16 14:09:00	4	DTA	14	1	4	M
1	2009-09-16 14:10:00	81	DTA	14	1	4	M
1	2009-09-16 14:11:00	135	DTA	14	1	4	M
1	2009-09-16 14:12:00	117	DTA	14	1	4	M
1	2009-09-16 14:13:00	0	DTA	14	1	4	M
1	2009-09-16 14:14:00	0	DTA	14	1	4	M
1	2009-09-16 14:15:00	0	DTA	14	1	4	M
1	2009-09-16 14:16:00	185	DTA	14	1	4	M
1	2009-09-16 14:17:00	86	DTA	14	1	4	M
1	2009-09-16 14:18:00	0	DTA	14	1	4	M
1	2009-09-16 14:19:00	38	DTA	14	1	4	M
1	2009-09-16 14:20:00	75	DTA	14	1	4	M
1	2009-09-16 14:21:00	0	DTA	14	1	4	M
1	2009-09-16 14:22:00	912	DTA	14	1	4	M
1	2009-09-16 14:23:00	810	DTA	14	1	4	M
1	2009-09-16 14:24:00	731	DTA	14	1	4	M
1	2009-09-16 14:25:00	55	DTA	14	1	4	M
1	2009-09-16 14:26:00	0	DTA	14	1	4	M
1	2009-09-16 14:27:00	0	DTA	14	1	4	M
1	2009-09-16 14:28:00	0	DTA	14	1	4	M
1	2009-09-16 14:29:00	0	DTA	14	1	4	M
1	2009-09-16 14:30:00	0	DTA	14	1	4	M
1	2009-09-16 14:31:00	0	DTA	14	1	4	M
1	2009-09-16 14:32:00	75	DTA	14	1	4	M
1	2009-09-16 14:33:00	0	DTA	14	1	4	M
1	2009-09-16 14:34:00	0	DTA	14	1	4	M
1	2009-09-16 14:35:00	0	DTA	14	1	4	M
1	2009-09-16 14:36:00	0	DTA	14	1	4	M
1	2009-09-16 14:37:00	0	DTA	14	1	4	M
1	2009-09-16 14:38:00	0	DTA	14	1	4	M
1	2009-09-16 14:39:00	4	DTA	14	1	4	M
1	2009-09-16 14:40:00	0	DTA	14	1	4	M
1	2009-09-16 14:41:00	0	DTA	14	1	4	M
1	2009-09-16 14:42:00	0	DTA	14	1	4	M
1	2009-09-16 14:43:00	4	DTA	14	1	4	M
1	2009-09-16 14:44:00	0	DTA	14	1	4	M
1	2009-09-16 14:45:00	0	DTA	14	1	4	M
1	2009-09-16 14:46:00	0	DTA	14	1	4	M
1	2009-09-16 14:47:00	81	DTA	14	1	4	M
1	2009-09-16 14:48:00	21	DTA	14	1	4	M
1	2009-09-16 14:49:00	17	DTA	14	1	4	M
1	2009-09-16 14:50:00	0	DTA	14	1	4	M
1	2009-09-16 14:51:00	0	DTA	14	1	4	M
1	2009-09-16 14:52:00	0	DTA	14	1	4	M
1	2009-09-16 14:53:00	0	DTA	14	1	4	M
1	2009-09-16 14:54:00	0	DTA	14	1	4	M
1	2009-09-16 14:55:00	0	DTA	14	1	4	M
1	2009-09-16 14:56:00	0	DTA	14	1	4	M
1	2009-09-16 14:57:00	0	DTA	14	1	4	M
1	2009-09-16 14:58:00	0	DTA	14	1	4	M
1	2009-09-16 14:59:00	0	DTA	14	1	4	M
1	2009-09-16 15:00:00	0	DTA	14	1	4	M
1	2009-09-16 15:01:00	0	DTA	15	1	4	M
1	2009-09-16 15:02:00	0	DTA	15	1	4	M
1	2009-09-16 15:03:00	0	DTA	15	1	4	M
1	2009-09-16 15:04:00	0	DTA	15	1	4	M
1	2009-09-16 15:05:00	0	DTA	15	1	4	M
1	2009-09-16 15:06:00	0	DTA	15	1	4	M
1	2009-09-16 15:07:00	0	DTA	15	1	4	M
1	2009-09-16 15:08:00	0	DTA	15	1	4	M
1	2009-09-16 15:09:00	47	DTA	15	1	4	M
1	2009-09-16 15:10:00	0	DTA	15	1	4	M
1	2009-09-16 15:11:00	51	DTA	15	1	4	M
1	2009-09-16 15:12:00	0	DTA	15	1	4	M
1	2009-09-16 15:13:00	0	DTA	15	1	4	M
1	2009-09-16 15:14:00	0	DTA	15	1	4	M
1	2009-09-16 15:15:00	0	DTA	15	1	4	M
1	2009-09-16 15:16:00	0	DTA	15	1	4	M
1	2009-09-16 15:17:00	0	DTA	15	1	4	M
1	2009-09-16 15:18:00	0	DTA	15	1	4	M
1	2009-09-16 15:19:00	0	DTA	15	1	4	M
1	2009-09-16 15:20:00	0	DTA	15	1	4	M
1	2009-09-16 15:21:00	4	DTA	15	1	4	M
1	2009-09-16 15:22:00	0	DTA	15	1	4	M
1	2009-09-16 15:23:00	0	DTA	15	1	4	M
1	2009-09-16 15:24:00	0	DTA	15	1	4	M
1	2009-09-16 15:25:00	0	DTA	15	1	4	M
1	2009-09-16 15:26:00	42	DTA	15	1	4	M
1	2009-09-16 15:27:00	25	DTA	15	1	4	M
1	2009-09-16 15:28:00	86	DTA	15	1	4	M
1	2009-09-16 15:29:00	0	DTA	15	1	4	M
1	2009-09-16 15:30:00	0	DTA	15	1	4	M
1	2009-09-16 15:31:00	101	DTA	15	1	4	M
1	2009-09-16 15:32:00	101	DTA	15	1	4	M
1	2009-09-16 15:33:00	91	DTA	15	1	4	M
1	2009-09-16 15:34:00	0	DTA	15	1	4	M
1	2009-09-16 15:35:00	0	DTA	15	1	4	M
1	2009-09-16 15:36:00	0	DTA	15	1	4	M
1	2009-09-16 15:37:00	0	DTA	15	1	4	M
1	2009-09-16 15:38:00	4	DTA	15	1	4	M
1	2009-09-16 15:39:00	106	DTA	15	1	4	M
1	2009-09-16 15:40:00	0	DTA	15	1	4	M
1	2009-09-16 15:41:00	0	DTA	15	1	4	M
1	2009-09-16 15:42:00	0	DTA	15	1	4	M
1	2009-09-16 15:43:00	0	DTA	15	1	4	M
1	2009-09-16 15:44:00	0	DTA	15	1	4	M
1	2009-09-16 15:45:00	0	DTA	15	1	4	M
1	2009-09-16 15:46:00	0	DTA	15	1	4	M
1	2009-09-16 15:47:00	0	DTA	15	1	4	M
1	2009-09-16 15:48:00	0	DTA	15	1	4	M
1	2009-09-16 15:49:00	0	DTA	15	1	4	M
1	2009-09-16 15:50:00	0	DTA	15	1	4	M
1	2009-09-16 15:51:00	0	DTA	15	1	4	M
1	2009-09-16 15:52:00	0	DTA	15	1	4	M
1	2009-09-16 15:53:00	0	DTA	15	1	4	M
1	2009-09-16 15:54:00	0	DTA	15	1	4	M
1	2009-09-16 15:55:00	0	DTA	15	1	4	M
1	2009-09-16 15:56:00	0	DTA	15	1	4	M
1	2009-09-16 15:57:00	0	DTA	15	1	4	M
1	2009-09-16 15:58:00	0	DTA	15	1	4	M
1	2009-09-16 15:59:00	17	DTA	15	1	4	M	Peak DTA
1	2009-09-16 16:00:00	47	DTA	15	1	4	M	Peak DTA
1	2009-09-16 16:01:00	0	DTA	16	1	4	M	Peak DTA
1	2009-09-16 16:02:00	0	DTA	16	1	4	M	Peak DTA
1	2009-09-16 16:03:00	96	DTA	16	1	4	M	Peak DTA
1	2009-09-16 16:04:00	0	DTA	16	1	4	M	Peak DTA
1	2009-09-16 16:05:00	47	DTA	16	1	4	M	Peak DTA
1	2009-09-16 16:06:00	0	DTA	16	1	4	M	Peak DTA
1	2009-09-16 16:07:00	0	DTA	16	1	4	M	Peak DTA
1	2009-09-16 16:08:00	0	DTA	16	1	4	M	Peak DTA
1	2009-09-16 16:09:00	0	DTA	16	1	4	M	Peak DTA
1	2009-09-16 16:10:00	51	DTA	16	1	4	M	Peak DTA
1	2009-09-16 16:11:00	0	DTA	16	1	4	M	Peak DTA
1	2009-09-16 16:12:00	0	DTA	16	1	4	M	Peak DTA
1	2009-09-16 16:13:00	0	DTA	16	1	4	M	Peak DTA
1	2009-09-16 16:14:00	0	DTA	16	1	4	M	Peak DTA
1	2009-09-16 16:15:00	0	DTA	16	1	4	M	Peak DTA
1	2009-09-16 16:16:00	0	DTA	16	1	4	M	Peak DTA
1	2009-09-16 16:17:00	0	DTA	16	1	4	M	Peak DTA
1	2009-09-16 16:18:00	0	DTA	16	1	4	M	Peak DTA
1	2009-09-16 16:19:00	0	DTA	16	1	4	M	Peak DTA
1	2009-09-16 16:20:00	0	DTA	16	1	4	M	Peak DTA
1	2009-09-16 16:21:00	0	DTA	16	1	4	M	Peak DTA
1	2009-09-16 16:22:00	0	DTA	16	1	4	M	Peak DTA
1	2009-09-16 16:23:00	0	DTA	16	1	4	M	Peak DTA
1	2009-09-16 16:24:00	0	DTA	16	1	4	M	Peak DTA
1	2009-09-16 16:25:00	0	DTA	16	1	4	M	Peak DTA
1	2009-09-16 16:26:00	0	DTA	16	1	4	M	Peak DTA
1	2009-09-16 16:27:00	0	DTA	16	1	4	M	Peak DTA
1	2009-09-16 16:28:00	86	DTA	16	1	4	M	Peak DTA
1	2009-09-16 16:29:00	34	DTA	16	1	4	M	Peak DTA
1	2009-09-16 16:30:00	0	DTA	16	1	4	M	Peak DTA
1	2009-09-16 16:31:00	0	DTA	16	1	4	M	Peak DTA
1	2009-09-16 16:32:00	0	DTA	16	1	4	M	Peak DTA
1	2009-09-16 16:33:00	0	DTA	16	1	4	M	Peak DTA
1	2009-09-16 16:34:00	0	DTA	16	1	4	M	Peak DTA
1	2009-09-16 16:35:00	65	DTA	16	1	4	M	Peak DTA
1	2009-09-16 16:36:00	0	DTA	16	1	4	M	Peak DTA
1	2009-09-16 16:37:00	0	DTA	16	1	4	M	Peak DTA
1	2009-09-16 16:38:00	0	DTA	16	1	4	M	Peak DTA
1	2009-09-16 16:39:00	0	DTA	16	1	4	M	Peak DTA
1	2009-09-16 16:40:00	0	DTA	16	1	4	M	Peak DTA
1	2009-09-16 16:41:00	0	DTA	16	1	4	M	Peak DTA
1	2009-09-16 16:42:00	0	DTA	16	1	4	M	Peak DTA
1	2009-09-16 16:43:00	0	DTA	16	1	4	M	Peak DTA
1	2009-09-16 16:44:00	0	DTA	16	1	4	M	Peak DTA
1	2009-09-16 16:45:00	8	DTA	16	1	4	M	Peak DTA
1	2009-09-16 16:46:00	0	DTA	16	1	4	M	Peak DTA
1	2009-09-16 16:47:00	0	DTA	16	1	4	M	Peak DTA
1	2009-09-16 16:48:00	0	DTA	16	1	4	M	Peak DTA
1	2009-09-16 16:49:00	0	DTA	16	1	4	M	Peak DTA
1	2009-09-16 16:50:00	0	DTA	16	1	4	M	Peak DTA
1	2009-09-16 16:51:00	0	DTA	16	1	4	M	Peak DTA
1	2009-09-16 16:52:00	0	DTA	16	1	4	M	Peak DTA
1	2009-09-16 16:53:00	0	DTA	16	1	4	M	Peak DTA
1	2009-09-16 16:54:00	4	DTA	16	1	4	M	Peak DTA
1	2009-09-16 16:55:00	0	DTA	16	1	4	M	Peak DTA
1	2009-09-16 16:56:00	8	DTA	16	1	4	M	Peak DTA
1	2009-09-16 16:57:00	0	DTA	16	1	4	M	Peak DTA
1	2009-09-16 16:58:00	0	DTA	16	1	4	M	Peak DTA
1	2009-09-16 16:59:00	0	DTA	16	1	4	M	Peak DTA
1	2009-09-16 17:00:00	0	DTA	16	1	4	M	Peak DTA
1	2009-09-16 17:01:00	4	DTA	17	1	4	M	Peak DTA
1	2009-09-16 17:02:00	0	DTA	17	1	4	M	Peak DTA
1	2009-09-16 17:03:00	0	DTA	17	1	4	M	Peak DTA
1	2009-09-16 17:04:00	0	DTA	17	1	4	M	Peak DTA
1	2009-09-16 17:05:00	0	DTA	17	1	4	M	Peak DTA
1	2009-09-16 17:06:00	0	DTA	17	1	4	M	Peak DTA
1	2009-09-16 17:07:00	0	DTA	17	1	4	M	Peak DTA
1	2009-09-16 17:08:00	0	DTA	17	1	4	M	Peak DTA
1	2009-09-16 17:09:00	75	DTA	17	1	4	M	Peak DTA
1	2009-09-16 17:10:00	47	DTA	17	1	4	M	Peak DTA
1	2009-09-16 17:11:00	0	DTA	17	1	4	M	Peak DTA
1	2009-09-16 17:12:00	0	DTA	17	1	4	M	Peak DTA
1	2009-09-16 17:13:00	0	DTA	17	1	4	M	Peak DTA
1	2009-09-16 17:14:00	0	DTA	17	1	4	M	Peak DTA
1	2009-09-16 17:15:00	0	DTA	17	1	4	M	Peak DTA
1	2009-09-16 17:16:00	86	DTA	17	1	4	M	Peak DTA
1	2009-09-16 17:17:00	0	DTA	17	1	4	M	Peak DTA
1	2009-09-16 17:18:00	0	DTA	17	1	4	M	Peak DTA
1	2009-09-16 17:19:00	0	DTA	17	1	4	M	Peak DTA
1	2009-09-16 17:20:00	0	DTA	17	1	4	M	Peak DTA
1	2009-09-16 17:21:00	0	DTA	17	1	4	M	Peak DTA
1	2009-09-16 17:22:00	0	DTA	17	1	4	M	Peak DTA
1	2009-09-16 17:23:00	0	DTA	17	1	4	M	Peak DTA
1	2009-09-16 17:24:00	0	DTA	17	1	4	M	Peak DTA
1	2009-09-16 17:25:00	0	DTA	17	1	4	M	Peak DTA
1	2009-09-16 17:26:00	0	DTA	17	1	4	M	Peak DTA
1	2009-09-16 17:27:00	0	DTA	17	1	4	M	Peak DTA
1	2009-09-16 17:28:00	0	DTA	17	1	4	M	Peak DTA
1	2009-09-16 17:29:00	0	DTA	17	1	4	M	Peak DTA
1	2009-09-16 17:30:00	0	DTA	17	1	4	M	Peak DTA
1	2009-09-16 17:31:00	0	DTA	17	1	4	M	Peak DTA
1	2009-09-16 17:32:00	0	DTA	17	1	4	M	Peak DTA
1	2009-09-16 17:33:00	0	DTA	17	1	4	M	Peak DTA
1	2009-09-16 17:34:00	0	DTA	17	1	4	M	Peak DTA
1	2009-09-16 17:35:00	0	DTA	17	1	4	M	Peak DTA
1	2009-09-16 17:36:00	0	DTA	17	1	4	M	Peak DTA
1	2009-09-16 17:37:00	0	DTA	17	1	4	M	Peak DTA
1	2009-09-16 17:38:00	0	DTA	17	1	4	M	Peak DTA
1	2009-09-16 17:39:00	0	DTA	17	1	4	M	Peak DTA
1	2009-09-16 17:40:00	0	DTA	17	1	4	M	Peak DTA
1	2009-09-16 17:41:00	0	DTA	17	1	4	M	Peak DTA
1	2009-09-16 17:42:00	0	DTA	17	1	4	M	Peak DTA
1	2009-09-16 17:43:00	0	DTA	17	1	4	M	Peak DTA
1	2009-09-16 17:44:00	0	DTA	17	1	4	M	Peak DTA
1	2009-09-16 17:45:00	0	DTA	17	1	4	M	Peak DTA
1	2009-09-16 17:46:00	0	DTA	17	1	4	M	Peak DTA
1	2009-09-16 17:47:00	0	DTA	17	1	4	M	Peak DTA
1	2009-09-16 17:48:00	0	DTA	17	1	4	M	Peak DTA
1	2009-09-16 17:49:00	0	DTA	17	1	4	M	Peak DTA
1	2009-09-16 17:50:00	0	DTA	17	1	4	M	Peak DTA
1	2009-09-16 17:51:00	0	DTA	17	1	4	M	Peak DTA
1	2009-09-16 17:52:00	0	DTA	17	1	4	M	Peak DTA
1	2009-09-16 17:53:00	0	DTA	17	1	4	M	Peak DTA
1	2009-09-16 17:54:00	0	DTA	17	1	4	M	Peak DTA
1	2009-09-16 17:55:00	0	DTA	17	1	4	M	Peak DTA
1	2009-09-16 17:56:00	0	DTA	17	1	4	M	Peak DTA
1	2009-09-16 17:57:00	0	DTA	17	1	4	M	Peak DTA
1	2009-09-16 17:58:00	0	DTA	17	1	4	M	Peak DTA
1	2009-09-16 17:59:00	0	DTA	17	1	4	M	Peak DTA
1	2009-09-16 18:00:00	0	DTA	17	1	4	M	Peak DTA
1	2009-09-16 18:01:00	0	DTA	18	1	4	M	Peak DTA
1	2009-09-16 18:02:00	0	DTA	18	1	4	M	Peak DTA
1	2009-09-16 18:03:00	4	DTA	18	1	4	M	Peak DTA
1	2009-09-16 18:04:00	0	DTA	18	1	4	M	Peak DTA
1	2009-09-16 18:05:00	0	DTA	18	1	4	M	Peak DTA
1	2009-09-16 18:06:00	0	DTA	18	1	4	M	Peak DTA
1	2009-09-16 18:07:00	106	DTA	18	1	4	M	Peak DTA
1	2009-09-16 18:08:00	75	DTA	18	1	4	M	Peak DTA
1	2009-09-16 18:09:00	51	DTA	18	1	4	M	Peak DTA
1	2009-09-16 18:10:00	0	DTA	18	1	4	M	Peak DTA
1	2009-09-16 18:11:00	141	DTA	18	1	4	M	Peak DTA
1	2009-09-16 18:12:00	60	DTA	18	1	4	M	Peak DTA
1	2009-09-16 18:13:00	60	DTA	18	1	4	M	Peak DTA
1	2009-09-16 18:14:00	0	DTA	18	1	4	M	Peak DTA
1	2009-09-16 18:15:00	0	DTA	18	1	4	M	Peak DTA
1	2009-09-16 18:16:00	0	DTA	18	1	4	M	Peak DTA
1	2009-09-16 18:17:00	0	DTA	18	1	4	M	Peak DTA
1	2009-09-16 18:18:00	0	DTA	18	1	4	M	Peak DTA
1	2009-09-16 18:19:00	0	DTA	18	1	4	M	Peak DTA
1	2009-09-16 18:20:00	0	DTA	18	1	4	M	Peak DTA
1	2009-09-16 18:21:00	147	DTA	18	1	4	M	Peak DTA
1	2009-09-16 18:22:00	0	DTA	18	1	4	M	Peak DTA
1	2009-09-16 18:23:00	0	DTA	18	1	4	M	Peak DTA
1	2009-09-16 18:24:00	0	DTA	18	1	4	M	Peak DTA
1	2009-09-16 18:25:00	0	DTA	18	1	4	M	Peak DTA
1	2009-09-16 18:26:00	0	DTA	18	1	4	M	Peak DTA
1	2009-09-16 18:27:00	0	DTA	18	1	4	M	Peak DTA
1	2009-09-16 18:28:00	0	DTA	18	1	4	M	Peak DTA
1	2009-09-16 18:29:00	0	DTA	18	1	4	M	Peak DTA
1	2009-09-16 18:30:00	0	DTA	18	1	4	M	Peak DTA
1	2009-09-16 18:31:00	0	DTA	18	1	4	M	Peak DTA
1	2009-09-16 18:32:00	101	DTA	18	1	4	M	Peak DTA
1	2009-09-16 18:33:00	25	DTA	18	1	4	M	Peak DTA
1	2009-09-16 18:34:00	0	DTA	18	1	4	M	Peak DTA
1	2009-09-16 18:35:00	0	DTA	18	1	4	M	Peak DTA
1	2009-09-16 18:36:00	0	DTA	18	1	4	M	Peak DTA
1	2009-09-16 18:37:00	0	DTA	18	1	4	M	Peak DTA
1	2009-09-16 18:38:00	0	DTA	18	1	4	M	Peak DTA
1	2009-09-16 18:39:00	0	DTA	18	1	4	M	Peak DTA
1	2009-09-16 18:40:00	0	DTA	18	1	4	M	Peak DTA
1	2009-09-16 18:41:00	0	DTA	18	1	4	M	Peak DTA
1	2009-09-16 18:42:00	0	DTA	18	1	4	M	Peak DTA
1	2009-09-16 18:43:00	17	DTA	18	1	4	M	Peak DTA
1	2009-09-16 18:44:00	0	DTA	18	1	4	M	Peak DTA
1	2009-09-16 18:45:00	0	DTA	18	1	4	M	Peak DTA
1	2009-09-16 18:46:00	0	DTA	18	1	4	M	Peak DTA
1	2009-09-16 18:47:00	0	DTA	18	1	4	M	Peak DTA
1	2009-09-16 18:48:00	0	DTA	18	1	4	M	Peak DTA
1	2009-09-16 18:49:00	0	DTA	18	1	4	M	Peak DTA
1	2009-09-16 18:50:00	0	DTA	18	1	4	M	Peak DTA
1	2009-09-16 18:51:00	0	DTA	18	1	4	M	Peak DTA
1	2009-09-16 18:52:00	0	DTA	18	1	4	M	Peak DTA
1	2009-09-16 18:53:00	0	DTA	18	1	4	M	Peak DTA
1	2009-09-16 18:54:00	0	DTA	18	1	4	M	Peak DTA
1	2009-09-16 18:55:00	0	DTA	18	1	4	M	Peak DTA
1	2009-09-16 18:56:00	0	DTA	18	1	4	M	Peak DTA
1	2009-09-16 18:57:00	0	DTA	18	1	4	M	Peak DTA
1	2009-09-16 18:58:00	0	DTA	18	1	4	M	Peak DTA
1	2009-09-16 18:59:00	0	DTA	18	1	4	M	Peak DTA
1	2009-09-16 19:00:00	0	DTA	18	1	4	M	Peak DTA
1	2009-09-16 19:01:00	0	DTA	19	1	4	M	Peak DTA
1	2009-09-16 19:02:00	0	DTA	19	1	4	M	Peak DTA
1	2009-09-16 19:03:00	60	DTA	19	1	4	M	Peak DTA
1	2009-09-16 19:04:00	51	DTA	19	1	4	M	Peak DTA
1	2009-09-16 19:05:00	0	DTA	19	1	4	M	Peak DTA
1	2009-09-16 19:06:00	0	DTA	19	1	4	M	Peak DTA
1	2009-09-16 19:07:00	0	DTA	19	1	4	M	Peak DTA
1	2009-09-16 19:08:00	0	DTA	19	1	4	M	Peak DTA
1	2009-09-16 19:09:00	47	DTA	19	1	4	M	Peak DTA
1	2009-09-16 19:10:00	60	DTA	19	1	4	M	Peak DTA
1	2009-09-16 19:11:00	0	DTA	19	1	4	M	Peak DTA
1	2009-09-16 19:12:00	0	DTA	19	1	4	M	Peak DTA
1	2009-09-16 19:13:00	0	DTA	19	1	4	M	Peak DTA
1	2009-09-16 19:14:00	106	DTA	19	1	4	M	Peak DTA
1	2009-09-16 19:15:00	0	DTA	19	1	4	M	Peak DTA
1	2009-09-16 19:16:00	0	DTA	19	1	4	M	Peak DTA
1	2009-09-16 19:17:00	0	DTA	19	1	4	M	Peak DTA
1	2009-09-16 19:18:00	0	DTA	19	1	4	M	Peak DTA
1	2009-09-16 19:19:00	323	DTA	19	1	4	M	Peak DTA
1	2009-09-16 19:20:00	578	DTA	19	1	4	M	Peak DTA
1	2009-09-16 19:21:00	4	DTA	19	1	4	M	Peak DTA
1	2009-09-16 19:22:00	0	DTA	19	1	4	M	Peak DTA
1	2009-09-16 19:23:00	0	DTA	19	1	4	M	Peak DTA
1	2009-09-16 19:24:00	0	DTA	19	1	4	M	Peak DTA
1	2009-09-16 19:25:00	17	DTA	19	1	4	M	Peak DTA
1	2009-09-16 19:26:00	0	DTA	19	1	4	M	Peak DTA
1	2009-09-16 19:27:00	0	DTA	19	1	4	M	Peak DTA
1	2009-09-16 19:28:00	0	DTA	19	1	4	M	Peak DTA
1	2009-09-16 19:29:00	0	DTA	19	1	4	M	Peak DTA
1	2009-09-16 19:30:00	25	DTA	19	1	4	M	Peak DTA
1	2009-09-16 19:31:00	0	DTA	19	1	4	M	Peak DTA
1	2009-09-16 19:32:00	91	DTA	19	1	4	M	Peak DTA
1	2009-09-16 19:33:00	0	DTA	19	1	4	M	Peak DTA
1	2009-09-16 19:34:00	0	DTA	19	1	4	M	Peak DTA
1	2009-09-16 19:35:00	0	DTA	19	1	4	M	Peak DTA
1	2009-09-16 19:36:00	21	DTA	19	1	4	M	Peak DTA
1	2009-09-16 19:37:00	42	DTA	19	1	4	M	Peak DTA
1	2009-09-16 19:38:00	0	DTA	19	1	4	M	Peak DTA
1	2009-09-16 19:39:00	0	DTA	19	1	4	M	Peak DTA
1	2009-09-16 19:40:00	0	DTA	19	1	4	M	Peak DTA
1	2009-09-16 19:41:00	0	DTA	19	1	4	M	Peak DTA
1	2009-09-16 19:42:00	0	DTA	19	1	4	M	Peak DTA
1	2009-09-16 19:43:00	387	DTA	19	1	4	M	Peak DTA
1	2009-09-16 19:44:00	331	DTA	19	1	4	M	Peak DTA
1	2009-09-16 19:45:00	359	DTA	19	1	4	M	Peak DTA
1	2009-09-16 19:46:00	369	DTA	19	1	4	M	Peak DTA
1	2009-09-16 19:47:00	418	DTA	19	1	4	M	Peak DTA
1	2009-09-16 19:48:00	505	DTA	19	1	4	M	Peak DTA
1	2009-09-16 19:49:00	0	DTA	19	1	4	M	Peak DTA
1	2009-09-16 19:50:00	0	DTA	19	1	4	M	Peak DTA
1	2009-09-16 19:51:00	0	DTA	19	1	4	M	Peak DTA
1	2009-09-16 19:52:00	0	DTA	19	1	4	M	Peak DTA
1	2009-09-16 19:53:00	0	DTA	19	1	4	M	Peak DTA
1	2009-09-16 19:54:00	0	DTA	19	1	4	M	Peak DTA
1	2009-09-16 19:55:00	0	DTA	19	1	4	M	Peak DTA
1	2009-09-16 19:56:00	0	DTA	19	1	4	M	Peak DTA
1	2009-09-16 19:57:00	0	DTA	19	1	4	M	Peak DTA
1	2009-09-16 19:58:00	0	DTA	19	1	4	M	Peak DTA
1	2009-09-16 19:59:00	0	DTA	19	1	4	M	Peak DTA
1	2009-09-16 20:00:00	0	DTA	19	1	4	M	Peak DTA
1	2009-09-16 20:01:00	0	DTA	20	1	4	M	Peak DTA
1	2009-09-16 20:02:00	0	DTA	20	1	4	M	Peak DTA
1	2009-09-16 20:03:00	0	DTA	20	1	4	M	Peak DTA
1	2009-09-16 20:04:00	4	DTA	20	1	4	M	Peak DTA
1	2009-09-16 20:05:00	0	DTA	20	1	4	M	Peak DTA
1	2009-09-16 20:06:00	0	DTA	20	1	4	M	Peak DTA
1	2009-09-16 20:07:00	0	DTA	20	1	4	M	Peak DTA
1	2009-09-16 20:08:00	0	DTA	20	1	4	M	Peak DTA
1	2009-09-16 20:09:00	0	DTA	20	1	4	M	Peak DTA
1	2009-09-16 20:10:00	0	DTA	20	1	4	M	Peak DTA
1	2009-09-16 20:11:00	0	DTA	20	1	4	M	Peak DTA
1	2009-09-16 20:12:00	0	DTA	20	1	4	M	Peak DTA
1	2009-09-16 20:13:00	0	DTA	20	1	4	M	Peak DTA
1	2009-09-16 20:14:00	0	DTA	20	1	4	M	Peak DTA
1	2009-09-16 20:15:00	0	DTA	20	1	4	M	Peak DTA
1	2009-09-16 20:16:00	0	DTA	20	1	4	M	Peak DTA
1	2009-09-16 20:17:00	0	DTA	20	1	4	M	Peak DTA
1	2009-09-16 20:18:00	0	DTA	20	1	4	M	Peak DTA
1	2009-09-16 20:19:00	0	DTA	20	1	4	M	Peak DTA
1	2009-09-16 20:20:00	0	DTA	20	1	4	M	Peak DTA
1	2009-09-16 20:21:00	4	DTA	20	1	4	M	Peak DTA
1	2009-09-16 20:22:00	0	DTA	20	1	4	M	Peak DTA
1	2009-09-16 20:23:00	17	DTA	20	1	4	M	Peak DTA
1	2009-09-16 20:24:00	0	DTA	20	1	4	M	Peak DTA
1	2009-09-16 20:25:00	0	DTA	20	1	4	M	Peak DTA
1	2009-09-16 20:26:00	0	DTA	20	1	4	M	Peak DTA
1	2009-09-16 20:27:00	0	DTA	20	1	4	M	Peak DTA
1	2009-09-16 20:28:00	0	DTA	20	1	4	M	Peak DTA
1	2009-09-16 20:29:00	0	DTA	20	1	4	M	Peak DTA
1	2009-09-16 20:30:00	0	DTA	20	1	4	M	Peak DTA
1	2009-09-16 20:31:00	0	DTA	20	1	4	M	Peak DTA
1	2009-09-16 20:32:00	0	DTA	20	1	4	M	Peak DTA
1	2009-09-16 20:33:00	0	DTA	20	1	4	M	Peak DTA
1	2009-09-16 20:34:00	0	DTA	20	1	4	M	Peak DTA
1	2009-09-16 20:35:00	0	DTA	20	1	4	M	Peak DTA
1	2009-09-16 20:36:00	0	DTA	20	1	4	M	Peak DTA
1	2009-09-16 20:37:00	0	DTA	20	1	4	M	Peak DTA
1	2009-09-16 20:38:00	0	DTA	20	1	4	M	Peak DTA
1	2009-09-16 20:39:00	0	DTA	20	1	4	M	Peak DTA
1	2009-09-16 20:40:00	0	DTA	20	1	4	M	Peak DTA
1	2009-09-16 20:41:00	408	DTA	20	1	4	M	Peak DTA
1	2009-09-16 20:42:00	777	DTA	20	1	4	M	Peak DTA
1	2009-09-16 20:43:00	25	DTA	20	1	4	M	Peak DTA
1	2009-09-16 20:44:00	0	DTA	20	1	4	M	Peak DTA
1	2009-09-16 20:45:00	0	DTA	20	1	4	M	Peak DTA
1	2009-09-16 20:46:00	0	DTA	20	1	4	M	Peak DTA
1	2009-09-16 20:47:00	0	DTA	20	1	4	M	Peak DTA
1	2009-09-16 20:48:00	0	DTA	20	1	4	M	Peak DTA
1	2009-09-16 20:49:00	0	DTA	20	1	4	M	Peak DTA
1	2009-09-16 20:50:00	0	DTA	20	1	4	M	Peak DTA
1	2009-09-16 20:51:00	0	DTA	20	1	4	M	Peak DTA
1	2009-09-16 20:52:00	0	DTA	20	1	4	M	Peak DTA
1	2009-09-16 20:53:00	0	DTA	20	1	4	M	Peak DTA
1	2009-09-16 20:54:00	0	DTA	20	1	4	M	Peak DTA
1	2009-09-16 20:55:00	0	DTA	20	1	4	M	Peak DTA
1	2009-09-16 20:56:00	0	DTA	20	1	4	M	Peak DTA
1	2009-09-16 20:57:00	0	DTA	20	1	4	M	Peak DTA
1	2009-09-16 20:58:00	0	DTA	20	1	4	M	Peak DTA
1	2009-09-16 20:59:00	8	DTA	20	1	4	M	Peak DTA
1	2009-09-16 21:00:00	0	DTA	20	1	4	M	Peak DTA
1	2009-09-16 21:01:00	0	DTA	21	1	4	M	Peak DTA
1	2009-09-16 21:02:00	0	DTA	21	1	4	M	Peak DTA
1	2009-09-16 21:03:00	0	DTA	21	1	4	M	Peak DTA
1	2009-09-16 21:04:00	0	DTA	21	1	4	M	Peak DTA
1	2009-09-16 21:05:00	0	DTA	21	1	4	M	Peak DTA
1	2009-09-16 21:06:00	0	DTA	21	1	4	M	Peak DTA
1	2009-09-16 21:07:00	0	DTA	21	1	4	M	Peak DTA
1	2009-09-16 21:08:00	0	DTA	21	1	4	M	Peak DTA
1	2009-09-16 21:09:00	0	DTA	21	1	4	M	Peak DTA
1	2009-09-16 21:10:00	0	DTA	21	1	4	M	Peak DTA
1	2009-09-16 21:11:00	17	DTA	21	1	4	M	Peak DTA
1	2009-09-16 21:12:00	38	DTA	21	1	4	M	Peak DTA
1	2009-09-16 21:13:00	0	DTA	21	1	4	M	Peak DTA
1	2009-09-16 21:14:00	4	DTA	21	1	4	M	Peak DTA
1	2009-09-16 21:15:00	505	DTA	21	1	4	M	Peak DTA
1	2009-09-16 21:16:00	631	DTA	21	1	4	M	Peak DTA
1	2009-09-16 21:17:00	644	DTA	21	1	4	M	Peak DTA
1	2009-09-16 21:18:00	0	DTA	21	1	4	M	Peak DTA
1	2009-09-16 21:19:00	0	DTA	21	1	4	M	Peak DTA
1	2009-09-16 21:20:00	0	DTA	21	1	4	M	Peak DTA
1	2009-09-16 21:21:00	0	DTA	21	1	4	M	Peak DTA
1	2009-09-16 21:22:00	0	DTA	21	1	4	M	Peak DTA
1	2009-09-16 21:23:00	553	DTA	21	1	4	M	Peak DTA
1	2009-09-16 21:24:00	553	DTA	21	1	4	M	Peak DTA
1	2009-09-16 21:25:00	860	DTA	21	1	4	M	Peak DTA
1	2009-09-16 21:26:00	0	DTA	21	1	4	M	Peak DTA
1	2009-09-16 21:27:00	0	DTA	21	1	4	M	Peak DTA
1	2009-09-16 21:28:00	0	DTA	21	1	4	M	Peak DTA
1	2009-09-16 21:29:00	0	DTA	21	1	4	M	Peak DTA
1	2009-09-16 21:30:00	0	DTA	21	1	4	M	Peak DTA
1	2009-09-16 21:31:00	0	DTA	21	1	4	M	Peak DTA
1	2009-09-16 21:32:00	0	DTA	21	1	4	M	Peak DTA
1	2009-09-16 21:33:00	298	DTA	21	1	4	M	Peak DTA
1	2009-09-16 21:34:00	644	DTA	21	1	4	M	Peak DTA
1	2009-09-16 21:35:00	0	DTA	21	1	4	M	Peak DTA
1	2009-09-16 21:36:00	0	DTA	21	1	4	M	Peak DTA
1	2009-09-16 21:37:00	0	DTA	21	1	4	M	Peak DTA
1	2009-09-16 21:38:00	0	DTA	21	1	4	M	Peak DTA
1	2009-09-16 21:39:00	0	DTA	21	1	4	M	Peak DTA
1	2009-09-16 21:40:00	0	DTA	21	1	4	M	Peak DTA
1	2009-09-16 21:41:00	0	DTA	21	1	4	M	Peak DTA
1	2009-09-16 21:42:00	0	DTA	21	1	4	M	Peak DTA
1	2009-09-16 21:43:00	0	DTA	21	1	4	M	Peak DTA
1	2009-09-16 21:44:00	0	DTA	21	1	4	M	Peak DTA
1	2009-09-16 21:45:00	0	DTA	21	1	4	M	Peak DTA
1	2009-09-16 21:46:00	0	DTA	21	1	4	M	Peak DTA
1	2009-09-16 21:47:00	0	DTA	21	1	4	M	Peak DTA
1	2009-09-16 21:48:00	17	DTA	21	1	4	M	Peak DTA
1	2009-09-16 21:49:00	0	DTA	21	1	4	M	Peak DTA
1	2009-09-16 21:50:00	4	DTA	21	1	4	M	Peak DTA
1	2009-09-16 21:51:00	0	DTA	21	1	4	M	Peak DTA
1	2009-09-16 21:52:00	25	DTA	21	1	4	M	Peak DTA
1	2009-09-16 21:53:00	42	DTA	21	1	4	M	Peak DTA
1	2009-09-16 21:54:00	0	DTA	21	1	4	M	Peak DTA
1	2009-09-16 21:55:00	0	DTA	21	1	4	M	Peak DTA
1	2009-09-16 21:56:00	0	DTA	21	1	4	M	Peak DTA
1	2009-09-16 21:57:00	34	DTA	21	1	4	M	Peak DTA
1	2009-09-16 21:58:00	17	DTA	21	1	4	M	Peak DTA
1	2009-09-16 21:59:00	38	DTA	21	1	4	M
1	2009-09-16 22:00:00	8	DTA	21	1	4	M
1	2009-09-16 22:01:00	0	DTA	22	1	4	M
1	2009-09-16 22:02:00	17	DTA	22	1	4	M
1	2009-09-16 22:03:00	226	DTA	22	1	4	M
1	2009-09-16 22:04:00	192	DTA	22	1	4	M
1	2009-09-16 22:05:00	0	DTA	22	1	4	M
1	2009-09-16 22:06:00	171	DTA	22	1	4	M
1	2009-09-16 22:07:00	65	DTA	22	1	4	M
1	2009-09-16 22:08:00	205	DTA	22	1	4	M
1	2009-09-16 22:09:00	306	DTA	22	1	4	M
1	2009-09-16 22:10:00	378	DTA	22	1	4	M
1	2009-09-16 22:11:00	171	DTA	22	1	4	M
1	2009-09-16 22:12:00	147	DTA	22	1	4	M
1	2009-09-16 22:13:00	159	DTA	22	1	4	M
1	2009-09-16 22:14:00	553	DTA	22	1	4	M
1	2009-09-16 22:15:00	471	DTA	22	1	4	M
1	2009-09-16 22:16:00	91	DTA	22	1	4	M
1	2009-09-16 22:17:00	617	DTA	22	1	4	M
1	2009-09-16 22:18:00	81	DTA	22	1	4	M
1	2009-09-16 22:19:00	164	DTA	22	1	4	M
1	2009-09-16 22:20:00	331	DTA	22	1	4	M
1	2009-09-16 22:21:00	106	DTA	22	1	4	M
1	2009-09-16 22:22:00	34	DTA	22	1	4	M
1	2009-09-16 22:23:00	13	DTA	22	1	4	M
1	2009-09-16 22:24:00	25	DTA	22	1	4	M
1	2009-09-16 22:25:00	198	DTA	22	1	4	M
1	2009-09-16 22:26:00	359	DTA	22	1	4	M
1	2009-09-16 22:27:00	153	DTA	22	1	4	M
1	2009-09-16 22:28:00	0	DTA	22	1	4	M
1	2009-09-16 22:29:00	0	DTA	22	1	4	M
1	2009-09-16 22:30:00	0	DTA	22	1	4	M
1	2009-09-16 22:31:00	0	DTA	22	1	4	M
1	2009-09-16 22:32:00	0	DTA	22	1	4	M
1	2009-09-16 22:33:00	0	DTA	22	1	4	M
1	2009-09-16 22:34:00	0	DTA	22	1	4	M
1	2009-09-16 22:35:00	0	DTA	22	1	4	M
1	2009-09-16 22:36:00	30	DTA	22	1	4	M
1	2009-09-16 22:37:00	0	DTA	22	1	4	M
1	2009-09-16 22:38:00	0	DTA	22	1	4	M
1	2009-09-16 22:39:00	0	DTA	22	1	4	M
1	2009-09-16 22:40:00	0	DTA	22	1	4	M
1	2009-09-16 22:41:00	21	DTA	22	1	4	M
1	2009-09-16 22:42:00	0	DTA	22	1	4	M
1	2009-09-16 22:43:00	21	DTA	22	1	4	M
1	2009-09-16 22:44:00	0	DTA	22	1	4	M
1	2009-09-16 22:45:00	0	DTA	22	1	4	M
1	2009-09-16 22:46:00	4	DTA	22	1	4	M
1	2009-09-16 22:47:00	672	DTA	22	1	4	M
1	2009-09-16 22:48:00	123	DTA	22	1	4	M
1	2009-09-16 22:49:00	0	DTA	22	1	4	M
1	2009-09-16 22:50:00	0	DTA	22	1	4	M
1	2009-09-16 22:51:00	13	DTA	22	1	4	M
1	2009-09-16 22:52:00	42	DTA	22	1	4	M
1	2009-09-16 22:53:00	0	DTA	22	1	4	M
1	2009-09-16 22:54:00	0	DTA	22	1	4	M
1	2009-09-16 22:55:00	0	DTA	22	1	4	M
1	2009-09-16 22:56:00	4	DTA	22	1	4	M
1	2009-09-16 22:57:00	8	DTA	22	1	4	M
1	2009-09-16 22:58:00	0	DTA	22	1	4	M
1	2009-09-16 22:59:00	86	DTA	22	1	4	M
1	2009-09-16 23:00:00	123	DTA	22	1	4	M
1	2009-09-16 23:01:00	141	DTA	23	1	4	M
1	2009-09-16 23:02:00	141	DTA	23	1	4	M
1	2009-09-16 23:03:00	153	DTA	23	1	4	M
1	2009-09-16 23:04:00	178	DTA	23	1	4	M
1	2009-09-16 23:05:00	159	DTA	23	1	4	M
1	2009-09-16 23:06:00	198	DTA	23	1	4	M
1	2009-09-16 23:07:00	212	DTA	23	1	4	M
1	2009-09-16 23:08:00	234	DTA	23	1	4	M
1	2009-09-16 23:09:00	212	DTA	23	1	4	M
1	2009-09-16 23:10:00	178	DTA	23	1	4	M
1	2009-09-16 23:11:00	141	DTA	23	1	4	M
1	2009-09-16 23:12:00	111	DTA	23	1	4	M
1	2009-09-16 23:13:00	369	DTA	23	1	4	M
1	2009-09-16 23:14:00	205	DTA	23	1	4	M
1	2009-09-16 23:15:00	331	DTA	23	1	4	M
1	2009-09-16 23:16:00	306	NTA	23	2	4	M
1	2009-09-16 23:17:00	185	NTA	23	2	4	M
1	2009-09-16 23:18:00	81	NTA	23	2	4	M
1	2009-09-16 23:19:00	0	NTA	23	2	4	M
1	2009-09-16 23:20:00	331	NTA	23	2	4	M
1	2009-09-16 23:21:00	644	NTA	23	2	4	M
1	2009-09-16 23:22:00	75	NTA	23	2	4	M
1	2009-09-16 23:23:00	13	NTA	23	2	4	M
1	2009-09-16 23:24:00	281	NTA	23	2	4	M
1	2009-09-16 23:25:00	171	NTA	23	2	4	M
1	2009-09-16 23:26:00	178	NTA	23	2	4	M
1	2009-09-16 23:27:00	826	NTA	23	2	4	M
1	2009-09-16 23:28:00	30	NTA	23	2	4	M
1	2009-09-16 23:29:00	0	NTA	23	2	4	M
1	2009-09-16 23:30:00	0	NTA	23	2	4	M
1	2009-09-16 23:31:00	0	NTA	23	2	4	M
1	2009-09-16 23:32:00	21	NTA	23	2	4	M
1	2009-09-16 23:33:00	111	NTA	23	2	4	M
1	2009-09-16 23:34:00	0	NTA	23	2	4	M
1	2009-09-16 23:35:00	0	NTA	23	2	4	M
1	2009-09-16 23:36:00	0	NTA	23	2	4	M
1	2009-09-16 23:37:00	0	NTA	23	2	4	M
1	2009-09-16 23:38:00	0	NTA	23	2	4	M
1	2009-09-16 23:39:00	0	NTA	23	2	4	M
1	2009-09-16 23:40:00	0	NTA	23	2	4	M
1	2009-09-16 23:41:00	0	NTA	23	2	4	M
1	2009-09-16 23:42:00	164	NTA	23	2	4	M
1	2009-09-16 23:43:00	21	NTA	23	2	4	M
1	2009-09-16 23:44:00	91	NTA	23	2	4	M
1	2009-09-16 23:45:00	257	NTA	23	2	4	M
1	2009-09-16 23:46:00	129	NTA	23	2	4	M
1	2009-09-16 23:47:00	51	NTA	23	2	4	M
1	2009-09-16 23:48:00	0	NTA	23	2	4	M
1	2009-09-16 23:49:00	0	NTA	23	2	4	M
1	2009-09-16 23:50:00	0	NTA	23	2	4	M
1	2009-09-16 23:51:00	0	NTA	23	2	4	M
1	2009-09-16 23:52:00	0	NTA	23	2	4	M
1	2009-09-16 23:53:00	0	NTA	23	2	4	M
1	2009-09-16 23:54:00	0	NTA	23	2	4	M
1	2009-09-16 23:55:00	0	NTA	23	2	4	M
1	2009-09-16 23:56:00	0	NTA	23	2	4	M
1	2009-09-16 23:57:00	0	NTA	23	2	4	M
1	2009-09-16 23:58:00	0	NTA	23	2	4	M
1	2009-09-16 23:59:00	0	NTA	23	2	4	M
1	2009-09-17	0	NTA	23	2	4	M
1	2009-09-17 00:01:00	70	NTA	0	2	5	M
1	2009-09-17 00:02:00	34	NTA	0	2	5	M
1	2009-09-17 00:03:00	0	NTA	0	2	5	M
1	2009-09-17 00:04:00	0	NTA	0	2	5	M
1	2009-09-17 00:05:00	0	NTA	0	2	5	M
1	2009-09-17 00:06:00	0	NTA	0	2	5	M
1	2009-09-17 00:07:00	17	NTA	0	2	5	M
1	2009-09-17 00:08:00	13	NTA	0	2	5	M
1	2009-09-17 00:09:00	42	NTA	0	2	5	M
1	2009-09-17 00:10:00	0	NTA	0	2	5	M
1	2009-09-17 00:11:00	0	NTA	0	2	5	M
1	2009-09-17 00:12:00	0	NTA	0	2	5	M
1	2009-09-17 00:13:00	0	NTA	0	2	5	M
1	2009-09-17 00:14:00	70	NTA	0	2	5	M
1	2009-09-17 00:15:00	0	NTA	0	2	5	M
1	2009-09-17 00:16:00	0	NTA	0	2	5	M
1	2009-09-17 00:17:00	0	NTA	0	2	5	M
1	2009-09-17 00:18:00	0	NTA	0	2	5	M
1	2009-09-17 00:19:00	0	NTA	0	2	5	M
1	2009-09-17 00:20:00	0	NTA	0	2	5	M
1	2009-09-17 00:21:00	0	NTA	0	2	5	M
1	2009-09-17 00:22:00	0	NTA	0	2	5	M
1	2009-09-17 00:23:00	0	NTA	0	2	5	M
1	2009-09-17 00:24:00	81	NTA	0	2	5	M
1	2009-09-17 00:25:00	91	NTA	0	2	5	M
1	2009-09-17 00:26:00	25	NTA	0	2	5	M
1	2009-09-17 00:27:00	0	NTA	0	2	5	M
1	2009-09-17 00:28:00	0	NTA	0	2	5	M
1	2009-09-17 00:29:00	30	NTA	0	2	5	M
1	2009-09-17 00:30:00	0	NTA	0	2	5	M
1	2009-09-17 00:31:00	0	NTA	0	2	5	M
1	2009-09-17 00:32:00	4	NTA	0	2	5	M
1	2009-09-17 00:33:00	0	NTA	0	2	5	M
1	2009-09-17 00:34:00	0	NTA	0	2	5	M
1	2009-09-17 00:35:00	65	NTA	0	2	5	M
1	2009-09-17 00:36:00	65	NTA	0	2	5	M
1	2009-09-17 00:37:00	51	NTA	0	2	5	M
1	2009-09-17 00:38:00	51	NTA	0	2	5	M
1	2009-09-17 00:39:00	0	NTA	0	2	5	M
1	2009-09-17 00:40:00	4	NTA	0	2	5	M
1	2009-09-17 00:41:00	101	NTA	0	2	5	M
1	2009-09-17 00:42:00	0	NTA	0	2	5	M
1	2009-09-17 00:43:00	0	NTA	0	2	5	M
1	2009-09-17 00:44:00	0	NTA	0	2	5	M
1	2009-09-17 00:45:00	0	NTA	0	2	5	M
1	2009-09-17 00:46:00	0	NTA	0	2	5	M
1	2009-09-17 00:47:00	212	NTA	0	2	5	M
1	2009-09-17 00:48:00	378	NTA	0	2	5	M
1	2009-09-17 00:49:00	0	NTA	0	2	5	M
1	2009-09-17 00:50:00	0	NTA	0	2	5	M
1	2009-09-17 00:51:00	25	NTA	0	2	5	M
1	2009-09-17 00:52:00	25	NTA	0	2	5	M
1	2009-09-17 00:53:00	0	NTA	0	2	5	M
1	2009-09-17 00:54:00	0	NTA	0	2	5	M
1	2009-09-17 00:55:00	0	NTA	0	2	5	M
1	2009-09-17 00:56:00	0	NTA	0	2	5	M
1	2009-09-17 00:57:00	0	NTA	0	2	5	M
1	2009-09-17 00:58:00	0	NTA	0	2	5	M
1	2009-09-17 00:59:00	0	NTA	0	2	5	M
1	2009-09-17 01:00:00	51	NTA	0	2	5	M
1	2009-09-17 01:01:00	0	NTA	1	2	5	M
1	2009-09-17 01:02:00	0	NTA	1	2	5	M
1	2009-09-17 01:03:00	0	NTA	1	2	5	M
1	2009-09-17 01:04:00	0	NTA	1	2	5	M
1	2009-09-17 01:05:00	0	NTA	1	2	5	M
1	2009-09-17 01:06:00	0	NTA	1	2	5	M
1	2009-09-17 01:07:00	0	NTA	1	2	5	M
1	2009-09-17 01:08:00	0	NTA	1	2	5	M
1	2009-09-17 01:09:00	0	NTA	1	2	5	M
1	2009-09-17 01:10:00	0	NTA	1	2	5	M
1	2009-09-17 01:11:00	0	NTA	1	2	5	M
1	2009-09-17 01:12:00	0	NTA	1	2	5	M
1	2009-09-17 01:13:00	0	NTA	1	2	5	M
1	2009-09-17 01:14:00	0	NTA	1	2	5	M
1	2009-09-17 01:15:00	0	NTA	1	2	5	M
1	2009-09-17 01:16:00	0	NTA	1	2	5	M
1	2009-09-17 01:17:00	0	NTA	1	2	5	M
1	2009-09-17 01:18:00	0	NTA	1	2	5	M
1	2009-09-17 01:19:00	0	NTA	1	2	5	M
1	2009-09-17 01:20:00	0	NTA	1	2	5	M
1	2009-09-17 01:21:00	0	NTA	1	2	5	M
1	2009-09-17 01:22:00	0	NTA	1	2	5	M
1	2009-09-17 01:23:00	0	NTA	1	2	5	M
1	2009-09-17 01:24:00	0	NTA	1	2	5	M
1	2009-09-17 01:25:00	0	NTA	1	2	5	M
1	2009-09-17 01:26:00	0	NTA	1	2	5	M
1	2009-09-17 01:27:00	0	NTA	1	2	5	M
1	2009-09-17 01:28:00	0	NTA	1	2	5	M
1	2009-09-17 01:29:00	0	NTA	1	2	5	M
1	2009-09-17 01:30:00	51	NTA	1	2	5	M
1	2009-09-17 01:31:00	0	NTA	1	2	5	M
1	2009-09-17 01:32:00	0	NTA	1	2	5	M
1	2009-09-17 01:33:00	0	NTA	1	2	5	M
1	2009-09-17 01:34:00	60	NTA	1	2	5	M
1	2009-09-17 01:35:00	0	NTA	1	2	5	M
1	2009-09-17 01:36:00	0	NTA	1	2	5	M
1	2009-09-17 01:37:00	0	NTA	1	2	5	M
1	2009-09-17 01:38:00	0	NTA	1	2	5	M
1	2009-09-17 01:39:00	42	NTA	1	2	5	M
1	2009-09-17 01:40:00	21	NTA	1	2	5	M
1	2009-09-17 01:41:00	4	NTA	1	2	5	M
1	2009-09-17 01:42:00	0	NTA	1	2	5	M
1	2009-09-17 01:43:00	86	NTA	1	2	5	M
1	2009-09-17 01:44:00	47	NTA	1	2	5	M
1	2009-09-17 01:45:00	70	NTA	1	2	5	M
1	2009-09-17 01:46:00	0	NTA	1	2	5	M
1	2009-09-17 01:47:00	0	NTA	1	2	5	M
1	2009-09-17 01:48:00	460	NTA	1	2	5	M
1	2009-09-17 01:49:00	30	NTA	1	2	5	M
1	2009-09-17 01:50:00	0	NTA	1	2	5	M
1	2009-09-17 01:51:00	0	NTA	1	2	5	M
1	2009-09-17 01:52:00	0	NTA	1	2	5	M
1	2009-09-17 01:53:00	0	NTA	1	2	5	M
1	2009-09-17 01:54:00	0	NTA	1	2	5	M
1	2009-09-17 01:55:00	0	NTA	1	2	5	M
1	2009-09-17 01:56:00	0	NTA	1	2	5	M
1	2009-09-17 01:57:00	0	NTA	1	2	5	M
1	2009-09-17 01:58:00	0	NTA	1	2	5	M
1	2009-09-17 01:59:00	0	NTA	1	2	5	M
1	2009-09-17 02:00:00	0	NTA	1	2	5	M
1	2009-09-17 02:01:00	21	NTA	2	2	5	M
1	2009-09-17 02:02:00	0	NTA	2	2	5	M
1	2009-09-17 02:03:00	0	NTA	2	2	5	M
1	2009-09-17 02:04:00	0	NTA	2	2	5	M
1	2009-09-17 02:05:00	0	NTA	2	2	5	M
1	2009-09-17 02:06:00	0	NTA	2	2	5	M
1	2009-09-17 02:07:00	0	NTA	2	2	5	M
1	2009-09-17 02:08:00	0	NTA	2	2	5	M
1	2009-09-17 02:09:00	0	NTA	2	2	5	M
1	2009-09-17 02:10:00	0	NTA	2	2	5	M
1	2009-09-17 02:11:00	0	NTA	2	2	5	M
1	2009-09-17 02:12:00	38	NTA	2	2	5	M
1	2009-09-17 02:13:00	0	NTA	2	2	5	M
1	2009-09-17 02:14:00	0	NTA	2	2	5	M
1	2009-09-17 02:15:00	0	NTA	2	2	5	M
1	2009-09-17 02:16:00	0	NTA	2	2	5	M
1	2009-09-17 02:17:00	0	NTA	2	2	5	M
1	2009-09-17 02:18:00	0	NTA	2	2	5	M
1	2009-09-17 02:19:00	0	NTA	2	2	5	M
1	2009-09-17 02:20:00	0	NTA	2	2	5	M
1	2009-09-17 02:21:00	0	NTA	2	2	5	M
1	2009-09-17 02:22:00	0	NTA	2	2	5	M
1	2009-09-17 02:23:00	60	NTA	2	2	5	M
1	2009-09-17 02:24:00	8	NTA	2	2	5	M
1	2009-09-17 02:25:00	4	NTA	2	2	5	M
1	2009-09-17 02:26:00	13	NTA	2	2	5	M
1	2009-09-17 02:27:00	106	NTA	2	2	5	M
1	2009-09-17 02:28:00	0	NTA	2	2	5	M
1	2009-09-17 02:29:00	0	NTA	2	2	5	M
1	2009-09-17 02:30:00	0	NTA	2	2	5	M
1	2009-09-17 02:31:00	0	NTA	2	2	5	M
1	2009-09-17 02:32:00	38	NTA	2	2	5	M
1	2009-09-17 02:33:00	0	NTA	2	2	5	M
1	2009-09-17 02:34:00	8	NTA	2	2	5	M
1	2009-09-17 02:35:00	13	NTA	2	2	5	M
1	2009-09-17 02:36:00	0	NTA	2	2	5	M
1	2009-09-17 02:37:00	0	NTA	2	2	5	M
1	2009-09-17 02:38:00	8	NTA	2	2	5	M
1	2009-09-17 02:39:00	86	NTA	2	2	5	M
1	2009-09-17 02:40:00	0	NTA	2	2	5	M
1	2009-09-17 02:41:00	4	NTA	2	2	5	M
1	2009-09-17 02:42:00	111	NTA	2	2	5	M
1	2009-09-17 02:43:00	30	NTA	2	2	5	M
1	2009-09-17 02:44:00	70	NTA	2	2	5	M
1	2009-09-17 02:45:00	17	NTA	2	2	5	M
1	2009-09-17 02:46:00	0	NTA	2	2	5	M
1	2009-09-17 02:47:00	0	NTA	2	2	5	M
1	2009-09-17 02:48:00	70	NTA	2	2	5	M
1	2009-09-17 02:49:00	0	NTA	2	2	5	M
1	2009-09-17 02:50:00	0	NTA	2	2	5	M
1	2009-09-17 02:51:00	17	NTA	2	2	5	M
1	2009-09-17 02:52:00	0	NTA	2	2	5	M
1	2009-09-17 02:53:00	123	NTA	2	2	5	M
1	2009-09-17 02:54:00	0	NTA	2	2	5	M
1	2009-09-17 02:55:00	289	NTA	2	2	5	M
1	2009-09-17 02:56:00	0	NTA	2	2	5	M
1	2009-09-17 02:57:00	17	NTA	2	2	5	M
1	2009-09-17 02:58:00	0	NTA	2	2	5	M
1	2009-09-17 02:59:00	212	NTA	2	2	5	M
1	2009-09-17 03:00:00	0	NTA	2	2	5	M
1	2009-09-17 03:01:00	0	NTA	3	2	5	M
1	2009-09-17 03:02:00	0	NTA	3	2	5	M
1	2009-09-17 03:03:00	178	NTA	3	2	5	M
1	2009-09-17 03:04:00	0	NTA	3	2	5	M
1	2009-09-17 03:05:00	185	NTA	3	2	5	M
1	2009-09-17 03:06:00	185	NTA	3	2	5	M
1	2009-09-17 03:07:00	106	NTA	3	2	5	M
1	2009-09-17 03:08:00	4	NTA	3	2	5	M
1	2009-09-17 03:09:00	178	NTA	3	2	5	M
1	2009-09-17 03:10:00	86	NTA	3	2	5	M
1	2009-09-17 03:11:00	123	NTA	3	2	5	M
1	2009-09-17 03:12:00	159	NTA	3	2	5	M
1	2009-09-17 03:13:00	264	NTA	3	2	5	M
1	2009-09-17 03:14:00	147	NTA	3	2	5	M
1	2009-09-17 03:15:00	96	NTA	3	2	5	M
1	2009-09-17 03:16:00	141	NTA	3	2	5	M
1	2009-09-17 03:17:00	0	NTA	3	2	5	M
1	2009-09-17 03:18:00	42	NTA	3	2	5	M
1	2009-09-17 03:19:00	81	NTA	3	2	5	M
1	2009-09-17 03:20:00	96	NTA	3	2	5	M
1	2009-09-17 03:21:00	4	NTA	3	2	5	M
1	2009-09-17 03:22:00	249	NTA	3	2	5	M
1	2009-09-17 03:23:00	65	NTA	3	2	5	M
1	2009-09-17 03:24:00	0	NTA	3	2	5	M
1	2009-09-17 03:25:00	0	NTA	3	2	5	M
1	2009-09-17 03:26:00	0	NTA	3	2	5	M
1	2009-09-17 03:27:00	34	NTA	3	2	5	M
1	2009-09-17 03:28:00	30	NTA	3	2	5	M
1	2009-09-17 03:29:00	0	NTA	3	2	5	M
1	2009-09-17 03:30:00	60	NTA	3	2	5	M
1	2009-09-17 03:31:00	0	NTA	3	2	5	M
1	2009-09-17 03:32:00	0	NTA	3	2	5	M
1	2009-09-17 03:33:00	0	NTA	3	2	5	M
1	2009-09-17 03:34:00	0	NTA	3	2	5	M
1	2009-09-17 03:35:00	0	NTA	3	2	5	M
1	2009-09-17 03:36:00	55	NTA	3	2	5	M
1	2009-09-17 03:37:00	13	NTA	3	2	5	M
1	2009-09-17 03:38:00	0	NTA	3	2	5	M
1	2009-09-17 03:39:00	0	NTA	3	2	5	M
1	2009-09-17 03:40:00	0	NTA	3	2	5	M
1	2009-09-17 03:41:00	0	NTA	3	2	5	M
1	2009-09-17 03:42:00	0	NTA	3	2	5	M
1	2009-09-17 03:43:00	0	NTA	3	2	5	M
1	2009-09-17 03:44:00	0	NTA	3	2	5	M
1	2009-09-17 03:45:00	0	NTA	3	2	5	M
1	2009-09-17 03:46:00	0	NTA	3	2	5	M
1	2009-09-17 03:47:00	0	NTA	3	2	5	M
1	2009-09-17 03:48:00	0	NTA	3	2	5	M
1	2009-09-17 03:49:00	0	NTA	3	2	5	M
1	2009-09-17 03:50:00	0	NTA	3	2	5	M
1	2009-09-17 03:51:00	0	NTA	3	2	5	M
1	2009-09-17 03:52:00	0	NTA	3	2	5	M
1	2009-09-17 03:53:00	0	NTA	3	2	5	M
1	2009-09-17 03:54:00	75	NTA	3	2	5	M
1	2009-09-17 03:55:00	21	NTA	3	2	5	M
1	2009-09-17 03:56:00	17	NTA	3	2	5	M
1	2009-09-17 03:57:00	147	NTA	3	2	5	M
1	2009-09-17 03:58:00	0	NTA	3	2	5	M
1	2009-09-17 03:59:00	505	NTA	3	2	5	M
1	2009-09-17 04:00:00	0	NTA	3	2	5	M
1	2009-09-17 04:01:00	0	NTA	4	2	5	M
1	2009-09-17 04:02:00	0	NTA	4	2	5	M
1	2009-09-17 04:03:00	0	NTA	4	2	5	M
1	2009-09-17 04:04:00	0	NTA	4	2	5	M
1	2009-09-17 04:05:00	0	NTA	4	2	5	M
1	2009-09-17 04:06:00	0	NTA	4	2	5	M
1	2009-09-17 04:07:00	159	NTA	4	2	5	M
1	2009-09-17 04:08:00	0	NTA	4	2	5	M
1	2009-09-17 04:09:00	0	NTA	4	2	5	M
1	2009-09-17 04:10:00	0	NTA	4	2	5	M
1	2009-09-17 04:11:00	0	NTA	4	2	5	M
1	2009-09-17 04:12:00	0	NTA	4	2	5	M
1	2009-09-17 04:13:00	0	NTA	4	2	5	M
1	2009-09-17 04:14:00	0	NTA	4	2	5	M
1	2009-09-17 04:15:00	65	NTA	4	2	5	M
1	2009-09-17 04:16:00	13	NTA	4	2	5	M
1	2009-09-17 04:17:00	0	NTA	4	2	5	M
1	2009-09-17 04:18:00	153	NTA	4	2	5	M
1	2009-09-17 04:19:00	0	NTA	4	2	5	M
1	2009-09-17 04:20:00	0	NTA	4	2	5	M
1	2009-09-17 04:21:00	0	NTA	4	2	5	M
1	2009-09-17 04:22:00	0	NTA	4	2	5	M
1	2009-09-17 04:23:00	0	NTA	4	2	5	M
1	2009-09-17 04:24:00	0	NTA	4	2	5	M
1	2009-09-17 04:25:00	0	NTA	4	2	5	M
1	2009-09-17 04:26:00	0	NTA	4	2	5	M
1	2009-09-17 04:27:00	0	NTA	4	2	5	M
1	2009-09-17 04:28:00	0	NTA	4	2	5	M
1	2009-09-17 04:29:00	0	NTA	4	2	5	M
1	2009-09-17 04:30:00	0	NTA	4	2	5	M
1	2009-09-17 04:31:00	0	NTA	4	2	5	M
1	2009-09-17 04:32:00	0	NTA	4	2	5	M
1	2009-09-17 04:33:00	0	NTA	4	2	5	M
1	2009-09-17 04:34:00	0	NTA	4	2	5	M
1	2009-09-17 04:35:00	42	NTA	4	2	5	M
1	2009-09-17 04:36:00	257	NTA	4	2	5	M
1	2009-09-17 04:37:00	8	NTA	4	2	5	M
1	2009-09-17 04:38:00	55	NTA	4	2	5	M
1	2009-09-17 04:39:00	0	NTA	4	2	5	M
1	2009-09-17 04:40:00	0	NTA	4	2	5	M
1	2009-09-17 04:41:00	0	NTA	4	2	5	M
1	2009-09-17 04:42:00	0	NTA	4	2	5	M
1	2009-09-17 04:43:00	0	NTA	4	2	5	M
1	2009-09-17 04:44:00	0	NTA	4	2	5	M
1	2009-09-17 04:45:00	0	NTA	4	2	5	M
1	2009-09-17 04:46:00	0	NTA	4	2	5	M
1	2009-09-17 04:47:00	0	NTA	4	2	5	M
1	2009-09-17 04:48:00	0	NTA	4	2	5	M
1	2009-09-17 04:49:00	0	NTA	4	2	5	M
1	2009-09-17 04:50:00	0	NTA	4	2	5	M
1	2009-09-17 04:51:00	0	NTA	4	2	5	M
1	2009-09-17 04:52:00	0	NTA	4	2	5	M
1	2009-09-17 04:53:00	0	NTA	4	2	5	M
1	2009-09-17 04:54:00	0	NTA	4	2	5	M
1	2009-09-17 04:55:00	0	NTA	4	2	5	M
1	2009-09-17 04:56:00	0	NTA	4	2	5	M
1	2009-09-17 04:57:00	0	NTA	4	2	5	M
1	2009-09-17 04:58:00	0	NTA	4	2	5	M
1	2009-09-17 04:59:00	0	NTA	4	2	5	M
1	2009-09-17 05:00:00	0	NTA	4	2	5	M
1	2009-09-17 05:01:00	0	NTA	5	2	5	M
1	2009-09-17 05:02:00	0	NTA	5	2	5	M
1	2009-09-17 05:03:00	0	NTA	5	2	5	M
1	2009-09-17 05:04:00	30	NTA	5	2	5	M
1	2009-09-17 05:05:00	164	NTA	5	2	5	M
1	2009-09-17 05:06:00	298	NTA	5	2	5	M
1	2009-09-17 05:07:00	4	NTA	5	2	5	M
1	2009-09-17 05:08:00	17	NTA	5	2	5	M
1	2009-09-17 05:09:00	8	NTA	5	2	5	M
1	2009-09-17 05:10:00	25	NTA	5	2	5	M
1	2009-09-17 05:11:00	192	NTA	5	2	5	M
1	2009-09-17 05:12:00	0	NTA	5	2	5	M
1	2009-09-17 05:13:00	0	NTA	5	2	5	M
1	2009-09-17 05:14:00	47	NTA	5	2	5	M
1	2009-09-17 05:15:00	81	NTA	5	2	5	M
1	2009-09-17 05:16:00	0	NTA	5	2	5	M
1	2009-09-17 05:17:00	0	NTA	5	2	5	M
1	2009-09-17 05:18:00	0	NTA	5	2	5	M
1	2009-09-17 05:19:00	96	NTA	5	2	5	M
1	2009-09-17 05:20:00	0	NTA	5	2	5	M
1	2009-09-17 05:21:00	777	NTA	5	2	5	M
1	2009-09-17 05:22:00	894	NTA	5	2	5	M
1	2009-09-17 05:23:00	672	NTA	5	2	5	M
1	2009-09-17 05:24:00	860	NTA	5	2	5	M
1	2009-09-17 05:25:00	777	NTA	5	2	5	M
1	2009-09-17 05:26:00	1171	NTA	5	2	5	M
1	2009-09-17 05:27:00	777	NTA	5	2	5	M
1	2009-09-17 05:28:00	387	NTA	5	2	5	M
1	2009-09-17 05:29:00	505	NTA	5	2	5	M
1	2009-09-17 05:30:00	164	NTA	5	2	5	M
1	2009-09-17 05:31:00	81	NTA	5	2	5	M
1	2009-09-17 05:32:00	141	NTA	5	2	5	M
1	2009-09-17 05:33:00	96	NTA	5	2	5	M
1	2009-09-17 05:34:00	135	NTA	5	2	5	M
1	2009-09-17 05:35:00	0	NTA	5	2	5	M
1	2009-09-17 05:36:00	0	NTA	5	2	5	M
1	2009-09-17 05:37:00	0	NTA	5	2	5	M
1	2009-09-17 05:38:00	0	NTA	5	2	5	M
1	2009-09-17 05:39:00	0	NTA	5	2	5	M
1	2009-09-17 05:40:00	0	NTA	5	2	5	M
1	2009-09-17 05:41:00	106	NTA	5	2	5	M
1	2009-09-17 05:42:00	25	NTA	5	2	5	M
1	2009-09-17 05:43:00	0	NTA	5	2	5	M
1	2009-09-17 05:44:00	0	NTA	5	2	5	M
1	2009-09-17 05:45:00	0	NTA	5	2	5	M
1	2009-09-17 05:46:00	0	NTA	5	2	5	M
1	2009-09-17 05:47:00	101	NTA	5	2	5	M
1	2009-09-17 05:48:00	38	NTA	5	2	5	M
1	2009-09-17 05:49:00	0	NTA	5	2	5	M
1	2009-09-17 05:50:00	0	NTA	5	2	5	M
1	2009-09-17 05:51:00	0	NTA	5	2	5	M
1	2009-09-17 05:52:00	159	NTA	5	2	5	M
1	2009-09-17 05:53:00	0	NTA	5	2	5	M
1	2009-09-17 05:54:00	0	NTA	5	2	5	M
1	2009-09-17 05:55:00	0	NTA	5	2	5	M
1	2009-09-17 05:56:00	75	NTA	5	2	5	M
1	2009-09-17 05:57:00	42	NTA	5	2	5	M
1	2009-09-17 05:58:00	8	NTA	5	2	5	M
1	2009-09-17 05:59:00	0	NTA	5	2	5	M
1	2009-09-17 06:00:00	0	NTA	5	2	5	M
1	2009-09-17 06:01:00	0	NTA	6	2	5	M
1	2009-09-17 06:02:00	0	NTA	6	2	5	M
1	2009-09-17 06:03:00	0	NTA	6	2	5	M
1	2009-09-17 06:04:00	0	NTA	6	2	5	M
1	2009-09-17 06:05:00	0	NTA	6	2	5	M
1	2009-09-17 06:06:00	0	NTA	6	2	5	M
1	2009-09-17 06:07:00	0	NTA	6	2	5	M
1	2009-09-17 06:08:00	0	NTA	6	2	5	M
1	2009-09-17 06:09:00	0	NTA	6	2	5	M
1	2009-09-17 06:10:00	101	NTA	6	2	5	M
1	2009-09-17 06:11:00	314	NTA	6	2	5	M
1	2009-09-17 06:12:00	192	NTA	6	2	5	M
1	2009-09-17 06:13:00	101	NTA	6	2	5	M
1	2009-09-17 06:14:00	38	NTA	6	2	5	M
1	2009-09-17 06:15:00	289	NTA	6	2	5	M
1	2009-09-17 06:16:00	350	DTA	6	2	5	M
1	2009-09-17 06:17:00	38	DTA	6	2	5	M
1	2009-09-17 06:18:00	86	DTA	6	2	5	M
1	2009-09-17 06:19:00	0	DTA	6	2	5	M
1	2009-09-17 06:20:00	117	DTA	6	2	5	M
1	2009-09-17 06:21:00	42	DTA	6	2	5	M
1	2009-09-17 06:22:00	0	DTA	6	2	5	M
1	2009-09-17 06:23:00	0	DTA	6	2	5	M
1	2009-09-17 06:24:00	0	DTA	6	2	5	M
1	2009-09-17 06:25:00	0	DTA	6	2	5	M
1	2009-09-17 06:26:00	0	DTA	6	2	5	M
1	2009-09-17 06:27:00	289	DTA	6	2	5	M
1	2009-09-17 06:28:00	147	DTA	6	2	5	M
1	2009-09-17 06:29:00	4	DTA	6	2	5	M
1	2009-09-17 06:30:00	0	DTA	6	2	5	M
1	2009-09-17 06:31:00	135	DTA	6	2	5	M
1	2009-09-17 06:32:00	8	DTA	6	2	5	M
1	2009-09-17 06:33:00	81	DTA	6	2	5	M
1	2009-09-17 06:34:00	178	DTA	6	2	5	M
1	2009-09-17 06:35:00	4	DTA	6	2	5	M
1	2009-09-17 06:36:00	185	DTA	6	2	5	M
1	2009-09-17 06:37:00	323	DTA	6	2	5	M
1	2009-09-17 06:38:00	242	DTA	6	2	5	M
1	2009-09-17 06:39:00	171	DTA	6	2	5	M
1	2009-09-17 06:40:00	242	DTA	6	2	5	M
1	2009-09-17 06:41:00	565	DTA	6	2	5	M
1	2009-09-17 06:42:00	0	DTA	6	2	5	M
1	2009-09-17 06:43:00	331	DTA	6	2	5	M
1	2009-09-17 06:44:00	13	DTA	6	2	5	M
1	2009-09-17 06:45:00	428	DTA	6	2	5	M
1	2009-09-17 06:46:00	0	DTA	6	2	5	M
1	2009-09-17 06:47:00	0	DTA	6	2	5	M
1	2009-09-17 06:48:00	0	DTA	6	2	5	M
1	2009-09-17 06:49:00	0	DTA	6	2	5	M
1	2009-09-17 06:50:00	0	DTA	6	2	5	M
1	2009-09-17 06:51:00	0	DTA	6	2	5	M
1	2009-09-17 06:52:00	0	DTA	6	2	5	M
1	2009-09-17 06:53:00	0	DTA	6	2	5	M
1	2009-09-17 06:54:00	0	DTA	6	2	5	M
1	2009-09-17 06:55:00	0	DTA	6	2	5	M
1	2009-09-17 06:56:00	8	DTA	6	2	5	M
1	2009-09-17 06:57:00	0	DTA	6	2	5	M
1	2009-09-17 06:58:00	0	DTA	6	2	5	M
1	2009-09-17 06:59:00	0	DTA	6	2	5	M
1	2009-09-17 07:00:00	0	DTA	6	2	5	M
1	2009-09-17 07:01:00	0	DTA	7	2	5	M
1	2009-09-17 07:02:00	101	DTA	7	2	5	M
1	2009-09-17 07:03:00	731	DTA	7	2	5	M
1	2009-09-17 07:04:00	298	DTA	7	2	5	M
1	2009-09-17 07:05:00	226	DTA	7	2	5	M
1	2009-09-17 07:06:00	234	DTA	7	2	5	M
1	2009-09-17 07:07:00	141	DTA	7	2	5	M
1	2009-09-17 07:08:00	86	DTA	7	2	5	M
1	2009-09-17 07:09:00	408	DTA	7	2	5	M
1	2009-09-17 07:10:00	541	DTA	7	2	5	M
1	2009-09-17 07:11:00	129	DTA	7	2	5	M
1	2009-09-17 07:12:00	449	DTA	7	2	5	M
1	2009-09-17 07:13:00	701	DTA	7	2	5	M
1	2009-09-17 07:14:00	350	DTA	7	2	5	M
1	2009-09-17 07:15:00	341	DTA	7	2	5	M
1	2009-09-17 07:16:00	0	DTA	7	2	5	M
1	2009-09-17 07:17:00	0	DTA	7	2	5	M
1	2009-09-17 07:18:00	21	DTA	7	2	5	M
1	2009-09-17 07:19:00	34	DTA	7	2	5	M
1	2009-09-17 07:20:00	0	DTA	7	2	5	M
1	2009-09-17 07:21:00	0	DTA	7	2	5	M
1	2009-09-17 07:22:00	0	DTA	7	2	5	M
1	2009-09-17 07:23:00	38	DTA	7	2	5	M
1	2009-09-17 07:24:00	13	DTA	7	2	5	M
1	2009-09-17 07:25:00	0	DTA	7	2	5	M
1	2009-09-17 07:26:00	0	DTA	7	2	5	M
1	2009-09-17 07:27:00	0	DTA	7	2	5	M
1	2009-09-17 07:28:00	0	DTA	7	2	5	M
1	2009-09-17 07:29:00	34	DTA	7	2	5	M
1	2009-09-17 07:30:00	4	DTA	7	2	5	M
1	2009-09-17 07:31:00	34	DTA	7	2	5	M
1	2009-09-17 07:32:00	0	DTA	7	2	5	M
1	2009-09-17 07:33:00	0	DTA	7	2	5	M
1	2009-09-17 07:34:00	38	DTA	7	2	5	M
1	2009-09-17 07:35:00	0	DTA	7	2	5	M
1	2009-09-17 07:36:00	25	DTA	7	2	5	M
1	2009-09-17 07:37:00	30	DTA	7	2	5	M
1	2009-09-17 07:38:00	0	DTA	7	2	5	M
1	2009-09-17 07:39:00	0	DTA	7	2	5	M
1	2009-09-17 07:40:00	0	DTA	7	2	5	M
1	2009-09-17 07:41:00	0	DTA	7	2	5	M
1	2009-09-17 07:42:00	0	DTA	7	2	5	M
1	2009-09-17 07:43:00	0	DTA	7	2	5	M
1	2009-09-17 07:44:00	0	DTA	7	2	5	M
1	2009-09-17 07:45:00	0	DTA	7	2	5	M
1	2009-09-17 07:46:00	42	DTA	7	2	5	M
1	2009-09-17 07:47:00	17	DTA	7	2	5	M
1	2009-09-17 07:48:00	0	DTA	7	2	5	M
1	2009-09-17 07:49:00	0	DTA	7	2	5	M
1	2009-09-17 07:50:00	0	DTA	7	2	5	M
1	2009-09-17 07:51:00	0	DTA	7	2	5	M
1	2009-09-17 07:52:00	21	DTA	7	2	5	M
1	2009-09-17 07:53:00	38	DTA	7	2	5	M
1	2009-09-17 07:54:00	0	DTA	7	2	5	M
1	2009-09-17 07:55:00	0	DTA	7	2	5	M
1	2009-09-17 07:56:00	0	DTA	7	2	5	M
1	2009-09-17 07:57:00	4	DTA	7	2	5	M
1	2009-09-17 07:58:00	0	DTA	7	2	5	M
1	2009-09-17 07:59:00	0	DTA	7	2	5	M
1	2009-09-17 08:00:00	13	DTA	7	2	5	M
1	2009-09-17 08:01:00	0	DTA	8	2	5	M
1	2009-09-17 08:02:00	65	DTA	8	2	5	M
1	2009-09-17 08:03:00	0	DTA	8	2	5	M
1	2009-09-17 08:04:00	0	DTA	8	2	5	M
1	2009-09-17 08:05:00	0	DTA	8	2	5	M
1	2009-09-17 08:06:00	0	DTA	8	2	5	M
1	2009-09-17 08:07:00	30	DTA	8	2	5	M
1	2009-09-17 08:08:00	0	DTA	8	2	5	M
1	2009-09-17 08:09:00	0	DTA	8	2	5	M
1	2009-09-17 08:10:00	0	DTA	8	2	5	M
1	2009-09-17 08:11:00	25	DTA	8	2	5	M
1	2009-09-17 08:12:00	0	DTA	8	2	5	M
1	2009-09-17 08:13:00	21	DTA	8	2	5	M
1	2009-09-17 08:14:00	0	DTA	8	2	5	M
1	2009-09-17 08:15:00	0	DTA	8	2	5	M
1	2009-09-17 08:16:00	0	DTA	8	2	5	M
1	2009-09-17 08:17:00	4	DTA	8	2	5	M
1	2009-09-17 08:18:00	0	DTA	8	2	5	M
1	2009-09-17 08:19:00	38	DTA	8	2	5	M
1	2009-09-17 08:20:00	0	DTA	8	2	5	M
1	2009-09-17 08:21:00	25	DTA	8	2	5	M
1	2009-09-17 08:22:00	21	DTA	8	2	5	M
1	2009-09-17 08:23:00	0	DTA	8	2	5	M
1	2009-09-17 08:24:00	0	DTA	8	2	5	M
1	2009-09-17 08:25:00	47	DTA	8	2	5	M
1	2009-09-17 08:26:00	4	DTA	8	2	5	M
1	2009-09-17 08:27:00	0	DTA	8	2	5	M
1	2009-09-17 08:28:00	0	DTA	8	2	5	M
1	2009-09-17 08:29:00	0	DTA	8	2	5	M
1	2009-09-17 08:30:00	0	DTA	8	2	5	M
1	2009-09-17 08:31:00	0	DTA	8	2	5	M
1	2009-09-17 08:32:00	0	DTA	8	2	5	M
1	2009-09-17 08:33:00	0	DTA	8	2	5	M
1	2009-09-17 08:34:00	0	DTA	8	2	5	M
[truncated: 36,376 more rows]

## Sheet: Pivot NTA
Peak DTA Time?	(All)
DTA vs NTA	NTA
Average of Activity	Column Labels
Row Labels	1	2	3	4	5	6	7	8	9	10	11	12	13	14	Grand Total
1	31.031	51.8833	19.931	21.0496	12.8381	23.1893	34.4315	78.0928	10.881	80.1876	45.5487	74.922	80.5954	99.8689	49.3084
2	51.8259	55.2755	37.3105	46.5674	46.1821	10.7781	37.4712	23.3442	13.008	28.5833	24.1586	24.6529	47.009	32.8088	35.6543
Grand Total	42.7281	53.7758	29.5862	32.2823	34.8882	17.0676	35.8012	48.7658	11.8843	59.2062	33.3561	54.7556	63.6114	66.1536	42.3876

## Sheet: Pivot DTA
Peak DTA Time?	(All)
DTA vs NTA	DTA
Average of Activity	Column Labels
Row Labels	1	2	3	4	5	6	7	8	9	10	11	12	13	Grand Total
1	43.5147	42.7729	84.801	53.9167	84.1206	60.3706	99.0692	62.648	81.1841	83.4639	89.0145	117.434	93.3222	75.9353
2	61.5901	48.1692	88.3429	54.5211	97.9892	61.4178	68.2783	73.8935	78.798	59.772	88.4397	79.6893	65.5257	71.1849
Grand Total	52.0373	45.4314	86.4787	54.2049	90.7162	60.9055	83.746	68.3307	79.9851	71.6013	88.6956	97.302	79.9711	73.5702

## Sheet: Pivot PeakDTA
Peak DTA Time?	Peak DTA
DTA vs NTA	DTA
Average of Activity	Column Labels
Row Labels	1	2	3	4	5	6	7	8	9	10	11	12	13	Grand Total
1	31.625	27.1139	112.575	62	79.1639	79.4778	105.856	101.914	125.997	48.2306	88.8778	111.608	81.1333	81.1979
2	90.5474	64.1611	81.1972	64.9568	85.4806	50.3889	82.1028	97.3222	111.128	68.1972	114.644	103.958	117.278	87.0647
Grand Total	59.671	45.6375	96.8861	63.4512	82.3222	64.9333	93.9792	99.6181	118.562	58.2139	101.761	107.783	99.2056	84.1168

## Sheet: 9.15.09
Actogram, Copy Raw Data, All Days
Identity:	Kelsie
Filename:	E:\Active Research Files\Nighttime Activity\cases\kelsie\Kelsie.AWC
Gender:	M
Age:	11
Height:	76.2 cm	30.0 in
Weight:	30.0 kg	66.1 lbs
Start Date:	15-Sep-2009 (Tue)
Start Time:	18:00:00
Interval:	1.00 mins
Date Stamp:	Time Stamp:	Activity Data:	Marker Press:
2009-09-15	00:00:00	0
2009-09-15	00:01:00	0
2009-09-15	00:02:00	0
2009-09-15	00:03:00	0
2009-09-15	00:04:00	0
2009-09-15	00:05:00	0
2009-09-15	00:06:00	0
2009-09-15	00:07:00	0
2009-09-15	00:08:00	0
2009-09-15	00:09:00	0
2009-09-15	00:10:00	0
2009-09-15	00:11:00	0
2009-09-15	00:12:00	0
2009-09-15	00:13:00	0
2009-09-15	00:14:00	0
2009-09-15	00:15:00	0
2009-09-15	00:16:00	0
2009-09-15	00:17:00	0
2009-09-15	00:18:00	0
2009-09-15	00:19:00	0
2009-09-15	00:20:00	0
2009-09-15	00:21:00	0
2009-09-15	00:22:00	0
2009-09-15	00:23:00	0
2009-09-15	00:24:00	0
2009-09-15	00:25:00	0
2009-09-15	00:26:00	0
2009-09-15	00:27:00	0
2009-09-15	00:28:00	0
2009-09-15	00:29:00	0
2009-09-15	00:30:00	0
2009-09-15	00:31:00	0
2009-09-15	00:32:00	0
2009-09-15	00:33:00	0
2009-09-15	00:34:00	0
2009-09-15	00:35:00	0
2009-09-15	00:36:00	0
2009-09-15	00:37:00	0
2009-09-15	00:38:00	0
2009-09-15	00:39:00	0
2009-09-15	00:40:00	0
2009-09-15	00:41:00	0
2009-09-15	00:42:00	0
2009-09-15	00:43:00	0
2009-09-15	00:44:00	0
2009-09-15	00:45:00	0
2009-09-15	00:46:00	0
2009-09-15	00:47:00	0
2009-09-15	00:48:00	0
2009-09-15	00:49:00	0
2009-09-15	00:50:00	0
2009-09-15	00:51:00	0
2009-09-15	00:52:00	0
2009-09-15	00:53:00	0
2009-09-15	00:54:00	0
2009-09-15	00:55:00	0
2009-09-15	00:56:00	0
2009-09-15	00:57:00	0
2009-09-15	00:58:00	0
2009-09-15	00:59:00	0
2009-09-15	01:00:00	0
2009-09-15	01:01:00	0
2009-09-15	01:02:00	0
2009-09-15	01:03:00	0
2009-09-15	01:04:00	0
2009-09-15	01:05:00	0
2009-09-15	01:06:00	0
2009-09-15	01:07:00	0
2009-09-15	01:08:00	0
2009-09-15	01:09:00	0
2009-09-15	01:10:00	0
2009-09-15	01:11:00	0
2009-09-15	01:12:00	0
2009-09-15	01:13:00	0
2009-09-15	01:14:00	0
2009-09-15	01:15:00	0
2009-09-15	01:16:00	0
2009-09-15	01:17:00	0
2009-09-15	01:18:00	0
2009-09-15	01:19:00	0
2009-09-15	01:20:00	0
2009-09-15	01:21:00	0
2009-09-15	01:22:00	0
2009-09-15	01:23:00	0
2009-09-15	01:24:00	0
2009-09-15	01:25:00	0
2009-09-15	01:26:00	0
2009-09-15	01:27:00	0
2009-09-15	01:28:00	0
2009-09-15	01:29:00	0
2009-09-15	01:30:00	0
2009-09-15	01:31:00	0
2009-09-15	01:32:00	0
2009-09-15	01:33:00	0
2009-09-15	01:34:00	0
2009-09-15	01:35:00	0
2009-09-15	01:36:00	0
2009-09-15	01:37:00	0
2009-09-15	01:38:00	0
2009-09-15	01:39:00	0
2009-09-15	01:40:00	0
2009-09-15	01:41:00	0
2009-09-15	01:42:00	0
2009-09-15	01:43:00	0
2009-09-15	01:44:00	0
2009-09-15	01:45:00	0
2009-09-15	01:46:00	0
2009-09-15	01:47:00	0
2009-09-15	01:48:00	0
2009-09-15	01:49:00	0
2009-09-15	01:50:00	0
2009-09-15	01:51:00	0
2009-09-15	01:52:00	0
2009-09-15	01:53:00	0
2009-09-15	01:54:00	0
2009-09-15	01:55:00	0
2009-09-15	01:56:00	0
2009-09-15	01:57:00	0
2009-09-15	01:58:00	0
2009-09-15	01:59:00	0
2009-09-15	02:00:00	0
2009-09-15	02:01:00	0
2009-09-15	02:02:00	0
2009-09-15	02:03:00	0
2009-09-15	02:04:00	0
2009-09-15	02:05:00	0
2009-09-15	02:06:00	0
2009-09-15	02:07:00	0
2009-09-15	02:08:00	0
2009-09-15	02:09:00	0
2009-09-15	02:10:00	0
2009-09-15	02:11:00	0
2009-09-15	02:12:00	0
2009-09-15	02:13:00	0
2009-09-15	02:14:00	0
2009-09-15	02:15:00	0
2009-09-15	02:16:00	0
2009-09-15	02:17:00	0
2009-09-15	02:18:00	0
2009-09-15	02:19:00	0
2009-09-15	02:20:00	0
2009-09-15	02:21:00	0
2009-09-15	02:22:00	0
2009-09-15	02:23:00	0
2009-09-15	02:24:00	0
2009-09-15	02:25:00	0
2009-09-15	02:26:00	0
2009-09-15	02:27:00	0
2009-09-15	02:28:00	0
2009-09-15	02:29:00	0
2009-09-15	02:30:00	0
2009-09-15	02:31:00	0
2009-09-15	02:32:00	0
2009-09-15	02:33:00	0
2009-09-15	02:34:00	0
2009-09-15	02:35:00	0
2009-09-15	02:36:00	0
2009-09-15	02:37:00	0
2009-09-15	02:38:00	0
2009-09-15	02:39:00	0
2009-09-15	02:40:00	0
2009-09-15	02:41:00	0
2009-09-15	02:42:00	0
2009-09-15	02:43:00	0
2009-09-15	02:44:00	0
2009-09-15	02:45:00	0
2009-09-15	02:46:00	0
2009-09-15	02:47:00	0
2009-09-15	02:48:00	0
2009-09-15	02:49:00	0
2009-09-15	02:50:00	0
2009-09-15	02:51:00	0
2009-09-15	02:52:00	0
2009-09-15	02:53:00	0
2009-09-15	02:54:00	0
2009-09-15	02:55:00	0
2009-09-15	02:56:00	0
2009-09-15	02:57:00	0
2009-09-15	02:58:00	0
2009-09-15	02:59:00	0
2009-09-15	03:00:00	0
2009-09-15	03:01:00	0
2009-09-15	03:02:00	0
2009-09-15	03:03:00	0
2009-09-15	03:04:00	0
2009-09-15	03:05:00	0
2009-09-15	03:06:00	0
2009-09-15	03:07:00	0
2009-09-15	03:08:00	0
2009-09-15	03:09:00	0
2009-09-15	03:10:00	0
2009-09-15	03:11:00	0
2009-09-15	03:12:00	0
2009-09-15	03:13:00	0
2009-09-15	03:14:00	0
2009-09-15	03:15:00	0
2009-09-15	03:16:00	0
2009-09-15	03:17:00	0
2009-09-15	03:18:00	0
2009-09-15	03:19:00	0
2009-09-15	03:20:00	0
2009-09-15	03:21:00	0
2009-09-15	03:22:00	0
2009-09-15	03:23:00	0
2009-09-15	03:24:00	0
2009-09-15	03:25:00	0
2009-09-15	03:26:00	0
2009-09-15	03:27:00	0
2009-09-15	03:28:00	0
2009-09-15	03:29:00	0
2009-09-15	03:30:00	0
2009-09-15	03:31:00	0
2009-09-15	03:32:00	0
2009-09-15	03:33:00	0
2009-09-15	03:34:00	0
2009-09-15	03:35:00	0
2009-09-15	03:36:00	0
2009-09-15	03:37:00	0
2009-09-15	03:38:00	0
2009-09-15	03:39:00	0
2009-09-15	03:40:00	0
2009-09-15	03:41:00	0
2009-09-15	03:42:00	0
2009-09-15	03:43:00	0
2009-09-15	03:44:00	0
2009-09-15	03:45:00	0
2009-09-15	03:46:00	0
2009-09-15	03:47:00	0
2009-09-15	03:48:00	0
2009-09-15	03:49:00	0
2009-09-15	03:50:00	0
2009-09-15	03:51:00	0
2009-09-15	03:52:00	0
2009-09-15	03:53:00	0
2009-09-15	03:54:00	0
2009-09-15	03:55:00	0
2009-09-15	03:56:00	0
2009-09-15	03:57:00	0
2009-09-15	03:58:00	0
2009-09-15	03:59:00	0
2009-09-15	04:00:00	0
2009-09-15	04:01:00	0
2009-09-15	04:02:00	0
2009-09-15	04:03:00	0
2009-09-15	04:04:00	0
2009-09-15	04:05:00	0
2009-09-15	04:06:00	0
2009-09-15	04:07:00	0
2009-09-15	04:08:00	0
2009-09-15	04:09:00	0
2009-09-15	04:10:00	0
2009-09-15	04:11:00	0
2009-09-15	04:12:00	0
2009-09-15	04:13:00	0
2009-09-15	04:14:00	0
2009-09-15	04:15:00	0
2009-09-15	04:16:00	0
2009-09-15	04:17:00	0
2009-09-15	04:18:00	0
2009-09-15	04:19:00	0
2009-09-15	04:20:00	0
2009-09-15	04:21:00	0
2009-09-15	04:22:00	0
2009-09-15	04:23:00	0
2009-09-15	04:24:00	0
2009-09-15	04:25:00	0
2009-09-15	04:26:00	0
2009-09-15	04:27:00	0
2009-09-15	04:28:00	0
2009-09-15	04:29:00	0
2009-09-15	04:30:00	0
2009-09-15	04:31:00	0
2009-09-15	04:32:00	0
2009-09-15	04:33:00	0
2009-09-15	04:34:00	0
2009-09-15	04:35:00	0
2009-09-15	04:36:00	0
2009-09-15	04:37:00	0
2009-09-15	04:38:00	0
2009-09-15	04:39:00	0
2009-09-15	04:40:00	0
2009-09-15	04:41:00	0
2009-09-15	04:42:00	0
2009-09-15	04:43:00	0
2009-09-15	04:44:00	0
2009-09-15	04:45:00	0
2009-09-15	04:46:00	0
2009-09-15	04:47:00	0
2009-09-15	04:48:00	0
2009-09-15	04:49:00	0
2009-09-15	04:50:00	0
2009-09-15	04:51:00	0
2009-09-15	04:52:00	0
2009-09-15	04:53:00	0
2009-09-15	04:54:00	0
2009-09-15	04:55:00	0
2009-09-15	04:56:00	0
2009-09-15	04:57:00	0
2009-09-15	04:58:00	0
2009-09-15	04:59:00	0
2009-09-15	05:00:00	0
2009-09-15	05:01:00	0
2009-09-15	05:02:00	0
2009-09-15	05:03:00	0
2009-09-15	05:04:00	0
2009-09-15	05:05:00	0
2009-09-15	05:06:00	0
2009-09-15	05:07:00	0
2009-09-15	05:08:00	0
2009-09-15	05:09:00	0
2009-09-15	05:10:00	0
2009-09-15	05:11:00	0
2009-09-15	05:12:00	0
2009-09-15	05:13:00	0
2009-09-15	05:14:00	0
2009-09-15	05:15:00	0
2009-09-15	05:16:00	0
2009-09-15	05:17:00	0
2009-09-15	05:18:00	0
2009-09-15	05:19:00	0
2009-09-15	05:20:00	0
2009-09-15	05:21:00	0
2009-09-15	05:22:00	0
2009-09-15	05:23:00	0
2009-09-15	05:24:00	0
2009-09-15	05:25:00	0
2009-09-15	05:26:00	0
2009-09-15	05:27:00	0
2009-09-15	05:28:00	0
2009-09-15	05:29:00	0
2009-09-15	05:30:00	0
2009-09-15	05:31:00	0
2009-09-15	05:32:00	0
2009-09-15	05:33:00	0
2009-09-15	05:34:00	0
2009-09-15	05:35:00	0
2009-09-15	05:36:00	0
2009-09-15	05:37:00	0
2009-09-15	05:38:00	0
2009-09-15	05:39:00	0
2009-09-15	05:40:00	0
2009-09-15	05:41:00	0
2009-09-15	05:42:00	0
2009-09-15	05:43:00	0
2009-09-15	05:44:00	0
2009-09-15	05:45:00	0
2009-09-15	05:46:00	0
2009-09-15	05:47:00	0
2009-09-15	05:48:00	0
2009-09-15	05:49:00	0
2009-09-15	05:50:00	0
2009-09-15	05:51:00	0
2009-09-15	05:52:00	0
2009-09-15	05:53:00	0
2009-09-15	05:54:00	0
2009-09-15	05:55:00	0
2009-09-15	05:56:00	0
2009-09-15	05:57:00	0
2009-09-15	05:58:00	0
2009-09-15	05:59:00	0
2009-09-15	06:00:00	0
2009-09-15	06:01:00	0
2009-09-15	06:02:00	0
2009-09-15	06:03:00	0
2009-09-15	06:04:00	0
2009-09-15	06:05:00	0
2009-09-15	06:06:00	0
2009-09-15	06:07:00	0
2009-09-15	06:08:00	0
2009-09-15	06:09:00	0
2009-09-15	06:10:00	0
2009-09-15	06:11:00	0
2009-09-15	06:12:00	0
2009-09-15	06:13:00	0
2009-09-15	06:14:00	0
2009-09-15	06:15:00	0
2009-09-15	06:16:00	0
2009-09-15	06:17:00	0
2009-09-15	06:18:00	0
2009-09-15	06:19:00	0
2009-09-15	06:20:00	0
2009-09-15	06:21:00	0
2009-09-15	06:22:00	0
2009-09-15	06:23:00	0
2009-09-15	06:24:00	0
2009-09-15	06:25:00	0
2009-09-15	06:26:00	0
2009-09-15	06:27:00	0
2009-09-15	06:28:00	0
2009-09-15	06:29:00	0
2009-09-15	06:30:00	0
2009-09-15	06:31:00	0
2009-09-15	06:32:00	0
2009-09-15	06:33:00	0
2009-09-15	06:34:00	0
2009-09-15	06:35:00	0
2009-09-15	06:36:00	0
2009-09-15	06:37:00	0
2009-09-15	06:38:00	0
2009-09-15	06:39:00	0
2009-09-15	06:40:00	0
2009-09-15	06:41:00	0
2009-09-15	06:42:00	0
2009-09-15	06:43:00	0
2009-09-15	06:44:00	0
2009-09-15	06:45:00	0
2009-09-15	06:46:00	0
2009-09-15	06:47:00	0
2009-09-15	06:48:00	0
2009-09-15	06:49:00	0
2009-09-15	06:50:00	0
2009-09-15	06:51:00	0
2009-09-15	06:52:00	0
2009-09-15	06:53:00	0
2009-09-15	06:54:00	0
2009-09-15	06:55:00	0
2009-09-15	06:56:00	0
2009-09-15	06:57:00	0
2009-09-15	06:58:00	0
2009-09-15	06:59:00	0
2009-09-15	07:00:00	0
2009-09-15	07:01:00	0
2009-09-15	07:02:00	0
2009-09-15	07:03:00	0
2009-09-15	07:04:00	0
2009-09-15	07:05:00	0
2009-09-15	07:06:00	0
2009-09-15	07:07:00	0
2009-09-15	07:08:00	0
2009-09-15	07:09:00	0
2009-09-15	07:10:00	0
2009-09-15	07:11:00	0
2009-09-15	07:12:00	0
2009-09-15	07:13:00	0
2009-09-15	07:14:00	0
2009-09-15	07:15:00	0
2009-09-15	07:16:00	0
2009-09-15	07:17:00	0
2009-09-15	07:18:00	0
2009-09-15	07:19:00	0
2009-09-15	07:20:00	0
2009-09-15	07:21:00	0
2009-09-15	07:22:00	0
2009-09-15	07:23:00	0
2009-09-15	07:24:00	0
2009-09-15	07:25:00	0
2009-09-15	07:26:00	0
2009-09-15	07:27:00	0
2009-09-15	07:28:00	0
2009-09-15	07:29:00	0
2009-09-15	07:30:00	0
2009-09-15	07:31:00	0
2009-09-15	07:32:00	0
2009-09-15	07:33:00	0
2009-09-15	07:34:00	0
2009-09-15	07:35:00	0
2009-09-15	07:36:00	0
2009-09-15	07:37:00	0
2009-09-15	07:38:00	0
2009-09-15	07:39:00	0
2009-09-15	07:40:00	0
2009-09-15	07:41:00	0
2009-09-15	07:42:00	0
2009-09-15	07:43:00	0
2009-09-15	07:44:00	0
2009-09-15	07:45:00	0
2009-09-15	07:46:00	0
2009-09-15	07:47:00	0
2009-09-15	07:48:00	0
2009-09-15	07:49:00	0
2009-09-15	07:50:00	0
2009-09-15	07:51:00	0
2009-09-15	07:52:00	0
2009-09-15	07:53:00	0
2009-09-15	07:54:00	0
2009-09-15	07:55:00	0
2009-09-15	07:56:00	0
2009-09-15	07:57:00	0
2009-09-15	07:58:00	0
2009-09-15	07:59:00	0
2009-09-15	08:00:00	0
2009-09-15	08:01:00	0
2009-09-15	08:02:00	0
2009-09-15	08:03:00	0
2009-09-15	08:04:00	0
2009-09-15	08:05:00	0
2009-09-15	08:06:00	0
2009-09-15	08:07:00	0
2009-09-15	08:08:00	0
2009-09-15	08:09:00	0
2009-09-15	08:10:00	0
2009-09-15	08:11:00	0
2009-09-15	08:12:00	0
2009-09-15	08:13:00	0
2009-09-15	08:14:00	0
2009-09-15	08:15:00	0
2009-09-15	08:16:00	0
2009-09-15	08:17:00	0
2009-09-15	08:18:00	0
2009-09-15	08:19:00	0
2009-09-15	08:20:00	0
2009-09-15	08:21:00	0
2009-09-15	08:22:00	0
2009-09-15	08:23:00	0
2009-09-15	08:24:00	0
2009-09-15	08:25:00	0
2009-09-15	08:26:00	0
2009-09-15	08:27:00	0
2009-09-15	08:28:00	0
2009-09-15	08:29:00	0
2009-09-15	08:30:00	0
2009-09-15	08:31:00	0
2009-09-15	08:32:00	0
2009-09-15	08:33:00	0
2009-09-15	08:34:00	0
2009-09-15	08:35:00	0
2009-09-15	08:36:00	0
2009-09-15	08:37:00	0
2009-09-15	08:38:00	0
2009-09-15	08:39:00	0
2009-09-15	08:40:00	0
2009-09-15	08:41:00	0
2009-09-15	08:42:00	0
2009-09-15	08:43:00	0
2009-09-15	08:44:00	0
2009-09-15	08:45:00	0
2009-09-15	08:46:00	0
2009-09-15	08:47:00	0
2009-09-15	08:48:00	0
2009-09-15	08:49:00	0
2009-09-15	08:50:00	0
2009-09-15	08:51:00	0
2009-09-15	08:52:00	0
2009-09-15	08:53:00	0
2009-09-15	08:54:00	0
2009-09-15	08:55:00	0
2009-09-15	08:56:00	0
2009-09-15	08:57:00	0
2009-09-15	08:58:00	0
2009-09-15	08:59:00	0
2009-09-15	09:00:00	0
2009-09-15	09:01:00	0
2009-09-15	09:02:00	0
2009-09-15	09:03:00	0
2009-09-15	09:04:00	0
2009-09-15	09:05:00	0
2009-09-15	09:06:00	0
2009-09-15	09:07:00	0
2009-09-15	09:08:00	0
2009-09-15	09:09:00	0
2009-09-15	09:10:00	0
2009-09-15	09:11:00	0
2009-09-15	09:12:00	0
2009-09-15	09:13:00	0
2009-09-15	09:14:00	0
2009-09-15	09:15:00	0
2009-09-15	09:16:00	0
2009-09-15	09:17:00	0
2009-09-15	09:18:00	0
2009-09-15	09:19:00	0
2009-09-15	09:20:00	0
2009-09-15	09:21:00	0
2009-09-15	09:22:00	0
2009-09-15	09:23:00	0
2009-09-15	09:24:00	0
2009-09-15	09:25:00	0
2009-09-15	09:26:00	0
2009-09-15	09:27:00	0
2009-09-15	09:28:00	0
2009-09-15	09:29:00	0
2009-09-15	09:30:00	0
2009-09-15	09:31:00	0
2009-09-15	09:32:00	0
2009-09-15	09:33:00	0
2009-09-15	09:34:00	0
2009-09-15	09:35:00	0
2009-09-15	09:36:00	0
2009-09-15	09:37:00	0
2009-09-15	09:38:00	0
2009-09-15	09:39:00	0
2009-09-15	09:40:00	0
2009-09-15	09:41:00	0
2009-09-15	09:42:00	0
2009-09-15	09:43:00	0
2009-09-15	09:44:00	0
2009-09-15	09:45:00	0
2009-09-15	09:46:00	0
2009-09-15	09:47:00	0
2009-09-15	09:48:00	0
2009-09-15	09:49:00	0
2009-09-15	09:50:00	0
2009-09-15	09:51:00	0
2009-09-15	09:52:00	0
2009-09-15	09:53:00	0
2009-09-15	09:54:00	0
2009-09-15	09:55:00	0
2009-09-15	09:56:00	0
2009-09-15	09:57:00	0
2009-09-15	09:58:00	0
2009-09-15	09:59:00	0
2009-09-15	10:00:00	0
2009-09-15	10:01:00	0
2009-09-15	10:02:00	0
2009-09-15	10:03:00	0
2009-09-15	10:04:00	0
2009-09-15	10:05:00	0
2009-09-15	10:06:00	0
2009-09-15	10:07:00	0
2009-09-15	10:08:00	0
2009-09-15	10:09:00	0
2009-09-15	10:10:00	0
2009-09-15	10:11:00	0
2009-09-15	10:12:00	0
2009-09-15	10:13:00	0
2009-09-15	10:14:00	0
2009-09-15	10:15:00	0
2009-09-15	10:16:00	0
2009-09-15	10:17:00	0
2009-09-15	10:18:00	0
2009-09-15	10:19:00	0
2009-09-15	10:20:00	0
2009-09-15	10:21:00	0
2009-09-15	10:22:00	0
2009-09-15	10:23:00	0
2009-09-15	10:24:00	0
2009-09-15	10:25:00	0
2009-09-15	10:26:00	0
2009-09-15	10:27:00	0
2009-09-15	10:28:00	0
2009-09-15	10:29:00	0
2009-09-15	10:30:00	0
2009-09-15	10:31:00	0
2009-09-15	10:32:00	0
2009-09-15	10:33:00	0
2009-09-15	10:34:00	0
2009-09-15	10:35:00	0
2009-09-15	10:36:00	0
2009-09-15	10:37:00	0
2009-09-15	10:38:00	0
2009-09-15	10:39:00	0
2009-09-15	10:40:00	0
2009-09-15	10:41:00	0
2009-09-15	10:42:00	0
2009-09-15	10:43:00	0
2009-09-15	10:44:00	0
2009-09-15	10:45:00	0
2009-09-15	10:46:00	0
2009-09-15	10:47:00	0
2009-09-15	10:48:00	0
2009-09-15	10:49:00	0
2009-09-15	10:50:00	0
2009-09-15	10:51:00	0
2009-09-15	10:52:00	0
2009-09-15	10:53:00	0
2009-09-15	10:54:00	0
2009-09-15	10:55:00	0
2009-09-15	10:56:00	0
2009-09-15	10:57:00	0
2009-09-15	10:58:00	0
2009-09-15	10:59:00	0
2009-09-15	11:00:00	0
2009-09-15	11:01:00	0
2009-09-15	11:02:00	0
2009-09-15	11:03:00	0
2009-09-15	11:04:00	0
2009-09-15	11:05:00	0
2009-09-15	11:06:00	0
2009-09-15	11:07:00	0
2009-09-15	11:08:00	0
2009-09-15	11:09:00	0
2009-09-15	11:10:00	0
2009-09-15	11:11:00	0
2009-09-15	11:12:00	0
2009-09-15	11:13:00	0
2009-09-15	11:14:00	0
2009-09-15	11:15:00	0
2009-09-15	11:16:00	0
2009-09-15	11:17:00	0
2009-09-15	11:18:00	0
2009-09-15	11:19:00	0
2009-09-15	11:20:00	0
2009-09-15	11:21:00	0
2009-09-15	11:22:00	0
2009-09-15	11:23:00	0
2009-09-15	11:24:00	0
2009-09-15	11:25:00	0
2009-09-15	11:26:00	0
2009-09-15	11:27:00	0
2009-09-15	11:28:00	0
2009-09-15	11:29:00	0
2009-09-15	11:30:00	0
2009-09-15	11:31:00	0
2009-09-15	11:32:00	0
2009-09-15	11:33:00	0
2009-09-15	11:34:00	0
2009-09-15	11:35:00	0
2009-09-15	11:36:00	0
2009-09-15	11:37:00	0
2009-09-15	11:38:00	0
2009-09-15	11:39:00	0
2009-09-15	11:40:00	0
2009-09-15	11:41:00	0
2009-09-15	11:42:00	0
2009-09-15	11:43:00	0
2009-09-15	11:44:00	0
2009-09-15	11:45:00	0
2009-09-15	11:46:00	0
2009-09-15	11:47:00	0
2009-09-15	11:48:00	0
2009-09-15	11:49:00	0
2009-09-15	11:50:00	0
2009-09-15	11:51:00	0
2009-09-15	11:52:00	0
2009-09-15	11:53:00	0
2009-09-15	11:54:00	0
2009-09-15	11:55:00	0
2009-09-15	11:56:00	0
2009-09-15	11:57:00	0
2009-09-15	11:58:00	0
2009-09-15	11:59:00	0
2009-09-15	12:00:00	0
2009-09-15	12:01:00	0
2009-09-15	12:02:00	0
2009-09-15	12:03:00	0
2009-09-15	12:04:00	0
2009-09-15	12:05:00	0
2009-09-15	12:06:00	0
2009-09-15	12:07:00	0
2009-09-15	12:08:00	0
2009-09-15	12:09:00	0
2009-09-15	12:10:00	0
2009-09-15	12:11:00	0
2009-09-15	12:12:00	0
2009-09-15	12:13:00	0
2009-09-15	12:14:00	0
2009-09-15	12:15:00	0
2009-09-15	12:16:00	0
2009-09-15	12:17:00	0
2009-09-15	12:18:00	0
2009-09-15	12:19:00	0
2009-09-15	12:20:00	0
2009-09-15	12:21:00	0
2009-09-15	12:22:00	0
2009-09-15	12:23:00	0
2009-09-15	12:24:00	0
2009-09-15	12:25:00	0
2009-09-15	12:26:00	0
2009-09-15	12:27:00	0
2009-09-15	12:28:00	0
2009-09-15	12:29:00	0
2009-09-15	12:30:00	0
2009-09-15	12:31:00	0
2009-09-15	12:32:00	0
2009-09-15	12:33:00	0
2009-09-15	12:34:00	0
2009-09-15	12:35:00	0
2009-09-15	12:36:00	0
2009-09-15	12:37:00	0
2009-09-15	12:38:00	0
2009-09-15	12:39:00	0
2009-09-15	12:40:00	0
2009-09-15	12:41:00	0
2009-09-15	12:42:00	0
2009-09-15	12:43:00	0
2009-09-15	12:44:00	0
2009-09-15	12:45:00	0
2009-09-15	12:46:00	0
2009-09-15	12:47:00	0
2009-09-15	12:48:00	0
2009-09-15	12:49:00	0
2009-09-15	12:50:00	0
2009-09-15	12:51:00	0
2009-09-15	12:52:00	0
2009-09-15	12:53:00	0
2009-09-15	12:54:00	0
2009-09-15	12:55:00	0
2009-09-15	12:56:00	0
2009-09-15	12:57:00	0
2009-09-15	12:58:00	0
2009-09-15	12:59:00	0
2009-09-15	13:00:00	0
2009-09-15	13:01:00	0
2009-09-15	13:02:00	0
2009-09-15	13:03:00	0
2009-09-15	13:04:00	0
2009-09-15	13:05:00	0
2009-09-15	13:06:00	0
2009-09-15	13:07:00	0
2009-09-15	13:08:00	0
2009-09-15	13:09:00	0
2009-09-15	13:10:00	0
2009-09-15	13:11:00	0
2009-09-15	13:12:00	0
2009-09-15	13:13:00	0
2009-09-15	13:14:00	0
2009-09-15	13:15:00	0
2009-09-15	13:16:00	0
2009-09-15	13:17:00	0
2009-09-15	13:18:00	0
2009-09-15	13:19:00	0
2009-09-15	13:20:00	0
2009-09-15	13:21:00	0
2009-09-15	13:22:00	0
2009-09-15	13:23:00	0
2009-09-15	13:24:00	0
2009-09-15	13:25:00	0
2009-09-15	13:26:00	0
2009-09-15	13:27:00	0
2009-09-15	13:28:00	0
2009-09-15	13:29:00	0
2009-09-15	13:30:00	0
2009-09-15	13:31:00	0
2009-09-15	13:32:00	0
2009-09-15	13:33:00	0
2009-09-15	13:34:00	0
2009-09-15	13:35:00	0
2009-09-15	13:36:00	0
2009-09-15	13:37:00	0
2009-09-15	13:38:00	0
2009-09-15	13:39:00	0
2009-09-15	13:40:00	0
2009-09-15	13:41:00	0
2009-09-15	13:42:00	0
2009-09-15	13:43:00	0
2009-09-15	13:44:00	0
2009-09-15	13:45:00	0
2009-09-15	13:46:00	0
2009-09-15	13:47:00	0
2009-09-15	13:48:00	0
2009-09-15	13:49:00	0
2009-09-15	13:50:00	0
2009-09-15	13:51:00	0
2009-09-15	13:52:00	0
2009-09-15	13:53:00	0
2009-09-15	13:54:00	0
2009-09-15	13:55:00	0
2009-09-15	13:56:00	0
2009-09-15	13:57:00	0
2009-09-15	13:58:00	0
2009-09-15	13:59:00	0
2009-09-15	14:00:00	0
2009-09-15	14:01:00	0
2009-09-15	14:02:00	0
2009-09-15	14:03:00	0
2009-09-15	14:04:00	0
2009-09-15	14:05:00	0
2009-09-15	14:06:00	0
2009-09-15	14:07:00	0
2009-09-15	14:08:00	0
2009-09-15	14:09:00	0
2009-09-15	14:10:00	0
2009-09-15	14:11:00	0
2009-09-15	14:12:00	0
2009-09-15	14:13:00	0
2009-09-15	14:14:00	0
2009-09-15	14:15:00	0
2009-09-15	14:16:00	0
2009-09-15	14:17:00	0
2009-09-15	14:18:00	0
2009-09-15	14:19:00	0
2009-09-15	14:20:00	0
2009-09-15	14:21:00	0
2009-09-15	14:22:00	0
2009-09-15	14:23:00	0
2009-09-15	14:24:00	0
2009-09-15	14:25:00	0
2009-09-15	14:26:00	0
2009-09-15	14:27:00	0
2009-09-15	14:28:00	0
2009-09-15	14:29:00	0
2009-09-15	14:30:00	0
2009-09-15	14:31:00	0
2009-09-15	14:32:00	0
2009-09-15	14:33:00	0
2009-09-15	14:34:00	0
2009-09-15	14:35:00	0
2009-09-15	14:36:00	0
2009-09-15	14:37:00	0
2009-09-15	14:38:00	0
2009-09-15	14:39:00	0
2009-09-15	14:40:00	0
2009-09-15	14:41:00	0
2009-09-15	14:42:00	0
2009-09-15	14:43:00	0
2009-09-15	14:44:00	0
2009-09-15	14:45:00	0
2009-09-15	14:46:00	0
2009-09-15	14:47:00	0
2009-09-15	14:48:00	0
2009-09-15	14:49:00	0
2009-09-15	14:50:00	0
2009-09-15	14:51:00	0
2009-09-15	14:52:00	0
2009-09-15	14:53:00	0
2009-09-15	14:54:00	0
2009-09-15	14:55:00	0
2009-09-15	14:56:00	0
2009-09-15	14:57:00	0
2009-09-15	14:58:00	0
2009-09-15	14:59:00	0
2009-09-15	15:00:00	0
2009-09-15	15:01:00	0
2009-09-15	15:02:00	0
2009-09-15	15:03:00	0
2009-09-15	15:04:00	0
2009-09-15	15:05:00	0
2009-09-15	15:06:00	0
2009-09-15	15:07:00	0
2009-09-15	15:08:00	0
2009-09-15	15:09:00	0
2009-09-15	15:10:00	0
2009-09-15	15:11:00	0
2009-09-15	15:12:00	0
2009-09-15	15:13:00	0
2009-09-15	15:14:00	0
2009-09-15	15:15:00	0
2009-09-15	15:16:00	0
2009-09-15	15:17:00	0
2009-09-15	15:18:00	0
2009-09-15	15:19:00	0
2009-09-15	15:20:00	0
2009-09-15	15:21:00	0
2009-09-15	15:22:00	0
2009-09-15	15:23:00	0
2009-09-15	15:24:00	0
2009-09-15	15:25:00	0
2009-09-15	15:26:00	0
2009-09-15	15:27:00	0
2009-09-15	15:28:00	0
2009-09-15	15:29:00	0
2009-09-15	15:30:00	0
2009-09-15	15:31:00	0
2009-09-15	15:32:00	0
2009-09-15	15:33:00	0
2009-09-15	15:34:00	0
2009-09-15	15:35:00	0
2009-09-15	15:36:00	0
2009-09-15	15:37:00	0
2009-09-15	15:38:00	0
2009-09-15	15:39:00	0
2009-09-15	15:40:00	0
2009-09-15	15:41:00	0
2009-09-15	15:42:00	0
2009-09-15	15:43:00	0
2009-09-15	15:44:00	0
2009-09-15	15:45:00	0
2009-09-15	15:46:00	0
2009-09-15	15:47:00	0
2009-09-15	15:48:00	0
2009-09-15	15:49:00	0
2009-09-15	15:50:00	0
2009-09-15	15:51:00	0
2009-09-15	15:52:00	0
2009-09-15	15:53:00	0
2009-09-15	15:54:00	0
2009-09-15	15:55:00	0
2009-09-15	15:56:00	0
2009-09-15	15:57:00	0
2009-09-15	15:58:00	0
2009-09-15	15:59:00	0
2009-09-15	16:00:00	0
2009-09-15	16:01:00	0
2009-09-15	16:02:00	0
2009-09-15	16:03:00	0
2009-09-15	16:04:00	0
2009-09-15	16:05:00	0
2009-09-15	16:06:00	0
2009-09-15	16:07:00	0
2009-09-15	16:08:00	0
2009-09-15	16:09:00	0
2009-09-15	16:10:00	0
2009-09-15	16:11:00	0
2009-09-15	16:12:00	0
2009-09-15	16:13:00	0
2009-09-15	16:14:00	0
2009-09-15	16:15:00	0
2009-09-15	16:16:00	0
2009-09-15	16:17:00	0
2009-09-15	16:18:00	0
2009-09-15	16:19:00	0
2009-09-15	16:20:00	0
2009-09-15	16:21:00	0
2009-09-15	16:22:00	0
2009-09-15	16:23:00	0
2009-09-15	16:24:00	0
2009-09-15	16:25:00	0
2009-09-15	16:26:00	0
2009-09-15	16:27:00	0
2009-09-15	16:28:00	0
2009-09-15	16:29:00	0
2009-09-15	16:30:00	0
2009-09-15	16:31:00	0
2009-09-15	16:32:00	0
2009-09-15	16:33:00	0
2009-09-15	16:34:00	0
2009-09-15	16:35:00	0
2009-09-15	16:36:00	0
2009-09-15	16:37:00	0
2009-09-15	16:38:00	0
2009-09-15	16:39:00	0
2009-09-15	16:40:00	0
2009-09-15	16:41:00	0
2009-09-15	16:42:00	0
2009-09-15	16:43:00	0
2009-09-15	16:44:00	0
2009-09-15	16:45:00	0
2009-09-15	16:46:00	0
2009-09-15	16:47:00	0
2009-09-15	16:48:00	0
2009-09-15	16:49:00	0
2009-09-15	16:50:00	0
2009-09-15	16:51:00	0
2009-09-15	16:52:00	0
2009-09-15	16:53:00	0
2009-09-15	16:54:00	0
2009-09-15	16:55:00	0
2009-09-15	16:56:00	0
2009-09-15	16:57:00	0
2009-09-15	16:58:00	0
2009-09-15	16:59:00	0
2009-09-15	17:00:00	0
2009-09-15	17:01:00	0
2009-09-15	17:02:00	0
2009-09-15	17:03:00	0
2009-09-15	17:04:00	0
2009-09-15	17:05:00	0
2009-09-15	17:06:00	0
2009-09-15	17:07:00	0
2009-09-15	17:08:00	0
2009-09-15	17:09:00	0
2009-09-15	17:10:00	0
2009-09-15	17:11:00	0
2009-09-15	17:12:00	0
2009-09-15	17:13:00	0
2009-09-15	17:14:00	0
2009-09-15	17:15:00	0
2009-09-15	17:16:00	0
2009-09-15	17:17:00	0
2009-09-15	17:18:00	0
2009-09-15	17:19:00	0
2009-09-15	17:20:00	0
2009-09-15	17:21:00	0
2009-09-15	17:22:00	0
2009-09-15	17:23:00	0
2009-09-15	17:24:00	0
2009-09-15	17:25:00	0
2009-09-15	17:26:00	0
2009-09-15	17:27:00	0
2009-09-15	17:28:00	0
2009-09-15	17:29:00	0
2009-09-15	17:30:00	0
2009-09-15	17:31:00	0
2009-09-15	17:32:00	0
2009-09-15	17:33:00	0
2009-09-15	17:34:00	0
2009-09-15	17:35:00	0
2009-09-15	17:36:00	0
2009-09-15	17:37:00	0
2009-09-15	17:38:00	0
2009-09-15	17:39:00	0
2009-09-15	17:40:00	0
2009-09-15	17:41:00	0
2009-09-15	17:42:00	0
2009-09-15	17:43:00	0
2009-09-15	17:44:00	0
2009-09-15	17:45:00	0
2009-09-15	17:46:00	0
2009-09-15	17:47:00	0
2009-09-15	17:48:00	0
2009-09-15	17:49:00	0
2009-09-15	17:50:00	0
2009-09-15	17:51:00	0
2009-09-15	17:52:00	0
2009-09-15	17:53:00	0
2009-09-15	17:54:00	0
2009-09-15	17:55:00	0
2009-09-15	17:56:00	0
2009-09-15	17:57:00	0
2009-09-15	17:58:00	0
2009-09-15	17:59:00	0
2009-09-15	18:00:00	0	M
2009-09-15	18:01:00	234
2009-09-15	18:02:00	249
2009-09-15	18:03:00	123
2009-09-15	18:04:00	205
2009-09-15	18:05:00	86
2009-09-15	18:06:00	289
2009-09-15	18:07:00	0
2009-09-15	18:08:00	86
2009-09-15	18:09:00	212
2009-09-15	18:10:00	438
2009-09-15	18:11:00	257
2009-09-15	18:12:00	264
2009-09-15	18:13:00	219
2009-09-15	18:14:00	192
2009-09-15	18:15:00	75
2009-09-15	18:16:00	91
2009-09-15	18:17:00	51
2009-09-15	18:18:00	178
2009-09-15	18:19:00	117
2009-09-15	18:20:00	34
2009-09-15	18:21:00	159
2009-09-15	18:22:00	341
2009-09-15	18:23:00	272
2009-09-15	18:24:00	159
2009-09-15	18:25:00	117
2009-09-15	18:26:00	930
2009-09-15	18:27:00	1171
2009-09-15	18:28:00	505
2009-09-15	18:29:00	418
2009-09-15	18:30:00	631
2009-09-15	18:31:00	0
2009-09-15	18:32:00	0
2009-09-15	18:33:00	0
2009-09-15	18:34:00	0
2009-09-15	18:35:00	4
2009-09-15	18:36:00	0
2009-09-15	18:37:00	0
2009-09-15	18:38:00	0
2009-09-15	18:39:00	0
2009-09-15	18:40:00	4
2009-09-15	18:41:00	0
2009-09-15	18:42:00	289
2009-09-15	18:43:00	369
2009-09-15	18:44:00	912
2009-09-15	18:45:00	38
2009-09-15	18:46:00	91
2009-09-15	18:47:00	553
2009-09-15	18:48:00	0
2009-09-15	18:49:00	0
2009-09-15	18:50:00	0
2009-09-15	18:51:00	631
2009-09-15	18:52:00	323
2009-09-15	18:53:00	4
2009-09-15	18:54:00	65
2009-09-15	18:55:00	644
2009-09-15	18:56:00	482
2009-09-15	18:57:00	55
2009-09-15	18:58:00	96
2009-09-15	18:59:00	51
2009-09-15	19:00:00	0
2009-09-15	19:01:00	0
2009-09-15	19:02:00	0
2009-09-15	19:03:00	0
2009-09-15	19:04:00	860
2009-09-15	19:05:00	746
2009-09-15	19:06:00	449
2009-09-15	19:07:00	378
2009-09-15	19:08:00	212
2009-09-15	19:09:00	13
2009-09-15	19:10:00	13
2009-09-15	19:11:00	198
2009-09-15	19:12:00	60
2009-09-15	19:13:00	257
2009-09-15	19:14:00	289
2009-09-15	19:15:00	153
2009-09-15	19:16:00	55
2009-09-15	19:17:00	8
2009-09-15	19:18:00	13
2009-09-15	19:19:00	25
2009-09-15	19:20:00	171
2009-09-15	19:21:00	129
2009-09-15	19:22:00	123
2009-09-15	19:23:00	51
2009-09-15	19:24:00	226
2009-09-15	19:25:00	38
2009-09-15	19:26:00	0
2009-09-15	19:27:00	0
2009-09-15	19:28:00	0
2009-09-15	19:29:00	0
2009-09-15	19:30:00	264
2009-09-15	19:31:00	13
2009-09-15	19:32:00	25
2009-09-15	19:33:00	13
2009-09-15	19:34:00	449
2009-09-15	19:35:00	249
2009-09-15	19:36:00	658
2009-09-15	19:37:00	672
2009-09-15	19:38:00	517
2009-09-15	19:39:00	171
2009-09-15	19:40:00	0
2009-09-15	19:41:00	0
2009-09-15	19:42:00	0
2009-09-15	19:43:00	0
2009-09-15	19:44:00	0
2009-09-15	19:45:00	0
2009-09-15	19:46:00	0
2009-09-15	19:47:00	0
2009-09-15	19:48:00	0
2009-09-15	19:49:00	0
2009-09-15	19:50:00	0
2009-09-15	19:51:00	0
2009-09-15	19:52:00	0
2009-09-15	19:53:00	0
2009-09-15	19:54:00	0
2009-09-15	19:55:00	0
2009-09-15	19:56:00	0
2009-09-15	19:57:00	0
2009-09-15	19:58:00	13
2009-09-15	19:59:00	0
2009-09-15	20:00:00	0
2009-09-15	20:01:00	0
2009-09-15	20:02:00	0
2009-09-15	20:03:00	0
2009-09-15	20:04:00	0
2009-09-15	20:05:00	0
2009-09-15	20:06:00	0
2009-09-15	20:07:00	0
2009-09-15	20:08:00	0
2009-09-15	20:09:00	0
2009-09-15	20:10:00	0
2009-09-15	20:11:00	0
2009-09-15	20:12:00	0
2009-09-15	20:13:00	0
2009-09-15	20:14:00	0
2009-09-15	20:15:00	0
2009-09-15	20:16:00	0
2009-09-15	20:17:00	0
2009-09-15	20:18:00	0
2009-09-15	20:19:00	0
2009-09-15	20:20:00	0
2009-09-15	20:21:00	0
2009-09-15	20:22:00	0
2009-09-15	20:23:00	0
2009-09-15	20:24:00	0
2009-09-15	20:25:00	0
2009-09-15	20:26:00	0
2009-09-15	20:27:00	0
2009-09-15	20:28:00	0
2009-09-15	20:29:00	0
2009-09-15	20:30:00	0
2009-09-15	20:31:00	306
2009-09-15	20:32:00	226
2009-09-15	20:33:00	331
2009-09-15	20:34:00	387
2009-09-15	20:35:00	418
2009-09-15	20:36:00	428
2009-09-15	20:37:00	314
2009-09-15	20:38:00	60
2009-09-15	20:39:00	51
2009-09-15	20:40:00	0
2009-09-15	20:41:00	0
2009-09-15	20:42:00	0
2009-09-15	20:43:00	0
2009-09-15	20:44:00	30
2009-09-15	20:45:00	0
2009-09-15	20:46:00	0
2009-09-15	20:47:00	106
2009-09-15	20:48:00	493
2009-09-15	20:49:00	341
2009-09-15	20:50:00	658
2009-09-15	20:51:00	449
2009-09-15	20:52:00	986
2009-09-15	20:53:00	38
2009-09-15	20:54:00	70
2009-09-15	20:55:00	34
2009-09-15	20:56:00	117
2009-09-15	20:57:00	123
2009-09-15	20:58:00	81
2009-09-15	20:59:00	123
2009-09-15	21:00:00	117
2009-09-15	21:01:00	17
2009-09-15	21:02:00	13
2009-09-15	21:03:00	13
2009-09-15	21:04:00	60
2009-09-15	21:05:00	135
2009-09-15	21:06:00	153
2009-09-15	21:07:00	117
2009-09-15	21:08:00	34
2009-09-15	21:09:00	17
2009-09-15	21:10:00	21
2009-09-15	21:11:00	17
2009-09-15	21:12:00	17
2009-09-15	21:13:00	25
2009-09-15	21:14:00	17
2009-09-15	21:15:00	17
2009-09-15	21:16:00	17
2009-09-15	21:17:00	17
2009-09-15	21:18:00	17
2009-09-15	21:19:00	17
2009-09-15	21:20:00	13
2009-09-15	21:21:00	17
2009-09-15	21:22:00	21
2009-09-15	21:23:00	13
2009-09-15	21:24:00	17
2009-09-15	21:25:00	65
2009-09-15	21:26:00	135
2009-09-15	21:27:00	65
2009-09-15	21:28:00	21
2009-09-15	21:29:00	13
2009-09-15	21:30:00	359
2009-09-15	21:31:00	192
2009-09-15	21:32:00	17
2009-09-15	21:33:00	13
2009-09-15	21:34:00	13
2009-09-15	21:35:00	13
2009-09-15	21:36:00	13
2009-09-15	21:37:00	13
2009-09-15	21:38:00	13
2009-09-15	21:39:00	13
2009-09-15	21:40:00	51
2009-09-15	21:41:00	13
2009-09-15	21:42:00	123
2009-09-15	21:43:00	13
2009-09-15	21:44:00	13
2009-09-15	21:45:00	129
2009-09-15	21:46:00	38
2009-09-15	21:47:00	17
2009-09-15	21:48:00	1044
2009-09-15	21:49:00	843
2009-09-15	21:50:00	13
2009-09-15	21:51:00	106
2009-09-15	21:52:00	86
2009-09-15	21:53:00	341
2009-09-15	21:54:00	0
2009-09-15	21:55:00	0
2009-09-15	21:56:00	0
2009-09-15	21:57:00	331
2009-09-15	21:58:00	141
2009-09-15	21:59:00	257
2009-09-15	22:00:00	949
2009-09-15	22:01:00	761
2009-09-15	22:02:00	715
2009-09-15	22:03:00	565
2009-09-15	22:04:00	164
2009-09-15	22:05:00	0
2009-09-15	22:06:00	0
2009-09-15	22:07:00	0
2009-09-15	22:08:00	226
2009-09-15	22:09:00	249
2009-09-15	22:10:00	13
2009-09-15	22:11:00	101
2009-09-15	22:12:00	314
2009-09-15	22:13:00	8
2009-09-15	22:14:00	8
2009-09-15	22:15:00	0
2009-09-15	22:16:00	0
2009-09-15	22:17:00	323
2009-09-15	22:18:00	369
2009-09-15	22:19:00	198
2009-09-15	22:20:00	34
2009-09-15	22:21:00	281
2009-09-15	22:22:00	219
2009-09-15	22:23:00	47
2009-09-15	22:24:00	298
2009-09-15	22:25:00	47
2009-09-15	22:26:00	47
2009-09-15	22:27:00	8
2009-09-15	22:28:00	418
2009-09-15	22:29:00	212
2009-09-15	22:30:00	192
2009-09-15	22:31:00	75
2009-09-15	22:32:00	4
2009-09-15	22:33:00	0
2009-09-15	22:34:00	0
2009-09-15	22:35:00	323
2009-09-15	22:36:00	164
2009-09-15	22:37:00	350
2009-09-15	22:38:00	289
2009-09-15	22:39:00	517
2009-09-15	22:40:00	493
2009-09-15	22:41:00	408
2009-09-15	22:42:00	117
2009-09-15	22:43:00	257
2009-09-15	22:44:00	38
2009-09-15	22:45:00	192
2009-09-15	22:46:00	350
2009-09-15	22:47:00	257
2009-09-15	22:48:00	378
2009-09-15	22:49:00	359
2009-09-15	22:50:00	111
2009-09-15	22:51:00	51
2009-09-15	22:52:00	0
2009-09-15	22:53:00	0
2009-09-15	22:54:00	0
2009-09-15	22:55:00	604
2009-09-15	22:56:00	212
2009-09-15	22:57:00	8
2009-09-15	22:58:00	8
2009-09-15	22:59:00	34
2009-09-15	23:00:00	60
2009-09-15	23:01:00	185
2009-09-15	23:02:00	117
2009-09-15	23:03:00	0
2009-09-15	23:04:00	0
2009-09-15	23:05:00	0
2009-09-15	23:06:00	0
2009-09-15	23:07:00	0
2009-09-15	23:08:00	0
2009-09-15	23:09:00	0
2009-09-15	23:10:00	0
2009-09-15	23:11:00	42
2009-09-15	23:12:00	0
2009-09-15	23:13:00	0
2009-09-15	23:14:00	0
2009-09-15	23:15:00	0
2009-09-15	23:16:00	0
2009-09-15	23:17:00	0
2009-09-15	23:18:00	0
2009-09-15	23:19:00	0
2009-09-15	23:20:00	0
2009-09-15	23:21:00	21
2009-09-15	23:22:00	60
2009-09-15	23:23:00	0
2009-09-15	23:24:00	0
2009-09-15	23:25:00	0
2009-09-15	23:26:00	0
2009-09-15	23:27:00	0
2009-09-15	23:28:00	0
2009-09-15	23:29:00	0
2009-09-15	23:30:00	4
2009-09-15	23:31:00	25
2009-09-15	23:32:00	25
2009-09-15	23:33:00	0
2009-09-15	23:34:00	0
2009-09-15	23:35:00	0
2009-09-15	23:36:00	13
2009-09-15	23:37:00	4
2009-09-15	23:38:00	0
2009-09-15	23:39:00	0
2009-09-15	23:40:00	4
2009-09-15	23:41:00	0
2009-09-15	23:42:00	0
2009-09-15	23:43:00	21
2009-09-15	23:44:00	0
2009-09-15	23:45:00	8
2009-09-15	23:46:00	34
2009-09-15	23:47:00	129
2009-09-15	23:48:00	0
2009-09-15	23:49:00	0
2009-09-15	23:50:00	0
2009-09-15	23:51:00	0
2009-09-15	23:52:00	0
2009-09-15	23:53:00	0
2009-09-15	23:54:00	0
2009-09-15	23:55:00	0
2009-09-15	23:56:00	0
2009-09-15	23:57:00	0
2009-09-15	23:58:00	0
2009-09-15	23:59:00	0
2009-09-16	00:00:00	0
2009-09-16	00:01:00	0
2009-09-16	00:02:00	0
2009-09-16	00:03:00	8
2009-09-16	00:04:00	30
2009-09-16	00:05:00	0
2009-09-16	00:06:00	25
2009-09-16	00:07:00	0
2009-09-16	00:08:00	0
2009-09-16	00:09:00	0
2009-09-16	00:10:00	0
2009-09-16	00:11:00	0
2009-09-16	00:12:00	0
2009-09-16	00:13:00	0
2009-09-16	00:14:00	0
2009-09-16	00:15:00	4
2009-09-16	00:16:00	0
2009-09-16	00:17:00	0
2009-09-16	00:18:00	0
2009-09-16	00:19:00	0
2009-09-16	00:20:00	0
2009-09-16	00:21:00	0
2009-09-16	00:22:00	0
2009-09-16	00:23:00	0
2009-09-16	00:24:00	13
2009-09-16	00:25:00	4
2009-09-16	00:26:00	25
2009-09-16	00:27:00	13
2009-09-16	00:28:00	0
2009-09-16	00:29:00	0
2009-09-16	00:30:00	0
2009-09-16	00:31:00	0
2009-09-16	00:32:00	0
2009-09-16	00:33:00	0
2009-09-16	00:34:00	0
2009-09-16	00:35:00	13
2009-09-16	00:36:00	38
2009-09-16	00:37:00	4
2009-09-16	00:38:00	0
2009-09-16	00:39:00	0
2009-09-16	00:40:00	21
2009-09-16	00:41:00	0
2009-09-16	00:42:00	0
2009-09-16	00:43:00	0
2009-09-16	00:44:00	0
2009-09-16	00:45:00	0
2009-09-16	00:46:00	25
2009-09-16	00:47:00	55
2009-09-16	00:48:00	0
2009-09-16	00:49:00	8
2009-09-16	00:50:00	0
2009-09-16	00:51:00	81
2009-09-16	00:52:00	0
2009-09-16	00:53:00	0
2009-09-16	00:54:00	0
2009-09-16	00:55:00	0
2009-09-16	00:56:00	123
2009-09-16	00:57:00	0
2009-09-16	00:58:00	123
2009-09-16	00:59:00	101
2009-09-16	01:00:00	185
2009-09-16	01:01:00	81
2009-09-16	01:02:00	81
2009-09-16	01:03:00	55
2009-09-16	01:04:00	0
2009-09-16	01:05:00	0
2009-09-16	01:06:00	91
2009-09-16	01:07:00	0
2009-09-16	01:08:00	101
2009-09-16	01:09:00	0
2009-09-16	01:10:00	75
2009-09-16	01:11:00	147
2009-09-16	01:12:00	4
2009-09-16	01:13:00	0
2009-09-16	01:14:00	111
2009-09-16	01:15:00	70
2009-09-16	01:16:00	42
2009-09-16	01:17:00	106
2009-09-16	01:18:00	289
2009-09-16	01:19:00	117
2009-09-16	01:20:00	0
2009-09-16	01:21:00	0
2009-09-16	01:22:00	0
2009-09-16	01:23:00	0
2009-09-16	01:24:00	0
2009-09-16	01:25:00	0
2009-09-16	01:26:00	0
2009-09-16	01:27:00	0
2009-09-16	01:28:00	0
2009-09-16	01:29:00	0
2009-09-16	01:30:00	0
2009-09-16	01:31:00	0
2009-09-16	01:32:00	0
2009-09-16	01:33:00	0
2009-09-16	01:34:00	0
2009-09-16	01:35:00	65
2009-09-16	01:36:00	101
2009-09-16	01:37:00	38
2009-09-16	01:38:00	21
2009-09-16	01:39:00	0
2009-09-16	01:40:00	91
2009-09-16	01:41:00	34
2009-09-16	01:42:00	482
2009-09-16	01:43:00	0
2009-09-16	01:44:00	0
2009-09-16	01:45:00	0
2009-09-16	01:46:00	0
2009-09-16	01:47:00	0
2009-09-16	01:48:00	0
2009-09-16	01:49:00	0
2009-09-16	01:50:00	0
2009-09-16	01:51:00	0
2009-09-16	01:52:00	0
2009-09-16	01:53:00	0
2009-09-16	01:54:00	0
2009-09-16	01:55:00	0
2009-09-16	01:56:00	0
2009-09-16	01:57:00	0
2009-09-16	01:58:00	0
2009-09-16	01:59:00	0
2009-09-16	02:00:00	0
2009-09-16	02:01:00	60
2009-09-16	02:02:00	4
2009-09-16	02:03:00	106
2009-09-16	02:04:00	147
2009-09-16	02:05:00	0
2009-09-16	02:06:00	0
2009-09-16	02:07:00	0
2009-09-16	02:08:00	0
2009-09-16	02:09:00	0
2009-09-16	02:10:00	0
2009-09-16	02:11:00	30
2009-09-16	02:12:00	0
2009-09-16	02:13:00	0
2009-09-16	02:14:00	0
2009-09-16	02:15:00	0
2009-09-16	02:16:00	0
2009-09-16	02:17:00	0
2009-09-16	02:18:00	0
2009-09-16	02:19:00	0
2009-09-16	02:20:00	0
2009-09-16	02:21:00	0
2009-09-16	02:22:00	0
2009-09-16	02:23:00	0
2009-09-16	02:24:00	0
2009-09-16	02:25:00	0
2009-09-16	02:26:00	0
2009-09-16	02:27:00	0
2009-09-16	02:28:00	0
2009-09-16	02:29:00	0
2009-09-16	02:30:00	0
2009-09-16	02:31:00	0
2009-09-16	02:32:00	0
2009-09-16	02:33:00	0
2009-09-16	02:34:00	0
2009-09-16	02:35:00	0
2009-09-16	02:36:00	0
2009-09-16	02:37:00	0
2009-09-16	02:38:00	0
2009-09-16	02:39:00	0
2009-09-16	02:40:00	0
2009-09-16	02:41:00	0
2009-09-16	02:42:00	0
2009-09-16	02:43:00	0
2009-09-16	02:44:00	0
2009-09-16	02:45:00	0
2009-09-16	02:46:00	86
2009-09-16	02:47:00	212
2009-09-16	02:48:00	51
2009-09-16	02:49:00	17
2009-09-16	02:50:00	226
2009-09-16	02:51:00	17
2009-09-16	02:52:00	0
2009-09-16	02:53:00	0
2009-09-16	02:54:00	0
2009-09-16	02:55:00	0
2009-09-16	02:56:00	75
2009-09-16	02:57:00	192
2009-09-16	02:58:00	178
2009-09-16	02:59:00	106
2009-09-16	03:00:00	0
2009-09-16	03:01:00	0
2009-09-16	03:02:00	0
2009-09-16	03:03:00	0
2009-09-16	03:04:00	0
2009-09-16	03:05:00	0
2009-09-16	03:06:00	0
2009-09-16	03:07:00	341
2009-09-16	03:08:00	147
2009-09-16	03:09:00	117
2009-09-16	03:10:00	0
2009-09-16	03:11:00	0
2009-09-16	03:12:00	0
2009-09-16	03:13:00	0
2009-09-16	03:14:00	0
2009-09-16	03:15:00	0
2009-09-16	03:16:00	0
2009-09-16	03:17:00	0
2009-09-16	03:18:00	47
2009-09-16	03:19:00	30
2009-09-16	03:20:00	0
2009-09-16	03:21:00	0
2009-09-16	03:22:00	0
2009-09-16	03:23:00	0
2009-09-16	03:24:00	0
2009-09-16	03:25:00	0
2009-09-16	03:26:00	0
2009-09-16	03:27:00	0
2009-09-16	03:28:00	0
2009-09-16	03:29:00	0
2009-09-16	03:30:00	0
2009-09-16	03:31:00	0
2009-09-16	03:32:00	0
2009-09-16	03:33:00	0
2009-09-16	03:34:00	0
2009-09-16	03:35:00	0
2009-09-16	03:36:00	0
2009-09-16	03:37:00	0
2009-09-16	03:38:00	0
2009-09-16	03:39:00	0
2009-09-16	03:40:00	0
2009-09-16	03:41:00	0
2009-09-16	03:42:00	0
2009-09-16	03:43:00	0
2009-09-16	03:44:00	0
2009-09-16	03:45:00	0
2009-09-16	03:46:00	0
2009-09-16	03:47:00	0
2009-09-16	03:48:00	0
2009-09-16	03:49:00	0
2009-09-16	03:50:00	0
2009-09-16	03:51:00	0
2009-09-16	03:52:00	0
2009-09-16	03:53:00	0
2009-09-16	03:54:00	0
2009-09-16	03:55:00	0
2009-09-16	03:56:00	0
2009-09-16	03:57:00	0
2009-09-16	03:58:00	0
2009-09-16	03:59:00	0
2009-09-16	04:00:00	81
2009-09-16	04:01:00	81
2009-09-16	04:02:00	30
2009-09-16	04:03:00	198
2009-09-16	04:04:00	21
2009-09-16	04:05:00	0
2009-09-16	04:06:00	164
2009-09-16	04:07:00	75
2009-09-16	04:08:00	0
2009-09-16	04:09:00	0
2009-09-16	04:10:00	0
2009-09-16	04:11:00	0
2009-09-16	04:12:00	0
2009-09-16	04:13:00	86
2009-09-16	04:14:00	0
2009-09-16	04:15:00	0
2009-09-16	04:16:00	0
2009-09-16	04:17:00	0
2009-09-16	04:18:00	0
2009-09-16	04:19:00	0
2009-09-16	04:20:00	0
2009-09-16	04:21:00	0
2009-09-16	04:22:00	0
2009-09-16	04:23:00	0
2009-09-16	04:24:00	0
2009-09-16	04:25:00	0
2009-09-16	04:26:00	0
2009-09-16	04:27:00	0
2009-09-16	04:28:00	0
2009-09-16	04:29:00	0
2009-09-16	04:30:00	0
2009-09-16	04:31:00	0
2009-09-16	04:32:00	0
2009-09-16	04:33:00	0
2009-09-16	04:34:00	0
2009-09-16	04:35:00	0
2009-09-16	04:36:00	0
2009-09-16	04:37:00	0
2009-09-16	04:38:00	0
2009-09-16	04:39:00	0
2009-09-16	04:40:00	0
2009-09-16	04:41:00	0
2009-09-16	04:42:00	4
2009-09-16	04:43:00	0
2009-09-16	04:44:00	0
2009-09-16	04:45:00	0
2009-09-16	04:46:00	0
2009-09-16	04:47:00	0
2009-09-16	04:48:00	0
2009-09-16	04:49:00	0
2009-09-16	04:50:00	0
2009-09-16	04:51:00	0
2009-09-16	04:52:00	0
2009-09-16	04:53:00	0
2009-09-16	04:54:00	0
2009-09-16	04:55:00	0
2009-09-16	04:56:00	0
2009-09-16	04:57:00	0
2009-09-16	04:58:00	0
2009-09-16	04:59:00	0
2009-09-16	05:00:00	0
2009-09-16	05:01:00	0
2009-09-16	05:02:00	111
2009-09-16	05:03:00	0
2009-09-16	05:04:00	86
2009-09-16	05:05:00	117
2009-09-16	05:06:00	42
2009-09-16	05:07:00	0
2009-09-16	05:08:00	0
2009-09-16	05:09:00	0
2009-09-16	05:10:00	47
2009-09-16	05:11:00	101
2009-09-16	05:12:00	226
2009-09-16	05:13:00	212
2009-09-16	05:14:00	171
2009-09-16	05:15:00	117
2009-09-16	05:16:00	171
2009-09-16	05:17:00	198
2009-09-16	05:18:00	810
2009-09-16	05:19:00	894
2009-09-16	05:20:00	604
2009-09-16	05:21:00	387
2009-09-16	05:22:00	123
2009-09-16	05:23:00	0
2009-09-16	05:24:00	0
2009-09-16	05:25:00	60
2009-09-16	05:26:00	0
2009-09-16	05:27:00	0
2009-09-16	05:28:00	0
2009-09-16	05:29:00	0
2009-09-16	05:30:00	0
2009-09-16	05:31:00	60
2009-09-16	05:32:00	0
2009-09-16	05:33:00	0
2009-09-16	05:34:00	0
2009-09-16	05:35:00	0
2009-09-16	05:36:00	0
2009-09-16	05:37:00	25
2009-09-16	05:38:00	65
2009-09-16	05:39:00	96
2009-09-16	05:40:00	0
2009-09-16	05:41:00	0
2009-09-16	05:42:00	0
2009-09-16	05:43:00	0
2009-09-16	05:44:00	0
2009-09-16	05:45:00	0
2009-09-16	05:46:00	51
2009-09-16	05:47:00	60
2009-09-16	05:48:00	0
2009-09-16	05:49:00	0
2009-09-16	05:50:00	0
2009-09-16	05:51:00	0
2009-09-16	05:52:00	264
2009-09-16	05:53:00	212
2009-09-16	05:54:00	234
2009-09-16	05:55:00	205
2009-09-16	05:56:00	0
2009-09-16	05:57:00	0
2009-09-16	05:58:00	0
2009-09-16	05:59:00	0
2009-09-16	06:00:00	17
2009-09-16	06:01:00	0
2009-09-16	06:02:00	0
2009-09-16	06:03:00	0
2009-09-16	06:04:00	17
2009-09-16	06:05:00	0
2009-09-16	06:06:00	4
2009-09-16	06:07:00	17
2009-09-16	06:08:00	21
2009-09-16	06:09:00	0
2009-09-16	06:10:00	0
2009-09-16	06:11:00	81
2009-09-16	06:12:00	460
2009-09-16	06:13:00	0
2009-09-16	06:14:00	0
2009-09-16	06:15:00	289
2009-09-16	06:16:00	111
2009-09-16	06:17:00	715
2009-09-16	06:18:00	967
2009-09-16	06:19:00	1127
2009-09-16	06:20:00	1005
2009-09-16	06:21:00	1005
2009-09-16	06:22:00	793
2009-09-16	06:23:00	553
2009-09-16	06:24:00	553
2009-09-16	06:25:00	578
2009-09-16	06:26:00	826
2009-09-16	06:27:00	967
2009-09-16	06:28:00	860
2009-09-16	06:29:00	289
2009-09-16	06:30:00	106
2009-09-16	06:31:00	25
2009-09-16	06:32:00	281
2009-09-16	06:33:00	81
2009-09-16	06:34:00	205
2009-09-16	06:35:00	178
2009-09-16	06:36:00	793
2009-09-16	06:37:00	272
2009-09-16	06:38:00	281
2009-09-16	06:39:00	298
2009-09-16	06:40:00	0
2009-09-16	06:41:00	0
2009-09-16	06:42:00	0
2009-09-16	06:43:00	0
2009-09-16	06:44:00	0
2009-09-16	06:45:00	65
2009-09-16	06:46:00	0
2009-09-16	06:47:00	0
2009-09-16	06:48:00	0
2009-09-16	06:49:00	0
2009-09-16	06:50:00	387
2009-09-16	06:51:00	0
2009-09-16	06:52:00	0
2009-09-16	06:53:00	0
2009-09-16	06:54:00	0
2009-09-16	06:55:00	0
2009-09-16	06:56:00	0
2009-09-16	06:57:00	604
2009-09-16	06:58:00	0
2009-09-16	06:59:00	0
2009-09-16	07:00:00	13
2009-09-16	07:01:00	0
2009-09-16	07:02:00	0
2009-09-16	07:03:00	0
2009-09-16	07:04:00	0
2009-09-16	07:05:00	0
2009-09-16	07:06:00	8
2009-09-16	07:07:00	4
2009-09-16	07:08:00	0
2009-09-16	07:09:00	21
2009-09-16	07:10:00	0
2009-09-16	07:11:00	0
2009-09-16	07:12:00	0
2009-09-16	07:13:00	0
2009-09-16	07:14:00	0
2009-09-16	07:15:00	0
2009-09-16	07:16:00	0
2009-09-16	07:17:00	0
2009-09-16	07:18:00	51
2009-09-16	07:19:00	0
2009-09-16	07:20:00	0
2009-09-16	07:21:00	0
2009-09-16	07:22:00	164
2009-09-16	07:23:00	331
2009-09-16	07:24:00	0
2009-09-16	07:25:00	0
2009-09-16	07:26:00	0
2009-09-16	07:27:00	13
2009-09-16	07:28:00	51
2009-09-16	07:29:00	0
2009-09-16	07:30:00	0
2009-09-16	07:31:00	0
2009-09-16	07:32:00	0
2009-09-16	07:33:00	0
2009-09-16	07:34:00	0
2009-09-16	07:35:00	0
2009-09-16	07:36:00	0
2009-09-16	07:37:00	0
2009-09-16	07:38:00	0
2009-09-16	07:39:00	0
2009-09-16	07:40:00	0
2009-09-16	07:41:00	0
2009-09-16	07:42:00	0
2009-09-16	07:43:00	38
2009-09-16	07:44:00	0
2009-09-16	07:45:00	0
2009-09-16	07:46:00	0
2009-09-16	07:47:00	0
2009-09-16	07:48:00	0
2009-09-16	07:49:00	0
2009-09-16	07:50:00	0
2009-09-16	07:51:00	0
2009-09-16	07:52:00	0
2009-09-16	07:53:00	0
2009-09-16	07:54:00	0
2009-09-16	07:55:00	0
2009-09-16	07:56:00	0
2009-09-16	07:57:00	0
2009-09-16	07:58:00	0
2009-09-16	07:59:00	0
2009-09-16	08:00:00	0
2009-09-16	08:01:00	0
2009-09-16	08:02:00	0
2009-09-16	08:03:00	0
2009-09-16	08:04:00	0
2009-09-16	08:05:00	38
2009-09-16	08:06:00	0
2009-09-16	08:07:00	0
2009-09-16	08:08:00	0
2009-09-16	08:09:00	0
2009-09-16	08:10:00	0
2009-09-16	08:11:00	0
2009-09-16	08:12:00	0
2009-09-16	08:13:00	0
2009-09-16	08:14:00	0
2009-09-16	08:15:00	0
2009-09-16	08:16:00	0
2009-09-16	08:17:00	0
2009-09-16	08:18:00	42
2009-09-16	08:19:00	0
2009-09-16	08:20:00	0
2009-09-16	08:21:00	0
2009-09-16	08:22:00	0
2009-09-16	08:23:00	0
2009-09-16	08:24:00	0
2009-09-16	08:25:00	0
2009-09-16	08:26:00	0
2009-09-16	08:27:00	0
2009-09-16	08:28:00	0
2009-09-16	08:29:00	0
2009-09-16	08:30:00	0
2009-09-16	08:31:00	0
2009-09-16	08:32:00	0
2009-09-16	08:33:00	0
2009-09-16	08:34:00	0
2009-09-16	08:35:00	13
2009-09-16	08:36:00	38
2009-09-16	08:37:00	0
2009-09-16	08:38:00	0
2009-09-16	08:39:00	0
2009-09-16	08:40:00	0
2009-09-16	08:41:00	0
2009-09-16	08:42:00	0
2009-09-16	08:43:00	0
2009-09-16	08:44:00	0
2009-09-16	08:45:00	0
2009-09-16	08:46:00	0
2009-09-16	08:47:00	0
2009-09-16	08:48:00	0
2009-09-16	08:49:00	96
2009-09-16	08:50:00	0
2009-09-16	08:51:00	0
2009-09-16	08:52:00	0
2009-09-16	08:53:00	0
2009-09-16	08:54:00	0
2009-09-16	08:55:00	0
2009-09-16	08:56:00	0
2009-09-16	08:57:00	0
2009-09-16	08:58:00	0
2009-09-16	08:59:00	0
2009-09-16	09:00:00	0
2009-09-16	09:01:00	0
2009-09-16	09:02:00	0
2009-09-16	09:03:00	0
2009-09-16	09:04:00	13
2009-09-16	09:05:00	0
2009-09-16	09:06:00	47
2009-09-16	09:07:00	0
2009-09-16	09:08:00	0
[truncated: 49,851 more rows]
