# Supplementary material for: Initial evaluation of nighttime restlessness in a naturally occurring canine model of osteoarthritis pain
Source: PeerJ. 2015 Feb 17;3:e772. doi: 10.7717/peerj.772 (PMC4340376; doi:10.7717/peerj.772)
Supplement: Supplemental Information 72 [file peerj-03-772-s072.xlsx]

## Sheet: 14_Data
Tx #	DateTime	Activity	DTA vs NTA	Hour	Tx Day	Weekday	Tx Rx	Peak DTA Time?	Last 7 Day?
1	2009-09-29 23:31:00	0	NTA	23	1	3	P
1	2009-09-29 23:32:00	0	NTA	23	1	3	P
1	2009-09-29 23:33:00	0	NTA	23	1	3	P
1	2009-09-29 23:34:00	0	NTA	23	1	3	P
1	2009-09-29 23:35:00	0	NTA	23	1	3	P
1	2009-09-29 23:36:00	0	NTA	23	1	3	P
1	2009-09-29 23:37:00	0	NTA	23	1	3	P
1	2009-09-29 23:38:00	0	NTA	23	1	3	P
1	2009-09-29 23:39:00	0	NTA	23	1	3	P
1	2009-09-29 23:40:00	0	NTA	23	1	3	P
1	2009-09-29 23:41:00	0	NTA	23	1	3	P
1	2009-09-29 23:42:00	0	NTA	23	1	3	P
1	2009-09-29 23:43:00	0	NTA	23	1	3	P
1	2009-09-29 23:44:00	0	NTA	23	1	3	P
1	2009-09-29 23:45:00	0	NTA	23	1	3	P
1	2009-09-29 23:46:00	0	NTA	23	1	3	P
1	2009-09-29 23:47:00	0	NTA	23	1	3	P
1	2009-09-29 23:48:00	0	NTA	23	1	3	P
1	2009-09-29 23:49:00	0	NTA	23	1	3	P
1	2009-09-29 23:50:00	0	NTA	23	1	3	P
1	2009-09-29 23:51:00	66	NTA	23	1	3	P
1	2009-09-29 23:52:00	66	NTA	23	1	3	P
1	2009-09-29 23:53:00	20	NTA	23	1	3	P
1	2009-09-29 23:54:00	0	NTA	23	1	3	P
1	2009-09-29 23:55:00	0	NTA	23	1	3	P
1	2009-09-29 23:56:00	0	NTA	23	1	3	P
1	2009-09-29 23:57:00	0	NTA	23	1	3	P
1	2009-09-29 23:58:00	0	NTA	23	1	3	P
1	2009-09-29 23:59:00	61	NTA	23	1	3	P
1	2009-09-30	0	NTA	23	1	3	P
1	2009-09-30 00:01:00	0	NTA	0	1	4	P
1	2009-09-30 00:02:00	0	NTA	0	1	4	P
1	2009-09-30 00:03:00	0	NTA	0	1	4	P
1	2009-09-30 00:04:00	0	NTA	0	1	4	P
1	2009-09-30 00:05:00	0	NTA	0	1	4	P
1	2009-09-30 00:06:00	0	NTA	0	1	4	P
1	2009-09-30 00:07:00	0	NTA	0	1	4	P
1	2009-09-30 00:08:00	0	NTA	0	1	4	P
1	2009-09-30 00:09:00	0	NTA	0	1	4	P
1	2009-09-30 00:10:00	46	NTA	0	1	4	P
1	2009-09-30 00:11:00	0	NTA	0	1	4	P
1	2009-09-30 00:12:00	0	NTA	0	1	4	P
1	2009-09-30 00:13:00	0	NTA	0	1	4	P
1	2009-09-30 00:14:00	0	NTA	0	1	4	P
1	2009-09-30 00:15:00	0	NTA	0	1	4	P
1	2009-09-30 00:16:00	0	NTA	0	1	4	P
1	2009-09-30 00:17:00	0	NTA	0	1	4	P
1	2009-09-30 00:18:00	0	NTA	0	1	4	P
1	2009-09-30 00:19:00	0	NTA	0	1	4	P
1	2009-09-30 00:20:00	0	NTA	0	1	4	P
1	2009-09-30 00:21:00	0	NTA	0	1	4	P
1	2009-09-30 00:22:00	0	NTA	0	1	4	P
1	2009-09-30 00:23:00	0	NTA	0	1	4	P
1	2009-09-30 00:24:00	0	NTA	0	1	4	P
1	2009-09-30 00:25:00	0	NTA	0	1	4	P
1	2009-09-30 00:26:00	0	NTA	0	1	4	P
1	2009-09-30 00:27:00	0	NTA	0	1	4	P
1	2009-09-30 00:28:00	0	NTA	0	1	4	P
1	2009-09-30 00:29:00	41	NTA	0	1	4	P
1	2009-09-30 00:30:00	36	NTA	0	1	4	P
1	2009-09-30 00:31:00	176	NTA	0	1	4	P
1	2009-09-30 00:32:00	0	NTA	0	1	4	P
1	2009-09-30 00:33:00	0	NTA	0	1	4	P
1	2009-09-30 00:34:00	25	NTA	0	1	4	P
1	2009-09-30 00:35:00	0	NTA	0	1	4	P
1	2009-09-30 00:36:00	0	NTA	0	1	4	P
1	2009-09-30 00:37:00	0	NTA	0	1	4	P
1	2009-09-30 00:38:00	0	NTA	0	1	4	P
1	2009-09-30 00:39:00	0	NTA	0	1	4	P
1	2009-09-30 00:40:00	0	NTA	0	1	4	P
1	2009-09-30 00:41:00	0	NTA	0	1	4	P
1	2009-09-30 00:42:00	0	NTA	0	1	4	P
1	2009-09-30 00:43:00	84	NTA	0	1	4	P
1	2009-09-30 00:44:00	0	NTA	0	1	4	P
1	2009-09-30 00:45:00	30	NTA	0	1	4	P
1	2009-09-30 00:46:00	0	NTA	0	1	4	P
1	2009-09-30 00:47:00	0	NTA	0	1	4	P
1	2009-09-30 00:48:00	0	NTA	0	1	4	P
1	2009-09-30 00:49:00	0	NTA	0	1	4	P
1	2009-09-30 00:50:00	0	NTA	0	1	4	P
1	2009-09-30 00:51:00	0	NTA	0	1	4	P
1	2009-09-30 00:52:00	0	NTA	0	1	4	P
1	2009-09-30 00:53:00	0	NTA	0	1	4	P
1	2009-09-30 00:54:00	0	NTA	0	1	4	P
1	2009-09-30 00:55:00	0	NTA	0	1	4	P
1	2009-09-30 00:56:00	0	NTA	0	1	4	P
1	2009-09-30 00:57:00	0	NTA	0	1	4	P
1	2009-09-30 00:58:00	0	NTA	0	1	4	P
1	2009-09-30 00:59:00	0	NTA	0	1	4	P
1	2009-09-30 01:00:00	0	NTA	0	1	4	P
1	2009-09-30 01:01:00	0	NTA	1	1	4	P
1	2009-09-30 01:02:00	0	NTA	1	1	4	P
1	2009-09-30 01:03:00	0	NTA	1	1	4	P
1	2009-09-30 01:04:00	0	NTA	1	1	4	P
1	2009-09-30 01:05:00	0	NTA	1	1	4	P
1	2009-09-30 01:06:00	0	NTA	1	1	4	P
1	2009-09-30 01:07:00	0	NTA	1	1	4	P
1	2009-09-30 01:08:00	0	NTA	1	1	4	P
1	2009-09-30 01:09:00	0	NTA	1	1	4	P
1	2009-09-30 01:10:00	0	NTA	1	1	4	P
1	2009-09-30 01:11:00	0	NTA	1	1	4	P
1	2009-09-30 01:12:00	0	NTA	1	1	4	P
1	2009-09-30 01:13:00	0	NTA	1	1	4	P
1	2009-09-30 01:14:00	0	NTA	1	1	4	P
1	2009-09-30 01:15:00	25	NTA	1	1	4	P
1	2009-09-30 01:16:00	10	NTA	1	1	4	P
1	2009-09-30 01:17:00	61	NTA	1	1	4	P
1	2009-09-30 01:18:00	10	NTA	1	1	4	P
1	2009-09-30 01:19:00	5	NTA	1	1	4	P
1	2009-09-30 01:20:00	0	NTA	1	1	4	P
1	2009-09-30 01:21:00	840	NTA	1	1	4	P
1	2009-09-30 01:22:00	723	NTA	1	1	4	P
1	2009-09-30 01:23:00	1030	NTA	1	1	4	P
1	2009-09-30 01:24:00	1137	NTA	1	1	4	P
1	2009-09-30 01:25:00	1252	NTA	1	1	4	P
1	2009-09-30 01:26:00	1010	NTA	1	1	4	P
1	2009-09-30 01:27:00	970	NTA	1	1	4	P
1	2009-09-30 01:28:00	230	NTA	1	1	4	P
1	2009-09-30 01:29:00	951	NTA	1	1	4	P
1	2009-09-30 01:30:00	326	NTA	1	1	4	P
1	2009-09-30 01:31:00	109	NTA	1	1	4	P
1	2009-09-30 01:32:00	10	NTA	1	1	4	P
1	2009-09-30 01:33:00	5	NTA	1	1	4	P
1	2009-09-30 01:34:00	326	NTA	1	1	4	P
1	2009-09-30 01:35:00	0	NTA	1	1	4	P
1	2009-09-30 01:36:00	15	NTA	1	1	4	P
1	2009-09-30 01:37:00	20	NTA	1	1	4	P
1	2009-09-30 01:38:00	0	NTA	1	1	4	P
1	2009-09-30 01:39:00	5	NTA	1	1	4	P
1	2009-09-30 01:40:00	0	NTA	1	1	4	P
1	2009-09-30 01:41:00	5	NTA	1	1	4	P
1	2009-09-30 01:42:00	262	NTA	1	1	4	P
1	2009-09-30 01:43:00	213	NTA	1	1	4	P
1	2009-09-30 01:44:00	0	NTA	1	1	4	P
1	2009-09-30 01:45:00	0	NTA	1	1	4	P
1	2009-09-30 01:46:00	0	NTA	1	1	4	P
1	2009-09-30 01:47:00	0	NTA	1	1	4	P
1	2009-09-30 01:48:00	0	NTA	1	1	4	P
1	2009-09-30 01:49:00	0	NTA	1	1	4	P
1	2009-09-30 01:50:00	0	NTA	1	1	4	P
1	2009-09-30 01:51:00	0	NTA	1	1	4	P
1	2009-09-30 01:52:00	0	NTA	1	1	4	P
1	2009-09-30 01:53:00	0	NTA	1	1	4	P
1	2009-09-30 01:54:00	0	NTA	1	1	4	P
1	2009-09-30 01:55:00	0	NTA	1	1	4	P
1	2009-09-30 01:56:00	0	NTA	1	1	4	P
1	2009-09-30 01:57:00	0	NTA	1	1	4	P
1	2009-09-30 01:58:00	0	NTA	1	1	4	P
1	2009-09-30 01:59:00	0	NTA	1	1	4	P
1	2009-09-30 02:00:00	0	NTA	1	1	4	P
1	2009-09-30 02:01:00	0	NTA	2	1	4	P
1	2009-09-30 02:02:00	0	NTA	2	1	4	P
1	2009-09-30 02:03:00	0	NTA	2	1	4	P
1	2009-09-30 02:04:00	0	NTA	2	1	4	P
1	2009-09-30 02:05:00	0	NTA	2	1	4	P
1	2009-09-30 02:06:00	0	NTA	2	1	4	P
1	2009-09-30 02:07:00	0	NTA	2	1	4	P
1	2009-09-30 02:08:00	0	NTA	2	1	4	P
1	2009-09-30 02:09:00	0	NTA	2	1	4	P
1	2009-09-30 02:10:00	0	NTA	2	1	4	P
1	2009-09-30 02:11:00	0	NTA	2	1	4	P
1	2009-09-30 02:12:00	0	NTA	2	1	4	P
1	2009-09-30 02:13:00	0	NTA	2	1	4	P
1	2009-09-30 02:14:00	0	NTA	2	1	4	P
1	2009-09-30 02:15:00	0	NTA	2	1	4	P
1	2009-09-30 02:16:00	0	NTA	2	1	4	P
1	2009-09-30 02:17:00	0	NTA	2	1	4	P
1	2009-09-30 02:18:00	5	NTA	2	1	4	P
1	2009-09-30 02:19:00	0	NTA	2	1	4	P
1	2009-09-30 02:20:00	0	NTA	2	1	4	P
1	2009-09-30 02:21:00	0	NTA	2	1	4	P
1	2009-09-30 02:22:00	0	NTA	2	1	4	P
1	2009-09-30 02:23:00	0	NTA	2	1	4	P
1	2009-09-30 02:24:00	0	NTA	2	1	4	P
1	2009-09-30 02:25:00	0	NTA	2	1	4	P
1	2009-09-30 02:26:00	0	NTA	2	1	4	P
1	2009-09-30 02:27:00	0	NTA	2	1	4	P
1	2009-09-30 02:28:00	0	NTA	2	1	4	P
1	2009-09-30 02:29:00	0	NTA	2	1	4	P
1	2009-09-30 02:30:00	0	NTA	2	1	4	P
1	2009-09-30 02:31:00	0	NTA	2	1	4	P
1	2009-09-30 02:32:00	0	NTA	2	1	4	P
1	2009-09-30 02:33:00	0	NTA	2	1	4	P
1	2009-09-30 02:34:00	10	NTA	2	1	4	P
1	2009-09-30 02:35:00	51	NTA	2	1	4	P
1	2009-09-30 02:36:00	0	NTA	2	1	4	P
1	2009-09-30 02:37:00	0	NTA	2	1	4	P
1	2009-09-30 02:38:00	15	NTA	2	1	4	P
1	2009-09-30 02:39:00	0	NTA	2	1	4	P
1	2009-09-30 02:40:00	0	NTA	2	1	4	P
1	2009-09-30 02:41:00	0	NTA	2	1	4	P
1	2009-09-30 02:42:00	0	NTA	2	1	4	P
1	2009-09-30 02:43:00	0	NTA	2	1	4	P
1	2009-09-30 02:44:00	0	NTA	2	1	4	P
1	2009-09-30 02:45:00	0	NTA	2	1	4	P
1	2009-09-30 02:46:00	0	NTA	2	1	4	P
1	2009-09-30 02:47:00	0	NTA	2	1	4	P
1	2009-09-30 02:48:00	0	NTA	2	1	4	P
1	2009-09-30 02:49:00	0	NTA	2	1	4	P
1	2009-09-30 02:50:00	0	NTA	2	1	4	P
1	2009-09-30 02:51:00	0	NTA	2	1	4	P
1	2009-09-30 02:52:00	0	NTA	2	1	4	P
1	2009-09-30 02:53:00	0	NTA	2	1	4	P
1	2009-09-30 02:54:00	0	NTA	2	1	4	P
1	2009-09-30 02:55:00	0	NTA	2	1	4	P
1	2009-09-30 02:56:00	0	NTA	2	1	4	P
1	2009-09-30 02:57:00	0	NTA	2	1	4	P
1	2009-09-30 02:58:00	0	NTA	2	1	4	P
1	2009-09-30 02:59:00	0	NTA	2	1	4	P
1	2009-09-30 03:00:00	0	NTA	2	1	4	P
1	2009-09-30 03:01:00	0	NTA	3	1	4	P
1	2009-09-30 03:02:00	0	NTA	3	1	4	P
1	2009-09-30 03:03:00	0	NTA	3	1	4	P
1	2009-09-30 03:04:00	121	NTA	3	1	4	P
1	2009-09-30 03:05:00	109	NTA	3	1	4	P
1	2009-09-30 03:06:00	0	NTA	3	1	4	P
1	2009-09-30 03:07:00	0	NTA	3	1	4	P
1	2009-09-30 03:08:00	0	NTA	3	1	4	P
1	2009-09-30 03:09:00	0	NTA	3	1	4	P
1	2009-09-30 03:10:00	0	NTA	3	1	4	P
1	2009-09-30 03:11:00	0	NTA	3	1	4	P
1	2009-09-30 03:12:00	0	NTA	3	1	4	P
1	2009-09-30 03:13:00	0	NTA	3	1	4	P
1	2009-09-30 03:14:00	0	NTA	3	1	4	P
1	2009-09-30 03:15:00	0	NTA	3	1	4	P
1	2009-09-30 03:16:00	0	NTA	3	1	4	P
1	2009-09-30 03:17:00	0	NTA	3	1	4	P
1	2009-09-30 03:18:00	0	NTA	3	1	4	P
1	2009-09-30 03:19:00	0	NTA	3	1	4	P
1	2009-09-30 03:20:00	0	NTA	3	1	4	P
1	2009-09-30 03:21:00	0	NTA	3	1	4	P
1	2009-09-30 03:22:00	0	NTA	3	1	4	P
1	2009-09-30 03:23:00	0	NTA	3	1	4	P
1	2009-09-30 03:24:00	0	NTA	3	1	4	P
1	2009-09-30 03:25:00	0	NTA	3	1	4	P
1	2009-09-30 03:26:00	0	NTA	3	1	4	P
1	2009-09-30 03:27:00	0	NTA	3	1	4	P
1	2009-09-30 03:28:00	0	NTA	3	1	4	P
1	2009-09-30 03:29:00	0	NTA	3	1	4	P
1	2009-09-30 03:30:00	0	NTA	3	1	4	P
1	2009-09-30 03:31:00	0	NTA	3	1	4	P
1	2009-09-30 03:32:00	0	NTA	3	1	4	P
1	2009-09-30 03:33:00	0	NTA	3	1	4	P
1	2009-09-30 03:34:00	0	NTA	3	1	4	P
1	2009-09-30 03:35:00	0	NTA	3	1	4	P
1	2009-09-30 03:36:00	0	NTA	3	1	4	P
1	2009-09-30 03:37:00	0	NTA	3	1	4	P
1	2009-09-30 03:38:00	0	NTA	3	1	4	P
1	2009-09-30 03:39:00	0	NTA	3	1	4	P
1	2009-09-30 03:40:00	0	NTA	3	1	4	P
1	2009-09-30 03:41:00	0	NTA	3	1	4	P
1	2009-09-30 03:42:00	0	NTA	3	1	4	P
1	2009-09-30 03:43:00	0	NTA	3	1	4	P
1	2009-09-30 03:44:00	0	NTA	3	1	4	P
1	2009-09-30 03:45:00	0	NTA	3	1	4	P
1	2009-09-30 03:46:00	0	NTA	3	1	4	P
1	2009-09-30 03:47:00	0	NTA	3	1	4	P
1	2009-09-30 03:48:00	0	NTA	3	1	4	P
1	2009-09-30 03:49:00	97	NTA	3	1	4	P
1	2009-09-30 03:50:00	176	NTA	3	1	4	P
1	2009-09-30 03:51:00	78	NTA	3	1	4	P
1	2009-09-30 03:52:00	0	NTA	3	1	4	P
1	2009-09-30 03:53:00	15	NTA	3	1	4	P
1	2009-09-30 03:54:00	213	NTA	3	1	4	P
1	2009-09-30 03:55:00	0	NTA	3	1	4	P
1	2009-09-30 03:56:00	0	NTA	3	1	4	P
1	2009-09-30 03:57:00	0	NTA	3	1	4	P
1	2009-09-30 03:58:00	0	NTA	3	1	4	P
1	2009-09-30 03:59:00	0	NTA	3	1	4	P
1	2009-09-30 04:00:00	0	NTA	3	1	4	P
1	2009-09-30 04:01:00	0	NTA	4	1	4	P
1	2009-09-30 04:02:00	0	NTA	4	1	4	P
1	2009-09-30 04:03:00	25	NTA	4	1	4	P
1	2009-09-30 04:04:00	0	NTA	4	1	4	P
1	2009-09-30 04:05:00	0	NTA	4	1	4	P
1	2009-09-30 04:06:00	0	NTA	4	1	4	P
1	2009-09-30 04:07:00	0	NTA	4	1	4	P
1	2009-09-30 04:08:00	0	NTA	4	1	4	P
1	2009-09-30 04:09:00	0	NTA	4	1	4	P
1	2009-09-30 04:10:00	46	NTA	4	1	4	P
1	2009-09-30 04:11:00	0	NTA	4	1	4	P
1	2009-09-30 04:12:00	0	NTA	4	1	4	P
1	2009-09-30 04:13:00	0	NTA	4	1	4	P
1	2009-09-30 04:14:00	0	NTA	4	1	4	P
1	2009-09-30 04:15:00	0	NTA	4	1	4	P
1	2009-09-30 04:16:00	0	NTA	4	1	4	P
1	2009-09-30 04:17:00	0	NTA	4	1	4	P
1	2009-09-30 04:18:00	0	NTA	4	1	4	P
1	2009-09-30 04:19:00	0	NTA	4	1	4	P
1	2009-09-30 04:20:00	0	NTA	4	1	4	P
1	2009-09-30 04:21:00	693	NTA	4	1	4	P
1	2009-09-30 04:22:00	0	NTA	4	1	4	P
1	2009-09-30 04:23:00	61	NTA	4	1	4	P
1	2009-09-30 04:24:00	205	NTA	4	1	4	P
1	2009-09-30 04:25:00	565	NTA	4	1	4	P
1	2009-09-30 04:26:00	1300	NTA	4	1	4	P
1	2009-09-30 04:27:00	299	NTA	4	1	4	P
1	2009-09-30 04:28:00	115	NTA	4	1	4	P
1	2009-09-30 04:29:00	127	NTA	4	1	4	P
1	2009-09-30 04:30:00	397	NTA	4	1	4	P
1	2009-09-30 04:31:00	0	DTA	4	1	4	P
1	2009-09-30 04:32:00	0	DTA	4	1	4	P
1	2009-09-30 04:33:00	20	DTA	4	1	4	P
1	2009-09-30 04:34:00	213	DTA	4	1	4	P
1	2009-09-30 04:35:00	213	DTA	4	1	4	P
1	2009-09-30 04:36:00	0	DTA	4	1	4	P
1	2009-09-30 04:37:00	5	DTA	4	1	4	P
1	2009-09-30 04:38:00	0	DTA	4	1	4	P
1	2009-09-30 04:39:00	0	DTA	4	1	4	P
1	2009-09-30 04:40:00	56	DTA	4	1	4	P
1	2009-09-30 04:41:00	0	DTA	4	1	4	P
1	2009-09-30 04:42:00	0	DTA	4	1	4	P
1	2009-09-30 04:43:00	0	DTA	4	1	4	P
1	2009-09-30 04:44:00	0	DTA	4	1	4	P
1	2009-09-30 04:45:00	0	DTA	4	1	4	P
1	2009-09-30 04:46:00	0	DTA	4	1	4	P
1	2009-09-30 04:47:00	0	DTA	4	1	4	P
1	2009-09-30 04:48:00	0	DTA	4	1	4	P
1	2009-09-30 04:49:00	0	DTA	4	1	4	P
1	2009-09-30 04:50:00	662	DTA	4	1	4	P
1	2009-09-30 04:51:00	1093	DTA	4	1	4	P
1	2009-09-30 04:52:00	932	DTA	4	1	4	P
1	2009-09-30 04:53:00	970	DTA	4	1	4	P
1	2009-09-30 04:54:00	756	DTA	4	1	4	P
1	2009-09-30 04:55:00	989	DTA	4	1	4	P
1	2009-09-30 04:56:00	756	DTA	4	1	4	P
1	2009-09-30 04:57:00	970	DTA	4	1	4	P
1	2009-09-30 04:58:00	756	DTA	4	1	4	P
1	2009-09-30 04:59:00	1010	DTA	4	1	4	P
1	2009-09-30 05:00:00	46	DTA	4	1	4	P
1	2009-09-30 05:01:00	0	DTA	5	1	4	P
1	2009-09-30 05:02:00	0	DTA	5	1	4	P
1	2009-09-30 05:03:00	46	DTA	5	1	4	P
1	2009-09-30 05:04:00	0	DTA	5	1	4	P
1	2009-09-30 05:05:00	0	DTA	5	1	4	P
1	2009-09-30 05:06:00	0	DTA	5	1	4	P
1	2009-09-30 05:07:00	84	DTA	5	1	4	P
1	2009-09-30 05:08:00	308	DTA	5	1	4	P
1	2009-09-30 05:09:00	115	DTA	5	1	4	P
1	2009-09-30 05:10:00	0	DTA	5	1	4	P
1	2009-09-30 05:11:00	0	DTA	5	1	4	P
1	2009-09-30 05:12:00	0	DTA	5	1	4	P
1	2009-09-30 05:13:00	367	DTA	5	1	4	P
1	2009-09-30 05:14:00	66	DTA	5	1	4	P
1	2009-09-30 05:15:00	10	DTA	5	1	4	P
1	2009-09-30 05:16:00	0	DTA	5	1	4	P
1	2009-09-30 05:17:00	0	DTA	5	1	4	P
1	2009-09-30 05:18:00	0	DTA	5	1	4	P
1	2009-09-30 05:19:00	30	DTA	5	1	4	P
1	2009-09-30 05:20:00	72	DTA	5	1	4	P
1	2009-09-30 05:21:00	0	DTA	5	1	4	P
1	2009-09-30 05:22:00	0	DTA	5	1	4	P
1	2009-09-30 05:23:00	0	DTA	5	1	4	P
1	2009-09-30 05:24:00	0	DTA	5	1	4	P
1	2009-09-30 05:25:00	0	DTA	5	1	4	P
1	2009-09-30 05:26:00	0	DTA	5	1	4	P
1	2009-09-30 05:27:00	0	DTA	5	1	4	P
1	2009-09-30 05:28:00	0	DTA	5	1	4	P
1	2009-09-30 05:29:00	0	DTA	5	1	4	P
1	2009-09-30 05:30:00	0	DTA	5	1	4	P
1	2009-09-30 05:31:00	0	DTA	5	1	4	P
1	2009-09-30 05:32:00	0	DTA	5	1	4	P
1	2009-09-30 05:33:00	0	DTA	5	1	4	P
1	2009-09-30 05:34:00	0	DTA	5	1	4	P
1	2009-09-30 05:35:00	78	DTA	5	1	4	P
1	2009-09-30 05:36:00	20	DTA	5	1	4	P
1	2009-09-30 05:37:00	230	DTA	5	1	4	P
1	2009-09-30 05:38:00	0	DTA	5	1	4	P
1	2009-09-30 05:39:00	0	DTA	5	1	4	P
1	2009-09-30 05:40:00	0	DTA	5	1	4	P
1	2009-09-30 05:41:00	0	DTA	5	1	4	P
1	2009-09-30 05:42:00	0	DTA	5	1	4	P
1	2009-09-30 05:43:00	0	DTA	5	1	4	P
1	2009-09-30 05:44:00	0	DTA	5	1	4	P
1	2009-09-30 05:45:00	0	DTA	5	1	4	P
1	2009-09-30 05:46:00	0	DTA	5	1	4	P
1	2009-09-30 05:47:00	0	DTA	5	1	4	P
1	2009-09-30 05:48:00	0	DTA	5	1	4	P
1	2009-09-30 05:49:00	0	DTA	5	1	4	P
1	2009-09-30 05:50:00	0	DTA	5	1	4	P
1	2009-09-30 05:51:00	0	DTA	5	1	4	P
1	2009-09-30 05:52:00	41	DTA	5	1	4	P
1	2009-09-30 05:53:00	740	DTA	5	1	4	P
1	2009-09-30 05:54:00	5	DTA	5	1	4	P
1	2009-09-30 05:55:00	72	DTA	5	1	4	P
1	2009-09-30 05:56:00	109	DTA	5	1	4	P
1	2009-09-30 05:57:00	103	DTA	5	1	4	P
1	2009-09-30 05:58:00	154	DTA	5	1	4	P
1	2009-09-30 05:59:00	489	DTA	5	1	4	P
1	2009-09-30 06:00:00	431	DTA	5	1	4	P
1	2009-09-30 06:01:00	0	DTA	6	1	4	P
1	2009-09-30 06:02:00	552	DTA	6	1	4	P
1	2009-09-30 06:03:00	857	DTA	6	1	4	P
1	2009-09-30 06:04:00	840	DTA	6	1	4	P
1	2009-09-30 06:05:00	476	DTA	6	1	4	P
1	2009-09-30 06:06:00	397	DTA	6	1	4	P
1	2009-09-30 06:07:00	1913	DTA	6	1	4	P
1	2009-09-30 06:08:00	823	DTA	6	1	4	P
1	2009-09-30 06:09:00	806	DTA	6	1	4	P
1	2009-09-30 06:10:00	951	DTA	6	1	4	P
1	2009-09-30 06:11:00	772	DTA	6	1	4	P
1	2009-09-30 06:12:00	605	DTA	6	1	4	P
1	2009-09-30 06:13:00	1351	DTA	6	1	4	P
1	2009-09-30 06:14:00	1429	DTA	6	1	4	P
1	2009-09-30 06:15:00	1483	DTA	6	1	4	P
1	2009-09-30 06:16:00	538	DTA	6	1	4	P
1	2009-09-30 06:17:00	1010	DTA	6	1	4	P
1	2009-09-30 06:18:00	662	DTA	6	1	4	P
1	2009-09-30 06:19:00	121	DTA	6	1	4	P
1	2009-09-30 06:20:00	230	DTA	6	1	4	P
1	2009-09-30 06:21:00	46	DTA	6	1	4	P
1	2009-09-30 06:22:00	367	DTA	6	1	4	P
1	2009-09-30 06:23:00	176	DTA	6	1	4	P
1	2009-09-30 06:24:00	0	DTA	6	1	4	P
1	2009-09-30 06:25:00	0	DTA	6	1	4	P
1	2009-09-30 06:26:00	10	DTA	6	1	4	P
1	2009-09-30 06:27:00	0	DTA	6	1	4	P
1	2009-09-30 06:28:00	0	DTA	6	1	4	P
1	2009-09-30 06:29:00	0	DTA	6	1	4	P
1	2009-09-30 06:30:00	0	DTA	6	1	4	P
1	2009-09-30 06:31:00	0	DTA	6	1	4	P
1	2009-09-30 06:32:00	0	DTA	6	1	4	P
1	2009-09-30 06:33:00	0	DTA	6	1	4	P
1	2009-09-30 06:34:00	0	DTA	6	1	4	P
1	2009-09-30 06:35:00	0	DTA	6	1	4	P
1	2009-09-30 06:36:00	0	DTA	6	1	4	P
1	2009-09-30 06:37:00	0	DTA	6	1	4	P
1	2009-09-30 06:38:00	66	DTA	6	1	4	P
1	2009-09-30 06:39:00	10	DTA	6	1	4	P
1	2009-09-30 06:40:00	246	DTA	6	1	4	P
1	2009-09-30 06:41:00	823	DTA	6	1	4	P
1	2009-09-30 06:42:00	565	DTA	6	1	4	P
1	2009-09-30 06:43:00	221	DTA	6	1	4	P
1	2009-09-30 06:44:00	72	DTA	6	1	4	P
1	2009-09-30 06:45:00	109	DTA	6	1	4	P
1	2009-09-30 06:46:00	66	DTA	6	1	4	P
1	2009-09-30 06:47:00	66	DTA	6	1	4	P
1	2009-09-30 06:48:00	66	DTA	6	1	4	P
1	2009-09-30 06:49:00	25	DTA	6	1	4	P
1	2009-09-30 06:50:00	46	DTA	6	1	4	P
1	2009-09-30 06:51:00	46	DTA	6	1	4	P
1	2009-09-30 06:52:00	346	DTA	6	1	4	P
1	2009-09-30 06:53:00	377	DTA	6	1	4	P
1	2009-09-30 06:54:00	823	DTA	6	1	4	P
1	2009-09-30 06:55:00	387	DTA	6	1	4	P
1	2009-09-30 06:56:00	46	DTA	6	1	4	P
1	2009-09-30 06:57:00	0	DTA	6	1	4	P
1	2009-09-30 06:58:00	5	DTA	6	1	4	P
1	2009-09-30 06:59:00	0	DTA	6	1	4	P
1	2009-09-30 07:00:00	213	DTA	6	1	4	P
1	2009-09-30 07:01:00	25	DTA	7	1	4	P
1	2009-09-30 07:02:00	0	DTA	7	1	4	P
1	2009-09-30 07:03:00	5	DTA	7	1	4	P
1	2009-09-30 07:04:00	0	DTA	7	1	4	P
1	2009-09-30 07:05:00	0	DTA	7	1	4	P
1	2009-09-30 07:06:00	5	DTA	7	1	4	P
1	2009-09-30 07:07:00	10	DTA	7	1	4	P
1	2009-09-30 07:08:00	25	DTA	7	1	4	P
1	2009-09-30 07:09:00	0	DTA	7	1	4	P
1	2009-09-30 07:10:00	0	DTA	7	1	4	P
1	2009-09-30 07:11:00	72	DTA	7	1	4	P
1	2009-09-30 07:12:00	0	DTA	7	1	4	P
1	2009-09-30 07:13:00	0	DTA	7	1	4	P
1	2009-09-30 07:14:00	36	DTA	7	1	4	P
1	2009-09-30 07:15:00	72	DTA	7	1	4	P
1	2009-09-30 07:16:00	0	DTA	7	1	4	P
1	2009-09-30 07:17:00	84	DTA	7	1	4	P
1	2009-09-30 07:18:00	0	DTA	7	1	4	P
1	2009-09-30 07:19:00	10	DTA	7	1	4	P
1	2009-09-30 07:20:00	894	DTA	7	1	4	P
1	2009-09-30 07:21:00	912	DTA	7	1	4	P
1	2009-09-30 07:22:00	591	DTA	7	1	4	P
1	2009-09-30 07:23:00	154	DTA	7	1	4	P
1	2009-09-30 07:24:00	1050	DTA	7	1	4	P
1	2009-09-30 07:25:00	1483	DTA	7	1	4	P
1	2009-09-30 07:26:00	740	DTA	7	1	4	P
1	2009-09-30 07:27:00	857	DTA	7	1	4	P
1	2009-09-30 07:28:00	1326	DTA	7	1	4	P
1	2009-09-30 07:29:00	951	DTA	7	1	4	P
1	2009-09-30 07:30:00	336	DTA	7	1	4	P
1	2009-09-30 07:31:00	662	DTA	7	1	4	P
1	2009-09-30 07:32:00	1114	DTA	7	1	4	P
1	2009-09-30 07:33:00	1093	DTA	7	1	4	P
1	2009-09-30 07:34:00	591	DTA	7	1	4	P
1	2009-09-30 07:35:00	489	DTA	7	1	4	P
1	2009-09-30 07:36:00	336	DTA	7	1	4	P
1	2009-09-30 07:37:00	538	DTA	7	1	4	P
1	2009-09-30 07:38:00	806	DTA	7	1	4	P
1	2009-09-30 07:39:00	408	DTA	7	1	4	P
1	2009-09-30 07:40:00	205	DTA	7	1	4	P
1	2009-09-30 07:41:00	538	DTA	7	1	4	P
1	2009-09-30 07:42:00	740	DTA	7	1	4	P
1	2009-09-30 07:43:00	772	DTA	7	1	4	P
1	2009-09-30 07:44:00	648	DTA	7	1	4	P
1	2009-09-30 07:45:00	756	DTA	7	1	4	P
1	2009-09-30 07:46:00	464	DTA	7	1	4	P
1	2009-09-30 07:47:00	377	DTA	7	1	4	P
1	2009-09-30 07:48:00	221	DTA	7	1	4	P
1	2009-09-30 07:49:00	147	DTA	7	1	4	P
1	2009-09-30 07:50:00	740	DTA	7	1	4	P
1	2009-09-30 07:51:00	442	DTA	7	1	4	P
1	2009-09-30 07:52:00	154	DTA	7	1	4	P
1	2009-09-30 07:53:00	326	DTA	7	1	4	P
1	2009-09-30 07:54:00	262	DTA	7	1	4	P
1	2009-09-30 07:55:00	442	DTA	7	1	4	P
1	2009-09-30 07:56:00	387	DTA	7	1	4	P
1	2009-09-30 07:57:00	756	DTA	7	1	4	P
1	2009-09-30 07:58:00	634	DTA	7	1	4	P
1	2009-09-30 07:59:00	326	DTA	7	1	4	P
1	2009-09-30 08:00:00	0	DTA	7	1	4	P
1	2009-09-30 08:01:00	0	DTA	8	1	4	P
1	2009-09-30 08:02:00	5	DTA	8	1	4	P
1	2009-09-30 08:03:00	0	DTA	8	1	4	P
1	2009-09-30 08:04:00	0	DTA	8	1	4	P
1	2009-09-30 08:05:00	0	DTA	8	1	4	P
1	2009-09-30 08:06:00	0	DTA	8	1	4	P
1	2009-09-30 08:07:00	0	DTA	8	1	4	P
1	2009-09-30 08:08:00	0	DTA	8	1	4	P
1	2009-09-30 08:09:00	0	DTA	8	1	4	P
1	2009-09-30 08:10:00	0	DTA	8	1	4	P
1	2009-09-30 08:11:00	10	DTA	8	1	4	P
1	2009-09-30 08:12:00	0	DTA	8	1	4	P
1	2009-09-30 08:13:00	0	DTA	8	1	4	P
1	2009-09-30 08:14:00	10	DTA	8	1	4	P
1	2009-09-30 08:15:00	0	DTA	8	1	4	P
1	2009-09-30 08:16:00	0	DTA	8	1	4	P
1	2009-09-30 08:17:00	0	DTA	8	1	4	P
1	2009-09-30 08:18:00	0	DTA	8	1	4	P
1	2009-09-30 08:19:00	0	DTA	8	1	4	P
1	2009-09-30 08:20:00	0	DTA	8	1	4	P
1	2009-09-30 08:21:00	0	DTA	8	1	4	P
1	2009-09-30 08:22:00	0	DTA	8	1	4	P
1	2009-09-30 08:23:00	0	DTA	8	1	4	P
1	2009-09-30 08:24:00	0	DTA	8	1	4	P
1	2009-09-30 08:25:00	591	DTA	8	1	4	P
1	2009-09-30 08:26:00	162	DTA	8	1	4	P
1	2009-09-30 08:27:00	30	DTA	8	1	4	P
1	2009-09-30 08:28:00	0	DTA	8	1	4	P
1	2009-09-30 08:29:00	0	DTA	8	1	4	P
1	2009-09-30 08:30:00	0	DTA	8	1	4	P
1	2009-09-30 08:31:00	0	DTA	8	1	4	P
1	2009-09-30 08:32:00	0	DTA	8	1	4	P
1	2009-09-30 08:33:00	0	DTA	8	1	4	P
1	2009-09-30 08:34:00	46	DTA	8	1	4	P
1	2009-09-30 08:35:00	20	DTA	8	1	4	P
1	2009-09-30 08:36:00	0	DTA	8	1	4	P
1	2009-09-30 08:37:00	0	DTA	8	1	4	P
1	2009-09-30 08:38:00	0	DTA	8	1	4	P
1	2009-09-30 08:39:00	0	DTA	8	1	4	P
1	2009-09-30 08:40:00	36	DTA	8	1	4	P
1	2009-09-30 08:41:00	5	DTA	8	1	4	P
1	2009-09-30 08:42:00	46	DTA	8	1	4	P
1	2009-09-30 08:43:00	41	DTA	8	1	4	P
1	2009-09-30 08:44:00	46	DTA	8	1	4	P
1	2009-09-30 08:45:00	30	DTA	8	1	4	P
1	2009-09-30 08:46:00	41	DTA	8	1	4	P
1	2009-09-30 08:47:00	61	DTA	8	1	4	P
1	2009-09-30 08:48:00	5	DTA	8	1	4	P
1	2009-09-30 08:49:00	10	DTA	8	1	4	P
1	2009-09-30 08:50:00	0	DTA	8	1	4	P
1	2009-09-30 08:51:00	36	DTA	8	1	4	P
1	2009-09-30 08:52:00	15	DTA	8	1	4	P
1	2009-09-30 08:53:00	0	DTA	8	1	4	P
1	2009-09-30 08:54:00	41	DTA	8	1	4	P
1	2009-09-30 08:55:00	0	DTA	8	1	4	P
1	2009-09-30 08:56:00	0	DTA	8	1	4	P
1	2009-09-30 08:57:00	0	DTA	8	1	4	P
1	2009-09-30 08:58:00	0	DTA	8	1	4	P
1	2009-09-30 08:59:00	0	DTA	8	1	4	P
1	2009-09-30 09:00:00	0	DTA	8	1	4	P
1	2009-09-30 09:01:00	30	DTA	9	1	4	P
1	2009-09-30 09:02:00	15	DTA	9	1	4	P
1	2009-09-30 09:03:00	0	DTA	9	1	4	P
1	2009-09-30 09:04:00	36	DTA	9	1	4	P
1	2009-09-30 09:05:00	20	DTA	9	1	4	P
1	2009-09-30 09:06:00	357	DTA	9	1	4	P
1	2009-09-30 09:07:00	476	DTA	9	1	4	P
1	2009-09-30 09:08:00	61	DTA	9	1	4	P
1	2009-09-30 09:09:00	357	DTA	9	1	4	P
1	2009-09-30 09:10:00	662	DTA	9	1	4	P
1	2009-09-30 09:11:00	951	DTA	9	1	4	P
1	2009-09-30 09:12:00	1010	DTA	9	1	4	P
1	2009-09-30 09:13:00	894	DTA	9	1	4	P
1	2009-09-30 09:14:00	1947	DTA	9	1	4	P
1	2009-09-30 09:15:00	1159	DTA	9	1	4	P
1	2009-09-30 09:16:00	806	DTA	9	1	4	P
1	2009-09-30 09:17:00	56	DTA	9	1	4	P
1	2009-09-30 09:18:00	453	DTA	9	1	4	P
1	2009-09-30 09:19:00	0	DTA	9	1	4	P
1	2009-09-30 09:20:00	0	DTA	9	1	4	P
1	2009-09-30 09:21:00	0	DTA	9	1	4	P
1	2009-09-30 09:22:00	0	DTA	9	1	4	P
1	2009-09-30 09:23:00	1181	DTA	9	1	4	P
1	2009-09-30 09:24:00	442	DTA	9	1	4	P
1	2009-09-30 09:25:00	552	DTA	9	1	4	P
1	2009-09-30 09:26:00	501	DTA	9	1	4	P
1	2009-09-30 09:27:00	591	DTA	9	1	4	P
1	2009-09-30 09:28:00	501	DTA	9	1	4	P
1	2009-09-30 09:29:00	513	DTA	9	1	4	P
1	2009-09-30 09:30:00	78	DTA	9	1	4	P
1	2009-09-30 09:31:00	15	DTA	9	1	4	P
1	2009-09-30 09:32:00	290	DTA	9	1	4	P
1	2009-09-30 09:33:00	121	DTA	9	1	4	P
1	2009-09-30 09:34:00	0	DTA	9	1	4	P
1	2009-09-30 09:35:00	0	DTA	9	1	4	P
1	2009-09-30 09:36:00	0	DTA	9	1	4	P
1	2009-09-30 09:37:00	0	DTA	9	1	4	P
1	2009-09-30 09:38:00	56	DTA	9	1	4	P
1	2009-09-30 09:39:00	0	DTA	9	1	4	P
1	2009-09-30 09:40:00	162	DTA	9	1	4	P
1	2009-09-30 09:41:00	336	DTA	9	1	4	P
1	2009-09-30 09:42:00	823	DTA	9	1	4	P
1	2009-09-30 09:43:00	377	DTA	9	1	4	P
1	2009-09-30 09:44:00	41	DTA	9	1	4	P
1	2009-09-30 09:45:00	10	DTA	9	1	4	P
1	2009-09-30 09:46:00	0	DTA	9	1	4	P
1	2009-09-30 09:47:00	0	DTA	9	1	4	P
1	2009-09-30 09:48:00	0	DTA	9	1	4	P	Peak DTA
1	2009-09-30 09:49:00	0	DTA	9	1	4	P	Peak DTA
1	2009-09-30 09:50:00	0	DTA	9	1	4	P	Peak DTA
1	2009-09-30 09:51:00	0	DTA	9	1	4	P	Peak DTA
1	2009-09-30 09:52:00	25	DTA	9	1	4	P	Peak DTA
1	2009-09-30 09:53:00	431	DTA	9	1	4	P	Peak DTA
1	2009-09-30 09:54:00	678	DTA	9	1	4	P	Peak DTA
1	2009-09-30 09:55:00	648	DTA	9	1	4	P	Peak DTA
1	2009-09-30 09:56:00	254	DTA	9	1	4	P	Peak DTA
1	2009-09-30 09:57:00	5	DTA	9	1	4	P	Peak DTA
1	2009-09-30 09:58:00	634	DTA	9	1	4	P	Peak DTA
1	2009-09-30 09:59:00	0	DTA	9	1	4	P	Peak DTA
1	2009-09-30 10:00:00	0	DTA	9	1	4	P	Peak DTA
1	2009-09-30 10:01:00	0	DTA	10	1	4	P	Peak DTA
1	2009-09-30 10:02:00	46	DTA	10	1	4	P	Peak DTA
1	2009-09-30 10:03:00	0	DTA	10	1	4	P	Peak DTA
1	2009-09-30 10:04:00	0	DTA	10	1	4	P	Peak DTA
1	2009-09-30 10:05:00	0	DTA	10	1	4	P	Peak DTA
1	2009-09-30 10:06:00	0	DTA	10	1	4	P	Peak DTA
1	2009-09-30 10:07:00	0	DTA	10	1	4	P	Peak DTA
1	2009-09-30 10:08:00	0	DTA	10	1	4	P	Peak DTA
1	2009-09-30 10:09:00	0	DTA	10	1	4	P	Peak DTA
1	2009-09-30 10:10:00	0	DTA	10	1	4	P	Peak DTA
1	2009-09-30 10:11:00	0	DTA	10	1	4	P	Peak DTA
1	2009-09-30 10:12:00	0	DTA	10	1	4	P	Peak DTA
1	2009-09-30 10:13:00	254	DTA	10	1	4	P	Peak DTA
1	2009-09-30 10:14:00	10	DTA	10	1	4	P	Peak DTA
1	2009-09-30 10:15:00	25	DTA	10	1	4	P	Peak DTA
1	2009-09-30 10:16:00	0	DTA	10	1	4	P	Peak DTA
1	2009-09-30 10:17:00	0	DTA	10	1	4	P	Peak DTA
1	2009-09-30 10:18:00	0	DTA	10	1	4	P	Peak DTA
1	2009-09-30 10:19:00	489	DTA	10	1	4	P	Peak DTA
1	2009-09-30 10:20:00	591	DTA	10	1	4	P	Peak DTA
1	2009-09-30 10:21:00	66	DTA	10	1	4	P	Peak DTA
1	2009-09-30 10:22:00	0	DTA	10	1	4	P	Peak DTA
1	2009-09-30 10:23:00	0	DTA	10	1	4	P	Peak DTA
1	2009-09-30 10:24:00	0	DTA	10	1	4	P	Peak DTA
1	2009-09-30 10:25:00	0	DTA	10	1	4	P	Peak DTA
1	2009-09-30 10:26:00	0	DTA	10	1	4	P	Peak DTA
1	2009-09-30 10:27:00	230	DTA	10	1	4	P	Peak DTA
1	2009-09-30 10:28:00	932	DTA	10	1	4	P	Peak DTA
1	2009-09-30 10:29:00	78	DTA	10	1	4	P	Peak DTA
1	2009-09-30 10:30:00	20	DTA	10	1	4	P	Peak DTA
1	2009-09-30 10:31:00	10	DTA	10	1	4	P	Peak DTA
1	2009-09-30 10:32:00	15	DTA	10	1	4	P	Peak DTA
1	2009-09-30 10:33:00	0	DTA	10	1	4	P	Peak DTA
1	2009-09-30 10:34:00	72	DTA	10	1	4	P	Peak DTA
1	2009-09-30 10:35:00	0	DTA	10	1	4	P	Peak DTA
1	2009-09-30 10:36:00	0	DTA	10	1	4	P	Peak DTA
1	2009-09-30 10:37:00	0	DTA	10	1	4	P	Peak DTA
1	2009-09-30 10:38:00	0	DTA	10	1	4	P	Peak DTA
1	2009-09-30 10:39:00	5	DTA	10	1	4	P	Peak DTA
1	2009-09-30 10:40:00	0	DTA	10	1	4	P	Peak DTA
1	2009-09-30 10:41:00	0	DTA	10	1	4	P	Peak DTA
1	2009-09-30 10:42:00	0	DTA	10	1	4	P	Peak DTA
1	2009-09-30 10:43:00	0	DTA	10	1	4	P	Peak DTA
1	2009-09-30 10:44:00	0	DTA	10	1	4	P	Peak DTA
1	2009-09-30 10:45:00	0	DTA	10	1	4	P	Peak DTA
1	2009-09-30 10:46:00	0	DTA	10	1	4	P	Peak DTA
1	2009-09-30 10:47:00	78	DTA	10	1	4	P	Peak DTA
1	2009-09-30 10:48:00	823	DTA	10	1	4	P	Peak DTA
1	2009-09-30 10:49:00	894	DTA	10	1	4	P	Peak DTA
1	2009-09-30 10:50:00	103	DTA	10	1	4	P	Peak DTA
1	2009-09-30 10:51:00	97	DTA	10	1	4	P	Peak DTA
1	2009-09-30 10:52:00	5	DTA	10	1	4	P	Peak DTA
1	2009-09-30 10:53:00	0	DTA	10	1	4	P	Peak DTA
1	2009-09-30 10:54:00	0	DTA	10	1	4	P	Peak DTA
1	2009-09-30 10:55:00	0	DTA	10	1	4	P	Peak DTA
1	2009-09-30 10:56:00	36	DTA	10	1	4	P	Peak DTA
1	2009-09-30 10:57:00	0	DTA	10	1	4	P	Peak DTA
1	2009-09-30 10:58:00	0	DTA	10	1	4	P	Peak DTA
1	2009-09-30 10:59:00	30	DTA	10	1	4	P	Peak DTA
1	2009-09-30 11:00:00	20	DTA	10	1	4	P	Peak DTA
1	2009-09-30 11:01:00	41	DTA	11	1	4	P	Peak DTA
1	2009-09-30 11:02:00	0	DTA	11	1	4	P	Peak DTA
1	2009-09-30 11:03:00	10	DTA	11	1	4	P	Peak DTA
1	2009-09-30 11:04:00	36	DTA	11	1	4	P	Peak DTA
1	2009-09-30 11:05:00	453	DTA	11	1	4	P	Peak DTA
1	2009-09-30 11:06:00	788	DTA	11	1	4	P	Peak DTA
1	2009-09-30 11:07:00	262	DTA	11	1	4	P	Peak DTA
1	2009-09-30 11:08:00	387	DTA	11	1	4	P	Peak DTA
1	2009-09-30 11:09:00	97	DTA	11	1	4	P	Peak DTA
1	2009-09-30 11:10:00	538	DTA	11	1	4	P	Peak DTA
1	2009-09-30 11:11:00	565	DTA	11	1	4	P	Peak DTA
1	2009-09-30 11:12:00	453	DTA	11	1	4	P	Peak DTA
1	2009-09-30 11:13:00	154	DTA	11	1	4	P	Peak DTA
1	2009-09-30 11:14:00	0	DTA	11	1	4	P	Peak DTA
1	2009-09-30 11:15:00	0	DTA	11	1	4	P	Peak DTA
1	2009-09-30 11:16:00	0	DTA	11	1	4	P	Peak DTA
1	2009-09-30 11:17:00	46	DTA	11	1	4	P	Peak DTA
1	2009-09-30 11:18:00	0	DTA	11	1	4	P	Peak DTA
1	2009-09-30 11:19:00	0	DTA	11	1	4	P	Peak DTA
1	2009-09-30 11:20:00	0	DTA	11	1	4	P	Peak DTA
1	2009-09-30 11:21:00	0	DTA	11	1	4	P	Peak DTA
1	2009-09-30 11:22:00	61	DTA	11	1	4	P	Peak DTA
1	2009-09-30 11:23:00	0	DTA	11	1	4	P	Peak DTA
1	2009-09-30 11:24:00	0	DTA	11	1	4	P	Peak DTA
1	2009-09-30 11:25:00	0	DTA	11	1	4	P	Peak DTA
1	2009-09-30 11:26:00	0	DTA	11	1	4	P	Peak DTA
1	2009-09-30 11:27:00	0	DTA	11	1	4	P	Peak DTA
1	2009-09-30 11:28:00	0	DTA	11	1	4	P	Peak DTA
1	2009-09-30 11:29:00	0	DTA	11	1	4	P	Peak DTA
1	2009-09-30 11:30:00	0	DTA	11	1	4	P	Peak DTA
1	2009-09-30 11:31:00	0	DTA	11	1	4	P	Peak DTA
1	2009-09-30 11:32:00	0	DTA	11	1	4	P	Peak DTA
1	2009-09-30 11:33:00	0	DTA	11	1	4	P	Peak DTA
1	2009-09-30 11:34:00	0	DTA	11	1	4	P	Peak DTA
1	2009-09-30 11:35:00	0	DTA	11	1	4	P	Peak DTA
1	2009-09-30 11:36:00	0	DTA	11	1	4	P	Peak DTA
1	2009-09-30 11:37:00	0	DTA	11	1	4	P	Peak DTA
1	2009-09-30 11:38:00	0	DTA	11	1	4	P	Peak DTA
1	2009-09-30 11:39:00	72	DTA	11	1	4	P	Peak DTA
1	2009-09-30 11:40:00	0	DTA	11	1	4	P	Peak DTA
1	2009-09-30 11:41:00	0	DTA	11	1	4	P	Peak DTA
1	2009-09-30 11:42:00	66	DTA	11	1	4	P	Peak DTA
1	2009-09-30 11:43:00	246	DTA	11	1	4	P	Peak DTA
1	2009-09-30 11:44:00	0	DTA	11	1	4	P	Peak DTA
1	2009-09-30 11:45:00	61	DTA	11	1	4	P	Peak DTA
1	2009-09-30 11:46:00	66	DTA	11	1	4	P	Peak DTA
1	2009-09-30 11:47:00	678	DTA	11	1	4	P	Peak DTA
1	2009-09-30 11:48:00	0	DTA	11	1	4	P	Peak DTA
1	2009-09-30 11:49:00	5	DTA	11	1	4	P	Peak DTA
1	2009-09-30 11:50:00	0	DTA	11	1	4	P	Peak DTA
1	2009-09-30 11:51:00	0	DTA	11	1	4	P	Peak DTA
1	2009-09-30 11:52:00	0	DTA	11	1	4	P	Peak DTA
1	2009-09-30 11:53:00	0	DTA	11	1	4	P	Peak DTA
1	2009-09-30 11:54:00	0	DTA	11	1	4	P	Peak DTA
1	2009-09-30 11:55:00	0	DTA	11	1	4	P	Peak DTA
1	2009-09-30 11:56:00	0	DTA	11	1	4	P	Peak DTA
1	2009-09-30 11:57:00	0	DTA	11	1	4	P	Peak DTA
1	2009-09-30 11:58:00	0	DTA	11	1	4	P	Peak DTA
1	2009-09-30 11:59:00	0	DTA	11	1	4	P	Peak DTA
1	2009-09-30 12:00:00	0	DTA	11	1	4	P	Peak DTA
1	2009-09-30 12:01:00	565	DTA	12	1	4	P	Peak DTA
1	2009-09-30 12:02:00	51	DTA	12	1	4	P	Peak DTA
1	2009-09-30 12:03:00	72	DTA	12	1	4	P	Peak DTA
1	2009-09-30 12:04:00	56	DTA	12	1	4	P	Peak DTA
1	2009-09-30 12:05:00	0	DTA	12	1	4	P	Peak DTA
1	2009-09-30 12:06:00	0	DTA	12	1	4	P	Peak DTA
1	2009-09-30 12:07:00	0	DTA	12	1	4	P	Peak DTA
1	2009-09-30 12:08:00	0	DTA	12	1	4	P	Peak DTA
1	2009-09-30 12:09:00	0	DTA	12	1	4	P	Peak DTA
1	2009-09-30 12:10:00	0	DTA	12	1	4	P	Peak DTA
1	2009-09-30 12:11:00	0	DTA	12	1	4	P	Peak DTA
1	2009-09-30 12:12:00	0	DTA	12	1	4	P	Peak DTA
1	2009-09-30 12:13:00	0	DTA	12	1	4	P	Peak DTA
1	2009-09-30 12:14:00	0	DTA	12	1	4	P	Peak DTA
1	2009-09-30 12:15:00	0	DTA	12	1	4	P	Peak DTA
1	2009-09-30 12:16:00	0	DTA	12	1	4	P	Peak DTA
1	2009-09-30 12:17:00	115	DTA	12	1	4	P	Peak DTA
1	2009-09-30 12:18:00	25	DTA	12	1	4	P	Peak DTA
1	2009-09-30 12:19:00	15	DTA	12	1	4	P	Peak DTA
1	2009-09-30 12:20:00	25	DTA	12	1	4	P	Peak DTA
1	2009-09-30 12:21:00	246	DTA	12	1	4	P	Peak DTA
1	2009-09-30 12:22:00	0	DTA	12	1	4	P	Peak DTA
1	2009-09-30 12:23:00	20	DTA	12	1	4	P	Peak DTA
1	2009-09-30 12:24:00	408	DTA	12	1	4	P	Peak DTA
1	2009-09-30 12:25:00	205	DTA	12	1	4	P	Peak DTA
1	2009-09-30 12:26:00	0	DTA	12	1	4	P	Peak DTA
1	2009-09-30 12:27:00	0	DTA	12	1	4	P	Peak DTA
1	2009-09-30 12:28:00	0	DTA	12	1	4	P	Peak DTA
1	2009-09-30 12:29:00	0	DTA	12	1	4	P	Peak DTA
1	2009-09-30 12:30:00	15	DTA	12	1	4	P	Peak DTA
1	2009-09-30 12:31:00	0	DTA	12	1	4	P	Peak DTA
1	2009-09-30 12:32:00	0	DTA	12	1	4	P	Peak DTA
1	2009-09-30 12:33:00	0	DTA	12	1	4	P	Peak DTA
1	2009-09-30 12:34:00	0	DTA	12	1	4	P	Peak DTA
1	2009-09-30 12:35:00	308	DTA	12	1	4	P	Peak DTA
1	2009-09-30 12:36:00	78	DTA	12	1	4	P	Peak DTA
1	2009-09-30 12:37:00	0	DTA	12	1	4	P	Peak DTA
1	2009-09-30 12:38:00	0	DTA	12	1	4	P	Peak DTA
1	2009-09-30 12:39:00	0	DTA	12	1	4	P	Peak DTA
1	2009-09-30 12:40:00	0	DTA	12	1	4	P	Peak DTA
1	2009-09-30 12:41:00	0	DTA	12	1	4	P	Peak DTA
1	2009-09-30 12:42:00	0	DTA	12	1	4	P	Peak DTA
1	2009-09-30 12:43:00	0	DTA	12	1	4	P	Peak DTA
1	2009-09-30 12:44:00	0	DTA	12	1	4	P	Peak DTA
1	2009-09-30 12:45:00	154	DTA	12	1	4	P	Peak DTA
1	2009-09-30 12:46:00	30	DTA	12	1	4	P	Peak DTA
1	2009-09-30 12:47:00	0	DTA	12	1	4	P	Peak DTA
1	2009-09-30 12:48:00	0	DTA	12	1	4	P	Peak DTA
1	2009-09-30 12:49:00	0	DTA	12	1	4	P	Peak DTA
1	2009-09-30 12:50:00	0	DTA	12	1	4	P	Peak DTA
1	2009-09-30 12:51:00	0	DTA	12	1	4	P	Peak DTA
1	2009-09-30 12:52:00	0	DTA	12	1	4	P	Peak DTA
1	2009-09-30 12:53:00	0	DTA	12	1	4	P	Peak DTA
1	2009-09-30 12:54:00	0	DTA	12	1	4	P	Peak DTA
1	2009-09-30 12:55:00	0	DTA	12	1	4	P	Peak DTA
1	2009-09-30 12:56:00	0	DTA	12	1	4	P	Peak DTA
1	2009-09-30 12:57:00	0	DTA	12	1	4	P	Peak DTA
1	2009-09-30 12:58:00	0	DTA	12	1	4	P	Peak DTA
1	2009-09-30 12:59:00	0	DTA	12	1	4	P	Peak DTA
1	2009-09-30 13:00:00	0	DTA	12	1	4	P	Peak DTA
1	2009-09-30 13:01:00	51	DTA	13	1	4	P	Peak DTA
1	2009-09-30 13:02:00	0	DTA	13	1	4	P	Peak DTA
1	2009-09-30 13:03:00	0	DTA	13	1	4	P	Peak DTA
1	2009-09-30 13:04:00	0	DTA	13	1	4	P	Peak DTA
1	2009-09-30 13:05:00	0	DTA	13	1	4	P	Peak DTA
1	2009-09-30 13:06:00	0	DTA	13	1	4	P	Peak DTA
1	2009-09-30 13:07:00	0	DTA	13	1	4	P	Peak DTA
1	2009-09-30 13:08:00	299	DTA	13	1	4	P	Peak DTA
1	2009-09-30 13:09:00	246	DTA	13	1	4	P	Peak DTA
1	2009-09-30 13:10:00	0	DTA	13	1	4	P	Peak DTA
1	2009-09-30 13:11:00	205	DTA	13	1	4	P	Peak DTA
1	2009-09-30 13:12:00	15	DTA	13	1	4	P	Peak DTA
1	2009-09-30 13:13:00	0	DTA	13	1	4	P	Peak DTA
1	2009-09-30 13:14:00	0	DTA	13	1	4	P	Peak DTA
1	2009-09-30 13:15:00	0	DTA	13	1	4	P	Peak DTA
1	2009-09-30 13:16:00	51	DTA	13	1	4	P	Peak DTA
1	2009-09-30 13:17:00	326	DTA	13	1	4	P	Peak DTA
1	2009-09-30 13:18:00	0	DTA	13	1	4	P	Peak DTA
1	2009-09-30 13:19:00	0	DTA	13	1	4	P	Peak DTA
1	2009-09-30 13:20:00	0	DTA	13	1	4	P	Peak DTA
1	2009-09-30 13:21:00	0	DTA	13	1	4	P	Peak DTA
1	2009-09-30 13:22:00	0	DTA	13	1	4	P	Peak DTA
1	2009-09-30 13:23:00	0	DTA	13	1	4	P	Peak DTA
1	2009-09-30 13:24:00	0	DTA	13	1	4	P	Peak DTA
1	2009-09-30 13:25:00	0	DTA	13	1	4	P	Peak DTA
1	2009-09-30 13:26:00	0	DTA	13	1	4	P	Peak DTA
1	2009-09-30 13:27:00	0	DTA	13	1	4	P	Peak DTA
1	2009-09-30 13:28:00	0	DTA	13	1	4	P	Peak DTA
1	2009-09-30 13:29:00	0	DTA	13	1	4	P	Peak DTA
1	2009-09-30 13:30:00	0	DTA	13	1	4	P	Peak DTA
1	2009-09-30 13:31:00	0	DTA	13	1	4	P	Peak DTA
1	2009-09-30 13:32:00	0	DTA	13	1	4	P	Peak DTA
1	2009-09-30 13:33:00	0	DTA	13	1	4	P	Peak DTA
1	2009-09-30 13:34:00	30	DTA	13	1	4	P	Peak DTA
1	2009-09-30 13:35:00	0	DTA	13	1	4	P	Peak DTA
1	2009-09-30 13:36:00	0	DTA	13	1	4	P	Peak DTA
1	2009-09-30 13:37:00	0	DTA	13	1	4	P	Peak DTA
1	2009-09-30 13:38:00	0	DTA	13	1	4	P	Peak DTA
1	2009-09-30 13:39:00	0	DTA	13	1	4	P	Peak DTA
1	2009-09-30 13:40:00	0	DTA	13	1	4	P	Peak DTA
1	2009-09-30 13:41:00	0	DTA	13	1	4	P	Peak DTA
1	2009-09-30 13:42:00	0	DTA	13	1	4	P	Peak DTA
1	2009-09-30 13:43:00	0	DTA	13	1	4	P	Peak DTA
1	2009-09-30 13:44:00	0	DTA	13	1	4	P	Peak DTA
1	2009-09-30 13:45:00	0	DTA	13	1	4	P	Peak DTA
1	2009-09-30 13:46:00	0	DTA	13	1	4	P	Peak DTA
1	2009-09-30 13:47:00	0	DTA	13	1	4	P	Peak DTA
1	2009-09-30 13:48:00	0	DTA	13	1	4	P	Peak DTA
1	2009-09-30 13:49:00	0	DTA	13	1	4	P	Peak DTA
1	2009-09-30 13:50:00	0	DTA	13	1	4	P	Peak DTA
1	2009-09-30 13:51:00	0	DTA	13	1	4	P	Peak DTA
1	2009-09-30 13:52:00	15	DTA	13	1	4	P	Peak DTA
1	2009-09-30 13:53:00	254	DTA	13	1	4	P	Peak DTA
1	2009-09-30 13:54:00	140	DTA	13	1	4	P	Peak DTA
1	2009-09-30 13:55:00	0	DTA	13	1	4	P	Peak DTA
1	2009-09-30 13:56:00	121	DTA	13	1	4	P	Peak DTA
1	2009-09-30 13:57:00	25	DTA	13	1	4	P	Peak DTA
1	2009-09-30 13:58:00	0	DTA	13	1	4	P	Peak DTA
1	2009-09-30 13:59:00	0	DTA	13	1	4	P	Peak DTA
1	2009-09-30 14:00:00	0	DTA	13	1	4	P	Peak DTA
1	2009-09-30 14:01:00	442	DTA	14	1	4	P	Peak DTA
1	2009-09-30 14:02:00	0	DTA	14	1	4	P	Peak DTA
1	2009-09-30 14:03:00	0	DTA	14	1	4	P	Peak DTA
1	2009-09-30 14:04:00	0	DTA	14	1	4	P	Peak DTA
1	2009-09-30 14:05:00	0	DTA	14	1	4	P	Peak DTA
1	2009-09-30 14:06:00	0	DTA	14	1	4	P	Peak DTA
1	2009-09-30 14:07:00	0	DTA	14	1	4	P	Peak DTA
1	2009-09-30 14:08:00	0	DTA	14	1	4	P	Peak DTA
1	2009-09-30 14:09:00	0	DTA	14	1	4	P	Peak DTA
1	2009-09-30 14:10:00	0	DTA	14	1	4	P	Peak DTA
1	2009-09-30 14:11:00	61	DTA	14	1	4	P	Peak DTA
1	2009-09-30 14:12:00	0	DTA	14	1	4	P	Peak DTA
1	2009-09-30 14:13:00	0	DTA	14	1	4	P	Peak DTA
1	2009-09-30 14:14:00	0	DTA	14	1	4	P	Peak DTA
1	2009-09-30 14:15:00	0	DTA	14	1	4	P	Peak DTA
1	2009-09-30 14:16:00	0	DTA	14	1	4	P	Peak DTA
1	2009-09-30 14:17:00	0	DTA	14	1	4	P	Peak DTA
1	2009-09-30 14:18:00	0	DTA	14	1	4	P	Peak DTA
1	2009-09-30 14:19:00	0	DTA	14	1	4	P	Peak DTA
1	2009-09-30 14:20:00	0	DTA	14	1	4	P	Peak DTA
1	2009-09-30 14:21:00	0	DTA	14	1	4	P	Peak DTA
1	2009-09-30 14:22:00	0	DTA	14	1	4	P	Peak DTA
1	2009-09-30 14:23:00	0	DTA	14	1	4	P	Peak DTA
1	2009-09-30 14:24:00	0	DTA	14	1	4	P	Peak DTA
1	2009-09-30 14:25:00	0	DTA	14	1	4	P	Peak DTA
1	2009-09-30 14:26:00	0	DTA	14	1	4	P	Peak DTA
1	2009-09-30 14:27:00	0	DTA	14	1	4	P	Peak DTA
1	2009-09-30 14:28:00	0	DTA	14	1	4	P	Peak DTA
1	2009-09-30 14:29:00	0	DTA	14	1	4	P	Peak DTA
1	2009-09-30 14:30:00	0	DTA	14	1	4	P	Peak DTA
1	2009-09-30 14:31:00	0	DTA	14	1	4	P	Peak DTA
1	2009-09-30 14:32:00	0	DTA	14	1	4	P	Peak DTA
1	2009-09-30 14:33:00	0	DTA	14	1	4	P	Peak DTA
1	2009-09-30 14:34:00	0	DTA	14	1	4	P	Peak DTA
1	2009-09-30 14:35:00	0	DTA	14	1	4	P	Peak DTA
1	2009-09-30 14:36:00	0	DTA	14	1	4	P	Peak DTA
1	2009-09-30 14:37:00	0	DTA	14	1	4	P	Peak DTA
1	2009-09-30 14:38:00	20	DTA	14	1	4	P	Peak DTA
1	2009-09-30 14:39:00	5	DTA	14	1	4	P	Peak DTA
1	2009-09-30 14:40:00	25	DTA	14	1	4	P	Peak DTA
1	2009-09-30 14:41:00	169	DTA	14	1	4	P	Peak DTA
1	2009-09-30 14:42:00	10	DTA	14	1	4	P	Peak DTA
1	2009-09-30 14:43:00	0	DTA	14	1	4	P	Peak DTA
1	2009-09-30 14:44:00	20	DTA	14	1	4	P	Peak DTA
1	2009-09-30 14:45:00	78	DTA	14	1	4	P	Peak DTA
1	2009-09-30 14:46:00	0	DTA	14	1	4	P	Peak DTA
1	2009-09-30 14:47:00	36	DTA	14	1	4	P	Peak DTA
1	2009-09-30 14:48:00	36	DTA	14	1	4	P	Peak DTA
1	2009-09-30 14:49:00	133	DTA	14	1	4	P	Peak DTA
1	2009-09-30 14:50:00	30	DTA	14	1	4	P	Peak DTA
1	2009-09-30 14:51:00	0	DTA	14	1	4	P	Peak DTA
1	2009-09-30 14:52:00	0	DTA	14	1	4	P	Peak DTA
1	2009-09-30 14:53:00	0	DTA	14	1	4	P	Peak DTA
1	2009-09-30 14:54:00	15	DTA	14	1	4	P	Peak DTA
1	2009-09-30 14:55:00	20	DTA	14	1	4	P	Peak DTA
1	2009-09-30 14:56:00	0	DTA	14	1	4	P	Peak DTA
1	2009-09-30 14:57:00	0	DTA	14	1	4	P	Peak DTA
1	2009-09-30 14:58:00	1511	DTA	14	1	4	P	Peak DTA
1	2009-09-30 14:59:00	326	DTA	14	1	4	P	Peak DTA
1	2009-09-30 15:00:00	169	DTA	14	1	4	P	Peak DTA
1	2009-09-30 15:01:00	176	DTA	15	1	4	P	Peak DTA
1	2009-09-30 15:02:00	56	DTA	15	1	4	P	Peak DTA
1	2009-09-30 15:03:00	0	DTA	15	1	4	P	Peak DTA
1	2009-09-30 15:04:00	10	DTA	15	1	4	P	Peak DTA
1	2009-09-30 15:05:00	0	DTA	15	1	4	P	Peak DTA
1	2009-09-30 15:06:00	0	DTA	15	1	4	P	Peak DTA
1	2009-09-30 15:07:00	0	DTA	15	1	4	P	Peak DTA
1	2009-09-30 15:08:00	0	DTA	15	1	4	P	Peak DTA
1	2009-09-30 15:09:00	0	DTA	15	1	4	P	Peak DTA
1	2009-09-30 15:10:00	0	DTA	15	1	4	P	Peak DTA
1	2009-09-30 15:11:00	0	DTA	15	1	4	P	Peak DTA
1	2009-09-30 15:12:00	0	DTA	15	1	4	P	Peak DTA
1	2009-09-30 15:13:00	0	DTA	15	1	4	P	Peak DTA
1	2009-09-30 15:14:00	0	DTA	15	1	4	P	Peak DTA
1	2009-09-30 15:15:00	0	DTA	15	1	4	P	Peak DTA
1	2009-09-30 15:16:00	0	DTA	15	1	4	P	Peak DTA
1	2009-09-30 15:17:00	0	DTA	15	1	4	P	Peak DTA
1	2009-09-30 15:18:00	0	DTA	15	1	4	P	Peak DTA
1	2009-09-30 15:19:00	0	DTA	15	1	4	P	Peak DTA
1	2009-09-30 15:20:00	0	DTA	15	1	4	P	Peak DTA
1	2009-09-30 15:21:00	0	DTA	15	1	4	P	Peak DTA
1	2009-09-30 15:22:00	0	DTA	15	1	4	P	Peak DTA
1	2009-09-30 15:23:00	0	DTA	15	1	4	P	Peak DTA
1	2009-09-30 15:24:00	0	DTA	15	1	4	P	Peak DTA
1	2009-09-30 15:25:00	0	DTA	15	1	4	P	Peak DTA
1	2009-09-30 15:26:00	0	DTA	15	1	4	P	Peak DTA
1	2009-09-30 15:27:00	0	DTA	15	1	4	P	Peak DTA
1	2009-09-30 15:28:00	0	DTA	15	1	4	P	Peak DTA
1	2009-09-30 15:29:00	0	DTA	15	1	4	P	Peak DTA
1	2009-09-30 15:30:00	0	DTA	15	1	4	P	Peak DTA
1	2009-09-30 15:31:00	0	DTA	15	1	4	P	Peak DTA
1	2009-09-30 15:32:00	0	DTA	15	1	4	P	Peak DTA
1	2009-09-30 15:33:00	0	DTA	15	1	4	P	Peak DTA
1	2009-09-30 15:34:00	0	DTA	15	1	4	P	Peak DTA
1	2009-09-30 15:35:00	0	DTA	15	1	4	P	Peak DTA
1	2009-09-30 15:36:00	0	DTA	15	1	4	P	Peak DTA
1	2009-09-30 15:37:00	0	DTA	15	1	4	P	Peak DTA
1	2009-09-30 15:38:00	0	DTA	15	1	4	P	Peak DTA
1	2009-09-30 15:39:00	0	DTA	15	1	4	P	Peak DTA
1	2009-09-30 15:40:00	0	DTA	15	1	4	P	Peak DTA
1	2009-09-30 15:41:00	0	DTA	15	1	4	P	Peak DTA
1	2009-09-30 15:42:00	25	DTA	15	1	4	P	Peak DTA
1	2009-09-30 15:43:00	30	DTA	15	1	4	P	Peak DTA
1	2009-09-30 15:44:00	30	DTA	15	1	4	P	Peak DTA
1	2009-09-30 15:45:00	0	DTA	15	1	4	P	Peak DTA
1	2009-09-30 15:46:00	15	DTA	15	1	4	P	Peak DTA
1	2009-09-30 15:47:00	0	DTA	15	1	4	P	Peak DTA
1	2009-09-30 15:48:00	0	DTA	15	1	4	P
1	2009-09-30 15:49:00	0	DTA	15	1	4	P
1	2009-09-30 15:50:00	0	DTA	15	1	4	P
1	2009-09-30 15:51:00	0	DTA	15	1	4	P
1	2009-09-30 15:52:00	41	DTA	15	1	4	P
1	2009-09-30 15:53:00	66	DTA	15	1	4	P
1	2009-09-30 15:54:00	0	DTA	15	1	4	P
1	2009-09-30 15:55:00	0	DTA	15	1	4	P
1	2009-09-30 15:56:00	0	DTA	15	1	4	P
1	2009-09-30 15:57:00	0	DTA	15	1	4	P
1	2009-09-30 15:58:00	0	DTA	15	1	4	P
1	2009-09-30 15:59:00	0	DTA	15	1	4	P
1	2009-09-30 16:00:00	0	DTA	15	1	4	P
1	2009-09-30 16:01:00	0	DTA	16	1	4	P
1	2009-09-30 16:02:00	0	DTA	16	1	4	P
1	2009-09-30 16:03:00	0	DTA	16	1	4	P
1	2009-09-30 16:04:00	0	DTA	16	1	4	P
1	2009-09-30 16:05:00	0	DTA	16	1	4	P
1	2009-09-30 16:06:00	0	DTA	16	1	4	P
1	2009-09-30 16:07:00	10	DTA	16	1	4	P
1	2009-09-30 16:08:00	78	DTA	16	1	4	P
1	2009-09-30 16:09:00	0	DTA	16	1	4	P
1	2009-09-30 16:10:00	0	DTA	16	1	4	P
1	2009-09-30 16:11:00	0	DTA	16	1	4	P
1	2009-09-30 16:12:00	0	DTA	16	1	4	P
1	2009-09-30 16:13:00	0	DTA	16	1	4	P
1	2009-09-30 16:14:00	0	DTA	16	1	4	P
1	2009-09-30 16:15:00	84	DTA	16	1	4	P
1	2009-09-30 16:16:00	36	DTA	16	1	4	P
1	2009-09-30 16:17:00	78	DTA	16	1	4	P
1	2009-09-30 16:18:00	5	DTA	16	1	4	P
1	2009-09-30 16:19:00	97	DTA	16	1	4	P
1	2009-09-30 16:20:00	0	DTA	16	1	4	P
1	2009-09-30 16:21:00	0	DTA	16	1	4	P
1	2009-09-30 16:22:00	0	DTA	16	1	4	P
1	2009-09-30 16:23:00	0	DTA	16	1	4	P
1	2009-09-30 16:24:00	0	DTA	16	1	4	P
1	2009-09-30 16:25:00	20	DTA	16	1	4	P
1	2009-09-30 16:26:00	0	DTA	16	1	4	P
1	2009-09-30 16:27:00	0	DTA	16	1	4	P
1	2009-09-30 16:28:00	0	DTA	16	1	4	P
1	2009-09-30 16:29:00	0	DTA	16	1	4	P
1	2009-09-30 16:30:00	0	DTA	16	1	4	P
1	2009-09-30 16:31:00	0	DTA	16	1	4	P
1	2009-09-30 16:32:00	0	DTA	16	1	4	P
1	2009-09-30 16:33:00	408	DTA	16	1	4	P
1	2009-09-30 16:34:00	0	DTA	16	1	4	P
1	2009-09-30 16:35:00	0	DTA	16	1	4	P
1	2009-09-30 16:36:00	0	DTA	16	1	4	P
1	2009-09-30 16:37:00	0	DTA	16	1	4	P
1	2009-09-30 16:38:00	84	DTA	16	1	4	P
1	2009-09-30 16:39:00	133	DTA	16	1	4	P
1	2009-09-30 16:40:00	72	DTA	16	1	4	P
1	2009-09-30 16:41:00	109	DTA	16	1	4	P
1	2009-09-30 16:42:00	0	DTA	16	1	4	P
1	2009-09-30 16:43:00	357	DTA	16	1	4	P
1	2009-09-30 16:44:00	0	DTA	16	1	4	P
1	2009-09-30 16:45:00	10	DTA	16	1	4	P
1	2009-09-30 16:46:00	367	DTA	16	1	4	P
1	2009-09-30 16:47:00	15	DTA	16	1	4	P
1	2009-09-30 16:48:00	0	DTA	16	1	4	P
1	2009-09-30 16:49:00	5	DTA	16	1	4	P
1	2009-09-30 16:50:00	0	DTA	16	1	4	P
1	2009-09-30 16:51:00	0	DTA	16	1	4	P
1	2009-09-30 16:52:00	10	DTA	16	1	4	P
1	2009-09-30 16:53:00	15	DTA	16	1	4	P
1	2009-09-30 16:54:00	0	DTA	16	1	4	P
1	2009-09-30 16:55:00	10	DTA	16	1	4	P
1	2009-09-30 16:56:00	0	DTA	16	1	4	P
1	2009-09-30 16:57:00	20	DTA	16	1	4	P
1	2009-09-30 16:58:00	0	DTA	16	1	4	P
1	2009-09-30 16:59:00	46	DTA	16	1	4	P
1	2009-09-30 17:00:00	0	DTA	16	1	4	P
1	2009-09-30 17:01:00	0	DTA	17	1	4	P
1	2009-09-30 17:02:00	5	DTA	17	1	4	P
1	2009-09-30 17:03:00	0	DTA	17	1	4	P
1	2009-09-30 17:04:00	0	DTA	17	1	4	P
1	2009-09-30 17:05:00	0	DTA	17	1	4	P
1	2009-09-30 17:06:00	0	DTA	17	1	4	P
1	2009-09-30 17:07:00	36	DTA	17	1	4	P
1	2009-09-30 17:08:00	10	DTA	17	1	4	P
1	2009-09-30 17:09:00	25	DTA	17	1	4	P
1	2009-09-30 17:10:00	5	DTA	17	1	4	P
1	2009-09-30 17:11:00	0	DTA	17	1	4	P
1	2009-09-30 17:12:00	15	DTA	17	1	4	P
1	2009-09-30 17:13:00	5	DTA	17	1	4	P
1	2009-09-30 17:14:00	162	DTA	17	1	4	P
1	2009-09-30 17:15:00	20	DTA	17	1	4	P
1	2009-09-30 17:16:00	0	DTA	17	1	4	P
1	2009-09-30 17:17:00	0	DTA	17	1	4	P
1	2009-09-30 17:18:00	10	DTA	17	1	4	P
1	2009-09-30 17:19:00	0	DTA	17	1	4	P
1	2009-09-30 17:20:00	0	DTA	17	1	4	P
1	2009-09-30 17:21:00	36	DTA	17	1	4	P
1	2009-09-30 17:22:00	20	DTA	17	1	4	P
1	2009-09-30 17:23:00	0	DTA	17	1	4	P
1	2009-09-30 17:24:00	15	DTA	17	1	4	P
1	2009-09-30 17:25:00	41	DTA	17	1	4	P
1	2009-09-30 17:26:00	1429	DTA	17	1	4	P
1	2009-09-30 17:27:00	951	DTA	17	1	4	P
1	2009-09-30 17:28:00	1483	DTA	17	1	4	P
1	2009-09-30 17:29:00	1030	DTA	17	1	4	P
1	2009-09-30 17:30:00	1181	DTA	17	1	4	P
1	2009-09-30 17:31:00	1687	DTA	17	1	4	P
1	2009-09-30 17:32:00	1781	DTA	17	1	4	P
1	2009-09-30 17:33:00	1657	DTA	17	1	4	P
1	2009-09-30 17:34:00	970	DTA	17	1	4	P
1	2009-09-30 17:35:00	823	DTA	17	1	4	P
1	2009-09-30 17:36:00	1597	DTA	17	1	4	P
1	2009-09-30 17:37:00	1351	DTA	17	1	4	P
1	2009-09-30 17:38:00	1511	DTA	17	1	4	P
1	2009-09-30 17:39:00	788	DTA	17	1	4	P
1	2009-09-30 17:40:00	205	DTA	17	1	4	P
1	2009-09-30 17:41:00	0	DTA	17	1	4	P
1	2009-09-30 17:42:00	772	DTA	17	1	4	P
1	2009-09-30 17:43:00	367	DTA	17	1	4	P
1	2009-09-30 17:44:00	41	DTA	17	1	4	P
1	2009-09-30 17:45:00	20	DTA	17	1	4	P
1	2009-09-30 17:46:00	0	DTA	17	1	4	P
1	2009-09-30 17:47:00	397	DTA	17	1	4	P
1	2009-09-30 17:48:00	605	DTA	17	1	4	P
1	2009-09-30 17:49:00	30	DTA	17	1	4	P
1	2009-09-30 17:50:00	0	DTA	17	1	4	P
1	2009-09-30 17:51:00	154	DTA	17	1	4	P
1	2009-09-30 17:52:00	140	DTA	17	1	4	P
1	2009-09-30 17:53:00	806	DTA	17	1	4	P
1	2009-09-30 17:54:00	951	DTA	17	1	4	P
1	2009-09-30 17:55:00	912	DTA	17	1	4	P
1	2009-09-30 17:56:00	513	DTA	17	1	4	P
1	2009-09-30 17:57:00	51	DTA	17	1	4	P
1	2009-09-30 17:58:00	397	DTA	17	1	4	P
1	2009-09-30 17:59:00	84	DTA	17	1	4	P
1	2009-09-30 18:00:00	5	DTA	17	1	4	P
1	2009-09-30 18:01:00	0	DTA	18	1	4	P
1	2009-09-30 18:02:00	30	DTA	18	1	4	P
1	2009-09-30 18:03:00	0	DTA	18	1	4	P
1	2009-09-30 18:04:00	5	DTA	18	1	4	P
1	2009-09-30 18:05:00	72	DTA	18	1	4	P
1	2009-09-30 18:06:00	346	DTA	18	1	4	P
1	2009-09-30 18:07:00	5	DTA	18	1	4	P
1	2009-09-30 18:08:00	0	DTA	18	1	4	P
1	2009-09-30 18:09:00	0	DTA	18	1	4	P
1	2009-09-30 18:10:00	0	DTA	18	1	4	P
1	2009-09-30 18:11:00	0	DTA	18	1	4	P
1	2009-09-30 18:12:00	0	DTA	18	1	4	P
1	2009-09-30 18:13:00	0	DTA	18	1	4	P
1	2009-09-30 18:14:00	0	DTA	18	1	4	P
1	2009-09-30 18:15:00	0	DTA	18	1	4	P
1	2009-09-30 18:16:00	41	DTA	18	1	4	P
1	2009-09-30 18:17:00	5	DTA	18	1	4	P
1	2009-09-30 18:18:00	30	DTA	18	1	4	P
1	2009-09-30 18:19:00	0	DTA	18	1	4	P
1	2009-09-30 18:20:00	0	DTA	18	1	4	P
1	2009-09-30 18:21:00	0	DTA	18	1	4	P
1	2009-09-30 18:22:00	30	DTA	18	1	4	P
1	2009-09-30 18:23:00	0	DTA	18	1	4	P
1	2009-09-30 18:24:00	0	DTA	18	1	4	P
1	2009-09-30 18:25:00	0	DTA	18	1	4	P
1	2009-09-30 18:26:00	0	DTA	18	1	4	P
1	2009-09-30 18:27:00	0	DTA	18	1	4	P
1	2009-09-30 18:28:00	0	DTA	18	1	4	P
1	2009-09-30 18:29:00	51	DTA	18	1	4	P
1	2009-09-30 18:30:00	0	DTA	18	1	4	P
1	2009-09-30 18:31:00	0	DTA	18	1	4	P
1	2009-09-30 18:32:00	0	DTA	18	1	4	P
1	2009-09-30 18:33:00	0	DTA	18	1	4	P
1	2009-09-30 18:34:00	5	DTA	18	1	4	P
1	2009-09-30 18:35:00	0	DTA	18	1	4	P
1	2009-09-30 18:36:00	0	DTA	18	1	4	P
1	2009-09-30 18:37:00	84	DTA	18	1	4	P
1	2009-09-30 18:38:00	20	DTA	18	1	4	P
1	2009-09-30 18:39:00	10	DTA	18	1	4	P
1	2009-09-30 18:40:00	0	DTA	18	1	4	P
1	2009-09-30 18:41:00	0	DTA	18	1	4	P
1	2009-09-30 18:42:00	0	DTA	18	1	4	P
1	2009-09-30 18:43:00	30	DTA	18	1	4	P
1	2009-09-30 18:44:00	30	DTA	18	1	4	P
1	2009-09-30 18:45:00	36	DTA	18	1	4	P
1	2009-09-30 18:46:00	20	DTA	18	1	4	P
1	2009-09-30 18:47:00	0	DTA	18	1	4	P
1	2009-09-30 18:48:00	0	DTA	18	1	4	P
1	2009-09-30 18:49:00	36	DTA	18	1	4	P
1	2009-09-30 18:50:00	0	DTA	18	1	4	P
1	2009-09-30 18:51:00	30	DTA	18	1	4	P
1	2009-09-30 18:52:00	0	DTA	18	1	4	P
1	2009-09-30 18:53:00	0	DTA	18	1	4	P
1	2009-09-30 18:54:00	15	DTA	18	1	4	P
1	2009-09-30 18:55:00	0	DTA	18	1	4	P
1	2009-09-30 18:56:00	5	DTA	18	1	4	P
1	2009-09-30 18:57:00	0	DTA	18	1	4	P
1	2009-09-30 18:58:00	84	DTA	18	1	4	P
1	2009-09-30 18:59:00	133	DTA	18	1	4	P
1	2009-09-30 19:00:00	147	DTA	18	1	4	P
1	2009-09-30 19:01:00	84	DTA	19	1	4	P
1	2009-09-30 19:02:00	0	DTA	19	1	4	P
1	2009-09-30 19:03:00	0	DTA	19	1	4	P
1	2009-09-30 19:04:00	25	DTA	19	1	4	P
1	2009-09-30 19:05:00	0	DTA	19	1	4	P
1	2009-09-30 19:06:00	36	DTA	19	1	4	P
1	2009-09-30 19:07:00	5	DTA	19	1	4	P
1	2009-09-30 19:08:00	0	DTA	19	1	4	P
1	2009-09-30 19:09:00	20	DTA	19	1	4	P
1	2009-09-30 19:10:00	0	DTA	19	1	4	P
1	2009-09-30 19:11:00	0	DTA	19	1	4	P
1	2009-09-30 19:12:00	25	DTA	19	1	4	P
1	2009-09-30 19:13:00	1749	DTA	19	1	4	P
1	2009-09-30 19:14:00	1030	DTA	19	1	4	P
1	2009-09-30 19:15:00	299	DTA	19	1	4	P
1	2009-09-30 19:16:00	823	DTA	19	1	4	P
1	2009-09-30 19:17:00	538	DTA	19	1	4	P
1	2009-09-30 19:18:00	772	DTA	19	1	4	P
1	2009-09-30 19:19:00	678	DTA	19	1	4	P
1	2009-09-30 19:20:00	857	DTA	19	1	4	P
1	2009-09-30 19:21:00	756	DTA	19	1	4	P
1	2009-09-30 19:22:00	740	DTA	19	1	4	P
1	2009-09-30 19:23:00	951	DTA	19	1	4	P
1	2009-09-30 19:24:00	221	DTA	19	1	4	P
1	2009-09-30 19:25:00	693	DTA	19	1	4	P
1	2009-09-30 19:26:00	489	DTA	19	1	4	P
1	2009-09-30 19:27:00	1159	DTA	19	1	4	P
1	2009-09-30 19:28:00	1050	DTA	19	1	4	P
1	2009-09-30 19:29:00	377	DTA	19	1	4	P
1	2009-09-30 19:30:00	36	DTA	19	1	4	P
1	2009-09-30 19:31:00	0	DTA	19	1	4	P
1	2009-09-30 19:32:00	15	DTA	19	1	4	P
1	2009-09-30 19:33:00	36	DTA	19	1	4	P
1	2009-09-30 19:34:00	20	DTA	19	1	4	P
1	2009-09-30 19:35:00	0	DTA	19	1	4	P
1	2009-09-30 19:36:00	25	DTA	19	1	4	P
1	2009-09-30 19:37:00	0	DTA	19	1	4	P
1	2009-09-30 19:38:00	20	DTA	19	1	4	P
1	2009-09-30 19:39:00	0	DTA	19	1	4	P
1	2009-09-30 19:40:00	36	DTA	19	1	4	P
1	2009-09-30 19:41:00	25	DTA	19	1	4	P
1	2009-09-30 19:42:00	0	DTA	19	1	4	P
1	2009-09-30 19:43:00	0	DTA	19	1	4	P
1	2009-09-30 19:44:00	0	DTA	19	1	4	P
1	2009-09-30 19:45:00	36	DTA	19	1	4	P
1	2009-09-30 19:46:00	10	DTA	19	1	4	P
1	2009-09-30 19:47:00	46	DTA	19	1	4	P
1	2009-09-30 19:48:00	56	DTA	19	1	4	P
1	2009-09-30 19:49:00	41	DTA	19	1	4	P
1	2009-09-30 19:50:00	10	DTA	19	1	4	P
1	2009-09-30 19:51:00	36	DTA	19	1	4	P
1	2009-09-30 19:52:00	0	DTA	19	1	4	P
1	2009-09-30 19:53:00	0	DTA	19	1	4	P
1	2009-09-30 19:54:00	0	DTA	19	1	4	P
1	2009-09-30 19:55:00	25	DTA	19	1	4	P
1	2009-09-30 19:56:00	90	DTA	19	1	4	P
1	2009-09-30 19:57:00	5	DTA	19	1	4	P
1	2009-09-30 19:58:00	0	DTA	19	1	4	P
1	2009-09-30 19:59:00	51	DTA	19	1	4	P
1	2009-09-30 20:00:00	30	DTA	19	1	4	P
1	2009-09-30 20:01:00	78	DTA	20	1	4	P
1	2009-09-30 20:02:00	0	DTA	20	1	4	P
1	2009-09-30 20:03:00	41	DTA	20	1	4	P
1	2009-09-30 20:04:00	377	DTA	20	1	4	P
1	2009-09-30 20:05:00	127	DTA	20	1	4	P
1	2009-09-30 20:06:00	30	DTA	20	1	4	P
1	2009-09-30 20:07:00	10	DTA	20	1	4	P
1	2009-09-30 20:08:00	0	DTA	20	1	4	P
1	2009-09-30 20:09:00	41	DTA	20	1	4	P
1	2009-09-30 20:10:00	0	DTA	20	1	4	P
1	2009-09-30 20:11:00	15	DTA	20	1	4	P
1	2009-09-30 20:12:00	41	DTA	20	1	4	P
1	2009-09-30 20:13:00	36	DTA	20	1	4	P
1	2009-09-30 20:14:00	10	DTA	20	1	4	P
1	2009-09-30 20:15:00	0	DTA	20	1	4	P
1	2009-09-30 20:16:00	25	DTA	20	1	4	P
1	2009-09-30 20:17:00	36	DTA	20	1	4	P
1	2009-09-30 20:18:00	0	DTA	20	1	4	P
1	2009-09-30 20:19:00	0	DTA	20	1	4	P
1	2009-09-30 20:20:00	0	DTA	20	1	4	P
1	2009-09-30 20:21:00	36	DTA	20	1	4	P
1	2009-09-30 20:22:00	51	DTA	20	1	4	P
1	2009-09-30 20:23:00	56	DTA	20	1	4	P
1	2009-09-30 20:24:00	0	DTA	20	1	4	P
1	2009-09-30 20:25:00	20	DTA	20	1	4	P
1	2009-09-30 20:26:00	15	DTA	20	1	4	P
1	2009-09-30 20:27:00	0	DTA	20	1	4	P
1	2009-09-30 20:28:00	0	DTA	20	1	4	P
1	2009-09-30 20:29:00	0	DTA	20	1	4	P
1	2009-09-30 20:30:00	0	DTA	20	1	4	P
1	2009-09-30 20:31:00	103	DTA	20	1	4	P
1	2009-09-30 20:32:00	0	DTA	20	1	4	P
1	2009-09-30 20:33:00	0	DTA	20	1	4	P
1	2009-09-30 20:34:00	0	DTA	20	1	4	P
1	2009-09-30 20:35:00	442	DTA	20	1	4	P
1	2009-09-30 20:36:00	25	DTA	20	1	4	P
1	2009-09-30 20:37:00	46	DTA	20	1	4	P
1	2009-09-30 20:38:00	0	DTA	20	1	4	P
1	2009-09-30 20:39:00	0	DTA	20	1	4	P
1	2009-09-30 20:40:00	41	DTA	20	1	4	P
1	2009-09-30 20:41:00	10	DTA	20	1	4	P
1	2009-09-30 20:42:00	41	DTA	20	1	4	P
1	2009-09-30 20:43:00	25	DTA	20	1	4	P
1	2009-09-30 20:44:00	0	DTA	20	1	4	P
1	2009-09-30 20:45:00	0	DTA	20	1	4	P
1	2009-09-30 20:46:00	230	DTA	20	1	4	P
1	2009-09-30 20:47:00	205	DTA	20	1	4	P
1	2009-09-30 20:48:00	10	DTA	20	1	4	P
1	2009-09-30 20:49:00	894	DTA	20	1	4	P
1	2009-09-30 20:50:00	1010	DTA	20	1	4	P
1	2009-09-30 20:51:00	238	DTA	20	1	4	P
1	2009-09-30 20:52:00	431	DTA	20	1	4	P
1	2009-09-30 20:53:00	723	DTA	20	1	4	P
1	2009-09-30 20:54:00	662	DTA	20	1	4	P
1	2009-09-30 20:55:00	894	DTA	20	1	4	P
1	2009-09-30 20:56:00	476	DTA	20	1	4	P
1	2009-09-30 20:57:00	788	DTA	20	1	4	P
1	2009-09-30 20:58:00	932	DTA	20	1	4	P
1	2009-09-30 20:59:00	0	DTA	20	1	4	P
1	2009-09-30 21:00:00	0	DTA	20	1	4	P
1	2009-09-30 21:01:00	0	DTA	21	1	4	P
1	2009-09-30 21:02:00	5	DTA	21	1	4	P
1	2009-09-30 21:03:00	5	DTA	21	1	4	P
1	2009-09-30 21:04:00	5	DTA	21	1	4	P
1	2009-09-30 21:05:00	0	DTA	21	1	4	P
1	2009-09-30 21:06:00	15	DTA	21	1	4	P
1	2009-09-30 21:07:00	10	DTA	21	1	4	P
1	2009-09-30 21:08:00	5	DTA	21	1	4	P
1	2009-09-30 21:09:00	0	DTA	21	1	4	P
1	2009-09-30 21:10:00	0	DTA	21	1	4	P
1	2009-09-30 21:11:00	0	DTA	21	1	4	P
1	2009-09-30 21:12:00	46	DTA	21	1	4	P
1	2009-09-30 21:13:00	0	DTA	21	1	4	P
1	2009-09-30 21:14:00	90	DTA	21	1	4	P
1	2009-09-30 21:15:00	0	DTA	21	1	4	P
1	2009-09-30 21:16:00	0	DTA	21	1	4	P
1	2009-09-30 21:17:00	0	DTA	21	1	4	P
1	2009-09-30 21:18:00	0	DTA	21	1	4	P
1	2009-09-30 21:19:00	5	DTA	21	1	4	P
1	2009-09-30 21:20:00	756	DTA	21	1	4	P
1	2009-09-30 21:21:00	634	DTA	21	1	4	P
1	2009-09-30 21:22:00	772	DTA	21	1	4	P
1	2009-09-30 21:23:00	912	DTA	21	1	4	P
1	2009-09-30 21:24:00	876	DTA	21	1	4	P
1	2009-09-30 21:25:00	1813	DTA	21	1	4	P
1	2009-09-30 21:26:00	2283	DTA	21	1	4	P
1	2009-09-30 21:27:00	1483	DTA	21	1	4	P
1	2009-09-30 21:28:00	788	DTA	21	1	4	P
1	2009-09-30 21:29:00	857	DTA	21	1	4	P
1	2009-09-30 21:30:00	840	DTA	21	1	4	P
1	2009-09-30 21:31:00	708	DTA	21	1	4	P
1	2009-09-30 21:32:00	147	DTA	21	1	4	P
1	2009-09-30 21:33:00	262	DTA	21	1	4	P
1	2009-09-30 21:34:00	147	DTA	21	1	4	P
1	2009-09-30 21:35:00	20	DTA	21	1	4	P
1	2009-09-30 21:36:00	154	DTA	21	1	4	P
1	2009-09-30 21:37:00	420	DTA	21	1	4	P
1	2009-09-30 21:38:00	262	DTA	21	1	4	P
1	2009-09-30 21:39:00	162	DTA	21	1	4	P
1	2009-09-30 21:40:00	84	DTA	21	1	4	P
1	2009-09-30 21:41:00	246	DTA	21	1	4	P
1	2009-09-30 21:42:00	708	DTA	21	1	4	P
1	2009-09-30 21:43:00	970	DTA	21	1	4	P
1	2009-09-30 21:44:00	30	DTA	21	1	4	P
1	2009-09-30 21:45:00	25	DTA	21	1	4	P
1	2009-09-30 21:46:00	61	DTA	21	1	4	P
1	2009-09-30 21:47:00	84	DTA	21	1	4	P
1	2009-09-30 21:48:00	271	DTA	21	1	4	P
1	2009-09-30 21:49:00	97	DTA	21	1	4	P
1	2009-09-30 21:50:00	254	DTA	21	1	4	P
1	2009-09-30 21:51:00	140	DTA	21	1	4	P
1	2009-09-30 21:52:00	41	DTA	21	1	4	P
1	2009-09-30 21:53:00	420	DTA	21	1	4	P
1	2009-09-30 21:54:00	0	DTA	21	1	4	P
1	2009-09-30 21:55:00	78	DTA	21	1	4	P
1	2009-09-30 21:56:00	0	DTA	21	1	4	P
1	2009-09-30 21:57:00	51	DTA	21	1	4	P
1	2009-09-30 21:58:00	0	DTA	21	1	4	P
1	2009-09-30 21:59:00	0	DTA	21	1	4	P
1	2009-09-30 22:00:00	41	DTA	21	1	4	P
1	2009-09-30 22:01:00	538	DTA	22	1	4	P
1	2009-09-30 22:02:00	127	DTA	22	1	4	P
1	2009-09-30 22:03:00	103	DTA	22	1	4	P
1	2009-09-30 22:04:00	367	DTA	22	1	4	P
1	2009-09-30 22:05:00	15	DTA	22	1	4	P
1	2009-09-30 22:06:00	0	DTA	22	1	4	P
1	2009-09-30 22:07:00	46	DTA	22	1	4	P
1	2009-09-30 22:08:00	0	DTA	22	1	4	P
1	2009-09-30 22:09:00	0	DTA	22	1	4	P
1	2009-09-30 22:10:00	176	DTA	22	1	4	P
1	2009-09-30 22:11:00	190	DTA	22	1	4	P
1	2009-09-30 22:12:00	90	DTA	22	1	4	P
1	2009-09-30 22:13:00	90	DTA	22	1	4	P
1	2009-09-30 22:14:00	290	DTA	22	1	4	P
1	2009-09-30 22:15:00	377	DTA	22	1	4	P
1	2009-09-30 22:16:00	525	DTA	22	1	4	P
1	2009-09-30 22:17:00	41	DTA	22	1	4	P
1	2009-09-30 22:18:00	133	DTA	22	1	4	P
1	2009-09-30 22:19:00	133	DTA	22	1	4	P
1	2009-09-30 22:20:00	205	DTA	22	1	4	P
1	2009-09-30 22:21:00	56	DTA	22	1	4	P
1	2009-09-30 22:22:00	0	DTA	22	1	4	P
1	2009-09-30 22:23:00	15	DTA	22	1	4	P
1	2009-09-30 22:24:00	0	DTA	22	1	4	P
1	2009-09-30 22:25:00	0	DTA	22	1	4	P
1	2009-09-30 22:26:00	0	DTA	22	1	4	P
1	2009-09-30 22:27:00	0	DTA	22	1	4	P
1	2009-09-30 22:28:00	0	DTA	22	1	4	P
1	2009-09-30 22:29:00	5	DTA	22	1	4	P
1	2009-09-30 22:30:00	0	DTA	22	1	4	P
1	2009-09-30 22:31:00	0	DTA	22	1	4	P
1	2009-09-30 22:32:00	169	DTA	22	1	4	P
1	2009-09-30 22:33:00	56	DTA	22	1	4	P
1	2009-09-30 22:34:00	84	DTA	22	1	4	P
1	2009-09-30 22:35:00	103	DTA	22	1	4	P
1	2009-09-30 22:36:00	723	DTA	22	1	4	P
1	2009-09-30 22:37:00	46	DTA	22	1	4	P
1	2009-09-30 22:38:00	20	DTA	22	1	4	P
1	2009-09-30 22:39:00	15	DTA	22	1	4	P
1	2009-09-30 22:40:00	36	DTA	22	1	4	P
1	2009-09-30 22:41:00	213	DTA	22	1	4	P
1	2009-09-30 22:42:00	290	DTA	22	1	4	P
1	2009-09-30 22:43:00	299	DTA	22	1	4	P
1	2009-09-30 22:44:00	20	DTA	22	1	4	P
1	2009-09-30 22:45:00	0	DTA	22	1	4	P
1	2009-09-30 22:46:00	0	DTA	22	1	4	P
1	2009-09-30 22:47:00	0	DTA	22	1	4	P
1	2009-09-30 22:48:00	0	DTA	22	1	4	P
1	2009-09-30 22:49:00	0	DTA	22	1	4	P
1	2009-09-30 22:50:00	0	DTA	22	1	4	P
1	2009-09-30 22:51:00	0	DTA	22	1	4	P
1	2009-09-30 22:52:00	0	DTA	22	1	4	P
1	2009-09-30 22:53:00	0	DTA	22	1	4	P
1	2009-09-30 22:54:00	0	DTA	22	1	4	P
1	2009-09-30 22:55:00	0	DTA	22	1	4	P
1	2009-09-30 22:56:00	0	DTA	22	1	4	P
1	2009-09-30 22:57:00	0	DTA	22	1	4	P
1	2009-09-30 22:58:00	0	DTA	22	1	4	P
1	2009-09-30 22:59:00	0	DTA	22	1	4	P
1	2009-09-30 23:00:00	0	DTA	22	1	4	P
1	2009-09-30 23:01:00	0	DTA	23	1	4	P
1	2009-09-30 23:02:00	0	DTA	23	1	4	P
1	2009-09-30 23:03:00	0	DTA	23	1	4	P
1	2009-09-30 23:04:00	0	DTA	23	1	4	P
1	2009-09-30 23:05:00	0	DTA	23	1	4	P
1	2009-09-30 23:06:00	0	DTA	23	1	4	P
1	2009-09-30 23:07:00	0	DTA	23	1	4	P
1	2009-09-30 23:08:00	0	DTA	23	1	4	P
1	2009-09-30 23:09:00	0	DTA	23	1	4	P
1	2009-09-30 23:10:00	0	DTA	23	1	4	P
1	2009-09-30 23:11:00	0	DTA	23	1	4	P
1	2009-09-30 23:12:00	0	DTA	23	1	4	P
1	2009-09-30 23:13:00	84	DTA	23	1	4	P
1	2009-09-30 23:14:00	0	DTA	23	1	4	P
1	2009-09-30 23:15:00	0	DTA	23	1	4	P
1	2009-09-30 23:16:00	84	DTA	23	1	4	P
1	2009-09-30 23:17:00	56	DTA	23	1	4	P
1	2009-09-30 23:18:00	0	DTA	23	1	4	P
1	2009-09-30 23:19:00	0	DTA	23	1	4	P
1	2009-09-30 23:20:00	0	DTA	23	1	4	P
1	2009-09-30 23:21:00	90	DTA	23	1	4	P
1	2009-09-30 23:22:00	0	DTA	23	1	4	P
1	2009-09-30 23:23:00	0	DTA	23	1	4	P
1	2009-09-30 23:24:00	0	DTA	23	1	4	P
1	2009-09-30 23:25:00	0	DTA	23	1	4	P
1	2009-09-30 23:26:00	0	DTA	23	1	4	P
1	2009-09-30 23:27:00	20	DTA	23	1	4	P
1	2009-09-30 23:28:00	15	DTA	23	1	4	P
1	2009-09-30 23:29:00	0	DTA	23	1	4	P
1	2009-09-30 23:30:00	0	DTA	23	1	4	P
1	2009-09-30 23:31:00	0	NTA	23	2	4	P
1	2009-09-30 23:32:00	0	NTA	23	2	4	P
1	2009-09-30 23:33:00	25	NTA	23	2	4	P
1	2009-09-30 23:34:00	0	NTA	23	2	4	P
1	2009-09-30 23:35:00	0	NTA	23	2	4	P
1	2009-09-30 23:36:00	51	NTA	23	2	4	P
1	2009-09-30 23:37:00	0	NTA	23	2	4	P
1	2009-09-30 23:38:00	0	NTA	23	2	4	P
1	2009-09-30 23:39:00	0	NTA	23	2	4	P
1	2009-09-30 23:40:00	0	NTA	23	2	4	P
1	2009-09-30 23:41:00	0	NTA	23	2	4	P
1	2009-09-30 23:42:00	0	NTA	23	2	4	P
1	2009-09-30 23:43:00	0	NTA	23	2	4	P
1	2009-09-30 23:44:00	0	NTA	23	2	4	P
1	2009-09-30 23:45:00	0	NTA	23	2	4	P
1	2009-09-30 23:46:00	0	NTA	23	2	4	P
1	2009-09-30 23:47:00	0	NTA	23	2	4	P
1	2009-09-30 23:48:00	0	NTA	23	2	4	P
1	2009-09-30 23:49:00	0	NTA	23	2	4	P
1	2009-09-30 23:50:00	0	NTA	23	2	4	P
1	2009-09-30 23:51:00	0	NTA	23	2	4	P
1	2009-09-30 23:52:00	0	NTA	23	2	4	P
1	2009-09-30 23:53:00	0	NTA	23	2	4	P
1	2009-09-30 23:54:00	0	NTA	23	2	4	P
1	2009-09-30 23:55:00	0	NTA	23	2	4	P
1	2009-09-30 23:56:00	0	NTA	23	2	4	P
1	2009-09-30 23:57:00	0	NTA	23	2	4	P
1	2009-09-30 23:58:00	0	NTA	23	2	4	P
1	2009-09-30 23:59:00	0	NTA	23	2	4	P
1	2009-10-01	0	NTA	23	2	4	P
1	2009-10-01 00:01:00	0	NTA	0	2	5	P
1	2009-10-01 00:02:00	0	NTA	0	2	5	P
1	2009-10-01 00:03:00	0	NTA	0	2	5	P
1	2009-10-01 00:04:00	0	NTA	0	2	5	P
1	2009-10-01 00:05:00	0	NTA	0	2	5	P
1	2009-10-01 00:06:00	0	NTA	0	2	5	P
1	2009-10-01 00:07:00	0	NTA	0	2	5	P
1	2009-10-01 00:08:00	0	NTA	0	2	5	P
1	2009-10-01 00:09:00	0	NTA	0	2	5	P
1	2009-10-01 00:10:00	0	NTA	0	2	5	P
1	2009-10-01 00:11:00	0	NTA	0	2	5	P
1	2009-10-01 00:12:00	0	NTA	0	2	5	P
1	2009-10-01 00:13:00	0	NTA	0	2	5	P
1	2009-10-01 00:14:00	0	NTA	0	2	5	P
1	2009-10-01 00:15:00	0	NTA	0	2	5	P
1	2009-10-01 00:16:00	0	NTA	0	2	5	P
1	2009-10-01 00:17:00	0	NTA	0	2	5	P
1	2009-10-01 00:18:00	0	NTA	0	2	5	P
1	2009-10-01 00:19:00	0	NTA	0	2	5	P
1	2009-10-01 00:20:00	0	NTA	0	2	5	P
1	2009-10-01 00:21:00	0	NTA	0	2	5	P
1	2009-10-01 00:22:00	0	NTA	0	2	5	P
1	2009-10-01 00:23:00	0	NTA	0	2	5	P
1	2009-10-01 00:24:00	0	NTA	0	2	5	P
1	2009-10-01 00:25:00	0	NTA	0	2	5	P
1	2009-10-01 00:26:00	0	NTA	0	2	5	P
1	2009-10-01 00:27:00	0	NTA	0	2	5	P
1	2009-10-01 00:28:00	72	NTA	0	2	5	P
1	2009-10-01 00:29:00	25	NTA	0	2	5	P
1	2009-10-01 00:30:00	41	NTA	0	2	5	P
1	2009-10-01 00:31:00	0	NTA	0	2	5	P
1	2009-10-01 00:32:00	0	NTA	0	2	5	P
1	2009-10-01 00:33:00	0	NTA	0	2	5	P
1	2009-10-01 00:34:00	0	NTA	0	2	5	P
1	2009-10-01 00:35:00	326	NTA	0	2	5	P
1	2009-10-01 00:36:00	634	NTA	0	2	5	P
1	2009-10-01 00:37:00	989	NTA	0	2	5	P
1	2009-10-01 00:38:00	169	NTA	0	2	5	P
1	2009-10-01 00:39:00	46	NTA	0	2	5	P
1	2009-10-01 00:40:00	0	NTA	0	2	5	P
1	2009-10-01 00:41:00	0	NTA	0	2	5	P
1	2009-10-01 00:42:00	0	NTA	0	2	5	P
1	2009-10-01 00:43:00	0	NTA	0	2	5	P
1	2009-10-01 00:44:00	0	NTA	0	2	5	P
1	2009-10-01 00:45:00	0	NTA	0	2	5	P
1	2009-10-01 00:46:00	0	NTA	0	2	5	P
1	2009-10-01 00:47:00	0	NTA	0	2	5	P
1	2009-10-01 00:48:00	0	NTA	0	2	5	P
1	2009-10-01 00:49:00	0	NTA	0	2	5	P
1	2009-10-01 00:50:00	0	NTA	0	2	5	P
1	2009-10-01 00:51:00	0	NTA	0	2	5	P
1	2009-10-01 00:52:00	0	NTA	0	2	5	P
1	2009-10-01 00:53:00	0	NTA	0	2	5	P
1	2009-10-01 00:54:00	0	NTA	0	2	5	P
1	2009-10-01 00:55:00	0	NTA	0	2	5	P
1	2009-10-01 00:56:00	0	NTA	0	2	5	P
1	2009-10-01 00:57:00	0	NTA	0	2	5	P
1	2009-10-01 00:58:00	0	NTA	0	2	5	P
1	2009-10-01 00:59:00	0	NTA	0	2	5	P
1	2009-10-01 01:00:00	0	NTA	0	2	5	P
1	2009-10-01 01:01:00	0	NTA	1	2	5	P
1	2009-10-01 01:02:00	0	NTA	1	2	5	P
1	2009-10-01 01:03:00	0	NTA	1	2	5	P
1	2009-10-01 01:04:00	0	NTA	1	2	5	P
1	2009-10-01 01:05:00	0	NTA	1	2	5	P
1	2009-10-01 01:06:00	0	NTA	1	2	5	P
1	2009-10-01 01:07:00	0	NTA	1	2	5	P
1	2009-10-01 01:08:00	0	NTA	1	2	5	P
1	2009-10-01 01:09:00	0	NTA	1	2	5	P
1	2009-10-01 01:10:00	0	NTA	1	2	5	P
1	2009-10-01 01:11:00	0	NTA	1	2	5	P
1	2009-10-01 01:12:00	0	NTA	1	2	5	P
1	2009-10-01 01:13:00	0	NTA	1	2	5	P
1	2009-10-01 01:14:00	0	NTA	1	2	5	P
1	2009-10-01 01:15:00	0	NTA	1	2	5	P
1	2009-10-01 01:16:00	0	NTA	1	2	5	P
1	2009-10-01 01:17:00	0	NTA	1	2	5	P
1	2009-10-01 01:18:00	0	NTA	1	2	5	P
1	2009-10-01 01:19:00	0	NTA	1	2	5	P
1	2009-10-01 01:20:00	0	NTA	1	2	5	P
1	2009-10-01 01:21:00	0	NTA	1	2	5	P
1	2009-10-01 01:22:00	0	NTA	1	2	5	P
1	2009-10-01 01:23:00	0	NTA	1	2	5	P
1	2009-10-01 01:24:00	0	NTA	1	2	5	P
1	2009-10-01 01:25:00	0	NTA	1	2	5	P
1	2009-10-01 01:26:00	0	NTA	1	2	5	P
1	2009-10-01 01:27:00	0	NTA	1	2	5	P
1	2009-10-01 01:28:00	0	NTA	1	2	5	P
1	2009-10-01 01:29:00	0	NTA	1	2	5	P
1	2009-10-01 01:30:00	0	NTA	1	2	5	P
1	2009-10-01 01:31:00	0	NTA	1	2	5	P
1	2009-10-01 01:32:00	0	NTA	1	2	5	P
1	2009-10-01 01:33:00	0	NTA	1	2	5	P
1	2009-10-01 01:34:00	0	NTA	1	2	5	P
1	2009-10-01 01:35:00	0	NTA	1	2	5	P
1	2009-10-01 01:36:00	0	NTA	1	2	5	P
1	2009-10-01 01:37:00	0	NTA	1	2	5	P
1	2009-10-01 01:38:00	0	NTA	1	2	5	P
1	2009-10-01 01:39:00	0	NTA	1	2	5	P
1	2009-10-01 01:40:00	0	NTA	1	2	5	P
1	2009-10-01 01:41:00	0	NTA	1	2	5	P
1	2009-10-01 01:42:00	0	NTA	1	2	5	P
1	2009-10-01 01:43:00	0	NTA	1	2	5	P
1	2009-10-01 01:44:00	0	NTA	1	2	5	P
1	2009-10-01 01:45:00	0	NTA	1	2	5	P
1	2009-10-01 01:46:00	0	NTA	1	2	5	P
1	2009-10-01 01:47:00	0	NTA	1	2	5	P
1	2009-10-01 01:48:00	0	NTA	1	2	5	P
1	2009-10-01 01:49:00	0	NTA	1	2	5	P
1	2009-10-01 01:50:00	0	NTA	1	2	5	P
1	2009-10-01 01:51:00	0	NTA	1	2	5	P
1	2009-10-01 01:52:00	397	NTA	1	2	5	P
1	2009-10-01 01:53:00	0	NTA	1	2	5	P
1	2009-10-01 01:54:00	0	NTA	1	2	5	P
1	2009-10-01 01:55:00	0	NTA	1	2	5	P
1	2009-10-01 01:56:00	0	NTA	1	2	5	P
1	2009-10-01 01:57:00	0	NTA	1	2	5	P
1	2009-10-01 01:58:00	0	NTA	1	2	5	P
1	2009-10-01 01:59:00	0	NTA	1	2	5	P
1	2009-10-01 02:00:00	0	NTA	1	2	5	P
1	2009-10-01 02:01:00	0	NTA	2	2	5	P
1	2009-10-01 02:02:00	0	NTA	2	2	5	P
1	2009-10-01 02:03:00	0	NTA	2	2	5	P
1	2009-10-01 02:04:00	0	NTA	2	2	5	P
1	2009-10-01 02:05:00	0	NTA	2	2	5	P
1	2009-10-01 02:06:00	0	NTA	2	2	5	P
1	2009-10-01 02:07:00	0	NTA	2	2	5	P
1	2009-10-01 02:08:00	0	NTA	2	2	5	P
1	2009-10-01 02:09:00	0	NTA	2	2	5	P
1	2009-10-01 02:10:00	0	NTA	2	2	5	P
1	2009-10-01 02:11:00	0	NTA	2	2	5	P
1	2009-10-01 02:12:00	0	NTA	2	2	5	P
1	2009-10-01 02:13:00	0	NTA	2	2	5	P
1	2009-10-01 02:14:00	0	NTA	2	2	5	P
1	2009-10-01 02:15:00	0	NTA	2	2	5	P
1	2009-10-01 02:16:00	0	NTA	2	2	5	P
1	2009-10-01 02:17:00	0	NTA	2	2	5	P
1	2009-10-01 02:18:00	0	NTA	2	2	5	P
1	2009-10-01 02:19:00	0	NTA	2	2	5	P
1	2009-10-01 02:20:00	0	NTA	2	2	5	P
1	2009-10-01 02:21:00	0	NTA	2	2	5	P
1	2009-10-01 02:22:00	0	NTA	2	2	5	P
1	2009-10-01 02:23:00	36	NTA	2	2	5	P
1	2009-10-01 02:24:00	0	NTA	2	2	5	P
1	2009-10-01 02:25:00	0	NTA	2	2	5	P
1	2009-10-01 02:26:00	0	NTA	2	2	5	P
1	2009-10-01 02:27:00	0	NTA	2	2	5	P
1	2009-10-01 02:28:00	0	NTA	2	2	5	P
1	2009-10-01 02:29:00	0	NTA	2	2	5	P
1	2009-10-01 02:30:00	0	NTA	2	2	5	P
1	2009-10-01 02:31:00	0	NTA	2	2	5	P
1	2009-10-01 02:32:00	0	NTA	2	2	5	P
1	2009-10-01 02:33:00	0	NTA	2	2	5	P
1	2009-10-01 02:34:00	0	NTA	2	2	5	P
1	2009-10-01 02:35:00	0	NTA	2	2	5	P
1	2009-10-01 02:36:00	0	NTA	2	2	5	P
1	2009-10-01 02:37:00	0	NTA	2	2	5	P
1	2009-10-01 02:38:00	0	NTA	2	2	5	P
1	2009-10-01 02:39:00	0	NTA	2	2	5	P
1	2009-10-01 02:40:00	0	NTA	2	2	5	P
1	2009-10-01 02:41:00	0	NTA	2	2	5	P
1	2009-10-01 02:42:00	0	NTA	2	2	5	P
1	2009-10-01 02:43:00	0	NTA	2	2	5	P
1	2009-10-01 02:44:00	0	NTA	2	2	5	P
1	2009-10-01 02:45:00	0	NTA	2	2	5	P
1	2009-10-01 02:46:00	0	NTA	2	2	5	P
1	2009-10-01 02:47:00	0	NTA	2	2	5	P
1	2009-10-01 02:48:00	10	NTA	2	2	5	P
1	2009-10-01 02:49:00	230	NTA	2	2	5	P
1	2009-10-01 02:50:00	41	NTA	2	2	5	P
1	2009-10-01 02:51:00	0	NTA	2	2	5	P
1	2009-10-01 02:52:00	0	NTA	2	2	5	P
1	2009-10-01 02:53:00	0	NTA	2	2	5	P
1	2009-10-01 02:54:00	0	NTA	2	2	5	P
1	2009-10-01 02:55:00	0	NTA	2	2	5	P
1	2009-10-01 02:56:00	0	NTA	2	2	5	P
1	2009-10-01 02:57:00	0	NTA	2	2	5	P
1	2009-10-01 02:58:00	0	NTA	2	2	5	P
1	2009-10-01 02:59:00	0	NTA	2	2	5	P
1	2009-10-01 03:00:00	0	NTA	2	2	5	P
1	2009-10-01 03:01:00	0	NTA	3	2	5	P
1	2009-10-01 03:02:00	0	NTA	3	2	5	P
1	2009-10-01 03:03:00	0	NTA	3	2	5	P
1	2009-10-01 03:04:00	0	NTA	3	2	5	P
1	2009-10-01 03:05:00	0	NTA	3	2	5	P
1	2009-10-01 03:06:00	0	NTA	3	2	5	P
1	2009-10-01 03:07:00	0	NTA	3	2	5	P
1	2009-10-01 03:08:00	0	NTA	3	2	5	P
1	2009-10-01 03:09:00	0	NTA	3	2	5	P
1	2009-10-01 03:10:00	0	NTA	3	2	5	P
1	2009-10-01 03:11:00	0	NTA	3	2	5	P
1	2009-10-01 03:12:00	0	NTA	3	2	5	P
1	2009-10-01 03:13:00	0	NTA	3	2	5	P
1	2009-10-01 03:14:00	0	NTA	3	2	5	P
1	2009-10-01 03:15:00	0	NTA	3	2	5	P
1	2009-10-01 03:16:00	0	NTA	3	2	5	P
1	2009-10-01 03:17:00	0	NTA	3	2	5	P
1	2009-10-01 03:18:00	0	NTA	3	2	5	P
1	2009-10-01 03:19:00	0	NTA	3	2	5	P
1	2009-10-01 03:20:00	0	NTA	3	2	5	P
1	2009-10-01 03:21:00	0	NTA	3	2	5	P
1	2009-10-01 03:22:00	0	NTA	3	2	5	P
1	2009-10-01 03:23:00	0	NTA	3	2	5	P
1	2009-10-01 03:24:00	0	NTA	3	2	5	P
1	2009-10-01 03:25:00	0	NTA	3	2	5	P
1	2009-10-01 03:26:00	0	NTA	3	2	5	P
1	2009-10-01 03:27:00	0	NTA	3	2	5	P
1	2009-10-01 03:28:00	0	NTA	3	2	5	P
1	2009-10-01 03:29:00	0	NTA	3	2	5	P
1	2009-10-01 03:30:00	0	NTA	3	2	5	P
1	2009-10-01 03:31:00	0	NTA	3	2	5	P
1	2009-10-01 03:32:00	0	NTA	3	2	5	P
1	2009-10-01 03:33:00	0	NTA	3	2	5	P
1	2009-10-01 03:34:00	5	NTA	3	2	5	P
1	2009-10-01 03:35:00	0	NTA	3	2	5	P
1	2009-10-01 03:36:00	0	NTA	3	2	5	P
1	2009-10-01 03:37:00	0	NTA	3	2	5	P
1	2009-10-01 03:38:00	0	NTA	3	2	5	P
1	2009-10-01 03:39:00	0	NTA	3	2	5	P
1	2009-10-01 03:40:00	0	NTA	3	2	5	P
1	2009-10-01 03:41:00	0	NTA	3	2	5	P
1	2009-10-01 03:42:00	0	NTA	3	2	5	P
1	2009-10-01 03:43:00	46	NTA	3	2	5	P
1	2009-10-01 03:44:00	36	NTA	3	2	5	P
1	2009-10-01 03:45:00	20	NTA	3	2	5	P
1	2009-10-01 03:46:00	66	NTA	3	2	5	P
1	2009-10-01 03:47:00	61	NTA	3	2	5	P
1	2009-10-01 03:48:00	0	NTA	3	2	5	P
1	2009-10-01 03:49:00	0	NTA	3	2	5	P
1	2009-10-01 03:50:00	0	NTA	3	2	5	P
1	2009-10-01 03:51:00	25	NTA	3	2	5	P
1	2009-10-01 03:52:00	0	NTA	3	2	5	P
1	2009-10-01 03:53:00	0	NTA	3	2	5	P
1	2009-10-01 03:54:00	0	NTA	3	2	5	P
1	2009-10-01 03:55:00	0	NTA	3	2	5	P
1	2009-10-01 03:56:00	0	NTA	3	2	5	P
1	2009-10-01 03:57:00	0	NTA	3	2	5	P
1	2009-10-01 03:58:00	0	NTA	3	2	5	P
1	2009-10-01 03:59:00	0	NTA	3	2	5	P
1	2009-10-01 04:00:00	0	NTA	3	2	5	P
1	2009-10-01 04:01:00	0	NTA	4	2	5	P
1	2009-10-01 04:02:00	0	NTA	4	2	5	P
1	2009-10-01 04:03:00	0	NTA	4	2	5	P
1	2009-10-01 04:04:00	0	NTA	4	2	5	P
1	2009-10-01 04:05:00	0	NTA	4	2	5	P
1	2009-10-01 04:06:00	0	NTA	4	2	5	P
1	2009-10-01 04:07:00	0	NTA	4	2	5	P
1	2009-10-01 04:08:00	0	NTA	4	2	5	P
1	2009-10-01 04:09:00	0	NTA	4	2	5	P
1	2009-10-01 04:10:00	66	NTA	4	2	5	P
1	2009-10-01 04:11:00	25	NTA	4	2	5	P
1	2009-10-01 04:12:00	0	NTA	4	2	5	P
1	2009-10-01 04:13:00	0	NTA	4	2	5	P
1	2009-10-01 04:14:00	0	NTA	4	2	5	P
1	2009-10-01 04:15:00	0	NTA	4	2	5	P
1	2009-10-01 04:16:00	0	NTA	4	2	5	P
1	2009-10-01 04:17:00	0	NTA	4	2	5	P
1	2009-10-01 04:18:00	0	NTA	4	2	5	P
1	2009-10-01 04:19:00	56	NTA	4	2	5	P
1	2009-10-01 04:20:00	0	NTA	4	2	5	P
1	2009-10-01 04:21:00	0	DTA	4	2	5	P
1	2009-10-01 04:22:00	0	DTA	4	2	5	P
1	2009-10-01 04:23:00	0	DTA	4	2	5	P
1	2009-10-01 04:24:00	0	DTA	4	2	5	P
1	2009-10-01 04:25:00	0	DTA	4	2	5	P
1	2009-10-01 04:26:00	25	DTA	4	2	5	P
1	2009-10-01 04:27:00	0	DTA	4	2	5	P
1	2009-10-01 04:28:00	0	DTA	4	2	5	P
1	2009-10-01 04:29:00	0	DTA	4	2	5	P
1	2009-10-01 04:30:00	0	DTA	4	2	5	P
1	2009-10-01 04:31:00	0	DTA	4	2	5	P
1	2009-10-01 04:32:00	78	DTA	4	2	5	P
1	2009-10-01 04:33:00	238	DTA	4	2	5	P
1	2009-10-01 04:34:00	408	DTA	4	2	5	P
1	2009-10-01 04:35:00	230	DTA	4	2	5	P
1	2009-10-01 04:36:00	46	DTA	4	2	5	P
1	2009-10-01 04:37:00	221	DTA	4	2	5	P
1	2009-10-01 04:38:00	0	DTA	4	2	5	P
1	2009-10-01 04:39:00	36	DTA	4	2	5	P
1	2009-10-01 04:40:00	0	DTA	4	2	5	P
1	2009-10-01 04:41:00	0	DTA	4	2	5	P
1	2009-10-01 04:42:00	66	DTA	4	2	5	P
1	2009-10-01 04:43:00	121	DTA	4	2	5	P
1	2009-10-01 04:44:00	66	DTA	4	2	5	P
1	2009-10-01 04:45:00	15	DTA	4	2	5	P
1	2009-10-01 04:46:00	121	DTA	4	2	5	P
1	2009-10-01 04:47:00	840	DTA	4	2	5	P
1	2009-10-01 04:48:00	552	DTA	4	2	5	P
1	2009-10-01 04:49:00	0	DTA	4	2	5	P
1	2009-10-01 04:50:00	5	DTA	4	2	5	P
1	2009-10-01 04:51:00	30	DTA	4	2	5	P
1	2009-10-01 04:52:00	0	DTA	4	2	5	P
1	2009-10-01 04:53:00	0	DTA	4	2	5	P
1	2009-10-01 04:54:00	0	DTA	4	2	5	P
1	2009-10-01 04:55:00	30	DTA	4	2	5	P
1	2009-10-01 04:56:00	36	DTA	4	2	5	P
1	2009-10-01 04:57:00	0	DTA	4	2	5	P
1	2009-10-01 04:58:00	0	DTA	4	2	5	P
1	2009-10-01 04:59:00	0	DTA	4	2	5	P
1	2009-10-01 05:00:00	0	DTA	4	2	5	P
1	2009-10-01 05:01:00	271	DTA	5	2	5	P
1	2009-10-01 05:02:00	1403	DTA	5	2	5	P
1	2009-10-01 05:03:00	951	DTA	5	2	5	P
1	2009-10-01 05:04:00	1137	DTA	5	2	5	P
1	2009-10-01 05:05:00	857	DTA	5	2	5	P
1	2009-10-01 05:06:00	1010	DTA	5	2	5	P
1	2009-10-01 05:07:00	1159	DTA	5	2	5	P
1	2009-10-01 05:08:00	1159	DTA	5	2	5	P
1	2009-10-01 05:09:00	857	DTA	5	2	5	P
1	2009-10-01 05:10:00	723	DTA	5	2	5	P
1	2009-10-01 05:11:00	894	DTA	5	2	5	P
1	2009-10-01 05:12:00	61	DTA	5	2	5	P
1	2009-10-01 05:13:00	0	DTA	5	2	5	P
1	2009-10-01 05:14:00	0	DTA	5	2	5	P
1	2009-10-01 05:15:00	0	DTA	5	2	5	P
1	2009-10-01 05:16:00	0	DTA	5	2	5	P
1	2009-10-01 05:17:00	0	DTA	5	2	5	P
1	2009-10-01 05:18:00	41	DTA	5	2	5	P
1	2009-10-01 05:19:00	0	DTA	5	2	5	P
1	2009-10-01 05:20:00	0	DTA	5	2	5	P
1	2009-10-01 05:21:00	0	DTA	5	2	5	P
1	2009-10-01 05:22:00	0	DTA	5	2	5	P
1	2009-10-01 05:23:00	0	DTA	5	2	5	P
1	2009-10-01 05:24:00	0	DTA	5	2	5	P
1	2009-10-01 05:25:00	15	DTA	5	2	5	P
1	2009-10-01 05:26:00	0	DTA	5	2	5	P
1	2009-10-01 05:27:00	0	DTA	5	2	5	P
1	2009-10-01 05:28:00	0	DTA	5	2	5	P
1	2009-10-01 05:29:00	0	DTA	5	2	5	P
1	2009-10-01 05:30:00	0	DTA	5	2	5	P
1	2009-10-01 05:31:00	0	DTA	5	2	5	P
1	2009-10-01 05:32:00	0	DTA	5	2	5	P
1	2009-10-01 05:33:00	0	DTA	5	2	5	P
1	2009-10-01 05:34:00	0	DTA	5	2	5	P
1	2009-10-01 05:35:00	0	DTA	5	2	5	P
1	2009-10-01 05:36:00	0	DTA	5	2	5	P
1	2009-10-01 05:37:00	0	DTA	5	2	5	P
1	2009-10-01 05:38:00	0	DTA	5	2	5	P
1	2009-10-01 05:39:00	0	DTA	5	2	5	P
1	2009-10-01 05:40:00	0	DTA	5	2	5	P
1	2009-10-01 05:41:00	0	DTA	5	2	5	P
1	2009-10-01 05:42:00	0	DTA	5	2	5	P
1	2009-10-01 05:43:00	0	DTA	5	2	5	P
1	2009-10-01 05:44:00	0	DTA	5	2	5	P
1	2009-10-01 05:45:00	0	DTA	5	2	5	P
1	2009-10-01 05:46:00	0	DTA	5	2	5	P
1	2009-10-01 05:47:00	0	DTA	5	2	5	P
1	2009-10-01 05:48:00	0	DTA	5	2	5	P
1	2009-10-01 05:49:00	0	DTA	5	2	5	P
1	2009-10-01 05:50:00	0	DTA	5	2	5	P
1	2009-10-01 05:51:00	0	DTA	5	2	5	P
1	2009-10-01 05:52:00	0	DTA	5	2	5	P
1	2009-10-01 05:53:00	0	DTA	5	2	5	P
1	2009-10-01 05:54:00	0	DTA	5	2	5	P
1	2009-10-01 05:55:00	0	DTA	5	2	5	P
1	2009-10-01 05:56:00	0	DTA	5	2	5	P
1	2009-10-01 05:57:00	0	DTA	5	2	5	P
1	2009-10-01 05:58:00	0	DTA	5	2	5	P
1	2009-10-01 05:59:00	51	DTA	5	2	5	P
1	2009-10-01 06:00:00	25	DTA	5	2	5	P
1	2009-10-01 06:01:00	0	DTA	6	2	5	P
1	2009-10-01 06:02:00	0	DTA	6	2	5	P
1	2009-10-01 06:03:00	0	DTA	6	2	5	P
1	2009-10-01 06:04:00	0	DTA	6	2	5	P
1	2009-10-01 06:05:00	408	DTA	6	2	5	P
1	2009-10-01 06:06:00	205	DTA	6	2	5	P
1	2009-10-01 06:07:00	30	DTA	6	2	5	P
1	2009-10-01 06:08:00	0	DTA	6	2	5	P
1	2009-10-01 06:09:00	0	DTA	6	2	5	P
1	2009-10-01 06:10:00	0	DTA	6	2	5	P
1	2009-10-01 06:11:00	0	DTA	6	2	5	P
1	2009-10-01 06:12:00	0	DTA	6	2	5	P
1	2009-10-01 06:13:00	0	DTA	6	2	5	P
1	2009-10-01 06:14:00	0	DTA	6	2	5	P
1	2009-10-01 06:15:00	0	DTA	6	2	5	P
1	2009-10-01 06:16:00	0	DTA	6	2	5	P
1	2009-10-01 06:17:00	5	DTA	6	2	5	P
1	2009-10-01 06:18:00	0	DTA	6	2	5	P
1	2009-10-01 06:19:00	0	DTA	6	2	5	P
1	2009-10-01 06:20:00	51	DTA	6	2	5	P
1	2009-10-01 06:21:00	15	DTA	6	2	5	P
1	2009-10-01 06:22:00	205	DTA	6	2	5	P
1	2009-10-01 06:23:00	723	DTA	6	2	5	P
1	2009-10-01 06:24:00	525	DTA	6	2	5	P
1	2009-10-01 06:25:00	20	DTA	6	2	5	P
1	2009-10-01 06:26:00	15	DTA	6	2	5	P
1	2009-10-01 06:27:00	183	DTA	6	2	5	P
1	2009-10-01 06:28:00	317	DTA	6	2	5	P
1	2009-10-01 06:29:00	205	DTA	6	2	5	P
1	2009-10-01 06:30:00	41	DTA	6	2	5	P
1	2009-10-01 06:31:00	20	DTA	6	2	5	P
1	2009-10-01 06:32:00	115	DTA	6	2	5	P
1	2009-10-01 06:33:00	525	DTA	6	2	5	P
1	2009-10-01 06:34:00	280	DTA	6	2	5	P
1	2009-10-01 06:35:00	15	DTA	6	2	5	P
1	2009-10-01 06:36:00	0	DTA	6	2	5	P
1	2009-10-01 06:37:00	0	DTA	6	2	5	P
1	2009-10-01 06:38:00	61	DTA	6	2	5	P
1	2009-10-01 06:39:00	5	DTA	6	2	5	P
1	2009-10-01 06:40:00	0	DTA	6	2	5	P
1	2009-10-01 06:41:00	0	DTA	6	2	5	P
1	2009-10-01 06:42:00	0	DTA	6	2	5	P
1	2009-10-01 06:43:00	10	DTA	6	2	5	P
1	2009-10-01 06:44:00	20	DTA	6	2	5	P
1	2009-10-01 06:45:00	0	DTA	6	2	5	P
1	2009-10-01 06:46:00	0	DTA	6	2	5	P
1	2009-10-01 06:47:00	0	DTA	6	2	5	P
1	2009-10-01 06:48:00	0	DTA	6	2	5	P
1	2009-10-01 06:49:00	133	DTA	6	2	5	P
1	2009-10-01 06:50:00	56	DTA	6	2	5	P
1	2009-10-01 06:51:00	0	DTA	6	2	5	P
1	2009-10-01 06:52:00	0	DTA	6	2	5	P
1	2009-10-01 06:53:00	20	DTA	6	2	5	P
1	2009-10-01 06:54:00	5	DTA	6	2	5	P
1	2009-10-01 06:55:00	41	DTA	6	2	5	P
1	2009-10-01 06:56:00	15	DTA	6	2	5	P
1	2009-10-01 06:57:00	41	DTA	6	2	5	P
1	2009-10-01 06:58:00	56	DTA	6	2	5	P
1	2009-10-01 06:59:00	51	DTA	6	2	5	P
1	2009-10-01 07:00:00	205	DTA	6	2	5	P
1	2009-10-01 07:01:00	662	DTA	7	2	5	P
1	2009-10-01 07:02:00	1947	DTA	7	2	5	P
1	2009-10-01 07:03:00	1276	DTA	7	2	5	P
1	2009-10-01 07:04:00	1657	DTA	7	2	5	P
1	2009-10-01 07:05:00	377	DTA	7	2	5	P
1	2009-10-01 07:06:00	772	DTA	7	2	5	P
1	2009-10-01 07:07:00	723	DTA	7	2	5	P
1	2009-10-01 07:08:00	756	DTA	7	2	5	P
1	2009-10-01 07:09:00	513	DTA	7	2	5	P
1	2009-10-01 07:10:00	565	DTA	7	2	5	P
1	2009-10-01 07:11:00	788	DTA	7	2	5	P
1	2009-10-01 07:12:00	605	DTA	7	2	5	P
1	2009-10-01 07:13:00	56	DTA	7	2	5	P
1	2009-10-01 07:14:00	15	DTA	7	2	5	P
1	2009-10-01 07:15:00	0	DTA	7	2	5	P
1	2009-10-01 07:16:00	36	DTA	7	2	5	P
1	2009-10-01 07:17:00	823	DTA	7	2	5	P
1	2009-10-01 07:18:00	525	DTA	7	2	5	P
1	2009-10-01 07:19:00	788	DTA	7	2	5	P
1	2009-10-01 07:20:00	66	DTA	7	2	5	P
1	2009-10-01 07:21:00	0	DTA	7	2	5	P
1	2009-10-01 07:22:00	5	DTA	7	2	5	P
1	2009-10-01 07:23:00	254	DTA	7	2	5	P
1	2009-10-01 07:24:00	464	DTA	7	2	5	P
1	2009-10-01 07:25:00	634	DTA	7	2	5	P
1	2009-10-01 07:26:00	857	DTA	7	2	5	P
1	2009-10-01 07:27:00	591	DTA	7	2	5	P
1	2009-10-01 07:28:00	280	DTA	7	2	5	P
1	2009-10-01 07:29:00	1010	DTA	7	2	5	P
1	2009-10-01 07:30:00	61	DTA	7	2	5	P
1	2009-10-01 07:31:00	0	DTA	7	2	5	P
1	2009-10-01 07:32:00	0	DTA	7	2	5	P
1	2009-10-01 07:33:00	0	DTA	7	2	5	P
1	2009-10-01 07:34:00	0	DTA	7	2	5	P
1	2009-10-01 07:35:00	1205	DTA	7	2	5	P
1	2009-10-01 07:36:00	72	DTA	7	2	5	P
1	2009-10-01 07:37:00	387	DTA	7	2	5	P
1	2009-10-01 07:38:00	246	DTA	7	2	5	P
1	2009-10-01 07:39:00	0	DTA	7	2	5	P
1	2009-10-01 07:40:00	20	DTA	7	2	5	P
1	2009-10-01 07:41:00	420	DTA	7	2	5	P
1	2009-10-01 07:42:00	377	DTA	7	2	5	P
1	2009-10-01 07:43:00	20	DTA	7	2	5	P
1	2009-10-01 07:44:00	0	DTA	7	2	5	P
1	2009-10-01 07:45:00	0	DTA	7	2	5	P
1	2009-10-01 07:46:00	0	DTA	7	2	5	P
1	2009-10-01 07:47:00	0	DTA	7	2	5	P
1	2009-10-01 07:48:00	36	DTA	7	2	5	P
1	2009-10-01 07:49:00	5	DTA	7	2	5	P
1	2009-10-01 07:50:00	0	DTA	7	2	5	P
1	2009-10-01 07:51:00	97	DTA	7	2	5	P
1	2009-10-01 07:52:00	103	DTA	7	2	5	P
1	2009-10-01 07:53:00	0	DTA	7	2	5	P
1	2009-10-01 07:54:00	20	DTA	7	2	5	P
1	2009-10-01 07:55:00	0	DTA	7	2	5	P
1	2009-10-01 07:56:00	0	DTA	7	2	5	P
1	2009-10-01 07:57:00	0	DTA	7	2	5	P
1	2009-10-01 07:58:00	41	DTA	7	2	5	P
1	2009-10-01 07:59:00	20	DTA	7	2	5	P
1	2009-10-01 08:00:00	0	DTA	7	2	5	P
1	2009-10-01 08:01:00	30	DTA	8	2	5	P
1	2009-10-01 08:02:00	1050	DTA	8	2	5	P
1	2009-10-01 08:03:00	620	DTA	8	2	5	P
1	2009-10-01 08:04:00	221	DTA	8	2	5	P
1	2009-10-01 08:05:00	0	DTA	8	2	5	P
1	2009-10-01 08:06:00	10	DTA	8	2	5	P
1	2009-10-01 08:07:00	0	DTA	8	2	5	P
1	2009-10-01 08:08:00	5	DTA	8	2	5	P
1	2009-10-01 08:09:00	0	DTA	8	2	5	P
1	2009-10-01 08:10:00	5	DTA	8	2	5	P
1	2009-10-01 08:11:00	0	DTA	8	2	5	P
1	2009-10-01 08:12:00	0	DTA	8	2	5	P
1	2009-10-01 08:13:00	0	DTA	8	2	5	P
1	2009-10-01 08:14:00	0	DTA	8	2	5	P
1	2009-10-01 08:15:00	0	DTA	8	2	5	P
1	2009-10-01 08:16:00	0	DTA	8	2	5	P
1	2009-10-01 08:17:00	0	DTA	8	2	5	P
1	2009-10-01 08:18:00	0	DTA	8	2	5	P
1	2009-10-01 08:19:00	0	DTA	8	2	5	P
1	2009-10-01 08:20:00	0	DTA	8	2	5	P
1	2009-10-01 08:21:00	15	DTA	8	2	5	P
1	2009-10-01 08:22:00	46	DTA	8	2	5	P
1	2009-10-01 08:23:00	10	DTA	8	2	5	P
1	2009-10-01 08:24:00	0	DTA	8	2	5	P
1	2009-10-01 08:25:00	0	DTA	8	2	5	P
1	2009-10-01 08:26:00	0	DTA	8	2	5	P
1	2009-10-01 08:27:00	708	DTA	8	2	5	P
1	2009-10-01 08:28:00	299	DTA	8	2	5	P
1	2009-10-01 08:29:00	147	DTA	8	2	5	P
1	2009-10-01 08:30:00	176	DTA	8	2	5	P
1	2009-10-01 08:31:00	806	DTA	8	2	5	P
1	2009-10-01 08:32:00	197	DTA	8	2	5	P
1	2009-10-01 08:33:00	61	DTA	8	2	5	P
1	2009-10-01 08:34:00	10	DTA	8	2	5	P
1	2009-10-01 08:35:00	0	DTA	8	2	5	P
1	2009-10-01 08:36:00	0	DTA	8	2	5	P
1	2009-10-01 08:37:00	0	DTA	8	2	5	P
1	2009-10-01 08:38:00	0	DTA	8	2	5	P
1	2009-10-01 08:39:00	0	DTA	8	2	5	P
1	2009-10-01 08:40:00	0	DTA	8	2	5	P
1	2009-10-01 08:41:00	0	DTA	8	2	5	P
1	2009-10-01 08:42:00	0	DTA	8	2	5	P
1	2009-10-01 08:43:00	0	DTA	8	2	5	P
1	2009-10-01 08:44:00	0	DTA	8	2	5	P
1	2009-10-01 08:45:00	72	DTA	8	2	5	P
1	2009-10-01 08:46:00	10	DTA	8	2	5	P
1	2009-10-01 08:47:00	0	DTA	8	2	5	P
1	2009-10-01 08:48:00	0	DTA	8	2	5	P
1	2009-10-01 08:49:00	0	DTA	8	2	5	P
[truncated: 34,808 more rows]

## Sheet: Pivot NTA
Peak DTA Time?	(All)
DTA vs NTA	NTA
Average of Activity	Column Labels
Row Labels	1	2	3	4	5	6	7	8	9	10	11	12	13	14	Grand Total
1	49.7467	12.0621	34.8378	21.2205	50.5179	26.4282	23.003	24.2597	28.0479	38.8679	16.3104	42.5588	45.1714	18.0848	31.2974
2	21.5492	26.4005	11.5084	34.9266	55.437	28.1889	22.4756	25.5548	75.8154	76.7911	31.0214	44.4515	48.9917		38.8256
Grand Total	33.3473	20.2585	23.6171	28.7612	53.3742	27.4505	22.6987	24.9552	49.4609	57.2772	23.1756	43.3024	47.2089	18.0848	35.1011

## Sheet: Pivot DTA
Peak DTA Time?	(All)
DTA vs NTA	DTA
Average of Activity	Column Labels
Row Labels	1	2	3	4	5	6	7	8	9	10	11	12	13	Grand Total
1	151.257	113.407	146.26	143.61	184.025	134.014	153.474	195.605	129.254	116.362	113.796	118.069	197.876	146.947
2	198.775	277.1	311.952	167.862	381.441	293.828	217.358	175.283	192.421	121.737	173.286	164.252		221.51
Grand Total	173.731	193.84	228.027	154.599	270.769	211.571	184.503	185.434	161.745	119.131	145.829	141.505	197.876	181.988

## Sheet: Pivot PeakDTA
Peak DTA Time?	Peak DTA
DTA vs NTA	DTA
Average of Activity	Column Labels
Row Labels	1	2	3	4	5	6	7	8	9	10	11	12	13	Grand Total
1	56.3972	26.1583	101.969	92.5056	203.053	184.839	222.442	210.044	159.275	64.9056	60.1333	147.817	213.889	134.11
2	139.758	149.697	246.15	87.8889	338.133	328.131	202.383	151.897	107.964	36.0556	199.714	202.981		182.563
Grand Total	98.0778	87.9278	174.06	90.1972	270.593	256.485	212.412	180.971	133.619	50.4806	129.924	175.399	213.889	157.367

## Sheet: 9.23.09
Actogram, Copy Raw Data, All Days
Identity:	Kelly
Filename:	E:\Active Research Files\Nighttime Activity\cases\kelly\Kelly.AWC
Gender:	F
Age:	11
Height:	76.2 cm	30.0 in
Weight:	31.8 kg	70.1 lbs
Start Date:	23-Sep-2009 (Wed)
Start Time:	18:00:00
Interval:	1.00 mins
Date Stamp:	Time Stamp:	Activity Data:	Marker Press:
2009-09-23	00:00:00	0
2009-09-23	00:01:00	0
2009-09-23	00:02:00	0
2009-09-23	00:03:00	0
2009-09-23	00:04:00	0
2009-09-23	00:05:00	0
2009-09-23	00:06:00	0
2009-09-23	00:07:00	0
2009-09-23	00:08:00	0
2009-09-23	00:09:00	0
2009-09-23	00:10:00	0
2009-09-23	00:11:00	0
2009-09-23	00:12:00	0
2009-09-23	00:13:00	0
2009-09-23	00:14:00	0
2009-09-23	00:15:00	0
2009-09-23	00:16:00	0
2009-09-23	00:17:00	0
2009-09-23	00:18:00	0
2009-09-23	00:19:00	0
2009-09-23	00:20:00	0
2009-09-23	00:21:00	0
2009-09-23	00:22:00	0
2009-09-23	00:23:00	0
2009-09-23	00:24:00	0
2009-09-23	00:25:00	0
2009-09-23	00:26:00	0
2009-09-23	00:27:00	0
2009-09-23	00:28:00	0
2009-09-23	00:29:00	0
2009-09-23	00:30:00	0
2009-09-23	00:31:00	0
2009-09-23	00:32:00	0
2009-09-23	00:33:00	0
2009-09-23	00:34:00	0
2009-09-23	00:35:00	0
2009-09-23	00:36:00	0
2009-09-23	00:37:00	0
2009-09-23	00:38:00	0
2009-09-23	00:39:00	0
2009-09-23	00:40:00	0
2009-09-23	00:41:00	0
2009-09-23	00:42:00	0
2009-09-23	00:43:00	0
2009-09-23	00:44:00	0
2009-09-23	00:45:00	0
2009-09-23	00:46:00	0
2009-09-23	00:47:00	0
2009-09-23	00:48:00	0
2009-09-23	00:49:00	0
2009-09-23	00:50:00	0
2009-09-23	00:51:00	0
2009-09-23	00:52:00	0
2009-09-23	00:53:00	0
2009-09-23	00:54:00	0
2009-09-23	00:55:00	0
2009-09-23	00:56:00	0
2009-09-23	00:57:00	0
2009-09-23	00:58:00	0
2009-09-23	00:59:00	0
2009-09-23	01:00:00	0
2009-09-23	01:01:00	0
2009-09-23	01:02:00	0
2009-09-23	01:03:00	0
2009-09-23	01:04:00	0
2009-09-23	01:05:00	0
2009-09-23	01:06:00	0
2009-09-23	01:07:00	0
2009-09-23	01:08:00	0
2009-09-23	01:09:00	0
2009-09-23	01:10:00	0
2009-09-23	01:11:00	0
2009-09-23	01:12:00	0
2009-09-23	01:13:00	0
2009-09-23	01:14:00	0
2009-09-23	01:15:00	0
2009-09-23	01:16:00	0
2009-09-23	01:17:00	0
2009-09-23	01:18:00	0
2009-09-23	01:19:00	0
2009-09-23	01:20:00	0
2009-09-23	01:21:00	0
2009-09-23	01:22:00	0
2009-09-23	01:23:00	0
2009-09-23	01:24:00	0
2009-09-23	01:25:00	0
2009-09-23	01:26:00	0
2009-09-23	01:27:00	0
2009-09-23	01:28:00	0
2009-09-23	01:29:00	0
2009-09-23	01:30:00	0
2009-09-23	01:31:00	0
2009-09-23	01:32:00	0
2009-09-23	01:33:00	0
2009-09-23	01:34:00	0
2009-09-23	01:35:00	0
2009-09-23	01:36:00	0
2009-09-23	01:37:00	0
2009-09-23	01:38:00	0
2009-09-23	01:39:00	0
2009-09-23	01:40:00	0
2009-09-23	01:41:00	0
2009-09-23	01:42:00	0
2009-09-23	01:43:00	0
2009-09-23	01:44:00	0
2009-09-23	01:45:00	0
2009-09-23	01:46:00	0
2009-09-23	01:47:00	0
2009-09-23	01:48:00	0
2009-09-23	01:49:00	0
2009-09-23	01:50:00	0
2009-09-23	01:51:00	0
2009-09-23	01:52:00	0
2009-09-23	01:53:00	0
2009-09-23	01:54:00	0
2009-09-23	01:55:00	0
2009-09-23	01:56:00	0
2009-09-23	01:57:00	0
2009-09-23	01:58:00	0
2009-09-23	01:59:00	0
2009-09-23	02:00:00	0
2009-09-23	02:01:00	0
2009-09-23	02:02:00	0
2009-09-23	02:03:00	0
2009-09-23	02:04:00	0
2009-09-23	02:05:00	0
2009-09-23	02:06:00	0
2009-09-23	02:07:00	0
2009-09-23	02:08:00	0
2009-09-23	02:09:00	0
2009-09-23	02:10:00	0
2009-09-23	02:11:00	0
2009-09-23	02:12:00	0
2009-09-23	02:13:00	0
2009-09-23	02:14:00	0
2009-09-23	02:15:00	0
2009-09-23	02:16:00	0
2009-09-23	02:17:00	0
2009-09-23	02:18:00	0
2009-09-23	02:19:00	0
2009-09-23	02:20:00	0
2009-09-23	02:21:00	0
2009-09-23	02:22:00	0
2009-09-23	02:23:00	0
2009-09-23	02:24:00	0
2009-09-23	02:25:00	0
2009-09-23	02:26:00	0
2009-09-23	02:27:00	0
2009-09-23	02:28:00	0
2009-09-23	02:29:00	0
2009-09-23	02:30:00	0
2009-09-23	02:31:00	0
2009-09-23	02:32:00	0
2009-09-23	02:33:00	0
2009-09-23	02:34:00	0
2009-09-23	02:35:00	0
2009-09-23	02:36:00	0
2009-09-23	02:37:00	0
2009-09-23	02:38:00	0
2009-09-23	02:39:00	0
2009-09-23	02:40:00	0
2009-09-23	02:41:00	0
2009-09-23	02:42:00	0
2009-09-23	02:43:00	0
2009-09-23	02:44:00	0
2009-09-23	02:45:00	0
2009-09-23	02:46:00	0
2009-09-23	02:47:00	0
2009-09-23	02:48:00	0
2009-09-23	02:49:00	0
2009-09-23	02:50:00	0
2009-09-23	02:51:00	0
2009-09-23	02:52:00	0
2009-09-23	02:53:00	0
2009-09-23	02:54:00	0
2009-09-23	02:55:00	0
2009-09-23	02:56:00	0
2009-09-23	02:57:00	0
2009-09-23	02:58:00	0
2009-09-23	02:59:00	0
2009-09-23	03:00:00	0
2009-09-23	03:01:00	0
2009-09-23	03:02:00	0
2009-09-23	03:03:00	0
2009-09-23	03:04:00	0
2009-09-23	03:05:00	0
2009-09-23	03:06:00	0
2009-09-23	03:07:00	0
2009-09-23	03:08:00	0
2009-09-23	03:09:00	0
2009-09-23	03:10:00	0
2009-09-23	03:11:00	0
2009-09-23	03:12:00	0
2009-09-23	03:13:00	0
2009-09-23	03:14:00	0
2009-09-23	03:15:00	0
2009-09-23	03:16:00	0
2009-09-23	03:17:00	0
2009-09-23	03:18:00	0
2009-09-23	03:19:00	0
2009-09-23	03:20:00	0
2009-09-23	03:21:00	0
2009-09-23	03:22:00	0
2009-09-23	03:23:00	0
2009-09-23	03:24:00	0
2009-09-23	03:25:00	0
2009-09-23	03:26:00	0
2009-09-23	03:27:00	0
2009-09-23	03:28:00	0
2009-09-23	03:29:00	0
2009-09-23	03:30:00	0
2009-09-23	03:31:00	0
2009-09-23	03:32:00	0
2009-09-23	03:33:00	0
2009-09-23	03:34:00	0
2009-09-23	03:35:00	0
2009-09-23	03:36:00	0
2009-09-23	03:37:00	0
2009-09-23	03:38:00	0
2009-09-23	03:39:00	0
2009-09-23	03:40:00	0
2009-09-23	03:41:00	0
2009-09-23	03:42:00	0
2009-09-23	03:43:00	0
2009-09-23	03:44:00	0
2009-09-23	03:45:00	0
2009-09-23	03:46:00	0
2009-09-23	03:47:00	0
2009-09-23	03:48:00	0
2009-09-23	03:49:00	0
2009-09-23	03:50:00	0
2009-09-23	03:51:00	0
2009-09-23	03:52:00	0
2009-09-23	03:53:00	0
2009-09-23	03:54:00	0
2009-09-23	03:55:00	0
2009-09-23	03:56:00	0
2009-09-23	03:57:00	0
2009-09-23	03:58:00	0
2009-09-23	03:59:00	0
2009-09-23	04:00:00	0
2009-09-23	04:01:00	0
2009-09-23	04:02:00	0
2009-09-23	04:03:00	0
2009-09-23	04:04:00	0
2009-09-23	04:05:00	0
2009-09-23	04:06:00	0
2009-09-23	04:07:00	0
2009-09-23	04:08:00	0
2009-09-23	04:09:00	0
2009-09-23	04:10:00	0
2009-09-23	04:11:00	0
2009-09-23	04:12:00	0
2009-09-23	04:13:00	0
2009-09-23	04:14:00	0
2009-09-23	04:15:00	0
2009-09-23	04:16:00	0
2009-09-23	04:17:00	0
2009-09-23	04:18:00	0
2009-09-23	04:19:00	0
2009-09-23	04:20:00	0
2009-09-23	04:21:00	0
2009-09-23	04:22:00	0
2009-09-23	04:23:00	0
2009-09-23	04:24:00	0
2009-09-23	04:25:00	0
2009-09-23	04:26:00	0
2009-09-23	04:27:00	0
2009-09-23	04:28:00	0
2009-09-23	04:29:00	0
2009-09-23	04:30:00	0
2009-09-23	04:31:00	0
2009-09-23	04:32:00	0
2009-09-23	04:33:00	0
2009-09-23	04:34:00	0
2009-09-23	04:35:00	0
2009-09-23	04:36:00	0
2009-09-23	04:37:00	0
2009-09-23	04:38:00	0
2009-09-23	04:39:00	0
2009-09-23	04:40:00	0
2009-09-23	04:41:00	0
2009-09-23	04:42:00	0
2009-09-23	04:43:00	0
2009-09-23	04:44:00	0
2009-09-23	04:45:00	0
2009-09-23	04:46:00	0
2009-09-23	04:47:00	0
2009-09-23	04:48:00	0
2009-09-23	04:49:00	0
2009-09-23	04:50:00	0
2009-09-23	04:51:00	0
2009-09-23	04:52:00	0
2009-09-23	04:53:00	0
2009-09-23	04:54:00	0
2009-09-23	04:55:00	0
2009-09-23	04:56:00	0
2009-09-23	04:57:00	0
2009-09-23	04:58:00	0
2009-09-23	04:59:00	0
2009-09-23	05:00:00	0
2009-09-23	05:01:00	0
2009-09-23	05:02:00	0
2009-09-23	05:03:00	0
2009-09-23	05:04:00	0
2009-09-23	05:05:00	0
2009-09-23	05:06:00	0
2009-09-23	05:07:00	0
2009-09-23	05:08:00	0
2009-09-23	05:09:00	0
2009-09-23	05:10:00	0
2009-09-23	05:11:00	0
2009-09-23	05:12:00	0
2009-09-23	05:13:00	0
2009-09-23	05:14:00	0
2009-09-23	05:15:00	0
2009-09-23	05:16:00	0
2009-09-23	05:17:00	0
2009-09-23	05:18:00	0
2009-09-23	05:19:00	0
2009-09-23	05:20:00	0
2009-09-23	05:21:00	0
2009-09-23	05:22:00	0
2009-09-23	05:23:00	0
2009-09-23	05:24:00	0
2009-09-23	05:25:00	0
2009-09-23	05:26:00	0
2009-09-23	05:27:00	0
2009-09-23	05:28:00	0
2009-09-23	05:29:00	0
2009-09-23	05:30:00	0
2009-09-23	05:31:00	0
2009-09-23	05:32:00	0
2009-09-23	05:33:00	0
2009-09-23	05:34:00	0
2009-09-23	05:35:00	0
2009-09-23	05:36:00	0
2009-09-23	05:37:00	0
2009-09-23	05:38:00	0
2009-09-23	05:39:00	0
2009-09-23	05:40:00	0
2009-09-23	05:41:00	0
2009-09-23	05:42:00	0
2009-09-23	05:43:00	0
2009-09-23	05:44:00	0
2009-09-23	05:45:00	0
2009-09-23	05:46:00	0
2009-09-23	05:47:00	0
2009-09-23	05:48:00	0
2009-09-23	05:49:00	0
2009-09-23	05:50:00	0
2009-09-23	05:51:00	0
2009-09-23	05:52:00	0
2009-09-23	05:53:00	0
2009-09-23	05:54:00	0
2009-09-23	05:55:00	0
2009-09-23	05:56:00	0
2009-09-23	05:57:00	0
2009-09-23	05:58:00	0
2009-09-23	05:59:00	0
2009-09-23	06:00:00	0
2009-09-23	06:01:00	0
2009-09-23	06:02:00	0
2009-09-23	06:03:00	0
2009-09-23	06:04:00	0
2009-09-23	06:05:00	0
2009-09-23	06:06:00	0
2009-09-23	06:07:00	0
2009-09-23	06:08:00	0
2009-09-23	06:09:00	0
2009-09-23	06:10:00	0
2009-09-23	06:11:00	0
2009-09-23	06:12:00	0
2009-09-23	06:13:00	0
2009-09-23	06:14:00	0
2009-09-23	06:15:00	0
2009-09-23	06:16:00	0
2009-09-23	06:17:00	0
2009-09-23	06:18:00	0
2009-09-23	06:19:00	0
2009-09-23	06:20:00	0
2009-09-23	06:21:00	0
2009-09-23	06:22:00	0
2009-09-23	06:23:00	0
2009-09-23	06:24:00	0
2009-09-23	06:25:00	0
2009-09-23	06:26:00	0
2009-09-23	06:27:00	0
2009-09-23	06:28:00	0
2009-09-23	06:29:00	0
2009-09-23	06:30:00	0
2009-09-23	06:31:00	0
2009-09-23	06:32:00	0
2009-09-23	06:33:00	0
2009-09-23	06:34:00	0
2009-09-23	06:35:00	0
2009-09-23	06:36:00	0
2009-09-23	06:37:00	0
2009-09-23	06:38:00	0
2009-09-23	06:39:00	0
2009-09-23	06:40:00	0
2009-09-23	06:41:00	0
2009-09-23	06:42:00	0
2009-09-23	06:43:00	0
2009-09-23	06:44:00	0
2009-09-23	06:45:00	0
2009-09-23	06:46:00	0
2009-09-23	06:47:00	0
2009-09-23	06:48:00	0
2009-09-23	06:49:00	0
2009-09-23	06:50:00	0
2009-09-23	06:51:00	0
2009-09-23	06:52:00	0
2009-09-23	06:53:00	0
2009-09-23	06:54:00	0
2009-09-23	06:55:00	0
2009-09-23	06:56:00	0
2009-09-23	06:57:00	0
2009-09-23	06:58:00	0
2009-09-23	06:59:00	0
2009-09-23	07:00:00	0
2009-09-23	07:01:00	0
2009-09-23	07:02:00	0
2009-09-23	07:03:00	0
2009-09-23	07:04:00	0
2009-09-23	07:05:00	0
2009-09-23	07:06:00	0
2009-09-23	07:07:00	0
2009-09-23	07:08:00	0
2009-09-23	07:09:00	0
2009-09-23	07:10:00	0
2009-09-23	07:11:00	0
2009-09-23	07:12:00	0
2009-09-23	07:13:00	0
2009-09-23	07:14:00	0
2009-09-23	07:15:00	0
2009-09-23	07:16:00	0
2009-09-23	07:17:00	0
2009-09-23	07:18:00	0
2009-09-23	07:19:00	0
2009-09-23	07:20:00	0
2009-09-23	07:21:00	0
2009-09-23	07:22:00	0
2009-09-23	07:23:00	0
2009-09-23	07:24:00	0
2009-09-23	07:25:00	0
2009-09-23	07:26:00	0
2009-09-23	07:27:00	0
2009-09-23	07:28:00	0
2009-09-23	07:29:00	0
2009-09-23	07:30:00	0
2009-09-23	07:31:00	0
2009-09-23	07:32:00	0
2009-09-23	07:33:00	0
2009-09-23	07:34:00	0
2009-09-23	07:35:00	0
2009-09-23	07:36:00	0
2009-09-23	07:37:00	0
2009-09-23	07:38:00	0
2009-09-23	07:39:00	0
2009-09-23	07:40:00	0
2009-09-23	07:41:00	0
2009-09-23	07:42:00	0
2009-09-23	07:43:00	0
2009-09-23	07:44:00	0
2009-09-23	07:45:00	0
2009-09-23	07:46:00	0
2009-09-23	07:47:00	0
2009-09-23	07:48:00	0
2009-09-23	07:49:00	0
2009-09-23	07:50:00	0
2009-09-23	07:51:00	0
2009-09-23	07:52:00	0
2009-09-23	07:53:00	0
2009-09-23	07:54:00	0
2009-09-23	07:55:00	0
2009-09-23	07:56:00	0
2009-09-23	07:57:00	0
2009-09-23	07:58:00	0
2009-09-23	07:59:00	0
2009-09-23	08:00:00	0
2009-09-23	08:01:00	0
2009-09-23	08:02:00	0
2009-09-23	08:03:00	0
2009-09-23	08:04:00	0
2009-09-23	08:05:00	0
2009-09-23	08:06:00	0
2009-09-23	08:07:00	0
2009-09-23	08:08:00	0
2009-09-23	08:09:00	0
2009-09-23	08:10:00	0
2009-09-23	08:11:00	0
2009-09-23	08:12:00	0
2009-09-23	08:13:00	0
2009-09-23	08:14:00	0
2009-09-23	08:15:00	0
2009-09-23	08:16:00	0
2009-09-23	08:17:00	0
2009-09-23	08:18:00	0
2009-09-23	08:19:00	0
2009-09-23	08:20:00	0
2009-09-23	08:21:00	0
2009-09-23	08:22:00	0
2009-09-23	08:23:00	0
2009-09-23	08:24:00	0
2009-09-23	08:25:00	0
2009-09-23	08:26:00	0
2009-09-23	08:27:00	0
2009-09-23	08:28:00	0
2009-09-23	08:29:00	0
2009-09-23	08:30:00	0
2009-09-23	08:31:00	0
2009-09-23	08:32:00	0
2009-09-23	08:33:00	0
2009-09-23	08:34:00	0
2009-09-23	08:35:00	0
2009-09-23	08:36:00	0
2009-09-23	08:37:00	0
2009-09-23	08:38:00	0
2009-09-23	08:39:00	0
2009-09-23	08:40:00	0
2009-09-23	08:41:00	0
2009-09-23	08:42:00	0
2009-09-23	08:43:00	0
2009-09-23	08:44:00	0
2009-09-23	08:45:00	0
2009-09-23	08:46:00	0
2009-09-23	08:47:00	0
2009-09-23	08:48:00	0
2009-09-23	08:49:00	0
2009-09-23	08:50:00	0
2009-09-23	08:51:00	0
2009-09-23	08:52:00	0
2009-09-23	08:53:00	0
2009-09-23	08:54:00	0
2009-09-23	08:55:00	0
2009-09-23	08:56:00	0
2009-09-23	08:57:00	0
2009-09-23	08:58:00	0
2009-09-23	08:59:00	0
2009-09-23	09:00:00	0
2009-09-23	09:01:00	0
2009-09-23	09:02:00	0
2009-09-23	09:03:00	0
2009-09-23	09:04:00	0
2009-09-23	09:05:00	0
2009-09-23	09:06:00	0
2009-09-23	09:07:00	0
2009-09-23	09:08:00	0
2009-09-23	09:09:00	0
2009-09-23	09:10:00	0
2009-09-23	09:11:00	0
2009-09-23	09:12:00	0
2009-09-23	09:13:00	0
2009-09-23	09:14:00	0
2009-09-23	09:15:00	0
2009-09-23	09:16:00	0
2009-09-23	09:17:00	0
2009-09-23	09:18:00	0
2009-09-23	09:19:00	0
2009-09-23	09:20:00	0
2009-09-23	09:21:00	0
2009-09-23	09:22:00	0
2009-09-23	09:23:00	0
2009-09-23	09:24:00	0
2009-09-23	09:25:00	0
2009-09-23	09:26:00	0
2009-09-23	09:27:00	0
2009-09-23	09:28:00	0
2009-09-23	09:29:00	0
2009-09-23	09:30:00	0
2009-09-23	09:31:00	0
2009-09-23	09:32:00	0
2009-09-23	09:33:00	0
2009-09-23	09:34:00	0
2009-09-23	09:35:00	0
2009-09-23	09:36:00	0
2009-09-23	09:37:00	0
2009-09-23	09:38:00	0
2009-09-23	09:39:00	0
2009-09-23	09:40:00	0
2009-09-23	09:41:00	0
2009-09-23	09:42:00	0
2009-09-23	09:43:00	0
2009-09-23	09:44:00	0
2009-09-23	09:45:00	0
2009-09-23	09:46:00	0
2009-09-23	09:47:00	0
2009-09-23	09:48:00	0
2009-09-23	09:49:00	0
2009-09-23	09:50:00	0
2009-09-23	09:51:00	0
2009-09-23	09:52:00	0
2009-09-23	09:53:00	0
2009-09-23	09:54:00	0
2009-09-23	09:55:00	0
2009-09-23	09:56:00	0
2009-09-23	09:57:00	0
2009-09-23	09:58:00	0
2009-09-23	09:59:00	0
2009-09-23	10:00:00	0
2009-09-23	10:01:00	0
2009-09-23	10:02:00	0
2009-09-23	10:03:00	0
2009-09-23	10:04:00	0
2009-09-23	10:05:00	0
2009-09-23	10:06:00	0
2009-09-23	10:07:00	0
2009-09-23	10:08:00	0
2009-09-23	10:09:00	0
2009-09-23	10:10:00	0
2009-09-23	10:11:00	0
2009-09-23	10:12:00	0
2009-09-23	10:13:00	0
2009-09-23	10:14:00	0
2009-09-23	10:15:00	0
2009-09-23	10:16:00	0
2009-09-23	10:17:00	0
2009-09-23	10:18:00	0
2009-09-23	10:19:00	0
2009-09-23	10:20:00	0
2009-09-23	10:21:00	0
2009-09-23	10:22:00	0
2009-09-23	10:23:00	0
2009-09-23	10:24:00	0
2009-09-23	10:25:00	0
2009-09-23	10:26:00	0
2009-09-23	10:27:00	0
2009-09-23	10:28:00	0
2009-09-23	10:29:00	0
2009-09-23	10:30:00	0
2009-09-23	10:31:00	0
2009-09-23	10:32:00	0
2009-09-23	10:33:00	0
2009-09-23	10:34:00	0
2009-09-23	10:35:00	0
2009-09-23	10:36:00	0
2009-09-23	10:37:00	0
2009-09-23	10:38:00	0
2009-09-23	10:39:00	0
2009-09-23	10:40:00	0
2009-09-23	10:41:00	0
2009-09-23	10:42:00	0
2009-09-23	10:43:00	0
2009-09-23	10:44:00	0
2009-09-23	10:45:00	0
2009-09-23	10:46:00	0
2009-09-23	10:47:00	0
2009-09-23	10:48:00	0
2009-09-23	10:49:00	0
2009-09-23	10:50:00	0
2009-09-23	10:51:00	0
2009-09-23	10:52:00	0
2009-09-23	10:53:00	0
2009-09-23	10:54:00	0
2009-09-23	10:55:00	0
2009-09-23	10:56:00	0
2009-09-23	10:57:00	0
2009-09-23	10:58:00	0
2009-09-23	10:59:00	0
2009-09-23	11:00:00	0
2009-09-23	11:01:00	0
2009-09-23	11:02:00	0
2009-09-23	11:03:00	0
2009-09-23	11:04:00	0
2009-09-23	11:05:00	0
2009-09-23	11:06:00	0
2009-09-23	11:07:00	0
2009-09-23	11:08:00	0
2009-09-23	11:09:00	0
2009-09-23	11:10:00	0
2009-09-23	11:11:00	0
2009-09-23	11:12:00	0
2009-09-23	11:13:00	0
2009-09-23	11:14:00	0
2009-09-23	11:15:00	0
2009-09-23	11:16:00	0
2009-09-23	11:17:00	0
2009-09-23	11:18:00	0
2009-09-23	11:19:00	0
2009-09-23	11:20:00	0
2009-09-23	11:21:00	0
2009-09-23	11:22:00	0
2009-09-23	11:23:00	0
2009-09-23	11:24:00	0
2009-09-23	11:25:00	0
2009-09-23	11:26:00	0
2009-09-23	11:27:00	0
2009-09-23	11:28:00	0
2009-09-23	11:29:00	0
2009-09-23	11:30:00	0
2009-09-23	11:31:00	0
2009-09-23	11:32:00	0
2009-09-23	11:33:00	0
2009-09-23	11:34:00	0
2009-09-23	11:35:00	0
2009-09-23	11:36:00	0
2009-09-23	11:37:00	0
2009-09-23	11:38:00	0
2009-09-23	11:39:00	0
2009-09-23	11:40:00	0
2009-09-23	11:41:00	0
2009-09-23	11:42:00	0
2009-09-23	11:43:00	0
2009-09-23	11:44:00	0
2009-09-23	11:45:00	0
2009-09-23	11:46:00	0
2009-09-23	11:47:00	0
2009-09-23	11:48:00	0
2009-09-23	11:49:00	0
2009-09-23	11:50:00	0
2009-09-23	11:51:00	0
2009-09-23	11:52:00	0
2009-09-23	11:53:00	0
2009-09-23	11:54:00	0
2009-09-23	11:55:00	0
2009-09-23	11:56:00	0
2009-09-23	11:57:00	0
2009-09-23	11:58:00	0
2009-09-23	11:59:00	0
2009-09-23	12:00:00	0
2009-09-23	12:01:00	0
2009-09-23	12:02:00	0
2009-09-23	12:03:00	0
2009-09-23	12:04:00	0
2009-09-23	12:05:00	0
2009-09-23	12:06:00	0
2009-09-23	12:07:00	0
2009-09-23	12:08:00	0
2009-09-23	12:09:00	0
2009-09-23	12:10:00	0
2009-09-23	12:11:00	0
2009-09-23	12:12:00	0
2009-09-23	12:13:00	0
2009-09-23	12:14:00	0
2009-09-23	12:15:00	0
2009-09-23	12:16:00	0
2009-09-23	12:17:00	0
2009-09-23	12:18:00	0
2009-09-23	12:19:00	0
2009-09-23	12:20:00	0
2009-09-23	12:21:00	0
2009-09-23	12:22:00	0
2009-09-23	12:23:00	0
2009-09-23	12:24:00	0
2009-09-23	12:25:00	0
2009-09-23	12:26:00	0
2009-09-23	12:27:00	0
2009-09-23	12:28:00	0
2009-09-23	12:29:00	0
2009-09-23	12:30:00	0
2009-09-23	12:31:00	0
2009-09-23	12:32:00	0
2009-09-23	12:33:00	0
2009-09-23	12:34:00	0
2009-09-23	12:35:00	0
2009-09-23	12:36:00	0
2009-09-23	12:37:00	0
2009-09-23	12:38:00	0
2009-09-23	12:39:00	0
2009-09-23	12:40:00	0
2009-09-23	12:41:00	0
2009-09-23	12:42:00	0
2009-09-23	12:43:00	0
2009-09-23	12:44:00	0
2009-09-23	12:45:00	0
2009-09-23	12:46:00	0
2009-09-23	12:47:00	0
2009-09-23	12:48:00	0
2009-09-23	12:49:00	0
2009-09-23	12:50:00	0
2009-09-23	12:51:00	0
2009-09-23	12:52:00	0
2009-09-23	12:53:00	0
2009-09-23	12:54:00	0
2009-09-23	12:55:00	0
2009-09-23	12:56:00	0
2009-09-23	12:57:00	0
2009-09-23	12:58:00	0
2009-09-23	12:59:00	0
2009-09-23	13:00:00	0
2009-09-23	13:01:00	0
2009-09-23	13:02:00	0
2009-09-23	13:03:00	0
2009-09-23	13:04:00	0
2009-09-23	13:05:00	0
2009-09-23	13:06:00	0
2009-09-23	13:07:00	0
2009-09-23	13:08:00	0
2009-09-23	13:09:00	0
2009-09-23	13:10:00	0
2009-09-23	13:11:00	0
2009-09-23	13:12:00	0
2009-09-23	13:13:00	0
2009-09-23	13:14:00	0
2009-09-23	13:15:00	0
2009-09-23	13:16:00	0
2009-09-23	13:17:00	0
2009-09-23	13:18:00	0
2009-09-23	13:19:00	0
2009-09-23	13:20:00	0
2009-09-23	13:21:00	0
2009-09-23	13:22:00	0
2009-09-23	13:23:00	0
2009-09-23	13:24:00	0
2009-09-23	13:25:00	0
2009-09-23	13:26:00	0
2009-09-23	13:27:00	0
2009-09-23	13:28:00	0
2009-09-23	13:29:00	0
2009-09-23	13:30:00	0
2009-09-23	13:31:00	0
2009-09-23	13:32:00	0
2009-09-23	13:33:00	0
2009-09-23	13:34:00	0
2009-09-23	13:35:00	0
2009-09-23	13:36:00	0
2009-09-23	13:37:00	0
2009-09-23	13:38:00	0
2009-09-23	13:39:00	0
2009-09-23	13:40:00	0
2009-09-23	13:41:00	0
2009-09-23	13:42:00	0
2009-09-23	13:43:00	0
2009-09-23	13:44:00	0
2009-09-23	13:45:00	0
2009-09-23	13:46:00	0
2009-09-23	13:47:00	0
2009-09-23	13:48:00	0
2009-09-23	13:49:00	0
2009-09-23	13:50:00	0
2009-09-23	13:51:00	0
2009-09-23	13:52:00	0
2009-09-23	13:53:00	0
2009-09-23	13:54:00	0
2009-09-23	13:55:00	0
2009-09-23	13:56:00	0
2009-09-23	13:57:00	0
2009-09-23	13:58:00	0
2009-09-23	13:59:00	0
2009-09-23	14:00:00	0
2009-09-23	14:01:00	0
2009-09-23	14:02:00	0
2009-09-23	14:03:00	0
2009-09-23	14:04:00	0
2009-09-23	14:05:00	0
2009-09-23	14:06:00	0
2009-09-23	14:07:00	0
2009-09-23	14:08:00	0
2009-09-23	14:09:00	0
2009-09-23	14:10:00	0
2009-09-23	14:11:00	0
2009-09-23	14:12:00	0
2009-09-23	14:13:00	0
2009-09-23	14:14:00	0
2009-09-23	14:15:00	0
2009-09-23	14:16:00	0
2009-09-23	14:17:00	0
2009-09-23	14:18:00	0
2009-09-23	14:19:00	0
2009-09-23	14:20:00	0
2009-09-23	14:21:00	0
2009-09-23	14:22:00	0
2009-09-23	14:23:00	0
2009-09-23	14:24:00	0
2009-09-23	14:25:00	0
2009-09-23	14:26:00	0
2009-09-23	14:27:00	0
2009-09-23	14:28:00	0
2009-09-23	14:29:00	0
2009-09-23	14:30:00	0
2009-09-23	14:31:00	0
2009-09-23	14:32:00	0
2009-09-23	14:33:00	0
2009-09-23	14:34:00	0
2009-09-23	14:35:00	0
2009-09-23	14:36:00	0
2009-09-23	14:37:00	0
2009-09-23	14:38:00	0
2009-09-23	14:39:00	0
2009-09-23	14:40:00	0
2009-09-23	14:41:00	0
2009-09-23	14:42:00	0
2009-09-23	14:43:00	0
2009-09-23	14:44:00	0
2009-09-23	14:45:00	0
2009-09-23	14:46:00	0
2009-09-23	14:47:00	0
2009-09-23	14:48:00	0
2009-09-23	14:49:00	0
2009-09-23	14:50:00	0
2009-09-23	14:51:00	0
2009-09-23	14:52:00	0
2009-09-23	14:53:00	0
2009-09-23	14:54:00	0
2009-09-23	14:55:00	0
2009-09-23	14:56:00	0
2009-09-23	14:57:00	0
2009-09-23	14:58:00	0
2009-09-23	14:59:00	0
2009-09-23	15:00:00	0
2009-09-23	15:01:00	0
2009-09-23	15:02:00	0
2009-09-23	15:03:00	0
2009-09-23	15:04:00	0
2009-09-23	15:05:00	0
2009-09-23	15:06:00	0
2009-09-23	15:07:00	0
2009-09-23	15:08:00	0
2009-09-23	15:09:00	0
2009-09-23	15:10:00	0
2009-09-23	15:11:00	0
2009-09-23	15:12:00	0
2009-09-23	15:13:00	0
2009-09-23	15:14:00	0
2009-09-23	15:15:00	0
2009-09-23	15:16:00	0
2009-09-23	15:17:00	0
2009-09-23	15:18:00	0
2009-09-23	15:19:00	0
2009-09-23	15:20:00	0
2009-09-23	15:21:00	0
2009-09-23	15:22:00	0
2009-09-23	15:23:00	0
2009-09-23	15:24:00	0
2009-09-23	15:25:00	0
2009-09-23	15:26:00	0
2009-09-23	15:27:00	0
2009-09-23	15:28:00	0
2009-09-23	15:29:00	0
2009-09-23	15:30:00	0
2009-09-23	15:31:00	0
2009-09-23	15:32:00	0
2009-09-23	15:33:00	0
2009-09-23	15:34:00	0
2009-09-23	15:35:00	0
2009-09-23	15:36:00	0
2009-09-23	15:37:00	0
2009-09-23	15:38:00	0
2009-09-23	15:39:00	0
2009-09-23	15:40:00	0
2009-09-23	15:41:00	0
2009-09-23	15:42:00	0
2009-09-23	15:43:00	0
2009-09-23	15:44:00	0
2009-09-23	15:45:00	0
2009-09-23	15:46:00	0
2009-09-23	15:47:00	0
2009-09-23	15:48:00	0
2009-09-23	15:49:00	0
2009-09-23	15:50:00	0
2009-09-23	15:51:00	0
2009-09-23	15:52:00	0
2009-09-23	15:53:00	0
2009-09-23	15:54:00	0
2009-09-23	15:55:00	0
2009-09-23	15:56:00	0
2009-09-23	15:57:00	0
2009-09-23	15:58:00	0
2009-09-23	15:59:00	0
2009-09-23	16:00:00	0
2009-09-23	16:01:00	0
2009-09-23	16:02:00	0
2009-09-23	16:03:00	0
2009-09-23	16:04:00	0
2009-09-23	16:05:00	0
2009-09-23	16:06:00	0
2009-09-23	16:07:00	0
2009-09-23	16:08:00	0
2009-09-23	16:09:00	0
2009-09-23	16:10:00	0
2009-09-23	16:11:00	0
2009-09-23	16:12:00	0
2009-09-23	16:13:00	0
2009-09-23	16:14:00	0
2009-09-23	16:15:00	0
2009-09-23	16:16:00	0
2009-09-23	16:17:00	0
2009-09-23	16:18:00	0
2009-09-23	16:19:00	0
2009-09-23	16:20:00	0
2009-09-23	16:21:00	0
2009-09-23	16:22:00	0
2009-09-23	16:23:00	0
2009-09-23	16:24:00	0
2009-09-23	16:25:00	0
2009-09-23	16:26:00	0
2009-09-23	16:27:00	0
2009-09-23	16:28:00	0
2009-09-23	16:29:00	0
2009-09-23	16:30:00	0
2009-09-23	16:31:00	0
2009-09-23	16:32:00	0
2009-09-23	16:33:00	0
2009-09-23	16:34:00	0
2009-09-23	16:35:00	0
2009-09-23	16:36:00	0
2009-09-23	16:37:00	0
2009-09-23	16:38:00	0
2009-09-23	16:39:00	0
2009-09-23	16:40:00	0
2009-09-23	16:41:00	0
2009-09-23	16:42:00	0
2009-09-23	16:43:00	0
2009-09-23	16:44:00	0
2009-09-23	16:45:00	0
2009-09-23	16:46:00	0
2009-09-23	16:47:00	0
2009-09-23	16:48:00	0
2009-09-23	16:49:00	0
2009-09-23	16:50:00	0
2009-09-23	16:51:00	0
2009-09-23	16:52:00	0
2009-09-23	16:53:00	0
2009-09-23	16:54:00	0
2009-09-23	16:55:00	0
2009-09-23	16:56:00	0
2009-09-23	16:57:00	0
2009-09-23	16:58:00	0
2009-09-23	16:59:00	0
2009-09-23	17:00:00	0
2009-09-23	17:01:00	0
2009-09-23	17:02:00	0
2009-09-23	17:03:00	0
2009-09-23	17:04:00	0
2009-09-23	17:05:00	0
2009-09-23	17:06:00	0
2009-09-23	17:07:00	0
2009-09-23	17:08:00	0
2009-09-23	17:09:00	0
2009-09-23	17:10:00	0
2009-09-23	17:11:00	0
2009-09-23	17:12:00	0
2009-09-23	17:13:00	0
2009-09-23	17:14:00	0
2009-09-23	17:15:00	0
2009-09-23	17:16:00	0
2009-09-23	17:17:00	0
2009-09-23	17:18:00	0
2009-09-23	17:19:00	0
2009-09-23	17:20:00	0
2009-09-23	17:21:00	0
2009-09-23	17:22:00	0
2009-09-23	17:23:00	0
2009-09-23	17:24:00	0
2009-09-23	17:25:00	0
2009-09-23	17:26:00	0
2009-09-23	17:27:00	0
2009-09-23	17:28:00	0
2009-09-23	17:29:00	0
2009-09-23	17:30:00	0
2009-09-23	17:31:00	0
2009-09-23	17:32:00	0
2009-09-23	17:33:00	0
2009-09-23	17:34:00	0
2009-09-23	17:35:00	0
2009-09-23	17:36:00	0
2009-09-23	17:37:00	0
2009-09-23	17:38:00	0
2009-09-23	17:39:00	0
2009-09-23	17:40:00	0
2009-09-23	17:41:00	0
2009-09-23	17:42:00	0
2009-09-23	17:43:00	0
2009-09-23	17:44:00	0
2009-09-23	17:45:00	0
2009-09-23	17:46:00	0
2009-09-23	17:47:00	0
2009-09-23	17:48:00	0
2009-09-23	17:49:00	0
2009-09-23	17:50:00	0
2009-09-23	17:51:00	0
2009-09-23	17:52:00	0
2009-09-23	17:53:00	0
2009-09-23	17:54:00	0
2009-09-23	17:55:00	0
2009-09-23	17:56:00	0
2009-09-23	17:57:00	0
2009-09-23	17:58:00	0
2009-09-23	17:59:00	0
2009-09-23	18:00:00	183
2009-09-23	18:01:00	20
2009-09-23	18:02:00	46
2009-09-23	18:03:00	190
2009-09-23	18:04:00	109
2009-09-23	18:05:00	221
2009-09-23	18:06:00	183
2009-09-23	18:07:00	246
2009-09-23	18:08:00	56
2009-09-23	18:09:00	197
2009-09-23	18:10:00	97
2009-09-23	18:11:00	254
2009-09-23	18:12:00	90
2009-09-23	18:13:00	84
2009-09-23	18:14:00	5
2009-09-23	18:15:00	0
2009-09-23	18:16:00	41
2009-09-23	18:17:00	41
2009-09-23	18:18:00	176
2009-09-23	18:19:00	90
2009-09-23	18:20:00	51
2009-09-23	18:21:00	61
2009-09-23	18:22:00	213
2009-09-23	18:23:00	190
2009-09-23	18:24:00	121
2009-09-23	18:25:00	90
2009-09-23	18:26:00	61
2009-09-23	18:27:00	103
2009-09-23	18:28:00	121
2009-09-23	18:29:00	51
2009-09-23	18:30:00	109
2009-09-23	18:31:00	72
2009-09-23	18:32:00	41
2009-09-23	18:33:00	0
2009-09-23	18:34:00	0
2009-09-23	18:35:00	0
2009-09-23	18:36:00	0
2009-09-23	18:37:00	51
2009-09-23	18:38:00	246
2009-09-23	18:39:00	127
2009-09-23	18:40:00	246
2009-09-23	18:41:00	290
2009-09-23	18:42:00	61
2009-09-23	18:43:00	205
2009-09-23	18:44:00	367
2009-09-23	18:45:00	1030
2009-09-23	18:46:00	1718
2009-09-23	18:47:00	1205
2009-09-23	18:48:00	620
2009-09-23	18:49:00	806
2009-09-23	18:50:00	1159
2009-09-23	18:51:00	989
2009-09-23	18:52:00	693
2009-09-23	18:53:00	1879
2009-09-23	18:54:00	1093
2009-09-23	18:55:00	857
2009-09-23	18:56:00	538
2009-09-23	18:57:00	1137
2009-09-23	18:58:00	894
2009-09-23	18:59:00	876
2009-09-23	19:00:00	1483
2009-09-23	19:01:00	1072
2009-09-23	19:02:00	367
2009-09-23	19:03:00	336
2009-09-23	19:04:00	367
2009-09-23	19:05:00	552
2009-09-23	19:06:00	772
2009-09-23	19:07:00	662
2009-09-23	19:08:00	823
2009-09-23	19:09:00	552
2009-09-23	19:10:00	377
2009-09-23	19:11:00	932
2009-09-23	19:12:00	442
2009-09-23	19:13:00	723
2009-09-23	19:14:00	238
2009-09-23	19:15:00	154
2009-09-23	19:16:00	36
2009-09-23	19:17:00	127
2009-09-23	19:18:00	989
2009-09-23	19:19:00	476
2009-09-23	19:20:00	84
2009-09-23	19:21:00	0
2009-09-23	19:22:00	90
2009-09-23	19:23:00	162
2009-09-23	19:24:00	0
2009-09-23	19:25:00	15
2009-09-23	19:26:00	0
2009-09-23	19:27:00	0
2009-09-23	19:28:00	213
2009-09-23	19:29:00	133
2009-09-23	19:30:00	0
2009-09-23	19:31:00	0
2009-09-23	19:32:00	0
2009-09-23	19:33:00	0
2009-09-23	19:34:00	230
2009-09-23	19:35:00	1483
2009-09-23	19:36:00	501
2009-09-23	19:37:00	0
2009-09-23	19:38:00	127
2009-09-23	19:39:00	36
2009-09-23	19:40:00	0
2009-09-23	19:41:00	238
2009-09-23	19:42:00	262
2009-09-23	19:43:00	154
2009-09-23	19:44:00	513
2009-09-23	19:45:00	15
2009-09-23	19:46:00	30
2009-09-23	19:47:00	0
2009-09-23	19:48:00	221
2009-09-23	19:49:00	56
2009-09-23	19:50:00	5
2009-09-23	19:51:00	20
2009-09-23	19:52:00	5
2009-09-23	19:53:00	109
2009-09-23	19:54:00	0
2009-09-23	19:55:00	0
2009-09-23	19:56:00	0
2009-09-23	19:57:00	0
2009-09-23	19:58:00	262
2009-09-23	19:59:00	15
2009-09-23	20:00:00	36
2009-09-23	20:01:00	0
2009-09-23	20:02:00	0
2009-09-23	20:03:00	0
2009-09-23	20:04:00	0
2009-09-23	20:05:00	0
2009-09-23	20:06:00	115
2009-09-23	20:07:00	0
2009-09-23	20:08:00	36
2009-09-23	20:09:00	20
2009-09-23	20:10:00	10
2009-09-23	20:11:00	51
2009-09-23	20:12:00	0
2009-09-23	20:13:00	0
2009-09-23	20:14:00	20
2009-09-23	20:15:00	109
2009-09-23	20:16:00	0
2009-09-23	20:17:00	271
2009-09-23	20:18:00	20
2009-09-23	20:19:00	97
2009-09-23	20:20:00	1276
2009-09-23	20:21:00	326
2009-09-23	20:22:00	72
2009-09-23	20:23:00	513
2009-09-23	20:24:00	246
2009-09-23	20:25:00	262
2009-09-23	20:26:00	254
2009-09-23	20:27:00	121
2009-09-23	20:28:00	72
2009-09-23	20:29:00	97
2009-09-23	20:30:00	15
2009-09-23	20:31:00	115
2009-09-23	20:32:00	140
2009-09-23	20:33:00	0
2009-09-23	20:34:00	0
2009-09-23	20:35:00	41
2009-09-23	20:36:00	140
2009-09-23	20:37:00	299
2009-09-23	20:38:00	230
2009-09-23	20:39:00	25
2009-09-23	20:40:00	36
2009-09-23	20:41:00	15
2009-09-23	20:42:00	10
2009-09-23	20:43:00	0
2009-09-23	20:44:00	56
2009-09-23	20:45:00	336
2009-09-23	20:46:00	788
2009-09-23	20:47:00	271
2009-09-23	20:48:00	78
2009-09-23	20:49:00	0
2009-09-23	20:50:00	0
2009-09-23	20:51:00	36
2009-09-23	20:52:00	115
2009-09-23	20:53:00	51
2009-09-23	20:54:00	154
2009-09-23	20:55:00	5
2009-09-23	20:56:00	0
2009-09-23	20:57:00	0
2009-09-23	20:58:00	0
2009-09-23	20:59:00	0
2009-09-23	21:00:00	0
2009-09-23	21:01:00	0
2009-09-23	21:02:00	0
2009-09-23	21:03:00	0
2009-09-23	21:04:00	0
2009-09-23	21:05:00	0
2009-09-23	21:06:00	0
2009-09-23	21:07:00	5
2009-09-23	21:08:00	0
2009-09-23	21:09:00	0
2009-09-23	21:10:00	190
2009-09-23	21:11:00	121
2009-09-23	21:12:00	0
2009-09-23	21:13:00	0
2009-09-23	21:14:00	5
2009-09-23	21:15:00	20
2009-09-23	21:16:00	0
2009-09-23	21:17:00	0
2009-09-23	21:18:00	10
2009-09-23	21:19:00	10
2009-09-23	21:20:00	0
2009-09-23	21:21:00	0
2009-09-23	21:22:00	0
2009-09-23	21:23:00	0
2009-09-23	21:24:00	0
2009-09-23	21:25:00	0
2009-09-23	21:26:00	0
2009-09-23	21:27:00	72
2009-09-23	21:28:00	0
2009-09-23	21:29:00	5
2009-09-23	21:30:00	0
2009-09-23	21:31:00	0
2009-09-23	21:32:00	90
2009-09-23	21:33:00	0
2009-09-23	21:34:00	0
2009-09-23	21:35:00	0
2009-09-23	21:36:00	0
2009-09-23	21:37:00	0
2009-09-23	21:38:00	0
2009-09-23	21:39:00	121
2009-09-23	21:40:00	0
2009-09-23	21:41:00	0
2009-09-23	21:42:00	0
2009-09-23	21:43:00	0
2009-09-23	21:44:00	0
2009-09-23	21:45:00	0
2009-09-23	21:46:00	0
2009-09-23	21:47:00	0
2009-09-23	21:48:00	0
2009-09-23	21:49:00	0
2009-09-23	21:50:00	84
2009-09-23	21:51:00	15
2009-09-23	21:52:00	109
2009-09-23	21:53:00	56
2009-09-23	21:54:00	0
2009-09-23	21:55:00	0
2009-09-23	21:56:00	0
2009-09-23	21:57:00	0
2009-09-23	21:58:00	0
2009-09-23	21:59:00	0
2009-09-23	22:00:00	56
2009-09-23	22:01:00	133
2009-09-23	22:02:00	84
2009-09-23	22:03:00	0
2009-09-23	22:04:00	109
2009-09-23	22:05:00	308
2009-09-23	22:06:00	336
2009-09-23	22:07:00	51
2009-09-23	22:08:00	30
2009-09-23	22:09:00	20
2009-09-23	22:10:00	0
2009-09-23	22:11:00	0
2009-09-23	22:12:00	0
2009-09-23	22:13:00	0
2009-09-23	22:14:00	0
2009-09-23	22:15:00	0
2009-09-23	22:16:00	0
2009-09-23	22:17:00	0
2009-09-23	22:18:00	0
2009-09-23	22:19:00	0
2009-09-23	22:20:00	0
2009-09-23	22:21:00	0
2009-09-23	22:22:00	0
2009-09-23	22:23:00	0
2009-09-23	22:24:00	0
2009-09-23	22:25:00	0
2009-09-23	22:26:00	0
2009-09-23	22:27:00	46
2009-09-23	22:28:00	56
2009-09-23	22:29:00	0
2009-09-23	22:30:00	0
2009-09-23	22:31:00	0
2009-09-23	22:32:00	0
2009-09-23	22:33:00	0
2009-09-23	22:34:00	0
2009-09-23	22:35:00	0
2009-09-23	22:36:00	0
2009-09-23	22:37:00	0
2009-09-23	22:38:00	0
2009-09-23	22:39:00	0
2009-09-23	22:40:00	0
2009-09-23	22:41:00	0
2009-09-23	22:42:00	0
2009-09-23	22:43:00	0
2009-09-23	22:44:00	0
2009-09-23	22:45:00	0
2009-09-23	22:46:00	0
2009-09-23	22:47:00	0
2009-09-23	22:48:00	0
2009-09-23	22:49:00	5
2009-09-23	22:50:00	0
2009-09-23	22:51:00	0
2009-09-23	22:52:00	0
2009-09-23	22:53:00	0
2009-09-23	22:54:00	0
2009-09-23	22:55:00	377
2009-09-23	22:56:00	30
2009-09-23	22:57:00	0
2009-09-23	22:58:00	0
2009-09-23	22:59:00	0
2009-09-23	23:00:00	0
2009-09-23	23:01:00	0
2009-09-23	23:02:00	0
2009-09-23	23:03:00	0
2009-09-23	23:04:00	0
2009-09-23	23:05:00	0
2009-09-23	23:06:00	0
2009-09-23	23:07:00	0
2009-09-23	23:08:00	0
2009-09-23	23:09:00	0
2009-09-23	23:10:00	0
2009-09-23	23:11:00	0
2009-09-23	23:12:00	0
2009-09-23	23:13:00	0
2009-09-23	23:14:00	0
2009-09-23	23:15:00	0
2009-09-23	23:16:00	0
2009-09-23	23:17:00	0
2009-09-23	23:18:00	0
2009-09-23	23:19:00	0
2009-09-23	23:20:00	0
2009-09-23	23:21:00	0
2009-09-23	23:22:00	0
2009-09-23	23:23:00	0
2009-09-23	23:24:00	0
2009-09-23	23:25:00	0
2009-09-23	23:26:00	0
2009-09-23	23:27:00	5
2009-09-23	23:28:00	0
2009-09-23	23:29:00	0
2009-09-23	23:30:00	0
2009-09-23	23:31:00	0
2009-09-23	23:32:00	0
2009-09-23	23:33:00	0
2009-09-23	23:34:00	0
2009-09-23	23:35:00	5
2009-09-23	23:36:00	0
2009-09-23	23:37:00	0
2009-09-23	23:38:00	0
2009-09-23	23:39:00	0
2009-09-23	23:40:00	0
2009-09-23	23:41:00	0
2009-09-23	23:42:00	0
2009-09-23	23:43:00	0
2009-09-23	23:44:00	0
2009-09-23	23:45:00	0
2009-09-23	23:46:00	0
2009-09-23	23:47:00	0
2009-09-23	23:48:00	0
2009-09-23	23:49:00	0
2009-09-23	23:50:00	0
2009-09-23	23:51:00	0
2009-09-23	23:52:00	0
2009-09-23	23:53:00	46
2009-09-23	23:54:00	10
2009-09-23	23:55:00	46
2009-09-23	23:56:00	0
2009-09-23	23:57:00	0
2009-09-23	23:58:00	0
2009-09-23	23:59:00	0
2009-09-24	00:00:00	0
2009-09-24	00:01:00	0
2009-09-24	00:02:00	0
2009-09-24	00:03:00	5
2009-09-24	00:04:00	0
2009-09-24	00:05:00	0
2009-09-24	00:06:00	0
2009-09-24	00:07:00	0
2009-09-24	00:08:00	0
2009-09-24	00:09:00	0
2009-09-24	00:10:00	0
2009-09-24	00:11:00	0
2009-09-24	00:12:00	0
2009-09-24	00:13:00	0
2009-09-24	00:14:00	10
2009-09-24	00:15:00	0
2009-09-24	00:16:00	0
2009-09-24	00:17:00	0
2009-09-24	00:18:00	0
2009-09-24	00:19:00	51
2009-09-24	00:20:00	15
2009-09-24	00:21:00	0
2009-09-24	00:22:00	0
2009-09-24	00:23:00	0
2009-09-24	00:24:00	0
2009-09-24	00:25:00	0
2009-09-24	00:26:00	0
2009-09-24	00:27:00	0
2009-09-24	00:28:00	0
2009-09-24	00:29:00	0
2009-09-24	00:30:00	0
2009-09-24	00:31:00	0
2009-09-24	00:32:00	0
2009-09-24	00:33:00	5
2009-09-24	00:34:00	0
2009-09-24	00:35:00	0
2009-09-24	00:36:00	0
2009-09-24	00:37:00	0
2009-09-24	00:38:00	0
2009-09-24	00:39:00	0
2009-09-24	00:40:00	0
2009-09-24	00:41:00	0
2009-09-24	00:42:00	0
2009-09-24	00:43:00	0
2009-09-24	00:44:00	0
2009-09-24	00:45:00	0
2009-09-24	00:46:00	0
2009-09-24	00:47:00	0
2009-09-24	00:48:00	90
2009-09-24	00:49:00	90
2009-09-24	00:50:00	20
2009-09-24	00:51:00	0
2009-09-24	00:52:00	0
2009-09-24	00:53:00	0
2009-09-24	00:54:00	0
2009-09-24	00:55:00	0
2009-09-24	00:56:00	0
2009-09-24	00:57:00	0
2009-09-24	00:58:00	0
2009-09-24	00:59:00	280
2009-09-24	01:00:00	420
2009-09-24	01:01:00	476
2009-09-24	01:02:00	538
2009-09-24	01:03:00	1030
2009-09-24	01:04:00	72
2009-09-24	01:05:00	246
2009-09-24	01:06:00	109
2009-09-24	01:07:00	476
2009-09-24	01:08:00	1030
2009-09-24	01:09:00	1030
2009-09-24	01:10:00	1010
2009-09-24	01:11:00	1300
2009-09-24	01:12:00	1072
2009-09-24	01:13:00	806
2009-09-24	01:14:00	254
2009-09-24	01:15:00	127
2009-09-24	01:16:00	30
2009-09-24	01:17:00	127
2009-09-24	01:18:00	10
2009-09-24	01:19:00	176
2009-09-24	01:20:00	513
2009-09-24	01:21:00	10
2009-09-24	01:22:00	0
2009-09-24	01:23:00	56
2009-09-24	01:24:00	140
2009-09-24	01:25:00	72
2009-09-24	01:26:00	0
2009-09-24	01:27:00	5
2009-09-24	01:28:00	41
2009-09-24	01:29:00	30
2009-09-24	01:30:00	30
2009-09-24	01:31:00	20
2009-09-24	01:32:00	0
2009-09-24	01:33:00	0
2009-09-24	01:34:00	0
2009-09-24	01:35:00	0
2009-09-24	01:36:00	0
2009-09-24	01:37:00	0
2009-09-24	01:38:00	10
2009-09-24	01:39:00	0
2009-09-24	01:40:00	0
2009-09-24	01:41:00	0
2009-09-24	01:42:00	0
2009-09-24	01:43:00	0
2009-09-24	01:44:00	0
2009-09-24	01:45:00	0
2009-09-24	01:46:00	0
2009-09-24	01:47:00	0
2009-09-24	01:48:00	0
2009-09-24	01:49:00	0
2009-09-24	01:50:00	0
2009-09-24	01:51:00	0
2009-09-24	01:52:00	0
2009-09-24	01:53:00	0
2009-09-24	01:54:00	72
2009-09-24	01:55:00	0
2009-09-24	01:56:00	0
2009-09-24	01:57:00	0
2009-09-24	01:58:00	0
2009-09-24	01:59:00	0
2009-09-24	02:00:00	0
2009-09-24	02:01:00	0
2009-09-24	02:02:00	0
2009-09-24	02:03:00	0
2009-09-24	02:04:00	0
2009-09-24	02:05:00	0
2009-09-24	02:06:00	0
2009-09-24	02:07:00	0
2009-09-24	02:08:00	0
2009-09-24	02:09:00	0
2009-09-24	02:10:00	0
2009-09-24	02:11:00	0
2009-09-24	02:12:00	0
2009-09-24	02:13:00	0
2009-09-24	02:14:00	0
2009-09-24	02:15:00	0
2009-09-24	02:16:00	0
2009-09-24	02:17:00	0
2009-09-24	02:18:00	0
2009-09-24	02:19:00	0
2009-09-24	02:20:00	5
2009-09-24	02:21:00	0
2009-09-24	02:22:00	0
2009-09-24	02:23:00	0
2009-09-24	02:24:00	0
2009-09-24	02:25:00	0
2009-09-24	02:26:00	0
2009-09-24	02:27:00	0
2009-09-24	02:28:00	0
2009-09-24	02:29:00	0
2009-09-24	02:30:00	0
2009-09-24	02:31:00	0
2009-09-24	02:32:00	0
2009-09-24	02:33:00	0
2009-09-24	02:34:00	0
2009-09-24	02:35:00	0
2009-09-24	02:36:00	0
2009-09-24	02:37:00	0
2009-09-24	02:38:00	0
2009-09-24	02:39:00	0
2009-09-24	02:40:00	0
2009-09-24	02:41:00	0
2009-09-24	02:42:00	0
2009-09-24	02:43:00	0
2009-09-24	02:44:00	78
2009-09-24	02:45:00	10
2009-09-24	02:46:00	0
2009-09-24	02:47:00	0
2009-09-24	02:48:00	0
2009-09-24	02:49:00	0
2009-09-24	02:50:00	30
2009-09-24	02:51:00	0
2009-09-24	02:52:00	0
2009-09-24	02:53:00	0
2009-09-24	02:54:00	0
2009-09-24	02:55:00	0
2009-09-24	02:56:00	0
2009-09-24	02:57:00	0
2009-09-24	02:58:00	0
2009-09-24	02:59:00	0
2009-09-24	03:00:00	0
2009-09-24	03:01:00	0
2009-09-24	03:02:00	0
2009-09-24	03:03:00	0
2009-09-24	03:04:00	0
2009-09-24	03:05:00	0
2009-09-24	03:06:00	0
2009-09-24	03:07:00	78
2009-09-24	03:08:00	0
2009-09-24	03:09:00	0
2009-09-24	03:10:00	0
2009-09-24	03:11:00	0
2009-09-24	03:12:00	0
2009-09-24	03:13:00	0
2009-09-24	03:14:00	0
2009-09-24	03:15:00	0
2009-09-24	03:16:00	0
2009-09-24	03:17:00	0
2009-09-24	03:18:00	0
2009-09-24	03:19:00	0
2009-09-24	03:20:00	0
2009-09-24	03:21:00	0
2009-09-24	03:22:00	0
2009-09-24	03:23:00	0
2009-09-24	03:24:00	0
2009-09-24	03:25:00	0
2009-09-24	03:26:00	0
2009-09-24	03:27:00	0
2009-09-24	03:28:00	0
2009-09-24	03:29:00	0
2009-09-24	03:30:00	0
2009-09-24	03:31:00	5
2009-09-24	03:32:00	61
2009-09-24	03:33:00	5
2009-09-24	03:34:00	0
2009-09-24	03:35:00	0
2009-09-24	03:36:00	5
2009-09-24	03:37:00	0
2009-09-24	03:38:00	0
2009-09-24	03:39:00	20
2009-09-24	03:40:00	0
2009-09-24	03:41:00	0
2009-09-24	03:42:00	0
2009-09-24	03:43:00	0
2009-09-24	03:44:00	0
2009-09-24	03:45:00	0
2009-09-24	03:46:00	0
2009-09-24	03:47:00	0
2009-09-24	03:48:00	0
2009-09-24	03:49:00	0
2009-09-24	03:50:00	0
2009-09-24	03:51:00	0
2009-09-24	03:52:00	51
2009-09-24	03:53:00	56
2009-09-24	03:54:00	0
2009-09-24	03:55:00	0
2009-09-24	03:56:00	0
2009-09-24	03:57:00	0
2009-09-24	03:58:00	51
2009-09-24	03:59:00	84
2009-09-24	04:00:00	5
2009-09-24	04:01:00	0
2009-09-24	04:02:00	0
2009-09-24	04:03:00	0
2009-09-24	04:04:00	20
2009-09-24	04:05:00	0
2009-09-24	04:06:00	0
2009-09-24	04:07:00	0
2009-09-24	04:08:00	0
2009-09-24	04:09:00	0
2009-09-24	04:10:00	0
2009-09-24	04:11:00	0
2009-09-24	04:12:00	0
2009-09-24	04:13:00	0
2009-09-24	04:14:00	5
2009-09-24	04:15:00	0
2009-09-24	04:16:00	0
2009-09-24	04:17:00	0
2009-09-24	04:18:00	0
2009-09-24	04:19:00	0
2009-09-24	04:20:00	0
2009-09-24	04:21:00	0
2009-09-24	04:22:00	0
2009-09-24	04:23:00	90
2009-09-24	04:24:00	0
2009-09-24	04:25:00	0
2009-09-24	04:26:00	0
2009-09-24	04:27:00	90
2009-09-24	04:28:00	0
2009-09-24	04:29:00	0
2009-09-24	04:30:00	0
2009-09-24	04:31:00	0
2009-09-24	04:32:00	0
2009-09-24	04:33:00	0
2009-09-24	04:34:00	0
2009-09-24	04:35:00	0
2009-09-24	04:36:00	0
2009-09-24	04:37:00	0
2009-09-24	04:38:00	72
2009-09-24	04:39:00	15
2009-09-24	04:40:00	0
2009-09-24	04:41:00	0
2009-09-24	04:42:00	280
2009-09-24	04:43:00	0
2009-09-24	04:44:00	0
2009-09-24	04:45:00	36
2009-09-24	04:46:00	0
2009-09-24	04:47:00	30
2009-09-24	04:48:00	0
2009-09-24	04:49:00	0
2009-09-24	04:50:00	36
2009-09-24	04:51:00	5
2009-09-24	04:52:00	30
2009-09-24	04:53:00	0
2009-09-24	04:54:00	0
2009-09-24	04:55:00	0
2009-09-24	04:56:00	0
2009-09-24	04:57:00	0
2009-09-24	04:58:00	0
2009-09-24	04:59:00	0
2009-09-24	05:00:00	0
2009-09-24	05:01:00	0
2009-09-24	05:02:00	41
2009-09-24	05:03:00	0
2009-09-24	05:04:00	0
2009-09-24	05:05:00	0
2009-09-24	05:06:00	30
2009-09-24	05:07:00	0
2009-09-24	05:08:00	0
2009-09-24	05:09:00	0
2009-09-24	05:10:00	0
2009-09-24	05:11:00	0
2009-09-24	05:12:00	0
2009-09-24	05:13:00	0
2009-09-24	05:14:00	0
2009-09-24	05:15:00	0
2009-09-24	05:16:00	0
2009-09-24	05:17:00	0
2009-09-24	05:18:00	0
2009-09-24	05:19:00	0
2009-09-24	05:20:00	0
2009-09-24	05:21:00	0
2009-09-24	05:22:00	5
2009-09-24	05:23:00	0
2009-09-24	05:24:00	0
2009-09-24	05:25:00	0
2009-09-24	05:26:00	0
2009-09-24	05:27:00	0
2009-09-24	05:28:00	0
2009-09-24	05:29:00	0
2009-09-24	05:30:00	0
2009-09-24	05:31:00	0
2009-09-24	05:32:00	0
2009-09-24	05:33:00	0
2009-09-24	05:34:00	0
2009-09-24	05:35:00	176
2009-09-24	05:36:00	154
2009-09-24	05:37:00	103
2009-09-24	05:38:00	0
2009-09-24	05:39:00	0
2009-09-24	05:40:00	162
2009-09-24	05:41:00	806
2009-09-24	05:42:00	56
2009-09-24	05:43:00	280
2009-09-24	05:44:00	140
2009-09-24	05:45:00	0
2009-09-24	05:46:00	213
2009-09-24	05:47:00	147
2009-09-24	05:48:00	72
2009-09-24	05:49:00	0
2009-09-24	05:50:00	72
2009-09-24	05:51:00	1114
2009-09-24	05:52:00	1030
2009-09-24	05:53:00	1276
2009-09-24	05:54:00	1159
2009-09-24	05:55:00	326
2009-09-24	05:56:00	0
2009-09-24	05:57:00	0
2009-09-24	05:58:00	0
2009-09-24	05:59:00	0
2009-09-24	06:00:00	0
2009-09-24	06:01:00	0
2009-09-24	06:02:00	0
2009-09-24	06:03:00	36
2009-09-24	06:04:00	0
2009-09-24	06:05:00	15
2009-09-24	06:06:00	0
2009-09-24	06:07:00	51
2009-09-24	06:08:00	0
2009-09-24	06:09:00	0
2009-09-24	06:10:00	0
2009-09-24	06:11:00	36
2009-09-24	06:12:00	0
2009-09-24	06:13:00	254
2009-09-24	06:14:00	127
2009-09-24	06:15:00	0
2009-09-24	06:16:00	0
2009-09-24	06:17:00	30
2009-09-24	06:18:00	0
2009-09-24	06:19:00	15
2009-09-24	06:20:00	0
2009-09-24	06:21:00	25
2009-09-24	06:22:00	0
2009-09-24	06:23:00	36
2009-09-24	06:24:00	90
2009-09-24	06:25:00	41
2009-09-24	06:26:00	0
2009-09-24	06:27:00	317
2009-09-24	06:28:00	133
2009-09-24	06:29:00	0
2009-09-24	06:30:00	0
2009-09-24	06:31:00	0
2009-09-24	06:32:00	0
2009-09-24	06:33:00	10
2009-09-24	06:34:00	0
2009-09-24	06:35:00	0
2009-09-24	06:36:00	0
2009-09-24	06:37:00	0
2009-09-24	06:38:00	0
2009-09-24	06:39:00	0
2009-09-24	06:40:00	0
2009-09-24	06:41:00	20
2009-09-24	06:42:00	0
2009-09-24	06:43:00	5
2009-09-24	06:44:00	15
2009-09-24	06:45:00	0
2009-09-24	06:46:00	213
2009-09-24	06:47:00	84
2009-09-24	06:48:00	0
2009-09-24	06:49:00	5
2009-09-24	06:50:00	0
2009-09-24	06:51:00	5
2009-09-24	06:52:00	5
2009-09-24	06:53:00	25
2009-09-24	06:54:00	46
2009-09-24	06:55:00	0
2009-09-24	06:56:00	0
2009-09-24	06:57:00	0
2009-09-24	06:58:00	0
2009-09-24	06:59:00	0
2009-09-24	07:00:00	0
2009-09-24	07:01:00	0
2009-09-24	07:02:00	0
2009-09-24	07:03:00	0
2009-09-24	07:04:00	0
2009-09-24	07:05:00	0
2009-09-24	07:06:00	30
2009-09-24	07:07:00	15
2009-09-24	07:08:00	41
2009-09-24	07:09:00	15
2009-09-24	07:10:00	51
2009-09-24	07:11:00	620
2009-09-24	07:12:00	0
2009-09-24	07:13:00	10
2009-09-24	07:14:00	280
2009-09-24	07:15:00	912
2009-09-24	07:16:00	387
2009-09-24	07:17:00	501
2009-09-24	07:18:00	723
2009-09-24	07:19:00	565
2009-09-24	07:20:00	367
2009-09-24	07:21:00	238
2009-09-24	07:22:00	115
2009-09-24	07:23:00	578
2009-09-24	07:24:00	346
2009-09-24	07:25:00	84
2009-09-24	07:26:00	662
2009-09-24	07:27:00	876
2009-09-24	07:28:00	740
2009-09-24	07:29:00	109
2009-09-24	07:30:00	648
2009-09-24	07:31:00	1093
2009-09-24	07:32:00	894
2009-09-24	07:33:00	420
2009-09-24	07:34:00	326
2009-09-24	07:35:00	56
2009-09-24	07:36:00	15
2009-09-24	07:37:00	408
2009-09-24	07:38:00	420
2009-09-24	07:39:00	15
2009-09-24	07:40:00	0
2009-09-24	07:41:00	36
2009-09-24	07:42:00	15
2009-09-24	07:43:00	0
2009-09-24	07:44:00	133
2009-09-24	07:45:00	20
2009-09-24	07:46:00	97
2009-09-24	07:47:00	0
2009-09-24	07:48:00	0
2009-09-24	07:49:00	0
2009-09-24	07:50:00	0
2009-09-24	07:51:00	420
2009-09-24	07:52:00	442
2009-09-24	07:53:00	246
2009-09-24	07:54:00	336
2009-09-24	07:55:00	10
2009-09-24	07:56:00	823
2009-09-24	07:57:00	823
2009-09-24	07:58:00	1010
2009-09-24	07:59:00	367
2009-09-24	08:00:00	0
2009-09-24	08:01:00	10
2009-09-24	08:02:00	0
2009-09-24	08:03:00	0
2009-09-24	08:04:00	0
2009-09-24	08:05:00	0
2009-09-24	08:06:00	0
2009-09-24	08:07:00	0
2009-09-24	08:08:00	0
2009-09-24	08:09:00	0
2009-09-24	08:10:00	0
2009-09-24	08:11:00	0
2009-09-24	08:12:00	0
2009-09-24	08:13:00	0
2009-09-24	08:14:00	0
2009-09-24	08:15:00	0
2009-09-24	08:16:00	5
2009-09-24	08:17:00	0
2009-09-24	08:18:00	0
2009-09-24	08:19:00	0
2009-09-24	08:20:00	0
2009-09-24	08:21:00	0
2009-09-24	08:22:00	0
2009-09-24	08:23:00	0
2009-09-24	08:24:00	0
2009-09-24	08:25:00	10
2009-09-24	08:26:00	0
2009-09-24	08:27:00	0
2009-09-24	08:28:00	0
2009-09-24	08:29:00	0
2009-09-24	08:30:00	0
2009-09-24	08:31:00	5
2009-09-24	08:32:00	5
2009-09-24	08:33:00	0
2009-09-24	08:34:00	5
2009-09-24	08:35:00	0
2009-09-24	08:36:00	0
2009-09-24	08:37:00	0
2009-09-24	08:38:00	0
2009-09-24	08:39:00	61
2009-09-24	08:40:00	10
2009-09-24	08:41:00	0
2009-09-24	08:42:00	0
2009-09-24	08:43:00	0
2009-09-24	08:44:00	51
2009-09-24	08:45:00	0
2009-09-24	08:46:00	0
2009-09-24	08:47:00	0
2009-09-24	08:48:00	0
2009-09-24	08:49:00	0
2009-09-24	08:50:00	0
2009-09-24	08:51:00	0
2009-09-24	08:52:00	0
2009-09-24	08:53:00	0
2009-09-24	08:54:00	205
2009-09-24	08:55:00	605
2009-09-24	08:56:00	912
2009-09-24	08:57:00	970
2009-09-24	08:58:00	317
2009-09-24	08:59:00	525
2009-09-24	09:00:00	932
2009-09-24	09:01:00	1030
2009-09-24	09:02:00	1718
2009-09-24	09:03:00	1114
2009-09-24	09:04:00	221
2009-09-24	09:05:00	0
2009-09-24	09:06:00	0
2009-09-24	09:07:00	41
2009-09-24	09:08:00	0
[truncated: 58,491 more rows]
