# Supplementary material for: Initial evaluation of nighttime restlessness in a naturally occurring canine model of osteoarthritis pain
Source: PeerJ. 2015 Feb 17;3:e772. doi: 10.7717/peerj.772 (PMC4340376; doi:10.7717/peerj.772)
Supplement: Supplemental Information 75 [file peerj-03-772-s075.xlsx]

## Sheet: 18_Data
Tx #	DateTime	Activity	DTA vs NTA	Hour	Tx Day	Weekday	Tx Rx	Peak DTA Time?	Last 7 Day?
1	2009-10-06 19:31:00	12	NTA	19	1	3	P
1	2009-10-06 19:32:00	0	NTA	19	1	3	P
1	2009-10-06 19:33:00	183	NTA	19	1	3	P
1	2009-10-06 19:34:00	0	NTA	19	1	3	P
1	2009-10-06 19:35:00	0	NTA	19	1	3	P
1	2009-10-06 19:36:00	0	NTA	19	1	3	P
1	2009-10-06 19:37:00	24	NTA	19	1	3	P
1	2009-10-06 19:38:00	24	NTA	19	1	3	P
1	2009-10-06 19:39:00	239	NTA	19	1	3	P
1	2009-10-06 19:40:00	0	NTA	19	1	3	P
1	2009-10-06 19:41:00	0	NTA	19	1	3	P
1	2009-10-06 19:42:00	344	NTA	19	1	3	P
1	2009-10-06 19:43:00	0	NTA	19	1	3	P
1	2009-10-06 19:44:00	12	NTA	19	1	3	P
1	2009-10-06 19:45:00	0	NTA	19	1	3	P
1	2009-10-06 19:46:00	0	NTA	19	1	3	P
1	2009-10-06 19:47:00	0	NTA	19	1	3	P
1	2009-10-06 19:48:00	0	NTA	19	1	3	P
1	2009-10-06 19:49:00	0	NTA	19	1	3	P
1	2009-10-06 19:50:00	0	NTA	19	1	3	P
1	2009-10-06 19:51:00	0	NTA	19	1	3	P
1	2009-10-06 19:52:00	0	NTA	19	1	3	P
1	2009-10-06 19:53:00	0	NTA	19	1	3	P
1	2009-10-06 19:54:00	0	NTA	19	1	3	P
1	2009-10-06 19:55:00	0	NTA	19	1	3	P
1	2009-10-06 19:56:00	0	NTA	19	1	3	P
1	2009-10-06 19:57:00	0	NTA	19	1	3	P
1	2009-10-06 19:58:00	0	NTA	19	1	3	P
1	2009-10-06 19:59:00	0	NTA	19	1	3	P
1	2009-10-06 20:00:00	0	NTA	19	1	3	P
1	2009-10-06 20:01:00	0	NTA	20	1	3	P
1	2009-10-06 20:02:00	0	NTA	20	1	3	P
1	2009-10-06 20:03:00	0	NTA	20	1	3	P
1	2009-10-06 20:04:00	0	NTA	20	1	3	P
1	2009-10-06 20:05:00	0	NTA	20	1	3	P
1	2009-10-06 20:06:00	0	NTA	20	1	3	P
1	2009-10-06 20:07:00	0	NTA	20	1	3	P
1	2009-10-06 20:08:00	0	NTA	20	1	3	P
1	2009-10-06 20:09:00	0	NTA	20	1	3	P
1	2009-10-06 20:10:00	0	NTA	20	1	3	P
1	2009-10-06 20:11:00	0	NTA	20	1	3	P
1	2009-10-06 20:12:00	0	NTA	20	1	3	P
1	2009-10-06 20:13:00	0	NTA	20	1	3	P
1	2009-10-06 20:14:00	0	NTA	20	1	3	P
1	2009-10-06 20:15:00	0	NTA	20	1	3	P
1	2009-10-06 20:16:00	0	NTA	20	1	3	P
1	2009-10-06 20:17:00	0	NTA	20	1	3	P
1	2009-10-06 20:18:00	0	NTA	20	1	3	P
1	2009-10-06 20:19:00	0	NTA	20	1	3	P
1	2009-10-06 20:20:00	0	NTA	20	1	3	P
1	2009-10-06 20:21:00	0	NTA	20	1	3	P
1	2009-10-06 20:22:00	0	NTA	20	1	3	P
1	2009-10-06 20:23:00	0	NTA	20	1	3	P
1	2009-10-06 20:24:00	0	NTA	20	1	3	P
1	2009-10-06 20:25:00	0	NTA	20	1	3	P
1	2009-10-06 20:26:00	24	NTA	20	1	3	P
1	2009-10-06 20:27:00	0	NTA	20	1	3	P
1	2009-10-06 20:28:00	0	NTA	20	1	3	P
1	2009-10-06 20:29:00	0	NTA	20	1	3	P
1	2009-10-06 20:30:00	0	NTA	20	1	3	P
1	2009-10-06 20:31:00	0	NTA	20	1	3	P
1	2009-10-06 20:32:00	0	NTA	20	1	3	P
1	2009-10-06 20:33:00	0	NTA	20	1	3	P
1	2009-10-06 20:34:00	0	NTA	20	1	3	P
1	2009-10-06 20:35:00	0	NTA	20	1	3	P
1	2009-10-06 20:36:00	0	NTA	20	1	3	P
1	2009-10-06 20:37:00	0	NTA	20	1	3	P
1	2009-10-06 20:38:00	0	NTA	20	1	3	P
1	2009-10-06 20:39:00	0	NTA	20	1	3	P
1	2009-10-06 20:40:00	24	NTA	20	1	3	P
1	2009-10-06 20:41:00	0	NTA	20	1	3	P
1	2009-10-06 20:42:00	0	NTA	20	1	3	P
1	2009-10-06 20:43:00	0	NTA	20	1	3	P
1	2009-10-06 20:44:00	0	NTA	20	1	3	P
1	2009-10-06 20:45:00	0	NTA	20	1	3	P
1	2009-10-06 20:46:00	0	NTA	20	1	3	P
1	2009-10-06 20:47:00	0	NTA	20	1	3	P
1	2009-10-06 20:48:00	0	NTA	20	1	3	P
1	2009-10-06 20:49:00	0	NTA	20	1	3	P
1	2009-10-06 20:50:00	0	NTA	20	1	3	P
1	2009-10-06 20:51:00	0	NTA	20	1	3	P
1	2009-10-06 20:52:00	0	NTA	20	1	3	P
1	2009-10-06 20:53:00	0	NTA	20	1	3	P
1	2009-10-06 20:54:00	0	NTA	20	1	3	P
1	2009-10-06 20:55:00	0	NTA	20	1	3	P
1	2009-10-06 20:56:00	0	NTA	20	1	3	P
1	2009-10-06 20:57:00	0	NTA	20	1	3	P
1	2009-10-06 20:58:00	0	NTA	20	1	3	P
1	2009-10-06 20:59:00	0	NTA	20	1	3	P
1	2009-10-06 21:00:00	0	NTA	20	1	3	P
1	2009-10-06 21:01:00	0	NTA	21	1	3	P
1	2009-10-06 21:02:00	0	NTA	21	1	3	P
1	2009-10-06 21:03:00	0	NTA	21	1	3	P
1	2009-10-06 21:04:00	0	NTA	21	1	3	P
1	2009-10-06 21:05:00	24	NTA	21	1	3	P
1	2009-10-06 21:06:00	12	NTA	21	1	3	P
1	2009-10-06 21:07:00	0	NTA	21	1	3	P
1	2009-10-06 21:08:00	0	NTA	21	1	3	P
1	2009-10-06 21:09:00	254	NTA	21	1	3	P
1	2009-10-06 21:10:00	142	NTA	21	1	3	P
1	2009-10-06 21:11:00	0	NTA	21	1	3	P
1	2009-10-06 21:12:00	0	NTA	21	1	3	P
1	2009-10-06 21:13:00	24	NTA	21	1	3	P
1	2009-10-06 21:14:00	0	NTA	21	1	3	P
1	2009-10-06 21:15:00	0	NTA	21	1	3	P
1	2009-10-06 21:16:00	0	NTA	21	1	3	P
1	2009-10-06 21:17:00	0	NTA	21	1	3	P
1	2009-10-06 21:18:00	0	NTA	21	1	3	P
1	2009-10-06 21:19:00	0	NTA	21	1	3	P
1	2009-10-06 21:20:00	0	NTA	21	1	3	P
1	2009-10-06 21:21:00	0	NTA	21	1	3	P
1	2009-10-06 21:22:00	0	NTA	21	1	3	P
1	2009-10-06 21:23:00	0	NTA	21	1	3	P
1	2009-10-06 21:24:00	0	NTA	21	1	3	P
1	2009-10-06 21:25:00	0	NTA	21	1	3	P
1	2009-10-06 21:26:00	0	NTA	21	1	3	P
1	2009-10-06 21:27:00	0	NTA	21	1	3	P
1	2009-10-06 21:28:00	0	NTA	21	1	3	P
1	2009-10-06 21:29:00	0	NTA	21	1	3	P
1	2009-10-06 21:30:00	0	NTA	21	1	3	P
1	2009-10-06 21:31:00	0	NTA	21	1	3	P
1	2009-10-06 21:32:00	0	NTA	21	1	3	P
1	2009-10-06 21:33:00	0	NTA	21	1	3	P
1	2009-10-06 21:34:00	0	NTA	21	1	3	P
1	2009-10-06 21:35:00	0	NTA	21	1	3	P
1	2009-10-06 21:36:00	0	NTA	21	1	3	P
1	2009-10-06 21:37:00	0	NTA	21	1	3	P
1	2009-10-06 21:38:00	0	NTA	21	1	3	P
1	2009-10-06 21:39:00	0	NTA	21	1	3	P
1	2009-10-06 21:40:00	0	NTA	21	1	3	P
1	2009-10-06 21:41:00	0	NTA	21	1	3	P
1	2009-10-06 21:42:00	0	NTA	21	1	3	P
1	2009-10-06 21:43:00	0	NTA	21	1	3	P
1	2009-10-06 21:44:00	0	NTA	21	1	3	P
1	2009-10-06 21:45:00	0	NTA	21	1	3	P
1	2009-10-06 21:46:00	0	NTA	21	1	3	P
1	2009-10-06 21:47:00	0	NTA	21	1	3	P
1	2009-10-06 21:48:00	0	NTA	21	1	3	P
1	2009-10-06 21:49:00	0	NTA	21	1	3	P
1	2009-10-06 21:50:00	0	NTA	21	1	3	P
1	2009-10-06 21:51:00	0	NTA	21	1	3	P
1	2009-10-06 21:52:00	0	NTA	21	1	3	P
1	2009-10-06 21:53:00	0	NTA	21	1	3	P
1	2009-10-06 21:54:00	0	NTA	21	1	3	P
1	2009-10-06 21:55:00	0	NTA	21	1	3	P
1	2009-10-06 21:56:00	0	NTA	21	1	3	P
1	2009-10-06 21:57:00	0	NTA	21	1	3	P
1	2009-10-06 21:58:00	0	NTA	21	1	3	P
1	2009-10-06 21:59:00	0	NTA	21	1	3	P
1	2009-10-06 22:00:00	0	NTA	21	1	3	P
1	2009-10-06 22:01:00	0	NTA	22	1	3	P
1	2009-10-06 22:02:00	0	NTA	22	1	3	P
1	2009-10-06 22:03:00	0	NTA	22	1	3	P
1	2009-10-06 22:04:00	0	NTA	22	1	3	P
1	2009-10-06 22:05:00	0	NTA	22	1	3	P
1	2009-10-06 22:06:00	0	NTA	22	1	3	P
1	2009-10-06 22:07:00	0	NTA	22	1	3	P
1	2009-10-06 22:08:00	0	NTA	22	1	3	P
1	2009-10-06 22:09:00	0	NTA	22	1	3	P
1	2009-10-06 22:10:00	0	NTA	22	1	3	P
1	2009-10-06 22:11:00	0	NTA	22	1	3	P
1	2009-10-06 22:12:00	0	NTA	22	1	3	P
1	2009-10-06 22:13:00	0	NTA	22	1	3	P
1	2009-10-06 22:14:00	0	NTA	22	1	3	P
1	2009-10-06 22:15:00	59	NTA	22	1	3	P
1	2009-10-06 22:16:00	130	NTA	22	1	3	P
1	2009-10-06 22:17:00	0	NTA	22	1	3	P
1	2009-10-06 22:18:00	0	NTA	22	1	3	P
1	2009-10-06 22:19:00	0	NTA	22	1	3	P
1	2009-10-06 22:20:00	0	NTA	22	1	3	P
1	2009-10-06 22:21:00	0	NTA	22	1	3	P
1	2009-10-06 22:22:00	0	NTA	22	1	3	P
1	2009-10-06 22:23:00	0	NTA	22	1	3	P
1	2009-10-06 22:24:00	0	NTA	22	1	3	P
1	2009-10-06 22:25:00	36	NTA	22	1	3	P
1	2009-10-06 22:26:00	0	NTA	22	1	3	P
1	2009-10-06 22:27:00	0	NTA	22	1	3	P
1	2009-10-06 22:28:00	71	NTA	22	1	3	P
1	2009-10-06 22:29:00	12	NTA	22	1	3	P
1	2009-10-06 22:30:00	0	NTA	22	1	3	P
1	2009-10-06 22:31:00	0	NTA	22	1	3	P
1	2009-10-06 22:32:00	0	NTA	22	1	3	P
1	2009-10-06 22:33:00	0	NTA	22	1	3	P
1	2009-10-06 22:34:00	0	NTA	22	1	3	P
1	2009-10-06 22:35:00	0	NTA	22	1	3	P
1	2009-10-06 22:36:00	0	NTA	22	1	3	P
1	2009-10-06 22:37:00	0	NTA	22	1	3	P
1	2009-10-06 22:38:00	24	NTA	22	1	3	P
1	2009-10-06 22:39:00	12	NTA	22	1	3	P
1	2009-10-06 22:40:00	0	NTA	22	1	3	P
1	2009-10-06 22:41:00	0	NTA	22	1	3	P
1	2009-10-06 22:42:00	0	NTA	22	1	3	P
1	2009-10-06 22:43:00	95	NTA	22	1	3	P
1	2009-10-06 22:44:00	12	NTA	22	1	3	P
1	2009-10-06 22:45:00	12	NTA	22	1	3	P
1	2009-10-06 22:46:00	0	NTA	22	1	3	P
1	2009-10-06 22:47:00	0	NTA	22	1	3	P
1	2009-10-06 22:48:00	0	NTA	22	1	3	P
1	2009-10-06 22:49:00	0	NTA	22	1	3	P
1	2009-10-06 22:50:00	0	NTA	22	1	3	P
1	2009-10-06 22:51:00	0	NTA	22	1	3	P
1	2009-10-06 22:52:00	0	NTA	22	1	3	P
1	2009-10-06 22:53:00	0	NTA	22	1	3	P
1	2009-10-06 22:54:00	0	NTA	22	1	3	P
1	2009-10-06 22:55:00	0	NTA	22	1	3	P
1	2009-10-06 22:56:00	0	NTA	22	1	3	P
1	2009-10-06 22:57:00	0	NTA	22	1	3	P
1	2009-10-06 22:58:00	0	NTA	22	1	3	P
1	2009-10-06 22:59:00	0	NTA	22	1	3	P
1	2009-10-06 23:00:00	0	NTA	22	1	3	P
1	2009-10-06 23:01:00	0	NTA	23	1	3	P
1	2009-10-06 23:02:00	0	NTA	23	1	3	P
1	2009-10-06 23:03:00	0	NTA	23	1	3	P
1	2009-10-06 23:04:00	0	NTA	23	1	3	P
1	2009-10-06 23:05:00	0	NTA	23	1	3	P
1	2009-10-06 23:06:00	0	NTA	23	1	3	P
1	2009-10-06 23:07:00	0	NTA	23	1	3	P
1	2009-10-06 23:08:00	24	NTA	23	1	3	P
1	2009-10-06 23:09:00	0	NTA	23	1	3	P
1	2009-10-06 23:10:00	0	NTA	23	1	3	P
1	2009-10-06 23:11:00	95	NTA	23	1	3	P
1	2009-10-06 23:12:00	47	NTA	23	1	3	P
1	2009-10-06 23:13:00	479	NTA	23	1	3	P
1	2009-10-06 23:14:00	24	NTA	23	1	3	P
1	2009-10-06 23:15:00	0	NTA	23	1	3	P
1	2009-10-06 23:16:00	0	NTA	23	1	3	P
1	2009-10-06 23:17:00	0	NTA	23	1	3	P
1	2009-10-06 23:18:00	0	NTA	23	1	3	P
1	2009-10-06 23:19:00	0	NTA	23	1	3	P
1	2009-10-06 23:20:00	0	NTA	23	1	3	P
1	2009-10-06 23:21:00	0	NTA	23	1	3	P
1	2009-10-06 23:22:00	0	NTA	23	1	3	P
1	2009-10-06 23:23:00	0	NTA	23	1	3	P
1	2009-10-06 23:24:00	0	NTA	23	1	3	P
1	2009-10-06 23:25:00	0	NTA	23	1	3	P
1	2009-10-06 23:26:00	36	NTA	23	1	3	P
1	2009-10-06 23:27:00	0	NTA	23	1	3	P
1	2009-10-06 23:28:00	12	NTA	23	1	3	P
1	2009-10-06 23:29:00	183	NTA	23	1	3	P
1	2009-10-06 23:30:00	0	NTA	23	1	3	P
1	2009-10-06 23:31:00	0	NTA	23	1	3	P
1	2009-10-06 23:32:00	0	NTA	23	1	3	P
1	2009-10-06 23:33:00	0	NTA	23	1	3	P
1	2009-10-06 23:34:00	0	NTA	23	1	3	P
1	2009-10-06 23:35:00	0	NTA	23	1	3	P
1	2009-10-06 23:36:00	0	NTA	23	1	3	P
1	2009-10-06 23:37:00	0	NTA	23	1	3	P
1	2009-10-06 23:38:00	0	NTA	23	1	3	P
1	2009-10-06 23:39:00	0	NTA	23	1	3	P
1	2009-10-06 23:40:00	12	NTA	23	1	3	P
1	2009-10-06 23:41:00	47	NTA	23	1	3	P
1	2009-10-06 23:42:00	0	NTA	23	1	3	P
1	2009-10-06 23:43:00	0	NTA	23	1	3	P
1	2009-10-06 23:44:00	0	NTA	23	1	3	P
1	2009-10-06 23:45:00	0	NTA	23	1	3	P
1	2009-10-06 23:46:00	0	NTA	23	1	3	P
1	2009-10-06 23:47:00	0	NTA	23	1	3	P
1	2009-10-06 23:48:00	0	NTA	23	1	3	P
1	2009-10-06 23:49:00	0	NTA	23	1	3	P
1	2009-10-06 23:50:00	0	NTA	23	1	3	P
1	2009-10-06 23:51:00	0	NTA	23	1	3	P
1	2009-10-06 23:52:00	0	NTA	23	1	3	P
1	2009-10-06 23:53:00	0	NTA	23	1	3	P
1	2009-10-06 23:54:00	0	NTA	23	1	3	P
1	2009-10-06 23:55:00	0	NTA	23	1	3	P
1	2009-10-06 23:56:00	0	NTA	23	1	3	P
1	2009-10-06 23:57:00	0	NTA	23	1	3	P
1	2009-10-06 23:58:00	0	NTA	23	1	3	P
1	2009-10-06 23:59:00	0	NTA	23	1	3	P
1	2009-10-07	0	NTA	23	1	3	P
1	2009-10-07 00:01:00	0	NTA	0	1	4	P
1	2009-10-07 00:02:00	0	NTA	0	1	4	P
1	2009-10-07 00:03:00	0	NTA	0	1	4	P
1	2009-10-07 00:04:00	0	NTA	0	1	4	P
1	2009-10-07 00:05:00	0	NTA	0	1	4	P
1	2009-10-07 00:06:00	0	NTA	0	1	4	P
1	2009-10-07 00:07:00	0	NTA	0	1	4	P
1	2009-10-07 00:08:00	0	NTA	0	1	4	P
1	2009-10-07 00:09:00	0	NTA	0	1	4	P
1	2009-10-07 00:10:00	0	NTA	0	1	4	P
1	2009-10-07 00:11:00	0	NTA	0	1	4	P
1	2009-10-07 00:12:00	0	NTA	0	1	4	P
1	2009-10-07 00:13:00	0	NTA	0	1	4	P
1	2009-10-07 00:14:00	12	NTA	0	1	4	P
1	2009-10-07 00:15:00	0	NTA	0	1	4	P
1	2009-10-07 00:16:00	0	NTA	0	1	4	P
1	2009-10-07 00:17:00	0	NTA	0	1	4	P
1	2009-10-07 00:18:00	0	NTA	0	1	4	P
1	2009-10-07 00:19:00	0	NTA	0	1	4	P
1	2009-10-07 00:20:00	0	NTA	0	1	4	P
1	2009-10-07 00:21:00	0	NTA	0	1	4	P
1	2009-10-07 00:22:00	0	NTA	0	1	4	P
1	2009-10-07 00:23:00	0	NTA	0	1	4	P
1	2009-10-07 00:24:00	0	NTA	0	1	4	P
1	2009-10-07 00:25:00	0	NTA	0	1	4	P
1	2009-10-07 00:26:00	0	NTA	0	1	4	P
1	2009-10-07 00:27:00	0	NTA	0	1	4	P
1	2009-10-07 00:28:00	0	NTA	0	1	4	P
1	2009-10-07 00:29:00	0	NTA	0	1	4	P
1	2009-10-07 00:30:00	0	NTA	0	1	4	P
1	2009-10-07 00:31:00	0	NTA	0	1	4	P
1	2009-10-07 00:32:00	0	NTA	0	1	4	P
1	2009-10-07 00:33:00	0	NTA	0	1	4	P
1	2009-10-07 00:34:00	0	NTA	0	1	4	P
1	2009-10-07 00:35:00	47	NTA	0	1	4	P
1	2009-10-07 00:36:00	0	NTA	0	1	4	P
1	2009-10-07 00:37:00	0	NTA	0	1	4	P
1	2009-10-07 00:38:00	0	NTA	0	1	4	P
1	2009-10-07 00:39:00	0	NTA	0	1	4	P
1	2009-10-07 00:40:00	0	NTA	0	1	4	P
1	2009-10-07 00:41:00	0	NTA	0	1	4	P
1	2009-10-07 00:42:00	0	NTA	0	1	4	P
1	2009-10-07 00:43:00	0	NTA	0	1	4	P
1	2009-10-07 00:44:00	0	NTA	0	1	4	P
1	2009-10-07 00:45:00	0	NTA	0	1	4	P
1	2009-10-07 00:46:00	0	NTA	0	1	4	P
1	2009-10-07 00:47:00	0	NTA	0	1	4	P
1	2009-10-07 00:48:00	0	NTA	0	1	4	P
1	2009-10-07 00:49:00	0	NTA	0	1	4	P
1	2009-10-07 00:50:00	0	NTA	0	1	4	P
1	2009-10-07 00:51:00	0	NTA	0	1	4	P
1	2009-10-07 00:52:00	0	NTA	0	1	4	P
1	2009-10-07 00:53:00	0	NTA	0	1	4	P
1	2009-10-07 00:54:00	36	NTA	0	1	4	P
1	2009-10-07 00:55:00	0	NTA	0	1	4	P
1	2009-10-07 00:56:00	0	NTA	0	1	4	P
1	2009-10-07 00:57:00	0	NTA	0	1	4	P
1	2009-10-07 00:58:00	0	NTA	0	1	4	P
1	2009-10-07 00:59:00	0	NTA	0	1	4	P
1	2009-10-07 01:00:00	0	NTA	0	1	4	P
1	2009-10-07 01:01:00	0	NTA	1	1	4	P
1	2009-10-07 01:02:00	0	NTA	1	1	4	P
1	2009-10-07 01:03:00	0	NTA	1	1	4	P
1	2009-10-07 01:04:00	0	NTA	1	1	4	P
1	2009-10-07 01:05:00	0	NTA	1	1	4	P
1	2009-10-07 01:06:00	0	NTA	1	1	4	P
1	2009-10-07 01:07:00	0	NTA	1	1	4	P
1	2009-10-07 01:08:00	0	NTA	1	1	4	P
1	2009-10-07 01:09:00	0	NTA	1	1	4	P
1	2009-10-07 01:10:00	0	NTA	1	1	4	P
1	2009-10-07 01:11:00	0	NTA	1	1	4	P
1	2009-10-07 01:12:00	0	NTA	1	1	4	P
1	2009-10-07 01:13:00	0	NTA	1	1	4	P
1	2009-10-07 01:14:00	633	NTA	1	1	4	P
1	2009-10-07 01:15:00	0	NTA	1	1	4	P
1	2009-10-07 01:16:00	142	NTA	1	1	4	P
1	2009-10-07 01:17:00	327	NTA	1	1	4	P
1	2009-10-07 01:18:00	0	NTA	1	1	4	P
1	2009-10-07 01:19:00	0	NTA	1	1	4	P
1	2009-10-07 01:20:00	0	NTA	1	1	4	P
1	2009-10-07 01:21:00	0	NTA	1	1	4	P
1	2009-10-07 01:22:00	0	NTA	1	1	4	P
1	2009-10-07 01:23:00	0	NTA	1	1	4	P
1	2009-10-07 01:24:00	0	NTA	1	1	4	P
1	2009-10-07 01:25:00	0	NTA	1	1	4	P
1	2009-10-07 01:26:00	0	NTA	1	1	4	P
1	2009-10-07 01:27:00	0	NTA	1	1	4	P
1	2009-10-07 01:28:00	0	NTA	1	1	4	P
1	2009-10-07 01:29:00	0	NTA	1	1	4	P
1	2009-10-07 01:30:00	0	NTA	1	1	4	P
1	2009-10-07 01:31:00	0	NTA	1	1	4	P
1	2009-10-07 01:32:00	0	NTA	1	1	4	P
1	2009-10-07 01:33:00	0	NTA	1	1	4	P
1	2009-10-07 01:34:00	0	NTA	1	1	4	P
1	2009-10-07 01:35:00	0	NTA	1	1	4	P
1	2009-10-07 01:36:00	0	NTA	1	1	4	P
1	2009-10-07 01:37:00	0	NTA	1	1	4	P
1	2009-10-07 01:38:00	0	NTA	1	1	4	P
1	2009-10-07 01:39:00	0	NTA	1	1	4	P
1	2009-10-07 01:40:00	0	NTA	1	1	4	P
1	2009-10-07 01:41:00	0	NTA	1	1	4	P
1	2009-10-07 01:42:00	0	NTA	1	1	4	P
1	2009-10-07 01:43:00	0	NTA	1	1	4	P
1	2009-10-07 01:44:00	0	NTA	1	1	4	P
1	2009-10-07 01:45:00	0	NTA	1	1	4	P
1	2009-10-07 01:46:00	0	NTA	1	1	4	P
1	2009-10-07 01:47:00	0	NTA	1	1	4	P
1	2009-10-07 01:48:00	0	NTA	1	1	4	P
1	2009-10-07 01:49:00	0	NTA	1	1	4	P
1	2009-10-07 01:50:00	0	NTA	1	1	4	P
1	2009-10-07 01:51:00	0	NTA	1	1	4	P
1	2009-10-07 01:52:00	0	NTA	1	1	4	P
1	2009-10-07 01:53:00	0	NTA	1	1	4	P
1	2009-10-07 01:54:00	0	NTA	1	1	4	P
1	2009-10-07 01:55:00	0	NTA	1	1	4	P
1	2009-10-07 01:56:00	0	NTA	1	1	4	P
1	2009-10-07 01:57:00	0	NTA	1	1	4	P
1	2009-10-07 01:58:00	0	NTA	1	1	4	P
1	2009-10-07 01:59:00	0	NTA	1	1	4	P
1	2009-10-07 02:00:00	0	NTA	1	1	4	P
1	2009-10-07 02:01:00	0	NTA	2	1	4	P
1	2009-10-07 02:02:00	0	NTA	2	1	4	P
1	2009-10-07 02:03:00	0	NTA	2	1	4	P
1	2009-10-07 02:04:00	0	NTA	2	1	4	P
1	2009-10-07 02:05:00	0	NTA	2	1	4	P
1	2009-10-07 02:06:00	0	NTA	2	1	4	P
1	2009-10-07 02:07:00	0	NTA	2	1	4	P
1	2009-10-07 02:08:00	0	NTA	2	1	4	P
1	2009-10-07 02:09:00	83	NTA	2	1	4	P
1	2009-10-07 02:10:00	12	NTA	2	1	4	P
1	2009-10-07 02:11:00	0	NTA	2	1	4	P
1	2009-10-07 02:12:00	0	NTA	2	1	4	P
1	2009-10-07 02:13:00	0	NTA	2	1	4	P
1	2009-10-07 02:14:00	24	NTA	2	1	4	P
1	2009-10-07 02:15:00	12	NTA	2	1	4	P
1	2009-10-07 02:16:00	0	NTA	2	1	4	P
1	2009-10-07 02:17:00	0	NTA	2	1	4	P
1	2009-10-07 02:18:00	0	NTA	2	1	4	P
1	2009-10-07 02:19:00	0	NTA	2	1	4	P
1	2009-10-07 02:20:00	0	NTA	2	1	4	P
1	2009-10-07 02:21:00	0	NTA	2	1	4	P
1	2009-10-07 02:22:00	12	NTA	2	1	4	P
1	2009-10-07 02:23:00	0	NTA	2	1	4	P
1	2009-10-07 02:24:00	517	NTA	2	1	4	P
1	2009-10-07 02:25:00	142	NTA	2	1	4	P
1	2009-10-07 02:26:00	24	NTA	2	1	4	P
1	2009-10-07 02:27:00	12	NTA	2	1	4	P
1	2009-10-07 02:28:00	0	NTA	2	1	4	P
1	2009-10-07 02:29:00	0	NTA	2	1	4	P
1	2009-10-07 02:30:00	0	NTA	2	1	4	P
1	2009-10-07 02:31:00	12	NTA	2	1	4	P
1	2009-10-07 02:32:00	71	NTA	2	1	4	P
1	2009-10-07 02:33:00	12	NTA	2	1	4	P
1	2009-10-07 02:34:00	12	NTA	2	1	4	P
1	2009-10-07 02:35:00	0	NTA	2	1	4	P
1	2009-10-07 02:36:00	47	NTA	2	1	4	P
1	2009-10-07 02:37:00	24	NTA	2	1	4	P
1	2009-10-07 02:38:00	0	NTA	2	1	4	P
1	2009-10-07 02:39:00	0	NTA	2	1	4	P
1	2009-10-07 02:40:00	0	NTA	2	1	4	P
1	2009-10-07 02:41:00	0	NTA	2	1	4	P
1	2009-10-07 02:42:00	0	NTA	2	1	4	P
1	2009-10-07 02:43:00	36	NTA	2	1	4	P
1	2009-10-07 02:44:00	0	NTA	2	1	4	P
1	2009-10-07 02:45:00	0	NTA	2	1	4	P
1	2009-10-07 02:46:00	0	NTA	2	1	4	P
1	2009-10-07 02:47:00	0	NTA	2	1	4	P
1	2009-10-07 02:48:00	0	NTA	2	1	4	P
1	2009-10-07 02:49:00	71	NTA	2	1	4	P
1	2009-10-07 02:50:00	0	NTA	2	1	4	P
1	2009-10-07 02:51:00	0	NTA	2	1	4	P
1	2009-10-07 02:52:00	12	NTA	2	1	4	P
1	2009-10-07 02:53:00	0	NTA	2	1	4	P
1	2009-10-07 02:54:00	0	NTA	2	1	4	P
1	2009-10-07 02:55:00	0	NTA	2	1	4	P
1	2009-10-07 02:56:00	24	NTA	2	1	4	P
1	2009-10-07 02:57:00	0	NTA	2	1	4	P
1	2009-10-07 02:58:00	0	NTA	2	1	4	P
1	2009-10-07 02:59:00	0	NTA	2	1	4	P
1	2009-10-07 03:00:00	0	NTA	2	1	4	P
1	2009-10-07 03:01:00	0	NTA	3	1	4	P
1	2009-10-07 03:02:00	0	NTA	3	1	4	P
1	2009-10-07 03:03:00	0	NTA	3	1	4	P
1	2009-10-07 03:04:00	0	NTA	3	1	4	P
1	2009-10-07 03:05:00	0	NTA	3	1	4	P
1	2009-10-07 03:06:00	0	NTA	3	1	4	P
1	2009-10-07 03:07:00	0	NTA	3	1	4	P
1	2009-10-07 03:08:00	0	NTA	3	1	4	P
1	2009-10-07 03:09:00	0	NTA	3	1	4	P
1	2009-10-07 03:10:00	0	NTA	3	1	4	P
1	2009-10-07 03:11:00	1512	NTA	3	1	4	P
1	2009-10-07 03:12:00	2600	NTA	3	1	4	P
1	2009-10-07 03:13:00	879	NTA	3	1	4	P
1	2009-10-07 03:14:00	282	NTA	3	1	4	P
1	2009-10-07 03:15:00	808	NTA	3	1	4	P
1	2009-10-07 03:16:00	83	DTA	3	1	4	P
1	2009-10-07 03:17:00	443	DTA	3	1	4	P
1	2009-10-07 03:18:00	1479	DTA	3	1	4	P
1	2009-10-07 03:19:00	12	DTA	3	1	4	P
1	2009-10-07 03:20:00	24	DTA	3	1	4	P
1	2009-10-07 03:21:00	12	DTA	3	1	4	P
1	2009-10-07 03:22:00	12	DTA	3	1	4	P
1	2009-10-07 03:23:00	24	DTA	3	1	4	P
1	2009-10-07 03:24:00	12	DTA	3	1	4	P
1	2009-10-07 03:25:00	12	DTA	3	1	4	P
1	2009-10-07 03:26:00	12	DTA	3	1	4	P
1	2009-10-07 03:27:00	0	DTA	3	1	4	P
1	2009-10-07 03:28:00	24	DTA	3	1	4	P
1	2009-10-07 03:29:00	633	DTA	3	1	4	P
1	2009-10-07 03:30:00	344	DTA	3	1	4	P
1	2009-10-07 03:31:00	443	DTA	3	1	4	P
1	2009-10-07 03:32:00	612	DTA	3	1	4	P
1	2009-10-07 03:33:00	327	DTA	3	1	4	P
1	2009-10-07 03:34:00	0	DTA	3	1	4	P
1	2009-10-07 03:35:00	0	DTA	3	1	4	P
1	2009-10-07 03:36:00	0	DTA	3	1	4	P
1	2009-10-07 03:37:00	142	DTA	3	1	4	P
1	2009-10-07 03:38:00	344	DTA	3	1	4	P
1	2009-10-07 03:39:00	427	DTA	3	1	4	P
1	2009-10-07 03:40:00	536	DTA	3	1	4	P
1	2009-10-07 03:41:00	808	DTA	3	1	4	P
1	2009-10-07 03:42:00	296	DTA	3	1	4	P
1	2009-10-07 03:43:00	12	DTA	3	1	4	P
1	2009-10-07 03:44:00	12	DTA	3	1	4	P
1	2009-10-07 03:45:00	327	DTA	3	1	4	P
1	2009-10-07 03:46:00	498	DTA	3	1	4	P
1	2009-10-07 03:47:00	211	DTA	3	1	4	P
1	2009-10-07 03:48:00	1031	DTA	3	1	4	P
1	2009-10-07 03:49:00	344	DTA	3	1	4	P
1	2009-10-07 03:50:00	296	DTA	3	1	4	P
1	2009-10-07 03:51:00	612	DTA	3	1	4	P
1	2009-10-07 03:52:00	239	DTA	3	1	4	P
1	2009-10-07 03:53:00	761	DTA	3	1	4	P
1	2009-10-07 03:54:00	1169	DTA	3	1	4	P
1	2009-10-07 03:55:00	676	DTA	3	1	4	P
1	2009-10-07 03:56:00	517	DTA	3	1	4	P
1	2009-10-07 03:57:00	633	DTA	3	1	4	P
1	2009-10-07 03:58:00	593	DTA	3	1	4	P
1	2009-10-07 03:59:00	633	DTA	3	1	4	P
1	2009-10-07 04:00:00	460	DTA	3	1	4	P
1	2009-10-07 04:01:00	479	DTA	4	1	4	P
1	2009-10-07 04:02:00	0	DTA	4	1	4	P
1	2009-10-07 04:03:00	0	DTA	4	1	4	P
1	2009-10-07 04:04:00	36	DTA	4	1	4	P
1	2009-10-07 04:05:00	0	DTA	4	1	4	P
1	2009-10-07 04:06:00	0	DTA	4	1	4	P
1	2009-10-07 04:07:00	12	DTA	4	1	4	P
1	2009-10-07 04:08:00	47	DTA	4	1	4	P
1	2009-10-07 04:09:00	12	DTA	4	1	4	P
1	2009-10-07 04:10:00	0	DTA	4	1	4	P
1	2009-10-07 04:11:00	0	DTA	4	1	4	P
1	2009-10-07 04:12:00	95	DTA	4	1	4	P
1	2009-10-07 04:13:00	0	DTA	4	1	4	P
1	2009-10-07 04:14:00	0	DTA	4	1	4	P
1	2009-10-07 04:15:00	36	DTA	4	1	4	P
1	2009-10-07 04:16:00	12	DTA	4	1	4	P
1	2009-10-07 04:17:00	12	DTA	4	1	4	P
1	2009-10-07 04:18:00	0	DTA	4	1	4	P
1	2009-10-07 04:19:00	36	DTA	4	1	4	P
1	2009-10-07 04:20:00	47	DTA	4	1	4	P
1	2009-10-07 04:21:00	12	DTA	4	1	4	P
1	2009-10-07 04:22:00	0	DTA	4	1	4	P
1	2009-10-07 04:23:00	0	DTA	4	1	4	P
1	2009-10-07 04:24:00	0	DTA	4	1	4	P
1	2009-10-07 04:25:00	36	DTA	4	1	4	P
1	2009-10-07 04:26:00	0	DTA	4	1	4	P
1	2009-10-07 04:27:00	0	DTA	4	1	4	P
1	2009-10-07 04:28:00	0	DTA	4	1	4	P
1	2009-10-07 04:29:00	0	DTA	4	1	4	P
1	2009-10-07 04:30:00	0	DTA	4	1	4	P
1	2009-10-07 04:31:00	0	DTA	4	1	4	P
1	2009-10-07 04:32:00	0	DTA	4	1	4	P
1	2009-10-07 04:33:00	0	DTA	4	1	4	P
1	2009-10-07 04:34:00	0	DTA	4	1	4	P
1	2009-10-07 04:35:00	0	DTA	4	1	4	P
1	2009-10-07 04:36:00	0	DTA	4	1	4	P
1	2009-10-07 04:37:00	36	DTA	4	1	4	P
1	2009-10-07 04:38:00	47	DTA	4	1	4	P
1	2009-10-07 04:39:00	0	DTA	4	1	4	P
1	2009-10-07 04:40:00	24	DTA	4	1	4	P
1	2009-10-07 04:41:00	211	DTA	4	1	4	P
1	2009-10-07 04:42:00	0	DTA	4	1	4	P
1	2009-10-07 04:43:00	0	DTA	4	1	4	P
1	2009-10-07 04:44:00	0	DTA	4	1	4	P
1	2009-10-07 04:45:00	0	DTA	4	1	4	P
1	2009-10-07 04:46:00	0	DTA	4	1	4	P
1	2009-10-07 04:47:00	0	DTA	4	1	4	P
1	2009-10-07 04:48:00	0	DTA	4	1	4	P
1	2009-10-07 04:49:00	0	DTA	4	1	4	P
1	2009-10-07 04:50:00	0	DTA	4	1	4	P
1	2009-10-07 04:51:00	0	DTA	4	1	4	P
1	2009-10-07 04:52:00	0	DTA	4	1	4	P
1	2009-10-07 04:53:00	0	DTA	4	1	4	P
1	2009-10-07 04:54:00	0	DTA	4	1	4	P
1	2009-10-07 04:55:00	0	DTA	4	1	4	P
1	2009-10-07 04:56:00	0	DTA	4	1	4	P
1	2009-10-07 04:57:00	0	DTA	4	1	4	P
1	2009-10-07 04:58:00	0	DTA	4	1	4	P
1	2009-10-07 04:59:00	0	DTA	4	1	4	P
1	2009-10-07 05:00:00	0	DTA	4	1	4	P
1	2009-10-07 05:01:00	0	DTA	5	1	4	P
1	2009-10-07 05:02:00	0	DTA	5	1	4	P
1	2009-10-07 05:03:00	0	DTA	5	1	4	P
1	2009-10-07 05:04:00	0	DTA	5	1	4	P
1	2009-10-07 05:05:00	0	DTA	5	1	4	P
1	2009-10-07 05:06:00	0	DTA	5	1	4	P
1	2009-10-07 05:07:00	0	DTA	5	1	4	P
1	2009-10-07 05:08:00	0	DTA	5	1	4	P
1	2009-10-07 05:09:00	0	DTA	5	1	4	P
1	2009-10-07 05:10:00	0	DTA	5	1	4	P
1	2009-10-07 05:11:00	0	DTA	5	1	4	P
1	2009-10-07 05:12:00	0	DTA	5	1	4	P
1	2009-10-07 05:13:00	0	DTA	5	1	4	P
1	2009-10-07 05:14:00	0	DTA	5	1	4	P
1	2009-10-07 05:15:00	0	DTA	5	1	4	P
1	2009-10-07 05:16:00	0	DTA	5	1	4	P
1	2009-10-07 05:17:00	0	DTA	5	1	4	P
1	2009-10-07 05:18:00	0	DTA	5	1	4	P
1	2009-10-07 05:19:00	0	DTA	5	1	4	P
1	2009-10-07 05:20:00	0	DTA	5	1	4	P
1	2009-10-07 05:21:00	0	DTA	5	1	4	P
1	2009-10-07 05:22:00	0	DTA	5	1	4	P
1	2009-10-07 05:23:00	0	DTA	5	1	4	P
1	2009-10-07 05:24:00	0	DTA	5	1	4	P
1	2009-10-07 05:25:00	0	DTA	5	1	4	P
1	2009-10-07 05:26:00	0	DTA	5	1	4	P
1	2009-10-07 05:27:00	0	DTA	5	1	4	P
1	2009-10-07 05:28:00	0	DTA	5	1	4	P
1	2009-10-07 05:29:00	0	DTA	5	1	4	P
1	2009-10-07 05:30:00	0	DTA	5	1	4	P
1	2009-10-07 05:31:00	0	DTA	5	1	4	P
1	2009-10-07 05:32:00	0	DTA	5	1	4	P
1	2009-10-07 05:33:00	0	DTA	5	1	4	P
1	2009-10-07 05:34:00	0	DTA	5	1	4	P
1	2009-10-07 05:35:00	0	DTA	5	1	4	P
1	2009-10-07 05:36:00	0	DTA	5	1	4	P
1	2009-10-07 05:37:00	0	DTA	5	1	4	P
1	2009-10-07 05:38:00	0	DTA	5	1	4	P
1	2009-10-07 05:39:00	0	DTA	5	1	4	P
1	2009-10-07 05:40:00	0	DTA	5	1	4	P
1	2009-10-07 05:41:00	0	DTA	5	1	4	P
1	2009-10-07 05:42:00	0	DTA	5	1	4	P
1	2009-10-07 05:43:00	0	DTA	5	1	4	P
1	2009-10-07 05:44:00	0	DTA	5	1	4	P
1	2009-10-07 05:45:00	0	DTA	5	1	4	P
1	2009-10-07 05:46:00	0	DTA	5	1	4	P
1	2009-10-07 05:47:00	0	DTA	5	1	4	P
1	2009-10-07 05:48:00	0	DTA	5	1	4	P
1	2009-10-07 05:49:00	0	DTA	5	1	4	P
1	2009-10-07 05:50:00	0	DTA	5	1	4	P
1	2009-10-07 05:51:00	0	DTA	5	1	4	P
1	2009-10-07 05:52:00	0	DTA	5	1	4	P
1	2009-10-07 05:53:00	0	DTA	5	1	4	P
1	2009-10-07 05:54:00	0	DTA	5	1	4	P
1	2009-10-07 05:55:00	0	DTA	5	1	4	P
1	2009-10-07 05:56:00	0	DTA	5	1	4	P
1	2009-10-07 05:57:00	0	DTA	5	1	4	P
1	2009-10-07 05:58:00	0	DTA	5	1	4	P
1	2009-10-07 05:59:00	0	DTA	5	1	4	P
1	2009-10-07 06:00:00	0	DTA	5	1	4	P
1	2009-10-07 06:01:00	0	DTA	6	1	4	P
1	2009-10-07 06:02:00	0	DTA	6	1	4	P
1	2009-10-07 06:03:00	0	DTA	6	1	4	P
1	2009-10-07 06:04:00	0	DTA	6	1	4	P
1	2009-10-07 06:05:00	0	DTA	6	1	4	P
1	2009-10-07 06:06:00	0	DTA	6	1	4	P
1	2009-10-07 06:07:00	0	DTA	6	1	4	P
1	2009-10-07 06:08:00	0	DTA	6	1	4	P
1	2009-10-07 06:09:00	0	DTA	6	1	4	P
1	2009-10-07 06:10:00	0	DTA	6	1	4	P
1	2009-10-07 06:11:00	0	DTA	6	1	4	P
1	2009-10-07 06:12:00	0	DTA	6	1	4	P
1	2009-10-07 06:13:00	0	DTA	6	1	4	P
1	2009-10-07 06:14:00	0	DTA	6	1	4	P
1	2009-10-07 06:15:00	0	DTA	6	1	4	P
1	2009-10-07 06:16:00	0	DTA	6	1	4	P
1	2009-10-07 06:17:00	0	DTA	6	1	4	P
1	2009-10-07 06:18:00	0	DTA	6	1	4	P
1	2009-10-07 06:19:00	0	DTA	6	1	4	P
1	2009-10-07 06:20:00	0	DTA	6	1	4	P
1	2009-10-07 06:21:00	0	DTA	6	1	4	P
1	2009-10-07 06:22:00	0	DTA	6	1	4	P
1	2009-10-07 06:23:00	0	DTA	6	1	4	P
1	2009-10-07 06:24:00	119	DTA	6	1	4	P
1	2009-10-07 06:25:00	0	DTA	6	1	4	P
1	2009-10-07 06:26:00	12	DTA	6	1	4	P
1	2009-10-07 06:27:00	0	DTA	6	1	4	P
1	2009-10-07 06:28:00	0	DTA	6	1	4	P
1	2009-10-07 06:29:00	0	DTA	6	1	4	P
1	2009-10-07 06:30:00	0	DTA	6	1	4	P
1	2009-10-07 06:31:00	0	DTA	6	1	4	P
1	2009-10-07 06:32:00	0	DTA	6	1	4	P
1	2009-10-07 06:33:00	0	DTA	6	1	4	P
1	2009-10-07 06:34:00	12	DTA	6	1	4	P
1	2009-10-07 06:35:00	0	DTA	6	1	4	P
1	2009-10-07 06:36:00	0	DTA	6	1	4	P
1	2009-10-07 06:37:00	0	DTA	6	1	4	P
1	2009-10-07 06:38:00	0	DTA	6	1	4	P
1	2009-10-07 06:39:00	0	DTA	6	1	4	P
1	2009-10-07 06:40:00	0	DTA	6	1	4	P
1	2009-10-07 06:41:00	0	DTA	6	1	4	P
1	2009-10-07 06:42:00	0	DTA	6	1	4	P
1	2009-10-07 06:43:00	0	DTA	6	1	4	P
1	2009-10-07 06:44:00	0	DTA	6	1	4	P
1	2009-10-07 06:45:00	0	DTA	6	1	4	P
1	2009-10-07 06:46:00	0	DTA	6	1	4	P
1	2009-10-07 06:47:00	0	DTA	6	1	4	P
1	2009-10-07 06:48:00	0	DTA	6	1	4	P
1	2009-10-07 06:49:00	0	DTA	6	1	4	P
1	2009-10-07 06:50:00	0	DTA	6	1	4	P
1	2009-10-07 06:51:00	0	DTA	6	1	4	P
1	2009-10-07 06:52:00	0	DTA	6	1	4	P
1	2009-10-07 06:53:00	0	DTA	6	1	4	P
1	2009-10-07 06:54:00	0	DTA	6	1	4	P
1	2009-10-07 06:55:00	0	DTA	6	1	4	P
1	2009-10-07 06:56:00	0	DTA	6	1	4	P
1	2009-10-07 06:57:00	0	DTA	6	1	4	P
1	2009-10-07 06:58:00	0	DTA	6	1	4	P
1	2009-10-07 06:59:00	0	DTA	6	1	4	P
1	2009-10-07 07:00:00	0	DTA	6	1	4	P
1	2009-10-07 07:01:00	0	DTA	7	1	4	P
1	2009-10-07 07:02:00	0	DTA	7	1	4	P
1	2009-10-07 07:03:00	0	DTA	7	1	4	P
1	2009-10-07 07:04:00	0	DTA	7	1	4	P
1	2009-10-07 07:05:00	0	DTA	7	1	4	P
1	2009-10-07 07:06:00	0	DTA	7	1	4	P
1	2009-10-07 07:07:00	0	DTA	7	1	4	P
1	2009-10-07 07:08:00	0	DTA	7	1	4	P
1	2009-10-07 07:09:00	0	DTA	7	1	4	P
1	2009-10-07 07:10:00	0	DTA	7	1	4	P
1	2009-10-07 07:11:00	0	DTA	7	1	4	P
1	2009-10-07 07:12:00	0	DTA	7	1	4	P
1	2009-10-07 07:13:00	36	DTA	7	1	4	P
1	2009-10-07 07:14:00	59	DTA	7	1	4	P
1	2009-10-07 07:15:00	12	DTA	7	1	4	P
1	2009-10-07 07:16:00	0	DTA	7	1	4	P
1	2009-10-07 07:17:00	0	DTA	7	1	4	P
1	2009-10-07 07:18:00	0	DTA	7	1	4	P
1	2009-10-07 07:19:00	0	DTA	7	1	4	P
1	2009-10-07 07:20:00	0	DTA	7	1	4	P
1	2009-10-07 07:21:00	0	DTA	7	1	4	P
1	2009-10-07 07:22:00	12	DTA	7	1	4	P
1	2009-10-07 07:23:00	0	DTA	7	1	4	P
1	2009-10-07 07:24:00	0	DTA	7	1	4	P
1	2009-10-07 07:25:00	0	DTA	7	1	4	P
1	2009-10-07 07:26:00	0	DTA	7	1	4	P
1	2009-10-07 07:27:00	0	DTA	7	1	4	P
1	2009-10-07 07:28:00	0	DTA	7	1	4	P
1	2009-10-07 07:29:00	0	DTA	7	1	4	P
1	2009-10-07 07:30:00	0	DTA	7	1	4	P
1	2009-10-07 07:31:00	0	DTA	7	1	4	P
1	2009-10-07 07:32:00	460	DTA	7	1	4	P
1	2009-10-07 07:33:00	0	DTA	7	1	4	P
1	2009-10-07 07:34:00	12	DTA	7	1	4	P
1	2009-10-07 07:35:00	0	DTA	7	1	4	P
1	2009-10-07 07:36:00	0	DTA	7	1	4	P
1	2009-10-07 07:37:00	0	DTA	7	1	4	P
1	2009-10-07 07:38:00	0	DTA	7	1	4	P
1	2009-10-07 07:39:00	0	DTA	7	1	4	P
1	2009-10-07 07:40:00	0	DTA	7	1	4	P
1	2009-10-07 07:41:00	0	DTA	7	1	4	P
1	2009-10-07 07:42:00	0	DTA	7	1	4	P
1	2009-10-07 07:43:00	0	DTA	7	1	4	P
1	2009-10-07 07:44:00	0	DTA	7	1	4	P
1	2009-10-07 07:45:00	0	DTA	7	1	4	P
1	2009-10-07 07:46:00	0	DTA	7	1	4	P
1	2009-10-07 07:47:00	0	DTA	7	1	4	P
1	2009-10-07 07:48:00	0	DTA	7	1	4	P
1	2009-10-07 07:49:00	0	DTA	7	1	4	P
1	2009-10-07 07:50:00	0	DTA	7	1	4	P
1	2009-10-07 07:51:00	0	DTA	7	1	4	P
1	2009-10-07 07:52:00	36	DTA	7	1	4	P
1	2009-10-07 07:53:00	12	DTA	7	1	4	P
1	2009-10-07 07:54:00	0	DTA	7	1	4	P
1	2009-10-07 07:55:00	0	DTA	7	1	4	P
1	2009-10-07 07:56:00	0	DTA	7	1	4	P
1	2009-10-07 07:57:00	0	DTA	7	1	4	P
1	2009-10-07 07:58:00	0	DTA	7	1	4	P
1	2009-10-07 07:59:00	0	DTA	7	1	4	P
1	2009-10-07 08:00:00	0	DTA	7	1	4	P
1	2009-10-07 08:01:00	0	DTA	8	1	4	P
1	2009-10-07 08:02:00	0	DTA	8	1	4	P
1	2009-10-07 08:03:00	0	DTA	8	1	4	P
1	2009-10-07 08:04:00	0	DTA	8	1	4	P
1	2009-10-07 08:05:00	0	DTA	8	1	4	P
1	2009-10-07 08:06:00	0	DTA	8	1	4	P
1	2009-10-07 08:07:00	0	DTA	8	1	4	P
1	2009-10-07 08:08:00	0	DTA	8	1	4	P
1	2009-10-07 08:09:00	0	DTA	8	1	4	P
1	2009-10-07 08:10:00	0	DTA	8	1	4	P
1	2009-10-07 08:11:00	0	DTA	8	1	4	P
1	2009-10-07 08:12:00	0	DTA	8	1	4	P
1	2009-10-07 08:13:00	0	DTA	8	1	4	P
1	2009-10-07 08:14:00	12	DTA	8	1	4	P
1	2009-10-07 08:15:00	0	DTA	8	1	4	P
1	2009-10-07 08:16:00	0	DTA	8	1	4	P
1	2009-10-07 08:17:00	0	DTA	8	1	4	P
1	2009-10-07 08:18:00	0	DTA	8	1	4	P
1	2009-10-07 08:19:00	0	DTA	8	1	4	P
1	2009-10-07 08:20:00	0	DTA	8	1	4	P
1	2009-10-07 08:21:00	12	DTA	8	1	4	P
1	2009-10-07 08:22:00	0	DTA	8	1	4	P
1	2009-10-07 08:23:00	0	DTA	8	1	4	P
1	2009-10-07 08:24:00	0	DTA	8	1	4	P
1	2009-10-07 08:25:00	0	DTA	8	1	4	P
1	2009-10-07 08:26:00	0	DTA	8	1	4	P
1	2009-10-07 08:27:00	0	DTA	8	1	4	P
1	2009-10-07 08:28:00	0	DTA	8	1	4	P
1	2009-10-07 08:29:00	0	DTA	8	1	4	P
1	2009-10-07 08:30:00	0	DTA	8	1	4	P
1	2009-10-07 08:31:00	0	DTA	8	1	4	P
1	2009-10-07 08:32:00	24	DTA	8	1	4	P
1	2009-10-07 08:33:00	12	DTA	8	1	4	P
1	2009-10-07 08:34:00	0	DTA	8	1	4	P
1	2009-10-07 08:35:00	0	DTA	8	1	4	P
1	2009-10-07 08:36:00	107	DTA	8	1	4	P
1	2009-10-07 08:37:00	12	DTA	8	1	4	P
1	2009-10-07 08:38:00	0	DTA	8	1	4	P
1	2009-10-07 08:39:00	12	DTA	8	1	4	P
1	2009-10-07 08:40:00	0	DTA	8	1	4	P
1	2009-10-07 08:41:00	0	DTA	8	1	4	P
1	2009-10-07 08:42:00	0	DTA	8	1	4	P
1	2009-10-07 08:43:00	0	DTA	8	1	4	P
1	2009-10-07 08:44:00	0	DTA	8	1	4	P
1	2009-10-07 08:45:00	0	DTA	8	1	4	P
1	2009-10-07 08:46:00	0	DTA	8	1	4	P
1	2009-10-07 08:47:00	0	DTA	8	1	4	P
1	2009-10-07 08:48:00	0	DTA	8	1	4	P
1	2009-10-07 08:49:00	0	DTA	8	1	4	P
1	2009-10-07 08:50:00	0	DTA	8	1	4	P
1	2009-10-07 08:51:00	0	DTA	8	1	4	P
1	2009-10-07 08:52:00	0	DTA	8	1	4	P
1	2009-10-07 08:53:00	0	DTA	8	1	4	P
1	2009-10-07 08:54:00	0	DTA	8	1	4	P
1	2009-10-07 08:55:00	0	DTA	8	1	4	P
1	2009-10-07 08:56:00	0	DTA	8	1	4	P
1	2009-10-07 08:57:00	0	DTA	8	1	4	P
1	2009-10-07 08:58:00	0	DTA	8	1	4	P
1	2009-10-07 08:59:00	0	DTA	8	1	4	P
1	2009-10-07 09:00:00	0	DTA	8	1	4	P
1	2009-10-07 09:01:00	0	DTA	9	1	4	P
1	2009-10-07 09:02:00	0	DTA	9	1	4	P
1	2009-10-07 09:03:00	0	DTA	9	1	4	P
1	2009-10-07 09:04:00	0	DTA	9	1	4	P
1	2009-10-07 09:05:00	0	DTA	9	1	4	P
1	2009-10-07 09:06:00	0	DTA	9	1	4	P
1	2009-10-07 09:07:00	0	DTA	9	1	4	P
1	2009-10-07 09:08:00	0	DTA	9	1	4	P
1	2009-10-07 09:09:00	0	DTA	9	1	4	P
1	2009-10-07 09:10:00	0	DTA	9	1	4	P
1	2009-10-07 09:11:00	0	DTA	9	1	4	P
1	2009-10-07 09:12:00	0	DTA	9	1	4	P
1	2009-10-07 09:13:00	0	DTA	9	1	4	P
1	2009-10-07 09:14:00	0	DTA	9	1	4	P
1	2009-10-07 09:15:00	0	DTA	9	1	4	P
1	2009-10-07 09:16:00	0	DTA	9	1	4	P
1	2009-10-07 09:17:00	0	DTA	9	1	4	P
1	2009-10-07 09:18:00	0	DTA	9	1	4	P
1	2009-10-07 09:19:00	0	DTA	9	1	4	P
1	2009-10-07 09:20:00	0	DTA	9	1	4	P
1	2009-10-07 09:21:00	12	DTA	9	1	4	P
1	2009-10-07 09:22:00	12	DTA	9	1	4	P
1	2009-10-07 09:23:00	0	DTA	9	1	4	P
1	2009-10-07 09:24:00	296	DTA	9	1	4	P
1	2009-10-07 09:25:00	0	DTA	9	1	4	P
1	2009-10-07 09:26:00	0	DTA	9	1	4	P
1	2009-10-07 09:27:00	0	DTA	9	1	4	P
1	2009-10-07 09:28:00	95	DTA	9	1	4	P
1	2009-10-07 09:29:00	0	DTA	9	1	4	P
1	2009-10-07 09:30:00	0	DTA	9	1	4	P
1	2009-10-07 09:31:00	808	DTA	9	1	4	P
1	2009-10-07 09:32:00	197	DTA	9	1	4	P
1	2009-10-07 09:33:00	12	DTA	9	1	4	P
1	2009-10-07 09:34:00	12	DTA	9	1	4	P
1	2009-10-07 09:35:00	0	DTA	9	1	4	P
1	2009-10-07 09:36:00	0	DTA	9	1	4	P
1	2009-10-07 09:37:00	0	DTA	9	1	4	P
1	2009-10-07 09:38:00	0	DTA	9	1	4	P
1	2009-10-07 09:39:00	47	DTA	9	1	4	P
1	2009-10-07 09:40:00	0	DTA	9	1	4	P
1	2009-10-07 09:41:00	0	DTA	9	1	4	P
1	2009-10-07 09:42:00	0	DTA	9	1	4	P
1	2009-10-07 09:43:00	0	DTA	9	1	4	P
1	2009-10-07 09:44:00	0	DTA	9	1	4	P
1	2009-10-07 09:45:00	0	DTA	9	1	4	P
1	2009-10-07 09:46:00	0	DTA	9	1	4	P
1	2009-10-07 09:47:00	0	DTA	9	1	4	P
1	2009-10-07 09:48:00	0	DTA	9	1	4	P
1	2009-10-07 09:49:00	0	DTA	9	1	4	P
1	2009-10-07 09:50:00	0	DTA	9	1	4	P
1	2009-10-07 09:51:00	0	DTA	9	1	4	P
1	2009-10-07 09:52:00	0	DTA	9	1	4	P
1	2009-10-07 09:53:00	0	DTA	9	1	4	P
1	2009-10-07 09:54:00	0	DTA	9	1	4	P
1	2009-10-07 09:55:00	0	DTA	9	1	4	P
1	2009-10-07 09:56:00	24	DTA	9	1	4	P
1	2009-10-07 09:57:00	36	DTA	9	1	4	P
1	2009-10-07 09:58:00	0	DTA	9	1	4	P
1	2009-10-07 09:59:00	0	DTA	9	1	4	P
1	2009-10-07 10:00:00	0	DTA	9	1	4	P
1	2009-10-07 10:01:00	268	DTA	10	1	4	P
1	2009-10-07 10:02:00	12	DTA	10	1	4	P
1	2009-10-07 10:03:00	0	DTA	10	1	4	P
1	2009-10-07 10:04:00	0	DTA	10	1	4	P
1	2009-10-07 10:05:00	24	DTA	10	1	4	P
1	2009-10-07 10:06:00	0	DTA	10	1	4	P
1	2009-10-07 10:07:00	0	DTA	10	1	4	P
1	2009-10-07 10:08:00	0	DTA	10	1	4	P
1	2009-10-07 10:09:00	0	DTA	10	1	4	P
1	2009-10-07 10:10:00	0	DTA	10	1	4	P
1	2009-10-07 10:11:00	0	DTA	10	1	4	P
1	2009-10-07 10:12:00	0	DTA	10	1	4	P
1	2009-10-07 10:13:00	0	DTA	10	1	4	P
1	2009-10-07 10:14:00	0	DTA	10	1	4	P
1	2009-10-07 10:15:00	0	DTA	10	1	4	P
1	2009-10-07 10:16:00	0	DTA	10	1	4	P
1	2009-10-07 10:17:00	0	DTA	10	1	4	P
1	2009-10-07 10:18:00	0	DTA	10	1	4	P
1	2009-10-07 10:19:00	0	DTA	10	1	4	P
1	2009-10-07 10:20:00	0	DTA	10	1	4	P
1	2009-10-07 10:21:00	0	DTA	10	1	4	P
1	2009-10-07 10:22:00	0	DTA	10	1	4	P
1	2009-10-07 10:23:00	0	DTA	10	1	4	P
1	2009-10-07 10:24:00	0	DTA	10	1	4	P
1	2009-10-07 10:25:00	0	DTA	10	1	4	P
1	2009-10-07 10:26:00	0	DTA	10	1	4	P
1	2009-10-07 10:27:00	0	DTA	10	1	4	P
1	2009-10-07 10:28:00	0	DTA	10	1	4	P
1	2009-10-07 10:29:00	0	DTA	10	1	4	P
1	2009-10-07 10:30:00	0	DTA	10	1	4	P
1	2009-10-07 10:31:00	0	DTA	10	1	4	P
1	2009-10-07 10:32:00	0	DTA	10	1	4	P
1	2009-10-07 10:33:00	12	DTA	10	1	4	P
1	2009-10-07 10:34:00	0	DTA	10	1	4	P
1	2009-10-07 10:35:00	0	DTA	10	1	4	P
1	2009-10-07 10:36:00	0	DTA	10	1	4	P
1	2009-10-07 10:37:00	0	DTA	10	1	4	P
1	2009-10-07 10:38:00	0	DTA	10	1	4	P
1	2009-10-07 10:39:00	0	DTA	10	1	4	P
1	2009-10-07 10:40:00	36	DTA	10	1	4	P
1	2009-10-07 10:41:00	498	DTA	10	1	4	P
1	2009-10-07 10:42:00	12	DTA	10	1	4	P
1	2009-10-07 10:43:00	0	DTA	10	1	4	P
1	2009-10-07 10:44:00	0	DTA	10	1	4	P
1	2009-10-07 10:45:00	24	DTA	10	1	4	P
1	2009-10-07 10:46:00	24	DTA	10	1	4	P
1	2009-10-07 10:47:00	0	DTA	10	1	4	P
1	2009-10-07 10:48:00	0	DTA	10	1	4	P
1	2009-10-07 10:49:00	0	DTA	10	1	4	P
1	2009-10-07 10:50:00	0	DTA	10	1	4	P
1	2009-10-07 10:51:00	0	DTA	10	1	4	P
1	2009-10-07 10:52:00	0	DTA	10	1	4	P
1	2009-10-07 10:53:00	0	DTA	10	1	4	P
1	2009-10-07 10:54:00	0	DTA	10	1	4	P
1	2009-10-07 10:55:00	0	DTA	10	1	4	P
1	2009-10-07 10:56:00	0	DTA	10	1	4	P
1	2009-10-07 10:57:00	0	DTA	10	1	4	P
1	2009-10-07 10:58:00	0	DTA	10	1	4	P
1	2009-10-07 10:59:00	0	DTA	10	1	4	P
1	2009-10-07 11:00:00	0	DTA	10	1	4	P
1	2009-10-07 11:01:00	0	DTA	11	1	4	P
1	2009-10-07 11:02:00	12	DTA	11	1	4	P
1	2009-10-07 11:03:00	0	DTA	11	1	4	P
1	2009-10-07 11:04:00	0	DTA	11	1	4	P
1	2009-10-07 11:05:00	0	DTA	11	1	4	P
1	2009-10-07 11:06:00	0	DTA	11	1	4	P
1	2009-10-07 11:07:00	0	DTA	11	1	4	P
1	2009-10-07 11:08:00	12	DTA	11	1	4	P
1	2009-10-07 11:09:00	0	DTA	11	1	4	P
1	2009-10-07 11:10:00	0	DTA	11	1	4	P
1	2009-10-07 11:11:00	0	DTA	11	1	4	P
1	2009-10-07 11:12:00	0	DTA	11	1	4	P
1	2009-10-07 11:13:00	0	DTA	11	1	4	P
1	2009-10-07 11:14:00	0	DTA	11	1	4	P
1	2009-10-07 11:15:00	0	DTA	11	1	4	P
1	2009-10-07 11:16:00	0	DTA	11	1	4	P
1	2009-10-07 11:17:00	0	DTA	11	1	4	P
1	2009-10-07 11:18:00	0	DTA	11	1	4	P
1	2009-10-07 11:19:00	0	DTA	11	1	4	P
1	2009-10-07 11:20:00	36	DTA	11	1	4	P
1	2009-10-07 11:21:00	282	DTA	11	1	4	P
1	2009-10-07 11:22:00	0	DTA	11	1	4	P
1	2009-10-07 11:23:00	12	DTA	11	1	4	P
1	2009-10-07 11:24:00	0	DTA	11	1	4	P
1	2009-10-07 11:25:00	0	DTA	11	1	4	P
1	2009-10-07 11:26:00	0	DTA	11	1	4	P
1	2009-10-07 11:27:00	0	DTA	11	1	4	P
1	2009-10-07 11:28:00	0	DTA	11	1	4	P
1	2009-10-07 11:29:00	0	DTA	11	1	4	P
1	2009-10-07 11:30:00	0	DTA	11	1	4	P
1	2009-10-07 11:31:00	0	DTA	11	1	4	P
1	2009-10-07 11:32:00	0	DTA	11	1	4	P
1	2009-10-07 11:33:00	0	DTA	11	1	4	P
1	2009-10-07 11:34:00	0	DTA	11	1	4	P
1	2009-10-07 11:35:00	0	DTA	11	1	4	P
1	2009-10-07 11:36:00	0	DTA	11	1	4	P
1	2009-10-07 11:37:00	0	DTA	11	1	4	P
1	2009-10-07 11:38:00	0	DTA	11	1	4	P
1	2009-10-07 11:39:00	0	DTA	11	1	4	P
1	2009-10-07 11:40:00	0	DTA	11	1	4	P
1	2009-10-07 11:41:00	0	DTA	11	1	4	P
1	2009-10-07 11:42:00	0	DTA	11	1	4	P
1	2009-10-07 11:43:00	0	DTA	11	1	4	P
1	2009-10-07 11:44:00	47	DTA	11	1	4	P	Peak DTA
1	2009-10-07 11:45:00	36	DTA	11	1	4	P	Peak DTA
1	2009-10-07 11:46:00	0	DTA	11	1	4	P	Peak DTA
1	2009-10-07 11:47:00	0	DTA	11	1	4	P	Peak DTA
1	2009-10-07 11:48:00	0	DTA	11	1	4	P	Peak DTA
1	2009-10-07 11:49:00	0	DTA	11	1	4	P	Peak DTA
1	2009-10-07 11:50:00	0	DTA	11	1	4	P	Peak DTA
1	2009-10-07 11:51:00	0	DTA	11	1	4	P	Peak DTA
1	2009-10-07 11:52:00	0	DTA	11	1	4	P	Peak DTA
1	2009-10-07 11:53:00	0	DTA	11	1	4	P	Peak DTA
1	2009-10-07 11:54:00	0	DTA	11	1	4	P	Peak DTA
1	2009-10-07 11:55:00	0	DTA	11	1	4	P	Peak DTA
1	2009-10-07 11:56:00	0	DTA	11	1	4	P	Peak DTA
1	2009-10-07 11:57:00	0	DTA	11	1	4	P	Peak DTA
1	2009-10-07 11:58:00	0	DTA	11	1	4	P	Peak DTA
1	2009-10-07 11:59:00	0	DTA	11	1	4	P	Peak DTA
1	2009-10-07 12:00:00	0	DTA	11	1	4	P	Peak DTA
1	2009-10-07 12:01:00	0	DTA	12	1	4	P	Peak DTA
1	2009-10-07 12:02:00	0	DTA	12	1	4	P	Peak DTA
1	2009-10-07 12:03:00	0	DTA	12	1	4	P	Peak DTA
1	2009-10-07 12:04:00	0	DTA	12	1	4	P	Peak DTA
1	2009-10-07 12:05:00	0	DTA	12	1	4	P	Peak DTA
1	2009-10-07 12:06:00	0	DTA	12	1	4	P	Peak DTA
1	2009-10-07 12:07:00	0	DTA	12	1	4	P	Peak DTA
1	2009-10-07 12:08:00	0	DTA	12	1	4	P	Peak DTA
1	2009-10-07 12:09:00	0	DTA	12	1	4	P	Peak DTA
1	2009-10-07 12:10:00	0	DTA	12	1	4	P	Peak DTA
1	2009-10-07 12:11:00	0	DTA	12	1	4	P	Peak DTA
1	2009-10-07 12:12:00	0	DTA	12	1	4	P	Peak DTA
1	2009-10-07 12:13:00	0	DTA	12	1	4	P	Peak DTA
1	2009-10-07 12:14:00	0	DTA	12	1	4	P	Peak DTA
1	2009-10-07 12:15:00	36	DTA	12	1	4	P	Peak DTA
1	2009-10-07 12:16:00	0	DTA	12	1	4	P	Peak DTA
1	2009-10-07 12:17:00	0	DTA	12	1	4	P	Peak DTA
1	2009-10-07 12:18:00	0	DTA	12	1	4	P	Peak DTA
1	2009-10-07 12:19:00	0	DTA	12	1	4	P	Peak DTA
1	2009-10-07 12:20:00	0	DTA	12	1	4	P	Peak DTA
1	2009-10-07 12:21:00	0	DTA	12	1	4	P	Peak DTA
1	2009-10-07 12:22:00	0	DTA	12	1	4	P	Peak DTA
1	2009-10-07 12:23:00	0	DTA	12	1	4	P	Peak DTA
1	2009-10-07 12:24:00	0	DTA	12	1	4	P	Peak DTA
1	2009-10-07 12:25:00	0	DTA	12	1	4	P	Peak DTA
1	2009-10-07 12:26:00	0	DTA	12	1	4	P	Peak DTA
1	2009-10-07 12:27:00	24	DTA	12	1	4	P	Peak DTA
1	2009-10-07 12:28:00	0	DTA	12	1	4	P	Peak DTA
1	2009-10-07 12:29:00	0	DTA	12	1	4	P	Peak DTA
1	2009-10-07 12:30:00	0	DTA	12	1	4	P	Peak DTA
1	2009-10-07 12:31:00	95	DTA	12	1	4	P	Peak DTA
1	2009-10-07 12:32:00	0	DTA	12	1	4	P	Peak DTA
1	2009-10-07 12:33:00	36	DTA	12	1	4	P	Peak DTA
1	2009-10-07 12:34:00	0	DTA	12	1	4	P	Peak DTA
1	2009-10-07 12:35:00	0	DTA	12	1	4	P	Peak DTA
1	2009-10-07 12:36:00	0	DTA	12	1	4	P	Peak DTA
1	2009-10-07 12:37:00	71	DTA	12	1	4	P	Peak DTA
1	2009-10-07 12:38:00	0	DTA	12	1	4	P	Peak DTA
1	2009-10-07 12:39:00	0	DTA	12	1	4	P	Peak DTA
1	2009-10-07 12:40:00	0	DTA	12	1	4	P	Peak DTA
1	2009-10-07 12:41:00	0	DTA	12	1	4	P	Peak DTA
1	2009-10-07 12:42:00	47	DTA	12	1	4	P	Peak DTA
1	2009-10-07 12:43:00	0	DTA	12	1	4	P	Peak DTA
1	2009-10-07 12:44:00	0	DTA	12	1	4	P	Peak DTA
1	2009-10-07 12:45:00	0	DTA	12	1	4	P	Peak DTA
1	2009-10-07 12:46:00	0	DTA	12	1	4	P	Peak DTA
1	2009-10-07 12:47:00	479	DTA	12	1	4	P	Peak DTA
1	2009-10-07 12:48:00	0	DTA	12	1	4	P	Peak DTA
1	2009-10-07 12:49:00	0	DTA	12	1	4	P	Peak DTA
1	2009-10-07 12:50:00	24	DTA	12	1	4	P	Peak DTA
1	2009-10-07 12:51:00	0	DTA	12	1	4	P	Peak DTA
1	2009-10-07 12:52:00	0	DTA	12	1	4	P	Peak DTA
1	2009-10-07 12:53:00	36	DTA	12	1	4	P	Peak DTA
1	2009-10-07 12:54:00	0	DTA	12	1	4	P	Peak DTA
1	2009-10-07 12:55:00	0	DTA	12	1	4	P	Peak DTA
1	2009-10-07 12:56:00	71	DTA	12	1	4	P	Peak DTA
1	2009-10-07 12:57:00	24	DTA	12	1	4	P	Peak DTA
1	2009-10-07 12:58:00	0	DTA	12	1	4	P	Peak DTA
1	2009-10-07 12:59:00	0	DTA	12	1	4	P	Peak DTA
1	2009-10-07 13:00:00	0	DTA	12	1	4	P	Peak DTA
1	2009-10-07 13:01:00	0	DTA	13	1	4	P	Peak DTA
1	2009-10-07 13:02:00	0	DTA	13	1	4	P	Peak DTA
1	2009-10-07 13:03:00	36	DTA	13	1	4	P	Peak DTA
1	2009-10-07 13:04:00	0	DTA	13	1	4	P	Peak DTA
1	2009-10-07 13:05:00	0	DTA	13	1	4	P	Peak DTA
1	2009-10-07 13:06:00	0	DTA	13	1	4	P	Peak DTA
1	2009-10-07 13:07:00	24	DTA	13	1	4	P	Peak DTA
1	2009-10-07 13:08:00	59	DTA	13	1	4	P	Peak DTA
1	2009-10-07 13:09:00	12	DTA	13	1	4	P	Peak DTA
1	2009-10-07 13:10:00	0	DTA	13	1	4	P	Peak DTA
1	2009-10-07 13:11:00	47	DTA	13	1	4	P	Peak DTA
1	2009-10-07 13:12:00	47	DTA	13	1	4	P	Peak DTA
1	2009-10-07 13:13:00	24	DTA	13	1	4	P	Peak DTA
1	2009-10-07 13:14:00	282	DTA	13	1	4	P	Peak DTA
1	2009-10-07 13:15:00	12	DTA	13	1	4	P	Peak DTA
1	2009-10-07 13:16:00	130	DTA	13	1	4	P	Peak DTA
1	2009-10-07 13:17:00	0	DTA	13	1	4	P	Peak DTA
1	2009-10-07 13:18:00	0	DTA	13	1	4	P	Peak DTA
1	2009-10-07 13:19:00	0	DTA	13	1	4	P	Peak DTA
1	2009-10-07 13:20:00	0	DTA	13	1	4	P	Peak DTA
1	2009-10-07 13:21:00	197	DTA	13	1	4	P	Peak DTA
1	2009-10-07 13:22:00	0	DTA	13	1	4	P	Peak DTA
1	2009-10-07 13:23:00	0	DTA	13	1	4	P	Peak DTA
1	2009-10-07 13:24:00	0	DTA	13	1	4	P	Peak DTA
1	2009-10-07 13:25:00	0	DTA	13	1	4	P	Peak DTA
1	2009-10-07 13:26:00	0	DTA	13	1	4	P	Peak DTA
1	2009-10-07 13:27:00	0	DTA	13	1	4	P	Peak DTA
1	2009-10-07 13:28:00	36	DTA	13	1	4	P	Peak DTA
1	2009-10-07 13:29:00	0	DTA	13	1	4	P	Peak DTA
1	2009-10-07 13:30:00	0	DTA	13	1	4	P	Peak DTA
1	2009-10-07 13:31:00	0	DTA	13	1	4	P	Peak DTA
1	2009-10-07 13:32:00	0	DTA	13	1	4	P	Peak DTA
1	2009-10-07 13:33:00	0	DTA	13	1	4	P	Peak DTA
1	2009-10-07 13:34:00	107	DTA	13	1	4	P	Peak DTA
1	2009-10-07 13:35:00	0	DTA	13	1	4	P	Peak DTA
1	2009-10-07 13:36:00	0	DTA	13	1	4	P	Peak DTA
1	2009-10-07 13:37:00	0	DTA	13	1	4	P	Peak DTA
1	2009-10-07 13:38:00	0	DTA	13	1	4	P	Peak DTA
1	2009-10-07 13:39:00	0	DTA	13	1	4	P	Peak DTA
1	2009-10-07 13:40:00	59	DTA	13	1	4	P	Peak DTA
1	2009-10-07 13:41:00	0	DTA	13	1	4	P	Peak DTA
1	2009-10-07 13:42:00	0	DTA	13	1	4	P	Peak DTA
1	2009-10-07 13:43:00	0	DTA	13	1	4	P	Peak DTA
1	2009-10-07 13:44:00	0	DTA	13	1	4	P	Peak DTA
1	2009-10-07 13:45:00	0	DTA	13	1	4	P	Peak DTA
1	2009-10-07 13:46:00	24	DTA	13	1	4	P	Peak DTA
1	2009-10-07 13:47:00	0	DTA	13	1	4	P	Peak DTA
1	2009-10-07 13:48:00	0	DTA	13	1	4	P	Peak DTA
1	2009-10-07 13:49:00	0	DTA	13	1	4	P	Peak DTA
1	2009-10-07 13:50:00	0	DTA	13	1	4	P	Peak DTA
1	2009-10-07 13:51:00	0	DTA	13	1	4	P	Peak DTA
1	2009-10-07 13:52:00	0	DTA	13	1	4	P	Peak DTA
1	2009-10-07 13:53:00	0	DTA	13	1	4	P	Peak DTA
1	2009-10-07 13:54:00	0	DTA	13	1	4	P	Peak DTA
1	2009-10-07 13:55:00	0	DTA	13	1	4	P	Peak DTA
1	2009-10-07 13:56:00	0	DTA	13	1	4	P	Peak DTA
1	2009-10-07 13:57:00	0	DTA	13	1	4	P	Peak DTA
1	2009-10-07 13:58:00	0	DTA	13	1	4	P	Peak DTA
1	2009-10-07 13:59:00	36	DTA	13	1	4	P	Peak DTA
1	2009-10-07 14:00:00	0	DTA	13	1	4	P	Peak DTA
1	2009-10-07 14:01:00	0	DTA	14	1	4	P	Peak DTA
1	2009-10-07 14:02:00	0	DTA	14	1	4	P	Peak DTA
1	2009-10-07 14:03:00	0	DTA	14	1	4	P	Peak DTA
1	2009-10-07 14:04:00	0	DTA	14	1	4	P	Peak DTA
1	2009-10-07 14:05:00	0	DTA	14	1	4	P	Peak DTA
1	2009-10-07 14:06:00	0	DTA	14	1	4	P	Peak DTA
1	2009-10-07 14:07:00	0	DTA	14	1	4	P	Peak DTA
1	2009-10-07 14:08:00	0	DTA	14	1	4	P	Peak DTA
1	2009-10-07 14:09:00	0	DTA	14	1	4	P	Peak DTA
1	2009-10-07 14:10:00	0	DTA	14	1	4	P	Peak DTA
1	2009-10-07 14:11:00	0	DTA	14	1	4	P	Peak DTA
1	2009-10-07 14:12:00	0	DTA	14	1	4	P	Peak DTA
1	2009-10-07 14:13:00	0	DTA	14	1	4	P	Peak DTA
1	2009-10-07 14:14:00	12	DTA	14	1	4	P	Peak DTA
1	2009-10-07 14:15:00	0	DTA	14	1	4	P	Peak DTA
1	2009-10-07 14:16:00	0	DTA	14	1	4	P	Peak DTA
1	2009-10-07 14:17:00	0	DTA	14	1	4	P	Peak DTA
1	2009-10-07 14:18:00	0	DTA	14	1	4	P	Peak DTA
1	2009-10-07 14:19:00	0	DTA	14	1	4	P	Peak DTA
1	2009-10-07 14:20:00	0	DTA	14	1	4	P	Peak DTA
1	2009-10-07 14:21:00	0	DTA	14	1	4	P	Peak DTA
1	2009-10-07 14:22:00	0	DTA	14	1	4	P	Peak DTA
1	2009-10-07 14:23:00	0	DTA	14	1	4	P	Peak DTA
1	2009-10-07 14:24:00	12	DTA	14	1	4	P	Peak DTA
1	2009-10-07 14:25:00	0	DTA	14	1	4	P	Peak DTA
1	2009-10-07 14:26:00	0	DTA	14	1	4	P	Peak DTA
1	2009-10-07 14:27:00	83	DTA	14	1	4	P	Peak DTA
1	2009-10-07 14:28:00	24	DTA	14	1	4	P	Peak DTA
1	2009-10-07 14:29:00	0	DTA	14	1	4	P	Peak DTA
1	2009-10-07 14:30:00	71	DTA	14	1	4	P	Peak DTA
1	2009-10-07 14:31:00	0	DTA	14	1	4	P	Peak DTA
1	2009-10-07 14:32:00	0	DTA	14	1	4	P	Peak DTA
1	2009-10-07 14:33:00	0	DTA	14	1	4	P	Peak DTA
1	2009-10-07 14:34:00	12	DTA	14	1	4	P	Peak DTA
1	2009-10-07 14:35:00	0	DTA	14	1	4	P	Peak DTA
1	2009-10-07 14:36:00	0	DTA	14	1	4	P	Peak DTA
1	2009-10-07 14:37:00	12	DTA	14	1	4	P	Peak DTA
1	2009-10-07 14:38:00	0	DTA	14	1	4	P	Peak DTA
1	2009-10-07 14:39:00	0	DTA	14	1	4	P	Peak DTA
1	2009-10-07 14:40:00	0	DTA	14	1	4	P	Peak DTA
1	2009-10-07 14:41:00	119	DTA	14	1	4	P	Peak DTA
1	2009-10-07 14:42:00	24	DTA	14	1	4	P	Peak DTA
1	2009-10-07 14:43:00	517	DTA	14	1	4	P	Peak DTA
1	2009-10-07 14:44:00	24	DTA	14	1	4	P	Peak DTA
1	2009-10-07 14:45:00	0	DTA	14	1	4	P	Peak DTA
1	2009-10-07 14:46:00	0	DTA	14	1	4	P	Peak DTA
1	2009-10-07 14:47:00	12	DTA	14	1	4	P	Peak DTA
1	2009-10-07 14:48:00	0	DTA	14	1	4	P	Peak DTA
1	2009-10-07 14:49:00	0	DTA	14	1	4	P	Peak DTA
1	2009-10-07 14:50:00	0	DTA	14	1	4	P	Peak DTA
1	2009-10-07 14:51:00	119	DTA	14	1	4	P	Peak DTA
1	2009-10-07 14:52:00	36	DTA	14	1	4	P	Peak DTA
1	2009-10-07 14:53:00	0	DTA	14	1	4	P	Peak DTA
1	2009-10-07 14:54:00	0	DTA	14	1	4	P	Peak DTA
1	2009-10-07 14:55:00	0	DTA	14	1	4	P	Peak DTA
1	2009-10-07 14:56:00	0	DTA	14	1	4	P	Peak DTA
1	2009-10-07 14:57:00	12	DTA	14	1	4	P	Peak DTA
1	2009-10-07 14:58:00	0	DTA	14	1	4	P	Peak DTA
1	2009-10-07 14:59:00	0	DTA	14	1	4	P	Peak DTA
1	2009-10-07 15:00:00	0	DTA	14	1	4	P	Peak DTA
1	2009-10-07 15:01:00	0	DTA	15	1	4	P	Peak DTA
1	2009-10-07 15:02:00	0	DTA	15	1	4	P	Peak DTA
1	2009-10-07 15:03:00	0	DTA	15	1	4	P	Peak DTA
1	2009-10-07 15:04:00	0	DTA	15	1	4	P	Peak DTA
1	2009-10-07 15:05:00	0	DTA	15	1	4	P	Peak DTA
1	2009-10-07 15:06:00	0	DTA	15	1	4	P	Peak DTA
1	2009-10-07 15:07:00	12	DTA	15	1	4	P	Peak DTA
1	2009-10-07 15:08:00	0	DTA	15	1	4	P	Peak DTA
1	2009-10-07 15:09:00	0	DTA	15	1	4	P	Peak DTA
1	2009-10-07 15:10:00	24	DTA	15	1	4	P	Peak DTA
1	2009-10-07 15:11:00	0	DTA	15	1	4	P	Peak DTA
1	2009-10-07 15:12:00	142	DTA	15	1	4	P	Peak DTA
1	2009-10-07 15:13:00	36	DTA	15	1	4	P	Peak DTA
1	2009-10-07 15:14:00	12	DTA	15	1	4	P	Peak DTA
1	2009-10-07 15:15:00	0	DTA	15	1	4	P	Peak DTA
1	2009-10-07 15:16:00	0	DTA	15	1	4	P	Peak DTA
1	2009-10-07 15:17:00	0	DTA	15	1	4	P	Peak DTA
1	2009-10-07 15:18:00	0	DTA	15	1	4	P	Peak DTA
1	2009-10-07 15:19:00	410	DTA	15	1	4	P	Peak DTA
1	2009-10-07 15:20:00	0	DTA	15	1	4	P	Peak DTA
1	2009-10-07 15:21:00	0	DTA	15	1	4	P	Peak DTA
1	2009-10-07 15:22:00	12	DTA	15	1	4	P	Peak DTA
1	2009-10-07 15:23:00	71	DTA	15	1	4	P	Peak DTA
1	2009-10-07 15:24:00	574	DTA	15	1	4	P	Peak DTA
1	2009-10-07 15:25:00	460	DTA	15	1	4	P	Peak DTA
1	2009-10-07 15:26:00	47	DTA	15	1	4	P	Peak DTA
1	2009-10-07 15:27:00	0	DTA	15	1	4	P	Peak DTA
1	2009-10-07 15:28:00	0	DTA	15	1	4	P	Peak DTA
1	2009-10-07 15:29:00	12	DTA	15	1	4	P	Peak DTA
1	2009-10-07 15:30:00	47	DTA	15	1	4	P	Peak DTA
1	2009-10-07 15:31:00	0	DTA	15	1	4	P	Peak DTA
1	2009-10-07 15:32:00	0	DTA	15	1	4	P	Peak DTA
1	2009-10-07 15:33:00	0	DTA	15	1	4	P	Peak DTA
1	2009-10-07 15:34:00	0	DTA	15	1	4	P	Peak DTA
1	2009-10-07 15:35:00	0	DTA	15	1	4	P	Peak DTA
1	2009-10-07 15:36:00	0	DTA	15	1	4	P	Peak DTA
1	2009-10-07 15:37:00	0	DTA	15	1	4	P	Peak DTA
1	2009-10-07 15:38:00	0	DTA	15	1	4	P	Peak DTA
1	2009-10-07 15:39:00	0	DTA	15	1	4	P	Peak DTA
1	2009-10-07 15:40:00	740	DTA	15	1	4	P	Peak DTA
1	2009-10-07 15:41:00	785	DTA	15	1	4	P	Peak DTA
1	2009-10-07 15:42:00	2356	DTA	15	1	4	P	Peak DTA
1	2009-10-07 15:43:00	536	DTA	15	1	4	P	Peak DTA
1	2009-10-07 15:44:00	268	DTA	15	1	4	P	Peak DTA
1	2009-10-07 15:45:00	268	DTA	15	1	4	P	Peak DTA
1	2009-10-07 15:46:00	83	DTA	15	1	4	P	Peak DTA
1	2009-10-07 15:47:00	0	DTA	15	1	4	P	Peak DTA
1	2009-10-07 15:48:00	832	DTA	15	1	4	P	Peak DTA
1	2009-10-07 15:49:00	808	DTA	15	1	4	P	Peak DTA
1	2009-10-07 15:50:00	1031	DTA	15	1	4	P	Peak DTA
1	2009-10-07 15:51:00	311	DTA	15	1	4	P	Peak DTA
1	2009-10-07 15:52:00	785	DTA	15	1	4	P	Peak DTA
1	2009-10-07 15:53:00	393	DTA	15	1	4	P	Peak DTA
1	2009-10-07 15:54:00	2309	DTA	15	1	4	P	Peak DTA
1	2009-10-07 15:55:00	12	DTA	15	1	4	P	Peak DTA
1	2009-10-07 15:56:00	718	DTA	15	1	4	P	Peak DTA
1	2009-10-07 15:57:00	443	DTA	15	1	4	P	Peak DTA
1	2009-10-07 15:58:00	0	DTA	15	1	4	P	Peak DTA
1	2009-10-07 15:59:00	0	DTA	15	1	4	P	Peak DTA
1	2009-10-07 16:00:00	0	DTA	15	1	4	P	Peak DTA
1	2009-10-07 16:01:00	36	DTA	16	1	4	P	Peak DTA
1	2009-10-07 16:02:00	410	DTA	16	1	4	P	Peak DTA
1	2009-10-07 16:03:00	808	DTA	16	1	4	P	Peak DTA
1	2009-10-07 16:04:00	427	DTA	16	1	4	P	Peak DTA
1	2009-10-07 16:05:00	0	DTA	16	1	4	P	Peak DTA
1	2009-10-07 16:06:00	0	DTA	16	1	4	P	Peak DTA
1	2009-10-07 16:07:00	59	DTA	16	1	4	P	Peak DTA
1	2009-10-07 16:08:00	197	DTA	16	1	4	P	Peak DTA
1	2009-10-07 16:09:00	0	DTA	16	1	4	P	Peak DTA
1	2009-10-07 16:10:00	0	DTA	16	1	4	P	Peak DTA
1	2009-10-07 16:11:00	296	DTA	16	1	4	P	Peak DTA
1	2009-10-07 16:12:00	12	DTA	16	1	4	P	Peak DTA
1	2009-10-07 16:13:00	0	DTA	16	1	4	P	Peak DTA
1	2009-10-07 16:14:00	24	DTA	16	1	4	P	Peak DTA
1	2009-10-07 16:15:00	0	DTA	16	1	4	P	Peak DTA
1	2009-10-07 16:16:00	344	DTA	16	1	4	P	Peak DTA
1	2009-10-07 16:17:00	574	DTA	16	1	4	P	Peak DTA
1	2009-10-07 16:18:00	0	DTA	16	1	4	P	Peak DTA
1	2009-10-07 16:19:00	0	DTA	16	1	4	P	Peak DTA
1	2009-10-07 16:20:00	12	DTA	16	1	4	P	Peak DTA
1	2009-10-07 16:21:00	574	DTA	16	1	4	P	Peak DTA
1	2009-10-07 16:22:00	927	DTA	16	1	4	P	Peak DTA
1	2009-10-07 16:23:00	479	DTA	16	1	4	P	Peak DTA
1	2009-10-07 16:24:00	239	DTA	16	1	4	P	Peak DTA
1	2009-10-07 16:25:00	12	DTA	16	1	4	P	Peak DTA
1	2009-10-07 16:26:00	0	DTA	16	1	4	P	Peak DTA
1	2009-10-07 16:27:00	0	DTA	16	1	4	P	Peak DTA
1	2009-10-07 16:28:00	0	DTA	16	1	4	P	Peak DTA
1	2009-10-07 16:29:00	0	DTA	16	1	4	P	Peak DTA
1	2009-10-07 16:30:00	12	DTA	16	1	4	P	Peak DTA
1	2009-10-07 16:31:00	24	DTA	16	1	4	P	Peak DTA
1	2009-10-07 16:32:00	197	DTA	16	1	4	P	Peak DTA
1	2009-10-07 16:33:00	393	DTA	16	1	4	P	Peak DTA
1	2009-10-07 16:34:00	142	DTA	16	1	4	P	Peak DTA
1	2009-10-07 16:35:00	0	DTA	16	1	4	P	Peak DTA
1	2009-10-07 16:36:00	12	DTA	16	1	4	P	Peak DTA
1	2009-10-07 16:37:00	377	DTA	16	1	4	P	Peak DTA
1	2009-10-07 16:38:00	1112	DTA	16	1	4	P	Peak DTA
1	2009-10-07 16:39:00	517	DTA	16	1	4	P	Peak DTA
1	2009-10-07 16:40:00	197	DTA	16	1	4	P	Peak DTA
1	2009-10-07 16:41:00	785	DTA	16	1	4	P	Peak DTA
1	2009-10-07 16:42:00	119	DTA	16	1	4	P	Peak DTA
1	2009-10-07 16:43:00	676	DTA	16	1	4	P	Peak DTA
1	2009-10-07 16:44:00	427	DTA	16	1	4	P	Peak DTA
1	2009-10-07 16:45:00	211	DTA	16	1	4	P	Peak DTA
1	2009-10-07 16:46:00	676	DTA	16	1	4	P	Peak DTA
1	2009-10-07 16:47:00	633	DTA	16	1	4	P	Peak DTA
1	2009-10-07 16:48:00	197	DTA	16	1	4	P	Peak DTA
1	2009-10-07 16:49:00	183	DTA	16	1	4	P	Peak DTA
1	2009-10-07 16:50:00	410	DTA	16	1	4	P	Peak DTA
1	2009-10-07 16:51:00	0	DTA	16	1	4	P	Peak DTA
1	2009-10-07 16:52:00	12	DTA	16	1	4	P	Peak DTA
1	2009-10-07 16:53:00	0	DTA	16	1	4	P	Peak DTA
1	2009-10-07 16:54:00	0	DTA	16	1	4	P	Peak DTA
1	2009-10-07 16:55:00	0	DTA	16	1	4	P	Peak DTA
1	2009-10-07 16:56:00	0	DTA	16	1	4	P	Peak DTA
1	2009-10-07 16:57:00	0	DTA	16	1	4	P	Peak DTA
1	2009-10-07 16:58:00	211	DTA	16	1	4	P	Peak DTA
1	2009-10-07 16:59:00	427	DTA	16	1	4	P	Peak DTA
1	2009-10-07 17:00:00	211	DTA	16	1	4	P	Peak DTA
1	2009-10-07 17:01:00	24	DTA	17	1	4	P	Peak DTA
1	2009-10-07 17:02:00	0	DTA	17	1	4	P	Peak DTA
1	2009-10-07 17:03:00	0	DTA	17	1	4	P	Peak DTA
1	2009-10-07 17:04:00	327	DTA	17	1	4	P	Peak DTA
1	2009-10-07 17:05:00	211	DTA	17	1	4	P	Peak DTA
1	2009-10-07 17:06:00	119	DTA	17	1	4	P	Peak DTA
1	2009-10-07 17:07:00	47	DTA	17	1	4	P	Peak DTA
1	2009-10-07 17:08:00	393	DTA	17	1	4	P	Peak DTA
1	2009-10-07 17:09:00	119	DTA	17	1	4	P	Peak DTA
1	2009-10-07 17:10:00	83	DTA	17	1	4	P	Peak DTA
1	2009-10-07 17:11:00	1318	DTA	17	1	4	P	Peak DTA
1	2009-10-07 17:12:00	225	DTA	17	1	4	P	Peak DTA
1	2009-10-07 17:13:00	427	DTA	17	1	4	P	Peak DTA
1	2009-10-07 17:14:00	268	DTA	17	1	4	P	Peak DTA
1	2009-10-07 17:15:00	83	DTA	17	1	4	P	Peak DTA
1	2009-10-07 17:16:00	0	DTA	17	1	4	P	Peak DTA
1	2009-10-07 17:17:00	0	DTA	17	1	4	P	Peak DTA
1	2009-10-07 17:18:00	12	DTA	17	1	4	P	Peak DTA
1	2009-10-07 17:19:00	59	DTA	17	1	4	P	Peak DTA
1	2009-10-07 17:20:00	12	DTA	17	1	4	P	Peak DTA
1	2009-10-07 17:21:00	2451	DTA	17	1	4	P	Peak DTA
1	2009-10-07 17:22:00	282	DTA	17	1	4	P	Peak DTA
1	2009-10-07 17:23:00	12	DTA	17	1	4	P	Peak DTA
1	2009-10-07 17:24:00	410	DTA	17	1	4	P	Peak DTA
1	2009-10-07 17:25:00	12	DTA	17	1	4	P	Peak DTA
1	2009-10-07 17:26:00	327	DTA	17	1	4	P	Peak DTA
1	2009-10-07 17:27:00	239	DTA	17	1	4	P	Peak DTA
1	2009-10-07 17:28:00	24	DTA	17	1	4	P	Peak DTA
1	2009-10-07 17:29:00	0	DTA	17	1	4	P	Peak DTA
1	2009-10-07 17:30:00	36	DTA	17	1	4	P	Peak DTA
1	2009-10-07 17:31:00	24	DTA	17	1	4	P	Peak DTA
1	2009-10-07 17:32:00	0	DTA	17	1	4	P	Peak DTA
1	2009-10-07 17:33:00	0	DTA	17	1	4	P	Peak DTA
1	2009-10-07 17:34:00	12	DTA	17	1	4	P	Peak DTA
1	2009-10-07 17:35:00	47	DTA	17	1	4	P	Peak DTA
1	2009-10-07 17:36:00	0	DTA	17	1	4	P	Peak DTA
1	2009-10-07 17:37:00	0	DTA	17	1	4	P	Peak DTA
1	2009-10-07 17:38:00	12	DTA	17	1	4	P	Peak DTA
1	2009-10-07 17:39:00	12	DTA	17	1	4	P	Peak DTA
1	2009-10-07 17:40:00	12	DTA	17	1	4	P	Peak DTA
1	2009-10-07 17:41:00	24	DTA	17	1	4	P	Peak DTA
1	2009-10-07 17:42:00	24	DTA	17	1	4	P	Peak DTA
1	2009-10-07 17:43:00	239	DTA	17	1	4	P	Peak DTA
1	2009-10-07 17:44:00	360	DTA	17	1	4	P
1	2009-10-07 17:45:00	254	DTA	17	1	4	P
1	2009-10-07 17:46:00	633	DTA	17	1	4	P
1	2009-10-07 17:47:00	427	DTA	17	1	4	P
1	2009-10-07 17:48:00	268	DTA	17	1	4	P
1	2009-10-07 17:49:00	1479	DTA	17	1	4	P
1	2009-10-07 17:50:00	239	DTA	17	1	4	P
1	2009-10-07 17:51:00	282	DTA	17	1	4	P
1	2009-10-07 17:52:00	979	DTA	17	1	4	P
1	2009-10-07 17:53:00	311	DTA	17	1	4	P
1	2009-10-07 17:54:00	393	DTA	17	1	4	P
1	2009-10-07 17:55:00	427	DTA	17	1	4	P
1	2009-10-07 17:56:00	0	DTA	17	1	4	P
1	2009-10-07 17:57:00	0	DTA	17	1	4	P
1	2009-10-07 17:58:00	0	DTA	17	1	4	P
1	2009-10-07 17:59:00	0	DTA	17	1	4	P
1	2009-10-07 18:00:00	0	DTA	17	1	4	P
1	2009-10-07 18:01:00	0	DTA	18	1	4	P
1	2009-10-07 18:02:00	0	DTA	18	1	4	P
1	2009-10-07 18:03:00	0	DTA	18	1	4	P
1	2009-10-07 18:04:00	0	DTA	18	1	4	P
1	2009-10-07 18:05:00	12	DTA	18	1	4	P
1	2009-10-07 18:06:00	59	DTA	18	1	4	P
1	2009-10-07 18:07:00	12	DTA	18	1	4	P
1	2009-10-07 18:08:00	0	DTA	18	1	4	P
1	2009-10-07 18:09:00	12	DTA	18	1	4	P
1	2009-10-07 18:10:00	12	DTA	18	1	4	P
1	2009-10-07 18:11:00	0	DTA	18	1	4	P
1	2009-10-07 18:12:00	536	DTA	18	1	4	P
1	2009-10-07 18:13:00	0	DTA	18	1	4	P
1	2009-10-07 18:14:00	0	DTA	18	1	4	P
1	2009-10-07 18:15:00	0	DTA	18	1	4	P
1	2009-10-07 18:16:00	0	DTA	18	1	4	P
1	2009-10-07 18:17:00	36	DTA	18	1	4	P
1	2009-10-07 18:18:00	0	DTA	18	1	4	P
1	2009-10-07 18:19:00	12	DTA	18	1	4	P
1	2009-10-07 18:20:00	12	DTA	18	1	4	P
1	2009-10-07 18:21:00	24	DTA	18	1	4	P
1	2009-10-07 18:22:00	0	DTA	18	1	4	P
1	2009-10-07 18:23:00	0	DTA	18	1	4	P
1	2009-10-07 18:24:00	0	DTA	18	1	4	P
1	2009-10-07 18:25:00	0	DTA	18	1	4	P
1	2009-10-07 18:26:00	12	DTA	18	1	4	P
1	2009-10-07 18:27:00	36	DTA	18	1	4	P
1	2009-10-07 18:28:00	254	DTA	18	1	4	P
1	2009-10-07 18:29:00	327	DTA	18	1	4	P
1	2009-10-07 18:30:00	239	DTA	18	1	4	P
1	2009-10-07 18:31:00	0	DTA	18	1	4	P
1	2009-10-07 18:32:00	0	DTA	18	1	4	P
1	2009-10-07 18:33:00	0	DTA	18	1	4	P
1	2009-10-07 18:34:00	0	DTA	18	1	4	P
1	2009-10-07 18:35:00	0	DTA	18	1	4	P
1	2009-10-07 18:36:00	327	DTA	18	1	4	P
1	2009-10-07 18:37:00	0	DTA	18	1	4	P
1	2009-10-07 18:38:00	95	DTA	18	1	4	P
1	2009-10-07 18:39:00	197	DTA	18	1	4	P
1	2009-10-07 18:40:00	0	DTA	18	1	4	P
1	2009-10-07 18:41:00	24	DTA	18	1	4	P
1	2009-10-07 18:42:00	0	DTA	18	1	4	P
1	2009-10-07 18:43:00	0	DTA	18	1	4	P
1	2009-10-07 18:44:00	12	DTA	18	1	4	P
1	2009-10-07 18:45:00	0	DTA	18	1	4	P
1	2009-10-07 18:46:00	59	DTA	18	1	4	P
1	2009-10-07 18:47:00	12	DTA	18	1	4	P
1	2009-10-07 18:48:00	268	DTA	18	1	4	P
1	2009-10-07 18:49:00	225	DTA	18	1	4	P
1	2009-10-07 18:50:00	0	DTA	18	1	4	P
1	2009-10-07 18:51:00	0	DTA	18	1	4	P
1	2009-10-07 18:52:00	0	DTA	18	1	4	P
1	2009-10-07 18:53:00	0	DTA	18	1	4	P
1	2009-10-07 18:54:00	0	DTA	18	1	4	P
1	2009-10-07 18:55:00	0	DTA	18	1	4	P
1	2009-10-07 18:56:00	24	DTA	18	1	4	P
1	2009-10-07 18:57:00	0	DTA	18	1	4	P
1	2009-10-07 18:58:00	0	DTA	18	1	4	P
1	2009-10-07 18:59:00	0	DTA	18	1	4	P
1	2009-10-07 19:00:00	24	DTA	18	1	4	P
1	2009-10-07 19:01:00	0	DTA	19	1	4	P
1	2009-10-07 19:02:00	0	DTA	19	1	4	P
1	2009-10-07 19:03:00	0	DTA	19	1	4	P
1	2009-10-07 19:04:00	0	DTA	19	1	4	P
1	2009-10-07 19:05:00	0	DTA	19	1	4	P
1	2009-10-07 19:06:00	0	DTA	19	1	4	P
1	2009-10-07 19:07:00	0	DTA	19	1	4	P
1	2009-10-07 19:08:00	0	DTA	19	1	4	P
1	2009-10-07 19:09:00	12	DTA	19	1	4	P
1	2009-10-07 19:10:00	0	DTA	19	1	4	P
1	2009-10-07 19:11:00	0	DTA	19	1	4	P
1	2009-10-07 19:12:00	24	DTA	19	1	4	P
1	2009-10-07 19:13:00	0	DTA	19	1	4	P
1	2009-10-07 19:14:00	24	DTA	19	1	4	P
1	2009-10-07 19:15:00	0	DTA	19	1	4	P
1	2009-10-07 19:16:00	0	DTA	19	1	4	P
1	2009-10-07 19:17:00	130	DTA	19	1	4	P
1	2009-10-07 19:18:00	360	DTA	19	1	4	P
1	2009-10-07 19:19:00	0	DTA	19	1	4	P
1	2009-10-07 19:20:00	24	DTA	19	1	4	P
1	2009-10-07 19:21:00	12	DTA	19	1	4	P
1	2009-10-07 19:22:00	47	DTA	19	1	4	P
1	2009-10-07 19:23:00	0	DTA	19	1	4	P
1	2009-10-07 19:24:00	0	DTA	19	1	4	P
1	2009-10-07 19:25:00	36	DTA	19	1	4	P
1	2009-10-07 19:26:00	0	DTA	19	1	4	P
1	2009-10-07 19:27:00	0	DTA	19	1	4	P
1	2009-10-07 19:28:00	59	DTA	19	1	4	P
1	2009-10-07 19:29:00	410	DTA	19	1	4	P
1	2009-10-07 19:30:00	0	DTA	19	1	4	P
1	2009-10-07 19:31:00	0	DTA	19	1	4	P
1	2009-10-07 19:32:00	36	DTA	19	1	4	P
1	2009-10-07 19:33:00	183	DTA	19	1	4	P
1	2009-10-07 19:34:00	83	DTA	19	1	4	P
1	2009-10-07 19:35:00	0	DTA	19	1	4	P
1	2009-10-07 19:36:00	0	DTA	19	1	4	P
1	2009-10-07 19:37:00	0	DTA	19	1	4	P
1	2009-10-07 19:38:00	0	DTA	19	1	4	P
1	2009-10-07 19:39:00	0	DTA	19	1	4	P
1	2009-10-07 19:40:00	0	DTA	19	1	4	P
1	2009-10-07 19:41:00	0	DTA	19	1	4	P
1	2009-10-07 19:42:00	0	DTA	19	1	4	P
1	2009-10-07 19:43:00	0	DTA	19	1	4	P
1	2009-10-07 19:44:00	0	DTA	19	1	4	P
1	2009-10-07 19:45:00	0	DTA	19	1	4	P
1	2009-10-07 19:46:00	0	DTA	19	1	4	P
1	2009-10-07 19:47:00	0	DTA	19	1	4	P
1	2009-10-07 19:48:00	0	DTA	19	1	4	P
1	2009-10-07 19:49:00	0	DTA	19	1	4	P
1	2009-10-07 19:50:00	0	DTA	19	1	4	P
1	2009-10-07 19:51:00	0	DTA	19	1	4	P
1	2009-10-07 19:52:00	0	DTA	19	1	4	P
1	2009-10-07 19:53:00	0	DTA	19	1	4	P
1	2009-10-07 19:54:00	0	DTA	19	1	4	P
1	2009-10-07 19:55:00	47	DTA	19	1	4	P
1	2009-10-07 19:56:00	0	DTA	19	1	4	P
1	2009-10-07 19:57:00	0	DTA	19	1	4	P
1	2009-10-07 19:58:00	0	DTA	19	1	4	P
1	2009-10-07 19:59:00	0	DTA	19	1	4	P
1	2009-10-07 20:00:00	0	DTA	19	1	4	P
1	2009-10-07 20:01:00	0	NTA	20	2	4	P
1	2009-10-07 20:02:00	0	NTA	20	2	4	P
1	2009-10-07 20:03:00	0	NTA	20	2	4	P
1	2009-10-07 20:04:00	0	NTA	20	2	4	P
1	2009-10-07 20:05:00	0	NTA	20	2	4	P
1	2009-10-07 20:06:00	0	NTA	20	2	4	P
1	2009-10-07 20:07:00	0	NTA	20	2	4	P
1	2009-10-07 20:08:00	0	NTA	20	2	4	P
1	2009-10-07 20:09:00	0	NTA	20	2	4	P
1	2009-10-07 20:10:00	0	NTA	20	2	4	P
1	2009-10-07 20:11:00	0	NTA	20	2	4	P
1	2009-10-07 20:12:00	0	NTA	20	2	4	P
1	2009-10-07 20:13:00	0	NTA	20	2	4	P
1	2009-10-07 20:14:00	0	NTA	20	2	4	P
1	2009-10-07 20:15:00	0	NTA	20	2	4	P
1	2009-10-07 20:16:00	0	NTA	20	2	4	P
1	2009-10-07 20:17:00	0	NTA	20	2	4	P
1	2009-10-07 20:18:00	0	NTA	20	2	4	P
1	2009-10-07 20:19:00	0	NTA	20	2	4	P
1	2009-10-07 20:20:00	0	NTA	20	2	4	P
1	2009-10-07 20:21:00	0	NTA	20	2	4	P
1	2009-10-07 20:22:00	0	NTA	20	2	4	P
1	2009-10-07 20:23:00	0	NTA	20	2	4	P
1	2009-10-07 20:24:00	0	NTA	20	2	4	P
1	2009-10-07 20:25:00	47	NTA	20	2	4	P
1	2009-10-07 20:26:00	0	NTA	20	2	4	P
1	2009-10-07 20:27:00	0	NTA	20	2	4	P
1	2009-10-07 20:28:00	0	NTA	20	2	4	P
1	2009-10-07 20:29:00	0	NTA	20	2	4	P
1	2009-10-07 20:30:00	0	NTA	20	2	4	P
1	2009-10-07 20:31:00	0	NTA	20	2	4	P
1	2009-10-07 20:32:00	0	NTA	20	2	4	P
1	2009-10-07 20:33:00	0	NTA	20	2	4	P
1	2009-10-07 20:34:00	0	NTA	20	2	4	P
1	2009-10-07 20:35:00	0	NTA	20	2	4	P
1	2009-10-07 20:36:00	0	NTA	20	2	4	P
1	2009-10-07 20:37:00	0	NTA	20	2	4	P
1	2009-10-07 20:38:00	0	NTA	20	2	4	P
1	2009-10-07 20:39:00	0	NTA	20	2	4	P
1	2009-10-07 20:40:00	0	NTA	20	2	4	P
1	2009-10-07 20:41:00	0	NTA	20	2	4	P
1	2009-10-07 20:42:00	0	NTA	20	2	4	P
1	2009-10-07 20:43:00	119	NTA	20	2	4	P
1	2009-10-07 20:44:00	59	NTA	20	2	4	P
1	2009-10-07 20:45:00	536	NTA	20	2	4	P
1	2009-10-07 20:46:00	0	NTA	20	2	4	P
1	2009-10-07 20:47:00	24	NTA	20	2	4	P
1	2009-10-07 20:48:00	0	NTA	20	2	4	P
1	2009-10-07 20:49:00	0	NTA	20	2	4	P
1	2009-10-07 20:50:00	0	NTA	20	2	4	P
1	2009-10-07 20:51:00	0	NTA	20	2	4	P
1	2009-10-07 20:52:00	0	NTA	20	2	4	P
1	2009-10-07 20:53:00	0	NTA	20	2	4	P
1	2009-10-07 20:54:00	0	NTA	20	2	4	P
1	2009-10-07 20:55:00	0	NTA	20	2	4	P
1	2009-10-07 20:56:00	0	NTA	20	2	4	P
1	2009-10-07 20:57:00	0	NTA	20	2	4	P
1	2009-10-07 20:58:00	0	NTA	20	2	4	P
1	2009-10-07 20:59:00	0	NTA	20	2	4	P
1	2009-10-07 21:00:00	0	NTA	20	2	4	P
1	2009-10-07 21:01:00	0	NTA	21	2	4	P
1	2009-10-07 21:02:00	0	NTA	21	2	4	P
1	2009-10-07 21:03:00	0	NTA	21	2	4	P
1	2009-10-07 21:04:00	0	NTA	21	2	4	P
1	2009-10-07 21:05:00	0	NTA	21	2	4	P
1	2009-10-07 21:06:00	0	NTA	21	2	4	P
1	2009-10-07 21:07:00	0	NTA	21	2	4	P
1	2009-10-07 21:08:00	0	NTA	21	2	4	P
1	2009-10-07 21:09:00	0	NTA	21	2	4	P
1	2009-10-07 21:10:00	0	NTA	21	2	4	P
1	2009-10-07 21:11:00	0	NTA	21	2	4	P
1	2009-10-07 21:12:00	0	NTA	21	2	4	P
1	2009-10-07 21:13:00	0	NTA	21	2	4	P
1	2009-10-07 21:14:00	0	NTA	21	2	4	P
1	2009-10-07 21:15:00	0	NTA	21	2	4	P
1	2009-10-07 21:16:00	0	NTA	21	2	4	P
1	2009-10-07 21:17:00	0	NTA	21	2	4	P
1	2009-10-07 21:18:00	0	NTA	21	2	4	P
1	2009-10-07 21:19:00	0	NTA	21	2	4	P
1	2009-10-07 21:20:00	0	NTA	21	2	4	P
1	2009-10-07 21:21:00	0	NTA	21	2	4	P
1	2009-10-07 21:22:00	0	NTA	21	2	4	P
1	2009-10-07 21:23:00	0	NTA	21	2	4	P
1	2009-10-07 21:24:00	0	NTA	21	2	4	P
1	2009-10-07 21:25:00	59	NTA	21	2	4	P
1	2009-10-07 21:26:00	0	NTA	21	2	4	P
1	2009-10-07 21:27:00	311	NTA	21	2	4	P
1	2009-10-07 21:28:00	12	NTA	21	2	4	P
1	2009-10-07 21:29:00	0	NTA	21	2	4	P
1	2009-10-07 21:30:00	0	NTA	21	2	4	P
1	2009-10-07 21:31:00	0	NTA	21	2	4	P
1	2009-10-07 21:32:00	0	NTA	21	2	4	P
1	2009-10-07 21:33:00	0	NTA	21	2	4	P
1	2009-10-07 21:34:00	0	NTA	21	2	4	P
1	2009-10-07 21:35:00	0	NTA	21	2	4	P
1	2009-10-07 21:36:00	0	NTA	21	2	4	P
1	2009-10-07 21:37:00	0	NTA	21	2	4	P
1	2009-10-07 21:38:00	0	NTA	21	2	4	P
1	2009-10-07 21:39:00	0	NTA	21	2	4	P
1	2009-10-07 21:40:00	0	NTA	21	2	4	P
1	2009-10-07 21:41:00	0	NTA	21	2	4	P
1	2009-10-07 21:42:00	0	NTA	21	2	4	P
1	2009-10-07 21:43:00	0	NTA	21	2	4	P
1	2009-10-07 21:44:00	0	NTA	21	2	4	P
1	2009-10-07 21:45:00	0	NTA	21	2	4	P
1	2009-10-07 21:46:00	0	NTA	21	2	4	P
1	2009-10-07 21:47:00	0	NTA	21	2	4	P
1	2009-10-07 21:48:00	0	NTA	21	2	4	P
1	2009-10-07 21:49:00	0	NTA	21	2	4	P
1	2009-10-07 21:50:00	0	NTA	21	2	4	P
1	2009-10-07 21:51:00	0	NTA	21	2	4	P
1	2009-10-07 21:52:00	0	NTA	21	2	4	P
1	2009-10-07 21:53:00	0	NTA	21	2	4	P
1	2009-10-07 21:54:00	71	NTA	21	2	4	P
1	2009-10-07 21:55:00	0	NTA	21	2	4	P
1	2009-10-07 21:56:00	0	NTA	21	2	4	P
1	2009-10-07 21:57:00	0	NTA	21	2	4	P
1	2009-10-07 21:58:00	0	NTA	21	2	4	P
1	2009-10-07 21:59:00	0	NTA	21	2	4	P
1	2009-10-07 22:00:00	0	NTA	21	2	4	P
1	2009-10-07 22:01:00	0	NTA	22	2	4	P
1	2009-10-07 22:02:00	0	NTA	22	2	4	P
1	2009-10-07 22:03:00	0	NTA	22	2	4	P
1	2009-10-07 22:04:00	0	NTA	22	2	4	P
1	2009-10-07 22:05:00	0	NTA	22	2	4	P
1	2009-10-07 22:06:00	0	NTA	22	2	4	P
1	2009-10-07 22:07:00	0	NTA	22	2	4	P
1	2009-10-07 22:08:00	0	NTA	22	2	4	P
1	2009-10-07 22:09:00	0	NTA	22	2	4	P
1	2009-10-07 22:10:00	0	NTA	22	2	4	P
1	2009-10-07 22:11:00	0	NTA	22	2	4	P
1	2009-10-07 22:12:00	0	NTA	22	2	4	P
1	2009-10-07 22:13:00	0	NTA	22	2	4	P
1	2009-10-07 22:14:00	0	NTA	22	2	4	P
1	2009-10-07 22:15:00	0	NTA	22	2	4	P
1	2009-10-07 22:16:00	0	NTA	22	2	4	P
1	2009-10-07 22:17:00	0	NTA	22	2	4	P
1	2009-10-07 22:18:00	0	NTA	22	2	4	P
1	2009-10-07 22:19:00	0	NTA	22	2	4	P
1	2009-10-07 22:20:00	0	NTA	22	2	4	P
1	2009-10-07 22:21:00	0	NTA	22	2	4	P
1	2009-10-07 22:22:00	0	NTA	22	2	4	P
1	2009-10-07 22:23:00	0	NTA	22	2	4	P
1	2009-10-07 22:24:00	0	NTA	22	2	4	P
1	2009-10-07 22:25:00	0	NTA	22	2	4	P
1	2009-10-07 22:26:00	0	NTA	22	2	4	P
1	2009-10-07 22:27:00	12	NTA	22	2	4	P
1	2009-10-07 22:28:00	47	NTA	22	2	4	P
1	2009-10-07 22:29:00	12	NTA	22	2	4	P
1	2009-10-07 22:30:00	0	NTA	22	2	4	P
1	2009-10-07 22:31:00	0	NTA	22	2	4	P
1	2009-10-07 22:32:00	0	NTA	22	2	4	P
1	2009-10-07 22:33:00	0	NTA	22	2	4	P
1	2009-10-07 22:34:00	0	NTA	22	2	4	P
1	2009-10-07 22:35:00	0	NTA	22	2	4	P
1	2009-10-07 22:36:00	0	NTA	22	2	4	P
1	2009-10-07 22:37:00	12	NTA	22	2	4	P
1	2009-10-07 22:38:00	0	NTA	22	2	4	P
1	2009-10-07 22:39:00	0	NTA	22	2	4	P
1	2009-10-07 22:40:00	0	NTA	22	2	4	P
1	2009-10-07 22:41:00	0	NTA	22	2	4	P
1	2009-10-07 22:42:00	0	NTA	22	2	4	P
1	2009-10-07 22:43:00	0	NTA	22	2	4	P
1	2009-10-07 22:44:00	0	NTA	22	2	4	P
1	2009-10-07 22:45:00	0	NTA	22	2	4	P
1	2009-10-07 22:46:00	0	NTA	22	2	4	P
1	2009-10-07 22:47:00	0	NTA	22	2	4	P
1	2009-10-07 22:48:00	0	NTA	22	2	4	P
1	2009-10-07 22:49:00	0	NTA	22	2	4	P
1	2009-10-07 22:50:00	0	NTA	22	2	4	P
1	2009-10-07 22:51:00	0	NTA	22	2	4	P
1	2009-10-07 22:52:00	0	NTA	22	2	4	P
1	2009-10-07 22:53:00	0	NTA	22	2	4	P
1	2009-10-07 22:54:00	0	NTA	22	2	4	P
1	2009-10-07 22:55:00	0	NTA	22	2	4	P
1	2009-10-07 22:56:00	0	NTA	22	2	4	P
1	2009-10-07 22:57:00	0	NTA	22	2	4	P
1	2009-10-07 22:58:00	0	NTA	22	2	4	P
1	2009-10-07 22:59:00	0	NTA	22	2	4	P
1	2009-10-07 23:00:00	0	NTA	22	2	4	P
1	2009-10-07 23:01:00	0	NTA	23	2	4	P
1	2009-10-07 23:02:00	0	NTA	23	2	4	P
1	2009-10-07 23:03:00	0	NTA	23	2	4	P
1	2009-10-07 23:04:00	0	NTA	23	2	4	P
1	2009-10-07 23:05:00	0	NTA	23	2	4	P
1	2009-10-07 23:06:00	0	NTA	23	2	4	P
1	2009-10-07 23:07:00	12	NTA	23	2	4	P
1	2009-10-07 23:08:00	12	NTA	23	2	4	P
1	2009-10-07 23:09:00	130	NTA	23	2	4	P
1	2009-10-07 23:10:00	856	NTA	23	2	4	P
1	2009-10-07 23:11:00	12	NTA	23	2	4	P
1	2009-10-07 23:12:00	47	NTA	23	2	4	P
1	2009-10-07 23:13:00	59	NTA	23	2	4	P
1	2009-10-07 23:14:00	239	NTA	23	2	4	P
1	2009-10-07 23:15:00	410	NTA	23	2	4	P
1	2009-10-07 23:16:00	130	NTA	23	2	4	P
1	2009-10-07 23:17:00	0	NTA	23	2	4	P
1	2009-10-07 23:18:00	0	NTA	23	2	4	P
1	2009-10-07 23:19:00	24	NTA	23	2	4	P
1	2009-10-07 23:20:00	0	NTA	23	2	4	P
1	2009-10-07 23:21:00	0	NTA	23	2	4	P
1	2009-10-07 23:22:00	0	NTA	23	2	4	P
1	2009-10-07 23:23:00	0	NTA	23	2	4	P
1	2009-10-07 23:24:00	0	NTA	23	2	4	P
1	2009-10-07 23:25:00	0	NTA	23	2	4	P
1	2009-10-07 23:26:00	0	NTA	23	2	4	P
1	2009-10-07 23:27:00	0	NTA	23	2	4	P
1	2009-10-07 23:28:00	0	NTA	23	2	4	P
1	2009-10-07 23:29:00	0	NTA	23	2	4	P
1	2009-10-07 23:30:00	0	NTA	23	2	4	P
1	2009-10-07 23:31:00	0	NTA	23	2	4	P
1	2009-10-07 23:32:00	0	NTA	23	2	4	P
1	2009-10-07 23:33:00	0	NTA	23	2	4	P
1	2009-10-07 23:34:00	0	NTA	23	2	4	P
1	2009-10-07 23:35:00	0	NTA	23	2	4	P
1	2009-10-07 23:36:00	0	NTA	23	2	4	P
1	2009-10-07 23:37:00	0	NTA	23	2	4	P
1	2009-10-07 23:38:00	0	NTA	23	2	4	P
1	2009-10-07 23:39:00	0	NTA	23	2	4	P
1	2009-10-07 23:40:00	0	NTA	23	2	4	P
1	2009-10-07 23:41:00	0	NTA	23	2	4	P
1	2009-10-07 23:42:00	0	NTA	23	2	4	P
1	2009-10-07 23:43:00	0	NTA	23	2	4	P
1	2009-10-07 23:44:00	0	NTA	23	2	4	P
1	2009-10-07 23:45:00	0	NTA	23	2	4	P
1	2009-10-07 23:46:00	0	NTA	23	2	4	P
1	2009-10-07 23:47:00	36	NTA	23	2	4	P
1	2009-10-07 23:48:00	36	NTA	23	2	4	P
1	2009-10-07 23:49:00	0	NTA	23	2	4	P
1	2009-10-07 23:50:00	0	NTA	23	2	4	P
1	2009-10-07 23:51:00	0	NTA	23	2	4	P
1	2009-10-07 23:52:00	0	NTA	23	2	4	P
1	2009-10-07 23:53:00	0	NTA	23	2	4	P
1	2009-10-07 23:54:00	0	NTA	23	2	4	P
1	2009-10-07 23:55:00	0	NTA	23	2	4	P
1	2009-10-07 23:56:00	0	NTA	23	2	4	P
1	2009-10-07 23:57:00	71	NTA	23	2	4	P
1	2009-10-07 23:58:00	0	NTA	23	2	4	P
1	2009-10-07 23:59:00	47	NTA	23	2	4	P
1	2009-10-08	479	NTA	23	2	4	P
1	2009-10-08 00:01:00	12	NTA	0	2	5	P
1	2009-10-08 00:02:00	0	NTA	0	2	5	P
1	2009-10-08 00:03:00	24	NTA	0	2	5	P
1	2009-10-08 00:04:00	0	NTA	0	2	5	P
1	2009-10-08 00:05:00	0	NTA	0	2	5	P
1	2009-10-08 00:06:00	0	NTA	0	2	5	P
1	2009-10-08 00:07:00	0	NTA	0	2	5	P
1	2009-10-08 00:08:00	0	NTA	0	2	5	P
1	2009-10-08 00:09:00	0	NTA	0	2	5	P
1	2009-10-08 00:10:00	0	NTA	0	2	5	P
1	2009-10-08 00:11:00	0	NTA	0	2	5	P
1	2009-10-08 00:12:00	24	NTA	0	2	5	P
1	2009-10-08 00:13:00	0	NTA	0	2	5	P
1	2009-10-08 00:14:00	0	NTA	0	2	5	P
1	2009-10-08 00:15:00	0	NTA	0	2	5	P
1	2009-10-08 00:16:00	0	NTA	0	2	5	P
1	2009-10-08 00:17:00	0	NTA	0	2	5	P
1	2009-10-08 00:18:00	0	NTA	0	2	5	P
1	2009-10-08 00:19:00	0	NTA	0	2	5	P
1	2009-10-08 00:20:00	0	NTA	0	2	5	P
1	2009-10-08 00:21:00	0	NTA	0	2	5	P
1	2009-10-08 00:22:00	0	NTA	0	2	5	P
1	2009-10-08 00:23:00	0	NTA	0	2	5	P
1	2009-10-08 00:24:00	0	NTA	0	2	5	P
1	2009-10-08 00:25:00	0	NTA	0	2	5	P
1	2009-10-08 00:26:00	0	NTA	0	2	5	P
1	2009-10-08 00:27:00	12	NTA	0	2	5	P
1	2009-10-08 00:28:00	0	NTA	0	2	5	P
1	2009-10-08 00:29:00	0	NTA	0	2	5	P
1	2009-10-08 00:30:00	0	NTA	0	2	5	P
1	2009-10-08 00:31:00	0	NTA	0	2	5	P
1	2009-10-08 00:32:00	0	NTA	0	2	5	P
1	2009-10-08 00:33:00	0	NTA	0	2	5	P
1	2009-10-08 00:34:00	0	NTA	0	2	5	P
1	2009-10-08 00:35:00	0	NTA	0	2	5	P
1	2009-10-08 00:36:00	0	NTA	0	2	5	P
1	2009-10-08 00:37:00	0	NTA	0	2	5	P
1	2009-10-08 00:38:00	0	NTA	0	2	5	P
1	2009-10-08 00:39:00	0	NTA	0	2	5	P
1	2009-10-08 00:40:00	0	NTA	0	2	5	P
1	2009-10-08 00:41:00	0	NTA	0	2	5	P
1	2009-10-08 00:42:00	0	NTA	0	2	5	P
1	2009-10-08 00:43:00	0	NTA	0	2	5	P
1	2009-10-08 00:44:00	0	NTA	0	2	5	P
1	2009-10-08 00:45:00	0	NTA	0	2	5	P
1	2009-10-08 00:46:00	0	NTA	0	2	5	P
1	2009-10-08 00:47:00	0	NTA	0	2	5	P
1	2009-10-08 00:48:00	0	NTA	0	2	5	P
1	2009-10-08 00:49:00	0	NTA	0	2	5	P
1	2009-10-08 00:50:00	0	NTA	0	2	5	P
1	2009-10-08 00:51:00	0	NTA	0	2	5	P
1	2009-10-08 00:52:00	0	NTA	0	2	5	P
1	2009-10-08 00:53:00	0	NTA	0	2	5	P
1	2009-10-08 00:54:00	0	NTA	0	2	5	P
1	2009-10-08 00:55:00	0	NTA	0	2	5	P
1	2009-10-08 00:56:00	0	NTA	0	2	5	P
1	2009-10-08 00:57:00	0	NTA	0	2	5	P
1	2009-10-08 00:58:00	0	NTA	0	2	5	P
1	2009-10-08 00:59:00	12	NTA	0	2	5	P
1	2009-10-08 01:00:00	12	NTA	0	2	5	P
1	2009-10-08 01:01:00	24	NTA	1	2	5	P
1	2009-10-08 01:02:00	0	NTA	1	2	5	P
1	2009-10-08 01:03:00	142	NTA	1	2	5	P
1	2009-10-08 01:04:00	0	NTA	1	2	5	P
1	2009-10-08 01:05:00	24	NTA	1	2	5	P
1	2009-10-08 01:06:00	211	NTA	1	2	5	P
1	2009-10-08 01:07:00	536	NTA	1	2	5	P
1	2009-10-08 01:08:00	0	NTA	1	2	5	P
1	2009-10-08 01:09:00	517	NTA	1	2	5	P
1	2009-10-08 01:10:00	12	NTA	1	2	5	P
1	2009-10-08 01:11:00	0	NTA	1	2	5	P
1	2009-10-08 01:12:00	0	NTA	1	2	5	P
1	2009-10-08 01:13:00	0	NTA	1	2	5	P
1	2009-10-08 01:14:00	0	NTA	1	2	5	P
1	2009-10-08 01:15:00	0	NTA	1	2	5	P
1	2009-10-08 01:16:00	0	NTA	1	2	5	P
1	2009-10-08 01:17:00	0	NTA	1	2	5	P
1	2009-10-08 01:18:00	0	NTA	1	2	5	P
1	2009-10-08 01:19:00	0	NTA	1	2	5	P
1	2009-10-08 01:20:00	0	NTA	1	2	5	P
1	2009-10-08 01:21:00	0	NTA	1	2	5	P
1	2009-10-08 01:22:00	12	NTA	1	2	5	P
1	2009-10-08 01:23:00	0	NTA	1	2	5	P
1	2009-10-08 01:24:00	24	NTA	1	2	5	P
1	2009-10-08 01:25:00	59	NTA	1	2	5	P
1	2009-10-08 01:26:00	0	NTA	1	2	5	P
1	2009-10-08 01:27:00	83	NTA	1	2	5	P
1	2009-10-08 01:28:00	0	NTA	1	2	5	P
1	2009-10-08 01:29:00	0	NTA	1	2	5	P
1	2009-10-08 01:30:00	0	NTA	1	2	5	P
1	2009-10-08 01:31:00	12	NTA	1	2	5	P
1	2009-10-08 01:32:00	0	NTA	1	2	5	P
1	2009-10-08 01:33:00	0	NTA	1	2	5	P
1	2009-10-08 01:34:00	0	NTA	1	2	5	P
1	2009-10-08 01:35:00	0	NTA	1	2	5	P
1	2009-10-08 01:36:00	0	NTA	1	2	5	P
1	2009-10-08 01:37:00	0	NTA	1	2	5	P
1	2009-10-08 01:38:00	0	NTA	1	2	5	P
1	2009-10-08 01:39:00	0	NTA	1	2	5	P
1	2009-10-08 01:40:00	0	NTA	1	2	5	P
1	2009-10-08 01:41:00	0	NTA	1	2	5	P
1	2009-10-08 01:42:00	0	NTA	1	2	5	P
1	2009-10-08 01:43:00	0	NTA	1	2	5	P
1	2009-10-08 01:44:00	0	NTA	1	2	5	P
1	2009-10-08 01:45:00	0	NTA	1	2	5	P
1	2009-10-08 01:46:00	0	NTA	1	2	5	P
1	2009-10-08 01:47:00	119	NTA	1	2	5	P
1	2009-10-08 01:48:00	12	NTA	1	2	5	P
1	2009-10-08 01:49:00	0	NTA	1	2	5	P
1	2009-10-08 01:50:00	0	NTA	1	2	5	P
1	2009-10-08 01:51:00	12	NTA	1	2	5	P
1	2009-10-08 01:52:00	95	NTA	1	2	5	P
1	2009-10-08 01:53:00	0	NTA	1	2	5	P
1	2009-10-08 01:54:00	0	NTA	1	2	5	P
1	2009-10-08 01:55:00	0	NTA	1	2	5	P
1	2009-10-08 01:56:00	47	NTA	1	2	5	P
1	2009-10-08 01:57:00	12	NTA	1	2	5	P
1	2009-10-08 01:58:00	0	NTA	1	2	5	P
1	2009-10-08 01:59:00	0	NTA	1	2	5	P
1	2009-10-08 02:00:00	0	NTA	1	2	5	P
1	2009-10-08 02:01:00	0	NTA	2	2	5	P
1	2009-10-08 02:02:00	0	NTA	2	2	5	P
1	2009-10-08 02:03:00	0	NTA	2	2	5	P
1	2009-10-08 02:04:00	0	NTA	2	2	5	P
1	2009-10-08 02:05:00	0	NTA	2	2	5	P
1	2009-10-08 02:06:00	12	NTA	2	2	5	P
1	2009-10-08 02:07:00	0	NTA	2	2	5	P
1	2009-10-08 02:08:00	0	NTA	2	2	5	P
1	2009-10-08 02:09:00	0	NTA	2	2	5	P
1	2009-10-08 02:10:00	0	NTA	2	2	5	P
1	2009-10-08 02:11:00	0	NTA	2	2	5	P
1	2009-10-08 02:12:00	0	NTA	2	2	5	P
1	2009-10-08 02:13:00	0	NTA	2	2	5	P
1	2009-10-08 02:14:00	0	NTA	2	2	5	P
1	2009-10-08 02:15:00	0	NTA	2	2	5	P
1	2009-10-08 02:16:00	0	NTA	2	2	5	P
1	2009-10-08 02:17:00	0	NTA	2	2	5	P
1	2009-10-08 02:18:00	0	NTA	2	2	5	P
1	2009-10-08 02:19:00	0	NTA	2	2	5	P
1	2009-10-08 02:20:00	0	NTA	2	2	5	P
1	2009-10-08 02:21:00	0	NTA	2	2	5	P
1	2009-10-08 02:22:00	0	NTA	2	2	5	P
1	2009-10-08 02:23:00	0	NTA	2	2	5	P
1	2009-10-08 02:24:00	0	NTA	2	2	5	P
1	2009-10-08 02:25:00	0	NTA	2	2	5	P
1	2009-10-08 02:26:00	0	NTA	2	2	5	P
1	2009-10-08 02:27:00	59	NTA	2	2	5	P
1	2009-10-08 02:28:00	0	NTA	2	2	5	P
1	2009-10-08 02:29:00	183	NTA	2	2	5	P
1	2009-10-08 02:30:00	536	NTA	2	2	5	P
1	2009-10-08 02:31:00	24	NTA	2	2	5	P
1	2009-10-08 02:32:00	36	NTA	2	2	5	P
1	2009-10-08 02:33:00	0	NTA	2	2	5	P
1	2009-10-08 02:34:00	0	NTA	2	2	5	P
1	2009-10-08 02:35:00	0	NTA	2	2	5	P
1	2009-10-08 02:36:00	0	NTA	2	2	5	P
1	2009-10-08 02:37:00	0	NTA	2	2	5	P
1	2009-10-08 02:38:00	0	NTA	2	2	5	P
1	2009-10-08 02:39:00	0	NTA	2	2	5	P
1	2009-10-08 02:40:00	410	NTA	2	2	5	P
1	2009-10-08 02:41:00	24	NTA	2	2	5	P
1	2009-10-08 02:42:00	0	NTA	2	2	5	P
1	2009-10-08 02:43:00	12	NTA	2	2	5	P
1	2009-10-08 02:44:00	0	NTA	2	2	5	P
1	2009-10-08 02:45:00	0	NTA	2	2	5	P
1	2009-10-08 02:46:00	36	NTA	2	2	5	P
1	2009-10-08 02:47:00	0	NTA	2	2	5	P
1	2009-10-08 02:48:00	0	NTA	2	2	5	P
1	2009-10-08 02:49:00	0	NTA	2	2	5	P
1	2009-10-08 02:50:00	24	NTA	2	2	5	P
1	2009-10-08 02:51:00	12	NTA	2	2	5	P
1	2009-10-08 02:52:00	47	NTA	2	2	5	P
1	2009-10-08 02:53:00	0	NTA	2	2	5	P
1	2009-10-08 02:54:00	0	NTA	2	2	5	P
1	2009-10-08 02:55:00	0	NTA	2	2	5	P
1	2009-10-08 02:56:00	71	NTA	2	2	5	P
1	2009-10-08 02:57:00	12	NTA	2	2	5	P
1	2009-10-08 02:58:00	0	NTA	2	2	5	P
1	2009-10-08 02:59:00	0	NTA	2	2	5	P
1	2009-10-08 03:00:00	0	NTA	2	2	5	P
1	2009-10-08 03:01:00	24	NTA	3	2	5	P
1	2009-10-08 03:02:00	0	NTA	3	2	5	P
1	2009-10-08 03:03:00	0	NTA	3	2	5	P
1	2009-10-08 03:04:00	24	NTA	3	2	5	P
1	2009-10-08 03:05:00	0	NTA	3	2	5	P
1	2009-10-08 03:06:00	0	NTA	3	2	5	P
1	2009-10-08 03:07:00	0	NTA	3	2	5	P
1	2009-10-08 03:08:00	71	NTA	3	2	5	P
1	2009-10-08 03:09:00	443	NTA	3	2	5	P
1	2009-10-08 03:10:00	0	NTA	3	2	5	P
1	2009-10-08 03:11:00	1380	NTA	3	2	5	P
1	2009-10-08 03:12:00	1839	NTA	3	2	5	P
1	2009-10-08 03:13:00	393	NTA	3	2	5	P
1	2009-10-08 03:14:00	327	NTA	3	2	5	P
1	2009-10-08 03:15:00	785	NTA	3	2	5	P
1	2009-10-08 03:16:00	183	DTA	3	2	5	P
1	2009-10-08 03:17:00	183	DTA	3	2	5	P
1	2009-10-08 03:18:00	83	DTA	3	2	5	P
1	2009-10-08 03:19:00	59	DTA	3	2	5	P
1	2009-10-08 03:20:00	0	DTA	3	2	5	P
1	2009-10-08 03:21:00	808	DTA	3	2	5	P
1	2009-10-08 03:22:00	183	DTA	3	2	5	P
1	2009-10-08 03:23:00	254	DTA	3	2	5	P
1	2009-10-08 03:24:00	24	DTA	3	2	5	P
1	2009-10-08 03:25:00	832	DTA	3	2	5	P
1	2009-10-08 03:26:00	360	DTA	3	2	5	P
1	2009-10-08 03:27:00	517	DTA	3	2	5	P
1	2009-10-08 03:28:00	197	DTA	3	2	5	P
1	2009-10-08 03:29:00	0	DTA	3	2	5	P
1	2009-10-08 03:30:00	12	DTA	3	2	5	P
1	2009-10-08 03:31:00	0	DTA	3	2	5	P
1	2009-10-08 03:32:00	574	DTA	3	2	5	P
1	2009-10-08 03:33:00	225	DTA	3	2	5	P
1	2009-10-08 03:34:00	443	DTA	3	2	5	P
1	2009-10-08 03:35:00	83	DTA	3	2	5	P
1	2009-10-08 03:36:00	377	DTA	3	2	5	P
1	2009-10-08 03:37:00	254	DTA	3	2	5	P
1	2009-10-08 03:38:00	12	DTA	3	2	5	P
1	2009-10-08 03:39:00	0	DTA	3	2	5	P
1	2009-10-08 03:40:00	0	DTA	3	2	5	P
1	2009-10-08 03:41:00	225	DTA	3	2	5	P
1	2009-10-08 03:42:00	268	DTA	3	2	5	P
1	2009-10-08 03:43:00	517	DTA	3	2	5	P
1	2009-10-08 03:44:00	676	DTA	3	2	5	P
1	2009-10-08 03:45:00	71	DTA	3	2	5	P
1	2009-10-08 03:46:00	142	DTA	3	2	5	P
1	2009-10-08 03:47:00	555	DTA	3	2	5	P
1	2009-10-08 03:48:00	130	DTA	3	2	5	P
1	2009-10-08 03:49:00	654	DTA	3	2	5	P
1	2009-10-08 03:50:00	740	DTA	3	2	5	P
1	2009-10-08 03:51:00	1446	DTA	3	2	5	P
1	2009-10-08 03:52:00	903	DTA	3	2	5	P
1	2009-10-08 03:53:00	282	DTA	3	2	5	P
1	2009-10-08 03:54:00	633	DTA	3	2	5	P
1	2009-10-08 03:55:00	360	DTA	3	2	5	P
1	2009-10-08 03:56:00	574	DTA	3	2	5	P
1	2009-10-08 03:57:00	197	DTA	3	2	5	P
1	2009-10-08 03:58:00	0	DTA	3	2	5	P
1	2009-10-08 03:59:00	0	DTA	3	2	5	P
1	2009-10-08 04:00:00	0	DTA	3	2	5	P
1	2009-10-08 04:01:00	12	DTA	4	2	5	P
1	2009-10-08 04:02:00	0	DTA	4	2	5	P
1	2009-10-08 04:03:00	0	DTA	4	2	5	P
1	2009-10-08 04:04:00	0	DTA	4	2	5	P
1	2009-10-08 04:05:00	0	DTA	4	2	5	P
1	2009-10-08 04:06:00	0	DTA	4	2	5	P
1	2009-10-08 04:07:00	0	DTA	4	2	5	P
1	2009-10-08 04:08:00	0	DTA	4	2	5	P
1	2009-10-08 04:09:00	0	DTA	4	2	5	P
1	2009-10-08 04:10:00	0	DTA	4	2	5	P
1	2009-10-08 04:11:00	0	DTA	4	2	5	P
1	2009-10-08 04:12:00	12	DTA	4	2	5	P
1	2009-10-08 04:13:00	0	DTA	4	2	5	P
1	2009-10-08 04:14:00	0	DTA	4	2	5	P
1	2009-10-08 04:15:00	0	DTA	4	2	5	P
1	2009-10-08 04:16:00	0	DTA	4	2	5	P
1	2009-10-08 04:17:00	12	DTA	4	2	5	P
1	2009-10-08 04:18:00	0	DTA	4	2	5	P
1	2009-10-08 04:19:00	0	DTA	4	2	5	P
1	2009-10-08 04:20:00	0	DTA	4	2	5	P
1	2009-10-08 04:21:00	0	DTA	4	2	5	P
1	2009-10-08 04:22:00	327	DTA	4	2	5	P
1	2009-10-08 04:23:00	0	DTA	4	2	5	P
1	2009-10-08 04:24:00	0	DTA	4	2	5	P
1	2009-10-08 04:25:00	0	DTA	4	2	5	P
1	2009-10-08 04:26:00	0	DTA	4	2	5	P
1	2009-10-08 04:27:00	0	DTA	4	2	5	P
1	2009-10-08 04:28:00	0	DTA	4	2	5	P
1	2009-10-08 04:29:00	12	DTA	4	2	5	P
1	2009-10-08 04:30:00	12	DTA	4	2	5	P
1	2009-10-08 04:31:00	0	DTA	4	2	5	P
1	2009-10-08 04:32:00	0	DTA	4	2	5	P
1	2009-10-08 04:33:00	0	DTA	4	2	5	P
1	2009-10-08 04:34:00	0	DTA	4	2	5	P
1	2009-10-08 04:35:00	0	DTA	4	2	5	P
1	2009-10-08 04:36:00	0	DTA	4	2	5	P
1	2009-10-08 04:37:00	0	DTA	4	2	5	P
1	2009-10-08 04:38:00	0	DTA	4	2	5	P
1	2009-10-08 04:39:00	0	DTA	4	2	5	P
1	2009-10-08 04:40:00	0	DTA	4	2	5	P
1	2009-10-08 04:41:00	0	DTA	4	2	5	P
1	2009-10-08 04:42:00	0	DTA	4	2	5	P
1	2009-10-08 04:43:00	0	DTA	4	2	5	P
1	2009-10-08 04:44:00	0	DTA	4	2	5	P
1	2009-10-08 04:45:00	0	DTA	4	2	5	P
1	2009-10-08 04:46:00	107	DTA	4	2	5	P
1	2009-10-08 04:47:00	0	DTA	4	2	5	P
1	2009-10-08 04:48:00	0	DTA	4	2	5	P
1	2009-10-08 04:49:00	0	DTA	4	2	5	P
[truncated: 36,343 more rows]

## Sheet: Pivot NTA
Peak DTA Time?	(All)
DTA vs NTA	NTA
Average of Activity	Column Labels
Row Labels	1	2	3	4	5	6	7	8	9	10	11	12	13	14	Grand Total
1	24.0882	29.3195	28.1445	27.9716	15.2624	13.3009	19.6494	12.7397	11.5444	8.42541	5.82703	6.65074	19.6351	8.59608	17.0223
2	9.34286	14.0303	21.1185	22.7	14.7156	15.9375	10.2143	29.2258	21.8	10.5028	8.69277	5.66566	8.88974	6.53761	13.589
Grand Total	17.0904	22.7242	24.6315	25.1663	14.9681	14.704	14.8461	15.1335	16.9739	9.46409	7.18234	6.10927	14.4741	7.6289	15.3505

## Sheet: Pivot DTA
Peak DTA Time?	(All)
DTA vs NTA	DTA
Average of Activity	Column Labels
Row Labels	1	2	3	4	5	6	7	8	9	10	11	12	13	Grand Total
1	70.4129	72.2657	75.8418	73.2449	110.156	83.7289	87.0585	77.7565	83.8081	194.302	108.717	91.1218	99.9677	94.762
2	63.0694	81.4562	191.627	116.83	100.806	63.9005	64.6903	81.8101	77.9865	165.101	75.7157	90.4617	62.8863	94.618
Grand Total	66.5589	76.894	135.392	93.0763	105.481	74.1834	74.2355	79.6787	80.8973	179.501	92.5948	90.7917	80.2477	94.6892

## Sheet: Pivot PeakDTA
Peak DTA Time?	Peak DTA
DTA vs NTA	DTA
Average of Activity	Column Labels
Row Labels	1	2	3	4	5	6	7	8	9	10	11	12	13	Grand Total
1	109.169	95.1806	99.0583	80.6806	160.022	75.4194	132.486	97.7028	81.9028	92.5278	94.7833	74.2611	141.356	102.658
2	99.2306	145.478	90.9167	66.4472	166.814	20.6889	87.0917	87.4139	97.0028	8.16944	47.5722	74.7111	71.0028	81.7338
Grand Total	104.2	120.329	94.9875	73.5639	163.418	48.0542	109.789	92.5583	89.4528	50.3486	71.1778	74.4861	106.179	92.1957

## Sheet: 10.6.09
Actogram, Copy Raw Data, All Days
Identity:	Rebel
Filename:	E:\Active Research Files\Nighttime Activity\cases\rebel\Rebel.AWC
Gender:	F
Age:	11
Height:	91.4 cm	36.0 in
Weight:	31.6 kg	69.7 lbs
Start Date:	06-Oct-2009 (Tue)
Start Time:	18:00:00
Interval:	1.00 mins
Date Stamp:	Time Stamp:	Activity Data:	Marker Press:
2009-10-06	00:00:00	0
2009-10-06	00:01:00	0
2009-10-06	00:02:00	0
2009-10-06	00:03:00	0
2009-10-06	00:04:00	0
2009-10-06	00:05:00	0
2009-10-06	00:06:00	0
2009-10-06	00:07:00	0
2009-10-06	00:08:00	0
2009-10-06	00:09:00	0
2009-10-06	00:10:00	0
2009-10-06	00:11:00	0
2009-10-06	00:12:00	0
2009-10-06	00:13:00	0
2009-10-06	00:14:00	0
2009-10-06	00:15:00	0
2009-10-06	00:16:00	0
2009-10-06	00:17:00	0
2009-10-06	00:18:00	0
2009-10-06	00:19:00	0
2009-10-06	00:20:00	0
2009-10-06	00:21:00	0
2009-10-06	00:22:00	0
2009-10-06	00:23:00	0
2009-10-06	00:24:00	0
2009-10-06	00:25:00	0
2009-10-06	00:26:00	0
2009-10-06	00:27:00	0
2009-10-06	00:28:00	0
2009-10-06	00:29:00	0
2009-10-06	00:30:00	0
2009-10-06	00:31:00	0
2009-10-06	00:32:00	0
2009-10-06	00:33:00	0
2009-10-06	00:34:00	0
2009-10-06	00:35:00	0
2009-10-06	00:36:00	0
2009-10-06	00:37:00	0
2009-10-06	00:38:00	0
2009-10-06	00:39:00	0
2009-10-06	00:40:00	0
2009-10-06	00:41:00	0
2009-10-06	00:42:00	0
2009-10-06	00:43:00	0
2009-10-06	00:44:00	0
2009-10-06	00:45:00	0
2009-10-06	00:46:00	0
2009-10-06	00:47:00	0
2009-10-06	00:48:00	0
2009-10-06	00:49:00	0
2009-10-06	00:50:00	0
2009-10-06	00:51:00	0
2009-10-06	00:52:00	0
2009-10-06	00:53:00	0
2009-10-06	00:54:00	0
2009-10-06	00:55:00	0
2009-10-06	00:56:00	0
2009-10-06	00:57:00	0
2009-10-06	00:58:00	0
2009-10-06	00:59:00	0
2009-10-06	01:00:00	0
2009-10-06	01:01:00	0
2009-10-06	01:02:00	0
2009-10-06	01:03:00	0
2009-10-06	01:04:00	0
2009-10-06	01:05:00	0
2009-10-06	01:06:00	0
2009-10-06	01:07:00	0
2009-10-06	01:08:00	0
2009-10-06	01:09:00	0
2009-10-06	01:10:00	0
2009-10-06	01:11:00	0
2009-10-06	01:12:00	0
2009-10-06	01:13:00	0
2009-10-06	01:14:00	0
2009-10-06	01:15:00	0
2009-10-06	01:16:00	0
2009-10-06	01:17:00	0
2009-10-06	01:18:00	0
2009-10-06	01:19:00	0
2009-10-06	01:20:00	0
2009-10-06	01:21:00	0
2009-10-06	01:22:00	0
2009-10-06	01:23:00	0
2009-10-06	01:24:00	0
2009-10-06	01:25:00	0
2009-10-06	01:26:00	0
2009-10-06	01:27:00	0
2009-10-06	01:28:00	0
2009-10-06	01:29:00	0
2009-10-06	01:30:00	0
2009-10-06	01:31:00	0
2009-10-06	01:32:00	0
2009-10-06	01:33:00	0
2009-10-06	01:34:00	0
2009-10-06	01:35:00	0
2009-10-06	01:36:00	0
2009-10-06	01:37:00	0
2009-10-06	01:38:00	0
2009-10-06	01:39:00	0
2009-10-06	01:40:00	0
2009-10-06	01:41:00	0
2009-10-06	01:42:00	0
2009-10-06	01:43:00	0
2009-10-06	01:44:00	0
2009-10-06	01:45:00	0
2009-10-06	01:46:00	0
2009-10-06	01:47:00	0
2009-10-06	01:48:00	0
2009-10-06	01:49:00	0
2009-10-06	01:50:00	0
2009-10-06	01:51:00	0
2009-10-06	01:52:00	0
2009-10-06	01:53:00	0
2009-10-06	01:54:00	0
2009-10-06	01:55:00	0
2009-10-06	01:56:00	0
2009-10-06	01:57:00	0
2009-10-06	01:58:00	0
2009-10-06	01:59:00	0
2009-10-06	02:00:00	0
2009-10-06	02:01:00	0
2009-10-06	02:02:00	0
2009-10-06	02:03:00	0
2009-10-06	02:04:00	0
2009-10-06	02:05:00	0
2009-10-06	02:06:00	0
2009-10-06	02:07:00	0
2009-10-06	02:08:00	0
2009-10-06	02:09:00	0
2009-10-06	02:10:00	0
2009-10-06	02:11:00	0
2009-10-06	02:12:00	0
2009-10-06	02:13:00	0
2009-10-06	02:14:00	0
2009-10-06	02:15:00	0
2009-10-06	02:16:00	0
2009-10-06	02:17:00	0
2009-10-06	02:18:00	0
2009-10-06	02:19:00	0
2009-10-06	02:20:00	0
2009-10-06	02:21:00	0
2009-10-06	02:22:00	0
2009-10-06	02:23:00	0
2009-10-06	02:24:00	0
2009-10-06	02:25:00	0
2009-10-06	02:26:00	0
2009-10-06	02:27:00	0
2009-10-06	02:28:00	0
2009-10-06	02:29:00	0
2009-10-06	02:30:00	0
2009-10-06	02:31:00	0
2009-10-06	02:32:00	0
2009-10-06	02:33:00	0
2009-10-06	02:34:00	0
2009-10-06	02:35:00	0
2009-10-06	02:36:00	0
2009-10-06	02:37:00	0
2009-10-06	02:38:00	0
2009-10-06	02:39:00	0
2009-10-06	02:40:00	0
2009-10-06	02:41:00	0
2009-10-06	02:42:00	0
2009-10-06	02:43:00	0
2009-10-06	02:44:00	0
2009-10-06	02:45:00	0
2009-10-06	02:46:00	0
2009-10-06	02:47:00	0
2009-10-06	02:48:00	0
2009-10-06	02:49:00	0
2009-10-06	02:50:00	0
2009-10-06	02:51:00	0
2009-10-06	02:52:00	0
2009-10-06	02:53:00	0
2009-10-06	02:54:00	0
2009-10-06	02:55:00	0
2009-10-06	02:56:00	0
2009-10-06	02:57:00	0
2009-10-06	02:58:00	0
2009-10-06	02:59:00	0
2009-10-06	03:00:00	0
2009-10-06	03:01:00	0
2009-10-06	03:02:00	0
2009-10-06	03:03:00	0
2009-10-06	03:04:00	0
2009-10-06	03:05:00	0
2009-10-06	03:06:00	0
2009-10-06	03:07:00	0
2009-10-06	03:08:00	0
2009-10-06	03:09:00	0
2009-10-06	03:10:00	0
2009-10-06	03:11:00	0
2009-10-06	03:12:00	0
2009-10-06	03:13:00	0
2009-10-06	03:14:00	0
2009-10-06	03:15:00	0
2009-10-06	03:16:00	0
2009-10-06	03:17:00	0
2009-10-06	03:18:00	0
2009-10-06	03:19:00	0
2009-10-06	03:20:00	0
2009-10-06	03:21:00	0
2009-10-06	03:22:00	0
2009-10-06	03:23:00	0
2009-10-06	03:24:00	0
2009-10-06	03:25:00	0
2009-10-06	03:26:00	0
2009-10-06	03:27:00	0
2009-10-06	03:28:00	0
2009-10-06	03:29:00	0
2009-10-06	03:30:00	0
2009-10-06	03:31:00	0
2009-10-06	03:32:00	0
2009-10-06	03:33:00	0
2009-10-06	03:34:00	0
2009-10-06	03:35:00	0
2009-10-06	03:36:00	0
2009-10-06	03:37:00	0
2009-10-06	03:38:00	0
2009-10-06	03:39:00	0
2009-10-06	03:40:00	0
2009-10-06	03:41:00	0
2009-10-06	03:42:00	0
2009-10-06	03:43:00	0
2009-10-06	03:44:00	0
2009-10-06	03:45:00	0
2009-10-06	03:46:00	0
2009-10-06	03:47:00	0
2009-10-06	03:48:00	0
2009-10-06	03:49:00	0
2009-10-06	03:50:00	0
2009-10-06	03:51:00	0
2009-10-06	03:52:00	0
2009-10-06	03:53:00	0
2009-10-06	03:54:00	0
2009-10-06	03:55:00	0
2009-10-06	03:56:00	0
2009-10-06	03:57:00	0
2009-10-06	03:58:00	0
2009-10-06	03:59:00	0
2009-10-06	04:00:00	0
2009-10-06	04:01:00	0
2009-10-06	04:02:00	0
2009-10-06	04:03:00	0
2009-10-06	04:04:00	0
2009-10-06	04:05:00	0
2009-10-06	04:06:00	0
2009-10-06	04:07:00	0
2009-10-06	04:08:00	0
2009-10-06	04:09:00	0
2009-10-06	04:10:00	0
2009-10-06	04:11:00	0
2009-10-06	04:12:00	0
2009-10-06	04:13:00	0
2009-10-06	04:14:00	0
2009-10-06	04:15:00	0
2009-10-06	04:16:00	0
2009-10-06	04:17:00	0
2009-10-06	04:18:00	0
2009-10-06	04:19:00	0
2009-10-06	04:20:00	0
2009-10-06	04:21:00	0
2009-10-06	04:22:00	0
2009-10-06	04:23:00	0
2009-10-06	04:24:00	0
2009-10-06	04:25:00	0
2009-10-06	04:26:00	0
2009-10-06	04:27:00	0
2009-10-06	04:28:00	0
2009-10-06	04:29:00	0
2009-10-06	04:30:00	0
2009-10-06	04:31:00	0
2009-10-06	04:32:00	0
2009-10-06	04:33:00	0
2009-10-06	04:34:00	0
2009-10-06	04:35:00	0
2009-10-06	04:36:00	0
2009-10-06	04:37:00	0
2009-10-06	04:38:00	0
2009-10-06	04:39:00	0
2009-10-06	04:40:00	0
2009-10-06	04:41:00	0
2009-10-06	04:42:00	0
2009-10-06	04:43:00	0
2009-10-06	04:44:00	0
2009-10-06	04:45:00	0
2009-10-06	04:46:00	0
2009-10-06	04:47:00	0
2009-10-06	04:48:00	0
2009-10-06	04:49:00	0
2009-10-06	04:50:00	0
2009-10-06	04:51:00	0
2009-10-06	04:52:00	0
2009-10-06	04:53:00	0
2009-10-06	04:54:00	0
2009-10-06	04:55:00	0
2009-10-06	04:56:00	0
2009-10-06	04:57:00	0
2009-10-06	04:58:00	0
2009-10-06	04:59:00	0
2009-10-06	05:00:00	0
2009-10-06	05:01:00	0
2009-10-06	05:02:00	0
2009-10-06	05:03:00	0
2009-10-06	05:04:00	0
2009-10-06	05:05:00	0
2009-10-06	05:06:00	0
2009-10-06	05:07:00	0
2009-10-06	05:08:00	0
2009-10-06	05:09:00	0
2009-10-06	05:10:00	0
2009-10-06	05:11:00	0
2009-10-06	05:12:00	0
2009-10-06	05:13:00	0
2009-10-06	05:14:00	0
2009-10-06	05:15:00	0
2009-10-06	05:16:00	0
2009-10-06	05:17:00	0
2009-10-06	05:18:00	0
2009-10-06	05:19:00	0
2009-10-06	05:20:00	0
2009-10-06	05:21:00	0
2009-10-06	05:22:00	0
2009-10-06	05:23:00	0
2009-10-06	05:24:00	0
2009-10-06	05:25:00	0
2009-10-06	05:26:00	0
2009-10-06	05:27:00	0
2009-10-06	05:28:00	0
2009-10-06	05:29:00	0
2009-10-06	05:30:00	0
2009-10-06	05:31:00	0
2009-10-06	05:32:00	0
2009-10-06	05:33:00	0
2009-10-06	05:34:00	0
2009-10-06	05:35:00	0
2009-10-06	05:36:00	0
2009-10-06	05:37:00	0
2009-10-06	05:38:00	0
2009-10-06	05:39:00	0
2009-10-06	05:40:00	0
2009-10-06	05:41:00	0
2009-10-06	05:42:00	0
2009-10-06	05:43:00	0
2009-10-06	05:44:00	0
2009-10-06	05:45:00	0
2009-10-06	05:46:00	0
2009-10-06	05:47:00	0
2009-10-06	05:48:00	0
2009-10-06	05:49:00	0
2009-10-06	05:50:00	0
2009-10-06	05:51:00	0
2009-10-06	05:52:00	0
2009-10-06	05:53:00	0
2009-10-06	05:54:00	0
2009-10-06	05:55:00	0
2009-10-06	05:56:00	0
2009-10-06	05:57:00	0
2009-10-06	05:58:00	0
2009-10-06	05:59:00	0
2009-10-06	06:00:00	0
2009-10-06	06:01:00	0
2009-10-06	06:02:00	0
2009-10-06	06:03:00	0
2009-10-06	06:04:00	0
2009-10-06	06:05:00	0
2009-10-06	06:06:00	0
2009-10-06	06:07:00	0
2009-10-06	06:08:00	0
2009-10-06	06:09:00	0
2009-10-06	06:10:00	0
2009-10-06	06:11:00	0
2009-10-06	06:12:00	0
2009-10-06	06:13:00	0
2009-10-06	06:14:00	0
2009-10-06	06:15:00	0
2009-10-06	06:16:00	0
2009-10-06	06:17:00	0
2009-10-06	06:18:00	0
2009-10-06	06:19:00	0
2009-10-06	06:20:00	0
2009-10-06	06:21:00	0
2009-10-06	06:22:00	0
2009-10-06	06:23:00	0
2009-10-06	06:24:00	0
2009-10-06	06:25:00	0
2009-10-06	06:26:00	0
2009-10-06	06:27:00	0
2009-10-06	06:28:00	0
2009-10-06	06:29:00	0
2009-10-06	06:30:00	0
2009-10-06	06:31:00	0
2009-10-06	06:32:00	0
2009-10-06	06:33:00	0
2009-10-06	06:34:00	0
2009-10-06	06:35:00	0
2009-10-06	06:36:00	0
2009-10-06	06:37:00	0
2009-10-06	06:38:00	0
2009-10-06	06:39:00	0
2009-10-06	06:40:00	0
2009-10-06	06:41:00	0
2009-10-06	06:42:00	0
2009-10-06	06:43:00	0
2009-10-06	06:44:00	0
2009-10-06	06:45:00	0
2009-10-06	06:46:00	0
2009-10-06	06:47:00	0
2009-10-06	06:48:00	0
2009-10-06	06:49:00	0
2009-10-06	06:50:00	0
2009-10-06	06:51:00	0
2009-10-06	06:52:00	0
2009-10-06	06:53:00	0
2009-10-06	06:54:00	0
2009-10-06	06:55:00	0
2009-10-06	06:56:00	0
2009-10-06	06:57:00	0
2009-10-06	06:58:00	0
2009-10-06	06:59:00	0
2009-10-06	07:00:00	0
2009-10-06	07:01:00	0
2009-10-06	07:02:00	0
2009-10-06	07:03:00	0
2009-10-06	07:04:00	0
2009-10-06	07:05:00	0
2009-10-06	07:06:00	0
2009-10-06	07:07:00	0
2009-10-06	07:08:00	0
2009-10-06	07:09:00	0
2009-10-06	07:10:00	0
2009-10-06	07:11:00	0
2009-10-06	07:12:00	0
2009-10-06	07:13:00	0
2009-10-06	07:14:00	0
2009-10-06	07:15:00	0
2009-10-06	07:16:00	0
2009-10-06	07:17:00	0
2009-10-06	07:18:00	0
2009-10-06	07:19:00	0
2009-10-06	07:20:00	0
2009-10-06	07:21:00	0
2009-10-06	07:22:00	0
2009-10-06	07:23:00	0
2009-10-06	07:24:00	0
2009-10-06	07:25:00	0
2009-10-06	07:26:00	0
2009-10-06	07:27:00	0
2009-10-06	07:28:00	0
2009-10-06	07:29:00	0
2009-10-06	07:30:00	0
2009-10-06	07:31:00	0
2009-10-06	07:32:00	0
2009-10-06	07:33:00	0
2009-10-06	07:34:00	0
2009-10-06	07:35:00	0
2009-10-06	07:36:00	0
2009-10-06	07:37:00	0
2009-10-06	07:38:00	0
2009-10-06	07:39:00	0
2009-10-06	07:40:00	0
2009-10-06	07:41:00	0
2009-10-06	07:42:00	0
2009-10-06	07:43:00	0
2009-10-06	07:44:00	0
2009-10-06	07:45:00	0
2009-10-06	07:46:00	0
2009-10-06	07:47:00	0
2009-10-06	07:48:00	0
2009-10-06	07:49:00	0
2009-10-06	07:50:00	0
2009-10-06	07:51:00	0
2009-10-06	07:52:00	0
2009-10-06	07:53:00	0
2009-10-06	07:54:00	0
2009-10-06	07:55:00	0
2009-10-06	07:56:00	0
2009-10-06	07:57:00	0
2009-10-06	07:58:00	0
2009-10-06	07:59:00	0
2009-10-06	08:00:00	0
2009-10-06	08:01:00	0
2009-10-06	08:02:00	0
2009-10-06	08:03:00	0
2009-10-06	08:04:00	0
2009-10-06	08:05:00	0
2009-10-06	08:06:00	0
2009-10-06	08:07:00	0
2009-10-06	08:08:00	0
2009-10-06	08:09:00	0
2009-10-06	08:10:00	0
2009-10-06	08:11:00	0
2009-10-06	08:12:00	0
2009-10-06	08:13:00	0
2009-10-06	08:14:00	0
2009-10-06	08:15:00	0
2009-10-06	08:16:00	0
2009-10-06	08:17:00	0
2009-10-06	08:18:00	0
2009-10-06	08:19:00	0
2009-10-06	08:20:00	0
2009-10-06	08:21:00	0
2009-10-06	08:22:00	0
2009-10-06	08:23:00	0
2009-10-06	08:24:00	0
2009-10-06	08:25:00	0
2009-10-06	08:26:00	0
2009-10-06	08:27:00	0
2009-10-06	08:28:00	0
2009-10-06	08:29:00	0
2009-10-06	08:30:00	0
2009-10-06	08:31:00	0
2009-10-06	08:32:00	0
2009-10-06	08:33:00	0
2009-10-06	08:34:00	0
2009-10-06	08:35:00	0
2009-10-06	08:36:00	0
2009-10-06	08:37:00	0
2009-10-06	08:38:00	0
2009-10-06	08:39:00	0
2009-10-06	08:40:00	0
2009-10-06	08:41:00	0
2009-10-06	08:42:00	0
2009-10-06	08:43:00	0
2009-10-06	08:44:00	0
2009-10-06	08:45:00	0
2009-10-06	08:46:00	0
2009-10-06	08:47:00	0
2009-10-06	08:48:00	0
2009-10-06	08:49:00	0
2009-10-06	08:50:00	0
2009-10-06	08:51:00	0
2009-10-06	08:52:00	0
2009-10-06	08:53:00	0
2009-10-06	08:54:00	0
2009-10-06	08:55:00	0
2009-10-06	08:56:00	0
2009-10-06	08:57:00	0
2009-10-06	08:58:00	0
2009-10-06	08:59:00	0
2009-10-06	09:00:00	0
2009-10-06	09:01:00	0
2009-10-06	09:02:00	0
2009-10-06	09:03:00	0
2009-10-06	09:04:00	0
2009-10-06	09:05:00	0
2009-10-06	09:06:00	0
2009-10-06	09:07:00	0
2009-10-06	09:08:00	0
2009-10-06	09:09:00	0
2009-10-06	09:10:00	0
2009-10-06	09:11:00	0
2009-10-06	09:12:00	0
2009-10-06	09:13:00	0
2009-10-06	09:14:00	0
2009-10-06	09:15:00	0
2009-10-06	09:16:00	0
2009-10-06	09:17:00	0
2009-10-06	09:18:00	0
2009-10-06	09:19:00	0
2009-10-06	09:20:00	0
2009-10-06	09:21:00	0
2009-10-06	09:22:00	0
2009-10-06	09:23:00	0
2009-10-06	09:24:00	0
2009-10-06	09:25:00	0
2009-10-06	09:26:00	0
2009-10-06	09:27:00	0
2009-10-06	09:28:00	0
2009-10-06	09:29:00	0
2009-10-06	09:30:00	0
2009-10-06	09:31:00	0
2009-10-06	09:32:00	0
2009-10-06	09:33:00	0
2009-10-06	09:34:00	0
2009-10-06	09:35:00	0
2009-10-06	09:36:00	0
2009-10-06	09:37:00	0
2009-10-06	09:38:00	0
2009-10-06	09:39:00	0
2009-10-06	09:40:00	0
2009-10-06	09:41:00	0
2009-10-06	09:42:00	0
2009-10-06	09:43:00	0
2009-10-06	09:44:00	0
2009-10-06	09:45:00	0
2009-10-06	09:46:00	0
2009-10-06	09:47:00	0
2009-10-06	09:48:00	0
2009-10-06	09:49:00	0
2009-10-06	09:50:00	0
2009-10-06	09:51:00	0
2009-10-06	09:52:00	0
2009-10-06	09:53:00	0
2009-10-06	09:54:00	0
2009-10-06	09:55:00	0
2009-10-06	09:56:00	0
2009-10-06	09:57:00	0
2009-10-06	09:58:00	0
2009-10-06	09:59:00	0
2009-10-06	10:00:00	0
2009-10-06	10:01:00	0
2009-10-06	10:02:00	0
2009-10-06	10:03:00	0
2009-10-06	10:04:00	0
2009-10-06	10:05:00	0
2009-10-06	10:06:00	0
2009-10-06	10:07:00	0
2009-10-06	10:08:00	0
2009-10-06	10:09:00	0
2009-10-06	10:10:00	0
2009-10-06	10:11:00	0
2009-10-06	10:12:00	0
2009-10-06	10:13:00	0
2009-10-06	10:14:00	0
2009-10-06	10:15:00	0
2009-10-06	10:16:00	0
2009-10-06	10:17:00	0
2009-10-06	10:18:00	0
2009-10-06	10:19:00	0
2009-10-06	10:20:00	0
2009-10-06	10:21:00	0
2009-10-06	10:22:00	0
2009-10-06	10:23:00	0
2009-10-06	10:24:00	0
2009-10-06	10:25:00	0
2009-10-06	10:26:00	0
2009-10-06	10:27:00	0
2009-10-06	10:28:00	0
2009-10-06	10:29:00	0
2009-10-06	10:30:00	0
2009-10-06	10:31:00	0
2009-10-06	10:32:00	0
2009-10-06	10:33:00	0
2009-10-06	10:34:00	0
2009-10-06	10:35:00	0
2009-10-06	10:36:00	0
2009-10-06	10:37:00	0
2009-10-06	10:38:00	0
2009-10-06	10:39:00	0
2009-10-06	10:40:00	0
2009-10-06	10:41:00	0
2009-10-06	10:42:00	0
2009-10-06	10:43:00	0
2009-10-06	10:44:00	0
2009-10-06	10:45:00	0
2009-10-06	10:46:00	0
2009-10-06	10:47:00	0
2009-10-06	10:48:00	0
2009-10-06	10:49:00	0
2009-10-06	10:50:00	0
2009-10-06	10:51:00	0
2009-10-06	10:52:00	0
2009-10-06	10:53:00	0
2009-10-06	10:54:00	0
2009-10-06	10:55:00	0
2009-10-06	10:56:00	0
2009-10-06	10:57:00	0
2009-10-06	10:58:00	0
2009-10-06	10:59:00	0
2009-10-06	11:00:00	0
2009-10-06	11:01:00	0
2009-10-06	11:02:00	0
2009-10-06	11:03:00	0
2009-10-06	11:04:00	0
2009-10-06	11:05:00	0
2009-10-06	11:06:00	0
2009-10-06	11:07:00	0
2009-10-06	11:08:00	0
2009-10-06	11:09:00	0
2009-10-06	11:10:00	0
2009-10-06	11:11:00	0
2009-10-06	11:12:00	0
2009-10-06	11:13:00	0
2009-10-06	11:14:00	0
2009-10-06	11:15:00	0
2009-10-06	11:16:00	0
2009-10-06	11:17:00	0
2009-10-06	11:18:00	0
2009-10-06	11:19:00	0
2009-10-06	11:20:00	0
2009-10-06	11:21:00	0
2009-10-06	11:22:00	0
2009-10-06	11:23:00	0
2009-10-06	11:24:00	0
2009-10-06	11:25:00	0
2009-10-06	11:26:00	0
2009-10-06	11:27:00	0
2009-10-06	11:28:00	0
2009-10-06	11:29:00	0
2009-10-06	11:30:00	0
2009-10-06	11:31:00	0
2009-10-06	11:32:00	0
2009-10-06	11:33:00	0
2009-10-06	11:34:00	0
2009-10-06	11:35:00	0
2009-10-06	11:36:00	0
2009-10-06	11:37:00	0
2009-10-06	11:38:00	0
2009-10-06	11:39:00	0
2009-10-06	11:40:00	0
2009-10-06	11:41:00	0
2009-10-06	11:42:00	0
2009-10-06	11:43:00	0
2009-10-06	11:44:00	0
2009-10-06	11:45:00	0
2009-10-06	11:46:00	0
2009-10-06	11:47:00	0
2009-10-06	11:48:00	0
2009-10-06	11:49:00	0
2009-10-06	11:50:00	0
2009-10-06	11:51:00	0
2009-10-06	11:52:00	0
2009-10-06	11:53:00	0
2009-10-06	11:54:00	0
2009-10-06	11:55:00	0
2009-10-06	11:56:00	0
2009-10-06	11:57:00	0
2009-10-06	11:58:00	0
2009-10-06	11:59:00	0
2009-10-06	12:00:00	0
2009-10-06	12:01:00	0
2009-10-06	12:02:00	0
2009-10-06	12:03:00	0
2009-10-06	12:04:00	0
2009-10-06	12:05:00	0
2009-10-06	12:06:00	0
2009-10-06	12:07:00	0
2009-10-06	12:08:00	0
2009-10-06	12:09:00	0
2009-10-06	12:10:00	0
2009-10-06	12:11:00	0
2009-10-06	12:12:00	0
2009-10-06	12:13:00	0
2009-10-06	12:14:00	0
2009-10-06	12:15:00	0
2009-10-06	12:16:00	0
2009-10-06	12:17:00	0
2009-10-06	12:18:00	0
2009-10-06	12:19:00	0
2009-10-06	12:20:00	0
2009-10-06	12:21:00	0
2009-10-06	12:22:00	0
2009-10-06	12:23:00	0
2009-10-06	12:24:00	0
2009-10-06	12:25:00	0
2009-10-06	12:26:00	0
2009-10-06	12:27:00	0
2009-10-06	12:28:00	0
2009-10-06	12:29:00	0
2009-10-06	12:30:00	0
2009-10-06	12:31:00	0
2009-10-06	12:32:00	0
2009-10-06	12:33:00	0
2009-10-06	12:34:00	0
2009-10-06	12:35:00	0
2009-10-06	12:36:00	0
2009-10-06	12:37:00	0
2009-10-06	12:38:00	0
2009-10-06	12:39:00	0
2009-10-06	12:40:00	0
2009-10-06	12:41:00	0
2009-10-06	12:42:00	0
2009-10-06	12:43:00	0
2009-10-06	12:44:00	0
2009-10-06	12:45:00	0
2009-10-06	12:46:00	0
2009-10-06	12:47:00	0
2009-10-06	12:48:00	0
2009-10-06	12:49:00	0
2009-10-06	12:50:00	0
2009-10-06	12:51:00	0
2009-10-06	12:52:00	0
2009-10-06	12:53:00	0
2009-10-06	12:54:00	0
2009-10-06	12:55:00	0
2009-10-06	12:56:00	0
2009-10-06	12:57:00	0
2009-10-06	12:58:00	0
2009-10-06	12:59:00	0
2009-10-06	13:00:00	0
2009-10-06	13:01:00	0
2009-10-06	13:02:00	0
2009-10-06	13:03:00	0
2009-10-06	13:04:00	0
2009-10-06	13:05:00	0
2009-10-06	13:06:00	0
2009-10-06	13:07:00	0
2009-10-06	13:08:00	0
2009-10-06	13:09:00	0
2009-10-06	13:10:00	0
2009-10-06	13:11:00	0
2009-10-06	13:12:00	0
2009-10-06	13:13:00	0
2009-10-06	13:14:00	0
2009-10-06	13:15:00	0
2009-10-06	13:16:00	0
2009-10-06	13:17:00	0
2009-10-06	13:18:00	0
2009-10-06	13:19:00	0
2009-10-06	13:20:00	0
2009-10-06	13:21:00	0
2009-10-06	13:22:00	0
2009-10-06	13:23:00	0
2009-10-06	13:24:00	0
2009-10-06	13:25:00	0
2009-10-06	13:26:00	0
2009-10-06	13:27:00	0
2009-10-06	13:28:00	0
2009-10-06	13:29:00	0
2009-10-06	13:30:00	0
2009-10-06	13:31:00	0
2009-10-06	13:32:00	0
2009-10-06	13:33:00	0
2009-10-06	13:34:00	0
2009-10-06	13:35:00	0
2009-10-06	13:36:00	0
2009-10-06	13:37:00	0
2009-10-06	13:38:00	0
2009-10-06	13:39:00	0
2009-10-06	13:40:00	0
2009-10-06	13:41:00	0
2009-10-06	13:42:00	0
2009-10-06	13:43:00	0
2009-10-06	13:44:00	0
2009-10-06	13:45:00	0
2009-10-06	13:46:00	0
2009-10-06	13:47:00	0
2009-10-06	13:48:00	0
2009-10-06	13:49:00	0
2009-10-06	13:50:00	0
2009-10-06	13:51:00	0
2009-10-06	13:52:00	0
2009-10-06	13:53:00	0
2009-10-06	13:54:00	0
2009-10-06	13:55:00	0
2009-10-06	13:56:00	0
2009-10-06	13:57:00	0
2009-10-06	13:58:00	0
2009-10-06	13:59:00	0
2009-10-06	14:00:00	0
2009-10-06	14:01:00	0
2009-10-06	14:02:00	0
2009-10-06	14:03:00	0
2009-10-06	14:04:00	0
2009-10-06	14:05:00	0
2009-10-06	14:06:00	0
2009-10-06	14:07:00	0
2009-10-06	14:08:00	0
2009-10-06	14:09:00	0
2009-10-06	14:10:00	0
2009-10-06	14:11:00	0
2009-10-06	14:12:00	0
2009-10-06	14:13:00	0
2009-10-06	14:14:00	0
2009-10-06	14:15:00	0
2009-10-06	14:16:00	0
2009-10-06	14:17:00	0
2009-10-06	14:18:00	0
2009-10-06	14:19:00	0
2009-10-06	14:20:00	0
2009-10-06	14:21:00	0
2009-10-06	14:22:00	0
2009-10-06	14:23:00	0
2009-10-06	14:24:00	0
2009-10-06	14:25:00	0
2009-10-06	14:26:00	0
2009-10-06	14:27:00	0
2009-10-06	14:28:00	0
2009-10-06	14:29:00	0
2009-10-06	14:30:00	0
2009-10-06	14:31:00	0
2009-10-06	14:32:00	0
2009-10-06	14:33:00	0
2009-10-06	14:34:00	0
2009-10-06	14:35:00	0
2009-10-06	14:36:00	0
2009-10-06	14:37:00	0
2009-10-06	14:38:00	0
2009-10-06	14:39:00	0
2009-10-06	14:40:00	0
2009-10-06	14:41:00	0
2009-10-06	14:42:00	0
2009-10-06	14:43:00	0
2009-10-06	14:44:00	0
2009-10-06	14:45:00	0
2009-10-06	14:46:00	0
2009-10-06	14:47:00	0
2009-10-06	14:48:00	0
2009-10-06	14:49:00	0
2009-10-06	14:50:00	0
2009-10-06	14:51:00	0
2009-10-06	14:52:00	0
2009-10-06	14:53:00	0
2009-10-06	14:54:00	0
2009-10-06	14:55:00	0
2009-10-06	14:56:00	0
2009-10-06	14:57:00	0
2009-10-06	14:58:00	0
2009-10-06	14:59:00	0
2009-10-06	15:00:00	0
2009-10-06	15:01:00	0
2009-10-06	15:02:00	0
2009-10-06	15:03:00	0
2009-10-06	15:04:00	0
2009-10-06	15:05:00	0
2009-10-06	15:06:00	0
2009-10-06	15:07:00	0
2009-10-06	15:08:00	0
2009-10-06	15:09:00	0
2009-10-06	15:10:00	0
2009-10-06	15:11:00	0
2009-10-06	15:12:00	0
2009-10-06	15:13:00	0
2009-10-06	15:14:00	0
2009-10-06	15:15:00	0
2009-10-06	15:16:00	0
2009-10-06	15:17:00	0
2009-10-06	15:18:00	0
2009-10-06	15:19:00	0
2009-10-06	15:20:00	0
2009-10-06	15:21:00	0
2009-10-06	15:22:00	0
2009-10-06	15:23:00	0
2009-10-06	15:24:00	0
2009-10-06	15:25:00	0
2009-10-06	15:26:00	0
2009-10-06	15:27:00	0
2009-10-06	15:28:00	0
2009-10-06	15:29:00	0
2009-10-06	15:30:00	0
2009-10-06	15:31:00	0
2009-10-06	15:32:00	0
2009-10-06	15:33:00	0
2009-10-06	15:34:00	0
2009-10-06	15:35:00	0
2009-10-06	15:36:00	0
2009-10-06	15:37:00	0
2009-10-06	15:38:00	0
2009-10-06	15:39:00	0
2009-10-06	15:40:00	0
2009-10-06	15:41:00	0
2009-10-06	15:42:00	0
2009-10-06	15:43:00	0
2009-10-06	15:44:00	0
2009-10-06	15:45:00	0
2009-10-06	15:46:00	0
2009-10-06	15:47:00	0
2009-10-06	15:48:00	0
2009-10-06	15:49:00	0
2009-10-06	15:50:00	0
2009-10-06	15:51:00	0
2009-10-06	15:52:00	0
2009-10-06	15:53:00	0
2009-10-06	15:54:00	0
2009-10-06	15:55:00	0
2009-10-06	15:56:00	0
2009-10-06	15:57:00	0
2009-10-06	15:58:00	0
2009-10-06	15:59:00	0
2009-10-06	16:00:00	0
2009-10-06	16:01:00	0
2009-10-06	16:02:00	0
2009-10-06	16:03:00	0
2009-10-06	16:04:00	0
2009-10-06	16:05:00	0
2009-10-06	16:06:00	0
2009-10-06	16:07:00	0
2009-10-06	16:08:00	0
2009-10-06	16:09:00	0
2009-10-06	16:10:00	0
2009-10-06	16:11:00	0
2009-10-06	16:12:00	0
2009-10-06	16:13:00	0
2009-10-06	16:14:00	0
2009-10-06	16:15:00	0
2009-10-06	16:16:00	0
2009-10-06	16:17:00	0
2009-10-06	16:18:00	0
2009-10-06	16:19:00	0
2009-10-06	16:20:00	0
2009-10-06	16:21:00	0
2009-10-06	16:22:00	0
2009-10-06	16:23:00	0
2009-10-06	16:24:00	0
2009-10-06	16:25:00	0
2009-10-06	16:26:00	0
2009-10-06	16:27:00	0
2009-10-06	16:28:00	0
2009-10-06	16:29:00	0
2009-10-06	16:30:00	0
2009-10-06	16:31:00	0
2009-10-06	16:32:00	0
2009-10-06	16:33:00	0
2009-10-06	16:34:00	0
2009-10-06	16:35:00	0
2009-10-06	16:36:00	0
2009-10-06	16:37:00	0
2009-10-06	16:38:00	0
2009-10-06	16:39:00	0
2009-10-06	16:40:00	0
2009-10-06	16:41:00	0
2009-10-06	16:42:00	0
2009-10-06	16:43:00	0
2009-10-06	16:44:00	0
2009-10-06	16:45:00	0
2009-10-06	16:46:00	0
2009-10-06	16:47:00	0
2009-10-06	16:48:00	0
2009-10-06	16:49:00	0
2009-10-06	16:50:00	0
2009-10-06	16:51:00	0
2009-10-06	16:52:00	0
2009-10-06	16:53:00	0
2009-10-06	16:54:00	0
2009-10-06	16:55:00	0
2009-10-06	16:56:00	0
2009-10-06	16:57:00	0
2009-10-06	16:58:00	0
2009-10-06	16:59:00	0
2009-10-06	17:00:00	0
2009-10-06	17:01:00	0
2009-10-06	17:02:00	0
2009-10-06	17:03:00	0
2009-10-06	17:04:00	0
2009-10-06	17:05:00	0
2009-10-06	17:06:00	0
2009-10-06	17:07:00	0
2009-10-06	17:08:00	0
2009-10-06	17:09:00	0
2009-10-06	17:10:00	0
2009-10-06	17:11:00	0
2009-10-06	17:12:00	0
2009-10-06	17:13:00	0
2009-10-06	17:14:00	0
2009-10-06	17:15:00	0
2009-10-06	17:16:00	0
2009-10-06	17:17:00	0
2009-10-06	17:18:00	0
2009-10-06	17:19:00	0
2009-10-06	17:20:00	0
2009-10-06	17:21:00	0
2009-10-06	17:22:00	0
2009-10-06	17:23:00	0
2009-10-06	17:24:00	0
2009-10-06	17:25:00	0
2009-10-06	17:26:00	0
2009-10-06	17:27:00	0
2009-10-06	17:28:00	0
2009-10-06	17:29:00	0
2009-10-06	17:30:00	0
2009-10-06	17:31:00	0
2009-10-06	17:32:00	0
2009-10-06	17:33:00	0
2009-10-06	17:34:00	0
2009-10-06	17:35:00	0
2009-10-06	17:36:00	0
2009-10-06	17:37:00	0
2009-10-06	17:38:00	0
2009-10-06	17:39:00	0
2009-10-06	17:40:00	0
2009-10-06	17:41:00	0
2009-10-06	17:42:00	0
2009-10-06	17:43:00	0
2009-10-06	17:44:00	0
2009-10-06	17:45:00	0
2009-10-06	17:46:00	0
2009-10-06	17:47:00	0
2009-10-06	17:48:00	0
2009-10-06	17:49:00	0
2009-10-06	17:50:00	0
2009-10-06	17:51:00	0
2009-10-06	17:52:00	0
2009-10-06	17:53:00	0
2009-10-06	17:54:00	0
2009-10-06	17:55:00	0
2009-10-06	17:56:00	0
2009-10-06	17:57:00	0
2009-10-06	17:58:00	0
2009-10-06	17:59:00	0
2009-10-06	18:00:00	0	M
2009-10-06	18:01:00	555
2009-10-06	18:02:00	697
2009-10-06	18:03:00	443
2009-10-06	18:04:00	254
2009-10-06	18:05:00	979
2009-10-06	18:06:00	536
2009-10-06	18:07:00	740
2009-10-06	18:08:00	479
2009-10-06	18:09:00	0
2009-10-06	18:10:00	12
2009-10-06	18:11:00	0
2009-10-06	18:12:00	0
2009-10-06	18:13:00	0
2009-10-06	18:14:00	0
2009-10-06	18:15:00	0
2009-10-06	18:16:00	0
2009-10-06	18:17:00	24
2009-10-06	18:18:00	0
2009-10-06	18:19:00	0
2009-10-06	18:20:00	0
2009-10-06	18:21:00	2086
2009-10-06	18:22:00	740
2009-10-06	18:23:00	296
2009-10-06	18:24:00	12
2009-10-06	18:25:00	0
2009-10-06	18:26:00	0
2009-10-06	18:27:00	0
2009-10-06	18:28:00	0
2009-10-06	18:29:00	83
2009-10-06	18:30:00	2866
2009-10-06	18:31:00	555
2009-10-06	18:32:00	0
2009-10-06	18:33:00	0
2009-10-06	18:34:00	0
2009-10-06	18:35:00	0
2009-10-06	18:36:00	24
2009-10-06	18:37:00	0
2009-10-06	18:38:00	0
2009-10-06	18:39:00	0
2009-10-06	18:40:00	0
2009-10-06	18:41:00	24
2009-10-06	18:42:00	0
2009-10-06	18:43:00	0
2009-10-06	18:44:00	0
2009-10-06	18:45:00	0
2009-10-06	18:46:00	0
2009-10-06	18:47:00	0
2009-10-06	18:48:00	0
2009-10-06	18:49:00	12
2009-10-06	18:50:00	12
2009-10-06	18:51:00	71
2009-10-06	18:52:00	12
2009-10-06	18:53:00	12
2009-10-06	18:54:00	0
2009-10-06	18:55:00	0
2009-10-06	18:56:00	0
2009-10-06	18:57:00	12
2009-10-06	18:58:00	95
2009-10-06	18:59:00	536
2009-10-06	19:00:00	555
2009-10-06	19:01:00	130
2009-10-06	19:02:00	393
2009-10-06	19:03:00	36
2009-10-06	19:04:00	808
2009-10-06	19:05:00	443
2009-10-06	19:06:00	0
2009-10-06	19:07:00	360
2009-10-06	19:08:00	130
2009-10-06	19:09:00	0
2009-10-06	19:10:00	517
2009-10-06	19:11:00	211
2009-10-06	19:12:00	95
2009-10-06	19:13:00	12
2009-10-06	19:14:00	0
2009-10-06	19:15:00	0
2009-10-06	19:16:00	36
2009-10-06	19:17:00	0
2009-10-06	19:18:00	0
2009-10-06	19:19:00	36
2009-10-06	19:20:00	12
2009-10-06	19:21:00	498
2009-10-06	19:22:00	654
2009-10-06	19:23:00	12
2009-10-06	19:24:00	0
2009-10-06	19:25:00	0
2009-10-06	19:26:00	12
2009-10-06	19:27:00	0
2009-10-06	19:28:00	0
2009-10-06	19:29:00	0
2009-10-06	19:30:00	59
2009-10-06	19:31:00	12
2009-10-06	19:32:00	0
2009-10-06	19:33:00	183
2009-10-06	19:34:00	0
2009-10-06	19:35:00	0
2009-10-06	19:36:00	0
2009-10-06	19:37:00	24
2009-10-06	19:38:00	24
2009-10-06	19:39:00	239
2009-10-06	19:40:00	0
2009-10-06	19:41:00	0
2009-10-06	19:42:00	344
2009-10-06	19:43:00	0
2009-10-06	19:44:00	12
2009-10-06	19:45:00	0
2009-10-06	19:46:00	0
2009-10-06	19:47:00	0
2009-10-06	19:48:00	0
2009-10-06	19:49:00	0
2009-10-06	19:50:00	0
2009-10-06	19:51:00	0
2009-10-06	19:52:00	0
2009-10-06	19:53:00	0
2009-10-06	19:54:00	0
2009-10-06	19:55:00	0
2009-10-06	19:56:00	0
2009-10-06	19:57:00	0
2009-10-06	19:58:00	0
2009-10-06	19:59:00	0
2009-10-06	20:00:00	0
2009-10-06	20:01:00	0
2009-10-06	20:02:00	0
2009-10-06	20:03:00	0
2009-10-06	20:04:00	0
2009-10-06	20:05:00	0
2009-10-06	20:06:00	0
2009-10-06	20:07:00	0
2009-10-06	20:08:00	0
2009-10-06	20:09:00	0
2009-10-06	20:10:00	0
2009-10-06	20:11:00	0
2009-10-06	20:12:00	0
2009-10-06	20:13:00	0
2009-10-06	20:14:00	0
2009-10-06	20:15:00	0
2009-10-06	20:16:00	0
2009-10-06	20:17:00	0
2009-10-06	20:18:00	0
2009-10-06	20:19:00	0
2009-10-06	20:20:00	0
2009-10-06	20:21:00	0
2009-10-06	20:22:00	0
2009-10-06	20:23:00	0
2009-10-06	20:24:00	0
2009-10-06	20:25:00	0
2009-10-06	20:26:00	24
2009-10-06	20:27:00	0
2009-10-06	20:28:00	0
2009-10-06	20:29:00	0
2009-10-06	20:30:00	0
2009-10-06	20:31:00	0
2009-10-06	20:32:00	0
2009-10-06	20:33:00	0
2009-10-06	20:34:00	0
2009-10-06	20:35:00	0
2009-10-06	20:36:00	0
2009-10-06	20:37:00	0
2009-10-06	20:38:00	0
2009-10-06	20:39:00	0
2009-10-06	20:40:00	24
2009-10-06	20:41:00	0
2009-10-06	20:42:00	0
2009-10-06	20:43:00	0
2009-10-06	20:44:00	0
2009-10-06	20:45:00	0
2009-10-06	20:46:00	0
2009-10-06	20:47:00	0
2009-10-06	20:48:00	0
2009-10-06	20:49:00	0
2009-10-06	20:50:00	0
2009-10-06	20:51:00	0
2009-10-06	20:52:00	0
2009-10-06	20:53:00	0
2009-10-06	20:54:00	0
2009-10-06	20:55:00	0
2009-10-06	20:56:00	0
2009-10-06	20:57:00	0
2009-10-06	20:58:00	0
2009-10-06	20:59:00	0
2009-10-06	21:00:00	0
2009-10-06	21:01:00	0
2009-10-06	21:02:00	0
2009-10-06	21:03:00	0
2009-10-06	21:04:00	0
2009-10-06	21:05:00	24
2009-10-06	21:06:00	12
2009-10-06	21:07:00	0
2009-10-06	21:08:00	0
2009-10-06	21:09:00	254
2009-10-06	21:10:00	142
2009-10-06	21:11:00	0
2009-10-06	21:12:00	0
2009-10-06	21:13:00	24
2009-10-06	21:14:00	0
2009-10-06	21:15:00	0
2009-10-06	21:16:00	0
2009-10-06	21:17:00	0
2009-10-06	21:18:00	0
2009-10-06	21:19:00	0
2009-10-06	21:20:00	0
2009-10-06	21:21:00	0
2009-10-06	21:22:00	0
2009-10-06	21:23:00	0
2009-10-06	21:24:00	0
2009-10-06	21:25:00	0
2009-10-06	21:26:00	0
2009-10-06	21:27:00	0
2009-10-06	21:28:00	0
2009-10-06	21:29:00	0
2009-10-06	21:30:00	0
2009-10-06	21:31:00	0
2009-10-06	21:32:00	0
2009-10-06	21:33:00	0
2009-10-06	21:34:00	0
2009-10-06	21:35:00	0
2009-10-06	21:36:00	0
2009-10-06	21:37:00	0
2009-10-06	21:38:00	0
2009-10-06	21:39:00	0
2009-10-06	21:40:00	0
2009-10-06	21:41:00	0
2009-10-06	21:42:00	0
2009-10-06	21:43:00	0
2009-10-06	21:44:00	0
2009-10-06	21:45:00	0
2009-10-06	21:46:00	0
2009-10-06	21:47:00	0
2009-10-06	21:48:00	0
2009-10-06	21:49:00	0
2009-10-06	21:50:00	0
2009-10-06	21:51:00	0
2009-10-06	21:52:00	0
2009-10-06	21:53:00	0
2009-10-06	21:54:00	0
2009-10-06	21:55:00	0
2009-10-06	21:56:00	0
2009-10-06	21:57:00	0
2009-10-06	21:58:00	0
2009-10-06	21:59:00	0
2009-10-06	22:00:00	0
2009-10-06	22:01:00	0
2009-10-06	22:02:00	0
2009-10-06	22:03:00	0
2009-10-06	22:04:00	0
2009-10-06	22:05:00	0
2009-10-06	22:06:00	0
2009-10-06	22:07:00	0
2009-10-06	22:08:00	0
2009-10-06	22:09:00	0
2009-10-06	22:10:00	0
2009-10-06	22:11:00	0
2009-10-06	22:12:00	0
2009-10-06	22:13:00	0
2009-10-06	22:14:00	0
2009-10-06	22:15:00	59
2009-10-06	22:16:00	130
2009-10-06	22:17:00	0
2009-10-06	22:18:00	0
2009-10-06	22:19:00	0
2009-10-06	22:20:00	0
2009-10-06	22:21:00	0
2009-10-06	22:22:00	0
2009-10-06	22:23:00	0
2009-10-06	22:24:00	0
2009-10-06	22:25:00	36
2009-10-06	22:26:00	0
2009-10-06	22:27:00	0
2009-10-06	22:28:00	71
2009-10-06	22:29:00	12
2009-10-06	22:30:00	0
2009-10-06	22:31:00	0
2009-10-06	22:32:00	0
2009-10-06	22:33:00	0
2009-10-06	22:34:00	0
2009-10-06	22:35:00	0
2009-10-06	22:36:00	0
2009-10-06	22:37:00	0
2009-10-06	22:38:00	24
2009-10-06	22:39:00	12
2009-10-06	22:40:00	0
2009-10-06	22:41:00	0
2009-10-06	22:42:00	0
2009-10-06	22:43:00	95
2009-10-06	22:44:00	12
2009-10-06	22:45:00	12
2009-10-06	22:46:00	0
2009-10-06	22:47:00	0
2009-10-06	22:48:00	0
2009-10-06	22:49:00	0
2009-10-06	22:50:00	0
2009-10-06	22:51:00	0
2009-10-06	22:52:00	0
2009-10-06	22:53:00	0
2009-10-06	22:54:00	0
2009-10-06	22:55:00	0
2009-10-06	22:56:00	0
2009-10-06	22:57:00	0
2009-10-06	22:58:00	0
2009-10-06	22:59:00	0
2009-10-06	23:00:00	0
2009-10-06	23:01:00	0
2009-10-06	23:02:00	0
2009-10-06	23:03:00	0
2009-10-06	23:04:00	0
2009-10-06	23:05:00	0
2009-10-06	23:06:00	0
2009-10-06	23:07:00	0
2009-10-06	23:08:00	24
2009-10-06	23:09:00	0
2009-10-06	23:10:00	0
2009-10-06	23:11:00	95
2009-10-06	23:12:00	47
2009-10-06	23:13:00	479
2009-10-06	23:14:00	24
2009-10-06	23:15:00	0
2009-10-06	23:16:00	0
2009-10-06	23:17:00	0
2009-10-06	23:18:00	0
2009-10-06	23:19:00	0
2009-10-06	23:20:00	0
2009-10-06	23:21:00	0
2009-10-06	23:22:00	0
2009-10-06	23:23:00	0
2009-10-06	23:24:00	0
2009-10-06	23:25:00	0
2009-10-06	23:26:00	36
2009-10-06	23:27:00	0
2009-10-06	23:28:00	12
2009-10-06	23:29:00	183
2009-10-06	23:30:00	0
2009-10-06	23:31:00	0
2009-10-06	23:32:00	0
2009-10-06	23:33:00	0
2009-10-06	23:34:00	0
2009-10-06	23:35:00	0
2009-10-06	23:36:00	0
2009-10-06	23:37:00	0
2009-10-06	23:38:00	0
2009-10-06	23:39:00	0
2009-10-06	23:40:00	12
2009-10-06	23:41:00	47
2009-10-06	23:42:00	0
2009-10-06	23:43:00	0
2009-10-06	23:44:00	0
2009-10-06	23:45:00	0
2009-10-06	23:46:00	0
2009-10-06	23:47:00	0
2009-10-06	23:48:00	0
2009-10-06	23:49:00	0
2009-10-06	23:50:00	0
2009-10-06	23:51:00	0
2009-10-06	23:52:00	0
2009-10-06	23:53:00	0
2009-10-06	23:54:00	0
2009-10-06	23:55:00	0
2009-10-06	23:56:00	0
2009-10-06	23:57:00	0
2009-10-06	23:58:00	0
2009-10-06	23:59:00	0
2009-10-07	00:00:00	0
2009-10-07	00:01:00	0
2009-10-07	00:02:00	0
2009-10-07	00:03:00	0
2009-10-07	00:04:00	0
2009-10-07	00:05:00	0
2009-10-07	00:06:00	0
2009-10-07	00:07:00	0
2009-10-07	00:08:00	0
2009-10-07	00:09:00	0
2009-10-07	00:10:00	0
2009-10-07	00:11:00	0
2009-10-07	00:12:00	0
2009-10-07	00:13:00	0
2009-10-07	00:14:00	12
2009-10-07	00:15:00	0
2009-10-07	00:16:00	0
2009-10-07	00:17:00	0
2009-10-07	00:18:00	0
2009-10-07	00:19:00	0
2009-10-07	00:20:00	0
2009-10-07	00:21:00	0
2009-10-07	00:22:00	0
2009-10-07	00:23:00	0
2009-10-07	00:24:00	0
2009-10-07	00:25:00	0
2009-10-07	00:26:00	0
2009-10-07	00:27:00	0
2009-10-07	00:28:00	0
2009-10-07	00:29:00	0
2009-10-07	00:30:00	0
2009-10-07	00:31:00	0
2009-10-07	00:32:00	0
2009-10-07	00:33:00	0
2009-10-07	00:34:00	0
2009-10-07	00:35:00	47
2009-10-07	00:36:00	0
2009-10-07	00:37:00	0
2009-10-07	00:38:00	0
2009-10-07	00:39:00	0
2009-10-07	00:40:00	0
2009-10-07	00:41:00	0
2009-10-07	00:42:00	0
2009-10-07	00:43:00	0
2009-10-07	00:44:00	0
2009-10-07	00:45:00	0
2009-10-07	00:46:00	0
2009-10-07	00:47:00	0
2009-10-07	00:48:00	0
2009-10-07	00:49:00	0
2009-10-07	00:50:00	0
2009-10-07	00:51:00	0
2009-10-07	00:52:00	0
2009-10-07	00:53:00	0
2009-10-07	00:54:00	36
2009-10-07	00:55:00	0
2009-10-07	00:56:00	0
2009-10-07	00:57:00	0
2009-10-07	00:58:00	0
2009-10-07	00:59:00	0
2009-10-07	01:00:00	0
2009-10-07	01:01:00	0
2009-10-07	01:02:00	0
2009-10-07	01:03:00	0
2009-10-07	01:04:00	0
2009-10-07	01:05:00	0
2009-10-07	01:06:00	0
2009-10-07	01:07:00	0
2009-10-07	01:08:00	0
2009-10-07	01:09:00	0
2009-10-07	01:10:00	0
2009-10-07	01:11:00	0
2009-10-07	01:12:00	0
2009-10-07	01:13:00	0
2009-10-07	01:14:00	633
2009-10-07	01:15:00	0
2009-10-07	01:16:00	142
2009-10-07	01:17:00	327
2009-10-07	01:18:00	0
2009-10-07	01:19:00	0
2009-10-07	01:20:00	0
2009-10-07	01:21:00	0
2009-10-07	01:22:00	0
2009-10-07	01:23:00	0
2009-10-07	01:24:00	0
2009-10-07	01:25:00	0
2009-10-07	01:26:00	0
2009-10-07	01:27:00	0
2009-10-07	01:28:00	0
2009-10-07	01:29:00	0
2009-10-07	01:30:00	0
2009-10-07	01:31:00	0
2009-10-07	01:32:00	0
2009-10-07	01:33:00	0
2009-10-07	01:34:00	0
2009-10-07	01:35:00	0
2009-10-07	01:36:00	0
2009-10-07	01:37:00	0
2009-10-07	01:38:00	0
2009-10-07	01:39:00	0
2009-10-07	01:40:00	0
2009-10-07	01:41:00	0
2009-10-07	01:42:00	0
2009-10-07	01:43:00	0
2009-10-07	01:44:00	0
2009-10-07	01:45:00	0
2009-10-07	01:46:00	0
2009-10-07	01:47:00	0
2009-10-07	01:48:00	0
2009-10-07	01:49:00	0
2009-10-07	01:50:00	0
2009-10-07	01:51:00	0
2009-10-07	01:52:00	0
2009-10-07	01:53:00	0
2009-10-07	01:54:00	0
2009-10-07	01:55:00	0
2009-10-07	01:56:00	0
2009-10-07	01:57:00	0
2009-10-07	01:58:00	0
2009-10-07	01:59:00	0
2009-10-07	02:00:00	0
2009-10-07	02:01:00	0
2009-10-07	02:02:00	0
2009-10-07	02:03:00	0
2009-10-07	02:04:00	0
2009-10-07	02:05:00	0
2009-10-07	02:06:00	0
2009-10-07	02:07:00	0
2009-10-07	02:08:00	0
2009-10-07	02:09:00	83
2009-10-07	02:10:00	12
2009-10-07	02:11:00	0
2009-10-07	02:12:00	0
2009-10-07	02:13:00	0
2009-10-07	02:14:00	24
2009-10-07	02:15:00	12
2009-10-07	02:16:00	0
2009-10-07	02:17:00	0
2009-10-07	02:18:00	0
2009-10-07	02:19:00	0
2009-10-07	02:20:00	0
2009-10-07	02:21:00	0
2009-10-07	02:22:00	12
2009-10-07	02:23:00	0
2009-10-07	02:24:00	517
2009-10-07	02:25:00	142
2009-10-07	02:26:00	24
2009-10-07	02:27:00	12
2009-10-07	02:28:00	0
2009-10-07	02:29:00	0
2009-10-07	02:30:00	0
2009-10-07	02:31:00	12
2009-10-07	02:32:00	71
2009-10-07	02:33:00	12
2009-10-07	02:34:00	12
2009-10-07	02:35:00	0
2009-10-07	02:36:00	47
2009-10-07	02:37:00	24
2009-10-07	02:38:00	0
2009-10-07	02:39:00	0
2009-10-07	02:40:00	0
2009-10-07	02:41:00	0
2009-10-07	02:42:00	0
2009-10-07	02:43:00	36
2009-10-07	02:44:00	0
2009-10-07	02:45:00	0
2009-10-07	02:46:00	0
2009-10-07	02:47:00	0
2009-10-07	02:48:00	0
2009-10-07	02:49:00	71
2009-10-07	02:50:00	0
2009-10-07	02:51:00	0
2009-10-07	02:52:00	12
2009-10-07	02:53:00	0
2009-10-07	02:54:00	0
2009-10-07	02:55:00	0
2009-10-07	02:56:00	24
2009-10-07	02:57:00	0
2009-10-07	02:58:00	0
2009-10-07	02:59:00	0
2009-10-07	03:00:00	0
2009-10-07	03:01:00	0
2009-10-07	03:02:00	0
2009-10-07	03:03:00	0
2009-10-07	03:04:00	0
2009-10-07	03:05:00	0
2009-10-07	03:06:00	0
2009-10-07	03:07:00	0
2009-10-07	03:08:00	0
2009-10-07	03:09:00	0
2009-10-07	03:10:00	0
2009-10-07	03:11:00	1512
2009-10-07	03:12:00	2600
2009-10-07	03:13:00	879
2009-10-07	03:14:00	282
2009-10-07	03:15:00	808
2009-10-07	03:16:00	83
2009-10-07	03:17:00	443
2009-10-07	03:18:00	1479
2009-10-07	03:19:00	12
2009-10-07	03:20:00	24
2009-10-07	03:21:00	12
2009-10-07	03:22:00	12
2009-10-07	03:23:00	24
2009-10-07	03:24:00	12
2009-10-07	03:25:00	12
2009-10-07	03:26:00	12
2009-10-07	03:27:00	0
2009-10-07	03:28:00	24
2009-10-07	03:29:00	633
2009-10-07	03:30:00	344
2009-10-07	03:31:00	443
2009-10-07	03:32:00	612
2009-10-07	03:33:00	327
2009-10-07	03:34:00	0
2009-10-07	03:35:00	0
2009-10-07	03:36:00	0
2009-10-07	03:37:00	142
2009-10-07	03:38:00	344
2009-10-07	03:39:00	427
2009-10-07	03:40:00	536
2009-10-07	03:41:00	808
2009-10-07	03:42:00	296
2009-10-07	03:43:00	12
2009-10-07	03:44:00	12
2009-10-07	03:45:00	327
2009-10-07	03:46:00	498
2009-10-07	03:47:00	211
2009-10-07	03:48:00	1031
2009-10-07	03:49:00	344
2009-10-07	03:50:00	296
2009-10-07	03:51:00	612
2009-10-07	03:52:00	239
2009-10-07	03:53:00	761
2009-10-07	03:54:00	1169
2009-10-07	03:55:00	676
2009-10-07	03:56:00	517
2009-10-07	03:57:00	633
2009-10-07	03:58:00	593
2009-10-07	03:59:00	633
2009-10-07	04:00:00	460
2009-10-07	04:01:00	479
2009-10-07	04:02:00	0
2009-10-07	04:03:00	0
2009-10-07	04:04:00	36
2009-10-07	04:05:00	0
2009-10-07	04:06:00	0
2009-10-07	04:07:00	12
2009-10-07	04:08:00	47
2009-10-07	04:09:00	12
2009-10-07	04:10:00	0
2009-10-07	04:11:00	0
2009-10-07	04:12:00	95
2009-10-07	04:13:00	0
2009-10-07	04:14:00	0
2009-10-07	04:15:00	36
2009-10-07	04:16:00	12
2009-10-07	04:17:00	12
2009-10-07	04:18:00	0
2009-10-07	04:19:00	36
2009-10-07	04:20:00	47
2009-10-07	04:21:00	12
2009-10-07	04:22:00	0
2009-10-07	04:23:00	0
2009-10-07	04:24:00	0
2009-10-07	04:25:00	36
2009-10-07	04:26:00	0
2009-10-07	04:27:00	0
2009-10-07	04:28:00	0
2009-10-07	04:29:00	0
2009-10-07	04:30:00	0
2009-10-07	04:31:00	0
2009-10-07	04:32:00	0
2009-10-07	04:33:00	0
2009-10-07	04:34:00	0
2009-10-07	04:35:00	0
2009-10-07	04:36:00	0
2009-10-07	04:37:00	36
2009-10-07	04:38:00	47
2009-10-07	04:39:00	0
2009-10-07	04:40:00	24
2009-10-07	04:41:00	211
2009-10-07	04:42:00	0
2009-10-07	04:43:00	0
2009-10-07	04:44:00	0
2009-10-07	04:45:00	0
2009-10-07	04:46:00	0
2009-10-07	04:47:00	0
2009-10-07	04:48:00	0
2009-10-07	04:49:00	0
2009-10-07	04:50:00	0
2009-10-07	04:51:00	0
2009-10-07	04:52:00	0
2009-10-07	04:53:00	0
2009-10-07	04:54:00	0
2009-10-07	04:55:00	0
2009-10-07	04:56:00	0
2009-10-07	04:57:00	0
2009-10-07	04:58:00	0
2009-10-07	04:59:00	0
2009-10-07	05:00:00	0
2009-10-07	05:01:00	0
2009-10-07	05:02:00	0
2009-10-07	05:03:00	0
2009-10-07	05:04:00	0
2009-10-07	05:05:00	0
2009-10-07	05:06:00	0
2009-10-07	05:07:00	0
2009-10-07	05:08:00	0
2009-10-07	05:09:00	0
2009-10-07	05:10:00	0
2009-10-07	05:11:00	0
2009-10-07	05:12:00	0
2009-10-07	05:13:00	0
2009-10-07	05:14:00	0
2009-10-07	05:15:00	0
2009-10-07	05:16:00	0
2009-10-07	05:17:00	0
2009-10-07	05:18:00	0
2009-10-07	05:19:00	0
2009-10-07	05:20:00	0
2009-10-07	05:21:00	0
2009-10-07	05:22:00	0
2009-10-07	05:23:00	0
2009-10-07	05:24:00	0
2009-10-07	05:25:00	0
2009-10-07	05:26:00	0
2009-10-07	05:27:00	0
2009-10-07	05:28:00	0
2009-10-07	05:29:00	0
2009-10-07	05:30:00	0
2009-10-07	05:31:00	0
2009-10-07	05:32:00	0
2009-10-07	05:33:00	0
2009-10-07	05:34:00	0
2009-10-07	05:35:00	0
2009-10-07	05:36:00	0
2009-10-07	05:37:00	0
2009-10-07	05:38:00	0
2009-10-07	05:39:00	0
2009-10-07	05:40:00	0
2009-10-07	05:41:00	0
2009-10-07	05:42:00	0
2009-10-07	05:43:00	0
2009-10-07	05:44:00	0
2009-10-07	05:45:00	0
2009-10-07	05:46:00	0
2009-10-07	05:47:00	0
2009-10-07	05:48:00	0
2009-10-07	05:49:00	0
2009-10-07	05:50:00	0
2009-10-07	05:51:00	0
2009-10-07	05:52:00	0
2009-10-07	05:53:00	0
2009-10-07	05:54:00	0
2009-10-07	05:55:00	0
2009-10-07	05:56:00	0
2009-10-07	05:57:00	0
2009-10-07	05:58:00	0
2009-10-07	05:59:00	0
2009-10-07	06:00:00	0
2009-10-07	06:01:00	0
2009-10-07	06:02:00	0
2009-10-07	06:03:00	0
2009-10-07	06:04:00	0
2009-10-07	06:05:00	0
2009-10-07	06:06:00	0
2009-10-07	06:07:00	0
2009-10-07	06:08:00	0
2009-10-07	06:09:00	0
2009-10-07	06:10:00	0
2009-10-07	06:11:00	0
2009-10-07	06:12:00	0
2009-10-07	06:13:00	0
2009-10-07	06:14:00	0
2009-10-07	06:15:00	0
2009-10-07	06:16:00	0
2009-10-07	06:17:00	0
2009-10-07	06:18:00	0
2009-10-07	06:19:00	0
2009-10-07	06:20:00	0
2009-10-07	06:21:00	0
2009-10-07	06:22:00	0
2009-10-07	06:23:00	0
2009-10-07	06:24:00	119
2009-10-07	06:25:00	0
2009-10-07	06:26:00	12
2009-10-07	06:27:00	0
2009-10-07	06:28:00	0
2009-10-07	06:29:00	0
2009-10-07	06:30:00	0
2009-10-07	06:31:00	0
2009-10-07	06:32:00	0
2009-10-07	06:33:00	0
2009-10-07	06:34:00	12
2009-10-07	06:35:00	0
2009-10-07	06:36:00	0
2009-10-07	06:37:00	0
2009-10-07	06:38:00	0
2009-10-07	06:39:00	0
2009-10-07	06:40:00	0
2009-10-07	06:41:00	0
2009-10-07	06:42:00	0
2009-10-07	06:43:00	0
2009-10-07	06:44:00	0
2009-10-07	06:45:00	0
2009-10-07	06:46:00	0
2009-10-07	06:47:00	0
2009-10-07	06:48:00	0
2009-10-07	06:49:00	0
2009-10-07	06:50:00	0
2009-10-07	06:51:00	0
2009-10-07	06:52:00	0
2009-10-07	06:53:00	0
2009-10-07	06:54:00	0
2009-10-07	06:55:00	0
2009-10-07	06:56:00	0
2009-10-07	06:57:00	0
2009-10-07	06:58:00	0
2009-10-07	06:59:00	0
2009-10-07	07:00:00	0
2009-10-07	07:01:00	0
2009-10-07	07:02:00	0
2009-10-07	07:03:00	0
2009-10-07	07:04:00	0
2009-10-07	07:05:00	0
2009-10-07	07:06:00	0
2009-10-07	07:07:00	0
2009-10-07	07:08:00	0
2009-10-07	07:09:00	0
2009-10-07	07:10:00	0
2009-10-07	07:11:00	0
2009-10-07	07:12:00	0
2009-10-07	07:13:00	36
2009-10-07	07:14:00	59
2009-10-07	07:15:00	12
2009-10-07	07:16:00	0
2009-10-07	07:17:00	0
2009-10-07	07:18:00	0
2009-10-07	07:19:00	0
2009-10-07	07:20:00	0
2009-10-07	07:21:00	0
2009-10-07	07:22:00	12
2009-10-07	07:23:00	0
2009-10-07	07:24:00	0
2009-10-07	07:25:00	0
2009-10-07	07:26:00	0
2009-10-07	07:27:00	0
2009-10-07	07:28:00	0
2009-10-07	07:29:00	0
2009-10-07	07:30:00	0
2009-10-07	07:31:00	0
2009-10-07	07:32:00	460
2009-10-07	07:33:00	0
2009-10-07	07:34:00	12
2009-10-07	07:35:00	0
2009-10-07	07:36:00	0
2009-10-07	07:37:00	0
2009-10-07	07:38:00	0
2009-10-07	07:39:00	0
2009-10-07	07:40:00	0
2009-10-07	07:41:00	0
2009-10-07	07:42:00	0
2009-10-07	07:43:00	0
2009-10-07	07:44:00	0
2009-10-07	07:45:00	0
2009-10-07	07:46:00	0
2009-10-07	07:47:00	0
2009-10-07	07:48:00	0
2009-10-07	07:49:00	0
2009-10-07	07:50:00	0
2009-10-07	07:51:00	0
2009-10-07	07:52:00	36
2009-10-07	07:53:00	12
2009-10-07	07:54:00	0
2009-10-07	07:55:00	0
2009-10-07	07:56:00	0
2009-10-07	07:57:00	0
2009-10-07	07:58:00	0
2009-10-07	07:59:00	0
2009-10-07	08:00:00	0
2009-10-07	08:01:00	0
2009-10-07	08:02:00	0
2009-10-07	08:03:00	0
2009-10-07	08:04:00	0
2009-10-07	08:05:00	0
2009-10-07	08:06:00	0
2009-10-07	08:07:00	0
2009-10-07	08:08:00	0
2009-10-07	08:09:00	0
2009-10-07	08:10:00	0
2009-10-07	08:11:00	0
2009-10-07	08:12:00	0
2009-10-07	08:13:00	0
2009-10-07	08:14:00	12
2009-10-07	08:15:00	0
2009-10-07	08:16:00	0
2009-10-07	08:17:00	0
2009-10-07	08:18:00	0
2009-10-07	08:19:00	0
2009-10-07	08:20:00	0
2009-10-07	08:21:00	12
2009-10-07	08:22:00	0
2009-10-07	08:23:00	0
2009-10-07	08:24:00	0
2009-10-07	08:25:00	0
2009-10-07	08:26:00	0
2009-10-07	08:27:00	0
2009-10-07	08:28:00	0
2009-10-07	08:29:00	0
2009-10-07	08:30:00	0
2009-10-07	08:31:00	0
2009-10-07	08:32:00	24
2009-10-07	08:33:00	12
2009-10-07	08:34:00	0
2009-10-07	08:35:00	0
2009-10-07	08:36:00	107
2009-10-07	08:37:00	12
2009-10-07	08:38:00	0
2009-10-07	08:39:00	12
2009-10-07	08:40:00	0
2009-10-07	08:41:00	0
2009-10-07	08:42:00	0
2009-10-07	08:43:00	0
2009-10-07	08:44:00	0
2009-10-07	08:45:00	0
2009-10-07	08:46:00	0
2009-10-07	08:47:00	0
2009-10-07	08:48:00	0
2009-10-07	08:49:00	0
2009-10-07	08:50:00	0
2009-10-07	08:51:00	0
2009-10-07	08:52:00	0
2009-10-07	08:53:00	0
2009-10-07	08:54:00	0
2009-10-07	08:55:00	0
2009-10-07	08:56:00	0
2009-10-07	08:57:00	0
2009-10-07	08:58:00	0
2009-10-07	08:59:00	0
2009-10-07	09:00:00	0
2009-10-07	09:01:00	0
2009-10-07	09:02:00	0
2009-10-07	09:03:00	0
2009-10-07	09:04:00	0
2009-10-07	09:05:00	0
2009-10-07	09:06:00	0
2009-10-07	09:07:00	0
2009-10-07	09:08:00	0
[truncated: 51,291 more rows]
