# Supplementary material for: Initial evaluation of nighttime restlessness in a naturally occurring canine model of osteoarthritis pain
Source: PeerJ. 2015 Feb 17;3:e772. doi: 10.7717/peerj.772 (PMC4340376; doi:10.7717/peerj.772)
Supplement: Supplemental Information 77 [file peerj-03-772-s077.xlsx]

## Sheet: 20_Data
Tx #	DateTime	Activity	DTA vs NTA	Hour	Tx Day	Weekday	Tx Rx	Peak DTA Time?	Last 7 Day?
1	2009-10-13 23:01:00	334	NTA	23	1	3	P
1	2009-10-13 23:02:00	83	NTA	23	1	3	P
1	2009-10-13 23:03:00	9	NTA	23	1	3	P
1	2009-10-13 23:04:00	65	NTA	23	1	3	P
1	2009-10-13 23:05:00	419	NTA	23	1	3	P
1	2009-10-13 23:06:00	28	NTA	23	1	3	P
1	2009-10-13 23:07:00	28	NTA	23	1	3	P
1	2009-10-13 23:08:00	0	NTA	23	1	3	P
1	2009-10-13 23:09:00	0	NTA	23	1	3	P
1	2009-10-13 23:10:00	0	NTA	23	1	3	P
1	2009-10-13 23:11:00	0	NTA	23	1	3	P
1	2009-10-13 23:12:00	0	NTA	23	1	3	P
1	2009-10-13 23:13:00	9	NTA	23	1	3	P
1	2009-10-13 23:14:00	0	NTA	23	1	3	P
1	2009-10-13 23:15:00	83	NTA	23	1	3	P
1	2009-10-13 23:16:00	0	NTA	23	1	3	P
1	2009-10-13 23:17:00	0	NTA	23	1	3	P
1	2009-10-13 23:18:00	121	NTA	23	1	3	P
1	2009-10-13 23:19:00	165	NTA	23	1	3	P
1	2009-10-13 23:20:00	9	NTA	23	1	3	P
1	2009-10-13 23:21:00	0	NTA	23	1	3	P
1	2009-10-13 23:22:00	0	NTA	23	1	3	P
1	2009-10-13 23:23:00	9	NTA	23	1	3	P
1	2009-10-13 23:24:00	9	NTA	23	1	3	P
1	2009-10-13 23:25:00	0	NTA	23	1	3	P
1	2009-10-13 23:26:00	0	NTA	23	1	3	P
1	2009-10-13 23:27:00	0	NTA	23	1	3	P
1	2009-10-13 23:28:00	0	NTA	23	1	3	P
1	2009-10-13 23:29:00	0	NTA	23	1	3	P
1	2009-10-13 23:30:00	0	NTA	23	1	3	P
1	2009-10-13 23:31:00	0	NTA	23	1	3	P
1	2009-10-13 23:32:00	0	NTA	23	1	3	P
1	2009-10-13 23:33:00	0	NTA	23	1	3	P
1	2009-10-13 23:34:00	0	NTA	23	1	3	P
1	2009-10-13 23:35:00	0	NTA	23	1	3	P
1	2009-10-13 23:36:00	28	NTA	23	1	3	P
1	2009-10-13 23:37:00	9	NTA	23	1	3	P
1	2009-10-13 23:38:00	37	NTA	23	1	3	P
1	2009-10-13 23:39:00	0	NTA	23	1	3	P
1	2009-10-13 23:40:00	0	NTA	23	1	3	P
1	2009-10-13 23:41:00	0	NTA	23	1	3	P
1	2009-10-13 23:42:00	0	NTA	23	1	3	P
1	2009-10-13 23:43:00	0	NTA	23	1	3	P
1	2009-10-13 23:44:00	0	NTA	23	1	3	P
1	2009-10-13 23:45:00	0	NTA	23	1	3	P
1	2009-10-13 23:46:00	0	NTA	23	1	3	P
1	2009-10-13 23:47:00	0	NTA	23	1	3	P
1	2009-10-13 23:48:00	0	NTA	23	1	3	P
1	2009-10-13 23:49:00	0	NTA	23	1	3	P
1	2009-10-13 23:50:00	0	NTA	23	1	3	P
1	2009-10-13 23:51:00	0	NTA	23	1	3	P
1	2009-10-13 23:52:00	0	NTA	23	1	3	P
1	2009-10-13 23:53:00	0	NTA	23	1	3	P
1	2009-10-13 23:54:00	0	NTA	23	1	3	P
1	2009-10-13 23:55:00	0	NTA	23	1	3	P
1	2009-10-13 23:56:00	0	NTA	23	1	3	P
1	2009-10-13 23:57:00	0	NTA	23	1	3	P
1	2009-10-13 23:58:00	0	NTA	23	1	3	P
1	2009-10-13 23:59:00	0	NTA	23	1	3	P
1	2009-10-14	0	NTA	23	1	3	P
1	2009-10-14 00:01:00	0	NTA	0	1	4	P
1	2009-10-14 00:02:00	0	NTA	0	1	4	P
1	2009-10-14 00:03:00	0	NTA	0	1	4	P
1	2009-10-14 00:04:00	0	NTA	0	1	4	P
1	2009-10-14 00:05:00	9	NTA	0	1	4	P
1	2009-10-14 00:06:00	0	NTA	0	1	4	P
1	2009-10-14 00:07:00	0	NTA	0	1	4	P
1	2009-10-14 00:08:00	0	NTA	0	1	4	P
1	2009-10-14 00:09:00	0	NTA	0	1	4	P
1	2009-10-14 00:10:00	0	NTA	0	1	4	P
1	2009-10-14 00:11:00	0	NTA	0	1	4	P
1	2009-10-14 00:12:00	0	NTA	0	1	4	P
1	2009-10-14 00:13:00	0	NTA	0	1	4	P
1	2009-10-14 00:14:00	0	NTA	0	1	4	P
1	2009-10-14 00:15:00	0	NTA	0	1	4	P
1	2009-10-14 00:16:00	0	NTA	0	1	4	P
1	2009-10-14 00:17:00	0	NTA	0	1	4	P
1	2009-10-14 00:18:00	0	NTA	0	1	4	P
1	2009-10-14 00:19:00	0	NTA	0	1	4	P
1	2009-10-14 00:20:00	0	NTA	0	1	4	P
1	2009-10-14 00:21:00	0	NTA	0	1	4	P
1	2009-10-14 00:22:00	0	NTA	0	1	4	P
1	2009-10-14 00:23:00	0	NTA	0	1	4	P
1	2009-10-14 00:24:00	0	NTA	0	1	4	P
1	2009-10-14 00:25:00	0	NTA	0	1	4	P
1	2009-10-14 00:26:00	0	NTA	0	1	4	P
1	2009-10-14 00:27:00	0	NTA	0	1	4	P
1	2009-10-14 00:28:00	0	NTA	0	1	4	P
1	2009-10-14 00:29:00	0	NTA	0	1	4	P
1	2009-10-14 00:30:00	0	NTA	0	1	4	P
1	2009-10-14 00:31:00	0	NTA	0	1	4	P
1	2009-10-14 00:32:00	0	NTA	0	1	4	P
1	2009-10-14 00:33:00	0	NTA	0	1	4	P
1	2009-10-14 00:34:00	0	NTA	0	1	4	P
1	2009-10-14 00:35:00	0	NTA	0	1	4	P
1	2009-10-14 00:36:00	0	NTA	0	1	4	P
1	2009-10-14 00:37:00	65	NTA	0	1	4	P
1	2009-10-14 00:38:00	0	NTA	0	1	4	P
1	2009-10-14 00:39:00	0	NTA	0	1	4	P
1	2009-10-14 00:40:00	0	NTA	0	1	4	P
1	2009-10-14 00:41:00	0	NTA	0	1	4	P
1	2009-10-14 00:42:00	0	NTA	0	1	4	P
1	2009-10-14 00:43:00	0	NTA	0	1	4	P
1	2009-10-14 00:44:00	0	NTA	0	1	4	P
1	2009-10-14 00:45:00	0	NTA	0	1	4	P
1	2009-10-14 00:46:00	0	NTA	0	1	4	P
1	2009-10-14 00:47:00	0	NTA	0	1	4	P
1	2009-10-14 00:48:00	0	NTA	0	1	4	P
1	2009-10-14 00:49:00	0	NTA	0	1	4	P
1	2009-10-14 00:50:00	0	NTA	0	1	4	P
1	2009-10-14 00:51:00	0	NTA	0	1	4	P
1	2009-10-14 00:52:00	0	NTA	0	1	4	P
1	2009-10-14 00:53:00	0	NTA	0	1	4	P
1	2009-10-14 00:54:00	0	NTA	0	1	4	P
1	2009-10-14 00:55:00	0	NTA	0	1	4	P
1	2009-10-14 00:56:00	0	NTA	0	1	4	P
1	2009-10-14 00:57:00	0	NTA	0	1	4	P
1	2009-10-14 00:58:00	0	NTA	0	1	4	P
1	2009-10-14 00:59:00	0	NTA	0	1	4	P
1	2009-10-14 01:00:00	0	NTA	0	1	4	P
1	2009-10-14 01:01:00	0	NTA	1	1	4	P
1	2009-10-14 01:02:00	0	NTA	1	1	4	P
1	2009-10-14 01:03:00	0	NTA	1	1	4	P
1	2009-10-14 01:04:00	0	NTA	1	1	4	P
1	2009-10-14 01:05:00	0	NTA	1	1	4	P
1	2009-10-14 01:06:00	0	NTA	1	1	4	P
1	2009-10-14 01:07:00	0	NTA	1	1	4	P
1	2009-10-14 01:08:00	0	NTA	1	1	4	P
1	2009-10-14 01:09:00	28	NTA	1	1	4	P
1	2009-10-14 01:10:00	19	NTA	1	1	4	P
1	2009-10-14 01:11:00	0	NTA	1	1	4	P
1	2009-10-14 01:12:00	0	NTA	1	1	4	P
1	2009-10-14 01:13:00	0	NTA	1	1	4	P
1	2009-10-14 01:14:00	0	NTA	1	1	4	P
1	2009-10-14 01:15:00	0	NTA	1	1	4	P
1	2009-10-14 01:16:00	0	NTA	1	1	4	P
1	2009-10-14 01:17:00	0	NTA	1	1	4	P
1	2009-10-14 01:18:00	0	NTA	1	1	4	P
1	2009-10-14 01:19:00	0	NTA	1	1	4	P
1	2009-10-14 01:20:00	0	NTA	1	1	4	P
1	2009-10-14 01:21:00	0	NTA	1	1	4	P
1	2009-10-14 01:22:00	0	NTA	1	1	4	P
1	2009-10-14 01:23:00	0	NTA	1	1	4	P
1	2009-10-14 01:24:00	0	NTA	1	1	4	P
1	2009-10-14 01:25:00	0	NTA	1	1	4	P
1	2009-10-14 01:26:00	0	NTA	1	1	4	P
1	2009-10-14 01:27:00	0	NTA	1	1	4	P
1	2009-10-14 01:28:00	0	NTA	1	1	4	P
1	2009-10-14 01:29:00	0	NTA	1	1	4	P
1	2009-10-14 01:30:00	0	NTA	1	1	4	P
1	2009-10-14 01:31:00	0	NTA	1	1	4	P
1	2009-10-14 01:32:00	0	NTA	1	1	4	P
1	2009-10-14 01:33:00	0	NTA	1	1	4	P
1	2009-10-14 01:34:00	28	NTA	1	1	4	P
1	2009-10-14 01:35:00	0	NTA	1	1	4	P
1	2009-10-14 01:36:00	0	NTA	1	1	4	P
1	2009-10-14 01:37:00	0	NTA	1	1	4	P
1	2009-10-14 01:38:00	0	NTA	1	1	4	P
1	2009-10-14 01:39:00	0	NTA	1	1	4	P
1	2009-10-14 01:40:00	0	NTA	1	1	4	P
1	2009-10-14 01:41:00	0	NTA	1	1	4	P
1	2009-10-14 01:42:00	0	NTA	1	1	4	P
1	2009-10-14 01:43:00	0	NTA	1	1	4	P
1	2009-10-14 01:44:00	0	NTA	1	1	4	P
1	2009-10-14 01:45:00	0	NTA	1	1	4	P
1	2009-10-14 01:46:00	0	NTA	1	1	4	P
1	2009-10-14 01:47:00	83	NTA	1	1	4	P
1	2009-10-14 01:48:00	121	NTA	1	1	4	P
1	2009-10-14 01:49:00	0	NTA	1	1	4	P
1	2009-10-14 01:50:00	0	NTA	1	1	4	P
1	2009-10-14 01:51:00	0	NTA	1	1	4	P
1	2009-10-14 01:52:00	0	NTA	1	1	4	P
1	2009-10-14 01:53:00	0	NTA	1	1	4	P
1	2009-10-14 01:54:00	0	NTA	1	1	4	P
1	2009-10-14 01:55:00	0	NTA	1	1	4	P
1	2009-10-14 01:56:00	0	NTA	1	1	4	P
1	2009-10-14 01:57:00	0	NTA	1	1	4	P
1	2009-10-14 01:58:00	0	NTA	1	1	4	P
1	2009-10-14 01:59:00	0	NTA	1	1	4	P
1	2009-10-14 02:00:00	0	NTA	1	1	4	P
1	2009-10-14 02:01:00	0	NTA	2	1	4	P
1	2009-10-14 02:02:00	0	NTA	2	1	4	P
1	2009-10-14 02:03:00	0	NTA	2	1	4	P
1	2009-10-14 02:04:00	0	NTA	2	1	4	P
1	2009-10-14 02:05:00	28	NTA	2	1	4	P
1	2009-10-14 02:06:00	0	NTA	2	1	4	P
1	2009-10-14 02:07:00	0	NTA	2	1	4	P
1	2009-10-14 02:08:00	0	NTA	2	1	4	P
1	2009-10-14 02:09:00	0	NTA	2	1	4	P
1	2009-10-14 02:10:00	0	NTA	2	1	4	P
1	2009-10-14 02:11:00	0	NTA	2	1	4	P
1	2009-10-14 02:12:00	0	NTA	2	1	4	P
1	2009-10-14 02:13:00	0	NTA	2	1	4	P
1	2009-10-14 02:14:00	0	NTA	2	1	4	P
1	2009-10-14 02:15:00	0	NTA	2	1	4	P
1	2009-10-14 02:16:00	0	NTA	2	1	4	P
1	2009-10-14 02:17:00	0	NTA	2	1	4	P
1	2009-10-14 02:18:00	0	NTA	2	1	4	P
1	2009-10-14 02:19:00	0	NTA	2	1	4	P
1	2009-10-14 02:20:00	0	NTA	2	1	4	P
1	2009-10-14 02:21:00	0	NTA	2	1	4	P
1	2009-10-14 02:22:00	0	NTA	2	1	4	P
1	2009-10-14 02:23:00	0	NTA	2	1	4	P
1	2009-10-14 02:24:00	0	NTA	2	1	4	P
1	2009-10-14 02:25:00	0	NTA	2	1	4	P
1	2009-10-14 02:26:00	0	NTA	2	1	4	P
1	2009-10-14 02:27:00	0	NTA	2	1	4	P
1	2009-10-14 02:28:00	0	NTA	2	1	4	P
1	2009-10-14 02:29:00	132	NTA	2	1	4	P
1	2009-10-14 02:30:00	0	NTA	2	1	4	P
1	2009-10-14 02:31:00	0	NTA	2	1	4	P
1	2009-10-14 02:32:00	0	NTA	2	1	4	P
1	2009-10-14 02:33:00	0	NTA	2	1	4	P
1	2009-10-14 02:34:00	0	NTA	2	1	4	P
1	2009-10-14 02:35:00	0	NTA	2	1	4	P
1	2009-10-14 02:36:00	0	NTA	2	1	4	P
1	2009-10-14 02:37:00	0	NTA	2	1	4	P
1	2009-10-14 02:38:00	0	NTA	2	1	4	P
1	2009-10-14 02:39:00	0	NTA	2	1	4	P
1	2009-10-14 02:40:00	0	NTA	2	1	4	P
1	2009-10-14 02:41:00	0	NTA	2	1	4	P
1	2009-10-14 02:42:00	0	NTA	2	1	4	P
1	2009-10-14 02:43:00	0	NTA	2	1	4	P
1	2009-10-14 02:44:00	0	NTA	2	1	4	P
1	2009-10-14 02:45:00	0	NTA	2	1	4	P
1	2009-10-14 02:46:00	0	NTA	2	1	4	P
1	2009-10-14 02:47:00	0	NTA	2	1	4	P
1	2009-10-14 02:48:00	0	NTA	2	1	4	P
1	2009-10-14 02:49:00	0	NTA	2	1	4	P
1	2009-10-14 02:50:00	0	NTA	2	1	4	P
1	2009-10-14 02:51:00	0	NTA	2	1	4	P
1	2009-10-14 02:52:00	0	NTA	2	1	4	P
1	2009-10-14 02:53:00	0	NTA	2	1	4	P
1	2009-10-14 02:54:00	0	NTA	2	1	4	P
1	2009-10-14 02:55:00	0	NTA	2	1	4	P
1	2009-10-14 02:56:00	0	NTA	2	1	4	P
1	2009-10-14 02:57:00	0	NTA	2	1	4	P
1	2009-10-14 02:58:00	0	NTA	2	1	4	P
1	2009-10-14 02:59:00	0	NTA	2	1	4	P
1	2009-10-14 03:00:00	0	NTA	2	1	4	P
1	2009-10-14 03:01:00	0	NTA	3	1	4	P
1	2009-10-14 03:02:00	0	NTA	3	1	4	P
1	2009-10-14 03:03:00	9	NTA	3	1	4	P
1	2009-10-14 03:04:00	0	NTA	3	1	4	P
1	2009-10-14 03:05:00	0	NTA	3	1	4	P
1	2009-10-14 03:06:00	0	NTA	3	1	4	P
1	2009-10-14 03:07:00	0	NTA	3	1	4	P
1	2009-10-14 03:08:00	0	NTA	3	1	4	P
1	2009-10-14 03:09:00	0	NTA	3	1	4	P
1	2009-10-14 03:10:00	0	NTA	3	1	4	P
1	2009-10-14 03:11:00	0	NTA	3	1	4	P
1	2009-10-14 03:12:00	0	NTA	3	1	4	P
1	2009-10-14 03:13:00	0	NTA	3	1	4	P
1	2009-10-14 03:14:00	0	NTA	3	1	4	P
1	2009-10-14 03:15:00	0	NTA	3	1	4	P
1	2009-10-14 03:16:00	0	NTA	3	1	4	P
1	2009-10-14 03:17:00	0	NTA	3	1	4	P
1	2009-10-14 03:18:00	0	NTA	3	1	4	P
1	2009-10-14 03:19:00	0	NTA	3	1	4	P
1	2009-10-14 03:20:00	0	NTA	3	1	4	P
1	2009-10-14 03:21:00	0	NTA	3	1	4	P
1	2009-10-14 03:22:00	210	NTA	3	1	4	P
1	2009-10-14 03:23:00	0	NTA	3	1	4	P
1	2009-10-14 03:24:00	0	NTA	3	1	4	P
1	2009-10-14 03:25:00	0	NTA	3	1	4	P
1	2009-10-14 03:26:00	0	NTA	3	1	4	P
1	2009-10-14 03:27:00	0	NTA	3	1	4	P
1	2009-10-14 03:28:00	46	NTA	3	1	4	P
1	2009-10-14 03:29:00	0	NTA	3	1	4	P
1	2009-10-14 03:30:00	0	NTA	3	1	4	P
1	2009-10-14 03:31:00	19	NTA	3	1	4	P
1	2009-10-14 03:32:00	0	NTA	3	1	4	P
1	2009-10-14 03:33:00	9	NTA	3	1	4	P
1	2009-10-14 03:34:00	19	NTA	3	1	4	P
1	2009-10-14 03:35:00	0	NTA	3	1	4	P
1	2009-10-14 03:36:00	0	NTA	3	1	4	P
1	2009-10-14 03:37:00	0	NTA	3	1	4	P
1	2009-10-14 03:38:00	0	NTA	3	1	4	P
1	2009-10-14 03:39:00	0	NTA	3	1	4	P
1	2009-10-14 03:40:00	0	NTA	3	1	4	P
1	2009-10-14 03:41:00	0	NTA	3	1	4	P
1	2009-10-14 03:42:00	0	NTA	3	1	4	P
1	2009-10-14 03:43:00	0	NTA	3	1	4	P
1	2009-10-14 03:44:00	0	NTA	3	1	4	P
1	2009-10-14 03:45:00	0	NTA	3	1	4	P
1	2009-10-14 03:46:00	0	NTA	3	1	4	P
1	2009-10-14 03:47:00	0	NTA	3	1	4	P
1	2009-10-14 03:48:00	0	NTA	3	1	4	P
1	2009-10-14 03:49:00	0	NTA	3	1	4	P
1	2009-10-14 03:50:00	0	NTA	3	1	4	P
1	2009-10-14 03:51:00	0	NTA	3	1	4	P
1	2009-10-14 03:52:00	0	NTA	3	1	4	P
1	2009-10-14 03:53:00	0	NTA	3	1	4	P
1	2009-10-14 03:54:00	0	NTA	3	1	4	P
1	2009-10-14 03:55:00	0	NTA	3	1	4	P
1	2009-10-14 03:56:00	0	NTA	3	1	4	P
1	2009-10-14 03:57:00	0	NTA	3	1	4	P
1	2009-10-14 03:58:00	0	NTA	3	1	4	P
1	2009-10-14 03:59:00	0	NTA	3	1	4	P
1	2009-10-14 04:00:00	0	NTA	3	1	4	P
1	2009-10-14 04:01:00	0	NTA	4	1	4	P
1	2009-10-14 04:02:00	0	NTA	4	1	4	P
1	2009-10-14 04:03:00	0	NTA	4	1	4	P
1	2009-10-14 04:04:00	0	NTA	4	1	4	P
1	2009-10-14 04:05:00	0	NTA	4	1	4	P
1	2009-10-14 04:06:00	0	NTA	4	1	4	P
1	2009-10-14 04:07:00	0	NTA	4	1	4	P
1	2009-10-14 04:08:00	0	NTA	4	1	4	P
1	2009-10-14 04:09:00	0	NTA	4	1	4	P
1	2009-10-14 04:10:00	0	NTA	4	1	4	P
1	2009-10-14 04:11:00	0	NTA	4	1	4	P
1	2009-10-14 04:12:00	0	NTA	4	1	4	P
1	2009-10-14 04:13:00	0	NTA	4	1	4	P
1	2009-10-14 04:14:00	0	NTA	4	1	4	P
1	2009-10-14 04:15:00	0	NTA	4	1	4	P
1	2009-10-14 04:16:00	0	NTA	4	1	4	P
1	2009-10-14 04:17:00	0	NTA	4	1	4	P
1	2009-10-14 04:18:00	165	NTA	4	1	4	P
1	2009-10-14 04:19:00	0	NTA	4	1	4	P
1	2009-10-14 04:20:00	0	NTA	4	1	4	P
1	2009-10-14 04:21:00	0	NTA	4	1	4	P
1	2009-10-14 04:22:00	0	NTA	4	1	4	P
1	2009-10-14 04:23:00	0	NTA	4	1	4	P
1	2009-10-14 04:24:00	0	NTA	4	1	4	P
1	2009-10-14 04:25:00	0	NTA	4	1	4	P
1	2009-10-14 04:26:00	0	NTA	4	1	4	P
1	2009-10-14 04:27:00	0	NTA	4	1	4	P
1	2009-10-14 04:28:00	28	NTA	4	1	4	P
1	2009-10-14 04:29:00	19	NTA	4	1	4	P
1	2009-10-14 04:30:00	0	NTA	4	1	4	P
1	2009-10-14 04:31:00	0	NTA	4	1	4	P
1	2009-10-14 04:32:00	0	NTA	4	1	4	P
1	2009-10-14 04:33:00	0	NTA	4	1	4	P
1	2009-10-14 04:34:00	0	NTA	4	1	4	P
1	2009-10-14 04:35:00	0	NTA	4	1	4	P
1	2009-10-14 04:36:00	0	NTA	4	1	4	P
1	2009-10-14 04:37:00	0	NTA	4	1	4	P
1	2009-10-14 04:38:00	0	NTA	4	1	4	P
1	2009-10-14 04:39:00	0	NTA	4	1	4	P
1	2009-10-14 04:40:00	0	NTA	4	1	4	P
1	2009-10-14 04:41:00	0	NTA	4	1	4	P
1	2009-10-14 04:42:00	0	NTA	4	1	4	P
1	2009-10-14 04:43:00	0	NTA	4	1	4	P
1	2009-10-14 04:44:00	0	NTA	4	1	4	P
1	2009-10-14 04:45:00	0	NTA	4	1	4	P
1	2009-10-14 04:46:00	0	NTA	4	1	4	P
1	2009-10-14 04:47:00	0	NTA	4	1	4	P
1	2009-10-14 04:48:00	0	NTA	4	1	4	P
1	2009-10-14 04:49:00	0	NTA	4	1	4	P
1	2009-10-14 04:50:00	0	NTA	4	1	4	P
1	2009-10-14 04:51:00	0	NTA	4	1	4	P
1	2009-10-14 04:52:00	0	NTA	4	1	4	P
1	2009-10-14 04:53:00	0	NTA	4	1	4	P
1	2009-10-14 04:54:00	0	NTA	4	1	4	P
1	2009-10-14 04:55:00	0	NTA	4	1	4	P
1	2009-10-14 04:56:00	0	NTA	4	1	4	P
1	2009-10-14 04:57:00	0	NTA	4	1	4	P
1	2009-10-14 04:58:00	0	NTA	4	1	4	P
1	2009-10-14 04:59:00	0	NTA	4	1	4	P
1	2009-10-14 05:00:00	0	NTA	4	1	4	P
1	2009-10-14 05:01:00	0	NTA	5	1	4	P
1	2009-10-14 05:02:00	46	NTA	5	1	4	P
1	2009-10-14 05:03:00	0	NTA	5	1	4	P
1	2009-10-14 05:04:00	0	NTA	5	1	4	P
1	2009-10-14 05:05:00	0	NTA	5	1	4	P
1	2009-10-14 05:06:00	0	NTA	5	1	4	P
1	2009-10-14 05:07:00	0	NTA	5	1	4	P
1	2009-10-14 05:08:00	0	NTA	5	1	4	P
1	2009-10-14 05:09:00	0	NTA	5	1	4	P
1	2009-10-14 05:10:00	0	NTA	5	1	4	P
1	2009-10-14 05:11:00	0	NTA	5	1	4	P
1	2009-10-14 05:12:00	0	NTA	5	1	4	P
1	2009-10-14 05:13:00	0	NTA	5	1	4	P
1	2009-10-14 05:14:00	0	NTA	5	1	4	P
1	2009-10-14 05:15:00	0	NTA	5	1	4	P
1	2009-10-14 05:16:00	0	NTA	5	1	4	P
1	2009-10-14 05:17:00	0	NTA	5	1	4	P
1	2009-10-14 05:18:00	0	NTA	5	1	4	P
1	2009-10-14 05:19:00	0	NTA	5	1	4	P
1	2009-10-14 05:20:00	0	NTA	5	1	4	P
1	2009-10-14 05:21:00	93	NTA	5	1	4	P
1	2009-10-14 05:22:00	132	NTA	5	1	4	P
1	2009-10-14 05:23:00	0	NTA	5	1	4	P
1	2009-10-14 05:24:00	0	NTA	5	1	4	P
1	2009-10-14 05:25:00	0	NTA	5	1	4	P
1	2009-10-14 05:26:00	0	NTA	5	1	4	P
1	2009-10-14 05:27:00	0	NTA	5	1	4	P
1	2009-10-14 05:28:00	0	NTA	5	1	4	P
1	2009-10-14 05:29:00	0	NTA	5	1	4	P
1	2009-10-14 05:30:00	0	NTA	5	1	4	P
1	2009-10-14 05:31:00	37	NTA	5	1	4	P
1	2009-10-14 05:32:00	0	NTA	5	1	4	P
1	2009-10-14 05:33:00	0	NTA	5	1	4	P
1	2009-10-14 05:34:00	0	NTA	5	1	4	P
1	2009-10-14 05:35:00	0	NTA	5	1	4	P
1	2009-10-14 05:36:00	0	NTA	5	1	4	P
1	2009-10-14 05:37:00	0	NTA	5	1	4	P
1	2009-10-14 05:38:00	0	NTA	5	1	4	P
1	2009-10-14 05:39:00	0	NTA	5	1	4	P
1	2009-10-14 05:40:00	0	NTA	5	1	4	P
1	2009-10-14 05:41:00	0	NTA	5	1	4	P
1	2009-10-14 05:42:00	0	NTA	5	1	4	P
1	2009-10-14 05:43:00	0	NTA	5	1	4	P
1	2009-10-14 05:44:00	0	NTA	5	1	4	P
1	2009-10-14 05:45:00	0	NTA	5	1	4	P
1	2009-10-14 05:46:00	28	NTA	5	1	4	P
1	2009-10-14 05:47:00	0	NTA	5	1	4	P
1	2009-10-14 05:48:00	0	NTA	5	1	4	P
1	2009-10-14 05:49:00	0	NTA	5	1	4	P
1	2009-10-14 05:50:00	56	NTA	5	1	4	P
1	2009-10-14 05:51:00	9	NTA	5	1	4	P
1	2009-10-14 05:52:00	9	NTA	5	1	4	P
1	2009-10-14 05:53:00	0	NTA	5	1	4	P
1	2009-10-14 05:54:00	0	NTA	5	1	4	P
1	2009-10-14 05:55:00	0	NTA	5	1	4	P
1	2009-10-14 05:56:00	0	NTA	5	1	4	P
1	2009-10-14 05:57:00	0	NTA	5	1	4	P
1	2009-10-14 05:58:00	37	NTA	5	1	4	P
1	2009-10-14 05:59:00	0	NTA	5	1	4	P
1	2009-10-14 06:00:00	0	NTA	5	1	4	P
1	2009-10-14 06:01:00	74	DTA	6	1	4	P
1	2009-10-14 06:02:00	74	DTA	6	1	4	P
1	2009-10-14 06:03:00	176	DTA	6	1	4	P
1	2009-10-14 06:04:00	1534	DTA	6	1	4	P
1	2009-10-14 06:05:00	562	DTA	6	1	4	P
1	2009-10-14 06:06:00	74	DTA	6	1	4	P
1	2009-10-14 06:07:00	176	DTA	6	1	4	P
1	2009-10-14 06:08:00	464	DTA	6	1	4	P
1	2009-10-14 06:09:00	1132	DTA	6	1	4	P
1	2009-10-14 06:10:00	725	DTA	6	1	4	P
1	2009-10-14 06:11:00	375	DTA	6	1	4	P
1	2009-10-14 06:12:00	19	DTA	6	1	4	P
1	2009-10-14 06:13:00	390	DTA	6	1	4	P
1	2009-10-14 06:14:00	360	DTA	6	1	4	P
1	2009-10-14 06:15:00	419	DTA	6	1	4	P
1	2009-10-14 06:16:00	111	DTA	6	1	4	P
1	2009-10-14 06:17:00	143	DTA	6	1	4	P
1	2009-10-14 06:18:00	154	DTA	6	1	4	P
1	2009-10-14 06:19:00	165	DTA	6	1	4	P
1	2009-10-14 06:20:00	28	DTA	6	1	4	P
1	2009-10-14 06:21:00	74	DTA	6	1	4	P
1	2009-10-14 06:22:00	232	DTA	6	1	4	P
1	2009-10-14 06:23:00	9	DTA	6	1	4	P
1	2009-10-14 06:24:00	0	DTA	6	1	4	P
1	2009-10-14 06:25:00	0	DTA	6	1	4	P
1	2009-10-14 06:26:00	111	DTA	6	1	4	P
1	2009-10-14 06:27:00	282	DTA	6	1	4	P
1	2009-10-14 06:28:00	308	DTA	6	1	4	P
1	2009-10-14 06:29:00	0	DTA	6	1	4	P
1	2009-10-14 06:30:00	65	DTA	6	1	4	P
1	2009-10-14 06:31:00	0	DTA	6	1	4	P
1	2009-10-14 06:32:00	0	DTA	6	1	4	P
1	2009-10-14 06:33:00	0	DTA	6	1	4	P
1	2009-10-14 06:34:00	334	DTA	6	1	4	P
1	2009-10-14 06:35:00	83	DTA	6	1	4	P
1	2009-10-14 06:36:00	321	DTA	6	1	4	P
1	2009-10-14 06:37:00	37	DTA	6	1	4	P
1	2009-10-14 06:38:00	28	DTA	6	1	4	P
1	2009-10-14 06:39:00	19	DTA	6	1	4	P
1	2009-10-14 06:40:00	154	DTA	6	1	4	P
1	2009-10-14 06:41:00	37	DTA	6	1	4	P
1	2009-10-14 06:42:00	28	DTA	6	1	4	P
1	2009-10-14 06:43:00	37	DTA	6	1	4	P
1	2009-10-14 06:44:00	9	DTA	6	1	4	P
1	2009-10-14 06:45:00	0	DTA	6	1	4	P
1	2009-10-14 06:46:00	0	DTA	6	1	4	P
1	2009-10-14 06:47:00	0	DTA	6	1	4	P
1	2009-10-14 06:48:00	0	DTA	6	1	4	P
1	2009-10-14 06:49:00	0	DTA	6	1	4	P
1	2009-10-14 06:50:00	0	DTA	6	1	4	P
1	2009-10-14 06:51:00	0	DTA	6	1	4	P
1	2009-10-14 06:52:00	0	DTA	6	1	4	P
1	2009-10-14 06:53:00	0	DTA	6	1	4	P
1	2009-10-14 06:54:00	0	DTA	6	1	4	P
1	2009-10-14 06:55:00	0	DTA	6	1	4	P
1	2009-10-14 06:56:00	0	DTA	6	1	4	P
1	2009-10-14 06:57:00	0	DTA	6	1	4	P
1	2009-10-14 06:58:00	0	DTA	6	1	4	P
1	2009-10-14 06:59:00	0	DTA	6	1	4	P
1	2009-10-14 07:00:00	83	DTA	6	1	4	P
1	2009-10-14 07:01:00	9	DTA	7	1	4	P
1	2009-10-14 07:02:00	0	DTA	7	1	4	P
1	2009-10-14 07:03:00	0	DTA	7	1	4	P
1	2009-10-14 07:04:00	0	DTA	7	1	4	P
1	2009-10-14 07:05:00	0	DTA	7	1	4	P
1	2009-10-14 07:06:00	0	DTA	7	1	4	P
1	2009-10-14 07:07:00	0	DTA	7	1	4	P
1	2009-10-14 07:08:00	9	DTA	7	1	4	P
1	2009-10-14 07:09:00	0	DTA	7	1	4	P
1	2009-10-14 07:10:00	0	DTA	7	1	4	P
1	2009-10-14 07:11:00	0	DTA	7	1	4	P
1	2009-10-14 07:12:00	495	DTA	7	1	4	P
1	2009-10-14 07:13:00	256	DTA	7	1	4	P
1	2009-10-14 07:14:00	256	DTA	7	1	4	P
1	2009-10-14 07:15:00	232	DTA	7	1	4	P
1	2009-10-14 07:16:00	449	DTA	7	1	4	P
1	2009-10-14 07:17:00	210	DTA	7	1	4	P
1	2009-10-14 07:18:00	83	DTA	7	1	4	P
1	2009-10-14 07:19:00	93	DTA	7	1	4	P
1	2009-10-14 07:20:00	0	DTA	7	1	4	P
1	2009-10-14 07:21:00	0	DTA	7	1	4	P
1	2009-10-14 07:22:00	37	DTA	7	1	4	P
1	2009-10-14 07:23:00	102	DTA	7	1	4	P
1	2009-10-14 07:24:00	176	DTA	7	1	4	P
1	2009-10-14 07:25:00	0	DTA	7	1	4	P
1	2009-10-14 07:26:00	0	DTA	7	1	4	P
1	2009-10-14 07:27:00	0	DTA	7	1	4	P
1	2009-10-14 07:28:00	37	DTA	7	1	4	P
1	2009-10-14 07:29:00	19	DTA	7	1	4	P
1	2009-10-14 07:30:00	0	DTA	7	1	4	P
1	2009-10-14 07:31:00	0	DTA	7	1	4	P
1	2009-10-14 07:32:00	0	DTA	7	1	4	P
1	2009-10-14 07:33:00	0	DTA	7	1	4	P
1	2009-10-14 07:34:00	434	DTA	7	1	4	P
1	2009-10-14 07:35:00	529	DTA	7	1	4	P
1	2009-10-14 07:36:00	187	DTA	7	1	4	P
1	2009-10-14 07:37:00	154	DTA	7	1	4	P
1	2009-10-14 07:38:00	232	DTA	7	1	4	P
1	2009-10-14 07:39:00	0	DTA	7	1	4	P
1	2009-10-14 07:40:00	707	DTA	7	1	4	P
1	2009-10-14 07:41:00	1534	DTA	7	1	4	P
1	2009-10-14 07:42:00	983	DTA	7	1	4	P
1	2009-10-14 07:43:00	2285	DTA	7	1	4	P
1	2009-10-14 07:44:00	0	DTA	7	1	4	P
1	2009-10-14 07:45:00	154	DTA	7	1	4	P
1	2009-10-14 07:46:00	210	DTA	7	1	4	P
1	2009-10-14 07:47:00	495	DTA	7	1	4	P
1	2009-10-14 07:48:00	154	DTA	7	1	4	P
1	2009-10-14 07:49:00	143	DTA	7	1	4	P
1	2009-10-14 07:50:00	102	DTA	7	1	4	P
1	2009-10-14 07:51:00	93	DTA	7	1	4	P
1	2009-10-14 07:52:00	0	DTA	7	1	4	P
1	2009-10-14 07:53:00	132	DTA	7	1	4	P
1	2009-10-14 07:54:00	28	DTA	7	1	4	P
1	2009-10-14 07:55:00	295	DTA	7	1	4	P
1	2009-10-14 07:56:00	74	DTA	7	1	4	P
1	2009-10-14 07:57:00	56	DTA	7	1	4	P
1	2009-10-14 07:58:00	187	DTA	7	1	4	P
1	2009-10-14 07:59:00	419	DTA	7	1	4	P
1	2009-10-14 08:00:00	102	DTA	7	1	4	P
1	2009-10-14 08:01:00	0	DTA	8	1	4	P
1	2009-10-14 08:02:00	419	DTA	8	1	4	P
1	2009-10-14 08:03:00	221	DTA	8	1	4	P
1	2009-10-14 08:04:00	0	DTA	8	1	4	P
1	2009-10-14 08:05:00	0	DTA	8	1	4	P
1	2009-10-14 08:06:00	28	DTA	8	1	4	P
1	2009-10-14 08:07:00	0	DTA	8	1	4	P
1	2009-10-14 08:08:00	56	DTA	8	1	4	P
1	2009-10-14 08:09:00	19	DTA	8	1	4	P
1	2009-10-14 08:10:00	9	DTA	8	1	4	P
1	2009-10-14 08:11:00	111	DTA	8	1	4	P
1	2009-10-14 08:12:00	65	DTA	8	1	4	P
1	2009-10-14 08:13:00	9	DTA	8	1	4	P
1	2009-10-14 08:14:00	9	DTA	8	1	4	P
1	2009-10-14 08:15:00	132	DTA	8	1	4	P
1	2009-10-14 08:16:00	9	DTA	8	1	4	P
1	2009-10-14 08:17:00	9	DTA	8	1	4	P
1	2009-10-14 08:18:00	154	DTA	8	1	4	P
1	2009-10-14 08:19:00	9	DTA	8	1	4	P
1	2009-10-14 08:20:00	0	DTA	8	1	4	P
1	2009-10-14 08:21:00	282	DTA	8	1	4	P
1	2009-10-14 08:22:00	651	DTA	8	1	4	P
1	2009-10-14 08:23:00	282	DTA	8	1	4	P
1	2009-10-14 08:24:00	419	DTA	8	1	4	P
1	2009-10-14 08:25:00	562	DTA	8	1	4	P
1	2009-10-14 08:26:00	529	DTA	8	1	4	P
1	2009-10-14 08:27:00	787	DTA	8	1	4	P
1	2009-10-14 08:28:00	111	DTA	8	1	4	P
1	2009-10-14 08:29:00	102	DTA	8	1	4	P
1	2009-10-14 08:30:00	154	DTA	8	1	4	P
1	2009-10-14 08:31:00	74	DTA	8	1	4	P
1	2009-10-14 08:32:00	28	DTA	8	1	4	P
1	2009-10-14 08:33:00	221	DTA	8	1	4	P
1	2009-10-14 08:34:00	132	DTA	8	1	4	P
1	2009-10-14 08:35:00	9	DTA	8	1	4	P
1	2009-10-14 08:36:00	28	DTA	8	1	4	P
1	2009-10-14 08:37:00	0	DTA	8	1	4	P
1	2009-10-14 08:38:00	0	DTA	8	1	4	P
1	2009-10-14 08:39:00	0	DTA	8	1	4	P
1	2009-10-14 08:40:00	0	DTA	8	1	4	P
1	2009-10-14 08:41:00	0	DTA	8	1	4	P
1	2009-10-14 08:42:00	0	DTA	8	1	4	P
1	2009-10-14 08:43:00	0	DTA	8	1	4	P
1	2009-10-14 08:44:00	0	DTA	8	1	4	P
1	2009-10-14 08:45:00	0	DTA	8	1	4	P
1	2009-10-14 08:46:00	0	DTA	8	1	4	P
1	2009-10-14 08:47:00	19	DTA	8	1	4	P
1	2009-10-14 08:48:00	0	DTA	8	1	4	P
1	2009-10-14 08:49:00	0	DTA	8	1	4	P
1	2009-10-14 08:50:00	0	DTA	8	1	4	P
1	2009-10-14 08:51:00	0	DTA	8	1	4	P
1	2009-10-14 08:52:00	0	DTA	8	1	4	P
1	2009-10-14 08:53:00	0	DTA	8	1	4	P
1	2009-10-14 08:54:00	0	DTA	8	1	4	P
1	2009-10-14 08:55:00	0	DTA	8	1	4	P
1	2009-10-14 08:56:00	0	DTA	8	1	4	P
1	2009-10-14 08:57:00	0	DTA	8	1	4	P
1	2009-10-14 08:58:00	0	DTA	8	1	4	P
1	2009-10-14 08:59:00	0	DTA	8	1	4	P
1	2009-10-14 09:00:00	0	DTA	8	1	4	P
1	2009-10-14 09:01:00	0	DTA	9	1	4	P
1	2009-10-14 09:02:00	0	DTA	9	1	4	P
1	2009-10-14 09:03:00	0	DTA	9	1	4	P
1	2009-10-14 09:04:00	0	DTA	9	1	4	P
1	2009-10-14 09:05:00	0	DTA	9	1	4	P
1	2009-10-14 09:06:00	0	DTA	9	1	4	P
1	2009-10-14 09:07:00	0	DTA	9	1	4	P
1	2009-10-14 09:08:00	0	DTA	9	1	4	P
1	2009-10-14 09:09:00	0	DTA	9	1	4	P
1	2009-10-14 09:10:00	0	DTA	9	1	4	P
1	2009-10-14 09:11:00	0	DTA	9	1	4	P
1	2009-10-14 09:12:00	0	DTA	9	1	4	P
1	2009-10-14 09:13:00	0	DTA	9	1	4	P
1	2009-10-14 09:14:00	19	DTA	9	1	4	P
1	2009-10-14 09:15:00	0	DTA	9	1	4	P
1	2009-10-14 09:16:00	0	DTA	9	1	4	P
1	2009-10-14 09:17:00	19	DTA	9	1	4	P
1	2009-10-14 09:18:00	0	DTA	9	1	4	P
1	2009-10-14 09:19:00	0	DTA	9	1	4	P
1	2009-10-14 09:20:00	9	DTA	9	1	4	P
1	2009-10-14 09:21:00	19	DTA	9	1	4	P
1	2009-10-14 09:22:00	198	DTA	9	1	4	P
1	2009-10-14 09:23:00	28	DTA	9	1	4	P
1	2009-10-14 09:24:00	0	DTA	9	1	4	P
1	2009-10-14 09:25:00	0	DTA	9	1	4	P
1	2009-10-14 09:26:00	0	DTA	9	1	4	P
1	2009-10-14 09:27:00	9	DTA	9	1	4	P
1	2009-10-14 09:28:00	0	DTA	9	1	4	P
1	2009-10-14 09:29:00	37	DTA	9	1	4	P
1	2009-10-14 09:30:00	9	DTA	9	1	4	P
1	2009-10-14 09:31:00	0	DTA	9	1	4	P
1	2009-10-14 09:32:00	111	DTA	9	1	4	P
1	2009-10-14 09:33:00	449	DTA	9	1	4	P
1	2009-10-14 09:34:00	143	DTA	9	1	4	P
1	2009-10-14 09:35:00	56	DTA	9	1	4	P
1	2009-10-14 09:36:00	19	DTA	9	1	4	P
1	2009-10-14 09:37:00	9	DTA	9	1	4	P
1	2009-10-14 09:38:00	0	DTA	9	1	4	P
1	2009-10-14 09:39:00	0	DTA	9	1	4	P
1	2009-10-14 09:40:00	37	DTA	9	1	4	P
1	2009-10-14 09:41:00	321	DTA	9	1	4	P
1	2009-10-14 09:42:00	9	DTA	9	1	4	P
1	2009-10-14 09:43:00	0	DTA	9	1	4	P
1	2009-10-14 09:44:00	0	DTA	9	1	4	P
1	2009-10-14 09:45:00	0	DTA	9	1	4	P
1	2009-10-14 09:46:00	0	DTA	9	1	4	P
1	2009-10-14 09:47:00	0	DTA	9	1	4	P
1	2009-10-14 09:48:00	0	DTA	9	1	4	P
1	2009-10-14 09:49:00	0	DTA	9	1	4	P
1	2009-10-14 09:50:00	0	DTA	9	1	4	P
1	2009-10-14 09:51:00	0	DTA	9	1	4	P
1	2009-10-14 09:52:00	0	DTA	9	1	4	P
1	2009-10-14 09:53:00	0	DTA	9	1	4	P
1	2009-10-14 09:54:00	0	DTA	9	1	4	P
1	2009-10-14 09:55:00	0	DTA	9	1	4	P
1	2009-10-14 09:56:00	37	DTA	9	1	4	P
1	2009-10-14 09:57:00	9	DTA	9	1	4	P
1	2009-10-14 09:58:00	0	DTA	9	1	4	P
1	2009-10-14 09:59:00	9	DTA	9	1	4	P
1	2009-10-14 10:00:00	0	DTA	9	1	4	P
1	2009-10-14 10:01:00	0	DTA	10	1	4	P
1	2009-10-14 10:02:00	0	DTA	10	1	4	P
1	2009-10-14 10:03:00	0	DTA	10	1	4	P
1	2009-10-14 10:04:00	0	DTA	10	1	4	P
1	2009-10-14 10:05:00	0	DTA	10	1	4	P
1	2009-10-14 10:06:00	0	DTA	10	1	4	P
1	2009-10-14 10:07:00	0	DTA	10	1	4	P
1	2009-10-14 10:08:00	0	DTA	10	1	4	P
1	2009-10-14 10:09:00	0	DTA	10	1	4	P
1	2009-10-14 10:10:00	0	DTA	10	1	4	P
1	2009-10-14 10:11:00	0	DTA	10	1	4	P
1	2009-10-14 10:12:00	0	DTA	10	1	4	P
1	2009-10-14 10:13:00	0	DTA	10	1	4	P
1	2009-10-14 10:14:00	0	DTA	10	1	4	P
1	2009-10-14 10:15:00	0	DTA	10	1	4	P
1	2009-10-14 10:16:00	0	DTA	10	1	4	P
1	2009-10-14 10:17:00	0	DTA	10	1	4	P
1	2009-10-14 10:18:00	0	DTA	10	1	4	P
1	2009-10-14 10:19:00	0	DTA	10	1	4	P
1	2009-10-14 10:20:00	0	DTA	10	1	4	P
1	2009-10-14 10:21:00	37	DTA	10	1	4	P
1	2009-10-14 10:22:00	187	DTA	10	1	4	P
1	2009-10-14 10:23:00	0	DTA	10	1	4	P
1	2009-10-14 10:24:00	0	DTA	10	1	4	P
1	2009-10-14 10:25:00	0	DTA	10	1	4	P
1	2009-10-14 10:26:00	0	DTA	10	1	4	P
1	2009-10-14 10:27:00	9	DTA	10	1	4	P
1	2009-10-14 10:28:00	0	DTA	10	1	4	P
1	2009-10-14 10:29:00	0	DTA	10	1	4	P
1	2009-10-14 10:30:00	0	DTA	10	1	4	P
1	2009-10-14 10:31:00	0	DTA	10	1	4	P
1	2009-10-14 10:32:00	0	DTA	10	1	4	P
1	2009-10-14 10:33:00	0	DTA	10	1	4	P
1	2009-10-14 10:34:00	0	DTA	10	1	4	P
1	2009-10-14 10:35:00	0	DTA	10	1	4	P
1	2009-10-14 10:36:00	46	DTA	10	1	4	P
1	2009-10-14 10:37:00	9	DTA	10	1	4	P
1	2009-10-14 10:38:00	0	DTA	10	1	4	P
1	2009-10-14 10:39:00	0	DTA	10	1	4	P
1	2009-10-14 10:40:00	0	DTA	10	1	4	P
1	2009-10-14 10:41:00	0	DTA	10	1	4	P
1	2009-10-14 10:42:00	0	DTA	10	1	4	P
1	2009-10-14 10:43:00	0	DTA	10	1	4	P
1	2009-10-14 10:44:00	0	DTA	10	1	4	P
1	2009-10-14 10:45:00	0	DTA	10	1	4	P
1	2009-10-14 10:46:00	0	DTA	10	1	4	P
1	2009-10-14 10:47:00	83	DTA	10	1	4	P
1	2009-10-14 10:48:00	0	DTA	10	1	4	P
1	2009-10-14 10:49:00	0	DTA	10	1	4	P
1	2009-10-14 10:50:00	0	DTA	10	1	4	P
1	2009-10-14 10:51:00	0	DTA	10	1	4	P
1	2009-10-14 10:52:00	0	DTA	10	1	4	P
1	2009-10-14 10:53:00	0	DTA	10	1	4	P
1	2009-10-14 10:54:00	0	DTA	10	1	4	P
1	2009-10-14 10:55:00	0	DTA	10	1	4	P
1	2009-10-14 10:56:00	0	DTA	10	1	4	P
1	2009-10-14 10:57:00	0	DTA	10	1	4	P
1	2009-10-14 10:58:00	0	DTA	10	1	4	P
1	2009-10-14 10:59:00	0	DTA	10	1	4	P
1	2009-10-14 11:00:00	0	DTA	10	1	4	P
1	2009-10-14 11:01:00	0	DTA	11	1	4	P
1	2009-10-14 11:02:00	74	DTA	11	1	4	P
1	2009-10-14 11:03:00	0	DTA	11	1	4	P
1	2009-10-14 11:04:00	0	DTA	11	1	4	P
1	2009-10-14 11:05:00	28	DTA	11	1	4	P
1	2009-10-14 11:06:00	56	DTA	11	1	4	P
1	2009-10-14 11:07:00	28	DTA	11	1	4	P
1	2009-10-14 11:08:00	0	DTA	11	1	4	P
1	2009-10-14 11:09:00	28	DTA	11	1	4	P
1	2009-10-14 11:10:00	0	DTA	11	1	4	P
1	2009-10-14 11:11:00	0	DTA	11	1	4	P
1	2009-10-14 11:12:00	9	DTA	11	1	4	P
1	2009-10-14 11:13:00	449	DTA	11	1	4	P
1	2009-10-14 11:14:00	9	DTA	11	1	4	P
1	2009-10-14 11:15:00	9	DTA	11	1	4	P
1	2009-10-14 11:16:00	0	DTA	11	1	4	P
1	2009-10-14 11:17:00	19	DTA	11	1	4	P
1	2009-10-14 11:18:00	210	DTA	11	1	4	P
1	2009-10-14 11:19:00	0	DTA	11	1	4	P
1	2009-10-14 11:20:00	56	DTA	11	1	4	P
1	2009-10-14 11:21:00	360	DTA	11	1	4	P
1	2009-10-14 11:22:00	19	DTA	11	1	4	P
1	2009-10-14 11:23:00	28	DTA	11	1	4	P
1	2009-10-14 11:24:00	9	DTA	11	1	4	P
1	2009-10-14 11:25:00	19	DTA	11	1	4	P
1	2009-10-14 11:26:00	9	DTA	11	1	4	P
1	2009-10-14 11:27:00	0	DTA	11	1	4	P
1	2009-10-14 11:28:00	0	DTA	11	1	4	P
1	2009-10-14 11:29:00	0	DTA	11	1	4	P
1	2009-10-14 11:30:00	0	DTA	11	1	4	P
1	2009-10-14 11:31:00	0	DTA	11	1	4	P
1	2009-10-14 11:32:00	19	DTA	11	1	4	P
1	2009-10-14 11:33:00	321	DTA	11	1	4	P
1	2009-10-14 11:34:00	93	DTA	11	1	4	P
1	2009-10-14 11:35:00	0	DTA	11	1	4	P
1	2009-10-14 11:36:00	9	DTA	11	1	4	P
1	2009-10-14 11:37:00	37	DTA	11	1	4	P
1	2009-10-14 11:38:00	0	DTA	11	1	4	P
1	2009-10-14 11:39:00	19	DTA	11	1	4	P
1	2009-10-14 11:40:00	0	DTA	11	1	4	P
1	2009-10-14 11:41:00	0	DTA	11	1	4	P
1	2009-10-14 11:42:00	0	DTA	11	1	4	P
1	2009-10-14 11:43:00	0	DTA	11	1	4	P
1	2009-10-14 11:44:00	0	DTA	11	1	4	P
1	2009-10-14 11:45:00	46	DTA	11	1	4	P
1	2009-10-14 11:46:00	19	DTA	11	1	4	P
1	2009-10-14 11:47:00	9	DTA	11	1	4	P
1	2009-10-14 11:48:00	46	DTA	11	1	4	P
1	2009-10-14 11:49:00	19	DTA	11	1	4	P
1	2009-10-14 11:50:00	19	DTA	11	1	4	P
1	2009-10-14 11:51:00	28	DTA	11	1	4	P
1	2009-10-14 11:52:00	0	DTA	11	1	4	P
1	2009-10-14 11:53:00	56	DTA	11	1	4	P
1	2009-10-14 11:54:00	28	DTA	11	1	4	P
1	2009-10-14 11:55:00	143	DTA	11	1	4	P
1	2009-10-14 11:56:00	0	DTA	11	1	4	P
1	2009-10-14 11:57:00	0	DTA	11	1	4	P
1	2009-10-14 11:58:00	9	DTA	11	1	4	P
1	2009-10-14 11:59:00	0	DTA	11	1	4	P
1	2009-10-14 12:00:00	0	DTA	11	1	4	P
1	2009-10-14 12:01:00	19	DTA	12	1	4	P
1	2009-10-14 12:02:00	0	DTA	12	1	4	P
1	2009-10-14 12:03:00	0	DTA	12	1	4	P
1	2009-10-14 12:04:00	0	DTA	12	1	4	P
1	2009-10-14 12:05:00	0	DTA	12	1	4	P
1	2009-10-14 12:06:00	0	DTA	12	1	4	P
1	2009-10-14 12:07:00	0	DTA	12	1	4	P
1	2009-10-14 12:08:00	0	DTA	12	1	4	P
1	2009-10-14 12:09:00	0	DTA	12	1	4	P
1	2009-10-14 12:10:00	0	DTA	12	1	4	P
1	2009-10-14 12:11:00	0	DTA	12	1	4	P
1	2009-10-14 12:12:00	0	DTA	12	1	4	P
1	2009-10-14 12:13:00	0	DTA	12	1	4	P
1	2009-10-14 12:14:00	0	DTA	12	1	4	P
1	2009-10-14 12:15:00	0	DTA	12	1	4	P
1	2009-10-14 12:16:00	0	DTA	12	1	4	P
1	2009-10-14 12:17:00	0	DTA	12	1	4	P
1	2009-10-14 12:18:00	9	DTA	12	1	4	P
1	2009-10-14 12:19:00	0	DTA	12	1	4	P
1	2009-10-14 12:20:00	0	DTA	12	1	4	P
1	2009-10-14 12:21:00	0	DTA	12	1	4	P
1	2009-10-14 12:22:00	0	DTA	12	1	4	P
1	2009-10-14 12:23:00	0	DTA	12	1	4	P
1	2009-10-14 12:24:00	0	DTA	12	1	4	P
1	2009-10-14 12:25:00	165	DTA	12	1	4	P
1	2009-10-14 12:26:00	419	DTA	12	1	4	P
1	2009-10-14 12:27:00	0	DTA	12	1	4	P
1	2009-10-14 12:28:00	0	DTA	12	1	4	P
1	2009-10-14 12:29:00	37	DTA	12	1	4	P
1	2009-10-14 12:30:00	0	DTA	12	1	4	P
1	2009-10-14 12:31:00	0	DTA	12	1	4	P
1	2009-10-14 12:32:00	19	DTA	12	1	4	P
1	2009-10-14 12:33:00	0	DTA	12	1	4	P
1	2009-10-14 12:34:00	0	DTA	12	1	4	P
1	2009-10-14 12:35:00	0	DTA	12	1	4	P
1	2009-10-14 12:36:00	0	DTA	12	1	4	P
1	2009-10-14 12:37:00	0	DTA	12	1	4	P
1	2009-10-14 12:38:00	0	DTA	12	1	4	P
1	2009-10-14 12:39:00	0	DTA	12	1	4	P
1	2009-10-14 12:40:00	0	DTA	12	1	4	P
1	2009-10-14 12:41:00	0	DTA	12	1	4	P
1	2009-10-14 12:42:00	0	DTA	12	1	4	P
1	2009-10-14 12:43:00	198	DTA	12	1	4	P
1	2009-10-14 12:44:00	360	DTA	12	1	4	P
1	2009-10-14 12:45:00	0	DTA	12	1	4	P
1	2009-10-14 12:46:00	0	DTA	12	1	4	P
1	2009-10-14 12:47:00	0	DTA	12	1	4	P
1	2009-10-14 12:48:00	0	DTA	12	1	4	P
1	2009-10-14 12:49:00	0	DTA	12	1	4	P
1	2009-10-14 12:50:00	46	DTA	12	1	4	P
1	2009-10-14 12:51:00	9	DTA	12	1	4	P
1	2009-10-14 12:52:00	0	DTA	12	1	4	P
1	2009-10-14 12:53:00	0	DTA	12	1	4	P
1	2009-10-14 12:54:00	0	DTA	12	1	4	P
1	2009-10-14 12:55:00	0	DTA	12	1	4	P
1	2009-10-14 12:56:00	0	DTA	12	1	4	P
1	2009-10-14 12:57:00	0	DTA	12	1	4	P
1	2009-10-14 12:58:00	0	DTA	12	1	4	P
1	2009-10-14 12:59:00	0	DTA	12	1	4	P
1	2009-10-14 13:00:00	0	DTA	12	1	4	P
1	2009-10-14 13:01:00	19	DTA	13	1	4	P
1	2009-10-14 13:02:00	0	DTA	13	1	4	P
1	2009-10-14 13:03:00	0	DTA	13	1	4	P
1	2009-10-14 13:04:00	0	DTA	13	1	4	P
1	2009-10-14 13:05:00	0	DTA	13	1	4	P
1	2009-10-14 13:06:00	0	DTA	13	1	4	P
1	2009-10-14 13:07:00	0	DTA	13	1	4	P
1	2009-10-14 13:08:00	0	DTA	13	1	4	P
1	2009-10-14 13:09:00	0	DTA	13	1	4	P
1	2009-10-14 13:10:00	0	DTA	13	1	4	P
1	2009-10-14 13:11:00	0	DTA	13	1	4	P
1	2009-10-14 13:12:00	0	DTA	13	1	4	P
1	2009-10-14 13:13:00	0	DTA	13	1	4	P
1	2009-10-14 13:14:00	0	DTA	13	1	4	P
1	2009-10-14 13:15:00	0	DTA	13	1	4	P
1	2009-10-14 13:16:00	0	DTA	13	1	4	P
1	2009-10-14 13:17:00	0	DTA	13	1	4	P
1	2009-10-14 13:18:00	0	DTA	13	1	4	P
1	2009-10-14 13:19:00	0	DTA	13	1	4	P
1	2009-10-14 13:20:00	0	DTA	13	1	4	P
1	2009-10-14 13:21:00	0	DTA	13	1	4	P
1	2009-10-14 13:22:00	65	DTA	13	1	4	P
1	2009-10-14 13:23:00	187	DTA	13	1	4	P
1	2009-10-14 13:24:00	154	DTA	13	1	4	P
1	2009-10-14 13:25:00	0	DTA	13	1	4	P
1	2009-10-14 13:26:00	9	DTA	13	1	4	P
1	2009-10-14 13:27:00	0	DTA	13	1	4	P
1	2009-10-14 13:28:00	9	DTA	13	1	4	P
1	2009-10-14 13:29:00	579	DTA	13	1	4	P
1	2009-10-14 13:30:00	688	DTA	13	1	4	P
1	2009-10-14 13:31:00	870	DTA	13	1	4	P
1	2009-10-14 13:32:00	688	DTA	13	1	4	P
1	2009-10-14 13:33:00	1210	DTA	13	1	4	P
1	2009-10-14 13:34:00	464	DTA	13	1	4	P
1	2009-10-14 13:35:00	766	DTA	13	1	4	P
1	2009-10-14 13:36:00	347	DTA	13	1	4	P
1	2009-10-14 13:37:00	198	DTA	13	1	4	P
1	2009-10-14 13:38:00	0	DTA	13	1	4	P
1	2009-10-14 13:39:00	19	DTA	13	1	4	P
1	2009-10-14 13:40:00	19	DTA	13	1	4	P
1	2009-10-14 13:41:00	0	DTA	13	1	4	P
1	2009-10-14 13:42:00	0	DTA	13	1	4	P
1	2009-10-14 13:43:00	9	DTA	13	1	4	P
1	2009-10-14 13:44:00	28	DTA	13	1	4	P
1	2009-10-14 13:45:00	0	DTA	13	1	4	P
1	2009-10-14 13:46:00	0	DTA	13	1	4	P
1	2009-10-14 13:47:00	9	DTA	13	1	4	P
1	2009-10-14 13:48:00	0	DTA	13	1	4	P
1	2009-10-14 13:49:00	28	DTA	13	1	4	P
1	2009-10-14 13:50:00	0	DTA	13	1	4	P
1	2009-10-14 13:51:00	0	DTA	13	1	4	P
1	2009-10-14 13:52:00	0	DTA	13	1	4	P
1	2009-10-14 13:53:00	56	DTA	13	1	4	P
1	2009-10-14 13:54:00	28	DTA	13	1	4	P
1	2009-10-14 13:55:00	0	DTA	13	1	4	P
1	2009-10-14 13:56:00	0	DTA	13	1	4	P
1	2009-10-14 13:57:00	0	DTA	13	1	4	P
1	2009-10-14 13:58:00	0	DTA	13	1	4	P
1	2009-10-14 13:59:00	0	DTA	13	1	4	P
1	2009-10-14 14:00:00	9	DTA	13	1	4	P
1	2009-10-14 14:01:00	0	DTA	14	1	4	P
1	2009-10-14 14:02:00	670	DTA	14	1	4	P
1	2009-10-14 14:03:00	9	DTA	14	1	4	P
1	2009-10-14 14:04:00	0	DTA	14	1	4	P
1	2009-10-14 14:05:00	0	DTA	14	1	4	P
1	2009-10-14 14:06:00	0	DTA	14	1	4	P
1	2009-10-14 14:07:00	9	DTA	14	1	4	P
1	2009-10-14 14:08:00	0	DTA	14	1	4	P
1	2009-10-14 14:09:00	0	DTA	14	1	4	P
1	2009-10-14 14:10:00	19	DTA	14	1	4	P
1	2009-10-14 14:11:00	0	DTA	14	1	4	P
1	2009-10-14 14:12:00	0	DTA	14	1	4	P
1	2009-10-14 14:13:00	0	DTA	14	1	4	P
1	2009-10-14 14:14:00	9	DTA	14	1	4	P
1	2009-10-14 14:15:00	0	DTA	14	1	4	P
1	2009-10-14 14:16:00	0	DTA	14	1	4	P
1	2009-10-14 14:17:00	0	DTA	14	1	4	P
1	2009-10-14 14:18:00	0	DTA	14	1	4	P
1	2009-10-14 14:19:00	0	DTA	14	1	4	P
1	2009-10-14 14:20:00	28	DTA	14	1	4	P
1	2009-10-14 14:21:00	0	DTA	14	1	4	P
1	2009-10-14 14:22:00	0	DTA	14	1	4	P
1	2009-10-14 14:23:00	0	DTA	14	1	4	P
1	2009-10-14 14:24:00	0	DTA	14	1	4	P
1	2009-10-14 14:25:00	0	DTA	14	1	4	P
1	2009-10-14 14:26:00	0	DTA	14	1	4	P
1	2009-10-14 14:27:00	0	DTA	14	1	4	P
1	2009-10-14 14:28:00	0	DTA	14	1	4	P
1	2009-10-14 14:29:00	0	DTA	14	1	4	P
1	2009-10-14 14:30:00	0	DTA	14	1	4	P
1	2009-10-14 14:31:00	0	DTA	14	1	4	P
1	2009-10-14 14:32:00	0	DTA	14	1	4	P
1	2009-10-14 14:33:00	0	DTA	14	1	4	P
1	2009-10-14 14:34:00	0	DTA	14	1	4	P
1	2009-10-14 14:35:00	0	DTA	14	1	4	P
1	2009-10-14 14:36:00	0	DTA	14	1	4	P
1	2009-10-14 14:37:00	0	DTA	14	1	4	P
1	2009-10-14 14:38:00	0	DTA	14	1	4	P
1	2009-10-14 14:39:00	0	DTA	14	1	4	P
1	2009-10-14 14:40:00	0	DTA	14	1	4	P
1	2009-10-14 14:41:00	0	DTA	14	1	4	P
1	2009-10-14 14:42:00	0	DTA	14	1	4	P
1	2009-10-14 14:43:00	46	DTA	14	1	4	P
1	2009-10-14 14:44:00	0	DTA	14	1	4	P
1	2009-10-14 14:45:00	0	DTA	14	1	4	P
1	2009-10-14 14:46:00	0	DTA	14	1	4	P
1	2009-10-14 14:47:00	0	DTA	14	1	4	P
1	2009-10-14 14:48:00	0	DTA	14	1	4	P
1	2009-10-14 14:49:00	0	DTA	14	1	4	P
1	2009-10-14 14:50:00	28	DTA	14	1	4	P
1	2009-10-14 14:51:00	0	DTA	14	1	4	P
1	2009-10-14 14:52:00	0	DTA	14	1	4	P
1	2009-10-14 14:53:00	0	DTA	14	1	4	P
1	2009-10-14 14:54:00	0	DTA	14	1	4	P
1	2009-10-14 14:55:00	0	DTA	14	1	4	P
1	2009-10-14 14:56:00	0	DTA	14	1	4	P
1	2009-10-14 14:57:00	0	DTA	14	1	4	P
1	2009-10-14 14:58:00	0	DTA	14	1	4	P
1	2009-10-14 14:59:00	0	DTA	14	1	4	P
1	2009-10-14 15:00:00	0	DTA	14	1	4	P
1	2009-10-14 15:01:00	0	DTA	15	1	4	P
1	2009-10-14 15:02:00	0	DTA	15	1	4	P
1	2009-10-14 15:03:00	0	DTA	15	1	4	P
1	2009-10-14 15:04:00	0	DTA	15	1	4	P
1	2009-10-14 15:05:00	46	DTA	15	1	4	P
1	2009-10-14 15:06:00	0	DTA	15	1	4	P
1	2009-10-14 15:07:00	37	DTA	15	1	4	P
1	2009-10-14 15:08:00	0	DTA	15	1	4	P
1	2009-10-14 15:09:00	0	DTA	15	1	4	P
1	2009-10-14 15:10:00	0	DTA	15	1	4	P
1	2009-10-14 15:11:00	0	DTA	15	1	4	P
1	2009-10-14 15:12:00	0	DTA	15	1	4	P
1	2009-10-14 15:13:00	0	DTA	15	1	4	P
1	2009-10-14 15:14:00	0	DTA	15	1	4	P
1	2009-10-14 15:15:00	0	DTA	15	1	4	P
1	2009-10-14 15:16:00	0	DTA	15	1	4	P
1	2009-10-14 15:17:00	0	DTA	15	1	4	P
1	2009-10-14 15:18:00	0	DTA	15	1	4	P
1	2009-10-14 15:19:00	0	DTA	15	1	4	P
1	2009-10-14 15:20:00	0	DTA	15	1	4	P
1	2009-10-14 15:21:00	0	DTA	15	1	4	P
1	2009-10-14 15:22:00	0	DTA	15	1	4	P
1	2009-10-14 15:23:00	0	DTA	15	1	4	P
1	2009-10-14 15:24:00	0	DTA	15	1	4	P
1	2009-10-14 15:25:00	0	DTA	15	1	4	P
1	2009-10-14 15:26:00	0	DTA	15	1	4	P
1	2009-10-14 15:27:00	0	DTA	15	1	4	P
1	2009-10-14 15:28:00	0	DTA	15	1	4	P
1	2009-10-14 15:29:00	0	DTA	15	1	4	P
1	2009-10-14 15:30:00	0	DTA	15	1	4	P
1	2009-10-14 15:31:00	0	DTA	15	1	4	P
1	2009-10-14 15:32:00	0	DTA	15	1	4	P
1	2009-10-14 15:33:00	0	DTA	15	1	4	P	Peak DTA
1	2009-10-14 15:34:00	56	DTA	15	1	4	P	Peak DTA
1	2009-10-14 15:35:00	0	DTA	15	1	4	P	Peak DTA
1	2009-10-14 15:36:00	0	DTA	15	1	4	P	Peak DTA
1	2009-10-14 15:37:00	0	DTA	15	1	4	P	Peak DTA
1	2009-10-14 15:38:00	0	DTA	15	1	4	P	Peak DTA
1	2009-10-14 15:39:00	0	DTA	15	1	4	P	Peak DTA
1	2009-10-14 15:40:00	0	DTA	15	1	4	P	Peak DTA
1	2009-10-14 15:41:00	0	DTA	15	1	4	P	Peak DTA
1	2009-10-14 15:42:00	0	DTA	15	1	4	P	Peak DTA
1	2009-10-14 15:43:00	0	DTA	15	1	4	P	Peak DTA
1	2009-10-14 15:44:00	0	DTA	15	1	4	P	Peak DTA
1	2009-10-14 15:45:00	0	DTA	15	1	4	P	Peak DTA
1	2009-10-14 15:46:00	0	DTA	15	1	4	P	Peak DTA
1	2009-10-14 15:47:00	0	DTA	15	1	4	P	Peak DTA
1	2009-10-14 15:48:00	0	DTA	15	1	4	P	Peak DTA
1	2009-10-14 15:49:00	0	DTA	15	1	4	P	Peak DTA
1	2009-10-14 15:50:00	0	DTA	15	1	4	P	Peak DTA
1	2009-10-14 15:51:00	0	DTA	15	1	4	P	Peak DTA
1	2009-10-14 15:52:00	0	DTA	15	1	4	P	Peak DTA
1	2009-10-14 15:53:00	0	DTA	15	1	4	P	Peak DTA
1	2009-10-14 15:54:00	0	DTA	15	1	4	P	Peak DTA
1	2009-10-14 15:55:00	0	DTA	15	1	4	P	Peak DTA
1	2009-10-14 15:56:00	0	DTA	15	1	4	P	Peak DTA
1	2009-10-14 15:57:00	0	DTA	15	1	4	P	Peak DTA
1	2009-10-14 15:58:00	0	DTA	15	1	4	P	Peak DTA
1	2009-10-14 15:59:00	0	DTA	15	1	4	P	Peak DTA
1	2009-10-14 16:00:00	0	DTA	15	1	4	P	Peak DTA
1	2009-10-14 16:01:00	0	DTA	16	1	4	P	Peak DTA
1	2009-10-14 16:02:00	0	DTA	16	1	4	P	Peak DTA
1	2009-10-14 16:03:00	0	DTA	16	1	4	P	Peak DTA
1	2009-10-14 16:04:00	0	DTA	16	1	4	P	Peak DTA
1	2009-10-14 16:05:00	0	DTA	16	1	4	P	Peak DTA
1	2009-10-14 16:06:00	0	DTA	16	1	4	P	Peak DTA
1	2009-10-14 16:07:00	0	DTA	16	1	4	P	Peak DTA
1	2009-10-14 16:08:00	0	DTA	16	1	4	P	Peak DTA
1	2009-10-14 16:09:00	0	DTA	16	1	4	P	Peak DTA
1	2009-10-14 16:10:00	0	DTA	16	1	4	P	Peak DTA
1	2009-10-14 16:11:00	0	DTA	16	1	4	P	Peak DTA
1	2009-10-14 16:12:00	74	DTA	16	1	4	P	Peak DTA
1	2009-10-14 16:13:00	0	DTA	16	1	4	P	Peak DTA
1	2009-10-14 16:14:00	0	DTA	16	1	4	P	Peak DTA
1	2009-10-14 16:15:00	0	DTA	16	1	4	P	Peak DTA
1	2009-10-14 16:16:00	0	DTA	16	1	4	P	Peak DTA
1	2009-10-14 16:17:00	56	DTA	16	1	4	P	Peak DTA
1	2009-10-14 16:18:00	1080	DTA	16	1	4	P	Peak DTA
1	2009-10-14 16:19:00	512	DTA	16	1	4	P	Peak DTA
1	2009-10-14 16:20:00	232	DTA	16	1	4	P	Peak DTA
1	2009-10-14 16:21:00	187	DTA	16	1	4	P	Peak DTA
1	2009-10-14 16:22:00	670	DTA	16	1	4	P	Peak DTA
1	2009-10-14 16:23:00	256	DTA	16	1	4	P	Peak DTA
1	2009-10-14 16:24:00	93	DTA	16	1	4	P	Peak DTA
1	2009-10-14 16:25:00	143	DTA	16	1	4	P	Peak DTA
1	2009-10-14 16:26:00	198	DTA	16	1	4	P	Peak DTA
1	2009-10-14 16:27:00	334	DTA	16	1	4	P	Peak DTA
1	2009-10-14 16:28:00	243	DTA	16	1	4	P	Peak DTA
1	2009-10-14 16:29:00	9	DTA	16	1	4	P	Peak DTA
1	2009-10-14 16:30:00	0	DTA	16	1	4	P	Peak DTA
1	2009-10-14 16:31:00	0	DTA	16	1	4	P	Peak DTA
1	2009-10-14 16:32:00	0	DTA	16	1	4	P	Peak DTA
1	2009-10-14 16:33:00	0	DTA	16	1	4	P	Peak DTA
1	2009-10-14 16:34:00	0	DTA	16	1	4	P	Peak DTA
1	2009-10-14 16:35:00	0	DTA	16	1	4	P	Peak DTA
1	2009-10-14 16:36:00	0	DTA	16	1	4	P	Peak DTA
1	2009-10-14 16:37:00	37	DTA	16	1	4	P	Peak DTA
1	2009-10-14 16:38:00	0	DTA	16	1	4	P	Peak DTA
1	2009-10-14 16:39:00	0	DTA	16	1	4	P	Peak DTA
1	2009-10-14 16:40:00	0	DTA	16	1	4	P	Peak DTA
1	2009-10-14 16:41:00	0	DTA	16	1	4	P	Peak DTA
1	2009-10-14 16:42:00	37	DTA	16	1	4	P	Peak DTA
1	2009-10-14 16:43:00	0	DTA	16	1	4	P	Peak DTA
1	2009-10-14 16:44:00	0	DTA	16	1	4	P	Peak DTA
1	2009-10-14 16:45:00	0	DTA	16	1	4	P	Peak DTA
1	2009-10-14 16:46:00	0	DTA	16	1	4	P	Peak DTA
1	2009-10-14 16:47:00	0	DTA	16	1	4	P	Peak DTA
1	2009-10-14 16:48:00	0	DTA	16	1	4	P	Peak DTA
1	2009-10-14 16:49:00	0	DTA	16	1	4	P	Peak DTA
1	2009-10-14 16:50:00	0	DTA	16	1	4	P	Peak DTA
1	2009-10-14 16:51:00	0	DTA	16	1	4	P	Peak DTA
1	2009-10-14 16:52:00	0	DTA	16	1	4	P	Peak DTA
1	2009-10-14 16:53:00	0	DTA	16	1	4	P	Peak DTA
1	2009-10-14 16:54:00	334	DTA	16	1	4	P	Peak DTA
1	2009-10-14 16:55:00	232	DTA	16	1	4	P	Peak DTA
1	2009-10-14 16:56:00	0	DTA	16	1	4	P	Peak DTA
1	2009-10-14 16:57:00	19	DTA	16	1	4	P	Peak DTA
1	2009-10-14 16:58:00	37	DTA	16	1	4	P	Peak DTA
1	2009-10-14 16:59:00	9	DTA	16	1	4	P	Peak DTA
1	2009-10-14 17:00:00	19	DTA	16	1	4	P	Peak DTA
1	2009-10-14 17:01:00	0	DTA	17	1	4	P	Peak DTA
1	2009-10-14 17:02:00	0	DTA	17	1	4	P	Peak DTA
1	2009-10-14 17:03:00	19	DTA	17	1	4	P	Peak DTA
1	2009-10-14 17:04:00	0	DTA	17	1	4	P	Peak DTA
1	2009-10-14 17:05:00	0	DTA	17	1	4	P	Peak DTA
1	2009-10-14 17:06:00	0	DTA	17	1	4	P	Peak DTA
1	2009-10-14 17:07:00	56	DTA	17	1	4	P	Peak DTA
1	2009-10-14 17:08:00	0	DTA	17	1	4	P	Peak DTA
1	2009-10-14 17:09:00	9	DTA	17	1	4	P	Peak DTA
1	2009-10-14 17:10:00	9	DTA	17	1	4	P	Peak DTA
1	2009-10-14 17:11:00	154	DTA	17	1	4	P	Peak DTA
1	2009-10-14 17:12:00	766	DTA	17	1	4	P	Peak DTA
1	2009-10-14 17:13:00	165	DTA	17	1	4	P	Peak DTA
1	2009-10-14 17:14:00	93	DTA	17	1	4	P	Peak DTA
1	2009-10-14 17:15:00	111	DTA	17	1	4	P	Peak DTA
1	2009-10-14 17:16:00	232	DTA	17	1	4	P	Peak DTA
1	2009-10-14 17:17:00	9	DTA	17	1	4	P	Peak DTA
1	2009-10-14 17:18:00	0	DTA	17	1	4	P	Peak DTA
1	2009-10-14 17:19:00	232	DTA	17	1	4	P	Peak DTA
1	2009-10-14 17:20:00	243	DTA	17	1	4	P	Peak DTA
1	2009-10-14 17:21:00	269	DTA	17	1	4	P	Peak DTA
1	2009-10-14 17:22:00	9	DTA	17	1	4	P	Peak DTA
1	2009-10-14 17:23:00	0	DTA	17	1	4	P	Peak DTA
1	2009-10-14 17:24:00	9	DTA	17	1	4	P	Peak DTA
1	2009-10-14 17:25:00	0	DTA	17	1	4	P	Peak DTA
1	2009-10-14 17:26:00	0	DTA	17	1	4	P	Peak DTA
1	2009-10-14 17:27:00	0	DTA	17	1	4	P	Peak DTA
1	2009-10-14 17:28:00	19	DTA	17	1	4	P	Peak DTA
1	2009-10-14 17:29:00	176	DTA	17	1	4	P	Peak DTA
1	2009-10-14 17:30:00	390	DTA	17	1	4	P	Peak DTA
1	2009-10-14 17:31:00	232	DTA	17	1	4	P	Peak DTA
1	2009-10-14 17:32:00	9	DTA	17	1	4	P	Peak DTA
1	2009-10-14 17:33:00	0	DTA	17	1	4	P	Peak DTA
1	2009-10-14 17:34:00	0	DTA	17	1	4	P	Peak DTA
1	2009-10-14 17:35:00	19	DTA	17	1	4	P	Peak DTA
1	2009-10-14 17:36:00	0	DTA	17	1	4	P	Peak DTA
1	2009-10-14 17:37:00	0	DTA	17	1	4	P	Peak DTA
1	2009-10-14 17:38:00	0	DTA	17	1	4	P	Peak DTA
1	2009-10-14 17:39:00	0	DTA	17	1	4	P	Peak DTA
1	2009-10-14 17:40:00	0	DTA	17	1	4	P	Peak DTA
1	2009-10-14 17:41:00	0	DTA	17	1	4	P	Peak DTA
1	2009-10-14 17:42:00	0	DTA	17	1	4	P	Peak DTA
1	2009-10-14 17:43:00	0	DTA	17	1	4	P	Peak DTA
1	2009-10-14 17:44:00	0	DTA	17	1	4	P	Peak DTA
1	2009-10-14 17:45:00	0	DTA	17	1	4	P	Peak DTA
1	2009-10-14 17:46:00	0	DTA	17	1	4	P	Peak DTA
1	2009-10-14 17:47:00	0	DTA	17	1	4	P	Peak DTA
1	2009-10-14 17:48:00	19	DTA	17	1	4	P	Peak DTA
1	2009-10-14 17:49:00	0	DTA	17	1	4	P	Peak DTA
1	2009-10-14 17:50:00	0	DTA	17	1	4	P	Peak DTA
1	2009-10-14 17:51:00	9	DTA	17	1	4	P	Peak DTA
1	2009-10-14 17:52:00	1534	DTA	17	1	4	P	Peak DTA
1	2009-10-14 17:53:00	479	DTA	17	1	4	P	Peak DTA
1	2009-10-14 17:54:00	449	DTA	17	1	4	P	Peak DTA
1	2009-10-14 17:55:00	479	DTA	17	1	4	P	Peak DTA
1	2009-10-14 17:56:00	111	DTA	17	1	4	P	Peak DTA
1	2009-10-14 17:57:00	111	DTA	17	1	4	P	Peak DTA
1	2009-10-14 17:58:00	37	DTA	17	1	4	P	Peak DTA
1	2009-10-14 17:59:00	479	DTA	17	1	4	P	Peak DTA
1	2009-10-14 18:00:00	360	DTA	17	1	4	P	Peak DTA
1	2009-10-14 18:01:00	232	DTA	18	1	4	P	Peak DTA
1	2009-10-14 18:02:00	419	DTA	18	1	4	P	Peak DTA
1	2009-10-14 18:03:00	360	DTA	18	1	4	P	Peak DTA
1	2009-10-14 18:04:00	390	DTA	18	1	4	P	Peak DTA
1	2009-10-14 18:05:00	19	DTA	18	1	4	P	Peak DTA
1	2009-10-14 18:06:00	9	DTA	18	1	4	P	Peak DTA
1	2009-10-14 18:07:00	19	DTA	18	1	4	P	Peak DTA
1	2009-10-14 18:08:00	28	DTA	18	1	4	P	Peak DTA
1	2009-10-14 18:09:00	9	DTA	18	1	4	P	Peak DTA
1	2009-10-14 18:10:00	102	DTA	18	1	4	P	Peak DTA
1	2009-10-14 18:11:00	9	DTA	18	1	4	P	Peak DTA
1	2009-10-14 18:12:00	74	DTA	18	1	4	P	Peak DTA
1	2009-10-14 18:13:00	295	DTA	18	1	4	P	Peak DTA
1	2009-10-14 18:14:00	121	DTA	18	1	4	P	Peak DTA
1	2009-10-14 18:15:00	46	DTA	18	1	4	P	Peak DTA
1	2009-10-14 18:16:00	65	DTA	18	1	4	P	Peak DTA
1	2009-10-14 18:17:00	0	DTA	18	1	4	P	Peak DTA
1	2009-10-14 18:18:00	0	DTA	18	1	4	P	Peak DTA
1	2009-10-14 18:19:00	9	DTA	18	1	4	P	Peak DTA
1	2009-10-14 18:20:00	0	DTA	18	1	4	P	Peak DTA
1	2009-10-14 18:21:00	0	DTA	18	1	4	P	Peak DTA
1	2009-10-14 18:22:00	0	DTA	18	1	4	P	Peak DTA
1	2009-10-14 18:23:00	0	DTA	18	1	4	P	Peak DTA
1	2009-10-14 18:24:00	0	DTA	18	1	4	P	Peak DTA
1	2009-10-14 18:25:00	0	DTA	18	1	4	P	Peak DTA
1	2009-10-14 18:26:00	0	DTA	18	1	4	P	Peak DTA
1	2009-10-14 18:27:00	0	DTA	18	1	4	P	Peak DTA
1	2009-10-14 18:28:00	0	DTA	18	1	4	P	Peak DTA
1	2009-10-14 18:29:00	0	DTA	18	1	4	P	Peak DTA
1	2009-10-14 18:30:00	0	DTA	18	1	4	P	Peak DTA
1	2009-10-14 18:31:00	0	DTA	18	1	4	P	Peak DTA
1	2009-10-14 18:32:00	0	DTA	18	1	4	P	Peak DTA
1	2009-10-14 18:33:00	9	DTA	18	1	4	P	Peak DTA
1	2009-10-14 18:34:00	9	DTA	18	1	4	P	Peak DTA
1	2009-10-14 18:35:00	9	DTA	18	1	4	P	Peak DTA
1	2009-10-14 18:36:00	28	DTA	18	1	4	P	Peak DTA
1	2009-10-14 18:37:00	0	DTA	18	1	4	P	Peak DTA
1	2009-10-14 18:38:00	28	DTA	18	1	4	P	Peak DTA
1	2009-10-14 18:39:00	0	DTA	18	1	4	P	Peak DTA
1	2009-10-14 18:40:00	269	DTA	18	1	4	P	Peak DTA
1	2009-10-14 18:41:00	65	DTA	18	1	4	P	Peak DTA
1	2009-10-14 18:42:00	9	DTA	18	1	4	P	Peak DTA
1	2009-10-14 18:43:00	449	DTA	18	1	4	P	Peak DTA
1	2009-10-14 18:44:00	243	DTA	18	1	4	P	Peak DTA
1	2009-10-14 18:45:00	848	DTA	18	1	4	P	Peak DTA
1	2009-10-14 18:46:00	221	DTA	18	1	4	P	Peak DTA
1	2009-10-14 18:47:00	282	DTA	18	1	4	P	Peak DTA
1	2009-10-14 18:48:00	360	DTA	18	1	4	P	Peak DTA
1	2009-10-14 18:49:00	308	DTA	18	1	4	P	Peak DTA
1	2009-10-14 18:50:00	0	DTA	18	1	4	P	Peak DTA
1	2009-10-14 18:51:00	0	DTA	18	1	4	P	Peak DTA
1	2009-10-14 18:52:00	9	DTA	18	1	4	P	Peak DTA
1	2009-10-14 18:53:00	321	DTA	18	1	4	P	Peak DTA
1	2009-10-14 18:54:00	165	DTA	18	1	4	P	Peak DTA
1	2009-10-14 18:55:00	321	DTA	18	1	4	P	Peak DTA
1	2009-10-14 18:56:00	334	DTA	18	1	4	P	Peak DTA
1	2009-10-14 18:57:00	46	DTA	18	1	4	P	Peak DTA
1	2009-10-14 18:58:00	154	DTA	18	1	4	P	Peak DTA
1	2009-10-14 18:59:00	434	DTA	18	1	4	P	Peak DTA
1	2009-10-14 19:00:00	187	DTA	18	1	4	P	Peak DTA
1	2009-10-14 19:01:00	187	DTA	19	1	4	P	Peak DTA
1	2009-10-14 19:02:00	210	DTA	19	1	4	P	Peak DTA
1	2009-10-14 19:03:00	210	DTA	19	1	4	P	Peak DTA
1	2009-10-14 19:04:00	210	DTA	19	1	4	P	Peak DTA
1	2009-10-14 19:05:00	102	DTA	19	1	4	P	Peak DTA
1	2009-10-14 19:06:00	9	DTA	19	1	4	P	Peak DTA
1	2009-10-14 19:07:00	65	DTA	19	1	4	P	Peak DTA
1	2009-10-14 19:08:00	165	DTA	19	1	4	P	Peak DTA
1	2009-10-14 19:09:00	83	DTA	19	1	4	P	Peak DTA
1	2009-10-14 19:10:00	154	DTA	19	1	4	P	Peak DTA
1	2009-10-14 19:11:00	102	DTA	19	1	4	P	Peak DTA
1	2009-10-14 19:12:00	143	DTA	19	1	4	P	Peak DTA
1	2009-10-14 19:13:00	187	DTA	19	1	4	P	Peak DTA
1	2009-10-14 19:14:00	111	DTA	19	1	4	P	Peak DTA
1	2009-10-14 19:15:00	187	DTA	19	1	4	P	Peak DTA
1	2009-10-14 19:16:00	83	DTA	19	1	4	P	Peak DTA
1	2009-10-14 19:17:00	165	DTA	19	1	4	P	Peak DTA
1	2009-10-14 19:18:00	165	DTA	19	1	4	P	Peak DTA
1	2009-10-14 19:19:00	65	DTA	19	1	4	P	Peak DTA
1	2009-10-14 19:20:00	221	DTA	19	1	4	P	Peak DTA
1	2009-10-14 19:21:00	93	DTA	19	1	4	P	Peak DTA
1	2009-10-14 19:22:00	74	DTA	19	1	4	P	Peak DTA
1	2009-10-14 19:23:00	0	DTA	19	1	4	P	Peak DTA
1	2009-10-14 19:24:00	83	DTA	19	1	4	P	Peak DTA
1	2009-10-14 19:25:00	210	DTA	19	1	4	P	Peak DTA
1	2009-10-14 19:26:00	232	DTA	19	1	4	P	Peak DTA
1	2009-10-14 19:27:00	111	DTA	19	1	4	P	Peak DTA
1	2009-10-14 19:28:00	28	DTA	19	1	4	P	Peak DTA
1	2009-10-14 19:29:00	111	DTA	19	1	4	P	Peak DTA
1	2009-10-14 19:30:00	37	DTA	19	1	4	P	Peak DTA
1	2009-10-14 19:31:00	143	DTA	19	1	4	P	Peak DTA
1	2009-10-14 19:32:00	102	DTA	19	1	4	P	Peak DTA
1	2009-10-14 19:33:00	154	DTA	19	1	4	P	Peak DTA
1	2009-10-14 19:34:00	56	DTA	19	1	4	P	Peak DTA
1	2009-10-14 19:35:00	143	DTA	19	1	4	P	Peak DTA
1	2009-10-14 19:36:00	198	DTA	19	1	4	P	Peak DTA
1	2009-10-14 19:37:00	121	DTA	19	1	4	P	Peak DTA
1	2009-10-14 19:38:00	221	DTA	19	1	4	P	Peak DTA
1	2009-10-14 19:39:00	404	DTA	19	1	4	P	Peak DTA
1	2009-10-14 19:40:00	74	DTA	19	1	4	P	Peak DTA
1	2009-10-14 19:41:00	308	DTA	19	1	4	P	Peak DTA
1	2009-10-14 19:42:00	870	DTA	19	1	4	P	Peak DTA
1	2009-10-14 19:43:00	390	DTA	19	1	4	P	Peak DTA
1	2009-10-14 19:44:00	404	DTA	19	1	4	P	Peak DTA
1	2009-10-14 19:45:00	243	DTA	19	1	4	P	Peak DTA
1	2009-10-14 19:46:00	121	DTA	19	1	4	P	Peak DTA
1	2009-10-14 19:47:00	132	DTA	19	1	4	P	Peak DTA
1	2009-10-14 19:48:00	419	DTA	19	1	4	P	Peak DTA
1	2009-10-14 19:49:00	295	DTA	19	1	4	P	Peak DTA
1	2009-10-14 19:50:00	2330	DTA	19	1	4	P	Peak DTA
1	2009-10-14 19:51:00	269	DTA	19	1	4	P	Peak DTA
1	2009-10-14 19:52:00	143	DTA	19	1	4	P	Peak DTA
1	2009-10-14 19:53:00	308	DTA	19	1	4	P	Peak DTA
1	2009-10-14 19:54:00	111	DTA	19	1	4	P	Peak DTA
1	2009-10-14 19:55:00	347	DTA	19	1	4	P	Peak DTA
1	2009-10-14 19:56:00	19	DTA	19	1	4	P	Peak DTA
1	2009-10-14 19:57:00	0	DTA	19	1	4	P	Peak DTA
1	2009-10-14 19:58:00	0	DTA	19	1	4	P	Peak DTA
1	2009-10-14 19:59:00	0	DTA	19	1	4	P	Peak DTA
1	2009-10-14 20:00:00	154	DTA	19	1	4	P	Peak DTA
1	2009-10-14 20:01:00	121	DTA	20	1	4	P	Peak DTA
1	2009-10-14 20:02:00	0	DTA	20	1	4	P	Peak DTA
1	2009-10-14 20:03:00	9	DTA	20	1	4	P	Peak DTA
1	2009-10-14 20:04:00	0	DTA	20	1	4	P	Peak DTA
1	2009-10-14 20:05:00	0	DTA	20	1	4	P	Peak DTA
1	2009-10-14 20:06:00	0	DTA	20	1	4	P	Peak DTA
1	2009-10-14 20:07:00	0	DTA	20	1	4	P	Peak DTA
1	2009-10-14 20:08:00	0	DTA	20	1	4	P	Peak DTA
1	2009-10-14 20:09:00	0	DTA	20	1	4	P	Peak DTA
1	2009-10-14 20:10:00	0	DTA	20	1	4	P	Peak DTA
1	2009-10-14 20:11:00	0	DTA	20	1	4	P	Peak DTA
1	2009-10-14 20:12:00	0	DTA	20	1	4	P	Peak DTA
1	2009-10-14 20:13:00	0	DTA	20	1	4	P	Peak DTA
1	2009-10-14 20:14:00	0	DTA	20	1	4	P	Peak DTA
1	2009-10-14 20:15:00	0	DTA	20	1	4	P	Peak DTA
1	2009-10-14 20:16:00	0	DTA	20	1	4	P	Peak DTA
1	2009-10-14 20:17:00	0	DTA	20	1	4	P	Peak DTA
1	2009-10-14 20:18:00	0	DTA	20	1	4	P	Peak DTA
1	2009-10-14 20:19:00	0	DTA	20	1	4	P	Peak DTA
1	2009-10-14 20:20:00	0	DTA	20	1	4	P	Peak DTA
1	2009-10-14 20:21:00	0	DTA	20	1	4	P	Peak DTA
1	2009-10-14 20:22:00	0	DTA	20	1	4	P	Peak DTA
1	2009-10-14 20:23:00	0	DTA	20	1	4	P	Peak DTA
1	2009-10-14 20:24:00	0	DTA	20	1	4	P	Peak DTA
1	2009-10-14 20:25:00	0	DTA	20	1	4	P	Peak DTA
1	2009-10-14 20:26:00	9	DTA	20	1	4	P	Peak DTA
1	2009-10-14 20:27:00	334	DTA	20	1	4	P	Peak DTA
1	2009-10-14 20:28:00	102	DTA	20	1	4	P	Peak DTA
1	2009-10-14 20:29:00	111	DTA	20	1	4	P	Peak DTA
1	2009-10-14 20:30:00	9	DTA	20	1	4	P	Peak DTA
1	2009-10-14 20:31:00	9	DTA	20	1	4	P	Peak DTA
1	2009-10-14 20:32:00	0	DTA	20	1	4	P	Peak DTA
1	2009-10-14 20:33:00	19	DTA	20	1	4	P	Peak DTA
1	2009-10-14 20:34:00	9	DTA	20	1	4	P	Peak DTA
1	2009-10-14 20:35:00	0	DTA	20	1	4	P	Peak DTA
1	2009-10-14 20:36:00	0	DTA	20	1	4	P	Peak DTA
1	2009-10-14 20:37:00	93	DTA	20	1	4	P	Peak DTA
1	2009-10-14 20:38:00	9	DTA	20	1	4	P	Peak DTA
1	2009-10-14 20:39:00	0	DTA	20	1	4	P	Peak DTA
1	2009-10-14 20:40:00	0	DTA	20	1	4	P	Peak DTA
1	2009-10-14 20:41:00	0	DTA	20	1	4	P	Peak DTA
1	2009-10-14 20:42:00	0	DTA	20	1	4	P	Peak DTA
1	2009-10-14 20:43:00	0	DTA	20	1	4	P	Peak DTA
1	2009-10-14 20:44:00	0	DTA	20	1	4	P	Peak DTA
1	2009-10-14 20:45:00	65	DTA	20	1	4	P	Peak DTA
1	2009-10-14 20:46:00	19	DTA	20	1	4	P	Peak DTA
1	2009-10-14 20:47:00	0	DTA	20	1	4	P	Peak DTA
1	2009-10-14 20:48:00	37	DTA	20	1	4	P	Peak DTA
1	2009-10-14 20:49:00	19	DTA	20	1	4	P	Peak DTA
1	2009-10-14 20:50:00	0	DTA	20	1	4	P	Peak DTA
1	2009-10-14 20:51:00	46	DTA	20	1	4	P	Peak DTA
1	2009-10-14 20:52:00	0	DTA	20	1	4	P	Peak DTA
1	2009-10-14 20:53:00	19	DTA	20	1	4	P	Peak DTA
1	2009-10-14 20:54:00	9	DTA	20	1	4	P	Peak DTA
1	2009-10-14 20:55:00	0	DTA	20	1	4	P	Peak DTA
1	2009-10-14 20:56:00	0	DTA	20	1	4	P	Peak DTA
1	2009-10-14 20:57:00	0	DTA	20	1	4	P	Peak DTA
1	2009-10-14 20:58:00	9	DTA	20	1	4	P	Peak DTA
1	2009-10-14 20:59:00	0	DTA	20	1	4	P	Peak DTA
1	2009-10-14 21:00:00	0	DTA	20	1	4	P	Peak DTA
1	2009-10-14 21:01:00	0	DTA	21	1	4	P	Peak DTA
1	2009-10-14 21:02:00	0	DTA	21	1	4	P	Peak DTA
1	2009-10-14 21:03:00	0	DTA	21	1	4	P	Peak DTA
1	2009-10-14 21:04:00	0	DTA	21	1	4	P	Peak DTA
1	2009-10-14 21:05:00	0	DTA	21	1	4	P	Peak DTA
1	2009-10-14 21:06:00	0	DTA	21	1	4	P	Peak DTA
1	2009-10-14 21:07:00	0	DTA	21	1	4	P	Peak DTA
1	2009-10-14 21:08:00	0	DTA	21	1	4	P	Peak DTA
1	2009-10-14 21:09:00	0	DTA	21	1	4	P	Peak DTA
1	2009-10-14 21:10:00	0	DTA	21	1	4	P	Peak DTA
1	2009-10-14 21:11:00	0	DTA	21	1	4	P	Peak DTA
1	2009-10-14 21:12:00	0	DTA	21	1	4	P	Peak DTA
1	2009-10-14 21:13:00	0	DTA	21	1	4	P	Peak DTA
1	2009-10-14 21:14:00	0	DTA	21	1	4	P	Peak DTA
1	2009-10-14 21:15:00	0	DTA	21	1	4	P	Peak DTA
1	2009-10-14 21:16:00	0	DTA	21	1	4	P	Peak DTA
1	2009-10-14 21:17:00	0	DTA	21	1	4	P	Peak DTA
1	2009-10-14 21:18:00	0	DTA	21	1	4	P	Peak DTA
1	2009-10-14 21:19:00	0	DTA	21	1	4	P	Peak DTA
1	2009-10-14 21:20:00	9	DTA	21	1	4	P	Peak DTA
1	2009-10-14 21:21:00	0	DTA	21	1	4	P	Peak DTA
1	2009-10-14 21:22:00	0	DTA	21	1	4	P	Peak DTA
1	2009-10-14 21:23:00	0	DTA	21	1	4	P	Peak DTA
1	2009-10-14 21:24:00	0	DTA	21	1	4	P	Peak DTA
1	2009-10-14 21:25:00	0	DTA	21	1	4	P	Peak DTA
1	2009-10-14 21:26:00	0	DTA	21	1	4	P	Peak DTA
1	2009-10-14 21:27:00	0	DTA	21	1	4	P	Peak DTA
1	2009-10-14 21:28:00	0	DTA	21	1	4	P	Peak DTA
1	2009-10-14 21:29:00	0	DTA	21	1	4	P	Peak DTA
1	2009-10-14 21:30:00	0	DTA	21	1	4	P	Peak DTA
1	2009-10-14 21:31:00	0	DTA	21	1	4	P	Peak DTA
1	2009-10-14 21:32:00	0	DTA	21	1	4	P	Peak DTA
1	2009-10-14 21:33:00	0	DTA	21	1	4	P
1	2009-10-14 21:34:00	0	DTA	21	1	4	P
1	2009-10-14 21:35:00	0	DTA	21	1	4	P
1	2009-10-14 21:36:00	0	DTA	21	1	4	P
1	2009-10-14 21:37:00	0	DTA	21	1	4	P
1	2009-10-14 21:38:00	0	DTA	21	1	4	P
1	2009-10-14 21:39:00	0	DTA	21	1	4	P
1	2009-10-14 21:40:00	0	DTA	21	1	4	P
1	2009-10-14 21:41:00	0	DTA	21	1	4	P
1	2009-10-14 21:42:00	0	DTA	21	1	4	P
1	2009-10-14 21:43:00	0	DTA	21	1	4	P
1	2009-10-14 21:44:00	37	DTA	21	1	4	P
1	2009-10-14 21:45:00	0	DTA	21	1	4	P
1	2009-10-14 21:46:00	0	DTA	21	1	4	P
1	2009-10-14 21:47:00	0	DTA	21	1	4	P
1	2009-10-14 21:48:00	0	DTA	21	1	4	P
1	2009-10-14 21:49:00	0	DTA	21	1	4	P
1	2009-10-14 21:50:00	0	DTA	21	1	4	P
1	2009-10-14 21:51:00	0	DTA	21	1	4	P
1	2009-10-14 21:52:00	0	DTA	21	1	4	P
1	2009-10-14 21:53:00	0	DTA	21	1	4	P
1	2009-10-14 21:54:00	0	DTA	21	1	4	P
1	2009-10-14 21:55:00	0	DTA	21	1	4	P
1	2009-10-14 21:56:00	0	DTA	21	1	4	P
1	2009-10-14 21:57:00	0	DTA	21	1	4	P
1	2009-10-14 21:58:00	0	DTA	21	1	4	P
1	2009-10-14 21:59:00	0	DTA	21	1	4	P
1	2009-10-14 22:00:00	65	DTA	21	1	4	P
1	2009-10-14 22:01:00	308	DTA	22	1	4	P
1	2009-10-14 22:02:00	0	DTA	22	1	4	P
1	2009-10-14 22:03:00	0	DTA	22	1	4	P
1	2009-10-14 22:04:00	0	DTA	22	1	4	P
1	2009-10-14 22:05:00	0	DTA	22	1	4	P
1	2009-10-14 22:06:00	0	DTA	22	1	4	P
1	2009-10-14 22:07:00	0	DTA	22	1	4	P
1	2009-10-14 22:08:00	0	DTA	22	1	4	P
1	2009-10-14 22:09:00	0	DTA	22	1	4	P
1	2009-10-14 22:10:00	0	DTA	22	1	4	P
1	2009-10-14 22:11:00	9	DTA	22	1	4	P
1	2009-10-14 22:12:00	0	DTA	22	1	4	P
1	2009-10-14 22:13:00	0	DTA	22	1	4	P
1	2009-10-14 22:14:00	0	DTA	22	1	4	P
1	2009-10-14 22:15:00	0	DTA	22	1	4	P
1	2009-10-14 22:16:00	0	DTA	22	1	4	P
1	2009-10-14 22:17:00	0	DTA	22	1	4	P
1	2009-10-14 22:18:00	0	DTA	22	1	4	P
1	2009-10-14 22:19:00	0	DTA	22	1	4	P
1	2009-10-14 22:20:00	0	DTA	22	1	4	P
1	2009-10-14 22:21:00	0	DTA	22	1	4	P
1	2009-10-14 22:22:00	0	DTA	22	1	4	P
1	2009-10-14 22:23:00	0	DTA	22	1	4	P
1	2009-10-14 22:24:00	0	DTA	22	1	4	P
1	2009-10-14 22:25:00	0	DTA	22	1	4	P
1	2009-10-14 22:26:00	0	DTA	22	1	4	P
1	2009-10-14 22:27:00	0	DTA	22	1	4	P
1	2009-10-14 22:28:00	0	DTA	22	1	4	P
1	2009-10-14 22:29:00	0	DTA	22	1	4	P
1	2009-10-14 22:30:00	0	DTA	22	1	4	P
1	2009-10-14 22:31:00	0	DTA	22	1	4	P
1	2009-10-14 22:32:00	0	DTA	22	1	4	P
1	2009-10-14 22:33:00	0	DTA	22	1	4	P
1	2009-10-14 22:34:00	0	DTA	22	1	4	P
1	2009-10-14 22:35:00	449	DTA	22	1	4	P
1	2009-10-14 22:36:00	121	DTA	22	1	4	P
1	2009-10-14 22:37:00	321	DTA	22	1	4	P
1	2009-10-14 22:38:00	334	DTA	22	1	4	P
1	2009-10-14 22:39:00	983	DTA	22	1	4	P
1	2009-10-14 22:40:00	707	DTA	22	1	4	P
1	2009-10-14 22:41:00	28	DTA	22	1	4	P
1	2009-10-14 22:42:00	187	DTA	22	1	4	P
1	2009-10-14 22:43:00	221	DTA	22	1	4	P
1	2009-10-14 22:44:00	545	DTA	22	1	4	P
1	2009-10-14 22:45:00	102	DTA	22	1	4	P
1	2009-10-14 22:46:00	121	DTA	22	1	4	P
1	2009-10-14 22:47:00	176	DTA	22	1	4	P
1	2009-10-14 22:48:00	132	DTA	22	1	4	P
1	2009-10-14 22:49:00	74	DTA	22	1	4	P
1	2009-10-14 22:50:00	65	DTA	22	1	4	P
1	2009-10-14 22:51:00	56	DTA	22	1	4	P
1	2009-10-14 22:52:00	595	DTA	22	1	4	P
1	2009-10-14 22:53:00	347	DTA	22	1	4	P
1	2009-10-14 22:54:00	9	DTA	22	1	4	P
1	2009-10-14 22:55:00	9	DTA	22	1	4	P
1	2009-10-14 22:56:00	9	DTA	22	1	4	P
1	2009-10-14 22:57:00	0	DTA	22	1	4	P
1	2009-10-14 22:58:00	0	DTA	22	1	4	P
1	2009-10-14 22:59:00	165	DTA	22	1	4	P
1	2009-10-14 23:00:00	0	DTA	22	1	4	P
1	2009-10-14 23:01:00	0	NTA	23	2	4	P
1	2009-10-14 23:02:00	0	NTA	23	2	4	P
1	2009-10-14 23:03:00	65	NTA	23	2	4	P
1	2009-10-14 23:04:00	0	NTA	23	2	4	P
1	2009-10-14 23:05:00	9	NTA	23	2	4	P
1	2009-10-14 23:06:00	0	NTA	23	2	4	P
1	2009-10-14 23:07:00	0	NTA	23	2	4	P
1	2009-10-14 23:08:00	0	NTA	23	2	4	P
1	2009-10-14 23:09:00	0	NTA	23	2	4	P
1	2009-10-14 23:10:00	0	NTA	23	2	4	P
1	2009-10-14 23:11:00	0	NTA	23	2	4	P
1	2009-10-14 23:12:00	0	NTA	23	2	4	P
1	2009-10-14 23:13:00	0	NTA	23	2	4	P
1	2009-10-14 23:14:00	0	NTA	23	2	4	P
1	2009-10-14 23:15:00	0	NTA	23	2	4	P
1	2009-10-14 23:16:00	0	NTA	23	2	4	P
1	2009-10-14 23:17:00	0	NTA	23	2	4	P
1	2009-10-14 23:18:00	0	NTA	23	2	4	P
1	2009-10-14 23:19:00	0	NTA	23	2	4	P
1	2009-10-14 23:20:00	0	NTA	23	2	4	P
1	2009-10-14 23:21:00	0	NTA	23	2	4	P
1	2009-10-14 23:22:00	0	NTA	23	2	4	P
1	2009-10-14 23:23:00	0	NTA	23	2	4	P
1	2009-10-14 23:24:00	0	NTA	23	2	4	P
1	2009-10-14 23:25:00	9	NTA	23	2	4	P
1	2009-10-14 23:26:00	19	NTA	23	2	4	P
1	2009-10-14 23:27:00	0	NTA	23	2	4	P
1	2009-10-14 23:28:00	0	NTA	23	2	4	P
1	2009-10-14 23:29:00	0	NTA	23	2	4	P
1	2009-10-14 23:30:00	0	NTA	23	2	4	P
1	2009-10-14 23:31:00	0	NTA	23	2	4	P
1	2009-10-14 23:32:00	0	NTA	23	2	4	P
1	2009-10-14 23:33:00	46	NTA	23	2	4	P
1	2009-10-14 23:34:00	0	NTA	23	2	4	P
1	2009-10-14 23:35:00	0	NTA	23	2	4	P
1	2009-10-14 23:36:00	0	NTA	23	2	4	P
1	2009-10-14 23:37:00	0	NTA	23	2	4	P
1	2009-10-14 23:38:00	0	NTA	23	2	4	P
1	2009-10-14 23:39:00	0	NTA	23	2	4	P
1	2009-10-14 23:40:00	0	NTA	23	2	4	P
1	2009-10-14 23:41:00	0	NTA	23	2	4	P
1	2009-10-14 23:42:00	0	NTA	23	2	4	P
1	2009-10-14 23:43:00	0	NTA	23	2	4	P
1	2009-10-14 23:44:00	0	NTA	23	2	4	P
1	2009-10-14 23:45:00	0	NTA	23	2	4	P
1	2009-10-14 23:46:00	0	NTA	23	2	4	P
1	2009-10-14 23:47:00	0	NTA	23	2	4	P
1	2009-10-14 23:48:00	0	NTA	23	2	4	P
1	2009-10-14 23:49:00	0	NTA	23	2	4	P
1	2009-10-14 23:50:00	0	NTA	23	2	4	P
1	2009-10-14 23:51:00	0	NTA	23	2	4	P
1	2009-10-14 23:52:00	0	NTA	23	2	4	P
1	2009-10-14 23:53:00	0	NTA	23	2	4	P
1	2009-10-14 23:54:00	0	NTA	23	2	4	P
1	2009-10-14 23:55:00	0	NTA	23	2	4	P
1	2009-10-14 23:56:00	0	NTA	23	2	4	P
1	2009-10-14 23:57:00	0	NTA	23	2	4	P
1	2009-10-14 23:58:00	0	NTA	23	2	4	P
1	2009-10-14 23:59:00	0	NTA	23	2	4	P
1	2009-10-15	0	NTA	23	2	4	P
1	2009-10-15 00:01:00	0	NTA	0	2	5	P
1	2009-10-15 00:02:00	0	NTA	0	2	5	P
1	2009-10-15 00:03:00	0	NTA	0	2	5	P
1	2009-10-15 00:04:00	0	NTA	0	2	5	P
1	2009-10-15 00:05:00	0	NTA	0	2	5	P
1	2009-10-15 00:06:00	0	NTA	0	2	5	P
1	2009-10-15 00:07:00	0	NTA	0	2	5	P
1	2009-10-15 00:08:00	0	NTA	0	2	5	P
1	2009-10-15 00:09:00	0	NTA	0	2	5	P
1	2009-10-15 00:10:00	0	NTA	0	2	5	P
1	2009-10-15 00:11:00	0	NTA	0	2	5	P
1	2009-10-15 00:12:00	0	NTA	0	2	5	P
1	2009-10-15 00:13:00	0	NTA	0	2	5	P
1	2009-10-15 00:14:00	0	NTA	0	2	5	P
1	2009-10-15 00:15:00	0	NTA	0	2	5	P
1	2009-10-15 00:16:00	0	NTA	0	2	5	P
1	2009-10-15 00:17:00	0	NTA	0	2	5	P
1	2009-10-15 00:18:00	0	NTA	0	2	5	P
1	2009-10-15 00:19:00	0	NTA	0	2	5	P
1	2009-10-15 00:20:00	0	NTA	0	2	5	P
1	2009-10-15 00:21:00	0	NTA	0	2	5	P
1	2009-10-15 00:22:00	0	NTA	0	2	5	P
1	2009-10-15 00:23:00	0	NTA	0	2	5	P
1	2009-10-15 00:24:00	0	NTA	0	2	5	P
1	2009-10-15 00:25:00	65	NTA	0	2	5	P
1	2009-10-15 00:26:00	0	NTA	0	2	5	P
1	2009-10-15 00:27:00	0	NTA	0	2	5	P
1	2009-10-15 00:28:00	0	NTA	0	2	5	P
1	2009-10-15 00:29:00	0	NTA	0	2	5	P
1	2009-10-15 00:30:00	0	NTA	0	2	5	P
1	2009-10-15 00:31:00	0	NTA	0	2	5	P
1	2009-10-15 00:32:00	143	NTA	0	2	5	P
1	2009-10-15 00:33:00	121	NTA	0	2	5	P
1	2009-10-15 00:34:00	0	NTA	0	2	5	P
1	2009-10-15 00:35:00	0	NTA	0	2	5	P
1	2009-10-15 00:36:00	0	NTA	0	2	5	P
1	2009-10-15 00:37:00	0	NTA	0	2	5	P
1	2009-10-15 00:38:00	0	NTA	0	2	5	P
1	2009-10-15 00:39:00	0	NTA	0	2	5	P
1	2009-10-15 00:40:00	0	NTA	0	2	5	P
1	2009-10-15 00:41:00	0	NTA	0	2	5	P
1	2009-10-15 00:42:00	0	NTA	0	2	5	P
1	2009-10-15 00:43:00	0	NTA	0	2	5	P
1	2009-10-15 00:44:00	0	NTA	0	2	5	P
1	2009-10-15 00:45:00	0	NTA	0	2	5	P
1	2009-10-15 00:46:00	0	NTA	0	2	5	P
1	2009-10-15 00:47:00	0	NTA	0	2	5	P
1	2009-10-15 00:48:00	0	NTA	0	2	5	P
1	2009-10-15 00:49:00	0	NTA	0	2	5	P
1	2009-10-15 00:50:00	0	NTA	0	2	5	P
1	2009-10-15 00:51:00	0	NTA	0	2	5	P
1	2009-10-15 00:52:00	0	NTA	0	2	5	P
1	2009-10-15 00:53:00	19	NTA	0	2	5	P
1	2009-10-15 00:54:00	0	NTA	0	2	5	P
1	2009-10-15 00:55:00	0	NTA	0	2	5	P
1	2009-10-15 00:56:00	0	NTA	0	2	5	P
1	2009-10-15 00:57:00	0	NTA	0	2	5	P
1	2009-10-15 00:58:00	0	NTA	0	2	5	P
1	2009-10-15 00:59:00	0	NTA	0	2	5	P
1	2009-10-15 01:00:00	0	NTA	0	2	5	P
1	2009-10-15 01:01:00	0	NTA	1	2	5	P
1	2009-10-15 01:02:00	0	NTA	1	2	5	P
1	2009-10-15 01:03:00	0	NTA	1	2	5	P
1	2009-10-15 01:04:00	0	NTA	1	2	5	P
1	2009-10-15 01:05:00	0	NTA	1	2	5	P
1	2009-10-15 01:06:00	0	NTA	1	2	5	P
1	2009-10-15 01:07:00	0	NTA	1	2	5	P
1	2009-10-15 01:08:00	0	NTA	1	2	5	P
1	2009-10-15 01:09:00	0	NTA	1	2	5	P
1	2009-10-15 01:10:00	0	NTA	1	2	5	P
1	2009-10-15 01:11:00	0	NTA	1	2	5	P
1	2009-10-15 01:12:00	0	NTA	1	2	5	P
1	2009-10-15 01:13:00	0	NTA	1	2	5	P
1	2009-10-15 01:14:00	0	NTA	1	2	5	P
1	2009-10-15 01:15:00	0	NTA	1	2	5	P
1	2009-10-15 01:16:00	37	NTA	1	2	5	P
1	2009-10-15 01:17:00	0	NTA	1	2	5	P
1	2009-10-15 01:18:00	0	NTA	1	2	5	P
1	2009-10-15 01:19:00	0	NTA	1	2	5	P
1	2009-10-15 01:20:00	0	NTA	1	2	5	P
1	2009-10-15 01:21:00	0	NTA	1	2	5	P
1	2009-10-15 01:22:00	0	NTA	1	2	5	P
1	2009-10-15 01:23:00	0	NTA	1	2	5	P
1	2009-10-15 01:24:00	0	NTA	1	2	5	P
1	2009-10-15 01:25:00	0	NTA	1	2	5	P
1	2009-10-15 01:26:00	0	NTA	1	2	5	P
1	2009-10-15 01:27:00	0	NTA	1	2	5	P
1	2009-10-15 01:28:00	0	NTA	1	2	5	P
1	2009-10-15 01:29:00	0	NTA	1	2	5	P
1	2009-10-15 01:30:00	0	NTA	1	2	5	P
1	2009-10-15 01:31:00	0	NTA	1	2	5	P
1	2009-10-15 01:32:00	0	NTA	1	2	5	P
1	2009-10-15 01:33:00	0	NTA	1	2	5	P
1	2009-10-15 01:34:00	0	NTA	1	2	5	P
1	2009-10-15 01:35:00	0	NTA	1	2	5	P
1	2009-10-15 01:36:00	0	NTA	1	2	5	P
1	2009-10-15 01:37:00	0	NTA	1	2	5	P
1	2009-10-15 01:38:00	46	NTA	1	2	5	P
1	2009-10-15 01:39:00	46	NTA	1	2	5	P
1	2009-10-15 01:40:00	9	NTA	1	2	5	P
1	2009-10-15 01:41:00	0	NTA	1	2	5	P
1	2009-10-15 01:42:00	0	NTA	1	2	5	P
1	2009-10-15 01:43:00	0	NTA	1	2	5	P
1	2009-10-15 01:44:00	0	NTA	1	2	5	P
1	2009-10-15 01:45:00	0	NTA	1	2	5	P
1	2009-10-15 01:46:00	0	NTA	1	2	5	P
1	2009-10-15 01:47:00	0	NTA	1	2	5	P
1	2009-10-15 01:48:00	0	NTA	1	2	5	P
1	2009-10-15 01:49:00	0	NTA	1	2	5	P
1	2009-10-15 01:50:00	0	NTA	1	2	5	P
1	2009-10-15 01:51:00	0	NTA	1	2	5	P
1	2009-10-15 01:52:00	0	NTA	1	2	5	P
1	2009-10-15 01:53:00	0	NTA	1	2	5	P
1	2009-10-15 01:54:00	0	NTA	1	2	5	P
1	2009-10-15 01:55:00	0	NTA	1	2	5	P
1	2009-10-15 01:56:00	28	NTA	1	2	5	P
1	2009-10-15 01:57:00	0	NTA	1	2	5	P
1	2009-10-15 01:58:00	0	NTA	1	2	5	P
1	2009-10-15 01:59:00	0	NTA	1	2	5	P
1	2009-10-15 02:00:00	0	NTA	1	2	5	P
1	2009-10-15 02:01:00	0	NTA	2	2	5	P
1	2009-10-15 02:02:00	0	NTA	2	2	5	P
1	2009-10-15 02:03:00	0	NTA	2	2	5	P
1	2009-10-15 02:04:00	0	NTA	2	2	5	P
1	2009-10-15 02:05:00	0	NTA	2	2	5	P
1	2009-10-15 02:06:00	0	NTA	2	2	5	P
1	2009-10-15 02:07:00	0	NTA	2	2	5	P
1	2009-10-15 02:08:00	0	NTA	2	2	5	P
1	2009-10-15 02:09:00	0	NTA	2	2	5	P
1	2009-10-15 02:10:00	0	NTA	2	2	5	P
1	2009-10-15 02:11:00	0	NTA	2	2	5	P
1	2009-10-15 02:12:00	0	NTA	2	2	5	P
1	2009-10-15 02:13:00	0	NTA	2	2	5	P
1	2009-10-15 02:14:00	0	NTA	2	2	5	P
1	2009-10-15 02:15:00	0	NTA	2	2	5	P
1	2009-10-15 02:16:00	0	NTA	2	2	5	P
1	2009-10-15 02:17:00	0	NTA	2	2	5	P
1	2009-10-15 02:18:00	0	NTA	2	2	5	P
1	2009-10-15 02:19:00	0	NTA	2	2	5	P
1	2009-10-15 02:20:00	28	NTA	2	2	5	P
1	2009-10-15 02:21:00	0	NTA	2	2	5	P
1	2009-10-15 02:22:00	0	NTA	2	2	5	P
1	2009-10-15 02:23:00	0	NTA	2	2	5	P
1	2009-10-15 02:24:00	0	NTA	2	2	5	P
1	2009-10-15 02:25:00	0	NTA	2	2	5	P
1	2009-10-15 02:26:00	0	NTA	2	2	5	P
1	2009-10-15 02:27:00	0	NTA	2	2	5	P
1	2009-10-15 02:28:00	0	NTA	2	2	5	P
1	2009-10-15 02:29:00	0	NTA	2	2	5	P
1	2009-10-15 02:30:00	0	NTA	2	2	5	P
1	2009-10-15 02:31:00	0	NTA	2	2	5	P
1	2009-10-15 02:32:00	0	NTA	2	2	5	P
1	2009-10-15 02:33:00	0	NTA	2	2	5	P
1	2009-10-15 02:34:00	0	NTA	2	2	5	P
1	2009-10-15 02:35:00	0	NTA	2	2	5	P
1	2009-10-15 02:36:00	19	NTA	2	2	5	P
1	2009-10-15 02:37:00	0	NTA	2	2	5	P
1	2009-10-15 02:38:00	0	NTA	2	2	5	P
1	2009-10-15 02:39:00	0	NTA	2	2	5	P
1	2009-10-15 02:40:00	46	NTA	2	2	5	P
1	2009-10-15 02:41:00	0	NTA	2	2	5	P
1	2009-10-15 02:42:00	0	NTA	2	2	5	P
1	2009-10-15 02:43:00	0	NTA	2	2	5	P
1	2009-10-15 02:44:00	0	NTA	2	2	5	P
1	2009-10-15 02:45:00	0	NTA	2	2	5	P
1	2009-10-15 02:46:00	0	NTA	2	2	5	P
1	2009-10-15 02:47:00	0	NTA	2	2	5	P
1	2009-10-15 02:48:00	0	NTA	2	2	5	P
1	2009-10-15 02:49:00	9	NTA	2	2	5	P
1	2009-10-15 02:50:00	9	NTA	2	2	5	P
1	2009-10-15 02:51:00	132	NTA	2	2	5	P
1	2009-10-15 02:52:00	9	NTA	2	2	5	P
1	2009-10-15 02:53:00	0	NTA	2	2	5	P
1	2009-10-15 02:54:00	0	NTA	2	2	5	P
1	2009-10-15 02:55:00	0	NTA	2	2	5	P
1	2009-10-15 02:56:00	0	NTA	2	2	5	P
1	2009-10-15 02:57:00	0	NTA	2	2	5	P
1	2009-10-15 02:58:00	0	NTA	2	2	5	P
1	2009-10-15 02:59:00	0	NTA	2	2	5	P
1	2009-10-15 03:00:00	0	NTA	2	2	5	P
1	2009-10-15 03:01:00	0	NTA	3	2	5	P
1	2009-10-15 03:02:00	0	NTA	3	2	5	P
1	2009-10-15 03:03:00	0	NTA	3	2	5	P
1	2009-10-15 03:04:00	0	NTA	3	2	5	P
1	2009-10-15 03:05:00	0	NTA	3	2	5	P
1	2009-10-15 03:06:00	0	NTA	3	2	5	P
1	2009-10-15 03:07:00	0	NTA	3	2	5	P
1	2009-10-15 03:08:00	0	NTA	3	2	5	P
1	2009-10-15 03:09:00	0	NTA	3	2	5	P
1	2009-10-15 03:10:00	0	NTA	3	2	5	P
1	2009-10-15 03:11:00	0	NTA	3	2	5	P
1	2009-10-15 03:12:00	56	NTA	3	2	5	P
1	2009-10-15 03:13:00	0	NTA	3	2	5	P
1	2009-10-15 03:14:00	0	NTA	3	2	5	P
1	2009-10-15 03:15:00	0	NTA	3	2	5	P
1	2009-10-15 03:16:00	0	NTA	3	2	5	P
1	2009-10-15 03:17:00	0	NTA	3	2	5	P
1	2009-10-15 03:18:00	0	NTA	3	2	5	P
1	2009-10-15 03:19:00	0	NTA	3	2	5	P
1	2009-10-15 03:20:00	0	NTA	3	2	5	P
1	2009-10-15 03:21:00	0	NTA	3	2	5	P
1	2009-10-15 03:22:00	0	NTA	3	2	5	P
1	2009-10-15 03:23:00	9	NTA	3	2	5	P
1	2009-10-15 03:24:00	132	NTA	3	2	5	P
1	2009-10-15 03:25:00	0	NTA	3	2	5	P
1	2009-10-15 03:26:00	0	NTA	3	2	5	P
1	2009-10-15 03:27:00	0	NTA	3	2	5	P
1	2009-10-15 03:28:00	0	NTA	3	2	5	P
1	2009-10-15 03:29:00	0	NTA	3	2	5	P
1	2009-10-15 03:30:00	0	NTA	3	2	5	P
1	2009-10-15 03:31:00	0	NTA	3	2	5	P
1	2009-10-15 03:32:00	9	NTA	3	2	5	P
1	2009-10-15 03:33:00	0	NTA	3	2	5	P
1	2009-10-15 03:34:00	0	NTA	3	2	5	P
1	2009-10-15 03:35:00	0	NTA	3	2	5	P
1	2009-10-15 03:36:00	0	NTA	3	2	5	P
1	2009-10-15 03:37:00	0	NTA	3	2	5	P
1	2009-10-15 03:38:00	562	NTA	3	2	5	P
1	2009-10-15 03:39:00	210	NTA	3	2	5	P
1	2009-10-15 03:40:00	154	NTA	3	2	5	P
1	2009-10-15 03:41:00	165	NTA	3	2	5	P
1	2009-10-15 03:42:00	269	NTA	3	2	5	P
1	2009-10-15 03:43:00	295	NTA	3	2	5	P
1	2009-10-15 03:44:00	111	NTA	3	2	5	P
1	2009-10-15 03:45:00	28	NTA	3	2	5	P
1	2009-10-15 03:46:00	0	NTA	3	2	5	P
1	2009-10-15 03:47:00	0	NTA	3	2	5	P
1	2009-10-15 03:48:00	0	NTA	3	2	5	P
1	2009-10-15 03:49:00	0	NTA	3	2	5	P
1	2009-10-15 03:50:00	0	NTA	3	2	5	P
1	2009-10-15 03:51:00	19	NTA	3	2	5	P
1	2009-10-15 03:52:00	0	NTA	3	2	5	P
1	2009-10-15 03:53:00	19	NTA	3	2	5	P
1	2009-10-15 03:54:00	0	NTA	3	2	5	P
1	2009-10-15 03:55:00	9	NTA	3	2	5	P
1	2009-10-15 03:56:00	121	NTA	3	2	5	P
1	2009-10-15 03:57:00	512	NTA	3	2	5	P
1	2009-10-15 03:58:00	0	NTA	3	2	5	P
1	2009-10-15 03:59:00	0	NTA	3	2	5	P
1	2009-10-15 04:00:00	9	NTA	3	2	5	P
1	2009-10-15 04:01:00	0	NTA	4	2	5	P
1	2009-10-15 04:02:00	0	NTA	4	2	5	P
1	2009-10-15 04:03:00	0	NTA	4	2	5	P
1	2009-10-15 04:04:00	0	NTA	4	2	5	P
1	2009-10-15 04:05:00	28	NTA	4	2	5	P
1	2009-10-15 04:06:00	0	NTA	4	2	5	P
1	2009-10-15 04:07:00	74	NTA	4	2	5	P
1	2009-10-15 04:08:00	56	NTA	4	2	5	P
1	2009-10-15 04:09:00	83	NTA	4	2	5	P
1	2009-10-15 04:10:00	9	NTA	4	2	5	P
1	2009-10-15 04:11:00	0	NTA	4	2	5	P
1	2009-10-15 04:12:00	0	NTA	4	2	5	P
1	2009-10-15 04:13:00	0	NTA	4	2	5	P
1	2009-10-15 04:14:00	0	NTA	4	2	5	P
1	2009-10-15 04:15:00	0	NTA	4	2	5	P
1	2009-10-15 04:16:00	0	NTA	4	2	5	P
1	2009-10-15 04:17:00	19	NTA	4	2	5	P
1	2009-10-15 04:18:00	0	NTA	4	2	5	P
1	2009-10-15 04:19:00	0	NTA	4	2	5	P
1	2009-10-15 04:20:00	0	NTA	4	2	5	P
1	2009-10-15 04:21:00	0	NTA	4	2	5	P
1	2009-10-15 04:22:00	0	NTA	4	2	5	P
1	2009-10-15 04:23:00	0	NTA	4	2	5	P
1	2009-10-15 04:24:00	0	NTA	4	2	5	P
1	2009-10-15 04:25:00	0	NTA	4	2	5	P
1	2009-10-15 04:26:00	0	NTA	4	2	5	P
1	2009-10-15 04:27:00	0	NTA	4	2	5	P
1	2009-10-15 04:28:00	0	NTA	4	2	5	P
1	2009-10-15 04:29:00	0	NTA	4	2	5	P
1	2009-10-15 04:30:00	0	NTA	4	2	5	P
1	2009-10-15 04:31:00	0	NTA	4	2	5	P
1	2009-10-15 04:32:00	0	NTA	4	2	5	P
1	2009-10-15 04:33:00	0	NTA	4	2	5	P
1	2009-10-15 04:34:00	0	NTA	4	2	5	P
1	2009-10-15 04:35:00	0	NTA	4	2	5	P
1	2009-10-15 04:36:00	28	NTA	4	2	5	P
1	2009-10-15 04:37:00	165	NTA	4	2	5	P
1	2009-10-15 04:38:00	0	NTA	4	2	5	P
1	2009-10-15 04:39:00	0	NTA	4	2	5	P
1	2009-10-15 04:40:00	0	NTA	4	2	5	P
1	2009-10-15 04:41:00	0	NTA	4	2	5	P
1	2009-10-15 04:42:00	0	NTA	4	2	5	P
1	2009-10-15 04:43:00	0	NTA	4	2	5	P
1	2009-10-15 04:44:00	0	NTA	4	2	5	P
1	2009-10-15 04:45:00	0	NTA	4	2	5	P
1	2009-10-15 04:46:00	0	NTA	4	2	5	P
1	2009-10-15 04:47:00	0	NTA	4	2	5	P
1	2009-10-15 04:48:00	0	NTA	4	2	5	P
1	2009-10-15 04:49:00	0	NTA	4	2	5	P
1	2009-10-15 04:50:00	0	NTA	4	2	5	P
1	2009-10-15 04:51:00	0	NTA	4	2	5	P
1	2009-10-15 04:52:00	0	NTA	4	2	5	P
1	2009-10-15 04:53:00	0	NTA	4	2	5	P
1	2009-10-15 04:54:00	0	NTA	4	2	5	P
1	2009-10-15 04:55:00	0	NTA	4	2	5	P
1	2009-10-15 04:56:00	0	NTA	4	2	5	P
1	2009-10-15 04:57:00	0	NTA	4	2	5	P
1	2009-10-15 04:58:00	0	NTA	4	2	5	P
1	2009-10-15 04:59:00	0	NTA	4	2	5	P
1	2009-10-15 05:00:00	0	NTA	4	2	5	P
1	2009-10-15 05:01:00	0	NTA	5	2	5	P
1	2009-10-15 05:02:00	0	NTA	5	2	5	P
1	2009-10-15 05:03:00	0	NTA	5	2	5	P
1	2009-10-15 05:04:00	0	NTA	5	2	5	P
1	2009-10-15 05:05:00	0	NTA	5	2	5	P
1	2009-10-15 05:06:00	0	NTA	5	2	5	P
1	2009-10-15 05:07:00	0	NTA	5	2	5	P
1	2009-10-15 05:08:00	0	NTA	5	2	5	P
1	2009-10-15 05:09:00	0	NTA	5	2	5	P
1	2009-10-15 05:10:00	0	NTA	5	2	5	P
1	2009-10-15 05:11:00	9	NTA	5	2	5	P
1	2009-10-15 05:12:00	0	NTA	5	2	5	P
1	2009-10-15 05:13:00	0	NTA	5	2	5	P
1	2009-10-15 05:14:00	0	NTA	5	2	5	P
1	2009-10-15 05:15:00	0	NTA	5	2	5	P
1	2009-10-15 05:16:00	0	NTA	5	2	5	P
1	2009-10-15 05:17:00	0	NTA	5	2	5	P
1	2009-10-15 05:18:00	0	NTA	5	2	5	P
1	2009-10-15 05:19:00	0	NTA	5	2	5	P
1	2009-10-15 05:20:00	0	NTA	5	2	5	P
1	2009-10-15 05:21:00	0	NTA	5	2	5	P
1	2009-10-15 05:22:00	0	NTA	5	2	5	P
1	2009-10-15 05:23:00	0	NTA	5	2	5	P
1	2009-10-15 05:24:00	0	NTA	5	2	5	P
1	2009-10-15 05:25:00	0	NTA	5	2	5	P
1	2009-10-15 05:26:00	0	NTA	5	2	5	P
1	2009-10-15 05:27:00	0	NTA	5	2	5	P
1	2009-10-15 05:28:00	0	NTA	5	2	5	P
1	2009-10-15 05:29:00	0	NTA	5	2	5	P
1	2009-10-15 05:30:00	0	NTA	5	2	5	P
1	2009-10-15 05:31:00	0	NTA	5	2	5	P
1	2009-10-15 05:32:00	0	NTA	5	2	5	P
1	2009-10-15 05:33:00	0	NTA	5	2	5	P
1	2009-10-15 05:34:00	0	NTA	5	2	5	P
1	2009-10-15 05:35:00	0	NTA	5	2	5	P
1	2009-10-15 05:36:00	0	NTA	5	2	5	P
1	2009-10-15 05:37:00	0	NTA	5	2	5	P
1	2009-10-15 05:38:00	0	NTA	5	2	5	P
1	2009-10-15 05:39:00	0	NTA	5	2	5	P
1	2009-10-15 05:40:00	0	NTA	5	2	5	P
1	2009-10-15 05:41:00	0	NTA	5	2	5	P
1	2009-10-15 05:42:00	0	NTA	5	2	5	P
1	2009-10-15 05:43:00	0	NTA	5	2	5	P
1	2009-10-15 05:44:00	0	NTA	5	2	5	P
1	2009-10-15 05:45:00	0	NTA	5	2	5	P
1	2009-10-15 05:46:00	0	NTA	5	2	5	P
1	2009-10-15 05:47:00	0	NTA	5	2	5	P
1	2009-10-15 05:48:00	0	NTA	5	2	5	P
1	2009-10-15 05:49:00	0	NTA	5	2	5	P
1	2009-10-15 05:50:00	0	NTA	5	2	5	P
1	2009-10-15 05:51:00	0	NTA	5	2	5	P
1	2009-10-15 05:52:00	0	NTA	5	2	5	P
1	2009-10-15 05:53:00	0	NTA	5	2	5	P
1	2009-10-15 05:54:00	0	NTA	5	2	5	P
1	2009-10-15 05:55:00	0	NTA	5	2	5	P
1	2009-10-15 05:56:00	0	NTA	5	2	5	P
1	2009-10-15 05:57:00	0	NTA	5	2	5	P
1	2009-10-15 05:58:00	0	NTA	5	2	5	P
1	2009-10-15 05:59:00	0	NTA	5	2	5	P
1	2009-10-15 06:00:00	28	NTA	5	2	5	P
1	2009-10-15 06:01:00	37	NTA	6	2	5	P
1	2009-10-15 06:02:00	46	NTA	6	2	5	P
1	2009-10-15 06:03:00	19	NTA	6	2	5	P
1	2009-10-15 06:04:00	19	NTA	6	2	5	P
1	2009-10-15 06:05:00	74	NTA	6	2	5	P
1	2009-10-15 06:06:00	512	NTA	6	2	5	P
1	2009-10-15 06:07:00	0	NTA	6	2	5	P
1	2009-10-15 06:08:00	0	NTA	6	2	5	P
1	2009-10-15 06:09:00	0	NTA	6	2	5	P
1	2009-10-15 06:10:00	0	NTA	6	2	5	P
1	2009-10-15 06:11:00	0	NTA	6	2	5	P
1	2009-10-15 06:12:00	0	NTA	6	2	5	P
1	2009-10-15 06:13:00	0	NTA	6	2	5	P
1	2009-10-15 06:14:00	512	NTA	6	2	5	P
1	2009-10-15 06:15:00	143	NTA	6	2	5	P
1	2009-10-15 06:16:00	0	NTA	6	2	5	P
1	2009-10-15 06:17:00	0	NTA	6	2	5	P
1	2009-10-15 06:18:00	37	NTA	6	2	5	P
1	2009-10-15 06:19:00	143	NTA	6	2	5	P
1	2009-10-15 06:20:00	512	NTA	6	2	5	P
1	2009-10-15 06:21:00	0	NTA	6	2	5	P
1	2009-10-15 06:22:00	0	NTA	6	2	5	P
1	2009-10-15 06:23:00	937	NTA	6	2	5	P
1	2009-10-15 06:24:00	256	NTA	6	2	5	P
1	2009-10-15 06:25:00	19	NTA	6	2	5	P
1	2009-10-15 06:26:00	295	NTA	6	2	5	P
1	2009-10-15 06:27:00	37	NTA	6	2	5	P
1	2009-10-15 06:28:00	9	NTA	6	2	5	P
1	2009-10-15 06:29:00	0	NTA	6	2	5	P
1	2009-10-15 06:30:00	9	NTA	6	2	5	P
1	2009-10-15 06:31:00	221	NTA	6	2	5	P
1	2009-10-15 06:32:00	165	NTA	6	2	5	P
1	2009-10-15 06:33:00	0	NTA	6	2	5	P
1	2009-10-15 06:34:00	0	NTA	6	2	5	P
1	2009-10-15 06:35:00	0	NTA	6	2	5	P
1	2009-10-15 06:36:00	0	NTA	6	2	5	P
1	2009-10-15 06:37:00	0	NTA	6	2	5	P
1	2009-10-15 06:38:00	0	NTA	6	2	5	P
1	2009-10-15 06:39:00	0	NTA	6	2	5	P
1	2009-10-15 06:40:00	0	NTA	6	2	5	P
1	2009-10-15 06:41:00	0	NTA	6	2	5	P
1	2009-10-15 06:42:00	0	NTA	6	2	5	P
1	2009-10-15 06:43:00	0	NTA	6	2	5	P
1	2009-10-15 06:44:00	0	NTA	6	2	5	P
1	2009-10-15 06:45:00	0	NTA	6	2	5	P
1	2009-10-15 06:46:00	0	NTA	6	2	5	P
1	2009-10-15 06:47:00	0	NTA	6	2	5	P
1	2009-10-15 06:48:00	0	NTA	6	2	5	P
1	2009-10-15 06:49:00	0	NTA	6	2	5	P
1	2009-10-15 06:50:00	0	NTA	6	2	5	P
1	2009-10-15 06:51:00	0	NTA	6	2	5	P
1	2009-10-15 06:52:00	0	NTA	6	2	5	P
1	2009-10-15 06:53:00	0	NTA	6	2	5	P
1	2009-10-15 06:54:00	0	NTA	6	2	5	P
1	2009-10-15 06:55:00	0	NTA	6	2	5	P
1	2009-10-15 06:56:00	56	NTA	6	2	5	P
1	2009-10-15 06:57:00	282	NTA	6	2	5	P
1	2009-10-15 06:58:00	375	NTA	6	2	5	P
1	2009-10-15 06:59:00	74	NTA	6	2	5	P
1	2009-10-15 07:00:00	154	NTA	6	2	5	P
1	2009-10-15 07:01:00	0	DTA	7	2	5	P
1	2009-10-15 07:02:00	0	DTA	7	2	5	P
1	2009-10-15 07:03:00	0	DTA	7	2	5	P
1	2009-10-15 07:04:00	360	DTA	7	2	5	P
1	2009-10-15 07:05:00	562	DTA	7	2	5	P
1	2009-10-15 07:06:00	321	DTA	7	2	5	P
1	2009-10-15 07:07:00	9	DTA	7	2	5	P
1	2009-10-15 07:08:00	0	DTA	7	2	5	P
1	2009-10-15 07:09:00	0	DTA	7	2	5	P
1	2009-10-15 07:10:00	37	DTA	7	2	5	P
1	2009-10-15 07:11:00	19	DTA	7	2	5	P
1	2009-10-15 07:12:00	0	DTA	7	2	5	P
1	2009-10-15 07:13:00	19	DTA	7	2	5	P
1	2009-10-15 07:14:00	0	DTA	7	2	5	P
1	2009-10-15 07:15:00	0	DTA	7	2	5	P
1	2009-10-15 07:16:00	74	DTA	7	2	5	P
1	2009-10-15 07:17:00	74	DTA	7	2	5	P
1	2009-10-15 07:18:00	0	DTA	7	2	5	P
1	2009-10-15 07:19:00	19	DTA	7	2	5	P
1	2009-10-15 07:20:00	295	DTA	7	2	5	P
1	2009-10-15 07:21:00	198	DTA	7	2	5	P
1	2009-10-15 07:22:00	83	DTA	7	2	5	P
1	2009-10-15 07:23:00	210	DTA	7	2	5	P
1	2009-10-15 07:24:00	102	DTA	7	2	5	P
1	2009-10-15 07:25:00	0	DTA	7	2	5	P
1	2009-10-15 07:26:00	0	DTA	7	2	5	P
1	2009-10-15 07:27:00	143	DTA	7	2	5	P
1	2009-10-15 07:28:00	232	DTA	7	2	5	P
1	2009-10-15 07:29:00	65	DTA	7	2	5	P
1	2009-10-15 07:30:00	1807	DTA	7	2	5	P
1	2009-10-15 07:31:00	1957	DTA	7	2	5	P
1	2009-10-15 07:32:00	1380	DTA	7	2	5	P
1	2009-10-15 07:33:00	2374	DTA	7	2	5	P
1	2009-10-15 07:34:00	2285	DTA	7	2	5	P
1	2009-10-15 07:35:00	176	DTA	7	2	5	P
1	2009-10-15 07:36:00	787	DTA	7	2	5	P
1	2009-10-15 07:37:00	1184	DTA	7	2	5	P
1	2009-10-15 07:38:00	143	DTA	7	2	5	P
1	2009-10-15 07:39:00	74	DTA	7	2	5	P
1	2009-10-15 07:40:00	74	DTA	7	2	5	P
1	2009-10-15 07:41:00	545	DTA	7	2	5	P
1	2009-10-15 07:42:00	232	DTA	7	2	5	P
1	2009-10-15 07:43:00	269	DTA	7	2	5	P
1	2009-10-15 07:44:00	766	DTA	7	2	5	P
1	2009-10-15 07:45:00	295	DTA	7	2	5	P
1	2009-10-15 07:46:00	404	DTA	7	2	5	P
1	2009-10-15 07:47:00	187	DTA	7	2	5	P
1	2009-10-15 07:48:00	9	DTA	7	2	5	P
1	2009-10-15 07:49:00	65	DTA	7	2	5	P
1	2009-10-15 07:50:00	232	DTA	7	2	5	P
1	2009-10-15 07:51:00	37	DTA	7	2	5	P
1	2009-10-15 07:52:00	165	DTA	7	2	5	P
1	2009-10-15 07:53:00	154	DTA	7	2	5	P
1	2009-10-15 07:54:00	102	DTA	7	2	5	P
1	2009-10-15 07:55:00	154	DTA	7	2	5	P
1	2009-10-15 07:56:00	121	DTA	7	2	5	P
1	2009-10-15 07:57:00	143	DTA	7	2	5	P
1	2009-10-15 07:58:00	0	DTA	7	2	5	P
1	2009-10-15 07:59:00	37	DTA	7	2	5	P
1	2009-10-15 08:00:00	154	DTA	7	2	5	P
1	2009-10-15 08:01:00	65	DTA	8	2	5	P
1	2009-10-15 08:02:00	0	DTA	8	2	5	P
1	2009-10-15 08:03:00	187	DTA	8	2	5	P
1	2009-10-15 08:04:00	0	DTA	8	2	5	P
1	2009-10-15 08:05:00	375	DTA	8	2	5	P
1	2009-10-15 08:06:00	102	DTA	8	2	5	P
1	2009-10-15 08:07:00	143	DTA	8	2	5	P
1	2009-10-15 08:08:00	0	DTA	8	2	5	P
1	2009-10-15 08:09:00	0	DTA	8	2	5	P
1	2009-10-15 08:10:00	0	DTA	8	2	5	P
1	2009-10-15 08:11:00	132	DTA	8	2	5	P
1	2009-10-15 08:12:00	0	DTA	8	2	5	P
1	2009-10-15 08:13:00	0	DTA	8	2	5	P
1	2009-10-15 08:14:00	0	DTA	8	2	5	P
1	2009-10-15 08:15:00	102	DTA	8	2	5	P
1	2009-10-15 08:16:00	111	DTA	8	2	5	P
1	2009-10-15 08:17:00	83	DTA	8	2	5	P
1	2009-10-15 08:18:00	0	DTA	8	2	5	P
1	2009-10-15 08:19:00	0	DTA	8	2	5	P
[truncated: 36,401 more rows]

## Sheet: Pivot NTA
Peak DTA Time?	(All)
DTA vs NTA	NTA
Average of Activity	Column Labels
Row Labels	1	2	3	4	5	6	7	8	9	10	11	12	13	14	Grand Total
1	6.97381	18.8438	12.2244	10.2667	7.54902	5.80741	23.4685	26.9537	10.7604	91.0083	12.2861	34.78	59.5333	7.88571	23.1268
2	21.4952	24.213	26.1381	49.0467	57.0933	14.6574	31.3021	18.5037	16.6095	10.0476	12.3	31.5944	20.3062	26.7167	25.4088
Grand Total	14.2345	21.6863	18.9414	33.0784	25.8988	10.2324	27.1549	22.7287	13.49	47.4141	12.294	33.0424	41.601	17.3012	24.273

## Sheet: Pivot DTA
Peak DTA Time?	(All)
DTA vs NTA	DTA
Average of Activity	Column Labels
Row Labels	1	2	3	4	5	6	7	8	9	10	11	12	13	Grand Total
1	77.5627	82.9226	74.4509	46.2927	102.829	72.0544	53.9344	50.6802	100.206	99.1833	85.42	131.048	84.099	81.8259
2	102.664	104.23	110.327	93.459	76.3659	96.9698	97.0967	92.9489	78.288	73.4676	71.6021	93.7222	70.1137	88.4156
Grand Total	89.3292	94.0682	90.1469	67.4362	87.6037	84.914	75.5156	71.1328	88.6025	86.6929	78.8204	112.987	77.002	85.0972

## Sheet: Pivot PeakDTA
Peak DTA Time?	Peak DTA
DTA vs NTA	DTA
Average of Activity	Column Labels
Row Labels	1	2	3	4	5	6	7	8	9	10	11	12	13	Grand Total
1	91.1833	84.3	107.983	83.7333	149.811	102.222	81.4778	71.3056	178.867	100.708	100.764	171.764	75.5417	107.666
2	154.208	97.3833	125.05	97.0417	129.692	129.914	90.5444	71.8056	108.561	71.725	14.4639	119.564	74.3111	98.7895
Grand Total	122.696	90.8417	116.517	90.3875	139.751	116.068	86.0111	71.5556	143.714	86.2167	57.6139	145.664	74.9264	103.228

## Sheet: 10.13.09
Actogram, Copy Raw Data, All Days
Identity:	Gracie
Filename:	E:\Active Research Files\Nighttime Activity\cases\gracie\Gracie.AWC
Gender:	F
Age:	6
Height:	63.5 cm	25.0 in
Weight:	27.0 kg	59.5 lbs
Start Date:	13-Oct-2009 (Tue)
Start Time:	10:58:00
Interval:	1.00 mins
Date Stamp:	Time Stamp:	Activity Data:	Marker Press:
2009-10-13	00:00:00	0
2009-10-13	00:01:00	0
2009-10-13	00:02:00	0
2009-10-13	00:03:00	0
2009-10-13	00:04:00	0
2009-10-13	00:05:00	0
2009-10-13	00:06:00	0
2009-10-13	00:07:00	0
2009-10-13	00:08:00	0
2009-10-13	00:09:00	0
2009-10-13	00:10:00	0
2009-10-13	00:11:00	0
2009-10-13	00:12:00	0
2009-10-13	00:13:00	0
2009-10-13	00:14:00	0
2009-10-13	00:15:00	0
2009-10-13	00:16:00	0
2009-10-13	00:17:00	0
2009-10-13	00:18:00	0
2009-10-13	00:19:00	0
2009-10-13	00:20:00	0
2009-10-13	00:21:00	0
2009-10-13	00:22:00	0
2009-10-13	00:23:00	0
2009-10-13	00:24:00	0
2009-10-13	00:25:00	0
2009-10-13	00:26:00	0
2009-10-13	00:27:00	0
2009-10-13	00:28:00	0
2009-10-13	00:29:00	0
2009-10-13	00:30:00	0
2009-10-13	00:31:00	0
2009-10-13	00:32:00	0
2009-10-13	00:33:00	0
2009-10-13	00:34:00	0
2009-10-13	00:35:00	0
2009-10-13	00:36:00	0
2009-10-13	00:37:00	0
2009-10-13	00:38:00	0
2009-10-13	00:39:00	0
2009-10-13	00:40:00	0
2009-10-13	00:41:00	0
2009-10-13	00:42:00	0
2009-10-13	00:43:00	0
2009-10-13	00:44:00	0
2009-10-13	00:45:00	0
2009-10-13	00:46:00	0
2009-10-13	00:47:00	0
2009-10-13	00:48:00	0
2009-10-13	00:49:00	0
2009-10-13	00:50:00	0
2009-10-13	00:51:00	0
2009-10-13	00:52:00	0
2009-10-13	00:53:00	0
2009-10-13	00:54:00	0
2009-10-13	00:55:00	0
2009-10-13	00:56:00	0
2009-10-13	00:57:00	0
2009-10-13	00:58:00	0
2009-10-13	00:59:00	0
2009-10-13	01:00:00	0
2009-10-13	01:01:00	0
2009-10-13	01:02:00	0
2009-10-13	01:03:00	0
2009-10-13	01:04:00	0
2009-10-13	01:05:00	0
2009-10-13	01:06:00	0
2009-10-13	01:07:00	0
2009-10-13	01:08:00	0
2009-10-13	01:09:00	0
2009-10-13	01:10:00	0
2009-10-13	01:11:00	0
2009-10-13	01:12:00	0
2009-10-13	01:13:00	0
2009-10-13	01:14:00	0
2009-10-13	01:15:00	0
2009-10-13	01:16:00	0
2009-10-13	01:17:00	0
2009-10-13	01:18:00	0
2009-10-13	01:19:00	0
2009-10-13	01:20:00	0
2009-10-13	01:21:00	0
2009-10-13	01:22:00	0
2009-10-13	01:23:00	0
2009-10-13	01:24:00	0
2009-10-13	01:25:00	0
2009-10-13	01:26:00	0
2009-10-13	01:27:00	0
2009-10-13	01:28:00	0
2009-10-13	01:29:00	0
2009-10-13	01:30:00	0
2009-10-13	01:31:00	0
2009-10-13	01:32:00	0
2009-10-13	01:33:00	0
2009-10-13	01:34:00	0
2009-10-13	01:35:00	0
2009-10-13	01:36:00	0
2009-10-13	01:37:00	0
2009-10-13	01:38:00	0
2009-10-13	01:39:00	0
2009-10-13	01:40:00	0
2009-10-13	01:41:00	0
2009-10-13	01:42:00	0
2009-10-13	01:43:00	0
2009-10-13	01:44:00	0
2009-10-13	01:45:00	0
2009-10-13	01:46:00	0
2009-10-13	01:47:00	0
2009-10-13	01:48:00	0
2009-10-13	01:49:00	0
2009-10-13	01:50:00	0
2009-10-13	01:51:00	0
2009-10-13	01:52:00	0
2009-10-13	01:53:00	0
2009-10-13	01:54:00	0
2009-10-13	01:55:00	0
2009-10-13	01:56:00	0
2009-10-13	01:57:00	0
2009-10-13	01:58:00	0
2009-10-13	01:59:00	0
2009-10-13	02:00:00	0
2009-10-13	02:01:00	0
2009-10-13	02:02:00	0
2009-10-13	02:03:00	0
2009-10-13	02:04:00	0
2009-10-13	02:05:00	0
2009-10-13	02:06:00	0
2009-10-13	02:07:00	0
2009-10-13	02:08:00	0
2009-10-13	02:09:00	0
2009-10-13	02:10:00	0
2009-10-13	02:11:00	0
2009-10-13	02:12:00	0
2009-10-13	02:13:00	0
2009-10-13	02:14:00	0
2009-10-13	02:15:00	0
2009-10-13	02:16:00	0
2009-10-13	02:17:00	0
2009-10-13	02:18:00	0
2009-10-13	02:19:00	0
2009-10-13	02:20:00	0
2009-10-13	02:21:00	0
2009-10-13	02:22:00	0
2009-10-13	02:23:00	0
2009-10-13	02:24:00	0
2009-10-13	02:25:00	0
2009-10-13	02:26:00	0
2009-10-13	02:27:00	0
2009-10-13	02:28:00	0
2009-10-13	02:29:00	0
2009-10-13	02:30:00	0
2009-10-13	02:31:00	0
2009-10-13	02:32:00	0
2009-10-13	02:33:00	0
2009-10-13	02:34:00	0
2009-10-13	02:35:00	0
2009-10-13	02:36:00	0
2009-10-13	02:37:00	0
2009-10-13	02:38:00	0
2009-10-13	02:39:00	0
2009-10-13	02:40:00	0
2009-10-13	02:41:00	0
2009-10-13	02:42:00	0
2009-10-13	02:43:00	0
2009-10-13	02:44:00	0
2009-10-13	02:45:00	0
2009-10-13	02:46:00	0
2009-10-13	02:47:00	0
2009-10-13	02:48:00	0
2009-10-13	02:49:00	0
2009-10-13	02:50:00	0
2009-10-13	02:51:00	0
2009-10-13	02:52:00	0
2009-10-13	02:53:00	0
2009-10-13	02:54:00	0
2009-10-13	02:55:00	0
2009-10-13	02:56:00	0
2009-10-13	02:57:00	0
2009-10-13	02:58:00	0
2009-10-13	02:59:00	0
2009-10-13	03:00:00	0
2009-10-13	03:01:00	0
2009-10-13	03:02:00	0
2009-10-13	03:03:00	0
2009-10-13	03:04:00	0
2009-10-13	03:05:00	0
2009-10-13	03:06:00	0
2009-10-13	03:07:00	0
2009-10-13	03:08:00	0
2009-10-13	03:09:00	0
2009-10-13	03:10:00	0
2009-10-13	03:11:00	0
2009-10-13	03:12:00	0
2009-10-13	03:13:00	0
2009-10-13	03:14:00	0
2009-10-13	03:15:00	0
2009-10-13	03:16:00	0
2009-10-13	03:17:00	0
2009-10-13	03:18:00	0
2009-10-13	03:19:00	0
2009-10-13	03:20:00	0
2009-10-13	03:21:00	0
2009-10-13	03:22:00	0
2009-10-13	03:23:00	0
2009-10-13	03:24:00	0
2009-10-13	03:25:00	0
2009-10-13	03:26:00	0
2009-10-13	03:27:00	0
2009-10-13	03:28:00	0
2009-10-13	03:29:00	0
2009-10-13	03:30:00	0
2009-10-13	03:31:00	0
2009-10-13	03:32:00	0
2009-10-13	03:33:00	0
2009-10-13	03:34:00	0
2009-10-13	03:35:00	0
2009-10-13	03:36:00	0
2009-10-13	03:37:00	0
2009-10-13	03:38:00	0
2009-10-13	03:39:00	0
2009-10-13	03:40:00	0
2009-10-13	03:41:00	0
2009-10-13	03:42:00	0
2009-10-13	03:43:00	0
2009-10-13	03:44:00	0
2009-10-13	03:45:00	0
2009-10-13	03:46:00	0
2009-10-13	03:47:00	0
2009-10-13	03:48:00	0
2009-10-13	03:49:00	0
2009-10-13	03:50:00	0
2009-10-13	03:51:00	0
2009-10-13	03:52:00	0
2009-10-13	03:53:00	0
2009-10-13	03:54:00	0
2009-10-13	03:55:00	0
2009-10-13	03:56:00	0
2009-10-13	03:57:00	0
2009-10-13	03:58:00	0
2009-10-13	03:59:00	0
2009-10-13	04:00:00	0
2009-10-13	04:01:00	0
2009-10-13	04:02:00	0
2009-10-13	04:03:00	0
2009-10-13	04:04:00	0
2009-10-13	04:05:00	0
2009-10-13	04:06:00	0
2009-10-13	04:07:00	0
2009-10-13	04:08:00	0
2009-10-13	04:09:00	0
2009-10-13	04:10:00	0
2009-10-13	04:11:00	0
2009-10-13	04:12:00	0
2009-10-13	04:13:00	0
2009-10-13	04:14:00	0
2009-10-13	04:15:00	0
2009-10-13	04:16:00	0
2009-10-13	04:17:00	0
2009-10-13	04:18:00	0
2009-10-13	04:19:00	0
2009-10-13	04:20:00	0
2009-10-13	04:21:00	0
2009-10-13	04:22:00	0
2009-10-13	04:23:00	0
2009-10-13	04:24:00	0
2009-10-13	04:25:00	0
2009-10-13	04:26:00	0
2009-10-13	04:27:00	0
2009-10-13	04:28:00	0
2009-10-13	04:29:00	0
2009-10-13	04:30:00	0
2009-10-13	04:31:00	0
2009-10-13	04:32:00	0
2009-10-13	04:33:00	0
2009-10-13	04:34:00	0
2009-10-13	04:35:00	0
2009-10-13	04:36:00	0
2009-10-13	04:37:00	0
2009-10-13	04:38:00	0
2009-10-13	04:39:00	0
2009-10-13	04:40:00	0
2009-10-13	04:41:00	0
2009-10-13	04:42:00	0
2009-10-13	04:43:00	0
2009-10-13	04:44:00	0
2009-10-13	04:45:00	0
2009-10-13	04:46:00	0
2009-10-13	04:47:00	0
2009-10-13	04:48:00	0
2009-10-13	04:49:00	0
2009-10-13	04:50:00	0
2009-10-13	04:51:00	0
2009-10-13	04:52:00	0
2009-10-13	04:53:00	0
2009-10-13	04:54:00	0
2009-10-13	04:55:00	0
2009-10-13	04:56:00	0
2009-10-13	04:57:00	0
2009-10-13	04:58:00	0
2009-10-13	04:59:00	0
2009-10-13	05:00:00	0
2009-10-13	05:01:00	0
2009-10-13	05:02:00	0
2009-10-13	05:03:00	0
2009-10-13	05:04:00	0
2009-10-13	05:05:00	0
2009-10-13	05:06:00	0
2009-10-13	05:07:00	0
2009-10-13	05:08:00	0
2009-10-13	05:09:00	0
2009-10-13	05:10:00	0
2009-10-13	05:11:00	0
2009-10-13	05:12:00	0
2009-10-13	05:13:00	0
2009-10-13	05:14:00	0
2009-10-13	05:15:00	0
2009-10-13	05:16:00	0
2009-10-13	05:17:00	0
2009-10-13	05:18:00	0
2009-10-13	05:19:00	0
2009-10-13	05:20:00	0
2009-10-13	05:21:00	0
2009-10-13	05:22:00	0
2009-10-13	05:23:00	0
2009-10-13	05:24:00	0
2009-10-13	05:25:00	0
2009-10-13	05:26:00	0
2009-10-13	05:27:00	0
2009-10-13	05:28:00	0
2009-10-13	05:29:00	0
2009-10-13	05:30:00	0
2009-10-13	05:31:00	0
2009-10-13	05:32:00	0
2009-10-13	05:33:00	0
2009-10-13	05:34:00	0
2009-10-13	05:35:00	0
2009-10-13	05:36:00	0
2009-10-13	05:37:00	0
2009-10-13	05:38:00	0
2009-10-13	05:39:00	0
2009-10-13	05:40:00	0
2009-10-13	05:41:00	0
2009-10-13	05:42:00	0
2009-10-13	05:43:00	0
2009-10-13	05:44:00	0
2009-10-13	05:45:00	0
2009-10-13	05:46:00	0
2009-10-13	05:47:00	0
2009-10-13	05:48:00	0
2009-10-13	05:49:00	0
2009-10-13	05:50:00	0
2009-10-13	05:51:00	0
2009-10-13	05:52:00	0
2009-10-13	05:53:00	0
2009-10-13	05:54:00	0
2009-10-13	05:55:00	0
2009-10-13	05:56:00	0
2009-10-13	05:57:00	0
2009-10-13	05:58:00	0
2009-10-13	05:59:00	0
2009-10-13	06:00:00	0
2009-10-13	06:01:00	0
2009-10-13	06:02:00	0
2009-10-13	06:03:00	0
2009-10-13	06:04:00	0
2009-10-13	06:05:00	0
2009-10-13	06:06:00	0
2009-10-13	06:07:00	0
2009-10-13	06:08:00	0
2009-10-13	06:09:00	0
2009-10-13	06:10:00	0
2009-10-13	06:11:00	0
2009-10-13	06:12:00	0
2009-10-13	06:13:00	0
2009-10-13	06:14:00	0
2009-10-13	06:15:00	0
2009-10-13	06:16:00	0
2009-10-13	06:17:00	0
2009-10-13	06:18:00	0
2009-10-13	06:19:00	0
2009-10-13	06:20:00	0
2009-10-13	06:21:00	0
2009-10-13	06:22:00	0
2009-10-13	06:23:00	0
2009-10-13	06:24:00	0
2009-10-13	06:25:00	0
2009-10-13	06:26:00	0
2009-10-13	06:27:00	0
2009-10-13	06:28:00	0
2009-10-13	06:29:00	0
2009-10-13	06:30:00	0
2009-10-13	06:31:00	0
2009-10-13	06:32:00	0
2009-10-13	06:33:00	0
2009-10-13	06:34:00	0
2009-10-13	06:35:00	0
2009-10-13	06:36:00	0
2009-10-13	06:37:00	0
2009-10-13	06:38:00	0
2009-10-13	06:39:00	0
2009-10-13	06:40:00	0
2009-10-13	06:41:00	0
2009-10-13	06:42:00	0
2009-10-13	06:43:00	0
2009-10-13	06:44:00	0
2009-10-13	06:45:00	0
2009-10-13	06:46:00	0
2009-10-13	06:47:00	0
2009-10-13	06:48:00	0
2009-10-13	06:49:00	0
2009-10-13	06:50:00	0
2009-10-13	06:51:00	0
2009-10-13	06:52:00	0
2009-10-13	06:53:00	0
2009-10-13	06:54:00	0
2009-10-13	06:55:00	0
2009-10-13	06:56:00	0
2009-10-13	06:57:00	0
2009-10-13	06:58:00	0
2009-10-13	06:59:00	0
2009-10-13	07:00:00	0
2009-10-13	07:01:00	0
2009-10-13	07:02:00	0
2009-10-13	07:03:00	0
2009-10-13	07:04:00	0
2009-10-13	07:05:00	0
2009-10-13	07:06:00	0
2009-10-13	07:07:00	0
2009-10-13	07:08:00	0
2009-10-13	07:09:00	0
2009-10-13	07:10:00	0
2009-10-13	07:11:00	0
2009-10-13	07:12:00	0
2009-10-13	07:13:00	0
2009-10-13	07:14:00	0
2009-10-13	07:15:00	0
2009-10-13	07:16:00	0
2009-10-13	07:17:00	0
2009-10-13	07:18:00	0
2009-10-13	07:19:00	0
2009-10-13	07:20:00	0
2009-10-13	07:21:00	0
2009-10-13	07:22:00	0
2009-10-13	07:23:00	0
2009-10-13	07:24:00	0
2009-10-13	07:25:00	0
2009-10-13	07:26:00	0
2009-10-13	07:27:00	0
2009-10-13	07:28:00	0
2009-10-13	07:29:00	0
2009-10-13	07:30:00	0
2009-10-13	07:31:00	0
2009-10-13	07:32:00	0
2009-10-13	07:33:00	0
2009-10-13	07:34:00	0
2009-10-13	07:35:00	0
2009-10-13	07:36:00	0
2009-10-13	07:37:00	0
2009-10-13	07:38:00	0
2009-10-13	07:39:00	0
2009-10-13	07:40:00	0
2009-10-13	07:41:00	0
2009-10-13	07:42:00	0
2009-10-13	07:43:00	0
2009-10-13	07:44:00	0
2009-10-13	07:45:00	0
2009-10-13	07:46:00	0
2009-10-13	07:47:00	0
2009-10-13	07:48:00	0
2009-10-13	07:49:00	0
2009-10-13	07:50:00	0
2009-10-13	07:51:00	0
2009-10-13	07:52:00	0
2009-10-13	07:53:00	0
2009-10-13	07:54:00	0
2009-10-13	07:55:00	0
2009-10-13	07:56:00	0
2009-10-13	07:57:00	0
2009-10-13	07:58:00	0
2009-10-13	07:59:00	0
2009-10-13	08:00:00	0
2009-10-13	08:01:00	0
2009-10-13	08:02:00	0
2009-10-13	08:03:00	0
2009-10-13	08:04:00	0
2009-10-13	08:05:00	0
2009-10-13	08:06:00	0
2009-10-13	08:07:00	0
2009-10-13	08:08:00	0
2009-10-13	08:09:00	0
2009-10-13	08:10:00	0
2009-10-13	08:11:00	0
2009-10-13	08:12:00	0
2009-10-13	08:13:00	0
2009-10-13	08:14:00	0
2009-10-13	08:15:00	0
2009-10-13	08:16:00	0
2009-10-13	08:17:00	0
2009-10-13	08:18:00	0
2009-10-13	08:19:00	0
2009-10-13	08:20:00	0
2009-10-13	08:21:00	0
2009-10-13	08:22:00	0
2009-10-13	08:23:00	0
2009-10-13	08:24:00	0
2009-10-13	08:25:00	0
2009-10-13	08:26:00	0
2009-10-13	08:27:00	0
2009-10-13	08:28:00	0
2009-10-13	08:29:00	0
2009-10-13	08:30:00	0
2009-10-13	08:31:00	0
2009-10-13	08:32:00	0
2009-10-13	08:33:00	0
2009-10-13	08:34:00	0
2009-10-13	08:35:00	0
2009-10-13	08:36:00	0
2009-10-13	08:37:00	0
2009-10-13	08:38:00	0
2009-10-13	08:39:00	0
2009-10-13	08:40:00	0
2009-10-13	08:41:00	0
2009-10-13	08:42:00	0
2009-10-13	08:43:00	0
2009-10-13	08:44:00	0
2009-10-13	08:45:00	0
2009-10-13	08:46:00	0
2009-10-13	08:47:00	0
2009-10-13	08:48:00	0
2009-10-13	08:49:00	0
2009-10-13	08:50:00	0
2009-10-13	08:51:00	0
2009-10-13	08:52:00	0
2009-10-13	08:53:00	0
2009-10-13	08:54:00	0
2009-10-13	08:55:00	0
2009-10-13	08:56:00	0
2009-10-13	08:57:00	0
2009-10-13	08:58:00	0
2009-10-13	08:59:00	0
2009-10-13	09:00:00	0
2009-10-13	09:01:00	0
2009-10-13	09:02:00	0
2009-10-13	09:03:00	0
2009-10-13	09:04:00	0
2009-10-13	09:05:00	0
2009-10-13	09:06:00	0
2009-10-13	09:07:00	0
2009-10-13	09:08:00	0
2009-10-13	09:09:00	0
2009-10-13	09:10:00	0
2009-10-13	09:11:00	0
2009-10-13	09:12:00	0
2009-10-13	09:13:00	0
2009-10-13	09:14:00	0
2009-10-13	09:15:00	0
2009-10-13	09:16:00	0
2009-10-13	09:17:00	0
2009-10-13	09:18:00	0
2009-10-13	09:19:00	0
2009-10-13	09:20:00	0
2009-10-13	09:21:00	0
2009-10-13	09:22:00	0
2009-10-13	09:23:00	0
2009-10-13	09:24:00	0
2009-10-13	09:25:00	0
2009-10-13	09:26:00	0
2009-10-13	09:27:00	0
2009-10-13	09:28:00	0
2009-10-13	09:29:00	0
2009-10-13	09:30:00	0
2009-10-13	09:31:00	0
2009-10-13	09:32:00	0
2009-10-13	09:33:00	0
2009-10-13	09:34:00	0
2009-10-13	09:35:00	0
2009-10-13	09:36:00	0
2009-10-13	09:37:00	0
2009-10-13	09:38:00	0
2009-10-13	09:39:00	0
2009-10-13	09:40:00	0
2009-10-13	09:41:00	0
2009-10-13	09:42:00	0
2009-10-13	09:43:00	0
2009-10-13	09:44:00	0
2009-10-13	09:45:00	0
2009-10-13	09:46:00	0
2009-10-13	09:47:00	0
2009-10-13	09:48:00	0
2009-10-13	09:49:00	0
2009-10-13	09:50:00	0
2009-10-13	09:51:00	0
2009-10-13	09:52:00	0
2009-10-13	09:53:00	0
2009-10-13	09:54:00	0
2009-10-13	09:55:00	0
2009-10-13	09:56:00	0
2009-10-13	09:57:00	0
2009-10-13	09:58:00	0
2009-10-13	09:59:00	0
2009-10-13	10:00:00	0
2009-10-13	10:01:00	0
2009-10-13	10:02:00	0
2009-10-13	10:03:00	0
2009-10-13	10:04:00	0
2009-10-13	10:05:00	0
2009-10-13	10:06:00	0
2009-10-13	10:07:00	0
2009-10-13	10:08:00	0
2009-10-13	10:09:00	0
2009-10-13	10:10:00	0
2009-10-13	10:11:00	0
2009-10-13	10:12:00	0
2009-10-13	10:13:00	0
2009-10-13	10:14:00	0
2009-10-13	10:15:00	0
2009-10-13	10:16:00	0
2009-10-13	10:17:00	0
2009-10-13	10:18:00	0
2009-10-13	10:19:00	0
2009-10-13	10:20:00	0
2009-10-13	10:21:00	0
2009-10-13	10:22:00	0
2009-10-13	10:23:00	0
2009-10-13	10:24:00	0
2009-10-13	10:25:00	0
2009-10-13	10:26:00	0
2009-10-13	10:27:00	0
2009-10-13	10:28:00	0
2009-10-13	10:29:00	0
2009-10-13	10:30:00	0
2009-10-13	10:31:00	0
2009-10-13	10:32:00	0
2009-10-13	10:33:00	0
2009-10-13	10:34:00	0
2009-10-13	10:35:00	0
2009-10-13	10:36:00	0
2009-10-13	10:37:00	0
2009-10-13	10:38:00	0
2009-10-13	10:39:00	0
2009-10-13	10:40:00	0
2009-10-13	10:41:00	0
2009-10-13	10:42:00	0
2009-10-13	10:43:00	0
2009-10-13	10:44:00	0
2009-10-13	10:45:00	0
2009-10-13	10:46:00	0
2009-10-13	10:47:00	0
2009-10-13	10:48:00	0
2009-10-13	10:49:00	0
2009-10-13	10:50:00	0
2009-10-13	10:51:00	0
2009-10-13	10:52:00	0
2009-10-13	10:53:00	0
2009-10-13	10:54:00	0
2009-10-13	10:55:00	0
2009-10-13	10:56:00	0
2009-10-13	10:57:00	0
2009-10-13	10:58:00	464
2009-10-13	10:59:00	295
2009-10-13	11:00:00	0
2009-10-13	11:01:00	0
2009-10-13	11:02:00	0
2009-10-13	11:03:00	0
2009-10-13	11:04:00	0
2009-10-13	11:05:00	0
2009-10-13	11:06:00	0
2009-10-13	11:07:00	0
2009-10-13	11:08:00	0
2009-10-13	11:09:00	0
2009-10-13	11:10:00	0
2009-10-13	11:11:00	0
2009-10-13	11:12:00	0
2009-10-13	11:13:00	0
2009-10-13	11:14:00	0
2009-10-13	11:15:00	0
2009-10-13	11:16:00	0
2009-10-13	11:17:00	0
2009-10-13	11:18:00	0
2009-10-13	11:19:00	0
2009-10-13	11:20:00	0
2009-10-13	11:21:00	0
2009-10-13	11:22:00	0
2009-10-13	11:23:00	0
2009-10-13	11:24:00	0
2009-10-13	11:25:00	0
2009-10-13	11:26:00	0
2009-10-13	11:27:00	0
2009-10-13	11:28:00	0
2009-10-13	11:29:00	0
2009-10-13	11:30:00	0
2009-10-13	11:31:00	0
2009-10-13	11:32:00	0
2009-10-13	11:33:00	0
2009-10-13	11:34:00	0
2009-10-13	11:35:00	0
2009-10-13	11:36:00	0
2009-10-13	11:37:00	0
2009-10-13	11:38:00	0
2009-10-13	11:39:00	0
2009-10-13	11:40:00	0
2009-10-13	11:41:00	0
2009-10-13	11:42:00	0
2009-10-13	11:43:00	0
2009-10-13	11:44:00	0
2009-10-13	11:45:00	0
2009-10-13	11:46:00	0
2009-10-13	11:47:00	0
2009-10-13	11:48:00	0
2009-10-13	11:49:00	0
2009-10-13	11:50:00	0
2009-10-13	11:51:00	0
2009-10-13	11:52:00	0
2009-10-13	11:53:00	0
2009-10-13	11:54:00	0
2009-10-13	11:55:00	0
2009-10-13	11:56:00	0
2009-10-13	11:57:00	0
2009-10-13	11:58:00	0
2009-10-13	11:59:00	0
2009-10-13	12:00:00	0
2009-10-13	12:01:00	0
2009-10-13	12:02:00	0
2009-10-13	12:03:00	0
2009-10-13	12:04:00	0
2009-10-13	12:05:00	0
2009-10-13	12:06:00	0
2009-10-13	12:07:00	807
2009-10-13	12:08:00	1007
2009-10-13	12:09:00	707
2009-10-13	12:10:00	65
2009-10-13	12:11:00	65
2009-10-13	12:12:00	221
2009-10-13	12:13:00	19
2009-10-13	12:14:00	143
2009-10-13	12:15:00	28
2009-10-13	12:16:00	0
2009-10-13	12:17:00	9
2009-10-13	12:18:00	9
2009-10-13	12:19:00	9
2009-10-13	12:20:00	0
2009-10-13	12:21:00	37
2009-10-13	12:22:00	0
2009-10-13	12:23:00	0
2009-10-13	12:24:00	0
2009-10-13	12:25:00	9
2009-10-13	12:26:00	0
2009-10-13	12:27:00	143
2009-10-13	12:28:00	9
2009-10-13	12:29:00	334
2009-10-13	12:30:00	892
2009-10-13	12:31:00	176
2009-10-13	12:32:00	360
2009-10-13	12:33:00	479
2009-10-13	12:34:00	121
2009-10-13	12:35:00	0
2009-10-13	12:36:00	9
2009-10-13	12:37:00	19
2009-10-13	12:38:00	0
2009-10-13	12:39:00	0
2009-10-13	12:40:00	74
2009-10-13	12:41:00	143
2009-10-13	12:42:00	360
2009-10-13	12:43:00	545
2009-10-13	12:44:00	746
2009-10-13	12:45:00	1158
2009-10-13	12:46:00	870
2009-10-13	12:47:00	1106
2009-10-13	12:48:00	1632
2009-10-13	12:49:00	959
2009-10-13	12:50:00	269
2009-10-13	12:51:00	132
2009-10-13	12:52:00	390
2009-10-13	12:53:00	19
2009-10-13	12:54:00	28
2009-10-13	12:55:00	19
2009-10-13	12:56:00	65
2009-10-13	12:57:00	19
2009-10-13	12:58:00	37
2009-10-13	12:59:00	9
2009-10-13	13:00:00	19
2009-10-13	13:01:00	9
2009-10-13	13:02:00	28
2009-10-13	13:03:00	0
2009-10-13	13:04:00	19
2009-10-13	13:05:00	9
2009-10-13	13:06:00	111
2009-10-13	13:07:00	37
2009-10-13	13:08:00	74
2009-10-13	13:09:00	19
2009-10-13	13:10:00	28
2009-10-13	13:11:00	360
2009-10-13	13:12:00	295
2009-10-13	13:13:00	495
2009-10-13	13:14:00	93
2009-10-13	13:15:00	93
2009-10-13	13:16:00	102
2009-10-13	13:17:00	132
2009-10-13	13:18:00	9
2009-10-13	13:19:00	0
2009-10-13	13:20:00	232
2009-10-13	13:21:00	243
2009-10-13	13:22:00	176
2009-10-13	13:23:00	766
2009-10-13	13:24:00	56
2009-10-13	13:25:00	37
2009-10-13	13:26:00	28
2009-10-13	13:27:00	0
2009-10-13	13:28:00	0
2009-10-13	13:29:00	0
2009-10-13	13:30:00	0
2009-10-13	13:31:00	37
2009-10-13	13:32:00	221
2009-10-13	13:33:00	187
2009-10-13	13:34:00	360
2009-10-13	13:35:00	1534
2009-10-13	13:36:00	915
2009-10-13	13:37:00	937
2009-10-13	13:38:00	633
2009-10-13	13:39:00	651
2009-10-13	13:40:00	390
2009-10-13	13:41:00	746
2009-10-13	13:42:00	143
2009-10-13	13:43:00	176
2009-10-13	13:44:00	198
2009-10-13	13:45:00	256
2009-10-13	13:46:00	807
2009-10-13	13:47:00	464
2009-10-13	13:48:00	165
2009-10-13	13:49:00	65
2009-10-13	13:50:00	93
2009-10-13	13:51:00	102
2009-10-13	13:52:00	56
2009-10-13	13:53:00	111
2009-10-13	13:54:00	111
2009-10-13	13:55:00	143
2009-10-13	13:56:00	334
2009-10-13	13:57:00	19
2009-10-13	13:58:00	37
2009-10-13	13:59:00	9
2009-10-13	14:00:00	9
2009-10-13	14:01:00	37
2009-10-13	14:02:00	0
2009-10-13	14:03:00	0
2009-10-13	14:04:00	0
2009-10-13	14:05:00	28
2009-10-13	14:06:00	0
2009-10-13	14:07:00	143
2009-10-13	14:08:00	360
2009-10-13	14:09:00	295
2009-10-13	14:10:00	154
2009-10-13	14:11:00	9
2009-10-13	14:12:00	0
2009-10-13	14:13:00	0
2009-10-13	14:14:00	0
2009-10-13	14:15:00	0
2009-10-13	14:16:00	19
2009-10-13	14:17:00	295
2009-10-13	14:18:00	360
2009-10-13	14:19:00	9
2009-10-13	14:20:00	0
2009-10-13	14:21:00	19
2009-10-13	14:22:00	0
2009-10-13	14:23:00	0
2009-10-13	14:24:00	0
2009-10-13	14:25:00	0
2009-10-13	14:26:00	390
2009-10-13	14:27:00	143
2009-10-13	14:28:00	0
2009-10-13	14:29:00	0
2009-10-13	14:30:00	0
2009-10-13	14:31:00	0
2009-10-13	14:32:00	198
2009-10-13	14:33:00	221
2009-10-13	14:34:00	221
2009-10-13	14:35:00	9
2009-10-13	14:36:00	0
2009-10-13	14:37:00	143
2009-10-13	14:38:00	746
2009-10-13	14:39:00	1237
2009-10-13	14:40:00	419
2009-10-13	14:41:00	210
2009-10-13	14:42:00	295
2009-10-13	14:43:00	198
2009-10-13	14:44:00	102
2009-10-13	14:45:00	176
2009-10-13	14:46:00	176
2009-10-13	14:47:00	46
2009-10-13	14:48:00	19
2009-10-13	14:49:00	187
2009-10-13	14:50:00	19
2009-10-13	14:51:00	0
2009-10-13	14:52:00	0
2009-10-13	14:53:00	9
2009-10-13	14:54:00	375
2009-10-13	14:55:00	282
2009-10-13	14:56:00	132
2009-10-13	14:57:00	132
2009-10-13	14:58:00	269
2009-10-13	14:59:00	0
2009-10-13	15:00:00	132
2009-10-13	15:01:00	256
2009-10-13	15:02:00	0
2009-10-13	15:03:00	0
2009-10-13	15:04:00	0
2009-10-13	15:05:00	0
2009-10-13	15:06:00	111
2009-10-13	15:07:00	176
2009-10-13	15:08:00	232
2009-10-13	15:09:00	375
2009-10-13	15:10:00	19
2009-10-13	15:11:00	0
2009-10-13	15:12:00	0
2009-10-13	15:13:00	28
2009-10-13	15:14:00	19
2009-10-13	15:15:00	74
2009-10-13	15:16:00	28
2009-10-13	15:17:00	37
2009-10-13	15:18:00	37
2009-10-13	15:19:00	37
2009-10-13	15:20:00	154
2009-10-13	15:21:00	9
2009-10-13	15:22:00	0
2009-10-13	15:23:00	334
2009-10-13	15:24:00	334
2009-10-13	15:25:00	9
2009-10-13	15:26:00	28
2009-10-13	15:27:00	19
2009-10-13	15:28:00	9
2009-10-13	15:29:00	243
2009-10-13	15:30:00	0
2009-10-13	15:31:00	0
2009-10-13	15:32:00	0
2009-10-13	15:33:00	0
2009-10-13	15:34:00	0
2009-10-13	15:35:00	0
2009-10-13	15:36:00	0
2009-10-13	15:37:00	0
2009-10-13	15:38:00	0
2009-10-13	15:39:00	0
2009-10-13	15:40:00	0
2009-10-13	15:41:00	0
2009-10-13	15:42:00	0
2009-10-13	15:43:00	0
2009-10-13	15:44:00	0
2009-10-13	15:45:00	0
2009-10-13	15:46:00	9
2009-10-13	15:47:00	0
2009-10-13	15:48:00	0
2009-10-13	15:49:00	0
2009-10-13	15:50:00	0
2009-10-13	15:51:00	0
2009-10-13	15:52:00	0
2009-10-13	15:53:00	0
2009-10-13	15:54:00	0
2009-10-13	15:55:00	0
2009-10-13	15:56:00	0
2009-10-13	15:57:00	0
2009-10-13	15:58:00	0
2009-10-13	15:59:00	0
2009-10-13	16:00:00	46
2009-10-13	16:01:00	0
2009-10-13	16:02:00	0
2009-10-13	16:03:00	0
2009-10-13	16:04:00	0
2009-10-13	16:05:00	0
2009-10-13	16:06:00	0
2009-10-13	16:07:00	0
2009-10-13	16:08:00	0
2009-10-13	16:09:00	0
2009-10-13	16:10:00	0
2009-10-13	16:11:00	0
2009-10-13	16:12:00	0
2009-10-13	16:13:00	9
2009-10-13	16:14:00	0
2009-10-13	16:15:00	0
2009-10-13	16:16:00	0
2009-10-13	16:17:00	0
2009-10-13	16:18:00	0
2009-10-13	16:19:00	0
2009-10-13	16:20:00	0
2009-10-13	16:21:00	19
2009-10-13	16:22:00	37
2009-10-13	16:23:00	19
2009-10-13	16:24:00	0
2009-10-13	16:25:00	9
2009-10-13	16:26:00	0
2009-10-13	16:27:00	0
2009-10-13	16:28:00	0
2009-10-13	16:29:00	0
2009-10-13	16:30:00	0
2009-10-13	16:31:00	0
2009-10-13	16:32:00	0
2009-10-13	16:33:00	0
2009-10-13	16:34:00	0
2009-10-13	16:35:00	0
2009-10-13	16:36:00	0
2009-10-13	16:37:00	0
2009-10-13	16:38:00	0
2009-10-13	16:39:00	0
2009-10-13	16:40:00	0
2009-10-13	16:41:00	0
2009-10-13	16:42:00	0
2009-10-13	16:43:00	0
2009-10-13	16:44:00	269
2009-10-13	16:45:00	449
2009-10-13	16:46:00	111
2009-10-13	16:47:00	210
2009-10-13	16:48:00	9
2009-10-13	16:49:00	0
2009-10-13	16:50:00	9
2009-10-13	16:51:00	28
2009-10-13	16:52:00	65
2009-10-13	16:53:00	0
2009-10-13	16:54:00	0
2009-10-13	16:55:00	0
2009-10-13	16:56:00	0
2009-10-13	16:57:00	0
2009-10-13	16:58:00	0
2009-10-13	16:59:00	9
2009-10-13	17:00:00	0
2009-10-13	17:01:00	0
2009-10-13	17:02:00	0
2009-10-13	17:03:00	74
2009-10-13	17:04:00	93
2009-10-13	17:05:00	46
2009-10-13	17:06:00	0
2009-10-13	17:07:00	0
2009-10-13	17:08:00	37
2009-10-13	17:09:00	0
2009-10-13	17:10:00	0
2009-10-13	17:11:00	0
2009-10-13	17:12:00	0
2009-10-13	17:13:00	0
2009-10-13	17:14:00	0
2009-10-13	17:15:00	0
2009-10-13	17:16:00	74
2009-10-13	17:17:00	0
2009-10-13	17:18:00	0
2009-10-13	17:19:00	56
2009-10-13	17:20:00	221
2009-10-13	17:21:00	83
2009-10-13	17:22:00	176
2009-10-13	17:23:00	0
2009-10-13	17:24:00	46
2009-10-13	17:25:00	9
2009-10-13	17:26:00	0
2009-10-13	17:27:00	0
2009-10-13	17:28:00	19
2009-10-13	17:29:00	0
2009-10-13	17:30:00	0
2009-10-13	17:31:00	0
2009-10-13	17:32:00	0
2009-10-13	17:33:00	0
2009-10-13	17:34:00	46
2009-10-13	17:35:00	74
2009-10-13	17:36:00	0
2009-10-13	17:37:00	46
2009-10-13	17:38:00	56
2009-10-13	17:39:00	46
2009-10-13	17:40:00	9
2009-10-13	17:41:00	37
2009-10-13	17:42:00	0
2009-10-13	17:43:00	0
2009-10-13	17:44:00	545
2009-10-13	17:45:00	143
2009-10-13	17:46:00	102
2009-10-13	17:47:00	0
2009-10-13	17:48:00	0
2009-10-13	17:49:00	0
2009-10-13	17:50:00	0
2009-10-13	17:51:00	707
2009-10-13	17:52:00	746
2009-10-13	17:53:00	334
2009-10-13	17:54:00	143
2009-10-13	17:55:00	143
2009-10-13	17:56:00	243
2009-10-13	17:57:00	0
2009-10-13	17:58:00	269
2009-10-13	17:59:00	495
2009-10-13	18:00:00	1132
2009-10-13	18:01:00	176
2009-10-13	18:02:00	176
2009-10-13	18:03:00	210
2009-10-13	18:04:00	132
2009-10-13	18:05:00	9
2009-10-13	18:06:00	154
2009-10-13	18:07:00	0
2009-10-13	18:08:00	111
2009-10-13	18:09:00	56
2009-10-13	18:10:00	464
2009-10-13	18:11:00	512
2009-10-13	18:12:00	529
2009-10-13	18:13:00	390
2009-10-13	18:14:00	614
2009-10-13	18:15:00	545
2009-10-13	18:16:00	651
2009-10-13	18:17:00	360
2009-10-13	18:18:00	334
2009-10-13	18:19:00	46
2009-10-13	18:20:00	0
2009-10-13	18:21:00	9
2009-10-13	18:22:00	308
2009-10-13	18:23:00	390
2009-10-13	18:24:00	495
2009-10-13	18:25:00	176
2009-10-13	18:26:00	529
2009-10-13	18:27:00	37
2009-10-13	18:28:00	46
2009-10-13	18:29:00	0
2009-10-13	18:30:00	65
2009-10-13	18:31:00	375
2009-10-13	18:32:00	83
2009-10-13	18:33:00	579
2009-10-13	18:34:00	0
2009-10-13	18:35:00	37
2009-10-13	18:36:00	28
2009-10-13	18:37:00	65
2009-10-13	18:38:00	269
2009-10-13	18:39:00	9
2009-10-13	18:40:00	434
2009-10-13	18:41:00	221
2009-10-13	18:42:00	232
2009-10-13	18:43:00	347
2009-10-13	18:44:00	198
2009-10-13	18:45:00	9
2009-10-13	18:46:00	0
2009-10-13	18:47:00	0
2009-10-13	18:48:00	19
2009-10-13	18:49:00	419
2009-10-13	18:50:00	9
2009-10-13	18:51:00	9
2009-10-13	18:52:00	19
2009-10-13	18:53:00	9
2009-10-13	18:54:00	0
2009-10-13	18:55:00	65
2009-10-13	18:56:00	198
2009-10-13	18:57:00	93
2009-10-13	18:58:00	0
2009-10-13	18:59:00	0
2009-10-13	19:00:00	256
2009-10-13	19:01:00	495
2009-10-13	19:02:00	9
2009-10-13	19:03:00	0
2009-10-13	19:04:00	19
2009-10-13	19:05:00	0
2009-10-13	19:06:00	0
2009-10-13	19:07:00	0
2009-10-13	19:08:00	0
2009-10-13	19:09:00	0
2009-10-13	19:10:00	0
2009-10-13	19:11:00	0
2009-10-13	19:12:00	0
2009-10-13	19:13:00	56
2009-10-13	19:14:00	19
2009-10-13	19:15:00	37
2009-10-13	19:16:00	0
2009-10-13	19:17:00	28
2009-10-13	19:18:00	56
2009-10-13	19:19:00	375
2009-10-13	19:20:00	56
2009-10-13	19:21:00	132
2009-10-13	19:22:00	9
2009-10-13	19:23:00	102
2009-10-13	19:24:00	0
2009-10-13	19:25:00	9
2009-10-13	19:26:00	419
2009-10-13	19:27:00	187
2009-10-13	19:28:00	121
2009-10-13	19:29:00	83
2009-10-13	19:30:00	143
2009-10-13	19:31:00	390
2009-10-13	19:32:00	232
2009-10-13	19:33:00	165
2009-10-13	19:34:00	46
2009-10-13	19:35:00	198
2009-10-13	19:36:00	198
2009-10-13	19:37:00	449
2009-10-13	19:38:00	74
2009-10-13	19:39:00	0
2009-10-13	19:40:00	0
2009-10-13	19:41:00	0
2009-10-13	19:42:00	0
2009-10-13	19:43:00	0
2009-10-13	19:44:00	321
2009-10-13	19:45:00	111
2009-10-13	19:46:00	0
2009-10-13	19:47:00	295
2009-10-13	19:48:00	9
2009-10-13	19:49:00	0
2009-10-13	19:50:00	0
2009-10-13	19:51:00	0
2009-10-13	19:52:00	0
2009-10-13	19:53:00	0
2009-10-13	19:54:00	19
2009-10-13	19:55:00	28
2009-10-13	19:56:00	0
2009-10-13	19:57:00	0
2009-10-13	19:58:00	28
2009-10-13	19:59:00	9
2009-10-13	20:00:00	0
2009-10-13	20:01:00	0
2009-10-13	20:02:00	0
2009-10-13	20:03:00	0
2009-10-13	20:04:00	9
2009-10-13	20:05:00	0
2009-10-13	20:06:00	0
2009-10-13	20:07:00	0
2009-10-13	20:08:00	0
2009-10-13	20:09:00	0
2009-10-13	20:10:00	0
2009-10-13	20:11:00	0
2009-10-13	20:12:00	0
2009-10-13	20:13:00	0
2009-10-13	20:14:00	0
2009-10-13	20:15:00	0
2009-10-13	20:16:00	0
2009-10-13	20:17:00	0
2009-10-13	20:18:00	0
2009-10-13	20:19:00	0
2009-10-13	20:20:00	0
2009-10-13	20:21:00	0
2009-10-13	20:22:00	0
2009-10-13	20:23:00	0
2009-10-13	20:24:00	0
2009-10-13	20:25:00	0
2009-10-13	20:26:00	0
2009-10-13	20:27:00	0
2009-10-13	20:28:00	0
2009-10-13	20:29:00	0
2009-10-13	20:30:00	37
2009-10-13	20:31:00	0
2009-10-13	20:32:00	0
2009-10-13	20:33:00	0
2009-10-13	20:34:00	0
2009-10-13	20:35:00	0
2009-10-13	20:36:00	0
2009-10-13	20:37:00	0
2009-10-13	20:38:00	0
2009-10-13	20:39:00	0
2009-10-13	20:40:00	0
2009-10-13	20:41:00	0
2009-10-13	20:42:00	0
2009-10-13	20:43:00	0
2009-10-13	20:44:00	0
2009-10-13	20:45:00	0
2009-10-13	20:46:00	0
2009-10-13	20:47:00	0
2009-10-13	20:48:00	28
2009-10-13	20:49:00	9
2009-10-13	20:50:00	9
2009-10-13	20:51:00	154
2009-10-13	20:52:00	479
2009-10-13	20:53:00	0
2009-10-13	20:54:00	0
2009-10-13	20:55:00	19
2009-10-13	20:56:00	9
2009-10-13	20:57:00	0
2009-10-13	20:58:00	0
2009-10-13	20:59:00	0
2009-10-13	21:00:00	0
2009-10-13	21:01:00	0
2009-10-13	21:02:00	28
2009-10-13	21:03:00	0
2009-10-13	21:04:00	0
2009-10-13	21:05:00	0
2009-10-13	21:06:00	0
2009-10-13	21:07:00	0
2009-10-13	21:08:00	308
2009-10-13	21:09:00	308
2009-10-13	21:10:00	132
2009-10-13	21:11:00	232
2009-10-13	21:12:00	334
2009-10-13	21:13:00	495
2009-10-13	21:14:00	132
2009-10-13	21:15:00	0
2009-10-13	21:16:00	74
2009-10-13	21:17:00	0
2009-10-13	21:18:00	46
2009-10-13	21:19:00	65
2009-10-13	21:20:00	83
2009-10-13	21:21:00	111
2009-10-13	21:22:00	102
2009-10-13	21:23:00	0
2009-10-13	21:24:00	0
2009-10-13	21:25:00	308
2009-10-13	21:26:00	614
2009-10-13	21:27:00	256
2009-10-13	21:28:00	360
2009-10-13	21:29:00	93
2009-10-13	21:30:00	404
2009-10-13	21:31:00	256
2009-10-13	21:32:00	65
2009-10-13	21:33:00	187
2009-10-13	21:34:00	37
2009-10-13	21:35:00	243
2009-10-13	21:36:00	9
2009-10-13	21:37:00	9
2009-10-13	21:38:00	9
2009-10-13	21:39:00	321
2009-10-13	21:40:00	0
2009-10-13	21:41:00	0
2009-10-13	21:42:00	0
2009-10-13	21:43:00	9
2009-10-13	21:44:00	9
2009-10-13	21:45:00	0
2009-10-13	21:46:00	0
2009-10-13	21:47:00	19
2009-10-13	21:48:00	0
2009-10-13	21:49:00	0
2009-10-13	21:50:00	0
2009-10-13	21:51:00	0
2009-10-13	21:52:00	0
2009-10-13	21:53:00	0
2009-10-13	21:54:00	0
2009-10-13	21:55:00	0
2009-10-13	21:56:00	9
2009-10-13	21:57:00	0
2009-10-13	21:58:00	0
2009-10-13	21:59:00	0
2009-10-13	22:00:00	9
2009-10-13	22:01:00	0
2009-10-13	22:02:00	0
2009-10-13	22:03:00	0
2009-10-13	22:04:00	0
2009-10-13	22:05:00	0
2009-10-13	22:06:00	0
2009-10-13	22:07:00	0
2009-10-13	22:08:00	0
2009-10-13	22:09:00	0
2009-10-13	22:10:00	0
2009-10-13	22:11:00	0
2009-10-13	22:12:00	0
2009-10-13	22:13:00	0
2009-10-13	22:14:00	0
2009-10-13	22:15:00	0
2009-10-13	22:16:00	0
2009-10-13	22:17:00	143
2009-10-13	22:18:00	154
2009-10-13	22:19:00	198
2009-10-13	22:20:00	0
2009-10-13	22:21:00	0
2009-10-13	22:22:00	0
2009-10-13	22:23:00	0
2009-10-13	22:24:00	0
2009-10-13	22:25:00	0
2009-10-13	22:26:00	0
2009-10-13	22:27:00	0
2009-10-13	22:28:00	0
2009-10-13	22:29:00	0
2009-10-13	22:30:00	0
2009-10-13	22:31:00	102
2009-10-13	22:32:00	165
2009-10-13	22:33:00	176
2009-10-13	22:34:00	360
2009-10-13	22:35:00	143
2009-10-13	22:36:00	0
2009-10-13	22:37:00	0
2009-10-13	22:38:00	0
2009-10-13	22:39:00	0
2009-10-13	22:40:00	0
2009-10-13	22:41:00	0
2009-10-13	22:42:00	0
2009-10-13	22:43:00	0
2009-10-13	22:44:00	0
2009-10-13	22:45:00	9
2009-10-13	22:46:00	0
2009-10-13	22:47:00	0
2009-10-13	22:48:00	579
2009-10-13	22:49:00	93
2009-10-13	22:50:00	102
2009-10-13	22:51:00	9
2009-10-13	22:52:00	37
2009-10-13	22:53:00	9
2009-10-13	22:54:00	19
2009-10-13	22:55:00	1210
2009-10-13	22:56:00	807
2009-10-13	22:57:00	375
2009-10-13	22:58:00	595
2009-10-13	22:59:00	983
2009-10-13	23:00:00	308
2009-10-13	23:01:00	334
2009-10-13	23:02:00	83
2009-10-13	23:03:00	9
2009-10-13	23:04:00	65
2009-10-13	23:05:00	419
2009-10-13	23:06:00	28
2009-10-13	23:07:00	28
2009-10-13	23:08:00	0
2009-10-13	23:09:00	0
2009-10-13	23:10:00	0
2009-10-13	23:11:00	0
2009-10-13	23:12:00	0
2009-10-13	23:13:00	9
2009-10-13	23:14:00	0
2009-10-13	23:15:00	83
2009-10-13	23:16:00	0
2009-10-13	23:17:00	0
2009-10-13	23:18:00	121
2009-10-13	23:19:00	165
2009-10-13	23:20:00	9
2009-10-13	23:21:00	0
2009-10-13	23:22:00	0
2009-10-13	23:23:00	9
2009-10-13	23:24:00	9
2009-10-13	23:25:00	0
2009-10-13	23:26:00	0
2009-10-13	23:27:00	0
2009-10-13	23:28:00	0
2009-10-13	23:29:00	0
2009-10-13	23:30:00	0
2009-10-13	23:31:00	0
2009-10-13	23:32:00	0
2009-10-13	23:33:00	0
2009-10-13	23:34:00	0
2009-10-13	23:35:00	0
2009-10-13	23:36:00	28
2009-10-13	23:37:00	9
2009-10-13	23:38:00	37
2009-10-13	23:39:00	0
2009-10-13	23:40:00	0
2009-10-13	23:41:00	0
2009-10-13	23:42:00	0
2009-10-13	23:43:00	0
2009-10-13	23:44:00	0
2009-10-13	23:45:00	0
2009-10-13	23:46:00	0
2009-10-13	23:47:00	0
2009-10-13	23:48:00	0
2009-10-13	23:49:00	0
2009-10-13	23:50:00	0
2009-10-13	23:51:00	0
2009-10-13	23:52:00	0
2009-10-13	23:53:00	0
2009-10-13	23:54:00	0
2009-10-13	23:55:00	0
2009-10-13	23:56:00	0
2009-10-13	23:57:00	0
2009-10-13	23:58:00	0
2009-10-13	23:59:00	0
2009-10-14	00:00:00	0
2009-10-14	00:01:00	0
2009-10-14	00:02:00	0
2009-10-14	00:03:00	0
2009-10-14	00:04:00	0
2009-10-14	00:05:00	9
2009-10-14	00:06:00	0
2009-10-14	00:07:00	0
2009-10-14	00:08:00	0
2009-10-14	00:09:00	0
2009-10-14	00:10:00	0
2009-10-14	00:11:00	0
2009-10-14	00:12:00	0
2009-10-14	00:13:00	0
2009-10-14	00:14:00	0
2009-10-14	00:15:00	0
2009-10-14	00:16:00	0
2009-10-14	00:17:00	0
2009-10-14	00:18:00	0
2009-10-14	00:19:00	0
2009-10-14	00:20:00	0
2009-10-14	00:21:00	0
2009-10-14	00:22:00	0
2009-10-14	00:23:00	0
2009-10-14	00:24:00	0
2009-10-14	00:25:00	0
2009-10-14	00:26:00	0
2009-10-14	00:27:00	0
2009-10-14	00:28:00	0
2009-10-14	00:29:00	0
2009-10-14	00:30:00	0
2009-10-14	00:31:00	0
2009-10-14	00:32:00	0
2009-10-14	00:33:00	0
2009-10-14	00:34:00	0
2009-10-14	00:35:00	0
2009-10-14	00:36:00	0
2009-10-14	00:37:00	65
2009-10-14	00:38:00	0
2009-10-14	00:39:00	0
2009-10-14	00:40:00	0
2009-10-14	00:41:00	0
2009-10-14	00:42:00	0
2009-10-14	00:43:00	0
2009-10-14	00:44:00	0
2009-10-14	00:45:00	0
2009-10-14	00:46:00	0
2009-10-14	00:47:00	0
2009-10-14	00:48:00	0
2009-10-14	00:49:00	0
2009-10-14	00:50:00	0
2009-10-14	00:51:00	0
2009-10-14	00:52:00	0
2009-10-14	00:53:00	0
2009-10-14	00:54:00	0
2009-10-14	00:55:00	0
2009-10-14	00:56:00	0
2009-10-14	00:57:00	0
2009-10-14	00:58:00	0
2009-10-14	00:59:00	0
2009-10-14	01:00:00	0
2009-10-14	01:01:00	0
2009-10-14	01:02:00	0
2009-10-14	01:03:00	0
2009-10-14	01:04:00	0
2009-10-14	01:05:00	0
2009-10-14	01:06:00	0
2009-10-14	01:07:00	0
2009-10-14	01:08:00	0
2009-10-14	01:09:00	28
2009-10-14	01:10:00	19
2009-10-14	01:11:00	0
2009-10-14	01:12:00	0
2009-10-14	01:13:00	0
2009-10-14	01:14:00	0
2009-10-14	01:15:00	0
2009-10-14	01:16:00	0
2009-10-14	01:17:00	0
2009-10-14	01:18:00	0
2009-10-14	01:19:00	0
2009-10-14	01:20:00	0
2009-10-14	01:21:00	0
2009-10-14	01:22:00	0
2009-10-14	01:23:00	0
2009-10-14	01:24:00	0
2009-10-14	01:25:00	0
2009-10-14	01:26:00	0
2009-10-14	01:27:00	0
2009-10-14	01:28:00	0
2009-10-14	01:29:00	0
2009-10-14	01:30:00	0
2009-10-14	01:31:00	0
2009-10-14	01:32:00	0
2009-10-14	01:33:00	0
2009-10-14	01:34:00	28
2009-10-14	01:35:00	0
2009-10-14	01:36:00	0
2009-10-14	01:37:00	0
2009-10-14	01:38:00	0
2009-10-14	01:39:00	0
2009-10-14	01:40:00	0
2009-10-14	01:41:00	0
2009-10-14	01:42:00	0
2009-10-14	01:43:00	0
2009-10-14	01:44:00	0
2009-10-14	01:45:00	0
2009-10-14	01:46:00	0
2009-10-14	01:47:00	83
2009-10-14	01:48:00	121
2009-10-14	01:49:00	0
2009-10-14	01:50:00	0
2009-10-14	01:51:00	0
2009-10-14	01:52:00	0
2009-10-14	01:53:00	0
2009-10-14	01:54:00	0
2009-10-14	01:55:00	0
2009-10-14	01:56:00	0
2009-10-14	01:57:00	0
2009-10-14	01:58:00	0
2009-10-14	01:59:00	0
2009-10-14	02:00:00	0
2009-10-14	02:01:00	0
2009-10-14	02:02:00	0
2009-10-14	02:03:00	0
2009-10-14	02:04:00	0
2009-10-14	02:05:00	28
2009-10-14	02:06:00	0
2009-10-14	02:07:00	0
2009-10-14	02:08:00	0
2009-10-14	02:09:00	0
2009-10-14	02:10:00	0
2009-10-14	02:11:00	0
2009-10-14	02:12:00	0
2009-10-14	02:13:00	0
2009-10-14	02:14:00	0
2009-10-14	02:15:00	0
2009-10-14	02:16:00	0
2009-10-14	02:17:00	0
2009-10-14	02:18:00	0
2009-10-14	02:19:00	0
2009-10-14	02:20:00	0
2009-10-14	02:21:00	0
2009-10-14	02:22:00	0
2009-10-14	02:23:00	0
2009-10-14	02:24:00	0
2009-10-14	02:25:00	0
2009-10-14	02:26:00	0
2009-10-14	02:27:00	0
2009-10-14	02:28:00	0
2009-10-14	02:29:00	132
2009-10-14	02:30:00	0
2009-10-14	02:31:00	0
2009-10-14	02:32:00	0
2009-10-14	02:33:00	0
2009-10-14	02:34:00	0
2009-10-14	02:35:00	0
2009-10-14	02:36:00	0
2009-10-14	02:37:00	0
2009-10-14	02:38:00	0
2009-10-14	02:39:00	0
2009-10-14	02:40:00	0
2009-10-14	02:41:00	0
2009-10-14	02:42:00	0
2009-10-14	02:43:00	0
2009-10-14	02:44:00	0
2009-10-14	02:45:00	0
2009-10-14	02:46:00	0
2009-10-14	02:47:00	0
2009-10-14	02:48:00	0
2009-10-14	02:49:00	0
2009-10-14	02:50:00	0
2009-10-14	02:51:00	0
2009-10-14	02:52:00	0
2009-10-14	02:53:00	0
2009-10-14	02:54:00	0
2009-10-14	02:55:00	0
2009-10-14	02:56:00	0
2009-10-14	02:57:00	0
2009-10-14	02:58:00	0
2009-10-14	02:59:00	0
2009-10-14	03:00:00	0
2009-10-14	03:01:00	0
2009-10-14	03:02:00	0
2009-10-14	03:03:00	9
2009-10-14	03:04:00	0
2009-10-14	03:05:00	0
2009-10-14	03:06:00	0
2009-10-14	03:07:00	0
2009-10-14	03:08:00	0
2009-10-14	03:09:00	0
2009-10-14	03:10:00	0
2009-10-14	03:11:00	0
2009-10-14	03:12:00	0
2009-10-14	03:13:00	0
2009-10-14	03:14:00	0
2009-10-14	03:15:00	0
2009-10-14	03:16:00	0
2009-10-14	03:17:00	0
2009-10-14	03:18:00	0
2009-10-14	03:19:00	0
2009-10-14	03:20:00	0
2009-10-14	03:21:00	0
2009-10-14	03:22:00	210
2009-10-14	03:23:00	0
2009-10-14	03:24:00	0
2009-10-14	03:25:00	0
2009-10-14	03:26:00	0
2009-10-14	03:27:00	0
2009-10-14	03:28:00	46
2009-10-14	03:29:00	0
2009-10-14	03:30:00	0
2009-10-14	03:31:00	19
2009-10-14	03:32:00	0
2009-10-14	03:33:00	9
2009-10-14	03:34:00	19
2009-10-14	03:35:00	0
2009-10-14	03:36:00	0
2009-10-14	03:37:00	0
2009-10-14	03:38:00	0
2009-10-14	03:39:00	0
2009-10-14	03:40:00	0
2009-10-14	03:41:00	0
2009-10-14	03:42:00	0
2009-10-14	03:43:00	0
2009-10-14	03:44:00	0
2009-10-14	03:45:00	0
2009-10-14	03:46:00	0
2009-10-14	03:47:00	0
2009-10-14	03:48:00	0
2009-10-14	03:49:00	0
2009-10-14	03:50:00	0
2009-10-14	03:51:00	0
2009-10-14	03:52:00	0
2009-10-14	03:53:00	0
2009-10-14	03:54:00	0
2009-10-14	03:55:00	0
2009-10-14	03:56:00	0
2009-10-14	03:57:00	0
2009-10-14	03:58:00	0
2009-10-14	03:59:00	0
2009-10-14	04:00:00	0
2009-10-14	04:01:00	0
2009-10-14	04:02:00	0
2009-10-14	04:03:00	0
2009-10-14	04:04:00	0
2009-10-14	04:05:00	0
2009-10-14	04:06:00	0
2009-10-14	04:07:00	0
2009-10-14	04:08:00	0
2009-10-14	04:09:00	0
2009-10-14	04:10:00	0
2009-10-14	04:11:00	0
2009-10-14	04:12:00	0
2009-10-14	04:13:00	0
2009-10-14	04:14:00	0
2009-10-14	04:15:00	0
2009-10-14	04:16:00	0
2009-10-14	04:17:00	0
2009-10-14	04:18:00	165
2009-10-14	04:19:00	0
2009-10-14	04:20:00	0
2009-10-14	04:21:00	0
2009-10-14	04:22:00	0
2009-10-14	04:23:00	0
2009-10-14	04:24:00	0
2009-10-14	04:25:00	0
2009-10-14	04:26:00	0
2009-10-14	04:27:00	0
2009-10-14	04:28:00	28
2009-10-14	04:29:00	19
2009-10-14	04:30:00	0
2009-10-14	04:31:00	0
2009-10-14	04:32:00	0
2009-10-14	04:33:00	0
2009-10-14	04:34:00	0
2009-10-14	04:35:00	0
2009-10-14	04:36:00	0
2009-10-14	04:37:00	0
2009-10-14	04:38:00	0
2009-10-14	04:39:00	0
2009-10-14	04:40:00	0
2009-10-14	04:41:00	0
2009-10-14	04:42:00	0
2009-10-14	04:43:00	0
2009-10-14	04:44:00	0
2009-10-14	04:45:00	0
2009-10-14	04:46:00	0
2009-10-14	04:47:00	0
2009-10-14	04:48:00	0
2009-10-14	04:49:00	0
2009-10-14	04:50:00	0
2009-10-14	04:51:00	0
2009-10-14	04:52:00	0
2009-10-14	04:53:00	0
2009-10-14	04:54:00	0
2009-10-14	04:55:00	0
2009-10-14	04:56:00	0
2009-10-14	04:57:00	0
2009-10-14	04:58:00	0
2009-10-14	04:59:00	0
2009-10-14	05:00:00	0
2009-10-14	05:01:00	0
2009-10-14	05:02:00	46
2009-10-14	05:03:00	0
2009-10-14	05:04:00	0
2009-10-14	05:05:00	0
2009-10-14	05:06:00	0
2009-10-14	05:07:00	0
2009-10-14	05:08:00	0
2009-10-14	05:09:00	0
2009-10-14	05:10:00	0
2009-10-14	05:11:00	0
2009-10-14	05:12:00	0
2009-10-14	05:13:00	0
2009-10-14	05:14:00	0
2009-10-14	05:15:00	0
2009-10-14	05:16:00	0
2009-10-14	05:17:00	0
2009-10-14	05:18:00	0
2009-10-14	05:19:00	0
2009-10-14	05:20:00	0
2009-10-14	05:21:00	93
2009-10-14	05:22:00	132
2009-10-14	05:23:00	0
2009-10-14	05:24:00	0
2009-10-14	05:25:00	0
2009-10-14	05:26:00	0
2009-10-14	05:27:00	0
2009-10-14	05:28:00	0
2009-10-14	05:29:00	0
2009-10-14	05:30:00	0
2009-10-14	05:31:00	37
2009-10-14	05:32:00	0
2009-10-14	05:33:00	0
2009-10-14	05:34:00	0
2009-10-14	05:35:00	0
2009-10-14	05:36:00	0
2009-10-14	05:37:00	0
2009-10-14	05:38:00	0
2009-10-14	05:39:00	0
2009-10-14	05:40:00	0
2009-10-14	05:41:00	0
2009-10-14	05:42:00	0
2009-10-14	05:43:00	0
2009-10-14	05:44:00	0
2009-10-14	05:45:00	0
2009-10-14	05:46:00	28
2009-10-14	05:47:00	0
2009-10-14	05:48:00	0
2009-10-14	05:49:00	0
2009-10-14	05:50:00	56
2009-10-14	05:51:00	9
2009-10-14	05:52:00	9
2009-10-14	05:53:00	0
2009-10-14	05:54:00	0
2009-10-14	05:55:00	0
2009-10-14	05:56:00	0
2009-10-14	05:57:00	0
2009-10-14	05:58:00	37
2009-10-14	05:59:00	0
2009-10-14	06:00:00	0
2009-10-14	06:01:00	74
2009-10-14	06:02:00	74
2009-10-14	06:03:00	176
2009-10-14	06:04:00	1534
2009-10-14	06:05:00	562
2009-10-14	06:06:00	74
2009-10-14	06:07:00	176
2009-10-14	06:08:00	464
2009-10-14	06:09:00	1132
2009-10-14	06:10:00	725
2009-10-14	06:11:00	375
2009-10-14	06:12:00	19
2009-10-14	06:13:00	390
2009-10-14	06:14:00	360
2009-10-14	06:15:00	419
2009-10-14	06:16:00	111
2009-10-14	06:17:00	143
2009-10-14	06:18:00	154
2009-10-14	06:19:00	165
2009-10-14	06:20:00	28
2009-10-14	06:21:00	74
2009-10-14	06:22:00	232
2009-10-14	06:23:00	9
2009-10-14	06:24:00	0
2009-10-14	06:25:00	0
2009-10-14	06:26:00	111
2009-10-14	06:27:00	282
2009-10-14	06:28:00	308
2009-10-14	06:29:00	0
2009-10-14	06:30:00	65
2009-10-14	06:31:00	0
2009-10-14	06:32:00	0
2009-10-14	06:33:00	0
2009-10-14	06:34:00	334
2009-10-14	06:35:00	83
2009-10-14	06:36:00	321
2009-10-14	06:37:00	37
2009-10-14	06:38:00	28
2009-10-14	06:39:00	19
2009-10-14	06:40:00	154
2009-10-14	06:41:00	37
2009-10-14	06:42:00	28
2009-10-14	06:43:00	37
2009-10-14	06:44:00	9
2009-10-14	06:45:00	0
2009-10-14	06:46:00	0
2009-10-14	06:47:00	0
2009-10-14	06:48:00	0
2009-10-14	06:49:00	0
2009-10-14	06:50:00	0
2009-10-14	06:51:00	0
2009-10-14	06:52:00	0
2009-10-14	06:53:00	0
2009-10-14	06:54:00	0
2009-10-14	06:55:00	0
2009-10-14	06:56:00	0
2009-10-14	06:57:00	0
2009-10-14	06:58:00	0
2009-10-14	06:59:00	0
2009-10-14	07:00:00	83
2009-10-14	07:01:00	9
2009-10-14	07:02:00	0
2009-10-14	07:03:00	0
2009-10-14	07:04:00	0
2009-10-14	07:05:00	0
2009-10-14	07:06:00	0
2009-10-14	07:07:00	0
2009-10-14	07:08:00	9
2009-10-14	07:09:00	0
2009-10-14	07:10:00	0
2009-10-14	07:11:00	0
2009-10-14	07:12:00	495
2009-10-14	07:13:00	256
2009-10-14	07:14:00	256
2009-10-14	07:15:00	232
2009-10-14	07:16:00	449
2009-10-14	07:17:00	210
2009-10-14	07:18:00	83
2009-10-14	07:19:00	93
2009-10-14	07:20:00	0
2009-10-14	07:21:00	0
2009-10-14	07:22:00	37
2009-10-14	07:23:00	102
2009-10-14	07:24:00	176
2009-10-14	07:25:00	0
2009-10-14	07:26:00	0
2009-10-14	07:27:00	0
2009-10-14	07:28:00	37
2009-10-14	07:29:00	19
2009-10-14	07:30:00	0
2009-10-14	07:31:00	0
2009-10-14	07:32:00	0
2009-10-14	07:33:00	0
2009-10-14	07:34:00	434
2009-10-14	07:35:00	529
2009-10-14	07:36:00	187
2009-10-14	07:37:00	154
2009-10-14	07:38:00	232
2009-10-14	07:39:00	0
2009-10-14	07:40:00	707
2009-10-14	07:41:00	1534
2009-10-14	07:42:00	983
2009-10-14	07:43:00	2285
2009-10-14	07:44:00	0	M
2009-10-14	07:45:00	154
2009-10-14	07:46:00	210
2009-10-14	07:47:00	495
2009-10-14	07:48:00	154
2009-10-14	07:49:00	143
2009-10-14	07:50:00	102
2009-10-14	07:51:00	93
2009-10-14	07:52:00	0
2009-10-14	07:53:00	132
2009-10-14	07:54:00	28
2009-10-14	07:55:00	295
2009-10-14	07:56:00	74
2009-10-14	07:57:00	56
2009-10-14	07:58:00	187
2009-10-14	07:59:00	419
2009-10-14	08:00:00	102
2009-10-14	08:01:00	0
2009-10-14	08:02:00	419
2009-10-14	08:03:00	221
2009-10-14	08:04:00	0
2009-10-14	08:05:00	0
2009-10-14	08:06:00	28
2009-10-14	08:07:00	0
2009-10-14	08:08:00	56
2009-10-14	08:09:00	19
2009-10-14	08:10:00	9
2009-10-14	08:11:00	111
2009-10-14	08:12:00	65
2009-10-14	08:13:00	9
2009-10-14	08:14:00	9
2009-10-14	08:15:00	132
2009-10-14	08:16:00	9
2009-10-14	08:17:00	9
2009-10-14	08:18:00	154
2009-10-14	08:19:00	9
2009-10-14	08:20:00	0
2009-10-14	08:21:00	282
2009-10-14	08:22:00	651
2009-10-14	08:23:00	282
2009-10-14	08:24:00	419
2009-10-14	08:25:00	562
2009-10-14	08:26:00	529
2009-10-14	08:27:00	787
2009-10-14	08:28:00	111
2009-10-14	08:29:00	102
2009-10-14	08:30:00	154
2009-10-14	08:31:00	74
2009-10-14	08:32:00	28
2009-10-14	08:33:00	221
2009-10-14	08:34:00	132
2009-10-14	08:35:00	9
2009-10-14	08:36:00	28
2009-10-14	08:37:00	0
2009-10-14	08:38:00	0
2009-10-14	08:39:00	0
2009-10-14	08:40:00	0
2009-10-14	08:41:00	0
2009-10-14	08:42:00	0
2009-10-14	08:43:00	0
2009-10-14	08:44:00	0
2009-10-14	08:45:00	0
2009-10-14	08:46:00	0
2009-10-14	08:47:00	19
2009-10-14	08:48:00	0
2009-10-14	08:49:00	0
2009-10-14	08:50:00	0
2009-10-14	08:51:00	0
2009-10-14	08:52:00	0
2009-10-14	08:53:00	0
2009-10-14	08:54:00	0
2009-10-14	08:55:00	0
2009-10-14	08:56:00	0
2009-10-14	08:57:00	0
2009-10-14	08:58:00	0
2009-10-14	08:59:00	0
2009-10-14	09:00:00	0
2009-10-14	09:01:00	0
2009-10-14	09:02:00	0
2009-10-14	09:03:00	0
2009-10-14	09:04:00	0
2009-10-14	09:05:00	0
2009-10-14	09:06:00	0
2009-10-14	09:07:00	0
2009-10-14	09:08:00	0
[truncated: 49,851 more rows]
